# Supplementary material for: Genome sequencing and molecular characterisation of Staphylococcus aureus ST772-MRSA-V, “Bengal Bay Clone”
Source: PubMed Central journal article supplement (PMC3878137; doi:10.1186/1756-0500-6-548), 2013-12-20
Supplement: 1756-0500-6-548-S1.pdf [file 1756-0500-6-548-S1.pdf]

Supplemental table S1: Full array hybridisation for isolates from this study

| Target (class)                                                        | Target (Description)                        | Target (Symbol)         | CC1 strains for comparison |     | CC5 strains for comparison |       | Other ST772-MRSA-V isolates |     |       |       |       |       |       |       |       |       | Related (ST573/772) isolates for comparison |       |       |       |
|-----------------------------------------------------------------------|---------------------------------------------|-------------------------|----------------------------|-----|----------------------------|-------|-----------------------------|-----|-------|-------|-------|-------|-------|-------|-------|-------|---------------------------------------------|-------|-------|-------|
|                                                                       |                                             |                         | USA                        | UK  | Japan                      | Japan | USA                         | UK  | ST573 | ST573 | ST573 | ST573 | ST573 | ST573 | ST573 | ST573 | ST573                                       | ST573 | ST573 | ST573 |
| BACKGROUND & TYPING DATA                                              | geographic origin                           |                         | USA                        | UK  | Japan                      | Japan | USA                         | UK  | ST573 | ST573 | ST573 | ST573 | ST573 | ST573 | ST573 | ST573 | ST573                                       | ST573 | ST573 | ST573 |
|                                                                       | ST573 typing                                |                         | POS                        | POS | POS                        | POS   | POS                         | POS | POS   | POS   | POS   | POS   | POS   | POS   | POS   | POS   | POS                                         | POS   | POS   | POS   |
| SPECIES MARKER                                                        | Domain 1 of 23S rRNA                        | <i>rnd1 (S. aureus)</i> | POS                        | POS | POS                        | POS   | POS                         | POS | POS   | POS   | POS   | POS   | POS   | POS   | POS   | POS   | POS                                         | POS   | POS   | POS   |
|                                                                       | glycerol-3-phosphate dehydrogenase, locus 1 | <i>gapA</i>             | POS                        | POS | POS                        | POS   | POS                         | POS | POS   | POS   | POS   | POS   | POS   | POS   | POS   | POS   | POS                                         | POS   | POS   | POS   |
|                                                                       | ketolase A                                  | <i>kdsA</i>             | POS                        | POS | POS                        | POS   | POS                         | POS | POS   | POS   | POS   | POS   | POS   | POS   | POS   | POS   | POS                                         | POS   | POS   | POS   |
|                                                                       | CSA                                         | <i>csa</i>              | POS                        | POS | POS                        | POS   | POS                         | POS | POS   | POS   | POS   | POS   | POS   | POS   | POS   | POS   | POS                                         | POS   | POS   | POS   |
|                                                                       | thermostable extracellular nuclease         | <i>agnI</i>             | POS                        | POS | POS                        | POS   | POS                         | POS | POS   | POS   | POS   | POS   | POS   | POS   | POS   | POS   | POS                                         | POS   | POS   | POS   |
|                                                                       | staphylococcal protein A                    | <i>spa</i>              | POS                        | POS | POS                        | POS   | POS                         | POS | POS   | POS   | POS   | POS   | POS   | POS   | POS   | POS   | POS                                         | POS   | POS   | POS   |
|                                                                       | IgG-binding protein                         | <i>sbp</i>              | POS                        | POS | POS                        | POS   | POS                         | POS | POS   | POS   | POS   | POS   | POS   | POS   | POS   | POS   | POS                                         | POS   | POS   | POS   |
|                                                                       | staphylococcal accessory regulator A        | <i>sarA</i>             | POS                        | POS | POS                        | POS   | POS                         | POS | POS   | POS   | POS   | POS   | POS   | POS   | POS   | POS   | POS                                         | POS   | POS   | POS   |
|                                                                       | histidine protein kinase, sac locus         | <i>sps5</i>             | POS                        | POS | POS                        | POS   | POS                         | POS | POS   | POS   | POS   | POS   | POS   | POS   | POS   | POS   | POS                                         | POS   | POS   | POS   |
|                                                                       | sensor protein                              | <i>vraS</i>             | POS                        | POS | POS                        | POS   | POS                         | POS | POS   | POS   | POS   | POS   | POS   | POS   | POS   | POS   | POS                                         | POS   | POS   | POS   |
| accessory gene regulator allele I                                     | <i>agrI (total)</i>                         | NEG                     | NEG                        | NEG | NEG                        | NEG   | NEG                         | NEG | NEG   | NEG   | NEG   | NEG   | NEG   | NEG   | NEG   | NEG   | NEG                                         | NEG   | NEG   |       |
| accessory gene regulator allele II                                    | <i>agrII (total)</i>                        | NEG                     | NEG                        | NEG | NEG                        | NEG   | NEG                         | NEG | NEG   | NEG   | NEG   | NEG   | NEG   | NEG   | NEG   | NEG   | NEG                                         | NEG   | NEG   |       |
| accessory gene regulator allele III                                   | <i>agrIII (total)</i>                       | NEG                     | NEG                        | NEG | NEG                        | NEG   | NEG                         | NEG | NEG   | NEG   | NEG   | NEG   | NEG   | NEG   | NEG   | NEG   | NEG                                         | NEG   | NEG   |       |
| accessory gene regulator allele IV                                    | <i>agrIV (total)</i>                        | NEG                     | NEG                        | NEG | NEG                        | NEG   | NEG                         | NEG | NEG   | NEG   | NEG   | NEG   | NEG   | NEG   | NEG   | NEG   | NEG                                         | NEG   | NEG   |       |
| haemolysin theta                                                      | <i>hly</i>                                  | POS                     | POS                        | POS | POS                        | POS   | POS                         | POS | POS   | POS   | POS   | POS   | POS   | POS   | POS   | POS   | POS                                         | POS   | POS   |       |
| alternate penicillin binding protein 2, defining MRSA                 | <i>mecA</i>                                 | POS                     | POS                        | POS | POS                        | POS   | POS                         | POS | POS   | POS   | POS   | POS   | POS   | POS   | POS   | POS   | POS                                         | POS   | POS   |       |
| truncated signal transducer protein MecR1                             | <i>delta_mecR</i>                           | POS                     | POS                        | POS | POS                        | POS   | POS                         | POS | POS   | POS   | POS   | POS   | POS   | POS   | POS   | POS   | POS                                         | POS   | POS   |       |
| glycerophosphoryl diester phosphodiesterase                           | <i>uspQ</i>                                 | POS                     | POS                        | POS | POS                        | POS   | POS                         | POS | POS   | POS   | POS   | POS   | POS   | POS   | POS   | POS   | POS                                         | POS   | POS   |       |
| cassette chromosome recombinase genes A/B1                            | <i>ccrA-1</i>                               | POS                     | POS                        | POS | POS                        | POS   | POS                         | POS | POS   | POS   | POS   | POS   | POS   | POS   | POS   | POS   | POS                                         | POS   | POS   |       |
|                                                                       | <i>ccrB-1</i>                               | POS                     | POS                        | POS | POS                        | POS   | POS                         | POS | POS   | POS   | POS   | POS   | POS   | POS   | POS   | POS   | POS                                         | POS   | POS   |       |
| plasmid-sensitive surface protein                                     | <i>pldSCC (COL)</i>                         | NEG                     | NEG                        | NEG | NEG                        | NEG   | NEG                         | NEG | NEG   | NEG   | NEG   | NEG   | NEG   | NEG   | NEG   | NEG   | NEG                                         | NEG   | NEG   |       |
| hypothetical protein from SCCmec elements                             | <i>Q9X868-dcs</i>                           | NEG                     | NEG                        | NEG | NEG                        | NEG   | NEG                         | NEG | NEG   | NEG   | NEG   | NEG   | NEG   | NEG   | NEG   | NEG   | NEG                                         | NEG   | NEG   |       |
| cassette chromosome recombinase genes A/B2                            | <i>ccrA-2</i>                               | POS                     | POS                        | POS | POS                        | POS   | POS                         | POS | POS   | POS   | POS   | POS   | POS   | POS   | POS   | POS   | POS                                         | POS   | POS   |       |
|                                                                       | <i>ccrB-2</i>                               | POS                     | POS                        | POS | POS                        | POS   | POS                         | POS | POS   | POS   | POS   | POS   | POS   | POS   | POS   | POS   | POS                                         | POS   | POS   |       |
| potassium-translocating ATPase A, chain 2                             | <i>kdpA-SCC</i>                             | NEG                     | NEG                        | NEG | NEG                        | NEG   | NEG                         | NEG | NEG   | NEG   | NEG   | NEG   | NEG   | NEG   | NEG   | NEG   | NEG                                         | NEG   | NEG   |       |
| potassium-transporting ATPase B, chain 1                              | <i>kdpB-SCC</i>                             | NEG                     | NEG                        | NEG | NEG                        | NEG   | NEG                         | NEG | NEG   | NEG   | NEG   | NEG   | NEG   | NEG   | NEG   | NEG   | NEG                                         | NEG   | NEG   |       |
| potassium-translocating ATPase C, chain 2                             | <i>kdpC-SCC</i>                             | NEG                     | NEG                        | NEG | NEG                        | NEG   | NEG                         | NEG | NEG   | NEG   | NEG   | NEG   | NEG   | NEG   | NEG   | NEG   | NEG                                         | NEG   | NEG   |       |
| sensor kinase protein                                                 | <i>kdpE-SCC</i>                             | NEG                     | NEG                        | NEG | NEG                        | NEG   | NEG                         | NEG | NEG   | NEG   | NEG   | NEG   | NEG   | NEG   | NEG   | NEG   | NEG                                         | NEG   | NEG   |       |
| NDP operon transcriptional regulatory protein                         | <i>kdpF-SCC</i>                             | NEG                     | NEG                        | NEG | NEG                        | NEG   | NEG                         | NEG | NEG   | NEG   | NEG   | NEG   | NEG   | NEG   | NEG   | NEG   | NEG                                         | NEG   | NEG   |       |
| methicillin resistance regulatory protein                             | <i>mecI</i>                                 | NEG                     | NEG                        | NEG | NEG                        | NEG   | NEG                         | NEG | NEG   | NEG   | NEG   | NEG   | NEG   | NEG   | NEG   | NEG   | NEG                                         | NEG   | NEG   |       |
| signal transducer protein MecR2                                       | <i>mecR</i>                                 | NEG                     | NEG                        | NEG | NEG                        | NEG   | NEG                         | NEG | NEG   | NEG   | NEG   | NEG   | NEG   | NEG   | NEG   | NEG   | NEG                                         | NEG   | NEG   |       |
| homolog of xylase repressor, associated with SCCmec elements          | <i>xylR</i>                                 | NEG                     | NEG                        | NEG | NEG                        | NEG   | NEG                         | NEG | NEG   | NEG   | NEG   | NEG   | NEG   | NEG   | NEG   | NEG   | NEG                                         | NEG   | NEG   |       |
| cassette chromosome recombinase genes A/B3                            | <i>ccrA-3</i>                               | NEG                     | NEG                        | NEG | NEG                        | NEG   | NEG                         | NEG | NEG   | NEG   | NEG   | NEG   | NEG   | NEG   | NEG   | NEG   | NEG                                         | NEG   | NEG   |       |
|                                                                       | <i>ccrB-3</i>                               | NEG                     | NEG                        | NEG | NEG                        | NEG   | NEG                         | NEG | NEG   | NEG   | NEG   | NEG   | NEG   | NEG   | NEG   | NEG   | NEG                                         | NEG   | NEG   |       |
| mercury resistance operon                                             | <i>merA</i>                                 | NEG                     | NEG                        | NEG | NEG                        | NEG   | NEG                         | NEG | NEG   | NEG   | NEG   | NEG   | NEG   | NEG   | NEG   | NEG   | NEG                                         | NEG   | NEG   |       |
|                                                                       | <i>merB</i>                                 | NEG                     | NEG                        | NEG | NEG                        | NEG   | NEG                         | NEG | NEG   | NEG   | NEG   | NEG   | NEG   | NEG   | NEG   | NEG   | NEG                                         | NEG   | NEG   |       |
| cassette chromosome recombinase genes "ccrAA" (hypothetical) and ccrC | <i>ccrC (RS-2082)</i>                       | NEG                     | NEG                        | NEG | NEG                        | NEG   | NEG                         | NEG | NEG   | NEG   | NEG   | NEG   | NEG   | NEG   | NEG   | NEG   | NEG                                         | NEG   | NEG   |       |
|                                                                       | <i>ccrA-4</i>                               | NEG                     | NEG                        | NEG | NEG                        | NEG   | NEG                         | NEG | NEG   | NEG   | NEG   | NEG   | NEG   | NEG   | NEG   | NEG   | NEG                                         | NEG   | NEG   |       |
|                                                                       | <i>ccrB-4</i>                               | NEG                     | NEG                        | NEG | NEG                        | NEG   | NEG                         | NEG | NEG   | NEG   | NEG   | NEG   | NEG   | NEG   | NEG   | NEG   | NEG                                         | NEG   | NEG   |       |
| cassette chromosome recombinase genes A/B4                            | <i>ccrA-5</i>                               | NEG                     | NEG                        | NEG | NEG                        | NEG   | NEG                         | NEG | NEG   | NEG   | NEG   | NEG   | NEG   | NEG   | NEG   | NEG   | NEG                                         | NEG   | NEG   |       |
|                                                                       | <i>ccrB-5</i>                               | NEG                     | NEG                        | NEG | NEG                        | NEG   | NEG                         | NEG | NEG   | NEG   | NEG   | NEG   | NEG   | NEG   | NEG   | NEG   | NEG                                         | NEG   | NEG   |       |
| beta-lactamase                                                        | <i>blaZ</i>                                 | POS                     | POS                        | POS | POS                        | POS   | POS                         | POS | POS   | POS   | POS   | POS   | POS   | POS   | POS   | POS   | POS                                         | POS   | POS   |       |
| beta lactamase repressor (inhibitor)                                  | <i>blaI</i>                                 | POS                     | POS                        | POS | POS                        | POS   | POS                         | POS | POS   | POS   | POS   | POS   | POS   | POS   | POS   | POS   | POS                                         | POS   | POS   |       |
| hypothetical protein regulatory protein                               | <i>blaR</i>                                 | POS                     | POS                        | POS | POS                        | POS   | POS                         | POS | POS   | POS   | POS   | POS   | POS   | POS   | POS   | POS   | POS                                         | POS   | POS   |       |
| RNA methyltransferase, erythromycin/clindamycin resistance            | <i>erm(A)</i>                               | NEG                     | NEG                        | NEG | NEG                        | NEG   | NEG                         | NEG | NEG   | NEG   | NEG   | NEG   | NEG   | NEG   | NEG   | NEG   | NEG                                         | NEG   | NEG   |       |
| erythromycin/clindamycin resistance                                   | <i>erm(B)</i>                               | NEG                     | NEG                        | NEG | NEG                        | NEG   | NEG                         | NEG | NEG   | NEG   | NEG   | NEG   | NEG   | NEG   | NEG   | NEG   | NEG                                         | NEG   | NEG   |       |
|                                                                       | <i>erm(C)</i>                               | NEG                     | NEG                        | NEG | NEG                        | NEG   | NEG                         | NEG | NEG   | NEG   | NEG   | NEG   | NEG   | NEG   | NEG   | NEG   | NEG                                         | NEG   | NEG   |       |
| incouamid-nucleotidyltransferase                                      | <i>trp(A)</i>                               | NEG                     | NEG                        | NEG | NEG                        | NEG   | NEG                         | NEG | NEG   | NEG   | NEG   | NEG   | NEG   | NEG   | NEG   | NEG   | NEG                                         | NEG   | NEG   |       |
| energy dependent efflux of erythromycin                               | <i>mei(A)</i>                               | NEG                     | NEG                        | NEG | NEG                        | NEG   | NEG                         | NEG | NEG   | NEG   | NEG   | NEG   | NEG   | NEG   | NEG   | NEG   | NEG                                         | NEG   | NEG   |       |
| macrolide efflux protein A                                            | <i>mei(A)</i>                               | NEG                     | NEG                        | NEG | NEG                        | NEG   | NEG                         | NEG | NEG   | NEG   | NEG   | NEG   | NEG   | NEG   | NEG   | NEG   | NEG                                         | NEG   | NEG   |       |
| probable 1,5-bisphosphatidylglycerol synthase                         | <i>mgp(C)</i>                               | NEG                     | NEG                        | NEG | NEG                        | NEG   | NEG                         | NEG | NEG   | NEG   | NEG   | NEG   | NEG   | NEG   | NEG   | NEG   | NEG                                         | NEG   | NEG   |       |
| erythromycin A acetyltransferase                                      | <i>vat(A)</i>                               | NEG                     | NEG                        | NEG | NEG                        | NEG   | NEG                         | NEG | NEG   | NEG   | NEG   | NEG   | NEG   | NEG   | NEG   | NEG   | NEG                                         | NEG   | NEG   |       |
| acetyltransferase inactivating streptogramin A                        | <i>vat(B)</i>                               | NEG                     | NEG                        | NEG | NEG                        | NEG   | NEG                         | NEG | NEG   | NEG   | NEG   | NEG   | NEG   | NEG   | NEG   | NEG   | NEG                                         | NEG   | NEG   |       |
| ATP binding protein, streptogramin A resistance                       | <i>vgp(A)</i>                               | NEG                     | NEG                        | NEG | NEG                        | NEG   | NEG                         | NEG | NEG   | NEG   | NEG   | NEG   | NEG   | NEG   | NEG   | NEG   | NEG                                         | NEG   | NEG   |       |
|                                                                       | <i>vgp(B) (BM 2327)</i>                     | NEG                     | NEG                        | NEG | NEG                        | NEG   | NEG                         | NEG | NEG   | NEG   | NEG   | NEG   | NEG   | NEG   | NEG   | NEG   | NEG                                         | NEG   | NEG   |       |
| verginamycin B hydrolase                                              | <i>vgb(A)</i>                               | NEG                     | NEG                        | NEG | NEG                        | NEG   | NEG                         | NEG | NEG   | NEG   | NEG   | NEG   | NEG   | NEG   | NEG   | NEG   | NEG                                         | NEG   | NEG   |       |
| beta-lactamase                                                        | <i>ampA</i>                                 | NEG                     | NEG                        | NEG | NEG                        | NEG   | NEG                         | NEG | NEG   | NEG   | NEG   | NEG   | NEG   | NEG   | NEG   | NEG   | NEG                                         | NEG   | NEG   |       |
| beta-lactamase                                                        | <i>ampA</i>                                 | NEG                     | NEG                        | NEG | NEG                        | NEG   | NEG                         | NEG | NEG   | NEG   | NEG   | NEG   | NEG   | NEG   | NEG   | NEG   | NEG                                         | NEG   | NEG   |       |
| beta-lactamase                                                        | <i>ampA</i>                                 | NEG                     | NEG                        | NEG | NEG                        | NEG   | NEG                         | NEG | NEG   | NEG   | NEG   | NEG   | NEG   | NEG   | NEG   | NEG   | NEG                                         | NEG   | NEG   |       |
| beta-lactamase                                                        | <i>ampA</i>                                 | NEG                     | NEG                        | NEG | NEG                        | NEG   | NEG                         | NEG | NEG   | NEG   | NEG   | NEG   | NEG   | NEG   | NEG   | NEG   | NEG                                         | NEG   | NEG   |       |
| beta-lactamase                                                        | <i>ampA</i>                                 | NEG                     | NEG                        | NEG | NEG                        | NEG   | NEG                         | NEG | NEG   | NEG   | NEG   | NEG   | NEG   | NEG   | NEG   | NEG   | NEG                                         | NEG   | NEG   |       |
| beta-lactamase                                                        | <i>ampA</i>                                 | NEG                     | NEG                        | NEG | NEG                        | NEG   | NEG                         | NEG | NEG   | NEG   | NEG   | NEG   | NEG   | NEG   | NEG   | NEG   | NEG                                         | NEG   | NEG   |       |
| beta-lactamase                                                        | <i>ampA</i>                                 | NEG                     | NEG                        | NEG | NEG                        | NEG   | NEG                         | NEG | NEG   | NEG   | NEG   | NEG   | NEG   | NEG   | NEG   | NEG   | NEG                                         | NEG   | NEG   |       |
| beta-lactamase                                                        | <i>ampA</i>                                 | NEG                     | NEG                        | NEG | NEG                        | NEG   | NEG                         | NEG | NEG   | NEG   | NEG   | NEG   | NEG   | NEG   | NEG   | NEG   | NEG                                         | NEG   | NEG   |       |
| beta-lactamase                                                        | <i>ampA</i>                                 | NEG                     | NEG                        | NEG | NEG                        | NEG   | NEG                         | NEG | NEG   | NEG   | NEG   | NEG   | NEG   | NEG   | NEG   | NEG   | NEG                                         | NEG   | NEG   |       |
| beta-lactamase                                                        | <i>ampA</i>                                 | NEG                     | NEG                        | NEG | NEG                        | NEG   | NEG                         | NEG | NEG   | NEG   | NEG   | NEG   | NEG   | NEG   | NEG   | NEG   | NEG                                         | NEG   | NEG   |       |
| beta-lactamase                                                        | <i>ampA</i>                                 | NEG                     | NEG                        | NEG | NEG                        | NEG   | NEG                         | NEG | NEG   | NEG   | NEG   | NEG   | NEG   | NEG   | NEG   | NEG   | NEG                                         | NEG   | NEG   |       |
| beta-lactamase                                                        | <i>ampA</i>                                 | NEG                     | NEG                        | NEG | NEG                        | NEG   | NEG                         | NEG | NEG   | NEG   | NEG   | NEG   | NEG   | NEG   | NEG   | NEG   | NEG                                         | NEG   | NEG   |       |
| beta-lactamase                                                        | <i>ampA</i>                                 | NEG                     | NEG                        | NEG | NEG                        | NEG   | NEG                         | NEG | NEG   | NEG   | NEG   | NEG   | NEG   | NEG   | NEG   | NEG   | NEG                                         | NEG   | NEG   |       |
| beta-lactamase                                                        | <i>ampA</i>                                 | NEG                     | NEG                        | NEG | NEG                        | NEG   | NEG                         | NEG | NEG   | NEG   | NEG   | NEG   | NEG   | NEG   | NEG   | NEG   | NEG                                         | NEG   | NEG   |       |
| beta-lactamase                                                        | <i>ampA</i>                                 | NEG                     | NEG                        | NEG | NEG                        | NEG   | NEG                         | NEG | NEG   | NEG   | NEG   | NEG   | NEG   | NEG   | NEG   | NEG   | NEG                                         | NEG   | NEG   |       |
| beta-lactamase                                                        | <i>ampA</i>                                 | NEG                     | NEG                        | NEG | NEG                        | NEG   | NEG                         | NEG | NEG   | NEG   | NEG   | NEG   | NEG   | NEG   | NEG   | NEG   | NEG                                         | NEG   | NEG   |       |
| beta-lactamase                                                        | <i>ampA</i>                                 | NEG                     | NEG                        | NEG | NEG                        | NEG   | NEG                         | NEG | NEG   | NEG   | NEG   | NEG   | NEG   | NEG   | NEG   | NEG   | NEG                                         | NEG   | NEG   |       |
| beta-lactamase                                                        | <i>ampA</i>                                 | NEG                     | NEG                        |     |                            |       |                             |     |       |       |       |       |       |       |       |       |                                             |       |       |       |
