# Supplementary material for: Genome sequencing and molecular characterisation of Staphylococcus aureus ST772-MRSA-V, “Bengal Bay Clone”
Source: PubMed Central journal article supplement (PMC3878137; doi:10.1186/1756-0500-6-548), 2013-12-20
Supplement: 1756-0500-6-548-S3.pdf [file 1756-0500-6-548-S3.pdf]

> **dnaA**

Function: protein coding sequence; chromosomal replication initiator protein (core genome, constant)

Best match: dnaA\_D89066.1[456:1817] (completely identical)

Position: 001-contig\_254\_RC: 9187 ... 10549; Length: 1362 bp

Sequence:

```
ATGTCGGAAAAAGAAATTTGGGAAAAAGTGCTTGAAATTGCTCAAGAAAAATTATCAGC
TGTAAGTTACTCAACTTTCTAAAAGATACTGAGCTTTACACGATTAAGATGGTGAAGC
TATCGTATTATCGAGTATTCCTTTTAATGCAAATTGGTTAAATCAACAATATGCTGAAATT
ATCCAAGCAATCTTATTTGATGTTGTAGGCTATGAAGTTAAACCTCACTTTATTACTACTG
AAGAATTAGCAAATTATAGTAATAATGAAACTGCTACTCCAAAAGAAACAACAAAACCT
TCTACTGAAACAACCTGAGGATAATCATGTGCTTGGTAGAGAGCAATTCAATGCCATAAC
ACATTTGACACTTTTGTAAATCGGACCTGGTAACCGCTTTCCACATGCAGCAAGTTAGCTG
TAGCCGAAGCACCAGCCAAAGCGTACAATCCATTATTTATCTATGGAGGTGTTGGTTTAG
GAAAAACCCATTTAATGCATGCCATTGGTCATCATGTTTTAGATAATAATCCAGATGCCA
AAGTGATTTACACATCAAGTGAAAAATTCACAAATGAATTTATTAATCAATTCGTGATA
ACGAAGGTGAAGCTTTCAGAGAAAGATATCGTAATATCGACGTCTTATTAATCGATGATA
TTCAGTTCATACAAAACAAGGTACAAACACAAGAAGAATTTTTCTATACTTTTAATGAAT
TGCATCAGAATAACAAGCAAATAGTTATTTTCGAGTGATCGACCACCAAAGGAAATTGCAC
AATTAGAAGACCGATTACGTTACGCTTTGAATGGGGGCTAATTGTTGATATTACGCCAC
CAGATTATGAACTCGAATGGCAATTTTGCAGAAGAAAATTGAAGAAGAAAAATTAGAT
ATTCCACCAGAAGCTTTAAATTATATAGCAAATCAAATCAATCTAATATTCGTGAATTA
GAAGGTGCATTAACACGTTTACTTGCATATTCACAATTATTAGGAAAACCAATTACAAC
GAATTAAGTCTGAAGCTTTAAAAGATATCATTCAAGCACCAAATCTAAAAAGATTACC
ATCCAAGATATTCAAAAAATTGTAGGCCAGTACTATAATGTTAGAATTGAAGATTTTCAGT
GCAAAAAAACGTACAAAGTCAATTGCATATCCGCGTCAAATAGCTATGTACTTGTCTAGA
GAGCTTACAGATTTCTCATTACCTAAAATTGGTGAAGAATTTGGTGGGCGTGATCATAACG
ACCGTCATTCATGCTCATGAAAAATATCTAAAGATTTAAAAGAAGATCCTATTTTTAAA
CAAGAAGTAGAGAATCTTGAAAAAGAAATAAGAAATGTATAA
```

> **dnaN**

Function: protein coding sequence; DNA polymerase III subunit beta (core genome, constant)

Best match: dnaN\_CC001-ST772\_118\_AJGE0100004.1[31202:32335:r] (completely identical)

Position: 001-contig\_254\_RC: 10826 ... 11960; Length: 1134 bp

Sequence:

```
ATGATGGAATTCACTATTAAGAGATTATTTTATTACACAATTAATGACACATTAATAA
GCTATTTACCAAGAACAACATTACCTATATTAAGTGGTATCAAAATCGATGCGAAAGAA
CATGAAGTTATATTAAGTGGTTCAGACTCTGAAATTTCAATAGAAATCACTATTCCTAAA
ACTGTAGATGGCGAAGATATTGTCAATATTTTCAGAAACAGGCTCAGTAGTACTTCCTGGA
CGATTCCTTTGTTGATATTATAAAAAAATTACCTGGTAAAGATGTTAAATTATCTACAAATG
ACAATTCCAGACATTAATTACATCAGGTCATTCTGAATTTAATTTAAGTGGCTTAGATCC
AGATCAATATCCTTTATTACCTCAAGTTTCTAGAGATGACGCAATTCAATTGTCGGTAAAA
GTGCTTAAAAACGTGATTGCACAAACAAATTTTGCAGTGTCCACCTCAGAAACACGCCCA
GTACTAACTGGTGTGAACTGGCTTATACAAGAAAATGAATTAATATGCACAGCGACTGAC
TCACACCGCTTGGCTGTAAGAAAGTTGCAGTTAGAAGATGTTTCTGAAAACAAAAATGTC
ATCATTCCAGGTAAGGCTTTAGCTGAATTAATAAAATTATGTCTGACAATGAAGAAGAC
ATTGATATCTTCTTTGCTTCAAACCAAGTTTTATTAAAGTTGGAAATGTGAACTTTATTT
TCGATTATTAGAAGGACATTATCCTGATACAACACGTTTATTCCCTGAAAACCTATGAAATT
AAATTAAGTATAGACAATGGGGAGTTTTATCATGCGATTGATCGTGCCTCTTTATTAGCAC
GTGAAGGTGGTAATAACGTTATTAATTAAGTACAGGTGATGACGTTGTTGAATTATCTT
CTACATCACCAGAAATTGGTACTGTAAAAGAAGAAGTTGATGCAAACGATGTTGAAGGT
GGTAGCCTGAAAATTTCACTCAACTCTAAATATATGATGGATGCTTTAAAAGCAATCGAT
AATGATGAGGTTGAAGTTGAATTCTTCGGTACAATGAAACCATTTATTCTAAAACCAAAA
GGTGACGACTCGGTAACGCAATTAATTTTACCAATCAGAACTTACTAA
```

> **recF**

Function: protein coding sequence; DNA replication and repair protein F (core genome, constant)

Best match: recF\_CC001\_MW2-USA400\_BA000033.2[3912:5024] (completely identical)

Position: 001-contig\_254\_RC: 12582 ... 13695; Length: 1113 bp

Sequence:

```
ATGAAGTTAAATACACTCCAATTAGAAAATTATCGTAACTATGATGAGGTTACGTTGAAA
TGTCATCCTGACGTGAATATCCTCATTGGAGAAAATGCACAAGGAAAGACAAATTTACTT
GAATCAATTTATACCTTAGCTTTAGCAAAAAGTCATAGAACGAGTAATGATAAGGAACTC
ATACGTTTTAATGCTGATTATGCTAAAATAGAAGGTGAGCTTAGTTATAGACACGGCACG
ATGCCATTAACAATGTTTTATAACTAAAAAAGGTAACAAGTCAAAGTGAATCACTTAGAG
CAAAGTCGTCTAACTCAATATATTGGACACCTCAATGTGGTTCTATTTGCGCCAGAAGATT
TGAATATTGTAAGGCTCTCCTCAAATAAGACGACGCTTTATAGATATGGAGTTGGGCC
AAATTTCTGCTGTTTACTTAAATGATTTAGCTCAATACCAACGTATTTTAAAGCAAAAAGAA
TAATTACTTAAAGCAGTTACAATTAGGCCAAAAAAGGACTTAAACAATGTTGGAAGTATT
AAATCAGCAGTTTGCTGAATATGCAATGAAAGTAACTGATAAACGTGCACATTTTATTCA
AGAGCTAGAGTCGTTAGCTAAACCGATTCATGCTGGTATCACAAATGATAAAGAAGCGTT
GTCGCTGAATTATTTACCTAGTCTTAAATTTGATTATGCTCAAAATGAAGCGGCACGACTT
GAAGAAATTATGTCTATTCTTAGCGATAATATGCAAAGAGAAAAAGAACGAGGCATTAG
CTTATTCGGACCACATCGAGATGATATAAGTTTTGATGTGAATGGCATGGATGCTCAAAC
ATATGGTTCTCAAGGACAGCAACGTACAACGGCTTTGTCCATTAAATTAGCTGAAATTGA
GTTAATGAATATCGAAGTTGGGGAATATCCCATCTTATTATTAGACGATGTACTCAGTGA
ATTAGATGATTCGCGTCAAACGCATTTATTAAGTACGATTCAGCATAAAGTACAAACATT
TGTCACTACGACATCTGTAGATGGTATTGATCATGAAATCATGAATAACGCTAAATTGTA
TCGTATTAATCAAGGTGAAATTATAAAGTAA
```

### > **yaaA**

Function: protein coding sequence; RNA-binding S4 domain protein (core genome, constant)

Best match: yaaA\_CC001\_MW2-USA400\_BA000033.2[3670:3915] (completely identical)

Position: 001-contig\_254\_RC: 12340 ... 12586; Length: 246 bp

Sequence:

```
GTGATTATTTTGGTTCAAGAAGTTGTAGTAGAAGGAGACATTAATTTAGGTCAATTTCTA
AAAACAGAAGGGATTATTGAATCTGGTGGTCAAGCAAAATGGTTCTTGCAAGACGTTGA
AGTATTAATTAATGGAGTGCCTGAAACACGTCGCGGTA AAAAGTTAGAACATCAAGATC
GTATAGATATCCAGAATTACCTGAAGATGCTGGTTCTTTCTTAATCATTCAAGGTGA
ACAATGA
```

### > **gyrB**

Function: protein coding sequence; DNA topoisomerase type II subunit B (core genome, constant)

Best match: gyrB\_CC001-ST772\_118\_AJGE0100004.1[27523:29457:r] (completely identical)

Position: 001-contig\_254\_RC: 13704 ... 15639; Length: 1935 bp

Sequence:

```
ATGGTGACTGCATTGTCAGATGTAAACAACACGGATAATTATGGTGCTGGGCAAATACAA
GTATTAGAAGGTTTAGAAGCAGTACGTAAAAGACCAGGTATGTATATAGGATCGACTTCA
GAGAGAGGTTTGCACCATTTAGTGTGGGAAATTGTCGATAATAGTATCGATGAAGCATT
GCTGGTTATGCAAATCAAATTGAAGTTGTTATTGAAAAAGATAACTGGATTAAAGTAACG
GATAACGGACGTGGTATCCAGTTGATATTCAAGAAAAAATGGGACGTCCAGCTGTCTGA
AGTTATTTTAACTGTTTTACATGCTGGTGGTAAATTCGGCGGTGGCGGATACAAAGTATCT
GGTGGTTTACATGGTGTGGTTCATCAGTTGTAAACGCATTGTCACAAGACTTAGAAGTA
TATGTACACAGAAATGAGACTATATATCATCAAGCATATAAAAAAGGTGTACCTCAATTT
GACTTAAAAGAAGTTGGCACAACACTGATAAGACAGGTACTGTCATTTCGTTTTAAAGCAGAT
GGAGAAATCTTCACAGAGACAACACTGTATACAACTATGAAACATTACAGCAGCGTATTAG
AGAGCTTGCTTTCTTAAACAAAGGAATTCAAATCACATTAAGAGATGAACGTGATGAAGA
AAACGTTAGAGAAGACTCCTATCACTATGAGGGCGGTATTAATTCGTACGTTGAGTTATT
GAACGAAAATAAAGAACCTATTCATGATGAGCCAATTTATATTCATCAATCTAAAGATGA
TATTGAAGTAGAAATTGCGATTCAATATAACTCAGGATATGCCACAAATCTTTTAACTTA
CGCAAATAACATTCATACGTATGAAGGTGGTACGCATGAAGACGGATTCAAACGTGCATT
```

AACGCGTGTCTTAAATAGTTATGGTTTAAAGTAGCAAGATTATGAAAGAAGAAAAAGATA  
GACTTTCTGGTGAAGATACACGTGAAGGTATGACAGCAATTATATCTATCAAACATGGTG  
ATCCTCAATTCGAAGGTCAAACGAAGACAAAATTAGGTAATTCTGAAGTGCCTCAAGTTG  
TAGATAAATTATTCTCAGAGCACTTTGAACGATTTTTATATGAAAATCCACAAGTCGCAC  
GTACAGTGGTTGAAAAAGGTATTATGGCGGCACGTGCACGTGTTGCTGCGAAAAAAGCG  
CGTGAAGTAACACGTTCGTAATCAGCGTTAGATGTAGCAAGTCTTCCAGGTAAATTAGCC  
GATTGCTCTAGTAAAAGTCCTGAAGAATGTGAGATTTTCTTAGTTCGAAGGGGACTCTGCC  
GGGGGTCTACAAAATCTGGTTCGTGACTCTAGAACGCAGGCGATTTTACCATTACGAGGT  
AAGATATTAATGTTGAAAAAGCACGATTAGATAGAATTTTGAATAACAATGAAATTCGT  
CAAATGATCACAGCATTGTTGACAGGAATCGGTGGCGACTTTGATCTAGCGAAAGCAAG  
ATATCACAAAATCGTCATTATGACTGATGCCGATGTGGATGGAGCGCATATTAGAACATT  
GTTATTAACATTCTTCTATCGATTTATGAGACCGTTAATTGAAGCAGGCTATGTGTATATT  
GCACAGCCACCGTTGTATAAACTGACACAAGGTAACAAAAGTATTATGTATACAATGAT  
AGGGAACCTTGATAAACTTAAATCTGAATTGAATCCAACACCAAAAATGGTCTATTGCACGA  
TACAAAGGTCTTGGAGAAATGAATGCAGATCAATTATGGGAAACAACAATGAACCCTGA  
GCACCGCGCTCTTTTACAAGTAAAACCTGAAGATGCGATTGAAGCGGACCAACATTTGA  
AATGTTAATGGGTGACGTTGTAGAAAACCGTAGACAATTTATAGAAGATAATGCAGTTTA  
TGCAAACCTTAGACTTCTAA

> **gyrA**

Function: protein coding sequence; DNA topoisomerase type II subunit A (core genome, constant)

Best match: gyrA\_CC005\_04-02981\_CP001844.2[7005:9674] (completely identical)

Position: 001-contig\_254\_RC: 15675 ... 18345; Length: 2670 bp

Sequence:

ATGGCTGAATTACCTCAATCAAGAATAAATGAACGAAATATTACCAGTGAAATGCGTGA  
ATCATTTTTAGATTATGCGATGAGTGTATCGTTGCTCGTGCATTGCCAGATGTTTCGTGAC  
GGTTTAAAACCAGTACATCGTCGTATACTATATGGATTAATGAACAAGGTATGACACCG  
GATAAATCATATAAAAAATCAGCACGTATCGTTGGTGACGTAATGGGTAAATATCACCCCT  
CATGGTGACTTATCTATTTATGAAGCAATGGTACGTATGGCTCAAGATTTTCAGTTATCGTT  
ATCCGCTTGGTATGGCCAAGGTAACTTTGGTTCAATGGATGGAGATGGCGCAGCAGCAA  
TGCGTTATACTGAAGCGCGTATGACTAAAATCACACTTGAACGTTACGTGATATTAATA  
AAGATACAATAGATTTTATCGATAACTATGATGGTAATGAAAGAGAGCCGTCAGTCTTAC  
CTGCTCGATTCCCTAACTTGTTAGCCAATGGAGCATCAGGTATAGCGGTAGGTATGGCAA  
CGAATATCCACCACATAACTTAACAGAATTAATCAATGGTGTACTTAGCTTAAGTAAGA  
ACCCTGATATTTCAATTGCTGAGTTAATGGAGGATATTGAAGGTCCTGATTTCCCAACTGC  
TGGACTTATTTTAGGTAAGAGTGGTATTAGACGTGCATATGAAACAGGTCGTGGTTCAAT  
TCAAATGCGTTCTCGTGCAGTTATTGAAGAACGTGGAGGCGGACGTCAACGTATTGTTGT  
CACTGAAATTCCTTTCCAAGTGAATAAGGCTCGTATGATTGAAAAAATTGCAGAGCTCGT  
TCGTGACAAGAAAATTGACGGTATCACTGATTTACGTGATGAAACAAGTTTACGTACTGG  
TGTGCGTGTGCTTATTGATGTGCGTAAGGATGCAAATGCTAGTGTCAATTTAAATAACTTA  
TACAAACAACACCTCTTCAAACATCATTTGGTGTGAATATGATTGCACTTGTAAATGGT  
AGACCGAAGCTTATTAATTTAAAAGAAGCGTTGGTACATTATTTAGAGCATCAAAGACA  
GTTGTTAGAAGACGTACGCAATACAACCTACGTAAAGCTAAAGATCGTGCCACATTTTA  
GAAGGATTACGTATCGCACTTGACCATATCGATGAAATTTTCAACGATTCGTGAGTCA  
GATACAGATAAAGTTGCAATGGAAAGCTTGCAACAACGCTTCAAACCTTCTGAAAAACA  
AGCTCAAGCTATTTTAGACATGCGTTTAAAGACGTCTAACAGGTTTAGAGAGAGACAAAAT  
TGAAGCTGAATATAATGAGTTATTAATTTATATTAGTGAATTAGAAACAATCTTAGCTGA  
TGAAGAAGTATTACTACAATTAGTTAGAGATGAATTAACAGAAATTCGAGATCGTTTCGG  
TGATGATCGTCGTAAGTAAATCCAATTAGGTGGATTTGAAGATTTAGAAGATGAAGATCT  
CATTCCAGAAGAACAATTTGTAATTACACTAAGCCATAATAACTACATTAACGTTTGCC  
GGTATCTACATATCGTGCTCAAACCGTGGTGGTTCGTGGTGTCAAGGTATGAATACATT  
GGAAGAAGATTTTGTGAGTCAATTGGTAACCTTTAAGTACACATGACCATGTATTGTTCTTT  
ACTAACAAGGTCGTGTATACAACTTAAAGGTTATGAAGTGCCTGAGTTATCAAGACAG  
TCTAAAGGTATTCCTGTAGTGAATGCTATTGAACTTGAATAATGATGAAGTCATTAGTACA  
ATGATTGCTGTAAAGACCTTGAAGTGAAGACAACCTTCTTAGTGTGTTGCAACTAAACGT  
GGTGTGCTTAAACGTTTCAGCATTAAGTAACTTCTCAAGAATAAATAGAAATGGTAAGATT

GCGATTTTCGTTTCAGAGAAGATGATGAGTTAATTGCAGTTCGCTTAACAAGTGGTCAAGAA  
GATATCTTGATTGGTACATCACATGCATCATTAATTCGATTCCCTGAATCAACATTACGTC  
CTTTAGGCCGTACAGCAACGGGTGTGAAAGGTATTACACTTCGTGAAGGTGACGAAGTTG  
TAGGGCTTGATGTAGCTCATGCAAACAGTGTTGATGAAGTATTAGTAGTACTGAAAATG  
GTTATGGTAAACGTACGCCAGTTAATGACTATCGTTTATCAAATCGTGGTGGTAAAGGTA  
TTAAAACAGCTACGATTACTGAGCGTAATGGTAATGTTGTATGTATCACTACAGTAACTG  
GTGAAGAAGATTTAATGATTGTTACTAATGCAGGTGTCATTATTCGACTAGATGTTGCAG  
ATATTTCTCAAAAATGGTTCGTGCAGCACAAAGGTGTTTCGCTTAATTCGCTTAGGTGATGATCA  
ATTTGTTTCAACGGTTGCTAAAAGTAAAAGAAGATGCAGAAGATGAAACGAATGAAGATG  
AGCAATCTACTTCAACTGTATCTGAAGATGGTACTGAACAACAACGTGAAGCGGTTGTAA  
ATGATGAAACACCAGGAAATGCAATTCATACTGAAGTGATTGATTGAGAAGAAAATGAT  
GAAGATGGACGTATTGAAGTAAGACAAGATTTTCATGGATCGTGTTGAAGAAGATATACA  
ACAATCATCAGATGAAGATGAAGAATAA

### > **txbi\_gyrA**

Function: bidirectional rho-independent terminator of gyrA (core genome, constant)

Best match: txbi\_gyrA\_CC398\_SO385-pig\_AM990992.19665:9724

Position: 001-contig\_254\_RC: 18335 ... 18398; Length: 63 bp

Sequence:

TGAAGAATAATAAAAAAATAAGACTTCCCTATATGTAGGGGAGTCTTATTTTTATGCTAG  
AAA

### > **yjeF**

Function: protein coding sequence; putative carbohydrate kinase (core genome, variable)

Best match: yjeF\_CC005\_N315\_BA000018.3[9762:10592:r]RC (completely identical)

Position: 001-contig\_254\_RC: 18432 ... 19263; Length: 831 bp

Sequence:

TTAACTTTCTAATTGTTTCATTGCGTAAGGTATTTTCATTGATAAGTCTTGATGGTGGTACC  
ACATACATATCTTTTGCAAGGTTTTTCGCCAATAAACTATGTGTATATGTGGCACTCATAA  
CCGCTTCTTTAAGTTATCAAATTGACCGACAAAACCTTGTAATCATACCAGCAAGTGTATC  
GCCCATACCACCAGTCGCCATTGCTGGGCTACCGATTGTTAATTTAAAGTCTTCATCTTTA  
AAGAAAATTTTCAGTACCATGTTTTTTAAGTACAACAGTTGCACCTAAACGATCAACTGCT  
TCACGATTACGCTCATATGTCTGTTCTCAATAGGAATACCACTTAATCGTTCCCATTCTT  
TGAGGTGTGGAGTAAAGATCACACGACATGTAGGTAATTGCGGTTTCAGTTTACTAAAGA  
TTGTAATCGCATCGCCGTCTACGATTAAATTTTGATGCGGTTGTATATTTTGTAGTAGGAA  
TGTAATGGCATTATTTCCCTTTGAAATCAACGCCAAGACCTGGACCAATTAGTATACTGTCA  
GTCATTTCAATCATTTTCGTCAACATTTTCGTATCATTAAATATCAATAACCATCGCTTCTGG  
GCAACGAGAATGTAATGCTGAATGATTTGTTGGATGTGTAGCTACAGTGATTAACCACT  
ACCGCTAAATACACATGCACGAGCCGCTAACATAATGGCACCACCTAAGTTAGCAGATCC  
ACCAATTAATAAAAATTTTGCCATAATCACCTTTATGTGAATCTTCTTTACGCTTAGGAATG  
TTAATAGAATTTAACGTTTCCATAGTGATATAACCTCCCAT

### > **hutH**

Function: protein coding sequence; histidine ammonia lyase (core genome, constant)

Best match: hutH\_CC001-ST772\_118\_AJGE01000004.1[22077:23591:r] (completely identical)

Position: 001-contig\_254\_RC: 19570 ... 21085; Length: 1515 bp

Sequence:

ATGACTTTATATTTAGATGGTGAACAACACTAACAATTGAGGATATTAATCATTTTTACAAC  
ACAATCAAAGATTGAAATTATTGATGATGCGTTAGAACGTGTCAAAAAAAGTAGAGCG  
GTAGTTGAACGTATTATTGAAAATGAGGAAACGGTTTACGGTATCACTACAGTTTTGGG  
TTATTTAGTGATGTACGTATAGACCCGACGCAATATAATGAATTACAAGTGAATCTGATA  
CGCTCACATGCCTGTGGACTAGGTGAGCCATTTTCAAAGAAGTAGCATTAGTCATGATG  
ATTTTACGATTGAATACATTATTAAGGTCATTCAGGTGCCACTTTAGAATTAGTGAGA  
CAATTACAATTTTTATAAATGAACGTATTATACCGATAATCCCACAACAAGGCTCTCTCG  
GTGCATCAGGAGATTTAGCGCCATTATCACATTTAGCATTAGCATTAAATTGGTGAAGGGA

AAGTATTGTACAGAGGGGAAGAAAAGGATAGTGACGATGTATTAAGAGAATTAATAGACAACCTTTGAACCTTCAGGCTAAAGAGGGTTTAGCATTGATTAATGGTACGCAAGCTATGACAGCTCAAGGTGTCATTAGTTATATAGAAGCAGAAGATTTAGGTTACCAATCTGAATGGATTGCTGCATTAACGCATCAGTCTCTTAATGGCATTATAGATGCATATCGACATGATGTGCACTCTGTTTCGTAATTTTCAAGAACAGATTAATGTGGCAGCGCGTATGCGTGATTGGTTAGAAGGATCAACATTAACGACGCGACAAGCAGAAATACGTGTACAAGATGCATATACGTTGCGTTGTATAACCACAAATCCATGGCGCGAGTTTTCAAGTATTCAATTATGTTAAACAGCAATTAGAATTTGAAATGAATGCGGCTAATGATAATCCACTTATATTTGAGGAAGCAAATGAAACGTTTGTATTTCAGGTGGTAACTTCCATGGACAACCTATTGCTTTTGCATTAGATCATCTTAAATTAGGTGTAAGTGAATTAGCAAACGTATCGGAACGTCGTCTAGAGCGACTAGTAAATCCTCAATTAATGGTGATTTACCAGCATTCTTAGTCCAGAGCCAGGATTGCAAAGTGGCGCGATGATTATGCAATATGCTGCTGCAAGTCTCGTTTCTGAAAATAAACTTTAGCGCATCCAGCGAGTGTGATTCTATCACTTCATCTGCGAACCAAGAAGATCACGTATCTATGGAACTACAGCTGCTAGACATGGTTATCAAATTATTGAAAATGCAAGACGTGTGTTGGCAATCGAATGTGTTATTGCATTACAAGCAGCAGAGTTGAAAGGTGTCGAAGGATTATCACCAA AACACGTCGTAAATATGAGGAGTTTCGAAGTATCGTGCCATCCATTACACATGACCGTCAATTTATAAAGATATTGAAGCGGTTGCACAGTATTTAAAGCAATCAATTTATCAAACGACTGCATGTCACTAA

### > **tbox01**

Function: noncoding RNA T-box leader element (core genome, constant)

Best match: tbox01\_CC001-ST772\_118\_AJGE0100004.1[21788:21999:r] (completely identical)

Position: 001-contig\_254\_RC: 21162 ... 21374; Length: 212 bp

Sequence:

CATTGTTTCGTAGGACAAGTAATATATAGTGTTTCGATATCAGAGAGCTTGTGGTTAGTGTG AACAAGAATCAACATATATATGAATCTACCTACTTAATTTAAAAGAACAATCGGTGATAA CCGTTATTTTAGTGAAGTGCAATTTAGGTTTAGTTTATCTTTATAACTTAAATTGTTAAAT AGGGTGGCAACGCGTAGACCACGTCCCTTGT

### > **serS**

Function: protein coding sequence; seryl-tRNA synthetase (core genome, constant)

Best match: serS\_CC005\_Mu50-VRSA\_BA000017.4[12793:14079] (completely identical)

Position: 001-contig\_254\_RC: 21463 ... 22750; Length: 1287 bp

Sequence:

ATGTTAGACATTAGATTATTCAGAAATGAGCCTGACACAGTTAAGAGCAAAATTGAATTA CGTGGAGATGATCCAAAAGTTGTAGATGAAATTTTAGAATTGGATGAGCAACGACGTAA ATTAATTAGTGCAACAGAAGAAATGAAAGCACGTCGTAATAAAGTAAGCGAAGAAATCG CATTAAAAAACGTAATAAAGAAAATGCTGATGATGTGATTGCTGAAATGCGCACATTA GGTGACGATATTAAGAAAAAGATAGTCAATTAATGAAATTGATAATAAAATGACAGG TATCCTTTGTCGATTCCAAATTTAATAAGTGATGATGTACCTCAAGGTGAATCTGATGAA GATAACGTTGAAGTTAAAAGTGGGGTACACCACGTGAGTTTTTCATTTGAACCAAAGCA CATTGGGATATTGTAGAAGAATTGAAAATGGCTGATTTTGATCGTGACGCAAAAGTTTCA GGTGCGCGTTTTGTATATTTAACAAATGAAGGTGCGCAATTAGAGCGTGCTTTAATGAAC TATATGATTACAAAACATACAACACAACATGGTTATACAGAAATGATGGTACCACAGCTT GTGAACGCAGATACAATGTATGGTACAGGTCAATTACCTAAATTTGAAGAAGATTTATTT AAAGTAGAAAAAGAAGGATTATATACAATTCCAACCTGCTGAAGTACCATTAACGAATTTT TACCGTAATGAAATTATTCAACCAGGTGTACTTCCTGAAAAATTCCTGGTCAATCTGCAT GTTTCCGTAAGTGAAGCAGGATCAGCAGGTAGAGATACAAGAGGATTAATTCGTTTACATC AATTCGATAAAGTGGAAATGGTACGTTTTGAACAACCTGAAGATTCATGGAATGCTTTAG AAGAAATGACAACAAATGCAGAAGCAATTCTAGAAGAGTTAGGTTTACCATACCGTCGT GTTATTTTATGTACAGGTGATATTGGATTTAGTGCAAGCAAAACATATGATATAGAAGTT TGGTTACCAAGCTACAATGATTATAAAGAAATTAGTTCATGCTCAAACCTGTACGGATTTT CAAGCGCGTCGTGCTAACATCCGCTTCAAGCGTGACAAAGCAGCTAAACCAGAATTAGC ACATACATTAATGGTAGTGGTTTAGCAGTTGGACGTACATTTGCTGCTATTGTTGAAAAT

TACCAAAATGAAGATGGAACAGTAACAATTCCAGAAGCATTAGTACCATTTATGGGTGGT  
AAAACACAAATTTCAAAACCAGTTAAATAA

### > **tnpIS431-06**

Function: protein coding sequence; transposase for IS431 (mobile element)

Best match: tnpIS431-06\_circ\_S-epidermidis\_GQ900381.1[43799:43807] (completely identical)

Position: 001-contig\_254\_RC: 21994 ... 22003; Length: 9 bp

Sequence:

ATGAACTAT

### > **azlC**

Function: protein coding sequence; branched chain amino acid transporter (core genome, variable)

Best match: azlC\_CC005\_Mu50-VRSA\_BA000017.4[14730:15425] (completely identical)

Position: 001-contig\_254\_RC: 23400 ... 24096; Length: 696 bp

Sequence:

ATGGCAACACATTTAAGTTTTACACAAGGCGTACAAGAGTGTATCCCAACATTATTGGGT  
TATGCCGGTGTGGTATTTTCATTTGGTATTGTGGCTTCGTCTCAAACTTTAGTATTTTAGA  
AATTATCTTGTTATGTCTTGTTATATATGCCGGTGCTGCGCAATTTATTATGTGCGCGTTGT  
TTATAGCAGGTACACCGATATCAGCGATTGTACTAACTGTATTTATCGTAAATTCAAGAA  
TGTTCTTTTAAAGTATGTCTGCTTGCACCAAACCTCAAGACATATGGGTTTTGGAACCGTGT  
TGGATTAGGTTTATTAGTAAGTACTGACGAAACGTTTGGCGTCGCCATTACACCTTATTTAAAA  
GGAGAAGCTATCAATGATCGTTGGATGCATGGTCTTAATATCACAGCATATTTATTTTGG  
GCAATTTTATGTGTAGCTGGGGCTTTATTTGGCGAATATATCTCAAATCCGCAAACGCTA  
GGGTTAGATTTTGTCTATCACGGCTATGTTTATCTTTTTGGCCATTGCGCAATTTGAATCAA  
TTACTAAATCGCGATTAAGAATTTACATAGTACTCATTATTGCCGTCATAGTAATGATGTT  
ATCGCTAAGTATGTTTATGCCTTCATATCTAGCAATATTAATTGCAGCCACAATTTTCAGCA  
GCGTTAGGAGTGATGATGGAACGATGA

### > **azlD**

Function: protein coding sequence; branched chain amino acid transporter (core genome, constant)

Best match: azlD\_CC005\_Mu50-VRSA\_BA000017.4[15422:15751] (completely identical)

Position: 001-contig\_254\_RC: 24092 ... 24422; Length: 330 bp

Sequence:

ATGATAACTCATATGAACATGTTAATACTTATTTTATTGTGTGGTATCGTAAACGCTATTAA  
TTCGAATTATACCTTTTATCATGATTTCAAAAGTGCAATTGCCTGATGTTGTGGTTTCGATG  
GCTATCATTATCCCAATCACACTATTTACGGCACTTGTCAATTGACAGCATTATTCAACAG  
ACGCCTCATGGTGAGGGGTATACATTAACATCCCTTACATTATCGCGCTCATTCCGACG  
GTTATTTTATCTATAATCACGCGTAGTTTAACTATTACAATTATTAGTGGGATTGTTATCA  
TGGCAACATTACGATTTTTCTTTTAA

### > **sam-L1**

Function: noncoding RNA SAM riboswitch locus 1 (core genome, constant)

Best match: sam-L1\_CC001\_MW2-USA400\_BA000033.2[15949:16047] (completely identical)

Position: 001-contig\_254\_RC: 24626 ... 24725; Length: 99 bp

Sequence:

TTCTTATTGTGAGAAGTTGAGGGACTTGGCCCTGTGATACTTCAGCAACCGACTTTATAGC  
ACGGTGCTAAAACCAACGAGTTACTCGAATGATAAGTA

### > **metX**

Function: protein coding sequence; homoserine O-acetyltransferase (core genome, constant)

Best match: metX\_CC005\_Mu50-VRSA\_BA000017.4[16115:17083] (completely identical)

Position: 001-contig\_254\_RC: 24784 ... 25753; Length: 969 bp

Sequence:

ATGACAAATTACACAGTAGATACTTTAAATCTAGGGAAATTTATTACAGAATCTGGGGAA  
GTCATAGATAACTTGCCTTTGAGATATGAGCATGTTGGTTATCATGGACAACCATTAGTT

GTAGTTTGTGCATGCATTAACCTGGCAATCATTTAACATATGGAACAGATGATTATCCGGGT  
GGTGGCGAGAAATTATTGATGGGGGATATATACCCATTACGATTATCAATTTTAAACAT  
TTGATGTTATTGGTAGTCCTTTTCGGTTCAAGTTCACCTTTAAACGACCCTCATTTTCCTAAA  
AAATTAACATTAAGAGATATAGTCAGAGCGAATGAACGAGGTATAACAAGCCCTTGGTTAT  
GATAAGATTAATATTTTAAATAGGGGGAAGTCTTGGAGGTATGCAAGCAATGGAACACTT  
TACAATCAACAGTTTGAAGTAGATAAAGCCATTATCCTTGCTGCAACAAGTCGAACATCA  
TCTTATAGTAGAGCTTTCAATGAAATTGCAAGGCAAGCCATTATCTTGGTGGTAAGGAA  
GGTCTAAGTATTGCACGCCAATTAGGTTTTTTGACATATCGATCATCAAAAAGTTATGATG  
AACGTTTACGCCGGATGAAGTAGTCGCATACCAACAACATCAAGGTAATAAATTTAAAG  
AACATTTTGATTTGAATTGTTATCTGACACTGCTAGATGTATTGGATAGTCACAACATTGA  
CCGAGGTCGCACAGACGTAACGCATATTTTAAAAATTTAGAAACGAAAGTCTTAACGAT  
GGGTTTCATAGATGATTTGCTATATCCGGACGATCAAGTTCGTGCATTAGGTGAACGTTTT  
AAATATCATCGTCATTTCTTCGTGCCTGATAATGTTGGACATGATGGATTCTACTAACT  
TTAGTACCTGGGCACCTAATTATATCATTTCTTAAATTTAAAGCATTTTAAGCGTAAGTA  
A

### > Q6GD77

Function: protein coding sequence; putative membrane protein (core genome, constant)

Best match: Q6GD77\_CC001-ST772\_118\_AJGE01000004.1[16178:17164:r] (completely identical)

Position: 001-contig\_254\_RC: 25997 ... 26984; Length: 987 bp

Sequence:

TTGTTAATTTCCATTAAGAGAGGTTAAATAAATAGCTATAGTTAAAAATATGGGAGTGGCT  
TATGTGTTTTCAAAAATACAACCTAAAGCAACAATAATTGCAACGATTACGTTGGTATTT  
GTCGCTTTAGCTTTATATCTAGTGCCTGGTTTGGGACTAATATTTGCATTATTTGCAACCA  
TACCAGGTATCGTTTTATGGAATAAATCAATACAATCTTTCGGGGTTAGTGCACCTATTAC  
AGTAATTATAACAACCTGTTTTAGGTAATACTTTTCGTTTTAAGTGCCATCATATTAGTCTTA  
ATTGCAAGTTAATTATTGGTCAATTGCTCAAAGAAAGAACGTCTAAAGAAAGAATGTTA  
TACGTAACAACAGTAGCGATGAGCTTAATTTCAATTCGCTTTTATGTTACTACAAACAT  
TCGGAAGGATTCCACCATCAGCGAGCATAGTAAAACCTTCAAGCAAACATTACATGAAG  
CGATTACGATGAGCGGTGCCGATGCGAATATGACCCAAATATTAGAAGAAGGGTTTAGA  
CAAGCGACCGTTCAATTACCAGGTTTCATCATTATCATTACATTTTAAATTGTCTTAATTA  
ACTTAATCGTTACATTTCCGGTTTTACGAAAATTTAAAATCGCTACACCTGTATTTAAGCC  
ACTTTTCGCGTGGCAAATGAGCGGTATTTTATTATGGATATACATTATTGTTATCATATGT  
TTATTATTTACAGGTCAACCGAGTGTGTTCCAGAGCATTCTTTTAAACTTCCAACCTTGTGT  
TATCATTAGTAATGTATATTCAAGGTTTAAAGTGTTATTCATTTCTTTGGTAAAGCGAAAGG  
TTTGCCGAATGCAGTAACGATTTTACTATTGATTATCGGTACAATACTGACACCTACGACA  
CATATTGTAGGACTACTTGGTGTATCGATTTAAGTTTGAATTTGAAGCGAATCATGAAA  
AATAATTCTAAAAAGTGA

### > gdpP

Function: protein coding sequence; cyclic di-AMP phosphodiesterase (core genome, constant)

Best match: gdpP\_CC001-ST772\_118\_AJGE01000004.1[14196:16163:r] (completely identical)

Position: 001-contig\_254\_RC: 26998 ... 28966; Length: 1968 bp

Sequence:

ATGAATCGGCAGTCCACTAAGAAAGCTTTACTAATACCATTTGTCATCATGATCATCACA  
GCAATTGTTTTAATGGGTGTATGGTTTATCTTTAATAGTCTTATAGCATTAAATTGCATCTAT  
CGTTCTTGTGCGTATGATTATTGTTAGCATCATTTTATTCAGACAAGCTTTAATGAAAATG  
GATAGTTATGTAGATGGTTTGGAGTCTCAAATTTCAACAACAATAATAAAGCAATCAAA  
CATTTACCAATTGGTATCATTGTTTTAGATGAAAATGATCACATCGAATGGGTTAACCAAT  
TTATGACAAATCATATGGAAGCAAATGTCATTTCTGAATCTGTAATGAAGTATTTCCAA  
ACATTTTAAAGCAATTAGATAGAGTGAAATCCGTTGAAATAGAATATAATCAGTATCATT  
TCCAAGTACGTTATTCTGAGAATGATCATTGCCTCTATTTCTTTGATATAACTGAACAAGT  
ACAAACAATGAACTATATGAAAATTCTAAACCAATCATTGCGACATTATTTTATAGATAA  
CTACGATGAGATTACTCAAATATGAATGATACGCAGCGTTCGGAAATCAATTCAATGGT  
AACGCGTGTATTAGTCGATGGGCAACTGAGTATAATATATTCTTTAAAGGTATAGTTC

CGATCAATTCGTAGCCTATTTAAATCAAAAAATATTAGCTGACTTAGAAGAATCTAAATT  
TGATATCTTGAGTCAATTACGTGAAAAAGTGTGGTTATCGTGCCCAATTAACATTAAG  
TATTGGTGTGGTGAAGGTACTGAAAATTTAATCGATTTAGGTGAATTATCACAATCAGG  
CCTAGACTTAGCATTAGGGCGCGGTGGCGACCAAGTTGCAATTAAGTATTAATGGTAA  
TGTGCGTTTCTATGGCGGTAAGACTGACCCGATGGAGAAACGTACTCGTGTAAGAGCACG  
AGTGATCTCACATGCGTTAAAAGATATCCTTGCAGAGGGTGACAAAGTCATTATCATGGG  
ACATAAACGTCCTGACTTAGATGCAATTGGTGCAGCAATCGGTGTGTCTAGATTTGCAAT  
GATGAATAATTTAGAAGCATACATCGTATTAATGAGACTGACATTGATCCAACATTACG  
ACGCGTGATGAACGAAATTGATAAAAAGCCAGAGTTAAGAGAGCGATTTATAACATCAG  
ATGATGCTTGGGATATGATGACATCTAAGACAACCGTAGTGATTGTTGATACGCATAAAC  
CGGAACTGGTTTTAGATGAAAATGTCTTAAATAAAGCAAACCGTAAAGTTGTTATCGATC  
ATCATAGACGTGGTGAAAGCTTCATCTCTAATCCATTGTTGATATATATGGAACCATACG  
CAAGTTCAACAGCTGAATTGGTAACAGAGTTACTGGAATATCAACCAACAGAACAACGTT  
TAACACGTCTTGAATCAACAGTGATGTATGCAGGTATTATTGTAGATAACAAGAACTTTA  
CATTACGAACAGGATCAAGAACATTCGATGCAGCGAGTTATTTACGTGCACATGGTGCAG  
ATACGATTTTAAACGCAACATTTCTTAAAAGATGATGTGGATACTTACATTAATCGATCTGA  
ATTAATTCGAACTGTAAAAGTTGAAGATAATGGCATAGCCATTGCGCATGGTTCAGACGA  
TAAAATTTATCATCCAGTAACAGTTGCACAAGCAGCAGATGAACTGTTAAGTTTAGAAGG  
TATTGAAGCATCATATGTTGTTGCGAGACGTGAAGATAATCTGATTGGTATATCTGCGCG  
TTCCTCGTTTCAGTAAATGTTTCAGTTAACAATGGAAGCACTTGGTGGCGGTGGACATTT  
AACCAATGCTGCAACACAACCTTAAAGGTGTGACAGTCGAAGAGGCGATAGCACAAATTAC  
ACAAGCAATTACAGAACAATTAAGTAGGAGTGAAGATGCATGA

### > **rplI**

Function: protein coding sequence; 50S ribosomal protein L9 (core genome, constant)

Best match: rplI\_CC005\_Mu50-VRSA\_BA000017.4[20293:20739] (completely identical)

Position: 001-contig\_254\_RC: 28962 ... 29409; Length: 447 bp

Sequence:

ATGAAAGTAATTTTTACACAAGATGTTAAAGGTAAAGGTAAAAAAGGTGAAGTTAAAGA  
AGTACCAGTAGGTTATGCAAATAACTTCTTATTGAAAAAGAATTATGCTGTAGAAGCAAC  
ACCAGGTAACCTTAAACAATTAGAGTTACAGAAAAACGTGCAAAAACAAGAACGCCAAC  
AAGAAATTGAAGATGCTAAAGCATTAAAAGAAACGTTATCAAACATTGAAGTTGAAGTA  
TCAGCAAAAACCTGGTGAAGGTGGTAAATTGTTTGGATCAGTAAGTACAAAACAATTGCC  
GAAGCACTAAAAGCACAAACATGATATTAATTTGATAAACGTAAAATGGATTTACCAA  
TGGAATTCATTCCCTAGGATATACGAATGTACCTGTTAAATTAGATAAAGAAGTTGAAGG  
TACAATTCGCGTACACACAGTTGAACAATAA

### > **dnaC**

Function: protein coding sequence; replicative DNA helicase (core genome, constant)

Best match: dnaC\_CC005\_Mu50-VRSA\_BA000017.4[20771:22171]

Position: 001-contig\_254\_RC: 29440 ... 30841; Length: 1401 bp

Sequence:

ATGGATAGAATGTATGAGCAAAATCAAATGCCACATAACAATGAAGCTGAACAGTCTGT  
CTTAGGTTCAATTATTATAGATCCAGAATTGATTAATACTACTCAGGAAGTTTTGCTTCT  
GAGTCGTTTTATAGGGGTGCCCATCAACATATTTCCGTGCAATGATGCACTTAAATGAA  
GATAATAAAGAAATTGATGTTGTAACATTGATGGATCAATTATCGACGGAAGGTACGTTG  
AATGAAGCGGGTGGCCCGCAATATCTTGCAGAGTTATCTACAAATGTACCAACGACGCGA  
AATGTTTCAGTATTATACTGATATCGTTTCTAAGCATGCATTAACCGTAGATTGATTCAA  
CTGCAGATAGTATTGCCAATGATGGATATAATGATGAACTTGAAGTAGATGCGATTTTAA  
GTGATGCAGAACGTCGAATTTTAGAGCTGTCATCTTCTCGTGAAAGCGATGGCTTTAAAG  
ACATTCGAGACGTCTTAGGACAAGTGTATGAAACAGCTGAAGAGCTTGATCAAAATAGT  
GGTCAAACACCAGGTATACCTACAGGGTATCGAGATTTAGACCAAATGACAGCAGGGTT  
CAACCGAAATGATTTAATTATCCTTGCAGCGCGTCCATCTGTAGGTAAAGACTGCGTTTCG  
ACTAATATTGCACAAAAAGTTGCAACGCATGAAGATATGTATACAGTTGGTATTTTCTC  
ACTAGAGATGGGTGCTGATCAGTTAGCCACACGTATGATTTGTAGTTCTGGTAATGTTGA



CTCAAACCGCTTAAGAACGGGTACTATGACTGAGGAAGATTGGAGTCGTTTTACTATAGC  
GGTAGGTAAATTATCACGTACGAAGATTTTTATTGATGATACACCGGGTATTTCGAATTAA  
TGATTTACGTTCTAAATGTCGTCGATTAAAGCAAGAACATGGCTTAGACATGATTGTGAT  
TGACTACTTACAGTTGATTCAAGGTAGTGGTTCACGTGCGTCCGATAACAGACAACAGGA  
AGTTTCTGAAATCTCTCGTACATTAAGCATTAGCCCGTGAATTAGAATGTCCAGTTATC  
GCATTAAGTCAGTTATCTCGTGGTGTGAACAACGACAAGATAAACGTCCAATGATGAGT  
GATATTCGTGAATCTGGTTCGATTGAGCAAGATGCTGATATCGTTGCGTTCCTTATACCGTG  
ATGATTACTATAACCGTGGTGGCGATGAAGATGATGACGATGATGGTGGTTTCGAGCCAC  
AAACGAATGATGAAAACGGTGAATTTGAAATTATCATTGCTAAGCAACGTAACGGTCCA  
ACAGGCACAGTTAAGTTACACTTTATGAAACAATATAATAAATTTACCGATATCGATTAT  
GCACATGCAGATATGATGTAA

### > **purA**

Function: protein coding sequence; adenylosuccinate synthetase (core genome, constant)

Best match: purA\_CC005\_Mu50-VRSA\_BA000017.4[22449:23732]

Position: 001-contig\_254\_RC: 31119 ... 32403; Length: 1284 bp

Sequence:

ATGTCATCAATCGTAGTAGTTGGGACACAATGGGGAGACGAAGGAAAAGGAAAAATAAC  
GGATTTCTTGGCAGAACAGTCAGATGTTATCGCGCGTTTTTTCAGGTGGTAATAATGCAGG  
CCATACCATTCAATTTGGCGGAGAAACATATAAATTACATTTAGTACCATCTGGTATCTTT  
TACAAAGACAAATTAGCGGTAATCGGTAACGGTGTGCTTGTGATCCAGTTGCACTATTG  
AAAGAATTAGACGGATTAATGAACGTGGCATTCTACAAGTAATTTACGTATATCTAAT  
CGTGCACAAGTGATTTTACCATATCACTTAGCACAAGATGAATATGAAGAACGTTTACGC  
GGTGACAATAAGATTGGTACAATAAAAAAGGTATCGGTCCAGCATATGTAGACAAAGT  
TCAACGTATCGGTATTCGTATGGCAGATTTACTTGAAAAAGAAACATTCGAAAGATTATT  
AAAATCAAACATTGAATATAAACAAGCATATTTCAAAGGTATGTTTAAACGAAACATGTCC  
ATCATTGTGATGATATCTTTGAAGAATACTATGCTGCAGGTCAACGTTTAAAGAATTTGTA  
ACAGACACATCAAAAATCTTAGACGATGCATTTGTAGCAGATGAAAAGGTACTTTTCGAA  
GGTGCACAAGGTGTAATGTTAGATATCGACCATGGTACATACCCATTTCGTTACATCAAGT  
AATCCAATTGCAGGTAACGTTACTGTTGGTACAGGTGTAGGTCCTACATTCGTTTCAAAG  
GTAATTGGTGTATGTAAAGCTTATACATCACGTGTTGGTGTATGGTCCATTCCCTACTGAAT  
TATTCGATGAAGATGGACATCATATTAGAGAGGTTGGTCGTGAATACGGTACAACAACAG  
GACGTCCACGTCGTGTAGGTTGGTTTGATTTCAGTTGTATTACGTCCTCTCGTCGTGTAAG  
TGGTATTACAGATTTATCTATTAACCTCAATCGATGTTTTAACAGGCCTAGACACAGTGAA  
AATCTGTACAGCTTATGAATTAGACGGTAAAGAAATTACTGAGTACCCAGCAAACCTTAGA  
TCAATTAACGTTGTAACCAATCTTTGAAGAGTTACCAGGTTGGACAGAAGACGTAAC  
AAGTGTGCGTACTTTAGAAGAATTACCTGAAAATGCACGTAAATATTTAGAGCGTATTTTC  
AGAATTATGTAATGTACAAATTTCTATCTTCTCAGTTGGTCCAGATAGAGAACAAACAAA  
CCTATTAAGAATTGTGGTAG

### > **tx\_purA**

Function: rho-independent terminator of purA

Best match: tx\_purA\_CC005\_Mu50-VRSA\_BA000017.4[23758:23813] (completely identical)

Position: 001-contig\_254\_RC: 32428 ... 32484; Length: 56 bp

Sequence:

ATTATAAATACATGAGCCTTCTATCTTTATTGGTAGGAGGCTTTTGCTTTGTTTGC

### > **tRNAglu**

Function: tRNA tRNA glutamate

Best match: tRNAglu\_CC001\_MW2-USA400\_BA000033.2[24156:24230] (completely identical)

Position: 001-contig\_254\_RC: 32831 ... 32906; Length: 75 bp

Sequence:

GGCTCCTTGGTCAAGCGGTTAAGACACCGCCCTTTCACGGCGGTAACACGGGTTTCGAGTC  
CCGTAGGAGTCACCA

> **tRNAasp**

Function: tRNA tRNA asparagine

Best match: tRNAasp\_CC001\_MW2-USA400\_BA000033.2[24238:24313] (completely identical)

Position: 001-contig\_254\_RC: 32913 ... 32989; Length: 76 bp

Sequence:

GGTCTCGTAGTGTAGCGGTTAACACGCCTGCCTGTCACGCAGGAGATCGCGGGTTCGATT  
CCGTCGAGACCGTAC

> **tx\_tRNAasp**

Function: : rho-independent terminator

Best match: tx\_tRNAasp\_1\_CC001\_MW2-USA400\_BA000033.2[24302:24353] (completely identical)

Position: 001-contig\_254\_RC: 32977 ... 33029; Length: 52 bp

Sequence:

TCGAGACCGTACAAATGCCTATCCAAGAGGATAGGCATTTTTTTGCGTTTAA

> **vicR**

Function: protein coding sequence; two-component sensor/response regulator (core genome, constant)

Best match: vicR\_CC001\_MW2-USA400\_BA000033.2[24930:25631]

Position: 001-contig\_254\_RC: 33598 ... 34300; Length: 702 bp

Sequence:

ATGGCTAGAAAAGTTGTTGTAGTTGATGATGAAAAACCGATTGCTGATATTTTAGAATTT  
AACTTAAAAAAGAAGGATACGATGTGTACTGTGCATACGATGGTAATGATGCAGTCGA  
CTTAATTTATGAAGAAGAACCAGACATCGTATTATTAGATATCATGTTACCTGGTCGTGAT  
GGTATGGAAGTATGTCGTGAAGTGCGCAAAAAATACGAAATGCCAATTATAATGCTTACT  
GCTAAAGATTCAGAAATTGATAAAGTGCTTGGTTTAGAAGTGGTGCAGATGACTATGTA  
ACGAAACCGTTTACGCGTGAATTAATCGCACGTGTGAAAGCGAACTTACGTCGTCAT  
TACTCACAACCAGCACAAGACACTGGAAATGTAACGAATGAAATCACAATTAAGATAT  
TGTGATTTATCCAGACGCATATTCTATTAATAAACCGTGGCGAAGATATTGAATTAACACA  
TCGTGAATTTGAATTGTTCCATTATTTATCAAACATATGGGACAAGTAATGACACGTGA  
ACATTTATTACAAACAGTATGGGGCTATGATTACTTTGGCGATGTACGTACGGTCGATGT  
AACGATTCGTCGTTTACGTGAAAAGATTGAAGATGATCCGTCACACCCTGAATATATTGT  
GACGCGTAGAGGCGTTGGATATTTCTCCAACAACATGAGTAG

> **vicK**

Function: protein coding sequence; two-component sensor/histidine kinase subunit (core genome, constant)

Best match: vicK\_CC001-ST772\_118\_AJGE01000004.1[7023:8849:r] (completely identical)

Position: 001-contig\_254\_RC: 34312 ... 36139; Length: 1827 bp

Sequence:

ATGAAGTGGCTAAAACAACACTACAATCCCTTCATACTAAACTTGTAATTGTTTATGTATTAC  
TGATTATCATTGGTATGCAAATTATCGGGCTGTATTTTACAAATAACCTTGAAAAAGAGC  
TGCTTGATAATTTAAGAAGAATATTACGCAGTACGCGAAACAATTAGAAATTAGTATTG  
AAAAAGTATATGACGAAAAGGGCTCCGTAAATGCACAAAAGATATTCAAAATTTATTA  
AGTGAGTATGCCAACCGTCAAGAAATTGGAGAAATTCGTTTTATAGATAAAGACCAAATT  
ATTATTGCGACGACGAAGCAGTCTAACCGGAGTCTAATCAATCAAAAAGCGAATGATAG  
TTCTGTCCAAAAGCACTATCACTAGGACAATCAAACGATCATTTAATTTAAAAGATTA  
TGGCGGTGGTAAGGACCGTGTCTGGGTATATAATATCCCAGTTAAAGTCGATAAAAAGGT  
AATTGGTAATATTTATATCGAATCAAAAATTAATGACGTTTATAACCAATTAATAATAT  
AAATCAAATATTCATTGTTGGTACAGCTATTTTATTATTAATCACAGTCATCCTAGGATTC  
TTTATAGCGCGAACGATTACCAAACCAATCACCGATATGCGTAACCAGACGGTTGAAATG  
TCCAGAGGTAACTATACGCAACGTGTGAAGATTTATGGTAATGATGAAATTGGCGAATTA  
GCTTTAGCATTTAATAACTTGTCTAAACGTGTACAAGAAGCGCAGGCTAATACTGAAAGT  
GAGAAACGTAGACTGGACTCAGTTATCACCCATATGAGTGATGGTATTATTGCAACAGAC  
CGCCGTGGACGTATTCGTATCGTCAATGATATGGCACTTAAGATGCTTGGTATGGCGAAA

GAAGACATCATTGGATATTACATGTTAAGTGTATTAAGTCTTGAAGATGAATTTAACTT  
GAAGAAATTC AAGAGAATAATGATAGTTTCTTATTAGATTTAAATGAAGAAGAAGGTCTA  
ATCGCACGTGTTAACTTTAGTACGATTGTGCAGGAAACAGGATTTGTAACCTGGTTATATC  
GCTGTGTTACATGACGTTACTGAACAACAACAAGTTGAACGTGAACGTCGTGAATTTGTT  
GCCAATGTATCACATGAGTTACGTACACCTTTAACTTCTATGAATAGTTACATTGAAGCAC  
TTGAAGAAGGTGCATGGAAAGATGAGGAACTTGCGCCACAATTTTTATCTGTTACCCGTG  
AAGAAACAGAACGAATGATTCGACTGGTCAATGACTTGCTACAGTTATCTAAAATGGATA  
ATGAGTCTGATCAAATCAACAAAGAAATTATCGACTTTAACATGTTCAATTAATAAAATTA  
TTAATCGACATGAAATGTCTGCGAAAGATACAACATTTATTCGAGATATTCCGAAAAAGA  
CGATTTTCACAGAATTTGATCCTGATAAAATGACGCAAGTATTTGATAATGTCATTACAA  
ATGCGATGAAATATTCTAGAGGCGATAAACGTGTGCGAGTTCCACGTGAAACAAAATCCAC  
TTTATAATCGAATGACGATTTCGTATTAAGATAATGGCATCGGTATTCCTATCAATAAAG  
TCGATAAGATATTCGACCGATTCTATCGTGTAGATAAGGCGCGTACGCGTAAAATGGGTG  
GTACTGGATTAGGACTAGCCATTTGAAAGAGATTGTGGAAGCGCACAAATGGTTCGATTT  
GGGCAAACAGTGTAGAAGGTCAAGGTACATCTATCTTTATCACACTTCCATGTGAAGTCA  
TTGAAGACGGTGATTGGGATGAATAA

### > **yycH**

Function: protein coding sequence; putative protein (core genome, variable)

Best match: *yycH\_CC001-ST772\_118\_AJGE01000004.1*[5696:7030:r] (completely identical)

Position: 001-contig\_254\_RC: 36131 ... 37466; Length: 1335 bp

Sequence:

ATGAATAATAAGGAGCATATTAATCTGTCAATTTAGCGCTACTTGTCTTGATGAGTGTGCG  
TATTGACATATATGGTATGGAACCTTTCTCCTGATATTGCAAATGTGCGACAATACAGATAG  
TAAGAAGAGTGAAACGAAACCTTTAACGACACCTATGACAGCCAAAATGGATACAACATA  
TTACGCCATTTACAGATTATTCATTCGAAAAATGATCATCCAGAAGGTACGATCGCGACGG  
TTTCTAATGTGAATAAGCTGACGAAACCTTTAAAAAATAAAGAAGTGAAGTCCGTGGAAC  
ATGTTTCGTGCGTATCATAACTTTGATGATTCCTGATTTGAGCAGTGATTTTACATTATTCGA  
TTTTACGTATGATTTACCGTTATCAACATATCTTGGTCAAGTACTGAACATGAATGCGAAA  
GTACCAAATCATTTCATTTCAATTCGTTTGGTCATAGATCATGATGCTGATGATAATATCG  
TGCTTTATGCTATAAGCAAAGATCGCCACGATTACGTAAAATTAACAACACTACAACGAAAA  
ATGATCATTTTTTTAGATGCATTAGCAGCAGTGAAAAAAGATATGCAACCATACACAGATA  
TCATCACAAACAAGATACAATTGATCGTACGACGCATGTTTTTGCACCAAGTAAACCTG  
AAAAGTTAAAAACATATCGCATGGTATTTAACACGATTAGTGTTGAGAAAATGAATGCTA  
TACTATTTGACGATTCAACCATCGTTCGTAGTTCAAAGAGTGGTGTACTACTTATAACAA  
TAATACAGGTGTGCAAACTATAACGATAAAAATGAAAAATACCATTATAAAAACCTGTC  
CGAAGATGAAGCAAGTTCAGCAAAAATGGAAGAAACGATTCCAGGAACCTTTGATTTTAT  
TAATGGTCATGGTGGTTTTCTTAAACGAAGACTTCAGATTGTTTAGTACGAATAATCAGTC  
AGGCGAGTTAACATATCAACGTTTCTTAAACGTTATCCAACGTTTAAATAAAGAAGGCTC  
TAATCAAATTCAAGTCACTTGGGGTGAAAAAGGCGTCTTTGACTATCGTTCGTTTATTG  
CGCACCGACGTTGTGTTAAATAGTGAGGATAATAAAACGTTGCCGAAATTAGAGTCTGTA  
CGTTCAAGCTTAGCGAACAATAGTGATATTAATTTTGAAAAAGTAACAACATCGCTATC  
GGTTACGAAATGCAGGATAAATCAGATCATAATCACATTGAAGTGCAGATTAACAGTGA  
ACTCGTACCGCGTTGGTATGTAGAATATGATGGCGAATGGTATGTTTATAACGATGGGAG  
GCTTGAATAA

### > **yycI**

Function: protein coding sequence; putative protein (core genome, variable)

Best match: *yycI\_CC001-ST772\_118\_AJGE01000004.1*[4907:5695:r] (completely identical)

Position: 001-contig\_254\_RC: 37466 ... 38255; Length: 789 bp

Sequence:

ATGAACTGGAAACTGACAAAGACACTTTTCATTTTCGTGTTTATTCTTGTCAACATCGTGT  
TAGTATCGATTTATGTTAATAAAGTCAATCGCTCACACATTAATGAAGTCGAGAGTAACA  
ATGAAGTGAATTTCAACAAGAAGAAATTAGGGTGCCAGCCAGTATTTTAAATAAATCTG  
TTAAAGGCATACAATTAGAACAATTAAGGACGATCAAAGACTTTAGTTCAAAGCTA

AAGGTGATTCTGATTTATCCACATCAGATAGTGGAAAATTATTAATGCGAACATCAGCC  
AATCGGTA AAAAGTTAGTGATAATAACTTAAAAGATTTAAAAGATTACGTTAACAAACGCG  
TATTTAAAGGTGCTGAATATCAATTAAGCGAGATTAGTTCAGATTCTGTAAAATATGAAC  
AAACGTATGATGATTTTCCAATTTTAAATAACAGCAAAGCGATGTTGAACTTTAAAATAG  
AAGATAACAAAGCAACTAGTTATAAACAGTCAATGATGGATGACATTAAGCCGACTGAT  
GGTGCAGATAAGAAGCATCAAGTTATTAGTGTGAGAAAAGCAATCGAGGCATTATATTAT  
AATCGTTACTTGAAAAAAGGTGATGAAGTCATTAATGCTAGACTCGGTTACTACTCAGTC  
GTGAATGAAACGAATGTTCAATTGTTACAACCAAACACTGGGAAATTAAGTGAAGCATGA  
CGGTAAGGACAAAACGAATACTTACTATGTGCGAAGCGACAAATAATAACCCTAAAATTA  
TTAATCATTAA

> **yycJ**

Function: protein coding sequence; metallo-beta-lactamase family protein (core genome, variable)

Best match: yycJ\_CC001-ST772\_118\_AJGE01000004.1[3711:4511:r] (completely identical)

Position: 001-contig\_254\_RC: 38650 ... 39451; Length: 801 bp

Sequence:

ATGAGCCGCTTGATACGCATGAGTGTATTAGCAAGTGGTAGTACAGGTAACGCCACTTTT  
GTAGAAAATGAAAAAGGTAGTCTATTAGTTGATGTTGGTTTGACTGGCAAGAAAATGGA  
AGAATTGTTTAGTCAAATTGACCGTAATATTCAAGATTTAAATGGTATTTTAGTAACCCAT  
GAACATATTGATCATATTAAGGATTAGGTGTTTTGGCGCGTAAATATCAATTGCCAATTT  
ATGCGAATGAAAAGACTTGGCAGGCAATTGAAAAGAAAGATAGTCGCATCCCTATGGAT  
CAGAAATTCATTTTTAATCCTTATGAAACGAAATCTATTGCAGGTTTCGATGTTGAATCGT  
TTAACGTGTCACATGATGCAATAGATCCGCAATTTTATATTTCCATAATAACTATAAGAA  
GTTTACGATTTTAAACGGATACGGGTTACGTGTCTGATCGTATGAAAGGTATGATACGTGG  
CAGCGATGCGTTTTATTTTTGAGAGTAATCATGACGTCGATATGTTGAGAATGTGTCGTTAT  
CCATGGAAGACGAAACAACGTATTTTAGGCGATATGGGTCATGTATCTAATGAGGATGCG  
GGTCATGCAATGACAGACGTGATTACAGGTAACACGAAACGTATTTACTTATCACATTTA  
TCACAAGATAATAATATGAAAGATTTGGCGCGTATGAGTGTGGTCAAGTATTGAACGAA  
CACGATATTGATACGGAAAAAGAAGTATTGCTATGTGATACGGATAAAGCTATTCCAACG  
CCAATATATACAATATAA

> **sasH**

Function: protein coding sequence; cell-wall attached adenosine synthase A (core genome, variable)

Best match: sasH\_CC001-ST772\_118\_AJGE01000004.1[1166:3484:r] (completely identical)

Position: 001-contig\_254\_RC: 39677 ... 41996; Length: 2319 bp

Sequence:

ATGAAAGCTTTATTACTTAAAACAAGTGTATGGCTCGTTTTGCTTTTTAGTGTAATGGGAT  
TATACCATGTCTCGAACGCGGCTGAGCAGCATAACCAATGAAAGCACATGCAGTAACA  
ACGATAGACCAAGCAGCAACAGATAAGCAACTAGTAACGCCAACAAAGGAAGCGGCTCA  
TTATTATGGTGAAGAAGCGGCAACCAACGTATCAGCATCAGCGCAGGGAACAGCTGATG  
ATACAAACAACAAAGTAACATCCAACGAACCATCTAATAAACCATCTACAGCAGTTTCAA  
CAACAGTAAACGAAACGCGCGATGTAGATACACAACAAGCCTCAACACAAAAACCAACT  
CACACAGCAACATTCACATTATCAAATGCTAAAACAGCATCACTTTCACCACGAATGTTT  
GCTGCCAATGTACCACAAACAACAACATAAAATATTACATACAATGATATCCATGGC  
CGACTAGCCGAAGAAAAAGGGCGTGCATCGGTATGGCTAAATTA AAAACAGTAAAAGA  
ACAAGAAAAGCCTGATTTAATGTTAGATGCAGGAGACGCCTTCCAAGGTTTACCACTTTC  
AAACCAGTCTAAAGGTGAAGAAATGGCTAAAGCAATGAATGCAGTAGGTTATGATGCTA  
TGCGAGTCGGTAACCACGAATTTGACTTTGGATACGACCAGTTGAAAAGTTAGAGGGTA  
TGTTAGACTTCCCGATGCTAAGCACTAACGTTTATAAAGATGGGAAACGCGGTTTTAAAC  
CATCAACGATTGTAACAAAAAATGGTATTCGTTTTGGAATTATTGGCGTAACGACACCAG  
AAACAAAGACGAAAACAAGACCTGAAGGCATTAAGGTGTTGAATTTAGAGATCCATTA  
CAAAGTGTGACAGCAGAAATGATGCGTATTTATAAAGACGTAGATACATTTGTTGTTATA  
TCACATTTAGGGATTGATCCTTCAACGCAAGAAACATGGCGTGGTGATTACTTAGTGAAA  
CAATTAAGTCAAAATCCACAATTGAAGAAACGTATTACAGTTATTGATGGTCATTCACAT  
ACCGTACTTCAAATGGTCAAATTTATAACAATGATGCATTAGCACAAACAGGTACAGCA

CTTGCGAATATCGGTAAGATTACATTTAATTACCGCAATGGAGAGGTATCGAATATTAAG  
CCGTCATTGATTAATGTTAAAGACGTTGAAAATGTGACACCGAACAAAGCATTAGCTGAA  
CAAATTAATCAAGCTGATCAAACATTTAGAGCACAAACTGCAGAGGTAATTATTCCAAAC  
AATACCATTGATTTCAAAGGAGAAAGAGATGACGTTAGAACGCGTGAAACAAATTTAGG  
AAACGCGATTGCAGATGCTATGGAAGCGTATGGCGTTAAGAATTTCTCTAAAAAGACTGA  
CTTTGCCGTGACAAATGGTGGAGGTATTTCGTGCTCTATCGCAAAGGTAAGGTGACACG  
CTATGATTTAATCTCAGTATTACCATTTGGAAATACGATTGCGCAAATTGATGTAAAAGG  
TTCAGACGTCTGGACAGCTTTTGAACATAGTTTAGGCGCACCAACAACACAAAAAGATGG  
TAAGACAGTATTAACAGCGAATGGTGGTTTACTACATATCTCTGATTCAATCCGTGTTTAC  
TATGATATGAATAAACCATCTGGCAAACGAATTAACGCTATTCAAATTTTAAATAAAGAG  
ACAGGTAAGTTTGAAAATATTGATTTAAAACGTGTATATCACGTAACGATGAATGACTTC  
ACAGCATCAGGTGGCGACGGATATAGTATGTTCCGTGGCCCTAGAGAAGAAGGTATTTCA  
TTAGATCAAGTACTAGCAAGTTATTTAAAAACAGCTAACTTAGCTAAGTATGATACGACA  
GAACCACAACGTATGTTATTAGGTAACCAGCAGTAAGTGAACAACCAGCTAAAGGACA  
ACAAGGTAGCAAAGGTAGTGAGTCTGGTAAAGATGCACAACCAATTGGTGACGACAAAG  
TGATGGATCCAGCGAAACAAACAGCTTCAGGTAAAGTTGTGTTGTTACCAGCGTATAGAG  
GAACTGTTAGTAGTGGTAGAGAAGGTTCTGATCGCGCATTGGAAGGAACTGCTGTATCAA  
GTAAGAGTGGGAAACAATTGGCTAACAAAGTCAGCGCCTAAAGGTAGCGCACATGAGAAA  
CAGTTACCAAAAACCTGGAAGTATCAAAGTTCAAGCCAGCAGCGATGTTTGTATTAGTA  
GCAGGTATAGGTTTAAATTGCGACTGTACGACGTAGAAAAGCTAGCTAA

> **tx\_sasH**

Function: rho independent terminator of sasH

Best match: tx\_sasH\_CC001-ST772\_118\_AJGE01000004.1[1099:1164:r] (completely identical)

Position: 001-contig\_254\_RC: 41997 ... 42063; Length: 66 bp

Sequence:

ATATATTGAAAACAATACTACTGTATTTCTTAAATAAGAGGTACGGTAGTGTTTTTTTATG  
AAAAA

> **orfX**

Function: protein coding sequence; 23S rRNA methyltransferase (core genome, constant)

Best match: orfX\_CC001-ST772\_118\_AJGE01000004.1[319:798:r] (completely identical)

Position: 001-contig\_254\_RC: 42363 ... 42843; Length: 480 bp

Sequence:

ATGAAAATCACCATTTTAGCTGTAGGGAAACTAAAAGAGAAATACTGGAAGCAAGCCAT  
AGCAGAATATGAAAAACGTTTAGGCCCATACCCAAGATAGACATCATAGAAGTTCCAG  
ACGAAAAAGCACCAGAAAATATGAGCGACAAAGAAATCGAGCAAGTAAAAGAAAAAGA  
AGGCCAACGAATACTAGCCAAAATCAAACCACAATCCACAGTCATTACATTAGAAATAC  
AAGGAAAGATGCTATCTTCCGAAGGATTGGCCCAAGAATTGAACCAACGCATGACCCAA  
GGCAAAGCGACTTTGTATTTCGTTATTGGCGGATCAAACGGCCTGCACAAGGACGTCTTA  
CAACGCAGTAACTACGCACTATCATTAGCAAATGACATTTCCACATCAAATGATGCGG  
GTTGTGTTAATTGAACAAGTGTATAGAGCATTTAAGATTATGCGAGGAGAAGCGTATCAC  
AAATAA

> **attSCCx**

Function: attachment site of SCC/right part (SCCmec)

Best match: attSCCx-Mu50\_part\_AY751822\_AY751822.1[1:19:r]

Position: 001-contig\_254\_RC: 42794 ... 42813; Length: 19 bp

Sequence:

AGTGTATAGAGCATTTAAG

> **attSCCy**

Function: attachment site of SCC/left part (SCCmec)

Best match: attSCCy-HU25\_CC001-ST772\_118\_AJGE01000004.1[306:337:r] (completely identical)

Position: 001-contig\_254\_RC: 42824 ... 42856; Length: 32 bp

Sequence:  
AGAAGCGTATCACAAATAAAACTAAAAAATAG

> **sccterm**

Function: terminus of SCC towards orfX (SCCmec)  
Best match: sccterm11\_ref\_CC001-ST772\_118\_AJGE01000004.1[1:318:r] (completely identical)  
Position: 001-contig\_254\_RC: 42843 ... 43161; Length: 318 bp

Sequence:  
AACTAAAAAATAGATTGTGTATAATATAAAAAGGAAGGGATTTATATTTAAAATTTTGAATT  
CAAAAATTATTGAAAGGGAAGCTACCTTAGAAATTGAATCTATGGCCACTAATACATTGA  
AAATAAACCCAGACATTAATTCTTACTATACAGAAATGTCTTTTCGATGGAGAATTGGAAG  
TGTATGATCCTGAAAATTTGAATAAAAAATTTTCGTTGGAAAATACAAGTTCAAGTTAAA  
GGAAAAGAAGTAGCTAAAAGAGGAGGTAAGATTATTCGTCTGAAGTAATGGGTTCTGTTG  
CAAAGTAAAAAATATAGC

> **tnpIS431-04**

Function: protein coding sequence; insertion sequence IS257e (mobile element)  
Best match: tnpIS431-04\_CC005\_CIG1165\_AHVE01000014.1[1655:2329]RC  
Position: 001-contig\_254\_RC: 43191 ... 43221; Length: 30 bp

Sequence:  
TTAACTTGCTAGCATGATGCTAATTTTCGTG

> **tnpIS431-06**

Function: protein coding sequence; transposase for IS431 (mobile element)  
Best match: tnpIS431-06\_circ\_S-epidermidis\_GQ900381.1[43799:43807]RC (completely identical)  
Position: 002-contig\_329\_RC: 1 ... 10; Length: 9 bp

Sequence:  
ATAGTTCAT

> **mvaS-SCC**

Function: protein coding sequence; truncated 3-hydroxy-3-methylglutaryl CoA synthase (SCCmec)  
Best match: mvaS-SCC\_trunc-ref\_CC001\_MW2-USA400\_BA000033.2[37179:37531]  
Position: 002-contig\_329\_RC: 82 ... 435; Length: 353 bp

Sequence:  
ATGTTGGTAACATTTATACAGGATCATTATACTTAAGTTTAATTTTCGTTATTACAGAACCA  
CACATTCCAACCAGAAGAGAAAGTATGTCTATTTAGTTATGGTTCAGGAGCAGTAGGAGA  
AATCTTTAGTGGTTCAATCGTTAAAGGATATGACAAAGCATTAGATAAAGAGAAACACTT  
AAATATGCTAGAATCTAGAGAGCAATTATCAGTCGAAGAATACGAAACATTCTTTAACAG  
ATTTGATAATCAAGAATTTGATTTTCGAACGTGAATTGACACAAGATCCATATTCAAAGT  
ATACTTATACAGTATAGAAGACCATATCAGAACATATAAGATAGAGAAATAA

> **Q5HJW6**

Function: protein coding sequence; putative protein (SCCmec)  
Best match: Q5HJW6\_CC001\_MW2-USA400\_BA000033.2[37629:37859]  
Position: 002-contig\_329\_RC: 532 ... 562; Length: 30 bp

Sequence:  
ATGCTTATTTTTTATCTTACGATTTTGTA

> **Q5HJW6**

Function: protein coding sequence; putative protein (SCCmec)  
Best match: Q5HJW6\_part\_M06/0171\_LCL\_10048.1[1:176]  
Position: 003-contig\_276: 2 ... 258; Length: 256 bp

Sequence:

CTGGAGCCATTAGTCTCTCGCACATACTATTCCCTCAGGCGTCAGCACTTACAAAATCGGT  
TGTAATTTTCATTTTTATACGCATTCTTACTGAGATTATACTAATAAGAGGAATAGTAAAA  
GCAATTCTAAGTAAAATTGCAGATAAGAGGTTTGTAAAAGCAGTTCTCAGTAAAATTAC  
AGATAAGAGGTACGTTAAAAGCAGTTCTAAGTAAAATTGCAGATAAGAGGTTTGTAAA  
AGCAGTTCTAAGTAA

> **dru**

Function: SCC direct repeat units (SCCmec)

Best match: dru-45394F\_CC008-ST239\_T0131-ST239\_CP002643.1[37657:38014]

Position: 003-contig\_276: 87 ... 525; Length: 438 bp

Sequence:

TCTTACTGAGATTATACTAATAAGAGGAATAGTAAAAGCAATTCTAAGTAAAATTGCAGA  
TAAGAGGTTTGTAAAAGCAGTTCTCAGTAAAATTACAGATAAGAGGTACGTTAAAAGCA  
GTTCTAAGTAAAATTGCAGATAAGAGGTTTGTAAAAGCAGTTCTAAGTAAAATTGCAGA  
TAAGAGGTACGTTAAAAGCAATTCCATGCAAAATTGCTGATAAGGGGTAAGTTAAAAGC  
AGTTCTCAGTAAAATTGCAGATAAGAGGTACGTTAAAAGCAGTTCTAGGCAAAATTGCAG  
ATAAGAGGTGCGTTAAAAGCAGTTCTCAGTAAAATTGCTGATAAGGGGTAAGTTAAAAG  
CAATCCTAAGTAAAATTGCAGATAAGAGGTAAGTTAAAAGCAATCCTAAGTAAAATTGC  
AGATAAGGGGTACAGAAAAAC

> **ugpQ**

Function: protein coding sequence; glycerophosphoryl diester phosphodiesterase (SCCmec)

Best match: ugpQ\_CC001\_MW2-USA400\_BA000033.2[38288:39031] (completely identical)

Position: 003-contig\_276: 726 ... 1470; Length: 744 bp

Sequence:

ATGCTAACTGTATATGGACATAGAGGATTACCTAGTAAAGCTCCGGAAAATACAATTGCA  
TCATTTAAAGCTGCTTCAGAAGTAGAAGGTATAAACTGGTTGGAGTTAGATGTTGCAATT  
ACAAAAGATGAACAACCTGATTATCATTTCATGATGATTATTTAGAACGGACTACAAATATG  
TCCGGGGAAATAACTGAATTGAATTATGATGAAATTAAGATGCTTCTGCAGGATCTTGG  
TTTGGTGAAAAATTCAAAGATGAACATTTGCCAACTTTCGATGATGTAGTAAAAATAGCA  
AATGAATATAATATGAATTTAAATGTAGAATTAAGGTATTACTGGACCGAATGGACTA  
GCACTTTCTAAAAGTATGGTTAAGCAAGTGGAAGAACAATTAACAACTTAAATCAGAAT  
CAAGAAGTGCTCATTTCAGCTTTAATGTTGTGCTTGTAAACTTGCAGAAGAAATCATG  
CCACAATATAACAGAGCAGTTATATCCATACAACTTCGTTTCGTGAAGACTGGAGAACA  
CTTTTAGATTACTGTAATGCTAAAATAGTAAACACTGAAGATGCCAACTTACTAAAGCA  
AAAGTAAAATGGTAAAAGAAGCGGGTTATGAATTGAACGTATGGACTGTAAACAAACC  
AGCACGTGCAAACCAACTTGCTAATTGGGGAGTTGATGGTATCTTTACAGACAATGCAGA  
TAAAATGGTGCAATTTGTCTCAATAG

> **ydeM**

Function: protein coding sequence; putative dehydratase (SCCmec)

Best match: ydeM\_CC001\_MW2-USA400\_BA000033.2[39128:39556] (completely identical)

Position: 003-contig\_276: 1566 ... 1995; Length: 429 bp

Sequence:

ATGAAATACGATGATTTTATAGTAGGAGAAACATTCAAAAACAAAAGCCTTCATATTACA  
GAAGAAGAAATTATCCAATTTGCAACAACTTTTGATCCTCAATATATGCATATAGATAAA  
GAAAAGCAGAACAAGTAGATTTAAAGGTATCATTGCATCTGGCATGCATACACTTTCA  
ATATCATTTAAATTATGGGTAGAAGAAGGTAAATACGGAGAAGAAGTTGTAGCAGGAAC  
ACAAATGAATAACGTTAAATTTATTAACCTGTATACCCAGGTAATACATTGTACGTTAT  
CGCTGAAATTACAAATAAGAAATCCATAAAAAAAGAAAATGGACTCGTTACAGTGTAC  
TTCAACATACAATGAAAATGAAGAAATTGTATTTAAGGGAGAAGTAACAGCACTTATTA  
ATAATTCATAA

> **txbi\_mecA**

Function: bidirectional rho-independent terminator of mecA (SCCmec)

Best match: txbi\_mecA\_CC001\_MW2-USA400\_BA000033.2[39547:39611:r]RC (completely identical)

Position: 003-contig\_276: 1985 ... 2050; Length: 65 bp

Sequence:

TAATTCATAATAAAACAGTGAAGCAACCATCGTTACGGATTGCTTCACTGTTTTGTTATTC  
ATCT

### > **mecA**

Function: protein coding sequence; penicillin binding protein 2a (SCCmec)

Best match: mecA\_CC398\_SO385-pig\_AM990992.1[47524:49530:r]RC (completely identical)

Position: 003-contig\_276: 2040 ... 4047; Length: 2007 bp

Sequence:

TTATTCATCTATATCGTATTTTTATTACCGTTCTCATATAGCTCATCATACACTTTACCTG  
AGATTTTGGCATTGTAGCTAGCCATTCTTTATCTTGTACATCTTTAACATTAATAGCCAT  
CATCATGTTTGGATTATCTTTATCATATGATATAAACCACCCAATTTGTCTGCCAGTTTCTC  
CTTGTTTCATTTTGGAGTTCTGCAGTACCGGATTTGCCAATTAAGTTTGCATAAGATCTATA  
AATATCTTCTTTATGTGTTTTATTTACGACTTGTTGCATACCATCAGTTAATAGATTGATAT  
TTTCTTTGGAAATAATATTTTCTTCCAACTTTGTTTTTCGTGTCTTTTAATAAGTGAGGT  
GCGTTAATATTGCCATTATTTTCTAATGCGCTATAGATTGAAAGGATCTGTACTGGGTTAA  
TCAGTATTTACCTTGTCCGTAACCTGAATCAGCTAATAATATTTTCATTATCTAAATTTTTG  
TTTGAAATTTGAGCATTATAAAATGGATAATCACTTGGTATATCTTCACCAACACCTAGTT  
TTTTCATGCCTTTTTCAAATTTCTTACTGCCTAATTCGAGTGCTACTCTAGCAAAGAAAAT  
GTTATCTGATGATTCTATTGCTTGTTTAAGTCGATATTACCATTACCACCTCATATCTTG  
TAACGTTGTAACCACCCCAAGATTTATCTTTTTGCCAACCTTTACCATCGATTTTATAACTT  
GTTTTATCGTCTAATGTTTTGTTATTTAACCAATCATTGCTGTTAATATTTTTTGAGTTGA  
ACCTGGTGAAGTTGTAATCTGGAACCTGTTGAGCAGAGGTTCTTTTTTATCTTCGGTTAAT  
TTATTATATTCTTCGTTACTCATGCCATACATAAATGGATAGACGTCATATGAAGGTGTGC  
TTACAAGTGCTAATAATTCACCTGTTTGGAGGTTGGATAGCAGTACCTGAGCCATAATCAT  
TTTTCATGTTGTTATAAATACTCTTTTGAACCTTTAGCATCAATAGTTAGTTGAATATCTTTG  
CCATCTTTTTTCTTTTTCTTATTAATGTATGTGCGATTGTATTGCTATTATCGTCAACGAT  
TGTGACACGATAGCCATCTTCATGTTGGAGCTTTTTATCGTAAAGTTTTTCGAGTCCCTTTT  
TACCAATAACTGCATCATCTTTATAGCCTTTATATTCTTTTTGTTTTAATTCTTCAGAGTTA  
ATGGGACCAACATAACCTAATAGATGTGAAGTCGCTTTTCCTAGAGGATAGTTACGACTT  
TCTGTTTCATTAGTTGTAAGATGAAATTTTTTTCGAAATCTCTTAAATATTCATCCATTTT  
TTTAACGGTTTTAAGTGGAACGAAGGTATCATCTTGTACCCAATTTTGATCCATTTGTTGT  
TTGATATAGTCTTCAGAAATACTTAGTTCTTTAGCGATTGCTTTATAATCTTTTTTAGATAC  
ATTCTTTGGAACGATGCCTATCTCATATGCTGTTCTGTATTGGCCAATTCACATTGTTTC  
GGTCTAAAATTTTACCACGTTCTGATTTTAAATTTTCAATATGTATGCTTTGGTCTTTCTGC  
ATTCCTGGAATAATGACGCTATGATCCCAATCTAACTTCACATAACCATCTTCTTTAACAA  
AATTAATTGAACGTTGCGATCAATGTTACCGTAGTTTGTTTAATTTTATATTGAGCATC  
TACTCGTTTTTTATTTTTAGATACTTTTTTTATTTTACGATCCTGAATGTTTATATCTTTAAC  
GCCTAAACTATTATATATTTTTATCGGACGTTTCAGTCATTTCTACTTCACCATTATCGCTTT  
TAGAAATATAACTGCTATCTTTATAAACTTGTGTTGAAATTTTTATCTTCAATTGCATCAAT  
AGTATTATTAATTTCTTTATCTTTTGAAGCATAAAAATATATACCAAACCCGACAACACTACA  
ACTATTAATAAAGTGGAACAATTTTTATCTTTTTTCAT

### > **mecR**

Function: protein coding sequence; signal transducer protein MecR1 (SCCmec)

Best match: mecR\_part\_CC008\_NCTC8325\_X52593.1[1:40:r]

Position: 003-contig\_276: 4146 ... 4186; Length: 40 bp

Sequence:

GTGTTATCATCTTTTTTAATGTAAAGTATAATCAGTTCAT

### > **tnpIS431-06**

Function: protein coding sequence; transposase for IS431 (mobile element)



Best match: tnpIS431-06\_circ\_FM207105.1[6418:7045]  
Position: 004-contig\_253\_RC: 30 ... 60; Length: 30 bp  
Sequence:  
ATAAAAAGAACCGCAGGTCTCTTCAGATCT

### > Q4LAG7

Function: protein coding sequence; putative protein (SCCmec)  
Best match: Q4LAG7\_CC001-ST772\_118\_AJGE01000059.1[137:565:r]RC (completely identical)  
Position: 004-contig\_253\_RC: 166 ... 595; Length: 429 bp  
Sequence:  
CTAATTTTTTCTCTTTGTAAATAAATGCAAAGAGATACCATAAGGATCTCTTACATAACCA  
TAACCTTCAGTATAGAATTCTGGACTAAATGTTTTCAATACCTCACTGCCTTTTTCTATTA  
ACTGGTCATATACATGTTTAGTTTCTTCTACTTGGTCAAAGTGAGACAAAGAGATATATT  
ATTACCTTGTGTTATGGGCAAACCTTCAGTGTCTGCGATCATAATTTTTATATCTCCA  
AATTGAAGTACACATTGATCAATTTTATTTAAATCATTTCGTCAATATTAAGTTGCTTAT  
CTATAGGTCTATCTTTAATACGTTGAATATACAGTGTTTTAGCGCCAAACAGCTCTTCATA  
CAACTTTTTTAAACCCTCTGCATTTTGAGTGATTAATAAATATGGACTTACTTGAAATTC  
AT

### > Q3T2N0-var1

Function: protein coding sequence; transcriptional regulator (SCCmec)  
Best match: Q3T2N0-var1\_CC398\_SO385-pig\_AM990992.1[51021:51950] (completely identical)  
Position: 004-contig\_253\_RC: 675 ... 1605; Length: 930 bp  
Sequence:  
ATGAAAAAATCTGTTAGATTATATAATATGATTGAATATTGTAATGAAAATAGGAACTTC  
AAATTAATGATTTAATGTCAGAATTTAATATTTCTCGTAGTACCGCTTTAAGGGATATAA  
AAGAAATTGAAGCATTAGGAGTACCTTTATATAGTAATCCAGGGAAAAATGGTGGTTATA  
CGATCATAGGTAATCGAGACCAAACGAAAATAGCAATCTCAGATGAAGAGTTGAAAGCT  
TTAGTATTTACACTTTTCGAGTATTTCAAATGTGAGTAATCTACCTTTTCAAACAGAATATC  
AAGAAATATTAATAAATAAATAAATAAATAAATAAATAAATAAATAAATAAATAAATAA  
AATGATCTATTTCAATATTTAATGAAGATAAGTATCAGTTCAAAGTTATAAGTTATTTA  
ATGAAATCATTAGATTGATAATTGAGAATAAGTCTTTTGAAACCTGTTATTCACAAAAT  
ATATTAAGAACAATATAAAGGTATTGGCATTATGTATAAAAATCATCAATGGTATTTTG  
TTGTAGCTAATATAGAATCAAAGTTAGTGAATCTATTAAATATTTGAAAATAAAGAAC  
TATATGAAATGGGAGAGACTCAAGAGTGTAATGATATAACTATGCAGAATTTTCAACAGT  
TCATGGTTAAAAATGAAACAGCTATTGATATTCTTATTAGAAGCAATGTTATGGGATTGA  
ATATCTTGAAAGGCTACCTGTGGAGTGACTATATGATTGAAAATATTGACGAAGAGACAT  
ATTTATTTAAATCAAAGTGAACGCGAAAGATATAGATTTTATAGCTAAGTTAATTGTCA  
CAGGTGGTGTCAATGTAAAAGTAGAGACCCTAATAGTTTGAAAATGCTGTTAAAGTTG  
AATTAATAAATAAATAAACAATGTATTA

### > Q4LAG4

Function: protein coding sequence; putative protein in SCCmecV (SCCmec)  
Best match: Q4LAG4\_CC001-ST772\_118\_AJGE01000059.1[1737:3725] (completely identical)  
Position: 004-contig\_253\_RC: 1766 ... 3755; Length: 1989 bp  
Sequence:  
GTGAATAAAAATATTACAGCTCTAAAATCTACTGAAAATACTACATATATGCAGTATACG  
GTTTCATATCGATGATCAAATTATAAATAATATAAAAGAGTGTACCAAAAAGTTTAAAATT  
TTGCCTATGGAAGATAAAATTCCATTATCACCGTTGTTACAACCAGAATATGCAGGAGAG  
GTACAAGATTTTATTAGTACATATGAGCAGTTTATGATTAATTTTGGTAAAGTAATATTGG  
ATAGTCAAGGCATAAAAATACAGTTTGAAAGTGAATCATTAAAGTAGTATTCAACGAGGC  
ATTCAAGAACATTGTTACTTAAATGAGCGAACAAATGACATTGATGTGACTAAAGAATGG  
TATTTATGCAAATTTCAAATCAAACATTAGAAGAGGATAAAAATCAATTGTATAATGCT  
TTAAAGCAACTCATGAATGATTCTAAAATAAAAAGCAAGCTTTTCAAGAGGTGTTTAAAG  
GTTTCATATTGATATTTATCTCTACAATAAAGAAAAATCTGAATATAAGTATCAAGTATCTA

GTTATTTCAATCTTGTAAGAAAATCCTAAAATAACTTATAAAAAAAGACATTTACAAG  
AGAAACAAGGTGTCAAGGGTACAACCTTTCACGAACAAATTAAAATTATTGAACAAAATG  
TATGGTGTAGATGTTGCAAAATATCAGCCATTTTATAATTCTAATAATCCTGAATATGAAA  
GAGGTCAATTTGGTGAAAGATACATTTCTCAAAGATCTAACTATGAATTTAATAGACTTC  
AATATCAAATTATAGATATGTTATCGAAAATACTTGATAAGCATCCATTACCAAAGTCAG  
ATAATAATTATAAACATATTCCAACCTATTGAAAAAGCAATATTAAGTGGGGATTCTCATA  
GTTTTTATGAGTATTTTGAAGATATAATGAAAGAAATTATAAGTATGGAAAATTCTTCTTT  
AAAGGAAAAATTATTGACTGATTTTACATATCAATCTCAATGTAGATGGTACTCTGAAAG  
TGAAAAATTAATAATTGCAACTTGAAAGTTTTATGCATAAAGTTTTGGAGAGCAATTATTA  
TGAGGGTAACAAATTATATAGAATGTTGTCTCATGCAATTGAAGAAACAATCAATGAGGC  
TGATGAAGATAAGGTTCAATTTCAATTATTTTAAAGATTATTTTTTGACAGACGGTGGGGT  
AGAATTGGGAGCAGATTAGCGAGAAAATTACTGAATTCATGGTAAAGTTATTAACGA  
TATCCAAAATGAATATAATAAGATTCAATTTAATAACGCAAATCGAAATCAGAACTAAA  
CTTTAATTATTTATACCATTGCTTTGAGTTTAGTAATAACTTAGTAAAAGCAAGGGTAAAT  
GGAAATAGAGGTTACATTTTATATTTGTAGATAAATAAAAATAAAAATGCCCTTTTTG  
GATCAATTATTAATCAATTATTTGAATCAAGAAATAGGTCAGGAAAGTATTAATTATAAT  
ATGCAACATTGTTTGAAAAAGAAAGATATGATAGAAGTAGTACCATTGAAAAATTAGT  
AGCAACAAGCAAATTTAAGTATGAAAAAGATGATTCAGATTTATTCAAACAACCTTTTCAA  
TGATGTTGAAAATTCAATAGACAGATTAGGTATTTACTTACTAAATAATGGTATAAATTC  
GAATGATGAAAATGCAAGATATTATAGATCGTTTTTAAAGGAACTTAGTAGAATAAAAA  
GTAAATTAACGCCATTTTCTCTTGAAATAAGTAAGTCTAGCGGAAGAGAGCAACATTATC  
CTGATGATGCTATTGATGATAAAGATGAGAGAAGAAAAAATAAAGAAGAAACATATCAT  
GCTTTTGATGATAAAAGCGATATTGACTCCAATTAAGAATAAAAATAAATGTTTCTATC  
GATAATTTATTGTCAGTTAAAATTAAGAGCAATTTGTATGATATTAGTCCAATACAAAA  
AAACAATAA

### > Q4LAG3

Function: protein coding sequence; putative protein in SCCmec III & V (SCCmec)

Best match: Q4LAG3-PM1\_CC398\_SO385-pig\_AM990992.1[54295:55404] (completely identical)

Position: 004-contig\_253\_RC: 3949 ... 5059; Length: 1110 bp

Sequence:

ATGTATCAAGCAAATATACGTGATTTAATTACAAAATTGCCTCAAAGCAATAAAACAGAA  
CACTTTTTAATGAACAAATTTTCAAATCAAGATAAAGTTCAGCAGCTACAAAGACAAATT  
AGCCAACAGCTAGATCAACAATATAATGAGCTTTTGGCTAATGAAAAAGCTAAGCTAGA  
CCAATACGTGGAAGTACACCATAATTTAGAACCATTAAGAAAGAGATTGAATCAGAAT  
CTATTAACCTTGATACCGATAAATTACCTGATATCAAAGCGACAATGCTTGAAAAGGCTA  
AGAACGATGAACATTTTGATAAAATCGAACAGCTATTTGATAGATTAGATCAGTCATTAA  
ATGGTACGAATCGATTATATACGCAATTATCGTTGATTGGCACACGAACACATCGGATCA  
CAACGAAAAGATTTAATGTTCAAGGCTTGCCTAAATTAGTCCAACAAATGATTTTACCTT  
CGCAATTTAAAAGGTTTATACAATAGATTTTAAATCATTCGAACCATCAGTTGCTGCGT  
ATATGACACAAGACGAACAACCTGATTGACTACTTGAATCATGAAGAAGGGTTATACGAT  
GCATTACTGAGAGACTTATCTTTGTCAAAGAGAAGCGCGTGAGTGTGAAACGTGCATTT  
ATAGGGTCATTTCTTTTTGGCGGTCGTTATAGTAGCTCTAAATTCAAAATCAATCAAGAGG  
TTAGTGAAATTAAGTGGCTACAAGTAATGAGCAAATTCAGAAGGTCATTGAATTTAAGG  
AGCAAGTCGAAAAATATAAAACAATGCCTACGCCTTACGGCATTGAACATGATATGAGC  
GCATTTCAAGGTAGTAGTATTATGGCAATTTATGTACAAACGGTAGCAAGCTATATTTT  
AAGCACATTTTGTGGAAGTGTACAAAGCACAGTGCGAAAAAAAAACGTTCAAGATTAT  
AGTGCCGATACACGATGCGATTATGATTGAATGTAATGATAAGGGGATTGCACAAAATGT  
AGCACAGCTCATGAAAGATACAGCTAATCAACTGTTTAAATGGTGAATTTGCACATGTGAC  
AGTGAAGCTTTAGGAGGTATAGACAATGAATAA

### > Q3T2M7-var1

Function: protein coding sequence; putative protein (SCCmec)

Best match: Q3T2M7-var1\_CC398\_SO385-pig\_AM990992.1[55397:55765] (completely identical)

Position: 004-contig\_253\_RC: 5051 ... 5420; Length: 369 bp

Sequence:

ATGAATAATGATAGAGGAAAAAGTCTTCAAATTCCCCAAAGTACATTGTTAAAAGAAGG  
ATCTATATACGTTGCTACGTTACATTCTGTGTACGAGAAGAAGTCTCAGGTGATATTTAA  
CATCAGTTTACGTATGAAGTAGAACTTAACCAAGAAACGCACTATGTAAATCGCAATATT  
ACCGTAAAATCTATGAGTCACCAATTATCAATTGCTGATTGGATTAAACGTCACAGTAAC  
TATAACGTAACCACATTAATTATGATCCATACATTGATCGAAAACATTTGGTCTTGTAG  
GGCAATATAACGGAAATTATTATATTCAAGATGTAGCACCATTAGATGAATTTGGAGGGG  
TATTGTAA

### > **ccrAA**

Function: protein coding sequence; cassette chromosome recombinase AA (SCCmec)

Best match: ccrAA-TSGH17\_CC398\_SO385-pig\_AM990992.1[55765:57381] (completely identical)

Position: 004-contig\_253\_RC: 5419 ... 7036; Length: 1617 bp

Sequence:

ATGAATCATATTTTAGAAATGTTAATAAAAATTATTTAAAAGTGGGTATGGAGGCAATCGAC  
CGTAAAGGTCTGATTGCCATCCTAACAAGTAGTATTGGAAATGATGAAATGGATGATTCT  
GAACAAGCTGTAATGGTGTATAACGAGCTTATCGATAAGCTACAGCTTAACATTCCTAAA  
GATGTCGACTATAGACCTAACATATACAGTTATTTTGGTATTCAAAAAAAGCCAAATGAC  
ACAATATTAGTGGAAATGATGATATGTATTTTTCATATCAAGCGTTTTGATTCAGAGTTGT  
TTGTTTTCAAAGATAAAGGTTGGCAAAGGTAAGTGAAGATGAATTGCAAGGGTTGATAT  
CTAAAATGATACAAGTGTGCTAGTTGATTATAAACCTTCACTAAGTACTTTGAAAAACG  
TAGTAGATGGCATAACAGAAATCAACGGACATAGAAAACTTGTGAGCATAGACAGTAC  
ATTGGTTGTGGACGAAATATGTTCAATCTAAAGACCTTTAAAGTGGTTGATAATGACCTT  
GAAATATTCCTAAAACACGCTTAGATTTGGAATTAGATATAAATGACACGATTACGGAC  
AAGATACCCCGAATTTCAAACAATATATGTTAGAGTTGGCGAATTATGACCATGATTTA  
CAATATTTCTTTTCCAACATATGGCAGTGTTATTGACGGCAGATACTAAACTACGTCGTG  
GACTTTTTTTGTATGGAAGTCAAAAAATGGGAAATCGGTCTATATTAATTAGTTAAGT  
CATTCTTTTATAGTAATGATATCGTATCTAAAACACTTAATGAACTTGGCGGGCGTTTCGA  
TAAGGAAAGTCTAATTGGTAAACGAATTATGGCAAGTGAAGTGGGGAAAGCTAATA  
TTGATGAAGCAACTGTGAATGATTTCAAAAAATTACTATCTGTTGAACCAATTCATGCTG  
ACCGTAAAGGAAGAACGCAAGTAGAAGTTACTTTAGATTTAAAACCTCATTTTTAATACGA  
ATGCTGTACTCAATTTTCCATCATCACATGCAAAGCATTAGAGCGTAGAATTGCTGTTAT  
TCCATGTGAATATTATGTTGAAAAAGCTGACCCTGACTTAATTGAAAAGTTACAGGATGA  
AAAGAAAGAAATCTTTCTTTACTTGATGTATGTGTATAAGCAAATTGTAAAAAATGATAT  
CGAGTACCTCCAAAATGATCGTGTTACTGAAATTTCTCATGATTGGTTAAATTTTGGATAT  
GAATTTGTTTCTAGTAAATCAGCAAATATTGCACATCAGAAAGCGTGTATTAATTTACTCA  
GAAAACCTTATAGAAATCAAACCAGGGTCACGTATCAAAGTGTCTAGGCTAAATGAGGTT  
ATTAGAGATGAAATTAAGTAAGCTCTCAAGTTATTAATGATTTGGTTCAAGCTAACTTT  
AATGTACAAAGTAGACTAAATAATGGTTATAAGTATTGGGTCGATTTAGGATGGAAAGA  
AACTGATAAAAAAGATGACATGATTTCAATTCGATAAAAAATGAGAATGTAACAGATGATG  
AATTCTTATACGAAGATGATTTGAACTTAGGTTGGGAGGACTTTGACGATGAATAA

### > **ccrC**

Function: protein coding sequence; cassette chromosome recombinase C (SCCmec)

Best match: ccrC-TSGH17\_CC001-ST772\_118\_AJGE0100059.1[7230:8909] (completely identical)

Position: 004-contig\_253\_RC: 7260 ... 8940; Length: 1680 bp

Sequence:

ATGAAGGGTAAAATTGCACTTTATTACGTTAGTACGTCTGAGCAGTCAGAACATGGT  
TATTCTGAAAAGGAGCAGGAACAACACTCATCAAAGAAGTTATGAAAAATTTCCAGGT  
TATGACTATGAGACATATACTGACTCAGGCATTTTCAAGTAAAAATATTGAAGGTCGTCCG  
GCAATGAAACGTCTATTACAAGATGTTAAGGATAATAAAAATCGAAATGGTATTAAGTTGG  
AAATTGAATCGTATTTCTCGCTCAATGAGAGACGTGTTTAAATATTATTCATGAATTCAAAG  
AACATGACGTAGGGTATAAATCGATTTCTGAGAATATTGATACATCCAATGCTTCTGGAG  
AAGTACTCGTTACAATGTTTGGACTAATAGGATCTATAGAACGCCAGACTTTGATTTCCA  
ATGTGAAACTTTCTATGAATGCTAAGGCAAGGAGCGGAGAGGCAATCACCGGTCGTGTTT

TAGGCTACAAATTATCACTTAATCCATTGACACAGAAAAATGATTTAGTTATTGATGAAA  
ATGAAGCTCATATTGTACGGGAAATCTTTGATTTATATTTGAATCACAATAAAGGATTTA  
AAGCAATCACGACAATTCTAAATCAAAAAGGATATCGTACCATTAATCAAAAACCATTTT  
CAGTGTGGCGTGAAATACATTTTGAATAATCCAGTCTATAAAGGCTATGTCAGATTCA  
ATAATCATCAAAATTGGGCTGTTTCAGCGAAGAAGTGGTAAAAGTGATAAAAATGATGTG  
ATATTGGTCAAAGGTAAGCATGAAGCCATTATAAGTGAAGATGATTTGATCAAGTTCAT  
GAGAACTAGCTTCTAAAAGTTTTAAACCGGGTCGACCTATTGGTGGAGATTTCTACTTA  
CGTGGCCTTATTAATGCCGAGAATGCGGAAATAATATGGTATGTCGACGGACGTATTAT  
AAAACGAAAAAGTCCAAGAACGCACAATCAAACGCTATTACATTTGTTCAATTATTCAAT  
CGCTCAGGAAGTTCTGCCTGTCATAGTAATGCGATTAATGCTGAAGTCGTCGAACGCGTA  
ATCAATGTTCAATTTGAATCGTATTCTTTACAACCTAATGTTATTAAGCAGATTGCGTCAA  
GTGTGATAGAAGAACTGAAACAAAAGCATAGTAAACAAACAGAAATAAAAATATGATATT  
AATAGTCTAGAAAAACAAAAGCAAAAAGTTAAAACACAACAAGAACGATTATTGGAATT  
GTTCTTAGATGATGAAATGGATAGCGAAATGTTAAAAGCTAAACAAAGTGAAATGAATC  
AACAGTTAGAAGTATTAGACCAACAAATTAAGAAGCAAAAACAAGCAAATCAATCACAG  
GATGATATACCCAATTTTGATAAGTTAAAAGCACGACTCATTGATGATAACACGATTC  
AGTGTGACTTAAGAAAGGCTACACCCGAAGCTAAAATCAACTTATGAAAATGTTAATT  
GATTCAATTGAAATTACGAAAGATAAACAAGTGAAACTCGTAAGGTATAAAAATTGACGA  
AAGTCTTATCCCTCAATCTTTGAAAAAAGATTGGGGGTCTTTTTTATACCTAAATTTAAC  
TTTGTGATAAATGTCACAAAGAAAAATAGGATTGAAAATTTATCACTTTTACCCTTTTT  
AG

#### > **Q4LAF9**

Function: protein coding sequence; putative protein (SCCmec)

Best match: Q4LAF9\_CC398\_SO385-pig\_AM990992.1[59374:59712] (completely identical)

Position: 004-contig\_253\_RC: 9028 ... 9367; Length: 339 bp

Sequence:

ATGACGCTAAGCAAACAACCTTAAAACGTATATCACTGAACGATTTAAATTAAATTATCAA  
GAAACTTGGGCTTGTGAAACCATAGATGCGGTGGCTGAAGATGTATTACCTGAAAAATAT  
ATTAATAATAGTCCACTTGAACATAAAATTTTAAATACTTTTACCTATTACAATGATGAAT  
TACATGAAATCAGCATTTACCCTTTTTTATGTTATCTAGATAAGGAATTAGTAGCAATAGG  
TTATTTAGATAATTTTGATTTAGACTTTATATTTTTAAATGACACTCATCAAGTTATTATTG  
ATGAACGCTACTTGTACAAAAAGGGGGCCAGTAA

#### > **Q7A206**

Function: protein coding sequence; putative protein (SCCmec)

Best match: Q7A206\_trunc\_AY894416\_TSGH17\_AY894416.1[5033:5119]

Position: 004-contig\_253\_RC: 9372 ... 9402; Length: 30 bp

Sequence:

AATTGGATCAAGGTCGCTCAACTATCTGTC

#### > **Q7A207**

Function: protein coding sequence; putative protein (SCCmec)

Best match: Q7A207\_CC001-ST772\_118\_AJGE01000059.1[9430:9741] (completely identical)

Position: 004-contig\_253\_RC: 9460 ... 9772; Length: 312 bp

Sequence:

ATGAACATCAATCGATACATCACAAGAGGAATTAATGAAAGTATTCCACTAGACCTTCAA  
ATCTTACTTTGGCACATGGTAGAAGAAAAAGATAACCAGCCTCATACCGATTACCTACAC  
ATTTTCAAACCTACAAGAAGATGATAATATGTTGTCAATTAACATGAACAAGAACAGCCC  
GCATACAAGTTAGAATATCACTATACAAACTATGAAAAAATCAAAATGCATTACCTAAG  
AAAGTCTACGTCATTCGTGAAGATGGCGTAGACGCTTTTTATTATGTGATGCTTTTACCAG  
AAGAATACTAA

#### > **Q9KX75-v1-TYH1**

Function: protein coding sequence; putative protein (SCCmec)

Best match: Q9KX75-v1-TYH1\_CC001-ST772\_118\_AJGE01000059.1[9759:10262] (completely identical)

Position: 004-contig\_253\_RC: 9789 ... 10293; Length: 504 bp

Sequence:

```
ATGAATACAATCAAAAATACGATATACACAGAAGCTATATTTAGCAAGGATGAAAAACA
CCGCTATTTACTCAAGAAAACATGGGATGAAAAGAAACCTGCTTGTACAGTGATAACGAT
GTACCCTCATTTAGATGGTGTATTATCACTCGATCTCACAACCTGTTCTTATTCTTAACCAA
TTAGCGAATTCTGAACAATATGGTTCTGTATATCTTGTAAATCTATTCTCTAATATTAATA
CACCAGAGAACCTTAAACATATTAAGAACCTTATGATGAGCACACAGATATACACTTAA
TGAAAGCGATAAGTGAAAGTGACACAGTGATTTTAGCCTATGGTGTATGCAAAGCGTC
CCGTTGTTGTCGAACGTGTTGAGCAAGTGATGGAAATGTTAAAACCTCATAAAAAGAAAG
TAAAAGGCTCATAAATCCAGCAACGAATGATATTATGCATCCGCTTAATCCTAAAGCGC
GTCAAAAATGGACATTGAAATAA
```

### > **A9UFT0**

Function: protein coding sequence; putative protein (SCCmec)

Best match: A9UFT0\_CC001-ST772\_118\_AJGE01000059.1[10276:10497] (completely identical)

Position: 004-contig\_253\_RC: 10306 ... 10528; Length: 222 bp

Sequence:

```
ATGAACCATGAACTAAACAATCAGATTGGCATACGGTTGCTAATTGTTTAGAATCGCAA
AATTATACATCGATCGTAAAAGGATTAGTACATCATTTACAGCGATTGAAGATGAAGAA
ATACTTGATAAAATCTATGATGATTTTATGAATGATGACTCTATAACAACGGTACTTAAC
AATGATTTACAGATAATTATTAATCATTACCTATCAAAATGA
```

### > **tx\_hsdR\_WIS\_Shae**

Function: bidirectional rho-independent terminator of hsdR\_WIS in *S.haemolyticus* (SCCmec)

Best match: tx\_hsdR\_WIS\_Shae\_85-2082\_AB037671.1[46796:46857]RC

Position: 004-contig\_253\_RC: 10571 ... 10601; Length: 30 bp

Sequence:

```
CGGTGAGGGATGCTCTTTTAGTTTATTTTT
```

### > **hsdRx**

Function: protein coding sequence; type I restriction-modification system endonuclease

Best match: hsdR\_WIS\_CC001-ST772\_118\_AJGE01000059.1[10571:13690:r]RC (completely identical)

Position: 004-contig\_253\_RC: 10601 ... 13721; Length: 3120 bp

Sequence:

```
TTATTGGTTACTCGCCATAAGCTCTGCTTGTCTACGACTTGCTCTACAGCCATTTTTTGTA
AATCTGGTGGATAGCCATATTTTTTAAGCAATCTTCTAACAGCTACGCGCATTTTAGCTTT
TGCGCTATCACGTTTAGACCAATCAACACCCATGTTTTCTTCACTGTTTAGTTAGCTCAT
GAGCAATCGCACGTAGTTCTTTATCTCCCATGGCTTCTTTTGCTGTTTCATGTGAAGCTAA
AGCATCGTAAAACGCAATCTCATCTGAATTCAGGCCTAATCTTTTCCTCGTTGTTGTTCT
TGTTTGATATCTTTAGCGAGTTGAATAAGTTCTTCAATCACTTTAGATGTTTCAATGGAAC
GACTATTATATTTATTAATCGAGTTTCTTAACATTTTCAGAGAAACGCTTAGATACTGTCGC
GTTTCGTTTTCAATTAATGATTTGACTTGCCCTTTGAGTAATCGATTTAATAATTCTACTGCAA
CATTTTTTTGTTTCAATCCTTCCACGTCTTTTAAGAAATCATCTGATAGGATTGATAAATC
GGGTTGTTCAAGACCTAGCGTTTGATAAACATCAATGACATCTTCAGTCACAACAGATTG
TGACACAAGTTGATTAATCTCTGCTTCAACTTCTGCAGGTGTTTTACGTATTTTTCTTCTT
TTGGCGGTTGTAACAATTTAACAAGTCCTGCTTTAACCGCTTTAAGAAGGCAATTTTCATC
ATTGAGTTCTTGGGCTGTTGGTTTCAGTCGCACAAAGAGCAAAGGCTTTACCTAACTCTGT
GACCGTTTTAATAAAAACGTTGACGTTTCATCTTACCTAAACCAATCACATAATCCATCGTA
TTCGATATTGTATAATAACGTTCCAATTTTTTATTTGAATTAATTTAGAATAATCAAGAT
TATATAACATATCTTGAATTACATCATACTTCAATAACATCAATTCACCGCTTTATCTGT
ATCTATCGCTGTTGAGCTTGATCAGATTCTGTATACTCTTTAAGTGCTTCTTTCAAACCTT
CGGCAATACCCACATAATCGACAATCAATCCACCGGTTTATCTTTAAACACTCGATTAA
```

CTCGGGCAATTGCTTGCATCAAATTATGGCCTTTCATTGGTTTATCAATATACATCGTATG  
CATAGAAGGAACATCAAACCCTGTCAGCCACATATCTCGAACAAATCACGAGTTGTAATTC  
ATCATTACATCTTTTCATACGTTTTTCTAATAAATTACGACGTTTTTTAGGACCAATATGTC  
TTTGAAAAGAAGCTGGGTCAGTAGAGGAGCCCGTCATTACCACTTTAATGACCCCTTTAT  
CATCATCATCTGAATGCCATTCTGGTTTTAGACGAATGATTTTCATCATATAAATCAACAGC  
AATTTCGACGACTCATCGTTACAATCATTCTTTGCCTTTCATCGCTTGTGACGTGTTTTCAA  
AGTGTGGATGATATCTTTGGCTAGGGCTTCGATACGAGGTTTTGCACCTGCTAAGGCTTC  
AATTCGTGACCATTTTGATTTTTAAACGCTGTTTTACATCCTCTTCTTGGTCTTCTGTAATGT  
CATTATATGCTTCATCTAAATCTAAATTTTGGGGTAGATTTAATGGAATTACACGACTTTC  
ATAGTAAATTTTAACTGTACTTCCATCAGCTACAGCTTGTGTCATGTCATAAACATCGATA  
TAGTTTTCCGAAAACCATTTGTGTATTTTTATCCGTTGAAGCTACGGGTGTGCCCGTAAATC  
CGACGAATGTTGCATTCGGTAAAGCATCTCTTAAATATTTAGCATAACCATATTTAATGCC  
TTCACCTTTATCATTATACTTTGCATTAAGCCATATTGTGTACGATGAGCCTCATCTGCC  
ATAACAATCACATTTTTACGTTCTGTTAGGGCAGCCATGGTTCGTTTTATTTTGTTCAGGTT  
CAAATTTTTGCATTGTTGTAATAACAATACCACCCGACTCAACAGATAATAACGATTTTA  
ATTCTTTACGTGTTTCAGCTTGTTTTGGCGTTTGTCTTAATAATCCTTTACCAGAACGTCCT  
TTTGATTTAACAATGTACTGTATAGTTGGTTATCTAAATCATTACGATCTGTAACAACGA  
CTAAGGTAGGATTATTCAGCATTGAATTAATTTCCAGAGAAAAAGACCATGGTTAAAC  
TTTTACCAGACCCTTGGGTATGCCAATAACGCCGCTTTACCATCACCCGCCCAGATG  
AAGCTAATAAAGCTCTATCAACAGCTTTATTAACAGCATAGTATTGATGATATGCTGCTA  
GAATTTTACTGATATGCCCTTTACCATCATCTTGAATAATAACAAAATATCGAATTAATC  
AAGTAGAGTATTAGGATTTAACATCCCATGAATCAGTACGTCTAAGCTAGCTAAACTTGA  
CGAAGATTCTGTTTCTCCATCTTTAGAACGCCAAGTCATAAAACGATCATAGTTTCGCAGTT  
AGTGAACCTGGCTTTAGTATTAATAACCATCACTTGTAAACAAGCACTTCATTAATGTAAAT  
AATTGTGGAATACGCATCTTATACGTTTCTAATTGATGATAACCATCTTCGACGCCTACGG  
TTTCATTGGTTGAATTTTTAAGTTCGATCACAACGATAGGCAAGCCATTGATAAAGAGGA  
CAATATCGGGACGTTTTGTATAGTCTCCGTTAATGACAGTGAATTGATTGACTGCTAAAA  
AATCATTGTTTTGTGGATGTTCAAAATCAACGATTTTAACAATTTCTACTACCGATTGTCC  
TTCGTCATCATAGTCTTCGATTTCAATACCATTGATCAAATTTTCATGAAAGGTAAGGTTA  
TTTTCTAAAAGATTGGGCGACTTCTCTAAAGTTAGTTCATGTATGGCTTTTTTCGATAAAAC  
GATGATGAATATCTGAATTAATCTTTCTTAATGATTTTTCTAATCGTTCATGAAGGACAAC  
ATCTTTATCACTTTTACGTTCTGGCGCTAGACCTGTCATACTAATCTCATTACCTTTTTTGT  
AGTCATAGCCCAGTGATTGTAGCCATTCTAATGCGACTTGTCTAAATCATCTTCACTAAA  
TTGAAAGCTCAT

### > **hsdS\_CC22**

Function: protein coding sequence; type I restriction-modification system site-specificity determinate (genomic island)

Best match: hsdS\_CC22\_CC093\_JKD6159-ST93\_CP002114.2[64670:65902]RC

Position: 004-contig\_253\_RC: 13704 ... 13734; Length: 30 bp

Sequence:

CTAAATTGAAAGCTCATCTTCATTCACCTC

### > **hsdM2-scc**

Function: protein coding sequence; type I restriction-modification system DNA methylase (SCCmec)

Best match: hsdM2-WIS\_CC001-ST772\_118\_AJGE01000059.1[14821:16335:r]RC (completely identical)

Position: 004-contig\_253\_RC: 14851 ... 16366; Length: 1515 bp

Sequence:

TTAAACTCCATAGCCTAATCCCTCCAATGATTTGCGGATTTGGTTTTCAAGTTCTTTTGATT  
TCGCAAATTGTTTCGCTTAATTCAGAAGTAATGCGTTCCATTTTTTGGCTCAAACGGTTCCTTT  
ATCTTCTTCAACATCAGTTAAACCTACATAACGTCCTGGCGTTAAAATATATTCATTATTC  
TTAATTTCTTCAAGGTTAGCTACTTTACAAAACCAGCTATATCTTCATAGGATTTGTCGT  
TTGTACCTTTCCACGCATGATACGTTTGTGCTACTTTTTGAATATCTTCATCTGAAAATTCT  
TTAATGTTCTAGATACCATATGACCGATTTACGAGCATCAATAAATAAAATTTCAATTTT

TACGTTCTTTTTTACCATTTTGACCTTTATTATTACTAATGAACCAAAGACATACAGGTAT  
TTGTGTTGAATAAAAGAGTTGACCTGGTAAGGTAACAATACATTCCACTAAATCTTGTTCT  
GATAAGATTTTTTCGGATTTCTAATTCATCTTTTCCACTTGTAGACATTGAACCGTTGGCT  
AATACAAATCCTGCTGTACCATTAGGTGCTAATTTTGAATCATATGTTCAATCCATGCAT  
AGTTGGCATTACCTTTTGGCGGAATACCAAATTGCCAACGGTAATCATCAAGTAATCGTT  
CTTGACCCCAATCACTTGGCGTTAAAAGGAGGATTGGCTAATATGTAATCTGCTTTTAATCC  
TTTATGTAAATCGTTATGGAATGTATCAGCATTTCGTTACCTAAGTCATTATCAATACCA  
CGAATCGCTAAGTTCATTTTAGCTAATTTCCAAGTTGTAGGATTAGATTCTTGCCATAAA  
TCGCAATATCGTCTAATCGACCTTGATGTCTTTCAACGAAGCGTTCCTTTGTACAAACAT  
CCCACCTGAACCACAGCATGGATCGTAGATACGACCTTTATAAGGTTCAATCATCTCAAC  
CAATAATTTTACAATTGATGAGGGGGTATAGAACTCTCCGGCATTTTTCCCTTCAGCGCTT  
GCAAAGTTAGCAATAAAATACTCATACACTCGGCCTAATACATCTTGCTTACGACTTTCA  
GTATCGCCTACCTTAAAAGTAAATAAATCAATAATATCGCCTAATTTTTCTTTATCTAACG  
CAGGGCGCGCATATTCTTTAGGTAACACACCTTTAATGATTCATTTTCTTTTCAATCGC  
AATCATGGCTTTATCAATAATTTGTCCAATTTCTGGTTTTTTCGCATTATCATTAAATATATT  
GCCATCTTGCTTCTTTTGGCACCCAGAAAATATTTTCTGCTAAATATTCATCTTGATCCTCT  
TCATCAGCATAAGGATCTTGCTTCAATTCTTCATACTTTTCTTCAAAGAATCTGATACAT  
ATTTTAAAAGATTAAACCTAATGCTACGTTCTTATATTCAGCAGCATCCATACTTCCTCT  
TAATTTATCGGCAGCTTGCCATAATTTTTCTTCAAATCCGATTGTGCCAT

> **dus**

Function: protein coding sequence; tRNA-dihydrouridine synthase (core genome, constant)

Best match: dus\_part\_CC005\_MR1\_ACZQ01000311.1[1:278:r]

Position: 005-contig\_59: 43 ... 73; Length: 30 bp

Sequence:

TGAAGCCCAAATGGACGAAGACGTTAAAAT

> **entCM14**

Function: protein coding sequence; enterotoxin-like protein (genomic island)

Best match: entCM14\_CC001-ST772\_AJGE01000059.1[26448:27227]RC (completely identical)

Position: 005-contig\_59: 265 ... 1045; Length: 780 bp

Sequence:

CTACTTTTTAGTTAAGTGCACCTTCTATTTCCGTTTTGGCTGATTCAACTGTTTCATTACCTC  
GATATATCATCAAATATTTAGACTGAGTAAAGCCAGGGTCTGGCATCATATCATACCAAT  
AATATCGATTACCATTTTCTATAAATTTAATGTATCCCGTTTCATATGAAGTGCCACCTAA  
ATGGTATAAATTGATTTTAGAAATTAATTTATTTCTCACTTTATAATCTAACTCTTGAATA  
GTTACAGTCTCTTTATCAATATTGATATCAAAGAAAGAGTAACACTGTCATTCTCGTAA  
ACTTTTACAACAATAGGCTGAATTCTATTATTGGTATTGTTCTCATTTAATGTTATACCAC  
CATACATAACAAGTTTTTTTACTTCCAGCTCCTTGATTACTATCACACTGTATATTTTCATTT  
GAAAAATAGCATTGATCAAAAATAATTGACGCCAAAAATATCGACTTCTTTCCCATCAAAT  
GAACTAGCCATTGACTGTCTTTTAACTCAGTTTTAACATAGTCATAATGACCAGGGTTAT  
TTATTGGAACAATGAAGTCATGACTCAAAAATTTGTCACTTAGCTTTATTTTTTTAGCATT  
AACTGGATCGCTATTATATAAATACCATATATTATGCCAAGAACCCGTATATTGACTAGA  
TTTGTTTAAATCACTTATATTTGGATCATTTTGTGTCTCTGCTCTAGCTTCCAACAAAGAAT  
AGCTACTGTAACCAAATAACAAAGTGATTAGTATAAATACTTTTCTCAT

> **tx\_entCM**

Function: rho independent terminator of entCM\_bov (genomic island)

Best match: tx\_entCM\_CC001-ST772\_AJGE01000059.1[27283:27330]RC (completely identical)

Position: 005-contig\_59: 162 ... 210; Length: 48 bp

Sequence:

AAGTAATTAAAAAAAGCAACTTTTCCAAGTCGCTTTAATTCATTAATA

> **Q6GKL6**

Function: protein coding sequence; putative protein (genomic island)

Best match: Q6GKL6\_CC001-ST772\_118\_AJGE01000059.1[25912:26070]RC (completely identical)  
Position: 005-contig\_59: 1422 ... 1581; Length: 159 bp  
Sequence:  
TTATTTAAAAGCGATTTTACGAATAAGTTCATTTGTAATTTCTTTCTCATTATTAATTGCAT  
GAAGAATTTGTATTTGCAGTTCTCGTGTAACATACATACCTTCAAGTGAAAGGTTTTTAGC  
GATTTGTTTATTAATCTTTGAATCAATAGTAATCAT

### > **tnpIS232**

Function: protein coding sequence; transposase for IS232  
Best match: tnpIS232\_trunc\_15584\_EU272081.1[7731:7833:r]  
Position: 005-contig\_59: 1819 ... 1922; Length: 103 bp  
Sequence:  
AAATTATTTTTAGATATAAATGCGAATTTGAAGTTGCTACTCTTTAAGGTTTACTAAAAT  
AAAAGTTTATATAAAGAACTTGAACATGAGAACAAATAAAA

### > **mcrC**

Function: protein coding sequence; type IV 5-methylcytosine-specific restriction enzyme subunit C  
(genomic island)  
Best match: mcrC\_trunc\_15584\_EU272081.1[7531:7640]RC  
Position: 005-contig\_59: 2012 ... 2122; Length: 110 bp  
Sequence:  
TTATTTTAGTAAAAATATATCATTA ACTATCCCATTCAACTGTTTTTTAATAATAGTAAAA  
TCACAGTTCAAATCTAATGTCTTAATAATGATTTGACTACCACTCATAT

### > **Q9KX84-M10**

Function: protein coding sequence; putative protein (SCCmec)  
Best match: Q9KX84-M10\_trunc\_CC012\_21266\_AFTT01000014.1[137215:137286:r]  
Position: 005-contig\_59: 3779 ... 3851; Length: 72 bp  
Sequence:  
ATGAACAGCAATTGGAGACGTGGTTGCAAGCAATAATTGGAAATATGGATACGAAAGAT  
GTAAAAGATGTGA

### > **Q8VUY2-GI**

Function: protein coding sequence; putative protein (genomic island)  
Best match: Q8VUY2-GI\_CC001-ST772\_118\_AJGE01000054.1[314:1069:r]RC (completely identical)  
Position: 006-contig\_274: 241 ... 997; Length: 756 bp  
Sequence:  
TTATAAAATGAGTTGAACTATAGCAAAAACGATTA AAAATACTGATAATCCATTTTTGTAT  
TATGTTAGGGACTTTTTTACTTAATTTTAAACCCTATTGGAGCAAATATAACTCCCTATT  
ATAAGGAATAAGGCGTCATATAAAGGGATATAACCTTGAATAAGTTTGATGACAAAAGC  
ACCAATTGAAGATATAAAAGCAATTACTATACTATTAGCGACTACAGTATTCATTGGTAA  
TTTGAATAAAACCAATAATATAGGAATAATAATGAAGGCACCACCTGCACCTACTATACC  
TGAAATAATACCAATGAAAAGGCCAATGATAACTAATAAATATTTATTAAATGAAGACTT  
TTCGGAAGTACTGTTTCACTTTAATAAACATTAATGTTAATGCAAGTAAAGCAATAATGAT  
ATATACCGTATTTACAAATGTAGCATCAAATAAATTTGCTAGAAATGCACCTAACATACT  
CCCTATAATCATGCCGCCACCCATATAAAGA ACTAATTGTGGCGAGA ACTCTGTTTTTTTT  
CGAGCTTTTAAATGAGCCACTTAATGTACTGAAAAAGACTTGGCTAGAAGTAAGACCTGAT  
GCGATATATGCGCTATATGCAGGGGCTCCGAATAATGGTGGTAATAATAAAATAGCTGGA  
TAAATAATGATAGCACCACTACGCCTACTAGACCAGATATGAACCCGCCGAATACCCCA  
ATGAGTAACATGATAACTATATTAACAATATCCAT

### > **Q9XBC0-GI**

Function: protein coding sequence; putative protein (genomic island)



Best match: Q9XBC0-GI\_CC001\_MW2-USA400\_BA000033.2[64924:65184:r]RC (completely identical)

Position: 006-contig\_274: 996 ... 1257; Length: 261 bp

Sequence:

```
TTACTTACTTTTTACCAATAAGTTTACAGCTTCATTAATTAACCTCTGGGAGCTTTCTTCAT
CATCCGCAGCTGCTTTTTACACATTCTATTAATTTCTACTAATAATGATACCCATCAAGCG
TTGGAGTGAACCTCTTTGATGCACTTATTTGTGTAATGACATCTTTACAGTCTTTTCCTTCCT
CCATCATTTTAATAAATTCCATTTAGTTGCCCTTGTATTCTATTAATACGATTAATCATTFFFF
TTATCATAATTCAT
```

### > Q9XB85

Function: protein coding sequence; putative protein (genomic island)

Best match: Q9XB85\_CC001-ST772\_118\_AJGE01000054.1[1466:2533] (completely identical)

Position: 006-contig\_274: 1393 ... 2461; Length: 1068 bp

Sequence:

```
ATGAAACAATACGGAGAAAAGTTTATCGATGAATTTAGTAAAGCAGAATTGGAAAAACT
AGCCAAGCAAGGGCAATTAATTGATGTTAGAACAGAAGAGGAGTATGCATTAGGACATA
TCAATGGTTCCATACTTCATCCTGTTGATGAGATTGAGTCATTCAATAAAGAAAAAATA
AAACCTATTATGTAATCTGTAGAAGTGGTAACAGAAGTGCTAATGCTAGTAAATATTTAG
CTAAACAAGGTTATAACGTTATAAATCTTGATGGTGGTTATAAAGCTTATGAAGAAGAAA
ACGATAGTTATGATACACAAGAAGAATATAAAAGTATAGAAATTAAGCAGATCGTAAA
CAATTTAACTATCGTGGTCTTCAATGTCCAGGGCCAATTGTAAAAATTAGTCAAGAAATG
AAGAATATTGAAGTAGGTGACCAAATTGAAGTCAAAGTCACAGACCCTGGATTCCTTAGT
GACATTA AAAAGTTGGGTGAAACAAACAAGGCATACTTTAGTTAAGCTTGATGAAAATAA
CAATGGAATTAATGCGATTATTCAAAAAGAAAAAGCAAAAAGATTTAGATATAAATTATTC
TGCTAAAGGTACTACAATTGTATTATTTAGTGGAGAATTAGACAAAGCTGTAGCAGCATT
GATTATTGCAAATGGCGCTAGAGCTGCTGGAAAAGATGTAACCTATCTTCTTTACTTTTTGG
GGGCTTAATGCATTA AAAAAGTGCAAACAGTTAATGTTAAAAAGCAAGGTATTGCAAAA
AATGTTTGATTTAATGTTGCCAAAAAAGAATATACGAATGCCTCTTTCCAAAATGAATAT
GTTTGGTTTAGGAAATATGATGATGCGCTACGTAATGAAAAAGAAAAATGTTGATTTCATT
ACCAACACTTATCAATCAAGCTATTGAGCAAAATATCAAATTAATCGCTTGTACGATGAG
TATGGATGTCATGGGTATTCAGAAAGAAGAACTTAGAGATGAAGTTGAGTACGGTGGTGT
AGGCACTTATATTGGTGCTACTGAAAATGCGAATCATAATTTATTTATCTAA
```

### > Q2G1R6

Function: protein coding sequence; putative hydroxyacylglutathione hydrolase (?) (genomic island)

Best match: Q2G1R6\_CC001-ST772\_118\_AJGE01000054.1[2564:3898] (completely identical)

Position: 006-contig\_274: 2491 ... 3826; Length: 1335 bp

Sequence:

```
ATGTTTTTTAAACAGTTTTACGATAATCATTTATCTCAAGCATCATATTTAGTGGGTTGTC
AACGTACAGGAGAGGCAATAATAATAGACCCTGTTCTGATTTATCGAAATATATAGAAG
TTGCAGATTCTGAAGGTTAACAATTACACAAGCTACAGAAACACATATTCATGCTGATT
TTGCTTCAGGAATTCGTGATGTGGCTAAACGTTTAAATGCAAATATATATGTGTCTGGCG
AAGGTGAAGATGCATTAGGGTATAAAAATATGCCATCAAAAACACAATTTGTTAAACAT
GGAGATATCATTCAAGTAGGCAATGTTAAATTAGAAGTTCTGCATACTCCAGGGCACACG
CCTGAAAGTATTAGCTTTTTACTCACTGATTTAGGCGGTGGTTCAAGTGTTCCGATGGGAT
TATTTAGTGGTGACTTTATTTTTGTTGGTGATATAGGTAGACCTGATTTATTAGAAAAATC
TGTTCAAATAAAGGGTTCTACAGAAATTAGCGCGAAACAAATGTATGAGTCCGTTCAAAA
TATTA AAAAATTTACCAGACTATGTTCAAATCTGGCCGGGTCATGGTGCTGGAAGCCCTTG
TGGTAAAGCATTAGGTGCCATACCTATATCTACAATAGGTTATGAGAAAATTAATAACTG
GGCATTTAATGAAATTGATGAGACTAAATTTATTGAATCATTAACATCAAATCAACCAGC
ACCACCGCATCATTTTGCACAAATGAAACAAGTTAATCAGTTTGGTATGAATTTATATCA
ATCATATGATGTTTATCCTAGTTTAGATAATAAGAGAGTAGCATTTGATCTTCGTAGCAAA
GAGGCCTTTCACGGTGGCCACACAAAAGGAACAATCAATATACCATACAACAAAAAATT
TATTAATCAAATTGGTTGGTACTTAGATTTTGAAAAAGATATAGATTTAATTGGAGATAA
```

ATCTACTGTTGAGAAAGCGAAACACACTTTACAATTAATTGGGTTTGATAAAGGTAGCAGG  
CTATCGTTTGCCAAAATCAGGCATTTCAACCCAGTCCGTTTCATAGCGCTGATATGACAGG  
TAAAGAAGAACATGTATTAGACGTACGTAATGATGAAGAGTGAATAATGGACACTTAG  
ATCAAGCAGTTAATATTCCACATGGTAAATTATTAATGAAAATATTCCTTTTAATAAAG  
AGGATAAAATATATGTACATTGTACAGTCAGGTGTTAGAAGTTCAATTGCAGTGGGTATAT  
TGGAAGCAAAGTTTTGAAAATGTGGTGAATATTAGAGAAGGCTATCAAGATTTTCCAG  
AATCATTAATAAATAA

### > **Q2G1R5-GI**

Function: protein coding sequence; putative sulfide-quinone reductase (genomic island)

Best match: Q2G1R5-GI\_CC001-ST772\_118\_AJGE01000054.1[3917:5110] (completely identical)

Position: 006-contig\_274: 3844 ... 5038; Length: 1194 bp

Sequence:

ATGAATAAGCATTATCAAATTGTTATTATTGGTGGCGGTACAGCAGGTGTTACCGTAGCA  
TCAAGACTATTAAGAAAAAATCAAACCTTAAAAGAGAAAATAGCAATTATAGACCCAGC  
AGACCATCATTACTATCAACCATTATGGACGTTGGTTGGTGCAGGGGTATCTAGTTTGAA  
AAGTTCTCGTAAAGATATGGAAAGTGTTATACCTGAAGGTGCTCACTGGATAAAACAGGC  
TGTTTCAAGTTTTCAACCTGAAAATAATAGCGTTATTTTAGGAGATAATACAGTCGTTTAT  
TATGATTTTTTAGTAGTAGCTCCAGGATTACAGATTAATTGGTCTTCAATTAAGGACTAA  
AAGAAAATATAGGTA AAAATGGTGTGCTCTAACTATTCACCTGACTATGTTAACGAAA  
CTTGGAAACCAATTTCTAATTTTAAACAAGGAAATGCCATTTTTACGCATCCAAACACCC  
CTATAAAGTGTGGAGGTGCGCCTATGAAAATTATGTATTTAGCTGAAGATTATTTTAGGA  
AACATAAAATCCGTTCTAACGCTAATGTGATATATGCAACGCCAAAAGATGCTTTATTTG  
ACGTAGGAAAATATAATAAAGAATTAGAGAGGATTGTTGAAGAAAGAAATATAACAGTC  
AATTATAATTATAACCTTGTGAAATCGACGGTGACAAAAAAGTGGCTACATTCGAACAT  
ATCAAAACATACGATAGAAAAACAATAAGTTATGATATGTTACATGTAACACCACCTATG  
GGTCCCTTAGATGTAGTAAAAGAAAGTACACTTTCAGATAGTGAGGGTTGGGTAGATGTT  
AACCCAACCACATTACAGCATAAAAGCTACTCTAATGTATTTGCACTTGGTGATGCTTCA  
AATGTACCTACTTCAAAAACAGGCGCAGCTATTCGTAAGCAAGCACCTATCGTCGCTAAT  
AATTTATTGCAAGTGATGAATAATCAAATGTTAACGCATCATTATGATGGTTATACTTCAT  
GTCCTATTGTTACTGGATATAATAGGTTAATACTTGCAGAGTTTGATTATAATAAAAATAC  
TAAAGAAACAATGCCGTTTAATCAGGCCAAAGAACGTAGAAGTATGTATATATTTAAGA  
AAGATTTATTACCTAAAATGTATTGGTACGGCATGCTAAAAGGATTAATATAA

### > **txbi\_Q5HJT6**

Function: rho independent terminator of Q5HJT6

Best match: txbi\_Q5HJT6\_ST425\_LGA251-cow\_FR821779.1[78806:78878:r]RC (completely identical)

Position: 006-contig\_274: 5216 ... 5289; Length: 73 bp

Sequence:

TTATGAAAATAGAAACAGCAGTAAGATGTTTTCTAATTGAAAATCATCTCACTGCTGTTTT  
TTTAAAGGTTTA

### > **Q5HJT6**

Function: protein coding sequence; putative protein (genomic island)

Best match: Q5HJT6\_CC001-ST772\_118\_AJGE01000054.1[5378:5479:r]RC (completely identical)

Position: 006-contig\_274: 5305 ... 5407; Length: 102 bp

Sequence:

TTATTTAATAATAATTAATGGTATTTGAGCAAGTTTAGCGACTTTATGACTGACATTACCA  
ATTTCCATTTCTTGCCAGATATTCAAACCACGTGTACTCAA

### > **dus**

Function: protein coding sequence; tRNA-dihydrouridine synthase (core genome, constant)

Best match: dus\_CC005\_21318\_AFNQ01000029.1[56403:57389]RC

Position: 006-contig\_274: 5701 ... 6688; Length: 987 bp

Sequence:

```
CTATAATTCTATTTTAAACGTCTTCGTCCATTTGGGCTTCAAATTCATCGAGTAGTGCTCGT
GCTTCTGCAATTGATTGTGTGTTTCATCAATTGATGGCGAAGTTCGCTAGCGCCTCTTATGC
CACGCACATAGATTTTAAAGAATCTACGCAAGCTCTTGAATTGTCGTATCTCATCTTTCTC
ATATTTGTAAACAATGATAGATGCAATCTCAACAGATCTAATAGTTCTTTGCTTGTGTGT
TCACGTGGTTCTTTTTCAAAGCGAATGGATTGTGGAAAATGCCTCTACCAATCATGACG
CCATCAATGCCATATTTTTCTGCCAGTTC AAGTCCTGTTTTTCTATCGGGAATATCACCGTT
AATTGTAAACAATGTATTTGGTGCAATTCGTCACGTAAATTTTTAATAGCTTCGATTAAT
TCCAATGTGCATCTACTTTACTCATTCTTTACGTGTACGAAGATGAATAGATAAATTGG
CAATGCTTGTTCGAAGACGTGCTTCAACCAATCTTTCCATTCATCGATTCATAGTAGCC
AAGGCGTGTTTTAAACACTTACCGGAAGCCACCTGCTTTAGTCGCTTGAATAATTTCCGCA
GCAACGTCAGGTCTTAAGATTAAGCCGGAACCCTTACCCTTTTTAGCAACATTTGCTACA
GGACATCCCATATTTAAGTCTATGCCTTTAAAGCCCATTTTAGCTAGTTGAATACTCGTTT
CACGGAAGTGTCTGGCTTATCTCCCATATATGAGCGACCATCGGCTGTTTCATCTTCGCT
AAAAGTTAAGCGTCCACGCACACTATGTATGCCTTCAGGGTGGCAAAGCTTTCAGTATT
TGTAATTCAGTGAAAAACACATCCGGTCTAGCTGCTTCACTTACAACGTGTCGAAAGAC
GATATCTGTAACGTCTTCCATTGGCGCCAAAATAAAAAATGGACGTGGTAATTCACCTCA
AAAATTTCTTTTCAT
```

### > **tnpIS431-06**

Function: protein coding sequence; transposase for IS431 (mobile element)

Best match: tnpIS431-06\_circ\_S-epidermidis\_GQ900381.1[43799:43807]RC (completely identical)

Position: 006-contig\_274: 6875 ... 6884; Length: 9 bp

Sequence:

```
ATAGTTCAT
```

### > **A6TXM6**

Function: protein coding sequence; putative protein (core genome, variable)

Best match: A6TXM6\_CC001-ST772\_118\_AJGE01000049.1[1164:1367] (completely identical)

Position: 006-contig\_274: 6996 ... 7200; Length: 204 bp

Sequence:

```
ATGGAAGATTTAAAGCATTCTTTAAAAAGTTTAGGTTGGTGGGATTTATTTTTTGCATAC
CTATGTTTCTACTATTCGCATACCTTCCAAACTATAATTTTATAACGATATTTCTTAACATT
GTTATCATTATTTTCTTTTCCATAGGTTTGATTTTAACTACGCATATAATTATAGATAAAAT
TAAGAGCAACACGAAATGA
```

### > **A6QD71**

Function: protein coding sequence; putative protein (core genome, variable)

Best match: A6QD71\_CC001-ST772\_118\_AJGE01000049.1[1416:1712] (completely identical)

Position: 006-contig\_274: 7248 ... 7545; Length: 297 bp

Sequence:

```
ATGGCGACTAAGAAAGATGTACATGATTTATTTTTAAATCATGTGAATTCAAATGCCGTT
AAAAGTAGAAAGATGATGGGAGAATATATTATTTATTATGATGGTGTGTTATAGGTGGT
TTGTATGATAATAGATTATTGGTCAAGGCGACTAAAAGTGCACGTCAATTTCAAGAT
AATACATTAGTATCGCCGTATCCTGGTGCTAAAGAGATGATATTAATTCCAGATTTTGAC
GAAGCAACAAATCTCACTGATTTATTTAAGACCATAAAAAATGATTTGAAAAACTAA
```

### > **Q6GKK6**

Function: protein coding sequence; putative protein (genomic island)

Best match: Q6GKK6\_CC008\_NCTC8325\_CP000253.1[49481:50092] (completely identical)

Position: 006-contig\_274: 7743 ... 8355; Length: 612 bp

Sequence:

```
GTGAACGATATGTTAATTAGTCTTGTAATCCCAGTTTTTGGCTTTGTTAGTTATTGGTGGTAT
TATTTGGATGATTATAGAAGGTATAGTACATATTTCAAAAAAGAATAAAGCAATTGATAA
CTTTTTTAAACCAAGTTAATAAAGTAAGTGAGACATATAAATTCGCTACTACTTTTTTATTT
```

CTAATCTTGGCTACGGCTGGTATTTCTCAATTTTATCTATATTATATAGTATCAGCGTTTCT  
TTTTTGGCTTGTCACTACTACCTTTGGCATTGCAGGTATCATTTTTTTAATGCCATATGGAT  
TATGTTTTCTACCGTTTTATAAGCAAAAAAAGAAAAAACAGACATTTAAAAAATACATGG  
TTTACTACTACGATTGGTTTGTCAATTTGTCTAGGCTTATCTCTAGTTTTGGTTCACACTACG  
AAAATTTATATGGACGAAGGTGGCGTAAGATACTATTACGGTAGTTTTGTAAATGAAACAA  
GCGGGCGGTTATGCTTATTTAGCTTTAGCGGTACTTTCAACGTTGTTAATTGTTGCGAAAA  
AAGCTACAAATAAAAAATAAAGAAATCGAAACCGTCGACAATACAAATATAACGGAAAGA  
TAA

> **Q7A890**

Function: protein coding sequence; putative protein (genomic island)

Best match: Q7A890\_CC001\_MSSA476\_BX571857.1[76016:79168]

Position: 006-contig\_274: 8621 ... 11774; Length: 3153 bp

Sequence:

ATGAGTCAATTGCTAAATGATACGTTATCGGCTTGGTTGTTAATTGAATCTTTAAGTGCAG  
GAGAAGTAAATTTTACAGCGGAAGATATACTCTCAGCTGAACATTTTAAAAATGGTACAA  
AGCAAGCACAGCTTCAAAGTTTTGATGAATATTTTAAAATATGGAACGATGAACGTTTTA  
TTGTGTCAGAAGAAAAATCAGAGACTGGGGAACCTATATTTAAATTTTATAGACATTGCT  
TCCGCTATAATGAAATTAATTTGAAAATTCAAGATATTTTTGAAAATCACTCTGATATTCA  
TAATCCAAATGGGACACACTGTTATGGTTACACATTTAACACAGATAAACACGGCAAAGT  
GATAGTTGATTCTATACATATTCCGATGATTATGAGTGCATTAAGAAATTGAAAAGAA  
CAAAAATGCCAATATAGAAGAAAAATTTAATGATTCTGTTGAAAAATTTGTTCAAAAAGT  
AAAAGAAATTTAGCAGATGAACCAATTAATGAATTTAAATTGAAGAAGATGGACAAAG  
CTTATGATGAGTACTTTTCTGTATTAATTCAAAGAAAGATGGATTATTTGGACATTATGT  
AGCAATAGAATATGTGAAAGATAGTGATTTACCACAGCCGGAATTTAACAGTTTCTTCAT  
AAGTGATATTGAGAAAGCAAGAAAATCTCCAACCAAACTTTAATTGATTACATTGAAGG  
TGTAAGAAGAAAGTCAGCGCATAGAAGTAGATGAAAATAAAGAAATGTTTGACAAATTTT  
TACATCCTTCACGTTTGCCTGATGGACGATGGCCATCACAGACTGAGTTTAGATTGTCTTT  
AATGCAACAACCTTGCTGTAAACCAATTACGAGTGGTAATGAAAGAATAAGTTCAGTTAA  
TGGGCCACCAGGGACAGGTAAGACTACTTTATTAAGATATATTTGCTCATCTAGTAGT  
TGAAAGAGGTAAAGAGTTAGCTAAACTAAATAATCCTAAAGATGCATTTGTCAAAACAA  
AAATTCATGAAACGGATGATAAATACGTATACTTACTAAAGGAATCTATTGCCAATATA  
AGATGGTAGTCGCATCTAGTAATAATGGAGCTGTTGAAAATATATCTAAAGATTTACCGA  
AAATTGAAGAAATTATAAGAAATCCCGAAAAATGTAAATTCCTAAATATGAACAGAAT  
TATGCAAATTTAGCACATGAATTAAGAGATTTTGGCTGAAATAGCTGAAGGTTTGATTGGT  
GAAAGTGCCTGGGGCTTATTTTCTGGAGTATTTGGAAAAAGCAGTAACATTAATAAAGTA  
TTGGAGCACATGCTAAAAAAAGATGGGAATGATATTGGCTTTGCTAAATTACTACAAAAT  
GAGAATAATCGTATGAGTTATAACGAGTTAATGAGTGAATGGCAATCACATCAACGTGCA  
TTTTTAGAAGAGTTGAGGCATGTTGAAATGTTAAAGAAGAATCTATTAGAGCATATGAT  
GTTTATAAAAATTGTGAGTCTTCTCTAAGATTGAACAGGTTATTAATAGTGAAAAAACA  
AGTATTGAAGAACAGGTATATCATTTAGATAATGAAACGTTACGAGACAATAAAGAAAT  
AGAAGATTTGGATAATCGAATTAATTATATTGTTAAGCAAATAGAACTTTAAATGAGTT  
AATTAATCCATCAAAGAAAGCAACAAAGGTTTTATTAACAACTGAAAGCGATGTTTAA  
TTCAGAAGAAGATGAAAGCTATAAAGATCATAATAAAGAGAAGCAACAATTATTAACAC  
AACAGTTAGAGTTAGAGAAATGTAAAAAAAACAAACATGAAGACCTTGTTAGCAAACATA  
AAAGAAAAAGAGAAATTAATTAACAATTAACTAAAGTACAGTTGCAATTAGACGAGTT  
AAATTCACAGTTACAAGAGTTAGAAGCATATCGTATTGAGTCAAAAATTACAATTCAGA  
AAAAGATTTTTGGAGTGACAACAATTATGATGAGCGCCAAGTTACTAATCTGTGGACGAG  
TGACGAACTTCAATACAGACGTGCCATGCTCTTTTTAAGAGCAATGATATTGCATAAATT  
ATTATTGATTGCTAATAATACAACATTTATTATGCGATTAATGATTTTAAAGATAGAAGG  
AAATTAATTGATGCAAATCCAGATAAAGTACACAACGCATGGAATGTGATGCATTTAATA  
TTCCAGTAGTTAGTACGACGTTTGAAGTTTTAAATCTATGTATGGGGGCATACCAAAA  
GATTCATAGACTACTTATTTATTGATGAAGCAGGACAAGCAATACCTCAAGCAGCTGTG  
GGAGCATTATATCGTTCAAAAAAAGTTGTAGCTGTAGGTGATCCGATTCAAATAGAACCG  
GTTGTGACTTTAGAAAGTCATTTAATTGATAACATTCGTAAAAATTATCATGTTCCGGAAT  
ATCTAGTTTCTAAAGAAGCTTCTGTGCAGTCTGTTGCAGACAACGCCAATCAATATGGTTT

TTGGAAATCTGATGCTACTGATAGTAATCAAAAAACCTGGATAGGCATACCTTTATGGGT  
GCACAGACGATGTTTAAAACCTATGTTACGATAGCTAACCAAATCGCTTATAATAATAA  
AATGGTGTTGCCAAGTAATATTACAAAAGTAGGTAAAACAGGTTGGTATGACGTAAAG  
GAAACGCAGTTCAAAAACAATTTGTGAAAAGAGCATGGTGAAAAAGTAGTGGGATTATTA  
GCTGATGATTGGATTGAAGCAATTAAGGAAGGTAAAAATGAACCGAGCTCATTTGTAATA  
TCGCCTTTTTTCAGCAGTACAGCAACAGATTAACGTATGTTAAAGCAACAACACTACCGACT  
AGAATTGATATTGAACGTACAAAAATTAATCAATGGGTCGATAAATCCATTGGTACTGTT  
CATACTTTTTCAAGGTAAAGAGGCTCAGAAGGTGTATTTTGTAATAGGTACTGATAATACC  
CAAGATGGTGCTGTGAACTGGTCATGCGAAAAACCAAACCTTGTTAAACGTTGCAGTGACA  
AGAGCTAAGAAAGAGTTTTATGTAATTGGCGACATGCAAAGAATACAGATGAAACCATT  
TTATGAGACGATTTTTAAAGAAAGAAATGTAAAATAA

### > **Q2YUT2**

Function: protein coding sequence; putative protein (core genome, constant)

Best match: Q2YUT2\_CC001-ST772\_118\_AJGE01000049.1[5998:6480] (completely identical)

Position: 006-contig\_274: 11830 ... 12313; Length: 483 bp

Sequence:

ATGGAGAAATTTAACAACCTGGATATTAATGCAATAAGTGGATCTCAAACAGACAAGAA  
TGGAACAACCTAAAGAATTAAGAGGGGCAAAATTTATCATTTTATATGCATATTCAATGCT  
CGTTTTGCTTGCCTTAGTAATTTCTAACATATTCATTCACATTTTGGAGCCTAAACTATCA  
ATCACCCTCAAATCATCATCGTTTTGATTTAATTGAAGCACTAATTGGACTGCGTTTTCT  
TGAAAGCGTACGATGTTAAGCGTGGCAAAGATAAAGAAAATAAGAAAAATAGTAAGGAT  
TTCGTTAAACTAAATCAATTTTAGTAGCAATTTTATTACATCATTGGCGCTGACAGCAG  
GTACTGTAGCTGATATATACGGTTTCACTGACTTAGGAAATACTAGAAGTGATTTAATCG  
TTTGGAGCATAGGTGGTATTATATTTGGCCTCGTATGTTACACAATGGAAGATAAAAGAT  
AA

### > **plc**

Function: protein coding sequence; phosphatidylinositol-specific phospholipase C (core genome, constant)

Best match: plc\_CC001-ST772\_118\_AJGE01000049.1[6685:7671] (completely identical)

Position: 006-contig\_274: 12517 ... 13504; Length: 987 bp

Sequence:

ATGAAAAAGTGATTAAGACTTTGTTTTTAAGTATCATTTTAGTAGTGATGAGTGGTTGGT  
ATCATTACAGCACATGCGTCAGATTCGTTGAGTAAAAGTCCAGAAAATTGGATGAGTAAAC  
TTGATGATGGAAAACATTTAACTGAGATTAATATACCGGGTTCACATGATAGTGGCTCAT  
TCACTTTAAAGGATCCATTAATAATCAGTTTGGGCAAAGACTCAAGATAAAGATTACCTTA  
CCCAAATGAAGTCGGGAGTCAGGTTTTTTGATATTAGAGGTAGAGCAAGTGCTGATAATA  
TGATTTACAGTTCATCACGGCATGGTTTTATTTGCATCATGAATTAGGAAAATTTCTCGATGA  
TGCTAAATATTACTTGAGTGCTTATCCAAACGAAACAATTGTGATGTCTATGAAAAAGGA  
CTACGATAGCGATTCTAAAGTTACGAAGACATTTGAAGAAAATTTTAGAGAATATTATTA  
TAATAACCCGCAATATCAGAATCTTTTTTACACAGGAAGTAATGCGAATCCTACTTTAAA  
AGAAACGAAAGGTAATAATTGTCTATTCAATAGAATGGGGGGTACGTACATAAAAAGTG  
GTTATGGTGCTGACACGTCAGGTATTCAATGGGCAGACAATGCGACATTTGAAACGAAAA  
TTAATAATGGTAGCTTAAATTTAAAAGTACAAGATGAGTATAAAGATTACTATGATAAAA  
AAGTTGAAGCTGTTAAAAATTTATTGGCTAAAGCTAAAACGGATAGTAACAAAGACAAT  
GTATATGTGAATTTCTTGAGTGTAGCGTCTGGAGGCAGCGCATTAAATAGTACTTATAACT  
ATGCATCACATATAAATCCTGAAATTGCAAAAACGATTAAGCAAATGGGAAAGCTAGA  
ACGGGTTGGCTGATTGTTGACTATGCAGGATATACGTGGCCTGGATATGATGATATCGTA  
AGTGAATTATAGATAGTAATAAATAA

### > **lpl-SAOUHSC\_00054**

Function: protein coding sequence; tandem lipoprotein-like (genomic island)

Best match: lpl-SAOUHSC\_00054\_CC008\_COL\_CP000046.1[91050:91823]

Position: 006-contig\_274: 13724 ... 14495; Length: 771 bp

Sequence:

ATGATGAAACGATTAACAAATTAGTGTTAGGCATTATTTTTCTGTTTTTAGTCATTAGTA  
TCACTGCTGGTTGTGGCATAGGTAAGAAGCGGAAATAAAGAAAAGCTTTGAAAAACA  
TTGAGTATGTACCCTATTA AAAATCTAGAGGATTTATACGATAAGGAAGGCTATCGTGAT  
GATCAGTTTTGATAAAAATGATAAAGGTACATGGATTATAAATTCTGAAATGGTTATTCAA  
CCTAATAATGAAGATATGGTAGCTAAAGGCATGGTTCTATATATGAATAGAAATACCAA  
ACAACAAATGGTTACTACTATGTTCGATGTGACTAAGGACGAGGATGAAGGAAAACCGCA  
CGACAATGAAAAAAGATATCCGGTTAAAATGGTCGATAATAAATCATTCCAACAAAAG  
AAATTAAGATGAAAAATAAAAAAAGAAATCGAAAACCTTAAGTTCTTTGTTCAATATG  
GCGACTTTAAAGATTTGTCTGAAGTATAAAGATGGAGACATTTTCATATAATCCAGAGGTGC  
CGAGTTATTCAGCCAAATATCAATTA ACTAATGATGATTATAATGTAAAACAATTACGTA  
AAAGATATGATATACCAACAAATAACGCGCCGAAGTTGTTGTTGAAAGGTACAGGGAAT  
TTAAAAGGTTTCATCAGTTGGATATAAAGATATTGAATTTACGTTTGTAGAGAAAAAAGAA  
GAAAACATTTACTTTAGTGATGGGTTAATTTTTAAACCAAGTGAGGATAAATAA

### > **lplTerminator-2**

Function: protein coding sequence; (genomic island)

Best match: lplTerminator-MW2-2\_CC001\_MSSA476\_BX571857.1[83756:85132]

Position: 006-contig\_274: 16558 ... 16708; Length: 150 bp

Sequence:

GAACCACATAATGAAATAAAAGACAAACTAAATAAAATTACGGACTTATCTAAGAAATA  
TAATTCGTATTTACAGCAAATCGAAAAAGTATTAATGAAATAGTTGCTAAGGATCAACA  
ATTGGCAGGGCAAATAGGTGATTTAATATGA

### > **Q8NYT6**

Function: protein coding sequence; HTH-type transcript regulator (core genome, variable)

Best match: Q8NYT6\_CC001-ST772\_118\_AJGE01000049.1[13632:15869] (completely identical)

Position: 006-contig\_274: 17600 ... 19838; Length: 2238 bp

Sequence:

ATGCAACGTGATTATTTAATTCGAGTAGAACTGAGAGTATGTCAGATTTCAAAGGCTC  
AATGGTTAATGATTGGTTTTGTTATTAAGGTGAGGCGCATATTTATGATGAAAATAAT  
ATGACGCAATACAACAGTGGCGACATTTTCATCATTAAACCACCGCGACTTGTATCGATTT  
CAACTTCAACAAGAGGGCATCATATGTTATATCCAATTCCAAATGAAATATTTAGCAGAC  
AAGTTTGATGATGCGCATTGTCTATATTTTCACTAACAGATGCGACCACAACCAAGAAT  
ATACATCAACTGAGAAATATAATGGCAAGACTGGTTTCAACACACATTCGACATAATGAG  
TTGTCTAAATTGACTGAGCAACA ACTTGTGATTCAGTTGCTTATGCATATGATTCATTATG  
TCCCGCGTACATATCATTTCGAACCAAAGTATCTTAAATGATGATAAAGTGAATCAAGTAT  
GCGACTATATCGAGTTACATTTTCATGAAGATTTAAGCCTTTCAGAATTAAGCGAATACG  
TTGGGTGGTCAGAGAGCCATCTGTCTAAAAAGTTTACAGAATCGCTAGGTGTAGGATTCC  
AACATTTCTTAAATACGACGCGAATTGAGCATGCGAAACTCGATTTAACATACACAGATG  
AAACGATTACTGATATTGCATTGCAAAATGGCTTTTCAAGTGCAGCGAGCTTTGCGAGAA  
CATTTAAACACTTTACGCATCAAACGCCTAAACAATATCGAGGTGATCGTCCAGCAATCA  
CTGAAAACCAGCAATCGTTACAACATAATTATCACGACCGTGAATTGATTA TTTTAA  
ATGACTACATTGAAGAAATGAATCATTTCATTGAAGATATTGAAAAGGTGAACTATAAAG  
AGATTGCCTTTAAACCAACTAATCAACA ACTAATCAATTTAATCATATTATTCAAGTGG  
GCTATTTGAGGAATTTGCTCAATACACAGTATCAATCACAGTACTTACATGCCATCATGA  
TTTTCATGTCAATGAAGTATTAGCATATGATGTGATGCCATATATTATGAAAAGCTCAAT  
GCGCCATTCACGTATGATGCAGAGATTTTCGAATATATTTTATGATATCGATTTGTGTTAG  
ACTTTTTATTAGATCATAACTTTAGTTTGACAATGCATTTGGATCAGTATGACTCACGTGA  
TTATATCGATGCATTCAAAGTATTTATCCATCACGTTGCCCTGCATGTCAGTCATAGAAAA  
GATTTGAAGTTCAACTTGTATGTGACGACATTGCACAATTCTTTGATTGAAATGATTGATT  
ATTTTAAAGCATTATTTCCCAATGGTGGCTTGTACGTTCACTTAGATCAAGCTACGGAAA  
GACATCTACCATTGTTGAAACGACTTGAGCCACACATCGACCATTTTGTATTTGATGCCAA  
TTCAAATGACGCTGTTGATTTTAAATAAAATGAATGATGATGAATTTAAAACCGCAAGTCA  
AATGATTATTAATAAAACGAATTACCTTATCGACTTAATGCATCGCCATAACCTAAAGCG

TCCACTCATTTTACTCAATTGGAATACATTGACGGGTGATACATTTATTACAAACGGCGA  
ATATTTTAGAGGTGGTATCATCATTGAGCAATTATTAATAAAGTTCTAAAGTAGAGGG  
TATCGGGTATTGGTTGAATTATGATTTGCACGTCAGTCATTGTAGAAATGAACGGGATTA  
TATGAATTCTATTGAACTGTTTCATCAATATAATGGAAAACGTCCGGTCTATTTACGGCA  
TTGCTATTTAATAAATTAACAAGTAATATTTTATATTCTGATGATACATGTATTGTCACGG  
GAACTGATTCAAATTTTCAAATATTGTTATATGATGCAAAGCATTTTAATCCGTA CTTAGC  
GTTGGACAATCAAATGAATATGCGTGCAACGGAAATGATCCATTTGAACATTAATGCCTT  
GGAAGAAGGTATGTATAAGATTA AACATTTTACCTTAGATAAAGAAAATGGTGC GTTATT  
TAATCTTTGGCGCAAACATCATACGATACATGGCATGGACAAGGACTCTATAGATTACGT  
TAATCGAATGAGTTTTCCGAAATTAGAAGTATATGATATAGATATCACGGACACACTGGC  
ATTAACATTAATAAATGATTACGAATGGGATTCACTTAATTGAAGTAAAACGTTACCCAAG  
TTCATAA

### > **Q8NYT5**

Function: protein coding sequence; aminoacylase (core genome, constant)

Best match: Q8NYT5\_CC001\_MSSA476\_BX571857.1[88413:89591] (completely identical)

Position: 006-contig\_274: 19988 ... 21167; Length: 1179 bp

Sequence:

ATGAATCAACAATTAATTGAAACTTTAAAATCTAAAGAAGGCAAAAATGATTGAGATCAG  
ACGTTATTTACATCAGCATCCAGAATTATCTTTTCATGAAGATGAAACGGCGAAATACAT  
CGCTGAATTTTACAAAGGTAAGATGTGGAAGTAGAAACGAATATCGGACCACGTGGAA  
TTAAAGTAACGATTGATTCAGGGAAACCTGGTAAAACATTAGCAATCCGTGCAGACTTTG  
ATGCATTACCTATTACTGAAGATACAGGATTATCTTTTGCATCACAAAATAAAGGTGTTAT  
GCACGCATGTGGTCACGATGCACATACAGCATAACATGCTTGTATTAGCAGAGACGCTTGC  
TGAAATGAAAGATAGTTTTACAGGAAAAGTCGTTGTGATACATCAACCAGCTGAAGAAG  
TACCACCAGGTGGTGCTAAAGCAATGATTGAAAATGGTGTATTAGACGGTGTGATCATG  
TATTAGGTGTACACGTCATGAGCACAATGAAAACAGGTAATGTGTATTACAGACCTGGTT  
ATGTTCAAACAGGACGCGCATTTTTCAAATTGAAAGTTCAAGGTAAAGGTGGTCATGGTT  
CATCACCCCATATGGCCAATGATGCCATTGTTGCAGGTAGCTACTTCGTACACAGCGTTAC  
AAACAGTTGTATCTAGACGACTAAGTCCATTTGAAACCGGTGTTGTCACAATCGGTTTCAT  
TTGACGGTAAAGGTCAATCAATGTCATTAAAGATGTTGTTGAAATTGAAGGTGATGTAC  
GTGGATTAACAGATGCTACAAAAGCAACAATTGAAACAGAAATTAACGTTTATCAAAA  
GGATTAGAAGCATTGTATGGTGTAACTTGCACATTAGAATATAACGATGATTATCCTGCA  
TTATATAATGATCCAGAGTTTACTGAGTACGTGGCTAAGACGTTAAAAGAAGCAAACCTT  
GATTTTGGTGTGCAAATATGTGAACCACAACCACCTTCAGAAGACTTTGCATACTATGCT  
AAAGAACGTCCAAGTGCCTTTATTTATACAGGTGCAGCTGTGGAAGATGGTGAATTTAC  
CCACATCATCCTAAATTTAACATTTACAGAAAATCATTACTTATTTCCGGCAGAAGCTG  
TAGGGACAGTTGTTTTAGATTACCTTAAAGGAGATAACTAA

### > **norC**

Function: protein coding sequence; multidrug efflux pump (core genome, constant)

Best match: norC\_CC001-ST772\_118\_AJGE01000049.1[17200:18588] (completely identical)

Position: 006-contig\_274: 21168 ... 22557; Length: 1389 bp

Sequence:

ATGAATGAAACGTATCGCGGGGGCAACAAGTTAATCTTAGGTATTGTATTAGGTGTTATT  
ACATTTTGGTTGTTTGCACAATCACTTGTAATGTTGTACCAAATTTACAACAAAGTTTTG  
GTGCAGACATGGGAACAATTAGTATTGCGGTAAGTCTAACC GCACTATTTTCAGGCATGT  
TTGTTGTTGGAGCAGGCGGCCTAGCAGATAAAAATTGGGCGCGTGAAAATGACGAATATC  
GGTTTATTGTTAAGTATTATTGGTTCAGCATTAAATTATTATTACGAATTTACCGGCATTATT  
AATTTTAGGTCGTATTATACAAGGCGTATCAGCAGCGTGTATTATGCCTTCCACATTGGCC  
ATTATGAAAAC TTATTATGAGGGTGCTGAACGTCAGCGCGCCTTAAGCTACTGGTCTATC  
GGTTCTTGGGGTGGAAAGTGGTATCTGTTCACTCTTCGGTGGGGCAGTTGCGACA ACTATG  
GGTTGGAGATGGATTTTCATCTTCTCAATTATCGTTGCCGTA CTTTCAATGTTACTCATCA  
AAGGGACGCCTGAAACGAAATCAGAAGTTACCAATACACATAAATTTGACGTTGCAGGG  
CTAATTGTTCTAGTAGTTATGTTGCTAAGTTTAAACGTTGTCATTACTAAAGGTGCAGCAC

TTGGTTACACATCATTATGGTTCTTTGGTTAATTGCAATCGTAATTGTAGCATTCTTTATT  
TTCTTAAAAGTTGAGAAAAAAGTAGATAATCCGCTTATTGATTTTAAATTATTTGAAAAT  
AAACCATATACAGGTGCAACGATTTCTGAACCTTCTTATTAACGGTGTTCAGGTACATTA  
ATTGTAGCGAATACATTTCGTGCAACAAGGTTTAGGTTATACAGCATTGCAGGCAGGATAC  
TTATCAATTACTTATTTAATCATGGTGTTATTGATGATTTCGAGTTGGTGAAAAATTATTAC  
AAAAAATGGGTTCTAAGCGACCAATGTTATTAGGTACATTCATTGTGGTCATTGGTATTG  
CACTTATTTTCATTAGTATTCTTACCAGGCATATTTTATGTTATCAGTTGTGTCGTAGGATAT  
TTATGTTTCGGACTAGGCTTAGGTATTTATGCAACACCTTCTACAGATACAGCTATTTCAA  
ATGCACCGTTAGATAAAGTTGGCGTTGCTTCAGGTATTTATAAAATGGCTTCATCACTTGG  
TGGTGCATTTCGGTGTGCAATTAGTGGTGCAGTATATGCCGGTGCAGTTGCTGCAACGAG  
CATTACATACAGGTGCGATGATTGCACTTTGGGTTAACGTATTAATGGGAATCATGGCATT  
ATCGCAATTTTATTTGCGATTCTAATGATGATAAACGTGTCAAAGATGCGAAATAA

### > txbi\_universal1

Function: bidirectional rho independent terminator

Best match: txbi\_universal1\_CC022\_HE681097.1[2619148:2619217:r] (completely identical)

Position: 007-contig\_191: 14 ... 84; Length: 70 bp

Sequence:

TGTATAAATATAGAACAGCAGTAAGATATCTTCTAATTGAAAATTATCTTACTGCTGTTTT  
TTAGGGATT

### > Q1Y1J7

Function: protein coding sequence; putative Na<sup>+</sup>/Pi-cotransporter protein (core genome, constant)

Best match: Q1Y1J7\_CC009\_21334\_AGTW01000007.1[298140:299801:r]RC (completely identical)

Position: 007-contig\_191: 159 ... 1821; Length: 1662 bp

Sequence:

TTAAATTTTCAGTTGTTGCAATTTCTTCATCTGTAGGTACATCATCGTTAAGGCCAACAAAGT  
GCTTCAGAAACATTTTCGTGAATGATAACCGATACGTTCAAGAACACCAATCATATCGATA  
TATAGTAATCCGCCTTTTGTGTACATTCACCACGATTAAGGCGTTTAAATATGACCTTTCG  
GTAGTTTATGTTCAATATTAATGATTCTCTACTACGTTCTACAATTTTCATCTTTTTTCGTT  
TTGTCATAAACATCTAACATGTCGATGGCTTTATCAAATGACTCAGCAACATGGTTGAAT  
AATTTATCCATACCGCGTTGTGCATCTTCTGTAATGCGAATATCTTCATCATGTTGGCGTT  
TTAATTGAGCGACATACTCTTCTGTTAGCTCTGCTACTTTTAAAATAGAGCGATTGACATC  
AAACATAACTGCTAAACGCTCAACGTCAGCCTTCGTTATGGCTTTTGTAGAAATTCTAACT  
AAATAATTTTCGAATGCTATCATTGATTGTTTTCAACAGCTTGGTGCTTTTGTTCAGCTTTT  
GATCAATTTTTTATCGTCTTTTTGTAATTTTCGCGAATGTCTTCAAACATTGATAAGACAATC  
TGACCAACATTTTGTAAATCTTTTTGAGTTTCTTGTAAATGCAACACCAGGTGCGTGATAAA  
CAAGATCTTTGTTAAGTGCTGAGGTTTATAGTCATCAGCAATATCTTTACCTGGGACAAG  
CTTTGTAACAATCCATGCTAAACCTGCTACAAATGGTAATTGAATCAAAGTATTTGTTATG  
TTGAAGATACCATGTGATACTGCAATCGTCATCGCTGGTTTTAAGTGCCATACATCTTGTA  
ACAACTAATCAAATGAATCACAACCTGGCAAGAAAATTGTGAAGATAATTACCCCGATT  
AAGTTAAAGATGACGTGTACAAGCGCCGACGTTTTGTCAGCGATTGAGCCGGCTAAACTA  
GCTAAGATAGCTGTAATCGTTGTACCAATATTATCGCCTAGTAACACAGGGATTGCTGCG  
TTAAGCTAATTAATCTTGTGATAAAATCTTGTAAAATACCAATCGTCGCACTTGAAC  
TTTGAAGTACTGCTGTTAACCCTGCGCCGACAATGACAGCAAGTATTGGATTTGTAGACA  
TATCAAGCATTAAATTGCTTAAATCCATCTAATGATGCTAAAGGTTTAAACGGCATCACCCAT  
AAATTCTAGACCGAAGAATAGAGAACCGAAACCGAATAGTATGCGGCCAATGTTATTGA  
TTTTAGAGCGTTTAAAGAAAAAGATTAATAAATGCACCTAATGCTAAAATTGGCATTGCAT  
ATTCGCCTAAATCTATACCGATAATAAATGCGGTTACCGTTGTTCCGATATTGGCACCCAT  
TATCACTCCAATAGCTTGTTTTAAACGTCATAAATCCAGCTGTTACCAGTCCGATTGTGATA  
ACGGTCGTACCTGAACACTTTGTATTAATAATAGTTACAACGATACCTGCAATAACACCT  
AATACTGGATTTGATGTAATTTGTTTAAAATATCTCGTAGCCTGTCTCCTGCTGATGCTT  
GAAGCCCGTCTCCCATGATTTTTAAGCCGTAAAGGAAAATACCTAAACCACCTAAAAAGG  
AGAAAATGACTTCTGTAACCGACAT



## > **Q2YUS5**

Function: protein coding sequence; 67 kDa myosin-crossreactive streptococcal antigen homologue (core genome, constant)

Best match: Q2YUS5\_CC001-ST772\_118\_AJGE01000014.1[33670:35445]RC (completely identical)

Position: 007-contig\_191: 2144 ... 3920; Length: 1776 bp

Sequence:

```
TTATAACAATTTGTGTTCTTTTAATAATGTCTCAATGTACGTACCTTTTACCTTTTTAAGGA
ATCCAGCTAATGCGAGTTTTTGTATTTTCGAATCTTTAGTAATCTCGCGCAAATCTTGATG
GTCATTTCAGTTCGTATACGGCATCCATTAAGACGCGAAGATCAAATGTACTATTGATGAC
CTCTGGAATACCACGATCTATATTTAGTAATTGATAAACAGCTTCCATGGCAGTACGAAC
CGAATATTCTGTTGTAATAACAGTGTCTCGCTCTGTTTCTGCAAAGTTACCAATAAATGCT
AAATTTTGTGATTGATGCGGAACGACTAAAGGTCTGTGCGCGATAGCACGCGTCATGAAA
TAAGAGGTAATATATGGCATATAAACAGGAATCGTATTAGATGCATGTTTTGCTAAGTCT
TCAATTTTGTGAGTTGGTACACCTAAGTGATATAGCCATTCTTGACATATTTTATTACCAC
TACATTCTGTGATTGGCTTTTTAATATAATCGCCGTTTACATCTGAATATAAAGCATAAAT
CCACGTAGATATTTTCAATTTTAGGTTGGTCTTTAAACTGTTGCTGACGATTGATTGTAATA
CTGATTTGCCATGCAGAATCATTGATTGTAATAATTCCGCCAGTAACCGTTTTGCCTGCAA
GAGGGTCACGTTTACAAATGCTTTCTATTGTATCGATAAATATCTTTATTGTTTGTGTCGAT
GTTGCAGAAACAAACCAACTCTTTTGGAGGAATATTTTGGCAAACCTTATCAGGATTACCA
AATTCAGGACTTTGTGCGGCTAAATTTTTCCATAGTGTCCAACCTACCACCTAATTCGTCAG
TTGGTGGTGTGGTGTATCATTATCACCATACGTAGAGCTTTCCGTAATACTACCGTTTGT
CACAAAGACAAGATCATCTACAGTCAGTTTAATTGACTCTGCTTTGCCATGTGCGGTGAATT
AATATTTCTCGGGCAATTTTTTGTACTTGTGCGTAACATCTACTTTAATATCTTCTACTTTTAC
ATCGTATTCAAATTGAACCCCATGCGATTTTAAATATTCAACCATAGGTAATACTAAAGA
TTCATATTGATTATATTTAGTGAATTTTAAAGCTGAAAAGTCTGCGAGACCACCAATATG
ATGAACGAATCGCATTAGATAGCGACGCATTTCCATAGCAGAATGCCACGGTTCAAATGC
AAACATCGTTTTCCAGTAAATACAAAAGTTTGAATTAAGAAGTCATCGGAAAATACATC
TGTTATTTTGTGACATCATCTAAATCTTCTTTCATTTCGTTAAGCATAAATCTAAAATTTCTTTAA
TCGCTTTTTTGGTCAAAGTGAAGTCTCCATCGGTAACCTAAACGTTGACCCTGTTTTTCAAT
AACTCGACAGCGAGAATAGTTAGGGTCTTCTTTGTTTAGCCAATAGAACTCATCTAATAC
AGACGCGTTATCGATTTCTAATGAAGGGATAGATCTGAATAAGTCCCACAAACATTCAA
GTGGTTCTCCATTTACGACCACCTCGGACAACATAGCCTTTTAAAGGCATATTTTACCA
TCAAGACTACCACCTGCTTTAGGTAACCTCTTCTAAAATATGAATCTTCGAACCTTCCATTT
GACCATCCCTAATTAAGAAACAAGCTGCCGCAAGTGAAGCTAACCAGACCCGATTAAA
TAAGCAGATTTGTTTTCTACATTTTTCAGGTTTTTTAGGGCGCGCAAATGCTTCATAATTC
CATAACTGTAATACAT
```

## > **A5INY0**

Function: protein coding sequence; putative protein (core genome, constant)

Best match: A5INY0\_CC009\_21334\_AGTW01000007.1[302251:302724] (completely identical)

Position: 007-contig\_191: 4270 ... 4744; Length: 474 bp

Sequence:

```
ATGTCTAAAATCAGGTCTTTTACAATATTAAGTCTACTTATTTACTTAGCTATGATGTGCT
ATACAGTAGTGACCTATTCAAATTTACCAACCAAAGTACCTATTCAATATAATTTAGCAG
GGGATGCTGATAACTTTGCTGATAAATGGGTACTGCTTTTGATAAATAGCGCATTATAGT
GATTTGGCTTATATTTTTCATTGCAGGTAGATACTATGAACGATTTGCCAAATGGTCACAT
TATAATCATAACACCAGTGAATTCGAGCGATTAAATATTTTTAAGTACGTTAAATTTAG
AGATTATGAGCTATATGTCTATCTTCACAGTATTAGAAATTTGGCAAATACAACACCATC
ATCAATTAATTTACTATGGTTTAATATGATATTTATCATTATCATTGGTTTGACGCTTGTC
ATATTTTGTTTACTTCTACAATTCACAAAATGAGAGATTCTCAATAA
```

## > **lctP-L1**

Function: protein coding sequence; L-lactate permease (core genome, variable)

Best match: lctP-locus1\_CC009\_21334\_AGTW01000007.1[302986:304578] (completely identical)

Position: 007-contig\_191: 5005 ... 6598; Length: 1593 bp

Sequence:

```
ATGACACTACTTACTGTAAATCCATTTCGATAATGTTGGATTATCAGCCTTAGTTGCAGCAG
TACCTATTATTTTATTTTATTATGCTTAACCGTTTTTAAAATGAAAGGCATTTATGCAGCA
TTGACAACCTTTGGTTGTTACATTGATTGTGGCTTTATTTGTATTTGAATTACCAGCGCGTGT
ATCAGCAGGTGCGATTACAGAAGGCGTTGTTGCCGGTATTTTCCCAATAGGATATATCGT
TTTAATGGCAGTTTGGTTATATAAAGTTTCTATTAACAGGACAATTTTCTATTATTCAA
GATAGTATTGCAAGTATTTTCAGTGGACCAAAGAATCCAACCTATTATTAATTGGATTTTGT
TCAACGCATTTTLAGAAGGTGCAGCAGGATTTGGTGTGCCAATTGCGATTTGTGCAGTATT
ATTAATTCAACTTGGATTTGAACCATTAAGCAGCGATGTTATGTTTAATTGCTAATGGT
GCGGCGGGTGCCTTTGGTGC AATTGGTTTACCAGTTAGTATTATTGATACGTTTAACTTAA
GTGGAGGCGTTACAACATTAGATGTTGCGAGATACTCAGCATTAACTTCCAATTTTAA
ACTTTATTATTCCATTTGTTTTAGTATTCATTGTAGATGGTATGAAAGGTATTAAGAAAT
TTTACCTGTCATTTTAAACAGTGAGTGGTACATATACTGGATTACAATTATTATTAACAATA
TTCCATGGTCCAGAACTAGCAGACATTATTCCATCACTAGCAACAATGGTGGTGTAGCA
TTTGTGTTGTCGTAAATTTAAACCGAAAAACATTTTCAGATTGGAAGCGTCTGAACATAAA
ATTCAAAAACGAACGCCTAAAGAAATTGTCTTTGCTTGGAGTCCGTTTCGTAATTTTAACTG
CCTTTGTATTAGTATGGAGTGCACCATTTTCAAAAATTTTCCAACCTGGAGGTGCACT
TGAAAGTTTAGTAATAAAATTGCCAATTCCAATACTGTGAGTGATTTATCGCCTAAAGG
AATTGCGTTGCGTCTCGATTTAATTGGTGC AACTGGGACAGCGATTTTATTAACAGTAATT
ATTACAATTTTAAATTACGAAGTTAAAATGGAAAAGTGCAGGTGCTTTATTGGTCAAGCA
ATTAAGAATTATGGTTACCGATCCTTACAATTTTCACTATCCTAGCTATTGCTAAAGTTA
TGACATACGGTGGTTTACTGTAGCAATTGGACAAGGTATTGCTAAAGCGGGAGCAATTT
TCCCATTATTCTCTCCAGTATTAGGTTGGATTGGTGTGTTTATGACGGGTTTCAAGTTGTA
TAACAATACTTTATTTCGCACCTATTCAAGCGACAGTGGCACAACAATTTCAACAAGCGG
TTCATTACTTGTGGCAGCTAACACTGCAGGTGGTGTAGCAGCGAACTTATTTCAACACA
ATCAATTGCCATTGCGACTGCAGCTGTTAAAAAAGTTGGTGAAGAATCTGCATTATTA
AATGACGCTAAAATACAGTATTATTTGTTGCTTTTATTTGTGTTTGGACGTTTATACTA
ACGTTAATATTCTAA
```

### > **txbi\_lctP**

Function: bidirectional rho-independent terminator of lctP (core genome, constant)

Best match: txbi\_lctP\_CC001\_MW2-USA400\_BA000033.2[99244:99315] (completely identical)

Position: 007-contig\_191: 6641 ... 6713; Length: 72 bp

Sequence:

```
CTAATTATTCATGAATCGAACTAGTACGAAATGCATTGAGCATCTTGTCTAGTTTCGATTTT
TTAATGTCTAA
```

### > **txbi\_proteinA**

Function: bidirectional rho-independent terminator of protein A (core genome, constant)

Best match: txbi\_proteinA\_CC705\_RF122-cow\_AJ938182.165518:65579

Position: 007-contig\_191: 6772 ... 6838; Length: 66 bp

Sequence:

```
AAGTAAGTAAAATAAAAAATGCACTGAGCAACAAAAGATGTTGCTAGTGCATTTAGATG
ATTCTTA
```

### > **spa**

Function: protein coding sequence; immunoglobulin G binding protein A chv

Best match: spa\_CC001-ST772\_118\_AJGE01000014.1[29545:30663]RC

Position: 007-contig\_191: 6926 ... 8417; Length: 1491 bp

Sequence:

```
TTATAGTTCGCGACGACGTCCAGCTAATAACGCTGCACCTAACGCTAATGATAATCCACC
AAATACAGTTGTACCGATGAATGGATTTTCTTCACCAGTTTCTGGTAATGCTTGAGCTTTG
TTAGCATCTGCATGGTTTGTGGTTGCTTCTTATCAACAACAAGTTCTTGACCAGGTTTGA
TCATGTTTTTATCAGCTAATTTGTTATCTGCAGCAATTTTGTGTCAGCAGTAGTGCCGTTTGT
TTTGCAATGTCATTTACTGTATCACCAGGTTTAAACGACATGTACTCCGTTGCCGTTCTTCTT
```

ACCAGGTTTTTTGTTGTCTTCTTTGCCAGGCTTGTTGCCATCTTCTTTACCAGGTTTTTTGTT  
GTCTTCTTTACCAGGCTTGTTGCCGTCTTCTTTGCCAGGCTTGTTGTTGTCTTCTTTACCAG  
GTTTTGTTGCCGTCTTCTTTACCAGGTTTTTTGTTGTCTTCTTCTTTTGGTGCTTGAGCATCGT  
TTAGCTTTTTAGCTTCTGCTAAAATTTCTTTGCTCACTGAAGGATCGTCTTTAAGGCTTTGG  
ATGAAGCCGTTACGTTGTTCTTTCAGTTAAGTTAGGTAATGTAAAATTTTCATAGAAAGCA  
TTTTGTTGTTCTTTGTTGAAATTTGTTGTCAGCTTTTGGTGCTTGTGCATCATTTAGCTTTTTA  
GCTTCTGCTAAAAGGTTAGCGCTTTGGCTTGGGTCATCTTTTAAGCTTTGGATGAAACCAT  
TGC GTTGTCTTCGTTTAAGTTAGGTAATGTAAAGATTTTCATAGAAAGCATTTTGTTGTTC  
TTTGTGAAATTTGTTATCCGCTTTTCGGTGCTTGAGATTCATTTAACTTTTTAGCTTCTGACA  
ATAGGTTAGCACTTTGACTTGGGTCATCTTTTAAGCTTTGGATGAAACCATTTGCGTTGTTC  
TTCGTTCAAGTTAGGCATGTTCAAGATTTTCATAGAAAGCATTTTGTTGTTCTTTGTTGAAA  
TTGTTGTCAGCTTTTCGGTGCTTGAGATTCGTTTAATTTTTTAGCTTCACCTAAAACGTTAGT  
GCTTTGGCTTGGATCGTCTTTAAGACTTTGAATGAAACCATTTGCGTTGCGCTTCGTTAAG  
TTAGGCATGTTCAAAAATTTTCATAGAAGGCGCTTTGTTGATCTTTGTTGAAGTTATTTTGT  
GCGCATCAGCTTTTGGAGCTTGAGAGTCATTAAGTTTTTTAGCTTCACCTAAAACGTTAGC  
ACTTTGGCTTGGATCATCTTTAAGGCTTTGGATAAAAACCATTTGCGTTGATCAGCATTTAAG  
TTAGGCATATTTAAGACTTGATAAAAAGCATTTTGTTGAGCTTCATCGTTGCGCAGCAT  
TTGCAGCAGGTGTTACGCCACCAGATATAAGTAATGTACCTAAAGTTACAGATGCAATAC  
CTACACCTAGTTTACGAATTGAATAAATGTTTTCTTTTCAAATTAATACCCCTGTATGT  
ATTTGTAAAGTCATCAT

### > **tx\_sarS**

Function: rho independent terminator of sarS (core genome, constant)

Best match: tx\_sarS\_CC001\_MW2-USA400\_BA000033.2[101369:101431:r]RC (completely identical)

Position: 007-contig\_191: 8742 ... 8805; Length: 63 bp

Sequence:

TTAAAAAATAGAAAACACAAGTGCACCTTAGAATACAGCACACTTGCGTAATAGAGATA  
TTAT

### > **sarS**

Function: protein coding sequence; HTH-type transcript regulator (core genome, constant)

Best match: sarS\_CC001\_MW2-USA400\_BA000033.2[101428:102180:r]RC (completely identical)

Position: 007-contig\_191: 8801 ... 9554; Length: 753 bp

Sequence:

TTATTCAAAAACAAGATGTAAATGATCTTTATCTGCTAATAAATTGATTCACCTTGAGCTAAT  
AATTGTTTCAGCATGGTCTTGCTGCGCGTCATCCATATGAATTAATAATTTTTCTTTCATCTTC  
AGTTGAGCGTTCTTTTATTAGATAGCCTTGCTTTTTTAAATTATTGAGAGCTCTAACAGTTT  
GAGGGTATTTATGGTGGATTGTTTCAATTAATCTTTAAGAAGAACGATGTTTTTATTTTG  
AGAAGTGATAATAGCTAGAATTGTGAATTCTACAAAACCTTAATGTTAGATGTTTTTTGAT  
AATATTTCTTGAAATACATTGTATACATCATCAAGTTTAGAAATCTTTACTATCTTTTGGT  
ATCATCTGTGATTCACCTTTGATCTGCAAGGTTAAATTGTTTAATGATTTGATCAAACAATG  
TAACACGTTCTGCAATTTTCTCTCGTTGTTCTTCAGATATTGAAATGTAAGTATTACGCTC  
ATCAATTTTACTTCGAACTTTACTAATATATGAATGTTTCACAAGTACTTTTATATGCTGT  
ACTAAATCCGATTGTTTATAACATAAATCTGAAACAATCTTCTTAAATGGAAGTGTGTTTT  
CTTGCTGATGAAATAAATAAGTCAGTAATATAAATTCTTTTATAGTCATATCGACTTCAGG  
CTTGACTTTTTTCTTAAAACGAAACATATATGCTTCAATGATTATAAAATCTCTAATTTTG  
TCATGGTTATTATATTTTCAT

### > **sirC**

Function: protein coding sequence; siderophore 'staphylobactin' ABC transporter/permease (core genome, constant)

Best match: sirC\_CC005\_ED98-hen\_CP001781.1[88085:89083:r]RC

Position: 007-contig\_191: 9922 ... 10921; Length: 999 bp

Sequence:

TTATAACTTTTTACGGTTAATAATAAGTATATGAAGAATGGGGCACCAAAAAGCAGCAAT  
AAATACACCTGCTGGCACTTCTTTAGGCAAGAATAAGGTACGCCAATTAAGTCTGCAAT  
ACAATTGATATGGCACCAATCATTGCTGACATTAGTAACCTTTTTAGCATAACTTCCGCGA  
ACGATTGTTTTCGCGATATGTGGTGCGATTAAACCGACAAACCCAATGTTACCTACTAAA  
CTGATTGCCATAGATACGAGTATAGTAGAAGTGATTAATTGGATTAGTTTCATACGTTGT  
ACATGTAAGCCTAAGCCAATCGCTACAGGGTCATCAAGTATAGATATTTTTCATTTTTGGTA  
TAACAAGAAATAACAACGGCACAAACAGCTAAAATAACCATACCCAAAATGATTGTATCT  
TTAAACGTAGCACCGTAAAGACTTCCGACTAGCCATGTATAAGCTTTGGCAGCAGATAAT  
TGCTTCGTTGTAATGAGTAATCCTTGGACAAGCGCAATAAACAACGTTTGCATCGAAATA  
CCGATGATTATGAGTGTTGTCGGGCGTATTTGTCCTTTCGTTTGAAACACTAATAGTATCA  
TCATTGCAACTGCGCCACCTAATACTGCAATAGTGAAAGTAAATGTATCGTTAAATGGC  
TGAAAAATGCAATAAAGACAACAGCACTTAAGCTAGCACCACTGTGATACCGATAATA  
TCAGGTGAGGCAATTGGATTTTTAATACATTTTGCAACATTAACCCTCATTCTAGTG  
CGGCACCTGCTAAAATCGCAAGTGTAATGCGAGGTAAGCGTAATACTTCTAAAGTGAATT  
GATCCATACTGTCATTTGGATTTATAAAGTACATCAGTACGCGTTGTAATGGTATAAAGCT  
TGAACCAATCATCATACTTACCCTGAAACGATGGCTAAAAAGATTAACGCGAAGATGA  
GATGGTAATTGTCTTTTTTATTAATCTTTTCGGTTCAT

> **sirB**

Function: protein coding sequence; siderophore 'staphylobactin' ABC transporter/permease (core genome, constant)

Best match: sirB\_CC005\_Mu50-VRSA\_BA000017.4[126499:127494:r]RC (completely identical)

Position: 007-contig\_191: 10917 ... 11913; Length: 996 bp

Sequence:

TCATAAGCGTTGACGTCCTTTCTTCATAATATAGATTAAGACAATAGCGCCAATGACAGC  
GGTAACGACACCGATAGGCAACTCTAGTGGCTTAATTATTATACGAGCAACAATGTCTGA  
AATGATCATTAGGATTGCTCCAGCTAATGCAGTAAAAGGAATTAATACTTATAGTTTGG  
TGGTAATAATCGTTTGCTAATATTCGGTACGATAAGACCCACAAAGACGATTGATCCAGC  
TACGGCTACCGAAATACCGGCTAACATACTGATGAGCATAATAATCATCCATTTGATTAA  
TTTTATGTTTTGACCGAGGCCGGTTGCAATGTCGTCACCTTGTCATCAAGATGTTGATGTGT  
GCAGCCATGCTAAATGCAATTAATAAAGTATCAATACAAGCGGAATAATCCATGGGAT  
ATCCCAAATATTACGTAATGAAACGGAGCCACTTAACCAAATAATAGGCCTTGTAAGTC  
TGTTTCGTTTATAATAAGTATGCCTTGAGTAAAGGCTGTAATAGCATCGCAATCGCAGC  
ACCTGCCAAAATGACACGGTGAGGTGAGAATAGTGTGTTGTCTAAACATACCTAGCGCAAC  
AACTAATATAGTAACAACAATGGCACCTAAAAATGCAATAACTACAATCATTTTTAAAAGA  
TTGAATTTGGATAAATGTAATACTAAAAATGACAAAAAATACTGCGCCTGCATTGACACC  
GAAAAGCCCTGGTGAGGCTATTGGGTTTCGTGTAAGTGCTTGCATCAACAAACCTGAGAC  
AGCAAGGGCAGCACCAAGTCAATAACGCAATGATTGTTCTCGACGCCCGTGCACCAGTGAC  
AACATCATGTAAATCGTTTTCACTATCAAAGTTGAATAACGCCTGTATCACCGTACCTGGT  
GACACAAGCGTATTTCCAATCATTAACTTAAGATAGCTACTATTGCAAGACATAAACCA  
GCAATAACGATTTGGTATTTTGGTTTAAGTAGCAT

> **sirA**

Function: protein coding sequence; siderophore 'staphylobactin' ABC transporter/substrate-binding protein (core genome, variable)

Best match: sirA\_sabac-114\_AC025949.4[1:518]RC (completely identical)

Position: 007-contig\_191: 11928 ... 12446; Length: 518 bp

Sequence:

TTATTTTGATTGTTTTCAATATTTAACTTTTCATATAAATCGTCAATAAGTTTTAATGAAG  
ATTTATATCCGCCAGCTAAGTTCCAAGTGATTTTCATCTAAATCATCAGATACTTGGTTGTT  
TTAACTGCGTCTAAATTTTTCCACTCTTTACTTGAAGTCCATTCGCTTTCAGTCTTTTTAA  
CTAATGCAGCATCTTTCGCATTTGGATCTGATTTTACTACAAAAATATGATCAGCGTTCAT  
TAATGGAATGCTTTCTTTAGATGTAAGTTGGATAATATCTTTACCATTATCAACTTGTTTTT  
GTAAGTCTTTATTACGTTTGAATCCTAAATCATTTAAGATTTTACCAGCATATCCACCAGC  
ATAAATTCTTGTATGATCAGCACGGAAGTTAACAACTGAAGCTTTCATGGCCATGCATC

TTTATACTTTGCTTTTGCATCTTTTGGGAATGCAGCTACTTTATCATCGTACTTTTTAAGTA  
AATCTTCAGCTTCTTTTTCTTTCCCTA

### > **sbnA**

Function: protein coding sequence; siderophore biosynthesis protein A (core genome, constant)

Best match: *sbnA*\_CC001-ST772\_118\_AJGE01000014.1[23830:24810:r] (completely identical)

Position: 007-contig\_191: 13151 ... 14132; Length: 981 bp

Sequence:

TTGATTGAAAAAAGTCAAGCATGTCACGATTCATTGTTAGATTCTGTAGGGCAAACACCT  
ATGGTTCAACTTCATCAACTATTTCCGAAACATGAAGTGTGGCAAAGTTAGAGTATATG  
AATCCTGGAGGCAGCATGAAAGATCGACCTGCCAAGTACATCATTGAACATGGTATTAAA  
CATGGTTAATCACTGAGAATACACATTTAATTGAAAGTACTTCTGGTAATTTAGGCATTG  
CGTTGGCAATGATATCTAAAATCAAGGGATTAAACTCACGTGTGTTGTTGATCCTAAAA  
TATACCAACAAATTTGAAAATTATTAAGTTATGGTGCCAATGTAGAAATGGTTGAAG  
AACCTGATGCACATGGGGGTTATTTAATGACTCGTATTGCAAAGGTGCAAGAAATGTTAG  
CCACTATTGACGATGCATATTGGATTAATCAATATGCGAATGAGTTAAATTGGCAATCCC  
ATTATCATGGTGCAGGCACAGAGATTGTTGAAACAATTAAGCAACCTATAGATTATTTTG  
TCGCGCCAGTCAGCACGACAGGTAGCATTATGGGTATGAGTAGAAAAATAAAAGAAGTG  
CATCCAAACGCACAAATTTGTTGCTGTTGATGCGAAAGGGTCAGTCATTTTTGGTGACAAA  
CCTATTAATAGAGAATTACCTGGTATCGGTGCTAGTCGTGTACCCGAAATATTGAATAGA  
TCAGAAATTAATCAAGTGATCCATGTAGATGATTATCAATCTGCTTTGGGCTGTGAAAA  
CTGATTGATTATGAAGGCATATTTGCCGGAGGTTCAACAGGCTCGATTATTGCAGCGATT  
GAGCAGTTGATAACGTCAATTGAAGAAGGTGCAACAATTGTCACGATTTACCAGATCGA  
GGCGATCGTTACTTAGATTTAGTTTATTCAGATACATGGTTAGAAAAAATGAAATCAAGA  
CAAGGAGTTAAATCAGAATGA

### > **sbnB**

Function: protein coding sequence; siderophore biosynthesis protein B (core genome, constant)

Best match: *sbnB*\_CC001-ST772\_118\_AJGE01000014.1[22823:23833:r] (completely identical)

Position: 007-contig\_191: 14128 ... 15139; Length: 1011 bp

Sequence:

ATGAATAGAGAGATGTTGTATTTAAATAGATCAGATATTGAACAAGCGGGAGGTAATCAT  
TCACAAGTTTATGTGGACGCATTAACAGAAGCATTAAACAGCCCATGCGCACAATGATTTT  
GTACAACCGCTTAAGCCGTATTTAAGACAGGATCCTGAAAATGGACACATCGCAGATCGA  
ATTATTGCAATGCCAAGTCATATCGGTGGTGAACACGCAATTCAGGTATTAAGTGGATA  
GGTAGTAAGCACGACAATCCATCGAAACGTAATATGGAGCGTGCAAGTGGTGTCAATTATT  
TTGAATGATCCAGAAACGAATTATCCAATTGCAGTTATGGAAGCAAGTTTAATTAGTAGT  
ATGCGTACTGCAGCAGTTTCAGTGATTGCAGCTAAGCATTGGCTAAAAAAGGATTTAAA  
GACTTAACAATCATTGGATGCGGGCTAATCGGAGACAAGCAATTACAAAGTATGTTAGA  
GCAATTCGATCATATTGAACGCGTGTGTTTACGATCAATTCTCTGAAGCATGTGCACGC  
TTTGTTGATAGATGGCAACAACAGCGTCCGGAAATTAATTTTATTGCGACAGAAAATGCT  
AAAGAAGCAGTATCAAATGGTGAAGTAGTCATTACATGTACCGTAACGGATCAACCATA  
CATTGAATATGATTGGTTACAAAAGGGTGCATTTATTAGCAACATTTCTATCATGGATGTG  
CATAAAGAAGTCTTTATTAAGCTGACAAAGTCGTAGTAGATGACTGGTCACAATGTAAT  
CGAGAAAAGAAAACCTATTAACCAATTGGTGTAGAAAGGTAATTCAGCAAAGAAGCACT  
TCATGCTGAACTAGGACAACCTTGTGACAGGTGACATACCAGGACGTGAAGACGATGATG  
AAATCATATTACTTAATCCGATGGGTATGGCTATCGAAGATATTTCAAGTGCTTACTTTAT  
TTATCAACAGGCACAACAACAAAATATTGGGACAACATTGAACCTATATTA

### > **sbnC**

Function: protein coding sequence; siderophore biosynthesis protein C (core genome, variable)

Best match: *sbnC*\_CC001-ST772\_118\_AJGE01000014.1[21048:22802:r] (completely identical)

Position: 007-contig\_191: 15159 ... 16914; Length: 1755 bp

Sequence:

TTGCAGAATCATACAGCAGTCAATACAGCACAAACGATAATATTAAGAGATTTAGTTGAT  
GCATTATTATTTGAAGATATAGCCGGTATTGTATCGAATAGTGAGATTACTAAAGAAAAT  
GGACAAACCATTTTGATATACAAACGTGAAACACAGCAAATAAAGATACCTGTTTATTTT  
AGTGCTTTAAATATGTTTCGTTATGAAAGTTCACAACCAATTACGATAGAGGGGAAGGCTG  
TCTAAGCAACCTTTAACGGCAGCTGAATTTTGGCAAACAATTGCTAATATGAATTGTGAT  
TTAAGTCATGAATGGGAAGTGGCTCGCGTTGAAGAAGGACTGACTACTGCTGCCACACAG  
CTTGCTAAACAATTATCAGAATTAGATTTAGCGTCACATCCTTTTGTGATGTCAGAGCAGT  
TTGCAAGTTTAAAAGATCGTCCATTTTCATCCATTAGCTAAAGAAAAAAGAGGATTAAGAG  
AAGTGGATTATCAAGTGTATCAAGCTGAATTAATCAATCATTTCCTTTAATGGTTGCAGC  
AGTTAAAAAGACACATATGATTCATGGCGATACTGCAAATATCGATGAATTAGAAAATTT  
GACAGCACCTATAAAAGAACAAGCGACAGACATGTTAAATGATCAAGGGTTATCAATAG  
ATGACTATGTAATTTCCAGTACATCCTTGGCAATATCAGCATATTCTGCCGAACGTCTT  
TGCGAAAGAGATTAGTGAAGTGGTTGTTACTATTACCGTTAAAATTTGGAGATTATCT  
GTCGTCTTCAAGTATGCGTTCATTAATTGATATTGGCGCACCGTATAACCATGTCAAAGTA  
CCATTTGCAATGCAGTCATTAGGCGCATTAAAGGCTAACGCCTACGCGTTACATGAAAAAC  
GGAGAACAAGCAGAACAATTATTACGTCAGCTTATAGAAAAAGATGAAGCACTAGCTAA  
GTATGTCATGGTTTGTGATGAAACAGCTTGGTGGTCATATATGGGTCAAGATAATGATAT  
TTTCAAAGATCAATTAGGTCATCTAACTGTTTCAAGTAAAGAAAATATCCCGAAGTGCTAGC  
CAAAAATGATACGCAACAGCTAGTGTCAATGGCAGCACTCGCGGCAAATGATCGCACTTT  
ATATCAAATGATTTGTGGAAAAGATAATATTTCTAAAAATGATGTCATGACGTTATTTGA  
AGATATCGCACAAAGTCTTTTTAAAGGTAACACTATCATTATGCAATACGGCGCATTACC  
AGAGTTGCATGGTCAAAAATATATTGTTGTCATTTGAAGATGGACGTGTACAAAAATGCGT  
GTTACGTGATCATGATACTGTCAGAATTTATAAACCATGGCTAACAGCACATCAGCTTTC  
ATTGCCGAAGTATGTCGTCAGAGAAGATACACCTAATACGCTAATTAATGAAGATTTGGA  
AACATTTCTTGCTTATTTTCAAACATTAGCTGTATCGGTAATCTATATGCCATTATTGAT  
GCAATTCAGATTTATTTGGTGTAAAGTGAAGCATGAACTTATGTCGTTGTTAAAACAAATTT  
TAAAAAATGAAGTGGCAACTATTTCCCTGGGTTATAACTGATCAGCTAGCTATCAGACACA  
TTTTATTTGATAAACAGACGTGGCCATTCAAACAAATTTTATTACCATTGCTATATCAACG  
TGATAGTGGTGGAGGTAGTATGCCTTCAGGTTTAACTACCGTACCAAATCCAATGGTGAC  
ATATGATTAA

### > **sbnD**

Function: protein coding sequence; siderophore biosynthesis protein C (core genome, constant)

Best match: sbnD\_CC001-ST772\_118\_AJGE01000014.1[19799:21055:r] (completely identical)

Position: 007-contig\_191: 16906 ... 18163; Length: 1257 bp

Sequence:

ATGATTAATCAGTCTATATGGCGCAGTAACTTTTCGCATTTTATGGCTCAGTCAGTTTATAG  
CGATTGCTGGACTGACAGTACTTGTGCCATTATTGCCAATTTATATGGCATCACTACAAAA  
TCTATCAGTTCGTAGAAATACAGTTGTGGAGTGGTATAGCGATTGCTGCTCCAGCTGTAAC  
GACGATGATAGCTTCGCCGATATGGGGGAAGCTAGGTGATAAGATCAGCCGAAAATGGA  
TGGTGTAAAGAGCGTTACTTGGTTTGGCGGTATGCTTATTTTTAATGGCATTGTGTACGAC  
ACCATTACAGTTTGTACTTGTGAGGTTATTGCAGGGACTATTTGGTGGTGTGTTGATGCA  
TCAAGTGCCTTTGCGAGTGCAGAGGCCAGCTGAAGATCGTGGAAAGGTATTAGGAAG  
ACTGCAAAGTTCAGTCAGCGCAGGGTCTCTTGTGGGGCCATTAATTGGCGGTGTTACAGC  
TTCGATATTAGGTTTTAGTGCCTTACTGATGAGTATTGCCGTTATTACTTTTATTGTCTGTA  
TTTTCGGTGCATTAATAATTGATTGAAACGACACATATGCCAAAATCACAAACACCAAATA  
TTAATAAAGGTATTCGCCGTTCAATTCATGTCTATTATGCACACAACAACATGTCGATT  
TATTATCGTTGGCGTTTTAGCAAACCTTGCTATGTATGGCATGCTAACTGCATTATACCA  
CTTGCTTCATCAGTGAATCATACAGCGATAGATGACCGTAGTGTGATTGGATTTTTACAGT  
CCGCATTTTGGACGGCTTCGATATTAAGCGCGCCTTTATGGGGACGCTTAATGATAAATC  
ATATGTTAAATCAGTATATATATTTGCCACGATTGCATGTGGTTGTAGTGCGATACTGCAA  
GGTTTAGCGACGAATATAGAGTTTTTAATGGCTGCAAGAATACTTCAAGGATTAACATAT  
AGTGCATTGATTCAAAGTGTATGTTTGTGTCGTAATGCGTGTATCAACAACCTAAAG  
GCACATTTGTTGGAACGACGAACAGTATGTTAGTTGTTGGTCAAATATTGGCAGTCTTA  
GTGGCGCTGCCATTACAAGTTATACTACACCAGCTACTACGTTTATTGTTATGGGCGTAGT

ATTTGCAGTAAGTAGTTTATTTTTAATTTGTTCAACCATCACTAATCAAATCAACGATCAC  
ACATTAATGAAATTATGGGAGTTGAAACAAAAAAGTGCAAATAA

> **sbnE**

Function: protein coding sequence; siderophore biosynthesis protein D (core genome, variable)

Best match: *sbnE*\_CC001-ST772\_118\_AJGE01000014.1[18073:19809:r] (completely identical)

Position: 007-contig\_191: 18152 ... 19889; Length: 1737 bp

Sequence:

GTGCAAAATAAAGAATTAATACAACATGCAGCGTATGCGGCTATCGAACGCATTTTAAAT  
GAATATTTTAGAGAAGAAAATTTATATCAAGTACCACCTCAAATCATCAATGGTCTATA  
CAATTATCAGAGCTCGAAACTTTAACGGGTGAATTTTCGCTATTGGTCTGCGATGGGGCAT  
CATATGTATCATCCAGAGGTATGGCTTATCGATGGAAAAAGTAAAAAATAACAACCTTAT  
AAAGAAGCAATTGCGCGTATTTTGCAACATATGGCTCAAATTGCAGATAATCAAACGGCA  
GTGCAACAACATATGGCGCAAATTATGTCTGACATCGATAATAGCATTTCATCGCACGGCG  
CGTTATTTGCAAAGTAACACAATAGACTACACAGAAGATCGCTATATCGTTTCAGAACAT  
TCTTTATACTTAGGTCATCCATTTTCATCCGACTCCTAAGAGTGCAAGTGGGTTTTCAAAG  
CAGATTTAGAGAAATATGCACCCGAATGTCATACATCATTCCAATTGCATTATTTAGCTGT  
GCATAAAGATGTTCTGCTCACGCGCTATGTAGAAGGTAAAGAAGATCAGGTTGAGAAAG  
TGTTGTATCAATTAGCAGATATAGACATATCAGAGATACCCAAAGATTTTATTTTATTACC  
AATACATCCTTATCAAATCAATGTGTTGCGACAGCATCCACAGTATATGCAATATAGTGA  
ACAAGGTTTAATAAAAGACCTTGGCATTTCGCGTGATTCAGTGTACCCGACGTCTTCGGTT  
AGAAGTGTATTTCAAAGCATTAAACATTTATTTAAAATTACCGATACACGTTAAAATT  
ACTAATTTTATACGTACGAATGATCTTGAACAGATTGAACGGACAATCGATGCCGCGCAA  
GTTATTGCATCAGTCAAAGATGAGGTTGAAACACCCCATTTTAAATTGATGTTTGAAGAA  
GGATATCGTGCATTGTTACCGAATCCGTTAGGGCAAACAGTTGAACCTGAAATGGATTTA  
TTAACAAATAGTGCCATGATTGTTTCGTGAAGGGATACCGAATTACCATGCTGATAAAGAT  
ATTCATGTATTGGCGTCATTATTTGAAACGATGCCTGATTCACCGACCTCTAAGTTATCAC  
AAGTGATTGAGCAAAGTGGTTTAGCACCAGAAGCATGGCTTGAATGTTATTTGGATCGTA  
CATTATTGCCGATATTAAGCTGTTTAGTAACACAGGCATTAGTCTAGAAGCACATGTAC  
AAAATACATTAATTGAATTAAGATGGCATAACCCGACGTGTGCTATGTCAGAGATTTAG  
AAGGCATTTGTCTATCTAGAACGATTGCTACTGAAAACAGCTTGTGCCAAATGTTGTGG  
CAGCATCAAGCCCTGTTGTATATGCACATGATGAAGCATGGCATCGTCTTAAATATTACG  
TTGTAGTAAATCACTTAGGACATTTAGTATCAACTATTGGTAAAGCGACTAGAAATGAAG  
TTGTGTTATGGCAAATTGTAGCGCATCGTCTTATGACATGGAAAAAAGAATACGCGAATA  
ACGCAGTATTTGTTGACTGTGTAGAAGATTTATATCAAACGCCGACCATTGCGGCTAAAG  
CGAATTTGATGAGTAAATTGAATGATTGTGGTGCAAACCCTATTTATACACATATACCAA  
ATCCAATTTGTCATAACAAGGAGGTATCGTATTGTGAATCAAACAATTCTTAA

> **sbnF**

Function: protein coding sequence; siderophore biosynthesis protein F (core genome, constant)

Best match: *sbnF*\_CC001-ST772\_118\_AJGE01000014.1[16314:18053:r] (completely identical)

Position: 007-contig\_191: 19908 ... 21648; Length: 1740 bp

Sequence:

ATGCACCAACTGGTATCATCACTTATTTATGAGAATATTGTTGTGTATAAAGCGTCATATC  
AAGACGGTGTCCGGTCATTTTACAATAGAAGGACATGATTCAGAGTATCGTTTTACTGCTG  
AAAAGACACATAGCTTTGATCGTATACGTATCACATCACCAATTGAGCGTGTCTGATAGGAG  
ATGAGGCAGATACAACAACAGACTATACACAATTATTGAGAGAGGCTGTATTTACATTTT  
CTAAAAATGATGAAAAGCTAGAACAATTTATTGTTGAGTTATTACAGACAGAATTAAG  
ATACACAAAGTATGCAGTATCGAGAATCAAACCCACCAGCAACACCTGAGACATTTAAC  
GACTATGAATTTTATGCGATGGAAGGGCATCAGTATCATCCAAGTTACAAATCACGTTTA  
GGATTTACGTTGAGTGATAATTTGAAATTTGGTCCTGATTTTGTACCAAACATTAAGTGC  
AGTGGTTAGCTATCGACAAAGGTAAAGTAGAAACGACGGTATCAAGAAATGTTGTAGTT  
AACGAAATGTTACGTCAACAAGTTGGCGATAAAGACTTATGAACATTTTGTACAGCAAATT  
GAAGCGTCTGGCAAACATGTAATGATGTTGAGATGATACCTGTACACCCATGGCAGTTT  
GAACATGTCATCCAAGTTGATTTGGCTGAAGAAAGGCTTAATGGCACAGTACTATGGTTA

GGGGAAAGTGATGAGCTATATCACCCCTCAACAATCGATTTCGTACGATGTCGCCAATAGAC  
ACGACAAAATATTATTTAAAGGTACCAATAAGTATAACGAACACTTCAACGAAACGAGT  
GTTGGCGCCTCATACAATTGAAAATGCAGCGCAAATTACGGATTGGTTAAAGCAGATACA  
GCAACAAGATACGTATTTAAAAGATGAATTAAGACAGCTTTTCTAGGGGAAGTCTTAGG  
ACAGTCTTATTTAAATACACAACCTTCGCCTTATAAAACAAACTCAAGTTTATGGTGCCTTA  
GGTGTATATGGCGTGAAAATATATATCACATGTTAATCGATGAAGAGGATGCGATACCA  
TTAATGCACTTTATGCAAGTGATAAGGATGGTGTACCATTCAATAAAAATTGGATTAAA  
CAATATGGTTCTGAAGCTTGGACAAAGCAATTTTATAGCTGTAGCGATTTCGTCCAATGATTC  
ATATGCTTTATTATCACGGTATTGCCTTTGAATCGCATGCACAAAATATGATGCTCATTCA  
TGAAAATGGTTGGCCTACACGTATTGCCTTAAAAGATTTCCATGATGGTGTTCGTTTTAAG  
CGTGAGCATTAAAGTGAAGCTGCTTACACCTGACATTAAGCCAATGCCAGAAGCACAT  
AAAAAAGTGAATAGTAATTCATTTATTGAAACAGATGACGAACGTTTAGTACGCGACTTT  
TTACACGATGCATTTTCTTTATTAATATCGCCGAAATCATCTTATTTATTGAAAAGCAAT  
ATGGTATCGATGAGCAGCGACAATGGCAATGGGTAAAGGCATCATCGAGGCGTATCAA  
GAAGCATTTCAGAGTTGAATAACTATCAACATTTTCGATTTGTTTGAACCTACGATTCAAG  
TTGAAAAGTTAACGACACGTCGATTATTAAGTGACTCCGAGTTAAGAATTCATCATGTTA  
CAAATCCATTAGGTGTAGGAGGTATCAATGATGCAACAACATCTCTGAAACATAG

### > **sbnG**

Function: protein coding sequence; siderophore biosynthesis protein G (core genome, constant)  
Best match: *sbnG\_CC001-ST772\_118\_AJGE01000014.1*[15563:16339:r] (completely identical)  
Position: 007-contig\_191: 21622 ... 22399; Length: 777 bp

Sequence:

ATGCAACAACATCTCTGAAACATAGATTAACAATGGTGATTTCAGTTTATGGCATTTTTA  
ATTCTATACCGGACCCATTGATGATCGAGGTTATCGCAGCAAGCGGGTATGACTTTGTTG  
TGATTGATACAGAACACGTGGCGATTAATGATGAGACACTAGCGCATTTAATTCGTGCAG  
CTGAAGCAGCGCATATTATACCAATTGTACGTGTCAGTGCAGTGATAGATAGAGATATCA  
TTAAAGTGTTGGATATGGGTGCGAGAGGTATTATTGTGCCACACGTTAAAGATCGTGAGA  
CAGTTGAGCATATTGTGAAATTAAGTCGTTATTACCCGCAAGGATTAAGAAGTTTGAATG  
GTGGTCGCATGGCAAGATTTGGACGTACACCATTACTTGATGCAATGGAGATGGCTAATG  
AGCATATTATGGTGATTGCCATGATAGAAGATGTTGAAGGGGTTATGGCCATTGACGATA  
TAGCTCAAGTCGAAGGTTTAGACATGATAGTTCGAAGGTGCCGCAGATTTATCGCAGTCAC  
TTGGCATAACCATGGCAAACGCGTGATGATCAAGTAACATCACATGTTCAACATATTTTTG  
AAGTTGTGAATGCACATGGTAAACATTTTTGTGCATTACCACGTGAAGATGAAGATATTG  
CAAATGGCAGGCACAAGGTGTACAAACATTTATTTTAGGTGATGATCGCGGAAAAATAT  
ATCGCCATTTAAGTGCATCTCTAGCGACGTCTAAACAGAAAGGGGATGAAGGCTAA

### > **sbnH**

Function: protein coding sequence; siderophore biosynthesis protein H (core genome, variable)  
Best match: *sbnH\_CC001-ST772\_118\_AJGE01000014.1*[14361:15563:r] (completely identical)  
Position: 007-contig\_191: 22398 ... 23601; Length: 1203 bp

Sequence:

ATGCGTATAGTTCAACCTGTTATTGAACAATTAAGCACAATCTCATCCAGTTTGTTCATT  
ATATCTATGATTTAGTCGGACTGGAACATCATTGCAACATATTACATCGTCATTGCCGAG  
TAATTGTCAAATGTACTATGCAATGAAAGCAAATAGTGAACGAAAAATCCTAGATACAAT  
TAGTCAGTATGTTGAAGGATTCGAAGTTGCATCTCAAGGTGAAATAGCAAAAGGTCTTGC  
TTTTAAACCAGCAAATCATATTATTTTTGGTGGCCCTGGTAAGACAGACGAGGAACTAAG  
ATATGCAGTAAGTGAAGGTGTTTCAGCGTATTTCATGTTGAAAGTATGCATGAATTACAACG  
GCTAAATGCCATCTTAGAACATGAAGATAAGACACAACACATTTTATTGCGTGTTAATTT  
AGCAGGACCATTTCCCAATGCAACGTTGCATATGGCAGGACGCCAACACAATTTGGTAT  
TTCTGAAGACGAAGTTGATGATGTCATTGAAGCTGCGCTCGCAATGCCAAAGATTCATCT  
AGATGGATTTTCAATTTTCAATTTCTAATTTCTAACAATTTAGACTCGAATTTACATGTCGATGTA  
GTGAAACTTTATTTTAAAAAAGCAAAGGCATGGTCTGAAAAACATCGATTTCCACTCAA  
CATATCAATCTTGGTGGTGGCATAGGCGTTAACTATGCAGATTTAACTAACCAATTTGAA  
TGGGATAATTTTGTAGAAAATTTTAAAACACTTATCGTTGAGCAAGAAATGGAAGATGTG



ACATTGAACTTTGAATGTGGGCGCTTTATTGTGGCACATATTGGTTACTATGTGACAGAA  
GTGCTAGATATTAAGAAAGTGCATGGTGCCTTGGTATGCCATTTTAAGAGGAGGTACGCAA  
CAATTTAGACTGCCGGTATCTTGGCAGCATAACCATCCTTTTGAATTTATCGTTATAAGG  
ACAATCCATATTCATTTGAAAAAGTTTCAATTTTCGAGACAGGACACAACGTTAGTCGGTC  
AATTATGTACACCGAAAGATGTCTTTGCTAGAGAAGTGCAGATAGACTCAATCAGTACAG  
GCGACGTTATTGTTTTCAAATATGCAGGTGCATACGGATGGTCTATTTACATCACGATTT  
CTTAAGCCATCCACATCCTGAATTTATTTATTTAACGCAAACAAAGGAGGATGAATAA

### > **sbnI**

Function: protein coding sequence; siderophore biosynthesis protein I (core genome, constant)

Best match: *sbnI\_CC093\_JKD6159-ST93\_CP002114.2*[122755:123519] (completely identical)

Position: 007-contig\_191: 23604 ... 24369; Length: 765 bp

Sequence:

TTGAATCATATTCATGAACATTTAAAATTGGTACCAGTAGATAAGATTGATCTTCACGAA  
ACATTCGAACCTTTAAGATTGGAAAAGACGAAAAGTAGTATTGAAGCAGATGATTTTATA  
CGTCATCCTATTTTAGTGACAGCGATGCAACATGGTAGATATATGGTTATAGATGGTGTG  
CATCGGTATACAAGTTTGAAAGCGTTAGGATGTAAGAAAGTTCCAGTGCAAGAAATCCAT  
GAAACACAATATTCAATTAGTACATGGCAACATAAAGTTCCATTTGGTGTGTGGTGGGAA  
ACGTTACAACAAGAACATCGCTTGCCATGGACTACTGAGACAAGACAAGAAGCGCCATT  
TATTACGATGTGTTCATGGTGATACAGAACAATTTTGTATACAAAAGATTTAGGCGAAGC  
ACATTTTCAAGTATGGGAAAAGGTTGTGCGCAAGTTATAGTGGTTGTTGTTCTGTAGAGAG  
AATTGCACAAGGTACATATCCTTGTCTTTCTCAACAAGATGTACTCATGAAGTATCAGCC  
ATTGAGTTATAAGGAAATTGAAGCGGTTGTTTCATAAAGGGGAAACTGTGCCAGCAGGTGT  
GACACGCTTTAATATTTTCAGGACGATGTCTTAATCTTCAAGTACCACTGGCATTACTTAAA  
CAAGATGATGATGTTGAACAACCTGCGCAATTGGAAGCAGTTTTTTAGCAGATAAGTTTGCC  
AATATGAGATGCTATACTGAAAAAGTATACTTGGTGGAGCAATAG

### > **Q5HJP3-var1**

Function: protein coding sequence; putative protein (core genome, variable)

Best match: *Q5HJP3-var1\_CC001\_MW2-USA400\_BA000033.2*[117648:118274]

Position: 007-contig\_191: 25021 ... 25648; Length: 627 bp

Sequence:

ATGGAAAAAATGTAGAAAAATCATTTCATAAAGATAGGTTTATATTTTCAAATAGCTTAT  
ATAGTACTCATGGCTATAACTTTATGTGGGTTTGTAAATTTGCTATGGACTAATTTTCGGCC  
TTTTCTATTTATTATCAGGTAGCAAAGTTGATTATTTAATAGTAACAATAGTTATATCGGC  
AATAATTTCTATATTTGTAATTATACTTTCAATCGTACCTGTCATCGTATTGGCATCTGACT  
TATTTAAAGAAAGGATTTCAAAGGTGTCATATTAATTGTATTGGCTATTATTGCTTTAGT  
ATTATGCAACTTTGTATCTGCAATACTCTGGTTTGTTCAGCCATATCTATTTTAGGTAGA  
AAAAAATTAGTAGCTGCAGCAGATACTACCACTATTCAAAAAAGTAAAGGGAACGCAAA  
TCAAGCATCACATAAAGACACGTGTA AAAAGGAACCTTGATAGTCAAGACATGATGGAAC  
ATCCTGAGGTTAAAAATCCCACGACTAAAAACCTTGAAGGATTTAACGAAGAAATACAT  
AAAGATGAAGCTACAACATAAAGTTGTGTCAGTGATAACACGGAACCGCCGATTGAATCAA  
AGACCATGTCTCGAAAAAAGATTGA

### > **butA**

Function: protein coding sequence; acetoin(diacetyl) reductase

Best match: *butA\_CC005\_Mu50-VRSA\_BA000017.4*[140984:141760] (completely identical)

Position: 007-contig\_191: 25859 ... 26636; Length: 777 bp

Sequence:

ATGACAAACAACAAAGTAGCATTAGTAACTGGCGGAGCACAAGGATTGGTTTTAAAAT  
TGCAGAACGTTTAGTGGAAGATGGTTTCAAAGTAGCAGTTGTTGATTTCAATGAAGAAGG  
GGCAAAGCAGCTGCACTTAAATTATCAAGTGATGGTACAAAAGCTATTGCTATCAAAGC  
AGATGTATCAAACCGTGATGATGATTTAACGCAGTAAGACAAACTGCCGCGCAATTTGG  
CGATTTCCATGTCATGGTTAACAATGCCGGCCTTGGACCAACAACACCAATCGATACAAT  
TACTGAAGAACAGTTTAAAACAGTATATGGCGTGAACGTTGCAGGTGTGCTATGGGGTAT

TCAAGCCGCACATGAACAATTTAAAAAATTCAATCATGGCGGTAAAATTATCAATGCAAC  
ATCTCAAGCAGGCGTTGAGGGTAACCCAGGCTTGTCTTTATATTGCAGTACAAAATTCGC  
AGTGCGAGGTTTAAACACAAGTAGCCGCACAAGATTTAGCGTCTGAAGGTACTACTGTGAA  
TGCATTTCGCACCTGGTATCGTTCAAACACCAATGATGGAAAGTATCGCAGTGGCAACAGC  
CGAAGAAGCAGGTAAACCTGAAGCATGGGGTTGGGAACAATTTACAAGTCAGATTGCTT  
TGGGCAGAGTTTCTCAACCAGAAGATGTTTCAAATGTAGTGAGCTTCTTAGCTGGTAAAG  
ACTCTGATTACACTACTGGACAAACAATTATTGTAGATGGTGGTATGAGATTCCGTTAA

### > **capX\_epi**

Function: protein coding sequence; UDP-glucose 4-epimerase (core genome, variable)

Best match: capX\_epi\_CC001\_MW2-USA400\_BA000033.2[119607:120578] (completely identical)

Position: 007-contig\_191: 26980 ... 27952; Length: 972 bp

Sequence:

TTGGAAGAGTTTTGATAACTGGTGGGGCTGGTTTTATTGGGTCGCATTTAGTAGATGATT  
TACAACAAGATTATGATGTTTTATGTTCTAGATAACTATAGAACAGGTAAACGAGAAAATA  
TTAAAAGTTTGGCTGACGATCATGTGTTTGAATTAGATATTCGTGAATATGATGCAGTTGA  
ACAAATCATGAAGACATATCAATTTGATTATGTTATTCATTTAGCAGCATTAGTTAGTGTT  
GCTGAGTCGGTTGAGAAACCTATCTTATCTCAAGAAATAAACGTCGTAGCAACATTAAGA  
TTGTTAGAAATCATTAATAAATAATAATAGTCATATAAAAACGTTTTATCTTTGCTTCGTCAG  
CAGCTGTTTATGGTGATCTTCCTGATTTGCCTAAAAGTGATCAATCATTAATCTTACCATT  
ATCACCATATGCAATAGATAAATATTACGGCGAACGGACGACATTAATTAATTGTTTCGTT  
ATATAACATACCAACAGCGGTTGTTAAATTTTTTAATGTATTTGGGCCAAGACAGGATCC  
TAAGTCACAATATTCAGGTGTGATTTCAAAGATGTTTCGATTCATTTGAGCATAACAAGCC  
ATTTACATTTTTTGGTGACGGACTGCAAACCTAGAGATTTTGTATATGTATATGATGTTGTT  
CAATCTGTACGCTTAATTATGGAACACAAAGATGCAATTGGACACGGTTATAACATTGGT  
ACAGGCACTTTTACTAATTTATTAGAGGTTTATCGTATTATTGGTGAATTATATGGAAAAT  
CAGTCGAGCATGAATTTAAGAAGCACGAAAAGGAGATATTAAGCATTCTTATGCAGAT  
ATTTCTAACTTAAAGGCATTAGGATTTGTTTCTAAATATACAGTAGAAACAGGTTTAAAG  
GATTACTTTAATTTTGAGGTAGATAATATTGAAGAAGTTACAGCTAAAGAAGTGGAATG  
TCGTGA

### > **capX\_5M**

Function: protein coding sequence; capsular polysaccharide biosynthesis glycosyltransferase

Best match: capX\_5M\_CC001\_MW2-USA400\_BA000033.2[120541:121233] (completely identical)

Position: 007-contig\_191: 27914 ... 28607; Length: 693 bp

Sequence:

TTGAAGAAGTTACAGCTAAAGAAGTGGAAATGTCGTGAAAATGACATTGAAGCTGTCCA  
TAATAATAAGGGTTATGCCTATCAAAGAAAATTAGACAAACTAGAAGAAGTGAGAAAAA  
GCTATTACCAATTAACGTCGATTGACTTAATTTAAGCATTGTTTTATTATTTTTAACT  
TTACCGATTATGGTTATATTCGCCATTGCTATCGTCATAGATTCGCCAGGAAACCCTATTT  
ATAGTCAGGTTAGAGTTGGGAAGATGGGTAAATTAATTAATAATATACAAATTACGTTCGA  
TGTGCAAAAACGCAGAGAAAAACGGTGCGCAATGGGCTGATAAAGATGATGATCGTATA  
ACAAATGTCGGGAAGTTTATTCGTAAAACACGCATTGATGAATTACCACAATAATTAAT  
GTTGTTAAAGGGGAAATGAGTTTTATTGGACCACGCCCGGAACGTCCGGAATTTGTAGAA  
TTATTTAGTTCAGAAGTGATAGGTTTCGAGCAAAGATGTCTTGTTACACCAGGGTTAACA  
GGACTTGCGCAAATTCAGGTGGATATGACTTAACACCGCAACAAAACTGAAATATGA  
CATGAAATATATACATAAAGGTAGTTAATGATGGAACCTATATATATCAATTAGAACATT  
GATGGTTGTTATTACAGGGGAAGGCTCAAGGTAG

### > **capX\_cps2H**

Function: protein coding sequence; O-antigen polymerase

Best match: capX\_cps2H\_CC001\_MSSA476\_BX571857.1[121296:122534]

Position: 007-contig\_191: 29963 ... 31202; Length: 1239 bp

Sequence:

ATGGAAAATCAACACAATAGTAAATTACTAACATTGTTACTTATCGGTTTAGCGGTTTTTA  
TTCAGCAATCTTCGGTTATTGCCGGTGTGAATGTTTCTATAGCTGACTTTATCACATTACT  
AATATTAGTTTATTTACTGTTTTTCGCTAACCATTTATTAAGGCAAATCATTTTTTACAGT  
TTTTTATTATTTGTATACATATCGTATGATTATTACGCTTTGTTTGCTATTTTTTGTATGATT  
TGATATTTATTACGGTTAAGGAAGTCCTTGCATCTACAGTTAAATATGCATTTGTAGTCAT  
TTATTTCTATTTAGGGATGATCATCTTTAAGTTAGGTAATAGCAAAAAAGTGATCGTTACC  
TCTTATATTATAAGCAGTGTGACTATAGGTCTATTTTGTATTATAGCTGGTTTGAACAAGT  
CCCCTTTACTAATGAAATTGTTATATTTTTGATGAAATACGTTCAAAGGATTAATGAATGA  
CCCTAACTATTTTCGCGATGACACAGATTATTACATTGGTACTTGCTTACAAGTATATTCAT  
AATTACATATTC AAGGTCCTTGCATGTGGTATTTTGGCTATGGTCTTTAACTACAACGGGGT  
CTAAGACTGCGTTTATCATATTAATCGTCTTAGCCATTTATTTCTTTATTA AAAAGTTATTT  
AGTAGAAATGCGGTAAGTGTGTGAGTATGTTAGTGATTATGCTGATATTACTTTGTTTTA  
CCTTTTATAATATCAACTACTATTTATTCCAATTAAGCGACCTTGATGCCTTACCGTCATT  
AGATCGAATGGCGTCTATTTTTGAAGAGGGGTTTGCATCATTAATGATAGTGGATCTGA  
GCGAAGTGTGTATGGATAAATGCCATTT CAGTAATTAATATACATTAGGTTTTGGTGT  
GGCTTAGTGGATTATGTACATATGGCTCGCAAATTAATGGTATTTTACTTGTTGCCATA  
ATACATATTTGCAAATTTTTGCGGAATGGGGCATTTTATTCGGTGC GTTATTTATCATATT  
TATGCTTTATTTACTGTTTGAATTATTTAGATTTAACATTTCTGGGAAAATGTAACAGCA  
ATTGTTGTAATGTTGACGATGCTGATTTACTTTTTAACAGTATCATTTAATAACTCAAGAT  
ATGTCGCTTTTATTTAGGAATTATCGTCTTTATTGTTCAATATGAAAAGATGGAAAGGA  
TCGTAATGAAGAGTGA

> **capX\_wzy**

Function: protein coding sequence; lipopolysaccharide flipase (wzy)

Best match: capX\_wzy\_CC005\_Mu50-VRSA\_BA000017.4[146316:147746]

Position: 007-contig\_191: 31191 ... 32622; Length: 1431 bp

Sequence:

ATGAAGAGTGATTCACTAAAAGAAAATATTATTTATCAAGGGCTATACCAATTGATTAGA  
ACGATGACACCACTGATTACAATACCCATTATTTACGTCATTTGGTCCCAGTGGTGTGG  
GTATTGTTTCATTTTCTTTCAATATCGTGCAATACTTTTTGATGATTGCAAGTGTGGCGTT  
CAGTTATATTTAATAGAGTTATCGCGAAGTCCGTTAACGACAAACGGCAATTGTACAG  
CAGTTTTGGGATATCTTTGTCAGTAAATTATTTTTAGCGTTAACAGTTTTTGCATGTATAT  
GGTCGTAATTACTATATTTATTGATGATTACTATCTTATTTTCTACTACAAGGAATCTAT  
ATTATAGGTGCAGCACTCGATATTTATGTTTATGCTGGAAGTAAAAGTTAAAATTC  
CTAGCCTCAGTAATATTGTTGCGTCTGGTATTGTATTAAGTGTAGTTGTTATCTTTGTCAA  
AGATCAATCAGATTTATCATTGTATGTTTACTATTGCTATTGTGACGGTATTAACCAA  
TTACCTTTGTTTATCTATTTAAAACGATACATTAGCTTTGTTTTCGGTTAATTGGATACCGT  
CTGGCAATTGTTTCGTTTCGTCATTAGCATACTTATTACCAAATGGACAGCTCAACTTATAT  
ACTAGTATTTCTTGC GTTGTCTTGGTTTAGTAGGCACATACCAACAAGTTGGTATCTTTT  
CTAACGCATTTAATATTTAACGGTTCGCAATCATAATGATTAATACATTTGATCTTGTAAT  
GATTCCGCGTATTACCAAAAATGTCTATCCAGCAATCACATAGTTTAACTAAAACGTTAGC  
TAATAATATGAATATTC AATTGATATTAACAATACCTATGGTCTTTGGTTAATTGCAATT  
ATGCCATCATTTTATTTATGGTCTTTGGTGAGGAATTCGCATCAACTGTCCCATGATGA  
CCATTTTAGCGATACTTGTATTAATCATTCTTTAAATATGTTGATAAGCAGGCAATATTT  
ATTAATAGTGAATAAAATAAGGTTATATAATGCGTCAATTACTATTGGTGC GGTAATGAA  
TTTAGTATTATGTCTTGTTTTGTATATTTTTATGGAATTTACGGTGCTGCTATTGCGCGTT  
TAATTACAGAGTTTTTCTTGCTCATTGGCGATTTATTGATATTACTAAAATCAATGTGAA  
GTTGAATATTGTAAGTACGATTCAATGTGTCATTGCTGCCGTTATGATGTTTATTGTGCTT  
GGTGTGGTCAATCATTATTTGCCCCCTACAATGTACGCTACGCTGCTATTAATTGCGATTG  
GTATAGTAGTTTATCTTTTATTAATGATGACTATGAAAATCAATACGTATGGCAAATATT  
GAGGCATCTTCGACATAAAACAATTTAA

> **sodA-L1**

Function: protein coding sequence; superoxide dismutase/locus 1 (core genome, constant)

Best match: sodA-L1\_CC001\_MW2-USA400\_BA000033.2[125516:126115] (completely identical)

Position: 007-contig\_191: 32888 ... 33488; Length: 600 bp

Sequence:

```
ATGGCATTAAATTACCAAATTTACCATATGCATATGATGCATTGGAACCATATATAGAT
CAAAGAACAATGGAGTTTCATCACGACAAACATCACAATACGTACGTGACGAAATTA
CGCAACAGTTGAAGGAACAGAGTTAGAGCATCAATCATTAGCGGATATGATTGCTAACT
AGACAAGGTACCGGAAGCGATGAGGATGTCAGTCCGTAATAATGGCGGTGGTCATTTA
ACCATTCAATTATTCTGGGAAATACTATCACCTAATTCTGAAGAAAAGGTGGCGTAATAG
ATGACATCAAAGCGCAGTGGGGCACTTTAGATGAATTTAAAATGAATTTGCAAATAAA
GCAACAACATTATTTGGATCAGTTGGACTTGGTTAGTTGTTAATGATGGCAAATTAGAA
ATTGTGACAACGCCAAACCAAGATAATCCATTAACAGAAGGCCAAAACACCAATCTTACT
ATTTGATGTTTGGGAGCATGCCTACTATCTGAAATATCAAATAAACGTCCAGACTATAT
GACTGCATTTTGAATATTGTTAACTGGAAAAAGTTGATGAATTATACCAAGCAGCAA
ATAA
```

### > **sasD**

Function: protein coding sequence; Staphylococcus aureus surface protein D (core genome, variable)

Best match: sasD\_CC001-ST772\_118\_AJGE01000014.1[3380:4105:r] (completely identical)

Position: 007-contig\_191: 33856 ... 34582; Length: 726 bp

Sequence:

```
ATGAAAAAATTAGCAACAGTAGGTTCTTTAATTGTAACAAGCACTTTAGTATTCTCAAGT
ATGCCTTTTCAAATGCGCATGCCGACACAACCTTCAATGAATGTGTCGAATAAACAAAGC
CAAATGTACAAAATCATCGTCCTTATGGCGGAGTAGTACCACAAGGAATGACGCAAGC
ACAATATACTGAATTAGAGAAAGCTTTACCCCAATTAAGCGCTGACAGTAATATGCAAGA
CTATAATATGAAATTGTATGATGCGACGCAAAATATTGCTGATAAATACAATGTGATAAT
TACAACATAATGTAGGGGTATTTAAACCACATGCTGTTAGAGATATGAATGGCCATGCGTT
ACCTTTAACAAAAGATGGCAATTTTATCAAACGAATGTAGATGCAAATGGTATTAATCA
TGGTGGTAGTGAATGGTGCAAAATAAAACAGGTCATATGAGTCAACAAGGCCATATGA
ATCAGAACACACACATGAACCAACAGCCACACATGCAACAAGGTCATATGCAATCATCA
AACCATCAAATGATGAGTCCAAAAGCAAATATGCATTCATCAAATCATCAAATGAACCA
AAGTAACAAAAAAGTTTTACCAGCTGCTGGTGAAAGTATGACATCAAGTATTCTTACTGC
AAGTATTGCCGCACTACTATTAGTATCTGGGTTATTCTTAGCATTTAGACGACGTTCAACA
AATAAATAA
```

### > **Q5HJN3**

Function: protein coding sequence; transcript regulator/GntR family (core genome, constant)

Best match: Q5HJN3\_CC001\_MW2-USA400\_BA000033.2[127399:128154:r]RC

Position: 007-contig\_191: 34772 ... 35528; Length: 756 bp

Sequence:

```
TTAATAATCCGATTGTCTTATACGTGTCAGTGTTAATTCAGAGATTTCTGTGGAATATAC
CACTTATTAATCATAATTGGATAAGGTGTTTGTGCGTACAATGTTTCAATAATCAGCCAAC
AATGTGTATCACCATCAAACACGTGACTATGATTTTTGAAGTGGGGCGCTTTGGTAATAG
ACATTTTTAAATCTGATTGATATGCATTGTTATAAATCGTTTGCTCAACGAACGTCTTCAT
GTCGTCTTCGTTTTGTGTAATCACTTTAAATGTGTCAATGACATTTAACGGTATAAAGGTA
AAACAAAATGCATCAGCTTGCTTAGAATGATTGTCTTTTTTTGATAATAGCGTTCCATTG
CAATGACGGCAGAAGGATGGTTTGCAAACAAATGATTTGTATATTTCACTTTCTAAATCAA
CACGATAATTAATTGATGACATAGATACGCGAGCTAGCAATATTTGATCAAGTGGATGCT
TAAATTGATCCATACTTGAAGCGTGTTGGGCATTTGTTTGTGGAATAACAAAGTGTCCCTT
CCCTCTTGTACTCTCTACGATGCCATCTTCGGCTAACAAATTTTATAGCTTGGCGCAAAGTC
ATGCGACTGACATCAAAGCGCGCACAAAGTTCCTTTTCAGTAGGTAATGCATGGCCACTC
GGATATTTTCTATTTGAATTTCTTTATATAACGTATTATAAATCGTTAAAAATTTGGTTG
TGTTTGCATCACGTAGACAACCTCCAT
```

### > **deoD-L1**

Function: protein coding sequence; purine nucleoside phosphorylase locus 1 (core genome, constant)

Best match: deoD-L1\_CC005\_Mu50-VRSA\_BA000017.4[150887:151594]

Position: 007-contig\_191: 35763 ... 36471; Length: 708 bp

Sequence:

```
ATGAAATCAACACCACACATTAACCAATGAATGACGTCGAAATTGCAGAAACGGTTCT
ATTGCCAGGAGATCCGTTAAGAGCTAAGTTCATTGCAGAAACTTATTTGGATGATGTGGA
ACAGTTCAATACAGTGCAGAAACATGTTTGGTTTTACCGGAACATATAAAGGTAAAAAAGT
TTCTGTCATGGGTTCCGGTATGGGTATGCCATCTATTGGCATTACTCTTATGAATTAATT
CATACATTTGGTTGTAAAAAATTAATTCGCGTTGGCTCTTGTGGCGCGATGCAAGAAAAC
ATTGATTTATATGATGTGATTATTGCACAAGGTGCCTCTACTGATTCAAATTACGTTCAAC
AATATCAATTACCAGGTCATTTTGCGCCAATTGCTTCTTATCAATTATTAGAAAAAGCAGT
TGAAACAGCACGTGACAAAGGTGTACGTCATCATGTAGGTAATGTGTTATCAAGTGATAT
TTTCTATAACGCGGATACAACAGCGAGTGAACGTTGGATGCGTATGGGTATTTTAGGTGT
AGAAATGGAATCAGCTGCATTATACATGAATGCAATTTACGCTGGTGTGCAAGCATTAGG
TGTGTTACAGTGAGCGATCATTTAATTCATGAAACGTCAACAACACCTGAGGAAAGGGA
ACGTGCATTTACAGATATGATTGAAATTGCACTGTCATTGGTGTAG
```

### > **tet38**

Function: protein coding sequence; membrane transport protein (core genome, variable)

Best match: tet38\_CC008\_A9765\_ACSN01000018.1[60782:62134]

Position: 007-contig\_191: 36477 ... 37830; Length: 1353 bp

Sequence:

```
ATGAATGTTGAATATTCTAAAATAAAGAAAGCAGTACCTATTTTATTATTCTTATTTGTAT
TCAGTTTGGTTATAGACAACTCATTTAAATTGATTTCTGTAGCCATTGCTGATGACTTAAA
CATATCTGTAACGACAGTAAGTTGGCAAGCGACATTAGCCGGTTTAGTAATTGGTATTGG
CGCTGTAGTATACGCTTCATTATCTGATGCCATTAGTATACGCACACTATTTATTTATGGC
GTGATATTAATCATTATCGGATCAATTATTGGTTACATTTTCCAACATCAATTCCCATTAC
TTTTAGTTGGACGTATTATTCAAACCTGCCGGTTTAGCTGCTGCAGAGACATTATATGTGAT
ATATGTTGCAAAGTATCTTTCTAAAGAGGACCAGAAGACTTACCTTGGCTTAAGTACGAG
CAGTTATTCCTTGTCAATTAGTTATCGGTACATTATCAGGTGGATTTATTTCTACGTATTTAC
ACTGGACAAATATGTTTTTAATTGCATTAATCGTAGTATTTACGTTGCCATTCCTATTTAA
ATTATTACAAAAGAAAATAAATACGAATAAAGCTCATTTAGATTTTGGTTGGCTTAATTCTA
GTGGCAACTATTGCTACAACAGTCATGCTGTTTATTACGAACTTTAATTGGTTATATATGA
TTGGTGCCTTAATTGCGATTATCGTTTTTTCGCTATATATTAAAAATGCGCAACGTCCATT
AGTAAATAAATCATTTTTTCCAAAATAAACGTTATGCTTCATTTTTATTTATAGTATTTGTA
ATGTATGCTATCCAATTGAGTTATATTTTTACGTTCCCATTTCATAATGGAGCAAATTTATC
ATCTGCAACTAGACACAACATCACTGTTATTAGTACCGGGTTATATAGTAGCAGTCATTG
TTGGTGCACCTAAGTGGTAAAATCGGCGAATATCTGAATTCAAAACAAGCGATTATCACAG
CAATTATTTTAATAGCACTGAGCTTGATTTTACCTGCATTTGCAGTAGGTAATCACATTTT
AATCTTCGTCATTTCTATGATATTCTTTGCAGGTAGCTTTGCTTTAATGTATGCACCTTTAC
TTAACGAAGCCATTAACAATAGATCTTAATATGACAGGTGTGGCTATTGGTTTTTTATA
ATTTAATTATTAATGTGGCGGTATCTGTAGGTATTGCGATTGCTGCGGCTCTAATCGATTT
TAAAGCATTAAATTTCCAGGCAATGATGCATTAAGTTCACATTTCCGGTATTATTTTAATT
ATTTTAGGTTAATGAGTATTGTCGGATTAGTTTTATTCGTCAGCTTAAATCGTTGGACAC
AATCTGAAAAATAA
```

### > **deoC-L1**

Function: protein coding sequence; deoxyribose-phosphate aldolase locus 1 (core genome, constant)

Best match: deoC-L1\_CC001\_MW2-USA400\_BA000033.2[130537:131199]

Position: 007-contig\_191: 37910 ... 38573; Length: 663 bp

Sequence:

```
ATGAAATTTGAGAAATATATAGATCACACTTTATTGAAGCCTGAGTCAACACGTACGCAA
ATCGATCAAATCATCGATGAAGCGAAAGCATACAATTTTAAATCTGTATGTGTGAATCCA
ACGCATGTTAAATATGCAGCAGAGCGACTAGCTGATTACAGAGGTGCTCGTTTGTACGGTA
ATAGGATTCCCATTAGGTGCGTCGACAACTGCAACGAAAGCATTGAAACAGAAGATGC
AATTCAAAATGGTGCAGATGAAATTGACATGGTCATCAACATCGGCGCATTAAGAAGATG
GACGTTTTGATGATGTACAACAAGACATTGAAGCAGTGGTGAAAGCTGCGAAAGGTCAC
```

ACAGTAAAAGTGATTATTGAGACGGTATTGTTGGACCATGACGAAATCGTAAAAGCGAG  
TGAATTAACAAAAGTGGCTGGTGC GGACTTCGTTAAAACCTTCAACAGGTTTTGCAGGTGG  
CGGTGCGACTGCAGAAGACGTTAAATTAATGAAAGATACAGTAGGTGCTGATATAGAAG  
TAAAAGCATCAGGTGGCGTACGTAATTTAGAAGATTTCAATAAAAATGGTTGAAGCAGGTG  
CGACACGTATTGGTGCGAGCGCAGGCGTTCAAATTATGCAAGGTTTAGAAGCAGATTCAG  
ATTACTAA

### > **deoB**

Function: protein coding sequence; phosphopentomutase (core genome, constant)

Best match: deoB\_CC005\_Mu50-VRSA\_BA000017.4[153724:154902] (completely identical)

Position: 008-contig\_256: 46 ... 1225; Length: 1179 bp

Sequence:

ATGACAAGACCATTTAATCGTGTACATTTAATCGTAATGGATTTCAGTAGGTATTGGTGAA  
GCGCCAGACGCAGCTGATTTTTAAAGATGAAGGTTTACATACTTTAAGACATACCTTAGAA  
GGTTTCGATCAAACCTTTACCAAACCTTAAAAGTTAGGTCTAGGGAACATCGATAAATTA  
CCAGTAGTAAATGCAGTTGAACAACCAGAAGCATACTATACTAAATTGAGTGAAGCTTCA  
GTTGGTAAAGATACAATGACTGGTCACTGGGAAATTATGGGATTAATATTATGCAACCT  
TTTTAAAGTATACCCTAATGGATTCCCTGAAGAGTTAATTCAACAAATTGAAGAAATGACA  
GGTCGTAAAGTTGTTGCTAACAAACCGGCATCGGGTACGCAAATTATCGATGAGTGGGGC  
GAGCACAAATGAAAACCTGGTGACTTAATTGTTTATACAAGTGCAGACCCAGTATTGCAA  
ATTGCTGCACATGAAGACATTATCCCATTAGAAGAGTTATATGATATTTGTGAAAAGGTT  
CGTGAGTTGACAAAAGACCCTAAATATTTAATTGGTTCGTATTATCGCACGTCCATATGTTG  
GTGAACCAGGAAACTTTACACGTACATCTAATCGACATGACTATGCGTTAAAACCTTTG  
GTAAAACCTGTCTTAGATCATTGAAAGACGGTGGTTATGATGTTATTGCCATCGGTAAAA  
TTAATGACATTTATGATGGTGAAGGTGTAACAGAAGCGGTTTCGTACGAAGAGTAACATGG  
ACGGTATGGATCAATTGATGAAAATTGTTAAGAAAGATTTACAGGTATTAGCTTCTTAA  
ACTTAGTAGACTTTGATGCATTATACGGTCATCGTCGTGATAAACCAGGTTATGCACAAG  
CAATTAAGATTTTCGATGATCGCTTGCCAGAAGCTGTTAGCAACTTAAAAGAAGACGATT  
TAGTAATTATTACAGCAGACCATGGTAATGACCCGACAGCGCCAGGTACGGACCATACG  
AGAGAATATATCCCAGTAATTATGTACAGTCCGAAATTTAAAGGTGGTCATGCACTAGAA  
AGTGATACTACATTCAGTTCTATCGGTGCAACTATAGCAGATAATTTCAACGTAACATTA  
CCAGAGTTCGGTAAAAGTTATTTAAAGGAATTGAAATAG

### > **phnE2**

Function: protein coding sequence; phosphonate ABC transporter/permease protein 2 (core genome, variable)

Best match: phnE2\_CC188\_21340\_AGTX01000018.1[42261:43076:r]RC

Position: 008-contig\_256: 1355 ... 2171; Length: 816 bp

Sequence:

TTAAACAATACGTTTTTCGGATTGAACCGGAAATTAATCTACAATTGCGACCATTAGTAC  
TAAACCGATTAATATAATACCTACACGGTCCCAAGAACGTGTTTGAATGGCAAATATGAG  
TGGTGTCCCGATACCACCAGCCCAATTAGCCCAGTATAGAAGCTGAACGTAAGTTTAG  
TTCAAAGCGATAAAGTATGAGAGATAGAAAGGCAGGCATAATTTGTGGTATGACTGCAA  
ATACGAGTGTTTAATCTTATTTGCACCACTGGCCTTTAATGATTCTATAGCACTGAAATC  
TAGACCTTCAATATCTTCAGCTAAAAGTTTCCCAAGCATACCTACAGAATGGATACCTAA  
AGCTAATACACCTGAAAATGAACCTGGGCCAACAGCTTTGATAAATATAAGTGCCATTAC  
AATTTCTGGGAAGACACGTATAACACTTAAAATAAATTTGCTAACACCTGAAACCGGGCG  
TAACTTTACCATATTATTTGCACCTAGAAATGCTAATGGAATACAGATAAATTGCGGCGAT  
GAAAGTACCTACAACGGCTATCGCAAAGGTTTCAAGTAAACCACGTAATAAGTCTTCGCC  
ATCTGGTATATAGATATAGCTGATGTCAGGATGGAATAATCCGCTGAATATGGATTTTAA  
GATTTCTAATGATTTACTTTTAAAGTTCTAAACTTGGTACACCTGCAAATGCCAGATGATA  
ATAGCTAAGACGACAATTGCAATAAGCCATCTTTAATCAATTTTCGTTTTGTGTGCTTTTG  
TGTGAACATTATATTTTGCTATTTGCTGTGTCAT

### > **phnE1**

Function: protein coding sequence; phosphonate ABC transporter/permease protein 1 (core genome, variable)

Best match: phnE1\_CC188\_21340\_AGTX01000018.1[43073:43873:r]RC (completely identical)

Position: 008-contig\_256: 2167 ... 2968; Length: 801 bp

Sequence:

```
TCATGCGAGATGTGCCCTCACTTTCGTAAGTCAATGACGACGACGATAACTAA
AGTAAATAAAATAATCGTTGCTGTTTTTGGATATTGAAATAAACCAAGTGTGATCATA
AAACAATCCAATACCGCCAGCGCCGACTAATCCAAGAACAGCTGAAGCACGTATATTTAC
TTCAAATGCATATAATACGTATGACATAAATGACGATATGGCTTGTGGTACAACACCGAA
ACAATCCATTTTATTTTATTAGCACCAACAGCCGTCATTGCTTCCATTGGACCTGGATCT
ATCGTTTCCAATGATTCATATAATAATTTTCCAATAATACAGATAGTTAAAATAACAAT
GCTAATATCCCTGGAATTTGACCGATTCCAAATACCGCCACAAAGATTGCTGCTAATAGC
AAATCCGGTATAGTACGAACTATATTTAAAATAAACGCGAGGGTATTGAAATCCACTTT
TGATGAACGATATTGCTAGCACATAATAACGCAATTGGTATTGAAACGATGCTACCTAAT
ACTGTACTTACGATAGCCATTCGAATGGTATCTAACATTGGCGTTGTAATTTGTTGTAAT
ACTCGAAATCAGGTGGAATCATTGTTTGAATAGATCACCTATTTGAGGTATTCCTATCAT
TAAATCTCCAAAATTAACCCCGTATAAATGAAGCTCCAAATGATAAGCACGATGATTAA
CATGAAGGTAAACTCGTTTTTAAAGAAACCTTTTTCTTTAAAGGGAGTCATACTTTGTA
GGTGTCTTAAAGGCAT
```

### > **phnC**

Function: protein coding sequence; phosphonate ABC transporter/ATP-binding protein (core genome, variable)

Best match: phnC\_CC005\_Mu50-VRSA\_BA000017.4[156645:157418:r]RC

Position: 008-contig\_256: 2969 ... 3743; Length: 774 bp

Sequence:

```
TTAGTTCACTCCTAGCTTTTCATCTTCTTTAATTGTACGTCCATATATTTCACTAAATACGT
CATCTGTTGCTTCAGATGCAGGACCATCATAGACAACTTCACCATCACGTAAACCAATGA
TGCGTGTGCCATATCTTTTGCCAAGTCAACAAAATGTAAATTAATTAATAATTGTAATGCC
TAATCTTGGTTGATTTTTCTTAAATCATCCATAACCTGTTTCGTTGTTAATGGGTCTAATG
AAGCAACTGGTTCATCTGCAAGAATAATTTTCGGATTCTTGGCATAGCGCACGTGCAATAG
ATATACGTTGTTGTTGGCCACCTGATAATTCATCAGAGCGTTGATTATATTTATCTAAGAT
GTTGACCCGTTCTAGTGCATCCATTGCTTTAATTTTGTCTTCTTTTGGAAATAAACCTAATA
CCATTTTCCAAGTAGGGTGATAACCTACACGTCCACTTAGTACATTTCTGTAATACACTTGA
CCGTTTAACTAAATTAATAATGTTGGAAAATCATACTATATTTTCGGCGCATTTCTAATAAT
GCTTTACCATGGGCTTTAGTGATTGATTTACCTTGGATGAAAATTTACCTGACGTGATAT
TATGCAAACGATTTACAGATCTTAATAACGTGGATTTCCAGCACCAGATAGTCCGACAA
TAACTGCAAATTCACCTTTTTCAATATTTAAGTTAATATTTTTCAAGCCTACATGACCGTT
AGGATAGACTTTACTGACGTTTTTAAATTCGATTTGACTCAT
```

### > **phnB**

Function: protein coding sequence; phosphonate ABC transporter/substrate-binding protein (core genome, variable)

Best match: phnB\_CC007\_TCH959-USA300\_AASB02000033.1[3918:4874:r]RC

Position: 008-contig\_256: 3956 ... 4913; Length: 957 bp

Sequence:

```
TTATTTTCATATCTTTAACTAATTTTTTCGTAAGTCAATGTCGAAATTTGAATCTTTTCG
TTTCTGTGTATCCTTCATGTGAATAAACTTCGCTAATAATTTTGTGACCTTCTTTTGATTTA
GCAATGTCTATAAAAGCTTTTTTCAATTTTTCTTGAATAATCTTTATCCATATCTGGTCTTAC
AGAAATTGTGTCATTCGGAATAGCTTGTGTTAATTTTAAAATTCGTGTGTCTTTAAATACA
TTTGGTTGGTCTTTTTTTCACAGTATTACGTGCATCGTTAAATACAGCTGCAGCATCTACAT
CTCCATTTAATAATGAGATAACTGCTTGGTTCATGACCTTTAACATTCACAATTTTCATATC
TTTAGTTGCATTAATACCTGCTTCGTTTTTAAACATCGCAAGTGGGAATGTATATCCAGCA
GTTGATGTTACATCTTGTAAAGCAATTTTCTTACCTTTTAAATCTTTCAAGCTTTTAAATTT
TGAGTCTTTTTTAAACAAGAATTTCTGATTTATAGCTATCTACAAGTTCTTTACTTGCTGAAC
```

CATCTTCTTTTACACCGAAACGTTGTGCTTGTAAATAATAAATCAGCTGCTTTTTGATCATG  
TGCTAATGTGTATGCCGTTGGTGGTAAGAAACCAACATCAACTTTTTAGACTTCATAGCT  
TCAACAATTGTATTGTAGTTAGTTGATACAGACACTTTAACTGGAATCCCTAATTCTTTAG  
ATAGTAATTTTTCTAATGGTTTTGCTTTAGCTTCTAATGTTCCAGCATTTTTGCGAAGGTAC  
AAATTGAACGGTTAATTCTTTAGGTTTGTATCCTCCTGATTTAGAATCCGAATCATTACTA  
GCGTTCTTTTGATTATCTAAAGAACTTGAATTTCCACATGCTGCTGCAAAAACAATGACTG  
CTAACATTAATACAAATAAACACTTAAAATTTTTTCAT

### > Q5HJM4

Function: protein coding sequence; putative exported protein (core genome, variable)

Best match: Q5HJM4\_CC001-ST772\_118\_AJGE01000016.1[101146:102690:r] (completely identical)

Position: 008-contig\_256: 5142 ... 6687; Length: 1545 bp

Sequence:

ATGAAAAAATATATAAGTCATTAAGTGTCTCTGCAATTGTTGCAACGGTATCATTAAAGT  
GCTTTACCGCAATCTTTAGCTATAACGCATGAATCGCAACCTACAAAGCAACAGCGAACG  
GTATTATTCGATCGTTCTCATGGTCAAACAGCTGGTGTGCTGAGATTGGGTTAGTGATGGTG  
CATTTTCAGATTATGCGGATTCAATACAAAAACAAGGTTATGACGTTAAAGCTATTGATG  
GTCATTGCAACATAACAGAAGCAAGTTTGAAAATTTCCAAAATATTTGTAATTCCTGAGG  
CTAACATTCCTTTCAAAGAATCAGAACAGGCAGCAATTGTTAACTATGTGAAACAAGGTG  
GCAATGTTGTCTTTATTTAGATCATTACAATGCTGACCGAAATTTAAATCGTATTGATTC  
ATCAGAGGCAATGAATGGTTATCGACGTGGAGCGTATGAAGATATGTCGAAAGGTATGA  
ATGCAGAAGAAAAAAGTTCTACTACAATGCAAGGTGTGAAAAGTTCAGATTGGTTATCTA  
CAAACCTTTGGCGTACGTTTTTCGATATAATGCACTAGGTGATTTAAATACGAGCAATATTGT  
TTCTTCAAAGAAAGTTTCGGTATTACTGAAGGTGTGAAATCTGTCTCTATGCATGCCGG  
ATCGACATTAGCAATTAATCCAGAGAAAGCAAAAGGTATTGTGTATACACCAGAAC  
AATTGCCAGCGAAAAGTAAATGGTCAATGCTGTAGATCAAGGTATTTATAATGGGGGCG  
GTAAAGCAGAAGGCCCTATGTAGCAATTTCTAAAGTTGGAAAAGGTAAAGCAGCATTT  
ATCGGTGATTCATCACTTGTGGAAGATAGTTCGCCCAAATATGTAAGAGAAGATAATGGA  
GAAAAGAAGAAAACATATGATGGTTTTAAAGAACAAGACAACGGTAAGCTATTAATAAA  
TATAACGGCTTGGATGTCTAAAGATAATGATGGGAAATCACTTAAGGCGAGTGGCCTAAC  
ATTAGATACAAAGACTAAGTTGCTTGATTTTGAACGACCAGAGCGTTCAACTGAGCCTGA  
AAAAGAGCCATGGTCAACACCGCCGAGTGGTTATAAATGGTATGATCCAACAACATTTAA  
AGCAGGTAGTTATGGCAGCGAAAAGGCGCAGATCCTCAGCCAAACACACCAGATGATC  
ATACACCACCAAATCAGAACGAAAAGTAACATTTGATATCCCGCAAATGTTTTCTGTAA  
ATGAGCCATTTGAAATGACAATACATTTAAAAGGATTTGAAGCAAATCAAACACTTGAAA  
ATCTTAGAGTTGGTATTTACAAAGAAGGCGGACGTCAAATCGGACAATTTTCAAGTAAAG  
ATAACGATTATAACCCACCAGGTTACAGTACTTTGCCAACAGTTAAAGCAGATGAAAACG  
GAAATGTCACAATTAAGGTCAATGCTAAAGTACTTTGAAAGTATGGAAGGTTCAAAGATTC  
GTTTAAAACCTCGGTGACAAAACCTTGATTACAACAGACTTCAAATAA

### > cpdB

Function: protein coding sequence; putative 5' nucleotidase (core genome, constant)

Best match: cpdB\_ST425\_LGA251-cow\_FR821779.1[139788:141323]

Position: 008-contig\_256: 6737 ... 8273; Length: 1536 bp

Sequence:

ATGTCAAACATAGCATTTTATGTCGTGAGTGACGTACATGGTTATATTTTCCCAACAGATT  
TTACGAGTAGAAATCAATATCAACCTATGGGATTGTTACTAGCGAATCATGTTATAGAAC  
AAGACAGAAGGCAGTATGACCAAAGTTTTAAAATAGATAATGGTGATTTTTTGAAGGGT  
CACCATTTTGTAACTTAATCGCGCATAGCGGCAGTAGCCAGCCTTTAGTTGATTTTTTA  
TAATCGAATGGCATTCAACTTTGGTACGCTTGGTAATCATGAATTTAATTATGGATTACCA  
TACTTAAAAGACACTTTACGCAGACTCAATTATCCAGTTTTGTGCGCTAATATTTATGAAA  
ATGATAGTACATTGACTGATAACGGTGTGCAGTATTTTCAGGTTGGAGATCAAACGGTTG  
GTGTGATAGGTTTAAACGACACAATTTATCCCCATTGGGAACAACCAGAGCATATTCAGT  
CACTTACGTTTCATAGTGCTTTTGAACACTTCAACAACACTTACCTGAAATGAAGCGAC



ATGCAGATATCATTGTGGTTTGTACCATGGTGGATTTGAAAAGGATTTAGAAAGTGGTA  
TGCCGACCGAAGTGTTAACGGGTGAAAATGAAGGATATGCCATGTTAGAAGCATTCTTA  
AAGATATAGATATCTTTATTACGGGTCACCAACATCGACAAATTGCTGAAAGATTTAAGC  
AAACGGCTGTGATTCAACCTGGTACGAGAGGTACAACCTGTAGGCAAAGTTGTCTTGAGTA  
CTGATGAATATGAAAATGTATCCGTTGAATCATGTGAATTACTTCCTGTTATAGATGATTC  
CACATTTACTATTGATGAAGATGACCAACATTTACGAAAGCAGTTAGAGGACTGGTTAGA  
TTACGAAATTACTACATTGCCATATGATATGACGATTAATCATGCATTTGAGGCACGTGT  
GGCACCGCATCCTTTACTAATTTTATGAATTACGCTTTATTAGAAAAAAGTGGTGCAGAT  
GTTGCCTGTACAGCTTTGTTTGATTCTGCTAGTGGTTTCAAGCAAGTCGTGACGATGCGAG  
ATGTTATTAACAATTACCCATTTCCAATACATTTAAAGTTTTAGCTGTAAGTGGTGCCAA  
ACTTAAAGAAGCCATTGAACGATCAGCAGAATATTTTGACGTGAAAAATGATGAAGTAA  
GTGTGAGCGCAGACTTCCTTGAACCCAAACCCCAACACTTTAATTATGATATATATGGTG  
GCGTAAGTTATAACATTCATGTTGGAAGGCCAAAGGGACAACGTGTGAGCAATATGATG  
ATCCAAGGGCACGCAGTTGATTTAAAGCAGACATATACAATTTGTGTAATAATTATCGT  
GCAGTTGGCGGTGGTCAGTATGATATGATATCGACGCGCCAGTTGAAAAGATATTTCAA  
GTTGAAGGCGCACAATTACTTATTGATTTTTTATCAAATAATAATTTGATGCGCATCCCCG  
AAGTTGTTGATTTTAAAGTTGAAAAGTGA

### > **A5IP16**

Function: protein coding sequence; putative protein (genomic island)

Best match: A5IP16\_CC005\_N315\_BA000018.3[162124:162891]

Position: 008-contig\_256: 8429 ... 9197; Length: 768 bp

Sequence:

TTGGAACAATTAACAAGAAGTAAGAGAATCTATTGTTAAAGGAATTATCGCGGGATA  
TAAGGACTATGTTAATGAGAGAAATGAAGTCAAGAAACGTATGGTGATTAGTGATGCCT  
ATGCCTTTACTAAATCTAATCATATTGAAAGTCAAGTTGCTAAGCATTGGAAAATTTGT  
TAAGTATATTAAGAAAATGCTGGACCGTCATGGAAGTATTTAAAGTTTATATTTAATAT  
GGATGAAGAGAAAAATAATATCATGTTTATATTGAAAAATGAAGATTACTTTGATGAAAA  
AAATGTAAGCGTAGGGAAGAGTTTAGTTGCCGATAAAAATCAAAAAAGTAAAAACTATC  
TAGAGGGACTTATGGCTAAGAATAGGGACATTAATTTTGATACTGTTGAAGAAGATTTTA  
AAATTAGGCATCAAATGACTGCAGATAGTATATTATTTAATATAAAAAGAAGGCAGTAATA  
GAGATATCAATTCTTATTTTTTAATTATTACATATCGTATTGATAAAGAATCAAAGCAATT  
AGCTGCAATCAAACAATGGTTACCAAATCCAGAAACAAATTCTGCAATTATGGTTGATGA  
TTTGATAGAGTTGATAGAAAAAGTAATAGTAGAAAGAGAAGATTATCATATTGACGAAG  
AAGAGTTAGAAGTACTTAAAAACGATGGAGAGTTAGAACTCATAGATGTGGAACATGCA  
TTTGGTATCAGTATCGATGAAGGTAACGATATGATTGAAAGTGAAAGGTGA

### > **Q1Y4B9**

Function: protein coding sequence; putative DNA-binding protein (core genome, variable)

Best match: Q1Y4B9\_CC005\_N315\_BA000018.3[162897:164072]

Position: 008-contig\_256: 9202 ... 10378; Length: 1176 bp

Sequence:

ATGTTTATTGGCAAGAATTTAGAATACGTGAGAAAGCTTAATGCTCTAAGTAGAAAAGAA  
TTATCAGAAAAATAAATGTGAGTGAACAAGCAATTTGGCAATATGAAACAAAAAATAT  
GATGCCAGAAATTAGTAAAATTTATGATATGACATCTATTTTTAATGTTAAATCTAGCTAC  
TTTATTAGCGAGCAGCCCGAAGAGCTCCTAATAAATTCTGTGATAAACATAGTATAGCT  
TTTAGAGCAAAAAATTATAAAGTATCTACGAACTATTAATAAAGCAATATTATCAAGCA  
ATGTATTTATCTAATTTAACTAACTACTTATTTTCTTTGTAAAGATAACCGGATAATATTAT  
TTTATCGTTAATAAATAATTTAGATGACTTGTGAAATGGCAATTTAGAATCACTAAATAAA  
AAAGAAAGCATAAAAGAAACTGCTAAAGTTGTGAGGGCTAAAATTTCTCAAGACGAAAG  
CAATGAAGCACTATTATTTATGCTTGAAAAAGCGGGTATAGTTATATACGAAAAGCGAAT  
TAATGATAGCATAGACGCATATAGTTTTTGGAGTAAAGATCTGACACCTTTTATTATACTG  
GGTACAAATAAGGGGGTAGCAGTTAGAAGGAATTTTGATCTTGACATGAGCTGGGACA  
TCTCGTTCTACATCGTCATATTCAATTCGACTTATTATCTCCTGAAGAATATAAGACAATT  
GAACATGAGGCAGATATTTTCGCCTCTGAATTTTTACTACCTGAAGAAGCGTTTAAAAAA

GACTTTGATCAAATGACCAAAAAATCAAATCCTGACTATTTAGCTGTATTGAAAGAAAA  
TGGTATGTTTCTATACAAGCAATTGCAATGAGAGCGTATTATCTAGGCCTAATGTCTAGTA  
CTCAGTACAGATATTTTTGGGCATCATTAATAAAAAAGGCTATAAAAGTAAAGAGCCTT  
TAGACGACGTGATTGAAATGTCACGTCCTGTCAAAATGAATAGTTTATTAAGTTGTATTT  
TGATAGAAATTTACTGACACCACAAAAATTATTGAATTATTTAAAAGTCGATGAAACATT  
TTTGAATCATCTAGCAGGTATTAATTTAAAACCTTTAAGGATTATGTTAATGAAAATAGA  
GAATATAATATAACGAATCTATATAAATAA

> **txbi\_Q1Y4B9**

Function: bidirectional rho independent terminator of Q1Y4B9 (core genome, constant)  
Best match: txbi\_Q1Y4B9\_CC005\_Mu50-VRSA\_BA000017.4[164035:164097] (completely identical)

Position: 008-contig\_256: 10379 ... 10442; Length: 63 bp

Sequence:

GCACCAATATTTAAAACCTCGAGCTGAAAAGATCATCATTTTCAGTTCGAGTTTTTTTTGTGTA  
AC

> **adhE**

Function: protein coding sequence; alcohol-acetaldehyde dehydrogenase (core genome, constant)

Best match: adhE\_CC001\_MW2-USA400\_BA000033.2[142665:145274]

Position: 008-contig\_256: 10762 ... 13372; Length: 2610 bp

Sequence:

ATGTTAACTATACCTGAAAAAGAAAATCGTGGATCGAAAGAACAAGAAGTGGCAATTAT  
GATTGATGCTCTAGCTGACAAAGGGAAAAAAGCATTAGAAGCATTATCTAAAAAGTCAC  
AAGAAGAAATTGATCATATTGTTTCATCAAATGAGCTTAGCAGCTGTTGATCAACATATGG  
TGCTAGCAAAATTAGCACATGAAGAACTGGAAGAGGTATATACGAAGATAAAGCGATT  
AAAAATTTATACGCTTCTGAATATATATGGAATTCATAAAAGACAATAAGACAGTAGGG  
ATTATTGGTGAAGATAAAGAAAAAGGATTAACGTATGTAGCGGAACCAATTGGTGTATT  
TGTGGTGTACGCCAACAAACAATCCTACGTCGACAACCTATTTTTAAAGCGATGATTGCA  
ATTAAGACAGGAAATCCAATCATTTTTGCATTCCATCCAAGTGCACAAGAATCGTCGAAG  
CGTGCAGCAGAAGTTGTATTAGAAGCGGCAATGAAGGCAGGTGCACCTAAAGATATTAT  
TCAGTGGATTGAAGTGCCTTCTATCGAAGCAACAAAACAATTAATGAATCACAAAGGTAT  
TGCATTAGTTCTAGCAACAGGTGGTTCGGGCATGGTTAAGTCTGCATATTCAACTGGCAA  
ACCGGCATTAGGTGTGGGACCAGGTAACGTGCCGTCTTACATTGAAAAACAGCACACAT  
TAAACGTGCAGTAAATGATATCATTGGTTCAAAACATTTGATAATGGTATGATTTGTGC  
TTCTGAACAAGTTGTAGTCATTGATAAAGAAATTTATAAAGACGTTACTAATGAATTTAA  
AGCACATCAAGCATATTTTGTTAAAAAAGATGAATTACAACGCTTAGAAAAATGCAATTAT  
GAATGAACAAAAACAGGTATTAAGCCTGATATTGTCGGTAAATCTGCAGTTGAAATAGC  
TGAATTAGCAGGTATACCTGTCCCCGAAAATACAAAACCTTATCATAGCCGAAATTAGCGG  
TGTAGGTTCAGACTATCCGTTATCTCGTGAAAAATTATCTCCAGTATTAGCCTTAGTAAAA  
GCCAATCTACAAAACAAGCATTTCAAATTTGTGAAGACACACTACATTTTGGTGGATTA  
GGACACACAGCCGTTATCCATACAGAAGATGAAACATTACAAAAGATTTTGGACTAAG  
AATGAAAGCTTGTCGTGTAAGTGTAAATACACCATCAGCGGTTGGAGGTATTGGTGATAT  
GTATAACGAATTGATTCCGTCTTTAACATTAGGTTGTGGTTCCTACGGTAGAACTCAATT  
TCACATAATGTTAGTGCGACAGATTTATTAACATTAACGATTGCTAAACGACGTAAT  
AATACTCAAATTTCAAGGTGCCTGCTCAAATTTATTTGAAGAAAATGCAATCATGAGT  
CTAACAACAATGGACAAGATTGAAAAAGTGATGATTGTCTGTGACCCTGGTATGGTAGAA  
TTCGGTTATACAAAACAGTTGAGAATGTATTAAGACAAAGAACGGAACAGCCTCAAAT  
TAAAATATTTAGCGAAGTCGAACCGAACCCATCAACTAATACAGTATATAAAGGTCTGGA  
AATGATGGTTGATTTCCAACCGGATACAATCATTGCACTTGGTGGTGGTTCAGCGATGGA  
TGCTGCAAAAGCAATGTGGATGTTCTTTGAACACCCTGAGACATCATTCTTCGGTGCTAA  
ACAAAAGTTCCTAGACATCGGTAACGTAATTATAAAATAGGCATGCCTGAAAATGCGAC  
GTTCAATTTGTATCCCTACGACATCAGGTACAGGTTTCAGAAGTAACACCATTTGCAGTTATC  
ACAGATAGTGAACAAATGTAAAATATCCGTTGGCTGATTTTGCTTTAACACCTGACGTT  
GCAATTATTGACCCTCAATTTGTGATGAGTGTGCCAAAAGCGTTACAGCAGATACAGGA

ATGGATGTACTAACGCATGCAATGGAATCATATGTATCTGTAATGGCTTCAGACTATACA  
AGAGGTTTGAGTCTACAAGCGATTAATTTGACGTTTGAATATTTAAAATCATCTGTTGAA  
AAGGGTGATAAAGTTTCAAGAGAGAAAATGCATAACGCATCAACTTTGGCTGGTATGGC  
ATTTGCAAATGCATTCTTAGGTATTGCACACTCAATTGCACATAAAATTGGTGGCGAATA  
TGGTATTCCGCATGGTAGAGCGAATGCGATATTACTACCGCATATTATCCGTTATAATGCC  
AAAGACCCGCAAAAACATGCATTATTCCCTAAATATGAGTTCTTCAGAGCAGATACAGAT  
TATGCAGATATTGCCAAATTCTTAGGATTA AAAAGGGAATACGACAGAAGCACTCGTAGA  
ATCATTAGCTAAAGCTGTCTACGAATTAGGTCAATCAGTCGGAATTGAAATGAATTTGAA  
ATCACAAGGTGTGTCTGAAGAAGAATTAATGAGTCAATTGATAGAATGGCAGAGCTCG  
CATTTGAAGATCAATGTACAACCTGCTAATCCTAAAGAAGCACTAATCAGTGAAATCAAAG  
ATATCATTCAAACATCATATGATTATAAGCAATAA

### > **tx\_adhE**

Function: (core genome, constant)

Best match: tx\_adhE\_CC001\_MW2-USA400\_BA000033.2[145327:145383] (completely identical)

Position: 008-contig\_256: 13424 ... 13481; Length: 57 bp

Sequence:

CCACATAAACTTTAAGTCGATAATCATTATACGGTTATCGGCTTTTATTTATTGCCA

### > **capA-L1**

Function: protein coding sequence; capsular polysaccharide biosynthesis protein A/locus 1 (core genome, constant)

Best match: capA-L1\_CC001\_MSSA476\_BX571857.1[144318:144986] (completely identical)

Position: 008-contig\_256: 13716 ... 14385; Length: 669 bp

Sequence:

ATGGAAAGTACATTAGAATTAACAAAAATTAAAGAAGTATTACAAAAAACTTGAAGAT  
TTTAATTATTTTACCGCTATTATTTTAATTATTAGCGCTATTGTTACATTTTTTCGTCTTATC  
ACCTAAATATCAAGCTAATACTCAAATCTTAGTGAATCAAACCTAAGGGTGACAATCCTCA  
GTTTATGGCACAAGAGGTTCAAAGTAATATTCAACTTGTAATACGTATAAAGAAATTGT  
TAAAAGTCCTAGAATTTTAGATGAGGTGTCAAAGGACTTAAATGATAAGTATTCACCATC  
TAAATTGTCGAGTATGTTGACAATTACAAACCAAGAAAATACGCAACTTATCAACATCCA  
AGTTAAAAGTGGTCATAAACAAGATTTCGGAAAAAATTGCGAATAGCTTCGCTAAAGTTAC  
AAGTAAACAAATTCGGAAGATTATGAGTGTGGATAACGTATCAATTTTATCTAAAGCAGA  
CGGTACAGCAGTTAAAGTCGCACCAAAAACCTGTAGTGAATCTAATCGGTGCATTCTTTTT  
AGGATTAGTTGTCGCGCTTATATATATCTTCTTCAAAGTAATTTTCGATAAGCGAATTA  
AAGATGAAGAAGATGTAGAGAAAGAATTAGGATTGCCTGTATTGGGTTCAATTCAAAAATTT  
AATTAA

### > **capB-L1**

Function: protein coding sequence; capsular polysaccharide biosynthesis protein B/locus 1 (core genome, constant)

Best match: capB-L1\_CC005\_Mu50-VRSA\_BA000017.4[168054:168740] (completely identical)

Position: 008-contig\_256: 14400 ... 15087; Length: 687 bp

Sequence:

ATGTCAAAAAAGGAAAATACGACAACAACACTATTTGTATATGAAAAACCAAAATCAAC  
AATTAGTGAAAAGTTTCGAGGTATACGTTCAAACATCATGTTTTCAAAGCAAATGGTGA  
AGTAAAGCGCTTATTGGTACTTCTGAAAAGCCTGGTGCAGGTAAAAGTACAGTTGTATC  
GAATGTAGCGATTACTTATGCACAAGCAGGCTATAAGACATTAGTTATTGATGGCGATAT  
GCGTAAGCCAACACAAAACCTATATTTTTAATGAGCAAAAATAATAATGGACTATCAAGCTT  
AATCATTGGTTCGAACGACTATGTCAGAAGCAATTACGTCGACAGAAATTGAAAATTTAGA  
TTTGCTAACAGCTGGCCCTGTACCTCCAAATCCATCTGAGTTAATTGGGTCTGAAAGGTT  
AAAGAATTAGTTGATCTGTTTAATAAACGTTACGACATTATTATTGTCGATACACCGCCA  
GTTAATACTGTGACTGATGCACAACCTATATGCGCGTGCTATTAAGATAGTCTGTAGTA  
ATTGATAGTAAAAAAATGATAAAAATGAAGTTAAAAAAGCAAAAGCACTTATGGAAAA

AGCAGGCAGTAACATTCTAGGTGTCATTTTGAACAAGACAAAGGTCGATAAATCTTCTAG  
TTATTATCACTATTATGGAGATGAATAA

### > **capC-L1**

Function: protein coding sequence; capsular polysaccharide biosynthesis protein C/locus 1 (core genome, constant)

Best match: capC-L1\_CC001\_MW2-USA400\_BA000033.2[146991:147755]

Position: 008-contig\_256: 15089 ... 15854; Length: 765 bp

Sequence:

ATGATTGATATTCATAACCATATATTGCCTAATATCGATGACGGTCCGACAAATGAAACA  
GAGATGCTGGATCTTTTAAAACAAGCGACAACACAAGGTGTTACAGAAATCATTGTAACA  
TCACATCACTTACATCCTCGATATACCACACCTATAGAAAAAGTGAAATCATGTTTAAAC  
CATATTGAAAGCTTAGAGGAAGTACAAGCACTAAATCTAAAGTTTTATTATGGTCAGGAA  
ATAAGAATTACCGATCAAATTCTTAATGATATTGATCGAAAAGTTATTACCGGTATTAAT  
GATTCACGCTATTTACTAATAGAATTTCCATCAAATGAAGTTCCACACTATACTGATCAAT  
TATTTTTCGAATTACAGAGTAAAGGCTTTGTACCGATTATTGCACATCCAGAGCGGAATA  
AAGCAATAAGTCAAAACCTTGACATACTATACGATTTAATTAACAAAGGTGCTTTAAGTC  
AAGTGACAACGGCGTCATTAGCGGGTATTTCCGGTAAAAAATTAGAAAATTAGCAATTC  
AAATGATTGAAAACAATCTGACACATTTTCATCGGTTTCAGATGCGCATAACACAGAAATCA  
GACCGTTCTTAATGAAAGACTTATTTAATGATAAGAAATTACGTGATTATTATGAAGATA  
TGAACGGATTATTAGTAATGCGAAGTTAGTTGTTGATGATAAAAAAATTCCTAAACGAA  
TGCCACAACAAGATTATAAACAGAAAAGATGGTTTGGGTTATAA

### > **capD**

Function: protein coding sequence; (core genome, constant)

Best match: capD\_CC001\_MW2-USA400\_BA000033.2[147775:149598]

Position: 008-contig\_256: 15873 ... 17697; Length: 1824 bp

Sequence:

ATGGCACATTTATCTGTGAAATTGCGGCTTTTAATACTAGTATTAATCGATTCACTGATAG  
TGACATTTTCAGTATTCGTAAGTTATTACATTTTAGAACCGTATTTCAAAACATATTCTGT  
CAAATTATTAATATTGGCAGCTATATCACTATTCATATCGCATCATATTTTCAGCATTATT  
TTTAATATGTATCATCGAGCGTGGGAATATGCCAGTGTGAGTGAATTGATTTTAATTGTTA  
AAGCTGTGACGACATCTATCGTTATTACGATGGTGGTTCGTGACAATTGTTACAGGCAATA  
GACCGTTTTTTAGATTGTATTTAATTACTTGGATGATGCACTTGATTTTAATAGGTGGCTC  
AAGGTTATTTTGGCGTATTTATCGGAAATACCTTGGAGGTAAGTCATTTAATAAGAAGCC  
AACTTTAGTTGTTGGTGCTGGTCAAGCAGGTTCAATGCTGATTAGACAAATGTTGAAAAG  
TGACGAAATGAACTTGAACCGGTATTAGCAGTCGATGATGACGAACATAAACGCAATA  
TCACAATTACTGAGGGTGTAAGTCCAAGGTAATAATTGCGGATATTCCAGAAGTACTAGTGA  
GGAAATATAAGATTAATAAATCATCATTGCAATTCCAATATTGGTCAAGAGCGTTTGA  
AAGAAATTAATAATATTGCCATATGGATGGCGTTGAGTTATTGAAAATGCCAAATATAG  
AAGACGTATGTCTGGTGAGTTAGAAGTGAACCAACTTAAAAAAGTTGAAGTAGAAGAT  
TACTAGGCAGAGATCCTGTTGAATTAGATATGGATATGATATCAAATGAATTGACGAAT  
AAAATTTTTAGTTACGGGTGCAGGTGGTTCAATAGGATCAGAAATTTGTAGACAAGTT  
TGTAATTTCTATCCAGAACGTATTATTCTACTTGGCCATGGTAAAACAGTATTTATTTAA  
TCAATCGTGAATTGCGAAATCGCTTCGGAAAAAATGTTGATATCGTTTCTATTATAGCGG  
ATGTGCAAAATAGAGCGCGTATGTTTGAAATTATGGAAACGTATAAACCATACGCAGTTT  
ATCATGCAGCAGCACACAAGCACGTGCCGTTAATGGAAGACAACCTGAAGAAGCAGTA  
CGTAATAATATTTTAGGTACGAAAAATACTGCTGAAGCTGCTAAAAATGCAGAGGTA  
GAAATTCGTTATGATTTCTACGGATAAAGCCGTTAATCCGCCTAATGTCATGGGCGCTTCA  
AAGCGAATTGCAGAAATGATTATTCAAAGTTTAAATGATGAAACGCATCGAACAAATTTT  
GTTGCAGTGAGATTTGGTAATGTACTTGGATCGAGAGGATCTGTGATTCCACTTTTCAA  
AGTCAAATTGAAGAAGGTGGGCCAGTTACTGTGACACATCCTGAAATGACACGTTACTTT  
ATGACAATTCCTGAAGCTTCTAGACTAGTTTTGCAGGCAGGGGCATTAGCAGAAGGTGGC  
GAAGTATTTGTGCTAGATATGGGAGAACCAGTGAAAATTGTTGATTTGGCACGTAATTTA  
ATTAAGCTAAGTGGTAAAAAAGAGGACGACATACGCATTACTTATACAGGGATTAGACC

CGGCGAAAAAATGTTTGAAGAGCTTATGAATAAAGATGAAGTTCATCCTGAACAAGTATT  
TGAAAAAATTTATCGTGGCAAAGTACAACATATGAAATGTAATGAAGTTGAAGCCATTAT  
TCAAGACATCGTCAATGACTTTAGTAAAGAAAAAATTATTA ACTATGCCAATGGCAAAAA  
GGGAGATAATTATGTTTCGATGA

> **capE**

Function: protein coding sequence; (core genome, constant)

Best match: capE\_CC001\_MW2-USA400\_BA000033.2[149588:150616]

Position: 008-contig\_256: 17686 ... 18715; Length: 1029 bp

Sequence:

ATGTTTCGATGACAAAATTTTATTAATTACTGGGGGCACAGGATCATTCCGTAATGCTGTT  
ATGAAACGGTTTTTTAGATTCTAATATTAAGAAATTCGTATTTTTTTCACGCGATGAGAAA  
AAACAAGATGACATTCGAAAAAATATAATAATTCAAAATTAAGTTCTACATTGGTGAT  
GTGCGTGATAGTCAAAGTGTAGAAACAGCAATGCGAGATGTTGATTACGTATTCCATGCA  
GCAGCTTTAAAACAAGTGCCGTCATGTGAATTCTTTCCAGTTGAGGCAGTGAAGACAAAT  
ATTATTGGTACAGAAAATGTCTTACAAAGTGCTATTTCATCAAATGTTAAAAAAGTCATA  
TGTTTATCTACAGATAAGGCAGCGTATCCTATTAATGCTATGGGTATTTCAAAGCAATG  
ATGAAAAAAGTATTCGTAGCCAAATCAAGAAATATTCGTAGTGAACAAACGCTTATTTGT  
GGTACAAGATACGGTAATGTGATGGCTTCAAGAGGATCAGTAATACCTTTGTTTATCGAC  
AAAATCAAAGCTGGAGAACCCTTTAACGATTACAGATCCTGATATGACAAGATTTTTAATG  
AGCTTAGAAGATGCGGTAGAACTAGTTGTTTCATGCATTTAAGCATGCAGAGACAGGAGAT  
ATTATGGTTCAAAGCACCAGCTCAACGGTAGGGGATCTTGCGACCGCATTATTAGAA  
TTGTTTGAAGCTGATAATGCAATTGAAATCATTGGTACGCGACATGGAGAGAAAAAAGC  
AGAAACATTGTTGACGAGAGAAGAATACGCACAATGTGAAGATATGGGTGATTATTTTA  
GAGTGCCCGCAGACTCCAGAGATTTAAATTATAGTAATTATGTTGAACCCGGTAACGAAA  
AGATTACGCAATCTTATGAATATAACTCCGATAATACACATATTTTAAACGGTGGAAGAGA  
TAAAAGAAAAACTTTTAACTAGAAATATGTTAGAAACGAATTGAATGATTATAAAGCTT  
CAATGAGATAG

> **capF**

Function: protein coding sequence; (core genome, constant)

Best match: capF\_CC001\_MW2-USA400\_BA000033.2[150629:151738]

Position: 008-contig\_256: 18727 ... 19837; Length: 1110 bp

Sequence:

TTGAATATTGTAATTACAGGAGCAAAGGTTTTGTAGGAAAAA ACTTGAAAGCAGATTTA  
ACATCAACGACAGATCATCATATTTTCGAAGTACATCGACAAACTAAAGAGGAAGAATT  
AGAGTCAGCATTGTTGAAAGCAGACTTTGTCGTGCATTTAGCGGGTGTTAATCGACCTGA  
ACATGACAAAGAATTCAGCTTAGGAAACGTGAGTTATTTAGATCATGTACTTGATATATT  
AACTAGAAATACGAAAAAGCCAGCGATATTATTATTGTCTTCAATACAAGCAACACAAG  
ATAATCCTTATGGTGAGAGTAAGTTGCAAGGGGAACAGCTATTAAGAGAGTATGCCGAA  
GAGTATGGCAATACGGTTTATATTTATCGCTGGCCAAATTTATTCGGCAAGTGGTGTAAG  
CCGAATTATAACTCAGTGATAGCAACATTTTGTACAAAATTGCACGTAACGAAGAGATT  
CAAGTTAATGATCGGAATGTTGAACTAACGCTAAACTACGTGGATGATATCGTCGCTGAA  
ATAAAGCGTGCTATTGAAGGAACTCCAACGATTGAAAATGGTGTACCTACAGTACCAAAC  
GTATTTAAAGTGACATTGGGAGAAATTGTAGATTTATTATACAAGTTCAAACAGTCACGT  
CTCGATCGAACATTGCCGAAATTAGATAACTTGTGTTGAAAAAGATTTGTATAGTACGTAT  
TTAAGCTATCTACCTAGTACAGACTTTAGTTATCCCTTACTTATGAATGTGGATGATAGGG  
GTTCTTTTACAGAATTTATAAAAACACCGGATCGTGGTCAAGTTTCTGTAAATATTTCTAA  
GCCAGGTATTACTAAAGGTAATCACTGGCATCATACTAAAAACGAAAAATTTCTAGTCGT  
ATCAGGTAAAGGGGTAATTCGTTTTAGACATGTTAATGATGATGAAATCATTGAGTATTA  
CGTTTCTGGCGACAAATTAGAAGTTGTAGACATAACCAGTAGGATACACACATAATATTGA  
AAATTTAGGTGACACAGATATGGTAACTATTATGTGGGTGAATGAAATGTTTGATCCAAA  
TCAGCCAGATACGTATTTCTTGGAGGTATAG

> **capG**

Function: protein coding sequence; (core genome, variable)  
Best match: capG\_CC001\_MW2-USA400\_BA000033.2[151742:152866]  
Position: 008-contig\_256: 19840 ... 20965; Length: 1125 bp  
Sequence:

```
ATGGAAAACTAAAATTAATGACAATAGTTGGTACAAGGCCTGAAATCATTTCGTTTATCA
TCAACGATTAAGCATGTGATCAATATTTAATCAGATATTAGTACACACTGGTCAAAAT
TATGATTATACATTGAATCAAATTTTCTTTGATGATTTGGAATTGAGACAACCGGACCACT
ACTTAGAGGCAGTTGGAAGTAACCTTGGAGAAACGATGGGGAATATTATTGCGAAGACA
TATGACGTTTTATTACGCGAACAACCAGATGCACTTTTAATTCTTGGTGATACAAATAGTT
GTTTAGCAGCAGTATCTGCTAAACGATTAAAGATTCCTGTGTTCCACATGGAAGCGGGTA
ATAGATGCTTTGATCAGAATGTACCTGAAGAAATCAATCGTAAAATTGTTGACCATGTCA
GTGATGTGAATCTACCTTATACGGAACATAGCAGACGTTATTTATTAGATGAAGGCTTCA
ATAAAGCGAATATCTTTGTGACAGGATCACCGATGACAGAAGTGATAGAAGCGCATCGA
GATAAAATTAATCACAGTGACGTTTTAAATAAACTAGGATTAGAACCGCAACAATACATT
TTAGTATCTGCGCATAGAGAAGAGAATATCGATAATGAAAAGAATTTTAAATCATTAATG
AATGCGATAAATGATATTGCCAAAAAGTATAAAATGCCTGTGATTTATTCAACGCATCCA
AGAAGTTGGAAGAAAATTGAAGAAAGTAAATTTGAATTTGATCCATTAGTTAAACAGTTA
AAGCCATTTGGTTTCTTTGATTATAATGCATTGCAAAAAGATGCATTTGTTGTGCTATCAG
ATAGTGAACATTGTCAGAAGAGTCGTCTATTTTGAAGTTCCTGGTGTCTTATTTCGAAC
TTCCACAGAAAGACCGGAAGTACTAGATAAAGGTACGGTTATTGTAGGTGGTATTACCTA
TAACAATCTAATCCAATCCGTTGAACTAGCAAGAGAGATGCAAAAACAATAACGAACCGA
TGATTGATGCTATTGATTATAAAGACACTAACGTTTCGACAAAGGTAGTTAAAATTATTC
AAAGCTATAAAGATATTATCAATCGAAATACTTGGAGGAAATGA
```

### > **capH**

Function: protein coding sequence; O-acetyl transferase (genomic island)  
Best match: capH5\_CC001-ST772\_118\_AJGE01000016.1[86222:86848:r] (completely identical)  
Position: 008-contig\_256: 20967 ... 21594; Length: 627 bp  
Sequence:

```
ATGAGGATAGCGATTGAAAAGATAAATTGGTTTGCTGAAAACCAGTCCTCTAAAGAATCG
AATGTTAAGATTTCATCGCTTGGCGTATATTACAAACTCAAATTTGATGGCAATAACTAT
ATAGATAGATGGTGTAAAATCAGGAATTCTCACATTGGTGAATACAGTTATATTGGATTT
GGTAGTGATTTTAATAATGTAGAAGTAGGAAGATATTGTTTCGATATCTTCGGATGTAAAA
ATTGGGTTAGGAAAACATCCTACACACTTTTTTAGCTCATCACCGATTTTTTATTCTAATA
ATAATCCATTTAACATAAAGCAAAAAGTTTATAGACTTTAATGACCAACCAAGCCGTACAA
CAATTA AAAATGATGTGTGGATTGGTGCAAATGTAATTATTATGGATGGTTTAAACAATAA
ATACTGGTGCAGTCATAGCAGCCGGCTCAGTTGTTACTAAAAATGTAGGAGCATATGAGG
TTGTTGGTGGGGTTTCTTGCAAAAAGTGATTAAGAAGCGATTTGACAATAAAACAATTGAAA
AACTTTTGGAAAGCAAGTGGTGGGAGAAAACGCCTGATAAACTAAAAGGATTTTTCGGTT
GAATATTTAAATAAAAAGGATACTTAA
```

### > **capI**

Function: protein coding sequence; capsular polysaccharide biosynthesis protein Cap5I (genomic island)  
Best match: capI5\_CC001-ST772\_118\_AJGE01000016.1[85108:86217:r] (completely identical)  
Position: 008-contig\_256: 21598 ... 22708; Length: 1110 bp  
Sequence:

```
ATGAGAATTTTAAATATTGTATCGAGTAATATTGTTCAAGACCCAAGGGTACTTAAACAA
ATGGAAACAATTAAGACGTTACGGATGATTATAAAATTGTTGGAATGAATAATTCACAA
GCTACTAATAAGCGATTGGAAAATTTAGATTGTAATTATCGTTTGTAGGTAGCAAGGTA
GATCCAAAAAATATTCTTTCTAAATTAATTAAGCGTATAAGATTTGCAACAGGTGTTATCC
GAGAAATTAAGCTTATAAACCTGACGTGATTCATGCAAATGATTTGACGATTTATTTAA
TGGTCTATTTAAGCAATTATAAAAAAGCTAATATTGTTTATGATGCGCATGAAATATATG
CGAAAAATGCCTTTATTAATAAAGTTCCACTTATTTCAAAGTTTGTAGAAAGTATAGAAA
AACACATAGTAAAACATCGTGTTAATGCCTTCGTAACAGTAAGTCATGCAGCAAAAAGAA
```

ATTATCAATCTAAAGGATATAAGAAGGAAGCGAATGTTATTACGAATGCACCTATTTTAA  
ATGATAGCAGAGAATTTAAAGAAATCGAAAACCTTTAAAGAAATTGTATATCAAGGTCAA  
ATTGTAATGGACAGAGGATATGAAGAGTTTATTATTGCTTCATCAGCTTTTAAACAAAAT  
GCTCCTTCATTCATAATTCGAGGGTTTGGTCCGCATGAAGAAGTGATAAAAAGAAGTATT  
AGTTATAACTCGGAAAATATTAGGTTGGATAAACAGTTGAAGTAAAAGAATTGGTTGAT  
AAGTTAGCAGAAAGTAATGTTGGTGTATCTTGACGAAACCTGTATCTATTAATTTTGAAT  
ATACAGTATCTAATAAAAATTTTGAATGTATACATGCTGGTTTACCAGTAATTTTATCTCC  
TGTCAAAGAGCATATTTATCTCAATGAAAAATATAAATTTGGCATTGTTTTAAAGGAAGT  
TACGCCGTTAGAAATTGAAAAGGCGGTTAGAAAATTAAGAGATAATCACGATTTGTTTAA  
TCATTTACGTCAAATGCAATTAAGGCGTCTAAAATTTTGAATTGGCAAATAGAAAGTGA  
ACGATTAGTAGAATTATATAAATTTTAA

### > **capJ**

Function: protein coding sequence; O-antigen polymerase (genomic island)

Best match: capJ5\_CC009\_21334\_AGTW01000044.1[118940:120106:r] (completely identical)

Position: 008-contig\_256: 22721 ... 23888; Length: 1167 bp

Sequence:

ATGAAATTTTTTGTACTTTGTGCAATTATCAGCATGAACATATTTATAGTAATCTCTACAT  
TTACTAAAGAAGTATTAGGGTTCCTATAGAGCCGGTGTATTACTCTACCATGGTTGGTAT  
AGCATTAACTACTACGGTGTGTTGCTATTTATAAGATAATTGTCACGCAAGAAATTCGCG  
AGGGTTAATATTATTAATTGCTATATGTTTGCTTTATCTAGCTTTTTATTATTTTTCCACCAG  
ATAAGGAAGAGAACTAGCTAAAAATAATATTCTATTCTTTTTAACATGGGCAGTTCCAG  
CGGCAATTAGTGGTATTTATATTAATATATAACAAGGCTACGGTAGAAAGATTTTTTA  
AATTAGTATTTTTCATATTTTCTATTTCAATTTATTTTTGTAATTTAATAACAAAACCTTACA  
GGTGAGATACCTAGCTATATCAATTTGGACTTATGAACTATCAAACGCTTCGTACCTTT  
CAGCATTTACTGCCGGATTAGGCATTTATTTCAATATGAAAGGTTTCAGTGAAACATAAGT  
GGATATATGTTCTATTTACAATAATTGATATCCCTATTGTGTTTATACCAGGAGGGCGTGG  
AGGTGCTATTTTATTAATTCTTTACGGCTTATTTGCATTTATACTTATTACGTTTAAAAGAG  
GAATACCTATTGCAGTAAAAGCATTATGTATATTTTTGCATTAAGCATATCTAGTGTATT  
GATTTACTTTCTTTTTACAAAAGGTTTCGAATACTAGAACATTTTCATATCTACAAGGTGGA  
ACACTTAATTTAGAAGGTACTTCTGGAAGAGGACCGATTTATGAAAAGGTATTTACTTT  
ATTCAACAAAGTCCGTTATTAGGCTATGGGCCATTTAACTATTATAAACTAATCGGAAAT  
ATACCACATAACATCATTATTGAGTTGATTCTATCATTGGCTTATTAGGGTTTTTTATCAT  
AATGATTTGCATTTTGCTACTAGTTTATAAAATGATTAGGAAGTATGATCCAAACACTATA  
GATTTACTCGTTATGTTTATAGCAATCTATCCAATCACATTATTAATGTTTAGTTCAAATT  
ATTTAGTTGTAAGTGAATTTGGTTTGTGTTGTTCTATTTTATTACAAAAGGACGGCGTCA  
TCATGGTTAA

### > **tnpIS431-06**

Function: protein coding sequence; transposase for IS431 (mobile element)

Best match: tnpIS431-06\_circ\_S-epidermidis\_GQ900381.1[43799:43807] (completely identical)

Position: 008-contig\_256: 23180 ... 23189; Length: 9 bp

Sequence:

ATGAACTAT

### > **capK**

Function: protein coding sequence; capsular polysaccharide biosynthesis protein Cap5K (genomic island)

Best match: capK5\_CC005\_Mu50-VRSA\_BA000017.4[177534:178739] (completely identical)

Position: 008-contig\_256: 23880 ... 25086; Length: 1206 bp

Sequence:

ATGGTTAAGAAAGTTTTTATTATGGATAGCGTAAAGACAATAAATTGGTACGTTGCTTATA  
GCTTTAGGATTACAATTTTAGCTTATCCAATTATTAATCAACGAGTAGGTAATGAAGCGT  
TTGGTTCTATTTAACGATTTATACAATAATAACAATCACGAGTGTGTTATTAGGCAATAC  
GCTTAACAATATACGATTAATTAATATGAATCTATACAAATCCAATCATTACTACTGGAA

ATTTGTGTCGATACTTTTAATTTCAATTCTGATTGAGAGTATAGCTTTAATTATTGTATTTCT  
TTACTTTTTTAATTTGAACACCATCGATATTATCTTTTTAATTCTACTTAATATTTTAATG  
TGTTAAAGGATTTATCTGAATGTATTTTTTAGGATGACTTTAAAATATAATCAGATTTTGT  
ATATTGCTCTTATTCAATTTTTAGGTTTGCTGATAGGACTATTTCTATATTATTTAATCCAA  
AACTGGATTGTTTGTTTTATTACCAGTGAATTGTTTGAACGATATATACATTGGTTAAAT  
TACGGGGATTAAGTATAGGCGAGTATCAAAGTGAAGATAATAATGTGGTCAAAGATTAT  
GTGATGCTACTGAGTACAAATAGCCTTAATAATTTGAATCTCTACTTAGATAGATTAATCT  
TATTACCAATTATAGGTGGAACAGCTGTAAGTATATCATTCTTTCAACATTTATTGGGAA  
AATGTTAGCTACATTTCTGTATCCGATTAATAATGTAGTACTTTCATATATTTCTGTAAAT  
GAAAGCGACAATATAAAGAAGCAATATTTGAAAATACTATTTGCTATAGCTGCACTA  
TGTTTAGTCATGATTATATGTTATCCAATTACATTAATTATTGTCTCTTTACTGTATAACAT  
TGATTCAAGTTTATATTCGAAGTTTATTATTTTAGGTAATATAGGTGTTTATTCAATGCA  
GTGAGTATTATGATCCAACTTTAAATACAAAACACGCATCAATAACATTACAAGCGAAT  
TATATGACGCTTCACACGATTACATTTATATTCATAACTATTTAATGACAATTGCGTTTG  
GTCTAAATGGATTCTTTTGGACAACGCTGTTCAGCAACATTATTAAGTATGTGATTTTAA  
TATTATAGGTTTAAAGTCTAAATTCATTAATAAAAAGGACGTCGATTAG

### > **capL**

Function: protein coding sequence; capsular polysaccharide synthesis enzyme (core genome, variable)

Best match: capL\_CC001-ST772\_118\_AJGE01000016.1[81524:82729:r] (completely identical)

Position: 008-contig\_256: 25086 ... 26292; Length: 1206 bp

Sequence:

ATGAGTGAAGAAAAAGATTTTGATTTTATGTCAGTATTTTATCCGGAATATGTATCTTCTG  
CGACGTTACCAACTCAATTGGCGGAAGATTTAATTGCGAATCACATTAATGTCGATGTCA  
TGTGTGGATGGCCATATGAATATAGTAATCATAAACAGGTTTCTAAAACCGAGATGCATC  
GTGGTATTCGCATTTCGACGTCTCAAGTATTCGAGGTTTAAATAACAAAAGTAAGGTTGGAA  
GGATCATCAATTTCTTTAGTTTATTTTCAAATTCGTGATTAATATACCTAAAATGTTGAA  
ATATGATCAGATTCTTGTACTCTAATCCACCAATCTTGCCATTAATACCAGACGTTTAA  
CACAGACTGCTTAAGAAAAAATATTCTTTTGTGGTGTATGATATAGCACCTGATAATGCG  
ATTAAGACAGGTGCAACTCGTCCAGGTAGCATGATTGATAAGCTGATGCGTTACATTAAT  
AGACATGTCTACAAGAATGCTGAAAATGTCATTGTCTTGGTACGGAAATGAAAACTAC  
TTACTAAATCATCAAATTTCTAAAATGCTGACAATATCCATGTGATTCCCTAACTGGTATG  
ACATGCGTCAATTACAAGACAATCGTATCTATAATGACACATTTAAAGCTTACCGTGAGC  
AATACGACAAAATTTTATTGTATAGCGGTAATATGGGGCAGTTACAGGATATGGAGACAC  
TTATCTCATTTTTAAAATTAATAAAGGATCAGCCTCAAACGTTAACAATACTTTGTGGTCA  
TGGTAAGAAATTTGCAGATGTCAAACGGCAATAGAAGACCATCGTATTGAAAATGTTA  
AAATGTTTGAGTTTTTAAACAGGTACAGACTATGCTGACGTATTAATAAATTGCGGATGTAT  
GTATTGCATCGCTGATTAAGAAGGCGTTCGTTTAGGCGTGCCGAGCAAGAATTATGGCT  
ACCTTGACGCTAAGAAACCGTTGGTACTCATCATGGATAAGCAATCTGATATCGTTCAAC  
ATGTTGAACAATATGATGCGGGTATCCAAATTGATAATGGCGATGCACATGCCATTTATA  
ACTTCATCAACACTCACTCGAGTAAGGAATTGCACGAGATGGGTGAGCGCGCACATCAAC  
TGTTTAAAGATAAATATACGAGAGAAATTAATACTATGAAGTATTACAATCTGTTGAAGT  
GA

### > **capM**

Function: protein coding sequence; capsular polysaccharide synthesis enzyme (core genome, variable)

Best match: capM\_CC005\_Mu50-VRSA\_BA000017.4[179956:180513] (completely identical)

Position: 008-contig\_256: 26302 ... 26860; Length: 558 bp

Sequence:

ATGAAGCGATTATTCGATGTAGTGAGTTCAATATATGGTTTAGTAGTTTTAAGTCCGATTC  
TGTTAATTACAGCATTACTAATTAATAATGGAATCACCTGGACCAGCCATTTTCAAACAAA  
AAAGACCGACGATTAATAATGAATTGTTTAAATTTTATAAGTTTAGATCAATGAAAATAG  
ACACACCTAATGTTGCAACTGATTTAATGGATTCAACATCGTATATAACAAAGACAGGGA  
AGGTCATTCGTAAGACCTCTATTGATGAATTGCCACAATTATTGAATGTTTTAAAAGGAG  
AAATGTCAATTGTAGGTCCTAGACCAGCGCTTTATAATCAATACGAATTAATCGAAAAAC



GTACAAAAGCGAACGTGCATACGATTAGACCAGGTGTGACAGGACTAGCTCAAGTGATG  
GGGAGAGATGATATTACTGATGATCAAAAAGTAGCGTATGATCATTATTACTTAACACAT  
CAATCTATGATGCTTGATATGTATATCATATATAAAAACAATTA AAAATATCGTTACTTCAG  
AAGGTGTGCATCACTAA

> **capN**

Function: protein coding sequence; capsular polysaccharide synthesis enzyme (core genome, variable)

Best match: capN\_CC001\_MSSA476\_BX571857.1[157643:158530]

Position: 008-contig\_256: 27717 ... 27747; Length: 30 bp

Sequence:

GATGAAACGACAACCAAAGATAAGGCATAA

> **capO**

Function: protein coding sequence; capsular polysaccharide synthesis enzyme (core genome, constant)

Best match: capO\_CC001-ST772\_118\_AJGE01000016.1[78753:80015:r] (completely identical)

Position: 008-contig\_256: 27800 ... 29063; Length: 1263 bp

Sequence:

ATGAAGTTAACAGTAGTTGGCTTAGGTTATATTGGTTTACCAACATCAATTATGTTTGCAA  
AACATGGCGTCGATGTGCTTGGTGTGATATTAATCAGCAAACGATTGATAAGTTACAAA  
GTGGTCAAATTAGTATTGAAGAACCTGGATTACAAGAGGTTTATGAAGAGGTACTGTCAT  
CGGGAAAATTGAAGGTATCTACAACGCCAGAAGCATCTGATGTTTTTATCATTGCCGTT  
CGACGCCGAATAATGATGATCAGTACCGGTCATGTGACATTTTCGCTAGTTATGCGTGCAT  
TAGATAGTATTTTATCATTTTTAGAAAAAGGAAATACTATTATTGTAGAGTCGACAATTGC  
GCCTAAAACGATGGATGATTTTGTAAAACCAGTCATCGAAAATTTAGGATTTACAATAGG  
TGAAGATATTTATTTAGTGCATTGTCCAGAACGTGTACTGCCAGGAAAAATTTAGAAGA  
ATTAGTTCATAACAATCGTATCATTGGCGGTGTGACTAAAGCTTGTATTGAAGCGGGTAA  
ATGTGTCTATCGCACATTCGTTTCAGGGAGAAATGATTGAAACAGATGCACGTACTGCTGA  
AATGAGTAAGCTAATGGA AAAACACATATAGAGACGTGAACATTGCTTTAGCTAATGAATT  
AACAAAAATTTGCAACA ACTTAAATATTAATGTATTAGATGTGATTGAAATGGCAAACAA  
ACATCCGCGTGTTAATATCCATCAACCTGGTCCAGGTGTAGGCGGTCATTGTTTAGCTGTT  
GATCCGTA CTTTATTATTGCTAAAGACCCTGAAAATGCAAAGTTAATTCAA ACTGGACGT  
GAAATTAATAATTCAATGCCGGCCTATGTTGTTGATACAACGAAGCAAATCATCAAAGCG  
TTGAGCGGGAATAAAGTCACAGTCTTTGGTTTAACTTATAAAGGTGATGTTGATGATATA  
AGAGAATCGCCAGCATTTGATATTTATGAGCTATTA AATCAAGAACCAGACATAGAAGTA  
TGTGCTTATGATCCACATGTTGAATTAGATTTTGTGGAACATGATATGTCACATGCTGTCA  
AAGACGCATCGCTAGTATTGATTTTAAAGTGACCACTCAGAATTTAAAAATTTATCGGACA  
GTCATTTTGATAAAATGAAGCATAAAGTGATTTTGTGATACAAAAAATGTTGTGAAATCAT  
CATTGGAAGATGTATCGTATTATAATTATGGCAATATATTTAATTTTATCGACAAATAA

> **capP**

Function: protein coding sequence; capsular polysaccharide synthesis enzyme (core genome, constant)

Best match: capP\_CC001-ST772\_118\_AJGE01000016.1[77531:78706:r] (completely identical)

Position: 008-contig\_256: 29109 ... 30285; Length: 1176 bp

Sequence:

ATGTGTTTGAAC TTCAGAGAGGATAATGTTATGAAAAAATTATGGTTATTTTCGGTACG  
AGACCCGAAGCAATAAAAAATGGCACCATTAGTAAAAGAAATTGATCATAATGGGAACTT  
TGAAGCGAACATTGTGATTACAGCACAACATAGAGATATGTTAGATAGTGTGTTAAGTAT  
ATTTGATATTCAAGCTGATCATGATTTAAATATTATGCAAGATCAACAAACGTTAGCGGG  
CCTTACGGCGAATGCGCTTGCTAAACTTGATAGCATCATTAAATGAGGAACAACCGGATAT  
GATTTTAGTACATGGTGATACTACAACGACTTTTGTAGGAAGTTTGGCAGCATTTTATCAT  
CAAATTCGGTTCGGACATGTAGAAGCTGGACTTCGAACACATCAGAAATACTCACCATT  
CCTGAAGAGTTAAATCGAGTCATGGTAAGTAATATTGCTGAATTGAATTTTGCGCCAACA  
GTAATTGCAGCTAAAAATTTACTTTTTGAAAACAAAGACAAAGAGCGTATCTTTATTACT  
GGAAATACAGTTATTGACGCATTGTCAACAACAGTTCAA AATGATTTTGTTC AACGATT  
ATTAATAAACATAAAGGCAAGAAAGTATTTTACTAACAGCGCATCGTCTGAAAATATT

GGGGAACCGATGCATCAGATTTTTAAAGCAGTAAGAGATTTGGCAGATGAATATAAAGA  
TGTTGTCTTCATTTATCCAATGCATCGTAATCCAAAGGTAAGAGCGATTGCCGAAAAATA  
TTTATCTGGGAGAAATCGGATTGAATTAATTGAGCCATTAGATGCGATTGAGTCCATAA  
TTTTACAAATCAATCGTACCTCGTGCTGACAGATTCTGGTGGTATTCAAGAGGAGGCTCCT  
ACATTTGGAAAACCTGTGTTGGTATTAAGGAATCATAACAGAGCGTCCCGAAGGCGTTGAG  
GCGGGAACATCGAGAGTAATTGGCACAGATTATGACAATATTGTTTCGAAATGTGAAACA  
ATTGATTGAGGATGATGAAGCGTATCAACGTATGAGTCAAGCGAATAATCCATATGGTGA  
TGGACAAGCATCACGACGATTTTGTGAAGCAATAGAATATTATTTTGGATTGCGCACAGA  
CAAGCCGGATGAATTCGTACCTTTACGTCACAAATAA

### > **isdI**

Function: protein coding sequence; heme-degrading monooxygenase (core genome, variable)  
Best match: *isdI\_CC008\_NCTC8325\_CP000253.1*[136125:136451:r]RC (completely identical)  
Position: 008-contig\_256: 30349 ... 30676; Length: 327 bp

Sequence:

TTATTTTTGATAGTGGTAGCCAATATCATATTTGAATACTTTATTTGATAAATATTGGACTTT  
GCTGTCCATCGTCATCACTTTTTAAACGTACATTTTTATGAGCTTCTTTAAATACATCGGA  
ATTCAACCAATTATTAAGCTATCTTCAGATTCCCAAATAGTTAAGATTTTAACTTCGTCT  
GTATCCTCGGTATTTAATGTTTTAGTGACAAACATTTGTTGGAAGCCTTCAATAGTTTCAA  
TACCTTGTCTATTGTAAAACGTTCAATCGTTTCTTCCGCACTGCCTTTTTGTAATTGTAAT  
CTATTTTCTGCCATAAACAT

### > **aldA1**

Function: protein coding sequence; aldehyde dehydrogenase/locus 1 (core genome, constant)  
Best match: *aldA1\_CC001\_MSSA476\_BX571857.1*[162276:163763]  
Position: 008-contig\_256: 31492 ... 32980; Length: 1488 bp

Sequence:

ATGGCAGTAAACGTTTCGAGATTATATAGCAGAGAATTATGGTTTATTTATCAATGGGGAA  
TTTGTTAAAGGTAGCAGTGACGAAACAATCGAAGTGACTAATCCAGCAACTGGAGAAAC  
ACTATCACATATTACAAGAGCAAAAGATAAAGATGTCGATCATGCAGTCAAAGTGGCGC  
AAGAGGCATTTGAATCATGGTCATTAACCTTCTAAATCAGAACGTGCACAAATGTTGCGTG  
ATATTGGTGATAAATTAATGGCACAAAAGATAAAAATTGCAATGATTGAAACATTAATA  
ATGGTAAACCGATTCGTGAGACAACAGCAATTGATATTCCATTTGCTGCAAGACATTTCC  
ATTATTTGCAAGTGTTATTGAAACAGAAGAAGGTACAGTAAATGATATCGATAAAGACA  
CAATGAGTATCGTACGACATGAGCCGATTGGCGTTCGTAGGTGCTGTTGTTGCTTGGAACT  
TCCAATGCTATTAGCTGCATGGAAGATTGCGCCAGCCATTGCTGCAGGTAATACAATTG  
TGATTCAACCTTCGTCTTCAACACCATTAAGTTTATTGGAAGTTGCTAAAATTTCCAAGA  
GGTATTACCTAAAGGTGTTGTCAATATACTAACGGGTAAAGGTTTCAGAATCAGGTAATGC  
AATTTTCAATCATGATGGTGTAGATAAATTATCATTTACGGGCTCAACTGATGTAGGTTAT  
CAAGTTGCCGAAGCTGCAGCAAAACATCTAGTACCCGCTACATTAGAGCTTGGTGGTAAA  
AGCGCCAATATCATATTAGATGATGCTAATTTAGACCTTGCAGTTGAAGGTATTCAGTTA  
GGTATTTTATTCAACCAAGGTGAAGTATGTAGTGCAGGTTCTCGATTATTAGTTCATGAAA  
AAATTTATGATCAATTGGTGCCACGTTTACAAGAGGCATTTTCAAATATTAAGTTGGAG  
ATCCACAAGATGAAGCTACACAAATGGGTAGTCAAACCTGGTAAGGATCAATTAGATAAA  
ATTCAATCATATATTGATGCAGCAAAAGAATCAGATGCACAAATTTAGCAGGCGGTCAT  
CGCTTAACTGAAAATGGATTAGATAAAGGGTCTTCTTTGAGCCGACATTAATTGCTGTG  
CCAGACAATCATCACAAATTAGCACAGAAGAATATTTGGACCAGTGTTAACAGTTATT  
AAAGTGAAGGACGATAAAGAAGCAATTGATATAGCTAATGATTCTGAGTATGGTTTAC  
AGGCGGTGATTTTCTCAAATATCACACGTGCATTAATATTGCTAAAGCTGTACGTAC  
AGGACGTATTTGGATTAACACTTACAACCAAGTACCAGAAGGCGCACCATTTGGTGGTTA  
TAAAAAATCAGGTATCGGTGAGAACTTATAAAGGTGCGTTAAGTAACTATCAACAAGT  
TAAAAATATTTATATTGATACAAGCAATGCTTTAAAAGGTTTGTACTAG

### > **tauB**

Function: protein coding sequence; taurine ABC transporter/ATP-binding protein (core genome, variable)

Best match: tauB\_CC001-ST772\_118\_AJGE01000016.1[71192:71932:r] (completely identical)

Position: 008-contig\_256: 35883 ... 36624; Length: 741 bp

Sequence:

```
ATGATTA AAAATTCAACAATTACAACATCACTTTGGATCACATAAAGTAATTCATAACTTT
AATTTGGACATTAGCAAGGGAGAAATAGTCACTTTCATAGGGAAAAGTGGTTGCGGAAA
GTCTACTTTACTCAATATTATCGGTGGATTTATTCATCCATCGTCTGGTCTGTCATTATTG
ATAACGAAATTAACAACAGCCATCTCCAGATTGTTTAATGTTATTTCAACATCATAAATT
GCTGCCATGGAAAACGATTAATGACAACATTAGGATTGGATTTCAACAGAAAATTAGTGA
TGAAGAGATTAACGCACAGCTTAAATTAGTTGATTTAGAAGACAGGGGAAAGCATTTTCC
CGAGCAACTGTCCGGGGGTATGAAACAACGTGTGGCACTATGTGCGAGCGCATGTGCATA
AGCCTAACGTTATATTGATGGATGAGCCATTAGGTGCATTAGATGCATTTACACGTTATA
AACTTCAGGATCAACTAGTGCAACTAAAACATAAAAACGCAATCAACTATTATTTTAGTGA
CGCATGACATTGATGAAGCTATTTATCTTTCTGACCGCATTGTTCTGTTAGGTGAAGGGTG
CAATATTATTTCTCAATATGAAATTACAGCATCACATCCACGCAGTCGTAATGATAGCCA
CCTACTTAAGATTCGTAATGAAATTATGGAAACATTTGCATTGAATCATCATCAAGTTGA
ACCTGAATATTATTTATAA
```

### > tauA

Function: protein coding sequence; taurine ABC transporter/substrate-binding protein (core genome, variable)

Best match: tauA\_CC001\_MW2-USA400\_BA000033.2[168952:169926] (completely identical)

Position: 008-contig\_256: 36637 ... 37612; Length: 975 bp

Sequence:

```
ATGAAAAGGTTAAGCATAATCGTCATCATTGGAATCTTTATAATTACAGGATGTGATTGG
CAAAGGACGTCTAAAGAACCGTCTAAAAATGCCCAAATCAGCAAGTGATTA AAAATTGG
ATATTTGCCGATTACACATTCAGCTAATTTGATGATGACTAAAAAATTATTATCACAAATAC
AATCATCCGAAATATAAACTAGAATTAGTTAAATTC AATAATTGGCCAGATTTAATGGAC
GCATTAAACAGTGGTTCGTATTGATGGTGCATCAACTTTAATAGAGCTAGCGATGAAATCA
AAACAGAAGGGCTCAAATATAAAGGCTGTGGCATTGGGCCATCATGAAGGCAATGTCAT
TATGGGACAAAAGGTATGCACTTAAATGAATTTAATAATAATGGCGATGATTACCATTT
TGGTATACCACATCGTTATTCAACACATTATCTTTTACTTGAGGAATTACGTAAACAATTA
AAGATTA AACCGGGGCATTTTAGCTATCATGAAATGTGCGCCAGCAGAAATGCCAGCCGCA
TTGAGTGAACACAGAATTACAGGGTATTCTGTAGCCGAACCATTCCGGTGCCTGGGTGAA
AAGTTAGGCAAAGGTAAGACTTTGAAACATGGTGTGACGTTATACCTGATGCGTATTGC
TGTGTGCTAGTACTGAGAGGGGAATTGCTTGATCAACACAAGGATGTAGCGCAAGCATT
GTACAAGATTATAAAAAGTCTGGCTTTAAAATGAATGATCGCAAGCAAAGTGTAGACATT
ATGACGCATCATTTTAAACAAAGTCGTGACGTTTTTAACACAGTCAGCGGCATGGACATCC
TATGGTGATTTAACAATTAAGCCATCCGGCTATCAAGAAATTACGACATTGGTAAAACAA
CATCATTTGTTTAATCCACCTGCATATGATGACTTTGTTGAACCGTCATTGTATAAGGAGG
CATCGCGTTCATGA
```

### > DUF2294

Function: protein coding sequence; putative protein (genomic island)

Best match: DUF2294\_CC001\_MW2-USA400\_BA000033.2[171945:172304] (completely identical)

Position: 008-contig\_256: 39631 ... 39991; Length: 360 bp

Sequence:

```
GTGAATACTATAGATACGCATACTAAAGAACAACAATTCTCGAATCTAGTAAGATCTTAT
CGTAAAGAATACGTGGGTAAAGGACCCAATAGTATTCGAGTGTGCTTTAAAGATAATTGG
GCGATTGCACATATGACAGGTGTTTTGAGTAAAGTTGAGAGTTTTTACCTAAACGACAAA
CGCAATGAATCGATGCTCCATTATACACGCACAGAGAAGATTAAACAGATGTATAAAGA
AATAGATGTAAATGAGATGGAAAGTCTTGTAGGCGCTAAGTTTGTAAAATTATTTACAGA
TATTGATTTGAATGATGATGAAGTCATTTCAATATTTGTTTTTCGATAAGTCAATAGAATAA
```

### > **fdh**

Function: protein coding sequence; NAD-dependent formate dehydrogenase (genomic island)  
Best match: fdh\_CC001-ST772\_118\_AJGE01000016.1[66627:67652:r] (completely identical)  
Position: 008-contig\_256: 40163 ... 41189; Length: 1026 bp

Sequence:

```
ATGAAAATCGTAGCGTTATTTCCAGAAGCAGTAGAAGGTCAAGAAAATCAATTACTTAAT
ACTAAAAAAGCATTAGGATTAACAAACATTTTTAGAGGAAAGAGGACATGAGTTCATTAT
ATTAGCAGATAATGGTGAAGACTTAGATAAACATTTACCAGATATGGATGTGATTATTAG
TGCGCCATTTTATCCTGCATATATGACTCGTGAACGTATTGAAAAAGCACCGAACTTGAA
ATTAGCAATTACAGCAGGTGTAGGATCTGACCATGTAGATTTAGCGGCAGCAAGTGAACA
CAATATTGGTGTCTGTTGAAGTTACAGGAAGTAATACAGTTAGTGTGGCAGAACATGCGGT
TATGGATTTATTAATACTTCTTAGAAACTATGAAGAAGGTCATCGTCAATCAGTAGAAGG
TGAATGGAACCTGTCTCAAGTAGGTAATCATGCGCATGAATTACAACACAAAACAATTGG
TATTTTTGGATTTGGTTCGAATTGGACAACCTTGTGCTGAAAGATTAGCGCCATTTAATGTA
ACATTACAACACTATGATCCAATCAATCAACAAGACCATAAATTGTCTGAATTTGTAAGC
TTTGATGAACTTGTTCACAACAAGTGATGCGATTACAATTCATGCACCATTAACACCAGAA
ACTGATAACTTATTTGATAAAGATGTTTTAAGTCGTATGAAAAAACACAGTTATTTAGTG
AATACTGCACGTGGTAAAATTGTAAATCGCGATGCGTTAGTTGAAGCGTTAGCATCCGAG
CATTTACAAGGATATGCTGGTGTGTTGGTATCCACAACCTGCACCTGCTGATCATCCAT
GGAGAACAATGCCTAGAAATGCTATGACGGTTCCTACTATTCAGGTATGACTTTAGAAGCAC
AAAAACGTATTGAAGATGGAGTTAAAGATATTTTAGAGCGTTTCTTCAATCATGAACCTT
TCCAAGATAAAGATATTATTGTTGCAAGTGGTCGTATTGCTAGTAAAAGTTATACAGCTA
AATAG
```

### > **lmrP**

Function: protein coding sequence; integral membrane transport protein (core genome, variable)  
Best match: lmrP\_CC008\_NCTC8325\_CP000253.1[147348:148598] (completely identical)  
Position: 008-contig\_256: 41574 ... 42825; Length: 1251 bp

Sequence:

```
ATGAAACGCTTAAGTACGACTTTGAAAGTACGATTGATTAGCAATTTTTTACAGCTAATT
ATTACGACAGCATTATACCGTTTATAGCACTATATTTAACAGATATGTTAAGTCAATCAA
TTGTCGGTATATATCTTGTGGTTTGTGGTTCTAAAATTTCCATTGTCCATTATATCTGGT
TACCTTATTGAGATATTTCCGAAAAAGTTGCTAGTACTTATTTATCAAGCGACGATGGTGA
TAATGCTTGTGTTTCATGGGCGTATTTGGGTACATCAATTGTGGCAAATTATTGGTTTTTG
TGTTGCATATGCCATATTTACAATCGTTTGGGGATTACAATTTCCAGTTATGGACACATTA
ATTATGGATGCAATTACCGAAGACGTGGAACATTATATTTACAAGATTAGCTATTGGATG
ACAACTTATCGGTAGCTATTGGGGCATTGTTAGGTGGCTTGATGTATGGCTACAGTATG
TTACTACTTTTCTTAATAGCAGCTTGTATATTTTTAATTGTACTCTTATTTTATATATTTGG
TTACCTCAAGACCGAAATCAAGTAAAGCAAAGTGATGACAAGAGGCATGCAAGTCGTTA
TCAAAAATTACAAATAATGAATATATTTTCGCAGTTATAAATTAGTTTTGAAAGACCGTAA
TTATATGTTATTGATTTCTGGGGTTCAGTATCATCATGATGGGTGAATTTCAATCTCCTCA
TATATTGCTATTAGACTAAAGGATCAGTTTGAACAATAAGTATAGGTTTCATATGATATT
ACAGGTGCTAAGATGTTAGCAATCTTGCTAATGATTAATACGGTTCGTCGTCATTTTACTCA
CGTATTCAATCTCGAAAGTTGTATTGAAAATAGATTTTAAAAAAGCTTTAATCACTGGTTT
GCTGATTTATATTGTTGGCTATAGTGGTCTAACCTATCTTAATCAGTTTGGCTTATTAGTTG
TTTTTATGATAAATTGCGACTGTAGGTGAAATTATTTATTCGCCTATAGTTTCAGAACACCG
CTTTAAAATTATTCCTAAAGCTAAAAGAGGAACATATAGTGCAGTTAATGCATTAGGTAT
TCATTTTTTCAGAAACACTAGCTAGGTTAGGGATTGTGTTGGGTGTTTTCTTAACGTCATTA
CAAATGGGACTGTATATGTTTATCGTTTTAACAATTGGTGCTAGCATGCTTGTGCTGGTG
TATTTGGGGGACAAAAACAAGTGAATACAAATTGA
```

### > **ausA**

Function: protein coding sequence; non-ribosomal peptide synthetase (core genome, variable)  
Best match: ausA\_CC001-ST772\_118\_AJGE01000016.1[57369:64544:r] (completely identical)  
Position: 008-contig\_256: 43271 ... 50447; Length: 7176 bp

Sequence:

ATGATTATGGGTAATTTGAGATTTCAACAGGAATATTTTCGTATATACAAAAATAATACA  
GAATCAACGACACACCGTAATGCGTATTGGGTTAAACTCGCTAAAAATGTTGAAGCTACT  
AAAATGATGTATGCATTATCGACAATTGTGCAACAACATGCATCTATAAGACATTTTTTTG  
ATGTTACTACCGATGACAATTTAACAATGATACTTCATGAATTTCTGCCTTTTATTGAGAT  
AAAACAAGTTCCATCTTCTTCCGCAAACATGATTTAGAAGCTTTTTTTAAGCAAGAATTA  
AGTACTTACCATTTTAATGATTCACCTTTATTCAAAGTTAAATTGTTTCAGTTCGCTGATG  
CTGCATATATACTATTAGATTTTCATGTGTCCATTTTCGATGATAGTCAAATTGATATTTTT  
CTTGATGATTTATGCAATGCATATCGTGGCAATACTGTTATTAACAATACTCGACAGCATG  
CACATATAAATAGAAATGATGATAAAGACAATCAAGATGCATCGCATATAGCATTAGAC  
TCAAACATTTTCGGTTAGAGAATAACTCTGACATCCATATTGATAGTTATTTTCCAATTA  
AGCATCCATTTGAACAAGCTTTATATCAAACGTATTTGATTGATGATATGACATCAATAG  
ATATGGCATCGTTGGCTGTTAGTGTGTATTTAGCTAATCATATAATGAGTCAACAACATG  
ATGTCACATTAGGTATACATGTACCATCACATTTACCAAATGATTTACACGGAAATATTGT  
GCCGTTAACGTTAAACAATCGATGCAAAAGATGTATGTCAACGTTTTACAACAGATTTTAA  
TAAATGTGTGTTGCAAAATATGTCGCAATTACAGTGCGCGAAGTCTTCGCTTTCCTAGTA  
GACTATTTTTCATTGTTATCATCATATGATGTCTTGTTGTAATGATGTTATTGAGGATGTAC  
ATCAAATACATGATGCACATACATCTTTAGCGGATATTGAAATTTTTCCACATCAACACG  
GGTTCAAATATATATAACAGTGCAGCATATGATTTGCTCTCAATCGAGACGCTGAGTG  
ACTTAGTTCGAAATATTTATTTGCAAATTACTGAAGAAAATGGAAATAAACGAACAACCTG  
TAGATGAACTTAATTTGATGACAGAACGTGATATTCAATTATATGACGATATCAATTTAA  
GTTTGCCTGAGATAGATGATGCGCAAACAGTTGTTACCTTATTTGAGCAACAAGTTGAAG  
CAACGCCGAATCATGTCGCTGTGCAATTTGACGGAGTGTTTATAACATATCAAACATTGA  
ATGCACGCGCGAATGATTTAGCACACCGTTTGAGAAACCAGTATGGTGTTGAACCTAATG  
ATCGTGTGCTGTATAGCTGAAAAAAGTATTGAGATGATAATAGCGATGATAGGTGTGT  
TGAAAGCTGGTGGGGCTTACGTGCCAATTGATCCGAACTATCCAAGTATCGTCAGGAGT  
ACATTTTAAAAGATGCAACGCCTAAAGTTGTAATAACGTACCAAGCTTTATATGAAAATG  
GTAAACAAAATATTAATCACATTGATTTGAATAAGATAGCGTGGAAAAATATTGATAATC  
TTTCTAAATGTAACACGTTAGAAGATCATGCTTATGTTATTTACACGTCGGGGACAACCTG  
GTAACCCTAAAGGGACATTAATTCGCACCGAGGTATTGTTTCGCTTGGTCCATCAAATC  
ATTATGTACCATTAATGAAGAGACGACGATTTTGTATCAGGAACTATAGCCTTTGATG  
CTGCAACATTTGAAATATATGGTGCATTGCTCAATGGTGGAAAGTTGATTGTTGCTAAAA  
AAGAACAATTATTAATCCAATAGCGTTAGAACAATTAATCAATGAAAATGACGTTAATA  
CTATGTGGTTAACCTCCTCATTATTTAATCAGATTGCTAGTGAACGAATAGAAGTATTGGT  
ACCGTTAAAGTATTTATTAATTGGTGGAGAAGTATTGAATGCTAAGTGGGTGGATTTGCT  
TAATCAAAAACCGAAGCATCCTCAAATTATTAATGGTTATGGACCAACTGAAAATACAAC  
ATTTACAACGACTTATAATATACCTAACAAAGTTCCAAATTGTATTCCATTGGTAAACCG  
ATTCTTGGTACTCATGTTTATATCATGCAAGGCGAGCGTCGATGTGGCGTTGGTATTCCCTG  
GAGAATTATGTACAAGTGGCTTTGGGTTAGCTGCAGGTTATTTAAATCAGCCAGAATTGA  
CAGCAGATAAATTTATCAAAGATTCAAATATAAATCAGCTGATGTATAGAAGTGGTGATA  
TCGTTTCGTTTGTACCCGATGGCAACATAGATTATTTATATCGAAAGGACAAACAAGTTA  
AGATTCGAGGGTTTAGGATTGAGTTGTCAGAGGTTGAGCATGCGCTCGAGCGTATACAAG  
GTATTAATAAAGCAGTTGTTATTGTTCAAAATCATGATCAAGATCAGTATATCGTTGCTTA  
TTATGAAGCGATGCATACATTATCACATAATAAGATTAATCACAATTACGTATGACCTT  
ACCGGAGTACATGATACCAGTTAATTTTCATGCATATTGAGCAAATTCCTATTACTATTAAT  
GGGAAATTAGATAAGAAGGCATTGCCTATCATGGACTATGTCGATACGGATGCCTATGTA  
GCACCGAGTACAGATACCGAACACTTGCTATGCCAAATTTTTGCAGATATTTTACATGTG  
AATCAAGTAGGTATTCATGATAATTTCTTTGAATTAGGTGGCCATTCATTAAGCAACG  
TTAGTGGTGAATCGGATAGAGGCATCTACTGGGAAACGATTACAAATTTGGTGATTTATTA  
CAAAAGCCAACTGTATTTGAACTAGCACAAGCGATTGCTAAGGTTCAAGAACAAAACCTAT  
GAAGTGATTCCAGAACTATAGTTAAAGATGATTATGTGCTGAGCTCTGCACAAAAGCGT  
ATGTATTTATTATGGAAATCAAACCATAAAGATACGGTGTATAACGTACCTTTTTTATGGC  
GGTTATCATCAGAACTTAATGTAGCTCAATTGCGACAAGCAGTGCAGCGTTTGATAGCGC  
GACATGAGATTTTACGAACACAATATAATTGTTGTAGATGATGAGGTTTCGACAACGTATTG  
TGGCAGATGTTGCAGTTGACTTTGAAGAAGTTAACACGCATTTTACGGATGAACAAGAAA  
TCATGCGCCAATTTGTAGCACCTTTTAATTTGGAAAAGCCAAGTCAAATTAGAGTGAGAT

ACATTAGAAGTCCCTTACATGCATACCTCTTTATAGATACACATCATATCATTAAATGACGG  
TATGAGTAATATAACAATTAATGAATGATCTTAACGCACTTTATCAACATAAATTATTGTTA  
CCACTTAAATTGCAATATAAAGACTATAGTGAGTGGATGTCGCATCGTGATATGACGAAA  
CATAGACAATATTGGTTATCTCAATTCAAAGATGAAGTACCTATTTTAAGCTTACCGACA  
GACTATGTTAGACCAAATATTA AAAACGACAAATGGAGCAATGATGTCATTTACAATGAAT  
CAACAAATGAGACAGCTACTTCAAAGTATGTAGAAAAGCATCAAATTA CTGATTTTATG  
TTCTTTATGAGTGTGGTCATGACGTTGTTAAGCAGATATGCTCGAAAAGATGATGTTGTTG  
TCGGTAGTGTGATGAGTGCGCGTATGCATAAAGGCACGGAGCAAATGCTAGGCATGTTTG  
CTAATACGTTGGTATATAGAGGGCAACCGTCACCTGATAAAAATGTGGACACAGTTTTTAC  
AAGAGGTTAAGGAAATGAGTTTGGGTGCATACGAGCATCAAGAATACCCATT CGAATGTT  
TAGTAAATGACTTAGATCAATCACATGATGCCTCACGGAATCCATTATTTGATGTCATGTT  
AGTACTACAAAACAATGAAACGAATCATGCTCATTTTGGGCATAGTAAATTAACACACAT  
TCAACCCAAATCAGTGACGGCGAAATTTGATTTATCTTTCATCATTGAAGAAGATCGCGA  
TGACTATACAATCAATATCGAGTATAATACCGATTTATATCACTCAGAAAACAGTTCGTC  
CATGGGTAATCAATGTATGATTATGATTGATTATTTTTGAAGCATCAAGATACACTACA  
AATTTGTGATATACCAAACGGTACGGAGGAACTTCTAAATGGGTCAATACGCATGTTAA  
CGATCGAATGCTTAATGTCCCGGAAATAAATCTATCATAAGTTACTTTAATGAAGCTGT  
CTCACGACAAGGTAATCATGTTGCGCTAGTCATGAATGATTTGACAATGACGTATGAAAC  
ATTACGCAACTATGTGGATGCCATTGCGCACATGCTCCTATCAAATGGTGTGGGCAATGG  
TCAACGGGTTGCCTTGTTTACAGAACGTAGTTTTGAAATGATTGCGGCGATGTTGGCGAC  
AGTTAAAGTAGGTGCATCTTATATACCTATCGATATTGATTTTCCGAATAAACGACAAGG  
TGCAATTTTGGAGGATGCTAAAGTAACTGCAGTCATGTCTTACGGCGTTGAAATTGAAAC  
GACATTACCAGTCATTCAATTGAAAATGCTAAAGGCTTTGTTGAATCAAAGGAAAATGA  
ACAATATGATGATTTACATGGCAATCAACTTGAAAACACAGCGATGTTAGATAATGAGAT  
GTATGCTATTTACACATCTGGTACGACCGGGATGCCTAAAGGGGTTGCCATACGACAACG  
AAATTTGTTGAATTTAGTGCATGCATGGTCAACTGAATTGCAATTAGGCGACAATGAAGT  
ATTTTTGCAACATGCAAATATTGTTTTTGATGCATCAGTTATGGAGATTTATTGTTGTTTGT  
TAAATGGTCATACGCTTGTGATTCCAGATAGAGAGGAACGTGTTAATCCAGAACAGTTAC  
AACAAC TCATTAATAAGCATCGTGTGACGGTTGCGTCGATTCCGTTACAGATGTGTAGTG  
TTATGGAAGACTTTTATATTGAAAAGTTGATTACAGGCGGGGCAACTAGTACGGCATCCT  
TTGTTAAATATATTGAGAAGCATTGTGGCACGTATTTCAATGCCTATGGACCATCTGAGTC  
AACAGTCATCACATCGTATTGGTCACATCATTGTGGTGATTTGATACCTGAGACGATTCCA  
ATTGGCAAACCCTTATCTAACATCCAAGTGTATATTATGTCAGATGGTTTGTATGCGGTA  
TTGGTATGCCAGGCGAGTTGTGTATTGCAGGTGATAGTTTAGCGATAGGATATATTAATC  
GTCCAGAATTAATGGCTGATAAATGGCAAATAATCCATTTGGTAAAGGAAAGTTGTATC  
ATAGTGGTGATTTAGCACGTTATACATCTGATGGTCAAATTTGAATTTTTAGGAAGAATAG  
ATAACAAGTGAAAGTTAACGGGTACCGTATTGAACTTGATGAAATTGAAAATGCAATAT  
TAGCTATTCGTGGTATATCTGATTGTGTTGTAACAGTAAGTCACTTTGATACGCATGATAT  
ATTGAATGCTTATTATGTTGGAGAGCAACAAGTGGAGCAGGATTTGAAGCAATATTTAAA  
TGATCAGCTGCCTAAGTATATGATTCCTAAGACTATAACGCATATCGATTGTATGCCATTA  
ACCACGAATGACAAGGTGGATACTACGCGTTTGCCAAATCCATCACCTATAACAACAGTCT  
AATAAAGTGTATAGCGAACCCCTCTAATGAAATTGAGCAGACATTTGTTGATGTATTTGGA  
GAGGTATTGAAACAAAATGATGTCGGTGTGACGATGATTTCTTTGAACTTGGTGGTAAC  
TCATTAGAGGCGATGTTAGTTGTCTCGCATTTAAAACGATTTGGCCATCATATTTCAATGC  
AGACATTATACCAATATAAAACCGTGCGACAGATTGTTAATTATATGTACCAAATCAAC  
AATCATTAGTTGCATTACCGGATAATCTTTCGGAATTACAAAAGATTGTTATGTCTCGTTA  
TAAC TTGGGTATTTTTAGAGGATAGTCTAAGTCATCGACCTCTAGGAAATACACTATTGAC  
TGGCGCGACAGTTTTTTTAGGTGCTTATCTGATTGAAGCACTACAAGGATACAGTCATCG  
CATTATTTGTTTCATACGTGCTGATAATGAGGAAATAGCATGGTATAAGTTGATGACGAA  
TTTTAAATGATTATTTTTCAGAAGAGACGGTTGAAATGATGTTATCAAACATTGAAGTCATT  
GTTGGTGATTTTCGAGTGTATGGATGATGTTGTTTTACCAGAAAACATGGATACGATTATTC  
ATGCAGGTGCTCGTACAGATCACTTTGGTGATGATGATGAATTTGAAAAAGTAAATGTTT  
AAGGTACTGTTGATGTCATACGTTTGGCACAACAACATCATGCAAGGTTAATATATGTGT  
CTACGATAAGTGTGGGAACTTATTTTGATATAGACACAGAAGATGTGACATTTTCAGAAG  
CGGATGTCTATAAAGGGCAACTACTAACATCACCATATACACGGAGCAAATTTTATAGTG  
AATTA AAAGTATTAGAAGCTGTAATAATGGCTTAGATGGTCCGATTGTACGTGTTGGTA

ATTTGACGAGTCCTTACAATGGAAGATGGCATATGAGAAATATAAAGACTAACCGTTTTT  
CAATGGTAATGAATGATTTGTTACAACCTGGATTGTATCGGGGTTAGCATGGCTGAAATGC  
CTGTAGATTTTTCTTTTGTGGATACGACTGCAAGACAAATTGTTCGCATTAGCACAGGTCAA  
CACACCACAAATCATTTACCATGTGCTATCACCTAATAAAATGCCGGTGAATCTTTGTTA  
GAATGCGTTAAGCGCAAAGAAATTGAACTCGTCAGCGATGAATCATTTAATGAAATTTTA  
CAGAAACAAGACATGTACGAAACGATTGGATTAAGTGTGACCGTGAACAACAACCT  
AGCAATGATAGATACAACATTAACATTAATAATAATGAATCACATCAGTGAAAAATGGC  
CAACGATAACTAACAATTGGCTGTATCATTGGGCACAATATATCAAAACAATATTCAATA  
AGTAA

> **ausB**

Function: protein coding sequence; holo-acyl-carrier-protein synthase (core genome, constant)  
Best match: ausB\_CC001-ST772\_118\_AJGE01000016.1[56712:57356:r] (completely identical)  
Position: 008-contig\_256: 50459 ... 51104; Length: 645 bp

Sequence:

ATGACAGTATTTGTAATGCAATTACAGAGTAACTTGAAAAGTATTGAAGAATTAATATCA  
CAAAGTCGTTGGTCATATAAAAAACCGCGTACAGTCAACTATAGATACAATCAAGATAA  
ACTCATGCACAGATTGGGAGATATTTTAGTGCAATATGGAATTCAACATGACACAGGTTT  
ATTACCACATGAATGGCATTATCACATTTGCCACGAGGTAAGGCAGATATTGTTCAACA  
CAATCGTGATGGACAGCCATCTATGTGAGCTTATCATATAGTTATCCTTATATCGTGTGT  
GTTGTCGATAAAGAACCAGTTGGTATTGATATCGAAAAGATATCACAACGTTTAGACTGG  
CGTACGTTAGTGACGTGTTTCTCTACAAACGAAGCACATCAAATATGTAGTTTAAATGAT  
TTTTATCAAATATGGACACA AAAAGAAAGTTTTACAAAATTGATTGGTGAAGGTTTAATC  
AAAGGATTGGATATTTATGATATGACACAATCACACTTTTATCAATCACGTGAAGTGAAG  
TTCAAACAATTTATTTTTGATCAGTTTATGGTACAGGTATGTTTCTTAGGAGAGGCACCCT  
GGGGTTATAAAAAAGTGTCTGTATTTTCAGTTATTGAGTAGTTAA

> **argB**

Function: protein coding sequence; acetylglutamate kinase  
Best match: argB\_CC001\_MW2-USA400\_BA000033.2[184495:185259:r]RC  
Position: 008-contig\_256: 52178 ... 52943; Length: 765 bp

Sequence:

TTATGAATTAAGGATTGTTGTGCCAACAAAATCATTATTGTAAATAGATTCAATGATATTT  
GGCTTGTTCCTGATGCAATGATAACTTTAGGACAGCCATTTTCAATCGCATTTTTGGCAT  
CTAGCACTTTGGGAATCATACTCCATAAATATCACCATGTTCAATATATTGATGAATATC  
GACTAATGGCAATTGAGGTATAACCATATCATTGATGAGTACACCTGCAATATTACTTAA  
TACATAAATAGGCGCTTTTAATGATGATGCAATAAAATAGGCAAGCGTGTGAGCATTAAAT  
ATTGTAAAATTCTCCATCATGGTTATTGAAACCAATCGAATTGATGATAGGTACAAATTT  
AGTACATATACTGTAAAGCATCCTTATTTAAAGCGGTCGGGACACCGACATATCCATA  
TTGTTGATCAAAACGTTTAATTTCAAATAATTGAGCATCCAAACCACATAAGCCTATCGC  
AGAACATTGGTGCTGGTTAAATTGAGCTACTAATGCAGTGTTAACGTCTGCAATGAGCGT  
GTGTTTAGTAATGGTCATGGTTGCTTTATCAGTCACTCTTAGGCCATTAACAAAGTGTGGC  
TCGATTTGCTGGTTTGATAATGCATCATTAATAAATGGGCCACCGCCATGAACGATAATA  
GGGTAGATGTTGTTAATCGTAAATGCTTAATAATTGTTAATAATTGATGGATGCATGTCAC  
TAAGTGTACTGCCACCAATTTAATGACAATAAATTTTCAT

> **argJ**

Function: protein coding sequence; arginine biosynthesis bifunct protein  
Best match: argJ\_CC001\_MW2-USA400\_BA000033.2[185275:186516:r]RC (completely identical)  
Position: 008-contig\_256: 52958 ... 54200; Length: 1242 bp

Sequence:

TTATGTTTCGATATGATGCGTTGATACGCACATAATCATAGGATAAATCACAACCGTATGC  
AGTCGCTGCAGCGTTACCTAAACCAAGCTGAACGTCAATTGTGACATTTTCATGAGTTAA  
TGTATTTCGACATAGCTTGCTCATCAAATAGTACAGCCATACCTTTATCAACGACAGGTATT  
TGGTTCAGTTGAACATATGTGCAGTTAGGATCAATTTACATCCGCTGTAGCCAATAGCT

GTAATGATTTCGACCAAAATTGGCATCTTCGCCAAAAATAGCTGATTTTACTAGATTTGAA  
CTTACGATAGTTTTACCGATTTTTCTTGCATCTGATATTGATTTAGCGCCTGACACATTGA  
CGCTGATTAACCTTTGTTGCGCCTTCGCCATCTCTGGCTATAGCTTTAGCTAAAAATGTACA  
GACAAAATTGAATGCATCAACAAATGTTTCCCATTGTGGATGGTCTTGACTAAGTATTTG  
GTGTTCAACTTGGTGATTTGCCATGACTAATACCATGTCATTTGTACTTGTATCGCCATCA  
ACAGTAATCATATTAATGTATGGTCAGTCGAAGATTTTAATAATTGATGAAGTGTATTC  
GATTCAATCGATGCATCGGTTGTTATAAAAAGCAAGCATGGTAGCCATATTTGGGTGAATC  
ATACCTGAACCTTTGGTGCTACCACCAATTGTAACGGTTTTACCATCGATTTTTAGTGATA  
CAGCGATATGTTTTGTACAGGTATCAGTTGTTAAAATTGCCTCGTTAAACGCACCTGGCGT  
TGCAAAAATTAGCATCCTTAATATGTTTCGGTCCCAGTCTTAATTTTATCCATAGGCCAAATAT  
TCACCAATGACCCAGTTGAAGCAACAGCAACATGCTCAGATGGTATTTGAAGTTGTTGA  
GCAACCCATGTTTGTGTTTGTTCGTGCATCATCTATGCCTTGTGACCGGTACAAGAATTTG  
CATTAGCTGAATTAACAACAAGTGTCTTGTAAATTTTCTTTAGACTTTTGTAAAGTGTCTTC  
AGTGACAATAAGTGGTGCAGCTTTAAACTGATTTAAAGTATATACGGCAGCTGCACTTGC  
CAAAGACGATGAGTAAATCCACCCAAAGTCTTTTTTGTAGCGCGTAAACCGATGTGCAT  
ACCACCAGCCGTGAAGCCTTGAGGTGACTGATATCGCCATGTTTAATAATTGAAAAGTT  
ATATTGTTGTGATGTCGTTTCTTGATGTTTCAT

### > **argC**

Function: protein coding sequence; N-acetyl-gamma-glutamyl-phosphate reductase

Best match: argC\_CC001\_MW2-USA400\_BA000033.2[186528:187562:r]RC

Position: 008-contig\_256: 54211 ... 55246; Length: 1035 bp

Sequence:

TTATGGATAAACTGGTGATTGATTTAGGCCAGTCGTCACCTTCAAATCATATAATATATTT  
AAATTTTGAATGGCTTGCCCACTTGCGCCTTTGACAAGGTTATCAATCACTGATACTAAAA  
TTGCTGTTTGCCTTGTTCATCTACATAGATGCCGATATCGCAGTAGTTACTACCGAGTAC  
TTCTTTTGTGGTTGGAAAAGTCCAATATCTCTAATTCTGACAAATGGCTGATTAGCATAA  
TAAGAGGTCATTAATTTATGTAATGATTCAGTCGTATATTCAGATGATAATTTGACATATA  
TTGTTGATAAAATACCTCGTGTCATTGGTACGAGATGTGGTGTAATATGACTGATACAT  
CTTGACCCGCAATGATAGATAAATATTGCTCGATTTCCGGTTTGTGTTTATGGTTTCCGAT  
TGCATAAGCGCTTAGATTTTCATTCATTTCTGAAAATGAACACGTTGTGATAATGAACG  
ACCAGCACCTGACACGCCGGTCTTAGCATCAATAATAATAGATGACAAATCTACTATTTT  
TTCGCTAATAAGTGGATGTAATGCTAATAATGTTGCTGTAGGGAAACAGCCAGGATTAGA  
AATGAGCTTCGTTCCATTGTTATCAAACGATTGCCATTCTGAAATGCTGTAAATAGCATGA  
TTCAAATCATCTTGTGCTGCAGCAGTTTCTTTGTAATATGCTTCATATATTTACGATTCTT  
AATTCTAAATGCGCCAGATAAATCGATAACATGAATACCTTTTTCTACTAAGGGAGGGAT  
ACATGTTTTACTTACGGGTGCTGGTGTGCAAAAGAAAATCACATCACAGTCATTATTGTCC  
ACTGTAAGTGCTTCGAAATGTTGCATAATATGTTGTAATGTGGAAATGTTAATTTCAAC  
GGTTCATCTACTTTTGAATGTGAGTAGATGTGTGCAATCGTTACATGAGGATGTGTTTGT  
ACAATCGAATTAATTCAATTGCGCCATAACCGCTACCGCCAACGATACCTACTTTAATCA  
TCAT

### > **argD1**

Function:

Best match: argD1\_CC001\_MW2-USA400\_BA000033.2[187598:188782:r]RC

Position: 008-contig\_256: 55281 ... 56466; Length: 1185 bp

Sequence:

TTAATTTTTAAAAACGTCTTGAAAAGCTGCAACAATTTGATGGATTTCTCTTTATCAATG  
ACTAGAGGTGGTGACAATCGAATGATAGTACGATGCGTGTCTTTGCACAAGATTCCACGT  
TGAATCAGTTGATCCACAAAAGGTGCAGCATCTGTGTTAAGCTCTATGCCTATAAATAAA  
CCACGACCTCTAATTTCTTTAATACTAGGATGTTTAAAGTTGTAGCAACGCTTTTAATAAAA  
ATGAACCTAAGCGTTCTGATCGTTCAACCAGTTGTTTCATCTTTAAGTACATCAAGCGCTGC  
CGTCGATATTGCAATGGCTAAAGGGTTACCACCAAATGTGCAACCATGTGTACCTGGTGT  
TAGAACACGCATGACATCATTATTTGCAAGTACAGCAGATACAGGGTATAAGCCGCCACC  
CAATGCCTTACCTAAAATATAAATGTCTGGAACAACCTTGCTCCCATTCATCGCAAACCA



TTTCCCAGTTCTACCAAGACCAACTTGAATTTTCATCTGCAATCAATAATATTTGATATTTA  
TCACATAGATGACGCACAGCTTGAATATATCCTTTTCGGTGGTATATTAACGCCACCTTCAC  
CTTGAATTGGTTCCAAAATAATTGCTGCTGTATTTGGTGAAATAGCTTGTGTTAATTGTTC  
AATGTCTCCAAAATCTACAGTTGTAGTGCCTTGAAGTAGGGGGTGAAATCCTGCTTTATA  
TGCGTCGTGGTTAGATAGTGATAATGAGCCAAGTGTACGACCGTGAAAATTGTTATTCAT  
AGCGATGATTTCAACTTGTCCGTCAGTAATGCCTTTAACTTCAGAGCCCCATTTTCTAGCA  
ATTTAATGGCTGCTTCAACAGCTTCAGTACCAGAGTTAAGGGGGAGTACTTTGTCTTTCT  
TAGCAAGATGACAAATTTTTTCTTCCCATTTCCCAGATTGTCACTATAAAGGACACGTGA  
AATGATAGACAACTTTGAAGCTTGTCTGTCATCGCTTTAACAATTGTTGGATGACAATGG  
CCTTGGTTTGCAACTGAAAAACCCGAAATGCAATCTATATATTGTTTGCCATCAGTATCCC  
AACTTTGACACCTTTACCTTTAGAAATGACAAGCTTAAGTGGTGCATAATTATTAGAGC  
TATAATAATCAGTTAATTCAATGATTGAATTCAT

### > **rocD1**

Function: protein coding sequence; ornithine aminotransferase 1 (core genome, variable)

Best match: rocD1\_CC001-ST772\_118\_AJGE01000016.1[51350:52534]RC (completely identical)

Position: 008-contig\_256: 55281 ... 56466; Length: 1185 bp

Sequence:

TTAATTTTTAAAAACGTCTTGAAAAGCTGCAACAATTTGATGGATTTCTCTTTATCAATG  
ACTAGAGGTGGTGACAATCGAATGATAGTACGATGCGTGTCTTTGCACAAGATTCCACGT  
TGAATCAGTTGATCCACAAAAGGTGCAGCATCTGTGTTAAGCTCTATGCCATAAATAAA  
CCACGACCTCTAATTTCTTTAATACTAGGATGTTAAGTTGTAGCAACGCTTTTAATAAAA  
ATGAACCTAAGCGTTCTGATCGTTCAACCAGTTGTTTCATCTTTAAGTACATCAAGCGCTGC  
CGTCGATATTGCAATGGCTAAAGGGTTACCACCAAATGTCGAACCATGTGTACCTGGTGT  
TAGAACACGCATGACATCATTATTTGCAAGTACAGCAGATACAGGGTATAAGCCGCCACC  
CAATGCCTTACCTAAAATATAAATGTCTGGAACAACCTGCTCCCATTCCATCGCAAACCA  
TTTCCCAGTTCTACCAAGACCAACTTGAATTTTCATCTGCAATCAATAATATTTGATATTTA  
TCACATAGATGACGCACAGCTTGAATATATCCTTTTCGGTGGTATATTAACGCCACCTTCAC  
CTTGAATTGGTTCCAAAATAATTGCTGCTGTATTTGGTGAAATAGCTTGTGTTAATTGTTC  
AATGTCTCCAAAATCTACAGTTGTAGTGCCTTGAAGTAGGGGGTGAAATCCTGCTTTATA  
TGCGTCGTGGTTAGATAGTGATAATGAGCCAAGTGTACGACCGTGAAAATTGTTATTCAT  
AGCGATGATTTCAACTTGTCCGTCAGTAATGCCTTTAACTTCAGAGCCCCATTTTCTAGCA  
ATTTAATGGCTGCTTCAACAGCTTCAGTACCAGAGTTAAGGGGGAGTACTTTGTCTTTCT  
TAGCAAGATGACAAATTTTTTCTTCCCATTTCCCAGATTGTCACTATAAAGGACACGTGA  
AATGATAGACAACTTTGAAGCTTGTCTGTCATCGCTTTAACAATTGTTGGATGACAATGG  
CCTTGGTTTGCAACTGAAAAACCCGAAATGCAATCTATATATTGTTTGCCATCAGTATCCC  
AACTTTGACACCTTTACCTTTAGAAATGACAAGCTTAAGTGGTGCATAATTATTAGAGC  
TATAATAATCAGTTAATTCAATGATTGAATTCAT

### > **brnQ1**

Function: protein coding sequence; branched-chain amino acid transport system II carrier protein

Best match: brnQ1\_CC008\_NCTC8325\_CP000253.1[162494:163849:r]RC (completely identical)

Position: 008-contig\_256: 56718 ... 58074; Length: 1356 bp

Sequence:

TTATGCTTGTGGAATTTTACGATGCTTAATTTTATAAATAATGAAGCCGATAATGAAACCA  
ATCAAACCTGAGAACAACCCAGCCCATACCAATGTCTGATAATGGTAAATATTTTTGGCTG  
AAATTAATCAAAGTTTGTGAGAATGATGTGCTTGAATGAACTCTGGACTAGCTTTTAAT  
CCATCTACTAATGCAGCAATCATTGTAAAGAAAATGGTACATTGATAAATAAGTTTTGAA  
TGATGGAATTTGCTACTAAATAATGTTAGTACAATCAAGGCAATTGCTAATGGATATAAG  
AACATTAACACTGGGACTGAGTACATAATAATCTTAGTTAAACCAACATTTCGCGAATAAG  
AACGAAATAAAGCTTACAACCTGTTGCAATCGCTAGGTAATTCATTTTAGGGAAAAGGTGT  
TCGAATGTTTCTGAAAATGCCGTAATCAAACCGATGGCTGTTTTTAACAAGCAACCATA  
ACGATAAGTGACAACAGGACGATACCGTAGTTACCTAAGTAGTATTGAGTAATTTGCGCT  
AAGGCAATACCACCATTTTCACTAAGTTTGAATGACCAATACTTAATGTACCCATGATT  
GCTAGTAGGGTATAAATGATCCCCATCATAATGATACTGATAGTACCAGACTTAATTGTT

TCTTTAGCGATATCAGTTGGATTTTCGATACCTAACTTTTTAATCGTTGCAACAATGATAA  
TACCAAATGCCAATGACGCTAGCGCATCTAAGGTATTGTATCCATCTAAAAAGCCGTTAA  
ATAAGGCATGTGATTGATATTGTTTACTAATAGGTGCATCAGATATGCCACCTAATGGAT  
GGATAAAAGCAAATAATAAAATAATTGCTAATAATACTAAGAATACCGGATTTAAAAAT  
TTACCGATATATTCTAAAATTCTTGATGGCTTTCTCGCAAAAAACCATGCAATCACAAAG  
AAGACGAAGCTAAAAATAAATAAATAAAGTGATTTGCTTTGGTGATAAAAAATGGCGA  
AAATGCAATTTCAAATGATGTCGTTGCCAGTCTAGGTAAGGCGAAAAATGGTCCGATAAC  
TAGATATAAGGCAATCGTGAAAATGTAAGCATATGTTTTATTAACACGCGATGCAATTC  
AAATAAACCAGATGTCTTTGAAATGCCAATAGCAATGATACCTAGAAATGGTAAGCCAAT  
TGCTGTAATTA AAAATCCTAAGTTAGCGATAAAAACGTTAGAACCAGCAGCTTGACCCAA  
GTGTATTGGGAAGATAAGATTGCCGGCACCAAAGAATAAACCAATAACATAGAACCTA  
TAAACATGTTTTCTTTAAATGTTAGTTTCTTCTTCAT

> **Q5HJ16**

Function: protein coding sequence; isochorismatase (core genome, variable)

Best match: Q5HJ16\_CC005\_Mu50-VRSA\_BA000017.4212238:212735:rRC

Position: 008-contig\_256: 58350 ... 58848; Length: 498 bp

Sequence:

TTAGTTCAATATATTTAGTAATTCGCTTGTGGTTACTGTTTGCCTTATTATAGGGAATACA  
TTATCTATTGGAAATTGATGTAGCGTTTCGTTTTGTGCACTCATCATATCTGTAACAAAAA  
ACTGATTGTAGTTAATTGATAGGCATCTCGCGCTGTCGTATCTACGCCAATATGCGTTGC  
GACACCACCAAGAACAATCGTATCAATTCCTCGACGTCGCAATTGTAAGTCCAAATCTGT  
TCCTACAAATGCACTAAAATGTCGTTTGTCTATGACAAAATCGTCATCTCTCTGTCTAAT  
AAATGATGGAAACGACTGTAGTCGTCGCCTTCTTTTGGTGGTAATGAGATCATTGCATTTG  
GTTGCAATACATCTTTACCATCATAGAAATTCACGCGAACAAAAGCGATAAAGCCATTGT  
TTTTTCTAAAACATCTATTAATTTATTAGCGTTTTGAACGACATTTTCAGCTGTATGTGG  
CGCATAATCCAT

> **ipdC**

Function: protein coding sequence; indole-3-pyruvate decarboxylase (core genome, constant)

Best match: ipdC\_CC001\_MW2-USA400\_BA000033.2[191290:192930:r]RC

Position: 008-contig\_256: 58974 ... 60615; Length: 1641 bp

Sequence:

TTATTTATTTTGTGTGAAAAGCTTTAGCGATATCGATGAGTTTCTTCGGTGCGTCTTCG  
ACAGACATTTTGACTTCGACAAAATGCATCACATCGGGATGACCATTAATTGCATTAAAC  
GTGTCTTGTAATCTTTTGTGATTCAACGTCATGAATTTCAACATTTTACCACCAATA  
CAGCTGGTAAAGCTTTATAATCCCACATGTGAATTTCAATTATAAGGTTACATACATGCCGTG  
AATAAGTCGTTCTACCGTATAGCCGTCATTATTAATCACAAATAATACCGGTTAATATGC  
TGTCTAATCATAGTTGAAATAGCTTGAACAGTTAGTTGCAATGAGCCATCACCAATTAAT  
AATAAGTTACGACGATCTTTGTCTGCTAATTGTGAACCTAATGTTGCAGGTAATGTATAGC  
CGATAGAACCCCATAAACGGTTGCCCTATAAAAGTATTGTTTTGTATAATGCTAAATCATA  
AGCACCAAAGAATGATGTACCTTGATCAGCAATAATGACATCATTGGTTTTAAGAAATT  
TTGCATCATTTTAAAATAAGTTTGTGTGTTAATGGTTCTGTGCCAACTGTATAATCGGGT  
GATGTTGGACGATGATACGCAGGGAACGTTGCGTTATTCGTATGTGAAATATTGGATAAC  
TGTTTTAACAAATGATGGTAGAGATATTTATCATTGTAACATCGTCAATTTTGATATTGT  
GATGATTTAACATAACGACATCATCGATATTGAATTGGTATGAAAAACCTGCTGTTGCTG  
AATCTGTTAATTTGGCTCCAATATTTAAAATTAATCGCTGTTGTCCACATAATCTCGTAT  
TTATCTTCGGCAATTTTCCCATCGTAAATACCCATATAATATGGATTTTCTCATTAAAA  
GCACCTTTTCTAATGAAAGTTGTGCTACTGGTATCTGTGTTTGATTTACAAAATCTTCTA  
ATTCTTGATGAAGGTGAAAACCTGTTAATTTTCATGTCCAGTAATGATGATAGGCTGCTTCG  
ATTGATGCAATTTAGATGTTAATAACTCTATATATGTTGATGCATCCGTATCTTTGGCTGC  
CGTTACTTCAAATGGTGTGCGGTATCTCAATTTTCAGAGATTGCGACATCGATTGGTAAATGT  
AAATGAACTGGGCGTCTTTCGGCGATTGCTGTATTAATTAACGTGGTATTTTCGGTTGTTG  
CATTTTCAGGTGTGATATAACCTTGTGCAACGGTTATATGTGCAAACATTTTTCGGTAGTC  
GTCAAATGTACCTTCACCAAGTGAGTGATGTACATATTTACCGGCATGTTCAACAGCACG

TGTCGGCGCACCTGTAATCGCAATGACAGGTATGCGTTCAGCATATGAACCTGCGATAACC  
GTTGACGGCACTTAATTCGCCAACACCAAATGTAGTAACTAATGCAGCGAGTCCATTAAG  
ACGGGCATAACCGTCCGCTGCGTAACTTGCCTTTAATTCATTTGTATTCCTACCCAATCT  
ACATTGGGATTGCTGATAATATCGTCTAGAAAAGCGAGATTAATAATCACCAGGAACACC  
AAAAATTTTATCGACGCCTGCTCGATGAATAGCGTCAATTAAGTAAGCTCCAATGCGTTG  
TTTCAT

> **glcA**

Function: protein coding sequence; glucose-specific PTS transporter protein/IIABC component (core genome, constant)

Best match: glcA\_CC005\_Mu50-VRSA\_BA000017.4[214774:216819:r]RC

Position: 008-contig\_256: 60887 ... 62933; Length: 2046 bp

Sequence:

TTATTTAGCTTCAAATAATTGATCGCCAAATGAAATGTTGCCATGTTACCTTGTTTTAAAA  
TCAAGGTTTGTAATGTTTCCTTGTGTACAGATAATAGGCGTAATATCACTCTTTCATGAT  
TGCGGATGTAGTCTAAATCAAAGTTGATTAATAAATCACCTTGTTTAACTTCTTGACCTTC  
CTCAACATGTAAAGTAAAGCCTTCTCCGTTTAAATTTAACAGTGTCTAAACCGATGTGGATT  
AATAGTTCTAAACCACTATCTGATACAAGACCAATTGCATGTTTTGTTGGGAAAATCATT  
GTACTTTACCGTTGAATGGTGCACGAACCTTACCTTGTGAAGGTTTGATAGCGATACCGTC  
ACCCATCATTTTTTCGCTGAACACTTGATCAGGCACTTCTGATAAAGGTGTTACTTCACCA  
GTTAATGGTGCATGAACGATATGGCTCAATTCGCTTGTTCAGATTTATCTTCTGCAACAA  
CAACAGTTTCGTCTTTATCGTCTTCCATAGTAGTAGGGTTTTTCTACTACTTGACCATTCTA  
ATCTGTTGCATTTTCATGTTTGATTTGGTTCAGATTTAGGACCAAAAATTGCTTGCATATTAT  
TGCCGACTTCTAATACACCAGATGCGCCTAAATCTTCAAACCAGGAACATCAACTTTAG  
ATTTGTCGTTAACTTCAACACGTAGACGTGTGATACAAGCGTCTAAATGTTTAAATGTTTGC  
TTTGCCACCCATAGCTTCTAATACTGCATATGGTAATTCAGTTGCTGAAGCAGTAGCCGCT  
TGTGATTGTTTATCTTACGACCTGGTGTGTTTTGATTTTTAATTTTACAATTAAGAATCGGA  
ATACGAAGTAGTAAATAACTGCGTATACAAGACCTACAGGAATGACTAACCCATTGTG  
TCTTATTAGGTAGTATACCGAGTAAGAAGTAGTCGATGAAACCACCTGAGAATGTATAAC  
CTAGATGAAGATCTAATAAGTACAATGTTAAGAATGATAAACCATCAAGTACTGCGTGAA  
TAAAGAATAATAATGGTGCTACAAATAAGAATGAGAATTCTAATGGTTCTGTAATACCAG  
TTAAGAATGATGTTAAAGCAGCAGAACCCATTAACCTGCTACCCTTCTTATTTTCAGG  
TTTAGCTGTGTGATAAATTGCTAAAGCTGCTGCAGGTAAACCGAACATCATAACAGGGAA  
TTCACCTTGCATGAATTTACCAGCTGTCAAATGTGCGCCTTACGAATTTGTTTCGATAAAG  
ATACGTTGGTCACCGTGAATAATTTACCAGCTGCATTTTTCCATGAACCAAACCTCGAACC  
AGAACGGTGCCTGGAAAATGTGATGTAGACCGAATGGAATTAATAAACGCTTGATGAAA  
CCAAATAAGAATACGGCAACACCAGTATTTGAATCTAATAATCCTGTACTGAATGCATTT  
AATCCTGATTGAATCGTTGGCCAAATTAATGCCATTGGGAATGCTAAAATAAATGATGTT  
GTAGCCATCATAATAGGTACGAAACGCTTACCAGCAAAGAAACCTAAATAAGATGGTAA  
GTTAATGTTATAGAACTTGTATAACACCAAGCTGCCAGGGCCCCGATAATAATACCGCC  
GAACACACCTGTTTGTAAATGTTGGAATACCTAAAATGCTAGCGTAACCACTCGCTGGATC  
AGTAACATTTTTAGGTGTAACCTGTAAAAAGTCGCCATTGTTTTGTTTCATGATTATGTAA  
CCGACGAATGCTGCGATAGCTGCTACGCCATCACCGCCAGCTAATCCGATTGCGACACCT  
AATGCGAAAATCATAGGTAAGTTTTCAAAAATAATACTACCGGCAGCTGTCATTAATTTA  
GCGACATTTTGAACGCCACCATTTTGTATAAACGGCAAGTAGTGTGTAATGCTTCGCCTT  
GTATAGCTGTACCGATAGCTAATAACAGACCCGCTGCTGGTAAAATTGCAACAGGTAACA  
TTAGCGCTTTACCAATACGTTGCAATTGACCGAAAAGTTTCTTCCTCAC

> **rsaK**

Function: noncoding RNA ncRNA of Staphylococcus aureus K (core genome, constant)

Best match: rsaK\_CC001\_MW2-USA400\_BA000033.2[195307:195518:r]RC (completely identical)

Position: 008-contig\_256: 62991 ... 63203; Length: 212 bp

Sequence:

AATAGACTGTGTTGGTAACCATCACAGCTTAATTTAACTCATGCCTAATCTTACTTAGTAA  
CACGTTGGTGTATGTAATTAATGTAAAAGAAGCAATTGACTAAGTAGTATATAAACTGA

TACGTTAGTTTATCTAGCTTACCATCACATCTTATTGAATCTTATTTGTTTGC GACTCCTAT  
TTTAGCATGGTGAAGTATGCGTTTTCAAT

> **murQ**

Function: protein coding sequence; N-acetylmuramic acid 6-phosphate etherase (core genome, constant)

Best match: murQ\_CC001\_MW2-USA400\_BA000033.2196885:197784

Position: 008-contig\_256: 64569 ... 65469; Length: 900 bp

Sequence:

GTGATGGAAAATAGTACGACCGAAGCACGTAATGAAGCGACGATGCATCTTGATGAAAT  
GACTGTGGAAGAGGCTTTAATTACGATGAATAAAGAAGATCAGCAAGTCCCGTTAGCAG  
TTCGAAAGGCAATACCACAATTGACAAAAGTAATTAATAAAAAACAATTGCACAGTATAAA  
AAGGGTGGACGATTGATCTATATCGGTGCAGGTACAAGTGAAGATTGGGTGTCTTAGAT  
GCAGCGGAGTGTGTACCTACATTCAATACTGACCCTCATGAAATTATAGGTATTATTGCT  
GGTGGACAACATGCTATGACGATGGCTGTAGAAGGTGCGGAAGATCACAAAAAATTAGC  
GGAAGAAGATTTGAAAAATATAGATTTAACATCAAAAGATGTCGTTATAGGAATTGCCGC  
GAGTGGCAAAACGCCATATGTTATAGGCGGTTTAACATTTGCTAACACAATCGGTGCTAC  
AACAGTATCTATTTTCATGCAATGAACATGCAGTTATAAGTGAATTGCGCAGTATCCAGT  
AGAAGTTAAAGTTGGTCCAGAAGTATTAAGTGGTTCAACGCGTTTAAAGTCTGGTACAGC  
ACAAAAATTAATTTTAAATATGATTTCAACCATCACAAATGGTTGGTGTGCGAAAAGTTTA  
TGATAACCTCATGATTGATGTTAAAGCAACCAATCAAAAAGTATCGACCGTTCAGTGCG  
TATTATTCAAGAAATATGTGCTATCACATATGATGAAGCAATGGCGTTATATCAGGTATC  
TGAGCATGATGTGAAAGTTGCGACAGTTATGGGTATGTGTGGCATTCTAAGGAAGAAGC  
ACAAGACGTTATTAACAATGGTGACATTGTTAAACGAGCAATCAGAGATAGACAAC  
CTTAG

> **A6QDH7**

Function: protein coding sequence; putative phosphosugar-binding transcript regulator/RpiR family (core genome, constant)

Best match: A6QDH7\_CC001\_MW2-USA400\_BA000033.2[199250:200128] (completely identical)

Position: 008-contig\_256: 66934 ... 67813; Length: 879 bp

Sequence:

ATGATGACAAATATTTTATATCGCATTGATAAGCAGTTGAGTGATTTTACGAAGACAGAA  
AAGATAATCGCTGATTACATTTTAAAGAATCCACATAAAATCATTGATATGACTGTGAAT  
GATTTGGCAGATGTTACGAATGTTAGTACAGCATCAATTGTTAGATTTAGTCGGAAAATG  
ACACATCAAGGTTTTCAAGAGCTAAAGATTGCGATATCTCGATACTTACCCGAAGATATT  
GCAACCAATCCACATTTAGAATTGATTGAAAATGAATCTGTAGAAACTTTGAAAAATAAA  
ATGATTGCTAGAGCAACGAATACGATGCGATTTGTAGCTACTAATATTATGGATGCGCAA  
ATTGATGCAATTTGTGATGTGTTGAAAAATGCCAGGACAATATTTTATTTGGATTTGGCG  
CATCGAGTTTACTATTGGTGATCTTTTTCAAAGTTATCTCGTATTGGCTTAAATGTCAG  
GTTATTACATGAAACGCATTTACTTGTGTCAACATTTGCGACGCATGATGATAGAGATTG  
CATGATTTTTGTGACGAATCAAGGTAGTCATAGTGAATTGCAGTCAATTGCACAGGTGGC  
CACACATTACAGTATCCCATCATAACTATATCTAGTACAGCTAATAATCCAGTGGCTCA  
AATTGCAGACTATGCATTGATTTATGGCAGAAGTATGAAAATGAAATGCGTATGGCGGC  
TACAACGTCACTATTTGCACAGTTATTCACGGTAGATATATTGTACTATCGATTTGTAGCA  
TTAAATTATCATGCGATTCTAGATTGTATAACCAATCGAAAATGGCACTTGATAATTAC  
AGGAAGCATCTTGCGACGATAGATTTTAAACATTAG

> **A5IP63**

Function: protein coding sequence; putative protein (core genome, constant)

Best match: A5IP63\_ref\_CC001\_MW2-USA400\_BA000033.2[200322:200603:r]RC

Position: 008-contig\_256: 68125 ... 68275; Length: 150 bp

Sequence:

TAGGTAGTAGTACATAAAGAGTATGGCTGCGAACATGCCGAATATTGAAGTGAAGTTACC  
TACAGTGACTGCCATGTAATGATTTAAAGTTAAATAGTAACTTAGACTAATAATAAAAAA  
TAAATGATTTGATAGGTAATTAACACCAT

> **hsdR**

Function: protein coding sequence; type I restriction-modification system endonuclease (core genome, constant)

Best match: hsdR\_CC001\_MW2-USA400\_BA000033.2[200816:203605]

Position: 008-contig\_256: 68487 ... 71277; Length: 2790 bp

Sequence:

ATGGCATAACCAAAGTGAATACGCATTAGAAAATGAAATGATGAATCAACTTGAACAATT  
GGGTTACGAAAGAGTAACAATACGTGATAATAAGCAATTGCTTGATAATTTTAGAACGAT  
TTTAAATGAGCGTCATGCGGACAAATTAGAAGGCAATCCCTAACAGATAAAGAATTTCA  
ACGTCTGTTAACGATGATTGATGGGAAAAGTATTTTCGAGAGTGCCCGTATTTTACGTGA  
TAAATTACCACTTAGACGTGATGATGAGTCTGAGGTTTATTTGTCGTTTTTAGATACGAAA  
AGTTGGTGTAAAAATAAGTTTCAAGTGACGAATCAAGTATCTGTCGAGGATACATATAAA  
GCACGTTATGATGTAACGATATTAATCAACGGACTACCCCTTGCCAAGTTGAATTGAAA  
CGTCGAGGTATTGATATTAATGAGGCGTTTAAACCAAGTAAAACGTTACCGCAAACAAAAT  
TACACAGGCTTATTCCGCTACATACAAATGTTTATCATTAGTAATGGTGTTGAAACGCGAT  
ACTTTTCTAATAATGATAGCGAACTATTGAAGAGTCACATGTTTTATTGGAGTGATAAAC  
AGAATAACCGAATCAATACATTACAATCGTTTGCTGAGTCGTTTATGAGACCTTGTC AATT  
AGCTAAGATGATATCGCGCTATATGATTATTAATGAAACAGATAGAATACTGATGGCAAT  
GCGTCCGTATCAAGTGTATGCGGTAGAAGCACTTATTCAACAAGCGACTGAGACAGGGA  
ATAATGGATATGTATGGCATAACA ACTGGAAGTGGTAAGACATTGACTTCTTTTAAAGCGA  
GTCAGATTTTATCACAGCAAGATGACATTAAGAAAGTTATCTTTTTGGTTGACCGTAAAG  
ACTTGGATAGTCAAACAGAAGAGGAATTTAATAAATTTGCTAAGGGTGCTGTAGACAAA  
ACTTTTAATACCTCGCAACTGGTACGCCAACTAAATGATAAAAAGTTTGCCACTTATTGTA  
CGACGATACAAAAAATGGCTAAAGCGATTCAAGGTAATGCCCATTTATTAGAACAGTATA  
AAACGAATAAAGTTGTATTTATTATTGATGAGTGTCATCGCAGTCAATTTGGTGACATGC  
ATCGTCTAGTTAAACAACATTTCAAAAATGCCCAATACTTTGGATTCACTGGTACGCCAC  
GTTTTCCAGAAAATAGTAGTCAAGATGGTAGAACAACTGCAGATATTTCCGGTAGATGCT  
TACATACGTATTTAATTAGAGATGCCATTCATGATGGTAATGTACTTGGTTTCTCAGTTGA  
CTATATTAATACTTTTTAAAAATAAAGCTTTAAAAGCAGAAGATAACAGCATGGTTGAAGC  
AATTGATACGGAAGAAGTATGGTTAGCGGATAAACGTGTGGAATTAGTAACACGACATA  
TCATCAATAATCATGATAAATATACACGTAATCGTCAATATTCAAGTATATTTACAGTCCA  
AAGTATTCACGCGCTTATTAATATTATGAGACATTTAAGCGACTTAACAAAAAGTTGGA  
ACAACCGTTAACGATAGCTGGTATATTTACGTTTAAACCTAATGAAGATGATCGTGATGG  
TGAAGTGCCATATCATTACGTGAAAAATTAGAGATAATGATTAGCGATTATAATAAAAA  
GTTTCGAGACGAATTTTTCAACAGACACA ACTAATGAGTATTTTAATCATATTTCAAAAAA  
CGTTAAAAAAGGGCGTTAAAGATAGTAAAATTGATATCTTAATCGTTGTTAATATGTTCTTA  
ACTGGTTTTGATAGTAAAGTACTGAACACTTTATATGTTGATAAGAATTTAATGTATCATG  
ATTTAATTCAAGCGTATTCACGTACAAATAGGGTTGAAAAAGAATCAAAGCCATTTGGTA  
AAATTGTAAACTATCGTGACTTGAAAAAAGAGACAGACGATGCACTGAGAGTATTCTCAC  
AAACAAATGATACGGATACAATTTAATGCGCAGTTATGAAGAGTATAAAAAAGAATTT  
ATGGACGCTTATCGTGAGCTTAAATGATTGTGCCGACACCACACATGGTTGATGACATT  
CAAGATGAAGAAGAGCTAAAGCGCTTTGTTGAAGCTTATCGTTTATTAGCTAAAATAATA  
TTACGTTTAAAAGCATTGACGAGTTTGAGTTTACAATTGATGAAATTGGAATGGATGAA  
CAAGAGAATGAAGACTATAAAAGTAAATATTTAGCTGTGTACGATCAAGTAAAAGAGC  
GACGGCTGAGAAAAATAAAGTATCCATTTAAATGATATTGATTTGAAAATAGAAATGAT  
GCGTAATGATACGATTAATGTGAATTATATTATGAATATATTGAGACAAATTGATCTTGA  
AGACAAAGCGGAACAACGTCTGAACCAAGAACA AATTAGACGCATTTTAGATCATGCAG  
ATGATCCGACATTGAGGTTAAAACGAGATCTAATTAGAGAATTCATCGACAATGTTGTAC  
CTTCTTTAAATAAGGATGATGATATCGATCAAGAATATGTTAATTTGAAAAGTATTA AAA  
AAGAAGCGGAGTTCAAAGGATTTGCTGGAGAGAGATCTATCGATGAACAAGCCCTAAAA  
ACAATTTCAAATGACTACCAGTATAGTGGTGTTGTA AACCCACATCACCTTAAAAAATG

ATTGGTGATTTGCCATTGAAAGAAAAGCGTAAAGCAAGAAAAGCCATTGAATCTTTCGTG  
GCAGAAACAACCTGAAAAATACGGTGTGTAA

### > **hsdRx**

Function: protein coding sequence; type I restriction-modification system endonuclease

Best match: hsdR\_part\_DQ413432.1[1:432]

Position: 008-contig\_256: 69888 ... 70320; Length: 432 bp

Sequence:

TGGTTAGCGGATAAACGTGTGGAATTAGTAACACGACATATCATCAATAATCATGATAAA  
TATACACGTAATCGTCAATATTCAAGTATATTTACAGTCCAAAGTATTCACGCGCTTATTA  
AATATTATGAGACATTTAAGCGACTTAACAAAAAGTTGGAACAACCGTTAACGATAGCTG  
GTATATTTACGTTTAAACCTAATGAAGATGATCGTGATGGTGAAGTGCCATATCATTAC  
GTGAAAAATTAGAGATAATGATTAGCGATTATAATAAAAAGTTTCGAGACGAATTTTTCAA  
CAGACACAACCTAATGAGTATTTAATCATATTTCAAAAACGTTAAAAAGGGCGTTAAAG  
ATAGTAAAATTGATATCTTAATCGTTGTTAATATGTTCTTAACTGGTTTTGATAGTAAAGT  
ACTGAACACT

### > **Q5HJH7**

Function: protein coding sequence; putative protein (genomic island)

Best match: Q5HJH7\_CC080\_11819-97\_CP003194.1[219535:220377] (completely identical)

Position: 008-contig\_256: 71481 ... 72324; Length: 843 bp

Sequence:

ATGGATAATAGAAATATGATTAATCGTGTTTTTAGTCAAAAAGATATTACATCAAATTGCA  
ATCAAAAATAAAAAGTGATGTTGTTGATGAGGCATATGATTTTTATATACAGGGACCTAAA  
AATATCAATGTAATACAGAAGATGAAATCTTTATATAATTATCTTAAAAAGTCTTATCGT  
AACGAATATTTTTACAAAACACAATACTTAATAAACTCCTTCTAGGACGACATTCTATT  
AATACAACACTACTGCACTTTCTGAGATGCCCATAGGGAAAAGTATTGCTGATTTTTATATTGT  
TAAACGGCAAAGGCGTTGTCTATGAGATTAACAGAAATTAGATAAGCTGGATAGATTA  
GATAATCAAATTAATGATTATTATGAAGTGTTAATTATGTAGTAGTTATTACAAATGACA  
AACATCTGAATAAAGTTATGGCTAGATACAAAGATACAACAGTTGGAATTTTAGTGTTAA  
CACTAGAAATACACTGAGTGAAGTTCAAAAACCTAAAGAAAACAATAGTCTCTTAAAC  
ACAAAAGCGATGTATAACTTTTTACGAAAAGAAGAAAAGAAAAGAGTTATTGCACAAAA  
TCATATGGATGTGCCAACTTATAATGATTTTACAGAGTATGATGTGTTATTTGACGTGTTT  
AAAGAAATACCAATGACGAACTGCATAACAATATGATTTCTGAGTTGAAAAAAAGAGG  
CAACATGAAAGAATACAAAGATGAATTTTTAGCAGCGCCGGCTGAAATTAAGTTCTTGTT  
ATATTTTCGCAAAAATGACAAAGAAAGATAAAAATAAACTATATCATTTTCTTAAAGGAGGA  
TTAA

### > **Q9RL82**

Function: protein coding sequence; putative protein (genomic island)

Best match: Q9RL82\_CC012\_21266\_AFTT01000027.1[229333:230256:r] (completely identical)

Position: 008-contig\_256: 72325 ... 73249; Length: 924 bp

Sequence:

ATGTATTATCCTTATTTGCGTGGGAAACAAAATGAACTATTTGCAATTAGAGAATTGTTA  
GAGAAAGGTTTGATTGGTGATTGTATTCAACCTATAAATTGAACCGATTAAGTATACAACC  
ACGTTTAAAAATGTTTTGAAATATTGTGGTGAAAAAGAATTTTCGTATAAATTTAGTAGTA  
AATTCGAAGTTAACTGAAGAAGAGATTAGTAACGAACTGTTGAAGACTTAAGCGAAAT  
AATAACAAAAAACAAAAGTGTTATTCAAAAAGCTTACTTGGGTCCTTCTGATGAAGGCGA  
TGATAGGTTGAAACAGCAATTTTCAAGTAATAGTTTAGCTATTTTAAACAAGTGTAGATGA  
CTGGGAAATGTTTGGAGATAAAAATAAACTTGAATGGTTTTTGTACCAGATGATAGACA  
CATTAAACGTAAATTGCGTAATATTCCAACAAAGGCATCATTATGGATCCTTTTAATAA  
ACTAAGTCGTAATGTTGATTATTTAGATAAATGATGACGAGTTTTATAGCGACGATCACCTT  
TATTATAAGGAAGATGGATACGTAGCATTTTTCAGACTATTCTGTTATAGGTGGAGAATAT  
GTAGACGGTGGCTTTTCGCCATTAGCTATTGCGATACATATTGTCTATTTTGATGAGGCTA  
ATGAGTTAAGAGTTAAACATTTTGTCTCTGATTCTAATAACGATAGATTAATCCAGCTA

AAAAGTTTTTTGAGGCTGTAGATAAATTAGTAACTTGGTCTAAAACTTAGATAATAAAA  
ATAGATCTTATGCAATCGGACAATTTGAAGAATTAATGAAAATAATAAGTATCCAGGAT  
TAGGTTTAATTAAGGTTATCTATCATGCATCATCTAGAAATTATGAATAGATACTTGG  
AGTCTCAAAATGAAAATATGTGA

### > **A6QDI2**

Function: protein coding sequence; putative protein (genomic island)

Best match: A6QDI2\_CC080\_11819-97\_CP003194.1[221289:222401] (completely identical)

Position: 008-contig\_256: 73235 ... 74348; Length: 1113 bp

Sequence:

ATGAAAATATGTGAAAAATGTTTTAATAATACTGAAATCGTAGAAATCATTGTAAATGAT  
AATAGCAAATTTGACAATTGTGATATTGATAACGATCATCTTGGTGTAAAATATTTGATA  
CGACTCGACACATAGATAAATTAGAGCAGATTAGAGATTATTTAAGACCAGCGTTAGAAT  
TATATGATATTAGTATAAATTTACCAGATACTTTTAGCCAAAAAGAAGGTAaaaaaATTG  
AAACAGCATTAAAAGATGATTGGAGTATATTTAATGTTGAAGAAGCTCAAATAAGTTGTA  
TTTTAAATGAACTTTTTAAAGATGATGAAAATATAGATAGACGGGTGTTGGAAGGTTAG  
TAAGCGCTAAAATCATTAAAGATAAAAAATATACAAATGAAAATCTAATTGTAGCAAAT  
AATGACTGGGATGGATTTTGTGAGAGCTTGAAGTATAAAAAATAGATTCATAATAATATG  
ATCAATTTAGAGAATTTAGCGTTCTTTCTCGATATCACTACTAATTACTATAGTATTGAGG  
AATTTAGAGAAAGATTTGAACCATTATATAGATCTAGAATAGTTAAGTTCATTACAGAGA  
AAAGTGAACATAATGTCACCACCAAAGGGATTTGCAACGGCAGGAAGATTGAATTCTAAA  
TGGATAAGCGTATTATACCTTAGTACAAAAGAACAGGTCAGTATAGAAGAAGTTAAACCT  
AAGCATAATGACATTATTTATATAGGTAAGGTTAAGTTACAAAAAACGTTACAAAAGA  
GAAATTGAAAATTGCGAATTTAACTAATTTAACTAGTAATGCAATCAAAGCTGGCGATGA  
TGGATTTAGAAAGTATTTTGTAAATCACCAAACATTAaaaaaAGATTCATAAAGGAATAAC  
AAATCCAAGCGATGAACAAGGAATAGATTATTTGCCATTTCAATATTTAGCTGATTATAT  
TCGAAGCCTTAAATATGACGGGATAATGTATGAGAGCATATTGCAAGATGGTACTTTTAA  
CTTTGTGTTTTTTGATCAAAATTTATTTGAATGTGTTAATTATGAAAGAAAAAGAGTAAGT  
GATGTTAAATATACATTGACTAAGCTAAGTTGA

### > **tx\_oppF2**

Function: rho independent terminator

Best match: tx\_oppF2\_CC008\_TCH1516\_CP000730.1[234728:234786:r]RC (completely identical)

Position: 008-contig\_256: 74373 ... 74432; Length: 59 bp

Sequence:

ATAAAATATAAATAATCCCCGCACTTCACATAGTGGCGGGGGATTTATTCTGGCGTTA

### > **oppF2**

Function: protein coding sequence; putative oligopeptide ABC transporter/ATP-binding protein (core genome, constant)

Best match: oppF2\_CC001-ST772\_118\_AJGE01000016.1[31611:33203]RC (completely identical)

Position: 008-contig\_256: 74612 ... 76205; Length: 1593 bp

Sequence:

TTATTTAGCAATAACTGCTACTTCTGAAATAAGTTGCTTTGCATAGTCTGATTGCGGATGT  
TTGATAATATCTTCTGTGTTATTCAGTTCAACGATTTTCGCCATTTTTCATAACTGCTACGCG  
ATCACATATTTCAATTGATAACCCCATGTGATGTGTGATGAATAAATAAGTGATGCCGAA  
GTCTAACTGTAATTTGTTTTAATAACTCGATGATATCTTTTTGAATTGAAACGCTAAAGCG  
GACTGCTCGTCGCAACAATCACTTTAGGTTCTACAGCAAGTGCTCTCGCGATACTT  
ACACGCTGACGTTGCCACCAGATAATTCGTGTGGATAGCGATATAAGAACTTTGATCT  
AGGCCAACTTTTTCTAACAACGATACGACAGTTTTAATAATGTCATCATTATCTTTGACTT  
TCCCATGAATGATTAGTGGTCGTTAATCACATCAATGACTTTAAATCTTGGATTAATAGA  
TGCGAATGGATCTTGAAAAATCATTGTATCTCTTGTGCGTAAAGATTTCAATTCATCATCT  
TTAAATAAACTTAATGGTAATTCGTTATACCAAATAAAGCCTTCTGACTTCCTTTAGAC  
CGACGACCGTCTTAGCTAATGTCGATTTCCCTGACCCTGATTCACCGACAATGCCTAATGT  
TTCGCCTTTTCTAATACCCAAGTTAATATCATTAACTGCTCGGTATAGGCTGCCACTCGGT

GATGTGTAATCCACGCTCACGCGATCGAATTTTAATAAAAATATCATTGTTTAACGGTCTTG  
GCGGACGCGTTTGATGAATATCAGGAATCGCATCTATTAAGCGTTTTGTATAGGTATGTT  
GTGGCGATTTAAAAATACTTTCAACCGTGCCACTTTCAACGACACTTCCATCTTTCATTAC  
AATCACATCGTCGCAAAATTGATACACAGCGCCTAAATCGTGAGTGATAAAAATAATAG  
ATGTTTCTGTGTACTCATAAAGGGACTTCATTAACTGCAGTAATTGATTTTGTGTACTGGC  
ATCTAATGCCGTTGTTGGTTCATCTGCGATTAATAATTTGTGGCTTTAAAATCAATGCCATT  
GCTATCATGACACGTTGACGCATAACCACCAGAAAGTTCATGTGGATAAGCATCAAATTGT  
CGAGTTGCATGTTTTATACCTACTTTTTCTAAAATGTCTATTGTTCATCGACTTTGCTTCAGA  
TTAGATACACGTTTATGTTGAAATAGTACTTCTGTAATTTGTTTGCCAATCGTTAATCTTG  
GATTCAACGAAGAGAGTGGATCTTGAAAAATCATTGAAATATCCTTACCTCGAATTTGTT  
GTAACGCTGAAGTTGATAAATTATTTAACGATTGCCATTAAAAATAATTTCTCCTGTAA  
TGTGTGATCTGGATAATCTGGTAGTAGCCCTAAAATAGATTTAGCAGTAATACTTTTCT  
GATCCTGATTCACCAACAATACCTAGGATATGTTTTTTTCGTAATTCGAAAGAGACATTT  
TTACCGCTTGAACGTGAGTTTCATCATAATTGAATTGTACATTACAGACTGTTGACTTCTAA  
TAAATTTGACAT

### > oppB4

Function: protein coding sequence; putative oligopeptide ABC transporter/permease protein (core genome, constant)

Best match: oppB4\_CC001\_MW2-USA400\_BA000033.2[213096:214403]

Position: 008-contig\_256: 76332 ... 77640; Length: 1308 bp

Sequence:

TTGTATCACAAGGCATTTTACAAGTTTGTATTATCGGTATTAAGCTTGCCAATATTTTTAT  
ATGCAGTGATAAAGTTTTCTTTCTGCTAAGAGAAAAAATTTTTACGCTAATAAATTCTGA  
AATTTAGAAATTGAACGAGCGTTACATCAAAAATATAAATATTTATCGCAGCAAAAAGTC  
ATCCACACAAATACATAAAGAAGCATTAAAAATATTTCAAGGCACAAAGTTCTAATACGA  
GTTCAAAGAATATTGAACAAGCACATTTTCAACATACTTTGAAAATTTATTATTTTCATAA  
GTTTCATCATGATCAAAGTAATATTGGCCTTGCCGATGTTTCATCTTATTGACTATTTATTA  
CAGCCATTAGTTAGATATATTTTTGAGAGAAATTGTCATGGCTGTGATTGTCATCATTGGTG  
TTATTGTCAGTGTGTTTACCATTCTGTATTTTTACCGCTTGATGCGGCTTATAGCATACTG  
GGACAAAATGCAACAAAGGCACAGATACATCAATTCAATGTATTACATCATCTTAACGAA  
CCTTATTTTTATTCAATTGTGGGATACCATCAAGGGTGTTTTTACCTTTGACTTAGGTACGA  
CTTACAAAGGGAATGAGGTTGTGACTAAAGCAGTTGGCGAAAGAATTCCAATTACAATA  
ATTGTCGCAGTATTAGCGCTAATTGTGGCATTAAATTATTGCAATACCAATTGGTATTATCA  
GTGCGATGAAGCGAAATAGTTGGCTTGATATCACGTTAATGATAATTGTATTAATTGGTTT  
ATCTATTCCAAGTTTCTGGCAAGGGCTATTATTCATTTTAGCGTTCTCATTGAAATTGGAT  
ATTTTGCCACCATCTTATATGCCAGAACATCCAATATCGTTGATTTTACCTGTACTTGTCA  
TTGGAACAAGTATTGCTGCTTCTATCACGCGTATGACAAGGTCTTCTGTACTTGAAGTAAT  
GCGCAGCGATTATGTTTTAACTGCTTATGCAAAAGGATTATCGACGACACAAGTTGTTAT  
TAAACATATTTTAAAAATGCCATTATTCCAATTGTAACGTTAGTTGGTCTTCTAGTGGCA  
GAGTTACTAGGCGGTTTACGAGTGACGGAACAAGTATTTAACATTAATGGTATCGGGCGT  
TATATCGTCCAAAAACAATAACCTGATATCCAGCAGTCATGGGTGGGGTTCGTATAT  
ATATCAATTGTAATATCTTTAGCAAATTAATTATTGATATATTTTATGCTTTAATCGATCC  
AAAATTACGTAGTGAATTAACGAAAGGAAGTGA

### > Q8NYL1

Function: protein coding sequence; putative oligopeptide ABC transporter/membrane protein (core genome, variable)

Best match: Q8NYL1\_CC001\_MW2-USA400\_BA000033.2[214409:215572] (completely identical)

Position: 008-contig\_256: 77645 ... 78809; Length: 1164 bp

Sequence:

ATGGTAAAACCTTACAACAAAGATAGCTTCCCTTAAAACCTATTCGCAAGTTATGCTATAGCA  
ACTTATATTTTAGTTATATTAACGAGTGCATTAAATCTTTTTAAAGGTTATGTGGCCGATA  
CGTTCTATATTGCTGAAACATTGCTAATCGTTTTAACCATCATTTTAATTATCATTTTAAACA  
ACGGAACAAACATGGAAGCATCATGACTTATGGCGACGTATCGTCGAAGTGTTGTTATTG



TTGATGACATTAACAGGCAACGTATTTACATTATTAATGTTTGTAAGTATTAGACGTTACC  
AACGTACATCGCAAATACATAGTTATAACGGGTGGGAATCGTTTATACGAAAACTACTA  
GACATCGTATTGCGATTATCGGGTACTTATTTTAGTCTACATGCTGACATTATCAATTGT  
GTCACAATTTACATTTGATACGACATTGGCTACTAAAAATCAGTTCAATGCACTGTTACAT  
GGACCGAGTCTAGCCTATCCGTTTGGTACTGATGATTTTCGGTAGAGACTTATTTACACGCG  
TAGTTGTAGGAACGAAGCTGACATTTTCAATTTCAATTATTTTCAGTAGTTATTGCAGTTAT  
TTTTGGTGTGTTACTAGGCACTATCGCAGGTTATTTAATCATATTGATAATTTAATAATG  
CGAATTTTAGATGTAGTGTGTTGCAATTCATCATTATTGTTAGCGGTGGCAATTATTGCAT  
CATTTGGAGCAAGTATTCCAAATTTAATTATTGCTTTAAGTATCGGTAATATACCATCATT  
TGCACGGACAATGCGTGCCAGTGTGTTTAGAAATTAACGCATGGAATATGTAGATGCAGC  
ACGTATCACTGGTGAAAACACTTGAATATCATATGGCGTTATATTTACCGAATGCGAT  
TGCGCCTATGATTGTACGTTTTTCATTAATATAGGTGTGGTTGTATTAACAACAAGTAGT  
TTAAGTTTCTAGGACTTGGTGTGACCTGATGTAGCTGAATGGGGCAACATTTTACGTA  
CCGGTAGTAACACTTGGAAACGCACAGTAATTTAGCTATTGTACCTGGTGTGTTGATTAT  
GTTTCGTCGTTTTAGCATTTAATTTTATAGGTGATGCAGTGCCTGATGCACTAGATCCAAGA  
ATTCATTA

> **rlp**

Function: protein coding sequence; RGD-containing lipoprotein (core genome, constant)

Best match: rlp\_CC005\_Mu50-VRSA\_BA000017.4[237518:239293]

Position: 008-contig\_256: 78825 ... 80601; Length: 1776 bp

Sequence:

GTGAAGAAAATCATTAGTATCGCAATTATAGTTTTAGCGTTGGTATTAAGTGGTTGTGGT  
GTCCCTACGAAATCAGAAGTGGCTCAAAAGTCATCGAAAGTTGAAGTGAAAGGCGAGCG  
ACCAACAATACATTTCTAGGACAAGCAAGTTATGAAAATGATATGAATATCGTTAAAGA  
TCAATTGGAAAATGCAGGATTTAACGTGAAGATGAATATCCAACCAGATTATGGTAGCTA  
TCGTACACAACGTCAAGCCGGCAATTATGATATCCAAATTGATGACTGGATGACAGTGTT  
TGGTGACCCGAACTATGCTATGACGGCATTATTTAGTTCTACAGGATCAAATAGTTTATTG  
AAAGATAAACATGTAGACCAGTTGTTAAATAAAGCTTCTACTCAAATGAAGCAGATGTT  
AAACAAACATATAAGCAAATTGAAGATGAAGTTGATTTGATAAAGGGTATATGGCGCCT  
TTATATGGATCAAAAAGAATTTAGTATATGACAATAAAGTGTTAGATAAAAATAGTGTT  
GGATTGCCAAATTCACGTGCATTAATATGGCAACAATTTGATTACAACAATAGTAGAGAA  
CGAGATACGCGGCCACTTGTGATGACACAACAAGATGGTGAAATTCCTACATTGGATCCA  
ATACGTTCAATTGCGCCGTCAGTATATTCAATTAATATGAATATGTACACAAGGTTATTAT  
TATTAGATGAAAATGATCACTTAACAACGAAAGGTTTCGTTAAGTCGTGATTATGCTGTGA  
ATAAGGACAATAAAGCATTTTTATTTCTTGTTAAGAGATGATGATTATTTTGTGAAAGTGGT  
CAATGGACAAGCACGTAATACTGGAGAGCGTGTATCGGCTGAAGATGTTAAGTTTTCTTT  
AGATAGAGCACGTGATAAAAAGTCTGTGCCTAACAATAACTTACAATATGCACAAAC  
ATATAAATGACATCAAGATATTA AAAAGATGAGGACATCGATCAGTTGCGTAAAGAGAAA  
GACAAGGACGATAAATCAATCTATGATAAGTTGATTAAAGCTTATAACGTCAAATCGTTA  
ACGACAGATGGTCAAAAAGTAAATAATAAAGACGGTATTTATCAAATTGTTAAAATTACG  
ACAGATCAATCGATGCCTCGAGAGGTA AATTA ACTTAACACACTCTTCGGCAGGCATTTTA  
TCTAAAAAATTTGTTAATCAAGTAAATCAAGAATATCCAAAAGGATATGGGGATAGCAGT  
ACAATTCCTGCAAATTCAGATGGGAAAAATGCGCTGTATGCAAGTGGCGCATAACATTATG  
ACACAGAAAAATGCATATCAAGCAACGTTTCAACGTAATCCAGGATTCAACGAAACAGA  
AAAAGGTAGTTATGGACCAGCTAAAATTA AAAATATTACATTGAAGTTAATGGTGACCC  
GAATAATGCATTGTCAGA ACTTAGAAATCATTCAATTGATATGTTGGCAGATGTGAATCA  
AAAACATTTTGATTTAATTAAGTCGGATAAAAATTTAAGCATTATTCGAAAAATGGACG  
CAAGTCAGTCTTTTTAATGCTAAATATTA AAAAAGGTATATTTAAGACGCATCCAACTT  
GAGACAAGCAGTAGTTAATGCGATAGATCAGGATCAATTTATTAAGTTTTATCGTGGCGA  
TAAATTTAAAATTGCATCACCGATTACACCACTTGTGCTACTGGTAACGAGCAACGTCA  
AGATATAGAAAAAGTAGAAAAAGCCATTAATCAATAA

> **ggt**

Function: protein coding sequence; gamma-glutamyltransferase (core genome, constant)

Best match: ggt\_CC005\_Mu50-VRSA\_BA000017.4[239331:241337]

Position: 008-contig\_256: 80638 ... 82645; Length: 2007 bp

Sequence:

```
ATGGTCATTAACCTTAAATGACAAACAGACAAAAACATCTAAAGAAGGGTAAATTTCCGTA
TCACATCCTCTTGC GGCTAAAATTGGTAAGGATGTATTAGATCAAGGTGGCAACGCCATG
GATGCAGTGATTGCAATTCAACTGGCATTGAATGTGGTAGAACCATTTGCATCAGGTATT
GGTGGTGGCGGGTATTTGCTATATTATGAGCAAAGTACTGGCAGTATAACTGCTTTTGAT
GCGCGTGAGACAGCCCCTGCACATGTAGACAAACAATTTTATCTAGATGATTCAGGCGAA
TATAAATCATTTTTTGGATATGACTACACATGGTAAAACCTGTCGCTGTGCCAGCAATTCCAA
AGCTGTTTGATTATATTCACAAGCGTTATGCTAAGTTGTCATTGGAAGATTTAATTAATCC
TGCAATTGAACTAGCTATTGAAGGTCATGCAGCCAATTGGGCTACTGAAAAATATTCGCG
CCAGCAACACGCACGATTGACAAAGTATCATGAAACGGCACAAGTATTTACGCATGAAA
ATCAATATTGGCGTGAAGGTGATTGGATTGTACAACCCGAATTAGGTAAGACATTTCAA
TATTAAGAGAACAAGGGTTAATGCATTTATAAAGGTGACATTGCGAAACAATTAGTCA
ATGTTGTTAAAGCATGTGGTGGGACAATCACTTTAGAGGATCTAGCCAATTATGACATTC
AGATTAAGCGCCAATCAGTGCGACATTTAAAGACTATGACATTTATTCAATGGGACCAT
CTAGTTCTGGCGGTATCACGGTCATTCAAATATTGAAGTTATTAGAACATGTTCGATTTACC
ATCTATGGGTCCAAGATCTGTCGATTACTTGCATCATTTGATACAAGCGATGCATTTAGCA
TATAGTGATCGCGCGCAATACTTGGCGGATGATAATTTTCATGAGGTGCCTGTACAGTCA
TTAATTGATGACGATTATTTAAAAGCACGCAGTACGCTCATTGATAGCAATAAAGCAAAT
ATTGATATAGAGCATGGTGTGTGTCTGATTGCATTAGTCATACAGATGTTGAAGAAAAT
CATACCGAAACAACCTCATTTTTGTGTGATTGATAAGGAAGGTAATATTGCTTCATTTACGA
CATCAATCGGTATGATTTACGGATCGGGTATTACGATTCAGGGTACGGCGTGTATTGA
ATACCACAATGGATGGTTTTGATGTAGTAGATGGTGGTATTAACGAAATTGCACCATATA
AACGACCACTAAGTAACATGGCTCCAACGATTGTGATGCATCACGGGAAGCCGATATTA
CAGTAGGTGCACCTGGTGCCATAAGTATCATTGCTAGTGTTGCGCAAACATTAATCAATG
TATTAGTGTTTGGCATGGATATTCAGCAGGCTATAGATGAACCTAGAATTTATAGTAGCC
ATCCTAATCGCATTGAATGGGAGCCTCAATTTTACAATCTACAATATTAGCATTGATTGC
ACGTGGACATGCAATGGAACATAAACCAGATGCCTATATTGGAGATGTACATGGGTTACA
GGTTGACTTGAATACACGTGACGCGTCGGGAGGTGCTGATGATACGAGGGAAGGCACAG
TGATAGGTGGCGATGTATTATCAATTAGAAAACAACCATTACCTAGTCCGAAAATATACG
ATAATGACACCCATCGAGTATATTTCAATGATATGCAGTTGCCATTATATGCTGAACAAG
TGCGGTGGATGCATGACAAATATTGGGTTGATGAAAGTGTTATTAGAATCATTTTCCCTG
AAGTTAGTGTGCATATTGAAGATTTAAGAAGTTATGAAATCGCCGGAAAAAATTATATAG
ATATTGCCTGGTTGGCACGGAAGAAAGGTTATCAAGTTACCTTAAAGGATGACAGTTTAT
ACTTAACTGATGAAACATATCATTCAAGTAAAGCAAACACAAATGCATACTATAGATATG
ATCGAGATAGTATCACAAAGATAA
```

### > **acpD**

Function: protein coding sequence; FMN-dependent NADH-azoreductase (core genome, variable)

Best match: acpD\_CC001\_MW2-USA400\_BA000033.2[220684:221310:r]RC

Position: 008-contig\_256: 84381 ... 84531; Length: 150 bp

Sequence:

```
TGGAATATAAGTTTCAAATAAATCAATATGTTTCACTTCATCATCAGGATGTTGTTGTTGA
TATGTTTCGATAAATGCTTTACCAGCCGCATAGAATTTGATACCAGTTCATTAAGGGT
GTGCTGTAATATATAATACTTTTGCCAT
```

### > **msmX**

Function: protein coding sequence; maltose ABC transporter/ATP-binding protein (core genome, constant)

Best match: msmX\_CC030\_MRSA252\_BX571856.1[238058:239155]

Position: 008-contig\_256: 85701 ... 86799; Length: 1098 bp

Sequence:

```
ATGGCAGAACTAAAGTTAGAGCATATTA AAAAGACGTATGATAACAACAATACTGTAGT
GAAAGATTTAATCTACATATTACTGACAAAGAATTCATTGTATTTGTTGGACCATCGGG
```

ATGTGGTAAATCAACAACATTACGAATGGTTGCTGGACTAGAGTCTATCACATCTGGAGA  
TTTTTATATTGATGGGGAACGCATGAACGATGTTGAACCAAAGAATAGAGATATTGCGAT  
GGTATTTCAAACACTATGCATTATATCCACATATGACTGTTTTTGAAAATATGGCATTGGG  
CTAAAGCTACGTAAAGTAAATAAAAAAGAGATTGAACAAAAAGTTAATGAAGCAGCTGA  
AATATTAGGATTAAGTATCTTGGTCGTAAACCAAAGCGTTATCTGGCGGACAGCG  
TCAACGTGTTGCTTTGGGCAGAGCTATTGTTAGGGATGCGAAAGTCTTTTTAATGGATGA  
ACCATTATCGAATCTTGATGCGAAGCTTCGAGTACAAATGCGCACAGAAATATTGAAATT  
ACATAAGCGACTTAATACTACGACAATTTATGTTACACATGATCAAACCTGAAGCATTGAC  
GATGGCTAGTCGAATTGTTGTTTTGAAAGATGGCGACATTATGCAAGTCGGCACACCTAG  
AGAAATATATGATGCCCTAATTGCATATTTGTGGCGCAATTTATCGGCTCACCAGCAAT  
GAATATGTTGAATGCTACAGTTGAAATGGACGGATTGAAGGTAGGAACACACCATTTTAA  
ATTACATAATAAAAAATTTGAAAAGTTAAAAGCTGCTGGCTACTTAGACAAGGAAATTAT  
TTTAGGTATTCGAGCTGAAGACATTCATGAAGAACCAATATTTATTCAAACCTTCTCCAGA  
GACACAATTTGAATCTGAAGTAGTTGTATCCGAACTGTTAGGTTTCAGAAATTATGGTACA  
TAGCACATTCCAAGGAATGGAATTGATTTCTAAATTAGATTCAAGAACACAAGTGATGGC  
GAACGACAAGATTACACTAGCATTTGATATGAATAAGTGTCACTTTTTTGGATGAAAAAAC  
AGGAAATCGTATCGTCTAA

> **STAR**

Function: Staphylococcus aureus repeat element

Best match: STAR\_CC001\_MW2-USA400\_BA000033.22371925:2372149:r

Position: 008-contig\_256: 90261 ... 90370; Length: 109 bp

Sequence:

GGGAGTGGGACAGAAATGATATTTTCGCAAATTTATTTTCGTTCGTCACCCCAACTTGC  
ATTGTCTGTAGAAATTGGGAATCCAATTTCTCTATGTTGGGGCCCCGCC

> **Q2FZB6**

Function: protein coding sequence; putative protein (genomic island)

Best match: Q2FZB6\_CC001\_MSSA476\_BX571857.1[1167133:1167311]RC

Position: 008-contig\_256: 90348 ... 90378; Length: 30 bp

Sequence:

TTCTCTATGTTGGGGCCCCGCCAACTTGCA

> **repeat\_nyS**Agamma

Function: repeat element

Best match: repeat\_nySAgamma\_CC001\_MSSA476\_BX571857.1[2756252:2756375]

Position: 008-contig\_256: 90357 ... 90387; Length: 30 bp

Sequence:

TTGGGGCCCCGCCAACTTGACATTATTGT

> **mviM**

Function: protein coding sequence; NADH-dependent dehydrogenase (core genome, variable)

Best match: mviM\_CC001-ST772\_118\_AJGE01000016.1[15157:16197:r] (completely identical)

Position: 008-contig\_256: 91618 ... 92659; Length: 1041 bp

Sequence:

ATGACAAAATTA AAAAGTTGGTGTGATAGGTGTTGGTGGTATTGCACAAGACCGTCATATT  
CCAGCATTGCTGAAACTCAAAGACACAGTCTCATTAGTTGCAGTACAAGATATTAATACA  
GTGCAGATGATTGATGTTGCGAAGCGCTTTAATATACCTCATGCAGTTGAGACACCTAGC  
GAGCTGTTTAAACTTGTTGATGCGGTGGTCATTTGTACACCCAATAAAATTCATGCTGATC  
TTTCTATAGAAGCATTGAACCATGGTGTCCATGTTTTATGCGAAAAGCCAATGGCAATGA  
CGACGGAAGAGTGTGACCGCATGATTGAAGCGGCTAATAAAAATCACAAATTACTAACT  
GTCGCTTATCATTATCGCCACACAGATGTGGCAATTA CTGCTAAAAAGCAATTGAATCA  
GGTGTGGTTGGTAAACCTTTAGTAGCACGTGTACAAGCGATGCGTAGGCGTAAAGTACCT  
GGGTGGGGCGTTTTTACCAATAAAGCGTTGCAAGGTGGCGGTAGTTTAAATCGATTATGGT  
TGCCACTTGTTAGACTTATCTTTGTGGCTATTAGGCAAAGATATGGTGCCGCATGAAGTGC

TAGGAAAAACATATAATCAATTGAGTAAACAACCGAATCAAATTAATGATTGGGGAACA  
TTTGATCATACTAAATTTGATGTCGATGATCATGTTACTAGTTATATGACATTTGCCAATC  
GAGCAAGCATGCAGTTTGAATGTTCTGCTGGTCTGCAAATATAAAGGAAGATAAGGTACAC  
GTTAGTTTATCAGGCGAAGATGGCGGTATCAATTTATTTCCATTTGAAATATATGAGCCCC  
GCTTTGAACTATTTTTGAAAACAAAGCTAATGTTGAGCATAACGAAGACATTGCTGGTG  
AGAGACAGGCGCTAACTTTGTCAATGCGTGTAGGGATAGAAGAGATTGTGGTGA  
CCGGAAGAAGCACGCAATGTAAATGCCCTTATAGAAGCGATTTATCGTAGCGATCTTGAT  
ACAAGAGCATACAACCTTAA

### > **iolE**

Function: protein coding sequence; sugar phosphate isomerase/epimerase (core genome, variable)

Best match: iolE\_CC005\_Mu50-VRSA\_BA000017.4[251172:252140] (completely identical)

Position: 008-contig\_256: 92713 ... 93682; Length: 969 bp

Sequence:

ATGAAAATAGGTGTATTTTCAGTATTATTTTACGATAAAAATTTTGAAGATATGTTAGATT  
ATGTCGCAGAATCTGGATTGGATATGATTGAAGTTGGAACAGGTGGTAACCCAGGAGAT  
AAATTTTGTAAAGTTAGATGAGTTGTTAGAAAATGAAGACAAGCGACAAGCATTATGAAG  
TCAATCACAGACAGAGGCTTACAAATAAGTGGTTTCAGTTGTCATAACAATCCAATTTCT  
CCAGATCCGATAGAAGCGAAAAGAAGCCGATGAAACGTTACGTAAAACAATCCGTTTAGC  
AAATCTATTAGACGTGCCAGTTGTTAATACATTTTCTGGCATTGCAGGGTCAGATGATACC  
GCTAAAAGCCTAATTGGCCTGTTACACCTTGGCCAACAGCCTACTCTGAAATTTATGATT  
ATCAGTGGAATGAAAAGTTGATACCATATTGGCAAGATTTAGCTGAGTTTGCAAAAGAGC  
AAGATGTAAAATTTGCCATAGAGTTACATGCAGGATTTTATGTTTCATACACCATATACGA  
TGTTAAAGTTACGTGAGGCTACAAATGAATATATCGGTGCTAACTTAGATCCTAGTCATTT  
ATGGTGGCAAGGTATTGATCCAATTGCTGCGATTTCGCATATTAGGCCAAGCAAATGCAAT  
TCATCACTTCCATGCTAAAGATACGTATATTAATCAAGAAAATGTAAATATGTATGGTCT  
AACTGATATGCAACCATATGGTAACGTTGCGACAAGAGCATGGACATTCCGTACAGTTGG  
TTATGGACATAGTCCATATGTATGGGCAGATATCATAAGTCAACTTATTATTAATGGATAT  
GATTATGTATTAAGTATTGAACATGAAGATCCTATTATGTTCAGTAGAAGAAGGTTTCCAA  
AAAGCTTGTCAAACTTTGAAATCTGTTAATATTTACGACAAGCCAGCAGACATGTGGTGG  
GCATAA

### > **Q7A1X1**

Function: protein coding sequence; putative protein (core genome, constant)

Best match: Q7A1X1\_CC001\_MW2-USA400\_BA000033.2[230572:231066:r]RC (completely identical)

Position: 008-contig\_256: 94042 ... 94537; Length: 495 bp

Sequence:

TTAAATATTCATTAATTTCTCTTCTTGTTTAATACGTACATATAAGAAATACGCATACGGT  
ACTAATAAAAATAGTTGTATATGTTGCGTGTGTTAATAATAATACCCGATTAATTCAGGA  
ATGATGTTTAAAGAAGTAATTTGGGTGTTTTGTAATTTTATATAATCCAGATTTAATAATAG  
GATGGTTAGGTAAAATGAATAATTTAATGTCCAAATACCACCTAAAGTTTTAATAACCA  
TAAATAACATGATATAAGCAAAGATTAATATAACTAAGCCAATACCATTTGCAAAGCTAA  
ATGTATCTTTATTAATAAATGCCTCTACACCAGCCAATACATAAATTAACCGTGTGTTAT  
TGCTAAAACCTTCGAATTTTAAACGCCATATCAACTGCACCGTCTGCTTTTAATTGTTTT  
GAGTGATTAATAGATATCTTTAAGCTGACAAGTCTGATACAGAAAAGATAAGTAATATA  
GATAGAATCAT

### > **uhpT**

Function: protein coding sequence; putative hexose phosphate transporter (core genome, constant)

Best match: uhpT\_part\_AJ566817.1[1:1373]

Position: 008-contig\_256: 94769 ... 96142; Length: 1373 bp

Sequence:

ATGAACTTTTTTGATATCCATAAGATTCCGAACAAAGGCATTCCATTATCGGTACAACGT  
AAATTATGGCTTAGAACTTCATGCAAGCTTCTTTGTAGTGTCTTTGTTTATATGGCTAT

GTATTTAATTCGAAACAACCTTTAAGGCGGCCCAACCGTTTTTAAAAGAGGAAATTGGATT  
ATCTACATTAGAACTTGGTTATATCGGATTAGCATTTAGTATCACGTACGGTTTAGGGAA  
AACATTACTTGGATATTTTGTTCGATGGACGTAACACAAAACGTATTATCTCGTTCTTACTT  
ATCTTATCTGCGATTACAGTTTTAATTATGGGATTTGTTTTAAGTTACTTTGGTTCTGTAAT  
GGGATTATTAATTGTACTTTGGGGACTTAACGGGGTGTCCAATCAGTTGGTGGACCTGC  
AAGTTATTCAACGATTTCAAGATGGGCGCCAAGAACGAAACGTGGCCGATACTTAGGATT  
TTGGAATACATCACATAATATCGGTGGTGCCATTGCAGGTGGTGTGCACTTTGGGGTGC  
TAATGTATTCTTCCATGGAAATGTTATAGGGATGTTCAATTTCCCATCGGTGATTGCATTA  
CTTATTGGTATCGCAACATTATTTATCGGAAAAGATGATCCGGAAGAATTAGGATGGAAT  
CGTGCTGAAGAAATTTGGGAAGAGCCGGTTCGATAAAGAAAATATTGATTCTCAAGGTAT  
GACGAAATGGGAGATCTTTAAAAAATATATCCTGGGAAATCCTGTTATATGGATTCTATG  
TGTTTCAAACGTCTTTGTATACATTGTACGAATCGGTATTGATAACTGGGCACCGTTATAT  
GTGTCAGAGCATTACACTTTAGTAAAGGCGATGCAGTTAATACGATATTCTACTTTGAA  
ATTGGTGCATTAGTTGCAAGTTTATTATGGGGCTACGTATCAGACTTATTAAGGTGCTC  
GTGCAATTGTAGCTATTGGCTGTATGTTTATGATTACATTTGTTGTCTTATTCTACACAAAT  
GCTACAAGTGTGATGATGGTTAACATTTTATTGTTTGCATTAGGTGCGTTAATCTTTGGTC  
CGCAATTATTAATTGGTGTATCATTGACTGGTTTTGTTCCCTAAAAATGCCATCAGTGTAGC  
AAACGGAATGACAGGTTTCAATTCGCGTATCTATTCGGTACTCAATGGCGAAAGTTGGTTT  
GGCGGCTATTGCTGATCCAACACGTAACGGTTTAAACATCTTTGGATATACATTAAGTGG  
ATGGACAGATGTTTTATCGTCTTCTATGTTGCATTATTCCTAGGCATGATTCTATTAGGA  
ATCGTTGCTTTCTATGAAGAAAAGAAAATTAGAAGTTTAAA

### > **rsaG**

Function: noncoding RNA ncRNA of *Staphylococcus aureus* G (core genome, constant)

Best match: *rsaG\_CC001\_MW2-USA400\_BA000033.2*[232733:232926] (completely identical)

Position: 008-contig\_256: 96203 ... 96397; Length: 194 bp

Sequence:

CCCCGACGGCATGTGCGTGAAGAGATGAAAGATACTGCTTCTACCCTTGCAAATATATCA  
TCTCTATGTCTCGGGCAGATCATAATTCCTGTTATGAAGTATCCTTATTTGCCCGACTT  
AGGGTACTCAATGAATTTACTCCTTACAATAAAGACATATAGCGGTGTCAATATTGTAG  
GGAGTATTGTTTT

### > **txbi\_rsaG**

Function: bidirectional rho-independent terminator of *rsaG* (core genome, variable)

Best match: *txbi\_rsaG\_CC001\_MW2-USA400\_BA000033.2*[232932:233001] (completely identical)

Position: 008-contig\_256: 96402 ... 96472; Length: 70 bp

Sequence:

TAAACTCTCTAAAAAGCGGACTGAAAGAAAAGTGAAAACCTTCTCTATCAGTCCGCTTTTT  
CATAGAACAA

### > **yesN**

Function: protein coding sequence; two-component sensor/response regulator (core genome, variable)

Best match: *yesN\_CC001-ST772\_118\_AJGE01000016.1*[10550:11308]RC (completely identical)

Position: 008-contig\_256: 96507 ... 97266; Length: 759 bp

Sequence:

CTATTTTGCTTGCTTACAATAATCACTTGGCGACATTTGTAAATATTTTTTAAAATGATAG  
CTAAACATTTTATACTCTGAAAAGCCTACTTTGTCTGCAATTTCATAGTGTTTGTAATGTC  
GATCTAACAATTGCAGAGATTGTAATAACGATAGCGATTTAAATAATCGACAATTGTAA  
TACCAACATGATCTTTAAATGTTTCGCATCGCATAACGATTCACCTAACATCGATATGTTGAAT  
TAAATCTGAAACAGTCACTTTTCGTTTGTAAAGATTGCTTAATTTGATCAACAATCTGATTT  
ACATAATAATCATCGTATTCTACTTTTAAATAGTGGTTGGAAGGCATCATGACAAGATGCT  
AAGCTACGGCCGTTCTGTGATTGTTGCTCTAATAAGGTACGGACAAGTCTTCCTAAAATA  
ACTTCTAATTGTGCATGGTCTACTGGTTTTAATAAATAATCAAGAACATGATGTTGAATAC  
CGGCTTTCATATATTCAAAGTCATCGTAACTCGATAATATGATGACATTACAATCTAGATG  
CGCAATATCATTGAGTAAATCGACGCCATTCTTACGTGGCATAACGAATATCAGTAATTAC

TAATTCTGGCTGATGTTGTTGAATTAGTGATAATGCTTCAACACCATCTTTAGCAGTGTAT  
ATTGTATTGAAATGATAGTCTCCCCACGGAATGATTTGCTTTAAACCTTCTCGAATAATAC  
GCTCATCATCACAAATAACTACCTTAAACAT

> **yesM**

Function: protein coding sequence; two-component sensor/histidine kinase subunit (core genome, variable)

Best match: yesM\_CC001\_MSSA476\_BX571857.1[232488:234044:r]RC

Position: 008-contig\_256: 97258 ... 98815; Length: 1557 bp

Sequence:

TTAAACATCTACATTCCCCCTTGAAAGTGGTATTTTATAACAAATTAACGTACCTTGATTA  
CGCTTTGAAAAAATATGGAGTCGTGCATGTGAACCATATTGAATCATTGCTTTATTATGTA  
AATGATTTAATCCCAAATGCTTAGTATCAAATACATCATTATTAAGAGATTGGCGTACAT  
ATTGCAGGCGAGATGACGACATCCCAATACCATTGTCGCAAACAAAACATGTAAATTCT  
GACGTGCCAATGTCAGGCGTATAGTAATGTCCAATGACTCAGTATCTCTACCATGTTTAAT  
AGCATTTTCTATGAGTGGCTGAAGCATCATTTTACCAATTGTCTGGTGACGCGCTTCTCA  
GAACCTTCGATATGGAGCTTAATCATGTCATCAAAACGGATGTTTTGTATCGCAACATACT  
GTTCAATGTAGTTCAACTCTTCGTTTAATTCCACTGTATGTGAGTTTGTACGTAATGAGTA  
ACGTAACATTTGCGATAATTGTTGGACCACAGTTTGTGCTAATTTAGGAGATAACGTAAT  
TAAATATTGTATTGTTTGCATCGTATTGAATAGGAAATGAGGTTGGAATTGGCGCTCTATT  
TCCTTTAACTGAATATCACGCAAGCGACGTTCTGTATGCTCGATAGAATGGATTAGTTGCT  
CATTTGATTCAAATAAATCGTAAATATAATTATTAATTTCTTCTAGTTCACTGTTGTTTTTT  
AAAGGCGTATATGTACCTAGATGACGATTTTTGGCATAGTAAATTTTTGAATAATCGTTT  
CGATATCTTTTGTGTCGTTTAGCCATATTATCTGCGCTAATGAAACCAAATATTACTAG  
TAAAACAAGAACTACGGCCATAACAATTAACAACGTGATACCATCTTCAATGTTTTCATG  
TATATCTTTATAAATAATGAGACGATGGTCAGCATGGTTTAATTTTACAGATTCATTCATA  
AATCCGAATTGTTGCGGTCTATACTTTTCACCTATAGTAAAACGGTCATCGTTGGCGTATA  
AAATATTGTCATATTGATCAACGATAAGTGCGAATTGTCGGCTATCTTTCTTAATTTCACT  
TAAACGTGGGGTGTTAGCCATATAAATTTAAGCATATATGTAATTTAAGT  
TGATGCGTTGAAAATAAATACATATTTTAGTGTTTAAATGTTTCATAATTATTGGTTATAA  
ACTGATTTGGTCCAGATAATTCATAATAAAGTGTTGCGGGCTGTTGGTGTATTAATTTAA  
TAATTCACGTTTTGTAGCGGTAACATCATGATGATTTGTTAAATCGAGCTCTTGAAACGAA  
TTATTATGCTGTGTAATAAATGTCTGAATCTGCTTTTCAGTGTGATGTAAAGATGACTGAC  
TTTCATCAACATGTTGATGAATCGTACGATGCTCAATCCAAATATAGATGGCATAGAAGC  
TTACTAGTCCAATAATAATGACTAAAAATACTGGAAAAATAGTAGACGCAAATAACGAT  
CGTCTCAATTGATGTCTATAAGGTTTGTATGCCGTCAT

> **Q8NYJ7**

Function: protein coding sequence; iron(III) transport system substrate-binding protein (core genome, variable)

Best match: Q8NYJ7\_ref\_CC001\_MW2-USA400\_BA000033.2[235341:236309:r]RC (completely identical)

Position: 008-contig\_256: 98811 ... 99780; Length: 969 bp

Sequence:

TCATTGAATCATCTCCAAAAATTTATGATGTGGAATGTCCGGTAATTTAGATTTCCGGTATT  
AAAGGTATGTTCTTAAGATTTTCGATAGACTGATCGCTTTGTTCACTAACATCCTTTTCGAA  
TTGACTTGGCATCGAACTCTGCAACTAATCGTTGTTGTACTGAGCGGCTTGTTAAATATTG  
CACTAACTTTTTACGCTTAGGATGAGGGTGTGCATTTTTAACTAAAGCAATACCATCAAC  
ATTTAACATTGTTCCCTTCAATTGGATAAACGATTGATACAGGATAACCTTTGTTTTTCCAT  
GTGCGTGCATCTTGTTTCGTAGCTTAGACCTGCGTAATATTTACCTTTTGCAACATCTTCAA  
TGACTTTAGACGTCTTTGACAGTTGCATCGCATGGTTTTGGAATTGATGCACATCACTTAC  
TCGATGATGCATGCTATAAATAGCGCGCATATGTTGATAGCCTGTCGTTGTTGTATTTGGA  
TTTGAGTACGCAATTTTACCTTTAAGTATAGGTTGTAATAAATCTTGATAACCTCGAATCT  
TAATATCTCCTTGTAATCTGAATTCACTACTATAACTGTTGGCATTAAATAGAAAACCTAGT  
AACATATTTATTGTTTCGAGCGATAATCCTCTAATTGCTGTGTTACAGATGTATCTTGATAG

GGAACAAAATCTTCTGGATGATCAATTGTTTCTGATAACACACCACCCATAAAGACGTCA  
CCACGCTCCGAAAAATCTTCGTTATGCAAGTTTGAAAGCAGTACTTGAGTAGATCCATGT  
TTGATTTCAATTTTGACATGCTCTTGTGTTTTCAAATTCATTTAAAATTGGACGAATCAAGTT  
TGATTGATACGGAGAATAAACTGTTAATACATTTTTATCTGATTCAGAGTGACGCGTATTA  
GCGCATGCTGATAAAAAAATGAGAAATAATAGCAAGATATAAATTTTTGATTTTCAT

> **pflB**

Function: protein coding sequence; formate acetyltransferase (core genome, constant)

Best match: pflB\_CC001\_MW2-USA400\_BA000033.2[236897:239146]

Position: 008-contig\_256: 100367 ... 102617; Length: 2250 bp

Sequence:

ATGTTAGAAACAAATAAAAATCATGCAACAGCTTGGCAAGGATTTAAAATGGAAGATG  
GAACAGACACGTAGATGTAAGAGAGTTTATCCAATTAACACTACACTCTTTATGAAGGTAA  
TGATTCATTTTTAGCAGGACCAACAGAAGCAACTTCTAAACTTTGGGAACAAGTAATGCA  
GTTATCGAAAGAAGAACGTGAACGTGGCGGCATGTGGGATATGGACACGAAAGTAGCTT  
CAACAATCACATCTCATGATGCTGGTTATTTAGACAAAGATTTAGAAACAATTGTAGGTG  
TACAACTGAAAAGCCATTCAAACGTTCAATGCAACCATTCCGGTGGTATTCGTATGGCGA  
AAGCAGCTTGTGAAGCTTACGGTTACGAATTAGACGAAGAACTGAAAAAATCTTTACA  
GATTATCGTAAAACACATAACCAAGGTGTATTCGATGCATATTCTAGAGAAATGTTGAAC  
TGCCGTAAAGCAGGTGTAATCACTGGTTTACCTGATGCATACGGACGTGGACGTATTATC  
GGTACTATCGTCGTGTAGCTTTATATGGTGTAGATTTCTTAATGGAAGAAAAAATGCAC  
GACTTCAACACGATGTCTACAGAAATGTCAGAAGATGTAATTCGTTTACGTGAAGAATTA  
TCAGAACAATATCGTGCATTAAGAATTAAAAGAAGCTTGGACAAAAATATGGTTTCGAT  
TTAAGCCGTCCAGCAGAAAACCTTCAAAGAAGCAGTTCAATGGTTATACTTAGCATACTT  
GCTGCAATTAAGAACAACCGGTGCAGCAATGAGTTTAGGTCGTACATCAACATTCTTA  
GATATCTATGCTGAACGTGACCTTAAAGCAGGCGTTATTACTGAAAGCGAAGTTCAAGAA  
ATTATTGACCACTTCATCATGAAATTACGTATTGTTAAATTTGCTCGTACACCTGATTACA  
ATGAATTATTCTCTGGAGACCCAACCTGGGTAACCTGAATCTATCGGTGGTGTAGGTATTG  
ACGGACGTCCACTTGTACGAAAACTCATTCCGTTTCTTACACTCATTAGATAACTTAGG  
TCCAGCACCAGAACCAAACTTAACAGTATTATGGTCAGTACGTTTACCTGACAACCTCAA  
AACATACTGTGCAAAAATGAGTATTAACAAGTTCTATCCAATATGAAAATGATGACAT  
TATGCGTGAAAGCTATGGCGATGACTATGGTATCGCATGTTGTGTATCAGCGATGACAAT  
TGGTAAACAAATGCAATTCTTCGGTGCACGTGCGAACTTAGCTAAACATTACTTTACGC  
TATCAATGGTGGTAAAGATGAAAAATCTGGTGCACAAGTTGGTCCAACTTCGAAGGTAT  
TAACAGCGAAGTATTAGAATATGACGAAGTATCAAGAAATTTGATCAAATGATGGATTG  
GCTAGCAGGTGTTACATTAACCTAATAATGTTATTCACTACATGCACGATAAATACAG  
CTATGAACGTATTGAAATGGCATTACATGATACAGAAATTGTACGTACAATGGCAACAGG  
TATCGCTGGTTTATCAGTAGCAGCTGACTCATTATCTGCAATTAATATGCACAAGTTAAA  
CCAATTCGTAACGAAGAAGGTCTTGTAGTAGACTTTGAAATCGAAGGCGACTTCCCTAAA  
TACGGTAAACAATGACGACCGTGTAGATGATATCGCAGTTGATTTAGTAGAACGCTTCATG  
ACTAAATTACGTAGTCATAAAACATATCGTGATTCAGAACATACAATGAGTGTATTAACA  
ATTACTTCAAACGTTGTATACGGTAAGAAAACCTGGTAACACACCAGACGGACGTAAAGCT  
GGCGAACCATTTGCACCAGGTGCAAACCCAATGCATGGCCGTGACCAAAAAGGTGCATT  
ATCTTCATTAAGTTCTGTAGCTAAGATCCCTTACGATTGCTGTAAAGATGGTATTTCAAAT  
ACATTCAGTATCGTACCAAAATCATTAGGTAAAGAACCAGAAGATCAAACCGTAACTTA  
ACTAGTATGTTAGATGGTTACGCAATGCAATGTGGTCACCACTTAAATATTAACGTATTTA  
ACCGTGAACATTAATAGATGCAATGGAACATCCAGAAGAATATCCACAGTTAAACAATC  
CGTGTATCTGGTTACGCTGTTAACTTCATTAATTAACACGTGAACAACAATTAGATGTA  
ATTTCTCGTACATTCCATGAAAGTATGTAA

> **pflA**

Function: protein coding sequence; pyruvate formate-lyase-activating enzyme (core genome, constant)

Best match: pflA\_CC001\_MW2-USA400\_BA000033.2[239169:239924]

Position: 008-contig\_256: 102639 ... 103395; Length: 756 bp

Sequence:

ATGCTTAAGGGACACTTACATTCTGTGCGAAAGTTTAGGTACTGTGCGATGGACCGGGATTA  
AGATATATATTATTTACACAAGGATGCTTACTTAGATGCTTGTATTGCCATAATCCAGATA  
CTTGGAAAATTAGTGAGCCATCAAGAGAAGTCACAGTTGATGAAATGGTGAATGAAATA  
TTACCATACAAACCATACTTTGATGCATCGGGTGGCGGTGTAACAGTCAGTGGTGGCGAA  
CCATTGTTACAAATGCCATTCTTAGAAAAATTATTTGCAGAATTA AAAAGAAAATGGTGTG  
CACACTTGCTTAGACACATCGGCTGGATGTGCTAATGATACAAAAGCATTTC AAAGGCAT  
TTTGAAGAATTACAAAACATACAGACTTGATATTATTAGATATAAAAACATATTGATAAT  
GACAAACATATTAGATTGACAGGAAAGCCTAATACACACATCCTTAACCTTCGCGCGCAAA  
CTGTCAGATATGAAACAACCTGTATGGATTCGACATGTCCTTGTGCCTGGTTATTCTGATG  
ATAAAGACGATTTAATTA AACTAGGGGAATTTATTAATTCTCTTGATAACGTCGAAAAGT  
TTGAAATTCTGCCATATCATCAGTTAGGTGTT CATAAGTGGAAAACATTGGGCATTGCAT  
ATGAATTAGAAGATGTCGAAGCGCCCGATGATGAAGCTGTTAAAGCAGCCTACCGTTATG  
TTAACTTCAAAGGGAAAATTCCCGTTGAATTATAA

### > **glpQ1**

Function: protein coding sequence; glycerophosphoryl diester phosphodiesterase (core genome, variable)

Best match: glpQ1\_AB158555.1[1:1764]

Position: 008-contig\_256: 103730 ... 105494; Length: 1764 bp

Sequence:

ATGAAGAGAATTAGTAAAGATATATGGGCAGTATTTAAATTACTGTATCAAAAATAAAGG  
GCGTTTTAGCATTAAATGCCTTACTATTGCAGTTAATCATGATTTTTATTAGTAGTACATAC  
TTAATTTTACTATTTAATATGATGTTAAAAGTAGCTGGGCAAAGCCAACCTTACGATTAAC  
AATTGGACGGAAATCATAAGTCATCCTGCCAGTGTGATACTTCTTATTATATTCATATTA  
GTGTTGCTTTTCTGATTTATGTAGAGTTTTCAATTGTTAGTTTATATGGTTTATGCCGGCTTT  
GATCGACAGATTATTACATTTAAATCCATTTTTAAAAATGCCTTTGTAAATGTGCGTAAAC  
TCATAGGTGTACCAGTTATTTCTTTGTCATTTATTTAATGTTAATGATACCCATTGCCAAC  
CTAGGACTAAGTTCAGTATTAACAAAAAATATTTACATACCTAAATTTTTAACGGAAGAA  
CTTATGAAAACGACGAAAGGTATAATCATTACGGTACCTTTATGATTGCTGTATTTATAT  
TAACTTTAAATTAATATTTACCTTACCGTTAACGATTTTAAACCGTCAGTCGTTATTTAA  
AAATATGAGACTAAGTTGGCAAATTACGAAGCGAAATAAGTTTTCGACTTGTATAGAAAT  
AGTTATATTGGAACCTCATCATTGGTGCATTTTTAACATTAATTATTTTCAGGAGCAACATAT  
CTTGCTATTTGTGTAGATGAAGAAGGAGATAAGTTTTTGTCTCATCAATTTTATTTGTTG  
TATTGAAAAGCGCATTGTTCTTCTATTATTTATTTACGAAATTATCATTAAATCAGTGTGTT  
AGTACTGCACTTAAAACAAGAGAATGTATTAGACCAACCGGGCTTAGAATTTAAATACCC  
AAAACCGAAACGGAAGTCTAGGTTCTTTATAATTTCAATGGTGCTTGCAGTGACATGTTTT  
ATCGGTTATAACATGTACTTACTTTACAATAATACTATCAATACAAATATCTCCATTATTG  
GCCATCGTGGTTTCGAAGATAAAGGCGTTGAAAATTTCTATTCCGTCATTGAAAGCTGCTG  
CAAAGCGAATGTCGAATACGTTGAGTTAGATACAATTATGACGAAAGATAAACAATTT  
GTTGTTAGTCATGATAACAATTTGAAACGTTTAAACAGGTGTTAATAAAAACATTTCTGAA  
TCTAATTTCAAAGATGTCGTCGGTTTTGAAAATGCGTCAAAAATGGACATGAAGCAAAACTT  
GTATCCTTAGACGAATTTATTGAAACGGCTAAACAATCAAATGTGAAGCTATTAGTAGAG  
TTAAAGCCACATGGTAAAGAACCAGCAAATTATACACAACGTGTTATTGATATTTTGAAA  
AAGCATGGTGTGGAACATCAATATCGTGTGATGTCATTGGATTATGATGTGATGACTAAG  
TTGAAAAAAGAAGCGCCATATCTCAAGTGTGGTTATATCATTCCGTTGCAGTTTGGTCATT  
TTAAAGAAACATCATTAGATTTCTTTGTCATCGAAGATTTTCTTATTCCGCAAGACTTGT  
TAATCAAGCGCACTTGGAAAATAAAGAAGTCTATACTTGGACTATTAACGGCGAAGAAG  
ATTTAACGAAATACTTACAAACCAATGTTGATGGTATTATCACAGATGACCCAGCATTAG  
CTGATCAGATTAAGAAGAAAAGAAAGACGAAACATACTTCGATCGTTCTATAAGAATTT  
TGTTTGAATAA

### > **Q2YV49**

Function: protein coding sequence; putative protein (core genome, variable)

Best match: Q2YV49\_CC001-ST772\_118\_AJGE01000016.1[1814:2158]RC (completely identical)

Position: 008-contig\_256: 105657 ... 106002; Length: 345 bp



Sequence:

```
TTAATTGTTTTGTGAATGCAAAGGGTTAGAAATTGAATCGTAAATACTTTCTAATCTATGT
TTCGCTTTAGTCATTTGATCCAAATTTTTAGTGCGTATAACGGATTTTGCAATATAATGTG
CAGCTAAAATATCGCGTTTTTGATAAGCGTCTAAATTTAGGTACGATAATTTATTTAAGTC
AGTGTGGCTATTAATTCATGTAATTGATCTACAAGCGCTTGATGTTGATACGTATGTGAT
GTAGTTTCAGATTTGCTTGCTAATTTAATACCAGTCGTATCAAGGAGCGCCGCTTTAATAC
CAGCAACTAAATATGTTTTGATTTTCATTTGTGTTGTCAT
```

> **coa**

Function: protein coding sequence; staph coagulase chv

Best match: coa-SV06\_ref\_AB158552.1[2462:4450] (completely identical)

Position: 008-contig\_256: 106191 ... 108180; Length: 1989 bp

Sequence:

```
ATGAAAAAGCAAATAATTTGCTAGGCGCATTAGCAGTTGCATCTAGCTTATTTACATGG
GATAACAAAGCAGATGCGATAGTAACAAAGGATTATAGTGGGAAATCACAAGTTAATGC
TGGGAGTAAAAATGGGACACCGATTTCTAATGGTTACTTTTGGGGGAAAATCGATAGTCT
AGAATCACAATTTCTAAAGCATTAGCAATAATTGAAGAGTATCAATATGGTGAGAAAGA
ATATAAAGATGCAAAGATAAGTTTATGGATAGAATTTTGTGAGAAGATCAATATCTTTT
GGAGAAAAAGAAAGCTCTGTATGAGAAATATAAAGAGTGGTATAAAAAGCACAAAGAG
ATAAACCCAACTTATCCAAAATGCAAACATTCCATGAATTTAGTGTATATAATCTAACT
ATGGAAGAATACAATGAGATTTCTAAATCTTTGAAAGATGCGGAAGAAGAGTTTCGTAA
AAATGTAAGAGAAGTTCAAGAGAAAGAAGTCAAATTA AAAACATATAGCGAAGATGAA
GAAGAAAAGGCAACTAAAGAAGTATACGATCTTGTAGCCGAAGTTGATACTATATATGT
ATCTTATTTTGGACATGATAAACATGGTCAAAGTGCTAAAGAATTGCGTGCGAAATTAGA
TTTAATAATTGGAGAGGAAAAAACGCCTTTTCGTATTACTAATGAACGTATAAAAAATGA
AATGATTTATGACTTAAATTCTATTATTGACGATTTCTTTATGGAAACTAACCAAAATAGA
CCGAAAATATAACAAAATTTGATTGGGATAAGCATGATTATAGAAATAAACCAGAAAA
CAAAGCAAATTTTGAGGCTCTAGTTAAAGAACTAAAGGTGCGGTGCGATAAGGCAGATG
ATTCTTGGAAAACAAAACGTCAAAAATTACGGTGAATCTGAAACAAAATCGCCAGTAG
TAAAAGAAGAGAAGAAAGTTGAAGAACCTCAAGCACCTAAAGTTGATAACCAACAAGAA
GTTAAACTACTGCTGGTAAAGCTGAAGAAACAACACAACCAGTGGCACAGCCATTAGT
AAAATTCCACAAGGAACAATCTATGGTAAAACCTGTA AAAAGGTCCAGACTATCCAACAT
GGAAAATAAAACGTTACAAGGTGTAATTGTTCAAGGTCCAGATTTCCCAACAATGGAACA
AAGCGGCCCATCATTAAAGCAATAATTATACAAACCCACCGTTAACGAACCCTATTTTAGA
AGGTCTTGAAGGTAGCTCATCTAACTTGAATAAAAACCACAAGGTACTGAATCAACGTT
AAAAGGTACTCAAGGAGAATCAAGTGATATTGAAGTTAAACCTCAAGCATCTGAAACAA
CAGAAGCATCACATTATCCAGCGAGACCTCAATTTAACAAAACACCTAAATATGTTAAAT
ATAGAGATGCTGGTACAGGTATCCGTGAATACAACGATGGAACATTTGGATATGAAGCG
AGACCAAGATTCAATAAGCCATCAGAAACAAACGCATACAACGTAACGACAAATCAAGA
TGGCACAGTAACATATGGCGCTCGTCCAACACAAAACAAGGCAAGCAAAAACAAACGCAT
ATAACGTAACAACACATGCAAACGGTCAAGTATCATAACGAGCTCGTCCGACATACAAG
AAGCCAAGCAAAAACAAATGCATACAACGTAACAACACATGCAAATGGTCAAGTATCATA
TGGCGCTCGCCCGACACAAAACAAGCCAAGCAAAAACAAATGCATATAACGTAACAACAC
ATGCAAATGGTCAAGTATCATAACGAGCTCGCCCGACATACAAGAAGCCAAGCGAAACA
AATGCATACAACGTAACAACACATGCAAATGGTCAAGTATCATATGGCGCTCGCCCGACA
CAAAAAAGCCAAGCGAAACAACGCATATAACGTAACAACACATGCAGATGGTACTGC
GACATATGGGCCTAGAGTAACAAAATAA
```

> **tx\_coa**

Function: rho-independent terminator

Best match: tx\_coa\_CC001\_MW2-USA400\_BA000033.2[244890:244937] (completely identical)

Position: 008-contig\_256: 108447 ... 108495; Length: 48 bp

Sequence:

```
CAAGTCTAGTTCGAACACACACTGATGTGAGTGGTTTTCTTTATTTTA
```

> **fadA**

Function: protein coding sequence; 3-ketoacyl-CoA transferase (core genome, variable)

Best match: fadA\_CC005\_Mu50-VRSA\_BA000017.4[267199:268383:r]RC (completely identical)

Position: 008-contig\_256: 108766 ... 109951; Length: 1185 bp

Sequence:

```
CTAACGCACATACTCAAATATAGCAGCTGCACCCATGCCGACACCAATACACATCGTAAC
CATGCCGTAACGGCTATCGGGACGTCTACCCATTTCAATTAAGTAAACGCGCGGTTAACAT
TGCCCCTGTAGCACCTAATGGATGACCTAAAGCAATAGCGCCACCATTACATTTCGTACG
TGATATATCTAGACCTACTTCTTTAATAGATGCAATCGTTTGAGAAGCAAATGCTTCGTTT
AATTCGATCAAATCAATGTCTTCAACAGATAGATTGCTGAGTGACAATACTTCAGGAATC
GCATATGCAGGCCAATACCCATAATTTTCGGGTCAACGCCTACTGCCTTATAACCAACG
AATCGTGCAATAGGTGTCACGCCTAGTTCTTTCACCTTATCTCCAGACATTAAAACACTACAA
ATCCTGCACCATCAGAAAGTGGGGCAGATGTTCCCGCAGTCACAGTGCCGTCAGCTTTAA
ATACTGTACGTAATTTGGCTAATGCCTCCATCGTGGTGTGAGGGCGTATAAATTCATCTTG
GTCAAAGATATTTGTGTGTACTTTTGGTCCTGCGTTTGTATATCAACTGAGTTTACCCGT
ATTGGAATAAATTTTCACTTTTGAACCGACCATCACGTTGTGCGTCATAGGCACGTTGATGAC
TTCTGACAGCATAAGCATCTTGATCTTCGCGTGATACGTCAAATTGGGATGCTACATTTTC
AGCAGTTAAACCCATAGGATATGACGCACCTATATCATCATATTGTAAGGTTGGATTGTT
TGTGGGCTCGTTGCCACCCATTGGTACGGCACTCATCAATTCAACGCCACCAGCTACAAG
TATATCTCCTTGACCAGCCATAATTTGATTGGCTGCAATCGCGATGGTTTGTAAATCCTGAT
GAGCAGTAGCGATTCACTGTTTGACCCGGTACCGTGTGAGATAATCCCGCACGCAATGCA
ATCGTTTCGTGCAATGTTTTGTCCTTGTAAATCCTTCTGGAAAAGCCGTACCAACAATGACAT
CTTCAATCATATTCTTATTGAATTTCCGTCAATACGTTTCAATACGCCTTGTAATACTTTG
GCTGCGACATCATCAGGTCTTTCGTGGAATAATGCGCCTTGCTTTGCTTTCGCTGCGGCTG
AACGCCATAAGCTACAATGTATGCTTCTTGCAT
```

> **fadB**

Function: protein coding sequence; NAD binding 3-hydroxyacyl-CoA dehydrogenase (core genome, constant)

Best match: fadB\_CC005\_Mu50-VRSA\_BA000017.4[268413:270674:r]RC

Position: 008-contig\_256: 109980 ... 112242; Length: 2262 bp

Sequence:

```
TTAATTACGTAATGGCTTACCAGTTTTTAACATATGTGCAATTCTTTCATATGATTTTTTTAG
ATTTTAGTAAGTCAATAAAGCCAATTTTCTCCAACGATTGAATGTAACGTTGATTTATAAA
TGATTTTCTTGGTAAATCACCACCCGCTAAAATTGTGGCGATATTTAAGGCGATATGATA
ATCATGGTCGCTAATAAAAATGCCCCCGTCTTTGCGCATCTAATTGTCCTTGGATCAATGCT
TTGAAGTCTTCACCTAAAGCGATATATTGATGTCTAGGATTCGGAATATAGTTTGTTTCTG
CTTCATATTTTCGCACGTTTGTGAGCGCAACTTCGACACGTTGTGCTGTATTGAAAATAATCGT
ATCTGTATCACGTAAATAACCATAACGACGTGCCTCAAAGGCATTTGTAGAGACTTTTCGC
AAATGCGATATTCGTCAGTACTTTTGTGTCATGGAAGCTTGTGTCATCAAACCTTATGCGAT
GTGCGTAATATGCGATCAGCCATTTCTGCAAGGCCACCGCCACTCGGTAATAAGCCAACG
CCTGCTTCAACAAGACCTATATATGTTTCACTTGCAGCGACAACAATAGGTGAGTAAAGT
ACAAGCTCACAGCCACCGCCTAAGGCACGACCTTGAACAGCTGTGACTACTGGTTTCAA
CTATACTTCAAACGATTAAAGCTATAATGTAATTTATCAATTGATTGTGCAACGACATCAT
CTACAAGACCGTCTTCATGCGCCTTTTTCATTAAGAAAAGGTTAGCACCCACACTGAAAT
TATTACCATCTGCATAAATGACCATACTTGTGTAATGGTCATTTTCCAGTAAATCAATGGC
ATCAACTAACGCATCGTTGAATTCATCGGTAATGACATTATTTTACTTTGTAATTTTCAAGT
AACAGTTGATCATCATGAGTTACGGAAAGTTTGGCATCACCTTTATCCCAAAGTTCATCTT
TTACGAAGTGAGAAACAGGTGTTGCATATTCGATGGTCTCATCTTGTGTTATAAAAGCCAC
CATCTAAATCACTAATCCATTGTGGTAAGTCTCCAATTTTCGTCTTCCATACGTGTTTTAAC
ACGTTTCATATCCCATTGCATCCCATAATTGGAATGGACCAAGTTTCCAGTTGAACCCCA
GACAAGCGCACGGTCTATGTCTCGGAAATCATCGGTAGCTTTAGGTACATTGATAGCAGA
GTAATAGAAATTATTACGTAATGTCTCCATAAAAATAGTCCCGCTTCGTCTTGCAGATTG
AATATGACATCAAGGTTATGCACTAAGTCTTTATTAATTCATTTAAAATTTGGTAATTGTG
GTTGCGATACAGGTACATAATCTTGTTTTTCAACATCGTAAACAAGTCGAGCTTTAGTTTC
```

TTTATCCTTTTTGTAAAATCCTTGTTTTCGTTTTACGTCCGAGTGCGCCATTGTCAAACAACG  
TATTTACAATTTTGACATCATGAAAATAAGGCGTTTCTTCAGGTACTTGTTGCATGCCTTT  
AATTACAGACACTGCAATATCTAAACCGACTAGGTCAGATAGGGCATATGTACCTGTTTT  
AGGACGACCAATCGCTTGCCCAGTTAAAGCATCCACATCTACAATGCTTAACTTGTGTTG  
CTCGGCGCGATAATAATATCATTCAATTGTTTGCCTGCGGACTCTATTTGCGACAAAGCCA  
GGCACATCATTGACGACAATGACACCTTTACCTAACACATTTTGCAGGAAATTTTTTACAT  
CTAATATGATAGATTCCCTTCGTGTGTGACGTAGGTATTAACCTCCACTAATTCATAATACG  
TGGTGGGTTAAAGAAATGTAGACCAAAGAATCGTTCCTTGATCCTTCTCGTTAAATGTTTG  
AGCAATCGCATTAAATTGGAATACCTGATGTATTTGTAGCGAATAAAGCATCTTCTTTAGC  
ATGTTGTAGAAGTTGTTGCCAAACAGCATGCTTAATTTCAATATCTTCTTTAACTGCTTCG  
ATATATAAATCAGCATCATCATTTACCAAGTCATCATCAAAATTACCATATGTTAAATGA  
CTCGCTAGATTTAAGTCGAATAGTAGCGGCCGTTTCTTATCTGTAATTTTATCGTAAGATT  
TTTTCGCAATGAGATTTGGATCGTTTTTGTCCACTACAATATCTAATAGTTTTACTTTAAGT  
CCAGCATTCACAAAGAGTGCTGCCAGTTGAGCGCCCATCGTGCCTGCGCCAAGAACGGTT  
ACTTTATTAATTGTCAT

### > **fadD**

Function: protein coding sequence; putative acyl-CoA dehydrogenase (core genome, constant)

Best match: fadD\_CC001\_MSSA476\_BX571857.1[247587:248798:r]RC (completely identical)

Position: 008-contig\_256: 112428 ... 113640; Length: 1212 bp

Sequence:

TTATACGAAAGCAGAATCTCCAGTCAAAGCGCGTCCAATTAAGGCATTAATTTTCATG  
TGTACCTTCGTACGTGTAATCGCTTCTGCATCAGAGAAGAAACGTGCAATATCATAATC  
GTCAGCTAGTATGCCATTACCACCTGTAATACCACGGCCCATAGCTACTGTCTCACGCAA  
ACGTAAGGCATTCATCATCTTCGCCGTTGAAGTTGCAACCTCGTCATATTCACCATGTGCT  
TGCATATTAGCTAATTGAGCACATGTTGCCATTGCTTGAGCTAAATTACCTTGCATCATTG  
CTAGCTTTTCTTGTATTAAGTATTTACTAATTGGTTTGGCCGAATTGCTTACGCTCAGTG  
ACATAATCTAATGTGGCACGTAAAGCGCCAGCCATACCACCTGTAGCCATATAAGCAACG  
CCTGCTCTCGTTGAATAAAGAATTTTGGCAATATCTTTAAAGCTTGTTATGTTTTGTAAGC  
GATCCGCTTCATCTACTTTGACATTAGTTAATTTAATTAGGGCGTTAGGAACAATGCGAA  
GTGCGATTTTATTATCAATGACTTCAATATCGACGCCATCTTGTCTGGTCTGACTACAAA  
GCAATGGGGTTTGCCAGTTTCTTTATTTACTGCGAATACTGGAATGACATCAGATACATGT  
GCACCACCAATCCATTTCTTTTACCATTGATAACCCAAGTATCGCCCTGGCGTTCAGCGA  
CTGTTTCAAGACCTCCCGCAACGTCCGAACCGTGTCTGGTTCAGTTAAAGCAAAGCATG  
TACGCAGTTCATGTGACTGTAATTTAGGTACATATTTGCAATTTGTTCTTTGCTACCTCC  
GAAATAGAAAGTGTTATGCCCTAAACCTTGGTGAACACCGAGTAGGGTAGCTAAGGAAA  
TATCAAATCGCGCGAGTAGGTAAGACATGAAAAACTGAAATAGTTGACTAGGCATTTTGG  
CGTTTGGACGATCCTTGTAAGTAATGGATTGTTAAAATAATTTAATTCTCCAGATCTTT  
AAAATAGTCCCTCGGGTACAGTAGCGTCTATCCAATGTTGATTAATATTTTACGGTACTTA  
CTTTCTAGCAATGAATCTACTTGTGTAATAAATTCGACTTCACCGTCTGTTAAACCTTTAG  
CAATACTAAGTACATCTTCAGGAAATAATGTTTTTAAGACCGTTTCTTTTCAAATGTCAT

### > **fadE**

Function: protein coding sequence; putative acyl-CoA synthetase (core genome, constant)

Best match: fadE\_CC001\_MW2-USA400\_BA000033.2[250210:251715:r]RC (completely identical)

Position: 008-contig\_256: 113751 ... 115257; Length: 1506 bp

Sequence:

TTAAAGTGTTTGTGAGACTTTGTCATTCATCATTTGTGCAATCGCAAGTTTATCTGGTTTCT  
GCGTACTGTTTAAACGGCATATGTGTCACTGGTACATACATTCTTGGGACTTTATAACCTGC  
TAAACGACTTCGCATATGTTGATCTAAAATTTACAGCGTAATGAGGTTTCATCTTCGCGAAGT  
ATAATGGCTGCAGCAATTGATTCACCATATTTTGGATGATCATAGCCAACGACCACACAC  
CGGTCTACTAGTGGATGCTCAGCTAAAGCATTTTCGACTTCGGATGGTAAGACATTTTCGC  
CACCAGTTATGATTAATTCTTTTTTTCGGTCAATAAATAAATATATCGCCATCGTCGTCAT  
CTTCGCTAAGTACCAGTTAATAAATAACGACCATGAAATGCTTTGGCAGTCTCTGCTGG  
TTTATTCCAATATCCTGGCGTGACATTTTTAGCCTTAATTGCAAGTTCGCCAATCTCACCA

GTAGGTACTTCCTCACCGTTATCATCAAGGATACGTGCATCAACGAACATGACTGCTTTA  
CCAATACTCATTGGCTTACGTTTTGAATTTTCCGGTGTATTAACAAGTACAAGAGGTGCTT  
CAGTTAAACCATAGCCGTTAATAATGTTTATGCCATATTGTTTAAAAGCTGCTTGGATACT  
TGTAATGGTTGTGAACCACCTTGGATGATATAATCCATAGCTTTAAAATTTTCAGGATTA  
AAATTACTAGCACGTAGCGTACTATAATACATTGTCGGAATCATGATAATAAATGTAGGG  
TGATATTGTGCAATCATGTCATTCAATTCTTCGCCGTTAAAGTAACGTTGAAGAATAAGTG  
TGCCACCTGACATCAATACTGGTAATACAGTATCGTTAAACCCTAAAACATGGAACATTG  
GTGTTGATACAATCGTAATATAGTTTGAATTGAACTTATACGTCAGCTCTAAGTTTGCACC  
GTTATGAACAAATGATTCATATGAGAACATCACACCTTTAGGTGATCCGTTGTACCACT  
TGTATAAATTAATGCTGCAAGATCTTGTGGTTCGACAGGTGTTGCTTGAAAAGGTTGGTG  
ATAATCTGGATTTACGATTTTCATCATATTGCGCTACATCAATATCCATATGCAATAAGTTT  
TGGTCAATATCGGTGAGTGAACCTTAAATGTTTTTCAGCATAGAAGAGCAGTTTTAATTGT  
GCATCTTCCACAATGGCTGCAATTTCTTTGGGTTAAGCCGCAATTCAATGGTAAAAAA  
ACCGCACCTGTTTTAAAACAAGCAAACAATAAATCTAATATTGCAATATCATTTGGCGCA  
AAAATACCGATAACATCGCCTTTTTAACACCTTGAGATGTTAAATAATGTGCCATATTAT  
CAGCGCGTGCATTGAGTTGTTGGTATGTCCAAGATGTTTGTGTTTGCCTGATCAATAACGGC  
AGGCTTGTATCATCGAAGTCTGAACGCGTTTTTATCCAATCGAAATTCAT

### > **fadX**

Function: protein coding sequence; putative acetyl-CoA/acetoacetyl-CoA transferase (core genome, constant)

Best match: fadX\_CC001\_MSSA476\_BX571857.1[250441:252003:r]RC (completely identical)

Position: 008-contig\_256: 115282 ... 116845; Length: 1563 bp

Sequence:

TCATACTTTATGAATTGATTGTTTAAAGTTGTCCCATTTTTCTTTGTAATGCTGGTATCAA  
TTAATTTTAAATGATCAGCAATAATTGGTTTAAAAGCCATTTGATTCAAAATATCTTTATG  
CAAATCAAGACCTGGTGAATTTCAATTAGTTTCAAGCCTTGATTGGTGAGTTCGAATACT  
GCACGCTCAGTAACAAAATAGACTTCTTGCTCGAGTGATTGTGAATATTGTGCATTAAG  
TCGATATGGCTCACATCTGATACAAATTTCTGGTTTTGTCCTTCAGTTTCAATGTTTAAATCG  
TTGATTATGGCATGAGACATGACTGCCAGCTACAAAAGTACCTGAAAAGATAATTTTATT  
TACAGATTGCGTAATGTCTATAAAGCCACCACATCCATTTAGTCGGTCATTGAAGTAAGA  
CACGTTGACATTGCCGTATTGATCAACCTCAGCAAAGCTAAGATAGGCAACTGATACACC  
ATTGTTATAAATAAAATCCCATGCTCGATCATGAGGCATGCGCACATCTGCATTGTAATTC  
ATACCAAATGTTACGACTCCCAACGAATCCACCGAAAATGCCAACATCTAAAATCGGT  
TGCACATCATGTTCAACACATTCTTCGTGCAATAAATTAGAGAGTTCATTATTGATGCCAT  
AACCGATGCTAATTGTATCGCCATAAGTTAAAAACTGAGCAGCACGTCGGAGAATCAATT  
TGCGACTATTAAGGTAATGCGGGTTCAGGTATTCCATCAATTCTGTTCTTCTCCAGACAA  
GGCTGGTAAATAATGACTCTGAATTACTTGGCGGTGATTCTTTTCATCTTCTGTGACGTAT  
ACATAATCGACAAGATTTCTGGGATAACAACCTTCATTCGGTTTTAGTTGATATCCGTCAA  
CTAAAGCTTTAACTTGTACAATAACTTTCCCATGATTGGCTTTCGCGTTTAAATGCGACATG  
ATAACACTCGCTCAAGTACGCTTCTTGAGTTAAATAAATGTTACCTTGTTGATCTGCGTAT  
GTTCTCTCAGTAGTGCCACATCAACGCTAGGGAATGTGTAATGTAAGTATGTTTCATCGT  
TGATGGTTACTAATGAACTAAATCATCAGTTGTTCTGTGATTTACTTTACCGCCACCGTA  
TCTAGGATCAACAGCTGTGTTTAAATCCGATTTTAGTAATAACTCCAGGTAATAATTGATTA  
CTCTGACGATAATGAGTTGCAATGATACCTTGTGGTAAAAAATAAGCTTCAATGTCATTA  
TTTTTCATTGCTTGTGCCGTTTTGGAAGAAGCCGTTAAAATGCTCATAATGACACGTTTAA  
TCATGCGACGTTCTATAAAATCATCTAAATCCGGTGCGGCACCTAAACTATGGATATCAT  
TCGCTAATAATAACGTTAAATCTTTGGGCGTATGATATGTGTCATGTTGCGCTAACACAGC  
ACGTAGAACTTCGGCGGGTAAGTTGGCTACAGCTAATGCTGGTAAACCAATCACATCACC  
ATCTTTAATGATATGTTGTAAGTCGTGCCATGTGATTTGTTCAA

### > **Q5HJE2**

Function: protein coding sequence; putative protein (core genome, variable)

Best match: Q5HJE2\_CC001-ST772\_118\_AJGE01000065.1[68669:69811:r] (completely identical)

Position: 008-contig\_256: 117300 ... 118443; Length: 1143 bp

Sequence:

```
ATGTCATCAGCAAGTACACAATCAACTAAGACGTCCGACATACATAATGAATCTATCAAT
AAACAAATGGAAGCCAAAGCGCATGAAACAGCGCAAATGCAGATTTAAAAACCGAAG
CAAGAAGTTTATTTGATAATGCAACCAAATCAATCGGTAGACTAGCCGGCAATGATGAAA
GCTTAAATCTTAATTTAAAAAGATATGTTTTCTGAAGTATTTAAGCCGCATACTAAAAACG
AAGCAGATGAAATATTTATAGCGGGTACTGCTAAAACACTACGCCAGCAATTTGTGACATAT
CAGAAGAATGGGGGAAGCCATGGCTCTTTTCTCGAGTATTCATCGCTTTCACAGTAACAT
TTATTGGATTATGGGTCATGGCAGCGATTTTTTAATAACACTAACGCGATTCCGGGTCTCAT
TTTTATAGGGGCTTTAACAGTACCATTATCGGGTTTGTCTTCTTTTATGAATCAAATGCG
TTTTAAAAATATTAGCATTTTTGAAGTTATTATCATGTTCTTTATTGGCGGCGTATTTTCATT
ACTAAGTACGATGGTATTATATAGATTTGTCTGTTTTAGTGATCAATTCGAAAGGTTTGGT
TCTTTAACATTTTTCGATGCATTTTGTAGTAGGATTAGTTGAAGAACTGGAAAAGCACTCA
TTATTGTTTATTTTCGTCATAAAATTGAAAACAAATAAGATTTTGAATGGATTATTAATCGG
TGCTGCTATTGGTGCAGGGTTCGCAGTTTTTGAATCAGCAGGTATATTTTGAATTCGCT
TTAGGGGAAAATGTCCATTATTAGATATTGTCTTCACACGTGCGTGGACTGCGATTGGT
GGTCATTTAGTTGGTCAGCGATTGTTGGTGCTGCAATAGTTATTGCGAAAGAACAGCAT
GGCTTTGAATTCAAAGATATTTTTGATAAACGCTTTTTAATATTCTTTTTATCAGCCGTTGG
TTTACATGGCATTGTTGGGATACATCTTTAACTGTACTTGGCAGTGATACGTTGAAAATATTT
ATTTAATCGTTATTGTGTGGATACTTGTATTCAATTTAATGGGGGCAGGTTTAAAACAAG
TGAATTTACTGCAGAAAGAATTTAAGAACAACAGAAAAAAGTAGGCGAATAA
```

### > **hmp**

Function: protein coding sequence; FAD-binding oxidoreductase (core genome, variable)

Best match: hmp\_CC001-ST772\_118\_AJGE01000065.1[64825:65970]RC (completely identical)

Position: 008-contig\_256: 121141 ... 122287; Length: 1146 bp

Sequence:

```
TTATACTGCAACGCTTAGTCTTGGAAATAAATGTTTCGTAGTGTACGCGATCCATATCGTAA
TTTAAAGATTTAAGTGCTTCGATCATAGATTGTAAGAATTTTGTACCACCACAGATATAA
ATTTACAGGTTTATTTGCTAAAAATACTTGTAAATCTTCAGCGCCAATATAGCCTTGTTTAT
CTTTTAAAGTGAGTATATAACTTAGCGTTGTCATGATGGCTTGCGATACTGTTGAAGTTGTC
TTTGAAAGGTAAATGTTGTTTCAATTTTCAGCAACTTGAACCATCTGTGTATCTAAACCTTTG
GCAGAGGCAGCTTCATACATAGCTACTAAAGGTGTAACACCAATACCTGAACCTAAGAA
AAGTTGTGGTTCAGTCGTATTCTCTAATACGAATCCACCTACAGGTGCAACTAAATTAATC
ATATCGCCTTCTTTAATCTCATCGTGTAATAATTGTTGAAACTTCGCCTTCATGTTCTGTTGT
GACATCACGTTTAAACGCCAAAAGTTAAATGGTTTTTATCACCTGATACGATAGAATAGTG
ACGTTTAGCTCTATATGGAAGTTTATCACTAGAAACATCAACTGTGATGTATTGGCCTGGT
ATAAATTCACTAAAGTCATATTCTTCAGTTTCAACTGTAAATGATTTAATGTCTTCAGATT
CTTGTTTAAATATTGGTAATTTTGAATGGTTTAAAACCAATCCACATCATTTGATCATAAAT
TTCTTTTTCAATTTGGATGAACACGTCCGCAATAACGCCATATGCTTTCGCCAAGCTTGA
ATGACAGGGTCATTTTCTTCTAATCCTGTACACATCTTGAATGGCTTTTAAATAAATTTCCCC
CACAATTGGATAATGTTTCAGCATAAACTTGTAGTGCGCAGTGTTTATATGCGACTGGCAT
AATGACTGGTTTAAATAACACTTAAATTATCGATATTAACCGCTGCAGCCATTACAGCTTGT
GCTAATGCTGAAGATTGCATGCCTCGTTTTTGGTTTCGTTTGATTAAACATGTTTAAAAGTT
CAGGATGCGCTTTAAACATTTTGGATAAAAAGATTGACGTAATTTCTGTCCCTTTCTCTTT
AAGTAAAGGCACCGTTTGGTTTGATAATGTCTTTCTTGTCTGTGAATCAT
```

### > **lctE**

Function: protein coding sequence; L-lactate dehydrogenase 1 (core genome, constant)

Best match: lctE\_CC001-ST772\_118\_AJGE01000065.1[63299:64252:r] (completely identical)

Position: 008-contig\_256: 122859 ... 123813; Length: 954 bp

Sequence:

```
ATGAACAAATTTAAAGGGAACAAAGTTGTATTAATAGGTAATGGTGCAGTAGGTTCAAG
CTACGCATTTTCATTAGTGAACCAAAGCATTGTTGATGAATTAGTCATCATTGATTTAGAC
ACTGAAAAAGTTTCGAGGAGATGTTATGGATTTAAAACATGCTACACCATATTCTCCAACA
ACAGTTCGTGTGAAAGCTGGCGAATACAGTGATTGTCATGATGCGGATCTAGTTGTCATC
```

TGTGCTGGTGGCTGCACAAAAACCTGGAGAAACACGTTTGTAGATTTAGTATCTAAAACTTG  
AAAATATTCAAATCAATTGTTGGTGAAGTAATGGCATCAAAAATTTGATGGTATTTTCTTGG  
TAGCTACAAATCCTGTTGATATTTTAGCGTATGCAACATGGAAATTTCTCTGGTTTACCTAA  
AGAACGTGTTATAGTTCTGGTACAATTTAGACTCTGCACGCTTTAGATTATTGTTAAGC  
GAAGCGTTCGATGTTGCGCCACGTAGCGTCGATGCTCAAATTTGTTGAACATGGTGAC  
ACTGAATTACCAGTATGGTCACACGCTAATATTGCGGGTCAACCTTTGAAGACATTACTT  
GAACAACGTCCTGAGGGCAAAGCGCAAATTTGAACAAATTTTGTTCAAACACGTGATGCA  
GCATATGACATTATTCAAGCTAAAGGTGCCACTTATTATGGTGTTCGAATGGGATTAGCT  
AGAATTACTGAAGCGATTTTCAGAAATGAAGATGCCGTATTGACTGTATCAGCATTATTA  
GAAGGCGAATATGATGAAGAAGATGTTTATATTGGTGTTCAGCAGTCATCAATAGAAAC  
GGTATTTCGCAACGTCGTAGAAATCCCATTAAACGACGAAGAACAAGCAAGTTCGCACA  
TTCAGCTAAAACATTAAGATATTATGGCTGAAGCAGAAGAAGCAACTTAAATAA

### > ptsIIBC

Function: protein coding sequence; putative PTS transport system/IIBC component (core genome, variable)

Best match: ptsIIBC\_CC001-ST772\_118\_AJGE01000065.1[61449:62978]RC (completely identical)

Position: 008-contig\_256: 124133 ... 125663; Length: 1530 bp

Sequence:

TTAATCCCCGAGCAATTCTTCAATCTCATTTTTGATAACTGTAACGTGAGGCCCATAAATT  
ACTGACACCAGTGCCTTGCTGGATTACACCTTTGGCACCAGTACTTTTCGAGTAATACTT  
TATCGACTTTGTCATTTTGTGATGAAGTGTGACGCGTAGTCTCGTTGCACAACAGTCAACGAT  
TTCAATGTTATCCTTGCCTCCCAAACCAGCAACAATAGTTTGTGCTCTTTCAGTAGCCTCA  
ACTTGTGTTGTGCTGCAGCTTTATCTTCTCGACCAGGTGTTTTGAAATTAATTTTCGTAATTA  
AGAATCTGAAAACGATGTAATACAAACAGAACCACACAATTCCAATAGGTATGACGTAT  
AGGTAGTTTGTGTTTACTATTACCTTGTAGCACACCAAAAAGTAAGAAATCGATAAAGCCT  
CCACTGAAGGTTTGACCAATTGTAATGTTGAAAATGTCTGCCATCATAAATGCTAATCCA  
TCAAAGAAGGCATGGATTACATAAAGAATAGGTGCGACAAAACAAGAACTAAACTCTAA  
AGGTTTCGGTAATACCTGTTAAAAATGAAGTGAGTGCAGCGGATAACATTAACCCGCCGA  
CAACTTTTTTATGTTTCAGGTTTAGCTGTGTGATAAATTGCAAGTGCGGCACCACATAAGCC  
GAACATCATCGTAATAAAACGGCCTGACATAAAGCGTGACACACCTGAATAATACTTCGT  
CACATCTGGATACCAAGTTGAGCAAAGAAGATGTTCTGCGTACCTTGAACCTAAGTGCCC  
TTTGACTTCTAAAGTACCACCAAGTGCCGTCTGCCAAAACGGTAAGTAAAAAATATGGTG  
TAAACCGAGTGGACCTAACAACTTAAGATGAAGCCATAAACAAGTACCGATGGCAC  
CTGTTTTTCGTTACAAATCCACCAACATGATAAATGCCGGCTTGTATGCTTGGCCAAATGA  
AAAACATCAATACACCTAAAAAGATTGCGGCAAATGCTGTGACAATAGGGACAAATCTA  
GAGCCACCAAAGAAACCTAAATACGGTGGTAATACCACTTTGTGATATTTGTTGTGAAGT  
ATTGCGGTTCATAATACCTGTGATAATCCCGCCAAAACACCGGTTTCAACCGTTTGTATA  
CCGAGCACCATGCCTTGTCCATTTTGTGCAAGCTGATCTTTTGCCAATGTGCCCGTGATAG  
TTAATAAGCCATTCATAGTTACGTTTATAAATTAAGAAACCGAGCAGCGCAGCTAAACCTG  
CAGTACCTTTATCGCTTCTAGATAATCCGATTGCGACACCAATGGCAAAGATGACCGGTA  
AATTTTGGAAAACAATACTACCTGCAGCTGACATTAATGTAAAAATATTTTGTAAATAAGG  
TAATATCTAAAATAGGGTATGCTTTAACGGTGTGTTGGATTACTTAATGCACCACCGATACC  
CAACAATAGACCTGCAGCTGGTAAGATTGCGATAGGTAGCATAAAGGACTTGCCGAAC  
GCTGTGCTTTTTCAAATAAAGATTTTCAT

### > rihA

Function: protein coding sequence; inosine-uridine preferring nucleoside hydrolase (core genome, variable)

Best match: rihA\_CC001-ST772\_118\_AJGE01000065.1[60152:61087:r] (completely identical)

Position: 008-contig\_256: 126024 ... 126960; Length: 936 bp

Sequence:

ATGAAAAGAAAGATTATTATGGATTGTGATCCAGGACACGATGATGCAATAGCATTAAATT  
TTAGCGGGGGCAATTGACAGTCCACTAGAGATATTAGCTGTAACAACAGTCGCAGGTAAT  
CAATCAGTTGACAAGAATACGACAAACGCCTTGAACGTATTGGATATTATGGGACGCCAA

GATATAGCAGTAGCGAAAGGTGCGGATAGGCCGTTAATTAACCAGCTGCCTTTGCTTCT  
GAAATACATGGGGAATCTGGATTAGATGGTCCGAAACTACCGTCGACACCATCACGTCAA  
GCAGTTGCAATGCCAGCATCAGATGTGATTATAAACAAAGTGATGACGAGTGATACACCT  
GTAACAATTGTAGCGACAGGTCCTCTTACGAATGTAGCAACGGCATTGATTCGTGAGCCA  
AGAATCGCTGAGCATATTGAATCTATTACTTTGATGGGTGGTGGTACATTTGGAAATTGG  
ACGCTACAGCAGAATTC AATATTTGGGTAGATGCTGAAGCAGCGAAGCGTGT TTTTGA  
AGTGGGATTACTATAAATGTGTTTGGTCTAGATGTAACACATCAAGTTTTAGCCGACAAT  
CACGTGATTGAACGCTTTGAAAGTATCAATAATCCTGTTGCACAGTTCGTCGTAGAATTAT  
TGCAATTCTTTAAGAAGACATACAAGACTCACTTTAATATGGATGGTGGTCCAATACATG  
ATGCTTGTACAATTTTGTATTTGTTACAACCAGAATTGTTTACAATGGTACCCGTTAATAT  
CGACATTGAACATCAAAGTCCACTAACTTATGGCACTATGGCTGTCGATTTAAATCATGTT  
ACAGGTAAGCCTGTCAATGCTTATTTTGGCTACAGCAGTTGATGTTGAAGAAGTGTGGAAC  
TTGATAGATTATAAGTTACGTACTTACGAATAA

> **bglG**

Function: protein coding sequence; transcript antiterminator/PTS regulator (core genome, variable)

Best match: bglG\_CC001-ST772\_118\_AJGE01000065.1[57718:59814:r] (completely identical)

Position: 008-contig\_256: 127297 ... 129394; Length: 2097 bp

Sequence:

ATGAACGGGGATAATCAGCAAATACTCAGAGAAATTGTATTGAATCCTACTATTCATGGT  
AAAGAACTTGAATCGATATTTGGTTTGTCTCGTAGACAACCTAGGATATCGCATTCAAAAA  
ATCAATTTGTGGCTTGAACAAGAGGGTTATCCAAAACCTGAAAGAACAAGCCAAGGAAA  
TTTTATTGTAAGTCTGAAATCATGACGTTATTCAAGCGAGATGTATCGGAGCAGCAAAT  
GTTAAACGGCAACAATGTCATTTTTAGCATAGAAACACGTCGTTATTATTTAATGCTCATG  
CTTTTTAGTAAGGAAAATGCAATGTCTCTAAACCATTTTTCAATTGATTTACAAGTCAGTA  
AAAATACTGTCATTCACGATATAAATCATGTGAAAGAGCAATTGGAAGATCATGGTTTTGT  
CACTTAAGTATTCTCGAAAGCATGGTTATGAAATTGTTGGTGTGATGAATTTGAAGTTCGCC  
GTTTCTTCATTAAGTTGATTGATCAAAGGTTGAATCATGATTAATAAAGTGAAGTTTT  
AAAGGCGCTCAACTAACATTCGAAGATATCGCATATCAAAAAGACAAGATCAAACAGG  
TAGAACAATTTTTGAAGAGTCGCTTATAGACAAATCACTTAGTTCATTGCCTTATGTCCT  
TTGTGTGATTTCGTAGACGAATTCAAAGTGGTTCATGTGATGAATCCATTAATATTAATTAT  
CAGTATTTGAGGGATACGAAAGAATATCAAGCAACGGAGATTATGACGCAACATGAGCC  
GGATTTGCCAGAAGCGGAAAAGTTATATTTGACATTACACTTACTTTCAACAAGTGTGCA  
ATGGACTGATTTGCAGGAATCAGATAACATATCGAATTTAACGATGGCCATCGCTCAAAT  
GATTCACCATTTTGAACAAATCACTTTTATTAACATTGAAGATAAGGAGAAATTATCACA  
GCAACTCTTGTTACATTTAACGCCTGCTTTTTATAGGATTAATATAACTTAACGGATCGT  
GATGAATTAATAAATCCTTTACAAGGAAATTATCAATCCTTATTTTCATATGGTGAACAA  
TCATGTCAATCGTTAACTGAATATTTTCGGAAAATCGTTGCCTGATAATGAAATAGCATATT  
TAACCATGTTGTTTCGGAGGTAGTTTGTGAGACGTCAAGATGAAAACCTTCGATGGCAAGATAA  
AAGCTATTATCGTGTGTACACAAGGCACGTCAGTATCACAAATGATGTTATACGAGTTGC  
GAAACTTATTTCCAGAAATTATTTTCTTAGATGCGATTTCACTTAGAACATTTGAAAATTA  
CACATTAGATTATGACATCGTCTTTTACCAATGTTTGTCTAACACATAAAAAAATTATTT  
ATCACAAAAGTAGCTTTATCTGAAAATGAGCAACGAAAGTTACGTAAAGATGTGATGAA  
GTACATTAATAAGGAATCGGCTGACATTGATAAGGAAATAAACAAGTTAATGGCATTAAAT  
TGAACGCACAACGACAGTTAATGACATTACAGAACTACGTGATGGTTTAGAAGATTTTAT  
TGCCAATTATAATTCAATTTCAACCATTAATGGATCGATTGTCACACAAAATAAGACATT  
AGATTTAGCTGACTTGATACCGGCAAGGCACGTGAAAAGAATGCATCATGTTGAAAATAT  
TGATGAAGCTATTGCTAAAGCAAGTGATGTGTTAGTTGCTAATCATTTTATTGATATTA  
TATATTCATGAGATGCAACAGGTATTTGATGATTCGTATATGGTTATCATGCAAAATATTG  
CTATCCACATGCATACTCTGAAAAGCATGTACATAAAACAGCGATGAGTATGTTGATAT  
TACAAGAACCAATATACATGTCAGATGGCACAGCAATCCATATTATTGTACCTATTGCTG  
CTGTTGATAAAGTGACACACTTAAGAGCGTTACTACAATTGAGAGATGTGGCGCAAGACA  
ATGACGCAATTAAGCGCATCATACAAAGTCGCAAAAATTCTGATGTAATGAGATTTTAA  
AAAATTATTCAAATAAAGAAGCGAGGGAAAATGGATGGGACAGCAATTAG

## > Q5HJD2

Function: protein coding sequence; phosphotransferase system sugar-specific component IIA (core genome, variable)

Best match: Q5HJD2\_CC008\_NCTC8325\_CP000253.1[234857:235324] (completely identical)

Position: 008-contig\_256: 129378 ... 129846; Length: 468 bp

Sequence:

```
ATGGGACAGCAATTAGTGCATAAAGAAAATATAATGCTCAATTTGTCGGCAACTGATAAA
GAATCCGTATTGTCACAAATGTCAGATGTGTTATTTCAAATGGGTTTCGTGAAGTCAACG
TTTAAAGATGCAGTCATCGACAGAGAAAAAGAATTTGCTACTGGTTTACCAACGCATCTA
TGTTCCGGTCGCTATACCGCATAACAGATGTCGAACATATTAACCATAGAACGATAGGTGTG
GCTGTTCTAGAAAAAGAAGTGCCGTTTATTGAAATGGGAACACTTGATCAACAGACAGA
AGTGA AAAATCGTTTTTATGTTAGCAATGGATAAAGTAGATGATCAACTTAAGCTGTTACA
ACAGTTGATGCAAATTTTTCAAAGTGAAGAAAAATTGGAGCAGATTCTACGAACGAAAG
ATGAAACAATTTTAGCAACACTAATCAATGATTATTTGGAATATAACTAA
```

## > Q5HJD1

Function: protein coding sequence; phosphotransferasesystem sugar-specific IIB component (core genome, constant)

Best match: Q5HJD1\_CC001-ST772\_118\_AJGE01000065.1[56965:57243:r] (completely identical)

Position: 008-contig\_256: 129868 ... 130147; Length: 279 bp

Sequence:

```
ATGAAACAAGTATTAGTAGCGTGTGGTGCAGGTATTGCAACGTCAACAGTAGTAAATAAT
GCAATTGAAGAAATGGCAAAGGAACACAATATTAAGTAGATATTAACAAATCAAAAT
TACAGAAGTTGGACCTTATGAAGACACTGCAGATTTATTAGTTACAACCTGCAATGACAAA
AAAAGAATATAAATTCCCAGTTATCAACGCACGTAATTTTTAACTGGTATTGGTATTGA
AGAAACAAAACAACAAATCTTAACAGAGTTACAAAATAA
```

## > gatC1

Function: protein coding sequence; PTS system/sorbitol-specific IIC component (core genome, constant)

Best match: gatC1\_CC001-ST772\_118\_AJGE01000065.1[55479:56738:r] (completely identical)

Position: 008-contig\_256: 130373 ... 131633; Length: 1260 bp

Sequence:

```
ATGAGTTACTTCACTGATTTTGTAAAGGGATTTTTAGATTTAGGTGCAACTGTTATTTTAC
CGGTTGTCATATTCTTGCTTGGCCTATTCTTTAGGCAGAAAATTGGAGCGGCATTTAGGTC
TGGTTTAAACAATAGGTGTGGCTTTTGTAGGGATTTTCTTAGTCATCGATTTATTAGTTAAA
AATTTAGGGCCAGCAGCACAAGCGATGGTTAAAAATTTAGGCGTCAGTCTGAATGTGATT
GATGTAGGTTGGCCAGCAACATCATCTATCGCTTGGGCATCATCTGTGCGCAGCATTTATTA
TTCCACTCGGAATCATAGTTAACGTTGTATTGCTAGTAACTAAAGTGACAAAGACGATGA
ATGTAGATATTTGGAATTTTTGGCATTATACGTTTACAGCAGCAATGGTTTATGCCGTATC
AGGCAGTATTTGGCAAGCGTTATTAGCAGCAGTATTTTCCAAGTTATCTGTTTGAAAGTA
GCAGATTGGACAGCACCGATGATGAGTGAGTTCTTTGATTTACCAGGTGTATCGATTGCT
ACAGGAAGTACAATTTCTTATGCACCAGGTATTTACTTAGTTAAATTGTTACAAAAGTA
CCCGGTCTGAATAAGTTAGATGCTGATCCTGAAACAATTCAAAAACGTTTTGGCGCATTT
GGAGAGTCTATCTTTGTCGGCTTAATTTTAGGTTTAGGTATTGGTGTGTTAGCAGGTTACA
AACCTGGAGACATCATTAATTTAGGAATGTCAATGGCTGCAGTAATGGTATTAATGCCTA
GAATGGTAAAAATCTTAATGGAAGGTTAATGCCAGTTTCAGAGTCTGCAAGAACATGGC
TAAATAAACGTTTTGGCGAACGTGAAATTTATATTGGTTTGGATGCAGCAGTAGCATTAG
GTCATCCAGCGGTTATTTGACAGCATTAAATTTAGTACCTATCACTGTTTTATTAGCCGT
TATTTTACCAGGAAACCAAGTACTACCTTTTGGTGACTTAGCAACGATACCATTGTGTGTC
GCGTTTATTGTTGGTGCAGCAAGAGGAAACATTATTCATTCTGTCATTGTGGGTACGATTA
TGATTGCAATTTCACTATATATTGCAACAGACGTAGCACCTATTTTACAGATATGGCGA
AAGGTACGAATGTACAAATGCCAAAAGGTTTCATCTGAAATTTCAAGTATTGATCAAGGTG
GTAATATCGTTAACTATCTTATCTTTAACTATTTAGTCTATTCAATTA
```



## > **gutB**

Function: protein coding sequence; L-iditol 2-dehydrogenase (core genome, variable)

Best match: gutB\_CC001-ST772\_118\_AJGE01000065.1[54406:55461:r] (completely identical)

Position: 008-contig\_256: 131650 ... 132706; Length: 1056 bp

Sequence:

```
GTGAAAGCTTTAGTAAAAACAAGAGAAGGACATGGCAACTTAGAACTTCTTGATAAAGA
AGTTGCAACACCGCTAGATGATAAAGTAAAGATTAAGTACATTATGCAGGAATTTGTGG
CACAGATATTCATACTTATGAAGGTCATTATAAAGTTAATTTTCCAGTGACATTAGGTCAT
GAATTTTCTGGTCAAATCGTTGAAGTTGGAGCAGACGTTAAAGATTTTAAAGTTGGTGAC
CGTGTCACCTTCTGAAACGACATTCTATGTTTGTAAATGAGTGTGAATACTGTAAATCAAAA
GACTATAATTTATGCAACCATCGAAAAGGTATTGGAACACAAGTTGATGGCGCATTTACT
AATTATGTCATTGCACGTGAAGAAAGTTTGCATCATATTCCAGATGAAGTATCGTATCAG
TCTGCAGCTATGACAGAACCATTAGCATGTGCACATCATGGCGTTTCTAAGATTCAAGTC
AATTCAGGCGATGTAGCAGTTGTAATGGGACCTGGGCCAATCGGATTACTTGTAGCACAA
GTGTTAAAAAGTAAAGGCGCAACTGTTGTGGTAACTGGATTGGACAATGACAAAGTCAG
ATTAGATAAAGCAGAAGCATTGCACATGGATTATGTAGTCAATTTACAACAAACAGACTT
AAAAACGTATATCAATGGAATTACAGACGGTTACGGTGCAGATGTTGTTGTTGAATGTTT
AGGTGCAGTTCAGCAGCACGACAAGGTTTGGATATTTTACGCAAAAAAGGTTTCTACAG
TCAAATAGGTATTTTAAAGGATGCTGAAATTCCATTTGATATGGAAAAAGTGATTCAAAA
AGAAATAACAGTTGTTGGTAGTAGAAGTCAAAAGCCAGCAGATTGGGAACCTTCATTGC
AACTTATGGCGGATGGTTTAGTAAATGCTGAAGCTTTGGTGACAAAAATATATGATATTT
CGAAATGGGACGAGGCGTATCAACATTTAAATCCGGCGAAGGTATTAAGCATTACTTA
AGCCGCTCGATTTAGATGAAAATGAAGGAGAGAATTAA
```

## > **Q5HJC7**

Function: protein coding sequence; putative protein (core genome, variable)

Best match: Q5HJC7\_CC001\_MW2-USA400\_BA000033.2[269164:269310] (completely identical)

Position: 008-contig\_256: 132707 ... 132854; Length: 147 bp

Sequence:

```
ATGGTAGAATCAATGCTAACTTTTATGCTTGGGCCATTAAGACAAATCACTGATTTTTATA
TGGAACATTTACTCGTAAGTAATTCATTGTCATTGCAGGTTATTTTGCAGCAGGTATTTT
TAAAAAGAAAAAAGTTGTGAATTAA
```

## > **Q5HJC6**

Function: protein coding sequence; putative sugar-phosphate dehydrogenase (core genome, variable)

Best match: Q5HJC6\_CC001-ST772\_118\_AJGE01000065.1[53191:54234:r] (completely identical)

Position: 008-contig\_256: 132877 ... 133921; Length: 1044 bp

Sequence:

```
GTGAAAGCATTGAAATTATATGGCGTGGAAGATTTACGGTATGAGGATAACGAAAAGCC
AGTCATTGAAAGTGCGAATGACGTTATTATTAAGTACGAGCGACTGGCATATGTGGTTC
AGACACGTCACGATACAAAAAATGGGGCCATACATTAAGGTATGCCATTTGGTCATG
AATTTTCCAGGTGTAGTAGATGCCATTGGAAGTGATGTTACGCATGTTAATGTGGGCGACA
AAGTGACAGGTTGCCAGCAATACCTTGTATCAATGCGAGTATTGTTTAAAGGTGAAT
ATGCACGATGTGAAAAGTTATTCGTCATTGGCTCATATGAACCTGGATCGTTCGCGGAAT
ATGTCAAATTGCCAGCGCAAAATGTTTTAAAGGTTCCAGACAATGTTGATTACATTGAAG
CAGCAATGGTTGAGCCATCAGCCGTTGTTGCGCATGGGTTTTATAAATCGAATATACAAC
CTGGTATGACTGTTGCAGTAATGGGGTGTGGCAGTATAGGTTTGTAGCTATTCAATGGG
CACGAATATTTGGTGCTGCACATATCATCGCTATAGATATAGATGCGCATAAACTAGATA
TTGCAACATCATTGGGCGCACATCAAACAATCAATTCAAAAGAAGAAAATCTTGAGAAA
TTCATCGAAAATCATTACGCCAATCAAATCGATTTAGCTATAGAATCATCAGGTGCTAAA
GTTACGATTGGTCAAATATTGACGCTACCTAAAAAAGGTGGCGAGGTGGTATTACTCGGA
ATACCATATGATGATATTGAGATTGATCGCGTTCATTTTGAAAAAATCTGCGTAACGAG
TTGACAGTATGTGGCTCTTGGAACTGTTTGTCCAGTAATTTCCGGGCAAAGAGTGGACG
GCAACCTTACATTATATGAAGACGAAAGATATTAATGTAAAGCCTATTATTTCTATTTTT
```

TACCGTTAGAAAAAGGCCCGGAGACATTTGATAAATTAGTTAACAAGAAAGAACGATT  
GATAAAGTCATGTTTACGATTTATTAG

> **tarI1**

Function: protein coding sequence; 2-C-methyl-D-erythritol 4-phosphate cytidyltransferase 1 (core genome, variable)

Best match: tarI1\_CC001-ST772\_118\_AJGE01000065.1[51947:52663:r] (completely identical)

Position: 008-contig\_256: 134448 ... 135165; Length: 717 bp

Sequence:

ATGATTTATGCAGGTATTTTAGCAGGAGGTATTGGTTCGAGAATGGGGAACGTGCCATTA  
CCAAAACAATTTTATAGATATTGATAATAAACCGATTTAATCCATACAATTGAGAAGTTC  
ATTTAGTGAGTGAATTTAATGAGATTATTATCGCAACGCCAGCACAGTGGATTCCC  
ACACAGGATATTTAAAAAATATAACATTACAGATCAACGTGTCAAAGTAGTTGCAGGT  
GGTACGGATCGAAACGAAACAATTATGAACATTATCGACCATATTCGCAATGTAAATGGA  
ATTAATAATGATGATGTGATTGTAACCTCATGATGCCGTAAGACCATTTTAACTCAACGTA  
TTATTAAGAGAACATTGAAGTAGCAGCAAAATATGGTGCAGTAGATACAGTCATTGAA  
GCAATTGATACGATTGTAATGTCTAAAGATAAACAGAACATACACAGTATCCCTGTAAGG  
AATGAAATGTATCAAGGCCAAACACCACAATCATTTAATATTAATTATTACAAGATAGT  
TATCGCGCCTTAAGTAGTGAACAAAAAGAAATCTTATCAGATGCATGTAAAATCATTGTC  
GAATCTGGATATGCAGTTAAATTGGTACGTGGAGAACTATACAACATTAAGTGACAACA  
CCGTATGATTTAAAAGTAGCAAATGCCATTATTCAAGGTGATATTGCCGATGATTAA

> **tarJ1**

Function: protein coding sequence; CDP-ribitol synthetase (core genome, variable)

Best match: tarJ1\_CC001-ST772\_118\_AJGE01000065.1[50929:51954:r] (completely identical)

Position: 008-contig\_256: 135157 ... 136183; Length: 1026 bp

Sequence:

ATGATTAATCAAGTATATCAACTCGTTGCACCGAGACAGTTCGACGTCACATATAATAAT  
GTTGATATTTATGGTAATCATGTCATCGTAAGACCTTTATACTTGTCTATTTGTGCAGCTG  
ATCAAAGGTATTACACAGGTCGAAGAGATGAAAATGTACTGCGCAAAAAATTGCCAATG  
TCATTAGTTCATGAAGCTGTTGGTGAAGTTGTATTTCGATAGTAAAGGCGTATTTGAAAA  
GGTACGAAAGTAGTAATGGTGCCGAATACACCTACAGAGCAACATCATATTATTGCGGA  
GAATTACTTAGCCTCTAGTTATTTTAGATCTAGTGGTTATGATGGTTTTATGCAAGACTAC  
GTTGTGATGGCACATGATCGTATCGTTCGCTGCCTAATGCCATTGATTTGAGTACGATTT  
CATACACAGAGTTAGTGTACAGTAAGTTATCATGCTATACAACGATTTGAACGTAAATCTA  
TACTTTTGAAAACCAGCTTTGGTATTTGGGGTGATGGTAACTTAAGTTATATTACTGCTAT  
TTTGCTACGTAAGTTGTACCCAGAAGCTAAAATTTATGATTTGGTAAGACAGACTATAA  
ATTAAGTCATTTTTCATTTGTAGATGACATCTTTACAGTAAATCAAATACCAGATGATCTT  
AAAATTAATCATGCATTTGAATGTGTTGGAGGTAAAGGAAGTCAAGTTGCACTTCAACAA  
ATAGTTGAACATATTTACCAGAAAGGCAGTATTGCTTTGTTAGGCGTAAGTGAATTACCC  
GTGGAAGTGAATACACGATTAGTACTTAAAAAGGATTAACATTGATTGGTAGTAGTCGA  
AGCGGCTCTAAAGATTTTGAGCAAGTTGTTGATTTATATCGTAAGTACCCAGACATTGTTG  
AAAAGTTAGCATTATTAAGGACATGAAATTAATGTATGTACGATGCAAGATATCGTCC  
AAGCGTTTGAATGGATTTATCGACATCTTGGGGAAAAACAGTATTGAAATGGACGATTT  
AA

> **tarL1**

Function: protein coding sequence; glycosyl/glycerophosphate transferase (core genome, variable)

Best match: tarL1\_CC001-ST772\_118\_AJGE01000065.1[49213:50907:r] (completely identical)

Position: 008-contig\_256: 136204 ... 137899; Length: 1695 bp

Sequence:

ATGACAAAAACGAAACAAGCAATACATATTGATAACATATACTGGGAACGTGTTTCAGTT  
ATATATTGAAGGACATAGTGAAGGTGTCGATTTAACATCAGGACAATTTGTTCTGAGGAA  
TTTAAACGAAACAAAAACATTAGAAGCAAATGAAATGAAATAGACGGTAATACATTTA  
TATGTAGATTCAACGTCGCAATATTAGACGATGGGTATTATTTACCAATGGATAAATATTT

ATTTGTTTATCATGACCAGTTAGAGTATATTGGACAACCTTAATCCAAATATTATTGATCAA  
GCTTATGCGGCATTAATGAAGAGCAAATTGAAGAATACAATGAGCTGACTACACAAAA  
TGGAAAAGTGAACATTTTATTAGCGTATGATGCTAAAGTTTTCCGTAAAGGTGGCGTATC  
ACAACATACGGTCTATACCATTACTCCGGAAATAGCAAGTGACGTTAACGAATTTGTATT  
TGATATTGAAATCACCTTACCTCAAGAGAAAATCAGGGGTCATTGCGACAAGCGCACACTG  
GCTTCATAAACAAGGACATAAAGCTTCATTTGAAAGTAGAAGTTTCTTATTTAAAGCTAT  
TTTTAATATTACAAAGTTACTACATATTAAGAAGCAAAACAATATTATTCACATCAGA  
TTCGCGTCCGAATTTATCAGGGAATTTCAAGTATGTATATGATGAGTTACTTCGCCAAAA  
AGTAGATTTTGATTATGATATTAACCGGTATTTAAGGCGAATATTACGGATAGACGTAA  
ATGGAGAGACAAGTTTAGATTGCCATATTTACTTGGTAAGGCAGATTATATTTTTGTTGAT  
GATTTCCATCCATTAATTTATACGGTTCGCTTTAGACCATCACAAGAAATTATTCAAGTGT  
GGCATGCCGTTGGTGCTTTTAAAACAGTTGGCTTTAGTCGTACAGGAAAAAAAGGTGGTC  
CGTTTATCGATTCAATTAACCATCGTAGTTACACGAAAGCATATGTTTCATCAGAAACCG  
ATATTCCATTTTATGCTGAAGCATTTGGAATTAGAGAAGAAAATGTTGTACCAACAGGTG  
TACCACGTACTGATGTAATTTGATGAAGCTTATGCAACACAAATTAACAAGAGATGG  
AAGATGAATTGCCAATTATAAAGGTAAGAAAGTTATTCTATTCGCACCGACATTTAGAG  
GTAATGGTCACGGTACGGCACATTATCCATTTTTTAAAATTGATTTTGAACGTTTAGCAAG  
ATACTGCGAGAAGCATAATGCAGTTGTGTTATTCAAAATGCATCCGTTTCGTAATAAATAG  
ACTAATATTTACGTGAACATAGACAATACTTTATCGATGTGTCAGATCATCGTGAAGTT  
AACGATATTCTCTTTGTTACAGACTTGTGATTAGTGATTATTCATCTTTAATATATGAAT  
ATGCAGTATTTAAAAGCCGATGATTTTCTATGCATTTGACTTAGAAGATTACATTACGAC  
GCGTGATTTCTATGAACCATATGAATCATTTGTTCCAGGTAATAATTGTACAATCCTTTGAT  
GCATTAATGGATGCTTTGGACAATGAAGATTATGAGGTTGAAAAAGTTGTGCCATTCTTA  
GATAAACATTTTAAATATCAAGATGGTCGCTCAAGTGAACGTTTAGTCAAAGATTTGTTT  
AGACGCTAA

> **tarL2**

Function: protein coding sequence; glycosyl/glycerophosphate transferase (core genome, constant)

Best match: tarL2\_part\_CC009\_21334\_AGTW01000002.1[1:1438:r]

Position: 008-contig\_256: 137633 ... 137663; Length: 30 bp

Sequence:

CTTTAATATATGAATATGCAGTATTTAAAA

> **tarF**

Function: protein coding sequence; CDP-glycerol-poly(Glycerophosphate) glycerophosphotransferase (core genome, variable)

Best match: tarF\_CC001-ST772\_118\_AJGE01000065.1[47616:48785:r] (completely identical)

Position: 008-contig\_256: 138326 ... 139496; Length: 1170 bp

Sequence:

ATGATTAATAACAATTAATAAATTGATAGAACATAGTATATATACGACTTTTAAATTA  
CTATCAAAATTGCCAAACAAGAATCTAATTTATTTTGAAGCTTTTCATGGTAAACAATAC  
AGCGACAACCCCAAAGCATTATATGAATACTTAACTGAACATAGTGATGCCCAATTAATA  
TGGGGTGTGAAAAAAGGATATGAACACATATCCAACAGCACAATGTACCATATGTTACA  
AAGTTTTCAATGAAATGGTTTTTAGCGATGCCAAGAGCGAAAGCATGGATGATTAACACA  
CGTACACCAGATTGGTTATATAAATCACCGCGAACGACTTACAAACATGGCATGGC  
ACGCCATTGAAAAAGATTGGTTTTGGATATTAGTAACGTTAAAATGCTAGGAACAAATACT  
CAAATTACCAAGATGGTTTTTAAAAAAGAAAGCCAACGTTGGGATTATCTAGTGTCACCT  
AATCCATATTCGACATCGATATTTCAACATGCATTTTCATGTTAGTCGAGATAAGATTTTGG  
AAACAGGTTATCCAAGAAATGATAAATTATCACATAAACGCAATGATACTGAATATATTA  
ACGGTATTAAGACAAAATTAATATTTCCATTAGATAAAAAAGTGATTATGTACGCGCCAA  
CTTGGCGTGACGATGAAGCGATTTCGAGAAGGTTTCATATCAATTTAATGTTAACTTTGATA  
TAGAAGCTTTGCGTCAAGCGCTGGATGATGATTATGTTATTTTATTACGCATGCATTATTT  
AGTTGTGACACGTATTGATGAACATGATGATTTTGTGAAAGACGTTTCAGATTATGAAGA  
TATTCGGATTTATACTTAATCAGCGATGCGTTAGTTACCGACTACTCATCTGTCATGTTT  
GACTTCGGTGTATTAAGCGTCCGCAAATTTTCTATGCGTATGACTTAGATAAATATGGC

GATGAGCTTAGAGGTTTTACATGGATTATAAAAAAGAGTTGCCAGGTCCAATTGTTGAA  
AATCAAACAGCACTCATTGATGCATTA AAAACATATCGATGAGACTGCAAATGAGTATATT  
GAAGCACGAACGGTATTTTATCAAAAATTCTGTTCAATAGAAAGATGGACACGCGTCACAA  
CGAATTTGCCAAACGATTTTTTAAGTGA

### > **tarI2**

Function: protein coding sequence; 2-C-methyl-D-erythritol 4-phosphate cytidyltransferase 2 (core genome, variable)

Best match: tarI2\_CC001-ST772\_118\_AJGE01000065.1[46624:47340:r] (completely identical)

Position: 008-contig\_256: 139771 ... 140488; Length: 717 bp

Sequence:

ATGAAATACGCTGGTATTCTAGCTGGAGGTATAGGCTCAAGAATGGGTAACGTACCTTTA  
CCTAAACAATTTTTAGATTTAGACAACAAACCGATTTTAATCCATACATTAGAAAAATTT  
ATTTTAATTAATGATTTTGAAAAAATTATTATCGCGACGCCACAACAATGGATGACGCAT  
ACGAAAGATACACTTAGAAAATTCAAAATTTCTGATGAAAGAATTGAAGTCATTCAAGGT  
GGTAGCGATCGTAACGATACAATTATGAATATCGTTAAACATATTGAATCAACAAATGGT  
ATTAACGATGACGATGTTATTGTGACACATGATGCAGTTAGACCATTTTTAACGCATCGT  
ATTATTAAGAAAATATTCAAGCTGCTTTAGAGTACGGTGCAGTAGATACAGTGATTGAT  
GCTATAGATACGATTGTTACATCTAAAGATAATCAAACGATTGATGCAATTCCAGTGCCT  
AATGAAATGTACCAAGGTCAAACACCTCAATCGTTTAATATTAATTTATTA AAAAGAAAAGC  
TATGCACAGTTGAGTGATGAGCAAAAAGAGTATTTTATCTGATGCTTGTAAGATTATTGTA  
GAAACAAACAAACCGGTTTCGACTTGTA AAAAGGTGAGTTATATAACATTAAAGTAACAAC  
ACCTTACGATTTAAAAGTAGCGAATGCTATTATTCGAGGTGGTATTGCCGATGATTAA

### > **tarJ2**

Function: protein coding sequence; CDP-ribitol synthetase (core genome, variable)

Best match: tarJ2\_CC001\_MSSA476\_BX571857.1[276235:277260] (completely identical)

Position: 008-contig\_256: 140480 ... 141506; Length: 1026 bp

Sequence:

ATGATTAATCAAGTATATCAATTAGTTGCACCTAGACAATTTGAAGTTACGTATAACAAC  
GTAGATATTTACAGTGACTATGTCATTGTACGTCCTTTATATATGTCAATTTGTGCTGCCG  
ATCAAAGATATTATACTGGTAGCCGTGATGAGAATGTCTTATCTCAGAAATTGCCAATGT  
CTTTAATTCATGAAGGTGTTGGTGAGGTCGATTTGACAGTAAAGGTGTGTTTAATAAAG  
GTACAAAAGTAGTTATGGTACCGAATACGCCGACAGAAAAAGACGATGTCATTGCTGAA  
AACTATTTAAAATCGAGCTACTTCAGATCAAGTGGACATGATGGGTTTTATGCAAGATTTT  
GTGTTGCTAAATCATGATAGAGCTGTACCACTACCTGATGATATTGATTTAAGTATTATTT  
CATATACAGAGCTTGTAACAGTAAGTTTGCATGCTATTCGTCGTTTTGAAAAGAAATCTAT  
TTCAAATAAAAATACATTTGGTATTTGGGGTGATGGTAACTTAGGTTACATTACAGCCATT  
TTATTACGTAAATTATATCCAGAGTCTAAAATATATGTCTTTGGTAAAACAGATTATAAAT  
TGAGTCACTTCTCATTTGTTGATGATGTCTTCTTTATTAATAAAAATACCTGAAGGCTTAAC  
ATTTGATCATGCAATTTGAGTGTGTGGGTGGTCGCGGTAGTCAATCAGCCATAAATCAAAT  
GATCGATTACATTTACCAGAAGGAAGCATTGCACTGTTAGGTGTAAGTGAGTTCCAGT  
AGAAGTTAATACACGTCTAGTATTGGAAAAAGGACTAACGTTGATTGGTAGTAGTCGAAG  
TGGTTCAAAGATTTCCAAGATGTTGTAGACTTATACATTCAATACCCAGATATTGTAGAT  
AAATTAGCGTTGTTAAAAGGTCAAGAATTTGAAATTGCAACAATTAATGATCTTACAGAA  
GCTTTTGAAGCAGACCTGTCTACATCTTGGGGTAAAACAGTATTAAAATGGATTATGTAA

### > **Q5HJB8**

Function: protein coding sequence; glycosyl transferase/group 2 family protein (core genome, variable)

Best match: Q5HJB8\_CC001-ST772\_118\_AJGE01000065.1[42138:43863:r] (completely identical)

Position: 008-contig\_256: 143248 ... 144974; Length: 1726 bp

Sequence:

ATGATGAAATTTTCAGTAATAGTTCCAACATACAATTCAGAAAAGTATATAACAGAATTA  
CTTAATAGCCTTGCGAAACAAGATTTCCGAAAACCTGAATTTGAAGTGGTTGTAGTTGAT

GACTGTTCAACAGATCAAACGTTACAAATAGTTGAAAAGTATCGTAATAAATTGAACTTG  
AAAGTAAGTCAACTCGAAACAAATTCTGGTGGTCCAGGTAAACCTAGAAATGTGGCGTTA  
AAACAAGCAGAAGGTGAATTTGTATTATTTGTGGACTCCGATGACTATATAACAAAGAG  
ACTTTAAAGGATGCAGCAGCATTATTTGATGAACATCACTCAGATGTCTTGTTGATTTAA  
ATGAAAGGTGTTAATGGTCGTGGTGTACCACAATCTATGTTTAAAGAAACAGCACCTGAA  
GTTACTTTGTTAAATTCAAGAATTATCTATACTTTAAGCCCAACTAAAATCTATAGAACAG  
CATTACTAAAAGATAATGACATTTATTTTCCAGAAGAATTAAGAGAGTGCAGAAGATCAAT  
TATTTACAATGAAAGCATATTTGAATGCAAATCGAATCAGTGTGTTAAGTGATAAAGCGT  
ATTATTATGCTACAAAGCGTGAAGGTGAACATATGAGTAGTGCGTATGTTTCACCTGAAG  
ACTTTTACGAAGTCATGAGATTGATTGCTGTAGAAATATTAATGCAGATTTAGAAGAAG  
CTCATAAAGATCAAATCTTAGCAGAATTTTTAAATCGTCATTTTAGTTTTCTCGTACGAA  
TGGCTTCTCACTTAAAGTTAACTAGAAGATCAACCGCAATGGATTAATGCTCTAGGAGA  
CTTTATAACAAGCAGTTCAGAACGTGTAGATGCATTGGTGATGAGTAAATTACGACCATT  
GTTGCACTACGCGAGAGCGAAAGATATAGACAACCTATAGAAGTGTAGAAGAAAGTTACC  
GTCAAGGTCAATACTACCGTTTTGATATTGTAGATGGTAAATTAACATTCATTTCAATG  
AAGGCGAACCATACTTTGAAGGCATTGATATCGCTAAGCCAAAAGTGAAAATGACAGCA  
TTTAAATTTGATAATCATAAAATTTGTTACAGAGCTAACGTTAAATGAATTTATGATTGGCG  
AAGGACATTATGATGTCAGACTTAAATTACATTCACGAAACAAGAAGCACACAATGTATG  
TACTTTTAAGTGCAATGCGAATAACAATATCGTTTTAACATTATGTTAGAAGATATTTAA  
AGCGTATTTACCTAAAGAAAAAATTTGGGATGTTTTCTTAGAAGTCCAAATAGGTACGGA  
AGTATTTGAAGTGCGTGTGGTAATCAACGTAATAAATATGCATATACTGCAGAAACAAG  
TGCATTAATTCATTTGAATAATGATTTTTATAGATTAACACCGTATTTACAAAAGACTTT  
AATAACATTTGTTATACTTTACAGCTATTACATTAACGGATTCAATCTCAATGAAGTTAA  
AAGGTAAAAACAAAATCATTTTAACTGGTCTGGATCGTGGTTATGTATTTGAAGAAGGTA  
TGGCTAGTGTGCTGCTAAAAGACGACATGATTATGGGAATGTTAAGCCAAACGTCAGAA  
AACGAAGTGGAATCTTACTTAGTAAAGATATTAAGAAGCGAGACTTCAAAAATATTGTT  
AAGTTAAACACTGCACATATGACTTACTCGCTAAAATAAATAA

### > **scdA**

Function: protein coding sequence; cell wall metabolism protein (genomic island)

Best match: scdA\_CC001-ST772\_118\_AJGE01000065.1[41324:41998:r] (completely identical)

Position: 008-contig\_256: 145113 ... 145788; Length: 675 bp

Sequence:

ATGATAAATAAAAATGACATAGTAGCAGATGTAGTAACAGATTATCCGAAAGCAGCAGA  
TATTTTTAGAAGCGTAGGTATAGACTTTTGTGCGGTGGACAAGTAAGTATAGAAGCAGC  
ATCCTTAGAAAAGAAATATGTAGATTTGAACGAATTATTACAGCGTCTCAATGACGTTGA  
ACAAACGAATACACCAGGTTTCGCTTAAACCCTAAATTTTTAAATGTTTCGTCCTTATTCAA  
TATATTCAAGCAGCATATCATGAACCTCTTAGAGAAGAATTTAAAAATTTAACACCTTAT  
GTGACGAAATTATCGAAAGTACATGGACCTAACCATCCATATTTAGTCGAGTTAAAAGAA  
ACATATGATACATTTAAAAATGGCATGTTAGAGCATATGCAAAAAGAAGATGATGTTGAT  
TTTCCAAAACCTAATTAATATGAACAAGGTGAAGTAGTAGACGATATTAATACAGTGATT  
GATGATTTAGTATCTGATCACATTGCAACAGGACAATTGTTAGTGAAAATGAGCGATTTA  
ACATCTAGCTATGAACCACCGATAGAGGCATGTGGTACGTGGCGACTCGTTTATCAGAGA  
TTAAAAGCACTTGAAGTGTTAACACATGAGCATGTTTCATTTAGAGAATCATGTTTTATTTA  
AAAAGTATCATAA

### > **lytS**

Function: protein coding sequence; sensor histidine kinase/subunit S (core genome, constant)

Best match: lytS\_CC001-ST772\_118\_AJGE01000065.1[39325:41079:r] (completely identical)

Position: 008-contig\_256: 146032 ... 147787; Length: 1755 bp

Sequence:

GTGCTATCGCTAACAATGTTATTACTTGAGCGTGTAGGTTTAAATTATTATTTTGGCCTATG  
TGTTGATGAATATTCCATATTTTAAAACTTAATGAATCGTCGACGTACATGGAAAGCAC  
GTTGGCAATTATGTATTATTTTTCAGTTTGTGTTGCTTAATGTCTAATTTAACTGGTATCGTC  
ATCGATCATCAACATAGTTTGTGAGGAAGTGTGTACTTCCGTTTAGATGATGATGATCTT

TAGCTAACACACGTGTATTAACGATAGGTGTCGCAGGATTAGTTGGTGGTCCTTTTGTAG  
GTCTATTTGTTGGCGTTATTTTCAGGTATTTTCAGAGTGTATATGGGTGGGGCGGATGCACA  
AGTTTATCTTATCTCATCTATATTTATCGGTATAAATTGCTGGTTATTTTGGCTTACAAGCTC  
AAAGACGCAAGCGTTACCCGAGTATTGCGAAAAGTGCCATGATTGGAATTGTTATGGAA  
ATGATTCAAATGTTGAGCATTTTAACATTTTCCCACGACAAAGCATATGCGGTTGACCTCA  
TATCATTAATTGCACTACCAATGATTATTGTTAATAGCGTTGGTACGGCGATTTTTATGTC  
TATTATCATTTC AACATTAAGCAAGAAGAGCAAATGAAGGCTGTTCAAACACATGACGT  
ACTGCAATTGATGAACCAGACATTGCCGTATTTTAAAGAAGGATTGAATAGAGAATCGGC  
ACAGCAAATTGCGATGATTATTA AAAAATTTAATGAAAGTATCTGCCGTAGCAATTACAAG  
CAAAAATGAAATCTTATCGCATGTAGGTGCAGGTAGTGATCATCACATACCAACAAATGA  
AATATTAACAAGTCTGTCTAAAGATGTATTGAAATCAGGAAAGTTGAAAGAAGTTCATAC  
TAAAGAAGAGATTGGTTGTAGTCATCCGAATTGCCCGCTTAGAGCAGCTATCGTGATACC  
ACTTGAGATGCATGGTTCTATCGTCGGTACATTGAAGATGTATTTTACAAACCCTAATGAT  
TTAACTTTTGTGGAACGTCAACTTGCAGAAGGATTGGCAAATATTTTATAGTAGCCAAATT  
GAACTTGGTGAAGCCGAAACGCAAAGTAAGTTATTGAAAGATGCTGAGATTAAGTCATT  
ACAGGCACAAGTGAGTCCACATTTTTTCTTCAATTCAATTAACACGATTTTCAGCTTTAGTT  
AGAATAAATAGCGAAAAGGCACGAGAGTTACTATTAGAATTGAGTTATTTTTTTCAGAGCG  
AATTTACAAGGCTCAAAGCAACATACGATTACTTTAGATAAAGAGTTAAGTCAAGTGCCT  
GCATACTTATCACTCGAACAAGCACGTTATCCAGGAAGATTTAATATCAATATTAATGTT  
GAAGACAAATATCGCGATGTGCTTGTACCACCATTTTTTAATTCAAATTTTAGTTGAAAATG  
CCATCAAACATGCGTTTACGAATCGAAAGCAAGGTAACGATATTGACGTGTCAGTGATTA  
AAGAACTGCAACACATGTACGTATTATTGTACAAGATAATGGTCAGGGTATTTCTAAAG  
ATAAAATGCATTTGTTGGGAGAAACATCTGTAGAATCAGAATCTGGAAGTGGTAGTGCTT  
TAGAAAATTTAACTTACGCCTAAAAGGATTATTTGGAAAATCCGCAGCATTACAATTTG  
AATCGACATCGAGCGGTACCCTTTTTGGTGTGTACTTCTTATGAAAGACAAGAGGAGG  
AATAA

### > **lytR**

Function: protein coding sequence; sensor histidine kinase/subunit R (core genome, constant)  
Best match: lytR\_CC001-ST772\_118\_AJGE01000065.1[38582:39322:r] (completely identical)  
Position: 008-contig\_256: 147789 ... 148530; Length: 741 bp

Sequence:

ATGAAAGCATTAAATCATAGATGATGAGCCATTAGCACGTAATGAATTAACATATTTATTA  
AATGAAATTGGTGGTTTTGAAGAAATTAATGAGGCAGAAAATGTAAGAAACATTGGA  
AGCACTACTGATCAATCAATATGACATTATTTTTTAGATGTCAATTTAATGGATGAAAAT  
GGGATCGAATTAGGAGCTAAGATTCAAAGATGAAAGAGCCACCTGCGATTATTTTTGCA  
ACTGCACATGACCAATACGCAGTACAGGCATTTGAATTAATGCGACAGACTATTTTTG  
AAACCGTTTGGTCAAAAACGTATTGAACAAGCAGTCAATAAAGTGCCTGCGACTAAAGC  
CAAAGATGATAATAACGCAAGTGCAATTGCGAATGATATGTCGGCGAATTTTGATCAAAG  
TTTACCTGTTGAAATTGACGATAAAATTCACATGTTAAAGCAACAAAATATTATTGGGAT  
TGGCACACATAATGGTATTACAACCATACATAACAACGAATCATAAATACGAAACAACAG  
AGCCATTGAATCGTTATGAAAAACGATTGAATCCCCTTATTTTATACGTATTCATCGTTC  
ATATATTATTAACACTAAACACATTAAGAAGTGCAACAATGGTTTAACTACACTTATAT  
GGTAATATTGACAAATGGTGTCAAGATGCAAGTTGGACGTTTCATTTATGAAAGATTTTAA  
AGCGTCGATAGGATTACTTTAA

### > **lrgA**

Function: protein coding sequence; holin-like protein (core genome, constant)  
Best match: lrgA\_CC005\_Mu50-VRSA\_BA000017.4[307072:307515] (completely identical)  
Position: 008-contig\_256: 148642 ... 149086; Length: 444 bp

Sequence:

ATGGTCGTGAAACAACAAAAGACGCATCAAACCAGCACACTTTTTTTCACCAAGTCATT  
GTAATTGCTTTAGTACTCTTTGTATCGAAAATAATTGAATCATTTATGCCAATTCCTATGC  
CTGCATCAGTAATCGGTTTAGTATTATTATTTGTATTATTATGTACTGGTGCTGTTAAGTTA  
GGCGAAGTCGAAAAGTAGGAACGACACTAACAAATAACATTGGCTTACTCTTCGTACC

AGCCGGTATCTCAGTTGTTAACTCTTTAGGTGTCATTAGCCAAGCACCATTTTAAATCATT  
GGACTAATAATCGTCTCAACAATACTATTACTTATTTGTACTGGCTATGTCACACAAATTA  
TTATGAAAGTTACTTCGAGATCTAAAGGTGACAAAGTCACAAAAAAGATCAAAATAGAG  
GAGGCACAAGCTCATGATTAA

### > **lrgB**

Function: protein coding sequence; antiholin-like protein (core genome, constant)

Best match: lrgB\_CC001-ST772\_118\_AJGE01000065.1[37332:38033:r] (completely identical)

Position: 008-contig\_256: 149078 ... 149780; Length: 702 bp

Sequence:

ATGATTAACCACTTAGCACTAAACACACCTTACTTCGGAATACTGTTATCCGTTATACCAT  
TTTTCTTAGCGACCATATTATTTGAAAAACTAATCGTTTCTTCTTATTCGCACCGCTATTT  
GTCAGTATGGTATTTGGTGTGGCCTTCTCTATTAAACAGGCATTCCGTATAAGACTTACA  
AAATAGGTGGAGACATTATTTATTTCTTCTTAGAACCGGCAACAATCTGTTTTGCGATTCC  
GTTATATAAAAAGCGTGAAGTGCTTGTTAAACATTGGCATCGTATCATCGGAGGTATTGG  
CATCGGTACAGTTGTAGCGTTATTAATTATTTAACTTTTGCGAAGTTAGCACAAATTTGCC  
AATGATGTTATTTTATCAATGTTACCTCAAGCAGCAACTACAGCGATTGCGTTACCAGTAT  
CAGCTGGTATCGGTGGTATAAAAGAATTAACATCATTAGCAGTTATTTAAATGGTGTCA  
TTATTTATGCCCTAGGTAATAAATTCTTGAAGCTTTTCCGAATTACTAACCCATTGCCCCG  
AGGATTAGCACTTGGAAACAAGTGGTCACACATTAGGTGTAGCACCAGCCAAAGAATTAG  
GACCTGTAGAAGAATCAATGGCAAGTATAGCTTTAGTGTTAGTTGGTGTAGTTGTTGTAG  
CAGTTGTGCCTGTCTTTGTAGCAATATTCTTCTAA

### > **Q6GK48**

Function: protein coding sequence; putative nitric oxide reductase (genomic island)

Best match: Q6GK48\_CC022\_21310\_AFNP01000014.1[33698:35989:r]

Position: 008-contig\_256: 150119 ... 152411; Length: 2292 bp

Sequence:

ATGAGTATGCAAAGTTCATATAAACGTTTGTAAAGTGCTACTAACGATTTTGTAGTGATT  
GTGTTTTCAATTTTACTAGTAGGTGGTTGGTATATTTTTAAAAATGAAGCACCTCGTCCAA  
CAAAGATAGTAGATCAACAAGGTCATACGCTTGTTACAAAAGACGAGCTGATCAGTGGG  
CAAGCGATATATGAGAAATATGGGTTAACAGATTATGGCTCCTACCTAGGCAATGGTTCT  
TACTTAGGCCAGATTATACAGCAGAGGCATTACATCATTACCTGATTGGTATGCGTAAA  
TATTATGCACAAGATTTTATCATAAGCAACTTCATAAATTAATCATGCAGAGTTAGCC  
GTAGTTAAAGATAAAGTGATGAAAGAAATACGGATTAATCGTTATTCTGAAAAAGAAGA  
TCAACTTGTATTAACGCCAGGACAAGTATACGGTCTAAAATATTTGCAAGATTATTATAA  
AGAAGAGTTTGTAAATAACCCTAAACAAGTAGGGTTAAATGAAAATATGATTAAACAGTT  
TCAAATGATGATTATATGGTTCGCAGGAAATAAAGTTGAACATTTAAGTCAATTCTTTTTC  
TGGGGTGCTTGGCTATCGTCAACAGATAGACCTGGAAAAACATTTTCATATACAAATAAT  
TGGCCATACGATGTGGATGCAGGAAATACGTTGCCTAGTGCAGGGATTTTATGGACTGCT  
ATATCTGTAACATTACTGATTGCAGGCTTGGCATCCATTATATATATTCAAAGCGTTATC  
AATTTGACATGAAGCCGACGTATGAGTCGGAACGGGAACTACCAAAGAGTGAAGTGGAT  
CGTAAAATCACTGATAGTCAACGAAAAGTTGGGAAATATTTAGTCGTTGTATGTTACTA  
TTTTTGGTTCAAATATTATTAGGCGAATTACTGGCACATTATTATGTAGAGAATAAATTTT  
TTGGTATAGAAATACAAAGGCTCTTCCATTTAATATTGCGAAGACATGGCATGTGCAAT  
TAGTTATTTTCTGGGTTGCTACGACTTGGTTAGCAGCAGGAATATACATTGTACCTAAAGT  
ATTGGGCAAAGAACCAAAGAAACAAGGCGTATTAGTAGATATATTGTTTTGGCCTTAAT  
CATAGTTGTGATGGGCAGCATGATTGGAGAATGGGGTCATATTTTAGGTTGGATTGATTC  
TCATTGGTGGCTATTCGGGCACCTTTGGTTGGGAATATATAGAATTAGGTAAATTTTGGCA  
AATATTATTTATAGTAGGTATGATCTTATGGGTTATCATTCTTTGTCGAGGTTTTTTACCAG  
CTATTCGCAACAAAGTACAAGTGAATCATGATAAACGTCACCTATTGACGCTATTGTTTGT  
TGGAGCAATTGCAATTCGTTATTTTATCTTGCATCATTATTTATAATGCCGAATTCACAT  
GTGACGTTTGCCGATTACTGGCGATGGTGGATTGTTCACTTATGGGTTGAAGGTATATTTG  
AAGCATTTGCCGTAGTGTGATTGGTTTCTTAATGGTTAATATGAAATTAACCTACCATTGA  
AACGACGATTCGTGCATTATATTTCAATTAATCTTATTACTAGGTACAGGTATTGTTGGT

ATGGGTCATCATTACTATTGGCAAGGTGATCATTCCATATGGCTAGCACTGGGTTCTTGTT  
TTTCAGCATTAGAAGTCGTGCCGCTTTGTTTTATTAATTTGGGAAGCATAACACACTATCG  
CTTATATAAGAATAGTGACATCGCTTTTCCTTACAAAGGTACATTTATTTTTCTTGCTTCA  
ACAGGATTGTGGAATGCAATTGGTGCTGGAGCATTAGGCTTTTTAATTAACACACCAGCA  
GTAACTACTTTGAACATGGTACGCAATGGACTGCAGCACATGCCCATGGTTCTATGGCT  
GGCGTGTATGGTATGTTCTCAATTGCAATTGCGTTGTATGTTTTTAAAAATATTACTAAAA  
AAGAATTTGGACACCGAAAGTTGAAAAATGGATAAAAAATATCATGTTGGGCTTTAAATA  
TTGGCTTGGCAGGTATGGTTTTCGTTACATTAATGCCAGTAGGTTATATCCAACCTTAAAGA  
TGCATTAGAACATGGTTATTGGCATTCAAGACTAACGTCATTTTATGAACAACCACTTGTA  
AAAGCAATCATGTGGGGGAGAATGCCTTGGGACATTATATTCACAGTAGGTGTCATTATA  
TTAGTAGTTATTTTATAAGGGGATACAGACACTTAAAACCAAATAACAGAGTATAG

## > Q5HJB2

Function: protein coding sequence; putative transcript regulator/GntR family (core genome, variable)

Best match: Q5HJB2\_CC025\_21193\_AFEG01000009.1[165880:166584]RC

Position: 008-contig\_256: 152636 ... 153341; Length: 705 bp

Sequence:

CTACTTTTTACTTGGAAATATAAACTGTGCATGACGATAATGAAATACGATGTCAGACGA  
ATCAAAAGGTTTGCCAGTCATTGTATAAAACGTTTGGTGATAACGTAACATGGTTTCGCC  
TGCAGATAATTGTAGTAATGTCGCTTCACTTGAAGTGAGTTTATCTACATTAAAGAAAAT  
ATCTGAAAAACCAATACGAAGTTTCATGTTTGATTCTAAATAATCGAAGATAGAGCCCTT  
AGCAATATCATCATTAAATATTTACGATTTCTTTATGATAATAAGAATATTCGATACAT  
AAAACATCATCGTCCACGAATCTTAATCGCTCTAAATAGTAGACGGTATCATCTGCATTT  
AATTGGAGTTCATCTTGTACAGATTTAGGTGGCGTTGCCATCTCCTTAAAAACAAGTACCT  
TACTTGTCATTTCGATGTTACCTAAACTTTTAGAGAAACCATTAGTCTTAAAGACGTTGAT  
ACGATTGGCATCTGCAATATTTCTCACATAAATACCACTGCCTTGTGCTTGATAGATCAAA  
CCATCTTGTTCOAATAAGCCTAATGCTTTAATGATAGTACTCTTACTTACTTGATAACGTT  
CTTTAATTGCGTCACGCTTGGCAATTTATCACCGGGTTTGAAATTAGATTGATGTATAAA  
CGCATTAAGTTGCTTAGCAATATGTTCACTTTAAACA

## > Q1YAD5

Function: protein coding sequence; PTS system/IIA component (core genome, variable)

Best match: Q1YAD5\_CC001-ST772\_118\_AJGE01000065.1[32831:33622:r] (completely identical)

Position: 008-contig\_256: 153489 ... 154281; Length: 792 bp

Sequence:

ATGAGCAATAAATATAAAGAACAAGCCCAAGACATTCTTACAGCTGTAGGTGGTGTGCGA  
AAACATTGTTGATGCAACGTATGATACGAAGTGCATTACAATTCATATGCAACATACAAT  
TCCTTCTACAGCAAATGAAGTGAAACAAATAGTTGATGTGACATCTGTAGCAGAAAATGA  
TGCGCAGTTAGTTATAAAATTAATGGAAATGTTGATGAAGTGTATCAGCAATTACAGCG  
ATTAATTAAGAATGCTAATGTCGAAGAGAGTGAGAATACTGACAATATTAATAGCCAAG  
ATACAAGTTATACACCTCAAGTAAAAGTAACAACACCAATTTTAGTGAAAGCACCAATCG  
CTGGTCGTCGTATTTACTTAAAGAAGTAAGAGATTCAATTTTAGAGAGAAAATGGTAG  
GCGAAGGCTTGGCAATCAAAGCTCATGAAGAATCCAAAGTAATCGCACCGTTCAATGGTT  
TAGTATCTATGATTGTACCAACTAAGCATGCAGTTGGTATTCAATCAGAAGACGGTGTGG  
ACATAGTCATTCATATTGGCGTGAATACAGTTGACTTGGAAAGGTAAAGGGTTCAAGTGCT  
TTGTAAAGCAAATGATCGTGTTGAAGCAGGGCAAACGTTGTTACAATTCGACCAGCAAT  
ATATAACAACAAGGCTACAATGCTGACGTTATTGTCGTTATTAGCAACTCTGCCGATTT  
AGGAAAAGTAGAACTGACAATGAATGAAATCATTACGACTGAAGATGTTATTTTTAAAT  
ATTTAAAAACTAG

## > bglA

Function: protein coding sequence; putative 6-phospho-beta-glucosidase (core genome, variable)

Best match: bglA\_CC001-ST772\_118\_AJGE01000065.1[31379:32815:r] (completely identical)

Position: 008-contig\_256: 154296 ... 155733; Length: 1437 bp

Sequence:



ATGACAAAATTACCGCAAATTTTCATGTGGGGTGGCGCACTTGCCGCAAATCAATTTGAA  
GGTGGATATGATAAAGGTGGTAAAGGGTTAAGTGAATTGATGTTATGACGAGTGGTGCA  
CATGGCAAAGCACGTCAGATTACAGAATTTATAGATCCCAATCACTATTATCCAAATCAT  
GAAGGTATTGATTTTTATCATCGTTATAAGGAAGATATTGCCTTGTTAAAGAAATGGGA  
TTGAAATGTTTACGTACGTCGATTGCGTGGACACGTATCTTTCCGAATGGGGATGAAGAT  
GTGCCAAACGAAGAAGGACTCGCCTTTTATGATCGTATCTTTGATGAATTAATTGCACAA  
GGTATTGAACCTGTTGTGACGTTATCACATTTTGAGATGCCACTTCATTTAGCGAAACATT  
ATGGTGGATTTAGAAATAGAGAAGTTGTCGATTATTTTGTGCATTTTGC CGGTGTTGTATT  
TGAAAGATATAAAGATAAAGTTACATATTGGATGACGTTTAATGAAATTAATAATCAGAT  
GGACACATCAAATCCTATCTTTTTATGGACGAATTCTGGGGTAGCATTGACAGAAAATGA  
TAATCCTGAAGAAGTCTTGTATCAAGTAGCACATCATGAACTTTTAGCCAGTGCTTTAGC  
AGTTCGTCTTGGTAAAGAGATTAATCCGAAGTTTAAGATTGGAACAATGATTTACATGT  
ACCCATTTATCCATATTCGTGTCATCCGAAAGATATGATGGAAGCACAAATTGCGAATCG  
CTTACGTTTCTTTTTCCCGGATGTCCAAGTGAGAGGTTATTATCCAAGCTATGCTAAAAAA  
ATGTTGGCACGAAAAGGATATGATGTTGGATGGCAAGAAGGGGACGACAGTATTTTACA  
GCAGGGCACGGTTGATTATATTGGCTTTAGTTATTACATGTCTACGGCTGTAAAACATGAT  
GTTGATACTACAGTTGAAAACAACATCGTCAACGGTGGTTTGAATCATTCTGTGGAGAAT  
CCGCATATCGCAACGAGTGATTGGGGTTGGGCGATTGATCCAGATGGCTTAAGATATACA  
TTGAATGTGTTATATGATCGTTATCAGTTACCACTTTTTATTGTGGAATAATGGTTTTGGTG  
CAGTTGATGAAGTGGTAGATGGACATATTCATGATGATTATCGCATTGAATATTTAAAAG  
CACATATTACAGCAGCGATAGAAGCAGTTGATCAAGATGGTGTAGATTTAATCGGTTATA  
CACCGTGGGAATCATTGATATTGTTTCATTTACAACCGGTGAAATGAAGAAACGCTATG  
GTTTAATATATGTTGATCGAGATAATGATGGTCATGGCACGATGGAACGCTTGAAAAAAG  
ATTCGTTCTATTGGTATCAACAAGTGATAGCATCAAATGGAGATAAATTATAA

### > **Q5HJA9**

Function: protein coding sequence; putative methyltransferase (genomic island)

Best match: Q5HJA9\_CC001-ST772\_118\_AJGE01000065.1[30213:30974]RC (completely identical)

Position: 008-contig\_256: 156248 ... 157010; Length: 762 bp

Sequence:

TTAGTGCTCTTTTTTAGCGACAAAAGTAATATAATTCATATCTTTACGCAATTTAGTCATC  
GTTTTAAACATTTTACAAAACATTGGTCGATTTTCTTTTTTAAAGCATTGTTGATAATCTT  
TATAGTTCCAACAATACCTTCGTCATAAATTAACCTTTTGGTGTCAATTAACCTCATTGGA  
CCAGTATGATAATGCACATGATTAACCAGCTTGATTATATAAATCTAACCAGCCAAGT  
TTCGTCTGCGGTGAGACATTGACATTAATTGCTGCAGATAATGATTTAACTACATGTGTGG  
CATGTGATTCATTAACGATGACAATATCATGTGTTAACAAGATACCCCGAGGCTTTAAGA  
CTCGGTAGTACTCGCGTAATGCTTTTTCTTTATGGCGATGGGTAACATTGTTAACATTGC  
TTCATTTAAAACGATATCGAATTGATTGTCATCAAAGGGCAATTTAACAGCATTTCGCTTGT  
TGAACCTGAATATATGATTCAAGACCTGCTGCTGAAATATTTTCTGTGCTTTTTCTAATG  
CTTTCTTATTTATATCAACGCCTTGAATGTGACAGCCATATGTATGAGCTAGATAAATAGA  
TGTTGTGCACATATTACATGCCACTTCTAACACTTTTTTATCTTGTGAAATGCCCTTGT  
GTATTAACCAATCTGTTGCTGCTTACCACCGGGCGTAGACGAGTTTTTCTAATTTAGC  
TAAAAATGTATGACCAGCTTCTTTGGACAT

### > **rbsK**

Function: protein coding sequence; ribokinase (core genome, variable)

Best match: rbsK\_CC001-ST772\_118\_AJGE01000065.1[29048:29962]RC (completely identical)

Position: 008-contig\_256: 157260 ... 158175; Length: 915 bp

Sequence:

TTACACTTGATTTACTTCTTCTAGTAGAGGAATAGATGCTTGC CGCGCCGTGTTTTGTACA  
GTGAGTGAGCTCGCTTTATTACCAAATCAATAGCATCTGCTAAGTTATCTTGC GACTTGT  
TTAAGCGACTGACAAATGCACCAATAAATGTGTCGCCTGCAGCAGTTGTATCAATCGCAT  
TTACTTTATAAGCTTCGATGTGTTGGCTTTGATTTTTAGTAGCAAATATGTACCTTGCTTA  
CCTAGCGTAATCAAACAGTCTTAATGCCTAAAGATAAAAAGTAATTGGCATTGTCTTTC  
ATAGATTGTTTATTAGTTACTTTAATCCAGATAACAATTCGGCTTCTGTTTCGTTTGGCA

CAATAATATCGATTAATGATAATAATTCATTAGGTAATGCTTTCGCTGGTGCAGGATTTAA  
TACTGTGTCACACCATGTGCCTTGGCAATTTCAAATGCAGATATAATAGCCGGGATGGG  
TACTTCTAATTGTGCAACGACAAAGTCTGCATTGATTATAGCGTCTTTTTCGTTAATAACA  
TCTTCAGGTGTCATCGTCATATTCGCACCACCATAAACATAGATGGTATTTTGTCTTCTG  
CATTACAGTGATAAAGGCTTGGCCCGTTTTTGTCTCAGTTGATTTGATAATATATGATGT  
ATCAATATGAGCTGCTTTAAAATCTTCTAAGATGAAATCAGCAACGCCATCAGTGCCAAT  
TTAGTAATAAATGTTGTGTCTGCTTGCATGCGTGCAGTGGCAATAGCCTGGTTGGCACCT  
TTACCTCCGCCGAATGCTTTTTGTGCTTCTTCAACATGTAATGTTTTCGCCTGGTTGTGCATA  
TCTTCAACTGTTAAAATGATCGACATTCGTTGAACCTAAAATAACAACCTTTGTTGGTC  
AT

### > **rbsD**

Function: protein coding sequence; D-ribose pyranase (core genome, constant)

Best match: rbsD\_CC001-ST772\_118\_AJGE01000065.1[28616:29020]RC (completely identical)

Position: 008-contig\_256: 158202 ... 158607; Length: 405 bp

Sequence:

TTAAAAAGTAACATTTCGATTCTAATGCAATATTAGAGTAGGGCGTTGTTTCACCAGTACG  
AATATTACCTTTATTTAATGGGTGAGCTAAGTTACTTTTCATTTCTTCGTGAGGAATGAAA  
ATGATTTTCGATTTCCGATGAAATCAATTGTTAATTTGTTGCAATTGTGTAGGGTTATGTT  
CTTTTATTTCTTCTGCTAAGTATATTTTTTGTATTTCCATTTCTTCTAACACTGTAGCTAAG  
ACATCAATAAAGCGTGGTAAGTTTTTAGTTACAGCTAGGTCGATACGACGATGATCATT  
GGAATTGGCATGCCAGCGTCATTAATCGTTAATAGATCAAATGACCAATTGTTCGCGATT  
GCTTTTGAAATATGTTCAATTTAAAACAGCTGTTTTTTTCAT

### > **rbsU**

Function: protein coding sequence; ribose uptake protein (core genome, constant)

Best match: rbsU\_CC001-ST772\_118\_AJGE01000065.1[27720:28601]RC (completely identical)

Position: 008-contig\_256: 158621 ... 159503; Length: 882 bp

Sequence:

TTATTTTATAAATACTGTAACAGAAGCGGCTACTAAAATGAGTACTAAGCCGATGATTGT  
AATAACCATTTCTTTTGACGTTTTATGTTGTTTTAAGAAATAAATACCAGTTAATGTAGCA  
AGCACAACGGATGTTTGAGAAAGAATAAATCCAGTTGCTAAACCATTCATATTAGGTTGT  
GCTGAAATAAGATATGTTAAGGCACCAAATGCAAAGAAGAAACCTGAAATAATTTGTAA  
CCACGTAATTTTATTACGGAATGGATTCTCTGCTTTCATATTCATAAAGCCATAAATGACT  
GCAACAATTACCATAACCCATTGCTTGAGGTAAAAAGGCAGTTAGGCCATCAATAGAAGTT  
GCTTGCGGTGCAGCTGAATATAACCAGTATCCAAATTCACCAATTAACAGAAGTACCACT  
GCACGACGTAAATTTTTGGCGTTACTTGTCTTTGCGTTCACTCCAACTGTCATACGCG  
CACCAATTAGAATAACGACTAAAGCTGTAATCCAATGATTTTATGACCAATGCCTGGCC  
AATTTCTAATGCAAAGACACCCATAAAGATGCGCCTAATAAATTGGAATGCTGTTGTGA  
CTGGCATGGCACGAGATGAGCCGACTAATTCGAACGCTTTAAATGTAATGATTTGTCCGA  
ATCCCCATCCTGCACCTGATAATAAGGCGAATAGCAAATTGGTTCCAGTAGGGAAGCCAC  
TTGATGTGACTACGGCTAATAAATAGCGAAGATTAACGTACCTACAGTAGCACCATAA  
TTGATGTACAGGTTTACCACCAAACCTTTGAAGCGACTGTTGGGAAGAAGCCCCAGCCAA  
TTAAGGGGCTAACCCGATAAGTAATGCAACAATGCTCAT

### > **rbsR**

Function: protein coding sequence; ribose operon transcript repressor (core genome, variable)

Best match: rbsR\_CC001\_ATCC51811-ST1\_ADVP01000041.1[145517:146515]RC (completely identical)

Position: 008-contig\_256: 159734 ... 160733; Length: 999 bp

Sequence:

TTAGTTTGAAAGATGATAGCCAGTTGTTGCACGAATTTTTAAAGTCGTTGGTAATTC AATC  
ATATCAATGGATTTATCTAAGTGCTGTAATCGTTGAAGTAATAAGGTTAAAGATGTTTTGC  
CAATATCAGTTATAGGTTGTGCCACAGTAGTTAAAGGTGGCGAGACGTACGCTGCATAAT  
CAATGTCGTCATAACCTATTAATGAGATATCTTTCGGAATACTGATGCCATGTTCAATTAG

TCCTCGTAAAATGCCAATAGCGAGTTCATCGTTAATAGCGAAGATTGCAGTGGCAGATTG  
AACCATGATGTCATCAACAATGGTTAGCCACCGCGCTTAGATAAATTCAGTATGGACGAT  
TTGTGGTTCTGGCAATTGATTCGCGCGCAAAGTATCAACAAATCCAGCGACACGAGTCGA  
CATATTCGCCATCATGTATATGGTGCAACAATCATCATATTGTTGTGACCGAGTTCTATT  
AAATGTTGTGCTGCAAGTTGTCCGCCTTGATATTCATTTGTCCGAACAAAATCTGTATAGC  
CTTGATGGTCATTTTGTATCCAGTACGACATAAGGTACATGATGTTTCTTTAGATAGTTATT  
TAGGGCGTCCGGGGATGAAATGTATTGTGCGATAATTAATCCGTCAATACCTCGATCAAT  
TAAATGTTTAAATATTGTCATACAAATCAGTTGCTGTAGATGTTAAAAAGCATAAATCAAC  
ATCAGATGGTTTATGGTCATGAATACTTTGCATCAGTGCTGAGAAAAACGGATTTGTTAA  
GCTAGGCAAAATGACGCCAATAGTTTGAATTTTACTGCCGCGCAATTGTTTTGCATGTTTA  
TTAGGGGCATAGCCTAAACGTTCTGAAACAGCATGTACGTTTTTTATCGTTGTTGCGGAA  
AAACGACTATCATTATGATTTAAAATATGTGACACAGTTGTAAGTATACACCAGCTTCT  
CTAGCAACATCTTTAATTGACACTTTTTTTCAT

### > **lytM**

Function: protein coding sequence; lysostaphin (core genome, variable)

Best match: lytM\_CC001\_MW2-USA400\_BA000033.2298898:299848 [4\_50ANF10END]

Position: 008-contig\_256: 164560 ... 165511; Length: 951 bp

Sequence:

ATGAAAAAATTAACAGCAGCAGCGATTGCAACGATGGGGCTTCGCTACATTTACAATGGCG  
CATCAAGCAGATGCAGCAGAAACGACAAACACCCAACAAGCACATACACAAATGTCAAC  
ACAATCACAAGACGTATCTTATGGTACTTATTATACAATTGATTCTAATGGGGATTATCAT  
CACACACCTGATGGTAACTGGAATCAAGCAATGTTTGATAATAAAGAATATAGCTATACA  
TTCGTAGATGCTCAAGGACATACGCATTATTTTTATAACTGTTATCCAAAAAATGCAAAT  
GCCAATGGAAGCGGCCAAACATATGTGAATCCAGCAACAGCAGGAGATAACAATGACTA  
CACAGCGAGTCAAAGCCAACAGCATATTAATCAATATGGCTATCAATCAAATGTAGGTCC  
AGACGCGAGCTATTATTCACATAGTAACAACAACCAAGCGTATAACAGCCATGATGGTA  
ATGGAAAGGTCAATTCCCCTAATGGCACGTCTAATCAAAATGGCGGATCAGCAAGTAAA  
GCGACAGCTAGTGGTCATGCGAAAGACGCAAGCTGGTTAACAAGTCGTAACAACACTACA  
ACCATATGGACAATATCACGGTGGTGGTGCGCATTACGGTGTGCGACTATGCAATGCCTGA  
AAATTCACCAGTTTACTCATTAACTGATGGTACAGTAGTACAAGCAGGTTGGAGTAACTA  
TGGTGGTGGTAATCAAGTAACGATTAAGAAGCGAACAGTAATAACTACCAATGGTATA  
TGCATAATAATCGTTTAACTGTTTCAGCTGGTGATAAAGTCAAAGCTGGTGACCAAATTG  
CATATTCAGGTAGTACGGGTAATTC AACAGCGCCTCACGTACACTTCCAACGTATGTCTG  
GTGGCATCGGTAATCAATATGCAGTAGACCCAATGTCATACTTGCAAAGTAGATAA

### > **ssaA**

Function: protein coding sequence; staph secretory antigen A (core genome, constant)

Best match: ssaA\_CC001-ST772\_118\_AJGE01000065.1[16080:16982]RC (completely identical)

Position: 008-contig\_256: 170240 ... 171143; Length: 903 bp

Sequence:

TTAATGGATGTAATTATATGATGAACTTCTGAAGCAGAGATGGTTCTTGATGAAACGAT  
ATATTCACCGATCCAATTCATTTCTGAAATTAGAATGCTTCCATCAATATTAACTTTTTCA  
ACGTAGGCTACATGACCAAATGGACCGTTTACTGTTTGTA AAAATTGAACCTCGTGTTGGG  
TGTCTATCTACTTTGAAGCCATTGCTTGAAGCTTGGCCTGCCAGTTTTTAGCATCTCCCC  
AAAATGTACTAATCGTGTGTCCATCTTTGGCACGTTTATCAAAGACATACCATGTACATTG  
TCCAGCAGTATATAAGTTGTTCTTACTTGTGATAAGAGGCTGATCAATGATTTTACCGTTA  
CCTAATGCTAAAGGTTTACCGTCAGCAGTCTTTGCTTTGTCATTAAATTCGGCGATTTGTA  
ATTCGTCATACAATTCGTCTAAATCGATGCCTGTAATAAGCCCTTTGTTATCTTTGAAAA  
AGCGTTATTTAATTCATCGTCATTGTCTTCGACATTCGGTATTGCTGGTGTCAAAGGATTG  
CTTGGTGACGTTTGAGGCGGTGTGTGTGAATCAATTGCGTCATTAATGTGCGTATACTGAC  
CACTTAATGAAGAATGGTACTGATTGTTGTTAAGATCACGTTGATTTGCGTGTTGATGATT  
GTCGTTTGTACGTGACTGGTTTTGATGATTGTTGTTTGGCGTGTTGTTTTTGCATATGTAT  
AAGTATACGCGCCGGTGTCTTTATCACTTTGAACTGTGCGTTTGGGTGTGCTTTCTTTGCT

TCTTCTAATGTTTTGCTATCATTCGTATATGCTTGAGCCGAGTTAGGCGACATACTAAATA  
AAGTAAGAGTTGTCATCGTCAGTAAAATTGTTTTCTTCATAATAACCAT

> **esxA**

Function: protein coding sequence; virulence factor esxA (core genome, constant)

Best match: esxA\_CC001\_MW2-USA400\_BA000033.2[305719:306012] (completely identical)

Position: 008-contig\_256: 171381 ... 171675; Length: 294 bp

Sequence:

ATGGCAATGATTAAGATGAGTCCAGAGGAAATCAGAGCAAAAATCGCAATCTTACGGGCA  
AGGTCAGACCAAATCCGTCAAATTTTATCTGATTTAACACGTGCACAAGGTGAAATTGC  
AGCGAACTGGGAAGGTCAAGCTTTCAGCCGTTTCGAAGAGCAATTCCAACAACCTTAGTCC  
TAAAGTAGAAAAATTTGCACAATTATTAGAAGAAATTAACAACAATTGAATAGCACTG  
CTGATGCCGTTCAAGAACAAGACCAACAACCTTTCTAATAATTTTCGGTTTGCAATAA

> **esaA**

Function: protein coding sequence; protein esaA (core genome, constant)

Best match: esaA\_CC705\_RF122-cow\_AJ938182.1[273193:276222]

Position: 008-contig\_256: 171757 ... 174787; Length: 3030 bp

Sequence:

ATGAAAAGAAAAATTGGATTTATGCATTAATTGTCACCTTAATTATTATAATTGCCATAG  
TTAGTATGATATTTTTTGTTCAAACAAAATATGGAGATCAATCAGAAAAAGGATCCCAAA  
GTGTAAGTAATAAAAAATAAAAAACATATCGCAATTGTTAACGAGGATCAACCAACG  
ACATATAACGGTAAAAAAGTTGAGCTGGGTCAAGCATTTATTTAAAAGGTTAGCAAATGA  
GAAAACTATAAATTTGAAACAGTAACAAGAAACGTTGCTGAGTCTGGTTTGAAAAATG  
GTGGATACCAAGTCATGATTGTTATCCCAGAAAACCTTTTCAAATTTGGCAATGCAATTAG  
ACGCTAAAACACCATCGAAAATATCGCTACAGTATAAACAGCTGTAGGACAAAAAGAA  
GAAGTAGCTAAAACACAGAAAAAGTTGTAAGTAATGTACTTAACGACTTTAACAAAAA  
CTTAGTCGAAATTTATTTAACAAGCATCATTGATAATTTACATAATGCACAAAAAATGT  
TGGCGCTATTATGACGCGTGAACATGGTGTGAATAGTAAATTCTCGAATTACTTATTTAA  
TCCAATTAACGACTTCCCGGAATTATTTACAGATACGCTTGTAATTTCAATTTCTGCAAC  
AAAGACATTACAAAATGGTTCCAAACATACAATAAATCATTATTGAGTGCGAATTCAGAT  
ACGTTTCAGGGTGAACACAGATTATAATGTTTCGACTTTAATTGAAAAACAAAATTCATTA  
TTTGACGAGCACAATACAGCGATGGATAAAATGTTACAAGATTATAAATCGCAAAAAGA  
TAGTGTGGAACCTTGATAACTATATCAATGCATTAACAGATGGACAGCCAAATTGATCA  
ACAATCAAGTATGCAAGATACAGGTAAGAAGAATATAAACAACTGTTAAAGAAAACCT  
TAGATAAATTAAGAGAAATCATTCAATCACAAGAGTCACCATTTTCAAAGGTATGATTG  
AAGACTATCGTAAGCAATTAACAGAATCACTGCAAGATGAGCTTGCAAATAACAAAGAC  
TTACAAGATGCGCTAACAGTATTTAAATGAACAATGCTCAATTTGCTGAAAATCTAGAA  
AAACAGCTACATGATGATATCGTTAAAGAACCAGATAAAGATACAACATTTATCTATAAC  
ATGTCTCAACAAGACTTTATAGCTGCAGGTTTAAATGAGGATGAAGCTAATAAATACGAA  
GCAATTGTCAAAGAAGCAAAACGTTATAAAAACGAATATAATTTGAAAAACCGTTAGC  
AGAACACATTAATTTAACAGATTACGATAACCAAGTTGCGCAAGACACAAGTAGTTTGAT  
TAATGATGGTGTCAAAGTGCAACGTAACGTAACGATTAAGTAATGATATTAATCAATT  
AACTGTTGCAACAGATCCTCATTTTAAATTTTGAAGGCGACATTAATAATTAATGGTAAAAA  
ATATGACATTAAGGATCAAAGTGTTCAACTCGATACATCTAACAAAGGAATATAAAGTTGA  
AGTCAATGGCGTTGCTAAATTGAAAAAGGATGCTGAGAAAGATTTCTTAAAAGATAAAA  
CAATGCATTTACAATTGTTATTTGGACAAGCAAATCGTCAAGAAGAACCAATGATAAGA  
AAGCAACGAGTGTGTGGACGTAACATTGAATCATAACTTTGATGATCGCTTATCGAAAG  
ATGCATTAAGCCAGCAATTGAGTGCCTTATCTAGGTTTGTGACATTATCAAATGTACA  
CAGATACAAAAGGCAGAGAAGATAAACCATTCGATAACAAACGTTTAAATTGATATGATG  
GTTGACCAAGTTATCAATGACATGGAAAGTTTCAAAGACGATAAAGTAGCTGTGTTACAT  
CAAATTGATTCAATGGAAGAAAACCTCAGACAACTGATTGATGACATTTTAAATAACAAA  
AAGAATACAACAAAAAATAAAGAAGATATTTCTAAGCTGATTGATCAGTTAGAAAACGT  
TAAAAAGACATTTGCTGAAGAGCCACAAGAACCAAAAATTGATAAAGGCAAAAATGATG  
AATTAATACGATGTCTTCAAATTTAGATAAAGAAATTAGTAGAATTTCTGAGAAAAGTA

CGCAATTGCTATCAGATACACAAGAATCAAAAACAATTGCAGATTCAGTTAGTGGACAAT  
TAAATCAATTAGATAATAATGTGAATAAACTACATGCGACAGGTCGAGCATTAGGCGTAA  
GAGCGAATGATTTGAACCGTCAAATGGCTAAAAACGATAAAGATAATGAGTTGTTGCGCTA  
AAGAGTTTAAAAAAGTATTACAAAATTCTAAAGATGGCGACAGACAAAACCAAGCATT  
AAAGCATTTATGAGTAATCCGGTTCAAAGAAAAACTTAGAAAATGTTTTAGCTAATAAT  
GGTAATACAGACGTGATTTACCGGACATTATTCGTATTATTGATGTATTTACTATCAATGA  
TTACAGCATATATTTTCTATAGTTATGAACGTGCCAAAGGACAAATGAATTTTCATTAAG  
ATGATTATAGTAGTAAAAACCATCTTTGGAATAATGTCATTACGTCAGGTGTTATTGGTAC  
AACTGGTTTGGTAGAAGGATTAATTGTCGGTTTAATTGCAATGAATAAGTTCATGTATTA  
GCTGGCTATAGAGCGAAATTCATCTTAATGGTGATTTAACTATGATGGTCTTCGTA  
TTAATACGTATTTACTAAGACAGGTAAAATCTATCGGTATGTTCTTAATGATTGCTGCATT  
GGGTCTATACTTTGTAGCTATGAATAATTTGAAAGCGGCTGGACAAGGTGTGACTAATAA  
AATTTACCATTGTCTTATATCGATAACATGTTCTTCAATTATTTAAATGCAGAGCATCCT  
ATAGGCTTGGCGCTAGTAATATTAACAGTACTTGTGATTATTGGCTTTGTACTGAACATGT  
TTATAAAACACTTTAAGAAAGAGAGATTAATCTAA

> **essA**

Function: protein coding sequence; protein *essA* (core genome, constant)

Best match: *essA\_CC001\_MW2-USA400\_BA000033.2*[309124:309582] (completely identical)

Position: 008-contig\_256: 174786 ... 175245; Length: 459 bp

Sequence:

ATGTTGATGAATAGCGTGATTGCTTTAACTTTTTTAAACAGCATCTAGCAATAATGGCGGAC  
TTAATATTGACGTGCAACAAGAAGAGGAAAAGCGAATCAATAATGATTTAAATCAATAT  
GATACAACGCTATTTAATAAAGACAGCAAAGCGGTTAATGATGCGATTGCTAAGCAGAA  
AAAAGAACGACAACAACAATAAAAAATGATATGTTTCAAATCAAGCGAGTCACTCGA  
CTCGCTTGAATGAAACTAAAAAAGTGTTATTTTCAAATCTAACTTAGAAAAGACTTCGG  
AGAGTGATAAAAGCCCCTATATTCAAACAAGCAGGAGAAAAAATATTCCCGTACATT  
TTGATGTCTGTAGGGGCTTTTTGACTTTAGGATTTGTCATTTTTTCAATTCATAAAGGGA  
GACGAACGAAAAATGAATCAGCACGTAAAAGTAACATTTGA

> **esaB**

Function: protein coding sequence; protein *esaB* (core genome, constant)

Best match: *esaB\_CC005\_Mu50-VRSA\_BA000017.4*[330865:331107] (completely identical)

Position: 008-contig\_256: 175216 ... 175459; Length: 243 bp

Sequence:

ATGAATCAGCACGTAAAAGTAACATTTGATTTTACTAATTATAATTACGGCACATATGAC  
TTAGCAGTACCAGCATATTTACCGATAAAAAATTTAATAGCTTTAGTATTGGATAGTTTGG  
ACATTTCAATATTTGATGTCAATACACAAATTAAGTGATGACGAAAGGTCAATTA  
TTGAAAATGATCGACTCATTGATTATCAAATCGCTGATGGAGATATTTTGAAGTTACTATA  
G

> **essB**

Function: protein coding sequence; protein *essB* (core genome, constant)

Best match: *essB\_CC001\_MW2-USA400\_BA000033.2*[309809:311143]

Position: 008-contig\_256: 175471 ... 176806; Length: 1335 bp

Sequence:

ATGGTTAAAAATCATAACCCTAAAAATGAAATGCAAGATATGTTAACGCCTTTAGATGCT  
GAAGAAGCAGCTAAAACAAAATTACGCTTAGATATGAGAGAGATTCCTAAGTCTTCAATT  
AAACCAGAACATTTTCATTTAATGTACTTATTAGAACAACATTCCTCATATTTTATAGATG  
CTGAATTAACCTGAACTACGTGATAGTTTCAAATACATTATGACATTAATGACAATCATA  
CACTTTTTGATAATATTAATCATTACTAAAAATGAAAAATTACGTTACTTACTCAATAT  
CAAAAATTTAGAAGAAGTAAATCGTACACGCTACACATTTGTGTTGGCACCAGATGAATT  
ATTTTTACAAGAGATGGATTACCAATTGCTAAAACAAGAGGTTTACAAAATGTTGTTGA  
CCCATTACCGGTGTCAGAAGCTGAATTTTTAACAAGATATAAAGCACTGGTTATCTGTGC  
ATTCAATGAGAAACAATCATTGATGCTTTAGTTGAAGGAAACTTAGAATTACATAAAGG

AACGCCATTTGAAACTAAAGTTATTGAAGCGGCAACGTTAGATTTACTAACGGCATT  
AGATGAACAGTATCAGAAACAAGAACAAGATTATAGTCAAAATTATGCATATGTACGCA  
AAGTAGGGCATACCGTTTTTAAATGGGTTGCTATCGGTATGACAACGTTAAGTGT  
AATTGCATTCTTAGCCTTTTTATATTTTTTCAGTAATGAAGCATAATGAGCGCATTG  
GGATACCAAGCATTGTAAAGGATGATTATACGCAAGTACTAAATACGTATGATGATTA  
GATGGTAAAAAATTAGATAAAGAGGCCTTTACATTTATGCCAAAAGTTATATCCAAACA  
AATAAACAAAGGTTTAGAAAAAGATAAGAAAGAAAATTTACTTAATAACGTGACACCAA  
TTCAAATAAAGACTACTTATTATATTGGATGGAATTAGGACAAGGACATCTTGATGAAGC  
GATTAATATTGCCACTTATTTAGATGATAACGATATTACAAAGTTAGCGTTGATTAATA  
GTTAAATGAGATTAATAAATAACGGAGATTTATCGAATGATAAACGTTCTGAAGAAACGA  
AAAAGTATAACGATAAATTGCAAGATATTTTAGACAAAGAAAAACAAGTTAAAGATGAA  
AAAGCGAAATCTGAAGAAGAGAAAGCAAAAGCGAAAGATGAGAAATTAAGCAACAAG  
AAGAGAACGAAAAGAAACAAAAAGAACAAGCACAAAAAGATAAAGAAAAACGCCAAG  
AAGCTGAAAGAAAAAATAG

> **essC**

Function: protein coding sequence; protein essC (core genome, variable)  
Best match: [essC\\_CC001\\_MW2-USA400\\_BA000033.2\[311165:315604\]](#)  
Position: 008-contig\_256: 176827 ... 176857; Length: 30 bp  
Sequence:  
ATGCATAAATTGATTATAAAATATAACAAA

> **orfHyp-MRSA252**

Function: protein coding sequence; putative protein (genomic island)  
Best match: [orfHyp-MRSA252\\_ref\\_CC030\\_MRSA252\\_BX571856.1\[333582:334646\]](#)  
Position: 008-contig\_256: 180211 ... 181276; Length: 1065 bp  
Sequence:  
ATGGAAGAATATGAAGAAATGATGTCTAAGGTGACACGTGAAGGTTTAGCATTAGGGGT  
ATACATCATTCTTTCAGGATCAAGATCAAGTGCAATAAAATCAGCTATATTTACTAACATT  
AAAACAAGAGTTGCACTATACCTCTTTGAAAATAATGAATTAACAAATATTATTGGTTCT  
TATAAAAAAGGTGTGAAAGATGTTAAAGGTAGAGCTGCAATAAATGATGATAACTTCAC  
ACAGTTCCAAATTGCGCAACCATTTGAATTAGCAGAAGGACAAACATATAACGAGCGCA  
TTAAAAATGAAGTAGCACAAATGAAAGAATTCTATGTAGGAGATTATCCAAAACATATCC  
CAATGATGCCAGATAAGGTATTAATGGATGATATTCAAGAAACATATGATTTGGAAAAA  
ATCATTATCATGAAGAACACAAATTACCATTAGGATTAGACTTTGAGGATGTGGAAGTACTAGTT  
AGCTTAGATCTGACAAGTTCTTCGATTGTAACAGCAATTAACCAACTGAGATGGAAAAA  
ATGAATGATGTTATAATGTCTAGTTTATCAGTATATAGTAAAAACCAATTTGTTATCTTGG  
TTGATGCAGAAGATAATATGAGCCAGTATGCAGAAGATGTAACCTCTTATTATTCAGCAC  
CATCAGATTTGAGCAACATTAGATTAGGATTTAAGCAAGAAATAGAAGCAAGGAAAAAAT  
GGCGAGAAAAGTATAGAGGAATGCAAGATTGTATTTATAAATAATATTAACGATTCAAT  
CAATTAACCTGGAATGACAGAAGATGAAATTCGTGTGTTATTTAATGAAGGTCAAAAAGTT  
AATATTATCATTATTGCAAGTGGACTATACTCAGATACAATTGGTGCATTTGATAGAGAA  
AGTAAAATGATGGTAAGAACTATAAATCAAGCTTTGATTAGTCATAAGATATCGGAACAA  
GAATTTATAAGAGTTAAAGATCGATTTGGTGAACCAGAATTAAGTGGGAGAAATGTA  
TTACATTAATAATCAAGAATATCAAAAAATAAACTAATGGAGGGATAG

> **Q6GK23**

Function: protein coding sequence; putative protein (genomic island)  
Best match: [Q6GK23-MRSA252\\_ref\\_CC030\\_MRSA252\\_BX571856.1\[334649:334915\]](#)  
Position: 008-contig\_256: 181395 ... 181545; Length: 150 bp  
Sequence:  
TTTAAAGAATATGTAAATATGTTTGAAGATTATCAATCAGCTCTATCTAATTATGAAAAC  
ATAATTGAACAAGATACGACGGCTATGGATACAACGGTAACAGAAATTGTTGAAAACGA  
TAGAGAAATAGCAGGACAAATTAATAAATAA

### > Q6GK22

Function: protein coding sequence; putative protein (genomic island)

Best match: Q6GK22-MRSA252\_ref\_CC030\_MRSA252\_BX571856.1[334938:335333]

Position: 008-contig\_256: 181567 ... 181963; Length: 396 bp

Sequence:

```
ATGAGTAATAAGGGAGAAATAAGAAGGCCAAATTGCTAATAAAGAAAGAGAAAAAGCAA
GTAAAGAAGCACAACTAACAGATTTAAAAGAGGATTTAAGAAGGTTGAAAGACGCTTCG
AAAAAATTGGATACAGCAGGAGAAGATTTTAACAAAGGACAGAGTAGTTATAACAAAGT
AGAAATTAGTACTTCAGATTGGAAAGGAGAAAGAAGGACTAAAAGTGACAGCAAAAAG
AAAGATGTCGATTCTGAATTAATAAAAAGTTGAACAAGACTTTGATGATGCGAAGAAGGC
TATTAATAAAGATATTCAGGATAAAGAAGGAGAAATCAAGGGAGTCGAAGGAGAAATC
AGTACTATAAATGCAGCTATAGATGCACTTAAATCAAATTATAA
```

### > Q6GK21

Function: protein coding sequence; putative protein (genomic island)

Best match: Q6GK21-MRSA252\_ref\_CC030\_MRSA252\_BX571856.1[335355:337025]

Position: 008-contig\_256: 181984 ... 182134; Length: 150 bp

Sequence:

```
ATGGGGTACAAAGTTGATATGTCTGAAGTGCACAATATGCAAAGTCTATTGATTCAAGC
TTAAGTGCATAAATAACAAAGGTTAGCACGCTTAGCAGTAGCATAAACCAACCTTATAAAT
ACTGAAGGATTCGAAGGTCAGACAGCAAGT
```

### > Q6GK19

Function: protein coding sequence; putative protein (genomic island)

Best match: Q6GK19-MRSA252\_ref\_CC030\_MRSA252\_BX571856.1[337685:338140]

Position: 008-contig\_256: 184314 ... 184770; Length: 456 bp

Sequence:

```
ATGGAAGTAGGAATGTTAATTATGCCGTTTTGTGTGAAGATTACATTTGAAATTGATAAA
AATGATAAATTGGTTAAATGCATTAGATACAGTAAATGAATTTTTTATGGATAAAGATATA
TATCCTACTGGACCTATAATTTTCCAAAGAGAATTAGCAGGTTTGGGTGAATATAAATAT
ACAGCATATATAGCTCTTAATGATGAACTCCAAGATATACCTGAATTGAACATTAATAT
ATTGATTGTTTAGAGGTAGGACCTACGTTATCAACTAAGTGTTTTGAAGAAGAGGAATTT
GAAAGAGCCTATAAAGAAATTGAATATGTAGCTAACGAAAATAATATTAAGATTCTAAA
TCAACCATATTATCATGTAATGGTGGATTATTTGGTGGTACGGCTTTTGAATTTATGCT
CAAGTAGATTTGGATGAGAGTGAAGTATATGGATAA
```

### > Q6GK17-var1

Function: protein coding sequence; putative protein (genomic island)

Best match: Q6GK17-var1\_CC012\_21266\_AFTT01000027.1[118923:119510:r] (completely identical)

Position: 008-contig\_256: 185245 ... 185833; Length: 588 bp

Sequence:

```
ATGATAATTTTTATTTTAATAACAATATTTGCTATTTATTATATAGCTATGATTGCTAGTTT
GTTTAAAAGTGAAGGTTTTTCAATAATAGGTTAATATTGGATATAGTTATTTTGACAACG
TTAATTTTTTATTATTTGTAGGTGCGCGTTTTGTTGATCATGATTTAAGCAACTTTTTAGC
ATTTATGCATTTGGGTTCAATTTGTGTATATTTACTTTGCAATTAAGTGTTTTATGGGTGAAA
CCTAAGGTAGTAAATTATTTGATTGCAAAAGAATTGGATGAATCTAAAGAGGTCATTGAA
GAGCAGGAATTAGATTTACAGACATCAAAGATAAGAGGTATCTACTTTTTTATTATTGCA
GTAGTGATGTTAATTATTGCTAAATTAAGGATGCAACCAGAATTACAAGTAGATGCGTTA
TCAATGAATCCAGTTTTTATTTTTATAGGAGTTATTATCATCTTAATTTGGCTAGTACTGG
ATATATATCGTAAAGAAAAAATACGGTATATTCTTATTCAAGACGATAGTGCCATTAGTTG
TTACGACTTGGATTATTATAGCTACTATTGTACTTTCGTAA
```

### > Q9L3N6

Function: protein coding sequence; putative protein (genomic island)

Best match: Q9L3N6\_CC030\_MRSA252\_BX571856.1[339379:339597] (completely identical)

Position: 008-contig\_256: 186013 ... 186232; Length: 219 bp

Sequence:

ATGGAAAACCAAAAACAAGGCAATGGCTTAAAAATTGCAACATGGGTATTTATTGTATTA  
ACAGTAGTTACACCGCTATTTGGTATTGGAAGTATTGTTTGTAGTATTAATTACAAAAAAT  
ACGATGCAGAAAAAGGTTTCGAAGTTATTGAAAATTGCAATTATCGTAACAATAATTGTTT  
TTGTTTTAAATTTATTAGCATATTTAGGTTTAAGATAA

### > Q9L3N5-locus1

Function: protein coding sequence; putative protein (genomic island)

Best match: Q9L3N5-locus1\_CC030\_MRSA252\_BX571856.1[339729:340229]

Position: 008-contig\_256: 186363 ... 186393; Length: 30 bp

Sequence:

ATGACTTTCGAAGAGAAGTTAAGTCAAATG

### > Q9L3N5-locus10

Function: protein coding sequence; putative protein (genomic island)

Best match: Q9L3N5-locus10\_CC008\_NCTC8325\_CP000253.1[293073:293573]

Position: 009-contig\_245\_RC: 57 ... 207; Length: 150 bp

Sequence:

GATTGGGCGAATTCAGAGTTTGGACAAATGGGAAGAGAACATTATTACATGTATAAAAA  
ATTTGGAATTTGGCCTGAAAAAGAATATGCCATAAATTGGGTAAAAAAAATAAAAAGATT  
ATGTTAAAGAGCAAGATGAAGCTGAACCTATAG

### > Q9L3N5-locus4

Function: protein coding sequence; putative protein (genomic island)

Best match: Q9L3N5-locus4\_ref\_CC001\_MW2-USA400\_BA000033.2[325134:325622]

Position: 009-contig\_245\_RC: 217 ... 1217; Length: 1000 bp

Sequence:

ATGACTTTCGAAGAAAAGCTAAGTCAAATGTACAATGAAATTGCAGATGAAATCAGTGG  
AATGATACCAGTTGAATGGGAAAATATATATACAATTGCCTATGTAACCTGATCAAGGTGG  
AGAGGTCATTTTTAATTATACTAAACCAGGTAGCGATGAATTGAATTATTACACGGATAT  
CCCTAGAGAGTATAATGTCTCTGAAAAAGTATTTTATGATTTGTGGACGGATTTATATAG  
ATTGTTTAAGAAGTTAAGAGAACTTTTAAAGAAGAAGGGCTTGAACCATGGACATCAA  
GTGAATTTGACTTTACAAGCGAAGGTAAATTTAAAGTTTCATTTGATTATATTGATTGGAT  
AAATACAGAGTTTGATCAATTAGGCCGTGAAAACCTATTATATGTATAAAAAGTTTGGTGT  
TTTACCAGAAATGGAATACGAAATGGAAGAAGTTAAAGAAATCGAGCAATATATTAAG  
AGCAAGATGAAGCTGAACTATAGGGGCGATAACATGACTTTCGAAGAAAAGCTAAGTCA  
AATGTACAATGAAATTGCAAAATGAAATCAGTGGAATGATACCAGTAGAATGGGAAAAAG  
TATATACAATTGCCTACGTAGATGATGAAGGTGGAGAGGTTGTTTTTAATTATACTAAAC  
CAGGAAGTGAAGATTTGAATTATTATTCAGATATTCCTAAAGATTGCAATGTCTCAAAG  
ATATTTTTAAGAATTCATGGTTTAAAGTTTATCGAATGTTTGTGATGAGTTAAGAGAACTTT  
TAAAAAAGAAGATTTAGAACCGTGGACATCATGTGAATTTGACTTTACAAGAAAGGGAA  
ATTTAAAAGTATCATTTGATTATATAGATTGGATTAATAGGTTTTGGCCCATCAGGAAA  
GGAAAACCTACTATATGTACAAAAAATTGGTATTTTACCAGATATGGAATATGAAATGGA  
AGAAATTCGAGAAGTAGAGAAGTATGTTAAAGACCAAGAGTAG

### > Q1Y4S0

Function: protein coding sequence; putative protein (core genome, variable)

Best match: Q1Y4S0\_CC001-ST772\_118\_AJGE01000018.1[109069:109443:r] (completely identical)

Position: 009-contig\_245\_RC: 1839 ... 2214; Length: 375 bp

Sequence:

ATGAAAAGAATATTGGTAGTATTTTTAATGTTAGCAATTATATTGGCAGGTTGTTCTAATA  
AAGGTGAAAAGTATCAAAAAGATATTGATAAAGTGTACAAAGAACAGAATCAAATGAAT  
AAAATTGCCTCGAAAGTACAAAACACTATTTAAAACAGACATTAACAAGAAGACAGTAA



TACACATGTTTATAAAGATGGTAAAGTCATTGTTATTGGTATTCAATTATATAAAGATCGT  
GAAAAAATGTATTATTTTCGCATATGAAATAAAAGATGGTAAGGCAGAAATCAATAGAGA  
AATAGACCCAATTAAGTATATGAAAGACCATAAAGCAGATTATGAAGATGAAAATGTAG  
AAGTGGAAAAAGATTAA

### > **Q2G173**

Function: protein coding sequence; putative membrane protein (core genome, variable)

Best match: Q2G173\_CC001\_MW2-USA400\_BA000033.2[326771:327169]

Position: 009-contig\_245\_RC: 2363 ... 2762; Length: 399 bp

Sequence:

ATGGAAAAATCGATCAAAAATAATGACAATAATAGGAATTGTGATTCAGGGTTTAGCAAC  
GGTATTTAGTTTACTATTGATGGTTTTAGCAGCATCAGGTGTAATGACTACAGATGTGTCA  
ACAACAGTTAATGGTGAGGTTGACCCAGTTGATGCAGAAACAGCAGCAGCAATTTTCACT  
GTATTATTCTTATCCCTATTCATATTTGGAATCATTTCATTATTTTAGGTGCAATCGGTAT  
GTTTAAAGCATCTAAAAACAAAAAATGAGTGGTATATTGTTGATTATTGGAGCTGTAAT  
AAGTGGTAACATAATTACATTTGCTTTATGGTTAGTCAGTGGTATTAACCTCCTTACTAAT  
ACAAGCCTAAAGATGAAATAAGCGACTTATCATAA

### > **nirC-L1**

Function: protein coding sequence; formate/nitrite transporter/locus 1 (core genome, variable)

Best match: nirC-L1\_CC005\_Mu50-VRSA\_BA000017.4[347433:348257:r]RC

Position: 009-contig\_245\_RC: 2976 ... 3801; Length: 825 bp

Sequence:

TTAATTATTTTTATAAAAATTGATGATGATCATTCAAGTAAGCATAGAATAAACCTATAATG  
AGTCCGCCTCCAATATAGTTACCGATAAAAGCCGCAGCGATATTCGAAATAGCTGGTATG  
AAGTGAATGTATCAACTTGATAAATTAACCACCCATAAATAAGCAACTGTTGTAAACG  
ACATGTTCATAACCCATAAAGGCGAATATGGTAACACCGAACATCATGACAAACATTTTT  
GCGAGTACATCGTCAATTTGCATGGCAATAACTAATGAAATATTGATAAAGAAATTGGCG  
AATATCGCTTTCATTAATATACTTACAAAACCAGTAGACAACGTTTTATGCTCTATAACTG  
CTGATAACTGATTTAACATATCTGGCGTCATTACATTTGAAAAACGCATGAAACTAAATA  
AAATAGCAGCACCTAAAATATTTTCTGCAAAGCACAATAAAAAATATTTTCAATACTCTAG  
TCGGTTTAATTACTTTATAATACAGGCCTACAGTAAAGTACATGAAGTTACTGGTTAGTA  
GTTTCGGAGTTTGTAATAAAAATGAGTACTAACGCAAACCTGAATGTAATGGCGCTGGCCA  
TATTCACAATGCCTGGCGGTAAATCTGGTTTCGTGTGTTGCTTTAACTGATAATACGAAGAC  
CGTAATAATCCCGATAATAAATCCTGCCATCATAGCGCGTAATAAATAACGTTTTAAATA  
AACGCTTTGTAATATATCTTTCGTTCTTATCGTTTCGACTACGTTATTTACCCAGTCGTCCC  
CATAAAAAATCTTATCCCATTTAATATGTTTTCTCCTTCAC

### > **brnQ2**

Function: protein coding sequence; branched-chain amino acid transport system II carrier protein (core genome, variable)

Best match: brnQ2\_CC008\_NCTC8325\_CP000253.1[297408:298715:r]RC

Position: 009-contig\_245\_RC: 4039 ... 5347; Length: 1308 bp

Sequence:

TTAAGTTGTTCGCTTGTTCGGACGGCGTATAACTACATCGATGATGAAACCTATGATTGCC  
AAAAGAATGAATGGTACAAGCCAAGCTAAATCGATATCTGCTAAAGGTAACATCATAAA  
CCATTTCAAATAACACCGTGTAATAAGTTGAAACTATTTAGTATTTGTAATAATTGAAAT  
AATCAATGTAATAACAGTTGCGAGTCGATAGGCCCAACTGAATCTGAATGTGCTAAACAT  
GTTAGCAAATGATATCAGTACAAGTGCAATAGACACGGGATATATTAATGTCAACAATGG  
TACAGCAATTTTTAAAATCATTCTAAACCAAGTGTGTAATAAGAACCCTATGATAGA  
GAAATAAGTGCGAATATTTTATAAGAAAACCTTAGGTACGTGTTTCTTAGTAAATGTGGC  
GCAAGCATTGACGAGTCCTATACATGTTGTTAAACATGCAAGTATCACTGTCATACCAA  
TACTATGTTGCCAAATGAACCAAATACGCGTAATGAATTGTACGTCAATATATCAGTACC  
ATCTTTAAAGTTTCTGGAGCTGTTGACGCACCTACATATGCCAACGCAAAGTAAATCAT  
ACCAAGTAATATAGCTGCAATAAATCCTGAAAAGCAGACATACTTTAATATTTTCATGCG

ATCTGTGAGGCCTTTAAACTTATAGCCATTGACAATGACTACGGAAAAAGCTAACGCAGC  
AACAAGATCCATTGTAAAATAGCCTTCCAAACTTCCTGAAATGAAAGGATGTGTTATATA  
TTTATCCTTAGGTGCACTTAGTGCAGATTCAGGGTTGAAAATGACAGCAATACTTAATAG  
AGCGACCATTAATAGTAATAACGGTGTTAATAATTTACCTAAATTATCAACGATTTTCGAT  
GGATTTAAACTAATCCAGTAAACGATGGCAAAAAAGACTGCTGCGAATATAATTAAGT  
CCATTGGTTGTGCACAGGTAATAATGTGTCTTGTACCAATTTTCGTACGCGACATTTGCAGCA  
CGTGAATACCGTAAAATGCTCCGATAGACATGTAAATCACGACAGCAAAAAATAAACCC  
GAACCATGGATGTATACGATTGCCTACACTTTC AACACCTTCATCATAAAAATGCAACAAC  
AATAACAGTAATAAAGGGGAGTAATATGCCTGTAAGGGCAAAGCCTAACATACCAATCC  
ACATATTTTGACCTGCTGTATGGCCAAGCATGGGCGGGAATATTAATTTCCGGCTCCAA  
AAAATAGTAAAATAACATGAGGCCCGAAATAATAACTTGTTTTTTCAA

### > Q99WS0

Function: protein coding sequence; acid phosphatase precursor (core genome, variable)

Best match: Q99WS0\_CC001\_MW2-USA400\_BA000033.2[330373:331263]

Position: 009-contig\_245\_RC: 5930 ... 6821; Length: 891 bp

Sequence:

ATGAATAAAAATTTCAAAGTATATTGCAATAGCATCATTATCGGTAGCGGTTACAGTTTCG  
GCACCACAAACGACAAATTCTACAGCGTTTGCCAAAAGTTCTGCTGAAGTTCAACAAACA  
CAACAAGCTTCTATACCAGCATCACAAAAGGCGAATCTTGGTAATCAAAAATATTATGGCA  
GTGGCTTGGTATCAAAAATTCAGCTGAAGCAAAGCATTATATTTACAAGGTTATAACAGT  
GCAAAGACTCAGTTAGATAAAGAGATTA AAAAAGAATAAAGGTAAACATAAGTTAGCTAT  
TGCTTTGGATTTAGATGAAACAGTTTTAGATAATTCTCCATATCAAGGCTATGCATCAATA  
CATAATAAACCTTTCCAGAAAGTTGGCATGAATGGGTACAAGCTGCTAAAGCTAAACCT  
GTCTATGGCGCAAAAAGAATTCTTGAAATATGCTGACAAAAAAGGTGTCGATATCTACTAT  
ATTTCTGATAGAGATAAAGAAAAAGATTTAAAGGCAACACAAAAGA ACTTAAAACAACA  
AGGTATCCCTCAAGCTAAGAAGAGTCATATTTACTAAAAGGTAAAGATGATAAGAGTA  
AAGAATCACGCAGACAAATGGTTCAAAGGATCATAAACTTGTCATGCTATTTGGAGATA  
ATTTATTAGACTTTACAGATCCAAAAGAAGCTACAGCTGAATCTCGTGAAGCATTAAATTG  
AAAACATAAAGACGATTTCCGGTAAGAAATATATCATTTTCCCTAACCCAATGTATGGTA  
GTTGGGAAGCTACAATTTACAACAATAACTATAAAGCAAGTGACAAAGCAAAGATAAA  
TTACGTAAAATGCTATTAAGCAATTCGATCCTAAAACAGGCCGAAGTTAAATAA

### > Q2G168

Function: protein coding sequence; ABC transporter/permease protein (core genome, constant)

Best match: Q2G168\_CC005\_Mu50-VRSA\_BA000017.4[351524:352573]

Position: 009-contig\_245\_RC: 7070 ... 8120; Length: 1050 bp

Sequence:

ATGTTTTTAGCTTGAATGAAATACGGCGCAACAAATTGAAGTTTGGACTAATTATTGGT  
GTGTTAACGATGATTAGTTACTTGCTATTTTTATTATCTGGATTGGCGAATGGTCTTATCA  
ATATGAATAAAGAAGGCATTGATAAGTGGCAAGCAGATGCCATTGTTCTAAATAAAGAT  
GCCAATCAAACCTGTGCAACAATCTGTTTTTAACAAGAAAGATATTGAAAATAAATAACAAG  
AAGCAAGCTACTTTGAAGCAAACAGGGGAAATTGTGTCTAATGGCCATCAAAAAGACAA  
TGTTTTAGTGTTCCGGTGTGAAAAGTCATCATTTTTAGTTCCGAGTTTAAATAGAAGGGCAT  
AAAGCGACTAAAGATAATGAAGTGTTAGCTGATGAAACACTTAAAATAAAGGATTTAA  
AATTGGCGACACATTATCACTATCTCAATCAGATGAAAAATTGCATATCGTAGGTTTTAC  
AGAAAGTGCAAAATATAATGCGTCACCAGTCATTTTCACGAATGACGCTACCATTGCCAA  
GATCAATCCTAGATTGACTGGAGATAAAATTAATGCAGTTGTTGTACGTGATTCAAATTG  
GAAAGACAAAAAATTAACCAAGAGCTTGAAGCGGTAAGTATTAATGACTTTATTGAAA  
ATTTACCAGGTTATAAACCGCAGAACTTAACATTA AACTTTATGATTTCAATTCTTATTTGT  
CATTTACAGCTACAGTTATAGGCATTTTCTTATATGTCATGACATTACAAAAACAAGTTTA  
TTTGGCATATTAAGGCTCAAGGATTTACGAATGGCTATTTAGCGAACGTAGTTATTTCCG  
AGACGCTCATATTAGCATTATTTGGTACGGCATTTGGCTTACTGTTAACAGGGCGTTACAGG  
TGCATTTTTACCTGATGCAGTACCTGTCAAATTCGATGTACTAACATTGCTCGTATTTGCA

ATTGTGTTAATGATTGTCTCTGTATTAGGAAGTTTATTCTCCATTTTAACAATTAGAAAA  
TAGATCCGTTAAAGGCGATTGGGTAG

### > **A5IPH6**

Function: protein coding sequence; ABC transporter related protein (core genome, constant)

Best match: A5IPH6\_CC001\_MW2-USA400\_BA000033.2[332575:333252] (completely identical)

Position: 009-contig\_245\_RC: 8132 ... 8810; Length: 678 bp

Sequence:

ATGTTGAAATTTGAAAATGTAACAAAGTCATTTAAAGATGGGAATCGTAACATTGAAGCG  
GTAAAGATACAAATTTTGAGATAAATAAAGGTGATATTATAGCATTGGTTGGACCTTCT  
GGCTCTGGTAAAAGTACATTTCTAACTATGGCAGGTGCTTTACAAACGCCGACATCTGGG  
CACATTTTAATCAATAACCAAGATATTACGACAATGAAGCAAAAAGCATTGGCAAAAAGTT  
AGAATGTCTGAAATAGGTTTTATTTTACAAGCTACAAACCTTGTGCCATTTTAAACGGTAA  
AGCAACAATTTACATTATTGAAAAAGAAAAATAAGAATGTTATGTCTAATGAAGACTATC  
AGCAACTTATGTCACAATTAGGGCTAACTTCATTGCTTAATAAGTTACCTTCAGAAATTC  
AGGTGGTCAGAAACAACGTGTGGCGATAGCTAAAGCGTTATATACGAATCCGTCGATTAT  
TTTAGCGGATGAACCTACCGCGGCGTTAGATACTGAAAATGCGATTGAAGTCATTTAAAT  
TCTACGTGATCAAGCCAAACAAAGAAAGAAAGCATGTATTATTGTTACACATGATGAACG  
ACTTAAAGCATATTGTGATCGTTCATATCATATGAAAGATGGCGTCCTTAATCTTGAAAAT  
GAAACAGTAGAATAG

### > **pfoR**

Function: protein coding sequence; putative perfringolysin O regulator protein (core genome, constant)

Best match: pfoR\_CC001\_MW2-USA400\_BA000033.2[333460:334491]

Position: 009-contig\_245\_RC: 9017 ... 10049; Length: 1032 bp

Sequence:

ATGGATTTATTGATAGGTACTTTATTTTTATTTTTGGTCTTAGTGATTTTACATTATTTAC  
ATATAAAGCACCTAATGGTATGCGTGCCATGGGAGCATTAGCTAATGCAGCAATCGCAAC  
ATTTTTAGTAGAAGCATTTAATAAATATGTTGGTGGCGAAGTATTCGGTATTAATTTTTA  
GAAGAGCTAGGAGACGCTGCGGGAGGTCTAGGTGGTGTGCTGCTGCCGCTGGATTAACAGC  
ATTAGCTATCGGTGTGTCACCAGTATATGCATTAGTTATAGCAGCCGCGTGCGGTGGTAT  
GGATTTATTACCAGGTTTCTTTGCGGGTTATATGATTGGATATGTGATGAAATATACAGAG  
AAATATGTGCCGGATGGTGTGCGACTTAATTGGATCGATTGTCATCTTAGCGCCATTAGCTC  
GTCTTATTGCAGTATTATTAACGCCAGTAGTGAATAGTACATTGATTCGAATTGGTGATAT  
TATCCAAAGTAGTACGAATACGAATCCAATTATCATGGGTATCATTTTAGGTGGTATTATT  
ACGTTGTGCGGCACAGCGCCATTGAGTTCAATGGCATTGACAGCATTATTAGGTTTAAACG  
GGTGTACCTATGGCTATTGGTGCCATGGCAGCATTAGTTCGGCATTATGAATGGGACG  
CTATCCATCGCTTAAAATTAGGTGATCGTAAGTCTACGATTGCAGTAAGTATTGAACCTT  
TATCAAAAGCAGATATTGTATCAGCCAATCCAATCTATATTACAAATTTCTTTGG  
TGGTGCATTGCTGGTTAATTATTGCTATGTCAGGTTAATTAACGATGCGACAGGTACA  
GCTACACCGATTGCAGGATTTTAGTTATGTTTGGATTAAATCATCCGACGACAATTGTGA  
TTTATGGTGTAGTAATGGCGATTGTAGGTGCGCTTGCAGGTTATCTTGGTTCAATTGTATT  
TAAAAAATATCCAATTGTTACTAAGCAAGACATGATTAATCGAGGTGCAGTAGACGCATA  
G

### > **Q5HJ57**

Function: protein coding sequence; PfkB family carbohydrate kinase (core genome, constant)

Best match: Q5HJ57\_CC001\_MW2-USA400\_BA000033.2[334834:335952]

Position: 009-contig\_245\_RC: 10391 ... 11510; Length: 1119 bp

Sequence:

ATGAGCGATTCTGAGAAAGAAATTTTAAAAAGAATTAAGATAATCCGTTTATTTACAA  
CGTGAACCTTGCTGAGGCAATTGGATTATCTAGACCCAGCGTAGCAAACATTATTTAGGA  
TTAATACAAAAGGAATATGTTATGGGAAAGGCATATGTTTTAAATGAAGATTATCCTATT  
GTTTGTATTGGCGCAGCGAATGTAGATCGTAAGTTTTATGTGCATAAAAATTTAGTTGCA

GAAACATCAAATCCTGTAACGTCAACACGCTCTATTGGTGGCGTAGCAAGAAATATTGCT  
GAGAACTTAGGTAGGCTTGGCGAAACGGTCGCTTTTTTATCTGCTAGTGGACAAGATAGT  
GAATGGGAAATGATTAACGATTGTCCACACCATTTATGAATTTGGATCATGTTCAACAA  
TTTGAAAATGCGAGTACAGGTTTCATATACAGCTTTAATTAGTAAAGAAGGCGACATGACA  
TATGGCTTAGCAGATATGGAAGTATTTGACTACATTACGCCTGAATTTTTAATTAAGCGTT  
CACACTTATTGAAAAAGGCTAAGTGCATTATTGTTCGATTTGAATTTAGGCAAAGAGGCAT  
TAAACTTCTTATGTGCCTATACCACGAAACATCAAATCAAATTAGTTATCACCACGGTTTC  
TTCCCCAAAATGAAAAATATGCCTGATTCATTACATGCTATTGATTGGATTATCACGAAT  
AAAGATGAAACAGAAACATACTTAAATTTAAAAATAGAATCTACTGATGATATAAAAAT  
AGCTGCTAAACGCTGGAATGATTTAGGTGTTAAAAATGTTATTGTGACAAATGGCGTGAA  
AGAACTCATTTATCGAAGTGGTGAGGAAGAAATCATCAAGTCAGTTATGCCATCAAATAG  
TGTGAAAGATGTTACAGGTGCAGGTGATTCATTCTGTGCTGCAGTAGTGTATAGCTGGTT  
AAATGGGATGTCTACTGAAGATATATTAATTGCTGGTATGGTTAACGCAAAGAAAACGAT  
AGAAACGAAATATACAGTTAGGCAAACCTAGATCAACAGCAACTTTATCACGATATGG  
AGGATTATAAAAATGGCAAATTTACAAAAGTATATTGA

### > **psuG**

Function: protein coding sequence; pseudouridine-5'-phosphate glycosidase (core genome, variable)

Best match: psuG\_CC001-ST772\_118\_AJGE01000018.1[98875:99798:r] (completely identical)

Position: 009-contig\_245\_RC: 11484 ... 12408; Length: 924 bp

Sequence:

ATGGCAAATTTACAAAAGTATATTGAGTATTCTCGAGAAGTTCAGCAAGCACGGGAGAA  
CAATCAACCGATTGTAGCATTAGAATCAACAATTATTTTCGCATGGTATGCCGTACCCACA  
AAATGTTGAAATGGCAACAACAGTAGAGCAAATTATCAGGAATAATGGTGCCATTCCAG  
CAACCATAGCCATTATAGATGGCAAAAATTAATAATTGGTTTAGAAAAGCGAAGATTTAGAA  
ATACTGGCAACTAGTAAAGACGTTGCTAAAGTATCTAGAAGGGATTTAGCAGAAGTTGTT  
GCGATGAAGTGTATTGGTGCTACTACTGTAGCGACGACGATGATATGTGCTGCAATGGCT  
GGTATTCAATTTTTTTGTTACAGGAGGTATTGGGGGCGTCCATAAAGGTGCAGAACATACG  
ATGGACATTTTCAGCAGACTTAGAAGAAGTGTCTAAAACAAATGTCACTGTTATCTGTGCA  
GGTGCCAAATCAATTTTAGACTTACCTAAGACGATGGAGTATTTAGAAAACAAAAGGCGTT  
CCAGTTATTGGATATCAAACGAATGAATTGCCAGCATTCTTCACTCGCGAAAGCGGTGTT  
AAGTTAACAAGTTCGGTTGAAACGCCAGAACGACTTGTGACATTCATTTAACAAAACAG  
CAGTTAAATCTTGAAGGCGGCATTGTTGTTGCTAATCCAATTCCATATGAGCATGCCTTAT  
CAAAGCATATATTGAGGCAATCATAAATGAAGCTGTTGTTGAAGCGGAAAATCAAGGT  
ATTAAGGTAAGGACGCCACACCGTTCTTGTTAGGGAAAATTGTAGAAAAAACGAATGG  
TAAAAGTTTAGCAGCAAATATAAACTTGTTGAAAACAATGCGGCGTTGGGTGCTAAAAT  
TGCTGTGCTGTTAATAAATTATTGTAG

### > **nupC2**

Function: protein coding sequence; nucleoside permease C/locus 2 (core genome, variable)

Best match: nupC2\_CC015\_CIGC93\_AHVD01000006.1[17555:18775]

Position: 009-contig\_245\_RC: 12418 ... 13639; Length: 1221 bp

Sequence:

ATGAATATTTTATTCGCTATCACAGGGATAGCATTTCGACTATTTGTTGCGTTTTTTATTCA  
GTTTTGATCGTAAAAACATAGACTTCAAAAAGACGTTAATAATGATATTTATTCAAGTGT  
TGATTGTGTTATTTATGATGAACACAACGATTGGTTTAAACAATCTTAACTGCATTAGGCTC  
ATTTTTTTGAAGGGTTAATAAATGTTAGTAAAGCAGGTATAAACTTTGTTTTTTGGAGATATA  
CAAATAAAAATGGCTTTACGTTCTTTTTAAATGTGTTGCTGCCATTAGTGTTTCATTTCTG  
TATTAATAGGCATTTTTAATTATATTAAGGTATTACCATTTATTATCAAATATGTAGGTAT  
CGCTATTAATAAAAATAACGAGAATGGGGCGCTTAGAAAAGTTACTTTGCTATTTCAACAGC  
AATGTTTGGACAACCAGAAGTATATTTAACAATAAAAAGATATTATTCCAAGATTATCTAG  
AGCGAAATTATATACAATTGCGACGTCTGGTATGAGTGCTGTTAGTATGGCAATGTTGGG  
TTCATATATGCAGATGATTGAGCCCAAGTTCGTAGTTACAGCTGTAATGTTAAATATTTTT  
AGTGCGCTTATCATCGCCAGTGAATCAATCCCTATAAATCTGATGATAGTGATGTTGAA  
ATTGATAACTTAACTAAATCAACGGAAACGAAATCAGTGAATGGAAAACAGGAAAACC

TAAGAAAGTTGCCTTTTTCCAAATGATTGGTGATAGTGCGATGGATGGGTTTAAAATCGC  
TGTTGTAGTAGCCGTGATGTTGTTAGCGTTTATTTTCATTAATGGAAGCAATCAATATCATT  
TTTGGTAGTGTGGTTTGAATTTTAAACAGTTAATTGGTTATTTGTTTGCACCTATCGCATT  
CTTAATGGGGATTCCCTGGAGTGAAGCTGTTCCAGCTGGCTCTTTAATGGCTACAAAATTA  
ATTACAAATGAGTTTGTAGCAATGCTAGATTTTAAAAATGTTTTGGGTGACGTATCAGCT  
AGAACACAAGGTATTATCTCAGTTTACTTAGTGAGTTTTGCTAATTTCCGGTACTGTTGGTA  
TCATCGTTGGTTCAATTAAGGAATTAGTGATAAGCAAGGAGAAAAAGTTGCATCCTTTG  
CAATGAGGTTGCTACTTGGTTCAACTCTAGCTTCAATCATTTCAGGATCAATTATTGGCTT  
AGTATTGTAA

> **sss**

Function: protein coding sequence; sodium solute symporter (core genome, variable)

Best match: sss\_CC001-ST772\_118\_AJGE01000018.1[96007:97539]RC (completely identical)

Position: 009-contig\_245\_RC: 13743 ... 15276; Length: 1533 bp

Sequence:

CTACTTTTTTCGTAGCCGTTTTTGAATGTATGTTGATGGTTTATCTTTTTCAAAAATTGTTA  
ATCCCGTTATATCTTTTTTATGTTTTGAAGGGACAATGAAGCTAAGTATATAAGCAAAGA  
CAAAGCAACTGTAAATGAAATGGTAGATACATAGAAAGGTGAGTTACCTTTGCCAACA  
CCATTATAGATATAAGCAAAGATGATACCCAATATTAATCCACAAATAACACCGAATGTA  
TTCGTACGTTTGTAGTAAAATACCAACTGCAAATACACCAGCTAATGGAACACCGAATAAT  
CCAGTTACAAACAAGAATAAATCCCATAGTCATTTGAATTAGAAGCAATTAAGTATAGT  
GACATTCCAAACCGAAAATACCTGCAATGATGATAATCAAACGTGCAAAGTTAACTTCG  
TGTCGCTCGCTACCTTTTCCGAAGAAGCGTTGCTTAATGTCGATTGAAATACAAGCAGAT  
ATAGAATTTAACTAGATGAAATGGTAGACTGTGCAGCGGCGAAAATGGCTGCAATAAG  
TAATCCTGCTACAAATGGTGGCATCTCAGTCAAATGAAATATGGCACTACAGATGATGT  
ATTGAAGCCTTTTGGTAAAACAGCTTCATGTGTATAAAATGAATACAGCATTGTACCCAT  
ACCATAAAATAAGGGTGTGAAATTAAGCTAGGATACCATTTGTCCATAACGATTTATT  
TGTTTCTTTTAACTATCAGAAGCTTGATAACGCTGCACGACGTCTTGACTCGCTGTGTAT  
TGATACAAGTTGTTGAAAATATTTCTAGGAAAATAATTGGAATGGCAGCTGCCGCAGTG  
TTAGCTTCCAATTATCTGCACTAATTAATTTTTTGTGCTCAATCGCATCTGCAAAGACAG  
TGCCAAAACCGCCTTTAATGTTTATAACACCTAGATAATAATAACTAAAGCGCCGCCTA  
ATAAAATGACGCCTTGAATGAAATCACTCCAACCCACACCTTCGAATCCACCTAAAAATG  
TATATAAAATACATAGTAAACCAACGAGTGATGCAACGATATAAGGGTTCATGTCTGATA  
CAGATGTGATTGCTAATGTTGGTAAGTAGATAACGATTGCAACACGCCCTAAATGGTAAA  
CGACAAATAATAATGAGCCAATAACACGTATGCTAGGGCCGAATCTAGCTTCTAAATATT  
CATATGCAGATGTTACCTTTAACTTTTTAAAGAATGGAACATAGAAATAAATGAGTAATG  
GAATAATTGCTACGATAGCGATGTTACCTGCAATATATGACCAATCTGTTAAAAATGCTT  
TCTCTGGTGTAGACATAAACGTAATTGCACTTAATGTAGTAGCATAAATGGAAAAACCA  
CTACCCAAGATGGCAAGCGACCACTTGCGGTAAAGAACTATTCGTACTTTGACTCGCGC  
GCTTGGTAAAATAAACGCCAATGAGTAACATAGCTAGTAGATAAATGATAACGGCAACC  
CAGTTTAGTGTGCCAAATCCAACCTTCTTTCAT

> **nanA**

Function: protein coding sequence; N-acetylneuraminase lyase (core genome, variable)

Best match: nanA\_CC001\_MW2-USA400\_BA000033.2[339759:340640:r]RC

Position: 009-contig\_245\_RC: 15315 ... 16197; Length: 882 bp

Sequence:

CTATAAATCGTATTTTGAATGAGTTGATCTAATGTTTGTGCGATGTGCTTCGTTAAAAGGT  
TTGAAAGGTCTTTTTCGGTAATCCTGCATCAATGCCACGATGACGTAATATTTCTTTCAATG  
TTGGATAAATCCCCATTGATAACACTGTTTCGATAATGTCGTTTGAATCATGTTGTAGTTG  
GTAAGCTTCTTGAATTTGACCTTGTCTTGCTAAGTTCGAAGATTTTTCTAGCGCGGCGACCA  
TTAACGTTATATGTAGAACCAATTGCACCATCTACGCCAGAAATCGTAGCTTGAACCTAAC  
ATTTTCATCAAAGCCAGATAAGATTAATTTGTCTGGGAATGCTTTTCTAATACGTTTCGAGTA  
GGAAGAAGTTTGGCGCTGTATATTTAACACCAACAATTTTTTCATGATTAATAGCTCGCT  
GAATTGTTCAATAGAAATATTCACACCTGTTAAATCTGGTATTGCATAAATAATCATATTG

TTCTGAGTTGCTTCGATAATATCGAAATAGTAATCTCTAATTTCTTCAAAAAGTAAATGGAT  
AGTAGAATGGTGTACGGCGGAAAGTGCATCATAACCGAGTTCTGTGGCATATTTTCCAA  
GTTCAATGGCTTCATTTAAATCTAACGAACCTACTTGAGCAATCAATTTCACTTTATCCCC  
AACTGCCTCTTTGGCAACTTTGAAAAGTCTTCTTCTGCTCTGTATTTAATAAAAAGTTTT  
CGCCTGAGCTACCATTTACATAAAGACCGTCTAATTCTTCAGTTTCAATGGCATTGAGC  
AATTTGTTGAGTCTTGTTCATTTACTTGACCATTTTCATCAAAGGAACGAGTAACGCT  
GCATATAAACCTTTTAAATCTTTGTTCAT

> **rok**

Function: protein coding sequence; putative protein/repressor/ORF/kinase-family (core genome, variable)

Best match: rok\_CC001\_MW2-USA400\_BA000033.2[340798:341658] (completely identical)

Position: 009-contig\_245\_RC: 16354 ... 17215; Length: 861 bp

Sequence:

GTGTATTACATCGCAATCGATATTGGAGGCACTCAAATTAATCGGCAGTTATTGATAAG  
CAATTGAATATGTTTGACTATCAACAAATATCAACGCCGGACAACAAAAGTGAGCTTATT  
ACTGACAAAGTATATGAGATTGTAACAGGATATATGAAGCAATATCAGTTGATCCAACCT  
GTCATAGGTATTTTCATCAGCAGGCGTTGTTGATGAACAAAAAGGCGAAATTGTATACGCA  
GGGCCAACCAATTCCGAATTATAAAGGTAATAATTTAAGCGATTATTAATAAATCACTGTCT  
CCTTATGTCAAAGTAAAAAATGATGTAAACGCTGCATTACTAGGCGAATTGAAATTACAT  
CAATATCAAGCAGAACGGATCTTTTGTATGACGCTTGGTACAGGCATTGGGGGTGCGTAC  
AAGAATAATCAAGGTCATATTGATAATGGTGAGCTTCATAAGGCAAATGAAGTTGGGTAT  
TTATTGTATCGTCCAACCTGAAAATACAACGTTTGGAGCAACGTGCTGCAACGAGTGCATTG  
AAAAAGCGCATGATTGCCGGAGGATTTACGAGAAGCACACATGTGCCAGTATTGTTTGAA  
GCAGCTGAAGAAGGTGATGATATTGCAAAACAAATATTGAATGAGTGGGCAGAAGATGT  
AGCAGAAGGGATTGCCCAAATACAGGTCATGTATGATCCAGGGCTTATATTAATTGGGGG  
CGGTATATCTGAACAAGGAGATAATCTCATTAAATATATCGAGCCGAAAGTTGCACACTA  
TTTACCAAAGACTATGTTTATGCACCAATACAAACGACTAAGAGTAAAAATGATGCAGC  
ATTATATGGCTGTTTGAATGA

> **nanE**

Function: protein coding sequence; N-acetylmannosamine-6-phosphate 2-epimerase (core genome, constant)

Best match: nanE\_CC008\_NCTC8325\_CP000253.1[311800:312468]

Position: 009-contig\_245\_RC: 18431 ... 19100; Length: 669 bp

Sequence:

ATGTTACCACATGGATTAATAGTATCTTGTTCAGGCACTACCAGATGAACCATTGCATTTCAT  
CTTTTATTATGTGCGAAAATGGCATTAGCTGCGTATGAAGGTGGTGCTGTTGGTATTCGCGC  
AAATACTAAGGAAGACATTTTAGCAATTAAGAAACGGTAGATTTACCAGTTATTGGCAT  
TGTGAAACGTGACTATGATCACTCAGATGTTTTTACTTACTGCAACGTCAAAGAAGTTGA  
TGAAGTATAGAAAGCCAATGTGAAGTCATTGCATTGGATGCAACGTTACAGCAACGTTCC  
GAAAGAAACGTTAGACGAATTAGTATCATATATTAGAACACATGCACCGAACGTTGAAA  
TCATGGCTGATATCGCGACCGTTGAAGAAGCTAAAAATGCCGCACGACTTGGCTTTGATT  
ATATTGGCACGACGTTACATGGCTATACTAGTTATACGCAAGGACAATTACTTTATCAGA  
ATGACTTCCAATTTCTAAAAGATGTACTACAAAGTGTTGATGCAAAAGTTATTGCGGAAG  
GTAATGTCATTACACCGGATATGTATAACGTTGTGATGGACTTAGGCGTTTATTGTTTCAAT  
CGTTGGTGGTGCATAACACGACCAAAGAAATTACGAAACGTTTTTGTTCAAATTATGGA  
AGATTAA

> **A6TYA3**

Function: protein coding sequence; putative membrane protein (core genome, constant)

Best match: A6TYA3\_CC008\_NCTC8325\_CP000253.1[312595:313908:r]RC

Position: 009-contig\_245\_RC: 19226 ... 20540; Length: 1314 bp

Sequence:

TTATCCAAAATAAGTAAAGCGACGGGGATGGTGATTAATAGCGACAACGCCACGCGTA  
AAAACCAAATGATGATGAGTTTCCAGACAGGTATTTTAATTTTCAGTTGCTAGTATACATG  
GACTAATGCTGAGAAAAAGATAATGGCTGATACGCTTACTACACCGACGACAAATTTAG  
TACTCATTGCAGCTTTAGTTACTAACAAAGATGGTAGAAACATTTCTACAATAGAAATCG  
CTGACGCTTTTGCAAGTACAGCCTGATCAGCAATTGGGAAGATATAAATAAATGGATAGA  
ATATATAGCCAAGCCAATCAATGAATGGTGTATAGTTCGCTACAATCAGTCCTAAAAAAC  
CAATCGATAATATAGAAGGTAAAATACCAACAGTCATTTCTAAACCGTCTTTCAAATTGT  
CCCAAACGTTCTTCACGAGAGATGGTGTTAATGCATTTTGTATCATCGCCTCTGCATATGC  
AGTTTTTCAGTCTGCTTCCTTCAATAGCAACTTCTTGTTCCTTCTTGTCCGTTATAATATT  
CTGTTGATTCATTGCTGATTGGCGGTAGCCATGCAGTAATTGCAGTCACGACAAATGTGA  
TGACTAAAGTTATCCAAAAGTATAAATTCCAATGCGGCATTAATCCTAAAGTTTTAGCAA  
CGATAATCATAAAAGTTGCTGAAACTGTTGAAAAGCCAGTCGCAATAATCGTGGCTTCTC  
GTTTGTGTACATCCCTTGCTTATAGACACGATTAGTAATCAATAATCCTAAGGAATAACT  
GCCGACAAACGAAGCCACTGCATCGACAGCGGATTTTCTGGTGTTTTAAAAATAGGTCT  
CATAATAGGCTCCATATAAACACCGACAAATTCTAATAAGCCATAGCCACTAATAAAGA  
AAGCGCAATTGCACCTACTGGAATTAAGATACTAATGGCATCATTAATTTTTCAAACAA  
AAACGGACCATAGTTAGCTTTAAATAGTATTGATGGACCGATTTTAAATACATACATTAT  
ACCAATCATTGCACCTGCAACTTTAAATAATGTAATGACCAAGTTTGTGATTGAAGTCAT  
AAAAGTACGTCTCACTATTGGTAACGCTGTACCAATTAATAATCATAATCAGTGCAACATA  
GGGCATAAGTGGACCTATGATTGAGCGAATGGCTAGATGAACATGATCGACGAAAATAG  
TGTTGTTACCATTAATCGTAAAAGGAATAAAGAAACATAGTATGCCCACTAAACTATAGA  
CAAAAAACGCCATGCACCTGGTTGTTGTGCATTAGAATGATATTGATTCAT

## > lip2

Function: protein coding sequence; lipase 2 (core genome, constant)

Best match: lip2\_CC001-ST772\_118\_AJGE01000018.1[88253:90325:r] (completely identical)

Position: 009-contig\_245\_RC: 20957 ... 23030; Length: 2073 bp

Sequence:

ATGTTAAGAGGACAAGAAGAAAGAAAGTATAGTATTAGAAAAGTATTCAATAGGCGTGGT  
GTCAGTGTTAGCGGCTACAATGTTTGTGTGTCATCACATGAAGCACAAGCCTCGGAAAA  
AACACCAACTAATGCAGCGGCACAAAAAGAAACACTAAATCAACCGGGAGAACAAGGG  
AATGCGATAACGTCACATCAAATGCAGTCAGGAAAGCAATTAGACGATATGCATAAAGA  
GAATGGTAAAAGTGGAACAGTGACAGAAGGTAAAGATACGCTTCAATCATCGAAGCATC  
AATCAACACAAAATAGTAAAACAATCAGAACGCAAAATGATAATCAAGTAAAGCAAGAT  
TCTGAACGACAAGGTTCTAAACAGTCACACCAAAAACAATGCGACTAACAAAACCTGAACG  
TCAAAATGATCAGGTTCAAAATACCCATCATGCTGAACGTAATGGATCACAATCGACAAC  
GTCACAATCGAATGATGTTGATAAATCACAACCATCCATTCCGGCACAAAAGGTAATACC  
CAATCATGATAAAGCAGCACCAACTTCAACTACAACCCCGTCTAATGATAAACTGCACC  
TAAATCAACAAAAGCACAAGATGCAACCACGGACAAACATCCAAATCAACAAGATACAC  
ATCAACCCCGCGCATCAAATCATAGATGCAAAGCAAGATGATACTGTTTCGCCAAAGTGAA  
CAGAAACCACAAGTTGGCGATTTAAGTAAACATATCGATGGTCAAATTTCCCAGAGAA  
ACCGACAGATAAAAATACTGATAATAAACAACATAATCAAAGATGCGCTTCAAGCGCCTA  
AAACACGTTTCGACTACAAATGCAGCAGCAGATGCTAAAAAGGTTTCGACCACTTAAAGCG  
AATCAAGTACAACCACTTAACAAATATCCAGTTGTTTTTGTACATGGATTTTTAGGATTAG  
TAGGCGATAATGCACCTGCTTTATATCCAAATTATTGGGGTGGAAATAAATTTAAAGTTA  
TCGAAGAATTGAGAAATCAAGGCTATAATGTACATCAAGCAAGTGTTAGTGCATTTGGTA  
GCAACTATGATCGTGCTGTAGAACTTTATTATTACATCAAAGGTGGTTCGCGTAGATTATG  
GTGCAGCACATGCAGCTAAATACGGACATGAGCGCTATGGTAAGACATATAAAGGAATC  
ATGCCTAATTGGGAACCTGGTAAAAAGGTACATCTTGTAGGGCATAGTATGGGTGGTCAA  
ACAATTCGTTAATGGAAGAGTTTTTAAAGAAATGGTAACAAAGAAGAAATTGCCTATCAT  
AAAGCGCATGGTGGAGAAATATCACCATTATTCCTGGTGGTGCATAACAATATGGTTGCA  
TCAATCACAACATTAGCAACACCACATAATGGTTCACAAGCAGCTGATAAGTTTGGAAAT  
ACAGAAGCTGTTAGAAAAATCATGTTTCGCTTTAAATCGATTTATGGGTAACAAGTATTCCG  
AATATCGATTTAGGATTAACGCAATGGGGCTTTAAACAATTACCAATGAGAGTTACATT  
GACTATATAAAACGCGTTAGTAAAAGCAAAATTTGGACATCAGACGACAATGCTGCCTAT  
GATTTAACGTTAGATGGCTCTGCAAATTTGAACAACATGACAAGTATGAATCCTAATATT

ACGTATACGACTTATACAGGTGTATCATCTCATACTGGTCCATTAGGTTATGAAAATCCTG  
ATTTAGGTACATTTTTCTTAATGGATACAACGAGTAGAATTATTGGTCATGATGCAAGAG  
AAGAATGGCGTAAAAATGATGGTGTCTGACCAGTAATTTTCGTCATTACATCCGTCCAATC  
AACCATTTGTTAATGTTACGAATGATGAACCTGCCACACGAAGAGGTATCTGGCAAGTTA  
AACCAATCATACAAGGATGGGATCATGTCTGATTTTATCGGTGTAGATTTTCTAGATTTCA  
AGCGTAAAGGTGCAGAAGCTCGCCAAGTCTATACAGGTATTATAAATGACTTGTTCGCTG  
TTGAAGCGACTGAAAGTAAAGGAACACAATTGAAAGCAAGTTAA

### > attB\_phiSa5

Function: attachment site in bacterial chromosome for int1-phiL54a (mobile element)

Best match: attB\_phiSa5\_empty\_ST425\_LGA251-cow\_FR821779.1[342202:342299:r]RC

(completely identical)

Position: 009-contig\_245\_RC: 22831 ... 22929; Length: 98 bp

Sequence:

TGAACCTGCCACACGAAGAGGTATCTGGCAAGTTAAACCAATCATACAAGGATGGGATC  
ATGTCTGATTTTATCGGTGTAGATTTTCTAGATTTCAAGC

### > A5IPQ2

Function: protein coding sequence; esterase/lipase-like protein (core genome, variable)

Best match: A5IPQ2\_CC001-ST772\_118\_AJGE0100018.1[87184:88011]RC (completely identical)

Position: 009-contig\_245\_RC: 23271 ... 24099; Length: 828 bp

Sequence:

TTACATCATTGTTATAGCGTTTAAGAAATCAACAACCTTACGATAAAATAGTGATTGCTTCG  
TCATTAGGTCTACGATCAAAATCATGCTCGTTTTTATTCACGCGTTCAAATGTTGAATGTG  
GAACATGATTCATGATATGTTTCGCTTTCCTCAACGGGAACATCATAATCGCCATTACAAT  
GCGTAATGAACACCGGGGGAAGTGTTTTAAGTTCATATGGTGCAATATTATATTTTGAAT  
CAGTATAATCAGCAATGTTAATCATATTTATCCATTTACCTGTGCCACGTGCATAAACGTA  
GATTAACAAACGTTGTGCGATTTGATCTTGAACAACCGGTGTTGGTGAAGTGAGTTGTGC  
AATCATTGTTTCGTTTACGCTTTGAGCTATTTTTGCGTAATAACTATTAGTTGTTTTAAAG  
GTTTCAGTGTTGATGCGACTATAACCATAAAAATCAATAACACCATCAATATCTCTGTCTC  
GTGCAATTAATAGACTTAAATATGCACCTGATGATCTGCCAAAGGTAAAAATAGGGCAAT  
TAGAATATTGTGATTGAATCGCATCGAATGATGCGTAGACATCCTCAATAATGCAATCGA  
GACTTACTTCTGGTAATAAACGATAACTTAGTTGAATTAATCGTAATGTTCCGTAAGGA  
TATCGATATACTGTGGGGATAAATCGTTAGCTTTACCGAACATTAATCCACCACCGTGGA  
TGTAGACAATAGCGCCTTTTGTGGTTGATTTTTTGTCTTAATAATTGTGTAAGGTAATGC  
AAATGCATCTTTAGTAATTACTTTATCTTTAATTTTCAGTCAC

### > Q6GJZ4

Function: protein coding sequence; putative NADH-flavin oxidoreductase (core genome, variable)

Best match: Q6GJZ4\_CC001\_MW2-USA400\_BA000033.2[348620:349819:r]RC

Position: 009-contig\_245\_RC: 24171 ... 25371; Length: 1200 bp

Sequence:

TTAAGACGATGAGTCATGATAATTCTGTTCCAATTGACGTAAAGCGTCACGGGTATGCTT  
CTTTAGACCTTCCCATAATCCATCATTTTAACAATATCTTTAAAAGCAGCATGTGGAATG  
GCTAAATCTTCTAAATCTGCCATAGAAAATTCAAGATTGATATCATGTGGTCGCTGTTTACG  
CAAGTTTATGCACAAAGTCAGGTTCTGTGACAAAAGGCGAAGACATGCCGACCATATCTG  
CATGTTGTAAAGCATCTAAAGCAGACTCTGGAGAATTAATCCCGCCACTTGCAATTAAG  
GGATACGACCTGCTAAATGTTTCATAGACAATTTGGTTAACTGGTTCGACCGAAATGATCAC  
CTGGTGTACGAGACGTATTTTGATAAATATGTCTGACCCCAGCTAGCGATTGCTAAGTATT  
GGATGTTTGAACGTCATGACCAATCGATTAATTGGTTGAACTCGTCAATGGTATATC  
CTAAATCACTGCCTCTGGTTTCTTCTGGCGTTGCTCGAAATCCTAAAATAAAATTGTCAGG  
TGCTTCTTTATCAATCACTTCTTGTACCGCACGCATAACTTCTAAACATAATCTTGCACGA  
TTTTTTAATGAGTCGGCACCGTAATGGTCTGTACGTTTATTCGAAAAAGTTGAGAAAAAT  
GTTTGAATCAGCAAACGTTGTGCAATCGAAATTTCCACACCATCAAAACCTGCTTTAATC  
GCGCGTAATGTAGCATCGCGATACTGCTGAATGATGCTATTGATTTTCTCATGAGACATG



GCGATAACATCGTGTTC AATCGGTGAATGCAAAGTCATAGGACTTGGTCCATACACCTTT  
CCAAAATTTAAAATGGCTTGATTTGAAAAACGACCAGCATGCGCTAGCTGGATAATAGCG  
AGGCTACCATGTTGTTTCATCGTAGATGCCATGTTAGTTAATCCAGGGATAACAAGCATCA  
TGATCAATATTAAGCCATATTC AAACAATTGACCATAAGGTTCAATGTAAGCAGCGCCG  
GTGACTTGCATTCCAGCTGAATTAGAGCGACGTGCAGCATAAGCCAAGTCTGCTTTTGTA  
ATATAGCCTTCTTTTGTGATGTGTTTACGGTCATTGGTGATAATACAAAGCGATTTCGAAA  
TTTTGATGCCATTAGGTAAGTGGATTGATTGTAAAAGTGGTTTGTATCGGTACAT

### > **lplA1**

Function: protein coding sequence; lipoate-protein ligase A/locus 1 (core genome, variable)

Best match: lplA1\_CC008-ST239\_16K-ST239\_BABZ01000038.1[6384:7406]

Position: 009-contig\_245\_RC: 28752 ... 29775; Length: 1023 bp

Sequence:

ATGTACTTAATAGAACCGATTAGGAATGGAGAATATATTACTGATGGTGC GATTGCACTC  
GCTATGCAAGTTTATGTTAATCAGCATATCTTTTTAGATGAAGATATTTTATTCCCTTATTA  
TTGTGATCCAAAAGTGGAAATTGGACGTTTTCAAATACTGCTATAGAAGTGAATCAAGA  
TTATATAGATAAACACAGTATTCAAGTAGTTCGCCGAGATACTGGTGGTGGCGCTGTGTA  
TGTTGATAAAGGTGCCGTTAATATGTGTTGATTTTTAGAACAAGACACTTCAATTTATGGT  
GATTTTCAACGATTTTATCAGCCAGCTATAAAGGCGTTGCATACATTAGGTGCAACAGAT  
GTGATACAAAGCGGTAGAAATGATTTAACATTGAATGGTAAAAAAGTGCAGGCCGCCGC  
AATGACATTAATGAACAATCGTATTTATGGCGGTTATTCGCTATTACTTGATGTTAATTAT  
GAAGCAATGGATAAAGTGTTAAAGCCTAATCGCAAAAAGATTGCATCGAAAGGGATTAA  
ATCTGTGCGTGCACGTGTTGGTCATCTTAGAGAAGCACTGGATGAAAAGTATCGTGATAT  
ACAATTGAAGAATTTAAAAATTTAATGGTGACGCAGATTTTGGGAATCGATGACATTAA  
AGAGGCAAAACGATACGAATTATCTGATGCAGATTGGGAAGCGATTGAAGAATTGGCGA  
GTAAAAAGTATAAAAATTGGGATTGGAATTATGGGAAGTCACCTAAATATGAATATAATC  
GAAGTGAAAGATTATCATCAGGTACGGTAGACATAACAATTTCTGTTGAACAAAATCGTA  
TCGCAGATTGTCGATTTTATGGGGATTTCTTTGGACAAGGTGATATAAAAGATGTGGAAAG  
AAGCATTACAAGGAACAAAATGACAAGAGAAGATTTAACGCACCAGTTAAAGCAATTA  
GACATCGTTTATTATTTTGGCAATGTTACGGTAGAATCATTGGTTGAGATGATTTTAAGTT  
AA

### > **Q5HIW6**

Function: protein coding sequence; putative NAD-dependend oxidoreductase (genomic island)

Best match: Q5HIW6\_CC001-ST772\_118\_AJGE01000018.1[80167:81192:r] (completely identical)

Position: 009-contig\_245\_RC: 30090 ... 31116; Length: 1026 bp

Sequence:

ATGAATAATAAAGTATTAGTAACCGGTGGTACAGGGTTTGTGGCATGCGAATTATTTCA  
CGATTATTAGAACAAGGTTATGAGGTACAAACAACGATACGTGATTTAAGTAAAGCTGAT  
AAAGTAATTTAAAACAATGCAAGACAATGGCATTTCACAGAGCGATTAATGTTTGTGCGAA  
GCGGATTTATCACAAGATGAACATTGGGATGAAGCAATGAAAGATTGTAAATATGTCTTG  
AGTGTAGCATCTCCGGTGTTTTTCGGTAAAACAGACGATGCAGAAGTGATGGCGAAGCCT  
GCCATTGAAGGCATACAACGTATTTTAAAGAGCTGCAGAACATGCTGGCGTGAAGCGTGTG  
GTGATGACTGCAAACCTTGGTGCAGTTGGTTTTAGCAATAAAGATAAAAAATTCATCACA  
AATGAAAGTCATTGGACAAATGAAGATGAACCAGGCTTATCAGTATATGAAAAATCAAA  
ATTGTTAGCTGAAAAGGCAGCGTGGGATTTTGTGAGAATGAAAATACAACAGTAGAATT  
TGCCACAATCAATCCAGTTGCAATTTTTGGGCCATCATTAGATGCACACGTTTCAGGAAG  
CTTTCATTTATTAGAAAATTTATTGAATGGTTCAATGAAACGTGTACCGCAAATTCATTG  
AATGTTGTTGATGTGAGAGACGTAGCTGAACTACACATTTTGGCAATGACAAATGAACAG  
GCTAATGGCAAGCGATTTATTGCTACAGCTGATGGACAAATTAATTTGTTGGAAATTGCA  
AAATTAATTAAGAAAAGAGACCTGAAATAGCTCAAAAAGTTTCTACTAAAAAATTACC  
AGACTTTGTTTTGAGTCTAGGTGCTAAATTTAATCATCAAGCTAAAGAAGGTAAACTTTTA  
TTAGATATGAATCGAAATGTAAGTAACGAACGAGCAAAAATACTTCTTGGTTGGGAACCG  
ATTGCGACACAAAAGAAGCAATTTTAGCAGCTGTCGATAGTATGGCTAAGTATCATTTA  
ATATAA

> **break**

Function: integration site of chromosomal replacement

Best match: break\_ST239\_2\_CC001\_MW2-USA400\_BA000033.2[355545:355593] (completely identical)

Position: 009-contig\_245\_RC: 31096 ... 31145; Length: 49 bp

Sequence:

CTAAGTATCATTTAATATAATACAAAACACCGTCCATAAGTAAGTGGCT

> **ulaA**

Function: protein coding sequence; putative sugar-specific permease/SgaT/UlaA (core genome, constant)

Best match: ulaA\_CC001\_ATCC51811-ST1\_ADVP01000041.1[83583:84929]RC

Position: 009-contig\_245\_RC: 31208 ... 32555; Length: 1347 bp

Sequence:

CTATTGCTGTGGCTTTTGACGGCCTTTTAATAAAAATTGCTGTTCGCACCTACGATAATAATA  
AATAGAATCGCACCAAATAATCCCATATATTTACTGCGTTACCGAACACGATACCGACA  
GTTAAAAAGTCTGTATCTGAGAATGTTGTTGCAGCACCACCTAATTCGCCTAAAAATGGC  
AAGAATAATAATGGTAAAAACGTGATTAGGATACCATTTAGAGCGGCGCCAGCAACAGC  
ACCTTTAATACCGCCTCTTGCATTACCGAATACAGCAGCCGTTGCACCTAAGAAGAAGTG  
TGCAACTACGCCAGGTAAAATGACGACGCCACCAAATAAGAATAAGATAAACATACCGA  
TGACACCTGTAATAAAGCTGACAAAGAATCCAATTAATACTGCATTTTGTGCATAAGGGA  
ACACAATAGGGCAGTCTAATGCAGGTTTAGAATTTGGTACAAGCTTTTCAGAAATTCCTT  
TAAATGCTGGGACGATTTTCAGCTAAGATTAACGAACGCCCGTTAAAAATAATAAATACAC  
CAGCAGCAAATGTCACACCTTGAATTAAGAAAAGACAATAAAGTTTTGACCATCACTAA  
TAGATTCGTGTACATAACTAACGCCCGCAAATAAGCATGCGATGAAGTAAAGTAATGCCA  
TCGTAATCGAGATACTAATTGTAATTTCTCGTAAGAACTTAAGCCTTTTGGAAATTTAAT  
CTCTCCGTTGATTTAGACTTACCTTTGAATAATTGACCTACAGCACCTGCGGCAAAGTAA  
CTGATTGAGCCAAAATGACCTAACGCTACTTGGTCATTCCTGTAATTTTTTCGCATTGTAG  
GTTGGAGTAATGCAGGTAAGACTGCCATGATTAATCCTAATACGAGTGCGCCGATAACAA  
TCGTTAGCCAGCCTTTAATATGACTGACTGTTAAAATGATTGCTAAAAACGCAGCCATGT  
AAAATGTATGATGACCTGTTAAAAAGATATATTTTAAATTAGTGAAGCGGGCAATTA  
TATTAACAATCATGCCACAGACCATGATGAGTGCAGCTGTTGTTCCAAAATCTTTTAAGG  
CTAGTGAGACGATAGCTTCGTTGTTAGGTACGATACCTTGACACCAAATGCGTGTTGGA  
ATATTTTGCCGAATGGTTCAAGAGATCGAACGACGACATCAGCACCTGCACTTAAAATTA  
AGAAGCCTAATATCGTTTTAATGGTTCCTGAAGTGATCGTTGCGGCAGGTTTTTTCTGAAC  
GATTAACCTATAAAGGCAATCAGTGCAACAAGAATGGCTGGTTGACTTAAAATATCGAC  
TATAAAATTAAGGATTGCTTGCAT

> **A8YZF7**

Function: protein coding sequence; transcript antiterminator/BglG family (core genome, variable)

Best match: A8YZF7\_CC001-ST772\_118\_AJGE01000018.1[76024:77979]RC (completely identical)

Position: 009-contig\_245\_RC: 33303 ... 35259; Length: 1956 bp

Sequence:

TTAAGCCTCCTTTGTCATAGTTAAAGCAATGTGTTGTTTAAATTTAAAAATATTCCCATCT  
AAGAAATCTTGTGCATATAAGTCGTTGCTTAAAGCATTTCGCTTAACTGTCCCAATGCCTTTA  
AATGTGCATTGGGGTGGTCCGTTGCTAATGTAATTACAAGGTGAACGGGATCGTTAGCTT  
TACTACCAAAGATAATCCCTTCAGTGAAATATGTTAGTGCGAAACCTACACCATTCTGTA  
CATAATCAGTACCAGCGTGAATAAGTGCAATATGTGGACTAATGACCATATATGACCCGA  
ATTGTTCAAATTTGTTTTAAAATTGCAGCTGTATAATTTGAATAGACAATGCCATCATTGAT  
TAAAGGTTGCACAGCCACTGCAATTGCGGATTCAATTGATAATGGTTGTTTATTTATAATG  
ATGCGATGTTCAAGCAATAAATCTGCGAGTGACTTGCCATCAGTTGCCATTTTCATGACTC  
GTTGTTCTCTTGAGTCATTGATAATTTGATTCAATTTTTGACGAGATTGTTGATTGATAAA  
TGGATCGACATGAATAACTGGTACAGCTGATATTTACAAGGTAAGTGTGAAATGACATA  
ATCAATGTTATCTTGCAATAATCGACTTTCTTCCAATTGATAAATGGAATAGGCATCCCAA

ATGTGAAACTCAGGATACAGGTGATTTAGTTTTGATTTTAAAAGTTGCGACGTGCCTATA  
CCAGAACCACATAGTAAGACAACCTTAATCATTGATTGTTTATGTGTTGCAACACGCTCT  
ATACTTGATGCGAAGTGAATTGTAATGTATGTTAATTCATCTTCGTTGAAGCGAATAGCA  
GCATCTTGTTCAATTGGGCTAATATGCTTGCTAACGGCTTCAATGATTTGAGGATAGCGAC  
GCATAACTTCTTGCCCTCAAAGGATTAGGTTGTAGCATATCATATTTAATACGATGTATAGC  
TGGTTTGATATGTGTGATCAGACTGGTATGTAACCTTGTTGCTTTTGACATATCAATGCCT  
AATTCTTGGCTAACACAAGTGATTAATTCATGTATATTTTGCATAAATCATGGTATTCAA  
AGGCAATTGAAGACGCTGTATGTTCCGGTCATTTTAGAGCCTAGTAAATGTAACGTGATAA  
AGATAATTTTCAGACTCTGGAAATGTGACATTACAACACTACGTTCTAAGTTTTCTATCATTTT  
TGAAGCAATAGCATACTGATTAGTATGTGCGCATTATCAATTTTCATTGATAGGTATATCG  
AACGAAAAATTTTCATTTAGACGCTGAATGGCAATGAGTATATGATAGATTAAGCCATCG  
ATAGCCGACTGAACTAAATGATAATTTTCACTATTTAATGTCTTAATAATGGCACGGCGA  
ACCAATGCGATTGATTCTGAATTAAGATATCCGCCTCTATAAAAGGTGCAGCTTGTTTC  
ATATATTGATGTATAAAGTGTGCATACGCTTTACGATAGTGATCTTCCCTACCAATAATAT  
TGAATCCTTTATTGTGGACATAATTTAACTTTAAATGGTATTGATCTAGTTGGGCTTGAAT  
CATTTTAATATCATCTGCAATTGTCCGACGCGAAACATTAGCATCTTGCGCAAGTTGCTTT  
GTTGAAACAGGATCGGTTGTTTCGAATAACTTTAAAGCGATATGTGTGAGTCGTTTCATCTT  
TTGAAAAATGAATTTGATTTGTTAGATTGTGCTCTAATTCATTTAATAGTGTGCGGTGAGC  
TGTTGTTACTTTGATGCCTGCAGCTTTATTACGGCTGACTTGGTAATGATAAGTTTCAGCA  
TATTGCTCAATATATGCTATATCATATTGAATGGTACGAGGTGATACACCAAGTTGATTA  
GCAATGGTATTGATTGGAATAAACGTTTGCTCATGAATTAAGATAACAAAATTTTCGATT  
TGCTATAACTTAACAA

### > **mepR**

Function: protein coding sequence; MATE regulatory protein (core genome, constant)

Best match: mepR\_CC001\_MW2-USA400\_BA000033.2[359919:360338] (completely identical)

Position: 009-contig\_245\_RC: 35470 ... 35890; Length: 420 bp

Sequence:

ATGGAATTCACTTATTCGTATTTATTTAGAATGATTAGTCATGAGATGAAACAAAAGGCT  
GATCAAAAGTTAGAGCAATTTGATATTACAAATGAGCAAGGTCATACGTTAGGTTATCTT  
TATGCACATCAACAAGATGGACTGACACAAAATGATATTGCTAAAGCATTACAACGAAC  
AGGTCCAACCTGTCAGTAATTTATTAAGGAACCTTGAACGTAAAAAGCTGATCTATCGCTA  
TGTCGATGCACAAGATACGAGAAGAAAGAATATAGGGCTGACTACCTCTGGGATTA AAC  
TCGTAGAAGCATTCACTTCGATATTTGATGAAATGGAACAAACTCGTATCGCAGTTAT  
CTGAAGAAGAAAATGAACAAATGAAAGCAAACCTTAACTAAAATGTTATCTAGTTTACAA  
TAA

### > **mepA**

Function: protein coding sequence; staph virulence regulator A (core genome, constant)

Best match: mepA\_CC001\_MW2-USA400\_BA000033.2[360445:361800]

Position: 009-contig\_245\_RC: 35996 ... 37352; Length: 1356 bp

Sequence:

ATGAAAGACGAACAATTATATTATTTTGGAGAAATCGCCAGTATTTAAAGCGATGATGCAT  
TTCTCATTGCCAATGATGATAGGGACTTTATTAAGCGTTATTTATGGCATATTAATATTT  
ACTTTATAGGATTTTTAGAAGATAGCCACATGATTTCTGCTATCTCTAACACTGCCAGT  
ATTTGCTATCTTAATGGGGTTAGGTAATTTATTTGGCGTTGGTGCAGGAACCTTATATTTCA  
CGTTTATTAGGTGCGAAAGACTATAGTAAGAGTAAATTTGTAAGTAGTTTCTCTATTTATG  
GTGGTATTGCACTAGGACTTATCGTGATTTTAGTTACTTTACCATTCAAGTATCAAAATCGC  
AGCAATTTTAGGGGCGAGAGGTGAAACGTTAGCTTTAACAAGTAATTTTGAAGTAAT  
GTTTTTAAGTGCACCTTTTGTAAATTTTGTCTTCATATTAGAACAATTTGCACGTGCAATTG  
GGGCACCAATGGTTTCTATGATTGGTATGTTAGCTAGTGTAGGCTTAAATATTATTTTAGA  
TCCAATTTTAATTTTGGTTTTGATTTAAACGTTGTTGGTGCAGCTTTGGGTAAGTCAATCA  
GTAATGTTGCTGCTGCTCTGTTCTTTATCATTTATTTTATGAAAAATAGTGACGTTGTGTCA  
GTTAATATTAACCTTGCAGAAACCTAATAAAGAAATGCTTTCTGAAATCTTTAAAATAGGT  
ATTCCTGCATTTTAAATGAGTATCTTAATGGGATTCACAGGATTAGTTTTAAATTTATTTTT

AGCACATTATGGAAACTTCGCGATTGCAAGTTATGGTATCTCATTTAGACTTGTGCAATTT  
CCAGAACTTATTATCATGGGATTATGTGAAGGTGTTGTACCACTAATTGCATATAACTTTA  
TGGCAAATAAAGGTCGTATGAAAGACGTTATCAAAGCAGTTATCATGTCTATCGGTGTTA  
TCTTTGTTGTATGTATGATTGCTGTATTTACAATTGGACATCATATGGTTGGACTATTTACT  
ACTGATCAAGCCATTGTTGAGATGGCGACATTTATTTTGAAGTAACAATGACATCATT  
TTATTAATGGTATAGGTTTCTTGTTTACTGGTATGCTTCAAGCAACTGGTCAAGGTCGTG  
GAGCTACAATTATGGCTATTTTACAAGGTGCGATTATCATTCCAGTATTATTTATTATGAA  
TGCTTTGTTTGGACTAACAGGTGTCATTTGGTCATTATTAATTGCTGAGTCACTTTGTGCA  
TTTGCTGCAATGTTAATTGTCTATTTATTACGTAATCGTTTGACAGTTGATACATCTGAATT  
AATAGAAGGTTAA

### > **mepB**

Function: protein coding sequence; putative protein (core genome, variable)

Best match: mepB\_CC022\_HE681097.1[355767:356197]

Position: 009-contig\_245\_RC: 37455 ... 37886; Length: 431 bp

Sequence:

ATGTATAAATCTAAAATACTGTTGAAATATATTTTTAGTGAAGAATCAGAAGTTAAAGAC  
TTAACTGAAGAAAAATATAATCAAGATTACGAAGCATTAAACATTTAGCTTTAAAGAGGAA  
ACATATCAAAGTAGGTTAGCTAAGAAAACACCGACTAAAACAGGGTATTTTGTACATGT  
TGGACAAAAGACGAGAACAATTGCAATCAACCATACTCAAAGAGGCATTTGCAGATTA  
CTTAATGATTATAGTTATTGATGAAGAATTAAGCGGTTATTTCTTATTTCCCTAGGGAATTA  
TTGGTAGAAAAAGGCATCTTAACTACATTTGAACATAAAGGTAAGATAGCTTTTAGAGTT  
TATCCTAAGTGGTGTAAATCAATTGAATAAAACAGCAGGGCAAACACAAAAGTGGCAATG  
TAAATATTTTTT

### > **txbi\_glpT**

Function: bidirectional rho-independent terminator of glpT and mepB (core genome, constant)

Best match: txbi\_glpT\_CC001\_MW2-USA400\_BA000033.2362340:362428 [4\_50ANF10END]

Position: 009-contig\_245\_RC: 37888 ... 37977; Length: 89 bp

Sequence:

AATACTAATAAAAAGTCATATGGTTGAACTTATAAGAGATGAATATATCATCTTTTCGATA  
AGATAACCCTATGACTTTATTTTTTATCA

### > **glpT**

Function: protein coding sequence; glycerol-3-phosphate transporter (core genome, constant)

Best match: glpT\_AJ563809.1[1:1359]RC

Position: 009-contig\_245\_RC: 37978 ... 39337; Length: 1359 bp

Sequence:

TTAATGATGAACGGTTTCTTGTCCTACTTTATTCCAAGTGAGGATAAAGCTCAACATTGCA  
AACACACTGATTGCTGTTAATAAAAATAAAACCGACATCCCATCCGAATTTATCAACTACA  
GCACCTAAGACGATGTTGGCCATTACAGCACCAAACAGATAACCAAATAATCCTGTTAAT  
CCAGCTGCTGTGCCAGCTGCTTTTTTAGGTACATAATCTAATGCTTGTAACCAATTAACA  
TAACTGGTCCATATATTAAGAAACCAATGGCAATTAATGAGACATTGTCTAACCAAGCAT  
TGCCTGGAGGATTTAACCAATAAATTAATACAAATACTGTGACACCTAACATAAAGAAGA  
AACCTGCAGGTCCACGACGACCTTTGAATAATTTATCAGAAATGTAACCACATAATAATG  
TACCAGGAATTCAGCCCATTCGTATAAGAAGTATGCCAACCTGATGCTTTTAAAGTCGA  
AATGTTTTTCTTCACTTAAGTAGACTGGCGCCCAATCAAGTACACCATAACGCACGAAAT  
AAACAAATATATTTGCAAAGGCAATTGCCCATACCCATTTATTGTTTCAGTACATATTTAA  
TAAAATTTCTTTTGTAGTTAATTCTGTTTCTAATGTTTTCTTATCGCTTGTAAGCAAGTCAT  
TTTTATAAATTTTCGATTGGAGGTAACCTTGAGATTGAGGTGTGTCTCTAATCAATACGTA  
TGAAATTGCGGCAATGATAAGTGCTAAGAGTGCAGGGTAAATGAATACACCTTCGAAAC  
CTTTTAAATAACCAAAGTTGATAAATGCTGTTGTTGTAATACCCCAAGCAGCAATAGGTG  
CCATAATACCTCCACCAACATTATGCGCAACGTTCCAAAGGGCAGTCTTACTTCCGCGTTC  
ACTTACACTAAACCAGTGAACGAGAACACGGCCTGAAGGTGGCCAGCCCATACCTTGAA  
ACCATCCATTTAAGAATAATAGGACAAACATAATACCGATACCTGATGTAAAGAACGGT

ACAAATCCCATTAACAAATTGACGATAGCAGTGAGTGCTAATCCAAGAACTAAGAATATC  
CGAGCATTGCTCCGATCACTTACAGTACCCATAAAGAACTTACTAAATCCATATGCGATG  
GAAACAGCAGAAAGTGCAAACCTAGTTCCGCTTTTGTAAAACCTTGCTCTTGCAATGCC  
GGCATCGCTAATGAAAAGTTTTTACGTAATAAATAGTACCCAGCGTAACCGATGAAAATA  
CCAAGAAATACTTGGAGACGTAATCGTTTATAGGTATCATCTATCTGATTTTCTGGCAA  
GGCTTAATATGCTTTGCAGGTTTAAGAAAATTCAT

### > **yeiH**

Function: protein coding sequence; UPF0324 membrane protein (core genome, variable)

Best match: yeiH\_CC001\_MW2-USA400\_BA000033.2[366741:367736:r]RC

Position: 009-contig\_245\_RC: 42289 ... 43285; Length: 996 bp

Sequence:

TTAACTATATAGCCAATGAACGACGATAAAGGCAAGTGATGACAAGCATATTGAGGTAA  
TAATGATTGTCATAAGCGGTTTAAGTGCGGATTTTAAAGATCTTAAATGCCACATTTAA  
CCCTAAAGCAACCATGGCCATTAATAAGCAAATTGTTGATACAGTATTTAAAATATTTAG  
CAATGCTGACGGAATAGTTACATATGTATTCACTAAGGCCATAATGACAAATCCAATTAA  
AAAGTATGGAATGCTTATTCGACCCTTGCTAGATGATTCTGATGAACGGAAACGCATAAT  
TAAAATAAGTACGATGGTTAATGGAATCAGTAAGAATACTCTACCAAGTTTGCCGAGAAG  
TGCAATTTTAAGTGCATCACTACCACCAAAGCCACCAGCTAAGACAACGTGTGCAATTTT  
ATGAAGACTAACACCAGACCAAGCGCCATAAACATTTGTCGTCATTGAAAAGATAGCGT  
AGATAGCTGTATATATAAGTGAGAATATCGTACCAATCAATGCGATGATACCGATACTAA  
TAGCTGTATCCTTTTCACGTGATTTGAATATTGGAGCTACTGCAGCAATAGCGGCAGCAC  
CACAAACGCCTGTACCTACACCTAGTAATAATGCGATGTTTTTGTACCATGTAACAGTTT  
GTTGACAAAGAGCATCATTACAATACTAAAAATAACGCACACCTACATCGATGGCTAATAG  
TCTACTACCTTGACCGATAATATCGAATATATTGAGTTTAAAGTCCATATAGGATGATTGCA  
AATCTTAATAAATATTTAGATGAAAACGTAATACCTGAGCTATATTGTTTCAGGATATCCTC  
TAAAGTGACGATATAGAATAGCGATTAATATCGCGATAGTTAATGCGCCAACCTTATCTA  
AGATTGGCAATTTAGCTGCTAAAAAGCTAAATAATGCGACTATAAATGTTAATGATAGTC  
CAATCATAAAATGCTTATTTTTCAATGATGCCAT

### > **STAR**

Function: Staphylococcus aureus repeat element

Best match: STAR\_CC121\_21269\_AFTU01000042.1[72955:73177]RC

Position: 009-contig\_245\_RC: 43434 ... 43464; Length: 30 bp

Sequence:

GGCGGGGCCCAACAAAGAAGCTGACGAAA

### > **repeat\_nySAGamma**

Function: repeat element

Best match: repeat\_nySAGamma\_CC705\_RF122-cow\_AJ938182.1[1695238:1695347:r]RC

Position: 009-contig\_245\_RC: 43461 ... 43491; Length: 30 bp

Sequence:

AAAAGTCAGCTTACAATAATGTGCAAGTTG

### > **Q2FZB6**

Function: protein coding sequence; putative protein (genomic island)

Best match: Q2FZB6\_CC008\_COL\_CP000046.1[1182242:1182414]

Position: 009-contig\_245\_RC: 43462 ... 43492; Length: 30 bp

Sequence:

AAAGTCAGCTTACAATAATGTGCAAGTTGG

### > **furbox-fep**

Function: binding site of ferric uptake regulator next to fep

Best match: furbox-fep\_CC001\_MW2-USA400\_BA000033.2[368688:368722:r]RC (completely identical)

Position: 009-contig\_245\_RC: 44405 ... 44440; Length: 35 bp

Sequence:

ATAATGATTTTGATAATTATTATCAACTAGATAAT

### > **fepA**

Function: protein coding sequence; lipoprotein (core genome, variable)

Best match: fepA\_CC001\_MW2-USA400\_BA000033.2[368853:369707]

Position: 009-contig\_245\_RC: 44570 ... 45425; Length: 855 bp

Sequence:

ATGAAAAAGTTAACAACGCTATTATTAGCATCAACGTTATTAATTGCTGCATGTGGGAAC  
GACGATAGTAAGAAGGATGATTCAAAGACATTGAAAAAGATGATGGTGTTAAAGCAGA  
ATTAACAACAGCAACAAAAGCATATGATAAATACTGATGAACAGTTAAATGAATTTTT  
AAAAGGTACAGAAAAATTTGTTAAAGCGATTGAAAATAATGATATGGCCAAGCAAAAG  
CGTTATATCCAAAAGTTCGTATGTATTATGAACGCTCTGAACCAGTTGCAGAAGCATTG  
GAGATTTAGATCCTAAAATTGATGCACGTCTTGCAGATATGAAAGAAGAGAAAAAGGAA  
AAAGAATGGTCAGGATATCATAAGATTGAAAAAGCATTATACGAAGATAAGAAAATTGA  
TGATGTGACTAAAAAGATGCACAACAATTATTGAAAGATGCAAAAAGAATTGCATGCCA  
AAGCTGATACATTAGATATCACACCAAAATTAATGTTACAAGGTTCTGTTGACCTATTAA  
ATGAAGTTGCAACTTCTAAAATCACAGGTGAAGAAGAAATTTATTCACATACAGATTTAT  
ATGATTTTAAAGCGAACGTTGAAGGCGCACAAAAAATTTATGACTTATTTAAACCTATTT  
TAGAGAAAAAGATAAAAAATTAAGTGATGATATTCAAATGAACTTCGATAAAGTGAAT  
CAATTATTGGATAAATATAAAGATAACAACGGCGGTTATGAGTCATTTGAAAAAGTATCG  
AAGAAAGACCGTAAAGCATTGCGGATGCTGTTAATGCATTAGGAGAGCCACTAAGTAA  
AATGGCTGTGATTACTGAATGA

### > **fepB**

Function: protein coding sequence; iron-dependent Dyp-type peroxidase (core genome, variable)

Best match: fepB\_CC001-ST772\_118\_AJGE01000018.1[64632:65861:r] (completely identical)

Position: 009-contig\_245\_RC: 45421 ... 46651; Length: 1230 bp

Sequence:

ATGACAAATTATGAACAAGTTAACGATAGTACGCAATTTTCAAGACGTACATTTTTGAAA  
ATGTTAGGTATTGGCGGTGCCGGTGTGCAATTGGCGCAAGTGGTGTTGGTAGCATGTGG  
TCTTTCAAATCAATGTTCAATACACCAGAAGATCCGGAAAAAGATGCGTATGAATTTTAT  
GGTAAAGTGCAACCAGGCATTACCACACCCACGCAAAAAACATGCAATTTTCGTTGCGTTA  
GATTTGAAGTCAAAAGATAGAGATGCAATTAAGGCAATGTTTAAAAAGTGGACGGTTAT  
GGCTGATCGTATGATGGATGGTGATACAGTTGGCAAGCCGAGTAACAATCCTTTAATGCC  
ACCAGTAGATACCGGTGAATCGATAGGATTAGGTGCAAGCAAGTTAACGATTACCTTTGG  
GATTAGTAAGTCTTTGATGAAGAAAATTGGGTTATCTAGTAAAATTCCCGATGCCTTTAA  
AGATTTACCGCATTTTCCGAATGATCAGTTAATAGACGATTACAGCGATGGTGATATTAT  
GATTCAAGCATGCTCAAATGATTCGCAAGTATCCTTTTCATGCGGTTTCATAATTTAGTTTCGT  
CCATTTTCGAGATATTGTTAAGGTACGTTGGGCGCAATCTGGTTTTATCTCTGCTAAAGGTA  
AGGAAACACCTAGAAATTTAATGGCATTAAAGATGGAACAATTAATCCTAGAAAAAGT  
AATCAACTTAAAGATTATGTGTTTATTGATGACGGATGGGCGAAACATGGAACCTATTGT  
GTTGTCAGACGTATTCAAATACACATTGAAACGTGGGATCGTACTGCACTGGAAGAACAA  
GAGGCTACATTTGGTTCGGAAACGACATAGTGGTGCGCCGTTAACAGGTGGGAAAGAGTT  
TGATGAAATTGACTTAAAAGCGAAAGATAGTCATGGCGAGTATATTATTGATAAAGATGC  
CCATACGAGACTAGCGAAAGAAGCAAATACGTCAATTTTACGTAGAGCCTTTAATTATGT  
TGATGGTACGGATGACCGCACAGGTAACCTTCGAAACAGGCTTGTTGTTTCATTGCTTTTCA  
AAAAGCGACAAAACAATTTATCGATATACAAAATAATTTAGGTAGTAATGATAAATTA  
ATGAATATATTACACATAGAGGTTCTGCTTCATTTTTAGTATTACCAGGTGTTAGTAAGGG  
AGGATACCTTGGTGAACATTATTTGACTAA

### > **fepC**

Function: protein coding sequence; high-affinity iron transporter (core genome, variable)

Best match: fepC\_CC005\_04-02981\_CP001844.2[390150:391862]

Position: 009-contig\_245\_RC: 46631 ... 48344; Length: 1713 bp

Sequence:

```
GTGAAACATTATTTGACTAAATTTGTAGCAATGCTAATAACTGCTGCTATGGTGTGTAGCT
TTGGGTTACTGAAAAGTCAGGCAGCAGAACAACAAAGTATTAGTGATGTATATAGTGTGA
TAACGGATGCGAAATCTGCACTTTCTAATAATTTCGATATCGAATGACAATAAGCAGAAAG
CAATTGAGCAAGTGGTAAGTGCAGTTAAGAAATTATCGCTTGAAGATAATAGTGAAAGT
AATGCTGTCAAATCAGATGTGAGAAAGCTTGAAGATGCAAAAGCGAATGATAATCAAAA
AGATACACTTTCGCAATTAACGAAGTCATTAATTGCTTATGAAGAGAAATTGGCTAGTAA
AGATGCGGGTTCTAAAATTAACACTATTGCAACAGCAAGTCGATGCCAAAGATGCAGTAAT
GACAAAAGCGATTAAAGATAAAAATAAAGCAGAGCTAGAATCGCTGAACAATAGTTTGA
ATCAGATTTGGACAAGTAATGAAACGGTAATTCGCAATTATGACGCAAATCAATATGGAC
AAATTGAAGTCGCATTACTGCAACTTAGAATCGCAATTCATAAGTCGCCATTAGATACAG
CGAAAGTGTACATGCTTGGACAACCTTTTAAATCAAATATTGATCATGTGCATAAGAAAA
GTGATACGTCTGCAAATGATCAATACCGTGTATCACAATTAATGATGAGTTAGAGAAGG
CGATTAAAGCTATCGACGACAATCAATTGTCGGATGCTGATGCTGCGCTTACACATTTTAT
AGAAATTTGGCCGTATGTTGAAGGTCAAATTCAACTAAAGACGGTGTCTTGTATACGAA
AATTGAAGATAAAAATACCATATTATCAAAGTGTATTAGACGAACATAATAAAGCACATGT
GAAAGATGGTTTAGTAGATTTAAATAACCAAATTAAGAGGTTGTTGGCCATAGTTATAG
CTTCGTGATGTGATGATTATCTTTTACGTGAAGGGCTAGAAGTGTGTTAATTGTAATG
ACATTGACTACCATGACGCGTAATGTAAAAGATAAGAAAGGGACTGCAAGTGTGATTGG
TGGTGCAATTGCCGGACTTGTACTGAGTATTATCTTAGCAATTACGTTTGTAGAACTTTA
GGGAATAGTGGCATTCTTCGTGAAAGTATGGAAGCGGGATTAGGTATCGTTGCGGTCATA
TTAATGTTTATCGTTGGTGTGGATGCACAAACGTTCAAATGCAAAACGTTGGAATGAC
ATGATTAATAATATGTATGCTAATGCGATTAGTAATGGTAATTTGGTATTGTTAGCGACG
ATTGGTTTAAATATCTGTGTTGCGTGAAGGTGTTGAGGTTATCATTTTCTATATGGGGATGA
TAGGTGAGCTAGCGACAAAAGATTTTATTATTGGTATTGCTTTAGCTATCGTTATATTAAT
TATCTTTGCGTTATTATTTAGATTTATCGTCAGATTGATACCTATATTCTATATATTTAGAG
TATTGTCGATCTTTATTTTATTATGGGATTCAAAATGCTTGGCGTAAGTATTCAAAAATT
ACAATTATTAGGTGCGATGCCGAGACATGTTATCGAAGGATTCCCAACGATTAACCTGGTT
AGGATTCTATCCAAGTTATGAACCATTGATAGCACAAGCTGCCTATATTATGGTAGTTGCT
ATCTTAATCTTTAAATTTAAAAAATAA
```

### > **tatC**

Function: protein coding sequence; twin-arginine translocation protein C (core genome, variable)

Best match: tatC\_CC188\_21340\_AGTX01000031.1[74906:75607:r]RC

Position: 009-contig\_245\_RC: 48435 ... 49137; Length: 702 bp

Sequence:

```
TTAATGTGTTGGCGGTTTGCCTCGGTATGTAAATTTAACGATGAACGTAAGTGAACACTCAA
GAGCAATATGAGTGGCAATGTGAGTAATATATTTAATGTTAAATCGGGTGGTGCAATGAT
ACTTGCTAATACAAAGCAAGCGAAATAAATATATTTTCGATAATGCTTCAATGATGTGGT
ATCTATAAGACCGAATTTTGCAAGTCCTATGAATAATATTGGCAATTGGAATAAAATGCC
AAAAGTGAAGCAACCGGATAAGTTCAACTAAATACGCTTTAAAGCCAATGACAGGCG
AAATGTTTAAAGTTAATGATAATTTTAAACGCGAATTGAATGATCATTGGAAAGCTAACAT
AAAATGCAAAAGCGACGCCAGCACAGAATAATAACACGCTGAAAAAACTATATTTATAA
ATAAATTGGCGCTCATTATTATGCAAACCAGGCGCAACAAACGCCCAATGATAAAAC
ATAACCGGTGAAATGAGACAAAACGCGATGAAAAATATAATCATCACGTATATTTGGAT
CATTTCTGTGAATGAAAATGCATGTAAGGACACATGTGCACGGGTAATATACGTTATGAA
TGGTGTGATCCACCAAAATGATGAAACATATACGACGATGACCGTAATGACGAACGACA
ATAAAATTTTACTAACCGATGGCGTAGTTTCGCTAAAGTGAACCAT
```

### > **tatA**

Function: protein coding sequence; twin-arginine translocation protein A (core genome, constant)

Best match: tatA\_CC001\_MW2-USA400\_BA000033.2[373436:373651:r]RC (completely identical)

Position: 009-contig\_245\_RC: 49153 ... 49369; Length: 216 bp

Sequence:

CTATTGCTCTCGCTGTTGCTTCGATTCCCTTACTGGGTGTATCGTGAGACTCTTTATCTAAAT  
CTTCTGTTGCAGATTTAAATTCTTTTAAAGTAGAACCGATAGCACGACCAAATTGTGGTA  
ATTTTTTCGGACCAAAAATAATTAAGCGATAATGCTAATGACGACAAGACTTGTGGAC  
CTGTGATGCCTAAAATAAAAAGTGTTAGTTATCAT

### > **ltrA**

Function: protein coding sequence; low temperature requirement A (core genome, constant)

Best match: ltrA\_CC001\_MW2-USA400\_BA000033.2[377187:378320:r]RC (completely identical)

Position: 009-contig\_245\_RC: 52884 ... 54018; Length: 1134 bp

Sequence:

TTATTCATGTTTATTACGTAGACGTTGATTTTTAAAATAAATCAGCATGATGCAGAAAGTC  
GCAACGGATACCGAGATAATCATTACTTGGTCATGCCCTTAAAGATAAGGCTGATGATA  
TATGATACTACAAGTATGCCTAGTGAAGAAGAAATATATTTTGCGTTTGTGAGTTCATTAT  
GGAAATAAGGCGTGATTAACCATAATCCAATATAGAATATTAAAAACACTGATATACATCA  
TATTAATTTCAAACAAGTCATTTAGTTTATTGTTATTACTAAAAACAATTGCAGCATTAAAT  
CACACCTAAAGCGATATTGATTAATAGATGCGTATACGATAAACGGAAACCGATAGATG  
ACAATTTATGATTAATGTAATTTTCAGTAATGATCCAATATACACCGAAAAGACTAATTA  
AAATCATAAATTGGAATATATAAATGTAACCTAAAATGATCAATGCTAAATGATGACGAA  
GCTAAACCAACCAGTACCTCGCCAAAAGATAATAATTGTTAGTAACGAAAAACGTTCTACT  
AAATGCATCATATTAACAGGTGATAATACAAGATATTTCTGAAATGGAATAAGTCCTGTC  
GCTGCAATGAATACGCCTAAAATCCAGGGATGTAATGGATACTTTGTGGTAGTACTAAT  
GATAGAAATGATAAAAATGAAATCACAAAGGCTACGCTCGCAAAGCTTGACATGTACG  
CTTATCGCCATAATCTAACCTGTACGTATATGTAATAAATACTGTAATCCGATACTTAAA  
TACATAATTGCCACGCATAAGAAGAATGGGAAGAATGTCTTTTCAAAGTCCGGATATAGG  
CTGTTAGATAGGAAGACCATGATGAACATATTAACATCATAAACGAGACGTCTTTGAAT  
GTAACCTGACCAAATCGATTTGTAAAAAATGTTTGTGATGAGACCACATTAACCATAAGAAC  
AAACTCATGACGATGTATTTGAAAAATAAATCAGCTGAAATGGAACCGTTTTGTGTTGTT  
AAAATCACATGTGCAATTTTTTGAATGGCATAGACGAAAATTAATCAAAGAACAACCTCA  
TGGAATCCTGCACGCTTTTCAGCTAAATGTTTTGGTGTTAATGCATTAACCAT

### > **thlA/yqil**

Function: protein coding sequence; acetyl-CoA acetyltransferase (core genome, constant)

Best match: thlA\_CC001-ST772\_118\_AJGE01000018.1[55545:56726:r] (completely identical)

Position: 009-contig\_245\_RC: 54556 ... 55738; Length: 1182 bp

Sequence:

ATGACGAGAGTCGTATTAGCAGCAGCATAACAGGACACCTATTGGCGTTTTTGGAGGTGCG  
TTTAAAGACGTGCCAGCCTATGATTTAGGTGCGACTTTAATAGAACATATTATTAAGAG  
ACGGGTTTGAATCCAAGTGAGATTGATGAAGTTATCATCGGTAACGTAACACTACAAGCAGGA  
CAAGGACAAAATCCAGCACGAATTGCTGCTATGAAAGGTGGCTTGCCAGAAACAGTACC  
TGCATTTACAGTGAATAAAGTATGTGGTTCTGGGTTAAAGTCGATTCAATTAGCATATCA  
ATCTATTGTGACTGGTGAAAATGACATCGTGCTAGCTGGCGGTATGGAGAATATGTCTCA  
GTCACCAATGCTTGTCAACAACAGTCGCTTCGGTTTTAAAATGGGACATCAATCAATGGT  
TGATAGCATGGTATATGATGGTTTAAACAGATGTATTTAATCAATATCATATGGGTATTACT  
GCTGAAAATTTAGTGGAGCAATATGGTATTTCAAGAGAAGAACAAGATACATTTGCTGTA  
AACTCACAACAAAAGCAGTACGTGCACAGCAAAAATGGTGAATTTGATAGTGAAATAGT  
TCCAGTATCGATTCTCAACGTAAAGGTGAACCAATCTTAGTCACTAAGGATGAAGGTGT  
ACGTGAAAATGTATCAGTCGAAAATTAAGTCGCTTAAAGACCAGCTTTCAAAAAGACG  
GGACAGTTACAGCAGGTAATGCATCAGGAATCAATGATGGTGCTGCGATGATGTTAGTCA  
TGTCAGAAGACAAAGCTAAAGAATTAATATCGAACCATTGGCAGTGCTTGTGCTTTG  
GAAGTCATGGCGTAGATCCTTCTATTATGGGTATTGCACCAGTTGGCGCTGTAGAAAAGG  
CTTTGAAACGTAGTAAAAAAGAATTAAGCGATATTGATGTATTTGAATTAATGAAGCAT  
TTGCAGCACAATCATTAGCTGTTGATCGTGAATTAATAATTACCTCCTGAAAAGGTGAATG  
TTAAAGGTGGCGCTATTGCATTAGGACACCCTATTGGTGCATCTGGTGCTAGAGTTTTAGT  
GACATTATTGCATCAACTGAATGATGAAGTTGAAACTGGTTTAAACATCATTGTGTATTGGT  
GGCGGTCAAGCTATCGCTGCAGTTGTATCAAAGTATAAATAA



> **Q5HIT9**

Function: protein coding sequence; cyclase family protein (core genome, constant)

Best match: Q5HIT9\_CC001\_MW2-USA400\_BA000033.2[380123:380875:r]RC (completely identical)

Position: 009-contig\_245\_RC: 55820 ... 56573; Length: 753 bp

Sequence:

```
TTAGTCATTTGATGGTTTAATTGCAAATGCTCTAACAGGGAACCCAGGTGCATCTTTTGGT
TTAGGGCTGATAGCGTAAATGATGGCGCCACGAGTTGGTAATTGATCTAAATTAGTTAAT
AACTCGACTTGGTATTTATCCTGACCAAGAATATAACGTTCCGCAACTAAATCACCATTTT
TTACAACGTCCACAGATGCATCGGTATCGAATGTTTCATGACCAACAGCTTCAACACGAC
GTTCTTCAATTAAGTACTTCAAAGCATCTAATCCCCAACCCGGTGCATGTTGTTGTCGGTT
CGCATCTTTGTTTTCAAACCTTTCAATATTAGGCCAACGTTTTGACCAATCGGTACGAAGT
GCAACAAAAGTGCCAGGTTCAATAGTACCATGCTCTTTTTCCCATGCTTCTATATGCGCAC
GTGTTACAATGAAATCATTGTTGTTGCTACTTCTGTTGAAAAGTCTAATACAATTAACGG
CAATACCAATCTTTTAAATCAATGTCTTCTAAATAACGTTTATTCTCGACAAAGTGAATT
GGTGCATCAATGTGAGTACCATATTGCGTTACAATATCCAACGTTGCACATAGAAACCA
TGATCTTTAACCGTGAATAAAGTTGAAACTTCGCCTTTTTCAAACCTACTAAAACGTGGTA
TTCCGGATCAAATGTATGCGTTAAATCAACCCAAGTTGCTTGTTTTAAAGTATTTAATTG
TTGCCATAAAGGATATTGTGTCAT
```

> **metE**

Function: protein coding sequence; 5-methyltetrahydropteroyltrimethylglutamate--homocysteine methyltransferase (core genome, constant)

Best match: metE\_CC030\_MRSA252\_BX571856.1[397296:399524:r]RC

Position: 009-contig\_245\_RC: 56615 ... 58844; Length: 2229 bp

Sequence:

```
TTATTCTTGGCGTTTAGCTTTAACAGCATTACACAAGCACAGTCAATGCATCTTTAACTTCT
TCTTCTTTTCGCGTTTTCAAACCACAGTCAGGGTTTACCCAGAATAATGAGCGGTTCGATTT
GTTGTAGTGAACGATTGATTGCTGTAGTAATTTCTTCTTTTGTGGAATACGTGGACTATG
AATATCATAACACACCTAGACCAATACCTAAATCATAATTAATATCTTCAAAGTCTTTAATT
AAATCACCATGGCTACGAGATGTTTCAATTGAAATAACATCAGCATCTAAGTCATGAATA
GCATGAATGATTTGACCGAATTGAGAATAACACATATGTGTATGGATTTGAGTTTCATCA
CGAACTGAAGACGTTGCAAGTTTAAATGATAAAACAGCATCTTTAAGATATTGTTTCGTGA
TATTCAGAGCGTAATGGTAAGCCTTACGTAATGCAGGTTTCGTCAACTTGGATAACTTTG
ATTCTGCAGCTTCAAGTGCTAATACTTCTTCGTTGATTGCTAAAGCAATTTGATCTTGAA
CGACTTTACGTGGTAAATCAACACGTTCAAATGACCAGTTTAGAATTGTTACAGGTCCAG
TTAACATACCTTTAACTGGTTTATCTGTAAAGCTTTGTGCATAAACTGTTTCATCAACAGT
TAAAGGCGCTGTCCATTTTACATCACCATAAATGATTGGTGGTTTTACGGCACGTGAACC
ATATGATTGCACCCAACCGAATTTAGTTACTAAGAAACCTTGTAATTTTTCTCCGAAGAAT
TCAACCATGTCATTACGTTCAAATTCACCGTGAACATAACATCTAAGCCAATGTCTTCTT
GAATTTTAAATCCATCGAGCAATTTTCAATTTTTAAGAATGTTTCATATGCTTCGTCTGTAAT
GCGTTTGTCTTCCAATCTGCACGGTATTTTCGAACTTCTCGGCTTTGTGGGAATGATCCA
ATAGTTGTTGTTGGTAAATCCGGTAAAGTTCAAACGTTTTTGTGTTGTTCAATACGTTGCG
CGAATGGTGATTGTCTTGAAGTACGCACGCTTTCGAAATCATAATCTAAGTTTTTGAATGA
TTGATTTTGGAAACGCTCATAACGTGCTTTTAAATTTATCATATTTAACACTATCGTTTTGAT
TAAATAGGCGACGCAATGCATCTAATTCGTCTAATTTTTTCAGTTGCAAAGCTTAAGCCTTC
GCCAACACTTGTATCTAATGTTTCATCATCTAAAGATACTGGAACATGTAATAATGAAGA
TGATGGTTGAATGACAAGTTCATTAGTGTGTGCTAACAATTTATCGATTAAGACTTTTTTA
GCTTCAATGTCACTTGGCCACACATTACGACCATCAATAATTCCAGCGTATAATGTTTTTG
ATTTATCAAAATCTCCAGCTTCAATTTGTTTAAAGTTATAGCCATTATCATGGACAAAGTC
TAAACCTAAACCACCAACAGGTAAGAAGTAAAGAATTTAAGATGTGCACGTTCAAAGT
ATGTTTGAATGACTAATTTTTTAGCAACACCAGCTTTTTTCGAAATAGTCATAAGCTTCACG
TGTAATATTTTCATAGCTTTCGCTGTCGTCTGTAACATAAGATTGGCTCATCAACTTGAATG
TACTCAGCACCTGCATCAATTAATGATTCAAACACTTCTTTATAAAGTGGTAATAACGTTT
```

TAACTTTTCTTCAAAGTTTGGTGACCGCCTTTTGATAATTTAACAAAAGTAATCGGACC  
ACAATGACAGGGTGAGCGTTAACGTTTAAAGATTGGGCATATTTAAAGCGATCTAATAA  
TACATTGCGACTCACTTTAGGCTCAACATTGTCCCATTCAGGTACGATGTAATGATAGTTA  
GTGTTAAACCATTTTATAAGTGCACCTTGCAACATGGTCTTTATTACCGCGAGCAATATCAA  
ATAATAAATCATCATCAATAGTTCTTCCCTTGGAACGTTCAAGGGATGATGTTGAATAATA  
ATGACGTATCTAATATATGGTCATATAAAGAGAAATCACCAACTGGGATGCTATCTAAGT  
GATAGTACTTTTGTAAATAATAAATTTCTTTATGTAGATCAGTTAATGTTTGATCTAATTCT  
TCTTTAGAAATCTTCTTTGCCCAATAACTTTCGATGGCTTTTTTCCATTCTTTTTTCTACCT  
AATCTTGGGAATCCTAAGTTTGATGTTTTAATTGTTGTCAT

### > **metH**

Function: protein coding sequence; methylenetetrahydrofolate reductase (core genome, constant)

Best match: meth\_CC008\_NCTC8325\_CP000253.1[352150:353991:r]RC

Position: 009-contig\_245\_RC: 58840 ... 60682; Length: 1842 bp

Sequence:

TCATAATATTGCCTCCTTGTGAGCAGTAATAGATTTTGAGTATGCTGCAAGTTCTAATGAA  
TCTTCGACATTTTGAAACGGTGTGATAATGTATAAACCATTAAAATATTCATGAACAGTA  
TCGATTAATCCTTTGAAAGCTTAAGACTTAGTTCTCGTGTTTTGGCTTTATCATCTTTAAC  
TGCTTCAAATTGTTGTAATAATTCATCTGACATCTTGATTCTTGGCACTTCATTATGCAAA  
AAGAGTGCGTTTTTTGTAACCTTGCATAGGCATAATGCCTATGAAAAATGGTTTGTTC AAG  
TGCTTAGTGGCATGGTAAATTTCAATGATTTTCTCTTTGCTGTACACGGGTTGTGTTATAA  
AATAAGACATTCCGCTTTCTATCTTTTTCTCTAATCTTTTGACGGCACCATCTAATTTACGA  
ACATTAGGGTTAAAGGCGCCAGCGATGTTGAAGTGTGTACGTTTCTTCAGCGCATCACCG  
TCAGTGTTAATACCTTGATTAAATCTTAGAGCGAGTTCAGTTAATCCTTTAGAATTAACAT  
CATAGACATTGGTTGCACCTGGTAAGTGACCAACTTTTGAAGGATCACCAAGTTATGGCTA  
ATATTTTCGTTAACGCCAATGAGCGATAATCCAAGTAAATGGGACTGCAAGCCGATTAAGT  
TTCGGTCTCGACATGTAATATGTACGAGTGGTTCAATATTGTAATATTGCTTAATTAAGCT  
AGCAGCAGCAATATTGCTAATTCTGACAGTTGCCAATGAATTATCTGCGAGTGTTACCGC  
ATCTACATTAGCTTTATCAAGTTTAGCGATATTTTCAAAAAATCTATCCGTGTCTAAATGT  
TTCGGTGTATCCAATTCGATAATAACGGTTGGACGTTCTTGAACCTTAGATGTTAATGATT  
GTCTAACTTTATTTTGAGATGGATTGAAAAGTGCTTTCGTTGGTATCGGAATCACTTTTTT  
GTCATTAACAGGTTTAAGTGTCTGAATAGATTCTTTAATAAATTTGATGTGCTCTGGCGTT  
GTACCACAGCAACCACCAATTAACGAACACCTTCGCGAATTAGATTTTGAGCAACTTGA  
CCGAAATATTGTGCATTGTCACTATACTTAAATTCACTATTTTCAATATCTAATAAGCTGG  
CATTTGGATAACAAGATAAGAATGCGTGCTCTGGTAATTCAATATGTGTGAAAGACTCTT  
GCATATGGTGCGGGCCATGATGACAATTGAGTCCCACGATGTTTGCACCACATTGAACGA  
GTTGTTTTAATCCTTCATTGATTGCCTGACCATTAACTAAGTAATTTGTGTTTGAAGCGGT  
TAATTGAGCAATGATTGGAATGTCGATTTTCTTTCTCGTTTCGTGAAATGACATTTGTAAAC  
TCTTCTAGGTCGTAATAACGTTTCGAAAAGTAGCGCGTCAACGCCTTCTTCAATTAAGGTGT  
CTATTTGAATTTCAAGTATGATAAAGAATAGTTTGTAAAGCTGATATCCTCTTGTTTGATACC  
TCTAAACCCACCAACTGTGCCTAATATATACGTATCTTTATTTGCTGCTTTTTTTGCGATGC  
GAACGGCGGCTTGATGTATTGCTTTAACTTTATCTTCAAGACCGAATCGTTTTAACTTTTC  
AAAATTTGCACCATAAGTATTGTTTTGAATGACATCAGCACCGGCTTCAATATATGAACG  
ATGGATGCGTTCAACTTTATCTGGATGGCTAAGATTATATGCTTCTGGACAGGTGTCTAAT  
CCTTCAGAGTATAAAATGGTTCCCTATAGCGCCATCAGCTACTAAAACATTATCTTTCAATT  
GTGTGAGGAATTGACTCAT

### > **A5IPT9**

Function: protein coding sequence; putative cystathionine beta-lyase (core genome, variable)

Best match: A5IPT9\_CC007\_TCH959-USA300\_AASB02000040.1[61053:62213:r]RC (completely identical)

Position: 009-contig\_245\_RC: 60650 ... 61811; Length: 1161 bp

Sequence:

TTATCTTTCAATTGTGTGAGGAATTGACTCATTGAATGCCTCCTTTAATGCGTATTTGATG  
TCTGCAATGAGTTCATCAGGATCTTCGAGACCAACACTTAATCGGAATAGACCGAAAGTG

ATACCACGTTCTTGCCTCACTTCTTCAGGTAGTGTGCGTGAGACATTGTTGCTGGGTGCG  
AAAGTATTGTTTCCACACCACCTAGACTCACTGAAACGAGTGGTAATGTCAGTGCATCGA  
CAAATTGTTGTGCTTTAGACTCATCAGCTAAACGTAAGCCAATAACGGCACCGCCATTTTT  
AGCTTGTCTAAATGAGATGCAGTAAGTCCCGGATAATAAACTTCTGAAATTCATCTTGC  
TTTATTA AAAATGACACGATTTTTTTCGCGCTTTTCGACAGATTGTTTAAATCTGATTGGAA  
ATGTTTTTAAATGTTTAGCAAGTGTCCAGCTATCTTGAGCAGATAACATATTGCCTGTACC  
ATTTTGTATTAAATAAAGAGCTTCACTAATTGCCTCATTATTAGTAATGACAGCACCAGCA  
ATTAATCGCTATGTCCACTTAAAAATTTGTAGCACTATGAATGACAATATCAGCGCCA  
AGTAATAAAGGTGATTGACCTAACGGTGTATGAATGTATTGTCCACAGCTACCAGTAGT  
TCATGCTTTTCGGCTATTTTAGAAACAGCTTTGATATCAGTAATTTTAAAACAGGGATTTCG  
ATGGTGTTCGATATAAATTAATTTTGTGTTTGATTGAATGGCACCCCTCGATTTGTTTCGAG  
CTTGGTAGTATCTACGGTTGTAATTTCAATATTAATCGATTCAAATTTGCTCAGTGAGG  
CGAAAAGTACCGCCATATACATCATCGGGTAAGATGACATGATCACCAGATTTGAAAGTC  
AAAAGTACTGCTGAAATCGCAGCAATACCTGATGCAAAAAGCAAAAAGCGAATTTCCCTGT  
TCTAATCGTGCTAACTTCTTCTAAAAGTTACGGTTAGGGTTGCCACTTCGTGCATAAT  
CATATTTAACATCGCCACCAAGACTTGTGTTGATGGAATGTTGAAGAATCATAGAGTGGTG  
GGTTAGCTGAATGATATTCCACACCTCTACGCCAATCGAATATCACTTCTGTCTTTTTGA  
AAGTGTCAAT

> **A5IPU0**

Function: protein coding sequence; putative cystathionine gamma-synthase/cysteine synthase (core genome, variable)

Best match: A5IPU0\_CC001\_MW2-USA400\_BA000033.2[386110:387213:r]RC

Position: 009-contig\_245\_RC: 61807 ... 62911; Length: 1104 bp

Sequence:

TCATACAATCTCTCCAATCTGAGCTTTATCTAATGCTTGGATGATATCGCGTTCGATGTCT  
TCATAATTTTCAACACCTAGTGATAAGCGGATTAATACTCATCAATGCCACGTTTATCTT  
TTTCAGCATCTGGCATATCAACATGTGTTTGGGTGTAAGGGAAGGTCACTAATGTTTCAGT  
ACCTCCTAAACTTTCTGCAAAAATGCAAATGTCTAAATTTTTTAATAATTTAGCGACGCTA  
TAGGCCTTGTTAAGTCTTAAACTAAGCATGCCAGTTTGGCCGCTATATAGTACTTCGTCAA  
TTGCTTGAAGTGACTGACATTTTTTAGCAAGTTTTCTAGCGTTTGATTGCGCACGCTCAAT  
GCGTAAATGCAAAGTTTTAAGTCCACGTAACAACAATAACTATCTATTGGTGAAAGTGT  
TGCGCCAGTCATGTTGTGAAAATCAAACAAGTGTGCGCGAGTGATTACCTTTGACGGT  
TACGACACCTGCTAGTACATCATTATGTCCACCAATATATTTTCGTAGCTGAATGTAAGACT  
ATATCAGCACCTTCTGCTAATGGTGTGAAAGATAAGGTGTTAAAAATGTATTGTTCGATA  
ATTGACAATAAGCCTTTAGCTTTACAAAGTTGATAGTACGGCTTTACATCAATAGCAATC  
ATTTGTGGGTTAGATATTGGTTCAATGAATAATGCAACTGTTTTATCAGTGATTTCTTTTTC  
AACTTGTTCATAATCTGTA AAAATCAACGTACTTAAATTTGATATTGTATTGTTGCTCATAA  
AATTCAAATAATCTAAATGTGCCGCCGTATAAATCGAATGAAACTAAAATTTTCATCGTGT  
GGTTTAAATAAATTACATATTAATTGAATGGCTGACATTCCACTTGATGTAGCGAATGAT  
GCAATACCATGTTTCGAGTTTGGCAAAAACAGGTTTCAAATGTTGAGCGTGTAGGATTTTTA  
GTACGTGTATAATCAAACCTGTTCGATTGTCCTAGTTTTGGATGCTTGTAGGCAGTAGATA  
AATGGATTGGATTCGCTATAGCACCGGTTGAATCATCGGTTAATGTGATTTGGGCTAACT  
GTGTATCCTTCAT

> **tbox02**

Function: noncoding RNA T-box leader element (core genome, constant)

Best match: tbox02\_CC001\_MW2-USA400\_BA000033.2[387279:387648:r]RC (completely identical)

Position: 009-contig\_245\_RC: 62976 ... 63346; Length: 370 bp

Sequence:

AAAAAGGACGAAAGCTTATGTTTCGCGGTACCACCTTTATTTGTTATTCCATCGCTGAAAT  
AACCTTATTACGTACGCATTA AAAAGTAAATATGCTTACTGAACAATTATCACAATTA AAG  
TCAGTAAGTAAGGATATAGTAATGTGCTATCCATACTTATTAACAAAAAATCGTGCAGTA  
AAGAATCCAGTACGCCATTTAACATCAATGTTAATACTGTATCGCTATAACGGGCGAACC

CGTAGACACCTCATATTGGCATCAACACTCCAAGGCCATTTTCAAACACGCTTTCAAAT  
CTTCTCTCAGCTACTAAAGACTCTCTGTATAAGCAGGGTGTGTTTTACTTTCCTCTTTATTG  
TGTTTAC

### > **spo0J**

Function: protein coding sequence; chromosome partitioning protein (core genome, variable)

Best match: spo0J\_CC001\_MW2-USA400\_BA000033.2[387877:388722] (completely identical)

Position: 009-contig\_245\_RC: 63574 ... 64420; Length: 846 bp

Sequence:

GTGAGTGAATTGTCAAAAAGTGAAGATCAACGTATTACTAAAACAAAAGATGAACAAAT  
TAAGCAAATAGATATATCGGATATCAAACCGAATCCGTATCAGCCCCGAAAAACTTTCGA  
TGAAAATCATTAAATGATTTGGCAGATTCAATTAAGCAATATGGAATTTTGAACCAAT  
TGTGCTTAGAAAAACAGTTC AAGGTTATTACATTGTAGTTGGTGAAGAAGGTTTAGAGC  
TTCGAAAATTGCTGGTCTAAAATACGTATCAGCGATTATCAAAGATTTAACAGATGAAGA  
TATGATGGAACCTGGCGGTCATCGAAAATTTACAACGAGAAGACTTAAATGCGATTGAAG  
AAGCTGAAAGTTATCAACGTTTGATGACAGATTTGAAAATTACACAACAAGAAGTAGCG  
AAGCGATTGAGTAAGTCGCGCCCGTATATAGCGAATATGTTGAGGTTATTACATTTGCCG  
AAAAAGATTGCTGACATGGTAAAAGATGGGCGACTGACAAGTGCACATGGACGAACGTT  
ATTGGCAATTAAGATGAACAACAATGCTTAGGTTAGCGAAACGGGTTGTTAAAGAAA  
AGTGGAGTGTTAGATATTTAGAAAACCATGTTAATGAATTAATAAATGTTTCGTCAAAGT  
CGGAAACAGACAAAGTAGATATAACTAAGCCTAAATTTATAAAGCAACAAGAACGACAG  
TTGCGAGAACAGTATGGTACCAAAGTAGATATATCAATAAAAAAATCGGTTGGTAAAAT  
CTCATTTGAGTTTGATTCACAAGAAGATTTTCTAAGAATAATTGAACAATTAATCGTAG  
GTATGGTAAATAG

### > **engD**

Function: protein coding sequence; GTP-dependent nucleic acid-binding protein EngD (core genome, constant)

Best match: engD\_CC001\_MW2-USA400\_BA000033.2[390005:391102]

Position: 009-contig\_245\_RC: 65702 ... 66800; Length: 1098 bp

Sequence:

ATGGCTTTAACAGCAGGTATCGTTGGATTGCCAAACGTTGGTAAATCAACATTATTTAAT  
GCAATAACAAAAGCAGGTGCTTTAGCAGCGAACTATCCATTCGCTACGATTGATCCTAAT  
GTAGGGATAGTAGAAGTGCCAGATGCTAGATTACTTAAATTAGAAGAAATGGTTCAACCT  
AAAAAGACATTGCCGACTACATTTGAATTTACAGATATCGCTGGTATTGTGAAAGGTGCT  
TCAAAGGGAGAAGGGTTAGGTAATAAATTCTTATCACATATTAGAGAAGTAGATGCGATT  
TGTCAGGTCGTTTCGTGCATTTGATGATGATAACGTAACCTCATGTTGCTGGTCGAGTAGACC  
CTATTGATGATATTGAAGTTATTAATATGGAATTAGTACTAGCGGACTTAGAATCTGTTGA  
GAAACGTTTGCCTAGAATTGAAAAATTAGCACGTCAAAAAGATAAGACTGCTGAAATGG  
AAGTACGTATTTTAACTATTAAGAAGCTTTAGAAAATGGTAAACCCGCTCGTAGTA  
TTGACTTTAATGAAGAAGATCAAAAATGGGTGAATCAAGCGCAATTACTGACTTCTAAAA  
AAATGCTTTATATCGCTAATGTTGGTGAAGATGAAATTTGGTGATGATGATAATGATAAAG  
TAAAAGCGATTCGTGAATATGCAGCGCAAGAAGACTCTGAAGTGATTGTTATTAGTGCAA  
AAATTGAAGAAGAAATTGCTACATTAGATGATGAAGATAAAGAAATGTTCTTAGAAGAT  
TTAGGTATCGAAGAACCAGGATTAGATCGATTAATTAGAACAACCTTATGAATTATTAGGA  
TTATCAACATATTTTACTGCTGGTGTGCAAGAAGTACGTGCTTGGACATTTAAACAAGGT  
ATGACTGCACCTCAATGTGCTGGTATCATTACTGATTTTGAACGTGGATTTATCCGTG  
CCGAAGTAACAAGTTATGACGACTATGTAATAATATGGTGGCGAAAGTGGCGCTAAAGAA  
GCGGGCAGACAACGATTAGAAGGTAAAGAATATATTATGCAAGATGGCGATATCGTTCA  
TTTCAGATTTAATGTATAA

### > **rpsF**

Function: protein coding sequence; 30S ribosomal protein S6 (core genome, constant)

Best match: rpsF\_CC008-ST72\_21259\_AFTS01000010.1[98755:99033:r] (completely identical)

Position: 009-contig\_245\_RC: 67338 ... 67617; Length: 279 bp

Sequence:

ATGTACATCGTACGCCCAAACATTGAGGAAGATGCTAAAAAAGCGTTAGTTGAACGTTTC  
AACGGCATCTTAGCTACTGAAGGTGCAGAAGTTTTAGAAGCAAAGACTGGGGTAAACG  
TCGCCTAGCTTATGAAATCAATGATTTCAAAGATGGCTTCTACAACATCGTACGTGTTAA  
ATCTGATAACAACAAAGCTACTGACGAATTCCAGCGTCTAGCTAAAATCAGTGACGATAT  
CATTCGTTACATGGTTATTCGTGAAGACGAAGACAAGTAA

> **ssb**

Function: protein coding sequence; single-stranded DNA-binding protein/chromosomal (core genome, constant)

Best match: ssb\_CC008-ST72\_21259\_AFTS01000010.1[98231:98734:r] (completely identical)

Position: 009-contig\_245\_RC: 67637 ... 68141; Length: 504 bp

Sequence:

ATGCTAAATAGAGTTGTATTAGTAGGTCGTTTAACGAAAGATCCGGAATACAGAACCACT  
CCCTCAGGTGTGAGTGTAGCGACATTCCTTGCAGTAAATCGTACGTTACGAATGCT  
CAAGGGGAGCGCGAAGCAGATTTTATTAAGTGTGTTGTTTTTAGAAGACAAGCAGATAAT  
GTAAATAACTATTTATCTAAAGGTAGTTTAGCTGGTGTAGATGGTCGCTTACAATCCCGTA  
ATTATGAAAATCAAGAAGGTCGTCGTGTTTGTACTGAAGTTGTATGTGATAGCGTTC  
AATTCCTTGAACCTAAAAATGCGCAACAAAATGGTGGCCAACGTCAACAAAATGAATTCC  
AAGATTACGGTCAAGGATTCGGTGGTCAACAATCAGGACAAAACAATTTCGTACAATAATT  
CATCAAACACGAAACAATCTGATAATCCATTTGCAAATGCAAACGGACCGATTGATATAA  
GTGATGATGACTTACCATTCTAA

> **rpsR**

Function: protein coding sequence; 30S ribosomal protein S18 (core genome, constant)

Best match: rpsR\_CC001\_MW2-USA400\_BA000033.2[392495:392737] (completely identical)

Position: 009-contig\_245\_RC: 68192 ... 68435; Length: 243 bp

Sequence:

ATGGCAGGTGGACCAAGAAGAGGCGGACGTCGTCGTAAAAAAGTATGCTATTTACACAGC  
AAATGGTATTACACATATCGACTACAAAGACACTGAATTATTAACGTTTTATCTCAGA  
ACGCGGTAAAATTTTACCACGTCGTGTAAGTACTTTCAGCTAAATATCAACGTATGTT  
GACTACAGCTATCAAACGTTCTCGTCATATGGCATTATTACCATATGTTAAAGAAGAACA  
ATAA

> **txbi\_rpsR**

Function: bidirectional rho-independent terminator of rpsR

Best match: txbi\_rpsR\_CC001\_MW2-USA400\_BA000033.2[392742:392795] (completely identical)

Position: 009-contig\_245\_RC: 68439 ... 68493; Length: 54 bp

Sequence:

TAATTTATTGTCAAACCCCGTAGGCATAGGCTTACGGGGCTTTTTGTGTTTTGG

> **txbi\_Q1XZL6**

Function: bidirectional rho-independent terminator of Q1XZL6 (genomic island)

Best match: txbi\_Q1XZL6\_CC001\_MW2-USA400\_BA000033.2[392889:392950] (completely identical)

Position: 009-contig\_245\_RC: 68586 ... 68648; Length: 62 bp

Sequence:

AGATGCATAAAAAAAGAACTACGCATTTTAAATAAAAATGCATAGCTCTTCTTTTTCTTGC  
AT

> **Q1XZL6**

Function: protein coding sequence; Abi-like protein (genomic island)

Best match: Q1XZL6\_CC005\_A6300\_ACKF01000002.1[51616:52554:r]RC

Position: 009-contig\_245\_RC: 68700 ... 69639; Length: 939 bp

Sequence:

TTATACTTTTGGTCTGTTGAAGTCAATAATTTTATCTAAAGCTATAAAAAATCTTTTGATA  
GCTAATGCATTATTATAATAGCTTTCGTTTCTTTTATATCGCTTTTGAAGTTGGTCCAAATC  
GTGATATCTTGCTGGATAATTGCATTACTACAACTTGATTATGTAATTCTAGCGTAGCG  
AAAGTATCTATGAAATTTTTTATTCCGAACATGTTTCTAGATATGCCTATATTATCCCTTT  
TTCAAATAAATATTGAGGAGATCTACTGTCATAATTTAGATTTGCTATGATGGGTTGGTTA  
TGAGCTGATTTGTTTCTTATATTTTTAACTAAAGGCATTAATAATTAGCAACTCTCAATT  
CTTCGTCATTGTACTTCTTGTAATAGAAGTTGAGAAACGAAACGAATTGACCTAGTTGCA  
TGAATTC AATGCAAACCTCATGCGGGTGGATTTTGATAGTATTTATTCAACTTCTCGGGTAG  
TTGTCCTCGTTTATTCATATGCTTGAATATTTTCGTTTATTTTTGATTTTGGTTCCATAAC  
TTCTTCTGGTGTCTTGAATTTGTGTCAAATTTGAATTGCTATATGATTTATCAATACATA  
AGA ACTCATCTATTATTTATAACCATCTTCTTGGTTATTTCTGTTATTAGTTTTAAGACT  
AGACACTTTAACTATGTTCAATATCTAAAGTTAAATGCAACATTGTGTATCTTAATTTCA  
TATCTATAGTTGCTAAATCTGATAAATAAGCAAATTCTATGAAATAGCCGCCATTCTTTTT  
TTCGAAATTTTTTCGGAAATAAGCTAGTTTGAAGAAGTAATTATTTTTTCTAAGAATTTCA  
TTTGCTTTTTTCGGTGTCAATAATATTA AAAAATATATTCATCTGTTTTAATTTTCGCTATTTG  
CTCATCAAAATTGAGCAT

### > **int5-setC**

Function: protein coding sequence; (mobile element)

Best match: int5-setC-COL\_trunc\_CC008\_NCTC8325\_CP000253.1[362987:363688:r]RC

Position: 009-contig\_245\_RC: 69677 ... 70379; Length: 702 bp

Sequence:

TAACTCCCAATCGTTCAAATTTATTCATCATATCTTTCGCCATCTGATTAGTAACATGT  
GTGTATATCTCTAGATTTTTTTTATAATCTGAATGACCTACATGCTCTTGCATTGCTTTTAA  
GTTAATTCCTAATTGAGCAAGTGTAGATATATGCGAATGATGTAATGTATGCGTCGTTAT  
AGGTTTCTTAATAGA ACTAATATCAGCGCCCCCTTAAATAATGTGGCTAATTTTGTTCGA  
GTCGATAGGGCTACCAGCCGTATTTGTGAATATGTACTCTCTATCAATAAACTTATCATTC  
CAAGCATAAGTGTCTTAGTAAGTCGATGCTTTGGGTAGTGAGCCCTATGGCCTTATAGCT  
ATTACTTCTTTCAGTTGTCTCTTTACTCCGAATGCTCCCGTCTTTTTTTCAGTTATCCAATT  
AATTGTACCATCGATATCTAGCGTTTTATCTTCATAGTTTATATTTTCTCTTTTATTGCAA  
GTAGCTCACCGATACGCATGTCATTAGCAATTTGAAACTGTACCATAGCTTTTACCATTTT  
ATAATTACGTTTTGTGCTTGGATATTTTTTATACTTAATTACATAGTCGAAACAATCCAGTA  
ACTCCTTATCTTCATTATCTTCTAAAGTGTATTACGTTTAGCTAGTAACGCATCACTATA  
GGGATATCTATTTTATCTATTACACATAT

### > **setC**

Function: protein coding sequence; staph enterotoxin-like toxin X (genomic island)

Best match: setC\_CC001-ST772\_118\_AJGE01000018.1[40087:40698:r] (completely identical)

Position: 009-contig\_245\_RC: 70584 ... 71196; Length: 612 bp

Sequence:

ATGTTCAAAAAACATCATTCTAAAAATTCAATTGTATTA A AATCTATTCTATCGCTAGGTA  
TCATCTATGGGGGAACATTTGGAATATATCCAAAAGGAGACGCGTCAACACAAAATTCCT  
CAAGTGTA CAAGATAAACAATTC AAAAAGTTGAAGAAGTACCAAATAATTTCAGAAAAA  
GCTTTGGTTAAAAAACTTTACGATAGATACAGCCAAAATACAATAAACGGAAAATCTAAT  
AAATCTAGGAATTGGGTTTATTCAGAGAGACCTTTAAATGAAAATCAAGTTCGCATACAT  
TTAGAAGGTACATACACAGTTGCTGGCAGAGTGTATACACCTAAGAGGAACATTACTCTT  
AATAAAGAAGTTGTCACTTTAAAAGAATTGGATCATATCATAAGATTTGCTCATATTTCTT  
ATGGCTTATATATGGGAGAACATTTGCCTAAAGGTAACATCGTCATAAATACAAAAGATG  
GCGGTAAATATACATTAGAGTCGCATAAAGAGCTACAAAAGATAGGGAAAATGTAGAA  
ATTAATACTGATGATATAAAAAATGTAACTTTCGAACTTGTGAAAAGTGTTAATGACATT  
GAACAAGTTTGA

### > **tx\_setC**

Function: rho-independent terminator of setC (genomic island)

Best match: tx\_setC\_CC001-ST772\_118\_AJGE01000018.1[39995:40056:r] (completely identical)

Position: 009-contig\_245\_RC: 71226 ... 71288; Length: 62 bp

Sequence:

TATCGCTAATACTTTGAAAGTTAGGTATCCGAAGATGCCTAACTTTCTTTGTTATGATTAG  
C

### > Q2G106

Function: protein coding sequence; putative exported protein (core genome, variable)

Best match: Q2G106\_CC080\_11819-97\_CP003194.1[407424:407792]

Position: 009-contig\_245\_RC: 71564 ... 71933; Length: 369 bp

Sequence:

TTGAAAACGATTTTAAAAACAATAACATATCTTGCCTTACTATCATTGGCGCTTATGCTG  
CTTTATTCATTTTAAAAACAATAGACTCTCATGGTATAACAGATCAATTTAACCCATTAGT  
AAAGGAAGATGATTCTTATGTTAAAACGACAGAGGTGTCTACTAGAATGGATGATCAACT  
CCGAAGTTATACTCAAAGTGCTTTTAAATAAAGAAGGGAAAGAAACGCAATTAATGTATAC  
TGCTACATTTGATGTTAAACCGCATAGATACTTGAAAATTACACATAAAGGTCATCATGT  
AGAAACTTTTGAAGAAGTTGAAAAGGAAGAAGTACCTAAAAAAGCATTAGACAAACTGA  
GTCGATAA

### > Q1Y9M1

Function: protein coding sequence; putative protein (core genome, constant)

Best match: Q1Y9M1\_CC001\_MW2-USA400\_BA000033.2[396429:397001]

Position: 009-contig\_245\_RC: 72113 ... 72686; Length: 573 bp

Sequence:

ATGAAATTTAAAATCATTAGCAGTGTTATCAATGTCAGCGGTGGTGCTTACTGCATGTGGC  
AATGATACTCCAAAAGATGAAACAAAATCAACAGAGTCAAATACTAATCAAGACACTAA  
TACAACAAAAGATGTTATTTCTTTAAAAGATGTTAAAACAAGCCCAGAAGATGCTGTGAA  
AAAAGCTGAAGAACTTACAAAGGCCAAAAGTTGAAAGGAATTTCAATTTGAAAATTCTA  
ATGGTGAATGGGCTTATAAAGTGACGCAACAAAATCTGGTGAAGAGTCAGAAGTACTT  
GTTGCTGATAAAAATAAAAAAGTGATTAATAAAAAGACTGAAAAAGAAGATACAGTGAA  
TGAAAATGATAACTTTAAATATAGCGATGCTATAGATTACAAAAAAGCCATTAAGAAG  
GACAAAAAGAATTTGATGGTGATATTAAGAATGGTCACTTGAAAAAGATGATGGCAA  
CTTGTTTACAATATCGATTTGAAAAAAGGTAATAAAAAACAAGAAGTTACTGTTGATGCT  
AAGAACGGTAAAGTATTAAGAGTGAGCAAGATCACTAA

### > Q5HIS2

Function: protein coding sequence; putative protein (core genome, constant)

Best match: Q5HIS2\_CC008\_NCTC8325\_CP000253.1[366133:366396:r]RC (completely identical)

Position: 009-contig\_245\_RC: 72823 ... 73087; Length: 264 bp

Sequence:

CTATTTATCCATGCGAATATCGACTTCTTCTAAATGTTTCTGATATTCTTTAACCTTACTTT  
CTAAAAACATTTTCATATGGTGCATCAAAGAAGTCAGCTAAATGCATGGCATCTTTAAATT  
TAGGTTTCATGGTGATGATTCTCCATTCCCAAATTTGATGTGCTTCATATTTAGTACCATA  
TTTCTCATTTAATTGCTGTGCTAATTCGTCAATTTCTAAATTATGTTTAGTTCGTAAGTTAT  
ATAAAATATGCATATTCAT

### > Q7A7J4

Function: protein coding sequence; putative protein (core genome, constant)

Best match: Q7A7J4\_CC001\_MW2-USA400\_BA000033.2[398373:398954]

Position: 009-contig\_245\_RC: 74060 ... 74642; Length: 582 bp

Sequence:

ATGACGATTTATTTAGTTAGACATGGCGAATCAAAAATCGAATTATGATAATAAACATTTT  
AGATCTTATTTTTGTGGACAATTAGATGTGCCGTTAACGGATACTGGCACAAAAAGTGCG  
GACGATTTATGTGATTATTTTAAAGAGAAACAGATTAAACATGTATATGTTTCAGACTTAT  
TAAGAACACAGCAAACGTTTGAACATATTTTTCCATATGACATTGCATCAACGACTACGC  
CTCTATTAAGAGAACGTTCACTTGGCGTATTTGAGGGTGAATATAAAGATGAAATCAGTG

CGAATCCGAAATATGAAAAATATTTCAATGATTCAAACCTTTAAAGACTTTCGTCATAGTTT  
TTCACAAAAAGCGCCTGAAGGAGAAAGTTATGAAGATGTATATCAACGCGTAGAACATT  
TTATGAATCATGTTGTCAATGAAGATACACAAAAAGATGATATTGTCATTGTTGCACATC  
AAGTTGTCATTTCGTTGTTAATGGTTTATTTTAATAACGTTTCACGGGAAGAAGCTGTGGA  
TTTAAAAGTTGAAAATTGCAAACCATATATCATTGAATAG

### > **A5IPV8**

Function: protein coding sequence; putative lipoprotein (core genome, constant)

Best match: A5IPV8\_CC008\_NCTC8325\_CP000253.1[368658:369284:r]RC (completely identical)

Position: 009-contig\_245\_RC: 75346 ... 75973; Length: 627 bp

Sequence:

TTATTTATCGATAACATCACTCTTGATACCTTTAGATTTTAAGAAATCTTTAATTTTATCTT  
GTTGCTTTTTATTAACATCACCGGCATATTTTGTGTCACGTCGACAACATTGATTTTATTT  
TGCGGTTGATAGCTAAGCTTTTCAATATCTTCATCAACATTGGCGATTGTAATTTAAAG  
CTTTGAAGTAATTCATCATTAAATTCAACGGGTTTCTTATATTCTTTAGGAATATTGTTTTCA  
GTGACAAATTTCTTGAAATGCAAATCGTTTTTAACAGCTAAGTTAGATAAGTGGCTAAGT  
GTTTCTGCTTGTTTTTCAGTCACTTTTGTGTTGACTGTCAATTTGTTTATCTAGTTTATGTTGC  
ATAATATATTTGTTATCAAGTATATCGCTATTTACAGACAAATACTTTTCTATAGCTTGCT  
TCATCTCTGCATCACTAATATCACTATTTTTCTTATCTGAGTTAAAGATATCTTTTGTCT  
AATTTTTAGCGCTTTTAGGTGCATGGATGCCAGTACTTGTATGATGATCTTCGTTATCAG  
ATTGATCGGACGCGCAACCTGTAAGAATTAATGTTCGATGCTAAAAATGTACTTAGTAGTA  
ATCTCTTTTTCAT

### > **ahpF**

Function: protein coding sequence; alkyl hydroperoxide reductase subunit F (core genome, constant)

Best match: ahpF\_CC001\_MSSA476\_BX571857.1[400727:402250:r]RC

Position: 009-contig\_245\_RC: 76417 ... 77941; Length: 1524 bp

Sequence:

TTAGTTTCTGATAATATAGTCAAAGGCATTTAATGCTGCATTTGCACCAGCGCCCATTGAA  
ATAATAATTTGTTTGTCTTCTGATCTGTGACATCGCCAGCAGCAAATATTCCAGGTACGT  
CAGTATTATTGTTACGATCAATAACAATTTACCACGTTTCGTTTAATTCAACAGCATCTTT  
TAACCATGATGTGTTTGGAAAGTAAACCAATTTGAACAAAGATACCATCTAAGTTAAGTAG  
ATGTTCTTCGCCGGTGCTCATGTCTTCGTAACGTATAACCTGTAACATGGTCTTCTCCGACA  
ACTTCAGTAGTTTTGGCATTTGTTTTGATATCAACATTTGATAAAGAACGTAAACGATCTT  
GTAACACGTTGTCTGCTTTTAATTCGCTAGCGAATTCGAATAATGTAACATGATTAACGAT  
ACCAGCAAGGTCAATTGCTGCTTCAACCCAGAGTTACCGCCACCGATAACTGCTACGTC  
TTTATTTTCAAATAGAGGTCCGTCACAGTGAGGGCAGAATGCAACACCTTTATTAATCAA  
TTGCTCTTCACCTGGAATGTTTAGCTTACGCCAACCTGCACCAGTAGCAATAATGACTGTT  
TTACTTTCTAAGACAGCACCGTTTTCTAACGTAACCTTTAATTGCTTCGTCAGTCTTTTCGAT  
ATCTGTAGCACGTATACCTGTCATTGCATCAATGTCATATTGATCAATGTGCGCTGCTAAG  
TTAGAAGAAAATTCAGAACCAGTTGTTTCTTTAACAGTAATGAAGTTCTCAATACCAGCA  
GTATCATTAACCTTGGCCACCGATACGATCAGCAACTATACCAGTACGTAAACCTTTACGT  
GCTGTGTAATCGCTGCACTACCACTAGCAGGACCACCACCAACGATTAAGACATCATAA  
GGTTCTTTATTTCAAACCTCAGATGCATCTGCCGTAAGTTCGAAAGAATATCTT  
GGATTGTCATACGACCATTGCCAAATCTTCGCCGTTTAAAAAGACAGCAGGGACTGCCA  
TGATGTTTTTACGATTCTTCACGGAACACTGCACCATCAATCATAGAATGCGTGATGTTAG  
GGTTGATCACACTCATTAAAGTTAAGTGCTTGAACGACATCAGGACATTTTTGACACGTTA  
AACTAATGAATGTTTCAAATGGAATGAACCTTCTAAGTTTTTAATTTGGTCAATAATTGA  
CTGTTTTTCTTTAGGTGCACGACCACTAACCTGTAAAATTGCTAAAACAAGTGAGTTAAA  
CTCGTGACCTAATGGAATTCCTGCAAATGTTACACCTGTTTCTTCGCCAGGACGGTTGACT  
GAGAAACTTGGTGTACGTTTTAAAGACTTTTCAGAAAGTGAAAGTCTAGGTGACATATCA  
GAAATTTCTGTTAATAATTTCTTTGAGTTCCTTAGATTTTTTCATCTGAACCAAGGCTGGCAA  
CGAATTCACGTTGCCCTCCATTAGTTCTAATAATTGTTTAAAGTTGTTGTTTTAAATCAGC  
ATTAAGCAT



### > **ahpC**

Function: protein coding sequence; alkyl hydroperoxide reductase subunit C (core genome, constant)

Best match: ahpC\_CC001\_MW2-USA400\_BA000033.2[403621:404190:r]RC (completely identical)

Position: 009-contig\_245\_RC: 77956 ... 78526; Length: 570 bp

Sequence:

```
TTAGATTTTACCTACTAAATCTAAACCAGGTTGCAATGTTTTAGCGCCTTCTTCCCATTTA
GCTGGGCATACTTCGCCAGGGTTTTTACGAACATATTGAGCTGCTTTGATTTTGTGAGCTA
ATGTACTAGCGTCACGGCCAATTCCGTCAGCGTTAATTTTCAGATGCTTGTACAACACCGTC
TGGGTCGATAATGAATGTACCACGTTGAGCTAAACCAGTAGCTTCATCTAATACATCAAA
ATTACGAGTGATTGTTTGTGATGGGTCACCAATCATAGTGTAAAGTGATTTTGCTAATTGCA
TCTGAATGGTCATGCCATGCTTTGTGTACGAAGTGAGTATCAGTTGATACTGAGAATACA
TTTACGCCTAATTTTTGTAATTCCTTCATATTGGTTTTGTAAAGTCTTCTAATTCAGTTGGACA
AACGAATGAGAAGTCAGCAGGATAGAAGCATACTACGCTCCAAGAACCTTTTAAATCTTC
TTGTGTAACCTCTTAAATTGATCTTTTTTTGGATCGAAAGCTTGCGCTGTAAATGGTAAG
ATTTCTTTGTTAATTAATGACAT
```

### > **nfrA**

Function: protein coding sequence; NADPH-dependent oxidoreductase (core genome, constant)

Best match: nfrA\_CC008\_NCTC8325\_CP000253.1[372329:373084] (completely identical)

Position: 009-contig\_245\_RC: 79017 ... 79773; Length: 756 bp

Sequence:

```
GTGTCAGAACATGTATATAATCTTGTGAAAAAGCATCATTCTGTTAGAAAATTTAAGAAT
AAACCTTTAAGTGAAGACGTTGTTAAGAAATTGGTAGAAGCTGGACAAAGCGCTTCGAC
GTCAAGTTTCTGCAAGCATACTCAATTATTGGTATCGACGATGAGAAGATTAAAGAAAA
TTTACGAGAAGTTTCTGGACAACCTTATGTTGTAGAAAATGGCTATTTATTCGTCTTTGTT
ATTGATTATTATCGTCATCATTAGTTGATCAACATGCTGAAACTGATATGGAAAATGCAT
ATGGTTCAACGGAAGGTTTGTAGTAGGTGCAATCGATGCAGCATTAGTTGCCGAAAATA
TTGCGGTAACGCTGAAGATATGGGGTATGGCATTGTCTTTTTAGGATCATTAAAGAAATG
ATGTTGAACGCGTTCGAGAAATTTAGACTTACCTGACTATGTCTTCCCGGTATTTGGTAT
GGCAGTAGGGGAACCCGCAGATGACGAAAATGGTGCAGCCAAGCCACGCTTACCATTTG
ACCATGTCTTCCATCATAATAAGTATCATGCTGATAAGGAAACACAGTATGCACAAATGG
CAGATTACGACCAGACAATCAGCGAGTACTATGATCAACGTACAAACGGGAATCGCAAA
GAAACATGGTTCGAGCAAATTGAGATGTTCTTAGGAAACAAAGCAAGATTAGATATGTT
AGAACAATTGCAAAAATCAGGCTTAATACAGCGATAG
```

### > **A6TYN5**

Function: protein coding sequence; putative transporter (core genome, constant)

Best match: A6TYN5\_CC008\_NCTC8325\_CP000253.1[373165:374553:r]RC (completely identical)

Position: 009-contig\_245\_RC: 79853 ... 81242; Length: 1389 bp

Sequence:

```
TTAGTGTGAAGTTAATGCAGCATTATCATTGAAATCGAAAGTATCTTTATCCCAATGTTTA
GTAACTTGGCGGTACCTGTACCAGCTAGCATTGAATCGTTCACGTTAATGCTGTTCTAC
CCATGTCAATCAATGGTTCAACGGAGATGAGCACGCCGGCTAAAGCGACTGGCAAGTTTA
ACGTTGACAACACCAATATGGATGCAAATGTAGCCCCGCCACCGACGCCAGCAACGCCG
AATGAACTAATAATCACGACAGCGATTAACGTTACAATAAATTGTAAATCAATTTCTACA
TTAGCGACGGGTGCGACCATAATTGCAAGCATGGCAGGGTAAATGCCTGCACAACCATTT
TGTTCAATCGACAATCCAAATGTCGCAGCGAAATTGGCAATACCTTCTGGCACGCCTAGA
CGTCTTGTGTTGTTGTACATTCAATGGTAAGGCACCCGCGCTTGAGCGTGATGTGAATG
CAAAGATTAATACTTCCAAAGTCTTTTTAACATAGCGAATTGGGCTAATACCTAACAGGC
TTAAAATAATTAAGTGAATGATATACATCGTAATTAATGCAGCGTACGATGCGATTAAGA
ATTTTCCTAAAGTCCAAATGGCGCCAAAGTCACTTGTGATAATGTGTTGGCCATAATTGC
TAATACACCGTATGGCGTTAAACGTAAGACGAACGTCACAATCGCCATTACTAGTGAATA
GATAGCGTCAATCGCACGCTTAAGCAATTCACCATGATCAGGTTGTTTGGCGTGCTACGCG
TAAATAAGCAAATCCTATAAACGAAGCAAATATCACGACAGCAATCGTGGAAGTTGCAC
GTTGTCCAGTGAATCTAAGAATGGATTTTTAGGCAATAATTCAAAATTTGTTGTGGTA
```

ACGTATGTGCTGTTAAATCTTTCGCTTGTTTAGCAATTTTCGCTTCCACGTGCTTGTTTCAGCG  
TTACCAAGGTTAATTGTTGATGCATCTAAACCAAACACCAAGGCATACACAACACCAACA  
ATCGCAGCAATGGTGACAGTGCCAATTA AAAAAGATAAAAATGAGACTACCAATTTTAGC  
AAACTTTTCTCCGATTTGAATTTTAGTGAATGCAGCTACAATAGAAATGAAAATTAAGG  
CATAACAATCATTGCAACAATGCAACGTAACCTTGCCGACAATGTTGAACCAGTCACT  
TGTTGATGTAATAACATTCGAATGTGTGCCATAAATAAGATGCAATAACACACCGAATAC  
TATACCAATCCCTAAAGCTGTAAACACACGTTTCGCAAAAGATATATGTTTTCGAGCCAT  
CATGTGCAATATTACGATGAAAATCACCAATACAATAATATTAATCAGTGTAAGAAAAGC  
ATTCAT

> **yflT**

Function: protein coding sequence; heat induced stress protein (core genome, variable)  
Best match: yflT\_CC008\_NCTC8325\_CP000253.1[377409:377816:r]RC (completely identical)  
Position: 009-contig\_245\_RC: 84097 ... 84505; Length: 408 bp

Sequence:

CTAAGCTTTGGGACCTTTAGATGCTTCAGCAAAATGTGTAATATCAATCTCTTCATAAGCT  
GAATTATTTTCATGCACTTCTTGATGTGATGATTTGTCACGAACCGCTACAACCTAACATTT  
TATCGTCTAAAATAAGTTGTTTATATTTTCTAATTCATCAGGCGCTAAGTTGTAGCGTGA  
TAAACTGCATGTTCCACCATCTTCTCCTGTTAACAGTTTAGTCATTCTATCACTAAATGTT  
CCACTTGTTGAGATAAGGGAGATTTTCAGAGTCGTGTAAGTCATTTAGGTGTAATTTACTTT  
TACTAATAATTGTTAGCTCTGATTCTAAATAACCTTCAGATTTCTTTTGATTGATTACGTTG  
TATAATTCGCCAGTGTCATTTACTACAGTAATATCTGCCAT

> **RF00167**

Function: noncoding RNA purine riboswitch (core genome, constant)  
Best match: RF00167\_CC001\_MW2-USA400\_BA000033.2[410546:410648] (completely identical)  
Position: 009-contig\_245\_RC: 84684 ... 84787; Length: 103 bp

Sequence:

GTAAATAATTTACATAAACTCATATAATCTAAAGAATATGGCTTTAGAAGTTTCTACCAT  
GTTGCCTTGAACGACATGACTATGAGTAACAACAATACTA

> **xpt**

Function: protein coding sequence; xanthine phosphoribosyltransferase (core genome, constant)  
Best match: xpt\_CC001\_MW2-USA400\_BA000033.2[410879:411457]  
Position: 009-contig\_245\_RC: 85017 ... 85596; Length: 579 bp

Sequence:

GTGGAGTTACTAGGACAAAAAGTAAAGGAAGACGGCGTTGTCATTGATGAGAAGATTTT  
AAAAGTCGATGGATTTTAAATCATCAAATGATGCAAAGTTAATGAATGAAGTTGGTGC  
CACTTTTTACGAGCAATTTAAAGATAAAGGGATTACTAAAATCTTAACCATTGAAGCTTC  
CGGTATCGCACCTGCAATCATGGCTGCACTGCAATTTGATGTGCCATGTTTATTTGCGAAA  
AAAGCAAACCTAGCACTTTGACGGATGGTTATTATGAAACATCTATTCATTCATTTACTA  
AAAATAAAACAAGTACGGTCATTGTTTCAAAGAGTTTTTATCAGAAGAAGATACTGTAC  
TTATCATCGATGACTTTGTAGCAAATGGTGTGCTTCATTAGGATTATACGATATCGCACA  
GCAAGCGAATGCTAAGACAGCTGGTATTGGTATTGTTGTTGAAAAGAGTTTCCAAAATGG  
GCATCAACGTTTAGAAGAAGCAGGTTTAAACAGTTTCTTCTCTCTGCAAGGTTGCTTCACTA  
GAAGGAAACAAAGTGACATTGGTGGGAGAAGAATAA

> **pbuX**

Function: protein coding sequence; xanthine permease (core genome, constant)  
Best match: pbuX\_CC007\_TCH959-USA300\_AASB02000040.1[87381:88649]  
Position: 009-contig\_245\_RC: 85595 ... 86864; Length: 1269 bp

Sequence:

ATGAAAATTTAATCCTAAGTGTTCAACATCTTTTAGCTATGTACGCAGGTGCTATCTTAG  
TTCCAATCATTGTTGGTACAAGTTTGAAGTTTACACCTGAACAAATCGCTTACTTAGTTAC  
AGTAGATATATTTATGTGTGGGGTTGCCACATTTTACAAGCCAATAAAGTAACAGGAAC

AGGATTACCAATCGTTCCTTGGATGTACATTCACGGCTGTTGCGCCCATGATTTTAATTGGT  
CAAACGAAAGGAATAGATGTACTTTATGGTTCGCTATTTTTATCAGGGATATTAGTTATTA  
TCATCGCGCCTTTCTTTTCACATCTTGTAATAATTCTTCCCACCAGTAGTAACGGGTAGTGT  
TGTTACTATCATTGGTATCAATTTAATGCCAGTAGCAATGAATTACTTAGCTGGAGGTCAA  
GGTGCAAAGGACTATGGAGATGTTAAGAACATTTTGTAGGTTAATGACATTAATCATT  
ATTCTTGTTTTACAAAGATTCACAACCTGGATTTATTAAGAGTATTGCCATATTAATTGGAC  
TCGTTTTAGGAACGATAGGTGCTGGCTTACTTGGGATGGTCGATATTAATCAAGTCAATC  
ATGCCGGTTGGTTAGGCATCCCAGTGCCGTTTAGATTCTCAGGATTTAGCTTTGATGTGAC  
ATCGACGTTAGTGTCTTTATTGTAGCTATCGTTAGTTAATTGAGTCGACAGGTGTCTAT  
CATGCGTTAAGTGAAATTACCGGTAAGAAGTTAGAAAAGAAAAGATTTTCGTAAAGGTTAT  
ACTGCGGAAGGTCTAGCGATAGTGTAGGTTCTATATTCAATTCATTTCCGTATACAGCCT  
ATTCGCAAAATGTAGGACTTGTTTCTTTATCCGGCGCTAAGAAAAACAATGTTATATACG  
GCATGGTCGTGTTACTTATATGTGGTTGTATACCTAAGCTTGGCGCATTAGCAAATAT  
CATACCGCTACCTGTGTTAGGCGGTGCGATGATAGCTATGTTTGGCATGGTAATGGCATA  
TGGTGTAGTATATTAGGACATATCGATTTTAAAAATCAAAAACAATTTATTAATTATCGCT  
GTATCAGTAGGATTAGGTAAGGATAAGCGCTGTACCACAAGCATTAAAGGTTTAGGT  
GAACAATTTGCATGGTTGACTCAAAACGGAATTGTTTTAGGCGCAATCTCTGCAATTATTC  
TTAATTTCTTTTTAATGGAATAAAGTATAAACAAACGGAAGAAAATGTGAAATAA

> **guaB**

Function: protein coding sequence; inosine-5'-monophosphate dehydrogenase (core genome, constant)

Best match: *guaB\_CC009\_21334\_AGTW01000029.1*[87100:88566]

Position: 009-contig\_245\_RC: 86901 ... 88368; Length: 1467 bp

Sequence:

ATGTGGGAAAGTAAATTTGCAAAAGAATCATTAAACGTTTGATGATGTGTTATTAATTCCA  
GCACAATCTGATATTTTACCGAAAGACGTTGATTTAAGCGTACAATTATCAGACAAAGTT  
AAATTAATATTTCCAGTTATTTCTGCTGGTATGGATACTGTAAGTGAATCTAAAATGGCG  
ATTGCTATGGCTCGTCAAGGTGGTTTAGGTGTTATTCATAAAAATATGGGCGTTGAAGAA  
CAAGCGGACGAAGTTCAAAAAGTAAAACGCTCAGAAAATGGTGTCAATTTCAAACCCATTT  
TTCTTAACGCCAGAAGAAAGCGTTTATGAAGCAGAAGCATTAAATGGGTAAATACCGTATT  
TCAGGTGTACCAATTGTTGATAATAAAGAAGATCGCAACTTAGTAGGTATTTTAAACAAAC  
CGTGACTIONCGTTTTATTGAAGACTTCTCGATTAAAATTGTAGATGTAATGACGCAAGAA  
AATTTAATTACAGCTCCAGTGAATACAACACTTGAAGAAGCAGAAAAAATTCTCCAAA  
ACATAAGATTGAAAAGTTACCATTAGTTAAAGACGGACGTCTAGAAGGTCTTATTACTAT  
TAAAGATATTGAAAAGTTATCGAATTCCTAATGCAGCAAAAGATGAACATGGTCGTCT  
ACTTGTAGCCGCAGCAATTGGTATTTCAAAGATACTGATATTCGTGCTCAAAAATTAGT  
CGAAGCAGGTGTGGATGTCTTAGTTATCGATACAGCACATGGTCACTCTAAAGGCGTTAT  
CGATCAAGTGAAACATATTAAGAAGACTTACCAGAAATCACATTAGTAGCTGGTAACGT  
AGCAACTGCAGAAGCAACAAAAGATTTATTTGAAGCGGGTGCAGATATTGTTAAAGTTG  
GTATTGGCCCAGGTTCAATTTGTACGACGCGTGTGTAGCAGGTGTTGGTGTACCACAAA  
TTACAGCAATTTATGATTGTGCAACTGAAGCACGCAAACATGGTAAAGCTATCATTGCTG  
ATGGCGGTATTAATTTCTCAGGAGATATCATTAAAGCATTAGCTGCTGGTGGACATGCGG  
TTATGTTAGGTAGCTTATTAGCAGGTAAGTGAAGAAAGTCCAGGTGCTACAGAAATTTCC  
AAGGTAGACAATACAAAGTATATCGCGGTATGGGTTCTTTAGGTGCGATGGAAAAAGGTT  
CAAACGACCGTTACTTCCAAGAAGACAAAGCGCCTAAGAAATTTGTACCTGAAGGTATCG  
AAGGACGTACAGCATATAAAGGTGCTTTACAAGATACAATTTACCAATTAATGGGCGGA  
GTGCGTGCTGGTATGGGTTACTGGTTCACACGATTTAAGAGAATTACGCGAAGAAGCA  
CAATTCACACGTATGGGTCCTGCTGGTTTAGCAGAAAGCCACCCACATAATTTCAAATT  
ACGAAAGAATCACCGAACTACTCATTCTAA

> **guaA**

Function: protein coding sequence; GMP synthase glutamine-hydrolyzing (core genome, variable)

Best match: *guaA\_CC001-ST772\_118\_AJGE01000018.1*[21349:22890:r] (completely identical)

Position: 009-contig\_245\_RC: 88392 ... 89934; Length: 1542 bp

Sequence:

ATGGAAATGGCAAAAGAACAAGAGTTAATCCTTGTCTTAGACTTTGGTAGCCAATACAAC  
CAATTAATTACACGCCGAATTCGTGAAATGGGCGTTTATAGTGAATTACACGATCATGAA  
ATTTCAATTGAAGAAATTAAGAAAATGAATCCAAAAGGTATTATCTTATCAGGTGGTCCA  
AATTCAGTTTATGAAGAAGGTTCAATTAACAATTGATCCGGAAATATATAATTTAGGAATT  
CCAGTACTTGGTATTTGTTACGGCATGCAATTAATACTACTAAATTATTAGGTGGTAAAGTTG  
AACGTGCCAATGAACGTGAATACGGTAAAGCAATCATTAATGCGAAGTCAGATGAGTTA  
TTCGCTGGCTTACCAGCAGAACAACACTGTTTGGATGAGTCATTCTGATAAAGTTATTGAA  
ATTCCAGAAGGCTTTGAAGTTATCGCTGATAGCCCAAGTACAGACTATGCAGCAATCGAA  
GATAAGAAACGTCGCATTTATGGTGTTC AATTCCATCCAGAAGTACGTCATACAGAATAT  
GGTAATGATTTATTAATAATTTTGTCCGTCGTGTTTGTGATTGTA AAGGTCAATGGACAA  
TGGAAAAC TTTATCGAAATCGAAATTGAAAAGATTCGTCAACGAGTAGGAGACCGTCGT  
GTATTATGTGCGATGAGTGGCGGCGTAGATTCACTCTGTTGTTGCTGTATTATTGCATAAAG  
CAATTGGGGATCAACTAACATGTATCTTTGTAGACCATGGCTTACTTCGTAAAGGTGAAG  
GCGACATGGTTATGGAACAATTCGGTGAAGGGTTCAACATGAATATTATTTCGTGTTAATG  
CGAAAGATCGTTTTATGAATAAATTA AAGGTGTTTCAGATCCTGAACAAAAACGTAAAA  
TCATTGGTAATGAATTTGTATATGTATTTGATGATGAAGCATCAAAACTGAAAGGTGTAG  
ACTTCCTTGC CAAGGAACACTTTATACAGACGTTATCGAATCAGGTACCAAGACAGCAC  
AAACAATCAAATCACATCACAATGTTGGTGGATTACCAGAAGACATGGAATTCGAATTA  
TCGAACCAATCAATACATTGTTTAAAGATGAGGTACGTA AATTAGGTATTGAATTAGGTA  
TTCCAGAACATTTAGTATGGAGACAACCATTCCCAGGACCTGGTCTTGGTATTCGTGTACT  
TGGAGAAATTACTGAAGATAAACTAGAAATCGTTAGAGAATCAGACGCAATTTTACGCC  
AAGTGATTAGAGAAGAAGGTCTTGAAAGAGAAATTTGGCAATACTTCACAGTGTTACCA  
AACATTCAATCAGTAGGTGTTATGGGAGACTACCGTACGTATGATCACACAGTAGGTATC  
CGTGCAGTAACATCTATCGACGGCATGACAAGTGATTTTGCACGCATCGATTGGGAAGTC  
TTACAAAAGATTTCAAGTCGTATCGTAAACGAAGTAGACCACGTTAACCGCGTAGTCTAT  
GACATTACATCAAAACCACCAAGCACAATTGAGTGGGAATAA

### > attB\_nySa2

Function: attachment site for int8-tetM (mobile element)

Best match: attB\_nySa2\_trunc\_CC001\_MW2-USA400\_BA000033.2[415744:415804:r]RC

Position: 009-contig\_245\_RC: 89882 ... 89943; Length: 61 bp

Sequence:

CGTAGTCTATGACATTACATCAA AACCAAGCACAATTGAGTGGGAATAATTATATAT  
A

### > tx\_guaA\_int7

Function: rho independent terminator of guaA

Best match: tx\_guaA\_int7\_CC001\_ATCC51811-ST1\_ADVP01000041.1[24733:24786:r] (completely identical)

Position: 009-contig\_245\_RC: 89938 ... 89992; Length: 54 bp

Sequence:

ATATAGCAAATGATAGGCTGGAGTTACCGT TACTATGCGGTTTCCAGCCTTTTT

### > Q8NY68

Function: protein coding sequence; putative protein (genomic island)

Best match: Q8NY68\_ref\_CC001\_MW2-USA400\_BA000033.2[416307:417413] (completely identical)

Position: 009-contig\_245\_RC: 90445 ... 91552; Length: 1107 bp

Sequence:

ATGGATAAATCACTTGAAATTA ACTTAAAAGAATTAGAAGGCATAATGTATAAAGAAAA  
AGTAATCGACGTTAAAGAGTATGATAATTTAAAAGTAACTTTTGAGACACTAAACGATGC  
TCCTAAAAGTGAAATACCCACTCCCTTTACAATAGAACAAATGTTATATAAATTAGAAAC  
TAAAATTTTATATTTTCTGAAATTAAGTCAAAGAAAAATGTGTGGAGCTTTTACATAG  
TGTTGGCTATTATAATTTGAAGCATTTTATGTATAATGAATTTGGTAAAGATGAGCCGAA  
AAATTTTGATGAAGTATATACTTTATAAATTTGATAGATATTTATTGAAACAATTATTT

AGTTTAGTAAATATGTTGGAACTCATATAAGAAATATTATTTTAGAAGTATATATGTTA  
GAAATTGAGTATAATAACAAGCCTTCGACACTGTTCTATTTAGATAAAGATTTATATTTTG  
AGAAAGTTAATGATGAGTATAAATATTCTGCCAAAAAGCTAAAAGAGTTCAATAGGTTAC  
AAAATGTTTTTTGGAGAGCTATAGAAAAAAGAAAAGTAACGATAACGTTAAACATAAT  
ATTAATAAATAACAATATTATACCAGCTTGGGTTTTATTCCAAAATTTTAGTTTTGGAGATT  
TGTCTACTTTTTATAGAACTACATTACCAACTTATAGAAATAAAGTAAGTAAGCGAATTG  
AAAATTTAATAGAAAAAATACTGGTATAAGCATAAAACCTCCAGAAAAGTTATTGTGTG  
CATGGTTGAATAGTATCAGGTTTTTGAGAAATAGAATAGCTCACACAGATATAATTTATG  
GAATTAATTTTACAAACACCTGTGCAAAACATCATAGTGATGAGGAAATGTATGTAAATA  
TAGAAAAGTATAAATATCAGCAAAGGTTAGTTACATTTTTATTAGCTATGAAGAAAATAT  
TTATGAGTATGCCAGAAAATAATATTATTGAATGGAATGAGACTCTAACTAAGATAGAGA  
ATAAATGTTTCAGAACATAACTTTATTAACCTTTCTAGGTTAGGAGTTATTGAAAATAACCT  
TTCTTACTTTAAAATAACTAAATAA

### > Q6GC78

Function: protein coding sequence; putative protein (genomic island)

Best match: Q6GC78\_CC009\_21334\_AGTW01000029.1[92374:92766:r]RC (completely identical)

Position: 009-contig\_245\_RC: 92176 ... 92569; Length: 393 bp

Sequence:

TTAAAAATCTATACTATTTATATTGAAATTTTTATTTATGGTTATGCCATAACTACTTTGTA  
TTCCGGTACTAACTTTGCAATATTGGGTAATAGTTATTAGCGAAACCAATAATAATGG  
AATTAATCACATTGATACTAAGTTCTTTATCTTCAGGTAATGCATTTTCTATTATTTTGATT  
AAGTCTATATATTTTTATTTTCATCAGAATTTTTATGTGCTAAATACTTCATAAAATCAGTTT  
GCACTTTTTCGAAAACGCTATATCTTAAGTCCATTTGTACAAATATTAAGCTGACAGTTTT  
AGTTTCGAATTGACTTTGACCCAAAACCTGAAGCAAGTTCTTCTATTGATTGATATAGCAAT  
CTGATATCGCCGCTATCTTCAAGCAT

### > Q6GC73

Function: protein coding sequence; putative protein (genomic island)

Best match: Q6GC73\_CC009\_21334\_AGTW01000029.1[93820:94242:r]RC (completely identical)

Position: 009-contig\_245\_RC: 93621 ... 94044; Length: 423 bp

Sequence:

TTAGTTAATATATTTAATTGCTAACTTATTATTAGGGTCTCTTTCAAGAATTTTTATTTGCGA  
CCAATTGAATATTCTCATGTGAAATCATATCAAAGTCTGGTTCTCCAAGGATTTCTAAAAA  
TTCGTATAATAAATTAGCATTATTAATTGCGAAATCTCTAACGATTGCCAATAATGATA  
GTATGCTAAATCATAGGCATTATCTATGTAATTGAAATGAAAGTGATAGATGCTTGCGAC  
CATTTCATGATATTCAATTGTATTTATTTGATTTCGCAAGATTTGATAAATATGATACTAAT  
TTTTCATCTGAAATTTTCGTTTCGACATAAAGTATGTTAGAATATTCTCCATATCTTTATTCTC  
TAACATATTTTTAATTCAGTTGGTAATAAATTTAATAGAATGTTAACGCTTTTCAT

### > Q8NY63

Function: protein coding sequence; putative protein (genomic island)

Best match: Q8NY63\_ref\_CC001\_MW2-USA400\_BA000033.2[419858:420190] (completely identical)

Position: 009-contig\_245\_RC: 97533 ... 97866; Length: 333 bp

Sequence:

GTGGCAACACTAAAAGATGTAAAGACTGGTAAAAAGGAAATTTTGCCATCAACTGCAAA  
AGATAAAAATGGTAAAAATGTTACGTTAATTTATTTTGAAAAAGACGGTAAATTAGGTTT  
TTATGTGCAGAAAACACAAAAAGAACGTGGAGTAGGGAAATGCGTTTCTGGTATAGCGG  
GTGGCGCAGTGACAGGAGGCACTACTTTAGGTCTTGCAGGTGCAGGAGTAGGAACAGTT  
ACTATTCCAGTAATTGGGACAGTTAGTGGAGGCGTAGTTGGAGCTGTTGGTGGTGTCTGC  
GGCGGTGGTCTAACCGGTGGAGCCACATTCTGCTAA

### > Q2YVN4

Function: protein coding sequence; putative protein (core genome, constant)

Best match: Q2YVN4\_CC008-ST72\_21259\_AFTS01000010.1[65761:66347]RC

Position: 009-contig\_245\_RC: 98465 ... 99052; Length: 587 bp

Sequence:

```
TTACTTAAGCTTGTA AAAATGCGGAAATAAGTTTTCTTTTTAGTTATTTTTCTTGGTATA
TTTTAAATCCACAATTATTGCAATAAAAATTCTTTCAAATTCTTATTATCATACCAATCAAC
ACAAACATGTCTTAGTGCAGTACGATCATAAATTCAGAAGCAATAGATAAGGCATAGTC
CATTACAATTTCTCCTGGTATATGCTTTTTGTGTTATCGCTCCTACCTAATTTAGTTATTA
ATAATGCTTGAAATTCTCCATTCTTTTTAGCATCAGACGAGATTTTTCTTTTTTCGTTTTTC
CACTAACGTCTTTTTCAAGCTTTATATTTACAATTTTTAAGAAGAAGTATCCCATTATTTTC
AAGGTCTGATTTATCTATAATTAATACGTACGTAAGGAATTTTGATCGTTCATTGTTATT
GCTTTATGTTTTAGGGAATGTGCTATTGAAGGGTTAAAGATGTTTGAAATGTCTTGGTTT
CTTGACTTATATAGTTATGAAAGAGGGCGTTGTCCTTTATAGCATTCTGAGATTAGAAAT
GCTATAAATAAAGTGATTAAGATTTTTTGTTCAT
```

### > Q5HIQ1

Function: protein coding sequence; putative membrane protein (core genome, variable)

Best match: Q5HIQ1\_CC008\_NCTC8325\_CP000253.1[386599:386958:r]RC (completely identical)

Position: 009-contig\_245\_RC: 99708 ... 100068; Length: 360 bp

Sequence:

```
TTACCAAAGCATTGATATGAGTGCCAATACTGGCAATGTGCCTTGTTTGAAAAAGATACT
AATATTGCTTGAAAGGCCACCATAAATAGCAACGCCAATGATATACCTAAAATAGCTGC
GCATATTTCTTTGGATTACTGCTGATAAACAACCGTATATTAGCAAACTCCGATTAAA
CCGTTATATACGCCTTGGTTCTTCAAAGTAGGTTAATATTTTTGTCTTTCAATTTATCGAC
GCTTATATTAATGTCTCGCTAGTCTTTTTGGAAGTTGTAGCAATCGTTTCAAGGTACATA
ATATAGAAAACTCTAATGCCACAAATATGATTA AAAATTGTTGAGATGATATTCAC
```

### > Q2G0Y0

Function: protein coding sequence; putative protein (core genome, variable)

Best match: Q2G0Y0\_CC001-ST772\_118\_AJGE01000018.1[10351:11196]RC (completely identical)

Position: 009-contig\_245\_RC: 100086 ... 100932; Length: 846 bp

Sequence:

```
TTAAATATTTTCTTGTA AAAAATGATTGCAGTGTCTGTGGTTGATCATTGACTAATTGTTGG
AAATCATTGGATTCTTGGTCTAATAGTCCTCTTGCTCCTGCGTCGTACATTGATGCCAATA
ATGCACCAAAGCCTTTAGGTTTCATCGTACATTTCTGCAAATGTCTCTAATGAAACGGGCTC
ATATTTAATTTCTGTGCCTGATGCCTCAGATAAAAATTGCAGCAAGTTCTTTCATATCATAA
CTGTAGCCTGATAATAAGTAGCGTTTGCCCCAAGTATCTGGATTTTTAATAATAGCAATG
ACACCTCTAGCAATATCATTCTAGTAATATAATTAATACGACCATCGCCAGCTGGATAA
ATCAGTTTATGCATATTCATCAATTCTGGTAAATATGGTTTAAGTGGATCCATGTACATTG
CCATTCTTACATACGTATAGTCAATGCCACTTGTTGCCAATAGACGTGCTGCATAACCAA
AATAAGGACTCATATGGAATGGATTATTATGCTGATCTGCGTAATAACCTATGAAAATGA
TATGAGCAACGCCGCTCTGCTTTGCCGCATATACTAAATTTTCCACTTCAGGAATACGTTT
GAATGATGGATGGATAATACTTGAATAAACACAACGGTATCCATTCTTTAAATGCTTC
TACCATGCTTTCTTGATTA AAAATAATCTAATTGTCGAACAGGAACTTTTCCGCGCCAATCT
TCTGGA ACTTTCTCAACATTTCTAACACCAATGTGAAAATGATCTATGTGATTTGCAATGG
CTTGATTTGTAATATGTGTGCCTAAATGACCTGTAGCACCTGTTAACATAATATTCAT
```

### > ssl01

Function: protein coding sequence; staph superantigene like protein locus 1 (genomic island)

Best match: ssl01-COL\_CC001-ST772\_118\_AJGE01000018.1[9199:9879:r] (completely identical)

Position: 009-contig\_245\_RC: 101403 ... 102084; Length: 681 bp

Sequence:

```
ATGAAATTTAAAGCGATAGCAAAGCAAGTTTAGCATTGGGAATGTTAGCAACAGGTGT
AATTACATCGAATGTACAATCAGTACAAGCGAAAGCAGAAGTTAAACAACAAAGTGAAT
CAGAGTTAAAACACTATTATAATAAACCAATTTTAGAGCGTAAAAATGTGACTGGATTTA
AATATACTGATGAGGGTAAACACTATTTAGAAGTCACAGTAGGGCAACAGCATTCTCGAA
```

TCACCTTACTTGGATCTGATAAAGATAAATTTAAAGACGGAGAAAACCTCAAATATAGATG  
TGTTTATCCTTAGAGAAGGTGACAGTAGACAAGCAACAAATTACTCAATTGGTGGCGTTA  
CAAATCAAATAGTGTGCAGTATATTGATTATATCAATACGCCAATTTTAGAAATCAAGA  
AAGATAATGAAGATGTACTTAAAGATTTTTACTACATTTCAAAGAAGACATCTCATTA  
AAGAAGTATTGATTATAGATTAAGAGAACGTGCGATTAAACAACACGGCTTGTATTCAAATG  
GTCTTAAACAAGGTCAAATTACAATTACAATGAATGATGGCACAACACATACAATCGATT  
TAAGTCAAAAACCTTGAAAAAGAACGTATGGGTGAGTCAATCGACGGCACTAAGATTAAT  
AAAATTCTAGTAGAAATCAAATAA

### > **ssl02**

Function: protein coding sequence; staph superantigene like protein locus 2 (genomic island)

Best match: ssl02\_CC001-ST772\_118\_AJGE01000018.1[8218:8913:r] (completely identical)

Position: 009-contig\_245\_RC: 102369 ... 103065; Length: 696 bp

Sequence:

ATGAAAATGAAATCAATTGCAAAAATAAGTTTGTATTAGGAATATTAGCAACAGGTGTA  
AACACTACAACGGAAAAACCAGTTCATGCCGAAAAGAAACCTATTGTAATAAGTGAAAA  
TAGCAAAAATTTAAAGCTTATTATAATCAACCTAGTATTGAATATAAAAATGTGACAGG  
TTATATCAGTTTCATTCAACCAAGTATTAATTTATGAATATCATAGATGGTAATTCTGTT  
AATAATATTGCTTTAATTGGCAAAGATAAGCAACATTATCATAACGGGTGTACATCGTAAT  
CTTAATATATTTTACGTTAATGAGGATAAGAGATTTGAAGGTGCAAAGTACTCTATTGGG  
GGTATCACGAGTGCAAACGATAAAGCTGTGACCTAATAGCAGAAGCAAGAGTTATTAA  
AGAAGATCATACTGGTGAATATGATTATGACTTTTTCCCATTTAAAATAGATAAAGAAGC  
GATGTCATTGAAAGAGATTGATTTTAAATTAAGAAAATACCTTATTGATAATTATGGTCTT  
TACGGTGAAATGAGTACAGGAAAAATTACAGTCAAAAAGAAATACTATGGAAAGTATAC  
ATTTGAATTGGATAAAAAGTTACAAGAAGACCGTATGTCCGATGTTATCAATGTCACAGA  
TATTGATAGAATTGAAATCAAAGTTATAAAAAGCATAA

### > **ssl03**

Function: protein coding sequence; staph superantigene like protein locus 3 (genomic island)

Best match: ssl03\_CC001-ST772\_118\_AJGE01000018.1[6818:7927:r] (completely identical)

Position: 009-contig\_245\_RC: 103355 ... 104465; Length: 1110 bp

Sequence:

ATGAAAATGAGAACAATTGCTAAAACCAGTTTAGCACTAGGGCTTTTAAACAACAGGCGC  
AATTACAGTAACGACGCAATCGGTCAAAGCAGAAAAAGTACAATCAACTATAGTTGACA  
AAGTACCAACGCTTAAAGCAGAGCGATCAGCAATGATAAACATAAACAGGTGCAAAT  
ACAGGGGCAACGCAAGCAGCTAACACAAGACAAGAACGCATGCCTAAACTCGAAAAGG  
CACCAAATACTAATGAGGAAAAAACTTCAATTTCCAAAATAGAAAAAATATCACAACCT  
AAACAAGAAGCGCAGAAATCGCTTAATATATCCACAACGCCAGCGCCTAAACAAGAACA  
TTCACAAACGACAACCGAATCCACAACGCAGCAAACCTAAAGTGACAACACCTCCATCAA  
CAAACACGCAGCAAACCTAAAGTGACAACACCTCCATCAACAAACACGCCACAACCAATG  
CAATCTACTAAATCAGACACACCACAATCTCCAACCATAAAACAAGCACAAACAGATAT  
GACTCCTAAATATGAAGATTTAAGAGCGTATTACACGAAACCGAGTTTTGAATTTGAAAA  
GCAGTTTGGATTTATGCTCAAACCATGGACGACGGTTAGGTTTATGAATGTTATTCCAAAT  
AGGTTTATCTATAAAAATAGCTTTAGTTGGAAAAGATGAGAAAAAATATAAAGATGGACC  
TTACGATAATATCGATGTATTTATCGTTTTAGAAAGACAATAAATATCAATTAAAAAAATA  
TTCTGTGCGGTGGCATCACGAAGACTAATAGTAAAAAAGTTGATCACAAAGCAGAATTAA  
GCGTTACTAAAAAAGATAATCAAGGTATGATTTACATGATGTTTCAGAATACATGATTA  
CTAAGGAAGAGATTTCTTGAAGAGCTTGATTTTAAATTGAGAAAGCAACTCATTGAAA  
AACATAATCTTTACGGTAACATGGGTTCAGGAACAATCGTTATTAAAATGAAAAACGGTG  
GGAAGTATACGTTTGAATTACAAAAAACTGCAAGAGCATCGTATGGCAGATGTCATA  
GAAGGTACAAACATTGATAAAAATTGAAGTGAATATAAAAATAA

### > **ssl04**

Function: protein coding sequence; staph superantigene-like protein locus 4 (genomic island)

Best match: ssl04-USA300\_delta\_CC001-ST772\_118\_AJGE01000018.1[5551:6453:r] (completely identical)

Position: 009-contig\_245\_RC: 104829 ... 105732; Length: 903 bp

Sequence:

```
ATGAAAATAACAACGATTGCTAAAACAAGTTTAGCACTAGGCCTTTTAACAACAGGTGTA
ATCACAACGACAACGCAAGCAGCAAAAGCGTCAACACCATCTTCCACTAAAGTGGAAGC
ACCACAATCAACACCGCCCTCAACTAAAGTAGAAGCACCGCAATCAAAACCAAACGCGA
CAACACCATCTTCCACTAAAGTGGAAGCACCGCAACAAACAGCAAATGCGACAACACCT
CCATCAACAAACACGCCACAACCAATGCAATCTACTAAATCAGACACACCACAATCGCC
AACCACAAAACAAGTACCAACAGAAATAAATCCTAAATTTAAAGATTTAAGAGCGTATT
ATACGAAACCAAGTTTAGAATTTAAAAATGAAATTGGTATTATTTTAAAAAAATGGACGA
CAATAAGATTTATGAATATTGTTCCAGATTATTTTCATATATAAAATTGCTTTAGTTGGTAA
AGACGATAAAAAATATGGTGAAGGAGTACATAGGAATGTCGATGTATTTGTCGTTTTAGA
AGAAAATAATTACAATCTGGAAAAATATTCTGTCGGTGGTATCACAAAGAGTAATAGTAA
AAAAGTTGATCACAAAGCAGGAGTAAGAATTAATAAGGAAGATAATAAAGGTATAATCT
CTCATGATGTTTCAGAATTCAGATTACTAAAGAGCAGATTTTCCTTGAAAGAACTTGATTT
TAAATTGAGAAAACAACTTATTGAAAAAAATAATCTGTACGGTAACGTTGGTTCAGGTAA
AATTGTTATTAATAATGAAAAACGGTGGAAAGTACACGTTTGAATTGCACAAAAAATTACA
AGAAAATCGCATGGCAGATGTCATAGATGGCACTAATATTGATAACATTGAAGTGAATAT
AAAATAA
```

### > **ssl05**

Function: protein coding sequence; staph superantigene like protein locus 5 (genomic island)

Best match: ssl05\_CC001-ST772\_118\_AJGE01000018.1[4483:5187:r] (completely identical)

Position: 009-contig\_245\_RC: 106095 ... 106800; Length: 705 bp

Sequence:

```
ATGAAAATGACAGCAATTGCGAAAGCAAGTTTAGCACTAGGTATTTTAGCAACAGGAAC
AATAACATCAACGCATCAAACGTAAATGCGAGTGAACATGAAGCAAAATATGAAAATG
TGACAAAAGATATTTTTGACTTAAGAGATTACTATAGTGGCGCAAGTAAGGAACTTAAAA
ATGTTACTGGTTATCGTTATAGCAAAGGTGGCAAGCATTACCTTATCTTTGATAAAAAATA
GAAAATTCACAAGAGTACAGATATTTGGTAAAGATATTGAAAGATTTAAAGCACGCAAA
AATCCGGGATTAGACATATTTGTTGTTAAAGAAGCGGAAAACCGTAATGGCACAGTGTTT
TCATATGGTGGTGTCACTAAGAAAAATCAAGACGCTTATTATGATTATATAAACGCACCA
AGATTTCAAATCAAGAGAGATGAAGGTGACGGTATTGCTACGTACGGTAGAGTACACTA
CATTTATAAAGAAGAGATTTCACTTAAGAAGTTCGACTTTAAATTGAGACAGTATTTAAT
TCAAATTTTTGATCTGTATAAAAAGTTTCCTAAAGATAGTAAGATAAAAAGTGATAATGAA
AGATGGCGGCTATTATACGTTTGAACCTAATAAAAAATTACAAACAAATCGCATGAGTGA
TGTCATTGACGGTAGAAATATTGAAAAAATAGAAGCCAACATTAGATAA
```

### > **ssl06**

Function: protein coding sequence; staph superantigene like protein locus 6 (genomic island)

Best match: ssl06-MW2\_CC049\_21262\_AHJW01000044.1[53855:54553]

Position: 009-contig\_245\_RC: 107230 ... 107260; Length: 30 bp

Sequence:

```
ATGAAATTA AAAACGTTAGCTAAAGCAACA
```

### > **ssl07**

Function: protein coding sequence; staph superantigene like protein locus 7 (genomic island)

Best match: ssl07\_CC001-ST772\_118\_AJGE01000018.1[3357:4052:r] (completely identical)

Position: 009-contig\_245\_RC: 107230 ... 107926; Length: 696 bp

Sequence:

```
ATGAAATTA AAAACGTTAGCTAAAGCAACATTGGCATTAGGCTTATTA ACTACTGGTGTG
ATTACATCAGAAAGGCCAAGCAGTTCAAGCAAAAGAAAAGCAAGAGAGAGTACAACATTT
ATATGATATTA AAGACTTACATCGATACTACTCATCAGAAAGTTTTGAATTCAGTAATATT
AGAGGTAAGGTTGAAAATTATAACGGTTCTAACGTTGTACGCTTTAACCAAGATGGTCAA
```



AATCACCAATTATTCTTATTAGGAGAAGATAAAGCTAAATATAAACAAGGACTTCAAGGT  
CAAGATGTCTTTGTGGTAAAAGAATTAATTGATCCAAACGGTAGACTATCTACTGTTGGT  
GGTGTAAACGAAGAAAAATAACCAATCTTCTGAACTAATACACCTTTAGTAGTTAATAAA  
GTGTATGGAGGAGATTTACATGCATCAATTGACTCATTTTCAATTAATAAAGAAGAAGTT  
TCACTGAAAGAACTTGATTTCAAATTAAGAAAGCAATTAGTTGAAAAATATGGTTTATAT  
AAAGGTACGACTAAATACGGTAAGATCACTATCAATTTGAAAGACGAGAAAAAGGAAGT  
AATTGATTTAGGTGATAAACTGCAATTCGAGCGCATGGGTGATGTGTTGAATAGTAAGGA  
TATTCAAATATAGCAGTGACTATTAATCAAATTTAA

### > **ssl08**

Function: protein coding sequence; staph superantigene like protein locus 8 (genomic island)  
Best match: ssl08\_CC005\_Mu50-VRSA\_BA000017.4[472430:473128] (completely identical)  
Position: 009-contig\_245\_RC: 108264 ... 108963; Length: 699 bp

Sequence:

ATGAAATTTACAGCGATAGCTAAAGCGATATTTGTATTAGGAATATTAACAACAAGTGTA  
ATGATAACAGAAAATCAATCGGTTAATGCAAAGGAAAGTATGAAAAAATGAACCGTTT  
ATATGATACAAACAAGTTACATCAATACTATTCAGGACCTAGTTATGAGTTAACAAATGT  
TAGTGGCCAAAGTCAAGGTTATTATGACTCTAACGTTTTGCTTTTTAACCAACAAAATCAA  
AAGTTCCAAGTATTTTTATTGGGAAAAGATGAAAATAAATACAAAGAAAAAACACATGG  
TTTAGATGTCTTTGCGGTACCAGAATTAGTAGATTTAGATGGAAGAATATTTAGTGTTAGT  
GGTGTAAACGAAGAAAAACGTAAAATCAATATTTGAGTCTCTAAGAACGCCGAACCTACTA  
GTTAAAAAATAGACGATAAAGACGGTTTTTCTATTGATGAATTTTTCTTTATTCAAAGG  
AAGAAGTGCATTGAAGGAACCTTGATTTTTAAAATAAGAAAACCTGTTGATTAAAAAATACA  
AACTGTATGAAGGGTCAGCTGATAAAGGTAGAATTGTTATTAATATGAAAGATGAAAAT  
AAGTATGAAATTGATTTAAGTGATAAATTAGATTTTCGAGCGTATGGCAGATGTCATTAAT  
AGTGAACAAATTAAGAACATCGAAGTGAATTTGAAATAA

### > **ssl09**

Function: protein coding sequence; staph superantigene like protein locus 9 (genomic island)  
Best match: ssl09-var1\_CC005\_Mu50-VRSA\_BA000017.4[473505:474203] (completely identical)  
Position: 009-contig\_245\_RC: 109339 ... 110038; Length: 699 bp

Sequence:

ATGAAATTGACTGCATTAGCAAAAGCAACATTAGCATTAGGAATATTAACACTACAGGTGTG  
TTTACAGCAGAAAGTAAAGCTGTTACGCGAAAGTAGAACTTGATGAGACACAACGCAA  
ATATTATATCAATATGCTACATCAATACTATTCTGAAGAAAGTTTTGAATCAACAAACATT  
AGCGTTAAAAGTGAAGACTATGTTTCTAACGTTTTAACTTTAACCAACGAAATAAA  
ACTTTCAAAGTGTCTGCTTGGTGACGATAAAAATAAATATAAAGAAAAAACACATGGC  
CTTGATGTCTTTGCAGTACCTGAATTAATAGATATAAAGGTGGCATATATAGCGTTGGC  
GGTATAACAAAGAAAAATGTGAGATCAGTGTTTGGATTTGTAAGTAATCCAAGTCTACAA  
GTTAAAAAAGTTGATGCTAAACATGGCTTTTCGATAAATGAGTTGTTCTTTATTCAAAG  
GAAGAAGTATCGTTGAAGGAACCTGGATTTAAAATAAGAAAAATGTTAGTCGAAAAATA  
TAGATTTGATAAAGGCGCGTCAGATAAAGGTAGAATCGTTATTAATATGAAAGACGAAA  
AGAAATATGTAATTGATTTAAGTGAAAAATTAAGTTTTGATCGTATGTTTGATGTAATGG  
ATAGTAAGCAAATTAAAAATATTGAAGTGAATTTGAATTAG

### > **ssl10**

Function: protein coding sequence; staph superantigene like protein locus 10 (genomic island)  
Best match: ssl10\_CC001-ST772\_118\_AJGE01000018.1[196:879:r] (completely identical)  
Position: 009-contig\_245\_RC: 110403 ... 111087; Length: 684 bp

Sequence:

ATGAAATTAACAGCGATAGCTAAAGCTGCATTAGCTTTAGGAATTTAACAACAGGAACT  
TTAACAACAGAAGTTCATTCAGGTCATGCAAACAAAATCAAAGTCAGTAAATAAACA  
TGACAAGGAAGCATTATACCGATACTACACTGGAAAGACTATGGAAATGAAAAATATTA  
GTGCTTTGAAACATGGTAAAAACAACCTACGTTTTAAGTTTTAGAGGTATTAAGATTCAAG  
TTTTACTGCCTGGAATGATAAAAGTAAATTTCAACAGCGTAGTTATGAGGGGTTAGATG

TTTTCTTTGTTCAAGAAAAAAGAGATAAGCACGATATATTTTATACTGTTGGTGGTGTAA  
ACAGAATAATAAAAACATCTGGAGTTGTCAGTGCACCAATATTTAAATGTTACAAAGGAAA  
AAGGTGAAGATGCTTTTGTGAAAGGGTACCCTTATTATATTTAAAAAAGAAAAAATAACAT  
TAAAAGAGTTAGATTTTAAATTGAGAAAGCATCTAATCGAAAAATATGGACTTTATAAAA  
CAATCTCAAAGATGGTAGGGTTAAAATTAGCTTGAAAGATGGCAGTTTTTATAACCTTG  
ATTTAAGATCTAAATTTAAATTTAAATATATGGGGGAAGTCATAGAAAGCAAACAAATTA  
AAGATATTGAAGTTAACTTAAAGTAA

### > **hsdM-Lx**

Function: protein coding sequence; type I restriction-modification system DNA methylase unknown locus (genomic island)

Best match: hsdM\_AB057421.1[3606:5162:r]

Position: 010-contig\_255: 241 ... 271; Length: 30 bp

Sequence:

AAAGAACTTGGGGTGTGAAAGATGAGTAA

### > **hsdS-etD**

Function: protein coding sequence; type I restriction-modification system site-specificity determinate (mobile element)/(genomic island)

Best match: hsdS-etd\_trunc\_CC080\_11819-97\_CP003194.1[450654:451318]

Position: 010-contig\_255: 263 ... 928; Length: 665 bp

Sequence:

ATGAGTAATACACAAAAGAAAAATGTGCCAAAATTGAGATTCCCAGGGTTTGAAGGCGA  
ATGGGAAGAGAAGCAATTTGCTGATTTTACTAAAATAAATCAAGGATTACAGATTGCTAT  
TAATGAACGTAAAACCTGAATATTCTCCAGAGTTGTATTTTTATATAACAAATGAATTTTA  
AGACCAAATAGTCAAACCTAAATATTTTATCGAAAATCCCCCTCAATCAGTAATTGCAAAT  
AAAGAAGATATTTAATGACTAGAACAGGTAATACTGGAAAAGTAGTAACCTAATGTATTT  
GGAGCGTTTCATAATAATTTTTTTAAAATTAATTTGATAAAAATCTGTATGATAGATTGT  
TTTTAGTAGAGGTTTTAAATTCATCTAAGATACAAAATAAAAATACTATCTTTAGCAGGATC  
TTCGACGATACCAGATTTAAACCATAGTGATTTTTATAGTATTAGTTCTTCTTATCCGCTG  
CTTAGAGAACAGCAAAAAATAGGTAAATTCTTCAGCAAACCTCGACCGACAAATTGAATT  
AGAAGAACAAAAGCTTGAATTACTTCAACAACAGAAAAAAGGCTATATGCAGAAAATCT  
TCTCACAGGAATTGCGATTTAAGGACGAGAATGGAAATGATTATCCGGATTGGGAGAAA  
AAGAA

### > **ssl11**

Function: protein coding sequence; staph superantigene like protein locus 11 (genomic island)

Best match: ssl11-CC80\_CC001-ST772\_118\_AJGE01000070.1[2117:2815] (completely identical)

Position: 010-contig\_255: 1861 ... 2560; Length: 699 bp

Sequence:

ATGAAATTA AAAAATATTGCTAAAGCAAGTTTAGCACTAGGGATTTTAAACAACAGAGATG  
ATTACAACACTACTGCTCAGCCAGTAAAAGCAGACGAAGCTAGTAGCAGATTATCAGTTACT  
TCAAAGATACACAAAATTTAAAGACGTATTATACTGGAGCAAGTTTTGATCTTAGAGGA  
TTAAGCGGATATAAAGAAGGAGATAAAGTAATATTTCTCAAATGGTCAACAAATTGAT  
GTTACATTAACAGGTAAAGAGGGAGACGTGGTTCAATCTAATGACGACGTTACAAATGTT  
GATGTGTTTGCTGTTCTGAAGGTACAGGTCGTTCTGCCATAATGACTACAATTGGTGGG  
ATTACTACCCAAACACTCAAAGTTATAAAGACACTACAAATAATGTGAACTTAAGAGTA  
TCAAAGAGTACAAGTCCCAATACCATATCTGTGTCTGTAAAAAATTATGATATTTTTAAA  
GAAAAAATTTCAATTAAGAAGAACTTGATTTCAAATTAAGAAAGCATTTAATTGATAATCAT  
GATCTTTATAAAACAGAACCTAAAGACAGTAAAATTAGAATTAATATGAAAGATGGCGG  
CTACTATACGTTTGAATTAATAAAAAGTTACAAACTCATCGTATGGGTGACGTAATTGA  
TGGTACTAAAATAAAAAGAAATTAATGTTGAATTAACCTAA

### > **tnpIS431-06**

Function: protein coding sequence; transposase for IS431 (mobile element)

Best match: tnpIS431-06\_circ\_S-epidermidis\_GQ900381.1[43799:43807]RC (completely identical)  
Position: 010-contig\_255: 2984 ... 2993; Length: 9 bp  
Sequence:  
ATAGTTCAT

> **Q6GC50**

Function:  
Best match: Q6GC50-COL\_CC008\_NCTC8325\_CP000253.1[403207:404715]  
Position: 010-contig\_255: 4112 ... 4142; Length: 30 bp  
Sequence:  
GAACGTAAGGCACCAAAATTAGAAAAATAA

> **txbi\_Q6GC50**

Function: rho independent terminator  
Best match: txbi\_Q6GC50\_CC001\_MW2-USA400\_BA000033.2[445740:445826]  
Position: 010-contig\_255: 4198 ... 4228; Length: 30 bp  
Sequence:  
TCAACGTCATTGAGCTGTTTTTTGTGCTTT

> **Q2G0X2**

Function: protein coding sequence; putative protein (genomic island)  
Best match: Q2G0X2\_CC005\_A5937\_ACKC01000031.1[393792:394100:r]RC  
Position: 010-contig\_255: 4248 ... 4557; Length: 309 bp  
Sequence:  
TTATTTTACGTGTTTCATATTTTGAACATCAAAGCCGCTTGCTTAGCTTTGTTGATAATAT  
CTTTGATTGAATGTAGTCCTTTATCGGCGAAGTATGATCTTAAGTTGTCTTTTGTAGCTTG  
GTCAGCATTCTTATCTAATAACACATCGATATAACTTAACTCGTGTTCTAAGAAGTTTGCG  
TCATCATGTAGTACGAGTCCATTTTGAAGAATACACTTTCGCATCTGCTTGATTACCATATC  
CAACAACGCCAGTTGCTAAAACACCTACCATTGCCGTAGCTACTAAAACCTTTTTAAATTT  
CAT

> **lpl**

Function: protein coding sequence; tandem lipoprotein-like (genomic island)  
Best match: lpl1\_CC008\_Newman\_AP009351.1[453191:453994]  
Position: 010-contig\_255: 4893 ... 4923; Length: 30 bp  
Sequence:  
ATGAAGTATAAAACAGAGACGTGAAGCG

> **lpl**

Function: protein coding sequence; tandem lipoprotein-like (genomic island)  
Best match: lpl13\_CC001\_MW2-USA400\_BA000033.2[447351:448121], lpl-  
SAB0394\_ref\_CC705\_RF122-cow\_AJ938182.1[429813:430607], lpl-  
SACOL0482\_CC008\_TCH1516\_CP000730.1[467620:468411] MANUAL OVERRIDE  
Position: 011-contig\_288\_RC: 228 ... 1081; Length: 853 bp  
Sequence:  
TATTTAAGTTATAAGCCAGCGAAAAAATAGTGTTGATAATTAATATTAGGGTGTGAAAT  
GATGAGATATTTAAAAAGAGTTGTACTGTACATAATTGTTATGGTTTTGAGTGTTTTTATA  
ATAGGTTGTGATAAATCAAGCGATACTTCAGAAAAGCCAAAAGAAGATTCAAAAAGAAGC  
ACAAATTA AAAAGAGTTTTGCAAAAACGTTAGACATGTATCCTACTGAAAATCTAGAAGA  
CTTTTATGACAAAGAGGGATATCGAGATGGAGAATTTAAAAAAGGTGACAAAGGGACTT  
GGCTAATTAGATCTGAAATAGTTAAACAGCCAAAGGGCAAAGTGATGAAAACAAGAGGT  
ATGCAATTATATATTAATAGAAATACCAAAAACAGCCAAAGGTTTCTTTGTTTTGAAAGAA  
ATAAGTGAAAATAATAATCGTGTAATAAAGATAAAGGAGGAAAAATACGAAGTGAAAAT  
GGTAGGAAATAAAATTATTCCTACTGAACAAATTAATGATGAGAAAATAAAAAAAGAAA  
TTGAAAACCTCAAGTTTTTTTTGTGCAATATGGAAACTTTAAAAATTTTCGAAAATAACAACA

ATGGTGAGTTTTTCATATAATCCTGAAGCACCAATCTATTTCGGCTAAATATCAATTACACA  
ACGACGATTACAATGTAAGGCAACTACGTAAAAGATATGACATTTCAACAAAAGAAACA  
CCGAAGTTACTTTTTGAAAGGTGGAGGAGATTTAAAAAATTCCTCAGTTGGTCAAACGAT  
ATTGAATTTACTTTTTGTTGAAAGAAAAGGTGAGAATATTTATTTTAACGATAGTGTGAAT  
TCATACCAAGTAAGTAA

### > **lpl4**

Function: protein coding sequence; tandem lipoprotein-like (genomic island)

Best match: lpl4\_CC005\_Mu50-VRSA\_BA000017.4[484932:485717]RC,

lpl10\_CC005\_JH9\_CP000703.1[494856:495617]RC, lpl-SAB0392\_ref\_CC705\_RF122-

cow\_AJ938182.1[428201:428986]RC, lpl2\_CC005\_N315\_BA000018.3[457923:458717]RC

Position: 012-contig\_282\_RC: 1000 ... 2763; Length: 1763 bp

Sequence:

GTACAATACTACTCTTTTTGAATCCCTCATTTTTTCTACTTCTCTCTATCATGTTAATGTTTG  
TTGAGTACTATCAACCTTTGTGTTATTTTTAGTCACTTGAATTAAGTTAATCCATCTGA  
AAAATATATATTTTTCTTTTTTATTTTCTATAAATATAAATTC AATTTCTTATATCCAAC TG  
AAGACCCTTTCAAATCCCCGAACCTTTCAACAACAATTTAGGCGCCTTTTCTGTTGGAAT  
ATTATATCTTTTTCGTAATTCCTTAACATTATAATCATCATTTTTTCAGTTTATATTTCTGCTG  
AATAAATAGGAGCTTCAGAATTATAGGAAATGTCACCATTTTCATAATTTCTCTATTCCTTT  
AAAAC TGCCATATTGCACAAAAAACTTAAAGTTTTCAATTTCTTTTTCAACTTTTCATCT  
TTTATCTCCTCAGTTGGAATAATTTTATTGTTTATCATTTTCACAGGATACTTTTTTTCTGTT  
TCTCTTTCATCAAGGCTTTTTCTTGAATCTATTTCTTCTATTGAAAAATAACCGGTTGTGGT  
CCTAGTATTTCTATTCATGTATAATATCATGCCTCTTGAAGTTAACTTTTACCTTTTGGTT  
GAATTATCATTTTCAGATCTAACAACCCACGTCCTTTGTCTCCCTTTTTAAATTCTCCATCT  
CGATATCCTTCTTTGTCATATAAGTCCTCGAGATTCTTAATTGGGTACATATCTAACGTTTT  
CGCAAAGCTCTTTTTGATTTGTGTTTCTTTTGAATCTTCAGGAGTGTCAAATACACCACTG  
CAACCTGACACTAATAGAATTAAGACTGACGTACCTATACACAACGCGTATTGCCTAAAA  
TTATTCATTGTTCCGATCCCCCTTTTTTCATCATAGTTAATAGTCCTCACTTGGGGTAAA  
CTCCAAACTATCAGTAAAAAATACATTCTCTTCTTGATTCTCAACGAAGGTA AACTCAAT  
GTCCTTATGTCCGATTGATGAACCTTTTAAATCTCCAGTACCTTTCAACAACAATTTAGGA  
CCTTTTTTGGTTTGAATGTCATACATTTTACGTAATTGTTTTACATTATAATCATCATTACT  
TAATTGAAATTTAGCAGAATAAGTAGGTGCTTCTGAGTTATATGAATAATCACCATTTTG  
ATAATTCTTTAATCCTTTAAAATCACCATATTGTGAGAAAACTTAAAGTTTTCAATTTCT  
TTTTTTACACCTTTATCATTAATTGGATCAATAGGTACTATTTTATTATTCACCATCTTTAC  
TGGATAACGTTTTTCTTTATCCTCTGTCTTTTTTAAAGTATCATTACTTGTTTCATCTACAA  
TAAAATATCCTTTTGGCTGTTTAAACCATTACTGAACTGATAACCCATGTCCTTTGTCAC  
CTTTTTTAAATTCGCCATCTCGATATCCTTCTTTGTCATATAAGTCCTCGAGATTCTTAATT  
GGGTACATATCTAATGTTTTCGCAAAGCTCTTTTTGATTTGTATTTCTTTTTGAATCTTCTTT  
TGTTTCATTACCTTTGCCACAACCTGCTACAATAACTATTAAAATCAAGATACTTATGTAC  
AATGCAAAACTTTTTAAATTTCCCATCATTTCGCGTCTCTCTGTTTTAGAATTATTTCTACA  
TCTAATAAACTTTAGCTATCTTCATCAGACGGCCCAA AATT

### > **lplTerminator-RF122**

Function: protein coding sequence; (genomic island)

Best match: lplTerminator-RF122\_ref\_CC705\_RF122-cow\_AJ938182.1[432435:433760]

Position: 013-contig\_317\_RC: 1836 ... 1866; Length: 30 bp

Sequence:

CTTGCATCTCAAATAGGTGGATTACTATGA

### > **Q5HIM7**

Function: protein coding sequence; putative protein (core genome, variable)

Best match: Q5HIM7\_CC001-ST772\_118\_AJGE01000070.1[20119:20313:r]RC (completely identical)

Position: 013-contig\_317\_RC: 2864 ... 3059; Length: 195 bp

Sequence:

TTACAAACCATAAAGCGCTGCAGTTAAGTATTGAATGGCATAGCCAATTGAAATGAAAAT  
AGCAATCGTTATAATAGCACTACCAATGGTATATAACGTATGTTTCGTAGATAATCCTTCA  
GTCTTTGAACCAAAAACACTGAGTAGAATAAATGCAATGCCAATGACATATAAGGCTAA  
AATGAAAAATAACAT

### > **cobW**

Function: protein coding sequence; cobalamin biosynthesis protein (core genome, constant)

Best match: cobW\_CC001\_MW2-USA400\_BA000033.2[453431:454633]

Position: 013-contig\_317\_RC: 3245 ... 4448; Length: 1203 bp

Sequence:

ATGGCTAAAATTCCAGTTACGGTATTAAGTGGTTATTTAGGCTCGGGGAAGACAACGTTG  
TTAAATCATATTTTACAAAATCGAGAAGGTCGACGTATCGCGGTAATTGTAATGATATG  
AGTGAAGTCAATATCGATAAAGATCTTGTGCGAGATGGTGGGGGACTATCGCGTACAGAT  
GAAAAATTAGTCGAACCTTCTAATGGTTGTATCTGTTGTACACTTAGAGACGATTTATTA  
AAGAAGTTGAGCGTTTAGTGAAAAAAGGTGGCATCGATCAAATTGTTATTGAGTCAACAG  
GGATTCAGAGCCAGTACCTGTTGCACAACTTTCTCATATATTGATGATGAACTTGGCAT  
TGATCTTACAGCGATTTGCCGTTTAGATACAATGGTTACAGTTGTGGATGCTAACCGCTTC  
GTACATGACATCAACTCAGAAGATTTATTGATGGATCGTGATCAAAGCGTTGATGAAACA  
GATGAGCGTTCGATTGCTGATTTATTAATTGACCAAGTTGAATTTTGTGATGTATTGATTA  
TTAATAAAATTGATTTAATTAGTGAAGAAGAAGTACGCAAGTTAGAAAAAGTGTTAAGTG  
CATTGCAACCGACTGCTAAAATTATTAAGACAACAAATTCTGAAGTAGATTTAAAAGAAG  
TCTTAAATACGCAGCGTTTTGATTTTAAAAAGCGAGCGAGTCAGCAGGATGGATCAAAG  
AACTTGAGTCTGGTGGTCATGCATCGCATAACGCTGAAACAGAAGAATATGGCATATCAT  
CATTTGTATATAAACGTCGTCTACCTTTCCATGCTAAAAGGTTCAATGATTGGTTAGAAAG  
CATGCCAAATAATGTCGTTTCGATCAAAGGTATCGTATGGTTAGCACAATACAATCATGT  
AGCATGTTTATTATCTCAAGCAGGGTCATCTTGAATATTCATCCAGTTACATATTGGGTG  
GCTAGTATGTCTGAAGCGCAACAAACACAAATATTAGCAGAACGTCAAGATGTCGCAGC  
TGAATGGGATCCAGAATATGGCGATCGTCATACACAATTTGTCAATTATTGGTACAGAATT  
AGATGAAGAAAAATTAACAAAAGAAGTTCGACGCATGCTTAGTCAATGCGCAAGAAATTG  
ATGCAGATTGGCAACAATTTGAAGATCCATATCAATGGCAAATTAGACCAGCACGATAA

### > **psmA4**

Function: protein coding sequence; phenol-soluble modulins alpha 4 (core genome, constant)

Best match: psmA4\_CC001\_MW2-USA400\_BA000033.2[455290:455352:r]RC (completely identical)

Position: 013-contig\_317\_RC: 5104 ... 5167; Length: 63 bp

Sequence:

TTATTTTGCGAAAATGTCGATAATTGCTTTGATGATTTAATGATAGTACCTACAATAGCC  
AT

### > **psmA3**

Function: protein coding sequence; phenol-soluble modulins alpha 3 (core genome, constant)

Best match: psmA3\_CC001\_MW2-USA400\_BA000033.2[455416:455484:r]RC (completely identical)

Position: 013-contig\_317\_RC: 5230 ... 5299; Length: 69 bp

Sequence:

TTAGTTGTTACCTAAAAATTTACCAAGTAAATCTTTAAAGAATTTGAATAATTTTGCTACG  
AATTCCAT

### > **psmA2**

Function: protein coding sequence; phenol-soluble modulins alpha 2 (core genome, constant)

Best match: psmA2\_CC001\_MW2-USA400\_BA000033.2[455536:455601:r]RC (completely identical)

Position: 013-contig\_317\_RC: 5350 ... 5416; Length: 66 bp

Sequence:

TTACTTACCAGTGAATTTCTCAATTAATCCTTTAATGAATTTAATGATTCCCTGCAATGATA  
CCCAT

> **psmA1**

Function: protein coding sequence; phenol-soluble modulins alpha 1 (core genome, constant)

Best match: psmA1\_CC001\_MW2-USA400\_BA000033.2[455633:455698:r]RC (completely identical)

Position: 013-contig\_317\_RC: 5447 ... 5513; Length: 66 bp

Sequence:

TTATTTACCAGTGAATTGTTTCGATTAAGCTTTTGATAACTTTAATGATGCCAGCGATGATA  
CCCAT

> **ndhF**

Function: protein coding sequence; NADH dehydrogenase subunit 5 (core genome, variable)

Best match: ndhF\_CC001\_MW2-USA400\_BA000033.2[456218:457702]

Position: 013-contig\_317\_RC: 6033 ... 7518; Length: 1485 bp

Sequence:

GTGTTAAGTTTTCAATTGCTATTTTCACTGTTTGTATTGCGCTTATCATTGCATTGATAAG  
TGGCTTGTGTTTTAGCACCAGTTATGCCAATGAGATATATTAAATTACATTTATACATA  
CTAGTCATGCCAGTATTATTTGCAGTCATTGGCTTTTTTCGGTATTCATGGTCAACATGTCTT  
AGGTCCATTTAAAATAGATCGTTTATCTTGGTTATTAGCTGGCTTTGTAATGGCGCTTGGT  
TTTATTATTCAAAGTTTTCAATGCGATATTTACTAGGTGATCATCATTATAGACATTACT  
TTCCATTGTTCACTGCGATTACGTCGTTTGCATCTTTAGCATGGATGTCTGAAGACTTAAG  
ACTGATGGCACTCTGCTGGGGTATGACATTATTATGTTTAAACATTGCTGATGAACGTTAAT  
CGTTTTTGGAAAGTGCCACGTGAGTCTGCGAAATTATCAAGTATGACATTTTTATGTGGTT  
GGCTTGCATTCGTTGGAGCAATTGTAACATTTATATTGCGACTGGCGAGTGGCGCGTGC  
CTCAACATATGTCTAATTCGACATGGTCATTGTTGACGAATGTACTACTTGTATTAGCTGT  
CATGATACCGGCAGCACAATTCCTTTTCATCGATGGTTGATTGAATCTGTAACGGCACCA  
ACGCCAGTATCGGCAATTATGCATGCAGGAATTGTGAATGCAGGTGGTGTATTCTAACT  
CGTTTTGCGCCGATATTTGATAATGGATTTGCGTTATCATTATTACTTATCTTTTCTAGTAT  
TTCTGTATTGTTAGGATCGGGTATTAGCTTAGTTCAAGTTGACTATAAACGCCAATTAGTG  
GGCTCTACGATGAGTCAAATGGGCTTTATGTTAGTTCAATGTGCATTGGGTGTATATTCAG  
CAGCGATTATTCATTTAATATTGCACGGTATTTTTAAAGCAACATTATTTTTACAATCAGG  
TTCTATCGTGAAGCGATTCAATATTCCAAAACAAGCATCTGCTAAAGACGCTTATGGCTG  
GATTGTCATGGGACGTGTATTAGCTATTATCGTGGCATTCTGTTTTGGATGAGTAGTGAC  
AGAAGTGCATATGAAGTGTTAAGTGCCTCATTCTAGCTTGGTCATTACTTGTATCTTGG  
ATCAAATGGTAGCCTTTAGTAAAGGACGCATGGCACGTCTTGTGGTATGATTTTGATTGC  
AATTGTGACATTTATCTACATCATCACACATAATTATTTTTACGATGTATTGCGAAATATA  
ACAACACATGCGACAACACCGCCTACAGTGAGTGTATCATTAGTGTGTCATTTTAATCT  
TTGGTAGTTTATTAAGTATTTGGGTGGCGCGTCATCGATACTCTAAGGGTTTTGCGGTATT  
GTACGTGTGGTTAGTTAATCTAGGTGAAGCACGCTCGAAAGCGATAGAAAGTCATCCGAA  
TTATTTGAAGAAGTATTTATAG

> **Q5HIM4**

Function: protein coding sequence; putative protein (core genome, variable)

Best match: Q5HIM4\_CC001-ST772\_118\_AJGE01000070.1[24785:27248] (completely identical)

Position: 013-contig\_317\_RC: 7530 ... 9994; Length: 2464 bp

Sequence:

ATGACAACACAGTTAAATATCAATTCAGTCATTGAAAATGCGAAACGTGTTATTACACCA  
TTATCACCGATTTTCGATTTTTGCAGCACGAAATCCATGGGAAGGATTAGAAGCGGATACG  
TTTGAAGATGTTGCAAAATGGTTACGTGACGTTTCGAGATGTGGATATTTTCCCAAATAAA  
GCATTAATAGAAAGCGCTGTGGCACGTGGTGAATTAGATGAAAGTGTCTTTAATCAACTT  
GTTACTGATATGTTACTTGAACATTACTACAATATCCCGCAACACTACATCAATCTTTATA  
TTGATAACATTTAAAACATTTAAAAGACGTACCTGCATCATATATGGATCATTCAAATGTTG

ATGTTGTTGCTGATCTACTATTAGAAAAATCAAACCGTGATATGGCTGAATCATATCATC  
ACTATGATGTACGTCCGATGAGTGATGCAATAATAGATGAACAAGGTGAGCCACTTAGCG  
AACAAGTGAATCGTCAAATGATTAATGGACGAACTTTATATCGATCAATTTCTATCGA  
GTTGGACAATGCCGAAGCGTGAGCAAAGTTTTTACCATGCATGGTTGCATTTAGCGCAAC  
ATGACCATAGTTTTACTAAAGCACAGCGCCAAGTGATTAAGGCTTACCCAATGATCCTG  
AAATGACGATAGAGTCAGTATTAACTCATTTTTCAATAGATCAGGAAGACTACCAAGCTT  
ATGTTGAAGGACATCTTTGGCGTTACCGGGTTGGGCAGGTATGTTATATTACCGTTCACA  
ACAGCATCACTTTGAACAACATTTGTTAACGGATTATTTGGCAATTCGGTTAGTTGTGCGAA  
CAATTGCTAGTTGGTGATGAGTTTAAGTCAGTCACTAAAGATTGTGAAAGTAGATCGGAA  
AATTGGTTTAAGCAAACCTGTTGCATCATGGTGTTACTACAGTGATATGCCTAGCGATGTAT  
TACTACAACATGACGTCCATGAAATTCAAACATTTATTCATTTTGCAGCAATTATGAATAA  
AAATGTATTTAAAAATTTATGGCTAATTGCCTGGGAAATGACATACGAATCTCAGTTAAA  
ACAAAAAATTAAGCAGGTCATGAAAGTGTGGCGGGCGCATTAGATGTAAACCAAGTAA  
ATGTCTCAGAAAATGATAACGTTAATCAGCCACATTCAGTATTGTTAAATGACACACAAG  
CAGTTGATGAAAATAATAGCGAGCTAAATCAGGTGGGCACATCAACGAAAGCGCAAATT  
GCATTTTGTATAGATGTTTCGTTTCCAGAACATTTTCGTAGACATATCGAAGCAGCAGGGCCC  
TTTGAAACGATTGGTATTGCAGGCTTCTTTGGATTACCTATTCAAAAAGATGCCGTCGACG  
ACAATTCAAACATGATTCATTACCTGTTCATGGTAACGCCGGCATATCGCATTAAAGAAT  
TTGCAGACCGCTACGATATGAATGTTTATCGACAACAGCAACAGACAATGTCATCGATGT  
TTTACACATTTAAATTGATGAAAAATAATGTTATGCCTAGTCTGTTATTGCCTGAATTAAG  
TGGGCCATTTTTAAGCTTGAGTACCATTGTCAATTCGATTATGCCTAGAAAAAGTCGCGC  
GTCTTTACAAAAAATAAAAACAAAAATGGTTGAAAAAGCCTGAAACAAAGTTAACGATTG  
ATCGTGAGTTTGACCGAACATCAGATTTACCTGTTGGATTTACTGAGCAAGAGCAAATTG  
ATTTTCGCGTTACAAGCGTTGAAATTGATGGATTTAACCGAAGCATTTCGCGCCGTTTCGTTGT  
GTTAGCAGGTCATGCTAGTCATTCTCACAATAATCCACATCATGCATCACTTGAATGTGG  
GGCTTGTGGTGGCGCATCAAGCGGTTTTAATGCTAAGTTATTAGCGATGATATGTAATCG  
TCCAAATGTCAGACAAGGATTA AAAACAAGCAGGCGTGTATATTCCAGAGACA ACTGTTTT  
TGCGGCAGCAGAACATCATACTACTGATACGTTGGCATGGGTATATGTGCCAGACAC  
ATTATCAGCTTTAGCTCTAGATGCATATGAATCATTGAATGACGCGATGCCGATGATTTCT  
GAACAATCGAATCGCGAACGTTTGGACAACTGCCAACGATTGGTCGTGTGAATCATCCA  
GTGGAAGAAGCGCAGCGGTTTTCGAGTGATTGGAGTGAGGTACGTCCAGAATGGGGCTT  
GGCTAAAAATGCATCATTATAATTGGACGACGCCAATTAACAAAAGGTATTGATTTAGA  
AGGGCGGACATTTTACACAATTATGATTGGCGTAAAGATAAAGATGGCACATTATTTAA  
TACCATCATTTCTGGTCCAGCGCTTGTGGCACAATGGATTAATTTACAATATTATGCGTCC  
ACAGTTGCGCCGCATTTTTACGGAAGTGGGAATAAAGCGACACAAACCGTCACGTCAG

### > **ybcL**

Function: protein coding sequence; putative protein (core genome, constant)

Best match: ybcL\_ST425\_LGA251-cow\_FR821779.1[448524:448886] (completely identical)

Position: 013-contig\_317\_RC: 10397 ... 10760; Length: 363 bp

Sequence:

ATGAAAAGAACGAAAGGTGAAATCGAAGCTGAAATCAGTAAAGCCATTACGCAATGGGA  
AAAAGATTTCTTGGCAGAGGTTCTTGTTCGGTTAAATCAGACATTTTAAGAGATATGGT  
GATTATTAGTTTACAAGGTATCTTAACGCCAGCAGAATATCGTGTGTGTAGTACGAATGA  
AGGATTACTAAATATTAACGAACACGTTCTGAATTAGTTGAATCCGGTGAGCAAGATTT  
GAATGATATCATTCTTAAAATTACAGGTATCAAAGTGATGAGCTTCCACAGTGATTTAAG  
TACAGTTACAGGTGAACGTATTATCGTATTCAAACCTTGAGGATAATTTGGAAAAGCATAT  
TTAA

### > **Q5HIM2**

Function: protein coding sequence; putative protein (core genome, constant)

Best match: Q5HIM2\_CC001\_MW2-USA400\_BA000033.2[461173:461520:r]RC (completely identical)

Position: 013-contig\_317\_RC: 10988 ... 11336; Length: 348 bp

Sequence:

TTACATAAAGAGTATATGTGTGACGTAGGCATATAATCGATAAAGTATTCCTAAAAAATT  
AGGTATAATGACCATTGTTGCAATAAGTTTTTCGGCCTTGAAACCGATAACGCATAGTAT  
AATAGGAATAAAAATATAATACAAATATCCAGTAAATCAAATTTGAAAACGATGGATGAA  
TAGGGGTAAAGAATCTAACTAATGTAATGATTAACGCTATATAGACAAAAATAACTCTAT  
TGATACGCCTTACCCCTCTGTATAATAAATATAGATCGTACTAAATTGAAAATAGCAAA  
ATATTGTTATTTCAATTATACAATGTTTTATTTGCAATATACATAACAA

### > Q5HIM1

Function: protein coding sequence; lipid phosphate phosphohydrolase 2 family protein (core genome, constant)

Best match: Q5HIM1\_CC001-ST772\_118\_AJGE01000028.1[1476:2150] (completely identical)

Position: 013-contig\_317\_RC: 11442 ... 12117; Length: 675 bp

Sequence:

ATGATAGATAAAAAATTAACATCACCGAAAATGACAGTGCCTTTATTTTTAATCGCGCTG  
ATTGTATTTATAGGTATGTTTTACAGTGTAGTGACAAATCAAGAATGGCTTAAAAATATA  
GATATGGGATCATTAACATGGTTTACAGATTATTTTCGGTGAGCCACAACGTCAGTATGTT  
ACAATTTATTTAATTACTATATGACGTTTAGTGCGGAAATTGGAGATGTCAAAGGTGTC  
GTGTTGATTTCCATTATCGTCACAATCGTACTGTTTTATTAACAGAGGCATTTAGCGGTTT  
GGTTTGTGACATATTTGGTTTCAGGCGTCATCATGAACAAATTAATTAAGATACTGTTTT  
ACGTCCAAGACCATATAATCATTAGCCGTTGATACAGGCTTTTTCATTTCCAAGTGGACAT  
TCCAACGCCAGCACATTATTATATTTTCGCCTTAATGATCATAATTATTTCACTTGCTGCTA  
AGACAATAACAAAAGTGTGAGTGCGCTAGTTATGGGAATATTATGGCTTAGCATATTAT  
TTTGTGCCTTTATTTTCATGCGCATTACTTTTCAGATGTCATTGGCGGCACGTCCTAGC  
AATCATTGGGTAGCGTTATTCTTAATGGTATACCCATACTTTATTAATCATCGACGACAA  
CGCGTTTAG

### > Q5HIM0

Function: protein coding sequence; putative esterase (core genome, variable)

Best match: Q5HIM0\_CC001-ST772\_118\_AJGE01000028.1[2187:2921] (completely identical)

Position: 013-contig\_317\_RC: 12153 ... 12888; Length: 735 bp

Sequence:

ATGAGAATTA AACACCGAGTCCATCGTATTTAAAAGGCACAAATGGACATGCGATATTA  
TTATTACATTCATTTACAGGTACAAATCGGGATGTGAAGCATCTTGCAGCTGAGTTAAAT  
GACCAAGGATTTAGTTGTTATGCACCGAATTATCCAGGTCATGGTTTATTGTTGAAAGATT  
TCATGACATATAATGTAGATGATTGGTGGGAAGAAGTTGAGAAAGCTTACCAATTTTTAG  
TCAATGAAGGTTATGAATCTATCAGTGCAACGGGTGTGTCTTTAGGTGGATTAATGACAT  
TAAAATTGGCACAACACTATCCTTTGAAACGTATCGCTGTCATGTCAGCACCAAAGGAAA  
AGAGTGATGATGGTTTAATAGAACATTTAGTTTATTATAGTCAACGCATGTCGGATATTTT  
AAATTTAGATCAGCAAGCATCGAGTGCGCAATTAGCAGCAATTGATGATTATGAAGGTGA  
AATTACGAAGTTTCAACATTTTATTGATGATATCATGACAAATTTAAATGTTATTAATAATG  
CCAGCTAATATATTATTTGGTGGTAAAGATGCGCCATCCTATGAAACAAGTGCACACTTT  
ATTTATGAACATTTAGGATCAGTAGACAAAGAATTAATGGTCTGAAGGATTCGCATCAT  
TTAATGACGCATGGAGAAGGCAGAGATTTTTAGAAGAAAATGTTATTCGCTTTTTCAAT  
GCTTTAACATAA

### > Q5HIL8

Function: protein coding sequence; transporter (core genome, variable)

Best match: Q5HIL8\_CC001\_MW2-USA400\_BA000033.2[463528:464865]

Position: 013-contig\_317\_RC: 13343 ... 14681; Length: 1338 bp

Sequence:

ATGAAAAGACAACAATCACAATGGAAGTCATCAACTGGATTTATTTTAGCTAGTGCGGGT  
TCTGCAATCGGTCTTGGTGCCATGTGGAATTTCCCATATATGGCAGGGATTTATGGCGGC  
GGTGCCTTTCTAGCTATGTTCTTAATATTCACCATTTTTGTTGGGTTGCCATTACTCATTAT  
GGAATTCAGTGTGGGAAAATGGGACGGACATATAACAACAAATATATAGTAAATTA  
CTGGTAAAAAATGGCTCAATATCATTGGCTGGAACGGTAATTTGGCAGTGTTTATTTTATT



TGGCTTCTATAGTGTTATCGGTGGTTGGATTGTCATTTACATCGGACAAGTATTATGGCAA  
TTAGTTATATTTCAACGCATCAATCATCTCCAAGAAATGAATTTTGAAGCGGTAATATCA  
AATCCTTGGTTAACCGTTCTAGGGCAAGGTATATTCATATTCGCTACGATGATTATTGTCA  
TGTTAGGTGTTGAAAAAGGATTAGAAAAGGCATCGAAAGTTATGATGCCATTGCTGTTTG  
TCTTTTTAATCGTCATTGTGATTAAGTCTTTAACATTAGATGGCGCCTTAGAAGGTGTGAA  
ATTTATTTTACAACCAAGAGTATCAGAGATTACTGCTGATGGCATCTTGTTTTCGCTAGGT  
CAATCATTCTTTACGTTATCATTAGGAACTACAGGTATGATTACTTATGCGAGTTATGCCT  
CTAAAGACATGACGATTAAGTCATCAGCTATTTCTATCGTTGTTATGAATATCTTTGTATC  
TGTATTGGCAGGTCTAGCTATATTTCCGGCTTTACATAGTTTTGGCTATGAACCACAAGAA  
GGCCTGGATTATTATTTAAAGTACTGCCAATGGTCTTTAGTCAAATGCATCTAGGCACAT  
TATTCTATTTGGGATTCTTAGTGCTGTTCTTATTTGCGGCTTTAACGTCATCTATTTCTTTA  
TTAGAATTAATGTTTCTAACTTCACGAAGAATGACAATACAAAACGTAAAAAAGTTCGCA  
GTGATCGGTAGTATTTTAGTATTTATCATTAGTATTCCAGCAACCTTATCTTTTGGTATCTT  
AAAAGATGTAAGATTCCGGTGCGGGAACGATTTTTGATAATATGGATTTACCGTTTCGAA  
TGTATTGATGCCATTAGGCGCATTAGGTACTACGCTTGTCGTAGGACAATTATTAGATAA  
AAAATTATTACAACAATATTTTGGTAAAGATCGATTTAGATTATTCAGTGGTTGGTATTAC  
TTAATTAAGTATGCGATGCCTGTCGTTATTATTTTAGTCTTTATCGTGCAATTATTTAGTTA  
A

### > **cysM**

Function: protein coding sequence; cysteine synthase (core genome, variable)

Best match: cysM\_CC008\_21209\_AGRP01000021.125427:26341:r

Position: 013-contig\_317\_RC: 14045 ... 15811; Length: 1766 bp

Sequence:

ATGATTACTTATGCGAGTTATGCCTCTAAAGACATGACGATTAAGTCATCAGCTATTTCTA  
TCGTTGTTATGAATATCTTTGTATCTGTATTGGCAGGTCTAGCTATATTTCCGGCTTTACAT  
AGTTTTGGCTATGAACCACAAGAAGGGCCTGGATTATTATTTAAAGTACTGCCAATGGTC  
TTTAGTCAAATGCATCTAGGCACATTATTCTATTTGGGATTCTTAGTGCTGTTCTTATTTGC  
GGCTTTAACGTCATCTATTTCTTTATTAGAATTAATGTTTCTAACTTCACGAAGAATGAC  
AATACAAAACGTAAAAAAGTCGCAGTGATCGGTAGTATTTTAGTATTTATCATTAGTATT  
CCAGCAACCTTATCTTTTGGTATCTTAAAAGATGTAAGATTCCGGTGCGGGAACGATTTTTG  
ATAATATGGATTTACCGTTTCGAATGTATTGATGCCATTAGGCGCATTAGGTACTACGCT  
TGTCGTAGGACAATTATTAGATAAAAAATTATTACAACAATATTTTGGTAAAGATCGATT  
TAGATTATTCAGTGGTTGGTATTACTTAATTAAGTATGCGATGCCTGTCGTTATTATTTTA  
GTCTTTATCGTGCAATTATTTAGTTAATATATAGAAGCATCTGACACACAAGTATTTGTGT  
TGCTCAGGTGTTTTTTGTTTGGAAATTGAAAATTTAGTACTGGTTCTGAATTAATCGAACT  
TAGATAATTGCAAAATAACAAAATGTAGTTTATAATTCTTATCTGAAAAGTAAGGATTAA  
AATTGAGACATGAAGAAAGGTTTCATTCATTTGATCGGCATGTCAGATGAGGGTGCATCT  
ATGATTACTTATGATTTAATTGGCAATACGCCATTAGTACTGTTAGAACATTATAGTGATG  
ATAAAGTTAAAATTTATGCCAAGCTTGAACAATGGAATCCTGGAGGCAGTGTTAAAGACA  
GACTCGGGAAATATTTAGTAGAGATGGCAATTCAAGAAGGGCGTGTGCGTGCAGGTCAA  
ACTATTGTTGAAGCGACTGCTGGCAATACAGGCATAGGGTTAGCTATTGCAGCAATAGA  
CATCATTTGAAATGTAAGATCTTTGCGCCGTATGGTTTTTTCAGAAGAAAAGATTAATATTA  
TGATAGCGCTTGGTGCAGATGTTTCAAGAACGAGTCAGTCTGAAGGTATGCATGGGGCAC  
AATTAGCTGCACGTTCCCTATGCTGAAAAATATGGTGCCATTTATATGAATCAATTTGAATC  
CGAACATAATCCGGATACATATTTTCATACATTGGGGCCCGAATTGACTTCAGCATTACA  
GCAAATTGATTATTTTGTGGCTGGTATTGGCTCAGGCGGTACATTTACAGGTACCGCACGT  
TATTTAAAGCAACATCACGTGCAATGTTATGCCGTTGAGCCAGAAGGGTCCGTGTTAAAT  
GGAGGGCCAGCTCATGCACATGACACTGAAGGTATCGGTTCTGAGAAATGGCCGATATTT  
CTAGAGAGACGTCCTGTAGATGGTATATTTACGATTAAGATCAAGATGCCTTTTCGAAAT  
GTCAAAAAGTTTGGCTATAAATGAAGGGTTGTTAGTAGGCAGTTCTTCAGGTGCAGCATT  
CAAGGTGCATTGAATTTAAAAGCGCAATTATCTGAAGGTACGATTGTTGTCGATTTCCA  
GATGGTAGTGATCGCTATATGTCTAAGCAAATATTTAATTATGAGGAGAATAATAATGAA  
CAAGAAAACATAA

> **metB**

Function: protein coding sequence; cystathionine gamma-synthase (core genome, variable)

Best match: metB\_CC008-ST72\_21259\_AFTS01000010.1[24276:25418:r]

Position: 013-contig\_317\_RC: 15794 ... 16937; Length: 1143 bp

Sequence:

```
ATGAACAAGAAACTAAATTAATTCATGGTGGGCACACAACAGACGATTATACAGGTGC
CGTTACAACACCAATTTATCAAACAAGTACATATTTACAAGATGATATTGGTGATTTACG
TCAAGGATATGAATATTCTCGTACTGCGAATCCAACAAGAAGTTCTGTAGAAAGCGTTAT
TGCGACATTAGAAAATGGCAAACATGGCTTTGCATTTAGTTCAGGTGTTGCAGCAATCAG
TGCAGTTGTTATGCTGTTGGACAAAGGAGATCATATTATTTAAATTCAGATGTATACGGC
GGTACTTATCGCGCATTGACAAAAGTATTTACACGATTTGGCATTGAAGTGGATTTTGTA
GATACAACGCATACAGATTCAATTGTACAAGCGATACGCCCAACAACAAGATGTTGTTT
ATTGAAACACCTTCTAATCCATTATTACGTGTTACTGACATTA AAAAGTCTGCTGAAATTG
CGAAAGAACACGTTTTGATTTAGTTGTTGATAACACATTTATGACACCTTATTATCAGA
ATCCATTAGATTTAGGTATCGATATTGTCTTACATTCTGCAACGAAATATTTAGGTGGACA
TAGTGATGTCGTTGCTGGTTTAGTTGCAACATCGGATGACAAGCTTGCAGAACGTTTAGC
ATTTATTTCAAATTCAACAGGTGGCATTTTAGGACCTCAAGATAGCTATTTACTTGTGAGG
GGTATTA AACATTAGGTTTACGTATGGAACAAATTAATCGCAGTGTTATTGAAATTATT
AAAATGTTACAAGCACATCCAGCTGTGCAACAAGTGTTCCATCCAAGTATTGAAAGTCAT
TTAAATCATGATGTCCATATGGCTCAAGCGGATGGCCATACAGGTGTGATTGCATTTGAA
GTGAAAAATACAGAAAGTGCCAAACAATTGATTAAAGCAACATCGTATTACACATTAGCT
GAAAGTTTAGGTGCAGTGGAAAGTTTAATTTAGTACCTGCATTGATGACACATGCATCC
ATTCCAGCAGATATTTCGAGCTAAAGAAGGTATTACAGACGGACTTGTAAGAATTTCTGTA
GGTATTGAAGATACTGAAGATTTAGTCGATGATTTAAACAAGCACTAGATACGTTATAA
```

> **metN1**

Function: protein coding sequence; methionine import ATP-binding protein 1 (core genome, variable)

Best match: metN1\_CC005\_CF-Marseille\_CABA01000058.1[22942:23967:r]

Position: 013-contig\_317\_RC: 17230 ... 18256; Length: 1026 bp

Sequence:

```
ATGATTGAGTTTCGACAAGTTAGTAAATCATTTCATAAGAAAAGGCCAAACAATAGATGCT
TTGAAGGACATATCATTACGGTCAATCGCAATGATATTTTTGGTGTGATTGGATATAGTG
GTGCAGGAAAAAGTACGTTGGTAAGACTCGTGAATCATCTTGAAGCTGCCTCGAATGGAC
AAGTGATTGTAGATGGACATGATATTACGAATTATAGCGAAAAAGGCATGCGAGAAATT
AAGAAAGATATCGGTATGATATTTAGCATTTC AATTTATTA AATTCAGCTACCGTATTTA
AAAATGTAGCAATGCCACTCATTTTAAGTAAGAAAAGCAAACAGAAATTAAGCAACGA
GTAACAGAAATGCTTGAATTTGTAGGATTGAGTGATAAAAAAGACCAATTTCTGATGAA
TTATCTGGTGGGCAGAAGCAAAGGGTGGCTATTGCAAGAGCGCTTGTTACTAATCCGAAA
ATACTCCTATGCGATGAAGCAACAAGCGCATTGGATCCAGCAACGACTGCTTCGATATTG
ACGTTATTAAGAATGTCAATCAAACCTTTGGCATTACAATTATGATGATTACACATGAA
ATGCGCGTTATTAAGACATTTGTAATCGTGTTGCTGTAATGGAAAAGGGGCAAGTGTT
GAAACAGGAACTGTTAAAGAGGTGTTTAGTCATCCTAAAACGACGATTGCTCAAAATTTT
GTGTCTACAGTTATACAGACTGAGCCAAGTACATCATTGATTCGTCGATTGAATGACGAA
CAAGTTGACGATTTTAAAGATTATAAAATCTTCGTCGAGGAAACTCAGGTGACACAACCG
ATTATAAATGACTTGATTCAAATTTGTGGCAGAGAGGTTAAAATTTTATTTTCATCTATGT
CAGAAATACAAGGTAACACCGTATGTTATATGTGGCTTCGATTTAATATAGATCAACAAT
TTGATGACACGGCAATAAATCAATATTTCAAAGAGAAAAATATTC AATTTGAGGAGGTGC
ATTAA
```

> **metI**

Function: protein coding sequence; D-methionine transport system permease (core genome, variable)

Best match: metI\_CC008\_COL\_CP000046.1[506065:506724]

Position: 013-contig\_317\_RC: 18889 ... 18919; Length: 30 bp

Sequence:

```
GTTCTAGCTAGATTCATACGTAGACATTAA
```

> **metQ**

Function: protein coding sequence; D-methionine transport system substrate-binding protein (core genome, constant)

Best match: metQ\_CC001\_MSSA476\_BX571857.1[467806:468648]

Position: 013-contig\_317\_RC: 18955 ... 19798; Length: 843 bp

Sequence:

```
ATGAAAAGATTGATTGGGTTAGTTATCGTAGCACTTGTATTATTAGCAGCGTGTGGTAGT
ACAATGATAAAAAAGTAACAATTGGTGTGCGCATCAAATGACACTAAGGCTTGGGAGAA
GGTAAAGAATTAGCTAAAAAAGATGATATTGATGTGGAGATTAAGCACTTCTCCGATTA
CAATTTACCGAATAAAGCATTAAACGATGGTGATATTGATATGAATGCATTCCAACATTT
TGCATTTTTAGATCAGTATAAGAAGGCACATAAAGGAACAAAGATTTTCAGCATTGAGTAC
AACAGTTTTAGCACCGTTGGGCATTTACTCAGATAAAATTAAGATATCAAAAAGGTTAA
AGATGGTGCTAAAGTTGTCATTCCAAATGATGTATCAAACCAAGCACGTGCACTTAAACT
ATTAGAAGCAGCTGGTTTAATAAAACTGAAAAAAGATTTTCGGATTAGCAGGTACAGTGA
AAGATATAACGTCAAATCCAAAACATTTAAAAATTACTGCAGTAGATGCACAACAACT
GCACGTGCTTTATCTGATGTCGATATTGCAGTTATTAATAACGGTGTAGCAACTAAAGCG
GGGAAAGACCCTAAAAATGATCCGATATTTTTAGAAAAATCAAATTCAGATGCTGTAAAG
CCATATATTAATATTGTTGCAGTTAATGACAAAGACTTGGATAACAAAACATATGCTAAA
ATCGTAGAATTGTATCATTCAAAGAAGCTCAAAAAGCGTTGCAGGAAGATGTCAAAGA
TGGAGAGAAACCTGTTAATTTATCTAAAGATGAGATTAAGGCAATAGAAACGTCATTAGC
AAAATAA
```

> **aaa**

Function: protein coding sequence; N-acetylmuramoyl-L-alanine amidase (core genome, variable)

Best match: aaa\_CC008\_A5948\_ACKD01000044.1[32597:33601]

Position: 013-contig\_317\_RC: 20129 ... 21137; Length: 1008 bp

Sequence:

```
GTGCAAAAAAAGTAATTGCAGCTATTATTGGGACAAGCGCGATTAGCGCTGTTGCGGCA
ACTCAAGCAAATGCGGCTACAACCTCACACAGTAAAACCGGGTGAATCAGTGTGGGCAAT
TTCAAATAAGTATGGGATTTTCGATTGCTAAATTAAGTCATTAACAATTTAACATCTAAT
CTAATTTTCCCAAACCAAGTACTAAAAGTATCTGGCTCAAGTAATTCTACGAGTAATAGT
AGCCGTCCATCAACGAACCTCAGGTGGCGGATCATACTACACAGTACAAGCAGGCGACTC
ATTATCATTAATCGCATCAAAAATATGGTACAACCTACCAAAAATATTATGCGTCTTAATGGT
TTAAATAATTTCTTTATTTATCCAGGTCAAAAATTAAGTATCAGGTACTGCTAGCTCAA
GTAACGCTGCGAGCAATAGTAGCCGTCCGTCAACGAACCTCAGGTGGCGGATCATACTATA
CAGTACAAGCAGGTGACTCATTGTCATTAATCGCATCAAAAATATGGTACAACCTATCAAA
AAATTATGAGCTTAAATGGCTTAAATAATTTCTTTATATATCCGGGTCAAAAATTAAG
TAACTGGTAATGCAACATCTTCAAACCTCAGGATCTGCAACAACGACAAATAGAGGTTACA
ATACACCAGTATTTAGTCACCAAACTTATATACATGGGGTCAATGTACATATCATGTATT
TAATCGTCGTGCTGAAATTGGTAAAGGTATTAGTACTTATTGGTGGAAATGCTAATAACTG
GGATAACGCAGCGGCAGCAGATGGTTACTATCGACAATAGACCTACTGTAGGTTCTAT
CGCTCAAACAGATGTAGGTTACTATGGTCATGTTATGTTTGTAGAACGTGTAATAACGA
TGGTAGTATTTTAGTTTCAGAAATGAACTATTCAGCTGCACCAGGTATTTAACTTACAGA
ACGGTACCAGCTTACCAAGTAAATAATTATAGATATATTTACTAA
```

> **tnpIS431-06**

Function: protein coding sequence; transposase for IS431 (mobile element)

Best match: tnpIS431-06\_circ\_S-epidermidis\_GQ900381.1[43799:43807] (completely identical)

Position: 013-contig\_317\_RC: 21053 ... 21062; Length: 9 bp

Sequence:

```
ATGAACTAT
```

> **gltC**

Function: protein coding sequence; transcription activator of glutamate synthase operon

Best match: *gltC*\_CC001\_MW2-USA400\_BA000033.2[474976:475860:r]RC

Position: 013-contig\_317\_RC: 24790 ... 25675; Length: 885 bp

Sequence:

```
TTAATGGAATGTAGACGTTTTAGTCATTAATTGCTGAATGAGTGTTAATAAGATAACCAAT
ATCACTCTTCGTATAAGGTTCTTTCGTAATAGCACATATCGTTCTTTTTAATTCAGTATGAT
CTAATTTTATATCTATCCATGATTTAGATTCTGGTAAATGTATATTTTGTGATGAAATGAT
GTAACCTTCTTTTTGACGAAGGAGATACTGCGCAAGTGGTTGGCTACTGATTGTGTATAC
ATCTGATTTAGTAATCTTGCGCAATTGTTTTTTTACAGTTTCGGCAAATGGTGCCAAGCAA
TAAATATGACTATGCTCAAACCTGAATTAATGGTGGGTGTGTCGCCATCGTAATTGGATCG
TCTGAAGGCGCATATAAATGATAGTGCTCTTCGAATAAAGGTAGCATATGTAATTGTTTG
TGTTTACGTATTTCTGGTGTAAAGTTCCGTGAAACCAATGTCTATATCCCATTTAATACGC
TATTTATAATTGTGTCATGTTCTAATAAGCTCGGTATGACATGTGTATCATTTTGTAAATG
AAACGTTTGGATAAGTGGTAGTAACATGTGGGATACGTCACTCTCATCATAGCCAATGTA
GATACTTTTATTTTTAGTTAATCCATGGCTTTGAAATTGTTCAATCGTGCTATCTAAATGTT
CAATAATACGCAGAGCTTCATTAATAATAATTTCCCTTCAGATGTGAGCGTAATATTGC
GTCCTTGCTTTTTAAATAAAGACACATTAAGTTCTTGTTCTAATAATGTAATTTGACGGCT
TATCGCTGATTGAGCAATGTTTAGTTCAAGTGCTGTTTCAGAGATATGTTCTCTTTTAGCG
ACCTCGATAAAATATCTTAATTGTTTAATTTCCAT
```

### > ***gltB***

Function: protein coding sequence; glutamine 2-oxoglutarate amidotransferase

Best match: *gltB*\_CC001\_MW2-USA400\_BA000033.2[476042:480541]

Position: 013-contig\_317\_RC: 25855 ... 30355; Length: 4500 bp

Sequence:

```
ATGCACAATGAGAAATTAATTAAGGCTTATATGACTATCGTGAGGAACATGATGCGTGT
GGTATTGGTTTTATGCGAATATGGATAATAAAAGGTCTCACGACATCATTGATAAATCG
CTTGAAATGTTGCGACGCTTAGATCATAGGGGCGGGGTGCGCGCAGATGGCATCACTGGT
GATGGCGCAGGTATTATGACTGAAATACCTTTTGCATTTTTCAAACAACATGTAACGGAC
TTTGATATCCCAGGTGAAGGTGAATATGCCGTGGGGTTATTTTTTTCCAAAGAACGCGTTT
TAGGTTCTGAACATGAAGCAGTTTTTAAAAAAATTTTGAAGGCGTAGGGTTATCAATTC
TTGGTTATCGTAATGTACCAGTTAATAAAGATGCCATTGCTAAACATGTAGCAGATACGA
TGCCAGTCATTCAACAAGTGTTTATTGATATTAGGGACATTGAAGATGTTGAAAAGCATT
TGTTTTTAGCGAGAAAACAATTAGAGTTCTATTGACTCAGTGCGATTTAGAATTGTATTT
TACGAGCTTATCACGCAAAACAATTGTATATAAAGGTTGGTTACGATCAGACCAAATTA
AAAACCTATATACAGATTTATCGGATGATTTATATCAATCAAAGCTAGGGTTAGTGCATTC
GAGATTTAGTACGAATACATTCCCGAGTTGGAAAAGGGCACATCCTAACCGTATGTTAAT
GCATAATGGTGAGATTAACACGATTAAGGTAATGTAAACTGGATGCGAGCACGCCAAC
ATAAATTAATCGAAACATTATTTGGCGAGGATCAACATAAAGTGTTTCAAATTGTTCGATG
AGGATGGTAGTGACTCTGCTATTGTAGATAATGCGCTAGAGTTCTTATCGTTAGCCATGG
AGCCAGAAAAGGCAGCGATGCTACTACCTGAACCTTGGTTATATAATGAAGCGAATG
ATGCAAATGTACGTGCGTTTTATGAATTTTATAGTTATTTAATGGAACCGTGGGATGGTCC
TACAATGATTTTCGTTCTGTAACGGTGACAACTTGGCGCGCTTACAGATAGAAATGGATT
ACGTCCAGGTCGTTATACGATTACTAAAGATAACTTTATTGTCTTTTCATCTGAAGTGGGT
GTTGTGGACGTACCTGAAAGTAATGTTGCTTTTAAAGGTCAATTGAATCCTGGAAAGTTA
TTGCTTGTGATTTTAAACAGAATAAAGTCATTGAAAATAATGATTTAAAGGTGCGATT
GCTGGAGAATTACCATATAAAGCGTGGATTGATAACCATAAAGTTGACTTTGATTTTGAA
AATATACAATATCAAGATTCGCAATGGAAAGATGAGACGTTATTTAAATTACAACGTCAG
TTTGCATACACGAAAGAAGAGATTCATAAATATATTCAGGAACTTGTAGAAGGTAAGAA
GGATCCTATCGGTGCAATGGGATATGATGCGCCAATTGCAGTGTTGAACGAGCGACCAGA
ATCACTATTTAATTACTTTAAACAGCTGTTTGCACAAGTTACGAATCCACCAATTGATGCG
TATCGTGAAAAAATCGTAACGAGTGAACCTTCTTATTTAGGTGGCGAAGGTAACCTACTA
GCACCTGACGAAACGGTTTTAGATCGTATTCAATTGAAAAGGCCGGTATTGAATGAATCA
CACTTAGCAGCGATTGATCAGGAACATTTTAAATTAACCTTATTTATCAACGGTATATGAA
GGGGATTTGGAAGATGCGTTAGAAGCATTAGGACGAGAAGCAGTGATGCTGTAAAGCA
AGGCGCTCAAATTCTAGTGTTAGATGATAGTGGATTAGTTGATAGCAATGGCTTTGCGAT
GCCGATGTTACTCGCAATAAGTCATGTGCATCAATTACTTATTAAGCAGATTTACGTATG
```

TCTACAAGTTTAGTCGCTAAATCTGGTGAGACACGAGAAGTGCATCATGTTGCTTGTTAC  
TCGCATATGGCGCGAATGCAATTGTGCCATACCTAGCGCAACGTACAGTTGAACAACCTGA  
CATTGACAGAAGGGTTACAAGGCACCGTTGTGCGATAATGTTAAGACATATACGGATGTAT  
TGTCGGAAGGTGTCATTAAGTAATGGCTAAGATGGGAATTCGACAGTGCAAAGTTATC  
AAGGTGCACAAATATTTGAAGCGATTGGCTTGTCTCATGATGTGATTGATCGTTATTTTAC  
TGGGACACAGTCTAAGTTATCGGGTATTCGATTGATCAAATTGATGCTGAAAATAAAGC  
ACGTCAACAAAGTGATGATAATTATCTTGCATCAGGTAGTACATTCCAATGGAGACAACA  
AGGTCAACATCATGCTTTTAATCCGGAATCTATTTTCTTATTGCAGCACGCATGTAAAGAA  
AATGACTATGCGCAATTTAAAGCATACTCTGAAGCGGTGAACAAAAATAGAACAGATCA  
CATTAGACATTTACTTGAATTTAAAGCATGTACACCGATTGACATCGACCAAGTTGAACC  
GGTAAGTGACATTGTCAAACGCTTTAATACAGGGGCGATGAGTTATGGATCGATTTTCAGC  
GGAAGCACATGAAACGTTAGCACAAAGCCATGAACCAATTAGGTGGAAGAGTAATAGTG  
GTGAAGGTGGCGAAGATGCAAACGTTATGAAGTACAAGTTGATGGAAGCAACAAAGTA  
AGTGCGATTAACAAGTTGCTTCTGGGCGTTTTGGTGTAACTAGTGATTATTTACAACATG  
CCAAAGAAATTCAAATTAAGTTGCGCAAGGTGCAAAGCCTGGTGAAGGTGGTCAATTA  
CCTGGTACTAAGGTATATCCGTGGATTGCGAAGACAAGAGGGTCAACGCCAGGTATCGGT  
CTGATTTACCACCGCCACATCATGATATTTATTCAATAGAAGATTTAGCGCAACTGATAC  
ATGATTTGAAAAATGCGAATAAAGATGCGGATATCGCGGTAAAATTAGTTTCGAAAACA  
GGTGTGGTACCATTGCATCTGGGGTGGCAAAGCATTTCAGATAAAAATTGCATCAGT  
GGTTACGATGGTGGTACAGGGGCTTCACCTAAAACGAGTATTCAGCATGCCGGTGTTCCT  
TGGGAGATTGGTTTAGCAGAAACACATCAAACATTA AAACTAAATGACTTAAGAAGTCGT  
GTTAAGTTAGAAACAGACGGTAAGTTATTA ACTGGTAAAGATGTAGCGTACGCATGTGCG  
CTTGGAGCGGAAGAATTTGGATTTGCAACTGCACCATTAGTGGTGTGGGCTGTATTATG  
ATGCGTGTATGCCATAAAGATACATGTCCAGTAGGAGTTGCAACTCAAACAAAGATTTA  
CGTGCTTTATATAGAGGTAAAGCACATCATGTTGTTAATTTTATGCATTTTATTGCACAAG  
AATTAAGAGAAATTTTAGCATCTTTAGGTTTGAACGTGTAGAAGACTTAGTTGGAAGAA  
CTGATTTATTACAACGATCATCAACATTA AAAAGCGAATAGCAAAGCGGCTAGTATTGATG  
TTGAAAAACTGTTATGTCCTTTCGATGGGCCAAACACAAAAGAAATTCAACAAAATCATA  
ATCTTGAGCATGGATTTGATTTAACA AATTTATATGAAGTAACGAAGCCATATATTGCTG  
AAGGGCGTCGCTATACAGGTAGCTTTACAGTAAATAATGAACAACGTGATGTAGGGGTTA  
TTACAGGTAGTGAGATTTCGAAACAATATGGAGAAGCAGGACTTCCTGAAAATACAATTA  
ATGTTTATACGAATGGTCATGCTGGTCAAAGTCTTGCAGCATATGCACCGAAAGGCTTAA  
TGATTCATCATACTGGAGATGCGAATGACTATGTTGGTAAAGGATTATCTGGTGGTACGG  
TCATTGTCAAAGCACCTTTTGAAGAACGACAAAATGAAATTATTGCTGGTAAACGTCTCAT  
TCTATGGTGCAGAGGTGGTAAGGCATTTATTAACGGTAGTGCAGGAGAAAGATTCTGTA  
TTAGAAATAGTGGTGTAGATGTTGTCGTTGAAGGTATCGGCGACCATGGATTAGAGTATA  
TGACTGGTGGACATGTCATTAATTTAGGTGATGTAGGTAAGA ACTTCGGTCAAGGTATGA  
GTGGTGGTATTGCTTACGTTATCCCGTCTGATGTAGAAGCTTTTGTGAAAATAATCAACT  
AGATACGCTTTCGTTTACAAAGATTA AACACCAAGAAGAAAAAGCATTCAATTAAGCAAAT  
GCTGGAAGAACATGTGTCACACACGAATAGTACGAGAGCGATTTCATGTGTTAAAACATTT  
TGATCGCATTGAAGATGTCGTCGTTAAAGTTATTCCTAAAGATTATCAATTAATGATGCA  
AAAAATTCATTTGCACAAATCATTACATGACAATGAAGATGAAGCGATGTTAGCTGCATT  
TTACGATGACAGTAAACAATCGACGCTAAACATAAACCAGCCGTTGTGTATTAA

> **gltD**

Function: protein coding sequence; glutamine 2-oxoglutarate amidotransferase

Best match: gltD\_CC030\_MRSA252\_BX571856.1[503158:504621]

Position: 013-contig\_317\_RC: 30372 ... 31836; Length: 1464 bp

Sequence:

ATGGGTGAATTTAAAGGATTTATGAAGTATGACAAACAGTACTTAGGTGAATTATCACTG  
GTAGACCGTTTGAAGCATCATAAAGCATATCAACAACGATTTACTAAAGAAGATGCCTCT  
ATCCAAGGTGCGCGATGTATGGATTGTGGAACGCCGTTTTGTCAAACCGGACAACAGTAT  
GGTAGGGAAACAATAGGTTGTCCAATTGAAACTACATTCCTGAATGGAACGACTTAGTG  
TATCATCAAGATTTTAAAACCTGCTTATGAACGCTTAAAGCGAAACAAATAACTTTCCTGAC  
TTTACAGGGCGTGTATGTCCTGCACCATGCGAAAGTGCTTGTGTGATGAAGATTAATAGA  
GAATCGATTGCGATTAAAGGTATTGAACGCACGATTATTGATGAAGCTTTTGA AAAATGGT

TGGGTTGAGCCGAAAATTCCAAGTCATCGTAGAAATGAAAAAGTTGCAATCATTGGTAGT  
GGTCCTGCAGGATTGACTGCCGCTGAAGAAGTGAATTTATTAGGGTACCAAGTGACAATT  
TATGAGCGTGCTAGAGAATCAGGCGGTTTATTAATGTATGGTATTCCAAATATGAAGCTT  
GATAAATATGTCGTTTCGTCGTCGTATTAATTAATGGAAGAAGCGGGCATAACTTTCATT  
AACGGCGTTGAAGTAGGTGTTGATATTGATAAAGAACTTTAGAATCTGAGTATGACGCT  
ATTATATTATGTAAGTGGGGCACAAAAAGGTAGGGATTTACCTTTGGAAGGTCGCATGGGT  
GAAGGTATACATTTTGCTATGGACTATCTGACTGAACAAACACAACCTTTTAAATGGTGAA  
ATTGATGATATCACTATTACAGCAAAGGATAAAAAATGTCATCATTATTGGTGCTGGTGAT  
ACAGGAGCAGACTGTGTAGCAACGGCATTAAAGAGAAAAGTGTAAATCGATTGTTCAATTT  
AATAAATATACGAAATTGCCAGAAGCAATTACATTTACAGAAAATGCATCATGGCCTTTA  
GCAATGCCGGTGTTTAAAATGGACTATGCGCACCAAGAGTACGAAGCTAAGTTTGGTAAG  
GAACCACGTGCATATGGTGTTCAAACAATGCGTTACGATGTTGACGATAAAGGACACATA  
CGTGGTTTGTATACTCAAATTTTAGAGCAAGGCGAAAATGGTATGGTCATGAAAGAAGGA  
CCTGAAAGATTTTGGCCTGCTGACCTTGTATTATTATCAATCGGCTTCGAAGGTACAGAAC  
CAACTGTACCGAATGCTTTTAAACATTAACCGGATAGAAATCGAATCGTGGCGGATGATA  
CAAATATCAAATAATAATGAAAAAGTATTTGCTGCTGGAGATGCTAGACGTGGTCAAA  
GTTTAGTTGTATGGGCGATTAAAGAAGGTAGAGGCGTAGCGAAAGCAGTAGATCAGTAT  
TTAGCGAGTAAAGTTTGTGTATAA

### > **tx\_universal3**

Function: bidirectional rho-independent terminator

Best match: tx\_universal3\_CC001\_MW2-USA400\_BA000033.2[1397772:1397835:r]RC

Position: 014-contig\_260\_RC: 31 ... 61; Length: 30 bp

Sequence:

TTAATAGAAATCAGCTTTTTTACATTGCCT

### > **tnpIS1272**

Function: protein coding sequence; transposase of insertion element IS1272

Best match: tnpIS1272\_15653\_EU272084.1[3547:5193]

Position: 014-contig\_260\_RC: 33 ... 63; Length: 30 bp

Sequence:

AATAGAAATCAGCTTTTTTACATTGCCTAA

### > **treP**

Function: protein coding sequence; PTS system/trehalose-specific IIBC component (core genome, constant)

Best match: treP\_CC008\_NCTC8325\_CP000253.1[440144:441571]

Position: 014-contig\_260\_RC: 491 ... 1919; Length: 1428 bp

Sequence:

ATGGCTGTAAAAAGAGAAGATGTAAAAGCCATCGTAACCGCTATTGGGGGAAAAGAAAA  
TCTTGAAGCTGCAACGCATTGTGTAACACGATTACGTTTAGTGCTGAAGGATGAAAGTAA  
AGTTGATAAAGACGCATTAAGTAATAACGCGTTGGTCAAGGGGCAGTTTAAAGCAGACC  
ATCAATATCAAATTGTCATTGGTCCAGGAACAGTCGATGAAGTGTATAAGCAGTTTATTG  
ATGAAACAGGTGCTCAAGAAGCTTCGAAAGATGAAGCGAAACAAGCAGCTGCGCAAAAA  
GGGAATCCAGTACAACGTTTGATCAAATTATTGGGGGATATTTTATAACCAATATTACCTG  
CGATTGTGACAGCTGGTTTGTAAATGGGAATCAATAATTTACTAACAATGAAAGGTTTAT  
TTGGTCCGAAAGCACTTATTGAGATGTATCCACAAATTGCTGATATTTCAAACATCATTA  
TGTGATTGCGAGTACGGCATTATTTTCTTACCAGCATTAAATTGGTTGGAGTAGTATGCGT  
GTATTTGGTGGTAGTCCGATTCTAGGCATAGTCTTAGGTTTGATTTAATGCATCCGCAAT  
TAGTATCTCAGTATGATTTGGCAAAGGGGAATATTCCGACATGGAACCTTATTTGGCTTAG  
AGATTAAGCAGTTGAATTACCAAGGTCAAGTGTTGCCAGTTTAAATTGCAGCTTATGTTCT  
AGCTAAAATTGAAAAAGGATTAATAAAAGTCGTTACGATTCGATAAAAATGTTGGTCGT  
TGGCCCCGTAGCGCTTTTAGTTACTGGATTTTAGCATTTATTATCATTGGACCAGTTGCA  
TTATTGATTGGTACAGGAATTACATCTGGTGTTACATTTATATTCCAACATGCAGGATGGC  
TTGGCGGAGCAATATATGGATTGTTATATGCACCACTTGTAAATTACAGGACTACACCATA

TGTTTTAGCAGTAGATTTCCAATTGATGGGTAGCAGCTTAGGTGGTACGTATTTATGGCC  
AATCGTTGCGATTTCCAATATTTGTCAGGGCTCTGCAGCATTTGGAGCATGGTTTGTCTAT  
AAACGTCGTA AAAATGGTTAAAGAAGAAGGCTTGGCATTAAACATCTTGTATTTCTGGTATG  
TTAGGTGTTACTGAACCAGCTATGTTTGGTGTGAACCTACCTCTGAAATATCCATTTATCG  
CTGCGATATCAACGTCTTGTGTATTGGGGGCAATCGTTGGTATGAATAACGTGCTTGGAA  
AAGTTGGTGTGGTGGCGTGCCAGCATTCAATTTCAATTCAAAAAGAATTTTGGCCAGTAT  
ATCTTATTGTGACAGCTATTGCTATTGTTGTACCATGTATACTAACAATTGTGATGTCTCA  
TTTTAGTAAACAAAAAGCGAAAGAAATTGTTGAAGATTAA

> **treC**

Function: protein coding sequence; alpha, alpha-phosphotrehalase (core genome, constant)

Best match: treC\_CC001\_MW2-USA400\_BA000033.2[484344:485984]

Position: 014-contig\_260\_RC: 1982 ... 3623; Length: 1641 bp

Sequence:

GTGTCGAAAGAAATAGATTGGAGAAAATCCGTTGTATATCAAATTTATCCTAAGTCGTTT  
AATGATACGACGGGGAATGGTATAGGAGATATCAATGGAATTATAGAAAAATTGGATTA  
TATCAAGTTATTGGGTGTTGATTATATTTGGTTAACACCAGTGTATGAATCACCGATGAAT  
GATAATGGCTATGATATCAGCAATTATTTAGAAATCAATGAAGACTTTGGAACGATGGAT  
GATTTTGAAAAGTTAATCAAAGTTGCGCATCAAAAAGACTTGAAAGTGATGTTAGATATT  
GTCATTAATCATAACGTCGACGGAGCATGAATGGTTTAAAGAAGCCCGTAAATCTAAAGAT  
AACCTTATAGAGATTACTTTTTTCAGATCATCTGAAGACGGGCCGCCAACAAATTGG  
CATTCTAAATTCGGTGGTAATGCATGGAAGTATGATTCTGAGACAGATGAATATTATTTA  
CATTATTTGATGTCAGTCAAGCTGATTTAAATTGGGATAATCCGGAAGTACGTCAATCGT  
TATATCGCATAGTCAATCATTGGATAGACTTCGGCGTTGATGGTTTTTCGATTTGATGTCAT  
TAACTTAATTTCTAAAGGTGAATTTAAGGACTCTGACAAAATAGGTAAAGAATTTTATAC  
GGATGGTTCTAGAGTGCATGAGTTTCTGCATGAATTAATCGTCAAACGTTTGGTAACAC  
TGACATGATGACTGTAGGAGAAATGTCTTCGACGACGATTGAAAATTGTATTAAGTATAC  
ACAACCAGAACGCCAAGAATTGAATAGTGTTTTTAATTTTCATCATCTAAAGGTTGATTAT  
GTTGATGGTGAAAAGTGGACAAATGCGAAGCTTGATTTCCATAAGTTAAAGAAAATTCTG  
ATGCAATGGCAACGAGGTATTTATGACGGTGGTGGATGGAACGCGATTTTCTGGTGTAAT  
CATGATCAGCCACGGGTAGTGTCTAGATTTGGTGATGATACGTCGGAAGAGATGAGGATA  
CAAAGTGCTAAAATGTTAGCTATCGCACTGCATATGTTGCAAGGGACGCCATATATTTAC  
CAAGGGGAAGAAATTGGTATGACGGACCCACATTTTACATCAATAGCACAAATATCGCGAT  
GTTGAATCGATTAATGCCTACCATCAGTTGTTAAGTGAAGGGCATGCTGAAGCGGATGTG  
TTAGCGATTTTAGGACAGAAGTCACGAGACAATTCGAGAACGCCTATGCAATGGAGTGAT  
GATGTTAATGCTGGATTTACAGCTGGTAAGCCTTGGATTGATATTTTCGAAAATTATCATC  
AGGTCAACGTTAGACAAGCACTTCAGAATAAAGAGTCTATTTTCTATACGTATCAAAAAT  
TAATACAATTAAGACATACGCATGATATTATTACGTATGGAGACATTGTGCCACGTTTTAT  
GGATCATGATCATTTATTTGTTTATGAACGTCATTATAAGAATCAACAATGGCTAGTAATT  
GCGAATTTCTCAGCATCGGCTGTTGATTGACCAGAAGGATTGGCTAGAGAAGGTCGTGTT  
GTGATTCAAACAGGCACAGTGGAAAATAATACGATAAGCGGGTTTGGTGCAATTGTAATC  
GAAACAAACGCGTAA

> **treR**

Function: protein coding sequence; trehalose operon repressor (core genome, constant)

Best match: treR\_CC030\_MRSA252\_BX571856.1[508595:509323]

Position: 014-contig\_260\_RC: 3647 ... 4376; Length: 729 bp

Sequence:

ATGGCGAAACAAAAAAGTTTATGAAGATTTATGAGGCGTTGAAAGAAGATATATTTAAA  
TGGGCAGATTCAATATGGTGAACAAATTCATCTGAACATGATTTGGTGAATTGTACCA  
GTCATCTCGAGAGACCGTGCGTAAAGGCATTAGATTTGTTGGCATTAGACGGCATGATTCA  
AAAGATTCATGGTAAAGGGTCACTTGTCAATTTATCAGGAGGTTACAGAGTTTCCATTTTCT  
GAACTTGTTAGTTTTAAAGAAATGCAAGAAGAAATGGGCGTCGCATATTTAACTGAAGTT  
GTTGTGAATGAGGTTGTTGAAGCGCATGAAGTTCCAGAAGTTCAACATGCTTTAAACATC  
AATTCTAGTGAATCACTCATTCATATTGTTAGA ACTCGTCGGCTTAACCAACATGTGAAG

ATTGTTGATGAAGATTATTTTCTAAAGTCGATTGTTTCAGATATAGGTAATGATGTTGCGA  
GTGATTCTATTTATGATTATTTGGAAAAGGTATTAATCTTAATATTAGTTATTCAAGTAA  
GTCTATTACTTTTGAACCGTTTGTGATGAACAAGCATATCAATTGTTGGTGATGTATCGGTG  
GCTTATTCAGCAACAGTTCGAAGTATTGTGTATTTAGAAAATACAATGCCGTTTCAATATA  
ATATTTCAAACATCTTGCAAATGAATTTAAATTTAATGACTTCTCAAGACGTCGTACAA  
AGTAA

> **ffs**

Function: noncoding RNA 4.5S-RNA (core genome, constant)

Best match: ffs\_CC001\_MW2-USA400\_BA000033.2[486799:487068] (completely identical)

Position: 014-contig\_260\_RC: 4437 ... 4707; Length: 270 bp

Sequence:

CCGTGCTAGGTGGGGAGGTAGCGGTTCCCTGTACTCGAAATCCGCTTTATGCGAGGCTTA  
ATTCCTTTGTTGAGGCCGTATTTTTGCGAAGTCTGCCAAAGCACGTAGTGTGTTGAAGATT  
TCGGTCCATGCAATATGAACCCATGAACCATGTCAGGTCCTGACGGAAGCAGCATTAAAG  
TGGATCATCATATGTGCCGTAGGGTAGCCGAGATTTAGCTAACGACTTTGGTTACGTTTCGT  
GAATTACGTTTCGATGCTTAGGTGCACGG

> **dnaX**

Function: protein coding sequence; DNA polymerase III gamma and tau subunits (core genome, constant)

Best match: dnaX\_AC025951.19[17480:19177]

Position: 014-contig\_260\_RC: 5607 ... 7305; Length: 1698 bp

Sequence:

TTGAATTATCAAGCCTTATATCGTATGTACAGACCCCAAAGTTTCGACGATGTCGTCGGA  
CAAGAACATGTCACGAAGACATTGCGCAATGCGATTTCGAAAGAAAAACAGTCGCATGC  
TTATATTTTATAGTGGTCCGAGAGGTACGGGGAAAACGAGTATTGCCAAAGTGTGTTGCTAA  
AGCAATCAACTGTCTAAATAGCACTGATGGAGAACCTTGAATGAATGTCATATTTGTAA  
AGGCATTACGCAGGGGACTAATTCAGATGTGATAGAAATTGATGCTGCTAGTAATAATGG  
CGTTGATGAAATAAGAAATATTAGAGACAAAGTTAAATATGCACCAAGTGAATCGAAAT  
ATAAAGTTTATATTATAGATGAGGTGCACATGCTAACCAACAGGTGCTTTTAAATGCCCTTTT  
AAAGACGTTAGAAGAACCTCCAGCACACGCTATTTTTATATTGGCAACGACAGAACCACA  
TAAAATCCCTCCAACAATCATTTCTAGGGCACAACGTTTTGATTTTAAAGCAATTAGCCTA  
GATCAAATTGTTGAACGTTTAAAATTTGTAGCAGATGCACAACAAATTGAATGTGAAGAT  
GAAGCCTTGGCATTATATCGCTAAAGCGTCTGAAGGGGGTATGCGTGATGCATTAAGTATT  
ATGGATCAGGCTATTGCATTTGGTGATGGTACGTTAACATTGCAAGATGCGTTGAATGTC  
ACAGGTAGCGTACATGATGAAGCGTTGGATCACTTGTGTTGATGATATTGTACAAGGTGAC  
GTACAAGCATCTTTTAAAAAATACCATCAGTTTATAACAGAAGGTAAGAAGTGAATCGC  
CTAATAAATGATATGATTTATTTTGTGAGAGATACGATTATGAATAAAACATCTGAGAAA  
GATACTGAGTATCGAGCACTGATGAACTTAGAATTAGATATGTTATATCAAATGATTGAT  
CTTATTAATGATACATTAGTGTGCGATTTCGTTTTAGTGTGAATCAAACGTTTCATTTTGAAG  
TGTTGTTAGTAAAATTAGCTGAGCAGATTAAGGGTCAACCACAAGTGATTGCGAATGTAG  
CTGAACCAGCACAAATTGCTTCATCGCCAAACACAGATGTATTGTTGCAACGTATGGAAC  
AGTTAGAGCAAGAACTAAAAACACTAAAAGCACAAAGGAGTGAGTGTGCTCCTGTTCAA  
AAATCTTCGAAAAGCCTGCGAGAGGCATACAAAATCTAAAATGCATTTTCAATGCA  
ACAAATTGCAAAAGTGCTAGATAAAGCGAATAAGGCAGATATCAAATTGTTGAAAGATC  
ATTGGCAAGAAGTGATTGATCATGCCAAAATAATGATAAAAAATCACTCGTTAGTTTAT  
TGCAAAATTTCGGAACCTGTGGCGGCAAGTGAAGATCACGTACTTGTGAAATTTGAGGAA  
GAGATCCATTGTGAAATCGTCAATAAAGACGACGAGAAACGTAAGTAGTATAGAAAGTGT  
TGTATGTAATATCGTTAATAAAAACGTTAAAGTTGTTGGTGTACCATCAGATCAATGGCA  
AAGAGTTCGAACGGAATATTTACAAAATCGTAAAACGAAGGCGATGATATGCCAAAGC  
ACAAGCACAAACAGATATTGCTCAAAAAGCAAAAAGATCTTTTCGGTGAAGAACT  
GTACATGTGATAGATGAAGAGTGA

> **yaaK**



Function: protein coding sequence; DNA binding protein (core genome, constant)  
Best match: yaaK\_CC005\_Mu50-VRSA\_BA000017.4[528695:529012] (completely identical)  
Position: 014-contig\_260\_RC: 7394 ... 7712; Length: 318 bp  
Sequence:

```
ATGCGCGGTGGCGGAAACATGCAACAAATGATGAAACAAATGCAAAAAATGCAAAAAGA  
AAATGGCTCAAGAACAAGAAAACTTAAAGAAGAGCGTATTGTAGGAACAGCTGGCGGT  
GGCATGGTTGCAGTTACTGTAACCTGGTCATAAAGAAGTTGTCGACGTTGAAATCAAAGAA  
GAAGCTGTAGACCCAGACGATATTGAAATGCTACAAGACTTAGTGTTAGCAGCTACTAAT  
GAAGCGATGAATAAAGCTGATGAGCTTACTCAAGAACGTTTAGGTAAACATACTCAAGG  
CTTAAACATCCCTGGAATGTGA
```

### > **recR**

Function: protein coding sequence; recombination protein R (core genome, constant)  
Best match: recR\_CC001\_MW2-USA400\_BA000033.2[490084:490680] (completely identical)  
Position: 014-contig\_260\_RC: 7718 ... 8315; Length: 597 bp  
Sequence:

```
ATGCATTATCCAGAACCTATATCAAACTTATTGATAGCTTTATGAAATTGCCAGGCATTG  
GTCCAAAGACAGCCCAACGTCTGGCTTTTCATACCTTAGATATGAAAGAAGACGATGTTG  
TTCAGTTTGCCAAAGCATTAGTAGATGTTAAGAGAGAATTAACATATTGTAGCGTATGTG  
GTCACATTACTGAAAATGATCCATGTTATATTTGTGAAGATAAGCAAAGAGATCGTTCAG  
TTATTTGTGTTGTGGAAGATGACAAAGATGTCATAGCTATGGAAAAAATGAGAGAATACA  
AAGGTTTATATCACGTTTTACATGGGTCTATTTTCGCTATGGATGGCATTGGACCAGAAG  
ATATTAATATTCCTTCATTGATTGAACGCTTGAAAACGATGAAGTTAGCGAATTAATCTT  
AGCTATGAACCCGAACCTAGAGGGGGAATCTACAGCCATGTATATTTCTAGATTAGTTAA  
GCCTATAGGTATCAAAGTGACGAGATTAGCACAAAGGGTTATCGGTAGGTGGCGATTTAGA  
GTATGCTGACGAAGTAACATTATCTAAAGCAATCGCAGGTAGAACAGAAATGTAA
```

### > **txbi\_Q1Y6R4**

Function: bidirectional rho-independet terminator (core genome, constant)  
Best match: txbi\_Q1Y6R4\_CC005\_Mu50-VRSA\_BA000017.4[536170:536241] (completely identical)  
Position: 015-contig\_316\_RC: 230 ... 302; Length: 72 bp  
Sequence:

```
ATTATAAAAAGTGAACAGCAGTAAGATAGTTTTTAAATCATAAATCATCTTACTGCTGTTTT  
TAGATTTTATG
```

### > **A5IQ33**

Function: protein coding sequence; putative Orn/Lys/Arg decarboxylase (core genome, constant)  
Best match: A5IQ33\_CC001\_MW2-USA400\_BA000033.2[497404:498741]  
Position: 015-contig\_316\_RC: 466 ... 1804; Length: 1338 bp  
Sequence:

```
ATGAAGCAACCTATTTTAAATAAATTAGAAAGTTTAAATCAAGAAGAAGCGATTTCTTTG  
CATGTTCCGGGTCATAAAAATATGACTATTGGTCATTTATCTCAATTATCAATGACAATGG  
ATAAACTGAAATACCTGGATTAGATGATTTACATCATCCTGAAGAAGTCATTTTGGAGA  
GTATGAAGCAGGTGGAGAAGCATTTCAGATTATGATGCTTATTTCTTAGTGAATGGCACCA  
CTTCAGGAATATTATCTGTCATCCAGTCTTTTTTCACAGAAAAAAGGCGATATCTTAATGGC  
AAGAAATGTACATAAATCTGTATTACATGCGCTCGATATTAGCCAACAAGAAGGGCATTT  
TATTGAAACGCATCAAAGTCCGTTAACGAATCATTATAATAAAGTTAATTTAAGCCGTTT  
GAATAATGACGGTCACAACTTGCTGTGTTGACTTATCCTAACTATTACGGTGAAACATTT  
AATGTAGAAGAGGTTATCAAATCTTTGCACCAATTAATATTCCTGTACTCATTGACGAA  
GCACACGGCGCGCACTTTGGATTGCAAGGATTTCCAGATTCTACATTAATTAATCAAGCT  
GACTATGTTGTTCAATCTTTTCATAAAACGTTACCAGCTTTAACGATGGGCTCGGTACTTT  
ATATTCATAAAAATGCACCTTATAGAGAACTATTATAGAATATCTAAGCTACTTCCAAA  
CATCTAGTCCTTCGTATTTGATTATGGCTAGTTTAGAGTCAGCTGCCGAGTTCTATAAAAC  
ATATGATAGTACCGTGTTTTTTGTATAAGAGAGCGCAATTAATCGAATGTTTGGAGAAGAA
```

GGGTTTTGAAATGCTTCAAGTTGATGATCCGTTGAAGTTGCTGATAAAAATATGAAGGTTTT  
ACAGGTCATGATATTCAAATGGTTTATGAATGCACATATCTATTTAGAATTAGCGGAC  
GACTATCAAGCATTAGCGATATTGCCGTTATGGCATCATGATGATACGTATTTATTTGATT  
CGCTTTTACGTAAAATTGAAGATATGATTTTACCGAAAAAATCAGTTTCTAAAGTTAAAC  
AAACACAACCTTTTAAACAACCTGAAGGTAACATAAAACCAAACGCTTTGAATATGTTACTT  
GGTGTGATTTGAAAAAGGCAAAAGGTAAGTTCTGGCGCGACATATTGTCCCGTATCCGC  
CAGGGATTCTATTATTTCAAAGGAGAAACAATAACTGAAAATATGATAGAATTGGTAA  
ATGAATATCTGGAACTGGAATGATAGTTGAAGGAATTAATAATAAAAATTTAGTTG  
AGGATGAATAA

> **tmk**

Function: protein coding sequence; thymidylate kinase (core genome, constant)

Best match: tmk\_CC001\_MW2-USA400\_BA000033.2[498743:499360]

Position: 015-contig\_316\_RC: 1805 ... 2423; Length: 618 bp

Sequence:

ATGTCAGCTTTTATAACTTTTGAGGGCCAGAAGGCTCTGGAAAAACAACCTGTAATTAAT  
GAAGTTTACCATAGATTAGTAAAAGATTATGATGTCATTATGACAAGAGAACCAGGGCGGC  
GTTCCCTACTGGTGAAGAAATACGTAAAATTGTATTAGAAGGCAATGATATGGACATTAGA  
ACTGAAGCAATGTTATTTGCTGCATCTAGAAGAGAACATCTTGTATTAAGGTCATACCA  
GCTTTAAAAGAAGGTAAGGTTGTGTTGTGTGATCGCTATATCGATAGTTCATTAGCTTATC  
AAGGTTATGCTAGAGGGATTGGCGTTGAAGAAGTAAGAGCATTAAACGAATTTGCAATA  
AATGGATTATATCCAGACTTGACGATTTATTTGAATGTTAGTGCTGAAGTAGGCCGCGAA  
CGTATTATTAATAAATCAAGAGATCAAATAGATTAGATCAAGAAGATTTAAAGTTTCAC  
GAAAAAGTAATTGAAGGTTACCAAGAAATCATTATAATGAATCACAACGGTTCAAAG  
CGTTAATGCAGATCAACCTCTTGAAAATGTTGTTGAAGACACGTATCAAACCTATCATCAA  
ATATTTAGAAAAGATATGA

> **tnpIS431-06**

Function: protein coding sequence; transposase for IS431 (mobile element)

Best match: tnpIS431-06\_circ\_S-epidermidis\_GQ900381.1[43799:43807]RC (completely identical)

Position: 015-contig\_316\_RC: 2088 ... 2097; Length: 9 bp

Sequence:

ATAGTTCAT

> **holB**

Function: protein coding sequence; DNA-directed DNA polymerase III delta' subunit

Best match: holB\_CC001\_MW2-USA400\_BA000033.2[499931:500857]

Position: 015-contig\_316\_RC: 2993 ... 3920; Length: 927 bp

Sequence:

ATGGATGAACAGCAACAATTGACGAATGCATATCATTCAAATAAATTATCGCATGCCTAT  
TTATTTGAAGGTGATGATGCACAAACGATGAAACAAGTTGCGATTAATTTTGCAAAGCTG  
ATTTTATGTCAAACAGATAGTCAATGTGAAACAAGGTTAGTACATATAATCATCCAGAC  
TTTATGTATATATCAACAACCTGAGAATGCAATTAAGAAAGAACAAGTTGAACAACCTTGTG  
CGTCATATGAATCAACTTCCTATAGAAAGCACAAATAAAGTGTACATCATTGAAGACTTT  
GAAAAGTTAACTGTTCAAGGGGAAAACAGTATCTTGAAATTTCTTGAAGAACCACCGGAC  
AATACGATTGCTATTTTATTGTCTACAAAACCTGAGCAAATTTTAGACACAATCCATTCAA  
GGTGTGAGCATGTGTATTTCAAGCCTATTGATAAAGAAAAGTTTATAAATAGATTAGTTG  
AACAAAACATGTCTAAGCCAGTAGCTGAAATGATTAGTACTTATACTACGCAAATAGATA  
ATGCAATAGCTTTAAATGAAGAATTTGATTTATTAGCATTAAAGGAAATCAGTTATACGTT  
GGTGTGAATTGTTGCTTACTAACAAGCCAATGGCACTTATAGGTATTATTGATTTATTGAA  
ACAGGCTAAAAATAAAAAACTGCAATCTTTAACTATTGCAGCTGTGAATGGTTTCTTCGA  
AGATATCATAACATAAAAGGTAATGTAGAGGATAAACAAATATATAGTGATTTAAAAA  
ATGATATTGATCAATATGCGCAAAGTTGTCGTTAATCAATTAATTTTGATGTTTGATCA  
ACTGACGGAAGCACATAAGAAATTGAATCAAATGTAAATCCAACGCTTGTATTTGAACA  
AATCGTAATTAAGGGTGTGAGTTAG

> **metS**

Function: protein coding sequence; methionyl-tRNA synthetase (core genome, constant)

Best match: metS\_CC001-ST772\_118\_AJGE01000045.1[7369:9342] (completely identical)

Position: 015-contig\_316\_RC: 7453 ... 9427; Length: 1974 bp

Sequence:

```
ATGGCTAAAGAAACATTTTATATAACAACCCCAATATACTATCCTAGTGGGAATTTACAT
ATAGGACATGCATATTCTACAGTGGCTGGAGATGTTATTGCAAGATATAAGAGAATGCAA
GGATATGATGTTTCGTTATTTGACTGGAACGGATGAACACGGTCAAAAAATTCAAGAAAA
AGCTCAAAAAGCTGGTAAGACAGAAATTGAATATTTGGATGAGATGATTGCTGGAATTA
ACAATTGTGGGCTAAGCTTGAAATTTCAAATGATGATTTTATCAGAACAACCTGAAGAAC
GTCATAAACATGTCGTTGAGCAAGTGTGTTGAAACGTTTATTAAGCAAGGTGATATCTATT
AGGTGAATATGAAGTTGGTATTCTGTTCCGGATGAAACATACTATACAGAGTCACAATT
AGTAGACCCACAATACGAAAACGGTAAAATTATTGGTGGCAAAAGTCCAGATTCTGGAC
ACGAAGTTGAACTAGTTAAAGAAGAAAGTTATTTCTTTAATATTAGTAAATATACAGACC
GTCTATTAGAATTCTATGACCAAAAATCCAGATTTTATACAACCACCATCAAGAAAAAATG
AAATGATTAACAACCTTCATTAACCAGGACTTGCTGATTTGGCTGTTTCTCGTACATCATT
TAACTGGGGTGTCCATGTTCCGTCTAATCCAAAACATGTTGTTTATGTTTGGATTGATGCG
TTAGTTAACTATATTTTCAGCATTAGGCTATTTATCAGATGATGAGTCACTATTTAACAAAT
ACTGGCCAGCAGATATTCATTTAATGGCTAAGGAAATTGTGCGATTCCACTCAATTATTTG
GCCTATTTTATTGATGGCATTAGACTTACCGTTACCTAAAAAAGTCTTCGCACATGGTTGG
ATTTTGATGAAAGATGGAAAAATGAGTAAATCTAAAGGTAATGTCGTAGACCCTAATATT
TTAATTGATCGCTATGGTTTAGATGCTACACGTTATTATCTAATGCGTGAATTACCATTG
GTTGATGAGCGTATTTACACCTGAAGCATTGTTGAGCGTACAAATTTTCGATCTAGCAA
ATGACTTAGGTAACCTAGTAAACCGTACGATTTCTATGGTTAATAAGTACTTTGATGGCG
AATTACCAGCGTATCAAGGTCCACTTCATGAATTAGATGAAGAAATGGAAGCTATGGCTT
TAGAAACAGTGAAAAGCTACACTGAAAGCATGGAAAGTTTGCAATTTTCTGTGGCATTAT
CTACGGTATGGAAGTTTATTAGTAGAACTAATAAGTATATTGACGAAACAACGCCTTGGG
TATTAGCTAAGGACGATAGCCAAAAGATATGTTAGGCAATGTAATGGCTCACTTAGTTG
AAAATATTCGTTATGCAGCTGTATTATTACGTCCATTCTTAACACATGCGCCGAAAGAGA
TTTTTGAACAATTGAACATTAACAATCCTCAATTTATGGAATTTAGTAGTTTAGCGCAATA
TGGTGTGCTTACTGAGACAATTATGGTTACTGGGCAACCTAAACCTATTTTCCCAAGATTG
GATAGCGAAGCGGAAATTGCATATATCAAAGAATCAATGCAACCGCCTGCTACTGAAGA
GGAAAAAGAAGAGATTCCCTAGCAAACCTCAAATTGATATTAAGACTTTGATAAAGTTG
AAATTAAGGCAGCAACGATTATTGATGCTGAACATGTTAAGAAGTCAGATAAGCTTTTTAA
AAATTCAGTAGACTTAGATTCTGAACAAAGACAAATTGTATCAGGAATTGCCAAATTCT
ATACACCAGATGATATTATTGGTAAAAAAGTAGCAGTTGTTACTAACCTGAAACCAGCTA
AATTAATGGGACAAAAATCTGAAGGTATGATATTATCTGCTGAAAAAGATGGTGTATTAA
CCTTAGTAAGTTTACCAAGTGCAATTCCAAATGGTGCAGTGATTAATAA
```

> **tatP**

Function: protein coding sequence; deoxyribonuclease (core genome, variable)

Best match: tatP\_CC001-ST772\_118\_AJGE01000045.1[9373:10146] (completely identical)

Position: 015-contig\_316\_RC: 9457 ... 10231; Length: 774 bp

Sequence:

```
ATGTTAATCGATACACATGTCCATTTAAATGATGAGCAATACGATGATGATTTGAGTGAA
GTGATTACACGTGCTAGAGAAGCAGGTGTTGATCGTATGTTTGTAGTTGGTTTTAACAAA
TCGACAATTGAACGCGCGATGAAATTAATCGATGAGTATGATTTTTTATATGGCATTATC
GGTTGGCATCCAGTTGACGCAATTGATTTTACAGAAGAACAACCTTGAATGGATTGAATCT
TTAGCTCAGCATCCAAAAGTGATTGGTATTGGTGAATGGGATTAGATTATCACTGGGAT
AAATCTCCTGCAGATGTTCAAAAAGGAAGTTTTTTAGAAAGCAAATTGCTTTAGCTAAGCGT
TTGAAGTTACCAATTATCATTTCATAACCGTGAAGCAACACAAGACTGTATCGATATCTTA
TTGGAGGAGCATGCTGAAGAGGTAGGCGGGATTATGCATAGCTTTAGTGGTTCTCCAGAA
ATTGCAGATATTGTAACCTAATAAGCTGAATTTTTATATTTTCATTAGGTGGACCTGTGACAT
TTAAAAATGCTAAACAGCCTAAAGAAGTTGCTAAGCATGTGTCAATGGAGCGTTTGCTAG
```

TTGAAACCGATGCACCGTATCTTTCGCCACATCCGTATAGAGGGAAGCGAAATGAACCGG  
CGAGAGTAACTTTAGTAGCTGAACAAATTGCTGAATTAAGGCTTATCTTATGAAGAAG  
TGTGCGAGCAAACAATAAAAATGCAGAGAAATTGTTTAATTTAAATTCATAA

> **rnmV**

Function: protein coding sequence; ribonuclease M5 (core genome, variable)

Best match: rnmV\_CC007\_TCH959-USA300\_AASB02000182.1[10255:10791]

Position: 015-contig\_316\_RC: 10397 ... 10934; Length: 537 bp

Sequence:

ATGAAAATCAATGAGTTTATAGTTGTAGAAGGACGAGATGATACTGAGCGTGTTAAACG  
AGCTGTTGAATGTGATACGATTGAAACGAATGGTAGTGCCATCAACGAACAACTTTAGA  
AGTAATTAGAAATGCTCAACAAAGTCGAGGCGTTATTGTATTAACAGATCCAGATTTCCC  
AGGAGATAAAATTAGAAGTACAATTACTGAACATGTCAAAGGTGTTAAACATGCGTATAT  
TGATAGAGAAAAAGCTAAAAATAAAAAAGGGGAAATTGGTGTGAACATGCCGACTTAA  
TTGATATTAAGAAGCGTTAATGCATGTTAGTTCACCCTTTGATGAAGCTTATGAATCAAT  
TGATAAATCTGTGCTTATAGAGTTGGGGTTAATTGTTGGGAAAGATGCAAGGCGCCGTAG  
AGAAATTTAAGTAGAAAATTGCGAATCGGCCATTCCAATGGTAAGCAGTTATTGAAAAA  
GTAAATGCATTTGGTTATACCGAAGCGGATGTAAGGCAAGCTTTAGAAGATGAATGA

> **ksgA**

Function: protein coding sequence; ribosomal RNA small subunit methyltransferase A (core genome, constant)

Best match: ksgA\_CC001\_MW2-USA400\_BA000033.2[507882:508775]

Position: 015-contig\_316\_RC: 10944 ... 11838; Length: 894 bp

Sequence:

ATGTTGGATAATAAAGATATTGCAACCCATCAAGAACGCGAGCGTTGTTAGATAAATAT  
GGCTTTAATTTTAAAAAAGTTTAGGACAGAACTTTTTGATAGATGTGAATATCATTAAAT  
AATATCATTGATGCAAGTGATATTGATGCACAACTGGGGTGATTGAAATTGGTCCAGGT  
ATGGGGTCGTTGACAGAACAATTGGCCAGACATGCTAAAAGAGTATTGGCATTGAAATT  
GATCAACGTTTAATACCTGTATTAATGATACACTATCACCTTATGATAATGTGACGGTG  
ATTAATGAAGATATTTTAAAAGCGAATATTAAGAAGCTGTTGAAAATCATTTACAAGAT  
TGTGAAAAATAATGGTTGTTGCAAACCTGCCGTAATATTACGACGCCAATTTTATTA  
AATTTAATGCAACAAGATATACCAATTGATGGCTACGTGGTGATGATGCAAAAAGAAGT  
GGGCGAACGCTTAAATGCTGAAGTAGGTTCAAAGCATATGGTTCGTTATCAATTGTCGT  
ACAATACTATACAGAGACTAGTAAAGTATTAACGGTACCTAAATCTGTATTTATGCCACC  
ACCTAATGTTGATTCAATAGTTGTAAACTGATGCAGAGAACTGAACCGTTAGTAACAGT  
AGATAACGAGGAAGCATTCTTTAAGTTAGCAAAGCAGCATTTCACAAAGAAGAAAGA  
CAATTAACAATAACTATCAAATTATTTTAAAGATGGTAAACAACACAAAGAAGTGATT  
TACAATGGTTGGAACAAGCAGGTATTGATCCAAGACGTGCGGGTGAACGCTATCTATTC  
AAGATTTTGCTAAATTGTATGAAGAAAAGAAAAAATTCCCTCAATTAGAAAATTA

> **veg**

Function: protein coding sequence; Veg protein (core genome, constant)

Best match: veg\_CC001\_MW2-USA400\_BA000033.2[508875:509138] (completely identical)

Position: 015-contig\_316\_RC: 11937 ... 12201; Length: 264 bp

Sequence:

ATGCCAAAATCAATTTTGGACATCAAAAATTCTATTGATTGTCATGTAGGAAATCGTATT  
GTAAGGAAAGCCAATGGAGGCCGTAAGAAAACAATAAAACGTTCTGGAATTTTAAAAGA  
AACATATCCGTCAGTTTTCATTGTTGAGTTAGATCAAGACAAACACAACACTTTGAGAGAGT  
ATCTTATACATACTGATGTGTTAACTGAAAATGTTCAAGTTTCATTTGAAGAGGATAAT  
CATCACGAATCAATTGCACACTAA

> **ispE**

Function: protein coding sequence; 4-diphosphocytidyl-2-C-methyl-D-erythritol kinase (core genome, constant)

Best match: ispE\_CC001\_MW2-USA400\_BA000033.2[509448:510296] (completely identical)  
Position: 015-contig\_316\_RC: 12510 ... 13359; Length: 849 bp

Sequence:

```
ATGATATATGAAACGGCACCAGCCAAAATTAATTTTACGCTCGATACACTTTTTAAAAGA
AATGATGGCTATCATGAGATTGAAATGATAATGACAACAGTTGATTTAAATGATCGTTTA
ACTTTTCATAAAAAGAAAAGATCGAAAAGATAGTTGTTGAGATTGAACATAATTATGTGCCT
TCTAATCATAAAAATCTCGCATATCGTGCAGCGCAACTATTTATTGAGCAATATCAACTA
AAGCAAGGTGTAACAATTTCTATCGATAAAGAAATACCTGTTTCTGCTGGCTTAGCTGGA
GGTTCGGCTGATGCAGCAGCAACGTTAAGAGGATTGAATCGACTTTTTGATATAGGGGCG
AGTTTGGAAGAATTGGCTCTACTAGGCAGTAAAATCGGGACAGATATTCCGTTTTGTATT
TATAATAAACTGCACTATGTACTGGAAGAGGAGAGAAAATCGAGTTTTTAAATAAACC
ACCTTCAGCTTGGGTGATTCTTGCTAAACCAAACCTTAGGCATATCATCACCAGATATATT
AAGTTGATCAATTTAGATAAGCGTTACGACGTACATACGAAAATGTGTTATGAGGCCTTA
GAAAATCGAGATTATCAACAATTATGTCAAAGTTTGTCTAATCGATTAGAGCCAATTTCT
GTTTCAAACACCCACAAATCGATAAATTAATAAATAATATGTTGAAAAGTGGTGCAGAT
GGTGCCTTAATGAGTGGAAAGCGGACCGACTGTGTATGGGCTAGCACGAAAAGAAAGCCA
AGCAAAAATATTTATAATGCAGTTAACGGTTGTTGTAATGAAGTGTACTTAGTTAGACT
ATTAGGATAG
```

### > **purR**

Function: protein coding sequence; purine operon repressor (core genome, constant)

Best match: purR\_CC001\_MW2-USA400\_BA000033.2[510310:511134] (completely identical)

Position: 015-contig\_316\_RC: 13372 ... 14197; Length: 825 bp

Sequence:

```
ATGAGATATAAACGAAGCGAGAGAATTGTTTTTATGACGCAATATTTGATGAACCATCCG
AATAAATTGATTCCATTAACTTTTTTTGTGAAAAAATTTAAACAGGCGAAGTCTTCAATAA
GTGAAGATGTCCAAATTATAAAAAATACATTCCAAAAAGAAAAGTTAGGTACAGTAATT
ACTACTGCTGGCGCAAGTGGTGGTGTACGTATAAACCAATGATGAGTAAAGAAGAGGC
GACTGAAGTTGTTAATGAGGTCATTACTCTATTAGAAGAGAAAGAACGTTTGTACCTGG
CGGGTATTTATTTTATCAGATTTGGTAGGTAATCCATCGCTACTAAACAAAGTTGGTAAG
TTAATTGCCAGTATTTACATGGAAGAAAATTAGATGCTGTTGTTACCATTGCGACAAAA
GGTATTTTCATTGGCAAATGCGGTTGCTAATATTTTAAATTTACCAGTAGTAGTGATTAGAA
AAGACAACAAGGTGACTGAAGGTTCTACAGTTTCAATTAATTACGTTTCAGGATCTTCAA
GAAAATAGAGACAATGGTACTTTCGAAGAGAACTTTAGCAGAAAATTCAAATGTTTTAG
TTGTTCGATGATTTTATGAGGGCTGGTGGCTCTATTAATGGTGTATGAATTTAATGAATGA
GTTTAAAGCCCATGTAAAAGGGGTATCAGTACTTGTAGAATCAAAGAAGTTAAACAAA
GATTGATTGAAGATTATACTTCCTTAGTGAAATTATCTGATGTAGATGAATATAATCAAG
AGTTTAAACGTAGAACCTGGCAACAGTTTATCTAAGTTTTTCATAA
```

### > **yabJ**

Function: protein coding sequence; translation initiation inhibitor (core genome, constant)

Best match: yabJ\_CC001\_MW2-USA400\_BA000033.2[511151:511531] (completely identical)

Position: 015-contig\_316\_RC: 14213 ... 14594; Length: 381 bp

Sequence:

```
ATGAAAATCATTAACACAACAAGATTACCGGAAGCACTTGGACCATATTCGCATGCAACA
GTTGTGAATGGTATGGTTTATACTTCTGGTCAGATTCCATTGAATGTTGATGGGGAAATCG
TAAGCGCTGATGTTCAAGCACAGACAAAACAAGTTTTAGAAAATTTAAAGGTTGTTTTGG
AAGAAGCAGGATCTGATTTGAATTCTGTTGCGAAAGCGACCATTTTCATTAAGATATGA
ATGATTTCCAAAAAATAAATGAAGTGTATGGTCAATATTTAATGAACACAAGCCAGCGC
GTAGTTGTGTAGAGGTTGCGCGTTTGCCAAAAGATGTGAAAGTAGAAATTGAATTAGTAA
GTAAAATTAAGGAATTATAA
```

### > **spoVG**

Function: protein coding sequence; septation protein spoVG (core genome, constant)

Best match: spoVG\_CC001\_MW2-USA400\_BA000033.2[511603:511905] (completely identical)

Position: 015-contig\_316\_RC: 14665 ... 14968; Length: 303 bp

Sequence:

```
ATGAAAGTGACAGATGTAAGACTTAGAAAAATACAAACAGATGGACGAATGAAAGCACT
CGTTTCCATTACATTAGATGAAGCTTTCGTAATTCATGATTTACGTGTAATTGAAGGAAAC
TCTGGCTTGTTTCGTTGCAATGCCAAGTAAACGTACACCAGATGGTGAATTCGCGACATC
GCGCATCCTATTAATTCAGATATGAGACAAGAAATTCAGATGCAGTGATGAAAGTATAT
GATGAAACAGATGAAGTAGTACCAGATAAAAACGCTACATCAGAAGATTCAGAAGAAGC
TTAA
```

### > **glmU**

Function: protein coding sequence; UDP-N-acetylglucosamine pyrophosphorylase (core genome, constant)

Best match: glmU\_CC001\_MW2-USA400\_BA000033.2[512249:513601] (completely identical)

Position: 015-contig\_316\_RC: 15311 ... 16664; Length: 1353 bp

Sequence:

```
ATGCGAAGACACGCGATAATTTTGGCAGCAGGTAAAGGCACAAGAATGAAATCTAAAAA
GTATAAAGTGCTACACGAGGTTGCTGGGAAACCTATGGTTCGAACATGTATTGGAAAGTGT
GAAAGGCTCTGGTGTTCGATCAAGTTGTAACCATCGTAGGACATGGTGTCTGAAAGTGTA
AGGACATTTAGGCGAGCGTTCTTTATACAGTTTTTCAAGAGGAACAACCTCGGTA
TGCAGTGCAAATGGCGAAATCACACTTAGAAGACAAGGAAGGTACGACGATCGTTGTAT
GTGGTGACACACCGCTCATCACAAGGAAACATTAGAAACATTGATTGCGCATCATGAG
GATGCTAATGCTCAAGCAACTGTATTATCTGCATCGATTCAACAACCATATGGATACGGA
AGAATCGTTTCGAAATGCGTCAGGTCGTTTAGAACGCATAGTTGAAGAGAAAGATGCAAC
GCAAGCTGAAAAGGATATTAATGAAATTAGTTCAGGTATTTTTGCGTTTAATAATAAAAC
GTTGTTTGA AAAAATTAACACAAGTGAAAAATGATAATGCGCAAGGTGAATATTACCTCCC
TGATGTATTGTCGTTAATTTAAATGATGGCGGCATCGTAGAAGTCTATCGTACCAATGAT
GTTGAAGAAATCATGGGTGTAATGATCGTGTAATGCTTAGTCAGGCTGAGAAGGCGATG
CAACGTCGTACGAATCATTATCACATGCTAAATGGTGTGACAATCATCGATCCTGACAGC
ACTTATATTGGTCCAGACGTTACAATTGGTAGTGATACAGTCATTGAACCAGGCGTACGA
ATTAATGGTTCGTACAGAAATTGGCGAAGATGTTGTTATTGGTTCAGTACTCTGAAATTAAC
AATAGTACGATTGAAAATGGTGCATGTATTCAACAGTCTGTTGTTAATGATGCTAGCGTA
GGAGCGAATACTAAGGTCGGACCGTTTTCGCAATTGAGACCAGGCGCGCAATTAGGTGC
AGATGTTAAGGTTGAAATTTTGTAGAAATTA AAAAAGCAGATCTTAAAGATGGTGCCAA
GGTTTCACATTTAAGTTATATTGGCGATGCTGTAATTGGTGAACGTAATAATTGGTTGC
GGAACGATTACAGTTAACTATGATGGTGA AAAATAAATTTAAA ACTATCGTCGGCAAAGAT
TCATTTGTAGGTTGCAATGTTAATTTAGTAGCACCTGTAACAATTGGTGATGATGTATTGG
TGGCAGCTGGTTCCACAATCACAGATGACGTACCAAATGACAGTTTAGCTGTGGCAAGAG
CAAGACAAACAACAAAAGAAGGATATAGGAAATAA
```

### > **prs**

Function: protein coding sequence; ribose-phosphate pyrophosphokinase (core genome, constant)

Best match: prs\_CC005\_Mu50-VRSA\_BA000017.4[552813:553778]

Position: 015-contig\_316\_RC: 16810 ... 17776; Length: 966 bp

Sequence:

```
ATGTTAAATAATGAATATAAGAATTCGTCATTAAAGATTTTTTTCATTGAAAGGAAACGAA
GCATTAGCGCAAGAAGTTGCTGACCAAGTAGGAATTGAACTAGGTAAATGTTTCAGTTAAA
CGTTTTAGTGATGGAGAAATTCAAATTAATATCGAAGAGAGTATTCGTGGTTGTGACGTA
TTTATTATTCAACCAACATCATATCCTGTGAATCTACATTTAATGGAATTATTAATTATGA
TTGACGCTTGTAACGTTGCTTCTGCAGCAACAATCAATATTGTAGTGCCATATTATGGATA
TGCAAGACAAGATAGAAAAGCCCGTAGCCGTGAGCCAATCACAGCTAAATTAGTTGCAA
ACTTAATCGAAACAGCTGGCGCAACTCGTATGATTGCGTTAGACTTACATGCACCACAAA
TTCAAGGATTCTTTGATATTCCAATTGACCACTTAATGGGTGTGCCAATTCTTGCTAAACA
TTTCAAAGATGATCCGAATATTAACCCAGAAGAATGTGTTCGTTGTTTCACCAGACCATGG
CGGTGTTACACGTGCACGTAAATTAGCTGACATTTTAAA AACTCCAATTGCAATTATAGA
TAAACGTCGTCCTAGACCAAATGTTGCTGAAGTGATGAACATTGTTGGTGAGATTGAAGG
```

ACGTACGGCAATTATTATTGACGATATTATTGATACAGCAGGTACAATCACTTTAGCTGC  
ACAAGCATTAAAAGATAAAGGTGCTAAAGAAGTATATGCTTGTGTACACACCCTGTTTT  
ATCAGGACCGGCTAAAGAACGTATCGAAAATTCTGCTATAAAAAGAATTAATCGTAACAA  
ACTCAATTCATTTAGATGAAGATCGCAAACCATCTAACACTAAAGAATTATCTGTTGCTG  
GTTAATCGCACAAGCTATCATTCGTGTATACGAAAGAGAATCAGTTAGCGTATTATTG  
ACTAA

> **rplY**

Function: protein coding sequence; 50S ribosomal protein L25 (core genome, constant)

Best match: rplY\_CC001\_MW2-USA400\_BA000033.2[514863:515516]

Position: 015-contig\_316\_RC: 17925 ... 18579; Length: 654 bp

Sequence:

ATGGCTTCATTAAGTCAATCATCCGTCAAGGTAAGCAAACACGTTTCAGATCTTAAACAA  
TTAAGAAAATCTGGTAAAGTACCAGCAGTAGTATACGGTTACGGTACTAAAAACGTGTCA  
GTTAAAGTTGATGAAGTAGAATTCATCAAAGTTATCCGTGAAGTAGGTCGTAACGGTGTT  
ATCGAATTAGGCGTTGGTCTAAAACCTATCAAAGTTATGGTTGCAGACTACCAATTCGAT  
CCACTTAAAAACCAAATTACTCACATTGACTTCTTAGCAATCAATATGAGTGAAGAACGT  
ACTGTTGAAGTACCAGTTCAATTAGTTGGTGAAGCAGTAGGCGCTAAAGAAGGCGGCGT  
AGTTGAACAACCATTATTCAACTTAGAAGTAACTGCTACTCCAGACAATATTCCAGAAGC  
AATCGAAGTAGACATTACTGAATTAACATTAACGACAGCTTAACTGTTGCTGATGTTAA  
AGTAACTGGCGACTTCAAAAATCGAAAATGATTCAGCTGAATCAGTAGTAACAGTAGTTGC  
TCCAACCTGAAGAACCAACTGAAGAAGAAATCGAAGCTATGGAAGGCGAACAACAAACTG  
AAGAACCAGAAGTTGTTGGCGAAAGCAAAGAAGACGAAGAAAAAACTGAAGAGTAA

> **pth**

Function: protein coding sequence; peptidyl-tRNA hydrolase (core genome, constant)

Best match: pth\_CC001\_MW2-USA400\_BA000033.2[515827:516399]

Position: 015-contig\_316\_RC: 18889 ... 19462; Length: 573 bp

Sequence:

ATGAAATGTATTGTAGGTCTAGGTAATATAGGTAACGTTTTGAACTTACAAGACATAAT  
ATCGGCTTTGAAGTCGTTGATTATATTTTAGAGAAAAATAATTTTTTCATTAGATAAACAAA  
AGTTTAAAGGTGCATATACAATTGAACGAATGAACGGCGATAAAGTGTTATTTATCGAAC  
CAATGACAATGATGAATTTGTCAGGTGAAGCAGTTGCACCGATTATGGATTATTACAATG  
TTAATCCAGAAGATTTAATTGTCTTATATGATGATTTAGATTTAGAACAAGGACAAGTTC  
GCTTAAGACAAAAAGGAAGTGCGGGCGGTCACAATGGTATGAAATCAATTATTTAAATG  
CTTGGTACAAACCAATTTAAACGTATTTCGTATTGGTGTGGGAAGACCAACGAATGGTATG  
ACGGTACCTGATTATGTTTTACAACGCTTTTCAAATGATGAAATGGTAACGATGGAAAAA  
GTTATCGAACACGCAGCACGCGCAATTGAAAAGTTTGTGAAACATCACGATTTGACCAT  
GTTATGAATGAATTTAATGGTGAAGTGAATAA

> **mfd**

Function: protein coding sequence; transcription-repair-coupling factor (core genome, constant)

Best match: mfd\_CC001\_MSSA476\_BX571857.1[515030:518536]

Position: 015-contig\_316\_RC: 19461 ... 22968; Length: 3507 bp

Sequence:

ATGACAATATTGACAACGCTTATAAAAAGAAGATAATCATTTTTCAAGACCTTAATCAGGTA  
TTTGGACAAGCAAACACACTAGTAACTGGTCTTTCCCGTCAGCTAAAGTGACGATGATT  
GCTGAAAAATATGCACAAAGTAATCAACAGTTATTATTAATTACCAATAATTTATACCAA  
GCAGATAAATTAGAAACAGATTTACTTCAATTTATAGATGCTGAAGAATTGTATAAGTAT  
CCTGTGCAAGATATTATGACCGAAGAGTTTTCAACACAAAGCCCTCAACTGATGAGTGAA  
CGTATTAGAACTTTAACTGCGTTAGCTCAAGGTAAGAAAGGGTTATTTATCGTTCCTTTAA  
ATGGTTTGA AAAAGTGGTAACTCCTGTTGAAATGTGGCAAATCACCAAATGACATTAC  
GTGTTGGTGAGGGTATCGATGTGGACCAATTTCTTAACAAATTAGTTAATATGGGGTACA  
AACGGGAATCCGTGGTATCGCATATTGGTGAATTCTCATTGCGAGGAGGTATTATCGATA  
TCTTTCCGCTAATGGGGAACCAATCAGAATTGAGCTATTTGATACCGAAATTGATTCTAT

TCGGGATTTTGGATGTTGAAACGCAGCGTTCCAAAGATAATATTGAAGAAGTCGATATCAC  
AACTGCAAGTGATTATATCATTACTGAAGAAGTAATCAGCCATCTTAAAGAAGAGTTAAA  
AACTGCATATGAAAATACAAGACCCAAAATAGATAAATCAGTGCGCAATGATCTGAAAG  
AAACGTATGAAAGCTTTAAATTATTTCGAAAGTACATACTTTGATCATCAAATACTACGTC  
GTTTAGTAGCGTTTATGTATGAAACACCTTCGACAATTATTGATTATTTCCAAAAAGATGC  
AATCATTGCAGTTGATGAATTTAATCGTATTAAGAAACTGAAGAAAGTTAACAGTAGA  
GTCTGATTCGTTTATTAGCAATATTATTGAAAGTGGTAATGGATTTATAGGACAAAGTTTT  
ATAAAATATGATGATTTTGAACATTGATTGAAGGCTATCCTGTCACCTATTTTTTCATTAT  
TCGCTACAACAATGCCGATAAAACTAAATCATATTATTAATTTTTCATGTAAACCTGTCCA  
ACAATTTTATGGGCAATATGACATTATGCGTTCGAAATTTCAACGATATGTTAATCAAAC  
TATCATATCGTGGTTTTGGTCGAAACCGAAACTAAAGTTGAACGTATGCAAGCGATGTTA  
AGTGAATGCATATCCATCAATAACAAAATTGCATCGCTCAATGTCATCGGGGCAAGCA  
GTGATTATTGAAGGCAGTTTATCTGAAGGATTTGAACTACCTGATATGGGATTAGTTGTC  
ATTACTGAGCGTGAGCTTTTTAAATCAAACAGAAAAAGCAACGAAAACGTACGAAAGC  
TATCTCAAATGCTGAAAAAATTAAGTCTTACCAAGATTTAAATGTGGGAGATTATATTGT  
TCATGTGCATCATGGTGTGGTAGATATTTAGGTGTTGAGACGCTCGAAGTGGGGCAAAC  
GCATCGTGATTATATTAATTTGCAATATAAAGGTACGGATCAACTATTTGTTCCAGTAGA  
TCAAATGGATCAAGTTCAAAAATATGTAGCTTCGGAAGATAAGACGCCAAAATTAATA  
AACTCGGTGGCAGTGAATGGAAAAAAACAAAAGCTAAAGTTCAACAAAGTGTGAAGAT  
ATTGCTGAAGAGTTGATTGATTTATATAAAGAAAGAGAAATGGCAGAAGGTTATCAATAT  
GGGGAAGACACAGCTGAGCAAACAACATTTGAATTAGATTTTCCATATGAACTTACGCCT  
GACCAAGCTAAATCTATCGATGAAATTAAGATGACATGCAAAAATCGCGTCCAATGGA  
TCGCTTGCTATGTGGTGATGTTGGTTATGGTAAACTGAAGTTGCAGTGAGAGCAGCATT  
CAAAGCTGTAATGGAAGGAAAGCAGGTTGCATTTTTAGTTCCTACAACATTTTAGCTCA  
GCAACATTATGAGACGTTAATTGAGCGTATGCAAGATTTTCTGTTGAAATTCAATTAAT  
GAGTCGTTTTAGAACGCCTAAAGAGATAAAACAAAATAAGGAAGGACTTAAAACCTGGAT  
TTGTTGACATAGTTGTTGGTACACACAAATTACTTAGTAAAGATATACAGTATAAAGATT  
TAGGGCTGTTGATTGTAGATGAAGAACAACGATTTGGTGTACGCCATAAAGAGCGTATTA  
AAACATTA AAAACATAATGTAGATGTACTAACATTGACTGCAACCCCAATACCTAGAACAT  
TGCATATGAGTATGCTAGGTGTGCGCGATTTGTCAGTGATTGAAACGCCGCCAGAAAATC  
GTTTCCCAGTTCAAACATATGTATTAGAACAGAACATGAGTTTTATCAAAGAAGCTTTAG  
AAAGAGA ACTATCCCGTGATGGCCAAGTGTTTATCTTTATAATAAAGTGCAATCCATTT  
ATGAAAAACGAGAACA ACTCCAGATGTTAATGCCAGATGCTAACATTGCAGTTGCTCATG  
GACAAATGACAGAGCGCGATTTAGAAGAAACGATGTTAAGTTTTATCAATAATGAATATG  
ATATTTTAGTAACGACGACGATTATTGAAACAGGTGTCGATGTCCCAAATGCAAATACTT  
TGATCATTGAAGATGCAGATCGCTTTGGATTGAGTCAGTTGTATCAATTAAGAGGTCGTG  
TTGGTCGTTCAAGTCGATTGGTTATGCATACTTCTTACATCCAGCAAATAAGGTACTAAC  
TGAGACTGCAGAAGATCGATTACAAGCGATTAAGAATTTACGGAGTTAGGCTCAGGATT  
TAAGATTGCGATGCGTGATTTGAACATTCGTGGTGCTGGTAATTTGTTAGGTAACAACA  
GCACGGCTTTATTGATACAGTTGGATTTGATTTGTACAGTCAAATGTTAGAAGAAGCTGT  
AAATGAAAAACGTGGTATTAAGGAACCAGAATCTGAGGTGCCAGAAGTCGAAGTTGATT  
TAACTTGGATGCATATTTGCCGACAGAATATATTGCAAATGAACAAGCTAAAATTGAAA  
TTTATAAAAAGCTACGAAAAACTGAAACATTTGATCAAATTATCGACATTAAGATGAAT  
TAATTGATCGTTTTAATGATTATCCTGTTGAAGTAGCACGTTTGCTTGATATAGTGGAAT  
AAAAGTACACGCATTACATTCAGGTATCACGTTGATTAAGATAAAGGGAAAATAATTG  
ATATTCATTTATCTGTAAAAGCCACTGAAAATATTGATGGCGAAGTGCTGTTCAAAGCAA  
CACAACCTTTAGGTAGAACAAATGAAGGTTGGTGTTCAAAATAATGCAATGACAATTACTT  
TAACGAAACAAAATCAATGGCTTGATAGTTTGAAGTTTTTAGTTAAGTGCATTGAAGAAA  
GTATGAGAATCAGTGATGAAGCATAA

> **ItrB**

Function: protein coding sequence; similar to low temperature requirement protein B (core genome, constant)

Best match: ItrB\_CC001\_MW2-USA400\_BA000033.2[519895:521421] (completely identical)

Position: 015-contig\_316\_RC: 22957 ... 24484; Length: 1527 bp

Sequence:



ATGAAGCATAAAGAAGCATTTAATGGCGTTGTCGTGTTAACTGCTGCATTAATTGTCATT  
AAAATTCTGAGTGCTGTATATCGAATCCATATCAAATATATTAGGTGATACAGGTTTGT  
ATGCATATCAACAAGTGTATCCAATTGTAGCATTAGGAATGATATTATCGATGAATGCCA  
TTCCTAGTGCAATTACACAAAATATAGGGAAGTATCATAGTGACGAAGCATATGCAAAA  
GCGGTCGCTTATATACAATTAGTTGGTATATTATTATTTATTGCTATTTTTGTGTTTGC  
CAATATTGCACATATGATGGGTGATAGCCATTTAACACCAATGATTCAAGCAGCAAGTTT  
AAGCTTTATATTATAGGTATGCTTGGCGTGTTAAGAGGTTATTATCAATCTGCAAATAAT  
ATGACAGTTCCGGCTATTTCCAGGTTATAGAACAAGTTATACGAGTAGGTATTATCATT  
GTTACTATTGTTATTTTTGTAGACAGAGGTTGGACGATATATGAAGCGGGAACAATTGCT  
ATTTTAGCATCAACGATAGGTTTTTTAGGTTCTTCAATTTATTTAGTAGCGCACCGACCTT  
TTAAGTTTAAAATGGTAAATAACACTGCAAAGATTGTTTGGAAACAGTTTCGCACTTTCCG  
TTTTGATTTTCGCTATCAGTCAATTAATCGTAATTTTATGGCAAGTGATTGATAGTGTTAC  
TATTATTAAGTCACTTCAAGCGATACGCGTGCCATTCGATGTTGCCATAACTGAAAAAGG  
AGTCTATGACCGTGGTGCATCATTTATTCAGATGGGATTGATTGTAACTACAACATTTAGT  
TTTGGCGCTCATTCTCTGTAAAGTGACGCAATCAAATGAATAATCAGGTACTTATGAATC  
GTTATGCAAATGCGTCATTAAGATTACGATTTTAATAAGTACAGCAGCGGGAATAGGAT  
TAATTAATTTATTGCCTTTAATGAACGGTGTGTTTTTAAAGACGAATGATTTAACCTAAC  
GTTAAGTGTTTATATGATTACGGTCATTTGTGTATCGTTAATTATGATGGATATGGCTTTA  
TTACAAGCGCAACATGCTGTGAGACCTATTTTTGTTGGTATGACGGCAGGATTGTTATTA  
AATTTATACTTAATATCATTTTGTTCGTTAAGTGGCATTATTGGTGCGAGCATTAGTAC  
TGTTGTATCATTAATTATATTCGGTACGATTATCCATATTGCTGTCACGAGAAAATACCAC  
TTACATGCGATGAGACGATTTTTTATCAATGTTGTTTTAGGTATGGTATTTATGTCGATTG  
TTGTTCAATGCGTGTAAACATAGTGACAACACACGGTAGATTCACTGGACTCATTGAAT  
TATTATGTGCAGCAGTATTAGGTATCATTGCATTGTTTTTCTATATTTTTAGATTTAATGT  
TTGACATATAAAGAGTTAACTTATTTACCATTTGGTTCAAAGTTGTATCAAATTAAGAAA  
GGAAGACGTTGA

### > **mazG**

Function: protein coding sequence; tetrapyrrole methylase (core genome, variable)

Best match: mazG\_CC001-ST772\_118\_AJGE01000044.1[12202:13395:r] (completely identical)

Position: 015-contig\_316\_RC: 24483 ... 25677; Length: 1194 bp

Sequence:

ATGGCACATACCATTACGATTGTTGGCTTAGGAAACTATGGCATTGATGATTTGCCGCTA  
GGGATATATAAATTTTTAAAGACACAAGATAAAGTTTATGCAAGAACGTTAGATCATCCA  
GTTATAGAATCATTGCAAGATGAATTAACATTTTCAGAGTTTTGACCATGTTTATGAAACA  
CATGACCAATTTGAAGATGTCTATAATGATATTGTGGCGCAATTGGTTGAAGCTGCTAAT  
GAAAAAGATATTGTCTATGCGGTTCCGGGTCATCCTAGAGTTGCTGAGACAACTACAGTG  
AAATTACTGGCTTTAGCAAAGGACAATACTGATATAGATGTGAAAGTTTTAGGTGGTAAA  
AGCTTTATTGATGATGTGTTTGAAGCAGTTAATGTAGATCCAAATGATGGCTTCACACTGT  
TAGATGCGACATCATTACAAGAAGTAACACTTAATGTTAGAACGCATACATTGATTACGC  
AAGTTTATAGTGCAATGGTTGCTGCTAATTTGAAAATCACTTTAATGGAACGATATCCTG  
ATGATTACCCTGTTCAAATTGTCACTGGTGCACGAAGCGATGGTGCGGATAACGTTGTGA  
CATGCCATTATATGAATTGGATCATGATGAAAATGCATTCAATAATTTGACGAGTGTAT  
TCGTACCAAAAATCATAACATCGACATATTTGTATCATGACTTTGATTTTGCAACGGAAGT  
GATTGATACTTTAGTTGATGAAGATAAAGGTTGTCCATGGGATAAAGTGCAAACGCATGA  
AACGCTTAAGCGTTATTTACTTGAAGAAACATTTGAATTGTTGGAAGCTATTGACAATGA  
AGATGATTGGCATATGATTGAAGAACTAGGAGATATTTTATTACAAGTGTTATTGCATAC  
TAGTATTGGTAAAAAGAAGGGTATATCGACATTAAGAAGTGATTACAAGTCTTAATGC  
TAAAATGATTCGTAGACACCCACACATATTTGGTGTATGCCAATGCTGAAACTATCGATGA  
CTTAAAAGAAATTTGGTCTAAGGCGAAAGATGCTGAAGGTAAACAGCCAAGAGTTAAAT  
TTGAAAAGATTTTGCAGAGCATTTTTTAAATTTATATGAGAAGACGAAGGATAAGTCAT  
TTGATGAGGCCGCGTTAAAGCAGTGGCTAGAAAAGGGGAGAGTAATACATGA

### > **divIC**

Function: protein coding sequence; cell-division protein (core genome, constant)

Best match: divIC\_CC008-ST72\_TCH130-ST72\_ACHD01000274.1[26209:26601] (completely identical)

Position: 015-contig\_316\_RC: 25954 ... 26347; Length: 393 bp

Sequence:

```
ATGAAAAATAAAGTAGAACATATAGAAAATCAGTACACGTCGCAAGAGAACAAGAAAA
AACACGTCAAAAAATGAAAATGCGTGTTGTTTCGTAGGCGTATTACAGTATTTGCGGGCG
TATTACTTGCGATAATTGTTGTTTTATCAATCTTGCTTGTGTCCAAAAACATCGCAATGA
TATCGATGCACAGGAGCGAAAAGCGAAAGAAGCACAGTTTCAAAAGCAACAAAATGAA
GAAATTGCGTTAAAAGAAAAGTTGAATAATCTGAATGACAAAGATTATATTGAAAAAAT
TGCGCGTGATGATTACTTAAGCAACAAAGGTGAAGTGATTTTTAGGTTGCCAGAAGA
CAAAGATTCGTCTAGCTCAAAATCTTCGAAAAAATAA
```

### > **tilS**

Function: protein coding sequence; tRNA(Ile)-lysidine synthase (core genome, constant)

Best match: tilS\_CC001\_MW2-USA400\_BA000033.2[523970:525265]

Position: 015-contig\_316\_RC: 27032 ... 28328; Length: 1296 bp

Sequence:

```
ATGCAGTTAAATAGTAATGGTTGGCATGTTGATGACCATATTGTTGTCGCTGTTTCTACAG
GTATTGATAGTATGTGTTTATTGTATCAACTACTAAATGATTATAAAGATAGTTATAGAAA
ACTAACATGCTTACATGTCAATCATGGCGTTAGGTCAGCTTCAATCGAGGAAGCCAGATT
TTTAGAAGTATACTGCGAACGTCATCACATCGATTTACATATCAAAAAGTTAGATTTGTC
GCATAGTCTCGACCGAAATAACAGCATTCAAGATGAAGCTCGAATTAACGTTACGAATG
GTTTGATGAAATGATGAATGTATTAGAAGCGGATGTATTGCTAACGGCGCATCATTTGGA
CGATCAATTAGAACTATTATGTATCGTATTTTAAATGGGAAATCGACGCGTAATAAACT
AGGATTTGATGAGTTATCGAAGCGAAAAGGTTATCAGATTTATCGACCACTTTTAGCTGT
CTCTAAAAAAGAAATAAAACAATTCCAAGAGAGATATCATATCCATATTTGAAGATGA
ATCTAATAAAGATAACAAATATGTTAGAAATGATATTCGTAATAGAATTATCCAGCTAT
TGATGAAAATAATCAACTTAAAGTATCGCATTTATTAATAAATAAACAATGGCATGATGA
ACAATATGATATTTTGCAATATTCAGCTAAACAATTTATCAAGAATTTGTGAAGTTTGAT
GAACAGTCAAAATATTTAGAGGTTTCTAGACAAGCTTTTAATAACTTACCAAACCTCATT
AAGATGGTTGTGTTGGATTGCCTATTATCAAAGTATTATGAGTTGTTAATATTAGTGCTA
AAACATACGAAGAGTGGTTTAAACAATTTAGTAGTAAGAAAGCACAAATTCAGTATTAATC
TCACGGATAAATGGATAATTCAAATTGCATATGGTAAATTAATAATAATGGCTAAAAATA
ATGGCGATACATATTTTAGAGTTCAAACCTATTGAAAAGCCAGGTAATTATATTTTAAACA
AATATCGATTAGAGATACATTCTAATTTACCAAATGTTTATTTCCGCTTACAGTGAGAAC
ACGACAAAGTGGCGATACATTTAAACTGAATGGGCGCGATGGTTATAAGAAAGTGAATC
GCCTGTTTATAGATTGTAAAGTGCAACAGTGGGTTCCGGGATCAAATGCCAATCGTATTGG
ATAACAACAGCGCATTATTGCGGTAGGAGATTTATATCAACAACAACAATAAAACAA
TGGATTATAATTAGTAAAAATGGAGATGAATAG
```

### > **hpt**

Function: protein coding sequence; hypoxanthine-guanine phosphoribosyltransferase (core genome, constant)

Best match: hpt\_CC001\_MW2-USA400\_BA000033.2[525270:525809] (completely identical)

Position: 015-contig\_316\_RC: 28332 ... 28872; Length: 540 bp

Sequence:

```
ATGCATAATGATTTGAAAGAAGTATTGTTAACTGAAGAAGATATTCAAAATATCTGTAAG
GAATTGGGAGCACAATTAACAAAGGATTATCAAGGTAAACCATTAGTATGCGTGGGTATC
TTAAAAGGCTCAGCAATGTTTATGTCAGATTTAATTAACGAATTGATACCCATTTATCAA
TTGATTTTCATGGATGTTTCTAGTTATCACGGAGGCACTGAGTCAACTGGTGAAGTTCAAAT
CATTAAAGATTTAGGTTCTTCTATTGAAAATAAAGACGTATTAATTATTGAAGATATCTTA
GAGACTGGTACTACTTAAGTCAATTACTGAATTATTACAATCTAGAAAAGTTAATTCA
TTAGAAATAGTTACTTTATTAGATAAACCAAACCGTCGTAAAGCGGACATTGAAGCTAAG
TATGTAGGTAAAAAATAACCAGATGAATTTGTTGTTGGTTACGGTTTAGATTATCGTGAA
TTATACCGAAACTTACCATATATCGGTACGTTAAACCTGAAGTGTATTCAAATTA
```

## > **ftsH**

Function: protein coding sequence; cell-division protein H (core genome, constant)

Best match: ftsH\_CC001\_MW2-USA400\_BA000033.2[526066:528159] (completely identical)

Position: 015-contig\_316\_RC: 29128 ... 31222; Length: 2094 bp

Sequence:

```
ATGCAGAAAGCTTTTCGCAATGTGCTAGTTATCGTAATAATAGGCGTTATTATTTTTGGTC
TATTTTCATATTTAAACGGTAATGGAAATATGCCGAAACAGCTTACATATAATCAATTTAC
TGAGAAGTTGGAAAAAGGTGACCTTAAACTTTAGAAATCCAACCACAACAAAATGTCT
ATATGGTAAGTGGTAAAACGAAAAATGATGAAGACTATTCATCAACTATTTTATATAACA
ACGAAAAAGAATTACAAAAAATTACTGATGCTGCTAAAAAGCAAAACGGTGTAAAATTA
ACGATTAAGAAGAAGAAAAACAAAGTGTCTTTGTGAGTATACTTTCAACATTAATTCCA
GTTGTAGTCATAGCGTTATTATTTATTTTCTTCCTAAGCCAAGCACAAAGGTGGCGGTAGTG
GCGGTCGTATGATGAACTTTGGTAAATCTAAAGCAAAAATGTACGATAATAATAAACGTC
GTGTTCTGTTTCTCTGATGTAGCAGGGGCAGATGAAGAAAAACAAGAATTAATTGAAATTG
TTGATTTCTTGAAAGATAATAAAAAATTCAAAGAAATGGGATCTAGGATTCCTAAAGGTG
TCTTACTTGTGGACCTCCAGGTACTGGTAAAACATTACTTGCTAGAGCGGTTGCAGGTG
AAGCTGGCGCACCATTTCTTCTTATTAGTGGTTCAGACTTTGTAGAGATGTTTGTGGTGT
TGGTGCAGCCGTGTTCTGTGACTTATTCGATAATGCTAAGAAAAACGCGCCTTGTATCAT
CTTTATCGATGAGATTGATGCTGTTGGTCGTCAACGTGGTGCAGGTGTTGGTGGCGGTCAT
GATGAACGTGAACAAACCCTAAACCAATTATTAGTTGAAATGGATGGTTTCGGTGAAAT
GAAGGTATCATTATGATAGCTGCTACAAACCGTCCTGATATCCTTGACCCAGCCTTATTAC
GTCCAGGTCGTTTTGATAGACAAATTCAAGTTGGTCGTCCAGATGTGAAAGGCCGTGAAG
CAATTCTTCATGTTTCATGCTAAAAACAAACCACTTGATGAAACGGTTGATTTAAAAGCAA
TTTCAACCGTACACCTGGTTTCTCAGGTGCTGATTTAGAGAACTTATTAATGAAGCATC
TTTAATTGCTGTACGTGAAGGTA AAAAGAAAATTGACATGAGAGATATCGAAGAGGCAA
CGGATAGAGTTATAGCCGGACCTGCTAAGAAATCTCGAGTTATTTCTAAGAAAGAACGTA
ATATTGTTGCTCATCACGAAGCTGGTCATACAATTATCGGTATGGTACTTGATGAGGCAG
AAGTAGTGCATAAAGTTACTATTGTTCCACGTGGACAAGCAGGTGGTTATGCAATGATGC
TACCTAAACAAGATCGTTTCTTAATGACTGAACAAGAGTTATTAGATAAAAATCTGTGGTT
TACTTGGTGGACGTGTATCAGAAGATATTAACCTTTAACGAAGTATCAACAGGTGCTTCAA
ATGACTTTCGAACGTGCAACACAAATCGCACGCTCAATGGTTACGCAATATGGTATGAGTA
AAAATTAGGACCATTACAGTTCGGTCATAGCAATGGTCAAGTATTCTTAGGTAAGATA
TGCAAGGTGAGCCTAATTATTCAAGCCAAATCGCATATGAAATTGATAAAGAAGTTCAAC
GAATCGTTAAAGAACAATACGAACGTTGTAAACAAATTTTATTAGAGCACAAAGAACAA
TTAATTTTAATTGCTGAAACATTATTAACAGAAGAAACATTAGTTGCTGAACAAATTCAA
TCATTATTCTACGAAGGTAAATTACCTGAAATTGATTATGATGCAGCTAAAGTTGTTAAA
GATGAAGATTCTGAATTTAATGATGGTAAATTCGGTAAATCTTATGAAGAGATTCGTAAA
GAGCAATTAGAAGATGGACAACGTGACGAAAGTGAAGATCGTAAAGAAGAAAAAGATA
TTGCTGAGGATAAAAAAGAAGCTGATAAATCTGATGAAAAAGATGAACCAGCACATCGA
CAAGCCCCAAATATCGAAAAACCTTACGATCCAAATCACCCAGACAATAAATAA
```

## > **hslO**

Function: protein coding sequence; 33 kDa chaperonin (core genome, constant)

Best match: hslO\_CC005\_A9299\_ACKH01000011.1[31361:32242]

Position: 015-contig\_316\_RC: 31450 ... 32332; Length: 882 bp

Sequence:

```
ATGACACACGATTATATTGTTAAAGCATTAGCATTGATGGGGAGATTAGGGCTTATGCT
GCTTTGACAACCTGAAACTGTTCAAGAAGCACAAACGAGACATTATACATGGCCGACAGC
ATCTGCTGCAATGGGAAGAACAATGACAGCAACAGCTATGATGGGCGCAATGTTGAAAG
GTGATCAAAAATTAACCTGTCACTGTAGATGGCCAAGGACCTATTGGACGAATTATTGCCG
ATGCAAATGCTAAAGGCGAGGTGCGTGCTTATGTAGACCATCCACAAACTCATTTTCCAT
TAAATGAGCAAGGTAAACTTGTGTAAGACGAGCAGTAGGGACAAATGGATCTATTATG
GTTGTTAAAGACGTTGGAATGAAAGACTATTTCTCTGGAGCAAGTCCAATTGTTTCAGGA
GAACTTGGTGAAGATTTTACTTATTATTATGCTACAAGTGAACAAACACCTTCATCGGTA
```

GGTCTTGGTGTATTGGTAAATCCTGATAATACGATTAAGCAGCAGGAGGATTTATCATT  
CAAGTTATGCCAGGTGCCAAAGATGAAACAATTTCAAATTAGAAAAAGCAATTAGTGA  
AATGACACCAGTTTCTAAATTAATTGAACAAGGATTAACGCCAGAAGGATTACTAAACGA  
AATCTTAGGTGAAGACCATGTGCAAATTTAGAGAAAATACCTGTTCAATTTGAATGTAA  
TTGTAGTCATGAGAAATTTTAAATGCTATTAAAGGATTGGGCGAGGCTGAGATTCAAAA  
TATGATTAAGAAGATCATGGTGCTGAAGCAGTATGTCATTTCTGTGGAAATAAATATAA  
ATATACTGAAGAAGAATTAACGTGTTGCTAGAAAGTTTAGCGTAA

### > **cysK**

Function: protein coding sequence; cysteine synthase (core genome, constant)

Best match: *cysK\_CC001\_MW2-USA400\_BA000033.2*[529448:530380] (completely identical)

Position: 015-contig\_316\_RC: 32510 ... 33443; Length: 933 bp

Sequence:

ATGGCACAAAAACCAGTAGATAATATTACTCAAATTATTGGCGGTACACCGGTAGTCAAA  
TTGAGAAATGTAGTAGATGACAATGCAGCAGATGTTTATGTAAAATTGGAATATCAAAAT  
CCAGGTGGTTCTGTAAAGGATAGAATTGCTTTAGCAATGATTGAAAAAGCAGAGCGAGA  
AGGCAAAATTAACCTGGCGATAACAATTGTAGAACCAACAAGTGGTAATACAGGTATCG  
GTTTAGCATTTGTATGTGCTGCTAAAGGATATAAAGCAGTATTTACTATGCCCGAAACAA  
TGAGCCAAGAGCGTCGTAATTTATTAAGCATAACGGTGCGGAATTAGTTTTAACGCCTG  
GATCAGAAGCGATGAAAGGTGCAATTAAGAAAGCTAAAGAATTGAAAGAAGAACATGGT  
TACTTCGAGCCACAACAATTTGAAAACCCTGCGAACCTGAAGTTCATGAGTAACTACA  
GGTCTGAGTTATTACAACAATTTGAAGGGAAAACCTATCGATGCGTTCCTAGCTGGTGTT  
GGTACTGGTGGTACGTTATCTGGTGTAGGTAAAGTTCTGAAAAAGAATATCCTAACATC  
GAAATTGTTGCTATAGAGCCTGAGGCTTCTCCAGTATTGAGCGGTGGTGAGCCAGGTCCA  
CATAAATTACAAGGTTTAGGTGCTGGATTTATTCCAGGCACCTTGAATACAGAAATCTAT  
GACAGTATTATTAAGTAGGAAATGATACAGCGATGGAAATGTCTCGTCGAGTTGCTAAA  
GAGGAAGGTATTTAGCAGGTATTTTCATCAGGTGCTGCGATTTATGCTGCCATTCAAAA  
GCAAAGAATTAGGAAAAGGTAAAACAGTAGTAACAGTATTGCCGAGTAATGGTGAACG  
CTACTTATCAACACCTTTATATTCATTTCGATGACTAA

### > **folP**

Function: protein coding sequence; dihydropteroate synthase (core genome, constant)

Best match: *folP\_CC009\_21334\_AGTW01000006.1*[3929:4732:r] (completely identical)

Position: 015-contig\_316\_RC: 33658 ... 34462; Length: 804 bp

Sequence:

ATGACTAAAACAAAAATTATGGGCATATTAACGTCACACCAGATTCATTCTCAGATGGT  
GGAAAATTTAATAATGTTGAATCAGCTATAAATAGAGTGAAAGCCATGATAGATGAAGG  
TGCTGACATTATAGATGTTGGAGGTGTTTCAACGAGACCCGGTCATGAAATGGTTTCATT  
AGAAGAAGAGATGAACAGAGTATTACCTGTTGTTGAAGCTATTGTTCGGTTTTGATGTAAA  
AATTTAGTCGATACATTTTCGAAGTGAGGTTGCTGAAGCATGTTTAAAATTAGGCGTTGA  
TATGATTAATGATCAATGGGCGGGTCTGTATGATCATCGTATGTTCCAAATTGTAGCTAA  
ATATGACGCGGAAATTTTAAATGCATAATGGAAATGGTAATCGTGATGAACCGGTTGT  
CGAAGAAATGTTAACATCTTTGTTAGCACAAAGCACATCAAGCTAAAATAGCTGGTATACC  
TTCAAATAAAATTTGGCTAGATCCAGGTATAGGTTTCGCTAAAACCTAGAAATGAAGAAGC  
CGAAGTTATGGCAAGACTGGATGAACTTGTTGCAACAGAATATCCAGTTTTATTAGCGAC  
AAGCCGAAACGTTTCACTAAAGAGATGATGGGTTATGATACAACACCGGTTGAAAGAG  
ATGAAGTAACTGCAGCTACGACTGCATATGGTATTATGAAAGGCGTTAGAGCAGTACGCG  
TTCATAATGTCGAGTTGAATGCTAAATTAGCTAAAGGTATAGATTTTTTAAAGGAGAATG  
AAAATGCAAGACACAATCTTTCTTAA

### > **folB**

Function: protein coding sequence; dihydroneopterin aldolase (core genome, constant)

Best match: *folB\_CC001\_MW2-USA400\_BA000033.2*[531377:531742] (completely identical)

Position: 015-contig\_316\_RC: 34439 ... 34805; Length: 366 bp

Sequence:

ATGCAAGACACAATCTTTCTTAAAGGTATGCGCTTTTATGGATATCATGGTGCTTTATCAG  
CTGAAAATGAAATAGGGCAAATTTTCAAAGTGGATGTAACCTTTGAAAGTAGACTTAGCTG  
AAGCTGGGCGTACTGATAATGTTATTGATACAGTTCATTATGGTGAAGTGTTCGAAGAGG  
TTAAATCAATTATGGAAGGTAAGGCCGTTAATTTACTTGAGCATCTAGCTGAACGTATTG  
CAAATCGTATAAATTCACAATATAATCGTGTAAATGGAAACGAAAGTGAGAATCACTAAA  
GAAAACCCACCGATTCCGGGTCATTATGATGGAGTAGGTATCGAAATAGTGAGGGAGAA  
TAAATGA

### > **folK**

Function: protein coding sequence; 2-amino-4-hydroxy-6-hydroxymethyldihydropteridin e  
pyrophosphokinase (core genome, constant)

Best match: folK\_CC008\_NCTC8325\_CP000253.1[489065:489541] (completely identical)

Position: 015-contig\_316\_RC: 34801 ... 35278; Length: 477 bp

Sequence:

ATGATTCAAGCATACTTAGGATTAGGTAGTAATATTGGTGATAGAGAAAGCCAGTTAAAC  
GATGCTATAAAGATTTTGAATGAATATGATGGTATTAACGTATCTAATATTTCTCCGATTT  
ATGAAACAGCACCAGTTGGGTATACTGAGCAACCTAACTTTTTAAATTTGTGTGTTGAAA  
TTCAAACAACACTCACAGTATTACAACCTGTTGGAATGTTGTTTGAAGACAGAAGAATGTT  
TACACCGTATTAGAAAGGAACGATGGGGTCCTAGAACTTTAGATGTGGATATTTTGTGTG  
ATGGAGAAGAAATGATAGATTTACCAAACCTGTCGGTGCCACATCCGAGAATGAATGAA  
CGTGCATTTGTTTTAATCCCATTAATGATATAGCAGCAAATGTCGTAGAACCACGTTTCG  
AAATTGAAAGTGAAAGATTTAGTTTTTGTTCGATGACAGTGTAAGAGATATAAATAA

### > **lysS**

Function: protein coding sequence; lysyl-tRNA synthetase (core genome, constant)

Best match: lysS\_leader\_CC001\_MW2-USA400\_BA000033.2[532609:532701] (completely identical)

Position: 015-contig\_316\_RC: 35671 ... 35764; Length: 93 bp

Sequence:

ATGGTTAATGATAAAGTATTAGAAACATCGAAAGAGATGTATGTTGAGCAAAAATGTCTG  
ATATTTTATAAACTTTAAAGGAAAATGTTTGA

### > **rrf**

Function: rRNA 5S ribosomal RNA

Best match: rrf\_part\_CC005\_21172\_AFEF01000015.1[3008:3119]

Position: 016-contig\_250: 0 ... 30; Length: 30 bp

Sequence:

CTTACGTTCCGCTAGAGTAGAACGTTGCCA

### > **txbi\_universal1**

Function: bidirectional rho independent terminator

Best match: txbi\_universal1\_CC001\_MW2-USA400\_BA000033.2546526:546597 [4\_50ANF10END]

Position: 016-contig\_250: 444 ... 516; Length: 72 bp

Sequence:

TGTATAAATAGAGAAGAGCAGTAAGACGGTATCTAATTGAAAATGATCTTACTGTTCTTT  
TATATACTTTAT

### > **Q1Y6R4**

Function: protein coding sequence; transcript regulator/GntR family (core genome, variable)

Best match: Q1Y6R4\_CC001-ST772\_118\_AJGE01000068.1[799:2181:r]RC (completely identical)

Position: 016-contig\_250: 595 ... 1978; Length: 1383 bp

Sequence:

TTACTTTATAATTAATGATTTTATTAGAGCGTCTACATGCGGTTTTAAAGCATCATCGTCT  
ATACCGCCAAAGCCTAATATAAATTTAGGGGTTTTCTTATAGTCTTGATCATCATCAAAT  
TATAAACTTGTAATTTTAACTTTACTTTGTTTGCTCTATCAAGACACTCTTGTAATGTTAAT

CCATTTTTTACTGTAATTGTAAAATGCATACCCGTTTCAGCACCTTGAATATCAAGCTGCT  
CTTTGTAAGGTTTCAATCTTTTTAAAATATAGGTTAGTTTTCTACGATAAATTCGTCTCATT  
TTATTTAAATGCCTTTCAAACCACCGGAAGATATAAACGTTGCAATAAGGTTTTGCATA  
TGAACAGGTACAGTGTTCCTTCAATGTGATTTTTGAGAATGATATTTTTTCATTATAGAAT  
AGGGTAACACCATATATGCAACTCGACAGCTAGGAAAAATAGACTTTGAAAATGTACTG  
ATATAAATCACTTTTTCTCCTCTTGAATATAGACCTTGAATTGCTGGAATGGGTTTGCCGA  
AATATCTAAACTCGGAATCATAATCATCTTCTATAATAAATCGTTCTTCTTTTTCTTGAGC  
CCATTGTATTAATTGAGTTCGCTTTTTTAAGTCCATCACATATCCAGTTGGAAATTGATGG  
GAAGGCGTTATATATACTATATTTTTTTGTGATTTAATAACTTCATCTACGTTTATTCCATT  
ATCTTCAACTTCAATTTGTTTCATATTCAACTTGTTTTTATCTAAAATATTTTTGATTGGTG  
GATAACTAGGTTTTTCGATAATAAATGTTGAAGTATAAAGTAAATCGACTAATTGATTTA  
CTAATTGTTTCGGTAGATGAGCCAATTATAATTTGATTAGGATCACAAATTACACCACGAT  
TAGTAAATAAATAAAATGCCAGTTGAAATCTTAAATGTAATTCTCCTTGAAAATGTCTCT  
ACGTAATTGATTTAAATGATTTGTATCATAAAGATCTTTGGAATACTTTCTGAAAAGTTCT  
ATAGGGAAATGTTTCGTATCTATTTTCATCCAAATTAAGAGCATAATCATAAGCTTCATCAC  
TCGTTTTGGTTTATATGAATCATCATCAAAAAGAGAGGGGATAGGTTGATTGTTTAAAA  
TTGTTAAAGATTCAATTCGGACACAAAATATCCAGAGCGAGGTCTTGAATAAATGTAAC  
CTTCGTCTAATAGAAGTTGATATGCATGCTCTACGGTTGTTTGGCTGATAGACAAATGTTT  
GCTTAATTGTCTTTTAGAATAAAATTTATCGCCTTCTTTAAATTGACCTTCAATTATTTGTT  
TTTTTAATTTTTTCATAAAGTTGATGGTATAAAGTGTTTTTCAA

### > **pdxS**

Function: protein coding sequence; pyridoxal synthetase (core genome, variable)

Best match: pdxS\_CC001-ST772\_118\_AJGE01000068.1[2285:3172] (completely identical)

Position: 016-contig\_250: 2081 ... 2969; Length: 888 bp

Sequence:

ATGAGTAAAATTATTGGATCAGACAGAGTCAAAGAGGTATGGCTGAAATGCAAAAAGG  
CGGCGTTATTATGGATGTCGTTAATGCTGAGCAAGCAAGAATTGCAGAAGAAGCTGGCGC  
GGTAGCAGTTATGGCATTAGAACGAGTACCTTCTGATATTAGAGCTGCTGGTGGCGTTGC  
ACGTATGGCAAACCCTAAAATTGTAGAAGAAGTAATGAATGCTGTTTCTATTCCAGTCAT  
GGCTAAAGCACGTATTGGTCATATCACTGAAGCAAGAGTATTAGAGGCGATGGGTGTTGA  
CTATATTGATGAATCAGAAGTGTTAACACCAGCAGATGAGGAATATCACTTAAGAAAAG  
ATCAATTTACAGTACCATTTGTATGTGGATGTCGTAATTTAGGTGAAGCTGCGCGTAGAA  
TTGGTGAAGGTGCTGCTATGTTACGTACTAAAGGTGAACCAGGTACAGGTAATATTGTTG  
AAGCTGTAAGACATATGAGACAAGTTAATTCAGAAGTTAGTCGTTTGACTGTAATGAATG  
ATGATGAGATTATGACTTTTTCGAAAGATATCGGTGCGCCTTATGAAATTTTAAAACAAA  
TTAAAGACAATGGTCGTTTACCGGTAGTTAACTTTGCAGCTGGTGGCGTTGCGACTCCTCA  
AGATGCTGCTTTAATGATGGAATTAGGTGCCGACGGTGTATTCGTTGGATCAGGTATTTTT  
AAATCAGAAGATCCAGAAAAATTTGCTAAAGCAATTGTTCAAGCAACAACACATTACCA  
AGACTATGAGCTAATTGGAAGATTAGCAAGTGAACCTGGCACTGCTATGAAAGGTTTAGA  
TATCAATCAATTATCATTAGAAGAACGTATGCAAGAGCGTGGTTGGTAA

### > **pdxT**

Function: protein coding sequence; amidotransferase involved in pyridoxal biosynthesis (core genome, variable)

Best match: pdxT\_CC001-ST772\_118\_AJGE01000068.1[3176:3736] (completely identical)

Position: 016-contig\_250: 2972 ... 3533; Length: 561 bp

Sequence:

ATGAAAATAGGTGTATTAGCATTACAAGGTGCAGTACGTGAACATATTAGACATATTGAA  
TTAAGTGGTCATGAAGGTATTGCAGTTAAAAAAGTTGAACAATTAGAAGAAATCGAGGG  
CTTAATATTACCTGGTGGCGAGTCTACAACGTTACGTCGATTAATGAATTTATATGGATTT  
AAAGAGGCTTTACAAAATTCAACTTTACCTATGTTTGGTACATGCGCAGGATTAATAGTT  
CTAGCGCAAGATATAGTTGGTGAAGAAGGATACCTTAACAAGTTGAATATTACTGTACAA  
CGAAACTCATTCGGTAGACAAGTTGACAGCTTTGAAACAGAATTAGATATTAATGTATC  
GCTACAGATATTGAAGGTGTCTTTATAAGAGCGCCACATATTGAAAAGTAGGCCAAGGC

GTAGATATCCTATGTAAGGTTAATGAGAAAATTGTAGCCGTCCAGCAAGGTAAATATTTA  
GGCGTATCATTCCATCCTGAATTAACAGATGACTATAGAGTAACTGATTACTTTATTAATC  
ATATTGTAAAAAAGCATAG

### > **nupC1**

Function: protein coding sequence; nucleoside permease C/locus 1 (core genome, constant)  
Best match: nupC1\_CC001\_MW2-USA400\_BA000033.2[549820:551034:r]RC (completely identical)

Position: 016-contig\_250: 3738 ... 4953; Length: 1215 bp

Sequence:

TTAAATAAAGAATCCAGCGATTGCAGCTGAAATGAAAGATACTAGTGTTGCACCGAATA  
ATAGTTTCAAACCAAAGCGGGCAACTGTATCTCCTTTTTTGTTCATTAAGTGATTTAATCGC  
ACCTGAAATAATACCAATAGAGCTAAAGTTAGCAAATGATACTAAGAATACAGATGTAA  
CACTTTTTGCCTGTTTCAGATAAATCACTAAGTTTACCAAGTGCTTGCATTGCTACAAATTC  
GTTAGATAATAGTTTTGTGCGCCATAACTGAACCGGCTTGAAGTGCATCTTGCCATGGCAC  
ACCGACTAAGAATGCAAATGGTGCAAAGACAAAACCAATTAATGTTTGGAAATCCCAAG  
AAATAGCGCCACCTGAAACTGTACTAAAGATATTGCTTACAATTCATTTAATAGAGCGA  
TAATAGCAATGTATCCGATTAACATTGCGCCTACAATGACAGCTACTTTAAATCCATCTA  
AAATATATTCTCCTAGCATTTCGAAGAATGATTGTTGTCTTTCTTCAGTTTCTTCAACTAAT  
AATTTGTCATCTTCTTCATTAACTTTATAAGGGTTAATAATTGAAGCGATGATGAAACCAC  
CAAATAAGTTTAAGACAACAGCCGTTACAACATATTTAGGTTCAATTAAGGTAAAGTATG  
CACCGATAATTGAAGCAGAAACAGTCGACATTGCTGAAGCTGTTAATGTGTATAAACGTT  
GCTTAGGTATGTATGGTAATTGTTTTTAATTGAAATAAATACTTCAGATTGTCCCAAAT  
TGCTGCAGCAACTGCATTGTATGATTCTAAACGTCCCATAACCATTAATTTAGAAATTAAG  
AATCCTAAAACATTAATGATTAAGGTAATAATCTTTGTGTATTGAAGGATACCGATAATC  
GCTGAAATAAATACGATAGGTAATAACTACTGAAGAAGAATGGTGGTTGCTTAGGATC  
GATATATTGAATACCACCGAATACAAAGTTAACACCATCTGCTGCTTTAATAATAAGTA  
GTTAAAACCGTTTGAATACCACCAATAACCTTGATTCCCATTTAGTATTTAAGCAAGAT  
AAATGCAAAGATAAGCTGAATTGCAAGTAAAATTCCTACATATTTCCAGCGAATATTTTT  
CCTGTCTGAGCTAAATAGAAACGCAAGTGCTAAAAGAAGATAATTCCGATAATCCCAAT  
TAGAATATGCAT

### > **ctsR**

Function: protein coding sequence; transcript regulator (core genome, constant)  
Best match: ctsR\_CC001\_MW2-USA400\_BA000033.2[551192:551653] (completely identical)

Position: 016-contig\_250: 5110 ... 5572; Length: 462 bp

Sequence:

ATGCACAATATGTCTGACATCATAGAACAATACATCAAACGTTTATTTGAAGAGTCGAAT  
GAAGATGTCGTTGAAATTCAGAGAGCGAATATCGCACAGCGTTTTGATTGTGTACCATCA  
CAATTAATTTATGTAATCAAACACGATTCCTAATGAACATGGTTATGAAATCGAAAGT  
AAACGTGGTGGTGGTGGTTACATCCGAATCACTAAAATTGAAAATAAAGATGCAACAGG  
TTATATTAATCATTGCTTCAGCTGATTGGACCTTCTATTTCTCAACAACAAGCTTATTATA  
TTATTGATGGGCTTTTAGATAAAATGTTAATAAATGAACGTGAAGCTAAAATGATTCAAG  
CAGTTATTGATAGAGAAACGCTATCAATGGATATGGTTTCTAGAGATATTATTAGAGCAA  
ATATTTTAAAACGTTTGTTACCAGTTATAAATTATTACTAA

### > **clpC**

Function: protein coding sequence; chaperone-like protein C (core genome, variable)  
Best match: clpC\_CC001\_MSSA476\_BX571857.1[551880:554336]

Position: 016-contig\_250: 7167 ... 7197; Length: 30 bp

Sequence:

ATGTTATTTGGTAGATTAAGTACTGAGCGTGCA

### > **radA**

Function: protein coding sequence; DNA repair protein A (core genome, constant)

Best match: radA\_CC008-ST72\_21259\_AFTS01000028.1[45190:46554:r] (completely identical)

Position: 016-contig\_250: 10107 ... 11472; Length: 1365 bp

Sequence:

```
TTGGCCAAGAAAAAAGTGATTTTTGAATGTATGGCTTGTGGTTATCAATCTCCTAAATGG
ATGGGGAAATGTCCTAATTGTGGCGCTTGAATCAAATGGAGGAAATTGTTGAAAAAGC
AGCCAATCCTAAACATGGAGTTAAAACCAAGGAATTAGCAGGTAAAGTACAAAAATTA
ATAGTATTAACATGAAACAACGCCGAGAGTGTTAACAGATTCAGCAGAATTC AACCGT
GTATTAGGTGGAGGTATTGTGAGCGGATCGTTAGTACTTATTGGTGGGGATCCAGGTATT
GGTAAGTCAACGTTACTTTTACAAATTTGTGCATCGTTATCTCAAAGAAAAAAGTACTA
TATATTACTGGAGAAGAATCGCTTAGTCAGACTAAATTACGTGCAGAGCGATTAGATGAA
GATTCAAGTGAATTGCAAGTATTAGCTGAAACAGATCTTGAAGTATTTATCAAACAGTA
AAAGAAGAACAACCTGATTTATTAGTAGTGGATTTCGATTCAAACAATATATCATCCTGAA
ATCAGCTCTGCGCCAGGTTCTGTTTCAAAAGTTCGTGAAAGTACACAAAGTTTAAATGAAT
ATTGCTAAACAAATGAACATTGCAACTTTTATAGTGGGTTCATGTAACGAAAGAAGGTCAA
ATTGCTGGCCCAAGATTGCTAGAACACATGGTTGATACTGTGCTTTATTTTGAAGGCGAT
GAACACCACGCATATCGAATTTTTCGAGCTGTTAAAAACCGTTTTGGTTCAACGAATGAA
ATGGGAATCTTCGAAATGAAGCAAAGTGGATTAAAAGGTGTAAATAATCCATCTGAAAT
GTTTTTAGAAGAACGTTCAACAAATGTTCCAGGTTCAACAATTGTTGCAACCATGGAGGG
AACCAGACCCTTTAATAGAAGTTCAAGCGCTGGTAACTCCAACGACTTTTAAACAATCC
GAGACGAATGGCAACAGGGATTGATCATAATCGATTAAGTTTGTGATGGCTGTTTTGGA
AAAGAAAGAAAATTATCTATTACAACAACAAGATGCTTATATCAAAGTAGCTGGCGGTGT
AAAGTTAACGGAGCCAGCAGTTGATTTAAGTGTAATTGTAGCAACTGCATCTAGCTTTAA
AGATAAAGCTGTGACGGATTAGATTGCTATATTGGAGAAGTTGGTTTAAACGGGCGAGGT
ACGTCGTGTATCTCGGATAGAACAACGCGTGCAAGAGGCTGCAAACTAGGTTTTCAAC
GTGTAATTATTCCTAAAAATAATATAGGCGGATGGACATATCCTGAAGGTATACAAGTAA
TAGGTGTAACACTGTACATGAAGCATTGTCATTTGCTCTTCATTCATAA
```

## > gluS

Function: protein coding sequence; glutamyl-tRNA synthetase (core genome, constant)

Best match: gluS\_CC001\_MW2-USA400\_BA000033.2[559208:560662]

Position: 016-contig\_250: 13126 ... 14581; Length: 1455 bp

Sequence:

```
ATGAGCGATCGTATAAGAGTAAGATATGCACCAAGTCCAACCTGGTTATCTTCATATTGGT
AATGCAAGAACAGCATTATTCAATTACTTGTATGCTAAACATTACAACGGAGATTTTGTG
ATTCGAATTGAAGATACTGATAAAAAACGTAATTTAGAAGATGGAGAAACATCACAATTT
GATAATCTTAAATGGTTAGGATTAGATTGGGATGAGTCTGTAGATAAAGACAATGGCTAC
GGACCATATCGTCAATCTGAACGTCAACATATCTACCAACCATTAATAGATCAGTTACTA
GCAGAAGATAAAGCATATAAATGCTATATGACAGAAGAAGAATTAGAAGCTGAACGTGA
AGCGCAAATCGCTCGTGGTGAATGCCTCGCTATGGTGGTCAACATGCGCATTTGACTGA
AGAACAACGTCAACAATTTGAAGCAGAAGGACGCCAACCATCAATTCGTTTCCGAGTACC
TCAAACCAAACGTATTCATTTGATGATATGGTAAAAGGAAATATTTTCAATTTGATTCAA
TGGTATTGGTGACTGGGTTATCGTAAAAAAGATGGCATTCCAACGTACAATTTTGCAGT
AGCTATAGATGATCATTACATGCAAATTTTCAGATGTAATTCGTGGTGATGATCATATTTCA
AACACGCCTAAACAAATTATGATTTATGAAGCATTGGCTGGGAGCCACCTCGTTTTGGT
CATATGTCATTAATTGTTAATGAAGAACGTA AAAAGTTAAGTAAACGTGATGGGCAAATT
TTACAATTTATTGAGCAATATCGTGACTTAGGTTATTTACCTGAAGCGTTATTTAATTTA
TTGCGTTATTAGGTTGGTCTCCTGAAGGTGAAGAAGAAATCTTTTCTAAAGAAGAATTA
TCAAATCTTTGATGAAAAGCGTTTGTCAAAATCACCAGCATTTTTTCGATAAGCAAAAAT
TAGCATGGGTTAATAACCAATATATGAAACAAAAAGATACTGAAACAGTATTC AATTAG
CATTACCTCATTTAATTAAGCAAATTTGATTCCTGAGGTGCCGTCAGAAGAGGATTTATC
TTGGGGACGCAAATTAATTGCGCTTTATCAAAGAAATGGGTTATGCCGGTGAAATTGT
ACCTTTATCAGAAATGTTCTTTAAAGAAATGCCAGCTCTTGGTGAAGAAGAACAACAAGT
GATTAATGGAGAGCAAGTACCAGAGTTAATGACGCACTTATTCAGTAAATTAGAAGCACT
TGAACCATTTGAAGCGGCTGAAATTA AAAAGACAATTAAGAAGTTCAAAGAAACAG
GAATAAAAGGCAAGCAATTTATGCCTATTCGTGTTGCTGTAACAGGCCAAATGCATG
```



GTCCTGAATTACCAAATACAATTGAAGTACTTGGTAAAGAAAAAGTGCTAAACCGTTTAA  
ACAATATAAGTAA

### > **tbox03**

Function: noncoding RNA T-box leader element (core genome, constant)

Best match: tbox03\_CC001\_MW2-USA400\_BA000033.2[560767:560992] (completely identical)

Position: 016-contig\_250: 14685 ... 14911; Length: 226 bp

Sequence:

ATAAAACGAAGGATTAGTAATTAATTTATACGATGCAGAGAGTGTACGGTTGCTGTGAG  
TACAACGTAGAAATTAATGAATGCACCTTCGTAAAATGAATTAATATATAATGAGAGTG  
ATGAGCATTAAAGTTGACTTAGTTTCCTTGATAATTTGGAAGCGCCCGCAATATTATTAATG  
TTATTCGCTAAATTCAGAGTGGAACCGTGCGGAAGCGCCTCTAAC

### > **cysE**

Function: protein coding sequence; serine acetyltransferase (core genome, constant)

Best match: cysE\_CC001\_MW2-USA400\_BA000033.2[561091:561732]

Position: 016-contig\_250: 15009 ... 15651; Length: 642 bp

Sequence:

TTGTTAAAAAGAATGAGAGACGATATAAAAATGGTATTTGAGCAGGATCCAGCGGCACG  
TTCAACATTAGAAGTCATTACAACGTATGCAGGTTTACATGCAGTTTGGAGTCATTTGATT  
GCACATAAGTTATAACAACCAAAAAAATATGTTGCAGCACGCGCGATATCTCAAATTTCA  
AGATTTTTCACAGGTATAGAAATCCATCCAGGTGCTAAAATTGGAAAGCGTCTATTTATA  
GATCATGGTATGGGCGTTGTAATAGGAGAAACATGTACAATTGGTGATAATGTGACAATC  
TATCAAGGCGTGACACTTGGTGGGACAGGGAAAGAAAGAGGGGAAAAGACACCCAGATAT  
AGGAGACAATGTTTTAATAGCAGCGGGTGCGAAAGTTTTAGGAAATATTAATAATAAATTC  
AAATGTAAATATTGGTGCAAATTCAGTTGTTTTACAATCAGTTCCAAGCTATTCAACGGTT  
GTTGGTATACCAGGACATATTGTTAAGCAAGATGGTGTTCGAGTTGGAAAAACATTTGAT  
CATCGCCATCTACCTGATCCAATTTATGAACAAATTAAGCATTTAGAACGACAACCTTGAA  
AAGACTAGGAATGGAGAGATTCAAGATGATTACATTATATAA

### > **cysS**

Function: protein coding sequence; cysteinyl-tRNA synthetase (core genome, constant)

Best match: cysS\_CC001\_MW2-USA400\_BA000033.2[561716:563116]

Position: 016-contig\_250: 15634 ... 17035; Length: 1401 bp

Sequence:

ATGATTACATTATATAATACGCTTACACGTCAAAAAGAAGTGTTCAAGCCTATAGAACCA  
GGAAAAGTAAAAATGTATGTATGTGGTCTACTGTATATAACTACATTCATATTGGTAAC  
GCAAGACCAGCAATTAATTATGACGTAGTGAGACGTTACTTTGAATACCAAGGATATAAT  
GTAGAATATGTATCAAATTTTACAGACGTAGATGATAAATTAATTAACGTTCTCAAGAA  
TTAAATCAGTCTGTTCCCGAAATTGCAGAAAAATATATCGCAGCTTTTCATGAAGATGTT  
GGTGCCTTAAATGTTAGAAAAGCGACTTCAAATCCAAGGTAATGGACCATATGGATGA  
CATTATTCAATTTATTAAGAGTTGGTGGATCAAGGTTATGCATATGAAAGTGGTGGCGA  
TGTTTACTTTAGAACACGTAATTTGAAGGTTATGGTAAATTAAGTCATCAATCCATAGAT  
GACTTAAAAGTGGGTGCTCGTATAGATGCAGGAGAGCATAAAGAAGATGCACTTGATTTT  
ACATTGTGGAAAAAAGCGAAGCCTGGCGAGATTAGTTGGGATAGCCATTTGGTGAAGG  
TAGACCAGGATGGCATATAGAATGTTCTGTAATGGCATTTCATGAGCTAGGACCTACAAT  
TGATATACATGCGGGTGGTTCAGATTTACAATTTCCACATCATGAAAATGAAATAGCACA  
ATCAGAAGCACATAATCATGCGCCATTTGCTAATTATTGGATGCATAATGGTTTCATTAAT  
ATTGATAATGAAAAAATGAGTAAATCACTAGGCAACTTTATTTTAGTTCACGATATTATT  
AAAGAAGTTGATCCAGATGTACTAAGATTCTTTATGATTAGCGTACATTATAGAAGCCCA  
ATTAACTATAATCTAGAATTTGGTAGAATCAGCACGTAGTGGACTAGAGCGTATTCGCAAT  
AGTTATCAATTAATTGAAGAGCGCGCACAAATTGCTACTAATATTGAAAATCAACAGACA  
TATATTGATCAAATTTGATGCGATTTTAAATCGTTTTGAAACAGTTATGAATGATGATTTTA  
ATACAGCTAATGCAATTACAGCTTGGTATGATTTAGCAAACTTGCGAATAAATATGTAC  
TAGAGAACACAACATCAACAGAAGTAATTGATAAATTTAAAGCAGTTTATCAAATTTTCA

CGCATGTTTTAGGTGTACCGTTAAAATCTAAAAATGCAGATGAATTATTGGATGAAGATG  
TTGAAAAATTAATCGAAGAGCGTAATGAAGCAAGGAAAAACAAAGATTTTGCACGAGCA  
GATGAAATTCGAGACATGCTGAAATCACAAAACATTATATTAGAAGACACACCTCAAGG  
GGTTAGATTTAAACGTGGATAA

### > **mrnC**

Function: protein coding sequence; minimal RNase III (core genome, constant)

Best match: mrnC\_CC001\_MW2-USA400\_BA000033.2[563109:563513] (completely identical)

Position: 016-contig\_250: 17027 ... 17432; Length: 405 bp

Sequence:

GTGGATAATCAACAAGATAATCACATTAAATTATTGAATCCATTGACCTTAGCATATATG  
GGAGACGCAGTCTTAGATCAATATGTACGTACCTATATCGTTTTAAAGCTTAAAAGTAAG  
CCTAATAAACTACATCAAATGTCTAAAAAATATGTATCTGCCAAAAGTCAGGCGCAAACG  
TTAGAATATTTAATGGAGCAAGAATGGTTTACAGACGAAGAAATGGATATTTTGAAGCGA  
GGGCGTAACGCGAAAAGTCATACTAAAGCTAAAAACACTGATGTTCAAACATATCGTAA  
AAGTTCAGCGATAGAAGCAGTGATAGGTTTTCTTTATTTAGAAAAAAGAGAAGAACGATT  
AGAGGCATTATTAATAAAATAATAACAATAGTAAACGAAAGGTAG

### > **yacO**

Function: protein coding sequence; tRNA/rRNA methyltransferase (core genome, constant)

Best match: yacO\_CC001\_MW2-USA400\_BA000033.2[563521:564267]

Position: 016-contig\_250: 17439 ... 18186; Length: 747 bp

Sequence:

GTGGAAGATACGGTTATTGTTGGTAGGCATGCTGTTAGAGAAGCGATTATTACTGGGCAT  
CCGATAAATAAGATATTGATTCAAGAAGGTATTA AAAAGCAACAAATTAATGAAATTTTA  
AAAAATGCAAAGATCAAAAAATCATTGTTCAAACGTACCAAATCTAAATTAGATTTT  
TTAGCAAATGCACCACATCAGGGTGTTCAGCGCTTATTGCACCATATGAATATGCTGAC  
TTCGATCAATTTTTAAAACAGCAAAAAGAAAAAGAAGGTTTATCGACAGTACTTATATTA  
GACGGCTTAGAAGACCCACATAACTTGGGATCAATTTTAAGAACAGCCGATGCAACGGG  
AGTTGATGGTGTATTATTTCCTAACGTCGTTACAGTTACACTAACGCAAACAGTTGCAAA  
AGCCTCAACAGGTGCAATTGAACATGTACCAGTTATTCGAGTGACAAATTTAGCTAAAAC  
TATCGATGAACTAAAAGATAATGGCTTTTGGGTAGCTGGCACTGAAGCTAATAATGCAAC  
AGATTATAGAAATCTAGAAGCGGACATGTCATTGGCTATTGTAATTGGTAGCGAAGGACA  
GGGTATGAGTCGCCTAGTAAGTGATAAATGCGATTTTTATATTAAGATTCCAATGGTTGG  
ACATGTAAACAGTTTGAATGCTTCGGTTGCAGCAAGTTTAAATGATGTACGAAGTATTCG  
AAAAGACATGATGTTGGAGAAATATAA

### > **yacP**

Function: protein coding sequence; putative protein (core genome, constant)

Best match: yacP\_CC001\_MW2-USA400\_BA000033.2[564267:564791] (completely identical)

Position: 016-contig\_250: 18185 ... 18710; Length: 525 bp

Sequence:

ATGAAAGAACGTTACTTAATCATTGATGGATACAATATGATAGGACAATCACCAACGCTA  
AGCGCCATTGCAAAGAGAATTTAGAAGAAGCTAGAATGCAATTAATAGATGCAATTGC  
AAATTATAATGCAGTTATTTAGATGAAATTTTGTGTTTTTCGATGCTTATGACCAATCG  
GGTGTGAAAGAGAATACATGTATCATGGCGTTAAAACGATTTTTACCAAGGAAAAAGA  
AACAGCTGATAGTTTCATAGAACGTTATGTTTATGAACTTTATGACAAGCATACTAAGCA  
TATTACAGTTGTAACAAGTGATATGAGTGAGCAACATGCTATCTTTGGATCAGGTGCATA  
TAGAATATCATCTCGCGAAATGTGGAGAGATTTAAAAGAAAATGAAATTGATGTGAGTA  
AATCATTAGATGATATAAGTGAAAACAAGCCAAGAAGCTCGAATTCGTTATCTTCTGAAA  
TCCTTGCAGAATTTGAAAAAATACGAAGAGGACATCATAAGAAATGA

### > **sigH**

Function: protein coding sequence; alternative sigma subunit of RNA polymerase (core genome, variable)

Best match: sigH\_CC001-ST772\_118\_AJGE01000068.1[19075:19563] (completely identical)

Position: 016-contig\_250: 18871 ... 19360; Length: 489 bp

Sequence:

```
ATGGATCTAAAACCATTAATTATTCGACGCATCAAACATTTGGATTTAATCATTATGATT
TAGAAGACTTATATCAAGAAATACTTATACGGATGTATAGGTCCGTCCAAACATTTGATT
TTAGTGGAGAGCAGCCTTTCACAAATTATGTTCAATGTTTAATTACGTCTGTAAAGTATGA
TTATTTGAGAAAATATTTAGCTACAAATAAAAGAATGGATAATTTGATTAATGAATATAG
AGTTACGTATCCATGTGCAATAAAGCGTTATGATGTTGAAAACAATTATTTGAATCAATT
AGCAATTAAGAGTTGATTCGTCAGTTAAGTATTTGAGTGCATTTGAAAAAGATGTCAT
GTATTTAATGTGTGAACAATATAAGCCGAGAGAAATTGCTCAACTGATGCATGTAAAAGA
GAAAGTGATTTATAATGCCATACAACGATGTAAAAATAAAATAAAACGTTATTTCAAAT
GATTTGA
```

### > **L10**

Function: noncoding RNA ribosomal protein L leader RNA (core genome, constant)

Best match: L10\_leader\_CC001\_MW2-USA400\_BA000033.2[568089:568235]

Position: 016-contig\_250: 22007 ... 22154; Length: 147 bp

Sequence:

```
CTTATTGTGATTATTTTACCTAAGACAGTAGGAGTTATTTATAACTTAAACTTATCCTGC
CGAGGCTAAAATTGACTTGAACGTGATGATCTATGATCTTTC AAGCACTTTTTGCCGTGGG
TAGAAAGTGCTTTTTTTATTAATTT
```

### > **rpmG**

Function: protein coding sequence; 50S ribosomal protein L33 (core genome, constant)

Best match: rpmG\_CC001\_MW2-USA400\_BA000033.2[565556:565699] (completely identical)

Position: 016-contig\_250: 19474 ... 19618; Length: 144 bp

Sequence:

```
GTGAGAAAAATACCTTTAAATTGTGAAGCTTGTGGCAATAGAAATTATAATGTTCTAAG
CAAGAAGGCTCGGCAACAAGATTAACCTTAAAGAAATATTGTCCAAAATGTAACGCGCA
CACAATTCATAAAGAATCGAAATAA
```

### > **secE**

Function: protein coding sequence; preprotein translocase subunit (core genome, constant)

Best match: secE\_CC001\_MW2-USA400\_BA000033.2[565755:565937] (completely identical)

Position: 016-contig\_250: 19673 ... 19856; Length: 183 bp

Sequence:

```
ATGGCTAAAAAAGAAAGTTTCTTTAAAGGCGTTAAGTCTGAAATGGAAAAACAAGTTG
GCCGACGAAAGAAGAGCTATTTAAATATACTGTAATTGTAGTTTCTACTGTTATATTCTTC
TTAGTCTTTTTCTATGCCTTAGATTTAGGAATTACAGCATTGAAAATTTATTATTTGGTTA
G
```

### > **nusG**

Function: protein coding sequence; transcription antitermination protein (core genome, constant)

Best match: nusG\_CC001\_MW2-USA400\_BA000033.2[565950:566498] (completely identical)

Position: 016-contig\_250: 19868 ... 20417; Length: 549 bp

Sequence:

```
ATGTCTGAAGAAGTTGGCGCAAAGCGTTGGTATGCAGTGCATACATATTCTGGATATGAA
AATAAAGTTAAAAAGAATTTAGAAAAAAGAGTAGAATCTATGAATATGACTGAACAAAT
CTTTAGAGTAGTCATACCGGAAGAAGAAGAACTCAAGTAAAAGATGGCAAAGCTAAAA
CGACTGTTAAAAAACATTCCTGGATATGTTTTAGTGGAAATTAATCATGACAGATGAAT
CATGGTATGTGGTAAGAAATACACCAGGTGTTACTGGTTTTGTAGGTTCTGCAGGTGCAG
GGTCTAAGCCAAATCCATTGTTACCAGAAGAAGTTCGCTTCATCTTAAAACAAATGGGTC
TTAAAGAAAAGACTATCGATGTTGAACTCGAAGTTGGCGAGCAAGTTCGTATTAATCAG
GTCCATTTGCGAATCAAGTTGGTGAAGTTCAAGAAATTGAAACAGATAAGTTTAAGCTAA
```

CAGTATTAGTAGATATGTTTGGCCGAGAAACACCAGTAGAAGTTGAATTCGATCAAATAG  
AAAAGCTTTAA

> **rplJ**

Function: protein coding sequence; 50S ribosomal protein L10 (core genome, constant)

Best match: rplJ\_CC001\_MSSA476\_BX571857.1[566904:567404] (completely identical)

Position: 016-contig\_250: 22191 ... 22692; Length: 501 bp

Sequence:

ATGTCTGCTATCATTGAAGCTAAAAACAACACTAGTTGATGAAATTGCTGAGGTA  
ACTATCA AATTCAGTTTCAACAGTAATCGTTGACTACCGTGGATTAACAGTAGCTGAAGTTACTGAC  
TTACGTTCACAATTACGTGAAGCTGGTGTGAGTATAAAGTATACAAAACACTATGGTA  
CGTCGTGCAGCTGAAAAAGCTGGTATCGAAGGCTTAGATGAATTCCTAACAGGTCCTACT  
GCTATTGCAACTTCAAGTGAAGATGCTGTAGCTGCAGCGAAAGTAATTTCTGGATTTGCT  
AAAGATCATGAAGCATTAGAAATTAATCAGGCGTTATGGAAGGCAATGTTATTACAGC  
AGAAGAAGTTAAAAGTGGTTCATTACCTTCACACGATGGTCTTGTATCTATGCTTTTA  
TCAGTATTACAAGCTCCTGTACGCAACTTCGCTTATGCGGTTAAAGCTATTGGAGAACA  
AAAGAAGAAAGCGCTGAATAA

> **rplL**

Function: protein coding sequence; 50S ribosomal protein L7/L12 (core genome, constant)

Best match: rplL\_CC001\_MW2-USA400\_BA000033.2[568816:569184] (completely identical)

Position: 016-contig\_250: 22734 ... 23103; Length: 369 bp

Sequence:

ATGGCTAATCATGAACAAATCATTGAAGCGATTAAGAAATGTCAGTATTAGAATTAAC  
GACTTAGTAAAAGCAATTGAAGAAGAATTTGGTGTAACTGCAGCTGCTCCAGTAGCAGTA  
GCAGGTGCAGCTGGTGGCGCTGACGCTGCAGCAGAAAAAACTGAATTTGACGTTGAGTT  
AACTTCAGCTGGTTCATCTAAAATCAAAGTTGTTAAAGCTGTTAAAGAAGCAACTGGTTT  
AGGATTAAGAAGATGCTAAAGAATTAGTAGACGGAGCTCCTAAAGTAATCAAAGAAGCTT  
TACCTAAAGAAGAAGCTGAAAAACTTAAAGAACAATTAGAAGAAGTTGGAGCTACTGTA  
GAATTAATAAATAA

> **Q5HID4**

Function: protein coding sequence; 16S rRNA methyltransferase C (core genome, constant)

Best match: Q5HID4\_CC001\_MW2-USA400\_BA000033.2[569359:569967] (completely identical)

Position: 016-contig\_250: 23277 ... 23886; Length: 609 bp

Sequence:

ATGAGTCATTATTACGATGAAGATCCAAGTGTAATTAGCAATGAACAACGTATTCAATAT  
CAATTAACCATCATAAAATTGATTTAATAACTGATAATGGAGTGTTCGAAAGATAAA  
GTAGATTATGGTTCAGATGTTCTTGTTCAAACCTTTTTTAAAAGCGCATCCACCTGGTCCAA  
GTAAGCGAATTGCCGATGTTGGTTGTGGTTACGGACCAATTGGTTTGATGATTGCTAAAG  
TATCACCACATCATTCAATTACAATGCTAGATGTTAATCACAGAGCGCTAGCCTTAGTTG  
AAAAAAACAAAAAATAAATGGTATTGATAATGCGATCGTAAAGGAAAGTGATGCTTTG  
TCTGCTGTGGAAGACAAAAGTTTTGATTTTATTTTAACCAATCCACCAATAAGAGCAGGG  
AAAGAAACCGTGCATCGTATATTGAGCAAGCATTACATAGATTAGACTCGAACGGTGA  
ACTATTCGTTGTAATTCAGAAGAAGCAAGGTATGCCATCTGCAAAGAAAAGAATGAATG  
AACTTTTTGGAAATGTAGAAGTGGTAAATAAAGATAAAGGATATTACATTCTGAGAAGTA  
TAAAAGCTTGA

> **rpoB**

Function: protein coding sequence; DNA-directed RNA polymerase beta subunit (core genome, variable)

Best match: rpoB\_CC001-ST772\_118\_AJGE01000068.1[24304:27855] (completely identical)

Position: 016-contig\_250: 24100 ... 27652; Length: 3552 bp

Sequence:

TTGGCAGGTCAAGTTGTCCAATATGGAAGACATCGTAAACGTAGAAACTACGCGAGAATT  
TCAGAAGTATTAGAATTACCAAACCTAATAGAAATTCAAACCTAAATCTTACGAGTGGTTC  
CTAAGAGAAGGTTTAATCGAAATGTTTAGAGACATTTCTCCAATTGAAGATTTTACTGGT  
AATTTGTCATTAGAGTTTGTGGATTACCGTTTAGGAGAACCAAAATATGATTTAGAAGAA  
TCTAAAAACCGTGACGCTACTTATGCTGCACCTCTTCGTGTAAAAGTGCCTAATCATTAA  
AAGAAACAGGAGAAGTTAAAGAACAAGAAGTCTTTATGGGTGATTTCCCATTAAATGACT  
GATACAGGTACGTTTCGTTATCAATGGTGCAGAACGTGTAATCGTATCTCAATTAGTTCGTT  
CACCATCCGTTTATTTCAATGAAAAAATCGACAAAAATGGTCGTGAAAACCTATGATGCAA  
CAATTATCCAAACCGTGGTGCATGGTTAGAATATGAAACAGATGCTAAAGATGTTGTAT  
ACGTACGTATTGATAGAACACGTAAACTACCATTAACAGTATTGTTACGTGCATTAGGTT  
TCTCAAGTGACCAAGAAATTGTTGACCTTTTAGGTGACAATGAATATTTACGTAATACTTT  
AGAGAAAGACGGCACTGAAAACACTGAACAAGCGTTATTAGAAATCTATGAACGTTTAC  
GTCCAGGTGAACCACCAACTGTTGAAAATGCTAAAAGTCTATTGTATTCACGTTTCTTTGA  
TCCAAAACGCTATGACTTAGCAAGCGTGGGTGCTTATAAAACAAACAAAAAATTACATTT  
AAAACATCGTTTATTTAATCAAAAATTAGCTGAGCCAATTGTAAATACTGAAAACCTGGTGA  
AATTGTAGTTGAAGAAGGTACAGTGCTTGCATCGTAAAATCGACGAAATCATGGATGT  
ACTTGAATCAAATGCAAACAGCGAAGTGTTGAATTGCATGGTAGCGTTATAGACGAGCC  
AGTAGAAATTCAATCAATTAAGTATATGTTCCCTAACGATGATGAAGGTCGTACGACAAC  
TGTAATTGGTAATGCTTTCCCTGACTCAGAAGTTAAATGCATTACACCAGCAGATATCATT  
GCTTCAATGAGTTACTTCTTTAACTTATTAAGCGGTATTGGATATACAGATGATATTGACC  
ATTTAGGTAACCGTCGTTTACGTTCTGTAGGTGAATTACTACAAAACCAATTCCGTATCGG  
TTTATCAAGAATGGAAAGAGTTGTACGTGAAAGAATGTCAATTCAAGATACTGAGTCTAT  
CACACCTCAACAATTAATTAATATTTCGACCTGTTATTGCATCTATTAAGAATTCTTTGGT  
AGCTCTCAATTATCACAATTCATGGACCAAGCAAATCCATTAGCTGAGTTAACGCATAAA  
CGTCGTCTATCAGCATTAGGACCTGGTGGTTTAAACACGTGAACGTGCTCAAATGGAAGTA  
CGTGACGTTCACTACTCTCACTATGGCCGTATGTGTCCAATTGAAACACCTGAGGGACCA  
AACATTGGATTGATTAACCTCATTATCAAGTTATGCACGTGTAATGAATTCGGCTTTATTG  
AAACACCATATCGTAAAGTTGATTTAGATACACATGCTATCACTGATCAAATGACTATTT  
AACAGCTGACGAAGAAGATAGCTATGTTGTAGCACAAGCAAACCTCTAAATTAGATGAAA  
ATGGTCGTTTCATGGATGATGAAGTTGTATGTCGTTTCCGTGGTAACAACACAGTTATGGC  
TAAAGAAAAAATGGATTATATGGATGTATCGCCGAAGCAAAGTTGTTTTCAGCAGCGACAG  
CATGTATTCATTCTTAGAAAATGATGACTCAAACCGTGCATTGATGGGTGCGAACATGC  
AACGTCAAGCAGTGCCCTTGTGAATCCAGAAGCACCATTTGTTGGAACAGGTATGGAAC  
ACGTTGCAGCACGTGATTCTGGTGCAGCTATTACAGCTAAGCACAGAGGTGCTGTTGAAC  
ATGTTGAATCTAATGAAATTCTTGTACGTGCTAGTTGAAGAGAACGGCGTTGAGCATG  
AAGGTGAATTAGATCGCTATCCATTAGCTAAATTTAAACGTTCAAACCTCAGGTACATGTT  
ACAACCAACGTCCAATCGTTGCAGTTGGAGATGTTGTTGAGTATAACGAGATTTTAGCAG  
ATGGACCATCTATGGAATTAGGAGAAATGGCATTAGGTAGAAACGTAGTAGTTGGTTTCA  
TGACTTGGGACGGTTACAACCTATGAGGATGCCGTTATCATGAGTGAAAGACTTGTGAAAG  
ATGACGTGTATACTTCTATTTCATATTGAAGAGTATGAATCAGAAGCACGTGATACTAAGT  
TAGGACCTGAAGAAATCACAAGAGATATTCCTAATGTTTCTGAAAGTGCCTTAAGAACT  
TAGACGATCGTGGTATCGTTTATATTGGTGCAGAAGTAAAAGATGGAGATATTTTAGTTG  
GTAAAGTAACGCCTAAAGGTGTAACCTGAGTTAACTGCCGAAGAAAGATTGTTACATGCA  
ATCTTTGGTGAAAAAGCACGTGAAGTTAGAGATACTTCATTACGTGTACCTCACGGCGCT  
GGCGGTATCGTTCTTGATGTAAAAGTATTCAATCGCGAAGAAGGCGACGATACATTATCA  
CCTGGTGTAACCAATTAGTACGTGTATACATCGTTCAAAAACGTAAAATTCATGTTGGT  
GATAAGATGTGTGGTGCACATGGTAACAAAGGTGTCATTTCTAAGATTGTTCTGAAGAA  
GATATGCCTTACTTACCAGACGGACGTCCGATCGATATCATGTTAAACCTCTTGGTGTAC  
CATCTCGTATGAACATCGGACAAGTATTAGAGCTACACTTAGGTATGGCTGCTAAAAATC  
TTGGTATTCACGTTGCATCACCAAGTATTTGACGGTGCAAACGATGACGATGTATGGTCAA  
CAATTGAAGAAGCTGGTATGGCTCGTGATGGTAAAACCTGTACTTTATGATGGACGTACAG  
GTGAACCATTCGATAACCGTATTTTCAGTAGGTGTAATGTACATGTTGAAACTTGCGCACA  
TGGTTGATGATAAATTACATGCGCGTTCAACAGGACCATATTCATTGTTACACAACAAC  
CACTTGGCGGTAAGCGCAATTCGGTGGACAACGTTTTGGTGAGATGGAGGTATGGGCAC  
TTGAAGCATATGGTGCTGCATACACATTACAAGAAATCTTAACTTACAAATCCGATGATA  
CAGTAGGACGTGTGAAAACATACGAGGCTATTGTTAAAGGTGAAAACATCTCTAGACCA

AGTGTTCCAGAATCATTCCGAGTATTGATGAAAGAATTACAAAGTTTAGGTTTAGATGTA  
AAAGTTATGGATGAGCAAGATAATGAAATCGAAATGACAGACGTTGATGACGATGATGT  
TGTAGAACGCAAAGTAGATTTACAACAAAATGATGCTCCTGAAACACAAAAAGAAGTTA  
CTGATTAA

> **rpoC**

Function: protein coding sequence; DNA-directed RNA polymerase beta' subunit (core genome, constant)

Best match: rpoC\_CC008\_NCTC8325\_CP000253.1[525848:529471] (completely identical)

Position: 016-contig\_250: 27788 ... 31412; Length: 3624 bp

Sequence:

TTGATTGATGTAATAATTTCCATTATATGAAAATAGGATTGGCTTCACCTGAAAAAATC  
CGTTCTTGGTCTTTTGGTGAAGTTAAAAACCTGAAACAATCAACTACCGTACATTA  
CCTGAAAAAGATGGTCTATTCTGTGAAAGAATTTTCGGACCTACAAAAGACTGGGAATGT  
AGTTGTGGTAAATACAAACGTGTTTCGCTACAAAGGCATGGTCTGTGACAGATGTGGAGTT  
GAAGTAACTAAATCTAAAGTACGTCGTGAAAGAATGGGTCACATTGAACTTGCTGCTCCA  
GTTTCTCACATTTGGTATTTCAAAGGTATACCAAGTCGTATGGGATTACTTGACATGT  
CACCAAGAGCATTAGAAGAAGTTATTTACTTTGCTTCTTATGTTGTTGTAGATCCAGGTCC  
AACTGGTTTAGAAAAGAAAACCTTTATTATCTGAAGCTGAATTCAGAGATTATTATGATAA  
ATACCCAGGTCAATTCGTTGCAAAAATGGGTGCAGAAGGTATTAAGATTACTTGAAGA  
GATTGATCTTGACGAAGAACTTAAATTGTTACGCGATGAGTTGGAATCAGCTACTGGTCA  
AAGACTTACTCGTGCAATTAACCGTTTAGAAGTTGTTGAATCATTCCGTAATTCAGGTAA  
CAAACCTTCATGGATGATTTTAGATGTACTTCCAATCATCCCACCAGAAATTCGTCCAATG  
GTTCAATTAGATGGTGGACGATTTGCAACAAGTGACTTAAACGACTTATACCGTCGTGTA  
ATTAATCGAAATAATCGTTTGAAACGTTTATTAGATTTAGGTGCACCTGGTATCATCGTTC  
AAAACGAAAACGTATGTTACAAGAAGCCGTTGACGCTTAAATTGATAATGGTTCGTGCTG  
GTCGTCCAGTACTGGCCAGGTAACCGTCCATTA  
AAAATCTTTATCTCATATGTTAAAAG  
TAAACAAGGTCGTTTCCGTCAAAACCTTACTTGGTAAACGTGTTGACTATTCAGGACGTT  
AGTTATTGCAGTAGGTCCAAGCTTGA  
AAATGTACCAATGTGGTTTACCAA  
AAAGAAATGGC  
ACTTGA  
ACTATTTAAACCATTTCGTAATGAA  
AGAATTAGTTCAACGTGAAATTGCA  
ACTAAC  
CATTAAAAATGCGAAGAGTAA  
AATCGAACGTATGGATGATGAAGTT  
TGGGACGTATTGG  
AAGAAGTAATTAGAGAACATCCTGT  
ATTACTTAAACCGTGCACCAACACTT  
CATAGACTTG  
GTATTCAAGCATTGAA  
CCAACCTT  
AGTTGAAGGTCGTGCGATT  
CGTCTACATCCACTTGT  
ACAACAGCTTATAACGCTGACTTT  
GACGGTGACCAAATGGCGGTT  
CACGTTCC  
TTTATC  
AAAAGAGGCACAAGCTGAAGCA  
AGAATGTTGATGTTAGCAGCACAA  
AACATCTTGAACC  
CTAAAGATGGTAAACCTGTAGTT  
ACACCATCACAAAGATATGGTACT  
TGGTAACTATTACC  
TTACTTTAGAAAGAAAAGATGC  
AGTAAATACAGGCGCAATCTTTA  
ATAATACAAATGAA  
GTATTA  
AAAGCATATGCAAATGGCTTTGT  
ACATTTACACACTAGAATTGGTGT  
ACATGCA  
AGTTCGTTCAATAATCCAACATTT  
ACTGAAGAACAAAACAAAAGATT  
CTTGCTACGTCA  
GTAGGTA  
AAATTATATTCAATGAAATCATT  
CCAGATTCATTTGCTTATATTAAT  
GAACCTA  
CGCAAGAAA  
ACTTAGAAAGAAAGACACCAA  
ACAGATATTT  
CATCGATCCTACA  
ACTTTA  
GGTGAAGGTGGATTAA  
AAGAATACTTTGAAAATGAAGA  
ATTAATTGAACCTTTCAACAA  
AAAATTCTTAGGTAATATTATT  
GCAGAAGTATTCAACAGATTTAG  
CATCACTGATACATC  
AATGATGTTAGACCGTATGAA  
AGACTTAGGATTCAAATTCTCAT  
CTAAAGCTGGTATTAC  
AGTAGGTGTTGCTGATATCGT  
AGTATTACCTGATAAGCAACA  
AATACTTGATGAGCATGA  
AAAATTAGTCGACAGAATTACA  
AAAACAATTC AACCGTGGTTA  
ATCACTGAAGAAGAAA  
GATATAATGCAGTTGTTGAA  
ATTTGGACAGATGCAAAAGAT  
CAAATTC AAGGTGAATTGA  
TGCAATCACTTGATAAA  
ACTAACCCAATCTTCATGAT  
GAGTGATTCAGGTGCCCGT  
GGTA  
ACGCATCTAACTTTACAC  
AGTTAGCAGGTATGCGTGG  
ATTGATGGCCGCACCATCT  
GGTA  
AGATTATCGAATTACCAAT  
CACATCTTCATTCCGTGA  
AAGGTTAACAGTACTTGA  
ATACTT  
CATCTCAACTCACGGTGC  
ACGTAAAGGTCTTGCCG  
ATACAGCACTTAAACAG  
CTGACTC  
AGGATATCTTACTCGT  
CGTCTTGTTGACGTGGC  
ACAAGATGTTATTGTT  
CGTGAAGAAGA  
CTGTGGTACTGATAG  
AGGTTTATTAGTTTCT  
GATATTAAGAAGGTAC  
AGAAATGATTGA  
ACCATTTATCGAACGT  
ATTGAAGGTCGTTATT  
CTAAAGAAACAATTC  
GTCATCCTGAAAC  
TGATGAAATAATCATT  
CGTCCTGATGAATTA  
ATTACACCTGAAATT  
GCTAAGAAAATTAC  
AGATGCTGGTATTGA  
ACAAATGTATATT  
CGCTCAGCATTTACTT  
GTAACGCACGACATGG

TGTTTGTGAAAAATGTTACGGTAAAAACCTTGCTACTGGTGAAAAAGTTGAAGTTGGTGA  
AGCAGTTGGTACAATTGCAGCCCAATCTATCGGTGAACCAGGTACACAGCTTACAATGCG  
TACATTCCATACAGGTGGGGTAGCAGGTAGCGATATCACACAAGGTCTTCCTCGTATTCA  
AGAGATTTTCGAAGCACGTAACCCTAAAGGTCAAGCGGTAATTACGGAAATCGAAGGTG  
TCGTAGAAGATATTAATTAGCAAAAAGATAGACAACAAGAAATTGTTGTTAAAGGTGCT  
AATGAAACAAGATCATACTTGCTTCAGGTACTTCAAGAATTATTGTAGAAATCGGTCAA  
CCAGTTCAACGTGGTGAAGTATTAAGTGAAGGTTCTATTGAACCTAAGAATTACTTATCT  
GTTGCTGGATTAAACGCGACTGAAAGCTACTTATTAAGAAGTACAAAAAGTTTACCGT  
ATGCAAGGTGTAGAAATCGACGATAAACACGTTGAGGTTATGGTTCGACAAATGTTACGT  
AAAGTTAGAATTATCGAAGCAGGTGATACGAAGTTATTACCAGGTTTATTAGTTGATATT  
CATAACTTTACAGATGCAAATAGAGAAGCATTAAACACCGTAAGCGTCTGCAACAGCT  
AAACCAGTATTACTTGGTATTACTAAAGCATCACTTGAAACAGAAAAGTTTCTTATCTGCA  
GCATCATTCCAAGAAACAACAAGAGTTCTTACAGATGCAGCAATTAAGGTAAGCGTGA  
TGACTTATTAGGTCTTAAAGAAAACGTAATTATTGGTAAGTTAATTCCAGCTGGTACTGGT  
ATGAGACGTTATAGCGACGTAATAACGAAAAACAGCTAAACCAGTTGCAGAAGTTGA  
ATCTCAAACCTGAAGTAACGGAATAA

### > **rplGAe**

Function: protein coding sequence; 50S ribosomal protein L7Ae (core genome, constant)

Best match: rplGAe\_CC001\_MW2-USA400\_BA000033.2[577630:577884] (completely identical)

Position: 016-contig\_250: 31548 ... 31803; Length: 255 bp

Sequence:

TTGTCTAAGGAAAAAGTTGCACGCTTTAACAAACAACATTTTGTAGTTGGTCTTAAAGAA  
ACGCTTAAAGCGTTAAAGAAAGATCAAGTTACATCTTTGATTATTGCTGAAGACGTTGAA  
GTATATTTAATGACTCGCGTGTTAAGCCAAATCAATCAGAAAAATATACCTGTATCTTTTT  
TCAAAGCAAACATGCTTTGGGTAAACATGTAGGTATTAACGTCAATGCGACAATAGTAG  
CATTGATTAATGA

### > **rpsL**

Function: protein coding sequence; 30S ribosomal protein S12 (core genome, constant)

Best match: rpsL\_CC005\_Mu50-VRSA\_BA000017.4[611666:612079] (completely identical)

Position: 016-contig\_250: 31900 ... 32314; Length: 414 bp

Sequence:

ATGCCAACTATTAACCAATTAGTACGTAAACCAAGACAAAGCAAAATCAAAAAATCAGA  
TTCTCCAGCTTTAAATAAAGGTTTCAACAGTAAAAAGAAAAAATTTACTGACTTAAACTC  
ACCACAAAAACGTGGTGTATGTACTCGTGTAGGTACAATGACACCTAAAAAACCTAACTC  
AGCGTTACGTAAATATGCACGTGTGCGTTTATCAAACAACATCGAAATTAACGCATACAT  
CCCTGGTATCGGACATAACTTACAAGAACACAGTGTTGTACTTGTACGTGGTGGACGTGT  
AAAAGACTTACCAGGTGTGCGTTACCATATTGTACGTGGAGCACTTGATACTTCAGGTGT  
TGACGGACGTAGACAAGGTCGTTTATTATACGGAACCTAAGAAACCTAAAAACTAA

### > **rpsG**

Function: protein coding sequence; 30S ribosomal protein S7 (core genome, constant)

Best match: rpsG\_CC001\_MW2-USA400\_BA000033.2[578461:578931] (completely identical)

Position: 016-contig\_250: 32379 ... 32850; Length: 471 bp

Sequence:

ATGCCTCGTAAAGGATCAGTACCTAAAAGAGACGTATTACCAGATCCAATTCATAACTCT  
AAGTTAGTAACTAAATTAATTAACAAAATTATGTTAGATGGTAAACGTGGAACAGCACAA  
AGAATTCCTTTATTCAGCATTTCGACCTAGTTGAACAACGCAGTGGTCGTGATGCATTAGAA  
GTATTCGAAGAAGCAATCAACAACATTATGCCAGTATTAGAAGTTAAAGCTCGTCGTGTA  
GGTGGTTCTAACTATCAAGTACCAGTAGAAGTTCGTCCAGAGCGTCGTACTIONTTAGGT  
TTACGTTGGTTAGTTAACTATGCACGTCTTCGTGGTGA AAAAACGATGGAAGATCGTTTA  
GCTAACGAAATTTTAGATGCAGCAAATAATACAGGTGGTGCCGTTAAGAAACGTGAGGA  
CACTCACAAAATGGCTGAAGCAAACAAGCATTGCTCACTACCGTTGGTAA

> **efg**

Function: protein coding sequence; translation elongation factor G (core genome, constant)  
Best match: efg\_CC001-ST772\_118\_AJGE01000068.1[33176:35257] (completely identical)  
Position: 016-contig\_250: 32972 ... 35054; Length: 2082 bp

Sequence:

```
ATGGCTAGAGAATTTTCATTAGAAAAAAGCTCGTAATATCGGTATCATGGCTCACATTGAT
GCTGGTAAAACGACTACGACTGAACGTATTCTTTATTACACTGGCCGTATCCACAAAATT
GGTGAACACACGAAGGTGCTTCACAAATGGACTGGATGGAGCAAGAACAAGACCGTGG
TATTACTATCACATCTGCTGCAACAACAGCAGCTTGGGAAGGTCACCGTGTAACATTAT
CGATACACCTGGACACGTAGACTTCACTGTAGAAGTTGAACGTTTATTACGTGTACTTGA
CGGAGCAGTTACAGTACTTGTATGCACAATCAGGTGTTGAACCTCAAACAGTTTG
GCGTACAGGCTACAACCTTATGGTGTTCCACGTATCGTATTTGTAAACAAAATGGACAAATT
AGGTGCTAACTTCGAATACTCTGTAAGTACATTACATGATCGTTTACAAGCTAACGCTGCT
CCAATCCAATTACCAATTGGTGCGGAAGACGAATTCGAAGCAATCATTGACTTAGTTGAA
ATGAAATGTTTCAAATATACAAATGATTTAGGTACTGAAATTGAAGAAATTGAAATTCCT
GAAGACCACTTAGATAGAGCTGAAGAAGCTCGTGCTAGCTTAATCGAAGCAGTTGCAGA
AACTAGCGACGAATTAATGGAAAAATATCTTGGTGACGAAGAAATTCAGTTTCTGAATT
AAAAGAAGCTATCCGCCAAGCTACTACTAACGTAGAATTCTACCCAGTACTTTGTGGTAC
AGCTTTCAAAAACAAAGGTGTTCAATTAATGCTTGACGCTGTAATTGATTACTTACCTTCA
CCACTAGACGTTAAACCAATTATTGGTACCCTGCTAGCAACCCTGAAGAAGAAGTAATC
GCGAAAGCAGACGATTCAGCTGAATTCGCTGCATTAGCGTTCAAAGTTATGACTGACCCT
TATGTTGGTAAATTGACATTCTTCCGTGTGTATTACAGGTACAATGACATCTGGTTCATACG
TTAAGAACTCTACTAAAGGTAAACGTGAACGTGTAGGTCGTTTATTACAAATGCACGCTA
ACTCACGTCAAGAAATCGATACTGTATACTCTGGAGATATCGCTGCTGCGGTAGGTCTTA
AAGATACAGGTACTGGTGATACTTTATGTGGTGAGAAAAATGACATTATCTTGGAATCAA
TGGAATTCCCAGAGCCAGTTATTCATTATCAGTAGAGCCAAAATCTAAAGCTGACCAAG
ATAAAATGACTCAAGCTTTAGTTAAATTACAAGAAGAAGACCCAACATTCCATGCACACA
CTGACGAAGAACTGGACAAGTTATCATCGGTGGTATGGGTGAGCTTCACTTAGACATCT
TAGTAGACCGTATGAAGAAAGAATCAACGTTGAATGTAACGTAGGTGCTCCAATGGTTT
CATATCGTGAAACATTCAAATCATCTGCACAAGTTCAAGGTAATTTCTCTCGTCAATCTG
GTGGTCGTGGTCAATACGGTGATGTTACATTGAATTCACACCAAACGAAACAGGCGCAG
GTTTCGAATTCGAAAACGCTATCGTTGGTGGTGTAGTTCCTCGTGAATACATTCCATCAGT
AGAAGCTGGTCTTAAAGATGCTATGAAAATGGTGTCTTAGCAGGTTATCCTTTAATTGA
TGTTAAAGCTAAATTATATGATGGTTCATACCATGATGTCGATTATCTGAAATGGCCTTC
AAAATTGCTGCATCATTAGCACTTAAAGAAGCTGCTAAAAAATGTGATCCTGTAATCTTA
GAACCAATGATGAAAGTAACTATTGAAATGCCTGAAGAGTACATGGGTGATATCATGGG
TGACGTAACATCTCGTCGTGGACGTGTTGATGGTATGGAACCTCGTGGTAATGCACAAGT
TGTTAATGCTTATGTACCACTTTCAGAAATGTTCCGTTATGCAACATCATTACGTTCAAAC
ACTCAAGGTCGCGGTACTTACACTATGTACTTCGATCACTATGCTGAAGTTCCAAAATCA
ATCGCTGAAGATATTATCAAGAAAAATAAAGGTGAATAA
```

> **tuf**

Function: protein coding sequence; translation elongation factor Tu (core genome, constant)  
Best match: tuf\_CC001-ST772\_118\_AJGE01000068.1[35474:36658] (completely identical)  
Position: 016-contig\_250: 35270 ... 36455; Length: 1185 bp

Sequence:

```
ATGGCAAAGAAAAATTCGATCGTCTAAAGAACATGCCAATATCGGTACTATCGGTCAC
GTTGACCATGGTAAAACAACATTAACAGCAGCAATCGCTACTGTATTAGCAAAAAATGGT
GACTCAGTTGCACAATCATATGACATGATTGACAACGCTCCAGAAGAAAAAGAACGTGG
TATCACAATCAATACTTCTCACATTGAGTACCAAACCTGACAAACGTCACTACGCTCACGT
TGACTGCCCAGGACACGCTGACTACGTTAAAAACATGATCACTGGTGCTGCTCAAATGGA
CGGCGGTATCTTAGTAGTATCTGCTGCTGACGGTCCAATGCCACAAACTCGTGAACACAT
TCTTTTATCACGTAACGTTGGTGTACCAGCATTAGTAGTATTCTTAAACAAAGTTGACATG
GTTGACGATGAAGAATTATTAGAATTAGTAGAAATGGAAGTTCGTGACTTATTAAGCGAA
TATGACTTCCCAGGTGACGATGTACCTGTAATCGCTGGTTCAGCATTAAAGCTTTAGAA
```



GGCGATGCTCAATACGAAGAAAAAATCTTAGAATTAATGGAAGCTGTAGATACTTACATT  
CCAACCTCCAGAACGTGATTCTGACAAACCATTTCATGATGCCAGTTGAGGACGTATTCTCA  
ATCACTGGTTCGTGGTACTGTTGCTACAGGCCGTGTTGAACGTGGTCAAATCAAAGTTGGT  
GAAGAAGTTGAAATCATCGGTTTACATGACACATCTAAAACAACCTGTTACAGGTGTTGAA  
ATGTTCCGTAAATTATTAGACTACGCTGAAGCTGGTGACAACATTGGTGCATTATTACGT  
GGTGGTTCGTGAAGACGTACAACGTGGTCAAGTATTAGCTGCTCCTGGTTCAATTACA  
CCACATACTGAATTCAAAGCAGAAGTATACGTATTATCAAAAAGACGAAGGCCGACGTCA  
CACTCCATTCTTCTCAAACCTATCGTCCACAATTCTATTTCCGTACTACTGACGTAACCTGGT  
GTTGTTCACTTACCAGAAGGTACTGAAATGGTAATGCCTGGTGATAACGTTGAAATGACA  
GTAGAATTAATCGCTCCAATCGCGATTGAAGACGGTACTCGTTTCTCAATCCGTGAAGGT  
GGACGTACTGTAGGATCAGGCCGTTGTTACTGAAATCATTAAATAA

### > **txbi\_1000-1**

Function: bidirectional rho-independent terminator

Best match: txbi\_1000-1\_CC001\_MW2-USA400\_BA000033.2582708:582783 [4\_50ANF10END]

Position: 016-contig\_250: 36626 ... 36702; Length: 76 bp

Sequence:

GACATTGTA AAAATGCTCCCTTCAAAGTTTTTCATTTTTTCAATGTCTACTTTGAAGAGAGCA  
TTTCATTAGTTTTATG

### > **kbl**

Function: protein coding sequence; 2-amino-3-ketobutyrate coenzyme A ligase (core genome, constant)

Best match: kbl\_CC008\_NCTC8325\_CP000253.1[536142:537329] (completely identical)

Position: 016-contig\_250: 38082 ... 39270; Length: 1188 bp

Sequence:

GTGGTTCAATCATTACATGAGTTTTAGAGGAAAATATAAATTATCTAAAAGAAAATGGT  
TTGTATAATGAAATAGATACAATTGAAGGTGCAAACGGACCAGAAATCAAATCAATGG  
GAAATCATACTAATACTTATCTTCAAATAATTATTTAGGACTAGCAACAAATGAAGATTT  
GAAATCAGCTGCAAAGCAGCTATTGATACACATGGTGTAGGTGCAGGCGCTGTTCGTAC  
AATCAATGGTACATTAGATTTACACGACGAATTAGAAGAAACACTAGCAAAATTTAAAG  
GAACAGAAGCTGCAATAGCTTATCAATCAGGATTTAATTGTAATATGGCTGCTATTTTCAG  
CTGTCATGAATAAAAATGATGCTATTTTTATCAGATGAGCTTAATCATGCATCAATTATTGA  
TGGATGTCGCTTATCTAAAGCTAAAATTATTCGAGTTAACCATTACAGACATGGATGATTTA  
CGTGCGAAAGCAAAGAAGCAGTTGAATCAGGTCAATACAATAAAGTGATGTATATCAC  
TGATGGCGTTTTTAGTATGGATGGTGTGTTGCTAAATTACCTGAAATTGTAGAAATTGC  
AGAAGAATTTGGTTTATTAACCTTATGTTGACGACGCTCATGGTTCAGGTGTTATGGGTAA  
AGGCGCTGGTACGGTTAAACATTTTTGGTTTACAAGATAAAAATCGATTTCCAAATAGGTAC  
GCTTTCTAAAGCAATTGGTGTTCGTTGGCGGTTATGTAGCAGGTACAAAAGAGTTAATAGA  
TTGGTTAAAAGCACAATCACGACCATTCTTATTCTCTACATCATTAGCACCTGGGGATACC  
AAAGCAATAACTGAAGCAGTTAAAAGTTAATGGATTCAACTGAATTACATGATAAATTA  
TGGAACAATGCACAATTTTTAAAAAATGGATTGTCAAATTAGGATATGATACAGGTGA  
GTCAGAACTCCAATTACACCAGTAATTATTGGTGTGAAAAAACAACCTCAAGAATTTAG  
TAAGCGTTTTAAAAGACGAAGGTGTCTATGTGAAATCTATCGTTTTCCCAACAGTACCAAG  
AGGTACAGGACGTGTAAGAAATATGCCTACAGCTGCACATACAAAAGACATGTTAGATG  
AAGCAATTGCGGCTTATGAAAAAGTAGGAAAAGAAATGAAGTTGATTTAA

### > **hchA**

Function: protein coding sequence; chaperone Hsp31 and glyoxalase 3 (core genome, variable)

Best match: hchA\_CC005\_Mu50-VRSA\_BA000017.4[619305:620183] (completely identical)

Position: 016-contig\_250: 39535 ... 40414; Length: 879

ATGTCACAAGATGTAATGAATTAAGTAAGCAACCAACGCCAGATAAAGCAGAAGATAA  
CGCATTTTTCCCATCACCATATTCCTTAGTCAATATACAGCACCTAAAACAGATTTTGAT  
GGTGTGAACACAAAGGTGCCTATAAAGATGGTAAATGGAAAGTATTGATGATTGCTGCT

GAAGAGAGATATGTATTATTGGAAAATGGAAAATGTTCTCTACGGGTAATCATCCTGTT  
GAAATGTTATTACCTTTACATCATTTAATGGAAGCAGGTTTTGACGTTGATGTTGCGACAT  
TATCTGGTTATCCAGTTAAATTAGAATTATGGGCTATGCCAACTGAAGACGAGGCAGTTA  
TAAGTACTTATAATAAATTGAAAAGAAAAATTTAAAACAGCCAAAAAAATTAGCAGATGTG  
ATTAATAAATGAATTAGGACCTGATTCAGACTATTTATCTGTCTTTATCCCAGGCGGACATG  
CTGCAGTTGTTGGTATTTCTGAAAGTGAGGACGTTCAACAAACATTAGATTGGGCATTAG  
ACAATGACCGCTTTATAGTTACATTATGTCATGGACCAGCAGCACTACTTTCAGCAGGGC  
TTAACAGAGAAAAATCTCCATTAGAAGGATACTCTGTTTGTGTCTTCCCTGACTCATTAGA  
TGAAGGTGCAAATATTGAAATAGGTTATTTACCTGGACGCTTGAAATGGTTAGTTGCTGA  
TTTATTAACATAACAAGGATTAAGTAGTTAACGACGATATGACAGGAAGAACGTTAA  
AAGATCGTAAATTATTAACAGGTGACAGTCCTTTAGCTTCAAATGAGTTAGGAAAATTAG  
CAGTTAATGAAATGTTAAATGCAATACAAAATAAATAA

### > **araB**

Function: protein coding sequence; ribulokinase (core genome, constant)

Best match: araB\_CC001\_MW2-USA400\_BA000033.2[586655:588292]

Position: 016-contig\_250: 40571 ... 42209; Length: 1638

ATGTCTTATAGCATTGGAATTGATTATGGAACAGCTTCAGGCCGTGTGTTTTTAATTAATA  
CAACTAACGGTCAAGTAGTATCAAAAATTTGTGAAACCATATACACATGGTGTCATTGAGA  
GTGAATTAAATGGTTTGAAAATACCACATACATATGCACTTCAAATAGTAATGATTATT  
TAGAAATTATGGAAGAAGGAATATCATATATAGTACGTGAATCAAAAATAGATCCAGTC  
AATATAGTAGGTATTGGTATAGACTTTACTTCATCTACTATTATTTTTACTGACGAAAACC  
TTAACCCGGTACATAATTTAAAACAATTTAAAACAATCCACATGCGTATGTGAAACTTT  
GGAAACATCATGGTGCATATAAAGAAGCAGAGAAATTATATCAAAGTCTATTGAAAAT  
AATAATAAGTGGTTAGGCCATTATGGATATAATGTTAGTAGTGAATGGATGATTCCCAA  
ATAATGGAAGTCATGAATCGAGCACCAGAAATTATGGAAAAACGGCTTATATTATGGA  
AGCGGGCGATTGGATTGTAAATAAATTAATAAATAAATGTACGCTCGAATTGTGGATT  
AGGTTTCAAAGCATTTTGGGAAGAAGAAACAGGGTTTCATTATGATTTATTTGATAAAAT  
AGACCCCAAATTATCAAAGTAATCAAGATAAAGTATCTGCACCGGTTGTTAATATTGG  
TGAAGTAGTAGGAAACTGGACGATAAAATGGCACAGAAATTAGGATTATCAAAGAGA  
CTATGGTAAGTCCTTTTATTATTGATGCCCATGCTAGTTTATTAGGTATTGGGTCTGAAAA  
AGATAAAGAAATGACTATGGTGATGGGAACAAGCACATGCCATCTTATGTTAAATGAAA  
AGCAACATCAAGTGCCAGGTATATCAGGTTCTGTAAAAGGAGCAATTATTCCAGAATTAT  
TTGCTTATGAAGCGGGCAATCAGCAGTAGGTGATTTGTTTGAGTATGTCGCTAAGCAAG  
CACCAAAGTCATATGTAGATGAAGCAGCAAATAGAAATATGACTGTATTTGAATTAATGA  
ATGAAAAGATAAAAACATCAAATGCCAGGTGAAAGTGGGCTCATTGCTCTTGATTGGCATA  
ATGGAAATCGAAGTGTATTAAGTGATAGCAATTTAACAGGTTGTATCTTTGGATTAACTTT  
ACAACTAAGCATGAGGATATTTATAGAGCATATTTAGAAGCTACAGCATTGTTGTTACTAA  
GATGATTATGCAACAGTATCAAGATTGGCATATGGAAGTAGAAAAGGTATTTGCATGTGG  
CGGTATACCTAAAAAGAATGCTGTTATGATGGATATCTATGCCAATGTACTGAATAAAAA  
ACTAATTGTTATGGATAGTGAGTATGCACCAGCAATAGGCGCAGCAATATTAGGTGCAGT  
CAGTGGTGGCGCACATAATTCATTAATGATGCAGTTGATGCTATGAAAGAGCCAATTTT  
ATACGAAATTAATCCAGAAGCGGAAAAAGTACAAAGGTATGAAACATTATTTAAAGCTT  
ATAAGGCTTTACATGATATCCATGGTTATAAAAAAGCTAATATAATGAAAGATATCCAGA  
GTTTAAGAGTTGAGGGATAA

### > **ilvE**

Function: protein coding sequence; branched-chain-amino-acid aminotransferase (core genome, variable)

Best match: ilvE\_CC001\_MW2-USA400\_BA000033.2[589806:590882] (completely identical)

Position: 016-contig\_250: 43723 ... 44800; Length: 1077

ATGTCACAAGCAGTTAAAGTTGAACGACGAGAAACATTAAAAACAAAACCAAATACATC  
TCAACTAGGTTTTGGTAAATATTTTACTGATTATATGTTGAGTTATGATTATGATGCAGAT

AAAGGATGGCATGATTTGAAGATAGTACCTTATGGTCCTATTGAAATTTACCTGCTGCA  
CAAGGTGTTTCATTATGGTCAATCGGTATTCGAAGGATTAAGCATATAAGAGATGGG  
GAAGTTGCACTTTTCCGTCCTGAAGAAAATTTAAGCGTCTTAATAACTCGTTAGCACGAT  
TAGAAATGCCTCAAGTAGACGAAGCAGAATTGTTAGAGGGGCTAAAACAATTAGTTGAT  
ATAGAAAGAGATTGGATTCCCTGAAGGGGAAGGTCAATCATTATATATTCGTCCATTTGTT  
TTTGCAACAGAAGGGGCACTTGGCGTTGGTGCATCACATCAGTATAAATTATTAATTATTT  
TATCTCCTTCAGGTGCATATTATGGTGGTGAGACTTTAAAACCAACTAAAATCTATGTAG  
AAGATGAATATGTGCGTGCTGTTTCGTGGCGGTGTAGGCTTTGCAAAAGTTGCAGGTA  
ACTATGCGGCAAGTTTATTAGCACAAACAATGCAAATAAATTAGGTTATGACCAAGTATTAT  
GGCTTGATGGTGTGAACAGAAATATATCGAAGAAGTTGGTAGCATGAATATTTCTTCG  
TTGAAAATGGAAAAGTAATTACACCAGAGTTGAATGGCAGTATTTACCTGGTATTACAC  
GTAAATCTATTATCGAATTAGCTAAAACTTAGGATATGAAGTCGAAGAGCGCCGCGTTT  
CAATCGATGAATTATTCGAATCATATGATAAAGGTGAGTTAACAGAAGTATTTGGTAGTG  
GTACTGCAGCAGTTATTTACCTGTGGGTACATTGAGATACGAAGATCGTGAAATCGTTA  
TTAATAATAATGAGACTGGTGAAATTACTCAAAAATTATACGACGTCTATACTGGTATTC  
AAAATGGTACTTTAGAAGATAAAAATGGTTGGAGAGTCGTTGTACCAAAAATATTA

### > **tadA**

Function: protein coding sequence; nucleoside deaminase (core genome, constant)

Best match: tadA\_CC001\_MW2-USA400\_BA000033.2[593271:593741] (completely identical)

Position: 016-contig\_250: 47188 ... 47659; Length: 471 bp

Sequence:

ATGACAAATGATATATATTTTATGACATTAGCGATTGAAGAAGCTAAAAAAGCAGCTCAA  
CTAGGCGAAGTACCTATAGGTGCTATCATCACTAAAGATGATGAAGTTATCGCTAGAGCA  
CATAATTTAAGAGAAACACTACAACAACCAACGGCGCATGCTGAACATATTGCAATTGA  
ACGTGCAGCCAAAGTGTTAGGTAGTTGGCGTTTAGAAGGTTGCACATTATATGTAACCTT  
AGAACCATGTGTCATGTGCGCAGGAACAATTGTAATGAGTCGCATTCCAAGAGTCGTCTA  
TGCGCAGATGATCCTAAAGGTGGTTGTAGTGGCAGTTTAAATGAATTTATTGCAACAATC  
TAATTTTAATCATCGTGCAATTGTTGATAAAGGTGTAATAAAGAAGCATGTAGCACATT  
ATTAACAACATTTTTTAAAACTTAAGAGCCAATAAGAAATCCACCAATTAG

### > **A5IQB3**

Function: protein coding sequence; putative hydrolase/haloacid dehalogenase-like family (core genome, constant)

Best match: A5IQB3\_CC001-ST772\_118\_AJGE01000068.1[48009:48878] (completely identical)

Position: 016-contig\_250: 47805 ... 48675; Length: 870 bp

Sequence:

ATGATAAAACTAATAGCCACTGATATGGATGGCAGCTACTTAATGCAGCACATGAAATT  
TCTCAACCTAATATTGATGCGATTAATAACGCTCAAGAACAAGGGATAACGGTTGTTATC  
GCGACAGGTCGAGCATTTTATGAAGCACAAGCACCAGTTGCTGACACAGATTTAACAGTA  
CCATATATTTGTTTGAATGGTGCTGAAGTACGTGATGAACTTTCAATGTAATGAGCACTT  
CACACCTTAATAAATCGTTAGTACACAAAATTACAAATGTTTTAAAAGATGCAGGTATTT  
ATTATCAAGTATACACGAGTCGTGCGATTTATACTGAAGATCCACAAAGAGATTTAGACA  
TTTACATAGATATTGCTGAGCGTGCAGGTCAACATGCAAACGTTGAGCGTATTAATAATG  
GTATTCAAAGACGCATAGATAATGGTACGTTGAAAGTTGTTGATAATTATGATGCTATTG  
AAACATACCTGGTGAATTAATTATGAAAATATTAGCATTTGATGGAAATTTAGAAAAAA  
TTGACAAAGCTAGTAAAATTTAGCTGAATCTCCGAATTTAGCTATATCATCATCTTCGAG  
AGGAAATATAGAAATAACGCATTCAGATGCACAAAAGGTATTGCGCTAGAAACAATTG  
CCGAAAGATTAGGGATTGAAATGAAAGAAGTCATGGCAATAGGTGACAATTTAAATGAC  
TTATCAATGTTAGAGAAAGTTGGCTATCCAGTTGCGATGGAAAATGGTGCAGAAGAAGTT  
AAAAAATAGCGAAATATGTCACAGATACGAATGAAAATAGTGGTGTGGAAAAGCTAT  
TATGAAATTATTACGTGAACAACAAGTTTAA

### > **azol**

Function: protein coding sequence; FMN-dependent NADPH-azoreductase (core genome, variable)

Best match: azo1\_CC001-ST772\_118\_AJGE01000068.1[48899:49465] (completely identical)

Position: 016-contig\_250: 48695 ... 49262; Length: 567 bp

Sequence:

```
ATGAAAGGATTAATTATTATTGGCAGTGCACAAGTGAATTCACATACAAGTGCCTAGCA
AGATACTTAACTGAGCATTTTTAAAACACATGATATTGAAGCGGAAATATTTCGATTTAGCA
GAAAAGCCGTTAAATCAATTAGATTTTTTCAGGAACAACACCGTCTATTGATGAAATCAAA
CAAAATATGAAAGATTTAAAAGAGAAAGCAATGGCGGCGGACTTTTTAATATTAGGAAC
GCCAACTATCATGGTTCATATTCTGGAATATTGAAAAATGCATTAGATCATCTAAATAT
GGATTATTTTTAAAATGAAACCTGTAGGCTTAATAGGAAATAGTGGTGGTATTGTTAGTTC
AGAGCCATTGTCACATTTAAGAGTAATCGTCAGAAGTTTACTAGGCATTGCTGTACCAAC
TCAAATAGCAACACATGATTCTGATTTTGCTAAAAATGAAGATGGTTCATATTACTTAAA
TGATAGTGAATTCCAATTACGAGCAAGATTATTTGTTCGATCAAATTGTATCTTTTGTGAAT
AATAGTCCATATGAACATTTAAAATAA
```

### > tx\_azo1\_1

Function: rho independent terminator

Best match: tx\_azo1\_1\_CC001\_MW2-USA400\_BA000033.2[595361:595442] (completely identical)

Position: 016-contig\_250: 49278 ... 49360; Length: 82 bp

Sequence:

```
AATATACATTA AAAATAGGTATGTAGCTTAAGGTATTTTCATTGAGAATGCTTTTAAGTCA
CATGCCTATTTTTTGTCTAAT
```

### > tx\_azo1\_2

Function: rho independent terminator

Best match: tx\_azo1\_2\_CC001\_MW2-USA400\_BA000033.2[595725:595769] (completely identical)

Position: 016-contig\_250: 49642 ... 49687; Length: 45 bp

Sequence:

```
GCAAAATATTATATTTATCAAATTTTGATATTTTAAAGGAGTATT
```

### > sdrC

Function: protein coding sequence; unidentified bone sialoprotein-binding protein, probably sdrC chv

Best match: sdrC\_CC012\_21266\_AFTT01000023.1[32762:35593:r]

Position: 016-contig\_250: 49692 ... 51688; Length: 1996 bp

Sequence:

```
ATGAATAATAAAAAGACAGCAACAAATAGAAAAGGCATGATACCAAATCGATTAAACAA
ATTTTCGATAAGAAAGTATTCTGTAGGTACTGCTTCAATTTTAGTAGGGACAACATTGATT
TTTGGGTAAAGTGGTCATGAAGCTAAAGCGGCAGAACATACGAATGGAGAATTAATCA
ATCAAAAATGAAACGACAGCCCCAAGTGAGAATAAAACAACCTGAAAAAGTTGATAGTC
GTCAACTAAAAGACAATACGCAAACCTGCAACTGCAGATCAGCCTAAAGTGACAATGAGT
GATAGTGCAACAGTTAAAGAACTAGTAGTAACATGCAATCACCACAAAACGCTACAGC
TAGTCAATCTACTACACAACTAGCAATGTAACAACAATGATAAATCATCAACTACATA
TAGTAATGAAACTGATAAAAGTAATTTAACACAAGCAAAAACGTTTCAACTACACCTAA
ACAACGACTATTAACCAAGAACATTAACCCTATGGCTGTGAACACAGTAGCAGCAC
CACAACAAGGTACAAATGTTAATGATAAAGTTCATTTTTCAAATATTGATATTGCTATTGA
TAAAGGACATGTAAATCAACAACCTGGCAAACTGAATTTTGGGCGACTTCTAGTGATGT
TTTTAAATTAAGCGAATTACAAAATCGATGATTCTGTAAAGAGGGCGATACATTTAC
ATTTAAATATGGACAGTATTTCCGTCCGGGTTCTGTAAGATTACCTTCACAACTCAAAT
TTATATAATGCCCAAGGTAATATTATTGCAAAAGGTATTTATGATAGTACAACAAACACA
ACAACATATACTTTTACGAACTATGTGGATCAATATACAAATGTTAGCGGTAGCTTTGAA
CAAGTTGCATTTGCGAAACGTGAAAATGCAACAACCTGATAAACAGCTTATAAAATGGA
AGTAACTTTAGGTAATGATACATATAGCGAAGAAGTCATCGTCGATTATGGTAATAAAAA
AGCACAACCGCTTATTTCAAGTACAACTATATCAATAATGAAGATTTATCACGAAATAT
GACTGTTTATGTAAATCAACCTAAAAATACATATACAAAAGAAACATTAGTAACAAATTT
AACTGGTTATAAATTTAATCCAGATGCTAAAACTTTAAAATTTATGAAGTAACTAACCA
AAATCAGTTTGTGGATAGTTTCACCCAGATACTTCAAACTTACAGATGTCACTGATAA
```

ATTTAAAATTACATACAGTAATGATAATAAGACGGCGACAGTTGATTTATTGAATGGTCA  
ATCTAGTAGTGATAAACAGTACATTATTCAACAAGTTGCTTATCCAGATAATAGTTCAAC  
AGATAATGGGAAAATTGATTATACTTTAGAAACACAAAATGGAAAAAGTAGTTGGTCAA  
ACAGTTATTCAAATGTGAATGGTTCATCAACTGCAAATGGCGACCAAAAAGAAATATAATC  
TAGGTGACTATGTATGGGAAGATACAAATAAAGATGGTAAACAAGATGCCAATGAAAAA  
GGGATTAAGGTGTTTATGTTCATTCTTAAAGATAGTAACGGTAAAGAATTAGATCGTACG  
ACAACAGATGAAAATGGTAAATATCAGTTCCTGTTTAAAGCAATGGAACCTTATAGTGTA  
GAGTTTTCAACACCAGCCGGTTATACACCGACAACCTGCAAATGCAGGAACCTGATGATGCT  
GTTGATTCAGATGGTTTAAACAACAACAGGTGTCATTAAAGACGCTGACAACATGACATTA  
GATAGTGGATTCTATAAAACACCAAAATATAGTTTAAAGGTGATTATGTTTGGTACGACAGT  
AATAAAGATGGTAAACAAGATTCGACTGAAAAAGGAATTAAGGTGTTAAAGTTACTTT  
GCAAAACGAAAAAGGCGAAGTAATTGGTACAACCTGAAACAGATGAAAATGGTAAATATC  
GTTTCGATAATTTAGATAGCGGTA

### > sdrD?

Function: protein coding sequence; unidentified bone sialoprotein-binding protein, probably sdrD

Best match: [MANUAL OVERRIDE/BLAST]

Position: 017-contig\_194\_RC: 1 ... 756; Length: 756 bp

Sequence:

ATTTACACTTGATAACGGATACTTCGAAGAAGATACATCAGATAGCGACTCAGATTCAG  
ATAGCGATTCAGATTCAGATAGCGACTCAGACTCAGACAGCGACTCAGATTCAGACAGC  
GACTCAGACTCGGATAGCGATTCAGATTCAGACAGTGATTCAGATTCAGACAGCGATTTCG  
GATTCAGACAGCGACTCAGACTCGGATAGCGACTCAGACTCAGATAGCGACTCAGATTCG  
GATAGCGACTCAGACTCAGACAGCGACTCAGATTCAGACAGCGACTCAGACACAGATAG  
CGACTCAGACTCAGACAGCGACTCAGACAGTGATTCAGACTCAGATAGCGATTCAGATTC  
AGACAGCGACTCAGACTCAGATAGTGACTCAGATTCAGATAGTGACTCAGACTCAGACA  
GTGATTCAGACTCAGACAGTGATTCAGATTCAGATAGCGACTCAGACTCAGATAGCGACT  
CAGATTCAGACAGCGATTCAGACTCAGATAGTGACTCAGATTCGGACAGCGATTCAGACT  
CAGATAGCGACTCAGATTCAGACAGTGATTCAGACTCAGATGCAGGTAAGCACACACCT  
GTTAAACCAATGAGTACTACTAAAGACCATCACATAAAGCAAAAAGCATTACCAGAAAC  
AGGTAATGAAAATAGCGGCTCAAATAACGCAACGTTATTTGGCGGATTATTCGCAGCATT  
AGGATCATTATTGTTATTCGGTTCGTCGTA AAAAACAAAATA

### > tx\_sdrD

Function: rho-independent terminator (genomic island)

Best match: tx\_sdrD\_CC001\_MW2-USA400\_BA000033.2[603049:603097]#[1\_PERFECT  
MATCH]#tx\_sdrD#[ter:rho-independent terminator]#[gi:21.5894:21.5475] (completely identical)

Position: 017-contig\_194\_RC: 757 ... 806; Length: 49 bp

Sequence:

ATAATACAGCTTATACCAGGTCCGTGAGGCCTGGTTTTTTATTTCAAAA

### > sdrE/bbp?

Function: protein coding sequence; unidentified bone sialoprotein-binding protein, probably sdrE/bbp

Best match: [MANUAL OVERRIDE/BLAST]

Position: 017-contig\_194\_RC: 807 ... 3656; Length: 2850 bp

Sequence:

TTTATGAAATGTATCTTATGTTTGAGATTA AATAGTGCAATTTTTTAAAAAATATAACATA  
AATCAACATAAATTTAATTCATCTTTACATTA AAAAGTACAAACGAATAAGAAAAGCAATT  
AAACACAGTATCAAACCATTTAAAACAATTGATATA AAAAGACAAACGAATAATTA AAAA  
TTACTAGAATTAATTTATTCAAACCAAAGTGTA AATAACAGTCTTAGATAAATAAATTT  
ATTTAAAGTATTGTGCTTTATCTAAA AATGTATTACGATGGGAATACAAATTTTTATATGT  
AAAAATATTAATTTTTTGCAAATATTGATATTTT AAAGGAGATTTATATGATTAACAGGG  
ATAATAAAAAGGCAATAACAAAAAAGGGTATGATTTCAAATCGCTTAAACAAATTTTCG  
ATTAGAAAGTATACTGTAGGA ACTGCATCGATTTTAGTAGGTACGACATTGATTTTTGGTC  
TAGGGAACCAAGAAGCTAAAGCTGCTGAAAACACTAGTACAGAAAATGCAAAAACAAGAT

GATGCAACGACTAGTGATAATAAAGAAGTAGTGTCTGGAACTGAAAATAATTTCGACAAC  
AGAAAATAATTCAACAAATCCAATTAAGAAAGAAACAAATACTGATTCACAACCAGAAG  
CTAAAAAGAATCAACTTCATCAAGTACTCAAAAACAGCAAAATAACGTTACAGCTACA  
ACTGAAACTAAGCCTCAAAACATTGAAAAAGAAAATGTTAAACCTTCAACTGATAAAAC  
TGCGACAGAAGATACATCTGTTATTTTAGAAGAGAAGAAAGCACCAAATAATACAAATA  
ACGATGTAACACAAAACCATCTACAAGTGAAATTCAAAACAAAACCAACTACACCTCAA  
GAATCTACAAATATTGAAAATTCACAATCGCAACCAACGCCTTCAAAAAGTAGACAATCAA  
GTTACAGATGCAACTAATCCAAAACAAACGGTAAATGTATCAAAAAGAAGATCTTAAAAA  
TGATCCTGAAAATTTAAAAGAATTAGTTAGAAGTGAAAATAACACTAATCATTCAACTAA  
ACCAGTTGCTACAGCACCAACAAGTGTTCACCAAAAACGATTAATGCGAAAATGCGTTT  
TGCAGTTGCACAACCAGCAGCAGTTGCGTCAAATAATGTAAATGATTTAATTACAGTGAC  
GAAACAGACGATCAAAGTTGGCGATGGTAAAGATAATGTGGCAGCAGCGCATGACGGTA  
AAGATATTGAATATGATACAGAGTTTACAATTGACAATAAAGTCAAAAAGGGCGATACA  
ATGACGATTAATTATGATAAGAATGTAATTCCTTCGGATTTAACAGATAAAAATGATCCT  
ATCGATATTACTGATCCATCAGGAGAGGTTATTGCCAAAAGGAACATTTGATAAAGCGACT  
AAGCAAATCACATATACATTTACAGATTATGTAGATAAATATGAAGATATAAAAGCACGT  
TAACTTTATACTCATATATTGATAAGCAAGCAGTACCTAATGAAACTAGTTTGAATTTAA  
CGTTTGCAACAGCAGGTAAGAAACTAGCCAAAACGTTTCTGTTGATTATCAAGACCCAA  
TGGTTCATGGTGATTCAAACATTCAATCTATCTTTACAAAGTTAGATGAAAACAAACAAA  
CTATTGAACAACAAATTTATGTTAATCCTTTGAAAAAACAGCAACTAACACTAAAGTTG  
ATATAGCTGGTAGTCAAGTAGATGATTATGGAAATATTAAACTAGGAAATGGTAGTACCA  
TTATTGACCAAAATACAGAAATAAAAAGTTTATAAAGTTAACCTAATCAACAATTGCCTC  
AAAGTAATAGAATCTATGATTTTAGTCAATACGAAGATGTAACAAGTCAATTTGATAATA  
AAAAATCATTAGTAATAATGTAGCAACATTGGATTTTGGTGATTAATTCAGCCTATAT  
TATCAAAGTTGTTAGTAAATATACACCTACATCAGATGGCGAACTAGATATTGCTCAAGG  
TACTAGTATGAGAACAACCTGATAAATATGGTTATTATAATTATGCAGGATATTCAAACCT  
CATCGTAACTTCTAATGACTCTGGCGGTGGTGACGGTACTGTTAAACCTGAAGAAAAGTT  
ATACAAAATTGGTGACTATGTATGGGAAGACGTTGATAAAGACGGTGTCCAAGGTACAG  
ATTCGAAAGAAAAGCCAATGGCAAACGTTTTAGTTACATTAACCTACCCAGACGGTACTA  
CAAATCAGTAAGAACAGATGCTAACGGTCATTATGAATTCGGTGGTTTGAAAGACGGA  
GAACTTATACAGTTAAATTCGAAACGCCAGCTGGATATCTTCCAACAAAAGTAAATGGA  
ACAACCTGATGGTGAAAAAGACTCAAATGGTAGTTCTGTAACCTGTTAAAATTAATGGTAAA  
GATGATATGTCTTTAGACACTGGTTTTTATAAAGAACCCTAAATATAATCTTGGTGACTATG  
TATGGGAAGATACAAATAAAGATGGTATCCAAGATGCTAATGAACCTGGTATCAAAGAT  
GTTAAGGTTACATTAAGATAGTACTGGAAAAGTTATTGGTACAACCTACTACTGATGCC  
TCGGGTAATATAAATTTACAGATTTAGATAATGGTAACTATACAGTAGAATTTGAAACA  
CCAGCAGGTTACACGCCAACGGTTAAAATACTACAGCTGATGATAAAGATTCTAATGGT  
TTAACAACAACAGGTGTCATTAAGATGCAGATAATATGACATTAGACAGTGGTTTCTAT  
AAAACACCAAAATACAGTTTAGGTGATTATGTTTGGTAC

> **bbp**

Function: protein coding sequence; unidentified bone sialoprotein-binding protein, probably sdrE/bbp  
chv

Best match: bbp\_CC005\_A9299\_ACKH01000033.1[20944:24243:r]

Position: 018-contig\_252: 1 ... 171; Length: 171 bp

Sequence:

ACACCTGTAAACCAATGAGTACTACTAAAGACCATCACAATAAAGCAAAAAGCATTACC  
AGAAACAGGTAGTGAAAATAACGGCTCAAATAACGCAACGTTATTTGGTGGATTATTTGC  
AGCATTAGGTTCAATTATTGTTATTCGGTCGTCGCAAAAACAAAACAAATAA

> **tx\_bbp**

Function: rho independent terminator

Best match: tx\_bbp\_CC001\_MW2-USA400\_BA000033.2[606868:606916] (completely identical)

Position: 018-contig\_252: 167 ... 216; Length: 49 bp

Sequence:

ATAATACAATATGACCCAGGTCCTTGTGGCCTGGTTTTTTTATAATTAC

> **Q2FJ76**

Function: protein coding sequence; putative poly(glycerol-phosphate) alpha-glucosyltransferase (core genome, variable)

Best match: Q2FJ76\_CC001-ST772\_118\_AJGE01000030.1[342:1814] (completely identical)

Position: 018-contig\_252: 289 ... 1762; Length: 1473 bp

Sequence:

ATGAATTACATTTTAGGAACAATTTTAGAAAAGTAAAATTACAGGTGTAGAAAAAGCGCA  
AATAAATAGATTGAAGTTGTTCAAACAACACGGCATATCTTCAAAATGTGTATATGTTAA  
ATGGAATCCTTATTCATACACATATGCGAAGCAACATCAGATTGAAAATGATGTATTTAC  
AATGTATGACTATTTTCAAAAAGCAATCAATTATAAAAAGACAAAGCAAGTTAACTGGAT  
ACAGTATTGGGAAAAGTCATGTAGGTACACATTGAAATTTGTGGAAAATTCAAATGATGT  
CAGAATATATGATGAAGAGCAATTTATAATGTATGCTCATTTTTTTAGATAAACAGTATCA  
TCATTTAACTATGTGAATTATTTTGATCATAAAAAGAAGAAAAGTAAAACGCGAATTGTA  
TGATGGAAGAGGCTTTTTAAGTTGTTCTCGAATTTTAGGTGAAGGACAACGGATTGACT  
CGAAAATTACTATACACCTAATGGGGAAATCGTCATCCAAAAATATTTGACGATATAAA  
AGGGAAAACACGCTCACAAAGGTTATCTTAAATGAAGATCAGCATCAACAATTTTTTGA  
TACAGAAGATGAATTAGTTCAATATTTTCTCCATCAATTATGTAAAAATAATGATCAAAT  
CATATTAGATCGTCCCTCATGAATTAGGAAATGTTATAGCGGGATTAAATCAAAGTATTCC  
AGTTGTTGTTGTGCTCCATAGTACACATTTATTCGGTACCGGTAATGGTATAAAAAGTTTT  
TATAAACAGTATTTAATAATTTAACACGTTATAAAGCGATTGTTGTATCAACAGAAAAG  
CAATGCCAAGATATTTCACAATATATTGAAAATAAAAATACCAGTTATCAATATTCGGTT  
GGCTACGTGGCAAATTTAAAGTATCAATTTGACATCAATCAAAGGAGAAAAATCATATC  
ATATCAATTGCTCGCCTCGTTGAAAATAAACAAATTAACATCAAATTGAAGTGATCAAG  
CAATTAGTAACAAAACATCCCAATATTCGAATTTATGGACATGGAAATGGTTTG  
TCAGAATATCGACAACCTTGTAGAAGATTATCATTTATCGGAACATGTTAAATTTTCATGGTT  
TTAAGACGCATATTAATGAAGAGATTGCTAAAGCAGAACTGATGTTATCGACAAGTAAA  
ATGGAAGGTTTTGGCTTAGCAATTTAGAGTCGCTTTCAGTAGGTACACCAGTGATCAGTT  
ATGATGTAGATTATGGTCCATCAGAACTGATTCGAAGATGGATTTAATGGCTATTTAGTAC  
CTCAAGGTGACATCAATCAAATGGTTGAAAAGGTGACCAATTACTAAATAATACTCAAA  
AATTGCAACAGTTTTCAATTAATAGCATAGAATCTGCACAACAGTACAATGCAACTACTA  
TCAGTACAAAGTGGCAAATATTTTAACTAA

> **Q5HIB0**

Function: protein coding sequence; putative poly(glycerol-phosphate) alpha-glucosyltransferase (core genome, variable)

Best match: Q5HIB0\_CC001-ST772\_118\_AJGE01000030.1[1939:3429:r]RC (completely identical)

Position: 018-contig\_252: 1886 ... 3377; Length: 1491 bp

Sequence:

TTATATAAGACGAACAAATTGGTCCCATTGTTTAATTAACGACGCTTTACTATATTGTTGT  
GCTTTTGCCAACTACTTTTGACAGTCGTTGCTGTACTTCAGGATGATCAATCACATATT  
TTACTTTATCAAATAGGGCATCTTCATCATTTTTAGTAATTAATAACCATTGAAATCTGA  
AGTAATCAGTTCGTTAGGTCCATATTTAATATCATAACTAATAACTGGAACACCATGTGCT  
AAAGATTCAAGTAGCGCTAAAGAGAAACCTCCATGTTACTTGTATTAAACTCAAATAG  
GCATCGCTATATTCTTGGTCTAGATTGCTTAAAAAGCCGCGTAAGTAAACATGATTTTCCA  
ATCCATATTTTTGTATCAATTCATTTAATTTTTTACTTTCAGAACCAAACCATAACATATG  
AAGCTCTATTTTTGGGACATACGATACTAAGCGTTTAATTAATTCAATTTGTTGATGTAAT  
TGTTTTTCAGGTGAATAACGAGCAACGGAAATTAATTTAACACTGCGCTGATCTAATGTTT  
GGACTGGTGTATCAATTGTTTCACTATAGCCGACAGGAATATTAACAACCTGGAATAGTAT  
GGTTAATACGTTTTTCAACATCTAATTTTTGCTGCTCAGTAGAAACGATAATTGCACGATA  
TCGAGATAAATTTCAAACATCGCTTTATATACATTTTTAAATGGCGATGAATCTAATGCA  
TCAATATTTTTAATGTGTGTACTGTGAAGCACAGCTACTACTGGGATTGACTCAGGCGTTA  
AGTTGAAAATAGGTGCTGTGTACACATTACGATCACTGAAAAATAAATCCCCATGTTGAT  
ATAGTTGTTAATGAAAATGCGCCTAATTCGGTTTCATTATTAAGAAATATTGTTTGT

AGCATAGTAAACAATAATTTTTGTACTTCTGGTTTGCCATCCTTGTAAGAAAAATACTTT  
TCTAATTTTGTGTCACCTTCTGGATTATAGAAAAATTCACATAATGTTTGTGTTTATCAA  
CAAGAATCCTACTACAACCTAAAAAGCCACGCACATCATAAAAATCACGTTTTACTTTTC  
GTCTTTGACTATCAAAATGATTCACATAATCTAATATACGATATTTAGGATCTTGAAAATG  
GGCATACATTAAGAAACGCTCTTGATCATATATTCTAAAGTCATGACTATTTTCAACATGT  
TTTAAAGTATAATGACATTCATCAGTCCAATACGACAACCAGTCAAATGGTTCATTGCGT  
TCTAAATATGTTGCTTCTTGGAAGAAATCATACATATTAATATAGTCAGAACTAGTAATAT  
AATTTTGGGCATTTCTATATAAATATCTATTCCATGACAGAAATACACATTGCGCTGGTCT  
TCCATTTCTTTAAATAAATTTAAACGATTAATAATTGCTTTCTCTATCCCAGTTAAATTA  
ACACCTAAACTATTACCTACAAAATAATTCAT

### > **folE2**

Function: protein coding sequence; GTP cyclohydrolase (core genome, variable)

Best match: folE2\_CC001-ST772\_118\_AJGE01000030.1[3711:4589:r]RC (completely identical)

Position: 018-contig\_252: 3658 ... 4537; Length: 879 bp

Sequence:

TTATTTGCGATACTTTAATTTAGCGAAAGCATCATGTTGATGGATAGACTCTTCATTACGA  
CATTTCGATATCGAAACCGTCTAACCAATCAAATTCAACTAAGTCCGCGGCAATTAACGA  
ATTAAGTCTTCGACAAAACGTGGATTTTCATATGCACGCTCTGTCACACGTTTTTCATCAG  
GACGTTTTAAATAGGGTATAGAATTGAACTTGCATTAGCTTCCATTGCATCTAAAATTTT  
ATTTTTATAGTCATCAACTATGTCTTGATCTTTATTAATATATGTTTTAACAGTGACAACA  
CCACGTTGGTTGTGCGCTGAATACTCACTTATTTCTTTTGAACAAGGGCATAGCGTTGTGA  
CAGTTGCTTCAATAGTAAGTTCTTTACGTGTAACCTTATCACCGTCAATTGCTAATCCATA  
AGTGACATCGGCATTGCCAACTGCTTTAATATTTGTGGTTGGACTATAGCGATCAAAGAA  
CCATTTCCAGAAACATCAACGCCTGCCGCATTTTGTTCATATTCGTTTGTAAAGTGCGT  
AACACCTGATAAAGTGTATTAATTCAGTTCAATACCATTATCATAGTGCTTTTCAACAC  
TTTCAATTATACGGCTCATATTAATACCTTTTTCGTCTTTTGTAAACTTGTGAAAAACTA  
AATGTGCCAGCTGTTTGATACTGGTCAACAAGTACAGGGTACACTAAGTTTTTAATACCA  
ACTTCTTCTATTTCAAATAAAAAATCTTTATGTGTACTTTGTAAATCTGTCAATTCGTTCTT  
AGTAGTAGTTTTCGTGCTTCAATAGGATCTACGGAACCAAAGTGTTTCCAACGACCTTC  
TCGTGTCGATAAATCAAATTCAGTCAT

### > **nagB**

Function: protein coding sequence; glucosamine-6-phosphate deaminase (core genome, constant)

Best match: nagB\_CC001-ST772\_118\_AJGE01000030.1[5919:6677] (completely identical)

Position: 018-contig\_252: 5866 ... 6625; Length: 759 bp

Sequence:

ATGAAAGTATTAAACTTAGGATCGAAAAACAAGCATCATTCTATGTTGCATGTGAGTTA  
TATAAAGAGATGGCATTTAATCAGCACTGTAACTTGGTTTAGCAACTGGTGGTACAATG  
ACAGATTTGTATGAACAACCTTGTTAAGTTATTAATAAAAAATCAGTTAAACGTAGACAAT  
GTATCCACGTTTAATTTAGACGAATATGTAGGTTAACTGCATCACATCCGCAAAGTTATC  
ACTATTATATGGATGACATGCTTTTCAAACAATATCCTTATTTTAATAGAAAGAACATTCA  
TATCCAAATGGAGATGCCGATGATATGAATGCGGAAGCGTCAAATATAATGACGTTTT  
AGAACAACAAGGTCAACGTGATATCAAATTTTAGGTATTGGAGAAAATGGTCATATTGG  
ATTTAATGAACCTGGTACGCCGTTTGATAGCGTTACTCATATCGTTGATTTGACTGAAAGT  
ACTATTAAGGCTAATAGTCGATATTTGAAAACGAAGATGATGTTCCAAAGCAAGCCATT  
TCGATGGGACTTGCTAATATTCTTCAAGCCAAACGTATCATTTTACTCGCATTTGGTGAAA  
AGAAACGTGCTGCTATTACACATTTATTAATCAGGAAATTTCTGTTGATGTTCCAGCCAC  
ATTACTTCACAAACACCCGAATGTTGAGATATATTTAGACGACGAAGCTTGCCCCAAAAA  
TGTTGCGAAAATTCATGTCGATGAAATGGATTGA

### > **hxlA**

Function: protein coding sequence; 3-hexulose-6-phosphate synthase (core genome, variable)

Best match: hxlA\_CC001-ST772\_118\_AJGE01000030.1[6754:7386] (completely identical)

Position: 018-contig\_252: 6701 ... 7334; Length: 633 bp



Sequence:

GTGGAATTACAATTAGCAATTGATTTATTAACAAAGAAGACGCGGCTGAGTTAGCAAAT  
AAAGTAAAAGATTATGTAGATATCGTAGAAATCGGTACGCCAATCATTTACAACGAAGGT  
TTACCAGCAGTTAAACATATGGCAGACAACATTAGTAATGTAAAAGTATTAGCAGACATG  
AAAATTATGGATGCAGCTGATTATGAAGTTAGCCAAGCAATTAATTTGGCGCGGATGTA  
ATTACAATACTAGGTGTTGCAGAAGATGCATCAATTAAGCAGCTATTGAAGAAGCTCAT  
AAAAATAATAACAATTACTAGTTGATATGATTGCTGTTCAAGATTTAGAAAAACGTGCA  
AAAGAACTAGATGAAATGGGTGCGGATTATATTGCAGTACACACTGGTTATGATTTACAA  
GCAGAAGGGCAATCACCATTAGAAAGTTAAGAACCGTTAAATCTGTTATTAATAAATTCT  
AAAGTTGCAGTAGCAGGTGGAATTAACCAGATACAATTAAGATATTGTCGCTGAAAG  
TCCTGATCTTGTTATTGTTGGTGGCGGAATCGCAAATGCAGATGATCCAGTAGAAGCTGC  
AAAACAATGTCGCGCTGCAATCGAAGGTAAGTAA

> **sis**

Function: protein coding sequence; sugar isomerase (core genome, variable)

Best match: sis\_CC005\_Mu50-VRSA\_BA000017.4[647833:648381] (completely identical)

Position: 018-contig\_252: 7335 ... 7884; Length: 549 bp

Sequence:

ATGGCTAAATTTAGTGACTATCAATTAATTCTAGATGAATTAAGATGACTTTGTCCACATG  
TTGAAGCGGATGAGTTTTCAACTTTTGCATCCAAAATACTACATGCTGAACATATATTTGT  
AGCTGGCAAAGGACGTTCAAGATTCGTGGCGAATAGTTTTGCAATGCGCTTAAATCAGCT  
CGGCAAACAGGCACATGTTGTTGGAGAATCAACGACACCTGCGATTAAGTCGAATGATGT  
ATTTGTAATTATCTCTGGTTCAGGTTCCACGGAACATTTAAGATTATTAGCAGACAAAGC  
AAAATCAGTAGGTGCTGACATCGTATTAATTACTACAAATAAAGATTCTGCAATAGGCAA  
TCTAGCTGGGACGAACATCGTTTTGCCTGCAGGTACAAAATATGATGAACAAGGCTCGGC  
ACAACCATTAGGAAGTTTGTGTTGAACAAGCATCTCAATTATTTTTAGATAGTGTGTAATG  
GGATTGATGACTGAAATGAATGTTACGGAACAAACGATGCAACAAAATCATGCTAATTTA  
GAATAA

> **Q2FJ68**

Function: protein coding sequence; putative haloacid dehalogenase-like hydrolase (core genome, variable)

Best match: Q2FJ68\_CC008\_COL\_CP000046.1[651653:652300]

Position: 018-contig\_252: 7996 ... 8644; Length: 648 bp

Sequence:

TTGAAGTTTGACAATTATATTTTTGATTTTGATGGTACGTTGGCAGACACGAAAAAATGTG  
GTGAAGTAGCAACACAAAGTGCATTTAAAGCATGTGGCTTAACGGAACCATCATCTAAA  
GAAATAACGCATTATATGGGAATACCTATTGAAGAATCATTTTTAAAATTAGCAGACCGA  
CCATTAGATGAAGTAGCATTAGCAAAGTTAATCGATACATTTAGACATACATATCAATCT  
ATTGAAAAGGACTATATTTATGAATTTGCGGGTATAACTGAAGCCATTACAAGTTTGTAT  
AACCAAGGGAAAAAATTTTCGTGGTGTCTAGTAAGAAGAGTGATGTATTAGAAAAGAAA  
TTTATCGGCTATTGGATTAATCACTTGATTACCGAAGCTGTTGGATCCGATCAAGTAAGT  
GCATATAAACCAAATCCTGAAGGCATACACAAATTGTGCAACGCTACAATTTAAATAGC  
CAACAAACGGTGTATATTGGTGATTCAACGTTTGTGATTGAGATGGCACAACGTGCTGGT  
ATGCAATCTGCAGCTGTCAGTTGGGGTGCACATGATGCAAGGTCATTACTTCATTCAAAT  
CCGGATTTTATTATTAATGATCCATCAGAAATTAATACCGTATTATAA

> **proP**

Function: protein coding sequence; putative proline/betaine symporter (core genome, variable)

Best match: proP\_part\_CC005\_CF-Marseille\_CABA01000111.1[9182:9701]

Position: 018-contig\_252: 9635 ... 9665; Length: 30 bp

Sequence:

TTGGGACATTATCAGGTTACATAGCTGCTT

> **vraA**

Function: protein coding sequence; long chain fatty acid CoA ligase (core genome, constant)  
Best match: vraA\_CC001-ST772\_118\_AJGE0100030.1[11142:12518] (completely identical)  
Position: 018-contig\_252: 11089 ... 12466; Length: 1377 bp  
Sequence:

```
ATGAACGTAATTTTAGAACAGTTGAAAACACATACTCAAATAAACCTAATGACATAGCA
TTACATATAGATGATGAAACAATTACATATAGTCAACTAAATGCCCGCATCACTAGCGCA
GTTGAATCTTTGCAGAAATATTCACTTAACCCTGTCGTTGCTATTAATATGAAATCATCGG
TTCAAAGTATTATTTGTTATTTAGCTTTGCATCGTGTACATAAAGTGCCTATGATGATAGA
AGGTAATGGCAAAGTACTATACATCGTCAATTGATTGAAAAATATGGTATTAAGATGT
AATTGAAGATACAGGTCTCATGCAGAGTATAGACTCACCGATGTTTATTGATGCAACGCA
ATTACAGCACTACCCCAATTTATTACATATTGGTTTTACTTCAGGGACAACCTGGACTGCCA
AAAGCATATTATCGTGATGAAGATTCATGGTTGGCTTCTTTTGAAGTTAATGAAATGTTGA
TGTTAAAAAATGAAAATGCAATAGCAGCCCCTGGACCACTATCGCACTCGTTAACATTAT
ATGCGTTATTGTTTGCTTTAAGTTCCGGTTCGTACTTTTATAGGACAGACCACTTTTCATCCT
GAAAAGTTACTTAATCAATGTCGTAATAATATCATCATACAAAGTTGCTATGTTTCTTGTTT
CAACGATGATTAATCATTATTGTTAGTTTACAACAATGAACATACAATCCAATCATTTTT
TAGCAGTGGAGATAAGCTGCATTCTTCTATTTTTAAAAAGATAAAAAATCAAGCAAATGA
CATAAATTTGATTGAATTTTTTGGTACATCGGAAACCAGTTTTATCAGCTATAACTTGAAT
CAGCAAGCACCAGTTGAATCAGTAGGTGTGCTATTTCCAAATGTGGAATTGAAAACAACG
AATCACGATCACAATGGTATAGGAACTATTTGTATAAAAAGTAATATGATGTTTAGTGGC
TATGTAAGTGAACAATGTATAAATAATGATGAATGGTTTGTACTAATGATAATGGCTAT
GTAAAAGAGCAGTATTTATATTTAACGGGACGTCAACAGGATATGTTAATTATTGGTGGT
CAAATATATATCCAGCACATGTTGAACGCCTTTTAACGCAATCTTCGAGCATTGATGAA
GCAATTATCATCGGTATTCCAAATGAGCGTTTTGGTCAAATAGGCGTATTGCTTTATTCTG
GTGATGTGACACTTACACATAAAAAATGTAAAAACAATTTTTAAAAAAGAAAGTGAAACGC
TATGAAATTCCATCGATGATTCATCATGTAGAAAAGATGTATTACACTGCAAGTGGTAAA
ATTGCTAGAGAAAAAATGATGTCGATGTATTTGAGAGGTGAATTATAA
```

### > **vraB**

Function: protein coding sequence; acetyl-CoA c-acetyltransferase (core genome, constant)  
Best match: vraB\_CC008\_NCTC8325\_CP000253.1[567450:568589] (completely identical)  
Position: 018-contig\_252: 12467 ... 13607; Length: 1140 bp  
Sequence:

```
ATGAATCAAGCAGTCATAGTTGCAGCTAAACGAACTGCATTTGGGAAATATGGTGGCACT
TTAAAACATTTAGAGCCAGAACAATTGCTTAAACCTTTATTCCAACATTTTAAAGAGAAG
TATCCAGAGGTAATATCTAAAATAGATGATGTAGTTTTAGGTAATGTTGTTGGGAATGGT
GGCAATATTGCAAGAAAAGCATTGCTTGAAGCGGGGCTTAAAGATTCAATACCTGGCGTC
ACAATCGATCGGCAATGTGGGTCTGGACTTGAAAGTGTTCAATATGCATGTCGCATGATC
CAAGCCGGAGCTGGCAAGGTATATATTGCAGGTGGTGTGAAAGTACAAGTCGAGCACC
TTGGAAAATCAAACGACCGCATTCTGTGTACGAAACAGCATTACCTGAGTTTTATGAGCG
TGCATCATTTGCACCTGAAATGAGCGACCCATCAATGATTCAAGGTGCTGAAAATGTGGC
CAAGATGTATGATGTTTCAAGAGAATTACAAGATGAATTTGCTTATCGAAGTCATCAATT
GACAGCGGAAAATGTAAAGAATGAAAATATTTCTCAGGAAATATTACCTATAACCGTTAA
AGGAGAAATATTCAACACTGATGAAAGTCTAAAATCACATATTCCGAAAGATAACTTTGG
CCGATTTAAGCCCGTGATCAAAGGTGGGACCGTTACCGCTGCGAATAGTTGTATGAAAAA
TGATGGTGCAGTTTTATTGCTTATTATGGAAAAAGATATGGCATAACGAATTAGGTTTCGA
GCATGGTTTTATTAAAGATGGTGTACGGTAGGTGTTGATTCTAATTTTCTGGCATT
GGTCCAGTACCAGCCATTTCCAACTTACTAAAAAGAAATCAATTAACGATAGAAAATATT
GAAGTCATTGAAATTAACGAAGCGTTCAGTGCACAGGTAGTTGCCTGCCAACAAAGCTTTA
AATATTTCAAATACGCAATTAATATATGGGGTGGTGCATTAGCATCAGGTCATCCATAC
GGTGAAGCGGTGCCCAATTAGTGACTCGATTATTTTATATGTTTGACAAAGAGACTATG
ATTGCATCTATGGGGATAGGGGGAGGTCTAGGAAATGCAGCATTATTTACTCGATTCTAA
```

### > **vraC**

Function: protein coding sequence; putative protein (core genome, constant)

Best match: vraC\_ref\_CC001\_MW2-USA400\_BA000033.2[620281:620646] (completely identical)  
Position: 018-contig\_252: 13581 ... 13947; Length: 366 bp

Sequence:

```
ATGCAGCATTATTTACTCGATTCTAACCAGCGATTAATGTGTCATTTTCTAAGGATAGTG
TGGCTGCATATTATCAGTGTTTAAACCAACCTTATAGAAAAGAAGTACCACCATTAATGT
GTGCGTCATTATGGCCAAAATTTGATTTATTTAAAAAATATGCAAATAGCGAACTGATTTT
AACAAAATCAGCAATTAATCAAACCTCAAAGATAGAAGTAGACACAATATATGTAGGGC
ATTTAGAAGATATTGAATGCCGACAGACTCGCAATATCACACGTTATACAATGGCTTTAA
CATTAACATAAAAATGATCAACATGTCATAACGGTTACACAACTTTTATTAAGGCGATGA
AGTAG
```

### > **ssr128**

Function: noncoding RNA small stable RNA 128 (core genome, constant)

Best match: ssr128\_CC001\_MW2-USA400\_BA000033.2[620913:621305:r]RC (completely identical)

Position: 018-contig\_252: 14213 ... 14606; Length: 393 bp

Sequence:

```
AAATAACCGATATTAGCTGCATGAACGCATATTAATTAGGAGATGAAAGGACAGCTAAT
ATCAGTTATGTATTGTTATTATTATTGGGAACAGAGATGAATATAGGTTACGTTTCTTTCT
TTGCACGGGGATGCATTAATCTAAAATAATAACAACCTATATCAATGTTTAATAAATT
CTGGATTATTGGAACGATTAGTCAATTTAACTAACTTTCATATGATCTATATCGTCTTGTA
ATAAAGAGAGCAATTTGAATATTTCAAGTACTAAATGAATCGTCACATTTAATTGAAA
CATGCTGAAACGTTTTGGTTATAATTTCAATAAAGTGGTGCGCCTTCATGGTGATACTGTGC
ATAAATAATCATAACCTATATTACCTCCTT
```

### > **thiD1**

Function: protein coding sequence; phosphomethylpyrimidine kinase (core genome, constant)

Best match: thiD1\_CC005\_Mu50-VRSA\_BA000017.4[655591:656421:r]RC (completely identical)

Position: 018-contig\_252: 15093 ... 15924; Length: 831 bp

Sequence:

```
TTAAACCTCTGTTACTTCAACATCGATATGTTCAATACGGTTGTATGCACCGTGATCCACA
GGACCAACAAAATCATTCAATTTCCAACCGTTTTTAATAGCAGAAGCGACGAAAGCTTTC
GCGCTAATCACAGCTTCTTTCCGGTGACTTACCGTTAGCTAAATATGCAGTTGTTGCCGCG
CAAATGTACAACCAGCACCATGGTTATAACTTTGTTGGAACATGTCTGTTGTTAGTTGATA
AAATGTTTGACCATCATAGTATAAGTCATACGATTTATCTTGATCTAAAGCTTTGCCACCT
TTAATGATGACATGCTGTGCGCCTTTATCAAAGATAATTGTTGCAGCCTTTTTTCATATCTT
CAATTGAATTTAATTTACCTAATCCTGATAATTGACCCGCTTCAAATAAGTTTGGTGTCAC
TACCGTTGCTTTAGGTAGTAAATATTTAATCATCGCCTCAGTATTTCCAGGATTAAGCACT
TCATCTTCGCCTTTACAAACCATGACAGGATCTACTACAAAATATTGTGCATTAGATGCCT
CATATACTTCTCCAGCACGTTTGATTATCTCCTCAGTACCTAACATACCTGTTTTAATAGC
ATCAGGTCCGATTGATAAAGCCGTTTCAAGTTGTTTTTCAAATACATCCATTGGTAATGGT
GTAACATCGTGTGACCATGTATCTTTATCCATAGTAACGATGGCAGTTAAAGCGACCATG
CCATACGTATCTAATCTTGGAACGTTTTCAAATCTGCTTGCATACCTGCGCCAGCACTTG
TGTCAGAACCGGCAATTGTTAAAACCTTTCTTTAAAGCCAT
```

### > **ung**

Function: protein coding sequence; uracil-DNA glycosylase (core genome, constant)

Best match: ung\_CC001\_MSSA476\_BX571857.1[621498:622154]

Position: 018-contig\_252: 16107 ... 16764; Length: 657 bp

Sequence:

```
ATGGAATGGTCGCAAATTTTTTCATGACATAACAACGAAACATGACTTTAAAGCTATGTAT
GATTTTTTAGAAAAAGAATATTCGACTGCAATCGTATACCCTGATAGGGAAAATATATAT
CAAGCGTTTGATTTAACACCGTTTGAAAATATCAAAGTTGTTATATTAGGACAAGACCCG
TATCATGGTCCAAACCAAGCACATGGATTAGCATTTTCAGTGCAACCTAACGCAAAAATTC
CCTCCATCTTTACGTAATATGTATAAAGAATTAGCAGATGATATTGGATGCGTTAGACAA
ACACCGCATTTACAAGATTGGGCAAGAGAAGGCGTCTTGTTATTGAATACAGTTTTAACC
```

GTAAGACAGGGTGAAGCAAATTCTCATCGTGATATTGGTTGGGAAACATTTACTGATGAA  
ATTATTAAGCAGTGTCTGATTATAAAGAACATGTTGTCTTTATTTTGTGGGGGAAACCTG  
CACAGCAAAAAATAAAGCTTATCGATACATCTAAACATTGTATTATAAAATCAGTGCATC  
CTAGTCCACTGTCTGCATATAGAGGATTCTTTGGATCAAACCCTATTCCAAAGCGAATG  
CCTATTTAGAGTCAGTAGGAAAATCACCAATTAATTGGTGTGAAAGTGAGGCGTAG

### > **rsaA**

Function: noncoding RNA ncRNA of Staphylococcus aureus A (core genome, constant)

Best match: rsaA\_CC001\_MW2-USA400\_BA000033.2[627561:627699] (completely identical)

Position: 018-contig\_252: 20860 ... 20999; Length: 139 bp

Sequence:

AGTTAACCATTACAAAATTGTATAGAGTAGCGACTGTATAATTTCTATTGAGGTTAACG  
TTTATATGTAGTGATAGTAGTTAAAGTTCTCCAAGGAAGACTACTCGGGTACACTTTGCT  
ATGAGCAAAGTGTACTTT

### > **pta**

Function: protein coding sequence; phosphotransacetylase (core genome, constant)

Best match: pta\_CC001-ST772\_118\_AJGE0100030.1[22141:23127] (completely identical)

Position: 018-contig\_252: 22088 ... 23075; Length: 987 bp

Sequence:

ATGGCTGATTTATTAATGTATTAAGACAACTTTCTGGTAAAAACGTTAAAATCGTA  
TTACCTGAAGGAGAGGACGAACGTGTTCTAACAGCTGCAACACAATTACAAGCAACAGA  
TTATGTTACACCAATCGTGTTAGGTGATGAGACTAAGGTTCAATCTTTAGCGCAAAAAC  
TGATCTTGATATTTCTAATATTGAATTAATTAATCCTGCGACAAGTGAATTGAAAGCTGAA  
TTAGTTCAATCATTGTTGAACGACGTAAGGTAAAGCGACTGAAGAACAAGCACAAGA  
ATTATTAACAATGTGAACTACTTCGGTACAATGCTTGTATGCTGGTAAAGCAGATGG  
TTAGTTAGTGGTGCAGCACATTCAACAGGAGACACTGTGCGTCCAGCTTTACAAATCAT  
CAAAACGAAACCAGGTGTATCAAGAACATCAGGTATCTTCTTTATGATTAAGGTGATGA  
ACAATACATCTTTGGCGATTGTGCAATCAATCCAGAACTTGATTACAAGGACTTGCAGA  
AATTGCAGTAGAAAGTGCAAAATCAGCATTAAAGCTTTGGCATGGATCCAAAAGTTGCAAT  
GTTAAGCTTTTCAACAAAAGGGTCTGCTAAATCAGACGACGTGACAAAAGTTCAAGAAG  
CTGTCAAATTAGCACAAACAAAAGCTGAAGAAGAAAAATTAGAAGCAATCATTGATGGC  
GAATTCCAATTTGATGCTGCGATTGTACCAGGTGTTGCTGAGAAAAAAGCGCCAGGTGCT  
AAATTACAAGGTGATGCAAATGTCTTTGTATTCCCAAGTTTAGAAGCTGGTAATATTGGTT  
ACAAAATTGCACAACGTTTAGGTGGATATGATGCAGTTGGTCCAGTATTACAAGTTTAA  
ATTCTCCAGTAAATGACTTATCACGTGGCTGCTCAATTGAAGATGTATACAATCTTTCAAT  
TATCACAGCAGCGCAAGCCTTACAATAA

### > **lipL**

Function: protein coding sequence; octanoyl-GcvHb protein N-octanoyltransferase

Best match: lipL\_CC001\_MW2-USA400\_BA000033.2[629778:630614] (completely identical)

Position: 018-contig\_252: 23077 ... 23914; Length: 837 bp

Sequence:

ATGGATTTAGCGAGTAAATATTTTAAATGGCGTCAACTGGCGATATATCGATCATTCTTCTG  
GATTAGAACCTATGCAATCTTTCGCATTTCGATGATACATTTTTCGAAAGTGTGGGCAAAG  
ATATATCAGATAATGTTGTGCGTACTTGGATTCATCAACATACTGTTATTCTTGGTATTCA  
TGATTCAAGATTGCCGTTTTTAAAAGATGGCATTGATTATTTAACGAATGAGATTGGTTAT  
AATGCCATTGTTAGAAATTCTGGTGGCTTAGGTGTCGTTCTAGATCAAGGTGTATTAATA  
TATCGCTGATGTTCAAAGGACAAACAGAAACAACGATTGATGAAGCGTTTACTGTGATGT  
ACCTCTTAATTAGCAAAATGTTTCGAAAATGAGAATGTTGATATTGATACGATGGAAATTG  
AACATTCTTATTGCCAGGAAAATTTGACTTAAGTATCGATGGTAAGAAAATTTGCAGGCA  
TATCGCAACGAAGAGTTAGAGGCGGTATTGCTGTACAAATTTATCTTTGTGTTGAAGGCT  
CTGGTTCAGAACGTGCATTGATGATGCAAACATTTTATGAACATGCTTTAAAAGGTGAAG  
TGACTAAATTTAAATATCCTGAAATTGAACCATCTTGTATGGCCTCATTAGAGACATTGCT  
TAACAAAACGATTACTGTTCAAGATGTAATGTTTTTACTATTATATGCAATCAAAGATCTT

GGCGGTGTATTAATATGACGCCAATTACTCAAGAAGAATGGCAAAGATACGATACGTA  
TTTTGATAAAATGATTGAAAGAAACAAGAAAATGATAGATCAAATGCAATAG

### > **mvaK1**

Function: protein coding sequence; mevalonate kinase 1 (core genome, constant)

Best match: mvaK1\_CC001\_MW2-USA400\_BA000033.2[631201:632121] (completely identical)

Position: 018-contig\_252: 24500 ... 25421; Length: 921 bp

Sequence:

ATGACAAGAAAAGGATATGGGGAATCGACAGGTAAGATTATTTAATAGGAGAACATGC  
TGTTACATTTGGAGAGCCTGCTATTGCAGTACCGTTAACGCAGGTA AAAATCAAAGTTTT  
AATAGAAGCCTTAGAGAGCGGGA ACTATTTCGTCTATAAAAGCGATGTTTACGATGGTAT  
GTTATATGATGCGCCTGACCATCTTAAGTCTTTGGTGAACCGTTTTGTAGAATTAATAAT  
ATTACAGAGCCGCTAGCAGTAACGATCCAAACGAATTTACCACCATCACGTGGATTAGGA  
TCGAGTGCAGCTGTCGCGGTTGCTTTTGTTCGTGCAAGTTATGATTTTTTAGGGAAATCAT  
TAACGAAAGAAGA ACTCATTGAAAAGGCTAATTGGGCAGAGCAAATTGCACATGGTAAA  
CCAAGTGGTATTGATACGCAAACGATTGTATCAGGCAAACCAGTTTGGTTCCAAAAAGGT  
CATGCTGAAACGTTGAAAACGTTAAGTTTAGACGGCTATATGGTTGTTATAGATACTGGT  
GTGAAAGGTTCAACAAGACAAGCAGTAGAAGATGTTCAATAA ACTTTGTGAGGACCCTCA  
GTACATGTCACATGTA AAAACATATCGGTAAGTTAGTTTTACGTGCGAGTGATGTGATTGA  
ACATCATAA CTTTGAAGCCTTAGCGGATATTTTTAATGAATGTCATGCGGATTTAAAGGC  
GTTGACAGTTAGTCATGATAAAATAGAACAATTAATGAAAATTGGTAAAGAAAATGGTG  
CGATTGCTGGAAA ACTTACTGGCGCTGGTCGTGGTGGAAAGTATGTTATTGCTTGCCAAAG  
ATTTACCAACAGCGAAA AATATTGTAAAAGCTGTAGAAAAGCTGGTGCAGCACATACTT  
GGATTGAGAATTTAGGAGGTTAA

### > **mvaD**

Function: protein coding sequence; mevalonate diphosphate decarboxylase (core genome, constant)

Best match: mvaD\_CC001\_MW2-USA400\_BA000033.2[632126:633109] (completely identical)

Position: 018-contig\_252: 25425 ... 26409; Length: 984 bp

Sequence:

TTGATTA AAAAGTGGCAAAGCACGTGCACATACGAATATTGCACTTATAAAAATATTGGGGT  
AAAAAAGATGAAGCACTAATCATTCCAATGAATAATAGCATATCTGTTACATTAGAAAAA  
TTTTACACTGAAACGAAAGTCACTTTTAACGACCAGTTAACACAGGATCAATTTTGGTTG  
AATGGTGAAAAGGTTAGTGGCAAAGAATTAGAGAAAATTTCAA AATATATGGATATTGT  
CAGAAATAGAGCTGGCATCGATTGGTATGCAGAAATTGAAAGCGACAATTTTGTACCAAC  
AGCAGCAGGGTTGGCTTCATCGGCAAGCGCATATGCAGCTTTAGCAGCAGCTTGTAATCA  
AGCGCTAGACATGCAGCTGTCAGATAAGGATTTATCGAGATTGGCGCAATTGGTTCGGG  
TTCTGCGTCGCGTAGTATTTATGGTGGATTTGCAGAATGGGAAAAGGGTATAGTGATGA  
GACGTCATATGCCGTTCCACTTGAATCGAATCATTTTGAAGATGACCTTGCCATGATATTT  
GTTGTGATTAATCAACATTCTAAAAGGTACCTAGTCGATATGGTATGTCATTGACACGA  
AACACATCAAGGTTTATCAATATTGGTTAGATCATATTGATGAAGATTTAGCTGAAGCA  
AAAGCAGCGATTCAAGACAAAGATTTTAAACGCCTTGGTGAAGTAATTGAAGAAAATGG  
TTTGCATGATGCCACGAATCTAGGATCAACACCGCCGTTACATATCTTGTGCAAGA  
AAGTTATGATGTCATGGCGCTTGTTCACGAATGCCGAGAAGCGGGGTATCCGTGTTATTT  
TACAATGGATGCGGGACCTAATGTGAAAATACTTGTAGAAAAGAAAAACAAGCAACAGA  
TTATAGATAAATTATTAACACAGTTTGATAATAACCAAATTATTGATAGTGACATTATTGC  
CACAGGAATTGAAATAATTGAGTAA

### > **mvaK2**

Function: protein coding sequence; phosphomevalonate kinase 2 (core genome, constant)

Best match: mvaK2\_CC008\_NCTC8325\_CP000253.1[581406:582482] (completely identical)

Position: 018-contig\_252: 26421 ... 27498; Length: 1077 bp

Sequence:

ATGATTCAGGTCAAAGCACCCGGAAA ACTTTATATTGCTGGAGAATATGCTGTAACAGAA  
CCAGGATATAAATCTGTACTTATTGCGTTAGATCGTTTTGTA ACTGCTACTATTGAAGAAG

CAGACCAATATAAAGGTACCATTTCATTCAAAGCATTACATCATAACCCAGTTACATTTA  
GTAGAGATGAAGATAGTATTGTCATTTTCAGATCCACATGCAGCAAAACAATTAATTTATG  
TGGTCACAGCTATTGAAATATTTGAACAATACGCGAAAAGTTGCGATATAGCGATGAAGC  
ATTTTCATCTGACTATTGATAGTAATTTAGATGATTCAAATGGTCATAAATATGGATTAGG  
TTCAAGTGCAGCAGTACTTGTGTCAGTTATAAAAGTATTAATGAATTTTATGATATGAA  
GTTATCTAATTTATAACATTTATAAACTAGCAGTGATTGCAAATATGAAGTTACAAAGTTTA  
AGTTCATGCGGAGATATTGCTGTGAGTGTATATAGTGGATGGCTAGCGTATAGTACTTTT  
GATCATGAATGGGTTAAGCATCAAATTGAAGATACTACGGTTGAAGAAGTTTAAATCAA  
AACTGGCCTGGATTGCACATCGAACCAATTACAAGCACCTGAAAATATGGAAGTACTTATC  
GGTTGGACTGGCTACCGGCGTCATCACCACTTTGTTAGCGAAGTGAAACGTTTGAAA  
TCAGATCCTTCATTTTACGGTGACTTCTTAGAAGATTCACATCGTTGTGTTGAAAACTTA  
TTCATGCTTTTAAAACAAATAACATTAAGGTGTGCAAAAGATGGTGCCTCAGAATCGTA  
CAATTATCAACGTATGGATAAAGAAGCTACAGTTGATATAGAACTGAAAAGCTAAAA  
TATTTGTGTGATATTGCTGAAAAGTATCACGGCGCATCTAAAACATCAGGCGCTGGTGGT  
GGAGACTGTGGTATTACAATTATCAATAAAGATGTAGATAAAGAAAAAATTTATGATGA  
ATGGACAAAACATGGTATTAAACCATTAAAATTTAATATTTATCATGGGCAATAA

### > **ykgC**

Function: protein coding sequence; FAD-dependent pyridine nucleotide-disulphide oxidoreductase (core genome, variable)

Best match: ykgC\_CC001-ST772\_118\_AJGE0100030.1[28120:29442:r]RC (completely identical)

Position: 018-contig\_252: 28067 ... 29390; Length: 1323 bp

Sequence:

CTAGAAATTAATAAATCATTAAATGATTTCGGCCATCGTAGGATGCGTATAAATATTATC  
TCGTAATACGGTATATGGAATGTTTTGATCAATCGCAAGTTTAATTATTAATTAATTCT  
TCAGATTGCTTACCATATAATGTAGCACCTAAAATCATATTATTTTCATTATTAATGACTA  
CTTTAAATAAACCTCTTGGATCATTGTTAATTTTGTGACGAGGTATAGCACTTACTAAAAG  
TTGATGTTTCAGTGTAAATCATAATGTTGAGCGGCAGCTTCTTTACCAGTTAATCCAACACGT  
GATAATGGTGGATCTATAAATACTGTATAAGGCACGCTGCCTCTATTGTCAGTCGTACGT  
GACTGATTACCATATAACGCTGATTTGATAAATTCGATAATCATCTAAAGATATATACGTA  
AATTGAAGTCCGCCTTTAACATCACCTGCAGCATAAATATGCGGCACAGTTGTTTGAAGA  
TGAGCATTGACTTTAATTTTCGCCTCTGTGCGCTAATTCGATATCAGTATTTTCTAAAGCTA  
AATCCGATTTCGGTTTGCAGCCGATAGCCAAAAGTACTGCATCAGCCTCAAAGTTACCAA  
CGTTAGTATGGACTGTTGTATGATGATTGTCAGATGACAATTCAGTCGTTTCAACATTTGT  
ATACAATGCAATGCCTTTATTTTCTAAGTCAGTAATAGCATGTGCAACGACATCTTGATCT  
TCACGTGGCATAAATGATTCACCACGTTCTAATACTGTAACCTTACTACCTAAATTCGCAA  
ACATTGAAGCAAATTCTAAGGCGATATAACCGCCACCTACAATAACGAGGTGCTTAGGTT  
GATAGCTAATGTTTAATAAACCTGTGCAATCGAAGACGTGTTTAGCTTGATCAAGGCCTT  
TAATGTTAGGAATGACAGAGGTAGCACCGGTATTAATAATGATATGAGGTGCAGTAATAC  
TATCGACGATATCGTCATGTTGATCTAATAAATTCACTTCAGTATTAGATTTAAACTGCGC  
TTTAAATCCAGTACATCAATGTTGTTATCGTCTGCTAATAAGTGGTAATTTTATTGTTT  
AGCGCATTGACAACATCGTTTTTACGGTTATAACTTGCTTCAAAGATTTGCCTTCTAATC  
CATCATGTACAAGTGTCTTCGAAGGTATACATCCTATATTTATACAAGTGCCTCCATACAT  
TTTCGAAGATTGTTTCGATAACTGCGACGTGTTGACCTGTTGATGCAGCGTATTTTCGCTAAA  
GTTTTACCAGCTTTCCCAAATCCTATTACAATTAATCATATGTTTTTCAT

### > **Q5HI81**

Function: protein coding sequence; transcript regulator (core genome, variable)

Best match: Q5HI81\_CC008\_NCTC8325\_CP000253.1[584361:584801:r]RC (completely identical)

Position: 018-contig\_252: 29376 ... 29817; Length: 441 bp

Sequence:

TCATATGTTTTTCATGACATAAATCCTCCTTTTGAATGTCTTCAATGACATCTTTGATTGTTT  
TTCCATTATAAAAATTAATAATGATATTCTGTTTCGCTTGTGCTGATAATGTGACATGGTAGT  
TGCAATATTACGAGCAATTTGACAGTGACTGCCTTCGTCGCCAGTAAATAGACGTGTGTG  
GTGTTCTTTCTCTAAGACAAAATGTTTATATAATGTTGCTAGAGAGACATCAGCACTTTGA

TCATTTGCTAAATAACCGCCATCTTTACCTCGTATTGTGTCAATCATTTTTTAAATCGACAA  
GTTGAGTCGTCACGCGTCGTAATTGAACAGGATTTAAACAAGTTAATTCTGCTAATGAAC  
TACTATTGAATTTTTCTGAATGATGCTTAGTTAAAAAAGCTAATACATGCACGGCAATGTT  
AAATTCTAAATTCAA

### > **Q5HI79**

Function: protein coding sequence; putative protein chv

Best match: Q5HI79-CC25\_CC025\_21305\_AFNO01000011.1[183738:185144:r]

Position: 018-contig\_252: 30441 ... 31848; Length: 1407 bp

Sequence:

ATGAGTATTGACATGTATTTAGACAGATCTCGAAACCAAGCTTCAAGTGTGGGGAATTTG  
AGTCAAACAATGAATTCAAATTATGATGCGTTGGAAAAAGCAATTACTCAATTTATTAAT  
GATGATGCGCTTAAAGGGAAAGCGTATACGTCAGCTAAGCAATTTTTTAGTACGGTGTTA  
ATTCATTATCAACAAGTATGAAAACATTGAGTGATTTAACGAAGCAAGCTTGCATAAT  
TTTGTGTCACGTTATACGAGTGAGGTTGATAGCATATCTTTAAAAGAATCAGAGCTTGAA  
GAAGATATCAGATCATTAAGTCAACAAATTACGCGATATGAAAATTTGAATAACAATTTG  
AAAAAGCATGCTTCCGATAATCAGCAAGCCATTTTCATCGAACCAACAAATAATACGAAC  
ATTAGGTCAACAAAACATGAATTAGAAGAGAAGCTACGCAAATTGCGTGAGTTTAATC  
AAAAATCACCAGAAATATTTAAAGAAGTTGAAGAATTTCAAAAAATTGTCCAACAAGGA  
CTTACCCAAGCGCAGAATTTTTGGAACCTTTTCAACAAATCAATTTAATATACCTTCAGGTA  
AAGAACTTGATTGGGCTAAAGCAAGTCATGAAAAATATTTGAAAGTTGCTATGGGGAAA  
ATTGAACATAAAGCAGAGAAAGAACTTTAAATAAAGCAGACTTTGCTGTTATAAAGGC  
ATATGCCAAAGAGCATCCAGAAGACGATATCCCGAAAAGTATACTGAAATATATAAATG  
ACAATAAAGACAGTATTTAAAAGAGATATAGGATTAGATATCACTTCAACACTTTTAGAGC  
AAGGCGGTATAAATGCAAGTAAATTCGGTGTATTTATCAATACAGCAGGTGGAGTGAAA  
GGCCCAGCAGGTCCAAATTCATTTGTGGAAGTCAAACGTACATCAGGTAATGTGTTTATA  
GAAAATGGTAGTAAATTTGCAAAAGGCGGAAAATACCTAGGTAAGGTGTTGCTGGTGT  
AGGATTTGGTATAGGTATGTATGATGACCTTGCAAATGATGATAAAACATTTGGAGAGGC  
ATTATCGCATAATGGTATGACGCTTGACGCTGGATCTGCAATGGGGACTATTGTGTCTGT  
AGGTATAACTATGCTGGCAAGTAATCCAGTAGGATGGGCGGTTTTAGGAGGTTTTGCTGC  
AGCAACAGGTTTTGCAATAGCGGCTGATTGGGCATATGAAAATAATTTGTGGGGATTAAA  
AGATGAAACAGACTGGGTAGGACATAAAATAGATGACGGTATCGATGTTGTAAAAAAT  
CTACAAAAAAGGCTGTTGATAGTGTAGAAAAAGCTGTTGGTGAAGCTACAAAAAGTATA  
TCTAATCATATAAATCCTATGAAATGGAGCTGGTAA

### > **DUF443-var1**

Function: protein coding sequence; putative protein (genomic island)

Best match: DUF443-var1\_CC001\_MW2-USA400\_BA000033.2[642305:642946] (completely identical)

Position: 018-contig\_252: 32602 ... 33244; Length: 642 bp

Sequence:

GTGGAGACATTGCTTTGCGAATCTAAAGTTATTAATAAAAACCCTAAATATCGAATAATC  
AAATACGATAGTGAATATTTAATGATTGATTTGGCAAGTAATTGGATTGTCTTCTTCTTC  
CATTTATTAACCTGGCTCATACCGAAAACATATGTCAAAATCACTAAGAATGATTATGAAA  
AATTAATATTGTCAAACCAGTTAAAAATAAATCGATAGGATGGACCATATTCGCGGGTA  
TTGTGTTACTTGGTGGTACTGTAAGAAGAAATACTTATTTATTTGATTTCAATTAGAAGA  
ACTAATTGTTTGGAGCAGCTGTTTCATTGGGTTTTTAGAGATTATTTTTTTTATTGTTATC  
TAAATAAGAAATTAACATTAATATTTATAATGAAAGTAAAAATAATGAACTTAAATTA  
GATTATTACCCTCCTTTAAAAATATTTGTTTCACAATTTTTTATTACCTATTTACTGGTTTC  
ATGTCTTATGGGGCATTTTACTTGTGGTATTTGAAAATGTGCAAAATTTAATCTTATATG  
TTTCTTGGCTTTTCATGACTATGCTATTTATGTTTATGAATATGCATTCAATTATAGATAAA  
AAAGTACATATATTTCTTAAAGTCTAATAAATAG

### > **DUF443-var10**

Function: protein coding sequence; putative protein (genomic island)

Best match: DUF443-var10\_ref\_CC008\_COL\_CP000046.1[679951:680580] (completely identical)  
Position: 018-contig\_252: 33290 ... 33920; Length: 630 bp

Sequence:

```
GTGCTTTGTGAATCTAGACAAATTTATAAAAATCCTAAATATCGAGTTATTAGATATAAT
AATGAATATTTTCATGGTTCGATTTAGTAAGTACTTGGATTACTTATTTTTTCCCTATGATTA
ATTGGTTTTTGCCTAAAAAATACGCAAAAATTAGCGAAAATGAATTTGAAAGGTTAAATA
TAGTCGAGCCTGTTAAAAATAATGTTTTTTGGCCGGTTGCAGGAAGTTCAGTTCTATTTGG
AATTATATTGAGAAAGTACGGTAACTTCTTTAATGTTTCAGTTTGAAAAACAACCTAGCAAT
CACTGTATTTTTTATCATGTTAATAGGGATGTTAATTTTTTATTTTTATCTAAATAAAAAAT
TAACATTA AAAATTTTTAATAACCAACGTGGTTAATAAGAATAGAGTTGTATTAATACCGA
CTTTCAAACAAGGATTGTTAATAGTTTTTGCCTACTTTTTTTTAGGAAGCGCTTCAATATTT
ACTTTAACCATCTTTTTGACGACAGAGTCACAAAATATAATAATTTTTTAACTTGGGTTA
TTATCACGATGTTTTTCTTTTTAGTGAATATGGCTTCGATAGGTAATAAAAATGTTTCATGT
TATTTTAAGAATAAACGAGTAG
```

### > DUF443-var7

Function: protein coding sequence; putative protein (genomic island)

Best match: DUF443-var7\_CC001\_MW2-USA400\_BA000033.2[644075:644704] (completely identical)

Position: 018-contig\_252: 34372 ... 35002; Length: 630 bp

Sequence:

```
ATGTTGCTTTGCGATGTCAGAGTCATTTATAAAAATCCGAAATACAAAGTCATTCAACAT
AACGGTGAATACTTATTAGTCGATTTAGTAAGCACTTGGTTCGTGTACTTTTTTCTTTTCAT
TAATTGGTTCATTCCAAAAAAGTACGCGATAAATTAGCGAAGAAGAATTTGAAAATTTAAA
TGTTGTTAAACCAAATAAAAATAATGTTTTCTGGTCAGTTATAGGAAGTTCGGTTTTGTTT
GGAGTACTTTAAGGAAATACATACATGTTTTTGATGTTCAATTAGATAAGCTAGTTGTAA
TGATATTGTGTGCTCTCGCTTTAATTTGTGTTATAGTTTTTTATTTTAACTTAAATAGAAAG
CTTAAGTTAAAAGTGTGTTGATACAAATATTGAAAAAATAAGAGAGTTATATTAATACCA
ACGTTTAACTTGGCTGTTTTTTAGTTTTCGGATATATTTTCGCTGGAAGTTTTTCAATATT
TTCATTAATTGCCCTTATGACAATCGAACCTCAAAATATAATAATATTTATTTATTGGATT
ATGATGACAATGCTTTTCTTTTTGTTAAATATGACTTCGATAGGTAATGAAAAAGTTCGCG
TTATAATGAAAAATAATTGA
```

### > DUF443-var4

Function: protein coding sequence; putative protein (genomic island)

Best match: DUF443-var4\_CC001\_MW2-USA400\_BA000033.2[644819:645469]

Position: 018-contig\_252: 35116 ... 35767; Length: 651 bp

Sequence:

```
GTGGAGACATTGCTTTGTGAAACTGAAAATATTAATAAGAATCCCAAATATAGAATTATC
AAATACAAAGATGAATATTTGATGATTGATTTAGTAAGTACATGGTTAGCACTCTTTTTCC
CAATGATTAATTGGCTGATTCCAAAAAAGTACGTCAAAATCAGCGAAAAAGATTTTGAAA
CTTTAAACATTGTGAAGACAACCTAAAATCAATCTTTTTGGCCAGTGGCAGGAAGTACGG
TCTTATTTGGTGTATGTTAAGAAGGTATTCCCATTTATTTATCGTTAAATATGAATATAG
TATAGTAATTTAATTTGTTGCATCATAATACTAGGTATTTTTCTGTTTTTTTTATATTTAA
ATCAAAGTTAAAGTTACAAATCTATAATGAAAACAAAAATAAAAGCAATAAGATAATC
ATATTTCCCACTTTAAAGAGTCTTTGTTTATCAATAGTTTTATATATTTATTTAGGTGGTGG
TTCATTCTTACTATTTATATGTTATTGACGATTGAAGTTCAAAATATAATATTATTTATAA
CTTTGTTTGTAATATTTTTGTTTTTCTTATTTTTAAATATGTGCTCACTATATGACAATAAA
GTTTCATGTATTATTTAAATCAAATGGAATTGAAAAGTTTTAA
```

### > DUF443-var5

Function: protein coding sequence; putative protein (genomic island)

Best match: DUF443-var5\_CC001\_MW2-USA400\_BA000033.2[646376:647002]

Position: 018-contig\_252: 36673 ... 37299; Length: 626 bp

Sequence:



ATGTTGCTATGCGAATCTAAAATCATCAATAAAAACCCAAAATATAGAATTATTAATAT  
AATGATGAATACTTAATGGTCGATATAATAAGCACTTGGATTAGTTTATTTTTCCTTTTAT  
TAATTGGTTCATCCCAAAGAATACGTCAAAATTAGTAGAGAAGAGTTTGAAAACCTTAAA  
TATTGTTAAACCTGCTAAAAGAATGTTTTTTGGCCAGTTGCAGGTAGCTCTGCTTTGCTG  
GGAGTTGCATTAAGAAAATATACACATTTACTTGACATTCAACTTGATAAAAAATTAGTT  
ATTGCCATATGTTGCATCACATTTATAGGGATTTAATATTTTATGTACGCCTAATTA  
AATCATCTTTAAATATTTATAATACTAAAATAAAAAGGTCAAAAATTTTTTAATACCTAC  
ACTAAAAATGTTTGTTCACATTATTTGGATATATTTTATTTGGCGGATTGACTATGCTA  
TTCCTAGATGCACTATTATCAATGAGTTATCAAAACATAATAGTATATTTTGTGGATTG  
CAGTTATAATGGGTTTTTTTCTAGTTAATATAGCTTTAATTATAGATAAAAACATTCATGT  
CATACTTAAAAACCAATAG

### > Q5HI67

Function: protein coding sequence; oxidoreductase (core genome, variable)

Best match: Q5HI67\_CC001\_MW2-USA400\_BA000033.2[647272:648210] (completely identical)

Position: 018-contig\_252: 37568 ... 38507; Length: 939 bp

Sequence:

ATGAAGCAATTTGTAACCTTAGGTAAATCTGATGTTGAAGTGTTCCTCAATCGCACTTGGG  
ACGAACGCAGTAGGTGGGCATAATTTATATCCGAACTTAGATGAAGAACAAGGAAAAGA  
TGTTGTTTCGTCAAGCCATTAATCATGGTATTAATTTATTAGATACGGCATATATTTATGGG  
CCAGAACGATCAGAAGAATTGGTTGGAGAAGTTGTTAAAGAATATCCGCGAGAGCAAAT  
TAAAATTGCTACGAAAGGGTCTCATGAATTTGATGAAAATCAAGAAGTACATCAGAACA  
ATCAACCGGAATATTTAAAACAACAAGTTGAGAATAGTTTGAAACGTCTACAACTGATT  
ATATCGATTTATATTATATTCATTTTCCGGATAACAACACTCCGAAAGATCAAGCAGTTGC  
AGCATTACAAGAGCTTAAGGAACAAGGGAAGATTAAGCAATTGGTGTATCAAATTTCA  
CATTAGATCAACTTAAAGAAGCAAATAAAGATGGTTACGTTGATGTTGTACAGTTAGAAT  
ATAATTTATTGCATCGCGAAAATGAGGCAGTATTACAATATTGTGTTGATCACCAAATCA  
CATTTATTCATATTTCCCATTAGCATCCGGTATTTTAGCTGGAAAATATGATGAGAACAC  
TAAATTTAGTGACCATCGTACTACACGTTCGTGATTTTAAACCAGGTGTATTTGAAGAAAA  
TGTGCGTCGCGTAAAAGCTTTGGAAAGCATAGCTGCAGCACATCAAACCTCAATTGCGAA  
CATTGTATTAGCATTTTATTTAACGAGACCAGCTATCGATGTGATTATTCCTGGTGAAAA  
CGTGCAGAACAAGTCGTTGAAAATATTAAGCTGCAGATATCGTTTTATCAGATGATGAG  
ATCAATATATCGATGAACTGTTCCGATTGAAGACTAA

### > Q5HI66

Function: protein coding sequence; NADPH-dependent FMN reductase (core genome, variable)

Best match: Q5HI66\_CC001\_MW2-USA400\_BA000033.2[648421:648957] (completely identical)

Position: 018-contig\_252: 38717 ... 39254; Length: 537 bp

Sequence:

ATGATTACTGTTTTGTTTGGTGGGAGTAGACCAAACGGTAATACTGCACAATTAACAAAA  
TTCGCTTTGCAAGATTTAGAGTATCAATGGATTGACGTGACACAACATCAGTTTAAACCG  
ATACGTGACGTGAGACATACAGCAGAGACTATTACTTCATATGACGATGACTATTTGCCG  
ATTCTAGATAAAAATATTGGCTAGTGATACAATTTTTTGCATCACCAGTGTATTGGTATA  
GCATTTACAGCACCATTGAAAGCATTATCGAACATTGGTCAGAAACATTACAAGATAAAC  
GATATCCTAATTTAAGGCACAAATGGCCGAAAAGGATTTTAGAGTTATTTAGTTGGTG  
GAGATTGTCCAAAATAAAAAGCGAAGCCAGCAATTACGCAAATGAAATATAGTTTAGAC  
TTTTTAGGTGCCACTTTAAATGGTTATATTATTGGAAGTCTGAAAAGCCTGGTGACATCA  
TGAAAGACAACCTATGCCTTAGCACGTGCAACTGAGTGAATAGTATATTGCAATAA

### > Q8NXU4

Function: protein coding sequence; GNAT family acetyltransferase (core genome, constant)

Best match: Q8NXU4\_CC005\_Mu50-VRSA\_BA000017.4[676945:677421] (completely identical)

Position: 018-contig\_252: 39422 ... 39899; Length: 477 bp

Sequence:

ATGTTCAAGGTAAGACAAGCAACTGAAAAAGATGTTGTTCAAATTAGAGATGTCGCAACT  
AAAGCTTGGTTTAATACATACTTAAATATATACGCTGCGACAACAGTTAATCACTTGTTA  
GAAGCTTCATATAATGAACATCATTTAAAGAAAAGACTTCAAGAACAATTATTCTTAGTC  
GTTGAAGAAGGTAATGACATCGTTGGCTTTGCTAACTTTATTTACGGTGAAGAATTATATT  
TATCAGCTCATTATGTTAAACCAGAATCGCAACATACAGGTTATGGTACAGCATTGTTAA  
ATGAAGGATTATCACGTTTTGAAGATAAATTTGAAGGTGTTACTTAGAAGTAGATAATA  
AAAATGAAGAAGCAGTAGCTTACTATAAAGAGCAAGGTTTTACAATCTTACGCTCTTATC  
AGCCAGAAATGTATGGCGAAAAGTTAGACTTAGCACTTATGTACAAAGCATTTTAA

### > Q5HI65

Function: protein coding sequence; phosphohydrolase (core genome, constant)

Best match: Q5HI65\_CC001\_MW2-USA400\_BA000033.2649642:650937

Position: 018-contig\_252: 39938 ... 41234; Length: 1296 bp

Sequence:

ATGACTAACGCATATGTAGGTTTAAAATTAGTAGAAGAAAAAGTTTTTAAAGACCCGATA  
CATCGATATATTCATGTTGAAGATCAATTGATATGGGATTTAATTAATAACTAAGGAATTC  
CAAAGGTTACGTGCAATTAGACAACACTAGGAACACTGTACCTATCTTTTCACACAGCAGAA  
CATAGTCGCTTTGGACATTTAGGTGTGTATGAAATAGTTAGACGATTAATTGATGAGT  
CATTTATTGGTCATGATGCATGGGACAATAAAGATAGACCGTTGGCATTATGTGCTGCAT  
TATTACATGATTTAGGACATGGTCCATTTTCACATAGTTTTGAAAAAATATTTAATACAGA  
CCATGAAGCATAACACAAGCGATTACTTGGAGATACTGAGGTGAATGCTGTATTACG  
TAAAGTGTCGCCTGAGTTTCCAAGAGAAGTTGCGGAAGTAATTAATAAAAACGCATCATAA  
TAAATTGGTCATTTTCGATGATTTTCGTCACAAATCGATGCGGATAGAATGGATTATTTACA  
ACGTGATGCGTATTTACAGGTGTATCATATGGTGCTTTTGATATGGAACGTATTTAAGA  
TTAATGCGACCTTCTAAAGATGAAGTACTAATTAAGAAAGTGGTATGCATGCAGTTGAA  
AACTTTATTATGAGTCGTTATCAAATGTATTGGCAAATTTATTTCCACCCAGTTAGTCGTG  
GTGGAGAAGTGCTGCTTAATAATTGTTTGAAACGCGCAAACAGCTTTATAATGAAGGCT  
ATGAATTTAAGTTGCATCCACATGATTTTATTCCATTTTTTTGAAGAGACAGTTACGATTGA  
ACAATATGTTGAACTCGATGAAGCGGTAGTTACGTATTTTGGAAAAATGGACAAAAGA  
AGATGATGCCATTTAAGTGATTTAGCAAGTCGATTTATTAATCGAGACTTATTTAAATAT  
ATTCATTTGATGGCTCAATTATTACAATATCAGAACTGCAAGAAGTGTGTTGAAGCAGGT  
GGTATTAATCCAGATTATTATTTTGTGAGTGAAGCATTTTCGGATTTGCCATATGACTATG  
ATCGACCTGGGTCAAATCGCAAACCGATTCATTTATTAAGACAAGATGGTACGATTAGAG  
AAATAAGCAATCAATCTTTAGTCATTCATAGTATTACAGGCATTAATCGCCAAGACTATA  
AATTATATTATCCTAGAGAAATGGTTGCAAAGATTAAGATAAGACAATTAGAGAAGCT  
ATTGAAAATTTGATTAATGAGCTTAATTA

### > adhA

Function: protein coding sequence; alcohol dehydrogenase I (core genome, constant)

Best match: adhA\_CC001\_MW2-USA400\_BA000033.2[651985:652995]

Position: 018-contig\_252: 42282 ... 43293; Length: 1011 bp

Sequence:

ATGAGAGCAGCAGTTGTAACGAAAGATCACAAAGTAAGTATTGAGGACAAAAAGTTAAG  
AGCTTTAAAACCTGGTGAAGCGTTGGTACAAACGGAATATTGTGGCGTTTGTGCATACCGA  
TTTACATGTTAAGAATGCTGATTTTGGTGATGTTACAGGCGTTACTTTAGGTCATGAAGGT  
ATTGGTAAAGTCATCGAAGTTGCGGAAGATGTAAAATCATTAAAAAATTGGAGACCGTGTG  
TCTATCGCTTGGATGTTTCGAAAGCTGTGGAAGATGTGAATATTGTACAACAGGTCGTGAA  
ACACTTTGCCGTAGTGTGAAAAATGCTGGTTATACAGTAGATGGTGAATGGCTGAACAA  
GTTATTGTTACTGCAGACTATGCTGTGAAAGTACCTGAAAAATTAGATCCAGCAGCAGCG  
TCTTCTATTACATGCGCAGGTGTGACAACCTTATAAAGCTGTAAAAGTAAGTAATGTA  
CCTGGACAATGGTTAGGTGTTTTTGGTATAGGTGGTTTAGGTAACCTAGCTTTACAATATG  
CTAAAAACGTTATGGGGGCTAAAATTGTTGCCTTCGACATCAATGATGATAAATTAACAT  
TCGCGAAAGAATTAGGTGCAGATGCTATTATTAATTCTAAAGATGTTGATCCAGTTGCAG  
AAGTTATGAAATTAAGTATAACAAAGGATTAGATGCAACAGTGGTAACTTCAGTTGCTA  
AGACGCCATTTAACCAAGCGGTTGATGTTGTAAAAGCTGGTGAAGAGTTGTTGCCGTTG

GTTTACCTGTTGATAAAAATGAACTTAGATATCCCAAGATTAGTGCTTGACGGTATTGAAG  
TAGTAGGTTCACTTGTGGTACAAGACAAGACTTACGTGAAGCGTTTGAATTTGCTGCTG  
AAAATAAAGTAACACCTAAAGTTCAATTAAGAAAATTAGAAGAAATTAATGATATTTTG  
AAGAAATGGAAAATGGTACTATAACTGGTAGAATGGTTATTAATTTTAA

### > **argS**

Function: protein coding sequence; arginyl-tRNA synthetase (core genome, constant)

Best match: argS\_CC008\_NCTC8325\_CP000253.1[601966:603627]

Position: 018-contig\_252: 43981 ... 45643; Length: 1662 bp

Sequence:

ATGAATATTATTGATCAAGTGAAACAAACATTAGTAGAAGAAATTGCAGCAAGTATTAAC  
AAAGCAGGATTAGCAGATGAGATTCTGATATTAATAATTGAAGTTCCTAAAGATACAAA  
AAATGGAGATTATGCTACTAATATTGCGATGGTACTGACTAAGATTGCAAAGCGTAATCC  
TCGTGAAATTGCTCAAGCGATTGTTGATAACTTAGATACTGAAAAAGCACATGTAAAACA  
AATTGACATTGCTGGTCCAGGATTCATTAATTTTTACTTAGATAATCAGTATTTAACAGCA  
ATTATTCCTGAAGCAATTGAAAAAGGTGATCAATTTGGACATGTAATGAATCAAAAAGGG  
CAAAATGTATTGCTTGAGTATGTTTCAGCTAACCTACAGGAGATTTACATATTGGTCATG  
CTAGAAATGCAGCAGTTGGTGATGCTTTAGCTAATATTTTAACTGCAGCTGGCTATAATGT  
AACACGTGAATATTATTAATGATGCTGGTAATCAAATTACTAACTTAGCGCGTTTCGATT  
GAAACACGTTTCTTTGAAGCTTTAGGTGACAATAGTTATTCAATGCCAGAAGATGGCTAT  
AATGGTAAAGATATTATTGAAATAGGTAAAGATTTAGCAGAGAAACATCCTGAAATTA  
AGATTATTCTGAAGAAGCACGTTTGAAGAATTTAGAAAATTAGGCGTAGAATACGAAA  
TGGCTAAACTGAAAAATGATTTAGCAGAGTTCAATACGCATTTTGATAATTGGTTTAGTG  
AAACATCTTTATATGAAAAAGGCGAAATCTTGAAGTTTTAGCAAAAATGAAAGAATTAG  
GTTATACGTATGAAGCTGATGGCGCTACATGGTTACGTACAACCTGATTTTAAAGACGACA  
AAGACAGAGTATTAATTAATAATGACGGTACATATACGTATTTCTTACCAGATATTGCGT  
ACCACTTCGATAAAGTTAAACGTGGTAATGACATTTTAATCGATTTATTTGGTGCTGATCA  
TCATGGTTATATTAATCGTTTGAAGCATCTCTTGAACGTTTGGTGTAGATAGTAATCGT  
TTAGAAATTCAAATCATGCAAATGGTTCGTTTAATGGAAAATGGTAAAGAAGTGAAGATG  
AGTAAACGTAAGTAAATGCGATTACATTAAGAGAAATTATGGACGAAGTTGGCGTTGAC  
GCTGCACGTTATTTCTTAACTATGCGTAGTCCTGATAGTCACTTTGATTTTGATATGGAAT  
TAGCGAAAGAGCAATCTCAAGACAATCCAGTTTACTATGCTCAATATGCACATGCGCGTA  
TTTGTTCAATTTTAAACAAGCGAAAGAGCAAGGAATTGAGGTAGCTGCTGCGAATGATT  
TTACAACGATTACAAATGAAAAAGCGATTGAATTGTTGAAAAAAGTAGCTGATTTCGAAC  
CTACAATTGAAAGTGCAGCTGAGCATAGATCAGCACATAGAATTACTAATTATATTCAAG  
ATTTAGCTTCTCATTTCATAAATTCTATAATGCTGAAAAAGTGTTAACAGATGATATTGA  
AAAAACAAAAGCACATGTTGCTATGATTGAAGCGGTCAGAATTACATTGAAAAATGCATT  
GGCAATGGTTCGGTGTAAAGCGCACCTGAATCAATGTAA

### > **tx\_universal2**

Function: rho independent terminator

Best match: tx\_universal2\_CC001\_MW2-USA400\_BA000033.2[655556:655596]

Position: 018-contig\_252: 45852 ... 45882; Length: 30 bp

Sequence:

CTGAACGAAAATTCGCTTGTAACAAGCTTT

### > **A5IQG3**

Function: protein coding sequence; similar to iron-binding transport protein (core genome, constant)

Best match: A5IQG3\_CC008\_NCTC8325\_CP000253.1[605030:605917] (completely identical)

Position: 019-contig\_265: 1036 ... 1924; Length: 888 bp

Sequence:

GTGAAGAAATCGTTAATTGCTTTTATTTTGATTTTATGCTTGTCTGAGTGGCTGTGGTAT  
GAAAGATAATGATAAACAAGGTAGCAATGATAATGGCTCGTCTAAATCGCCGTACCATA  
GAATTGTTTCGTTAATGCCTAGTAATACTGAAATTTATATGAATTAGGATTAGGTAATA  
CATAGTTGGTGTTCACCGTTGATGATTATCCAAAAGATGTGAAAAAGGGTAAGAAACA

ATTTGATGCTTTGAATCTAAATAAAGAGGAACTTTTAAAGGCAAAGCCAGATCTAATTCT  
TGCGCATGAGTCGCAAAAGGCAACTGCTAATAAAGTATTGTCATCATTAGAGAAACAAG  
GCATCAAAGTAGTGTATGTTAAAGATGCACAATCAATTGATGAACTTACAACACATTTA  
AGCAAATTGGGAAATTAACGCATCATGATAAGCAGGCTGAACAACCTGTTGAGGAACT  
AAAGATAATATCGATAAAGTCATAGATTCAATTCCTGCTCATCATAAAAAATCAAAAGTA  
TTTATTGAGGTTTCATCAAAGCCTGAAATATATACAGCAGGGAAGCATAACATTTTTTAAT  
GATATGTTAGAAAAATTAGAAGCCCAAAATGTGTATAGTGACATTAATGGTTGGAACCC  
GTAACGAAGGAAAGTATTATTA AAAAAGAACCCAGATATATTAATTTGACGGAAGCTAA  
GACAAGATCAGATTATATGGATATCATCAAAAAAAGAGGTGGATTCAATAAAATTAATG  
CTGTCAAGAATACACGTATTGAAGTTGTAAATGGTGATGAAGTATCAAGACCAGGTCCAC  
GTATTGATGAAGGATTAAGAATTAAGAGATGCAATTTATAGAAAATAA

### > **tx\_universal3**

Function: bidirectional rho-independent terminator

Best match: tx\_universal3\_CC001\_MW2-USA400\_BA000033.2[662739:662803] (completely identical)

Position: 019-contig\_265: 7091 ... 7156; Length: 65 bp

Sequence:

AGGCAATGTGAAAAAGCTGATTACTATTCATTATTTGATAGAAATCAGCTTTTTTTGAAAT  
GTAT

### > **sarA**

Function: protein coding sequence; staph accessory regulator A (core genome, constant)

Best match: sarA\_CC001\_MW2-USA400\_BA000033.2[662954:663328:r]RC (completely identical)

Position: 019-contig\_265: 7307 ... 7682; Length: 375 bp

Sequence:

TTATAGTTCAATTTTCGTTGTTTGCTTCAGTGATTTCGTTTATTTACTCGACTCAATAATGATT  
CGATTTTTTTACGTTGTTGTGCATTAACAAGAATTAATACAGTTCTTTCATCATGCTCATT  
CGTTTTTTATCGAAGTAATCTTCTTGAGATAAAATTTAACTGCTTTAACAACCTGTGGTT  
GTTTGTAGTTTAAATGATTAATAATATCTTTAAGATAGTATTCTTTCTCTTTGTTTTCGCTG  
ATGTATGTCAATACAGCGAATTCTTCAAAGCTAATTGAAAATTCCTTTTTAATTAACCTTT  
TTAATTTGTCAGCATAAGTGACCATTGATAACAACCTCAAAGCAATCATTGATTTTTGTAAT  
TGCCAT

### > **A6QES9**

Function: protein coding sequence; putative protein (core genome, variable)

Best match: A6QES9\_CC008\_NCTC8325\_CP000253.1[612385:612534:r]RC (completely identical)

Position: 019-contig\_265: 8391 ... 8541; Length: 150 bp

Sequence:

CTATGAAATATTAGCACGAATAACATAATTTTTGCTATTAATTTGGTGTAATTATTAAAA  
AATAACATTAATTTAGGTCTTAAGAATGAGTTGACTATCGAATTTGCTAAATTAATTTG  
TTGTGTCAAAGCATACTACCCAAATCAA

### > **Q2YSV8**

Function: protein coding sequence; putative protein (core genome, variable)

Best match: Q2YSV8\_CC001-ST772\_118\_AJGE01000030.1[54626:55555:r]RC (completely identical)

Position: 019-contig\_265: 8629 ... 9559; Length: 930 bp

Sequence:

TTAAAATAATCTTAAAAGTATAATGCCTGTCAAATACATAATAGACCAATAGTTTTTCT  
GGATGTCATTGCTATTTTAGGTGAACCAAATAATCCAAAGTGATCTATCAATATGCCCAT  
AGAATCTGGCCAAACATCCCAATAAGTGTTGTTAATGCTGCACCCATATGAGGCATTAAG  
ATAATGTTAGCTGTTACAAAAGCCATGCCAAGTATACCGCCAGTAAAATAGATAGGCTTT  
AATTTACCGAATTTTAAATGACTTGTTTTTAGTTTTAAAGAACGATTAAAAATAGCGGTTA  
AAATCAATAGCGCTATTGACCCAATTGTAAATGATACTAATGATGCAAAGGCTGTTGAAT

GAGTATGACTTGCTAAAGCACTATTAATTGTCGTTTGAATAGGTGGAAAGAAACCAAAAA  
TAAATCCTAAGAGAAGCCAAAACAGTAAATACTTTTGATCAGTTAGTAATAAATTATTCT  
TGTTAAATTGATTCATTATGACGATGCCGATAATGAGTAACAATACTCCAATTGCTTTAAT  
TAAATTTAAATCATGAATTGTAGCGCCAAATAAGCCCAATGTATCAATAATGACACCCAT  
AATAATTTGACCCGCAACTGTTGCAATTACAGTTAATGTTGCACCTAATTTTGGCAATAAC  
AATAAATTGCCAGTTAAAAAGCTAACCCCAAGCAAACCACCGACTACCCATGTGTAGTTA  
AATGATTGATTATTGTA AAAAGTGAATAGTAAATACTTCTGGATTGATAATGATATTTAAA  
ATAATTTAAACAAATTGTTCCA ACTGAAAATGAAATGAATGAAGTATAGAAAGGCGATTT  
AGTATACAGTGATAGTCTTGAATTGACAGATGTTTGGATAGGAATAAGCATTCCA ACTAG  
GACACCAATGATATAGAAAAGAAGCAT

### > **A6QET1**

Function: protein coding sequence; putative protein (core genome, variable)

Best match: A6QET1\_CC001\_MW2-USA400\_BA000033.2[665400:665624:r]RC

Position: 019-contig\_265: 9753 ... 9978; Length: 225 bp

Sequence:

CTATTTCTTATCTTCAAATAAAAACAGTTGTTGTTTTATCAATAATTTGAGCAGAATGTACT  
TTGGTGATAGTACC ACTATTTGACTTTATAATATTTAAATCTACTAATGCATTCATACTAT  
CACGTGCAACTTGCTCGGTCACTACGTTGTTAATTGTGATAATTGCAGTTTTACAGGCTT  
GTCTAGTGAAGATTTAAA ACTTAATTCAAGTGTTTTAGTCAT

### > **Q7A1N3-var1**

Function: protein coding sequence; putative protein (core genome, variable)

Best match: Q7A1N3-var1\_CC008\_COL\_CP000046.1[702663:702866:r]RC (completely identical)

Position: 019-contig\_265: 9994 ... 10198; Length: 204 bp

Sequence:

TTAAATTGATAAAGATTTGATGAGTTCGATATTGCTATATGTTTCTCCAGTAAGTCGCTCA  
ATAAGTTTGCTGAATGTTTTAATTTGGTCGTTTGATGCATCAGGGTTAATGTTAGCGAATC  
GACGCTTAAATTCTGTTTGTGGCCGTTAGCGTCTACTTTAGTAAATGATAATACAATAGT  
GATGTGGTTTATTTTACTCAT

### > **A5IQH4**

Function: protein coding sequence; putative phage integrase family protein ?? (core genome, constant)

Best match: A5IQH4\_CC001\_MW2-USA400\_BA000033.2[666003:666563] (completely identical)

Position: 019-contig\_265: 10356 ... 10917; Length: 561 bp

Sequence:

ATGAATAAAGTAGAAGCGATTAAATTTAATGATGATATTGTTAAAATGTATGAAGCGCTC  
AAGATAAAATCTGAACGTGACTATTTATTCTTTAAGTTAGCTATACATAGTGGATTGAAA  
GTATCAGAATTATTAACAATTACAGTCTCTCAAGTTAAGAGACTAATTGAAAAGTGTACC  
TTATCAGAAATGTGTAAAGCACATTTTCATTCGTTGATTAAAATTAGGTTACCAGAAACA  
TTATCGAAAGAACTACTTCAATATATAGAGGACAGGAGTCTTTTGAATGAAGACGTTCTT  
TTTCAATCACTACGAACAAATCAAGTATTATCTAGACAGCAAGCATATCGAATAATTCAC  
CAAGCATCAATTGAAGCTGGTATAGATAATGTAGGACTAACGACATTGCGTAAGACATTT  
GCATATCATGCTTATCAAAAAGGTATACCTATACCAGTCATTCAAAAAGTATTTAGGGCAT  
CAATCTGCTATTGAAACACTAAATTTTATCGGTTTAGAAAATGAGTGTGAACATAGTATTT  
ATATTTTATTACAATTATAG

### > **mrpA**

Function: protein coding sequence; Na<sup>+</sup>/H<sup>+</sup> antiporter/MnhA component/putative (core genome, constant)

Best match: mrpA\_CC001\_MW2-USA400\_BA000033.2[666582:668984]

Position: 019-contig\_265: 10935 ... 13338; Length: 2403 bp

Sequence:

ATGAGTTTGGTTTATTTATTAATTGCTATACTTGTGATTATGGCGATGATACTTCTAATGTC  
TAAACGTAGAGCATTGGCTAAATATGCCGGGTACATAGCGTTGGTTGCACCTGTAATTC

ATCTATCTATTTTTGATTCAAATACCATCAGTAGCTAAACTGCAATATCTTTCTACCTCTA  
TTCCATGGATTAAGACATTAGATATTAATTTAGATTTACGTTTAGATGGTTTAAAGTTAAT  
GTTTTCTCTTATTATTTCACTTATTGGAATTGCAGTATTCTTCTATGCAACTCAATATTTAT  
CCTCTCGAAAAGACAATTTACCAAGGTTTTATTTTTATTTAACGTTATTTATGTTTCAGTAT  
GATTGGTATTGTATTATCAGACAATACGATATTGATGTACATTTTTTTGGGAATTAACGAGT  
GTATCATCATTTTTATTGATTTTCATATTGGTATAACAACGGAGATAGTCAATTTGGTGCGA  
TGCAATCATTTATGATTACAGTATTTGGTGGTTGGCATTATTAGTTGGTTTTATCATGTTG  
TATATTATGACAGGAACGAATAACATCACAGAGATATTAGGACAAGCAGATTATATTTAA  
GAATCATGGATTGTTTATCCCTATGATTTTTATGTTTTTATTAGGTGCATTTACAAAATCA  
GCACAATTTCCATTTTCATATTTGGCTACCTAGAGCAATGGCTGCACCTACACCTGTAAGTG  
CTTATTTACATTCAGCCACGATGGTAAAAGCTGGTATCTTTTTATTACTTCGATTTACACC  
ATTATTAGGTCTTAGCAATATGTACGTATATATCGTTACGTTTGTGGTTTAAATAACAATG  
TTATTTGGTTCAATTACAGCTTTAAAACAATGGGATTTAAAAGGTATCCTAGCGTACTCTA  
CAATCAGTCAACTGGGATGATTATGGCTATGGTGGGTATAGGTGGCGGATATGCTCAAC  
ACCAACAAGACGCAATAGCATCTATTTATGTATTTGTATTATTTGGTGCCTATTTTCATCT  
AATGAATCATGCCATCTTTAAATGTGCGCTTTTCATGGGAGTAGGTATTTAGATCATGAA  
GCAGGTTCAAGGGATATACGAATTTTAAAGTGGAAATGCGTCAACTATTTCCATAAATGAAT  
CTAGTCATGACGATAGCGGCTCTATCTATGGCTGGAGTACCATTTTTAAATGGATTTTTAA  
GTAAAGAAATGTTTTTAGATGCATTAACACAACTGGACAATTATCCCAATTTAGTTTGA  
TTTCAATGATAGCTATCGTGTGTTGTTGGTGTATTGCGAGTGTTTTTACATTCACATATGCA  
CTATACATGGTAAAAGAAGTATTTGGACAAAATATGATTCTAAGGTTTTTACTAAAAAA  
AATATCCACGAACCATGGTTGTTTAGTTTACCATCTCTTATATTAATGGTGCTAGTACCTG  
TAATCTTTTTTGTACCAAATATATTTGGGAAGGGGATTATCGTTCTAGCATTAAAGAGCTGT  
ATCAGGTGGTAATCATCAAATTGATCAATTGGCACCACATGTTTCGCAATGGCATGGATT  
TAACATACCGCTTCTTTTAAACCATCATCATTATTTTATTGGGTAGTGTACTAGCAATCAAA  
GTAGATTGGAAAAAAGTGTTTCACAGGTAAAATTAGACAGATTTTCAGTTTCAAAAAGCTAT  
GAGATGGTATATCGACATTTTGAAAAGTTTGCTACGAAGCGATTTAAACGTGTTATGCAA  
GATCGTTTAAACCAATACATTATTATGACCTTAGGCATATTTATGATTATCATTGGATATG  
GTTATATTCGAATTGGACTTCCTAAAGTACATCAGTTACATGTTTCTGAATTTGGGGCATT  
AGAAATTATATTAGCAATCGTAACTGTCACAATTGGTATTTCTTTAATTTTTATACGTCAA  
CGACTGACAATGGTCATTTTAAATGGAGTCATCGGATTTGTTGTGACCTTATTCTTTATAG  
CAATGAAAGCCCCTGATCTAGCATTGACTCAGCTAGTAGTTGAAACAATAACGACGATAC  
TATTTATTGTCAGTTTTTCAAGATTACCAAACGTGCCAAGATCTAACGCTAACAAAAAAA  
GAGAAATAATTTAAATTTCTGTATCACTCTTGATGGCACTTATTGTTGTATCATTATTTT  
TATTACACAACAACAGATGGTTTATCATCAATATCAGACTTTTTATTTAAAAGCTGACAA  
ACTAACAGGTGGTAAAAATATTGTAAATGCGATACTTGGTGACTTTAGAGCATTAGATAC  
ATTATTTGAAGGATTAGTGTTAATTACTGGGCTAGGTATTTACACATTATTAATTAT  
CAAGATCGGAGGGGACAAGATGAAAGAGAATGA

> **mrpB**

Function: protein coding sequence; monovalent cation/proton antiporter protein B (core genome, constant)

Best match: mrpB\_CC001\_MW2-USA400\_BA000033.2[668971:669396] (completely identical)

Position: 019-contig\_265: 13324 ... 13750; Length: 426 bp

Sequence:

ATGAAAGAGAATGATGTCGTGTTAAGAACGGTCACGAACTTGTTGTATTTATTTTATTG  
ACTTTCGGATTCTATGTCTTCTTCGCAGGTCATAATAATCCTGGTGGTGGGTTTATTGGTG  
GTTTAAATATTTAGTTCAGCGTTTATTTTAAATGTTTCTGGCTTTTAAATGTTGAAGAGGTTTAA  
GAAAGTTTACCGATTGATTTTAGAATTTTAAATGATTATTGGAGCATTGGTATCATCTATTA  
CTGCGATAATACCTATGTTTTTTGGAAAACCATTTTTGTCTCAATATGAAACAACCTTGGAT  
ACTTCCAATTTTAGGACAAATTCATGTAAGTACAATAACACTTTTTGAATTAGGTATTTTAA  
TTCTCAGTTGTTGGTGTATTGTCACAGTGATGTTGTGCTTAGCGGAGGTCGATCATGA

> **mrpC**

Function: protein coding sequence; monovalent cation/proton antiporter protein C (core genome, constant)

Best match: mrpC\_CC001\_MW2-USA400\_BA000033.2[669393:669737] (completely identical)

Position: 019-contig\_265: 13746 ... 14091; Length: 345 bp

Sequence:

```
ATGAATTTAATATTATTACTAGTTATAGGATTTTTAGTGTTTATAGGAACATATATGATTT
TATCAATCAATTTAATTTCGTATTGTAATCGGAATTTCAATATATACTCATGCTGGTAATCT
CATTATTATGAGTATGGGAACGTATGGTTCTAGTAGATCAGAACCCTAATAACTGGTGG
AAACCAATTGTTTGTGATCCCTTGTACAAGCTATTGTACTAACTGCAATAGTTATAGGG
TTTGGGATGACTGCGTTTTTACTTGTACTTGTATAGAACTTATAAAGTAACAAAAGAAG
ATGAAATTGAAGGCCTAAGGGGGGAAGATGATGCTAAGTAA
```

### > **mrpD**

Function: protein coding sequence; monovalent cation/proton antiporter protein D (core genome, constant)

Best match: mrpD\_CC001\_MW2-USA400\_BA000033.2[669727:671223] (completely identical)

Position: 019-contig\_265: 14080 ... 15577; Length: 1497 bp

Sequence:

```
ATGCTAAGTAACTTATTGATTTTACCAATGTTATTACCATTCCTTTGTGCCTTAATCCTTGT
ATTTTTAAAAATAATGATCGTATTTCTAAATATTTATACTTAGGTACAATGACTATCACC
ACAATTATTTCAATTAATGCTATTAATTTATGTTTCAGCGTCACCGTCCAATTACGCTAGACT
TTGGAGGATGGTCAGCGCCCTTTGGTATACAGTTTTTAGGAGATTCTTTAAGTTTAATTAT
GGTTACAACCGCTTCGTTTGTGATTACTTTAATTATGGCATAACGGATTTGGGCGTGGCGAA
CATAAAGCAAATCGTTATCACTTGCCATCGTTCATATTTTTTAAAGTGTGGCGTGATAG
GCTCTTTTCTAACATCAGATTTATTTAATTTATACGTCATGTTTGAAATTATGTTACTAGCG
TCATTTGTACTCATTACACTTGGACAATCTGTAGAACAATTACGTGCTGCAATTATTTATG
TTGTCTTGAATATTATTGGTTCATGGCTATTCTTATTAGGTATAGGTTTACTTTATAAACA
GTAGGTACATTAACCTTTTCACATATTGCAATGCGTTTGAATGACATGGGAGATAATCGC
ACTGTTACAATGATTTTCATTAATCTTCTTAGTCGCATTTAGTGCGAAAGCAGCGCTGGTCC
TTTTTATGTGGCTACCCAAAGCCTACGCTGTGTTAAATACTGAGCTTGCAGCATTATTTGC
AGCGTTAATGACCAAAGTAGGGGCCTATGCATTAATTCGATTCTTCACTTTACTATTTGAT
CAACATAATGATCTCATAACATCCATTGCTAGCAACTATGGCTGCTATAACTATGGTCATCG
GCGCTATAGGTGTCATTGCTTATAAAGATATTA AAAAGATTGCAGCTTACCAAGTCATAA
TCTCAATAGGATTTATCATTTTAGGTTTAGGAACAAACACGTTTGCAGGTATTAATGGTGC
AATATTTTATTTGGTAAATGACATTGTTGTAAAAACATTGCTATTTTTTATTATTGGTAGTT
TAGTTTACATTACAGGCTATCGACAATATCAATATTTGAATGGCTTAGCTAAAAAAGAAC
CTTTATTTGGAGTTGCGTTTATTATAATGATTTTTGCTATTGGCGGCGTGCCTCCATTTAGT
GGCTTTCCGGGAAAGTACTTATTTTCCAAGGTGCATTGCAAAATGGCAATTATATTGGA
CTAGCGTTAATGATTATTACTAGTCTAATTGCAATGTACAGTTTATTTAGGATACTTTTTT
ATATGTATTTTGGAGATAAAGATGGGGAGGAAGTTAATTTTAAAGAAAATCCCGCTATATC
GAAAAAGAATTTTAAAGTATTTTAGTAGTTGTGGTTATCGCAATCGGAATTGCTGCACCTGT
TGTGTTAAATGTTACAAGTGATGCAACTGAGTTGAACACGAGTGATCAATTATATCAAAA
ACTTGTAATCCGCATTTGAAAGGAGAGGACTAA
```

### > **mrpE**

Function: protein coding sequence; monovalent cation/proton antiporter protein E (core genome, constant)

Best match: mrpE\_CC001\_MW2-USA400\_BA000033.2[671224:671706] (completely identical)

Position: 019-contig\_265: 15577 ... 16060; Length: 483 bp

Sequence:

```
ATGAATCAAATAGTTTTAAATATTATCATTGCATTCTTATGGGTATTATTTCAAGATGAAG
ATCATTTTAAATTCTCGACTTTCTTTTCTGGATATCTAATTGGTTTAATTGTCATTTATATA
TTACACAGGTTTTTTCAGCGATGATTTTTATGTTAGAAAAATATGGGTAGCTATTAATTTT
TAGGTGTTTATTTATATCAATTAATAACATCTAGCATTAGCACGATTAATTATATTCTTTTT
AAAACAAAAGATATGAACCCTGGATTACTTTTCATATGAAACAAGACTAACAAGTGATTG
```

GTCAATAACATTTTTTAACAATTTTAATTATTATAACTCCAGGGTCTACAGTAATACGAATT  
TCTCAAGACTCTAAAAAGTTTTTTATTTCATAGTATCGACGTGTCAGAAAAAGAAAAAGAT  
AGTTTGTTAAGAAGTATTAAGCATTATGAAGACTTAATATTGGAGGTGTCGCGATGA

### > **mrpF**

Function: protein coding sequence; monovalent cation/proton antiporter protein F (core genome, constant)

Best match: mrpF\_CC001\_MW2-USA400\_BA000033.2[671703:672005] (completely identical)

Position: 019-contig\_265: 16056 ... 16359; Length: 303 bp

Sequence:

ATGATACAAACAATAACACATATTATGATTATTAGTTCACTCATTATTTTTGGAATTGCAT  
TAATCATCTGTTTATTTAGATTAATCAAGGGACCTACAACAGCAGATCGTGTGCTTACATT  
TGATACAACAAGTGCTGTCGTAATGTCAATTGTGGGTGTGTTAAGTGTACTTATGGGCAC  
CGTTTCTTTCTTAGATTCAATCATGCTCATTGCCATTATATCTTTTGTAAAGTTCTGTTTCAA  
TATCACGCTTTATTGGTGGGGGGCATGTGTTTAATGGAAATAACAAAAGAAATCTTTAG

### > **mrpG**

Function: protein coding sequence; monovalent cation/proton antiporter protein G (core genome, constant)

Best match: mrpG\_CC001\_MW2-USA400\_BA000033.2[671980:672417] (completely identical)

Position: 019-contig\_265: 16333 ... 16771; Length: 438 bp

Sequence:

ATGGAAATAACAAAAGAAATCTTTAGTCTTATTGCTGCTGTGATGTTGTTGTTAGGTAGTT  
TTATTGCTCTTATTAGTGCAATAGGTATCGTGAAATCCAAGATGTTTTCTTAAGAAGTCA  
CGCTGCGACAAAAAGTTCAACTTTATCCGTGTTATTAACTTAATCGGTGTATTAATTTAT  
TTTATTGTGAATACAGGATTTTCAGTGTGCGTTTATTACTGTCACCTGTTTTTATTAATTT  
AACTTCACCAGTCGGCATGCACTTAGTCGCTCGCGCTGCTTATCGCAACGGCGCTTATATG  
TATCGAAAAAATGATGCTCACACACATGCATCAATATTATTAAGTTCAAATGAACAAAAC  
TCTACAGAAGCATTACAATTACGTGCTGAAAAACGAGAAGAGCATCGTAAGAAATGGTA  
TCAAACGATTGA

### > **Q5HI38**

Function:

Best match: Q5HI38\_L1\_CC001\_MW2-USA400\_BA000033.2[672757:674799] (completely identical)

Position: 019-contig\_265: 17110 ... 19153; Length: 2043 bp

Sequence:

TTGGAAATATTTGAAACAATTCTTATATTTATAGCTGTTGTGATACTAAGTTCGTTTGTCC  
ATACTTTCATACCTAAAGTACCCCTAGCATTTATACAAATTTCTTGGGCATGTTACTATT  
TATTACCCCAATCCCTGTTCAATTTAATTTTATTCTGAATTGTTTATGGTAACAATGATTG  
CGCCTTTGTTATTTGTAGAAGGTGTTAATGTTTCTAGAGTCCATTTAAGGAAATATATTA  
GCCAGTGATGATGATGGCATTAGGATTAGTCATTACTACTGTGATAGGTGTAGGTTTATTT  
ATTCATTGGATTTGGCCAGATTTACCTATTGGAGCAGCATTGCAATTGCTGCCATTCTTT  
GTCCTACTGATGCAGTAGCAGTGCAAGCAATCACTAAAGGAAAGGTCTTGCCAAAAGGA  
GCAATGACAATTCTTGAAGGTGAGTCATTATTGAATGATGCTGCTGGTATTATTTCAATTA  
AAATAGCTGTTGGAGTATTAGTTACAGGTGCTTTTTCACTTGTTGATGCTGTTTCAAGTTGTT  
TTTAATTGCATCAATTGGTGGCGCAGTGGTTGGTTTACTTATAGGTATGGCATTAGTAAGG  
TTCCGATTAACATTGATGCGTCGAGGATATGAAAACATTAATATGTTTACAATTATTCAAT  
TGTTAACACCATTTGTTACGTATTTAATTGCTGAATTGTTTCACGCATCAGGAATCATTGC  
AGCAGTAGTTGCAGGACTTGTACATGGTTTCGAACGTGACAGAATTATGCAAGTACGTAC  
ACAACCTGCAAATGAGTTACAATCATAACATGGAATATACTAGGTTATGTTTTAAATGGCTT  
TGTTTTTTCAATATTAGGATTTTATAGTACCTGAAGTTATTATTAATAAATTATCAAAAACAGAA  
CCGCACAATTTAATCTTTTTAATAGGCATCACTATTGTTGTTGCTTTAGCTGTCTATCTATT  
TAGATTTGTTTGGGTTTATGTCTTATATCCTTATTTTTATTTAGCCATCAGTCCATTCCAAA  
AAATGATGACTAAAAATGATGATGATAATCCAACGACTGAGAAACCACCAAAGCGAAGT



TTATACGCTTTAATTATGACGTTATGTGGTGTGCATGGAACAATTTCTTTAGCAATCGCAT  
TAACGTTACCGTATTTTTTAGCAGGGCATCATGCTTTTACGTATAGAAACGACTTATTATT  
TATTGCATCTGGTATGGTTATTATTAGTTTGGTAGTTGCGCAAGTATTATTGCCATTATTA  
ACGAAACCTGCACCTAAAACAGTAATTGGCAATATGTCGTTTAAAGTTGCTAGAATTTAT  
ATATTAGAACAAGTTATTGATTATCTAAATCAAAAATCTACTTTTCGAAACAAGTTTTAAAT  
ATGGTAACGTGATTAAGAATATCATGATAAATTAGCATTTTTTAAAAACTGTAGAGAAAG  
ATGATGAAAACCTCTAAAGAATTAGAACGTCTACAAAAAATTGCTTTTAAATGTAGAAACAA  
AAACATTAGAGTCTTTAGTAGATGAAGGACAAATAACGAATAGTGTACTTGAAAACCTATA  
TGC GTTATGCTGAAAGAACACAGGTATATAGACAAGCATCATTAAATAAGAAGAATGATT  
GTATTATTACGAGGTGCTTTATTA AAAACGAAGAGTACAAACGAGAGTGAACCTCCGCATCT  
TCACTTAGTGTACGGATAACTTAATGGAATTAATAAAAATTAATAAATTAGTCCATTAT  
AATGTGGTTAGTCGTTTGTCTAAGGAAACAACAAAAGATAATACACTTGAAGTTGGAATG  
GTTTGTGACGGTTATTTAATGCGAATTGAAAACCTAACACCATCAAATTTCTTCAACTCAG  
CAAGTGAAGATACGATTACTAAAATTAATTAATGCATTGAGAGAACAACGTCGCATTT  
TACGTGAGTTGATTGATACAGATGAAGTATCAGAAGGTACAGCGTTAAACTAAGAGAA  
GCCATCAATTACGATGAAATGGTTATTGTAGATAGTATGACGTAG

> **txbi\_Q5HI38**

Function: rho independent terminator

Best match: txbi\_Q5HI38\_L1\_CC001\_MW2-USA400\_BA000033.2[674803:674870:r]RC

(completely identical)

Position: 019-contig\_265: 19156 ... 19224; Length: 68 bp

Sequence:

CTAATTATGCTAAAAGGGATTGATGAAAAACTGAAGGGCTTTTCATCAATCCCTTTTATT  
TATGGGA

> **tx\_rsaC**

Function: rho-independent terminator of rsaC

Best match: tx\_rsaC\_CC001\_MW2-USA400\_BA000033.2[674987:675048:r]RC (completely identical)

Position: 019-contig\_265: 19340 ... 19402; Length: 62 bp

Sequence:

TATTCACAAAAAATAGCCCACTCATATGACATCGGATGAGTGTGGCTTAAGGATCTATG  
GG

> **rsaC**

Function: noncoding RNA ncRNA of Staphylococcus aureus C

Best match: rsaC\_ref\_GQ403617.1[1:533]RC

Position: 019-contig\_265: 19351 ... 19884; Length: 533 bp

Sequence:

AATAGCCCACTCATATGACATCGGATGAGTGTGGCTTAAGGATCTATGGGGGGAGGAA  
ACCATAGATGTTTACTTTGATAGGCCAGATTAAATATCAAAGTATGCGATTATTTATAGCT  
TGATGCAAAAGTGGTATGCCTATTA AAAAGTTACTGCACATAGCTTTTAAATATTCCGTTCAA  
AGGAAAGGGGCATACAATTGAACAATCTGTAATAGTACTTTTAAACCAGCTATGCTAAAAG  
TCTAGTAGGGAGAACAGTTGTCCAATCACATAAGAACCTCTAACTTCGTTAGTACGATTA  
AGAAAAGCTTTTTAGTTAGTATGTAATACAATTTATTGACGCGCGTGAATCTCTTTTATAA  
GAGTGTGTAGGGAATGGCGTTGTATAAATTGTATTAGAAGAACTTCTAACGCATCTCTGT  
GGTAAAAGAGATGAAGGGAACGACAGTTTAAATTA AAAACTGCATAAGA ACTTCTAGCTTT  
TCTCTCTCGTTCAAAGAGAAGCAGCTGTTTCGCAGTTTAAATCAA AACCAT

> **rsaC**

Function: noncoding RNA ncRNA of Staphylococcus aureus C

Best match: rsaC-CC8\_CC001\_MW2-USA400\_BA000033.2[674998:675725:r]RC

Position: 020-contig\_263 RC: 37 ... 67; Length: 30 bp

Sequence:

AGTGACAAATGTTTACAGTTTAATTA AAAAC

> **tx\_orphan01**

Function: rho-independent terminator

Best match: tx\_orphan01\_CC001\_MW2-USA400\_BA000033.2[676003:676063] (completely identical)

Position: 020-contig\_263 RC: 211 ... 272; Length: 61 bp

Sequence:

TATGTTGATGTGTGGCCTAAAATATTGGAGATACCAATATTTTAGGTTGCATCAACATCA  
A

> **mntC**

Function: protein coding sequence; manganese(II) ABC transporter/substrate-binding subunit (core genome, constant)

Best match: mntC\_CC001\_MW2-USA400\_BA000033.2[676093:677022:r]RC (completely identical)

Position: 020-contig\_263 RC: 301 ... 1231; Length: 930 bp

Sequence:

TTATTTTCATGCTTCCGTGTACAGTTTCAATATTTGATTTTCATCATTGTTGAGTAAGAGTCAC  
CTTTAGTGCCTTCTTTACCGATTGAATCTGTGTACACTTCACCAAAGATATCTTTCTTCGTT  
TCTTCAGATAAACTTTCCATTGCTTTCTTATCAACACTTGTTTCTACTAATAAGTGTTTTAA  
TTTGTGCTTTTTAAACAACTCAATAGCTTGTCTCATTGTTTCAGGTGTACCTTGTTTTTAG  
TGTTAATTTCCCAAATATAACCTGGTGAATACCGTATTGTTTTGAGAAGTACTTGAAGGC  
ACCTTCACTTGTAAATCATGGCACGTTGTTCTTTTGGAAATGTCATTAAATTTGTCTTTACTGT  
CATTATTTAATTTTTCCAATTGAGCAATGTATTTGTTACCTTGCTTTTCATAATCTGCTTTA  
TGTTTTTTGTCGTTATCGATAAAATGTTTGTGGAATGTTTTTACGTATTTAATACCGTTATC  
TAAACTTAACCATGCGTGTGGATCTTGTGTTATCTTTGTTGCCTTCTTCACCGTTTAAATAGA  
TAGGTTTAAACATCTTTTGATACTGCGATAACTTTTTTATCTTTTAATGATTTACCAGCCTGT  
TCTAAGGCTTTTTCAAACCAACCGTTACCAGTCTCTAAATTTAATCCGTTGTATAAAATAA  
CGTCAGCGTCAGTTAACTTTTTAATATCTTTAGGTTTAACTTCATATTCATGAGGATCTTG  
ACCAACAGGTACAATACTATGAATATCGACGTTGTCTCCACCAACATTTTTAGCCATATC  
ATATAAAATTGAATTCGTCGTTACTACTTTTTAATTTGCCATTTGACTTATCACTGCTTTGTT  
TACCACCAGTACCACATGCAGCAACTAGAAGTAATAAGGCTAATAATAAAGGTAATAA  
TTTTTCAT

> **mntB**

Function: protein coding sequence; manganese(II) ABC transporter/permease subunit (core genome, constant)

Best match: mntB\_CC001\_MW2-USA400\_BA000033.2[677019:677855:r]RC (completely identical)

Position: 020-contig\_263 RC: 1227 ... 2064; Length: 837 bp

Sequence:

TCATGTTAAACTTCCTCGTTTCTTTCTATTCGTA AATTTTGTGAAAATAATGTGATGATAT  
AAATTACAAACGTACAAAGTACGATTGTCGCACCACTAGGAATGTTGTAATATAGCTGT  
AATAAAGTCCGACAATTGAACTTATGACACTTATTA AACTTGCTATAATCATCATTGAGT  
ATAGTTTTTTACTAATTA AAAAATGCTGTAGATGCAGGTGTAATTAATAATGCAACTACAA  
GAATAATACCTACCGTTTGAATACTTGCTACTGTTACTAATGAGAGTAACAACATCACAA  
AGTAATGTAATAACGTCGTATTTAGACCACTCATTCTACTAAACGTTGGATCGAATGTAG  
AAATCATTAATGGACGATAGAAAATAATGATTAGAATAAGGACGATTGAACCAATCACA  
ATAGTTGTTAAAAATGCACTATTTGTGATTGCCAGTAAATTACCAAACAGAATATGGTAC  
AAATCTGTCGTAGTGTTTATTAAGCTAATAATAATAATCCCCGAAGCTAAGAAAGCGGTA  
AAACTAATTCCAATAGCGGCGTCAGTTTCGTTTTACTACTAGATGTGATATAACCGATA  
AAAATACTTGCGATCATACCAGTTATAAGTGCGCCTACAAACATTGGAATACCAAATAAG  
AATGATAGGGCAACACCAGGTAATACTGCGTGACTCATTGCATCTCCCATTAATGAAAGA  
CCACGTAATACAATTA AACTACCAACTGTACCACAACTATCCCTACAATAATTGAAGTT  
ATCAATGCTCGATTCAAGAATTGATATGTAAATAAATGTTTCGACAAACTCTAACAT

> **mntA**

Function: protein coding sequence; manganese(II) ABC transporter/ATP-binding subunit (core genome, constant)

Best match: mntA\_CC001\_MW2-USA400\_BA000033.2[677849:678592:r]RC

Position: 020-contig\_263 RC: 2057 ... 2801; Length: 744 bp

Sequence:

```
CTAACATGTTATATTGCTCCTTTGACTAGGGTCACTACAGTCAGTGCTACTCATAAATGTT
TCGTTTAAGCGAGTGACACTCATAGCCTCTTCACTATCACCAAAGTATCGTAATGTTTGAT
TTAATAGAATAAATGCGATCAAAGTATTGCTTTGCTTTTGATAGATCATGGTGGATGATAA
GAATAAGTTTTTCCTTGTTGTTTTAAGTTCTCGATTTTTGTCATGATTAATTTTTTCGCTACTA
AAATCAATTCCGACAAACGGCTCATCTAGAAAATAAACTTCACTTTCGGACATCAATGTT
CTTGCTACTAGCACACGTTGTAATTGTCCACCACTTAATTCTGAAATTTGTGCGATGACGTA
AAGATTCTAATTCTAAATCGCTTAATAACTGTTTGAGTTTATCCCTTGCTGATTTATTAGG
TCGTCTAAACCATCCAATTTCTTTGTAGCAACCTGATAAAATCACTTGTTCACACTTATA
GGAAAATCTAAATCAATATGTGCTTTTTGTGGAATATATGTAATATGTTGCAGTTGTTGTT
GTATAGGTTTGTATATAACAATTTAGTACCGGTAGCATTAAATTCACCAATTAAGACTT
GATAAGGGAAGATTTACCAGCACCATTCGGGCCCATGATACCAATTAATTCGCCGCGTAC
TGGTATCGATAAGGAAATGTTTTAAGTACATGCTTATTACCTAAAAACAGATTTAAATCT
TTGTTTCTAACAA
```

> **mntR**

Function: protein coding sequence; manganese-dependent transcript repressor (core genome, constant)

Best match: mntR\_CC001\_MW2-USA400\_BA000033.2[678714:679358]

Position: 020-contig\_263 RC: 2922 ... 3567; Length: 645 bp

Sequence:

```
ATGTTAACTGAAGAAAAAGAGGACTATTTAAAGGCAATCCTTACGAATAATGGCGATAA
AACTTTGTGACAAATAAAATCTTATCTCAATTTTTAAATATTAAGCCTCCATCTGTAAGT
GAAATGGTAGGACGTCTTGAAAAAGCAGGCTATGTTGAAACAAAACCATACAAAGGTGT
TAGATTAACAGAGGATGGTTTAAACGCATACGCTTGATATCATTAAAGAGACATCGACTATT
AGAATTATTTTTAATAGAAATATTGAAATATAATTGGGAAGAAGTACATCAAGAAGCAG
AAATTTTAGAACATCGAATTTTCAATTTATTTGTTGAAAGGCTGGATAGCTTGTTAAATTT
CCCAGAACTTGCCCGCACGGCGGTGTGATTCCTAGAAATAATGAATATAAAGAGAAAT
ATATAACAACGATATTGAATTATGAACCTGGCGATATCGTTACAATCAAACGTGTGAGAG
ATAAGACCGATTTGCTAATATATTTGTCTAGTAAAGATATTTCTATTGGTAATGAAGTGGA
AATTGTATCGAAAGATGAAATGAATAAAGTAATTATCATTAACGTAATGATAATGTAAT
TATTGTCAGTTACGAAAATGCAATGAACATGTTTGCTGAAAAATAA
```

> **tarA**

Function: protein coding sequence; N-acetylmannosamine transferase (core genome, constant)

Best match: tarA\_CC001\_MSSA476\_BX571857.1[678925:679689]

Position: 020-contig\_263 RC: 4634 ... 5399; Length: 765 bp

Sequence:

```
ATGACTGTTGAAGAAAGATCCAATACAGCCAAAGTTGACATTTTAGGGGTCGATTTTGAT
AATACAACAATGTTGCAAATGGTTGAAAATATTAACCTTTTTTGCAAATCAATCAACG
AATAATCTTTTTATAGTAACAGCCAACCCTGAAATAGTGAATTACGCGACGACACATCAA
GCGTATTTAGAGTTAATAAATCAAGCGAGCTATATTGTTGCTGATGGGACAGGAGTAGTC
AAAGCTTCGCATCGTTTTAAAGCAACCTCTAGCGCATCGTATACCTGGTATTGAGTTGATG
GATGAATGTTTGAAAATTGCTCATGTAAATCATCAAAAAGTATTTTTGCTAGGGGCAACT
AATGAAGTTGTAGAAGCGGCACAATATGCATTGCAACAAAGATATCCAACATATCGTTT
GCACATCATCACGGTTATATTGATTTAGAAGATGAGACAGTAGTAAACGAATTAACCTG
TTTAAACCTGATTACATATTTGTAGGTATGGGATTCCTAAACAAGAAGAATGGATTATG
ACACATGAAAACCAATTTGAATCTACAGTGATGATGGGCGTAGGTGGTTCTCTTGAAGTA
TTTGCTGGGGCTAAAAAGAGAGCGCCTTATATCTTTAGAAAATTAACATTGAATGGATA
TATAGAGCATTAAATAGATTGGAAACGTATTGGTAGATTAAGAGTATTCCTATATTTATG
TATAAATAGCCAAAGCAAAAAGAAAATAAAAAAGGCGAAATAA
```

> **tarH**

Function: protein coding sequence; teichoic acid ABC transporter ATP-binding protein (core genome, constant)

Best match: tarH\_CC001\_MW2-USA400\_BA000033.2[681251:682045:r]RC (completely identical)

Position: 020-contig\_263 RC: 5459 ... 6254; Length: 795 bp

Sequence:

```
TTATTTAATAACGAAGCGGGACTCATCGAGTTTGTTCCTAAATCTTTTTGTTTCGGCTTTG
GATTTCTTTTTAAAATCGTTAAGGAAAGCTTCATATTTAGGTAATACATCATCAAGTTCAC
CGTAATCTTTAACTTTCCGCCTTCAATCCAAGCAATCTTAGTACAAAATTGTCTCACTTG
TCCTAAGTTATGACTAACGAAAAGATGGTTTTGTTTTGCTCTTTAAACTCGTAAATTTTA
TCTAAACATTTTTGTGCAAAAGTTTGGTACCTACAGATAAAGCTTCGTCAATGACTAAG
ATATCTGGATTAAGTGTGATATTAATTGAAAAACCAAGTTTTGCACGCATACCACTTGAA
TACTTTTTAACTGGTTGATAAATAAACTACCAAGTTCACTAAATTCAATAATCTTAGGTG
TCATCGCTTTAATTTCTTTTCGCTTAAAGCCATACATAACATTTTAAATTCGATATTTTCA
ATCCCTGTAAGTTGTCCACTCAAGCCAGCACTAATTGCGATAACGCTGACTTCACCATTAC
GATCCACTTTGCCAACAGTAGGCGACAAAGAACCGCCAATGATATTGCTCAACGTTGATT
TGCCGGAACCATTGATGCCAACAAAGCCCTATGACGTCGCCTTCATATGCTTTTAAACTAAT
GTCATCTAAAGCGAAAAATGTTTTGTTTTATGTTTGGGAATGAGCGCATCTTTCATACGT
TCTTTATTTGTACGATAAATACGATATTCCTTTGTACATTTTTAATGTTTACCGAAACGTT
CAT
```

> **tarG**

Function: protein coding sequence; teichoic acid ABC transporter permease protein (core genome, constant)

Best match: tarG\_CC005\_Mu50-VRSA\_BA000017.4[711266:712099] (completely identical)

Position: 020-contig\_263 RC: 6579 ... 7413; Length: 834 bp

Sequence:

```
TTGAAAGTGTGGTTTAATGGAATGTCAGCAATAGGAACAGTTTTTAAAGAACATGTAAAG
AACTTTTATTTAATTCAAAGACTGGCTCAGTTTCAAGTTAAAATTATCAATCATAGTAACT
ATTTAGGTGTGGCTTGGGAATTAATTAACCTGTTATGCAAATTATGGTTTACTGGATGGT
TTTTGGATTAGGAATAAGAAGTAATGCACCAATTCATGGTGTACCTTTTGTATTGGTTA
TTGGTTGGTATCAGTATGTGGTTCTTCATCAACCAAGGTATTTTAGAAGGTAATAAGCA
ATTACACAAAAGTTTAATCAAGTATCGAAAATGAACTTCCCGTTATCGATAATACCGACA
TATATTGTGACAAGTAGATTTTATGGACATTTAGGCTTACTTTTACTTGTGATAATTGCAT
GTATGTTTACTGGTATTTATCCATCAATACATATCATTCAATTATTGATATATGTACCGTTT
TGTTTTTCTTAACTGCCTCGGTGACGTTATTAACATCAACACTCGGTGTGTTAGTTAGAG
ATACACAAATGTTAATGCAAGCAATATTAAGAATATTATTTTACTTTTACCAATTTTGTG
GCTACCAAAGAACCATGGTATCAGTGGTTAATTCATGAAATGATGAAATATAATCCAGT
TTACTTTATTGCTGAATCATACCGTGCAGCAATTTTATATCACGAATGGTATTTTCATGGAT
CATTGGAAATTAATGTTATACAATTTCCGGTATTGTTGCCATTTTCTTTGCAATTGGTGCCT
ACTTACACATGAAATATAGAGATCAATTTGCAGACTTCTTGTA
```

> **tarB**

Function: protein coding sequence; teichoic acid biosynthesis protein B (core genome, variable)

Best match: tarB\_CC001-ST772\_118\_AJGE01000015.1[7433:8536] (completely identical)

Position: 020-contig\_263 RC: 7511 ... 8615; Length: 1104 bp

Sequence:

```
ATGAACGTTTTAATAAAGAAATTTTATCATTGGTAGTTCGAATACTTTCTAAAATGATTA
CGCCTCAAGTGATTGATAAACCGCATATCGTATTTATGATGACTTTTCCAGAAGATATTA
GCCTATCATCAAAGCATTAAATAAATTCGTCGTATCAGAAAACCTGTTTTAACAAACACAAA
ACAAGCGCCTTATTTATCTGAACTTAGCGACGATGTTGATGTGATAGAAATGACTAATCG
AACATTGGTAAAACAAATTAAGGCTTTGAAAAGCGCGCAGATGATTATTATCGATAATTA
TTACCTATTACTAGGTGGATATAATAAGACTTCTAATCAACACATTGTTCAAACGTGGCAT
GCAAGTGGTGCATTAATAAATTTGGCTTAACAGATCATCAAGTCGATGTGTCTGACAAG
```

GCAATGGTTCAGCAGTACCGTAAAGTTTATCAAGCGACGGATTTTTACTTAGTGGGTTGT  
GAACAAATGTCACAATGTTTTAAACAGTCTTTAGGTGCAACAGAAGAGCAAATGCTGTAT  
TTTGGGCTTCCGAGAATTAATAAATATTACACAGCTGATAGAGCAACGGTTAAGGCAGAG  
TTAAAGGATAAATATGGAATTACAAATAAGTTGGTATTATATGTACCAACATATAGAGAA  
GATAAAGCAGATAATAGGGCTATTGATAAAGCTTATTTGAAAAATGTTTACCAGGATAT  
ACACTGATTAATAAATTACATCCATCAATTGAAGATTCAGACATTGATGACGTATCTTCA  
ATCGACACGTCTACATTAATGCTAATGTCAGATATAATTATTAGCGACTATAGTTCGCTGC  
CAATAGAAGCTAGCTTGTAGATATTCCAACATATTTTTATGTGTATGATGAAGGAACAT  
ATGATAAAGTGAGAGGCCTGAATCAATTTTACAAAGCAATACCGGATAGCTACAAAGTG  
TATACTGAAGAAGATTTAATAATGACGATACAAGAAAAAGAACATCTATTAAGTCCGTTA  
TTTAAAGATTGGCATAAGTATAATACTGATAAAAGTTTACATCAGCTCACAGAATATATA  
GATAAGATGGTGACAAAATGA

### > **tarX**

Function: protein coding sequence; teichoic acid biosynthesis protein X (core genome, constant)

Best match: tarX\_CC001-ST772\_118\_AJGE01000015.1[8533:9594] (completely identical)

Position: 020-contig\_263 RC: 8611 ... 9673; Length: 1062 bp

Sequence:

ATGAGGCTTACGATAATCATACTACATGTAATAATGAGGCAACAATTCGACAATTGTTA  
ATATCTATTGAGAGTAAAGAACACTATAGAATCCTTTGTATTGATGGTGGTTCTACTGATC  
AAACAATTCCTATGATTGAACGGTTACAAAGAGAACTCAAGCATATTCATTAATACAAT  
TACAAAATGCTTCGATAGCTACGTGTATTAATAAAGGTTTGTATGGATATCAAAATGACAG  
ATCCACATGATAGTGACGCATTTATGGTCATAAATCCAACATCAATCGTATTGCCAGGTA  
AATTAGATAGGTTAACTGCAGCTTTCAAAAATAATGATAAATATTGATATGGTAATAGGGC  
AGCGAGCTTACAATTACCATGGTGAATGGAAATTGAAAAGTGCTGATGAGTTTATTAAG  
ATAATCGAATCGTTACATTAACGGAACAACCAGATTTGTTATCAATGATGTCTTTTGACG  
GAAAGTTATTCAGTGCTAAATTTGTTGAATTACAGTGTGACGAACTTTAGCTAACACAT  
ACAATCACGCAATACTTGTCAAGGCGATGCAAAAAGCTACGGATATACATTTAGTTTCAC  
AGATGATTGTCGGAGATAACGATATAGATACACATGCTACAAGTAACGATGAAGATTTTA  
ATAGATATATCATAGAAATTATGAAAATAAGACAACGAGTCATGGAAATGTTACTATTAC  
CTGAACAAAGGCTATTATATAGTGATATGGTTGATCGTATTTTATTCAATAATTCATTA  
ATATTATATGAATGAACACCCAGCAGTAACGCACACGACAATTCAACTCGTAAAAGACTA  
TATTATGTCTATGCAGCATTCTGATTATGTATCGCAAACATGTTTGACATTATAAATACA  
GTTGAATTTATTGGTGAGAATTGGGATAGAGAAATATACGAATTGTGGCGACAAACATTA  
ATTCAAGTGGGCATTAATAGGCCGACTTATAAAAGATTCTTGATACAACCTTAAAGGGAGA  
AAGTTTGCACATCGAACAAAATCAATGTTAAAACGATAA

### > **tarD**

Function: protein coding sequence; glycerol-3-phosphate cytidyltransferase (core genome, constant)

Best match: tarD\_CC001\_MW2-USA400\_BA000033.2[685527:685925] (completely identical)

Position: 020-contig\_263 RC: 9735 ... 10134; Length: 399 bp

Sequence:

ATGAAACGTGTAATAACATATGGCACATATGACTTACTTCACTATGGTCATATCGAATTG  
CTTCGTCGTGCAAGAGAGATGGGCGATTATTTAATAGTAGCATTATCAACAGATGAATTT  
AATCAAATTAACATAAAAAATCTTATTATGATTATGAACAACGAAAAATGATGCTTGAA  
TCAATACGCTATGTGATTTAGTCATTCCAGAAAAGGGCTGGGGACAAAAGAAGACGA  
TGTCGAAAAATTTGATGTAGATGTTTTTGTATGGGACATGACTGGGAAGGTGAATTCGA  
CTTCTTAAAGGATAAATGTGAAGTCATTTATTTAAAACGTACAGAAGGCATTTTCGACGAC  
TAAAATCAAACAAGAATTATATGGTAAAGATGCTAAATAA

### > **txbi\_tarD**

Function: bidirectional rho-independent terminator of tarD and pbpD (core genome, constant)

Best match: txbi\_tarD\_CC001\_MW2-USA400\_BA000033.2[685975:686043] (completely identical)

Position: 020-contig\_263 RC: 10183 ... 10252; Length: 69 bp

Sequence:

AAAATAAATATAAAAACGGACAAGTTTCGCAGCTTTATAATGTGCAACTTGTCCGTTTTTA  
GTATGTTTT

> **pbpD**

Function: protein coding sequence; penicillin binding protein D (core genome, constant)

Best match: pbpD\_CC001-ST772\_118\_AJGE01000015.1[10172:11467:r]RC (completely identical)

Position: 020-contig\_263 RC: 10250 ... 11546; Length: 1296 bp

Sequence:

TTATTTTCTTTTTCTAAATAAACGATTGATTATCATATGAACAATTAGTGCTAATCCAGCG  
ACAAGGCATGCACCACCAATGATAGTGAATAATGGATGTTCTGCCACATACTTTTAGCA  
ACAGTATTTGCCTTTTGAATAATTGGCTGATGAACTTCTACAGTTGGAGGTCCATAATCTT  
TATTAATAAATTCTCTTGGATAGTCCGCGTGTACTTTACCATCTTCGACTACAAGTTTATA  
ATCTTTTTTACTAAAATCACTTGGTAAAACATCGTAAAGATCGTTTTCAACATAATATTTT  
TTACCATTTATCCTTTGCTCACCTTTAGACAATATTTTTACATATTTATACTGATCAAATGA  
GCGTTCCATTAATGCATTCCCATCATATTACGTTGCTTCTCGCCACCAAGGTTTTTATAG  
TCTCCCGCACCCATGATAACTTGATTAATTCTAAATTTACCTCGTTTGGTAGTAATCGTAT  
GGTTGTAATTTGCTGTATCACTTGATCCAGTTTTTAAACCATCTGTACCAGTCAAACATCAT  
TTTTGCACCTTCCAATGAAAAGTTGAATGTGTAATACGTAACCTGCATGCGTTGTTGGTGTCT  
AACTGCTTTGTAAAGTCTAATATTTTAGGTGTCTCTTTAATCACGTGTAAATCTAAAATGG  
CGTAGTCTCTAGCAGTCGTTACAGTACGTTCTTGGTCTTTATACTTTGTTGGTGCAAATGT  
ACGTAATCTTGAATTTTACAGCACCCGTTGGATTGACGAAATGTGTATTTTTTCATTCCGATA  
GCTTTAGCTTTGTTATTCATTAATCAACGAAATCGCTGGTGTTTTTTGAACCTTCTTAG  
CTAAAATTAATGCCGCGGCATTACTAGAATTAGATACTGTAATTTGTAATAGGTCTGCGA  
TTGTCCATACTTGTCCAGGATATAGTTTCGTATTACTCAACTCAGGTAGTGTAGACATAAT  
ATATTTCTTTGTTTCGTCATTGTGACAGTGTCAAGTGAAAGCTGCCCCTTATTTACAGCT  
TCCAATGTTAAGTACATTGTCATTAATTTAGTCATAGACGCTGGATTCCACTTAGTATCGA  
TATTGTATTGATACAGTAATTGTCCAGTTTGACTTACATTAACAGCACTCGTCGGTTCGTA  
TGCAGCTGACAAACCTGCATAACCATATTGATTTGCTGCTTGTACAGGGGTTACGTCACT  
GTTAGCAGCTTGTGCATATGGTGTCAATAACTTAATGTTAAACATAAAAATGATGATAAT  
AGATATTAATTTTTTCAT

> **abcA**

Function: protein coding sequence; ABC transporter ATP-binding protein (core genome, constant)

Best match: abcA\_CC398\_SO385-pig\_AM990992.1[755418:757145]

Position: 020-contig\_263 RC: 11966 ... 13694; Length: 1728 bp

Sequence:

ATGAAACGAGAAAATCCATTGTTTTTCTTATTTAAAAAACTATCATGGCCAGTGGGTCTTA  
TCGTTGCAGCTATCACTATTTCACTACTAGGGAGCTTAAGTGGACTATTAGTGCCACTGTT  
TACTGGTTCGAATTGTAGATAAATTTTCCGTGAGCCATATCAATTGGAATCTAATCGCATT  
TTTGGTGGTATCTTTGTTATCAATGCTTTATTAAGCGGATTAGGTTTATATTTATTAAGTAA  
AATTGGTGA AAAAATTATTTATGCGATACGCTCAGTTTTATGGGAGCATATCATACAATT  
AAAAATGCCATTCTTTGACAAAAATGAAAGTGGTCAATTAATGAGTCGATTAACCTGACGA  
TACGAAAGTGATAAATGAATTTATTTACAAAAGCTACCTAACTTATTACCATCAATCGTT  
ACATTAGTTGGGTCACTAATCATGTTATTTATTTTAGATTGGAAAATGACATTATTAACAT  
TTATAACGATACCGATATTCGTTTTAATTATGATTCCCTCTAGGTCGTATTATGCAAAAAGAT  
ATCGACAAGTACACAATCTGAAATTGCAAACCTTCAGTGGTTTGTAGGGCGTGTCTCTAAC  
TGAAATGCGTCTTGTTAAAATATCAAATACAGAGCGTCTTGAATTAGATAATGCACATAA  
AAATTTGAATGAAATATATAAATTAGGTTTAAAACAGGCTAAAATTGCGGCAGTTGTACA  
ACCAATTTCAAGGTATAGTTATGTTGCTAACAATTGCAATATTTTAGGTTTTGGTGCATTA  
GAAATTGCGACTGGTGAATCACTGCAGGTACATTAATTGCAATGATATTTTATGTTATTC  
AGTTATCTATGCCTTTAATCAATCTTTCAACGTTAGTTACAGATTATAAAAAGGCAGTCGG  
TGCAAGTAGTAGAATATACGAAATCATGCAAGAACCTATTGAACCGACAGAAGCTCTTG  
AAGATTCTGAAAATGTATTAATTGATGACGGTGTATTGTCATTTGAACATGTAGACTTTAA  
ATATGATGTGAAGAAAATATTAGATGATGTGTCGTTCCAAATCCCACAAGGTCAAGTGAG  
TGCTTTTGTAGGTCCTTCTGGGTCTGGTAAAAGTACGATATTTAATCTGATAGAACGTATG

TATGAAATTGAGTCAGGTGATATTAATATGGCCTTGAAAGTGTCTATAATATCCCGTTAT  
CTAAGTGGCGACGCAAAATTGGATATGTTATGCAATCAAATTCGATGATGAGTGGTACAA  
TTAGAGACAATATTTTATACGGAATTAATCGTCATGTTTCAGATGAAGAACTTATTAATTA  
TGCTAAATTAGCGAACTGTCATGATTTTATCATGCAATTTGATGAAGGATATGACACGCTT  
GTAGGTGAACGAGGATTGAAACTGTCTGGCGGACAACGTCAACGTATTGATATTGCTAGA  
AGTTTTGTAAAAATCCTGATATTTTGTACTTGTGATGAAGCAACAGCTAATCTCGATAGTG  
AAAGTGAATTGAAAATCAAGAAGCTTTAGAAACATTGATGGAAGGTAGAACAACGATT  
GTCATTGCGCATCGTTTGTCTACAATTA AAAAAGCCGGTCAAATTATATTCTTAGACAAA  
GGACAGGTAACAGGTAAAGGTACGCATTCAGA ACTGATGGCATCACATGCGAAGTATAA  
AAACTTTGTAGTGTCTCAAAAATTAACAGATTAA

### > **nupG**

Function: protein coding sequence; purine nucleoside transporter (core genome, constant)

Best match: nupG\_CC005\_CGS03\_ABWY01000024.1[17092:18321:r]

Position: 020-contig\_263 RC: 14050 ... 15280; Length: 1230 bp

Sequence:

ATGTTTTTATTAATCAACATTATTGGTCTAATTGTATTTCTTGGTATTGCGGTATTATTTTC  
AAGAGATCGCAAAAATATCCAATGGCAATCAATTGGGATCTTAGTTGTTTTAAACCTGTT  
TTTAGCATGGTTCTTTATTTATTTTGATTGGGGTCAAAAAGCAGTAAGAGGAGCAGCCAA  
TGGTATCGCTTGGGTAGTTCAGTCAGCGCATGCTGGTACAGGTTTTGCATTTGCAAGTTTG  
ACAAATGTTAAAAATGATGGATATGGCTGTTGCAGCCTTATTCCCAATATTATTAATAGTGC  
CATTATTTGATATCTTAATGTACTTTAATATTTTACCGAAAATTATTGGAGGTATTGGTTG  
GTTACTAGCTAAAGTAACAAGACAACCTAAATTCGAGTCATTCTTTGGGATAGAAATGAT  
GTTCTTAGGAAATACTGAAGCATTAGCCGTATCAAGTGAGCAACTAAAACGTATGAATGA  
AATGCGTGTATTAACAATCGCAATGATGTCAATGAGCTCTGTATCCGGAGCTATTGTAGG  
TGCGTATGTACAAATGGTACCAGGAGAACTGGTACTAACGGCAATTCCACTAAATATCGT  
TAACGCGATTATTGTGTATGCTTGTGAATCCAGTAAGTGTTGAAGAGAAAGAAGATAT  
TATTTACAGTCTTAAAAACAATGAAGTTGAACGTCAACCATTCTTCTCATTCTTGGAGAT  
TCTGTATTAGCAGCAGGTA AATTAGTATTAATCATCATCGCATTGTTATTAGTTTTGTAG  
CGTTAGCTGATCTATTTGATCGTTTTATCAATTTGATTACAGGATTGATAGCAGGATGGAT  
AGGCATTAAGGTAGTTTTCGGTTTAAACCAAATTTTAGGTGTGTTTATGTATCCATTTGCG  
CTATTACTCGGTTTACCTTATGATGAAGCGTGGTTGGTAGCACAACAAATGGCTAAGAAA  
ATTGTTACAAATGAATTTGTTGTTATGGGTGAAATTTCTAAAGATATTGCATCTTATACAC  
CACACCATCGTGCGGTTATTACAACATTCTTAATTTCAATTTGCAA ACTTCTCAACGATTGG  
TATGATTATCGGTACATTGAAAGGCATTGTTGATAAAAAGACATCAGACTTTGTATCTAA  
ATATGTACCTATGATGCTATTATCAGGTATCCTAGTTTCATTATTAACAGCAGCTTTCGTT  
GGTTTATTTGCATGGTAA

### > **rsaD**

Function: noncoding RNA ncRNA of Staphylococcus aureus D (core genome, constant)

Best match: rsaD\_CC001\_MW2-USA400\_BA000033.2[691221:691397:r]RC (completely identical)

Position: 020-contig\_263 RC: 15429 ... 15606; Length: 177 bp

Sequence:

AAAACCAAGTGCACATGGTAATACACTTGGCTTTTATGGGAAATGAATATTATTGTACA  
TATGACAGTAAGGACTAGGTACAGTCATAGTACTTCGAGCAAAATTTGTTTTGTTATTATA  
ACAACACAAAGGAGATAACTTCTCTATTGAAGAAGTTAAAAACATTATAGCAGAC

### > **yxD**

Function: protein coding sequence; putative membrane protein (core genome, constant)

Best match: yxD\_CC001\_MSSA476\_BX571857.1[690095:690928]

Position: 020-contig\_263 RC: 15804 ... 16638; Length: 834 bp

Sequence:

GTGAATAAAACGGTTAAAGATTTAATACTAGTTGTCTTAGGTTCAATTTATCTTTGCTGCAG  
GTGTAAATGCATTTATTATTTCTGGTAACTTAGGTGAAGGCGGGTTACAGGTTTAGCAA  
TTATTTTATATTATGCGTTTCATATTTACCAGCCATCACTAACTTCTTGGTCAACGCAGTA

TTGATTGCCATTGGTTATAAATTTTTGAGTAAGAGAAGTATGTACTTAACTATTCTTGTAACAATTCTTATTTCAATATTTTTGAGTTTAACAGAATCATGGCAAGTAGAACTGGAAACAGCATTGTGAATGCCATTTTTGGTGGTGTAAAGCGTTGGACTAGGAATCGGAGTAATTATCC TTGCAGGCGGTACAACAGCAGGTACAACAATTTGGCAAGAATTGCAACGAAATACCTC GATGTAAGCACGCCATATGCTTTGCTTTTCTTCGATATGATCGTTGTTGCAATTTCACTTA CAGTTATCCACTTGATAAAGTATTAGTAACAGTAATATCACTTTATATAGGAACAAAAG TGATGGAATATGTCATAGAAGGTTTAAACACTAAAAAGCTATGACGATTATTTCAACTA ATCCCGACAACTTGCCAAAGCAATAGACGAGCAAATTGGAAGAGGTTTAAACCATTTTAA ACGGACATGGCTATTATACGCGTGAAGAAAAAGATGTCTTATACGTTGTTATTTCTAAAA CACAAGTTTCAAAGCAAAGCGATTAATTAACAAATCGATAAAGATGCATTCCTCGTAA TTCATGATGTAAGAGATGTCTATGGTAATGGCTTTCTTGCAGATGAATAA

### > **fhuC**

Function: protein coding sequence; iron-hydroxamate uptake/ATP-binding protein

Best match: fhuC\_CC005\_Mu50-VRSA\_BA000017.4[721606:722403] (completely identical)

Position: 020-contig\_263 RC: 16919 ... 17717; Length: 798 bp

Sequence:

ATGAATCGTTTGCATGGACAACAAGTTAAAATTGGTTACGGGGATAACACGATTATAAAT AAATTAGATGTTGAAATACCAGATGGCAAAGTGACGTCAATCATTGGTCCTAACGGCTGC GGGAAATCTACTTTGCTAAAGGCATTGTCACGTTTATTGGCAGTTAAAGAAGGCGAAGTA TTTTAGATGGTGAAAATATTCATACACAATCTACGAAAGAGATTGCAAAAAAATAGCC ATTTTACCTCAATCACCTGAAGTAGCAGATGGCTTAACTGTTGGGGAATTAGTTTCATATG GTCGTTTTCCACATCAAAAAGGATTTGGTAGATTAAGTCTGAGGATAAGAAAGAAATTG ATTGGGCAATGGAAGTTACAGGAACTGATACATTCCGACACCGTTCAATCAATGATTTAA GTGGTGGTCAAAGACAACGTGTTTGGATTGCAATGGCATTAGCACAAAGAAGTATGATTA TCTTTTAGACGAACCAACAACATATTTAGATATCTGTCATCAATTAGAAATACTAGAATT AGTTCAGAAGCTAAATCAGGAACAAGGTTGTACAATTGTCATGGTTCTTCATGATATCAA CCAAGCGATTCGTTTCTCAGATCATCTTATTGCGATGAAAGAAGGGGATATCATCGCTAC AGGTTCAACAGAAGACGTATTAACACAGGAAATATTAGAAAAAGTTTTTAATATTGATGT TGTTTAAGTAAAGATCCTAAAACCTTTACTGGTAACTTATGACTTATGTCGCGC AGAGCTTATTCTTAA

### > **fhuB**

Function: protein coding sequence; iron-hydroxamate uptake/permease

Best match: fhuB\_CC005\_Mu50-VRSA\_BA000017.4[722439:723443]

Position: 020-contig\_263 RC: 17752 ... 18757; Length: 1005 bp

Sequence:

ATGACAAATAGAGAGAACCCAACGCCATTGAAGTTTTTATCCTATATTATAGGTTTAAAGT ATGATACTACTAATCACACTATTTATTTCTACATTAATAGGTGACGCCAAAATTCAAGCCT CTACAATTATAGAGGCTATTTTTAATTATAATCCTAGCAATCAACAGCAAAACATCATCA ATGAGATTAGGATCCCAGAAATATAGCAGCAGTAATTGTAGGTATGGCGCTTGCAGTTT CTGGTGCATTATACAAGGTGTTACTCGTAATGGTCTTGCTGATCCGGCGCTCATTGGTTT AAATTCAGGTGCTTCATTTGCTTTAGCATTAAACATATGCAGTTTTACCAAACACTTCATTT TTAATATTGATGTTTGTGGATTTTTAGGTGCTATTCTAGGAGGTGCTATTGTATTAATGA TAGGCCGATCTAGACGTGATGGATTTAATCCGATGCGTATTATTTAGCGGGTGCAGCAG TAAGTGCTATGTTAACAGCGCTAAGTCAAGGTATTGCATTAGCTTTTAGACTAAATCAAA CAGTAACATTTGGACTGCTGGAGGCGTTTCAGGCACAACATGGTCCACACCTTAAGTGGG CAATTCATTAATTGGTATTGCGTTATTCATTATATTAACAATTAGTAAACAACCTTACCAT TTTAAATCTTGGTGAATCATTAGCTAAAGGTTTAGGTCAAATGTAACAATGATCAGAGG CATATGTTAATTATTGCTATGATTCTAGCAGGTATTGCAGTTGCTATCGCTGGACAAGTT GCATTTGTAGTTTGTAGTTACCTCATATAGCAAGATTTTTAATTGGAACCTGATTATGCTA AAATTCTACCATTAACAGCCTTGTAGGTGGGATACTCGTGCTTGTGCGGATGTGATAGC ACGATATTTAGGAGAAGCGCCTGTTGGTGCAATCATTTCAATTTATCGGTGTTCTTACTTT TTATATTTAGTTAAAAAAGGAGGACGCTCAATATGA



### > **fhuG**

Function: protein coding sequence; iron-hydroxamate uptake/permease

Best match: fhuG\_CC001\_MW2-USA400\_BA000033.2[694546:695562] (completely identical)

Position: 020-contig\_263 RC: 18753 ... 19770; Length: 1017 bp

Sequence:

```
ATGATTAGTTCAAATAATAAACGCAGACAATGGATTGCACTGGCTGTTTTAGCATTCTA
CTATTTCTAGGTTGTA CTCTGGAGTATTACCTCAGGTGAATACAACATACTGTTGAAAGAT
TTTTCAAACCTTTAATTGGACAAGGTGATGCCATTGATGAGTTAATCTTATTAGATTTTCA
ATTACCTCGGATGATGATTACTATTTTGGCTGGCGCAGCGCTTAGTATTAGTGGTGCAATA
GTGCAAAGTGTCACGAAAAATCCAATAGCTGAACCCGGTATATTAGGTATTAACGCAGGT
GGCGGATTTGCAATCGCATTATTTATTGCAATTGGTAAAATTAATGCTGACAACCTTTGTTT
ATGTACTGCCGTTAATAAGTATACTAGGTGGTATCGCCACTGCATTGATTATTTTTATTTT
CAGTTTTAATAAAAATGAAGGTGTTACACCTGCGAGTATGGTATTAATAGGTGTAGGTTT
ACAAACAGCATTATATGGTGGCTCAATTACAATTATGTCAAATTTGATGATAAGCAATC
TGATTTTCATCGCTGCTTGGTTTGCAGGTAATATTTGGGGTGACGAATGGCCATTTGTCATT
GCATTTTTACCGTGGGTGTTGATTATTATTCCTTACTTACTATTTAAATCGAATACACTAA
ATATTATTCATACGGGTGATAATATTGCACGAGGTCTAGGTGTAAGGTTAAGCAGAGAAC
GTTTAATATTATCTTTATCGCAGTGATGTTATCATCTGCTGCTGTAGCAGTAGCAGGTTT
GATTTCTGTTTATCGGATTAATGGGTCCGCATATTGCCAAACGTATCGTTGGACCACGTCAC
CAGTTGTTTTTACCAATTGCCATTTTAGTAGGGGCATGTTTACTTGTATAGCTGATACAA
TTGGCAAATGTATTACAACCAGGTGGGGTTCAGCAGGTATTGTCGTAGCAATTATTG
GTGCACCGTATTTCTTATATTTAATGTACAAAACGAAAAATGTATAG
```

### > **dakK**

Function: protein coding sequence; putative dihydroxyacetone kinase/K subunit (kinase) (core genome, constant)

Best match: dakK\_CC001\_MW2-USA400\_BA000033.2[695796:696764] (completely identical)

Position: 020-contig\_263 RC: 20003 ... 20972; Length: 969 bp

Sequence:

```
ATGATGAAAAAGTTAATCAATAAAAAAGAAACATTTTTAACTGATATGCTTGAAGGATTG
TTAATTGCGCACCCAGAGTTAGATCTGATTGCTAATACAGTTATTGTAAAAAAGCTAAG
AAAGAACATGGTGTAGCAATAGTCTCTGGAGGTGGAAGCGGACATGAACCTGCGCATGC
CGGTTTTGTTGCAGAAGGTATGCTAGATGCAGCGGTTTGTGGCGAAGTATTTACATCACC
TACACCTGATAAAAATATTAGAAGCTATTAAGCAGTAGATACTGGTGTGGTGTATTACT
AGTTGTAAAAA ACTATGCAGGTGACGTGATGAATTTTCGAAATGGCACAAGAGCTTGCAG
AAATGGAAGGTATAAATGTTCAAACCTGTTATTGTTTCGTGACGACATTGCTGTGACAAACG
AAGTACAACGTCGTGGTGTTCAGGAACAGTGTTTGTTCATAAGCTTGCCGGTTATCTTGC
TGAAAAAGGTTATTCATTAACAGAGATAAAAATCGCGTGTAGAAGCGTTGTTACCTGAAAT
TAAAAGTATTGGTATGGCAATTGAGCCACCGCTTGTTCAACTACTGGAAAATATGGCTT
TGATATTGAAGACGACAAAATGGAAATCGGTATTGGTATACATGGTGA AAAAGGTATTC
ATAGGGAAGAAGTAAAGGATATTGATCATATTGTTGGAACATTGTTAGACGAATTGTATA
AAGAAGTTACTGCCAATGATGTCATATTAATGGTAAATGGTATGGGTGGTACGCCGTTAT
CTGAATTAATATCGTAACTAAATATATTCAACAAAATTTAGCTGCAAGAACGGTTAATG
TTGCTAAATGGTTTGTGGTGATTATATGACATCTTTAGACATGCAAGGTTTTTCTATAAC
TATCGTGCCTAATAAACAGGAATATTTGGAAGCATTTTTAGCACCAACAACAAGTCAATA
CTTTAAATAA
```

### > **dakL**

Function: protein coding sequence; putative dihydroxyacetone kinase/L subunit (core genome, constant)

Best match: dakL\_CC001\_MW2-USA400\_BA000033.2[696806:697390]

Position: 020-contig\_263 RC: 21013 ... 21598; Length: 585 bp

Sequence:

```
ATGAAAGTGAATGATATGAAAGCACGTTTATTAATTTAGAAGAAACGTTTAAAAAACAT
GAATCTGAATTA ACTGAATTAGATCGAGCAATTGGTGATGGTGACCACGGGGTTAACATG
```

GTTCGTGGGTTTAGTAGTCTTAAAGACAAACTTGATGATAGCTCAATGCAATCATTGTTCA  
AATCAACTGGTATGGCATTGATGTCAAATGTTGGGGGTGCATCTGGACCACTGTATGGCT  
TTAGCTTTGTTAAAATGTCTGCAGTCACCAAAGATGATATGGATAATCAAGATTTTCATTAC  
ACTAATTCAGGCATTTGCCGAAGCGGTTGAATCACGTGGTAAAGTTACTTTAAATGAAAA  
GACAATGTATGATGTAATAGCGCGAGCAGCAGAGAAGCTTAAAAATGGTGAAACTTTAA  
CATTCAATGATTTACAGCAATTAGCAGATAATACAAAAGATATGGTAGCAACGAAAGGT  
AGAGCTGCATATTTTGGAGAAGAATCAAAGGTTATATTGATCCAGGTGCTCAAAGTATG  
GTTTATATTTTAAACGCTTTGATTGGAGATGAAGATAATGCCTAA

### > **dakP**

Function: protein coding sequence; putative dihydroxyacetone kinase/phosphotransfer subunit (core genome, constant)

Best match: dakP\_CC001\_MW2-USA400\_BA000033.2697383:697745 [4\_50ANF10END]

Position: 020-contig\_263 RC: 21590 ... 21953; Length: 363 bp

Sequence:

ATGCCTAAAATTATACTTGTAGCCACAGTAAAGAAATTGCAAGTGGTACAAAATCTTTG  
TTAAAGCAAATGGCAGGTGACGTTGATATTATACCAATCGGGGGATTACCAGATGGTTCA  
ATTGGAACCTTCATTTGATATCATCCAAGAAGTTTTGACTAAATTAGAGGATGATGCATTGT  
GTTTTTACGATATTGGATCTTCAGAAATGAATGTAGATATGGCAATTGAAATGTATGATG  
GTAATCATCGTGTGTTAAAAGTTGATGCACCAATTGTTGAAGGCAGTTTTATCGCAGCAG  
TAAAGCTATCAATCGGCGGTTCAATTGATGATGCATTAGCAGAAATGAAACAATCATTTT  
AG

### > **graX**

Function: protein coding sequence; cofactor of GraRS (core genome, constant)

Best match: graX\_CC001-ST772\_118\_AJGE01000015.1[26790:27713] (completely identical)

Position: 020-contig\_263 RC: 26868 ... 27792; Length: 924 bp

Sequence:

ATGAAACCTAAAGTTTTATTAGCAGGTGGAACAGGATATATTGGTAAGTATTTAAGTGAA  
GTGATTGAAAATGATGCTGAACTTTTTACTATATCAAATATCCAGACAATAAAAAAACA  
GATGATGTTGAAATGACTTGGATTCAGTGTGATATATTTATTACGAACAGGTTGTTGCA  
GCAATGAATCAAATAGATATTGCTGTATTCTTTATCGACCCAACAAAGAATTCTGCCAAA  
ATAACACAATCATCAGCAAGAGATTTAACATTAATCGCAGCAGATAATTTTGGTCGAGCA  
GCGGCTATTAATCAAGTAAAAAAGTAATCTACATACCTGGGAGTCGTTATGATAATGAA  
ACAATTGAACGCCTAGGTGCATATGGTACTACTGTAGAAACAACAAATTTAGTTTTTAAA  
CGTCTTTAGTTAATGTAGAATTACAAGTTTCAAAGTATGATGATGTTAGATCAACGATG  
AAGGTAGTTTTACCAAAGGGATGGACATTAAGAACGTTGTAAACCATTTTATTGCATGG  
ATGGGTTACACTAAAGGAACTTTTGTGAAAACAGAAAAATCACATGATCAATTTAAGATA  
TATATTAAGAATAAGGTGCGACCGCTCGCAGTATTTAAAATAGAAGAAACAGCTGACGG  
AATAATAACTTTAATTTTATTGAGTGGAAGTTTAGTGAAAAAATACACAGTTAATCAAGG  
GAAGTTAGAATTTAGATTAATCAAAGAGTCGGCAGTCGTTTATATACATCTATACGATTA  
TATCCCTCGATTATTTTGGCCGATTTATTACTTTATACAAGCACAATGCAAAAAATGATG  
ATTCATGGCTTTGAAGTTGACTGCCGGATTAAAGATTTTCAAAGTCGATTAAAATCAGGA  
GAAAATATGAAATATACTAAATGA

### > **graR**

Function: protein coding sequence; response regulator of two-component sensor system (core genome, variable)

Best match: graR\_CC001-ST772\_118\_AJGE01000015.1[27729:28403] (completely identical)

Position: 020-contig\_263 RC: 27807 ... 28482; Length: 675 bp

Sequence:

ATGCAAATACTACTAGTAGAAGATGACAATACTTTGTTTCAAGAATTGAAAAAAGAATTA  
GAACAATGGGATTTTAAATGTTGCTGGTATTGAAGATTTTCGGCAAAGTAATGGATACATTT  
GAAAGTTTTAATCCTGAAATTGTTATATTGGATGTTCAATTACCTAAATATGATGGGTTTT  
ATTGGTGCAGAAAAATGAGAGAAGTTTCCAACGTACCAATATTATTTTTATCATCTCGTG

ATAATCCAATGGATCAAGTGATGAGTATGGAACCTGGCGCAGATGATTATATGCAAAAAC  
CGTTCTATACCAATGTATTAATTGCTAAATTACAAGCGATTTATCGTCGTGTCTATGAGTT  
TACAGCTGAAGAAAAACGTACATTGACTTGGCAAGATGCTGTCTGTTGATCTATCAAAAAGA  
TAGTATACAAAAGGTGACGATACGATTTTTCTATCCAAAACAGAAATGATTATATTAGA  
AATTCTTATTACCAAAAAAATCAAATCGTTTCGAGAGATACAATTACTGCATTATG  
GGATGATGAAGCATTGTAGTGATAATACGTTAACAGTAAATGTGAATCGTTTACGAAA  
AAAATTATCTGAAATAAGTATGGATAGTGCAATCGAAACAAAAGTAGGAAAAGGATATA  
TGGCTCATGAATAA

### > **graS**

Function: protein coding sequence; sensor histidine kinase (core genome, variable)

Best match: graS\_CC005\_Mu50-VRSA\_BA000017.4[733161:734201] (completely identical)

Position: 020-contig\_263 RC: 28474 ... 29515; Length: 1041 bp

Sequence:

ATGAATAATTTGAAATGGGTAGCTTATTTTTTGAATCTCGCATGAACTGGATATTTTGG  
TATTGTTTTAACTTGCTTATGTTAGGCATTAGTCTAATCGATTATGATTTTCCAATAGAC  
AGTTTATTTTATATTGTTTCTTTGAATTTAAGTTTAAACAATGATTTTTCTTATATTGACATA  
TTTTAAAGAAGTAAAATTATATAAGCATTTTGACAAAGATAAAGAAATAGAAGAAATTA  
AACATAAAGATTTAGCGGAAACGCCATTTCAACGTCATACAGTTGATTATTTATATCGTC  
AAATCTCAGCGCACAAAGAAAAGTTGTTGAGCAACAGTTACAATTGAACATGCATGAA  
CAAACCATTACAGAATTTGTGCACGACATAAAAACACCTGTGACAGCCATGAAATTATTA  
ATTGATCAAGAAAAAATCAAGAAAGAAAACAGGCATTACTATATGAATGGTCTCGTAT  
AACTCGATGCTGGATACACAGCTGTATATTACTAGATTAGAATCTCAACGCAAAGATAT  
GTATTTTGATTACGTGTCACCTAAACGCATGGTCATTGATGAAATACAATTAACAAGACA  
TATTAGTCAGGTTAAAGGTATTGGTTTTGATGTTGACTTTAAAGTGGATGATTATGTTTAT  
ACAGATACAAAATGGTGTCTGATGATTATTAGACAGATTTTGTCAAACGCATTGAAATAT  
AGTGAGAATTTAATATTGAAATTGGGACAGAATTAATGATCAACATGTTTCGTTATAT  
ATTAAGACTATGGCAGAGGTATTAGTAAAAAAGATATGCCGCGAATATTTGAACGAGG  
ATTTACGTCAACGGCTAACAGAAATGAAACGACGTCTTCAGGTATGGGTCTATATTTAGT  
AAATAGTGTAAGGATCAATTAGGTATTCACCTGCAAGTCACGTCGACTGTTGGTAAGGG  
GACAACTGTCAGATTGATTTCCATTACAAAATGAAATTGTTGAACGCATGTCGGAAGT  
GACAAATTTGTCATTTTAA

### > **vraF**

Function: protein coding sequence; ABC transporter/ATP-binding protein (core genome, variable)

Best match: vraF\_CC133\_ED133-shep\_CP001996.1[721175:721936]

Position: 020-contig\_263 RC: 29658 ... 30420; Length: 762 bp

Sequence:

GTGGCAATTTTAGAAGTAAAACAATTAACAAAAATATATGGAACATAAAAAATGGCACA  
AGAAGTGTTCGAGATATCAATATGTCTATTGAAGAAGGCGAGTTTATTGCTATTATGGG  
TCCCTCTGGATCTGGGAAAACGACATTATTAATGTTTTAAGTTCAATTGATTATATTTCA  
CAAGGTTCTATTACATTAAGGAAAAAATTAGAAAAGCTTTCAAACAAGGAATTATCT  
GATATACGCAAGCATGATATTGGTTTTATTTTTCAAGAGTATAATTTACTGCATACATTGA  
CTGTTAAAGAAAACATAATGTTACCACTAACGGTTCAGAAGTTAGATAAAGAACATATGT  
TAAATCGTTATGAAAAAGTAGCAGAAGCATTAAATATATTGGATATTAGTGATAAATACC  
CTTCTGAATTGTCTGGTGGACAAAGACAACGAACATCTGCTGCAAGAGCGTTTATTACAT  
TACTTCTATTATATTTGCTGACGAACCAACAGGTGCACTGGATTCTAAAAGTACTCAAG  
ATTTATTAACGATTAACAAGAATGAATGAAGCATTAAAGTCTACAATTATTATGGTAA  
CGCATGATCCTGTTGCAGCAAGTTATGCCAATAGAGTAGTGATGCTAAAAGATGGTCAA  
TTTTACTGAATTATACCAAGGGGATGACGATAAACATACCTTTTTCAAAGAAATAATAC  
GTGTACAAAGTGTTTTAGGTGGCGTTAATTATGACTTTAA

### > **vraG**

Function: protein coding sequence; ABC transporter/permease (core genome, variable)

Best match: vraG\_CC005\_ED98-hen\_CP001781.1[670281:672170]

Position: 020-contig\_263 RC: 30409 ... 32299; Length: 1890 bp

Sequence:

```
ATGACCTTTAACGAGATAATATTTAAAAAATTTCCGTCAAAATTTATCACATTATGCCATCT
ATCTTTTTTCATTAATTACGAGTGTAGTATTGTATTTTAGCTTTGTAGCATTAAAAATACGC
GCATAAACTAAACATGACAGAGTCATATCCAATTATAAAGGAAGGCTCACAAGTCGGAA
GCTACTTTCTATTTTTTCATCATAATTGCATTTTTTGTATATGCCAATGTGTTATTTATTA
CGACGAAGTTATGAGCTTGCATTATATCAAACATTAGGTTTATCTAAATTCAACATTATTT
ATATACTAATGCTCGAACAATTACTAATATTTATAATTACGGCAATATTAGGTATTATTAT
TGGTATTTTTGGTTTCGAAACTGTTATTAATGATTGTCTTTACATTATTAGGAATTAAGAA
AAGGTTCCAATTATTTTTAGTTTGAGGGCGGTATTTGAAACATTAATGTTAATCGGTGTCG
CTTATTTTTAACATCTGCTCAAAAATTTATATTAGTGTTCAAACAATCTATTTACAGATG
TCAAAGAATAACCAGGTTAAAGAAACAAATCATAATAAAATTACATTTGAAGAGGTTGTT
TTAGGCATCTTAGGTATAGTATTGATTACCACAGGATACTATCTATCTTTGAACATTGTTC
AATATTATGATTCTATCGGTACACTTATGTTTATTTATTGTCAACTGTGATTGGGGCATA
CTTATTTTTTAAAAGCTCTGTTTCTCTAGTTTTTAAAATGGTGAAGAAGTTTAGAAAAGAT
GTTATAAGTGTAATGATGTTCATGTTCTCATCATCTATTATGTATCGTATTAAGAAAAATG
CTTTTTCACTTACGGTCATGGCAATCATTTACAGCGATTACTGTTTCAGTTCTTTGCTTTGCT
GCTATAAGTAGAGCGTCCTTATCAAGTGAAATAAAAATATACTGCACCACACGACGTTACA
ATTAAGACCAACAAAAAGCTAATCAGTTAGCAAGTGAATTAACAATCAAAAAATTC
TCATTTTTATAATTATAAAGAAGTAATTCATACGAAATTGTATAAAGATAATTTATTTGAT
GTAAAAGCGAAAGAACCATAACAATGTAACAATTACTAGTGATAAATACATCCCTAATACT
GATTTGAAACGTGGGCAAGCTGATTTATTTGTAGCGGAAGGTTCTATCAAAGATTTAGTG
AAACATAAGAAGCATGGTAAAGCAATTATAGGAACGAAAAACATCATGTTAATATTA
GTTACGTAAAGATATTAATAAAAATCTATTTTATGACAGATGTTGATTTAGGTGGACCAAC
GTTTGTCTTAAATGACAAAGACTATCAAGAAATAAGAAAGTATACAAAGGCAAAGCATA
TCGTCTCTCAATTTGGATTTCGATTTGAAACATAAAAAAGATGCTTTAGCATTAGAAAAAG
CGAAAAATAAAGTTGATAAATCTATTGAAACAAGAAGTGAAGCGATAAGCTCAATATCA
AGTTTAACCGGAATATTATTATTGTAACATCATTTTTAGGTATTACATTCTTGATTGCTGT
ATGTTGCATTATATACATAAAGCAAATAGATGAAACCGAAGATGAGTTAGAGAATTATA
GTATTTTGAGAAAGCTTGGATTTACACAAAAAGATATGGCAAGGGGACTAAAGTTTAAA
ATTATGTTTAAATTTGGGTTACCTTTAGTTATTGCACTATCACATGCATATTTTACATCATT
AGCATATATGAAATTAATGGGTACAACGAATCAAATACCGGTTTTCATAGTAATGGGATT
ATACATTTGTATGTATGCTGTTTTTGCAGTGACGGCTTATAATCATTCCAAGCGAACAATT
AGACATTCCATATAA
```

### > pitA

Function: protein coding sequence; phosphate transporter (core genome, variable)

Best match: pitA\_CC001-ST772\_118\_AJGE01000015.1[33578:34585] (completely identical)

Position: 020-contig\_263 RC: 33656 ... 34664; Length: 1008 bp

Sequence:

```
ATGTCATATATAATCATCGTCACTATAGCTGTAGTATTTTCTCGCTGATATTTGACTTTAT
CAATGGATTCCATGATACAGCCAATGCAGTAGCTACTGCTGTATCTACTAGAGCGTTAAC
GCCTAAAACGGCAATTTTAAATGGCAGCAGTGATGAACTTTATAGGTGCTTTAACATTTAC
GGGCGTTGCAGGCACCATTACTAAAGACATTGTCGATCCATTTAAATTGGAAAATGGATT
AGTTGTTGTGTTAGCTGCAATACTTGC GGCTATTATTTGGAATTTAGCTACTTGGTTTTAC
GGAATTTCAAGTTCGTCTTCACATGCACTTATAGGTTCAATTGCGGGTGCAGCAATCGCA
TCTGAAGGCTCATTTGGAGTGTACATTACCAAGGTTTCACAAAAATTATTATTGTATTAA
TCGTTTACCGATTATCGCATTTTGTGTTGGTTTCTTGATGTATTCAATTTTTAAAGTTATC
TTTAAAAATGCAAATTTAACAAGAGCGAATCGTAACTTTAGATTTTTTCAAATTTTCACAG
CAGCGTTACAATCATTCTCTCACGGTACGAATGATGCGCAAAAGTCAATGGGTATTATTA
CGTTGGCATTAAATTGTTGCTAATGTACAGAATGATGGCAGCGTTGAACCACAGTTATGGG
TAAAATTTGCCTGTGCGACAGCAATGGGGCTTGGTACTGCAATTGGTGGCTGGAAAATTA
TCAAACACTGTAGGTGGTAATATTATGAAAATACGTCCAGCAAATGGTGCTGCGGCCGATT
TATCATCTGCATTAACAATTTTTGTTGCATCATCGCTACATTTCCATTATCAACAACCTCA
CGTTGTGTCATCATCAATCTTAGGTGTTGGTGCTTCTAACCGAGCTAAAGGTGTA AAAATG
```

GAGCACTGCGCAACGAATGATCATTACATGGGTGATTACATTACCTATTTTCAGCATTGTT  
AGCAGGTTTACTATTCTATATACTTAACTTATTTTTCTAA

> **ssaA5**

Function: protein coding sequence; staph secretory antigen A5 (core genome, constant)

Best match: ssaA5\_CC005\_Mu50-VRSA\_BA000017.4[739936:740733:r]RC (completely identical)

Position: 020-contig\_263 RC: 35252 ... 36050; Length: 798 bp

Sequence:

TTAATGGATGAATGCATAGCTAGAACTTCTGAAGCTGGAATTGTACGGTAGTTCATATT  
GTATGGACCATATGTGTAATTCATTTTCAGAAATCAAGATACTACCATCACCATTGACACG  
TTCAACATAAGCAACATGACCATATGGACCAGGTGTGCTTTGCATAATTGAACCAACTGA  
TGGTGTGTTGTTACTTGGTAACCATCATTAGCTGCGTTACCAGCCCAATACTTAGCGTCT  
GACCAATATGTGCTAATTGGACTACCAGCTTGAGCACGACGGTCAAATACGTACCATGTA  
CATTGACCAGCAGTGTATAAATTTTGGTGATTAAGATGATGCATTGCCATTGCTACCT  
GTTGTAGCTGTTGGTGTGTACCACCTGATCCACCATTAGGAATTTGTAATGTTTGGTTAG  
GCATAATTAATAACCACGTAAGTTATTGGCTGCCATTAATTGATCAACTGAAACACCAT  
ATCTGCTAGCAATGATATTTAATGATTCACCAGCTTGTACAGTATGAGATGATGCTGAAC  
CAGCTTGTGGAGAAGTGTGTGACGTATTTGTGCATCACTTCCACCTACTGAGATAACTTG  
ACCAGGGAATACCAAGTTGTTATCTAATTGGTTATTTGTTTAATACTCTCTACTGAAGTG  
TTGTATTTTGTAGCAATACTCCATAATGATTCACCAGATTGTACTGTATGTTGTGTAGAAG  
CTTGTGCATCATGATGCGTTAAAAATGCAGCTGCACCAGATGTTGCTGTTATTGCAAATG  
CTAATTTTTCTAA

> **rbf**

Function: protein coding sequence; regulator of biofilm formation (core genome, variable)

Best match: rbf\_CC005\_CF-Marseille\_CABA01000037.1[29963:32114]

Position: 020-contig\_263 RC: 37751 ... 39902; Length: 2151 bp

Sequence:

ATGGCAAATCATGCTTGCATATACTTACTAATAATGAATATGCGACAACGCGTTGCCAA  
GATGGCATAGTCTTATTTTGGCCAATTGACGGGGAAATCGAACTACAAAAATTTTCGTA  
AGTAAAATAATTGAAGATGATATATATATTATTAATCATCTGGATGTATTTAGTATTAAG  
AATAATAAAAAACGATCATGTTGTATTTGAGTAGCGATTGGTTTTCGGAATTAGGCTTT  
ACTTTCTTTAATTACCACTATACAGCAAAGTTGATTAATCATCCTATAATTTGAAATGTC  
TACTATTAATAATTGACATATCGATACCTTGATAATCAGCCTCTTAATGACGCTGATATTAG  
AAAATTACAGGATATTATTAATAATCATTGCAAAGAAGCAAGTATGGATAAAAAGATTG  
CACAAAATCAATATCGATATGCCTATTATGGTGATTTGCGTGACGAGCTCGAATATATTT  
ATCAAAATGTAAATCAACGATTGACATTAATAAAGTGTGCGCTGATAAATTATTTGTCTCAA  
AGTCAAATTTGTCATCACAATCCACTTACTTATGGGCATGGGTTTTAAAAAATATATTGA  
TACTTTGAAAATTGGTAAATCGATTGAAATTCTACTACTGATAGTACTATTAGCAAC  
ATAAGTGAACATTTAGGTTTTAGTAGTAGCTCCACTTACTCTAAAATGTTTAAAAGTTATA  
TGGATATAACACCGAATGAATATCGTAATTTATCAAAATATAATAAATGTTTAAATGCTAA  
AGCCGAAACCACTAGTAGGCAAAATGGTACAAGAAGTAAAAGAAATCATATTGAATTAT  
ATTGAACATTATAAAAACCACCTAACTGATGTTATACATATTGATGAAGACAAATTTGAA  
ACACCTAAATGTTTCAAACGGTTATTCAAATAAATACTTATACAGAAATGAAATTAGTT  
TTCTTAGAAGGAATCTTTAAAACCTTATTGAATAAGAACAGTCAAGTTGCTTTTTTCATCA  
TGCCATCGATTCTAAAAGTAAAATACCATGTCCGAAGAAGAAAATTCACAATCATTAA  
AAACAATAATTGAAAGTGATCTAAAGATAGCATTAAATATAAATGATATTGAAACA  
ACTTATTTTGTGAAAGGCTTTTATGAGTGTTCAGACAAATATCTCCAAACGAATTAAGTAA  
TCATAATAATTACGAAGTGCATTTTGTTCGATTTATCATTGATGGAATTAGAACAATT  
TATCGAATGATATTAATAATACATAACATCATGTTGAATGTGAAATTAGGATTGAACATT  
ACCTGTTTATTTGAAAAACCTTCAGTTTTTAAATCATTAGTATCACAAATAAAGCGACTTA  
AATTTCGATTCGTTAATAATAGATAATGCAAATTTAAGTAGCCCTTATTTGATGGGGGAAA  
GTGATGAGTACTATTGAAAAATATTTTGCATTTTAAAAATTTAAAAACAAGTAATTAATG  
AATTGGATATTGAACAAGAAAAGCTTATTTTCTAAATGTTGAAAATCATAAACTGCTTA  
ATAATAAAGAACGAGATTTAAGTAATAGTGCTCCATTAATTTATAAGACATTAAGTGCCG

TGTATCACAACCTTTGATGGCTTTGGATTAAACATTTTTGATAATCATCATACATTTAATGC  
GATGCATCTATATGATAAAAATGGATTTAAAACAACACTAGGTCTTATATTGGAAAAATT  
TATCGAATATGTCTCGAAACCAAATAACGAAAACAGTTATTATTCTATTTTTGATATAGA  
GAATTATTATTGCCTGGTTATTTATGATTGGCGAGTGATTGAGAGCGAGACAATTATGAG  
CAATTTTGAGGATAGTCAAGTTTATATAAATTTCAAAAATAATGTTTTAAACGATAAATA  
TCTAATTGTAATAGAAACATTGGACGAAAATAGTGGCAACATTAATCATTGATTTCTAA  
AGAATTAAGAGATAAATATGAATGGAACCCTAGTTACTATCTAAAATTGACAACCTACCT  
TAAACCAGCAATCGAGATTAAAGAGCATAATTTAGTGATAATTCCTTGAATATTAACGT  
TACTTTTAATGCGTTATACATAATTAATAATAGGAAAAAATAA

### > **sarX**

Function: protein coding sequence; HTH-type transcript regulator sarX (core genome, constant)

Best match: sarX\_CC001\_MW2-USA400\_BA000033.2[715773:716198] (completely identical)

Position: 020-contig\_263 RC: 39981 ... 40407; Length: 426 bp

Sequence:

ATGGCAAAAAAATTTAAGATAATAATGACAGAAGCATTGTCTTTATATATTTGGGGGTGC  
AACATTTTGAATACTGAGAAATTAGAAACATTGCTTGGCTTCTATAAACAATATAAAGCA  
TTATCTGAATATATTGATAAAAAATATAAGTTGTCGCTAAATGATTTAGCAGTCTTAGATT  
TAACGATGAAGCATTGCAAAGATGAAAAAGTACTTATGCAATCATTTTTAAAAACTGCAA  
TGGATGAGCTAGATTTAAGTAGGACAAAATTATTAGTTTCTATAAGAAGACTAATTGAAA  
AAGAAAGACTTAGTAAAGTTAGATCATCTAAAGATGAGCGTAAAATTTATATTTATTTAA  
ATAATGATGATATATCTAAATTTAATGCTTTATTTGAAGATGTAGAACAATTTTAAATAT  
TTAA

### > **A5IQM5**

Function: protein coding sequence; putative protein (core genome, constant)

Best match: A5IQM5\_CC008\_NCTC8325\_CP000253.1[666418:667062] (completely identical)

Position: 020-contig\_263 RC: 42138 ... 42783; Length: 645 bp

Sequence:

GTGAAAGTAAAGTATATAGATAAACGTCCTGCGTCGCCTAATTGATAGGGAATACAC  
AGAGGTA AAAAGTTAATAATAATAGGTTTAAAGGTATTATAGGCTTAGTCACGATGAAAA  
AGGTTCTGTATCCTTTAGAGGTGACGGTAGTTGGACAAAATATCATTGTCGCAGATGACA  
ATTATAAATGGTTGCAAATACTACCTGAAAAGAAACGTTATAGTATAACTGTAATGTTTG  
ATAATAAAGGCAATCCATTAGAATATTATTTTGATATAAATATCAAAAATATAACGCAAA  
AAGGTAATGCGCGTACAGTAGATTTATGTTTAGATGTTTTAGCATTACCAAGTGGTGAAT  
ATGAGTTGGTAGATGAAGATGATTTAATGTTTGCATTAGAAAGTGAGCAAATTACAAAAA  
AGCAATTTTCATGAAGCATATATGATTGCACATCAAATTATGGCAGAGTTAGAAAATGATT  
TTAAAGGATTCCAAAAGAAAATCATGTACTGCTTTAATAAAAATTAATGCAAAGGCTCAAA  
AAAATCATCAAAAGCCACAAAATAAACTAATATTGAAAAAAGCAAACAAATAAAGCCT  
AAGCAATATAATCAAATAAACTAAAAATCACCAACAACAAAAGAAAAACTAA

### > **A5IQM6**

Function: protein coding sequence; transcript regulator/LysR family (core genome, constant)

Best match: A5IQM6\_CC001\_MW2-USA400\_BA000033.2[718690:719556]

Position: 020-contig\_263 RC: 42898 ... 43765; Length: 867 bp

Sequence:

ATGAAGATTGAAGACTATCGTTTACTAATAACATTAGACGAAACGAAAACGTTACGTAAA  
GCGGCTGAAATTTTATATATATCTCAACCTGCTGTTACACAAAGACTAAAAGCTATTGAA  
AATGCTTTTGGAGTAGATATTTTTATCAGAACAAAAAACAATTGATTACAACAACCTGAA  
GGAACAATGATTATTGAGCATGCCCGTGACATGTTGAAAAGAGAGCGATTATTTTTTGAC  
AAAATGCAGGCACATATTGGTGAAGTGAATGGAACAATATCAATCGGGTGTTCTTCTTTG  
ATTGGACAAACCTTACTTCCTGAAGTTTTGAGCCTATATAATGCCCAATTTCTTAATGTTG  
AAATACAAGTGCAAGTTGGTTCAACTGAACAAATTAAGCAAATCATAGAGATTATCATG  
TTATGATAACTCGTGGAATAAGGTAATGAATTTAGCTAACACACATTTATTTAATGATG  
ATCATTATTTTATTTTCCAAAAAATAGAAGAGATGATGTTACAAAGTTACCATTTATAGA

GTTTCAAGCTGATCCGATTTATATAAATCAAATAAAAACAATGGTATAACGATAATTTAGA  
ACAAGATTACCATGCAACTATTACAGTGGATCAAGTAGCAACTTGCAAAGAAATGTTGAT  
TAGTGGTGTAGGTGTTACAATCTTGCCAGAAATTATGATGAAAAATATCAGCAAAGAACA  
ATTTGAGTTTGAAAAAGTAGAAATTGATAATGAACCGCTGATTCGTTTCGACATTTATGAG  
TTATGATCCGAGCATGTTGCAATTGCCACAAGTTGATTCTTTTGTAATCTCATGGCGAGC  
TTTGTGAAACAACCAAAGGCGTAG

### > **A8Z196**

Function: protein coding sequence; putative sugar efflux transporter (core genome, constant)

Best match: A8Z196\_CC001\_MW2-USA400\_BA000033.2[719965:721185]

Position: 021-contig\_267\_RC: 116 ... 1337; Length: 1221 bp

Sequence:

ATGGATATGTTTGCAGCGTTATTACAAATAAAGAATTATAAACTCTTTGTTGCTAATATGT  
TTCTACTAGGTATGGGTATTGCGGTTACGGTCCCATATCTTGTTCTTTTTGCAACTAAAGA  
TTTAGGTATGACAACAAATCAGTATGGATTACTTCTAGCATCTGCAGCGATTAGCCAGTTT  
ACAGTAAATTCAATTATTGCTAGATTTTCGGATACGCATCACTTTAATAGAAAAATTATTA  
TTATTCTCGCATTATTAATGGGTGCGCTTGGTTTTCAATATACTTTTTGTAGATAACAATC  
TGGTTATTCATATTACTATATGCGATTTTCCAAGGATTATTTGCACCAGCAATGCCCAAC  
TTTACGCATCTGCTAGAGAATCTATCAATGTTTCAAGCTCTAAAGATAGAGCTCAATTTGC  
CAACACAGTATTACGTTCAATGTTCTCATTGGGCTTTTTATTTGGTCCATTTATTGGTGCCC  
AATTAATCGGATTAAGGCTATGCTGGATTGTTGGTGGAACAATAAGTATCATTTTATT  
TACTTTAGTACTTCAAGTGTTTTTCTATAAGGATTAACATTAACACCCTATTAGTACG  
CAACAACATGTTGAAAAAATTGCTCCTAATATGTTTAAAGACAAAACGCTTTTATTACCA  
TTTATTGCATTTATTTTATTACACATTGGACAATGGATGTATACGATGAATATGCCTTTAT  
TTGTTACTGATTATTTAAAAGAAAATGAGCAACATGTCGGTTATTTAGCTAGTTTATGTGC  
TGGTTTAGAAGTGCCATTTATGATCATTCTTGGCGTTTTATCATCTAGATTACAGACTCGA  
ACATTGTTGATTTATGGAGCGATTTTGGTGGTTTATTCTACTTCAGCATTGGGGTATTTA  
AAAATTCTATATGATGTTAGCAGGACAGGTGTTTTAGCTATTTCTTAGCGGTTCTTTT  
AGGAATTGGTATTAGTTATTTCCAAGATATCTTACCAGATTTTCCAGGATACGCCTCAACA  
CTATTTTCTAATGCAATGGTTATTGGACAGTTAGGCGGTAACCTATTAGGTGGTGCTATGA  
GTCACTGGGTAGGTTTGGAAAATGTATTTTTGTATCAGCAGCATCAATCATGTTAGGTAT  
GATACTTATATTCTTTACTAAAATCAAAAATTACAAAAGAGGATGTGATATCAACATG  
A

### > **Q2YSN2**

Function: protein coding sequence; putative membrane protein (core genome, constant)

Best match: Q2YSN2\_CC005\_JH1\_CP000736.1[767471:767958]

Position: 021-contig\_267\_RC: 1333 ... 1822; Length: 489 bp

Sequence:

ATGACAATTATTTTATGGCTACTTATCATCGCTGCCTTCATGTTAGCATTGTTGGGTTGAT  
TAAGCCGATTATTCCTTCTGTTTTAGTATTATGGGTTGGCTTCTAATCTATCAATTTGGCT  
TTCATAATCAGCATTATCATGGGTGTTTTATGTATCTATGACATTGCTAACAATACTAAT  
TTTATGTGCGGACTTTTTAGCTAATAAATTTTTGTGAATCGCTTCGGTGGTTCTAAGTTT  
GGAGAGTATGCAGCTTTAATTGGTGTGGTTATTGGATGTTTTGTTTTACCGCCATTTGGAA  
TTATTATTACCTTTTTATTTGGTATTCATAGTTGAATTAATACAAGGCTATTCATTTGAA  
AGAGCAGTTAAAGTAAGTATAGGTTCAATCGTAGCATTTTTAAACAAGTAGTATAGCTCAA  
GCAATCATTATGTTTATAATGATTGTATGGTCTTTATAGATGCTTTATTGATTAATTA

### > **Q2YSQ6**

Function: protein coding sequence; putative uncharacterized protein (core genome, constant)

Best match: Q2YSQ6\_CC001\_MW2-USA400\_BA000033.2[721769:722458:r]RC

Position: 021-contig\_267\_RC: 1920 ... 2610; Length: 690 bp

Sequence:

TTATAAAAATGTATGAGAATGTTTTTTCGAAATATTTCTTTCAATGCGTAATCCAATAGGT  
ATAACTATAAATGAAAATATAATAAATACCCAATTGCTTACCTGAATATATGGTCCAAAG

GCAAGTAATGATTGTGGAATAAAGAATACATAGAAAAATCCTACAATTAGTAGAATGAT  
TGCTAAATAGGTGAATATCCATATCCAATTTGAATTGTTAAAACATTGCAGTTGTATTGTT  
TTAAAACATAACCATATAAATAAAAAAGACAATAAAGAATCCGACGACTACTGAAAACGG  
GAATGAAACAAAATATAAATTACTTCCATTTTTTTCCATGAAAAATCCTAAAAATCCTTTG  
AGAAAACATAACAATCCCAATTAATAGAACGATGTGTTGATAGATATATTTAAAAAATATTT  
TTAAATGTTTCATTAGGCATCGCTTTTAGTTCTTTTATTGCATGTGCTTTTGGGTTCGTGATT  
GAAAAAATCTAAGGCTAATAAACCATGTTGTTCTGCGCTTAATAATTGTTTGAGTATACG  
GTTAATAATTAACCTCTGTATCATGAGGGTTGACGCGAAAGTCAGAGCGCATATAAGTCAT  
ATAATTCTCGAAGATTTCTCTATCAGTATTGCTTAATCTTAATGATTTAACATTATTTTCTT  
TTGTTAATTGCGCAGTACTTTTCAT

### > **A5IQN0**

Function: protein coding sequence; putative acetyltransferase (core genome, constant)

Best match: A5IQN0\_CC001\_MW2-USA400\_BA000033.2[722585:723028]

Position: 021-contig\_267\_RC: 2736 ... 3180; Length: 444 bp

Sequence:

ATGAGGACACTTAATAAAGATGAACATAATTATATCAAGCAAATAGCTAATATACATGA  
GACATTATTGTCGCAAGTAGAATCCAATAAATGTACTAACTGAGTATTGCTCTTAG  
GTACGAGATGATATGTTCAAGATTAGAACATACAAATGATAAAAATTTATATATATGAAAA  
TGAAAGTCAATTAATAGCGTTTATTTGGGGACATTTTAGTAATGAAAAAAGTATGGTTAA  
CATTGAACTGCTATATGTTGAACCACAATTTTCGCAAAGTATGCTACGCAACTGAA  
GATTGCGCTTGAAAAATGGGCAAAAACATGAATGCAAAGCAAATAAGCAGTACAATTC  
ATAAAAATAATTTGCCAATGATATCTTTGAATAAAGATTTAGGTTATCAAGTGAGTCATG  
TGAAAATGTATAAAGATATTGATTAG

### > **A8YZU8**

Function: protein coding sequence; putative lipoprotein (core genome, variable)

Best match: A8YZU8\_CC007\_USA300\_TCH959\_AASB02000218.1[115805:116200] (completely identical)

Position: 021-contig\_267\_RC: 3246 ... 3642; Length: 396 bp

Sequence:

ATGAAGAAATTAATCATCAGTATTATGGCGGTCATGCTATTTTTAACAGGTTGTGGTAAA  
AGTCAAGAGAAAGCCACTCTGGAAAAGGATATCGATAATTTACAAAAAGAAAATAAAGA  
ATTAAGACAAAAAAGAAAAGCTTCAACAAGAAAAAGAAAAATTAGCAGATAAGCAA  
AAAGACCTTGAAAAAGAAGTGAAAGATTTAAAACCATCAAAAGAAGATAACAAGGATG  
ATAAAAAAGACGAAGACAAAAATAAAGACAAAGATAAAGATAAAGAGGCATCACAAGA  
TAAGCAATCAAAGATCAAACCTAAGTCATCGGATAAAGATAATCACAAAAAGCCTACAT  
CAGCAGATAAAGATCAAAAAGCTAATGACAAACACCAATCATAA

### > **rimL**

Function: protein coding sequence; acetyltransferase/GNAT family (core genome, variable)

Best match: rimL\_CC001-ST772\_118\_AJGE01000051.1[4090:4632] (completely identical)

Position: 021-contig\_267\_RC: 4158 ... 4701; Length: 543 bp

Sequence:

ATGATTTATTGTGAAACAGAGCGTTTAAATATTAAGAGACTGGCATGAAGATGATCTGTTA  
CCTTTTTAAAAAATGAATGCGAATTATGACGTACGTAAATATTTTCCAAGTTTATTGAGTT  
ATCGTCGTTTCAAGATTAGATATGAGAAGTATGGATGCGGTTATTAAGATTATGGCATTG  
GATTATTTGCTGTAGAAGATAAAGAGTCACATCAATGGATAGGCTTTATAGGTTTGAATT  
ATATTCCAGAAACAAGCGATTATCCATTTAAAGAATTACCGCTTTATGAAATAGGTTGGC  
GCTTGTTGCCAGAATTTTGGGGAAAAGGATTAGCAACTGAAGGCGCAAAGGCAACTTTG  
AAGTTAGCAGAAGAACATCAAATATACGATGTCTATAGTTTTACAGCAGAAGCAAATAA  
AGCTTCACAACGTGTAATGGAAAAAATTGGCATGACAGTGTATGATCATTTTCGAATTACC  
CAATCTAAGTAAGTATCATTTATTAATAAAGGCAAGTACGCTATTACATTAATCTTCGAAA  
GTGA



> **uppP**

Function: protein coding sequence; undecaprenyl-diphosphatase (core genome, constant)  
Best match: uppP\_CC008\_NCTC8325\_CP000253.1[674809:675684:r]RC (completely identical)  
Position: 021-contig\_267\_RC: 6680 ... 7556; Length: 876 bp

Sequence:

```
TTAAATACCTTTACCAATGCCAAATCCGAAGTAAAGTATAGCAATAAAGATTACTAATAC
AATTCTGTAAATGGCAAATGGAATTAGTTTGATTTTGTTAATTAGATGCAAGAATGTTTTG
ATTGCAATTAGTCCAACAGTAAATGCAGCTAAAAAGCCTAAAATATAAAAAGGTATATC
AGCAATCTGAATATCTTGATAATGTTTAAATAAAGATAAACCCTAGCTGCTAACATAAT
TGGAACAGCCATAATAAATGTAAAGTCCGATGCTGCTTTATGATTTAATTTTCATTAATACC
CCAGTTGAAATTGTTGAGCCTGAACGGCTGAAACCAGGCCACATAGCTACTGCTTGAGAA
ATACCAATTACAAATGCTTGGAAATAACTGATTTGATCTACTGTTTGTGGGTTTTTAACTT
TAGCTGAGTATTTATCAGCAATAATCATATAGATAGCACCTACGAATAAGCCAATCATAA
CAGTTGGCACACTAAATAAATGTTCTTCGATGAAATCATCAAATAGTAAGCCTAAAATAC
CTGCTGGCACCATACCCACTAATACATGTAATAAATTTAAACGTCTTGGCTTTGAACGTCT
TTGTTGATCGTTATCTCCTTCAACATGTTTGTGTTTACCAATATGTAAAATCTCTAAGAAG
CGTTCGCGGAACACCCATGCTGCTGCAAAGACGGATCCTAATTGGATGACGATTTTAAAT
GTAAATGCTGACTGAGAACCTAAAAATTCAGATGATTTTAAACCACATATCATCAACTAGG
ATCATATGTCCAGTAGAGGAAACAGGTGCAAATTCGTTAATCCTTCGACGACCCCTAAG
ATAATACCTTTTATTAATTCAATGATAAACAT
```

> **graA**

Function: protein coding sequence; ATP binding cassette transporter  
Best match: graA\_CC001\_MW2-USA400\_BA000033.2[727623:729254]  
Position: 021-contig\_267\_RC: 7774 ... 9406; Length: 1632 bp

Sequence:

```
GTGAAAAAATTAACAACAATACTGTTTCAATATAAAATTTTTCCGGTACTCATGTTCTTGG
TCAGTACTGGTCTCGGCATACTCGTTATAACGCAAAATATTTAATAGCAGATTTTTTACG
TAAAATTATAAGACATCAATTTCAAGGTTTATGGATTGTATTATTTATTTATTAGGTGTT
TTACTTTTAAGAGCAACTGTGCAATTTCTAAATCAATGGTTAGGTGATACATTAGCATTTA
AAGTTAAGCATATGCTTAGACAGCGGGTTATTTATAAAAATAATGGTCATCCAATCGGTG
AACAAATGACTATACTCACAGAAAACATTGATGGTCTAGCACCTTTTTATAAGAGTTATT
TGCCTCAAGTGTTCAAATCAATGATGGTTCGCTCATCATAATCATTGCAATGTTTTTCAT
CCATTTCAATACCGCATTAAATTATGTTAATAACTGCACCATTTATTCCTTTGTTTTATTA
TTTTCGGTTTGAAAACGCGAGATGAGTCAAAGATCAAATGACTTATTTGAATCAATTA
GTCAACGGTTTTTAAATATTGCTAAAGGTTTAGTGACGTTAAAGCTATTTAATCGTACAGA
GCAAACAGAGAAGCATATTTACGACGATAGTACTCAGTTTAGAACTTTAACAATGCGCAT
TTTACGCAGTGCTTTTTTATCGGGATTAATGCTCGAATTTATAAGTATGTTAGGTATTGGA
TTGGTTGCATTGGAAGCAACGCTAAGCTTAGTAGTATTTAATAATATTGATTTTAAAACCTG
CGGCAATTGCGATTATTTAGCGCCTGAATTTTATAATGCAATTAAGGACTTAGGGCAAG
CGTTCCATACTGGAACAAAGTGAAGGTGCCAGTGACGTTGTGTTTGAAGTTTTTAGAAC
AACCGAACTATAATAATGAATTTCTATTAAGTATGAGGAAAACAAAAGCCATTTATTC
AGTTAACAGACATATCATTTTCGATATGATGATTCTGATAGATTGGTATTAATGATTTAAA
TTTGAAAATATTTAAAGGTGATCAAATTCGACTTGTAGGTCCAAGCGGGGCAGGTAAATC
CACTTTGACACATCTTATTGCAGGTGTTTATCAGCCAACAATAGGTACTATAAGTACAAA
CCAGCGTGATTTAAATATAGGAATACTTAGTCAACAGCCATATATTTTCAGTGCTTCTATA
AAAGAGAATATTACGATGTTTAAAGATATAGAAAATAATACTATTGAAGAAGTGCTAGA
CGAAGTAGGTTTATTAGACAAAGTGCAATCTTTCACAAAAGGCATTAACACAATAATAGG
TGAAGGAGGCGAAATGTTATCTGGTGGACAGATGAGACGCATAGAACTTTGCCGTCTTTT
AGTTATGAAGCCAGATCTCGTTATATTTGATGAGCCTGCAACTGGTTTAGATATTCAAAC
AGAACACATGATTCAGAACGTTCTGTTTCAACATTTTAAAGATACAACGATGATTGTCAT
TGCACATAGAGATAATAAATTCGCCATTTACAACGACGCTTGTATATAGAAAATGGAAG
ACTGATTGCTGATGATCGCAATATTTTCAGTAAATATAACAGAAAATGGTGATGACTTATG
A
```

### > **A6TZG3**

Function: protein coding sequence; ABC transporter ATP-binding protein/MsbA family (core genome, constant)

Best match: A6TZG3\_CC001\_MW2-USA400\_BA000033.2[729251:730924]

Position: 021-contig\_267\_RC: 9402 ... 11076; Length: 1674 bp

Sequence:

```
ATGAAAACACGACTAAAATTTCAAGTAGATAAAGGATTTATTGTTAGCTATAGTTGTTGGT
GTTTGTGGAAGTTTAGTTGCGCTCGCCATGTTTTTCTTAAGTGGTTATATGGTGACACAAA
GTGCACTTGGTGCGCCACTATACGCTCTGATGATTTTAGTCGTAACAGTAAAATTGTTTGG
GTTTTTAAGAGCTATTACTCGATACGTAGAGCGCCTTATTTCTCATAAAGCTACATTTACA
ATGCTACGTGATATTCGGGTACAGTTTTTCGGTAAATTAGTAAATGTCATTCCTAATGTTT
ACCGTAAACTGAGTTCTAGTGATTTAATTTACCGTATGATTAGTCGTGTTGAGGCATTACA
AAATATATATTTACGTGTTTATTATCCACCAGTCGTCATCGGTTTGACAGCGCTAGTTACA
GTCATAGTTTTGGCGTTCATTTCAATCGGCCATGCGCTATTGATTATGGTTAGCATGTTGT
TTACTTTACTCATTGTTCCCTTGGTTAAGCTCAAAAAAAGCACGTACTTTAAAGAAACATGC
AGCTAATGAACAGGCCCGATTTTTAAATCATTTTTATGATTATAAAGCTGGTATGGATGA
ACTACGTCGATTTAATCAAATTAATCATTATCGAGATAATTTGATGGCTAAATTAATCAT
TTTGATAAATTACAACCTAAAGAGCAACGCTTTTTAACGATTTATGATTTTATATTAATA
TTATTGCTATGCTTTCGATTTTTGGTAGTTTAGTTCTAGGATTAATTCAAATTAATGCAGG
CCAATAAATATTATTTATATGACGAGTATAGTTTTAATGGTCTTAACTTTATTTGAACAA
GCTGTACCAATGACAAATGTCGCGTATTATAAAGCGGATACTGACCAAGCATTGCACGAT
ATTAATGAAGTGATATCTGTACCTTCTACTAATGGAAAAAACGTCTTAATGATAAGTAT
GATGCAACGAACATTTATGAAGTTAAGGATGCTAGTTTTAAGTATTGGAATCAGCAAACG
TATGTGTTGTCGGATATTAATTTAATGTTAATAGAGGCGAAAAGATTGCGATTGTGGGT
CCTTCTGGTTCAGGAAAAAGTACACTACTACAAATTATGGCAGGGTTATATCAATTAGAT
AGTGGCTCTGTTTCGTTTCGAAAATATGGATATGTTTGAATAGATGACAAAGATAAGTTT
GAATCGTTAAATGTCTTGCTACAATCTCAACAATTATTTGATGGTACAATACGTCAAATTT
TATTTACCGATGAAAAAGATGAAGCGGTGCAAGCAATATTTAAGCAATTAGATTTAGAAC
ATTTGGCACTAGAACGTCAAATTGACTTAGATGGTCATACATTATCTGGCGGAGAAATTC
AGCGTTTAGCGATTACGAGGATGTTATTAAGATACTGCATCAACATGGATTTTAGATG
AACCAACAACCTGCATTAGATAAACAAAATAGTTTTAAAGTTATGGATTTAATTGAAGCAC
ATGCAGAAACATTAATTGTTGCTACACACGATTTAACTTTATTGTCACGTTTTGAGACCAT
CATTGTGATGATAAATGGTAAAATAGTTGAAAAGGGAAACTATCAACAATTACTCGCTAA
TCAAGGTGCTTTATGGAATATGATTCAATATAATGCATAA
```

### > **mgrA**

Function: protein coding sequence; regulator of autolytic activity (core genome, constant)

Best match: mgrA\_CC001\_MW2-USA400\_BA000033.2[731051:731494:r]RC (completely identical)

Position: 021-contig\_267\_RC: 11202 ... 11646; Length: 444 bp

Sequence:

```
TTATTTTTCTTTGTTTCATCAAATGCATGAATGACTTTACCTAATAAGCGATTAAGTTCTT
TAACTTCATCTTGAGATAAAGAAGAAGCTGAAGCGACTTTGTGTCAGATGCATTACTTAATT
CTGGTCTAATAGTTTCACTTTTGTGTCAGTCAAGTGAATAAATACTTCACGTTGATCGACTTC
GGAACGTTACGCTTAATTAAGTCTACTTGTCCATTCGTTTTAATAATGGTGATACTGTA
CCAGTATCGAGTGCTAATTCAGTTACGACTTTCTTGACGTTTACAGGAGATTCATCCCATA
AAATTGTTAAGACAAGAAATTGTGGGTATGTTAGATTGTACTTCTTAAAACTTTGTTAG
AGTAGTAGCGATTAACCTTGTCTTTGAGCATTGTACAACTAAAGCATAGCTGTTCTTTTAA
ATTATGTTGATCAGACAT
```

### > **cobW2**

Function: protein coding sequence; cobalamin (vitamin B12) biosynthesis protein

Best match: cobW2\_CC007\_TCH959-USA300\_AASB02000218.1[124431:125357] (completely identical)

Position: 021-contig\_267\_RC: 11872 ... 12799; Length: 927 bp

Sequence:

ATGAAAAATAATAAAGATGAAAAATAAGAATATCCATAATTAACGGATTTTTGGGTAG  
TGGTAAAACCACGTTACTGACACATTATATTAGTGAATTATTAATAAATGATGAGAAAAT  
TAAAATCATCATGAATGAATTCGGTACTTTTGATATTGATAGCAATAGTATTTCAAATGA  
AATTGAAGTCCATTCATTGATTAATGGTTGTGTTTGTGCGATCTTAAACAAGAACTTGTC  
TATGAACTAAAAGCCATTGCTTTAAAAGGGGACGTTAATCATGTCATCATAGAAGCGACA  
GGCATTGCGCATCCTTTGGAATTACTAGTTGCATGTCAAGATCCGCAAATCGTTAATTTCT  
TTGAAAAGCCGATTATTTATGGTGTATTAGATGCGACTCGATTTTTAGAACGTCATCAATA  
TACCGAAAATACAGTTTCGCTGATGGAAGATCAGTTGAAACTAAGTGACATGATTATTAT  
TAATAAAATTGATCTTATAACTGATGACAGTCTTGAGAAAATTGATAAGCAATTAGGTAT  
GATTTGTGCAAGTATTCCAACCTTATAAAAACAACCTATGGAAAAGTTTCGTTGGAAGAATT  
GGACTTAACTGTTAAAGACAGAGAGATATCGTCTCATCATCACCATCATCATGGGATTAA  
AAGTATGACTTACACGTTTACAGGTCCGATTGATCGTCAATTGTTTTATCAATTTATAATG  
AAATTACCGGAATCTGTTCTACGTTTAAAAGGTTATGTGTCATTTAGAGATCAACCAAAT  
GCAATTTATGAATTTCAATATGCATATGGTTTACCAGACTATGGAATAATTGGCATGCAA  
TTACCATTAACGATTGTTATTATTGGTGAAACTTTAGATACAAATCACATACGTAATCAAT  
TGGATATGCTACAATTTACGTAA

### > **phrB**

Function: protein coding sequence; deoxyribodipyrimidine photo-lyase

Best match: phrB\_CC001\_MSSA476\_BX571857.1[734330:735703]

Position: 021-contig\_267\_RC: 16053 ... 16203; Length: 150 bp

Sequence:

ATGGCAATTGCTGTGTTATTAATCGAATGTTTCGAATGGAACACAATCCATTATTTGAAT  
ATATTTATCAACAAAAAGAAGACATTGATGCATGTTATTTTATCATTCCGGAAGAGGACA  
TGTCTTCAGCTTCTGATTTGAAAGCACAG

### > **Q2G0A5**

Function: protein coding sequence; putative membrane protein (core genome, variable)

Best match: Q2G0A5\_CC001\_MSSA476\_BX571857.1[735858:736142:r]RC

Position: 021-contig\_267\_RC: 17581 ... 17866; Length: 285 bp

Sequence:

TTATCTTAGTATGTCCGTAAATAAAGTGAGGTATAGTACGACATACTCTAAAAACGTAGT  
GAGATAAATATATTTCAATCTAACTTTTATGTTTTGAGGCACTTGCCATTTAGGATATTGT  
CGTTCGTAATACGACACTTGTGTATAAATACACCTAGTCCAAATGGCAGCATCATGAGT  
AAGATACTTCTTAAATAACTTAAACCAATATCATACCATATGTGTCCAATAATCAATTGA  
AAGCCAATGATAGATACTATTAACGATTATATTTATTGTCAC

### > **norA**

Function: protein coding sequence; multidrug efflux pump (core genome, variable)

Best match: norA\_CC001-ST772\_118\_AJGE01000051.1[19228:20394] (completely identical)

Position: 021-contig\_267\_RC: 19296 ... 20463; Length: 1167 bp

Sequence:

ATGAATAAACAGATTTTTGTCTTATATTTAATATTTTCTTGATTTTTTTAGGTATCGGTTT  
AGTAATACCAGTCTTACCTGTTTATTTAAAAGATTTGGGATTAAGTGGTAGTATTAGGA  
TTACTAGTTGCTGCTTTTGCCTTATCTCAAATGATTATATCGCCGTTTGGTGGTACGCTAG  
CTGACAAATTAGGGAAGAAATTAATTATATGTATAGGATTAATTTTGTTCAGTGTGAG  
AATTTATGTTTGCAGTTGGCCACAATTTTTCGGTATTGATGTTATCGAGAGTGATTGGTGG  
TATGAGTGCTGGTATGGTAATGCCTGGTGTGACAGGTTAATAGCTGACATTTACCAAG  
CCATCAAAAAGCAAAAACCTTTGGCTACATGTCAGCGATTATCAATTCGGATTCATTTT  
AGGACCAGGGATTGGTGGATTTATGGCAGAAGTTTCACATCGTATGCCATTTTACTTTGC  
AGGAGCATTAGGTATTCTAGCATTATAATGTCAATTGTATTGATTCACGATCCGAAAAA  
GTCTACGACAAGTGGTTTCCAAAAGTTAGAGCCACAATTGCTAACGAAAATTAAGTGGAA  
AGTGTATTACACCAGTTATTTAACACTTGTATTATCGTTTGGTTTATCTGCATTTGAAA  
CATTGTATTACTATACACAGCTGACAAGGTAATTTACCTAAAGATATTTTCGATTGC  
TATTACGGGTGGCGGTATATTTGGGGCACTTTTCCAAATCTATTTCTTCGATAAATTTATG

AAGTATTTCTCAGAGTTAACATTTATAGCTTGGTCATTATTATATTCAGTTGTTGTCTTAAT  
ATTATTAGTTTTTGGCTAATGGCTATTGGTCAATAATGTTAATCAGTTTTGTTGTCTTCATAG  
GTTTCGATATGATACGACCAGCCATTACAAATTATTTTTCTAATATTGCTGGAGAAAGGC  
AAGGCTTTGCAGGCGGATTGAACTCGACATTCACTAGTATGGGTAATTTTCATAGGTCCTTT  
AATCGCAGGTGCGTTATTTGATGTACACATTGAAGCACCAATTTATATGGCTATAGGTGTT  
TCATTAGCAGGTGTTGTTATTGTTTTAATTGAAAAGCAACATAGAGCAAATTTGAAAGAA  
CAAATATGTAG

### > **ybaK**

Function: protein coding sequence; transcript regulator (core genome, variable)

Best match: ybaK\_CC080\_11819-97\_CP003194.1[786508:786990] (completely identical)

Position: 021-contig\_267\_RC: 21381 ... 21864; Length: 483 bp

Sequence:

ATGGCTAAAATAAGAAAACGAACGCGATGCGTATGCTTGATCGTGCAAAAATTAATA  
CGAAGTTCATAGCTTTGAGGTACCAGAAGAACATTTATCTGGTCAAGAAGTCGCAGAACT  
CATACAAGCAAATGTTAAAACAGTATTTAAAACGCTTGTTCTAGAAAATACAAAACATGA  
ACATTTTGTATTTGTTATCCAGTAAGTGAACTTTAGATATGAAAAAGGCAGCTGCTTTG  
GTTGGAGAGAAGAAATTGCAGCTTATGCCTTTAGATAATTTGAAAAATGTAACGGGGTAC  
ATTCGTGGTGGGTGTTCCGCTGTTGGTATGAAAACATTGTTTCCAACAGTCGTTGACAAAT  
CGTGTGAAAATTATAGTCATATCAGTGTGAGTGGTGGGCTTCGAACAATGCAAATCACAA  
TAGCTGTTGAGGATTTGATTACAATAACTAAAGGCAAATTTGGAGCAGTTATCCATGAAT  
GA

### > **fruR**

Function: protein coding sequence; transcript regulator of fructose operon (core genome, constant)

Best match: fruR\_CC001\_MW2-USA400\_BA000033.2[741964:742725]

Position: 021-contig\_267\_RC: 22116 ... 22878; Length: 762 bp

Sequence:

ATGATAATTACAGAAAAAAGACACGAGTTAATTTTTAGAAGAACTTTTCGCACAAAGATTTT  
TTGACTTTACAAGAATTAATAGATCGAACTGGGTGCAGTGCTTCAACAATACGAAGAGAT  
TTATCTAAACTACAACAATTAGGGAAATTGCAACGTGTGCATGGTGGTGCATGTTAAAA  
GAAAATCGTATGGTTGAGGCGAATTTAACTGAAAAATTAGCAACGAATCTTGATGAAAA  
GAAAATGATTGCTAAAATAGCAGCTAATCAATCAACGATAATGAATGCTTATTTATCGA  
TGCTGGTTCATCTACATTGGAGCTAATTAATATATTCAAGCGAAAGATATCATTGTGGT  
AACCAATGGTTTAAACACATGTAGAAGCTTTACTTAAAAAAGGTATTAACAATTATGCT  
AGGTGGTCAAGTTAAAGAAAATACACTTGCTACGATTGGTTCTAGTGCCATGGAGATATT  
AAGACGATATTGTTTCGATAAAGCTTTTATCGGGATGAATGGATTAGATATTGAACTTGG  
ATTAACTACTCCCGATGAGCAAGAGGCATTAGTTAAACAAACAGCAATGTCATTAGCCAA  
TCAATCATTGTACTTATTGATCATTCTAAGTTAATAAAGTATATTTTGCTCGTGTACCTT  
TGCTAGAAAGTACGACAATCATCACATCTGAAAAAGCATTAATCAAGAATCGTTAAAA  
GAATACCAACAAAAGTATCACTTTATAGGAGGGACTTTATGA

### > **fruB**

Function: protein coding sequence; fructose 1-phosphate kinase

Best match: fruB\_CC001\_MW2-USA400\_BA000033.2[742722:743642]

Position: 021-contig\_267\_RC: 22874 ... 23795; Length: 921 bp

Sequence:

ATGATTTATACAGTGACTTTCAATCCTTCAATTGACTATGTCATTTTTTACGAATGATTTTA  
AAATTGATGGTTTGAACAGAGCAACAGCAACATATAAATTCGCTGGGGGGAAAGGTATT  
AATGTCTCGCGCTCTTAAAGACATTGGATGTTGAGTCAACTGCCTTGGGATTTGCAGGT  
GGATTTCTGGAGAATTCATTATAGATACATTAATAACAGTGCAATTCGAATTTT  
ATTGAAGTTGATGAAGATACACGTATTAATGTGAAATTAACAAACAGGACAAGAAACAGA  
AATCAATGCACCGGGTCTCATATAACGTCAACACAATTTGAACAACACTGTTACAACAAT  
TAAAAATACAACAAGCAAAGATATAGTTATTGTTGCTGGAAGTGTACCAAGTAGTATTCC  
AAGCGATGCGTATGCGCAAATTGCACAAATTACAGCACAGACAGGTGCTAAATTAGTAG

TCGACGCTGAAAAAGAATTGGCTGAAAGCGTTTTACCATATCACCCACTATTTATTA AAC  
CTAATAAAGATGAATTAGAAGTGATGTTTAATACAACAGTGAACCTCAGACGCAGATGTTA  
TTAAATATGGTCGTTTGTAGTTGATAAAGGTGCGCAATCTGTTATTGTCTCGCTTGGCGG  
TGATGGTGCTATTTATATTGATAAAGAAATCAGTATTAAGCAGTTAATCCACAAGGGAA  
AGTGGTTAATACAGTTGGCTCTGGTGATAGTACAGTTGCAGGCATGGTGGCTGGAATTGC  
TTCAGGTTTAAACGATTGAAAAAGCATTCCAACAAGCAGTCGCATGCGGTACTGCCACGGC  
ATTTGATGAGGACTTAGCAACACGGGACGCTATAGAAAAAATAAAATCACAAGTTACGA  
TTAGCGTACTTGATGGGGAGTGA

> **fruA**

Function: protein coding sequence; fructose specific permease

Best match: fruA\_CC001\_MW2-USA400\_BA000033.2[743648:745606]

Position: 021-contig\_267\_RC: 23800 ... 25759; Length: 1959 bp

Sequence:

ATGAGAGTAACAGAGTTATTAACAAAAGATACGATAGCAATGGATTTAATGGCAAATGA  
CAAAAATGGTGTATTGATGAGTTAGTAAATCAATTAGACAAAGCAGGTAAATTAAGTGA  
TGTCGCGTCATTTAAGGAAGCGATTCACAATCGAGAATCACAAGTACAACCTGGTATCGG  
CGAAGGTATTGCCATTCCACATGCCAAAGTGGCCGCAGTTAAGTCACCAGCTATTGCGTT  
TGGTAAATCTAAAGCAGGCGTAGATTATCAAAGTTTGGATATGCAACCAGCACACTTATT  
CTTTATGATTGCAGCGCCAGAAGGTGGCGCCCAAACACATCTAGATGCTTTAGCTAAGTT  
GTCTGGTATTTTAATGGATGAAAATGTACGTGAGAAATTATTACATGCTTCATCACCTGA  
AGAAGTACTAGCGATCATAGATGAGGCTGATGATGAAGTGACAAAAGAAGAAGAGGCA  
GAAGCTGAAGCACACAAGTTGCAACTGCAGAACAATCATCTAAACAATCTAATGAGCC  
ATATGTGTTAGCAGTAACTGCTTGTCCAACAGGTATTGCACACACATATATGGCACGTGA  
TGCATTGAAAAAGCAAGCGGATAAAATGGGTATTTAAATTAAGTTGAAACGAACGGTT  
CAAGCGGCATTTAAAACCATTTAACTGAACAAGATATTGAAAATGCAACAGGTATCATTG  
TTGCTGCTGATGTTTCATGTTGAGACGGATCGCTTCGATGGTAAAAATGTCGTAGAAGTAC  
CAGTAGCAGATGGTATTAACGCCAGAAAGAAATTAATTAATAAAGCATTAGATACAAGT  
CGTAAACCTTTTGTGGCCGTGATGGTCAAAGAAAAGGTAACCTCAAATGACAGTCAAGAA  
AAATTAAGCCCAGGTAAAGCTTTCTATAAACACTTAATGAACGGTGTTCCTAACATGTTG  
CCACTTGTAATATCTGGTGGTATTTTAATGGCAATTGTATTTTTATTTGGAGCAAATTCAT  
TTAATCCAAAAGCTCAGAGTACAATGCGTTTGCAGAGCAGCTTTGGAACATAGGTAGTA  
AAAGTGCATTTCGCGTTAATCATTCCAATTTTATCTGGATTCATTGCACGTAGTATTGCGGA  
TAAACCTGGTTTCGCTTCAGGTCTTGTAGGTGGTATGTTAGCAATTCAGGTGGTTCAGGA  
TTTATTGGTGGTATTATTGCAGGTTTCTTAGCAGGTTACTTAACACAAGGTGTTAAAGCGA  
TGACACGTAAGTTACCACAAGCATTAGAGGGATTAACCAACATTAATTTACCCACTAT  
TGACAGTAACAGCTACAGGCTTATTGATGATTTATGCCTTTAATCCACCAGCATCTTGGTT  
AAATCATTTGTTATTAGATGGATTAACAATTTATCAGGTTCTAATATTGTATTATTAGGT  
TTAGTTATTGGCGCTATGATGGCGATTGATATGGGCGGTCCATTCAACAAAGCGGCATAT  
GTTTTTGCAACAGGTGCGTTGATTGAAGGTAATGCAGCACCAATTACAGCTGCAATGATT  
GGTGGTATGATTCCACCGTTAGCAATTGCGACAGCGATGTTAATTTTCAGACGTAAATTT  
ACAAAAGAACAACGTGGTTCAATTATCCCTAACTATGTGATGGGTATGTCCTTTATTACA  
GAAGGTGCGATTCCATTTGCAGCTGCCGATCCATTACGTGTTATTCCTTCAATGATGATTG  
GTTCAAGTATAGGTGGCGCAATTGCTTTAGGCTTAGGTTACGAATTACTGCGCCACATG  
GTGGTATTATTGTAATTGTTGGTACGGATGGTGCACACTACTTCAAACCTTATTGCACT  
TCTAGTTGGTACATTAGTTTCAGCATTAAATTTACGGTTTAATCAAACCAAGTTAACTGAA  
ACAGAAATCGAAGCTTCAAAATCAATGGACGAGTAG

> **nagA**

Function: protein coding sequence; N-acetylglucosamine-6-phosphate deacetylase

Best match: nagA\_CC001\_MW2-USA400\_BA000033.2[745914:747095]

Position: 021-contig\_267\_RC: 26066 ... 27248; Length: 1182 bp

Sequence:

GTGTCAGAATTAATTATATATAACGGCAAAGTTTATACTGAAGATGGCAAATTCGATAAT  
GGTTACATTCATGTGAAAGATGGACAGATTGTTGCAATTGGAGAAGGGGATGATAAAGC

AGTAATTGATAATGATACGACAAATAAAATTCAAGTGATTGATGCTAAAGGTCATCATGT  
ATTACCAGGTTTTATTGATATACATATTCATGGTGGTTATGGTCAAGATGCAATGGATGG  
GTCATACGATGGCTTAAAATATCTATCCGAAAATTTGTTATCTGAAGGGACGACATCATA  
CTTGGCCACTACAATGACGCAATCTACTGATAAAATAGATAAAGCACTTACAAATATTGC  
TAAATATGAAGCGGAGCAAGATGTTACAATGCAGCGGAAATTGTAGGTATACATTTAG  
AAGGACCATTTATATCTGAAAATAAAGTTGGTGCTCAACATCCGCAATACGTTGTACGCC  
CATTTATCGATAAAATTAACATTTTCAAGAGACTGCTAACAGATTAATAAAGATTATGA  
CGTTTGCACCTGAAGTTGAAGGTGCAAAAGAAGCGCTTGAAACGTATAAAGATGACATT  
ATTTTTTCAATTGGTCATACAGTGGCAACATACGAAGAAGCAGTCGAAGCTGTTGAGCGA  
GGAGCTAAACATGTCACGCATTTATATAATGCAGCGACGCCATTCCAGCATAGAGAACCA  
GGTGTTTTTGGAGCAGCATGGTTGAATGATGCTCTACATACCGAAATGATTGTTGATGGC  
ACACATTCTCATCCGGCATCGGTTGCTATTGCTTACCGTATGAAAGGTAATGAACGTTTTT  
ATTTAATTACCGATGCAATGCGTGCAAAAGGTATGCCTGAAGGAGAATATGATTTGGGTG  
GACAAAAGTAACTGTTCAATCGCAACAAGCACGTCTTGCAAAATGGTGCGCTTGCTGGTA  
GTATTTTAAAAATGAATCATGGGTTACGTAACCTTAATATCATTTACAGGTGATACATTAG  
ATCATTTATGGCGAGTAAACAAGTTTAAATCAAGCCATTGCATTAGGTATCGATGATAGAA  
AAGGTAGTATTAAGTAAATAAGGATGCAGATCTTGTTATTCTAGATGATGATATGAATG  
TAAAATCTACAATAAAACAAGGTAAGGTTACACATTTAGCTAA

### > **corC**

Function: protein coding sequence; similar to magnesium and cobalt efflux protein (core genome, constant)

Best match: corC\_CC001\_MSSA476\_BX571857.1[745744:747093]

Position: 021-contig\_267\_RC: 27468 ... 28818; Length: 1350 bp

Sequence:

TTGGAACTTCGACCATAATTAGTTTTGATTATATTTATTCTATTAATTGCATTAACCACTG  
TATTTGTTGGTTCAGAAATTTGCATTAGTAAAAATTAGAGCAACAAGAATTGAACAGCTAG  
CAGATGAAGGAAATAAACCTGCTAAAATAGTAAAAAAGATGATTGCTAATCTAGATTATT  
ATCTTTCTGCTTGTGAGTTAGGTATAACAGTAAACATCTTTAGGGTTAGGTTGGCTTGGTGA  
ACCAACGTTTGAAAAGCTATTACACCCAATATTTGAAGCAATCAATTTACCAACTGCATT  
AACGACGACGATTTTCGTTTGCAGTGCATTTATAATCGTTACGTATTTGCATGTAGTACTT  
GGTGAATTAGCGCCTAAATCTATAGCGATTCAACATACTGAAAAGCTTGCTTTAGTATAT  
GCAAGACCATTGTTCTATTTTCGGTAACATTATGAAACCATTGATTTGGCTGATGAATGGTT  
CTGCACGTGTTATTATTAGAATGTTTGGTGTAAATCCTGATGCCCAAACCTGATGCAATGTC  
AGAAGAAGAAATCAAAATTATTATTAACAATAGTTATAATGGTGGAGAAATCAACCAAA  
CTGAATTGGCATATATGCAAAATATCTTTTCATTTCGATGAAAGACATGCAAAAGATATAA  
TGGTACCTAGAACTCAAATGATTACACTAAATGAACCTTTTAATGTAGACGAATTACTAG  
AAACAATAAAAGAACATCAATTTACGCGTTATCCAATTACTGATGATGGTGATAAAGACC  
ACATTAAGGATTTATTAACGTCAAAGAATTTTAACTGAATACGCTTCTGGAAAAACGA  
TTAAAATAGCAAATATATACATGAGTTGCCAATGATTTTCAGAGACAACACGTATCAGTG  
ATGCATTAATTAGAATGCAACGTGAACATGTACATATGAGTCTTATTATAGATGAATATG  
GTGGAACGGCAGGTATTTTAAACGATGGAAGATATTTTAGAAGAAATCGTTGGGGAAATTC  
GTGATGAATTTGATGATGATGAAGTGAATGATATCGTTAAAATTGATAATAAGACATTCC  
AAGTAAATGGTAGAGTACTATTGGATGATTTAACTGAAGAGTTCGGTATAGAATTTGATG  
ACTCTGAGGATATTGATACGATAGGTGGATGGTTACAATCTCGTAATACCAATTTACAAA  
AAGATGATTACGTGGATACAACCTTATGATCGCTGGGTTGTTTCAGAAATCGATAACCACC  
AAATTTTGGGTGATATTAACCTATGAATTTAATGAAGCGAGACCTACTATCGGACAGT  
CTGATGAAGATGAAAAATCAGAATAG

### > **txbi\_saeS**

Function: bidirectional rho-independent terminator of saeS

Best match: txbi\_saeS\_CC001\_MW2-USA400\_BA000033.2[750836:750889:r]RC (completely identical)

Position: 021-contig\_267\_RC: 30988 ... 31042; Length: 54 bp

Sequence:

AAATAAACAAAAAAGAAGCCCTCATTAATGGGAGCTTCTTTTTAGTCTTTGCA

> **saeS**

Function: protein coding sequence; histidine protein kinase/sae locus (core genome, constant)

Best match: saeS\_CC001-ST772\_118\_AJGE01000051.1[30997:32052:r]RC (completely identical)

Position: 021-contig\_267\_RC: 31065 ... 32121; Length: 1056 bp

Sequence:

TTATGACGTAATGTCTAATTTGTGTAATGTTACAGTCATCGTAGTTCCTACATCTATATCA  
CTGCTTACACTGATTTTTGCGTTATTTTGTGCGGAGTTCATTAGCTATATATAAGCCTA  
ATCCAGAACCACCCGTTTTTGTATTACGAGAGTTTTCTACTCTGAATGTACGTTCGAATAT  
ACGTTCTTGTAGTTCTGGTATAATGCCAATACCTTCATCGCTAATAGCAATGTCGATAGTA  
TCTTGATCTTTGTTTTCACTAATATTAATATCAATGCGACTACCAACATTTGAAAATTTTA  
GCGCATTATCAAGTAAGTTTGTAAAATACGCTCAAGTGGCGTTTCGATATTGATAAAATG  
CATCAATTTTCGCTACAGAAATTCACCTTCTAATGTGCGGTTTTTCATGTTTGATACGTTGCTC  
ATATGGTTGCAATATTGATACAAGTAATTGGTCTAGTTGTATTAATTCTGGGGGATATGTT  
TTACCTGTATTTAAAGTGATAATATGAGTCATATCATCAAATAATGTTGATAATCTGTTTG  
CTTGTTTAAATTAATATGTCGTATGACTCTTTAATCTCATGATCCTTAGTGATTATACCATCA  
CGTAGTCCTTCAGAATATGAAATAATGCTTGCTAAAGGTGTTTTTAAATCATGGGCTAAG  
TTTTGAATCAGTTCTGTTTTTCTTGTTGTTTCGGATTTAATTTGATTCATTTGTTGCGTAATT  
TCAGAAGCCATTTTATTAAGATTGATTTAATTCATAAATTTCTTTTGGTGAATTAACG  
TTTTATCATTGCTTTCGTAATTTCCGTTAGCAAATTGCTTAGTTTTTATATTAAACTGCTTA  
ATTTTTTGTATAAGTGGATTAATAAAAATACTACATATTAATAAGGTTAAACAGCTTGTA  
ATTATTGTCGTTAAGGTCAAAGTTAGTGCATATGGCCGTTAAACCACATTAATAATATAT  
GCAATTGCTAAAATAGTTGAAGTTAATAGTATACTCGATACGACGCCAATAATGATTTGA  
CTTCTAATTGATAACACCAT

> **saeR**

Function: protein coding sequence; response regulator/sae locus (core genome, constant)

Best match: saeR\_CC001\_MW2-USA400\_BA000033.2[751968:752654:r]RC (completely identical)

Position: 021-contig\_267\_RC: 32120 ... 32807; Length: 687 bp

Sequence:

TTATCGGCTCCTTTCAAATTTATATCCTAATCCCCATACAGTTGTGATGGTATATGTTGTA  
AAGCTCTCTTTTTCTAATTTTTCTCTAATACGGTGTATATGGACATTCACGGTATTAGCATC  
TTCGTAATAGTCATATCCCCAACTTTTTCAAGTAATTCTGATTTAGAAATAACTTCATTT  
TCTCTAGAAGCTAAATACCACAATAACTCAAATTCCTTAATACGCATAGGGACTTCGTGA  
CCATTTACAGTCACAACCTTACTTAAAGTTAATAAGTGTTAATTCATCAAACGACAGTTGTT  
CAACTGGTTGATGATGGTATTTCTTCATTCTTGTAAGTAAATTATTAATACGTAACGAG  
TTCCCTTGGACTAAATGGTTTTTTGACATAGTCATCTGCACCTAAAGTTAAGGCGTAAATG  
GTATCATGTTCTTGTGTTTTGGCAGTTAAATAGATAAAGGGGATATCTAATTTTTGCCTTT  
TCATTTCTTTGACAATGTCGTAACCATTAACCTTCTGGCATCATGATATCAAGTACCATGAT  
ATCAATATCATTTGATAGTAAAGAAATTGCTTCTTTACCGCTAGTTGTCGTTGTTACTTTG  
TAACCTTCATATTCAAAATAGGTTTGACAAATGTCTACAATGTCTTGTTTCATCATCCACGA  
TCAGTAAGTGGGTCAT

> **saeQ**

Function: protein coding sequence; putative protein (core genome, constant)

Best match: saeQ\_CC001\_MW2-USA400\_BA000033.2[752629:753102:r]RC (completely identical)

Position: 021-contig\_267\_RC: 32781 ... 33255; Length: 474 bp

Sequence:

TCATCCACGATCAGTAAGTGGGTCATCTATTTTTTACCTCTGTTCTTACGACCTCTAAAG  
TAATTAATGATTTCTTTAAGTGAATCTGTTTTAACAATGAGTGACTCATTAGTAAAAGGA  
TAAAGAAAGTTAATTGAAGAGGATACGTAAATATCATATCTGCTAAGATATAATTTATCA  
TAACAAAGGCTCCAAAGAACTAGCAGCATATGCAAAAACCTCCAAAATTAACCTAAT  
CCAATTGCAATCTCTCCGAGTGGGACAACAATATCAAATAATGACGTCGTATGTGCAACT  
ATATTTGCGAAAACCACTTATACCACTCTGGTGAATCAGTATTGTTAGCGATGACTGGT

ACTAAACCTTTCAGCGTAAATCCGCCCGTTAATTTTTTCGTAGCCTTGCATTAACATAACAA  
TACCTGAACCCACACGAATGATAAATGTAACGAGTAGCAATAATTTATTCAT

> **saeP**

Function: protein coding sequence; putative lipoprotein (core genome, variable)

Best match: saeP\_CC001\_MW2-USA400\_BA000033.2[753445:753885:r]RC (completely identical)

Position: 021-contig\_267\_RC: 33596 ... 34037; Length: 441 bp

Sequence:

TTATTTTAATTTAGCGCCGCCGAAGATGACGTGAGCTTTTTTACAATAGATTGTTACTTCA  
TCATATTTGCTTAAATCTACATTTTTAAGATCAAATGTTTGTTTTTCTTTATCGTAGTCAAC  
CATTGCGATTTCTTACCGTTTTTAATGTGCCATTTTTTGTAGGTAGACGTATAAATCTG  
GACTTTTGATGATTTGTAGTTAGTAAGCATTAAATTTACCATTTTTAATCTCAGCTTTACCT  
TCAACAGTTTCACCGTTTTTAGAACTGAATGTACCTGTTAGGTGTTTTGTTTTATCAGTTTT  
AACATTGCTATCTTCTGACTTTGTTTTTTGTTTCAGTTTTGTTACCTTGATCTTGTGAATTAG  
AATTACCACAAGCGCCTAAAGTTAATACAGAGGCAACAGCACCAACTGCTAAAAAATAT  
TTTGTATTCAT

> **queE**

Function: protein coding sequence; 7-cyano-7-deazaguanosine (PreQ) biosynthesis protein E

Best match: queE\_CC008\_132-ST8\_ACOT01000023.1[78584:79297:r]RC

Position: 021-contig\_267\_RC: 34999 ... 35713; Length: 714 bp

Sequence:

TTATACACCTTTTTTATTGCTCCAAAGTAATGTATGAAGTTGTGGTAACACATAAACGTGA  
TTCATATCATTACTTTGCATAACTAAATCCACCAACTGCTCGTAGCGTTCTAACAACTTTT  
CGGTATGATTATCTACGCTGTCTGATAAATATGGGTACCAACTTGTAATAGAAAGGAA  
TATCTGGATAACGGTGGTGTATCATTTTGGCAAATCATAATCTTTATCGTCGAATACAAC  
TACTTTTAAGTTAATGAGGAAGGTACGCATTGTGTAATCACTTCATCTAACTTTTTTAAA  
TCAGGTGTCATAGTTGAACTTGGTGGTTTTGGACTAATCGTTAAATCATCAATTTGTGTCA  
TCCAAGGTTGGAATTTACTGCCTTGTGTCTCCAGTGCCTGAAAATACCTTTATCTTGAAA  
TAAGTCAACTAACTCTTGGATACCTTTAATTAATGCTGGGTACCACCAGAAATTGTAAC  
GTGATTAATAAATCGCCACCAATTCGTTTTAATTCATCATAAATTTCTTCAGCGGTCATG  
AGTTTTATATCGCCTTTAGCACTACCATCCCAAGTAAATGCAGAATCACACCAGCTACAG  
CGATAATCACATCCAGCTGTTCTCACAAACATCGTTTTTCTACCGATTACTCTTCCTTCAC  
CCTGAATGGTTGGGCCGAATATTCGAGTACAGGAATTTTAGCCAT

> **queD**

Function: protein coding sequence; queuosine biosynthesis protein D

Best match: queD\_CC030\_MRSA252\_BX571856.1[798825:799244:r]RC

Position: 021-contig\_267\_RC: 35716 ... 36136; Length: 420 bp

Sequence:

TTACACCTGTTCCCTTTGGTCTAAATACGACATAACTTGTGGTGTCTCTTACAAATACTT  
GAATACATTTTGGTTGGTGTTCGAGCGATGCCAAATTTCTTTAACAATTTGATAAATTGT  
TTCCGCTACGATTTTCAAGTTGAAGGGATTTTGTTTTTAAAAGCAGGTAAGTTATTTAACAGT  
TGATGGTCAAATTTACCGTGTATCATCTTTTTTAAATGGCTAAAGTTCACTAAAAAGCCAG  
TGTCATCTAGTTTATCACCGACAATTGTAAATTAACAAAGTAAGTATGACCATGGACAT  
TTTGACAAATACCTGCTTCTTCACACGGAATGTGATGTGCAGCTGAAAAATTTAAATCTTT  
ATTTAATTCGAATTGATATGGATGCGTTGTACTAGGATAGATTTGTTGTAACAT

> **queC**

Function: protein coding sequence; 7-cyano-7-deazaguanine synthase

Best match: queC\_CC001\_MW2-USA400\_BA000033.2[755986:756654:r]RC (completely identical)

Position: 021-contig\_267\_RC: 36137 ... 36806; Length: 669 bp

Sequence:

TTAAAGCGCTCCTTTACTTTCAAGATATTGATTTAGTCCACGTTGACGTAAATGACAAGCT  
GGACATTCACCACAGCCATCCCAATGATACCGTTATAGCATGTTAATGTTTTTGTACGAA



TATAATCTAAAACCTTCGAGTTCATCACTTAATTTCCACGTTTCTGCTTTGTTTAACACATT  
AAAGGAGTATGAATGACAAAATCTTTGTCCATAGCTAGGCTTAATGTTACGTTTCATTGAT  
TTTATAAAAACCTATCGCGACAGTCTGGGTAGCCTGAAAAGTCTGTTTCACATACGCCTGTA  
ATAATATGCTTAGCCCCAATTTGATAAGCTAGAGCGCCTGCAAACGACAAGAAAAGTAA  
ATTTCTAGCTGGAACAAATGTATTAGGTATACCATCTTCATTATTAGTAATTTCCATATCA  
TGTTGTGTTAATGCGTTTGGAGTAAGTTGTGATAATAATGACATATCTAAAACGTGATGTT  
TCATTCCCTTGATCTTGTGCAATTTGTTTTGCGACTTCAATTTTCAGTATCATGTCTTTGGCCA  
TAATTAACGTTACGAGTTCAACTTCTTTGAAATGTTTTTTTGCATAAAAAGAGACATGTTG  
TACTGTCTTGACCACCACTAAAGACAACGATGGCTTTTTTCATTATTTAATACACTTTCCAT

### > **PreQ1\_riboswitch**

Function: noncoding RNA PreQ1 riboswitch (core genome, constant)

Best match: PreQ1\_riboswitch\_CC001\_MW2-USA400\_BA000033.2[756824:756870:r]RC

(completely identical)

Position: 021-contig\_267\_RC: 36975 ... 37022; Length: 47 bp

Sequence:

CAATGTCTAGTTTTTTATAGAGGGTTTCAGCTAGGAACCTCTGATAT

### > **pabA**

Function: protein coding sequence; putative para-aminobenzoate synthase/glutamine  
amidotransferase/component II (core genome, constant)

Best match: pabA\_CC005\_Mu50-VRSA\_BA000017.4[785621:786214]

Position: 021-contig\_267\_RC: 37156 ... 37750; Length: 594 bp

Sequence:

ATGATTCTAGTCATAGATAATAATGATTCATTTACATATAATTTAATAGACTATATTAAGA  
CTCAAACGAAACTAACAGTTCAAGTTGTTGGTATTGATAATCTGCTGATAGAAGACGTC  
TTAATATGAAGCCAAAAGCAATTGTTATTTACCTGGGCCGGGTAATCCGGATGATTATC  
CTATCTTGAATGAAGTGTTAGAACAAATTTATCAGCGTGTACCTATACTAGGTGTATGTTT  
AGGATTTCAATGTATCGTGTCTTATTTTGGTGGAAATATCATTACGGCTATCATCCTGTA  
CACGGACATACTACACAGTTACGCCATACCAATGAAGGTATTTTTCAAGGACTGCCTCAA  
AATTTCAATGTAATGCGTTATCATTCAATTAATTGCTGACGGAGCGACTTTTCAAATTGCT  
TAAAGATTACAGCAAAAACGATGAAGCGATTATTATGGCATTGAGCATATTAGATTTCC  
CGGTTTTTGGTGTGCAATATCATCCTGAATCTATTTTGGAGTGAATACGGTTATCGACAAGT  
TGAATTATTTTTATCGAAGGTAGGTGATTACTGTGAGAATAGAATATAA

### > **pabB**

Function: protein coding sequence; anthranilate/para-aminobenzoate synthase component I (core  
genome, constant)

Best match: pabB\_CC008\_COL\_CP000046.1[794399:795550]

Position: 021-contig\_267\_RC: 37733 ... 38885; Length: 1152 bp

Sequence:

GTGAGAATAGAATATAATTATCGCTACTATTTAACTGAAAATGAATATAAGCAATACCAT  
ATTCAATTAAGGGATTTATAAAGAAGTATGTTGCTACTAAGTTGGCTGATGTGGGAGAA  
GTGATACACTTTGCACAAGCGCAGCAACGACAAGGTAGATATGTCTCGTTATATTTAAGT  
TACGAAGCGGCAAAGTATTTAATCATGTTATGTGTACACATTCATTAGCTAAAGATGAT  
ATTTATGCAGTAGCTTATAGTTTTGAAAAAGCGGAAAGCATAAATTCAACATATGAACAT  
CAAACCTTCTTATGTATCAAAGCATCATTTTTTCATTTGTTGAATCTTCTGAGGTTATGATGA  
CTAATATTAACCGTGTCCAACAAGCAATTGTTGAAGGCGAAACGTATCAAGTGAACCTATA  
CGGCGCGCTTAACAGATAACATTTATTATCCTATTAGTACTTTATATGAACGATTAACCTCA  
ATTTAGTAATGGTAATTATACTGCGTTATTACAAACAGATGAAATCCAAGTAGCGTCTAT  
CTCACCAGAATTATTTTTTCAAAAAGGACAATTTAACAATGTCGATAACGTTATCATAAG  
CAAACCGATGAAAGGGACAATGCCTAGAGGTAAAACGGAAGCTGAAGATCAACAGTATT  
ATAAAACATTGCAAACCTTCTCGAAAGATCGTGCAGAAAATGTCATGATTGTTGATTTAC  
TAAGAAACGATATAGGGAGAATATCACAGAGTGGCTCAATTAAGGTGTATAAACTATTTT  
TTATTGAGGCATATAAACTGTATTTCAAATGACTTCGATGGTAAGTGGAACCTTTAAAAA

ATAATACAGACTTAACTCAAATTTTAACATCGTTATTTCTTGTGGTTTCGATTACAGGTGC  
ACCGAAACTGAATACAATGAAATATATTAACAATTAGAAAAGTTCACCTCGTGGTATATA  
CTGCGGAGCAATTGGACTATTACTTCCAAGTGAAGATGATAAAATGATTTTTAATATTCC  
GATTTCGCACTATTGAGTATAAATATGGACAAGCGATTTATGGAGTCGGAGCAGGTATTAC  
AATTGATTCTAAGCCAAAAGATGAAGTGAATTTTACGCAAAAACCAAGATTTTGA  
GATGTTATAA

### > **pabC**

Function: protein coding sequence; 4-amino-4-deoxychorismate lyase (core genome, constant)

Best match: pabC\_CC005\_Mu50-VRSA\_BA000017.4[787349:787957] (completely identical)

Position: 021-contig\_267\_RC: 38884 ... 39493; Length: 609 bp

Sequence:

ATGCAATTATTTGAAACAATGAAAATTGATAATGGACATATCCCTAGACTTACTTATCAT  
ACTAATCGCATAAAAATGTTCTTCTGAGCGATTAACTTTAAATTTGATGAACATGCATGG  
CGAAATGAATTAACGATGTAACAACAAAGTATCACAGTGGTCAATATAGACTTAAAAT  
CGTATTAATGCTGAAAGCAAATTTGAAACGATAGTGTACCTTTACCTGAGAAAAGTAG  
TTTTACAGCAAAATTTCAAGTGTGCCCCAAAGTAGTTAATCCAACCTTTATAAAAAATAA  
AACGACAGAACGAAAGCATTAGCACACAATCATGAAACAGATTTAATATTGCTAACTTC  
AGAGGACGGCAAGGTCCTTGAATTTGATATTGGCAACATTGTCATTGAAGAGGATGGAA  
AATGGTACACACCAAGTTATAAAGATGATTTCTTAAAAGGATGCATGCGTGATTATTTAA  
TAGATAGTGACAACTTGTGAAAAAGACTTTAATAAAAACGAATTGATTTATAAATATC  
ATAACAATGAGATACGTTTATTTTTGATAAATAGTTTACGAGAGGTTGCCGATGTCCACCT  
TTGCCTTTAA

### > **tnpIS431-06**

Function: protein coding sequence; transposase for IS431 (mobile element)

Best match: tnpIS431-06\_circ\_S-epidermidis\_GQ900381.1[43799:43807] (completely identical)

Position: 021-contig\_267\_RC: 39783 ... 39792; Length: 9 bp

Sequence:

ATGAACTAT

### > **ItaS**

Function: protein coding sequence; glycerol phosphate lipoteichoic acid synthase (core genome, constant)

Best match: ItaS\_CC008\_NCTC8325\_CP000253.1[710153:712093] (completely identical)

Position: 021-contig\_267\_RC: 42024 ... 43965; Length: 1941 bp

Sequence:

ATGAGTTCACAAAAAAGAAAATTAGTCTTTTTGCGTTCCTTATTAAACCGTAATAACGA  
TTACCTTGAAGACGTATTTTTCTTATTATGTTGATTTTTCTTTAGGTGTTAAAGGTTTAGTA  
CAAACCTTAATATTATTGATGAATCCTTATAGTTTAGTAGCACTGGTTTTAAGTGTGTTCC  
TATTCTTTAAAGGCAAAAAGCATTTTGGTTCATGTTTCATAGGCGGCTTCTTATTGACGTT  
CCTATTATATGCCAATGTTGTGTACTTTAGATTCTTCTCTGATTTTTTAACGTTTAGTACTT  
TAAACCAAGTAGGTAACGTAGAATCTATGGGTGGTGC GGTTAGTGCATCATTCAAATGGT  
ATGACTTTGTTTATTTTCATTGATACGTTAGTTTACTTATTCATTTAATATTTAAAACAAAA  
TGGTTAGACACAAAAGCATTTAGTAAGAAATTTGTTTCTGTCGTAATGGCGGCTTCAGTA  
GCATTATCTTCTTAACTTAGCTTTTGCTGAAACTGACAGACCAGAATTATTAACACGTA  
CATTTGACCATAAATATTTAGTGAAATATTTAGGACCTTATAACTTTACAGTATACGATGG  
TGTTAAAACCTATCGAAAATAATCAACAAAAAGCGCTAGCATCTGAAGATGACTTAAACAA  
AAGTATTAAATTATACGAAACAACGTCAAACAGAGCCTAACCCAGAATATTATGGGGTG  
GCAAAGAAGAAAAATATTATTAAGATTCATTTAGAAAAGTTTCAAACCTTCTTAATTAAT  
AAAAAGGTTAATGGTAAAGAAGTAACACCGTTTTTAAACAAATTATCAAGTGGGAAAGA  
GCAATTCACATACTTCCCTAACTTTTTCCATCAAACAGGTCAAGGTAAAACATCTGACTCT  
GAATTTACAATGGATAACAGTTTATACGGTTTACCGCAAGGTTCTGCCTTTTCATTTAAAG  
GAGATAATACGTATCAGTCATTACCAGCAATTTTAGATCAAAAAGCAAGGCTACAAATCTG  
ATGTCATGCACGGTGACTATAAAACATTCTGGAACAGAGACCAAGTATATAAACACTTTG

GTATCGATAAATTCTATGATGCAACATACTATGACATGTCAGATAAAAACGTTGTAACT  
TAGGCTTGAAAGACAAAATTTCTTTAAAGATTCTGCTAATTATCAAGCTAAGATGAAAT  
CACCATTCTATTCTCATTTAATTACATTGACTAACCCTATCCATTCACATTAGATGAAAA  
GGATGCAACTATTGAGAAATCAAACACAGGTGATGCAACAGTTGATGGTTATATTCAAAC  
AGCACGTTATTTAGACGAAGCATTAGAAGAATATATTAATGACTTGAAGAAAAAAGGAT  
TATATGACAATTCAGTGATTATGATTTATGGTGACCCTATGGTATCTCTGAAAACCATAA  
CAATGCCATGGAAAACTATTAGGTGAAAAAATCACACCGGCTAAATTTACAGATTTAAA  
CAGAACTGGTTTCTGGATTAATAATCCCTGGTAAATCTGGTGGTATCAATAATGAATATGC  
TGGTCAAGTCGATGTAATGCCAACAATTTTACATTTGGCTGGTATAGATACGAAGAACTA  
TTTAATGTTTCGGTACTGATTTATTCTCTAAAGGTCATAATCAAGTAGTTCATTGAGAAAT  
GGTGACTTTATAACAAAAGATTATAAATATGTTAATGGTAAGATTTATTCTAATAAAAAAT  
AATGAACTCATAACTACTCAACCAGCTGATTTGAAAAGAATAAAAAGCAAGTTGAAAA  
GGATCTCGAAATGAGTGACAACGTGCTTAATGGTGATTTGTTTAGATTCTACAAAAATCC  
AGACTTCAAAAAGGTAAATCCTTCGAAGTATAAATATGAAACAGGACCTAAAGCAAAT  
CTAAAAAATAA

> **recQ1**

Function: protein coding sequence; ATP-dependent DNA helicase (core genome, variable)

Best match: recQ1\_CC008\_NCTC8325\_CP000253.1[714259:716040] (completely identical)

Position: 021-contig\_267\_RC: 46130 ... 47912; Length: 1782 bp

Sequence:

ATGATGCAACAAACATTATCGCATTACTTTGGGTATGAAACGTTTCGACCAGGACAAGAA  
GAAATTATTAGCAAAGTATTAGACCATCGTAATGTGCTTGGTGTCTTACCAACTGGTGG  
GGTAAGTCTATATGCTATCAAGTACCAGGTTTATTGTTAGGTGGTACAACAATTGTAATA  
AGTCCACTAATATCATTAAATGAAAGATCAAGTGGATCAATTAAGCGATGGGAATTCAA  
GCTGCTTTTTTAAATAGTAGTTTGACTCAAAAAGAGCAACAACGTATTGAAAAAGCATT  
TCAAATGGAGAAATTCAATTTTTGTATGTTGCACCAGAACGATTTGAAAACCGATATTTT  
TAAATATGCTTCAGCGTATAAAGATTCCTTAGTCGCGTTTGATGAAGCGCATTGTATTT  
TAAATGGGGTCATGATTTGAGGCCGAGTTACCAAATGTTATTTCAAAGTATTTACGTT  
ACCTCAAGATTTTACAATAATAGCGTTGACAGCAACTGCCACGGTTGAAGTACAGCAAGA  
TATTAGAGAAAAGTTAAATATCGCTCAAACCTGATCAAATTAACGAGTACTAAGCGTAG  
AACTTAATTTTTAAAGTAAATCCTACTTATCAACGTCAAAAATTTATATTGGATTATATT  
AAAACACACGATGAAGATGCAGGTATTATTTATTGTTCTACACGTAAGCAAGTTGAAGAG  
CTTCAAGAAGCCTTAGAAAGTCAGAAAATTGAAAGTGTTATATATCATGCAGGTTTGAGC  
AATAAAGAAAGAGAAGAAGCGCAGAATGATTTCTTATTTGATCGTGTTAAAGTAGTCGTT  
GCTACAAATGCTTTTGGTATGGGTATTGATAAATCCAATGTACGCTTTGTTATTCATTATA  
ATATGCCTGGAGATTTAGAATCTTATTATCAAGAAGCGGGTCGTGCAGGTCGTGACGGGT  
TGAAAAGTGAATGTATTTTGTATTTAGCGAACGCGATATCAATTTACACGAGTATTTTAT  
AACAGTCTCTCAAGCTGATGATGACTATAAAGATAAAAATGGGCGAAAAGTTAACTAAAA  
TGATTCAATATACAAAAACAAAAAATGTCTAGAAGCAACAATTGTCCATTATTTTGAAC  
CGAATGAAAATTAGAAGAATGTGAACAATGTAGTAATTGTGTTCAACAAGATAAATCA  
TATAATATGACACAAGAAGCTAAGATGATTATTAGTTGCATCGCTCGTATGAAACAACAA  
GAGAGTTATAGTGTTATCATTCAAGTGTTAAGAGGAGAGTCAACAGATTATATTAAGTAT  
AAAGGTTATGACCAAATTTCAACCCATGGTTTAAATGAAAGGTTACACAACATCAGAATTA  
AGTCACTTAATAGATGAATTAAGATTCAAAGGGTCTTAAATGAAAATGACGAAATATTA  
ATGTGTGATACTTCAATTAATAAATACTCAGTAATGAAGTAGAAGTATTCACAACACCA  
TTTAAGCAAAAAGCGACTGAAAAAGTATTTATAAATACGGTTGAAGGGGTTGACCGAGT  
ATTATTCAGTCAGTTGGTAGAAGTTCGTA AAAAGTTAAGTGACAAATTAACGATAGCACC  
TGTAAGTATATTTTCTGATTACACGTTGGAGGAATTTGCTAAACGTAAGCCTGCTTCGAAA  
CAAGATATGATTAATATTGATGGCGTAGGTAGTTACAAATTA AACATTATTGTCCAGCA  
TTTTTAGAAACGATTCAAATTTATAAAGCCAAAGTATAG

> **opuBA**

Function: protein coding sequence; osmoprotectant ABC transporter/ATP-binding protein (core genome, constant)

Best match: opuBA\_CC008\_NCTC8325\_CP000253.1[716262:717239] (completely identical)

Position: 021-contig\_267\_RC: 48133 ... 49111; Length: 978 bp

Sequence:

```
GTGATTAAGTTTAAAAATGTAAC TAAGCGTTATGGCAAACATGTTGCTGTCGATAACATT
AGTTTCAATATTAATGAGGGTGAATTTTTTTGTGCTAATTGGACCTTCAGGTTGTGGAAAAA
CTACGACATTA AAAATGATTAATCGACTCATTCACTTAAGTGAAGGTTATATTTATTTAA
AGATAAACCAATAAGTGATTATCCAGTATACGAAATGCGTTGGGATATTGGATACGTATT
GCAGCAGATTGCATTATTCCCACATATGACAATCAAAGAAAATATTGCACAAGTGCCACA
AATGAAAAAGTGGAAAGAAAAAGATATAGATAAAAGAGTAGATGAATTACTTGAAATGG
TTGGATTAGAACCTGAAAAATATAAAAACAGAAAACCTGATGAATTGTCAGGGGGGCAA
CGACAACGTGTAGGAGTTATACGTGCGTTAGCAGCTGATCCACCAGTTATTTTAATGGAT
GAACCGTTT TAGTGATTAGACCCAATCAGCCGAGAAAACTTCAAGATGATTTAATTGAA
TTACAAACTAAAATTAAGAAGACAATCATATTTGTTACACATGATATTCAAGAGGCGATG
AACTTGGTGATAAGATTTGTCTTTTGAATGAAGGGCATATTGAACAAATTGACACACCA
GAAGGATTTAAAAATAATCCTCAAAGTGAATTTGTTAAACAATTTATGGGTAGTCATTTA
GAAGATGATGCGCCATGTGTTGAAGAGAACGCAATTATCCGTGACTTGGATATTATGAAA
CCAATCGATGAGGTTACATCTATGAGCGCTTATCCAATTGTTTATGACAATCAACCAATTG
AAGTATTGTATCAACTTTTATCAGAGAGCGAGCGTGCATTGTCATGCAAGAAGATAGCG
TAGGTCAATATGTTATTGATAGGAAAGATATCTTCAAATATTTGTCCAGAAAAAGGAGG
TAGCTCAACATGACTAA
```

### > opuBB

Function: protein coding sequence; osmotically activated L-carnitine/choline ABC transporter/permease protein (core genome, variable)

Best match: opuBB\_CC001\_MW2-USA400\_BA000033.2[768952:770466]

Position: 021-contig\_267\_RC: 49103 ... 50618; Length: 1515 bp

Sequence:

```
ATGACTAACTTTTTCGACATATTGAGTGAACGTAAGGGGCAACTCTTTTCGACAATGATA
GAACATATTCAAATATCATTATCGCATTATTGATTGCAACTGCTATTGCGGTACCATTAG
GTATTTTATTAACGAAGACTAAAACGATATCTGAAATCGTAATGAATATTGCGGCAATTC
TTCAAACCATACCATCGTTGGCATTATTAGGTTTAATGATTCCTTTATTTGGTATCGGTCCG
TGTGCCAGCAATTATTGCACTTGTAGTGTATGCGTTGTTACCAATTTAAGGAATACGTAT
ACTGGAATTAAGAAGTTGATCCATCACTCATTGAAGCGGCTAAAGGTATAGGTATGAAA
CCATTTAGACGTTTAACTAAAGTCGAACTTCCGATAGCAATGCCTGTTATAATGGCTGGT
GTAAGAACGGCTATGGTATTAATTATAGGTACAGCAACACTAGCAGCATTAAATTGGTGCA
GGCGGACTAGGAGATTTAATTTTATTAGGTATAGACCGTAACAATGCATCGTTGATATTA
TTAGGTGCAATTCCAGCAGCCTTATTGGCAATTATATTTGATTTAATTTAAGATTTATGG
CTAAATTATCTTATAAAAAGTTATTGATGACGTTAGGTGTTATAGTGATGATTATTATACT
GGCTATCGCTATTCCTATGTTTGCACAAAAGGTGATAAAATTACGTTAGCTGGAAAGCT
TGGCTCCGAGCCTTCGATTATTACAAATATGTATAAAATTTAATAGAAGAAGAGACCAA
AAATACTGTAGAAGTGAAAGATGGTATGGGGAAAACAGCATTTTTATTTAATGCTTTAAA
ATCTGATGATATAGATGGGTATTTAGAGTTTACTGGAACAGTTTTAGGTGAATTAACAAA
AGAACCATTGAAGTCAAAAAGAAGAGAAAAAAGTTTATGAACAAGCTAAGCAAAGTCTTG
AAAAGAAATATCAAATGACTATGTTAAAACCAATGAAGTATAACAATACGTATGCTTTAG
CTGTAAAACGTGATTTTGTCTAAACAACATAATATACGTACAATTGGTGATTTAAATAAGG
TTAAAGATCAACTTAAACCAGGATTTACATTGGAATTTAATGATCGTCCAGATGGTTACA
AAGCTGTTCAAAGGCTTATAATTTAAATTTAGATAACATACGTACAATGGAACCTAAGT
TGAGATATCAAGCGATCAATAAAGGTAATATTAATTTAATAGATGCATATTCAACTGACG
CTGAATTAACAATATGATATGGTTGTGTTAAAAGATGATAAGCACGTATTTCCACCAT
ATCAAGGAGCACCATTATTTAAAGAAAGCTTTTTAAAGAAACATCCAGAAATTAAGAAA
CCGTTAAACAACACTAGAAAACAAAATATCTGATGAAGATATGCAAATGATGAACTATAA
AGTAACAGTTAAAAATGAAGACCCATATACAGTTGCGAAAGATTATTTAAAAGCAAAG
GGTTAATCAAATAA
```

### > hisC2

Function: protein coding sequence; histidinol-phosphate aminotransferase locus 2 (core genome, variable)

Best match: hisC2\_CC007\_TCH959-USA300\_AASB02000218.1[163415:164473] (completely identical)

Position: 021-contig\_267\_RC: 50857 ... 51916; Length: 1059 bp

Sequence:

```
ATGAAAGAACAACCTTAATCAACTATCAGCATATCAGCCTGGTTTATCTCCAAGGGCATTG
AAAGAAAAGTATGGCATTGAAGGAGATTTATATAAACTTGCATCAAATGAAAATTTGTAT
GGACCATCGCCTAAAGTTAAAGAAGCGATATCAGCACACTTAGATGAGTTATATTATTAT
CCTGAAACAGGATCACCGACATTAAGAGCGGCGATTAGTAAACATTTAAATGTAGATCA
ATCACGCATTTTATTTGGTGCGGGATTAGATGAAGTTATATTAATGATTTCTAGAGCTGTA
TTAACGCCAGGGGATACTATTGTTACAAGTGAAGCGACATTCGGTCAATATTATCACAAT
GCGATTGTTGAATCAGCTAATGTGATACAAGTACCTTTAAAGGTGGTGGCTTCGATTTA
GAAGGTATTTTAAAGAAGTTAATGAAGATACGTCATTGGTATGGTTATGTAATCCAAAT
AATCCTACAGGTACATATTTTAAATCATGAGAGCTTAGATTCGTTTTTATCTCAAGTACCTC
CACATGTACCAGTAATTATAGATGAAGCTTATTTTGAATTTGTGACAGCAGAGGACTACC
CGGATACACTTGCTTTGCAACAAAATATGACAATGCTTTCTTATTACGTACATTTTCAA
GGCGTATGGATTAGCGGGTTTACGTGTGGGATATGTGGTAGCAAGTGAACATGCGATTGA
AAAATGGAACATCATTAGACCACCATTTAATGTGACACGTATATCTGAATACGCAGCAGT
TGCAGCACTTGAAGATCAACAATATTTAAAAGAGGTAACACATAAAAATAGTGTTGAAC
GCGAAAGATTTTATCAATTACCTCAAAGTGAGTATTTCTTGCCAAGTCAAACGAATTTTAT
ATTTGTAAAAACAAAGCGGGTAAATGAACTTTATGAAGCACTTTTAAATGTAGGGTGTAT
TACGCGACCATTTCCAACCTGGTGTTAGAATTACAATTGGTTTTAAAGAACAAAATGATAA
AATGTTAGAAGTTTTATCAAATTTTAAATACGAATAG
```

### > **tx\_universal2**

Function: rho indendent terminator

Best match: tx\_universal2\_CC001\_MW2-USA400\_BA000033.2[1067981:1068021:r]RC

Position: 021-contig\_267\_RC: 51987 ... 52017; Length: 30 bp

Sequence:

```
TAGAATTGAAAAAAGCTTGTTACAAGCGCA
```

### > **tx\_universal2**

Function: rho indendent terminator

Best match: tx\_universal2\_CC007\_TCH959-USA300\_AASB02000023.1[4549:4580:r]RC

(completely identical)

Position: 022-contig\_262: 0 ... 32; Length: 32 bp

Sequence:

```
AAAAAGCTTGTTACAAGCGCATTTTCGTTTCAG
```

### > **STAR**

Function: Staphylococcus aureus repeat element

Best match: STAR\_CC008\_NCTC8325\_CP000253.1[721055:721280:r]RC (completely identical)

Position: 022-contig\_262: 875 ... 1101; Length: 226 bp

Sequence:

```
TGCGGGGCCCCAACATAGAGAAATTGGATTCCCAATTTCTACAGACAATGCAAGTTGGGG
TGGGCCCCAACATAAAGAAATACTTTTTCTTTAGAAATTAGTATTTCTTATGCATGAGTGT
AACTCATGCATTCATATTTTAAAGTACACATTAGCTGTGACTAATGATAAAGAATCGCTAC
ATAATCAATCATTAGTCGTTCTTTATCATTTCGGTCCCGCTCTC
```

### > **dgkA1**

Function: protein coding sequence; lipid kinase (core genome, constant)

Best match: dgkA1\_CC012\_21266\_AFTT01000025.1[69867:70784]RC (completely identical)

Position: 022-contig\_262: 1381 ... 2299; Length: 918 bp

Sequence:

TTACAAATCATTGACAGTAAGTAACTGAATGGCATTGTTGGTATAACCTCAATATCAATAGG  
TGTTTCTAATGAAATTCGCCATCAATATCAACTTTCATTGCTGGATCTGTTGTAAGTGAA  
ATCTTTTTACCAGGTATATGCTCAATACCTTGAGTAATTTTCATTCCAATTCATGCTATCAC  
GCTTTTTAAAAATATCATTAAAAATACTGAAACTTTGTTTCAATAAAAATGAAAGTGTTGAG  
TTCACCATCTTGAGGAGACAAATCAGTCAATGGTATACGACTACCACCAATGAATGGACC  
ATTTGCTGTTAGTATCATGGTCGTTTCGCCAGAATATGTCTTATCATCTATTGATAATTGA  
TAATTAATTTGTGTTGGATTTAGCAGTGTTTTGACAGTTGATCCAATATAACTCAATTTAC  
CAAATATATCTTTTGAACCATCTTGTACGTTTTTCAGCGTTTTGAACAATGAGACCTAAGCC  
AACAAAGTTGAGTGCATATTGATTATTTATTTAATTACATCGTATGTACCAACTTGTGCA  
GAAATCATTGTTCACTAGCTTGTATGATTAGGTGCTATATTTAGCGTTTTTGTAAAAT  
CATTAAGTACCGCCTGGTAAAATGCCAATAGGGAGTTGAAGGTCATGTGACATAACA  
CCATTTATAAGTTCGTTAACCGTGCCATCACCGCCAAGAATAAATAATATCTACATCTT  
TTGCATAGTTTTTGTATTTCTTGGCAATATTTAATAATGTCACCTTCGTTTTCACTC  
AATTGAATAGAAAGATGCTTACAAATTGAACTTAATGCTGTTGTAACCTCCCAATACCTT  
GATTAATATTTTTAATCCACTGTGTTTCATGGTAAAAGAGGACACCATGTGTATATTTATT  
TTCCAT

### > **queF**

Function: protein coding sequence; NADPH-dependent 7-cyano-7-deazaguanine reductase (core genome, variable)

Best match: queF\_CC001-ST772\_118\_AJGE01000051.1[56341:56841:r]RC (completely identical)

Position: 022-contig\_262: 4413 ... 4914; Length: 501 bp

Sequence:

TTAACGATTATCTATTTTTTCGGGATATAAATCATGATTCATCAAACGATGCTCAGCCATT  
TTTTCATATTTAGAATTTGGACGTCCATAGTTTGTATAAGGATCAATAGAAATTCACCAC  
GTGGTGTGAACTTGCCCCAGACTTCAATATAATGTGGGTCCATAAGCTCTATCAAATCATT  
CATAATAATATTCATAACAATCTTCGTGAAAATCACCGTGATTTCTGAAACTAAATAAGTA  
TAATTTCAAAGATTTTGATTCAACCATTTAACATTTGGAATATATGAAATATAGATAGTT  
GCAAAATCTGGTTGCCAGTAATTGGACATAATGATGTAAATTCTGGACAGTTGAATTTT  
ACGAAATAGTCACGACCTTGATGCTTATTATCAAACGATTCTAATACATCAGGACGGTAG  
TCGAAATTGTAAGTATTGCTTTGATTTCCATAATAAGTTATATCTTGTAAATTCATCTTGTG  
ACGGCCATGTGCCAT

### > **Q5HHU3**

Function: protein coding sequence; putative integral membrane protein (core genome, constant)

Best match: Q5HHU3\_CC001\_MW2-USA400\_BA000033.2[776834:777700:r]RC

Position: 022-contig\_262: 4933 ... 5800; Length: 867 bp

Sequence:

TTATTTTTTTTATTATTTTGGCGTCTCGGCGTGCTTTTTCAAACATGTAATAACTTGCACCGA  
TAATAACGACGTAACCTAATGTTGCATAGAAATCTGGAGATTCTCCGAATAGAATAAATC  
CAAGTATTGCTGTGAAAATTATAGATGCATACGTAAAAATAGAAATATCTTTTGCGGCTG  
CAAACTATATGCTAAAGTAACACCAATTTGACCCACAGCGGCAGCTAAGCCAGCCCCTA  
ATAGATAAAGTATTTGCATCTGACTCATTGGTTCATAAGTATATGCAGTGAAAGGTATTA  
AAACGATGACAGAAAATAAGGAGAAGTAAAATACTATAGTATATGGTGCTTCTCTTGTAC  
TAAGTGCTCGAACACATGTATATGCTGATGCTGCAAAAATACCTGAGAATAAGCCAGCTA  
ATGATGGAATCATAGATGATGAAAATTCAGGTTTCACTATTAAGCATAACCTAAAATAG  
CAATTATCATTGCTGTTATTTGATACTTCTTACTTTTTCATGTAAGAAAACAATGCTTAAT  
AAAATCGTCCAGAAAGGATTGAGTTTCATTAATGAATCGGCATCACTAAGTACCATATGA  
TCAATGGCATAAATATTTAACAATACACCAATAAGTCCAAGTGTTGATCGTGTTATTAAT  
AAGGGTTGACTTGAAAGTCTGCCAAACATTGGCTGATGGTATTTATATATAAAAAATAAT  
GGAATAAACATTGCTACTAAGTTTCGTGCTAATGATTTTTGAAAAACAGGAAGGTCACCT  
GCAAGTCTGAAAAACACTGACATAAACTGAAACCAATAGCCGAAATTAANAATGGCAAT  
GATACCTTTTACTTTAGGATTCAA

### > **rnaIV**

Function: noncoding RNA regulatory RNA IV (core genome, variable)

Best match: rnaIV\_CC008\_NCTC8325\_CP000253.1[726391:726620] (completely identical)

Position: 022-contig\_262: 6210 ... 6440; Length: 230 bp

Sequence:

```
TAATATAGTGTGGTGAACGAAAAAGACACAATATCTTGTGTTTTGTATGCAAATGCTT
TATTTATGAAGAAATTACATTTAAAAGTAATTTAACACAGAAATTTAATAGTTATTATCA
ATTAATAGTCATATTTTTAGAAAATGTACTGAGCAAATGGAAGATATCCAATGATGTAAA
CACTACATATAGTGATTTTTATACATTCAACCCATATAAGCTACTATTTT
```

### > **nrdI**

Function: protein coding sequence; stimulator of ribonucleotide reduction

Best match: nrdI\_CC001\_MW2-USA400\_BA000033.2[778501:778899] (completely identical)

Position: 022-contig\_262: 6600 ... 6999; Length: 399 bp

Sequence:

```
ATGAAAATAATATATTTTTTCATTTACTGGAAATGTCCGTCGTTTTATTAAGAGAACAGAAC
TTGAAAATACGCTTGAGATTACAGCAGAAAATTGTATGGAACCAGTTCATGAACCGTTTA
TTATCGTTACTGGCACTATTGGATTTGGAGAAGTACCAGAACCCGTTCAATCTTTTTTAGA
AGTTAATCATCAATACATCAGAGGTGTGGCAGCTAGCGGTAATCGAAATTGGGGACTAA
ATTTTCGAAAAGCGGGTTCGCACGATATCAGAAGAGTATAATGTCCCTTTATTAATGAAGT
TTGAGTTACATGGAAAAACAAAGACGTTATTGAATTTAAGAACAAGGTGGGTAATTTTA
ATGAAAACCATGGAAGAGAAAAAGTACAATCATATTGA
```

### > **nrdE**

Function: protein coding sequence; ribonucleotide-diphosphate reductase alpha chain

Best match: nrdE\_CC001\_MW2-USA400\_BA000033.2[778862:780967]

Position: 022-contig\_262: 6961 ... 9067; Length: 2106 bp

Sequence:

```
ATGAAAACCATGGAAGAGAAAAAGTACAATCATATTGAATTAATAATGAGGTCACTAA
ACGAAGAGAAGATGGATTCTTTAGTTTAGAAAAAGACCAAGAAGCTTTAGTAGCTTATTT
AGAAGAAGTAAAAGACAAAACAATCTTCTTCGATACTGAAATCGAGCGTTTACGTTATTT
AGTAGACAACGATTTTTTATTTCAATGTGTTTGATATTTATAGTGAAGCGGATCTAATTGAA
ATCACTGATTATGCAAAATCAATCCCGTTTAATTTTGCAAGTTATATGTCAGCTAGTAAAT
TTTTCAAAGATTACGCTTTGAAAACAAATGATAAAAGTCAATACTTAGAAGACTATAATC
AACACGTTGCCATTGTTGCTTTATACCTAGCAAATGGTAATAAAGCACAAGCTAAACAAT
TTATTTCTGCTATGGTTGAACAAAGATATCAACCAGCGACACCAACATTTTTTAAACGCAG
GCCGTGCGCGTCGTGGTGAGCTAGTGTCAATGTTTCTTATTAGAAGTGGATGACAGCTTAA
ATTCAATTAACTTTATTGATTCAACTGCAAACAATTAAGTAAAATTGGGGGCGGCGTTG
CAATTAACTTATCTAAATTGCGTGCACGTGGTGAAGCAATTAAGGAATTAAGGCGTAG
CGAAAGGCGTTTTACCTATTGCTAAGTCACTGAAGGTGGCTTTAGCTATGCAGATCAAC
TTGGTCAACGCCCTGGTGTGCTGGTGTGTACTTAAATATCTTCCATTATGATGTAGAAGA
ATTTTTAGATACTAAAAAAGTAAATGCGGATGAAGATTTACGTTTATCTACAATATCAAC
TGGTTTAAATTGTTCCATCTAAATTCTTCGATTTAGCTAAAGAAGGTAAGGACTTTTATATG
TTTGCACCTCATACAGTTAAAGAAGAATATGGTGTGACATTAGACGATATCGATTTAGAA
AAATATTATGATGACATGGTTGCAAACCCAAATGTTGAGAAAAAGAAAAAGAATGCGCG
TGAAATGTTGAATTTAATTGCGCAAACACAATTACAATCAGGTTATCCATATTTAATGTTT
AAAGATAATGCTAACAGAGTGCATCCGAATTCAAACATTGGACAAATTAATGAGTAA
CTTATGTACGGAAATTTTCCAACACTACAAGAACTTCAATTATTAATGACTATGGTATTGAA
GACGAAATTAACGTGATATTTCTTGTAACCTGGGCTCATTAAATATTGTTAATGTAATGG
AAAGCGGAAAATTCAGAGATTCAGTTCCTGTTGATGGACGCATTAAGTGTGTGAGTG
ATGTAGCAAATATTCAAAATGCACCAGGAGTTAGAAAAGCTAACAGTGAATTACATTCA
GTTGGTCTTGGTGTGATGAATTTACACGGTTACCTAGCAAAAAATAAAATTGGTTATGAG
TCAGAAGAAGCAAAGATTTTGCAAATATCTTCTTTATGATGATGAATTTCTACTCAATCG
AACGTTCAATGGAAATCGCTAAAGAGCGTGGTATCAAATATCAAGACTTTGAAAAGTCTG
ATTATGCTAATGGCAAATATTTTCGAGTTCTATACAACCTCAAGAATTTGAACCTCAATTCGA
AAAAGTACGTGAATTATTCGATGGTATGGCTATTCCTACTTCTGAGGATTGGAAGAACT
```

ACAACAAGATGTTGAACAATATGGTTTATATCATGCATATAGATTAGCAATTGCTCCAAC  
ACAAAGTATTTCTTATGTTCAAATGCAACAAGTTCTGTAATGCCAATCGTTGACCAAATT  
GAACGTCGTACTIONTATGGTAATGCGGAAACATTTTACCCTATGCCATTCTTATCACCACAAA  
CAATGTGGTACTACAAATCAGCATTCAATACTGATCAGATGAAATTAATCGATTTAATTG  
CGACAATTCAAACGCATATTGACCAAGGTATCTCAACGATCCTTTATGTTAATTCTGAAAT  
TTCTACACGTGAGTTAGCAAGATTATATGTATATGCGCACTATAAAGGATTAATAACTACT  
TTACTATACTAGAAATAAATTATTAAGTGTAGAAGAATGTACAAGTTGTTCTATCTAA

> **nrdF**

Function: protein coding sequence; ribonucleotide-diphosphate reductase beta chain

Best match: nrdF\_CC001\_MW2-USA400\_BA000033.2[781085:782056] (completely identical)

Position: 022-contig\_262: 9184 ... 10156; Length: 972 bp

Sequence:

ATGATAGCTGTTAATTGGAACACACAAGAAGATATGACGAATATGTTTTGGAGACAAAAT  
ATATCTCAAATGTGGGTTGAAACAGAATTTAAAGTATCAAAGACATTGCAAGTTGGAAG  
ACTTTATCTGAAGCTGAACAAGACACATTTAAAAAAGCATTAGCTGGTTAACAGGCTTA  
GATACACATCAAGCAGATGATGGCATGCCTTTAGTTATGCTACATACGACTGACTTAAGG  
AAAAAAGCAGTTTATTCATTTATGGCGATGATGGAGCAAATACACGCGAAAAGCTATTCA  
CATATTTTCACAACACTATTACCATCTAGTGAAACAAACTACCTATTAGATGAATGGGTTT  
TAGAGGAACCCCATTTAAAATATAAATCTGATAAAATTGTTGCTAATTATCACAACTTT  
GGGGTAAAGAAGCTTCGATATACGACCAATATATGGCCAGAGTTACGAGTGTATTTTAG  
AAACATTCTTATTCTTCTCAGGTTTCTATTATCCACTATATCTTGCTGGTCAAGGGAAAAT  
GACGACATCAGGTGAAATCATTTCGTAAAATTCTTTTAGATGAATCTATTCATGGTGTATT  
ACCGGTTTAGATGCACAGCATTACGAAATGAACTATCTGAAAGTGAGAAACAAAAAGC  
AGATCAAGAAATGTATAAATTGCTAAATGACTTGTATTTAAATGAAGAGTCATACACAAA  
AATGTTATACGATGATCTTGGAACTCACTGAAGATGTGCTAAACTATGTTAAATATAATGG  
AAACAAAGCACTTTCAAACCTTAGGCTTTGAACCTATTTTGGAGAACGTGAATTTAACCC  
AATCATTGAGAATGCCTTAGATACAACAATAAAACCATGACTTCTTCTCAGTAAAAGG  
TGATGGTTATGTATTAGCATTAAACGTAGAAGCATTACAAGATGATGACTTTGTATTTGA  
CAACAAATAA

> **tnpIS431-06**

Function: protein coding sequence; transposase for IS431 (mobile element)

Best match: tnpIS431-06\_circ\_S-epidermidis\_GQ900381.1[43799:43807] (completely identical)

Position: 022-contig\_262: 9815 ... 9824; Length: 9 bp

Sequence:

ATGAACTAT

> **sstA**

Function: protein coding sequence; iron compound ABC transporter/permease protein (core genome, variable)

Best match: sstA\_CC008\_COL\_CP000046.1[819637:820608] (completely identical)

Position: 022-contig\_262: 10530 ... 11502; Length: 972 bp

Sequence:

ATGAAGTATTTATTAAAGGGAAATATTTTGCTTCTATTACTAATATTGTTGACAATTATTT  
CGTTGTTTCATAGGTGTGAGTGAACATCAATTAAGATTTACTACATTTAACTGAGTCACA  
GCGGAATATTTTATTCTCAAGCCGAATACCAAGGACGATGAGTATTTTAATTGCTGGAAG  
TTCGTTGGCTTTAGCAGGCTTGATAATGCAACAAATGATGCAAAAATAAGTTTGTAGTCC  
GACTACAGCTGGAACGATGGAATGGGCTAACTAGGTATTTAATTGCTTTATTGTTCTTT  
CCAACCGGTCATATTTTATTAAACTAGTATTTGCTGTTATTTGCAGTATTTGCGGTACGT  
TTTTATTTGTTAAAATCATTGATTTTATAAAAGTGAAAGATGTCATTTTTGTACCGCTTTA  
GGAATTATGATGGGTGGGATTGTTGCAAGTTTCACAACCTTCATCTCATTGCGCACGAAT  
GCTGTTCAAAGCATTGGTAACTGGCTTAAACGGGAACCTTTGCCATTATCACAAAGTGGACGC  
TATGAAATTTTATATTTAAGTATTCCTCTTTTAGCATTGACATATCTTTTTGCTAATCATT  
CACGATTGTAGGAATGGGTAAAGACTTTACTAATAATTTAGGTTTGAGTTACGAAAAATT



AATTAACATCGCATTGTTTATTACTGCAACTATTACAGCATTGGTAGTGGTACTGTTGGA  
ACATTACCGTTCTTAGGACTAGTAATACCAAATATTATTTCAATTTATCGAGGTGATCATT  
TGAAAAATGCTATCCCTCATACGATGATGTTAGGTGCCATCTTTGTATTATTTTCTGATAT  
AGTTGGCAGAATTGTTGTTTATCCATATGAAATAAATATTGGTTTAAACAATAGGTGTATTT  
GGAACAATCATTTTCCTTATCTTGCTTATGAAAGGTAGGAAAAATTATGCGCAACAATAA

> **sstB**

Function: protein coding sequence; iron compound ABC transporter/permease (core genome, variable)

Best match: sstB\_CC005\_N315\_BA000018.3[787998:788954] (completely identical)

Position: 022-contig\_262: 11488 ... 12445; Length: 957 bp

Sequence:

ATGCGCAACAATAATAAAAAATAATGCTTTTAATTGCAGTAACGTTATTAATTAGTATG  
CTGTACTTATTTGTAGGTATTGATTTTGAAATATTTGAATATCAATTTTCAAGTCGTTTAA  
GAAAGTTCATATTAATTATTTTAGTAGGTGCTGCCATTGCAACTTCAGTGGTGAATTTTCA  
AGCGATTACAAATAACCGTCTATTGACACCATCAATAATGGGGTTAGATGCAGTTTATTT  
ATTTATCAAAGTATTGCCAGTCTTTTTATTTGGAATTCAATCGGTATGGGTTACTAATGTA  
TATTTGAACTTTATATTAACACTTATAACGATGGTGTATTTCGCACTAATCCTATTCCAAG  
GTATCTTTAAAATTGGACATTTTTCAATTTATTTTATCTTACTTATTGGTGTCTTTTTAGGA  
ACATTTTTTAGAAGCATAACAGGTTTTATTCAACTGATTATGGATCCTGAGTCATTTTTAG  
CAATACAAAGTAGTATGTTTGCTAATTTAATGCTTCTAATTCGAATTTAGTTACTTTCTC  
AGCAGTGCTATTAGTAATCTTATTAGTCATTACAATTTTACTATTGCCTTATTTAGATGTAT  
TGCTTTTAGGTCGTGCTGAAGCAATTAATCTTGGGATATCGTATGAAAAATTAACGCGAA  
TTCTACTTGTAATAGTCTCAGTTTTAGTTTCTGTGTCAACTGCATTAGTAGGACCAATTAC  
ATTTTTAGGTTTATTAACTGTAAATCTAGCGCATGAACTAATGAAGACGTATGAACATAA  
GTATATTTAATTGCGACAATTTGCTTGAGTTGGATTAGTTTATTTAGTGCGCAATGGGTA  
GTTGAAAATGTGTTTGAAGCTACGACAGAAATGAGTATACTTATTGATTTGATTGGTGGA  
AGTTATTTCATTTATCTATTAGTTAGAAGGAGAAATGCGCAATGA

> **sstC**

Function: protein coding sequence; ABC transporter ATP-binding protein (core genome, variable)

Best match: sstC\_CC001\_MW2-USA400\_BA000033.2[784675:785436] (completely identical)

Position: 022-contig\_262: 12441 ... 13203; Length: 762 bp

Sequence:

ATGATTCAAGTTGAAAATTTAACTAAAACCTATAAATAATCAAATGATATTGGAAGATATT  
AGCATAGATATCGAAAAAGGTAAATTGACTTCTTTAATTGGACCTAATGGTGCGGGTAAG  
AGTACTTTACTTTACGCGATATGTAGGTTAATTCGTTTTGATAACGGTGAAGTGAANAATA  
GATGGACAGCTCATGTCTGATTATAAAAATAATGACTTGTGCAAAAAAATATCTATATTA  
AAACAAACAAACCATACTGAAATGAATATTACGGTAGAGCAGTTGGTAAACTTTGGACG  
ATTCCCTTATTCTAAAGGTCGTTTGACGAAAGAGGATCATGATATTGTCAATGATGCGCT  
AGATTTGTTGCAACTACAAGATATCAGAAATCGTAATATTAAGTCATTATCTGGTGGACA  
ACGTCAGCGTGCATACATTGCAATGACAATAGCACAAGATACTGAATATATTTTGCTAGA  
TGAACCATTAAATAATTTAGATATGAAGCATGCTGTTCAAATTATGCAAACGTTAAAAAT  
GTTAGCGCATAAAATGAATAAAGCGATTGTCATTGTGTTACATGATATTAACCTTTGCGTCC  
TGTTATTCAGATCAGATTGTAGCATTGAAAAACGGACAACCTAGTTAAGTCAGATTTGAAA  
GATAATGTCATTCAAAGTAGTGTTTTAAGTGATTTATATGACATGAATATTCAAATTGAAC  
ATATAAGAAATCAAAGGATTTGTTTATATTTAAGGATTGA

> **sstD**

Function: protein coding sequence; ferrichrome ABC transporter lipoprotein (core genome, variable)

Best match: sstD\_CC001\_MW2-USA400\_BA000033.2[785555:786583] (completely identical)

Position: 022-contig\_262: 13321 ... 14350; Length: 1029 bp

Sequence:

ATGAAGAAAACAGTCTTATATTTAGTATTAGCAGTAATGTTTTTATTAGCGGCATGCGGT  
AACAATTCTGATAAAGAACAATCAAAATCAGAACTAAAGGTTCTAAAGATACAGTAAA  
AATTGAAAATAACTATAAAATGCGTGGCGAGAAAAAAGATGGTAGTGACGCTAAAAAAG

TTAAAGAACTGTTGAAGTACCAAAAAATCCTAAAAATGCAGTTGTGTTAGACTATGGCG  
CATTAGATGTAATGAAAGAAATGGGCTTATCAGATAAAGTAAAAGCATTACCTAAAGGG  
GAAGGCGGTAAGTCATTACCGAATTTCTTAGAATCATTTAAAGATGATAAATATACAAAC  
GTTGGTAATTTAAAAGAAGTGAATTTTGATAAAATTGCTGCGACGAAACCCGAAGTAATC  
TTTATCTCTGGACGTACAGCTAATCAAAAAGAATTTAGATGAATTCAAAAAAGCTGCACCT  
AAAGCGAAAATTGTTTATGTTGGTGCAGATGAAAAGAAGCTTAATTGGTTCAATGAAACAA  
AACACTGAAAATATCGGTAAAATTTACGATAAAGAAGATAAAGCTAAAGAATTAATAAA  
AGATTTAGATAACAAAATTGCTTCAATGAAAGATAAAAACGAAAAACTTCAATAAACTG  
TTATGTATTTACTAGTTAACGAAGGTGAATTATCAACATTTGGACCTAAAGGTCGTTTTGG  
TGGATTAGTTTACGATACATTAGGATTCAATGCAGTTGATAAAAAAGTAAGTAATAGCAA  
TCATGGACAAAATGTTTCTAACGAATATGTTAATAAAGAAAATCCAGATGTTATTTTACG  
GATGGATAGAGGTCAAGCGATAAGTGGTAAATCAACTGCGAAACAAGCATTAAATAATC  
CTGTATTA AAAAATGTTAAAGCAATTAAGAAGACAAAGTATATAATTTAGATCCTAAAT  
TATGGTACTTTGCAGCTGGATCAACTACAATTAACAAATTGAGGAACTTGATA  
AAGTTGTA AAAATAA

### > **murB**

Function: protein coding sequence; UDP-N-acetylenolpyruvylglucosamine reductase (core genome, constant)

Best match: murB\_CC001\_MW2-USA400\_BA000033.2[787232:788155:r]RC (completely identical)

Position: 022-contig\_262: 14998 ... 15922; Length: 924 bp

Sequence:

TTACGATTCCTTTGGATGTTACCAATAATGCGAACTTCACGATTTAATTC AATGCCAAAT  
TTTTCTTTGACGGTCTTTTGTACATAATGAATAAGGTTTTTCATAATCTGTAGCAGTTCCATT  
GTCTACATTTACCATAAAACCAGCGTGTTTAGTTGAACTTCAACGCCGCAATACGGTG  
ACCTTGCAAATTAGAATCTTGTATCAATTTACCTGCAAATGACCAGGCGGTCTTTGGAA  
TACACTACCACATGAAGGATACTCTAAAGGTTGTTTAGATTCTCTACGTTCTGTAAATCA  
TCCATTTTAGCTTGTATTTACAGTCATTTTACCAGGAGCTAAAGTAAATGCAGCTTCTAATA  
CAACTAAGTGTTCTTTTTGAATAATGCTATTACGATAATCTAACTCTAATTCTTTTGTGTA  
AGTTTAATTAACGAGCCTTGTTTCGTTTACGCAAAGCGCATAGTCTATAACAATCTTTAACTT  
CGCCACCATAAGCGCCAGCATTATATACACTGCACCACCGATTGAACCTGGAATACCAC  
ATGCAAATTC AAGGCCAGTAAGTGCGTAATCACGAGCAACACGTGAGACATCAATAATT  
GCAGCGCCGCTACCGGCTATTATCGCATCATCAGATACTTCGATATGATCTAGTGATAAT  
AACTAATTACAATGCCACGAATACCACCTTCACGGATAATAATATTTGAGCCATTTCT  
AAATATGTAACAGGAATCTCATTTTGTAGGCATATTTAACA ACTGCTTGTACTTCTTCAT  
TTTTAGTAGGGGTAATATAAAAGTCGGCATTACCACCTGTTTTAGTATAAGTGTATCGTTT  
TAAAGGTTCACTAACTTTAATTTTTTTCATTTGGGATAAGTTGTTGTAAGCTTGATAGATG  
TCTTTATTTATCAC

### > **pepT**

Function: protein coding sequence; peptidase T (core genome, variable)

Best match: pepT\_CC001\_MW2-USA400\_BA000033.2[792003:793229:r]RC

Position: 022-contig\_262: 19774 ... 21001; Length: 1227 bp

Sequence:

TTAGTGATTTTCAGCGATATCTTCTACAATCCAATGATTACTTGTACTGCTTTTTCCATAA  
CATCAATGGATGCATATTCATATGGGCCGTGGAAGTTACCGCAACCTGTAAAGATGTTTG  
GAGTTGGTAACCCATAAATGACAATTGTGAACCATCTGTACCACCACGAATAGGTTTCAG  
TGTTTGCTGGAATATCTAATTTGGCAAAGACACGTTTAGGTATATCAATAATATGAGGCA  
ATGGTAATATTTTTCTGCCATATTGAAATATTGATCCGATATATCAACTTTAACTGGATA  
ATTTTCAAATGGGAATTGATATCGTCACGATTTCTAAAATACGTTTCTTACGCAATTTCG  
AATTGTTTTTATCATGATCACGAATAATGTATTGCAAAGTTGCTTTTTTCAACAGTTCCTTC  
AAAGTTCATTAAGTGATAAAAGCCTTCGTATCCTTCTGTTTCGCTCCGGA ACTTCACTATCA  
GGTAGCAA ACTATCGAATTGTTACCTAAACGTATTGCGTTTACCATTGCATTTTTAGCTG  
AACCAGGATGAACATTTACACCGTGGCATGTAATAACCGCTTCAGCAGCGTTAAAGCTTT  
CATATTGTAATTCTCCATATTGACTACCATCCATAGTATAAGCAAATCAGCATTGAAGC

GGTCAACATCAAATTTATGTGGACCACGACCGATTTCTTCGTCTGGTGTAAATCCAATGC  
GAATGGTACCATGTTTAATTTCTGGATGTTCTTGTAATAACAAATAGCTTCCATAATTTCC  
CACAATACCCGCTTTATCGTCTGCACCTAGTAACGATGTACCATCAGTTACCATTAATGTG  
TGACCAACTAACTGTTAAGTTCTGGAAATACTTTAGGATCTAAGACACGTTTAGTATTG  
CCTAGTTTGTATGGCTTACCATCATAGTTTTCAATAATTTGCGGTTTAACATTTGAAGCAT  
TGAAATCAGGTGATGTATCAACATGCGCCAAAAATCCAACCTGTTGGGACGTCGACATCGA  
TGTTACTTTCTAATGTAGCAAATAAGTAGCCATTTTCATCTAAATCAGTTGGCAATCCTAA  
TTGTTGTAATTTCTTTTCTAATAAATGTAACAAATCCCATTGCTTTTCAGTTGAAGGTGTTG  
TTGTAGATTTTGGATCAGATTGCGTATCAATTGTCGTATATCTTGTTAATCTATCTATCAAT  
TGGTTCTTCAT

### > **gdpS**

Function: protein coding sequence; membrane bound diguanylate cyclase GGDEF domain-containing protein (core genome, constant)

Best match: *gdpS*\_CC001-ST772\_118\_AJGE0100051.1[74411:75481:r]RC (completely identical)

Position: 022-contig\_262: 22483 ... 23554; Length: 1071 bp

Sequence:

TTATAAATTGATAATAGGGTTAAACATTACTTTGTTTCGCCCTTGATTTTTGGCTACATGC  
ACCATATCGTCTGCATCTTTAAACACTTTACGCTGTGATTTTGGATCGTCATCTGTAAAT  
AACCAACACCGATAGACACTGACAATTTAATAACTTCTTTGTTTGGTAAATGGAATGATG  
ATTTTTCAACACCCGAACGAATATTTTCAGCCAATTTAACACTTTGATCAAGTGAATAATT  
GTGAATGACAACCTGAGAACTCTTCGCCACCATTCTAAAAATTTTAAATTGATTCGGCAC  
ATAGTTTTTAAGTAATTGAGACATTTGTTTTAATACAGCATCACCTGATTTGTGTGAGTAG  
GTATCATTGACATCTTTAAATCCATCGATATCGATTAATAATAATGCGATACTTTGATGTT  
CTTTTTCAGCTTTTCGTGAAATTTCAATTTAAATGTCTATCAAATTTCTTTACATTACCTAAG  
CCTGTTAAGTAATCATATTTATCTTCGTTTTTCATAACGATTTACGAGTGAGAAGAAATGCC  
AAATATCGACAAATGTTATCGCTGAAGCTAAAGTGATAATTAATGAAATTGGTATTAATA  
TGATAACTTCCGATAGTGTGTAATAAGGACTCACTAACGCGACACCAAATAAAATGATTA  
TTGTAACAACATTAAGTATTAATAATGATAGCACATCATTTTGTTTTAAAAATGGTCCAAT  
AGCACTTGTTACTGCAGCAATAACAATCAACGTAACACCGTACATAATCGAGTTGTAAAA  
TACTACAATTTCAACAATTGCTACAATTACTGTGGCAGATAATGTATAGACCATATTTGTA  
AATCTACCTAAAAACAATAAAGGAACGAATGTTAAGTGAATTAATAAATCTTCACGATAA  
GGATAGGGTAGACAGATAATAATAATGATACGATTGTCATTAACAGTGACATAAAGC  
CTTAGAAAAAACCATACGTTTTGTTTTCTGAATACTGTAAGCGATGGAATAAATAGATTCC  
AGCGACTATAACAGATATATTGTATATAAATGCTTCGAACAT

### > **tarO**

Function: protein coding sequence; N-acetylglucosamine-1-phosphate transferase (core genome, variable)

Best match: *tarO*\_CC008\_NCTC8325\_CP000253.1[744387:745442] (completely identical)

Position: 022-contig\_262: 23871 ... 24927; Length: 1056 bp

Sequence:

ATGGTTACATTACTAGTTGCAGTAACAATGATTGTCAGTTTGACGATAACACCAATTG  
TTATTGCAATATCGAAAAGATTAATTTAGTTGATAAACCAAATTTTAGAAAAGTACACA  
CTAAACCTATTTAGTTATGGGTGGTACAGTGATTCTTTTTCATTTTTAATAGGTATTTGG  
ATTGGTCATCCTATTGAAACAGAAATCAAACCACTTATTATTGGTGCATTATTATGTACG  
TACTTGGGCTTGTAGATGATATCTACGATTTGAAACCGTATATAAAATTTGGCTGGTCAA  
TTGCCGCTGCCTTAGTAGTTGCTTTTTATGGTGTGACTATTGATTTTATTTGTTGCCAATG  
GGTACAACGATTCATTTTGGATTTCTTAGTATTCCAATTACTGTGATTTGGATTGTTGCTAT  
TACAAATGCAATTAACCTAATTGATGGACTCGATGGTTTGGCGTCGGGTGTTTCTGCAATC  
GGACTCATTACAATAGGGTTCATTGCAATTTTACAAGCTAATATTTTCATAACGATGATTT  
GTTGTGTTTTATTAGGCTCTTTAATTGGGTTTTTATTTTACAATTTCCATCCTGCCAAAATA  
TTTTTAGGTGATAGTGGGGCTTTAATGATTGGATTTATCATCGGATTCCTTTCTTTACTCGG  
ATTCAAAAATATTACAATTATTGCATTGTTCTTCCCAATTGTTATCTTAGCAGTTCCATTCA  
TTGATACTTTGTTTCGAATGATTCGACGTGTGAAAAAAGGGCAGCATATAATGCAAGCTG

ATAAATCGCATTTCATCATAAACTATTAGCTTTAGGCTACACACATAGACAAACAGTAT  
TATTAATCTATTCAATCTCTATTTTATTTAGTCTTTTCGAGCATTATTTTGTATGTATCGCCA  
CCATTAGGTGTTGTATTAATGTTTGTATTAATCATATTTAGTATTGAATTAATTGTTGAATT  
TACAGGATTAATAGATAACAACACTACCGACCAATATTAATTTAATTAGTCGTAAGTCATC  
TCATAAAGAGGAATAG

### > **comFA**

Function: protein coding sequence; type II DNA/RNA helicase (core genome, constant)

Best match: comFA\_CC008\_A5948\_ACKD01000058.1[123307:124389]

Position: 022-contig\_262: 27111 ... 28194; Length: 1083 bp

Sequence:

ATGGATAATGTAACAAGATATAAAAATAACAGAGAGTTTCGCAAAGTTCATCACAAGCATA  
TTATCATCTCTCATTTGAATTGTCGGAACAGCAGTCTTATGCCTCAGAACATATTGTTTCGA  
GCCATTAGAAAGAGACAAACGATTTTGTATATGCCGTAACAGGTGCAGGTAAGACAGA  
AATGATGTTTCAAGGCATTCAATATGCAAGAATACAGGGAGATAATATAGCTATTGTGTC  
ACCACGTGTAGATGTTGTTGTAGAAATTAGTAAACGTATTAAGACGCATTTCTTAATGA  
AGATATAGACATACTACACCAGCAATCAAGACAACAATTTGAAGGGCATTTTGTGTTGATG  
CACAGTGCATCAACTTTACCGATTCAAACAGCACTTTGATACTATTTTATTGATGAAGTC  
GATGCCTTTCCTTATCAATGGATAAAAATCTACAACAAGCATTGAAGTCATCTTCTAAA  
GTTGAACATGCAACAATTTATATGACAGCAACACCACCGAAACAATCTCTGTCAGAGATT  
CCCCACGAAAATATAATTAATTGCCAGCTCGCTTTCATAAAAAATCACTTCCAGTTCCTA  
AATATCGTTATTTCAAACCTTAATAATAAGAAGATTCAGAAAATGTTATACCGAATTTTAC  
AAGATCAAATTAATAATCAACGTTATACACTGGTGTTTTTTAACAATATAGAAACAATGA  
TTAAAACATTTTCGGTTTATAAGCAGAAAATTACTAAATTAACATACGTCCATAGCGAGG  
ATGTTTTTCGCTTTGAAAAAGTTGAACAATTAAGGAATGGACATTTTCGATGTCATTTTTAC  
TACGACAATATTAGAACGTGGATTTACAATGGCAAATTTGGATGTTGTTGTTATCGATGC  
ACATCAATATACTCAAGAGGCTTTAATACAAATTTGCTGGACGTGTTGGACGAAAATTAGA  
ATGTCCTACTGGAAAAGTATTGTTTTTCATGAAGGGGTAAGTATGAATATGATTCAAGC  
TAAAAAAGAGATTCAAAGGATGAACAAATTAGCATTAAAAAAGAGGTTGGATTGATGAAT  
AA

### > **comFC**

Function: protein coding sequence; type II DNA/RNA helicase (core genome, constant)

Best match: comFC\_CC001\_MW2-USA400\_BA000033.2[800414:801091] (completely identical)

Position: 022-contig\_262: 28183 ... 28861; Length: 678 bp

Sequence:

TTGATGAATAATTGTTTGAGTTGTGGTGCTAAGTTATATGAAAATATAACCATTTATAATT  
TGTTCAAGAAACCTAATAGATTATGTGACAGATGCAAAGAGAATTGGGACAATATTTAAA  
CTTGATATTAAGCAAGGCGATGTTCAAGGTGCTTAAACACTTAAATCAAGATGAAGCG  
TATTGTTTACTGCAAGTTTCTATCGGCACACTTTAATTTAATGGAACAATTATATTGTC  
AATTTCAATATGACGGTTTAAATGAAAGAGATGATACATCAGTATAAATTTTTGAAAGACT  
ATTATTTATGTGAATTATTGGCACATTTGATTGAAATACCACAAACATCTTATGACTATAT  
TGTGCCAATTCCTTCTTCGCCGGCACATGATTTATCTAGAACATTTAACCCGGTAGAAGCA  
GACTAAAAGCTAAAGGGATTTCGCTTTGATAAGATTTTAAAGATGTCAAATAGACCAAAA  
CAGTCTCATTTAACTAAGAAAGAGCGTCTGGCAGATGAAAATCCATTTATTATTGATACG  
GAATTAGATTTAAATGGCAAGGAAATATTACTCGTTGACGATATTTATACAACCTGGATTA  
ACAATTCATCGTGCAGGGTGTAATTATATGCTAAAAATATCAGAAAATTCAAAGTGTTT  
GCGTTTGCACGATAG

### > **yfiA**

Function: protein coding sequence; sigma-54 modulation protein (core genome, constant)

Best match: yfiA\_CC001\_MW2-USA400\_BA000033.2[801152:801724] (completely identical)

Position: 022-contig\_262: 28921 ... 29494; Length: 573 bp

Sequence:

ATGATTAGATTTGAAATTCATGGAGATAACCTCACTATCACAGATGCTATTCGCAACTAT  
ATTGAGGAAAAAATTGGTAAGTTGGAACGTTATTTTAATGACGTACCAAATGCAGTGGCG  
CATGTTAAAGTTAAAACCTTATTCAAATTCAGCTACTAAAATTGAAGTAACAATTCATTG  
AAAAATGTTACGTTAAGAGCTGAAGAGCGAAACGATGATTTATACGCAGGTATTGATTTA  
ATTAATAATAAACTTGAAAGACAAGTTCGAAAATATAAAACACGTATTAATCGTAAGAG  
CCGTGATCGAGGAGATCAAGAAGTGTTTGTGCCGAATTACAAGAAATGCAAGAAACAC  
AAGTTGATAATGACGCTTACGATGATAACGAGATAGAAATTATTCGTTCAAAAAGAATTCA  
GCTAAAACCAATGGATTGAGAAGAAGCGGTATTACAAATGAATCTATTAGGTCATGACT  
TCTTTGTATTCACAGACAGAGAACTGATGGAACAAGTATCGTTTACCGCCGTAAGACG  
GTAAATATGGCTTGATTCAAACACTAGTGAACAATAA

> **secA1**

Function: protein coding sequence; preprotein translocase subunit secA1 (core genome, variable)

Best match: secA1\_CC001-ST772\_118\_AJGE01000051.1[81835:84366] (completely identical)

Position: 022-contig\_262: 29907 ... 32439; Length: 2532 bp

Sequence:

ATGGGATTTTTATCAAAAATTCCTTGATGGCAATAATAAAGAAATTAACAGTTAGGTAAA  
CTTGCTGATAAAGTAATCGCTTTAGAAGAAAAAACGGCAATTTTAACTGATGAAGAAATT  
CGTAATAAAACGAAACAATTCCAAACAGAATTAGCTGACATTGATAATGTCAAAAAGCA  
AAATGATTATTTAGATAAAAATTTTACCAGAAGCATATGCACTTGTTAGAGAAGGCTCTAA  
ACGTGTATTCAATATGACACCATATAAAGTTCAAATTATGGGTGGTATTGCAATTCATAA  
AGGTGATATCGCTGAGATGAGAACAGGTGAAGGTAAAACATTAACAGCGACAATGCCAA  
CATACTTAAATGCATTAGCTGGTAGAGGTGTTACGTTATTACAGTCAATGAATACTTATC  
AAGTGTTCAAAGTGAAGAAATGGCTGAGTTATATAACTTCTTAGGTTTGACTGTCGGATT  
AACTTAAACAGTAAGACGACAGAAGAAAAACGTGAAGCATACGCACAAGACATTACTT  
ACAGTACTAATAATGAGCTAGGTTTTGATTACTTACGAGATAACATGGTGAATTATTCTG  
AAGATAGAGTAATGCGTCCATTACATTTTGAATCATTGATGAGGTTGACTCAATTTTAAT  
CGACGAGGCACGTACGCCATTAATTATTTCTGGTGAAGCTGAAAAGTCAACATCACTTTA  
TACACAAGCAAATGTTTTTGCGAAAATGTTAAAACAGGACGAAGATTATAAATACGATG  
AAAAACGAAAGCCGTACATTTAACAGAACAAGGTGCGGATAAAGCTGAACGTATGTTT  
AAAGTTGAAAACCTTATATGATGTACAAAATGTTGATGTTATTAGTCATATCAACACAGCT  
TTACGTGCGCACGTTACATTACAACGTGACGTAGACTATATGGTTGTTGATGGCGAAGTA  
CTAATTGTCGATCAATTTACAGGACGTACAATGCCAGGCCGTCGTTTCTCAGAAGGTTTA  
CACCAAGCTATTGAAGCGAAGGAAGGCGTTCAAATTCAAAATGAATCTAAAACCTATGGC  
GTCTATTACATTCCAAAACCTATTTTCAAGATGTACAATAAACTTGCGGGTATGACAGGTAC  
AGCTAAAACCTGAAGAAGAAGAATTTAGAAATATTTATAACATGACAGTAACTCAAATTC  
GACAAATAAACCTGTGCAACGTAACGATAAGTCTGATTTAATTTACATTAGCCAAAAAGG  
TAAATTTGATGCAGTAGTAGAAGATGTTGTTGAAAAACACAAGGCAGGGCAACCAGTGC  
TATTAGGTACTGTTGCAGTTGAGACTTCTGAATATATTTCAAATTTACTTAAAAACGTGG  
TATCCGTCATGATGTGTTAAATGCGAAAAATCATGAACGTGAAGCTGAAATTGTTGCAGG  
CGCTGGACAAAAAGGTGCCGTTACTATTGCCACTAACATGGCTGGTCGTGGTACAGATAT  
CAAATTAGGTGAAGGCGTAGAGGAATTAGGCGGTTTAGCAGTAATAGGTACAGAACGCAC  
ATGAATCTCGTCGTATTGATGACCAGTTACGTGGTCGTTCTGGACGTCAAGGTGATAAAG  
GGGATAGTCGCTTCTATTTATCATTACAAGATGAATTAATGATTCGTTTTGGTTCTGAACG  
TTTACAGAAAATGATGAGCCGACTAGGTTTAGATGACTCTACCAATTGAATCAAAAAT  
GGTATCAAGAGCTGTAGAATCAGCACAAAACGTGTAGAAGGTAATAACTTCGACGCGC  
GTAAACGTATCTTAGAATACGATGAAGTATTACGTAAACAACGTGAAATTATCTATAACG  
AAAGAAATAGTATTATTGATGAAGAAGACAGCTCTCAAGTTGTAGATGCAATGCTACGTT  
CAACGTTACAACGTAGTATCAATTACTATATTAATACAGCAGATGACGAGCCTGAATATC  
AACCATTATCGACTACATTAATGACATCTTCTTACAAGAAGGTGACATTACAGAGGATG  
ATATCAAAGGTAAGATGCTGAAGATATTTTCGAAGTCGTTTGGGCTAAGATTGAAGCAG  
CATATCAAAGTCAAAAAGATATCTTAGAAGAACAATGAATGAGTTTGAGCGTATGATTT  
TACTTCGTTCTATTGATAGCCATTGGACTGATCATATCGACACAATGGATCAATTACGTCA  
AGGTATCACTTACGTTCTTATGCACAACAAAATCCATTACGTGACTATCAAAAATGAAGG  
TCATGAATTTTGTATATCATGATGCAAAAATATTGAAGAAGATACTTGTAATTCATTTTA  
AAATCTGTAGTACAAGTTGAAGATAATATTGAACGTGAAAAACAACAGAGTTTGGTGA

AGCGAAGCACGTTTCAGCTGAAGATGGTAAAGAAAAAGTGAAACCGAAACCAATCGTTA  
AAGGCGATCAAGTTGGTCGTAACGATGATTGTCCATGTGGTAGTGGTAAAAAATTCAAAA  
ATTGCCATGGAAAATAA

> **prfB**

Function: protein coding sequence; peptide chain release factor 2/programmed frameshift (core genome, constant)

Best match: prfB\_CC001\_MW2-USA400\_BA000033.2[804984:806094]

Position: 022-contig\_262: 32753 ... 33864; Length: 1111 bp

Sequence:

ATGGAATTATCAGAAATCAAACGAAATATAGATAAGTATAATCAAGATTTAACACAAATT  
AGGGGGTCTCTTTGACTTAGAGAACAAGAACTAATATTCAAGAATATGAAGAAATGA  
TGGCAGAACCTAATTTTTGGGATAACCAAACGAAAGCGCAAGATATTATAGATAAAAAT  
AATGCGTTAAAAGCAATAGTTAATGGTTATAAAACACTACAAGCAGAAGTAGATGACAT  
GGATGCTACTTGGGATTTATTACAAGAAGAATTTGATGAAGAAATGAAAGAAGACTTAG  
AGCAAGAGGTCATTAATTTAAGGCTAAAGTGGATGAATACGAATTGCAATTATTATTAG  
ATGGGCCTCACGATGCCAATAACGCAATTCTAGAGTTACATCCTGGTGCAGGTGGCACGG  
AGTCTCAAGATTGGGCTAATATGCTATTTAGAATGTATCAACGTTATTGTGAGAAGAAAG  
GCTTTAAAGTTGAAACTGTTGATTATCTACCTGGGGATGAAGCAGGGATTAAGGTGTAA  
CATTGCTCATCAAAGGGCATAATGCTTATGGTTATTTAAAAGCTGAAAAAGGTGTACACC  
GACTAGTACGAATTTCTCCATTTGATTCATCAGGACGTCGTCATACATCATTTGCATCATG  
TGACGTGATTCCAGATTTTAATAATGATGAAATAGAGATTGAAATCAATCCGGATGATAT  
TACAGTTGATACATTTAGAGCTTCTGGTGCAGGTGGTCAGCATATTAACAAAACCTGAATC  
AGCAATACGAATTACCCACCACCCTCAGGTATAGTTGTTAATAACCAAAATGAACGTTTC  
TCAAATTAACCAACCGTGAAGCAGCTATGAAAATGTTAAAGTCTAAATTATATCAATTA  
ATTGGAAGAGCAGGCACGTGAAATGGCTGAAATTCGTGGCGAACAAAAAGAAATTGGCT  
GGGGAAGCCAAATTAGATCATATGTTTTCCATCCATACTCAATGGTGAAAGATCATCGTA  
CGAACGAAGAAACAGGTAAGGTTGATGCAGTGATGGATGGAGACATTGGACCATTTATC  
GAATCATATTTAAGACAGACAATGTTCGCACGATTA

> **lysM**

Function: protein coding sequence; LysM domain protein (core genome, constant)

Best match: lysM\_CC001-ST772\_118\_AJGE01000051.1[86200:87039] (completely identical)

Position: 022-contig\_262: 34272 ... 35112; Length: 840 bp

Sequence:

ATGAAAAAATCTCTTACAGTGACGGTTTCGTCAGTGTTAGCTTTTTTTAGCTTTAAATAATG  
CAGCACATGCACAACAACATGGCACACAAGTAAAAACACCTGTTCAACATAATTATGTAT  
CAAATGTTCAAGCACAAACGCAATCACCGACAACCTTATACAGTAGTTGCTGGCGATTTCAT  
TATATAAGATTGCTTTAGAGCATCACTTAACGTTGAATCAATTATATTCATACAATCCTGG  
TGTAACACCTTTAATTTTTCTGGTGACGTGATTTCACTTGTGCCTCAAAAATAAAGTGAAA  
CAAATAAAGCGGTTAAATCACCAGTAAGAAAAGCAAGCCAAGCTAAAAAGGTAGTAAA  
ACAACCTGTACAACAAGCATCTAAAAAAGTAGTAGTTAAGCAAGCACCTAAGCAAGCAG  
TAACTAAGACAGTTAATGTAGCATACAACCTGCTCAAGTACAAAAATCAGTACCAACTG  
TACCTGTTGCACATAACTACAATAAATCAGTTGCTAACAGAGGAACTTATATGCTTATG  
GAACTGCACATATTATGCTTTTCGATCGTCGTCGACAAATTAGGTAGAAGTATAGGAAGTT  
TATGGGGCAATGCAAATAACTGGAATTACGCAGCAAAAGTTGCAGGATTTAAAGTAGAT  
AAAACACCAGAAGTTGGCGCTATTTTCAAACAGCTGCTGGCCCATATGGACATGTTGGT  
GTTGTTGAATCTGTAAACCCTAATGGAACAATTACTGTTTCTGAAATGAACTATGCTGGAT  
TTAATGTAAATCTTCAAGAACAATTTTAAATCCAGGAAAATATAATTACATCCACTAA

> **uvrB**

Function: protein coding sequence; ultraviolet response system protein B (core genome, constant)

Best match: uvrB\_CC008\_Newman\_AP009351.1[814429:816420]

Position: 022-contig\_262: 36431 ... 38423; Length: 1992 bp

Sequence:

GTGACAATGGTTGAACATTATCCTTTTAAAATACATTCTGATTTTGAGCCTCAAGGTGACC  
AACCGCAAGCAATTAAGAAATCGTGGAAGGTATTAAGCGGGGAAAAGACATCAAAC  
TTATTAGGTGCTACTGGCACAGGGAAAACATTTACGATGAGTAATGTTATTAAGAAGTT  
GGGAAACCAACGTTAATTATCGCGCATAACAAAACATTAGCAGGACAATTATATAGTGA  
GTTTAAAGAATTTTTTCTGAAAACAGGGTGAATACTTTGTAAGTACTATGATTATTAT  
CAACCAGAGGCATACGTACCGTCTACTGACACTTTTATTGAAAAAGATGCCTCAATCAAT  
GATGAAATTGATCAACTACGACATTCTGCTACAAGTGCATTATTTGAACGCGATGATGTA  
ATTATTATTGCTAGTGTAAAGTTGTATATATGGTTTAGGTAATCCTGAAGAATATAAAGATT  
TAGTAGTAAGTGTTCGAGTTGGTATGGAAATGGATAGAAGTGAATTACTTAGAAAACCTG  
TAGATGTGCAATATACACGAAATGACATCGATTTCCAACGAGGAACGTTTCGAGTGCGTG  
GTGATGTAGTGGAAATATCCAGCCTCTAAAGAAGAAGTTTGTATAAGGGTTGAGTTTT  
TCGGCGATGAGATTGACCGTATCCGAGAAGTTAACTACCTAACAGGTGAAGTGTGAAAG  
AAAGAGAACATTTTGCATATCCAGCTTCTCACTTCGTAACACGTGAAGAAAAGTTGA  
AAGTTGCGATTGAACGTATTGAAAAAGAATTGGAAGAACGATTGAAAGAATTACGAGAT  
GAGAATAAATTACTAGAAGCGCAAAGGTTAGAACAGCGTACCAACTATGATTTAGAAAT  
GATGCGAGAGATGGGATTCTGTTTCAAGGAAATTGAAAACCTATCCGTACATTTAACTTTGCG  
ACCACTGGGTTTCGACACCATATACTTTATTGGATTACTTTGGCGATGATTGGTTAGTAATG  
ATTGATGAATCACATGTGACATTACCGCAAGTTTCGAGGCATGTATAACGGGAGACAGAGC  
GCGTAAACAAGTTTTGGTGGATCATGGGTTTAGATTACCGAGTGCATTAGATAACCGTCC  
ACTTAAATTTGAAGAATTTGAAGAAAAGACAAAACAACCTGTGTATGTATCTGCAACGCC  
TGGACCATACGAAATTGAACATACGGATAAGATGGTTGAACAAATTATTCGTCCTACTGG  
TTTACTGGATCCTAAGATTGAGGTTAGACCTACTGAAAATCAAATTGACGATTTATTAAG  
TGAAATTCAAACAAGAGTTGAGCGTAATGAACGCGTACTTGTTACAACGCTCACTAAAAA  
GATGAGTGAAGATTTAACCACATACATGAAAGAAGCGGGTATTAAGTTAATTATCTGCA  
TTCAGAAATCAAGACATTAGAACGAATCGAAATAATTAGAGACTTACGAATGGGTACAT  
ATGATGTTATCGTAGGTATTAATTTATTAAGAGAGGGTATTGATATAACCAGAAGTTTCTCT  
AGTTGTCATATTAGATGCAGATAAAGAAGGGTTTTTACGTTCTAACCGCTCATTAAATCAA  
ACAATAGGTAGAGCTGCGCGTAACGATAAAGGTGAAGTCATTATGTATGCCGATAAAAT  
GACTGATTCGATGAAGTATGCAATTGATGAGACACAACGTCGTCGAGAAATACAGATGA  
AACATAATGAAAAACATGGTATTACACCTAAAACAATTAATAAAAAAATACATGATTTA  
ATTAGTGCTACTGTTGAAAATGACGAAAATAATGACAAAGCACAACTGTGATACCTAA  
GAAGATGACGAAAAAAGAACGTCAAAGACAATCGACAATATAGAAAAAGAAATGAAA  
CAAGCAGCGAAAGATTTAGATTTTCGAGAAAGCTACAGAATTAAGAGATATGTTATTTGAA  
TTAAAAGCAGAAGGGTGA

> **uvrA**

Function: protein coding sequence; ultraviolet response system protein A (core genome, constant)

Best match: *uvrA\_CC001\_MW2-USA400\_BA000033.2*[810661:813507]

Position: 022-contig\_262: 38430 ... 41277; Length: 2847 bp

Sequence:

ATGAAAGAACCATCCATAGTAGTAAAAGGTGCTCGTGCGCATAACTTGAAAGATATTGAT  
ATCGAACTACCTAAAATAAATTAATTGTTATGACAGGTTTATCTGGGTCAGGTAATCG  
TCATTAGCATTTCGATACTATATATGCTGAAGGACAACGACGTTATGTTGAATCATTAAAGT  
GCCTATGCGCGTCAATTTTTAGGCCAAATGGACAAACCAGATGTTGATACAATTGAAGGA  
TTATCGCCAGCAATTTCAATAGATCAAAAAACAACAAGTAAAAATCCAAGATCAACTGTA  
GCAACAGTAACAGAAATATATGATTATATACGTTTGTATATGCACGTGTTGGTAAACCT  
TACTGTCCAAATCACAATATAGAAATTGAATCGCAAACAGTACAACAAATGGTTGACCGC  
ATTATGGAATTAGAGGCACGTACAAAGATTCAATTATTAGCACCTGTATCGCTCATCGT  
AAAGGTAGTCATGAAAAGCTAATCGAAGATATTGGTAAAAAAGGTTATGTACGTTTAAAG  
AATCGATGGCGAAATTGTTGATGTAAATGATGTACCTACTTTAGATAAGAACAAGAATCA  
TACAATAGAAGTTGTTGTAGACCGATTAGTTGTTAAAGATGGAATTGAAACACGACTAGC  
TGACTCTATAGAACTGCGTTAGAGCTTTTCAGAAGGACAATTAACAGTTGATGTCATTGA  
CGGGGAAGACCTTAAGTTTTAGAAAGCCATGCTTGTCTATATGTGGATTTTCAATCGG  
AGAGTTAGAACCAAGAATGTTTAGCTTTAACAGTCCTTTTGGTGCTTGTCCGACATGTGAT  
GGCTTAGGCCAAAAGTTAACAGTCGATGTAGACTTGGTTGTTCCCGACAAAGATAAGACG  
CTAAACGAAGGTGCAATAGAACCTTGGATACCGACGAGTTCTGATTTTTATCCAACATTG

TTAAAACGTGTTTGTGAAGTTTATAAAAATCAATATGGATAAACCTTTTAAAAAGTTAACA  
GAACGTCAACGTGATATATTATTGTATGGTTCGGGTGACAAAGAAATTGAATTTACATTT  
ACACAACGTCAAGGTGGTACTAGAAAACGAACAATGGTTTTTCGAGGGTGTAGTTCCTAAT  
ATAAGTAGACGATTCATGAATCTCCTCAGAATATACACGTGAAATGATGAGTAAATAT  
ATGACCGAACTACCTTGTGAACTTGTGCATGGAAAGCGATTGAGTCGTGAAGCTTTATCT  
GTTTATGTAGGTGGTTTAAATATTGGTGAAGTAGTCGAATACTCAATCAGTCAAGCGCTG  
AACTATTATAAAAAACATTGATTTGTGAGAACAAGATCAAGCGATTGCAAATCAAATATTG  
AAAGAAATTATTTCCCGACTCACTTTTTTAAATAATGTGGGACTTGAATATTTAACGCTAA  
ACAGAGCTTCAGGTACACTTTTCAGGTGGTGAAGCACAAACGTATTCGATTGGCAACGCAA  
TTGGGTCGCGTTTACTGGTGTCTTATATGTATTAGATGAGCCATCAATTGGACTGCATCA  
AAGAGATAATGATCGATTAATTAATACTTAAAGAAATGAGAGATTTAGGAAATACTTT  
AATTGTAGTTGAACACGATGATGATACAATGCGTGC GGCTGATTACTTAGTGGACATAGG  
GCCTGGTGTGTTGAACATGGAGGGCAGATTGTGTCTAGTGGGACACCTCAAAGGTAAT  
GAAAGATAAAAAATCATTAAACAGGACAATACTTGAGTGGTAAGAAACGTATTGAAGTAC  
CTGAATATCGCAGACCGGCTTCAGATCGTAAAATTTCTATACGTGGAGCTAGAAGCAACA  
ATCTTAAAGGGGTTGATGTGGACATAACCTATCAATCATGACGGTTGTTACAGGTGTAT  
CAGGTTCTGGTAAAAGCTCATTAGTAAATGAAGTATTATACAAATCATTAGCTCAAAAA  
TTAATAAATCTAAAGTAAAGCCAGGATTGTACGATAAGATTGAAGGTATTGATCAACTTG  
ATAAAATTATTGATATTGATCAATCACCGATAGGTAGAACGCCACGCTCTAATCCAGCAA  
CATATACTGGTGTGTTTGTATGATATACGTGATGTGTTTTCGCAAACAAATGAAGCTAAAA  
TTCGAGGATATCAAAAAGGGCGTTTTAGTTTTAATGTAAAAGGTGGACGCTGTGAAGCTT  
GTAAAGGTGACGGTATTATTAATAATTGAAATGCATTTTTTACCTGATGTTTATGTTCTTG  
TGAAGTGTGTGATGGTAAACGATATAATCGTGAGACACTAGAGGTTACTTACAAAGGTAA  
AAATATTGCTGACATTTTAGAAATGACTGTTGAAGAAGCAACACAATTTTTTGAATAT  
TCCTAAGATTAAGCGCAAGTTACAAACACTAGTTGATGTTGGTCTTGGATACGTCACATT  
AGGTCAACAAGCTACAACGTTATCAGGTGGTGAAGGCTCAACGTGTGAACTTGCATCTGA  
ACTTCATAAACGTTCAACTGGTAAATCTATTTATATCCTAGATGAACCGACAACAGGGTT  
ACATGTTGACGATATTAGTAGATTATTAATAAGTATTAACCGATTAGTTGAAAATGGTGA  
TACTGTTGTAATTATTGAACATAACCTAGATGTTATCAAAACAGCAGACTATATTATAGA  
CTTAGGTCCTGAAGGTGGTAGTGGCGGTGGTACTATTGTTGCGACTGGCACACCCGAAGA  
TATTGCTCAGACAAAGTCATCATATACAGGAAAGTATTTAAAAGAAGTACTTGAACGAGA  
TAAACAAAATACTGAAGATAAATAA

> **repeat\_nyS**Agamma

Function: repeat element

Best match: repeat\_nySAgamma\_CC001\_MW2-USA400\_BA000033.2[819195:819303]

Position: 022-contig\_262: 41622 ... 41652; Length: 30 bp

Sequence:

TTCTTTTCGAAATTCTCTGTGTTGGGGCCC

> **hprK**

Function: protein coding sequence; HPr kinase/phosphorylase (core genome, constant)

Best match: hprK\_CC001\_MW2-USA400\_BA000033.2[814114:815046] (completely identical)

Position: 022-contig\_262: 41896 ... 42829; Length: 933 bp

Sequence:

ATGTTAACGACAGAAAACTAGTTGAAACATTAAAGTTAGATTTAATCGCTGGTGAAGAA  
GGACTATCGAAGCCAATTA AAAATGCTGATATATCAAGACCGGGCTTAGAGATGGCAGG  
TTATTTTTTACATTATGCGTCAGATAGAATACA ACTATTAGGAACAACGGA ACTATCGTTT  
TACAATTTATTACCAGATAAGGATCGCGCAGGTCGATGCGTAAACTATGCAGACCAGAA  
ACGCCTGCAATTATTGTGACGCGTGGATTGCAGCCACCAGAAGAATTAGTTGAAGCTGCA  
AAAGAATTAATAACCCACTTATAGTTGCTAAAGATGCGACTACAAGTTTAAATGAGTCGC  
TTAACAACGTTTTT TAGAGCATGC ACTTGCAAAGACGACATCTTTACATGGTGT TTTAGTAG  
ATGTTTACGGTGT TGGTGTACTAATTACCGGTGATTCAGGAATAGGTAAAAGTGAGACTG  
CGTTGGAATTAGTTAAACGTGGGCATAGATTAGTAGCAGATGATAATGTAGAAATACGTC  
AAATTAATAAAGATGAACTAATAGGGAAACCACCAAAGTTAATAGAACATCTATTAGAA



ATACGTGGACTAGGTATTATCAATGTTATGACTTTATTTGGCGCGGGTTCAATATTAAC TG  
AAAAACGAATTAGATTAATATTAATTTGGAAAAC TGAACAAGCAAAAGTTATATGAC  
CGCGTAGGTCTTAATGAAGAGACGCTAAGTATTTTAGATACTGAAATCACTAAAAAACA  
ATACCTGTAAGACCTGGTAGAAATGTTGCGGTAATTATTGAGGTCGCTGCAATGAACTAT  
CGATTAATATCATGGGCATTAACACTGCCGAAGAATTTAGTGAAAGATTAATGAAGA  
AATTATCAAGAACAGTCATAAGAGTGAGGAGTAG

> **lgt**

Function: protein coding sequence; prolipoprotein diacylglycerol transferase (core genome, variable)

Best match: lgt\_CC001-ST772\_118\_AJGE01000051.1[94762:95601] (completely identical)

Position: 022-contig\_262: 42834 ... 43674; Length: 840 bp

Sequence:

ATGGGTATTGTATTTAACTATATAGATCCTGTGGCATTAACTTAGGACCACTGAGTGTAC  
GATGGTATGGAATTATCATTGCTGTGGAATATTACTTGGTTACTTTGTTGCACAACGTGC  
ACTAGTTAAAGCAGGATTACATAAAGATACTTTAGTAGATATTATTTTTTATAGTGCCTA  
TTTGGATTTATCGCGGCACGAATCTATTTTGTGATTTTCCAATGGCCATATTACGTGGAAA  
ATCCAAGTGAAATTATTAATAATGTCATGGTGGAAATAGCAATACATGGTGGTTAATAG  
GTGGCTTTATTGCTGGTGTATTGTATGTAAAGTGAAAAATTTAAACCCATTTCAAATTGG  
TGATATCGTTGCGCCAAGTATAATTTAGCGCAAGGAATTGGACGCTGGGGTAACTTTAT  
GAATCACGAGGCACATGGTGGACCTGTGTACGCGCTTTTTTAGAACAATTACATTTGCC  
TAATTTTATAATAGAAAATATGTATATTAACGGCCAATATTATCATCCAACATTCTTATAT  
GAATCCATTTGGGATGTCGCTGGATTTATTATTTAGTTAATATTCGTAAACATTTAAAAT  
TAGGAGAAACATTCTTTTTATATTTAACTTGGTATTCAATTGGTCGATTCTTTATAGAAGG  
ATTACGTACAGATAGCTTAATGCTCACAAGTAATATTAGAGTTGCACAATTAGTATCAAT  
TCTTTTAATTTTAATAAGTATAAGTTTAATTGTATATAGAAGGATTAAGTATAATCCACCG  
TTGTATAGCAAAGTTGGGGCGCTTCCATGGCCAACAAAAAAGTGAAGTAG

> **trxB**

Function: protein coding sequence; thioredoxin reductase (core genome, variable)

Best match: trxB\_AJ223781.2[1265:2200]

Position: 022-contig\_262: 45682 ... 46618; Length: 936 bp

Sequence:

ATGACTGAAATAGATTTTGATATAGCAATTATCGGTGCAGGTCCAGCTGGTATGACTGCT  
GCAGTATACGCATCACGTGCTAATTTAAAAACAGTTATGATTGAAAGAGGTATTCCAGGC  
GGTCAAATGGCTAATACAGAAGAAGTAGAGAACTTCCCTGGTTTCGAAATGATTACAGGT  
CCAGATTTATCTACAAAAATGTTTGAACACGCTAAAAAGTTTGGTGCAGTTTATCAATAT  
GGAGATATTAATCTGTAGAAGATAAAGGCGAATATAAAGTGATTAACTTTGGTAATAA  
AGAATTAACAGCGAAAGCGGTCATTATTGCTACAGGTGCAGAATACAAGAAAATTGGTG  
TTCCGGGTGAACAAGAAGTGGTGGACGCGGTGTAAGTTATTGTGCAGTATGTGATGGTG  
CATTCTTTAAAAATAAACGCCTATTTCGTTATCGGTGGTGGTACTCAGCAGTAGAAGAGG  
GAACATTCTTAATAAATTTGCTGACAAAGTAACAATCGTTCACCGTCGTGATGAGTTAC  
GTGCACAACGTATTTTACAAGATAGAGCATTCAAAAATGATAAAAATCGACTTTATTTGGA  
GTCATACTTTGAAATCAATTAATGAAAAAGACGGCAAAGTGGGTTCTGTGACATTAACGT  
CTACAAAAGATGGTTCAGAAGAAACACACGAGGCTGATGGTGTATTTCATCTATATTGGTA  
TGAAACCATTAACAGCGCCATTTAAAGACTTAGGTATTACAAATGATGTTGGTTATATTG  
TAACAAAAGATGATATGACAACATCAGTACCAGGTATTTTTGCAGCAGGAGATGTTCCGG  
ACAAAGGTTTACGCCAAATTGTCACTGCTACTGGTGTATGGCAGTATTGCAGCGCAAAGTG  
CAGCGGAATATATTGAACATTTAAACGATCAAGCTTAA

> **tx\_universal2**

Function: rho independent terminator

Best match: tx\_universal2\_CC001\_MW2-USA400\_BA000033.2[819367:819407:r]RC (completely identical)

Position: 023-contig\_244\_RC: 20 ... 61; Length: 41 bp

Sequence:

TAGAGTTGAAAAAAGCTTGTTGCAAGCGCGTTTTTCATT CAG

### > **Q2YSG2**

Function: protein coding sequence; P-loop ATPase protein (core genome, variable)

Best match: Q2YSG2\_CC008\_NCTC8325\_CP000253.1[768883:769794]

Position: 023-contig\_244\_RC: 251 ... 1163; Length: 912 bp

Sequence:

ATGGATAATAATGAAAAAGAAAAAGTAAAAGTGAAC TATTAGTTGTAACAGGTTTATC  
TGGCGCAGGTAAATCTTTGGTTATTCAATGTTTAGAAGACATGGGATATTTTTGTGTAGAT  
AATCTACCACCAGTGTTATTGCCTAAATTTGTAGAGTTGATGGAACAAGGAAATCCATCC  
TTAAGAAAAGTGGCAATTGCAATTGATTTAAGAGGTAAGGAACTATTTAATTCATTAGTT  
GCAGTAGTGGATAAAGTTAAAAGTGAAAGTGACGTCATCATTGATGTTATGTTTTTAGAA  
GCAAGTACTGAAAAATTAATTTCAAGATATAAGGAAACGCGTCGTGCACATCCTTTGATG  
GAACAAGGTAAAAGATCCTTAATCAATGCAATTAATGATGAGCGAGAGCATTGTCTCAA  
ATTAGAAGTATAGCTAATTTTGTATAGATACTACAAAGTTATCACCTAAAGAATTA  
GAACGCATTTCGTCGATACTATGAAGATGAAGAGTTTGAAACTTTTACAATTAATGTCACA  
AGTTTCGGTTTTAAACATGGGATTCAGATGGATGCAGATTTAGTATTTGATGTACGATTTT  
TACCAAATCCATATTATGTAGTAGATTTAAGACCTTTAACAGGATTAGATAAAGACGTTT  
ATAATTATGTTATGAAATGGAAAGAGACGGAGATTTTCTTTGAAAAATTA  
ACTGATTTGT TAGATTTTATGATACCCGGGTATAAAAAAGAAGGGAAATCTCAATTAGTAATTGCCATCG  
GTTGTACGGGTGGACAACATCGATCTGTAGCATTAGCAGAACGACTAGGTAATTATCTAA  
ATGAAGTATTTGAATATAATGTTTATGTGCATCATAGGGACGCACATATTGAAAGTGGCG  
AGAAAAAATGA

### > **tRNAarg1**

Function: tRNA tRNA-Arg (core genome, constant)

Best match: tRNAarg1\_CC001\_MW2-USA400\_BA000033.2[822868:822942:r]RC (completely identical)

Position: 023-contig\_244\_RC: 3521 ... 3596; Length: 75 bp

Sequence:

CAGCCTCCTTGAAGGGAATTGAACCCCTATCTTAAGAACCGGAATCTTACGTGTTATCCA  
TTACACCACAAGGAG

### > **clpP**

Function: protein coding sequence; ATP-dependent chaperone protease/proteolytic subunit

Best match: clpP\_CC001\_MW2-USA400\_BA000033.2[823129:823716] (completely identical)

Position: 023-contig\_244\_RC: 3782 ... 4370; Length: 588 bp

Sequence:

ATGAATTTAATTCCTACAGTTATTGAAACAACAAACCGCGGTGAACGTGCATATGATATA  
TACTCACGTTTATTAAGACCGTATTATTATGTTAGGTTTACAAATTGATGACAACGTAG  
CAAATTCAATCGTATCACAGTTATTATTCTTACAAGCGCAAGACTCAGAGAAAGATATTT  
ATTTATACATTAATTCACCAGGTGGAAGTGTAACAGCTGGTTTTGCGATTTATGATACAAT  
TCAACACATTAACCTGATGTTCAAACAATTTGTATCGGTATGGCTGCATCAATGGGATC  
ATTCTTATTAGCAGCTGGTGCAAAAGGTAAACGTTTCGCGTTACCAAATGCAGAAGTAAT  
GATTCACCAACCATTAGGTGGTGCTCAAGGACAAGCAACTGAAATCGAAATTGCTGCAA  
ATCACATTTTAAAAACACGTGAAAAATTAACCGCATTTTATCAGAGCGTACTGGTCAAA  
GTATTGAAAAAATACAAAAAGACACAGATCGTGATAACTTCTTAACTGCAGAAGAAGCT  
AAAGAATATGGCTTAATTGATGAAGTGATGGTACCTGAAACAAAATAA

### > **txbi\_clpP\_Q2G035**

Function: bidirectional rho-independent terminator of clpP and Q2G035

Best match: txbi\_clpP\_Q2G035\_CC001\_MW2-USA400\_BA000033.2[823827:823898] (completely identical)

Position: 023-contig\_244\_RC: 4480 ... 4552; Length: 72 bp

Sequence:

TGAACCGTAACTATATGAAATGTTCCCTTCAAAGTAGACATTGAAAGGAACATTTCAATC  
CTTTGTTTGTA

### > **Q2G035**

Function:

Best match: Q2G035\_CC005\_Mu50-VRSA\_BA000017.4[852653:853555:r]RC

Position: 023-contig\_244\_RC: 4612 ... 5515; Length: 903 bp

Sequence:

TTATTCCTTTGATTAAATCTTCAAGTGCCATTTTTAAATTAATTAATTAATTTAAATTGGAATCCCA  
ATGCTTGAATTTTATTAGGTAATACTTTTTGAGTATCCAATACTACTGTTGACATTTGACC  
AAGTATGAGACGCATTGCAAGACTTGGTGCCCAAGTTTCATGGGGCTTATGCATAGCTCT  
TGCTAAAGTGTAGCCAAATAAATTTTGACGCTCAGGTATAGGTGCAGTTAAATTAACCGG  
ACCACTAGCTGACTCGTTATTTATTAATAAATAAATAAGCTTGAATTAATCATTGATATG  
AATCCATGAATACCATTGTTGACCAGAACCTAATTTACCACCAATGTAATATTTGTATGGT  
AGTTTCATTGTTTGTAAACGCACCGCCTTCATTTCGATAAAAATCATAACCGAAACGACCGATG  
ACAACCTCGCGTACCTAATTGTTCAAATTTGTTGTGCGAAACGTTCCCATGATACACAATAT  
CTGATAAGAAATCAAATGGTAAAGTTTTATAAACTTCTGTGTAACCTCATAAATAAATCAG  
GAGGATAGTAACCAGTGGCACTAGCATTAAATAAACTTTAGGTGCTTTATTACGAGATT  
TAAACAATTCATATAAAGCTTGCCTAGATTGAACTCTACTTAGCATTAGCGTTTGTTTATA  
TTCCGGTGTCCATCGTTTATTCAGTGTAGCACCTGCTAAGTTGATGACCACATCGATATTT  
TGAGGAACTTTGTGTTCCACCCAGATTTAGCCCAGTTGACATATGAAATTTTCTTATCAT  
TTGAAATTTGGTTCGTGTCGCGTTAATATCGTGATATGTGAATCTGATTTTTTAATTCATTA  
ACTAATTGAGATCCAACCATAACCAGTCCCACCAGTAATTAAGTATTGTTTCAT

### > **yfcH**

Function: protein coding sequence; cell-division inhibitor (core genome, variable)

Best match: yfcH\_CC001-ST772\_118\_AJGE01000036.1[29661:30563]RC (completely identical)

Position: 023-contig\_244\_RC: 4612 ... 5515; Length: 903 bp

Sequence:

TTATTCCTTTGATTAAATCTTCAAGTGCCATTTTTAAATTAATTAATTAATTTAAATTGGAATCCCA  
ATGCTTGAATTTTATTAGGTAATACTTTTTGAGTATCCAATACTACTGTTGACATTTGACC  
AAGTATGAGACGCATTGCAAGACTTGGTGCCCAAGTTTCATGGGGCTTATGCATAGCTCT  
TGCTAAAGTGTAGCCAAATAAATTTTGACGCTCAGGTATAGGTGCAGTTAAATTAACCGG  
ACCACTAGCTGACTCGTTATTTATTAATAAATAAATAAGCTTGAATTAATCATTGATATG  
AATCCATGAATACCATTGTTGACCAGAACCTAATTTACCACCAATGTAATATTTGTATGGT  
AGTTTCATTGTTTGTAAACGCACCGCCTTCATTTCGATAAAAATCATAACCGAAACGACCGATG  
ACAACCTCGCGTACCTAATTGTTCAAATTTGTTGTGCGAAACGTTCCCATGATACACAATAT  
CTGATAAGAAATCAAATGGTAAAGTTTTATAAACTTCTGTGTAACCTCATAAATAAATCAG  
GAGGATAGTAACCAGTGGCACTAGCATTAAATAAACTTTAGGTGCTTTATTACGAGATT  
TAAACAATTCATATAAAGCTTGCCTAGATTGAACTCTACTTAGCATTAGCGTTTGTTTATA  
TTCCGGTGTCCATCGTTTATTCAGTGTAGCACCTGCTAAGTTGATGACCACATCGATATTT  
TGAGGAACTTTGTGTTCCACCCAGATTTAGCCCAGTTGACATATGAAATTTTCTTATCAT  
TTGAAATTTGGTTCGTGTCGCGTTAATATCGTGATATGTGAATCTGATTTTTTAATTCATTA  
ACTAATTGAGATCCAACCATAACCAGTCCCACCAGTAATTAAGTATTGTTTCAT

### > **rsaH**

Function: noncoding RNA ncRNA of Staphylococcus aureus H (core genome, constant)

Best match: rsaH\_CC001\_MW2-USA400\_BA000033.2[825010:825133] (completely identical)

Position: 023-contig\_244\_RC: 5663 ... 5787; Length: 124 bp

Sequence:

GTACCTTCGATAACGAATAAACATCTCTTAAAAGTATGTGTAAAACGCTGCATGATACAA  
ACGAAGGTAAAAATTTGACTCCCTTTAGTAGTGGACCCGTACGTTAATCGTGCGGGTTCGT  
TTTT

### > **Q5HHP8**

Function: protein coding sequence; putative exported protein (core genome, constant)  
Best match: Q5HHP8\_CC005\_Mu50-VRSA\_BA000017.4[854258:854887] (completely identical)  
Position: 023-contig\_244\_RC: 6217 ... 6847; Length: 630 bp

Sequence:

```
ATGTCGAATCAA AATTACGACTACAATAAAAAATGAAGATGGAAGTAAGAAGAAAATGAG
TACAACAGCGAAAGTAGTTAGCATTGCGACGGTATTGCTATTACTCGGAGGATTAGTATT
TGCAATTTTTTGCATATGTAGATCATTCTGAATAAAGCTAAAGAACGTATGTTGAACGAACA
AAAGCAGGAACAAAAAGAAAAGCGTCAAAAAGAAAATGCAGAAAAAGAGAGAAAGAA
AAAGCAACAAGAGGAAAAAGAGCAGAATGAGCTAGATTCACAAGCAAACCAATATCAG
CAATTGCCACAGCAGAATCAATATCAATATGTGCCACCTCAGCAACAAGCACCTACAAAG
CAACGTCCTGCTAAAGAAGAGAATGATGATAAAGCATCAAAGGATGAGTCGAAAGATAA
GGATGACAATGCATCTCAAGATAAATCAGATGATAATCAGAAGAAAACCTGATGATAATA
AACACCAGCTCAGCCTAAACCACAGCCGCAACAACCAACACCAAAGCCAAATAATAAT
CAACAAAATAATCAATCAAATCAGCAAGCAAAACCACAAGCACCACAACAAAATAGCCA
ATCAACAACAAATAAACAAAATAATGCTAATGATAAGTAG
```

### > repeat\_nyS $\gamma$

Function: repeat element

Best match: repeat\_nyS $\gamma$ \_CC001\_MW2-USA400\_BA000033.21142439:1142558:r  
[4\_50ANF10END]

Position: 023-contig\_244\_RC: 7098 ... 7163; Length: 65 bp

Sequence:

```
TTGGGGCCCCGCCAACTTGACATTATTGTAAGCTGACTTTCGCCAGCTTCTGTGTTGGG
GCC
```

### > gapR

Function: protein coding sequence; regulator of glyceraldehyde 3-phosphate dehydrogenase (core genome, constant)

Best match: gapR\_CC001\_MW2-USA400\_BA000033.2[826835:827848] (completely identical)

Position: 023-contig\_244\_RC: 7544 ... 8558; Length: 1014 bp

Sequence:

```
GTGAAAGACTTATTGCAAGCACAGCAAAAAGCTTATACCGGATCTCATAGATAAAAATGTAT
AAACGTTTTTCTATTCTTACTACTATCTCAAAAAATCAGCCTGTGCGACGTGCGAAGTTTAA
GCGAACATATGGATATGACTGAACGTGTAAGTCTGAAACAGATATGCTTAAGAAAC
AAGATTTGATAAAAAGTTAAGCCTACCGGAATGGAAATTACAGCTGAAGGTGAGCAACTG
ATTTGCGCAATTGAAAGGTTACTTTGATATCTATGCAGATGATAATCGTCTGTCAGAAGGT
ATTAAGAATAAATTTCAAATTAAGGAAGTTCATGTTGTTTCTGTTGATGCTGATAATAGT
CAATCTGTTAAAACAGAATTAGGTAGACAAGCAGGTCAATTACTTGAAGGCATATTACAA
GAAGACGCGATAGTTGCTGTAAGTGGCGGATCCACGATGGCATGTGTTAGTGAAGCAATT
CATTTATTACCATATAATGTATTCTTCGTACCAGCCAGAGGTGGACTAGGCGAAAATGTT
GTCTTTCAGGCAAACACAATTGCAGCCAGTATGGCACAACAAGCTGGCGGTTATTATACG
ACGATGTATGTACCTGATAATGTCAGTGAAACAACATATAACACATTGTTGTTAGAGCCA
TCAGTCATAAACACTTTAGACAAAATTAACAAGCAAACGTTATATTACACGGCATTGGT
GATGCGCTGAAGATGGCGCATCGACGTCAATCACCTGAAAAGGTCATTGAACAACCTTCAA
CATCATCAAGCTGTCGGAGAGGCATTTGGTTATTATTTTGATACACAAGGTCAAATTGTCC
ATAAGGTTAAAACAATTGGACTTCAATTAGAAGACCTTGAATCAAAGACTTTATTTTG
CAGTTGCAGGAGGCAAATCGAAAGGTGAAGCAATTAAGCATACTTGACGATTGCACCC
AAGAATACAGTGTTAATCACTGATGAAGCCGACGCAAAGATAATACTTGAATAA
```

### > gapA

Function: protein coding sequence; extracellular glyceraldehyde 3-phosphate dehydrogenase/locus 1 (core genome, constant)

Best match: gapA\_CC001\_MW2-USA400\_BA000033.2[827901:828911] (completely identical)

Position: 023-contig\_244\_RC: 8610 ... 9621; Length: 1011 bp

Sequence:

ATGGCAGTAAAAGTAGCAATTAATGGTTTTGGTAGAATTGGTCGTTTAGCATTTCAGAAGA  
ATTCAAGAAGTAGAAGGTCTTGAAGTTGTAGCAGTAAACGACTTAACAGATGACGACAT  
GTTAGCGCATTTATTAATAATATGACACTATGCAAGGTCGTTTCACAGGTGAAGTAGAGGT  
AGTTGATGGTGGTTTTCCGCGTAAATGGTAAAGAAGTTAAATCATTTCAGTGAACCAGATGC  
AAGCAAATTACCTTGGAAAGACTTAAATATCGATGTAGTGTTAGAATGTACTGGTTTTCTA  
CACTGATAAAGATAAAGCACAAAGCTCATATTGAAGCAGGCGCTAAAAAAGTATTAATCT  
CAGCACCAGCTACTGGTGACTTAAAAACAATCGTATTCAACACTAACCACCAAGAGTTAG  
ACGGTTCTGAAACAGTTGTTTTAGGTGCTTCATGTACTACAACTCATTAGCACCAGTTGC  
TAAAGTTTTAAACGATGACTTTGGTTTAGTTGAAGGTTTAATGACTACAATTCACGCTTAC  
ACAGGTGATCAAATACACAAGACGCACCTCACAGAAAAGGTGACAAACGTCGTGCTCG  
TGCAGCGGCAGAAAACATCATCCCTAACTCAACAGGTGCTGCTAAAGCTATCGGTAAAGT  
TATTCCTGAAATCGATGGTAAATTAGATGGTGGTGCACAACGTGTTCTGTAGCTACAGG  
TTCATTAACCTGAATTAACAGTAGTATTAGAAAAACAAGACGTAACAGTTGAACAAGTTAA  
CGAAGCTATGAAAAATGCTTCAAACGAATCATTTCGGTTACTGAAGACGAAATCGTTTT  
TTCAGACGTTGTAGGTATGACTTACGGTTCATTATTCGACGCTACACAACTCGTGTAAATG  
TCAGTTGGCGACCGTCAATTAGTTAAAGTTGCAGCTTGGTATGATAACGAAATGTCATAT  
ACTGCACAATTAGTTCGTACATTAGCATACTTAGCTGAACTTTCTAAATAA

> **pgk**

Function: protein coding sequence; phosphoglycerate kinase (core genome, constant)

Best match: pgk\_AJ133520.1[2995:4185]

Position: 023-contig\_244\_RC: 9759 ... 10950; Length: 1191 bp

Sequence:

ATGGCTAAAAAATTGTTTCTGATTTAGATCTTAAAGGTAAAACAGTCCTAGTACGTGCT  
GATTTTAAACGTACCTTTAAAAGACGGTGAAATTAATAATGACAACCGTATCGTTCAAGCT  
TTACCTACAATTCAATACATCATCGAACAAAGGTGGTAAAATCGTACTATTTTACATTTAG  
GTAAAGTGAAAGAAGAAAGTGATAAAGCAAATTAACCTTACGTCCAGTTGCTGAAGAC  
TTATCTAAGAAATTAGATAAAGAAGTTGTTTTCGTACCAGAAAACACGCGGCGAAAAACTT  
GAAGCTGCTATTAAGACCTTAAAGAAGGCGACGTATTATTAGTTGAAAATACACGTTAT  
GAAGATTTAGACGGTAAAAAAGAATCTAAAAATGATCCAGAATTAGGTAAATACTGGGC  
ATCTTTAGGTGATGTGTTTGTAATGATGCTTTTGGTACTGCGCATCGTGAGCATGCATCT  
AATGTTGGTATTTCTACACATTTAGAACTGCAGCTGGATTCTTAATGGATAAAGAAATT  
AAGTTTATTGGTGGCGTAGTTAACGATCCACATAAACCAGTTGTTGCTATTTTAGGTGGA  
GCAAAGTATCTGACAAAATTAATGTCATCAAAACTTAGTTAACATAGCTGATAAAATT  
ATCATCGGCGGAGGTATGGCTTATACTTTCTTAAAAGCGCAAGGTAAAGAAATTGGTATT  
TCATTATTAGAAGAAGATAAAATCGACTTCGCAAAAGATTTATTAGAAAAACATGGTGAT  
AAAATTGTATTACCAGTAGACACTAAAGTTGCTAAAGAATTTTCTAATGATGCCAAAATT  
ACTGTAGTACCATCTGATTCAATTCAGCAGACCAAGAAGGTATGGATATTGGACCAAAC  
ACTGTAAAATTATTTGCAGATGAATTAGAAGGTGCGCACACTGTTGTATGGAATGGACCT  
ATGGGTGTATTCGAGTTCAGTAACTTTGCACAAGGTACAATTGGTGTATGTAAGCAATT  
GCAAACCTTAAAGATGCAATTACGATTATCGGTGGCGGTGATTCAGCTGCAGCAGCAATC  
TCTTTAGGTTTTGAAAATGACTTCACTCATATTTCAACTGGTGGCGGTGCGTCATTAGAGT  
ACCTAGAAGGTAAAGAATTGCCTGGTATCAAAGCAATCAATAATAAATAA

> **tpi**

Function: protein coding sequence; triosephosphate isomerase (core genome, constant)

Best match: tpi\_CC001-ST772\_118\_AJGE01000036.1[23343:24104:r] (completely identical)

Position: 023-contig\_244\_RC: 11071 ... 11833; Length: 762 bp

Sequence:

ATGAGAACACCAATTATAGCTGGTAACTGGAAAATGAACAAAACAGTACAAGAAGCAAA  
AGACTTCGTCAATGCATTGCCAACATTACCAGATTCAAAGAAGTAGAATCAGTAATTTG  
TGCACCAGCAATTCAATTAGATGCATTAATACTACTGCAGTTAAAGAAGGAAAAGCACAAG  
GTTTAGAAATCGGTGCTCAAATACGTATTTTCGAAGATAATGGTGCCTTCACAGGTGAAA  
CGTCTCCAGTTGCATTAGCAGATTTAGGCGTTAAATACGTTGTTATCGGTCAATTCTGAACG  
TCGTGAATTATTCCACGAAACAGATGAAGAAATTAACAAAAAAGCGCACGCTATTTTCAA

ACATGGAATGACTCCAATTATTTGTGTTGGTCAAACAGACGAAGAGCGTGAAAGTGGTA  
AAGCTAACGATGTTGTAGGTGAGCAAGTTAAGAAAGCTGTTGCAGGTTTATCTGAAGATC  
AACTTAAATCAGTTGTAATTGCTTATGAGCCAATCTGGGCAATCGGAACTGGTAAATCAT  
CAACATCTGAAGATGCAAATGAAATGTGTGCATTTGTACGTCAAACCTATTGCTGACTTAT  
CAAGCAAAGAAGTATCAGAAGCAACTCGTATTCAATATGGTGGTAGTGTTAAACCTAACA  
ACATTAAGAATACATGGCACAACTGATATTGATGGGGCATTAGTAGGTGGCGCATCAC  
TTAAAGTTGAAGATTCGTACAATTGTTAGAAGGTGCAAAATAA

> **gpmI**

Function: protein coding sequence; 2,3-bisphosphoglycerate-independent phosphoglycerate mutase (core genome, constant)

Best match: gpmI\_CC001\_MW2-USA400\_BA000033.2[831126:832643] (completely identical)

Position: 023-contig\_244\_RC: 11835 ... 13353; Length: 1518 bp

Sequence:

ATGGCTAAGAAACCAACTGCGTTAATTATTTTAGATGGTTTTGCGAACCGCGAAAGCGAA  
CATGGTAATGCGGTAATAATTAGCAAACAAGCCTAATTTTGATCGTTATTACAACAAATAT  
CCAACGACTCAAATCGAAGCGAGTGGCTTAGATGTTGGACTACCTGAAGGACAAATGGG  
TAACTCAGAAGTTGGTCATATGAATATCGGTGCAGGACGTATCGTTTATCAAAGTTTAAAC  
TCGAATCAATAAATCAATTGAAGACGGTGATTTCTTTGAAAATGATGTTTTAAATAATGC  
AATTGCACACGTGAATTCACATGATTCAGCGTTACACATCTTTGGTTTATTGTCTGACGGT  
GGTGTGCACAGTCATTACAAACATTTATTTGCTTTGTTAGAAGTTGCTAAAAACAAGGT  
GTTGAAAAAGTTTACGTACACGCATTTTAGATGGTTCGTGACGTAGATCAAAAATCCGCT  
TTGAAATACATCGAAGAGACTGAAGCTAAATTCAATGAATTAGGCATTGGTCAATTTGCA  
TCTGTGTCTGGTCGTTATTATGCAATGGACCGTGACAAACGTTGGGAACGTGAAGAAAA  
GCTTACAATGCTATTCGTAATTTTGATGCCCAACTTATGCAACTGCCAAAGAAGGTGTA  
GAAGCAAGCTATAATGAGGGCTTAACTGACGAATTCGTAGTACCATTCATCGTTGAGAAT  
CAAATGACGGTGTTAATGATGGAGATGCAGTGATCTTCTATAATTTCCGACCTGATAGA  
GCAGCACAATTATCGGAAATTTTTCGGAACAGAGCATTTCGAAGGCTTAAAGTTGAACAA  
GTTAAAGACTTATTCTATGCAACATTCACTAAGTATAACGACAATATCGATGCGGCTATC  
GTTTTCGAAAAAGTTGATTTAAATAATAAATTGGTGAAATTGCACAAAATAACAATTTA  
ACACAATTACGTATTGCAGAACTGAAAATATCCTCACGTTACTTACTTTATGAGTGGT  
GGACGTAACGAGGAATTTAAAGGTGAACGCCGTCGTTTAAATTGATTCACCTAAAGTTGCA  
ACGTATGACTTGAAACCAGAAATGAGTGCTTATGAAGTTAAAGATGCATTATTAGAAGAG  
TTAAATAAAGGTGACTTGGACTTAATTATTTTAACTTTGCTAACCCCTGATATGGTTGGAC  
ATAGTGGTATGCTTGAGCCGACAATCAAAGCAATCGAAGCGGTTGATGAATGTTTAGGTG  
AAGTCGTTGATAAGATTTTAGACATGGACGGTTATGCAATTATTACTGCTGACCATGGTA  
ACTCTGATCAAGTATTGACGGATGATGATCAACCAATGACTACGCATACAACGAACCCAG  
TACCAGTGATTGTAACAAAAGAAGGCGTTACACTTCGAGAACTGGTCGCTTAGGTGACT  
TAGCACCTACATTATTAGATTTATTAATGTAGAACAACCTGAAGACATGACAGGTGAAT  
CTTTAATTAACACTAA

> **eno**

Function: protein coding sequence; enolase (core genome, constant)

Best match: eno\_CC001\_MW2-USA400\_BA000033.2[832773:834077] (completely identical)

Position: 023-contig\_244\_RC: 13482 ... 14787; Length: 1305 bp

Sequence:

ATGCCAATTATTACAGATGTTTACGCTCGCGAAGTCTTAGACTCTCGTGGTAACCCA  
TTGAAGTAGAAGTATTAAGTAAAGTGGCGCATTGTTGTCGTCATTAGTACCATCAGGTG  
CTTCAACTGGTGAACACGAAGCTGTTGAATTACGTGATGGAGACAAATCACGTTATTTAG  
GTAAAGGTGTTACTAAAGCAGTTGAAAACGTTAATGAAATCATCGCACCAGAAATTATTG  
AAGGTGAATTTTACGATTTAGATCAAGTATCTATTGATAAAATGATGATCGCATTAGACG  
GTACTCCAAACAAAGGTAAATTAGGTGCAAATGCTATTTTAGGTGTATCTATCGCAGTAG  
CACGTGCAGCAGCTGACTTATTAGGTCAACCACTTTACAAATATTTAGGTGGATTAAATG  
GTAAGCAGTTACCAGTACCAATGATGAACATCGTTAATGGTGGTTCTCACTCAGATGCTC  
CAATTGCATTCCAAGAATTCATGATTTTACCTGTAGGTGCTACAACGTTCAAAGAATCATT

ACGTTGGGGTACTGAAATTTTCCACAACCTTAAAATCAATTTTAAGCAAACGTGGTTTAGA  
AACTGCAGTAGGTGACGAAGGTGGTTTCGCTCCTAAATTTGAAGGTACTGAAGATGCTGT  
TGAAACAATTATCCAAGCAATCGAAGCAGCTGGTTACAAACCAGGTGAAGAAGTATTCTT  
AGGATTTGACTGTGCATCATCAGAATTCTATGAAAATGGTGTATATGACTACAGTAAGTT  
CGAAGGCGAACACGGTGCAAAACGTACAGCTGCAGAACAAGTTGACTACTTAGAACAAT  
TAGTAGACAAATATCCTATCATTACAATTGAAGACGGTATGGACGAAAACGACTGGGAT  
GGTTGGAAACAACCTACAGAACGTATCGGTGACCGTGTACAATTAGTAGGTGACGATTTA  
TTCGTAACAAACACTGAAATTTTAGCAAAAGGTATTGAAAACGGAATTGGTAACTCAATC  
TTAATTAAGTTAACCAAATCGGTACATTAAGTAAACATTTGATGCAATCGAAATGGCT  
CAAAAAGCTGGTTACACAGCAGTAGTTTCTCACCGTTCAGGTGAAACAGAAGATACAAC  
AATTGCTGATATTGCTGTTGCTACAAACGCTGGTCAAATTAAGTAACTGGTTCATTATCACGT  
ACTGACCGTATTGCTAAATACAATCAATTATTACGTATCGAAGATGAATTATTTGAACT  
GCTAAATATGACGGTATCAAATCATTCTATAACTTAGATAAATAA

### > **Q2YSE7**

Function: protein coding sequence; putative membrane protein (core genome, constant)

Best match: Q2YSE7\_CC008\_NCTC8325\_CP000253.1[783701:784159] (completely identical)

Position: 023-contig\_244\_RC: 15126 ... 15585; Length: 459 bp

Sequence:

ATGGCTGATAGAACGAATAAAGAAATTAACAGGACGCTTTATTGCAACTGCATCAATC  
GTATTCTCAATATTATTGATTATTCACTTTGTTTCGTTGGATAATGCGACTGCCAAAG  
CATTACTTAATTTAACGAATCAAACACTTCAGATAAAGCGATTGATTACATTTTAAACA  
GCTTTAGATTCACTGGTATTATGTATATTTGGCTTATCTAGCAGGCTTCATCACTTTTTGG  
AATCGACATACTTATGTGTGGTGGTTTATGTTTGCAGTTTATGTATCAAATAGTTTGTTA  
CGTTGATTAATTTATCAATCACAATTCAAGCAATAAAAGCTGCACACGGTTCGCTACTTAA  
CATTGCCAATTTTAATTGTTATTATAGGTTTCGGTTGCATTAGCGATTTATATGCTTGTGTT  
TCTATCAAACGTAAAAGTACATTTAATCGCTAG

### > **secG**

Function: protein coding sequence; preprotein translocase/SecG subunit (core genome, constant)

Best match: secG\_CC001\_MW2-USA400\_BA000033.2[834941:835174] (completely identical)

Position: 023-contig\_244\_RC: 15651 ... 15885; Length: 234 bp

Sequence:

ATGCATACATTTTTAATCGTATTATTAATCATTGATTGTATTGCATTAATAACTGTTGTACT  
ACTCCAAGAAGGTAAAAGCAGTGGACTTTCAGGTGCCATCAGTGGTGGTGTGCTGAGCAGTT  
ATTCGGTAAACAAAACAACGTGGCGTCGATTTATTCTTAAATAGATTAACAATTATTTT  
ATCAATATTATTTTTGTACTTATGATTTGCATAAGTTATCTTGGTATGTAA

### > **est**

Function: protein coding sequence; putative carboxylesterase (core genome, constant)

Best match: est\_CC001\_MW2-USA400\_BA000033.2[835290:836030]

Position: 023-contig\_244\_RC: 16000 ... 16741; Length: 741 bp

Sequence:

ATGCAGATAAAATTACCAAACCTTTCTTTTTTGAGGAAGGTAAACGTGCCGTGTTATTA  
CTACATGGTTTTACAGGCAATTCGTCTGATGTTTCGTCAATTAGGTCGATTTTTACAAAAGA  
AAGGTTATACATCATATGCACCGCAATATGAAGGCCATGCAGCACCGCCAGAAGAGATA  
CTTCAATCAAGTCCTTTTGGTTTAAAGATGCCTTAGATGGCTATGACTACCTTGTG  
AACAAGGTTATGATGAAATCGTTGTTGCTGGCTTGTTCATTAGGTGGCGATTTTGCATTAAA  
ATTAAGCTTAAATAGAGATGTAAAGGGTATTGTAACGATGTGTGCACCTATGGGTGGCAA  
AACTGAAGGTGCCATTTATGAAGGCTTTTTAGAATATGCACGCAATTTAAAAAGTATGA  
GGTAAAGATCAAGAAACGATTGATAACGAAATGTATCATTTCAAACCAACTGAACTTT  
AAAAGAATTAAGTGAAGCATTAGATACGATTAAGATCAAGTTGATGAGGTGTTTGACCC  
AATTTTAGTGATTCAAGCAGAAAACGACAATATGATTGATCCACAATCCGCAAATTATAT  
ATATGAACATGTAGACTCTGACGATAAAAATATCAAGTGGTACAGTGAATCTGGACATGT

TATTACGATTGATAAAGAAAAAGAACAAGTATTTGAAGATATTTATCAATTTTTAGAGTC  
ATTAGACTGGTCAGAATAA

> **rnr**

Function: protein coding sequence; ribonuclease R (core genome, constant)

Best match: rnr\_AC074317.5[11831:14203:r]

Position: 023-contig\_244\_RC: 19117 ... 19147; Length: 30 bp

Sequence:

AAAAGAAAGCACGTCGTAAGAAAAAATAA

> **ssrP**

Function: protein coding sequence; tmRNA and ssrA-binding protein (core genome, constant)

Best match: ssrP\_CC001-ST772\_118\_AJGE01000036.1[15543:16007:r] (completely identical)

Position: 023-contig\_244\_RC: 19168 ... 19633; Length: 465 bp

Sequence:

ATGGCTAAGAAGAAATCACCAGGTACATTAGCGGAAAATCGTAAAGCTAGACATGATTA  
TAATATTGAAGACACGATTGAAGCAGGAATTGTATTGCAAGGCACAGAAATAAAATCAA  
TTCGCCGAGGTAGTGCTAACCTTAAAGATAGTTATGCGCAAGTTAAAAACGGTGAAATGT  
ATTTGAATAATATGCATATAGCACCATACGAAGAAGGGAATCGTTTTAATCACGATCCTC  
TTCGTTCTCGAAAATTATTATTGCACAAGCGTGAAATCATTAAATTGGGTGATCAAACAC  
GTGAGATTGGTTATTCGATTGTGCCGTTAAAGCTTTATTTGAAGCATGGACATTGTAAGT  
ATTACTTGGTGTTCACGAGGTAAGAAAAAATATGATAAACGTCAAGCTTTGAAAGAAA  
AAGCAGTCAAACGAGATGTTGCGCGCGATATGAAAGCCCGTTATTA

> **ssrA**

Function: noncoding RNA tmRNA/regulatory RNA (core genome, constant)

Best match: ssrA\_CC001-ST772\_118\_AJGE01000036.1[15093:15452:r] (completely identical)

Position: 023-contig\_244\_RC: 19723 ... 20083; Length: 360 bp

Sequence:

GGGGACGTTTCATGGATTTCGACAGGGGTCCCCGAGCTCATTAAAGCGTGTCCGAGGGTTGT  
CTTCGTCATCAACACACACAGTTTATAATAACTGGCAAATCAAACAATAATTCGCAGTA  
GCTGCCTAATCGCACTCTGCATCGCCTAACAGCATTTCCTATGTGCTGTAAACGCGATTCA  
ACCTTAATAGGATATGCTAAACACTGCCGTTTGAAGTCTGTTTAGAAGAACTTAATCAA  
GCTAGCATCATGTTGGTTGTTTATCACTTTTCATGATGCGAACTTTTCGATAAACTACAC  
ACGTAGAAAGATGTGTATCAGGACCTCTGGACGCGGGTTCAAATCCCGCCGTCTCCAT

> **attB\_nySa3**

Function: attachment site of genomic island nySa3 carrying entL/entC in MW2 (mobile element)

Best match: attB\_nySa3\_empty\_CC025\_21305\_AFNO01000021.1[16544:16637]RC (completely identical)

Position: 023-contig\_244\_RC: 20028 ... 20122; Length: 94 bp

Sequence:

TAGAAAGATGTGTATCAGGACCTCTGGACGCGGGTTCAAATCCCGCCGTCTCCATTATAT  
AGTCTGCAACCTTAGTGGTTGTAGGCTTTTTGTT

> **tx\_ssra**

Function: rho independent terminator of ssrA (tmRNA)

Best match: tx\_ssra\_int4\_CC001-ST772\_118\_AJGE01000036.1[15047:15101:r] (completely identical)

Position: 023-contig\_244\_RC: 20074 ... 20129; Length: 55 bp

Sequence:

CGTCTCCATTATATAGTCTGCAACCTTAGTGGTTGTAGGCTTTTTGTTTTTGGAGT

> **int4-nySa3**



Function: protein coding sequence; bacteriophage integrase (mobile element)

Best match: int4-nySa3\_CC001-ST772\_118\_AJGE01000036.1[13874:14980]RC (completely identical)

Position: 023-contig\_244\_RC: 20195 ... 21302; Length: 1107 bp

Sequence:

```
TTATAAGTATTTAACTATTTCTTTCTGTGTACTAGGATATAAATGACCATATCGGTTATAT
ACTTCAGTCGTATCGCTGTGACCTAAACGCTGAGCTATAATCATTACACTGGCCCCTAGAT
TAACTAACATAGATGCATGACTATGTCTTAACTCGTGTATAACGATTCTAGGGAAATTTTG
TCCATTTGGTAATTGCTCATCCAACACTTTTAATGCGTTAGTAAACCAACGATCAATGGTA
GACTCGCTGTAAGCTTTATAGAATGTACCAAATAATACATAATCATCTTTAAATATGTTAT
TCTCTTTATACCAATTTAAATAACCTTTGATGTCATCCATCATGTGAGTAGGCAAATATAT
ATCGCGTATGGCTGATTTTCGTTTTAGGGGCTGTCACCTCACCGTGATAGTCCGTTTTGTTT
ATATGGATAAAATCATCATCAAAGTTAATATCGCGCCATGTGAGCGCTCTGATTTCCGCCTT
TGCGTGCTCCAGAGTAGAACAATAGTTTAAAGAATAACTTTTTGTTGTTGTGTCACTAGCG
CACCATAAAATTGATTGAATTGTTCTAATGTCCAATAATCAATCGTTTTCTGTGATTCTAT
TTCAAAATTCCCTACAAGAGATGCAACATTTTGTTTTAACTCATGAACTTCATTGCATGA
TTCAGTAATGATACTAAATATACATGCATCTTCTTTAAGTAGTCTCCAGAATGCCCTCTT
TTAACTTCTTATTCTGAAATTTTCATCACATCTTGTGTAGTCATTTTAAATACATCCATAGAT
TTAAAATAAGGTAGCAAGTGGTTATTTGTATGTGTTTTTAAATGCTTTTACACTTGATGTCT
TTCGACGTGCTGAATACCAGTCTATATATTCTTCAACGAGCTTGTCAAAGGTAATCTATT
AAGGTGTCCGACTCCCTCTAATTCGTCCATCATTTTCGTTACATTTCTTAACTGCGTCTTTAC
GTTGTTTTAAACCCCTTACGTGTTATGTACTTACGAGTATTGCTCTTGTGCATAGTAAGTGAT
ACGGAAATAATAAGTACCGGTTTTAGTGTCTTTATATATGTTATGGGATAGGTTTAAAGTTA
TGTGTCAT
```

### > **str-nySa3**

Function: protein coding sequence; putative protein (mobile element)

Best match: str-nySa3\_CC001-ST772\_118\_AJGE01000036.1[12488:12706:r] (completely identical)

Position: 023-contig\_244\_RC: 22469 ... 22688; Length: 219 bp

Sequence:

```
ATGACAAAAGTACTAGCTTATCCAATGTTATACATTACTAGAAAAGAAAAGGTGACACACA
AAAGAAAGTTGCTAGCAAAGTGGTATTAGTCCACAACGTTACCAGTTAAAGGAAAGTG
GTAAAGCAATATTTAATTTAAATGAGTGTGAGATTCTTTTCAGAAATGTATGATATGCCAA
TTGATGAGTTATTTTCATCAAAAATTAAGTAGGAGAATAG
```

### > **Q5HHJ1**

Function: protein coding sequence; putative protein (mobile element)

Best match: Q5HHJ1-COL\_ref\_CC008\_COL\_CP000046.1[908684:909004]

Position: 023-contig\_244\_RC: 23050 ... 23200; Length: 150 bp

Sequence:

```
ATGAATTGGGAAATTAAGATTTAATGTGTGACATTGAAGTGATAAAACAAAAAATTAAT
GATGTAGCTACCAAACATGCTTGGTTTGTGAAGATAGATTTGTAAAAAATGAATTAGAA
ACAAAACGGGAACATATTAATTTTTCTGCT
```

### > **Q5HHJ1-RN3984**

Function: protein coding sequence; putative protein (mobile element)

Best match: Q5HHJ1-RN3984\_CC001-ST772\_118\_AJGE01000036.1[11808:12125:r] (completely identical)

Position: 023-contig\_244\_RC: 23050 ... 23368; Length: 318 bp

Sequence:

```
ATGAATTGGGAAATTAAGATTTAATGTGTGACATTGAAGTGATAAAACAAAAAATTAAT
GATGTAGCTACCAAACATGCTTGGTTTGTGAAGATAGATTTGTAAAAAATGAATTAGAA
ACAAAACGGGAACATATTAATTTTTCTGCTAGCTATTTAGAACATCGTATACAAAATGAA
CATACAGTTGAGTTATTACATGTGTACTTAAAGAATTCGGTGAACCTTATACAAAAATTT
```

CATGAAATAGAAAAAGCATCATCTGAGAACTTTGGCGAGGTATCAGATGACGCACAAAA  
ATTA AAAAATCACAGAGTAA

> **O54473-nySa1**

Function: protein coding sequence; putative protein (mobile element)

Best match: O54473-nySa1\_CC001-ST772\_118\_AJGE01000036.1[10875:11744:r] (completely identical)

Position: 023-contig\_244\_RC: 23431 ... 24301; Length: 870 bp

Sequence:

ATGAATGAAATTAATTAGAATATGACACACATGTTTCAGTGGTACATTATGAAAGTTTA  
GACTCACGTTCAATTAATAGCTTTTCAAAAATTAATTGGAGTAAGTTGGTTAATAAACTGT  
CTGTACCTATAGAAGCAAATTATAAGTATGCACGTGGTGTGCTGTTTACGGTGATATTA  
AAAACGGTGCAAATGATCATGGTGAAATTATCAAAAAGCATCGCAATGACGTTAATGTC  
GTATACAGAGATGTGATTGTA CTTGATTACGATGAAATAAATGATTTAAAGCAATTACAT  
GAAGCAATCAGCTCAGCTTTAAGCAATGTTGCATGGTTTTGGCACACAAGTTACTCGCAC  
AGA ACTGAACAAGCTAGAATACGCCTGTATATCCCTCTAAATGAGCGAATAAGTGCAGAT  
GATTATCGTAATTATACAAAAGTATTAGCGAATAAAAATTGGCCACAAAGTTGATGAAGGT  
TCATATCAGCCAAGTAGATGTTTTGCGTTACCAGTTATTCAAAAAGGACACATATTTATTA  
AACGAGTGAATGACTGTCCGATTATGAATGTTGATATGCTCGAGCAGTGGTCAAAGGGGT  
ATAACAATCAAATGATAGTCCTAATATCAAAGGGTACACACGACGTGATAGTGCCTATT  
GGCGAGATATAGCTTTTGGTGTAAGTGAGGGAGAGCGCAATTCAACATTGGCTTCAATTA  
CAGGTTATCTTTTGCCTAGGTATGTAGATCCAACTTAGTTTATGGGTTAGTGAGTGCCTG  
GGCAAGTGTATGCAAACACCTATTAATCAAAGTGAAGTAAACAATACTTTTAAAAGTAT  
TTTGAAAAAAGATAGTAAATACAGTTAG

> **vapE**

Function: protein coding sequence; bacteriophage virulence associated protein (mobile element)

Best match: vapE\_CC001-ST772\_118\_AJGE01000036.1[9401:10825:r] (completely identical)

Position: 023-contig\_244\_RC: 24350 ... 25775; Length: 1425 bp

Sequence:

ATGATTGATAGCAGAACCGGTGTTTTAAATGCTAATGATTGGAAAAGTCAATTAAGGCGT  
TCTGCTACTACACAAGCATTGAAAAAACGACTACAAATGCTGAAATCATATTGTGTAAT  
GATGAGAGTTTAAAAGGGCTAGTACAATATGACGCTTTTGAAAAAGTAACCAAAGTAA  
ACGTCTACCGTATTGGAGGTCAAAGGGGATGCGAATTATTATTGGGCTGATATAGATAC  
CACACATGTGATTTACATATTGATAGATTGTATAATGTGCAGTTTAGCCGTGATCTTATT  
GATACTGTGATTGAAAAGGAAGCTTATCAAAATAGATTCCACCCTATTAATCGATGATT  
GAATCTAAATCATGGGACGGAATCAAAGAATTGAAACGCTCTTCATTGATTATTTAGGT  
GCTGAAGATAACCATTACAATAGAGAAGTTACAAAAAATGGATGATGGGTGCAGTTGC  
TAGAATCTATCAGCCAGGTATTAATATGATTCCATGATTATTTATATGGTGGTCAAGGT  
GTTGGGAAATCTACGGCAGTGAGTAAATTGGGAGGTCATTGGTATAACCAAAGTATTA  
ACGTTTAAAGGTGATGAGGTCTATAAGAAATTGCAGGGTCTTGGATATGTGAAATTGAA  
GAACTATCGGCATTTCAAAGTCTACTATTGAAGATATTAAGGGTTTTATAAGTGCCATT  
GTAGATATTTATAGAGCTTCGTATGGTAAACGCACAGAGCGTCATCCTAGACAGTGTGTG  
TTTGTAGGGACAACCAATAACTATGAGTTTTTAAAAGACCAAACAGGCAATCGTCGTTTT  
TTCCCTATTACGACAGATAAAAATAAAGCAACTAAAAGCCATTTGACGATCTAACACCA  
GATGTTGTGCAACAAATGTTTGCCGAAGCTAAAGTATATTTTGATGAGAATCCGACGGAT  
AAAGCATTGTTGCTAGATAAAGAAGCGAGTGAATGGCTTTAAAAGTCCAAGAAGCTCA  
TTCTGAAAAAGATGCTTTAGTTGGAGAAATAGAAGAATTTCTTGAACGTCCTATTCCGTC  
AGACTACTGGTATAGAACGTTAGAAGAAAAAAGAGTGTCTGCGCATGGTGTATAGACC  
AAGACTATATTAATTTATATGGTGTGTTAAATTGATTGAATTACCGAATACAAAACAG  
GTGCTTATGTATGGCGTGACAAGGTATGTAGCATGGAAATTTGGAAAGTGATGATGAAAC  
GAGATGACCAACCACAACAACACCATTTAAGAAAAATTGATAAAGCGTTAAGAAATACA  
AATTATTGTGACATTGTGAAAAAGCAAACGCGATATGGTGAAGGTATTGGTAAGCAATAT  
GGCTTTAGTGTAGATTTAGCTTCTTATTATCAGAACTTAAAGTTTAG

## > **Q5HHI6**

Function: protein coding sequence; putative protein (mobile element)

Best match: Q5HHI6\_CC001-ST772\_118\_AJGE01000036.1[7814:8455:r] (completely identical)

Position: 023-contig\_244\_RC: 26720 ... 27362; Length: 642 bp

Sequence:

```
ATGAACATAGAAACTGTAGTAAATGAATTTGAAACACAAGCAGGCACGTTACTAAGGTA
CTACACTGGATTATTAGAACATAGTAAAGTACAACCGTATTGCTTTAAGTTATACAATGA
TCCGTTTGATATGGTTTATGTGATGATGAACGGGAAGTTATTCGGTCATGTATATATTTAAA
GATTGTAAAGTAAGGCAATCATTGGAATTAGCGTCACCTAAGCACACTGAGGGGCTTATA
AGAAGTATAGAAGGTCATTATGTAGGTTATGAATTACATGACGGTAAACAGCTTTCTATT
AGTGATATGATGGCCAGTCAATTATTTGAAGATGAGTATTTTATGTATGGATTACAAACA
TATGCAGAATCAAATAATAGTGATGTGTTGAGTACCTAGAAAATGGATTTGATACCGAT
ACACTTGAGGGCATTCAATCGAGTAATACTGATGTGATATCGAATATTGAAATGTTGTAT
CAGATAGCTACGGGAATCAATGAACCAGCACCAGAGTTAGTTGAGGGGTTGAGATTAGT
AACTGAGTTTGTACAAGATGAGAAGGCTGCACAAGAGGATTACACGGGGTTAGAACGTA
AATTGAATGATCTAAAAGCGTCTTATTATAGTATAAGTAAATAA
```

## > **Q5HHI1**

Function: protein coding sequence; putative protein (mobile element)

Best match: Q5HHI1\_CC001-ST772\_118\_AJGE01000036.1[5047:5388:r] (completely identical)

Position: 023-contig\_244\_RC: 29787 ... 30129; Length: 342 bp

Sequence:

```
ATGGATAAAAAGCAAATAAAAAGGCTTCGTGTGTGATTATCATAAGCGAACTAGAAGTGA
TGTATTAATAGATGATGATATAAATACTGATGAATTTCTTTTCAATAGGTGATGAAAATCT
AATGAATGGATGACAGACGATAATGTTGATGATCATATTATAAAGAATCACTTAGAAATG
ATTGTTGACCGAGTAGCTAATGATAAAGAGTTTTATATTTTCGATTCTTTAATACAAGGAC
GTAGTTATCAAGATATTAGTAGTGTCTTAGATTGTTCTGAACAATCTGTAAGATTATGGTA
TGAAACCTTATTAGATAAAATTGTGGAGGTGATAGAATGA
```

## > **terminaseS-phiPT1028**

Function: protein coding sequence; bacteriophage terminase small subunit (mobile element)

Best match: terminaseS-phiPT1028\_CC030\_MRSA252\_BX571856.1[420468:421037] (completely identical)

Position: 023-contig\_244\_RC: 30125 ... 30695; Length: 570 bp

Sequence:

```
ATGAGTGAGTTAACGGCAAAGCAAGCGCGTTTTGTGAATGAGTATATAAGAACACTTAAT
GTGACACAAAGTGCCATAAAAGCAGGTTATAGCGCAAATAGTGACATGTGACAGGGTG
TAGGTTATTAAGAAGCCACACATCAAGCAATATATAACAAGAACAAAAGATAAGATTA
TAGATGAGAATGTATTAAGTCAAAAAGAGTTACTACATGTGCTTACGAATGCGGCAGTCG
GTGACGAAACAGAAACGAAAGAAGTTGTGGTCAAGCGTGGGGAATATAAAGAGAATCCA
CAAAGTGGCAAAGTACAGTTAGTCTATAATGAACATGTTGAACTGATAGAGGTGCCAATT
AAGCCAAGTGATCGTTTTAAAGCTCGTGATATGTTGGGTAAATACCATAAGTTATTTACA
GATAAGCATGATATCAACGGGGATGTTCCCTATATTCATTAACATTGGTGAATGGGACGGA
GACGATGAGGAATTAGATAAAACTGTAAAAGATGTATCTAACGCTAATCCTAACCATACT
GTGATTGTGGATGATATACCGTTAGAGGATTGA
```

## > **Q6GJT2**

Function: protein coding sequence; putative bacteriophage protein (mobile element)

Best match: Q6GJT2\_CC005\_Mu50-VRSA\_BA000017.4[878889:879857] (completely identical)

Position: 023-contig\_244\_RC: 30971 ... 31940; Length: 969 bp

Sequence:

```
ATGAAGCCATTTGAAAGTCATAATAAACAATTGAAAATTCTAAGAAGAAGAGGAATGGA
AGTACCGAGTAGTGCTAAAAGAGATTTAGAAAATGAAAATTATTATAATATCATAAATGG
TTATAAAGATTTATTTTTAGAACTAGATGTTAATGGTAATTTTTTGGTTCCTGATAAATAT
AAGCAAGGTAATCTATTTAAAGAAGTCTTTTCTTTATACAACTAGATAGAAAATTTAGG
```

AATGTTTTATTAGAGTATTTGTTAGTATTTGAAACTCATATTAATCAAGAATTCATATT  
ATTTTAGCGAAAAATATAGAGAACCACATTCATATTTATACTTTAAAAATTATTCATCTGA  
CACAAGTAAGACAGATAGCATCGTGAAAATGGTTGCTACATTTAGCTCGGTTATGAGTAA  
TAGAAAAAATAAACCATTAACACATTATATTAATACTCATAATGGAGTGCCACTATGGAT  
ATTGGTGAATTATTTAACTTTAGGTAATGTTTCAAAAATGTATTCCAATTTGGATGATGAT  
CTTCGATTGGAAGTTGCTAAAGACTATAAAAGGAAATTGGAAAGAGATTATAAAACACG  
TGTTCAAATAACTCCATCAGATGTAGACAGTATACTACAACAAGCACATATGTTTCGTAA  
CGTGTGTGCGCATGAAGAAAGATTGTATGATTATAAAAATAGACAGGGCTAAAAGTAGAG  
CTAATATATTCGCCAATTATAACAAAATATACGATAAAGAATACGTTCCCTACAATGAATG  
GTAGTTATGTATTCGATTTGTTGATTTCACTATGTCTATTTTTGAATAAACATGATTACATA  
AAATTGATGAAAAATATGGATAAACTAATAAGTAATTATTCACATTCCTTCTATACAATT  
ACTATAGATGACCTATATACAAAATGAATTTCCAGATCAAACAAAATACTGGATATG  
TTATAA

> **ear**

Function: protein coding sequence; enterotoxin-linked ampicillin resistance protein (mobile element)

Best match: ear-MNDon\_CC001-ST772\_118\_AJGE01000036.1[2485:3039]RC (completely identical)

Position: 023-contig\_244\_RC: 32136 ... 32691; Length: 555 bp

Sequence:

CTAGTTTATAGTTATTTTATCTATGTCCTTCTTGTATAACATATAATTCTTATGCTCAGTAA  
AATCTTGTCCAACACTATTCCAGAGATTTTAGGATCTTTTTGGTCTTTACTATGAATGGTACT  
TTATCACCATCTTTAATGATTTTCTGTCTTTTAATTTGTTAGTTAAATTCTTCCATGTATT  
ATTAGCATCAATTCTTTCGTTGAAATTAATAATTTACTTTTTTGATATTAATAGTAGTTA  
AACTTTCAATATCTATATTTTGTTCGAAAAATCTCCATTAGAGTTCCCATTTGCTGAAAT  
TTTATTTTCGCTACCATTTTCAATTTATAATTAACATCTATTGTTTCATTTTCATTTCCATC  
AATTATATTAGCCTCTTTCAAAGCATCTCTTACATTTTCCACAACCTGTCCGTCTGTTGTT  
CAGCAGCTTTTGCAACGTTATTAATACCATTATAATTTGAAGAAGAATGAAAACCTGAAC  
CTACTGTTGTTAAAATAATGCACCTTGCTATCAATGTTTTTGTAAATAGTTTTTTATTCAT

> **entC**

Function: protein coding sequence; enterotoxin C (mobile element)

Best match: entC-MW2\_CC001-ST772\_118\_AJGE01000036.1[901:1701:r] (completely identical)

Position: 023-contig\_244\_RC: 33474 ... 34275; Length: 801 bp

Sequence:

ATGAATAAGAGTCGATTTATTTTCATGCGTAATTTTGATATTTCGCACTTATACTAGTTCCTTT  
TACACCCAACGTATTAGCAGAGAGCCAACCAGACCCTACGCCAGATGAGTTGCACAAAT  
CAAGTGAGTTTACTGGTACGATGGGTAATATGAAATATTTATATGATGATCATTATGTATC  
AGCAACTAAAGTTATGTCTGTAGATAAATTTTTGGCACATGATTTAATTTATAACATTAGT  
GATAAAAACTAAAAAATTATGACAAAGTGAAAACAGAGTTATTAATGAAGATTTAGC  
AAAGAAGTACAAAGATGAAGTAGTTGATGTGTATGGATCAAATTACTATGTAACTGCTA  
TTTTTCATCCAAAGATAATGTAGGTAAGTTACAGGTGGTAAAACCTTGATGTATGGAGG  
ATAACAAAACATGAAGGAAACCACTTTGATAATGGGAACCTTACAAAATGTACTTATAA  
GAGTTTATGAAAATAAAGAAACACAATTTCTTTTGAAGTGCAAACTGATAAGAAAAGT  
GTAACAGCTCAAGAACTAGACATAAAAGCTAGGAATTTTTTAATTAATAAAAAAATTTG  
TATGAGTTTAAACAGTTCACCATATGAAACAGGATATATAAAATTTATTGAAAATAACGGC  
AATACTTTTTGGTATGATATGATGCCTGCACCAGGCGATAAGTTTGACCAATCTAAATATT  
TAATGATGTACAACGACAATAAAACGGTTGATTCTAAAAGTGTGAAGATAGAAGTCCAC  
CTTACAACAAAGAATGGATAA

> **entL**

Function: protein coding sequence; enterotoxin L (mobile element)

Best match: entL\_part\_CC001-ST772\_118\_AJGE01000036.1[28:734]RC

Position: 023-contig\_244\_RC: 34441 ... 35148; Length: 707 bp

Sequence:

TCATCTTTTTGAAATTTTCGACATCTAGATGAAATTGTGTTGAACCAACAGTTTTATTATCT  
TTGTAAATTTTTAAGAAGCTTTCTGGAAGACCGTATCCTGTGTAAAATAAATCATACGAG  
AAATTAGAACCATCATTTCATATGAAATACTACACTCCCCTTATCAAAACCGCTATAAAAT  
TTTGAAGAAGTGCCGTATTCTTTACCTTTACCAGTATCATTGTGTCCATAAATATTAAT  
CATCTTGCAAGTATTTTCTTAGTTTGACATCTATTTCTGTGCGGTAACCATTTTTTTATCT  
GTAGAAACACTTTTAGTTGTAAGTGTGATGCTTGCCATTGATAATTAATTTATAGGTA  
TTATTCTTGGCGAATCTAATTTATTGTTTTCTGCTTTAGTAACACCACCATATATAGTACG  
AGAGTTAGAACCATATTTATAGCTTATACCAAAAACATCGACATTTTTCCCTTTAGATCAC  
TAGTTATATATTCATTGTCAAATTCAGCATACAATGTATCATTTTTTATACGAGTATTCTAA  
GCGGTGTGATTCTGGTGAATTTTTGTCTTTAACATTCTTTAAATTCACATATTCATATTTAG  
TATAAAAATTTCTTAGGTTTCCTGTACCTACATCGCCGTTAGATAAGACTGTATGATTAGA  
AGAAAAATAAATAAAGTAATAACAATTACAAATAA

### > **dfrG**

Function: protein coding sequence; dihydrofolate reductase (mobile element)

Best match: dfrG\_CC008\_930918-3\_ABFA01000044.1[6452:6949:r] (completely identical)

Position: 023-contig\_244\_RC: 35419 ... 35917; Length: 498 bp

Sequence:

ATGAAAGTTTTCTTTGATTGCTGCGATGGATAAGAATAGAGTGATTGGCAAAGAGAATGAC  
ATTCCTTGGAGGATTCCCAAGGACTGGGAATATGTTAAAAATACTACAAAGGGACATCCG  
ATAATATTAGGTAGGAAGAACCTTGAATCAATCGGAAGAGCCTTACCTGACAGAAGAAA  
TATTATTCTGACGAGAGATAAGGGGTTTACCTTTAATGGTTGTGAAATTGTTCAATCAATA  
GAAGATGTTTTTGAGTTATGTAAAACGAAGAAGAAATTTTTATTTTCGGAGGAGAACAG  
ATTTATAATTTGTTTTTCCCTTATGTTGAGAAAATGTACATCACAAAATACATCATGAAT  
TCGAAGGAGATACTTTTTTCCAGAAGTGAATTATGAGGAATGGAATGAGGTATTTGCC  
AAAAGGGATAAAGAATGATAAAAATCCGTATAACTACTATTTTCATGTATATGAAAGA  
AAAACTTATTGAGTTAA

### > **attB\_nySa3**

Function: attachment site of genomic island nySa3 carrying entL/entC in MW2 (mobile element)

Best match: attB\_nySa3\_occupied\_CC001\_MW2-USA400\_BA000033.2[853791:853848:r]RC  
(completely identical)

Position: 024-contig\_320: 318 ... 376; Length: 58 bp

Sequence:

AACTCCCGCCGTCTCCATATTTGTAGCCTACAACCTTTGTGGATGTGGGCTTTTTTAT

### > **tx\_ssrA**

Function: rho independent terminator of ssrA (tmRNA)

Best match: tx\_ssrA\_CC001\_MW2-USA400\_BA000033.2[853801:853855]

Position: 024-contig\_320: 328 ... 358; Length: 30 bp

Sequence:

GTCTCCATATTTGTAGCCTACAACCTTTGT

### > **Q6GIK8**

Function: protein coding sequence; putative membrane protein (genomic island)

Best match: Q6GIK8\_ref\_CC030\_MRSA252\_BX571856.1[884556:885170]

Position: 024-contig\_320: 850 ... 1465; Length: 615 bp

Sequence:

ATGAATGACTTGAGTTTATCTTCATTTTTGAAACGCAGTAACAAATTTATGCAATTCAATT  
GTTTTATTTGTTTGATTCTAATAATAGTATTTTACATAATTGGTATGAATATACAGGACTTT  
AGTGATTTTCCTAGTAAAGATTTAAATCATAAAGTGACTTATAATTTAATGGGTTTTTGG  
AGATATTTGTTAATAATGCTTTTATAGTTCCCTTTGGTGTCACTTATATTATCGATAATACCA  
ATACCATATTTGTATTTTATTCCTACAATTTCTACAATTTATTCATTGTCGGTTATTATTGG  
GGTTACATTTTCATATAAATTAACGAAGGGATAGCTATTTTTATTGGTATTTTGCCTCAT  
GGTATTTTAGAAATATACTTAACAAGCATTGAACTATCAATGTTATTCTTATTAATGCGT

ATATTAGAAAAAATTCAATGAATTTATTTAGAAAAAGAAAAGAGACATTGCCAAAATTTT  
TTGTTTTATTTAAATCAATAGTAAAGTGTTACCTGCTAATATTTTTACCTGTGGCATTTTTA  
TGCGCTTTAATTGAAATTACTGTTACACCAACTGTTACAAATTTTTAACTAATATAATAT  
AG

### > **Q1YB79**

Function: protein coding sequence; putative lipoprotein (core genome, variable)

Best match: Q1YB79\_CC001-ST772\_118\_AJGE01000024.1[1795:2523:r]RC (completely identical)

Position: 024-contig\_320: 1749 ... 2478; Length: 729 bp

Sequence:

TTATACTTCATCTAAACCACTGTGGTCGTCATCTTTTTGCTTTTCTTTTTCTTCTCTCGTTC  
TTGTTCTTTTTGTACTCTTCTCAAATTCCTTTTTCTTTCTTTCTACTTCTTCTCTTGTTC  
GCTCTATGAGAAAAATCTTCGGTTTTAAGTTACTAAATTTGAATGATTTAGAATCAACTG  
TTTTATCTTCTGAGTATTTATGGACATTTAAATTAATATTTCCATCACCTCTTAACTCATAG  
ATGAACATGGCTTGTGCAGTTTTGTCTTTTTAATTTGATCTTGGTTATGTTCTGTCCAATC  
TTATATTTTTATCACTTAAAAGATAACCATCTCTTAATTTATTTACTGTATTTTTATCAT  
CTTGAGTAATATTAATATAGTCATGAGAAATAGAAGATGGATTTAAATCTTTATCGTCTTT  
TTTAGCAGTAATTTCCATTTTAAAAGCGATATATTTCTTTTTCTCATCTTTTTCAATTGATGA  
TAAACGGTCTTTTATTTAGCTTCAAATTTGTCACTAACAATAGTATCGCCTTTAATTTTT  
ATATCCATATTTTTTTGCTTTTAAATTCCTTAAAGTCTTCATTTAATTCCTTCATTGTCATTT  
TCTTTCTTTTTGTGACTAGTCTCTTTTTTTGCACTATCTTGATGATGTCCACAAGCACC  
TAAGATAAGTGTACTTGCTAATAATATCCCATTACTTTTTTCAT

### > **Q5HHN0**

Function: protein coding sequence; putative membrane protein (core genome, constant)

Best match: Q5HHN0\_CC001-ST772\_118\_AJGE01000024.1[3121:3642] (completely identical)

Position: 024-contig\_320: 3075 ... 3597; Length: 522 bp

Sequence:

ATGATTAACATTATTTTCAGCTATAGGATCTATTGGAACATTTATTATGGCTTTATTTTTATT  
TGTATCAGTTTCAGTTCAACTTTATCAAATGAAAATTAGCTTTCTGCCAGCTTTAGGTTTT  
AACCAAATTTTATTAGAAAGGGAGGAGGATCAACTTAATATAATGAATTCGGCAACAGA  
AGAGCATCATCATAAAGATTATATTAACCTATATAATTTAGGTGGCGGTGCTGCTAAAAA  
AATTGCAATAGAGGTTTTATTGGGTAATGATAAAGTCATTCAGAAAAAATACGTGAATAT  
TTTACCTAGTAAAGAAGGGGACATGTTACCAATTAATAAAAATGTGTACGAAGAATTAGA  
AAGAACGATTGAGAACAATGGTTATGAAGCTGATTTGAATGTACGTATGACTTATTATCA  
TAATGTAAGTCGCAAACAACAGGAAGTTATATTAAGAAGTCAAATCGACCGTTTTAATAC  
TTATAATAATAAAGAAATTTATGATTTGCAGTTTATCTAA

### > **Q1XZI1**

Function: protein coding sequence; putative acetyltransferase/GNAT family (core genome, constant)

Best match: Q1XZI1\_CC005\_Mu50-VRSA\_BA000017.4[886369:886899] (completely identical)

Position: 024-contig\_320: 3735 ... 4266; Length: 531 bp

Sequence:

ATGCAAATTAGACAAATACATCAACATGACTTTGCTCAAGTTGACCAGTTAATTAGAACG  
GCATTTGAAAATAGTGAACATGGTTATGGTAATGAATCAGAGCTAGTAGACCAAATTCGT  
CTAAGTGATACGTATGACAATAACTTAGAAATAGTAGCTGTTCTTCAAACGAAGTTGTA  
GGGCACGGTTTACTAAGTGAAGTTTATCTTGATAACGGAGCACAAACGGGAAATTGGATTA  
GTGTTAGCACCTGTATCTGTTGATATTCATCATCAAATAAAGGTATTGGGAAGCGATTG  
ATTCAAGCATTAGAACGAGAAGCAATATTAAGAAGGATATAATTTTATCAGTGTATTAGGA  
TGGCCGACGTATTATGCCAATCTAGGATATCAACGCGCAAGTATGTACGACATTTATCCA  
CCATATGATGGTATACCAGACGAAGCGTTTTTAATTAAGAATTAAGAAGTGAACAGTTTA  
GCGGGAAAAACAGGTACCATAAATTACACATCTGCTTTTGAAAAAATATGA

### > **clfA**

Function: protein coding sequence; clumping factor A chv

Best match: clfA-Mu50\_CC005\_04-02981\_CP001844.2[845954:848671]

Position: 024-contig\_320: 4528 ... 7408; Length: 2880 bp

Sequence:

ATGAATATGAAGAAAAAAGAAAAACACGCAATTCGGAAAAAATCGATTGGCGTGGCTTC  
AGTGCTTGTAGGTACGTTAATCGGTTTTGGACTACTCAGCAGTAAAGAAGCAGATGCAAG  
TGAAAATAGTGTTACGCAATCTGATAGCGCAAGTAACGAAAGCAAAAGTAATGATTCAA  
GTAGCATTAAATGCTGCACCTAAAACAGACAACACAAACGTGAGTGATACTAAAACAACG  
TCAAACACTAATAATGGCGAAACGAGTGTGGCGCAAAATCCAGCACAACAGGAAACGCAC  
ACAATCATCATCAACAAATGCAACTGCGGAAGAAACGCCGGTAACTGGTGAAGCTACTA  
CTACGACAACGAATCAAGCTAATACACCGGCAACAACCTCAATCAAGCAATACAAATGCG  
GAGGAATTAGTGAATCAAACAAGTAATGAAACGACTTCTAATGATACTAATACAGTATCA  
TCTGTAAATTCACCTCAAAATTCTACAAATGCGGAAAAAGTTTCAACAACGCAAGTACT  
TCAACTGAAGCAACACCTTCAAACAATGAATCAGCTCCACAGAGTACAGATGCAAGTAA  
TAAAGATGTAGTTAATCAAGCGTTAATACAAGTGCGCCTAGAATGAGAGCATTTAGTTT  
AGCGGCAGTAGCTGCAGATGCACCGGCAGCTGGCACAGATATTACGAATCAGTTGACGA  
ATGTGACAGTTGGTATTGACTCTGGTACGACTGTGTATCCGCACCAAGCAGGTTATGTCA  
AACTGAATTATGGTTTTTCAGTGCCTAATTCTGCTGTTAAAGGTGACACATTCAAAATAAC  
TGTACCTAAAGAATTAACCTTAAATGGTGTAACTTCAACTGCTAAAGTGCCACCAATTAT  
GGCTGGAGATCAAGTATTGGCAAATGGTGTAAATCGATAGTGATGGTAATGTTATTTATAC  
ATTTACAGACTATGTAAATACTAAAGATGATGTAAAAGCAACTTTGACCATGCCCGCTTA  
TATTGACCCTGAAAATGTTACAAAGACAGGTAATGTGACATTGGCTACTGGCATAGGAAG  
CAATACTGCTAGTAAGACAGTTTTAATCGACTATGAGAAATATGGACAATTCCATAATTT  
ATCAATTAAGGTACGATTGATCAAATCGACAAAACAACAATACGTATCGTCAAACGA  
TTTATGTCAATCCAAGTGGAGACAATGTTGTATTACCAGTGTTAACTGGTAATCTAATTCC  
TAAGAGTAATAGTAATGCTTTAATAGATGCCAACAATACTAATATTAAGTTTATAAAGT  
GGATAATGCTGATGATTTGTACATAGTTATTATGTGAATCCAAATGATTTTGAAGATGTA  
ACAGATCAGGTCAGAATTCATATCCTAATGATAATCAATATAAAGTAGAGTTTCCAACA  
GACGATGATCAAATTACAACACCGTATATTGTAGTTGTTAATGGTCATATTGATCCGAAT  
AGCAAAGGTGATTTAGCTTTACGTTCAACTTTATATGGATATGACTCAAGGTTTGTATGGA  
GATCTATGTCATGGGACAACGAAGTAGCATTTAATAACGGATCAGGTTCTGGTGACGGTA  
TCGATAAACCAGTTGTTTCTGAACAACCTGATGAGCCTGGTGAAATTGAACCAATTCCAG  
AGGATTCAGATTCTGACCCAGGTTGAGATTCTGGCAGCGATTCTAATTCAGATAGCGGTT  
CAGATTCGGGTAGTGATTCTACATCAGATAGTGGTTCAGATTCAGCGAGTGATTTCAGATT  
CAGCAAGTGATTTCAGACTCAGCGAGTGATTTCAGATTTCAGCAAGTGATTTCAGATTTCAGCA  
GTGATTTCAGACTCAGCAAGTGATTTCAGATTTCAGCAAGCGATTTCAGATTTCAGCGAGTGATT  
CCGACTCAGCGAGCGATTTCAGACTCAGGTAGTGACTCAGATTCCGATAGCGATTCCGACT  
CAGATAGCGACTCAGATTTCAGACAGCGATTCTGACTCAGACAGTGACTCAGATTCCGATA  
GCGATTCCGACTCAGACAGTGACTCAGATTCCGATAGCGATTCCGACTCAGACAGTGACT  
CAGATTTCAGATAGCGATTTCAGATTCCGACAGTGATTCCGACTCAGATAGCGATTCCGACT  
CAGATAGCGACTCAGATTTCAGACAGCGATTTCAGATTTCAGACAGCGATTTCAGATTTCAGATA  
GCGATTTCAGATTCCGACAGTGACTCGGATTTCAGATAGCGATTTCAGATTCCGACAGTGACT  
CAGATTCCGACAGTGACTCAGACTCAGACAGTGATTTCGGATTTCAGATAATGATTCCGATT  
CAGATAGTGATTCCGACTCCGACAGTGACTCGGATTTCAGATAGCGATTCCGACTCAGACA  
GTGACTCGGATTTCAGACAGCGATTTCAGACTCAGATAGCGACTCAGAATCAGACAGCGAC  
TCAGATTTCAGATAGCGACTCAGACTCGGATAGCGATTCCGACTCAGATAGCGATTCAAAC  
TCAGACAGCGATTTCAGATTTCAGACAGCGACTCAGACAGTGACTCAGATTTCAGATAGTGAC  
TCGGATTTCAGATAGCGATTTCAGATTCCGACAGCGACTCAGATTTCAGATTTCAGCGAGTGAT  
TCCGACTCAGAAAGTGATTCAAATAGCGATTCCGAGTCAGGTTCTAACAATAATGTAGTG  
CCGCTAATTCACCTAAAAATGGTACAAATGCTTCTAATAAAAAATGAGGCTAAAGATAGT  
AAAGAACCATTACCAGATACAGGTTCTGAAGATGAAGCGAATACGTCACTAATTTGGGG  
ATTATTAGCATCATTAGGTTCACTACTTTTCAGAAGAAAAAAGAAAAATAAAGATAA  
GAAATAA

> **vwb**

Function: protein coding sequence; van Willebrand factor binding protein chv

Best match: vwb-21266\_ref\_CC012\_21266\_AFTT01000017.1[724348:725869:r]

Position: 024-contig\_320: 7628 ... 9158; Length: 1530 bp

Sequence:

```
TTGAAAAATAAATTGCTAGTTTTATCATTGGGAGCATTATGTGTATCACAAATTTGGGAA
AGTAATCGTGCCTGTGCAGTGGTTTTCTGGGGAGAAGAATCTATATGTATCTGAGTCATTG
AACTAAATGATAACAAAAGTAAAAGCTTATCATTAGAAAAGTATAAAGAGAGTCTTAG
AAGTATAATGTGTACAAAAGAAATCAACAAAATGATGGATATGATGAGCCTGAATATA
AAGAAGCACTGAATACTTACAGAAAAAATTATTTGCTGAATTAGATGCACTTAATAAAT
TTTTAGATGAAGAGAGAAAAATAGCCAGTTACATTAAAAAAATATGGAAGTGCCAAGT
AATATTTTAGGATTAACACACGGTAGGTATACAGCAATATATAATGCAATTAAGAAAAT
AAAAATGAATTCGAAAAAATGTAGAAAATATTGAAAGTAAGCATCTGGATTTAAAAAG
GTTTGTATGAAGACAAAGATTATGAAGCAAGAGTTAAATTAATGAATTAGAAAATAAAG
TTTTAATGTTAGGTCAAGCTTTTCCTGATAAAGTAGATGCTAGAGAAAAGTCTTTATAATA
ATTGGATATGATTGTTGGTTAAGTAATGATGAAATTGAAGAAAGACATCCTCAAAATGA
AAGTTATTAAGAACGAGTTGAAGATTTAGAAACAATTATCGATGAATTCCTTAATGA
CATAGGTGAAAATAGACCGGAGAATATATCGCCATTAACATAAATGAATATAAAAAATA
AGGAAATGATTACAAAGCTAAAATCTGACACTGAAGCAGCTAAAAATGACGAAAACAAG
AGATGTAATCGAAGTAAAAGAAGTTTAGATTCTCAAATTATAAATCTGCTTCACAAGAA
GTAACCTGCAGAGCAAAAAGCAGAATATGAAAAAAGAGCTGAAGAAAGAAAAGCGAGAT
TTTTGGATAATCAAAAATTAAGAAAACACCTGTAGTGTCTATTAGAATATGATTTTGAGC
ATAACAACGTATTGACAACGAAAACGACAAGAACTTGTGGTTTTCTGCACCAACAAAG
AAACCAACATCACCGACTACATATACTGAAACAACGACACAGGTACCAATGCCTACAGTT
GAGCGTCAAACCTCAGCAACAAATTATTTATAATGCACCAAAAACAATTGGCTGGATTAAT
GGTGAAGTCATGATTTTCAACAACGCATCAATCACCAACAACCTTCAAATCACACGCAT
AATAATGTTGTTGAATTTGAAGAAACGTCTGCTTTACCTGGTAGAAAATCAGGATCACTG
GTTGGTATAAGTCAAATTGATTCTTCTCATCTAACTGAACGTGAGAAGCGTGAATTAAG
CGTGAACACGTTAGAGAAGCTCAAAGTTAGTTGATAATTATAAAGATACACATAGTTAT
AAAGACCGATTAAATGCACAACAAAAGTAAATACTTTAAGTGAAAGTCATCAAAAACG
TTTTAATAACAAATCAATAAAGTATATAATGGCAAATAA
```

### > **sspECM**

Function:

Best match: sspECM\_CC008-ST72\_21259\_AFTS01000012.1[77685:78707:r] (completely identical)

Position: 024-contig\_320: 9508 ... 10531; Length: 1023 bp

Sequence:

```
ATGAAAAAGAAATTATTAGTTTTAACTATGAGCACGCTATTTGCTACACAACCTTATCAATT
CAAATCACGCTAAAGCATCAGTGACAGATAGTGTGACAAAAAATTTGTAGTTCCAGAAT
CAGGAATTAATAAAATTATTCCAGCTTACGATGAATTTAAGAATTCGCCAAAAGTAAATG
TTAGTAATTTAACTGACAATAAAAACCTTTGTAGTTTCTGAAGACAAATTGAATAAGATTG
TAGATTCATCGGCAGCTAGTAAAATTGTAGATAAAAACCTTTGCCGTACCAGAATCAAAGT
TAGGAAACATTGTACCAGAGTACAAAGAAATCAATAATCGCGTGAATGTAGCAACAAAC
AATCCAGCTTCACAACAAGTTGATAAGCATTTTGTGCTAAAGGCCCAGAAGTAAATAGA
TTTATTACGCAAAAACAAAGTAAACCACCACTTCATTACTACGCAAACCCACTACAAGAAA
GTTATTACTTCATACAAATCAACACATGTACATAAACATGTAATCATGCAAAGGATTCT
ATTAATAAACACTTTATTGTTAAACCATCAGAATCGCCTAGATATACACATCCATCTCAAT
CTTTAATTATCAAGCATCATTTTGCAGTTCTGGATATCACGCGCATAAATTTGTAACACC
TGGGCATGCTAGCATTAAAATTAATCACTTTTGTGTTGTGCCACAAATAAATAGTTTCAAG
GTAATTCACCATATGGTCACAATTCACATCGTATGCATGTACCAAGTTTCCAAAATAAC
ACAACAGCAACACATCAAATGCTAAAGTAAATAAAGCATATGACTATAAATACTTCTAT
TCTTATAAAGTAGTTAAAGGTGTGAAGAAATATTTCTCATTTTCACAATCAAATGGTTATA
AAATTGGGAAACCATCATTAATATCAAAAATGTAATTAATCAATATGCTGTTCCAAGTT
ATAGCCCTACACACTACGTTCTGAATTTAAGGGTAGCTTACCAGCACCACGAGTATAA
```

### > **vwb2**

Function: protein coding sequence; truncated "van Willebrand factor" binding protein chv

Best match: vwb2-Mu50\_CC001\_MW2-USA400\_BA000033.2[863297:863818]



Position: 024-contig\_320: 10865 ... 11387; Length: 522 bp

Sequence:

```
ATGAAAAGGAAAGTATTAGTACTAACAATGGGTGTAATTTGTGCAACTCAATTATGGCAT
TCTAATCAAGCAAACGCATTAGTGACAGAGAGTGTGAAACTAATTTTGTGTAAAAGAT
TCGGATAATAAAAATATTTTACAACCCCATACTGAAATTACTACTGAGGAGAAATTTTCA
ATAGTAGAAAAGAGTCCATTAATAAATTAATACTACTATCTAATGACAACTACATAGAA
TATGATTTACATACTAATCAAACAGGCATTAATAAAGGTTGGTTTTATGGTTATAGTGAA
ATTGACTCATCACATTTACAGACCGTGATAAACGTGTTATTAGACGTGATCATGTTAAA
GAAGCACAAAGCTTAATTAACGATTATAAAGATACACAAAGCTATGAAGATCTCGCTAA
GGCAACTGCAAAAGTAAGTACACTTAGTCAGTCTCACCAAATTTAAATAAACAAAT
TGATAAAGTGAATAATAAGATAGAGAAAACCTGAAAAACGCTAA
```

### > **tx\_vwb2**

Function: rho indepenednet terminator of vwb2

Best match: tx\_vwb2\_CC001\_MW2-USA400\_BA000033.2[863934:863988] (completely identical)

Position: 024-contig\_320: 11502 ... 11557; Length: 55 bp

Sequence:

```
TGTCTCGATATGATAGTCTGCAACGATTCATGTTGTAGGCTTTTTAATTTTACAA
```

### > **nuc1**

Function: protein coding sequence; thermostable extracellular nuclease (core genome, variable)

Best match: nuc1\_CC001-ST772\_118\_AJGE01000037.1[4954:5640] (completely identical)

Position: 024-contig\_320: 11727 ... 12414; Length: 687 bp

Sequence:

```
ATGACAGAATACTTATTAAGTGCTGGCATATGTATGGCAATTGTTTCAATATTACTTATAG
GGATGGCTATCAGTAATGTTTCGAAAGGGCAATACGCAAAGAGGTTTTCTTTTTTCGCTA
CTAGTTGCTTAGTGTTAACTTTAGTTGTAGTTTCAAGTCTAAGTAGCTCAGCAAATGCATC
ACAAACAGATAACGGCGTAAATAGAAGTGGTTCTGAACATCCAACAGTATATAGTGCAA
CTTCAACTAAAAAATTACATAAAGAACCTGCGACATTAATTAAGCGATTGATGGTGATA
CGGTTAAATTAATGTACAAAGGTCAACCAATGACATTTAGACTATTATTGGTTGATACAC
CTGAAACAAAGCATCCTAAAAAAGGTGTAGAGAAATATGGTCCTGAAGCAAGTGCATTT
ACGAAAAAATGGTAGAAAATGCAAAGAAAATTGAAGTCGAGTTTGACAAAGGCCAAA
GAACTGATAAATATGGACGTGGCTTAGCGTATATTTATGCTGATGGAAAAATGGTAAACG
AAGCTTTAGTTTCGTCAAGGCTTGGCTAAAGTTGCTTATGTTTATAAACCTAACAAATACACA
TGAACAACCTTTTAAGAAAAAGTGAAGCACAAGCGAAAAAAGAGAAATTAATATTTGGA
GCGAAGACAACGCTGATTCAGGTCAATAA
```

### > **tx\_nuc1**

Function: rho-independent terminator of nuc1

Best match: tx\_nuc1\_CC001\_MW2-USA400\_BA000033.2[864845:864896] (completely identical)

Position: 024-contig\_320: 12413 ... 12465; Length: 52 bp

Sequence:

```
ATGCTCATTGTAAGTGTCACTGCTGCTAGTGGCACTTTTATAATTTTGG
```

### > **csp**

Function: csp\_thermoswitch

Best match: csp\_thermoswitch\_CC001-ST772\_118\_AJGE01000037.1[5892:6239] (completely identical)

Position: 024-contig\_320: 12665 ... 13013; Length: 348 bp

Sequence:

```
AAGAGCGTGAAGAAAAATGTGAGTTATTTATATAGAATATTCTCCTTTTCATTTATGAATT
TGTTACAAAATATTTAGTGCAAAAGCACGACGGAGGTATTCAATATGAATAACGGTACAG
TTAAATGGTTTAAATGCAGAAAAAGGTTTTGGTTTCATCGAAAGAGAAGATGGTAGCGACG
TATTCGTACATTTCTCAGCAATCGCTGAAGATGGATACAAATCATTAGAAGAAGGCCAAA
```

AAGTTGAATTCGACATCGTTGAAGGCGACCGTGGCGAGCAAGCTGCAAACGTAGTTAAA  
ATGTAATTTTAACTTATTCAAACAGCCCTTACTATAGGGCTGTTTTTT

> **cspC**

Function: protein coding sequence; cold shock protein C (core genome, constant)

Best match: cspC\_CC001-ST772\_118\_AJGE01000037.1[5997:6197] (completely identical)

Position: 024-contig\_320: 12770 ... 12971; Length: 201 bp

Sequence:

ATGAATAACGGTACAGTTAAATGGTTTAAATGCAGAAAAAGGTTTTGGTTTCATCGAAAAGA  
GAAGATGGTAGCGACGTATTCGTACATTTCTCAGCAATCGCTGAAGATGGATACAAATCA  
TTAGAAGAAGGCCAAAAAGTTGAATTCGACATCGTTGAAGGCGACCGTGGCGAGCAAGC  
TGCAAACGTAGTTAAAATGTAA

> **Q1Y1Z8**

Function: protein coding sequence; putative protein (core genome, constant)

Best match: Q1Y1Z8\_CC005\_Mu50-VRSA\_BA000017.4[895999:896217:r]RC (completely identical)

Position: 024-contig\_320: 13466 ... 13685; Length: 219 bp

Sequence:

TTAATTTACAGCGTCAAATATACTTATTTCTAATGCTTTGGGGTCTACTGAAACAAGTAAA  
GAATGATCGATGTTACTAATATTGCCATTCTCCAAATTTATTTCTGTGAGTATTTGGAAGC  
TACCATTAGGCAATGGTTTAAACAATAGACAATTGCTTTTCCGCTTGTGTATTAAAAAAGG  
TTTTGTAGATTGATTATTAATATGCCATTCACATCAT

> **Q2G007**

Function: protein coding sequence; putative protein (core genome, constant)

Best match: Q2G007\_CC005\_Mu50-VRSA\_BA000017.4[896279:896563:r]RC (completely identical)

Position: 024-contig\_320: 13746 ... 14031; Length: 285 bp

Sequence:

TCAACCAAATTTTGTTCAAATTCATAAATGTCTTGTTTAAAATAGAAATATTGTAAATG  
TTATCGTCCAAAATTTACCAGTTAAGTATTTGTTTTGAATTAATAATTTGGCAGTTAGTTA  
AGAAGTCTTGATAATCACGATCGCAAAAATAGTTTTCACGTGCATCTTTAGCATCGCCAA  
AAAAGTTAGCGACTGTTTCTGTTTCTCATTATTCGAACGTTCAATATATAATTTGTAAAA  
TTTAGCTATTGTATACTTTTGTCTTTAGTTAGTTCAATCAA

> **Q1YB69**

Function: protein coding sequence; putative exported protein (core genome, constant)

Best match: Q1YB69\_CC001-ST772\_118\_AJGE01000037.1[7345:7914:r]RC (completely identical)

Position: 024-contig\_320: 14118 ... 14688; Length: 570 bp

Sequence:

TTAATAAGCTTTAACAAGCCTTAGTTTGTATGGATCTATAAAATTATCTTTAATTGCATAG  
GGTGAAATAATATGTAGTCCATAACTTTTAACTGATTTTTCACTTACACCAAATTTATAAG  
CTTGGTAGATAATTTTAGTACAATACGTAAATTTTTGCTGTTCAAATTTAATGTAAGTACTAG  
ATAACGATGATTTGTATTCTCATAGTTTTTCTTAACCCAGTCAGCCGCTTTTTTACCTGCAC  
CAGGATAGCTGCAACGATAAACTTTCATCCAATCATTTTTGCCACTTGCATAATTATATTT  
AAAAGATTCTGAAGGATTGTGTAGTTGGTTTGTGCGCCAGGCCCTCAATTTGTAAAATCGT  
TTTATCATCAATCGCGATACTACAATGACCAAAAAATCCCCACATGACAGGGCCTTTTGT  
ACAATAATATCACCAGGTTGTAATTGGAATTTGTCATCTTGAATTTCTGAATACTTATTA  
TCTGCAATTTGTTTTTGGTGAGTTTATAGGGGATACGACAACGAATAATATAAGTAAAATT  
ATCGTTCGTTTAAATATAGTTCAC

> **gpmA1**

Function: protein coding sequence; putative phosphoglycerate mutase

Best match: gpmA1\_CC001\_MW2-USA400\_BA000033.2[868781:869365]

Position: 024-contig\_320: 16351 ... 16936; Length: 585 bp

Sequence:

```
TTGTTGGCTAAAACGTTATATTTAATGCGCCACGGACAAACTTTGTTTAATTTAAGGGAC
TAATTCAGGGATTTGGAGATTCGCCGCTAACAGAAGCTTGAATTGCTCAAGCTCAAAGG
CACGTAGTTATTATGAACTAAGGGGATAAACTTCGATTTATATGCATCATCAACGCAAG
AACGCGCAAGTGACACACTTGAAAATGTTGCACCTAACCAATCGTATCAACGTTTTAAGG
GACTGAAGGAATGGCATTGTTGGATTATTTGAAGGTGAGTCAGTCTATCTATTTGATAATCT
ATACAAGCCTGAAGACATATTCGGAGATCGAATTGTTTCCTTTCAAAGGAGAGGGCAAGGC
ACAAGTTGAAGATCGCATTGTGAAAACCTTACATGACATTATGTCTCAAACAAGAATA
ATGCATTAGTCGTGAGTCATGGAACAATAATGGGAGTATTTTAAGATATTGCCTTAAAC
TAGATGAAGCATTAAAGCATAATATCGGTAATTGTAATATCCTGAAATTTGAATATGACA
ATGGAACATTTAAATTTGTTGAGTTAATTGATCCAAATTTATAA
```

### > **osmC**

Function: protein coding sequence; osmotically inducible protein

Best match: osmC\_CC008\_NCTC8325\_CP000253.1[806980:807402:r]RC (completely identical)

Position: 024-contig\_320: 18673 ... 19096; Length: 423 bp

Sequence:

```
CTAATCTACAACATTTACATTTAAATCGACATTAATATTTTCCTTGAGTCGCTTTTGAATAT
GGACAAAATTCATGAGCCATTTGTAAATATTTTTCAGCTTCTTCTTGAGATATAACATTTT
TAATTGTCGCATCAATTGAAACACTTAATTTAGGACTTTCTGAGTCTGAATCATCTTCTAG
TCTCACTGTTAGTGTTACTTCTGGATGAGCATCACGCCTTTGTTTTGCTTTAAAATTAGG
TCGAAAGCACCGTTGAAGCAAGATGCATAACCTGCTGCAAATAATTGTTCCGGGGTTAGTA
GCTTTACCATCTGCTTGAGCAGGCGGAACGATATCAATATCTAATGCTCGATCATCAGTA
TAAACATGTCTTTACGTCCGCCAACATTCGTGCTTTAGTTTCATAATGTATTGCCAT
```

### > **aroD**

Function: protein coding sequence; 3-dehydroquinate dehydratase type I (core genome, constant)

Best match: aroD\_CC001\_MW2-USA400\_BA000033.2[871673:872389]

Position: 024-contig\_320: 19243 ... 19960; Length: 717 bp

Sequence:

```
ATGACACATGTGGAAGTAGTAGCGACTATCGCGCCACAATTATCTATCGAAGAACTTTA
ATTCAAAAAATTAATCATCGTATTGATGCAATAGACGTATTAGAATTACGAATTGATCAA
ATTGAAAATGTCACAGTTGATCAAGTGGCAGAAATGATTACAAAGCTGAAGGTTATGCA
AGATTCATTCAAATTATTAGTTACGTATCGTACAAAGTTACAAGGTGGCTATGGGCAATT
TACAAATGACTCGTATCTTAATTTAATATCAGACTTAGCAAATATCAATGGCATAGATAT
GATTGATATAGAATGGCAAGCAGATATTGACATTGAAAAACATCAACGAATCATTACAC
ATTTGCAACAGTATAATAAAGAGGTGGTTATATCACATCATAATTTGAAAGTACGCCTC
CATTAGATGAATTGCAATTTATATTTTTTAAAATGCAAAAATTCAACCCAGAATACGTTA
AATTAGCAGTAATGCCACATAATAAAAATGATGTGTTAAATTTATTGCAGGCAATGTCTA
CATTTTCAGATACTATGGACTGCAAAGTTGTTGGTATTTCAATGTCTAAACTTGGACTAAT
AAGTAGAACGGCTCAAGGCGTTTTTGGTGGTGCATTGACTTATGGTTGTATCGGAGAACC
ACAAGCTCCAGGACAGATTGATGTTACTGATTTAAAAGCACAAAGTGACTTTATACTAA
```

### > **arsC1**

Function: protein coding sequence; arsenate reductase

Best match: arsC1\_CC008\_NCTC8325\_CP000253.1[809502:809858] (completely identical)

Position: 024-contig\_320: 21195 ... 21552; Length: 357 bp

Sequence:

```
ATGATTAATTTTACCAATATAAGAATTGTACAACCTTGTAAAAAGGCAGCAAAGTTTTTA
GATGAATATGGCGTAAGTTATGAACCAATTGATATCGTTCAACATACACCTACAATAAAT
GAATTTAAAACAATAATTGCAAATACAGGCGTAGAAATTAATAAATTGTTTAATACACAC
GGCGCGAAATATCGTGAGCTTGATTTGAAAATAAATTACAACTTTATCAGATGATGAA
AAGTTAGAGTTGTTATCATCTGATGGTATGTTAGTAAAGCGTCCTCTAGCAGTAATGGGC
GATAAGATAACATTAGGATTTAAAGAAGATCAATATAAAGAGACTTGGTTAGCGTAA
```

### > **gcvH**

Function: protein coding sequence; glycine cleavage system protein H (core genome, constant)

Best match: gcvH\_CC001\_MW2-USA400\_BA000033.2[874139:874519] (completely identical)

Position: 024-contig\_320: 21709 ... 22090; Length: 381 bp

Sequence:

```
TTGGCAGTACCAAATGAATTGAAATATTCAAAGAGCATGAATGGGTAAAGTTGAAGG
TAATGTAGCAACAATTGGAATCACAGAATACGCACAAAGCGAGTTAGGTGATATTGTTTT
CGTTGAATTACCAGAAACAGATGATGAAATTAATGAAGGGGATACGTTTGGTAGCGTAG
AATCAGTTAAAACTGTATCAGAATTATATGCACCAATCTCTGGTAAAGTAGTTGAAGTCA
ACGAAGAAGTAGAAGATAGTCCCGAATTTGTAATGAATCTCCATACGAAAAAGCATGG
ATGGTAAAGTAGAAATTAGTGATGAAAGTCAGATTGAAGCTTTATTAACAGCTGAAAA
ATATTCAGAAATGATTGGTGAATAA
```

### > **ywqG**

Function: protein coding sequence; putative protein (core genome, constant)

Best match: ywqG\_CC001-ST772\_118\_AJGE01000037.1[15495:16373] (completely identical)

Position: 024-contig\_320: 22268 ... 23147; Length: 879 bp

Sequence:

```
ATGCTAAACATTCAAGACGTTAGTCATCTTTCTAAAAAGGAGCAAAAAGCATATAACCGT
TTCGTAGAATCTGTAGAAAACGGTAATTTACCAGTACTACCATGTATTGAAATGGATCTA
AAAGAGATGAAAGAAGAAACATTAACCAGAGTAAGATTGGTGGAAATGCCATTTTTAAA
ATCTTTTAAAGATATACCATTAGATGAAAATAATGTACCAATGGTATTGTTAGCACAGAT
TAATTTGGATAATCTTCCAGAACAACAAGAATTATTTCTGTAAATGAAGGGATATTGCA
GTTTTGGATTAGTTCAGAAGATCAAATGTATGGTATGACTGAAAATTTAAAGGGAAACAA
TATAAAGCAAGGCTTGTTTATATAAAAGAGCCAATTACAGATTTATCACTCGAAAATAT
TCAAGCGCATTGAAAGTCATTAGATGCTGATAATGAGGATATCCCGTTCAGTGGAGCATT
TTCTATAAAATTTAGATTGTGCAAAACAACTATTACATGTACTGATTATAAGTACGATGA
GGACGTGCTTGCATTGTGGAATAAAGTCAATCCATCCTTCGCGCTAAAATCAATGTTTGG
TGGTTATGATGAATTGATGGAACCTGTGTGTAACACATTTACTGCTAAGGAACCATTTAA
TCAACTTGGTGGTTATCCATATTTTGACCAAATAGATCCAAGAACGAACGATCAAGAAGT
GAAAATGTATGATAGAGTCTTACTGCAAATTGATTCTACAAGAGATGGTAATTCTTCGAT
TATATGGGGTGATTTAGGTATTGCCAATATCTTAGTAAAATCTACTGACCTTGAGGCTATG
AAGTTTGATGATTACATGTATTCATGGGATTGCAGCTAA
```

### > **tx\_universal2**

Function: rho indendent terminator

Best match: tx\_universal2\_CC001\_MW2-USA400\_BA000033.2[1067981:1068021:r]RC (completely identical)

Position: 025-contig\_192\_RC: 9 ... 50; Length: 41 bp

Sequence:

```
TAGAATTGAAAAAAGCTTGTTACAAGCGCATTTCGTTTCAG
```

### > **repeat\_nyS**Agamma

Function: repeat element

Best match: repeat\_nySAgamma\_CC001\_MSSA476\_BX571857.1[2756252:2756375]

Position: 025-contig\_192\_RC: 209 ... 239; Length: 30 bp

Sequence:

```
TTGGGGCCCCGCAACTTGCACATTATTGT
```

### > **Q2FZB6**

Function: protein coding sequence; putative protein (genomic island)

Best match: Q2FZB6\_CC008\_COL\_CP000046.1[1182242:1182414]RC

Position: 025-contig\_192\_RC: 220 ... 250; Length: 30 bp

Sequence:

CCAACCTGCACATTATTGTAAGCTGACTTT

> **yusF**

Function: protein coding sequence; small primase-like protein (toprim domain) (core genome, constant)

Best match: yusF\_CC001\_MW2-USA400\_BA000033.2[876317:876703]

Position: 025-contig\_192\_RC: 529 ... 916; Length: 387 bp

Sequence:

ATGGCTATTGTAATAAAGTGATAATTGTTGAAGGAAAATCTGATAAAAAAAGGGTGCA  
ACAGGTTATTGCAGAACCAGTCAATATTATTTGTACTCATGGAACAATGAGTATAGATAA  
GCTTGATGATATGATAGAATCACTGTATGATAACAAGTTTTTGTATTAGCCGATTCTGAT  
GACGAAGGAGATCGAATTAGAAATTGGTTTAAACGTTATTTGAGTGAAAGTGAACATATA  
TTTATTGATAAACTTACTGTCAAGTTTCGAATTGCCCAAACAATATTTGGCGCATGTAC  
TTTCAAACATGGCTTTACTTGTAAAGAAAGAAACACCTCTTTTACCGAATATAAATAATG  
AAAGGTTAGTTTTAGTAAATGAATAA

> **sam-L2**

Function: noncoding RNA SAM riboswitch locus 2 (core genome, constant)

Best match: sam-L2\_CC001\_MW2-USA400\_BA000033.2[877050:877153] (completely identical)

Position: 025-contig\_192\_RC: 1262 ... 1366; Length: 104 bp

Sequence:

CTCTTATCGAGAGTGGTGGAGGGATGTGCCCTACGAAGCCCGGCAACCGTCTTATATAGA  
AATGGTGCCAATTCACATAAAGTTTTAACTTTTGAAGATGAGAG

> **metN2**

Function: protein coding sequence; methionine import ATP-binding protein 2 (core genome, constant)

Best match: metN2\_CC001\_MW2-USA400\_BA000033.2[877242:878267]

Position: 025-contig\_192\_RC: 1454 ... 2480; Length: 1026 bp

Sequence:

GTGATTGAATTAAGAAGTTGTTAAAGAATATCGGACTAAAAATAAAGAAGTCCTTGCT  
GTAGATCACGTTAATTTATCGATTCGAGCAGGATCGATTTATGGCGTCATTGGTTTTCTG  
GAGCAGGAAAAAGTACTTTGATTCGAATGTTTAATCATTTAGAAGCGCCTACATCAGGTG  
AAGTTATTATAGATGGAGACCATATAGGTCAATTGTCCAAAAATGGATTAAGAGCAAAA  
AGACAAAAAGTAAGTATGATCTTCCAACATTTAATTTGTTATGGTCAAGGACTGTGTTA  
AAAAATATTATGTTTCCGCTTGAAATTGCAGGTGTCCCTAGAAGGAGAGCTAAGCAAAAA  
GCATTAGAACTTGTCGAACCTCGTCGGTTTAAAAGGTAGAGAAAAGGCTTATCCATCAGAG  
TTATCAGGTGGACAAAAGCAACGTGTTGGGATTGCACGAGCGTTAGCTAATGATCCAACG  
GTCCTTGCTTTGTGATGAGGCAACAAGTGCACTTGATCCGCAAACAACAGATGAAATTTTA  
GATCTACTACTAAAAATTAGAGAACAACAATAAATTAAACAATTGACTAATTACGCATGAA  
ATGCATGTCATTTCGTCGTATTTGTGATGAAGTTGCAGTTATGGAAAGTGGTAAAGTGATA  
GAACAAGGACCGGTGACACAGGTTTTTGGAAAATCCGCAACACACTGTGACAAAGCGATT  
TGTGAAAGACGATTTAAATGATGATTTTCGAAACATCTTTAACAGAATTAGAGCCATTAGA  
AAAAGATGCTTATATCGTTAGATTAGTTTTCGCTGGTTCAACAACAACCGAGCCTATTGTA  
TCGAGTCTATCAACTGCCTATGATATTAATAAATTAATTTTTAGAAGCAAATATTAATAAAT  
ACAAAAAATGGAACAGTCGGCTTTTTAGTTCTGCATATTCATATATTTCAAGTGTAGATT  
TTGGAAAATTCGAAAAAGAGTTAATTGAGCGACAAGTTAAAATGGAGGTGTTAAGACAT  
GGGTAA

> **A6QFC1**

Function: protein coding sequence; ABC transporter/permease protein (core genome, variable)

Best match: A6QFC1\_CC001-ST772\_118\_AJGE01000009.1[2226:2921] (completely identical)

Position: 025-contig\_192\_RC: 2472 ... 3168; Length: 696 bp

Sequence:

ATGGGTAAATCATTTAGTGAAATTATAAATGAAATGATTACAATGCCTAATATTCAGTGG  
CCAGAAGTTTGGACTGCAATAGTCGAAACACTATACATGACAGTCGTCTCAACTATATTT

GCATTTATACTCGGTCTTATTTTAGGTGTGTTATTATTCTTGTCTGCTAAAGGTAAGTCTAT  
CGGTGCAAGGTTATTTTATTCTATCGTTTCTTTTCATTGTTAACTTATTTAGAGCGATACCAT  
TTATTATTTTAATTTTATTATTAATTCCATTTACAAGTTTGATACTTGGAAACGATAAGTGGT  
CCGACAGGTGCGTTACCAGCCTTGATTATTGGCGCAGCACCGTTTTATGCAAGGCTCGTA  
GAAATTGCTTTTAAAGAAATTGATAAAGGTGTCATCGAAGCGGCCTGGTCAATGGGTGCC  
AATACTTGGACAGTAATTCGTAAAGTCCTCTTACCTGAAGCCATGCCAGCGCTAGTGTCT  
GGCATTACAGTTACAGCAATCGCTTTAGTTGGTTCAACAGCAGTTGCAGGTGTAATTGGT  
GCCGGTGGTTTAGGAAATTTAGCATACTTAACAGGTTTCACTCGAAATCAAATGATGTC  
ATTTTAGTATCAACTGTTTTTATTTAATTATTGTATTATAATCCAATTCATTGGGGATTG  
GCTTACAAATAAACTTGATAAACGATAA

### > **Q2FII0**

Function: protein coding sequence; putative lipoprotein (core genome, constant)

Best match: Q2FII0\_CC001-ST772\_118\_AJGE01000009.1[2938:3759] (completely identical)

Position: 025-contig\_192\_RC: 3184 ... 4006; Length: 822 bp

Sequence:

ATGAAAAAATTATTTGGTCTTATTTTAGTATTAACATTTGCAGTTGTATTAGCAGCTTGCG  
GTAATGGAAACAAAAGTGGCAGTGACGATAAGAAAATAACAGTAGGTGCTTCACCAGCA  
CCACATGCTGAAATTTTAGAAAAAGCAAAACCATTATTAGAGAAAAAAGGTTATGAACT  
AGATATTAACAATTAACGATTACACTACGCCTAATAAATTACTAGATAAAGGTGAAAT  
TGACGCAAATTTCCAACATACCCATATTTAAACACAGAGAAAAAGGATAAAGGTT  
ACAAAATCGTAAGTGCCGGTGATGTTCACTTAGAACCTATGGCTGTATACTCTAAAAAGT  
ATAAAAGTTTTAAAAGAATTACCAAAAAGGTGCGACAGTTTATGTGTCTAATAATCCAGCTG  
ACAAGGACGCTTCTTAAAATCTTCGTTGATGCAGGTTAATTAAGATCAAAAAAGGCG  
TAAAAATTGAAGATGCTAAGTTTTAGTGATATTACAGAGAATAAAAAAGATATTAAGTTTA  
ATAATAACAATCAGCAGAATTCTTACCTAAAATTTATCAAATGAAGACGCTGATGCTG  
TTATCATTAATTCAACTTTGCAATCGAACAAAACTAAATCCTAAAAAAGATTCTATTG  
CTGTAGAAAGTGCGAAAGATAATCCTTATGCAAATTAATTGCTGTTAAAGAAGGACATC  
AAGATGATAAGAAAATCAAAGCATTAAATTGAAGTATTACAATCTAAAGATATTCAAGACT  
TCATTAATGAAAAATACAACGGTGCAGTTATTCCTGCTAAATAA

### > **attB\_nySa1\_var1**

Function: attachment site in bacterial chromosome of int1-SaPII (mobile element)

Best match: attB\_nySa1\_var1\_empty\_CC005\_Mu50-VRSA\_BA000017.4[909898:909994:r]RC  
(completely identical)

Position: 025-contig\_192\_RC: 3949 ... 4046; Length: 97 bp

Sequence:

GATATTCAAGACTTCATTAATGAAAAATACAACGGTGCAGTTATTCCTGCTAAATAAATC  
ATATTAATGGCTCAGTAACGTGATGTTGCTGGGCTTT

### > **tx\_Q2FII0**

Function:

Best match: tx\_Q2FII0\_var1\_CC001\_MW2-USA400\_BA000033.2[879792:879846] (completely identical)

Position: 025-contig\_192\_RC: 4003 ... 4058; Length: 55 bp

Sequence:

TAAATCATATTAATGGCTCAGTAACGTGATGTTGCTGGGCTTTTTAATTTAAACA

### > **csbD-L1**

Function: protein coding sequence; stress response protein/locus 1 (core genome, constant)

Best match: csbD-L1\_CC001\_MW2-USA400\_BA000033.2[880148:880342] (completely identical)

Position: 025-contig\_192\_RC: 4359 ... 4554; Length: 195 bp

Sequence:

ATGGCAGACGAAAGTAAATTTGAACAAGCAAAAGGTAATGTTAAAGAAACAGTAGGTAA  
TGTTACTGATAATAAAAATTTAGAAAACGAAGGTAAAGAAGATAAAGCTTCTGGTAAAG

CGAAAGAATTCGTTGAAAATGCAAAAGAAAAAGCAACTGATTTTATTGATAAAGTAAAA  
GGTAACAAAGGCGAGTAA

> **Q2YWN7**

Function: protein coding sequence; putative membrane protein (core genome, constant)

Best match: Q2YWN7\_CC001\_MSSA476\_BX571857.1[864544:865395:r]RC

Position: 025-contig\_192\_RC: 4787 ... 5639; Length: 852 bp

Sequence:

TTATTCATTTTCAGCGGTAATTCGACCTAAAGTCAAACCTTACAATAAAAACCGATGATAAA  
TACTACTAATGAAACGAACCACATCACGATATTAGTTGGTAAACCTGGAAATACTGCAAA  
GAGGGAGCCAACAACAAAACCAATGATTAATGCAAAAGTCATTAGTTTATGATGTGTTAG  
GAAATACTGGATAATTTTGCTTGAAATAATGAATCCAGCAAGCACCCCAAATCCGACTGC  
AAGTAATATAGGAAGACCGGTAAAGTTAAGTTTAACTTCAGATATTGCTAGCATGAC  
CGTACCATAGACGCCAAATACTAATAACATAAATGACCCTGAAATACCTGGGAGTAACAT  
AGCACTAGATGCACACATACCTGCAATAAAATATTTAATAATAAGACTAGTTGATAGAGT  
AAGTGTCTCCAGCATGTTTATCACCATTATTCATTAATGTAATAACAATTAAGATAGCG  
ATACCAGCTATAACCATCATGTAATGTTTGTAAATGACGTTTTATAGTTAGAAATTT  
TCAATAAATATGGAACGATACCAATGATTAATCCACCAAAGAAAAACATAGTTGGAATA  
TGGTGTGGCTTAATAAATAATTAATAAAGATTACTTAGTGATCCCATTGCCAGTAACATTC  
CAATTATAATGGGGATTAATAAATGTAAACTTGGCCAAAACGTCGTGAGAATATGCCG  
CTAATTGAAGCGATAAATTGATTGTAATACCTAACAATAATGCGATAGTCCCACCGCTA  
ACACCAGGTACCAAGTCACTCGTTCCCATAGCAAAACCTTTTAGAATATTAATCCATTTA  
AATTGTTGCAT

> **sufC**

Function: protein coding sequence; FeS assembly ATPase SufC (core genome, constant)

Best match: sufC\_CC001\_MW2-USA400\_BA000033.2[881754:882515] (completely identical)

Position: 025-contig\_192\_RC: 5966 ... 6728; Length: 762 bp

Sequence:

ATGGCATCAACATTAGAAATCAAAGACCTACATGTGTCTATTGAGGATAAAGAAATCTTA  
AAAGGTGTTAACTTGACAATTAACACTGATGAAATACATGCGATTATGGGACCAAACGG  
GACAGGTAAATCAACTTTATCATCTGCAATTATGGGACACCCAAGCTATGAAGTAACTAA  
AGGAGAAGTACTTTTAGACGGTGTAATATTTTAGAATTAGAAGTTGATGAAAGAGCAA  
AAGCAGGATTATTCTTGGAATGCAATATCCATCAGAAATTACAGGTGTTACAAATGCTG  
ATTCATGCGTTCAGCAATCAATGCGAAACGTGAAGAAGGACAAGAAATCAACTTAATG  
CAATTTATTAAGAAATTAGATAAAAACATGGATTTTCTAGACATAGATAAAGACATGGCA  
CAACGTTATTTAAATGAAGGTTTCTCAGGTGGAGAGAAGAAACGTAACGAAATCTTACAA  
TTAATGATGTTAGAACCTAAGTTTGCAATCTTAGATGAAATCGATTCAGGGTTAGACATC  
GATGCATTAATAAGTTGTATCTAAAGGTATTAACCAAATGCGTGGGGAAAACCTTTGGTGCA  
TTAATGATTACACACTATCAACGATTATTAATAATTACCTACTCTGATAAAGTACATGTAA  
TGTATGCTGGTAAAGTCGTTAAATCTGGTGGTCCAGAATTAGCAAAACGTCTTGAAGAAG  
AAGGATATGAATGGGTAAAGAAGAGTTCGGTTCAGCTGAATAA

> **sufD**

Function: protein coding sequence; putative FeS assembly protein SufD (core genome, constant)

Best match: sufD\_CC001\_MW2-USA400\_BA000033.2[882613:883920]

Position: 025-contig\_192\_RC: 6826 ... 8134; Length: 1308 bp

Sequence:

ATGACAACTGATATTTTGAACATTTCTGAAGAACAACCTTGTTGATTATTCTAAAGCCCACA  
ATGAACCTTCTTGATGACAGAATTACGTAAAAAAGCTTTGAAATTAACAGAACTTTAG  
AAATGCCAAAACCTGATAAAACAAAATTAAGAAAATGGGATTTTGATTCTTTTAAACAAC  
ACGATGTAATAAGGTGATGTTTATCAATCTTTATCACAATTACCTGAGTCAGTAAGAGAAA  
TTATTGACGTAGATCATTCTAAAACTTAGTAATTCAACATAATAATACGATTGCGTACA  
CACAAGTTGATGATAATGCATCTAAAGATGGCGTTATCGTTGAAGGTTTAGCAGACGCTC  
TTATGAACCATAGTGATTTAGTACAAAAGTACTTTATGAAAGATGCAGTAACAGTAGATG

AACATCGTATCACAGCGCTACACACGGCATTAGTTAATGGTGGCGTATTTGTTTATGTTCC  
TAAAAATGTAGTTGTAGAACATCCAGTACAATACGTTGTGTTGCACGACGACAAAAATGC  
AAGCTTTTATAACCATGTTATCATCGTTACTGAAGAAAGCGCCGAAGTCACATATGTTGA  
AAATTACTTATCAAATGCATCTGGTGAAGGAAATCAATTAATATTATTTCTGAAGTGAT  
TGCTGGTGCAAATTCAAATATCACATATGGCTCAGTGGACTATATGGATAAAGGCTTTAC  
AGGTCATATCATTGACGTGGTATTACTGAAGCGGATGCCTCAATTAATTGGGCACTAGG  
TTAATGAATGAGGGTAGCCAAATTATTGATAATACAACAAATTTATTTGGTGATCGTTC  
ACAAGTTCACTTAAATCAGTAGTTGTAGGTACAGGCCGAACAAAAAATTAATCTAACATC  
TAAATCGTACAATATGGTAAAGAAACAGATGGTTATATCCTTAAACATGGTGTTATGAA  
AGAACATGCATCGTCTGTATTTAATGGTATCGGCTACATTAAGCATGGTGGAACATAAATC  
AATTGCTAATCAGGAATCACGTGTATTAATGTTATCTGAACATGCTCGTGGTGACGCGAA  
TCCTATTTTATTAATTGATGAAGATGATGTACAAGCTGGTCATGCTGCATCAGTAGGTCGT  
GTTGATCCAGATCAACTTTACTATTTAATGAGTCGTGGTATTTCTCAAAGAGAAGCGGAA  
CGTCTTGTTATACATGGTTTCTTAGATCCAGTAGTACGTGAATTACCTATCGAAGACGTTA  
AACGTCAATTGAGAGAAGTAATTGAACGCAAAGTTTCTAAATAA

> **sufS**

Function: protein coding sequence; cysteine desulfurase (core genome, constant)

Best match: sufS\_CC007\_TCH959-USA300\_AASB02000223.1[8002:9243]

Position: 025-contig\_192\_RC: 8248 ... 9490; Length: 1242 bp

Sequence:

GTGGCCGAACACTCATTGACGTTAATGAAGTAATCAAGGATTTTCCGATATTAGATCAA  
AAAGTCAATGGCAAACGTTTAGCATATCTTGATTCAACAGCGACAAGTCAAACGCCTGTG  
CAAGTGTTAAATGTTTTAGAGGATTACTACAAGCGTTATAATTCAAACGTTTCATCGTGGT  
GTTTCATACATTAGGATCATTGGCAACTGATGGTTATGAAAATGCCCGTGAAACTGTTTCGT  
CGTTTTTATTAATGCGAAGTATTTTGAAGAAATCATTTTACACGCGGAACAACACTGCGTCG  
ATTAACCTTGTAGCACATAGCTATGGTGATGCAAATGTTGAAGAGGGCGATGAAATTGTT  
GTCACTGAAATGGAACATCATGCCAATATTGTTTCTTGGCAACAGTTAGCAAAGCGTAAA  
AATGCGACATTGAAATTTATACCAATGACAGCTGACGGTGAATTAACATCGAAGATATT  
AAGCAAACGATTAATGATAAAAACAAGATCGTTGCTATTGCACATATTTCTAATGTACTC  
GGTACAATTAATGATGTTAAAACCATTGCAGAAATAGCTCATCAACATGGTGCAATTATC  
AGTGTTGATGGGGCGCAAGCAGCACCATATGAAACTTGATATGCAAGAAATGAATGC  
TGATTTTTATAGTTTTAGTGGTCATAAAATGCTTGGACCAACAGGTATTGGCGTATTATTT  
GGTAAACGTGAGTTACTACAAAAAATGGAACCGATTGAGTTCGGTGGCGACATGATTGAT  
TTTGTAAGTAAGTATGATGCAACATGGGCTGATTTACCTACTAAATTTGAGGCGGGTACT  
CCATTAATTGCACAAGCAATTGGGCTTGCAGAAGCTATTCGCTATTTAGAACGCATAGGT  
TTTGATGCAATTCATAAATATGAACAAGAATTAACGATATATGCTTATGAGCAAATGTCT  
GCAATTGAAGGAATTGAAATTTATGGCCCGCAAAGGATCGTCGTGCAGGTGTAATAACG  
TTAATTTACAAGATGTACATCCACACGATGTTGCTACAGCCGTAGATACAGAAGGTGTA  
GCGGTTAGAGCTGGGCATCATTGTGCGCAACCGTTAATGAAATGGTTAAATGTGTCTTCA  
ACAGCTAGAGCGAGTTTTTATATATAACAACGAAAGAAGACATTGATCAGTTAATAAAT  
GCCTTGAAACAAACGAAGGAGTTTTTCTTATGAATTTTAA

> **sufN**

Function: protein coding sequence; SUF system FeS assembly protein/NifU family (core genome, constant)

Best match: sufN\_CC001\_MW2-USA400\_BA000033.2[885266:885730] (completely identical)

Position: 025-contig\_192\_RC: 9479 ... 9944; Length: 465 bp

Sequence:

ATGAATTTTAATAATCTAGATCAATTATATAGATCTGTCATTATGGATCATTATAAAAATC  
CTAGAAATAAAGGTGTATTAGATAACGGGTCTATGACAGTAGATATGAATAACCCGACAT  
GCGGTGACCGTATACGACTAACATTTGATATAGAAGACGGCATTATAAAAGATGCTAAGT  
TTGAAGGTGAAGGTTGTTTCGATTTCAATGGCAAGTGCATCGATGATGACACAAGCTGTTA  
AAGGTCATTCACTTGGAGAAGCAATGCAAATGAGCCAAGAATTTACGAAAATGATGCCT  
GGTGAAGACTATGTGATTACAGAAGAAATGGGAGATATTGAAGCATTGCAAGGTGTATC



TCAATTCCCAGCTCGTATTAATGTGCCACATTAGCTTGGAAAGCATTGGAAAAAGGTAC  
TGTTGCTAAAGAAGGTAAAGCAGAAGGTACGACTGAAGAAGAATAG

> **sufB**

Function: protein coding sequence; iron-regulated ABC transporter membrane component (core genome, constant)

Best match: sufB\_CC001\_MW2-USA400\_BA000033.2[885881:887278]

Position: 025-contig\_192\_RC: 10094 ... 11492; Length: 1398 bp

Sequence:

ATGGCTAAAAAAGCACCTGATGTTGGGGATTATAAATATGGATTCCACGACGATGATGTG  
TCCATTTTCAGATCAGAACGTGGTTAACTGAGAATATCGTTAGAGAAATTTCTAACATG  
AAAAATGAGCCGAATGGATGTTAGATTTCCGTCTTAAATCATTAAAATTGTTTTATAAA  
ATGCCAATGCCTCAATGGGGTGGCGACTTATCAGAATTGAATTTTCGATGACATTACTTAC  
TATGTAAAGCCTTCAGAACAAGCTGAACGTTTCATGGGATGAAGTGCCAGAAGAAATTA  
AAGAACTTTTCGATAAATTAGGAATTCCTGAAGCTGAACAAAAATATTTAGCTGGTGTTC  
TGCTCAATATGAATCTGAAGTTGTTTACCATAATATGGAAAAAGAAGTTGAAGAAAAAGG  
TATTATCTTTAAAGATACAGATAGTGCTTTACAAGAAAATGAAGAATTATCAAAAAATA  
CTTTGCTTCTGTAGTACCTGCAGCAGATAACAAATTTGCGGCGTTAACTCAGCAGTATG  
GTCAGGTGGTTCGTTTATGTACCTAAAAATATCAAACCTAGATACGCCACTACAAGC  
TTATTTCCGTATTAACCTCTGAGAACATGGGTCAATTTGAACGTACATTAATCATTGCTGAT  
GAAGGTGCTTCTGTACATTACGTAGAAGGTTGACTGCACCAGTTTATACAACTAGTTCTT  
TACACTCTGCTGTTGTGGAAATCATTGTGCATAAAGATGCGCACGTTTCGTTATACTACGAT  
TCAAACCTGGGCGAACAATGTATACAATTTAGTTACAAAACGTACTTTTGTATTATGAAAA  
CGGAAATATGGAATGGGTAGATGGTAACTTAGGTTCTAAGTTAACGATGAAATATCCAAA  
CTGTGTTCTTTTAGGTGAAGGTGCAAAAGGTAGTACATTATCTATTGCATTTGCTGGTAAA  
GGACAAGTTCAAGATGCCGGTGCTAAAATGATTCATAAAGCACCAAATACATCTTCAACG  
ATTGTTTCTAAATCTATTTCTAAAAATGGTGGTAAAGTTATTTATCGTGGTATTGTACATT  
TTGGACGTAAAGCAAAGGCGCTCGTTCAAATATTGAGTGTGATACATTAATCCTTAGATA  
ACGAATCAACATCAGATACAATTCCATATAACGAAGTATTCAACGATCAAATATCATTAG  
AACATGAAGCAAAGGTTTCAAAGTTTCTGAAGAACAATTATTCTATCTAATGAGTCGTG  
GTATTTCTGAAGAAGAAGCGACAGAAATGATTGTTATGGGATTCATCGAACCATTTACAA  
AAGAACTTCCAATGGAATACGCGGTCGAAATGAACCGTTTAATCAAGTTCGAAATGGAA  
GGTAGTATTGGATAG

> **attB\_phiSa1**

Function: attachment site for int6-phiETA (mobile element)

Best match: attB\_phiSa1\_empty\_CC045-agrI\_21200\_AFTN01000029.1[429654:429823]RC

Position: 025-contig\_192\_RC: 11426 ... 11596; Length: 170 bp

Sequence:

CCAATGGAATACGCGGTCGAAATGAACCGTTTAATCAAGTTCGAAATGGAAGGTAGTATT  
GGATAGCTTTAAACCGCGATGTTAAGCTATTCTTGACTTCCGGAAATGGCTATTGATACC  
ATTTTGATACTGAATATAACAAAAGCCACATTACTGTGGCTTTTTTGT

> **txbi\_sufB**

Function: bidirectional rho independent terminator of sufB and Q2YWM5

Best match: txbi\_sufB\_AB046707.1[489:534]

Position: 025-contig\_192\_RC: 11556 ... 11586; Length: 30 bp

Sequence:

TGAATATAACAAAAGCCACATTACTGTGG

> **Q2YWM5**

Function: protein coding sequence; putative membrane protein (core genome, constant)

Best match: Q2YWM5\_CC001-ST772\_118\_AJGE01000009.1[11576:11890:r]RC (completely identical)

Position: 025-contig\_192\_RC: 11822 ... 12137; Length: 315 bp

Sequence:

```
TTAAAATAAGAAAACCTATTAATAATATTAAGTTCCTACTACAGATGTTGCTAATGGACCGTA
AGTTTTAAAGACATCTTTACTTTTATAACCAACAATCGCATCTAAAAATTGAACTAAAATC
ATTGCAATGGATATAGTTATCAAAAATATAGCACTATGAATGACTAAAGAAAAAATAGCT
AATAAAAATAAAGGTAAGCTTCGACTAAGTGCATAATATGCATTTATATTATGGCTAGAT
GAACATGCTTGAATTGAATAACCTAACTTACACTGGCACTGATTATTGTAAATATTGCT
AAAACAAAATACAT
```

> **hl**

Function: protein coding sequence; putative membrane protein (core genome, constant)

Best match: hl\_CC001-ST772\_118\_AJGE01000009.1[12255:13295] (completely identical)

Position: 025-contig\_192\_RC: 12501 ... 13542; Length: 1041 bp

Sequence:

```
GTGATCATTGCCATAATTATATTGATATTTATTTTCGTTTTTCTTTTCAGGAAGCGAGACGG
CATTAACGGCTGCCAATAAAACAAAATTTAAAACCTGAAGCTGACAAAGGTGATAAAAAA
GCAAAGGCATTGTAAAGTTACTTGAAAAACCAAGTGAGTTTATTACAACGATTCTAATT
GGGAATAATGTCGCGAATATTTTATTACCAACACTTGTTACAATTATGGCTTTACGTTGGG
GGATTAGCGTTGGTATTGCATCAGCTGTTTTAACAGTTGTTATCATTTTGATTTCCGAAGT
GATTCCCAAGTCTGTCGCTGCAACATTTCCAGATAAAAATAACAAGGCTTGTATATCCAGT
TATTAATATTTGTGTCATTGTGTTTTCGCCCTATCACACTTTTAAATAAGTTGACGGAC
AGTATTAATCGAAGTTTATCTAAGGGCCAACCTCAAGAACATCAATTTTCAAAGAAGAA
TTTAAACAATGTTAGCAATTGCTGGACATGAAGGTGCTTTAAATGAAATTGAGACGAGT
AGGTTGGAAGGTGTCATTAATTTTGAAAATTTAAAAGTAAAAGATGTAGATACAACACCT
AGAATTAATGTGACGGCATTGCTTCAAATGCGACATACGAAGAAGTTTATGAAACGGTT
ATGAATAAGCCATACACTAGATATCCAGTGTACGAGGGAGATATTGATAACATTATTGGA
GTGTTTCATTCTAAATATCTGTTGGCTTGGAGTAATAAAAAAGAAAATCAAATTACAAAC
TATTCAGCTAAGCCATTATTTGTGAATGAACACAATAAAGCTGAATGGGTATTACGTAAG
ATGACTATTTCTAGAAAACATTTAGCAATTGTGTTGGACGAATTTGGTGGTACCGAAGCG
ATAGTGTACATGAAGACTTAATTGAAGAATTATTAGGTATGGAAATTGAAGATGAGATG
GATAAAAAGGAAAAAGAAAAAAGCTTTCTCAACAGCAAATTCATTTCAACAACGGAAAAA
TCGCAACGTATCTATATAA
```

> **npd**

Function: protein coding sequence; putative 2-nitropropane dioxygenase (core genome, constant)

Best match: npd\_CC001\_MSSA476\_BX571857.1[873310:874377]

Position: 025-contig\_192\_RC: 13555 ... 14623; Length: 1068 bp

Sequence:

```
ATGTGGAATAAGAATCGACTTACTCAAATGTTAAGTATTGAATATCCAATTATACAAGCA
GGTATGGCAGGAAGTACGACACCGAAATTAGTTGCATCAGTAAGTAACAGTGGTGGATT
AGGCACAATAGGCGCAGGTTACTTTAATACGCAGCAATTAGAAGATGAAATAGATTATGT
ACGCCAATTAACGTCAAATTTCTTTGGTGTAAATGTCTTTGTACCAAGTCAACAATCATAT
ACCAGTAGTCAAATTGAAAATATGAATGCATGGTTAAAACCTTATCGACGCGCATTACAT
TTAGAAGAGCCGGTTGTAAAAATTACCGAAGAACAACAATTTAAGTGTATATTGATACG
ATAATTA AAAAGCAAGTGCCTGTATGTTGTTTTACTTTTGGAAATCCAAGCGAACAGATT
ATAAGCAGGTTGAAAGCAGCGAATGTCAAACCTTATAGGTACAGCAACAAGTGTGATGA
AGCTATTGCGAATGAAAAGCGGGTATGGATGCTATCGTTGCTCAAGGTAGTGAAGCAG
GTGGACATCGTGGTTCATTTTTAAAACCTAAAATCAATTACCTATGGTTGGAACAATAT
CTTTAGTGCCACAAATTGTAGATGTCGTTTCAATTCCGGTCATTGCCGCTGGTGGAAATTAT
GGACGGTAGAGGAGTTTTGGCAAGTATTGTCTTAGGTGCAGAAGGGGTACAAATGGGCA
CTGCATTTTTAACATCACAAGATAGTAATGCATCAGAACTACTACGAGACGCAATTATAA
ATAGTAAAGAAACAGATACAGTCATTACAAAAGCGTTTAGTGGAAGCTTGCACGCGGT
ATCAACAATAGGTTTATCGAAGAAATGTCCCAATACGAAGGCGATATCCCAGATTATCCA
ATACAAAATGAGCTAACAAGTAGCATAAGAAAAGCCGCGAGCAAACATCGGCGACAAAG
AGTTAACACATATGTGGAGTGGACAAAGCCGCGACTAGCAACAACGCATCCCGCCAAC
ACCATCATGTCCAATATAATCAATCAAATTAATCAAATCATGCAATATAAATAA
```

## > **Q2FZX5**

Function: protein coding sequence; putative 5'-nucleotidase (core genome, constant)

Best match: Q2FZX5\_CC001\_MSSA476\_BX571857.1[876268:877587]

Position: 025-contig\_192\_RC: 16594 ... 17914; Length: 1320 bp

Sequence:

```
TTGAGGCTTACAATTTATCATAACGAACGATATTCATAGTCATTTACATGAATACGAACGC
ATTAAAGCATATATGGCAGAACAACGGCCACGACTTAATCATCCTTCTTTATATGTTGATC
TAGGTGATCATGTAGATTTATCCGCACCTATAACTGAAGCAACTTTAGGTAAAAAGAATG
TGGCATTACTAAATGAAGCAAAATGTGATGTTGCAACAATCGGTAATAATGAAGGGATG
ACCATTTACACGAAGCTTTAAATCACCTTTACGACGAAGCAAAATTTATAGTGACATGT
AGCAATGTTATAGATGAATCAGGTCATTTACCAAATAATATCGTTTCTTCTTATATTAAGG
ATATAGACGGTGTGAAAATACTATTCGTTGCAGCGACAGCACCTTTTACCCCATTTTATCG
TGACTAAATTGGATTGTTACCGATCCACTTGAATCTATAAAAGAAGAAATTGAACTTCA
ACGAGGTAAATTTGATGTATTAATCGTGCTAAGTCATTGTGGCATTTCCTTCGATGAAACA
TTATGCCAAGAATTGCCTGAAATTGATGTCATTTTTGGTAGTCATACGCATCATTATTTTG
AACATGGTGAATCAATAATGGTGTACTGATGGCGGCAGCTGGAAAGTATGGTAATTATC
TTGGAGAGGTTAATTTAACTTTTGAGGCACATAAAGTAGTACATAAACTGCAAAGATTA
TTCCTTTAGAAACATTACCTGAAGTTGAACTTCATTTGAAGAAGAAGGAAAAACGTTAA
TGTCCAATTCAGTAATTCAACATCCAGTAGTGCTTAAGCGTAGTATGAATCACATAACTG
AAGCTGCATACTTATTAGCTCAAAGTGTTTGTGAGTATACACATGCACAATGTGCCATCA
TCAATGCTGGCTTACTCGTTAAAGATATTGTAAAAGATGAAGTGACAGAATATGACATTC
ATCAAATGTTACCGCATCCGATTAATATGGTAAGGGTTAGACTTTCTGGTGTGAAATTA
AAGAGATTATAGCTAAAAGTAATAACAAGAATATATGTATGAACATGCACAAGGTTTG
GGTTTCAGAGGGAATATATTTGGAGGATATATTCCTTTATAATTTAGGGTACATTCATTCTA
CAGGGCGTTACTATCTGAATGGAGAAGAAATCGAAGACGACAAAGAATATGTATTAGGT
ACGATAGACATGTATACGTTCCGGTCGTTATTTCCCAACACTGAAAGAATTACCAAAGAG
TATTTAATGCCAGAGTTTTTAAGAGATATATTTAAAGAAAAATTATTGGAATATTA
```

## > **lipA**

Function: protein coding sequence; lipoyl synthase (core genome, constant)

Best match: lipA\_CC001\_MW2-USA400\_BA000033.2[893702:894619]

Position: 025-contig\_192\_RC: 17997 ... 18915; Length: 918 bp

Sequence:

```
ATGGCGACAAAAACGAGGAAATATTACGTAAACCGGATTGGTTGAAAATAAAATTA
TACCAACGAAAACCTATACAGGACTTAAGAAGATGATGAGGGAAAAAATCTTAATACTG
TATGTGAAGAAGCTAAATGTCCTAATATACATGAATGTTGGGGTGCACGTCGTACAGCGA
CATTTATGATTTTAGGTGCCGTATGTACAAGAGCTTGTCTGTTTTTGTGCGGTTAAGACAGG
TTTACCTAATGAACCTTGATTTAAATGAGCCTGAACGTGTAGCTGAATCAGTTGAATTAAT
GAACCTGAAACACGTTGTTATCACTGCTGTTGCGCGTGATGATTTAAGAGATGCTGGTTC
AAATGTTTATGCTGAGACAGTACGTAAAGTTAGAGAAAGAAATCCATTTACAACGATTGA
AATTTTACCATCAGATATGGGCGGGGACTATGATGCGTTAGAAACATTAATGGCTTCAAG
ACCTGACATTTTAAACCATAATATTGAAACTGTTTCGTCGATTAACACCGAGAGTTCGTGC
GCGTGCGACTTACGACAGAACATTAGAGTTTTTACGTCGTTCAAAGAATTACAACCGGA
TATCCCAACTAAATCAAGTATTATGGTTGGATTAGGTGAACTATAGAAGAAATTTATGA
AACGATGGATGATTTACGTGCGAATGATGTAGATATTTTAAACGATTGGTCAATATTTACA
ACCTTCACGTAAACATTTAAAGGTTCAAAAATATTACACGCCTTTAGAGTTTGGTAAATT
AAGAAAAGTGGCAATGGATAAAGGGTTTAAACATTGCCAAGCTGGACCTTTAGTACGTA
GTTCTTATCATGCGGATGAGCAAGTAAATGAAGCTGCTAAAGAAAAGCAACGCCAAGGT
GAGGCACAGTTAAATAGTTAA
```

## > **nagD**

Function: protein coding sequence; nagD-like protein (core genome, variable)

Best match: nagD\_CC005\_Mu50-VRSA\_BA000017.4[972381:973160] (completely identical)

Position: 025-contig\_192\_RC: 20304 ... 21084; Length: 780 bp

Sequence:

```
ATGAAACAGTATAAAGCGTATTTAATCGATTTAGATGGCACAATGTATATGGGAACAGAT
GAGATTGATGGAGCAAAACAATTCATCGATTATTTAAATGTA AAAAGGCATTCCTCATTTA
TACGTA ACTAATAATTCAACAAAAACACCTGAGCAAGTAACTGAAAAATTACGTGAAAT
GCACATTGATGCTAAACCAGAAGAGGTTGTAACGTCAGCGTTAGCCACTGCTGATTATAT
TTCAGAACAAATCACCAGGAGCATCAGTATATATGTTAGGTGGGAGTGGTTTAAATACTGC
GTTAACCGAAGCGGGACTTGTCAATTA AAAATGACGAGCATGTTGATTATGTAGTTATTGG
ACTTGACGAACAAGTTACATATGAAAAGCTTGCGATTGCAACGTTAGGTGTAAGAAATGG
TGCAACATTTATTTCTACAAATCCTGATGTATCAATTCCTAAAGAGCGTGGTTTATTACCT
GGTAATGGTGCTATTACAAGTGTTGTAAGTGTATCGACAGGTGTATCGCCACAATTTATT
GGTAAACCAGAACCGATTATTATGGTTAAAGCATTAGAAATTTTAGGATTAGATAAATCC
GAAGTTGCTATGGTAGGCGATTTGTACGATACCGATATTATGTCTGGTATTAACGTAGGT
ATGGATACGATTCATGTACAAACAGGTGTATCTACGTTAGAAGATGTGCAAAAATAAAAAT
GTGCCACCAACGTATTCTTTTAAAGATTTAAATGAAGCAATAGCTGAATTAGAAAAATAG
```

### > **gyaR**

Function: protein coding sequence; glyoxylate reductase (core genome, variable)

Best match: *gyaR*\_CC001-ST772\_118\_AJGE0100009.1[20870:21829] (completely identical)

Position: 025-contig\_192\_RC: 21116 ... 22076; Length: 960 bp

Sequence:

```
TTGGTAAAAATAGTTGTTTCGAGGAAAATCCCAGATAAATTTTATCAACAATTAAGTAAA
CTTGGTGACGTTGTTATGTGGCAAAAATCATTAGTGCCTATGCCTAAAGATCAATTTGTGA
CAGCACTTCGTGACGCAGATGCTTGT TTTATTACATTAAGTGAACAGATCGATGCAGAAA
TTTTAGCGCAATCACCAAATTTAAAAGTAATTGCGAATATGGCTGTAGGATATGACAACA
TCGATGTTGAAAGTGCAACAGCGAATAACGTGGTTGTCACGAATACACCAAATGTACTTA
CTGAAACAACTGCAGAATTAGGATTTACATTAATGCTTGCTATAGCACGCCGTATTGTAG
AAGCTGAAAAATATGTAGAAGCAGATGCATGGCAAAGCTGGGGTCCTTATTTATTGTGAG
GTAAAGATGTCTTCAATTC AACTATTGGAATATATGGTATGGGAGATATTGGTAAAGCTT
TTGCAAGAAGGTTGCAAGGGTTAATACTAATATTCTTTATCATAATCGATCAAGACATA
AAGATGCAGAGGCCGACTTTAATGCAACATATGTTTCTTTTGAAACGTTGTTAGCAGAAA
GTGATTTTATCATCTGTACAGCGCCACTTACAAAAGAAACACATCATAAATTTAATGCTG
AAGCATTGTAACAAATGAAA AATGATGCAATTTTTATTAATATCGGTAGAGGACAAATTG
TAGATGAAACAGCATTAAATCGATGCACTAGACAATAAAGAAATTTTAGCATGTGGTTTAG
ATGTATTAGCAAATGAACCGATTGATCATAACATCCATTAATGGGACGTGATAATGTTC
TGATTACACCACACATTGGTAGCGCATCAGTAACAACACGGGACAATATGATTCAATTAT
GTATTAATAATATAGAAGCGGTTATGACAAATCAGGTACCACATACTCCAGTAAATTGA
```

### > **dltX**

Function: protein coding sequence; putative protein located in teichoic acid biosynthesis gene cluster (core genome, constant)

Best match: *dltX*\_CC001\_MW2-USA400\_BA000033.2[898192:898344] (completely identical)

Position: 025-contig\_192\_RC: 22487 ... 22640; Length: 153 bp

Sequence:

```
ATGAAATCTAAAAGTAAACAGCCACCTAATAAATATGTTGAAGCATTCAAACCATATTTA
TTAACTACTATTGTATTTGGCAATATTTATTACTTTATATTTAATTTATGGCAGTGGCGACA
CACACAATAACTTCATTTATAATGAGTTCTAA
```

### > **dltA**

Function: protein coding sequence; D-alanine-D-alanyl carrier protein ligase (core genome, constant)

Best match: *dltA*\_CC001\_MW2-USA400\_BA000033.2[898360:899817]

Position: 025-contig\_192\_RC: 22655 ... 24113; Length: 1458 bp

Sequence:

```
ATGACAGATATTATTAACAAGCTGCAAGCGTTTGCGGATGCAAATCCACAAAGCATTGCT
GTTAGACACACA ACTGATGAATTAACCTTATCAACAGTTAATGGATGAGTCTAGTAAATTA
GCACATCGATTACAAGGTAGTAAGAAACCGATGATTTTATTCGGTCACATGTCACCATAT
```

ATGATTGTTGGGATGATTGGTGCCATTAAGCAGGATGTGGATATGTACCTGTAGACACT  
TCAATTCCTGAAGACCGTATTAATAATGATTATTAACAAGGTTCAACCAGAGTTTGTATTTA  
ATACGACTGATGAATCATTTGAAAGTTTAGAAGGCGAAGTATTTACAATAGAAGATATTA  
AAACATCTCAAGACCCAGTAATTTTTGATAGTCAGATTAAGATAACGACACAGTATACA  
CAATCTTTACATCTGGTTCTACTGGGGAACCTAAAGGTGTTCAAATTTGAATATGCAAGTTT  
AGTTCAATTTACTGAGTGGATGTTAGAACTTAATAAATCAGGAAATGAACAACAATGGCT  
TAACCAAGCGCCATTTTCATTTGATTTATCTGTAATGGCTATTTATCCATGTTTAGCATCA  
GGCGGTACATTAATCTTGTAGATAAAAACATGATTAATAAACCTAAATTATTAATGAA  
ATGCTAACAGCAACACCGATTAACATTTGGGTATCAACACCATCATTTATGGAAATGTGT  
TTATTATTACCAACGCTTAATGAAGAACAATATGGTAGTCTTAATGAATTTCTTCTGTG  
GTGAAATTCTACCTCACAGAGCAGCAAAAGCGTTAGTAAACCGTTTCCAAGTGCAGCA  
TTTACAACACATATGGTCCAACCTGAAGCTACGGTAGCAGTTACAAGTATTCAAATTACAC  
AAGAAATCTTAGATCAATATCCGACATTACCTGTTGGCGTTGAAAGACCAGGCGCAAGAT  
TATCTACTACAGATGAAGGTGAACTTGTTATCGAAGGTCAAAGTGTAAGTTTAGGATACT  
TAAAAAATGACCAAAAAACAGCTGAAGTATTTAATTTTCGATGACGGTATTCGTACATATC  
ACACTGGTGATAAAGCGAAGTTTGAAAATGGTCAATGGTTCATTCAAGGTCGTATTGATT  
TCCAAATCAAATTGAATGGCTACAGAATGGAATTAGAAGAAATTGAAACACAATTACGC  
CAGTCTGAGTTCGTAAGAAGCGATTGTTGTACCTGTATATAAAAATGATAAAGTTATT  
CATTTAATTGGTGCAATTGTGCCAACGACTGAAGTTACGGACAATGCAGAAATGACTAAA  
AATATTA AAAATGACTTGAAATCACGCTTACCAGAGTATATGATTCCTAGAAAGTTTGAA  
TGGATGGAACAATTGCCATTGACTTCAAATGGTAAAATTGACAGAAAGAAAATTGCAGA  
GGTAATTAACGGATGA

### > **dltB**

Function: protein coding sequence; hypothethcal membrane transporter (core genome, constant)

Best match: dltB\_CC001\_MW2-USA400\_BA000033.2[899814:901028] (completely identical)

Position: 025-contig\_192\_RC: 24109 ... 25324; Length: 1215 bp

Sequence:

ATGATTCATATGGTGATTTTACATTCTTCTTAATTGCTTTAATTGCATTATTACCAGTCAT  
TATACTTGGATTTTTAGGTAAGCGAAGTTACATTTATAATGGCGTAGTTACAGCATTATG  
ATTGTGTTAATCTTTTCTTCTGATAAACATAATCTGTTTGACCAAAAGTATTTAAGTGTT  
AATTAATTAGTTTTATTATTTACGTCGTATGGCAAGTTTTATTGATAATGTTTTATTATCAT  
TCAAACCAAAAAATAATTCATTTTCAAATTTGTAAGTGAATGGTTTTATCAATATTGC  
CATTAGCACTTGTGAAAGTGTTACAAAGTACATGGTTAGGTGGACATCAGATTCCTTCC  
ATGAAAGTAAATTAATTGAATTTGTTGGTTTCTTAGGAATTTCTTATGTTACATTCAAAAG  
TGTGCAGTTAATTATGGAAATTCGTGATGGTCTATCAAAGAAATTAAGTATGGAAATT  
AATTCAATTTATTTCACTTCTTCCCAACGATTTTCATCTGGACCAATCGATCGTTACAAACGT  
TTCGTTAAAGACGATAAAAAAGTACCAACAGGCAATGAATATCGTGAATTAGTATTTAAA  
AGCAATTCACATGATTATGCTTGGTTTCTTGTATAAATATATTGTTGCTTACTTTATTAACA  
CATATGCAATCATGCCGTTACAATTAGACTTACATGGCTTTGTCAATTTGTGGTTATATAT  
GTACGCATACAGCTTATATTTATTTCTTTGACTTTGCAGGTTATAGTTTATTTGCGATAGCA  
TTTAGTTATTTATTCGGTATTA AAAACACCACCAAACTTCGATAAACCTTTCAAAGCGAAA  
AATATTAAGATTTCTGGAATAGATGGCATATGACATTATCATTCTGGTTCAGAGATTGT  
ATTTACATGAGATCTTTATTCTACATGTCTCGTAAAAAATTATTGAAGAGTCAATTTGCAA  
TGTCTAACGTGGCATTCTTAATCAACTTCTTCATAATGGGAATTTGGCATGGTATCGAAGT  
GTATTACATTGTTTATGGTTTATACCATGCAGCATTGTTTATAGGTTATGGCTATTATGAA  
CGTTGGCGTAAGAAACATCCGCCACGTTGGCAAAATGGTTTCAACACAGCACTTAGCATT  
GTGATTACATTCACCTTTGTAACATTTGGCTTTTAAATCTTCTCAGGTAAACTTATATAA

### > **dltC**

Function: protein coding sequence; D-alanine--poly(phosphoribitol) ligase subunit 2 (core genome, constant)

Best match: dltC\_CC001\_MW2-USA400\_BA000033.2[901046:901282] (completely identical)

Position: 025-contig\_192\_RC: 25341 ... 25578; Length: 237 bp

Sequence:

ATGGAATTTAGAGAACAAGTATTAATTTATTAGCAGAAGTAGCAGAAAATGATATTGTA  
AAAGAAAATCCAGACGTAGAAATTTTTGAAGAAGGTATTATTGATTCTTTCCAAACAGTT  
GGATTATTATTAGAGATTCAAAATAAACTTGATATCGAAGTATCTATTATGGACTTTGATA  
GAGATGAGTGGGCAACACCAAATAAAATCGTTGAAGCATTAGAAGAGTTACGATGA

### > **dltD**

Function: protein coding sequence; putative exoprotein (core genome, constant)

Best match: dltD\_CC001\_MW2-USA400\_BA000033.2[901279:902454] (completely identical)

Position: 025-contig\_192\_RC: 25574 ... 26750; Length: 1176 bp

Sequence:

ATGAAATTAACCTTTTTTACCCATTTAATTAGTGGAGCGGTATTCATTGTCTTTCTATT  
ATTACCTGCTAGTTGGTTTACAGGATTAGTAAATGAAAAGACTGTAGAAGATAATAGAAC  
TTCATTGACAGATCAAGTACTAAAAGGCACACTCATTCAAGATAAGTTATACGAATCAAA  
CAAGTATTATCCTATATACGGCTCTAGTGAATTAGGTAAAGATGACCCATTTAATCCTGC  
AATTGCATTAAATAAGCATAACGCCAACAAAAAAGCATTCTTATTAGGTGCTGGTGGTTC  
TACAGACTTAATTAACGCAGTTGAACTTGCATCACAGTATGATAAATTAAGGTAAAGAA  
ATTAACATTTATTATTTACCACAATGGTTTACAAACCATGGTTTAAACGAATCAAACTTT  
GATGCTCGTATGTCTCAAACCTCAAATTAATCAAATGTTCCAGCAGAAAAACATGTCTACT  
GAATTAACCGTTCGTTATGCACAACGTTTATTACAGTTTCCACATGTACACAATAAAGAA  
TACTTGAATCTTATGCTAAAAACCCTAAAGAACTAAAGATAGTTATATTTCTGGTTTTA  
AAGAGAATCAATTGATTAATAAGCGATTAAATCATTGTTTGCAATGGATAAATCTC  
CATTAGAACATGTTAAACCTGCTACAAAACAGACGCTTCTTGGGATGAGATGAAACAAA  
AAGCAGTTGAAATTGGTAAAGCTGATACTACATCGAATAAATTTGGTATTAGAGATCAAT  
ACTGGAAATTAATTCAAGAAAGTAAGCGTAAAGTTAGACGTGACTACGAATTCAATGTTA  
ATTCTCCAGAATCCAAGATTTAGAATTACTTGTAAAAACAATGCGTGCTGCTGGTGCAG  
ATGTTCAATATGTAAGTATTCCATCAAACGGTGTATGGTATGACCACATTGGTATCGATA  
AAGAACGTCGTCAAGCAGTTTATAAAAAAATCCATTCTACTGTTGTAGATAATGGTGGTA  
AAATTTACGATATGACTGATAAAGATTATGAAAAATATGTTATCAGTGATGCCGTACACA  
TCGGTTGGAAAGGTTGGGTTTATATGGATGAGCAAATTGCGAAACATATGAAAGGTGAA  
CCACAACCTGAAGTAGATAAACCTAAAAATTA

### > **tnpIS431-06**

Function: protein coding sequence; transposase for IS431 (mobile element)

Best match: tnpIS431-06\_circ\_S-epidermidis\_GQ900381.1[43799:43807] (completely identical)

Position: 025-contig\_192\_RC: 27569 ... 27578; Length: 9 bp

Sequence:

ATGAACTAT

### > **ampA**

Function: protein coding sequence; cytosolic leucine aminopeptidase (core genome, constant)

Best match: ampA\_CC001\_MW2-USA400\_BA000033.2[907224:908699] (completely identical)

Position: 025-contig\_192\_RC: 31519 ... 32995; Length: 1476 bp

Sequence:

ATGAATTTTAAATTAATAACACACTAAGCAACGAAATAAATACATTGATTATTGGTATA  
CCAGAACATTTAAATCAGTTAGAGCGCATTAGTTTTAATCATATCGATATTACAGAATCA  
CTTGAAAGACTAAAACATCAACATATTATTGGTAGTAAAGTTGGGAAGATTTATACAACT  
GCATTTGATGTACAAGATCAAACATATCGTTTAAATTACAGTTGGTTTAGGAACTTAAAG  
ACACGTAGTTATCAAGATATGTTGAAAATATGGGGACATCTTTTCCAATACATAAAGTCA  
GAACACATTGAAGATACGTATTTACTTATGGATTTCATTTATTTCAAATATGATCAGTTAT  
CAGATGTATTAATGGCATGCGGTATTCAAAGTGAGCGTGCAACATATGAATTCGATCATT  
ATAAATCAAGTAAGAAGGCACCGTTTAAAGACGAATTTAAACCTTATTAGTGAATCATTAA  
TTGAATTAGATTTTATTCATGAGGGTATCAGTATTGGCCAATCCATTAATTTGGCAAGAGA  
CTTTAGTAATATGCCACCGAATGTATTAACACCACAAACATTTGCAGAAGATATTGTTAA  
TCATTTTAAAAATACAAAGGTCAAAGTAGATGTTAAAGATTATGACACTTTAGTTTCTGA  
AGGATTCGGACTTTTACAAGCAGTAGGTAAAGGTAGTAAGCATAAACCGAGATTAGTAA

CCATCACATATAATGGCAAAGACAAAGATGAAGCACCAATTGCCTTAGTTGGTAAAGGT  
ATAACGTATGATTCTGGTGGTTATAGTATTAACGAAGAATGGCATGGCTACAATGAAG  
TTTGACATGTGTGGCGCTGCGAATGTCGTTGGTATCATTGAAGCGGCTAGTCGTTTACAAC  
TGCCTGTAAATATTGTCGGAGTGCTTGCCTGTGCTGAAAATATGATAAATGAAGCATCAA  
TGAAGCCAGATGATGATTTACAGCATTAAAGTGGTGAACCTGTAGAAGTAATGAATACAG  
ACGCTGAAGGTAGATTAGTCTTGCAGATGCTGTGTTTTATGCAAATCAATATCAGCCTA  
GTGTGATTATGGACTTTGCTACATTAACGGGTGCAGCAATTGTTGCACTAGGCGATGATA  
AAGCTGCTGCATTTGAATCGAATAGTAAAGTGATATTAACGATATATTACAAATAAGTT  
CTGAAGTCGATGAAATGGTATTTGAATTACCGATTACTGCAACCGAACGTGCAAGTATTA  
AACACAGTGATATCGCTGATTTAGTTAACCATACGAATGGACAAGGTAAAGCGCTATTTG  
CGGCAAGTTTTGTAACACATTTTAGTGGTCAAACACCTCACATTCATTTTCGATATTGCAGG  
TCCAGCAACGACTAATAAAGCTTCATATAATGGTCCAAAAGGGCCAACAGGATTTATGAT  
TCCGACGATAGTACAATGGTTAAAACAACAATAA

### > **nhaC3**

Function: protein coding sequence; Na<sup>+</sup>/H<sup>+</sup> antiporter (core genome, variable)

Best match: nhaC3\_CC001\_MW2-USA400\_BA000033.2[909110:910426] (completely identical)

Position: 025-contig\_192\_RC: 33405 ... 34722; Length: 1317 bp

Sequence:

ATGATAAATGCAGTAGTAATAGCAGTAATTTTAATGATTGTGCTATGTTTATGTTCGATTAA  
ACGTAGTTATAAGCTTATTTATCAGTGCCTAGTTGGTGGCTTAATTTTCAGGCATGAGCAT  
TGAAAAAGTTATAAATGTATTTGGGAAAAATATAGTCGATGGTGTGCTGAGGTAGCATTAAAG  
CTATGCTTTATTAGGTGGATTTGCAGCATTAAATTTTCATACAGTGGTATCACAGACTATTTA  
GTAGGAAAAATTATAAATGCAATTCACGCTGAAAATAGTCGATGGTCAAGAGTTAAAGT  
CAAAGTGACAATAATCATTGCATTATTAGCTATGAGTATCATGAGTCAAACTTAATTCC  
TGTACATATTGCATTCATTCCAATTGTATCCACCATTGTTAAGTCTGTTAATGACTTA  
AAAATAGATAGACGTTAATCGGTTTGATTATCGGTTTGGTTTATGTTTCCCGTATGTGT  
TATTACCATATGGATTCGGTCAAATTTTCCAGCAAATTATTCAAAGTGGCTTTGCAAAGGC  
GAATCACCCAATTGAGTTAATATGATTTGGAAAGCAATGCTTATTCCTTCAATGGGGTAT  
ATTGTTGGCTTACTTATCGGTTTATATGTATATCGTAAACCACGTGAATATGAAACACGTA  
AAATTTTCAGATAGTACAATGTTACAGAGTTAAAACCATATATCTTAATAGTAACAATTG  
TAGCAATACTAGCTACATTTTTAGTACAAACATTTACAGATTCAATGATTTTTGGTGCCT  
GGCAGGGGTACTCGTATTCTTTATTTACAGTGCATATAATTGGTATGAATTAGATGCTAAG  
TTTGTGAAAGGTATTAATAATTATGGCTTATATTGGTGTAGTTATTTAACAGCAAATGGAT  
TTGCTGGTGAATGAATGCTACTGGTGTATATAGATGAATTAGTTAAAACCTTTAACAAGTA  
TTACTGGTGATAATAAATTATTTAGCATTATCATGATGTATGTGATAGGTTTAATTGTCAC  
TTTAGGTATTGGATCATCATTTGCAACAATTCCTATTATCGCATCATTATTCATTCCTTTTG  
GAGCGTCAATTGGACTAGATACAATGGCATTAAATCGCATTGATTGGAACAGCGAGTGCAT  
TAGGTGACTCAGGTTACCTGCAAGTGATTCAACATTAGGACCAACTGCGGGATTAAATG  
TTGATGGCCAACATGATCATATACGCGATACATGTGTACCAAACCTTCTGTTTTATAATAT  
TCCTTTAATGATTTTCGGTACTATTGCTGCTATGGTACTATAA

### > **mnhG**

Function: protein coding sequence; Na<sup>(+)</sup>/H<sup>(+)</sup> antiporter/subunit G

Best match: mnhG\_CC008\_COL\_CP000046.1[951804:952160:r]RC (completely identical)

Position: 025-contig\_192\_RC: 36573 ... 36930; Length: 357 bp

Sequence:

CTACAATTTTGTGTCTTTTAAGTCTTCCGAAATTTTCATCGACTTTAGTCTTTTTAGTATAAG  
GCGTTTTAATATTATATGCTGCTTTCATAATCATATGACTTGAAAGAGGACCTGTAATTA  
TACAAAGATAATCGCAACGATTAATTGCATATTTACAAAACCTTGAGTAGCAATAAAATA  
TAAAACGTACCAAATAGTAATGACATTGCACCTAATGTTGATGCTTTTCCGGCAGCATG  
TGCACGTGAATATACATCTTCAAGTCTCAATAATCCTATAGCTGCTAGGGCGCTAATTA  
AGCACCGATGATAACAAAGATAAGTGCAAGACTAATCAGTATGATTTTGATCAT

### > **mnhF**

Function: protein coding sequence; Na(+)/H(+) antiporter/subunit F

Best match: *mnhF*\_CC001\_MW2-USA400\_BA000033.2[912612:912905:r]RC (completely identical)

Position: 025-contig\_192\_RC: 36907 ... 37201; Length: 294 bp

Sequence:

```
CTAATCAGTATGATTTTGGATCATGTTCAATCACCTTACCTTTGTCCATAAAATTTAGAGAAT
ACTGCAGTACCTAAAAAAGCTAATATACCAATCATCATAATAACGACAATCATGTATTTA
ATATTTAATAAAAATACTGAATAATGCTATAACTGCCATTAATTGAAGACCAATCGCATCT
AATGCGACAACACGATCGGCAAGTGATGGGCCTAGCACAAACGCGAATGAGCATAGCTAA
CATAGAAATGACAACCTATGATTAATGCAATAACGATAATAACATTATGATTCAT
```

### > ***mnhE***

Function: protein coding sequence; Na(+)/H(+) antiporter/subunit E

Best match: *mnhE*\_AB015981.1[5474:5953]RC

Position: 025-contig\_192\_RC: 37200 ... 37680; Length: 480 bp

Sequence:

```
TTATATTTTCGCCACCTCTCTTACAATTTTCTCTAATGATGTTTTAATACTTTCTACTTCTTG
CTCTTTAGTTGAAAAATCTATGGCATGAATATAAATTTTTGTACGATCGTCACTTACACCA
AGCACTACAGTACCAGGTGTTAATGTAATTAATTAGACAGCAAGACAATTTGCCAATCT
TTTTTTAAATCTGTGTGATAAACAAAGAATCCTGGTTCATTTTTAATCGAAGGTTAATAA
TAATTTTCAAACATCAAATTAGCTTTAATCAGTTCGATTAAGAAAATAATAACTAATTT
AATAATACGATATAGCGTGATGACATAAAATCTACCTGGTAACACCCTGTGTAAGAGGTA
AACAGAAGACTAGGCCAAAGATGAAACCTAACACAAAGTTATTTGTTGTGTAACTATTTGT
CACAAACAACCAAAACACTGCGATAATAAAGTTTAATACTAATTGTACAGCCAT
```

### > ***mnhD***

Function: protein coding sequence; Na(+)/H(+) antiporter/subunit D

Best match: *mnhD*\_AB015981.13976:5472RC

Position: 025-contig\_192\_RC: 37681 ... 39178; Length: 1497 bp

Sequence:

```
TTATTTACCTCCTAATACAGCTTTAACATAGGTTGATGGATTGTAGAATGTTTCTGCACCA
GCTTTTACCATTGGATATAAGTAATCTGCTGACAATCCATATAAAACAGTTATCACAACCT
GCAACGATTGCAATCGTAGTTAAATAATTGACGTCGACTTTGTTATTAAGATCATATCCTT
TTGGTTGACCGAAAAAGCCTTGTAGGAATATGCGAATGACAGAATATAATACGACTAAA
CTTGATAATAAGACAATGACACCACTTAAATAAAATCCTCTTTCAAATGTTGATTGGACA
ATGAAAAATTTTCATAAAAGCCACTGAGTGGGGGAATGCCAGCTAAACTTAATGCTGCG
ATAAAGAATGACCAACCAAGTACAGGATATCGTTTTAATTAAGCCACCAAATTGTCTTAAA
TCAGCAGTGCCTGTAATTTTAATCATAATTCCGATAAGCAAGAATAATGCAAGTTTTACT
AACATGTCGTGCAATGTATAGTAAATAGCCCCAATCATACCTGACTCTGTCATCATTGCA
ACGCCGACTAAGATCACACCTACAGCAATCATGACATTGTATAGGATGATTTTTTTAATG
TTGGCATATGCAACAGCACCGACACAACCAAGATGATCGTTAATAATGCTAAGAATAA
AATGACATAATGTGAAAAGCTTACATTACTAAAGAATAGGCTCAATGTTCTAGCGAT
TGCATAAACACCAACTTTTGTTAACAAAGCACCACCAAGAATGCAATGATTGGAATTGGTGG
TGCATAGTATGCACTAGGTAACCAACAAACATTGGGAATACGCCAGCTTTTGTAGCAAA
AACAAAGATAAATAGTATGAAAACGATATTGACTAAGCCACTGTCATGCGCTGAAAGGT
TAGCTAATTTATTGCTTATATCTGCTAGATTCAATGTTCCCTACTACTGAATATAAAATCGC
TACACCCATTACGAAGAAGGATGACGATACAACGTTAACAAGAACATATTTGATTGTTTC
TTGTAGTTGAATTTTTGTAGAACCAATTACTAATAAGAAATAAGATGACATTAATAAATAC
TTCGAAAAATACGAATAGGTTGAAAATGTCACCAGTTGTGAATGCACCAATGATACCTAT
TAACATAAATAGTACTGAAAATAATAATAATATCTTTCACGTTCAATACCAATTGTTTG
GTATGAATATAAAATCACAATAGCTGTAATAATAACTAGTAATTATTAGTAGGGCACT
GAATATGTCTAATACAAAGACAATACTGTATGGTGCTTTCCATGAACCTAGCTCTACGCG
TATTGGTCCATGTTTAAACAACATTTGCTAAATTGATAATTGCCACGACCAAGGTTAATAAT
GTACCGCCTAGTGCACATAACGCTTTATAATAGGACGCTTTCCAATAAAGACAAGTAAT
ATGGCTGTAATTACTGGAATAACTAGCGTTAACACAAGCATATTACTTTCAATCAT
```



> **mnhC**

Function: protein coding sequence; Na(+)/H(+) antiporter/subunit C

Best match: mnhC\_CC001\_MW2-USA400\_BA000033.2[914875:915216:r]RC (completely identical)

Position: 025-contig\_192\_RC: 39170 ... 39512; Length: 342 bp

Sequence:

```
TCAATCATCTTCTGGAACCTCTTTCATACTCTCAACGTTATCTGTGCCTAATTCTTTATATG
TTCTAAATGCTAATACTAAGAAAAAGGCTGTTGTGCGCAAAGGCGATAACGATTGCTGTTA
AAATAAGTGCTTGCGGGATAGGATCAACATAGCTTTTTACGTTTCGCTTCATAAATTGGAA
CAGTACCATGTTTAAAGTCCGCCCATAGTTATTAATAAATAAATTTGCTGCATGTGTTAATAG
TGTAGTTCCCATAAACAATTCGTATCAGACTTTTAGACAAAACGAGATAGACACTAATTGC
TGTGAGAATACCACTAACAAAAATCATAATAATTTCCAC
```

> **mnhB**

Function: protein coding sequence; Na(+)/H(+) antiporter/subunit B

Best match: mnhB\_AB015981.1[3214:3642]RC

Position: 025-contig\_192\_RC: 39511 ... 39940; Length: 429 bp

Sequence:

```
CTATTCGTTCTCTCCAATCGAAATAATAATTGTCATGACAGTACCAACTACTGCACATAAA
ACACCGAAATCAAAGAATACTGCTGTTGTCATATGAACAGGTTCTAATATAAATAACGGT
ATATCAAATGTGACATGCGTAAAGAAATTTTTGCCTAAAAACCAACTTGCATAGGCGTC
GCAATACAAAAACTAATCCGATACCTATCAAGATTTTAAAAATCTAATGGGAAAATTTTA
CGCATTGTTTCTATATCAAATGCAATCGTAATGATAACAAGTGAAGTTCGGAATAATAAT
CCGCCGACGAATCCGCCACCAGGTGTATAATGTCCTGCTAAGAAAAGTGAAAAACAAA
GACCATTACCATGAAAAAGATAATAACTGCAGCAAATTGCAAATTAGATCATTTTGTTC
TCTATTCAT
```

> **mnhA**

Function: protein coding sequence; Na(+)/H(+) antiporter/subunit A

Best match: mnhA\_CC001\_MW2-USA400\_BA000033.2[915637:918042:r]RC

Position: 025-contig\_192\_RC: 39932 ... 42338; Length: 2406 bp

Sequence:

```
CTATTCATGATTTTTACCTCGTTACCTTGCGTTTGACGCTTTTTACGTAATTTAATCATTG
TATATACAGCTAATCCTGCGATACCAAGCACAGATGACTCGAATAAAGTATCCATACCAC
GGAAATCAACAAGTATGACGTTTACCATGTTTTTACCGTGAGCTAAATCATAAACGTGCT
CTTGATAAACTTAGATATCGATTCAAATGTCTATTTCCGTATGCAATTAACCGATAAT
AATGACGGACAAACCAACACCACCAGCAATTAAGCATTAGTAAGCTGGAATGAGCGCT
TTTCATTATAACGATTTAAATTTGGTAAGTGGTAGAAGCATAATAAGAACAATGCTGTTG
AAATAGATTCAACGACAACTGTGTCAATGCTAAGTCGGGTGCTTTAAAGAATATAAACA
ATACAGACACAGCATATCCAACCTGCACTTAACATAATGATGCTAAATAATCTTGATTTAG
CGAAAAGAATTA AAAAGGCAGCACTTAATAATAAAAATTACGATACAACTTCGAAAATT
CTAATCGGACTAACGTCTTTAAAATTAATGTTGAAAGGTACTGAGAATATAGTGACAAAT
GTTAATAAAATTAATGCACCAAAAATGATAACTAAATTATTACGTGAATAATCGGTAACA
TAGCTATTCGTCATCTTTTCAGAGTAGTTTGGAAATAACATTTGCACTTCTGTTGTACCAAT
AATTGAATGTTAGTTTACCAGGTTGTCGTTGCAACAATTTACCCAATAACTAAATGTCAC
AATTAGTAAGATACCTAAAATATAAATCACTAATGTTGATAAAAAGGCAGGCGTTAATCC
ATGGAACATATGGAATTCACATCATCAATTACCGTATGATTAATCGAAGATGTAGCTGG
TTCAATAATCGAATTAGTTAAAATGCCAGGGAATAAACCGAATAACAATTAATAATGTAGC
TAAAATAGCTGGTGATAAAAGCATTAAATATTGATACTTCGTGTGCTTTTTTAAAGTAATTGT
TCAGGTTTATATTGTCCGAAAAATATATGCATTATAAATTTAATTGAATATACAAATGTGA
AGACACTGCCACTATACCAATGATTGGGAATAGATAGCCTAATGTATCAACACTGAATA
AATTTGCTTGGCTTGCTGTAAATGTTGTTTCTAAAAATGATTCTTTTGATAAGAAACCATT
GAACGGTGGTACACCAGCCATACTTAATGCTGTAATAACAGTGATTGTAATGAAATAGG
CATAATTGTTAGTAAGCCACCTAATTTCTTAACATCACGTGTACCAGTAGAATGATCCACT
GCACCTGTAATCATAAATAGGGCACCTTTAAATGTTGCATGGTTGATTAATGGAATATT
GCAGCCGTAATGCAGCAGCATATATTTTGCTATCATCGCCTTGATAGTGATAACTAATG
```

GCACCGATTCCAAGCATCGCCATAATCATACCTAATTGGGATACTGTTGAAAATGCCAGT  
ATACCTTTCAAGTCTTGTTGTTTTGTTGCGTTTAGCGAAGCCCAGAATAACGTAATTAAC  
CAACGAGTGTGACAGTCCATACCCAACCTTGCATGCTGCGAAGATTGGTGTTCATTGAG  
CGATTAAATATAACCCTGCTTTAACCATTGTTGCTGAATGAAGATAAGCACTGACTGGTG  
TAGGTGCTTCCATTGCATCTGGTAGCCAAATATAAAAATGGAACTGAGCAGATTTTGTAA  
AAGCACCAATCATGATTAATAATCATCGCAAAAATGAAGAATGGGCTATTTTGAATTTGAG  
AAGCATGTTGAATCATGTAATGCTAAATGATTGTGTTGGTATAGCGAGTAAGATGA  
TACCACCTAATAATGATAGACCACCAATACTGTGATTATGAGCGATTTTGTAGCACCAT  
ATATAGATGCTTGTGCTTCGCGCCAGAATGAAATAAGTAAAAAACTAGAAAATGACGTTA  
GCTCCCAGAATAAATATAGAATAATAACATTATCTGAAAGTACGACACCTAACATTGCAC  
CCATAAATAGTAATAAATAACAATAAAAATTCCCTAGTTGTTCTGACTTACTTAAGTAGC  
CGATTGAATATAACTACTAACTGCCGATTCCCTGAAATAAGCAAATAAAGAGTAAAC  
CTAAGCCATCAAGATATAAATCAAAGTTCATACCAAATGAGGCATCCAATTTAAGGTTT  
TCATTACAGTATTACCTGACATCGTCGTTTTAATTAATGTAAGCATATAAATAAATATGAC  
GATAGGGACAGGTAATACGAACCATCTAAATGTATACGTTTAAAAAATCTATACAGGAT  
AGGAATAATGAGTGCGAATATTAACGGTAATATCACCGCAATATGTAACAAACTCAC

### > **kapB**

Function: protein coding sequence; kinase associated protein B (core genome, constant)

Best match: kapB\_CC001\_MW2-USA400\_BA000033.2[918173:918556:r]RC (completely identical)

Position: 025-contig\_192\_RC: 42468 ... 42852; Length: 384 bp

Sequence:

TTATTTAAAATTTTCTTTGTATTGAAGTGAATAATCTTCTTTTAAGCGTGCTAAACTAGCT  
AAAGACATTTTCAGCATGTTTTGTTGCTGAGCTTTAAGTTTAGTTTCTAAATCTGTAATTG  
CTTGTTGAAGTGAATCTTCATAGCGCAATACATCAACATTGAAGTCGCGTAATTGTGAAC  
GTTTCGTATAGCGTTTTTCAAATGGCTTAATGCTTTGCGTTCATGGAAAAATACACCTTC  
AGTTTCAGTAGGGTTATGTAATCACCTTGTTTCGGGTGTTTGATAACTTGTTCAACTTTA  
ACAAGGACATCGTCTCCATTTTCTTCAACAATCGTGACACCATAGCTACCTGTTTTGTGTG  
AAAATCGATATAGCTTCAT

### > **prsA1**

Function: protein coding sequence; peptidyl-prolyl cis-trans isomerase (core genome, constant)

Best match: prsA1\_CC001\_MW2-USA400\_BA000033.2[918620:919213]

Position: 025-contig\_192\_RC: 42915 ... 43509; Length: 594 bp

Sequence:

ATGGCTAACTATCCACAGTTAAACAAAGAAGTACAACAAGGTGAAATTAAGTGGTTAT  
GCACACAAATAAAGGTGACATGACATTCAAATTATTTCCAAATATTGCACCAAAAACAGT  
TGAAAATTTTGTGATACATGCAAAAATGGTTATTATGATGGAATAACATTCCACCGTGT  
CATTAAATGACTTCATGATTCAAGGTGGCGATCCAACAGCTACTGGTATGGGTGGCGAAAG  
TATTTATGGCGGTGCTTTTGAAGATGAATTTTCATTAAATGCATTTAACTTATATGGCGCA  
TTATCAATGGCTAACTCAGGACCTAATACTAATGGTTCACAATTTTTCATTGTTCAAATGA  
AAGAAGTACCTCAAAATATGTTAAGTCAACTTGCAGATGGTGGTTGGCCACAACCAATCG  
TTGATGCATATGGCGAGAAGGGTGGTACACCATGGTTAGATCAAAAACATACAGTATTCG  
GTCAAATCATTGATGGTGAACCTACATTAGAAGATATTGCAAATACAAAAGTGGGACCA  
CAAGATAAACCACTTCATGATGTTGTAATTGAATCTATTGATGTTGAAGAATAA

### > **namA**

Function: protein coding sequence; NADH-flavin oxidoreductase (core genome, constant)

Best match: namA\_CC001\_MW2-USA400\_BA000033.2[920367:921494]

Position: 025-contig\_192\_RC: 44663 ... 45791; Length: 1128 bp

Sequence:

ATGAAAAGTAAATACGAACCATTGTTTGATAAAGTAGAATTACCAAATGGAGTAGAGTT  
GAGAAATCGATTTGTGTTAGCCCCTTTAACACATATTTCTTCAAATGATGATGGTACTATT  
TCAGATGTAGAACTTCCTTATATTGAAAAGCGTTCACAAGATGTTGGTATTACAATTAAT  
GCTGCGAGTAATGTGAGTGATGTGCGAAAAGCATTTTCAGGACAGCCATCAATCGCGCAT

GACAGTAATATTGAAGGACTAAAACGATTAGCTACAGCAATGAAGAAAAACGGTGCCAA  
AGCACTCGTACAAATACATCATGGCGGTGCACAAGCATTGCCTGAATTAACACCTGGTGG  
AGACGTCGTAGACCAAGTCCAATTTCTTTAAAAAGTTTCGGTCAGAAAACAAGAACATAG  
TGCTAGAGAAATGACGAATGAAGAGATTGAACAAGCAATCAAGGATTTTGGTGAAGCAA  
CGCGACGTGCAATTGAAGCAGGATTTGATGGTGTGAAATACATGGCGCGAATCATTACT  
TAATTCATCAATTTGTATCACCATACTATAATAGAAGAAATGATGTATGGGCAAATCAAT  
ATAAATTCCCGTTGCTGTGATTGAAGAAGTGCTTAAAGCGAAAGAAGTGTATGGCAATA  
AAGACTTTATTGTTGGATATAGATTGTCTCCGGAAGAAGCGGAGTCTCCAGGAATCACAA  
TGGAATTACAGAGGAACCTCGTTAATAAAAATTAGCCATATGCCAATCGACTATATTCATG  
TTTCAATGATGGATACGCATGCAACGACACGTGAAGGTAAATACGCTGGACAAGAAAGA  
CTGCCTTTAATTCACAAATGGATAAATGGTCGTATGCCACTTATCGGTATTGGTTCAATTT  
TCACAGCTGACGAAGCTTTAGATGCAGTTGAAAATGTTGGTGTGACTTAGTAGCCATTG  
GTAGAGAGCTACTATTGGATTATCAATTTGTTGAAAAAATTAAGATGGACGGGAAGATG  
AAATTATTAATTACTTTGATCCAGAGAGAGAAGATAATCATCACTTAACTCCTAATTTATG  
GCATCAATTTAATGAAGGATTCTATCCATTACCACGTAAGATAAATAA

### > rocD

Function: protein coding sequence; ornithine aminotransferase

Best match: rocD\_CC001\_MW2-USA400\_BA000033.2[921802:922992]

Position: 025-contig\_192\_RC: 46098 ... 47289; Length: 1191 bp

Sequence:

ATGACTAAATCTGAAAAAATTATTGAGTTAACAAATCATTACGGAGCACATAATTATTTA  
CCATTGCCAATTGTCATTTTCAGAAGCTGAAGGGGTATGGGTAAAGATCCTGAAGGCAAT  
AAATATATGGATATGTTATCTGCATATTCCGCTGTTAACCAAGGTCATAGACATCCGAAA  
ATTATTCAAGCATTAAAAGATCAAGCTGATAAAGTGACTCTAGTTTCACGTGCTTTTCATA  
GTGATAACTTAGGTGAATGGTACGAAAAAATTTGTAAACTGGCAGGTAAGATAAAGCT  
TTACCAATGAATACAGGTGCTGAAGCAGTAGAAACAGCTTTGAAAGCAGCACGACGCTG  
GGCATAACGATGTTAAAGGAATTGAGCCAAATAAAGCAGAAATCATTGCATTTAATGGTA  
ACTTCCATGGTCGAACAATGGCGCCAGTTTCATTATCTTCAGAAGCAGAATACCAACGTG  
GTTATGGTCCGTTATTAGATGGATTTAGAAAAGTTGATTTTGGAGATGTAGATGCATTGA  
AAGCTGCAATTAATGAAAATACTGCAGCAGTTTTAGTAGAACCAATTCAGGTGAAGCG  
GGTATAAATATACCGCCAGAAGGATATTTGAAAGCAATTAGAGAATTATGTGATGAACAT  
AATGTCTTATTTATTGCTGACGAAATCCAAGCAGGATTAGGTCGTTCCGGGTAATTTATTG  
CTACGGATTGGGATAATGTA AACCTGATGTCTATATTTTAGGTAAAGCACTAGGTGGTG  
GTGTCTTCCCAATTTCTGTTGTATTAGCAGATAAAGAAGTATTAGATGTCTTTACACCTGG  
CTCACATGGTTCAACATTTGGTGGTAATCCACTTGCTTGTGCTGCATCAATTGCTGCATTA  
GATGTTATCGTTGATGAGGATTTACCAGGGCGCTCTTTAGAATTAGGAGATTATTTTAAA  
GAACAATTAAGCAAATTGATCATCCATCAATTAAGAAGTCCGTGGACGTGGTTTGT  
ATAGGTGTGAACTTAATGAAAGTGCTAGACCATATTGTGAAGCTTTGAAAGAAGAAGG  
TTTATTATGTAAGAAACGCATGATACTGTCATTCGTTTTGCACCACCATTAATTACT  
AAAGAAGAATTGGACCTTGCACTTGAAAAAATAAGACATGTATTTCAATAA

### > rocD2

Function: protein coding sequence; ornithine aminotransferase 2 (core genome, constant)

Best match: rocD2\_CC001-ST772\_118\_AJGE01000009.1[45852:47042] (completely identical)

Position: 025-contig\_192\_RC: 46098 ... 47289; Length: 1191 bp

Sequence:

ATGACTAAATCTGAAAAAATTATTGAGTTAACAAATCATTACGGAGCACATAATTATTTA  
CCATTGCCAATTGTCATTTTCAGAAGCTGAAGGGGTATGGGTAAAGATCCTGAAGGCAAT  
AAATATATGGATATGTTATCTGCATATTCCGCTGTTAACCAAGGTCATAGACATCCGAAA  
ATTATTCAAGCATTAAAAGATCAAGCTGATAAAGTGACTCTAGTTTCACGTGCTTTTCATA  
GTGATAACTTAGGTGAATGGTACGAAAAAATTTGTAAACTGGCAGGTAAGATAAAGCT  
TTACCAATGAATACAGGTGCTGAAGCAGTAGAAACAGCTTTGAAAGCAGCACGACGCTG  
GGCATAACGATGTTAAAGGAATTGAGCCAAATAAAGCAGAAATCATTGCATTTAATGGTA  
ACTTCCATGGTCGAACAATGGCGCCAGTTTCATTATCTTCAGAAGCAGAATACCAACGTG

GTTATGGTCCGTTATTAGATGGATTTAGAAAAGTTGATTTTGGAGATGTAGATGCATTGA  
AAGCTGCAATTAATGAAAATACTGCAGCAGTTTTAGTAGAACCAATTCAAGGTGAAGCG  
GGTATAAATATACCGCCAGAAGGATATTTGAAAGCAATTAGAGAATTATGTGATGAACAT  
AATGTCTTATTTATTGCTGACGAAATCCAAGCAGGATTAGGTCGTTCCGGGTAAATTATTTG  
CTACGGATTGGGATAATGTAACCTGATGTCTATATTTTAGGTAAAGCACTAGGTGGTG  
GTGTCTTCCCAATTTCTGTTGTATTAGCAGATAAAGAAGTATTAGATGTCTTTACACCTGG  
CTCACATGGTTCAACATTTGGTGGTAATCCACTTGCTTGTGCTGCATCAATTGCTGCATTA  
GATGTTATCGTTGATGAGGATTTACCAGGGCGCTCTTTAGAATTAGGAGATTATTTTAAA  
GAACAATTAAGCAAATTGATCATCCATCAATTAAGAAGTCCGTGGACGTGGTTTGT  
ATAGGTGTGGAACCTAATGAAAGTGCTAGACCATATTGTGAAGCTTTGAAAGAAGAAGG  
TTTATTATGTAAGAAGAACGCATGATACTGTCATTCGTTTTGCACCACCATTAATTACT  
AAAGAAGAATTGGACCTTGCACTTGAAAAATAAGACATGTATTTCAATAA

### > **gluD**

Function: protein coding sequence; NAD-specific glutamate dehydrogenase (core genome, constant)

Best match: gluD\_CC001\_MW2-USA400\_BA000033.2[923101:924345]

Position: 025-contig\_192\_RC: 47397 ... 48642; Length: 1245 bp

Sequence:

ATGACTGAGAACAATAATTTAGTAACTTCTACTCAAGGAATTATTAAGAAGCATTGCAT  
AAATTAGGATTTGACGAAGGAATGTACGATTTAATTAAGAACCTTTAAGAATGTTACAA  
GTGCGTATCCCTGTACGAATGGATGATGGCACTGTTAAAACATTCACAGGTTACCGTGCG  
CAACATAATGATGCTGTTGGACCAACAAAAGGGGGCGTGCCTTCCACCCAGATGTTGAT  
GAAGAAGAAGTAAAAGCATTATCAATGTGGATGACTTTGAAATGTGGCATTGTAACCTTA  
CCATACGGTGGTGGTAAGGGTGGTATCGTTTGTGATCCACGTCAAATGAGCATTGATGAA  
GTTGAACGTTTATCACGCGGATATGTAAGAGCAATTCACAATTCGTAGGTCCGAACAAA  
GATATTCCAGCACCAGATGTATTTACAACTCACAAATTATGGCTTGGATGATGGATGAA  
TATAGTGCATTAGATAAATTTAATTCACCAGGTTTCATCACAGGTAAACCAATTGTATTGG  
GTGGTTCTCATGGACGCGACAGATCAACTGCACTAGGTGTAGTTATTGCAATTGAACAAG  
CTGCAAAACGTCGTAATATGCAAATTGAAGGTGCCAAGGTTGTTATTCAAGGTTTCCGGTA  
ATGCCGGAAGTTTCTTAGCTAAATTTCTATATGATTTAGGTGCAAAAATTGTAGGTATCTC  
TGATGCTTACGGTGCATTACACGATCCAAATGGCTTAGATATAGATTATTTATTAGACCGT  
CGTGATAGTTTTGGTACGGTAACAAATTTATTTGAAGAAACAATCTCAAATAAGAATTG  
TTTGAATTAGATTGTGACATTTTAGTACCAGCGGCTATTTCAAACCAAATTACAGAAGAC  
AATGCACATGATATTAAGCTAGTATCGTTGTTGAAGCTGCTAATGGACCTACAACACCA  
GAAGCAACACGTATTTAACTGAACGTGGTATATTATTAGTTCCAGACGTATTAGCAAGT  
GCTGGTGGTGTAAACGGTTTCTTACTTCGAATGGGTACAAAATAATCAAGGTTATTATTGGT  
CTGAAGAAGAAGTTAATGAAAAGCTACGTGAAAAATTAGAAGCGGCATTTGATACGATT  
TACGAATTGTCTCAAACCGAAAAATAGATATGAGACTTGCAGCATATATCATAGGTATT  
AAACGTACAGCAGAAGCAGCTAGATATCGTGGTTGGGCATAA

### > **txbi\_universal1**

Function: bidirectional rho independent terminator

Best match: txbi\_universal1\_CC001\_MW2-USA400\_BA000033.2[924625:924696:r]RC

Position: 025-contig\_192\_RC: 49024 ... 49054; Length: 30 bp

Sequence:

AATATCTTACTGCTGTTTTTTATAGTAATA

### > **glpQ2**

Function: protein coding sequence; glycerophosphodiester phosphodiesterase

Best match: glpQ2\_CC001\_MW2-USA400\_BA000033.2[924735:925664:r]RC

Position: 025-contig\_192\_RC: 49872 ... 50022; Length: 150 bp

Sequence:

CGTTAAATTTGTATGCCATTGAATAGCCTGAGGTTTATTTGCAATTTGATTTGTTTGTTC  
GCGCCAGCAGTAGGTACTGATAAAAATCCCATAGTAAAAACAGCAGAAGCAGCCATAAA  
TTTAGTGAAGCTTTTCGAAGAGTTAGTCAT

> **argH**

Function: protein coding sequence; argininosuccinate lyase

Best match: argH\_CC001\_MW2-USA400\_BA000033.2[925906:927285:r]RC

Position: 025-contig\_192\_RC: 50263 ... 51643; Length: 1380 bp

Sequence:

```
TTATTGTGATAGTAATTGTTTAGCAACATCAAGTTGTTGTTTGACCGATGATTGACCTGTT
GAACCGTAACTTTGACGTCGTTTTAAACAATTTTCAGGCTGCAAATAATCGTAAATATCG
GCATCAATACTAGAATGATGTTGTTGATATGTTGCTAAAGGAACATCTAATAAATAATGA
CCTTGTTGTATACATTCTAAGACAATTTTCCTACAATTTTCATGTGCAGTTCTAAATGGAA
TATTTTTAGTTACTAAATAATCTGCTAGTTCGGTTGCATTTGAAAAATCTTCTTTAACAGTT
TGATTGAGTCGTTCTTTATTAATTGTCATCGTTTGAATCATACCTTCGAAAATACGTAAAG
AACCTTTAATTGATGACAGCATCGAATAAACCTTCTTTATCTTCCTGCATATCTTTGTT
ATATGCTAGAGGTAATCCTTTTAAAGTCATAAGCATGCTCATTAAATGACCAGTCGTTTCG
ACCAACTTTACCTCTAATTAATTCTGCCATATCAGGATTTTTCTTTTGTGGCATAATAGAT
GAGCCAGTTGAAAATGCATCTGATAATGTAATGAATTTAGCTTCGTCTGTGGACCAGAAA
ATAATTTCTCTGCAAAGCGTGATAAGTGAACCATCGTTAAAGAAAATATTATGCAATATT
TCAATAATATAGTCTCTGTCACTAACAGCATCTAGGCTATTCTCATAGAGACTGCCAAAG
TTCAACAATGCTGTTGTCTCGTGTCTATCGATAGGGTATGTGGTACCACTTAAGGCTGCTG
CACCTAAAGGATTAATATCGATTTCGTTTTAAACTATCTTCAAATCGTTGTTGGTCTCGTTG
TAACATCCAAAAATAAGTCATAATATGATGTGCAAATGAAATTGGCTGTGCACGCTGTAA
ATGAGTATAACCAGGCATAATTGTATCAACATTATTGGAAGCGATGTCTACAATTACACT
TTGTAACGACTTAATTAATGCGATGATATCTTGCACCTGTTTCTTAGTGTACAAGTGCATG
TCTGTTGCAACTTGATCGTTTCTACTGCGTCCAGTATGCAACTTACCACCAGCATCACCAA
TACGTTTAATTAATTCATGTTCAATATTTAAATGAATATCTTCTAATGATGCACTAAATTG
AATTTGATCTTGATGATAATCATGTTGAATAGATTTTAGTCCTTGTATAATTTGTTTCGCTGT
CTTGTTGACTAATAATTCCTTGATTCGCAAGCATAGTTGCATGTGCAATGCTGCCTTCGAT
ATCTTGATCTATGAGCGTTTGATCAAAGTAATGGATGCGTTAAAGTCGTCAACCCACTC
TTCAGGTTGTACTTCAAATCTACCGCCCCAAGCTTTATTGCTCAT
```

> **argG**

Function: protein coding sequence; argininosuccinate synthase

Best match: argG\_CC001\_MSSA476\_BX571857.1[911244:912449:r]RC

Position: 025-contig\_192\_RC: 51632 ... 52838; Length: 1206 bp

Sequence:

```
TTATTGCTCATTGCTATAGCCTCCATGTAGCATCGCATTTACTTGAGTAGGTAAACCATAG
ATATCGATAAAGCCAACAGCAGCGTCTTGATTAAATGCATCTTCTTTTGTATAAGTTGCTA
ATTTTTCATCATATAATGTGTAAGGTGATTTTCTACCATTTACGATGGCATTACCTTTGAA
TAATTTAATTTCTGACATCACCACTTACGTATTGCTGAGTACTATCAATAAATAATTTAAG
CTATCAGTTAAAGGTGAGAACCAAAGTCCATTGTATAGTTGTTTCAGCAAATTTGCTTCTCG
ATGATTGGTTTAAAGTGTGCGACATCTTTCGTTAACGTAATCGTTTCTAATGCTTTATGCG
CTTTTAAATAAATTTCTGCAGCAGGTGCCTCATAAATTTCTCTTGATTTGATACCTACAAG
TCTATTTTCTACATGGTCAATTCTTCCGATACCATGCTTACCAGCTAATGCATTCAACGTT
AAAATTAATCGTCTAATTCATATGTTTTGCCATCAATTTGAACTGGGATGCCTTTATCAA
ACGTTAAATGATTTTCATCAGCAGTATCTGGTGGTTTCTTCTAAAGCATTGTTAGATCGAA
CGCATCCTCTGGTGGCGCAGCATAAGGATCTTCTAAAATACCACATTCATTCGCTCTGCC
CATAGATTTTGATCGATAGAATAAGGTGAATCATGGTTGATTGATACAGGGATATTATGT
TTAATTGCATAATCGATTTCTTCTTACGACTCCATGCCCACTCACGTACAGGTGCGAATG
CTTTCAATGATGGGTTTAAATGCTTTAATGGCAACTTCGAAACGTACTTGGTCATTCCCTTT
ACCAGTACAACCATGTGCAATACCTACTGAATTTGTTTTCTCAGCAATCTCTACTAATTTT
TTAGCGATTAATGGTCTTGATAAAGCTGAAACTAATGGATATGCATTTTCATACATTAAT
TTCCTTTGATTGCATAACTTACATACTCATCACTAAATTTCTTTTGTGTCATCAATAATATGA
CATTCAACTGCTCCCATATCTAAAGCTTTTTTATAAACGATGTCTAAATCTTTACCTTAC
CAACATCTAGGCAACAAGCTACAACCTTCGTATCCTTTGTTCGATAAGCCATTGAACGGCCA
CACTTGTATCTAGTCCTCCTGAATATGCTAAAACAATTTTCTCTTTCAT
```

> **pgi**

Function: protein coding sequence; glucose-6-phosphate isomerase (core genome, constant)

Best match: pgi\_CC005\_Mu50-VRSA\_BA000017.4[1005150:1006481] (completely identical)

Position: 025-contig\_192\_RC: 53188 ... 54520; Length: 1332 bp

Sequence:

```
ATGACTCATATTCAATTAGATTTTAGTAAAACGTTAGAATTTTTTCGGTGAACACGAATTAA
AACACAACAAGAAATTGTTAAATCAATTCACAAAACAATTCATGAAGGTTACTGGTGCA
GGTAGTGACTTCTTAGGCTGGGTTGATTTACCAGTTGATTACGACAAAAGAAGAATTTTCA
AGAATTGTTGAAGCATCAAAACGCATTAAAGAAAATTCTGATGTTTTAGTAGTCATCGGT
ATTGGTGGTTCTTACTTAGGTGCACGTGCAGCAATCGAAATGTTAACGTCATCATTTAGA
AACAGCAATGAATACCCTGAAATTGTATTTGTTGGTAATCACTTATCATCAACATATACG
AAAGAGTTAGTTGATTATTTAGCAGACAAAGATTTCTCTGTAAACGTTATTTCTAAATCTG
GTACAACACTACAGAACCAGCAGTTGCATTTAGATTGTTCAAACAATTAGTTGAAGAAAGAT
ACGGTAAAGAAGAAGCACAAAAACGTATATTTGCAACAACGGATAAAGAAAAAGGTGCT
TTAAAACAGTTGGCTACAAACGAAGGTTATGAAACGTTTATCGTACCTGATGATGTAGGT
GGAAGATATTCTGTTTTAACAGCAGTAGGATTATTACCAATTGCAACAGCTGGAATTAAC
ATCGAAGCTATGATGATTGGTGCTGCAAAAGCACGTGAAGAATTATCTTCAGATAAATTA
GAAGACAACATTGCATACCAATATGCGACAATTCGAAACATTTTATATGCAAAAAGGTTAT
ACAACAGAAATGTTGATTAACATGAACCATCTATGCAATACTTTAATGAATGGTGGAAA
CAATTATTTGGTGAATCAGAAGGTAAAGACTTCAAAGGTATCTATCCTTCAAGTGCCAAC
TACACAACACTGATTTACATTCTTTAGGTCAATATGTACAAGAAGGCCGTCGTTTCTTATTCG
AAACAGTGGTAAAAGTAAATCATCCTAAATATGATATTACTATTGAAAAAGATAGTGATG
ATCTAGACGGATTAAATTATTTGGCTGGTAAAACAATCGACGAAGTTAACACAAAAGCAT
TCGAAGGTACATTATTAGCGCATACTGATGGTGGTGTTCCTAACATGGTAGTGAACATTC
CACAATTAGATGAAGAACTTTCGGTTATGTTCGTATACTTCTTCGAACTTGCTTGTGCAAT
GAGTGGATACCAATTAGGTGTAAATCCATTTAACCAACCTGGTGTAGAAGCATATAAACA
AAACATGTTTCGCATTATTAGGTAAACCTGGTTTTGAAGACTTGAAAAAAGAATTAGAAGA
GCGTTTATAA
```

> **spsA**

Function: protein coding sequence; signal peptidase IA (core genome, variable)

Best match: spsA\_CC001-ST772\_118\_AJGE01000009.1[55178:55702] (completely identical)

Position: 025-contig\_192\_RC: 55424 ... 55949; Length: 525 bp

Sequence:

```
GTGAAAAAAGTTGTAAAATATTTGATTTTCATTGATACTTGCTATTATCATTGTACTGTTCCG
TACAAACTTTTGTAAATAGTTGGTCATGTCAATCCGAATAATGATATGTCACCAAGCCTTAA
CAAAGGGGATCGTGTTATTGTAAATAAAATTAAGTTACATTTAATCAATTGAATAATGG
TGATATCATTACATATAGGCGTGGTAACGAGATATATACTAGTCGAATTATTGCCAAACC
TGGTCAATCAATGGCGTTTCGTCAGGGACAATTATACCGTGATGACCGACCGGTTGACGC
ATCTTATGCCAAGAACAGAAAAATTAAGATTTTAGTTTGCGCAATTTTAAAGAATTAGA
TGGAGATATTATACCGCCTAACAATTTTGTGTGCTAAATGATCATGATAACAATCAGCA
TGATTCAAGACAATTTGGTTTAATTGATAAAAAGGATATTATTGGTAAATATAAGTTTGAG
ATATTATCCTTTTTCAAATGGACGATTCAGTTCAAATCTTAA
```

> **spsB**

Function: protein coding sequence; signal peptidase IB (core genome, constant)

Best match: spsB\_CC001-ST772\_118\_AJGE01000009.1[55178:56293] (completely identical)

Position: 025-contig\_192\_RC: 55964 ... 56540; Length: 576 bp

Sequence:

```
TTGAAAAAAGAATTATTGGAATGGATTATTTCAATTGCAGTCGCTTTTGTCAATTTTATTTA
TAGTAGGTAAATTTATTGTTACACCATATACGATTAAGGTGAATCAATGGATCCAACCTT
TGAAAGATGGCGAGCGAGTAGCTGTAAACATTATTGGATATAAAACAGGTGGTTTGGAA
AAAGGTAATGTAGTTGTCTTCCATGCAAACAAAATGATGACTATGTTAAACGTGTCATC
GGTGTTCCTGGCGATAAAGTAGAATATAAAAATGATACATTATATGTCAATGGTAAAAAA
```

CAAGATGAACCATATTTAAACTACAATTTAAAACATAAACAAGGTGATTACATTACTGGG  
ACTTTCCAAGTTAAAGATTTACCGAATGCGAATCCTAAATCAAATGTCATTCCAAAAGGT  
AAATATTTAGTGCTTGGAGATAATCGTGAAGTAAGTAAAGATAGCCGTGCGTTTGGCCTC  
ATTGATGAAGACCAAATTGTTGGTAAAGTTTCATTTAGATTCTGGCCATTTAGTGAATTTA  
AACATAATTTCAATCCTGAAAATACTAAAAATTA

> **rexB**

Function: protein coding sequence; ATP-dependent nuclease subunit B (core genome, variable)

Best match: rexB\_CC001-ST772\_118\_AJGE01000009.1[56453:59929] (completely identical)

Position: 025-contig\_192\_RC: 56699 ... 60176; Length: 3477 bp

Sequence:

ATGACATTACATGCTTATTTAGGTAGAGCGGGAACAGGTAAGTCTACGAAAATGTTGACC  
GAAATAAAACAAAAAATGAAAGCAGATCCGCTTGGAGATCCAATCATTTTAATTGCGCC  
AACTCAAAGTACATTTCAATTAGAACAAGCCTTTGTCAATGATCCGGAATTAATGGTAG  
TTTAAGAACAGAAGTGTTGCATTTTGAACGATTAAGTCATCGTATTTTCCAAGAAGTTGGT  
AGTTATAGCGAACAAAAGTTATCTAAAGCTGCAACGAAATGATGATTTATAACATTGTT  
CAAGAACAACAAAAGTATTTAAAACCTTTATCAATCACAAGCAAAAATATTATGGGTTTAGT  
GAAAAATTAACAGAACAAATTCAAGATTTTAAAAAATATGCAGTAACGCCTGAACATTTA  
GAACACTTTATTGCTGATAAAAAATATGCAAACCTCGAACTAAAAATAAGTTAGAGGATATT  
GCTTTAATATACCGTGAGTTCGAACAACGCATTCAAACGAGTTTATTACGGGTGAGGAT  
TCATTACAATATTTTATTGATTGTATGCCGAAATCAGAGTGGCTAAAACGTGCTGATATAT  
ATATTGATGGTTTTCACTTTTCAACGATTGAGTATTTAATAATCAAAGGATTAATTA  
ATATTCGAAGAGTGTCAACAATTATATTGACGACAGATGGTAACCACGATCAATTTAGTTT  
ATTTAGAAAACCATCGGAAGTGTTACGACATATTGAAGAAATAGCAAATGAACTCAATAT  
TTCTATTGAACGTCAATATTTCAAGCAATTATATCGCTTCAATAATCAAGATTTAAAGCAT  
CTTGAACAAGAATTTGATGCACTTCAAATCAATCGAGTGGCATGTCAAGGTCATATCAAT  
ATTTTAGAATCTGCGACTATGAGAGAGGAAATAAATGAAATTGCGCGACGTATCATCGTT  
GATATTCGTGATAAGCAATTACGATATCAAGATATTGCAATTTTATATCGTGACGAGTCTT  
ATGCTTATTTATTTGATTCCATATTACCGCTTTATAATATTCCTTATAACATTGATACAAAG  
CGTTCGATGACACATCATCCGGTCATGGAAATGATTTCGTTTATTGATTGAAGTTATTCAAT  
CTAATTGGCAAGTGAATCCAATGCTACGCTTATTGAAGACTGATGTGTTAACGGCATCAT  
ATCTAAAAAGTGCATACTTAGTTGATTTACTTAAAATTTTGTACTTGAACGTGGTATATA  
CGGTAAACGTTGGTTAGATGATGAGCTATTTAATGTGCAACATTTTAGCAAAATGGGGCG  
TAAAGCGCATAAACTGACCGAAGATGAACGTAACACATTTGAACAAGTCGTTAAGTTAA  
AGAAAGATGTCATTGATAAAATTTTACATTTTAAAAGCAAATGTCACAAGCGGAAACTG  
TAAAAGATTTTGAACCTGCTTTTTATGAAAGTATGGAATATTTGCAACTGCCAAATCAATT  
GATGACAGAGCGAGATGAACTTGATTTAAATGGTAATCATGAAAAGGCGGAGGAAATTG  
ATCAAATATGGAATGGCTTAATTCAAATCCTTGATGACTTAGTTCTAGTATTTGGAGATGA  
ACCAATGTCGATGGAACGTTTCTTAGAAGTATTTGATATTGGTTTAGAACAATTAGAATTT  
GTTATGATTCCGCAAACATTGGACCAAGTAAGTATTGGTACGATGGATTTGGCTAAAGTC  
GATAATAAGCAACATGTTTACTTAGTAGGTATGAATGACGGCACCATGCCACAACCAGTA  
ACTGCATCAAGTTTAATTACTGATGAAGAAAAGAAATATTTTGAACAACAAGCAAATGTA  
GAGTTGAGTCCTACATCAGATATTTTACAGATGGATGAAGCATTGTGTTGCTATGTTGCTA  
TGACTAGAGCTAAGGGAGATGTTACATTTTCTTACAGTCTAATGGGATCAAGTGGTGATG  
ATAAGGAGATCAGCCATTTTAAATCAAATTCATCATTGTTCAACCAATTGGAAATTA  
CTAACATTCCTCAATACCATGAAGTTAACCATTGTCCTAATGCAACATGCTAAGCAAA  
CCAAAATTACATTATTTGAAGCATTGCGTGCTTGGTTAGATGATGAAATTGTGGCTGATA  
GTTGGTTAGATGCTTATCAAGTAATTAGAGATAGCGATCATTTAAATCAAGGTTTAGATT  
ATTTAATGTCAGCATTAAACGTTTGACAATGAACTGTAAAATTAGGTGAAACGTTGTCTA  
AAGATTTATATGGTAAGGAAATCAATGCCAGTGTATCTCGATTTGAAGGTTATCAACAAT  
GCCATTTAAACACTATGCGTCACATGGTCTGAACTAAATGAACGAACGAAGTATGAAC  
TTCAAAACTTTGATTTAGGTGATATTTTCCATTCTGTTTTAAAATATATATCTGAACGTATT  
AATGGCGATTTTAAACAATTAGACCTGAAAAAATAAGACAATTAACGAATGAAGCATT  
GGAAGAAATTTTACCTAAAGTTCAGTTTAAATTTATTAATTCCTCAGCTTACTATCGTTAT  
TTATCAAGACGCATTGGCGCTATTGTAGAAACAACACTAAGCGCATTAAAATATCAAGGC  
ACGTATTCAAAGTTTATGCCAAAACATTTTGGAGACAAGTTTTAGAAGGAAACCAAGAACA

AATGACGAATTAATTGCACAAACATTAACGACAACCTCAAGGTATTCCAATTAATATTAGA  
GGGCAAATTGATCGTATCGATACGTATACAAAGAATGATACAAGTTTTGTTAATATCATT  
GACTATAAATCCTCTGAAGGTAGTGCACACTTGATTTAACGAAAGTATATTATGGTATG  
CAAATGCAAATGATGACATACATGGATATCGTTTTACAAAATAAACAACGCCTTGGATTA  
ACAGATATTGTGAAACCAGGTGGATTATTATACTTCCATGTACATGAACCTAGAATTA  
TTAAATCGTGGTCTGATATTGATGAAGATAAACTAGAACAAGATTTAATTA  
AAGCTGAGTGGTTAGTGAATGCAGACCAAACCTGTTATTGATGCATTGGATATTCGTTTA  
GAACCTAAATTCACTTCAGATATTGTACCAGTTGGTTTGAATAAAGATGGCTCTTTGAGTA  
AACGAGGCAGCCAAGTGGCAGATGAAGCAACAATTTATAAATTCATTCAGCATAACAAA  
GAGAATTTTATAGAAACAGCTTCAAATATTATGGATGGACATACTGAAGTTGCACCATTA  
AAGTACAAACAAAATTACCATGTGCTTTTTGTAGTTATCAATCGGTATGTCATGTAGAT  
GGCATGATTGATAGTAAGCGATATCGAACTGTAGATGAAACAATAAATCCAATTGAAGC  
AATTCAAAATATTAACATTAATGATGAATTTGGGGGTGAGCAATAG

> **rexA**

Function: protein coding sequence; ATP-dependent nuclease subunit A (core genome, variable)

Best match: *rexA\_CC001-ST772\_118\_AJGE01000009.1*[59930:63583] (completely identical)

Position: 025-contig\_192\_RC: 60176 ... 63830; Length: 3654 bp

Sequence:

ATGACAATTCAGAGAAACCACAAGGCGTGATTTGGACTGACGCGCAATGGCAAAGTAT  
TTACGCAACTGGACAAGATGTACTTGTGCAGCCGCGGCAGGTTTCAGGTA  
AAACAGCTGTACTAGTTGAGCGTATTATCCAAAAGATTTTACGTGATGGCATTGATGT  
CGATCGACTTTTATGTCGTAACGTTTACAAACTTAAGCGCACGTGAAATGAAGCATCGT  
GTAGACCAACGTATTCAAGAGGCATCGATTGCTGATCCTGCAAATGCACACTTGAAAA  
ACCAACGCATCAAAATTCATCAAGCACAAATATCTACACTTCATAGTTTTTGTCTGAA  
ATTAATTCAACAGCATTATGATGTATTAATATTGACCCGAACTTTAGAACAAGCAGT  
GAAGCTGAAAATATTTTATTATAGAACAACGATAGATGAAGTTATAGAACAACATT  
ACGATATCCTTGATCCTGCTTTTATTGAATTAACAGAGCAATTGTCTTCAGATAGA  
AGTGATGATCAGTTTCGAATGATTATTAACAATTTGTATTTCTTTAGCGTTGCAAAT  
CCAAATCCTACAAATTTGGTTGGATCAATTGGTGACACCATAACGAGAAGAAGCACA  
ACAAGCGCAACTTATTCAACTACTAACAGACTTATCTAAAGTATTTATCACAGCTG  
CTTATGATGCTTTAAATAAGGCGTATGATTTGTTTAGTATGATGGATAGCGTCGATA  
AAACATTTAGCTGTTATAGAAGATGAACGACGTTTAAATGGGGCGTGTTTTAGA  
AGGTGGCTTTATTGATATACCTTATTTAACTGGTCACGAATTTGGCGCGCGT  
TTGCCTAATGTAACAGCGAAAATTAAGAAGCAAATGAAATGATGGTCGATGCCTTAGA  
AGATGCTAAACTTCAGTATAAAAAATATAAATCATTAATTGATAAAGTGAAGAGT  
GATTA  
CTTTTCAAGAGAAGCTGATGATTTGAAAGCTGATATGCAACAATTGGCGCCACGAGT  
AAAGTACCTTGCGCGTATTGTGAAAGATGTTATGTCAGAATTCAATCGAAAAAAGC  
GTAGCAA  
AAATATTTTGGATTTTCTGATTATGAACATTTTGCATTACAAATTTTAACTAATG  
AGGATGGTTCGCCTTCAGAAATTGCCGAATCATAACCGTCAACACTTCCAAGAAAT  
ATTGGTCGATGAGTATCAAGATACGAACCGAGTTCAAGAGAAAATACTATCTTGCAT  
CAAAAACGGGTGATGAACATAATGGTAATTTATTTATGGTTGGAGATGTTAAGCAAT  
CCATTTATAAATTTAGACAAGCTGATCCAAGTTTATTTATTGAAAAGTATCAACGCTT  
TACTATAGATGGAGATGGC  
ACTGGACGTCGAATTGATTTGTCGCAAACTTCCGTTCTCGAAAAGAAGTACTGTCAAC  
GACTAACTATATATTCAAACATATGATGGATGAACAAGTCGGTGAAGTAAAATATGAT  
GAA  
GCGGCACAGTTGTATTATGGTGCACCATATGATGAATCGGACCATCCAGTAAACTT  
AAAA  
GTCCTTGTGAAAGCGGATCAAGAACATAGTGATTTAACTGGTAGTGAACAAGAAGC  
GCAT  
TTTATAGTAGAACAAGTTAAAGATATCTTAGAACATCAAAAAGTTTATGATATGAA  
AACA  
GGAAGCTATAGAAGTGCGACATACAAGGATATCGTTATTCTAGAACGCAGCTTTG  
GACAA  
GCTCGCAATTTACAACAAGCCTTTAAAAATGAAGATATTCCATTCCATGTGAATAG  
TCGT  
GAAGGTTACTTTGAACAAACAGAAGTCCGCTTAGTATTATCATTTTTAAAGAGCGAT  
AGAT  
AATCCATTACAAGATATTTATTTAGTTGGGTTAATGCGCTCCGTTATATATCAGTT  
CAAAG  
AAGACGAATTAGTTCAAATTAGAATATTGAGTCAAATGATGACTACTTCTATCAATCG  
ATTG  
TAAATTACATTAATGACGAAGCAGCAGATGCAATTTTATGTTGATAAATTA  
AAAA  
ATGTTTTATCAGATATTCAAAGTTACCAACAATATAGTAAAGATCATCCGGTGTATC  
AGTTAAT  
TGATAAATTTATAATGATCATTATGTTATTCAATACTTTAGTGGACTTATTGGTGG  
ACGT  
GGACGACGTGCAAATCTTTATGGTTTATTTAATAAAGCTATCGAGTTTGAGAATTCA  
AGTT



TTAGAGGTTTATATCAATTTATTCGTTTTATCGATGAATTGATTGAAAGAGGCAAAGATTT  
TGGTGAGGAAAATGTAGTTGGTCCAAACGATAATGTCGTTAGAATGATGACAATTCATAG  
TAGTAAAGGTCTAGAGTTTCCATTTGTCATTTATTCTGGATTGTCAAAGATTTTAATAAA  
CGTGATTTGAAACAACCAGTTATTTTAAATCAGCAATTTGGTCTCGGAATTGATTATTTTG  
ATGTGGATAAAGAAATGGCATTTCATCTTTAGCTTCGGTTGCATATAGAGCTGTTGCCG  
AAAAAGAACTTGTGTCAGAAGAAATGCGATTAGTCTATGTAGCATTAAACAAGAGCGAAA  
GAACAACCTTTATTTAATTGGTAGAGTGAAAAATGATAAATCATTACTAGAACTAGAGCAA  
TTGTCTATTTCTGGTGAGCACATTGCTGTCAATGAACGATTAACCTCACCAAATCCGTTCC  
ATCTTATTTATAGTATTTTATCTAAACATCAATCTGCGTCAATTCCAGATGATTTAAAATT  
TGAAAAAGATATAGCACAAATTGAAGATAGTAGTCGTCGGAATGTAATATTTCAATTGT  
GTACTTTGAAGATGTGTCTACAGAAACCATTTTAGATAATGATGAATATCGTTCGGTTAAT  
CAATTAGAACTATGCAAAATGGTAATGAAGATGTTAAAGCACAAATTAACACCAACT  
TGATTATCGATATCCATATGTAATGATACTAAAAAGCCCTCAAACAATCTGTTTCTGA  
ATTGAAAAGACAATATGAAACAGAAGAAAGTGGCACAAAGTTACGAACGAGTAAGGCAAT  
ATCGTATCGGTTTTTCAACGTATGAACGACCTAAATTTCTATGTGAACAAGGTAACGAA  
AAGCGAATGAAATTGGTACGTTAATGCATACAGTGATGCAACATTTACCATTCAAAAAAG  
AGCGCATATCTGAAGTTGAGTTACATCAGTATATCGATGGATTAATCGATAAACATATTA  
TCGAAGCAGATGCGAAAAAAGATATCCGTATGGATGAAATAATGACATTTATCAATAGT  
GAGTTATATTCGATTATTGCTGAAGCAGAGCAAGTTTATCGTGAATTACCGTTTGTAGTTA  
ACCAAGCATTAGTTGACCAATTGCCACAAGGAGACGAAGACGTCTCAATTATTCAAGGTA  
TGATTGACTTGATCTTTGTTAAAGACGGTGTGCATTATTTTGTAGACTATAAAACCGATGC  
ATTTAATCGTCGTCGTGGGATGACAGATGAAGAAATTGGTACACAATTAATAAATAAATA  
TAAGATACAGATGAAATATTATCAAATACGCTTCAAACGATTCTTAATAAAGAAGTTAA  
AGGTTATTTATACTTCTTCAAATTTGGTACATTGCAACTGTAG

### > Q5HHB6

Function: protein coding sequence; putative fumarylacetoacetase (core genome, variable)

Best match: Q5HHB6\_CC001\_MW2-USA400\_BA000033.2[939638:940540] (completely identical)

Position: 025-contig\_192\_RC: 63995 ... 64898; Length: 903 bp

Sequence:

ATGAAATTCTTATCATTCAAGTATAATGACAAAACCTTCATATGGCGTTAAAGTAAAACGC  
GAAGATGCTGTATGGGATTTAACACAAGTATTTGCTGACTTTGCAGAAGGAGATTTCCAT  
CCTAAAACATTGTTAGCTGTTTACAACAAAATCATACTTTAGATTTTCAAGAACAAGTA  
CGTAAAGCAGTTGTAGCAGCAGAAGATAGCGGCAAAGCTGAAGACTATAAAAATTTTCATT  
TAATGACATTGAATTCTTACCACCAGTAACACCTCCGAATAATGTGATTGCTTTTTGGTAGA  
AATTACAAAGATCATGCGAACGAATTAATCATGAAGTAGAAAAATTATATGTATTTACA  
AAAGCAGCGTCATCTTTAACAGGAGATAATGCAACAATTCCAAATCATAAAGATATTACT  
GATCAATTAGATTATGAAGGTGAATTAGGTATTGTTATTGGTAAGTCTGGTGAAAAGATT  
CCAAAAGCATTAGCTTTAGATTATGTTTACGGCTATACAATTATTAACGATATCACTGATC  
GCAAAGCACAAAGTGAACAAGATCAAGCATTTTTATCAAAAAGTTTAACTGGCGGTTGCC  
CAATGGGTCCCTTATATCGTTACTAAAGACGAACTACCATTACCTGAAAATGTAATATTG  
TTACAAAAGTTAACAATGAAATTAGACAAGATGGTAACACTGGCGAAATGATTCTTAAA  
ATTGATGAATTAATAGAAGAAATTTCAAATATGTTGCACTACATCCGGGAGATATTATT  
GCAACTGGTACACCAGCAGGCGTTGGTGCAGGTATGCAACCACCTAAATTTTACAACCA  
GGTGATGAAGTTAAAGTGACTATTGATAATATTGGAACGCTGACAACCTTATATCGCTAAA  
TAA

### > UPF0344

Function: protein coding sequence; unknown protein fold UPF0344 (core genome, variable)

Best match: UPF0344\_CC001-ST772\_118\_AJGE01000009.1[64979:65368] (completely identical)

Position: 025-contig\_192\_RC: 65225 ... 65615; Length: 390 bp

Sequence:

ATGTTACATTTACATATATTAAGTTGGGTATTAGCGATTATTTTATTTATCGCTACATACTT  
AAACATTTCAAAAAATCAAGGCGGATCACCATTTTTCAAACCGTTGCACATGATTTTACG  
CTTATTTATGCTGTTGACGTTAATTCAGGATTTTGGATATTAATTCAGTCATTTATGAATG

GCGGGGCAAATCATATGTTGCTTACATTGAAAATGCTGTGTGGTGTGCAGTAGTTGGAT  
TGATGGAAGTGTGCGATTGCTAAAAGAAAGAGACATGAACAAAGTCACACAATGTTTTGG  
ATAACAATGGCATTAAATTATCATCACAATGGTATTAGGTGTCATTCTACCGTTAGGGCCTA  
TATCAAATTATTTCGGTATTGGCTAA

> **cdr**

Function: protein coding sequence; coenzyme A disulfide reductase (core genome, variable)

Best match: cdr\_CC001-ST772\_118\_AJGE01000009.1[65540:66856:r]RC (completely identical)

Position: 025-contig\_192\_RC: 65786 ... 67103; Length: 1317 bp

Sequence:

TTATTTAGCTTTGTAACCAATCATATTGATTAATCTTTAGGGTGGCTATATGGTGGTGCA  
TAAGCCACTTCAAACCTCAGTTAACTCATCTACAGTTAGCTGGTTCATCATTGCCATCGATA  
GTACATCAATACGTTTATCTGCACCTTCTTTTCTACTGCAGCTGCTCTTAAAATCTGACG  
GTTTGAAGTGTGATAATATACCTTAAGTGTAAAGGGGAATTCCTGGGTAATAATTTCGC  
GTGTGCACCTTGAGTGACTTCTACCATTTTATAGTCAAATTGCTTTAGTTCATTTGGTTTAA  
CGCCGACACTCGCAAATGTATAATCAAAGAACTTCACAATATTGTTGCCTAAGAAGCCTT  
TGAATTC AATAGTGTCAATTTCCAGCAATTTGTTCCGCAACAATACTTGCTGCACGGTGAGC  
GCCCAAGCTAAAGGAACACTAGCCGGTAGATCGACATGTCGATAAATGTGATGTTGCAAT  
ATCGCCTATTGCATAAATGTTTGGAAACATTTGTTTCAAATTTATCGTTTACCGGTATGAAA  
CCTTTTCGATCAAGTTTGATATTTGAACTTTCGATAAAATTTGAATTGGGGTGAGTACCGA  
CACCTTCAATAATCATATCGTAATGTTCAACTTTTCTGATTTAAATGTAATTCATTTCCA  
TTGATAGCATCAATTTCTCATTTAAACGGTATGGAATCTCCCGCTTATCTAATTCATCAA  
GTATAGTTGATTCATGTCAGCATCCATTAATTTATTTATCTTATCAGATCGATGAATTA  
AGTAGGGTGTAAACCACGTTTCGTAAAGATTTTCAAGA ACTTCTAATGAAACATACCCTGC  
ACCTACA ACTAATACTTTATCAACTTGATTTGCTTTGATGAATTGATCGATAGCATCAGTG  
TCTTCTAAATTTCTAAGTGTAAATGTAATATCACTTTCAAAGCCAAGGCTATTTGCACTTG  
CACCAGGGCTTAAAATGAGTTTATCGTAAGATTCTTCAAATTTGTTGCTTGGTCTTTCTATT  
TAATACAGTTACAGTTTGTCTTTTCATCATTGATTGCAATAACTTCATGATAAGTTTTTACT  
GTAATTTGCTTTCTATCATAAAATTTTTCAGGTGTATACGCTAAAGCATATTTTCTATCTTC  
AACA ACTTCGCCAATGACATAAGGCAATGCACAATTAGCAAAGCTCATATCACGATCTTT  
TTCAA AAAATAATAATGTCACTTTCTTTATCTAAACGTCGAATTTGGCTGGCACATGTTGCA  
CCGCCAGCGACTGCTCCGACTACGACTATTTTGGGCAT

> **paaD**

Function: protein coding sequence; putative protein (core genome, constant)

Best match: paaD\_CC005\_Mu50-VRSA\_BA000017.4[1020055:1020363] (completely identical)

Position: 025-contig\_192\_RC: 68092 ... 68401; Length: 309 bp

Sequence:

ATGGAAGAGGCATTGAAAGATAGTATCTTAGGTGCATTAGAAATGGTAATTGACCCTGAA  
TTAGGAATTGATATCGTTAATTTAGGTTTAGTATACAAAGTGAATGTTGATGATGAAGGC  
GTATGTACAGTTGATATGACTTTAACATCAATGGGATGTCCAATGGGACCTCAAATTATT  
GATCAAGTTAAAACAGTATTAGCAGAGATTCTGAAATTCAGGATACTGAAGTGAATATC  
GTATGGAGTCCACCTTGGACAAAAGATATGATGTCACGTTACGCTAAGATTGCACTTGGT  
GTGAGCTAA

> **Q5HHB1**

Function: protein coding sequence; putative O-acetyltransferase (core genome, constant)

Best match: Q5HHB1\_CC001\_MW2-USA400\_BA000033.2[944592:946406]

Position: 025-contig\_192\_RC: 68948 ... 70763; Length: 1815 bp

Sequence:

ATGAACAAAACAAAGGGTTTTACAAAGTATAAGAAAATGAGATATATGCCAGGGCTCGA  
TGGTTTGAGGGCAATCGCTGTTCTAGGAATTATTATTTACCACTTAAACAAGCAATGGTTG  
ACAGGTGGCTTTTTAGGTGTGGATACATTTTTTGTGATCTCTGGTTATTTAATTACAAGCT  
TATTACTCAAAGAGTATGATGACACAGGTATCATTA AATTGAAAAGCTTTTGGATACGTC  
GTTTAAAACGTTTATTACCAGCAGTCATAGTTTTATTAATGTTGTAGGGACAGCAACCTT

ATTATTA AAAATCAGATAATATCATTAGGGTTAAACATGATATTATTGCTGCGATATTTTAT  
GTATCAA ACTGGTGGTATATAGCAAAAAGATGTTAATTATTTTGAGCAATTTTCATTTATGC  
CATTAAAGCATTATGGTCTTTAGCAATTGAAGAACAGTTTTACATATTTTCCCAGTTAT  
TTTGGTTACATTATTGTTAACAATTA AAAAAGCGATACAAAATAGGATTTATTTTTTTGGGA  
GTATCAATAATTTCTTTAGGGTTAATGATGTTTATCTACAGTATTAATGGGGATCATTAC  
GAGTGTATTTTGGTACAGATACTAGATTACAGACATTGTTACTGGGTGTTATTTTAGCTTT  
TTTATGGCCACCGTTTAAATTGAAAAATGATCCACCTAAAGTTGTAAAATATGTTATTGAT  
AGCATAGGTAGTTTATCATTATAGTACTTATATTATTATTTTTCATTATTAATGATGAGA  
CGAATTGGATATATGATGGTGGTTTCTATTTAATATCCATATTAACGTTATTTATTATTGCT  
AGTGTCTGTTCCATCCATCTACATGGATAGCGAAGATATTTTCAAATCCAGTGTAGTATTTA  
TCGGGAAAAGGTCTTATAGTTTATATTTATGGCATTTTGCAGTAATTAGTTTCGTACATAG  
TTACTATGTAGACGGACAGATACTGTATATGTGTACTTTATAGATATAAGTTTAAACAATT  
ATATTTGCAGAGCTATCATATCGCTTTATAGAACTCCATTTAGAAAAGAAGGTATTTAAA  
GCTTTAAATTGGCGACCTTCTTATATACCACAATTTATAAGAATGGCAATTGTAGTAACCT  
TGTTAATTCATTTATGTTGATTTTAGTAGGTGCATTCAATAAATATGGTAAAGACATTAT  
TGGAGAAAAAGCGAATAGCTTTGATACCACAATTGAAGATAATTATTTAATGCGGATAGC  
ACCAATTGATAACATACACATTGATGGCTTAGTAAGTGAGAAGAAAAAGGAATCTTCCG  
ACGTATATAATAATATTAACCTCTTTTAAATCGGTGATTCAGTAATGGTTGATATCGGTGA  
GTCATTTAAGTCATCAGTTCCTAAGTCTAGAATTGATGGAAAAGTAGGGCGTCAATTGTA  
TCAAACCTTACCTTTAGTTAAAGCGAATTATTCACAATATAAAAAATCATCTGATCAAGT  
CGTATTAGAATTAGGTACAAATGGCGACTTTACTGTCAAACAGCTCGACGATTTACTTAA  
TCAATTTGAAAAGCCAAGATTTATTTAGTTAATACACGTGTTCCAAGAATTTATGAGGC  
AAATGTAAATCGATTATTAGCTGACGCGGCGAAACGAAAGTCCAATGTCACATTAATTGA  
TTGGTATAAGCGATCACAAGGACATAGTGAATATTTTGCACCAGACGGTGTACATTTAGA  
GTACAAAGGAGTCCTAGCTTTAAAAGATGAAATATTTAAAAGCACTTAAAAAGAAATAA

> **clpB**

Function: protein coding sequence; chaperone-like protein B (core genome, variable)

Best match: clpB\_CC001-ST772\_118\_AJGE01000009.1[70719:73328] (completely identical)

Position: 025-contig\_192\_RC: 70965 ... 73575; Length: 2610 bp

Sequence:

ATGGATATAAATAAAAATGACATATGCTGTTCAAAGTGCTTTACAACAAGCAGTTGAACTG  
AGTCAGCAACATAAATTACAAAATATAGAAATTGAGGCAATTTTAAGCGCTGCCTTAAAT  
GAAAGTGAAAGCTTATATAAAAAGTATTTTAGAACGAGCAAATATTGAGGTAGATCAATTA  
AACAAAGCTTATGAAGACAAACTAAACACGTATGCATCTGTAGAAGGTGACAATATACA  
ATATGGTCAATATATTAGCCAACAAGCAAACCAATTGATAACTAAGGCTGAATCATACAT  
GAAAGAATATGAAGATGAATATATTTCAATGGAGCATATTTTACGTTTCGGCAATGGACAT  
TGATCAAACAACAAAACATTATATAAATAATAAAGTAGAAGTTATCAAAGAAATTATTA  
AAAAAGTAAGAGGGGGAAATCACGTGACATCACAAAATCCAGAAGTTAATTACGAAGCA  
TTAGCTAAATATGGCCGCGACTTAGTAGAAGAAGTTAGACAAGGTA AAAATGGATCCTGTT  
ATAGGAAGAGATGAAGAAATTCGAAATACGATTCGTATTTTAAGTCGTAAAACCTAAAA  
CAACCCTGTGCTCATTGGTGAACCAGGTGTTGGTAAAACCTGCAATTGTTGAAGGATTAGC  
GCAACGTATAGTTAAGAAAGATGTGCCAGAATCATTATTAGATAAAACTGTTTTTGGATT  
AGATTTAAGCGCATTAGTAGCGGGCGCTAAATATCGTGGTGAATTTGAAGAGAGATTAAA  
AGCAGTCCTAAAAGAAGTTAAAGAGTCTGATGGTGAATTATATTATTTATTGATGAAAT  
CCATATGCTTGTAGGTGCTGGTAAAACAGATGGTGCCATGGATGCAGGCAACATGCTAAA  
ACCAATGTTAGCACGAGGAGAGTTACATTGTATTGGTGAACAACCTTTAAATGAATATCG  
AGAATATATTGAAAAGATTTCGGCATTAGAGCGTCTGTTTCCAAAAGTAGCAGTTAGTGA  
GCCTGATGTTGAAGATACAATTTCAATTTTACGTGGTTTAAAAGAACGATATGAAGTGTA  
TCATGGTGTGCGTATTCAAGATAGAGCCTTAGTTGCTGCCGCTGAATTGTCTGATCGTTAC  
ATCACTGATCGTTTTTTTACCAGATAAAGCGATTGATTTAGTTGACCAAGCATGTGCAACA  
ATTCGTACGGAAATGGGATCAAATCCAACCTGAATTGGATCAAGTTAATAGACGTGTCATG  
CAATTAGAAATTGAAGAAAGCGCACTTAAAAATGAATCTGACAATGCGAGCAAACAGAG  
ATTACAAGA ACTACAAGAAGAGCTTGCCAATGAAAAAGAGAAACAAGCAGCACTTCAAT  
CTCGTGTAGAATCAGAAAAAGAAAAAATAGCAAATTTACAAGAAAAACGTGCGCAACTA  
GATGAAAGTAGACAAGCGTTGGAAGATGCACAAACAAATAACAATTTAGAAAAAGCTGC

TGAACTACAATATGGAACAATTCCTCAATTGGAAAAAGAACTTAGAGAATTAGAGGATA  
ATTTCCAAGATGAGCAAGGTGAAGATACAGATCGAATGATTCGTGAAGTTGTAACAGAC  
GAAGAAATTGGCGATATTGTCAGCCAATGGACAGGCATACCAGTTTCAAATTAGTTGAA  
ACAGAACGTGAAAAATTACTTCACTTAAGTGACATCTTGCATAAACGTGTTGTAGGTCAA  
GATAAAGCGGTTGACCTGGTTTCAGATGCAGTAGTTAGAGCAAGAGCAGGTATTAAGA  
TCCAAACAGACCTATTGGTAGTTTCTTATTCCCTAGGTCCAAGTGGAGTAGGTAAGACTGA  
ATTAGCTAAATCATTAGCTGCATCATTATTTGATTCTGAAAAACATATGATTCGTATTGAT  
ATGAGTGAATATATGGAACACATGCAGTATCAAGATTGATAGGGGCACCTCCAGGATA  
TATTGGACATGATGAAGGGGGTCAATTAAGTGAAGCGGTTTCGTCGTAATCCATACTCAGT  
TATCTTATTAGATGAGGTTGAAAAAGCGCATACTGACGTCTTTAATGTATTATTGCAAATT  
TTAGATGAAGGCCGTTTAACTGATTCTAAAGGACGTAGCGTTGATTTTAAAAATACTATT  
ATTATTATGACAAGTAATATTGGATCTCAAGTTTTATTAGAAAACGTAAAAGAGACTGGT  
GAAATTACAGAATCAACAGAAAAACTGTTATGACAAATTTAAATGCATATTTCAAACCA  
GAAATTTTGAATCGTATGGATGACATCGTATTATTTAAACCTCTATCTATTGATGACATGA  
GTATGATTGTAGACAAAATATTAACGCAATTAATATAAGATTATTAGAACAGCGAATCT  
CAATTGAAGTTTCTGATGATGCTAAAGCTTGGCTAGGTCAAGAAGCTTATGAACCTCAAT  
ACGGTGCAAGACCATTAAACGTTTTGTACAACGCCAAATTGAAACACCATTAGCACGTA  
TGATGATTAAGAGGGATTCCAGAAAGGTACAACGATTAAGTTAATTTAAATTCAGACA  
ATAACTTAACGTTTAAATGTTGAAAAATTCATGAATAA

### > Q5HHA9

Function: protein coding sequence; transcript regulator/LysR family (core genome, variable)

Best match: Q5HHA9\_CC001-ST772\_118\_AJGE01000009.1[73387:74256:r]RC (completely identical)

Position: 025-contig\_192\_RC: 73633 ... 74503; Length: 870 bp

Sequence:

TTATAATTGTTTCATTGGCAATATACTTTTTAAATGATTTAATAAAAACCAATATTTCTGGG  
CTTTCTTTTTTGCTGTATATATATGTAATGAAATAGGCGCTTGTAAAATTTTCGTGTTAAT  
AACCGAAATATTGTAATCACTATCTGTTGTTATATAAATAGGCAGGAATGATATACCTTG  
ATTCATTTTCGATTAATTTAATTGAAGTATGCACATCATTGATAGATAGAAATTGTGCTTTT  
CCATAAATATTTAAAATATTATTTTAAAGTGATGACCAATATTCTGGATGGTTATCACTTA  
TTATTTTGTATTTTCAAATAAAGATGCCTCAGTTAGAAGATGATTATTCTCTTTATTGGG  
AGCAATCAATACAATTTTACCTTCGCATACTTTTTCAGAATGAACTTCTCTTAGTTTAGGT  
TGATTTCTGCTAATCCCGATGTCATACGTATGATTATTAATATCTTTTTCAATATTTTCATT  
TTTGACATGGAGAGAAACATCGATAAACGGATGCTCGTTAAAGAAAGATTTTAAAAATTT  
GGGCATAATGAATGTCGCGATATATGAAGACACGACAACATTTAATTTTCGATTGAAACAT  
CGTTTTTTTAAAGTTGGATATGTTTGATGCCACTTTCATATTGTTCAATAAAACTTTGCGCA  
ATTGGAAGAAATGTATGACCATCTTCAGTCAAGATAATTTGATTTTATAAGTTTCAAATA  
GTTTCACATTGAGATGCTGTTCTAAATTTTTAATTTGCTTATGTATAGAAGGTATAGTGAG  
ATTAATTTCTTCACTAGCTAATCGATAGTTTAAACGTCTTCGCTAAAATGACAAATGTATAG  
TACCAATCTAAATTCAT

### > leuA2

Function: protein coding sequence; 2-isopropylmalate synthase/locus 2 (genomic island)

Best match: leuA2\_CC001-ST772\_118\_AJGE01000009.1[74366:75510] (completely identical)

Position: 025-contig\_192\_RC: 74612 ... 75757; Length: 1145 bp

Sequence:

ATGATTCGAATTCAAGATAATACAATAAGGGATGGTATGCAACAAAGTAATGTTTCGAAA  
AAGTCTAATTATAAAAAAAGAAGTATTGAAACAAATTAACAAGTTAAATATAAATTCTGT  
TGAAGTAGGCATGTGTACAACATCGAGGATGAATTTAATATTCATCAATTCAGAGACAT  
TTTAAAGTCCTGAAAAAGAATTAGTAGTATTGACTAGGCTTAATGAAAAAGAAATAAAAA  
AATAGTCAAATTAATAAATTCATAATTTAGTGGTAAAAATACTATTGCCAATATCTGACTT  
GCATATAAAAGAAAAGCTTAATTTTTCAAATAAATATTATATTCAGAAAATCAAAGACTG  
CTTGGATATATTAAGAAAGATAAAAAAGGAGTAGATATTTGTTTTGAAGATGCAACAA  
GGACTTCTAGAGAAAATTGAAGGAATACATGGAAATTATTTCAAATATCAAGTTAGA

ACAGTTACCTTTGCGGACACTGTAGGATGTTTCGACACCATTAGAATACGGAGATATTTTT  
AATTACTTTGTAAAAAATATTCTAACATAATTTTTCTGCTCATTGTCATAACGATCTAG  
GGTTGGCTACTGCAAATACATTAGCTGCAATTTTAAATGGTGCGAAACAAATAGAACTA  
CATTTTTGGGAATTGGTGAGAGAGCGGCTAATGCTCCTATTGAGGAAATAATTACTATTTT  
GACAAAAAACAATAAAAAGTACGGAATTCACTTTACCCGACGTATATAAACTAGTA  
TTAATATTTCTAAAATTCTCGATTTTCAAATATCAGAAAACAAACCTATAATTGGTGAAA  
ATATATTTAAACATGAATCAGGAATTCATCAAGATGGTACTAAAAAATATAAATATGT  
ATCAATATTTAGTTCCTAGTGATTTAGGATTGAAAAATTCACAAGTTGTTTCAGTTTCCAAT  
AAGTAATATTTCTAGTAAGAAAATCTTGCACAATAAATTTAAATCAATAGTTAACACTGA  
AGAAATTGATGAAAATATTTCTTTCTATAAACTTGTGAACAAGTTTTACCTGAAGTAGC  
ACCTGAAGATACAGTGGATTTACTTCAGATAATAAAAAGGAGGAGTAAAGATGGAAATT  
TTAAATGA

### > Q5HHA7

Function: protein coding sequence; Sua5/YciO/YrdC/YwlC family protein (genomic island)

Best match: Q5HHA7\_CC001\_MW2-USA400\_BA000033.2[951385:952026] (completely identical)

Position: 025-contig\_192\_RC: 75740 ... 76382; Length: 642 bp

Sequence:

ATGGAAATTTTAAATGATTCTGTAAAAAGTTTTGAAAACTTTATTTACAATTACAAGAT  
GGTTTTCCAGTGATTGTTCCCTACTGATACTAATTATAATTTATGTAGTTTACCTAACAACG  
ATCTTTGTATCGATAAAAATATTTGAATATAAAAAGCGATCGAAAGATAAGCCATTATCAT  
TATTTATTGATAAGCCAGAGGATTGGAAATTGTATGGAGATAATCAAATACGGAAATAG  
TTGATAAACTAGTTGAAATATTTTGGCCTGGACCATTAAATATTATTTTAAAAAATAAAA  
CAAGCTATAATTATATGCTCAATAATTCAGATAGTATAGCTATAGGATGTGTACAAAATA  
AAACGATGAGAAGATTTATTTTCATATATTAATTCACCTATAGCAATTACTTCAGCAAATAT  
ATCTGGAAGTCCGATGATATTTTAATAACTGAAAATGAAGCAATTAAGCACATGGGCGA  
AAATGTAAGATATATGCTAAGAAGTCAAATAAAAATAACTATAAAACATCTAGTACGA  
TTATTAAGTGACAGATAATAAAATTGAATTATTAAGAGAAGGAGATATAAAGTTTGAA  
GAAATAAAAGAAAGACTAGGTACAGGTATTATTTATGAATAA

### > Q5HHA6

Function: protein coding sequence; putative protein (genomic island)

Best match: Q5HHA6\_CC001\_MSSA476\_BX571857.1[935988:937106] (completely identical)

Position: 025-contig\_192\_RC: 76374 ... 77493; Length: 1119 bp

Sequence:

ATGAATAAGTTAATACTTGGGATTTATTTATACCGAATTTTTTTCACGAGCATACTTTTATT  
TACCGTTTTTATTAATTTACTTTTTGATTCAAGGTTATTCCATAATACAATTAGAAATATTA  
ATGGCGTCTTATGGCATTGCAGCATTTTTATTCTCTCTATACAAAGAGAAGTGTTTTAAAA  
TTTGTAACTTAAAAGATTCTAATAAATTAGTTGTTAGTGAAATATTCAAAATCATCGGTTT  
ATTGTTGTTATTATATCAAATCAATATTTAATTTTAGTAGTGGCACAAATATTATTAGGG  
TTAAGTTACTCAATGATGGCGGGTGTGATACCGCAATAATTAAGAAATATAACAAAT  
GAGAAATACGTACAAAATAAGTCAAATAGCTATATGTTCCCTATCATTATTAATTTACGGG  
ATTATAGGTAGTTATCTTTATGGAATAAATATTAATGGCCTATAATAATGACTGGTATAT  
TTCAATTCTAACAATTATAATTATTCGATGCACATTAGTTGAAAATAGGGAATTAATTT  
AATAGGAGAAACAAAGGGAAAGATAAAGAAATTTCTACCAGAAGAGAAGTTTTGGATAT  
TGCATTATTCTTTTTAAGAGCGTTAATATTAGGATTTTTATAGGATTTATTCCAATTAAT  
ATATATAATGATTTAAAAGTGAATAATTTACAATTTATTTTCAGTATTAATTTGTTACACAG  
TTATGGGTTTTGTATCTTCACGTTATTTAACTAAATACTTGAATTATAAGTTTGTGTCAGA  
AATTTGTTTAGTAATATTTTTAATAATATATACATATCAAAGTTTCATAGCAGTTACTATT  
TCTATGATATTTTTAGGTATTTCTTCAGGGTTAACTCGTCCACAACTATAAATAAACTTT  
CTAGCAGTAGTAACTTAAGAGTGATGCTTAATTATGCAGAAACGTTATATTTTTATTTTTAA  
TATCGCATTTTTACTTATGGGTGGTACTTATATACAATAGGAACTATTCAATACTTAATA  
TTATTTATTTTCGTTATTAATTTTTATATATTTAATAATAATTTTTATTTTACAAGGAGAGA  
GCAACATGAAAATAAAAAGTGA

## > **Q5HHA5**

Function: protein coding sequence; putative protein (core genome, variable)

Best match: Q5HHA5\_CC001-ST772\_118\_AJGE01000009.1[77230:77745] (completely identical)

Position: 025-contig\_192\_RC: 77476 ... 77992; Length: 516 bp

Sequence:

```
ATGAAAATAAAAACTGAATTTAAAGGGAACAATATACCATATGAATACGCAGCAGGTGC
AGATGTGAGTGATTCTATTAACGGGAATCCAATTAAGTCATTTCCATTTGAAGTAATTGA
ATTACCGGAAGGGACTAAATATCTTGCTTGGTCTTTAATTGACTATGATGCAATTCCTGTG
TGTGGCTTTGCATGGATTCAATTGGAGTGTTGCTAATGTAAGTGTTAGTGGCAATTC AATTT
CTATAAAAGCAGATTTATCAAGAACAAGGGTGACTATGTACAAGGTAAAAATAGCTTT
ACTAGTGGGTTATTGGCTGAAGATTTTTTCAGAAATAGAAAATCACTATGTAGGACCTACA
CCACCTGATCAAGATCATCAATATGAATTAACAGTTTATGCGTTAGATCATTCTTTAAATT
TGAAGAATGGGTTCTACTTGAATGAATTTTTAAAGAAGTAAATCAACATAAAATTGATC
AAACAAGTATTAACCTTATAGGAAGAAAAATTTAA
```

## > **eap-L1**

Function: protein coding sequence; putative exported protein/locus 1 (core genome, constant)

Best match: eap-L1\_CC001-ST772\_118\_AJGE01000009.1[78056:78490] (completely identical)

Position: 025-contig\_192\_RC: 78302 ... 78737; Length: 435 bp

Sequence:

```
ATGAAATTAATAATCATTATAACTGTAAC TTTGGCACTGGGCATGATCGCAACGACTGGC
GCTACTGTGGCAGGTAATGAGGTATCTGCAGCAGAAAAGGACAAACTACCGGCAACTCA
AAAAGCTAAAGAAATGCAAAATGTTCCATATACAATTGCAGTAGATGGCATTATGGCTTT
CAATCAATCTTACTTAAATTTACCAAAGATAGCCAATTATCATATTTAGATTTAGGAAAT
AAAGTTAAAGCTTTATTATATGATGAACGCGGTGTAACACCTGAGAAGATTCGAAATGCA
AAATCTGCCGTTTACACGATTACTTGGAAAGATGGCAGTAAAAAAGAAGTGGATTTAAA
GAAAGATAGTTATACAGCAA ACTTGT TTTGATTCAAATTC AATTAACAAATTGATATTA
TGTA AAAACTAAATAA
```

## > **A6U088**

Function: protein coding sequence; putative protein (core genome, constant)

Best match: A6U088\_CC001\_MW2-USA400\_BA000033.2[954638:954823:r]RC (completely identical)

Position: 025-contig\_192\_RC: 78993 ... 79179; Length: 186 bp

Sequence:

```
TTATTGTGATGAATCTTTCGGCGGTTTAATTACTGCAGCAAAAATTGCTGTGAAAATCGTG
ACAATACTGCCATGATAATTGGATTCACTACATTTAAGCTGTCTCCACCTACTAGGCTAT
TAAGTACAAAGTTAACCATTTGCATTAATAATAATGCCCAAAGAATGTTACGAGGTGTT
TCAT
```

## > **fabH**

Function: protein coding sequence; beta-ketoacyl-ACP synthase III (core genome, constant)

Best match: fabH\_ST425\_LGA251-cow\_FR821779.1[986175:987116] (completely identical)

Position: 025-contig\_192\_RC: 79473 ... 80415; Length: 942 bp

Sequence:

```
ATGAACGTGGGTATTAAGGTTTTGGTGCATATGCACCAGAAAAGATTATTGACAATGCC
TATTTTGAGCAATTTT TAGATACATCTGATGAATGGATTTCTAAGATGACTGGAATTAAG
AAAGACATTGGGCAGATGACGATCAAGATACTTCAGATTTAGCATATGAAGCAAGTGTA
AAAGCAATCGCTGACGCTGGTATTCAGCCGAAGATATAGATATGATAATTGTTGCCACA
GCAACTGGAGATATGCCATTTCCA ACTGT CGCAAATATGTTGCAAGAACGTTTAGGGACG
GGCAAAGTTGCCTCTATGGATCAACTTGCAGCATGTTCTGGATTTATGTATTCAATGATTA
CAGCTAAACAATATGTTCAATCTGGAGATTATCATAATTTTTAGTTGTCCGGTGCAGATA
AATTATCTAAAATAACAGATTTAACTGACCGTTCTACTGCAGTTCTATTTGGAGATGGTGC
AGGTGCGGTTATCATCGGTGAAGTTTCAGAAGGCAGAGGTATTATAAGTTATGAAATGGG
TTCTGATGGCACTGGTGGTAAACATTTATATTTAGATAAAGATACTGGTAAACTGAAAAT
```

GAATGGTTCGAGAAGTATTTAAATTTGCTGTTAGAATTATGGGTGATGCATCAACACGTGT  
AGTTGAAAAAGCGAATTTAACATCAGATGATATAGATTTATTTATTCCTCATCAAGCTAA  
TATTAGAATTATGGAATCAGCTAGAGAACGCTTAGGTATTTCAAAGACAAAATGAGTGT  
TTCTGTAAATAAATATGGAAATACTTCAGCTGCGTCAATACCTTTAAGTATCGATCAAGA  
ATTAATAAATGGTAAACTCAAAGATGATGATACAATTGTTCTTGTTCGGATTTCGGTGGCGG  
CCTAACTTGGGGCGCAATGACAATAAAATGGGGAAAATAG

### > **fabF**

Function: protein coding sequence; 3-oxoacyl-acyl-carrier-protein synthase 2 (core genome, constant)

Best match: fabF\_CC001\_MW2-USA400\_BA000033.2[956071:957315]

Position: 025-contig\_192\_RC: 80426 ... 81671; Length: 1245 bp

Sequence:

ATGAGTCAAATAAAAGAGTAGTTATTACAGGTATGGGAGCCCTTTCTCCAATCGGTAAT  
GATGTCAAACAACATGGGAGAATGCTCTAAAAGGCGTAAATGGTATCAATAAAATTAC  
ACGTATCGATACTGAACCTTATAGCGTTCACCTTAGCAGGAGAACTTAAAACTTTAATAT  
TGAAGATCATATCGACAAAAAAGAAGCGCGTCGTATGGATAGATTTACTCAATATGCAAT  
TGTAGCAGCTAGAGAGGCTGTTAAAGATGCGCAATTAGATATCAATGAAAATACTGCAG  
ATCGAATCGGTGTATGGATTGGTTCTGGTATCGGTGGTATGGAAACATTTGAAATTGCAC  
ATAACAATTAATGGATAAAGGCCAAGACGTGTGAGTCCATTTTTCTGTACCAATGTTAA  
TTCCTGATATGGCAACTGGGCAAGTATCAATTGACTTAGGTGCAAAAGGACCAAAATGGTG  
CAACAGTTACAGCATGTGCAACAGGTACAAATTCAATCGGAGAAGCATTTAAAAATTGTGC  
AACGCGGTGATGCAGATGCAATGATTACTGGTGGTACAGAAGCACCAATTACTCATATGG  
CAATTGCAGGTTTCAGTGCAAGTCGAGCGCTTTCTACAAATGATGACATTGAAACAGCAT  
GTCGTCCATTCCAAGAAGGTAGAGACGGTTTTGTTATGGGTGAAGGTGCTGGTATTTTAG  
TAATCGAATCTTTAGAATCAGCACAAGCTCGAGGTGCCAATATTTATGCTGAGATAGTTG  
GCTATGGTACTACAGGTGATGCTTATCATATTACAGCGCCAGCTCCAGAAGGTGAAGGCG  
GTTCTAGAGCAATGCAAGCAGCTATGGATGATGCTGGTATTGAACCTAAAGATGTACAAT  
ACTTAAATGCCCATGGTACAAGTACTCCTGTTGGTGACTTAAATGAAGTTAAAGCTATTA  
AAAATACATTTGGTGAAGCAGCTAAACACTTAAAAGTTAGCTCAACAAAATCAATGACTG  
GTCACTTACTTGGTGCAACAGGTGGAATTGAAGCAATCTTCTCAGCGCTTTCAATTAAG  
ACTCTAAAGTCGCACCGACAATTGATGCGGTAACACCAGATCCAGAATGTGATTTGGATA  
TTGTTCAAATGAAGCGCAAGACCTTGATATTACTTATGCAATGAGTAATAGCTTAGGAT  
TCGGTGGACATAACGCAGTATTAGTATTCAAGAAATTTGAAGCATAA

### > **Q2YWV0**

Function: protein coding sequence; putative protein (core genome, constant)

Best match: Q2YWV0\_CC001\_MW2-USA400\_BA000033.2[957370:957741:r]RC

Position: 025-contig\_192\_RC: 81725 ... 82097; Length: 372 bp

Sequence:

TTATACTAAGATGAGCGACAGCACAATCGTCATAATAAAATATAAAATATTTATTAATAA  
TAAGGGGATTATCCATGTAGAAACAAAGTAATGCTCTTTTTTTACCTCTTGTGGGTTGAAA  
AATGGATCATCAGAGATAGACTTCTTCTTTTTTCGAAGATGACATTTGATACTTTAATCTTC  
TAAAACCATAACTTGTGCGATCAAAAATGCCTTCTTGTACAAGTAAAATCAAAAATATGC  
TAATAAAAATAATTAATGAAACATAAAACAATATATTTAAATATGTAATGATAGTATGGC  
TATTAAAAACCCATATAATAAACGTTAACATTGGGGTTATTAGTGCCATTCCAAGCCATT  
TTTCAACAT

### > **oppB1**

Function: protein coding sequence; oligopeptide transport system permease protein (core genome, constant)

Best match: oppB1\_CC005\_Mu50-VRSA\_BA000017.4[1034300:1035226] (completely identical)

Position: 025-contig\_192\_RC: 82339 ... 83266; Length: 927 bp

Sequence:

ATGGGGAAATATATTTTCAAACGATTTATTTATATGCTTATTTCTTTATTTATTATTATTAC  
AATTACATTTTCTTAATGAAATTAATGCCAGGTTCCGCATTTAACGATGCTAAATTAAT

GCTGAACAAAAAGAAATTTTAAATGAAAAATATGGATTAATGATCCTGTAGCTACGCA  
GTATTTACATTATTTAAAAAATGTTGTTACAGGCGATTTTGGTAATTCATTCCAGTATCAT  
AATCAACCTGTGTGGGATTTGATTAACCGAGACTACTACCTTCTTTGAAATGGGTCTTA  
CAGCAATGTTTCATCGGTGTGATACTGGGACTTATTTTAGGTGTTGCAGCAGCTACTAAC  
AAAATTCCTGGGTTGACTATACAACTACAGTTATTTTCAGTTATTGCTGTATCTGTACCATC  
TTTTGTACTTGTGTACTTTTACAATATGTATTTGCAGTTAAATTAAGATGGTTCCAGTA  
GCTGGATGGGAAGGTTTTTCGACCCGCGTATTACCGTCACTTGCATTATCTGCAGCTGTTT  
TAGCAACTGTCGCCAGATACATAAGAGCAGAGATGATAGAGGTATTAAGTTCAGACTAT  
ATTTTATTAGCGAGAGCTAAAGGTAATTCGACAATGCGTGTACTTTTTGGACATGCACTTA  
GAAATGCTTTAATTCCAATTATTACAATTATCGTTCCCATGTTAGCAAGTATTTAACAGG  
CACTTTAACAAATTGAAAATATTTTGGGGTTCCTGGATTAGGGGATCAATTCGTACGTTCA  
ATTACAACAAATGATTTCTCAGTAATCATGGCAATCACACTATTATTTAGCACACTGTTTA  
TCGTTTCTATTTTATTGTAGATATTTTGTACGGTGTGATAGATCCACGAATTCGTGTTCAA  
GGAGGTAAAAAATAA

### > oppC

Function: protein coding sequence; (core genome, constant)

Best match: oppC\_CC001\_MW2-USA400\_BA000033.2[958910:959980]

Position: 025-contig\_192\_RC: 83265 ... 84336; Length: 1071 bp

Sequence:

ATGGCTGAAAATAAAAACAATTTGTCGATTAACGACGATCATTCTAATGCAGCTATGACG  
CATACCTCTGACGCTATCGCATCATCTGATTTTATTATTAGAGATTTAGATTTGAATCAGG  
AACCTGAAATGCAACGAGAAAGCAAAAACCTTTTGGCAAGATGCTTGGGCTCAGTTAAAA  
CGAAATAAGTTAGCTGTTGTTCGGTATGATAGGTTTAATTATCATTGTAATATTTGCTTTTA  
TCGGTCCAGTTATAAATAAACATGATTATGCTGAACAAAATGTAGAACATAGAAATCTTC  
CGGCAAAAATACCTGTATTAGACAAAAGTCCATTTTTACCTTTTGATGGTAAAGATGCAG  
ATGGCAAGGATGCTTATAAAGCAGCAAATGCTAAAGAAAATTATTGGTTTGGTACTGATC  
AGTTGGGTCGAGATTTATGGACAAGAACATGGAAAGGTGCTCAAATTTTCATTGTTTATCG  
GTGTTGTTGCAGCGATGTTAGATATTTTTATTGGCGTTGTATATGGTGCATTTCTGGATT  
CTTCGGTGGACGTGTCGATACGATTATGCAACGTATACTTGAAGTCATAGCATCTATTCCG  
AATTAATTGTCGTAATTTTTATTTGTATTAATTTTTGAACCATCCATTTGGACAATTATATT  
GGCTATGTCTATCACAGGCTGGTTAGGCATGAGCAGAGTTGTACGTGGAGAATTTTTAAA  
ATTA AAAAATCAAGAGTTTGTTCATGGCTTCGAAAACATTGGGGGCTTCAA AATTCAAATT  
GATATTTAAGCATATTTTACCTAATACATTAGGTGCTATCGTGGTTACATCAATGTTTACA  
GTACCTAGTGCTATTTTCTTCGAAGCATTTTTAAGTTTCATTGGTATAGGTGTACCCGCAC  
CTCAAACATCGTTAGGGTCATTAGTAAATGATGGGCGCGCAATGTTATTAATTTATCCAC  
ATGAATTATTTATACCAGCAATGATTTTAAGTTTATTAATTCTATTCTTTTACTTATTTAGT  
GATGGATTACGTGATGCATTTGATCCGAAAATGCGTAAATAA

### > oppD

Function: protein coding sequence; (core genome, constant)

Best match: oppD\_CC398\_SO385-pig\_AM990992.1[1032752:1033834]

Position: 025-contig\_192\_RC: 84351 ... 85434; Length: 1083 bp

Sequence:

ATGACTGAAAGAATATTAGAAGTAAATGATTTGCATGTTTCCTTTGATATTACAGCAGGG  
GAAGTGCAGGCAGTGAGAGGTGTAGATTTTTATTTAAACAAAGGGGAAACATTGGCAAT  
TGTTGGTGAATCAGGTTTCAGGTAATCTGTAACAACAAAAGCAATTACAAAATTATTCCA  
AGGGGACACAGGAAGAATTA AAAAAGGGAGAAATTTTTATTTTAGGGGAAGATTTAGCAA  
AAAAACCTGAAAATGAGTTAATTA AATTACGTGGCAAAGATATTTCAATGATCTTTCAAG  
ATCCAATGACATCTTTAAACCCAACGATGCAAATTGGTAAACAAGTCATGGAACCATTA  
TTAAGCACAAAATTATAGTAAAGCACAAGCTAAAAAGCGCGCATTGGAAATACTAAAT  
CTTGTAGGTTTACCAAATGCAGAAAAAAGATTTAAAGCATATCCACATCAATTTTCAGGT  
GGACAAAGGCAAAGAATTGTTATTGCAACCGCATTAGCTTGTGAACCTAAAGTGCTCATT  
GCTGATGAACCAACGACTGCATTAGACGTAACGATGCAGGCACAAATTTAGATTTAATG  
AAAGAACTACAACAAAAAATCGATACAGCAATTATTTTTATAACGCATGATTTAGGGGTT



GTTGCGAATATTGCTGATAGAGTAGCAGTTATGTATGGTGGTCAAATGGTTGAAACAGGA  
GATGTTAACGAAATATTTTATGATCCAAAGCATCCATATACATGGGGATTATTATCGTCA  
ATGCCTGATTTATCAACAACAAATGACACACCATTACTAGCGATTCTGGAGCGCCACCT  
GATTTATTACACCCACCTAAAGGTGATGCATTTGCGAGACGTAGTCAATATGCATTAGAT  
ATTGATTTTAAAGTAGAACCACCGTGGTTTAAAGTTTCACCGACACATTTTGTGAAATCTT  
GGTTATTAGACGCACGTGCACCAAAAGTTGAACTACCCGAGCTGGTAAAACAACGTATG  
AAACCGATGCCTAATAATTATGAAAAACCACTCAAGGTAGAAAGGGTGTCTTCAATGA  
AAAATGA

### > oppF1

Function: protein coding sequence; oligopeptide ABC transporter/ATP-binding protein/putative (core genome, constant)

Best match: oppF1\_CC001\_MW2-USA400\_BA000033.2[961068:962009] (completely identical)

Position: 025-contig\_192\_RC: 85423 ... 86365; Length: 942 bp

Sequence:

ATGAAAAATGATGAAGTGCTATTATCCATTA AAAAATTTAAAGCAATATTTTAAACGCAGGA  
AAGAAAAACGAAGTGAGAGCGATTGAAAATATTTTCGTTTGATATATACAAAGGGGAAAC  
ATTAGGTTTAGTAGGAGAATCGGGGTGTGGTAAATCTACA ACTGGTAAATCAATTATTAA  
ACTTAATGATATTACAAGTGGAGAAAATTTTGTATGAGGGTATTGATATACAAAAGATTTCG  
TAAACGTAAAGATTTGCTTAAATTTAATAAAAAGATACAGATGATTTTTCAAGACCCATA  
TGCGTCTTTAAATCCTAGGTTAAAAGTAATGGATATAGTAGCTGAAGGTATTGATATCCA  
TCATTTAGCAACTGATAAACGTGACCGTAAAAAACGTGTCTATGATTTACTTGAAACTGT  
TGGATTAAGTAAAGAACATGCCAATCGCTATCCTCATGAATTTTCAGGTGGACAACGCCA  
ACGTATTGGAATTGCCCGTGCATTAGCCGTTGAACCAGAATTTATTATCGCGGACGAACC  
AATATCGGCATTGGATGTTTCAATCCAAGCTCAAGTAGTTAATTTATTATTTAAAATTACAA  
CGTGAAAGAGGGATTACGTTCCCTATTTATAGCTCATGATCTATCAATGGTGAAGTATATTT  
CAGATCGTATTGCAGTGATGCATTTTGGGAAAATAGTTGAAATTGGACCGGCAGAAGAA  
ATTTATCAAAATCCATTACACGATTATACTAAGTCTTTATTATCAGCCATTCCACAACCTG  
ATCCTGAATCAGAACGCAGTCGCAAACGATTTAGTTATATTCATGATGAAGCAAATAATC  
ATTTAAGACAATTACATGAAATAAGACCACAGCATTTTGTCTTTAGTACTGAAGAAGAAG  
CGGCACA ACTACGAGAAAATAAATTGGTGACACAAAATTA

### > oppA1

Function: protein coding sequence; transport system extracellular binding lipoprotein (core genome, constant)

Best match: oppA1\_CC001\_MSSA476\_BX571857.1[945997:947652]

Position: 025-contig\_192\_RC: 86383 ... 88039; Length: 1656 bp

Sequence:

ATGACGAGAAAATTTAGAACA CTTATTTTAATTTTGATTGCTACAATTGCATTAAGTGGTT  
GTGCTAATGATGATGGTATTTATTCAGATAAAGGTCAAGTATTCAGAAAAATTTTGT CAT  
CAGACTTAACATCCCTTGATACATCATTAAATAACGGATGAAATATCTTCTGAAGTGACTG  
CGCAAACATTCGAAGGTTTATACACATTAGGAAAAGGTGACAAACCGGTGTTAGGTGTTG  
CGAAAGCTTTTCTGAAAAGAGTAAAGGTGGTAAAAC TTTAAAGGTTAAATTAAGAAGC  
GATGCTAAATGGAGCAATGGTGACAAAGTGACTGCGCAAGATTTTGT TATGCTTGGAGA  
AAAACAGTTGACCCTAAAACAGGTTCTGAATTTGCATACATTATGGGGGACATTA AAAAT  
GCGAGTGATATTAGTACTGGTAAGAAACCTGTAGAGCAATTAGGTATCAAAGCATTAGAT  
GATGAAACATTACAAATTGATTTAGAAAAGCCGTTCCATATATTAATCAATTATTAGCA  
CTTAATACCTTTGCACCTCAA AATGAAAAAGTTGCCAAAAAATATGGTAAAAAATTACGGT  
ACGGCAGCTGATAGAGCGGTATACAATGGTCCATTTAAAGTTGATGATTGGAAACAAGA  
AGATAAAACCTTACTATCTAAA AATCAGTATTATTGGGATAAAAAGAATGTAAAATTAGA  
TAAAGTGAATTATAAAGTTATTA AAGACTTACAAGCCGGTGCATCATTGTATGATACTGA  
ATCAGTAGATGACGCAGTTATTACTGCAGATCAAGTAAATAAATATAAAGATAACAAAG  
GATTA AACTTTGTGTTAACGACTGGGACATTTTTTTGTAAA AATGAATGAAAAACAATATC  
CTGATTTTAAA AACAAAAATTTAAGACTGGCTATCGCACAAAGCAATAGATAAAAAAGGA  
TACGTTGATTCAGTGAAAAACAATGGCTCAATTCCTTCCGATACACTAACAGCCAAAGGA

ATTGCGAAAGCGCCTAATGGCAAAGATTATGCGAGTACCATGAATTCGCCTTTAAAATAT  
AATCCTAAAGAAGCAAGAGCACACTGGGACAAAGCTAAAAAAGAGTTAGGTA AAAATG  
AAGTGACATTTTCAATGAACACAGAAGATACACCAGATGCAAAAATATCTGCTGAATATA  
TCAAATCGCAAGTTGAGAAAAATTTACCAGGAGTTACTTTGAAAATTAAGCAATTACCGT  
TTAAACAAAGAGTATCATTAGAACTGAGTAACAATTTTGAAGCATCACTTAGTGGTTGGT  
CTGCAGATTACCCTGATCCTATGGCTTATTTAGAAACAATGACCACAGGTAGCGCACAAA  
ATAATACAGACTGGGGTAATAAAGAATATGATCAATTACTTAAAGTAGCAAGAACCAAA  
TTGGCACTTCAACCGAACGAACGATATGAAAACCTTGAAAAAGCAGAAGAAATGTTCT  
AGGAGATGCACCGGTAGCACCAATTTATCAAAAAGGTGTTGCACATTTAACAAATCCTCA  
AGTAAAAGGATTAATTTACCATAAATTTGGTCCAATAACTCACTTAAACATGTATATAT  
TGATAAATCGATAGATAAAGAAACAGGTAAGAAGAAAAAATAA

### > oppA2

Function: protein coding sequence; transport system extracellular binding lipoprotein (genomic island)

Best match: oppA2\_CC005\_Mu50-VRSA\_BA000017.4[1040211:1041926]

Position: 025-contig\_192\_RC: 88250 ... 89966; Length: 1716 bp

Sequence:

ATGGGGAAGCTAATTAATATATTTCAATACTTATTGTTATCGTTTTAGTGTTGAGTGCTT  
GCGGAAAAAGCAGTAATAAAGATGAAGGAGTAAAAGATGCTACTAAAACAGAAACCTC  
AAAACATAAAGGTGGTACCTTAAATGTAGCATTAAACAGCACCTCCAAGTGGTGTATTTC  
TTCGTTATTAATAAGTACACATGCGGATGCTGTAGTTGAGGGATATTTAACGAAAGCTT  
ATTAGCAACTGATAAAAAAATACGTCCTAAGGCATATATTGCTTCATGGAAGGACATCGA  
GCCGGCTAAGAAAATAGAATTTAAAATTA AAAAAGGTATTAAATGGCATGATGGTAATG  
AATTGAAAATTGATGATTGGATTTATTCAATTGAAGTCTTAGCTAACAAGGACTACGAAG  
GTGCTTATTATCCAAGTGTAGAAAATATCCAAGGTGCGAAAAGATTATCATGAAGGAAAA  
ACTGATCATATTAGCGGATTGAAGAAAATAGATGACTACACTATGCAGGTTACATTTGAT  
AAAAACAAGAAAATTACTTAACAGGATTTATTACTGGACCTTTATTAAGTAAAAAATAT  
TTATCAGATGTACCAATTAAGATTTAGCGAAATCAGATAAAAATCCGAAAATATCCTATT  
GGTATTGGACCGTATAAAGTTAAGAAAATCGTTCCAGGTGAGGCTGTTCAACTCGTTAAA  
TTTGATGATTATTGGCAAGGTAAGCCTGCACTAGACAAAATCAATTTAAAAGTTATTGAT  
CAAGCTCAAATTATTAAGGCAATGGAAAAAGGCGATATTGATGTTGCGAATGATGCTACC  
GGTGCAATGGCAAAGATGCTAAGTCATCTAATGCTGGTCTCAAGGTATTATCTGCGCCA  
AGCTTAGACTACGGTTTAATAGGATTCGTATCTCATGATTACGATAAAAAGCTAATAAA  
ACTGGTAAAGTGAGACCAAAATATGAAGACAAAGAATTACGTAAGCAATGCTTTATGC  
AATTGATAGAGAAAATGGATCAAAGCGTTTTTCAATGGTTACGCTAGTGAAATCAATAG  
TTTTGTACCATCTATGCATTGGATAGCAGCCAATCCTAAGGACCTAAATGATTACAAATA  
TGATCCTGAAAAAGCTAAAAAATCTTAGATAAGTTAGGTTATAAAGATAGAGATGGTG  
ACGGATTTAGAGAAGATCCTAAAGGTAATAAATTTGAGATTA ACTTTAACATTATTTCAG  
GTTCAAATCCTACTTTTGAACCAAGAACTGCTGCGATAAAAGATTTCTGGGAAAAAGTTG  
GCTTGAAAACAAATGTGAAGTTAGTAGAATTCGGTAAATATAATGAAGACTTAGCAAAT  
GCATCTAAAGATATGGAAGTGTA CTTCAGATCATGGGCAGGAGGTACAGATCCAGATCC  
ATCAGATTTATACCACACTGATAGACCTCAAATGAAATGAGAACAGTTTTTACCAAATC  
AGATCAATATTTAGATGATGCATTAGACTTCGAAAAAGTAGGCATTGATGAAAAGAAAC  
GTAAAGATATTTATGTTAAATGGCAAAAATATATGAATGATGAGTTACCTGGATTACCAA  
TGTTCCAAGGTAATCGATAACTATTGTTAACGATAAAGTACGAAACTTAGACATTGAAA  
TTGGAAGTATCAAAGTTTATATAATTTAACTAAAGAAGCTTAG

### > appD

Function: protein coding sequence; (core genome, constant)

Best match: appD\_CC005\_Mu50-VRSA\_BA000017.4[1041977:1042963]

Position: 025-contig\_192\_RC: 90016 ... 91003; Length: 987 bp

Sequence:

ATGAATAATGTATTGTTAGAGGTTAAAGATTTAGAAACATCATTAAAAATAAATAATGAA  
TGGTTAGCAACTGTTGAAAATATTTCTTTTGAATTATCTAAAGGAGAAGTTTTGGGTATAG  
TAGGGGAATCTGGTTGCGGTAAGTCCATATTAAGTAAGTCAATTATTAATTATTACCAG

AAAAGATATCTAAACTAAGTAATGGAGAAGTTATATTTGATGGTAAACGAATCGATACGC  
TCAATGAGAAGCAATTGCTAGATATTCGAGGAAATGATATTGCTATGATTTTTCAAGAAC  
CTATGACTGCTTTAAATCCTGTATTTACCATAAAAAATCAACTTGTGGAATCTATAAAATC  
ACATAAAAAAATTTCTAAAAAAGAAGCAAATAACTTAGCAAAGATTTACTAAAAAAG  
TTGGAATTGCTAGACAAGATGAAATATTAATAGCTATCCACATCAATTATCTGGTGGTA  
TGAGACAAAGAGTAATGATTGCAATGGCCATTTTCATGTTCTCCTAAATTATTAATTGCTGA  
TGAACCTACAACAGCATTGGATGTCACGATTCAAGCGCAAATATTAGACTTATTAAGA  
ATTGCAAAGGAAACGCAAATGGCAATTATGATGATTACACATGATTTGAGTGTAGTTGC  
TGAGTTTTGCGATAAAGTCTTAGTTATGTATGCAGGTCAAATTGTAGAATTTGGAGGCAT  
AAAAGAAATACTACACAATCCGAAACATCCTTATACCCAAAAATTATTATCAACAATTCC  
AAAACCTAAAGAAGAGCAGAAACGACTTGAAACGATAGAAGGAATTGTGCCATCAATCC  
AAGCATTTACGTTAATAAGTGCAGATTTGCAAATAGATGTAACAAAAAAGTGGATATTT  
GTAATAATCAATCTCCTAAAATGCATGTTTGTGAAGACGTCATTGTACGTTGTCATTTGTA  
CAAAAATGAATATAAGGAGATATAA

### > **appF**

Function: protein coding sequence; (genomic island)

Best match: appF\_CC001\_MSSA476\_BX571857.1[950619:951599] (completely identical)

Position: 025-contig\_192\_RC: 91005 ... 91986; Length: 981 bp

Sequence:

ATGGAAAATATTTTAGAAGTCAACCAAATAAAAAAATACTACAAAATTTAAACTGGATT  
ATTACAAAAAACTCAGTACGTTAAAGCTGTTGATGACGTATCGTTTTCAATAAAAAAAGG  
ACAACTTTTGGATTAGTAGGAGAATCGGGTTGTGGTAAGTCAACGTTAGGTAAAGTGAT  
TATCAGGCTTGAAGATGCAACTTCAGGCTCAATAATTGTTAATGGTGAAGATATAACAAG  
ATTACAAGGTAAAAAACTCAGAAAATCACGACAACAATATCAGATGATATTTCAAGATC  
CGTATGCATCATTGAATCCGATGCAAATGGTTGGAGATATCATTTCAGAACCTATTTTAA  
ATTATAAAAAATTGCCAAAAGAAGAAATAAAAAAAGAAGTACTATATTTATTAATAATGT  
GTTGGCCTAAGTGAAGATGCATATTATAAATATGCACATGAATTTTCAGGTGGACAGAGA  
CAAAGAGTGGGAATTGCAAGAGCATTGGCTTTGCGTCCGAGTTAATTGTTGCTGATGAG  
CCTGTAAGTGCATTAGATGTATCTGTTCAATCTCAAGTACTGAATTTATTAAGATTTAC  
AGAACAATTTAACTTAAGCTATTTATTTATCGCACATGATTTAAGTGTAGTAAAACATAT  
AAGTGTATGTCATTGGAGTTATGTATTTAGGTCAATATAGTTGAAATCGCATCTGATAAAGA  
AATTTATGAAAATCCCAAACATCCATATACAAAAGCGTTGATTTTCATCAATACCACAAAT  
TGATAAACATAATAACAATAGAATTATATTAAGGAGAATTACCTTCGCCAAGTAATCC  
GCCGCAAGGTTGTCCTTTTCATACAAGATGTCCGATTGCAAAGATAAATGTAAAGAAAA  
TATACCACAATTAAGGACATTGGTGATGAACATCAAGTTGCTTGTTTTTATGTAAATAA  
AGTAGGTGATTTAAATGGTTAA

### > **oppB3**

Function: protein coding sequence; putative oligopeptide transport system permease protein (genomic island)

Best match: oppB3\_CC001\_MW2-USA400\_BA000033.2[967623:968585] (completely identical)

Position: 025-contig\_192\_RC: 91978 ... 92941; Length: 963 bp

Sequence:

ATGGTTAAATTAATATTAAGAGATTAGGTTTAATGATTCCGTTACTAATTTTAATTTCTA  
TTGTTGTATTTTCATTAGCTATCATTCAACCAGGAGATCCATTTTCAGATTTACAAAACGG  
AAAATAAAAACAAGAAGCGATAAATGCACAAAGGGAAAAGTTAGGCCTCAACGACTCTA  
TATCACATCAATACATTAGATGGGTCAATCATGTTATACATGGTGAATTTAGGGGAGTCAA  
TCAAATATAAAAGGCCGTAATTGATGTTATTGAGGAAAGAATCCAAATACAATATTAC  
TCGGTGCTATGTCATTAATTACTTATATTATCTCATTGCTTTAGGAATAACGTCAGG  
TAGATATTCTTACAGTTTGACTGATTATACTGTGCAAATATTTAATTATTTGATGTTAGCT  
ATTCCATCTTTTATTGCGGGAGTATTTGCAATTTTTATTTTTCTTTTGAATTACAATGGTT  
TCCGTTTCAAGGTTCTGTTGATATTAACCTTAAAGAAGGTACTTTTGAATATTATATGAGT  
AAAATTTATCATAATTTTTGCCTGCATTAACCTTAGGATTATTATCTACTGCTGGTTATAT  
TCAATATTTACGTAATGATATTATTGAAAATTCTAAAAAAGATTATGTATTGACGGCAAG

GTCAAAGGATTATCTATGAATAAAATTTATAATAAACATATATTGAGAAATTCTTTAAT  
ACCTATTATTACATTTTTAGGTGCTGATATTGTAAGTATTTTAGGTGGAGCTGTGATTACT  
GAGACTATCTTTTCATATAACGGTATCGGTAAATTATTTTAGAATCGGTAATAGGTCAAG  
ACTATCCATTAATGATGGCATTAAACGTTGTTTTCTCATTTTTAGGTTACTGGGTAATTTG  
ATTTCTGATATTACTTATGGATTTATAGATCCAAGAATTAGAAGTAACTAG

### > **appC**

Function: protein coding sequence; oligopeptide ABC transporter permease (genomic island)

Best match: appC\_CC005\_Mu50-VRSA\_BA000017.4[1044913:1045794]

Position: 025-contig\_192\_RC: 92952 ... 93834; Length: 882 bp

Sequence:

ATGCAAATAAGTCAAATCGCCTTTTAAAATTGCATTGTCTAGATTTATTCATAATAAA  
ATTGCAATGTTATCGATTATTTTTTTAATAATCATAACTATTGTATCAATTATAGCGCCATT  
AATAGCTCCTTTCCAGTGAACCAACAAGATTTATTAATATAAAAAGGTGAAATGACAGC  
ACAAAACATTCTTGGTACAGACTCTGGTGGTAGGGATAACTTTAGTCGTTTGTATATGCA  
GGTCGTATTTTATTATCCATTGGAATTACATCTACAATAGGAATGCTTTTGATTGGAATTA  
CAGTTGGAGTGATTTCTGGTTATTTTCGGAGGTATTGTTGATACATTATTAATGAGAATAAC  
CGAATTTGTTATGTTATTTCCATTTTAATATTTGCAATTGTATTAATGCTGCACTTGGAG  
ATAAAATTAATAATCCTTATGGATCTGCCATAATCCTTGTCTAGTTATTATCGTATTAAG  
TTGGGGAGGTATTGCAAGACTTGTTCGTGGTAAAGTACTTCAAGAAAAAGAAAATGAAT  
ACTTTTTGGCAGCAAATCAATTGGTACACCCACATATAAAATTTATTTGAAACATCTTTT  
GCCGAATATATTAAGTGTAGTTATCGTACAAGCAACATTGTTATTTGCCGGTATGATTGTA  
GTGGAATCAGGATTGAGCTTTTTAGGATTCGGAATTAGTAAAGCAATACCATCTTGGGGT  
AATATGTTGAGTGATGCTCAAGAAGGGGATGTTATAAGTGGTAAACCGTGGATATGGATG  
CCACCTGCTATAATGATTACATTAACTATATTAAGTATAAACTTTGTAGGGGAAGGGCTT  
AAAGATGCTTTTAATCCTAGAGGTAGACGTTAA

### > **trpS**

Function: protein coding sequence; tryptophanyl-tRNA synthetase (core genome, constant)

Best match: trpS\_CC005\_Mu50-VRSA\_BA000017.4[1045836:1046825:r]RC

Position: 025-contig\_192\_RC: 93875 ... 94865; Length: 990 bp

Sequence:

TTATCTCTTACGTCCTAATCCCATCGCTTTTTCCATTTTCTTCACTGTTTTAAATGAACTT  
TGTGTGCTTTATCTCTACCTTGATCTAAAATATCATCAAGTTTATCTGAGTTATAGAACT  
TTCGTATTTTTCTTGGAAATTCTACTAAAAATGCTTTAACTATTTTCAGCAAGGTCACCTTTA  
AATTTACCATAACCTTCCCCTTCATATTTTGCCTCAATGTCTTTGATAGGCATGTCGGTTA  
ATCCAGCATATATTGAAATTAATTAAGTAATGCCTGGTTTATTGTCGCGGTCGAATTTAAT  
AATACCATCTGAATCAGTTACAGCGCTTTTAATTTTTTTAGCTGCAACATTTCGGCTCGTCT  
AATAATGAAATGAAGTTTTTAGTATTATCATCACTCTTACTCATTTTTCTTGTGGGTCTTG  
TAAACTCATGACACGTCCACCACTTTAGGCATACGAATTTTCAGGTTTCACAAGCACATC  
ATTATAGCGACTATTAATCTATCTACAAGGTTACGAGTCAATTCGATATGCTGCTTTTGG  
TCATCTCCAACCTGGAACGATATTAGTATTGTAAAGAACAATATCAGCTGCCATTAAGGT  
GGATATGTTAATAGACCAGCAGGTATACCTTCAACTGCTTTCTGAGCTTTATCTTTGTATT  
GCGTCATACGCTCTAATTCTCCAACAGAAGCAATCGTAGTTAACATCCATCCTGCTTGTAC  
GTGTGCAGGGACTTCAGATTGTATGAACAATGTTGCTTTGTCTGGATCTATACCAGAAGC  
TAAATAAATCGCTGCTAATTGTCTGGTCTGTTTACGTAATTTTAAACGATCTTGTGGCATT  
GTAATTGCATGTTGATCTACGATACAGAAATAACAATCATAGTCATTTTGCACATCAACA  
AATTGTTTTAGTGCGCCAATATAATTTCCAATAGTAGGAATTCCACTAGGTTGGATGCCTG  
AAAATAATGTCTCCAT

### > **spxA**

Function: protein coding sequence; transcript regulator (core genome, constant)

Best match: spxA\_CC001\_MW2-USA400\_BA000033.2[970804:971199] (completely identical)

Position: 025-contig\_192\_RC: 95159 ... 95555; Length: 396 bp

Sequence:

ATGGTAACATTATTTACTTCACCAAGTTGCACATCTTGCCGTAAAGCGAAAGCATGGTTA  
CAAGAACATGACATTCCGTATACGGAGCGTAATATTTTTCTGAACATTTAACAATTGAT  
GAAATTAAGCAAATATTA AAAATGACTGAAGACGGTACTGATGAAATCATTCTACACGT  
TCTAAAACATACCAAAAATTAATGTTGATATTGATTCACTACCATTACAAGACTTATATT  
CAATCATTCAAGATAATCCTGGCTTATTACGTCGTCCAATTATTTTAGATAATAAACGACT  
ACAAGTTGGTTATAATGAGGACGAGATTCGACGTTTCTTACCTAGAAAAGTTCGTACGTT  
CCAATTACAAGAAGCACAACGTATGGTTGACTAA

### > **mecA2**

Function:

Best match: mecA2\_CC001\_MW2-USA400\_BA000033.2[971570:972289] (completely identical)

Position: 025-contig\_192\_RC: 95925 ... 96645; Length: 720 bp

Sequence:

ATGAGAATAGAACGAGTAGATGATACAACGTGTA AAAATTGTTTATAACATATAGCGATATC  
GAGGCCCGTGGATTTAGTCGTGAAGATTTATGGACAAATCGCAAACGTGGCGAAGAATTC  
TTTTGGTCAATGATGGATGAAATTAACGAAGAAGAAGATTTTGTGTAGAAGGTCCATTA  
TGGATTCAAGTACATGCCTTTGAAAAAGGTGTGCAAGTCACAATTTCTAAATCTAAAAAT  
GAAGATATGATGAATATGTCTGATGATGATGCAACTGATCAATTTGATGAACAAGTTCAA  
GAATTGTTAGCTCAAACATTAGAAGGTGAAGATCAATTAGAAGAATTATTTCGAGCAACG  
AACAAAAGAAAAAGAAGCTCAAGTTCTAAACGTCAAAAAGTCTTCAGCACGTAAAAATA  
CAAGAACAATTATTGTGAAATTTAACGATTTAGAAGATGTTATTAATTATGCATATCATA  
GCAATCCAATAACTACAGAGTTTGAAGATTTGTTATATATGGTTGATGGTACTTATTATTA  
TGCTGTACATTTTGATAGTCATGTTGATCAAGAAGTCATTAATGATAGTTACAGTCAATTG  
CTTGAATTTGCTTATCCAACAGACAGAACAGAAGTTTATTTAAATGACTATGCTAAAATA  
ATTATGAGTCATAACGTAACAGCTCAAGTTCGACGTTATTTTCCAGAGACAACTGAATAA

### > **trfB**

Function: protein coding sequence; putative competence protein (core genome, variable)

Best match: trfB\_CC001-ST772\_118\_AJGE0100009.1[96519:97505] (completely identical)

Position: 025-contig\_192\_RC: 96765 ... 97752; Length: 987 bp

Sequence:

ATGTTAGTAGCTTTAAATGAAGAAAAGGAACGTGTGTTAGCAACTACTGCATTGAGAAAG  
ACACAATATTTTTGTCCGGTGTGTGGCAAGCAAGTTATTTTAAAGCGTGGGCTCAAAGTA  
ATTAGTCATTTTGCACATAAACATTTAGCGGAACAAAAATGTTTTAATAATGAAACGATT  
AAACATTATAAAAGTAAATTGATTTTAGCACAGATGATACAGCAACAAGGATTTAAAGTA  
GAGATAGAGCCATTTTTAAAGAAATAAAACAAATTCGGATATTTTGATTAATAATAAA  
TATGTTATTGAGCTACAGTATTCGCCAATTCCTTATAAACAGATTCTTCAACGAACGGAA  
GGTTTAAAGAAAATGGGATATAAAGTAAGTTGGTTATTAATGATGTTGATTATTGTCAT  
AATAAAGTGAAGTTCAATCATTTTCAAAGTATGTTTATTAATCCATTCACTCGAAAAC TTC  
ATACGTTCAATTTAGAGAAAAAACAATAATGATGTTTCAACAAATACAATATTTAGGCG  
GGCACAATATGTCGCTGAAAAAAGAAATGCCAAAATTAGTGAGTTGTTAATGAGGCG  
CCTTGTGATTATCATGCTGTTTATAAATTATCAAAGTTCGCAATTAATCAATATATCAAAT  
ATTGTCGCTGGCAAAATCTGTTTTAGAACCCTTTAAGTGCAATGTATCAATTACAGTT  
AACTGATCAAGAAGTAGTGCACAATTATGGTTATATTTTCCAGAGCAAATTTATATTA  
AAATCATCCTATTGAGTGGCAATTACAAGTTGATTTATGGTTAAAGAATGGAAAAAGCAA  
ATTAGTAAATGACAATCTTAATTATTTTAAACTGAAAAAATTTATTGTTGCTCTAGAAAGT  
AAAACAGCAATTATAGAAAAACTTATTAACAATTATTTAAATATTTGTTTCAGATAAAGGT  
AATGACGTGCAAAATTTGTTCTAA

### > **pepF1**

Function: protein coding sequence; oligoendopeptidase F (core genome, constant)

Best match: pepF1\_CC005\_JH1\_CP000736.1[1052488:1054296]

Position: 025-contig\_192\_RC: 97799 ... 99608; Length: 1809 bp

Sequence:

ATGAGTCAACAATTATCGAGAGAAGAACAGGAACGTAAATATCCTGAATATACATGGGA  
CTTAACAACAATTTTCAAAGATGATGAAGCTTTTGAGGCTGCATTTAAAGAAGTTGAAAA  
TGAGTTAGGCAAAGAAGAACAATTTAAAGGACACATTGGTGATAGTGCTGAGACATTAT  
ACAATGCGTTAGAATTAGAAGATACATTAGGTACTAAATTAGAAAAAGTATATGTATACG  
CGCACCTAAAACAAGACCAAGATACAACGAACGACAAGTATACTGGTATGGAGTCAAGA  
GCACATCAATTAATTATTAATTTAGCTCGGCATGGAGTTTCTTAGTGCCAGAGATTTTAC  
AAATTGATGAAGATAAAATTCATCATTTGTAAATTCATATGATAAAATTACAAAAATTCG  
CATTTGATTTGAAGTTGATTAATGAAAAACGTCTCATATTTTAGATGCTGAAACTGAAA  
AGTTATTAACAGAAGCGCAGGACGCGTTATCAACGCCATCAAATGTATACGGTATGTTTA  
GCAACGCTGATTTAGTATTTGAAGATGCGATTGATAAAGATGGAAATGCACACCCGTTAA  
CACAAGGTACATTTATTAAGTATTTAGAATCAGATGATCGCAAATAAGAGAAAGTGCTT  
TTAGAAATGTATATAAAGCATATGGTGCTCATAATAACGCTTGGCGCTACGCTAGCAG  
GTGAAGTGAAGAAAAATGTATTTAATGCTCGTACACACAATTACAAAACGCAAGAGAA  
AAAGCATTGAGTAATAATCATATTCAGAAAATGTATATGACAATCTAGTAAAAACTGTA  
CATAAATATTTACCATTGCTACATAGATACTGAATTGCGCAAAGAATTGCTAGGTTTA  
GATGACTTGAAAATGTATGATTTATATACACCATTAATTAAGATATTAAGTTTGAAAATG  
CCTTATGAAGAAGCTAAAGAGTGGATGTTAAAAGCTTTAGAACCAATGGGTGAAGAATA  
TTTAAATGTAGTTAAAGAAGGCTTAAACAATCGTTGGGTGCGATGTCTATGAGAATAAAGG  
TAAACGTTCAAGGTGGCTATTCATCAGGTGCACATTTAACTAATCCATTTATTCTACTTAAC  
TGGTCTAATACTATTTTCAGACTTATACACATTAGTTCATGAATTTGGGCATTCAGCACATA  
GTTACTTCAGTAGAAAATTCCAACCGTCAAATTCTAGTGACTACACTATTTTTGTGCGCTGA  
AGTTGCATCAACTTGTAACGAAGCACTTTTAAGTGATTATATGGATAAACATCTTGATGA  
TGAAAAACGCTTATTATTATTAACCAAGAATTAGAACGTTTCAGAGCTACATTATCCG  
ACAAACAATGTTTCGCAGAATTTGAGCATAAAAATTCATGCAATTGAAGAAGCAGGTGAAC  
CATTAACGCCAACTAGAATGAATGAAGAATATGCCAAATTAATAAATTATACTTCGGTG  
ATTCTGTAGAAACTGATGAAGATATTAGTAAGGAATGGTCACGTATTCCACACTTCTATA  
TGAATTATTATGTATATCAATACGCAACTGGTTACAGTGCAGCTCAAAGCTTAAGTCATC  
AAATTTAACAGAAGGTAAGCCAGCAGTAGATAGATATATTAATGAATTCCTGAAAAAA  
GGTAGCTCAAATTATCCAATTGAGATATTAAAAAATGCTGGTGTAGATATGACAACACCT  
GAACCAATTGAACAAGCTTGTGAAGTTTTTGAACAAAAAATTGAACGCTTTTGAAAAATTA  
ATGAAAGCTTAG

> **rsaE**

Function: noncoding RNA ncRNA of Staphylococcus aureus E (core genome, constant)

Best match: rsaE\_CC001\_MW2-USA400\_BA000033.2[975352:975451] (completely identical)

Position: 025-contig\_192\_RC: 99707 ... 99807; Length: 100 bp

Sequence:

ATGAAATTAATCACATAACAAACATACCCCTTTGTTTTGAAGTGAAAAATTTCTCCCATCCC  
CTTTGTTTAGCGTCGTGATTCAGACACGACGTTTTTTTT

> **rsaF**

Function: noncoding RNA ncRNA of Staphylococcus aureus F (core genome, constant)

Best match: rsaF\_CC008\_COL\_CP000046.1[1015068:1015171] (completely identical)

Position: 025-contig\_192\_RC: 99785 ... 99889; Length: 104 bp

Sequence:

TATTCAGACACGACGTTTTTTTTATGTTCTTTTTTAATAAGAGGGAAGTGAAGTTGTATAAA  
AATGTATTAATATGCACTTTTTATACATTAACGATTCATATA

> **ltaB**

Function: protein coding sequence; dithiol-disulfide isomerase (core genome, constant)

Best match: ltaB\_CC001\_MW2-USA400\_BA000033.2[975712:976518:r]RC (completely identical)

Position: 025-contig\_192\_RC: 100067 ... 100874; Length: 807 bp

Sequence:

TTATTTTGATTTGATTTTAGGCATTTTAGATTTCCAGAAATCGCCATCTGGATATTTAAGTT  
TTTCAATTTTTGTTGAATGGCTAACTTCTTAACTCTTTGTTTAAAAGTTTTTCTGGCCAT

TCATAAATAGTAAGTAATTCTTCCATCGTTACAAGTTGTTGTTGCTGTATATAAGTTTCTA  
ATTTAGGAGGAAGATTCTTTTCGATAGGTTTACCCATCAATTCATTAATTATATAAGTATA  
GATGTGATATGGGTATAATCCTTCGACTTTTAAACCTTCTTCATGAACATCTTCACTAAAG  
AAAACGAGAGAAGGGGCTTGTTGATTTCCATTTCTCTTGCAATATGCAAATCAATTTTCA  
AGCTTTCGGTTAGTTTACTTTTTTGTAAAGTCGTCTTAAATACTTCTAAATCAATACCTGCA  
TTTTGAATACAGTCACAAATCATTGATTCTGTAATAATATCTCTTTTAGGTATGATTTTCATT  
TTGCATTAATGTATAAATCGTTCGGCACGTACACGACCTTGTAACTCAGCTGCTTTATAA  
GCTAGGGCGATGTTATCAAAGTTGGATGTACTTTGAGCTTGGCATTTCGTTAATACTTTTA  
ACGAAGGATTTAATATATGTCTGATACGTATATATTGATTATATTCAATTCTTAATTTGGA  
TAAGATTGCTGATAATTTGAAGCAATCGGAGCTAAATGGATCGAAAAATGAATAAATTC  
GATTTTACTTACAGGTGATAGATTAATATCTTCACGACTCTTATTTCCATTATTCGTAATT  
CTCCAGCCAT

### > **relA1**

Function: protein coding sequence; GTP pyrophosphokinase (core genome, constant)

Best match: relA1\_CC005\_N315\_BA000018.3[978184:978819] (completely identical)

Position: 025-contig\_192\_RC: 102508 ... 103144; Length: 636 bp

Sequence:

ATGAATCAATGGGATCAGTTCTTAACACCTTATAAGCAAGCGGTTGATGAGTTGAAAGTG  
AACTTAAAGGCATGCGCAAACAATATGAAGTTGGTGAACAAGCGTCGCCAATAGAATT  
TGTTACTGGTCGTGTTAAACCGATCGCTAGTATTATAGATAAGGCAAACAAACGACAAAT  
ACCATTTGATAGGTTAAGAGAAGAAATGTACGATATCGCTGGTTTAAAGAATGATGTGCCA  
ATTTGTAGAAGATATTGATGTTGTCGTCAATATTTTAAAGACAAAGAAAAGATTTTAAAGT  
AATTGAAGAACGAGATTATATTCGTAACACTAAAGAAAGTGGTTACCGCTCGTATCATGT  
CATTATTGAATATCCAATTGAAACATTACAAGGCCAAAAATTTATATTGGCTGAGATTCA  
GATTCGTACATTAGCAATGAATTTCTGGGCAACGATTGAACATACTTTACGATATAAATA  
TGATGGTGCTTATCCGGATGAAATTCAACATCGTTTGGAAAGAGCGGCAGAAGCAGCGTA  
TTTACTTGATGAAGAGATGTCTGAAATTAAGATGAAATTCAGGAAGCTCAAAAATATTA  
CACGCAAAAACGTTCTAAAAAACATGAAAATGATTA

### > **ppnK**

Function: protein coding sequence; putative inorganic polyphosphate/ATP-NAD kinase (core genome, constant)

Best match: ppnK\_CC005\_Mu50-VRSA\_BA000017.4[1055120:1055929] (completely identical)

Position: 025-contig\_192\_RC: 103160 ... 103970; Length: 810 bp

Sequence:

ATGCGTTATACAATTTTAACTAAAGGTGACTCCAAGTCTAATGCCTTAAAGCATAAAATG  
ATGAACTATATGAAAGATTTTCGCATGATTGAGGATAGTGAAAATCCTGAAATTGTTATT  
TCAGTTGGTGGTGGTACATTACTACAAGCATTCCATCAGTATAGCCACATGTTATCA  
AAAGTGGCATTGTTGGAGTTCATACAGGTCATTTAGGATTTTATGCGGATTGGTTACCTC  
ATGAAGTTGAAAATTAATCATCGAAATTAATAATTCAGAGTTTCAGGTCATTGAATATC  
CATTGCTTGAAATTATTATGAGATACAACGACAACGGCTATGAAACAAGGTATTTAGCAT  
TAAATGAAGCAACGATGAAAATGAAAATGGCTCAACACTTGTGTGGATGTTAACTTAA  
GAGGGAAACACTTTGAGCGATTTAGAGGCGATGGATTATGTGTATCAACACCTTCGGGTT  
CAACGGCTTATAACAAAGCGCTAGGTGGCGCACTGATACATCCTTCACTTGAAGCAATGC  
AAATTACAGAAATTGCCTCAATAAATAATCGTGTGTTTAGAACGGTAGGATCACCCTTG  
TATTACCAAAGCATCATAATGTTTAAATATCACCAGTTAATCATGATACCATTAGAATGA  
CGATAGATCATGTTAGTATCAAACATAAAAATGTTAATTCAATACAATACCGTGTAGCAA  
ATGAAAAGTGAGGTTTGCACGTTTTAGACCATTCCCGTTCTGGAAACGTGTACACGATT  
CTTTCATATCAAGTGATGAAGAACGATGA

### > **rluA1**

Function: protein coding sequence; RNA pseudouridine synthase (core genome, constant)

Best match: rluA1\_CC005\_04-02981\_CP001844.2[1014383:1015237]

Position: 025-contig\_192\_RC: 103966 ... 104821; Length: 855 bp

Sequence:

```
ATGAAATTTAAGTATCATATATCACAACAAGAACTGTTAAAGCTTTTTTAGCACGACAT
GATTTTTCTAAGAAGACAGTGAGCGCCATTAATAATAATGGCGCTTTAATTGTTAATGAT
GAACCAGTCACAGTACGTAAGCAATTAATGCCAAATGATATATTAGAAATTCATTTACCG
CGAGAAATACCGAGTGTTAATTTAATAACCTTATGCTCGTAAGCTAGAAGTATTGTATGAA
GATGCTTTTTATCATCATAGTTACTAAACCAACAATCAAAATTGTACGCCTTCGAGAGAA
CATCCTCATGAAAGTTAATCGAACAAGTACTATATCATTGTCAGGAACATGGTGAAAAT
ATTAACCCACATATTGTTACGCGTCTAGATCGTAATAACAACCTGGTATTGTGATATTCGCTA
AATATGGACATATCCATCATTTATTTTCTAAAGTAAACTTGAAAAAATATATACTTGCCT
TGTATATGGCAAACCCATACATCTGGTATTATTGAAGCTAATATTAGACGGTCAAAGGA
TAGTATTGTAAGTACGAGAAAGTTGCCTCGGATGGTAAATACGCTAAAACATCTTATGAAGT
AATAAATCAGAATGATAAATACAGTTTATGCAAAGTTCATTTGCATACGGGACGTACACA
TCAAATTCGTGTACATTTTCAACATATTGGGCATCCAATTGTGGGAGATTCTTTGTATGAT
GGTTTTCATGACAAAATTCATGGTCAAGTACTGCAATGTACGCAAATATATTTTGTTCATC
CAATCAATAAGAACAATATTTATATTACAATTGATTATAAGCAATTAATTAATTATTCAA
TCAACTCTAA
```

### > **mgtE**

Function: protein coding sequence; magnesium transporter E (core genome, variable)

Best match: mgtE\_CC005\_Mu50-VRSA\_BA000017.4[1056801:1058186] (completely identical)

Position: 025-contig\_192\_RC: 104841 ... 106227; Length: 1386 bp

Sequence:

```
ATGTCAATGAACACAGATGAAAAAGAGCGTGTTCAAGAGGAATTATATGATGAGACATT
ATTAGATCAATACTTAGAAAAATGATGATATTGATCAATTTAGAGATGAATTTCTAGCATT
ACACACATATGAACAAAAGTGAGTATTTTGAAGATACTACCGATGAAAATAGACAAAAGA
TTTTTCAATATTTATCACCTGAAGAGGTTGCAAATTTCTTTGATCAATTAGATATTGATGA
CGATGAATATGAGTTGCTATTTGATAAAATGAATGCGACATACGCAAGTCACATATTAGA
AGAAATGTCATACGATAATGCAGTAGATATTTAAATGAGTTGACTAAACCAAAAAGTTGC
TAGTCTTTTAAACATTGATGAATAAAGATGACGCGAATGAAATCAAAGCATTACTTCACTA
TGATGAGGATACGGCCGGCGGTATTATGACGACGGAGTATTTATCACTTAAAGCGCATA
GCCTGTTAAAGAAGCGTTATTATTGGTCAAAGCGCAAGCGCCAGACGCAGAAACAATAT
ATGTTATATTTGTCGTTGATGATGATGGTAAATTAGTAGGTGTTTTATCACTAAGAGATTT
AATTGTAGCTGAAAATGATGCTTATATTGAAGATATTATGAATGAACGTGTCATTAGTGT
GAATGTAGCAGACGACCAAGAAGATGTTGCTCAAGTTATGAGAGACTATGATTTTCATGGC
TGTACCTGTTATAGATTACCAAGAACATTTGCTTGGTATCATCACGATTGATGATATTTTA
GACGTTATGGATGAAGAGGCTAGTGAAGACTACTCTCGTTTAGCCGGGGTATCAGATATC
GATTCGACTAATGATTCAATCATTAAAACAGCATTAAAACGTTTACCATGGTTGATTATTT
TAACATTTTTAGGAATGATTACTGCGACAATTTTAGGGAGATTTGAAAAAACATTAGAAA
ATGTAGCGCTACTCGCAGCGTTTATTCCTATTATTAGTGGTATGTCAGGAAATTCAGGTAC
ACAATCTTTAGCCGTTTCAGTTCGTAACATTACGACAGGGGAAATTAATGAGCAAAGTAA
ATTTAGAATTGCATTAAGAGAAGCGGGAAGTGGTGTATTATCGGGCGTTGTATGTTCAAC
AATATTATTTACAATTATTGTTGCAATATATCATCAGCCACTTTTAGCATTAATCGTTGCA
GGAAGTTTAACTTGTGCGATGACGGTGGGGACGTTTGTAGGTTTCGATGATTCCATTATTG
ATGAATAAATTAATATCGATCCAGCAGTGGCTAGTGGACCATTATTACAACAATTAAT
GATATTATTAGTATGTTGATTTATTTGGTTTAGCTACATCATTTATGGCTTACTTAATTTA
A
```

### > **Q8NXC6**

Function: protein coding sequence; monovalent cation-H<sup>+</sup> antiporter (core genome, variable)

Best match: Q8NXC6\_CC005\_Mu50-VRSA\_BA000017.4[1058196:1060040] (completely identical)

Position: 025-contig\_192\_RC: 106236 ... 108081; Length: 1845 bp

Sequence:

```
ATGGAGTTTTTATCTTTAGTTATTGTTGTTTTAGCAGCGTTTTTAACTCCAATAATTGTCAA
TCGATTAATATTAATTTCTTGCCAGTTGTTGTTGCAGAAATTTGATGGGGATTGTGATT
GGAAATTCATTTCTAAATATAGTAGAAAGGGATTCAATTCTAAATATTTTATCAACGTTA
```



GGCTTTATCTTTTAATGTTTTAAGTGGTTTAGAAAATTGATTTTAAAGCTTTTAAAAAAG  
ATAAACGCGCACGTCAAGGACAAAATGATGATGAATCCTCAATTCCAGGGCATCTTAATC  
TAGCGTAACTGTATTTGCATTTATTATGATTATTTTCGATTCTTTTAGCGTATGTATTTAAA  
TGGCTTGGATTAGTGGATGATGTGTTATTAATGGTCATTATCATTTCAACTATTTCCCTTAG  
GCGTAGTTGTTCCAACCTTTAAAAGAAAATGAATATTATGAGAACAACCTATAGGGCAATTTA  
TCCTATTAGTAGCAGTACTTGCGGACTTAGTAACTATGATTTTATTAACGGTCTATGGCGC  
AATCAATGGTCAAGGCGGCAGTACAATATGGTTAATAGGTATATTAGTTGTTTTACACAGC  
AATTCATATATTTTAGGTGTTCAATTTAAAAGAATGTCATTTTTACAAAAATTGATGGAT  
GGTACGACGCAAATCGGTATTCGTGCGGTATTTGCATTAATAATATTATTAGTAGCCCTA  
GCAGAGGGAGTTGGCGCAGAAAATATATTAGGTGCATTCTTAGCAGGTGTCGTTGTTTCA  
TTATTAATCCAGATGAAGAAAATGGTTGAAAAGTTAGACTCATTGGTTATGGGTTCTTTA  
TTCCTATTTCTTTATAATGGTTGGTGTAGATTTAAACATACCTTCATTAATTAAGAACC  
GAAATTAATAATTATCATACCGATTTAATCGTTGCATTTATCATTTCAAAATTAATTCCA  
GTCATGTTTATTCGACGTTGGTTTGATATGAAAACAACGATTGCATCAGCATTTTTATTA  
CATCAACATTATCGCTCGTGATAGCTGCAGCCAAAATTCAGAAAAGATTAATGCTATTT  
CAGCTGAAACGTCAGGTATATTAATTTAAGCGCAGTCATTACATGTGTATTTCGTTCCGAT  
TATTTTCAAAAACTGTTTCCAGTTCAGATGAGTTAACCCTAAAATTGAAGTTAGTTTA  
ATTGGTAAAAATCAATTAACGATTCCCTATAGCGCAAAAATTTAACATCTCAGTTATATGAC  
GTGACATTATATTATCGCAAAGACTTGAGTGATCGTCGTCATTGTCAGATGATATCACG  
ATGATAGAAATTGCTGATTATGAACAAGATGTTTTAGAACGACTAGGTCTGTTTGACCGA  
GACATAGTTGTTTGTGCTACGAATGACGATGATATTAACCGAAAAGTTGCTAAATTAGCC  
AAAGCACATCAAGTTGAGCGTGTCAATTTGCAGACTTGAAAGCACAAACGGACGATACAGA  
GTTAGTTGATTCAGGTATTGAAATTTTCAGTAGCTACTTAAGTAATAAAAATCTTATTA  
GGTTTAATTGAAACACCTAACATGTTGAATTTATTAAGTAATGTTGAAACGTCATATATG  
AAATTCAAATGTTAAATTATAAATATGAAAATATTCAATTACGTAATTTCCCATTCGGAG  
GAGACATCATCTTCGTGCGTATTATCCGTAATAATGAGTCGATTGTTCCGCATGGAGATA  
CACAATTGCGATATGGAGATCGCTTAATTGTTACCGGTGCTAAAGAATACGTTGATGAAT  
TGAAGCAAGAGTTAGAATTTTATTTTAA

### > **fabI**

Function: protein coding sequence; trans-2-enoyl-ACP reductase (core genome, constant)

Best match: *fabI\_CC005\_Mu50-VRSA\_BA000017.4*[1060318:1061088] (completely identical)

Position: 025-contig\_192\_RC: 108358 ... 109129; Length: 771 bp

Sequence:

ATGTTAAATCTTGAAAACAAAACATATGTCATCATGGGAATCGCTAATAAGCGTAGTATT  
GCTTTTGGTGTGCTAAAGTTTTAGATCAATTAGGTGCTAAATTAGTATTTACTTACCGTA  
AAGAACGTAGCCGTAAAGAGCTTGAAAAATTATTAGAACAATTAATCAACCAGAAGCG  
CACTTATATCAAATTGATGTTCAAAGCGATGAAGAGGTTATTAATGGTTTTGAGCAAATT  
GGTAAAGATGTTGGCAATATTGATGGTGTATATCATTCAATCGCATTGCTAATATGGAA  
GACTTACGCGGACGCTTTTCTGAAACTTCACGTGAAGGCTTCTTGTTAGCTCAAGACATTA  
GTTCTTACTCATTAACAATTGTGGCTCATGAAGCTAAAAAATTAATGCCAGAAGGTGGTA  
GCATTGTTGCAACAACATATTTAGGTGGCGAATTCGCAGTTCAAAATTATAATGTGATGG  
GTGTTGCTAAAGCGAGCTTAGAAGCAAATGTTAAATATTTAGCATTAGACTTAGGTCCTG  
ATAATATTCGCGTTAATGCAATTTCACTGGTCCAATCCGTACATTAAGTGCAAAAGGTG  
TGGGTGGTTTCAATACAATTCTTAAAGAAAATCGAAGAGCGTGCACCTTTAAAACGTAACG  
TTGATCAAGTAGAAGTAGGTAACAGCGGCTTACTTATTAAGTGACTTATCAAGTGGCG  
TTACAGGTGAAAATATTCATGTAGATAGCGGATTCCACGCAATTAATAA

### > **yrbD**

Function: protein coding sequence; alanine or glycine carrier protein (core genome, constant)

Best match: *yrbD\_CC005\_Mu50-VRSA\_BA000017.4*[1062712:1064280] (completely identical)

Position: 025-contig\_192\_RC: 110752 ... 112321; Length: 1569 bp

Sequence:

ATGATTGAAAAATTAGTAACCTTTTTAAATGAGGTTGTTTGGAGTAAGCCATTAGTTTATG  
GTTTGCTAATTACTGGTGTGCTATTTACATTGCGTATGCGATTTTTTCAAGTTAGACATTTT

AAAGAAATGATTTCGATTAATGTTTCAAGGAGAGAAGTCTCCTAATGGTATTTCAAGTTTT  
CAAGCGATAGCCATGTCTTTAGCAGGCAGGGTTGGTACAGGTAATATTGTTCGGTGTATCT  
ACTGCAATATTTATAGGAGGACCTGGTGCAGTATTTTGGATGTGGATTACTGCGTTTTT  
GTGCAAGTAGTGCTTTTATTGAATCTACACTTGGTCAAATATTCAAGAGAGTTGAAAATA  
ATGAATACCGTGGTGGACCAGCGTATTATATTGAATATGGTATTGGTGGTAAATTTGGTA  
AAATTTACGGAATTATCTTTGCTATTGTTACGATTATCTCAGTAGGTCTATTGCTTCCTGGT  
GTGCAATCTAACGCTATAGCAAGTTCTATGCATAATGCGATTTCATGTTCCACAATGGTTA  
ATGGGTGCTATTGTTGTAGTTATTTTGGGATTAATTATTTTTGGTGGTGTACGTAGTATTG  
CCAATGTTGCAACAGCCGTTGTACCATTTATGGCAATTATTTACATACTGATGGCTGTCAT  
TATCATTGTTATCAATATACAAGAAGTGCCAGCGTTATTTGCATTAATTTCAAATCAGCA  
TTTGGATTACAATCTGCTTTTGGTGGTATCGTTGGCGCAATGATAGAGATTGGTGTAAAC  
GTGGATTATACTCAAATGAGGCTGGTCAAGGTACAGGTCCACACGCAGCAGCGGCAGCA  
GAAGTATCACATCCAAGTAAACAAGGTCTAGTACAAGCATTTCAGTTTATATTGATACA  
TTATTTGTATGTACTGCAACTGCTCTGATTATACTTATTTCTGGTACATATAATGTGACTG  
ATGGTACGGTTAATGCGAATGGCACACCGCATTTAATTAAGATGGCGGTATTTATGTTG  
AAAATGCAACAGGTAAAGATTATTCAGGTACTGCGATGTATGCACAAGCCGGCATTGATA  
AAGCGTTCATGGCAGTGGTTATCAATTTGATCCTACTTTCTCTGGCGTAGGTTTCGTA  
TATTGCATTTGCTTTATTCTTTGCTTTGCTTTACTACAATTTTGTTCGTA  
TACTACTACATTACAG  
AAACAAATGTTGCTTATTTAACGCGTAATCAAATAATCAAGTTTCATCGATATTTATTA  
TATTGCTCGTGTGATTATTTTGTTCGCTACATTTTACGGTGCAGTTAAACAGCTGATGTA  
GCATGGGCATTCGGTGTATTTAGGTGTAGGTCTAATGGCTTGGTTAAATATCATTGCGATT  
GGATTTTACATAAGCCTGCCGTAATGCTTTAAAAGATTATGAAATTCAAAGAAACGTT  
TAGGAAACGGTTATAATGCAGTTTATCAACCTGATCCGAATAAATTACCTAATGCTGTCTT  
TTGGTTGAAGACATATCCAGAACGTTTAAAACAAGCACGTGCCAAAAAGTAA

### > Q2FI63

Function: protein coding sequence; putative esterase (core genome, variable)

Best match: Q2FI63\_CC001\_MW2-USA400\_BA000033.2[988108:988866] (completely identical)

Position: 025-contig\_192\_RC: 112465 ... 113224; Length: 759 bp

Sequence:

ATGTCAGAAATTTAAAACCTGGTAAGATTAATAAACATGTTTTATATAGTAATATTTTAAATA  
GAGATGTCACGATAAGTATTTATTTACCAGAATCTTATAATCAACTTGTTAAATATAATGT  
CATTCTTTGCTTTGACGGATTAGATTTTTTACGTTTCGGGAGAATACAACGTACATATGAA  
TCGTTAATCAAAGAAGCGCGTATTGATGATGCGATCATTGTTGGATTCCATTATGAAGAC  
GTTGATAAGCGTAGAGAGGAATTTATCCACAAGGAAGTCGTTCTCATTAACTATTCAA  
TCAGTCGGTAAAGAAATATTGCCATTTATTGACTCGACGTTTTTCTACACTGAAAGTAGGT  
AATGCAAGGTTATTAGTAGGGGATAGTTTACGGGTAGTATTGCCTTATTAACGGCGTTG  
ACCTATCCAACGATTTTTAGTCGTGTAGCAATGTTAAGTCCACATTCAGATGACAAAGTA  
TTAGATAAGCTAAATCAATGTGCTAATAAAGAACAATTGACAATTTGGCATGTCATTGGT  
CTAGATGAAAAAGATTTTACTTTACCAACAAATGGTAAGCGTGCCGATTTCTTAACACCG  
AATAGAGAATTAGCTGAACAAATTAAGAAATATAATAACTTATTATTACGATGAATTT  
GAAGGTGGTCACCAATGGAAAGATTGGAAACCATTGCTGTCAGATATATTATTGTATTTT  
TTACGTAAAAACACAGATGATCAACATTATGAGTAA

### > ItaA

Function: protein coding sequence; glycolipid permease (core genome, variable)

Best match: ItaA\_CC005\_Mu50-VRSA\_BA000017.4[1065999:1067189:r]RC (completely identical)

Position: 025-contig\_192\_RC: 114039 ... 115230; Length: 1191 bp

Sequence:

TTACTTAGCTTTTTCTCTATTTGCTATAAAGTAGCTTCCATAAAAATACAGCTAAGACTAAA  
AAGATTAATGCCGAGAAATAAAATGTATTGTTAAATCGTTGGTAAATTGTGTAATTAAT  
CCGCCAAATAATGGCCCTATCATTGAGCCGAATCCTTGGATACTATTAACACACCCCAA  
GTTTCTTCTTGTTCATCTGATTTGATAAATCGTGCCATAAAGGTATTCATGCTGGTAATA  
AGATGCCATACATTAGACCGATAGCTAAAGCGATAATCCACACGATGTGAATATTAACAA  
TCATAGATAGAGTAAAAATTAATATCATGTATAAAATAAATCCGCTTAGAATAACACCAT

ACATAAAGTTTCTGCTGCGGTTATCTATTAGTTTCGATAAAAATAGCATCGAAACTGCAC  
AGCCGATACCACCAATAATGATTGCAACAGTATATTCAATTGTGCTTACGTTAATAACCTT  
AGTAGCATATGTTGGTAATATAGGAACTAGGGCAGCAATTGCGGCACCTTGTAAGAAT  
ACCAGGGAACAACAATAAATGGCGCTTTGTCACATCAACAATTTGTCTCAATTGAGCTTT  
AACTGGACGAGTATTATAATTTGTTAACTTTACATCGACAAAATAATATAATATCCATGC  
AATAAAACGACTAAAGACATCATGAAGGCAAAGCGTGTGGGTGCACCTTGATAAGTA  
GATTCATAAAAACCATACCTACCAATAGGCCTAACCAACCATGAAAAATAAACATAGCCC  
ATTTGTTTGCCACGTTTATCTTCTTCAACACTGGATAACATAATGACCCAAATAGGACTAA  
CTGCAATACCGAGCATCATAGCACTAAATATGATTACAAAAGGTGATGCTGGAAACCAA  
ATAACTAAAATAAACTTGTAAATGCTAAAATAAATCCAGTCGTTAAAACGATTTTTGTG  
CCGAATTTTTTCAGTAAAATCCTATAACAAAGTTTGTAGATGCATCAGCAATAAAATGT  
ATTGAAAATGCTAGAGACGTTATTGCTACAGCAATGGATGTAAGTGTGGCAAGAAATTA  
ATATAGCTTAGGATATACATGCCTCTCGCAAATTCATTAATAAATAAGATAATAAGCATT  
AAAATGAAATTTTTATGATTAGCGTAATTATTTAACGAAGAATCTTGCAT

### > **ugtP**

Function: protein coding sequence; processive diacylglycerol glucosyltransferase (core genome, constant)

Best match: *ugtP\_CC005\_Mu50-VRSA\_BA000017.4*[1067167:1068342:r]RC (completely identical)

Position: 025-contig\_192\_RC: 115207 ... 116383; Length: 1176 bp

Sequence:

TTATTTAACGAAGAATCTTGCATATAAAGGAACCTTCCATAAATCTCTTGTGGTTGTGAT  
GAATGACCGATTAAATCAAGTAAGTCTCGACATATTGTCTGTGTAGCATACTTAATTTTAT  
CTTGTTCCATTGTACTAATCATGTTAGTTAATTGCTCATTACCGTTCGTTAAACTTGCTACA  
ATTTTTATTGCTTCTTCTGGAGTATCAGCGATTTTACCAAACCTTTTTCTTCAAAGTAAA  
GGGCATTTTCAAGCTCTTGACCAGGTGCAGGATTTAGGAAAATCATTGGAATACAACGGG  
CGAAACCTTCAGTTATTGTGATACCACCAGGTTTCGTAATCATAAGTTGACTTGATGCCAT  
CCATTCATTCATGTGTTGGTATAACCTAGAATCAATACATTCTCGTTAGATTTAACTTA  
GCTATTAAGAACGCTTTAGCTCTTTGCTCTTACCACAAATCATAACTACTTGTGCATTTG  
CACTTTTCGCTAATATATCAGTAATCATCGTGTCAAACCTTTAGATACACCAAATGCACC  
AGCTGACATTAATAATAGTTTGGCTTATCTGGATCTAAGTTGTTGTCTATTAACCACTGCTTT  
TGATTAATAGGCGTTTCAAATTTGTTATCAATAGGAATACCTGTCACTTAACTGTTGAAG  
GATCAATACCTACGTCTATGAAGTCTTGTTTCGTTTCTTTTGTGGCCACATAATATCTTGT  
GAATACGGCGTAATCCAGTTTTTATGTAAGCGATAGTCTGTCATCACTGTAGCAACTGGA  
ATATTAATGTTAAATTGCTCAGTTAGTACCGACATAACTGGTGTAGGAAACGTTAATAAT  
ATTAATCTGGCTTTTCTTTTATCAATAAATTAATTAACTTATTAAGTCCATAGTATTTGTA  
AAAACATTTGTCTAGTTTATCTGGGCGGCTGTAATAAAACCCTTTGTACATATTTCTAAAA  
TATTTAAAGCTATTGATATACCATTTTTTACAAATAGAAGTCAAATGGATGAGCTTCCA  
TAAATAAATCGTGCTCAATGACGCTTAAATGGTCTAGATTCATATCATTAAGTTGATTAAC  
GATACTCTGTGTAACCTGCATATGACCGTTACCGAATGAGCCAGTAATAATCAATATCTTT  
TTATTTTGAGTAACCAT

### > **murE**

Function: protein coding sequence; UDP-N-acetylmuramoylalanine-D-glutamate--2,6-diaminopimelate ligase (core genome, constant)

Best match: *murE\_CC005\_Mu50-VRSA\_BA000017.4*[1068775:1070259] (completely identical)

Position: 025-contig\_192\_RC: 116815 ... 118300; Length: 1485 bp

Sequence:

TTGGATGCAAGTACGTTGTTTAAAGAAAGTAAAAGTAAAGCGTGTATTGGGTTCTTTAGAA  
CAACAAATAGATGATATCACTACTGATTCACGTACAGCGAGAGAAGGTAGCATTTTTGTG  
GCTTCAGTTGGATATACTGTAGACAGTCATAAGTTCTGTCAAATGTAGCTGATCAAGGG  
TGTAAGTTGGTAGTGGTCAATAAAGAACAATCATTACCAGCTAACGTAACACAAGTGGTT  
GTGCCGACACATTAAGAGTAGCTAGTATTCTAGCACACACATTATATGATTATCCGAGT  
CATCAGTTAGTGACATTTGGTGTAAACGGGTACAAATGGTAAAACCTTCTATTGCGACGATG  
ATTCATTTAATTCAAAGAAAGTTACAAAAAATAGTGCATATTTAGGAACTAATGGTTTC

CAAATTAATGAAACAAAGACAAAAGGTGCAAATACGACACCAGAAACAGTTTCTTTAAC  
TAAGAAAATTAAGAAGCAGTTGATGCAGGCGCTGAATCTATGACATTAGAAGTATCAA  
GCCATGGCTTAGTATTAGGACGACTGCGAGGCGTTGAATTTGACGTTGCAATATTTTCAA  
ATTTAACACAAGACCATTTAGATTTTCATGGCACAATGGAAGCATAACGGACACGCGAAGT  
CTTTATTGTTTAGTCAATTAGGTGAAGATTTGTCGAAAAGAAAAGTATGTCGTGTTAAACA  
ATGACGATTCATTTTCTGAGTATTTAAGAACAGTGACGCCTTATGAAGTATTTAGTTATGG  
AATTGATGAGGAAGCCCAATTTATGGCTAAAAATATTCAAGAATCTTTACAAGGTGTCAG  
CTTTGATTTTGTAAACGCCTTTTGGAACTTACCCAGTAAAATCGCCTTATGTTGGTAAGTTT  
AATATTTCTAATATTATGGCGCAATGATTGCGGTGTGGAGTAAAGGTACATCTTTAGAA  
ACGATTATTAAGCTGTTGAAAATTTAGAACCTGTTGAAGGGCGATTAGAAGTTTTAGAT  
CCTTCGTTACCTATTGATTTAATTATCGATTATGCACATACAGCTGATGGTATGAACAAAT  
TAATCGATGCAGTACAGCCTTTTGTAAAGCAAAGTTGATATTTTTAGTTGGTATGGCAG  
GCGAACGTGATTTAACTAAAACGCCTGAAATGGGGCGAGTTGCCTGTCGTGCAGATTATG  
TCATTTTCACACCGGATAATCCGGCAAATGATGACCCGAAAATGTTAACGGCAGAATTAG  
CCAAAGGTGCAACACATCAAACTATATTGAATTTGATGATCGTGCAGAAGGGATAAAA  
CATGCAATTGACATAGCTGAGCCTGGGGATACTGTCGTTTTAGCATCAAAAGGAAGAGAA  
CCATATCAAATCATGCCAGGGCATATTAAGGTGCCACATCGAGATGATTTAATTGGCCTT  
GAAGCAGCTTACAAAAGTTTCGGTGGTGGCCCTGTTGATCAATAA

### > **prfC**

Function: protein coding sequence; peptide chain release factor 3 (core genome, constant)

Best match: prfC\_CC005\_N315\_BA000018.3[994216:995778] (completely identical)

Position: 025-contig\_192\_RC: 118540 ... 120103; Length: 1563 bp

Sequence:

ATGAACTTAAAGCAAGAAGTTGAGTCTAGAAAGACTTTTGGCATTATTTACATCCCGAT  
GCAGGGAAAACAACGTTAACTGAAAACTATTGTACTTCAGTGGTGTCTATTCGTGAAGCG  
GGTACAGTTAAAGGGAAGAAGACTGGTAAATTTGCGACAAGTGACTGGATGAAAGTTGA  
ACAAGAGCGTGGTATTTCTGTAAGTTCAGTAATGCAATTTGATTACGATGATTATAA  
AATCAATATCTTAGATACACCAGGACATGAAGACTTTTCAGAAGATACGTATAGAACATT  
AATGGCAGTTGACAGTGCTGTCATGGTCATAGACTGTGCAAAAGGTATTGAACCACAAAC  
ATTGAAGTTATTTAAAGTTTGTAAAATGCGTGGTATTCCAATCTTTACATTCATTAATAAA  
TTAGACCGAGTAGGTAAAGAACCATTTGAATTATTAGATGAAATCGAAGAGACATTAAAT  
ATTGAAACATACCCTATGAATTGGCCAATTGGTATGGGACAAAGTTTCTTTGGCATCATT  
GATAGAAAGTCTAAAACAATTGAACCATTTAGAGATGAAGAAAATATATTACATTTGAAT  
GATGATTTTGGAGTTGGAAGAAGATCATGCAATTACAAATGATAGTGCTTTTGAACAAGCG  
ATTGAAGAATTAATGTTGGTTGAAGAAGCGGGTGAAGCCTTTGATAATGACGCGCTGTTG  
AGTGGAGACTTAACACCTGTATTTTTCGGTTTCAGCTTTAGCTAACTTTGGTGTACAAAATT  
TCTTAAATGCATATGTTGATTTTGCGCCAATGCCAAATGCGAGACAAACAAAAGAAGACG  
TTGAAGTAAGCCCGTTTGGATGATTCATTTTCAGGATTTATCTTTAAAATTCAAGCCAACAT  
GGACCCTAAACACCGTGATAGAATTGCCTTTATGCGTGTGCTTAGTGGTGCATTTGAACG  
TGGTATGGATGTTACTTTGCAACGTAATAAAAAGCAAAAGATCACACGTTCAACGTC  
ATTTATGGCAGACGATAAAGAACTGTGAATCATGCTGTAGCAGGCGATATCATTGGACT  
ATATGATACTGGTAATTATCAAATTGGAGATACTTTAGTTGGTGGAAAACAAACCTACAG  
TTTCCAAGATTTACCACAATTTACGCCAGAAATTTTATGAAAGTTTCTGCTAAAACGTC  
ATGAAACAGAAGCATTTCCATAAAGGTATTGAACAATTAGTACAAGAAGGTGCGATTCA  
ATACTATAAAACATTACACACAAACCAATTTATTTAGGTGCTGTTGGTCAGTTACAATTT  
GAAGTTTTCGAACATAGAATGAAAAACGAATATAATGTTGATGTTGTTATGGAGCCAGTA  
GGCCGTAATAATTGCACGTTGGATTGAAAATGAAGACCAAATTACAGATAAGATGAACAC  
ATCAAGATCGATTTTAGTGAAAGATAGATATGACGATTTAGTATTCTTATTTGAAAATGA  
ATTTGCAACAAGATGGTTTGAAGAGAAATTCCTTGAAATTAATTGTATAGTTTACTTTAA

### > **terC**

Function: protein coding sequence; putative integral membrane protein/TerC family (core genome, constant)

Best match: terC\_leader\_CC001\_MW2-USA400\_BA000033.2[995865:995993] (completely identical)

Position: 025-contig\_192\_RC: 120222 ... 120351; Length: 129 bp

Sequence:

```
CATTTTGTTCAGAGGGGAGTAACTTAAGAATCATGACCGTATAAATGATTCGACACTTTAT
CGTCATTACGAAGATATCTTCCGGTAAAGTGGGCAATTTAAATTGCTTAGTGAGACCTTT
GCTATTTAT
```

### > attB\_phiSa4

Function: attachment site in bacterial chromosome for int1-phiSa4 (mobile element)

Best match: attB\_phiSa4\_occupied\_CC001\_MSSA476\_BX571857.1[980957:981023:r]RC (completely identical)

Position: 025-contig\_192\_RC: 121345 ... 121412; Length: 67 bp

Sequence:

```
TAGCATTTTTCAATAGAAATTATATAGATTTTAAAGCAAATTAGGTGTTAATGTGTCATA
ATGATA
```

### > htrA

Function: protein coding sequence; serine protease (core genome, constant)

Best match: htrA\_CC005\_Mu50-VRSA\_BA000017.4[1073446:1075755] (completely identical)

Position: 025-contig\_192\_RC: 121441 ... 123751; Length: 2310 bp

Sequence:

```
GTGGATATTGGTAAAAACATGTAATTCCTAAAAGTCAGTACCGACGTAAGCGTCGTGAA
TTCTTCCACAACGAAGACAGAGAAGAAAATTTAAATCAACATCAAGATAAACAAAATAT
AGATAATACAACATCAAAAAAGCAGATAAGCAAATACATAAAGATTCAATTGATAAGC
ACGAACGTTTTAAAAATAGTTTATCATCGCATTTAGAACAGAGAAACCGTGATGTTAATG
AGAATAAAGCTGAAGAAAGTAAAAGTAATCAGGATAGTAAGTCAGCATATAACAGAGAT
CATTATTTAACAGACGATGTATCTAAAAAACAAAATTCATTAGATTCAGTGGACCAAGAT
ACAGAGAAATCAAAATATTATGAGCAAAATCTGAAGCGACTTTATCAACTAAATCAACC
GATAAAGTAGAATCAACTGAAATGAGAAAGCTAAGTTCAGATAAAAAACAAAGTTGGTCA
TGAAGAGCAACATGTACTTTCTAAACCTTCAGAACATGATAAAGAGACTAGAATTGATTC
TGAGTCTTCAAGAACTGATTCAGACAGCTCGATGCAGACAGAGAAAATAAAAAAAGACA
GTTTCAGATGGAAATAAAAAGTAGTAATCTGAAATCTGAAGTAATATCAGACAAATCAAAT
ACAGTACCAAATTTGTCGGAATCTGATGATGAAGTAAATAATCAGAAGCCATTAACTTTA
CCGGAAGAACAGAAATTTGAAAAGACAGCAAAGTCAAAATGAGCAAACAAAACCTATA
CATATGGTGATAGCGAACAAAATGACAAGTCTAATCATGAAAATGATTTAAGTCATCATA
CACCATCGATAAGTGATGATAAAGATAACGTTATGAGAGAAAATCATATTGTTGACGATA
ATCCTGATAATGATATCAATACACTATCATTATCAAAAATAGATGACGATCGAAAACCTG
ATGAAAAAATTCATGTTGAAGATAAACATAAACAAAATGCAGACTCGTCTGAAACGGTG
GGATATCAAAGTCAGTCAACTGCATCTCATCGTAGCACTGAAAAAAGAAATATTTCTATT
AATGACCATGATAAATTAACGGTCAAAAAACAAATACAAAGACATCGGCAAATAATAA
TCAAAAAAAGGCTACATCAAATTTGAACAAAGGGCGCGCTACGAATAATAATTATAGTG
ACATTTTGAAAAAGTTTTGGATGATGTATTGGCCTAAATTAGTTATTCTAATGGGTATTAT
TATTCTAATTGTTATTTTGAATGCCATTTTTAATAATGTGAACAAAATGATCGCATGAAT
GATAATAATGATGCAGATGCTCAAAAATATACGACAACGATGAAAAATGCCAATAACAC
AGTTAAATCGGTTCGTTACAGTTGAAAATGAAACATCAAAGATTTCATCATTACCTAAAGA
TAAAGCATCTCAAGACGAAGTGGGATCAGGTGTTGTATATAAAAAATCTGGAGATACGTT
ATATATTGTTACGAATGCACACGTTGTCGGTGATAAAGAAAATCAAAAAATAACTTTCTC
GAATAATAAAAAGTGTGTTGGGAAAGTGCTTGGTAAAGATAAATGGTCAGATTTAGCTGT
TGTTAAAGCAACTTCTTCAGACAGTTCAGTGAAAGAGATAGCTATTGGAGATTCAAATAA
TTTAGTGTTAGGAGAGCCAATATTAGTCGTAGGTAATCCACTTGGTGTAGACTTTAAAGG
CACTGTGACAGAAGGTATTATTTTCAGGTCTGAACAGAAATGTTCCCTATTGATTTTCGATAA
AGATAATAAATATGATATGTTGATGAAAGCTTTCCAAATTGATGCATCAGTAAATCCAGG
TAACTCGGGTGGTGCTGTCGTCAATAGAGAAGGAAAATTAATAGGTGTAGTTGCAGCTAA
AATTAGTATGCCAACGTTGAAAATATGTCATTTGCAATACCTGTTAATGAAGTACAAAA
```

GATTGTAAAAGATTTAGAAACAAAAGGTAAAATTGACTATCCCGATGTAGGTGTTAAAAT  
GAAGAATATTGCCAGTCTAAATAGTTTTGAAAGACAAGCAGTTAAATTGCCAGGAAAAG  
TTAAGAACGGTGTGTTGTAGATCAAGTTGACAACAATGGTTTAGCAGATCAATCTGGTC  
TGAAAAAAGGTGATGTAATTACTGAATTAGATGGCAAACCTTTTAGAAGATGATTTACGCT  
TTAGGCAGATTATTTAGTCATAAAGATGACTTGAAATCAATTACAGCGAAGATTTATA  
GAGATGGTAAAGAGAAAGAAATTAATATTAACATAAAATAA

### > **A6U0J2**

Function: protein coding sequence; putative Na<sup>+</sup>-transporting ATP synthase (core genome, constant)

Best match: A6U0J2\_CC005\_Mu50-VRSA\_BA000017.4[1075772:1077130] (completely identical)

Position: 025-contig\_192\_RC: 123767 ... 125126; Length: 1359 bp

Sequence:

GTGTCAATTTTTAGCCAGTTTTTAAAAGATCAAGCCCTCAACAAGGTATTGTATTGTACT  
ATATCGTCGCAATTGTCATTGCATTTTTATTATTAACCTACCGTATGTTTCATAAACCAGG  
TGTAGAAGTAAATCCAATTGACACATTATTTGTTGCCGTATCCGGAATTAGTGTTACTGGA  
TTGTCTCCGATAAGTATTGTCGATACCTATTCTACATTTGGACAATTAATTATCCTCGTGA  
TATTAATATTGGTGGAATTGGCGTCATGGCAATTGGTACGATGTTATGGGTGGTACTAG  
GTAAACATATTGGAATTAGAGAACGTCAGTTAATTATGTTAGATAATAACAAAAACACAA  
TGAGTGGTACCGTCAAATTGATTATTGATATTGTAAAATCAATATTTGTAATCGAACTCGT  
AGGAGCCATGTTATTAGCATTTTACTTTTATCGAGATAATCCAGATTTAAAATATGCAATC  
ATGCAAGGTGTTTTTGTCTATTCTGCCACTACCAATGGTGGATTAGATATTACAGGTA  
AGTCATTAATTCCTTATGCACATGATTATTTGTACAAGCGATAGTTATATTTTTAATAAT  
TTAGGATCAATCGGCTTCCCAGTATTATTAGAAGTTAAAGCTTATATTCAAATAGGGTT  
ACTAATTTTAGATTTTCATTATTTACTAAAATTACGACATCAACATATTTATTCCTATTTAT  
TGTTGGGGTATTAGCCATTCTATTATTTGAACATAACCATGCGTTCAAAGGTTTAAGTTGG  
CATCAATCGTTATTCTATTTCGCTGTTTCAATCAGCGACTACAAGAAGTGCGGGTCTTCAA  
CAATTGATGTGACAACACTAAGTGACCCCACTAATATTATCATGGGTATTTAATGTTTAT  
AGGATCTTCGCCAAGTTCGGTTGGTGGCGGTATTCGTACAACAACCTTCGCTATTTAATT  
TTGTTTTAATTAACCTTTAGTAATAATGCCGATAAAACATCCATTAAGTTTACAATAGAG  
AAGTACACATTATGGATATTCAACGTTCAATTTGCAGTATTTACAATGGCGACAATTTAAC  
ATTTTAGGAATGCTAATTATATCAGCTACTGAAAATGGTAAGCTTACATTTTACAAGTA  
TTTTTTGAAGTCATGTCTGCATTTGGAACCTTGTTGGACTATCGCTTGGTGTCAAGTGATA  
TTAGTGATATTTCTAAGGTCGTAATAATGGTACTCATGTTTATAGGACGTGTTGGCTTAAT  
ATCATTATCATTATGATAGCAGGACGTCGAGAACCAGATAAATTCATTATCCAAAAGA  
ACGTATTCAAATAGGATAA

### > **Q1XY52**

Function: protein coding sequence; putative 5'-nucleotidase (core genome, constant)

Best match: Q1XY52\_CC005\_N315\_BA000018.3[1000937:1002451] (completely identical)

Position: 025-contig\_192\_RC: 125261 ... 126776; Length: 1515 bp

Sequence:

ATGATGGAAAAAATGAAAACATTAATGTAGAGATTTTAACTACGTCAGATATGCATAGT  
CATTTCTTAAATGGTGATTATGGTTCAAATATTTATAGAGCTGGTACTTATGTTAACCAAA  
TAAGAGCACAAAATCATCGCGTCATTTTATTAGATAGTGGCGGAAGTTTAGCTGGCTCGT  
TAGCGGCCTATTATTATGCTATTGTTGCACCTTATAAACGACATCCAATGATAAAGTTAAT  
GAACAGAATGCATTATGATGCTAGCGGTGTGAGTCCAAGTGAATTCAAGTTTGGTTTATC  
ATTTTTAACTCGTTCAATTGCTTTGGCACGTTTTCCATGGTTATCAGCAAATATTGAATAC  
AATGTTACTAAGGAGCCTTATTTTTCAACTCCATATTGTATTAACATTTTGGTGACTTAA  
AAATTGCTATCGTAGGCGTCACAGCAGATGGTTTAAATGGAAAATGAGTATTCTGAAATGG  
AGCAAGATGTATCTATTGAAAAGACATTAGTGGCATCAAACGTTGGATTAGATATATCC  
ATGAAGTTGAAGAGCCAGATTTTTTATTGTAATTTATCATGGTGGATTGAATAAAATTA  
GTAATAGTACGAAAAATAAAAAGGCAAGTTCGAATGAAGCTGAAAAATTAATGGAAGAA  
CTCGGTGTTATAGATTTAATGATTACAGCTCATCAGCATCAAACAATAGTAGGTCAAGAT  
CATGAAACGTATTATGTTCAAGGCTGGTCAGGATGCCAAAGAGCTTGTACATCTTTCGATT  
AATTTTAAAAGAGAACAACAACCTTATGATGTTGAAAGCATTGATTCTAAAGTGATTGAC

TTAAATGAGTATGAAGAGGATCAAGAATTATTAGATTAAACATTCTATGATAGAAAAGCA  
GTGGCTTATTGGTCACAGGAAATCATAAGTGATAAAGGTTTGATGTTATCAGTGAATGGG  
TTACAAGATTTAGTCTGTCAAACACATCCATTTTCGCAATTATTACATGATGCAATTCAGC  
TTGCATTTGATAATGATATAACATGTGTCCACGTGCCTATGAACGGAGAGAAGGGGTTGA  
GTGGACAGATTCGAAATGAAGATTTGTATCATGCATACCCATATCCAGATAAGCCAATGG  
ATATGACAATTAGTGGTCAAATATCAAAGATATATTGGAGTATAGTTATTCACATTTAG  
ATTTTGTTAACGAGCAATTAAGCTTAACAATTATTGATGAAACGTTATGTACAATGTGGC  
AAGGATTCAATTATGAGATTGATATGAATCAAGAACCTGGGCAACGAGTAATGTTAGATC  
AAATTGATTTGACTAAGAGTTATAGAGTTACAATGACTGACTATTGTTATCGTAACTACA  
AGAATTATTTAAAAAATGCTATTATACATGAATCGTACGATGAAACAATGAGTACATTAA  
TTGCAGAGAAGTTAAGAGATCCGAATTATCGTATTTTCATGTAGTGATAATTTTGTAGTTAA  
AAACAGGTAA

### > **tRNAser2**

Function: tRNA tRNA serine (core genome, constant)

Best match: tRNAser2\_CC001\_MW2-USA400\_BA000033.2[1002595:1002686:r]RC (completely identical)

Position: 025-contig\_192\_RC: 126952 ... 127044; Length: 92 bp

Sequence:

TAACGGAAACGGAGGGATTTCGAACCCTCGCGCCGCTTTCGCGACCTACACCCTTAGCAGG  
GGCGCCTCTTCAGCCAACCTGAGTACGTTTC

### > **tRNAasn**

Function: tRNA tRNA asparagine

Best match: tRNAasn\_CC001\_MW2-USA400\_BA000033.2[1002689:1002763:r]RC (completely identical)

Position: 025-contig\_192\_RC: 127046 ... 127121; Length: 75 bp

Sequence:

TGGCTCCACAGGTAGGACTCGAACCTACGACCGATCGGTTAACAGCCGATAGCTCTACCA  
CTGAGCTACTGTGGA

### > **comK**

Function: protein coding sequence; putative competence transcription factor (core genome, constant)

Best match: comK\_CC005\_Mu50-VRSA\_BA000017.4[1079266:1079835:r]RC (completely identical)

Position: 025-contig\_192\_RC: 127262 ... 127832; Length: 570 bp

Sequence:

TTATTTATCTTCAAATAAAGAATAGCGTGTCAATGCTTCAAACACATTCAATGTGGCTTTA  
TTATAATCTATTGGTTGGTTCGGGATTTTTTGATATCATGCGAGATTGTTTATCTACCATGT  
AATAGTAAAAAATGGAATTGTTATATTGATGCCATAAACTGTGGTATGAAACATGAAGAA  
TGATAGATTCATTATTAATAAATGTCACTTTACATTTACGATTTTTTAATTCTTTAATACTT  
TCGATATAATGCATATTTAACCAAATATTTTCATTTTGTCTGTCAGAATGTGTTGGGAAAA  
AATAAGTTGGAAATAATGGTGTTAGTAAAATAGGTGGTTTACTAGAAATGCCAGTAATGC  
GGTTTGTCTCTGCTTTCTTGCCAAGATAAGTATTACCATAAAAATTTGCAAGAGCGTTCAAT  
GATTTTCTGGACTTTAAAAGGATTTTGAATACGCGTTTTGTCAAACCGAATTATTTCACTA  
CCGTTTCTTTGATCGTCATCATCAAATGCTGGTTCGAATAACCATGTCTCCTTTGCGTATCA  
CATAAATATTTTGAGAATACAT

### > **rli28**

Function: noncoding RNA Listeria sRNA rli28 homolog, locus 1 (core genome, variable)

Best match: rli28\_L1\_CC005\_N315\_BA000018.3[1006154:1006337] (completely identical)

Position: 025-contig\_192\_RC: 130478 ... 130662; Length: 184 bp

Sequence:

ATAAAAATAGTATAATATTTTGTGGGCAAGTTGAATTGATGGTGGCTATCTGAGTAAAGG  
GGGGTGGTACCTATGCCATTACTTAACACTTTTGAAAGGAAAAGCCTATTGTGATATCTA

TTGCAAACGCATTACATTTAATGTTAAGTTTCGGTATGTTTATCGTCACTTTCATTGGTAT  
AGT

> **txpA-var1**

Function: protein coding sequence; toxin involved in plasmid maintenance (core genome, constant)

Best match: txpA-var1\_CC001\_MW2-USA400\_BA000033.2[1006172:1006279] (completely identical)

Position: 025-contig\_192\_RC: 130588 ... 130696; Length: 108 bp

Sequence:

GTGATATCTATTGCAAACGCATTACATTTAATGTTAAGTTTCGGTATGTTTATCGTCACTTTCATTGGTATAGTAGTAGCAATAATAAATTTAAGCAATAAAAAATAA

> **Q7A194**

Function: protein coding sequence; similar to bacteriocin (core genome, variable)

Best match: Q7A194\_CC001\_MW2-USA400\_BA000033.2[1006908:1007201] (completely identical)

Position: 025-contig\_192\_RC: 131324 ... 131618; Length: 294 bp

Sequence:

GTGTTTTTATAGAAGAATAAAAATTTTTGGCACTATATTATATTTAACTTTAGCACTTGGAT  
TATCAACAGCAGCTTATGCATCTACAGAATACGCAGAAGGAGGCACTTGGAGTCACGGT  
GTCGGCAGTAAGTATGTTTGGTCTTATTATTATCATGGTCATAAAGGACATGGTGCAACA  
GCTATTGGAAAATATAGATCATTTAGTGGTTATACAAGAGCTGGTGTAAAAGCAAAAAGCA  
TCAGCTACTAAACATAATTGCTGGGTCAATAGAGCGTATTATAACATTTATTA

> **yujE**

Function: protein coding sequence; putative membrane protein (core genome, variable)

Best match: yujE\_CC005\_N315\_BA000018.3[1007337:1009301] (completely identical)

Position: 025-contig\_192\_RC: 131661 ... 133626; Length: 1965 bp

Sequence:

ATGAAATGGTTCAAATTAATACTTGATGTTACAACCTTCATTCTGATTGCTATATTGTTAT  
TTGTTTATACATATAAAGAAAACGAAGAAATATTGCCTGATACTAAATACCCTATAGCGG  
TAACTGACTGGAATAAAAAATATAGTAAAAATGAGATTTATAAACGTATAAATCAATTTCG  
CTAAAAATGAGAACGTAGCAATCTATAAATCAACTTCAAATTATACAAACAAAAACGTA  
GATAAAGATATATATGTATTTAATAAATCAAAGCAACAACACTATCACTCCTTTTAACGCT  
AAATATAACATTCATTATTTAAGTGACGACGAATTATTAATAAAGATATCAAAGGAAGT  
TATTTTGTAAGACAAAAATTTGACGTGTCTAAATTCATAAATTTTTTAAAGAATATG  
GTGTTACTGCTGAATCATAAAAATAGATCATATGATGATTGCCGTTGGTGTCAATTAAC  
AAATGAATATAGAAGTCCGTTATCCGCACTTTAATCGTTTATTTTATTATATTTTC  
GAAAAGAACATTAATTTCAAAGCGTATGCGATTAAGTATTTAAATGGTTTTACATTAAGA  
AAAATAATTTTTGAAAATTTTTCAAAAAAATGCACGTATTGGGTAACGTTAATCATAAGT  
CAAATTCCTTTAACTACAAGTGTACTTTGGATATTAATTAACACGGGTAATTTAGATTTAT  
TCATATTAAGATTAGTTCTGCTTTCATGTCTTTTCATTTAAACGATTAGTGTTATTAATTA  
TGGACTTCTTAATGTTACTAAATTTAAATATTGCTAATATGATTAAGGTAAGCAGCACT  
TTAAAACAATTCGTTTTATTAATACAGTTTGTAAGGATTTCTCTTAGTACTAATAGCTAG  
TGTAATGATAGAAAATACTAGTGTTATTAAGATTTGAATAAAATAAAGGAAACTGAGA  
AATATTGGAATGTATTAGATGATTATTACACGATTGAATTTGCACCTTATCACGAAACGA  
AACAAAGTTTGATTGATAATATGCTGCGATCAGAACAATTAGTAAAGGCTAGTGAAGCA  
GAAAATAATGCGATTTTATTCAAACCAAAGGGTACTCCGTTGACAATGACAACCTTTTCG  
CCTGATGAGGGGAATGTAATATTAGTAAATAATCAGTTCTGGTTCGATTTATTACAAGCAG  
TTTCAACCTGATATTCCGATAAAAAAATCAAAAAAATAATGTCGAAGTAATTATCCACAA  
AAGTTTCATGCAATGCGTAATGAAATCAATCAAGCATATCATTTCATGGTTTGAATTTGTAC  
AAAATAAAAAATAATAAAGAGAATAAGTTATCTATACAGTTTATCAACAAAAATGATTATC  
GAATTTTTTCATTTGATGCACGAGATAGTCGCCATTTGTCATTTATAGAGGCGCCAATCAT  
TGTGAATGTTCAAGCATCAGATTTATCGAATGATTTTTATTATGCCATGATCAGTCAAGGC  
GGGTATTTATTCAAAAATTATGACGCGCTAGTAAAAAATATTGAAAATTATCATCTTGAT  
GGGGAATCAGTGGAATAACCAATTATAAAGATAGCGTGATGGAAATGTATCATGAAAA



CAATTTGAAATTAACAGTACTCAACTTTTCACAAATCATTATCGCAATCATTTTAATAATT  
ATTATTTTATTTGATGTGAAATATTATTTTGAACAGCATCGAAAATTACTCGTAATCAAAA  
AGCTATATGGTTATTCAACATTAAGAGCCAATTACCAATACTTATTAATAAATAATATAG  
TTGTTGTTTTTATTGGAATATTGACGAATGTAATTTTACATTCTCAGTATATAATGATGAT  
ATTTGCAACGATTCTTGTCGTTCAAATATTATTGCAGATTTGCAGCCTATACTATCATGGC  
CGACGTTTTAATGAAGTTATCAAGGAGTTTTAA

### > **yxmA**

Function: protein coding sequence; putative exported protein (core genome, variable)

Best match: yxA\_CC005\_Mu50-VRSA\_BA000017.4[1085632:1085952] (completely identical)

Position: 025-contig\_192\_RC: 133628 ... 133949; Length: 321 bp

Sequence:

ATGAAATTTATCATTGCAATATTATTAGGATTAATCGTATCCATTACTATTGCTTTTACAA  
TCATACATCATCCTATACTTGATCGTTTTAATCCTTTCTTAAAAACGGAGTATAGTTATGC  
CAAAGTGCCAAAAGGTACGCAACAATATGTTAATATTACGGCTTATAGTGAAAGAGGGG  
AAAAGCTTGATTATAAATTAACATTTAATGGATTTTCACCTAGTAGAACGTATGTGCGAAA  
TAAAGCATAAAGGGCAATATGTCATATCGATCACATATGTTGAAAAAGAGGATATACCA  
AAAGAGGTAAGACAAGAATGA

### > **Q2FZN0**

Function: protein coding sequence; ABC transporter/ATP-binding protein (core genome, constant)

Best match: Q2FZN0\_CC005\_Mu50-VRSA\_BA000017.4[1085949:1086590] (completely identical)

Position: 025-contig\_192\_RC: 133945 ... 134587; Length: 642 bp

Sequence:

ATGATAGAATTAAGATTTAACCATACAAAAAGGTAATATACATATTTTGAAGAACTT  
AATTTGAAATTTCAATGTGGAAAATCATATGCACTTATTGGTAAAAGTGGATGCGGTAAA  
TCTACATTATTAATACTATTGCTGGACTTGAAAAACGGGGAAACAATATGTCTATTTT  
AATGGTCAATTAGAACAATTTAAATCTAATTTTTACAGAGATAAATTAGGATATTTATTT  
AAAATTATGGATTAATCGATAATTTGACAGTAAATGAAAATTTAGATATTGGATTAGCAT  
ATAAAAAAATAAGTAAGAAAAGAAAAAGAACAATTAAGATACGTTATATAGAACAGTTT  
GGTCTGTCAAACAGTTTAAAAAGAAAAGTTTCATACGCTAAGTGGAGGTGAACAACAACG  
TGTCGCTTTAATTAGAATGATGTTAAAAGATCCGATTGTTATGTTAGCTGATGAACCAAC  
GGGTGCGTTAGATCCTAAAACAGGACAGATGATTATTCAATCATTATTTGATTTGGTTCGA  
TGAAAATAAAGTGCTGATTTTAGCAACACATGATATGGCTATTGCAAATCAATGTGACGA  
AATAATAGATTTAGAACAGTATAGTAAAGTAGCATCTATGTGA

### > **tarM**

Function: protein coding sequence; alpha-GlcNAc appending glycosyltransferase (core genome, variable)

Best match: tarM\_trunc\_CC005\_Mu50-VRSA\_BA000017.4[1087050:1087246]

Position: 025-contig\_192\_RC: 135046 ... 135243; Length: 197 bp

Sequence:

GTGATTTTATAGAAGTTAATAAAAAATGGTTATTTAATAGAAAAACATAATATTAAAGACA  
TGGCTGATAAAATACTAAAGCTTGTTAATAATGATGTTTTAGCAGAGGAGTTTGGTTTCGA  
AAGCGAGAGAAAACATTATAGAAAAATATTCAACGGAATCAATATTAGAAAAATGGTTA  
AATCTTTTCAATAGCTAA

### > **Q5HH47**

Function: protein coding sequence; transport system extracellular binding lipoprotein (core genome, variable)

Best match: Q5HH47\_CC005\_Mu50-VRSA\_BA000017.4[1088179:1089138] (completely identical)

Position: 025-contig\_192\_RC: 136175 ... 137135; Length: 960 bp

Sequence:

GTGAATAGGAATATCGTTAAATTAGTTGTGTTTATGCTAATCTTAGTTGTAGCAGTAGCGG  
GTTGTGGTCAAAAAGATACTGAAGAGAAAAGTAAATGACGACAATAAAGATGAATTA

GGAAGTAAAAAATTAAGAAAAATCCTAAACGTGTTGTTGTATTAGAATATAGTTTTGCT  
GATTATTTAGCAGCATTAGATATGAAACCTGTTGGTATTGCAGATGATGGCAGCACTAAA  
AATATAACAAAGTCAGTAAGAGATAAGATTGGGGCATATGAATCGGTTGGATCTAGACC  
GCAACCGAATATGGAAGTGATAAGTAAATTAACCGGATTTGATCATTGCAGATGTTAG  
CAGACATAAGAAAATCAAATCAGAATTGAGCAAAATTGCTCCGACAATCATGTTAGTTAG  
CGGTACGGGAGATTATAATGCAAATATTGAAGCATTAAAACAGTCGCTAAAGCAGTAG  
GCAAAGAGAAAGAAGGCGAGAAGCGTCTGGAAAAGCATGATAAAATATTAGCGGAGAT  
TAGAAAGAAAATTGAACAGAGTACGTTAAAATCTGCATTTGCATTCCGGTATCTCAAGAGC  
AGGTATGTTTATTAATAATGAAGATACATTTATGGGACAATTCTTAATTAATGAGGTTAT  
CAACCTGAAGTCACAAAAGACAAAACACTACGCATGTTGGTGAACGCAAGGGTGGTCCTTA  
TATATATTTAAATAATGAAGAACTTGCCAATATCAATCCAAAAGTTATGATTTTAGCCACT  
GACGGAAAAACGGACAAAATAGAACGAAATTCATTGATCCTGCAGTTTGGAAATCATT  
AAAAGCTGTGAAAGATAACAAAGTTTATGACGTTGACCGAAATAAGTGGTTGAAATCAA  
GGGGGATTATCGCAAGTGAAAGTATGGCAGAAGATTTAGAAAAAATTGCAGAAAAAGCA  
AAATAA

### > **sbrA**

Function: protein coding sequence; sigma-B regulated protein A (core genome, constant)

Best match: sbrA\_CC005\_Mu50-VRSA\_BA000017.4[1089184:1089300:r]RC (completely identical)

Position: 025-contig\_192\_RC: 137180 ... 137297; Length: 117 bp

Sequence:

TTAATTATGTTTATTATCTGTCGGATGTGATGATTTACCTGAAAGTTTATTTTCGAATAAAT  
TTAATTACATAACCGACAAGGATTGTTTTAACAGTCTTTTAATGAATTGGCGCAT

### > **menA**

Function: protein coding sequence; 1,4-dihydroxy-2-naphthoate octaprenyltransferase

Best match: menA\_CC005\_Mu50-VRSA\_BA000017.4[1090362:1091300:r]RC (completely identical)

Position: 025-contig\_192\_RC: 138358 ... 139297; Length: 939 bp

Sequence:

TTAAATGCCTGCAAATAATGCACTAATATAAATACCTAATGCATATAATAAACCGAAAAA  
TGTATTTGTTTTACCAGCAGCAGCCATTGCTGGCATCATTGTAGGCGGTGTATCATTCTTC  
TTGAAACGTCTGATAACTTTAACAGGCATTGGGAATGATAACAACGCAAGTAAGTAAAT  
AATGAGCCACCAGGTTTAATAATGATCGTAAGTACAATAAAGGCATAAGCGATAAAGTA  
CATGATTGCCATAAATGTTAAAGAAGCATTTTTACCTAATAGAATGGGTAAAGTTTTGCG  
ACCACTTGCTTTATCTTTGACACGGTCGCGAATATTGTTAGCCATATTAATTAACCGATA  
GTGATTACTATAGGTACACTTAACCAAATTACATAACTTTGAATATTGCCAGTTTGAATAA  
AGAATGCAATAACGATAATAAACATACCCATAAATACGCCTGAGAATAATTCACCGAAA  
GGCGTCCATGAAATAGGGAAAGGGCCACCTGTATATAGGTAACCAACAGCCATACATAC  
TAATCCAACCTGGTAATAACCAAATGAAGAGTTAGCAGCTAAAAACAAACCTAATATTG  
CTGCTAAGATGTAATGCAATGGCTAATCGTAGCACAAGCTCTGGGCTCATACCGTTGC  
GAACAATGGCACCACCAATGCCTACAGATTCATGATCATCAAGGCCTTTTTTATAATCAT  
AGTATTCATTAAACATATTAGTTGCTGCTTGAATAAGTAAGCATGCTAGTAACATGGCAA  
TGAATAGGCTGATTTAATATGATCTTCGCTACCAAGAAAATATATTTTAGATGCTGCTGT  
ACCAACTAAAACGGGTAACGGAAGCAGTTAATGTATGAGGACGCATTAATGCCAAT  
ATTTCTTAACCTGTAGAATATTGCTGATATTGATTACTCAT

### > **menF**

Function: protein coding sequence; putative menaquinone-specific isochorismate synthase

Best match: menF\_CC005\_Mu50-VRSA\_BA000017.4[1091482:1092843] (completely identical)

Position: 025-contig\_192\_RC: 139478 ... 140840; Length: 1362 bp

Sequence:

ATGGCTACGGGCGTATTAGAGGACGATATTGTCAAAGAGATATATGGCAGCTCAAAGGA  
ATGGGTTTCAGTTGAAGTGAATTATCACAGTCACTAGACCCGAGCACATTATTTTCATCTC  
ACTGACAATGAGGCAGGAGATCGCTTTTATATGCGTTTGAATGATAATCGAACGTCATAT

TTTGGCTACAAAGCAATTCAATTATTCAAAAATAATTCTAAAAATAAACAATCTATTTTTA  
AAGACTGGGAAAAATTA AACATAACATCACATTTATACATCCGCAATCTGAGAAACATC  
ATCTTCGAGTTGTTGGAGGGTTTCAATTTTCAAGTCATAAATCAGATGATGAATGGCGAG  
AGTTTGGACTAAATCATTTTGTATTACCTGAAGTTTTAATTTCAACTGATAATAATGGGAC  
ATTTTTAACTTATACAGTTAAAAGGGAAAGTTTTACTGTTGAGGCATTGAACGATTTAATG  
GATTTGTTCAACAATATATCGGATATAGATGTGGACGAGCAAATTGGGGAAATTA CTAGA  
AATGAAGATATTTATAAAGATGACTGGCGTCAACTTGTAGTAGAAGCTATAGAATCTATT  
AATAATGAAGAAAAAATTGTACTAGCACGTAGACGGTTAATAAAGTTTCGATAAAGATAT  
CAGTATTCCATATATTCTAAAGCAAGCATATTCTAAAGAAAAAACAGTTATATATTCTT  
GTTAGAATCACAAGATTCTATTTTCTTTTCACAAACACCTGAACAATTAATAAAGGTCAAT  
AATAAAATACTATCGACTAAAGCTGTAGCAGGTACAATTAACGTTCCACAAGATGAGGA  
CGAAGATACAAAAAATGTTGAAGCATTTTTAAAAGATAATAAAAACTTAATCGAACATC  
GATTTGTTGTTGACAGTATTTTACATGATATTAACCTTATATCACTGAATTACATTATGA  
TAAGACGCCTAAAATTCTAAAAAATGATCATTTATATCACTTGTACACTGAAATAAAGGC  
GCCACTGAAGGATGATTCGTATATTAGTTAATTGATCATTTACATCCAACACCTGCTTTA  
GGTGGCTATCCAAAAGAATTTGCGATGGATTTTATTGAACAGAAAGAATTTGGTACACGA  
GGATTATATGGTGCGCCGGTTGGCTATATAGATATATATGATGATTGTGAATTTATTGTTG  
CAATTCGTTTCGATGCTTATTAAGAAAGCACAAAGCAACTTTATTTGCTGGGTGTGGCATTGT  
TAAAGATTCTGATCCAGATAGTGAATTGGCAGAAACGAACCTTAAGTTCACACCTATGAT  
GAATGCATTAGGAGTCGATATGAATGGGAAATCATAA

> **menD**

Function: protein coding sequence; 2-succinyl-6-hydroxy-2/4-cyclohexadiene-1-carboxylic acid  
synthase/2-oxoglutarate decarboxylase

Best match: menD\_CC005\_Mu50-VRSA\_BA000017.4[1092830:1094503] (completely identical)

Position: 025-contig\_192\_RC: 140826 ... 142500; Length: 1674 bp

Sequence:

ATGGGAAATCATAAAGCAGCTTTAACGAAGCAAGTTTTTACATTTGCATCTGAGTTATAT  
GCATACGGCGTAAGGGAAGTAGTTATCAGTCCGGGATCACGCTCAACGCCACTTGCACTT  
GCATTTGAAGCACATCCAAATATTA AACATGGATACACCCCGATGAGCGAAGTGCAGC  
ATTTTTGCAGTTGGGTAAATTAAGGCAGTGAAAGACCTGTCGCTATATTATGTACGTCA  
GGTACAGCAGCAGCGAATTATACGCCTGCAATTGCTGAAAGCCAAATTAGTAGAATTCCA  
TTAATCGTTTTAACAAGTGACCGTCCGCATGAATTAAGAAGTGTAGGCGCACCAAGCG  
ATTAATCAAGTAAATATGTTTAATAATTATGTAAGTTATGAGTTCGATATGCCTATTGCGG  
ATGATAGTAAAGAGACCATTAATGCAATTTATTATCAAATGCAAATTGCTAGTCAATATT  
TATATGGACCACATAAAGGGCCAATTCATTTAACTTGCCATTTAGAGATCCGTTAACAC  
CTGATTTGAATGCAACAGAATTGTTAACTTCTGAGATGAAGATTTTACCGCACTATCAAA  
AAAGTATAGATGCATCGGCATTAAGACACATTTTAAATAAGAAAAAAGGTTTAATTATTG  
TAGGGGATATGCAGCACCAAGAAGTTGATCAAATACTAACGTATTCAACGATATATGATT  
TGCCTATTTTAGCTGATCCTTTAAGTCATTTAAGAAAATTTGATCATCCGAATGTTATCTG  
TACATATGATTTGCTGTTTAGAAGCGGCTTAGACTTAAATGTGGATTTTCGTAATTCGTGTT  
GGGAAACCAGTGATTTCTAAAAAGTTGAATCAATGGTTAAAGAAAACCTGATGCATTTCAA  
ATATTAGTGCAAACAATGATAAGATTGATGTCTTTCCTATAGCGCCAGATATTTCATATG  
AGATTTCTGCAAATGATTTCTTTAGATCATTAAATGGAAGACACGACCATCAATCGCGTAA  
GTTGGTTAGAAAAATGGCAATGCTTAGAGAAAAAAGGGCGTAAAGAAATTAATGTTAT  
TTGGAACAAGCTACAGATGAGAGTGCATTCGTTGGTGAATTGATTAAGAAAACATCTGAA  
AAAGATGCATTATTTATTAGTAATAGTATGCCTATCAGAGATGTAGATAACTTGTATTGA  
ATAAAAATATAGATGTCTATGCGAATCGTGGTGCGAATGGTATTGATGGTATCGTTTCAA  
CTGCACTGGGTATGGCTGTGCATAAACGAATAACATTATTGATAGGTGATTTGTCATTTTA  
TCATGATATGAATGGACTATTAATGTCAAAATTAATAATATTCAGATGAATATTGTATT  
ATTGAACAACGATGGTGGCGGTATTTTTTCATATTTACCACAAAAAGAAAGTGCAACTGA  
CTATTTTGAACGGTTGTTTGGCACACCGACGGGATTGGATTTTCGAGTATACAGCTAAGTT  
ATATCAATTCGATTTTAAACGTTTTAACAGTGTTCAGAATTTAAAATGCCACATTGTTA  
TCTGAAACTTCGACGATTTATGAATTGATAACGAATCGCGAAGATAACTTTAAACAGCAT  
CAAATTTTATATCAGAAATTGAGTGAATGATTCATGACACATTATAA

## > **A5IRT0**

Function:

Best match: A5IRT0\_CC005\_Mu50-VRSA\_BA000017.4[1094490:1095293] (completely identical)

Position: 025-contig\_192\_RC: 142486 ... 143290; Length: 804 bp

Sequence:

```
ATGACACATTATAAATACTATGAAGCAAACGTTGAGACCAATCAAGTTTTAGTATTACTG
CATGGTTTTCTTAGCGACAGTCGTAATTATTATAATCACATCGATAAATACTGATATCT
GTCATGTCATCACTATAGACTTACCAGGCCATGGCGAAGATCAGTCTTCAATGGATGAAA
CGTGGAATTTTGATTATATTACGACGTTGTTAGACCGAATTTAGATAAATAAAAGATA
AATCAATAACATTGTTTGGATATTCAATGGGTGGGCGTGTTCATTATATTATGCAATTAA
TGGTCACATCCCTATATCTAATTTGATATTAGAAAGTACGTCACCAGGTATTAAAGAAGA
AGCAAATCAATTGGAACGCCGTCTTGTTGATGATGCACGTGCTAAAGTATTAGACATAGC
AGGTATTGAATTATTTGTTAATGATTGGGAAAAGTTGCCATTATTTCAATCGCAACTAGA
ATTACCAGTTGAAATACAACATCAAATAAGACTACAACGATTGTCTCAATCGCCACAGAA
AATGGCCAAAGCATTAAAGAGATTATGGTACAGGTCAAATGCCAACTTATGGCCGCGCCT
GAAAGAAATTAAGTACCAACATTAATATTAGCTGGAGAATATGATGAAAAATTTGTAC
AGATTGCGAAAAAATGGCAAATTTAATTCCTAATAGTAAATGTAAATTAATTTCTGCTA
CAGGTCATACAATTCATGTGGAAGATAGTGATGAATTTGATACAATGATATTAGGATTTT
TAAAGGAGGAGCAAAATGACTAA
```

## > **menB**

Function: protein coding sequence; naphthoate synthase

Best match: menB\_CC005\_Mu50-VRSA\_BA000017.4[1095286:1096107] (completely identical)

Position: 025-contig\_192\_RC: 143282 ... 144104; Length: 822 bp

Sequence:

```
ATGACTAACAGACAATGGGAAACACTTAGAGAATATGATGAAATCAAATATGAATTTTA
CGAAGGGATTGCTAAGGTAACAATAAATCGCCCTGAAGTACGCAATGCGTTTACACCTAA
AACAGTTGCTGAAATGATTGACGCATTTTCACGTGCACGTGATGATCAAAACGTTTCAGT
TATCGTATTAACCTGGTGAAGGTGATTTAGCATTCTGTTCTGGTGGTGACCAGAAGAAACG
TGGACATGGTGGTTATGTAGGTGAAGACCAAATCCCTCGCTTAAATGTATTAGATTTACA
GCGTTTAATTCGTATTATTCCAAAACCGGTTATCGCGATGGTAAAAGGTTATGCTGTAGGT
GGCGGTAATGTACTAAATGTTGTTTGTGACTTAACGATTGCTGCTGATAATGCTATTTTTG
GACAACTGGTCTAAAGTAGGTTCAATTTGATGCAGGTTATGGTTCAGGATATTTAGCAC
GTATCGTTGGACATAAGAAAGCACGTGAAATCTGGTACTTATGTCGTCAATACAATGCAC
AAGAAGCTTTAGATATGGGCCTAGTAAATACAGTGGTACCTTTAGATAAAGTTGAAGATG
AACTGTGCAATGGTGTAAAGAGATTATGAAACACTCACCAACAGCTTTACGATTCCTTA
AAGCAGCTATGAATGCTGACACAGATGGTTTAGCTGGTTTACAACAAATGGCTGGGGATG
CAACATTGCTTTATTACACAACCTGATGAAGCGAAAGAAGGCCGTGATGCGTTTAAAGAAA
AACGTGATCCTGACTTCGATCAATTCCCTAAATTCCCATAA
```

## > **sspC**

Function: protein coding sequence; staphostatin B (core genome, variable)

Best match: sspC\_CC005\_Mu50-VRSA\_BA000017.4[1096345:1096674:r]RC (completely identical)

Position: 025-contig\_192\_RC: 144341 ... 144671; Length: 330 bp

Sequence:

```
TTATACTAAGCGCTCATAAACGATTGGGCGCGAAGTGCCAATACCTTGTTTGGATGACGT
TTGCATGAGGATATGCTGTGTATCATCATAATCAAGAATATAAGTGATTTCTTCATTATCA
ATAGATGAAAATTTAATGCGTTGATGTGCCGTATCTATAAAAAGAATATGATATTGATTG
TGACTTGTATCATCGCCATGACGTATACAAATTGATTTTTGTAATTGATGATTACTCCAAT
TACCAATGAATAAATTGATATTGGTTTGTCTAGATGTGTGAGTTTGGTTGTGTCGTAAC
TAAATTTATAAATTGTAGTTGATACAT
```

## > **sspB**

Function: protein coding sequence; staphopain B (core genome, variable)

Best match: sspB\_CC005\_Mu50-VRSA\_BA000017.4[1096712:1097893:r]RC (completely identical)

Position: 025-contig\_192\_RC: 144708 ... 145890; Length: 1182 bp

Sequence:

```
TTAGTAACCTATCATTGAACCATAACCAGTTATAATCACGATTGAATGATAAATGTAATAG
GCTTGAATCTGCATCTTGGATTGATAATTCTGTATCCCAAGGATTCAGTAAATAAGTTTT
TCTTGGTCATTAATTTTAGCATTACCAACAACCTGCTAGGGCATGTCCTAAATGTGGATCAT
TAGGGTTTTGAGATACACTTTGTGCAAGAATCATAATTCCTACATTATCTTTTGTAAAGTTG
ATCAACTTGTTTCATATGATGGTACGCCTTCTTGATAATGAATATCTCTGCCTTGTGATTA
CCGTATTCAATCATTGATTAGGGAATGTTGAGCAATTAGGAAGGTCTTGCTCACTTACTT
CAGGGTATAATGTACGCATAAATATCATGTGCATTATAAGTGTCTGTATTTTTAGTTGCATT
TAATAATGCTGCCATACTAAATCCTGCACACCATGAGTTATCGAATTGTTGTTCTCTAATT
TTGAAGTTTTTTAATGTATTTTCATATTGAACTTGATCTTCTTGTATCGCTTCGTTTTCTTCA
ACTTTAGTAGGTGTTACTGTATTTTTAACTCTTGTTTCAATTTTGCTGAACTGTTTTAGC
ACTTCTTTTTCTTTTACATTACCAGGTAGTGGCGTAGCTTTTACTAATCTAACTTTGCCAT
CTTCTTCAAATAAAAACCTTTTTTCATCAGTAAGAACAGTGATATTTGAATTTTTATCTTT
AATTTGGTCTAAATCTTTAGCGATGAAGTTTGAATTTTAACTGTAATTCATGTCTTCT
TTTGATTTGTTTAAATCATCTTTATTTTTAGGGCTAAGTGTTAAAGTATAAACAATTTTACC
GTCTTTTATAACTGGATAATAGTAACTATTATCTTCTTACCATTAAATTTATAAATTTTAA
AAGCTTCGCCAAGTTCATATTTACCAGTTTTTGCATTACTTTGTTTATCTAATGCTTTAGCA
TAACCAGCAAATTGTTGTTGTGCTAGATCTTTTACTTTTTGAGGTACTTTGTCACTCTTAAC
ATTAATTTCTAGCTGTTTAGAGTGTGAATCGGCTTTGGCTTTATTGTTATTAGCAAATGCG
CCTAGTGATAAAATAAGCATTGAAACCATTATGATGCTTATAATATTGAATACTCTAGAT
TTATATGAACTATTCAT
```

### > **sspA**

Function: protein coding sequence; glutamyl endopeptidase chv

Best match: sspA-Mu50\_part\_CC005\_MR1\_ACZQ01000091.1[1:118]RC

Position: 025-contig\_192\_RC: 145971 ... 146089; Length: 118 bp

Sequence:

```
TTATGCAGCGTCAGGGTTGTCTGAATTATTGTTATCGCCATTGTCTGGATTATCAGGGTTG
TTAGGGTTGTCAGGGTTATTTGGTTCATCTGGGTTGTTAGGGTTATCAGGATTGTTA
```

### > **aspC**

Function: protein coding sequence; putative aspartate transaminase (core genome, variable)

Best match: aspC\_CC005\_Mu50-VRSA\_BA000017.4[1099531:1100685:r]RC (completely identical)

Position: 025-contig\_192\_RC: 147581 ... 148736; Length: 1155 bp

Sequence:

```
TTATTTAGTATTTAAATATTTAGCAAGTCTCTTCATACCTTCTTTTAAAACATCCATTTTCAT
AAGCATAGGAAATCCTTACAAATCCTTTACCGAATTCTGTAAAGGATGAGCCTGGAACGA
TTGCTAAATGTGTTGATTCAAGTAAATCGACACAAAATTCGAAATCGTCATCGGTGATAT
GTTTAATACTTGGGAAAATATAAAACGCGCCTTCAGGTTGAGCGGTAATCTCAAACCTA
ATTTAGTTAATTCAGATACTAAATAATTTCTTCGTTCTACATAAGCTTCGTTTCATATATTTA
GGAGCTTCTAATCCTTCGTTAAGTGCTGTTATACATGCTATTTGAGCTGGAACATTGGCAC
AAATACAATTATAGGCGTGCATAAATGTTAATTTATCAATCAAATATTGAGGCCCTAATA
GAAAACCAATTCTTATTCCGGTTGCTGAGTGTGATTTACTTAAACCACCAATTAATATTTAA
TTGATCACGAATGTCTTCAAATTCAGCGAAGGATACATGTTTACCACTAAATGTATTTTCA
GCATAAATCTCATCGCTAATAATAAATATCGGATATTTTTTTAATAACATTTACGATATTTA
AACTTCATTTCTTTTTAAACTACGCCAGTTGGATTAGTCGGATAATTTAACAAGACAGC
TTTTGTCTTTGGAGAAATATGACTTTCTAATGCATCAGGTGTAATTTTGAATTGTGTTGCT
GTTGTATCAATATAAATTGGTTTACCACCTAGTACTTCGATGAGTGGTATGTAGCCTGCAT
AAATTGGTCCCGGTATTATAATTTTCATCTCCAGGCTCTATGATAGAACGTAACGTTGTGTC
TATTGCTTCACTTGCTCCATTTGTCCACAATAATTTCTTCAGGATCATAGGAAAAATGATAA
CGATTTTTGAAGTATTGACTAATTGCTTCGCGAGTTTCTAATAACCCTTTATTGTGAGAGT
ATGATGTCTTGTCAATTGTTAATAGCATCAATATATGCCTTTTTTCAACATCAGGCATCGG
GAAGTCTGGTTGGCCAATAGTTAAATTAACACAATCATCAAATATTTCATACGATTTGA
AAATTGGCGAATACTTGGTGTCTTAAATATTTAGAATTAGAATTTAAAGAAAGTTTCAT
```

> **atl**

Function: protein coding sequence; autolysin (core genome, variable)

Best match: atl-Mu50\_CC005\_ED98-hen\_CP001781.1[1037532:1041278:r]RC (completely identical)

Position: 025-contig\_192\_RC: 150719 ... 154466; Length: 3747 bp

Sequence:

```
TTATTTATATTGTGGGATGTCGAAGTATTTGCCGACTTCGCCAATTTTATCATAGTAGCCT
TTGATGATTTTAGCATTGATGTTAGCCCAATCTACATCTGTAGCATATTGGTGTGTTCTCG
GATGTGCAGGATTCCATCTCATTTTGTAAAGTGTATTTTGACCAGCTTTTACATATGAGTT
GCCGATGAATTTAGCACCACCAACGATTGCTTTTGATACTGTGTCCCAACCAGCTTGTTTA
GCATATTTAATACCTTCACGTAAAGGATCGTTATCATATGCAGCAATACCAAATACGTTA
TGGTATTTTCGTGTTTGAGTTAGTTACAACCTTTGTTGTTCACTACATCTGCACCTTTCGCTAA
TTGAGAAGTACCGTTACCTGTTTCTAATAGGGCATGTGAGATAAGATAAACTTCATTAAT
GCCATACATTTGAGCAGCTTTGTAAATGCAGCACCTTGGTTTTCTAATACACCTTTACCT
TTTAAGAATTGATTAATTTTATCAATAGAAATATTTTGTGGTTGGTCTAAGCGTAAGAATT
GATATTTTAATGCTGGATCTTGAGCTAAACGCTTCGTATCCATTGCATGCTTAACATCATT
AAAGTTAGCATCTGTCCACTTACCTGGTACACGTTGTACTTGTGGTTTATATTGTAAACCA
GCTTGTATTTGAGCAACTTGGTTTAAATGTCATACCTGTTTGATTATACTTAATTAATTCTTT
AGCTAAATCAGTTGATTTAATCCATGCTAATTTACCGTTAGATAATTTACCATAGTACCAA
GTTTGTCCATTAATGACTTGTTCCTTTAACAACCTGCGAATGGTTGTTCAATTAATGCTTTTA
ATGAGTATTTAGCTGTATCAGAATTTGGTGTACATAGTAATAACCATTACCATTTTAAAT
TACATAAGTGTAGTTATAATCTTTGGCAGCTGATGTAGTTGGTTTCACAGCAGTTGGTGCA
GTTAAATCTTTTGCATTTACCCAACCAGTGCGGTTATTAATAGTACCGTATAAATAAACAT
CTTTGCCTACAGATACTTGTTCGTTGCATTAATGTACCTTGAGCAATGTTATTGCCTGTT
AAAATGACTTGGTTTTTAGTACCCCAAGGAACCATTGATAAGCCGTTATTTGATTTATTA
CAGTATATTTTGTAGTCGTTTTAACTTCTTTGCCTAAGTTTTGAACATTTAAGTCTTTTACA
TTGAACCAACCTAATGGGATGTTATGGCTTGATTTGTTTAAATAACATACGTTTCATTAC
CATGAGCACGCTCTTTTGTACATAGAACGTACGGTCTGCATATTTTCGCACCGTTTTTCGC
TGTTTTTTCATAAACAGAAGCACGAATACCAGTGTTGTTGGTTTAACTTGAGCAATCTTG
CTAACTGTTTGTAGTCGTTTGTGGTTTAGTAACAGTATAAGCTTTTACAGCTGTTTTGGTT
GTGCTACTGCTTTTTTAGGTGCAGCAGGTACAGCTAAATATGCTTTACTTACCCAACCAGA
TTTACCATTTACAGTTCCAAATAAATAGATAGATTTATCAATTTGTTGTTGCTTAGTCGCT
TTAAAAGTTTGGTTACCTGTACCAGAACTGCACCAGCTTCTTGTTTATAAGTGCCCAAG
GACTGAATATAATTTAGTGCCTGGTTTTACTGTATATGTTTGCATTACATTTACAGGTGA
TTTTGCATTGTTATAAATAACGTCACCTTGTTTAAACCAACCAATTAAGTTGGACTATTG
TAATCTTTAACTAAGTAGAATTTGTTTCCACCTAACTTGCTTCTTTTGTACAGCAAATG
TTTTTTGAACTTCTTTCGTTGGCTTACCAGTTTTGTCATAAACTGTAGTGAATAAGCCATTG
TTTTTAGCATTAAATTTGAGCAACACCGTTTAAATGATGAACTGTAAATTTATTATTTGTTGT
AGGTGTTGATGGCTTAGGTATTGGTGTAGGCGTAGGTTTAGCAGTATCAACTAAATATGC
TTTACTTACCCAACCAGATTTACCATTACAGAGCCATATAAATAAATTGATTTATCAATT
TGTGTTGCTTTGAAGCCTTAAATGTTTGGTTTCCAGAGCCAGACACGCTACCAGCAACTT
GTTTAGATGTACCCCAAGGTACTGTATAAAGTTTCGTACCAGATTTGATTGAATATGATTG
ATTTACATTTACAGGTGATTTAGCTGTGTTGTAAACCACATCGCCTTCTTTAACCCAACCA
AATTTATTACCAGAATTGTAATCTTGAACAAGATAGAATTTTTGATTACCTAATGTAGCTG
TTTTAGATACAGCAAATGTTTTTTGAACTTCATTAGTTGCTTTACCAGTTTTGTCGTAAC
AGTAGTATATAAACCACTATTTGTTGGTTTGAATTTGTGCGACACCATTGTTTGTCTGCAACT
GTTAATTTACCAGTTGATGGTTTCGACGGTGTGTTGGTTTTGATGGTGTAGTAGGGGTAG
TTGTAAATTGCGTACCCCATGGCGCCACTTTACCCATTTTTATTAATAATTTTTTCATTAATT
AAGTCATATAATTGATCATAACTATAATTATGACTTCTTAAATATCCATGTGGATCGGCAT
GGTCCGTACCACCTAAATATTTACTTACAGCGTAGTGAGTCCATACTGTACCATTTCCATC
ATACTCAGCACTGTCTGGTTTTAAACCATAATATTGTAATTGTGTAGCTGCATAGTCAGCA
TAGTTATTCATTGAACGTGCAAATGAAGCATAGTCGTGTGTGTGTACGATTTCAACATTG
ATGAATCTAGGGTTACCGACTGCACCGACACCCCAAGATAAGTAATCCGTTGGTGTCTGTT
TCGATTATACGATCCCCATCAACAAATGCATGTACGAATGCGTTTTGATAGTTATTTTTCA
TATAACTAATTTACCATTTATCGTTCGAACGATCATTAGCTGTATCATGAACTACGATACC
TTCAGGACGACCTACGCCGTTACGGTATGCGTATTTAGGGAAGTAAGATGTATAATCTTC
```

TTCAATTTTAGGTGCTTTTAAAGTTATTTTTACGAATGTAATCGTTAATTGAAGAGTTTACTT  
GTGGTTTATATTTTGGCAAACCTCGTTTTTGGTGTTCAGCAACTGATCTTGGTTGTGCTGA  
AGCGCTAAAAGTAGTTACTTTAGGTGTCGCTTCAGTTTTAGCTTTAGGTGCTGCGGCTTTA  
TATTGCGTTTCAAGAGCTGCAGGTTTAGCAGCTGATTTAATTAATTCTGGATTAATTTGAT  
GTTCTGAATTATCATCTTCATCATCAACTAACTATAACCAGCATTGTGAACATTAGTGTT  
AGTTTTAGGTGCTGTAGTGCTTGTGACTTTGCAACAGGCTGCGTATTATTTGTAGTCGCT  
GATTGATTAGCACGAGTGTCAACATTTACTTGTGCAGTATCAACTTTTTGACTTACTTGAG  
CATTGCCTGTTTTGTTATTTGCTGTTTTTGGTTGGACAATAGCAGGGTCTTGATATACTTGA  
GTGCCAGAAATGTTTTGCGTTGGATTTTTACCTCAGCTTTGCTTGTTCAGTAGTTGCTTT  
AACTTTATTACTATCTAAAACATTTTTATTAGTAGTTTGATCTTGTGTCGTCTCAGCTGCTT  
GAACCTGATGTGCAGTGACTGCTGAACCTACAAGCGTTAATGCAACCATTGATGGTAGTT  
TGTAATTGAATTTTTTCGCCAT

### > **fmtA**

Function: protein coding sequence; autolysis and meticillin resistant-related protein (core genome, variable)

Best match: fmtA\_CC001\_MW2-USA400\_BA000033.2[1034813:1036006] (completely identical)

Position: 025-contig\_192\_RC: 157468 ... 158662; Length: 1194 bp

Sequence:

ATGAAATTTAATAAAAGTAAAAGTAACTAGTTATACATGCGTGTGTAATTTATTTATCATTATTT  
CTATAGCGTTAATTTTTTCATCGATTACAGACGAAGACACATTCTATAGACCCAATACATA  
AGGAAACAAAATTATCAGACAATGAAAAATATTTAGTGGATCGTAATAAGGAAAAGGTT  
GCGCCGTCTAAACTAAAAGAGGTATATAATAGCAAGGATCCTAAATATAAGAAAATTGA  
CAAGTATTTACAAAGTTCATTATTTAACGGTTCAGTAGCTATATATGAAAATGGCAAATT  
GAAAATGAGTAAAGGTTATGGATATCAAGATTTTAAAAAGGTATTAACACACACCGA  
ATACGATGTTTTAATAGGTTTCAGCTCAAAAATTTTCAACAGGGTACTGTTAAAACAGTT  
AGAAGAAGAACATAAAAATAAATATCAATGATCCAGTAAAGTAAATACCTTCCATGGTTTAA  
AACATCTAAGCCTATCCCATTGAAAGATTTAATGTTGCATCAAAGTGGATTATATAAATA  
TAAATCCTCAAAAAGATTATAAAAATTTAGATCAAGCAGTTAAAGCGATTCAAAAACGTGG  
TATTGATCCTAAGAAATACAAAAGCATATGTATAACGATGGGAATTATTTAGTACTTGC  
GAAAGTAATTGAAGAAGTTACAGGTAATCTTATGCTGAGAATTATTATACAAAATAGG  
AGATCCTTTAAAACCTTCAGCACACAGCATTTTATGATGAACAACCTTTTAAAAAATATCT  
AGCAAAAGGTTATGCTTATAATAGTACAGGACTTTTATTCTTAAGACCTAATATTTTGGAC  
CAATACTATGGTGCAGGTAATTTATATATGACACCAACAGATATGGGTAAATTAATTACT  
CAAATACAACAATATAAATTATTCAGTCTAAAATAACCAATCCATTATTACATGAGTTT  
GGTACGAAACAGTATCCAGATGAATATCGATATGGTTTCTATGCTAAGCCAACATTGAAT  
AGACTTAACGGGGGATTCTTTGGACAAGTCTTTACTGTTTACTATAATGATAAGTATGTAG  
TTGTAATTGCATTAATGTAAAAGGAAACAATGAAGTTCGAATCAAACATATTTATAATG  
ATATTTTAAAACAAAATAAACCTTACAATACGAAGGGTGTATTGTTCAATAA

### > **tnpIS232**

Function: protein coding sequence; transposase for IS232

Best match: tnpIS232\_trunc\_CC001\_MW2-USA400\_BA000033.2[1036343:1036384]

Position: 025-contig\_192\_RC: 158998 ... 159040; Length: 42 bp

Sequence:

TGAGATTATCTTTAGACATAAATATGGATTTTGAAGTTACTA

### > **qoxD**

Function: protein coding sequence; quinol oxidase subunit 4 (core genome, constant)

Best match: qoxD\_CC001\_MW2-USA400\_BA000033.2[1036543:1036833:r]RC (completely identical)

Position: 025-contig\_192\_RC: 159198 ... 159489; Length: 291 bp

Sequence:

TTATAAGTGTGAAGAGTGACCGCCTTGCATAACCCAATATGTTCCGACAACGAAACAAAG  
TGTAATTACAAGAGCAAAGATAACTTTGAATGTTTGTAAACGTCCATCTTTACCTTCAGTT

AAATGCATGAACATTAATAATTGAAGTCCTGCTTGGACGAATGCAAAGCCAAAGATAATT  
GTCAACTTCGCGTGGAAATGTTAATGACGTGTATAGTGTACGTATACTGCTAAAAGCGTT  
AATACGATAGATGCGATAAATCCTACAGTATGTTTCATTATTGTACTCAT

> **qoxC**

Function: protein coding sequence; quinol oxidase subunit 3

Best match: qoxC\_CC001\_MW2-USA400\_BA000033.2[1036830:1037435:r]RC (completely identical)

Position: 025-contig\_192\_RC: 159485 ... 160091; Length: 606 bp

Sequence:

TCATCCGCTATACACCATCCCTATCATATATACGGCAGTAAAGATGAAAACCCAAACAAC  
ATCTAAGAAGTGCCAGTATAAACTTACTATAAATAATTTTGGCGCATTATATTTGTCTAAT  
CCGCGTCGTTGGATTTGGATTAATAAACAATGGCCAAACGATACCTAGCGATACGTGA  
CAACCATGCGTTCCTAATAGGATAAAGAACTAGACCAGTAAGAACCAATTGTTGGGTTA  
ACGCCTTCTGATGCATAGTGTGCGAATTCATAAATTCGAATCCAACAAAGACTAAACCT  
AAAAGTAACGTAATGATCATCCAAAACATCATTAACTTTTGTTTTTCTTGGCGCATGTAGT  
AAATAGCAATACCACATGTGTAAGAACTGAATAATAATGCAAACGTCATTATTAACA  
AGAGGCAATTCAAATAACTCAGTAGTCAATTTTACCTGCATAATCGCCACCATGTTGCAAA  
GTTAATAGTGTGCGCAAATAGGGTACCGAATAACGCAAATTCGGCTGTAATGAAAATCCAA  
AAGCCAAGCTTATTTAATTCGCCTTCATGTGTGCGTGAATCAATAGTGTTTGTATCATGAC  
TCAT

> **qoxB**

Function: protein coding sequence; quinol oxidase subunit 1

Best match: qoxB\_CC001\_MW2-USA400\_BA000033.2[1037425:1039413:r]RC (completely identical)

Position: 025-contig\_192\_RC: 160080 ... 162069; Length: 1989 bp

Sequence:

TCATGACTCATGACTTACAGCCTCCCTTTCTTTAATACGCGCTTCTCTTAATCTAGCTTCAG  
TTTCAGCAACTTCAGCAGCAGGGATATGATATCCGTGATCGATTTGGAACTGCGATAAA  
TCATAGTACCAAAAATACCGAATAAACAATTAATGCTGGAATTACAGTTTCGAAAATTA  
AGAAGAAACCGCCGATAGTCATAAAGATACCAATCCAGAATCCAACAGGAGTATTGTTT  
GGCATATGAATGTCTTTGTAATTATGGTTGTCTAAGTAATGACGACCATGTTCTTTCATAT  
CAACAAATGTGTCGTAGTCATTCCAATCTGGTGAATGGCAAAGTTGTATTTAGGTGGAA  
TTGCTGATGCAGTAGTCCACTCTAGAGTACGACCAAGGCCATCCCAGTTATCTCCAGTTG  
CTTCACGTGGAGATTTGAAGTGACTGTATACGATACTAACAACAAGGAATAAGAATCCGA  
TTGCCATTAATAATGCACCGATAGTTGAAATTAAGTTTAATAAGAACCAACCATCTGATG  
GCATATAAGTGTATAAACGACGTGGCATAACCATCTAATCCAAGAATGAATTGTGGTAAGA  
AACAAACGTTAAATCCGATCATGAAGAACCAGAAGCACCATTTGTTAATGTTTCGTTTA  
ATTTGTAACCCATCATCTTTGGATACCAGAAGATTAACCCAGCTAAGCAGGCAAATACAA  
CACCAGTAACCAATGTATAGTGGAAAGTGAGCTACTAAGAAGTACGTATTGTGATATTGAT  
AGTCAGCTGATGCCATTGCTAACATTACCCCGTAACACCACCTAAAAGGAAGTTAGGGA  
TAAATGCTAATGAGAATAGCATTGGTGACTCAAATGTAATACGTCCTTTATATAATGTTA  
ATAACCAGTTAAACAATTTACACCAGTTGGAATACCAATCAGCATTGTTGAAATTGAGA  
AGAATGAGTTGATTAACGCACCATTACCCATTGTGAAGAAATGGTGAACCCAAACTAAG  
AAACTAAGGAACGCGATACCGGCAGTTGCCATAACCTACTTTGATGTCCGAATAAACGC  
TTACGAGCGAATGTCGGGATAATTTCTGAGTAAATACCAAATGCTGGAAGGATAACGATA  
TAAACTTCAGGGTGCCCCATAACCCAGAAGAAGTTAGCCCAAAGCATTGGCATAACGCCA  
TGTGCAACTGTGAAGAATGCTGTGTCAAATATTCTATCAGTTGTCATTAATGCTAACGCTA  
CTGTTAAAGGAGGGAAAGCAAGAATAACAATTAATGTAGTAATAAATGTTGTTACTGTAA  
ACATTGGCATTTCATAAACTTCATAGTTGGTGTTTTACATCTTAAAATTGTTACAAAGAA  
GTTGATACCTGTAGCTAAGGTACCAAGCCCTGAAATTTGTATAGCTATTAAGTAATAGTT  
AACACCCGGACCAGGACTGAATTCACCTGCTAGTGGCGCATAGTTTGTCCAACCAGCTGC  
TGGTGAACCACCAATAATAAATGACAGGTTGAATAAAATCATACCTGCAAAGAATAGCC  
AGAACTTACGTTGTTAATACTGGGAATGCAACATCACGTGCTCCAATTTGTAATGGAA



CAACGATATTCCATAAACCAAAGATAAATGGCATTGCCATGAAGATAATCATGATTACAC  
CATGTGTACTAAAAATTTTCGTTATAGTGGTTAGATTCTAAAAATTTGTTATCAGGTTACTGT  
TAATTGCGCACGAATAAGTAACGCATCAATACCACCACGGACGAACATTAATACGGCAC  
AGATTAAATACATAATACCGATTTTCTTATGGTCTACAGATGTGAACCATTCTTTGTAAAG  
ATATTTCCATAATTTAAAGTAAGTAATTACTGCGATTAAACCAATAACTAAGAATGGGGC  
ACCAATTTGTGCCATTGTAATCATCCAGTTACCTTTAACTAGTAATTGATCCCATGGAAAA  
TTCAT

### > **qoxA**

Function: protein coding sequence; quinol oxidase subunit 2

Best match: qoxA\_CC001\_MW2-USA400\_BA000033.2[1039413:1040513:r]RC (completely identical)

Position: 025-contig\_192\_RC: 162068 ... 163169; Length: 1101 bp

Sequence:

TTAATGTCCACCTCCATGATCATCATTGTCTTGATCTTGCGCATCTTTTGAAATTTTCTTCA  
TTTCTTTTCGATTTTTCGATTCATCTTTCTTGAACCTCATTGTTATATGGTTTCGTCATTTCCAA  
GAATCATCAACTTCATACCATGTCGTTTATAGTTCGCATTTGTAATTTGAGCTTTACGAGC  
AGGTATTAATGGTTTGTCTGATACATCTTTAAACATATTTTCTTCACTAGTGAAGTTTGA  
TCTTTCAATTCGAAATTGAAACGTTTATATGCATAGAAGATGTATTCTGGATCGGCTGCTG  
GATCAACAAACGCCATATGTGTACCATTAAATTCTAAAGCTTTATTAGGTGTGCTTGGTA  
ATAATTGTTTATCAAATGTATCTTGATCTAACGTTTTCTTACCTTTAACTTCTTTACCCAT  
TTGTCGTAGTCTTTTTGACTAACGGCATTACTTTAAATGTTTGACGTGAGAATCCTTCAC  
CATTGAAGTTAGAGTTACGACCTCTGAACGTACCAGTTTGAGATGCTTCTAACGTCCAATT  
CATTGTCATGCCAGTCATGGCATATTTTGGACCCTAATTGTGGAATCCAGAACTTGTC  
ATTGTATCCATAGCTTGAAGCTTAAATACAACAGGACGATCTTTAGGGATTGTTAATGTG  
TTAACAGTCTCTATATGTTTCATCTGGATAAGCAAAGAACCATTTGTATCCTGCACTTACTG  
CATATAACAACCATTGGATCTTCTCACTCTTCGGTGGTTTTTCGTAATCGTATAAAGTTTTA  
ACTGTAGGAATAGCTAAAGCAGCAACGATTATGATAGGTATTACAAACCATATTGTTTCA  
ATGATGGCATTATGGTGCATCTTACCAGATTCGGCATTCTTATTATAACTATACTTGTA  
TAAAAATGGCGAACATGCCAAGTACAACGAAACAAATAACAAGCATGAAGACGATTGAA  
TAAAGAATCAAGAACTTCTGACTACTTGTACTGGCCCTTTTTCGTTGAAAATTTCTATAT  
TTGAACAACCACTAAGTAAATAGTGTGCCAAATAATAGAAGCAAAGACTTAAATTTTG  
ACAC

### > **iraE**

Function: protein coding sequence; chitinase B (core genome, constant)

Best match: iraE\_CC001\_MW2-USA400\_BA000033.2[1041085:1041402:r]RC (completely identical)

Position: 025-contig\_192\_RC: 163740 ... 164058; Length: 318 bp

Sequence:

CTATTTAACCTCAATATACCTAGTGGAAATTTTAATTGCACCATCTGAATCAGTGACATGA  
TATTTAATTTGATATTTACCAGATTTAGATGTATCAATTTGGCCATCGACTTTAATTTTATC  
GGTTAAATCTCCATCTTCTTTATCAAATGCACCTTATGCCGTTTAGAAGGTTATAATCTTGA  
CCTTTCTTAATAACGATATCATTAGCGCCTTTAATTTGTGGTGTAGTATTCGTCGTTGCATC  
TGCATTTAAATTTGGTGTTACTAGTGTAGCAGAAACACCGAGGGCTGATAATGACTGTAA  
TAGTTTATTCAT

### > **txbi\_1000-2**

Function: bidirectional rho-independent terminator

Best match: txbi\_1000-2\_CC001\_MW2-USA400\_BA000033.2[1041997:1042075] (completely identical)

Position: 025-contig\_192\_RC: 164655 ... 164734; Length: 79 bp

Sequence:

AAGAACAAGTGAAATGCTCCCTTCAAAGCCTTCATTTATTCAATGTCTACTTTGAAGGG  
AGCATTTGATCGATTAATG

### > **tx\_universal2**

Function: rho indendent terminator

Best match: tx\_universal2\_ST425\_LGA251-cow\_FR821779.1[1071185:1071224:r]RC

Position: 026-contig\_248\_RC: 6 ... 36; Length: 30 bp

Sequence:

AAAAGCTTGTACAAGCGAATTTTCGTTCA

### > **fold**

Function: protein coding sequence; bifunct methylenetetrahydrofolate dehydrogenase and methenyltetrahydrofolate

Best match: folD\_CC008\_NCTC8325\_CP000253.1[978261:979121:r]RC (completely identical)

Position: 026-contig\_248\_RC: 96 ... 957; Length: 861 bp

Sequence:

TTACGAATCAATACCTCGACGCATTTTTTCTGCAAGCAAAGTATTATTTAATACCATAGTA  
ATTGTTAATGGACCAACGCCACCAGGAACTGGTGTAAATAGCTCCAGCAATTTCTTTAACC  
GCATCATAATCAACGTCACCTTTTAATTTGCCATTTTCATCTGGCGTATTGCCAACATCGA  
TAATTACTGCTCCTTCTTTGACCACATCTTTTGTTACTAAACCAGGCTTACCAACTGCACT  
GACAATGACATCAGCATCTTTTAAATATGATGCCATATCTTTTGAACGAGAATGTAAGAT  
TGTTACTGATGCATTTTTTTGAAGTAGTAACTTAGAACTGGTTGTCCGACAATATGACTT  
CGTCCAATTACAACCTGCATTTTTACCTTCTAAATCAATATCAGCATGTTTTAATATTTCCAT  
GATGCCGAGCGGTGTGCAAGGTACAAAAGTTTGTTCATCGATATATAATTTCCCTATATTT  
ATTGGATGAAAACCGTCCACATCTTTTTCAGGATTGATTGCTTCTAATATTTTCTGTTTCGCT  
AACTTGTTTTGGTAATGGTACTTGTACCAAATACCCTTACAGAATCATCATTATTTAGT  
CTATTTAGTTCGTTTAATACTTCTTCTTCAGTAGCTGTTTCTTCCAAATGTACGATTTCTGA  
AATCATACCAATTTTTTTCAGCTGCTTTCTTTTTTGATCTAACATAACTTTGACTAGCGCCAT  
CATTACCAACTAATATAACGGATAATTTAGGTGTAACCCCTTTTCTTTTAGCGCTTCAAC  
TTGATCTTGTAACCCCTGTCTGTAGTCTTTGGCAATTTGTTTACCATCTAAAATTTTAGCAA  
CCAT

### > **purE**

Function: protein coding sequence; phosphoribosylaminoimidazole carboxylase catalytic subunit (core genome, constant)

Best match: purE\_CC008\_NCTC8325\_CP000253.1[979322:979804] (completely identical)

Position: 026-contig\_248\_RC: 1157 ... 1640; Length: 483 bp

Sequence:

GTGAAAGTAGCAGTCATTATGGGCAGTTCCTCCGATTGGAAAATTATGCAAGAGAGTTGT  
AACATGTTGGATTATTTTCAAATTCGGTACGAAAAACAAGTAGTATCCGCACATCGTACG  
CCAAAAATGATGGTTCAATTTGCTTCTGAAGCGAGAGAAAGAGGTATAAACATTATCATT  
GCAGGCGCTGGCGGTGCGGCACATTTACCAGGTATGGTTGCATCATTAAACGACGCTACCA  
GTTATTGGAGTGCCGATTGAAACAAAAGTTTAAAGGGTATAGATTCTTTATTATCAATT  
GTTCAAATGCCAGGAGGTATTCCGGTTGCAACGACTGCAATTGGTGCAGCAGGTGCTAAA  
AACGCAGGTATACTTGCAGCAAGAATGTTAAGTATTCAAATCCTTCTTTAGTTGAAAAA  
CTAAATCAGTATGAATCTTCGTTAATTCAAAAGTGGAGGACATGCAAAATGAACTTCAA  
TAA

### > **purK**

Function: protein coding sequence; phosphoribosylaminoimidazole carboxylase ATPase subunit (core genome, constant)

Best match: purK\_CC005\_Mu50-VRSA\_BA000017.4[1118401:1119525] (completely identical)

Position: 026-contig\_248\_RC: 1626 ... 2751; Length: 1125 bp

Sequence:

ATGAACTTCAATAAATTAAGTTTGGTGC GACTATTGGCATTATTGGTGGTGGTCAGCTTG  
GAAAGATGATGGCACAATCAGCTCAAAAATGGGTTATAAAGTGGTTGTATTGGATCCTT  
CTGAAGATTGTCCATGTAGATACGTTGCACACGAATTTATACAAGCCAAGTATGACGATG

AAAAGGCACTCAATCAATTAGGACAAAAATGTGATGTGATTACTTATGAATTTGAAAACA  
TTTCAGCCCAACAATTA AAAACTATTATGTGAAAAGTACAATATTCCGCAAGGTTACCAAG  
CTATACAGTTATTACAAGACCGCTTA ACTGAAAAAGAAACATTA AAAAAGTGCTGGTACCA  
AAGTTGTCCCGTTCATTTTCAGTAAAAGAATCTACAGATATTGACAAAGCAATTGAAACAT  
TAGGATATCCTTTTTATTGTAAAAACTAGATTTGGTGGCTACGATGGCAAAGGTCAAGTTTT  
AATTAACAACGAAAAAGACTTACAAGAAGGTTTTAAATTAATTGAACTAGTGAATGCGT  
AGCTGAAAAATATTTGAATATCAAGAAAGAAGTATCTCTTACTGTTACAAGAGGAAACA  
ACAATCAAATCACTTTTTTTCCATTACAAGAAAATGAGCATAGAAATCAAATACTTTTCA  
AAACAATTGTTCCAGCGAGAATAGATAAAAACAGCTGAGGCGAAAGAGCAAGTTAATAAA  
ATTATCCAATCGATTCATTTTCATTGGAACATTTACAGTGGAATTTTTTATAGATAGTAACA  
ACCAATTGTATGTGAACGAGATTGCACCAAGGCCTCACAAATCCGGACATTATTCAATTG  
AAGCATGTGATTATTCACAATTTGATACTCATATTTTAGCAGTTACCGGACAATCATTACC  
AAATTC AATTGAATTATTAAGCCTGCAGTCATGATGAACTTACTAGGTAAAGACTTAGA  
TTTATTGGAAAATGAATTTAATGAACATCCAGAGTGGCACTTACATATTTATGGTAAGTCT  
GGGCGTAAAGATAGCAGAAAAATGGGGCATATGACTGTACTAACGAATGATGTAAACCA  
AACTGAACAAGATATGTACGCTAAATTTGAGGGGAGTAATTA

### > **purC**

Function: protein coding sequence; phosphoribosylaminoimidazole-succinocarboxamide synthase (core genome, variable)

Best match: purC\_CC001\_MW2-USA400\_BA000033.2[1044843:1045547] (completely identical)

Position: 026-contig\_248\_RC: 2754 ... 3459; Length: 705 bp

Sequence:

ATGACATTATTATATGAAGGAAAAGCGAAGCGCATTTTTCTCAACAAATCAAGAAAATGA  
ATTAAGAGTTGAATATAAAGATGAAGTTACTGCTGGAAACGGGGCTAAGAAAGACACAA  
TGGCAGGTAAGGGGCGATTAAATAATCAAATTACTTCTATTATATTTAAATATTTACAAG  
AAAATGGAATAGAAAGTCACTTTATTAACAATTATCTGAAACAGAACAATTAGTTAAGC  
CTGTGAAAATAATTCCATTAGAAGTAGTTGTTTCGTAATATTGCTAGTGGATCTATTACAAA  
GCGTTTAGGTTTTGAAAATGGTGAAGTTTTTAGAGAACCCTTGTAGAATTTTTCTATAAA  
AATGATGCGTTAAATGATCCGTTGATAACGGATGACCATGTTAAATTGCTCAATATAGCA  
TCAGATGAAGATATTGAAATACTAAAATCCAAAGCATTAAAGATTAATAATGTGTTGAAA  
CAATTAATGGATGCTATGAATTTAAAATTAGTAGATTTTAAAATCGAATTTGGAAAGACT  
GAGACTGGTCAAATTTTGTAGCGGATGAAATATCTCCAGATACATGTCTGAATTTGGGAT  
AAAGCTACCAATGCAAACCTTTGATAAAGATGTATATAGAAATAACACTGGATCACTGATT  
GAAACATATCAAATATTTTTAAACA AATTGGAGGATTTAAAATAA

### > **purS**

Function: protein coding sequence; phosphoribosylformylglycinamide synthase (core genome, constant)

Best match: purS\_CC001\_MW2-USA400\_BA000033.2[1045547:1045810] (completely identical)

Position: 026-contig\_248\_RC: 3458 ... 3722; Length: 264 bp

Sequence:

ATGAAAACAATTGAACTACATATCACATTACAACCACAAGTATTAGATACGCAAGGACA  
AACGCTTACTCGAGCTGTACATGACTTAGGTTATGCACAAGTGAATGATATTCGTGTAGG  
AAAAGTATTATATATGACAGTGGATGAGGTTAGTGATGAAAAGGTACACAACATTATTAC  
AACTCTAAGTGA AAAAATTGTTTGCAAATACAGTGATTGAAGAATATAGCTATAAAGTGTT  
AGATGATGAAAAGGAGAATGCATAA

### > **purQ**

Function: protein coding sequence; phosphoribosylformylglycinamide synthase 1 (core genome, constant)

Best match: purQ\_CC005\_Mu50-VRSA\_BA000017.4[1120498:1121169] (completely identical)

Position: 026-contig\_248\_RC: 3723 ... 4395; Length: 672 bp

Sequence:

ATGAAATTTGCGGTTCTTGTTTTCCAGGTTCTGAATTGTGATAGAGACATGTTAATGCTG  
CTATTA AAAAGTGGTGTGAAGCGGAATATGTAGATTATAGAGAAACATCACTAAGTGGAT  
TTGATGGCGTACTTATTCCTGGTGGATTTTCATTCGGGGATTACTTAAGATCTGGGGCAAT  
GGCTAGTGTAGCGCCGATTATTTCCGGAAGTTAAACGTCTTGCAACTGAAGGTAAGCCAGT  
ATTAGGTGTTTGTAAATGGGTTTCAAATTTTAACTGAAATAGGCTTATTACCTGGTGCATTA  
TTGCATAACGATTCACATTTATTTATTAGTAGAAATGAAGAGTTAGAAATAGTGAATAAT  
CAAACGGCATTACAAATCTTTATGAGCAAGGTGAAAAAGTTATATATCCTGTAGCTCAC  
GGTGAAGGTCATTATTATTGTACTGATGAAATATATCAACAATTA AAAAGCTAACAATCAA  
ATTATTCTGAAATATGTGAATAATCCGAACGGTTCATATGATGATATTGCAGGAATTGTT  
AACGAAAAAGGCAATGTATGTGGCATGATGCCACATCCTGAAAGAGCTTTAGAAACGTT  
GTTAGGTACTGATAGTGGTGTGAAATTATTTGAAGCGATGGTAAAAAGTTGGAGGGAAC  
AACATGTCTAA

> **purL**

Function: protein coding sequence; phosphoribosylformylglycinamide synthase 2 (core genome, variable)

Best match: purL\_CC005\_A9299\_ACKH01000027.1[19557:21746:r]

Position: 026-contig\_248\_RC: 4387 ... 6577; Length: 2190 bp

Sequence:

ATGTCTAAATTTATCGAACCAAGCGTTGAAGAAATTA AACTTGAAAAAGTATATCAAGAT  
ATGGGATTAAGTGATCAAGAATATGAAAAAGTTTGCATATTTTAGGCAGACAACCTAAC  
TTTACAGAAACAGGTATCTTTTCTGTTATGTGGAGTGAACATTGCTCTTATAAACATTCTA  
AACCGTTTTTAAAGCAATTTCTACGTCAGGTGAGCATGTGCTTATGGGTCCAGGTGAAG  
GTGCAGGGGTAGTCGATATAGGTGATAATCAAGCCGTAGTATTTAAAGTAGAGTCTCACA  
ATCATCCATCAGCAATTGAACCATATCAAGGGGCTGCTACAGGCGTTGGTGGAAATCATT  
GTGACATTGTTTCTATTGGGGCTAGACCTATTAATTTGTTAAACAGTCTTAGATTTGGAGA  
ATTAGATAATAACAAAACCAAGATTACTTAAAGGGGTTGTAAGGGTATCGGAGGTT  
ATGGTAACTGCATTGGTATTCCAACAACCTGCTGGTGAATCGAATTTGATGAATGTTATG  
ATGGCAATCCACTTGTAAATGCAATGTGTGTTGGTGTATCAATCACGACATGATTCAAA  
AAGGCACAGCAAAAGGTGTAGGTAATTCGGTCATTTATGTTGGTTGAAAACTGGTTCGAG  
ATGGTATTCATGGTGCTACTTTTGCATCTGAAGAATTGACGGAAGAAAGCGAAAGTAAAC  
GACCTTCTGTACAAATCGGTGATCCATTTGTAGGTA AAAAATTAATGGAAGCAACACTTG  
AAGCAATTACATTTGATGAATTAGTTGGTATTC AAGATATGGGTGCTGCTGGTTAACATC  
TTCATCGTCTGAAATGGCGGCAAAAGGTGGTAGTGGGTTACATTTGAGATTAGAACAAGT  
GCCAACACGTGAGCCAGGTATTTCTCCTTATGAAATGATGCTTTCAGAACTCAAGAACG  
TATGTTACTAGTTGTTGAAAAAGGTAATGAACAAAATTCTTAGATTTATTTGATAAGCA  
CGAATTGGATAGTGCTGTTATAGGTGAAGTTACAGATACAAATCGTTTTGTTTTAACATAT  
GATGATGAAGTTTATGCTGACATTCCAGTTGAACCACTAGCTGATGAAGCACCTGTATAT  
ATTTTAGAAGGAGAAGAAAAAGATTATAACTTCTA AAAATGATTATACACACATCGAT  
GTTAAAGATACTTTCTTTAAATTACTTAAAGCATCCGACTATAGCATCTAAACACTATTTAT  
ATGATCAATACGACCAACAAGTTGGTGCCAATACGATAATTAAGCCAGGACTTCAAGCAT  
CGGTAGTACGTGTGGAAGGCACAAATAAGGCAATTGCTTCAACAATTGATGGTGAAGCG  
CGTTATGTATATAACAATCCATATGAAGGTGGAAAGATGGTAGTAGCTGAAGCTTATCGA  
AATTTAATTGCCGTGGGTGCAACACCATTAGCAATGACAGATTGTTTAAATTATGGTTCTC  
CTGAAAAGAAAGAAATCTATCAACAGTTGATAGATTCAACGAAAGGTATGGCAGAAGCA  
TGCGACATTCTTAAGACACCAGTAGTTTCTGGAATGTATCTTTATATAACGAAACGAAA  
GGTACTTCTATTTTCCCAACACCAGTTGTTGGAATGGTAGGTTTGATTGAAAATGTA AATT  
ATTTAAATGATTTTGAACCTCAAGTTGGAGATAAATTATATTTAATCGGTGATACTAAGG  
ACGACTTTGGTGGTAGTCAACTTGAAAAGTTAATTTATGGCAAAGTTAATCATGAATTTG  
AGTCATTAGATTTGAGTTCAGAAGTTGAAAAAGGTGAATCAATCAAGACCGCTATTCGTG  
AAGGACTATTATCACATGTTCAAACAGTTGGTAAAGGTGGCTTACTGATTACTTTAGCTA  
AACTAAGTGCGCATTACGGTTTAGGATTAAGTCTTCAATAGATATAACAAATGCACAAT  
TGTTTAGTGAGACGCAAGGCCGATATGTTGTTTCTGTTAAATCAGGTA AAAACTTTAAATAT  
TGATAATGCAATAGAAATTGGACTTTTAAACAGATAGTGATAATTTCAAAGTAACAACACC  
ATATACAGAGATTAGTGA AATGTTTCAGATATTAACAAATATGGGAAGGGGCAATTG  
CTCAATGTTTAACTACTCAGGATTA

> **purF**

Function: protein coding sequence; phosphoribosylpyrophosphate amidotransferase (core genome, variable)

Best match: purF\_CC007\_USA300\_TCH959\_AASB02000224.1[105546:107030]

Position: 026-contig\_248\_RC: 6555 ... 8040; Length: 1485 bp

Sequence:

```
ATGTTTAACTACTCAGGATTAACGAAGAATGTGGCGTGTGGTATTTGGAATCATCCT
GAAGCAGCGCAACTAACATATATGGGACTTCATAGTTTGCAACATCGTGGTCAAGAAGGT
GCAGGTATAGTTGTTTCTGATCAAAATGAATTAAGGCGAGCGAGGATTAGGCTTACTA
ACTGAAGCGATTAAAGATGATCAAATGGAACGATTAAAAGGATATCAACATGCAATTGG
TCACGTCCGTTATGCTACTTCAGGTAATAAAGGTATTGAAAATATTCAACCGTTTCTGTAT
CACTTTTATGATATGAGTGTAGGTATTTGTCATAATGGTAACCTCATTAATGCTAAATCAT
TGCGTCAGAATTTAGAAAAACAAGGTGCTATCTTCCATTTCGTCTTCTGATACTGAAGTCAT
TATGCATTTGATACGTCGAAGTAAAGCTCCTACTTTTGAGGAAGCGTTAAAAGAAAGTTT
GCGAAAAGTTAAAGGCGGTTTTACATTTGCGATATTAATAAAGATGCGTTATATGGCGC
AGTAGATCCAAATGCTATCAGACCACTTGTTGTAGGTAAAATGAAAGATGGTACATACAT
CCTTGCAAGTAAAACATGTGCAATAGATGTGTTAGGTGCAGAATTTGTTCAAGATATTCA
TGCAGGTGAATATGTCGTGATTAACGATAAAGGTATTACAGTTAAATCTTATACACATCA
TACGACAACCTGCAATTTCTGCGATGGAATATATTTATTTTGCTAGACCAGACTCAACAAT
AGCTGGTAAAAATGTCCATGCAGTACGTAAAGCTTCTGGTAAAAAATTAGCCCAAGAAA
GCCCTGTAAATGCTGATATGGTCATCGGTGTACCCAATTCATCGCTATCAGCTGCGAGTG
GTTATGCTGAAGAAATAGGTTTGCCATATGAAATGGGACTAGTTAAAATCAATATGTTG
CAAGAACATTTATTCAACCAACTCAAGAATTACGTGAGCAAGGTGTGAGAGTGAAGTTAT
CTGCGGTAAAAGATATAGTAGATGGGAAAAATATCATTCTTGTTGATGATTCCATTGTTT
GCGGTACGACAATTCGACGCATTGTGAAAATGTTAAAAGATTCTGGTGCAAATAAAGTAC
ATGTGCGTATAGCATCACCGGAATTTATGTTCCCAAGTTTTTATGGAATCGATGTTTCAAC
TACGGCAGAATTAATTTCTGCAAGCAAATCACCTGAAGAAATTAAGATTATATTGGCGC
TGATTCATTAGCATATCTATCTGTAGATGGGTTAATTGAATCAATTGGTTTAGATTATGAC
GCGCCATATAGTGGCTTATGTGTAGAAAGTTTCACTGGAGATTATCCTGCAGGGTTATAT
GATTATGAAGCAAATTATAAAGCGCATTAAAGTCATCGACAAAAGCAATATATTTCTAAA
AACAAACACTTTTTTGATAGCGAGGAAATTTAAATGTCTAA
```

> **purM**

Function: protein coding sequence; phosphoribosylformylglycinamide cyclo-ligase (core genome, constant)

Best match: purM\_CC005\_Mu50-VRSA\_BA000017.4[1124807:1125835]

Position: 026-contig\_248\_RC: 8032 ... 9061; Length: 1029 bp

Sequence:

```
ATGTCTAAAGCATATGAACAATCTGGTGTAATATTCATGCTGGTTATGAAGCTGTAGAA
AGAATGTCTAGTCATGTTAAACGTACGATGCGTAAAGAAGTTATCGGTGGTTTAGGTGGA
TTCGGTGCTACATTTGATTTATCACAATTAATATGACAGCACCAGTTTTAGTTTCTGGAA
CAGACGGAGTAGGTACGAAATTAAACTAGCTATCGACTATGGGAAACATGATTTCGATA
GGTATCGATGCAGTCGCAATGTGTGTTAATGATATTTAACGACAGGTGCAGAACCATTG
TATTTTTTAGATTACATCGCTACAAATAAAGTTGTTCCCTGAAGTTATTGAACAAATTGTTA
AAGGTATTAGTGATGCATGCGTTGAAACGAATACTGCCTTATCGGTGGAGAGACTGCTG
AAATGGGTGAAATGTATCACGAAGGTGAATATGATGTAGCCGATTTGCAGTTGGAGCA
GTTGAAAAGGATGACTATGTAGATGGTTCAGAAGTGAAGAGGGACAAGTTGTTATAGG
GCTTGCGTCAAGTGGCATTCAATCAAATGGATATAGTTTAGTGCGCAAATTAATTAATGA
ATCAGGCATTGATTTGGCATCAAACCTTCGATAATCGTCCATTTATAGATGTCTTTTTAGAA
CCAACATAATTATATGTCAAACCTGTACTTGTAAAAAAGAAGTTTCTATTAAGGCA
ATGAATCATATTACTGGTGGAGGCTTTTTATGAAAATATTCCACGTGCATTGCCAGCCGGA
TATGCTGCTAGAATTGATACTACATCATTTCCAACGCCAAAAATATTTGATTGGTTACAAC
AACAAAGCAATATAGACACAAATGAAATGTATAACATTTTTAACATGGGTATTGGCTATA
CGGTTATCGTTGATGAAAAAGATGCATCACGCGCTTTGAAGATTTTAGCAGAACAAAATG
```

TGGAAGCTTATCAAATTGGTCATATTGTGAAAAATGAGTCAACTGCAATTGAATTGTTGG  
GGGTATAA

> **purN**

Function: protein coding sequence; phosphoribosylglycinamide formyltransferase (core genome, constant)

Best match: purN\_CC001\_MW2-USA400\_BA000033.2[1051152:1051718]

Position: 026-contig\_248\_RC: 9063 ... 9630; Length: 567 bp

Sequence:

ATGGTTAAAATTGCGATTTTTGCATCAGGTTTCAGGAAGTAACTTTGAAAATATAGTTGAG  
CATATTGAATCAGGAAAACCTTGAAAATATTGAAGTTACGGCGCTATATACGGATCATCAA  
AATGCGTTTTGTATAGATAGAGCAAAAAGCACGGTATTCCTGTTTATATTAATGAACCA  
AAACAATTTGATTCAAAGCAGCGTATGAACAACATTTAGTAACACTATTAATAAAGAT  
AAGGTAGAGTGGATTATTTAGCTGGCTACATGCGTCTAATAGGTCCAGACTTATTAGCA  
TCATTTGAAGGTAATAATTGAATATACATCCATCTCTATTGCCGAAATATAAGGGGATT  
GACGCAATAGGCCAAGCATATCATAGTGGCGATACTATTACTGGTTCGACAGTACATTAT  
GTTGATAGTGGTATGGATACGGGAGAAATTATTGAACAGAGAAAATGTGATATTAGACC  
GGACGATTCAAAGAACAATTAGAAGAGAAAGTAAAAAAATTGGAATATGAATTATATC  
CAAGTGTTATTGCTAAAATTGTAAAATAA

> **purH**

Function: protein coding sequence; bifunct phosphoribosylaminoimidazolecarboxamide  
formyltransferase/IMP cyclohydrolase (core genome, constant)

Best match: purH\_CC001\_MW2-USA400\_BA000033.2[1051733:1053211]

Position: 026-contig\_248\_RC: 9644 ... 11123; Length: 1479 bp

Sequence:

ATGAAGAAAGCTATTTTGAGCGTATCAAATAAAAACAGGTATTGTAGAGTTTGCTAAAGCG  
TTAACGCAATTAATTATGAATTATATTCAACAGGTGGTACTAAACGTATATTAGATGAA  
GCAAATGTACCAGTTCGTTCTGTTTCAGACTTAACACATTTTCCAGAAATAATGGATGGCC  
GTGTTAAAACATTACATCCGGCTGTTTCATGGTGGCATTTTAGCTGATCGAAATAAACCGC  
AGCATTTAAATGAATTATCAGAACAACATATAGATTTAATTGATATGGTAGTAGTTAATT  
TATATCCATTCCAACAACTGTTGCAAACCTGATGTGACGATGGACGAAGCAATTGAAA  
ATATTGATATTGGTGGTCCAACAATGTTACGTGCTGCAGCTAAAAACTATAAACATGTAA  
CAACAATTGTACATCCGGCAGATTATCATGAAGTATTGACGCGATTAAGAAACGATTCGT  
TAGATGAGTCATATAGACAATCATTAAATGATTAAAGTTTTTTGAGCATACTGCAGAATATG  
ATGAAGCGATTGTACGTTTCTTTAAAGGGGATAAAGAACTTTAAGATATGGAGAAAATC  
CACAACAATCAGCGTATTTTGTGAGAACTTCGAATGCTAAGCACACGATTGCAGGCGCTA  
AACAATTACATGGGAAACAATTAAGCTATAACAATATTAAGATGCAGATGCTACACTA  
GCTTTAGTTAAAAGTTTGATACACCTGCTGCAGTTGCGGTTAAACACATGAATCCATGT  
GGTGTGGTATCGGTGACACGATTGAACAAGCATTTCAACATGCGTATGAAGCGGATAGT  
CAATCAATATTTGGTGGAAATTGTTGCATTAAACCGAGCTGTAACACCTGAGTTAGCAGAG  
CAATTGCATAGTATCTTTTTGGAAGTCATTATTGCACCAAAATTTACAGATGAAGCATTAG  
ATATTTTAAAACAAAAGAAGAATGTAAGATTATTAGAAATTGATATGACTATAGACAGTA  
ACGAAGAAGAGTTTGTTCAGTATCTGGCGGATATTTAGTTCAAGATAAAGACAATTATG  
TCGTGCCAAAAGAAGAAATGAAAGTTGTTACAGAAGTAGCACCTACTGATGAACAATGG  
GAAGCAATGTTATTAGGATGGAAAGTTGTACCATCAGTAAAAGTAATGCAATTATTTTA  
AGTAATAATAAACAACTGTAGGTATAGGTGCTGGACAAATGAATCGTGTGCGGTGCTGCT  
AAAATTGCGTTAGAGAGAGCTATTGAAATCAATGATCATGTAGCGTTAGTATCTGATGGA  
TTTTTCCCTATGGGAGATACAGTTGAACTTGCAGCACAAACATGGTATAAAGGCAATTATC  
CAACCGGGTGGTTCGATTAAAGATCAAGATTCAATTGATATGGCTAATAAACATGGTATT  
GCAATGGTAGTCACAGGCACTCGACATTTTAAACACTAA

> **purD**

Function: protein coding sequence; phosphoribosylamine-glycine ligase (core genome, constant)

Best match: purD\_CC010\_D139\_ACSR01000034.1[61660:62907]

Position: 026-contig\_248\_RC: 11144 ... 12392; Length: 1248 bp

Sequence:

```
ATGAATGTATTAGTAATTGGTGTCTGGTGGACGAGAACATGCACTTGCATATAAACTTAAT
CAATCGAATCTAGTTAAACAAGTGTGTTGTCATTCCAGGTAATGAGGCAATGACACCTATA
GCTGAAGTACACACTGAAATTTTCAGAATCTAATCATCAAGGGATACTAGATTTTGCTAAA
CAGCAAAATGTTGATTGGGTAGTTATAGGTCCAGAACAGCCGCTAATTGATGGATTAGCA
GACATTTTACGAGCTAATGGTTTCAAAGTGTGTTGGTCCAAATAAGCAAGCAGCTCAAATC
GAAGGCTCAAATTTATTGCTAAAAAGATAATGAAAAAATATAATATTCCAAGTGTGCTGAT
TATAAAGAAGTTGAGCGAAAAAAGGATGCTTTAACATATATTGAAAAGTGTGAATTGCC
GTTGTTGTCAAGAAAGATGGGTTAGCTGCTGGGAAAGGCGTTATTATTGCAGATACTATT
GAAGCAGCCAGAAGTGCTATTGAGATTATGTATGGTGATGAAGAAGAAGGTAAGTGTGTT
ATTTGAAACGTTTTTAGAAGGTGAAGAGTTCTCGCTAATGACATTTGTTAATGGTGATTTA
GCAGTACCTTTCGACTGTATTGCACAAGATCATAAACGCGCATTGATCATGATGAAGGA
CCAAATACTGGTGGTATGGGGGCTTATTGTCCAGTACCACATATTAGTGACGATGTTTTA
AACTTACAAATGAAACAATTGCACAACCCATTGCAAAGGCAATGCTTAATGAAGGTTAT
CAATTCCTTCGGTGTATTATACATTGGTGCTATTTTAACTAAAGATGGTCCAAAAGTAATAG
AATTTAATGCCCGTTTTGGTGATCCTGAAGCTCAAGTATTATTAAGTCGCATGGAAAGTG
ATTTAATGCAGCATATTATTGATTTAGATGAAGGAAAACGTAAGTCAAAATGGAAAA
ATGAATCTATTGTAGGGGTCATGTTGGCATCAAAGGATATCCTGATGCATATGAAAAAG
GGCATAAAGTAAGTGGCTTTGATTTAAATGAAAAGTATTTTGTAGTGGATTAAAGAAGC
AAGGTGATACCTTTGTTACTTCAGGTGGTAGAGTTATACTTGCCATCGGAAAAGGTGACA
ATGTACAAGATGCACAGCGAGACGCATACGAAAAAGTATCTCAAATACAAAGTGACCAT
TTATTCTATCGTCATGACATTGCGAATAAAGCACTACAAGTAAATAA
```

### > repeat\_Sgenus

Function: repeat repeat element alien/(mobile element)obile/

Best match:

Position: 026-contig\_248\_RC: 12401 ... 12431; Length: 30 bp

Sequence:

```
AAAAATACTAAGATTAGCTATGAAGAAATC
```

### > ykoC

Function: protein coding sequence; ATP binding cassette transporter/membrane protein (core genome, constant)

Best match: ykoC\_CC005\_ED98-hen\_CP001781.1[1064296:1065102:r]RC (completely identical)

Position: 026-contig\_248\_RC: 12658 ... 13465; Length: 807 bp

Sequence:

```
TTAACCTACACGACCAAGACGAACATCATCTATGCCCGTGATGGGTAAGGTGATTGAACA
ATAATATGCCATAGTAATAATGGCAATTTAAACTATAATAAAGATTATATCTTTATATGA
GAAAGGTACGTTGTAATAGTAAGTACGAGGACCATCTCTAAATCCTTTCGACTCCATCGC
AACTGATAATTGATGTGCCTTTCTAATATTTTGGCTTAATAGAGGTATAATTAATGCTTA
AATCGCTTTAACCCTCTATAATTTGCTGCGTCTATCATCTGATAGCGCATTTTTAAAGATC
TGCGAAGCTGTATTAAGAATAATCATTAAAGGTATCATAACGAATGGCAGCCATGAATG
CATAAGCAACTTTTGATTTAACCTTTAAATGTTGCATTAAGTATAAAATATCATGACAAC
CTGAGATGTAAGTGCATTAAGATACCGAAAAATGAAATAGCAATGGTCTTAATGATAC
ATGTAAACCACGAAGTAACTTTCTGTTGTAATATGGATAAATCCGAATTTCAAATTTGT
ATGGCTACCATTCCCGTATAAAATCATGAACAGGGAAGAGAGTAATGCAAAGCCAATAC
TTATAGTTATAAAAATTGCTGTAATTTTAACTGAGTACCATTAAACATCAATAAGAAAA
CTAACATTAAGATAGTGATATAAAGCATAAAATCGAAATTATGCACAAATATAATAAAG
AAAAATAGTATAATTCCAAGAAATAGTTTCGTTATAATGTTGACATCATCAACAAATGAT
TGCCGAAGTTCATTGCTCATAACAT
```

### > ykoD

Function: protein coding sequence; ABC transporter/ATP-binding protein (core genome, constant)

Best match: ykoD\_CC005\_Mu50-VRSA\_BA000017.4[1130233:1131633:r]RC (completely identical)

Position: 026-contig\_248\_RC: 13457 ... 14858; Length: 1401 bp

Sequence:

```
TCATACATTCGTATCACCATCACAATCTAGTAACGCACCATCTGAAATTTTAAGTCTTCTT
GATGGATAACGTTCAATTATTTTCATCGTCATGTGTAACCATGACAATACTTTGTCCCAAT
TAATTCGCTTTTGGAAAAGTTTGATCAACTGGAATGTATTATGGCTATCAAGTCCAAATGT
CGGTTTCATCTAAAAAGATAATATCAGCTTTAGAACTTAGTGCGGTAGCTACGCTAAGGCG
TCGTTTTTGACCAATAGACAACCTCATAAGGATGTTGATCTTTTACATTTTGTAAATCTAAA
AGTTTTAAAAGTTGTATCGTTTCATCATCACTTTGATCTTTAGAAAGGTGATTA AAAATGAA
TGTTAATTTTCATCATAAAACCGAATTTGTTATAAATTGTAATTCTGGGTTTTGATAAACTAG
GTACATGTGTTTTGCTGCATGTTTAATTTTTGTTAAACGCTGATTTTCAAATAAACATCA
CCTTGATATTTAATCAATTGCATAATTGATTCAAGCAAGGTTGTTTTACCACTACCATTTG
CCCCTGTAATTGTAATCCACTCACCTAGACCAATTTCTAAATCTGAGAATGAGAGCAATG
TTGATTTACCGCGAATAATACGTCCATTTTTAAATTGTAATAAGTGTGAGTTTGTGTTGG
AAAGTCAACACGACTTGGTGCGAATTCCCATGCACGTGGATGCCACACACCATATTTACT
GAGTAAATGAACATACTTCTGTAATATGATTTTCAGGACATTCATCGGCAATGATATTTCC
GTTATAATCCATCAAATGACGCGGTTCGACATGATTTCCAGATGTGTTTAACTTTATGTTCA
ACGATTACAACAGTTTGATCTTCCCAAAGTTCAATTAGTTTAGTCCATAAATCTTCTGTTG
CTTGAACATCTAACATTGCTGTGCGTTCATCTAAAAACAATGTTTTTGTGTTGAAGAAT
GGTTTCAACAATTGCCAATTTCTGTTTCATCCCGCCACTTAAATCTTTGATATACGTTTCA
GGGGTAACATTTAAATTGACCATATTTAAAGCATTGATAATTAACGCATCCATGTCTTCAC
GTGGTACTTGTCTATTTTCTAAAACGAATGCAAGTTCTTCGTATACTTTTGGCATACAAAA
CTGGCTATCAGGGTCTTGGAAAATAACGCCACTTAATGGGTCAACGATTAGTTCATCATA
TTTCATAGGTAATTCAATTAATTAGGAACAATACCACTTAATACATTCAGAAGTGTACTT
TTACCGCAACCAGAAGGACCGAGTAAAAGTACTTTTTCTTTGTCTTGAATAGTGATATTTA
AATGATCGAAAATTTTACGCTGACCATTTGGATATTTAATCGTAAATCACTTACTTTTAA
CAC
```

### > **ykoE**

Function: protein coding sequence; substrate-specific component of transporter for hydroxy-methyl-pyrimidine (core genome, constant)

Best match: ykoE\_CC001\_MW2-USA400\_BA000033.2[1056959:1057534:r]RC (completely identical)

Position: 026-contig\_248\_RC: 14872 ... 15448; Length: 576 bp

Sequence:

```
TTATAAGTTGTCGTAATCTTCTTTAGCAGCTGGTCTAAATAATTTTGTACGCCTGTCTTAT
CTAAAGCTTTTACTAAAAGGTAAGATAGGACGCCGCGACTACTGCACCACTAATTAATC
TAAATACGATGAATAATGTTAAGTTCCAACCTGCAACTTCATTTAAATAACCATAGAAAT
AATCTATAGGGAAAGCCGCGATTGCTGTACAAAACCTGCTAACATAGCTACCATAACTG
AACGAGATTGATATTTAAAAATTGCAAAGACAAGTTCACACGCTAAACCTTGTATGAAAG
CGTAAACGATTGTCGGAATATCGAAACGACCCATAATGATAGTTTTCGCCGGCACCTGCAG
CAAATTCAGCCAGTAAAGCAATACCTGGTTTTTGAATAATTAGATAGCAGACAATCGCTG
CCATGAACCAAACCCCGTTTGTAAATTGTTTCGAGGTGAAGGCCTGTAGCTTGCACACCAT
TGTAACAACAAACCACATAAATTGTAAATAACTGCGAATACTACTGAAATAAGTACGGTTA
CTAGTATTTTCAGATAGCTTTAAACCTTTTGACAT
```

### > **TPP\_riboswitch\_L1**

Function: noncoding RNA thiamine pyrophosphate binding riboswitch/locus 1 (core genome, constant)

Best match: TPP\_riboswitch\_L1\_CC001\_MW2-USA400\_BA000033.2[1057611:1057711:r]RC (completely identical)

Position: 026-contig\_248\_RC: 15524 ... 15625; Length: 101 bp

Sequence:

```
ATATGTATAGTAACACTTTTCTACGCTAGTTCAAGCTAGATCAGGTTCAAAGGGTTTGGAG
GGCAAGCCTCATCTCAGTATAAAAACACCCCTAGTGTGTGCG
```



### > **graF**

Function: protein coding sequence; putative protein (core genome, constant)

Best match: graF\_CC001\_MW2-USA400\_BA000033.2[1058055:1058189:r]RC (completely identical)

Position: 026-contig\_248\_RC: 16220 ... 16355; Length: 135 bp

Sequence:

```
TTAATTTAGTGTATCTTGGATATCTTGTTTTGTTTGATTAAATATCTTCTGTTTTTTCTTCTTT  
TTTATCTTTTAAATTTTTCTTCAACTTCTTTAGCTTTTTCTGCTGCTTTTTTATTTTGATTTTCA  
TTAGACAT
```

### > **ywbD**

Function: protein coding sequence; S-adenosylmethionine-dependent methyltransferase (core genome, constant)

Best match: ywbD\_CC001\_MW2-USA400\_BA000033.2[1060061:1061233]

Position: 026-contig\_248\_RC: 18226 ... 19399; Length: 1173 bp

Sequence:

```
ATGAAAATAGCAACTCTGAACAAAGGCCAAAGAAACAAAATATTTTAATGGATATCCTTTA  
ATTGAAGAAGAGGATATCTATTCACAAGATCATTTAAAAGAAGGAGATATTTTTCAAATT  
GTGACTGATAAATCACAATATGTTGCAACGGCTTATGTTGGTCGCCAACATAAAGGATTA  
GGTTGGGTTCTAACATACGATAAAGCTCAAGAAATCAACACAGCTTTCTTTGTGAAATTG  
TTAATACTGCATTAGCAGAACGTGATTATTATTTAATATAGATGGAACAAATGCTTTTA  
GATTATTTAATGCTGAAGGTGATGGTGTGGGGGATTAACAATCGACAATTACGATGGTC  
ATTTGTTGATTCAATGGTACTCAAAAGGTATTTATAAATTTAAATATGCCATTCTTGAAGC  
GGTTAGAAAAGTATTTGATTATAAATCTATTTACGAAAAGTAAGATTTAAAGACAGCGA  
ATATAGTGGTGGTTTTGTTGAAGGCGATGCACCTGAGTTTCCAATTGTTATCGAAGAAAA  
CTTCACATTTTATAATGTAGACCTTGAAGATGGTTTGATGACAGGTATCTTTTTAGATCAA  
AAAGAAGTGCGCAAGAAATTAAGGGGTCAATATGCCAAAGAACGCCATGTTTTAACTT  
ATTTAGTTATACAGGTGCTTTTTCTGTAATAGCAGCAAGTGAGGCATCTTCAACAACAAG  
TGTAGATTTGGCTAATCGTTCTCGTAGTTTAACTGAAGAAAATTTGGATTAAATGCTATT  
GATCCTAAATCCCAATATATTTATGTCATGGACACTTTTGATTTCTATAAATATGCTGCAC  
GACATGGACATAGTTATGACACGATCGTGATTGATCCACCTAGCTTTGCACGCAACAAAA  
AACGTACATTTTCAGTGCAAAAAGATTATGACAAATTAATTAATGGCGCCTTAAATATTT  
TATCATCTGAAGGAACATTATTGTTATGTACAAATGCAAGTGTATATCCATTAAGCAAT  
TTAAAAATACTATTA AAAAGACGCTTGAAGAGAGTGGCGTTGATTATGAATTA ACTGAAG  
TTATGGGATTACCAAAAAGATTTTAAAACGCATCCACATTATAAGCCATCTAAATATTTAA  
AAGCTGTTTTTGTAATATTAGACATTAA
```

### > **ptsH**

Function: protein coding sequence; phosphocarrier protein HPr (core genome, constant)

Best match: ptsH\_CC001\_MW2-USA400\_BA000033.2[1061983:1062249]

Position: 026-contig\_248\_RC: 20148 ... 20415; Length: 267 bp

Sequence:

```
ATGGAACAAAATTCATATGTAATCATCGACGAGACTGGTATTCACGCTAGACCAGCAACA  
ATGTTAGTACAAACAGCTTCAAATTCGATTCTGATATTCAATTAGAATATAACGGTAAG  
AAAGTAAATTTAAAATCAATCATGGGTGTTATGAGCCTTGGTGTGGTAAAGATGCTGAA  
ATTACAATTTATGCTGACGGTAGTGATGAATCTGACGCCATTCAAGCAATCAGTGACGTC  
TTATCAAAGAAGGATTGACTAAATAA
```

### > **ptsI**

Function: protein coding sequence; phosphoenolpyruvate-protein phosphotransferase (core genome, constant)

Best match: ptsI\_CC001\_MW2-USA400\_BA000033.2[1062252:1063970]

Position: 026-contig\_248\_RC: 20417 ... 22136; Length: 1719 bp

Sequence:

ATGTCTAAATTAATTAAGGTATTGCCGCATCTGATGGTGTGCGCAATTGCTAAAGCTTATT  
TATTAGTTGAGCCAGACTTAACATTTCGACAAAAATGAAAAAGTCACTGATGTTGAAGGAG  
AAGTTGCAAAGTTCAATAGCGCTATCGAAGCTTCTAAAGTTGAGTTAACTAAAATTAGAA  
ATAATGCAGAGGTTCAACTAGGTGCTGATAAAGCTGCTATCTTTGATGCACATTTATTAGT  
TTTAGATGACCCTGAATTAATTCAACCAATCCAAGATAAGATTAATAAATGAAAACGCTAA  
TGCTGCTACAGCATTAAACGGATGTAACAACACAATTTGTTACAATTTTTGAATCTATGGAT  
AACGAATACATGAAAGAACGTGCGGCTGATATTCGCGACGTTTCTAAACGTGTGTTATCA  
CATATTTTAGGTGTAGAATTACCGAATCCGAGTATGATTGATGAAAGCGTTGTTATTGTA  
GGGAATGACTTAACGCCATCTGATACTGCTCAATTAATAAAGAATTCGTACAAGGTTTT  
GCTACAAACATTGGCGGAAGAACAAGTCACTCTGCAATTATGAGTCGTTCTTTAGAAATT  
CCAGCAATTGTTGGTACAAAATCAATTACTCAAGAAGTTAAACAAGGCGACATGATTATC  
GTAGATGGATTAATGGTGTATGTAATCGTTAATCCAAGTGAAGATGAGTTAATCGCTTAT  
CAAGATAAACGTGAGCGTTATTTTGTGACAAGAAAGAATTACAAAACTACGTGATGCT  
GATACTGTTACAGTTGATGGTGTTCACGCAGAGCTTGCTGCAAATATTGGTACACCTAAT  
GATTTGCCAGGTGTTATTGAAAATGGTGCACAAGGTATCGGCTTATATAGAAGTGGTTT  
TTATATATGGGTCGTGACCAAATGCCTACAGAAGAAGAACAATTTGAAGCTTATAAAGAA  
GTATTAGAAGCAATGGGCGGTAAACGTGTTGTTGTACGTAAGTATAGATATAGGTGGAGAT  
AAAGAATTATCATACTTAACTTGCCTGAAGAAATTAATCCATTCTTAGGTTACCGTGCG  
ATTCGTTTATGCCTTGCGCAACAAGATATTTTCAGACCACAGCTACGTGCATTATTACGTG  
CATCAGTTTATGGTAAGTTAAATATCATGTTCCCAATGGTTGCAACAATTAACGAATTTAG  
AGAAGCTAAAGCTATATTATTAGAAGAAAAAGAAAACCTTAAAAATGAAGGTCATGACA  
TTTCGGATGATATAGAATTAGGAATCATGGTAGAGATACCTGCAACAGCAGCATTAGCTG  
ATGTCTTTGCTAAAGAAGTAGATTTCTTCAGTATCGGTACAAATGATTTAATTCAATACAC  
ATTAGCTGCTGACCGTATGTCAGAGCGTGTATCATATCTATACCAACCATATAACCCTTCA  
ATCTTACGTTTAGTTAAACAAGTTATTGAAGCGTCACATAAAGAAGGTAAATGGACAGGT  
ATGTGTGGTGAAATGGCTGGAGATGAAACAGCTATTCCATTATTGCTTGGTTTAGGTTTA  
GATGAGTTCTCTATGAGTGCAACGTCTATTCTGAAAGCAAGAAGACAAATTAATGGTTTA  
AGTAAAAATGAAATGACTGAACTTGCTAACCGTGCAGTCGACTGTGCAACGCAAGAAGA  
AGTTATTGAATTAGTTAACAACACTACGTAATAATAA

### > **nrdH**

Function: protein coding sequence; glutaredoxin (core genome, constant)

Best match: nrdH\_CC005\_Mu50-VRSA\_BA000017.4[1139211:1139444:r]RC (completely identical)

Position: 026-contig\_248\_RC: 22372 ... 22606; Length: 234 bp

Sequence:

TTAATCTTGGATATTTAATACTTTGTTGATTTTCATCAAGATCAACATGGTACATTGGATTG  
CCATTCAACAAAATAAACGGAGTTGAAAAAGCATCAAAATCTATCATTTTCGTTTCGATAT  
TGTTGATTGTTGATATTTCTCTCTTCAAATCAATTTGATGCTCATTTAGATAATTTTTTAC  
AAATGTACAAGGTGGACAATCATTCTGCGTATAAACGATTATTTCTGACAT

### > **cydA**

Function: protein coding sequence; cytochrome D ubiquinol oxidase subunit 1 (core genome, constant)

Best match: cydA\_CC001\_MSSA476\_BX571857.1[1093424:1094785]

Position: 026-contig\_248\_RC: 22803 ... 24165; Length: 1362 bp

Sequence:

ATGGATACAGTTGAAATCAGTCGGTTTTTGACAGCTATGACTTTAGCAGTTCATATCATT  
TTGCAACGATTGGTGTGGTATGCCTTAATGTTTCGCAATTGCAGAATTTTTAGGTATTTCG  
CAAAAATGATCTTCAATATATAGCTATGGCCAAAAGGTGGGCTAAAGCTTATACAATTAC  
TGTAGCAGTGGGAGTTGTTACAGGTACAATTATAGGACTTCAATTATCATTGATTTGGCCT  
ACTTTTATGGAAATGGGTGGACACGTTATTGCACTTCCATTATTTATGGAAACATTTGCGT  
TCTTCTTTGAAGCTATTTTCTTAAGTATATATTTATATACTTGGGACCGTTTTAAAAATAA  
ATGGACACATTTCTTAATTAGTATACCAGTAATTTTTGGTGGCTCTTCTCAGCATTCTTCA  
TTACTTCAGTGAATTCATTTATGAATACGCCTGCAGGTTTTGAGTTGAAGAATGGAAAGA  
TGGTCAATGTTCAACCTATAGAAGCGATGTTTAACCCATCGTTTATAGTTTCGATCATTTC

CGTAATTACTACAGCCGGTATGACGATGGCATTGTTATTGCATCAATAGCAGCTTTTAA  
TTATTGCGTAATCGTCAACCTAAAGATACTGTCTACCATAAGAAAGCTTTGAAAATGTCT  
ATGATAGTTGGATTCTTTTCAACTTTACTTTCTATGTTGGCAGGGGATTTATCTGCAAAT  
TTTTGCATAAATCCAACCTGAAAAATTAGCAGCTTATGAATGGCATTTCGATACATCTTC  
CCATGCTAAATTATTATTATTTGGTGTGTTAGATGAAAAGACTCAGCAAGTTAAAGGTGC  
GATTGAATTACCTGGACTATTGAGTTTCTTAGCAGATAAATAGTGTCAAACTAAAGTGCA  
AGGGTTAAATGATTTTCCAAAAAGTTTACATCCGCCTATGATTGTCCATTATTTCTTTGAT  
TTAATGGTAACGATGGGAATTTTATGTTTTGTCATTTCAGGTGTTTATGTTTTAACTTTAAT  
GTTTTAAAAGCTTAGAAAAGTTTCTACTCATAAATGGATGCTTTACGGAATATTATTAACA  
GGACCAGCTTCAATGCTAGCTATAGAATTTGGATGGTTCTTAACAGAGATGGGTAGACAG  
CCTTGGATTGTTTCGTGGTTATATGCGCGTGGCAGAAGCAGCAACACAAGCAGGCGGAATA  
ACCTTCGTTACAATTTTATTTGGCATATTGTACATCATTTTAAATGTATACATGTGCATACGT  
ATTAATTCGTATGTTTTAAAAATAAACCGGCGTATGAAGATGTAAATCGTTTAGCCAAGAA  
GCAAGGAGGAGAAATAGAAAAATGA

### > **cydB**

Function: protein coding sequence; cytochrome D ubiquinol oxidase subunit 2 (core genome, constant)

Best match: cydB\_CC001\_MW2-USA400\_BA000033.2[1065996:1067015]

Position: 026-contig\_248\_RC: 24161 ... 25181; Length: 1020 bp

Sequence:

ATGATTTATGCATTTATAGGTATAACAGTGTATGGTTGTTTTATTTTGCATATATCATTAT  
TGCTTCTATAGATTTTGGGGCAGGTTTCTTCGCATTGCATTCAAAGTTAACTGGTGATGAA  
AAGAAAATTAATCACTTAATTTACGTTATTTGAACCCAGTTTGGGAAGTTACGAATGTA  
TTCTTTGTTTTCTTCTTCGTAGGATTTCGTAGGTTTCTTCCAGAGTCAATCAAATATTTAGG  
CACGGTATTGTTAATACCAGGTTCAATAGCACTGATTATGATATCATTGAGAAACAGTTTT  
TATGCATTTGAAAATTATGGTCAAGATACAAAATTAGCATGGATGATCATGTATGGGGTA  
AGTGGATTATTAATTCAGCTTCATTATCTACTGCTTAACTATTACAGAAGGTGGCTATA  
TTAATGTTTCGAAACAATGTTATCGATCTAGATTGGGTGCAGTACTATTAAGCCCATTTGC  
TTGGTCTGTAGTATTCTTGGCAATTATTTAGTTTTATATATTTTCATCAGGATTTTTGACAT  
ATTATGCTAAAAAAGCAAATGACGAACCAGCATATAATTTAACAAGACAATGGCACATA  
TTTTTAGGGCCGCGGATGATTATCATTGTTTATTTCGTATTTCTATCATTACGCATTCAAAA  
TTCTGAACATTTTTATTCAGCTGTTTTGACTATTGGTGGATGTTTGCATATAAGTTTCTTAT  
TCTTGCATTAGCTTCATTGTTAACATTCCTTAAGAAAAACATGGTTTGGCTTTTGTATT  
GTTATTTTACAAATGATGTTTCGCGTTCCTTTGGCTATGGAATTAGTAAATTGCCATACCTTT  
TATATCCGTTTGTAATAATTACAGATGCATATGTTAATCCAGAAATGGGCTGGACATTAG  
TGATTGTCTTTATTTAGGTTTACTTTTATTACTTCCATCGTTAATATTATTATTAAGATTA  
TTTGTTCGACAAAGAATATGTTGAAGGAAAGAAATCATAA

### > **tx\_universal2**

Function: rho indendent terminator

Best match: tx\_universal2\_CC093\_JKD6159-ST93\_CP002114.2[1411399:1411438:r]RC

Position: 027-contig\_249: 0 ... 30; Length: 30 bp

Sequence:

AAAAGCTTGTTACAAGCGCATTTTCGTTCA

### > **rnjA**

Function: protein coding sequence; ribonuclease J1 (core genome, constant)

Best match: rnjA\_CC005\_Mu50-VRSA\_BA000017.4[1143060:1144757:r]RC

Position: 027-contig\_249: 168 ... 1866; Length: 1698 bp

Sequence:

TTATTTATTGTTTGATTCTTTTTGTTTCGTTTACCTTCATAATGACTGGTAAAATCATTGGTT  
TTCTAGCTGTTTTTCAAATAAATAAGGTTGTAATGTTTCAATGATAGAAGATTTAATCTG  
ATGCCATTGAATATCTTTATTTGATTAACTTACTAATAACATCAGTTTTGATTTTGCCTT  
GTGCATCATAAATTAATTGACCTGATTCCTCATATATACAAATCCTCGAGAAATAATGTC

TGGACCAGAAAGTAATTTATTTGTATTAAAATCAATACTAACAACAACGATAACTAAACC  
TTCTTCAGATAAATAGCTTACGGTCTCTTATTACAACATTACCGATATCACCGATAACCACTA  
CCATCAACAAGTACATTACCAGATGGAATGCGACCAGCTTTACGTGCTGAATCGTGTGTT  
AAAGCTAAGACATCTCCAATATCAAAGATGAAGACATTATCTTCTTCAACGCCGCATTCA  
ACACCAGTCTCACCATGTGCTTTTAAACATACGGTATTCACCATGAATAGGTAAGAAATAT  
TTCGGCTTGATTAATCGAAGCATTAAATTGTTGATCACCTTGAGAACCATGCCCTGAAGTAT  
GGATGTTAGAAATCTTGCTATGGATAACATCTGCACCAGCTTTATACAAGGAATTAATAG  
TTCTGTTAATACTTTTTGTATTACCTGGGATAGGTGATGAACTAAATACAACGGTATCTTC  
AGGTATAATTTTAATTTGCTTATGAGTACCATTAGCAATTCTAGATAATGCTGCCATTGGT  
TCACCTTGTGAACCAGTACACAGTATCAATAACTCATGCTTCGGTACGGTATTAATTTTAT  
TAGGTTCAATAAATGTTTCAGGTGGTGTCTTAATATAACCAAGTTCATACCGATTTTAAAT  
ATTGTTTTCCATCGAACGACCGAACGTAACAATTTTACGGTATTTTTGATAGCAGCTTCA  
ACTGCTTGTGAACTCGGTAAATATTAGAAGCGAAGGTAGCAAATATAATACGACCTTTA  
CAATTACGGAAGATCTTATCTACGTTTTGACCAACTTCACGTTTCGCTTAAAGTAAAATCAG  
GCACAAGTGAATTTGTTGAGTCTGAAAGTAAACATAGAACGCCCTTCTTCGCCTAATTGAG  
CCATTTTAGCAATGTTTGCTGGTTTTGCCTACAGGTGTAATAATCAAATTTAAAGTCACCGGT  
ATGAACTACTTTTCTTCAGGTGTATCTACGATGACGCCATAAGTTTCAGGAATACTATGC  
GTAGTTAAGTAGAAAGAAATCGTAAAGTGCTTAGATTTAATCACACTGTCCTCATTGATT  
TCATTTAGTTTAGCAGTACGTAATAAATGATGTTCTTCAAGTTTATTACGGATTAACCTA  
ATGCTAAAGGACCACCATAAATAGGTATATTAAGTTGTTTTAATAGGAAGGGCACACCGC  
CTATATGGTCTTCGTGACCATGTGTTATAAATAGGCCAACAAATTTTATCTTGGTTTTGAAC  
TAGATATGTGTAGTCAGGTATAACATAATCAATCCCTAATAAGTTATCATCAGGGAATTT  
GATACCTGCATCGATAATGACAATTTCTGCTTTATACTCAACTGCATAAGTATTTTTACCG  
ATTTACCTAGACCTCCAAGTGCATATACACCTACTTCATTTGGATGTAATTGTTTCAT

### > def1

Function: protein coding sequence; peptide deformylase (core genome, constant)

Best match: def1\_CC001-ST772\_118\_AJGE0100009.1[193196:193747:r]RC (completely identical)

Position: 027-contig\_249: 2565 ... 3117; Length: 552 bp

Sequence:

TTAAACTTCTACTGCATCTGTATGTGGTTGTAATGGGTGGTCTTTGTCAATGTGATCATAG  
AACATTACACCATTTAAATGATCAATTTTCATGTTGGAAAACAATTGCTGGATATCCTTTTA  
GTCGTAATTGTATATCATTACCTTCGATGTCTTTGGCTTTAATTGTAATTCTATTATGACGG  
TGAAGTAGACCAGCAACATTATCATCGACACTAAGGCAACCTTCACCAGTTGGTAAATAA  
GCTTCTTGAACGCTATGACTTACAATTTTTGGGTTTACAAGCATATAGTCATAAGATTTGC  
CACTGCCATCATCTGGTATTTAAAACAGCAATCATAACGTTTAGAAATATTAATTTGAGGTG  
CAGCCAAACCAACGCCTGAACGTAACCATATCGTTTCGCGATTTCTCCTCATCTTGACTATT  
TACTAAAACTCTCTCATGGCGATTAATGTTTCTTTTTCTTCTTTAGTTAATGGTAATTCTA  
ACTCAGCTGCTTTTTGACGCAAAGTTGGATGACCATCTCTAATGATGTCTTTCATTGTTAA  
CAT

### > pdhA

Function: protein coding sequence; pyruvate dehydrogenase E1 component/alpha subunit (core genome, constant)

Best match: pdhA\_CC001\_MW2-USA400\_BA000033.2[1072269:1073381] (completely identical)

Position: 027-contig\_249: 4278 ... 5391; Length: 1113 bp

Sequence:

ATGGCTCCTAAGTTACAAGCCCAATTCGATGCAGTAAAAGTTTTAAATGATACTCAATCG  
AAATTTGAAATGGTTCAAATTTTGGATGAGAATGGTAACGTCGTAATGAAGACTTAGTA  
CCTGATCTTACGGATGAACAATTAGTGGAAATTAATGGAAAGAATGGTATGGACTCGTATC  
CTTGATCAACGTTCTATCTCATTAAACAGACAAGGACGTTTAGGTTTCTATGCACCAACTG  
CTGGTCAAGAAGCATCACAATTAGCGTCACAATACGCTTTAGAAAAAGAAGATTACATTT  
TACCGGGATACAGAGATGTTCCCTCAAATTTTGGCATGGTTTACCATTAAGTGAAGCTTT  
CTTATTCTCAAGAGGTCACTTCAAAGGAAATCAATTCCTGAAGGCGTTAATGCATTAAG  
CCCACAAATTATTATCGGTGCACAATACATTCAAGCTGCTGGTGTTCATTTGCACTTAAA

AAACGTGGTAAAAATGCAGTTGCAATCACTTACACTGGTGACGGTGGTTCTTCACAAGGT  
GATTTCTACGAAGGTATTAACCTTGCAGCAGCTTATAAAGCACCTGCAATTTTCGTTATTC  
AAAACAATAACTATGCAATTTCAACACCAAGAAGCAAGCAAACCTGCTGCTGAAACATTA  
GCTCAAAAAGCAATTGCTGTAGGTATTCCTGGTATCCAAGTTGATGGTATGGATGCGTTA  
GCTGTATATCAAGCAACTAAAGAAGCACGTGACCGCGCAGTTGCAGGTGAAGGTCCAAC  
ATTAATTGAACTATGACATATCGTTATGGTCCTCATAACAATGGCTGGTGACGATCCAAC  
TCGTTACAGAACTTCAGACGAAGATGCTGAATGGGAGAAAAAAGACCCATTAGTACGTTT  
CCGTAAATTCCTTGAAAACAAAGGTTTATGGAATGAAGACAAAGAAAATGAAGTTATTG  
AACGTGCAAAAGCTGATATTAAGCAGCAATTAAGAGGCTGATAACACTGAAAAACAA  
ACTGTTACTTCTCTAATGGAAATTATGTATGAAGATATGCCTCAAACTTAGCAGAACAA  
TATGAAATTTACAAAGAGAAGGAGTCGAAGTAA

### > **pdhB**

Function: protein coding sequence; pyruvate dehydrogenase (core genome, constant)

Best match: pdhB\_AF235026.1[32:1009]

Position: 027-contig\_249: 5394 ... 6372; Length: 978 bp

Sequence:

ATGGCACAAATGACAATGGTTCAAGCGATTAATGATGCGCTTAAACTGAACTTAAAAAT  
GACCAAGATGTTTTAATTTTTGGTGAAGACGTTGGTGTAAACGGCGGTGTTTTCCGTGTTA  
CTGAAGGACTACAAAAAGAATTTGGTGAAGATAGAGTATTCGATACACCTTTAGCTGAAT  
CAGGTATTGGTGGTTAGCGATGGGTCTGCAGTTGAAGGATTCCGTCCGGTTATGGAAG  
TACAATTCCTAGGTTTCGTATTTCGAAGTATTTGATGCGATTGCTGGACAAATTGCACGTAC  
TCGTTCCGTTTCAGGCGGTACTAAAACCTGCACCTGTAACAATTCGTAGCCATTTGGTGGT  
GGCGTACACACACCTGAATTGCACGCAGATAACTTAGAAGGTATTTAGCTCAATCTCCA  
GGTCTAAAGGTTGTTATTCCTTCAGGCCATACGATGCGAAAGGTTTATTAATTTCTTCTA  
TTAGAAGTAATGACCCAGTCGTATACTTGGAGCATATGAAATTGTATCGTTCATTCCGTG  
AAGAAGTGCCTGAAGAAGAATATACAATTGACATTGGTAAGGCTAATGTGAAAAAAGAA  
GGTAATGACATTTCAATCATCACATACGGTGCAATGGTTCAAGAATCAATGAAAGCTGCA  
GAAGAAGTTGAAAAAGATGGTTATTCTGTTGAAGTAATTGACTTACGTACTGTCCAACCA  
ATCGATGTTGACACAATTGTAGCTTCAGTTGAAAAACTGGTCGTGCAGTAGTAGTTCAA  
GAAGCACAAACGTCAAGCTGGTGTGGTGCAGCAGTTGTAGCTGAATTAAGTGAACGTGCA  
ATCCTTTCATTAGAAGCACCTATTGGAAGAGTTGCAGCAGCAGATACAATTTATCCATTC  
ACTCAAGCTGAAAATGTTTGGTTACCAAACAAAAATGACATCATCGAAAAAGCAAAAGA  
AACTTTAGAATTTTAA

### > **pdhC**

Function: protein coding sequence; dihydrolipoyllysine-residue acetyltransferase component of pyruvate dehydrogenase complex (core genome, constant)

Best match: pdhC\_CC001\_MW2-USA400\_BA000033.2[1074453:1075745]

Position: 027-contig\_249: 6462 ... 7755; Length: 1293 bp

Sequence:

GTGGCATTGAAATTTAGATTACCCGATATCGGGGAAGGTATCCACGAAGGTGAAATTGTA  
AAATGGTTTTGTTAAAGCTGGAGATACTATTGAAGAAGACGATGTTTTAGCTGAGGTACAA  
AACGATAAATCAGTAGTAGAAATCCCATCACCAGTATCTGGTACTGTAGAAGAAGTTATG  
GTAGAAGAAGGTACAGTAGCTGTAGTTGGTGACGTTATTGTTAAAATCGATGCACCTGAT  
GCAGAAGATATGCAATTTAAAGGTCATGATGATGATTATCATCTAAAGAAGAACCCTGCG  
AAAGAGGAAGCGCCAGCAGAGCAAGCACCCGTAGCTACTCAAACCTGAAGAAGTAGATGA  
AAACAGAAGTGTAAAGCAATGCCTTCAGTACGTAAATACGCACGTGAAAAAGGTGTTA  
ACATTAAGCAGTTTCTGGATCTGGTAAAAATGGTCGTATTACAAAAGAAGATGTAGATG  
CATACTTAAATGGTGGTGCACCAACAGCTTCAAATGAATCAGTTGCTTCAGCTACAAGTG  
AAGAAGTTGCTGAAACTCCTGCAGCACCTGCAGCAGTAACATTAGAAGGCGACTTCCCAG  
AAACAAGTGAAAAAATCCCTGCTATGCGTAGAGCAATTGCGAAAGCAATGGTTAACTCTA  
AGCATACTGCACCTCATGTAACATTAATGGATGAAATTGATGTTCAAGCATTATGGGATC  
ACCGTAAGAAATTTAAAGAAATCGCAGCTGAACAAGGTAAGTTAACATTCTTACCTT  
ATGTTGTTAAAGCACTTGTCTGCATTGAAAAATACCCAGCACTTAACACTTCATTCAA

TGAAGAAGCTGGTGAATCGTTCATAAACATTACTGGAATATCGGTATTGCAGCAGACAC  
TGATAGAGGATTATTAGTACCTGTTGTTAAACATGCTGATCGTAAGTCTATTTTCCAAATT  
TCAGATGAAATTAATGAATTAGCTGTAAAGCACGTGATGGTAAATTAACAGCCGATGAA  
ATGAAAGGTGCTACATGCACAATCAGTAATATCGGTTGAGCTGGTGGACAATGGTTCCT  
CCAGTTATCAATCACCCAGAAGTAGCAATCTTAGGAATTGGCCGATTGCTCAAAAACCT  
ATCGTTAAAGATGGAGAAATTGTTGCAGCACCAGTATTAGCATTATCATTAAGCTTTGAC  
CACAGACAAATTGATGGTGCAACTGGCCAAAATGCAATGAATCACATTAACGTTTATTA  
ATAATCCAGAATTATTATTAATGGAGGGGTAA

### > **pdhD**

Function: protein coding sequence; dihydrolipoyl dehydrogenase (core genome, constant)

Best match: pdhD\_CC001\_MW2-USA400\_BA000033.2[1075749:1077155] (completely identical)

Position: 027-contig\_249: 7758 ... 9165; Length: 1407 bp

Sequence:

ATGGTAGTTGGAGATTTCCCAATTGAAACAGATACTATAGTAATCGGAGCAGGTCCTGGT  
GGATACGTTGCAGCAATTCGTGCAGCTCAATTAGGACAAAAAGTAACAATCGTTGAGAA  
AGGTAATCTTGGTGGTGTGTTGCTTAAACGTAGGATGTATTCCTTCAAAGCATTACTACAT  
GCTTCTCACCGTTTTGTTGAAGCACAACTTCTGAAAACCTTAGGTGTTATTGCTGAAAGTG  
TTTCTTTAAACTTCAAAAAGTTCAAGAATTCAAATCATCAGTTGTTAATAAAATTAAGTGG  
TGGTGTGAAAGGCTTACTTAAAGGTAACAAAGTTAACATCGTTAAAGGTGAAGCATATTT  
CGTAGATAACAATAGCTTACGTGTTATGGACGAAAAGAGCGCACAAACATAACAACCTTTA  
AAAATGCAATCATTGCAACAGGTTCAAGACCAATTGAAATTCCTAATTTCAAATTCGGTA  
AACGTGTTATCGACTCAACAGGTGCTTTAAACTTACAAGAAGTACCAGGTAATAGTTG  
TAGTTGGTGGAGGATACATTGGATCAGAATTAGGTACAGCATTGCTAACTTTGGTTCAG  
AAGTAACCATCCTTGAAGGTGCTAAAGATATCTTAGGTGGCTTCGAAAAACAAATGACAC  
AACCTGTTAAAAAAGGTATGAAAGAAAAAGGTGTTGAAATCGTTACTGAAGCTATGGCT  
AAATCAGCTGAAGAAACAGATAACGGAGTTAAAGTTACTTATGAAGCTAAAGGCGAAGA  
GAAAACAATCGAAGCTGATTATGTATTAGTAAGTGTAGGTGCTCGTCCAAACACAGACGA  
ATTAGGCCTAGAAGAATTAGGTGTTAAATTCGCTGACCGTGGATTATTAGAAGTTGATAA  
ACAAAGCCGTACGTCTATCAGCAATATCTATGCAATTGGTGATATCGTTCCAGGTTTACC  
ACTTGCTCACAAGCTAGCTATGAAGCTAAAGTTGCTGCTGAAGCAATTGATGGTCAAGC  
TGCTGAAGTTGATTACATTGGTATGCCAGCAGTATGCTTTACTGAACCAGAATTAGCTAC  
AGTTGGTTATTCAGAAGCGCAAGCTAAAGAAGAAGGTTTAGCAATTAAGCTTCTAAATT  
CCCATATGCAGCAAATGGTCGTGCATTATCATTAGATGATACTAACGGATTTGTTAAACTT  
ATTACACTTAAAGAAGATGATACTTTAATCGGTGCTCAAGTAGTTGGTACTGGTGCATCA  
GATATTATCTCTGAATTAGGTTTAGCAATTGAAGCTGGTATGAATGCTGAAGATATCGCA  
TTAACAATCCATGCACATCCAACATTAGGTGAGATGACTATGGAAGCAGCAGAAAAAGC  
TATCGGATACCCAATCCATACAATGTAA

### > **potA**

Function: protein coding sequence; spermidine/putrescine import ATP-binding protein (core genome, constant)

Best match: potA\_CC001\_MW2-USA400\_BA000033.2[1078294:1079388]

Position: 027-contig\_249: 10303 ... 11398; Length: 1095 bp

Sequence:

TTGGAACCGTTATTATCATTAAAATCAGTTAGTAAAAGCTACGATGATCTTAATATCTTAG  
ATGACATAGATATTGATATTGAATCAGGATACTTTTATACATTATTAGGTCCTTCAGGTTG  
TGGTAAAACAACAATTTTAAAATTAATTGCAGGGTTTGAATATCCTGACAGTGGTGAAGT  
GATTTATCAAAAACAAACCAATTGGTAATTTACCACCAAATAAACGTAAGTGAATACAGT  
CTTTCAAGATTATGCATTATTTCCACACTTAAACGTCTATGATAATATCGCTTTTGGTTTG  
AAATTAAAAAAATTATCAAAAACCGAAATTGATCAAAAAGTAACTGAGGCATTAATAATT  
AGTAAAACCTTTCAGGTTATGAAAAAAGAAATATTAATGAAATGAGTGGCGGACAAAAGC  
AACGTGTTGCAATTGCACGTGCTATCGTAAATGAACCAGAAATATTATTGTTAGATGAAT  
CTTTATCCGCATTAGATTTGAAATTGCGTACTGAAATGCAATATGAATTACGAGAATTGC  
AATCTAGATTAGGTATTACATTTATTTGTAACACATGATCAAGAAGAAGCGTTAGCAT

TAAGTGACTTTCTTTTTGTATTAAAAGATGGGAAAATTCAACAATTTGGCACACCAACAG  
ATATATATGACGAACCAGTGAATCGATTTGTAGCTGATTTTATTGGAGAATCTAATATTGT  
TGAAGGGCGCATGGTTAGAGATTATGTCGTGAATATTTATGGGCAAGATTTCGAATGTGT  
CGATATGGGTATTCCTGAAAATAAAAAAGTAGAAGTCGTTATTCGACCAGAAGATATATC  
ATTAATCAAAGCTGAAGAAGGATTATTTAAAGCAACTGTTGATTCTATGTTATTTAGAGG  
GGTCCACTATGAAATATGTTGTATAGACAATAAAGGTTATGAATGGGTAATACAAACGAC  
TAAAAAAGCTGAAGAAGGCAGTGAAGTTGGTCTTTATTTTGATCCTGAAGCCATTCATAT  
TATGGTTCCTGGAGAAACAGAAGAAGATTTGATAAACGTATTGAAAGCTATGAGGAAG  
TAGACAATGCGTAA

### > **potB**

Function: protein coding sequence; spermidine/putrescine ABC transporter (core genome, constant)

Best match: potB\_CC001\_MW2-USA400\_BA000033.2[1079381:1080178]

Position: 027-contig\_249: 11390 ... 12188; Length: 798 bp

Sequence:

ATGCGTAATACTAATAAATTTCTCTTAATCCCGTATTTACTATGGATGGTTATATTTATTAT  
TGTACCAGTTGTATTACTCATTTATTTTTCATTTTAGATATCAATGGACATTTTAGTTTCA  
CGAATTATCAACAAATTTTACTACAAAATATTTGAAAATGTTTGCATATTCAATTTTATA  
TGCCGCTTTAATAACAATTATTACCTTGACTATCAGTTATCCAGCTGCCTATTATATTACT  
CGTTCGAAATTTCAAATATCTTATTAATGATAATGATTATTCCAACATGGATAAATTTAT  
TGTTAAAGACATATGCTTTTATAGGTTTATTAAGTCATGATGGCGTGATTAATCAATTTTT  
CCACTTATTTAATTTACCATCATTCAATTTGTTATTTACAACCTGGTGCCTTTTTAGTAGTGG  
CAAGTTACATTTATATAACCATTTATGATTTTACCTATATTTAATAGCATGAAAGCAATTCC  
TAATAATTTATTGCAGGCCTCAAGTGATTTAGGTGCTAGTCCTTTCTATACTTTTAGAAAA  
GTAATCATGCCGTTAACAAAAGAAGGTGTTATGACTGGAATTCAAGTAACCTTTATTCCA  
TCACTTTCAATTATTTATGATTACAAGATTAATTGCAGGTAATAAAGTCATAAATATAGGTA  
CGGCAATAGAGGAACAATTTTAAACAATTCAAATTTATGGTATGGGATCAACTATAGCTA  
TATTCTTAATTGTATTTATGGCATTCAATTTAATCATTACAAAATCATCTAATGGGAGAGG  
GTGA

### > **potC**

Function: protein coding sequence; spermidine/putrescine transport system permease (core genome, constant)

Best match: potC\_CC005\_Mu50-VRSA\_BA000017.4[1155085:1155894] (completely identical)

Position: 027-contig\_249: 12193 ... 13003; Length: 810 bp

Sequence:

ATGAAATGGTATGGAAAGCTGTATATCGGGATACTTTTAGCGATTTTATACATCCCAATA  
TTCTTTTTAATGTTCTATTCAATTCGGCTGGTAATATGATTCACCTTTGAACATTTTAC  
ATTAGAGCATTATCAATCATTATTTCAAATGATCATTAAATGTCGGTCATTTTAAATACG  
ATAGCTGTAGCACTTTTAGCAGCCTCAATTTCTACAGTTATTGGTACATTTGGTGCCATTG  
CTATTTATTATTTAAGAAATAAAAAGTTTAAAGTAACTTTACTAACATTGAATAATGTCTT  
GATGGTATCATCCGACGTTGTCATAGGTGCATCATTCTTAATTATGTTTACAACGATTGGC  
CATTTTACTGGTCTTGGTTTAGGATTTTGGACAGTTCTAATATCTCATATTGCATTTTGCAT  
ACCTATAGTTGTGATTATCGTCTTACCACAACCTGTATGAAATGAATAATAATATGTTAAAT  
GCTGCAAGAGATTTAGGAGCGACTGAACCACAATTATTAAGCAACATTATTATTCCTAAT  
ATTTTACCTTCTATTATAGGAGGTTTCTTTATGGCTTTAACTTATTCACTAGACGATTTTAC  
AGTAAGTTTCTTCGTTACTGGTAATGGCTTTAGTGTGTTATCAGTTGAAGTTTATGCTATG  
GCGAGAAAAGGAATTAGTATGGAAATTAATGCGATTTCAACATTATTGTTTGTCTGTTATT  
GTATTAGGAATACTAGGATATTATTTGATTCAATACGTGATAAATAAGAAAAAACTAATC  
AAGCGAGGTGTAAAATAA

### > **potD**

Function: protein coding sequence; ABC transporter extracellular binding protein (core genome, constant)

Best match: potD\_CC001\_MW2-USA400\_BA000033.2[1080993:1082066] (completely identical)

Position: 027-contig\_249: 13002 ... 14076; Length: 1074 bp

Sequence:

```
ATGAAACGTTTTTTACAACCTCATTATAGGTGCATTAGTTGTGGGTATGCTTTGTCTTACTTT
AAGTCATTGGTTTAAATCTAAAGAACAAGTGCATACAAATCAAAAAATTTACGTATACAA
TTGGGGCGAATATATTGATCCAGAGTTAATTAAGAAATTTGAAAAAGAACTGGCATTCA
AGTCGTTTATGAAACTTTTCGATTCAAATGAAGCGATGGAAGCCAAAATTCGCAATGGCGG
TACACATTATGATGTTGCTTTTCCTAGTGAATATACAGTTCAAAAATTGAAAAGAGATCA
TTTATTGTTACCAATAGATCATAATAAGGTACCTAATATTAATAAATTTAGATTTCAGATTAT
ATGAATATGTCATTTGATAGAGGCAATAAATATTCTTTACCTTATTTCTTTGGAAGTGTAG
GTATTTTATATAATAAAGAAAAGTATCCAAATGAATCATTGATAGTTGGAAGTCATTGT
ATAATCCTAAATTTAAAAACCAAATTTTACTAGTTGACGGTGCTAGAGAGATTATAGGCA
TGAGTTTGAATAAACTTTGGGTATAATCTTAATGACCGTAATTCGCACCATTTAAAAGAAG
CAGAGCGAGATTTAACCAAAGTAGCACCACAAGTAAGAGGGTGTTCGTAGGTGATGAAATT
ACCATGATGCTTCAACAAAATGAAGGTAACATAGCGGTTGTTTGGAGTGGTGTTCAGCA
CCTCTAGTGCAAGAAGGGGATAAATAAATTATGTTATTCCTAAAGAAGGATCGAATTTA
TGGTTCGACAATATGGTAATTCAAAAACGGCACAAAATAAAGAGGGTGCATATAAATTT
ATGAATTTTTTATTAGATGCTAAAAATAACAAGCAAAATACAGAATTCGTAGGCTATGCA
ACGCCAAACAAGGCTGCTCGACAATTGTTGCCTAAAGAGATTAAAGACGACCATCGTTTT
TATCCGACTAAGAAAGAGCAAGAACGCCTTGAAGTTTATAAAGATTTAGGACCTGAAGTT
TTAAGTGAATACAATGAAAACCTTTTTGAATTTCAAAAATGTCATTAATAAATAA
```

### > **mntH**

Function: protein coding sequence; manganese transport protein (core genome, constant)

Best match: mntH\_CC001-ST772\_118\_AJGE01000009.1[206581:207933:r]RC (completely identical)

Position: 027-contig\_249: 15950 ... 17303; Length: 1353 bp

Sequence:

```
TTAACTTTGTAGTTCTTGGAAATGTTTGAACGATTAATAGACATTTAAAATACTTAGAATA
ATAATAAGTGTCCATGAAATGATATTAACCCATGTTTTATTATAGAAAGGTCCCATCAAG
TCTTTATTACTAGTAGCTAATTGTAATGGTATTAACAGAATGGCAGAGCAATACTTAAA
AATACTTGAGAGAATACAAGTAGTTGCTCAATTTTAGCTGCATTACCTTTAAAATGATT
AAGCATACGATAACAGGAATGACAGCAAGGGAACGTGTAATTAACGTCTTAACCAATT
TGGTATGTGTAATCTTAAAATCCTTCCATTACAATTTGTCCTGCTAAAGTACCAGTAATC
GTTGAATTTTGACCTGACGCTAATAATGCAACTGCAAATAATGTACTCATGATTGCACCC
ATTGTTGCACCTAGTACAGGTTTCAGTTTTTAAGGCGTGATATAAATCATAGAAACCACCT
AAATCGTCAGCATTTGAGTTGAAAAATAGTGATGCTCCTAACACTAATAATAAGCAATTG
ACTACAAATGCGATTGATAACTGAATGTTGCAATCTATCGTAGCAAATTTAATCGCTTGC
GCCTTTTCTTCATTGTTATGTCTTGAGTATGTTCTAGATTGTACAATTGATGAATGTAAGT
ACAAATTATGAGGCATAATTGTAGCGCCAATAATACCTAATGCAATATAGAGAATGCCGT
TATTTGTAATGATTTCACTATGTGGTATAAATCCATTTAACACAGCATTCAACTGTGGTGA
TGAAATATAGACTTCAAATATAAAGATGAATAACACTGTGAAAATTAATGTACCAACAAT
AGCTTCAATTTTTCTAAAACCATATTTTATTATAAATAGTAGTAAAAATACATCAAGTACA
GTTATTAGTGCACCGACGATTAAAGGTATGTTAAATAGGAGATTAAGAGCAATAGCACTA
CCAATAACCTCAGCAATATCTGTAGCGATAATTGCTAGTTCTGCAATGATCCAAAAGATT
ATAGCAATAGGTCTTGATAAATAATGTCGTGTCATTTGAGCTAAGTCCATACCTGTTGCTA
TTCTAATCTCACTGTCATGCTTTGAAGTAACATTGCTGATAAACTTGAATAAAGAATTAC
GAATAGCAAAGTATAGCCATATTGGGCGCCACCTTGCATTGATGTTATCCAGTTTCCGGG
ATCCATGTAACCAACAGCGACTAATAACCCAGGTCCAAGAAATGATAAAAATTTCTGTTT
ATTTGAACTGCGATGATCGAATTTAATTGTATTGTTTATTTCTGCTAAACTTAATTGTTTCA
TTGTTGAATGTCGTTTATTATTCAT
```

### > **typA**

Function: protein coding sequence; GTP-binding protein (core genome, constant)

Best match: typA\_CC001-ST772\_118\_AJGE01000009.1[210163:212010] (completely identical)

Position: 027-contig\_249: 19532 ... 21380; Length: 1848 bp



Sequence:

```
ATGACTAATAAAAGAGAAGATGTCCGCAATATAGCAATTATTGCTCACGTTGACCATGGT
AAAACAACCTTTAGTAGATGAGTTGTTAAAACAATCTGGTATATTCAGAGAAAATGAACAT
GTCGATGAACGTGCAATGGACTCTAACGATATCGAAAGAGAGCGTGGAATTACGATTCTA
GCCAAAATACGGCTGTTGATTATAAAGGTACACGTATTAATATTTTGGATACACCAGGA
CATGCAGACTTTGGTGGAGAAGTAGAACGTATTATGAAAATGGTTGATGGGGTTGTCTTA
GTAGTAGATGCGTATGAAGGTACAATGCCTCAAACACGTTTTTGTACTTAAAAAAGCGCTA
GAACAAAACCTGAAACCTGTTGTTGTTGTTAATAAAAATTGATAAACCATCAGCACGTCCA
GAGGGTGGTGTAGATGAAGTTTTAGATTTATTTATTGAATTAGAAGCAAACGATGAACAA
TTAGAATTCCTGTTGTTTATGCTTCAGCAGTAAATGGAACAGCTAGCTTAGATCCTGAAA
ACAAGATGATAATTTACAATCATTATATGAAACGATTATTGATTATGTACCAGCTCCAA
TTGATAACAGTGATGAGCCATTACAATTCCAAGTAGCATTGTTGGACTACAATGATTATG
TTGGACGTATTGGTATTGGTCGTGTATTACAGAGGTAATAATGCGTGTCCGAGATAATGTAT
CACTAATTAATTAGACGGTACAGTGAAAACTTCCGTGTAATAAAATCTTTGGTTACT
TTGGATTAAAACGTTTAGAAAATTGAAGAAGCACAAAGCTGGAGATTTAATTGCTGTTTCAG
GTATGGAAGACATTAATGTTGGTGAACCTGTAACACCACATGACCATCAAGAAGCATTGC
CAGTTCTACGTATTGATGAGCCTACTCTTGAAATGACATTTAAAGTTAACAATTCTCCATT
TGCTGGCCCGTGAAGGTGACTTTGTAACAGCACGTCAAATTCAGAACGTTTAAATCAACA
ATTAGAAACAGATGTATCTTTGAAAGTTTCTAACACAGATTCTCCAGATACATGGGTAGT
TGCTGGTTCGCGGTGAATTGCATTTATCAATCCTTATTGAAAATATGCGTTCGTGAAGGTTAT
GAATTACAAGTTTCAAACCACAAGTAATTATTAAGAAAATAGATGGTGTAAATGTGTGAA
CCATTTGAACGTGTGCAATGTGAAGTGCCACAAGAAAATGCAGGTGCTGTTATTGAATCA
TTAGGTGCACGTAAAGGTGAAATGGTTGATATGACTACAACCTGATAATGGACTTACACGT
TTAATCTTTAATGTACCGGCTCGTGGTATGATTGGTTATACGACTGAATTTATGTCAATGA
CAAGAGGTTACGGTATTATTAACCATACATTTGAAGAATTTAGACCACGTATTAAGCAC
AAATTGGCGGTTCGTGTAATGGTGCATTAATTTCAATGGATCAAGGTTCTGCAAGTACTT
ATGCCATTTTGGGACTTGAAGATAGAGGTGTAACCTTCATGGAACCTGGTACTGAAGTTT
ATGAAGGTATGATTGTTGGTGAACATAATCGTGAAAATGATTTAACTGTTAACATCACTA
AAACAAAACATCAAACCTAACGTACGTTCTGCAACGAAAGACCAAACACAACAATGAAT
AGACCGCGTATTCTAACATTGGAAGAAGCGTTACAATTCATTAATGATGATGAACTTGT
GAGGTTACACCAGAAAGTATACGTTTAAAGAAAGAAAATTTTAAACAAAATGTTTCGTGA
AAAAGAAGCAAAGCGTATCAAACAAATGATGCAAGAAAACGAATAA
```

## > ftsW2

Function: protein coding sequence; putative cell division protein (core genome, variable)

Best match: ftsW2\_CC001-ST772\_118\_AJGE01000009.1[213531:214757] (completely identical)

Position: 027-contig\_249: 22900 ... 24127; Length: 1227 bp

Sequence:

```
ATGAAGAATTTTAGAAGTATTTTACGGTATATTGGTAAAACCTCAAAGTTTATTGATTATC
CGTTATTAGTTACATATATTGTATTGAGTTTAATTGGATTAGTTATGGTATATAGTGCAAG
TATGGTTCCAGCAACTAAAGGCACATTGACTGGTGGTATCGATGTTCCAGGAACGTATTT
TTACAACCGACAATTAGCATATGTCATAATGAGTTTTATAATTGTATTTTTTATTGCATTTT
TAATGAATGTTAAATTACTGAGTAATATTAAGGTGCAAAAAGGTATGATTATAACTATCG
TCTCACTATTATTACTGACGTTAGTAATAGGTAAAGATATTAATGGTTCTAAAAGTTGGAT
AACTTAGGATTTATGAACTTACAGGCATCTGAGTTATTAATAAATTGCAATCATATTATAT
ATCCCATTTATGATCAGTAAAAAATGCCTAGAGTATTAAGTAAACAAAATTAATTTTA
AGTCCTATTGTATTAGCATTAGGTTGTACGTTTTTATGTTTTCTACAAAAGACGTAGGGC
AAACATTACTAATATTAATTTTATGTTGCGATCATTTTTTATTACAGGAATTGGGGTAAA
CAAAGTCCTAAGATTTGGTATACCAGCAGTGCTAGGATTCTTAGTAGTATTTGTCATTGCA
TTAATGGCTGGTTGGTTACCAAGTTATTTAACAGCCAGATTTAGTACGCTAACAGATCCAT
TCCAATTCGAATCAGGAACCTGGATACCATATTTCCAATTCATTGCTTGCAGATAGGTAACG
GTGGCGTATTTGGAAAAGGATTAGGAAATAGTGCAATGAAATTGGGCTATTTACCAGAAC
CACATACAGATTTTATTTTTGCAATTATTTGCGAAGAATTAGGTTTAAATCGGAGGATTGCT
AGTTATTACTTTAGAGTTCTTTATTGTATATCGTGCCTTCCAGTTTGCAAATAAAAACATCA
TCATATTTTTATAAACTTGTGTGTGTTGGGATTGCCACATACTTTGGAAGTCAAACGTTTG
TAAACATTGGCGGTATTTCCGCAACAATTCATTAATGTTGTTGCCATTGCCATTTATCAG
```

CTTTGGTGGATCATCAATGATTAGTTTAAGTATTGCTATGGGATTACTTCTGATTGTAGGT  
AAACAAATCAAAGTAGACCAGCAACGAAAGAAACAACAACAAAAAGTTGATATAAGAA  
GACAATTTAATTA

> **tx\_A5IS00**

Function: rho independent terminator

Best match: tx\_A5IS00\_CC001\_MW2-USA400\_BA000033.2[1092211:1092273] (completely identical)

Position: 027-contig\_249: 24219 ... 24282; Length: 63 bp

Sequence:

GATGAGTTCAATAACGGAAGTTAGGCAACCAAACAACGCTTAACTTCCTTTTTGTTTTGAT  
AT

> **pycA**

Function: protein coding sequence; pyruvate carboxylase (core genome, constant)

Best match: pycA\_CC001\_MW2-USA400\_BA000033.2[1092672:1096124]

Position: 027-contig\_249: 24680 ... 28133; Length: 3453 bp

Sequence:

TTGAAACAAATAAAAAAGTTACTTGTTGCTAACCGTGGAGAAATTGCAATTCGTATATTC  
AGAGCGGCGGCAGAATTAGACATCAGCACAGTTGCAATTTATTCGAATGAAGACAAAAG  
TTCATTACATAGATATAAAGCAGATGAATCCTATTTAGTTGGAAGTGATTTAGGTCCTGCT  
GAAAGTTATTTAAATATTGAGCGTATCATTGATGTAGCAAAACAAGCGAATGTGGATGCG  
ATTCATCCTGGCTATGGATTTTTAAGTGAAAATGAACAATTTGCGCGTCGTTGTGCAGAA  
GAAGGAATTAATTTATTGGTCCTCATTTAGAACATTTAGATATGTTTGGAGATAAAGTT  
AAAGCTCGTACAACGGCTATCAAGGCAGATTTACCAGTTATTCCTGGTACAGACGGTCCA  
ATTAATCATATGAATTAGCAAAAGAATTTGCAGAAGAAGCTGGTTTCCCGCTAATGATT  
AAAGCCACAAGTGGTGGCGGCGGTAAAGGTATGAGAATCGTTCGTGAAGAAAGTGAATT  
AGAAGATGCTTTCCATAGAGCAAAATCAGAAGCTGAAAAATCATTGGTAATAGTGAAG  
TTTACATAGAAAGATACATTGATAATCCAAAGCATATTGAAGTACAAGTTATAGGTGACG  
AACATGGAAATATCGTACACTTATTTGAACGTGATTGTTTCAGTACAACGTCGTCATCAAA  
AAGTTGTAGAAGTTGCACCATCAGTTGGATTATCACCAACATTACGTCAACGATTTTGTG  
ATGCTGCAATTC AATTGATGGAAAATATTAATATGTCAATGCAGGTAAGTTGAATTTCT  
AGTATCTGGTGACGAATTCCTTTATAGAAGTTAACCCCTCGTGTACAAGTTGAGCATAACA  
ATTACAGAGATGGTAACAGGAATTGATATTGTTAAGACACAAATTTAGTTGCAGCAGGT  
GCCGATTTATTTGGTGAAGAAATTAATATGCCGCAACAAAAGATATTACAACATTGGGC  
TATGCCATCCAATGTCGTATTACAACAGAAGATCCGTTAAATGATTTTCATGCCGGATACT  
GGAACAATCATTGCTTATCGTTCAAGCGGTGGCTTTGGTGTACGTCTCGATGCTGGAGAT  
GGTTTCCAAGGTGCTGAGATATCACCTTATTATGATTCATTACTCGTAAAATTATCTACAC  
ACGCGATATCATTAAACAAGCAGAAGAAAAAATGGTACGTTTCATTACGAGAAATGCGT  
ATTCGTGGTGTAAAATAATTTCCATTCTTAATTAATGTAATGAAGAATAAAAAAGTTC  
ACAAGTGGTGATTACACAATAAATTTATTGAAGAAACACCAGAACTTTTCGACATTCAG  
CCGTCTCTAGATAGAGGTAATAAACATTAGAATATATAGGTAATGTAACAATTAATGGT  
TTCCCAAATGTTGAGAAACGTCCGAAACCAGACTATGAATTAGCATCAATTCCAACTGTA  
TCTTCAAGTAAAATCGCTTCATTTAGTGGTACGAAACAATTGCTTGATGAAGTAGGTCCA  
AAAGGTGTAGCTGAATGGGTTAAAAGCAGGATGATGTCTTACTAACAGATACAACCTTT  
AGAGATGCACACCAATCATTATTAGCTACACGAGTTAGAATAAGGATATGATTAATATC  
GCATCCAAAACAGCGGACGTATTTAAAGATGGTTTCTCACTTGAAATGTGGGGCGGTGCT  
ACATTTGATGTGGCATATAATTTCTTGAAGGAAAACCCATGGGAACGACTTGAACGTCTA  
CGTAAAGCTATTCCAAATGTATTATTCCAAATGTTGTTACGTGCTTCAAACGCAGTTGGTT  
ATAAAAATCTATCCTGATAATGTTATTCATAAATTCGTACAAGAAAGTGCTAAAGCAGGCA  
TAGATGTCTTTAGAATTTTCGATTCTTTAAACTGGGTAGATCAAATGAAAGTTGCCAATGA  
AGCAGTACAAGAAGCGGGCAAAATCTCTGAAGGTAAGTATTTGTTATACAGGTGACATTTT  
AAATCCTGAGCGATCAAACATTTATACTTTAGAGTATTATGTCAAACACTAGCTAAAGAGTT  
AGAACGTGAAGGTTTCCATATTTTAGCGATTAAAGATATGGCAGGCTTATTAACCTAA  
AGCCGCTTACGAATTGATTGGTGAGTTAAAATCAGCTGTAGATTTACCAATTCATCTTAC

ACTCATGATACAAGTGGTAATGGTTTATTAACATACAAACAAGCAATAGATGCTGGTGTC  
GATATCATTGATACTGCTGTTGCTTCAATGAGTGGTTTAAACAAGTCAGCCAAGCGCCAAT  
TCGTTATATTATGCATTAATGGCTTCCCACGCCACCTTAGAACTGATATTGAAGGTATGG  
AGTCACTTAGTCATTATTGGTCAACTGTACGTACTTATTATTCAGACTTTGAAAGTGATAT  
CAAATCACCGAATACTGAAATTTATCAACATGAAATGCCTGGTGGACAGTATTCGAATTT  
AAGTCAACAAGCTAAAAGTTTAGGTTTAGGCGAAAGATTTGATGAAGTCAAAGATATGT  
ATCGCAGAGTGAATTTCTTATTTGGTGATATCGTAAAAGTAACTCCATCGTCTAAAGTAGT  
TGGTGATATGGCACTTTATATGGTACAAAATGATCTTGATGAACAATCCGTGATTACAGA  
TGGCTATAAATTAGATTTCCCAGAATCAGTAGTGTCTGTTCTTCAAAGGCGAAATAGGACA  
ACCTGTAAATGGTTTTAATAAAGATTTACAAGCGGTTATTTTAAAAGGCCAAGAAGCACT  
AACAGCTCGTCCAGGTGAATATCTAGAGCCAGTTGATTTTAAAAAGTCCGTGAGTTGCT  
TGAAGAAGAGCAACAAGGTCCTGTTACGGAGCAAGATATTATTAGTTATGTATTATATCC  
AAAGGTATATGAACAATATATTCAAACTAGAAATCAATACGGAACTTATCGTTACTTGA  
TACGCCTACATTCTTCTTTGGAATGCGTAATGGTGAAACAGTAGAAATCGAAATCGATAA  
GGGTAAACGATTAATTATTAACACTAGAAACGATTAGTGAACCAGATGAAAATGGTAATA  
GAACGATTTACTATGCGATGAATGGTCAAGCGAGACGTATTTACATTAAAGATGAGAATG  
TGCATACAAATGCGAACGTTAAGCCAAAAGCAGATAAGAGTAATCCAAGTCATATCGGT  
GCGCAAATGCCAGGTTTACAGTAACTGAAGTCAAGGTTAGTGTAGGTGAATCTGTGAAAGCT  
AACCAGCCGTTGCTAATTACTGAAGCTATGAAAATGGAAACAACAATTCAAGCACCATTT  
GACGGTGTGATTAAACAAGTAACTGTAAATAATGGTGACACAATAGCGACAGGCGATTT  
ATTAATCGAAATTGAAAAAGCAACTGACTAA

### > **ctaA**

Function: protein coding sequence; heme A synthase (core genome, constant)

Best match: ctaA\_CC001\_MW2-USA400\_BA000033.2[1096264:1097175:r]RC (completely identical)

Position: 027-contig\_249: 28272 ... 29184; Length: 912 bp

Sequence:

TTATTGCTTGTCACTTCTTACTGATCGTAACATTAGCATGATAAAGTATGTTGTCATACCA  
AATAAATAAGTGATAAATAATGCATGGAAAAGTGGCATTATCAGGTTAACATTTGTCATA  
ATAGATAATGCACCTGTGATAACTTGTAATATAACAAGTATAAATGCAGCTGTATAACCA  
TAATGAACAGTACGGTTATTTGGATAATTTTAAACAGCGTGAATATAAGTAATCATAATA  
ATCGTAAACACTATAAAAGCCATGATACGATGCGTGAGTTGAACCCAATCTTGTTCTGAA  
TGTGGTACAAGATCGTGGAAATGGCAATGGCCAACCACCATATGCTAAACTTGCATCCGCA  
TGTCTCACTAGTGCACCAGTATAAACACCACAATAAATGATGATTGCCATTAACCATGTT  
AAACGTCTTAATGGCTTTTTGATATATAATTCGTCAGCTTCATATTTTTGATCTATAGAGA  
AAATAATCAATGTTATTAATAAATACAGATGAGAACTGATTAATGATATACCAAAGTGCA  
ATGCTAAAACGTAATCGTTTTGTTGCCAATAACAGCAGCAGCTCCGATTAATGCTTGCA  
ATAATAAGAATCCAACACTAATGATTGATAAAGGTTTAAATTTCTTAAATATAGCCTATATG  
TTCCATGCAGTGATAACTAACCATAAGACCATTAATAAAGACAAAGCTGAAACGGCTCT  
ATGACTTAACTCAATAATCGTATCAATAGGAAAGAATTCTGGAATCAACGCACCATGACA  
TAGTGGCCAAGAAGAACCACAACCATCAGCTGATCCGGTTTTGGTAACTAAGGCTCCACC  
AAGTTGTACAAATGTCATCATTAAACGTTGCTACGACACCTAACCATTTTAAATTCTTTTTG  
CCAAACAA

### > **ctaB**

Function: protein coding sequence; protoheme IX farnesyltransferase (core genome, constant)

Best match: ctaB\_CC001\_MW2-USA400\_BA000033.2[1097615:1098526]

Position: 027-contig\_249: 29623 ... 30535; Length: 912 bp

Sequence:

ATGAGCAAAGAGCATACTTTGTCACAAAATATTAGCAGAGTTAACTTCAAAGAATTGCAA  
CAGATAATTAATAATGGGACTTGTTCAAGGTAACCTTAATTCCGGCTTTTGCGGGCGCATGG  
CTAGCAGTTGTAATGACAAATCATTCTTCTTATCATCAATACCTCAAATTTTATTAATGC  
TATTTGGATCTACTTTAATTATGGGTGGCGCATGTGCGTTAAATAATTATTACGACCAAGA  
TATTGATCGTATTATGCCTAGTAAACAAAATAGACCAACTGTAATAATAGAATTACAGA

TCAA AATTTATTACTATTAAGTTTTGGTATGATGTTAGTTGGAGAAATTTGTTTGTTTTTAT  
TGAATATAACCATCAGGCGTACTTGGTCTTATGGGGATTGTAGGTTATGTGTCTTATTACTC  
AATATGGTCTAAAAGACATAACAACATGGAACACAGTCATTGGGAGTTTTCTGGAGCAGT  
ACCACCCTAATTGGATGGGTTGCAATTGAAGGACAAATTAGTTTAAACAGCGATTGCGCT  
GTTTTTAGTTGTATTTTGTGGCAACCAATTCATTTTTATGCCTTAGCTATTAACGTAAAG  
ATGAATATGCACTTGCAAATATCCAATGTTACCATCAGTTAAGGGCTTTAAACGTACAC  
GTGTCAGTATGTTTATCTGGTTGATTATTTTATTGCCAGTACCTTTATTACTAATAAATTTA  
GGTGTCTGATTTCGTAGTGTAGCTACATTATTAATTTAGGATGGATTGCATTAGGTTTAA  
CAACATTTAAGAAAAATTCAGATCAAACAAAATGGGCAACACAAATGTTTATATATTCAC  
TAAATTATTTAGTGATCTTTTTCGTGTTAGCTGTGATTGTTTCATTACTTACTTTGATCTAG

### > **coaD**

Function: protein coding sequence; phosphopantetheine adenylyltransferase (core genome, constant)

Best match: coaD\_CC001\_MW2-USA400\_BA000033.2[1103314:1103796] (completely identical)

Position: 027-contig\_249: 35322 ... 35805; Length: 483 bp

Sequence:

ATGGAACATACAATAGCGGTCATTCCGGGTAGTTTTGACCCCATTAATTATGGTCATTTAG  
ACATTATTGAGAGAAGTACAGATAGATTTGATGAAATTCATGTCTGTGTTCTTAAAAATA  
GTAAAAAGAAGGTACGTTTAGTTTAGAAGAGCGTATGGATTTAATTGAACAATCTGTTA  
AACATTTACCTAATGTCAAGGTTCAATTTAGTGGTTTACTAGTCGATTATTGTGAACA  
AGTAGGAGCTAAAACAATCATACTGGTTTAAAGAGCAGTCAGTGATTTTGAATATGAATT  
ACGCTTAACTTCAATGAATAAAAAGTTGAACAATGAAATTGAAACGTTATATATGATGTC  
TAGTACTAATTATTCATTTATAAGTTCAAGTATTGTTAAAGAAGTTGCAGCTTATCGAGCA  
GATATTTCTGAATTCGTTCCACCTTATGTTGAAAAGGCATTGAAGAAGAAATTTAAGTAA

### > **Q4L5E0**

Function: protein coding sequence; putative protein (core genome, constant)

Best match: Q4L5E0\_CC030\_MRSA252\_BX571856.1[1145912:1146469] (completely identical)

Position: 027-contig\_249: 37132 ... 37690; Length: 558 bp

Sequence:

ATGAAATGGTCAATTACGCAATTAAGGAAATATCAAGGTAAGCCATTTGAATTTGATCAA  
ACGGTGAGTTTTGACAATTTAAAAGAATCATTAGATTTAATTGATTTATCTCCAATTACAA  
TCCAAGGTCAGTTAACCATTAAGTCAACAGAAGTCGTTGCGGATATTCACATTAAGTAA  
CGTATACAATGCCTTGTGCACGTACTCTTGTACCAGTTAAAGTCCCCTAGATGTAAGTAC  
TACAGAAGTATTTGATTTAGAAGGGTACAATCAGTATAACGATGATCAAGATGATGTAGA  
TGAACACTATCACATTATTAAGATGGTATGGTTAATCTTCAGGATATTGTCGAGGATAT  
AGTTATTATTGAGAAACCAATGAGAGCTTATTCAGAGCAAAGTGACCAATGTTGACAGT  
AGGTAATGGTTGGGAAGTAATCGATGAGGATCAATTAGATGAGCTTGCTAAACAGCAAG  
ACAAGATGATTCAGAATCACGACAAGTTGATCCAAGGCTTCAAAAATTACAACAATTAT  
ATGATAAAGAGCAATAA

### > **rpmF**

Function: protein coding sequence; 50S ribosomal protein L32 (core genome, constant)

Best match: rpmF\_CC001\_MW2-USA400\_BA000033.2[1105761:1105934] (completely identical)

Position: 027-contig\_249: 37769 ... 37943; Length: 174 bp

Sequence:

ATGGCAGTACCAAAAAGAAGAACTTCTAAAAGTAAAGAAACAAACGTCGTACGCATTT  
CAAAATTTAGTACCAGGTATGACTGAATGCCAAACTGTGGCGAATACAAATTATCACA  
CCGTGTATGTAAAAGTGTGGTTCTTACAATGGCGAAGAAGTAGCAGCTAAATAA

### > **tx\_rpmF**

Function:

Best match: tx\_rpmF\_isdB\_1\_CC001\_MW2-USA400\_BA000033.2[1105942:1106003]

Position: 027-contig\_249: 37950 ... 37980; Length: 30 bp

Sequence:

TACTCAATATAAAAAGTCCCGCTTAAAATG

> **attB\_phiSa7**

Function: attachment site for int (mobile element)

Best match: attB\_phiSa7\_empty\_CC001\_MW2-USA400\_BA000033.21105980:1106068:rRC

Position: 027-contig\_249: 37988 ... 38077; Length: 89 bp

Sequence:

AAGTGGGACTTTTTATATTGAGAAAAATAATTGGCGAACGAGGTAAGTGGATACCTCATC  
CGCCAATTAATAATTTGTTAATTTAATAAT

> **isdB**

Function: protein coding sequence; iron-regulated cell wall-anchored protein (core genome, variable)

Best match: isdB\_CC001\_MSSA476\_BX571857.1[1134874:1136811:r]RC

Position: 027-contig\_249: 38096 ... 39989; Length: 1893 bp

Sequence:

TTAGTTTTTACGTTTTCTAGGTAATACGAATGCAACGATGCTACTTAAAGCTAATAATGCC  
ATTAATGGTAATGTCATATCTTTATTTGATTCTTCACCAGTTTGTGGTAATGATTTTGCTTT  
ATTTCTTGTGTATTTTTATTGTTTTGGCTTTGAGTGTGTCCATCATTTGTGTTTTTAATGTT  
TGCTTTTTGTAATGGAGCACTATCTTTTGCTTCGCTAGAACCTGCTGAAGTTTGAACAACA  
TCTTTTGTGTTTTTGTGATGAAGCAGTTGTTGGTTTTGCAACATTTTGTAGTCGTAGATACTAC  
CTTAGTTGGAGTTGTACTACTTGATTCTACTTCACCTTTAGTTGGTTTTGTAGCAGGCGTTT  
TGCTTTTACCTGACTCACTAGATGCGTCATTTTCTTTTTCAACACTTGGTAATTGTTTATTG  
TCATCTTTTTGGCTGTCTTGTTTTTGTGATTCTTTTTCAACAGGTGATGGTGTGGTTTGCT  
AGGCGTAGCTGGAGTAGCTTCCCTTCTTAGCTGAGTTATCTTGTGTTCTTTTTTGTAGATT  
TATCGGTATTGGCTTTTTGTAAATGCTTCTTTATCAACGATTCTGACATGGTATTGTCCATC  
ATAATCAATCGTTTTTACGTGAACTTTAACGATAGCATCATATAGAGTTTTACCTTCAACA  
TATGGGAAAATAAATTGTTCTAGTATTATTTTTAGCATCTTTGCTTATAGTTCTAACACGTT  
GACCTTCAACCATGAAATCTTCCAGTAATCGTCATTAGTAGTTCCATGACCATATATTT  
TTTGCCGTTAAGCATACTGTTTTAATAGGGTGTTTAAACAAAAGTATCCATCATAGATTGCG  
TTATTCTCAACACTTTCATAAACAACATATTTTGTATCTTGTAATCAGTCATTTTTTTCATT  
TGTTGGTTGTACATTTTGGAAATTCAGTAATAGCTGATTTCACTTGCTCATCTAAAGCTTTCT  
TTGTATCCTCTAATTTCTTCTTGTACTCAGCCTTAAATTTTTCAGGAAGTTTATCTTGAATT  
TTATTTAATTCATAAACTTGTCTTTCTAGTGTTTTCGCTTTTTTATATGGCGCTAATAATTT  
TTCAGCTTTATAATCTTCTTCAGTTTTGAATTTATCTGCACTGTTATAAATTGGTTGTGCGA  
ATTCCATTAATGTGTAATCGTATTTTTCTTCTTTGTTATTGAAGTGTGTTGAACTAACAATT  
TTAACAGCTTTTGTTCATTTGATACAGAGAAGCGAATGTAAGCATAATCTTTAACAGTAT  
CGTATGATACTAATTTAATTGGCAACTTTTTGTCACCTTCATAAACTTCAAATTTTCTCCA  
AAATTGACCTGATTGTAATCCTAATTCAATTTCTGGTTTTGAATCAGTGAAAATAACTCTA  
GCAGGTTTAAACAGAAGTTGCATAATGATAAACTGTTGAGTTCCATCTTTCTTTTTTCATTT  
CAAATCAATTGGACGAGAGTTTGGTGCCTATGATCTTTGTCTTTTATTGCAGGGTTTTT  
AATCGCTTCTCTAAGTTCTGATTCAAAATAGGATATGTATTGTTAGTGGCTTTTGCTGCT  
GGTTTAACTTCTTTTGTTCAGAAGTAGGGGCTCAACTTCTTTATTAGATACTGAGACAG  
CATTAGCTACTGGTTTAGTTTCTGGAGCTTTTTCAGATGTTGTTGTTGGACTTGCAACTGCT  
TCAGTTTTTGGTTGTGCTTCTGTATTTGTACCACCTGTTTCTTCAGCTGCTGCTTGTGCTTC  
GCCATTTGACATTAATAATAAAAAGTGTACTAATTGCTACAGATGCAACGCCTAGTGATGA  
CTTTCTAATTGAATAAAAATGATTTAAATTTCTTTTTGCTGTTTGTTCAT

> **isdA**

Function: protein coding sequence; heme-binding protein (core genome, variable)

Best match: isdA\_CC001-ST772\_118\_AJGE01000009.1[230822:231874:r]RC (completely identical)

Position: 027-contig\_249: 40191 ... 41244; Length: 1053 bp

Sequence:

TTATTTAGATTCTTTTCTTTTGAAGTAATAAAGATAATGAACCTAAAAGGGCAAGTGTT  
GCGAAGGCAACTGTGCTAATAAAGTTATCAACTGAAGTTAAACCAGTTTTTGGTAATTCT  
TTAGCTTTAGATGCTTGTTTAGGCGTTTCGTTATGTTTTGTAACCTTTGTTAGTTTGTGTTGTA

TTTATTATCACTTACAGCTTGATTGTTGCTTTCAGATTTTCGCTGTTGCAACATCTTTAACAG  
GTGTTTGAACCTTATTTTGTTCCTGAGCAGTTTGTGCTGTTTTAACTGTATGAGCAGTTTGT  
GTTTTAGTTTGATCTTTTGTGTGTCAGTACTTACAACCTTAGTAGAGTGATTGTCTTCAAC  
TTTGCTTGTGTAGTTACAGTAGGTTAACTTTTTCAACTTTAGGTTGAACTGGTTTAGTTT  
GCTCAGTAGGTGTTTTAGGTTGAGCTGGTTTTGGTTGAACCGGTTAACATTGTTTGGTTT  
TGCTGCGTCAGCTAATGTAGGAATTGCTTTTTCAAATTCCAAATGCGTAGTATATCTATGA  
TTGTAATTAATTTGTGGCACGACAATATGTACTTTAGTAGTTAAGCTCTTATATCCAGGTT  
CAACTGCAACATTGATTGTTCTAGTATCCGCTTTTTTATTATCGTTAACAAACAGTTGTTGCT  
AATTCTTGATTGTTTGCATTGTAAAATTTGTATTCTTTCCAGAATGATGCATTGTTAACAC  
GGTTTGGAAATAATATTTATTATTTTGTTTAATTACTTTACCAGGGTGTTCATATAGTCA  
TCCATGTGTGACTTCTCTGAAGAGCCATCTTTTTGCACTTGGAATTAATTGGTTGTGATG  
TTGCTTGAGAACTTGTGTGCTTTGATTATTAGTTGCGTTCGTAGCTTCTGTTGCCGCATTG  
ACTTGTGGCTGCCTGCGCCTATGTATAACAAGGGAACCTAAAATGATAGATGCTGTACCC  
ATTGTAATCTTTTTCATAGCTGATGAACGTTGTTCTGATTGATACTTACTGTTTAAATAAT  
GTTTTGTCAT

### > isdC

Function: protein coding sequence; extracellular heme-binding protein (core genome, constant)

Best match: isdC\_CC001\_MW2-USA400\_BA000033.2[1109489:1110172]

Position: 027-contig\_249: 41452 ... 42136; Length: 684 bp

Sequence:

TTGAAAAATATTTTAAAAGTTTTTAATACAACGATTTTAGCGTTAATTATCATCATCGCGA  
CATTACAGTAATTCTGCAAATGCCGCAGATAGCGGTACTTTGAATTATGAGGTTTACAAAT  
ACAATACCAATGACACGTCAATTGCTAATGACTATTTTAATAAACCGGCAAAGTACATTA  
AGAAAAATGGTAAATTGTATGTTCAAATAACTGTCAACCACAGTCATTGGATTACTGGAA  
TGAGTATCGAAGGACATAAAGAAAATATTATTAGTAAAAACACTGCCAAAGATGAACGC  
ACTTCTGAATTTGAAGTAAGTAAGTTGAACGGTAAAAATAGATGGAAAAATTGACGTTTAT  
ATCGATGAAAAAGTAAATGGTAAGCCATTCAAATATGACCATCATTACAACATTACATAT  
AAATTTAATGGACCAACTGATGTAGCAGGTGCTAATGCACCAGGTAAAGATGATAAAAA  
TTCTGCTTCAGGTAGTGACAAAGGATCTGATGGAACGACTACTGGTCAAAGTGAATCTAA  
CAGTTCGAATAAAGACAAAGTAGAAAATCCACAAACAAATGCTGGTACACCTGCATATA  
TATATGCAATACCAGTTGCATCCTTAGCATTATTAATCGCAATCACATTGTTTGTAGAAA  
AAAATCTAAAGGCAATGTGGAATAA

### > isdD

Function: protein coding sequence; iron-responsive Surface Determinate (core genome, variable)

Best match: isdD\_CC008\_NCTC8325\_CP000253.1[1046312:1047388] (completely identical)

Position: 027-contig\_249: 42135 ... 43212; Length: 1077 bp

Sequence:

ATGAGAAATGTTAAACAAATTGCTACAAAATCTATTATAGCTATTATTAGCTTAGGTATA  
CTTACATATACAACAATGATTGGTAGCGTGTGGCTGATGAGATAAAAATATCCATCAGCC  
AAATTTAATCAACCTGAAGCAAAGATAAAACAGAATTAACACTACATCAATTTTTGATGAA  
AAGATAAAAGAGAATAAAGCGTTAGAGTTACTAATTTTTAATCAAGAAAATAAAAATGT  
AACTGAGGAACAACAACACTAGTTGACGAAAAGGCGCAATTGATTTAGATATGACTGGTA  
AAATTTACTTGAAGTAAAGCTAAAAGGTCAAATAGATAAAGAACAACCTGTTTTTCAA  
ATGACAAAAATGAAGAATTTCTTTTTGTTATAAAAAGATGAAAAGGATGACACAATAGTA  
AGAATTTTAATTGAACAGCATATGGATAAAAATCAATATGCATGTTAAAACGTTGGCTGAA  
AAGAAAAATCTAGATAACAAAGAAATGGTGTATTCTATTCTTTTAAAGAGAAAAAAGT  
ACAACATGATGATGCAAAAGAAGTGCCTTCAAACATCAAATCAAGAAAATAATCAAG  
ATCAGCTTAAAAAAGATATTGATGACAAAAAAGATAGTCAAATCAGATACTAAGGAA  
AGACGTAAGTACTGCTTTTTACTGAAAAAGGATTAATGATATTCCTGTACAAAAAGATAAA  
GTGCAACAAGACAGTAATAAAAAGATTGAAAATGAGCGACCTAAAGCATCAGGTACATT  
AAAAGTTGAAAATAGCCCTCCAACAATAAAAAGGTTGAAAATAATCACAAAGAGCAAC  
CGAAACATAAAGATGAAAATCAAAAAGGAAAAGAAAAAAGTAGTTGAAAAGAAAA  
AGCGTTACCAGCTTTTAAATAGAGATGATGATAGCAAGAATAGTAGTCAATTATCTAGTGA

TATTAAGAAGCTTGATGAACCAAATCATAAAAAGCAATATATGTTATTTGCAGCTGGCAT  
TGTGTTAGCAACTATTTTACTTATTTTCGGCACATTTATACAGCAGAAAGAGAGGTAACCA  
AGTTTGA

> **isdE**

Function: protein coding sequence; heme-binding lipoprotein of ATP-binding cassette transporter (core genome, constant)

Best match: isdE\_CC005\_JH9\_CP000703.1[1234393:1235271]

Position: 027-contig\_249: 43208 ... 44087; Length: 879 bp

Sequence:

TTGAGAATCATAAAGTATTTAACCATTTTAGTGATAAGCGTCGTTATCTTAACCAGCTGTC  
AATCTTCCAGTTCTCAAGAATCAACTAAATCCGGCGAATTCAGAATCGTACCAACAACCTG  
TTGCATTGACAATGACATTGGACAAATTGGATTTACCAATTGTCGGCAAACCCACGTCAT  
ATAAGACATTGCCTAATCGTTATAAAGATGTACCTGAAATTGGTCAACCAATGGAGCCGA  
ATGTTGAAGCTGTTAAAAAATTTAAACCAACACATGTTTTGAGTGTGTCAACGATTAAG  
ATGAAATGCAACCATTTTACAAACAATTAATATGAAAGGCTACTTTTATGATTTTGATA  
GTTTTAAAAGGGATGCAAAAGTCGATTACACAATTAGGTGATCAATTTAATCGTAAAGCAC  
AAGCAAAAGAATTAATGACCATTTAAATTCTGTTAAGCAAAAAAATTGAAAATAAAGCA  
GCTAAACAAAAGAAACATCCCAAAGTATTAATTAATGGGTGTACCGGGTAGCTATTTA  
GTAGCAACTGATAAATCATATATTGGTGATTTAGTTAAAATAGCAGGTGGAGAAAATGTT  
ATTAAGTGAAAGATCGTCAATATATTTTCGTCTAATACTGAAAATTTGTTGAATATCAATC  
CAGATATTATTTTAAGATTACCACACGGAATGCCTGAAGAAGTTAAGAAAATGTTTCAA  
AAGAATTTAAACAAAATGATATTTGAAACATTTTAAAGCTGTGAAAATAATCATGTTT  
ATGACTTAGAGGAAGTGCCATTCGGTATTACAGCAAATGTTGATGCTGATAAGGCAATGA  
CTCAATTATATGATTTATTTTATAAGGATAAAAAATAG

> **isdF**

Function: protein coding sequence; iron transport permease protein (core genome, constant)

Best match: isdF\_CC030\_MRSA252\_BX571856.1[1152956:1153921]

Position: 027-contig\_249: 44099 ... 45065; Length: 966 bp

Sequence:

ATGATAAAAAATAAAAAGAACTACTATTTTTATGTTTGTAGTCATTTTAATCGCAACG  
GCTTATATTTTCGTTTGTAAACCGGTACAATTAATTGTCATTTAATGACCTATTTACAAAAT  
TTACAACCTGGTAGCAATGAAGCAGTGGATTCAATCATTGATTTGCGATTGCCACGTATAT  
TAATTGCATTAATGGTTGGCGCAATGTTAGCAGTTTCTGGAGCATTATTACAAGCAGCAC  
TACAAAATCCTTTGGCAGAGGCGAATATCATTGGCGTTTCTTCAGGTGCACTTATAATGA  
GAGCACTTTGTATGTTGTTTATTCCACAATTGTACTTTTACTTACCATTATTAAGTTTTATT  
GGAGGTTTAATACCATTTTAAATAATTATATTGTTGCATTCTAAATTTAGATTCAATGCTG  
TAAGTATGATATTAGTAGGTGTTGCGTTATTCGTATTATTAATGGTGTTTTAGAAATTTT  
AACTCAAACCTTTAATGAAAATTCCTCAAGGCTTAACAATGAAAATATGGAGCGACGT  
ATACATATTAGCAGTATCAGCATTATTGGGATTAATATTAACATTACTATTGTCCCCTAAA  
TTGAATTTACTAAATTTAGACGACATACAAGCGCGAAGTATCGGTTTAAATATTGATCGTT  
ACAGATGGTTAACAGGTTTATTAGCAGTATTTTAGCAAGTGCAACTGTTGCGATTGTTGG  
ACAACCTAGCCTTTTATAGGTATTATTGTGCCACATGTGGTTAGAAAGCTAGTTGGGGGCAA  
TTACAGAGTACTTATTCGGTTTCTACAGTTATTGGTGCATGGCTATTGTTAGTGGCTGAT  
TTATTAGGACGAGTGATACAGCCTCCTTAGAAATTCAGCCAATGCTATTTTAATGATTG  
TCGGTGGTCCAATGCTAATTTACTTAATTTGTCAAAGTCAACGAAATCGAATCTAA

> **srtB**

Function: protein coding sequence; sortase B/NPQTN specific (core genome, constant)

Best match: srtB\_CC001\_MW2-USA400\_BA000033.2[1113163:1113897]

Position: 027-contig\_249: 45126 ... 45861; Length: 735 bp

Sequence:

ATGAGAATGAAGCGATTTTTAACTATTGTACAAATTTTATTGGTTGTAATTATTATCATTT  
TTGGTTACAAAATTGTTCAAACATATATTGAAGATAAGCAAGAACGCGCAAATTATGAGA

AATTACAACAAAAATTTCAAATGCTGATGAGCAAACATCAAGAACATGTGAGACCACAA  
TTTGAATCACTTGAAAAAATAAATAAAGACATTGTTGGATGGATAAAATTATCAGGAACA  
TCATTAATTATCCAGTACTACAAGGTAAGACAAATCACGATTATTTAAATTTAGATTTTG  
AGCGAGAACATCGACGTAAGGTAAGTATTTTTATGGATTTTAGAAATGAATTGAAGAATT  
TAAATCATAATACTATTTTATACGGGCACCATGTCTGGTGATAATACGATGTTTGATGTGT  
AGAAGATTATTTAAAGCAATCGTTTTATGAAAAACACAAGATAATTGAATTTGACAATAA  
ATATGGTAAATATCAATTGCAAGTATTTAGTGCATATAAACTACTACTAAAGATAATTA  
CATACGTACAGATTTTGAAAATGATCAAGATTATCAACAATTTTAGATGAGACAAAACG  
TAAATCTGTAATTAATTCAGATGTTAATGTAACGGTAAAAGATAGAATAATGACTTTATC  
AACGTGCGAAGATGCATATAGTGAAACAACGAAAAGAATTGTTGTTGTGCGAAAAATAA  
TTAAGGTAAGTTAA

### > **isdG**

Function: protein coding sequence; iron transport lipoprotein (core genome, constant)

Best match: *isdG\_CC005\_Mu50-VRSA\_BA000017.4*[1188814:1189137] (completely identical)

Position: 027-contig\_249: 45879 ... 46203; Length: 324 bp

Sequence:

ATGAAATTTATGGCAGAAAATAGGCTGACGTTAACAAAAGGAACAGCAAAAGATATTAT  
AGAACGATTTTACACGAGACATGGGATTGAAACATTAGAAGGCTTTGATGGCATGTTTGT  
TACACAAACTTTAGAACAAGAAGATTTTGATGAAGTGAAAATTTTAAACAGTTTGGAATC  
AAAGCAAGCTTTTACGGATTGGTTAAAATCTGATGTCTTTAAAGCAGCGCATAAACATGT  
TAGAAGTAAAAATGAAGATGAAAGTAGCCCGATTATCAATAACAAAGTAATTACATATG  
ATATAGGCTATAGTTACATGAAATAA

### > **spoU**

Function: protein coding sequence; putative tRNA/rRNA methyltransferase (core genome, constant)

Best match: *spoU\_CC001\_MW2-USA400\_BA000033.2*[1114623:1115363]

Position: 027-contig\_249: 46586 ... 47327; Length: 741 bp

Sequence:

ATGGAACAAATTACTTCTGCACAAAATAATAGAATTAACAAGCGAACAAGCTAAAAAA  
GAAACGTGAGAGGGATAAACTGGATTAGCTTTAATTGAAGGTGTGCATTTAATTGAAGA  
AGCTTATCAAAGTGGAATTGTAATTACACAATTTTGAATGAACCGGCAAGATTAGA  
TCAGCAAATTATCGCATACGCGCAAGAAGTTTTTGAAATAAACATGAAAGTTGCTGAATC  
TTTATCAGGTACAGTGACACCACAAGGGTTTTTCGCAATCATTGAGAAGCCGCATTATGA  
TATTTCTAAAGCACAACAAGTATTGCTCATCGATCGTGTTC AAGATCCTGGAAATTTAGG  
CACATTAATTAGA ACTGCGGATGCTGCTGGAATGGATGCTGTAATAATGGAGAAGGGTAC  
GACAGATCCTTATCAAGATAAAGTGTTGCGAGCGAGTCAAGGTAGTGTTCATTTGCC  
AGTTATGATACAAGATCTCGATACGTTTATTACTCAATTTAATGGTCCTGTTTATGGTACA  
GCACTTGAAAACGCAGTGGCATACAAAGAAGTTACTTCAAGTGATTCTTTTGCATTACTA  
TTAGGTAATGAGGGAGAAGGTGTTAATCCTGAATTATTAGCACATACTACAAAAAATTTA  
ATCATACCTATTTATGGTAGTGCTGAAAGTTTAAATGTAGCGATTGCAGGTAGTATTTTAC  
TTTATCATTTGAAAGGTTGA

### > **tbox04**

Function: noncoding RNA T-box leader element (core genome, constant)

Best match: *tbox04\_CC001\_MW2-USA400\_BA000033.2*[1115444:1115655] (completely identical)

Position: 027-contig\_249: 47407 ... 47619; Length: 212 bp

Sequence:

TAAACCAATAAAAAGGCATGGACATTTATATAAATAATTGTTTTAGGGAGAATAATCGTG  
ACTGCAAGTTATTCCAATTATTTAAAGTCTTTTCACCTTTTTGGTTACTTAAAGAGATTTA  
AGTCGGAAGACAATCCGTTATCAATATTAACAAGTGTATGCTTAGGCATAAATTTGGG  
TGGTACCACGGAATGACTTTCGTCCCTTAT

### > **pheS**



Function: protein coding sequence; phenylalanyl-tRNA synthetase alpha chain (core genome, constant)

Best match: pheS\_CC001\_MW2-USA400\_BA000033.2[1115744:1116802]

Position: 027-contig\_249: 47707 ... 48766; Length: 1059 bp

Sequence:

```
ATGTCTGAACAACAACAATGTCAGAGTTAAAACAACAAGCGCTTGTAGATATTAATGA
AGCAAATGATGAACGTGCACTGCAAGAAGTTAAAGTGAAATACTTAGGTAAAAAAGGGT
CAGTTAGCGGACTAATGAAATTGATGAAGGATTTGCCGAATGAAGAGAAACCTGCGTTTG
GTCAAAAAGTGAATGAATTGCGTCAAACAATTCAAATGAATTAGATGAAAGACAACAG
ATGTTAGTTAAAGAAAAATTAATAAGCAATTGGCTGAAGAAACAATTGATGTATCATT
CCAGGTCGTCATATTGAAATCGGTTCAAAGCATCCATTAACACGTACAATAGAAGAAATT
GAAGACTTATTCTTAGGTTTAGGTTATGAAATTGTGAATGGATATGAAGTTGAACAAGAT
CATTATAACTTCGAAATGCTGAATTTACCTAAATCACACCCTGCACGTGATATGCAAGAT
AGTTTCTATATTACGGATGAAATTTTATTACGTACGCATACATCACCAGTGCAGGCACGT
ACGATGGAATCACGTACATGGTCAAGGTCCAGTTAAAATTTTGGCCTGGTAAAGTGTAT
CGTCGTGACTCTGATGATGCGACACATAGTCATCAATTTACACAAATTGAAGGATTAGTT
GTTGATAAAAACGTTAAAATGAGTGATTTGAAAGGCACTTTAGAAATTGTTAGCTAAGAAA
TTATTTGGTGTGATCGTGAAATTCGTTTACGTCCAAGTTACTTCCCATTCACTGAACCTT
CTGTAGAAGTTGATGTGTCATGTTTTAAATGTAAGGAAAAGGTTGTAATGTGTGTAAAC
ACACAGGATGGATTGAAATTTTAGGTGCTGGAATGGTACATCCTAATGTATTAGAAATGG
CTGGTTTTGATTCTTCAGAGTACTCTGGATTTGCATTTGGTATGGGACCAGACCGTATTGC
AATGTTGAAATATGGTATAGAAGATATTCGTCATTTCTATACTAATGATGTGAGATTTTA
GATCAATTTAAAGCGGTAGAAGATAGAGGTGACATGTAA
```

## > pheT

Function: protein coding sequence; phenylalanyl-tRNA synthetase beta chain (core genome, constant)

Best match: pheT\_CC001\_ATCC51811\_ADVP01000010.1[55786:58188:r]

Position: 027-contig\_249: 48765 ... 51168; Length: 2403 bp

Sequence:

```
ATGTTGATATCAAATGAATGGTTGAAAGAATATGTAACAATCGATGATTCTGTAAGTAAT
TTGGCAGAACGTATTACGCGCACAGGTATTGAAGTGGATGATTTAATTGACTACACAAA
GATATCAAAAATTTAGTTGTTCGGCTTCGTTAAGTCAAAGAGAAACATCCTGATGCTGAT
AAATTAATGTTTGCCAAGTTGATATCGGAGAAGACGAACCTGTACAAATCGTATGTGGT
GCACCGAACGTTGATGCAGGACAATATGTCATTGTTGCTAAAGTAGGTGGCAGATTGCCT
GGTGGTATTAATAAAGCGTGCCAAATTACGCGGTGAACGTTTCAAGGATGATTTGT
TCGTTACAAGAAATTTGGTATTTCAAGTAACTATGTACCAAAAACGTTTGAATCTGGTATCT
ATGTATTTAGTGAAGCCCAAGTCCAGGAACAGATGCCTTACAAGCTTTATATTTAGATG
ATCAAGTAATGGAATTTGATTTAACGCCGAATCGTGCAGATGCTTTAAGTATGATAGGTA
CTGCTTATGAAGTTGCAGCATTATATAATACAAAATGACTAAGCCAGACACAACATCAA
ATGAGCTTGAGTTATCTGCAAATGATGAACTGACTGTGACAATAGAAAATGAAGATAAA
GTACCATATTATAGTGCACGTGTTGTTTACGACGTGACAATTGAACCCTCGCCAATTTGG
ATGCAAGCACGCTTAATAAAAGCGGGTATACGTCTTATAATAATGTTGTTGACATTTCA
AATTATGTATTATTAGAATACGGTCAACCATTGCACATGTTTGATCAAGATGCGATTGGTT
CACAACAAATTGTTGTTTCGTCAAGCTAATGAAGGCGAAAAAATGACAACATTAGATGAT
ACAGAACGTGAATTATTAACGAGCGATATTGTCATTACTAATGGACAAACTCCAATTGCA
TTAGCTGGTGTATGGGTGGCGATTTTTCAGAAGTTAAAGAACAACATCAAATATAGTG
ATTGAAGGTGCTATTTTTGATCCAGTTTCAATTCGTCATACATCAAGGCGTTTAAATTTAC
GCAGTGAATCATCTAGTCGTTTTGAAAAGGAATAGCTACTGAATTTGTAGATGAAGCAG
TCGACCGTGCATGTTATTTATTACAACTTATGCAAACGGAAAAGTGCTAAAAGATAGAG
TGTCTTCAGGAGAACTTGGTGCATTTATTACACCAATCGACATCACTGCTGATAAAATTA
ATCGCACTATTGGATTTGATTTGTCACAAAATGATATTGTTACTATTTTTAATCAATTAGG
GTTTGATACAGAAATAAATGATGATGTTATTACAGTGCAAGTACCATCACGTCGTAAAGA
TATTACAATTAAGAAGATTTAATTGAAGAAGTTGCACGTATATATGGTTACGACGATAT
TCCATCAACGTTACCTGTCTTCGAAAAAGTTACTAGTGGTCAGCTAACTGATCGCCAATAT
AAAAC TAGAATGGTTAAAGAAGTGTTAGAAGGTGCTGGATTAGACCAAGCTATTACGTAT
TCGTTAGTATCTAAAGAAGATGCTACTGCATTTTCGATGCAACAGCGTCAAACAATTGAT
```

TTATTGATGCCAATGAGTGAAGCGCATGCGTCATTACGTCAAAGTTTATTACCACATTTAA  
TCGAAGCGGCATCATATAATGTGGCACGCAAAAATAAAGATGTAAAATTATTTGAAATCG  
GCAATGTCTTCTTTGCTAATGGAGAAGGTGAACTACCAGATCAAGTTGAATATTTAAGTG  
GTATTTTAACTGGAGATTATGTAGTCAATCAATGGCAAGGTAAGAAAGAAACGGTTGATT  
TCTATTTAGCAAAAAGGTGTCGTGGATCGAGTATCTGAAAAGTTAAACCTTGAATTTAGTT  
ATCGTCGTGCCGATATTGATGGATTACATCCAGGTCGTACAGCTGAAATCTTATTAGAAA  
ATAAAGTTGTTGGTTTTATTGGTGAATTACATCCAACATTAGCAGCTGATAATGATTTAAA  
ACGTACGTATGTTTTTGGAGTTGAATTTTGGATGCATTAATGTCTGTGTCGGTAGGTTACATT  
AATTACCAGCCAATTCCGAGATTCCCAGGCATGTCTCGTGACATTGCATTAGAAGTAGAT  
CAAATATTCCAGCAGCTGATTTATTATCAACGATTCATGCACATGGTGGCAATATATTA  
AAAGATACACTTGTCTTTGATGTATATCAGGGCGAACATTTAGAAAAAGGTAAAAAATCA  
ATTGCAATACGTTTAAATTATTTAGACACAGAAGAAACATTGACAGATGAGCGCGTTTCA  
AAAGTACAAGCGGAAATTGAAGCAGCATTAATTGAACAAGGTGCTGTTATTAGATAA

### > **rnhC**

Function: protein coding sequence; ribonuclease HIII (core genome, constant)

Best match: rnhC\_CC001\_MSSA476\_BX571857.1[1148225:1149163:r]RC

Position: 028-contig\_257\_RC: 193 ... 1132; Length: 939 bp

Sequence:

TCAAAGAGGCTTTAAAATTTTTGGGGCTTTTTTCACGATTTTTAAAATGCTTTTTTGGAAATG  
GTATCTAAACGTGAAAGACCGTATTTTTTATAATTTTGGCGGCAATTACATCGACTTTAG  
CACCGGCACCTTTAGGAATCGTCATATTAATATTTTTTGGATATTTGATCCATATATGTAAC  
AAATGCGTATCGAGAAATTATGCTTGCCACTGCAATGGCTAATGACTTCGATTCTCCTTTT  
GTTTCAAATTTTGTCTTTCTTTGGAAGTGGTATATCTGATAATGCGTAATGGCTATACACTT  
CGCGTTTTGCGAACTGATCAATGACGATATAGTCTAATTGAGACGAATCAATTTTTTCAA  
GTACATTTTTGATGGCTTCATTATGAAGAACAGCTTTCATTTTTACTTGAGTCCAGCCTTTT  
GCTTGCTGAATATTATATTTTTTCATTGTGTAGTGTTAATAGTGAATGTGGGATGAAAGTAA  
CCAATTGCTCAGCAAGTTCTACAATTTTGGTATCGGTTAATTTTTTTGAGTCATCTACACC  
CAAAGTTTTTAAAATAGGGACATGCTCTTTGGTAACGAAAGCAGCACACACAGTCAACGG  
ACCAAAGTAATCACCCTCCAGCTTCATCACTACCAATACAGTTAAATTGATCATAACATT  
AAAGTTTGTTCAGAAAAGAATTAGCCATATTTTTCTTTTTAGTTTTATTAGTATTCAATT  
GAGAATGCTGCGGTAGAAGTTCTTCAGACACAGCTTCTGCATGATTACCCTGAAACATGA  
CTTTACCTGATTGGTAAATATTTACAGTTGTATTTTGATACTTTGCACGTGCTTTCATACCT  
TGAGGTAATTTCTCAGTATCAAAGAAATGCGTGACATTAATGTCGTTATGTCTTTATCCG  
ACAATTTAAAACGATATTCGCCAT

### > **zapA**

Function: protein coding sequence; cell division protein (core genome, constant)

Best match: zapA\_CC001\_MW2-USA400\_BA000033.2[1120747:1121013] (completely identical)

Position: 028-contig\_257\_RC: 1501 ... 1768; Length: 267 bp

Sequence:

ATGGCACAGTTTAAAAACAAGGTAAATGTATCAATTAATGATCAGCTTTTTACAATTGTT  
GGGGAAGATAACCCAGAGCACATACGATATGTAGCACATTTAGTTGATGATAAAAATAAA  
AGAATTAGGGTATAAAGCAGCAGGTTTAGATACTTCAAGAAAAGCAATACTAACTGCTGT  
GAATATTATGCATGAAAAGTACTACTAGAAGAAGAAAATCGACGTTTGAAACAACAAA  
TTCACAAATTGCAGCAGCGTGAGCAATAA

### > **polX**

Function: protein coding sequence; DNA-dependent DNA polymerase IV beta subunit (core genome, constant)

Best match: polX\_CC005\_04-02981\_CP001844.2[1154963:1156675]

Position: 028-contig\_257\_RC: 2362 ... 4075; Length: 1713 bp

Sequence:

ATGACAAAAAAGATGTTATCAAACCTATTAGAACAAATTGCTACTTATATGGAATTTAAA  
GGGGAATAACTTTTTAAAATATCAGCGTATCGAAAAGCAGCTCAAAGTCTTGAATTAGAT

GAACGACCATTAGATGAAATATCTGATGTAACGGAGTTAAAAGGCATTGGTAAAGGTGTT  
GCAGAAGTAATCAATGATTACCGTGAGACCGGTGAATCTCAGTATTTACAGCAATTACAG  
GAAGAAGTCCGGAAGGTCTTATTCCACTTTTGAAAATTCAAGGACTTGGAAAGCAAGAAA  
ATTGCTAAGCTATATAAAGAGTTGAATATTGTTGATAAAGCGTCACTTCAAGTTGCTTGTG  
AAAATGGAAAAGTTAGTGAATTAAGCGGATTTGCTAAGAAAACGGAACAAAACATATTA  
GAAGCTGTGAAACAACCTGGTGCTAAGAAAGATAGATATCCAATTGATCAAATGAGAAG  
ACTTAATCAAGAAATCATTGATTATATAGATACATTAATTATATCGATCAATATTCATCT  
GCAGGAAGCTTCCGTCGTTTTAAAGAAATGAGCAAAGATTTAGATTTTCATAATAAGTACC  
GATAACCCAAAAGCAGTGCAGCAGCAATTATTAATATTCCAATAAAGTAAAAGAAGT  
TGCAGTGGGGAACACAAAAGTTTCATTAGAATTAGCGTATGATGATGAAACGATTGGTGT  
CGATTTTCGATTAATTGAACCAAGTGCTTTTTATCATAACATTGCAGCATTTTACTGGGTCA  
AAAGAACATAATATAAGAATTCGACAACCTTGCTAAAGCACGTGATGAAAAAGTTAGTGA  
ATATGGAATTGAACAAGCTGATGGTACATTAATTCAATATGATAGTGAAGCCAAGATATA  
TGAACATTTTAATGTGAATTTTATACCACCTGCTATGCGAGAAGATGGTAGCGAATTTGA  
TAAAGATCTAAGTAATATCATTACATTAGATGATATTAATGGTGATATTCATATGCATAC  
AACGTATAGTGATGGTGCCTTTTCTATTTCGAGACATGGTAGAAGCAAATATCGCAAAAAG  
TTATAAATTCATGGTAATTACTGATCATTCACAAAGTTTACGTGTTGCTAATGGCTTACAA  
GTGGAAAGACTTTTAAGACAAAATGAAGAAATTAAGGCTTTAGATAAAGAATATAGTGA  
AATTGATATTTATTACAGGTACAGAAATGGATATATTACCTGATGGCTCGCTGGATTATGAT  
GATGAAATTTTAGCACAACTTGATTATGTAATTGGAGCTATTCATCAAAGCTTTAACCAAT  
CAGAAGAACAATTTATGGAACGATTAGCTAATGCATGTCGCAATCCATACGTGCGACATA  
TAGCGCATCCAACAGGGCGTATTATAGGTAGAAGAGATGGTTATAAACCGAATATTGAA  
CAATTAATGGCATTAGCTGAAGAAACGAATACAGTATTAGAAATTAATGCCAATCCACAT  
CGACTGGATCTGAACGCTGATATCGTTCGTAATATCCAAATGTGAAATTAATTAAC  
ACTGATGCGCATCATACAAATCATTTAGATTTTATGAATTATGGCGTAGCAACTGCGCAA  
AAAGGATTTGTAACAAAAGATAGAGTGATTAACGCATTATCGCGTGAAGCTTTTAAAGAC  
TTTATTGAAAATAATATAAAACTTAAGAAATAG

## > mutS2

Function: protein coding sequence; DNA mismatch repair family protein (core genome, variable)

Best match: mutS2\_CC007\_TCH959-USA300\_AASB02000228.1[1340:3688]

Position: 028-contig\_257\_RC: 4084 ... 6433; Length: 2349 bp

Sequence:

ATGAGACAAAAACATTAGACGTCTTAGAATTCGAAAAAATAAAATCACTCGTTGCCAAT  
GAAACTATTAGTGACTTAGGCTTGGAAAAGGTCAATCAAATGATGCCAGCTACTAATTTT  
GAAACGGTTGTTTTTCAAATGGAAGAAACGGATGAGATTGCTCAAATCTATAATAAGCAT  
CGTTTACCAAGCTTGAGTGGCTTATCTAAAGTATCAGCATTATTTCATCGCGCTGATATTG  
GCGGCGTTTTAAATGTATCAGAGCTTAACTTGATAAAAAGATTAATTCAAGTACAAAATC  
AATTCAAGACATTTTATAATCAATTGGTTGAAGAAGATGAAGGTGTTAAATACCCAATAT  
TAGATGACAAGATGAATCAATTACCTGTGTTAACTGATCTTTTTCAACAAATAAATGAAA  
CATGCGATACGTATGATTTATATGATAATGCGAGTTATGAATTGCAAGGGATTAGAAGTA  
AAATTTCTAGCACGAATCAACGTATTAGACAAAATTTGGACCGTATTGTTAAAAGCCAAG  
CAAATCAGAAAAAATTATCAGATGCTATTGTAACAGTTAGGAATGAAAGAAACGTTATA  
CCTGTCAAAGCTGAATATCGACAAGATTTAATGGGATTGTACATGATCAATCTGCTTCA  
GGACAAACATTGTATATTGAGCCATCATCAGTTGTTGAAATGAATAATCAAATTAGTCGA  
TTACGTCATGACGAAGCAATTGAAAAAGAACGCATTTTAAACGCAACTAACTGGTTATGTG  
GCTGCGGACAAAGATGCACTACTTGTGGCAGAACAAGTCATGGGTCAGTTAGATTTTTTA  
ATCGCAAAAGCGAGATATAGTAGAAGTATTAAGGAACAAAGCCGATATTTAAAGAGGA  
CCGTAATGATATTTACCTAAAGCATACCATCCATTATTAATCGTGAGACTGTTGTAGCT  
AATACCATCGAATTTATGGAAGATATTGAAACGGTAATTATTACAGGACCGAATACAGGT  
GGTAAACTGTAAACATTAATAAACATTAGGTTTAATTATTGTTATGGCTCAATCAGGATTG  
TTGATTCCCACACTTGATGGTAGTCAGTTAAGTGTATTTAAAATGTATATTGCGATATCG  
GAGATGAACAATCAATAGAACAATCATTATCAACTTTTTCATCTCATATGACGAATATAG  
TTGAAATTTTAAAGCATGCAGACAAACATAGTTTATGTTTATTTGATGAATTAGGTGCAG  
GTACAGATCCGAGTGAAGGTGCTGCATTAGCAATGAGCATTTTATAGATCATGTTAGAAAA  
TTGGTTCTCTAGTAATGGCAACGACGCACTATCCTGAACCTAAAGCATATAGTTATAATC

GAGAAGGCGTTATGAATGCGAGTGTAGAATTTGATGTAGATACTTTGAGTCCAACGTATA  
AGTTATTAATGGGTGTGCCGGGTCGTTCAAATGCTTTTGACATTTCTAAAAAGTTAGGTCT  
TAGTTTGAATATTATTAATAAGGCTAAGACGATGATTGGTACTGATGAAAAAGAAATAAA  
TGAAATGATTGAATCATTAGAGCGTAATTACAAACGTGTAGAGACACAGAGGTTAGAAC  
TGGACCGTCTTGTA AAAAGAAGCGGAGCAAGTGCATGATGATTTATCTAAGCAGTATCAAC  
AATTCCAAAATTATGAAAAGTCTCTAATAGAGGAAGCGAAAGAAAAAGCAAATCAGAAG  
ATTAAGCTGCAACAAAAGAAGCTGACGATATTATTAAGACTTAAGACAATTGCGTGA  
ACAAAAGGTGCAGATGTTAAAGAACATGAATTGATTGATAAGAAGAAACGATTAGATG  
ATCATTATGAAGCGAAATCTATAAAGCAAAATGTACAAAAGCAAAAATACGATAAAATT  
GTTGCTGGTGATGAAGTAAAAGTATTATCTTACGGTCAAAGGGTGAAGTTTTAGAAATT  
GTCAATGATGAAGAAGCAATTGTTCAAATGGGAATTATTA AAAATGAAGTTACCTATTGAA  
GATTTAGAGAAAAACAAAAGAAAAAGTTAAGCCAACGAAAATGGTTACACGTCAAAA  
TCGTCAAACAATTA AAACTGAACCTGACTTACGAGGCTATCGTTATGAGGATGCTTTAAT  
TGAAGTAGATCAATATTTAGATCAAGCTGTTTTAAGTAATTACGAACAAGTTTATATCATT  
CATGGTAAAGGTACAGGTGCACTTCAA AAAAGGTGTACAACAACATTTGAAAAAGCATAA  
AAGTGTTAGTGACTTTAGAGGTGGTATGCCAAGCGAAGGTGGATTTGGCGTTACCGTTGC  
AACACTAAAATAA

> **trxA**

Function: protein coding sequence; thioredoxin (core genome, constant)

Best match: *trxA\_CC001\_MW2-USA400\_BA000033.2*[1125851:1126165]

Position: 028-contig\_257\_RC: 6605 ... 6920; Length: 315 bp

Sequence:

ATGGCAATCGTAAAAGTAACAGATGCAGATTTTCGATTCAAAGTAGAATCTGGTGTACAA  
TTAGTAGATTTTTGGGCAACATGGTGTGGTCCATGTAAAATGATCGCTCCGGTATTAGAA  
GAATTAGCAGCTGACTATGAAGGTAAAGCTGACATTTTAAAATTAGATGTTGATGAAAAT  
CCATCAACTGCAGCTAAATATGAAGTGATGAGTATCCAACATTAATCGTCTTTAAAGAC  
GGTCAACCAGTTGATAAAGTTGTTGGTTTCCAACCAAAGAAAACCTTAGCTGAAGTTTAA  
GATAAACATTTATAA

> **uvrC**

Function: protein coding sequence; ultraviolet response system protein C (core genome, constant)

Best match: *uvrC\_CC001\_MW2-USA400\_BA000033.2*[1126489:1128270]

Position: 028-contig\_257\_RC: 7244 ... 9026; Length: 1782 bp

Sequence:

TTGGAAGACTATAAGCAACGAATTA AAAAATAAATTA AATGTCGTACCTATGGAACCAGG  
CTGCTATTTAATGAAAGATCGTAATGATCAAGTGATATATGTTGGCAAAGCTAAAAGCT  
AAGAAATCGATTGAGATCATATTTTACGGGTGCTCATGATGCTAAAACAACGAGACTGGT  
TGGTGA AATACGTCGCTTTGAGTTTATTGTCACGTCAAGTGAAACAGAGTCACTTTTACTA  
GAATTGAATCTGATTAACAATATCAACCAAGATATAATATATTATTA AAGGATGATAAA  
AGTTATCCATTTATTA AAAATTACGAAGGAGAAATATCCTAGACTACTAGTGACGAGAACT  
GTAAAACAAGGTACTGGCAAATATTTCCGACCGTATCCGAATGCATATTCTGCTCAAGAA  
ACTAAAAGTTATTAGACAGAATATATCCATATCGCAAATGTGATAAGATGCCAGATAAA  
TTATGTCTTTATTACCATATTGGACAATGTTTAGGACCATGTGTATATGACGTTGATTTGA  
GTAAATACGCACAAATGACGAAGGAAATTA CTGATTTTCTGAATGGGGAAGACAAAACA  
ATTTTAAAAGTTT TAGAAGAGCGAATGTTAACTGCAAGTGAATCACTTGATTTTGAACGG  
GCTAAGAATATAGAGATTTAATTCAACATATTCAA AATCTGACAAACAACAAAAAATT  
ATGTCATCAGATAAAACGATTCGTGATGTCTTTGGTTATAGTGTTGATAAAGGATGGATG  
TGTATCCAAGTTTTCTTTATACGACAAGGTAATATGATAAAGCGAGATACAACGATGATT  
CCATTACAGCAAACAGAAGAAGA AATTTTATACATTTATTGGACAATTTTATAGCTTA  
AACCAACATATTTTACCTAAGGAAGTTCATGTACCACGTAATTTGGATAAAGAAATGATT  
CAATCTGTTGTGGACACTAAAATCGTTCAACCCGCGGAGGTCCCAAAAAGATATGGTT  
GACCTAGCTGCACATAACGCTAAAGTATCCTTAAATAATAAATTTGAATTAATATCACGT  
GATGAGTCAAGAACGATTA AAGCTATTGAAGA ACTTGGAACACAAATGGGAATTCAAAC  
ACCAATTAGAATTGAAGCATTTCGATAATTCTAATATTCAAGGTGTGGATCCAGTGTACG

AATGGTTACATTTGTCGACGGTAAACCAGATAAGAAAAATTATAGAAAGTATAAAAATCA  
AAACGGTTAAAGGTCCAGATGATTACAAATCAATGAGAGAAGTAGTAAGACGACGATAT  
TCTCGGTTTTAAACGAAGGATTACCATTACCTGATTTAATAATAGTAGATGGTGGTAAA  
GGACATATGAACGGGGTTATTGATGTGCTACAAAACGAATTAGGTCTTGATATCCCTGTT  
GCAGGTTTGCAGAAAAATGATAAACACCAAACATCTGAATTATTATATGGCGCTAGTGCA  
GAAATTGTACCACTGAAGAAAAATAGCCAGGCATTTTATTTGTTGCATCGTATCCAAGAT  
GAGGTTACACAGATTCGCAATCACATTTTCATAGACAAACACGTCAAAGACAGGCTTGAA  
ATCAATACTTGATGATATAGATGGTATCGGTAACAAACGTAAAACATTATTATTGCGTTC  
ATTCGGTTCAATCAAGAAAATGAAGGAAGCTACACTTGAAGATTTTAAAAATATAGGTAT  
TCCTGAAAACGTGCAAAGAACCTACATGAACAATTGCATAAATAA

### > **sdhC**

Function: protein coding sequence; succinate dehydrogenase cytochrome b-558 (core genome, constant)

Best match: *sdhC*\_CC001-ST772\_118\_AJGE01000009.1[251389:252003] (completely identical)

Position: 028-contig\_257\_RC: 9349 ... 9964; Length: 615 bp

Sequence:

TTGGCTCAATCAAAAAATGAATTTTATCTAAGACGTATTCCTCGTTATTAGGTATTATCC  
CAATAGGTGCATTTTTGGTCGTTCAATTTATTAGTGAATCACCAAGCAACACAAGGTGCTG  
AAGCGTTTAATAAGGCATCTAACTTTATGGAATCATTACCATTTCTAATTATTGTAGAATT  
TTTATTTATATACATTCCGTTGTTATATCACGGTTTGGTTGGTATACACATTGCATTTACAG  
CAAAGAAAAATGTTGGACATTACTCGATTTTAGAACTGGATGTTCTTTTTCCAAAGAG  
TGAGTGGTATCTTAACATTTATCTTTATTGGTATCCATTTATGGCAAACACGTTTACAAAA  
AGCATTTTACGGCAAAGAAGTGAATTACGATTTAATGCACGAAACATTGCAACATCTTGG  
ATGGGCAATATTTTATATTATTTGTATTATTGCTGTTGTGTTCCACTTTGCAAATGGCTTAT  
GGTCATTCTTAGTTACTTGGGGTGGACTTCAATCTCCAAAATCACAACGAGTATTTACATG  
GGTTTCATTAATCGTATTCTTAGTTATTTTCGTATATTGGTGTACTGCAATTATTGCCTTTA  
TGTA

### > **sdhA**

Function: protein coding sequence; succinate dehydrogenase subunit A (core genome, variable)

Best match: *sdhA*\_CC001-ST772\_118\_AJGE01000009.1[252055:253821] (completely identical)

Position: 028-contig\_257\_RC: 10015 ... 11782; Length: 1767 bp

Sequence:

ATGGCAGAGAAACATCTTATTGTTGTCGGAGGTGGCCTAGCGGGCTTAATGTCAACAATT  
AAAGCGGCAGAAAAAGGTGCACATGTAGATTTGTTCTCAGTTGTACCAGTAAAGCGTTTCG  
CACTCTGTTTGTGCCCAAGGTGGCATTAAATGGTGCAGTCAATACTAAAGGGGAAGGCGAT  
TCTCCTTGGATTCATTTGATGATACAGTGTATGGTGGCGACTTCCTTGCAAACCAACCAC  
CTGTTAAAGCGATGACAGAGGCAGCACCTAAAATTATTCATTTATTAGACCGTATGGGCG  
TAATGTTCAATAGAACAAATGAAGGTCTATTAGATTTTAGACGTTTCGGTGGTACATTAC  
ACCACAGAACAGCATATGCAGGGGCAACAACCTGGACAACAATTATTATATGCATTGGAT  
GAACAAGTTCGTGCATATGAAGTAGATGGATTAGTTACGAAGTATGAAGGATGGGAATT  
CCTTGGCATAGTTAAAGGTGACGATGATAGTGCAAGAGGTATCGTTGCACAAAATATGAC  
AACTGCTGAGATTGAAACATTTGGTTCAGATGCAGTTATTATGGCAACGGGTGGCCCTGG  
TATTATTTTCGGTAAACAACAACACTCAATGATTAATACAGGATCAGCGGCTTCCATTGTT  
TACCAACAAGGCGCTATTTATGCTAATGGTGAGTTCATTCAAATTCATCTACTGCAATCC  
CTGGTGATGATAAACTGCGACTAATGAGTGAATCAGCACGTGGTGAAGGTGGACGAATTT  
GGACATATAAAGATGGTAAGCCTTGGTACTTCTTAGAAGAGAAATATCCTGATTATGGTA  
ACTTAGTACCTCGTGATATCGCAACGCGTGAAATTTTCGATGTATGTATTAACCAAAAATT  
AGGTATAAATGGCGAAAACATGGTATATCTTGATTTGTACATAAAGATCCACATGAGTT  
AGATGTAAAACCTAGGTGGTATCATTGAAATTTATGAAAAATTCCTGGTGATGACTCACG  
CAAAGTACCAATGAAGATTTTCCCAGCTGTTCACTATTCAATGGGTGGTCTATATGTAGAT  
TATGATCAAATGACAAATATTAAGGGTTATTTGCAGCTGGAGAATGTGACTTCTCTCAA  
CATGGTGGTAACCGCTTAGGTGCCAATTCATTGTTATCAGCGATTTATGGTGGTACAGTA  
GCAGGTCAAACGCGATTGATTATATTTCAAATATTGATCGATCATATACTGATATGGAC

GAAAGTATTTTTGAAAAGCGTAAAGCTGAAGAGCAAGAACGTTTTGATAAATTATTAGCT  
ATGCGCGGTACAGAAAATGCCTATAAATTACACCGTGAACCTGGTGAAATTATGACAGCA  
AATGTAAGTGTTCGTGAAAATGAAAACTGTTAGAAACAGATAAAAAGATTGTTGAA  
TTGATGAAACGTTATGAAGATATTGATATGGAAGATACTCAAACCTGGAGTAACCAAGCG  
GTATTCTTTACTCGTCAATTATGGAACATGTTAGTACTTGCACGTGTTATTACGATTGGTG  
CATATAACCGTAACGAATCACGCGGTGCCATTATAAACAGAAATCCAGAGCGTAATG  
ATGAAGAGTGGTTAAAAACGACAATGGCCTCATTCCAAGGCGCATTTGAAAAACACAG  
TTTACTTATGATGACGTGATGTGAGTTAATACCACCTCGTAAACGTGATTACACAAGTA  
AGTCTAAAGGGGGTAAAAATAA

### > **sdhB**

Function: protein coding sequence; succinate dehydrogenase subunit B (core genome, variable)  
Best match: *sdhB\_CC001-ST772\_118\_AJGE01000009.1*[253821:254636] (completely identical)  
Position: 028-contig\_257\_RC: 11781 ... 12597; Length: 816 bp

Sequence:

ATGACTGAACAATCAGTGAAAAACACTCCACAACATGAAACACAATCTAAACCGAAACA  
AAAAACAGTAAAATTAATTATTAACGACAAGATACAAGTGATTCTAAGCCTTATGAAG  
AAACATTTGAAATCCATATCGTGAAAATTTAAACGTCATTGCTTGTTAATGGAAATTAG  
ACGTAACCCAGTTAATATTAAGGTGAAAAACAACACCTGTTGTCTGGGATATGAACTG  
CTTAGAAGAAGTATGTGGAGCATGTTCTATGGTTATCAATGGTCGTGCAAGACAATCTTG  
TTCTGCGATTGTTGATCAATTAGAACAACCTATTCGTTTAGAGCCAATGAATACTTTCCCA  
GTTATCCGTGACTTACAAGTTGATCGTTCTAGAATGTTTCGATAACTTAAAACGTATGAAA  
GCATGGATCCCAATTGATGGAACGTATGATTTAGGTCCGGACCACGTATGCCAGAGAAA  
AAACGTCAAACAGCTTATGAATTATCTAAATGTATGACATGTGGTGTATGTTTAGAGGTT  
TGTCCTAATGTTACTGAAAATAATAAATTCGTTGGTTCGCAAGCAATCTCGCAAGTTCGTT  
TGTTAATTTGCACCCAACAGGATCTATGACTAAAGATGAACGTTTAAATGCATTAATGG  
GTACTGGTGGCTTACAGCAGTGTGGAATTCACAAAACCTGTGTTAATGCTTGCCCTAAAG  
GTATTCCATTAACAACATCCATTGCAGCAATGAACAGAGAAACAACATTCCACATGTTTA  
AATCATTTCTTTGGTTCAGACCATGAAGTAGAATAA

### > **murI**

Function: protein coding sequence; glutamate racemase (core genome, variable)  
Best match: *murI\_CC001-ST772\_118\_AJGE01000009.1*[254877:255677] (completely identical)  
Position: 028-contig\_257\_RC: 12837 ... 13638; Length: 801 bp

Sequence:

ATGAATAAACCAATAGGTGTAATAGACTCTGGTGTGCGGAGGTTTGACAGTAGCTAAAGA  
AATTATGCGTCAGTTGCCAAATGAGACGATTTATTACTTAGGTGATATTGGGCGATGCC  
ATATGGGCCAAGACCAGGAGAACAAGTAAAACAATATACAGTTGAAATCGCTCGTAAAT  
TAATGGAATTTGATATAAAAATGCTCGTGATTGCTTGTAATACAGCAACTGCTGTAGCTTT  
AGAATATTTACAAAAGACCTTATCAATCCCAGTGATTGGCGTAATTGAACCAGGTGCTAG  
AACAGCAATAATGACTACTAGAAATCAAATGTATTAGTACTAGGAACGGAAGGCACAA  
TTAAATCTGAAGCATATCGTACGCATATTAACGTATCAATCCACATGTAGAGGTACATG  
GCGTTGCCTGTCCAGGTTTTGTGCCACTTGTAGAACAAATGAGATATAGTGATCCAACAA  
TTACAAGCATTGTCATTCATCAAACACTGAAACGTTGGCGTAATAGTGAGTCTGATACTG  
TCATTTTAGGATGTACCCACTATCCATTGCTCTATAAACCTATCTATGATTATTTTGGTGGT  
AAAAGACAGTGATTTCTGCTGATTAGAAACGGCTCGTGAAGTTAGTGCATTGCTAACA  
TTTAGTAATGAACATGCAAGTTATACTGAAAATCCAGATCATCGATTTTTTGAACAGGT  
GATCCTACTCACATTACTAACATTATCAAAGAGTGGTTAAATTTATCTGTCAATGTGGAAC  
GTATATCAGTGAATGACTAG

### > **ntpA**

Function: protein coding sequence; nucleoside-triphosphatase (core genome, variable)  
Best match: *ntpA\_CC008\_NCTC8325\_CP000253.1*[1068965:1069552] (completely identical)  
Position: 028-contig\_257\_RC: 13649 ... 14237; Length: 588 bp

Sequence:

ATGAAAGAGATTGTTATTGCATCGAATAATCAAGGGAAAATAAATGACTTTAAAGTAATA  
TTTCCAGATTACCACGTAATAGGTATTTTCAGAACTAATACCAGATTTTGATGTGGAAGAA  
ACAGGATCAACATTTGAAGAAAATGCTATATTAATAATCAGAAGCTGCTGCAAAAGCATT  
GAATAAAACGGTCATAGCTGATGACAGTGGACTAGAAGTTTTTGCATTAAATGGTGAGCC  
AGGTATATACTCTGCACGTTATGCTGGTGAAAATAAAAAGCGATGAAGCAAATATTGAAA  
AATTATTAATAAGCTTGGTAATACAACTGATCGTCGTGCGCAATTTGTTTGTGCATAAG  
TATGAGTGGCCCTGATATGGAAACAAAAGTATTTAAAGGTACTGTTTCAGGTGAAATTGC  
AGATGGAAAATATGGCGAAAATGGTTTCGGATATGATCCGATATTTTATGTACCGAAATT  
AGATAAAACCATGGCTCAACTTTCAAAGAACA AAAAGGGCAAATTAGTCATAGACGAA  
ATGCGATTAATTTACTTCAAGCTTTTCTTGAAGGTGATAAAAATGTCTAA

### > **Q5HGT1**

Function: protein coding sequence; putative phosphodiesterase (core genome, variable)

Best match: Q5HGT1\_CC001\_ATCC51811\_ADVP01000010.1[41018:41521:r]

Position: 028-contig\_257\_RC: 14229 ... 14733; Length: 504 bp

Sequence:

ATGTCTAAATGGATTATTGTGAGTGATAACCATACAGAATCAGGCGTTTTATATCAAATTT  
ATGAAATGCACCCAGATGCAGATGTATTTTACATTTAGGAGATTCAGAATTCGCGTATG  
ATGATACGGAACCTTAGCTTATTTAATAGAGTAAAAGGCAATTGTGATTTTTACCCAGAAT  
TTGAAAATGAAGCGGTCGCAAAAATATAATGACGTGAAAGCATTTTATACTCATGGACATT  
TATATCAAGTCAATCGAACAAGAGATTTATTAGCTGAAAAGGACTTGAATTAGGTTGTT  
TGTTTGCATTTTTATGGACATACACATGTGGCAAAAATATGAGTATATTAATGGTGTTCATGT  
TATTAATCCTGGAAGTATATCTCAATCTAGAAGTTCAATGGAAGAAACATATGCTGAAGT  
TATTATTGATGATCAAACCTTTACATGGCACCATCAATTTCAAAAATCGACATCACGAAAC  
AATCAGTCATACTACTTTTTAA

### > **Q6GA61**

Function: protein coding sequence; putative protein (core genome, variable)

Best match: Q6GA61\_CC008-ST72\_TCH130\_ACHD01000022.1[4264:4431:r] (completely identical)

Position: 028-contig\_257\_RC: 14860 ... 15028; Length: 168 bp

Sequence:

ATGAAAAGAATTGTAATTTTAGAGAATGTGATTGTTGATGACCCTATATGGTTGAATCAT  
GTTGATTATTTGGTTAAAAGTGTATTATTA AAAAGTATAAAAATTAAGATTCCAAGAAGTC  
AGGAAATTTGAAATTTTAGTTAAAATCATGATTCGTATACATATTTAA

### > **ecb**

Function: protein coding sequence; extracellular complement-binding protein (core genome, variable)

Best match: ecb\_CC022\_HE681097.1[1102220:1102549]

Position: 028-contig\_257\_RC: 15221 ... 15551; Length: 330 bp

Sequence:

ATGAAAAGAATTTTATTGGGAAATCAATTTTAAGCATAGCTGCTATTAGTTTAAACGGTA  
TCAACGTTTGCCGGTGAATCTCATGCACAACTAAAACGCTGAAACTGTAAAAAATAT  
AACGAGTATCAAACAACTTTAAAAAACAAGTAAATAAAAAAGTAGTGACGCACAAAA  
AGCTGTAAACTTGTCAAACGTACAAGAACTGTTGCAACACACCGTAAAGCACAAAGAG  
CTGTTAATTTAATTCATTTCCAACACAGCTATGAAAAGAAAAAATTACAAAGACAAATCG  
ATCTAGTTTTAAATATAATACTTTAAAATAA

### > **flr**

Function: protein coding sequence; formyl peptide receptor inhibitory protein (core genome, variable)

Best match: flr\_CC007\_TCH959-USA300\_AASB02000228.1[13158:13559:r]RC [4\_150END]

Position: 028-contig\_257\_RC: 16172 ... 16322; Length: 150 bp

Sequence:

GTCCTTTTGTAGCTTGATCTGCTAAATTTTTGCGATTTCTAAACCTTTCCATTCATAACTAA  
AGAAAGCTTTAGCATCATTAGTTTGTGAGTTGAAAGACCTGCAGCGATTACTGTAGATGCGA  
TAATAGTTTTTGTGATATTTTTTTTCAT

> **Q2YXB9**

Function: protein coding sequence; putative membrane protein (core genome, constant)

Best match: Q2YXB9\_CC005\_Mu50-VRSA\_BA000017.4[1211324:1211830] (completely identical)

Position: 028-contig\_257\_RC: 16991 ... 17498; Length: 507 bp

Sequence:

```
ATGATAAATTTAAATTTTAAACAATTCTATTACTACTTTGTATATTGAGCTATTTGGTTACAA
ATAGAAAGAAGCCTTTTCTGTTCTTAAAGACACTCTTTATGGGTGTGGTATTTATCTTTAT
AGGATATATTTCACTGGCAATATCTGCCGTAATTATTTATGGTATTATTCAATTTATCACA
ATTGATTTTGGTAGTTTTTTCTTAATGGGTATTATATTGATCTTGATTCAAGTATATTCCA
ATTATTTATAGTTAGATTACTTTTTAGAAAAAGAATGTCGATTGACAGAGGTTGTCGTT
TTAGAGCATTTAATTC AATGGTTCTTAGTTTACTTTGCGATCTATCAAGCAGTAAATGAAA
AAATGGACATTAATGATATTAATATCGACAATTTCCAATCTGTCTTTTTTGTGACGTGTCTAA
TTTGAATTTAGTAATTCTACCAACGTTAATCATTAGCTGGGTCACAATATTTAACTATAGA
ATGAGAAGTTACAAATAA
```

> **efb**

Function: protein coding sequence; extracellular fibrinogen-binding protein (core genome, variable)

Best match: efb\_CC001-ST772\_118\_AJGE01000009.1[259797:260294] (completely identical)

Position: 028-contig\_257\_RC: 17757 ... 18255; Length: 498 bp

Sequence:

```
ATGAAAAATAAATTGATAGCAAAATCTTTATTAACAATAGCGGCAATAGGTATTACTACA
ACTACAATTGCGTCAACAGCAGATGCGAGCGAAGGATACGGTCCAAGAGAAAAGAAACC
AGTGAGTATTAATCACAATATCGTAGAGTACAATGATGGTACTTTTAAATATCAATCTAG
ACCAAAATTTAACTCAACACCTAAATATATTAATTTCAAACATGACTATAATATTTTAGA
ATTTAACGATGGTACATTCGAATATGGTGC GCGTCCACAATTTAATAAACCAGCAGCGAA
AACTGATGCAACTATTAATAAAGAACAATAAATTGATTCAAGCTCAAATCTTGTGAGAG
AATTTGAAAAACACATACTGTCAGTGCACATAGAAAAGCACAAAAGGCAGTCAACTTA
GTTTCGTTTGAATACAAAGTTAAGAAAATGATATTGCAAGAGCGAATTGATCAAGTATTA
AAGCAAGGATTAGTGAGATAA
```

> **scc**

Function: protein coding sequence; similar to complement inhibitor (core genome, variable)

Best match: scc\_CC001\_MW2-USA400\_BA000033.2[1137633:1137983]

Position: 028-contig\_257\_RC: 18726 ... 18756; Length: 30 bp

Sequence:

```
AAAGAAATTGATGAAATTATAAATAGATAA
```

> **tx\_universal2**

Function: rho independent terminator

Best match: tx\_universal2\_CC025\_21193\_AFEG01000027.1[76692:76730:r] (completely identical)

Position: 028-contig\_257\_RC: 19032 ... 19071; Length: 39 bp

Sequence:

```
CTAAATGAAAATACGCTTGTAACAAGTTTTTTCAATACT
```

> **Q2FZB6**

Function: protein coding sequence; putative protein (genomic island)

Best match: Q2FZB6\_CC001\_MW2-USA400\_BA000033.21138347:1138525 [4\_50ANF10END]

Position: 028-contig\_257\_RC: 19119 ... 19185; Length: 66 bp

Sequence:

```
TGCAAGTTGGCGGGGCCCAACATAGAGAAATTGGATCACCAATTTCAACAGACAATGC
AAGTTGG
```

> **STAR**





AGGTTGAACATATTTTCAGTGTATGACCAATCGAAACATTTGCACCAATAAGGCCGCAAT  
TTTTCTGTATCATCACCAGTAACATTACCGTTGAATCCATAAGTTAAAGTACTCATATAC  
TCTTTTGTATCAATCGAATTTCTTGGATAGCAATCAGATATTTGAGCTACTTCATTATCAG  
GTAGTTGCAACTGTACCTTAAAGGCTGAAGGCCAGGCTAAACCACTTTTGTTAGCACCTT  
CTTCGCTATAAACTCTATATTGACCAGCAATGGTACCTTTCGTTCTAATAACTAGCAGTTT  
TTTATTGTGATTTTTATCATCGATAAAACTATAAAATACTTTTTTGTGCATGCCATTTTCTT  
TATCATAAGTGACTAAATCACCTGTTTTACTGTAGTATTGCTTCCAATATCTGTAGTACC  
GGTTTTAATATTAATATCAGAATCTGCGGCATTAGCGACAGGATTCATTAATATGGAACC  
TAGCAATAGTGTGTGTTACTGAGCTGACTATACGTGTTTTTCAT

### > **A6U0Y3**

Function: protein coding sequence; putative protein (core genome, variable)

Best match: A6U0Y3\_CC005\_Mu50-VRSA\_BA000017.4[1218522:1218668] (completely identical)

Position: 028-contig\_257\_RC: 22500 ... 22647; Length: 147 bp

Sequence:

ATGAAACTATTTTATATCGTATTTCTTATTATTATATGGCTGAATATATTTTTAGGAAATG  
AAATTATCCATACACTGACTGTTTTAATAACAACATTGTATATTGTTAATTCAAGAAAGG  
GGATTA AAAATGACAGAGTTGAATAA

### > **Q2FZB4**

Function: protein coding sequence; putative protein (core genome, variable)

Best match: Q2FZB4\_CC005\_Mu50-VRSA\_BA000017.4[1218652:1218849] (completely identical)

Position: 028-contig\_257\_RC: 22630 ... 22828; Length: 198 bp

Sequence:

ATGACAGAGTTGAATAATATTATAAACTCTCTTCAATCTTTGTTTGAGTCTGAATCAGGCT  
ATAAAAATTTTCGAAAAATTCAGGAGTTCCATATCAAACAGTACAAGATTTAAGAAATGGG  
AAAACCAAACCTAGAAGATGCTAGATTTAGAACGATTATTAACCTTTATAGTTACTATGTC  
TCATTA AAAAGAACATTA

### > **txbi\_universal1**

Function: bidirectional rho independent terminator

Best match: txbi\_universal1\_CC001\_MW2-USA400\_BA000033.2[1397234:1397306:r]RC  
(completely identical)

Position: 028-contig\_257\_RC: 22895 ... 22968; Length: 73 bp

Sequence:

TAAATCCCTAAAAAACAGCAGTAAGATAATTTTCAATTAGAAAATATCTTACTGCTGTT  
CTCTATTTATACA

### > **tx\_universal3**

Function: bidirectional rho-independent terminator

Best match: tx\_universal3\_CC008\_COL\_CP000046.1[2415294:2415357:r]RC (completely identical)

Position: 029-contig\_258\_RC: 7 ... 71; Length: 64 bp

Sequence:

ATACATATCAAAAAAGCTGATTTCTATCAAATAATTAATAGAAATCAGCTTTTTTACATTG  
CCT

### > **tnpIS1272**

Function: protein coding sequence; transposase of insertion element IS1272

Best match: tnpIS1272\_15653\_EU272084.1[3547:5193]

Position: 029-contig\_258\_RC: 43 ... 73; Length: 30 bp

Sequence:

AATAGAAATCAGCTTTTTTACATTGCCTAA

### > **tx\_universal2**

Function: rho independent terminator

Best match: tx\_universal2\_CC001\_MW2-USA400\_BA000033.2[1142336:1142376] (completely identical)

Position: 029-contig\_258\_RC: 121 ... 162; Length: 41 bp

Sequence:

CCGAATGAAAATGCCCATGTAACAAGCATTTTTCAATTATA

### > repeat\_nyS $\gamma$

Function: repeat element

Best match: repeat\_nyS $\gamma$ \_CC008\_COL\_CP000046.12325058:2325185RC [4\_50ANF10END]

Position: 029-contig\_258\_RC: 162 ... 230; Length: 68 bp

Sequence:

GGCGGGGCCCAACATAGAGAATTTCAAAAAGAAATTCTACAGACAATGCAAGTTGGCG  
GGGCCCAA

### > Q2FZB6

Function: protein coding sequence; putative protein (genomic island)

Best match: Q2FZB6\_CC008\_COL\_CP000046.1[1182242:1182414]

Position: 029-contig\_258\_RC: 245 ... 275; Length: 30 bp

Sequence:

AAAGTCAGCTTACAATAATGTGCAAGTTGG

### > setB3

Function: protein coding sequence; staph enterotoxin-like toxin B (core genome, variable)

Best match: setB3\_CC001\_MW2-USA400\_BA000033.2[1142778:1143494:r]RC

Position: 029-contig\_258\_RC: 450 ... 1167; Length: 717 bp

Sequence:

CTAATCAAAGAGGACGTCAACAGTTATTTTATTAGGATTTTAAACATAAACATTTGCTAG  
ATCTGAATGTAATCTTTTGCTTAAATCAATAGTGTAGTTATTACCGCCACCGGTGATCTTA  
AGCTTACCTTTATTACGATTTTCGTTATATAATTTTTATTTTTTATTAACGCTTCTCGTGC  
ACGGAATCGATTTCTTTCAATGTTAATACTGGTTTATTGCCTTGGTATATTTTTATGCGCA  
CCAATAATCGTTTGTAGTTTATCTTTGTATTGCACAAAAAGATTATAAGTTTTATCAGAAG  
GTTTTGCGGCTGGTGTAACGCCACCTGTAAATGTCTCTCTATAAGACCACCATAACTGATC  
AGTATCTTTGTCTTTTAGTCCAAACACATCTACGTAACGATCTTTAACTGATTAATATTTT  
CCCAACTTTTACGCGCCCATAAAGATATATGTGCTGACCATGAATATCTCTTAAGTTCAAC  
ATAAATGTTTCCATTATCATATTGATATAGCCATTTATTTGAAAATGAAAATGAGGCTGT  
GTGTAATATTTAATTAATTCATTGATGTTAGTTTCATCTTGACCAATACTATAAGCTTTAG  
CTTCAGAGTAAAACTAAATACTGGTTTTTTGATTTTGAGGTAATACAGTACCTAATAGTA  
ATAATGTTGTCGTTAAAATTATATTTTCGTGATGTTCTTACTCAT

### > setB2

Function: protein coding sequence; staph enterotoxin-like toxin B (core genome, variable)

Best match: setB2\_CC001\_MW2-USA400\_BA000033.2[1143602:1144327:r]RC

Position: 029-contig\_258\_RC: 1274 ... 2000; Length: 726 bp

Sequence:

TTAGTTTGATTTTTTCGAGGATAACTTCAATTTTTGCATTTTGAGGTTTTTTAACATATCTAT  
TTGCATCAGTTGATGGCAACCTTTTACTTAAATCTATTGTGTAGTTATTGTCTGCACCTGTT  
ATTTTAATTTGTCCTTTATTATAAGAATTATTATATAATTTTTTACTTTTAATTAATGTTT  
ACGAATACGAAAATCTAATTTCTTTTAAAGTTAAAACAGGCTTATTGCCTTCATAAACTGG  
AAATCCGCCAGTAAACGTTTCTGCTTTATCTTTATATGTTACATTCAGTTTATAGTGTTTAT  
CGTTAGATGTTGCTGCAGGAGTAACACCACAGTAAACGTTTCTTGAGATAATGCAAAAAG  
AATCAATGGTTTCTTGGTCTTTTATGCCAAAAATATCAACGCTTTTATTTCTTAATGGTTG  
ATATTGCCCAACTTTCAGGTCCATAAACTTGAATATGACTATACCAAGAAAACCTGTAAC  
AACGTTGCATGAATCGTACCGTTATCTTTTTGCCATAACGTACTGTTTGAGAAGGTTAAAT  
ATTTTTGCGAGTAATATTTAGTTAACTCATTTACGTTAGTTTCGTTTTGATTTATATAATAA

GCTTTCGCTTCAGATGAAGAATTGATAGGTGTATTAGGAAATTGTGTAGATGCTGTACCT  
AATAGTAACAATGTTGTTGATAAAAATAATTTTTTTTCGTGATGTTATTGTTTCAT

### > **setB1**

Function: protein coding sequence; staph enterotoxin-like toxin B (core genome, variable)

Best match: setB1\_CC001\_MW2-USA400\_BA000033.2[1144422:1145147:r]RC

Position: 029-contig\_258\_RC: 2094 ... 2820; Length: 726 bp

Sequence:

TTAGTTAGATTTTTTCGAGTATGACTTCAATTTGTGCATTTTTAGGATTTTAAACATAACGGT  
TTGTGTCAGTTAATTTTAACTTTTTACTTAAATCAATCGTGTAAATTATTTCCATCAGCAGTT  
ATCTTAATTTGACCTTTATTAATTTCTCCGTTATATAACTTTTTATTCTTTATTAATGTTTG  
ACGAATACGGAAGTCTAATTTCTTTAGAGTTAATACTGGTTTATTTCCCTTTGTAAAATTCA  
TGTCCACCGATGATAGTTTGTGTTTATCACTATATTTTAAAAATAGTCTATAAGGTTTAT  
CAGATGAAGTAGCTGCTGGCGTAACACCACCAGTAAATGTTTCATCATAAGTCCAGTAAAC  
CTTCAACTGTGTCCTCATCTTTAGTTCCAAATATATCAACGTATTTATTTCTTAACTGATTA  
ATGTTTCCCAACTCTCGGATCCAAACACTTGAATATGACTATACCAAACCCACGTTTGCA  
ATGTTGCATGAATGCTACCATTGGGCTTTTGCCATAACCATTTATTTGATAGTGATAAATG  
AGGCTGTGTATAATACTTTATTAACCTCATTGATATTAGTCTCGTTTTCACTGATATTATAG  
GCTTTTGCTTCAGATGAAAACTGATTGGTGTTTTAGGAAGTTGTGTTGATGTGGTTCCTA  
AAAGTAACAATGCAGTTGATAAACTAATTTATTCATGATGTTCTTTTTTCAT

### > **arcB-L1**

Function: protein coding sequence; ornithine carbamoyltransferase locus 1 (core genome, constant)

Best match: arcB-L1\_CC001\_MW2-USA400\_BA000033.21145585:1146586 [4\_50ANF10END]

Position: 029-contig\_258\_RC: 3257 ... 4259; Length: 1002 bp

Sequence:

ATGAAAAATTTACGAAACAGAAGTTTTTTAACTTTATTAGACTTTTCACGACAAGAGGTA  
GAATTCTTATTAACACTCTCCGAGGATTTAAAACGTGCTAAATATATTGGCACTGAAAAG  
CCTATGTTAAAAAATAAAAAATATTGCACTGTTATTTGAAAAAGATTCTACAAGAACGCGA  
TGTGCATTTGAAGTTGCAGCGCATGATCAAGGTGCAAATGTAACCTTATTTAGGCCCAACT  
GGATCACAAATGGGTAAAAAAGAAACAACCTAAAGATACTGCACGTGTGCTTGGTGGAAAT  
GTATGATGGCATTGAATACCGTGGTTTTTACAAAAGAACAGTAGAACTTTAGCTGAGTA  
TTCAGGCGTACCAGTGTGGAATGGTTTAACTGATGAAGATCATCTACTCAAGTTCTTGCT  
GATTTCTTAAACAGCAAAAAGAGTCTTAAAAAAGATTATGCAGATATTAACTTTACATAT  
GTTGGAGATGGTCGTAATAACGTTGCAAATGCATTAATGCAAGGTGCTGCCATTATGGGT  
ATGAACTTCCATTTAGTTTGTCCAAAAGAATTAATCCAACAGATGAATTATTAATATCGC  
TGTA AAAAATATTGCCGCTGAAAATGGTGGCAACATATTAATCACAGATAATATTGACCAA  
GGTGTA AAAAGGTTCCGATGTAATTTACTGACGTTTGGGTATCAATGGGTGAACCTGAT  
GAAGTATGGAAAGAACGACTTGAATTATTGAAACCATATCAAGTAAATAAAGAAATGAT  
GGATAAACTGGTAATCCAAATGTTATTTTTGAGCATTGCTTACCATCTTTCCATAATGCT  
GATACGAAAATTGGTCAACAAATTTTTGAAAAATATGGAATTCGAGAAATGGAAGTTAC  
AGATGAAGTATTCGAAAGTAAAGCTTCAGTTGTATTCCAAGAAGCTGAGAACAGAATGC  
ATACAATCAAAGCAGTGATGATTGCTACATTGGGTGAATTTTAA

### > **arcC-L1**

Function: protein coding sequence; carbamate kinase/locus 1 (core genome, constant)

Best match: arcC-L1\_CC001\_ATCC51811-ST1\_ADVP01000010.1[27450:28382:r]

Position: 029-contig\_258\_RC: 4281 ... 5214; Length: 933 bp

Sequence:

ATGGCGAAAATAGTAGTAGCATTAGGTGGTAATGCTTTAGGAAAATCACCTCAAGAACA  
ACTCGAGCTTGTTAAAAATACTGCGAAATCATTAGTAGGATTAATAACAAAAGGACATGA  
GATTGTTATTAGTCATGGTAATGGACCACAGGTTGGAAGCATTAAATTTGGGACTTAACTA  
TGCTGCAGAACATAACCAAGGTCCGGCATTTCATTTGCTGAATGTGGCGCAATGAGTCA  
AGCTTACATCGGCTATCAATTACAAGAAAGCTTACAAAATGAATTGCATTCTATTGGAAT  
GGATAAACAAGTGGTAACACTAGTGACACAAGTTGAAGTTGATGAAAATGATCCGGCAT

TTAACAATCCTTCAAACCAATTGGGTTATTTTACAACAAAGAAGAAGCTGAACAAATTC  
AAAAAGAAAAGGATTTATATTTGTTGAAGATGCTGGAAGAGGATATAGACGCGTTGTT  
CTTACCACAACCCATCTCTATTATTGAATTAGAGAGTATTAACACTTATTAATAATG  
ATACACTCGTTATTGCTGCTGGCGGTGGAGGTATACCAGTAATTAGAGAGCAACATGATG  
GTTTTAAAGGTATTGATGCAGTTATAGACAAAGATAAAAACAAGTGCATTGTTGGGTGCTA  
ATATTCAATGCGATCAATTGATTATTTTAAACAGCAATTGATTATGTATATATTAATTTTAA  
CACTGAAAACCAACAGCCTTTGAAAACAATAAATGTTGATGAATTAACGATATATAG  
ACGAAAATCAATTTGCAAAAAGGAAGTATGTTACCAAAAATTGAAGCAGCCATATCATTTA  
TTGAAAACAATCCAAAAGGAAGCGTGCTTATAACATCATTAAATGAATTAGATGCTGCCT  
TAGAGGGTAAAGTAGGTACTGTGATTAATAAAGTAA

### > **arcD1**

Function: protein coding sequence; C4 transporter/TRAP family (core genome, constant)

Best match: arcD1\_CC008\_NCTC8325\_CP000253.1[1083751:1085307] (completely identical)

Position: 029-contig\_258\_RC: 5385 ... 6942; Length: 1557 bp

Sequence:

GTGGAAAATACAATTAATGAAAGTGAAAAGAAAAACGATTTAAATTAATAATGCCAGG  
TGCATTTATGATTTTATTCATTTAACGGTTGTTGCAGTTATAGCAACATGGGTTATTCCTG  
CTGGTGCATATTCTAAACTTTCTTACGAACCTTCATCCCAAGAACTAAAGATAGTTAACCC  
TCATAACCAAGTGAAAAAGGTTCCGGGTACGCAACAGGAACTAGACAAAATGGGGGTTA  
AAATTAAGATTGAACAATTTAAATCAGGTGCAATTAATAAGCCGGTATCAATTCCGAATA  
CTTATGAAAGATTAAAGCAACATCCAGCTGGACCAGAACAATAACAAGTAGCATGGTT  
GAAGGTACGATAGAAGCGGTCGATATCATGGTATTCATTCTTGTACTAGGGGGACTTATT  
GGCGTAGTTCAAGCCAGTGGTCTTTTGAATCGGGATTGTTAGCTTTAACGAAGAAAACA  
AAAGGGCATGAATTTATGCTAATTGTGTTTGTATCAACTAATGATTATCGGCCGGGACA  
TTATGTGGTATTGAAGAAGAAGCTGTAGCATTATCCGATTTTAGTCCCTATATTTATAG  
CGTTAGGATACGATTCTATCGTTTCAGTTGGTGCCATATTCCTTGCCAGCTCTGTCGGTAG  
TACATTTCAACTATTAACCCGTTCTCGGTTGTAATTGCCTCTAATGCCGCTGGTACAAC  
TTTACGGATGGCTTGTATTGGAGAATAGGTGCTTGTATTGTCCGGTGCATTTTGTATTATTA  
GTTATTTATATTGGTACTGTAAAAAATTAATAACGATCCTAAAGCGTCATATTCCTATGA  
AGACAAAGATGCTTTTGAACAGCAATGGTCTGTATTAAGATGACGATAGTGCCCATTT  
TACTTTGCGTAAGAAGATAATCCTTACATTATTTGTACTACCATTCCAATTATGGTATGG  
GGAGTTATGACGCAAGGTTGGTGGTCCCAGTTATGGCTTCAGCATTTTAATATTTACAA  
TTATAATAATGTTTATTGCTGGGACAGGTAATCTGGATTGGGAGAAAAGGAAGTGTAG  
ATGCATTTGTCAATGGTGCATCAAGTTTAGTAGGTGTATCTTTAATTATTGGTTTAGCTCG  
AGGTATTAATTTAGTGTGGAATGAAGGTATGATTTTCAGATACAATCTTACACTTTTCATCA  
TCTTTAGTTCAACATATGAGTGGACCATTATTTATCATCGTATTACTATTTATTTCTTCTG  
TTTAGGTTTATCGTGCCATCATCTTCTGGCTTAGCGGTATTATCAATGCCTATCTTTGCAC  
CACTAGCTGATACAGTAGGTATACCAAGATTTCGTCATCGTTACGACATATCAATTTGGTC  
AATATGCGATGTTATTCTTAGCGCCGACTGGACTTGTATGGCCACACTACAAATGTTAA  
ACATGCGATATTCACATTGGTTCCGATTTGTATGGCCGGTAGTTGCTTTTGTATTGATTTTC  
GGTGCCGGAGTACTAATTACGCAAGTACTAATTTATTCATAA

### > **A5IS57**

Function: protein coding sequence; putative membrane protein (core genome, constant)

Best match: A5IS57\_CC005\_Mu50-VRSA\_BA000017.4[1226137:1226364] (completely identical)

Position: 029-contig\_258\_RC: 7249 ... 7477; Length: 228 bp

Sequence:

ATGACACATTTGACAAAGGTTTTAGATACACTAACTGGAATATGCGTAGTATTATTATTTA  
GTAAATATTTTGTGGCGTATGCAAATATGGTGTGTTGATTGGAATTTAAGATGGTATTTGCT  
AGAAAACATACCACATTTGCCAATTATATTTATTCTGATGTTTATTTTCGGAGTACCT  
TCTGAAATGATAAAAGATAGGCAAAGGAAAAATAACGGTGTTTAA

### > **txbi\_per**

Function: bidirectional rho-independent terminator of per

Best match: txbi\_per\_CC008\_NCTC8325\_CP000253.1[1086063:1086126] (completely identical)

Position: 029-contig\_258\_RC: 7697 ... 7761; Length: 64 bp

Sequence:

AGGCATTGATATACACTAAAAAGAGGCAAGATTACCTGCCTCTTTTTAGTTATTAATAT  
ACGT

### > **per**

Function: protein coding sequence; putative permease (core genome, variable)

Best match: per\_CC001-ST772\_118\_AJGE01000008.1[7719:8666:r]RC (completely identical)

Position: 029-contig\_258\_RC: 7781 ... 8729; Length: 948 bp

Sequence:

TTACTGAGACGCATTACGAAGAAATTTATCTTGTTTTCTTTTTAAAAAGAAGTGAAGA  
TATCCTATAAAGACTCTAAGTACTATTACAGTGGCTAATAACACTTCGATAAACAAAAGA  
CCTTTCCAAATGTCTGAAACATAAGTACAGGCAAACTGTTCTTTAAAGCAGTTGCTGAG  
ATTACTAAAGGGAATGTGAAAGCTGAAAATACGGGCGAAAAAGGTTCTTTTAGTAATTTA  
GGCAATTGTATAATGATATAAAAAATAAAATATTTGAGCTAATAGTAAAAATATAATTACG  
ATAAAAGCATTTCGCCTTAGGAAAAGCTATAACATATGCTGCAGCGACTAAAGAAAATGG  
TGCGCAAATGTGCGATGTGTTTCGGTTTGATTGACGTCTGCAATGGAAATGCTTTTAATCGC  
TTGAAAATATAGGTAAGACAATACAAGTAGCTACAAAGCCATATATTACTGTTAATTGA  
CCTATGAAAAAATATCCGCTAACGGGTGCCGTCAATCCTGCGATAGCAATACCAATAAAA  
AGTACAGTCCACGAAGGATAAACATTTTCAAGTGAAAAATCTTTTAAATATTTTATTGAA  
AAAATAATCATATGCGTCATAATTCCCACAAGGCATAAAATCCAAATAGGCGTTATTAAG  
CTATTGATAAAAAGTTATGTTACTAAAAAATGTATTTAAATAAGTAGTACCTAAAAAGCCA  
GACATGAAAAATGTTGTGAACACTGATGAACTAGAGGACTGTTAATTGTTCTTTTACACA  
TTATTAATAATTTAATCATAGTACATAAAAGGTGAATCCAAATCAAGAAAGCAAAGATT  
CCGCAAACAGCGTTTAAAGTAAGAGATAAGTCTTTTAATAGATTACCCAGGCCTAATAAT  
CCTAAGACTAGTCCTGACGTTACTAGAGGTGCTTTTTGAAGTCTCAT

### > **A6QG73**

Function: protein coding sequence; putative DNA-binding protein (genomic island)

Best match: A6QG73\_CC001-ST772\_118\_AJGE01000008.1[8915:9103] (completely identical)

Position: 029-contig\_258\_RC: 8977 ... 9166; Length: 189 bp

Sequence:

ATGAGAAATCAAATTCAAAACTATTAGACAGTGATTTGAGCAGTTTACATATATCGAAA  
CAAACAGGAGTTCCACAAAGCACAAATACACAGAATGAGAAAAAATGAAAGATCATTAGA  
TAATATGTCATTGAAAAACGCTGAACTGCTTTATAAATTTGCCAATAGTATATTTAGCAAT  
GAAAATTAA

### > **tRNAarg3**

Function: tRNA tRNA-Arg (core genome, constant)

Best match: tRNAarg3\_CC001\_MW2-USA400\_BA000033.2[1151964:1152042:r]RC (completely identical)

Position: 029-contig\_258\_RC: 9635 ... 9714; Length: 79 bp

Sequence:

TAAACGTCCTGGGAGGGATTTCGAACCCCGACCGATGGCTTAGAAGGCCATTGCTCTATC  
CAGCTGAGCTACCAGGACA

### > **psmB1**

Function: protein coding sequence; phenol soluble modulins beta 1 (core genome, constant)

Best match: psmB1\_CC001-ST772\_118\_AJGE01000008.1[10014:10148] (completely identical)

Position: 029-contig\_258\_RC: 10076 ... 10211; Length: 135 bp

Sequence:

ATGGAAGGTTTATTTAACGCAATTAAGATACCGTAACTGCAGCAATTAATAATGACGGC  
GCAAATTAGGCACAAGCATTGTGAGCATCGTTGAAAATGGCGTAGGTTTATTAGGTAAA  
TTATTCGGATTCTAA

### > **psmB2**

Function: protein coding sequence; phenol soluble modulins beta 2 (genomic island)

Best match: psmB2\_CC001\_MW2-USA400\_BA000033.2[1152596:1152730] (completely identical)

Position: 029-contig\_258\_RC: 10267 ... 10402; Length: 135 bp

Sequence:

```
ATGACTGGACTAGCAGAAGCAATCGCAAATACTGTGCAAGCTGCACAACAACATGATAG
TGTGAAATTAGGCACAAGTATCGTAGACATCGTTGCTAACGGTGTGGGTTTACTAGGTAA
ATTATTTGGATTCTAA
```

### > **Q1Y2B3**

Function: protein coding sequence; putative haloacid dehalogenase-like hydrolase (core genome, constant)

Best match: Q1Y2B3\_CC005\_Mu50-VRSA\_BA000017.4[1229408:1230103] (completely identical)

Position: 029-contig\_258\_RC: 10525 ... 11221; Length: 696 bp

Sequence:

```
ATGGGGAAATTGGGATATAAAAATATTTTGTATAGACTTTGATGATACAATTGTTGATTTTT
ATGATGCAGAAGAATGGGCGTTTCACTATATGGCGAATGTTTTTAATCATAAAGCAACAA
AGGATGATTTTTTAACATTTAAAAAATCAATCACCAACATTGGGAAGCTTTTCAACAAA
ATAAATTAACGAAGTCTGAAGTATTATCAGAACGATTTGTGAATTACTTCAAACATCATC
AAATGGAAGTTGATGGGCATCGTGCAGATGTGTTATTTAGAAATGGATTAGCAGAAGCTA
AAGTTAAATACTTTGATCAAACATTAGAAAACAATTGTCTGAATTATCGAAAAGACATGATT
TATATATTGTTACTAATGGTGTAAACCGAAACGAAAAGAGAAGGTTAAATCAGACGCCGT
TGCATAAATATATTA AAAAGATATTTATATCTGAGGAAACAGGATATCAAAAACCTAATC
CGGAATTTTTTAATTATGTTTTTAATGATATTGGTGAGGATGAAAGACAGCACTCGATTAT
AGTTGGAGATTCTTTAACATCTGACATTCTAGGTGGAATCAATGCGGGTATAGCTACTTG
CTGTTTTAATTTAGAGGATTTGATCATAATCCAGGAATTATACCTGATTATGAAATTAAT
TCATGGAAACAACATAATGATATTGTACGTAA
```

### > **Q931T2**

Function: protein coding sequence; N-acetyltransferase/GNAT family (core genome, constant)

Best match: Q931T2\_CC001\_MW2-USA400\_BA000033.2[1153658:1154098:r]RC (completely identical)

Position: 029-contig\_258\_RC: 11329 ... 11770; Length: 441 bp

Sequence:

```
TTATGGTTTCCACAATAAGACATCATGTCCCTCTATATTTTTAGCTTCCACATCTGTAAAT
CCATGATGTAAAAAGAAATCCTTAGAATCATTTCTGCCAATGGCTTTAATTGGCATATTG
AAACTCTTTGCAAAATCAATCAATTCTGAAGCGTACCCTCTGTTTTGATATTTTTGGTAATA
CTTCTAACTTCCATAATAATATATAATCTTCAAATCTGGGAAGTAGATTTCTTCCGACATC
ACCTTTTTTTAGTAATGCCATTCTAGCTCCTAATTGATCTCCGACAAATATGCCATAAAAT
GGTGAATCTGAACTTGCATCAATCATTTGACCGTTTAACTCATTGACCATGTATAAGTCTT
TGTTGCCAAACGCTCTAAAGTTTTCGAATAAATTCGTCAGTTTTGTAATTAATTTCAAGACG
TTTGATTTCACTCAT
```

### > **Q5HGQ4**

Function: protein coding sequence; UPF0747 protein (core genome, variable)

Best match: Q5HGQ4\_CC001\_MW2-USA400\_BA000033.2[1154293:1155906]

Position: 029-contig\_258\_RC: 11964 ... 13578; Length: 1614 bp

Sequence:

```
ATGGACTGTAAAGTAGTTAGTTTAAATGAAAAAGATCAGTTTATACCAAAAATAAAGAG
CAGTGACCCTGTAAATAACAGGATTATTTCAATATGATGCAGCTCAACAAACTAGTTTTGA
AAAAAGGATGTCTAAAGAAAATAATGGAAGAGAAGCGGCATTAGCGAATGTTATTCGTG
AATATATGAGTGATTTAAAGCTTTCTAGTGAACAAGAATTAAACATAACAACATTTAGCTA
ATGGTTCAAAGTTGTGATTGGTGGACAACAAGCAGGGCTTTTCGGGGGACCATTGTATA
CATTCCATAAAATATTTTCAATCATTACTTTATCTAAGGAATTAACGGATACACATAAGCA
```

ACAAGTAGTACCAGTTTTTTGGATTGCAGGAGAAGATCATGATTTTCGATGAAGTGAATCA  
TACATTTGTTTATAACGAAAATCATGGGTCGCTGCATAAAGGTTAAATATCATAACAATGGA  
GATGCCAGAGACGACTGTCTCTAGATATTATCCTGATAAAGGCTGAGTTGAAACAACTTT  
AAAAACGATGTTTCATTTCATATGAAAGAACTGTTTCATACACAAGGTCTACTGGAGATTTG  
TGACAGAATTATTGACCAATATGACTCGTGGACTGATATGTTTAAAGCACTACTGCATGA  
AACATTTAAAGCATATGGCGTTCTATTTATAGATGCGCAGTTTGAGCCGTTAAGAAAAAT  
GGAAGCGCCTATGTTTAAAAAGATTTTGAAAAAACATCAGTTGCTTGATGATGCTTTTAG  
AGCAACACAACAACGCACTCAAAATCAAGGCTTGAATGCGATGATACAAACAGATACAA  
ATGTTCAATTTATTCTTACATGATGAAAATATGCGTCAATTAAGTTTCGATGATGGTAAGCA  
TTTTAAATTAATAAAAACAGATAAGACATATATAAAGGAAGAAATTATAAATATTGCGG  
AAAATCAACCTGAATTATTTTCTAATAATGTAGTGACAAGACCATTAATGGAAGAATGGT  
TATTTAACACGGTGGCATTGTTGGAGGACCGAGTGAAATTAAGTACTGGGCTGAACTAA  
AAGATGTATTTGAACTATTTGATGTTGAAATGCCTATCGTGATGCCAAGGCTTAGAATTA  
CTTATTTAAATGACCGTATAGAAAAATTACTTTGAAATACAATATTCCATTAGAAAAAG  
TGTTAGTCGATGGTGTGAAAGGAGAAAGAAGTAAGTTTATTAGAGAAACAAGCATCACATC  
AATTTATTGAAAAGGTAGAAGGTATGATTGAACAACAGCGTCGTCTAAACCAAGACTTAT  
TAGATGAAGTGGCGGGGAATCAAATAATATTAACCTTGTGAATAAAAAATAATGAAATT  
CATATACAACAGTATGATTATTTGTTAAAACGTTATCTTTTAAACATTGAAAGAGAAAAC  
GACATCAGTATGAAGCAATTTAGAGAAATTC AAGAAACACTCCATCCAATGGGAGGATT  
ACAAGAAAGAATATGGAATCCACTTCAAATTTTGAATGATTTTGGGACAGATGTGTTCAA  
GCCCTCCACCTATCCACCCTTTCTTACACTTTTGATCATATTATTATAAAACCTTAA

### > **mraZ**

Function: protein coding sequence; putative protein (core genome, constant)

Best match: mraZ\_CC001\_MW2-USA400\_BA000033.2[1156050:1156481] (completely identical)

Position: 029-contig\_258\_RC: 13721 ... 14153; Length: 432 bp

Sequence:

ATGTTTCATGGGAGAATACGATCATCAATTAGATACAAAAGGACGTATGATTATACCGTCC  
AAGTTTCGTTATGACTTAAATGAGCGTTTTATTATCACAAGAGGCCTTGATAAATGTTTAT  
TCGTTTACTCTAGACGAATGGCAACAGATTGAAGAGAAAATGAAAACCTTACCTATG  
ACAAAAAAGACGCACGTAAGTTTATGCGTATGTTCTTCTCTGGTGCTGTTGAAGTAGAA  
CTTGATAAGCAAGGGCGTATTAACATCCCTCAAACCTTGAAGAAATACGCTAATTTAACT  
AAAGAATGTACAGTAATCGGTGTTTCAAATCGTATTGAGATTTGGGATAGAGAACTTGG  
AATGATTTCTATGAAGAATCTGAAGAAAGTTTCGAAGATATTGCTGAAGATTTAATAGAT  
TTTGATTTTTTAA

### > **rsmH**

Function: protein coding sequence; ribosomal RNA small subunit methyltransferase H (core genome, constant)

Best match: rsmH\_CC001\_MSSA476\_BX571857.1[1185191:1186105]

Position: 029-contig\_258\_RC: 14189 ... 15104; Length: 915 bp

Sequence:

ATGTTAAACGAAACCATTGATTATTTAAATGTAAAAGAAAATGGTGTGTACATTGACTGT  
ACGCTAGGTGGAGCGGGACATGCCCTTTATTTACTAAATCAATTAATGACGACGGAAGA  
TTAATAGCAATCGATCAAGACCAAACCTGCAATTGATAATGCTAAAGAGGTATTAAGGAT  
CATTTGCATAAGGTGACTTTTGTTCATAGCAACTTCCGTGAATTAACCTCAAATATTTAAAG  
ACTTAAACATTGAAAAGTAGATGGAATTTATTACGACTTGGGTGTTTCAAGTCCCCAAC  
TCGACATTCAGAACGAGGATTCAGTTATCACCATGACGCAACATTAGACATGCGTATGG  
ACCAAACACAAGAATAACAGCATATGAAATTGTTAACAATTGGTCATATGAAGCGTTAG  
TGAAGATTTTTTATCGTTATGGCGAGGAGAAATTTTCAAACAGATAGCTCGAAGAATCG  
AAGCACATCGCGAACAACAACCAATAACAACAACATTAGAATTAGTTGACATTATAAAA  
GAAGGTATTCCTGCAAAAGCAAGAAGAAAAGGCGGACATCCTGCAAAACGAGTATTTCA  
AGCACTACGAATTGCAGTAAACGATGAATTGTCAGCTTTTGAAGATTCAATAGAACAAGC  
GATTGAATTAGTGAAGTAGACGGCAGGATTTCCGTAATCACTTTCCATTCTTTAGAAGA  
TCGTTTATGTAAACAGGTGTTCCAAGAATATGAAAAGGTCCAGAGGTACCAAGAGGATT



ACCAGTTATACCAGAAGCATATACACCTAAGTTAAAGCGTGTTAATCGTAAACCGATTAC  
CGCTACAGAAGAAGATTTAGATGACAATAACAGAGCACGAAGCGCGAAATTACGTGTAG  
CTGAAATACTTAAATAA

### > **ftsL**

Function: protein coding sequence; cell division protein L (core genome, constant)

Best match: ftsL\_CC001\_MW2-USA400\_BA000033.2[1157446:1157847] (completely identical)

Position: 029-contig\_258\_RC: 15117 ... 15519; Length: 402 bp

Sequence:

ATGGCTGTAGAAAAAGTGTACCAACCATATGACGAACAAGTTTATAATAGTATACCGAA  
GCAACAACCACAACTAAGCCCCGAAAAGAAGACTGTTTCGAGAAAAGTGGTTGTACAAT  
TAACTAAATTTGAAAAAGTTTTATACATAACTTTGATTACTGTAATTGCTATGTTAAGTAT  
TTATATGCTATCTTTAAAATGGATGCGTATGATACGCGAGGAAAGATTGCAGATTTAGA  
TTATAAAATAGATAAAACAATCAAGTGAAAACAGTGCTTTACAATCTGAAATCAAAAAGA  
ATTCTTCTTATGAACGCATATACGAAAAGGCTAAGAAACAGGGGATGAGCCTTGAGAAC  
GATAATGTAAAGGTAGTGCGTAGTAATGGCGAAGCAAAAAATTAA

### > **pbpA**

Function: protein coding sequence; penicillin binding protein A (core genome, constant)

Best match: pbpA\_CC001\_ATCC51811\_ADVP0100010.1[14930:17163:r]

Position: 029-contig\_258\_RC: 15499 ... 17734; Length: 2235 bp

Sequence:

ATGGCGAAGCAAAAATTTAAAATTAATAAAAAAATAAAAATAGGGGCAGTCCTACTTGTTGG  
TTTATTCCGACTGCTCTTTTTTATATTGGTTTTAAGAATTTTCATATATCATGATTACTGGAC  
ATTCTAATGGTCAAGACTTAGTCATGAAGGCAAATGAAAAGTATTTAGTTAAGAATGCAC  
ACAACCAGAACGAGGAAAGATATATGATCGTAATGGTAAAGTGCTAGCAGAAGATGTA  
GAAAGATATAAACTTGTTGCAGTAATAGATAAAAAGGCGAGTGCCAATTCTAAAAAACC  
TAGGCATGTAGTTGATAAAAAAGAGACTGCAAAGAAATTATCTACAGTCATTGATATGAA  
GCCAGAGGAAATTGAAAAGAGACTTAGTCAAAGAAAGCTTTCCAAATTGAATTTGGAC  
GCAAAGGAACAAATTTAACGTATCAGGACAAATTGAAAATAGAGAAAATGAATTTGCCT  
GGTATTTCTTTATTGCCTGAAACAGAACGCTTTTATCCAAATGGCAATTTTGCATCACACT  
TAATTGGTAGAGCTCAGAAAAATCCGGATACTGGTGAACCTAAAGGTGCACTTGGAGTTG  
AAAAGATTTTTGATAGTTATTTAAGTGGATCTAAAGGATCATTGAGATATATTCATGATAT  
TTGGGGATATATCGCACCAAATACTAAAAAAGAGAAGCAGCCTAAACGTGGTGTATGATG  
TCCATTTAACAATCGATTCAAATATTCAAGTATTTGTTGAAGAAGCTTTAGATGGCATGGT  
TGAAAGATACCAGCCGAAAGATTTATTTGCGGTTGTCATGGATGCCAAAACCTGGAGAAAT  
TTTAGCATAACAGTCAGCGACCAACATTTAATCCTGAAACTGGTAAAGACTTTGGTAAAAA  
GTGGGCAAATGACCTTTATCAAACACATACGAGCCTGGATCAACATTTAAATCATATGG  
GTTAGCAGCTGCTATTCAAGAAGGTGCTTTTGATCCTGATAAGAAATATAAATCTGGACA  
TAGAGATATTATGGGTTACGATTTTCAGACTGGAATAGAGTCGGTTGGGGTGAAATCCC  
AATGTCACTCGGATTTACTTATTCATCTAATACATTGATGATGCATTTACAAGATTTAGTT  
GGTGCAGACAAAATGAAATCTTGGTATGAACGATTTGGATTTGGAAAATCAACTAAAGGT  
ATGTTTGATGGAGAAGCACCTGGTCAAATTTGGATGGAGTAATGAGTTACAACAAAAAAC  
GTCATCATTTGGTCAATCGACAACCTGTAACACCTGTTCAAATGTTACAGGCGCAATCAGC  
GTTCTTTAATGATGGTAATATGTTAAAACCATGGTTTGTGAATAGCGTTGAAAATCCTGTT  
AGTAAAAGACAATTTTATAAAGGGCAAAAACAAATCGCAGGCAAACCAATAACAAAAGA  
TACTGCTGAAAAGTTGAAAAGCAATTGGATTTAGTTGTGAATAGTAAGAAGAGTCACGC  
TGCAAACCTATCGTATTGATGGTTATGAGGTTCGAAGGTAAGACTGGTACAGCACAAGTCGC  
TGCACCTAATGGTGGTGGATACGTTAAAGGTCCAAACCCATATTTTGTAAGTTTTATGGGT  
GACGCACCGAAGAAAAATCCTAAAGTTATTGTATACGCTGGTATGAGCTTGGCACAAAA  
AAATGACCAAGAAGCTTATGAATTAGGTGTTAGTAAAGCGTTTTAAACCAATAATGGAAA  
ATACTTTGAAATATTTAAATGTAGGTAAATCAAAGATGACACATCTAATGCAGAGTATA  
GTAAAGTGCCAGATGTTGAAGGTCAAGACAAACAAAAGCTATTGATAATGTGAGTGCA  
AAATCATTAGAACCAGTTACTATCGGTTCTGGCACACAAATAAAAGCACAAATCTATAAAA  
GCAGGGAATAAAGTCTTACCTCATAGTAAAGTACTGTTATTAACAGACGGGAGACTTAACT

ATGCCTGACATGTCAGGATGGACGAAAGAAGATGTCATTGCTTTTGAAAACCTAACAAAT  
ATTAAGTAAATTTAAAAGGTAGCGGTTTTGTGTCCCACCAATCAATTAGTAAGGGACAA  
AACTTACTGAAAAAGATAAAAATAGACGTAGAATTTTCATCAGAGAATGTAGACAGCAA  
TTCGACGAATAATTCTGATTCAAATTCAGATGATAAGAAGAAATCTGACAGTAAACTGA  
CAAGGATAAGTCGGACTAA

> **mraY**

Function: protein coding sequence; phospho-N-acetylmuramoyl-pentapeptide-transferase (core genome, variable)

Best match: mraY\_CC001\_MW2-USA400\_BA000033.2[1160354:1161319]

Position: 029-contig\_258\_RC: 18025 ... 18991; Length: 966 bp

Sequence:

ATGATTTTTGTATATGCGTTATTAGCGCTAGTGATTACATTTGTTTTGGTACCTGTTTTAAT  
ACCTACATTA AAAAAGGATGAAATTTGGTCAAAGTATTTCGAGAAGAAGGTCCACAAAGCC  
ATATGAAGAAGACTGGTACACCAACGATGGGTGGACTAACATTTCTATTAAGTATTGTGA  
TAACGCTTTTGGTGGCTATTATATTTGTGGATCAAGCTAATCCAATCATACTGTTATTATT  
TGTGACGATTGGTTTTGGGTTAATTGGTTTTATAGATGATTATATTATTGTTGTTAAAAAG  
AATAACCAAGGTTTAAACAAGTAAACAGAAGTTTTTGGCGCAAATTGGTATTGCGATTATT  
TTCTTTGTTTTAAGTAATGTGTTTCATTTGGTGAATTTTTCTACGAGCATACATATCCATT  
TACGAATGTAGCAATCCCACACTATCATTTCGATATGTTATTTTCATTGTTTTTTGGCAAGTA  
GGTTTTTCTAATGCGGTAAATTTAACAGATGGTTTAGATGGATTAGCAACTGGACTGTCA  
ATTATCGGATTTACAATGTATGCCATCATGAGCTTTGTGTTAGGAGAAACGGCAATTGGT  
ATTTTCTGTATCATTATGTTGTTTGCACCTTTTAGGATTTTTACCATATAACATTAACCCTGC  
TAAAGTGTATATGGGAGATACAGGTAGCTTAGCTTTAGGTGGTATATTTGCTACGATTTCA  
ATCATGCTTAATCAGGAATTATCATTAAATTTTTATAGGTTTAGTATTCGTAATTGAAACCT  
TATCTGTTATGTTACAAGTCGCTAGCTTTAAATTGACTGGAAAGCGTATATTTAAAATGAG  
TCCGATTCATCATCATTTTGAATTGATAGGATGGAGCGAATGGAAAGTAGTTACAGTATT  
TTGGGCTGTTGGTCTGATTTCAAGTTTAAATCGGTTTATGGATTGGAGTGCATTA

> **murD**

Function: protein coding sequence; UDP-N-acetylmuramoylalanine-D-glutamate ligase (core genome, variable)

Best match: murD\_CC001\_MSSA476\_BX571857.1[1189994:1191343]

Position: 029-contig\_258\_RC: 18992 ... 20342; Length: 1350 bp

Sequence:

ATGCTTAATTATACAGGGTTAGAAAATAAAAATGTATTAGTTGTCGGTTTTGGCAAAAAGT  
GGTTATGAAGCAGCTAAATTATTAAGTAAATTAGGTGCGAATGTAAGTGTCAATGATGGA  
AAAGACTTATCACAAGATGCTCATGCAAAAGATTTAGAATCTATGGGCATTTCTGTTGTA  
AGTGGAAGTCATCCATTAACGTTGCTTGATAATAATCCAATAATTGTTAAAAATCCTGGA  
ATACCTTATACAGTATCTATTATTGATGAAGCAGTGAAACGAGGTTTGAAAATTTTAAACA  
GAAGTTGAGTTAAGTTATCTAATCTCTGAAGCACCATCATAGCTGTAACGGGTACAAAT  
GGTAAAACGACAGTTACTTCTCTAATTGGAGATATGTTTAAAAAAGTCGCTTAACTGGA  
AGATTATCCGGCAATATTGGTTATGTTGCATCTAAAGTAGCACAAGAAGTAAAGCCTACA  
GATTATTTAGTTACAGAGTTGTCGTCATCCAGTTACTTGGAAATCGAAAAGTATAAACCA  
CACATTGCTATAATTACTAACATTTATTCGGCGCATCTAGATTACCATGAAAATTTAGAAA  
ACTATCAAATGCTAAAAGCAAATATATAAAAATCAAACGGAAGAAGATTATTTGATTT  
GTAATTATCATCAAAGACAAGTGATAGAGTCGGAAGAATTAAGCTAAGACATTGTATT  
TCTCAACTCAACAAGAAGTTGATGGTATTTATATTAAGATGGTTTTATCATTTATAAAGG  
TGTTGCTATTATTAACACTAAAGATCTAGTATTGCCTGGTGAACATAATTTAGAAAATATA  
TTAGCAGCTGTGCTTGCTTGATTTTAGCTGGTGTACCTATTAAGCAATTATTGATAGTT  
TAACTACATTTTCAGGAATAGAGCATAGATTGCAATATGTTGGTACTAATAGAACTAATA  
AATATTATAATGATTCCAAAGCAACAAACACGCTAGCAACACAGTTTGCCTTAAATTCAT  
TTAATCAACCAATCATTTGGTTATGTGGTGGTTTGGATCGAGGGAATGAATTTGACGAAC  
TCATTCCTTATATGGAAAATGTTTCGCGCGATGGTTGTATTTCGGACAAACGAAAGCTAAGT  
TTGCTAAACTAGGTAATAGTCAAGGGAATCGGTCATTGAAGCGAACAATGTCGAAGAC

GCTGTTGATAAAAGTACAAGATATTATAGAACCAAATGATGTTGTATTATTGTCACCTGCTT  
GTGCGAGTTGGGATCAATATAGTACTTTTTGAAGAGCGTGGAGAGAAATTTATTGAAAGAT  
TCCGTGCCCATTTACCATCTTATTAA

> **ftsQ**

Function: protein coding sequence; cell division protein Q (core genome, variable)

Best match: ftsQ\_AC027138.10[4092:5412]

Position: 029-contig\_258\_RC: 20357 ... 21677; Length: 1320 bp

Sequence:

ATGGATGATAAAACGAAGAACGATCAACAAGAATCAAATGAAGATAAAAGATGAATTAGA  
ATTATTTACGAGGAATACATCTAAGAAAAGACGGCAAAGAAAAGATCAAAGGCTACAC  
ATTTTTCTAATCAAATAAAGATGATACATCTCAACAAGCTGATTTTGTATGAAGAAATTT  
ACTTGATAAATAAAGACTTCAAAAAAGAACAAAGCAATGATGAAAATAATGATTCTGCT  
TCTAGTCGTGCAAATAATAATAATATCGATGATTCTACAGACTCTAATATTGAAAATGAG  
GATTATAGATATAATCAAGAAATTGACGACCAAATGAATCGAATGGAATTGCATTTCGAC  
AACGAACAACCTCAATCAGCTCCTAAAGAACAAAATGGCGACTCGAATGATGAGGAAAC  
AGTAACGAAAAAAGAACGAAAAAGTAAAGTAACACAATTAAGCCATTAACACTTGAAG  
AAAAGCGGAAGTTAAGACGTAAGCGACAAAACGAATCCAATACAGTGTTATTACAATA  
TTAATATTGTTGATTGCTGTTATATTAATTTACATGTTTTACCACCTTAGTAAAATTGCGCA  
TGTAATATAAATGGAAATAACCACGTTAGTACTTCAAAGATAAACAAAGTTTTAGGTGT  
TAAAAATGATTCAAGGATGTATACGTTTAGTAAAAAAAATGCTATTAATGATCTCGAAGA  
GGATCCATTAATCAAAGTGTTGAGATACACAAGCAATTACCAAACACATTAACGCTAG  
ATATCACAGAAAATGAAATTATTGCTTTAGTGAAATATAAAGGTAATATTTACCTTTATT  
AGAAAATGGTAAATTGCTTAAAGGTTCAAATGATGTCAAATTAATGATGCACCTGTCAT  
GGATGGTTTTCAAAGGTACAAAAGAAGATGATATGATTAAGGCGTTATCTGAAATGACAC  
CTGAAGTTAGACGATATATTGCCGAAGTGTCATACGCCCAAGTAAAAACAAACAAAGC  
AGAATTGAATTGTTTACGACAGATGGACTTCAAGTAATCGGTGATATTTTCGACGATATCT  
AAGAAAATGAAATATTATCCGCAGATGTCACAATCATTATCAAGGGATAGTTCGGGTAAA  
CTAAAAACACGAGGCTATATTGATTTATCAGTCGGTGCTTCATTTATCCCATACCGTGGAA  
ACACGCTAGTCAATCAGAAAGCGATAAAAAATGTGACTAAATCATCTCAAGAGGAAAAT  
CAAGCAAAGAAGAAATTACAAAGCGTTTTAAACAAAATTAACAAACAATCAAGTAAGAA  
TAATTA

> **ftsA**

Function: protein coding sequence; cell division protein A (core genome, variable)

Best match: ftsA\_CC005\_Mu50-VRSA\_BA000017.4[1240666:1242078] (completely identical)

Position: 029-contig\_258\_RC: 21782 ... 23195; Length: 1413 bp

Sequence:

ATGGAAGAACATTACTACGTAAGTATTGATATTGGATCATCAAGCGTAAAAACAATAGTA  
GGCGAGAAATTTACAATGGTATAAATGTGATAGGTACAGGACAAACCTACACGAGCGG  
TATAAAAAATGGTTTAATTGATGATTTTGTATTTGCGCGACAAGCAATCAAAGACACAAT  
TAAAAGGCATCAATCGCTTCGGGTGTTGATATTAAGAAGTTTTCTGAAATTACCTAT  
CATTGGAACGGAAGTTTATGATGAATCAAATGAAATCGACTTTTATGAGGATACAGAAAT  
CAACGGTTCACATATCGAAAAAGTATTAGAAGGTATTAGAGAAAAAAATGATGTGCAAG  
AAACAGAAGTAATTAATGTGTTCCCGATTCGTTTTATAGTCGATAAAGAAAATGAGGTTT  
CAGACCCTAAAGAATTAATTGCCAGACATTCATTAAGGTTGAAGCAGGCGTAATTGCTA  
TTCAAAAATCGATTTAATTAATATGATTAATGCGTAGAAGCATGTGGTGTGATGTATT  
AGATGTTTACTCTGATGCATATAACTATGGTTCAATCCTAACAGCTACTGAAAAAGAGTT  
AGGTGCATGTGTCATTGATATTGGTGAAGACGTTACGCAAGTTGCTTTTTATGAACGCGG  
TGAATTAGTAGATGCTGATTCTATCGAAATGGCAGGGCGTGATATTACAGACGATATTGC  
ACAAGGATTAACACTTCTTATGAACTGCTGAAAAAGTTAAACACCAATATGGTCATGC  
ATTCTATGATTCTGCTTCAGATCAAGATATCTTCACTGTTGAACAGGTTGATAGTGATGAA  
ACAGTACAGTATACTCAAAAAGATTTGAGTGACTTTATTGAAGCGCGTGTAGAAGAAATA  
TTCTTCGAAGTATTTGATGTTTTACAAGATTTAGGATTAACAAAAGTAAATGGTGGGTTTA  
TTGTAACCTGGTGGATCTGCAAACCTTACTTGGCGTAAAAGAATTATTATCAGATATGGTAA

GTGAAAAAGTTAGAATTCACACGCCATCACAAATGGGAATTAGAAAACCTGAATTTTCTT  
CAGCAATTTCTACAATTTCTAGTAGTATCGCTTTTGATGAGTTATTAGATTATGTTACAAT  
TAATTATCATGATAATGAAGAACTGAAGAAGATGTTATTGATGTGAAAGACAAAGATA  
ACGAATCTAAATTAGGCGGATTTGATTGGTTTAAACGTAAAACAAACAAAAAAGATACTC  
ATGAAAATGAAGTAGAGTCAACAGATGAAGAAATTTATCAATCAGAAGATAATCATCAG  
GAACATAAACAGAATCATGAACATGTTCAAGACAAAGATAAAGATAAAGAAGAAAGTA  
AATTCAAAAACTAATGAAATCTCTATTTGAATGA

### > **ftsZ**

Function: protein coding sequence; cell division protein Z (core genome, constant)

Best match: ftsZ\_CC001\_MW2-USA400\_BA000033.2[1165556:1166728] (completely identical)

Position: 029-contig\_258\_RC: 23227 ... 24400; Length: 1173 bp

Sequence:

ATGTTAGAATTTGAACAAGGATTTAATCATTAGCGACTTTAAAGGTCATTGGTGTAGGT  
GGTGGCGGTAACAACGCCGTAACCGAATGATTGACCACGGAATGAATAATGTTGAATTT  
ATCGCTATCAACACAGACGGTCAAGCTTTAACTTATCTAAAGCTGAATCTAAAATCCAA  
ATCGGTGAAAAATTAACACGTGGTTTAGGAGCAGGAGCTAATCCTGAAATCGGTAAAAA  
AGCTGCAGAGGAATCTCGTGAACAAATTGAAGATGCAATCCAAGGTGCAGACATGGTAT  
TTGTTACTTCTGGTATGGGTGGCGGAACTGGTACTGGTGCAGCACCAGTCGTTGCTAAAA  
TTGCAAAAGAAATGGGCGCATTAACTGTTGGTGTGTAACCTCGTCCATTTAGTTTTGAAG  
GACGTAAACGTCAAACCTCAAGCTGCTGCTGGAGTAGAAGCTATGAAAGCTGCAGTAGAT  
ACATTAATCGTTATACCAAATGACCGTTTATTAGATATCGTTGACAAATCTACGCCAATG  
ATGGAAGCATTTAAAGAAGCTGATAACGTGTTACGCCAAGGTGTACAAGGTATCTCAGAC  
TTAATCGCTGTTTCTGGTGAAGTAACTTAGACTTTGCAGACGTTAAGACAATTATGTCTA  
ACCAAGGTTCTGCATTAATGGGTATTGGTGTCTTCTGGTGAAAATAGAGCGGTAGAAG  
CTGCTAAAAAAGCAATCTCTTCTCCATTACTTGAAACATCTATCGTTGGTGCACAAGGTGT  
GCTTATGAATATTACTGGTGGCGAGTCATTGTCATTATTTGAAGCACAAAGAGGCTGCTGA  
TATTGTCCAAGATGCTGCAGATGAAGACGTTAATATGATTTTCGGTACAGTTATTAATCCT  
GAATTACAAGATGAGATTGTTGTAACAGTTATTGCAACTGGTTTTGATGACAAACCAACA  
TCACATGGTTCGTAATCTGGTAGCACTGGATTCGGAACAAGCGTAAATACTTCTAGCAAT  
GCAACTTCTAAAGATGAATCATTCACTTCAAATTCATCAAATGCACAAGCAACTGATAGT  
GTAAGTGAAAGAACACATACTAAAGAAGATGATATTCCTAGCTTCATTAGAAATAG  
AGAAGAAAGACGTTCAAGAAGAACAAGACGTTAA

### > **ylmD**

Function: protein coding sequence; putative protein similar to Bacillus subtilis YlmD (core genome, constant)

Best match: ylmD\_CC001\_MW2-USA400\_BA000033.2[1166988:1167779] (completely identical)

Position: 029-contig\_258\_RC: 24659 ... 25451; Length: 792 bp

Sequence:

GTGAATGATAATTTTAAAAAGCAACCGCATCATTAAATATATGAAGAGTTATTACAACAA  
GGTATTACTCTAGGTATTACAACCTAGAGGCGATGGTTTAAAGTACTATCCTAAAAATGCT  
TTAATATGGCGAGATATATTGATGATCGCCATATAATTAATCAACATCAATTGCAAT  
TAGCTGAAGAAATTGCGTTTGATAGAAAAAATGGGTGTTTCCCATTCAAACACATGAAA  
ATAAAGTTCGCTTGATTACAAAGGATGATATAGGCACAAATATAGACACTTTAACTGATG  
CGTTTCATGGTATTGATGCGATGTACACATATGATAGTAATGTCTTATTAACGATGTGTTA  
TGCAGACTGTGTACCAGTATATTTTTATAGTACAAAACATCATTTTATTGCATTGGCGCAT  
GCAGGTTGGCGTGGTACCTATACTGAAATTGTAAGAAGTGTAAAACATGTGAACTTT  
GATTTGAAAGACTTACATGTCGTTATTGGACCATCTACATCATCAAGTTATGAAATTAATG  
ATGATATTAATAAATAAATTTGAAACATTGCCAATTGATAGTGCCAACTATATTGAAACTA  
GAGGACGAGATCGTCATGGTATTGATTTGAAAAAAGCCAATGCTGCATTATTAATTAAT  
ATGGTGTTCCTAAAGAAAATATTTATACGACAGCGTATGCTACATCTGAACATTTAGAAT  
TATTTTTCTCTTATCGATTAGAAAAAGGTCAAACAGGACGCATGTTAGCATTTCATTGGTCA  
ACAGTAA

### > **ylmE**

Function: protein coding sequence; putative protein similar to Bacillus subtilis YlmE (core genome, constant)

Best match: ylmE\_CC001\_MW2-USA400\_BA000033.2[1167797:1168471] (completely identical)

Position: 029-contig\_258\_RC: 25468 ... 26143; Length: 675 bp

Sequence:

```
TTGCGTGTGAAAGATAATTTACAACAAATCTCAACACAAATTAATGACAAAAGTGAAAA
AAATAATTTTTCAACAAAACCAAACGTGATTGCAGTTACAAAATATGTTACAATAGAGCG
AGCTAAAGAAGCGTATGAGGCTGGAATAAGACATTTTGGTGAGAATAGATTGGAAGGCT
TTTTACAAAAGAAAGAAGCATTACCATCAGATGCGGTGATCCATTTTATAGGATCATTAC
AATCTCGAAAAGTTAAGGGCGTTATAAACGACGTAGATTATTTCCATGCTTTAGATCGAT
TGAGCTTAGCCAAAGAAATTAACAAACGTGCAGAACATAAAATTAATGTTTCTTGCAAG
TGAACGTTTCGGGAGAAGCTTCTAACATGGTATTGCTTTAGAAGATGTTGATCAGTTTAT
AGATGATCTTAAAAAATATGACAAAATCGAAATTGTAGTTTAAATGACGATGGCACCATT
GACAGATGATGAAGCATATATTAGATCGTTATTTAAACAGTTACGTTTGAAAAAAGAAGA
AATACAACGACTCAATTTAGAATATGCGCCTTGTGATGAATTATCAATGGGAATGAGTAA
TGACTATCTTATTGCAGTTGAAGAAGGTGCGACGTTTGTTAGAATTGGGACTAACTTGT
AGGAGAAGAGGAGTGA
```

### > **sepF**

Function: protein coding sequence; cell division protein (core genome, constant)

Best match: sepF\_CC001\_MW2-USA400\_BA000033.2[1168468:1169031] (completely identical)

Position: 029-contig\_258\_RC: 26139 ... 26703; Length: 564 bp

Sequence:

```
GTGAGCCACTTGGCTTTAAAAGATTTATTTAGTGGATTTTTTGTAAATAGATGATGAAGAG
GAAGTAGAAGTACCTGACAAACAACAACAGGTCAATGAAGCGCCAGCAAAAAGAGCAGTC
ACAACAACAACAACAACAACAACGCAATCAAATCAGTCCCTCAAAAATCTGCATCAAGAT
ATACAACAACGTCAGAAGAAAGGAATAACCGTATGTCTAATTATTCAAAAAATAATTCAC
GTAATGTTGTAACATGAACAATGCTACACCAACAATGCATCACAAGAAAGTTCAAAA
ATGTGTTTATTCGAACCACGTGTTTTTTTCAGATACACAAGATATTGCTGATGAGCTTAAAA
ACCGCCGTGCGACACTTGTCAATTTACAACGTATTGATAAAGTATCAGCGAAAAGAATTA
TTGATTTTTTAAGCGGTACTGTTTATGCAATCGGTGGAGATATCCAACGTGTAGGTACTGA
TATTTTCTTATGTACGCCTGATAATGTGGAAGTAGCTGGAAGCATTACAGACCATATTGA
AAATATGGAACATTCATTCGACTAA
```

### > **ylmG**

Function: protein coding sequence; putative protein (core genome, constant)

Best match: ylmG\_CC001\_MW2-USA400\_BA000033.2[1169043:1169333] (completely identical)

Position: 029-contig\_258\_RC: 26714 ... 27005; Length: 291 bp

Sequence:

```
ATGGATATAAATGTGCTAGCTACAATATTTAAATTTATCCTTTTTGTTGTTGAAATTTATT
ATTTTCGGCATGATTATATATTTCTTTACATCTTGGGTACCAAGTATTAGAGAACTAAGGT
AGGTTATTTTTTAGCGAAAATATATGAACCTTTCTTACAACCATTTAGAAAAGTAATTCCA
CCTATTGGAATTATCGACATATCATCAATCGCTGCAATTATCGTTTTAGTATTATTCCAAA
AAGGGTACTCCAAATCTTTAATTGGATTTTAATTCAATTACAATAA
```

### > **ylmH**

Function: protein coding sequence; putative protein similar to Bacillus subtilis YlmH (core genome, variable)

Best match: ylmH\_CC008\_21232\_AGTY01000013.1[4773:5579:r]

Position: 029-contig\_258\_RC: 27087 ... 27894; Length: 807 bp

Sequence:

```
ATGGTATTTTATAATTTTTTTAAGGTAGTGATTAACATAGATATTTATCAACACTTTAGAC
AGGAAGAATACGAATTAATTGATCAGCTAACGGATAAATGTGATCAAGCGGAACAGCAT
TATGCACCAGTATTAACGCATTTTTTAGATCCAAGAGAGCAATATATATTGGAAGTGATT
```

TGTGGCAGTTATGAAGATTTAAACGTATCTTTTTATGGTGGACCTAATGCTGAAAGAAAA  
AGAGCAATCATTTTCGCCGAACCTATTATGAACCTAAAGAAAGCGACTTTGAATTAACTTTA  
ATGGAAATAGATTATCCTGAAAAATTCGTCACTTTAAAACATCAACATATTTTAGGGACA  
TTAATGTCTTTAGGTATCGAACGCGAACAAAGTTGGAGATATAATTGTGAATGAACGAATT  
CAATTTGTTTTGACAAGTAGATTGGAATCATTTATTATGTTAGAATTACAACGTATTAAG  
GCGCATCAGTTAACTTTATACTATTCCAGTAACAGATATGATACAATCTAATGAGAATT  
GGAAAAATGAAAGTGCAACAGTTAGTCTTTAAGGTTAGATGTTGTTATTAAGAAATGA  
TACGTAAATCACGTACGATTGCGAAACAACCTAATCGAAAAAAAACGTGTTAAAGTGAAT  
CACACTATTGTTGATTCAGCAGATTTTCAATTACAAGCAAATGATTTAATATCCATCCAAG  
GTTTTGGTAGAGCACACATTACTGACTTAGGTGGTAAAACCTAAAAAAGATAAAACGCAC  
ATTACCTATAGAACATTATTCAAATAG

### > **Q7A131**

Function: protein coding sequence; putative cell-division initiation protein DivIVA (core genome, constant)

Best match: Q7A131\_CC005\_21201\_AFT001000027.1[4638:5254:r]

Position: 029-contig\_258\_RC: 27917 ... 28535; Length: 618 bp

Sequence:

ATGCCTTTTACACCAAATGAAATTAAGAATAAAGAGTTTTTCACGTGTAAAGAATGGTTTA  
GAACCTACTGAAGTTGCTAATTTTTTTGGAGCAACTAAGCACTGAAATTGAACGTCTTAAA  
GAAGATAAAAAACAACCTTGAAAAAGTAATCGAAGAGAGATACTAATATTAAGTCTTA  
TCAAGACGTGCATCAATCTGTAAGTGATGCTTTGATACAAGCTCAAAAAGCTGGTGAAGA  
AACTAAGCAAGCTGCAGAGAAACAAGCTGAAGCGATTATAGCTAAGGCAGAAGCGCAAG  
CTAATCAAATGGTTGGTGACGCGGTAGAAAAAGCACGCCGTTTAGCATTCCAGACTGAAG  
ATATGAAACGCCAATCAAAGTATTTAGATCGCGTTTCCGTATGTTAGTTGAAGCGCAAT  
TAGACTTATTAAAAAACGAAGATTGGGATTACTTGTGTAATTATGATTTAGACGCTGAAC  
AAGTGACGCTTGAAAATATTCATCATTTGCATGAAAATGATTTAAAGCCAGATGAAGTTG  
CAGCAAATGCACAAAATAATGCATCAAATACACCAGACAATAATCAACAATCCAATGAT  
TCAGAAACAACCTAAGAAGTAA

### > **tbox11**

Function: noncoding RNA T-box leader element (core genome, constant)

Best match: tbox11\_CC001\_MW2-USA400\_BA000033.2[1170869:1171041] (completely identical)

Position: 029-contig\_258\_RC: 28540 ... 28713; Length: 173 bp

Sequence:

AAATAAAGACAGACGCGTAATATACATTTAACTTTTCACAGCGAATTAGGTAATGGTGAG  
AGCCTAGTAAAAGCATGTATGTTATATCACTGGCTTTTTAATATTTAAATAATGTAATGAG  
AGAACTCTAAGTTGAGTTAATAAGGGTGGTACCGCGAGCAATCGTCCCTTTT

### > **ileS**

Function: protein coding sequence; isoleucyl-tRNA synthetase (core genome, constant)

Best match: ileS\_CC008\_NCTC8325\_CP000253.1[1107130:1109883]

Position: 029-contig\_258\_RC: 28755 ... 31509; Length: 2754 bp

Sequence:

ATGGATTACAAAGAAACGTTATTAATGCCTAAAACAGATTTCCCAATGCGAGGTGGTTTA  
CCAAACAAGGAACCGCAAATTCAGAAAAATGGGATGCAGAAGATCAATACCATAAAGC  
GTTAGAAAAAATAAAGGTAACGAAACATTCATTTTACATGATGGCCCACCATACGCGA  
ATGGTAACTTACATATGGGACATGCCTTGAACAAAATTTTAAAAGACTTTATTGTACGTT  
ATAAACTATGCAAGGGTCTATGCACCATACGTACCAGGTTGGGATACACATGGTTTAC  
CAATTGAACAAGCATTAAACGAAAAAAGGTGTTGACCGAAAGAAAATGTCAACGGCTGAA  
TTCCGTGAGAAATGTAAAGAATTTGCTTTAGAACAAATTGAATTACAGAAAAAAGATTTT  
AGACGTTTAGGTGTTTCGTGGTGACTTTAATGATCCATATATTACATTAACCTGAATACG  
AAGCTGCACAAATTCGTATTTTTGGAGAAATGGCAGATAAAGGTTAATTTATAAAGGTA  
AAAAGCCAGTTTATTGGTCTCCTCAAGTGAGTCTTCATTAGCAGAAGCAGAAATTGAAT  
ATCACGATAAACGTTACGCATCAATTTACGTTGCATTTGACGTTAAAGATGACAAAGGTG

TCGTTGATGCAGATGCTAAATTTATTATCTGGACAACAACGCCATGGACAATTCCATCAA  
ATGTTGCAATTACCGTTCATCCTGAATTAATAATATGGTCAATACAATGTAAATGGCGAAA  
AATATATTATTGCAGAAGCCTTATCTGACGCTGTAGCAGAAGCACTGGATTGGGATAAAG  
CATCAATCAAATTAGAAAAAGAATACACAGGTAAAGAATTGGAGTATGTTGTAGCACAA  
CATCCATTCTTAGACAGAGAATCGTTAGTGATTAATGGTGATCATGTTACTACAGATGCT  
GGTACAGGTTGTGTACATACAGCACCAGGCCACGGGAAGATGACTATATTGTTGGTCAA  
AAATATGAATTACCAGTAATTAGTCCAATCGATGATAAAGGTGTATTTACTGAAGAAGGC  
GGCCAATTTGAAGGGATGTTCTATGATAAAGCTAATAAAGCCGTTACTGATTTATTAACA  
GAAAAAGGTGCACTATTAATAATTAGACTTTATTACACATAGCTATCCACACGACTGGAGA  
ACAAAAAACCTGTAATCTTCCGTGCTACACCACAATGGTTTGCCTCAATCAGTAAAGTA  
AGACAAGATATTTAGATGCAATCGAAAATACAACTTCAAAGTAAATTGGGGTGAAC  
ACGTATTTACAATATGGTTCGTGACCGTGGCGAATGGGTTATTTCTCGTCAACGTGTGTGG  
GGTGTACCGTTACCAGTATTTATGCTGAAAATGGCGAAATTATCATGACGAAAGAAACA  
GTGAATCATGTTGCTGATTTATTTGCAGAACACGGTTCAAATATTTGGTTTGAAAGAGAA  
GCGAAAGACTTACTACCAGAAGGATTTACACATCCAGGCAGCCCTAACGGTACATTTACT  
AAAGAAACAGACATTATGGACGTTTGGTTTGATTCTGGTTCATCACACCGTGGCGTGTG  
GAAACAAGACCGGAATTAAGTTTCCCAGCGGATATGTATTTAGAAGGTAGTGACCAATAT  
CGTGGTTGGTTCAACTCTTCTATCACAACCTTCAGTTGCTACAAGAGGAGTATCACCTTATA  
AATTCTTACTTTCTCATGGTTTTGTTATGGATGGTGAAGGTAAGAAAATGAGTAAATCTTT  
AGGTAATGTGATTGTACCTGACCAAGTGGTTAAACAAAAGGTGCTGATATTGCGAGACT  
TTGGGTAAGTAGTACGGACTATTTAGCTGATGTTAGAATTTCTGATGAAATTTTAAAACA  
AACATCTGATGTTTATCGTAAAATCAGAAATACATTAAGATTTATGTTAGGTAACATTAA  
CGATTTCAATCCTGACACAGATAGCATTCTGAATCAGAGTTATTAGAAGTGGATCGTTA  
CTTGCTAAATCGTTTACGTGAATTTACTGCAAGTACGATTAACAACCTATGAAAACCTTGAC  
TACTTAAATATTTATCAAGAAGTTCAAAACCTTATCAATGTTGAGTTAAGTAATTTCTATT  
TGGATTACGGTAAAGATATTTTATATATTGAACAACGTGATTCTCATATCCGTCGTAGTAT  
GCAACAGTGTTATATCAAATTTTAGTTGATATGACGAAGTTGTTAGCACCAATCTTAGT  
GCATACAGCTGAAGAAGTTTGGTCTCATACACCACATGTTAAAGAAGAAAGTGTTCACTT  
AGCAGACATGCCTAAAGTTGTAGAAGTAGATCAAGCTTTATTGGATAAATGGCGTACATT  
TATGAATTTACGTGATGATGTGAACCGTGCATTAGAACTGCTCGTAATGAAAAAGTTAT  
TGGTAAATCATTAGAAGCTAAAGTTACGATTGCTAGTAACGATAAATTTAATGCATCTGA  
ATTCTTAACTTCATTTGATGCATTACATCAATTTTATCGTGTCAACAAGTTAAAGTTGTA  
GATAAGTTAGACGATCAGGCAACAGCTTATGAACATGGTGATATTGTCATCGAACATGCA  
GATGGTGAAAAATGTGAAAGATGTTGGAACCTTTCAGAGGATCTTGGTGCTGTTGATGAA  
TTGACGCATCTATGTCCACGATGCCAACAAGTTGTAATAATCACTTGTATAA

> **A5IS80**

Function: protein coding sequence; glyoxalase family protein (core genome, constant)

Best match: A5IS80\_CC005\_Mu50-VRSA\_BA000017.4[1250683:1251480]

Position: 029-contig\_258\_RC: 31798 ... 32596; Length: 798 bp

Sequence:

ATGTATCATAACAGTAACGCAAACCTTGTAAATGGTATCACTTTAAATGTGAGAGATAAG  
AATGAATTAAGCCATTTTATGAGGACGTATTAGGATTAATATTATAAATGAGACATTA  
ACATCGATACAATATGAAGTAGGTCAAATAATCATGTCATTACACTTGTTGAATTACAA  
AATGGACGTGAACCTTTAATGTCCGAAGCGGGACTGTTTCATATCGCAATTAACCTACCT  
CAAATTAGTGATTTAGCTAATTTACTAATTCATTTAAGCGAATATGATATTCCAGTTAACG  
GAGGTATACAGCCTGCTTCGTTATCATTATTTTTTGAAGACCCAGAAGGAAACGGTTTTA  
AATTTTATGTTGATAAAGACGAAGCGCAATGGACGAGGCAAAATGATTTAGTAAAAATT  
GATATTAGACCATTAATGTACCGAGATTAGTGAGTCATGCAACAAAATTTGTTATGGTTA  
GGTATTCCAGATGACGCTATTATAGGTGCATTGCATATTAAGACAATTCATTTATCAGAG  
GTAAAAGACTACTACCTCGATTATTTTGGACTAGAGCAATCGGCATATATGGATGATTAT  
TCAATATTTTTAGCATCGAATGGCTATTATCAACATTTGGCCATGAATGATTGGGTATCAG  
CAACGAAACGTGTAGAAAATTTTATACGTATGGATTAGCAATTGTTGACTTTCATTATCC  
TGAAACAACACATTTAAATTTACAAGGTCCGGATGGTATCTATTATCGCTTTAATCATATC  
GAAGTTGAAGATTAG

### > **txbi\_universal1**

Function: bidirectional rho independent terminator

Best match: txbi\_universal1\_CC005\_ED98-hen\_CP001781.1[1188459:1188529] (completely identical)

Position: 030-contig\_240: 207 ... 278; Length: 71 bp

Sequence:

```
TGTATAAATAGAGAACAGCAGTAAGATAATTTTTAATTAGAAAATATCTTACTACTGTCT
TTTTAGGGATT
```

### > **lspA**

Function: protein coding sequence; lipoprotein signal peptidase (core genome, constant)

Best match: lspA\_CC001\_MW2-USA400\_BA000033.2[1175777:1176268] (completely identical)

Position: 030-contig\_240: 487 ... 979; Length: 492 bp

Sequence:

```
ATGCACAAAAAATATTTTTATTGGCACTTCCATTTAATAGCAGTATTTGTCGTTATATTTG
ACCAAGTTACTAAATATATTATAGCTACTACAATGAAAATTGGAGATTCATTTGAAGTGA
TACCGCACTTTTTAAACATAACATCACATCGAAATAATGGTGCTGCATGGGGAATATTGA
GTGGAAAAATGACATTTTTCTTTATTATTACCATTATTATATTAATAGCCTTAGTATATTT
TTTTATTAAGATGCTCAATATAAATTTGTTTATGCAAGTTGCTATTAGTTTACTTTTTGCAGG
TGCACCTGGAACTTTATTGATAGAATTTAACAGGAGAAGTTGTTGACTTTATTGATACA
AATATTTTTGGTTATGATTTTCCAATATTTAATATCGCAGATTCAAGTTTAAACAATTGGTG
TAATATTAATTATTATTGCCTTATTAAAGGATACTTCCAATAAAAAGGAGAAGGAGGTTA
AGTAA
```

### > **ylyB**

Function: protein coding sequence; ribosomal large subunit pseudouridine synthase (core genome, constant)

Best match: ylyB\_CC001\_ATCC51811-ST1\_ADVP01000009.1[220028:220945:r]

Position: 030-contig\_240: 978 ... 1896; Length: 918 bp

Sequence:

```
ATGGAGACTTATGAATTTAACATTACAGATAAAGAACAACAGGTATGCGTGTAGATAA
GTTGCTGCCTGAATTAATAGTGATTGGTCTCGTAACCAGATACAAGATTGGATTAAAGC
AGGTTTAGTCGTTGCAAACGATAAAGTTGTTAAATCTAATTATAAAGTGAACTTAATGA
TCATATAGTTGTCCTGAAAAAGAAGTGGTTGAAGCTGATATTCTACCTGAAAATTTAAA
TTTAGATATTTATTATGAAGATGACGATGTTGCAGTTGTATATAAACCGAAAGGCATGGT
AGTTCATCCATCACCAGGGCATTATACCAATACATTAGTTAATGGTTAATGTATCAAATT
AAAAATTTGTCAGGTATTAATGGAGAAATTCGTCCAGGTATTGTTACCGTATAGATATG
GATACTTCTGGTTTATTAATGGTTGCTAAAAATGATATTGCTCATCGTGGGCTTGTAGAAC
AATTAATGGATAAATCTGTTAAAAGAAAATATATCGCTTTAGTTCACGGGAATATTCCTC
ATGATTACGGTACAATCGATGCGCCAATTGGTAGAAACAAAATGATCGTCAATCTATGG
CTGTTGTTGATGATGGTAAGGAAGCAGTGACACATTTAACGTACTAGAACATTTTAAAG
ATTATACGCTTGTGAATGTCAACTTGAAACAGGACGTACGCATCAAATCCGTGTTTACA
TGAAATATATTGGCTTCCCATTAGTTGGTGATCCAAAGTATGGACCGAAAAAGACATTGG
ATATTGGTGGTCAAGCTCTACATGCTGGACTTATTGGATTTCGAACATCCAGTAACAGGTG
AATATATTGAAAGACATGCTGAATTACCACAAGACTTTGAAGATTTATTAGATACAATTC
GAAAAAGAGATGCATAA
```

### > **pyrR**

Function: protein coding sequence; pyrimidine operon regulator and uracil phosphoribosyltransferase (core genome, constant)

Best match: pyrR\_CC001\_MW2-USA400\_BA000033.2[1177585:1178112] (completely identical)

Position: 030-contig\_240: 2295 ... 2823; Length: 528 bp

Sequence:

```
ATGTCTGAACGTATCATAATGGATGATGCCGCAATACAACGTACAGTGACGAGAATCGCT
CACGAAATTTGGAGTATAACAAAGGTACTGATAATTTAATTCTTTTAGGTATCAAACA
```



AGAGGTGAATATTTAGCGAATCGTATACAAGATAAAAATTCATCAAATTGAGCAACAACGT  
ATACCTACTGGAACAATTGATATTACATACTTTAGAGATGATATAGAGCACATGTCATCA  
CTTACGACAAAAGACGCAATAGACATCGACACAGATATTACAGATAAAGTAGTCATCATT  
ATTGATGATGTGCTGTATACTGGTCGAACGGTTTCGTGCTTCACTTGATGCTATTTTGCTAA  
ATGCTAGACCTATTAATAATTGGTTTAGCTGCTTTGGTTGATCGAGGACATCGTGAGTTACC  
AATTCGAGCAGATTTTGTGGTAAAAATATACCTACTTCTAAAGAGGAAACGGTAAGTGT  
CTATTTAGAAGAAATGGATCAAAGAAATGCAGTTATAATTAATAA

### > **pyrP**

Function: protein coding sequence; uracil-cation symporter (core genome, constant)

Best match: pyrP\_CC001-ST772\_118\_AJGE01000002.1[210156:211463:r] (completely identical)

Position: 030-contig\_240: 3040 ... 4348; Length: 1308 bp

Sequence:

ATGCAAAATGATGAAATGTTTGAACGAACAGTAAAACCAGTACTAGATGTAATGAAAA  
ACCACAACCAGCGCAATGGGCATTTTTAAGCTTACAACATTTATTTGCGATGTTTGGCGC  
AACAGTACTAGTACCATTCTTAACAGGACTACCAATATCCGCAGCGTTACTAGCTTCGGG  
AATCGGTACATTACTTTATATCTTAATAACGAAGGCGCAAATACCAGCATACTTGGGATC  
TAGCTTTGCATTTATCACACCAATTATCACGGGATTAAGTACGCATAGCTTAGGAGACAT  
GCTTGTAGCATTATTCATGAGTGGTGTATGTACGTCATCATCGGAATTCTAATCAAATTA  
AGTGGGACAGCATGGTAAATGAAATTATTACCACCAGTTGTTGTTGGACCAGTCATCATG  
GTAATTGGTTTAAAGCTTAGCGCCTACTGCAGTCAATATGGCAATGTATGAAAATCCTGGA  
GATATGAAAGGTTACAATATCAGTTTCTTAATTGTTGCAATGATAACCTTGCTTGTAACAA  
TAGTCGTTCAAGGATTTTTTAAAGGATTCCTATCTTTAATACCAGTACTTGTAGGTATTAT  
CGTAGGTTATGTGGTAGCGATTTTTATGGGGATTGTGAAATTTGATGCAATTATGTCAGCA  
AAATGGATAGATTTCCCTCATATTTATCTGCCATTTAAAGATTATGTACCTTCATTTCACTT  
AGGACTTGTACTTGTAAATGATTCCGATTGTGTTTGTAAACAGTAAGTGAACATATTGGGCA  
CCAAATGGTATTGAATAAAATCGTAGGTAGAACTTCTTTGAAAAGCCAGGACTTGATAA  
ATCAATCATTGGTGTGGTGTCTTACAATGTTTGCCAGTATTATTGGTGGACCACCAAGT  
ACAACATACGGTGAAAATATCGGTGTATTAGCGATTACCAGAATATACAGTATTTACGTC  
ATTGGTGGTGCAGCAGTTATAGCAATTGTTTTAGCATTCAATTGGTAAGTTCACTGCATTAA  
TTTCTTCTATACCTACACCAGTTATGGGAGGAGTATCTATATTACTTTTCGGAATTATTGC  
AGCAAGTGGCTTAAGAATGTTAGTTGAAAGCAAAGTAGATTTTGCGAACAATCGAAATTT  
AGTTATAGCTTCTGTAATTTTAGTTGTAGGTATCGGTAATTTAGTATTTAACTTAAAAGAA  
ATTGGTATCAACCTTCAAATTGAGGGGATGGCATTAGCTGCACCTTCAGGAATTATTTTGA  
ACTTAATCTTACCTAAAGAGAAAAAACAACAATTA

### > **pyrB**

Function: protein coding sequence; aspartate carbamoyltransferase (core genome, constant)

Best match: pyrB\_CC001\_MW2-USA400\_BA000033.2[1179665:1180546] (completely identical)

Position: 030-contig\_240: 4375 ... 5257; Length: 882 bp

Sequence:

ATGAATCATTTATTATCAATGGAACATTTATCTACAGATCAAATATACAACTTATCCAA  
AAGGCAAGTCAATTTAAATCTGGTGAACGTCAACTACCAAACCTTTGAAGGGAAATATGTC  
GCAAATTTATTTCTTTGAAAATTCTACTCGAACAAAATGTAGTTTTGAAATGGCAGAACTT  
AAGCTAGGGTTAAAACGATTAGCTTTGAAACATCAACATCATCTGTTTCAAAGGTGAA  
TCTTTATATGACACATGTAAAACCTTTAGAAAGTATTGGCTGTGATTTATTAGTCATTAGAC  
ATCCGTTTAAATACTACTATGAAAATTAGCGAATATTAACATCCCAATTGCGAATGCTG  
GTGATGGTAGTGGACAACATCCAACACAAAGTTTACTTGATTTAATGACGATATATGAAG  
AATATGGATATTTTGAAGGCTTGAATGTATTGATTTGTGGAGACATTAATAAATTCACGTG  
TCGCACGTAGTAATTACCATAGTTTAAAAGCATTAGGTGCAAACGTAATGTTTAAATAGCC  
CAAATGCTTGGATTGATGATTCTTTAGAAGCACCTTATGTAAATATAGATGATGTTATAG  
AAACAGTAGATATAGTTATGTTATTAAGAATTCAACATGAAAGACATGGGCTTGCAGAAG  
AAACTAGATTTGCAGCAGATGATTATCATCAAAGCATGGCTTAAATGAAGTGCCTATA  
ACAAATTACAAGAACATGCTATTGTTATGCATCCGGCACCTGTGAATAGAGGAGTAGAAA

TACAAAGCGATTTAGTAGAAGCTTCAAATCAAGAATTTTTAAGCAAATGGAAAATGGC  
GTTTACTTAAGAATGGCAGTCATTGATGAATTATTAATAATAG

> **pyrC**

Function: protein coding sequence; dihydroorotase (core genome, constant)

Best match: pyrC\_CC005\_Mu50-VRSA\_BA000017.4[1257091:1258365] (completely identical)

Position: 030-contig\_240: 5274 ... 6549; Length: 1275 bp

Sequence:

ATGAAATTAATTAACCGGTAAGTATTACAAAATGGAGAATTACAACAAGCAGATAT  
TTAATTGATGGTAAGGTAATTAACAAATTGCACCTGCAATTGAACCAAGCAATGGTGT  
TGACATCATAGATGCGAAAGGTCACCTTTGTGTCACCTGGATTTGTCGATGTTTCATGTT  
TTACGTGAACCTGGTGGTGAATATAAAGAGACAATTGAAACTGGTACTAAAGCTGCTGCT  
AGAGGCGGATTTACAACCTGTATGTCCAATGCCTAACACAAGACCGGTACCAGATTCTGTA  
GAACATTTTGAAGCTTTACAAAATTAATCGATGACAATGCTCAAGTACGTGTATTACCT  
TATGCTTCAATTACAACACGTCAATTAGGTAAAGAATTGGTTGATTTCCCAGCACTAGTA  
AAAGAAGGTGCCTTTGCGTTTACAGATGACGGTGTAGGAGTACAACTGCAAGCATGAT  
GTATGAAGGCATGATTGAAGCTGCAAAAGTAAACAAAGCCATCGTAGCACACTGTGAAG  
ATAATTCATTAATCTATGGTGGTGCATGCAATGCATGAAGGGAAACGCAGTAAAGAGTTAGGTA  
TACCAGGTATCCAAACATTTGTGAATCTGTTCAAATCGCAAGAGATGTACTATTAGCTG  
AAGCAGCAGGTTGTCATTATCATGTATGTCATGTTTCTACTAAAGAAAGTGTAGAGTCA  
TTCGTGACGCTAAACGCGCAGGCATTCATGTTACAGCTGAAGTTACACCACACCATTTAT  
TGTTAACAGAAGATGATATTCCTGGTAATAATGCCATTTATAAAATGAATCCACCATTGA  
GAAGTACTGAAGATAGAGAGGCTTTGTTAGAAGGGTTACTAGACGGTACAATTGACTGTA  
TCGCAACAGACCATGCACCACATGCACGTGATGAAAAAGCACAACCAATGGAAAAAGCA  
CCATTCGGAATTGTTGGTAGTGAAACAGCATTCCCATTATTATATACGCATTTTGTAAAAA  
ATGGTGATTGGACATTACAACAATTAGTAGATTACTTAACAATTAACCATGTGAGACAT  
TTAATTTAGAATACGGCACATTAAGAAAGAAATGGTTATGCAGATTTAACAATCATTGATT  
TAGATAGTGAACAAGAAATTAAGGAGAAGATTTCTTATCAAAGCAGATAATACACCA  
TTTATCGGCTATAAAGTTTATGGAAATCCGATCTTAACAATGGTTGAAGGCGAAGTTAAA  
TTTGAGGGGGATAAATAA

> **pyrAA**

Function: protein coding sequence; carbamoyl-phosphate synthase short chain (core genome, constant)

Best match: pyrAA\_CC005\_Mu50-VRSA\_BA000017.4[1258367:1259467] (completely identical)

Position: 030-contig\_240: 6550 ... 7651; Length: 1101 bp

Sequence:

ATGCAAAGCAAACGTTATCTAGTGTTAGAAGACGGTCTTTTTTACGAAGGCTACCGTTTA  
GGATCTGATAACTTAACTGTAGGAGAAATTGTATTTAATACAGCTATGACAGGTTATCAA  
GAAACTATTTTCAGATCCATCATATACAGGTCAGATCATTACTTTTACGTATCCATTAATCG  
GTAATTATGGTATCAATAGAGACGATTTTGAATCATTAGTACCTACATTAACGGTATTGT  
AGTGAAGAAGCGAGTGCATCAAGTAATTTAGACAACAAAGACACTTCATGACG  
TTTTAGAATTGCATCAAATCCAGGGATTGCAGGTGTTGATACAAGAAGTATTACGCGTA  
AAATTCGACAACACGGTGTGTTAAAAGCTGGTTTTACTGATCGAAAAGAAGATATTGATC  
AACTTGTCAAACATTTACAACAAGTAGAATTACCTAAAACGAAGTAGAAATCGTTTCGA  
CTAAAACACCGTATGTTTCGACAGGTAAGGATCTAAGTGTCTGACTTGTAGACTTTGGTA  
AGAAGCAAATATTGTTTCGAGAATTAACCGTCAGAGGTTGTAACGTCACAGTTGTACCAT  
ATACAACACTGCCGAAGAAATTTAGCAATGGCTCCAGATGGCGTTATGCTATCAAACG  
GACCAGGTAATCCTGAAGTTGTAGAATGTGCGATTCCAATGATTCAAGGAATTTTAGGGA  
AAATTCGTTCTTTGGTATCTGTCTAGGACATCAACTTTTTGCATTATCTCAAGGAGCAAG  
CTCATTTAAAATGAAGTTTGGTCATCGTGGTGCGAACCATCCAGTTAAAAATTTAGAGAC  
TGGAAGGTTGATATTACGAGTCAAACCATGGATATGCAATAGATATAGATTTCGTTAAA  
AAGTACTGATTTAGAAGTTACTCATCTTGCATTAAATGATGGTACTGTAGAAGGTTTAAA  
ACATAAACATTACCAGCATTTTCTGTTCAATACCATCCTGAAGCAAATCCAGGACCGTC  
AGATTCAAACTATCTATTTGATGATTTTGTAGCAATGATGACTAATTTTAAGGAAAAGGA  
GCGTCATATCAATGCCTAA

> **pyrAB**

Function: protein coding sequence; carbamoyl-phosphate synthase large chain (core genome, constant)

Best match: pyrAB\_CC001-ST772\_118\_AJGE01000002.1[203687:206860:r]

Position: 030-contig\_240: 7643 ... 10817; Length: 3174 bp

Sequence:

```
ATGCCTAACGTAATGATATCAAACAATTTTAGTAATAGGGTCTGGGCCAATTATCATA
GGTCAAGCAGCTGAATTTGATTATGCTGGAACACAAGCATGTCTAGCTTTAAAAGAAGAG
GGATATCGAGTTATTCTTGTAATTCAAATCCAGCGACAATCATGACTGATAAGGAAATT
GCGGATAAAGTATATATCGAACCGTTAACTCATGATTTTATAGCGCGAATTATACGTA
GAGCAACCTGACGCTTTACTTCCAACCTTAGGTGGTCAAACAGGTTTAAACATGGCGATT
CAACTACACGAAAGTGGTGTGCTTCAAGATAATAACGTCCAATTATTAGGAACTGAGCTA
ACATCAATTCAACAAGCAGAAGACCGTGAAATGTTTAGAACATTAATGAATGATTTAAAC
GTTCTGTACCAGAGAGTGACATTGTAATAACAGTAGAGCAAGCCTTTAAATTCAAAGAG
CAAGTGGGATACCCGCTAATTGTTAGACCGGCATTTACGATGGGTGGTACCGGAGGCGGT
ATTTGTCATAATGATGAAGAATTACATGAAATCGTCTCAAATGGTCTTCATTATAGTCCAG
CAACGCAATGTTTATTAGAAAAATCTATCGCAGGTTTTAAAGAAATCGAATACGAAGTAA
TGCGTGATAAAAACGATAATGCCATCGTTGTATGTAACATGGAAAATATTGATCCAGTTG
GTATTCATACAGGCGATTCAATTGTTGTGGCTCCTAGCCAAACATTATCAGATGTTGAGTA
TCAAATGTTACGTGATGTTTCATTAAGTTATTCGAGCTTTAGGTATCGAAGGTGGTTGT
AATGTTCAATTAGCATTAGATCCCATTCATTGATTATTATATTATAGAAGTAAATCCGC
GTGTATCACGTTTCATCAGCGTTAGCTTCAAAGCAACAGGATATCCTATTGCAAAATTAG
CTGCTAAAATCGCGTTGGTCTAACATTAGATGAAATGTTAAATCCAATTACAGGAACAT
CTTATGCAGCGTTTGAACCAACTTTAGACTATGTGATTTCAAAAATACCAAGATTTCTTT
TGATAAATTTGAAAAGGAGAACGAGAGCTTGGCACACAAATGAAAGCAACAGGTGAAG
TTATGGCCATTGGTTCGAACTTACGAAGAATCATTGTTAAAAGCAATTCGATCACTTGAGT
ATGGTGTGCATCACTTAGGATTACCAAATGGTGAAGCTTCGATCTTGATTATATTAAG
AACGTATTTACACCAAGATGATGAACGATTATTTTCATCGGCCGAAGCAATTAGAAGAG
GCACAACATTAGAAGAAATTCATAATATGACTCAGATTGATTACTTCTTACACAAGTT
CCAAAACATTATTGATATTGAGCATCAATTAAGAGCATCAAGGTGATTTAGAATATCT
TAAATATGCAAAAGATTATGGATTTAGTGATAAAACAATAGCGCATCGCTTTAATATGAC
GGAAGAAGAAGTATATCAATTGCGTATGGAAAATGATATTAACCTGTTTACAAGATGGT
TGATACTTGCGCAGCTGAATTTGAATCTTCAACACCATATTATTATGGTACATACGAACT
GAAAATGAATCCATAGTTACTGACAAAGAAAAAATCTTAGTATTAGGCTCTGGACCAATT
CGAATCGGCCAAGGTGTAGAATTTGACTATGCGACAGTTCACGCCGTTTGGGCAATTCAA
AAAGCAGGGTACGAAGCGATAATTGTGAATAACAATCCAGAAACAGTTTCAACAGACTT
CTCAATTTCTGACAAATTATACTTTGAACCTTTAACTGAAGAAGATGTGATGAATATCATT
AATTTAGAAAAACCTAAAGGTGTCGTTGTACAATTTGGAGGACAAACAGCGATTAATTTA
GCAGACAAATTGGCTAAACATGGTGTAAATACTTGGTACTTCACTAGAAAATCTAAAT
CGTGCTGAAGATAGAAAAGAATTTGAAGCACTATTAAGAAAAATTAACGTGCCACAGCC
ACAAGGAAAAACAGCTACATCACCTGAGGAAGCATTAGCGAATGCTGCAGAAATCGGAT
ATCCGGTTGTAGTAAGACCTTCTTATGTATTAGGTGGTTCGCGCAATGGAAATTGTAGACA
ATGACAAAGAGTTAGAAAACCTATATGACCCAGGCTGTAAAAGCGAGTCCGGAACATCCG
GTACTAGTCGATAGATATTTAACTGGTAAAGAAATTGAAGTTGATGCGATTTGTGATGGA
GAAACGGTCATTATTCCAGGAATCATGGAACATATTGAACGTGCTGGTGTGCATAGTGGT
GACTCAATCGCTGTATATCCGCCACAACTTTGACAGAAGACGAGTTAGCAACACTTGAG
GACTATACTATAAAATTAGCTAAAGGTTTTAAACATCATTGGCTTAATCAACATTCAATTC
GTTATAGCTCACGATGGTGTGTATGTTTTAGAAGTAAATCCACGTTCTAGTAGAACGGTA
CCATTCTTAAAGTAAAATTACTGATATCCAATGGCACAATTAGCTATGCGAGCAATCATT
GGGGAAAACTAACAGATATGGGTTATCAAGAAGGGTTCAACCATATGCTGATGGTGT
CTTTGTGAAAGCACCGGTATTTAGTTTTAATAAATTGAAAAATGTTGATATTACTTTAGGA
CCTGAAATGAAGTCAACAGGTGAAGTGATGGGGAAAGATACTACATTAGAAAAGGCGTT
ATTCAAAGGGTTAACAGGTAGTGGTGTGAAAGTTAAAGATCACGGTACAGTATTAATGAC
CGTCAGTGACAAAGATAAAGAGGAAGTTGTTAAATTGGCACAACGCTTAAATGAAGTTG
GCTATAAAATTTTAGCAACGTCTGGAACAGCTAATAAATTAGCTGAGTATGACATACCTG
CAGAAGTAGTAGGCAAAATTGGTGGCGAAAATGATTTATTAACACGTATTCAAAATGGTG
```

ATGTTCAAATCGTTATAAATACAATGACTAAAGGTAAAGAAGTAGAAAGGGATGGCTTC  
CAAATTAGACGTACTACAGTTGAAAATGGTATTCCATGTTTGACATCTTTAGATACAGCT  
AATGCCTTAACGAATGTAATTGAAAGTATGACATTTACAATGCGTCAAATGTAA

### > **pyrF**

Function: protein coding sequence; orotidine 5'-phosphate decarboxylase (core genome, constant)

Best match: pyrF\_CC005\_Mu50-VRSA\_BA000017.4[1262743:1263435] (completely identical)

Position: 030-contig\_240: 10926 ... 11619; Length: 693 bp

Sequence:

ATGAAAGATTTACCAATTATTGCATTAGATTTTGAATCAAAAGAAAAAGTAAATCAATTT  
TTAGATTTATTTGATGAATCATTATTCGTA AAAAGTAGGTATGGAAC TTTTTATCAAGAAG  
GTCCTCAATTAATTAATGAGATAAAAAGAAAGAGGCCATGATGTATTTTATAGATTTAAAAC  
TGCATGATATTCCTAATACAGTTGGTAAGGCGATGGAAGGACTAGCTAAATTGAATGTTG  
ATCTGGTAAATGTTTCATGCTGCTGGTGGCGTAAAAATGATGTCTGAGGCCATTAAGGAT  
TAAGAAAACATAATCAACATACAAAAATTATTGCAGTAACACAGCTTACGTCAACAACA  
GAAGACATGTTACGACACGAACAAAATATACAAACATCGATTGAAGAGGCCGTTTTAAA  
TTATGCCAAGTTAGCAAATGCAGCTGGTTTAGATGGCGTTGTTTGTTCACCTCTTGAAAGT  
CGTATGTTGACTGAAAAGTTAGGTACATCATTTTTAAAAGTAACACCAGGTATTAGACCT  
AAAGGTGCATCTCAAGATGACCAACACCGTATTACGACACCGGAAGAAGCAAGACAGCT  
TGGTTCGACGCATATTGTAGTCGGTAGACCGATTACACAAAGTGACAATCCAGTCGAAAG  
TTATCATAAAAATTAAGAAAGTTGGTTAGTATAA

### > **pyrE**

Function: protein coding sequence; orotate phosphoribosyltransferase (core genome, constant)

Best match: pyrE\_CC001-ST772\_118\_AJGE01000002.1[202274:202885:r] (completely identical)

Position: 030-contig\_240: 11618 ... 12230; Length: 612 bp

Sequence:

ATGGCTAAAGAAATTGCAAAATCATTATTAGATATTGAAGCTGTAACATTATCACCAAAT  
GATTTATATACATGGAGTTCAGGTATTAATCACCGATTTACTGTGATAACCGTGTTACGT  
TAGGTTATCCTTTAGTTCGAGGCGCAATCCGCGATGGTTTAATTA ACTTAATTAAGAAC  
ACTTTCCTGAAGTAGAAGTTATTTCTGGTACTGCAACAGCTGGTATTCCACATGCAGCTTT  
TATTGCTGAAAAATTAAAATTACCAATGAATTATGTTTCGTTTCATCAAATAAGAGTCATGG  
TAAGCAAAATCAAATCGAAGGTGCTAAAAGTGAAGGTAAAAAAGTAGTTGTGATAGAAG  
ATTTAATTTTCGACAGGAGGATCTTCAGTCACAGCAGTTGAAGCCTTAAAACAAGCAGGTG  
CAGAAGTATTAGGTGTTGTAGCTATCTTTACTTACGGTTTGAAAAAAGCAGATGATACAT  
TTAGCAATATTCAACTACCTTTTTACTTTAAGTGATTACAATGAATTAATTGAAGTAGC  
TGAAAATGAAGGTAAAATTTCTAGTGAAGATATCCAAACATTAGTTGAATGGAGAGACA  
ACTTAGCATAA

### > **Q5HGM6**

Function: protein coding sequence; putative protein (core genome, constant)

Best match: Q5HGM6\_CC005\_Mu50-VRSA\_BA000017.4[1264076:1264288] (completely identical)

Position: 030-contig\_240: 12259 ... 12472; Length: 213 bp

Sequence:

ATGAATGACAAAACATCTAATGATTTATATGGGAAGATAAAAACATTGTAACGAATTTATC  
AATCATTCAAATGATTCCAATCTATCTAGTAGTCACGATGTGACGAAAGTTCAACGAAG  
CAAAAACATATAAAAAATAAAACA ACTATAGATCATAATGATGATTTATTTAAACATGTA  
AAGGATATATTACGTAAACAAGGACAAATTTAA

### > **Q5HGM5**

Function: protein coding sequence; putative protein (core genome, constant)

Best match: Q5HGM5\_CC001-ST772\_118\_AJGE01000002.1[201194:201595:r] (completely identical)

Position: 030-contig\_240: 12908 ... 13310; Length: 402 bp

Sequence:

ATGGATATTCCAAAAATCACGACATTTTTAATGTTTAATAACCAAGCTGAAGAAGCTGTT  
AAACTATACACAAGCTTATTTGAAGATAGTGAGATTATAACAATGGCTAAGTATGGTGAA  
AATGGACCTGGTGATCCTGGGACTGTACAACACTCAATATTTACATTAATGGACAAGTA  
TTCATGGCAATTGATGCTAATAGTGGCACAGAATTACCAATGAATCCTGCGATTTTCATTAT  
TTGTTACAGTAAAAGATACTATTGAAATGGAACGACTATTTAATGGATTAAGAAGATGAAG  
GTGCCATTTTAATGCCAAAAACGAATATGCCACCATACAGAGAGTTTGCTTGGGTTCAAG  
ATAAGTTTGGAGTAAGTTTTCAATTAGCATTACCTGAGTAA

### > **fbpA**

Function: protein coding sequence; putative fibronectin/fibrinogen-binding protein (core genome, constant)

Best match: fbpA\_AC027138.10[30240:31936:r]RC

Position: 030-contig\_240: 13572 ... 15270; Length: 1698 bp

Sequence:

TTATGATTGTTTCATTTTTTTGAATAAGTTCATAATCAGGTGTAGCATACAAAGTTTTTTGA  
TTGTCATATGTTACAAACCCAGGCTTTGCACCTGATGGTTTATGCACATTTTTTAATTAACG  
TGTAATCAACAGGTATTTGTCCAGAATTACCAGCTTTTGAAAAATATCCTGCTAACATAG  
CCGCTTCTTGATTGTCGTATCACTGGTGCATCATTAAATATAACGACATGTGAACCAGG  
AATATCTTTTGTGTGTAACCATGTGTGAGTTTTTTTTAGCTTTTTTATTTGTTAAATAATCAT  
TTTGCTTGTTATTCTTGCCAACATATATATCGTCGCCATCAGTTGATACATAATGTTGTAA  
TTGAATCTGCGCTTTCTTTTTCTTAGTTTGATTTTTACGCTGTTTCATAAAGCCTTGTTCTG  
CTAATTCATCTCTAATTCATCAATGTCATGGACAGAAATATGATGTAATTGTTGTTTCGAT  
TGTTGAAAAATAATCTATATTGTCTTTCGTCAATTGAATTTGATGTTGTAATTCACGTTCTC  
TCGTTTTCATACGATTATATTGTTTATAATAATATTGAGCATTGCTGATGGGGATTTTGT  
AGGATTTAAAGGAATGACAACCTTCTTCATTCGTATAATAATTCAATGCCGTCACCTCTTTA  
TCGCCTTGCTTAATTCGATATATATTAGCAGTGATCAATTCACCATATAACTGTTCCAGTAT  
CTTTATTTTTAGACTGCTCATATTCTTCAATCAACTTCGCTAATTTATTTTGATATTTGTGC  
AACTGCTGTTGAACAAATCGAACTAAATCATTTCGCACGTTGTTAACGCGTTCACGTTCCG  
CACGCGCATCATAAAAACGGTCAAGTAAATCATTTAATGAATCGTATGTAACCTGTATCAT  
CATTAAATTGATTTAACTTTATAAAAATAGAAATCCTCTTTACCTGTTTCATGATTTTTATGA  
AAAATAGGAGTAGGTGGTAACTTGGTTTCTGCCATTACTTCGTCAAATGCTTCTGGTAATG  
TTGATGAAGTCATAAATTGACGACGACTAACGATTTTCATTCGTAATTAAGGGCTAAATC  
CTTCAAACCTGATTCAATAATTGTTTAGCAATATTACCTGCGTTAAAATCGATATATTTCAA  
CACCTCTGCACCTGTAATATCATACGGATTTATTTTTGTGCTGAGTAGGTGGTGCTTCATAA  
TTAAATCCTGGCATTACTGTACGATAGTGATTCGTATTTGGTGTAAAGTGTTTAAATCCTT  
CAATTATTTTGCATTTTCATCTACTAAAATTAAGTTACTATGTTTACCCATAATCTCAAG  
GATGACAGTGCGGTAAATAGTATCGCCAATTTTCATCTTTACTCTTTATATCGATTTCAATG  
CGACGATCATTACCAATTTGCTTAATCGATTCGATAATACCACCTTCTAAGTGTTTTCTAA  
AAACACGCGCAAACATGGGTGGATTAAATGGATTATCATATTTTTTTAGTAGTTAATTGTA  
ATCTTGAAAGGTTTGGATGGATTGACAATAACAATTGATGGTTTTGTCTATTTTGACGTAC  
AACCATTAGTATCGTGTCATTATCAGGTTGATTGATTTTGTGAACGCGTCCTGTTGTTAAA  
AATTGTAGAGACTCAACCATTTTCTTTGTAATAAGCCATCATAAGCCAT

### > **gmk**

Function: protein coding sequence; guanylate kinase (core genome, constant)

Best match: gmk\_CC001\_MW2-USA400\_BA000033.2[1190834:1191457] (completely identical)

Position: 030-contig\_240: 15544 ... 16168; Length: 624 bp

Sequence:

ATGGATAATGAAAAAGGATTGTTAATCGTTTTATCAGGACCATCTGGAGTAGGTAAAGGT  
ACTGTTAGAAAACGAATATTTGAAGATCCAAGTACATCATATAAGTATTCTATTTCAATG  
ACAACACGTCAAATGCGTGAAGGTGAAGTTGATGGCGTAGATTACTTTTTTAAACTAGG  
GATGCGTTTTGAAGCTTTAATCAAAGATGACCAATTTATAGAATATGCTGAATATGTAGGC  
AACTATTATGGTACACCAGTTCAATATGTTAAAGATACAATGGACGAAGGTCATGATGTA  
TTTTTAGAAATTGAAGTAGAAGGTGCAAAGCAAGTTAGAAAGAAATTTCCAGATGCGCTA  
TTTATTTTCTTAGCACCTCCAAGTTTAGAACACTTGAGAGAGCGATTAGTAGGTAGAGGA

ACAGAATCTGATGAGAAAATACAAAGTCGTATTAACGAAGCGCGTAAAGAAGTTGAAAT  
GATGAATTTATACGATTACGTTGTAGTTAATGATGAAGTAGAACTTGCGAAGAATAGAAT  
TCAATGTATTGTAGAAGCTGAGCACTTAAAAAGAGAGCGCGTAGAAGCTAAGTATAGAA  
AAATGATTTTGGAGGCTAAAAAATAA

> **rpoZ**

Function: protein coding sequence; DNA-directed RNA polymerase omega subunit (core genome, constant)

Best match: rpoZ\_CC030\_MRSA252\_BX571856.11233626:1233844 [4\_50ANF10END]

Position: 030-contig\_240: 16167 ... 16386; Length: 219 bp

Sequence:

ATGTTAAATCCACCATTAAACCAATTAACGTCACAAATTAATCAAAGTATTTAATTGCA  
ACAACCTGCAGCGAAAAGAGCGCGTGAAATTGATGAACAACCTGAACTGAATTATTAAG  
TGAATATCATTCAATTAACCAAGTTGGTAGAGCGTTAGAAGAAATTGCTGACGGTAAAAT  
TCGCCCTGTTATTTCAAGTGATTATTATGGTAAAGAATAG

> **coaBC**

Function: protein coding sequence; bifunct phosphopantothencysteine decarboxylase/phosphopantothenate-cysteine ligase (core genome, constant)

Best match: coaBC\_CC007\_USA300\_TCH959\_AASB02000232.1[16672:17871]

Position: 030-contig\_240: 16601 ... 17801; Length: 1200 bp

Sequence:

ATGAAGAAAATATTATTAGCCGTTACAGGTGGCATTGCGGCATATAAAGCGATTGATTTG  
ACAAGTAAGTTAACACAATCTGGGTATGAAGTTCGCGTTATGTTAACGAATCACGCACAA  
AAATTTGTGACACCATTAGCATTTCAGCAATAAGTCGAAATGCTGTTTATACAGATACT  
TTTATAGAAGAAAATCCTTCAGAAATACAGCATATTGCATTAGGTGATTGGGCAGATGCA  
ATCATTGTTGCACCTGCAACGGCAAATACAATTGCAAATGAGTGTAGGTATTGCTGAT  
GATTTGGTGCATCAACGTTGCTAGCAACAGAGACACCGAAATTTATTGCGCCTGCTATG  
AATGTGCATATGTATGAAAATAAACGTACGCAGCAAAATATTAATATTTTAAAAGAAGAT  
GGGTATCATTTTATCGAACCGGAAGCGGATTTCTAGCATGTGGTTATGTTGCTAAAGGA  
CGTATGGAAGAACCGCTTCAAATCGTTTCTGTTATTGATGCTCATTTTCAAATAGTAATC  
GTTTAGCTAATAGTTCATTTCAAGATAAACCGCGCATTGGTTACAGCAGGACCAACTATTG  
AAGTTATCGATCCAGTCAGATTTGTATCCAATCGTTCTTCTGGAAAAATGGGCTATGCAAT  
AGCTGAAGCATTGCGAAATCGAGGAGCTATCGTGACGTTAGTTGCTGGTCTACAACACT  
AGAGGATCCAAAAGATATTGAAGTTATTCATGTTCAAAGTGCTGAAGAAATGTTTGAACA  
AGTGACAAGCCGATTTGACGAACAAGATATTGTTGTAAGCAGCAGCCGTATCTGACTA  
TACACCAGTTGATGTATTAGAACATAAGATGAAAAGCAGGATGGTGATTTATCAGTATC  
TTTTAACGTACTAAAGACATTCTTAAATATTTAGGTGAACATAAAACATCACAGTATTT  
AATAGGCTTTGCAGCAGAGACTGAAGATATTGAAAATTATGCACAACAAAAATTACGCA  
AGAAAAATGCAGATGTGATTATTTCAAATAATGTTGGGGATATGTCTATCGGATTTAGTT  
CTGATGATAATGAATTGACAATGATTTTAAAAATAATGAAAAGGTAAATATCAAGAAA  
GGAAAAAAGTAGTATTAGCTGCACAAATTTTAGATGAACTAGAACTAGGTGGCAATA  
A

> **tnpIS431-06**

Function: protein coding sequence; transposase for IS431 (mobile element)

Best match: tnpIS431-06\_circ\_S-epidermidis\_GQ900381.1[43799:43807]RC (completely identical)

Position: 030-contig\_240: 17151 ... 17160; Length: 9 bp

Sequence:

ATAGTTCAT

> **priA**

Function: protein coding sequence; primosomal protein N' (core genome, constant)

Best match: priA\_CC001\_MW2-USA400\_BA000033.2[1193090:1195498]

Position: 030-contig\_240: 17800 ... 20209; Length: 2409 bp

Sequence:

```
ATGATAGCGAAAGTCATAGTCGATGTCGCGTTCGAAGAGCGTTGACTATAAATTTGATTAT
ATAATTCCTGAACAACCTCGAATCTGTTCATCCAACCTGGTGTGCGTGTGATTGTACCTTTTG
GACCAAGAACGATTCAAGGTTATGTAATGGAAGTAACAGCAGAACCTGATGCACAACCTT
GACGTTTCGAAGTTAAAAAAAATCATAGAAGTGAAAGATATACAACCTGAATTAACATC
AGAATTAATAGCTTTAAGTGAGTGGATGGGTTCAACTCATGTCATTAACGTATTTCTATG
CTAGAAGTGATGCTTCCGAGTGCTATTAAGCGAAGTATAAAAAAGCATTAAAGATGAA
AGATGACAAAGAGGTACCTTCAGCTTTATTACAAAAATTTGATAAGCATGGTTACTATTA
TTATAAAGATGCGCAAAAAAATAATGATATTCAATTGCTTATGAAGTTGTTAAAAGATGA
TATCGTTGAAGAAAAACGATTCTCACACAAAATATAACTAAAAAAACCAAGCGTGTCTG
TTCGTGTCATTGAAGGGTATCATCCTGATGAAGTATTAGCTAAGTTGGAGAAAGTTATTA
ACAATACGATTTGTATGCTTACTTGTCTGAAGAACAACATAAAACAATATTTTAACTG
ATATTGAGGATATGGGCTTTTCAAAATCCAGTTTAGATGGACTTATCAAAAAAGGTTATG
TTGAAAAATATGACGCGGTTGTTGAAAGAGACCCATTTAAAGATCGTGTTTTCGAACAAG
AATCAAAACAGCAATTAACAGAAGACCAATATAAAGCATATGAAGCGATTAAGCTAAA
ATTGTAAGCCAAGAGCAAGAAACATTTTACTTCATGGTGTGACGGGATCAGGTAAAACA
GAAGTATATTTACAAACGATAGAAGATGTTTTAAGCCAAGGAAAACAGGCGATGATGTT
AGTTCCTGAAATCGCTCTAACACCGCAAATGGTTTTACGCTTCAAACGTGATTTGGTGTG
GACGTTGCTGTATTACATTCTGGCTTATCTAATGGGGAACGTTATGATGAGTGGCAAAAA
ATTAGGGATGGTTCGTGCGAGAGTAAGTGTGGTGCAAGGTCAAGTGTGTTTCGCACCTTTC
AAAAATTTAGGGTTAATCATCATTGATGAAGAACATGAATCTACATATAAGCAAGAAGAT
TATCCGAGATATCATGCTAGAGAAATTGCCAATGGCGAAGTGAATATCATCACTGCCCA
GTCATTTTAGGAAGTGCAACACCATGTCTTGAAAGTTATGCACGAGCTGAAAAAGGCGTT
TATCATTTGCTATCATTACCAAACAGAGTGAACCAACAAGCTTTACCTGAAATTGATATA
GTAGATATGCGTGAAGAATTGAGTGAAGGTAATCGGTCAATGTTTTCAAAGATTTACGT
GAAGCCATACAATTAAGATTAGATCGACAGGAACAAGTTGTTTTATTTTTAAATCGACGT
GGTTATGCATCGTTTATGTTATGTCGGGATTGTGGATATGTACCGCAATGTCCAAACTGTG
ATATTTCATTAAACGTATCATAAAACGACAGACTTATTAAAATGTCACTATTGTGGTTACCA
AGAGACGCCACCGAATCAATGTCCAAATTGTGAGAGTGAACACATTTCGACAAGTAGGTA
CTGGTACTCAGAAAGTTGAAGAACTATTGCAACAAGAATTTGAAGATGCGCGCATAATTA
GGATGGATGTAGATACAACCTCAAAGAAAGGTGCACATGAAAAGTTATTGACTGAATTC
GAAAAAGGTAACGGTGATATTTTACTAGGTACTCAGATGATTGCGAAAGGATTAGATTAT
CCAAATATTACTTTAGTTGGTGTGCTGAATGCAGATACAATGTTAAATTTACCTGATTTTC
GGGCGAGCGAACGTACTTATCAACTATTAACGCAAGTGGCTGGTAGAGCTGGTTCGTCATG
AAAAGGCAGGTCAAGTCATCATTCAAACGTATAATCCGGATCATTATTCAATATTGGATG
TTCAAAAAAATGATTATTTAACATTTTATCGTCAGGAAATGGAATATCGTAAATTAGGAA
AGTATCCACCGTATTATTATTTGATTAATTTACAATCTCACATAAAGAAATGAAGAAGG
TTATGGAAGCATCGCAGCATGTTTATAAATTTTATTACAGCATTTAACAGAAAAAGCGC
TTGTACTAGGTCCATCTCCGGCAGCACTTGCAGAAATCAACAATGAATTTAGATTCCAAA
TTTTAGTGAATATAAAAGTGAACCTGGATTATTACAAGCCATTGATTTTTAGATGACTA
TTACCATGAAAAATTTATAAAGAAAAATTAGCATTGAAGATTGATATTGATCCACAGAT
GATGATGTAA
```

> **def2**

Function: protein coding sequence; peptide deformylase homolog (core genome, constant)

Best match: def2\_CC001\_MW2-USA400\_BA000033.2[1197619:1198107] (completely identical)

Position: 030-contig\_240: 22330 ... 22819; Length: 489 bp

Sequence:

```
ATGGCGATTAAAAAGTTAGTACCAGCATCGCATCCTATTTTAAACGAAAAAAGCGCAAGCA
GTTATAAATTTGATGATTCGTTAAAAAGATTATTACAAGATTTAGAAGATACAATGTAT
GCACAAGAAGCAGCTGGCTTATGTGCACCTCAAATTAATCAGTCATTGCAAGTGGCAATC
ATTGATATGGAAATGGAAGGATTATTACAACCTGTTAATCCGAAAATTATTAGTCAATCA
AATGAAACGATAACAGACTTAGAAGGTTCAATTACATTGCCAGATGTTTACGGCGAAGTG
ACAAGAAGTAAAATGATAGTTGTCGAAAGTTATGACGTCAATGGGAACAAAGTTGAACT
AACTGCACATGAAGATGTAGCAAGAATGATTTTGCATATTATAGATCAAATGAACGGTAT
```

CCCTTTTACAGAACGTGCGGACCGTATTTTAACAGATAAAGAAGTGGAGGCATATTTTAT  
AAATGACTAA

> **fmt**

Function: protein coding sequence; methionyl-tRNA formyltransferase (core genome, constant)  
Best match: fmt\_CC001\_MW2-USA400\_BA000033.2[1198100:1199035] (completely identical)  
Position: 030-contig\_240: 22811 ... 23747; Length: 936 bp

Sequence:

ATGACTAAAATAATATTTATGGGTACACCAGACTTTTCAACAACCTGTTTTAGAAATGCTTA  
TTGCAGAACATGATGTCATTGCAGTCGTAACGCAACCAGATCGACCTGTTGGACGTAAAC  
GTGTTATGACACCACCAGTTAAAAAAGTTGCAATGAAATATGATTTACCTGTATATC  
AGCCTGAAAAATTAAGTGGATCAGAAGAATTAGAACAATTGCTTCAATTAGATGTAGATT  
TAATTGTAACCTGCTGCTTTTGGACAATTATTACCTGAATCATTGTTGGCATTACCAAACT  
TGGGGCAATTAATGTACATGCATCATTGTTACCGAAGTATAGAGGTGGTGCACCAATTCA  
TCAGGCAATTATCGATGGTGAACAAGAAACCGGCATAACAATTATGTATATGGTTAAAAA  
ATTAGATGCGGGTAATATTATTTTCGCAACAAGCAATTAATAAGAAAATGATAATGT  
CGGTACGATGCATGATAAATTAAGTGTATTAGGGGCAGATTTATTAAGAACTTTACC  
ATCTATTATAGAGGGCACAAATGAAAGTGTACCTCAAGATGATACGCAAGCAACATTTGC  
TTCCAATATTCGACGCGAAGATGAGCGAATTAACCTGGAATAAACAGGAAGACAAGTGT  
TTAATCAAATTCGTGGATTATCACCATGGCCAGTTGCTTATACAACCTATGGATGACTA  
ACTTGAAAATATACGATGCTGAACTCGTTGAGACTAATAAGATAAACGAGCCTGGAACC  
ATTATAGAAACGACTAAAAAAGCCATTATTGTTGCTACAAATGATAATGAAGCTGTTGCA  
ATTAAGATATGCAATTAGCTGGGAAAAAGAGAATGTTAGCTGCCAATTATTAAGTGGT  
GCGCAAAACACACTAGTAGGGAAGAACTTATATGA

> **sun**

Function: protein coding sequence; ribosomal RNA small subunit methyltransferase B (core genome, constant)  
Best match: sun\_CC007\_TCH959-USA300\_AASB02000232.1[23813:25120]  
Position: 030-contig\_240: 23743 ... 25051; Length: 1308 bp

Sequence:

ATGATAGAAAACGTGAGAAGTCTTGCTTTTGACACGATTCAAGATATATTAATGAAGGT  
GCGTATAGTAACTTGCGTATTAATGAAGTGTGTCAGAAAATGAATTAATGCAATGGAT  
AAAGCCTTATTTACAGAAATTGTCTACGGAACCGTTAAAAGAAAATATACGTTAGATTTT  
TATTTAAAGCCTTTTGTGAAAACAAAGATTAAGGCATGGGTTAGGCAATTATTATGGATG  
AGTATTTATCAATATGTTTATTTAGATAAAGTTCCAAATCATGCCATTATTAATGAAGCAG  
TTGAAATAGCAAAAAGAACGCGGTGGCTATCATAATGGTAATGTCGTAAATGGTATTTTAC  
GTACAATGATGCGTAGTACTTACCTGATTTTAAATGAAATTGCAGATCCTAAAAAAGAA  
TGGCAATCGAATATAGTATGCCGAAGTGGATTATAGATCATTGGGCAACACATTATGGTC  
TCGAAGAACTGAAACAATTTTACAGTCATTTTATAGAAACGACATCAACAACCTGTGCGTG  
CCAACCTGACGCGAGCATCATTAGATGATATTATTGAAAAGTTGCAAGACGAAGGTTATG  
ACGTTGAAAAGATCATGACTTACCTTATTGTCTCCATATAGGTGGACAACCAATTATTC  
ATTCTCGTTTCAATTAAGATGGATTGTTTCAATTCAAGATAAAAGCTCAATGTTTGTGTC  
ACACATTATGAATGTAGACCGACATGATCACGTATTAGATGCATGTAGTGCACCTGGCGG  
TAAAGCTTGTACATTGCTGAAGTTTTAATGCCAGAAGGGCAAGTTGACGCTTCAGATAT  
ACATGATCACAAAATAGACTTAATTAATTTAATATAAAAAAATTACGATTAACAAATAT  
TAAAGCTTTTCAACATGATGCGACAAAACCTTATGATAAACATACGATAAGATACTTGT  
TGATGCACCATGTAGCGGATTAGGTGTAATGAGACATAAGCCGGAGATTAAGTATACTCA  
AAGCAAACAACATATTGAGTCACTAGTTGAATTACAGCTTGAAATATTGGAAAATGTAAA  
AAACAATGTAAAAATAGGTGGCGAAATCATCTATTCAACATGTACAATTGAGCAACTAG  
AAAATGAAAACGTGATTTATACGTTTTTGAATAATAAAAACTTCGAATTTGAACCGT  
TTCAACATCCGATAACTGGAGAGTTGGTCAAACGTTACAAATCATGCCGCAAGACTTTA  
ATTCAGATGGATTCTTTATCACTAAGATAAAAAGAAAGGACAATTAG

> **rlmN**



Function: protein coding sequence; ribosomal RNA large subunit methyltransferase (core genome, constant)

Best match: rlmN\_CC001-ST772\_118\_AJGE01000002.1[188356:189450:r] (completely identical)

Position: 030-contig\_240: 25053 ... 26148; Length: 1095 bp

Sequence:

```
ATGATAACTGCTGAAAAGAAAAAGAATAAATTTCTTCCAAATTTTGACAAGCAATCA
ATATATTCATTGCGATTTGACGAAATGCAAACTGGCTCGTTGAACAAGGTCAACAAAAA
TTTCGAGCGAAACAGATTTTTGAATGGTTATATCAAAAAAGAGTAGATTGCGATTGATGAA
ATGACGAACTTATCGAAAGACTTACGACAGCTTTTAAAAGATAACTTTACTGTTACAAC
TTAACAACCTGTAGTAAAACAAGAAAGTAAAGACGGTACAATTAATTTCTTATTTGAATTA
CAAGATGGCTATACAATTGAAACTGTTTTAATGAGACATGATTATGGAAATTCAGTATGT
GTAACGACACAAGTAGGTTGTCGTATCGGATGTACGTTTTGTGCTTCTACACTTGGCGGCT
TAAAAAGAAACCTTGAAGCTGGCGAAATTGTTTCACAAGTTTTAACAGTTCAAAAAGCCC
TTGATGCTACAGAAGAGCGCGTATCTCAAATTGTCATAATGGGTATCGGTGAACCAATTTG
AAAATTATGATGAAATGATGGACTTTTTAAGAATCGTCAATGATGATAATAGTTTAAATA
TTGGTGCACGTCACATTACAGTATCAACATCAGGTATCATTCCCTAGAATATACGACTTTGC
GGATGAAGATATCCAAATTAATTTTGGCTGTAAGCTTACACGCCGCAAAAGATGAAGTGCG
ATCACGCTTGATGCCAATTAACCGTGCATATAATGTTGAGAAGTTAATCGAAGCAATTCA
ATATTATCAAGAAAAACAAATCGTCGTGTTACTTTTTGAATATGGTCTGTTTGGTGGTGTG
AATGACCAACTAGAACATGCAAGAGAATTAGCACATTTAATAAAAGGCTTAAACTGCCA
TGTTAACTTAATTCCTGTCAACCATGTTCCAGAAAGAAATTATGTGAAAACGGCTAAAAA
TGATATCTTTAAATTTGAAAAAGAATTAAGAGACTAGGAATTAATGCCACAATACGTCG
TGAACAAGGTTCCGATATTGACGCAGCTTGTGGTCAATTAAGAGCAAAGGAACGACAAG
TAGAAACGAGGTAA
```

### > **stp1**

Function: protein coding sequence; serine/threonine protein phosphatase (core genome, constant)

Best match: stp1\_CC001\_MW2-USA400\_BA000033.2[1201443:1202186] (completely identical)

Position: 030-contig\_240: 26154 ... 26898; Length: 744 bp

Sequence:

```
ATGCTAGAGGCACAATTTTTTACTGATACTGGACAACATAGAGATAAGAATGAAGATGCG
GGTGGTATTTTTTATAATCGAACTAATCAACAACCTTTTAGTTCTGTGTGATGGTATGGGCG
GCCATAAAGCAGGAGAAGTTGCAAGTAAATTTGTTACAGATGAGTTGAAATCCCGTTTTG
AAGCGGAAAATCTTATAGAAGAACATCAAGCTGAAAATTGGTTGCGTAATAATATAAAA
GATATAAATTTTCAGTTATATCACTATGCACAAGAAAATGCAGAATATAAAGGTATGGGT
ACAACATGTGTTTGTGCACTTGTTTTTGAAAAATCAGTTGTGATAGCAAATGTCGGTGATT
CTAGAGCCTATGTTATTAATAGTAGACAAATTGAACAAATTAAGTATGATCACTCATTTGT
TAATCATCTTGTTTTAAACGGGTCAAATTACGCCGGAAGAAGCATTTACACATCCACAACG
TAATATTATTACGAAGGTGATGGGCACAGATAAACGTGTGAGTCCAGATTTGTTTATTA
GCGATTAAATTTTTATGATTATTTATTATTAATTCAGATGGATTAAGTATTATGTTAAA
GACAATGAAATTAAGCGTTTGTAGTAAAAGAAGGTACAATAGAAGATCATGGTGTATCA
ATTAATGCAATTGGCATTAGATAACCATTGAAAGATAACGTTACTTTCATACTCGCGGC
TATTGAAGGTGATAAAGTATGA
```

### > **pknB**

Function: protein coding sequence; serine/threonine-protein kinase (core genome, constant)

Best match: pknB\_Y18639.1[1:48:r] (completely identical)

Position: 030-contig\_240: 26894 ... 26942; Length: 48 bp

Sequence:

```
ATGATAGGTAAAATAAATAAATGAACGATATAAAATTGTAGATAAGCTT
```

### > **engC**

Function: protein coding sequence; ribosome small subunit-dependent GTPase A (core genome, constant)

Best match: engC\_CC001\_MW2-USA400\_BA000033.2[1204405:1205280]

Position: 030-contig\_240: 29116 ... 29992; Length: 876 bp

Sequence:

```
TTGAAGACAGGTTCGAATAGTGAAATCAATTAGTGGGGTATATCAAGTAGACGTTAATGGC
GAACGTTTCAATACAAAACCACGAGGATTATTTAGAAAGAAAAAATTTTCACCGGTAGTT
GGTGATATAGTGGAATTTGAAGTACAAAACATTAACGAAGGCTATATTCATCAAGTGTTT
GAGCGGAAAAATGAGTTGAAAAGACCACCTGTAAGTAATATAGATACACTAGTAATTGT
AATGAGTGCTGTCGAGCCAAATTTTCAACGCAATTATTAGATCGATTTTTAGTTATTGCA
CATTTCGTATCAGTTAAATGCGAGAGTTTTGGTGACTAAAAAAGATAAAACACCAATTGAA
AAGCAGTTCGAAATAAATGAGTTGTTGAAAATATATGAAAATATTGGCTATGAGACTGAA
TTTATTGGAAATGATGATGATCGAAAAAAAATTGTAGAAGCTTGGCCAGCTGGACTTATA
GTACTTAGTGGTCAATCAGGTGTCGGTAAGTCCACTTTCTTAAATCATTATCGTCCAGAAC
TTAATCTTGAGACAAATGATATATCAAATCATTAAATCGAGGAAAGCATACTACAAGAC
ATGTCGAACTATTCGAAACGTCAAACGGTTATATTGCAGACACACCTGGATTGAGTGCTT
TAGATTTTGATCATATAGATAAAGATGAAATAAAAGATTATTTTCTTGAATTAATCGAT
ATGGTGAAACATGTAAGTTTAGAAATTGTAATCATATCAAAGAACCTAATTGTAATGTTA
AGCATCAATTAGAGATAGGGAATATTGCGCAATTTAGATACGACCATTATTTACAACAT
TTAATGAAATTTCAAATAGAAAGGTTAGATATTA
```

### > **rpe**

Function: protein coding sequence; ribulose-5-phosphate 3-epimerase (core genome, constant)

Best match: rpe\_CC001-ST772\_118\_AJGE01000002.1[183867:184511:r] (completely identical)

Position: 030-contig\_240: 29992 ... 30637; Length: 645 bp

Sequence:

```
ATGACAAAACATATCCATCATTATTATCTGTTGATTTTTTTGGATTTACAACATGAATTA
AACGACTTGAAGAAGCAGGTGTCGACGGAGTTCATTTTGATGTTATGGATGGTCAATTTG
TGCCTAATATATCTATTGGTTTACCAATATTAGATGCAGTAAGAAAAGGCACAACATTAC
CTATAGACGTACATTTGATGATTGAAAATCCAGAAAAGTATATTGCATCATTGTCAGAAC
ATGGTGCCGATATGATTTCAATTCATGTCGAATCAACGCCTCATATTCATCGTGCTATTCA
AATGATTAACATTTAGATAAAAAAGCTGGTGTAATTAATCCTGGTACACCAATATC
ACAAATTGAACCTATTTTAGACATTGTTGATTATGTAAGTATGACTAGTGATGACAGTTAACCCAGG
GTTTGGTGGTCAATCATTATTGATCAATGCGTAGAAAAAATAGCGGGTCTTAATGCTATT
AAAATGGAACGTCAATTAACCTTTGATATTGAAGTTGATGGAGGCGTAAATACCGATACA
GCGAAAGTTTGTGTTGAAAATGGTGCTACAATGCTAGTAACAGGTTCATTTTTCTTTAAAC
AAGAGGATTATAAAAAAGTCACACAAGGATTGAAAGGTTGA
```

### > **thiN**

Function: protein coding sequence; thiamine pyrophosphokinase (core genome, constant)

Best match: thiN\_CC001-ST772\_118\_AJGE01000002.1[183219:183860:r] (completely identical)

Position: 030-contig\_240: 30643 ... 31285; Length: 642 bp

Sequence:

```
ATGCATATAAATTTATTATGTTCTGATCGACACTTGCCGCAAGATATTTGGGCCAAAAGT
AATGAAGGTAATGGGGCGGCGTTGATAGAGGTGCTTTGATTTTATTGAAGCATCAAATT
ATCCCTTTTTTCTCAGTGGGAGACTTTGATTCAGTCAGTAAAGAAGAACGCCAACTTTTAA
CAGAACAGTTACAAATCAAACCAGTTCAAGCTGAAAAAGCTGATACGGATTTAGCTTTAG
CGGTTGATAAAGCTGTTGCACTTGGATTTGATAGTATTACAATTTATGGTGCAACAGGCG
GACGATTAGATCACTTTTTTGGGGCAATTCAGTTATTATTGAAAAAAGCATATTATAAAC
ATGATGTTTCATATAGAAGTTATCGATCAACAAAATAAAATTGAATTATTGCCTAAAGGTC
AACATACAGTTGAAAAAGATAAGAGTTATCCGTACATTTTCAATTTATACCGATGACTGATG
ATGTAGAACTTTCTCTAGCAGGTTTTAAATATAATTTAGCTAGACAAATGCTTAATATAGG
TTCTACTTTAACTATTTCCAATGAAATTGAGTCTTTGCAAGCGAAAGTAACTGTACATGAT
GGGTTGATTTTGCAAATTAGAAGTACAGATTTAAATTA
```

### > **rpmB**

Function: protein coding sequence; 50S ribosomal protein L28 (core genome, constant)

Best match: rpmB\_CC001\_MW2-USA400\_BA000033.2[1206954:1207142:r]RC (completely identical)

Position: 030-contig\_240: 31665 ... 31854; Length: 189 bp

Sequence:

```
TTAAACTCTAGTTACTTTACCAGATTTTAAAGCACGTGCAGAAACCCAACTTTTTTTAGGT
TTACCGTCAACTAGGATTCTAACTTTTTGAAGGTTAGCGTTCATCTACGTTTAGTAGAGT
TTAAAGCGTGTGAACGTCTGTTACCAGTCTGAAGCTTTACGACCTGTTACGAAACATTGTTT
ACCCAT
```

### > yloV

Function: protein coding sequence; glycerone kinase (core genome, constant)

Best match: yloV\_CC030\_MRSA252\_BX571856.1[1250143:1251789]

Position: 030-contig\_240: 32685 ... 34332; Length: 1647 bp

Sequence:

```
ATGATTAGCAAAATTAATGGTAAATTATTTGCCGATATGATTATACAAGGGGCACAAAAT
TTATCTAACAATGCAGATTTGGTAGATTCTTTGAATGTGTATCCAGTGCCAGATGGTGATA
CAGGAACAAATATGAATCTTACTATGACTTCAGGTCGCGAAGAAGTAGAGAATAATTTGT
CGAAAAATATCGGCGAATTAGGTAAAACATTCTCGAAAGGTTTACTAATGGGTGCAAGA
GGTAACTCTGGTGTTCATCTTGTCAACAATTATTCAGAGGATTTTGTAAAAATATTGAAAGTG
AATCTGAAATTAATTCAAATTTAGCTGAAAGTTTTCAAGCTGGTGTGAAACGGCAT
ATAAAGCTGTTATGAAACCAGTTGAAGGTACAATACTTACAGTTGCAAAAGATGCTGCGC
AAGCTGCAATAGAAAAAGCAAATAATACTGAAGATTGTATAGAATTAATGGAGTACATT
ATTGTAAAAGCCAATGAATCACTTGAAAACACACCAAACCTATTAGCTGTACTTAAAGAA
GTTGGTGTGTTGATAGTGGCGGTAAAGGTTTGTATGCGTTTACGAAGGATTCTTAAAA
GCGCTTAAAGGTGAAAAAGTTGAAGCCAAAGTTGCAAAGATAGATAAAGATGAATTTGT
ACATGATGAACATGATTTCCATGGTGTAAATAACTGAAGATATTATTTATGGCTATTGT
ACTGAAATGATGGTTCGTTTTGGAAAGAATAAAAAAGCCTTTGATGAACAAGAATTCAGG
CAAGATATGAGTCAATTTGGTGATTCTTTATTAGTCATTAATGATGAAGAAATTTGTAAG
GTTACGTCATACCGAATACCCAGGTAAAGTGTTAATTATGGTCAACAATATGGTGAA
TTAATTAACCTTAAGGTTGAAAATATGAGAGAACAGCATCGTGAAGTGATTCGAAAAGA
ACAGCACACAGCTAAACCGAAAATGGAAACGGTTGAAACAGCGATTATTACTATTTCTAT
GGGTGAAGGTATTTTCAGAGATATTTAAATCAATGGGTGCCACACATATCATTAGTGGTGG
ACAAACGATGAATCCTTCTACAGAAGATATCGTTAAAGTCATTGAACAATCAAATGTAA
ACGTGCAATTATTTTACCGAATAATAAAAAATATCTTAATGGCAAGTGAACAAGCAGCGAG
TATTGTTGATGCAGAAGCAGTTGTTATTCCAACGAAATCTATTCCTCAAGGTATAAGCGC
ACTATTCCAATATGATGTGGACGCAACACTTGAAGAAAATAAAGCGCAAATGGCTGATTC
AGTAAATAACGTTAAATCTGGTTCATTAACGTACGCTGTTTCGTGATACGAAAATTGATGG
CGTTGAGATTAAAAAAGACGCGTTTATGGGCTTGATTGAAGATAAGATTGTAAGCAGCCA
AAGTGATCAATTAACAACGGTACTGAGTTGTTAAATGAGATGTTAGCAGAAGATAGTGA
AATATTGACTGTGATTATTGGTCAAGATGCAGAGCAAGCAGTTACAGATAACATGATAAA
CTGGATTGAAGAGCAATATCCAGATGTAGAAGTGGAAGTTCATGAAGGTGGACAACCAA
TTTATCAATATTTCTTTTCAGTAGAATAA
```

### > recG

Function: protein coding sequence; ATP-dependent DNA helicase (core genome, constant)

Best match: recG\_CC001-ST772\_118\_AJGE01000002.1[177922:179982:r] (completely identical)

Position: 030-contig\_240: 34521 ... 36582; Length: 2061 bp

Sequence:

```
TTGGCTAAAGTAACTTAATAGAAAGTCCATATTCTCTTTTACAATTAAGGTATAGGT
CCTAAGAAAATAGAAGTATTGCAACAATAAATATTCATACAGTGGAAGATCTTGTTCTT
TATTTGCCAACTAGATATGAAGATAATACAGTGATTGATTTGAATCAAGCAGAAGATCAA
TCTAACGTTACGATAGAAGGACAAGTATATACAGCTCCAGTAGTTGCATTTTTTTGGAAGA
AATAAATCAAATTAACCGTTCATTTAATGGTAAATAAATATTGCTGTCAAATGTATTTTTT
TCAATCAACCGTATTTAAAAAAGAAAATCGAATTAATCAAACCTATAACTGTTAAAGGTA
AGTGAATAGGGTTAAACAGGAAATTACTGGTAATAGGGTTTTCTTTAATTCACAAGGGA
```

CACAACTCAAGAAAACGCAGATGTTCAATTAGAACCAGTCTATCGTATTAAGGAAGGT  
ATTAACAAAAGCAAATACGAGACCAAATTAGACAAGCGTTAAATGATGTGACAATTCA  
TGAATGGTTAACTGATGAACTAAGAGAAAAATATAAATTAGAGACCTTGGACTTTACTTT  
GAACACATTACATCATCTAAAAGTAAAGAGGATTTATTACGTGCTCGTAGAACCTATGC  
ATTTACTGAACTGTTTTTATTTCGAATTACGTATGCAATGGCTAAATAGATTAGAAAAGTCA  
TCTGACGAAGCAATTGAAATTGATTATGACATAGACCAAGTTAAATCATTATTGATCGT  
TTACCTTTTGAACCTAACTGAAGCACAGAAATCCAGTGTTAATGAAATTTTTAGAGATTTA  
AAAGCACCAATACGTATGCATCGATTACTTCAAGGTGATGTAGGTTTCAGGAAAAACAGTA  
GTTGCTGCAATTTGTATGTATGCGTTAAAAACGGCTGGTTATCAATCAGCATTGATGGTAC  
CAACTGAAATTTTAGCAGAGCAACATGCTGAAAGTTTAAATGGCTTTATTTGGAGATTCTA  
TGAACGTTGCATTGTTAACTGGGTCAGTAAAAGGTAAGAAACGAAAGATACTTTTAGAAC  
AACTTGAAGATGGTACGATTGATTGTTTAAATGGAACCCATGCTTTGATTCAAGATGATGT  
GATTTTCCATAATGTTGGTTTAGTAATTACAGATGAACAACATCGATTTGGTGTGAATCAA  
CGCCAGCTTTTAAAGAGAAAAAGGTGCAATGACGAATGTGTTATTTATGACAGCAACGCCG  
ATACCAAGAACAAGTACGCAATATCAGTTTTTGGTGAGATGGATGTGTCTTCAATTAACAA  
TTACCAAAAAGGTCGTAAACCTATCATTACTACTTGGGCAAAGCATGAGCAATACGATAAA  
GTTTTGATGCAAATGACCTCAGAGTTGAAAAAAGGTCGTCAAGCATATGTCATTTGCCCG  
CTTATAGAAAGTTCTGAGCATCTCGAAGATGTTCAAATGTTGTTCGATTGTACGAGTCTT  
TACAACAGTATTATGGTGTTCCTCGTGTAGGGTTATTGCATGGTAAGTTGTCTGCCGATGA  
AAAAGATGAGGTCATGCAAAAAGTTTAGCAATCATGAGATAGATGTTTTAGTTTCTACTAC  
TGTTGTTGAAGTAGGTGTTAATGTACCGAATGCAACTTTTATGATGATTTATGATGCGGAT  
CGCTTTGGATTATCAACTTTACATCAGTTACGCGGACGTGTGGGTAGAAGTGACCAGCAA  
AGTTACTGTGTTTTAATTGCATCCCCTAAAACAGAAACAGGAATTGAAAGAATGACAATT  
ATGACACAAACAACGGATGGATTTGAATTGAGTGAACGAGACTTAGAAATGCGTGGTCC  
TGGCGATTTCTTTGGTGTTAAACAAAGTGGATTGCCAGATTTCTTAGTTGCCAATTTAGTT  
GAAGATTATCGTATGTTAGAAGTTGCTCGTGATGAAGCAGCTGAACTTATTCAATCTGGC  
GTATTCTTTGAAAATACGTATCAACATTTACGTCATTTTGTGAAGAAAATTTATTACATC  
GTAGTTTTGACTAA

### > **fapR**

Function: protein coding sequence; fatty acid and phospholipid biosynthesis transcript regulator (core genome, constant)

Best match: fapR\_CC001-ST772\_118\_AJGE01000002.1[177147:177704:r] (completely identical)

Position: 030-contig\_240: 36799 ... 37357; Length: 558 bp

Sequence:

TTGAAACTAAAGAAAGATAAACGTAGAGAAGCAATCAGACAACAAATTGATAGCAATCC  
CTTCATCACAGACCATGAACTAAGCGACTTATTTCAAGTGAGTATACAAACAATTTCGTTT  
AGATCGCACTTATTTAAACATAACCAGAATTAAGGAAGCGTATTAAATTAGTTGCTGAAAA  
GAATTATGACCAAATAAGTTCTATTGAAGAACAAGAATTTATTGGTGATTTGATTCAAGT  
CAATCCAAATGTTAAAGCGCAATCAATTTTAGATATTACATCGGATTCTGTTTTTCATAAA  
ACTGGAATTGCGCGTGGTCATGTGCTATTTGCTCAGGCAAATTCGTTATGTGTTGCGCTAA  
TTAAGCAACCAACAGTTTTAACTCATGAGAGTAGCATTCAATTTATTGAAAAAGTAAAAT  
TAAATGATACGGTAAGAGCAGAAGCACGAGTTGTAATCAAACCTGCAAAAACATTATTAC  
GTCGAAGTAAAGTCATATGTTAAACATACATTAGTTTTCAAAGGAAATTTAAAATGTTTT  
ATGATAAGCGAGGATAA

### > **plsX**

Function: protein coding sequence; glycerol-3-phosphate acyltransferase (core genome, constant)

Best match: plsX\_CC008\_NCTC8325\_CP000253.1[1148670:1149656] (completely identical)

Position: 030-contig\_240: 37361 ... 38348; Length: 987 bp

Sequence:

ATGGTTAAATTAGCAATTGATATGATGGGTGGCGACAATGCGCCTGATATCGTATTAGAA  
GCCGTACAAAAGGCTGTTGAAGACTTTAAAGATCTAGAAATTATACTTTTCGGTGACGAA  
AAAAAGTATAATCTGAACCATGAACGAATCGAATTTAGACATTGTTCTGAAAAGATTGAA  
ATGGAAGATGAGCCTGTTAGAGCGATTAAACGTAAAAAAGATAGCTCAATGGTAAAAAT

GGCTGAAGCTGTGAAATCTGGTGAAGCAGATGGATGTGTGTCAGCAGGTAATACTGGTGC  
TTTAATGTCAGCTGGTTTATTCATTGTTGGACGTATTAAGGTGTAGCTAGACCGGCTTTA  
GTAGTAACATTGCCAACGATTGATGGAAAAGGTTTTGTCTTTTATAGACGTTGGTGCAAAT  
GCTGATGCTAAACCTGAACACTTATTACAGTATGCGCAACTAGGGGATATTTATGCTCAA  
AAAATTAGAGGTATTGATAATCCGAAAATCTCATTATTAATATAGGAACCGAGCCAGCT  
AAAGGTAATAGTTTAAACGAAAAAATCATATGAGTTATTAATCATGATCATTCAATTGAAT  
TTTGTGGGAATATTGAAGCGAAGACATTAATGGATGGCGATACAGATGTTGTAGTTACC  
GATGGCTATACTGGGAACATGGTCCTTAAAAATTTAGAAGGTACTGCAAAATCAATCGGT  
AAAATGTTAAAAGATACGATTATGAGTAGTACTAAAAATAAATTAGCAGGTGCAATATTG  
AAGAAAGATTTAGCTGAATTCGCTAAAAAGATGGATTACTCAGAATACGGTGGTCCGTA  
TTATTAGGATTGGAAGGTACTGTAGTTAAAGCACACGGTAGTTCAAATGCTAAAGCTTTT  
TATTCTGCAATTAGACAAGCGAAAATCGCAGGAGAACAAAATATTGTACAAACAATGAA  
AGAGACTGTAGGTGAATCAAATGAGTAA

### > **fabD**

Function: protein coding sequence; malonyl CoA-acyl carrier protein transacylase (core genome, constant)

Best match: fabD\_CC008-ST72\_TCH130\_ACHD01000019.1[135693:136619:r] (completely identical)

Position: 030-contig\_240: 38340 ... 39267; Length: 927 bp

Sequence:

ATGAGTAAACAGCAATTATTTTTCCGGGACAAGGTGCCCAAAAAGTTGGTATGGCACAA  
GATTTGTTAATAACAATGATCAAGCAACTGAAATTTAACTTCAGCAGCAAAGACGTTA  
GACTTTGATATTTAGAGACAATGTTTACTGATGAAGAAGGTAAATTGGGTGAAACTGAA  
AACACGCAACCAGCTTTATTGACGCATAGTTCGGCATTATTAGCAGCGCTAAAAAATTTG  
AATCCTGATTTTACTATGGGGCATAGTTTAGGTGAATATTCAAGTTTAGTTGCAGCTGACG  
TATTATCATTTGAAGATGCAGTTAAAATTGTTAGAAAACGTGGTCAATTAATGGCGCAAG  
CATTTCTACTGGTGTAGGAAGCATGGCTGCAGTATTGGGCTTAGATTTTGATAAAGTCG  
ATGAAATTTGTAAGTCATTATCATCTGATGACAAAATAATTGAACCAGCAAACATTAATT  
GCCAGGTCAAATTGTTGTTTCAGGTCACAAAGCTTTAATTGATGAGCTAGTAGAAAAG  
GTAAATCATTAGGTGCAAAACGTGTCATGCCTTTAGCAGTATCTGGTCCATTCCATTATC  
GCTAATGAAAGTGATTGAAGAAGATTTTCAAGTTATATTAATCAATTTGAATGGCGTGA  
TGCTAAGTTTCCTGTAGTTCAAATGTAAATGCGCAAGGTGAAACTGACAAAGAAGTAAT  
TAAATCTAATATGGTCAAGCAATTATATTCACCAGTACAATTCATTAACTCAACAGAATG  
GCTAATAGACCAAGGTGTTGATCATTTTATTGAAATTGGTCCTGGAAAAGTTTTATCTGGC  
TTAATTAATAAATAAATAGAGATGTTAAGTTAACATCAATTCAACTTTAGAAGATGTG  
AAAGGATGGAATGAAAATGACTAA

### > **fabG**

Function: protein coding sequence; beta-ketoacyl-ACP reductase (core genome, constant)

Best match: fabG\_CC001\_MW2-USA400\_BA000033.2[1214548:1215282] (completely identical)

Position: 030-contig\_240: 39259 ... 39994; Length: 735 bp

Sequence:

ATGACTAAGAGTGCTTTAGTAACAGGTGCATCAAGAGGAATTGGACGTAGTATTGCGTTA  
CAATTAGCAGAAGAAGGATATAATGTAGCAGTAACTATGCAGGCAGCAAAGAGAAAGC  
TGAAGCAGTAGTCGAAGAAATCAAAGCTAAAGGTGTTGACAGTTTTGCGATTCAAGCAA  
ATGTTGCCGATGCTGATGAAGTTAAAGCAATGATTAAGAAGTAGTTAGCCAATTTGGTT  
CTTTAGATGTTTTAGTAAATAATGCAGGTATTACTCGCGATAATTTATTAATGCGTATGAA  
AGAACAAGAGTGGGATGATGTTATTGACACAAACTTAAAAGGTGTATTTAACTGTATCCA  
AAAAGCAACACCACAAATGTTAAGACAACGTAGTGGTGCTATCATCAATTTATCAAGTGT  
TGTTGGAGCAGTAGGTAATCCGGGACAAGCAAACACTATGTTGCAACAAAAGCAGGTGTTA  
TTGGTTTAACTAAATCTGCGGCGCGTGAATTAGCATCTCGTGGTATCACTGTAAATGCAGT  
TGCACCTGGTTTTATTGTTTCTGATATGACAGATGCTTTAAGTGATGAGCTTAAAGAACAA  
ATGTTGACTCAAATTCGGTTAGCACGTTTTGGTCAAGACACAGATATTGCTAATACAGTA

GCGTTCTTAGCATCAGACAAAGCAAATATATTACAGGTCAAACAATCCATGTAAATGGT  
GGAATGTACATGTAA

> **acpP**

Function: protein coding sequence; acyl carrier protein (core genome, constant)

Best match: acpP\_CC001\_MW2-USA400\_BA000033.2[1215716:1215949] (completely identical)

Position: 030-contig\_240: 40427 ... 40661; Length: 234 bp

Sequence:

GTGGAAAATTTTCGATAAAAGTAAAAGATATCATCGTTGACCGTTTAGGTGTAGACGCTGAT  
AAAGTAACTGAAGATGCATCTTTCAAAGATGATTTAGGCGCTGACTCACTTGATATCGCT  
GAATTAGTAATGGAATTAGAAGACGAGTTTGGTACTGAAATTCCTGATGAAGAAGCTGA  
AAAATCAACACTGTTGGTGTATGCTGTTAAATTTATTAACAGTCTTGAAAAATAA

> **rnc**

Function: protein coding sequence; ribonuclease 3 (core genome, constant)

Best match: rnc\_CC001\_MW2-USA400\_BA000033.2[1216065:1216796] (completely identical)

Position: 030-contig\_240: 40776 ... 41508; Length: 732 bp

Sequence:

ATGTCTAAACAAAAGAAAAGTGAGATAGTTAATCGTTTTAGAAAGCGCTTTGATACTAAA  
ATGACAGAGTTAGGCTTTACTTATCAAATATTGATTTATACCAACAAGCATTTCGCATT  
CGAGTTTTATTAATGATTTTAATATGAATCGTTTAGACCATAATGAGCGTTTAGAGTTTTT  
GGGTGATGCGGTATTAGAATTGACGTTTCACGATATTTATTTGATAAACATCCCAACTTG  
CCAGAAGGGAATTTAACAAAATGCGTGCCACTATTGTATGTGAGCCCTCACTTGTAATA  
TTTGCGAATAAAATTGGATTGAACGAAATGATTTTACTTGGTAAAGGTGAAGAGAAAACA  
GGGGGACGTACAAGACCATCATTAAATATCAGATGCATTCGAAGCATTATTGGGGCATTG  
TATTTGGATCAAGGACTAGATATAGTTTGGAAATTTGCTGAGAAAGTCATTTTCCCACAT  
GTAGAACAAAATGAGTTATTAGGCGTGGTAGATTTTAAACACAATTCGAAGAATATGTG  
CACCAGCAAATAAAGGTGATGTAACCTATAATTTAATAAAAGAAGAGGGACCGGCACA  
TCATCGTCTATTCCTCAGAAGTTATTCTGCAAGGGGAAGCAATAGCTGAAGGTAAAGG  
GAAAACGAAAAAAGAATCAGAACAACGTGCTGCTGAAAGTGCCTATAAGCAATTA AAC  
AAATTAATAG

> **smc**

Function: protein coding sequence; chromosome segregation SMC protein (core genome, constant)

Best match: smc\_CC001\_MW2-USA400\_BA000033.2[1216943:1220509]

Position: 030-contig\_240: 41654 ... 45221; Length: 3567 bp

Sequence:

ATGGTTTATTTAAAATCAATAGATGCCATTGGATTTAAGTCTTTTGCAGATCAAACCAATG  
TTCAATTCGATAAAGGTGTAACCTGCAATTGTTGGTCCAAATGGAAGCGGTAAAAGTAATA  
TTACAGATGCTATTAATGGGTGTTGGGTGAACAATCGGCTAAATCATTACGTGGCTCAA  
AAATGGAAGATATTATCTTCTCAGGTGCAGAACATCGCAAAGCTCAAATTATGCTGAAG  
TACAGTTAAGATTAGATAATCATTCTAAAAAGCTCAGTGTGATGAAAACGAAGTTATTG  
TAACAAGAAGATTGTATCGAAGTGGTGAAGTGAGTACTACATAAATAATGACCGTGCA  
AGATTAAGATATTGCCGATTTATTTTATAGATTCTGGATTGGGAAAAGAAGCGTATAGC  
ATTATCTCGCAAGGTAGAGTTGATGAAATACTAAATGCTAAACCAATTGATAGACGTCAA  
ATTATTGAAGAATCGGCTGGTGTACTTAAATATAAAAAACGTAAGGCTGAATCATTAAT  
AACTTGACCAAACAGAAGATAATTTAACGAGAGTAGAAGACATTTTATATGATTTGGAA  
GGTCGCGTAGAACCTCTAAAAGAGGAGGCAGCTATAGCTAAAGAATATAAGACACTTTC  
ACATCAAATGAAACATAGTGACATTGTAGTTACAGTGCACGATATTGATCAATATACAAA  
TGACAATAGACAATTAGATCAACGTTTAAATGATTTACAAGGTCAACAAGCAAATAAAG  
AAGCTGACAAGCAACGTTTAAAGCCAACAAATTCACAATATAAAGGTAAACGACATCAA  
CTTGATAACGATGTTGAATCGCTTAATTATCAATTAGTAAAAGCTACGGAAGCCTTTGAA  
AAATATACGGGACAATTAATGTTTTAGAAGAACGTAAGAAAAATCAATCTGAAACAAA  
TGCACGATATGAAGAAGAACAAGAAAATTTAATGGAGCTTTTAGAAAATATATCAAATG  
AGATTTCTGAAGCTCAAGATACTTATAAGTCTCTGAAAAGTAAACAAAAGAAGTCAATG

CTGTCATTCGTGAACTTGAAGAACAACACTATATGTTTCAGACGAAGCACATGATGAAAAAT  
TGGAAGAAATTA AAAACGAATACTATACATTAATGTCAGAGCAATCAGATGTTAACAAT  
GATATTCGTTTTTTAAAGCATACTATAGAAGAGAATGAGGCTAAAAAATCAAGACTAGAT  
TCTCGATTAGTTGAAGTTTTTGGAGCAATTGAAAGATATTCAGGGTCAAATAAAAACGACA  
AAAAAGAATATCAACAGACCAACAAAGAACTTTCTGCTGTAGATAAAGAAATTA AAAA  
TATAGAAAAATATCTCACTGATACAAAAAAGCACAAAATGAATACGAAGAGAAATTGT  
ATCAAGCATATCGATATACCGAAAAAATGAAAACACGTATTGATAGTTTTGGCAACGCAA  
GAGGAAGAATATACTTATTTTTTCAATGGCGTCAAACATATTTTTGAAAGCTAAAAATAAA  
GAATTAAGGGTATTCATGGTGCAGTTGCGGAAATTATTGATGTGCCATCTAAATTA ACT  
CAGGCAATTGAAACAGCATTAGGTGCTTCATTACAACATGTCATTGTAGATTCAGAAAAA  
GATGGACGCCAGGCTATTCAATTTTTAAAGAACGTAATTTAGGTCTGCGACGTTTTTA  
CCATTAATGTTATACAGAGTAGAGTGGTAGCGACTGATATTAATCTATTGCTAAAGAG  
GCAAACGGATTTATTAGTATCGCTTCGGAAGCAGTTAAAGTAGCACCAGAATATCAAAAT  
ATTATCGGGAATTTATTAGGTAATACGATTATCGTTGATCATTAAAGCATGCAAATGAA  
TTGGCACGTGCGATTAAATATCGAACTCGTATTGTTACTTTGGAAGGTGATATTGTA AATC  
CTGGTGGTTCTATGACTGGTGGTGGCGCTCGTAAGTCCAAAAGTATTCTGTCTCAAAAAG  
ACGAGTTGACAACAATGAGACACCAATTAGAAGATTACTTGCCTCAAACAGAATCATTTG  
ACAACAATTTAAAGAGTTGAAGATAAAAAGTGATCAATTAAGTGA ACTGTATTTTTGAAA  
AAAGTCAAAAGCATAATACACTTAAAGAGCAAGTGCATCATTTTTGAAATGGAGCTCGAT  
AGATTA ACTACACAAGAAACACAAATAAAAAATGATCATGAAGAATTCGAATTTGAAAA  
AAATGATGGTTATACGAGTGACAAAAGTCGACAACTTTGAGTGAAAAAGAACTCATT  
TAGAAAGTATTAAGCATCTTTAAAACGACTAGAAGATGAAATTGAACGCTACACAAAA  
CTTTCTAAAGAAGGTAAGGAAAGCGTAACTAAAACACAACAACGTTACATCAGAAACA  
ATCTGATCTTGCTGTGGTTAAAGAGCGTATTA AACACAACAACAGACAATAGATCGATT  
AAATAATCAAAGTCAACAACTAAACATCAATTA AAAAGATGTTAAAGAAAAAATTGCAT  
TCTTTAATTCGGATGAAGTGATGGGCGAACAAAGCTTTTCAAATATTAAGATCAAATTA  
ATGGTCAACAAGAAACGAGAACACGCTTATCTGATGAATTAGATAAATTGAAACAACAA  
CGTATTGAGTTGAATGAACAAATCGATGCGCAGGAAGCTACACTACAAGTTTGTACCAA  
GATATTTTAGCTATCGAAAATCACTACCAAGATATTAAGCTGAACAATCAAAGTTAGAT  
GTATTAATTCATCATGCGATAGATCATTAAATGATGAATATCAATTGACTGTTGAACGTG  
CGAAATCTGAATATACGAGTGATGAATCGATTGACGCATTACGTAAAAAAGTTAAGTTAA  
TGAAGATGTCGATTGATGAACTAGGTCTGTAACTTAAATGCAATTGAACAATTTGAAG  
AGTTAAATGAACGTTATACATTTTTAAGTGAACAACGTACAGATCTTCGTAAAGCTAAAG  
AAACATTAGAGCAAATTATAAGTGAAATGGATCAAGAGGTTACTGAAAGATTTAAAGAA  
ACTTTCCATGCTATTCAAGGACATTTTACAGCTGTGTTCAAACAATTTGTTTGGTGGAGGCG  
ATGCAGAATTGCAATTA ACTGAAGCCGATTATTTAACAGCTGGTATTGATATTGTGGTAC  
AACCACCGGGTAAAAAGTTGCAACATTTATCGTTACTGAGTGGTGGTGGAGCGTGCATTAA  
CTGCTATTGCTTTACTATTTGCAATTTTAAAAGTAAGATCTGCACCTTTTGTATATTAGAT  
GAGGTTGAAGCTGCACTAGATGAAGCAAATGTTATTAGATACGCAAAAATATTTAAATGAG  
TTATCAGACGAAACACAATTCATTGTTATTACACACCGTAAAGGAACAATGGAATTTGCG  
GATAGGTTATACGGTGTAACAATGCAAGAATCAGGTGTTACTAACTTGTGAGTGTGAAT  
TTAAATACAATAGATGATGTGTTGAAGGAGGAGCAATAA

> **ftsY**

Function: protein coding sequence; signal recognition particle-docking protein (core genome, constant)

Best match: ftsY\_CC001\_MW2-USA400\_BA000033.2[1220509:1221759] (completely identical)

Position: 030-contig\_240: 45220 ... 46471; Length: 1251 bp

Sequence:

ATGAGCTTTTTTAAACGCTTAAAAGATAAGTTTGGCAACAAATAAAGAAAATGAAGAAGTT  
AAATCCTTAACAGAAGAACAAGGTCAAGACAAATTAGAAGATACACATTCTGAAAGTTC  
AACGCAGGACGCAAATGATTTAGCAGAAAATGCTGAAGTGAAAAAGAAGCCACGCAAGT  
TGAGTGAAGCGGATTTTGTGACGATGGCTTAATATCAATTGAAGATTTTGAAGAAATTG  
AAGCTCAAAAAATGGGTGCTAAATTTAAAGCAGGACTCGAAAAATCTCGTCAAAAATTTCC  
AAGAACAATTAATAAATTTGATAGCGAGATATCGTAAAGTAGATGAAGACTTTTTTGAAG  
CTTTAGAAGAAATGTTAATCACTGCAGACGTGCGTTTTAATACAGTGATGACGTTAACTG

AAGAATTACGTATGGAAGCACAACGACGTAATATTCAAGATACTGAAGATTTGCGTGAA  
GTCATTGTTGAAAAAATCGTAGAGATTTACCATCAAGAAGATGATAATTCAGAAGCTATG  
AACTTAGAAGATGGTTCGTTTAAATGTCATTTTAAATGGTTGGTGTGAATGGTGTGGTAAA  
ACAACAACAATTGGAAAATTAGCTTACCGATATAAAAATGGAAGGTAAAAAAGTAATGTT  
AGCTGCGGGCGATACTTTTAGAGCGGGTGCTATTGATCAATTGAAAGTTTGGGGCGAACG  
TGTTGGTGTAGACGTAATTAGCCAAAGTGAAGGTTCTGATCCAGCTGCTGTTATGTATGA  
TGCGATTAATGCCGCTAAAAACAAAGGTGTTGATATTTTAAATCTGTGATACCGCTGGACG  
TTTACAAAATAAAAACAAATCTAATGCAAGAATTAGAAAAAGTTAAGCGTGTAAATTAATCG  
AGCAGTGCCAGATGCGCCTCATGAAGCATTACTATGTTTAGATGCTACAACCTGGTCAGAA  
TGCGTTGTCACAAGCTAGAACTTTAAAGAAGTAACAAATGTTACAGGTATTGTATTAAC  
GAAATTAGATGGTACAGCCAAAGGTGGTATCGTATTAGCCATTCGTAATGAATTGCACAT  
TCCAGTTAAATATGTAGGTTTAGGTGAGCAATTAGATGACTTACAACCTTTAACCCTGA  
AAGTTATGTCTACGGCTTATTCGCTGATATGATTGAACAAAATGAAGAAATAACAACAGT  
TGAAAATGATCAAATTGTAACAGAAGAAAAGGACGATAATCATGGGTCAAATGA

### > P67249

Function: protein coding sequence; putative transcription factor (core genome, constant)

Best match: P67249\_CC001\_MW2-USA400\_BA000033.2[1221746:1222078] (completely identical)

Position: 030-contig\_240: 46457 ... 46790; Length: 333 bp

Sequence:

ATGGGTCAAATGATTTAGTTAAAACGTTACGAATGAATTATTTGTTTGATTTTTATCAAT  
CCTTATTGACGAATAAACAACGTAATTATTTGGAATTATTTTATCTTGAAGATTATTCTTT  
AAGTGAAATCGCAGATACTTTAATGTGAGTAGACAAGCAGTTTATGATAATATAAGAAG  
AACTGGCGATTTAGTTGAAGATTATGAAAAGAAATTGGAATTATACCAGAAATTTGAGCA  
ACGCCGAGAAATATATGATGAAATGAAACAACATTTAAGTAATCCAGAACAATACAAC  
GTTATATTCAACAATTAGAAGACTTAGAATAG

### > ffh

Function: protein coding sequence; signal recognition particle subunit ffh (core genome, constant)

Best match: ffh\_CC001\_MW2-USA400\_BA000033.2[1222104:1223471] (completely identical)

Position: 030-contig\_240: 46815 ... 48183; Length: 1368 bp

Sequence:

ATGGCATTGGAAGGGTTATCAGAACGCTTGCAAGCGACGATGCAAAAAATGCGTGGTAA  
GGGTAAACTTACTGAAGCTGATATAAAGATAATGATGCGTGAAGTAAGATTAGCGTTACT  
TGAGGCTGACGTAAACTTTAAAGTGGTAAAAGAATTTATTA AAAACAGTATCAGAACGCGC  
ATTAGGTTCCGATGTAATGCAATCATTAAACACCAGGGCAACAAGTTATTA AAAATAGTTCA  
AGATGAATTAACGCAGTTGATGGGTGGAGAAAATACGTCGATTAATATGTCAAATAAAC  
CACCTACTGTTGTTATGATGGTTGGTTTACAAGGTGCTGGTAAAACAACA ACTGCAGGTA  
AATTAGCATTATTGATGCGTAAAAAATACAACAAAAAACCTATGTTAGTTGCAGCAGATA  
TTTATCGTCCAGCAGCGATAAATCAATTACAACAGTAGGGAAACAAATTGATATTCCTG  
TATACAGTGAAGGAGATCAAGTAAAGCCACAACAAATTGTA ACTAATGCATTA AACAT  
GCTAAAGAAGAACATTTAGACTTTGTAATCATTGATACAGCAGGTCGATTACACATCGAT  
GAAGCATTGATGAACGAATTA AAAAGAAGTAAAAGACATTGCTAAACCAAACGAAATTAT  
GTTAGTTGTCGATTCAATGACGGGTCAAGATGCTGTCAATGTTGCAGAATCTTTTGACGAT  
CAACTTGATGTCACAGGTGTTACCTTAACTAAATTAGATGGTGATACACGTGGTGGTGCA  
GCTTTATCTATTCGTTTCGGTGACACAAAACCAATTA AATTTGTTGGTATGAGTGAAAAG  
TTAGATGGTTTAGAGCTATTCCATCCTGAACGTATGGCATCACGTATTTTAGGTATGGGTG  
ATGTGTTAAGTTTAATTGAAAAAGCGCAACAAGATGTGGATCAAGAAAAAGCAAAGAT  
TTAGAGAAAAAGATGCGTGAGTCATCGTTTACTTTAGATGATTTTTTTAGAACAACTTGATC  
AGGTGAAAAATCTAGGACCACTGGATGATATTATGAAAATGATTCCAGGTATGAATAAA  
ATGAAAGGGCTAGATAAGCTTAATATGAGTGAAAAGCAAATTGATCATATTAAGCGAT  
TATCCAGTCAATGACGCCGGCTGAAAGAAACAATCCAGACACATTGAATGTATCACGTAA  
AAAGCGTATTGCTAAAGGGTCTGGTCGTTTATTACAAGAAGTCAATCGTTTGATGAAACA  
ATTTAACGATATGAAGAAAATGATGAAACAATTC ACTGGTGGCGGTAAAGGTAAAAAAG  
GTAAACGCAATCAAATGCAAAATATGTTAAAAGGTATGAATTTACCGTTTTAA



### > **rpsP**

Function: protein coding sequence; 30S ribosomal protein S16 (core genome, constant)

Best match: rpsP\_CC001\_MW2-USA400\_BA000033.2[1223906:1224181] (completely identical)

Position: 030-contig\_240: 48617 ... 48893; Length: 276 bp

Sequence:

```
ATGGCAGTTAAAATTCGTTTAAACACGTTTAGGTTCAAAAAGAAATCCATTCTATCGTATC
GTAGTAGCAGATGCTCGTTCTCCACGTGACGGACGTATCATCGAACAAATCGGTACTTAT
AACCCAACGAGCGCTAATGCTCCAGAAATTAAGTTGACGAAGCGTTAGCTTTAAAATGG
TTAAATGATGGTGCGAAACCAACTGATACAGTTCACAATATCTTATCAAAAAGAAGGTATT
ATGAAAAAATTTGACGAACAAAAGAAAGCTAAGTAA
```

### > **rimM**

Function: protein coding sequence; 16S rRNA processing protein (core genome, constant)

Best match: rimM\_CC001\_MW2-USA400\_BA000033.2[1224369:1224872] (completely identical)

Position: 030-contig\_240: 49080 ... 49584; Length: 504 bp

Sequence:

```
ATGAGAGTTGAAGTTGGTCAAATTGTTAACACACATGGTATTAAGGTGAAATTAAGTA
AAATCCAATTCAGACTTTACAGACGTTTCGTTTTCAACCCGGTCAAGTGCTGACAGTTGTGC
ATAACAATAACGACCTTGAATATACTGTTAAGTCACATAGAGTGCATAAAGGGCTTCATA
TGCTTACATTTGAAGGTATTAATAATATTAATGATATTGAGCATTAAAAGGGAGTTCTAT
TTATCAAGAGCGTGATCATGAAGATATCGTACTTGAGGAAAATGAATTTTATTATTCAGA
TATTATAGGATGTACAGTTTTTGGATGATCAAGAAACACCAATAGGTCGTGTAATTAATAT
ATTTGAAACAGGTGCGAATGATGTGTGGGTGATTAAGGATCTAAAGAATATTTGATTCC
TTATATTGCTGATGTTGTAAGAAGTGGATGTTGAAAATAAAAAAATTATCATCACGCC
AATGGAAGGATTGTTGGATTAA
```

### > **trmD**

Function: protein coding sequence; tRNA (guanine-N(1)-)-methyltransferase (core genome, constant)

Best match: trmD\_CC001\_MW2-USA400\_BA000033.2[1224872:1225609] (completely identical)

Position: 030-contig\_240: 49583 ... 50321; Length: 738 bp

Sequence:

```
ATGAAAATTGATTATTTAACTTTATTTCTGAAATGTTTGATGGTGTTTTAAATCATTCAA
TTATGAAACGTGCCCAAGAAAACAATAAATTACAAATCAATACGGTTAATTTTAGAGATT
ATGCAATTAACAAGCACAAACCAAGTAGATGATTATCCGTATGGTGGCGGACAAGGTATG
GTGTTAAAGCCTGAACCTGTTTTAATGCGATGGAAGACTTAGATGTACAGAACAACA
CGCGTTATTTAATGTGTCCACAAGGCGAGCCATTTTCACATCAGAAAGCTGTTGAATTA
AGCAAGGCCGACCACATCGTTTTTCATATGCGGACATTATGAAGGTTACGATGAACGTATC
CGAACACATCTTGTCACAGATGAAATATCAATGGGTGACTATGTTTTAACTGGTGGAGAA
TTGCCAGCGATGACCATGACTGATGCTATTGTTAGACTGATTCCAGGTGTTTTAGGTAATG
AACAGTCACATCAAGACGATTCATTTTCAGATGGGTATTAGAGTTTCCGCAATATACAC
GTCCGCGTGAATTTAAGGGTCTAACAGTTCAGATGTTTTATTGTCTGGAAATCATGCCAA
TATTGATGCATGGAGACATGAGCAAAAGTTGATCCGCACATATAATAAAAGACCTGACTT
AATTGAAAAATATCCATTAATAATGCAGATAAGCAAATATTAGAAAGATATAAAATAG
GATTGAAAAAAGGTTAG
```

### > **L19**

Function: noncoding RNA ribosomal protein L leader RNA (core genome, constant)

Best match: L19\_leader\_CC001\_MW2-USA400\_BA000033.2[1225650:1225692] (completely identical)

Position: 030-contig\_240: 50361 ... 50404; Length: 43 bp

Sequence:

```
ACTATGATCCGCTGCTATATATTTGTCGAGGCAAGAACATAGG
```

### > **rplS**

Function: protein coding sequence; 50S ribosomal protein L19 (core genome, constant)  
Best match: rplS\_CC001\_MW2-USA400\_BA000033.2[1225712:1226062] (completely identical)  
Position: 030-contig\_240: 50423 ... 50774; Length: 351 bp

Sequence:

```
ATGACAAATCACAATTAATCGAAGCAGTAACTAAATCACAATTACGTACAGACTTACCT
AGTTTCCGTCCTGGTGATACTTTACGTGTACACGTACGTATCATTGAGGGTACTCGTGAGC
GTATCCAAGTATTCGAAGGCGTTGTAATTAACGTCGTGGCGGTGGCGTTTCTGAAACGT
TTACAGTTCGTAAAATTTTCATCAGGTGTTGGCGTGGAACGTACATTCCCATTACACACACC
AAAAATTGAAAAAATCGAAGTTAAACGTCGTGGTAAAGTACGTCGTGCTAAATTATATTA
CTTACGTAGTTTACGTGGTAAAGCTGCTAGAATCCAAGAAATTCGTAA
```

### > tx\_universal2

Function: rho indendent terminator

Best match: tx\_universal2\_CC030\_MRSA252\_BX571856.1[2550413:2550453]

Position: 030-contig\_240: 51013 ... 51043; Length: 30 bp

Sequence:

```
CTGAACGAAAATACGCTTGTAACAAGCTTT
```

### > repeat\_nySAgamma

Function: repeat element

Best match: repeat\_nySAgamma\_CC705\_RF122-cow\_AJ938182.1[2700866:2700976]RC

Position: 031-contig\_247: 6 ... 36; Length: 30 bp

Sequence:

```
TGGCGGAAAGTCAGCTTACAATAATGTGCA
```

### > Q2FZB6

Function: protein coding sequence; putative protein (genomic island)

Best match: Q2FZB6\_CC008\_COL\_CP000046.1[1182242:1182414]

Position: 031-contig\_247: 12 ... 42; Length: 30 bp

Sequence:

```
AAAGTCAGCTTACAATAATGTGCAAGTTGG
```

### > yfhO

Function: protein coding sequence; putative membrane protein (core genome, variable)

Best match: yfhO\_CC001-ST772\_118\_AJGE01000002.1[160663:163269]RC (completely identical)

Position: 031-contig\_247: 115 ... 2722; Length: 2607 bp

Sequence:

```
TTATTTTTGTCTTGCCCATCTCGTGAAAATAATACTACATATAATGCCAAATATAGTAATT
GTTATAAGTAAATAATAGTATGGTGGGGCATAGCTCAATTGAATCTTTGTTATATTTTTAG
GTGCTTTAATGCCGTCATAACACCACTTACTTGTTCAACTTTAAGACTTTGATCACCTGA
TGTCGCTTTCATACCTTGATTATATGCTGTTGGCAAACAATATACCCAGATGAATTTTA
TTTTTAGTAATAGTATAACCTTGCTTTGTCTTACTAACTTTGACAGCCTCTAATGAATTTGA
AGCGTCTTTAAGCGTGGTATAATCTTCGCCGTATATCCCTTTTAAATTTACACGATACTTA
CCTTAGGCAATGATAATCTAATCCTATCTGAAGCTTTAATGCGTATTGTTACGGGTGTTA
CAAAGCGTCGATATTTATAAGTGAGTTTATTTCTTTCTTGTGTATATTCATTCACTTTAACA
TCATGAGCTTTATCCGGCGAAAGTAATTCTAAATCCATTTCAAATAACAAATCTTTAAATT
GATTAGAACTGATTTTGGCAACTGTACAGTTAGACCACCATTATTTGTTAACTTGTAA
TAAATGTTTTGTAGGAGATTGCCAGGCTGCACTATTTAATTTAATTGTTGAATCTGATAGT
AAATTTTTATTGGCTTTAAAATGTGTATTAACATCTTTAGTCTTGTTAGAAAACAATCCCTT
GCAACATTGCTTGTCTTTATCTAATGGAGATTTTAAATCTTTATTGGAAAAGACCTTATTT
GTAATATGTGCACTTGGATAATGGATGGTATTTTTAGAATGAATCCAACGAACTTTATTGT
CTTTGTGTTACAGACTTAATTTTAAATCCATATGGTAAGTTGTCATCATGATTCACTCTAATT
CGATCATTAACATTTCAAAGTGATAGTAAATTTTGACGATTGCCAAGTAATCTATAAGTG
CTGTTTTTATCGATTGGCATATTAATTTGGAGTGTCTTGTGCATAATATTTTAAATATGTCTCC
ATTA AAAATACTAGAATATAATGAAATGCCATTATAATGATATATAAATGGTGAATTTAA
```

TGCATAGTCTGACATATAATCAATGCGATTAATGGACCAGTTGCATTTTGATTTATCTTT  
TTTATAAGCTGGTTTACATAGTTACTATGGTAATCGTGTTGTTTCAACGTTGATAATGATT  
GTTGATAAGGTTTGATTGCCATATTTTTATTGTTATCTAAAATGACGATTTGTTGAATCAT  
AACGATTAATACTAATATTGCAACGGTTAATTTTTTATAACGCCATAAACTAAATTTTAA  
ATAACGGCAAGCACCATTAGCAGGATAATACCTACTATAAGTGCAAGTGGGTGTGTTCGGT  
GATAGTAATACATAAAGTAATGCGATGATGCTTACTGGTATTGTTCTGATTAATAATATT  
TCATATTTAATGTTGATAAATGTTGAATAAACAATCCGCAAAGAGCGCTTGATGATAGTG  
CTAAGATATACACCCAACGCCTTTCTGGAAATGAAAAACCATTAAAAGCACTGTCGAAAT  
ACTGTGATAATGAACCAATAAATAAATAACCATGTTACTATTGCGAAAAGTCTATAAAAGT  
AAAAACGATACAGTTTGAATGACAATAATGCAACGATAGTAAGAATTGAAATCGTAATA  
TAAAATCCATCGCTAAAGAAAAAATAATGGTAATCAAGTGGTGTCAAAAACGGTATATC  
AACATTGGGATTTTGTCTTTCTGTCATTTTCCAAAACGCAGAAATGCCAGTGAATAAACC  
AAATACACTTGATAACACACTCAAACTGTAGCAGATATGACGCAAATTAATTTTTGTGT  
TCTAGAGACAATGTCATATTTGTAAGTGAATAAATGAGTCGATATAAATAGTAGCAACCTAT  
ATAATAGCTTGATAATAACTGAAATAAAAATTGCTAAATAGTGTTAAGGCTATCGCAAC  
AATGAAAATACCGATTTTGCCTTGTGAAAATATCTTTCCAAACCAAGAATCGATAATGG  
TAATAAATATAATAAACTTCCATAAAAATGACCAAGTAAATTAAGTATATAACGACAGT  
TGACATGCCGTATAAAATCGTAGCGATCATATTTGTTGAGCGTTTAAAGTGTAAATTTTTA  
AATAAGTAGAAGGTCACGACAAATGTTATGATAGCTCTTATCATGGCCATAATAAGTTGG  
TTTGTTCGGCCAAAATGTATTGTTGTTCGGATTAATATAACCAACCGTTTCTCCTATTTTAA  
TGAATAGAAAATTTAGCCACATTAAGGTGACAGCGAATAATAATATGATAGTCCTTTCA  
TATAATCGCCACCTAATCCAAACGATGCATCATATAAACTAGAAAACTACTTAAATGTT  
CATACAAATACATTTGAAATGGCATCATTTGACGGAATCCATCTCCAGCCCCACTAAAA  
CAGTACCATTCACAATATAATCATAGATATGAGTAGAAAATAAAAATAAGCGTTAATATTA  
CACTAATGAAAGTTATAACAAAGAATTGTTTGACGTTTGAATTTAGCCACTTTTTTAAACAC

### > **rbgA**

Function: protein coding sequence; putative GTP-binding protein (core genome, constant)

Best match: rbgA\_CC001\_MW2-USA400\_BA000033.2[1229652:1230536] (completely identical)

Position: 031-contig\_247: 3122 ... 4007; Length: 885 bp

Sequence:

ATGGTTATTCAATGGTATCCAGGACATATGGCGAAAGCCAAAAGAGAAGTAAGTGAACA  
ATTAAAAAAAGTAGATGTAGTGTTTGAACTAGTAGATGCAAGAATTCCATATAGTTCAAG  
AAACCCTATGATAGATGAAGTTATTAACCAAAAACCACGTGTTGTTATATTAATAAAAA  
AGATATGTCTAATTTAAATGAGATGTCAAAATGGGAACAATTTTTTATTGATAAAGGATA  
CTATCCTGTATCGGTGGATGCTAAGCACGGTAAAAATTTAAAGAAAGTGGAAAGCTGCAGC  
AATTAAGCGACTGCTGAAAAATTTGAACGTGAAAAAGCAAAGGGACTTAAGCCAAGAG  
CGATTAGAGCGATGATTGTTGGAATTCCAAATGTTGGTAAATCCACATTAATAAATAAAC  
TGGCAAAGCGTAGTATTGCGCAGACTGGTAATAAACCAGGTGTGACCAAACAACAACAA  
TGGATTAAGTTGGTAATGCATTACAACCTATTAGACACACCAGGGATACTTTGGCCTAAA  
TTTGAAGATGAAGAAGTCGGTAAGAAGTTGAGTTTAAACAGGCGCGATTAAAGATAGCAT  
TGTGCACTTAGATGAAGTAGCTATATATGGATTGAACTTTTTAATTCAACATGATTTAGCG  
CGATTAAAGTCACATTATAATATTGAAGTTCCTGAAGATGCAGAAATCATAGCGTGGTTT  
GATGCGATAGGGAAAAAACGTGGCTTAATTCGACGTGGTAATGAAATTGATTACGAAGC  
AGTCATTGAACTGATTATTTATGATATTCGAAATGCTAAAATAGGAAATATTGTTTTGAT  
ATTTTTAAAGATATGACTGAGGAATTAGCAAATGACGCTAACAATTA

### > **rnhB**

Function: protein coding sequence; ribonuclease HII (core genome, constant)

Best match: rnhB\_CC001\_MW2-USA400\_BA000033.2[1230520:1231287] (completely identical)

Position: 031-contig\_247: 3990 ... 4758; Length: 768 bp

Sequence:

ATGACGCTAACAAATTAAGAAGTTAAGCAGTTGATTAATGCGGTTAATACAATAGAAGA  
ATTAGAAAATCATGAATGCTTTTTAGATGAGCGAAAAGGTGTTCAAAATGCCATAGCTAG  
GCGCAGAAAAGCGTTAGAAAAGAACAAGCTTTAAAAGAAAAGTATGTTGAAATGACTT

ACTTTGAAAATGAAATATTTAAAAGAGCATCCTAATGCAATTATTTGTGGTATTGATGAAG  
TTGGAAGAGGACCTTTAGCAGGTCCAGTCGTTGCATGCGCAACAATTTTAAATTCAAATC  
ACAATTATTTGGGCCTTGATGACTCGAAAAAGTACCTGTTACGAAACGTCTAGAATTA  
ATGAAGCACTAAAAAATGAAGTTACTGCTTTTGCATATGGTATCGCGACAGCTGAAGAAA  
TAGATGAATTTAATATTTATAAAGCTACTCAAATCGCCATGCAGCGAGCTATTGATGGAT  
TATCAGTACAACCAACGCATTTATTGATAGACGCGATGACGCTTGATAATGCACTGCCTC  
AAGTATCTTTAATCAAGGGTGTATGCAAGAAGTGTATCTATTGCAGCGGCAAGTATCATGG  
CAAAGGTTTTTCGTGATGATTATATGACACAGTTATCTAAAGATTATCCTGAATATGGTTT  
TGAAAAAACCGCGGGTTACGGTACCAAACAACATTTACTAGCAATCGATGATATTGGCAT  
TATGAAAGAGCATAGAAAAAGCTTTGAACCTATAAAAATCGTTACTGTAA

### > **sucC**

Function: protein coding sequence; succinyl-CoA synthetase subunit beta (core genome, constant)

Best match: sucC\_CC001\_MSSA476\_BX571857.1[1259891:1261057] (completely identical)

Position: 031-contig\_247: 4866 ... 6033; Length: 1167 bp

Sequence:

ATGAATATCCACGAGTATCAAGGTAAAGAAATATTTTCGTTCAATGGGCGTTGCAGTTCCA  
GAAGGACGAGTAGCATTACTGCTGAAGAAGCGGTGGAGAAAGCAAAGAATTAATTC  
TGATGTTTATGTTGTAAGCACAAATTCATGCTGGAGGTAGAGGTAAAGCAGGCGGAGT  
AAAAATTGCTAAATCTTTATCTGAGGTAGAAACATATGCAAAAAGAATTATTAGGGAAAC  
TTTGGTGACACATCAAACCTGGTCCAGAAGGTAAAGAAATTAAGCGTTTATATATCGAAGA  
AGGTTGTGCTATTCAAAAAGAATATTACGTTGGATTTCGTTATTGATCGTGCGACTGACCA  
AGTAACATTGATGGCGTCTGAAGAAGGGGGCCTGAGATTGAAGAAGTTGCTGCGAAGA  
CTCCTGAAAAGATCTTCAAAGAACTATCGATCCAGTAATCGGACTTTCACCATTCCAAG  
CAAGACGAATTGCGTTTAAATATTAATATTCCTAAAGAATCTGTAAACAAAGCAGCTAAAT  
TCTTATTAGCACTTTATAATGTATTCATTGAAAAAGATTGTTCAATCGTAGAAATCAACCC  
ATTAGTTACAACAGCTGATGGTGATGTATTGGCATTAGATGCTAAAATTAATTTTGATGAT  
AATGCATTATTCAGACATAAAGATGTTGTAGAATTACGTGATTTAGAAGAAGAAGATCCG  
AAAGAGATTGAAGCGTCTAAACATGATTTATCATAACATTGCATTAGATGGTGACATCGGA  
TGTATGGTTAATGGTGCAGGTTTAGCCATGGCAACAATGGATACGATTAATCATTTCGGT  
GGAAACCCAGCCAATTTCTTAGATGCAGGCGGAAGCGCTACTAGAGAAAAAGTAACTGA  
AGCATTAAAATCATTTTAGGTGATGAAAATGTTAAAGGTATTTTTGTAACATTTTCGGT  
GGCATTATGAAATGTGATGTTATCGCAGAAGGTATCGTTGAAGCTGTAAAAGAAGTAGAT  
TTAACTTTACCACTAGTTGTACGCTTAGAAGGTACAAATGTTGAGTTAGGTAAAAAAATC  
TTAAAAGACTCAGGATTAGCAATTGAACCAGCAGCAACAATGGCTGAAGGTGCACAAAA  
AATTGTTAACTAGTCAAAGAAGCATAA

### > **sucD**

Function: protein coding sequence; succinyl-CoA synthetase subunit alpha (core genome, constant)

Best match: sucD\_CC001\_MW2-USA400\_BA000033.2[1232584:1233492] (completely identical)

Position: 031-contig\_247: 6054 ... 6963; Length: 909 bp

Sequence:

ATGAGTGTATTTATAGATAAGAATACTAAAGTAATGGTACAAGGTATTACAGGGTCTACT  
GCCTTTTCCATACAAAACAAATGCTTGATTATGGTACGAAAATAGTAGCAGGTGTGACC  
CCTGGTAAAGGTGGTCAAGTTGTTGAAGGCGTTCCTGTTTTCAACACTGTTGAAGAAGCT  
AAAATGAAACCGGGGCAACGGTTTCAGTCATTTACGTTCCAGCACCATTTGCTGCAGAC  
TCAATTTTAGAAGCAGCTGATGCAGACTTAGATATGGTTATTTGTATCACTGAACATATTC  
CTGTATTAGACATGGTTAAAGTTAAACGCTACTTACAAGGTAGAAAAACACGTTTAGTTG  
GTCCAAACTGTCCAGGTGTGATTACAGCAGATGAATGTAAAATTGGTATTATGCCTGGCT  
ATATTCACAAAAAAGGTCATGTTGGTGTAGTATCTCGTTCAGGTACATTAACATATGAAG  
CAGTGCACCAATTGACTGAAGAAGGTATTGGTCAAACACTACAGCTGTTGGTATTGGTGGAG  
ACCCAGTCAACGGAACAAACTTTATTGATGTTTTAAAAGCATTCAATGAAGATGACGAAA  
CGAAAGCAGTTGTTATGATTGGTGAAATCGGTGGTACGGCTGAAGAAGAAGCAGCTGAA  
TGGATTAAGCGAATATGACAAAACAGTTGTAGGCTTTATCGGTGGACAAACAGCACCT  
CCTGGAAAACGTATGGGACATGCTGGTGCAATCATTTACAGGTGGTAAAGGTACTGCTGAA

GAGAAAATTTAAAACATTAATAGTTGTGGTGTGAAAACAGCGGCAACACCTTCAGAAAT  
TGGTTCAACATTAATTGAAGCTGCTAAAGAAGCAGGTATTTATGAAGCATTATTAAGTGT  
TAATAAATAA

> **lytN**

Function: protein coding sequence; cell-wall hydrolase (genomic island)

Best match: lytN\_CC001\_MW2-USA400\_BA000033.2[1233686:1234837] (completely identical)

Position: 031-contig\_247: 7156 ... 8308; Length: 1152 bp

Sequence:

ATGTTTGTATATTATTGTAAGGAGTGTTCATCATGAATAAACAACAAAGTAAAGTACGC  
TATTCAATTAGAAAAGTTAGTATTGGAATTTTGTCAATTTCAATAGGTATGTTTTTGGCAT  
TGGGTATGTGCAACAAAGCATATGCAGATGAAATTGATAAATCTAAAGATTTTACAAGAG  
GGTATGAGCAAATGTATTCGCGAAATCAGAGTTAAATGCTAATAAAAATACGACAAAA  
GACAAAATAAAAAATGAAGGTGCTGTTAAAACATCGGACACAAGTTTAAAGTTAGACAA  
CAAATCAGCAATTTCAAACGGAAATGAAATTAATCAAGATATAAAGATTTCAAATACTCC  
GAAAACTCAAGCCAAGGTAACAATCTAGTTATTAATAACAATGAACCTACTAAAGAAA  
TTAAAATTGCAAATTTGGAAGCTCAAAATTTCTAATCAGAAGAAAACGAATAAAGTTACTA  
ATAATTACTTTGGTTACTACAGTTTTAGAGAAGCTCCAAAAACACAAATCTATACTGTAA  
AAAAAGGAGACACACTTAGTGCTATAGCATTAAAATACAAAACTACAGTTTCAAATATTC  
AAAATACAAATAATATAGCAAATCCTAATTTAATATTTATTGGTCAAAAATTTAAAGTGC  
CAATGACACCATTAGTAGAACCAAAACCAAAAACAGTGTCTTCAAATAATAAAGTAAT  
AGTAATAGCAGTACATTAATTTGAAAACATTAGAGAATAGAGGATGGGATTTTCGAC  
GGTAGTTATGGATGGCAATGTTTCGATTTAGTTAATGTATATTGGAATCATCTTTATGGTC  
ATGGATTA AAAAGGATATGGAGCTAAAGATATACCATATGCAAATAATTTAATAGTGAAG  
CTAAAATTTATCACAACACACCAACTTTCAAAGCTGAACCTGGGGACTTAGTGGTTTTTA  
GTGGAAGATTTGGTGGAGGATATGGTCATACAGCTATTGTCTTAAATGGTGGATTATGATG  
GAAAATTAATGAAGTTCCAAAGTTTAGATCAAACTGGAATAATGGTGGATGGCGTAAA  
GCAGAGGTTGCACATAAAGTTGTTTATAAATTATGAAAATGATATGATTTTTATTAGACCA  
TTTAAAAAAGCATAA

> **fmhC**

Function: protein coding sequence; endopeptidase resistance gene (genomic island)

Best match: fmhC\_CC008\_TCH1516\_CP000730.1[1264248:1265492] (completely identical)

Position: 031-contig\_247: 8335 ... 9580; Length: 1245 bp

Sequence:

ATGAAATTTTCAACTTTAAGTGAAGAAGAATTTACCAACTACACCAAAAAGCACTTCAA  
CATTATACACAGTCTATAGAATTATATAAATTATAGAAATAAAAATAAATCATGAAGCACAT  
ATTGTGGGAGTGAAGAATGATAAAAATGAAGTTATAGCTGCATGTTTATTAACAGAGGCA  
CGAATTTTTAAATTTCTACAAATATTTCTACTCTCATAGAGGTCCTTTACTTGATTATTT  
TGCTAAATTAGTTTGTACTTTTTTAAAGAATTATCTAAATTCATTTATAAAAATAGAGGA  
GTATTTATTCTTGTGATCCATATTTAATAGAGAATTTAAGAGATGCAAATGGTAGGATA  
ATAAAGAATTATAATAATTCAGTGATAGTAAAGATGCTAGGGAAAATTTGGGTATCTCCAT  
CAAGGTTATACAACAGGATATTCAAATAAAAAGTCAAATTAGGTGGATTTCTGTATTGGAT  
TTAAAAGATAAAGATGAGAATCAACTTTTTAAAAGAAATGGAATACCAAACTAGAAGAAA  
TATAAAAAGACTATTGAGATTGGTGTTAAGGTTGAAGATTTATCTATTGAAGAAACAAA  
TCGATTTTATAAATTGTTTCAAATGGCTGAAGAAAACATGGTTTTTCATTTTCATGAATGAA  
GATTATTTTAAACGAATGCAAGAAATATATAAAGATAAAGCAATGTTAAAGATAGCTTGT  
ATAAATCTTAATGAATATCAAGATAAATTTAAAATACAATTATTGAAAATCGAAAATGAA  
ATGATGACTGTGAACAGAGCATTAAATGAAAATCCAAATTTCTAAAAAAAATAAATCAA  
ATTAATCAGTTAAATATGCAATTATCTAGTATTAATAATAGAATTAGTAAAACCGAAGA  
ACTAATATTTGAAGATGGACCTGTTTTGGATTTAGCTGCTGCTTTATTTATATGTACTGAT  
GATGAAGTTTATTATCTATCAAGTGGATCAAATCCGAAATATAATCAGTATATGGGTGCA  
TATCATCTACAATGGCATATGATAAAAATATGCAAATCACATAATTAATAGGTATAAT  
TTTTATGGAATAACAGGCGTCTTTAGTAATGAGGCGGATGATTTTGGTGTTCACAATTTA

AAAAGGGTTTTAATGCACATGTTGAAGAATTAATTGGTGATTCATCAAACCAGTAAGAC  
CAATTCTATATAAATTTGCAAACCTTATTTATAAGGTTTAA

### > **dprA**

Function: protein coding sequence; putative DNA processing protein/chain A (core genome, variable)

Best match: dprA\_CC001\_MW2-USA400\_BA000033.2[1236282:1237154] (completely identical)

Position: 031-contig\_247: 9752 ... 10625; Length: 873 bp

Sequence:

TTGATTAAACTATTTTTGCTTAAGTTATACTGGGCACACTTTTCGACTAAACAAATTCATC  
AATTTTTAATGGCATATCCTAATGTAATTAAGAGGAGGGAAGAAAAAAGATAGTTATT  
TATGTGAATGGGTGAATAGGGAAGAAAATGTTCAATTTATTACGTAATACTATGCTTTTA  
TAAACTTGATCATAACGATATTATTAAGAAGACTGCAGAAATTAAGTAAGTTACATTA  
CATATATGGATTCTGAATACCCAGTGCTATTAAGAAATATATCAATTTCCATTACTTCT  
TTTCTATAAAGGGAACATCAAATTAATAAATAATATGCATCATTGGCAGTAGTAGGTGC  
AAGAGATTCTACAAGTTATACCCAACAGTCTTTAGAATTTTTATTATCAAATGATAAAG  
CAAATATTTAACAATTGTTTCCGGCCTTGCTCAAGGAGCTGATGCAATGGCACATCAAAT  
AGCTTTAAAATAACAATCTCCCTACAATTGCAGTTTTAGCCTTTGGCCATCAAACACATTAT  
CCCAAAGTACATTAGCATTAAAGAAATAAAATAGAAGAAAAAGGTTTAGTTATATCCGA  
ATATCCACCACATACCCAATTGCTAAATATAGATTTCTGAGCGCAATAGAATTATCAG  
CGGTTTGTCAAAGGGGTTTTAATTACTGAGGCTAAGGAACAAAGTGGCAGTCACATCAC  
GATAGATTTTGCATTAGAGCAAATAGAAATGTTTATGTTTTACCTGGATCTATGTTTAAAT  
CCTATGACAAAAGGTAATTTATTACGTATCCAAGAAGGTGCTAAGGTAGTATTAACGCT  
AATGATATATTTGAAGACTACTATATTTAA

### > **topA**

Function: protein coding sequence; DNA topoisomerase 1 (core genome, constant)

Best match: topA\_CC001\_MW2-USA400\_BA000033.2[1237334:1239403]

Position: 031-contig\_247: 10804 ... 12874; Length: 2070 bp

Sequence:

TTGGCAGATAATTTAGTCATTGTTGAATCGCCTGCAAAAGCAAAAACCATTGAAAAGTAT  
TTAGGTAAGAAATATAAAGTTATAGCTTCAATGGGACACGTCAGAGACTTACCAAGAAGT  
CAAATGGGTGTCGACACTGAAGATAATTACGAACCAAAATATATAACAATACGCGGAAA  
AGGTTCTGTTGTAAGAATTGAAAAACATGCAAAAAAGCGAAAAACGCTTTTCTCG  
CAAGTGACCCCGACCGTGAAGGTGAAGCAATTGCTTGGCATTATCAAAAATTTAGAGC  
TTGAAGATTCTAAAGAAAATCGCGTTGTTTTCAACGAAATAACTAAAGACGCTGTTAAAG  
AAAGTTTTAAAATCCTAGAGAAATTGAAATGAACTTAGTCGATGCACAACAAGCGCGTC  
GAATATTAGATAGATTGGTTGGCTATAACATCTCGCCAGTTCTATGGAAAAAGTAAAAA  
AAGGTTTGTGAGCGGGTCGAGTTCAATCTGTTGCACTTCGTTTAGTCATTGACCGTGAAAA  
TGAAATTCGAAACTTTAAACCAGAAGAATATTGGACTATTGAAGGAGAATTTAGATACAA  
AAAATCAAAATTCATGCTAAATTCCTTCATTATAAAAATAAACCTTTTAAATTA AAAAC  
GAAAAAAGATGTTGAGAAAATTACAGCTGCACTAGATGGAGATCAATTCGAAATTACAA  
ACGTGACTAAAAAAGAAAAACGCGTAATCCAGCAAACCCATTTACAACTTCTACATTAC  
ACAAGAGGCGGCACGTAAATTAACCTTTAAAGCAAGAAAAACAATGATGGTTCGCACAA  
CAATTATATGAAGGTATAGATTTGAAAAACAAGGTACGATTGGTTAATAACATATATG  
AGAACCGATTCTACACGATTTTCAGATACTGCCAAAGCTGAAGCAAAACAGTATATAACT  
GATAAATACGGTGAATCTTACACTTCTAAACGTAAAGCATCAGGGAAACAAGGTGACCA  
AGATGCCCATGAGGCTATTAGACCTTCAAGTACTATGCGTACGCCAGATGATATGAAGTC  
ATTTTTGACGAAAGACCAATACCGATTATACAAATTAATTTGGGAACGATTTGTTGCTAG  
TCAAATGGCTCCAGCAATACTTGATACAGTCTCATTAGACATAACACAAGGTGACATTAA  
ATTTAGAGCGAATGGTCAAACAATCAAGTTTAAAGGATTTATGACACTTTATGTAGAAAC  
TAAAGATGATAGTGATAGCGAAAAGGAAAATAAACTGCCTAAATTAGAGCAAGGTGATA  
AAGTCACAGCAACTCAAATTGAACCAGCTCAACACTATACACAACCACCTCCAAGATATA  
CTGAGGCGAGATTAGTAAAAACACTAGAAGAATTGAAAATTGGGCGACCATCAACTTAT  
GCACCGACAATAGATACGATTCAAAGCGTAACTATGTCAAATTAGAAAGTAAGCGTTTT  
GTTCTACTGAGTTGGGAGAAATAGTTCATGAACAAGTGAAAGAATACTTCCCAGAGATT

ATTGATGTGGAATTCACAGTGAATATGGAAACGTTACTTGATAAGATTGCAGAAGGCGAC  
ATTACATGGAGAAAAGTAATCGACGGTTTCTTTAGTAGCTTTAAACAAGATGTTGAACGT  
GCTGAAGAAGAGATGGAAAAGATTGAAATCAAAGATGAGCCAGCCGGTGAAGACTGTGA  
AGTTTGTGGTTCTCCTATGGTTATAAAAATGGGACGCTATGGTAAGTTCATGGCTTGCTCA  
AACTTCCCGGATTGTCGTAATACAAAAGCGATAGTTAAGTCTATTGGTGTAAATGTCCA  
AAATGTAATGATGGTGACGTCGTAGAAAAGAAAATCTAAAAAGAATCGTGTCTTTTATGGA  
TGTTTCGAAATATCCTGAATGCGACTTTATCTCTTGGGATAAGCCGATTGGAAGAGATTGT  
CCAAAATGTAACCAATATCTTGTGAAAATAAAAAAGGCAAGACAACACAAGTAATATG  
TTCAAATTGCGATTATAAAGAGGCAGCGCAGAAATAA

### > **tnpIS431-06**

Function: protein coding sequence; transposase for IS431 (mobile element)

Best match: tnpIS431-06\_circ\_S-epidermidis\_GQ900381.1[43799:43807]RC (completely identical)

Position: 031-contig\_247: 12319 ... 12328; Length: 9 bp

Sequence:

ATAGTTCAT

### > **gid**

Function: protein coding sequence; tRNA uridine 5-carboxymethylaminomethyl modification enzyme (core genome, constant)

Best match: gid\_CC001\_MW2-USA400\_BA000033.2[1239559:1240866] (completely identical)

Position: 031-contig\_247: 13029 ... 14337; Length: 1308 bp

Sequence:

ATGACTCAAACGTAAATGTAATAGGTGCTGGTCTTGCCGGTTCAGAAGCGGCATATCAA  
TTAGCTGAAAGAGGAATTAAGTTAATCTAATAGAGATGAGACCTGTTAAACAAACACC  
AGCGCACCATACTGATAAATTTGCGGAACTTGTATGTTCCAATTCATTACGAGGAAATGC  
TTTAACTAATGGTGTGGGTGTTTTAAAAGAAGAAATGAGAAGATTGAATTCTATAATTAT  
TGAAGCGGCTGATAAGGCACGAGTTCAGCTGGTGGTGCATTAGCAGTTGATAGACACG  
ATTTTTCAGGTTATATTACTGAAACACTTAAAAATCATGAAAATATCACAGTTATTAATGA  
AGAAATTAATGCCATTCCAGATGGATACACAATTATCGCAACAGGACCACTTACTACAGA  
AACCCCTGCGCAAGAAATAGTGGACATTACTGGTAAAGATCAACTTTATTTCTATGATGC  
GGCTGCTCCAATTATTGAAAAAGAATCTATTGATATGGATAAAGTTTACTTAAAGTCCCG  
TTATGATAAAGGTGAAGCTGCATATTTAACTGTCCTATGACTGAGGATGAATTTAATCG  
CTTTTATGATGCAGTATTAGAAGCTGAAGTTGCGCCTGTAAATTCATTTGAAAAAGAAAA  
ATATTTTCGAGGGTTGTATGCCTTTTGAAGTAATGGCAGAACGCGGACGCAAGACATTACT  
ATTTGGACCAATGAAACCAGTAGGATTAGAAGATCCAAAGACTGGGAAACGTCCTTATG  
CAGTGGTTCAATTAAGACAAGATGATGCTGCTGGCACACTCTACAATATTGTCGGCTTCC  
AAACGCATTTAAAATGGGGAGCTCAAAAAGAAGTTATTAATTAATTCAGGTTTAGAAA  
ATGTTGATATTGTTAGATATGGTGTGATGCATAGAAATACCTTCATTAACCTCACCGGACGT  
ATTAACGAGAAATATGAATTGATTTACAACCAACATACAGTTTGCGGGACAAATGAC  
TGGTGTGAAAGTTATGTAGAAAGCGCAGCTAGCGGCTTAGTTGCAGGTATCAATCTTGC  
GCATAAAATATTAGGCAAAGGTGAGGTAGTATTTCTAGAGAAACGATGATTGGAAGTA  
TGGCTTACTATATTTCTCATGCTAAAAATAATAAGAATTTCCAACCTATGAATGCTAACTT  
CGGGTTATTACCATCTTTAGAACTAGAATTAAGATAAAAAAGAACGCTATGAAGCAC  
AAGCTAATAGAGCTTTGGATTACTTAGAAAATTTCAAAAAACTTTATAA

### > **xerC**

Function: protein coding sequence; site-specific recombinase C (core genome, constant)

Best match: xerC\_CC008\_NCTC8325\_CP000253.1[1176773:1177669] (completely identical)

Position: 031-contig\_247: 14753 ... 15650; Length: 897 bp

Sequence:

TTGAATCATATTCAAGATGCGTTTTTAAATACATTGAAAGTTGAACGGAATTTTTCGGAAC  
ACACATTGAAATCATATCAAGATGACTTAATTCAGTTAATCAATTTTTAGAACAAAGAAC  
ATTTAGAGTTGAATACTTTTGAATACAGAGATGCTAGAAATATTTGAGCTATTTATATTC  
AAATCATTTGAAAAGAACATCTGTTTCTCGTAAAATCTCAACGTTAAGAAGTTTCTATGA

ATATTGGATGACGCTTGATGAGAACATTATTAATCCATTTGTTCAATTAGTACATCCGAAA  
AAAGAAAAATATCTTCCGCAATTCTTTTACGAAGAAGAAATGGAAGCGTTATTCAAACCT  
GTAGAAGAGGACACTTCAAAAAATTTACGGGATCGAGTTATTCTTGAATTGTTGTATGCT  
ACAGGCATCCGTGTTTCGGAATTAGTAAATATTAACCAAGATATAGATTTTTACGCG  
AATGGTGTTACCGTATTAGGAAAAGGGAGCAAAGAGCGCTTTGTACCGTTTGGTGCTTAT  
TGTAGACAAAGCATCGAAAATTATTTAGAACATTTCAAACCAATTCAGTCATGCAATCAT  
GATTTTCTTATTGTAAATATGAAGGGTGAAGCAATCACTGAACGCGGTGTACGATATGTT  
TTAAATGATATTGTTAAACGAACAGCAGGCGTAAGTGAGATTCATCCCCACAAGCTCAGA  
CATACATTTGCAACGCATTTATTGAATCAAGGTGCAGACCTAAGAACAGTACAATCGTTA  
TTAGGTCATGTTAATTTGTCAACAACCTGGTAAATATACACACGTATCTAACCAACAATTA  
AGAAAAGTGTATCTAAATGCACATCCTCGAGCGAAAAAGGAGAATGAAACATGA

#### > hslV

Function: protein coding sequence; heat shock protein/ATP-dependent protease (core genome, constant)

Best match: hslV\_CC001\_MW2-USA400\_BA000033.2[1242176:1242721] (completely identical)

Position: 031-contig\_247: 15646 ... 16192; Length: 546 bp

Sequence:

ATGAGTAATACAACATTACATGCAACAACAATTTATGCTGTAAGACATAATGGGAAAGC  
AGCTATGGCTGGAGATGGGCAAGTAACGCTTGGTCAACAAGTCATCATGAAACAAACGG  
CAAGAAAAGTGCACGTTTATATGAAGGTAAAGTGTTAGCTGGTTTCGCAGGTAGTGTAG  
CAGATGCGTTTACGTTATTTGAAAAATTCGAAACAAAATTACAACAGTTTAGTGGTAACT  
TAGAAAGAGCTGCTGTTGAATTGGCACAAGAATGGCGAGGCGATAAACAATTACGTCAA  
TTAGAAGCTATGCTAATTGTAATGGATAAAGATGCTATTTTAGTTGTCAGTGGAACCTGGC  
GAAGTTATTGCCCCAGATGATGACCTTATCGCTATTGGATCAGGAGGCAACTACGCATTA  
AGCGCAGGACGTGCATTGAAACGCCATGCATCGCATTGTCTGCTGAAGAAATGGCATAT  
GAGAGCTTGAAAGTAGCGGCTGATATTTGTGTCTTTACCAACGATAATATTGTTGTTGAA  
ACACTATAA

#### > hslU

Function: protein coding sequence; heat shock protein/ATPase subunit (core genome, constant)

Best match: hslU\_CC001\_MW2-USA400\_BA000033.2[1242787:1244190]

Position: 031-contig\_247: 16257 ... 17661; Length: 1404 bp

Sequence:

ATGGATACAGCTGGAATAAGATTAACCTCCAAAAGAAATCGTATCTAAATTAATGAATAC  
ATCGTTGGACAAAATGATGCTAAACGTAAAGTGCCAATTGCCTTACGTAATCGATACAGA  
AGAAGTTTATTAGATGAGGAATCAAAGCAAGAAATTTACCTAAAAATATTTTGATGATT  
GGACCAACTGGCGTTGGTAAAACCTGAAATTGCAAGAAGAATGGCCAAAGTTGTCGGCGC  
GCCATTTATAAAAAGTAGAAGCTACTAAATTTACTGAGGTAGGTTATGTAGGACGAGATGT  
TGAAAGTATGGTTAGAGATCTTGTGATGTTTCAGTAAGATTAGTCAAGGCACAGAAAAA  
ATCATTGGTACAAGATGAAGCAACAGCTAAGGCCAATGAAAAACTTGTTAAGTTATTAGT  
TCCAAGTATGAAAAAGAAAGCGTCTCAAACGAATAATCCTTTAGAGTCACTTTTCGGAGG  
TGCAATTCCAAATTTTCGGACAAAATAACGAAGATGAAGAAGAACCACCTACTGAGGAAA  
TTAAAACAAAACGTTCTGAAATTAAGAGACAGCTAGAAGAAGGCCAAACTTGAAAAAGAA  
AAGGTAAGAATTAAGTCGAACAAGATCCTGGTGCTTTAGGTATGCTAGGTACAAATCAA  
AATCAGCAAATGCAAGAGATGATGAATCAATTAATGCCTAAAAAGAAAGTTGAGCGAGA  
AGTTGCTGTTGAGACGGCAAGGAAAATCTTAGCTGATAGTTATGCGGATGAACTAATTGA  
TCAAGAAAGCGCTAACCAAGAAGCGCTTGAATTAGCAGAACAAATGGGTATCATCTTTAT  
AGATGAAATCGACAAAGTTGCGACGAATAATCATAATAGTGGTCAAGATGTCTCAAGAC  
AAGGTGTTCAAAGAGATATTTTACCTATACTTGAAGGTAGCGTTATTCAAACCAATATG  
GTACTGTGAATACTGAACATATGCTGTTTATAGGTGCTGGAGCTTTCATGTATCTAAGCC  
GAGTGACTTGATACCAGAATTGCAAGGTCGTTTTCCGATTAGAGTTGAACTTGATAGTTT  
ATCGGTAGAAGATTTTGTAAAGAAATTTTGACAGAACCAAAATTTGTCATTAATTAACAATA  
TGAAGCATTGCTTCAAACAGAAGAAGTTACTGTAAACTTTACCGATGAAGCAATTACTCG  
CTTAGCTGAGATTGCTTATCAAGTAAATCAAGATACAGACAACATTGGTGCACGTCGACT



TCATACAATTTTAGAAAAGATGCTAGAAGATTTATCATTTCGAAGCACCAAGTATGCCGAA  
TGCAGTTGTAGATATTACCCACAATATGTTGATGATAAATTAATAATCAATTTCAACAAA  
TAAAGATTTAAGTGCATTTATTCTATAA

> **codY**

Function: protein coding sequence; GTP-sensing transcript pleiotropic repressor (core genome, constant)

Best match: codY\_CC008\_NCTC8325\_CP000253.1[1179705:1180478] (completely identical)

Position: 031-contig\_247: 17685 ... 18459; Length: 774 bp

Sequence:

ATGAGCTTATTATCTAAAACGAGAGAGTTAAACACGTTACTTCAAAAACACAAAGGTATT  
GCGGTTGATTTTAAAGATGTAGCACAAACGATTAGTAGCGTAACTGTAACAAATGTATTT  
ATTGTATCGCGTCGAGGTAATAATTTTAGGATCGAGTCTAAATGAATTATTAATAAGTCAA  
AGAATTATTCAAATGTTGGAAGAAAGACATATTCCAAGTGAATATACAGAACGATTAATG  
GAAGTTAAACAAACAGAATCAAATATTGATATCGACAATGTATTAACAGTATTCCCACCT  
GAAAACAGAGAATTATTCATAGATAGTCGTACAACCTATCTTCCAATTTTAGGTGGAGGG  
GAAAGATTAGGTACATTAGTACTTGGTCGAGTACATGATGATTTTAATGAAAATGATTTG  
GTACTAGGTGAATATGCTGCTACAGTTATTGGTATGGAAATCTTACGTGAGAAGCATAGT  
GAAGTAGAAAAAGAAGCGCGGATAAAGCTGCTATTACAATGGCAATTAATTCATTATCT  
TATTCTGAAAAAGAAGCGATTGAACATATCTTTGAAGAACTTGGCGGTACGGAAGGCCTA  
TTAATCGCATCAAAAGTTGCAGATAGAGTTGGTATTACTAGATCTGTAATTGTAAATGCA  
CTACGTAAATTAGAAAGTGCTGGTGAATTGAATCACGTTCTTTAGGAATGAAAGGTACT  
TTCATTAAGTTAAAAAGAAAAATTCTTAGATGAATTAGAAAAAGTAAATAA

> **rpsB**

Function: protein coding sequence; 30S ribosomal protein S2 (core genome, constant)

Best match: rpsB\_ref\_CC001\_MW2-USA400\_BA000033.2[1245330:1246097] (completely identical)

Position: 031-contig\_247: 18800 ... 19568; Length: 768 bp

Sequence:

ATGGCAGTAATTTCAATGAAACAATTACTAGAAGCGGGTGTTCACTTCGGTCACCAAACA  
CGTCGTTGGAACCCAAAAATGAAAAAATATATCTTCACTGAGAGAAATGGTATTTATATC  
ATCGACTTACAAAAACAGTGAAAAAGTAGACGAGGCATACAACCTTCTTGAAACAAGT  
TTCAGAAGATGGTGGACAAGTCTTATTCGTAGGAACATAAAAAACAAGCACAAGAATCAG  
TTAAATCTGAAGCAGAACGTGCTGGTCAATTCTACATTAACCAAAGATGGTTAGGTGGAT  
TATTAACATACTATAAAACGATCTCAAACGAATCAAACGTATTTCTGAAATTGAAAAA  
TGGAAGAAGATGGTTTATTCGAAGTATTACCTAAAAAGAAGTAGTAGAACTTAAAAA  
GAATACGACCGTTAATCAAATCTTAGGCGGAATTCGTGATATGAAATCAATGCCTCAA  
GCATTATTCGTAGTTGACCCACGTAAGAGCGTAATGCAATTGCTGAAGCTCGTAAATTA  
AATATTCCTATCGTAGGTATCGTTGACACTAACTGTGATCCTGACGAAATTGACTACGTTA  
TCCCAGCAAACGACGATGCTATCCGTGCGGTTAAATTATTAAGTCTAAAATGGCAGATG  
CAATCTTAGAAGGTCAACAAGGCGTTTCTAATGAAGAAGTAGCTGCAGAACAAAACATC  
GATTTAGATGAAAAAGAAAAATCAGAAGAAACAGAAGCAACTGAAGAATAA

> **tsf**

Function: protein coding sequence; translation elongation factor Ts (core genome, constant)

Best match: tsf\_CC008\_NCTC8325\_CP000253.1[1181770:1182651] (completely identical)

Position: 031-contig\_247: 19749 ... 20631; Length: 882 bp

Sequence:

ATGGCAACTATTTTCAGCAAACTTGTTAAAGAATTACGTGAAAAAACTGGCGCGGGTATG  
ATGGATTGTAAAAAGCGCTAACTGAACTGATGGTGACATCGATAAAGCGATTGACTA  
CCTACGTGAAAAAGGTATTGCTAAAGCAGCTAAAAAAGCAGACCGTATTGCGGCTGAAG  
GTTTAGTACATGTAGAACTAAAGGTAACGACGCAGTTATCGTTGAAATCAACTCTGAAA  
CAGACTTTGTTGCTCGTAACGAAGGTTTCCAAGAGTTAGTTAAAGAAATCGCTAATCAAG  
TATTAGATACAAAAGCTGAACTGTTGAAGCTTTAATGGAAACAACTTTACCAAATGGTA  
AATCAGTTGATGAAAGAATTAAGAAGCAATTTCAACAATCGGTGAAAAATTAAGTGTTCT

GTCGTTTTGCTATCAGAACTAAAACCTGATAACGATGCTTTCGGCGCTTACTTACACATGGG  
TGGACGCATTGGTGTATTAACAGTTGTTGAAGGTTCAACTGACGAAGAAGCAGCAAGAG  
ACGTTGCTATGCATATCGCTGCAATCAACCCTAAATATGTTTCTTCTGAACAAGTTAGCGA  
AGAAGAAATCAACCACGAAAGAGAAGTTTTAAAACAACAAGCATTAAATGAAGGTAAAC  
CAGAAAACATCGTTGAAAAAATGGTGGAAAGGACGTTTACGTAAATACTTACAAGAAATT  
TGTGCTGTAGATCAAGACTTCGTTAAAAACCCTGATGTAACAGTTGAAGCTTCTTAAAA  
ACAAAAGGTGGAAAACCTTGTGACTTCGTACGCTATGAAGTAGGCGAAGGTATGGAAAA  
ACGCGAAGAAAACCTTTCGGGATGAAGTTAAAGGACAAATGAAATAA

### > **pyrH**

Function: protein coding sequence; uridylylate kinase (core genome, constant)

Best match: pyrH\_CC001\_MW2-USA400\_BA000033.2[1247297:1248019] (completely identical)

Position: 031-contig\_247: 20767 ... 21490; Length: 723 bp

Sequence:

ATGGCTCAAATTTCTAAATATAAACGTGTAGTTTTGAAAACCTAAGTGGTGAAGCGTTAGCT  
GGAGAAAAAGGATTTGGCATAAATCCAGTAATTATTAAGTGTGCTGAGCAAGTGGCT  
GAAGTTGCTAAAATGGACTGTGAAATCGCAGTAATCGTTGGTGGCGGAAACATTTGGAG  
AGGTAAAACAGGTAGTGACTTAGGTATGGACCGTGGAACCTGCTGATTACATGGGTATGCT  
TGCAACTGTAATGAATGCCTTAGCATTACAAGATAGTTTAGAACAATTGGATTGTGATAC  
ACGAGTATTAACATCTATTGAAATGAAGCAAGTGGCTGAACCTTATATTCGTCGTCGTCG  
AATTAGACACTTAGAAAAGAAACGCGTAGTTATTTTTGCTGCAGGTATTGGAAACCCATA  
CTTCTCTACAGATACTACAGCGGCATTACGTGCTGCAGAAGTTGAAGCAGATGTTATTTT  
AATGGGCAAAAATAATGTAGATGGTGTATATTCTGCAGATCCTAAAGTAAACAAAGATG  
CGGTAAAATATGAACATTTAACGCATATTCAAATGCTTCAAGAAGGTTTACAAGTAATGG  
ATTCAACAGCATCCTCATTCTGTATGGATAATAACATTCCGTTAACTGTTTTCTCTATTAT  
GGAAGAAGGAAATATTAACGTGCTGTTATGGGTGAAAAGATAGGTACGTTAATTACAA  
AATAA

### > **frr**

Function: protein coding sequence; ribosome recycling factor (core genome, constant)

Best match: frr\_CC001\_MW2-USA400\_BA000033.2[1248038:1248592] (completely identical)

Position: 031-contig\_247: 21508 ... 22063; Length: 555 bp

Sequence:

ATGAGTGACATTATTAATGAAACTAAATCAAGAATGCAAAAATCAATCGAAAGCTTATCA  
CGTGAATTAGCTAATATCAGTGCAGGAAGAGCTAATTCAAATTTATTAACGGCGTAACA  
GTTGATTACTATGGTGCACCAACACCTGTACAACAATTAGCAAGCATCAATGTTCCAGAA  
GCACGTTTACTTGTTATTTCTCCATACGACAAAACCTTCTGTAGCTGACATCGAAAAAGCG  
ATAATAGCGGCTAACTTAGGTGTCAACCCAACAAGTGATGGTGAAGTGATACGTATTGCA  
GTACCTGCCTTAACAGAAGAGCGTAGAAAAGAGCGCGTTAAAGATGTTAAGAAAATTGG  
TGAAGAAGCTAAAGTATCTGTTTCGAAATATTCGTCGTGATATGAATGATCAGTTGAAAAA  
AGATGAAAAAATGGCGACATTACTGAAGATGAGTTGAGAAGTGGTACTGAAGATGTTT  
AGAAAGCAACAGACAATTCAATAAAAGAAATTGATCAAATGATTGCTGATAAAGAAAAA  
GATATTATGTCAGTATAA

### > **uppS**

Function: protein coding sequence; undecaprenyl pyrophosphate synthetase (core genome, constant)

Best match: uppS\_CC001\_MW2-USA400\_BA000033.2[1248965:1249735] (completely identical)

Position: 031-contig\_247: 22435 ... 23206; Length: 771 bp

Sequence:

ATGTTTAAAAGCTAATAAATAAAAAGAACACTATAAATAATTATAATGAAGAATTAGA  
CTCGTCTAATATACCTGAACATATCGCTATTATTATGGATGGTAATGGGCGATGGGCTAA  
GAAGCGAAAAATGCCTAGAATTAAGGTCATTACGAAGGTATGCAAACAATAAAAAAAA  
TTACTAGGGTAGCTAGTGATATTGGTGTAAAGTACTTAACCTTTATACGCCTTTTCCACTGA  
AAATTGGTCAAGACCTGAAAGTGAAGTAAATTATATTATGAATTTGCCTGTCAATTTCTTA  
AAGACATTCTTACCGGAACTAATTGAAAAAATGTCAAAGTTGAAACAATTGGATTTACT

GATAAGTTGCCAAAATCAACGATAGAAGCAATTAATAATGCTAAAGAAAAGACAGCTAA  
TAATACCGGCTTAAAATTAATATTTGCAATTAATTATGGTGGCAGAGCAGAACTTGTTCA  
TAGTATTAATAAATATGTTTGACGAGCTTCATCAACAAGGTTTAAATAGTGATATCATAGA  
TGAAACATATATAAACAATCATTTAATGACAAAAGACTATCCTGATCCAGAGTTGTAAAT  
TCGTACTIONCAGGAGAACAAGAATAAGTAATTTCTTGATTTGGCAAGTTTCGTATAGTGA  
ATTTATCTTTAATCAAAAATTATGGCCTGACTTTGACGAAGATGAATTAATTAATGTATA  
AAAATTTATCAGTCACGTCAAAGACGCTTTGGCGGATTGAGTGAGGAGTAG

> **cdsA**

Function: protein coding sequence; phosphatidate cytidyltransferase (core genome, constant)

Best match: cdsA\_CC008\_NCTC8325\_CP000253.1[1185233:1186015] (completely identical)

Position: 031-contig\_247: 23212 ... 23995; Length: 783 bp

Sequence:

ATGAAAGTTAGAACGCTGACAGCTATTATTGCCTTAATCGTATTCTTGCCTATCTTGTTAA  
AAGGCGGCCTTGTGTTAATGATATTTGCTAATATATTAGCATTGATTGCATTAAGAATT  
GTTGAATATGAATATGATTAATTTGTTTCAGTTCCTGGTTAATTAGTGCAGTTGGTCTT  
ATCATCATTATGTTGCCACAACATGCAGGGCCATGGGTACAAGTAATTCAATTAAGAAGT  
TTAATTGCAATGAGCTTTATTGTATTAAGTTATACTGTCTTATCTAAAAACAGATTTAGTT  
TTATGGATGCTGCATTTTGCTTAATGTCTGTGGCTTATGTAGGCATTGGTTTTATGTTCTTT  
TATGAAACGAGATCAGAAGGATTACATTACATATTATATGCCTTTTTAATTGTTTGGCTTA  
CAGATACAGGGGCTTACTTGTGGTAAAATGATGGGTAAACATAAGCTTTGGCCAGTAA  
TAAGTCCGAATAAAAACAATCGAAGGATTCATAGGTGGCTTGTCTGTAGTTTGATAGTAC  
CACTTGCAATGTTATATTTTGTAGATTTCAATATGAATGTATGGATATTACTTGGAGTGAC  
ATTGATTTAAGTTTATTTGGTCAATTAGGTGATTTAGTGAATCAGGATTTAAGCGTCAT  
TTCGGCGTTAAAGACTCAGGTCGAATACTACCTGGACACGGTGGTATTTTAGACCGATTT  
GACAGCTTTATGTTTGTGTTACCATTATTAATATTTTATTAATAACAATCTTAA

> **rseP**

Function: protein coding sequence; RIP metalloprotease (core genome, variable)

Best match: rseP\_CC001-ST772\_118\_AJGE01000002.1[137892:139178:r] (completely identical)

Position: 031-contig\_247: 24206 ... 25493; Length: 1287 bp

Sequence:

GTGAGCTATTTAGTTACAATAATTGCATTTATTATTGTTTTTGGTGTACTAGTAACTGTTCA  
TGAATATGGCCATATGTTTTTTGCGAAAAGAGCAGGCATTATGTGTCCAGAATTTGCGAT  
CGGTATGGGGCCGAAAATTTTLAGTTTTAGAAAAAATGAAACACTTTACTACTATTAGGTT  
ATTGCCTGTTGGTGGATATGTTTCGTATGGCAGGAGATGGCTTAGAAGAGCCACCAGTCGA  
GCCCAGTATGAACGTTAAAATTAACCTTAATGAAGAAAATGAAATAACACATATCATATT  
AGATGATCATCATAAGTTTCAACAAATTGAAGCGATCGAAGTTAAAAAATGTGATTTTAA  
GGATGACTTATTCATAGAAGGTATCACTGCTTATGATAATGAAAGACATCATTTTAAAAT  
TGCTAGAAAGTCTTTCTTTGTTGAAAATGGTAGCTTAGTTCAAATTGCTCCGAGAGACAG  
ACAATTTGCACATAAAAAGCCATGGCCGAAATTTTTAACATTATTTGCGGGACCGTTATTT  
AACTTTATATTAGCTTTAGTCCTATTTATTGGTCTTGCATATTATCAAGGCACGCCTACGT  
CTACTGTAGAACAAGTCGCAGATAAGTATCCAGCTCAACAAGCAGGATTACAAAAGGT  
GATAAGATCGTCCAAATTGGCAAATATAAAATATCTGAATTTGATGATGTTGATAAGGCG  
TTAGATAAAGTTAAAGATAATAAGACGACTGTTAAATTTGAACGTGATGGTAAAACAAA  
GTCAGTTGAATTAACACCTAAAAGACTGAAAAAAACTGACTAAAGTAAGTTCAGAGA  
CGAAGTATGTTCTCGGATTTCAACCAGCGAGTGAACATACACTTTTTAAACCAATTGTATT  
CGGATTTAAAAGCTTTTTAATCGGTAGTACTTATATTTTTACAGCTGTAGTAGGTATGTTG  
GCTAGTATATTTACGGGCGGATTCTCATTTGATATGTTAAATGGTCCGGTTGGTATTTATC  
ATAACGTCGACTCAGTTGTTAAAGCGGGTATCATTAGCTTAATTGGTTACTGCGTTATT  
AAGTGTAACCTTAGGTATTATGAATTTAATTCCTATTCCTGCACTAGACGGTGGTTCGTATT  
TTATTTGTTATATATGAAGCGATTTTCAGAAAACCAGTTAATAAAAAAGCGGAAACAACG  
ATTATTGCTATTGGTGCCATTTTCATGGTCGTTATAATGATATTAGTAACGTGGAATGATA  
TTCGACGATATTTCTTATAA

## > **proS**

Function: protein coding sequence; prolyl-tRNA synthetase (core genome, constant)

Best match: proS\_CC008\_NCTC8325\_CP000253.1[1187558:1189261]

Position: 031-contig\_247: 25512 ... 27216; Length: 1704 bp

Sequence:

```
ATGAAGCAATCCAAAGTTTTTATACCAACGATGCGTGACGTGCCATCAGAAGCAGAAGC
ACAAAGTCATCGTTTATTATTGAAATCGGGTTTGATAAAACAAAGTACAAGTGGGATTTA
TAGTTATTTACCGCTAGCAACACGTGTGTTAAATAATTTACTGCAATTGTGCGACAAGA
AATGGAACGTATCGATTCTGTTGAAATTTAATGCCAGCGTTACAACAAGCTGAATTATG
GGAAGAATCAGGACGTTGGGGTGCATATGGCCCAGAATTAATGCGTTTACAAGATAGAC
ATGGAAGACAATTTGCATTAGGTCCAACACATGAAGAATTAGTTACATCAATAGTAAGAA
ATGAATTGAAATCATAACAAACAATTACCGATGACATTATTCCAAATTCAATCTAAATTCC
GTGATGAAAAGAGACCACGTTTTGGTTTACTTCGTGGGCGTGAATTTATTATGAAAGATG
CATATTCATTCCATGCTGACGAGGCATCATTAGATCAAACGTATCAAGATATGTATCAAG
CGTATAGCCGTATTTTTGAGAGAGTTGGCATTAAACGCAAGACCAGTAGTTGCAGATTCAG
GTGCTATAGGCGGTAGCCATACACATGAATTTATGGCATTAAAGTGCTATCGGTGAGGATA
CAATCGTTTACAGTAAAGAAAGTGATTATGCTGCTAACATCGAAAAAGCAGAAGTCGTTT
ACGAACCAAATCATAAGCATACTACTGTGCAACCTTTAGAAAAAATTGAAACACCAAAT
GTAAAGACTGCGCAAGAATTGGCAGACTTCTTAGGTAGACCAGTAGATGAAATCGTTAA
ACGATGATTTTCAAAGTTGATGGCGAATATATTATGGTTTTAGTGCGTGGCCATCATGAA
ATTAATGACATTAATTTAAAATCTTATTTTCGGCACAGATAATATTGAATTAGCAACACAA
GACGAAATTGTTAATTTAGTTGGTGCAAATCCTGGTTCCTAGGTCCTGTAATTGATAAA
GAAATCAAATTTATGCAGATAATTTTGTGCAAGATTTAAATAATTTAGTTGTCGGTGCTA
ACGAAGATGGTTATCACTTAATTAATGTAATGTAGGTAGAGACTTCAACGTTGATGAAT
ATGGCGATTTCCGTTTTATTTTAGAAGGCGAAAAGTTAAGTGATGGTTCAGGCGTTGCAC
ATTTTGCTGAAGGTATTGAAGTTGGTCAAGTATTCAAATTTGGGTAAGTATTGAGAAAT
CAATGAATGCTACATTCTTAGATAACCAAGGAAAAGCTCAACCTTTAATTATGGGTTGTT
ACGGAATTGGAATTTCTAGAACGCTAAGTGCGATTGTTGAACAAAATCACGATGATAATG
GAATTGTTTGGCCTAAATCAGTTACTCCGTTTGATTTACATTTAATTTCTATTAATCCTAAG
AAAGATGATCAACGAGAACTAGCAGATGCACTATATGCTGAATTTAATACTAAATTTGAT
GTGTTGTACGATGATCGTCAGGAACGTGCAGGTGTCAAATTTAATGATGCCGATTTAATT
GGTTTACCCTGCGAATTGTTGTTGGTAAACGTGCATCGGAAGGTATTGTAGAAGTTAAA
GAACGTTTAAACAGGTGATAGCGAAGAAGTTCACATTGATGACTTAATGACTGTCATTACA
AATAAATATGATAACTTAAATAA
```

## > **polC**

Function: protein coding sequence; DNA polymerase III alpha chain (core genome, constant)

Best match: polC\_CC030\_MRSA252\_BX571856.1[1295711:1300021]

Position: 031-contig\_247: 27479 ... 31790; Length: 4311 bp

Sequence:

```
ATGACAGAGCAACAAAAATTTAAAGTGCTTGCTGATCAAATTTAAATTTCAAATCAATTA
GATGCTGAAATTTTAAATTCAGGTGAACTGACACGTATAGATGTTTCTAACAAAAACAGA
ACATGGGAATTTTCAATTACATTACCACAATTCTTAGCTCATGAAGATTATTTATTATTTA
TAAATGCAATAGAGCAAGAGTTTAAAGATATCGCCAACGTTACATGTCGTTTTACGGTAA
CAAATGGCACGAATCAAGATGAACATGCAATTAATACTTTGGGCACTGTATTGACCAAA
CAGCTTTATCTCCAAAAGTTAAAGGTCAATTGAAACAGAAAAAGCTTATTATGTCTGGAA
AAGTATTTAAAGTAATGGTATCAAATGACATTGAACGTAATCATTTTGGATAAGGCATGTA
ATGGAAGTCTTATCAAAGCGTTTAGAAATTGTGGTTTTGATATCGATAAAAATCATATTCG
AAACAAATGATAATGATCAAGAACAAAACCTTAGCTTCTTTAGAAGCACATATTCAAGAA
GAAGACGAACAAAGTGCACGATTGGCAACAGAGAACTTGAAAAAATGAAAGCTGAAA
AAGCGAAACAACAAGATAACAACGAAAGTGCTGTCGATAAGTGTCAAATTTGGTAAGCCG
ATTCAAATTTGAAAATATTTAAACCAATTGAATCTATTATTGAGGAAGAGTTTAAAGTTGCA
ATAGAGGGTGTCAATTTTTGATATAAACTTAAAAGAACTTAAAAGTGGTCGCCATATCGTA
GAAATTTAAAGTGACTGACTATACGGACTCTTTAGTTTTTAAAAATGTTTACTCGTAAAAAC
AAAGATGATTTAGAACATTTTAAAGCGCTAAGTGTGGTAAATGGGTTAGGGCTCAAGGT
```

CGTATTGAAGAAGATACATTTATTAGAGATTTAGTTATGATGATGTCTGATATTGAAGAG  
ATTAAGAAAGCGACAAAAAAGATAAGGCTGAAGAAAAGCGTGTAGAATTCCACTTGCA  
TACTGCAATGAGCCAAATGGATGGTATACCCAATATTGGTGCATGTTAAACAGGCAGC  
AGACTGGGGACATCCAGCCATTGCGGTTACAGACCATAATGTTGTGCAAGCATTTCAGA  
TGCTCACGCAGCAGCGGAAAAACATGGCATTAAAATGATATACGGTATGGAAGGTATGT  
TAGTTGATGATGGTGTTCGATTGCATACAAACCACAAGATGTCGTATTAAGATGCTA  
CTTATGTTGTGTTTCGACGTTGAGACAACCTGGTTTATCAAATCAGTATGATAAAATCATCGA  
GCTTGCAGCTGTGAAAGTTCATAACGGTGAAATCATCGATAAGTTTGAAGGTTTAGTAA  
TCCGCATGAACGATTATCGGAAACGATTATCAATTTGACGCATATTACGGATGATATGTT  
AGTAGATGCCCTGAGATTGAAGAAGTACTTACAGAGTTTAAAGAATGGGTTGGCGATGC  
GATATTCGTAGCGCATAATGCTTCGTTTGATATGGGCTTCATCGATACGGGATATGAACG  
TCTTGGGTTTGGACCATCAACGAATGGTGTATCGATACTTTAGAATTATCTCGTACGATT  
AATACTGAATATGGTAAACATGGTTTGAATTTCTTGGCTAAAAAATATGGCGTAGAATTA  
ACGCAACATCACCGTGCCATTTATGATACAGAAGCAACAGCTTACATTTTCATAAAAAATG  
GTTCAACAAATGAAAGAATTAGGCGTATTAATCATAACGAAATCAACAAAAAACTCAG  
TAATGAAGATGCATATAAACGTGCAAGACCTAGTCATGTCACATTAATTGTACAAAACCA  
ACAAGGTCTTAAAAATCTATTTAAAAATTGTAAGTGCATCATTGGTGAAGTATTTCTACCGT  
ACACCTCGAATTCCACGTTTATTGTTAGATGAATATCGTGAGGGATTATTGGTAGGTACA  
GCGTGTGATGAAGGTGAATTATTTACGGCAGTTATGCAGAAGGACCAGAGTCAAGTTGA  
AAAAATTGCCAAATATTATGATTTTATTGAAATTCAACCACCGGCACTTTATCAAGATTTA  
ATTGATAGAGAGCTTATTAGAGATACTGAAACATTACATGAAATTTATCAACGTTTAATA  
CATGCAGGTGACACAGCGGGTATACCTGTTATTGCGACAGGAAATGCACACTATTTGTTT  
GAACATGATGGTATCGCACGTAAAATTTTAAATAGCATCACAACCCGGCAATCCACTTAAT  
CGCTCAACTTTACCGGAAGCACATTTTAGAACTACAGATGAAATGTTAAACGAGTTTCAT  
TTTTTAGGTGAAGAAAAAGCGCATGAAATTGTTGTGAAAAATACAAACGAATTAGCAGA  
TCGAATTGAACGTGTTGTTCTTATTAAGATGAATTATACACACCCGCGTATGGAAGGTGC  
TAACGAAGAAATTAGAGAATAAGTTATGCAAATGCGCGTAAACTGTATGGTGAAGACC  
TGCCTCAAATCGTAATTGATCGATTAGAAAAAGAATTAAGTATTATCGGTAATGGAT  
TTGCGGTAATTTACTTAATTTTCGCAACGTTTAGTTAAAAAATCATTAGATGATGGATACTT  
AGTTGGTTCCCGTGGTTCAGTAGGTTCTAGTTTTGTAGCGACAATGACTGAGATTACTGAA  
GTAAACCCGTTACCGCCACACTATATTTGTCCGAACTGTAAAACGAGTGAATTTTTCAAT  
GATGGTTCAGTAGGATCAGGATTTGATTTACCTGATAAGACGTGTGAAACTTGTGGAGCG  
CCACTTATTAAGAAGGACAAGATATCCGTTTGAACATTTTTAGGATTTAAGGGAGAT  
AAAGTTCCTGATATCGACTTGAACCTTGTAGTGGTGAATATCAACCGAATGCCATAACTAC  
ACAAAAGTATTATTTGGTGAAGATAAAGTATTCGTCAGGTACAATTGGTACTGTTGCT  
GAAAAGACTGCTTTTGGTTATGTTAAAGGTTATTTGAATGATCAAGGTATCCACAAAAGA  
GGTGTGAAATAGATCGACTCGTTAAAGGATGTACAGGTGTTAAACGTACAACCTGGACA  
GCATCCAGGGGGTATTATTGTAGTACCTGATTACATGGATATTTATGATTTTACGCCGATA  
CAATATCCTGCCGATGATCAAAATTCAGCATGGATGACGACACATTTTGTATTTCCATTCTA  
TTCATGATAATGTATTAAACTTGATATACTTGGACACGATGATCCAACAATGATTCGTAT  
GCTTCAAGATTTATCAGGAATTGATCCAAAAACAATACCTGTAGATGATAAAGAAGTTAT  
GCAGATATTTAGTACACCTGAAAGTTTGGGTGTTACTGAAGATGAAATTTTTATGTAAAAC  
AGGTACGTTTGGGGTTCAGAAATTCGGTACAGGGTTCGTGCGTCAAATGTTAGAAGATAC  
AAAGCCAACAACATTTTCTGAATTAGTTCAAATCTCAGGATTATCTCATGGTACAGATGT  
GTGGTTAGGCAATGCTCAAGAATTAATTAACCAGGATATATGTGATTTATCAAGTGTAAAT  
TGGTTGTCGTGATGATATCATGGTTTATTTAATGTATGCTGGTTTGAACCATCAATGGCT  
TTTAAATAATGGAGTCAGTACGTAAAGGTTAAAGGTTTAACTGAAGAAATGATTGAAAC  
GATGAAAGAAAATGAAGTGCCGATTGGTATTTAGATTCATGTCTTAAAATTAAGTACAT  
GTTCCCTAAAGCCCATGCAGCAGCATAACGTTTTAATGGCAGTACGTATCGCATATTTCAA  
AGTACATCATCCACTTTATTACTATGCATCTTACTTTACAATTCGTGCGTCAGATTTTGTATT  
TAATCACGATGATTAAGATAAAACAAGCATTTCGAAATACTGTAAAAGACATGTATTCTC  
GCTATATGGATCTAGGTAAAAAAGAAAAAGACGTATTAACCTGTCTTGGAAATTATGAATG  
AAATGGCACATCGAGGTTATCGCATGCAACCGATTAGTTTGAAGAAAGAGTCAGGCGTTTCG  
AATTTATCATTGAAGGCGATACACTTATTCGCCGTTTCATATCAGTGCCTGGGCTTGGCGA  
AAACGTTGCGAAACGAATTGTTGAAGCTCGTGACGATGGACCATTTTTATCAAAAAGAAGA

TTTAAACAAAAAGCTGGATTATCTCAGAAAATTATTGAGTATTTAGATGAGTTAGGCTC  
ATTACCGAATTTACCAGATAAAGCTCAACTTTCGATATTCGATATGTAA

> **rimP**

Function: protein coding sequence; ribosome maturation factor (core genome, constant)

Best match: rimP\_CC001\_MW2-USA400\_BA000033.2[1258609:1259076] (completely identical)

Position: 031-contig\_247: 32079 ... 32547; Length: 468 bp

Sequence:

ATGAGTAAAATTACAGAACAAGTAGAAGTGATTGTAAACCAATTATGGAAGACTTGAA  
TTTTGAACTTGTAGACGTTGAATATGTCAAAGAGGGTAGAGATCATTTTCTTAGAATCTCT  
ATTGATAAAGAAGGTGGCGTAGATTTAAATGATTGTACGCTAGCTTCTGAAAAAATAAGT  
GAAGCTATGGATGCAAATGATCCTATTCCTGAAATGTATTATTTAGACGTAGCGTCACCT  
GGTGCAGAACGTCCAATTA AAAAAGAACAAGATTTCCAAAATGCAATAACTAAACCTGT  
ATTTGTTTCTTTATATGTACCAATTGAAGGTGAAAAGGAATGGTTAGGCATTTTACAAGA  
AGTCAATAATGAAACAATTGTAGTACAAGTTAAAATCAAAGCAAGAACGAAAGATATAG  
AGATACCGAGAGACAAAATAGCAAAAGCACGTCACGCAGTTATGATTTAA

> **nusA**

Function: protein coding sequence; transcription termination-antitermination factor (core genome, constant)

Best match: nusA\_CC008\_NCTC8325\_CP000253.1[1194613:1195788]

Position: 031-contig\_247: 32567 ... 33743; Length: 1176 bp

Sequence:

GTGTCAAGTAATGAATTATTATTAGCTACTGAGTATTTAGAAAAAGAAAAGAAGATTCCCT  
AGAGCAGTATTAATTGATGCTATTGAAGCAGCTTTAATTACTGCATACAAAAGAATTAT  
GATAGTGCAAGAAATGTCCGTGTGGAATTAATATGGATCAAGGTAATTTCAAAGTTATC  
GCTCGTAAAGATGTTGTTGAAGAAGTATTTGACGACAGAGATGAAGTGGATTTAAGTACA  
GCGCTTGTTAAAAACCCTGCATATGAAATTTGGTGATATATACGAAGAAGATGTAACACCT  
AAAGATTTTGGTCGTGTAGGTGCTCAAGCAGCGAAACAAGCAGTAATGCAACGTCTTCGT  
GATGCTGAACGTGAAATTTTATTTGAAGAATTTATAGACAAAGAAGAAGACATACTTACT  
GGAATTATTGACCGTGTGACCATCGTTATGTATATGTGAATTTAGGTCGTATCGAAGCTG  
TTTTATCTGAAGCAGAAAGAAGTCCTAACGAAAAATATATTCCTAACGAACGTATCAAAG  
TATATGTTAACAAAGTGGAACAAACGACAAAAGGTCCTCAAATCTATGTTTCTCGTAGCC  
ATCCAGGTTTATTA AAAACGTTTATTTGAACAAGAAGTTCCAGAAATTTACGATGGTACTG  
TAATTGTTAAATCAGTAGCACGTGAAGCTGGCGATCGCTCTAAAATTAGTGTCTTCTCTGA  
AAACAATGATATAGATGCTGTTGGTGCATGTGTTGGTGCTAAAGGCGCACGTGTTGAAGC  
TGTTGTTGAAGAGCTAGGTGGCGAAAAAATCGACATCGTTCAATGGAATGAAGATCCAA  
AAGTATTTGTAAAAAATGCTTTAAGCCCTTCTCAAGTTTTAGAAGTTATTGTTGATGAAAC  
AAATCAATCTACAGTAGTTGTTGTTTCTGATTATCAATTGTCATTAGCGATTGGTAAAAGA  
GGACAAAACGCACGTCTAGCTGCTAAATTAACCGGCTGGAAAATTGATATTAATCAGA  
AACAGATGCGCGTGAAGCGGGTATCTATCCAGTAGTTGAAGCTGAAAAGTAAGTGAAG  
AAGATGTTGCTTTAGAAGATGCTGACACAACAGAATCAACCGAAGAGGTAATGATGTTT  
CAGTTGAAACAAATGTAGAGAAAGAATCTGAATAA

> **infB**

Function: protein coding sequence; translation initiation factor IF-2 (core genome, constant)

Best match: infB\_CC001\_MW2-USA400\_BA000033.2[1260896:1263013]

Position: 031-contig\_247: 34366 ... 36484; Length: 2118 bp

Sequence:

ATGAGTAAACAAAGAATTTACGAATATGCGAAAGAATTAATCTAAAGAGTAAAGAGAT  
TATAGATGAGTTAAAAAGCATGAATATTGAGGTTTCAAATCATATGCAAGCTTTGGAAGA  
TGACCAAATTAAGCATTAGATAAAAAGTTCAAAAAAGAACA AAAAGAACGACAATAAAC  
AAAGCACTCAAAAATAATCACCAAAAATCAAACAATCAAAAACCAAAAATAAAGGGCAACAA  
AAAGATAACAAAAGAATCAACAACAAAATAATAAAGGCAACA AAAGGCAATAAAAAGA  
ATAATAGAAATAATAAGAAAAATAACAAGAATAATAAACCACAAAATCAACCAGCTGCT

CCAAAAGAAATACCATCAAAAGTGACATATCAAGAAGGTATTACATTAGGCGAATTTGC  
GGATAAATTAATGTTGAATCATCAGAAATTATCAAAAAATTATTCTTACTTGGTATTGTT  
GCTAATATCAATCAATCATTAAATCAAGAAACAATCGAATTAATTGCCGATGATTATGGC  
GTTGAGGTTGAAGAAGAAGTTGTGATTAATGAAGAAGATTTATCAATCTACTTCGAAGAC  
GAAAAAGATGATCCAGAAGCAATTGAGAGACCAGCAGTTGTAACAATTATGGGACATGT  
TGACCATGGTAAAACGACTTTATTAGATTCAATTCGTCATACAAAAGTTACAGCAGGTGA  
AGCAGGCGGAATCACTCAACATATTGGTGCATATCAAATTGAAAACGATGGCAAAAAA  
TCACTTTCTTAGATACACCGGGACATGCTGCATTTACAACGATGCGTGCGCGTGGTGCAC  
AAGTAACAGATATTACAATTTTAGTAGTTGCAGCTGACGATGGTGTTATGCCACAAACAA  
TTGAAGCAATTAACCATGCTAAAGAAGCAGAAGTACCAATTATTGTTGCAGTAAATAAAA  
TTGATAAACCAACTTCAAACCCTGATCGAGTTATGCAAGAATTAAGTGAATATGGTTTAA  
TTCCTGAAGATTGGGGCGGCGAAACAATTTTCGTTCCACTTTCTGCATTAAGTGGTGATGG  
TATCGACGATTTATTAGAAATGATAGGATTAGTTGCAGAAGTTCAAGAACTTAAAGCAAA  
TCCTAAAACCGTGCTGTTGGTACAGTTATCGAAGCTGAATTAGATAAATCACGTGGTCC  
TTCTGCATCATTATTAGTACAAAATGGTACATTAATGTTGGTGATGCGATTGTAGTTGGT  
AACTTACGGCCGTATCCGTGCAATGGTTAATGACTTAGGTCAAAGAATCAAACGGCT  
GGTCCATCAACGCCTGTTGAAATTACAGGTATTAATGATGTGCCACAAGCTGGGGATCGC  
TTTGTGTTATTTAGTGATGAAAAACAAGCTCGTTCGATTGGTGAATCAAGACACGAAGCT  
AGCATTGTACAACAACGTCAAGAAAGTAAAAATGTTTCATTAGATAACCTGTTTGAACAA  
ATGAAACAAGGTGAAATGAAAGATTTAAACGTTATTATTAAGGTGATGTTCAAGGTTCT  
GTTGAAGCTTTAGCTGCATCATTAAATGAAAATTGATGTTGAAGGCGTAAATGTTTCGTATC  
ATTCATACAGCGGTTGGTGAATTAATGAGTCAGACGTGACACTTGCTAATGCCTCAAAT  
GGTATTATCATTGGTTTCAATGTTTCGTCAGACAGTGGTGCAAACGCTGCTGCAGAAGCT  
GAAAATGTTGATATGCGTTTACACAGAGTTATTTATAATGTTATCGAAGAAATTGAATCA  
GCGATGAAAGGTTTACTTGATCCAGAATTTGAAGAACAAGTTATCGGACAAGCTGAAGTT  
CGTCAAACATTCAAAGTTTCTAAAGTTGGTACTATTGCTGGATGTTATGTTACTGAAGGTA  
AAATTACGCGAAATGCTGGTGTACGTATTATTCGTGATGGTATTGTTCAATATGAAGGCG  
AATTAGATACACTTAAACGTTTCAAAGATGATGCTAAGGAAGTTGCAAAGGTTATGAAT  
GTGGTATTACAATTGAAAACACTACAATGACCTTAAAGAAGGCGATGTTATCGAAGCATTG  
AAATGGTTGAAATTAAGCGTTAA

### > **rbfA**

Function: protein coding sequence; ribosome-binding factor A (core genome, constant)

Best match: rbfA\_CC001\_MW2-USA400\_BA000033.2[1263399:1263749] (completely identical)

Position: 031-contig\_247: 36869 ... 37220; Length: 351 bp

Sequence:

ATGAGCAGTATGAGAGCAGAGCGTGTGGTGAACAAATGAAGAAGGAATTAATGGATAT  
CATCAACAATAAAGTCAAAGATCCTCGAGTTGGTTTTATTACAATTACAGATGTTGTTTTA  
ACAAATGATTTATCGCAGGCTAAAGTATTTTTAACTGTATTAGGTAACGATAAAGAAGTA  
GAAAATACATTTAAAGCACTTGATAAAGCAAAGGCTTCATTAAGTCTGAATTAGGTTCT  
AGAATGCGATTACGTATTATGCCGGAATTAATGTATGAATATGATCAATCAATCGAATAT  
GGTAATAAAATTGAACGAATGATTCAAGATTTACACAAACAAGATAGATAA

### > **truB**

Function: protein coding sequence; tRNA pseudouridine synthase B (core genome, constant)

Best match: truB\_CC001\_MSSA476\_BX571857.1[1292414:1293331]

Position: 031-contig\_247: 37389 ... 38307; Length: 918 bp

Sequence:

ATGTATAATGGGATATTACCAGTATATAAAGAGCGCGGTTTAAACAAGTCATGACGTTGTA  
TTCAAATTGCGTAAAATATTA AAAA ACTAAAAAATAGGTACACGGGTACGCTTGATCCC  
GAAGTTGCAGGCGTGTACCAGTATGTATAGGTAATGCAACGAGAGTTAGTGATTATGTT  
ATGGATATGGGCAAAGCTTATGAAGCAACTGTATCGATAGGAAGAAGTACAACGACTGA  
AGATCAAACGGGTGATACATTGGAAACAAAAGGTGTACACTCAGCAGATTTTAATAAGG  
ACGATATTGACCGATTGTTAGAAAGTTTTAAAGGTATCATTGAACAAATCCGCCGATGT  
ACTCATCCGTCAAAGTAAATGGTAAAAAATTATATGAATATGCGCGTAATAATGAAACAG

TTGAAAGACCAAAGCGTAAAGTTAATATTATAGACATTGGGCGTATATCTGAATTAGATT  
TTAAAGAAAATGAGTGTCAATTTAAAATACGCGTCATCTGTGGTAAAGGTACATATATTA  
GAACGCTAGCAACTGATATTGGTGTGAAATTAGGCTTCCGGCACATATGTCGAAATTA  
CACGAATCGAGTCTGGTGGATTTGTGTTGAAAGATAGCCTTACATTAGAACAAATAAAAG  
AACTTCATGAGCAGGATTCATTGCAAAAATAAATTGTTTCCTTTAGAATATGGATTAAAGG  
GTTTGCCAAGCATTAAAATTAAGATTCGCACATAAAAAAACGTATTTAAATGGGCAGA  
AATTTAATAAAAATGAATTTGATAACAAAATTAAGACCAAATTGTATTTATTGATGATG  
ATTCAGAAAAAGTATTAGCAATTTATATGGTACACCCTACAAAAGAATCAGAAATTAAC  
CTAAAAAAGTCTTTAATTAA

### > **ribF**

Function: protein coding sequence; riboflavin biosynthesis protein (core genome, constant)

Best match: ribF\_CC008\_NCTC8325\_CP000253.1[1200366:1201337]

Position: 031-contig\_247: 38321 ... 39293; Length: 972 bp

Sequence:

ATGAAAGTCATAGAAGTGACACATCCTATACAATCTAAACAGTATATTACAGAGGATGTT  
GCAATGGCATTCCGATTTTTTCGATGGCATGCATAAAGGTCATGACAAAGTCTTTGATATA  
TTAAACGAAATAGCTGAGGCACGCAGTTTAAAAAAGCGGTGATGACATTTGATCCGCAT  
CCATCTGTCGTGTTGAATCCTAAAAGAAAACGAACAACGTATTTAACGCCACTTTCAGAT  
AAAATCGAAAAAATTAGCCAACATGATATTGATTATTGTATAGTGGTTAATTTTTTCATCTA  
GGTTTGCTAATGTGAGCGTTGAAGATTTTGGTGAATAATTATAAATAAATAATGTAA  
AAGAAGTCATTGCTGGTTTCGATTTTACTTTTGGTAAATTTGGAAAAGGTAATATGACTGT  
ACTTCAAGAATATGATGCGTTTAATACGACAATTGTGAGTAAACAAGAAATTGAAAATGA  
AAAAATTTCTACAACCTTCTATTCGTCAGATTTAATCAATGGTGAGTTGCAAAAAGCGAA  
TGATGCTTTAGGCTATATATATTCTATTAAGGCAGTGTAGTGCAAGGTGAAAAAAGGGG  
AAGAACTATTGGCTTCCCAACAGCTAACATTCAACCTAGTGATGATTATTTGTTACCTCGT  
AAAGGTGTTTATGCTGTTAGTATTGAAATCGGCAGTGAATAAATTATATCGAGGGGTA  
GCTAACATAGGTGTAAAGCCAACATTTATGATCCTAACAAAAGCAGAAGTTGTCATCGAA  
GTGAATATCTTTGACTTTGAGGATAAATTTATGGTGAACGAGTGACCGTGAATTGGCAT  
CATTTCTTACGTCCTGAGATTAATTTGATGGTATCGACCCATTAGTTAAACAAATGAACG  
ATGATAAATCGCGTGCTAAATATTTATTAGCAGTTGATTTTGGTGTATGAAGTAGCTTATAA  
TATCTAG

### > **rpsO**

Function: protein coding sequence; 30S ribosomal protein S15 (core genome, constant)

Best match: rpsO\_CC001\_MW2-USA400\_BA000033.2[1265937:1266206]

Position: 031-contig\_247: 39407 ... 39677; Length: 270 bp

Sequence:

ATGGCAATTTCAACAAGAACGTAAAAACGAAATCATTAAAGAATACCGTGTACACGAAAC  
TGATACTGGTTCACCAGAAGTACAAATCGCTGTACTTACTGCAGAAATCAACGCAGTAAA  
CGAACACTTACGTACACAAAAAAGACCACCATTCACGTCGTGGGTTATTAATAAATGGT  
AGGTGTCGTAGACATTTATTAATACTACTTACGTAGTAAAGATATTCAACGTTACCGTGA  
ATTAATTAATCACTTGGTATCCGTCGTAA

### > **pnpA**

Function: protein coding sequence; polyribonucleotide nucleotidyltransferase (core genome, constant)

Best match: pnpA\_CC001\_MW2-USA400\_BA000033.2[1266574:1268670]

Position: 031-contig\_247: 40046 ... 42143; Length: 2097 bp

Sequence:

ATGTCTCAAGAAAAGAAAGTTTTTAAAACCTGAATGGGCAGGAAGATCTTTAACGATTGAA  
ACAGGGCAATTAGCTAAACAAGCAAATGGCGCTGTATTGGTTCGTTATGGAGATACAGTC  
GTGTTATCGACGGCAACTGCATCAAAGAACCCTCGTGATGGAGATTTCTTCCCATTAAACA  
GTGAACATATGAAGAAAAAATGTACGCTGCGGGTAAAATTCCTGGTGGATTTAAAAAGAG  
AGAAGGACGTCCTGGTGACGATGCAACATTAACCTGCGCGATTAATTGATAGACCAATTAG  
ACCTTTATTCCCTAAAGGATATAAGCATGATGTTCAAATTATGAACATGGTATTAAGTGC



AGATCCTGATTGTTCCACCACAAATGGCTGCAATGATTGGTTCATCTATGGCGCTTAGTGTG  
TCGGATATTCCATTCCAAGGGCCAATCGCCGGTGTAATGTGGGTATATTGACGGTAAA  
TATATCATTAACCCAACAGTAGAAGAAAAAGAAGTTTCTCGCTTAGACCTTGAAGTAGCT  
GGTCATAAAGATGCAGTAAACATGGTAGAGGCAGGCGCTAGTGAGATTACTGAACAAGA  
AATGTTAGAGGCGATCTTCTTTGGTTCATGAAGAGATTCAACGTTTATGTTGATTTCCAACAA  
CAAATCGTCGACCACATTCAACCTGTAAACAAGAATTTATTCCAGCAGAGCGTGATGAA  
GCGCTAGTTGAACGTGTAATAATCTTTAACCGAAGAAAAAGGACTTAAAGAAACAGTTTTA  
ACATTTGATAAACAACAACGAGATGAAAATCTTGATAACTTAAAAGAAGAAATCGTCAA  
TGAATTTATCGATGAAGAAGATCCAGAGAATGAATTACTTATTAAAGAAGTTTATGCAAT  
TTTAAATGAATTAGTGAAAGAAGAAGTTAGACGTTTAATTGCAGATGAAAAAATTAGACC  
AGACGGCCGTAAACCTGATGAAATCCGTCCATTAGATTCTGAAGTTGGTATTTACCTAG  
AACGCATGGTTCAGGTCTATTTACACGTGGTCAGACTCAAGCACTTTCAGTTTTAACATTA  
GGTGCTTTAGGCGATTATCAATTAATTGATGGTTTAGGACCTGAAGAAGAAAAAAGATTC  
ATGCATCATTACAACCTCCCGAATTTTCAGTAGGTGAAACTGGTCCAGTACGTGCGCCA  
GGTCGTCGTGAAATTGGACATGGTGCCTTAGGTGAAAGAGCATTAAAAATATATTATCCT  
GATACTGCTGATTTCCCATATACAATTCGTATTGTAAGTGAGGTACTTGAATCAAATGGTT  
CATCATCTCAAGCGTCAATTTGTGGATCAACATTAGCATTAAATGGATGCGGGCGTACCGA  
TTAAAGCACCAGTTGCTGGTATTGCTATGGGCCTTGTTACACGTGAAGATAGCTATACGA  
TTTTAACTGATATCCAAGGTATGGAAGATGCATTAGGTGATATGGACTTTAAAGTCGCTG  
GTACTAAAGAAGGTATTACAGCAATCCAAATGGATATTAATAATTGACGGTTTAAACGCGTG  
AAATTATCGAAGAGGCTCTAGAACAAGCGAGACGTGGTCGTTTAGAAATAATGAATCAT  
ATGTTACAAACAATTGATCAACCACGTACTGAATTAAGTGCTTACGCGCCAAAAGTTGTA  
ACTATGACAATTAACCAGATAAGATTAGAGATGTTATCGGACCTGGTGGTAAAAAATT  
AACGAAATTATTGATGAAACAGGCGTTAAATTAGATATTGAACAAGATGGTACTATCTTT  
ATTGGTGCCGTTGATCAAGCTATGATAAATCGCGCTCGTGAAATCATTGAGGAAATTACA  
CGTGAAGCGGAAGTAGGTCAAACCTTATCAAGCCACTGTAAACGTATTGAAAAATACGGT  
GCGTTTGTAGGCCTATTCCCGGGTAAAGATGCGTTGCTTCACATTTACAAATTTCAAAAA  
ATAGAATTGAAAAAGTGGAAGATGTATTAATAATCGGTGACACAATTGAAGTTAAGATT  
ACTGAAATTGATAAACAAGGTCGAGTAAATGCTTCACACAGAGCATTAGAAGAATAA

> **rnjB**

Function: protein coding sequence; ribonuclease J2 (core genome, constant)

Best match: rnjB\_CC001\_MW2-USA400\_BA000033.2[1268906:1270579]

Position: 031-contig\_247: 42378 ... 44052; Length: 1674 bp

Sequence:

TTGAGTTTAATAAAGAAAAAGAATAAAGATATTCGCATTATACCATTAGGCGGTGTTGGC  
GAAATTGCTAAAAATATGTATATCGTTGAAGTAGACGATGAAATGTTTATGTTAGATGCT  
GGACTTATGTTTCCAGAAGACGAAATGCTAGGTATTGATATTGTTATAACCAGACATTTTAT  
ACGTACTIONGAAAATAAAGATAAATTGAAGGGTATATTCCTTACACACGGACATGAGCAGC  
CGATTGGTGCAGTGAGTTATGTTTTAGAACAATTAGATGCACCAGTATATGGATCTAAAT  
TGACAATAGCGTTAATTAAGAAAAATATGAAAGCCCGTAATATTGATAAAAAAGTTCGCT  
ACTATACAGTTAATAATGATTCAATTATGAGATTCAAAAACGTGAATATTAGTTTCTTTAA  
TACGACACACAGTATTCCTGATAGTTTAGGTGTTTGTATTACACTTCATATGGTGCCATT  
GTGTATACAGGTGAATTTAAGTTTGACCAAAGTTTACATGGACATTATGCACCAGATATT  
AAACGTATGGCAGAGATTGGTGAAGAAGGCGTATTTGTCTTAATCAGTGATTCTACTGAG  
GCAGAGAAACCTGGATATAATACTCCGGAATAATGTGATTGAACATCATATGTATGATGCT  
TTTGCAAAAGTGCGAGGTCGCTTGATAGTTTCATGTTATGCTTCGAACTTTATACGTATTC  
AGCAAGTTTTAAATATTGCTAGCAAGCTAAATCGTAAAGTGTCATTTTTAGGAAGATCAC  
TTGAAAGTTCATTTAATATTGCTCGTAAATGGGGTATTTTCGACATTCCTAAAGATTTGCT  
AATTCCTATAACAGAAGTTGATAATTATCCTAAAAATGAAGTGATAATTATAGCTACTGG  
TATGCAAGGAGAACCTGTAGAAGCCTTAAGTCAAATGGCGCAACATAAGCATAAAATTA  
TGAATATCGAAGAAGGCGATTCTGTATTTTTAGCAATTACGGCTTCTGCTAATATGGAAG  
TTATCATTGCGAATACATTAATGAGCTTGTACGTGCTGGCGCACATATTATCCAAATAA  
CAAGAAGATTTCATGCTCAAGTCATGGTTGCATGGAAGAATTAATAATGATGATTAATAT  
TATGAAACCTGAATACTTTATTCCTGTACAAGGTGAATTTAAATGCAGATAGCACATGC  
GAAGCTAGCAGCTGAAGCAGGTGTTGCACCAGAAAAGATTTTCCTTGTGGAAAAAGGAG

ATGTCATTAATTACAACGGTAAAGATATGATATTAATGAAAAGGTAAATTCAGGAAATA  
TTTTAATAGATGGTATTGGTATTGGGGATGTAGGAAATATCGTGTTGAGAGACCGTCATC  
TTTTAGCAGAAGATGGTATCTTTATTGCTGTAGTAACGTTAGATCCTAAAAATAGACGTAT  
AGCTGCGGGACCTGAAATTCAATCTCGTGGGTTTGTATATGTACGTGAAAGTGAAGACTT  
ATTACGTGAAGCAGAAGAGAAAGTACGTGAAATAGTAGAGGCTGGTTTACAAGAAAAAC  
GCATAGAATGGTCTGAAATTAAGCAAAATATGCGTGATCAAATTAGTAAACTATTATTCG  
AAAGTACAAAACGTCGTCCTATGATTATTCCAGTAATTTCTGAAATTTAA

> **ftsK**

Function: protein coding sequence; cell division protein K (core genome, variable)

Best match: ftsK\_CC001\_MW2-USA400\_BA000033.2[1270962:1273205]

Position: 031-contig\_247: 44433 ... 46677; Length: 2244 bp

Sequence:

ATGGTGTGGGTGTTTTCCAATTAGGAATAATAGGTTCGTCTAATTGACAGCTTCTTTAATT  
ATTTATTTGGGTACAGTAGATATTTAACATATATTTTAGTACTCTTAGCAACTGGTTTTATT  
ACATACTCTAAACGTATTCCTAAAACCTAGACGAACGGCTGGTTCGATTGTATTGCAAATT  
GCATTGCTATTTGTATCACAGTTAGTTTTTCATTTAATAGTGGTATCAAAGCTGAAAGAG  
AACCTGTACTTTCTTATGTGTATCAGTCATACCAACACAGTCATTTCCCAAATTTTGGTGG  
CGGTGTATTAGGCTTTTTATTTATTAGAGTTAAGCGTACCTTTAATTTTCATTATTTGGTGTAT  
GTATTACTATTTTATTATTATGCTCAAGTGTATTTTATTAACAAACCATCAACATCGT  
GAAGTTGCAAAAAGTTGCACTGGAAAATATAAAAAGCTTGGTTTGGTTCATTTAATGAAAA  
ATGTCGGAAAGAAACCAAGAAAAACAATTGAAGCGTGAAGAAAAAGCAAGACTTAAAG  
AAGAACAAAAGGCACGTCAAATGAACAGCCACAAATAAAAAGATGTGAGTGATTTTACG  
GAAGTGCCTCAAGAAAGAGATATTCCAATTTATGGGCATACTGAAAATGAAAGTAAAAG  
CCAGAGTCAACCAAGTCGAAAAAACGAGTGTTTGATGCAGAGAATAGTTTCGAATAACA  
TCGTAAATCATCATCAAGCAGATCAGCAAGAACAATTAACAGAACAACCTCATAACAGT  
GTTGAAAGTGAAAACACTATTGAAGAAGCTGGTGAAGTTACGAATGTATCGTATGTTGTT  
CCACCGTTAACTTTACTTAATCAACCTGCAAAACAAAAAGCAACATCTAAAGCTGAAGTG  
CAACGTAAAGGACAAGTACTAGAGAATACATTAAGATTTTGGGGTAAATGCAAAAAGT  
GACACAAATTAAGATTGGTCTGTAGTAACCTCAATATGAAATTCACCAGCTCAAGGGGT  
TAAAGTGAGTAAAATTGTAACTTGCATAATGATATTGCATTAGCTTTAGCAGCAAAAAGA  
TGTTAGAATCGAAGCGCCAATACCTGGTTCGTTCTGCAGTAGGTATTGAAGTGCCAAATGA  
GAAAATTTCATTAGTTTCACTAAAAGAAGTTTTAGATGAAAATTCCTCGTCTAATAATAA  
ACTAGAAGTTGGATTAGGAAGAGATATATCAGGTGATCCAATTACTGTTCCACTAAATGA  
AATGCCACACTTATTGGTGGCAGGATCGACGGGTAGTGGTAAATCTGTTTGTATAAATGG  
TATTATTACAAGTATTTTATTAATGCTAAGCCGCATGAAGTTAACTTATGTTAATCGAT  
CCGAAAATGGTTGAACTAAATGTTTATAACGGAATTCACACTTATTAATCCGGTTGTTA  
CAAATCCTCATAAAGCTGCTCAAGCTTTAGAAAAAATTGTAGCTGAGATGGAAAGACGTT  
ATGATTTATTCCAACATTCATCAACTAGAAACATTAAGGTTATAACGAATTAATCCGTA  
AGCAAAATCAAGAATTAGATGAGAAGCAACCAGAATTACCTTATATCGTTGTTATTGTAG  
ATGAGCTTGCAGATTTAATGATGGTAGCTGGTAAAGAAGTTGAAAATGCGATTCAACGTA  
TTACACAAATGGCACGTGCAGCAGGTATACATTTAATTGTAGCGACACAAAGACCTTCTG  
TGGATGTAATTACAGGTATCATTAAAAATAATATCCATCTAGAATAGCTTTTGCTGTGAG  
TTCTCAAACAGATTCAAGAACTATTATTGGTACTGGCGGCGCAGAAAAGTTACTTGGTAA  
AGGTGACATGTTATACGTTGGAAATGGTGACTCATCACAAACACGTATTCAAGGGGCGTT  
TTAAGTGACCAAGAGGTGCAAGATGTTGTAATTTATGTAGTAGAACAACAACAGGCAA  
ATTATGTAAGAAATGGAACCAGATGCACCAGTGGATAAATCGGAAATGAAAAGTGAA  
GATGCTTTATATGATGAAGCGTATTTGTTTGTGTTGAACAACAAAAGGCAAGTACATCA  
TTGTTACAACGCCAATTTAGAATTGGTTATAATAGAGCATCTAGGTTGATGGATGATTTA  
GAACGCAATCAGGTAATCGGTCCACAAAAGGAAGCAAGCCTAGACAAGTTTTAATAGA  
TCTTAATAATGACGAGGTGTAA

> **pgsA**

Function: protein coding sequence; CDP-diacylglycerol--glycerol-3-phosphate 3-  
phosphatidyltransferase (core genome, constant)

Best match: pgsA\_CC001\_MW2-USA400\_BA000033.2[1278586:1279164]

Position: 031-contig\_247: 52057 ... 52636; Length: 579 bp

Sequence:

```
ATGAATATTCCGAACCAGATTACGGTTTTTGTAGAGTAGTGTTAATACCAGTTTTTATATTGT
TTGCGTTAGTTGATTTTGGATTTGGCAATGTGTCATTTCTAGGAGGATATGAAATAAGGAT
TGAGTTATTAATCAGTGGTTTTATTTTTATATTGGCTTCCCTTAGCGATTTTGTGATGGTT
ATTTAGCTAGAAAATGGAATTTAGTTACAAATATGGGGAAATTTTTGGATCCATTAGCGG
ATAAATTATTAGTTGCAAGTGCTTTAATTGTACTTGTGCAACTAGGACTAACAAATTCTGT
AGTAGCAATCATTATTATTGCCAGAGAATTTGCCGTAACCTGGTTTACGTTTACTACAAATT
GAACAAGGATTCGTAAGTGCAGCTGGTCAATTAGGTAAAATTTAAAACAGCAGTTACTATG
GTAGCAATTACTTGGTTGTTATTAGGTGATCCATTGGCAACATTGATTGGTTTGTATTAG
GACAAATTTTATTATACATTGGCGTTATTTTTACTATCTTATCTGGTATTGAATACTTTTAT
AAAGGTAGAGATGTTTTTAAACAAAATAA
```

### > **cinA**

Function: protein coding sequence; competence-damage inducible protein (core genome, constant)

Best match: cinA\_CC001\_MW2-USA400\_BA000033.2[1279391:1280542]

Position: 031-contig\_247: 52860 ... 54012; Length: 1152 bp

Sequence:

```
ATGTCAATTGCCATTATTGCTGTAGGCTCAGAACTATTGCTAGGTCAAATCGCTAATACCA
ACGGACAATTTCTATCTAAAGTATTTAATGAAATTGGACAAAATGTATTAGAACATAAAG
TTATTGGAGATAATAAAAAACGTTTAGAATCAAGTGTACGTCATGCGCTAGAAAAATATG
ATACTGTTATTTTAAACAGGTGGCTTAGGTCCTACGAAAGATGACTTAACGAAGCATAACAG
TGGCCCAGATTGTTGGTAAAGATTTAGTTATTGATGAGCCTTCTTTAAAATATATTGAAAG
CTATTTTGAGGAACAAGGACAAGAAATGACACCTAATAATAACAACAGGCTTTAGTAA
TTGAAGGTTCAACTGTATTAACAAATCATCATGGCATGGCTCCAGGAATGATGGTGAATT
TTGAAAACAAACAAATTATTTTATTACCAGGTCCACCGAAAGAAATGCAACCAATGGTGA
AAAATGAATTGTTGTCACATTTTATAAACCATAATCGAATTATACATTCTGAACTATTAAG
ATTTGCGGGAATAGGTGAATCTAAAGTAGAAACAATTAATAGATCTTATCGATAAACA
GACTAATCCTACGATTGCGCCTTTGGCGGGAAGTCATGAAGTATATATTAGATTGACTGC
AAATGCCGACTCAAAGAACAAGCACAAATCATTGATTCAACCTGTTAAACAAGAAATTCT
TGATCGTATTGGAGAATATTATTATGGTTCAGATGACACATTAATTGAGCAAGCTGTAAT
AAAGAAAATTCATGAACCTTTTGTAAATATATGATGGTATTACTAATGGTGCTTTATATCAT
CGATTGAAAGAAGTGGATTTAAACGATGTTCTAAAGGGTATGATTAATCACAATGAAAAC
TTTGTTGATATTAATAAACCTATTGAGCAGCAATTTAAAGATGCAGTGCAATTTGTTAAT
AAATTGTTAATGTGTCATCAGCAATTATTCTATTAGAGTATGATGGTGTAGTCCATATAG
GCTATGATAATAACTTAGAATTTAAAACCTGAGCAATTTAAAATGTCTAAATCTAGAAATT
TATTAAGAACAGAAGTCAAATTTATGCGCTCATAAGATTATTAATTGGCTTAGAACAA
CAAATTA
```

### > **recA**

Function: protein coding sequence; recombinase A (core genome, constant)

Best match: recA\_CC007\_TCH959-USA300\_AASB02000234.1[54337:55380] (completely identical)

Position: 031-contig\_247: 54176 ... 55220; Length: 1044 bp

Sequence:

```
TTGATAACGATCGTCAAAAAGCTTTAGATACAGTAATTTAAAATATGGAGAAATCTTTC
GGTAAAGGTGCCGTAATGAAGTTGGGTGACAATATAGGTCCGCCGAGTTTCAACTACATCA
ACTGGTTCAGTTACATTAGATAAATGCGCTAGGTGTAGGTGGCTATCCTAAAGGACGAATT
ATTGAAATTTATGGTCCTGAAAGTTCTGGTAAGACAACAGTAGCGCTTCACGCTATTGCT
GAAGTACAAAGTAATGGCGGGGTGGCAGCATTTATCGATGCTGAACATGCTTTAGATCCA
GAATATGCTCAAGCATTAGGCGTAGATATCGATAATTTATATTTATCGCAACCGGATCAT
GGTGAACAAGGTCTTGAAATCGCCGAAGCATTGTTAGAAAGTGGTGCAGTTGATATTGTA
GTTGTAGACTCAGTTGCTGCTTTAACACCTAAAGCTGAAATTGAAGGAGAAATGGGAGAC
ACTCACGTTGGTTTACAAGCTCGTTTAAATGTCACAAGCGTTACGTAAACTTTACGGTGCTA
TTTCTAAATCAAATACAACCTGCTATTTTCATCAACCAAATTCGTGAAAAGTTGGTGTAT
```

GTTCGGTAATCCAGAGACTACACCAGGTGGACGTGCATTAAAATTCTATAGTTCAGTAAG  
ACTAGAAGTACGCCGTGCAGAACAGCTTAAACAAGGACAAGAAATTGTAGGTAATAGAA  
CTAAAATTAAGTCGTTAAAAATAAAGTGGCACCACCATTTAGAGTAGCTGAAGTTGATA  
TTATGTATGGACAAGGTATTTCTAAAGAGGGTGAACCTATTGATTTAGGTGTTGAAAACG  
ACATCGTTGATAAATCAGGAGCATGGTATTCTTACAATGGCGAACGAATGGGTCAAGGTA  
AGGAAAATGTTAAAATGTACTTGAAAGAAAATCCACAAATTAAGAAGAAATTGATCGT  
AAATTGAGAGAAAATTAGGTATATCTGATGGTGTGTTGAAGAAACAGAAGATGCACC  
AAAGTCATTATTTGACGAAGAATAG

> **rny**

Function: protein coding sequence; ribonuclease Y (core genome, constant)

Best match: rny\_CC001\_MW2-USA400\_BA000033.2[1282104:1283663]

Position: 031-contig\_247: 55573 ... 57133; Length: 1560 bp

Sequence:

GTGAATTTATTAAGCCTCCTACTCATTGCTGGGGATCATTCTAGGAGTTGTTGGAGGGT  
ATGTTGTTGCCGAAATTTGTTGCTTCAAAAGCAATCACAAGCTAGACAAACTGCCGAAG  
ATATTGTAAATCAAGCACATAAAGAAGCTGACAATATCAAAAAGAGAAATTACTTGAG  
GCAAAGAAGAAAACCAAATCCTAAGAGAACAACCTGAAGCAGAACTACGAGAAAGAC  
GTAGCGAACTTCAAAGACAAGAAACCCGACTTCTTCAAAAAGAAGAAAACCTTAGAGCGC  
AAATCTGATCTATTAGATAAAAAAGATGAGATTTTAGAGCAAAAAGAATCAAAAATTGA  
AGAAAACAACAACAAGTAGATGCAAAAGAGAGTAGTGTTCAAACGTTAATAATGAAGC  
ATGAACAAGAATTAGAACGCATCTCCGGTCTCACTCAAGAAGAAGCTATTAATGAGCAA  
CTTCAAAGAGTAGAGGAAGAAGTGTCAAGATATTGCAGTACTTGTTAAAGAAAAGA  
AAAAGAAGCTAAAGAAAAAGTTGATAAAACAGCAAAAGAATTATTAGCTACAGCAGTAC  
AAAGATTAGCAGCAGATCACACAAGTGAATCAACGGTATCAGTAGTTAACTTACCTAATG  
ATGAGATGAAAGGTCGAATCATTGGACGAGAAGGACGAAACATCCGCACACTTGAACCT  
TTAACTGGCATTGATTTAATTATTGATGACACACCAGAAGCGGTTATATTATCTGGTTTTG  
ATCCAATAAGAAGAGAAATTGCTAGAACAGCACTTGTTAACTTAGTATCTGATGGACGTA  
TTCATCCAGGTAGAATTGAAGATATGGTTCGAAAAGCTAGAAAAGAAGTAGAGGATATT  
ATTAGAGAAGCAGGTGAACAAGCTACATTTGAAGTGAACGCACATAATATGCATCCTGA  
CTTAGTAAAAATTGTAGGGCGTTTAACTATCGTACGAGTTACGGTCAAATGTACTTAA  
ACATTCAATTGAAGTTGCGCATCTTGCTAGTATGTTAGCTGCTGAGCTAGGCGAAGATGA  
GACATTAGCGAAACGAGCTGGACTTTTACATGATGTTGGTAAAGCAATTGATCATGAAGT  
AGAAGGTAGTCATGTTGAAATCGGTGTAGAATTAGCGAAAAAATATGGTGAAAATGAAA  
CGGTTATTAATGCAATCCATTCTCATCATGGTGTGTTGAACCTACATCTATTATATCTAT  
CCTTGTTGCTGCTGCAGATGCATTGTCTGCGGCTCGTCCAGGTGCAAGAAAAGAAACATT  
AGAGAATTATATTCGTCGATTAGAACGTTTAGAAAACGTTATCAGAAAGTTATGATGGTGT  
AGAAAAGCATTGCGATTCAGGCAGGTAGAGAAATCCGAGTGATTGTATCTCCTGAAG  
AAATTGATGATTTAAAATCTTATCGATTGGCTAGAGATATTAATAATCAGATTGAAGATG  
AATTACAATATCCTGGTCATATCAAGGTGACAGTTGTTTCGAGAGACTAGAGCAGTAGAAT  
ATGCGAAATAA

> **porA**

Function: protein coding sequence; pyruvate ferredoxin oxidoreductase alpha chain (core genome, constant)

Best match: porA\_CC005\_Mu50-omega\_BABM01000001.1[1362657:1364417]

Position: 031-contig\_247: 58755 ... 60516; Length: 1761 bp

Sequence:

ATGAAACCACAATTATCGTGGAAAGTTGGCGGTCAACAAGGCGAAGGTATTGAATCAAC  
TGGGGAAATCTTCGCTACGGCTATGAATAGAAAAGGATATTATTTATATGGATATAGACA  
TTTTTCAAGTCGTATCAAAGGTGGACATACGAATAATAAAATTAGAGTTTCTACGACGCC  
TGTTTCATGCAATTAGTGATGATTTAGATATTTTGATTGCATTTGACCAAGAAACAATTGAT  
GTAAACCATCATGAAATGAGAGAAGACAGTACTATTTTAGCTGATGCCAAGGCTAAACCT  
GTGAAACCAGAAGGATGTCATGCACAGCTTATTGAATTACCTTTTACAGCAACCGCTAAA  
GAATTAGGTACAGCATTAAATGAAAACATGGTTGCAATAGGTGCTACTAGCGCATTGATG

AATTTGAATACAAATACATTTGAAGAACTTATTACTAATATGTTTTCTAAAAAAGGTGAC  
AAGGTAGTTGAAGTCAATATCCAAGCATTAACGAAGGTTATCAATTAATGCAATCCCGC  
TTACCTGAAATCGACGGGACTTTGAATTAGAGTCAACAGATGCACTACCACATCTATAT  
ATGATTGGTAACGATGCCATTGGATTAGGTGCAATTGCTGCAGGTTACAATTTATGGCG  
GCATATCCTATTACACCTGCGTCTGAAGTTATGGAATATATGATTGCCAATATATCTAAAG  
TAAACGGAGCGGTTATTCAAACAGAAGATGAAATTGCTGCTGTAACCTATGGCTATTGGTG  
CAAATTATGGTGGAGTCAGAGCGTTTACGGCTAGTGCTGGTCCAGGTTTATCTTTAATGAT  
GGAAGCAATTGGATTATCTGGTATGACTGAAACGCCATTAGTCATTATTAATACTCAACG  
AGGTGGACCTTCTACTGGATTACCTACGAAACAAGAACAGTCAGATTTAATGCAAATGAT  
TTATGGTACACATGGTGATATTCCAAAAATAGTTGTAGCACCAACTGATGCAGAAGATGC  
ATTTTATTTAACTATGGAAGCCTTTAATTTAGCAGAACAATATCAATGCCCTGTTATAGTT  
TTAAGTGATTTGCAATTATCTTTAGGTAAACAACTGTTGAAAAATTAGATTATAATCGC  
ATTGAAATTAACGTGGTGAATCATTCAATCTGATATTGAACGTGAAGAAGATGATAAA  
GGTTATTTCAAGCGTTATGCGTTAACATCCAATGGTGTTCCTAGACCTATCCCCGGTG  
TTAAAGGAGGTATTCATCATATAACTGGTGTGGAACACAATGAAGAAGGTAACCTAGT  
GAATCTGCGTCAAATAGACAACAACAATGGAAAAACGAATGCGTAAAATTGAGCAGTT  
ACTAATTGAATCGCCAGTAGAAGCTAACTTACAACATGAGGATGCAGATATTCTTTATAT  
CGGTTTTATTTCTACAAAAGGTGCAATTCAAGAAGGTAGTAACCGTTTGAATCAACAAGG  
CATAAAAGTTAACTACTATACAAATTAGACAATTGCATCCATTCCCAACAAGCGTTATTCA  
AGATGCAGTTAATAAAGCGAAGAAAGTCGTTGTAGTGGAGCACAATTATCAAGGACAAT  
TGGCTAGTATTATAAAAATGAATGTCAATATTCATGATAAGATTGAAAATTATACAAAGT  
ATGATGGGACACCTTTCCTACCACATGAAATCGAAGAAAAAGGCAAAATAATTGCTACTG  
AAATAAAGGAGATGGTATAG

### > **porB**

Function: protein coding sequence; 2-oxoglutarate ferredoxin oxidoreductase subunit beta (core genome, constant)

Best match: porB\_CC705\_RF122-cow\_AJ938182.1[1252184:1253050]

Position: 031-contig\_247: 60516 ... 61383; Length: 867 bp

Sequence:

ATGGCGACATTTAAAGATTTTAGAAATAATGTTAAGCCTAACTGGTGCCCTGGATGTGGC  
GATTTCTCAGTACAAGCTGCAATTCAAAAAGCAGCCGCAAATATAGGGTTAGAACCCTGAA  
GAAGTAGCTATCATCACCGGTATAGGATGTTCTGGCCGTCTTTCAGGATATATTAATTCTT  
ATGGCGTTCATTCTATTACGGACGTGCATTACCTTTAGCTCAAGGTGTA AAAAATGGCGA  
ATAAAGATTTAACTGTTATTGCATCTGGAGGAGATGGTGATGGTTATGCTATAGGTATGG  
GGCATACAATCCATGCTTTAAGAAGAAATATGAACATGACGTATATAGTCATGGATAATC  
AAATTTATGGTTTGACAAAGGGACAAACATCGCCGTCATCAGCAGTAGGATTTGTTACTA  
AAACAACGCCAAAAGGTAATATAGAAAAAAATGTTGCGCCTTTAGAATTAGCATTATCAT  
CTGGTGCCACATTTGTAGCCCAAGGTTTTTCAAGTGATATTAAAGGATTAACAAA ACTAA  
TTGAAGATGCAATTAATCATGATGGATTTTCATTCGTTAATGTCTTTTCACCATGTGTGAC  
TTATAATAAAATTAACACATACGATTGGTTTAAAGAACATTTAACAAGTGTTGATGACAT  
TGAAAATTATGATTCTACAGATAAACAATTAGCGACTAGA ACTGTTATTGAACATGAATC  
TTAGTAACTGGTATTGTTTATCAAGATAAAGAAACACCATCATATGAATCTCAAATTA  
AGAGTTAGATGATACACCACTTGCTAAAAGAGATATCAA AATTACTGAAGACACGTTCAA  
TGCATTA ACTGAACAATTTATTTAA

### > **miaB**

Function: protein coding sequence; (dimethylallyl)adenosine tRNA methylthiotransferase (core genome, constant)

Best match: miaB\_CC001\_MW2-USA400\_BA000033.2[1288434:1289978]

Position: 031-contig\_247: 61903 ... 63448; Length: 1545 bp

Sequence:

GTGAACGAAGAACAAGAAAAGCAAGTTCTGTGGATGTTTTAGCTGAGAGAGATAAGAA  
AGCAGAAAAAGATTATAGTAAATATTTTGAACATGTTTATCAACCGCCTAATTTAAAAGA  
AGCGAAAAAAGAGGTAACAAGAAGTTCGTTATAATAGAGATTTCAAATTGATGAAA

AATATCGCGGTATGGGGAACGAGCGTACATTTTTAATTA AAAACATATGGATGTCAAATGA  
ATGCACATGACACTGAGGTCATTGCTGGTATACTTAAAGCATTAGGCTATCAAGCAACGA  
CTGATATTAACACTGCAGATGTTATTTTTAATTAATACATGTGCGATTAGAGAAAATGCCG  
AGAACAAAGTGTTTAGTGAAATAGGTAATTTGAAGCATTGAAAAAAGAACGACCTGAT  
ATTTTTAATCGGTGTTTGTGGTTGTATGTCACAAGAAGAGTCAGTAGTGAATAAAAATTTA  
AAATCGTATCAAAATGTAGATATGATATTTGGTACACATAATATTCATCATTACCAGAA  
ATTTTAGAAGAAGCATACTTATCTAAAGCAATGGTTGTTGAAGTATGGTCTAAAGAAGGA  
GACGTTATTGAAAATCTTCCAAAAGTCCGTGAAGGCAACATTAAAGCATGGGTCAATATT  
ATGTATGGTTGTGATAAGTTTTGTACATATTGTATTGTTCCATTTACAAGAGGTAAAGAAC  
GAAGCCGTAGACCTGAAGACATTATAGATGAAGTACGTGAACCTTGCTCGTGAAGGTTACA  
AAGAAATAACGCTTTTAGGTCAAAATGTAAATCTTATGGTAAAGATTTACAGGATATAG  
AATATGACTTAGGAGATCTTTTACAAGCAATTTCTAAAATAGCGATTCCAAGAGTTCGTTT  
CACAACAAGTCATCCTTGGGACTTTACAGATCACATGATTGATGTTATTTACAGAGGGTGG  
TAATATCGTTCGCGATATCCACTTGCCAGTTCAATCTGGAAATAATGCAGTATTA AAAAT  
AATGGGTAGAAAATATACACGAGAAAGTTATTTGGATTTAGTAAAACGAATCAAAGATA  
GAATTCCTAATGTAGCATTAACTACAGATATTATTGTAGGGTATCCAAATGAATCAGAGG  
ACAATTTGAAGAACTTTAACTCTGTATGATGAAGTTGGTTTTGAACATGCATATACGT  
ACTTGTATTCACAACGTGATGGTACGCCTGCTGCTAAAATGAAAGATAATGTACCTTTAG  
ATGTCAAAAAGGAACGATTGCAACGTTTGAATAAAAAAGTTGGTCATTATTCACAAATAG  
CTATGAGTAAGTACGAAGGACAACTGTAACAGTACTTTGTGAAGGTAGTAGTAAAAAA  
GATGATCAGGTTCTTGCTGGCTACACTGATAAAAATAAGCTAGTTAATTTCAAAGCGCCT  
AAAGAAATGATTGGTAAACTAGTGGAAGTACGAATAGATGAAGCTAAACAGTATTCATT  
AAATGGCAGTTTTGTAAAGGAAGTAGAGCCGAAATGGTGATTCAATAA

> **thiW**

Function: protein coding sequence; ThiW family protein (core genome, constant)

Best match: thiW\_CC001-ST772\_118\_AJGE01000002.1[99053:99544:r] (completely identical)

Position: 031-contig\_247: 63840 ... 64332; Length: 492 bp

Sequence:

ATGAAATCAAGAAAACCTGGCTATAACTGCACTTTTAATTGCAATAAATGTTGTATTAAGC  
AGTATTATCATCATTCCTCTAGGACCAGTTAAGGCAGCACCAGTACAGCATTGTTGTAAT  
GTATTAAGTGCGGTGATAGTAGGTCCTTGGTATGGATTAGCTCAAGCGCTTATATCATCA  
ATTTAAGAGTTCTTTTTGGTACTGGTACAGCTTTTGCATTTCCGGGTAGTATGATTGGAG  
TTTTATTGGCTAGTATGTTTTACATATATCGTAAACATATATTTATGGCCGCGGTCCGGTGA  
AGTACTTGGAACCTGGTGTATCGGAAGTTAATTTGTATACCATTAGCATATTTCTTGGG  
CTTCAAGACTTCTTCATTA AACCGTTAATGATTACGTT CATAGTCTCAAGTGCTATCGGAT  
CTATTATAAGTTATTTCTTATTAATTA ACTCTAAAAAACGTGGTATTCTTCAAAGGTTTAT  
AAAATAA

> **mutS**

Function: protein coding sequence; DNA mismatch repair protein (core genome, constant)

Best match: mutS\_CC001\_MW2-USA400\_BA000033.2[1291165:1293783]

Position: 031-contig\_247: 64634 ... 67253; Length: 2619 bp

Sequence:

ATGTCTAATGTTACACCAATGATGCAGCAATATTTAAAAATAAAATCAGAATACCAAGAT  
TGCTTATTATTTTTAGACTAGGTGATTTCTATGAAATGTTTTATGAAGATGCCAAGGAGG  
CATCACGTGTACTTGAAATTACTTTAACTAAAAGAGATGCTAAAAAAGAAAATCCAATTC  
CGATGTGTGGTGTCCGTATCATTCTGCAGATAGTTATATAGATACACTTGTTAATAATGG  
ATATAAAGTAGCTATTTGTGAACAGATGGAAGATCCGAAACAAACGAAAGGTATGGTTA  
GACGTGAGGTAGTAAGAATTGTGACTCCAGGA ACTGTGATGGAGCAAGGTGGTGTAGAT  
GATAAACAAAATAACTATATTTTAAAGTTTTGTTATGAATCAACCTGAAATTGCGCTTAGTT  
ACTGTGATGTTTCTACTGGCGAATTAAGGTTACACATTTTAAATGATGAAGCGACTTTATT  
AAATGAAATTACGACGATAAACCTAACGAAGTTGTTATCAATGACAATATTTCCGATAA  
TTTAAAAAGACAAATTAATATGGTGACAGAAACAATAACAGTCAGGGAAACGTTATCAT  
CAGAAATCTATAGTGTGAATCAA ACTGAACATAAATTAATGTATCAAGCGACACAATTAT

TGCTAGATTATATTCATCATACACAAAAACGTGATTTATCGCATATCGAGGATGTTGTTCA  
ATATGCAGCTATAGATTATATGAAAATGGATTTTTATGCTAAGAGAAACCTTGAGTTAAC  
GGAAAGCATTTCGATTAATAAATCAAAAAAAGGAACGCTACTTTGGCTAATGGACGAAACGA  
AAACACCAATGGGAGCACGCCGCTTAAACAATGGATAGATAGACCACTAATAAGTAAA  
GAACAAATTGAAGCACGATTAGATATCGTTGATGAATTTAGTGCTCATTTTCATAGAAAAGA  
GACACCTTAAGAACATATCTTAATCAAGTGTATGATATTGAACGTCTTGTGGGCGTGTTA  
GTTACGGAAATGTTAATGCGAGAGATTTAATTCAACTTAAACATTCCATTTCTGAAATAC  
CGAATATTAAGCATTACTAAATTCTATGAATCAGAATACTCTTGTACAAGTTAATCAAC  
TAGAACCCCTTGATGATTTACTTGATATATTAGAACAGAGTTTAGTAGAAGAACCACCAA  
TTTCAGTTAAAGATGGCGGACTATTCAAAGTTGGTTTTAATACGCAATTAGATGAATATCT  
TGAAGCTTCAAAAAACGGAAAAACATGGTTAGCAGAATTACAAGCCAAAGAAAGACAAC  
GTACAGGAATAAAATCATTGAAAATAAGCTTTAATAAAGTGTGGTTATTTTATAGAAA  
TAACACGTGCCAACTTGCAAAATTTTGAACCAAGTGAATTTGGTTATATGAGGAAGCAA  
CGTTATCGAATGCTGAACGTTTTATAACTGATGAACTTAAAGAAAAAGAAGATATCATTT  
TAGGTGCGGAAGACAAAAGCCATCGAATTAGAATATCAATTATTTGTTTCAGCTACGTGAAG  
AAGTTAAAAATATACTGAACGTTTACAACAACAAGCTAAAATTATTTTCAGAGCTAGATT  
GTTTACAGAGCTTTGCAGAAATTGCTCAAAAATATAATTACACTAGGCCTTCATTTAGTG  
AAAATAAACATTAGAATTAGTGGAATCTAGGCACCCAGTAGTGGAAGAGTAATGGAT  
TATAATGACTATGTGCCTAATAATTGTCGATTAGATAATGAAACATTTATATATTTAATTA  
CAGGTCCGAATATGTCTGGTAAATCGACATATATGAGACAAGTTGCCATAATTAGTATAA  
TGGCCCAAATGGGAGCTTATGTCCCTTGTAAGAGGCAGTGTTACCTATATTTGATCAA  
TATTCCTAGAAATAGGTGCGGCAGATGATTTGGTTTCAGGTAAGAGTACGTTTATGGTAG  
AAATGCTAGAAGCACAAAAGGCATTAACCTTATGCAACAGAGGATAGTTTGATTATTTTCG  
ATGAAATTGGACGTGGTACTTCAACGTATGACGTTTTAGCTTTAGCGCAGGCAATGATAG  
AGTATGTAGCTGAAACATCGCATGCTAAAACGTTATTTTCAACACATTATCATGAATTGA  
CAACATTAGATCAAGCATTACCAAGTCTAAAAAATGTTACGTCGCTGCTAATGAATATA  
AAGGTGAACTTATATTCTTGCATAAAGTCAAAGATGGTGCAGTTGACGATAGTTATGGTA  
TTCAAGTTGCGAAATTAGCTGATTTACCTGAAAAAGTTATTAGCAGAGCACAAAGTGATCC  
TAAGCGAGTTTGAAGCGTCTGCTGGTAAAAAATCATCGATATCAAATTTAAAAATGGTCG  
AAAATGAACCTGAAATTAATCAAGAAAATTTAACTTAAGTGTGAAGAAACAACCTGAT  
ACTTTATCCCAAAAAGACTTTGAACAAGCATCATTTGATTTGTTTGAAGAAATGATCAAGAA  
AGCGAGATTGAACTACAAATTAATAAATTTGAATTTATCTAATATGACACCAATTGAGGCA  
TTGGTGAAGTTAAGTGAATTACAAAATCAATTAATAATAG

> **mutL**

Function: protein coding sequence; DNA mismatch repair protein (core genome, constant)

Best match: mutL\_CC001\_MW2-USA400\_BA000033.2[1293796:1295805]

Position: 031-contig\_247: 67265 ... 69275; Length: 2010 bp

Sequence:

ATGGGGAAAATTAAGAAGCTCCAAACCTCATTAGCAAATAAAAATCGCAGCAGGTGAAGT  
AGTTGAAAGACCGAGTTCTGTTGTGAAAGAACTGTTGGAAAATGCTATAGATGCAGGCGC  
TACAGAAATAAGCATTGAAGTAGAGGAATCTGGCGTCCAATCTATTCGCGTAGTCGATAA  
TGGAAGCGGAATTGAAGCGGAAGACTTAGGATTAGTATTTTCATAGACATGCGACTAGTA  
AATTAGATCAAGATGAAGATTTATTTTCATATTAGGACATTAGGATTCCGTGGTGAAGCAC  
TAGCCAGTATTTTCATCAGTTGCTAAAGTAACATTGAAGACTTGCACGGATAATGCTAATG  
GAAATGAAATATATGTAGAAAATGGTGAATATTAATCATAAGCCTGCAAAAAGCGAAA  
AAAGGAACAGATATACTTGTAGAATCATTATTTTATAATACACCAGCACGTTTAAAATAT  
ATTAAGTTTATACACTGAACTAGGTAATAACAGATATTGTCAACAGAATGGCAATG  
AGCCATCCGGACATTTCGAATAGCACTCATTTTCAGATGGCAAAAACAATGTTAAGTACAAAT  
GGTTCAGGACGAACTAATGAAGTATGGCAGAGATTTATGGGATGAAAGTTGCACGAGA  
TTTAGTACATATATCTGGAGATACAAGTGATTATCACATTGAAGGTTTTGTTGCAAAGCCT  
GAACATTCTAGAAGTAATAAGCACTATATTTCTATTTTTATTAATGGACGATACATTA  
ACTTTATGCTAAATAAAGCGATTTTGAAGGCTATCATACACTCTTAACAATAGGTAGGT  
TCCCGATTTGTTATATTAATATTGAAATGGATCCAATCTTAGTAGACGTAATGTTTCATCC  
AACAAAACCTAGAAGTGCCTTTATCAAAAAGAAGAGCAACTATACCAATTGATTGTGAGCA  
AAATACAAGAAGCATTTAAAGACCGTATATTAATTCCTAAAAATAACTTGGATTATGTGC

CGAAAAAAAAATAAAGTGTTACATTCATTCGAACAACAAAAATCGAATTTGAACAAAGA  
CAAAACACAGAGAATAATCAAGAGAAGACGTTTTTCATCTGAAGAAAGTAACAGTAAGCC  
ATTTATGGTAGAAAATCAAACGATGAAATAGTTATAAGAGAAGATTCATATAATCCATT  
CGTAACGAAAACGTCTGAAAGTTTAATAGCTGATGATGAATCTTCCGGTTATAATAATAC  
ACGTGAAAAAGATGAAGACTACTTCAAAAAGCAACAAGAAATTCTACAAGAAATGGATC  
AAACATTTGATTTCGAATGACGATACATCTGTGCAAAATTATGAGAATAAAGCGTCTGATG  
ATTATTATGATGTAAACGATATTAAGGAACAAAAAGTAAAGACCCTAAACGAAGAATT  
CCATATATGGAAATTGTTGGCCAAGTACATGGAACGTATATTATTGCTCAAAATGAATTT  
GGCATGTACATGATTGACCAGCATGCAGCTCAAGAAAGAATAAAAATATGAATATTTTCGA  
GATAAAATAGGTGAAGTTACCAATGAAGTACAAGATTTATTAATCCCGTTAACATTTTCAT  
TTTTCAAAAGATGAACAATTAGTCATTGATCAATATAAAAATGAGCTTCAACAAGTAGGT  
ATCATGTTAGAACATTTTGGTGGTCATGATTATATTGTAAGTAGCTATCCAGTTTGGTTCC  
CTAAAGATGAAGTAGAAGAAATTATTAAGATATGATTGAGCTAATTTTGGAAAGAGAAA  
AAAGTAGATATCAAAAAATTACGTGAAGATGTAGCAATCATGATGTCATGTAAAAAATCT  
ATTAAGCGAATCATTATTTACAAAAACATGAAATGTCTGATTTAATTGATCAATTAAGA  
GAAGCGGAAGATCCATTTACATGTCCACATGGTCGTCCAATTATCATTATTTTCAAAAT  
ACGAATTAGAAAAATTATTTAAGCGTGTGATGTAG

### > **glpP**

Function: protein coding sequence; glycerol uptake operon antiterminator regulatory protein (core genome, constant)

Best match: glpP\_CC001\_MW2-USA400\_BA000033.2[1295820:1296353] (completely identical)

Position: 031-contig\_247: 69289 ... 69823; Length: 534 bp

Sequence:

GTGAATAACAACATATTGCCTGCCATAAGAAACATTAAGATTTAGAGAAACTGATTAAA  
ACAGATTATAAAATGTGTGTGCTTCTAGATATGCATATAGGACATATAAAAAGTATTATG  
GAATTGCTGAAGCAAAATCATATAGAGTGTTTTATTTCATATAGATTTGATAAAAGGTTTA  
AGCCACGATGAATTTGCAAGTGAATTTATTATTCAGCAATACAAGCCAAAAGGTATCGTA  
TCGACTAAATCTAAAGTAATAAAAAAAGCTAAATCATTAAATACTTTAACGATTTTTAGA  
GTATTTATTATTGATAGTCAAGCATTGAAACGCAGTATAGATTTGATAAAAAAAGTTGAA  
CCTGATTTTGTGGAAGTACTTCCAGGTGTTGCGAGTAAAGCGATTCATCATATTCAGAAA  
GAAACAAACACACAAGTCATTGCAGGTGGCCTAATTAATACAATAGATGAAGTCAATGA  
AGCTGTTAAAAATGGAGCGAAATATGTAACAACACTAGTTATGATAAACTTTGGTAA

### > **glpF**

Function: protein coding sequence; glycerol uptake facilitator (core genome, constant)

Best match: glpF\_CC001\_MW2-USA400\_BA000033.2[1296828:1297646] (completely identical)

Position: 031-contig\_247: 70297 ... 71116; Length: 819 bp

Sequence:

ATGAATGTATATTTAGCAGAATTCCTAGGAACTGCAATCTTAATCCTTTTTGGTGGTGGCG  
TTTGTGCCAATGTCAATTTAAAGAGAAGTGCTGCGAATGGTGCTGATTGGATTGTCATCA  
CAGCTGGATGGGATTAGCGGTTACAATGGGTGTGTTTGCTGTCCGGTCAATTCTCAGGTG  
CACATTTAAACCCAGCGGTGTCTTTAGCTCTTGCATTAGACGGAAGTTTTGATTGGTCATT  
AGTTCCTGGTTATATTGTTGCTCAAATGTTAGGTGCAATTGTCGGAGCAACAATTGTATGG  
TTAATGTACTTGCCACATTGGAAAGCGACAGAAGAAGCTGGCGCGAAATTAGGTGTTTTTC  
TCTACAGCACCGGCTATTAAGAATTACTTTGCCAACTTTTTAAGTGAGATTATCGGAACA  
ATGGCATTAACTTTAGGTATTTTTATTTATCGGTGTAACAAAATTGCCGATGGTTTAAATC  
CTTTAATTGTCGGAGCATTAAATTGTTGCAATCGGATTAAGTTTAGGCGGTGCTACTGGTTA  
TGCAATCAACCCAGCACGTGATTTAGGTCCGAGAATTGCACATGCGATTTTACCAATAGC  
TGGTAAAGGTGGTTCAAATTGGTCATATGCAATCGTTCCTATCTTAGGACCAATTGCCGGT  
GGTTTATTAGGTGCAGTGGTATACGCTGATTTTTATAAACATACATTTAATATTGGTTGTG  
CAATTGCAATTGTTGTAGTTATTACTTTGATTTTAGGTTACATTTTAAATAAATCATCA  
AAAAAAGGTGATATCGAATCAATTTACTAA

### > **glpK**



Function: protein coding sequence; glycerol kinase (core genome, constant)

Best match: *glpK\_CC001\_MSSA476\_BX571857.1*[1326270:1327766]

Position: 031-contig\_247: 71244 ... 72741; Length: 1497 bp

Sequence:

```
ATGGAAAAATATATTTTATCTATAGACCAAGGAACAACAAGCTCAAGAGCGATTTTATTC
AATCAAAAAGGGGAAATTGCAGGGGTAGCACACCGTGAGTTTAAGCAATATTTTCCACA
ATCAGGTTGGGTTGAACATGATGCAAATGAAATTTGGACATCTGTGTTAGCTGTAATGAC
GGAAGTAATTAATGAAAATGATGTTAGAGCTGATCAAATTCAGGAATCGGTATTACAA
ACCAACGTGAAACAACGGTTGTTTGGGACAAACATACTGGCCGCCCAATTTATCACGCAA
TTGTTTGGCAATCACGTCAAACACAATCAATTTGTTTCAGAGTTAAAACAACAAGGATATG
AACAAACATTTAGAGATAAGACAGGATTACTTTTAGATCCGTATTTTGCAGGTACAAAAG
TTAAATGGATTCTAGACAATGTTGAAGGTGCACGAGAAAAAGCAGAAAATGGCGATCTA
TTATTTGGAACGATTGATACTTGGTTAGTATGGAAATTATCAGGAAAAGCTGCGCATATT
ACTGATTATTCAAATGCGAGTCGTACATTAATGTTTAATATCCATGATTTAGAATGGGAC
GATGAGTTATTAGAACTACTTACAGTACCTAAAAATATGTTGCCAGAAGTTAAAGCTTCG
AGTGAAGTATATGGTAAGACAATTGATTACCACTTCTATGGTCAAGAAGTACCAATCGCT
GGAGTAGCTGGTGATCAACAAGCAGCATTATTTGGACAAGCTTGCTTCGAACGTGGTGAC
GTGAAAAACACATATGGAACCTGGTGGCTTCATGTTAATGAATACAGGTGACAAAGCGGTT
AAATCTGAAAGTGGTTTATTAACAACAATTGCTTATGGTATTGATGGAAAAGTAAATTAT
GCGCTTGAAGGTTCCATCTTTGTTTCGGGTTTCAGCAATCCAATGGTTACGTGATGGATTAA
GAATGATTAATTCAGCACCACAATCAGAAAGTTATGCGACACGAGTTGACTCTACTGAGG
GTGTTTATGTTGTTCCAGCTTTTGTAGGTTTAGGAACACCATATTGGGATTCTGAAGCACG
TGGTGCGATTTTTCGGTTTAAACACGTGGAACCTGAAAAAGAGCACTTTATCCGTGCAACTTT
AGAATCACTATGTTACCAAACCTCGTGACGTTATGGAAGCAATGTCAAAAAGACTCTGGTAT
TGATGTCCAAAGTTTACGTGTGCGATGGTGGTGCAGTTAAAAATAACTTTATTATGCAGTTC
CAAGCAGACATTGTTAATACTTCTGTTGAAAGACCTGAAATTCAAGAACTACAGCTTTA
GGTGCTGCATTTTATAGCAGGTTTAGCAGTTGGATTCTGGGAGAGTAAAGATGATATCGCT
AAAAACTGGAATTAGAAGAAAAATTCGATCCGAAAATGGATGAAGGCGAAAGAGAAA
AATTATATAGAGGTTGGAAAAAAGCTGTTGAAGCAACACAAGTTTTTAAAACAGAATAA
```

## > **glpD**

Function: protein coding sequence; aerobic glycerol-3-phosphate dehydrogenase (core genome, constant)

Best match: *glpD\_CC001\_MW2-USA400\_BA000033.2*[1299381:1301102]

Position: 031-contig\_247: 72850 ... 74572; Length: 1722 bp

Sequence:

```
ATGTGGGACAAGTCTCTCGTTTTTACATTTTTTAGGAGGCGTTTTGGAATGGCATTGTCTA
CTTTTAAGAGAGAACATATTA AAAAAGAATTTAAGAAATGATGAATATGATTTAGTAATTA
TTGGTGGCGGTATTACAGGTGCAGGTATTGCACTAGACGCGAGTGAAAGAGGAATGAAA
GTTGCATTAGTTGAAATGCAAGACTTTGCACAAGGAACAAGCTCAAGATCTACAAAATTA
GTCCATGGTGGTTTTCGTTACTTAAAACAATTCCAAATTTGGAGTAGTTGCCGAAACTGGT
AAAGAACGTGCGATTGTTTATGAAAATGGGCCTCATGTTACGACTCCAGAGTGGATGCTT
TTACCAATGCATAAAGGTGGAACATTTGGTAAATTCTCAACATCAATTGGTTTAGGAATG
TATGATCGTTTAGCAGGTGTTAAGAAGTCTGAACGTAAAAAATGTTATCTAAAAAAGAA
ACTTTAGCTAAAGAACCATTAGTTAAAAAAGAAGGTCTAAAAGGCGGCGGTTACTATGTT
GAATATCGTACTGACGATGCGCGTTTAACTATTGAAGTTATGAAGCGTGCTGCTGAAAAA
GGCGCAGAAATTATCAACTATACTAAATCTGAACACTTCACTTATGATAAAAATCAACAA
GTAAATGGTGTAAAGTTATAGATAAATTA ACTAATGAAAATTATACAATTAAGGCTAAA
AAAGTGGTTAATGCAGCAGGTCCATGGGTTGATGATGTTAGAAGTGGTGATTATGCACGC
AATAATAAAAAATTACGTTTAACTAAAGGTGTACATGTTGTTATTGATCAATCAAATTC
CCATTAGGTCAAGCAGTATACTTTGATACTGAAAAAGATGGAAGAATGATTTTTGCAATT
CCACGTGAAGGAAAAGCGTATGTAGGTACTACAGATACATTCTATGACAATATCAAATCT
TCACCATTA ACTACACAAGAAGACAGAGACTATTTAATCGATGCGATTAATTACATGTTT
CCTAGTGTTAATGTTACAGATGAAGATATTGAATCAACATGGGCAGGAATTAGACCATTA
ATTTACGAAGAAGGCAAAGACCCTTCTGAAATCTCTCGTAAGGATGAAATTTGGGAAGGT
AAATCAGGTTTATTA ACTATTGCAGGTGGTAAATTAACAGGCTATCGTCACATGGCTCAA
```

GACATTGTTGATTTAGTATCTAAACGCTTGAAAAAAGACTACGGTTTAAACATTTAGTCCAT  
GTAATACAAAAGGTCTGGCAATTTTCAGGTGGCGATGTAGGTGGTAGCAAGAAGTTTGTGATG  
CGTTTGTAGAGCAAAAAGTAGATGTAGCTAAAGGATTTCGGCATTGATGAAGATGTTGCAA  
GACGTTTAGCATCTAAATATGGTTCAAATGTTGATGAATTGTTCAACATTGCGCAAACAT  
CTCAATACCATGATAGCAAGTTACCATTAGAAAATTTATGTAGAACTTGTTTATAGTATTCA  
ACAAGAAATGGTATACAAACCTAACGATTTCTTAGTTCGTCGTTCTGGTAAAATGTATTTT  
AATATTAAGATGTATTAGATTATAAAGATGCTGTATCGATATTATGGTAGATATGCTT  
GATTACTCTCCAGCTCAAATTGAAGCATATACTGAAGAAGTTGAGCAAGCAATTAAAGAA  
GCGCAACATGGAAATAATCAACCAGCAGTTAAAGAATAA

### > **miaA**

Function: protein coding sequence; tRNA Delta(2)-isopentenylpyrophosphate transferase (core genome, constant)

Best match: miaA\_CC001\_MW2-USA400\_BA000033.2[1302184:1303119] (completely identical)

Position: 031-contig\_247: 75653 ... 76589; Length: 936 bp

Sequence:

ATGAATAAAAATAAGCCTTTTATTGTAGTAATTGTGGGGCCAACCTGCTTCAGGTAAAACA  
GAGCTTAGCATAGAACTCGCGAAGCGTATCAATGGTGAAATCATAAGCGGTGATTCTATG  
CAAGTTTACAAACATATGAATATTGGAAC TGCAAAGTAACACCTGAAGAAATGGATGG  
TATTCCACATCATTTAATTGATATCTTGAATCCTGATGATACATTTTCAGCATATGAATTC  
AAGCGATTAGCAGAAGATTTAATTACTGATATAACGAATAGAGGTAAAGTTCCAATCATA  
GCAGGTGGAACAGGCTTATATATTCAATCATTAAATATATAATTATGAATTAGAAGATGAA  
ACAGTTACACCTGCACAATTATCCATAGTTAAACAAAAGTTATCTGCATTAGAACATTTA  
GATAATCAGCAACTACACGATTATTTAGCTCAATTTGATGCGGTTTCTGCAGAAAATATTC  
ACCCTAACAAACCGCCAAAGAGTGTTGCGCGCTATTGAATATTATTTAAAAACAAAAAAC  
TTTTGAGTAATCGCAAGAAAGTGCAACAATTTACTGAAAATTATGATACATTATTATTAG  
GGATTGAAATGTGCGGTAACACATTATATTCAAGAATAAATAAACGTGTTGATATTATGT  
TGGATCACGGATTATTTAGAGAAGTGCAACAACCTGTTGAACAAGGCTATGAATCTTGCC  
AAAGTATGCAAGCTATTGGATATAAAGAATTAATACCTGTGATTAACGGACAAATGATTT  
ATGAAGATGCTGTCAATGATTTAAAGCAACATTCACGCCAATATGCAAAAACGACAAATG  
ACATGGTTCAAGAATAAAATGAGTGTTTATTGGTTAGATAAAGAAAATATGTCACTTCAA  
ATGATGTTAGATGAGATTACAACCCAGATTAAGTAA

### > **hfq**

Function: protein coding sequence; RNA chaperone Hfq (core genome, constant)

Best match: hfq\_CC001\_MW2-USA400\_BA000033.2[1303134:1303367] (completely identical)

Position: 031-contig\_247: 76603 ... 76837; Length: 234 bp

Sequence:

ATGATTGCAAACGAAAACATCCAAGACAAAGCACTAGAGAATTTTAAAGCAAACCAAAC  
TGAAGTAACTGTATTCTTTCTAAACGGTTTCCAATGAAAGGTGTTATTGAAGAATACGA  
CAAGTATGTGTAAGCTTAAATTCTCAAGGCAAACAACACTTGATTTACAAACATGCGAT  
CAGCACTTATACAGTAGAACTGAAGGTCAAGCATCTACTGAAAGTGAAGAATAA

### > **gpxA-L1**

Function: protein coding sequence; glutathione peroxidase locus 1 (core genome, constant)

Best match: gpxA-L1\_CC008\_NCTC8325\_CP000253.1[1239095:1239571:r]RC (completely identical)

Position: 031-contig\_247: 77058 ... 77535; Length: 477 bp

Sequence:

TTATAATAATTTTTCTATTTCTCTTTTCGATTTGAACAGGTTTTTTTTTGAGGTGCAAATCGTT  
TAACAACGTTACCTTCGCGATCCACTAAAACTTAGTGAAATTCCATTTGATTTTCTCATT  
AAAGAATCCGTGTTGTGCCGAGTCAAATATCTAAATAAAGGTAATTGATGTTCCCTTTT  
ACGTCTATTTTTGATGCATAGGGAAGGTAACACCATAGTTTAATTTACAGTTTTGAGCTG  
CTTCTTCGCCTGAACCAGGTTCTTGGCCACCAAATTGATTACAAGGGAAACCTAGAATTA  
CAAACCCTTGATCTTTGTATTTCTCGTATAATGATTGCAAACCTTCAAATTGTGAAGTAAA

GCCACATTCGCTAGCTGTATTAACAATTAGCATAACGTCACCCTTATATGCATCTAATTTG  
TAAGTAACACCTTTATTTGTTTCTACTACAAAATCATAAATTGTCTCCAT

> **ynbA**

Function: protein coding sequence; GTP-binding proteinase modulator (core genome, constant)

Best match: ynbA\_CC008\_NCTC8325\_CP000253.1[1239683:1240921] (completely identical)

Position: 031-contig\_247: 77646 ... 78885; Length: 1239 bp

Sequence:

ATGGCTCAGCAACAAATTCATGATACTAAAAATAAACTAGAAAAAGCTGTCTTAGTCCGGT  
GTACATGCTCAAGATGATAAGCAATTTAATTTTGAGTCTACAATGGAGGAATTATCATCT  
TTATCAGAGACTTGCCAACTTGAAGTGTGGGTCAAATTACTCAAACAGAGATCGTGTA  
GATCGCAAATATTATGTTGGTAAAGGTAATAATTGAAGAAATTCAAGCATTATTGAGTTC  
AAAGATATTGATGTAGTCATCACAATGATGAATTAACGACTGCACAATCCAAATCACTA  
AATGAAGCTTTAGGTGTAATAATTATTGATAGAACTCAGTTGATTCTTGAAATATTTGCAT  
TAAGAGCAAGAAGTAAAGAAGGTAATAATTGCAAGTAGAGCTAGCACAACCTTGATTATTTA  
TTACCTAGATTGCAAGGCCATGGTAAAAGCCTTTCTCGTTTAGGTGGCGGTATTGGAAC  
AGAGGCCCTGGTGAAACGAAGTTAGAGATGGATCGCAGACATATTCGAACTCGTATGAA  
TGAAATTAACATCAATTGCGGACGGTAGAAGAACATCGCGAAAGATATCGAAATAAAA  
GAAATCAAATCAGGTGTTTCAAGTAGCTTTAGTTGGTTATACAAATGCTGGTAAATCAT  
CATGGTTTAATGTTTTAGCAAATGAAGAGACGTATGAAAAAGATCAATTATTTGCAACGT  
TAGATCCTAAAACACGACAAATCAAATAAATGATGGATTAAATTAATTATTTTCAGATA  
CTGTTGGTTTTATACAGAACTACCTACGACGTTAATTGCAGCTTTTAAATCAACTTTAGA  
AGAGGCTAAAGGTGCAGATTTATTAGTACATGTCGTAGATAGTAGCCATCCTGAATACCG  
TACGCAGTATGACACAGTTAATGATTTAATCAAACAATTAGATATGAGTCATATTTCTCA  
AATAGTTATTTTTAATAAAAAGGACTTATGTGATCATGCATCAAATCGTCCAGCAAGTGA  
TTTGCCTAATGTTTTTGTCTTCTTAAAATGATGGTGATAAATTACTTGTAAAGACGTTAT  
TTATTGATGAAATCAAAGGCAATTAACCTATTATGATGAGACAATTGCGACGAATAATG  
CAGATCGATTATATTTTCTAAAACAACATACATTAGTGACTGAACTTAAATATGATGAAA  
TTGAAATGTTTATCGTATAAAAAGGATTTAAAAAATAA

> **glnR**

Function: protein coding sequence; glutamine synthetase repressor (core genome, constant)

Best match: glnR\_CC001\_MW2-USA400\_BA000033.2[1306916:1307284]

Position: 031-contig\_247: 80384 ... 80753; Length: 369 bp

Sequence:

ATGATATCGAATGATGCAATCAGACGAAATATGGCTGTCTTCTCTATGAGTGTAGTAAGT  
AAGTTAACGGATTTAACACCAAGGCAAATACGTTACTATGAAACACATGAACTCATCAAA  
CCTGAAAGAACAGAAGGTCAAAAACGTCTGTTCTCACTCAATGATTTGGAAAGATTACTA  
GAAATTAATCATTATTAGAAAAAGGATTTAATATCAAAGGGATTAAACAAATCATTTAT  
GACTCACAAGAGCATTTAACAACAGATGAACAAGAGATAAGAAAAAAGATGATTGTAGA  
TGCCACGCAAAAGCCTATTGGAGAACTTTGCCAATAAATCGTGGTGATTTATCCCGATT  
TATTAAATAA

> **glnA**

Function: protein coding sequence; glutamine synthetase/type I (core genome, variable)

Best match: glnA\_CC007\_TCH959-USA300\_AASB02000234.1[80932:82272] (completely identical)

Position: 031-contig\_247: 80771 ... 82112; Length: 1341 bp

Sequence:

ATGCCAAAACGTACTTTCACTAAAGACGACATTCGTAAATTTGCAGAAGAGGAAAATGTA  
AGATATTTAAGATTACAATTCAGTATTTTAGGAACAATTAATAAATGTTGAAGTGCCT  
GTAAGCCAATTAGAAAAAGTACTTGATAACGAAATGATGTTTGACGGTTCTTCTATCGAA  
GGTTTCGTACGTATCGAAGAATCAGATATGTACTTACATCCAGATTTAGATACTTGGGTA  
ATCTTCCCATGGACTGCTGGACAAGGTAAGTTGCACGTTTAATTTGTGATGTATATAAA  
ACAGATGGAACACCATTTGAAGGGGATCCTCGTGCAAATTAACGTTAAACGTTAATAAAGA  
AATGGAAGATTTAGGCTTCACAGACTTTAACCTAGGGCCTGAACCAGAATTCCTTCTTGTTT

AAGTTGGATGAAAAAGGGGAACCAACTTTAGAACTTAATGATGATGGTGGATATTTTCGAT  
TTAGCACCTACAGATTTAGGTGAAAAGTGTCTCGTCGTGATATTGTTTTAGAAATTAGAGGAT  
ATGGGCTTCGATATTGAAGCTAGTCACCATGAAGTTGCCCTGGTCAACATGAAATTGAC  
TTTAAATATGCAGATGCTGTTACAGCATGTGATAATATCCAAACATTTAAATTGGTTGTTA  
AAACAATCGCACGTAAACATAATTTACACGCAACATTTATGCCTAAACCATTATTCGGTG  
TGAATGGTAGCGGTATGCACCTTAAACGTTTCATTATTCAAAAGGTAAAGAAAATGCATTCT  
TTGATCCAAATACTGAAATGGGCTTAAACGGAAACTGCATATCAATTTACAGCAGGTGTGC  
TTAAAAATGCACGCGGATTTACTGCTGTATGTAACCCGTTAGTAAACTCATATAAACGTTT  
AGTACCTGGTTATGAAGCACCATGTTATATTGCATGGAGTGGTAAAACCGTTCACCATT  
AATCCGTGTACCATCTTCAAGAGGATTATCTACTCGTATCGAAGTACGTTACAGTAGATCC  
AGCTGCAAACCCATACATGGCGTTAGCTGCAATCTTAGAAGCTGGACTAGATGGTATTAA  
AAATAAATTTAAAGTTCCAGAACCAGTTAACCAAAAATATTTACGAAATGAACCGTGAAG  
AACGTGAAGCAGTAGGCATTCAAGACTTACCTTCAACACTTTATACTGCATTAAAAGCAA  
TGCGTGA AAAATGAAGTTATTA AAAAAGCTTTAGGAAATCATATCTATAATCAATTTATTA  
ATTCAAAATCAATTGAATGGGATTACTACAGAACTCAAGTATCTGAATGGGAAAGAGATC  
AGTACATGAAGCAATATTA

### > **A6U1C8**

Function: protein coding sequence; putative protein (core genome, constant)

Best match: A6U1C8\_CC001-ST772\_118\_AJGE01000002.1[80583:80780:r] (completely identical)

Position: 031-contig\_247: 82604 ... 82802; Length: 198 bp

Sequence:

ATGAATTGCTATGATGAAATATTCAATACAATCAAAAAGTTGATAGAAAACAAAGAGAT  
ATCGAGTTATCAAATTAATAAAGATACTGGGATAAGTTACGGTAATATTAATGCTATGCG  
CCGTGGAGAAAGAAGAATAGAAAATTTAAGCTTAAAGAATTCAAAAATCTTATATGAAT  
ATGCGAAAAAGGTATTATA

### > **Q2FYY4**

Function: protein coding sequence; putative protein (core genome, variable)

Best match: Q2FYY4\_CC001-ST772\_118\_AJGE01000002.1[79669:79893:r] (completely identical)

Position: 031-contig\_247: 83491 ... 83716; Length: 225 bp

Sequence:

TTGACAAAAATAATGAACCAGTTTAAAGAAATTTATAATACAATAGAAAAATTACTAAAT  
GATAAAACAATATCTAATTATAGAATTAATCAAGACACTGGTGTTCCTTATGGTGGTATA  
AGTGAATTAAGAAGCGGGAAAAGAAAAGTGAATAATTTAACTTTAGAAACAGCGGAAAA  
ACTCTATAATTACCAAAAACAATTAGAAATAATGATTGAAGATTAA

### > **A5ISJ3**

Function: protein coding sequence; putative protein (core genome, variable)

Best match: A5ISJ3\_CC001\_MW2-USA400\_BA000033.2[1310546:1310752] (completely identical)

Position: 031-contig\_247: 84012 ... 84219; Length: 207 bp

Sequence:

ATGAATGAGATTGAAACTATTATAAGTGAATAGAAAAGTTATTA ACTAACAATACACCA  
TATAGTATTTCAAAAAGTCTCAGGTGTACCACGTCAAACAGTTACTGATTTAAAGGTAGGT  
AAA ACTAAAATAAAAAGAAGCTAAATTTAAAACGATAATCAAGTTATATGAATATCAAAG  
AACATTAGAAAATAAAAACAGAATGTTAA

### > **Q2YXQ4**

Function: protein coding sequence; putative protein (core genome, constant)

Best match: Q2YXQ4\_CC001-ST772\_118\_AJGE01000002.1[77742:77927:r] (completely identical)

Position: 031-contig\_247: 85457 ... 85643; Length: 186 bp

Sequence:

ATGTCAGAATACAAGAAAAAGATAATTGAATTAATTGAAAGTAATTTAACAGGATATGA  
AATTTCTAAAAAACTGGAGTTTCTCAATATGTACTTTCACAATTAAGACAGGGCAAACG

CGAAGTAGATAATCTAACCCTTAATACAACAGAAAAATTATATGAATATGCCAATAAAGT  
TTTGTA

> **txbi\_1000-3**

Function: ter bidirectional rho-independent terminator

Best match: txbi\_1000-3\_CC001\_MW2-USA400\_BA000033.2[1312393:1312470]

Position: 031-contig\_247: 85860 ... 85890; Length: 30 bp

Sequence:

TGGATCGTCTTGAAATGCTCCCTTCAAAGT

> **Q2YXQ3**

Function: putative protein (genomic island)

Best match: Q2YXQ3\_trunc\_CC001\_MW2-USA400\_BA000033.2[1312686:1312726]

Position: 031-contig\_247: 86154 ... 86195; Length: 41 bp

Sequence:

ATGTTCAAAGTGAATTATTCGATTTTAAGTTATTATCCAGA

> **A6QGL3**

Function: protein coding sequence; putative protein (genomic island)

Best match: A6QGL3\_CC093\_JKD6159-ST93\_CP002114.2[1298443:1299024]

Position: 031-contig\_247: 86684 ... 86714; Length: 30 bp

Sequence:

ATGCTTTTTTA ACTATTTACTGAAATAGCA

> **Q8NWW7-L2**

Function: protein coding sequence; putative protein (genomic island)

Best match: Q8NWW7-L2\_CC030\_58-424\_ACUT01000044.1[91:613]

Position: 031-contig\_247: 86843 ... 86873; Length: 30 bp

Sequence:

ATGATACCAGGTGTGAATGCGCCACCTATG

> **A6QGL6-Sepi**

Function: protein coding sequence; putative protein

Best match: A6QGL6-Sepi\_CC705\_RF122-cow\_AJ938182.1[1280590:1281533]

Position: 031-contig\_247: 86936 ... 86966; Length: 30 bp

Sequence:

GAGCGTGAAGGTAAATATCAAGTAGAAGAT

> **Q8NWX1**

Function: protein coding sequence; putative protein (genomic island)

Best match: Q8NWX1\_ref\_CC001\_MSSA476\_BX571857.1[1342141:1342575] (completely identical)

Position: 031-contig\_247: 87113 ... 87548; Length: 435 bp

Sequence:

TTGCTTAAAGATGCCAAAGAAAACAATGATAGCAATGAAGTAGCTTATTTATTA AAAAGAT  
GGTAAAGTTACAAAAGTATATGGTGATCAAGATAGTGTATCTTTTGCACCAGGGGAAAAA  
GCAACAGAATTGTTATTTAACAGTAAACCGAATTCAATTGTTATGTTACATAACCATCCTG  
GGCAGTCTAGTTTTTCTTACAGACTTGTATTTATTTATTTAATAATTCTATTA AAAACA  
CTGACAATTGTTACAAATAAAGGTCAAACAAAGTACTTAACTAAGACAAAAGAATATTG  
CAAATCAACTTGTATTGATTGTATTA AAAAATAATAA AAAAATAAGAATATAAAAAAATT  
CAATCATAAGGATATTGATATGATTCTAAAGAGATTATATAATAGTGGTAACATAATATA  
TAAAGTTAGGTGA

> **A6QGL8**

Function: protein coding sequence; aromatic amino acid beta-eliminating lyase/threonine aldolase (core genome, variable)

Best match: A6QGL8\_CC001-ST772\_118\_AJGE01000002.1[72308:73333]RC (completely identical)

Position: 031-contig\_247: 90051 ... 91077; Length: 1026 bp

Sequence:

```
TTAGATTAATTCTAATAGTTTATTTAAATTTTCTTCGGTTGTTCGCCAGCTGGTTGCGAATC
TAACAACACGATGTTGATCATCGTATTTTTCCCAAACAGCAAATTTAACTTTTTGTTCTAA
CTCTGCTATTTTTCTCGTTACTTAAAATAAAAAATTGTTGATTGGTTGGAGAATCAAAGTAA
AGACGATAGCCTTTATTTTTAAACCCGCTTTTCATCTTATTTGCCATTTTCGATAGCATGTCT
GCTTATATATAAAATATAAATTGTCCGTAATAAATTCTAAAAATTGTATGCCTGTTAACCGT
CCTTTTGCTAAAAGGGCACCGTGGTGTGTTGATTTCGAGTGGTAAATTGTTTTGGTTCATTAT
TTTTTGTGAAAACAATAGCTTCTCCGCAAAGTGCACCAATCTTCGTACCACCTATATAAAA
TACATCACAATATTTAGCGATGTCTTTAATAGTCATATCTGATTGATCACTCATTAAATGCA
TATCCTAAACGTGCACCATCCATAAATAATGGAAGCTTATATTGCTTACATACTTTACATA
ACTCTTTCAATTCTGATTTAGAGTATAATGTGCCATATTCTGTAGGATGAGAAATATATAC
CATTCCTGGGAATACCATATGGTCCTTTTTAAAATCACTTTTAAATGTCTCCATGTAAGTT
TCAACATCTGAAGCACTAACTTTTCCTTCGTTAGATGCTAACGTAATTACTTTATGACCAC
TAAATTCAATAGCACCGCCTTCATGTACAGCAACATGTCCCGTATCCGCTGACAATACAC
CTTCGTAGCTTTCTAACATTGAATTAATAACAACCTGATTGGTTTGCCTCCACCTACTAA
AAAACGGATAGTAGCATTGGACAATCAATTGTATCTTTAATCTTTTCAATTGCCTGAGCT
GTGAATTGATCAAAGCCATATCCCGAAGCTTGTACAAGATTTGTATCTACTAATCGTTTTA
ATACTTTTTCATGAGCACCTTCTAAATAATCATTTTTCAAATGAGATCAC
```

### > **A5ISJ9**

Function: protein coding sequence; putative protein (core genome, variable)

Best match: A5ISJ9\_CC001\_MW2-USA400\_BA000033.2[1317882:1318079] (completely identical)

Position: 031-contig\_247: 91346 ... 91544; Length: 198 bp

Sequence:

```
ATGGAACAAATTAACCTTAAACTTTTTACAGCTGAGACTTTAGAGTTATTAGAAAAAAAC
ATTAATGCTTTTTTAAGTTCTGAAGAAGCTACAAATTTAAAATTAGTAAATATTACTATTA
AAGAAATAGAAGAAAGAACATTCCCAAATAATGAAGAAGAATCAATGCAATTTTAACT
TTATCTGTGAATAAATAA
```

### > **cls1**

Function: protein coding sequence; cardiolipin synthases 1 (core genome, variable)

Best match: cls1\_CC005\_ED98-hen\_CP001781.1[1328794:1330275]

Position: 031-contig\_247: 91600 ... 93082; Length: 1482 bp

Sequence:

```
ATGCGATATACATTTTCAAATGATTTAGGAACACTTTTTACCATTATTTTAGCCATTGGAT
TCATCATTAACCTTAGTATTGGCTTTTGTTATTATCTTTTTAGAAAGAAATAGGCGTACAGC
GAGTTCAACTTGGGCATGGCTATTTGTACTTTTTGTCTTACCATTGATTGGTTTTATTCTTT
ACTTGTTTTTTGGTAGAACCGTTTCGGCACGCAAATTGAATAAAAACAATGGTAACGTGT
TAACGGATTTTCGATGGACTTTTTAAAACAACAATAGAAAGCTTTGATAAAGGTAATTATG
TACTGATAACAAACAAGTTCAAAAACATCATGATTTAGTACGTATGCTTTTGATGGATC
AAGATGGTTTTTTAACTGAAAATAATAAAGTTGATCATTTCATTGATGGAAATGATTTATA
TGATCAAGTTTTAAAAGATATTTAAAATGCAAAAAGAATATATCCATTTAGAGTACTATAC
TTTCGCTTTAGATGGTTTAGGTAAAAGAATTTTACATGCTTTAGAAGAAAATTGAAACA
AGGTCTAGAAGTAAAATATTATATGATGATGTTGGATCTAAAATGTTAAGATGGCAAA
TTTTGATCACTTTAAATCATTAGGTGGCGAAGTTGAAGCATTTTTTGCTTCTAAATTACCC
TTATTAATTTCCGTATGAATAACAGAAATCATAGAAAATCATCGTAATCGATGGTCAA
CTAGGTTATGTCGGAGGATTTAACATTGGTGATGAATATCTAGGATTAGGTAAACTAGGG
TATTGGAGAGATACGCATTTACGTATACAAGGGGATGCGGTTGATGCACTGCAGTTGCGA
TTTATTTTAGACTGGAATTCGCAAGCGCACCGTCCACAATTTGAATATGATGTTAAGTATT
TCCCTAAAAGAACGGACCATTGGGCAATTCACCAATTCAAATAGCTGCAAGTGGCCAG
CTAGTGACTGGCATCAAATTGAATATGGTTATACAAAATGATTATGAGCGCTAAGAAGT
```

CGGTATATTTGCAATCGCCTTATTTCAATCCGGATAACTCATATATAAATGCCATTAAAAT  
TGCAGCTAAATCAGGTGTAGATGTTTCATCTAATGATTCCATGTAAGCCAGATCATCCTTTA  
GTTTATTGGGCGACATTTTCAAATGCCTCTGACTTATTATCAAGTGGTGTAAAATTTATA  
CGTATGAAAATGGATTTATACATTCTAAAATGTGCTTAATTGATGATGAAATCGTATCAG  
TGGGCACAGCAAATATGGACTTTAGAAGTTTTGAATTAATTTTGAAGTAAATGCCTTTG  
TATATGATGAAAATCTTGCTAAGGATTTAAGGGTGGCTTATGAACATGATATTACAAAAT  
CAAAACAATAACCAAAGAATCATATGCCAATAGACCGCTGTCTGTAAATTCAAAGAAT  
CGTTAGCAAATTAGTTTTCGCCAATTTTATAA

### > **A6QGM1**

Function: protein coding sequence; ABC transporter ATP-binding protein (genomic island)

Best match: A6QGM1\_CC001\_MW2-USA400\_BA000033.2[1319801:1320700]

Position: 031-contig\_247: 93265 ... 94165; Length: 900 bp

Sequence:

TTGATTCAAATATCTAATATCAACAAGTCATTTAATAAAAAGATGTGTTCTAAAAAATATTT  
CGTTCGATATTGAACAAGGTAAATGTATCGCTTTAATTGGAAAAAATGGTGCTGGAAAGT  
CAACGTTAATTGATATATTAATTGGTAATGTAAATGCTAATTCTGGTGAGATATTTGATAA  
AGACAAGTTATTACAAAGTGAAAATCGCAGTATAATGTTCCAAAAAACGATGTTTACAGA  
TCAATTAAGTTATTGAGATTATCAACTTATATCAATCATTTTACGAAAATCCATTACCA  
TTGGAAGAAATAATAGAAGTACGAAAATTTGATTCTAGTCAACTGAACCAATTTGTAAAT  
AAACTTTCTGGTGGTCAACAACGATTACTCGATTTTGTATTATCTTTAATCGGACAACCAC  
AATTGATCTTATTAGATGAACCAACATCGACTATGGATATAGAAATTAGAGAATATTTTT  
GGTCAATTATTGAAAATTTAAAAGAAGATAATCGAACGATACTCTATACATCGCACTATA  
TTGAAGAAGTCGAACGTATGTCAGACAAAATTATTCTCATTGAAAATGGAGAAATAATAC  
TTAATGATTCAACGTCACATATTAGAACCAATCAGCAATCTCAGATTACGTTATCCGATG  
AATATATAAGAAAGTTAAACTAGATAAAGATGATTTAGTTATTCAAAAAAATCATAATG  
GCACTATCAAAATTATTACTTCAAATGTAAATGATACGATTTTATATCTTCAACAACCTCA  
TATTAATTTGGATGATATTGAAATACAAAAAGTCTCAATTGTTGATTCATACTTCAACAAT  
AAAAGCAAAGGGGATCTAATTATGATACTAAGTTACTTGAAAATCGAATTTAA

### > **Q5HGA1**

Function: protein coding sequence; putative ABC transporter/permease protein (genomic island)

Best match: Q5HGA1\_CC008\_NCTC8325\_CP000253.1[1256491:1257222] (completely identical)

Position: 031-contig\_247: 94133 ... 94865; Length: 732 bp

Sequence:

ATGATACTAAGTTACTTGAAAATCGAATTTAAAGTTATAATGCGTAAAAAACAACATTA  
ATATTATCTATTTTATTTCTGTTATATTCTATATATTATTTACTTCGATATTGGAATTGCC  
GGAAGATGTTAAACCTAAATTTTATAAAGAGTATATGTATAGTATGACGGTTTATAGTTT  
GTTAAGTTTTAGTTTACTAACTTTTCCATTAGATATTATTAATGAAAAACAAAATGAATGG  
CGCCAAAGATTAATGGTAACACCAATTTACTTTTACTAGTTATTATATTTCAAAAAGTAGTGA  
AACTATGCTGCAATTTGCAATAGCGATATTAGTTATTTTTATGGTTGGACATTTTTATAA  
AGGTGTTGCAATGAGTGCAGTTCAATGGTTAGAGTCAGGAATATTTTTATGGTTAGGTGC  
GTCTCTATTAATAACTTTTGGCATATTATTTTCTTTGTTAAATGATATTCAAAAACAAGT  
GCTTTAGCTAATATCGTAACAATGGTTTAGCAGTATTAGGTGGATTGTGGTTTCCGATAA  
ACACATTTCCAAATTGGCTTCAACATGTTGCTCATGTTTTACCGAGCTATCATTGCGTAA  
ACTAGGTGTAGATATTGCTTCAAATCATCATATCAATTTAATATCATTGCTATAATACTC  
TTGTATGCTTTAGGGAGTATAATAGCAGTATATTGTATTAGTCATTTTAAAAGGGCGGAA  
TAA

### > **A5ISK3**

Function: protein coding sequence; putative sensor kinase protein (genomic island)

Best match: A5ISK3\_CC001\_MW2-USA400\_BA000033.2[1321404:1322495] (completely identical)

Position: 031-contig\_247: 94868 ... 95960; Length: 1092 bp

Sequence:

ATGAAATTTTTAAAAGATACTTCAATTGCTGAAATATCGTCTATACTTTATCTGATTTTTCT  
CTATTGCCGGTATATTTTTAATGAAGTATATGGTCCCAAATGGTTGTATATTATATCAGT  
CATTGTCTTTTCGTTGTCGTATCTTATATTAGTTATAGTAAATAATAGACTTAATACATTA  
ATGTTTTACATTTTGTGATTATTCATTATTTTATTATTTGTTATTTTGTTCAGTGTACAT  
CCAATGCTAAGTTTGTTCCTTTTATAGTGCTTTTGCCGTTCCATTTACTTTTAAAAATAA  
TGTTAAAAAACGGCAACTAATCTTTTCATACTAACAATGATTATATGTACAATAATAAC  
GTACTTATTGTATAACAACACTATTTTGTGCAATGATGGTTTATTATGTTCGTTATATCGTTAA  
TAATGCTAGATAATTTTAAAAAATGAAAAACCGTGAATATCAAAAAGAAATAGCAGAA  
AAAAATAGACATATTAATACATTAATTGCTGAACAAGAGCGACATAGAATTGGTCAAGA  
CTTACATGATACGTTAGGGCATGTGTTTGCAAGTTTATCATTAAAATCAGAATTAGCTTAT  
AACTAATAGATGCTGATGTAGAAAAAGTAAAAGCTGAATTATTAGCAATTAATAAATTA  
TCTCGTGAATCATTGAACAAAGTTCGAGAAATTATTGATGATGTAAAATTACCATCATT  
ATTGAAGAGATTGATAGTATACGTAAAGTTTAAAAGATGCTGATATTGATTTTACATTTG  
AAAATAAGAATTAGCGCAAGTATTAAGTCCTACTAAACAATCTATGTTAGTTATGATTA  
CGCGTGAAGCGATAAATAATGTTATTAACATGCAAATGCTTCAAAAGTTCATGGTAAAT  
TAAAACTGTAAACAATCATAAATTACTGCTTATGATTGAAGATGATGGCAAAGGTATCG  
ATAGTGATTGTGAGGTGAAAAGTATTCACAGCGTGTACAACATTTAAATGGAACCTTAG  
CAGTCGACTCAACAAATGGAACATAAATAATCATTGAAATCTCAACAGGAGGAATAGCA  
TGA

#### > **A5ISK4**

Function: protein coding sequence; two component transcript regulator/LuxR family (genomic island)

Best match: A5ISK4\_CC001\_MW2-USA400\_BA000033.2[1322492:1323094] (completely identical)

Position: 031-contig\_247: 95956 ... 96559; Length: 603 bp

Sequence:

ATGACATCTTTAATTATTGCAGAAGATCAAAATATGTTACGACAGGCAATGGTTCAATTA  
ATTAACACTACATGGTGATTTTCAAATTTTAGCAGATACTGATAATGGTCTCGATGCAATG  
AACTTATTGAAGAATATAATCCTAACGTTGTTATTTTAGATATAGAAATGCCAGGCATG  
ACTGGACTTGAAGTTTTAGCGGAAATTAGAAAAAGCATTGGAATATTAAGTGATTATT  
GTAACAACCTTTTAAAAGACCGGGATACTTTGAAAAAGCAGTTGTGAATGATGTGGATGCA  
TATGTTTTAAAAGAACGTTCTATAGAAGAATTGGTGGAAACCATTAATAAAGTAAATAAC  
GGAGAGAAAGAATATAGCGCCACATTGATGACTTCATTTTTTGTAGATAAAAACCCATTA  
ACGCCCAAAGAACAATTGTATTAAGGGAAATTGGCAATGGTTTAAGTAGTAAAGAAAT  
AAGTGAAAAATTATTTTTGACAGATGGAACAGTTAGAAATTATACATCTGTTATAATTGA  
TAAATTATTTGCAGATAATCGTTTTGATGCTTGAAAAAGGCAAATGAAAAAGGCTGGAT  
CTAA

#### > **Q99UF3**

Function: protein coding sequence; putative protein (core genome, constant)

Best match: Q99UF3\_CC001\_MW2-USA400\_BA000033.2[1323207:1323395:r]RC (completely identical)

Position: 031-contig\_247: 96671 ... 96860; Length: 189 bp

Sequence:

CTAATTTTTTCGCTTATTATAAAAACGAAACAATCAAGTAAACGATAAAGCCTACAAAGAT  
ACCCAATAAAATAGATAGTACTGCCGTCCTATTAATGGTAATTTGAAAAATATTTGTAG  
GAAATACCAATGATAATTGCGATAATTACTGCAATTAATGTGACTGTATTTTCATTTGAA  
ATGTTTCAT

#### > **nuc2**

Function: protein coding sequence; nuclease family protein (core genome, constant)

Best match: nuc2\_CC001\_MW2-USA400\_BA000033.2[1323534:1324067] (completely identical)

Position: 031-contig\_247: 96998 ... 97532; Length: 534 bp

Sequence:

ATGAAGTCAAATAAATCGCTTGCTATGATTGTGGTAGCCATCATTATTGTAGGTGTATTAG  
CATTTCAATTTATGAATCATACGGGTCTTTCAAAAAGGGGACGAATCATGAAACTGTAC



AAGATTTAAATGGTAAAGATAAAGTACATGTTCAAAGAGTTGTGGATGGTGATACATTTA  
TTGCAAATCAAATGGTAAAGAAATTAAGTTAGGCTTATAGGGGTTGATACGCCAGAA  
ACGGTGAACCGAATACGCCTGTACAACCATTTGGCAAAGAAGCATCAAATTATAGTAA  
GAAGACATTAACAAATCAAGATGTTTATTTAGAATATGATAAAGAAAAACAAGATCGCT  
ATGGTAGAACATTGGCGTATGTATGGATAAGTAAAGATCGTATGTACAATAAGGAATTAG  
TGGAAAAGGGACTTGCTAGAGAGAAGTATTTTTACCAAATGGCAAATATAGAAATGTAT  
TTATAGAAGCACAAAATAAAGCTAAACAACAGAAATTAATATTTGGAGTAAATAA

### > Q5HG96

Function: protein coding sequence; putative protein (core genome, constant)

Best match: Q5HG96\_CC001\_MW2-USA400\_BA000033.2[1324210:1325064:r]RC (completely identical)

Position: 031-contig\_247: 97674 ... 98529; Length: 855 bp

Sequence:

TTACTTGAATATAGCTGTGATTTGATCAACCTGTTCTTTATTTAAAGGGTGTTTAGATAGC  
TCTATGGCTTCGCTAATAATACGTCGTAACGAAGATTTTGTGAACTGTATCAACATATT  
TATCTCTTTCTTCAGAACCTTGAATGATATTAAGTACCATCACTAAAGTAAATAACACC  
GGTACTTTGGACTTTAAAGTTAAAGTTTTGTTC AATATGATCCTTTAATGCTTTTCGCATTAT  
TTGCTGCTAATTGATACGGATCATAATCATAAAAATCATAAATAACACGATTTGGTTGAA  
CTGTTTCTGTAAAAGTATAGATAGACTTTCTTGATGAATTAAGTGCATGATATTGCTG  
GCTAATGTAATGACCGACAACTTTTCAATATTACTATTGCTTATTTCTGTATCATGCTCAT  
CAGGTACATCAAAGTGATAAAAATGTTTTTTACCCAGCTTTTTACATCAACGTTTATTAA  
ACCGATATCTGAAACAATGATAAAAATCAAATGAACGTGCATACTCGAAAAACGGATGTTT  
AGTAGCTAAATTGCTTGTAAACGATAAATATCGTAATATTTAATTTACCATTTTCGAGATAG  
CTATCTAAAATCTTGCGTAAATTCTCTTTTAGCATTTTTGTATGCATGGTGGCCAACATCATT  
ATTAGAACTCAGCATTGACTTCTTAATTCAGCATTTTCTGCACTTAATGCTTTGTTCTTTT  
TAATAAGTTGCTTTCTTGCATAAACTTCGGTATCTATTTACTATTACTATACTTTGATTT  
AAAATAATATACCAATTAATGCTACAATGATAATGATAAGTACAACATAAAAAGACAT

### > Q5HG95

Function: protein coding sequence; putative protein (core genome, constant)

Best match: Q5HG95\_CC001\_MW2-USA400\_BA000033.2[1325380:1325970]

Position: 031-contig\_247: 98844 ... 99435; Length: 591 bp

Sequence:

TTGAGAGTGAATGAAATGAATGCTAAAGAACAATTAGTGGACAATTTAATGAAAACATC  
ATCGCAATTATTTAAATTTACCGGTGAAGTTGCCATGCAGCTTTTCTTAAATGATGAATTA  
AAATTACCTTCTATTGTTGAAATATGCGTAGAACGTAAGCGTTTAAAGTGATATTGTGAAA  
GTTATTCCGCAATCATATGCGTTACTATACATAGATAAGCAAGATCAAGCAATAGCTAAA  
GAAGATTTATCACTTTCAAAAATTGCAAAAAGTTTATGTGCAATATGATGATACAACAATA  
ATGAGTATTTTCGTTTATGATGTAGTAAACGATGAATGGATTTTTAGATTGGATCCGAATA  
TACGTATACCTAAGAGTAACATATACTTCCATAGTTTAAATTGGGATGTGGATTATATTAA  
ACCGGAGATCGTTCTAATGTATGATCTAATGCAACACCATCAGTATCATCATTATTCCAAT  
TATAAACGAGTCATAGATGCATTAAGCTACTATCAATTTTTTATTTTAAAATTTGTAGTAG  
GTGAGCAACGTATTAAGGATGCAATCCAGAGAACAATAAATAATTAA

### > txbi\_thrA

Function: bidirectional rho-independent terminator of thrA

Best match: txbi\_thrA\_CC001\_MW2-USA400\_BA000033.2[1325962:1326031:r]RC (completely identical)

Position: 031-contig\_247: 99426 ... 99496; Length: 70 bp

Sequence:

AATAATTAAGAAAAAGCAATTCATAACGCAGTTGAATACATGTGTTACGAATTGCTTTTA  
TATTAGTTTT

### > thrA

Function: protein coding sequence; aspartokinase (core genome, constant)

Best match: thrA\_CC001\_MW2-USA400\_BA000033.2[1326024:1327406:r]RC

Position: 031-contig\_247: 99488 ... 100871; Length: 1383 bp

Sequence:

```
TTAGTTTTTATCACACAAGTTTTTTAATGCAACCCCGTGATAGCAAAACTCATATGTAGAT
AATACAGCTTTTTTCAGCATCATCTACATGAATTCCAACATCATCGAGATTTCCGAAGCA
CCTGGTTAATCATTTTTAAGTTAATTTTTGATTCAGCTAAGGCATGTGTAATTTTATTTGC
AGTACCGATGACTTTATTCATACCTTCGCCGACAATCATTAAATATTGCTAAATCATGCTCA
ATACTTAGCTCATCAACATCACATTTTTGACGAATTCATTTAATACTTTTGTTCCTTATT
TTGAATTTGTTTTGAGCGCATAACGATACTGATAGTATCAATACCTGAAGGCATATGATC
AAATGAAATATTATTATCCTCTAAGACACCTAATATCTTTCTAGTAAAGCCGACTTGTCTA
TTCATTAATACTTTTTGATATTAATAACGGTAAAATCTTTATCACAACCTTATACCGCTAA
TCACATTTTTCGCATTTATTTCTCTATCATGCACTATAAATGTACCTTTATCTTGAGGGCGG
TTCGTATTTTTAATCACCACAGGGATGCGATCTTTATAAAGTGGTTGTAAGGCTTCATCAT
GGAAAACACTAAAACCAGCATAAGATAATTCACGCATTTCTCGATAAGTGATTTCTTCGA
TTAATTCAGGATCTTTGATGATATTTGGATTAGCTTTATAAATACCAGACACATCGGTGAA
ATTTTCATAAATTGTAGCTCTAACACCACTTGATATGATGGCGCCAGTTATATCTGATCCG
CCACGTGGAAATGTAACCTATATATCCTTCATGAGATACGCCGAAAAATCCTGGGATAATT
AGTTTCTCATCATAATCTCTTAATTTTTTAATTTTCAGAGTAAGCACTATCTAATATTTGTGC
TTCTTGTGGGACGTCAGTAACAAAAATACCCGCTTCCTTCGGTGATATATATTTTTGTTGGT
ATACCTTGACTATTATTATATAAAGCTATCAATTGCGCATTAAAATCTTCACCACAAGAA
AGTAATGCATCTAATAGTCTCTTTGGTTCATTTTTTAATTGATTAATATAATGTTCCAAAG
TCACATCTATCGTCCGTA AAAATACTTTCATCCATTTGCAATTTCTTTTACAATATCATCATA
ACGCTGAATAATTTCTCTTTTTTTATCATGATAATCAAGATGATTAATGACCTTTTCATAT
AATCTGATTAACAAATCAGTTGTTTTAATATCATTATCATGTCTTTTACCTGGAGCAGAAA
CGATAACAATCTTTCGCTCTGGATCAGAATTAACAATATTTAAAACCTTTTTAATTTGAGT
AGCATTGGAGACGGAGCTACCACCGAATTTGGAACTTTCAT
```

### > metL

Function: protein coding sequence; homoserine dehydrogenase (core genome, constant)

Best match: metL\_CC001\_MW2-USA400\_BA000033.2[1327597:1328877]

Position: 031-contig\_247: 101061 ... 102342; Length: 1281 bp

Sequence:

```
ATGAAAAAATTAATATAGCATTATTAGGATTAGGTACTGTCCGATCTGGTGTGTTAAA
ATCATCGAAGAGAACCGACAGCAAATTCAGATACATTAATAAAGATATTGTCATAAAA
GCATATTCTTGTTTCGAGATAAATCTAAAAAGAGACCGCTAAATATTAGCCAATATCATT
AACTGAAGATGTTAATGAAATTTTAAATGATGATTCATTAGATATTATCGTTGAAGTCAT
GGGAGGAATTGAACCAACTGTAGATTGGTTAAGAACAGCACTTAAAAATAAAAAACATG
TTATTACCGCAAATAAAGATTTATTAGCAGTACATCTTAACTTTTAGAAGATTTAGCAG
AAGAAAATGGTGTAGCTTTAAAGTTTGAAGCGAGTGTAGCAGGTGGTATTCCGATCGTAA
ATGCCATAAATAATGGTTTGAATGCGAATAATTTTCAAATTTATGGGAATTTTAAATG
GTACCTCTAATTTTATTTTATCTAAAATGACTAAAGAGCAAACGACATTTGAGGAAGCAC
TTGATGAAGCGAAAAGACTTGGTTTTGCTGAAGCGGATCCAACCTGATGATGTAGAAGGG
GTAGATGCAGCGCGTAAAGTTGTCATTACATCATATTTATCATTTAACCAAGTCATTAAT
TAAACGACGTTAAACGAAGAGGAATTAGTGGCGTAACTTTAACTGATATTAATGTAGCCG
ATCAACTGGGGTATAAAATTAATTTGATTGGTAAGGGAATATATGAAAATGGCAAAGTT
AATGCATCGGTAGAACCAACGTTAATTGATAAAAAGCATCAATTAGCAGCTGTAGAGGA
TGAATATAACGCGATTTATGTCATTGGTGATGCTGTTGGTGACACGATGTTTTATGGAAA
AGGAGCAGGCAGTTTAGCAACAGGTAGTGCCGTTGTCAGTGATTTATTGAATGTAGCATT
ATTCTTTGAATCAGATTTACACACATTGCCACCACATTTTGAATTAAGACAGATAAAAC
ACGGGAAATGATGGATTCAGATGCAGAAATTAATATTAAGAAAAATCCAATTTCTTTGT
AGTAGTGAATCATGTCAAAGGTTCAATTGAAAATTTTGA AAAATGAGTTAAAGGCAATATT
ACCATTTACCGATCATTAAAGAGTTGCAAATTACGATAATCAATCATATGCCGCTGTTATA
GTTGGATTGGAATCATCACCAGGAAGAATTAATCACTAAGCATGGATACGAAGTTGACAA
AGTATACCCAGTAGAAGGAGTTTAA
```

> **thrC**

Function: protein coding sequence; threonine synthase (core genome, constant)

Best match: thrC\_CC008\_NCTC8325\_CP000253.1[1264705:1265766] (completely identical)

Position: 031-contig\_247: 102347 ... 103409; Length: 1062 bp

Sequence:

```
ATGAGAAGATGGCAAGGATTAGTAGAAGAGTTTAAAGCACATTTACCAGTAAATGAAAA
TACACCAAAATTAACATTGAACGAGGGAAATACACCACTCATTTCATTGTGAAAATATGTC
TAAAATACTAGGCATAGATTTATATGTGAAGTATGAAGGTGCCAATCCGACAGGTTTCATT
TAAAGATCGCGGTATGGTAATGGCTGTGACAAAAGCAAAAGAGCAAGGTAAGAAAATTG
TAATATGCGCTTCGACTGGAAATACATCAGCGTCTGCAGCAGCATATGCAGCGAGAGCAG
GTTTAAAAGCTATCGTCGTAATACCAGAAGGTAATAATTGCATTAGGTAAATTGTCGCAAG
CAGTAATGTATGGTGCAGAAATCGTTTCTATTGAAGGAAACTTTGATGAAGCTTTAGAAA
TTGTAAGAAATTGCAAAAAGTGGCGAAATCGAGCTTGTAACTCTGTCAATCCATTTA
GAATCGAAGGACAAAAGACAGGCTCATTGAAATTGTACAACAATTAGACGGTGAAGCA
CCTGATATTTTAGCGATTCTGTAGGTAATGCAGGTAATATTACTGCATATTGGAAAGGCT
TTAAAGAATATCATGAAGCTAAAGGATCACAATTGCCGAAAATGTTTGGCTTCCAAGCTG
AAGGCGCATACCAATTGTTCAAATAAAGTCATTAATAATCCTGAAACGATTGCAACTG
CTATTCGAATTGGTAATCCTGCTAGTTGGGATAAGGCGACTAATGCTCTTAAAGAATCAA
ATGGATTAATAGATAGTGTTACTGATGATGAAATTCTAGAAGCATATCAGTTAATGACAA
CTAAAGAAGGTGTCTTTAGTGAACCAGCGAGTAATGCTTCTATTGCAGGTTAATTAAT
TGCATAGACAAGGTAAATTACCTCAAGGTAAGGTAAGTGTGCTATTTAACTGGTAATG
GATTAAGATCCTGATACTGCTATTTCACTACTAGATAATCCGATAAAGCCATTGCCAA
ATGATAAAGATAGCATTATCGATTATATTAAAGGAGCTTTATAA
```

> **thrB**

Function: protein coding sequence; homoserine kinase (core genome, constant)

Best match: thrB\_CC001\_MSSA476\_BX571857.1[1358442:1359356]

Position: 031-contig\_247: 103410 ... 104325; Length: 915 bp

Sequence:

```
ATGTCGAATGTTTTGGAGTTAACAATTCCTGCATCAACAGCCAACCTTGGAGTTGGCTTTG
ATTCTATAGGTATGGCTTTAGATAAATTTTTGCATCTGTCTGTAAAGGAAACATCAGGGA
CAAATGGGAATATATTTCCATGATGATGCATCTAAGCAATTGCCTACTGACGAAACAA
ACTTTATTTATCATGTAGCACACAAGTTGCTTCTAAATATAGTGTTGACTTGCCTAATTT
ATGTATCGAAATGAGAAGTGATATTCATTAGCAAGAGGGTTAGGTTTCGTCAGCTTCTGC
TTTAGTAGGAGCTATATATATCGCAAATTATTTTGGTGATATCCAACGTCTAAACATGAG
GTATTACAATTAGCGACTGAAATCGAAGGACATCCTGATAATGTTGCGCCGACCATTTAT
GGTGGTTTAATCGCTGGATATTATAATGATGTCTCGAAAGAAACGTCAGTTGCACATATC
GACATAACCAGACGTGGATGTGATTGTAACGATACCAACTTATGAACTAAAAACAGAAGC
ATCAAGACGTGCTTTACCACAAAAATTAACACATAGTGAAGCGGTTAAAAGTAGTGCAAT
TAGTAATAACAATGATTTGTGCATTAGCACAGCACAAATTATGAATTAGCAGGTAACATCAT
GCAACAAGATGGCTTTTCATGAACCGTATCGTCAGCATTTAATTGCTGAATTTGATGAAGT
GAAAACAATTGCTATTCAACATAATGCCTATGCAACTGTAATTAGTGGTGCTGGACCAAC
TATTTAATATTTAGTCGTAAAGAAAATAGTGGGGAATTGGTTCGCTCTTTAAATAGTCAG
GTAGTATCATGCCATTCTGAATTGGTCGATATTAATATCAGTGGTGTTAAAGAACGAATT
GTATACCAATAG
```

> **Q5HG87**

Function: protein coding sequence; putative amino acid permease (core genome, constant)

Best match: Q5HG87\_CC001\_MW2-USA400\_BA000033.2[1332546:1334000:r]RC

Position: 031-contig\_247: 106010 ... 107465; Length: 1455 bp

Sequence:

```
TTATTTTTGATTGTCATAATCGTGTGGTTTTAAATTTATTGTTTCTAGCTTTACAAATTTTG
TTTTGTGAATGATTTTATGAATAAAGTAAATCAACGCTAGAATGATTAAGGTAAGGTAAGT
TTTTAAAAGCATTTAACCATTGATCTTTTAAAATATATTCAACTGAGCCACCAAATAGCAA
GAATAATAGTGTAGTGATGACAATGATTGGTCCTAATGGATAAAAAGGTGCTTTATATGG
```

TAGGACCTTATTAGGGTCTTGACCTTGTTTTTAATAGCTTGTCGCAATCGTATTTGTGAC  
CAAATGCTTGATCCCCAAACAATAATCATTGAACCAATAATTTCAAGTAAATTA  
ACGGCATTGGAATTAAGTTTGCATAAATAATAACAATAACAACGACTGCATAAGTAGTT  
AATAATGCTCTTAAAGGTAACCTAGTTGTCTTGTTAATTTACTTAAAAATTGGGGTGCTT  
TTTTGTCTGAACTTAAGGAATACAACATTCTGCCTGTTGTATAAACACCTGAATTTGCAGC  
GGATAATAATGAAGTTAAAATAACCGCGTTGATTACTGATGCTGCAAAGGCTATGCCTAC  
TCTATCGAATACAATTGTAAATGGGCTTTGACTTATTGAACTACTTGCTCTTAATAATGAT  
GGATCTGTGTACGGAATAATTGCACCAATTACTGCAATTGATAAGACATAGAATAAAAGA  
ATACGCCAAAATACTTGTTAATTGCCTTAGGCATAGACTTTTTAGGGTCATCTGATTCAC  
CAGCAGTTACTGCTACTACTTCTGTACCACCAACCGAAAATCCGGCGACTAATAATACGC  
CTAAGAAACCAGAGATACCACCAACAAACGGTGCTTGGCCTTTTGTATAGTTTTCAAATC  
CATATGTATGACCACCTAAGATACCGAAAATCATTAAAAAGCCAAAAATAACGAATACG  
ATAATTGTTAACACTTTAATCAATGATAACCAAACTCAGTTTCTCCAAATGATTTTACAG  
AAAAATGTTAATAATAGTAAAATTGTAATAAAGATTAAGCTCCAAGTAATGGGGTGG  
AAAAATTTAAATGTGTCCAGAAATAAAGCACATTTGACGCTACTATGACATCAACACTT  
GTAATAATGACCACAATGCCCAATACAACCATCCCATGGTAAAGCCAAGAGATGAGTC  
AATAAAGCGTGTTGAATAAGAGCTGAATGAACCTGATACTGGATAAAATGTTGCCAACTC  
TCCAATTGATGACATTAAGAAATATAGCATGACACCAATAACAAGATAAGCGAGTATAG  
CGCCTCCAGGACCAGCTTGAGAAATGATATTACCAGTAGCTACAAATAGACCAGTCCCAA  
TTGCACCACCTATAGCAATCATGGAAATGTGTCTTGAGTTAAGACTACGGTTCATTTTATT  
ATCTTCCAT

> **katA**

Function: protein coding sequence; catalase A (core genome, variable)

Best match: katA\_CC001\_MW2-USA400\_BA000033.2[1334204:1335721] (completely identical)

Position: 031-contig\_247: 107668 ... 109186; Length: 1518 bp

Sequence:

ATGTCACAACAAGACAAAAAGTTAACTGGTGTTTTTGGGCATCCAGTATCAGACCGAGAA  
AATAGTATGACAGCAGGGCCTAGGGGACCTCTTTAATGCAAGATATTTACTTTTTAGAG  
CAAATGTCTCAATTTGATAGAGAAGTAATACCAGAACGTCGAATGCATGCCAAAGGTTCT  
GGTGCATTTGGGACATTTACTGTAACATAAAGATATAACAAAATATACGAATGCTAAAATA  
TTCTCTGAAATAGGTAAGCAAACCGAAATGTTTGCCCGTTTCTCTACTGTAGCAGGAGAA  
CGTGGTGCTGCTGATGCGGAGCGTGACATTCGAGGATTTGCGTTAAAGTTCTACACTGAA  
GAAGGGAAGTGGGATTTAGTAGGGAATAACACACCAGTATTCTTCTTTAGAGATCCAAAG  
TTATTTGTTAGTTTAAATCGTGCGGTGAAACGAGATCCTAGAACAAATATGAGAGATGCA  
CAAATAACTGGGATTTCTGGACGGGTCTTCCAGAAGCATTGCACCAAGTAACGATCTTA  
ATGTCAGATAGAGGGATTCTAAAGATTTACGTCATATGCATGGGTTTCGGTTCTCACACA  
TACTCTATGTATAATGATTCTGGTGAACGTGTTTGGGTAAATTCATTTTAGAACGCAAC  
AAGGTATTGAAACTTAACTGATGAAGAAGCTGCTGAAATTATAGCTACAGATCGTGATT  
CATCTCAACGCGATTTATTTCGAAGCCATTGAAAAAGGTGATTATCCAAAATGGACAATGT  
ATATTC AAGTAATGACTGAGGAACAAGCTAAAAACCATAAAGATAATCCATTTGATTTAA  
CAAAGTATGGTATCACGATGAGTATCCTCTAATTGAAGTTGGAGAGTTTGAATTAATA  
GAAATCCAGATAAATACTTTATGGATGTTGAACAAGCTGCGTTTGCACCAACTAATATTA  
TTCCAGGATTAGATTTTTCTCCAGACAAAATGCTGCAAGGGCGTTTATTCTCATATGGCGA  
TGCGCAAAGATATCGATTAGGAGTTAATCATTGGCAGATTCCTGTAAACCAACCTAAAGG  
TGTTGGTATTGAAAATATTTGTCTTTTAGTAGAGATGGTCAAATGCGCGTAGTTGACAAT  
AATCAAGGTGGAGGAACACATTATTATCCAAATAACCATGGTAAATTTGATTCTCAACCT  
GAATATAAAAAGCCACCATTCCCAACTGATGGATATGGCTATGAATATAATCAACGTCAA  
GATGATGATAATTTTTGAACAACCAGGTAAATTGTTTAGATTACAATCAGAGGACGCT  
AAAGAAAGAATTTTTACAAATACAGCAAATGCAATGGAAGGCGTAACGGATGATGTTAA  
ACGACGTCATATTCGTCATTGTTACAAAGCTGACCCAGAATATGGTAAAGGTGTTGCAAA  
AGCATTAGGTATTGATATAAATTCTATTGATCTTGAAACTGAAAATGATGAAACATACGA  
AAACTTTGAAAAATAA

> **rpmG2**

Function: protein coding sequence; 50S ribosomal protein L33/locus 2 (core genome, constant)  
Best match: rpmG2\_CC001\_MW2-USA400\_BA000033.2[1335812:1335961] (completely identical)  
Position: 031-contig\_247: 109276 ... 109426; Length: 150 bp  
Sequence:  
GTGCGCGTAAACGTAACATTAGCATGCACAGAATGTGGCGATCGTAACTATATCACTACT  
AAAAATAAACGTAATAATCCTGAGCGTATTGAAATGAAAAAATATTGCCCAAGATTTAAA  
CAAATATACGTTACATCGTGAAACTAAGTAA

### > rpsN

Function: protein coding sequence; 30S ribosomal protein S14 (core genome, constant)  
Best match: rpsN\_CC001\_MW2-USA400\_BA000033.2[1336415:1336684] (completely identical)  
Position: 031-contig\_247: 109879 ... 110149; Length: 270 bp  
Sequence:  
ATGGCTAAGAAATCTAAAATAGCAAAGAGAGAAAAAGAGAAGAGTTAGTAAATAAAT  
ATTACGAATTACGTAAAGAGTTAAAAGCAAAGGTGATTACGAAGCGTTAAGAAAATTA  
CCAAGAGATTCATCACCTACACGTTTAACTAGAAGATGTAAAGTAACTGGAAGACCTAGA  
GGTGTATTACGTAAATTTGAAATGTCTCGTATTGCGTTTATAGAGAACATGCGCACAAAGGA  
CAAATTCAGGTGTTAAAAAATCAAGTTGGTAA

### > guaC

Function: protein coding sequence; GMP reductase (core genome, constant)  
Best match: guaC\_CC001\_MW2-USA400\_BA000033.2[1336841:1337818]  
Position: 031-contig\_247: 110305 ... 111283; Length: 978 bp  
Sequence:  
GTGAAAATATTTGATTACGAAGATATTCAATTAATACCTAATAAATGCATAGTTGAAAAGT  
AGGTCTGAATGTGATACTATCCAATTTGGTCCGAAAAAATTCATCTACCTGTAGTT  
CCTGCAAATATGCAAACAGTTATGAATGAGAAATTAGCGAAATGGTTTGCTGAAAATGAT  
TACTTTTATATCATGCATCGTTTTGATGAAGAAGCAAGAATACCTTTTATAAAACATATGC  
AAAATTCAGGCTTATTTGCATCTATTTTCAGTTGGTGTAAAGAAAGCGGAATTTGATTTTAT  
TGAAAAGTTAGCTCAAGAAAAATTAATCCCCGAATATATTACAATAGATATTGCGCATGG  
TCACTCAGATTCAGTGATAAACATGATTAACATATAAAAAACCATATACCTGATAGTTT  
TGTTATTGCTGGTAATGTTGGTACGCCAGAAGGTGTTAGAGAATTAGAAAATGCTGGTGC  
TGATGCTACCAAAGTCGGTATAGGTCCTGGTAGAGTTTGTATTACAAAGATTTAAAACAGG  
TTTTGGTACTGGTGGTTGGCAGTTAGCGGCATTAACATATGTAGTAAAGCAGCTCGTAA  
ACCTTTGATTGCTGATGGTGGTATAAGAACGCATGGCGACATCGCTAAATCAATTAGATT  
TGGTGCATCAATGGTCATGATTGGTTCATTATTTGCGGCACACGAAGAATCACCTGGTGA  
AACTGTAGAACTTGATGGTAAACAGTATAAAGAATATTTTGGTAGTGCATCTGAATTTCA  
AAAAGGCGAACATAAAAAATGTGGAAGGTAAAAAATGTTTGTAGAACATAAGGGTTCAT  
TAATGGATACCTTAAAAGAAATGCAACAAGATTTACAAAGCTCAATTTTCATATGCCGGTG  
GAAAAGACTTGAAATCATTACGTACTGTAGATTATGTTATTGTTAGAACTCTATTTTCAA  
CGGTGATAGAGATTAA

### > lexA

Function: protein coding sequence; DNA damage-inducible LexA repressor (core genome, constant)  
Best match: lexA\_CC007\_TCH959-USA300\_AASB02000234.1[113984:114607:r]RC  
Position: 031-contig\_247: 112700 ... 113324; Length: 624 bp  
Sequence:  
TTACATTTTCGCGGTACAAACCAATTACTTTCCCAATTACAGCAACATTGTCGAGGTA AATT  
GGCTCCATTGTA CTATTTTCAGGTTGTAATCGATAACGATTTTTTTCTTTATAGAAGCGTTT  
GACAGTTGCTTCATCTTCCTCAGTCATAGCAACAATAATGTCTCCATTTTCTGCTATGGTT  
TGACTGCGAACAATTACTTTGTCTCCGTCTAATATAACCAGCCTCAATCATACTGTGCGCTA  
CGACGTTTAATATGAATATGTCGCTATTGTGTGTCGATGTTAAGTGTTTCAGGTAATGGAA  
AATATTCTTCAATATTTTCTACTGCGGTAATAGGAACACCTGCTGTGACTTTACCAATAAC  
TGGCACATGAATCGTTTCTTCATATTAATATTTTCATTTGTTTGATCACTTACAATTTCTA  
TAGCACGTGGTTTCGTCGGATCTCTTCTTATATAGCCTTTTTCTTCAAGACGTGAAAGGTG

ACCATGAACAGTTGAACTGGATGCTAAGCCAAGTCTTACCAATTTTCGCGAACACTAGG  
CGGATAACCTTTTCATTTGAACAAGTGTGTTAATATAGTTATATATTTTCGCTTTGTCGTTTTG  
TTAATTCTCTCAT

> **tkt**

Function: protein coding sequence; transketolase (core genome, constant)

Best match: tkt\_CC001\_MW2-USA400\_BA000033.2[1340731:1342719]

Position: 031-contig\_247: 114195 ... 116184; Length: 1989 bp

Sequence:

ATGTTTAATGAAAAAGATCAATTAGCTGTTGATACGCTGCGTGCACTAAGTATCGACACA  
ATCGAAAAAGCGAATTCTGGTCATCCAGGATTACCTATGGGAGCTGCCCAATGGCTTAC  
ACTTTGTGGACACGTCATCTGAATTTAATCCACAATCTAAAGATTACTTCAATAGAGACC  
GTTTCGTATTATCTGCAGGGCATGGTTCAGCATTATTGTATAGCTTGTACATGTTTCTGG  
TAGTTTAGAATTAGAAGAATTAAGCAATTTAGACAATGGGGTTCTAAAACACCAGGTCA  
TCCTGAATACAGACATACAGATGGTGTAGAAGTTACTACCGGACCACTTGGACAAGGTTT  
TGCTATGTCAGTAGGATTAGCTTTAGCAGAAGATCACCTAGCAGGGAAATTTAATAAAGA  
AGGATATAATGTTGTAGATCATTACACATATGTATTAGCTTCTGACGGTGATTTAATGGA  
AGGTATTTTCGCATGAAGCAGCTTCATTTGCTGGACATAATAAATTAAGTAAATTAGTTGTT  
TTATACGATTCAAATGATATTTTCATTAGATGGCGAATTAACAAAGCTTTTTTCTGAAAAC  
ACAAAAGCTCGTTTTGAAGCATATGGTTGGAATTACTTACTAGTTAAAGATGGTAATGAT  
TTAGAAGAAATTGATAATGCGATTACTACTGCTAAATCTCAAGAAGGACCAACAATTATC  
GAAGTTAAACAACAATCGGATTTGGTTCACCGAATAAAGCAGGAACTAATGGTGTTCAT  
GGGGCACCTTTAGGTGAAGATGAAAGAAAATTAACATTTGAAAATTACGGTTTAGATCCT  
GAAAACGTTTTAATGTTTCAGAAGAAGTATACGAAATTTTCCAAAATACTATGTTAAAA  
CGTGCTAATGAAGATGAATCTCAATGGAATTCATTATTAGAAAAATATGCAGAAACATAT  
CCTGAATTAGCAGAAGAATTTAAATTAGCAATTAGTGGTAAATTGCCTAAAAATTATAAG  
GATGAATTACCACGTTTTGAAGCTGGTTCATAATGGTGCATCTCGTGCTGATTCTGGTACTG  
TTATTCAAGCAATCAGTAAAAGCTTTCCTTTCATTCTTTGGTGGATCAGCAGACCTTGCTGG  
TTCAAACAAATCCAATGTAATGATGCAACTGATTATAGTTCTGAAACACCTGAAGGTAA  
AAATGTGTGGTTTGGTGTACGTGAATTTGCTATGGGTGCTGCTGTAAATGGTATGGCTGC  
ACATGGAGGTTTACATCCATATGGTGCAACATTCCTTCGTATTTAGTGATTATTTAAAACCA  
GCGTTACGTTTATCATCAATTATGGGATTAATGCAACGTTTCATCTTCACACATGATTCAA  
TTGCAGTAGGTGAAGATGGTCCGACTCATGAACCAATTGAGCAATTAGCTGGATTAAGAG  
CCATTCCAAATATGAATGTTATCCGTCCTGCTGATGGTAAATGAAACAAGAGTAGCATGGG  
AAGTTGCCTTAGAATCTGAATCTACACCTACTTCATTAGTATTGACACGTCAAACTTACC  
GGTATTAGATGTACCAGAAGATGTAGTTGAAGAAGGCGTTCGAAAAGGTGCCTATACAG  
TTTATGGCTCTGAAGAGACACCAGAATTCCTATTATTAGCTTCAGGTTTCAGAAGTTAGTCT  
TGCAGTTGAAGCTGCTAAAGATCTTGAAAAACAAGGTAAATCAGTACGTGTTGTTTCAAT  
GCCTAACTGGAATGCATTTGAACAACAATCTGAAGAATATAAAGAATCAGTTATTCCATC  
AAGCGTAAACAAACGTTGCGATTGAAATGGCTTCACCGCTTGGATGGCATAAATATGT  
AGGTAAGTGCAGGTAAAGTTATTGCTATTGACGGCTTTGGCGCAAGTGCACCTGGCGATTT  
AGTAGTTGAAAATATGGATTTACTAAAGAAAATATCTTAAACCAAGTTATGAGCTTATA  
A

> **ccdC**

Function: protein coding sequence; membrane protein involved in cytochrome C biogenesis (core genome, constant)

Best match: ccdC\_CC001\_MW2-USA400\_BA000033.2[1343418:1343885] (completely identical)

Position: 031-contig\_247: 116882 ... 117350; Length: 468 bp

Sequence:

GTCCTCTATTTAATATTTTTCAATCATTGTAGCTTTATTTATGGGAACTATAGTTATAGTTAT  
TCGTATGAAAGCTCAAAATTATCCGGTAAATGAGAAAAAATAGTTTTGCCACCGTTTTTT  
TATGGCGACCGGTGCATTGATGTACGTCGTTCCATATTTTAGGCTAACAGGATCGGAAAT  
GCTAGAAGCCTTTATAATTGGTTTGCTTTTTTCTACAGTTCTAATTTGGACTTCTCGATTTG  
AAGTCAAAGGTACAGAAATTTATATGAAACGATCTAAAGCATTTCAGTTATTTTGATTT

CATTA CTTATCATTTCG TACTGTGATGAAAATATTCATTAGTAATGAAATAGATCCTGGAG  
AATTAGGCGGCATGTTCTTTTTATTAGCATTCTGTATGATTGTTCCCTGGAGAGCAGCAAT  
GCTATATAAATACAAAAAACTAAAGAAAACATTAATCAATTA

> **sbcD**

Function: protein coding sequence; nuclease SbcCD subunit D (core genome, variable)

Best match: sbcD\_CC001-ST772\_118\_AJGE0100002.1[44790:45911:r] (completely identical)

Position: 031-contig\_247: 117473 ... 118595; Length: 1122 bp

Sequence:

ATGAAAATTATACATACAGCAGACTGGCACTTAGGGAAAATATTAATGGCAAACAGCT  
TTTAGAAGATCAAGCGTATATTTTAGATATGTTTCGTAGAAAAAATGAAAGAAGAAGAAC  
CCGATATCATTGTGATAGCTGGAGATTTATATGACACAACATATCCAAGTAAAGATGCAA  
TCATGTTATTAGAACAAGCGATTGGAAAGTTAAATTTAGAACTGCGTATACCAATAATTA  
TGATTAGTGGAAATCACGATGGTAAAGAGAGGTTAAACTATGGGGCGAGTTGGTTTGAA  
CATAATCAGTTATTTATAAGAACAGATTTTACATCGATTAATTCACCAATAGAGATAAAT  
GGGGTTAATTTTTATACACTCCCTTATGCTACTGTGAGCGAAATGAAACACTACTTTGAAG  
ATGACACCATTGAAACACATCAACAGGGAATTACGCGCTGTATTGAAACAATAGCACCG  
GAAATTGATGAAGATGCCGTCAATATTTTAATTAGTCATCTGACTGTTCAAGGTGGAAAG  
ACATCTGATTCTGAAAGACCATTAACTATTGGAACGGTTGAATCAGTTCAGAAAGGTGTT  
TTTGATATATTTGATTATGTCATGCTAGGTCCTGTCATCATCCATTTAGTATAGAAGACC  
ACAAAATTAAATATAGTGGCTCCTTATTGCAGTATTCATTTTCGGAAGCGGGTCAAGCTA  
AAGGGTATAGACGTGTAACAATTAATGATGGCATTATTAACGATGTATTTATTCCTCTTAA  
GCCACTTAGACAATTGGAAATTATCTCAGGCGAATATAATGATGTTATTAATGAAAAAGT  
TCATGTGAAAAATAAAGATAATTATTTACATTTTAACTTAAAAATATGTCTCATATTACT  
GATCCAATGATGAGTTTTAAAACAAATTTATCCTAATACTTTAGCGCTGACGAATGAAACT  
TTTAATTACAATGAAGAAAATAATGCTATAGAAATAAGTGGAAAAGATGACATGTCAATT  
ATCGAAATGTTTTATAAACATATAACTGATAAAGAATTATCGGATATCCAATCTAAAAAG  
ATAAAAAATATTTTAGAAAACGAATTGAGAAAAGGAGGATTA

> **sbcC**

Function: protein coding sequence; nuclease SbcCD subunit C (core genome, constant)

Best match: sbcC\_CC001\_MSSA476\_BX571857.1[1373630:1376659]

Position: 031-contig\_247: 118598 ... 121628; Length: 3030 bp

Sequence:

ATGAAACCATTACATTTAAAGTTGAATAATTTCCGCCCTTTTTAAAAGAAGAAATTGAT  
TTTTCTAAAATTGATAATAATGAATTGTTTTTAATAAGTGGTAAGACTGGATCGGGTAAA  
ACAATGATTTTTGATGCAATGACTTATGCCTTGTTTGGTAAAGCATCAACTGAACAAAGA  
GAAGAAAATGATTTGAGAAGTCATTTTCGCTGATGGTAAACAGCCGATGTCAGTAACATTT  
GAATTTCAATTAATCATCGAATTTATAAAGTGCATAGACAAGGCCCTTATATCAAAGAA  
GGTAATACAACAAAAACGAACGCTAAATTTGATGTATTTGAGATGGTGGATGGCAAGTAT  
GAAATTAGAGAAAGTAAAGTAATTTACAGGTACCCAATTCATTATTGAATTATTAGGAGTA  
AATGCAGATCAATTCGACAATTGTTTATTTGCCTCAAGGTGAATTCAAACGCTTTTTAA  
TATCAAACAGTCGTGAAAAGCAAGGGATATTAAGAACACTGTTTGACAGTGAAAAATTT  
GAAGCTATACGAGAAATATTAAGAAGAAAGTAAAAAAGAAAAGCTCAAATCGAGA  
ATAGATATCAACAAATTGACCTTTTATGGCAAGAAATTGAATCATTTGATGATGACAATA  
TAAAAGGCTTATTAGAGGTTGCCACTCAACAGATAGACAAATTGATTGAAAATATACCAC  
TTTTACAAGCTAGGTGCAAGAAATACTAGCATCTGTAAATGAAAGTAAAGAACTGCTA  
TTAAAGAATTTGAAATAATAGAAAAGAAAACATTAGAAAATAATATATTAAGATAAT  
ATTAATCAACTCAACAAAAATAAAATTGATTTTCGTTCAATTGAAAGAACAACAACCTGAA  
ATAGAGGGAATTGAAGCTAAGTTAAAGTTGTTACAAGATATTACAAACCTATTGAATTAT  
ATTGAAAATAGAGAAAAAATTGAAACTAAAATTGCTAATAGCAAAAAAGATATTTCTAA  
AACCAATAATAAAATATTGAATCTTGATTGTGATAAGCGAAACATAGACAAAGAGAAAA  
AAATGTTAGAAGAAAACGGAGATTTAATTGAAAGTAAAATCTTTTTATTGATAAAACTA  
GAGTATTATTTAACGATATTAATAAGTATCAACAAAGTTATCTCAATATTGAAAGCTTGA  
GAACTGAGGGTGAACAATTAGGTGATGAATTAATAATCTAATTAAGGTTTAGAAAAG

GTCGAAGATTCAATAGGTAATAACGAAAGTGATTACGAGAAAATTATCGAACTAAATAA  
TGCGATAACTAACATAAATAATGAAATTAATATAATTAAGAAAATGAAAAAGCTAAAG  
CTGAATTAGATAAACTATTAGGTAGTAAGCAAGAGTTAGAGAATCAAATTAATGAAGAA  
ACAACTATAATGAAGAATCTCGAAATAAAATTAGATCACTACGATAAATCAAAATTGGA  
CTTAAATGATAAAGAAAGCTTTATAAGTGAAATTAATCTGCTGTAAAGATTGGAGATCA  
ATGTCCGATATGTGGTAATGAAATTCAGGATTTAGGGCATCATATTGATTTTTGACAGTATT  
GCTAAACGTCAAAATGAAATTAAGAAATTGAAGCAAATATCCACGCAATAAAAATCGAA  
TATTGCTGTGCATAATTCTGAAATTAATTTGTTAATGAAAAAATATCGAATATTAATATT  
AAAACGCAAAGTGATTTTTCTACTCGAAGTATTGAATAAGCGTCTGCTAGAAAATGAAAT  
GCATTGAATAATCAAAGAGATCTTAATAAATTTATAGAACAAATGAAAGAAGAAAAAGA  
TAATCTAACGTTGCAAATTCATAATAACAATTGCGACTAAATAAAAATGAATCTGAGTT  
GAAATTATGTCGAGATCTCATCACTGAATTTGAAACACTCTCGAAATATAATAATATCAC  
TAATTTTGAGGTGGATTATAAGAAGTATATTCAAGATGTGAACCAACATCAAGAACACTC  
AAAGGAGATTGAAGATAAGTCAATGCAATTGTCTCAAAGAAAGTTAATTGAGCAAAAATA  
ATCTAAATCACTATGAAAATCACTAGAACTTACAATAATGACTTAGAATTGAATGAAA  
AATCTATTGAAATGGAAATGTCGAGGCTGAATTTAACTGACGACAATGATATAAATGAAA  
TAATAGCCTGGAGGGGCGAGCAAGAGGAATTAGAGCAGAAAAGGGATACTTATAAAAA  
ACGTTATCATGAATTTGAAATGGAAATAGCTAGGTTAGAATCATTAAACCAAGGATAAAGA  
GTTATTGGACTCTGATAAATTAAGATGAATATGAGCAAAAAAAGAAAAGATGAATA  
CACTGATAGATGAATACTCTGCTGTTTATTATCAATGTCAAATAATATTAATAAAACAC  
AATCTATAGTTTCGCATATTAATTAATTAATCAAGAATTAAGGATCAACAAGAAATTT  
TTCAATTGGCTGAAATTGTCAGTGGTAAGAATAACAAAAATCTTACATTGGAAAACTTTG  
TCTTAATTTACTATTTAGATCAAATTATTGCCCAAGCAAATCTGAGATTAGCAACAATGTC  
AGATAATCGATACCAACTAATTAGGCGAGAAGCGGTTTTCTCATGGTCTTAGTGGCCTAGA  
AATTGATGATTTGATTTGCATTCAAATAAGTCTAGACATATTAGCTCGTTATCAGGTGGA  
GAACTTTCCAATCGTCGCTTGCATTAGCTTTAGGGTTAAGCGAAATTGTACAGCAGCAA  
TCAGGAGGTATTTCACTAGAATCAATATTTATTGATGAAGGATTCGGTACATTAGATCAA  
GAAACGCTTGAAACAGCGTTAGACACTTTATTAATCTTAAATCAACTGGTAGAATGGTT  
GGGATTATTTACATGTGAGCGAATTGAAAAATAGAATACCTTTAGTTTTAGAAGTGAAA  
TCAGATCAATATCAGAGTTCAACAAGATTCAAAAGAAATTAA

### > **mscL**

Function: protein coding sequence; large-conductance mechanosensitive ion channel (core genome, constant)

Best match: mscL\_CC001\_MW2-USA400\_BA000033.2[1348234:1348596:r]RC

Position: 031-contig\_247: 121698 ... 122061; Length: 363 bp

Sequence:

TTATTTTTTCTCACGTAATAAATCTCTGATTTTCAGTTAATAACACAACATTTTCTTCCACAA  
CTGCTTCTTCTTCGGCTTCTTCTTCTTTCATTAATGTATTTGCAATCTTAACAAAGATGAAT  
AAAGCAAACGCGATGATAATAAAGTCGATAACAGATTGGATAAATAAACCGTATTTAAT  
ACCCAGAAATGACCATTCTTTAGCAAATCAACTGATCCGAAAATTTTACCAATTAATGG  
CATGATGATATTTTCTACTAATGAAGATATAATCTTGTTGAAAGCTGCACCCATCACAAC  
AGCAATTGCTAAATCTAAGACGTTACCTTTTAAGGCGAACTCTTTGAATTCTTTTAACAT

### > **opuD1**

Function: protein coding sequence; glycine betaine transporter 1 (core genome, constant)

Best match: opuD1\_CC001\_MW2-USA400\_BA000033.2[1348800:1350446]

Position: 031-contig\_247: 122264 ... 123911; Length: 1647 bp

Sequence:

ATGAATTCTTCTTACCAGAGAATCCAAATGGAAAGAAGTATTCACCAGTCTTCATCTAT  
AGTGCAATTGTTGTTGCTATAGTCGTATTACTTGGTGCATTTTTACCTGAACAATTCAACT  
ATGTTACCAATAATATTAATAATGTGGATTACAGAAAAGTTAGGTTGGTATTATCTTATTCT  
TACTACGATTATCGTGTCTTCTGTATATTCCTTATTTTTAGTCCTATTGGAAAACCTTAAAC  
TAGGTAAACCAATGACAAACCTGAGTTTAATACAATTTTCATGGTTTGCTATGTTGTTTGG  
TGCTGGTATGGGGATAGGTTTGGTGTTTTATGGTGCAGCTGAACCGATGGCGCACTTTGCT



ACGCCACCTACAGCAGATCCCAAACACTACTGAAGCTTATACTGAAGCTCTACGTTCAACA  
TTTTTCCATTGGGGATTCCATGCTTGGGCTGTTTATGGTGTGTTGCGTTAGCGTTGGCAT  
ATTCGCAATTCCGTAAAGGTGAACCAGGTTTATTATCTAGAACTTTACGTCCTCTTTTAGG  
TGATAAAGTAGAAGGTCCTATTGGGATTTTTATTGACGTTTTATCTGTATTTGCGACAATC  
GTTGGGGTAGCCGTTTCGTTAGGTATGGGTGCTCTACAAATTAATGGTGGTTTACATTACT  
TGTTCAATGTTCCAAATAATACGTTTGTACAAGCGATTATCATCATTGTTGTTACTATCTT  
ATTTATAGCAAGTGCATGGTCTGGATTAAGTAAAGGTATTCAATACTTAAGTAACTTGAA  
CATTGGTTTLAGGTACTATTTAATGGTAGCTGCTTTAATTGTTGGACCAACTGTTCTTATTT  
TAAATATGTTAACTAGCTCTACGGGTAGTTTACTAAACACATTCTTGTTAATAGTTTTGA  
TACAGCAGCTTTAAATCCTCAAAAACGTGAATGGATGTCTTCATGGACACTTTATTACTG  
GGGTTGGTGGTTAAGTTGGAGCCATTTCGTTGGAGTGTTTATTGCACGAGTTTCAAAGG  
ACGTTCAATTAGAGAGTTCATTTCTGGTGTCTTGCTAGTTCCAGCAATTGTTAGTTTTGTTT  
GGTTTAGTGTCTTTGGTGTATTAGGCATCGAGACAGGTAAGAAACACAAAGAAATTTTTG  
ATATGACTCCTGAAACACAGCTATTTGGAGTGTTAATCATGTGCCATTTGGCATTGTTTT  
ATCGTTGATTGCATTATTATTAATTGCATCATTCTTTATTACATCTGCTGACTCAGCAACAT  
TTGTATTAGGAATGCAAACAACATTTGGTTCATTAAATCCATCTAGTATGGTAAAAGTTGT  
TTGGGGAATTTACAGGCCTTAATAGCATTGTACTTTTATTAGCTGGTGGCGGTAACGGC  
GCTGAAGCTTTAAATGCGATTCAAAGTGCTGCAATTATAAGTGCATTCCCATTCTCCTTTG  
TCGTCATACTCATGATGGTAAGTTTCTACAAGGATGCGAACCAGGAACGTAAATTCCTAG  
GTTTAAACATTGACTCCGAATAAACATCGCTTACAAGAATATATCAAGAGTCAACAAGAAG  
ATTATGAATCTGACATTCTTGAAAAGCGTCAGTCACGTAGAAATATAGAGAAAAAAGAT  
AACTAA

> **acnA**

Function: protein coding sequence; aconitate hydratase (core genome, constant)

Best match: acnA\_CC001\_MW2-USA400\_BA000033.2[1351280:1353985]

Position: 032-contig\_259\_RC: 390 ... 3096; Length: 2706 bp

Sequence:

ATGGCTGCAAATTTTAAAGAGCAATCAAAAAACATTTTGACTTGAATGGCCAAAGTTAT  
ACTTACTATGATTTAAAAGCTGTAGAAGAGCAAGGTATTACTAAAGTTTCCAATTTACCTT  
ATTC AATTCGIGTTTTGTTAGAATCTTTACTTCGTCAAGAAGATGATTTTGTAATTACAGA  
CGATCATATTAAGCTTTAAGTCAGTTTGGAAAAGATGGAAATGAAGGCGAGGTACCATT  
TAAACCTTCTCGTGTTATTTTACAAGATTTACAGGTGTACCAGCCGTAGTTGATTTAGCT  
TCTTTACGTAAAGCAATGGATGACGTTGGGGGAGATATTACTAAAATTAATCCAGAAGTA  
CCGGTGGATTTAGTTATTGACCACTCAGTTCAAGTGGATAGCTATGCAAATCCAGAAGCT  
CTTGAACGTAATATGAAATTAGAATTTGAACGTA ACTATGAACGTTATCAGTTTTTAAATT  
GGGCAACGAAAGCATTGATAATTACAATGCAGTTCCTCCTGCAACTGGAATAGTTCACC  
AAGTTAACTTAGAATATTTAGCAAGTGTTGTACATGTTTCGTGATGTAGATGGTGAAAAAA  
CTGCATTTCCGGATACATTAGTTGGTACTGATTACATACAACAATGATAAATGGTATTG  
GCGTACTAGGATGGGGTGTGGTGGTATTGAAGCTGAAGCTGGAATGCTTGGACAACCTT  
CTTATTTCCCAATTCCAGAGGTTATTGGTGTACGACTAGTAAATTCATTACCACAAGGCGC  
AACAGCAACTGATTTAGCGTTAAGAGTAACTCAAGAGCTACGTAAAAAAGGTGTTGTTGG  
TAAATTTGTAGAGTTCTTTGGTCCAGGTGTACAACATTTACCACTAGCAGACCGTGCTACA  
ATTGCAAACATGGCACCAGAGTATGGAGCAACTTGCGGATTCTTCCCAGTTGATGATGAA  
TCTCTTAAATATATGAAGTAACTGGTAGATCAGACGAACATATCGCGCTAGTAAAAGAA  
TATTTGAAACAAAACCATATGTTCTTTGATGTTGAGAAAGAAGATCCTAATTATACAGAT  
GTTATCGAATTGGATTTATCAACAGTTGAAGCATCGCTTTCAGGACCAAAAACGTCCTCAA  
GATTTAATTTTCTTAAGTGATATGAAATCATCTTTGAAAATTCTGTAACAGCTCCAGCAG  
GCAACCAAGGACACGGTTTAGATAAAAAGTGAATTTGATAAGAAAGCTGAAATTAACCTT  
AAAGATGGATCAAAGCTACAATGAAAACAGGTGATATTGCAATAGCAGCAATTACATC  
ATGTACAAATACATCTAACCTTATGTAATGTTAGGTGCAGGTTTAGTTGCTAAAAAAGC  
AGTTGAAAAAGGCTTGAAAGTTCCTGAATACGTTAAAACCTTCTCTAGCACCAGGATCAAA  
AGTTGTTACCGGATATTTAAGAGATGCTGGCTTACAACCTTATTTAGATGATTTAGGCTTC  
AACTTGGTTGGTTATGGATGTACAACCTTGTATCGGTAATTCAGGTCTTTTATTACCAGAAA  
TTGAAAAAGCGATTGCTGATGAGGACCTATTAGTGACATCTGTATTATCTGGTAACCGTA  
ACTTTGAAGGTCGTATCCATCCTCTTGTTAAAGCCAATTACCTAGCTTACCACAGTTAGT

TGTTGCTTATGCATTAGCTGGAACGGTTGATATTGATTTACAGAATGAACCTATTGGTAAA  
GGTAATGACGGTGAAGATGTATATTTGAAAGATATTTGGCCATCAATTAAGAAGTTTCA  
GATACCGTTGATAGTGTGTAACACCTGAATTATTTATTGAAGAATATAATAACGTATAC  
AATAACAACGAATTATGGAATGAGATTGATGTAACCTGATCAACCTCTATATGACTTTGAT  
CCTAATTCAACATACATTCAAAATCCATCATTCTTCCAAGGATTATCTAAAGAACCGGGT  
ACGATTGTTCCATTAAATGGTTTACGTGTTATGGGTAAATTTCGGTGATTCTGTGACAACCTG  
ACCACATCTCTCCAGCAGGTGCAATTGGTAAAGATACGCCAGCTGGTAAATATTTACAAG  
ATCATCAAGTGCCTATTTCGTGAATTTAATTCATATGGTTCAAGACGTGGTAATCACGAAG  
TAATGGTTCGAGGTACGTTTGCTAATATACGTATTA AAAACCAATTAGCGCCAGGTACTG  
AAGGTGGTTTTACAACCTATTGGCCAACAAATGAAGTAATGCCTATCTTTGATGCTGCAA  
TGAAATATAAAGAAGATGGTACAGGTTTAGTTGTATTAGCTGGTAACGATTATGGTATGG  
GTTTCATCTCGTGACTGGGCAGCAAAGGTACAACTTATTAGGTGTTAAAACAGTTATTG  
CACAAAGTTATGAACGTATCCATCGTTCAAATTTAGTTATGATGGGTGATTACCATTAGA  
GTTTAAAAAAGGTGAATCAGCTGATTCTTGGTCTAGATGGTACAGAAGAAATTTCTGT  
TAATATTGATGAAAATGTTCAACCACATGACTACGTCAAAGTTACTGCTAAGAAGCAAGA  
TGGTGATTTGGTAGAATTTGACGCTATGGTTCGTTTTGACTCACTTGTTGAAATGGATTAC  
TATCGTCACGGTGGAAATTTTACAAATGGTTTTAAGAAATAAATTAGCGCAATAA

> **grlB**

Function: protein coding sequence; DNA topoisomerase IV/subunit B (core genome, constant)

Best match: grlB\_CC001\_MW2-USA400\_BA000033.2[1356324:1358315] (completely identical)

Position: 032-contig\_259\_RC: 5435 ... 7427; Length: 1992 bp

Sequence:

ATGAATAAACAAAATAATTATTCAGATGATTCAATACAGGTTTTAGAGGGGTTAGAAGCA  
GTTTCGTA AAAAGACCTGGTATGTATATTGGATCAACTGATAAACGGGGATTACATCATCTA  
GTATATGAAATTGTTCGATAACTCCGTCGATGAAGTATTGAATGGTTACGGTAACGAAATA  
GATGTAACAATTAATAAAGATGGTAGTATTTCTATAGAAGATAATGGACGTGGTATGCCA  
ACAGGTATACATAAATCAGGTAAACCGACAGTTCGAAGTTATCTTTACTGTTTTACATGCA  
GGAGGTAAATTTGGACAAGGCGGCTATAAACTTCAGGTGGTCTTCACGGTGTGGTGTCT  
TCAGTTGTAATGCATTGAGTGAATGGCTTGAAGTTGAAATCCATCGAGATGGTAATATA  
TATCATCAAAGTTTTAAAAACGGTGGTTCGCCATCTTCTGGTTTTAGTGAAAAAAGGTAAA  
ACTAAGAAAACAGGTACCAAAGTAACATTTAAACCTGATGACACAATTTTTAAAGCATCT  
ACATCATTTAATTTTGATGTTTTAAGCGAACGACTACAAGAGTCTGCGTTCCTATTGAAAA  
ATTTAAAAATAACGCTTAATGATTTACGCAGTGGTAAAGAGCGTCAAGAGCATTACCATT  
ATGAAGAAGGAATCAAAGAGTTTGTAGTTATGTCAATGAAGGAAAAGAAGTTTTGCAT  
GACGTGGCTACATTTTCAGGTGAAGCAAATGGTATAGAGGTAGACGTAGCTTTCCAATAT  
AATGATCAATATTCAGAAAGTATTTTAAAGTTTTGTAATAATGTACGTACTAAAGATGGT  
GGTACACATGAAGTTGGTTTTAAACAGCAATGACACGTGATTTAATGATTATGCACGT  
CGTATTAATGAACTTAAAACAAAAGATAAAACTTAGATGGTAATGATATTCGTGAAGGT  
TTAACAGCTGTTGTGTCTGTACGTATTCCAGAAGAATTATTACAATTTGAAGGACAAACG  
AAATCTAAATTGGGTACTTCTGAAGCTAGAAGTGCTGTTGATTCAGTTGTTGCAGACAAA  
TTGCCATTCTATTTAGAAGAAAAAGGACAATTGTCTAAATCACTTGTGAAAAAAGCGATT  
AAAGCACAACAAGCAAGGGAAGCTGCACGTAAGCTCGTGAAGATGCTCGTTCAGGTAA  
GAAAAACAAGCGTAAAGACACTTTGCTATCTGGTAAATTAACACCTGCACAAAGTAAAA  
ACACTGAAAAAATGAATTGTATTTAGTCGAAGGTGATTCTGCGGGAGGTTTCAGCAAAC  
TTGGACGAGACCGCAAATTTCCAAGCGATATTACCATTACGTGGTAAGGTAATTAATACAG  
AGAAAGCACGTCTAGAAGATATTTTTAAAAATGAAGAAATTAATACAATTATCCACACAA  
TCGGGGCAGGCGTTGGTACTGACTTTAAAATTGAAGATAGTAATTATAATCGTGTAAATTA  
TTATGACTGATGCTGATACTGATGGTGCGCATATTC AAGTGCTATTGTTAACATTCTTCTT  
CAAATATATGAAACCGCTTGTTCAAGCAGGTTCGTGTATTTATTGCTTTACCTCCACTTTAT  
AAATTGAAAAAAGGTAAAGGCAAAACAAGCGAGTTGAATACGCTTGGACAGACGAAG  
AGCTTAATAAATTACAAAAAGAACTTGGTAAAGGCTTCACGTTACAACGTTACAAAGGTT  
TGGGTGAGATGAACCCTGAACAATTATGGGAAACGACGATGAACCCAGAAACACGAACT  
TTAATTCGTGTACAAGTTGAAGATGAAGTGCCTCATCTAAACGTGTAACAACATTAATG  
GGTGACAAAGTACAACCTAGACGTGAATGGATTGAAAAGCATGTTGAGTTTGGTATGCA

AGAGGACCAAAGTATTTTAGATAAATTCTGAAGTACAAGTGCTTGAAAATGATCAATTTGA  
TGAGGAGGAAATCTAG

> **grlA**

Function: protein coding sequence; DNA topoisomerase IV/subunit A (core genome, constant)

Best match: grlA\_CC001\_MSSA476\_BX571857.1[1386869:1389271]

Position: 032-contig\_259\_RC: 7426 ... 9829; Length: 2403 bp

Sequence:

GTGAGTGAAATAAATTCAAGATTTATCACTTGAAGATGTTTTAGGTGATCGCTTTGGAAGA  
TATAGTAAATATATTATTCAAGAGCGTGCATTGCCAGATGTTTCGTGATGGTTTAAAACCA  
GTACAACGTCGTATTTTATATGCAATGTATTCAAGTGGTAATACACACGATAAAAATTC  
CGTAAAAGTGCGAAAACAGTCGGTGTATGTTATTGGTCAATATCATCCACATGGGAGACTAC  
TCAGTGTACGAAGCAATGGTCCGTTTAAAGTCAAGACTGGAAGTTACGACATGTCTTAATA  
GAAATGCATGGTAATAATGGTAGTATCGATAATGATCCGCCAGCGGCAATGCGTTACACT  
GAAGCTAAGTTAAGCTTACTAGCTGAAGAGTTATTACGTGATATTAATAAAGAGACAGTT  
TCTTTCATTCCAAACTATGATGATACGACACTCGAACCAATGGTATTGCCATCAAGATTTCT  
CTAACTTACTAGTGAATGGTCTACAGGTATATCTGCAGGTTACGCGACAGATATACCAC  
CACATAATTTAGCTGAAGTGATTCAAGCAACACTTAAATATATTGATAATCCGGATATTA  
CAGTCAATCAATTAATGAAATATATTAAGGTCTGATTTTCCAAGTGGTGGTATTATTCA  
AGGTATTGATGGTATTAATAAAGCTTATGAATCAGGTAAAGGTAGAATTATAGTTCGTTT  
TAAAGTTGAAGAAGAACTTTACGCAATGGACGTAAACAGTTAATTATTACTGAAATTCC  
ATATGAAGTGAACAAAAGTAGCTTAGTAAAACGTATCGATGAATTACGTGCTGACAAAA  
AAGTCGATGGTATCGTTGAAGTACGTGATGAACTGATAGAAGTGGTTTACGAATAGCAA  
TTGAATTGAAAAAAGATGTGAACAGTGAATCAATCAAAAATTATCTTTATAAAAACCTCG  
ATTTACAGATTTTATATAATTTCAACATGGTCGCTATTAGTGATGGTCGTCCAAAATTGAT  
GGGTATTCGTCAAATTATAGATAGTTATTTGAATCACCAAATTGAGGTTGTTGCAAATAG  
AACGAAGTTTGAATTAGATAATGCAGAAAAACGTATGCATATCGTTGAAGGTTTGATTAA  
AGCGTTGTCAATTTTAGATAAAGTAATCGAATTGATTCGTAGCTCTAAAAACAAGCGTGA  
CGCTAAAGAAAACCTTATCGAAGTATACGAGTTCACAGAAGAACAGGCTGAAGCAATTG  
TAATGTTACAGTTATATCGTTTAAACAAACACTGATATAGTTGCGCTTGAAGGTGAACATA  
AAGAAGTTGAAGCATTAAATCAAACAATTACGTCATATTCTTGATAACCATGATGCATTAT  
TGAATGTCATAAAAGAAGAATTGAATGAAATTAATAAAGAAATTCAAATCTGAACGACTG  
TCTTTAATTGAAGCAGAAAATTGAAGAAATTAATAAATTGACAAAGAAGTTATGGTGCCTAGT  
GAAGAAGTTATTTAAGTATGACACGTCATGGATATATTAACGTACTTCTATTTCGTAGCT  
TTAATGCTAGCGGTGTTGAAGATATTGGTTTAAAAGATGGTGACAGTTTACTTAAACATC  
AAGAAGTAAATACGCAAGATACCGTACTAGTATTTACAAATAAAGGTCGTTATCTATTTA  
TACCGGTTCATAAATTAGCAGATATTCGTTGGAAAGAATTGGGACAACATGTATCACAAA  
TAGTTCCTATCGAAGAAGATGAAGTGGTATTAATGTCTTTAATGAAAAGGACTTTAATA  
CAGATGCATTTTATGTTTTTGCGACTCAAATGGCATGATTAAGAAAAGTACAGTGCCTC  
TATTTAAAACAACGCGTTTTAATAAACCTTTAATTGCTACTAAAGTTAAAGAAAATGATG  
ATTTGATTAGTGTTATGCGCTTTGAAAAGATCAATTAATTACCGTCATTACTAATAAAGG  
TATGTCATTAACGTATAATACAAGTGAAGTATCAGATACCGGATTAAGGGCAGCTGGTGT  
TAAATCAATAAATCTTAAAGCTGAAGATTTTCGTTGTTATGACAGAAGGTGTTTCTGAAAA  
TGATACTATATTGATGGCCACACAACGCGGCTCGTTAAAACGTATTAGTTTTAAAATCTTA  
CAAGTTGCTAAAAGAGCACAAACGTGGAATAACTTTATTAAGAATTAAGAAAAATCC  
ACATCGTATTGTAGCTGCACATGTAGTGACAGGTGAACATAGTCAATATACATTATATTC  
AAAATCAAATGAAGAACATGGTTTAAATTAATGATATTCATAAATCTGAACAATATACAAA  
TGGCTCATTATTGTAGATACAGATGATTTTGGTGAAGTAATAGACATGTATATTAGCTA  
A

> **alsT**

Function: protein coding sequence; sodium-alanine symporter family protein (core genome, constant)

Best match: alsT\_CC001\_MW2-USA400\_BA000033.2[1360967:1362427] (completely identical)

Position: 032-contig\_259\_RC: 10078 ... 11539; Length: 1461 bp

Sequence:

TTGAAAGATTTTCGATAGTTTAATTCCTGGATGGTTTAAAGAATTTGTCCATGTTGGTACCG  
ATTTAATATGGTCTCAATATTTAATTGGTCTATTATTGACAGCTGGATTCTTCTTTACAATT  
AGTTCTAAATTCGTCCAATTACGAATGTTACCTGAAATGTTTAGAGCTTTAGTAGAACGTC  
CAGAACTTTAGAAGATGGTAAGAAGGGTATTTCCGCCATTCCAAGCATTGCGATTAGTG  
CTGGTTCGAGAGTTGGTACTGGTAATATTGCTGGTGTGCGACTGCGATTGTTTTAGGCGG  
TCCAGGTGCAGTGTGGTGGATGTGGGTTATTGCATTTATAGGTGCAGCGAGTGCATTTATA  
GAAGCGACTTTGGCTCAGGTTTATAAAGTACATGATAAAGATGGTGGATTCCGTGGTGGT  
CCAGCTTACTATAATTACTAAAGGTTTAAATCAAAAATGGCTAGGTATCGTATTTGCGATT  
TAATTACAATTACATTTGCATTTGTATTTAACACAGTGCAATCTAATACAATTGCGGAGTC  
GTTAAATACGCAATATAATATTAGTCCAGTAATCACAGGTATTATTTTAGCAATCGTAAC  
AGCTATTATTATTTGGTGGTGTACGTAGTATTGCTACGTTATCTTCGTTAATTGTACCG  
ATTATGGCTATCATTTACATTGGTATGGTTTTAGTAATATTGCTATTTAATTTAGATCAAA  
TTGTTCCATGATAGGTACGATTATTAAGTGCATTTGGTATCGAACAAGTAACTGGTG  
GCGCTGTAGGTGCTGCGGTTCTTCAAGGTATCAAACGTGGTTTATTCTCTAACGAAGCTG  
GTATGGGTTCTGCGCCGAATGCAGCGGCAACTGCTGCCGTACCACACCCTGTTAAGCAAG  
GTTAATCCAATCATTAGGTGTGTTCTTTGATACAATGTTGGTTTGTACAGCAACTGCAAT  
CATGATTTTACTATATTCAGGACTGAAATTTGGTGATAACGCACCTCAAGGTGTTGCAGTT  
ACTCAATCAGCACTTAATGAGCATTAGGTTCTGCTGGAGGTATTTTCTTAACAATAGCAG  
TTACACTGTTTGCATTTTCATCTGTGGTAGGTAATTACTATTACGGTCAATCTAATATTGA  
ATTTTTATCAACAAACCGTGAATATTATTTATCTTTAGATGTCTTGTGTAGTACTTGTCT  
TTGTCGGTGCAGTTGTAAAAACAGAAACAGTATGGAATACGGCAGACTTATTTATGGGCT  
TAATGGCAATTGTAAACATTATTTCCATTATAGGACTGTCCAATGTAGCTTTTGCATTGAT  
GAAAGATTATCAAAGCAGAAAAAGAAGGCAAGAACCCTGTCTTTAAACCTGAAAACCT  
TAGAAATTAACCTATTTGGAATTAGTGCTTGGGGCGCTAACAAATATAAGAACTCTGATA  
AATAA

> **tx\_alsT**

Function: rho-independent terminator of alsT

Best match: tx\_alsT\_CC001\_MW2-USA400\_BA000033.2[1362455:1362520:r]RC (completely identical)

Position: 032-contig\_259\_RC: 11566 ... 11632; Length: 66 bp

Sequence:

TAAAAATCAAATAAACCCCTGAGGTTTTCAAATTAAGCGAAAATCTCAGGGTTTTAAATT  
TGACT

> **glcT**

Function: protein coding sequence; transcript antiterminator (core genome, constant)

Best match: glcT\_CC001\_MW2-USA400\_BA000033.2[1362927:1363778] (completely identical)

Position: 032-contig\_259\_RC: 12038 ... 12890; Length: 852 bp

Sequence:

ATGGGAGAATATATTGTTACTAAAACATTGAACAACAATGTCGTAGTATGTACTAATAAT  
GATCAAGAAGTTATTTAATCGGTAAAGGTATTGGTTTTAACAAAAAGAGGGAATGGCG  
TTAAACGACCAAATATTACAATAGAGAAAATTTATAAATTAGAGAGTGAGCAACAAAA  
AGCACATTATAAAAGTTTAGTTGAAATCGCTGATGATAATGTATTACAAGTAATTATTGA  
TTCGTTGAATTTTATTCTAATACTGCGATGAATGTTGATTCAAACAACCTTGTAGTTTCA  
TTAACGGATCATATTATATTGCTTATAAACGCTTAAAACAACAATCAAGTTATTAGCAATC  
CATTTGTTATGGAACTATGCAGTTATATAGTGATGCATATCATATTGCTAAACAGGTGAT  
TGATCAGTTAAATGCAGCATTAGATGTACATTTTCTGAAGATGAGATAGGATTTATTGC  
ATTACATATTGCATCTAATACAGAAGATTTATCTATGCATGAGATGACCTTGATCAATAAT  
GTTATTAATAAAGGTATAGATATCATTGAATCAGACCTTGTGACAACCTGTTGATAAGGAA  
TCATTACAATACCAACGTTTTATAAGGCACGTACAATTTTTAATTCGCCGATTAAGAAGA  
AAAGAATATATACATGCACAAGATGATTTTGTGTCTATGATTAATAAATCACTATCCGATT  
TGCTATAACACAGCATATAAAATTTAACTATGATACAAAAACAATTTGATGTTAATATC  
AGTGAGTCTGAAATTATATATTTAACATTACACATTCATCATTTTGAAGAAAGGATTAATC  
AATCCTAA

> **mprF**

Function: protein coding sequence; lysylphosphatidylglycerol synthetase (core genome, variable)

Best match: mprF\_CC001\_MW2-USA400\_BA000033.2[1365602:1368124] (completely identical)

Position: 032-contig\_259\_RC: 14713 ... 17236; Length: 2523 bp

Sequence:

```
ATGAATCAGGAAGTTAAAAACAAAATATTTTCAATCTTAAAAATTACGTTTGCTACAGCT
TTATTTATTTTGTAGTAATCACATTGTATCGGGAGTTATCTGGTATTAACTTTAAAGATA
CGTTGGTTGAATTTAGTAAGATTAACCGTATGTCCTTAGTTTTACTATTTATTGGTGGTGG
GGCATCGCTTGTTATTCTATCAATGTATGATGTGATTTTATCTAGAGCTTTAAAAATGGAT
ATATCCTTAGGCAAAGTTTTAAGAGTAAGTTATATCATCAATGCATTGAATGCGATTGTA
GGTTTCGGTGGCTTTATTGGTGCAGGCGTTAGAGCTATGGTTTATAAAAACTATACGCAT
GATAAAAAGAAATTAGTTCACTTTATATCCTTAATACTTATTTCAATGTTGACAGGTTTAA
GCTTATTATCATTGTTAATTGTATTCCATGTTTTCGATGCATCTTAAATTTTAGATAAGATT
ACATGGGTAAGATGGGTATTATATGTAGTGTCAATTTTTCTTACCATTATTCATTATTTATTC
AATGGTTAGACCACCTGATAAAAACAATCGTTTTGTAGGATTGTACTGCACTTTAGTGTC
GTGTGTTGAATGGTTAGCAGCTGCAGTTGTATTATTTCTGTGGTGTAAATTGTTGACGCT
CATGTATCATTGATGTCCTTTATTGCAATATTTATCATTGCTGCATTATCAGGTTTAGTCAG
CTTTATTCTGGTGGTTTCGGCGCTTTTCGATTTAGTTGTATTACTAGGATTTAAAACTTTAG
GTGTCCCTGAGGAAAAAGTATTATTAATGCTACTTCTATATCGTTTTGCGTACTATTTTGT
ACCGGTAATTATTGCATTAATTTTATCATCATTTGAATTTGGTACATCAGCTAAGAAGTAC
ATTGAGGGATCTAAATACTTTATTCCTGCTAAAGATGTTACGTCATTTTTAATGTCTTATC
AAAAGGATATTATTGCTAAAATTCCATCATTATCATTAGCAATTTTAGTATTCTTTACAAG
TATGATCTTTTTTGTAAATAACTTAACGATTGTTTACGATGCTTTATATGATGGAAATCAC
TTAACGTATTATATTCTATTGGCAATTCATACTAGTGCTTGTTTATTACTTTTACTGAATGT
AGTTGGTATTTATAAGCAAAGTAGACGTGCCATCATCTTTGCTATGATTTCAATTTTATTA
ATCACAGTGGCGACATTTCTTCACTTACGCTTCATATATTTTAATAACATGGTTAGCTATTA
TTTTTGTCTGCTTATTGTAGCTTTCCGTAGAGCACGTAGGTTGAAACGCCCAGTAAGAAT
GAGAAATATAGTTGCAATGCTTTTATTCAGTTTATTTATTTTATATGTTAACCATATATTTA
TTGCTGGAACGTTATATGCATTAGATATTTATACGATTGAAATGCATACATCTGTATTGCG
CTATTACTTCTGGCTTACGATTTAATCATCGCTATCATCATAGGTATGATTGCATGGTTG
TTTGATTATCAATTTAGCAAAGTACGCATTTCTTCTAAAATTGAAGATTGCGAGGAGATTA
TTAATCAGTATGGCGGTAATTATTTGAGTCACTTGATATATAGTGGTGACAAGCAGTTTTT
CACTAATGAAAATAAAACAGCATTTTAATGTATCGTTATAAAGCAAGTTCATTAGTGGT
TCTTGAGATCCGTTAGGTGATGAAAATGCCTTTGATGAATTGTTAGAAGCATTCTATAAT
TACGCTGAGTATTTAGGCTATGATGTTATATTCTATCAAGTTACAGATCAACACATGCCTT
TATATCATAATTTCCGGTAACCAATTTTCAAATTAGGTGAAGAAGCAATTATTGATTTAAC
GCAATTTTCAACTTCAGGTAAAAACGCCGTGGATTTAGAGCGACTTTAAACAAATTCGA
TGAACTTAATATTTTCAATTCGAAATTATTGAACCACCGTTTTCAACTGAATTTATAAATGAA
CTTCAACATGTAAGTGATTTATGGCTAGATAATCGTCAGGAAATGCATTTCTCTGTGGGTC
AATTTAATGAAGAATACTTATCTAAAGCGCCAATTGGTGTAAATGCGAAATGAAGAAAATG
AAGTAATTGCATTTTGTAGTTAATGCCAACATACTTTAATGATGCCATTTTCAATCGATTT
AATTAGATGGTTGCCAGAGTTAGATTTACCATTAATGGATGGTCTATACTTGCATATGTTA
CTTTGGAGTAAAGAACAAGGTTATACAAAATTTAATATGGGTATGGCAACGTTATCGAAC
GTTGGTCAATTGCATTATTCATATTTAAGAGAACGACTTGCAGGCCGTGTCTTTGAACATT
TCAACGGTCTATATCGTTTCCAAGGATTACGTCGTTATAAATCTAAATATAATCCGAATTG
GGAACCACGCTTTTATGTTTATCGTAAAGATAATTCGCTTTGGGAATCACTTTCTAAAGTA
ATGCGTGTAAATACGTCACAAATAA
```

> **msrA1**

Function: protein coding sequence; peptide methionine sulfoxide reductase A1 (core genome, constant)

Best match: msrA1\_CC001\_MW2-USA400\_BA000033.2[1368327:1368836:r]RC (completely identical)

Position: 032-contig\_259\_RC: 17438 ... 17948; Length: 510 bp

Sequence:

```
TTATTGCTTATTTTTGTATTCTTGGCGTATTTTTTGTTCCTTCTGCATAGCGCTCTGGATTTTT
CTTATAAAAATCTTGGTGATAGTCTTCGGCTTTGTAAAATTGTGACGCGGGTAATTTTTT
GTTGCAATTGCCTTATCAGCATTAAATCGTATTTTTAAGCTGCTCGATATAAGTCTCAGCGA
GTTCTTTTTGATGATCATTAGTGTAGAAAATAGCTGTTTGATATTGAGGACCACGGTCTTG
ATATTGACCCCTGTATCTAATGGGTCAATGACTGAGAAAAATATTTCTAATAACTTATTG
TATGAGAATAATGCAACATCATATTGAATTTCAACAGTTTCTAAATGACCACTCGTACCT
GATTTTACTTGTTCGTAAGTAGGATTTTCAATATGTCCGCCATATATCCAGAAGTTACTT
TTTCTATGCCGTCAAAGGTGTCAAATGGTTTCGTCATACACCAAAGCAACCTCCGGCAA
AATAAGCTGTATTAATATTCAT
```

> **msrR**

Function: protein coding sequence; regulatory protein msrR (core genome, constant)

Best match: msrR\_CC001\_MW2-USA400\_BA000033.2[1368973:1369956] (completely identical)

Position: 032-contig\_259\_RC: 18084 ... 19068; Length: 984 bp

Sequence:

```
ATGGATAAAGAACTAATGACAACGAATATAGACGTCAAAGTGAACATCGCACTTCGGC
GCCTAAGCGAAAAAAGAAGAAGAAAATTAGGAAATTACCTATCATTCTTCTGATTGTTGT
AATTTTACTTATCGCATTAGTTGTATATATTGTGCATAGTTACAATAGCGGTGTAGAATAT
GCCAAGAAACATGCGAAAGATGTTAAAGTACATCAATTTAATGGACCAGTAAAAAATGA
TGGTAAAATTTCTATTCTTGTACTCGGTGCAGATAAAGCACAAGGTGGACAATCAAGAAC
AGATTCTATCATGGTTGTTCAATATGACTTTATCAATAAAAAGATGAAAATGATGTCTGTC
ATGCGTGATATTTATGCAGATATTCAGGATATGGAAAACACAAAATTAATTCAGCATAAC
GCTTTAGGTGGTCCAGAGCTACTTAGAAAAACACTTGATAAAAATTTAGGAATTAATCCT
GAATATTATGCAGTAGTTGATTTTACTGGATTTGAGAAAATGATTGATGAATTAATGCCA
GAAGGTGTACCAATTAATGTTCGAAAAGGATATGTTCGAAAATATTGGTGTATCTTTGAAA
AAGGGTAACCATAGGTTGAATGGTAAAGAATTACTTGGTTATGCAAGATTCCGTCACGAC
CCTGAAGGTGACTTCGGACGCGTGCGACGTCAGCAACAAGTGATGCAAACATTGAAAAA
AGAAATGGTTAATTTTAGAACAGTTGTTAAATTACAAAAGTTGCAGGTATTTAAGAGG
CTATGTGAATACAAACATTCCTGATTCAGGGATTTTCCAAACAGGTTTGAGTTTTGGTATC
CGAGGTGAAAAAGATGTTAAGTCATTGACTGTGCCAATCAAGAACTCATACGAAGATGTC
AATACAAATACTGATGGTAGTGCATTACAGATTAATAAAAACACAAATAACAAGCTATT
AAAGACTTTTTAGATGAAGATTAA
```

> **txbi\_msrR**

Function: bidirectional rho-independent terminator of msrR

Best match: txbi\_msrR\_CC001\_MW2-USA400\_BA000033.2[1369949:1370017] (completely identical)

Position: 032-contig\_259\_RC: 19060 ... 19129; Length: 69 bp

Sequence:

```
AAGATTAATAAATAACAAGGCGATTTCTATCATACTCAGATAGAAGTCGCCTTGTTTCGTT
TTCAAAGAA
```

> **dmpI**

Function: protein coding sequence; 4-oxalocrotonate tautomerase (core genome, constant)

Best match: dmpI\_CC001\_MW2-USA400\_BA000033.2[1370044:1370232:r]RC (completely identical)

Position: 032-contig\_259\_RC: 19155 ... 19344; Length: 189 bp

Sequence:

```
TTATTGATCTGACTTTCTTACGCCAGCCACACCATAATGGTTTGGTTTCATTTCTTCTATAA
CAACGTGAATTGCTTGTCTATTTGCCCCCGTTGTTTTTCTACGGCGTCAGTTACTTCGCTA
ACTAAATTTTTAATTGTTTCATCCGAACGACCTTCTAATAATTTTACATTGACGATTGGCA
TCAT
```

> **Q99UB7**

Function: protein coding sequence; DNA-damage repair protein (core genome, constant)  
Best match: Q99UB7\_CC001\_MW2-USA400\_BA000033.2[1370377:1371639] (completely identical)

Position: 032-contig\_259\_RC: 19488 ... 20751; Length: 1263 bp

Sequence:

```
GTGTATAATTATCATTTTATTAGAAGATAGGGATGTTCTATGTATTGACCAAAAAAGTTTTT
TTGCGAGTGTTCCTTGTATTGAAAAGGGGCTAGATCCATTAGAAACAAAGCTAGCTGTTG
TTGCAGATACTAAGCGTCAGGGTTCTGTAATATTGGCTGCGACACCTAAATTTAAAAGAAT
TAGGCATCAAGACAGGGTTCGCGATTGTTTCAAATACCACATAGAAATGATATTTACATTA
TCAATCCAAGTATGCGTAAATATCTTAATGTTTCAGTTGCTATTTCTAAGATTGCATTGCG
TTATATTCCACCTGAAGATTTACACCAATATAGTATTGACGAATTTTTTATGGATGTTACT
GATAGCTATCATAGATTTAGTTCTACAGTACATGCATTTTTCGCAAAGACTTAAACGTGAA
ATTTATGAAGAAACAGGCATTTATTGTTACTGTGGGCATTGGTTCTAATATGTTATTAAGTA
AAATTGCTATGGATGTTGAAGCGAAGCATAGTCAAAAATGGTATAGCTGAATGGCGATATC
AAGATGTACCAACGAAATTATGGCCAATTCAGCCCTTTCGCGAGATTTTTGGGGTATTAATC
GTCGAACAGAAGCCAAATTGAATAAAAAGAGGAATTTTTACTATAGGAGATTTAGCGAAA
TATCCATATAAATTTTTAAAAAAGAGTTCGGTATTTAGGTGTTGATATGCATCTACATG
CGAATGGGATAGATCAGAGTAAAGTACGTGAAAAGCACAAAGATCAGCAATCCATCGATA
TGCAAAAAGTCAAATATTAATGAGAGATTATCATTTTGATGAAGCAAAAAGTAGTAATGCAA
GAGTTAATTGAAGATGTTGCTAGCAGAGTTCGAGCAAGAAAAAAGTGGCAAGAACGAT
ACATTTTGCCTTTGGCTATAGTGATGAAGGCGGTGTACATAAGCAATATACTTTGAAAGA
TCCAACAACTTAGAAAAAGATATTTATAAAGTAGTAATGCATTTTCGAGATAAATTATG
TAATAAACAAGCACTATATCGTACGCTAAGTATATCTTTGAGTCAATTTATTAATGAGGA
TGAGCGACAGTTAAGTCTGTTTGAAGATGAATACCAACGCAAACGTGACGAATGTCTAGC
TAAAACGATAGACCAATTACATTTGAAATACGGCAAAGGTATTGTGTCCAAAGCAGTATC
GTTTACAGAAGCAGGTACAAAACACGGCAGATTAGGTTTAAATGGCTGGACATAAAAATGT
AA
```

### > **tyrA**

Function: protein coding sequence; prephenate dehydrogenase (core genome, constant)  
Best match: tyrA\_CC001\_MW2-USA400\_BA000033.2[1371775:1372866:r]RC (completely identical)

Position: 032-contig\_259\_RC: 20886 ... 21978; Length: 1092 bp

Sequence:

```
TTATTGGATATAACAATCAAATCACTCAATGCTTGCATACCGCGTTCTCGGTCAGTAGG
GTTTTTGAACATAATTTTTAAAGCACCGTATATATCTTCGCGTACTTCTAAGATTCTTAAG
TTGCTTATAGATATGTTATGTAACCTCAGGATATAAGTCACTTTACTTATCATACCTGATT
CATCCGGAATGTCTACATATAGATCATAACGAGTATTTAGTCCACCTAGTTGTTTAGCGGG
TAGTGCGTCGCGATACGATTTAGCTTGGGCAAAAATGATAACAATTTTTTCAGAATCATT
GCTTTCAATTAGTCTTTCTAAATCTTGAAACTGACTTTTTAGCTGTGCAATCATTCTAAA
ATATACGTTTTTACTCAAGGTGATATCTTTCCACATTTGTGCATTACTACTAGCTATAC
GAGTGATATCACGAAAACCACAGCTGCAAGTTTATTAATAAATGATGTTCTTGACCGT
TCTTTTGACTAACATGAACTAACTAGATGCAACGATATGAGGTAAATGACTTACGACGC
TTGTTACGTAGTCGTGTTCTTCAGCAGTAGTTACAATAAATTTAGCAAGAGTAGGTGATA
ACAGTTCTTTAACGTGTTTGTGCTGCTCATTCTTTGGCTCATTGTAGACTAAAATATA
ATAAGCGTTTTCAAATAAGTGCTTTTTAGCATTTAGTACACCAGATTTATGACTACCAGCC
ATTGGATGACCACTGACTAAATGAATATTATGCTTTAATAAATTGCATTCGTGTTGCTGTA
TCATTGCTTTAGTACTACCAGTATCAGAAACAATAACACCAGGTTTAGTTGGCATATCTAT
AAGCTCGCTAAGATATTTATTTGTGATAGCAACAGGTGTTGCATAAATAATTACATCGGC
TTTTTTAATAGCTTCACTATAATTTAAACATTTTTTCATTAATAATGCCGATTGATTTAGCTT
TATCTAACTGAGAAGTATCTGCATCGTATGCAATAATATTAGTATTAGGGTTATGGTATTT
TATATTGCTAGCAAGACTTCCACCAATTAATCCAAGCCCAACAATAAAAACCTGTTGTCAT
```

### > **tnpIS431-06**

Function: protein coding sequence; transposase for IS431 (mobile element)

Best match: tnpIS431-06\_circ\_S-epidermidis\_GQ900381.1[43799:43807] (completely identical)  
Position: 032-contig\_259\_RC: 23214 ... 23223; Length: 9 bp  
Sequence:  
ATGAACTAT

### > **tbox05**

Function: noncoding RNA T-box leader element (core genome, constant)  
Best match: tbox05\_CC001\_MW2-USA400\_BA000033.2[1374124:1374297] (completely identical)  
Position: 032-contig\_259\_RC: 23235 ... 23409; Length: 174 bp  
Sequence:  
AATTTTCTAAAGAAATAGTAGCAGATATGAAACGTAGCAAATAGAAAGCTAATGGGTGA  
TGGGAATTAGCACGCCATATCTTGTGAATTGGACTTTGGAAAACAATTGAATGAGTTTTG  
AAAGTGAACATGAATTATGTTAACTAAGGTGGCACCACGGTAACGCGTCCTTACA

### > **tbox06**

Function: noncoding RNA T-box leader element (core genome, constant)  
Best match: tbox06\_CC001\_MW2-USA400\_BA000033.2[1374325:1374511] (completely identical)  
Position: 032-contig\_259\_RC: 23436 ... 23623; Length: 187 bp  
Sequence:  
ATTTAGACAAAATGTAGTAGTTAATTAAAGGTAGCAACAGAAAGTTAGTGGATGATGTG  
AACTAACACCGAGATTAATGAAATTGGGTTTTGTCTGCAACAGAAAAATTATATATAGTA  
AAGAGTGAACATGAATATTTCAATATTCGGTTAATTTAGGTGGTACCACGCGTCAGCG  
TCCTTTAT

### > **trpE**

Function: protein coding sequence; putative anthranilate synthase component I (core genome, constant)  
Best match: trpE\_CC005\_Mu50-VRSA\_BA000017.4[1448894:1450300]  
Position: 032-contig\_259\_RC: 23665 ... 25072; Length: 1407 bp  
Sequence:  
ATGGATATATTTTATAAAAAAATAAAAGCAAATGTAACGCCCGAAGTTTTAGCACAACTT  
CATTCCAAGAAGATCATTTTGGAAAGTACAAATCAACAACAACTAAAGGTTCGCTATTCA  
GTTGTTATTTTGGATATTTATGGCACTTTAACTTTAGATAATGATGTATTATCAGTAAGTA  
CTTTAAAAGAATCGTATCAAATCACTGAAAGACCGTACCATTATTTAACGACTAAAATAA  
ATGAAGACTACCATAATATTCAAGATGAGCAACTTAAGTCATTACCATTTATATCTGGAT  
ATGTTGGGACGTGTAGCTTTGATTTAGTAAGACATGAATTTCTAAATTGCAATCAATAC  
AATTAGAAGATCACAAGCAGCACGATGTAAGGTTATATATGGTTGAACAAGTTTATGTAT  
TTGACCATTACAAAGATGAGTTATATATCATCGCGACGAATCAATTTTCAAATTCACAA  
AATCAGATCTTGAGAATCGAGTTATTAAGTCTATCGAAGACTTAACTAAAATCCAACCAT  
TCATGCCTACACAAGATTTTGATTTTAAACTAAAGAAATTCAATCAAACATTTCTGAAG  
AAAGATTTATCGAAATGATTCAGTATTTCAAAGAGAAAATAACAGAAGGGGATATGTTCC  
AAGTTGTGCCATCAAGAATTTACAAATATGCGCATCATGCTAGTCAGCATTAAATCAAC  
TTTCGTTTCAACTGTATCAAATTTAAACGACAAAACCCAAGTCCATATATGTATTATCT  
TAATATCGATCAACCATATATTGTCGGTAGTTCTCCCGAAAGTTTCGTAAGTGTCAAAGAT  
CAAATTGTAACAACATAATCCTATTGCAGGTACGATTCAACGTGGTGAGACGACACAAATA  
GATAATGAGAATATGAAACAACACTTAATGATCCAAAAGAATGCAGCGAACATCGTAT  
GCTAGTTGATTTAGGACGTAATGATATTCATAGAGTAAGTAAAATCGGTACCTCAAAAAT  
TACTAAATTAATGGTTATTGAAAAATATGAACATGTTATGCATATCGTAAGTGAAATCAC  
AGGTAATAAATCAAATTTATCACCAATGACAGTTATTGCGAATTTATTACCAACAGG  
TACCGTTTCAGGTGCACCAAATACGTGCAATTGAAAGAATATATGAACAATATCCACA  
TAAACGAGGCGTTTATAGTGGTGGTGGTGGATACATAAATTGTAATCATAACTTAGATTTT  
GCTTTAGCAATTCGAACGATGATGATAGATGAGCAGTATATCAACGTAGAAGCTGGTTGT  
GGCGTTGTATATGATTCTATTCCTGAAAAAGAAGTGAATGAAACGAAATTGAAAGCTAAA  
AGCTTATTGGAGGTGAGGCCATGA



### > **trpG**

Function: protein coding sequence; anthranilate synthase component II (core genome, constant)

Best match: trpG\_CC001\_MW2-USA400\_BA000033.2[1375957:1376523 [4\_50ANF10END]

Position: 032-contig\_259\_RC: 25068 ... 25635; Length: 567 bp

Sequence:

```
ATGATCTTAGTTGTAGATAATTATGATTCCTTTACATATAACCTAGTGGATATTGTTGCTC
AACATACTGACGTCATTGTTCAATATCCTGATGATGATAATGTGCTGAATCAATCGGTGG
ACGCTGTTATTATATCTCCTGGTCCAGGGCATCCATTAGACGATCAACAGTTAATGAAAA
TCATATCAACCTATCAACACAAACCCATTTTAGGTATTTGCCTAGGTGCTCAGGCACTGAC
TTGTTATTACGGTGGAGAAGTCATTAAGGCGACAAGGTTATGCACGGAAAAGTTGATAC
ACTAAAGGTTATATCGCATCATCAACATCTGTTATATCAAGATATACCAGAACAGTTTTTC
AATTATGAGATATCATTCAATAAAGTAACCCTGACAATTTCCAGAAGAATTGAAAAT
TACTGGACGTACCGAAGATTGTATACAGTCATTTGAGCATAAAGAAAGACCGCATTACGG
TATTCAGTACCATCCTGAATCATTGTCTACAGACTATGGTGTCAAATAATTACAAATTTT
ATTAATCTAGTGAAGGAAGGATGA
```

### > **trpD**

Function: protein coding sequence; anthranilate phosphoribosyltransferase (core genome, variable)

Best match: trpD\_CC001\_MW2-USA400\_BA000033.2[1376529:1377527]

Position: 032-contig\_259\_RC: 25640 ... 26639; Length: 999 bp

Sequence:

```
ATGACATTACTAACAAGAATAAAAACTGAAACTATATTACTTGAAAGCGACATTAAGA
GCTAATCGATATACTTATTTCTCCTAGTATTGGAAGTATTAATATGAATTACTTAGT
TCCTATTCGGAGCGAGAAATCCAACAACAAGAATTAACATATATTGTACGTAGCTTAATT
AATACAATGTATCCACATCAACCATGTTATGAAGGGGCTATGTGTGTGTGCGGCACAGGT
GGTGACAAGTCAAATAGTTTCAACATTTCAACGACTGTTGCTTTTGTGTAGCTAGTGCTG
GCATAAAAGTTATAAAACATGGTAATAAAAGTATTACCTCAAATTCAGGTAGTACGGATT
TGTTAAATCAAATGAACATACAAACAACAACACTGTTGATGATACACCTAACCAATTAATG
AAAAAGACCTTGTATTCATTGGTGCAACTGAATCATATCCAATCATGAAGTATATGCAAC
CAGTTAGAAAAATGATTGGAAAGCCTACAATATTAACCTTGTGGGTCCATTAATTAATC
CATATCACTTAACGTATCAAATGGTAGGCGTCTTTGATCCTACAAAGTTAAAGTTAGTTGC
TAAAACGATTAAGATTTAGGCAGAAAACGTGCAATCGTTTTACATGGTGCAAATGGTAT
GGATGAAGCAACACTATCTGGTGATAATTTGATATATGAATTGACTGAAGATGGAGAAAT
CAAAAATTACACATTAATGCGACTGATTATGGTTTGAATATGCACCGAATAGTGATTT
TAAAGGTGGTTCACCTGAAGAAAACCTTAGCAATCACACTGAATATTTTAAATGGTAATGA
TCGCTCAAGTCGACGTGATGTGGTTGTCTTAAATGCAGGTTTAAAGCCTATATGTTGCAGA
GAAAGTGGATACCATCGCAGAAGGCATAGAAGTTCGAACTACATTGATTGATAATGGTG
AAGCATTGAAAAAATACCATCAAATGAGAGGTGAATAA
```

### > **trpC**

Function: protein coding sequence; indole-3-glycerol phosphate synthase (core genome, variable)

Best match: trpC\_CC005\_ED98-hen\_CP001781.1[1388305:1389087]

Position: 032-contig\_259\_RC: 26640 ... 27423; Length: 783 bp

Sequence:

```
ATGACGATTTTAGCAGAAATTGTTAAATATAAACAGTCACTTTTACAAAATGGCTATTAT
CAAGACAAACTTAATACCTTAAAAAGTGTGAAGATTCAGAATAAAAAATCTTTTATAAAC
GCAATTGAGAAAGAACCAAGGCTAGCAATTATTGCAGAAATTAATCGAAGAGTCCTAC
AGTTAATGACTTACCTGAACGAGATTTATCGCAACAAATCTCAGATTATGACCAATATGG
TGCAAATGCCGTGTCCATTTTAACTGATGAAAAGTACTTTGGTGGTAGTTTTGAAAGATTA
CAAGCATTGACGACAAAAACAACATTACCCGATTATGCAAAGACTTTATTATAGACCCG
CTTCAAATTGATGTTGCCAAACAAGCTGGTGCATCTATGATTTTATTGATCGTTAACATCT
TATCGGATAAACAATTGAAAGATTTATATAACTACGCTATATCGCAAATTTAGAAGTGT
TAGTTGAAGTACATGATCGCCATGAATTAGAACGTGCCTATAAGGTTAATGCCAAATTGA
TTGGTGTAATAACAGGGACTTAAAACGATTTGTACAAATGTGGAACATACAAATACTA
TTTTAGAAAATAAAAAACCAAATCATTATTATTTCTGAAAGTGGTATTCACGATGCAT
```

CTGATGTAAGAAAAATCTTGCATAGTGGTATCGATGGCTTACTAATAGGTGAGGCGCTTA  
TGC GTTGTGACAATCTATCTGAATTTTTACCACAACCTGAAAATGCAAAAAGGTGAAGTCAT  
GA

### > **trpF**

Function: protein coding sequence; N-(5'-phosphoribosyl)anthranilate isomerase (core genome, variable)

Best match: trpF\_CC001\_MW2-USA400\_BA000033.2[1378311:1378943] (completely identical)

Position: 032-contig\_259\_RC: 27422 ... 28055; Length: 633 bp

Sequence:

ATGAAATTGAAATTTTGTGGCTTTACATCAATAAAGGATGTTACAGCGGCCAGTCAATTA  
CCTATTGATGCGATAGGTTTCATCCATTATGAAAAAGTAAAAGGCATCAAACAATTACC  
CAAATAAAAAAGTTAGCGTCTGCTGTTCCAAATCATATCGATAAAGTATGTGTCATGGTA  
AATCCTGATTTAACAACAATTGAACACGTATTAAGCAATACGTCAATTAACACAATACAG  
TTACACGGCACAGAATCTATTGATTTTATACAGGAAATTA AAAAAGAAATATTCAAGCATT  
AAAATCACTAAAGCTTTAGCTGCAGATGAAAACATAATCCAAAACATAAATAAATATAA  
AGGGTTCGTAGATTTATTTATTATCGACACACCCTCAGTGTTCGTATGGTGGTACCGGTCAA  
ACATATGACTGGACTATTTTGAAGCACATAAAGACATACCTTATTTGATAGCAGGAGGC  
ATTA ACTCTGAAAATATTCAAACAGTTAATCAACTTAAATTATCACATCAAGGTTATGAT  
CTTGCATCAGGTATAGAAGTAAATGGGCGAAAAGATATAGAAAAAATGACAGCAATTGT  
AAATATTGTGAAAGGAGATAGAGACAATGAATAA

### > **trpB**

Function: protein coding sequence; tryptophan synthase beta chain (core genome, constant)

Best match: trpB\_CC005\_Mu50-VRSA\_BA000017.4[1453276:1454490]

Position: 032-contig\_259\_RC: 29112 ... 29262; Length: 150 bp

Sequence:

GAAAGTGCACATGCACTGAGTTATGTTGAAAGACTAGCGCCTACGATGTCGAAAGAAGA  
TATTATTGTAGTA ACTATTTCTGGACGTGGCGATAAAGATATGGAAACAATTAGACAATA  
TATGGCAGAGCGAGGTCTTGCAAATGACTAA

### > **trpA**

Function: protein coding sequence; tryptophan synthase alpha chain (core genome, variable)

Best match: trpA\_CC001\_MW2-USA400\_BA000033.2[1380143:1380871]

Position: 032-contig\_259\_RC: 29254 ... 29983; Length: 729 bp

Sequence:

ATGACTAAATTATTTATACCTTATATTATGGGCAATAAAGATTTGATTGAAAATGCAACA  
TTGTTGAGTGAAAATGGTGCAGATATAATTGAAATTGGTGTACCTTTCTCTGATCCGGTTG  
CTGATGGTCCAGTTATCATGGAAGCAGGTCAACAAGCGATTAACAAGGCATAACGATA  
GATTATATTTTCGAGCAATTAGAAAAACACGGTAATCAAATTAAGTGTA ACTATGTATTA  
ATGACGTATTATAATATTATTTGTCATTATGGAGAACAAGCGTTTTTTGAAAATGTTCGAG  
ATACTGGTGTCTACGGCTTAATTATTCCTGATTTACCATATGAATTATCGCAGCGTTTTAAA  
ACAACAATTTAGTCACTATGGCGTCAAATCATATCGTTAGTTGCGATGACTACTGATGA  
CAAACGTATAAAGATATCGTATCCCATGCGGAAGGCTTTATTTATACTGTGACGATGAA  
TGCGACAACAGGGCAAACGGTGC GTTTCATCCAGAATTA AAAACGAAAATTGAGTCAA  
TTAAAGCGATAGCCAATGTGCCAGTTGTTCGAGGATTTGGTATAAGAACACCACAACATG  
TTGCAGATATAAAGAGGTTGCAGATGGCATTGTTCATTGGTAGCGAAATCGTTAAGCGAT  
TTAAATCTAACACGCGTGAGGAAATCATTAATATTTACAATCTATCCAACAACATTGA  
ATAATTAA

### > **femA**

Function: protein coding sequence; factor essential for meticillin resistance (core genome, variable)

Best match: femA\_CC001-ST772\_118\_AJGE01000002.1[7407:8669:r] (completely identical)

Position: 032-contig\_259\_RC: 30304 ... 31567; Length: 1263 bp

Sequence:

ATGAAGTTTACAAATTTAACAGCTAAAGAGTTTGGTGCCTTTACAGATAGCATGCCATAC  
AGTCATTTACGCAAACCTGTTGGCCACTATGAGTTAAAACCTTGCTGAAGGTTATGAAACA  
CATTTAGTGGGAATAAAAAACAATAAACGAGGTTATTGCAGCTTGCTTACTTACTGCT  
GTACCTGTTATGAAAGTGTTCAGTATTTTTATTCAAATCGCGGTCCAGTGATCGATTATG  
AAAATCAAGAACTCGTACACTTTTTCTTTAATGAATTATCAAAATATGTTAAAAAACATC  
GTTGTCTATACCTACATATCGATCCATATTTACCATATCAATACTTGAATCATGATGGCGA  
GATTACAGGTAATGCTGGTAATGATTGGTTCTTTGATAAAAATGAGTAACTTAGGATTTGA  
ACATACTGGATTCCATAAAGGGTTTGATCCTGTGCTACAAATTCGTTATCACTCAGTGTTA  
GATTTAAAAGATAAAACAGCAGATGACATCATTAAAAATATGGATGGACTTAGAAAAAG  
AAACACGAAAAAAGTTAAAAAGAATGGTGTAAAGTAAGATATTTATCTGAAGAAGAAC  
TGCCAATTTTTAGATCATTATGGAAGATACGTCAGAATCAAAGCTTTTGCTGATCGTGA  
TGACAAATTTACTACAATCGCTTAAAATACTACAAAGATCGTGTGTTAGTACCTTTAGCG  
TATATCAATTTTGATGAATATATTAAGAAGCTAAATGAAGAGCGTGATATTTTAAATAAA  
GATTTAAATAAAGCATTAAAGGATATTGAAAAACGTCCTGAAAAACAAAAAAGCGCATAA  
CAAGCGAGATAACTTACAACAACAACCTTGATGCAAATGAGCAAAGATTGAAGAAGGTA  
AACGTCTACAAGAAGAACATGGTAATGAATTACCTATCTCTGCTGGTTTCTTCTTTATCAA  
TCCATTTGAAGTTGTTTATTATGCTGGTGGTACATCAAATGCATTCCGTCATTTTGCCGGA  
AGTTATGCAGTGCAATGGGAAATGATTAATTATGCATTAATCATGGCATTGACCGTTAT  
AATTTCTATGGTGTAGTGGTAAATTTACAGAAGATGCTGAAGATGCTGGTGTAGTTAAA  
TTCAAAAAAGGTTACAATGCTGAAATTATTGAATATGTTGGTGACTTTATTAACCAATT  
AATAAACCTGTTTACGCAGCATATACCGCACTTAAAAAAGTTAAAGACAGAATTTTTTAG

### > **femB**

Function: protein coding sequence; aminoacyltransferase (core genome, constant)

Best match: femB\_CC001-ST772\_118\_AJGE01000002.1[6129:7388:r] (completely identical)

Position: 032-contig\_259\_RC: 31585 ... 32845; Length: 1260 bp

Sequence:

ATGAAATTTACAGAGTTAACTGTTACCGAATTTGACAACTTTGTACAAAATCCATCATTG  
GAAAGTCATTATTTCCAAGTAAAAGAAAATATAGTTACCCGTGAGAATGATGGCTTTGAA  
GTAGTTTTATTAGGTATTAAGACGACAATAACAAAGTAATTGCAGCAAGCCTTTTCTCT  
AAAATTCCTACTATGGGAAGTTATGTTTACTATTCGAATCGTGGTCCAGTAATGGATTTTT  
CAGATTTAGGATTAGTTGATTATTATTTAAAAGAGTTAGATAAATATTTACAGCAACATC  
AATGTTTATATGTTAAATTAGATCCGTATTGGTTATATCATCTATATGATAAAGATATCGT  
GCCATTTGAAGGTCGCGAGAAAAATGATGCCTTAGTAACTTGTTTAAATCACATGGTTA  
CGAGCATCATGGCTTTACAACCTGAGTATGATACATCGAGCCAAGTACGATGGATGGGCGT  
ATTAACCTTGAAGGTAACACCCGAAACATTGAAAAAGACATTTGATAGTCAACGTA  
AACGTAATATTAATAAAGCGATAAACTATGGTGTAAAGTCAGATTCCTTGAACGTGATG  
AGTTCAATCTTTTCTTAGATTTATATCGTGAACTGAAGAGCGTGCTGGATTTGTATCAA  
AACAGATGATTATTTTTATAACTTTATTGACACATATGGAGATAAAGTATTAGTACCATTA  
GCATATATTGACCTTGATGAATATGTGTTAAAGTTGCAACAGGAATTGAATGACAAAGAA  
AATCGTCGTGATCAAATGATGGCGAAAGAAAACAAATCAGATAAGCAAATGAAGAAAAT  
TGCAGAATTAGATAAGCAAATTGATCATGATCAGCATGAATTATTGAATGCAAGTGAATT  
GAGCAAAACGGACGGCCCAATTCTAAACCTTGCTTCTGGCGTTTATTTGCAAATGCATA  
TGAAGTGAATTATTTCTCTGGTGGTTCATCAGAAAAATATAATCAATTTATGGGACCATA  
CATGATGCATTGGTTTATGATTAACCTATTGCTTCGATAATGGCTATGATCGTTATAATTC  
TATGGTTTATCAGGTGATTTACGGAAAACAGTGAAGATTATGGCGTATACCGCTTTAAA  
CGTGGATTTAATGTACAAATCGAAGAATTAATAGGGGATTTCTATAAACCAATTCATAAA  
GTGAAATATTGGTTGTTCAACATTGGATAAATTACGTAAAAAATTAAGAAATAG

### > **tx\_femB**

Function: rho-independent terminator of femB (core genome, constant)

Best match: tx\_femB\_CC008\_COL\_CP000046.1[1423390:1423448] (completely identical)

Position: 032-contig\_259\_RC: 32845 ... 32904; Length: 59 bp

Sequence:

ATGTAAATGATGTTAGGGCTTATAGTTATTGATACTATAGGCTCTTTTTTATATGTTTT

> **cof**

Function: protein coding sequence; Cof-like hydrolase (core genome, variable)

Best match: cof\_CC001-ST772\_118\_AJGE01000002.1[4685:5451:r] (completely identical)

Position: 032-contig\_259\_RC: 33522 ... 34289; Length: 767 bp

Sequence:

```
ATGAGATTTGTCTTTGATATTGATGGTACGCTTTGTTTTGACGGCCGATTAATTGACCAGA
CTATTATTGATACATTGTTACAATTACAACATGCTGGTCATGAACTTATATTTGCATCAGC
ACGTCCGATTCGTGATTTGTTGCCAGTTTTACCATCAGTATTTTCATCAGCACACATTAATT
GGCGCAAATGGTGCTATGATTTTCACAGCAATCAAAGATTTCTGTTATCAAACCAATTCAT
ACAGATACATATCACCATATCTTAAAAATAATTCAAAGTATGAGTTAGATTATATTATT
GATGATGATTGGAATTATGCTGCACAACCTTGACGCTGAGAACGCGATTTTTGAGCGTTTA
GATCCACATAAGCTGGCAGTTTGTATTGATGTTGCAAATATCGACACACCAATCAAGATC
ATTTTATAAATATAGACCCGGCACAAATTACAACATATATTAGACGAGCTAAATAAATACC
ATCAAGAATTGGAAATGATTCACCATTCAAATGAGTATAACATTGATATAACAGCGCAAA
ATATTAATAAATATACTGCATTACAATATATATTTGATGCAGATGTTAAATATATAGCATT
TGGTAATGACCACAATGATATTGTCATGTTACAACATGCTAGTAGTGGCTATATTATAGG
ACCATCAGAAGCATAACACACGCAATATTGAACTTGATAAAATCAAACACATCAATA
ATAATACACAAGCTATTTGCAAAGTCTTAAAATCATATAAATAA
```

> **Q5HG42**

Function: protein coding sequence; putative protein (core genome, variable)

Best match: Q5HG42\_CC001\_MW2-USA400\_BA000033.2[1385765:1386238:r]RC (completely identical)

Position: 032-contig\_259\_RC: 34336 ... 34810; Length: 474 bp

Sequence:

```
TTAATAAAATTCGTCCTCGAACATTTCTTCTCTTCATCTAATCCAAATAATTCTGCCATT
CTCCATGTTCAATTAACATGTTTAAATATGCATCGCGGAGTTCTTCTTCACTCATATCATT
AATCATTTCTTTAAGACTATCAATCCACATATTTCTGCGTAATTGATAGTCTTCTTCAACTT
CGTTTAAACATCATTATATGTTTATTTGCTGCTTCTGGACTAGCTGTAAAGAGTAATGCAAT
CATATGTTTACATATCACTCGTCTTCCATCAGCATGAGGACAATTACATTTGGATTTTCTA
GGATGTTCCATATCAATATAACAACGATATACTTTGTTGCCACTGCCCTTTACTTCAGCCT
CATGCTGCGTTTCTGAAAATGATTTTAAAGTTAATGACGCATTCACTTTGATAATAATTA
AA GCCTCTTCTATAGAACGAATACTTGCAATATCAAGTAATCCCAT
```

> **opp2F**

Function: protein coding sequence; oligopeptide transport ATP-binding protein (core genome, variable)

Best match: opp2F\_CC001-ST772\_118\_AJGE01000002.1[3339:4040]RC (completely identical)

Position: 032-contig\_259\_RC: 34933 ... 35635; Length: 702 bp

Sequence:

```
CTAATATGAAAATGCTTGCACTAATTCTTTTTGTATAAGGGTGTCTATCAACATTAATAAAT
TCCTCTATTGCAAAAATCATCGACTATCATGCCATCCTTAAGAACGATAATTCTATTAACTA
AGCGTTGTAACACGGATAAATCATGAGAAATAACGATAAAATGATTTAAGTTCGTAATCG
TTTGCGCTTTTAAATATATTGATTACATTTTGTTCAGCTATAACATCTAAATTTGAAGTTATC
TCATCACATATTAACCGCGAGGCTGTGCTAATAACGAACGCATGACATTAATCTTTGT
AATTGTCCGCACTCACTTCGCTTGGTAATTTAGTCAATAATTGCGCGTTTAACTCAAAG
TAGATAAATGTTGTAATAATAATTGATCCTGAGCAGTATTATCAGTTAGGCCTCTGTAATA
ATATAACGCTTCTTTTAAATGAGGTCTCAATCGTCCAATCAGGGTTAAAGCTAGTTAAAGG
GTGTTGGAAAATCGGTAACACAGCATTGTCACTTAAGTAAATTTCTCCTTTAACAGGTTTA
ACAAGCCAAGAACCAATGAAGCGAGCGTACTTTTACCACAGCCACTTTTCGCCTAAAATA
CCAACATTTTCTCCATCGGGTATAGTAATATTGATATCTTGTAGCACCATCTGCTTTTTATT
ATAACCAAAAGTCACATGTTTTAATTCAATCAT
```

> **opp2D**

Function: protein coding sequence; oligopeptide transport ATP-binding protein (core genome, variable)

Best match: opp2D\_CC001-ST772\_118\_AJGE01000002.1[2573:3346]RC (completely identical)

Position: 032-contig\_259\_RC: 35627 ... 36401; Length: 774 bp

Sequence:

```
TCAATCATAGTAATCCCTCTTTAATTGTGTTCTATATTTAATTAGACGTTTCAGTATACGGA
TGCAAATGCTCATACTTGAAATGATTAATATTACCTCGTTCAATGATTTGACCTTCTTTTA
AAACATAAATGTACTGACAATATTTCAATACATGACTTAAGTTATGTGTGATAATAAATA
ATGTTTGACCATGTTCTAATACAATATGCTGTAATAAATCCATCACTTGATTACCGTTCAA
AGCATCCAATGATGCAACTGGTTCGTCTGCAATGATTAATTTAGGCTCCAACATGAGAAC
GCTTGCTATGTATACGCGTTCAAGTTGGCCCCCAGAAAGTTGGAAACTATATTTATTTAAT
ATATCTTTGCTTTGTAAATTAACCCACGACAAAGCCTTATCAACTTTGGACAAAGCCTCTT
CTTACTACCTTTATAATGCTTACGATAAATCGCAGTTAACTGTTTACCTAATTTAGTATG
GTCGTTAAAACCTTTCTGCATAATTTGGGAAATATAGCCAATTGTATGACCATAAATTGA
CTCAATCTACTAACAATTTCTCCATCAAATTGGTATGAATCATACGTGCAGGTTAAATCAA
ATGGTAAATATTCAAGTAAGGCTTTAGCAATCAAACCTTTTTCCAGCGCCGCTCTCTCCAA
CAAGGCATTAATCTGTTGACTAAAAATTTCAAATCAATCCCTTTAATAAGTGATTTCTCA
CTAGTATTCTTTATTGTTAAATTTTGTATATCAATGAGACTCAT
```

### > opp2C

Function: protein coding sequence; oligopeptide transport system permease protein (core genome, variable)

Best match: opp2C\_CC001-ST772\_118\_AJGE01000002.1[1756:2586]RC (completely identical)

Position: 032-contig\_259\_RC: 36387 ... 37218; Length: 831 bp

Sequence:

```
TCAATGAGACTCATCATATTCACCCCGTTGTTTCAGCAATCTATCTCTTAGCGCATCTCCG
GTAAATTAATAAATAAATAGTTATAGCAATGACTGAAGCAGGTGCAATCAACATAATT
GGATGAGACGAAATAAATCACGACCTTGTTGCAACATAGCGCCCCACTCTGGTGTGGC
GGTTGTGCACCTAACCAATAAATGATAGTGAACCTTATATATAGAATGATTTTACCGAAA
TCAACGACCATCAAAACGATAATAGCCGGTATAATTTTAGGTGTTAAATGACGTATTAAT
ATTGTTCTTGTAGGTACATGAAATAATTGTGCCATTTTTATATAAGGCTTATTCATTTGCT
ATTAACTATACTTCTAGTCAACCTTGTGTAATTCATCCATTTTATTACTGTAATTGAGATA
ACTAAATTCATAAAGATGGTTGAAAAAAGCTTGCTAAAGCAATCATGATGATAAATTCT
GGAATACTTAGACCAACATCAATAAACCTTAACACTAATCGTTCAATCCACCTTTTTTAT
ATCCGGCAAATAGACCTAGTGTAACACCTATGACAACGATAGCTATTAATGTTAAAACAG
TAACAAACAATGTTGAACGTGCACCGATAATAATTCGGGTAAATAAATCTCTCCATAAT
CATCAGTTCCTAATAAATGCAACCAACTAATAGGTTCAAAAGTTTGTGATAAATTGACTT
TGGTTGCATTTTCACTACTGACAAAGAATTGCAGTACAATTACCACAAAAATAAATGCAA
CGAATACAAAAATATCAGGTTATTTTTTGAAAATATTTTATGCAT
```

### > opp2B

Function: protein coding sequence; oligopeptide transport system permease protein (core genome, variable)

Best match: opp2B\_CC001-ST772\_118\_AJGE01000002.1[777:1763]RC (completely identical)

Position: 032-contig\_259\_RC: 37210 ... 38197; Length: 987 bp

Sequence:

```
TTATGCATGACGGTCACTACTTTCTGATATCAATGGTGTATTGGTTTTGTTTTTGGATTTC
CTAATTGTAACGCTGCTTCGGATCAAGTAATAACGTTAATAAATCAGCAATCGTATTGA
TAATAACAACGAAGAAGCCAATAAATAACACGCATCCTTGAATAACAGGATAATCTCGA
GATTTAATACTATCCATTAATAGATAACCAATACCAGGTATATCAAATAAATTTTCAATC
ACTACAGTACCACCTATTAGACTGCCAAGTGAAATCCCTAGTAATGGGATAATCGGCAAA
ATTGTTGGTTTTAGTAAATCATGAATTAATAATAACGTTCAATTCATACCGCGTAATCTTG
ATGCTTGTACGATATTACTTTGCAATAACATCAATAAATTAGAACGCACTAAACGAATGA
TGTATGCACACATACCTAAAGATAGCGTGATTACAGGTAATATAAACTGACTTAGTATAA
CGCTATCTATATTCATTAATTTGTGACAATAAATAAATAAATAAATACCGATAAAGAACC
```

CTGGTAAACTAATCGATAGTGTGAGATCACTCTAATCACTTTATCCGTCCACTTATGAAA  
TCGTTTGGCTGCTATAATGCCGAGCGGTATAGATATGCATAACGACACTACTAATGTTGA  
ACAAGATATGAGTAATGTTATGGGTGCATAGTTGAATAATATCTGTGTTACCGGTTCTTTT  
GATTCAAAACTTTTTCTAAATTAATAATGTAATAAATGATTCATCCAATGCCACCCTGTA  
CCAATAAAGAATCATTTAATCCCAATTTATCTTTGGTTGCATTTATTTGTTCCGTCGACAC  
TTGTGCTACATCAAGATGTAATATTTTATCAACAGGATTGCCTGGTGATAATTTCAATAAA  
ATGAATGTAAGTGTAGAAATAACAAATAAAACAACACTATCATTTGCATCAGTCTATAACAAC  
ATAGACTTAATTATGAACAT

### > **Q5HG37**

Function: protein coding sequence; putative protein (core genome, constant)

Best match: Q5HG37\_CC001-ST772\_118\_AJGE01000002.1[129:473]RC (completely identical)

Position: 032-contig\_259\_RC: 38500 ... 38845; Length: 345 bp

Sequence:

TTATTTTTTATCTTTACGGCGAAGTTCAGCGCCCTCATAGCCGTATTTTTCAATTTGCTTTT  
CTAATTTACGCGCTTTTCTTTCTTTACGCCAATTTCTAGTAAAATACCATAATAGAAAAC  
AATTAATAAACTCATGATCGCTAAAAATGCAGCGTATCCTAATAATGGTTGATATTTTAT  
ATCTTGAAAATTTGGAATAAAAAATGCAAGCACACCTAATAAACAATGTAATTACTGC  
AGATACAAACCATTTATTTAAAACTAAGCAACAGAATATTGTTAATAAAAATCATTATTA  
TGTGTGATCCATAAATAATTAGGTATATCGAATAATGTCAT

### > **tnpIS431-06**

Function: protein coding sequence; transposase for IS431 (mobile element)

Best match: tnpIS431-06\_circ\_FM207105.1[6418:7045]RC

Position: 033-contig\_261\_RC: 18 ... 48; Length: 30 bp

Sequence:

AGATCTGAAGAGACCTGCGGTTCTTTTTAT

### > **pepF2**

Function: protein coding sequence; oligoendopeptidase F/M3 family (core genome, variable)

Best match: pepF2\_CC005\_Mu50-VRSA\_BA000017.4[1464866:1466680] (completely identical)

Position: 033-contig\_261\_RC: 197 ... 2012; Length: 1815 bp

Sequence:

ATGTCTCAAGGTTTACCTTTAAGAGAAGATGTTCCCTGTTTCAGAAACATGGGATTTAGTA  
GACTTATTTAAAGATGATCAACAATATTATGAAAGTATTGACGCTCTAGTACAACAAGCA  
AATCAATTTATCATAATGCAACAACATTAATTCGAACAAATTAATACTGCT  
TTAGCTGAATTAGAAAATATTTAATTGCCTTAGATCGCTTAAGTAATTATGCAGAACTAC  
GTTTAAGTGTAGATACTAGTAATATCGAGGCACAAGTATTGAGCGCTAAATTATCTACTA  
CATACGGTAAAATTGTTAGCCAATTATCATTGTAGAGTCAGAAATACTTGAATTACCAG  
AAGAAATACTTCAACAATTAGAAGAATCATGTCCATATCAACACTATATTAACAGTTAA  
TAAACAAAAGCCATTCCAATTATCTGCGTCGGTAGAACAAGTATTAGCAACTTTATCAC  
CTACGCTAAACAGTCCTTACGATTTATACGGCACGACAAAATGCTAGATATTACATTTCG  
ATTCATTTGAACATGATGGTACAACGTACCCTGTCGACTATGCTACGTTTGAAAATGATTA  
TGAAGATAATAAAGATCCTGAGTTTAGACGTAAGTTTCAAATCGTTTAGCGATGGGAT  
TCGAAAATATCAGCATACTACCGCGGCTACATATAATATGCAAGTACAACAAGAAAAAA  
TTGAAGCTGATTTACGTGGATTTGAATCAGTCATCGATTATTTATTACATAGTCAAGAAGT  
AACGCGTGATATGTTTGACCGTCAAATCGATATGATTATGCGTGACTTGGCACCAGTTAT  
GCAGAAATATGCTAAACTTTTACAACGTATTCACGGATTAGATAACATGCGTTTTGAAGA  
CTTGAAGATTTCTGTAGACCCTGATTATGAACCAGAGATTTCAATTGAAGACTCAAAAAA  
TTATATTTTCGGTGCCTTAAAGTGTTTTAGGTGATGACTATACAACATGTTACGTGAAGCA  
TACGATCAGCGATGGATTGATTTGCACAAAATAAAGGTAAGATACAGGCGCATTTTGT  
GCAAGTCCATACTTTACACATTCATATGTGTTTATTTCTTGGACTGGTAAAATGGCTGAAG  
CATTTGTCTTAGCACATGAATTAGGTCATGCAGGTCATTTTACATTAGCTCAAAAACATCA  
ACCATATCTTGAATCAGAAGCATCAATGTACTTTGTTGAAGCCCCTTCTACAATGAATGA  
AATGTTGATGGCCAATTATTTATTTAACACAAGTGATAATCCAAGATTTAAGCGTTGGGTT

ATTGGCTCAATTTTATCTAGAACATATTATCATAATATGGTTACCCATTTATTAGAAGCTG  
CTTATCAACGTGAAGTGTATCACAAAGTAGATCAAGGTGAATCTTTAAATGCGCCGACAT  
TAAATGAAATAATGCTAAATGTTTATAAACAATTTTTTTGGAGATGCAGTAGACATGACTG  
AGGGTGCTGAATTAACATGGATGCGTCAACCTCATTACTATATGGGATTATATTCGTATA  
CGTATTCTGCTGGCTTAAACAATCGGAACTGTCGTTTCTCAAAAGATTA AAAAATGAAGGCC  
AACCAGCTGTTGATGCTTGGTTAGAAACATTGAAAAAAGGTGGTAGTGTATCACCTGTCC  
AACTTGCAAACATTGCAGGTGTAGACATTACTACAGAACAGCCACTTAAATCTACAATTC  
AATATATTTCTGATTTAGTCGATGAAGTTGAAAAATTAACAGATGAAATTGAGCAAGCAA  
ATAACTAA

### > **txbi\_pepF2**

Function: bidirectional rho-independent terminator of pepF2 and phoU

Best match: txbi\_pepF2\_CC005\_Mu50-VRSA\_BA000017.4[1466699:1466764] (completely identical)

Position: 033-contig\_261\_RC: 2030 ... 2096; Length: 66 bp

Sequence:

GTAGAACAATATAAACCAAGATTTTCACATTACTAATTGTGAGAATCTTGGTTTTTTTGGAG  
GGTTT

### > **phoU**

Function: protein coding sequence; phosphate transport system regulatory protein (core genome, constant)

Best match: phoU\_CC001\_MW2-USA400\_BA000033.2[1392431:1393072:r]RC (completely identical)

Position: 033-contig\_261\_RC: 2151 ... 2793; Length: 642 bp

Sequence:

TTATTGTTTCGTAATGTGTACCTGTTAAATAAAAATAAACACTTTCAGCGATGTTAATAATA  
TGATCACCAATACGTTCTAAATGTCTTGCTGCTAAATGAGCTTGTGCAGCGACAAATGGA  
TCGTTATCAATAAGATACGTTGCGTTAATAATATGACTATATAAGTCATCGATATCTTCAT  
CACGCTCAATTATTTCTCTTATTAATACGGTATCTTTCTTTTTAAATGCTTGATCTAAGTCC  
TTTAACATTAACATAGCTAATTTACCCATTGTCTTTAAACGGGTTAACACATAATCATCTG  
TAATCTTTGTACGCAATCGAATATTGGCAATACTCGATGCATTATCTCCTATTCTTTCTAA  
ATCGGAGGCGATTTTTAATGAAGAAATCATCATAACGCAAATCACTCGCAATGGGCTGTTG  
CTTTGTAATTAACATGATAACTCGCTCATTAATATCATAATTTAATTGATTGATATGTTTA  
TCGTTTTTAAGTGTGTCGTGCAAAGCCTCTATCGTCAATACTTAATGATTTTATAACCATT  
TTCAATACTCACATAGACATTTGCACCTAACCGACGTAATTCCTTTATTAATCATCAAGT  
TGCTCCTGATATCGCTGTCTAATTATTGCCAT

### > **pstB**

Function: protein coding sequence; phosphate import ATP-binding protein (core genome, constant)

Best match: pstB\_CC001\_MW2-USA400\_BA000033.2[1393079:1393930:r]RC

Position: 033-contig\_261\_RC: 2799 ... 3651; Length: 852 bp

Sequence:

TCAACCAAACCTTCCTGAAATATAATCTTCTGTTTTCTTGTGTTGATGGGTTAGAGAAAATT  
TTATCAGTATCATCATATTCATTGACATAACCATTTAAGAAAAATGCAGTTTTATCTGATA  
CACGAGCTGCTTGTTGCATATTATGTGTAACCATAATAATTGTATACTTTTCTTTTAGTTCT  
TGAACCAACTCTTCTACTCTTAATGTTGAGATTGGATCTAATGCTGATGTCGGTTCATCCA  
TTAAAATAACTTCAGGTTCAATTGCTAAACAACGCGGATACAAACACGTTGTTGTTGCC  
CACCGGATAAACTATATGCATTTGTGTGCAACCTATCCTTTAATTCATCCCAAATTGCAGC  
GCCACGTAATGATTTCTCAACGATTTTCATCAAGAACTTTTTTATTTTTAATACCGTGAATC  
TTTGGACCGTAAGTAATATTATCGTATATTGATTTTGGAAATGGATTAGGTTGTTGAAAGA  
CCATGCCACATTTGTACGTAATTGTTCTTTAGAATATTTTTGATCAAAAATGTCTTGATC  
TCGATATAATATTTTACCAGCTGTTTTACAGAAGGTACTAACTCAACCATTCGATTCAAA  
GTTTTAATATATGTTGATTTGCCACAACCAGATGGACCTATAATGGCAGTAATTTGGTTTT  
CATAAATATCTAAATTAATATTTTGTAAATGCATGATTTTCGCCATACCATAAGTCTAAATT

TTGTGTTGAATATATAACAGAATGTGAGTTTGTATCATCTGGTGTTTTATGATGACTTTGT  
GAGACATCAAACGTATGACTTTGAGATATTTGTTTAGTTTGTGCAAGTGTTCGCGCCAT

### > **pstA**

Function: protein coding sequence; phosphate ABC transporter/permease subunit A (core genome, variable)

Best match: pstA\_CC001-ST772\_118\_AJGE01000027.1[3642:4559:r]RC (completely identical)

Position: 033-contig\_261\_RC: 3697 ... 4615; Length: 918 bp

Sequence:

TTAGAATTTTTACTAAATTTGTTACGTAATAATCGCAACGCCATTCATTAAGATTAAG  
ATAACTAGTAAAACGATAATGCCTGCCGATGCAACATTCTGGAATTCTTCTTGAGGCATT  
TTCGCCCAAGTAAATATTTGGATTGGTAATGCTGAAAATTGATCCAATATACTTCTAGGTG  
TTGCCAATAATATAGTCGGTATACCGATTAGCACAAAGTGGCGCTGTTTCTCCAGTGCTCT  
TGAAAGAGACAAAATGAATCCAGTTAAAATACCAGGTAACGCTGCTGGTAAGACAACAC  
GTCTTATCGTTTGCCATTTATTAGCACCTAAACCATAAGAAGCTTCGCGTACTGAGTTAGG  
TACAGCTCTAATTGCTTCCTGACTTGAAACAATAATAATTGGTAATATCAGTAAGGTCATT  
GTTAGCGCTGCTGCCAATATACTGTTACCCATTTTCAAGGCTTCAATCCCCGCACCACCA  
CGAACAAAGTGTAACCTAATAACCCAAATACAACCTGATGGTACACCAGCTAAATTGGAA  
ATACTGATTTTAAACAACTGAGTAAATTTGTTGTTTTTCGCATATTCTTCTAAGTATATAG  
CTGTACCTATTCCTAGGATGATTGATAATGGAATGATACTTAACATTAACCAAAGTGAAC  
CGATTAACGCGCCTTTAACGCCAGCCATAGATGGTGTGGAAGAAGAAAAATTAGTGA  
AATTGTAAATTTAAATGACTTACCCCTTTAATCAATGTTTGGAGTTAACAACGCAATAAGTA  
CGACAAGTCCTAATAATGTACATGCTAAAAATATGAGTTTGAACACTTTATTTTTAACCGT  
TCTGGATGATAAATGTTTTTGGACAAGTTGTTGATCGACGAGTGATTGTCTATTATTATCT  
GTCGTTTCCAT

### > **pstC**

Function: protein coding sequence; phosphate ABC transporter/permease subunit C (core genome, variable)

Best match: pstC\_CC001\_MW2-USA400\_BA000033.2[1394896:1395822:r]RC (completely identical)

Position: 033-contig\_261\_RC: 4616 ... 5543; Length: 927 bp

Sequence:

TTAATACTCCTCCCTAAAACGCTTAGAAATCCACTGAGAAAGTAAATTCATGATTAAGGT  
AAAGATAAATAGTGTGAACCCTACAGCATAAATACTGTAATAAATATTTGATCCAAATGT  
TGCATCACCTGTGCTATCTCAACAATATATCCAGTCATTGTTTGAATCGAACTTGTTAAA  
CTTAATGAAGCTGTTGGCGAACTACCTGCCGCTAATGATACAATCATCGTTTCTCCAATTG  
CTCTTGAAATCGCGAGAACGATTGAAGCTACAATACCTGATGTTGCTGCGGGAAGTACGA  
CTTTAGTTGCTACTTCTAATTTAGTTGCTCCAAGTCCATAGGCACCTTCTCGAATTTTATTT  
GGTACAGATGCCATTGCATCCTCACTCAAACCTGTGATGAGAGGGACAATCATAATACCG  
ACAACCTAAGCCGGGACTTATAGCATTAAACTCTCCAAGACCTGGTATGAAAGATCTTAAT  
ACTGGTGTAACAAAGGTTAATGCAAAGAAACCAAACACAATTGTTGGTATTCCTGCTAAA  
ATTTCTAATATCGGTTTAAATATGCGTTCGTGCACGGTCACTTGCAATTCCTTAAATAAA  
TTGCTGCACCAAGCCCGACTGGAACCTGCAAATATAGTCGCAATAACTGTGATTTTTAAAG  
TCCCTATTATCAATGCCAGATACCAAACCTTAGGGTCTGAACCGGTAGGATTCCAAGTAG  
TAGAAAATAGAAATTCAGTTATTGGAATTCTGGTGAAAAAAGTGATGGTTTCTAAAAGCA  
ATGTGATTAATATACCTAGTGTGTTAAAATGGAAATCGCTGAAATTGCGGCTAAAATAA  
CTGGTATAATTTTGTCAATTATGCTTCCCTTTTTTATTATTATTTTTTTTCGATTAAGCTTTAA  
CATTAGTAGATGAAGTCAT

### > **pstS**

Function: protein coding sequence; phosphate ABC superfamily ATP binding cassette transporter/binding protein (core genome, constant)

Best match: pstS\_CC001\_MW2-USA400\_BA000033.2[1396013:1396996:r]RC

Position: 033-contig\_261\_RC: 5733 ... 6717; Length: 984 bp



Sequence:

```
TTATTTTTTGTCTTCAGACTTTTTATCATCAGATTTCTTGTCGTCTGATTTTTGATTTTTATC
AATAAATGCTTTTAAATCATCTAATTGTGATTTGTATGTTTTCTCTGGTGTCTACATATC
CAGCTTCTTCAGCTGCTTTACCTTTATCTTCTAAGACGAATTTGATAAATTCTGACATTACT
TTATTATCTTTCAATGCTTTTTTCATTTACATAAATGAATAATGGTCTACTTAATGCATAAG
AGTTATCTTGAATTGTTTTTTTCGTAGGCTCTGTTGCTTTACCATTTTCATCTTTGATTTTAA
CTTCTTTTAAATTTATCTTTATTTTGAACGTAGAAAGTTATATCCAAAGTATCCGATTCCCTCT
TTGTTTTTTCGTTACAGAAGAAACGATAGCATTGTATCAGCATTTTTTTTCTGCTTTAATATC
TTCTTTATTCATTACTTCATTTTCAAAGAAGTCATAAGTACCATGACTTGAGTTTGGTGAT
ACAGCATTTATTTTTTATCTGGCCATTTACTATTAACATCTTTCCATGTTTTAGCTTTTCC
AGAATAAATTGCTTTTAAATTGCTGTTTGTCTAATTCATCCACAAAATCATTTTCTTTATTTA
TAGCAACCGTTACACCATCTTGCGCAATTTTGAATCTTTGTATTTGATATTCTTATCTTGT
AATTTTGTCTTCTTCATCTTTAATTGGTCTAGAAGCATCAGCGAAGTCGATATCTCCTG
CAATGAATTTTGGAAACCAGCACCTGTACCAGCTTGTCCCTGCTGAGATTTTAGCATCCGA
GTGATCTTGAGCCCATTTTTCATTTAATTTCTCCACAATTGGTGCTACTGTTGATGAGCCA
TCACCTTTAGCTTCCCTTTTAAATCACTATTACCACTGCCACCATTACCGCCACCACAAG
CACCTAATAATAGTGTTGCACCTAAAGCTGTAGTACCAACAAATTGCCATTTTTTCAT
```

### > **txbi\_universal1**

Function: bidirectional rho independent terminator

Best match: txbi\_universal1\_CC001\_MW2-USA400\_BA000033.2[1397234:1397306:r]RC

(completely identical)

Position: 033-contig\_261\_RC: 6950 ... 7023; Length: 73 bp

Sequence:

```
TAAATCCCTAAAAAACAGCAGTAAGATAATTTCAATTAGAAAATATCTTACTGCTGTT
CTCTATTTATACA
```

### > **tnpIS1272**

Function: protein coding sequence; transposase of insertion element IS1272

Best match: tnpIS1272\_trunc\_CC075\_MSHR1132\_FR821777.2[2351735:2352717]

Position: 034-contig\_264\_RC: 7 ... 37; Length: 30 bp

Sequence:

```
TAAACGAGAGCTAGGTTTTGTATTAATGGC
```

### > **tx\_universal3**

Function: bidirectional rho-independent terminator

Best match: tx\_universal3\_CC001\_MW2-USA400\_BA000033.2[1397772:1397835:r]RC (completely identical)

Position: 034-contig\_264\_RC: 83 ... 147; Length: 64 bp

Sequence:

```
ATACATATCAAAAAGCTAATTTCCATCAAATAATTAATAGAAATCAGCTTTTTTACATTG
CCT
```

### > **cvfB**

Function: protein coding sequence; conserved virulence factor B (core genome, constant)

Best match: cvfB\_CC005\_Mu50-VRSA\_BA000017.4[1472360:1473262:r]RC (completely identical)

Position: 034-contig\_264\_RC: 284 ... 1187; Length: 903 bp

Sequence:

```
TTATTCTTTTGTGAGTCAATTCGACTCCAACCTTTTTTAGTTAAAGTGATTTTACCTGTTTCTA
TATTAATAATCTTCTGTTTATATAAGTGACCGATTGCACGTTTGAATGAACCTTTACTCAT
ATTGAATACTTCTTTAATCGCTTCAGGGCTTGATTTGTCCCAGAATGGTAATTCACCATCA
TATTCAACTAGTAAATCAAAGATGACTTGGCCGTCATCGTCTAAACGTTTCATGTGCAAGT
GGTAAAAATGAACCATTTAACTCACCTTTATCATTATGCCCGATAATTCTAACTTGAACAG
ATTCACCTAATCTTGGTTCAGCTTTACGTTCTGATTCATGTACGAAAATTTTGTAACTGTA
TTCGCTTAATAAGAAGCTACCAATTCGTAATACGCGGTAAGGTTTGGCTTCAATGACTTC
```

GTTTTTTAAATTATCATCGTGTACAGGTGTAAACATATTTTCTACAACAGATTCACTCGCT  
AAACGTCCATACATATGATTCTCACGGTCAATTCGTAATGTAAGTACTAGCAAATGATCACCA  
GGTTGTGGCCATAGTGATTTCACTTTTGGTAAATCTTCCCATGGTACTAACACTTCACGGG  
GTAAACCAACATCTATACGTGCCCATCGCGATCCGTTTTAAGTACTTTAGCAAATCAT  
ATTTATCTTTCGTAATATCAGGCATATTTTGAGTTGCAAATAATTCACCTGAACGGTTTGG  
ATAAATGAAGAACTATATTCTTCACCTACTTCTAATTCATCATCATCGTTCATTTCTGAT  
TGGTTAACTTTACGTTTTACCGTTTTGGTCTTTTAAAAGGTAAGTTGAGCCTTGTAACC  
CTACTACTTCAAGGAATTCTATAGAACCTACTATATCTTTGTCTAATGCCAT

### > **ykpA**

Function: protein coding sequence; ABC transporter/ATP-binding protein (core genome, variable)

Best match: ykpA\_CC001-ST772\_118\_AJGE0100012.1[28773:30374:r] (completely identical)

Position: 034-contig\_264\_RC: 1333 ... 2935; Length: 1602 bp

Sequence:

ATGTTACAAGTAACTGATGTGAGTTTACGTTTTGGAGATCGTAAACTATTTGAAGATGTA  
AATATTTAAATTTACAGAAGGTAATTGTTATGGATTAATTGGTGCGAATGGTGCAGGTA  
TCAACATTCTTAAAAATATTATCTGGTGAATTAGATTCTCAAACAGGACATGTTTCATTAG  
GGAAAAATGAACGTCTAGCTGTTTTAAAACAGGACCACTATGCTTATGAAGATGAACGCG  
TGCTTGATGTTGTAATTAAGGTCACGAACGTCTTTATGAGGTTATGAAAGAAAAAGATG  
AAATCTATATGAAGCCAGATTTTCAGTGATGAAGATGGTATCCGTGCTGCTGAACTTGAAG  
GTGAATTTGCAGAAATGAATGGTTGGAATGCTGAAGCTGATGCTGCTAACCTTTTATCTG  
GTTTAGGTATCGATCCAACCTTTACACGATAAAAAAATGGCTGAATTAGAAAACAACCAAA  
AAATTAAGTATTATTAGCGCAAAGTTTATTCGGTGAACCAGACGTAATACTGGATG  
AGCCTACTAACGGTCTCGATATTCCAGCAATCAGTTGGTTAGAAGATTTCTTAATTAACCT  
TGATAATACTGTTATCGTAGTATCGCATGACCGTCATTTCTTAAATAATGTATGTACTCAT  
ATCGCTGATTTAGACTTCGGTAAAATTAAGTTTATGTTGGTAACTATGATTTTTGGTATC  
AATCTAGTCAGTTAGCTCAAAGATGGCTCAAGAACAACAAGAAAAAAGAAGAAAA  
AATGAAAGAGTTACAGGACTTTATTGCACGTTTCTCAGCTAACGCTTCTAAATCTAAACA  
AGCAACAAGTCGTAAAAACAACCTTGAGAAAATTGAATTAGATGATATTCAACCATCATC  
AAGAAGATATCCTTTCGTAAATTCACGCCTGAGCGTGAGATTGGTAACGACTTATTAAT  
CGTTCAAATCTTTCTAAAACAATTGACGGCGAAAAAGTATTAGATAATGTATCATTAC  
AATGAATCCAATGATAAAGCGATTTTAATTGGAGATAGTGAAATTGCAAAAACAACATT  
ACTTAAAATATTAGCTGGCGAAATGGAACCAGACGAAGGTTCAATTAATGGGGTGTTAC  
TACATCATTAAGTTACTTCCCTAAAGATAACTCAGAGTTCTTTGAAGGTGTAATATGAAT  
CTCGTTGATTGGTTAAGACAATATGCTCCTGAAGATGAACAAACAGAAACATTTTTACGT  
GGTTTCTTAGGTCGTATGTTATTTAGTGGTGAAGAAGTTAAGAAAAAAGCTAGTGTGCTT  
TCAGGTGGAGAAAAAGTACGTTGTATGCTAAGTAAAATGATGTTATCAAGTGCGAATGTA  
CTTTTACTTGACGAACCTACTAACCACTTAGACTTAGAAAGTATTACTGCTGTCAATGATG  
GTCTTAAATCATTTAAAGGTTCTATCATCTTTACTTCTTATGACTTCGAATTTATCAACAG  
ATTGCAAACCGTGTTATCGATTTAAATAAACAAGGCGGCGTTTCAAAGAAATTCCATAT  
GAAGAATACTTGCAAGAAATCGGCGTTTTAAAATAA

### > **RF00168**

Function: noncoding RNA lysine riboswitch (core genome, constant)

Best match: RF00168\_CC008\_COL\_CP000046.1[1440344:1440519] (completely identical)

Position: 034-contig\_264\_RC: 3537 ... 3713; Length: 176 bp

Sequence:

ATATTTTGGATGAGGCGCATCAATCATGAGTAAAGTTTAGATTACTGTCTGCTAACAGCTA  
AATTTGAAAGGGTGCATGCCGAAGCAATTATAATAGCAGTTATAATTTGTTGGACTTTT  
TGGTTAAGAGCTGAGAGTTTGTCAATTATTTAAAATAATGGAGTGCATCACTTGTA

### > **lysC**

Function: protein coding sequence; aspartokinase

Best match: lysC\_CC005\_JH1\_CP000736.1[1524197:1525402]

Position: 034-contig\_264\_RC: 3794 ... 5000; Length: 1206 bp

Sequence:

```
ATGGTAACAAGAAGTGTGTTGAAATTTGGCGGATCATCCGTCAGTGATTTTACAAAAATA
AAAAGGATCGCTGAAATGTTAAAGGAGCGAGTCAATCAAGATGAACAATTAATTGTCGT
TGTAAGTGCTATGGGTAACACAACAGATCAATTAATGACGAATGTATCGACCTTGACTAA
AGCACCAAAAACAACAAGAAGTGGCATTATTATTGACAACCGGAGAGCAACAACTGTAT
CTTATTTATCAATGGTATTAATGATATCGGTGTGAATGCCAAAGCAATGACTGGCTATC
AAGCAGGTATTAACCATTGGCCATCATTTAAAAAGTAAAATTGCTCAAATTAATCCTC
AAACATTTGAACAAGCCTTTCAAGAAAACGATATTTTAGTAGTTGCTGGATTTCAAGGCA
TCAATGAACATCAGGAATTAACAACCTTTAGGCAGAGGCGGTTCTGATACGACCGCTGTGG
CACTTGCTGTTAGTAATCAAATACCTTGTGAAATTTATACCGACGTTGATGGTGTGTATGC
CACTGACCCAAGACTTTTACCAAAAAGCTAAACGACTAGACATCGTCTCATATGAAGAAAT
GATGGAAATGAGCGCTTTAGGTGCTGGTGTACTTGAACAAGAAGTGTGGAATTAGCTAA
AACTATAATATCCCTTTATATTTAGGAAAAACTTTATCGAACGTGAAAGGAACATGGAT
TATGTCAAATGAAGAAATATTAGAGAAAAAAGCAGTTACTGGTGTGGCTTTGGATAAAC
ATATGATGCATGTAACAATTAGTTATCCCTACCTGACAATCAGCTACTTACCCAACCTATT
TACGGAACCTTGAAGAAGGTGCTGTAAATGTTGATATGATTTTCACAAATCGTCAACTTGG
TGGACTACAACCTATCCTTCACGATTAAGATAGTGATTTTCATCAAATTTCTATGATTCTT
GAAACATTAAGAATCAATATGAAGCATTAGCTTATAAAATCAATGAGCATTATGTCAA
ATTTCAATTAATTGGCTCAGGCATGCGTGATATGTCAGGTGTGGCATCAAAGCATTTTTGA
CATTAATTGAAAATAATATACCTTTCTACCAACAACAACATCTGAAATAAGTATTTTCAT
ACGTCATTGATGATTTTAATGGGCAACAAGCGGTAGAAAAACTATATGACGCATTTAACA
TTTAA
```

> **asd**

Function: protein coding sequence; aspartate semialdehyde dehydrogenase (core genome, constant)

Best match: asd\_CC005\_Mu50-VRSA\_BA000017.4[1477341:1478330]

Position: 034-contig\_264\_RC: 5063 ... 6053; Length: 990 bp

Sequence:

```
ATGACAAAGTTAGCAGTTGTGGGTGCAACAGGATTAGTAGGCACAAAAATGTTGGAGAC
ATTAATCGTAAAAATATTCCTTTCGATGAATTAGTATTATTTTCATCAGCACGTTCTGCA
GGCAAGAAGTTGAATTTCAAGAAAAACATATACAGTACAAGAATTAAGTATGCTCG
TGCTAGTGAACATTTTCGATTATGTATTAATGAGTGCTGGTGGCGGTACAAGCGAACACTT
TGCCCCACTCTTTGAAAAGCTGGTGCAATCGTTATAGACAATTCAAGTCAATGGCGTAT
GGCAGAAGATATTGATTTAATCGTTCCGGAAGTCAATGAACCTACATTTACAAGAGGTAT
CATTGCCAATCCAACTGCTCTACGATTCAATCTGTTGTGCCATTAAGTATTGCAAGAT
GCTTATGGTTTTAAACGAGTGGCATATACAACATATCAAGCTGTATCAGGTTTCAGGGATG
AAAGGTAAGAAAGATTTAGCTGAAGGTGTAATGGTAAAGCACCAGAAGCATATCCACA
TCCAATTTATAATAATGTGTTACCGCATATTGATGTGTTTTTAGAAAACGGATATACAAA
GAAGAACAAAAAATGATTGATGAGACGAGAAAAATTTTAAATGCGCCAGACTTAAAAGT
AACAGCAACATGCGCACGTGTGCCTGTTCAAGATAGTCATAGTGTGAAATTGATGTAAC
GCTTGACAAAGAAACGACAGCAGAAGATATTAAGCGTTATTTGATCAAGATGACCGCG
TTGTTTTAGTAGACAATCCAGAGAACAATGAATATCCAATGGCAATTAATTCCACTAATA
AAGATGAAGTGTGTTGGCCGTATACGTAGAGATGATTCATTAGAAAATACTTTCCATG
TATGGTGTACATCAGACAATTTATTAAGGTTGCTGCATTAATGCTGTACAAGTATTGG
ACAAGTTATGCGTTTTAAAGGAGCGAATTA
```

> **dapA**

Function: protein coding sequence; dihydrodipicolinate synthase (core genome, variable)

Best match: dapA\_CC001\_MW2-USA400\_BA000033.2[1403749:1404636] (completely identical)

Position: 034-contig\_264\_RC: 6054 ... 6942; Length: 888 bp

Sequence:

```
ATGACACATTTATTTGAGGGTGTGGCGTTGCACTTACAACCCCTTTTACAAATAACAAA
ATTAATATTGAAGCTTTGAAAACACACGTTAATTTTTTTACTAGAAAATAATGCCCAAGCA
ATCATCGTTAATGGAACACTGCTGAGAGCCCTACTTTAACAACAGATGAAAAAGAACGG
ATTCTAAAAACAGTTATTGATCTTGTAGATAAACGTGTTCTTGTATAGCAGGAACTGGC
```

ACTAATGATACTGAAAAGTCAATCCAAGCTTCAATCCAAGCTAAAGCCTTAGGGGCTGAT  
GCAATTATGTTAATTACGCCCTACTACAACAAAACGAATCAACGTGGTTTAGTCAAACAC  
TTTGAAGCGATTGCAGATGCTGTGAAATTACCAGTCGTGCTGTACAATGTTCCCTTCAAGA  
ACGAACATGACAATTGAACCAGAACTGTAGAAATATTAAGTCAACATCCTTATATAGTT  
GCTTTAAAAGATGCTACGAATGATTTTGGAGTATTTAGAAGAAGTGAAAAAGCGAATTGAT  
ACAAATTCATTTGCATTATATAGTGGCAATGATGACAACGTCGTTGAATACTATCAACGT  
GGCGGTCAAGGGGTTATCTCTGTTATTGCCAATGTCATTCCTAAAGAATTTCAAGCGTTAT  
ACGATGCTCAACAAAGTGGATTAGATATTCAAGATCAATTTAAACCAATCGGCACACTGT  
TATCAGCCCTATCAGTTGATATTAACCAATTCCTATTAAGCTTTAACAAGTTATTTAGG  
ATTTGGAAATTATGAATTACGTTTACCATTGGTTAGCCTAGAAGATACAGATACTAAAGT  
GCTTCGTGAAGCATATGACACATTTAAAGCGGGTGAAAATGAGTGA

### > **dapB**

Function: protein coding sequence; dihydrodipicolinate reductase (core genome, variable)

Best match: dapB\_CC001\_MW2-USA400\_BA000033.2[1404633:1405355] (completely identical)

Position: 034-contig\_264\_RC: 6938 ... 7661; Length: 723 bp

Sequence:

GTGAAAATATTACTAATTGGCTATGGTGCAATGAATCAACGCGTTGCTAGATTAGCAGAA  
GAAAAAGGACATGAAATCGTTGGGGTCATTGAAAATACACCGAAAGCAACAACGCCATA  
TCAACAATATCAACATATTGCAGATGTTAAAGATGCCGATGTTGCAATAGATTTTTCAA  
TCCAAATCTGCTTTTCCCTTTATTAGATGAAGAGTTTCATTTGCCATTAGTTGTGGCAACA  
ACTGGCGAGAAAGAAAACTACTTAATAAGTTAGATGAATTGAGTCAAAATATACCTGT  
ATTTTTAGCGCGAACATGAGTTATGGCGTTCATGCACTGACTAAAATTTAGCAGCTGCT  
GTTCCCCTACTTGATGAATTCGACATCGAATTAAGTGGCACATCATAATAAAAAAGTA  
GATGCACCAAGTGGTACGTTAGAAAAATTGTATGATGTGATCGTATCTTTGAAAGAAAAT  
GTAACACCTGTGTATGATAGACATGAATTAATGAAAAACGCCAGCCACAAGATATTGGT  
ATACATTCTATTCGTGGAGGTACGATTGTCGGTGAACATGAAGTTCTATTTGCTGGCACTG  
ATGAAACGATTCAAATCACGCATCGTGCACAATCAAAAGATATTTTTGCGAATGGTGCAA  
TACAAGCAGCAGAACGCTTAGTTAATAAACCAACGGCTTTTATACGTTTGACAACCTTAT  
AA

### > **dapD**

Function: protein coding sequence; 2,3,4,5-tetrahydropyridine-2,6-dicarboxylate N-acetyltransferase (core genome, constant)

Best match: dapD\_CC005\_Mu50-VRSA\_BA000017.4[1479965:1480684] (completely identical)

Position: 034-contig\_264\_RC: 7687 ... 8407; Length: 720 bp

Sequence:

ATGGTACAACATTTAACAGCTGAAGAAATTATTCAATATATAAGTGATGCTAAAAAGTCT  
ACACCAATAAAAAGTATATTTAAATGGTAATTTTGAAGGCATCACATACCCAGAAAGTTTT  
AAAGTATTTGGTTCAGAACAATCTAAAGTAATCTTTTGTGAAGCGGATGATTGGAAACCT  
TTTTACGAAGCATATGGTAGTCAATTCGAAGATATAGAAATTGAAATGGATCGTCGCAAT  
TCTGCCATTCCATTAAGACTTAACAAATACGAATGCACGTATTGAACCAGGTGCATTT  
ATTAGAGAACAAGCCATTATTGAAGATGGTGTCTGCTTATGATGGGCGCAACAATTAAT  
ATTGGCGCAGTCGTTGGCGAAGGTACAATGATTGATATGAATGCTACTCTCGGTGGTTCGT  
GCTACAACCTGGTAAAAATGTACATGTAGGGGCTGGCGCAGTATTGGCAGGTGTGATTGAA  
CCCCCTAGTGCATCACCAGTTATAATCGAGGATGATGTATTAATCGGTGCAAATGCAGTT  
ATTTTAGAAGGTGTACGTGTTGGTAAAGGTGCTATTGTTGCAGCTGGCGCGATTGTGACA  
CAAGATGTACCAGCTGGTGCAGTTGTTGCTGGTACACCTGCAAAAGTGATTAAGCAAGCT  
TCTGAAGTACAAGATACTAAAAAGAGATTGTAGCAGCATTAAAGAAAAGTGAATGACTA  
G

### > **hipO**

Function: protein coding sequence; hippurate hydrolase

Best match: hipO\_CC001\_MW2-USA400\_BA000033.2[1406244:1407395]

Position: 034-contig\_264\_RC: 8549 ... 9701; Length: 1152 bp

Sequence:

```
ATGAATGAATTAGAATTTGTTACGAAACATCGCCGTCATTTACATCAACATCCTGAATTA
AGCTTACATGAATTTGAAACAACCTGCTTATATTAAGCGTTTTTAGATAGTTTAAATATTA
AATACGATTGCCATTGGAAACTGGCGTCATTGCATACTTAGAAGGTAATGGCTCACATA
CGATAGCGTATAGAGCTGATATTGATGCGTTACCTATTTTAGAGGAAAATGATGTGCCTT
ATCGCAGTCAATCTGATCATGTGATGCATGCTTGTGGACATGATGGTCATACAACTGCAT
TAATGCTTTTTGTACAACGTTGCAAAGACATGCAAGACGCAGGTCAATTACCGCAAATG
TCGTTTTCATTTTCCAACCTGCAGAAGAACTGGTGGCGGTGCAAATCGATTAATAAAAAG
CCGGTGCCTTTGATAAGTATCCAATTGAAGCGGTATTTGGTATTCATGTTAACCCATTTGC
TGATGAAGGCATTGCAGTGATAAGAGATGAAGAAATTACGGCCAGCGCAACAGAGTATC
GCTTTTTCTTAACAGGCCTGTCAAGTCATGTTGCTGATAAAGAACAAGGTCATTCTTGTGG
TGAAGCATTACAACATGTATTAECTCAAATATCACAAATTCACAATTTACCTTAACGG
TTTGAAACGAAATATTGTTTCATATTGGTCATTTTAAAGCTGGTGAAGCGATTAACACTGTA
CCAAGTAATGGTTATTTAGAAGGTACAATTCGTACATATGATATTGATGATTTAACAATC
GTTAAAAATCAAATGCACAAGATAGCAGAAAGTGTCAAGCTTCTGTTTAAATGTAGAATGT
GAAGTTAAATTTGCAGAAGGTTATCCCCCTACAATCAATAGTCCGAAATTACGTACTIONAA
ATAGAGGACGCCTTAATAAAAGCTGATTTAAATGTCTATGACAAACCAACGCCATTCTTA
TTTGGGAAGATTTTAGTTTTATGGTCAACAACCTAGCTCCAGCTTACTTTGTTTTATAG
GAACACGAAATGAAGATAAAGGTTTTGTAAGTGGTTTGCACACATCACATTTAAATTTTG
ATGAAAAAGTGTTAATAAACGTGGTTAATTTTTACGAAAATTTATTAATAATTACAAAG
AGGTGTAA
```

### > **alr2**

Function: protein coding sequence; putative alanine racemase/locus 2 (core genome, variable)

Best match: alr2\_CC001\_MW2-USA400\_BA000033.2[1407400:1408485]

Position: 034-contig\_264\_RC: 9705 ... 10791; Length: 1086 bp

Sequence:

```
TTGACAGCAACATGGTCTGTAAATAAGAAAATATTTTTACAAAATGCAATCACAGTCAAA
ACAATCAGCCATTAATGGCAGTTGTTAAAAATAATGCATATCACTATGACCTAGAATTT
GCTGTAACCTCAGTTTATCCATGCAGGTATAGATACATTTAGCACAAACATCACTACGAGAA
GCAATTCAAATTAGACAACCTTGCTCCAGATGCAACAATCTTTTTAATGAATGCAGTATAC
GAATTTGATTTAGTCCGTGAACATCAAATACACATGACTTTGCCGTCGTTGACATATTACT
ATAACCACAAAATGATTTAGCTGGTATTCATGTTCACTTAGAATTTGAAAATTTATTACA
TCGGTCTGGATTTAAAGATTTAAACGAAATTAAGAAGTATTGAAGGATCACCATCAAAA
TCAAAATGCAAAAATGATTATTAGTGGTTTATGGACCCATTTTGGATATGCTGATGAATTC
GATGTGTCAGATTATAATGTTGAACGTTCACAATGGATGGAAATTGTTGAATCACTTTTAT
CTGAAGGTTATCAGTTCGACCTAATCCATGCACAAAATAGTGCGAGTTTTTATCGGGAAG
GACAAATATTACTACCCACCATACACATGCGCGTGTAGGTATTGCGTTATACGGTTCAA
GACCATATAGTTCACTGAATCAACATGATATTGTTTCAGTCATTGACTGTAAAAGCACATG
TTATTCAAGTGCGCGAAGTGCAAGCTGGTATTATTGCGGTTATAGCTTTGCCTTTGAAGT
GACTAAAAACAATACAAAATAGCTGTAGTTGATATCGGTTATGGCGATGGAATTTTAAAG
AACACGTGCTAAACATGAAGCACTTATCAATGGTAAACGCTACCCGATACGTGCATTAAT
GATGAGCCATATGTTTGTGTAAGTAGATGGCAATGTACATGCACAAGATGAAGTTATTCT
TTATAATAATGATATCCGCATCGATGAATATACCTTTAAAGGTGTTGGTGCAAATTCTGA
ACAATTAAGTGCTATGAATCATGATTCTTTAAAAAAGGAGTACATTTCAAATGACTGTTA
A
```

### > **lysA**

Function: protein coding sequence; diamino pimelate decarboxylase

Best match: lysA\_CC005\_Mu50-VRSA\_BA000017.4[1483058:1484323] (completely identical)

Position: 034-contig\_264\_RC: 10780 ... 12046; Length: 1266 bp

Sequence:

```
ATGACTGTAAATATAATCAAAAATGGCGAATTAACAATGGATGGTATTAGTTTTAAAAACG
ATTGCACAAAGCTTTGGTACACCTACCATTGTTTATGATGAACTACAAATTAGAGAACAG
ATGCGCCGTTACCATCGCGCATTAAAGATAGTGGATTAAATACAATATTTTCATACGCC
```

TCAAAGGCATTTACTTGCATTCAAATGGTCAAACCTGTAGCTGAGGAAGATTTACAGTTA  
GATGTTGTTTTCTGAAGGTGAATTATATACAGCTTTAGAAAGCAGGTTTTGAACCGAGTCGC  
ATCCATTTCCATGGTAACAATAAAACGAAACATGAAATTAGGTATGCTTTAGAAAATAAT  
ATCGGTTATTTTGTATAGATTCATTAGAAGAAATTGAATTAATAGACCGCTATGCTAATG  
ATACGGTTCAAGTTGTATTACGAGTTAATCCAGGTGTTGAAGCACATACACACGAATTTA  
TTCAAACCTGGGCAAGAAGATAGTAAGTTTGGATTATCAATTCAATATGGCTTAGCTAAAA  
AAGCAATTGACAAAGTCCAACAATCTAAACACTTAAAATTAAGGTGTACATTGTCATA  
TTGGTTCACAGATTGAAGGTACAGAAGCATTATTGAAACTGCTAAAATTTGTTTTACGTTG  
GCTTAAAGAGCAAGGCATTCAAGTTGAATTATTAACCTTGGTGGTGGCTTTGGTATTAA  
ATATGTTGAAGGTGACGAAAGTTTCCCTATCGAAAGTGGTATTAAAGATATTACAGACGC  
AATAAAATCCGAAATTAAGTTCTAGGTATAGATGCACCAGAAATAGGTATTGAACCGG  
GACGATCAATTGTAGGTGAAGCTGGCGTTACTTTATATGAAGTTGGAACCATTAAGAAA  
TTCCAGAGATTAATAAATATGTTTCAATCGATGGCGGTATGAGTGATCATATCAGAACTG  
CACTTTATGACGCAAAGTATCAAGCATTGCTTGTTAATAGAAATGAAGAAGCAGATGACA  
GTGTAACCTATAGCTGGAAAATTATGTGAGTCTGGTGATATCATTATTAAGACGCTAAAT  
TACCTTCATCAGTCAAACGTGGAGACTATCTTGCTATATTATCAACTGGTGCATATCATT  
CTCTATGGCATCCAATTACAATCAAATGCAAAGCCTTCTGTGTTTTTCTTAAAAGATGGC  
AAAGCACGTGAAGTTATAAAGCGACAATCGTTAAGACAACCTCATTATTAATGATACAAA  
ATAA

> **msa**

Function: protein coding sequence; modulator of sarA

Best match: msa\_CC005\_Mu50-VRSA\_BA000017.4[1484563:1484964:r]RC (completely identical)

Position: 034-contig\_264\_RC: 12285 ... 12687; Length: 402 bp

Sequence:

TTAGATTTTATGCTTTACTTGCTTTTTCAAATAATATAAAAACGATAAGAATTAACAACAAA  
TATAATGTATAAAACAGAATTTTCATCAAATCCAAAATCTTTACTTGTAAATTAATACATCAA  
TATCTTCTAATTCCATCATCTCTGCTTTAATATAATTATTAAACTTTGGCAAAGTCATTAA  
ATGTACATTGTAATATAGTAATAAAAAGTCGATAAATATGATGTTAAAAAATATGTATGT  
TTTATCAATATTAGTTTTGAAAAATAGTATCCCAGAAATCATTATCGGAATCACTAATACA  
ATCATCATTGCTGCTAAAATATTAATATTTAATCCAATTGCAGATAATACACCGAAAAC  
AATAAATTAGCAACTAACTAAGGATAAGATATTTTCAT

> **cspA**

Function: protein coding sequence; cold shock protein A (core genome, constant)

Best match: cspA\_CC001\_MW2-USA400\_BA000033.2[1410578:1410778:r]RC (completely identical)

Position: 034-contig\_264\_RC: 12883 ... 13084; Length: 201 bp

Sequence:

TTATAGTTTAAACAACGTTTGCAGCTTGTGGACCGCGGTCGCCTTCAACTACTTCAAACCTCA  
ACAGCTTGACCTTCTTCTAATGATTTGTAACCATCTTGGTTAATTGCTGAAAAATGTACGA  
ATACGTCATTTTCTCCTTCAACTTCGATAAAGCCGAATCCTTTTTTCAGCGTTAAACCATTT  
AACTGTACCTTGTTTCAT

> **tnpIS431-06**

Function: protein coding sequence; transposase for IS431 (mobile element)

Best match: tnpIS431-06\_circ\_S-epidermidis\_GQ900381.1[43799:43807]RC (completely identical)

Position: 034-contig\_264\_RC: 13347 ... 13356; Length: 9 bp

Sequence:

ATAGTTCAT

> **xpaC**

Function: protein coding sequence; 5-bromo-4-chloroindolyl phosphate hydrolysis protein (core genome, constant)

Best match: xpaC\_CC001\_MW2-USA400\_BA000033.2[1411708:1412337] (completely identical)

Position: 034-contig\_264\_RC: 14013 ... 14643; Length: 630 bp

Sequence:

```
ATGACAGTGAGATATAATATTTCTCATATATTTGGGGTGTAGTGGGAATTCCTGTAGCGT
TTTTAACAAAGCATATTTGGGATGATTGCACTTGATGTATCTTTTTTAATTGATATGTCTATT
GGTATTGTTGGCTTTTTAATGACATACCTACCGATACAAAACTCACTTCACGCAAATATT
TAAACGAAATTGGTTTGACTAGAAAAGACTATCGCTATATTCGAAATCAGTTAAATCATA
CACACCAAAAACCTTAGAGGTATTTTAAAAACGTATGTCAATATAAGATCAATTAAGATT
TTAGGCAGATTAATGATATATACCAAATTTACAGTTCTATTTATACGACAGTTAGACAGA
GACCTGCATCATTTTTATAAAGTTGAAGGCTTTTTTTATTCTCATATTGATAATGCTTTAAAT
TTGGTTGATGCATATACACGTCTAGCAAAAATGCCCAAAAATCAATTAATGAACAGCAA
AAGTTAGAACAACACGAATTACTTTGGATGAGGTCAAACGAACATTAATCGCTGATTTA
AAGCGTCTCAACGAAGATGATTATGAACGTTTAGATATTGAAATGGAATTAATAAGTTA
CATCAAAAACATCATCAAGATTGA
```

### > **terA**

Function: protein coding sequence; putative tellurite resistance protein (core genome, constant)

Best match: terA\_CC008\_NCTC8325\_CP000253.1[1347708:1348844] (completely identical)

Position: 034-contig\_264\_RC: 14674 ... 15811; Length: 1137 bp

Sequence:

```
ATGACTGAAAATAAAAGTTTCAAAGAAAGCCATCCACTAGATGATTTTATAAGCGATAAAA
GAATTATCGAATACTACTATTCAAAAAGAAAAGTTAACAATTGAACAACAAAAACAGGT
AGACACAATCAGTAAACAAATTAACCCTTTAGACAATGAAGGTTTATTAGCGTTTGGTTC
TGATTTACAGAAACAATGTCTCAATTTTCACATCAAATGTTGGATGAAGTACAAAGTAA
AGATGTTGGTCCTATTGGAGATACTTTGTCAGATCTAATGTCAAACTAAAGTCAGTTAA
TCCAAATGAGTTAAATACTGATAAACCATCTATGTTAAAAAGAATTTTTAGCAGAGCAAA
GTCGTCTATCAATGAAATCTTTTCAAGAATGCAATCAGTTAGTGCTCAAGTCGATCGCAT
AACGATTCAACTGCAGAAACATCAAACACATTTAACAAGAGATATTGAATTATTAGATAC
GCTATATGATAAAAAACAACAATACTTTGATGACTTATCATTGCATATCATTGCTGCACA
GCAAAAAAAGTTGCAATTAGAAAATGAAAAGCTACCACAATTGCAACAGCAAGCGCAGC
AATCCACTAATCAAATGGATATTCAACAAGTTGCAGATATGCAGCAATTTATAGATAGAC
TAGATAAACGCATATATGACTTACAGCTTTCAGACAAATAGCTTTGCAAACCTGCGCCAC
AAATTCGTATGATTCAAATGTTAATCAAGCACTTGCCGAGAAGATACAAAGTTCAATTT
TGACAAGTATTCCTACTATGGAAAATCAAATGGCCATTGCGCTTACATTAATGAGACAGC
GTAATGCAGTTGCTGCACAACGAGCTGTCCTGATACAATAATGATTTATTAACAGCAA
ATGCTGAAATGTTGAAACAAAATGCGATTGAAACTGCAACAGAAAATGAGCGTGGCATT
GTTGATCTTGATACATTGAAACGTACACAGCGTAACATTATTGAGACAATTGAAGAAACA
TTAATTATTCAACAACACGGTCGCGAAGAACGACAATTAGCTGAAAAAGAATTACAACA
ATTAGAACAAGATTTAAAGTCACATTTAGTGAACATCAAAGGACCGAATAACAATCAT
AA
```

### > **braB**

Function: protein coding sequence; branched-chain amino acid transport system II carrier protein (core genome, constant)

Best match: braB\_CC005\_Mu50-VRSA\_BA000017.4[1488161:1489504:r]RC (completely identical)

Position: 034-contig\_264\_RC: 15883 ... 17227; Length: 1344 bp

Sequence:

```
TTATTCCTGTTGATATTTAATTGGATCTTGTTTTACAAATATGCCGACTAGATAGCCTAAT
ATCGTTGCAATAAATTGCTACTGGGAACCACTCTAAAGAATACGCTCTTAGAGGCAATGAT
TCTATAAAGTTAATTTTCAGCCAACCTAACTACTAATAACACTGAAAATCGACAATATA
AATACGATAAATACTGGAATTTGTTGTGAAATGCGTTTTGTGCGGTATGAATTTGGCAATTA
AAATTAATAATAACAACAGTTATTGCTACTGGGTATACAATGCTTAATACCGGAATTGACA
TTGAGATAACAGCATTTAAACCTTGGTTAGCAATAATAAACTCATTAAAATGAAAATA
ATACAAATGCTTTGTATGATACTTTAGGTACGATTCTATGGAAATATTCAGAACTGCAA
CAATAAGCCCGCATGCTGTAGTTAGACATGCCAGCGCCACAATGATGCCCAATAAATATT
TTCCGAATGAACCAAATCCTGTTGAAGCCATTGTCGTTAATAAATATGTCCAATGTTTCG
```

ATCTTTGGATTTCAATTGATCTAACGTCATGTCACCTTACTGGCATATGATTACCAATATAA  
CCTAATGAAATATATATGAAAATTAAGCTACGGCTGCAATTAACCAGCAGTCAAAGTT  
TGTTTGAATATTTGATTTGTTTTAGTAATGCCTGTTAGTTTTACTGCATTAACAACAATCAT  
TGAAAAAGCAATTGCTGCAATGGCATCCATTGTTAAATAGCCTTGTGTAAAGCCTTCAGC  
AAAACCTGAAAAATTAGAATGATATAGTGCTTCATTGCCCTTCCAGCACTATTACCGCTA  
AAGTCTAAGTATCCTTTAATAATCATCGCTAAAATAGTAATCAATAATAATGGTGTTAAT  
AATGAACCAATACGATCGATTAACCTTAGATGGATTTAAACAAATATACAAAACGACTATG  
AAGTAGATAATCGTAAATATAAATAAAGCGATACTACTATTGCTATGTATAATTGGTGTA  
ATTGTCATTTCAAAGATGTAGATGCAGTTCTAGGTATTGCGAAAAGTGGTCTATAGTC  
AAATAAATGATGATTAAGAACAATATTGAAAATTTAGGTGAAATTTTATTTAATGCGCCA  
ATATATCCTTCTTTATCAAGTGCACCTACAATCACACCTAATAATGGTAAACCAATCCCAG  
TTAGAACAAACGCTAAAATGGCGGGCCAGAAAAATTGACCACTATCCAATCCGAGATTA  
GGAGGAAAAATTAGATTGCCTGCGCCAAAAAACATAGCGAAGAGCGTAAACCAATGAC  
CCATGTATTTTTATTTCAT

> **norD**

Function: protein coding sequence; nitric oxide reductase activation protein (core genome, constant)

Best match: norD\_CC008-ST72\_21259\_AFTS0100032.1[24894:26774]RC

Position: 034-contig\_264\_RC: 17451 ... 19338; Length: 1887 bp

Sequence:

TTATAAAGATTTAAGTAGTAATTTTTTTAATAATGGAGAGAGATGTCCAGGTAATGCGC  
AACACCTTCAACGAAAATAGCATATTGACCATAAATATTATGAATTGTTTGTTCACATCT  
TCAGTTATTGGATCTTGACTCAAAAACACATTAATAACTTCAATGCCAAATTTACGTGAC  
ATTTCTACAGCTTCATACGTATCAATAATACCATCTTGACTATAAATTAATGCAGACGGTT  
CGCCGTCTGAAAATACGATTAATAATCGTTGATGTTGATTTTCGACGCATTAATCGTTCCT  
TGCAACTCTAATAGCAACACCATCACGATTATCATCTTGAGGTTCAAGTGCCATAATACG  
TGGGCCATCTTTTTCAAAGGTTGAGTAATCATAGTTAATAATTCATTAATGATATTTGGT  
TGTGCATGATCGTCTGAATCAAAGGCATCCTCACTGAATGATAAAAATTCATGTTAATGT  
TCAATGCTTTTAAACGTCTCGTGGAATAAACTACACCTTCTTCGTTTCAGCCATTTTATCA  
TGCATACTTGCTGACGCATCAATTAACAATGTAAACGTCGCATCAAATGATTTACTTAAA  
TCTTGTTTTTTGTAAAACAATTTATATTGATCGTCGATAAACCAATTAATTAATCCTTTTG  
TAATCGTCCTTTTGTTAAATTAACCGTGCATCTCGTTGTTCTCGTTCAATCGTTTTCTTTA  
TAATTTGAATTAAGTCTTTGATTTTCATATTGTACGTCTTGTTTCGATTCTTGATATTCTAAA  
ACATATTGTGGCTCAATTTTCAGGAATTTGCCATTTTATTTCTACATTTTTGTTACACCATC  
AAGTTGAAATGCTTGGCTTTGACCAACAGCATCGCCTTCTTCACGATTTAGCGTATCGTTT  
GAACCTTTGCCCTTTTTGGTTCATCATATCAGTCATATCATCTGTAGCATCGCCTTCACGTG  
CTTCATCATTACCCAATGTTTCACTATTTTGCCTTCGTGAAGTTCCATTTCTAAATAGGCG  
CCACCTTTTGACTCACTATCTGCAGATTTAGAGTCAGCTTTTTCACTTCCGTTATCATCATC  
TTCTGAAGTATCATCTTGCCCATCGACTTGACTTGCATCAGTTCTCTTTAAATCATCAAAC  
TCTGGACTAGCTAATGTATTATATAGTGTTTTAGGTAAGTAATAATATTCGTTTAGCATAT  
CTTCTTTTAAATATCATCTACTTGGATACATAATTCTTTGAGCCAGATACATATTATCTTCA  
GAATTTTGATTTTGGAAAAAATTAGGTAATATAAGAACATATTAACTACAATATCATCT  
AAATCTGAATGTATAGATGGTATATCAAAGAAATCTTGGCTTAAAAATGCATGTTCTAAA  
TACAAAATAATAAATCTGTATATTGTGTTTTAGTACGATACACTTTAATTTGAGATTCCG  
TATATGATATACGTGTATCTAAGCGAAGATCAATTAATTTAGCAGTACTTGGGCGCTCAA  
CTTTAATAGAATTTAATACGCGCATATCTTCTAATAATTTAAAAAGTTGTTGATAAAAATTT  
AGGGTGTTTAAAAGTTTTATCTTGTACTACTTCATTTACAATTTGTACATCCATCATATGA  
TAACCGTAAGCAGCTAACATAACATCTGTTTTTAAACCAGCCATTTTCGATATGGCTTTGTC  
GATGTGACCAAAACCAACTCGTAATCAAACATTTTGAACAGGATTATAGTAAGGGAATT  
TTTGGATTTTAACTTGTGTTTGTTCATTTTTTAAATAAGAGTCGAGCTAAGTCTTGCAACATC  
ATTACTTGCTTGGCATCTAACTGTTCTGTCGTTAAATTTTATGAAACGATCACTCAT

> **txbi\_odhB**

Function: rho independent terminator of odhB

Best match: txbi\_odhB\_CC005\_Mu50-VRSA\_BA000017.4[1494112:1494182:r]RC



Position: 034-contig\_264\_RC: 21833 ... 21904; Length: 71 bp

Sequence:

TATAAAAATAAAGTACAGCAGTAAGATATTTTGACTAGAAAATAATCTTACTGCTGTTTG  
TTATTGATTTG

### > **odhB**

Function: protein coding sequence; dihydrolipoyllysine-residue succinyltransferase (core genome, constant)

Best match: odhB\_CC001-ST772\_118\_AJGE01000012.1[8495:9763]RC (completely identical)

Position: 034-contig\_264\_RC: 21944 ... 23213; Length: 1269 bp

Sequence:

TTAAGATTCTAATAATAAGTCTTCTGGGTTTTCAATTAATTCTTTAATTGTTTTTAAGAATC  
CAACTGCTTCTTTACCGTCAATAATTCTATGATCATAGCTTAATGCAATATACATCATTGG  
ACGATTTTCGATTGTATCTTGATCAATCGCAATTGGTCTTGTAATAATTGAATGCATGCCT  
AAGATTGCAGCTTGATTACCATTGATAATTGGCGTACTCATCATTGATCCAAAAATACCG  
CCATTTGTAATCGTAAATGAACCATTAACCATATCATCTAAGCCAAGTTTTTCTCTCGTG  
CTTTAACTGCTAAATTAGCAATTTCTGCTTCGATTTCTGCAAATTTCTTTTTATCACAACT  
CTTACAAATGGTACTAATAATCCATCATCTGTAGAAACAGCTACACCAATATCATAATAT  
TGTTTCGTAATCATGTCGTCGCCGTCGATTTCTGCATTAACCTTCTGGATACTTTTTCAAAGC  
TGCTACAGAAGCTTTAGTAAAGAATGACATAAATCCTAATTTAGTACCATCATGATCTTTC  
ATAAATTGTTCTTTCTTACGTTTACGCAATTCATAACATTTGTCATGTCAACTTCGTTAAA  
TGTTGTTAACATAGCTGTATTATTAGATACCTCTAATAATTTTTTGGCAGCTGTTTTCTTTC  
TGCGTGACATTTTTTACGAATCACTGGTTTTGTAGGATATTGATTGTATTTTTTCTCTTCT  
TTTGCAGGTGCTTGTGTGTTGTTTGTGTTGATGCCGGTGCCTGTTGTTTCTTATCAATATC  
TTCTTTACGAACCACATCATTTGTTTTCGGACTTACTTCAGCAAGATTCACACCATTTTCA  
CGAGCATATCGACGCGCAGAAGGCGTAGCATTAAACGTTGCTGATTGTCATCATTTGCT  
TGATTGACTTCAGCTTTATCTACCGAATTTTGTGTTTCTTCTTTTTTATTATTTGTTTCT  
TCATTTTGTGTTGGAGTATTGTCGTTACTATTTTCTTTAGAAAGCATTGCCACTACCTTCGCC  
GATGACAGCAATTGCTTGTCCAACCTTCTACAGTGTCCGCTTCACTTGCAAGTTGTTTCAGAT  
AATACACCTGCTTCTTCAGATACAACCTTCGACATTAACCTTTATCAGTTTCTAATTCAGAA  
TAGCTTCACCTTTTTCTACGCTATCCCCTACGTTTTTCAACCATTCTGCAATGGTACCTTCT  
GTAATAGATTCTGCTAATTCTGGAACCTTAAACCTCTGGCAT

### > **odhA**

Function: protein coding sequence; 2-oxoglutarate dehydrogenase E1 component (core genome, variable)

Best match: odhA\_CC001-ST772\_118\_AJGE01000012.1[5683:8481]RC (completely identical)

Position: 034-contig\_264\_RC: 23226 ... 26025; Length: 2799 bp

Sequence:

CTAGTTATTTTTAATGCATTTTCTATAATTTTATTTTGAACAAGTTTATGAATTTCTCCAT  
CGCCTTCAGCTGGAGCAGCCCTTTGAATTCTGCCATGATAACTTAAATCATATTTATCTGC  
AACTAGCACTTTAACATATGGATAGACATATAACCATGCACCTTGATTTTTAGGTTCTTCT  
TGTACCCATGACACTTCTTCAAGGTTTGGCAATTGTGCTAGTAATGCTTCAATCTCTTCCT  
CTGGGAATGGATACAATCTTCAATCGCAACGAGTAATACTGATTCTGCTGGATTTTTAGC  
TAATGCTTCTTTAAATCAATGAACATTTTACCAGTCGCTAAAATAACTTTTTGTAACCTTA  
TCCGATTGATATGATTCTGTCAAAATTGGCTCAAATCCACCAGAAGTAAATTCATCAATT  
GGTTTTGCAACTGTTTTATTTCTCAATAAGCTTTTTGGTGACATAACAACCAATGGTCGCA  
TTTGTTTCAAGTCTAAACTAGCCGCTTGTGCACGCAATAAGTGGAAATAATTAATTTGAAC  
TAGATAAGTTGACAACCTGTGCAATTTTTCAGCAGCTAATTGTAAAAACCTCTCTAATCT  
TGCTGATGAATGTTTCAAGGACCTTGACCCTCATATGCATGAGGTAAGAATAATGTTAATCC  
TGAACGTTCTCCCCATTTTGTGAGCGAGAAGTGAATAAGAAGTTGTCAAAAATCATTGTGA  
CATATTTGCAAATCACCATATTGCGCTTCCCAAATATTGAAGCTTTTTTTGTTTTCCACAT  
TATAGCCGATTCAAACCAACTACTGCTGCTTCTGAAAGCGGAGAATTGTGTATATCAA  
ATGTCGCTTTTTGATCAGGAACATGATGTAAAGGTGTATATGTTTACCTGTTTGCTCATC  
ATGTAACACGGCATGCCTATGACTGAATGTACCACGTTCACTATCTTGACCAGTTAAGCG

AATCGGTGTACCATCTTGTAAAATTGTCGCAAATGCAAGTTGTTCTGCTTGTGCCCAATCA  
ACTAAGCCATCTTCTTTATTAACGGCTCATGACGCTTCTCAAGAACTTTGTTAACTTTTT  
CAAATGTTAAAGCCATCCGGATATGTTAACAATGCATCATTTATTTCTTTCAAATGATCA  
AACGTAAATGATTGTTCTGCTGCTTGTAAACGGTAATGCAAGTTCTGCAGGTTTTTCCATAT  
CTGGATTATCCATTTTATCAGCTTTATTAATTTTATCATGAGCTTGTCTTAGTTCCTTTTGG  
ACTTGTCTATAAATGAATGCATTTTCATCTTCTGAAATGACACCTTCATTAACAAGCTTTT  
TACCAAACACATATTCAACAGAGTCATGTTTGCGAATATTCTGATAAGGAACTGGATTAG  
TAATTGATGGTTCATCCATTTTCGTTATGTCCGAAACGACGATAACCTACTAAATCAATAAC  
GACGTCTTTATGAAACTCTTTTCTAAATTCATTGCAATATCAATTGCTTCAATAGTAGCT  
TCAACGTCATCAGCATTGACATGGAATATTGGCACATCATAACCTTTGGCCACATCTGTA  
GAATAAGTTGTTGAACGTGCATCAATTGGTCTGTAGTAAATCCAATTCTATTGTTAGTAA  
TAATATGCAATGAACACCCGTAGAATAGCCTTTCAAGTTTCCTAAGTTCATTGTTTCGAA  
GTTAATTCCTTGACCAGGATAAGCAGCATCGCCATGTATAATAATTGGCATTGCTTTATGA  
TGATCAGTCGTCGGAGCCCCAGCACGTTGTGTATCATCTTGTGCTGCTCTCGTACGCCCT  
CAACAACAGGTGCAACAATTTCCAAGTGAAGTTGGATTGTTAGCCAGTGCAATACGCTGCA  
TTGTACCGTATGAATCAGTAGTTTTAATGCCACCAAGGTGATATTTACATCACCAGTCCA  
TCCAGCAGTAACTGCAAGCTACCATCTTCAGGTAAGAATTTCAATTGGATCTGTATGCATA  
AATTCTGAAATCATCATTTTCGTACGGTTTTTCTAAGACATGCGTTAAAACGTTTAAACGTC  
CACGGTGAGCCATGCCTATTTGTATATTTTAAATACCTTCTTTCGCAGCAATCGTAATAGT  
ACGTTGTAACATCGGTACAAGTGCCTTACCCCTTCAATTGAAAAACGCTTTGCACCAAC  
GAAGTTTTTATGAAGATATTTTTCAAACCCTTCAACATACGCTAATTGTTTGAATAGTGCC  
CTTTTTTCGTTATTATTTAACGTTACTTTATATGGCGTTTCAATTCTTCTTTTAAACCAACC  
ACGTTTCGGTATTGTTATTAATATGTGTATACTCAAATGCAATTGGTCTTTGTAAACGTTTTT  
CCATTCTTAAAATTGCTTCATAAGCATTATCATAAATGTGCGCAAAGTGATCTGAAACAA  
TTCTGCTGATATACCTTCCAAAGTCTGTTGATCTAAATCAAAGTCTTCAATCTCTAATTT  
AGGTACATGTTTCTTTTTGGAGGATTTACAGGATAAATATCGGCTTTAAGATGCCCGTAT  
TGGCGAATATTATCAATTAACGCATGACACGCTTAATTGTGCCGTCGCTATTTTGGCTAC  
TTGTACTTTTTAAAGCTGGTACAATTGAGTCATCATTCTTAATTGTGCTGAATAAGACTTG  
TAAATCTTCTGGTACAGATGATGGATCTTGTA AAAAGTCATCATATAGATCTAACATTAG  
ACCTAAATTCGCACCGAAGTTTACAGGAGCCTCTGAAACTTCTTTTCTTTCGTTAGTCAT

> **arlS**

Function: protein coding sequence; signal transduction histidine-protein kinase (core genome, constant)

Best match: arlS\_CC001-ST772\_118\_AJGE01000012.1[4044:5399]RC (completely identical)

Position: 034-contig\_264\_RC: 26308 ... 27664; Length: 1356 bp

Sequence:

TTAAAATATGATTTTTAAACGTTGTTCTTTGTTAATTTCACTTTTTAATTTTAAATCGATCCTC  
CGTTTAAATTGAATGATTTTTTGGAGCAATAGATAATCCAAGTCCATTACCGCCTTGACTTCT  
TGAACGAGATTTATCCACTCGATAAAAAGCGATCAAAAATGAAATCTTGATCTTCTCTGG  
AATACCAATTCATGATCTGTAATTTCAATTATTTTTTGGCTTATTTTTTAACTTGTCTTAA  
CTTTAATTTTCTTATTCTTACATCATATTTGATTGCATTATCAATAAAGATTAAAAATAAT  
TGTTCGAATTGATGAGGTTTCATTTTAAATTTCTAGATTTTTAGATGTCAGATCCGTATCAA  
ATTGATAATCAGGATGCAATTGTTTTAATGAGTGTATTTCGCGAACGAATTCATCATTAAAT  
ATGCACGGTCTGTGCTTCAGAAGAAATGTCATTTACATCTCCTTTAGTCAATTCAAGTAAT  
TCTTCGACTAATTTTATGATACGATTCATTTCTTCAATAGAAATATTTAACGATCTTCTAA  
TACTGCTGGGTCTTTTTTTCCCATCGCTGAATCAAATTTAAATGACCTTGAATAATTTGT  
AATGGTGTTTCGTAATTCATGTGACGCATCTTCAACAAATTGTCTTTGTTGATTAATGATT  
CTTCAATTTGGCTCATCATCTCATTAACGATTTTGCTAAATTATCTATTTCTTCATAATTT  
GTATTTAATTGCAATTTATTTTGA AAACCATCTCGTCGAATCTCAATCATTTTATTTGATA  
AACTGACAAGCGGTTTAGTAATTTGTGTTGAAAATACATAACTGATTGTGGCAGTTATAA  
TTGTTGCAATCACTCCAAATGCCAGCGCAATGATATACAATGATTTTACGATGTTATCATA  
ATTTTCTAGTGAATGAATTAACAAGCTATACCCTTTGAAATCTTGC GTTGTAAATTGGTCT  
TTAATAAATTAATATTC AATGCCTTTATAGCGTTTTTTTTATTACGCGGTCAAATAACGGT  
GTTCATAACCTGGTTCAACTCTCACTGTGTTATCATTTCGATGTCTCAAATAATTTATTATTA  
TGCTCATCATAAATAATTATCTTGTAAAATTACCTAAAGATGCATTCAAGTCTAATGCAG

ATATATCTTTAACAGGCTTAGAATGAAATAAATTATTAATATCGCTTGAGCTTCGTTCTGC  
ATCATCAAGCTCACTATTATGCAGTGTATCTTTCAAGAAAAATAATAATTAACAAAA  
CAAAAATATCGTGACAAACGTAATCATTGTGGTAACAATAATCCAGTTATTGCGCAATTT  
ACGTTTTGTCAT

> **arlR**

Function: protein coding sequence; response regulator

Best match: arlR\_CC005\_Mu50-VRSA\_BA000017.4[1499939:1500598:r]RC (completely identical)

Position: 034-contig\_264\_RC: 27660 ... 28320; Length: 660 bp

Sequence:

TCATCGTATCACATACCCAACGCCACGAACTGTTTCAATCATTTTTGTCACGATCGTATGGT  
TTTAACTTGTTCGTAATAATATCTTATATAAACATCTACGACATTTGTTTCTACTTCACTATT  
ATAACCCATACATGATTTAAAATTTGTTCCCGTTGCATAACATGGTTTTTATTTTCAGCT  
AGAAGATATAGTAAATCATACTCTGTTTTTGTAAATCAATTTCTGCGCCATTTACCGTCA  
CTTTAAAAGCGTTCTTATCAATTGTAATACCGTTGACATCGATAATATCCTTTTTGTGGCTG  
ACGACGTAATAATTGCACGAATCCTTGCTAAAAGTTCTTCAATATCAAACGGCTTAACTAT  
ATAATCGTCTGCACCGTAATCAAGCCAGCAACTTTGTCATACGTATCACTTTTCGCTGTA  
ATTATAATGATAGGTGTAGATTGTTGTTGTCTAATTTTGGGACAAATTTCTAAGCCATTAA  
TTGACGGCAACATTAATCTAATATGATTAAATCATAGTAATGGCTAAGCGCTTTATCTA  
AACCGTCTTGCCATCATACTCTGTGTCCACATTGTAATTTTCATGTGTGAGTTCCAATTC  
AAGAAATCTTGCTAAGTTTTGTTTCATCTTCTACTATTAAAATTTGCGTCAT

> **murG**

Function: protein coding sequence; undecaprenyldiphospho-muramoylpentapeptide beta-N-  
acetylglucosaminyltransferase (core genome, constant)

Best match: murG\_CC001-ST772\_118\_AJGE01000012.1[900:1970]RC (completely identical)

Position: 034-contig\_264\_RC: 29738 ... 30809; Length: 1071 bp

Sequence:

TTAATTCAATGCGTCTTTAATCATCTTATCAAATAAAGCTTCTTTTCGTATAACTTTGTTTCAT  
ACGATTTTCATATTATTGATAATTCGAGTTCCTTTCCTGTTCCATTTCAATTTAGTTCTTGTAAT  
AAAATTTGTGCTGTTAATTGTTCTTCATCAATCGTTTTAGCATAACCTTTATCAGCAAAAT  
GATTTGCATTGTCAATTTGGTCGCCTCGGGATTGATCTAAACCTAATGGTACTAATAACAT  
TGGTATACGTAATGTTAAGAACTCATAAATCGCATTGATCCAGCTCTACTTATTACTGTG  
TCCGTAATTGCTAATAAATCTGTTAAATCCTCTTTAACAAATTCATATTGTATATATCCTG  
ATTTTTTAACTTGAGCATCTTTTAAATCCTTTACCAGTTAAATGTATCACTTGATATTGTTGT  
AATAATGCATCTAAGTTTTTCGCGAATAATGCTATTTAATTTTTTACTTCCCTAAGCTTCCAC  
CCATAACGAGTAAAACCTTTTTTATTTTCATTAAGCCTGTTAATTGATAACCATTATGTGC  
ATTACCATTTTTTAAATCTTCTCGAATTGTTGCTCCAATAAAATCAGCTTTCTCTTTAGGTA  
GGTAGTTTAGCGTTTCTTCAAATGTTGTATATATTTTCTTGGCAAATTTAAGTGCTATCTTA  
TTCGCTAATCCTGGTGTTAAGTCAGATTCATGAATAATAGTTGGTATATTTAATGATTTGG  
CTGCAATAACAACAGGCACAGATACAAATCCACCTTTTAAAATAATAGATCAGGTTTTT  
CTTTTTTCAAACCTTTACGAGCATCAAGAATACCTTTCAATACTTTAAATACGTCTTTGGC  
ATTTTCTAAAGAAATATATCTTCTTAATTTACCACTCGAAATAGGATAATACTTAATTTCT  
GGTAGTTGTGATTCAATCATTTCTCTTTCAATACCATTTTTAGAACCAATATAAAGCGCTT  
CATAACCTTGATAATGCAGTTGGAATTAACCTTAAATTTACTGATACGTGTCCAACCTGT  
TCCCCCTCCGGTAAATGCGATTTTCGTCAT

> **txbi\_universal1**

Function: bidirectional rho independent terminator

Best match: txbi\_universal1\_CC001\_MW2-USA400\_BA000033.2[1430297:1430367:r]RC  
(completely identical)

Position: 034-contig\_264\_RC: 31663 ... 31734; Length: 71 bp

Sequence:

TACATCCCTAAAAAAGCAGTAAGATAATTTTCAATTAGAAAATATCTTACTGCTGTTCTC  
TATTTATACA

### > **tnpIS1272**

Function: protein coding sequence; transposase of insertion element IS1272

Best match: tnpIS1272\_trunc\_CC001\_MW2-USA400\_BA000033.2[1430518:1431031]

Position: 035-contig\_268\_RC: 8 ... 38; Length: 30 bp

Sequence:

AAACTATATCGTGAAGTTAGTTGAAGAAAA

### > **tx\_universal3**

Function: bidirectional rho-independent terminator

Best match: tx\_universal3\_CC001\_MW2-USA400\_BA000033.2[1397772:1397835:r]RC

Position: 035-contig\_268\_RC: 57 ... 87; Length: 30 bp

Sequence:

TTAATAGAAATCAGCTTTTTTACATTGCCT

### > **ctpA**

Function: protein coding sequence; carboxy-terminal processing protease (core genome, constant)

Best match: ctpA\_CC001-ST772\_118\_AJGE0100010.1[7960:9450]RC (completely identical)

Position: 035-contig\_268\_RC: 157 ... 1648; Length: 1491 bp

Sequence:

TTATTTTAAAATATTAATCAATTTATCGAGAACATCATCATGTTTATTAGCTTTTTCAACTA  
ATAACTCAGTAAATTTATTATTCGTTTCTTATTAAATTCACCAGTTACCTCGAGTTTATTC  
GCTTGTTGGAAAGCTTTAACTTGATTTTCTAAAGCTTGATCAAATTGCGTTGTTTCATTAT  
CAACTTTATAACCTAAAGCTGACAAACCAATTTTAATAGTTTTAATATTTTTATCATCGTC  
TCCAACCTTAAATGTTTTCGTATTAGGAATGACATTTAAAGATTGATATTTAGGTGTGTCA  
ATAGTAACGTCTGGTTTAAATGCCTTTACCGTGAATATAATGACCATCTGGCGTTAACCATT  
TCATTTTCAGTATATTTTAAACAATGAACCATCCTTAAACTCTCTTGTAGTTTGTACGACACC  
TTTGCCGAATGTTTTGACCCATAAACTTTAGCTTTATTATAGTCTTTTAGCGCACCAGTA  
AACACTTCAGAAGCGCTAGCTGAACCTTCATTCACTAAGATGGATATATCCATGTCTTTTCG  
CTTCTTTTAAACGCATCATTAGAAGTTTGAATTGCTTCAGTATCTTTACCTTTTTCTAGTTTA  
ACAACAGTTTTTCTTTATTGATAAAAATATTTGCCATTTTAAACAGCTTCATCTAGTAGTC  
CACCTGGATTATTTCTTAAATCTAAAACAATCTTTTTCAAACCATCTTTGTGAGCTTTTAG  
AACTGCATCTTTCAATTCACCTGATGTATCATTCTGGAATTTATTAATAGTAATAACTCCA  
ACTTTACCTTTTTCTTATACTCAACACTTTTAAACATGAATTTTTTACGTTTAACTTAAAC  
GTCTTTTTCTTCACTACCTCGTTGAACAGTTAAAGTGACTTCAGTGTTTTCTTTACCACGAA  
CATCTTTGACAACCTTCATCTAATGCTTTTCTTTAATTGATTTTCCATTTACTTTAGTAATG  
ACATCTTTAGGACGAATGCCAGCACGTTCTGCTGGAGATCCCTTCATAGGACTAGTAACC  
ATAATTTGATCATTTTTCTTTTGCATTTCTGCACCAATACCTACAAAATCACCTGAAACAC  
CTTCATTAAGGATTTTCGTTTGTCTTTTGTAAATATTCAGAATAAGGATCTTTTAAATTCT  
TTGACCATGCCATCAATTGCAGCTTTACTTAACTTGTGACAGATCCTGTTTTTTGTAATAAT  
CACTATTTAAGATTTTATACACATTTTCAATTTTATTTAAGTTTGCTTGATCAGTTTTGTTT  
AAACCACTTATTTTTGATTTATAAAAATATATGCAACAACCTGTGATGACAGCTGTTATTA  
GGATTGTACCAATTAATATTGATATGAATTGCCAACGTTTTAAGTGAACGCGTTTCGATG  
AATTAGTTTCTTGGTCTTGATTGCTTGTGCAATTTTCAGCGCGTTCATCATCGGATGAAGA  
TGTGTGTTGCTTATCATCCAT

### > **ptsIIA**

Function: protein coding sequence; PTS system/glucose-specific IIA component (core genome, constant)

Best match: ptsIIA\_CC008\_COL\_CP000046.1[1471380:1471880:r]RC (completely identical)

Position: 035-contig\_268\_RC: 2060 ... 2561; Length: 501 bp

Sequence:

TTAGTTCATTGTCACATCAATCACTTTTGTTCACCTTTAATCACAGCATTTTCATCATAAA  
TATTAATTGAAGCTGCTTGATCAGTGTTAGTAATTATAATTGGTGAATTACAGATTTAGC  
GTTATTATTAATATATTCAAGGTTGAATCTTACTAATGGATCTCCGACGTTAACTTCGTC

CCACTAGACACTAACACTTCAAATCCTTCACCGTCTAATTGAACTGTGTCTAAACCGATAT  
GAACTAATAATTCTAATCCGTTATCTGCTTTTAACCCAATCGCATGCTTAGTTGGAAAGAC  
ATTGTCAACACGTCTGCAATTGGAGACACAACCTTCTCCTTCAGTTGGATTAATACAAA  
ACCTTCGCCCATCATTTTTTTGTGCGAATACAGGATCTGGAATATCTTCAATTTTCACGAAT  
TCTCCAGTTAATGGTGCATAAATTGCGATATCTTTCTGAACTTCTTTGCCTTTTCCGAATA  
ATTTTTTAAACAT

### > **mrsB**

Function: protein coding sequence; peptide methionine sulfoxide reductase (core genome, constant)  
Best match: mrsB\_CC001\_MW2-USA400\_BA000033.2[1433566:1433994:r]RC (completely identical)

Position: 035-contig\_268\_RC: 2572 ... 3001; Length: 429 bp

Sequence:

CTACTTATCAAAAATGTGATATTAATCGCCATAACCCAATTCTTCTAACTTTTCATATGGA  
ATAAATTGAATTGCAGCGGAATTGATACAGTATCTTAAGCCGCCACTTTCTTTAGGTCCAT  
CATTAAAGACATGTCCTAAATGACTATTTGATTCTTCTGAACGCACCTCAGTTCTCAACAT  
ACCAAATGATTTGTCGACTAATTCTATAATTTTCATCGTCATCAAGCGCTTTGGAAAAGCTA  
GGCCATCCACATTCAGAATGAAACTTTTCTTCAGATGTAAATAAAGGTTTACCAGAAATT  
TTATCTACATAAATTCCTTTAGCAAAATGATTCCAATATTCATTCATAAATGGTGGTTCAG  
TGCCGTTTTCTTGTGTAACAATATATTCTATATCTGTTAGTTCACTTTTATCTTTTTTAAGC  
AT

### > **msrA2**

Function: protein coding sequence; peptide methionine sulfoxide reductase A2 (core genome, constant)

Best match: msrA2\_CC001-ST772\_118\_AJGE01000010.1[6081:6614]RC (completely identical)

Position: 035-contig\_268\_RC: 2993 ... 3527; Length: 534 bp

Sequence:

TTAAGCATTTTGATTCCCCCAATGTGATTCTATAAACGCTTTTCTACCTGAACCACGTTGA  
TATTGGTAATAATGTACCGGGTCTTTTTATAATAATCTTGATGGTAGTCTTCAGCTGGAT  
AGAAATTTTTATATGGTTTAATAGGTGTAATCACTGGTTTCTTGAAAATACCTTGTTTCATT  
TAATTGTTGCTTTTTAAACTCAGCAGCCTTTTTCTGATGTTTCATCATGATAGAAAATGACT  
GGTTGATAGCTTTTCGCCTCTATCGAAAAATTGCCCTTGATCATCAGTTGGGTCAAATGTTT  
TGAAATATATGTCTAATATATTTTCAAAGGAAGTAACCTCTGGATCAAACGTAATTTGTA  
CTGCTTCGACATGGCCGGTTTGATTTCGTACATACCTGTTTCATAAGTTGGGTTGTCAACATG  
ACCGCCACTATAACCAGATACGACTGACTTGATGCCTGGATATGATGTAAATGGTTTAAC  
CATGCACCAGAAACATCCTCCTGCTAATGTTGCATATTCTTTTGTCAT

### > **degV**

Function: protein coding sequence; DegV domain-containing protein (core genome, variable)

Best match: degV\_CC001\_MW2-USA400\_BA000033.21434606:1435445:rRC

Position: 035-contig\_268\_RC: 3612 ... 4452; Length: 840 bp

Sequence:

TTACTTCTTAAGGACTACTAGGCCAATCGCACCTTGACCAGTATGTGCAGAAATAACTGG  
TGTAGTTACATTTATATCGTAATTATTCACATGAAAAGCTTCATTA AAAACTTTCTTCAAT  
TTATCAACATATTCAATGACGTTAGCATGTGCGACACCAACGGATTTGATTTTCATGATCTC  
CTATAAATTCAGCAATTTCTTTTTCAAGTATTGGATACTAGAATTTTGAGTTCTCGCATT  
GTGCACAAGCTCTAAGCGACCATCATCTAGTGTACCAATTGGTTTAATTTTCATAAGATTA  
CCAATCAAACCTTTTGTTTTACTAATTCTGCCACCTTTAATTAATTGATTCAATTGCCCTAT  
AACTACAAATAATTTAATGTTTTCTCTTAAATGATTTAACTTTTTAACTATTTTCAGAAGTT  
GAGACACCTTCTTTTACAAGCTCTACTAGGTGTTGTATTTGATACCCTAAACCAAAAAGAA  
ATAGATTTTGAATCAATAACAGTTACATTAGCATCTACCATTTGACTTGCTTGGTAAGCAG  
TGTTATATGTACCACTTAATCCTGAAGAAAGATGAATACTTATGATTTTCAGAGCCATCTTT  
TCCTAGTTCTTCATAAGCAGATATAAATTCACCTATGGCTGGCTGACTTGTCTTTACATCT  
TCATCATTTTCAATATGATTAATAAATTCCTTCTGATGTAATATCTACTTGGTCAACGTATG

AAGCTCCTTCAATAGTTAAACTTAAAGGAATTACATGAATGTTGTTTGCTTCTAAGTATTC  
TTTAGATAAATCGGATGTTGAGTCTGTTACTATAATCTGTTTTGTCAT

### > **folA**

Function: protein coding sequence; chromosomal dihydrofolate reductase (core genome, constant)

Best match: folA\_CC008-ST72\_21259\_AFTS01000032.1[7714:8193]RC (completely identical)

Position: 035-contig\_268\_RC: 4466 ... 4946; Length: 480 bp

Sequence:

TTATTTTTTACGAATTAATGTAGAAAGGTATGTGGAATTGTATTTTTCTCATCTAGTTTA  
CCTTCAACTGAAGAGGCAATTTCCAGTCTTCAAATGTATAAGGTGGAAAGAACGTATCA  
CCACGGAATTTACCTTCAATAACAGTAATATAACATGTCGTCCTTATCAATCATTTCTT  
CAAATAATGTTTGCCCTCCAAATATGAAAACATGGCCCGGTAGTTGGTAAATATCTTCAA  
TAGAGTGAATTACATCAACGCCCTCTACGTTGAAACTTGTATCTGAAGTAAGTACAACAT  
TTCGACGATTCGGTAGTGGTTTACCAATCGATTCAAATGTCTTACGACCCATTACTAAAGT  
ATGACCTGTTGATAATTTTTTAACATGCTTCAAATCATTTGGTAGGTGCCAAGGTAATTGA  
TTTTCAAACCAATTACTCGTTGCAAGTCATGTGCAACTAGAATGGATAAAGTCAT

### > **thyA-chr**

Function: protein coding sequence; thymidylate synthase (core genome, constant)

Best match: thyA-chr\_CC005\_Mu50-VRSA\_BA000017.4[1508996:1509952:r]RC

Position: 035-contig\_268\_RC: 5145 ... 6102; Length: 957 bp

Sequence:

CTACACTGCTATTGGAGCTTTTATTGCTGGATGTGATTCATAGCCAACAATTTCCAAATCT  
TCATAATTTATGTCGAAAATAGACTTGTCACTGTTAATTTTTAATGTTGGAGGATTGAAAC  
TTTCACGTGCTAATTGTGTTTGAATCGCATCAATATGATTTGAATAAATATGTGCATCTCC  
AAATGTATGCACAAATTTCTCTACTTCAAGTCCACATTCTTTGGCAATAAGGTGTGTCAAT  
AAAGCGTAGCTTGCATATTAATGGCACACCTAAAAGATATCTGCGCTACGTTGGTAT  
AACTGGCAACTTAACTTACCATCTTGGACATAAAACTGGAACATGGTATGACAAGGCGGA  
AGTGCCATTGTATCAATTTCTGTTGGATTCCATGCAGATACGATGTGTCGTCTTGAATCTG  
GATTATGCTTAATTTGTTCAATTACTGTTTTAAGTTGATCAAATGATTACCATCTTTATCA  
ACCCAATCTCGCCATTGTTTACCATAAACATTTCTTAAATCACCGAATTGCTTCGCAAAAG  
TATCATCTTCAAGAATACGTTGCTTAAATTGTTTCATTTGTTCTTTATATTGTTCGTTAAAT  
TCAGGATCACTCAATGCACGATGCCCGAAATCTGTCATATCTGGACCTTTATACTCGTCTG  
ATTTGATATAATTTTCAAAGCCATTCGTTCCATATATTATTATTATTTTAATAAGTAT  
TGGATGTTTGTATCTCCTTTAATGAACCATAATAATTCGGTTGCTACTAATTTAAAAGAAA  
CTTTCTTTGTCGTTAATAGTGGAATCCTTTAGATAAGTCAAAGCGAAGTTGATGACCAA  
ATTTTGAATCGTACCTGTATTTGTGCGATCATTTTCGTGTATTTCTATTTCTAAAACCTTCT  
TCACAAAGACTGTGATATGCTGCATCAAATGAATTCAACAT

### > **cvfC3**

Function: protein coding sequence; conserved virulence factor C operon/protein 3 (core genome, variable)

Best match: cvfC3\_CC001-ST772\_118\_AJGE01000010.1[1505:2629]RC (completely identical)

Position: 035-contig\_268\_RC: 6978 ... 8103; Length: 1125 bp

Sequence:

TTAAATTGTTCTGTTTGCCATTTGTTTCCATACTGAACCAAGTGCCTCATCTCCGTTTTCAA  
TACGAGATATGGCCATTTCAATTTGTAATTTAACTTCAAACGCATTGTCATTAATATGGGC  
TTTTAGTGCGGGAAGCTGCTCTGCATTACCTTCATCAAAGATAAACATAGCAGCACGCCA  
CCTAACGATTTTCTGTGGATCATCTAATAGTAGCACCATTTCTGGTAGTGCCTCTGGATAC  
CCTAAATCGCTTATGCAATCCCCTGCTGTTCTTCTTACAGCAGGACTTTTATCACGAAGCC  
CCTTATATAAATACGGTAAAATTTCTTTACTTTCAATCATACTAATAATAACAATCGCTTG  
ACGTCTAACCGGTACTTTTTTCATCAGATAAAGCTAAATCAAGCAGCGGTATATCTTCAA  
AGTCGGCTTTGGAAAATGGTTTAAACATTCGTAATCGAGTCTTCCAATTATCAGTCGCATGA  
TATTCATCAAAGAGACATGTCGATAGAAATGATAATTATTAGTTACGTGATTTTCTTCTA  
AAGCATGCTTTACCAATACAGGTAACCTGTGATTCTGGATAGGTAGCTAGCACTTCTTCTA

GGACACCATCCATTACTTCTTCAATATTTCCATAGCGATTTCTAAATCTAGCCATTTACG  
CATAAAAACAATATTGTCATGTTCTGTTTGGCGTTGAGTCATATAATCAACATATGTTTGT  
GGTAATTGTTCTCTTAATTCTTGGTCAGCAGAAGTTAGCTTAATTTGATACGGTATACCC  
TAAAGGTTAATAGTTCAGCTTTAATTTACCAAAAATGATTGTCAATTTGAGCTTCATTTAC  
AGATTCTAAAACCTGATTCCCATCAGAAAAACAGCTTTAATATCAGGTAATATGACTTC  
CCAATCAGCTTTTGGCGCCTTATCAACAGCTAAGAAGTTCATGACATGAAAAATAGAAGT  
GATACCGTCTATAGATAAACAAGTATTATAAATCTTGGTTGTGTTTCTTCTACTTTTTTAT  
AAGTATTAGATAACTTGTCTTTTCTTGTAAATGACAAAACAACCTTTCATTGTATTTGGACT  
TGGCGTTGGCTCTATACGTAAAATTTCCAT

#### > **cvfC4**

Function: protein coding sequence; conserved virulence factor C operon/protein 4 (core genome, constant)

Best match: cvfC4\_CC001\_MW2-USA400\_BA000033.2[1437519:1437956:r]RC (completely identical)

Position: 035-contig\_268\_RC: 6525 ... 6963; Length: 438 bp

Sequence:

CTATTTACAATTTTCGTCAAAGGCATCCTTTAAGTCCATTGCAATGTCATTAATATCTCTA  
CCTTCGATAAATTCTCTAGGCATAAAATAAACTAAATCTTGACCTTTGAATAAAGCATA  
GAAGGACTAGATGGTGCTTGTGAATGAATTCTCGCATTGTAGCAGTTGCTTCTTTATCTT  
GCCAGCAAAAAGTGAAGTGTATTTGTAGGTCTATGTTCAATTTGTGTTGCAACTGCTAC  
TGCAGCTGGTCTTGTAAATCCAGCTGCACAGCCGCATGTAGAGTTAATAACTACAAAAGT  
AGTGTTCATCAGCATTACTTGGTTCATATACTCCGATACTGCTTCGCTCGTTTCTAACTT  
GTAAAACCATTTTGAGTTAATTCGCCACGCATTTGTTGCGCAATTTCTTTCATATAAGCAT  
CATATGCATTCAT

#### > **cvfC2**

Function: protein coding sequence; conserved virulence factor C operon/protein 2 (core genome, variable)

Best match: cvfC2\_CC705\_RF122-cow\_AJ938182.1[1401081:1401332:r]RC (completely identical)

Position: 035-contig\_268\_RC: 8140 ... 8392; Length: 252 bp

Sequence:

TTATTCGAATACAGCCTCTACTTTTGGCAATACTGTTTCCCAATTTGCGTCATTTTCTTTAT  
CTACTGAAATAAAGTCCATAACATGGAAAATTGATTTAACACCTTCAACCTTTAAGATGT  
CATTAATAAATGCTGGCTGTGAATCATCAACTTTAGTATACGTATCTGATGTCATACCTTC  
TCTGCTTTCACTAAGTGTAATCTTCATTGTGTTGTGGTTCGGTGTCTGATATAGATATAA  
TTTGCAT

#### > **cvfC1**

Function: protein coding sequence; conserved virulence factor C operon/protein 1 (core genome, constant)

Best match: cvfC1\_CC001\_MW2-USA400\_BA000033.2[1439397:1439591:r]RC

Position: 035-contig\_268\_RC: 8403 ... 8598; Length: 195 bp

Sequence:

CTATTGAAGTTCATTTCCCTAATTGTTTTATTTCTTTCCCTATTGAACACTCATTGATACAAA  
AATGATGGGCCTTCGTTTTCCCTCTAATTTACGCAGACGAGTTTTGATTGGACATTGATT  
GCAATAAGTATTCATTAATCATCTATTTTCGCGAGTGCATTTTGCTCTGAAAAAGTTAAA  
ATACGCGACAC

#### > **Q5HFZ1**

Function: protein coding sequence; putative membrane protein (core genome, constant)

Best match: Q5HFZ1\_CC005\_Mu50-VRSA\_BA000017.4[1512693:1513397]

Position: 035-contig\_268\_RC: 8842 ... 9547; Length: 705 bp

Sequence:

ATGTATAATGAAATTTTAGGACTAGTTACGTTTATTGCAACGTTTCGTACTTATGGTACTTA  
TGTATCGCTTTTTTGGTAAACAAGGTTTAATTGCATGGGTTGCAATTGGCACAATCATTGC  
CAACATACAAGTGATTA AAACTGTAGAAATCTTTGGTATTTTCAGCAACTTTAGGTAATGT  
CATGTTTGCTTCTATTTATTTAGCAACAGATATTTTAAATGATATTTATGGGCGTAGAGTT  
GCAAAAAGAGCAGTTTGGTTAGGCTTTTCATCAACATTAATTATGATTATTGTTATGCAAT  
TGTCATTACATTTTATTCCTGCACCAGAAGATATGGCACAAAAAGCATTACACGCAATCT  
TTGATGTTGTGCCACGTATTGCTTTAGGCTCAATCGTCGCATATATTATTGGTCAACATAT  
TGATGTATTTATCTTTTCACTAATTA AAAAAGTATTTAGTTCTGATAAAAACGTTTTTCATCC  
GTGCATATGGTAGTACATTTTTAAGCTCAATAATTGATACAGCTTTATTTGTAGCTATCGC  
TTTTATCGGAAGTTTACCTGGTACAGTTGTATTTGAAATATTTATTACAACCTTACGTATTA  
AAATTAGCTTCAACAGTTTCAATGTACCATTGGATATATTGCTAAATCATTTTATCGTA  
AAGGTAAGATTGATAAGTTAGATCAAGGCTATTA

### > **STAR**

Function: Staphylococcus aureus repeat element

Best match: STAR\_CC005\_CF-Marseille\_CABA0100081.1[16587:16794]

Position: 035-contig\_268\_RC: 9637 ... 9667; Length: 30 bp

Sequence:

CATTGTCTGTAGAAATTGGGAATCCAATTT

### > **tx\_universal2**

Function: rho indendent terminator

Best match: tx\_universal2\_CC001\_MW2-USA400\_BA000033.2[1440798:1440838:r]RC

Position: 036-contig\_189: 2 ... 32; Length: 30 bp

Sequence:

AAAGCTTGTTACAAGCGCATTTTTGTTCAG

### > **rnhA**

Function: protein coding sequence; ribonuclease HI-like protein (core genome, variable)

Best match: rnhA\_CC008\_NCTC8325\_CP000253.1[1375631:1376032] (completely identical)

Position: 036-contig\_189: 273 ... 675; Length: 402 bp

Sequence:

ATGGCGAAAATAAATTTTGATGCTGCGACGAAAGGAAATCCAGGCATAAGTACATGTGC  
CATTGTAATCAAAGAAGATGAGCAGCATTATACATATACACATGAGTTAGGCGAAATGG  
ATAACCACACTGCAGAATGGGCTGCATGTATTTATGCACTAGAACATGCACGTGAATTA  
ATGTTCAAACGCACTATTATATACAGACTCAAAGCTAATTGCAGATAGCATTGAAGCTG  
GTTATGTGAAAAACGCAAATTTCAAACCTTATTTGATCAAATAGAAATATTTGAAAAAG  
ATTTTGATTTATTATTTGTTAAATGGATACCGAGAGAACAAAACAAAGAAGCGAATCAAC  
ACGCTCAACAGGCATTGTATAAATTAATTA AAAAAGAATAAATAA

### > **tx\_rnhA**

Function: rho indendent terminator

Best match: tx\_rnhA\_ebh\_CC001\_MW2-USA400\_BA000033.2[1441469:1441533] (completely identical)

Position: 036-contig\_189: 662 ... 727; Length: 65 bp

Sequence:

AAAGAATAAATAAAAGGAGCACCGACTGATGTGATGTCAATCGGTGCTCCTCTATTTATC  
AAAGA

### > **ebh**

Function: protein coding sequence; (genomic island)

Best match: ebh-Mu50\_CC005\_04-02981\_CP001844.2[1472718:1504353:r]RC

Position: 036-contig\_189: 733 ... 32377; Length: 31644 bp

Sequence:



TTATTTTTTATTTTTCTTAGATTTCTTTTTCTTCTTTTTAGCTGCTACCTTTTTAGAAAGTATTT  
TTTGATGCTGACTTTTTGTCTTTGGATTGGTTATCTTTTTGATTTTTCTTTTTAGCCAATAAT  
AAAGGAACGTCCTCATCTTTAGATTCAATACTAGTTGTTGTTTCAACATCTTCTCTTTATC  
TTTGCCTCGTTTTGCGAATAAGAGTGGTGAATGTTTCGTTATCTTTCAACACTTTTTCATCTG  
TGTTTTCATTTGTAACCTCCACATCTTCTTCATCTTCTTTACGACGACGTTTTGGTAAGAAG  
AACGGCGTATGTTAACTTTATCGAGTGACTCGCCATTATTTAGCGAATCTTTTTCTTCAA  
CAGTAACATCTTCTTCATCTTCTTTTTCTGCGACGTTTCGCAAATAAAAGTGGTAAATGTTT  
TGTATCGTCTAAAGTCTCTTTTTATTGAATCTTTATTATTATCTCTTATTTCTAATTCCTCCTC  
TTCATCTTCTTTACGACGACGTTTGGCAATGAAGAACCAGAACTAGCTAGTAAGCCAGA  
GATACCCACCACACCAATAGCGTTTTTAATAACATTACCGAAATTATTACTAAAGTGACG  
CATATGAAGTGGATCAATGTCATCATCTTCATCAATTTTTCTTTTTATGTCCAATAGTCGAA  
CTGTTAAATGGATGATTTGCAGTCCATAACCAATTGTTAAATGGCTATTAGATTCATTTT  
CAGTACTTGACGATTGTTTAGCAGCATCAGATATTACAATTTGTACTGCTGAAATTCGAGC  
AATACCATTGTTCAATGCAGCCTCAACTTGCTGTAATGTATGCGCATTATTAATATCTCTA  
ATTGTTTTCAAGCACAATTTTCGTTAATTTGATTCATTGCTGCTTGTTTTTTCATCAGTTGTGCC  
AATTTCACTATTTTCGAATACTATTTATTTTTTCATTTGAAAAGTCTTTAATTCTACTAATTG  
CTTCTTGCTTGCGTTTAGCTAGTTCTTCTGCTGTTGGATTAGCTGCTTTCATTTGAGCTTTA  
AATTGTTCCAATTGCTCAGTTATTTTCATCGATGCTTTGCGCACGTTGAATCGCTTGAATTG  
CTTGTTCTTTAATTGATTTAACTTAGCAATAGCTTCTTGCTTCTCTTTATCTGTTAGATCA  
GTACGAGCTTTGATTTTCATCAATCATATGTTGAATTGCATCTTCAATCAATTTAATTGCAT  
TTGATTTTGCTTGTTCATCGTAAATTGTTCTGGATTAAATTGTTCAATATGCGCTTGTCT  
TGTTGTTGAATTTCTTCAACTGAATGAACATCAGGTGCATTGTTAATATGATCAATCGCTT  
GTTGTTAAGCTTATTAACCTCTGCAATTGCAGCTTCTTTTTGTTCCAGTGTTAATGTCACA  
CTATTATTGATTTCAATTAATCTTTTTGTTGTGCTGCATTTTCGATTGATTCAATTGCCTGTTG  
TTTGACTACTGACAATTCTTTTTCTACAACTTTTACAGGAACATTAACAATCACTTTTGAT  
CCATCAAGCAATGTAACCTTCAACTTTTGCTGTTAAGCTATCAGAAATCGTTGCAGTTGATG  
GTGTATCAATAACTTCTGCTGAAAGCTGATCAATTAAGTTTATGTGTGCAAGAATATCTTG  
TCTGTAATGATGTCATCACGATGTACAATGAGTTCACCATTAACTAGGATTGCTCAGGT  
GTTGCTTCAAAAATTTCAATTTACAGCAGGTTGTTTCATCAACCTCCCATACATGTGTATTT  
TAATGTCATCTAAACCTAAGTTTAATCCTCGATTTAATTGATCTATAGTTTGAGCATTCTC  
AACGTTTTGTAGTGCTCGTTTTTCAGCTTCGTCAATTTCTTTGAGCGCTTTTGCTTTTTGCT  
CAGGTGTTAAATCTGGATTTGAATTGATTTGATCACGCTTCGCATTAGCTAAGGCTTTTAT  
TGCATTTTTCGCATCTTCTTTAGCTTTCACTAAATCTTTGATGTCTTGCAATGCTTGTGCAA  
GTTGTGCTTTGGCTTGTTCATTTCTTCTTTAGTCATCGCATTGTTAATGCCGTTATGACCT  
TGTGAAAGTATTTGATTAATTCGATCTTTAAGTGCTTGTTTTTCTTATCTGTTAGATTTGG  
ATTTGATCGATTTTCGTCATTAAGCTTGTACACGTTTATCAATATCTTGTTTCGCATTTT  
CTTTAGCTTTCACTAAATCTTTGATGTCTTGTAAATGCTTGTGCAAGTTGTGCTTTGGCTTGT  
TCAATTTCTTCTTTAGTCATCGCATTGTTAATGTCGTTATGACCTTGTGAAGTATTTGGTT  
AATTCTATCTTTAAGCGCTTGTTTTTCTTATCTGTTAGATTTGGATTTTCGATCAATTTTCGT  
CAATTAATGCTTGAACCTTGTGTTCAACATCTTTATTCGCATCAATTTTAGCTTTTCGGTATT  
TCATTGGCATGCACTTGTTCATCGCATGGTTGCCAGCTGTTTGAACCTGAGATACATCCT  
GATTACTTGTGCTTTATTAATGTTGTTGATGATGCTGTTTGCCAATCTTCTGCTTTATTT  
TTCGCAATAAGCTTGTCTTGATCCGTCGCATTTGAAGCTTCGATTTCTTTTAGCTTATTAGC  
TAAAGCTTGATTAATAGATTGAATTGCCTTTTTCTTTAGCATCTTGTAGTCGTTGATCACCA  
TTAAGATTATGGATTGCATCATTGACTGCTTGGATTGCGCCATTGATATCATTACATTTG  
TGTTATCACTATTTAGCAATGTATTTGCTAGACGTTTGGCATCATCGAAGTTTGTTTTAGC  
ATTATCGTCAGCGTTTTGGTAATTGACAGTTTGTCTGCATTTGGAATTTCAATTGTCAACT  
AAATGTTTCAATGTTTCCATTGCATCATTTAAGTCAATTTGATTATTAACAATATCTGTTA  
CATCTGATACAGTATCGGCATTGTTAATTGCTTTATGTGCAAGATCTTGTGCTGTTGATT  
TAATCCATTTAACGAATTAACAAACGCATTTGCTTTATCTTTGGCATTGCAAGGTTTTGG  
TCTCCATTTAATGCATTTTGGAGCATCGATAATTTTTGTTTCAATTGCTCTGCTTCAGCTTT  
TGCAATTGCATTACCTTGCATTTATCTAACTCATGTGCTGCATTTCGCAATTGCATTATCA  
TAATTTGCTTTCAAATGTGCATCTGCATTGATGTAATTTGTGCTGCTGATAACACCAAGGT  
GCTGTTTCGTCATATATTGTTGTAAGTGCACCCATTGCATTATCTAATTTAGTTGCTCTATTA  
ATTGCTCGAGATGCTTTATTTAGCGTTTCAGCATTATTAATTTGTTGGATTGCTAATTGCT  
TTGAGCATTGTTAGATGTGTTAATTGATCCAATCTTTGTAATGCTTCAGCTTTACGATTAT

TAAGTCTTTCTTCACCATTTAATGCTTTCTTAGCTGCAGTGACTGCATCATTTAATTTGATA  
ACTTGTCTGCAGTTAAGTTTTGCCAGACGATTTATCAAGTGCTTGTTCGCTTTATCAA  
CCGCTTCATCATATACTTGTGGACTTGTGTATCTGCATTGACATAGTTCGTGCTACCTTC  
GTGCGTCCCTTCATTGCCAGTGATTTCTTGTGACAATTGATCCATTGCACGATTAAGTGCCT  
TAGCCTCATCTACAATTTGTGGATTTGATTTAAATCGTTTTGATTGATCGATGCGACCTTT  
AAATCCATCTTGTGAGCATTGTTAATGCATTCAATTGGTCGATGTCATGTTACCATTT  
GTTTTAGCAAGTGCTACACGTTTCATCACCATTTAATGCTTGTTCATTAAAATATTTTTG  
AAGTGCTTGATCCACTTGTGCTTATTCGCATTTTGTTCATAACATTTTCAGCATCAGCA  
ATCGCTTGTATAAGCCTTTTGTCTATCTGAATCTGCTTGTGTGAATCTATAGTTTGCTC  
AACGTTAGCATGTTCAATAACTGCTTGTGTAATTGATCCATTGATTGGTTCAATTGCGTT  
GCTTGATCTACTAATTCAGCGATTGGTTGAAGTTTCGTGCTTGTGATCAATATTTGTTAG  
CAGTTGCAATTTGATCAGCATTTAAATGTGTTAATTGGTCAATAGTTTGTTCGCTTGTGT  
TTTAGCTTCAGCGACTCTCTCATTACCATTTAACTCATTCACTTTTTCTTGAAGCTTAGTTA  
ATGCTTGTCTACAGCGTCTTATTCGCATTTGAACCATTAGTTGGATCTGTAATGCTTTGT  
GCAGCTTGTAAACGCTTGTACTGCTTCTTTTTATCAGTTGACGCTTCAGTGTAATTTGG  
TTGAGCCTTATCTGTATTCATTGATCAACTTTATTTTTCAATGTTTCCATCGCGTGATCAA  
GTTTCAGTAGCAGTTTGAACATGTTGTGCAACCTCTGTTCTTGTAGGCGCTGCATTTATAGC  
ATCAGTTAATGTTTGTGTTGTGCATGATTTAAGTTTGGCAATGCATTTACAGTTGTTACT  
GCTTGTGTTGATCAGGAGCAAGTTTTTGTATCACCATGTAGATTATCTTTGCAGTTGTTA  
CTGCTTGTGTTAATTGTTCTACTTGTGATTTGTGAGTGTGGATTACCTGTTTGGTTAATT  
AAATCTTTTGCATTTTGAAGTGTGCTTGGTAAGCATCTTTTGCAGTTTATCTTCATTGAT  
AACTTGCTACCCGCTTCCGTTTGTGTTGATCTTGAATACTATTTGTAATGCTTGCATTG  
CTTGATCAAGCGCTTTTGTTCAGCTAATTTTTGCGCTACTTCGCCACGAGTTGCTGCGTT  
GTTATTTGGCTTTCAAGTGCTTGCAGTTGCGGATTATCAAACCATTTAATTGATTTAAA  
TCAGTAACCGCATGTTGTTTATCGTCTGCAAGTTTTTGTATCACCCTGTAGGTTATCTTTAG  
CTTGTTTAAAAGCATGTGTCAATTGTTCAACTTGTGCTTTATCAAGCGTTGGATTACCTGT  
TTGGTTAATTAATCTTTTGCATTTTGAAGTGTGCTTGGTAAGCATCTTTTGCAGTTTAT  
CTTCATTAATAAACTTGTACCAGATTCTGTTTGTGTTGATCTTGAATGCTATTACGTAA  
AGCTTCCATTGCTTGGTTAAGTGCTTGTGCTTCAGTTAATTTTTGTGCTACTTCACCACGA  
GTTGCTGCATTATTGATTTGATTTTCAAGTGCTTGCAGTTGTGGTGTATTCAAGTTAGACA  
AGTTATTTAACGTTTCTGTTGCAGTTGCTTATCTTGTAGCTAGTTTTTGTATCACCATGTAAA  
TTGTTTTTAGCATCAGTCACTGCCTGTGTGCTTGTGATCAATGATTGATTTAGCTAATGTAG  
GATCAGTTGTTTTGTTAATCAAATCTTCGCGTGTGTACTGCTTGCATATATGCATCTTTT  
TGCGCTTGTATCCTCGTTAATAAATTTACTACTTGTTCAGTTTGTGGTTGATCCTTAATACT  
TTCTTTAATGCTTTCATCGCTTCATTTAATGCTTGCAGTTGTGCAATGATTTACAGCCACTT  
TATCAGAGTTGTTGCATTATTAATTTGATTTTCTAGCGCTTGTGTTGAGCTGGTGTAAAT  
TGATCTAAATGATTTAGAGAATTTCCAGCAGTTTGCTTATCTTGTAGCTAATCGTTCAACAC  
CATCTAATGCATTTTTAGATGATATTACTGCTTGTGCTTCAGTTAATTTTTGTGCTACTTCACCACGA  
GATAGTTGGATTATTTAATCCTGCAATGATAGACTCAGCATTTTGAAGTGTTCATCATAG  
GCTTGTTTTTTATTTCGGTCTGCATTGACATATGCACTGCTCGCACGTGTTGCATCTTTGTC  
AGCAATACTTTGTTGTAATGCATCCATAAGTTGATCTAATGCTTGTACTTCAGTCAAATCT  
TGCTTAACTGCTGTTCTAGTTGTTTCACTATCAATTAACGTATCTTCATATGTTTTTGTGC  
ATTGTTTAGATGTGCTAATTGGCTAACCCTTTGTTTAGCATGATCTTTATCATTTTGTAAAT  
TCACATCACCATGTAATGCTGCTTTCGTTGTATTCACAGTTGCCGCTACTTGATTAATCGC  
ATTATTATCTAATGTTGCAGTTTGTTCATTGATAATATTATTTGCAGCTTGAACAGCTTGA  
TCATAGTTTTGTTGCTCTGGTTGATCTTCGTTGATATAATTTGCTATTTGCTTTAGTTGCTGC  
GTTATCTTGAATGCTCTGTCTTAAACCATGCATTGCTTGGTTAAGCGTATTTCGCATTTTGT  
CAATTTGATGAACTGCAGTTACTAAAGTTGCAGCTGTAACCTGGTCTTTAATGCTGTTTT  
TTGAGGATCATTTAAGCTTGTAAAGCATCAATTGCTTGCCTCGCATTTGTTTTAGCAACT  
TGTAATATGATCTCCATTTAACGCTTGAAGTGTGTTTGAACCTTAGTAATAGCTTGT  
CTACTTCTGTTTGGTTTCGCATTTTGAACAGTTTGTGTTAATCATTGCTGCTGCTTCATTT  
ACCGCTGATTTATAAGCAGTTTGTATCAGTATCAGCATTGATGAAGTTACCACGTTGT  
CAACGGCTTCATGATCTGCAATCGCATTAAATTAAGTTACCCATCGCAGTATTTAAAGATT  
TGCTGTTTGTGTTGACCATTAACCTGCAGCAATATCAGATGATTGCGTAATTTGTGATTGT  
AACTGTTGCTTTTGCAGATTATCAAATGATCTAATTGATCAAGTCTGTTGTTTGTGTTG  
TTAGCTGCTGCAAGGTTTCATCACCATCTAATGCAACTTTCGTATTATTCATTGTGCTGC

TTGCACCATTAACATCATCTGGATTCATCGTAGGCGATGTAGTTTGATTAATGATATTATT  
AGCAGCTGTTACAGCTTTGTTATAGTCATTTTGTCTTTGCGCAGTTGCATCATGATAATCT  
TCAGACGCTAATGTCGTTTGATTATCCGCAACACTATTTCTTAATAATTCCATCGCATGAT  
CTAACGTTTGTGCTTTTTGATTAATCGTAGTGACATCTGTAACAAGTGGCGCTTGTGTAAT  
TTGACTTTCAAATGATTGTTTTTGTGCATCATTTAAGTGTGTTAAGTTCGCCAATTGTTGTT  
TTGCTTGTGTTTTGCAATTGCCAAATTGTCATTACCATTTAATGCTTGTTCGCTGCGTTC  
ACTTCATTAGTGATGCTTTCAACTTGTGCTTGTACTTCATTAGTACCCTTTGTTTTATTCAA  
TAATGCTTCAGCTTTTGGCTACTGCCTGTTTATACGCATTTTGTGTTGTCAGGATCTGCATTTA  
AGTAATTACCGTCCGCTAATATTTGATCTTTATCATTAAATAGCTTGTGATAATTGATCCAT  
TGCTTGATCTAGGCTCGTTGCTGTTTGTGTTAACTTGGTTCACTGTAGCAATTCAGGCGAT  
TGATCGATTTGACCTTTAATGCTTGTGTTTTGAGCATCGTTTAAATGCGTCATTCCACTTAC  
GGCATCTTTAGCATTTTGTGTTTTAGTGGCTAATTTAGCTTCACCGTTAAGCTATTTTTAG  
CATCAGTCACTTGAGTTAATGCACGAGTAATGTCATCTGGGTTAAGCGTTGGATTTGTCGT  
TTGATTGATAATACCTTCCGCTTGAGACACTGCATTTGTATATGCTGTTTGTGTTATCGACA  
TCAGCATCGTGGTAGTTCTCACTTGTGCTTTCACAGTATCTTTATTTGCAATACCTGTTTTCAA  
GTTACCCATTGCTGTATTACATTTTTGTGCATTTTGTGTTAGTTTGTGTTCAACTGTAGCTAAAG  
CTTGTGCTTGATTGATTGGTTTCGTAATGCATCACGTTGTGGTTGATTTAAGTCACGTAA  
CGTATCAAGATTTGCTAAAGCATCTTGTGTTTCGCTTGCCTAATTTTTTCATCACCGTTTAAAT  
GCATCTTTCGCTTGATTCATAGTTGTAAGTACTGCTTTTGTGTTACTGTATCAGGCGCCAATACAG  
GTGTTGGTGTGCCATTTGCGATTTGTTGCGCTTGGTTAGCTGCATTGTTATAAGCTTGTGTT  
TTGTCTTGATCCGCTTGTGTAAGTCAACTGATTGTGGTACTTGACTATTCGCTTGAATTT  
GTTGTTTTCAACGTACCCATTGCATTATTTAACGCATCAGCATTTTGTGTTAATAGCATTAAAC  
ACCTGTAACAAGTTCTGCATGCGACACTTGGTCTTTTAAATGCTGTTTTTTGTGGTTGATTTA  
AGTTTGGTAACTGATCAATGGCTGTATTTGCATTGTCTTTAGCAACTTGTAAGTTATGGTT  
ACCGTTTAAATCACCCTTAGCTTGATTCACTTGTGTTGTAACGCTTGAGCCACTTGTGTTGGA  
TCCACGTTTGCATTTGGTGTACCACTAATGATTGTTTCAGCATGCGCTACCGCATTGTTAT  
ATGCATTTTGTGTTATCAGTATCAGCATTGACAAAGTTACCATTTGCTTTAGTTTGGTCTTTA  
TCTGCAATACCTTGTGTTCAATTGTGTCATTGCTTGATTTAAATCTTGTGCTGTTTGTGTTAAT  
CGTGTGTTACATTTGCAACAGTTTTCGCGCAGCATCGACTTGTGTTTAAATGCATCTTTTTGCG  
CTTGATTTAAATCATTGTCATTTGTAATTAATGTTTTCGCTGCATCTTTTGCACGTTGTACA  
TTGTCATTACCATTCAATGCTTGTGTTTCGCTTCGTTACACGTTGCATCGCTTGTGCCACTTC  
AGTTTGACTIONGCATTGCTGCCATTTGCTTTAGATAAAAATACCTTCTGCATGTGAAACCGCA  
TTAGTATAATCATCTTTCTTAGCTTGATCTGCATCAGTAAAGTTAATGCTATTTAATGTCTC  
AGTTTTATCTTGTAATGCATTGTTTAAAGTTAGTCATAGCATTATTCAGATTTTGTGACTTTT  
GCTTAACATTATTAAGTGTGCAATATCTGGTGCTTGTGTTCAACTTGAGTTGTTAGCGCTTG  
TTTTTGTGACTCATTTAAATGATCTAGTGTACCAAGTGTGTTGCTTGTGCTTGTGTTGTTGCA  
TCAGCTAATTTTTGATTACCGTTAAGTGTGCTTGTGTTGTTGTTGTTCAACAATTCTTCTGCTTTT  
TTACTGCATTATCATATGCTGTTTGTGTTGCTTGTGCTGATCAGCATCGTGATAGTTCTCGCTACCT  
TTAATTTGTGCTTTATTCGCAATACCTTGTGTTCAATTGTGTCATCGCGTCATTAAGCGTTGT  
TGCCGCTTGTGTAATAGCATTGACGTTTGGTACAAGTGTGCTTGCCTGATTTGTTTGTGCTG  
TATTCATCACGTTGCGCTTGGTTTAAAGTTTGGCAATTGATCAATAGCATGTTGAACATTTT  
GTTTCGCCGTTGCTAAGTTTGTATTACCATTTAAATCATTTTTTAGCTTGCCTAAGTTTATTT  
AACGCTGCAGTAATTTGCTAGGTGTAACGACAACATCAGGCGTACCACTAATTAATGCT  
TCAGCTTTCGCTACTGCTTGTGATTATATGCATTTTGTGTTGCTGAGAATCTGCATTGACAAAGT  
TACCATCAGCTTTTGTGTTGTTCTTTATCTGCAATGCCTTGTGTTTAAATTGTGTCATCGCATTG  
TTTAACTCTTGCGCCGTTTGTGTTAACATTGTTTACACCAGCTACAGTAGTTGCATTTTGTAC  
TTGTTGTTTAAATGCATCTTTCTGTGCTTGGTTAAGATCATTAGAGTTATTAATTAATGCTG  
TTGCTTCGCTCTTTTGCATGTTGAACGTTGGCATTACCATTTAATGCTTGTGTTTGTGCTGCAATT  
ACTTGTGTTGATTGCTTGTGTTCAACTTCAGTTTGTGTTGCATTACCACCATTAGCTTTTGAAT  
GATATTTTTCAGCATTTGTAAGTGCAGTGTATATGCTTGTGTTTGTGTTTGTGCTTGTGCTGATCTGCATCAG  
TGAAGTTAACTGTTGCTTTTCGTAGCATCTTTATCAGCTATCGCTTGTGTTCAAGTTACCCATC  
GCAGTATTTAAGTTTTGCGCATTTTGTGTTAATTTGATTTGCTTCATCAACAGTATGCGCGC  
CATTAATTTGATTAGTAAACAGCTTGTGTTTTGCGCATTATTTAAGTTGTCTAATGAACCTAA  
AGATTGCGTTGCTTGTGCTTCGCTGCCTCTAAGTTTTTCATTACCATTTAAAGCATTTTTAG  
ACGTGCTTACTTGTCCAGCAGCTTGTGATTGATAACAGTCGGATCTAATGAAGGGTTTGTAG

TTTGATCAATAATACCTTGTGCAGTTGTGACAGCATTATTGTACGCATCCTTTTTATTTCGG  
ACTTGCATCAGTATAATTTTGGTTTTGTTTTGTTTGTGTCGCATTATCTGCAATACTTTGACGTA  
ATTTGTCCATTGCTGCATCAACATTGTTTGGCTTTTTGTTTATTACCTTGTGCTTCTGCAACA  
GTAGTCGATTGTTGTACCAATTGTTTTAATGCCTCTTTTTGTGCATTTGTTAAATGGCTTAA  
ACCGTCAATTGCTGTATTTGCGTGTGTTTCGCTTTTTCAAGGTTTTGAGTACCATTAAGC  
GCTGCTTTTTGTAGTATTCACTTGATTCATAGCTGCTTCAACTTGATCTTTAGGCACGTTCTGT  
ACCTGTAGATTTATTTAAAATATTTTCAGCATTACGAACCGCTTCATTGTATGCATTTTTCT  
TCTCTGGATCTGCATCTGCAAAGTTTTGACTGCCAAGTGTAGTGTCTTTATCATTCAAGCT  
ATTTTTCAAGTTACCCATCGCTGTATTAGTTCCTGAGCGGTTTGAATGGCTTGCCTTACT  
TCAGCTACAGTGTGCGCTTGATTGATGTTCCAGTAACAGCACCTTTTTGTGCATTGTTTA  
AGTTATCTAACGTAGATAATGTTTGGTTTGCATTGTTTTTAGCATCTGTTACTTTTCTATCA  
CCATTCAACGCTTGTTAGTAGTTGTTACAGTTGAAAGTGCTGCTTCAACTTGTGATTGGT  
TCGCATTTGTACCATTTGCTTGATTAATAATATTTTCAGCAGCAGTTACCGCATTGTTGTA  
TGCTGTTTGTCTGGATCTGCATCTGTAAAGTTAACACTTTGTTTCACTTGATCTTTGT  
CTTGGATTCCGTTGATTAACGTTCCATTGCTTGATCTAATTGTTTCACTTTAGTTTTCACT  
TGATTTACTGTGCTAATATTTGGTGCATTTGTCACTTGTGTATTTAAATCTTGGCTTTTTGAGC  
ATTGTTTAAATGACTTAAATCGGTTGATGTTAGCAGTTGTTTCTTGGCTTTTTATTTGCTAAGT  
TTTGCGCACCATTAAGCGCAGTTTTGTTAGTGTTCAGTTGATTAGCTGCTTGTGTTACTGC  
AGATGGATCAAGTGTGCGCTGACTCGTTGCATTAATGATATTTTCAGCACTTGTAACTGCT  
GTATTGTATGCATTTTTGTTTATCTGTATCTGCATCAACATATGGTTGACTCGCTTTACTTC  
ATCTTTATTCGCAATACTATTTTCAAGTTGATTGATTGCAAGATTTGTTGCAATTTGT  
CTTTCACACTTTGTACACCAGTTACTTGTGTCGCGCTATCAATTTGACCAGTAATACTTTG  
TTTTTGTGCATCAGATAAATGTGTCATTTGACGTAATGCATCTTTAGCTTGTGCTTCGCA  
GTTGCTAAGTTTGTATCACCATTTAAACTTGTTCAGCATTATTGACACGTTGTGTTGCCG  
CAGTAACATCTGCTGCATTTGTAATCACATTAGGTGAACCATTTACGATATTCTTCGCAGC  
ATTATATGCATCAGTGTAAAGCACCTTGTATATCAGGACTTGCCTTAGTGTAATTACCACCA  
GCTACAATTGTGTCATGATCACCATTGCTTGTTTTAAATTGATCCATCGCATTATTAAGTG  
ATGTAGCACTATTTTTTCAGATCAGTTACACCTGATACGCGTTGTGCAAGTTCAGTTGTTG  
TTTCAATGCTGTTTTTTCGCGTGTATTCAATTGTGTCAAGTTATCGATAGCTTGTGTAGCTT  
CAGTTTTAGCGCGTTGTAAGTTTCGCGTCACCGTTCAAAGCATTTCAGTAGACGTTACACT  
TTGAATTGCTTGTCAACAGCTTGTATCTTTATTCGTACCATGATCTTTATTTAAGTAAG  
ATTCAGCTTGTGTGATGGCATTATCAAATGCTGTTTTCTTAGTTGGATCTGCGTCAATGTA  
GTTTTCGCTCGCTTTAGTTTGTCTTTATTTGCGATTGCTGACTCTAATCGTTGCATTGCAC  
CATCTAAGTCTTGTGCTTTTCGTTTTAACACTATTTACACCGTTGACTGTTGTTGCACCTTCG  
ATTTGTGATGTTAAATCTTGTTTTTGTGCATTTTAAAGTGTGTTAATGTACCTAAGTTTGC  
TTTCGCATCTGATTTTGGCTTGTCTTACATTTGCATCACCAGTTTAAAGCATTCTTAGCAGTCG  
TTACTTGATTTAATGCAGCTTCAACTTGTGCTTTTGTGCATATTTTACCGTTTGGCTTTATCT  
AAAATACCTTGCAGATTTCGTAACAGCATTGTGTAAGCATCTTTCTTACCTTGGTCAGCAT  
CTGTAAAGTTCACTTGTGTTTAAACAGTGTTTTGGTCATTAATACCATTTTGAAGTTGACC  
CATTGCTGTATTTAATTCATTAGCAGTATTTTGTGCAAGCAGTTACGTCTGCTACTGTCGTT  
GCATTGTCAATTTGACTAGTTGCTGCAGTTGATTGCGCGTTATTCAAGTTACTATATGAAG  
CTAATGCACGTTTTGCTGTTTCTTTCGCTTGAAGCACTTTATTATCACCATTCAAGTCGTTT  
TTAGCTTGATTCAATTGGTTAAGCGCTGCTTGAAGTTGTGTTTCACTTCGCGTTACTGCCATT  
TGCATTAGTAATTGCTTCTGCTTGTGTAAGTGCAGTATCATAACGCTTGTGTTTTGGTTGAT  
CCGCATCTGTGTAATTGACACTACGTTTCGTAATATCCTTTTCAGCAAGTGCATGTTTCAA  
ATTACCCATCGCTGTGTTTAAACGATGTTGCTTTATTTTTAGCCGCTGTGACAGCTGCAAGA  
TTTGGTGTGCTTGTATCCACTTCAAGCATTGCGCGCAGTTGCTTGTGCATTGTTCAAGTCTGTCA  
AACGACCGATATCTGATTTTCGCAAGTTGTTTTGCTGCTGCTAATTTTTTCATCACCAGTTCAAT  
GCAGACTTCGCACTGTTCACTTGGCTCGCTTTTTGGTTAATTGTATCAGGATTCATTTAG  
GGTTATTCGTTGCACTAATAATACCTTCAAGCATTAGTTACCGCATCATTGTATGCATTTTGT  
TAAATCTGCATTCGCGTCTTGATAATCTTCGCTTGAATTTAGTCGCATCTTTAGAAGCAATA  
CTTTGTCTTAATTGATTCATTGCTTGAATTTAAAGTACCAGCATTGCTTGGATGCCTTGAA  
CACCAGCAACAGTTGTACCACGTTCAATTTGTTTCTGTTAAGTTTGTCTTTTTGAGCATTAGT  
TAAATGTGACATTGTCGCTAATTTGTTGTTTAGCTGTGTTCTTCGCTTCATTTAATCGCGCGT  
CACCATTTAATGCTGTTTTAGCAGTATTCACACGTTGTAATGCTTGTTCACCGGCTACTTT  
ATTGTCATTTGAACCAGCTGTTTTATCTAATAACGTTTTAGCTGCTGTTACAGCATCATTG

TATGCAGTTTGTATCTCTATCTGCTTCAGTATATTTCTGAGCTGCTTTTGTAGCTGCTTC  
GTCATTAATACCACGTTGTAAGTTGCTCATTGCAGTATTTAATTCAGATGCCATTGTAGAC  
ACTTGATTTACACCTGCAACTGTTGTCGCACCTTCAATTTGTGATTTCAATGCTGCTTTTTG  
TGCATTATAATTGATGTAAGGTTATTCAATGCATTTTTTCGCAGTTGTCTTAGCGTTCGCA  
ACATTTTGATTACCGTTCAATTCGTTTTTAGCACGTTGTACATTTTGTAAACGCAGTTTCGAC  
ACCGTCTTTTGCAGTATTTGGACCTTGTGCTTTATTTAAAATTTGTTTCAGCTTGCCTGCACTG  
CATTTGTATATGCATTACGTTTCGCTTCATCTGCATCAGTGAAGTTAACACCTTGCTTAAT  
CGTATTTTGATCCTGAATACCATTTTTCAAGTTTCGTCATAGCTGTATTTAATGCGTCCGCAT  
TATTTTGCCTTGTGTTACTTCATTAACATGCGTTGCACCTTCGATTTGGCGTTTCGCTGCA  
TCTTTTTGTGCATTAGTTAAGTCACTTAAGCCATTCAAATGTTGCTTCGCATTTGTTTGC  
AGTTCTTAAGTTTTCTTGACCGTTTAAACGCTTGTGTTTAGCTGTCACCTGGTCTTTTCGCTT  
GATTAATTTCTTGCGCAATCATTGATGGACTAGTTGTTTACCATGATTGCTTTTGTGCTG  
AGTGACTGCATTGTTGTAGTCATTTTGTGTTTGTGACTTGCATCTGTGTAGTTTGTGCTG  
CTTTAATCGTTGCTTCATTGCAATGCTATCTCGTAGACCTTTCATTGCAGTGTAAATGTT  
TGTGCATTATCACGAACAGTTTGAACATTTGGCAACGTCGTCGCTTGACCCACTTGTCTT  
TAAGTTTTGCTTTTTGCGGACCATTTAAAGAAGTTAAACCATCAATTGCTGTGTTAGCATT  
TTGTTTTCGCTACTTCTAAATTATGATTACCGTTTAACTGCGTCTTCGCATTCGTTACTTGC  
TTGCTGCATTTGTAACATCTGATGGTGTAAACGTTGGTGTGGTGTACCACTAACGATATG  
TTCTGCAGCTGTCACTTTTTCATCATATGCTTGGCGTTTATTTCGCATCAGCATTGACATAAT  
TACCACTAGCTTTTGTGTCAGCTTTATCAGCAATGGCACGTTTTAAAGCTGTCATCGCAGT  
ATTTAATTCAGTCGCAGTATGTTCAACACCATTTGCTGCAGATACGCGTCTGCACCTGTT  
ACTTGTGCTTTCAATGCTTCTTTTTGTTTTGTATTTAAGTCCGAAGCATTGTAATCGCTGT  
GTTTCGCAGCTGTTTCGCACGTTCTAAGTTTTGAATACCGTTAATGCAGTATTGGCTTGT  
GTAACAGCTTGCATTGCTCTTTCGACATCTGCTTTAGGTGTATTTCTCCAGCTGTTTTATT  
TAAAATAGTTGCTGCTGCATTTACTGCTTGAAGAATAAGCCGTTTCGTTTAGCATCATCAGCA  
TCTTGATAATTTGACTTTGTAACGTCGTTCTTTATCACGAATTGATGTTTCTAATTGACC  
CATAGCACCATCTAATTGTTGCGCTTTGGCTTTAACTGTATTAACACCTTCAACATTTGTT  
GCTTGTGTAATTTCAATTATCTAACGCATTACGTTGTGCATTATTAATGTGTGTTAATGTAC  
CTAACGTTTGTTCGCAGCAGCTTTAGCTTTCATTTAATTTTCGCATCACCGTTCAACGCCGT  
CTTCGTAAGTTTACATTTTGTAAATGCTTGTCAACTGCTGCTTTTTCTACATTTGACCAC  
TAGCTTTTGTAAAATTTGCTTTTGTGCTTTACTGCTTGTATCATAAGCTGATTTCTTACTT  
GGCTCAGCATCTAGGTATTTCTGAGTTTGTGTTTGTGTTGTCTCATCATTGATAACATTTG  
TAAACTGTGCATTGCGTTATTTAATTCTGTTGCTTTTGCAGTTTCTTGATTTACACCAGCTA  
CTGTAGTTGCACCATCAATGTTACGCGTTAACGCATCTTTTTGTGCATTGTTAATTGATGT  
TAAGTTATTCAAGTTGTTTTTCGCTGTTGTCTTAGCTTGTGCTAAGTTTTGCGCACCATTTA  
ATGCATGTTCTTTAGTTGTCACTTGTGATGTTGCTTGCCTAATAGTATTTGGTTCCATCGTT  
GGTTTCGATGTTTGATTAATGATTGCTTTTGTGCTGAGTAACTGCGCTGTCTACTCGTTAC  
GATTATTTGGACTTGCCTCAGTGTAGTTTGTGCTTAAATCGTTGCTTTCATTGCAAT  
ACTATCTCTTAAGCCTTTCATCGCTGTATTCAACGTTTGTGAACTATTTTAAACAGTTTGA  
ACACCATCTAATGTAGTTGCACCTTGAACCTGTTCTTTAATTTGCTTTTTGTACATTATT  
CAATTGTGCTAAGCCGTCAATTGTATTGTTAGCATGCTCTTTCGCTACACGTAAGTTGTTA  
TCACCATTTAATGCTGTTTTAGCCGATTGACTTGTGATGCCGCACTATTTACGTCATTGA  
CTGTTAATGTGCTGCTTTTGGTGTACCATTAATGATATTTTCAGCGTTAGTCACTTTTGAATC  
ATACGCTTGCAGTTTTTCTTGATCAGCATTGACATAATTACCGCTTGTCTTTGTTCTTTCTT  
TATCCGCAATAGCTGCTTTAAGTGCTGTCATCGCACCGTTCAATTCAGTAGCTGTATGTTG  
AACGTTATTTGCATCAGATACACGTTGTGCATTGTTAACTTGTGTTTTTAATGCATCTTTTT  
GTTTTTGGTTTAAAGTCTTGCCTGTTGTTAATTGTGTTTCGTCGCATTTGTTTTAGCTTGTGCT  
AAGTTTTGTGCACCATTTAACGCTGCTTTTGTGTTGATTGACTTGTATTGCCATGTCATTAAT  
CGCATTAGCATCCATATTTGGATTGTTTCGTTGCATTAATAACACCATTTGCATTATTTACA  
GCAGTATTGTAATTATTTTTGTTGCTATCAGATGCATCAAGATAATTTGACTTGTTTTCGT  
CGTATTATCATTTTGGATACTTGTACGTAATGCACCCATGGCAGTATTTAATGTATTACCT  
TTATCTTTAACACCATTTACACCAACTACATTTTGCCTTGTTCAACTTGTGCTTCAAGTT  
GCTTTTTGTAATTGTGTTAAGTTAGGTAAACCATTAATCGTATTTGTTGCTGAAGTTTTGC  
CATTTCTTAAGTTTTTCAGCACCATTTAAAGCCGCTTTCGCTCTTGTAACTGCATTTAATGC  
ATTATCAACGCTGCTTTAGATGTGTTACCACCTGTTTGTGTTATTTAAAATGCCTTCAGCC  
GCTGTGACAGCTTGCCTATATGCATTTTCGTTTTGATTCATCTGCATCAAGATAATTTGAT

TTCTTAATGTCGCATCTTTATCATTGATTGCACCTTGTAAGCTATTCATAGCGCCGTCTAAT  
GTATTGGCATTGTTTTACAGTATTAACGCCATCAACAGTCGTCGCTTGATTGATTTGAC  
CTTCTAACGCAGTACGTTGTGCATTTCGTAATATGGTTAAAGTACCTAAGTTTTGTCTAGC  
TGCCGCTTTCGCTTCTGCCAGTTAGCATCCCCATTCAATGCATCTTTCGTACTTGTTACTT  
GTTGTAATGCACGGTCAACTGCTGCTTTATCTGAATTTGAACCTGTTTGTATTTAAAAT  
TGCTTTCGCAGCAGCTACAGCTTGATCATAAGCAGTTTTCTTACTTTGTTTCAGCGTCACGA  
TATTTTTGAGTTTGTGTTTGCATTTTCATCATCAATACCATGTTGTAATTGACCCATAGC  
TGTATTAAGTTCATTTGCAGTTTGTGGATACTTGTTACATTTGCAACACGTTGCGCACTT  
GTCACTTGTGCTTTC AACGCATCTTTTTGCGCTTATTTAAGTTAGTAGCACCATCGATGG  
CATTGTTGCTGTTTGTTCGCTTGC GTTAAATTATGTGTACCATCTAATGCATTTTTCGTT  
GATGTCACTTGTGTAGCGATTTGGTTAATTGCATTAGCATCCATATTTGGATTGCTTGTG  
CATTAAATGACACCATTAGCACTATCAACAGCATTGTTATAGTTTGTGTTACTTCCTGT  
AGCATCAAGATAGTTTTGGCCATTTTTCGTAGCTGTGTTATCTTGAATGCTATTTCTAAC  
GTACCCATAGCACCATTTAATGTGTTGGCACTTGATTTAACAGTATCTACACCTGCAACAT  
TTTTGTGCTTGTGCACTTGTGTTTCAATTTATCTTTTTGAGCAGTTGTTAAATGTTGAAGT  
CCGTTTATAGTAGTGTGTCATTTGATTTAGCTTGCTCTAAATTATGGTTACCATTTAGGG  
CACTTTTCGCATTAGCAACTTGTGACAACGCGTTTTCAACGGCAGCTTTATCTAAATTTGA  
TCCACTATTTTTATTTAAAATATTTCTGCGTTCGCAACGGCTTGAGTATAAGCAGTTTTCT  
TATCTGAATCAGCATCATGATAGTTTTCACTTGCTAGTGTATTTGCTTTATCATTAAATACC  
ATTTTGCAAGTTAGCCATCGCTGTATTCAATTGTGTACCTGTATTAGATACAGCTTCAACA  
CCAGCTACAGTTGTTGCTTGATCAATTTAGTTGTTAAGTCACGTTTTGTGCATTATTAAT  
TGACGTTAAGTTATTTAATGCATTTTTAGCTGCATTCTTCGCATTTGTAACGTTTTGATCAC  
CATTCAATGCATTTTTAGCACTTGAACATTTTGAATAGCCGCTTCAACATCTTGTTTAGA  
CGTATTTGCACCTTGC GTTTTTATT CAGAATTGCTTCAGCTCTGCTTACCGCATTTGTATACG  
CATCACGTTTAGCTTTATCTGCATCAGTGAAGTTAACACCTTGTTTAACTGTGTTTTGATC  
ATGGATAGCTTGTCCAAAGTTGCCCATTTGCGTGTTTAACTCAGTTGCTGCATTTTTAGCA  
GCTGTTACCTCACTCACATGACCTGCACGGTCAATTTGTGATGAGATGGCAGATTTTTGGT  
TATTTGTTAAGTGTGATAACGTATTTAAGTTTTGCTTAGCAGTGTGTTGTGCATTTCTTAAG  
TTTTCAGCACCGTTTTAAACCATTTTTAGCATTATCACTTGTGTTGCAGCTTGGGTAATCG  
CACTAGCATCCATAGTCGGATTGTTAGTTTGATTAATGATACCTTTCGCATTTGACACAGC  
GCTATTATATGTTGATTGGTTATTCGGACTTGCCTGTATAGTTTTGACTTGCTTTGACTG  
TTGTTTCGTTAGCAATACTATCTCTAAGCCTTTCATTGCATTGTTCAATGCTTGTCCATTT  
GTTTGAACAGATTGTACGCTTCTAATCTATTGGCTTGCCACTTGTCTTTTAAATTTAGC  
TTTTTGAGGTGATTTAATTGTGTTAATGCATCAATAGCAGTATTGGCGTTTTGTTTTGCTT  
CACGTAATCTTTCGTCACCATTTAATTCTTGTTTCGCGCTGTTTACTTGATTAGCTGCAGCT  
GTTACTTCTGAAGGTGTCGTAACAACCGTTGGCGTACCGCTAATAATATGTTTCAGCATTG  
GTAACCTTAGTTGTGTAAGCATTTTTGTTTAGTGCTATCGGCATTAACATATTTACTGCTTG  
CTAACGTATTCGTCTTATCTGCGATGGCATGTTTTAATGTGCCCATTGCCGTGTTCAAGTTC  
AGTCGCATTGTGCTGTACATCTTGTGCATTAGATACGCGTTGAGCACCATTAGCTTGTGCT  
TTTAAATGCATCTTTTTGTTTTGATTTAAATCAGATGCGCCATTGATTGCTGTAATCGCTGC  
TTGTTTCGATTATTTAAGTTTTGCGTACCATTTAATGCATGTTTCGCACTATTAACATTAT  
TAAGTGCTTGTCAACCGCTGTTTTCGCTGTATTCGGTCCAGTTTGTGTTATTTAAAATGGTT  
TCGGCAGCTGATATAGCTTGATTGTAAGCATTACGTTTTTGTCTCATCAGCATCCAAGAAGT  
TTTTGGCTCGCTAATGTTCTGACTTATCGTTGATAGCCGTTTGTAAAGTTACCCATTGCGCC  
ATCTAAACTATTTGCACCTTTGTTTAACTGATTCAACACCAGCTAAGTTTGTAGCTTGTGAA  
ATTTGATTTGTTAAATCATTGCGTTGTGCTGTAGTGATATGCGTTAAAGTACCTAAATGTT  
GTTTCGCTGCGTTTTGAGCTGCAATTAATTTGCATCACCATTCAATGCATCTTTCGCAGT  
ATTAACACGTTGCAATGCTGCTTCAACTGCATTTTGCAGTGTGTTGGACCTGTGCTGATTTA  
TTTAAAATCGCTTTCGCTGCAGTAATAGCATTATCATACTCTTGTTGTTTATTTGTATCAGC  
ATCACGATATTTCTCAGATGATTTCACTTGAGATTTCGTTGTTAATAACCATTTTGTAAAGTTA  
GTCATAGCTTGATCTAGATGTTGTGCATTTTTGTTTTACAGTATCAACACCCTCACTCTTG  
TCGCACTAGTAATTTGACTAATCAAATGTTCTTTT GAGCATCTGTAATACTCGTTAATGT  
GTTTAAAGTACGTTTTCGCATTTTGTGTTTGGCGTAGCTAAGTTTTCATCACCGTTAAGTGCCG  
TTTTAGA ACTATTCATTGCTCTGCTTTTTGTGTAATCGTACTTGGATTCAATTTCTGGATTA  
CTATTTGCATTAATAATCGTTTCAGCAGCAGCTACTGCGTTGTTATATGCTGTTTGTCTTATC  
ATTATTAGCATCTACGTAATCTTCACTTGCTTTAGTCGCATCTTTGTTGGCAATACTTTGTC

TTAACGTATTCATGGCTTGATCTAATGTATTGGCATTGATTGAACCGTATGAACACCAGC  
GACAGTAGTACCCTATTAATTTGGTTTGTAAATTCGTTTTTTGTGCAGTTGTAAATGC  
GTCATATTATTTAACTGCTGTTTTGCTGTTGCTTCGCTTGATCTAATAAACGCGTACCATC  
TAAGTTATTTTAGCAGAATTCACCTTGATTCATCGCTCAGTAACTTGATCTTTGTTTTAT  
TTTGACCATTTGATTTATTTAAAATATCTTTCGCAGCTTGTACCGCATTGTGTATGCTGTT  
TTCTTACTTGGTGTGCATCTTGATAATTTGACTATTAAGTGTCGTTTGTTCATCATTGAT  
CGCACCTTGAAGTTACCCATCGCTGTATTTAAATCTGTACCTTGTGTTAACAGTATTT  
ACGCCAGCAATATTTGATGCAGCATTAAATTTAGATTTAACATCTGCTTTTTGTGCATTAT  
TTAAATGTGGTAATGCATCAATTGCTCTTGCAGCATCTGTTTTAGATTGTGCTAATTTTC  
ATCACCATTTAATGCATTTTTATTAGTAGTAACAGCTGAAGTTGCTCGATTAACATCATCA  
ACAGACATTGTCGGATTAGCTGTTTGATTAATAATTGTTTCAGCACTTGAACTGCACTAT  
TATATGCATTTTGTAGCTGTATCTGCATCCGCATAATCTTCTGTACGTTTCACTTGATCT  
TTATCTGCAACAGCTTGTCTTAAGTTACCCATTGCACTATTTAAGTTAGTTGCATTTTGCTT  
AATCGTATTAACCTGTCTCGATTTGATGCGCACCATTAATTTGCGATTGTAAGTTTTGACGT  
TGTGCATTATTCAAGTTATTTAATTGACCTAATGCAGTGTTCGCTTCTTGTGTTGGCAGCATT  
TAATTTTGTATTACCATTCAATGCTTGTCTTACTTGTGACATTTGATAAAGCATTGTTAA  
CATCACTGGTGTTATAACTGGATGTTGTGCATTACCATTAATAATGTCATTCGCATGGTT  
GTATGCATTGTTGTAATCATTTTTCTTATTAGTATCTGCGTTGACATAATTATCACTTTGTA  
CGACTTGGTTATGATTAGCAACGCCACGTTTTAAACCTGTCATAGCAGTATTTAAGCTTTG  
AGTCGTTTGTAAATATCATTTACTGCTTGCACGTTTTGTGCACTATCACTTGTGTTGTTA  
ATGCATTCTTTTGTGCTTGGTTAAATCACTTGCATGCGTAATCGCATTGTGTTGCTTCTGTT  
TTCGCACGTTGTAAGTTTTGTTGACCATCTAAAGCATCTTTCGTCGATTTAACAGATGCTG  
CTTTTTGGTTCACTGTGTTAACATCCATCGTTGGATTAGTCGTTTCTCCAATGACACCTTTA  
GCCGCATTAACCTGCATTATCATACGCTTGTATTATTAGCTGGTGTGCGTCAGTGTAATTTT  
GACCTGATTTAATTGTATTATTATCCGCAACACTGTCTTTTAATTTGTCATCGCAGTATTT  
AAAGCCGTAATGTTAGACTTAATTGTTTCAAGCGCAGCATGATTTGAGCAGCATTAAATTT  
GTTGCGTGAAATTATTTTGTGTTGCTTGGTTTAAAGTTAGATGCACCATGTAATGTTGTTAA  
CGCTGGCTGTCTATCTAATGTTAAACCTTGCAGTGTCTGTATTTAATTGATCCTTAGCTTGG  
TTTGCTTCTGCCACTTTATCATTGATATTTTGGACAGTTGGGTTGCCATTCAACACTTGATT  
AATTTAGTTAACTTTTGCAGCGCTGCTTGTAAATTTTGGTTGTACGCATTTAACGAAGCG  
GTCGTCATACCTGTTGTATCCGTTGGTTGATTAATGCTTTGTTCTAATTGCGTTTTTCGCAGT  
TTGAAGCGATGCTTTATCTGGTGTAAAGCTTGCAGTGCATGATCCAAATCAGATTTAGCT  
TGATTTGCTGCAGACGATTTGTATTAATTTGATCTACTGTTGGTGAACCTGCTAATACTT  
GATTGATTTGTTGAATCTTATTACGTGCAGCCGTTAACTTCGCATTGTATGCATTTACAGA  
GTCCTTGCATACACCAGTTGACTTGTGTTGCGTATCAATACTTTGTTGTAATTGAGCTTTTCG  
CATTTTCTAAAGGCGCTTTATCGACTGTTAAGCCATTACGTGCTTGATCAAGTGCTGATTT  
AGCGGCATTTCGCTGCTGTCACGTTTTGACGAATCGTTGCAACATCTGGATGAGAAGCCAG  
TACGCGATCAATTTCTGAATTTTAGTTCTAGCTGCTGAAAGTTTGTCAATTAATGCAGCA  
ACAGATGCGCTTGTACATACCAGTCGTAACGTTGGCTGATCAATATCATTTTGCAACTGAG  
TTTTTGCAGTTTGTAAATGGTGCCAAGTCTGGTGTAAATCCAGCAATTGCTTGTTTAAGCT  
ATTATATTTTTCTTCTACTTTTGTTTTTCTGCGGCAATTTGTTGGTCTGTGCGGTCACCATT  
GTTAATAACATTTTGTGCATTTGTTGATTCTGTTTGCCTGCACGTTTAGCATTTTCATATG  
CTTGGATTGATGATTGTGTCATACCATCAGTAGTTACTGATTTATTGATTTCTTCATCAAG  
TTTCGTTTAGCAGTTCTTAAAGCACTATTATCAGCTAAAGGTAATAATTGATTAATTGCT  
TGCGTTAATCGCTCATTGACACGATTTACATTTGTTAACGCAGATTGTACCTCTTGCCTG  
TTCTTATTGGCTTCTGAATGATAGCATTAGCGCTATTTTTAGCACTTGTTAAGTCACTTTGA  
AGTGCACGAATCGAATTATTGTAAGCAGTAATACTTGCCGGCTTCTTACCAGTCGTTGTAC  
CTGTGCGATTCAATTGTTGCACTGCTTGTCTAAGGCATGTGTATCTGCAGTTAAATCATG  
TTTCGCTTGGTTAATGCTGTTAATGCGTTATCAACACGATGTTTTTCATCTGAAATTTGTT  
GTGCAGTTGCATCGCCATTGTCAATAACACGTTGAGCTGCAGTTATTTAGTTTCTGCTTC  
ACGCTTCTTCGCATTATAGTTATCAATACTTTGTTGCGTCATACCAGCAGTTGATGGTACT  
TGGTTCACAGAACTTTGTAAGTTATTTTTAGACGTTACTAATTGGCTATTATCTTCTTTATT  
TTGAAGTAATGCTTTAGCTTGATCAATCTTAGTTTGTGCTGCACGAACCTTAGTTAGTGCG  
TCAGAACTTGTGTTGGTGTGTCACGCTCATTATTAATCACTTGTGTTGCTTCTGTTTTCGC  
AGTATTGATTTGTTGTTGCGCATTATGCATTGCATTATTGTACTGCGTAATTGTACCTGGC  
TTTTTACCTTCAGTGCTTACTGGATCATCTAAATGATTTTTAGCTGTGATTAACCTCACGTTT

ATCCGCTTTTGTGAAAATGGACTCTTGTACTTCTTCAGTACTACCATCATTGTAAGTTACT  
GTCACAGGAATCGTCGTTGTGCTACCACCAGCTAAATTAGTAGGCATTGCTGTGCCATTTT  
TAATCGTTGCAGTACGTTTATTAGCAACTTGAAGTGCATTGTTAATTTTCAGCTGCTGTTAC  
ATTTGAACCATAATCTTTTACAATTTTCAGTTGTGTTGACAGTATGTGCTGCCGGTGCAGTT  
AATGTACTTGGATTACTACTTACTGAGTGACCTGTACCTGCTTTTCGGAGTAATTGTGATTG  
ATGAATTTGGTTTTATAGTATTGGCATTGAACGTCACCTTACCAGTTTGTGCATCTAACGT  
TACATAGTCAGGCTTATTCGCAATTGTCCATTGATTATTCTGACCACGAACAACATTAATT  
GTCTTACTATGTTCTGCACCATTACCCACTTTTTTCAGTGTAAAGCAATATCCATTGCTTGTGT  
TGGATTAATTAATATGTCCTGATGGATTATTAGGCGTGATATCAATATGACCATTTTGCCAA  
ATCTTAGTAGTCGCTTGGTTCGGTGTGGTGCGACAACCTGTGAAATCATCACTACGTTGCT  
CATCACTGATTGTTTCACCACTACCTTGTGTTGCAACAACCTGAATTGTATCAGCAGGATT  
GAAAGTACCTGCTGCAACAGTAATACCATTATTAGTTCCAGCAATACCTGCTACAGTTGC  
TGCAGATGCTTCTTTACCCATGGACTTGTATTATTGCGACGTGTAATGTTGTCACGACA  
CTGCTGTTACGTTTAAATAACTAATTTATCAGCATAACGTCGTTACGTTACCGGCATGTGTAT  
TCACTGTTTGGTTTGTCCAGGTGCAATTGTAATCGCTCCTGCCGCTGTTTCAGTCACAGT  
TGGTTTCGCTGGTTGCACATCTTTTACTACAAATTTTCGCTGGTAAAGATGTTGCAAAAAGTA  
TGTCGGTTATAGATGACGTCATATTTTGCGTTAACGACTTTAGCCATATTAGGTTTATTCA  
TAGCTGCCCAGTTTGCATCGTTTGTACCAGTTGCTGCATTATTCCATTTATACGTAAATCC  
ATCTGTTGGTAAACCATTAGCGTTTGCATATGTGCATATCCTGATGCTTGCCTACCCTT  
GCTAAAGTGCCACCAACTGTTGTTGTATAAGTAGTTTGGAGGAATCAAATTGATATACG  
TTCACAGTTACAGGAACCTCGTTTAGCAGCTGAAATACCTGGATATGTGACATCGACATTT  
AAATGTTGAACGCCTGCTTGTGTTATTTGGTTGTTGTCTATTTGCCCATGCTGCTGTAA  
TACCATTGCTATTAGTATTTGATCAAATGTAATGTAATCAATAGCGTTTGTACCATGTGT  
CAAATTTTGACCTTTACATCACGTGATGGCGCCTTAGCATTAGCAACTGGATAAACTTTG  
ACTGGAACCTTCAACATTACGCGTACCTTGACCACTAGGTAATGTTACAACCGCAGTTTTAT  
GAGTGTACCAGCTGTATTCTTCCATGTATCTGGACTATCATGCCATGCAACCGTTGCCCC  
ATGTGGCGGGTTTTGAATAAATCTTTCTACGTGTCCGAAATCAAACCGTCGCCACCTTTA  
ATAAATACAGCGCCTTCAGTAGTTGCTTGTAAATTGTGGTGTCACTGTTACTGTTGCACTGT  
CATTTGAATCAACAGATTCATTTCTTGTACATCTATCGCTCGACCATGTTTATCTTGAGT  
AGTGTACGTCACATTATTCATTGTGATAGAAGACCTTGCCTTAATCACACCATTTGGTAAC  
GCATCACTTACCGTTACAACCTGCAGTATTACCACTACCATAAGTCGTGTTTGTAAATCGTTA  
ATGGCGTATTATCTGCTTTAAATAATTTAATAGATGAACTACTTAAACACATTATTAATTTT  
AATTTGTTGGTTAGTAAGACCTGCTTTATAAGTCACAGAGTTGCCATCAATTCGCGGTGG  
ATCTGGTTTAACTTTTGTAAAATCTTGATAATTTGCGTTTGGTGATTATCATAAGTAACT  
CGAATATCCCTTGTGAAATACCAACCACATCTTTACTTGGTCCATATGAATTTGTAAATT  
GGAAATTCATACGTTGCGCATTTTGTGTCCAAGAATCATTAACCTGGTTTAAACATATTGTTT  
CGCATCATAACATCAGATACACCTGGGAACACAGCGCCTCTATTTCGTCTCAAAGACATG  
CTTCGGTACTGTACTTACTACTTTATATGTTGCTGTTTTTCGTAATCGGCGTTGTTTCACCAT  
CAATTAAGATATGTGCAGTTACTGTTATATCTTACCAATACGTGTATTATCTTTATTTGG  
CGCTTGACCACTTACCCAAGTAATCGTCGCATCTGGAATGGCACTACCATTAGATAACTT  
AAAGTAATCTGATGCACTAGAACCATTACCTGCTGGGAAGTCTTGGCCTTGTACAGTGTA  
ATGCGAATGTGCAACGATTTCTGGAATGACATGCTTTACAGGTACAGTCACTGTTGATGT  
TGTTCCATCTTGATAAGTAGCAGTTACTGTAACATTGGCATTATTTCCAGTACGACTGACA  
TTACTAACTGTTTTACTAGTGATTTTATTTCGCACTTGTCTTGCATAACTTCTATTTGGTAC  
TGTTTCAGTAAACGTTAATGAATTAATAATTGCTGTTTGTGATCAGCTTGTGATACTGTCGCA  
TTATTCGAAATATTGGCAATTCTCACAGGATTAGCAGCCGTTGATGAAGTACCAACTCGA  
TATTTATCACGCAAAGGTTTCACTGTTACATTGAACGAAGTTGTAGCTGTATTGCCGCTTG  
TATCAGTTGCTAATAAATTGATTGTCTTATTAGTTGCTGATGTCACATTTGGTGCCGTTGC  
AGAAACATGTTGATGGTTATTATCAACAGTACCTGTAATTTGTGATGTATTTGGTACAGTT  
ACAGATTGCACACCAAGTTATCATTCGCTGTAATAGTATTTGTAAATGTTTCACCTGAGA  
ACACTTGATGATTAGTGTAATTACCTACTGAAATTGTAGGATTAACCTAAGTCACTTGGTAC  
AAAATAAATGTTAATAGCGTCAGTAGTATTTCTGTATTTTGTATTTAAATGTTCAACATAT  
TGTTTTGGACCATATGGCGTTAAGTATAACTGTGCTTTATAAACTGCATCACTTGCATTAT  
GTGTAGAATTACTTTTTACAACGTGGTCAATTGTAATGCGCCAGCACGATTAGCTGCCG  
GTTTCGTTTACGTTAACAACAGTTGAGTTACTATGGTTTGCACGAGTATTTGAATTTGTAAC  
AGGTTGCCACCATAACCGTTTGAAGGGTTGATGATGTCTAACACTTGAATCACTTGACC



ATCAACGTA AATTGACGTTGACCATCAGTTGTGCGCATTGATTGTGAATAACCAGTCGTT  
CTAAAGTTAGGTCTTCCGCCAGCTTCTGCTTGTGTTTTTTCATTACCAGTAATATTATTACG  
CAATCCAGGCACTGTAGTAGTCGCTTTTAGCATCGTTAAAATATCATTAGTTGTAATTTGT  
GTGCCTAATGTAGCATCATAACGATAAATTAAGATTTATGGTCATCAGACCATGATAAA  
CCACCATCTGTTGGTCTGTTTGCATTTTTCGATTCGTCATGTCACTGTATAATCTTGCGG  
GAAATTAACCCAACGCAAGAAATTCATATTAGCTAGGTTTACGCGAATGATTTGTTAA  
TCGACCTTTATTAATATTTACTGTAATAGTACTTACATTAGCACCATTAGGTGTATTTGTA  
ACTGAAATATCACCTCGGCAAGCGTAATTACATCTCTATTTGCATTAATAAAAGCTTGT  
TTACTTTTGTAGATTTTCATCAGTTGTTAAATCATATGTTGACGTACGATACACACGTTGATC  
GCCTTCAGGTTGTTTACATCAACGATTTTTAACTAATATAGAAATCTTCAGTGTCTTTA  
TGATATGCATTTGAAGCAACTATATGATATAACTGCGTGCCTGCATTCATTTGACTAACT  
CTTGTGCAGTTGGAATAGTTCTATCAGATGTAATATTTGTAATGTGCCACTTGGAAATAGC  
TTGTCCATTACTTAAAGTAAAATATTGTTTAAATATCACCAATACTAAATGATTGTCTTTA  
GCAATCGTTACCGTTGCAGTTTTCAGCTGCATTGGCAGTTTGATATTCAGATTTCACTG  
GTTTCGATGTCATCACATTTGTAGCATCAAGCGTTGTTGATGAGCCATCACGGTAATGTAA  
TGTGACATTACCATTATTATCGACAGTACTGGATCAGTTGATGCTAAATATCCTCTTATA  
TTTTGGTTTTTATTCATAAAGGCAGTAATTATGCTTTGCTTTTCATCATTAGATACAGCAGT  
CGGATTGACTACTACAACCTTCTCAGTATTTCCCTAATAACAATCGGATGAGCATCTTCACTA  
ATTTTACCTACATGAATTGACACATGTTTAGATTGACTATCATTGTCGTATTATTGACAT  
TGTCTGTCGCTGATACTTTAAATGTAATATCACTGTTAAATGCCTGATTCATAGAGACTCT  
ACCTGTAATAGCTAATGAGCCGTTTTTGTGTCGGATTTAGTTAAATTTGATGTCCAACCA  
CTTGGCAATGTCGTAATAGTTGTACTTTTTAATCCAGAATGTCTATCTGAAACCCCATAG  
TAAAGCTAACTTCATCACACGATAAATTTGGCATTATTCCAACAGGATTATTGATTGT  
TGGTGGAAATGTCATCTGGCAAAATAGTAACAGCATTACTCATATTAGATGCAACTACTTT  
ATTATAATAAACTACTGCTCTAATTTGTTTACCTACTGGTGGTATGAATACAACATAATCT  
TTTTGGTTGTATAGTAATTGTGTTATGGACCCCATCAGGTGTACCAGTCGCAAGTATCGTAT  
AACCAGATGGTATTTGATCTGCCTCACTACCACCATTCTAGTTTATTGTTGTTGGTGAAC  
TAAATAAACCAATGCAGATGGATCCAACGGTATTTCCGAAATATTAACAGGCACTTTTTG  
TAATGCTGTACCTCTTAATTGCTCAGCTGTCGTTGTAATTGTTGGTGTATGTGGTTTAA  
CGAATTTTGAATAATTGTTCTTTACGTCCAAAACGTATCGTACCAAAGTAATCCCCTGGTA  
ATAAATTACCAACAAGTTCAATGTTACGTTCTTAGCATTATTAGTTCTATTTGTCGAGTT  
TTCAATGTGTAATGTACGCGGAATACCTGTAATTTGCCAATCTTTATCTGTAAAATTCTCA  
TTACTTGTAAATTAATACGTAATGGTTGAATAGATGTTACGCTACCACCTAAATTCACGG  
AAGCATTCCCTTGGTTACCTGCATATACATAGAAAACCTGGATGCCAGCTTGTGTTGAAA  
ATGGTTTTTTCAGCAATATTTGAGTATCGTCATTTTTAAAGAATTTAATATTATGTTGGATT  
TCAGGTAATACCGTTAAGTTAACAGGAACTAAAGTTTCACTATTACCATAACCATCAGGA  
TAGTCGAAACCAATCATTAACTTATTGGGTTTCTAGTTCTTGCTGCTTCTTGTAATTTTTG  
ATCAGTAAATAATTGACTTAATTGATATTCATTTAATTCTTGAACGCCCCCGGTCTAAAA  
GCGTTAGTATTTGCATTAGTTGGGTA AAAACCTAACACTTTATTACTCGGCGTCTTAACAT  
AACTTAAAGGATCATCAACAAAATCATCTATATTTAGGTTTGTACTTTCTAATACCTTTTT  
CGTTTGTACATTTCTTACTCACTTCTACACGTTTAGTTGTACCTATGCGATATGTACGAT  
TAACCACTTGTCTTAAACCATTAAGACGTTGTTGATGGTCTTGCCTTGCATGATGACGATAG  
TTGACTGTACATAAATAATTGATTGTACTCTAAAGCACGCCACCTGCTGCATAATACAA  
TTTATTAACAGTTGGACCTTGTGTTTTAAATGAAATTTGATAACTTGCATCACCTTGACCG  
ATGAAAGTATAAACTTTAGGAACACCCGGTATTGAGCAGGTTTTTGGACCATTAATATAT  
TCAAAATTTTGTCTACCAAATGCTTTAGTAGCAGCTGTTGCTCCAGCTTCACTAAAATAAT  
CACTCGCTCTAGATAAATCTTCTAAAGAATAAATATGGACAGTTGGCCAGTCATATATTA  
CTTGGCCACTTCTATTTCTTATTTTAAAGTCATGTGAACGATGAGGATCATTACTCCATA  
TTCCACATTTGTTGAAGTGGTTTATTTGCACCTGCTCCTGCTCCATGACTCCATTGTACAT  
TTGTTCCATCTGAATTA ACTGTTACAAAGTCAGTTCTTCTACTGGCACTTGGTCTGCTGG  
TAATGCAAACCAGAAAATCATATTTTGTATGTGGAGCATGTCCTTTATTAACCTAATAAC  
CCATTGGTACCCGTTCCAGTTTGTTCGCTGCATAAGAGCAATTTCTTTGAGTCAGAG  
GCCTTCAATGTATTCCATGGTGTAGTTGGTAAATTATATGGCGCCCCCTTACTAGAAGCAT  
TGATATATGTACCAACAGGATAGCCCGAACCATCATTAGCATTTC AACATAATATGATG  
AATTTGCATTTTGTATAGTCTGATACTGATCTAGGCTCTGCAGCTCTTGATTCAACCGAACG  
CGTTTGAATTCTATTTGAACGTCGGCTAGTCTGTTGACGTTGAGGCATTGTACGAATTA

GCAACAGCTTGTTC AATTCTTTGTATGCAAGTTGCAAGTCTTTATTGTTTATTGGATCATT  
ACTGCCTAATAACGTATTAATCTTATCAAAAATGCCTTTTACATAGTTAAATGTGCCAGAA  
TCTGCATTTTCACGGTCAATAAAGCGATAATCATGATAATTTGCATCAAAAATGCTTGT  
AATTCATTTTCGGTCATGTTGTACGTTACCATTATCAGATGAATCTGAAGCTGTTACTACAT  
TTGCTTCATGATTTTCTACATGAGCCGCTCTATTGTCGTTTCCATTTTTATTAGCAGATTGA  
CTTTCGTTTTGTTTATGCTTACTTTGTTCTTTATCTGGTTGTGTTGTCGCAGCCGTTGCCGA  
ATCTTTCTTTGTATTTACATTTTGAGATGCTGGTTGTTTCATCATTAGTAGTAGATGATTGCG  
CTACTTTTTGATCTACTAAATTAGCTTGACTAATATTTGGTTGCTCATTTCATGAGTAGCA  
GATAATGATTGACCATTTTGTGAATTTTGAGAATTTTGTACTTGAGATTCTCGATTCTCAG  
TCTGTTTATTACTTTGTTGTTTCTGTTTAAACCACGCTTGCTGGTTGATTGTTTCAGCA  
GCATGTGCTTGTGATGTATTGAATCCTAAAAATACCAATGTGCAATGACAGTTGAAAAT  
GTACCAACTGTATTTACGAATACTAACTTTTGAATTTTATCACGATAATTAC

> **tx\_norB-var1**

Function: rho indendent terminator (core genome, variable)

Best match: tx\_norB-var1\_CC001-ST772\_118\_AJGE01000058.1[120245:120317]RC (completely identical)

Position: 036-contig\_189: 32658 ... 32731; Length: 73 bp

Sequence:

AAGAGTAATAAAAAACCAATCCCTATGTTTCATTTTAAATAATGACACATAAGAATCGGTT  
TATATTTTTGTTT

> **norB**

Function: protein coding sequence; multidrug efflux pump (core genome, variable)

Best match: norB\_CC001-ST772\_118\_AJGE01000058.1[118810:120201]RC (completely identical)

Position: 036-contig\_189: 32774 ... 34166; Length: 1392 bp

Sequence:

TCATAATTGAGTGTCGTTTTGTTTAGGCACAAGTAACAAAATGATAACGAATGATAATAT  
TCCCATACTGCATTTAACCATAATGCAATCATTGCACCTGTATAAATGTTTGTTCATATTT  
GATACGATTGCATATACTGCACCACTCAATGCGACGCCAAATGCTCCACCTAATGCAGAA  
GCCATTTTATAGATACTGCAGCAACGCCTACTTTTTCTAACGGTGCATTTGCAATTGCTG  
TATCTGTTGATGGTGTAGCATATATCCCTAGTCCTAAACCAAAGAATAAATAACCTATAA  
TACAACAAATGACATACAATATTTCTGGCAAGAAAGTTAATGAAATGAGACATTCTCCGA  
CAATAAGAACTCCTGTTCCAATTAACATTGGTTTCTTGCATCCGAGTGTGTTGAAGTAACTT  
TTCACCAACACGAATCATAATTAGTACCATTACTAAATAAGTGATTGATAAACTTCCTGCT  
TGCAATGAAGAATATCCTAAACCTCTTTGAACAAATGTGTTGGCTACTATTAATGTTCCCTG  
CAACACCATTTAACAAAAAGTTTGAAGCTGTTGCACCTGTGTAAGCTTTATTTTTAAATAA  
TTTTAAATCGATTAAAGGATTTGTAGCACGCTTTTCAAGAACTATAAATAAACTAAAAGA  
TCCAATTGCAATAGCTAATAAAGTAATAAAAAGAAGTGAGGTTACACCTAATTCTGATCC  
TTTAGTAATTAATAATTTAAACTGAGGAGCATAATGACTAAAAGAACCAGACCTTTAAT  
GTCAAATTTATTTAGAGAAATCGATTTAGATTTAGTTTCAGGTGTGCCTTTAATAAGAAAC  
AGTGCAATTAATGAAATTATAATTGATAGGATGAAAATCCAACGCCAACCTAAAAGCGTT  
GCAACTGCACCTCCAAAAAATGAACAAACACCAGAGCCGCCCATGAGCCAATTGACCA  
ATAACTTAAAGCGCGTTGTCTATCTTTCCCAATGTAATATGACTTAATAATAGACAAAGTT  
GCAGGCATAATACATGCTGCTGAAAGTCCTTGAATTAATCTTCCTATAATAAGTAATAAA  
GGAATATTTGAAATAATGATTAATAATGAACCTAATATATTTAAGATAATACCAATGTTT  
GTGAGTTTAATTCTGCCATATTTATCAGCAAGACCACCTGCTCCTACTACAAACATTCTG  
AAAATAAAGCAGTTATACTAACGGCGATATTAACCGTTCCAATATCTGTATTGAACTAT  
CTTCAAGTATTGGTACAACATTAACCAATGATTGTGCAAATAGCCAAAACGTTATTACAC  
TTAAAACAATTCCTATTAACAACCTTATTATTGCCTTCAAATGCCTCTCTTGACGGCTTTCC  
AT

> **Q5HFY6**

Function: protein coding sequence; amino acid permease (core genome, variable)

Best match: Q5HFY6\_CC001-ST772\_118\_AJGE01000058.1[117332:118654]RC (completely identical)

Position: 036-contig\_189: 34321 ... 35644; Length: 1323 bp

Sequence:

```
TTATGCTGCTTTTTGTTTCTTCTTATAGTAATAAACTGGTATACCAAGTGCTGTTATTAGAA
TTCCAATGATTGCTAATATAAATTGTGTAAACAGTGTATTAATTAATACAAAAGATCCTG
CCAAAATAGCAATTAAGGTATGATCGGATATAACGGTACTTTATATGGACGCTCCATAT
TTGGTTCACGTTTTCTTAAAATTATTACAGCAACAAATGACATACAATAGAACAACCCAAA
TAACAAAGATTAACATGTTTGTAAATTGTATCAAAATGCTCCCATGACATCATGATGATAG
CGATTATAAGTTGTATAAATTGCGCCAAACCATGGTGCACCAGATTTTGTAAATTTTGCAGAA
TAAGTGGCTAAATGGCAATAATTTTCTTTCAGCCATTGCATATGGTACGCGCATAACCAGTC
ATAGTATAGCCATTGATCGTACCATAAACAGAAATTAATATACCGATTGTAATAATCTTA
CCGCCATTTTACCAAATAATATTTTGTATCTGAAGCTGCATTTAAATTACCAGCAA
GTAGTTCTATTGGCAACGTTAATAAGAATGTAGCGTTAATTAATAAATACACAGCCATAA
TACAACCGATACCAACTGAAATCGCTAAAGGTAAATCGCGTTTAGGATTTTTAAGTTCCC
CCGCAACATTTCCCTACATGAATCCAACCATCATAAGCAAACATAGTTGCTAATAAACCCAC
TACCAATTGCTGTAAAGAAACCATTTCCCTGAATTACCTGTAGTTGGAATTAATGAAAAAG
TGATATCTCCAGATTGAAAAATACCAAAAATTACAATAACGATGATTGGAATCAGTTTAA
TTACTAAAGTAACTGATTGTAAAATTCCGCCTGCTTTTGAACCTAGGAAATTTATCAACAC
AATAGATAACGCAGATGCGATTGCTATTGGTATTAACGAACCTATAGATAAATGGAATAA
ATTAATTAGCTGTGTCGCAAATACGATAGACAATGCTGCTACGTTAGCTGGAAAATAAAT
AAATGATTGCGCCAAACCTGATAGGAAGCCCCAGAAATCACCGTATGTATATTCTATATA
CTTCGTTAAGCCACCTGTTTTCAGGGATTGCAGCAGCAAGTTCTGCTGCTGTTAACCCCGCA
CAAATGGTAATGATGCCGCCTAGGAACCATACAAACAAGGCCATTTCTGCTGTTCTCTGTT
ACTTCTGTTACGTTTGTATTTTAAAGAATACTCCTGAACCAATAACTGTCCCATAACAA
TAGCAAACGCTGAGAAGAAACCTATATTTTTTTGTAATTCTTTACCATTGACAT
```

### > **ilvA1**

Function: protein coding sequence; threonine dehydratase locus 1 (core genome, variable)

Best match: ilvA1-CC45\_ref\_CC045-agrI\_A9635\_ACKI01000001.1[48611:49651]RC

Position: 036-contig\_189: 35674 ... 36715; Length: 1041 bp

Sequence:

```
TTAACCTACCACACCCTTGCTTGTATCTGCAATATTCAGTCCATGTTCAATGACACCTGAA
ACTCTAGTTAAGTCAACATTCCC GCCTGAAACTAAAGCAACAACATTTTTATCTTCAAGCC
ATTTATTGTTTATTTTTCCACTTAAAATTGCAGCTGTTGGTAATGCGCCTGCACCTTCAGTA
ATAATTTTGGCAGCTGCATTAATCTTTCATAGCATGTTCAATTTCTTCTTCAGTAACAA
GAATAAATTCATCTACTAAATGTTTAACTACTTCATATGTTTGTTCACCAGGAACCTTTTAC
ATCACAACCATCTGCTATTGTGCTATCCACTCGATGTTTCAGTTAAATCTCTCTTATAGAAA
GACTCAGCCATACCATGAACATTCTCAGATTGAACACCGATAATATGAATTGAAGGGTTA
AATGATTTTAAATGCGGTGGCAATACCTGCAATTAATCCTCCACCGCCAACTGGTACGATG
ACTGTATTCACATTCCAAATATCATCTAAAATTTCTAAACCAATTGTTCCCTTGGCCTGCCA
TTACAAACTTATCGTCATATGGATGAACGATTGTCATGCCATTTTCTTTTCGCTAATTCTTCC
ATATAAAGTCTAGTTTCGTTAAAGTTTTTACCTTTTAAAATGACTTTTGCACCATATCCTTT
GGTAGCATTCTGTTTAGCAATTGGTGTCTGTTTCTGGCATCACAATCGTTGCATCAATACCT
AATAGTTTTGCTGTCAAAGCTACACCTTGTGCATGATTTCCGGCTGATGCGCCAATAATAC
CTTTAGCTTTTTGTTTCATCTGACAAATGATTAATTTTATTGCTAGCACCTCTAAATTTAAAT
GAACCTGTAAACTGCATATTTTCAAGTTTTAAATATACGTTACCTTTAGTGATATTTTAC
TTAAATACATAGATTTAATTAGTGGTGTTCGACGAATAAATGGTTTAAATGCTTGTCTTAGC
TTCTTCGATATCTCCTAAACTTACAATATGTGCTGTTTGTAAATGTAAGTGTGTTGGTTGTCA
T
```

### > **ald1**

Function: protein coding sequence; alanine dehydrogenase 1 (core genome, variable)

Best match: ald1\_CC001\_MW2-USA400\_BA000033.2[1475688:1476806:r]RC

Position: 036-contig\_189: 36809 ... 37928; Length: 1119 bp

Sequence:

```
CTATTCGATAACATTTAATATTTCTTTATAATCTAGGTCATGTGATGAAGCTAATCCTTGA
TTTGTCACTTGTCTTTGGTAAATGTTTACACCAGTACTTAAGGCTTCATTATCTTTAATTGC
TTGTTCTAAGCCTTTGTCACAAATTTCTAATATATAATCAATATTTCTTGTGCTAATGCCA
TTGTTGAAGTTCTTGGGACTGCTCCTGGTTGATTTGGTACACCATAATGAATCACACCTTC
TTCTTCATACTGGATCAGAAATTGTAGTTGGTCTAATTGTTTTCAATAGTTCCACCTTGG
TCAATAGCTATATCGATTAATACTGAACCTTTTTTTCATTGATTTAACCATCTCACGAGTAA
CCAATTTTGGCGGTTTCGCACCTGGAATTAATAATTGTAGAAATAAATACATCTGCTTTCTT
AATTTGTTCTGCTAAATTTTCTGGTGTGATTGACTACTGTGACATCTTTTTCTGCATACA
TATCTTCAAGATATTTAATGCGGTCATCGTTTAACTCGATAATGATTACTTTAGCATATAG
TCCCAAGGCAACATTTGCTGCATTTGTTGCTGCTACGCCACCACCGAAAATCACATATGT
ACTACCAGGTATATCCACATTTTCATGTACACCAGTCACTAAAGTACCTTGACCACCATGT
TGTGCTTCAGAGTAGTAAGCTCCATAATTGCTGAGCGTTGACCTGCTATAGCACTCATTG
GCGCTAATAATTCTGCTTTTCCATTTTTTATAATGGTTTCACCACTAATCGCAGTTACACC
AACTTCTTGCATTTTTCTACTATTTCTTTTGAAGATGCTAGATGTAAAAATCCCAGATA
ATTTGATTCTTTTTGAAATATTGATATTCGCTTTCATGAGGTTCTTTTACTTTGATAACAAG
ATCAGCTTCCCATGCTTGTTCGTGAGTTACGATCTTAGCGCCTTCTTTTTCATACATATCGT
TAGAAAATCCTGAACCAATGCCAGCATTTTTTTCAACAATTACTTTATGTCTGCATCCGT
TAACTTACGCACATTTTCGGGTGTGCAAGCTACACGTCCTTCACCTTGTTTTAATTCTTTG
ACTACTGCAACTAACAT
```

### > **tnpIS431-06**

Function: protein coding sequence; transposase for IS431 (mobile element)

Best match: tnpIS431-06\_circ\_S-epidermidis\_GQ900381.1[43799:43807]RC (completely identical)

Position: 036-contig\_189: 38563 ... 38572; Length: 9 bp

Sequence:

```
ATAGTTCAT
```

### > **Q2FGZ8**

Function: protein coding sequence; putative protein (core genome, variable)

Best match: Q2FGZ8\_CC001\_ATCC51811\_ADVP01000007.1[49342:52782]RC

Position: 036-contig\_189: 39300 ... 42741; Length: 3441 bp

Sequence:

```
TTAATATAAAATAGTTTTTCAGTTGTTGATGTTTATCTTTCAATTGATTGATAAGTGTTGTAT
CTAAATCAAATGCTAATAAATCGTTTATTTGCGTTTGAATATTAGCTTCAAACCTTTCAA
TTGCGATTCAGCTTCTACAGCCATTTGCTTAACATATAAATTCAAGTTGTTGCCTCAATAAT
CCCATTTGTGGTTGTAATAATCCTAACGTACTTTGACAAATTGATTCATGTATATCTCTTT
GCCCATTTGGATTCAAATTTTACGTTTTGTTAATTGTTTAGGCAATGCATTTAGCATATC
GTTGAAATCGATGTGCAATAATGGTTGCTCTATATTAGCTGATTCAAAGTTAAACTGAGG
ATTAATAATGACATGTAAATCTGCTAATTGTTGAACGATTGGTGCAATTTGCTCAGTGAGT
TGCTTATTAAGTATTTTTTATAACGTTCTGTAATTAAGATTGCTCTAAAAACAATCGTT
GATGAATTTGATCTAAGTATACTCTCGTAGACACTTTCTTTTCTTCATTAATAATCACTATTT
TGCGTCATTTGAGAATTAACACTGATTTAACATCGTCAAGTAGTTGTAGTTTTAAACGG
GCATTTAAATGATAAACTTGTTCTTCAACTTCGTTGCTGTATGTTGTAACGTCGCATCAA
TTAATTGATGTTGTAACGCTGTTTATCTTTATAATCTGTAAACCTTGTGGCGACGTGA
AATATCAGCTTTATTTGTTTCAAATCTGTAATCATCTCTACATAAGAACGATCCATTTGT
TGAAGCTGATGAATCATTGTTGTTCTAAAATTGATTTAGATTCAACATCAACAAATTGTT
GTATGCTTTGTTTTAATTGATCAATGCCCTTATCTTCAGCTTGCAATGCATTTGACTTGAT
ACAGCAAAAATGTCTGATTGTAAGTGTACTTGTCTTAATGCATCTGATACATATGTTTCAA
CTGCTTCAAGATCATCTTGACTTTCTGCTAAATCAGCAGCATTAAATTACCATTTTAAATGC
TTGTTTTTCATTCAACTGGTTCATATCTTTTCATGTGTTCTATAAACGCTTTGTCATTATCAG
TAAATGAATGATTAATAAATACTTACATACAATATTAAGTCTGAAGAAGTTAAAATTTGTT
CGGTTTCATTTGATGCCTTTGGTTATTTGAGTGTAGCCCTAATGAATCAACAATTATTTT
ACCTTTTAAACCAATCATGCATTAATGCAATGTGTACTGTTTTAACAAATGTTGCGTATTCA
TCTTCTGCACTCCACTTTTTCAATTCTTGTTGATTAATGGCATGTTTTTACCATTTTCAA
```

CATATTGACATACAAATTATAATGTTTTTCAACTGCATGTACAAAAGCGAGTTGATTTTTA  
TTTAAATGTGATTTTTAACTTTTCTAAATCTGAATTAATAAAGTCTTCTATAGTTGAAAAAG  
ACATATCTTGGTATTCAACTACTGCATTAATTTTCATCTAATAATTGCGATTGTGATTTTTAG  
CGTTATATAACTCTCGTCTCCATAAGATATTTCTGTAGTAGCTGCTGTAGTAGGATTTGGA  
GAACTGACTAAAATCTGCTCGCCTAATAATGCATTTATCAAACACTTTTTACCAGCACTAA  
ATGTTCCAAATACACCTATTTTTATTAATTTATTATCTATACGTGTTAATGTTTCGTGGATA  
TCTTGCTTTGTACGCTTGAACAAAGGCACATCCGAAATTATATCAAGCGCTTTTTGAATAT  
CTATAGACATATTTGTTGTAGCTGTATTTTGATTTAGCTGCTGATTATCACGATTATCCTG  
AGTATTATCAGTAGCCACTTGATATGTTGTCTCTTGTGCGACCTATTAATTTATCTAGAGAT  
TCATCTAAATGAATATAGTAGTGACGATAATTCTTAGTCGTCAATGACTGACGCAGCTCA  
TTTAATTTCTGTATAACGTTGATATTTCTTTTAAATCATCACTTTCTTCTGTTGGTAATTCATC  
TGCCTGTACATTTTCTATTATTTCTTTAAAAATTGGTGTGATTGTTGTTCAACATATTTCT  
TAATGGCTTTAACCCTTCGTCTGAAAATGTAAGTACATAAGTATTGCTGATTGATGTTTTG  
TGGTTGATATAAATCTTCAATCATTCCGGCTTAACGTCATAATGCTGATTTAATACTTTA  
TCTGAAGCTTCTTTTTTATTGATAAAACGCGTTACAAATGACATATCTTCTCGCATTGGTT  
GACGAATTTGTTGATTAACATGTTCTTGTAACGCATCTGTGCTGTTAATAATCGCTGTTG  
TTGAATTTGTAGCTTTTTCTTCTTTTTATTAATAAAACCCACCAACATTAAGTCTTGAGAC  
ATACTTTCCAAATAACTTCGTAACATTTCTCTCATATTATGCGGCATAATGTATGCATTTT  
CTAAAATATTTTTACGCTTATTCTTTAAAAATGCCATTAATTCATCTGGATTATTTAAAAG  
TTGTGCCTCTTCACTAATTGCTTGATGTTGTTGACTATTTAAAAATGCTTGTCAAACCTCCG  
CTTCTTCGATACCTAAATCTTCTAGTACTTCCTGAATTTCAAGACTGAATGTAATCTAGCTG  
AGCTTCGGTAATGTATTCAACCGTTCTTGATGTATAATCCTCTATTGTCTCTCTATGTTGAT  
CTAATGAAATTAGATAACTTGATAATACTTCAAGTTCATTTTCAGGGTGATCAAATTTAGA  
TACATAAAAGGTGCGTTCTAATTTAATGCCCAATCTGCAATTGATTTTTCAACTCGTGAT  
TTAAACGTAGAGAATGACAATTCATCGTCTTGATGCTTGTCAATTTGATTAATGATAAAC  
ACAACAGGTATTCCAACATCATTATATGCTTCATAAACTTAAAGTTAAGTTCAGATTGA  
ACGTGGTTATAGTCAACCGTATAAAATATCATATTACTTGTATACATATATTGTTCTGTTA  
TTGACTGATGTGATGCAACATTTGAATCAACACCTGGTGTATCTTGCAACGTAAACCCATT  
TTCAAATTTAGCTGATTGAAAATTAATTTCTACAGATTCAACGTCGACATTTTGGCGATTTC  
ATTTCCCTTACTTCATCATAATTAGATAATTTGGCATAACGTTTGATTCGGCAAATTAGCAA  
TAATATCGTGATTGTCTGAAACTGACACAATAGCAGTATTACTTGTGCTTGGTACAGGAG  
AACTTGGTAAGATATCTTGTTCAAATTAATAAATTTATCAGTGTGATTTACCTGCAGAAAA  
ATGTCCAACGAACGAACATGTATATTGCTGCAAATATACTTTCTTAATTACTTGGTTAATT  
GTATGTAAGTGTCTTCAATTCGCGACTTTTCAACTTCTTTTTTTAATTTATATAAAAGATC  
TAATTGTTCTTTATTAATCAT

> **piuB**

Function: protein coding sequence; iron-regulated membrane protein (core genome, variable)

Best match: piuB\_CC001\_MW2-USA400\_BA000033.2[1481924:1483264]

Position: 036-contig\_189: 43044 ... 44385; Length: 1341 bp

Sequence:

ATGAAAAATACATTTAATCCATTACAAAGATTACATTTCTATGCAGCAATATTTATTGCTC  
CACTGTTAATCACTTTAACCATTTTCGGGCATTGGTTACTTGTCTTTCCAGAAGTTGAAAA  
TAATATTTATAAGAATGAGTTTTTTGGTGACAGTGATGTAACAAACGCATCAAACATTA  
TGATGCAGTACATCAAGTTGAACAACAATATGAAGGATTCTTTGTAAGTAAAGTTAGCAT  
ACTTGATGAACCATATAACAAACGAATTACACTGAGTGATATGGTAGGAAATCAACGTTA  
CGTCTTTCTAGATCATAACAATCAATTTGTTGCAGATCAAAATGCGAAACATACGTATTCT  
AATGTGATGCGAAGTATACATAGTTCTTTGTTTACTGAAAATACTATTATTAATTTAG  
TAGAGTTAACCGCATGTTGGACGATATTCATGATTTTATCTGGTACTTATTTACTCATTAA  
GAAGCATTTAATTTCTAACAAAAGTAAAGGCACTTCGTTGGCAAAGTGGCACGCAATGAT  
TGGAGTTATCATTGCAATTCAGTATTTGTATTAGTTTTAACTGGATTGCCATGGTCTGGT  
TTTATGGGCAGTAAAATTGCCGGTATGATGGACACAAACGGTGACCTTGGTCAAGGTGAA  
TTAGCGATTAATCCACCTAAATCAGATTTGAACGAATTACCTTGGGCTACACGTAAAAAT  
AAACAGCCAGCTTCATCCGAAAAAGGTTCAAGTGGTCATCATGGTAATGCAGCAATGCCT  
CAAACCAAATTAGATTATCAAATATCTATTGATAAGGTCGTTGAACAGGCGCAAAAATCT  
GGTATTAATAAAAGCCGTTTTCAATCGTATATCCAAGTGATAAAAATGGTGCCTTTATTGTAT

CTAATACTAGTAATTCAGGTGTTACTGGGCTAGATGTATCACCTTACAAGGAACAAACAC  
TTTATTTTCGATCAATATAGCGGTAAAAAGCTAGGTACGATTAATATGATGACTACGGTA  
TTATTGCTAAATGGTTTACATGGGGCATTCCGCTTACGAAGGTCATTTATTCGGCATTTT  
AAATAAAATCATTAATTTATTTGTATGTATCGCTTTATTAGTAGCCATTGGCATGGGGTTT  
GTCTCTTGGATAAAGCGTACAAAAAATACTGCAGTAAAAGTACCACATCGCGTAAAAAA  
ACCAGCATCTATATCACTCATAATATGTTAATTGTATTAGGATTATTAATGCCATTATTT  
GGATTATCACTTATCCTTGTATTTATAATTGAATTAATATTATATATTAAGATCGTCGTG  
CTAAACAATAA

### > **ypsC**

Function: protein coding sequence; site-specific DNA-methyltransferase (core genome, constant)

Best match: ypsC\_CC008-ST72\_TCH130\_ACHD01000016.1[132658:133803]RC

Position: 036-contig\_189: 45006 ... 46152; Length: 1146 bp

Sequence:

TTAGTTTTCAATAGTTTTACGTTCTGTCTTTTTACCCAGTATTGATAATAAGTACATTCTA  
TATATCCATTAATAAATACTTACGTCGCTTTGTTGCTTTACGATCTACTAAATATTCAAATTCT  
TTATTACTTGTTAAAATGTATGTAGATAAAAATGGATGTTGTTTCATTAGTTTACCAATAT  
AACGGTACATTTCTTCAACTTCTTACGATCACCAATACGTTACCATATGGAGGATTTCC  
AATTAACGCCACCGGTTCTTCTGTATCAATTGTTAATGTATTGACATCTTTTACACTAAAT  
TTAATAATATCAGACAACCCAACCTTCTTACGCGTTACGCTTAGCAATCTCTACCATTTCTG  
GATCGATATCAGAAGCATATACTTCGATTTCTTTATCATAATCAGCCACCTTATCCGCTTC  
ATCACGGTAATCATCATAAATATTTGCTGGCATGATGTTCCATTGCTCTGATACGAACTCG  
CGATTA AAAACCAGGTGCGATATTTGAGCAATTAACAAGCTTCTATAGCTATTGTACCC  
GAACCGCAAATGGATCAATTAAGGTGTATCACCTTCCAGTTTGCAAGACGGATTA AAA  
CTTGCTGCCAACGTTTCTTTAATTGGTGCTTACCTTGTGCTAATCTATATCCACGTCTGTT  
CAAACCAGAACCTGATGTATCGATAGTCAATAATACATTATCTTTTAAAATGGCAACTTC  
AACGGGGTATTTTCGCACCTGATTCATTTAACCAACCTTTTTCGTTATATGCGCGACGTAAT  
CGTTCAACAATAGCTTTCTTAGTTATCGCCTGACAATCTGGCACACTATGTAGTGTGATT  
TAACGCTTCTACCTTGAACCTGGGAAGTTACCCTCTTTATCAATTATAGATTCCCAAGGGAG  
CGCTTTGGTTTGTTCGAATAATTCGTCAAACGTTGTTGCGTTAAAACGTCCAACAACAATT  
TTGATTTCGGTCTGCTGTGCGCAACCATAAATTTGCCTTTACAATTGCACTTTCGTCTCCTT  
CAAAAAATATACGACCATTTTCAACATTTGTTTCATAGCCTAATTCTTGAATTTCCCTAGC  
ACAACAGCTTCTAATCCATTGGACAAACTGCAAGTAATTGAAACAT

### > **rnpB**

Function: noncoding RNA ribonuclease P RNA component (core genome, constant)

Best match: rnpB\_CC001\_MW2-USA400\_BA000033.2[1485649:1486045:r]RC (completely identical)

Position: 036-contig\_189: 46346 ... 46743; Length: 397 bp

Sequence:

ACTAGTAGTGATATTTCTATAAGCCATGTTCTGTTCCATCGTACTCATCACGTGCACTAGT  
CACACTGGTACTCAGGTGATAACCATCTGTCTACACCACTTCATTTTCGCGAAGTGTGTCTC  
GTTTATACGTTGAATTCGGTTAAACAAGTGCTCCTACCAAATTTGGATTGCTCACTCGAGG  
GGTTTACCGCGTTCACCTTTTATATTTCTATAAAAAGCTACGTCACTGTGGCACTTTCAA  
TTACTCTATCCATATCGAAAGACTTAGGATATTTTCATTGCCGTCAAATTAATGCCTTGATT  
TATTGTTTCATCAAGCACGAACACTACAATCATCTCAGACTGTGTGAGCATGGACTTTCCT  
CTATATAATATAGCGATTACCCAAAATATCA

### > **gpsB**

Function: protein coding sequence; cell cycle protein (core genome, constant)

Best match: gpsB\_CC001\_MW2-USA400\_BA000033.2[1486105:1486449:r]RC (completely identical)

Position: 036-contig\_189: 46802 ... 47147; Length: 345 bp

Sequence:

TTATTTACCAAATACAGCTTTTTCTAAGTTTGAAATACGTTTTAAAATATCTACATTATTTG  
AAGATGTATTTGTTGTTGTATTATTCGAAGAAAACTTTTATTGTCCTGAGGTCTTGATGT  
TGCTACACGTAGTCTTAATTCTTCTAATTCCTTTTTAAGTTTATGATTCTCTTCTGATAATT  
TTACAACTTCATTATTCATATCGGCCATTTTTTGATAATCAGCAATAATGTCATCTAAAAA  
TGCATCTACTTCTTCTTCTATAGCCACGAGCCATCGTTTTTTCAAATCTTTTTCATAAA  
TATCTTTTGCTGATAATTTCAATGAAACATCTGACAT

### > **UPF0398**

Function: protein coding sequence; unknown protein fold 0398 (core genome, constant)

Best match: UPF0398\_CC001\_MW2-USA400\_BA000033.2[1486463:1487026:r]RC (completely identical)

Position: 036-contig\_189: 47160 ... 47724; Length: 564 bp

Sequence:

TTAGAAACTTTGATCTTCAGACCACTGTAAGTCATTGATGAATGCTGTTAATTCATCGAAC  
GTCACAATATCACAAGTATAGTTTGTATCCATAAAATCAACTAACATCTGCTTGAAGA  
ACTTAGGACTTGCCTCTTGTTCCTCATCATAAATGAGCAATGTTGATCCGAATGTTCAAG  
CATAAATTGATCTGCTTGTAAATTGAAAAGGACCCTGATACGACGTATGAAAAATACT  
ATCAACATAAATCTGCATGCTTAATTATGTTGGCATACTTACTTTGATTATGTTTCATTCCACT  
TTTCTGTATGTCCTTGGAACGGTGTAAATTACAGCAAACCTTAAACGAATCATATGTTTCGTTG  
TAATTCAATAACAACCTTCTGCAGTCCATAATTCTATACCCATTTGCCCTTGTATTAACACC  
CATTCTAATCCTTCATCCAACAGTTGTTCAATTTTATGTTTTATAAATTGTTTTAAATAATG  
TACTTCAGGTGCGTCATCTTTAAAATGTTTAATTTCGAATGATTTGTAACCTGTTACATAA  
ACTGTTTTAACCAT

### > **recU**

Function: protein coding sequence; recombination protein U (core genome, constant)

Best match: recU\_CC001\_MW2-USA400\_BA000033.2[1487908:1488534] (completely identical)

Position: 036-contig\_189: 48606 ... 49233; Length: 627 bp

Sequence:

ATGAATTATCCAAATGGTAAACCATATCGTAAAAATAGTGCTATAGACGGAGGGAAAAA  
GACCGCTGCCTTTAGTAATATTGAGTATGGTGGACGTGGTATGTCACCTGAAAAAGATAT  
CGAACATTCAAATACGTTTTATCTTAAAAGCGACATTGCAGTTATTCACAAAAAGCCTAC  
GCCAGTACAAATAGTTAATGTCAACTATCCTAAGCGGAGTAAAGCTGTGATTAACGAAGC  
TTATTTTCGTACACCTTCAACAACCTGATTACAACGGCGTTTATCAAGGTTATTATATTGAT  
TTTGAAGCAAAGGAACTAAAAACAAGACGTCCTTTCCCTTTAAATAATATTCATGACCAT  
CAAGTCGAACATATGAAAAATGCATATCAACAAAAAGGTATTGTGTTTTTAATGATTCGT  
TTTAAACGCTAGATGAAGTTTATCTTTTACCCTATTCAAATTCGAAGTATTTTGGGAAGA  
GATATAAAGATAATATTA AAAAGTCTATAACAGTTGATGAAATACGAAAAAATGGTTAC  
CATATTCCTTATCAGTATCAACCAAGATTAGACTATCTAAAAGCAGTTGATAAGTTGATA  
TTAGATGAAAGTGAGGACCGCGTATGA

### > **pbpB**

Function: protein coding sequence; penicillin binding protein B (core genome, constant)

Best match: pbpB\_CC001\_MW2-USA400\_BA000033.2[1488531:1490714]

Position: 036-contig\_189: 49229 ... 51413; Length: 2184 bp

Sequence:

ATGACGGAAAACAAAGGATCTTCTCAGCCTAAGAAAAATGGTAATAATGGTGGGAAATC  
CAACTCAAAAAAGAATAGAAATGTGAAGAGAACGATTATTAAGATTATTGGCTTCATGAT  
TATTGCATTTTTCGTTGTTCTTTTACTAGGTATCTTATTGTTTGCTTATTATGCTTGGAAAG  
CACCTGCTTTTACCGAAGCTAAATTACAAGATCCGATTCCTGCAAAGATATATGACAAGA  
ACGGAGAACTTGTTAAAACATTAGATAATGGCCAAAGACATGAGCATGTAAATTTAAAA  
GACGTGCCGAAATCAATGAAAGACGCAGTACTTGCAACTGAAGACAATCGTTTCTACGA  
ACATGGCGCACTTGATTATAAACGTTTATTCGGTGCAATTGGTAAGAACTTGACTGGTGG  
ATTTGGTTCTGAAGGTGCCTCAACATTAACACAACAAGTTGTTAAAGATGCATTTTTATCA  
CAACATAAATCTATTGGACGTAAAGCTCAAGAAGCATACTTATCATATCGTTTAGAACAA

GAGTATAGTAAAGATGATATCTTCCAAGTATATCTAAACAAAATTTACTATTCTGATGGC  
GTAACAGGTATTAAGCTGCTGCTAAGTATTACTTTAATAAAGATTTAAAAGATTTAAAC  
TTAGCGGAAGAAGCTTATTTAGCCGGTTTACCTCAGGTTCCAAACAATAATATTTATG  
ATCATCCAAAAGCTGCTGAAGATCGTAAAAACACTGTTTTATACTTAATGCATTATCATA  
AACGCATTACAGATAAACAGTGGGAAGATGCTAAGAAAATCGATTTAAAAGCGAACTTA  
GTAAATCGTACTCCTGAAGAACGTCAAAACATTGATACAAATCAAGATTCTGAGTATAAT  
TCATACGTTAACTTTGTGAAATCTGAATTAATGAATAATAAAGCATTCAAAGATGAAAAT  
TTAGGTAATGTATTACAAAGTGGTATTAATAATTTATACAAATATGGATAAAGATGTTCAA  
AAAACATTACAAAATGATGTTGATAATGGAAGCTTCTACAAGAATAAAGACCAACAAGT  
TGGTGCAACGATTCTTGATAGTAAAACACTGGTGGTTTGTGCTATATCTGGTGGACGTGAT  
TTCAAAGACGTCGTTAACAGAAACCAAGCAACAGATCCTCACCTACTGGTTCATCTTTA  
AAACCTTTCTTAGCGTATGGACCTGCCATTGAAAATATGAAATGGGCAACAAACCATGCG  
ATTCAGATGAATCTTCATATCAAGTTGACGGTTCTACATTTAGAACTATGATACGAAG  
AGTCACGGTACTGTATCTATTTATGATGCTTTACGACAAAAGTTTCAATATCCCAGCTTTAA  
AAGCTTGGCAATCAGTTAAGCAAAAATGCTGGTAATGATGCACCTAAGAAAATTCGCTGCCA  
AACTTGGCTTAAACTACGAAGGCGATATTGGTCCATCTGAAGTACTTGGTGGTTCTGCTTC  
AGAATTCTCACCAACACAATTAGCATCAGCATTGCTGCAATCGCTAACGGTGGTACTTA  
TAACAACGCGCATTCAATTCAAAAAGTAGTTACTCGTGATGGTGAACAATCGAATACGA  
TCATACTAGCCATAAAGCGATGAGTGATTACACTGCATACATGTTAGCTGAGATGCTAAA  
AGGTACATTTAAACCATATGGTTCTGCATATGGCCATGGTGTATCTGGAGTAAATATGGG  
TGCTAAGACAGGTAAGTACTGTTACGGTGTGAAACTTATTCACAATATAATTTACCTGAT  
AATGCAGCGAAAGACGTGTGGATTAACGGCTTTACACCTCAATACACTATGTCAGTGTGG  
ATGGGCTTCAGTAAAGTTAAACAATATGGTGAACACTCATTTGTGGGACATAGCCAACAA  
GAATATCCACAGTTCTTATATGAAAATGTGATGTCAAAAATTTTCATCTAGAGATGGCGAA  
GACTTTAAACGTCCTAGCTCAGTAAGTGGTAGTATCCCATCAATCAATGTTTCTGGTAGTC  
AAGATAACAACACTACAAATCGTAGTACACACGGTGGTAGTGACACATCAGCAAACAGC  
AGTGGTACTGCACAATCAAATAACAATACTAGATCTCAACAATCTAGAAACAGCGGTGG  
ATTAACAGGTATATTCAACTAA

### > **Q1YBU7**

Function: protein coding sequence; putative protein (core genome, constant)

Best match: Q1YBU7\_CC001\_MW2-USA400\_BA000033.2[1491278:1491619:r]RC

Position: 036-contig\_189: 51978 ... 52320; Length: 342 bp

Sequence:

CTATACCTGCTTATTCTTTAACCTTGTGGATAACTAGCATTTCATTTTAATCAATTCAGTTT  
TAAAGGTCTTCATTTGTCGATAGCCATAAAAATGATATTTACGTTCAATCATATAATCATA  
TCTTTCTTTAAAATTCATTGGCACAACAGGATATTGATTTAAATTATCAAAATCAATATTG  
CCAGTTATGTCATTAACCTGCTTAAAATAATCAATAATTTTACTATGGTATTCATCCAAGT  
AGGGCTTTGCTTCACTAGAACCTAATGTCTTATTTTTGGCAAATACATCAATCTCTTGTT  
TAAATTATCAAAATACCTCTTTTGTAAATATTTGTCAT

### > **nth**

Function: protein coding sequence; putative endonuclease III (core genome, constant)

Best match: nth\_S-epidermidis\_AGTZ01000030.1[432903:433562:r]RC (completely identical)

Position: 036-contig\_189: 52324 ... 52984; Length: 660 bp

Sequence:

TCACGCTTCTTTCAAACACTAGCTTTATAACGTTTTTGTCTTCTCTACAATCTTCTAATAATG  
GACAAATATCGCATTAGGTTTTTCGGGCTAAACAGTGGTATCTTCCAAGAAAATGAGTT  
GATGATGGCTCCTATCCATCTATCTCTAGGTATGACAGAACATAAACGGTCTTCTACCTG  
TCTCACATTATCTTTCCAACGATTAATACCTAAGCGTTTAGAAACACGTTCTACATGCGTA  
TCAACAGCTAATGAAGGTTCAATCAATGCTACACTCATGACTACATTAGCTGTTTTACGTC  
CTACACCTGCTAAACTTTCTAATTCCTTATGTGTTTGTGGTATTTCTCCATTAAATTGATCA  
ATCAAAGATTGACAAAGTTTCTTAATATTCTTAGCTTTGTTACGATACAAACCGATAGAA  
CGAATATCATTCAATAAGTTCTTCATCACTGACTGCCAAATAATCTTCAGGGCGTTTTGTATT  
TTTTAAACAGCTCAGTTGTTACTCTATTTACTAGAACGTCTGTACATTGCGCTGACAATAA



TACAGCAATAGTTAATTCGAACGGATTATCATGTTTTAATTCACATTCTGCATCCGGAAAC  
ATATTTGCTATAACATCAACCATTTCTAATGCTTTTTTCTTACTTACCAT

### > **dnaD**

Function: protein coding sequence; primosome/dnaD subunit (core genome, constant)

Best match: dnaD\_CC001\_MW2-USA400\_BA000033.2[1492273:1492959:r]RC

Position: 036-contig\_189: 52973 ... 53660; Length: 687 bp

Sequence:

TTACTTACCATCAAGGTTCTCCCCATTTAACCAATCAAATTTAGGTACCGTTTTAACTGTG  
TGCGTCAATTTTCGGTTTATTGAATTTTTCTCTTATTTTTCTAGAATCGTCAATTGTTTTGAC  
ATTGTTTTTCTTCCAATTAAGTAAAATACGATCTATATTTAAAGCTAAGTTTATTCAA  
CTATTCGCCTCGTCTAATGCCGCTTGTATAATTGCAGTATCGTGTTTATCAACATCAATCC  
ATTGATTTAACGTTTCTATTTTCATATGGAGATAACGGCCTTGCAAATGTATCCTCTAAAAC  
TCTAAATAATTGTTTTAAATTTTTCTTACTATTTTGCTCTTTCGTTTCCATACTTTGTTGCTT  
CAATATATGACTTAATTTTTCGAAAAAAGGATCTAGATTCATATATTCGGTAAATCTACCT  
TCTTCATCTTTTTGAACTTGTAAATTCTAGCAATTCACGTTGTATCAAATTTGAATAACCAT  
TGTAATATCACGTGGTTGCATAGTTGAGCCCTTCTGAAGTAATTCAATTGAAGGCTGTTTA  
TTTGATGTTTCGGAAGCATAAATCAATTTAAGCAAATGACTAAATCTTGCTCATCTAAA  
CCTAAGTCACTGTAATGGTCTAATAATTCTCTTCGTATCACTACAGGTCTTGCTTTTAATT  
GATATTTATCCAT

### > **asnS**

Function: protein coding sequence; asparaginyl-tRNA synthetase (core genome, constant)

Best match: asnS\_CC001\_MW2-USA400\_BA000033.2[1493287:1494579:r]RC (completely identical)

Position: 036-contig\_189: 53987 ... 55280; Length: 1293 bp

Sequence:

TTATGGATATAAACGGTTTAATAATCTTGGGAATGGCGCTGTTTCACGAACGTGTTCAAC  
ACCAGAAATCCATGCTACTGTACGTTCTAAACCTAAACCAAATCCACAGTGTGGCACACT  
ACCATAACGACGTAAGTCTAAGTAGTAACTATATGCTTCTTCGTCTAATCCATGTTCTTTA  
ACGCGTTGTTCTAACAAATCTAAGTCATCCACACGTTCCAGATCCACCAATAATTTACCGT  
ATCCTTCAGGTGCAATTAAGTCTGCACATAATACAGTTTCTTCATTTTCAGGATTTGGTTG  
CATATAGAAAGGCTTAATTTTAGTTGGATAATTAGTAATAAACACCGGTAATCATAATG  
ATTAGCAATGGCTGTTTCATGTGGCGCACCAAAATCTTCGCCCCATTCAATATCATCAA  
GCCTTCTGATTTTAAGAATTCAATTGCATCATCATATGAAATTCTAGGGAATGGTGTCCGA  
ACTTTTTCAAGTTTTGATGTATCACGCTCTAAAATTTTCAACTCTAGTTTACAATTTTCTAA  
AACTGATTTTACAACATGTGTTACATATTGTTCTTGAATTTCTAAACTTTCAGCATGATTT  
GTGAAAGCCATTTCCCCTTCAATCATCCAGAACTCGATCAAGTGTCTACGTGTTTTTGATT  
TTTCAGCTCTGAAAGTTGGACCAAATGAAAATACTTTTCCGTGTGCCATTGCTGCAGCTTC  
TAAGTATAACTGACCCTTTGAGATAAAAACGCATCTTGATCAAAGTATTTAGTATGGAA  
TAATTCATTTGTACCTTCTGGCGCACTTGCTGTCAAATTTGGTGGATCAACCTTTGTAAT  
CCATCTTTGTTGAAAAATTCATACGTTGCACGAATAACTTCATTTCTAATTTTCATTACAG  
CATGTTGTTTTTTAGAACGTAACCATAAATGACGGTGATCCATTAAGAATTCTGTACCATG  
ATTTTTAGGTGTAATCGGATAGTCATGCGCTTCTGAAATAACTTCAATTGATTTCACTTGC  
ATTCGTATCCTAAGTCAGAACGATTATCTTCTGTAATTGTGCCTGTAACGTATAGAGATG  
ATTCCTGAGTAATTTCTTTCGCAAGTTTGAATACCTCTTCATCAACTTCTGATTTAACTACT  
ACGCTTGCATAAAGCCTGTTCCATCACGTAATTGTA AAAAGGCGATTTTACCACTTGAA  
CGTTTATTTGTTAGCCAAGCACCAATTGTAACGTCTTGGTTTAAATGATCTTTCGCTTGTT  
AATCGTTGTTTTTCAT

### > **dinG**

Function: protein coding sequence; single-stranded DNA and RNA nuclease (core genome, constant)

Best match: dinG\_CC001\_MW2-USA400\_BA000033.2[1494901:1497594:r]RC

Position: 036-contig\_189: 55601 ... 58295; Length: 2694 bp

Sequence:

TCACTTTTCTTTTTTTGAATTTGTCTTAATAATTTTCCAAACTGTTGAATGTCGCCTTTTT  
CTGACGATAAATTTCAAGTGTGTTCAAAAAAGTTTTATAATTACTGTTTATAAGTCGA  
TCATCAAATGAACTATTATGCCGCGATCATTTTCACTTCTAATTAATCTTCCAAGTCCTT  
GTCTAAAACGTGTAAGTGCATCAGGTAATACATATTCCTTGAAAGTTGAAGTGAATTCAG  
AATCCATAAGCCAATATTTTGCATTATGCTTGTTCATAAACGGTAACTTCGCTATCATCAC  
ACATTTAATACCATTTGCTTGAAAATCAAAACCTTCAAAAAATGTTGACGTACCAAGCAG  
TATGGCCTTATCAAAATTATTAACCTGTTGTACTATTTTATAATTTTGGTTCTGCTGTTGTG  
TTAATACAACATAATCTTCAAATTCTGGCAATTCATTTAGCATATCTTGTACCATATGCAT  
CATTTTATAACTCGTAAATAAGACTAAACATTTTGTATGACGTTATAGTCGTATATTCAATA  
ATATAGCTTACAATCGATGCTACATACTCATCTATATTTTTATATTGATAAGATGCTACAT  
CACTCGGTATAAATACACTTGTATTTTTTGCACCTTGTAAACGACGTGTTAACTTCAAATGT  
ATTAAGTGAACATCTTTGTTGAATAACTGTTTAAAAGCTTCAAACGAATGATTAATTTT  
AAAGTACCAGATATAAAAATGAGTGATTTAAATTTTCCAATACTTGTTCGTTAATACAT  
CTTTTACAGCGTAATCTTTCACATATAAACGTATTGTTGATTTTTGAGATAAATTTTTAATC  
GAAATGAACTAGTATGTCCAGCTTTTAACTTTGTTGATATTTTTAAATTTATCTTTTA  
AATACAACAAGTGTTCGTAATGATTTAACTGTTTTATGACTAATGCCATTGAATATTTT  
TAGCGTTTTATTTAACTTATCGATAATCGCATGTAATCCTTCAAATGTCTTTTGTTCAA  
AAGTAAATACATTATGGAAGCGATGAATATCATCATATAAACATCAGAATCATTGATAA  
TCGTAATATCGTTGAGAACAATTGCTCATTAACTCATGAATCTCATTACTACTAGCCTT  
CAAGCCAAAATATCAATTGGTGAATATCTAATTTTTCCAAAATTCGCTGCTTTTCCAGT  
TGATCAATTGCCTTTAACAATTTTTCATTTTCGTTTTTACCAATCAAACCAAGCTGATATTT  
AATATCAGCATAACTCAACTCATTTGTCACTTGATTTAAGGCATAGTCTGGTAAGCGATGT  
GCTTCATCCACTATACAATCATCAAACAATTGATATATTGAATTTTCAACATCAGAATGA  
ATTAATGTGCATGATTTGTAATACCAATTTGAATGTTCTGTGCATTTTCGCTTAATAAAAT  
TATAATAATGAACATCGTGACGTGCCGGTACATATGTTTCAATTTTCTGGTCAAATACAT  
CTTTTGACCACCTTTTAAATTTAATTCCTGTATATCTCCGGACGGCGTCTCTGTAATCCAA  
ATCAACAATTGCATTTTCAAGATATTCACTTCGTAATTACTTGTGTCATCTTTTAAAATTTG  
ACTAATAAGTCCCAATGAAATGTAATCACTTTTACTTTTAAATCAATAGTGCATTAATTTTA  
AAATTCAACGCTTCATTCATTGCTGGAATATCTTTTTTCTAACAATTGACTTTGCAGTAATT  
TAGTATTGGTAGAAATCATGACATGCTTCCCAGTTTCAATATTATACATCAAGGCCGCAA  
GTAAATATGCTAATGATTTACCACTGCCTAGTGATGCTTCAATCATTGCTTTTTTCACTATG  
CATGAGCTGATCTAATATAGTTTCCGCTAAATATAATTGTTGCGGTGATATGTTAAGCCA  
AGTTGATCTACAGCTTTGCTATATAAAGACTTCAAGCTGCCATTATAATTTGTTGTGCGCT  
TTTTAAAATCAACTTGCTTACGATAGATAATCTGTTTCAACTTTTTCGTACGATTTATCCAA  
TGGCTTTGCATCATATTGCCTAACCATCTCAAAGAAAATATCATACAAATCGTATTTCAAC  
TGTTACTTAAATAATATAATTGCTTTAAAGTATCTAACGGTAACTTTTCAAATTTTTCAA  
AAGCTAATATCATCAATTTAGCAGTAGTAGCGGCATCTTCGTCAGCTCGATGGGCATTTG  
CTAAGGTAATACCATGTGCCTCTGCTAATTCACTTAATTGATAGCTTTTATCTGTAGGAAA  
AGCTATTTTAAAGATTTCTAGTGTATCTATAACTTTTTTGGGACGATATTGAATATTACAA  
TCTTTAAATGCCTTTTTAATAAAATTCAAATCAAAATCTACATTATGAGCGACAAAAATG  
CAATCTTTTATCTTATCGTAGATTTCTTGTGCAACTTGATTAATAATATGGCGCTTGTGTA  
GCATATTTTCTTCAATGGATGTTAACGCTTGAATGAACGGCGGAATCTCTAAATTTGTTCT  
AATCATAGAATGATATGTATCAATAATTTGGTTATTGCGCACAAACGTTATACCAATTTG  
AATGATATCGTCAAATCTAATTGGTTGCCTGTTGTTTCCAAATCCACAACGGCATAGGTT  
GCCATACCCAT

> **birA**

Function: protein coding sequence; BirA bifunct protein (core genome, constant)

Best match: birA\_CC001\_MW2-USA400\_BA000033.2[1497618:1498589:r]RC

Position: 036-contig\_189: 58318 ... 59290; Length: 972 bp

Sequence:

TTAAAAATCTATATCTGCACTAATTAACGGTGTGATTCACCCGCTTCATCTCTAACAATT  
AGATAGCCATCGTAATCTAAATCAATTGCTTGTCTTTAACTGTTTATCATTTTCTGTAA  
ATAGCAACGTTCTATTCCAAATATTAGAAGCTGCAATATATTCTTCACGAATTTTCAGAAA  
AAGGTAACGTTAAAAATTGATTATATCTTTTTTCAATTTCTTGAAGTAATCTCTCTAAAAA  
TTGATATCTATCTAATTTATTTTTATCATGTAATTGTATACTTGTGCTCTATGTCTAATAC

TTTCATCAAAGTCTTCTAGTTGTTGCGTCAAATTAATACCTATACCACATATTATTGCTTCT  
ATACCATCATTATTAGCAACCATTTTCAGTTAAGAAACCACACACTTTACCATTATCAATAT  
ATATATCATTTCGGCCATTTCACTTTGACTTCATCTTGACTAAAATGTTGAATCGCATCTCTT  
ATCCCTAATGCAATAAATAAATTAATTTAGATATCATTGAGAATGCAACGTTAGGTCTT  
AACACGACAGACATCCAAAGTCCTTGCCCTTTTGAAGAACTCCAATGTCTATTAATCGC  
CCACGACCTTTTCGTTTGTTCATCACTCAAGATAAAAAATGAAGATTGATTTCCAACAAGT  
GACTTTTTTCGCAGCAAGTTGTGTAGAATCTATTGAATCGTATACTTCACTAAAATCAAACA  
AAGCAGAACTTTTTGTATATTGGTCTATTATACCTTGATACCAAATATCTGGGAGTTGTTG  
TAATAAATGCCCTTTATGATTTACTGAATCAATTTTACATCCCTCTAACTTTAATTGGTCA  
ATCACTTTTTTTACTGCAGTGC GCGATATATTAAGTGATTCCGCAATGCTTTGTCCAGATA  
TATAATTCGGTTTATTTTTATAGAGTAATTGAAGTACATCTTGACTATATTTTGACAT

### > **papS**

Function: protein coding sequence; tRNA CCA-pyrophosphorylase (core genome, constant)

Best match: papS\_CC001\_MW2-USA400\_BA000033.2[1498576:1499778:r]RC

Position: 036-contig\_189: 59276 ... 60479; Length: 1203 bp

Sequence:

CTATATTTTGACATGATTATCCACCCATTTCAAATTTTCAGTTTCTTCGTTGCTTACTTTAC  
CTGTTACAATCGCTATCTCAATTTGTCTTAGCACATCTTTTAACCACGGACCACTTTTGGC  
ATTTAAATGTGCCATAAGTACACCGCCATTAACCATCATGTCTTTTCTATTATGCATAGGT  
AAACGATGCAATGTTTCATCAATCGTTTGAAGGTTAACGATTAATGGTTCATGTCCTTGAA  
TATCATTTGCCTTTAACACGTCTGCTGCAACCATTACATTTTTAATGAGATGCGTATCATA  
ATCATAAACAAACATTTTTAATTGTTCTTTTGAATAATACTTGGAATGCATTCATAATT  
TGAATATATTGATTGATATCTTTTACTTGTGCGTTACTTAGCTTTAAAGGCTTCAATGAGT  
AATTAATATCAAATTTAACTGACACTATAGCAATCAACAATTCTAAATCAATTGGTTCAG  
TTACATTAATTTGATTCATATCAAGTTGTTGAAATATGGCATATAATTAATGCTTTCAG  
CGATTTTAAATGAATAAACTCTCTTCAACATTAATACCTCGCATTAAATTTAGTTAGTTCA  
ATCACTATACGCTCAATTGATAAAAAATTAATATCTGCCATTTGTGTACGCATCGCTTCAA  
ATGTTTCCGTTGCAATATCAAATGATAATTGTGACTGGAATCTTAAACATCGAATCATA  
GTAAAGCATCTTCTTGGAATCGTTCCTCAGCTATACCTACAGTTCTTATTATTCGATTATT  
AATATCTTGTGACCATCAAATAATCATAAATTTGTATGCTGTATCCATTGCTATCGCA  
TTCATCGTGAAATCTCTTCGTTGCAAATCTTCGTATAAATCCCGAACAAATGTAACACCAC  
TTGGTCTACGGTGATCGACATAATCTTCTCAGCCCGGAATGTTGTCACTTCATAATTTTC  
ATTATTA AAAACTACATTTATGGTGCCATGTTCTTTACCTACAGGTATCGTATGACTAAAG  
ATAGATTCTATTTTCATCCGGCGTTGCACTTGTGTTGATATCTATATCATGAATATTTCTTCC  
CATGACATAATCTCTTACAGAGCCACCTACATAAATATGCTTCAAACCATTGTCTTGAATT  
TGTTCTAATATAGGCCTTGCTGTTCAAATAATGATTTATCCAT

### > **bshA**

Function: protein coding sequence; N-acetyl-alpha-D-glucosaminyl L-malate synthase (core genome, constant)

Best match: bshA\_CC001\_MW2-USA400\_BA000033.2[1499783:1500925:r]RC

Position: 036-contig\_189: 60483 ... 61626; Length: 1143 bp

Sequence:

TACTCGCCTTACTTTTGTATGCTCATTTAGCATTTTTTGGATAATAATACTCATATTGAT  
CTGTAATAAGTTCTGATCCAAAACGTTTCAGCAATATCTGCTAGCATGTTTTTCTGAAGTTT  
GTTGTATAACACCTTATCTTCAAGTAATCGGATAGCATAGTCACTCGCTGAATCACAATC  
ACCCACATCTACGACAAATCCAGTTTCACCATGTTTAATAACCTCTTTAATTCCACCGGCA  
TTTGAACCAATTGGAACGACGCCTGTTTTCATAGCCTCAAGTAAAGTTAGTCCAAAGCTTT  
CTTTTTCACTTAATAATAATACTAAGTCAGATAAATTGGTAAAATTCACTTACGCAATCTTG  
TTCCCTAAAAATAAAACATCCTCTTCTACGTTTAACTCTTTCGTCAATTGACGCATTGGC  
ACTAATTCAGGACCATCTCCAAGTAAAATTAATTTACTAGGTATCTTTTACGTACTTTTG  
CAAATGTTTCTATAAATAGTATCTATGCGTTTTACTTGTCTAAAATTCGATACATGTATTAA  
CACTTTTTCATCTGGTGCTATACCAAATTGTGATTTTGTGCTGTGTTATGTTTAGTTGGAA  
ACTCATTTTACGTACAAAATTATAAATCGGTATAATTTCTTTGTTAGTTTCAATAATTTTC

ATGTGTTTCTTGTGCTAAAGATTTACTCACACTTGTCAACAATATCACTTTTTTCAATGCCA  
AATTTAATTGCACCTTGGAGTGAATGATCATAGCCCAAACAGTAATATCAGTACCGTGT  
AGCGTTGTCATAATTTTTATATCTTTACCTGACATCTCACGAGCTAAAATCCACAAATTG  
CATGAGGTACAGCATAGTGCATATGCAACAAATCAAGATCATATTCTTTAATAACTTCAG  
CGATTTTAGTACTTAACGTAATATCATACGGTGGATACTGAAATACTGCATATTGATTCAC  
TTCAACTTGATGAAAAATCATATTCGGTAATGGTTTTCTTATTCTAAACGGGATATTTGAA  
GTGATAAAATGTACTTCGTGACCTCGCTCTGCTAATTTAATTCTTAATTCTGTGGCAATAA  
TTCCAGAACCACCCATGGACGGGTAACATGTTATACCTATCTTCAT

### > **ypjD**

Function: protein coding sequence; MazG nucleotide pyrophosphohydrolase (core genome, constant)

Best match: ypjD\_CC001\_MW2-USA400\_BA000033.2[1501167:1501484:r]RC (completely identical)

Position: 036-contig\_189: 61867 ... 62185; Length: 318 bp

Sequence:

TCACTTTCTTTTCGAATCGATTTTTATCTCTTGTATTAACTTTTCCATAGTTTCATTAAAGC  
TCTCTGTCATATCTATTCCCATTGAATTCGCTAAACATAACAACACAAATAAATTATCACC  
TAATTCTGCTTTAATCGTATTTGCTTCCTCTGAATCTTTCTTCTTTTTTTCACCATAGGTATG  
ATTTATTTACGTGCAAGTTCGCCCACTTCTTCAGTCAATCTAGCTAAGTTAGCTAATGGT  
GAAAAATATCCTGTTTTAAATTGTCCAATATATTCATCAACTTCACGTTGCATTTCTACCA  
TTGATTTTCAT

### > **ypiA**

Function: protein coding sequence; putative protein (core genome, constant)

Best match: ypiA\_NCTC8325-4\_L05004.11384:1735RC

Position: 036-contig\_189: 65331 ... 65684; Length: 353 bp

Sequence:

TTATCAATAGCAACTTCCATCATATTAATTTGTTGATATAAATCTGCTTCTAACATCAACT  
TTTCAGGTGATGGTTCAACATAACTTAAATATTCTAACGCTTCGTCAGTTTGATTTTCAGA  
CATTAAACCTTCAATAAAAATAAATCAGCAATTCACCTTTCGTCTGGATATTTTTGATATAAC  
ACGCGGAATACTTCCAAACCTTGTGGCATTAAATCCAAAATTGTAAAGTGTCTCTCCTAGA  
ATAAATAATGCGTCATCGTTGTCAGTAGTTATTGCTTCATTAACACGAGAGTCTAAATTTT  
CTAGTTTTTGTAGATTGATATCGTCTATTAATTTATAGATATCTTCCAT

### > **aroA**

Function: protein coding sequence; 5-enolpyruvylshikimate-3-phosphate synthase (core genome, variable)

Best match: aroA\_CC001\_ATCC51811-ST1\_ADVP01000007.1[24732:26030]RC

Position: 036-contig\_189: 65690 ... 66989; Length: 1299 bp

Sequence:

TTATCCCTCATTTTCTAAAAGCTTTAGTTTTGGTAAAAATCCTGGAAATGATACATTTACA  
GCATCAAATTGTTTGATTTTGACAGGCTCGCTTGAAAGTAGAGAAGCAACTGCAAGCATC  
ATTCCTATTCGATGATCAGTTAAACTATCAACTGTTGCATTTGTTTTAAATTCTGACGGAT  
GAATAATCAATCCATCATTAGTTGGTTGTAATTCAAACCCTAACAAGTTTAACATATCAG  
CCGTTGTATCAATTCTATTTGTTTCTTTACTTTTAATTCCTCGGCATCTTTAATTGTA CTG  
TGCCAACTGCTTGTGTACAAAGTAATGCTATTACAGGCAGTTCATCAATTGCTTTTGG AAC  
TAATTCTCCTTCGATTGTTATTGGTTGAAGCATTGGTGTGATTGAATACGAATAGAAGCA  
GTAGGTTACGACACCAGTTGTTGATTGAAAAGTTGGATATTACCGCCCATTTTTTCAACAA  
TATCAATAATACCTGAACGTGTTGGATTGATTCCAACATTATGAATTGTTACATCACTTCC  
TGGTGTGATAAGTGCTGCAACAATAAAGAACGCTGCAGATGAAATATCGCCAGGAACAT  
GAAAATCTGCAGGTTTAATGTATCGAATTGCTTCAGGGGTTGTATTAATTGATAACCCTTC  
TGCTTCAATTGGAATATTAATAATGTTTGAACATCGTCTCAGTATGATTTGACTTACATCT  
AATTCTTTAATGATGGTTCGGTTCCTTAGAAAACAACTTGCAAATAAAATGGCACTTTTTA  
CTTGTGCACTTGCAACTCCCATTTGATAATTTATACCTTTTATGACAGATGGCTTAATAAT  
TAATGGTGTATAATTATCTTCAATACCTTCAATATTCGCATCCATAAGTTTCAATGGTCTC

AAGACACGATCCATTGGCCTTTTACCAATTGAAACATCGCCAGACAAAACACTTTCAATA  
CCTAAACCACTTAACAAACCAGCTAATAATCGTGTTGTCGTACCAGAATTACCTGTATAC  
AATACTTGATGTGGCGTGTTAAAAGATTGATATCCTGGGGAAGTCACAATAATTTTTCA  
TCATCTTCTTTGATTTCTACACCTAACAGTCGGAAAATGTCCATCGTACGACGACAATCTT  
CGCCAAGTAGTGGCTTATATATAGTAGATACACCTTCAGCTAGCGACGCCAACATGATTG  
CACGGTGTGTCATTGACTTATCGCCCGGCACTTCTATTTGCCCCTTTAACGGACCTGAAAT  
ATCAATGATTTGTTCAATTTACCAT

### > **aroB**

Function: protein coding sequence; aroB (core genome, variable)

Best match: aroB\_CC005\_Mu50-VRSA\_BA000017.4[1580838:1581902:r]RC

Position: 036-contig\_189: 66998 ... 68063; Length: 1065 bp

Sequence:

CTACTTAAAATATGTTTTAGTTGTTACACGCATGTTGCAGTGTGTTTGGATCAATGTGTT  
GCACTACAATATCGCCAAAATGTTTAATCAATACCATTTGAACTCCTTGTTTGTGCTTCTT  
TTTATCACTTAGCATGTATTGATATATCGTTTCGAAATCTATGTCGGTTATTGTTTCTAAAG  
GATAACCTAATTTGTTAAATAATTAATATAATGTTGGATATCGTGATTAGAATTGAACA  
ATATATTCGCAACAATAAATTGATATATTATGCCTATCATTACGGCATGACCATGAGGTA  
TTTTATGATAGTATTCAACAGCATGCCCAAATGTATGACCTAAATTTAAAAATTTACGTAC  
ACCTTGTTCTTTTTTCATCTGCAACAACAATATCCAGCTTCGTTTCAATACCTTTAGCAATAT  
ATTTATCCATACCATTTAATGACTGTAATATCTCTCTATCTTTAAAGTGCTGTTGATATCT  
TGCGTCGTTGATTCACCATTCAATAACGCATGCTTATAAACTTCTGCATAGCCACTTAATA  
TTTGCTCAAATGGTAACGTCTTTAAAAAATCTAAATCATAAATCACAGCAGTTGGACGAT  
AAAATGCACCGATAAGGTTTTTACCTTGTTTTGAGTTAATACCCACTTTACCGCCAACT  
AGAATCATGCGCCAAAATCGTTGTAGGAACCTGTATAAAATGGACACCTCTTAATAGTGT  
TGCTGCTACAAATCCTGCAAAATCTCCTGTGCGACCACCACCAACAGCTATAATCGCTGT  
ATTACGCGTTACATGATGTGACAAAATGTATTCTAATGTTTCTTGATATTGCTCAAATGTT  
TTCGTCTTTTACCAGCTGGAATAATGACTTTATGCACATTTTCATATGATAAAAATATCAT  
CAAATTTATCAGCAAAATATTGATTTACATGCTCGTCAATTAATATAAACTTTGATCAAA  
CTGATCAATATACGTGCTAATATGGTCAATTGCACCATGTTCAACAAATATTGGATAATT  
GTTTGAAGGATAGGTTGTTTGTAAATTCAT

### > **aroC**

Function: protein coding sequence; aroC (core genome, constant)

Best match: aroC\_CC005\_Mu50-VRSA\_BA000017.4[1581928:1583094:r]RC

Position: 036-contig\_189: 68088 ... 69255; Length: 1167 bp

Sequence:

TTAAAACTCAACATTTAATTGTCTGCGGTCAGCAATTTGTTGTTGAAGTTGTTCAATATGG  
TTTGATTGAACTCTTCAAGTAATGCTTTCGCTATTTCAAATGCAACAACGTGTTACACA  
CTATACTTGCTGCAGGTACAGCACAACCTATCAGAACGTTCAATTGTTGCCTTAAAGTCTTC  
TTTAGTATTTATATCAACTGAATTTAATGGTTTATATAACGTAGGAATAGGTTTTCATTACA  
CCATTTACAATAATTGGCATACCATTTGACATACCACCCTCTAAACCACCTAAATGATTAG  
ATCCACGATAATAACCAATTTCACTATTATATAGAATTTTCATCTTGAATCTCACTACCTGG  
CTTTTCAGCTGCTTTAAATCCTTCACCAAAGCTTACACCTTTAAAAGCATTATGCTGACA  
ACACCTTGTGCAATCTTACCATCTAACTTACGATCATAATGCACATAACTACCAACACCA  
ACAGGCATATTTTCAACTACAACCTGAACGACACCGCCAATTGAATCTCCTTCATTTTTAG  
CTTCGTCAATTTTATCTCGCATTGCTTGTGCGATACTGTCATCAATTACACGAACATCATT  
ACGATCAAGATTTGCTTTAAATGTTTCTGAATCATAAAAATCTTTATCTTTAATTCACCT  
ATTTCAACAACACGACTGTATATATCGATATCTAACTGTTGTAATAAACTTTACATAAGG  
CACCGACTGCAACTCGAGCTGCTGTTTCTCTAGCAGATGATCGCTCTAGCACATTTTCGTAA  
ATCACGATGATTATATTTACATACCTCCAACCAATCTGCATGACCAGGTCTTGGTTTTGTA  
ATAGTACGTTTCATATTTTACGTTCTTCTTCACTTATTGGAGCTGCTCCCATAATTTTTCT  
CCAATGCGTAAAGTCATCATTGGTTACAACCATAGTAATTGGACTACCTAATGTATAACC  
ATTTCTAACGCCTGATACTATTTCTACTGTATCTTTCTCAATTTGCATGCGTCGGCCACGA  
CCATAACCCCTTGACGCTTGAACATTTCTTTATTAATATCTTCAACTTTAATTTCTAAATT

TGCTGGTATACCTTCGACAATAACTGTTAATTGAGGTCCATGTGATTCTCCTGAAGTTAGATATCTCAT

### > **Q2FYG8**

Function: protein coding sequence; putative protein (genomic island)

Best match: Q2FYG8\_CC001\_MSSA476\_BX571857.1[1534588:1534788:r]RC (completely identical)

Position: 036-contig\_189: 69641 ... 69842; Length: 201 bp

Sequence:

TTAAGCGCTTTTGTATACTTTGACTTCAAAAATATAATCAATTCTTTACTAATACATAA  
AAAATATAAATGAGAGTCAGTATAAAAATAATTTTTGTTATAGGATTAAGTGGTTTATCT  
AAAATATAGCACCATATAGTAATTCATTAATTTAAGAACATTA AAAATCCCCAAAATA  
ATCGAAATAATATTCTTCAT

### > **ndk**

Function: protein coding sequence; nucleoside diphosphate kinase (core genome, constant)

Best match: ndk\_CC001-ST772\_118\_AJGE01000058.1[82476:82925]RC (completely identical)

Position: 036-contig\_189: 70050 ... 70500; Length: 450 bp

Sequence:

TTATTCATATAACCATGCATCACGTGGTGAAGCATAGCTAGTAATTTTCATTTTCATTAAC  
CATAGATTAATTTACGTTTCAGCAGACTCTAATGAATCTGAACCGTGAATGATATTTCTAC  
CAACAGTTAAACCTAAATCACCTCTAATTGATCCTGGTGAAGCTTCTGAAGGATTGGTGC  
TGCCAATAATATGTCTAGATACATTA AACTGCATCTTCACCTTCAACTACCATTGCGAACAC  
TGGTGCTGATGTAATAAATGAAATTA AATCATTATAAAACGGTTTGCCTTGGTGTTCACC  
ATAATGTGTTTCAGCAAGTTCCATTGGTACTTGCATTAATTTACCACCGACAAGTTT TAGT  
CCTTTTCTTTC AATTCTTGAAATTA CTTCACCAATTAGATTTCTTTGTACTGCATCTGGTTT  
AATCATTA AAAAATGTACGTTCCAC

### > **gerCC**

Function: protein coding sequence; heptaprenyl diphosphate syntase component II (core genome, constant)

Best match: gerCC\_CC001\_MW2-USA400\_BA000033.2[1509891:1510850:r]RC

Position: 036-contig\_189: 70591 ... 71551; Length: 960 bp

Sequence:

CTACGTGTTTCTTGAACCCATTTTTTCGTCAAACCTAAAAGTAGTGATTTCCGGATGTCCA  
TCTGGTAACTCAGAAATCAAATCCAAAGCTTTACTTAAATACTTCGAACTTACTGCTTTAG  
ATTCATTAATACTGTCAGACTTTCTAATAATTTGAATACATTCTTCAAATTTCTTTTCGATCG  
CTGTCACGTGTAATTGCTCAATTTCAATTTGAAGTCTGGGTTTTTACGCATTTCTAATA  
AAATCGGTAACGTAATATGACCATTAAGCAAATCACTTCCGACCGGCTTACCTAATTTCTT  
TTCGGTACTTGTGAAGTCTAATACATCATCAATGATTTGGAAGCTCATACCTATATAATGA  
CCAATCATTTTCAATTTTCGTACAGTCTCTTTATCAGATTGAGATGTAATTGCACCAACTT  
CAGTTGATAAATTGAATTAACAGTGCTGTTTTGCGATTGATACGTCGTAAATAAATTGATAAT  
TGCTGTGACTGTTAAATTGGTCTTGAAATTGGAAAAGTTCCCCTCTACAAACATCAACG  
ATAGATTCAGATATCAATTGATGTACACGATTATCTTTAACGGCCATTAAGTGTTCAAGTC  
CTAATGCCAATAAAAAAATCCAGTTAAAATAGCCGTTGTCTGATCCCATTTCTTTGATAT  
GGTAACTTGCCTCGACGCTTGTGCTTTTATCAATAACGTCATCATGAACAAGTGTTGCC  
ATATGAATTA ACTCTAATGCGACTGCAACATGATACGTTTGTTCAGACGTTTGTTCATCTT  
TACCAAATTGGCTACTCAGAATCACA AATGCAGGTCGTACACGTTTTCCACCAGAAGACA  
ATAAATGTAAAGAAGCTTGTCTAGAACAGAATCTTTACTTTTTATTGCCTTTTCAAGTCG  
TTGTTCCACTTTCTTAATTTCAATTGTTTCATGTTTAACTTTGCCAC

### > **ubiE**

Function: protein coding sequence; menaquinone biosynthesis methyltransferase (core genome, constant)

Best match: ubiE\_CC001\_MW2-USA400\_BA000033.2[1510852:1511577:r]RC

Position: 036-contig\_189: 71552 ... 72278; Length: 726 bp

Sequence:

```
TTAATCACCTTTGGTATTATCTTTTTCTTTATAGCCAAGGTGCATTGCAGCAACGCCCCCT
GTAAAACTACGTACTCTTACATTTATGAAACCCGCTTCTTCAAACATGCGCTTCAACTCTT
CTTTTCCAGGAAAATTAACGTAGATTGCTGTAACCATTCATATTCTTCTTTTGATTTTGC
AAATAATTTTCCAAAAATAGGCATAACAAATTTAAAGTATAATGCATACATTTGTTTAAA
GACTGGCAAAGTTGGTTGGCTCGTTTCAAGACATAACCACCATAACCACCTGGTTTAAAGTAC
TCTATTCATTTCTTTTAAACGCGACTAAATAGTCTGGCACATTTCTTAATCCAAACCCAATT
GTTACATAATCAAAGAATTGTCTTCAAACGGCAATTCCATTGCATCACCATGAACAAGT
TTAACATTTTCCATTGAAGCAGTTTTTTCTTTTCTACTTCTAACATATTCTCACTAAAGTC
AATACCAGTAACTTACCTGTTGGTCTTACAGCTTTGCTTAATGCGATTGTCCAATCACCA
GTACCACAACAAACATCTAATGCTTTCGTCCCTTTTCTAACACCCATGTCTTTCATGACGC
GTTTTCTCCATACTTTATGCTGCTCAAACTAATAATATTATTTAATCTATCATTTTTTTT
GAAATATTTTGAAAAACGCGATGTACTTGCTCTTTATTTGCTTTATTGTCAGCCAT
```

### > gerCA

Function: protein coding sequence; putative protein (core genome, constant)

Best match: gerCA\_CC001\_MW2-USA400\_BA000033.2[1511580:1512152:r]RC

Position: 036-contig\_189: 72280 ... 72853; Length: 573 bp

Sequence:

```
TTAATTACCTCTACTTTTTAAATAACTTTTTGGGATATCGTGTAAGTAATGCTTTACTTCAC
TTTGATTATATTCTTGAAGTATGATGGATAGTAATCAGACATATCTTCAAATAAATAATT
ATATATTTCCGACTCATCAATATTGATACCGAAATGAGATAACGTAATATATGGGAAAAG
TGTTTCAATTTTTACTATTGCTTGAGAAATTCATAATCATTTAAAGCTTGATGATGTAAT
GAAGATTTCAATTCATTAATTTCAACAATTGCTTTACTAATTTTCAATTTTGAATGATAAAT
CATTGATTTCTGCTAGTAGCGTATAAAAATGTGCACTAATTAATCTCCAATCAAAATGG
AATGTTTAGACAAATGATTATATGTAATGTCATCAAGGTGTCTCATTGATGTGTCAATTGT
GAGGCATGCCACTTTGGCAACATCTGGAATATCATATGAATCAAGTAACTTACCTAACCG
ATGATTAATATTAATGGATTTCATATTCTGATACGCCCTTTAATCTTTCTTCTATTGTCTTT
CCAATTTGCTAACAGTTGTTTCCAT
```

### > hup

Function: protein coding sequence; DNA-binding protein HU (core genome, constant)

Best match: hup\_CC001\_MW2-USA400\_BA000033.2[1512583:1512855:r]RC (completely identical)

Position: 036-contig\_189: 73283 ... 73556; Length: 273 bp

Sequence:

```
TTATTTTACAGCATCTTTTAAATGCTTTACCAGCTTTGAATGCTGGAACCTTTACTTGCTGGG
ATATCAATTTCTTTACCAGTTTGAGGGTTACGACCTTTACGTGCAGCACGTTACGTACCT
CAAAGTTACCGAAACCAATTAATTGTACTTTTTACCTTTAGCAAGTGAGTTTTGGATTGA
TTCGAATACAGCATCTACTGCTGAACCAGCTTCTTTTTTAGTTAAATCAGCTTGCTCTGCA
ACTGCATTGATTAATCTGTTTTGTTCAT
```

### > gpdA

Function: protein coding sequence; glycerol-3-phosphate dehydrogenase (core genome, constant)

Best match: gpdA\_CC001\_MSSA476\_BX571857.1[1538674:1539672:r]RC

Position: 036-contig\_189: 73726 ... 74725; Length: 999 bp

Sequence:

```
TTATTCAGATTTTTTATCGCGCTCCATTAATCTTTTACGCATTCTTTTACTGAGATATTTT
CAAATAATACTCTATATAATGCATTTGTAATTGGCATATCCACATTTTTTTCTTTAGCTAA
ATGATAAACTGATTTAGTTGTATAAATACCTTCAACAACCATATTCATTTTCAGATAATGCT
TGATCCATTGATTCACCTTGCCAAGTTTATATCCTAATGTGAAATTTTCGAGAATGTGTTG
ATGTGCAAGTAACGATTAAGTCACCGATACCACCTAAACCTAGAAATGTCATAGGATCGG
CACCTAACTTTTACCTAATCTACTAATTTCCGCTAAACCACGAGTCATTAATGCAGCTTT
TGCATTATCACCGTAGCCAATTCCAGCTACGATACCCTTGCTACTGCGATGATATTTTTTC
AATGCACCACCAAGTTCAACACCAATCAAGTCATCATTTCGTGTACACACGTAATAATCA
```

TTCATAAATAAATCTTGCGTAAATTTACTTACATTTTTATCTTTTGATGAAGCAGCAACTG  
TAGTTGGTTGCTTGACTIONACTTCTCCGCATGACTTGGCCCGGACAACACGCCAATACC  
TGCATTATATTCAGGTGAAATAGAATCTTCAATCATTTCTGACACACGTTTAAATGTCCCA  
TTTTCAATACCTTTAGCAACATGTATAAAAAGTCTTTTTAGATGTCAGCTTATCATTAATTT  
GAGTAGCAACTTCTCGCATTGCTTTAGTAGGTAAAGCCATTAAGTAAATATCTGCAAATTT  
GAATTGCTTTGGTCATATCTGAAGTAGCGATGATGTTAACATCTAATTTTCGCGTATTTTTAA  
ATACTTTTTATTTGTATGACATGTATTTAATTCATCAACAGCATCTTGATTTTTACCCACA  
TCAAAACATCATGTCCATTTTCTGCAAGAACATTGGCAAGGGCTGTCCCAAACCTTCCCA  
TACCAAAAACGGTAATTTTAGTCAT

### > **engA**

Function: protein coding sequence; GTP-binding protein engA (core genome, constant)

Best match: engA\_CC001\_MW2-USA400\_BA000033.2[1514041:1515351:r]RC

Position: 036-contig\_189: 74741 ... 76052; Length: 1311 bp

Sequence:

TTAATTTCTCTTTTCGAGCTATAATATGAATTGGTGTACCTTCAAACCAAAGCGGCACG  
GATTTGATTCTCTAAATAGCGTTTATAAGAAAAATGCATTAATTCTACATCATTAACAAAT  
ACAACAAATGTCGGTGGTTCTATAGCAACTTGTGTTGCATAAAAGACATTCAAACGTCTA  
CCTTTGTCTGTTGGTGTAGGGTTCATGGAAATTGCATCAGTAACGACTTCATTTAAAGTTG  
AACTTTGAACACGTTTTTTATGGTTTTCACTTGCTTCATTAATGTAAGGGAATAATGTACG  
TAATCTTGTGCGTTCTTTAGCAGACACAAAAGCAATTTGTGCATAATCTAAAAATTGGAA  
TTCTTTACGTACTTCATCTTCAAATTTCTTCATCGTTTTACTATCTTTTTCCACAGTATCCCA  
TTTATTTACGACAATCAGACTGCTTTACCTTGTTCATGTGCATATCCTGCAACGCGTTTA  
TCTTGTTCAATGATGCCTTGTCTGCATCAATGACCACTAAAACAACATTTGAACGTTCAA  
TCGCTTTTAAAGCTCTTAGTACTGAATATTTCTCAGTTGATTCATATACTTTTCCTTTTTTA  
CGCATAACCAGCAGTATCGATTA AACATAATCTTGTCCATCATAACTATACTCTGTATCAA  
TAGCGTCTCTCGTTGTCCCTGCAACATTAGAAACGATAACGCGATCTTCACCTAAAATAG  
CATTTACTAAACTTGATTTACCTACGTTTGGTTCGTTCCAATAATGGATAGTCGAATTGTATC  
TTCATCATAAGGATCTTCTTCTCTTCCCAAATGAGAAACAACACTGCATCTAACAAGTC  
ACCAAGACCTAAACCATGTGATCCTGATATCGGATACGGTTCACCAAATCCTAATGAATA  
GAAATCATAACCGTCTGTACGCATTTCCATATTATCTACTTTGTTAACCGCTAATACGACC  
GGTTTTTTAGATTTGTATAAAAATTTGAGCGACCATTTTCATCGCTTTGTGTCAATCCTTAC  
GCACGTTAACCATAAAAATAATAACATCCGCTTCATCTATGGCGATTTCTGCCTGCGCTCT  
AATTTGTGTTTGAATGGTGCATACCAATTTCAATACCACCTGTATCAATAATATTGAAA  
TCATGTGTTAACCATTCACCTGAAGAATAAATACGATCTCGTGTTACACCTGGCGTGTCTT  
CCACAATCGAAACACGTTCTCCAATTTCTATTA AAAATTGTAGATTTACCTACATTAGG  
CCTACCTACAATAGCTACTATAGGTTTAGTCAT

### > **rpsA**

Function: protein coding sequence; 30S ribosomal protein S1 (core genome, constant)

Best match: rpsA\_CC001\_MW2-USA400\_BA000033.2[1515573:1516748:r]RC

Position: 036-contig\_189: 76273 ... 77449; Length: 1176 bp

Sequence:

TTATAGTTTAAAGATTTTTAAGTTTATCACCATCATATCGCCAATTGTTGGATTATCTTCTT  
CTTCGTTTTCTAAGTACGCCTTAGTCGTAGAAGGATCACTTCAACAACATCTTCGTTTGG  
TAATGTTGCTTTAATAGATAGTGATACTCTTTCATTCTCTTCATCAATACCTAATATTTTTAA  
CATTTACTTGTGACCAGGTTCTAACACTTCACCTGGCGTACCAATGTGTTTGTGTGCAAT  
TTCAGAAATATGTACAAGTCCTTGTACACCTGGTGAATTTCAACAATGCACCAAAGTT  
TGCCAATCTTACTACGACACCTTCAATGACATCATTTTCGTGGAATTGACCTTTAATATTT  
TCGAAAGGTGTTGGTAACGTATCTTTGATTGATAATGAAATACGTTCTGTATCTCTATCAA  
TAGATTTAATTTTAACTTTAACATCTTGACCAATTGAAACTACTTCTTCTGGTGTTTGAAC  
ATGTTTCGTGAGAAAGTTTCAGATACATGCACTAAACCATCAACACCACCAATGTCTATAAA  
TGCACCAAATTGAGTTAAACGCGCTACTTTACCATCAATAACATCGCCTTCATTTAAAGAT  
TGTAATAATTGATCTTTTTTAGCATCGTTTTCTTCTTGTTCAACTGCTTTACGGCTTAAAAT  
GACTCTATTATTTTCAGGATCCAATTTCAACTTTAATACGAATTGTTTGTCCATCAAAC



ACAGAGAAATCCTCAATGAAGTCTGTTGAAATTAGTGAAGCCGGAACAAAACCTCTTTGT  
CCTACATCAACAACCAAACCACCTTTAACAACCTTCTGTTACTTTTCGCTTCGATGATTCAT  
TATTATCTAATTTTTCTTGTAATAACTATAAGACTTCTCAGTTTCAAGTTGTCTTCTAGAT  
AAGATGTAAGCTCCAGTTTCATTTTCTTCATCAAACCTCAACTTTAGTGACATATGCTTCAA  
CTTCGTCGCCCTCTTTTACAACCTTCACTTGGGCTATCAATATGATGCGTAGATAGTTGACT  
AATAGGAATAATCCCATTAATAATTTACCACCGTTGATATGAACAACAACCTTGCTTGTCTTCA  
ACTTGTGTACCTCGCCAGTGACTTTGTCACCTTCTTTAATATCGTTAATCATTGATTCAAT  
GAATTCTTCAGTCAT

### > **Q2FYF8**

Function: protein coding sequence; putative protein (core genome, variable)

Best match: Q2FYF8\_trunc\_CC001\_MW2-USA400\_BA000033.2[1517005:1517102:r]RC

Position: 036-contig\_189: 77705 ... 77803; Length: 98 bp

Sequence:

TCATTGTTCTCTACAAGATATATTATAGTAAAATTTTATACTTTTATAAAAACAAAAGCCA  
CGTAATTGAGAACTTTTACATTTTGTAGTAAGAAG

### > **cmk**

Function: protein coding sequence; cytidine monophosphate kinase (core genome, constant)

Best match: cmk\_CC001-ST772\_118\_AJGE01000058.1[74170:74829]RC (completely identical)

Position: 036-contig\_189: 78146 ... 78806; Length: 660 bp

Sequence:

TTATTTAATTTGACTCACCATCGCTAAAATTTTCGTCAGTAACTTCTTCAATCGACTTGCCT  
GTCGTATCTAATGTCACCTGCATCATCTGCTTTTCTTAATGGTGATATTTACGGTTCATGTC  
ATATTGATCACGAGCTTCAATATCACGTTTTAAATCTTCAAATTTGATTCGATACCTCTT  
AATTGATTATCTTTATATCTTCTTTCTGCTCGCTCTTCAACTGATGCAATCATATATACTTT  
TAAATCTGCATCTGGTAGCACTACAGTTCCGATATCGCGACCATCCATTACGATACCTTTT  
TCTGCAGCTAACTCTTTTTGTTTTTAAACGGCGAATGAACGTACTGGCTCTTTAGATGCAA  
CGTATGAAACATGTTGCGTCACATCATTATTTCTTAAAAAGTCTGTTACATCTTCGTTATC  
TAAAATGACACATTGACCTTTATCTGCTTTATAAGTTAAATCTAATGTTGTTTGGTCAACT  
AGTTTTGCAAAGTCCCTCAGTTTTGTTTAAATTTTAAATATTTGTATGTTAATGCACGATACA  
TTGCTCCTGTATCGACATAAATCATTGATAGTTCACTGGCTACACGTTTTGCAATTGTACT  
TTTTCCGGCAGCAGCTGGACCATCTAATGCAATATTAATGGCTTTTCAT

### > **ansA**

Function: protein coding sequence; putative L-asparaginase (core genome, constant)

Best match: ansA\_CC001\_MW2-USA400\_BA000033.2[1518182:1519150]

Position: 036-contig\_189: 79701 ... 79851; Length: 150 bp

Sequence:

TACGCATACGATGGTGGTGGTTACCAACTCGCACAACAAGGTTTTATTTTTTCTAACGGTT  
TGAATGGTCCAAAAGCAAGATTAATAATTATTAGTTGCGTTAAGCAACAATTTAGATAAAG  
CTGAAATCAAATCATATTTTGAATTATAA

### > **A5IT07**

Function: protein coding sequence; FAD-dependent pyridine nucleotide-disulphide oxidoreductase (core genome, constant)

Best match: A5IT07\_CC001\_MW2-USA400\_BA000033.2[1519265:1520251:r]RC (completely identical)

Position: 036-contig\_189: 79965 ... 80952; Length: 987 bp

Sequence:

TTATGATTCTAACGGCGTTTTGTTTCTTAGCTAGCATGCTTTGAGCAATAATGCCACCGTGG  
AATTTACCATTTTCAATAAAAATGGTATTCGCATCATTCCCTGCAGCAATCACACCTGCAA  
TGTAGCAATTTTCGATATTTGTTTCGTATGTCTTTTATTATACATAGGCGCTGTTCCAAAT  
TCATTTGTATTAATTTGAATACCTACAGATTTTAAAAATTCATAATCGGGATGATAACCAA  
TCATCGCAAAAACATAATCATTGTGTATCGTTTTACTTTACCATTACTTCATAAGTCAC

AGTATCTTCAGTTATTTGGGTAACATTAGCATTAAATTCCATGTCAATTTTTTTCATGATTTA  
CTAATGCTGTGAAATTTGGAAGTATCCACGGTTTAATTGAAGGCGAATAATCTCCACCAC  
GATATAGAACCGTCACGTTAGCACCAGCTTTTTCCAACCTCAAAGCAGCATCGATAGCCG  
AATTCTTACCACCAATAATAACAACATCTTGATCAAAATACGGATGTGCCTCTTTAAAAT  
AATGGAACACTTTAGGTAAATCCGCACCTTCAACCTCTAATGTATTATGCTGACCATAAT  
AGCCTGTCGCGATTGTTAAAAATCGACATTCATAAACATCTTTCGTCGTAGTAATTGTAA  
TTTATTATTCATTTTTTTAACAGTTAATACTTCTTCAAATGCATTTACTTTTAATTGATGAT  
GTTTTACAACCTTCTCGGTAATAAACTAGCGCTTGATTACGTCTTGTTTTACTTTCTTCAAC  
GATAAACGGTACGTCCCAATACTTAATTTATCACTTGATGAGAAAAATGTTTGGTGAGT  
AGGATAATTATATATTGATTCAACGACATTACCTTTTCAATAATTAAGGTATCAATACCT  
TTTCTTTTTTGTTCATAGCCGCACTTAATCCGCATGGCCCTCCACCAATTATGATACTTTC  
AACTTTTTGCAT

### > **ebpS**

Function: protein coding sequence; cell surface elastin binding protein (core genome, variable)

Best match: ebpS\_CC001\_MW2-USA400\_BA000033.2[1520653:1522113:r]RC (completely identical)

Position: 036-contig\_189: 81353 ... 82814; Length: 1461 bp

Sequence:

TTATGGAATAACGATTTGTTGACCGTTTCTAATATTGTTACCACTTAAACCATTGGCACGT  
CTAATTTTTTCAACATTTTCCGGTGAACCTGAACCGTAGTATTGAATTGCGATACGGTATA  
AGTTTTCTTGACCATTCACTGTATGTCTTTGGCCACCACCTTGACGTTGTTGTTGCTGTTGT  
TGATTTTGATTAGCTTGTGTTGATTTTGATTATTTTGTGCTTGATTGTTGCTTGATTAGC  
GTTGTTTTGATCATTATCAGATTCATCTTTAGTCGCTTTGTCTTGATCCTCTTTTGATTTATC  
ACTGTCTGTAGATTTTGATTTATCTTTAGAAGCGTCTTTAGATGTGTCTTTGTCTTTACTTT  
CATCAGCATTATTTTTATTTGTATTCGCGATTTTATTTCTTTTGTACCATTATTATGATTGT  
TTAATGCCATGCCTCCAAATATCGCTAATGCACCGATAATTAGTACAGCTGCAATTAATG  
GTAACAATACTTTGGCCATGCCACCTTTTTTACGTTCTTTATCTCTGTCATGATTGTCATGT  
TCATCATGGTTTTGGCTTGCATTATTAGAGGCATGTGGTTTTGAAGCGGCAGAAGCACTTT  
TACTTGCTGCGCCTCCAGCCAAACCTGCTGTTCCAGCACCGATCGCTGCACCTTTTTTGCC  
ATTATGATGATCTTTAGACTTATCTTGAGACACTTTATCCTCAGTCGAGTTATTCGACTTG  
TCAGAATTACTTTTGTGTTGAGCGTCATTTGAATGTTTCTTAGCTTTAGAAACACCCATTG  
CACCAGCTGCACCTGCAACACCCGCTGTTCCAGCACCAATTGCTGCGCCTTTTTTACCCT  
ATGATGATCTTTAGATTCATCTTTGTCTTGCTTAACAGTTACATCATCATGTTTATCTTTTG  
ATGTATTTGCTTGGTTAGCACCTGTTGCAAAATATGGTTTAGGTTGCTGAGATTGTTGAGC  
TTCACTCTTATCAGAACTGTTGAATGCTCAGTGTTATTTTCTGCTTCTTTAATAGTCTCGT  
GTTTATCATTGTCTTCGATTGGTTCTGGATGTGATTTATCCATTGCAAAAGCATTCTTATTA  
TAATATTCCTCTTCATGTTGAGGTGACTGTCTTGATGGCTAGGTTCTTGACTTTCAGTACT  
GTGTGATGATTCGACTTGACGATCATCTATTGTGCCAGCCTCATTTTGAACATTGTCTTCA  
GATGTTTGTGATTCATTGTGAACTTGTTTATTATGATTCGTTGCTAAATCACGGCGTCTTTT  
TCTTCTTTGGGCATTTCTTGGCGGAACTGTTGCTCCGTATTCTCTATTGTATCCTGATGTT  
CTAATTCTGATTGGTCTTTTTTCAACATCTTCCGTATGGTCTTGATGTGAATTTGTGTCTATC  
GATTGACGATTTTTTTCAAAGTCATCTTTAAAATTATTAGACAT

### > **recQ2**

Function: protein coding sequence; ATP-dependent DNA helicase (core genome, variable)

Best match: recQ2\_CC001\_MW2-USA400\_BA000033.2[1522266:1523645:r]RC

Position: 036-contig\_189: 82966 ... 84346; Length: 1380 bp

Sequence:

CTATCTGAGAAATAAATTTTGCAACTTTTCATCAAATCCAATACTTCTAATTACCTTCTTCT  
TATTTAAAATTGCGATATCAGTTATATTAGAATCATTGTCACAACATCGATCTTGTGCCGG  
TGGATATTCACCGAAAAATTCTAATAAATACTTCCGTCTACATTGATCCAATTTGCAATAG  
CCAATCATGCGAAAGAATCCTAATTGCTTTCGTTTAAATGATTGCTTAAATATCTGTTTCA  
AGGCGCCGATACTATAGAATGAATGCAACGTTGTCAAACGTCCTTGTTTATCGGGAGCTA  
AAAATTCTCCTATTTGAAATTTTGTACATCTTCTTCTGTTATCATATCTGCAAATAATAAC

GTTTCTAAAATATATTTATCGTCCGGTTGGAATAAACTAATTGCCTGACTTAGTTCACCAT  
CGCGACCCGCACGGCCAATTTCTTGAATGTAGTTAGAAGGACTTGTTGAAAGATGAAAGT  
GAATGATTGTGCGAATATCTTTTTTATTAATTCCCATAACCAAAGCACTCGTTGCGACTAT  
AATCGGAATATCATTATTTAAAAAATTGTTGTTGAACTGTGTGTCGCTCTTGATAATTCATA  
TCACCATGATAAATACCTGTAAGAAAACCTGAATCATAAATAAGTTGCGCTAAATTCAGA  
CACATCTTTTTTCGATGAGACATAAATAATCGTTGGTCCCAGACTGTTGTAGAAACGGCAGC  
AACCATTCAATTTTATCTTCATCATCATGAAAATTAAGATGCTTAAAGCTTATGTTTGGGC  
GATTCATTGTAGTTTTAATAACATTGAATTGAATCGCTAACATTTCCGTCAAATCATCTTG  
TAAATGCGGTGGTGCAGTTGCTGTCAATGCTAAGACAACCGCTTCTTTAAAATGCTTTGTT  
ACTTTTCCTATTAGAGCATAATGTGGTCTGAAATCATATCCCCATTAGATAGGCAATGTG  
CTTCATCTAGAACAATCATGCCAAAGTCTATCATAGATATTAATTTAAAATTTGACGGTTG  
CAGGAGAAATTCTGGACTTAGAAAGATGAAGCGGCTATGTCGTAAACATTTAATATTATG  
CTTTTTCTCAATTTATCCATACCAGAGTGAATAGATGTTACATGTTTTTCTCCATTTATTT  
TCAACTGCATAACTTGGTCATCCATTAAGATATTAACGGTGAGATAATTAATGTCCGGCT  
TACCTGATAAATACGTAGGTATTTGATAACACAACTCTTCCACTTCCAGTTGGAAGAA  
TACCTAGAGTGTGCTGTTGAGACATTATACTTTCTATAATTTCCCTGTTGTCCCGGTTAAA  
ACTCTCGAAGCCAAATTTGTTTCGTAAAATATCATGCAACAT

### > **A5IT10**

Function: protein coding sequence; putative protein (core genome, constant)

Best match: A5IT10\_CC001\_MW2-USA400\_BA000033.2[1523635:1524588:r]RC

Position: 036-contig\_189: 84335 ... 85289; Length: 954 bp

Sequence:

TCATGCAACATTCAGATCACCTCTTTCAAATCCAACGATTAATACTTTTAATTGAAAATAT  
GATAACGTGTCAAATTGTTCTTTGTAAAATTTAATCGTTCCGCCACGATGTTGTTGATAAA  
AATTCAAAAATTGCAGTTGATTTTCTTGTTCACATAATCATCGTAATTAGACATGTAACC  
TTTGATTAAGATTTCAAGTACATGATCTTCGATAGTATTGATTTAACTTGTGTTGAGCC  
GCTATATCTTCCATCGTGAATTGTTCAAGCAATCTTGTATAAGTAATATAAGTTTGGTTTA  
ATAATGTAGGTTTCATTATTTTGTATAAAATAGTATATTCTCCACTTTCTAATTCAAAC  
ATCATTATCACTAAATTATTCATTTTCGTATTCAAACAATTGCTGTTGAGATAGTTTTTCTAT  
TAAACTAACTTGTGCTCGTATACATTGGTTCATCATAGCCTTGCAAATAATAATGTAAG  
TAACATGGCCCTTTTAAAGTTATTGCTTTAAACAAGTTATGTAGTTCATTTTCAAATCAA  
TTTGTAGCTTGTTCCTTAATGTAGTTATAGACAATCTTTACAGTTTCTTGTATCTTATTA  
TTTTGAGAGATTGGTACAAAATGAAAACATGTTGTTTGGTATTAGACATGGTTTGCAC  
AATAGTTGAATTGCTTCAAATGTTTGCCCCATACTTTCAAATGTATATCTAGGATGCAACA  
TGATTTCCATTTACGATTAATTCAGTTATATTTTCTAAAAATAGCTCAAAGACGGATA  
TTTTAATAGTGGTAAACTGTGATATAATGACAACTGTTGTTGACTACAAGCGTCAAAAAA  
GGTTTGGTGAGATTTCTTACCAACTAAGATATTGTAATACTTTTATTTGTTTTATAGTTA  
AATGTTTGTGTAATGCTGTTTTTATAATGTGTTGCAA

### > **fer**

Function: protein coding sequence; ferredoxin (core genome, constant)

Best match: fer\_CC001-ST772\_118\_AJGE01000058.1[67331:67579:r] (completely identical)

Position: 036-contig\_189: 85396 ... 85645; Length: 249 bp

Sequence:

TTGGCAAATATACAATCGTTGATATGGATACTTGTATTGCATGTGGTGCATGCGGTGCA  
GCAGCACCAGATATATATGATTACGACGACGAAGGTATTGCTTTCGTAATCCTTGACGAT  
AACCAAGGTACTGCAGAAGTACCTGAGGAATTATATGAAGATATGGAAGATGCAATTGA  
TGGATGCCCTACAGATTCTATTAATAATTGCAGACGAATCATTGATGGGGACGCTTTAAA  
ATTTGAATAA

### > **A5IT12**

Function: protein coding sequence; putative membrane protein (core genome, constant)

Best match: A5IT12\_CC001-ST772\_118\_AJGE01000058.1[66680:67225]RC (completely identical)

Position: 036-contig\_189: 85750 ... 86296; Length: 546 bp

Sequence:

```
TTAAATTCTTTTCAAGAAATTCGCAAGCCTTCTATATAGTAAAATAAATACAATAGAAAT
GACGATACCTTTAATAATATTGAATGGTATAATTCCTGAAACAATGATTACTTTAAGATTA
TTTGCGATATCAGCTAAGTTAAATATCATACCGTACAAAGGTAATAGAACGAAATAGTTC
AAGATACTCAACACGATAGTCATAACGATTGTTGCAATGATTAATCCAGTAATCAAAGAT
TTTGTTGAACGTTTATTTTTATAGATGGCGTAAGCAGTTAATAAGAACTTGCGCCTGCTA
AAAAGTTAGCAAATGGTCCAACCTGGATCGCCCATACTAAATAAGTAGTTCAATAAATTTT
TAACCAGTGCAACTACGATACCGGCAACTGGTCCAAACGTAATGTAGCTAGTAGTGACG
GTACATCACTAAAATCTAAAGTTAAGTATGGTGGCAAAAATGGTATAGGAACTTGATAA
AAGTTAACACAAACGCAATCGCGCTCAACATACTTATTGTGATAAGACGTTTATTTTGTG
CAT
```

### > **fmn-L1**

Function: noncoding RNA FMN riboswitch/locus 1 (core genome, constant)

Best match: *fmn-L1\_CC001\_MW2-USA400\_BA000033.2*[1525657:1525791:r]RC (completely identical)

Position: 036-contig\_189: 86357 ... 86492; Length: 135 bp

Sequence:

```
CTCCATCTTCTCCCATCCAGACTATACTGTCGGCTCTAGAATCTCACTAGATCAGCCACTA
ATATGATACATACTAGCAGGTCGCAGGCTTAATTTACTGCCGGTTGGGAATTACACCCGA
CCCCGAAGATGAAT
```

### > **graD04**

Function: protein coding sequence; putative lipoprotein (core genome, variable)

Best match: *graD04-MW2\_ref\_CC001\_MW2-USA400\_BA000033.2*[1526005:1526919:r]RC (completely identical)

Position: 036-contig\_189: 86705 ... 87620; Length: 915 bp

Sequence:

```
TTATTCATGATTAATAACACCTACTTCTATTACATCCTTCTTACTATAATTAGGTCTTGTTG
TATTTATATATTTATTAGAAATTTGAAGAGAAACATTCAAATCATGAGGAATATTCCTTTT
CTTTTTTAGCACTTCAGAAAAATCAATCATCTCGTCTATTGTATTATCTTTAGTAAAATTAT
CTTTAGTACTAAATAAAGTTGTAACAACATATGGACGTGATTTATCTTTAAGTTGTTTTTT
TGAGTTTCTCATACCGTCCCTAAAAGACTTATCATCCTCTTTGATTAAGGGTTGAAAATAC
TTTTTATATTCATCTAAAGTATATGGAATTGCAGTCAAATAATAACTCATTTCTAAAAC
CACTATTCTGCGTTTTTCATAATTGCATTTTCAGTATAACCAGTATATTTATATTTACTTTTA
TATTCTTTTAAAACCTTCTGTTAAATTATCCAACCTTTCCTTATGTGCTCGATATTCAAAGCC
ACTCAACACTGTACCAACTAAAGTACTCATATCATCGCCTTTATCCTCACTTCTTAATGAG
CTATCACTGTCAATAATTGATTTGTCAAATGGAATACTCGCATTAAATACGATATCGTGGT
CATCACAATGCACGTATACTTCTACGCCGTCGCCACTACCTACAACATTCGTAGCTTTAAC
TTTTAGACCGAAGTTATCCATAAAAAAATTGTTTCGCCACGTTTAGCAATTTTATCTTTATGC
TTCTTCGCAAATTC AATCGCATCTTTTTCTGCAGGTGGTTGGAAGCCTTGACCTACATATT
TTGAAGCTTCCATTTCTTCTGGTACTGATTTTGTTCCTTTATTAGATTCGTTATTGGTAGTT
GAACATCCTGATAGTATTATCGTTGCTATTAAGATTAGTTTAATTCTTTTAAACAT
```

### > **graD03**

Function: protein coding sequence; (core genome, variable)

Best match: *graD03-Mu50\_CC005\_21172\_AFEF01000006.1*[385055:385951:r]RC

Position: 036-contig\_189: 87590 ... 87620; Length: 30 bp

Sequence:

```
TATTAAGATTAGTTTAATTCTTTTAAACAT
```

### > **graD02**

Function: protein coding sequence; (core genome, variable)

Best match: *graD02-COL\_CC008\_NCTC8325\_CP000253.1*[1461363:1462280:r]RC

Position: 036-contig\_189: 88564 ... 88594; Length: 30 bp

Sequence:

TATTAAGATTAGTTTAGTTCTTTTAAACAT

> **A5IT17, disrupted - upstream fragment**

Function: protein coding sequence; putative protein: disrupted - upstream fragment (core genome, variable)

Best match: A5IT17-

CC1\_ref\_CC001\_MSSA476\_BX571857.1[1554595:1556757:r]RC#[2\_150ANF&END]#A5IT17#[CDS:putative protein]#[cv:54.602:54.2126] MANUAL OVERRIDE

Position: 036-contig\_189: 89647 ... 89782; Length: 136 bp

Sequence:

TTAGTATACAGCTAGTTTTCTAATTGTTCTTAACTTGAATTAAGTTTGACCGTATTAGA  
GAGGCAGATTGATCCATCGTTTGAATTGCTTGTCTTCATTTTCGTTCAAGCCATTACAAA  
CAACTTCAAACGT

> **attB\_phiSa2-1**

Function: attachment site of bacteriophage (mobile element)

Best match: attB\_phiSa2-1\_occupied\_CC001\_MW2-USA400\_BA000033.2[1529083:1529151]  
(completely identical)

Position: 036-contig\_189: 89783 ... 89852; Length: 69 bp

Sequence:

TGTGCCATTTGATCAAGACGCGCATGAGCTTGTGTGTTTAAATAAACATATCGTCATAA  
TGTGATGGT

> **tx\_lukF-PV**

Function:

Best match: tx\_lukF-PV\_ref\_CC001\_MW2-USA400\_BA000033.2[1529274:1529329:r]RC  
(completely identical)

Position: 036-contig\_189: 89974 ... 90030; Length: 56 bp

Sequence:

TTTGCCCTGAAAAATAACCACGTCAATTAAGACGTGGTTACCCTAATATAGAAAG

> **lukF-PV**

Function: protein coding sequence; Pantone-Valentine leukocidine F (mobile element)

Best match: lukF-PV\_ref\_CC001\_MW2-USA400\_BA000033.2[1529381:1530358:r]RC (completely identical)

Position: 036-contig\_189: 90081 ... 91059; Length: 978 bp

Sequence:

TTAGCTCATAGGATTTTTTTCCTTAGATTGAGTATCTATTAATTTAACTGTATGATTTTCCC  
AATCAACTTCATAAATTGATGTATGAGTTGCTCTATTTTCATCTTTATAATTATTACCTATC  
CAGTGAAGTTGATTCCAAAAGTTTGTATATCTATCCATTTCTCTTTGATAAGTAACAGTAA  
TTTTTGATTTTTTTGCAGCGTTTTGTTCGAGATAGGACACCAATAAATTCTGGATTGAA  
GTTACCTCTGGATAAACTGGCATTGTTGTGATATCCAAGAAGTTTGTCCAGCATTTAAG  
TTGCTTTGTCTTGAGCCTAAAACATTTTCATTACCATAAGTTGAATGATAACTATCTCTGC  
CATATGGTCCCAACCATTATTCATAATTTTATGTGCTTCAACATCCCAACCAATTTTTTTG  
AAATTAGTTCTTTTATCTAAGCTAGTTCTATAGCTTTCTTGTTTATAGTTAATTGTCTCTGA  
AAAAGATTTTGAACCATTACCTCCACCTGATAAGCCGTTAGAGATATTAATATCTCCACC  
ATAAGAATAACCTACCGTTTGTGTACTTGAAATTTCTCATTTTGAATTTTAGGTGCATAA  
TCTACAACGTTTACTGAGTCATTAGAATCTGAATTAATTGAAATGTTGTACTTAGAACCC  
AATAAAATTGAGAACTAATAGTGTCTTTTGGATTTGGCTTTGTATAGCCAGAATAAATGTT  
TCCAGCAGCTTTGAGTATTAATGTATCTTTATCATAACTTTTATCTTTAATAAAATTA  
GTTAAAATCTGAGAAATTTTAACTTATCGGAATCTGATGTTGCAGTTGTTTTGTACAAAG  
TAATTTTATCATCAACTTTTTCTCACTTACAGGTGTGATATGTTGAGCTGCATCAACTGT  
ATTGGATAGCAAAGCAATGCAATTGATGTAACAACCTGATGATTTGACTATTTTTTTCAT

### > **lukS-PV**

Function: protein coding sequence; Pantone-Valentine leukocidine S (mobile element)  
Best match: lukS-PV\_CC001\_CIGC128\_AHVY01000005.1[221466:222404:r]RC (completely identical)

Position: 036-contig\_189: 91060 ... 91999; Length: 939 bp

Sequence:

```
TCAATTATGTCCTTTCACTTTAATTTTCATGAGTTTTCCAGTTCACCTTCATATTTAACTGTGT
AATTTCTGTTTACAAATGCGTTGTGTATTCTAGATCCTTCTAAATAACTATTGCCATAGTG
TGTGTTCTTCTAGTAGCATGAGTAACATCCATATTTCTGCCATACGTTATTTCAAATTCA
CTTGATCTCCTGAGCCTTTTTCATGAGAAACAGTTGCAATAAAATGAAGGATTGAAACCA
CTGTGTAATAATGGGGGTAATTCATTGTCTGGCACAAAATAGTCTCTCGGATTTTGACTAT
ATGGTTTATATCCAACAAATAAATTTGGATCATGTCCAGACATTTTACCTAATGATGTGAT
AAATGAATTAGCTTTTATTCCCATTGAACACTTTTTGAATTTTGTATGTTCTACTTCACTGA
TATAGTTTTGTTGATTATAACTAATTGTTTTTGAATAATTAATGAACCATTACCTCCTGTT
GATGGACCACTATTTAAATACCACCTATGTTATAACCTAATGTTTGACTAACATTTACTG
AATCTATTTTATTTTTAGGTAGATAATTTATTAATCTACATTGGGGTCATTTGTTTTGAGA
CCAATATTGTATTGGAAAGGCCACCTCATTGCTTTTATATGATCTGTGTTTTTGTAAATTGT
AATAAGTAGTCTTTGAATTGATAAAACCTTGCATTTTTTAAAATCAAAGCGTCTTTGTTATA
CTTTTTATCTTTAACAAAATCAAACCTGAATATTTTGTGTGACCCCCACTTATCGCTACTT
GTATCTTCTGTTCTTTTGACTACCTCAGCGCCATCACCAATATTCTCAATATTGTTATCAGC
TTTAGATTCATGAAACGAAGTAGCAATAGGAGTGATTATTCCTAACGACAATGTTGCAGC
TAATAGTCTTTTTTTGACCAT
```

### > **O80065**

Function: protein coding sequence; putative protein directly upstream of lukS-PV - leader-peptide of lukPV (mobile element)

Best match: O80065\_pseudo\_CC001\_CIGC128\_AHVY01000005.1[222512:222644:r]RC (completely identical)

Position: 036-contig\_189: 92106 ... 92239; Length: 133 bp

Sequence:

```
CTATAAATGTGTTTTTTTACTATTATTTTCGAAAAAAACCCGTTTCATTACCAAACAAATTAT
AAATAATTTATATTTTGATTGATAATAAACATAAAACCACGATATAGTTGACCATAACAA
CTTTTTAATCAT
```

### > **tx\_amidase1-phiSLT**

Function:

Best match: tx\_amidase1-phiSLT\_CC008\_TCH1516\_CP000730.1[1562363:1562418:r]RC (completely identical)

Position: 036-contig\_189: 92327 ... 92383; Length: 56 bp

Sequence:

```
ATTAATTTTAAATAATAGGCAAGTACCGAAGTACCTGCCTAAGATTCATCATATAC
```

### > **amidase1-phi12**

Function: protein coding sequence; bacteriophage amidase (mobile element)

Best match: amidase1-phi12\_CC001\_MW2-USA400\_BA000033.2[1531688:1533142:r]RC

Position: 036-contig\_189: 92388 ... 93843; Length: 1455 bp

Sequence:

```
TCAAACCTGCACTAAACTTACCAAACTGCTTATTCTATTACCTGCCTTGTCTACCTCTCCT
GTAGCAATATAACGACGTTGTCCACTATTAGCAATATAAGTAATCCATCTATACCCATTG
ATGCAATATGCGCCGTCATATTTGATTGTTGCGTTATTAGGTAATACACCTGTAATTCTTG
AATTAGTTGAATAGCCATCCCTCACGTTATTACCTTTAACATTGGCAACTGTGTAATAACC
AGTTTCTTTTTTATACGGTACATTATTTTTATCGGGTGTATAACCTGCTGGCACTGGCGGA
TTCTTTTCGTTTTTAACTGGTGTTTTAACTCACTAGATATCACACCACCGATAGGCTTACC
ATGAATCGCACCGGCTATTAATTTAGAATACAAGTCATAGTTTTTCTTAATCCAATCCATA
TCATTTTTATTAGTGATAAAACCTAATTCAGATAAGCGATAATTTATATTTATTCTGCTG
```

ATACGTTAACATTTAGTAAATCGTTACGAGGTGTTACACCTCTTATTTGTCCTAAATTATT  
TTTAATAACATCTTGTATACTTTTATCAATAGTATCTGCATTGAATTGACTTGAGATAATA  
ACATGCCACCACCTTGCCTTTCTCCTGCTGCGTCTAAATGTATTTCTAGAACAATGTCAT  
ACCCCTGTGATTTAACCCAATATAAGCCATAATCTTTTTTATTACCTACATTAACACCGTA  
TGCTGTATCTTGATACATGTCTTGTGATTGACTTGAGCCACCATATAATGCGACTTCATGA  
CCGGCATGTCTTAAATACTTAGCGATATTTGGCGTTATATATTTACGTATAAAAATCGCGTT  
CGTTTGTCCGTTTCCTACTGCTCCAGGATCGTTATAACCATGACCGGCTACAAGCATAAT  
TTTTTTAGGTTTAATTACTGCTTGTCTTTTTGGCAGTTGCTTGCTTAATAATGCTTTTAGCTT  
TATCCCCAACACTTACTTTGTCAGGGAAATTTAATCTAATAAAAATACATTGGGTCATCGTA  
ATAATGAACATGTCTTGTAAACAGTTTCAGGACCCCAACCAGGTTGCACAACGCCATTTGT  
CCAACCTTTACCATTCCAATTTTGGCCAAACGATGTGAAAGTGTTTAAATTTGCGCTCTCA  
ATAATTTCAACGTGTCCAGCTCCGCCACCATACTTCGACGGGAAAACGACAATGTCCAAC  
TTTTGCGGTAAAAGCTATCATAGTTTTTAATTATTTGCCCGTATTTTTCAATCCTTGCTTT  
ATTATCAAATGGAATATTATAAGCGTATAAACCTTGTAACCTTTCGCCTGTTGCTATCATA  
AAAAACATATTTGCGTAATCGTAACACTGAAATCCATAAAACAAATCAGGATTGAACTGC  
TTCCCTAATGAATTATCAAACCATTTTTCTGCTTGGTTTTTTGTTATCAACAT

### > **holin1-phiL54a**

Function: protein coding sequence; bacteriophage holin (mobile element)

Best match: holin1-phiL54a\_CC001\_MSSA476\_BX571857.1[1023464:1023766]RC +MANUAL  
OVERRIDE

Position: 036-contig\_189: 93853 ... 94156; Length: 303 bp

Sequence:

CTACCCTAAATCATTGTGTCGTTTCATATTCGTAGGTGTCATTACTTCTTTAATTGGCGCTT  
GCCCTGTTGCTTTTCTATACTTGTTCAGCTTTATATTTCTTTAGCTTTTGATTTGCCATT  
TACCTTCTTGAGATGTTGGATTATCTTTATATGTAGTATATAAAGCAACAACCTGTTAAGAT  
AATCGATGAAACACTTTCTTCATCTACTGGTATCGGACTTATACCTTTATTCGCTAAAAAC  
TGATTGACTAACGCTAAAATTAATACTATATATCTTGTTATTACTTTTGCATTTCAT

### > **sprFG**

Function: noncoding RNA small pathogenicity island RNA F and G (mobile element)

Best match: sprFG\_CC005\_ED98-hen\_CP001781.1892742:892952:r [4\_50ANF10END]

Position: 036-contig\_189: 94155 ... 94366; Length: 211 bp

Sequence:

TTTGTTTGCTCCTTTTATCCAAAATAAAAAGACGACTAATAAGCCGTCTATTTGATATTTA  
TATTATGGTGTGTTAATTTATATTTAGAAAAAGGGCAACATACGCAAACATGTTACCTA  
ATGAGCCCGTTAAAAGACGGTGGCTATTTAGATTAAAGATTAAATTAATAACCATTTA  
ACCATCGAAACCAACCAAAGTTAGCGATGG

### > **rli28**

Function: noncoding RNA Listeria sRNA rli28 homolog, locus 2 (core genome, variable)

Best match: rli28\_L2-1\_CC001\_MW2-USA400\_BA000033.2[2051199:2051377:r]RC (completely  
identical)

Position: 036-contig\_189: 94395 ... 94574; Length: 179 bp

Sequence:

TTGATTACTAGACCTATCAATGCAATAAGGAATAAACCAAACCTGCAACATGGTACTAATT  
GTAATCATTAGGCGTCTCCTTTCTAAAGATTTTCAGTAATGCCACCATAGGCACCACCTCCT  
TATACTCAGATAGCCACCATCTATCCAACCTTGCTCAAAGCATATTATAGCACATATAC

### > **txpA-phage**

Function: protein coding sequence; toxin involved in plasmid maintenance

Best match: txpA-phage\_ref[BA000033]MW2-USA400\_BA000033.2[2051171:2051305:r] MANUAL  
OVERRIDE

Position: 036-contig\_189: 94400 ... 94535; Length: 135 bp

Sequence:

TATTTTTTTTATTGCTTAATTCAATAAGCTTGATTACTAGACCTATCAATGCAATAAGGAAT  
AAACCAAAGTCAACATGGTACTAATTGTAATCATTAGGCGTCTCCTTTCTAAAGATTTC  
GTAATGCCACCAT

> **entA**

Function: protein coding sequence; enterotoxin A (mobile element)

Best match: entA-FRI281A\_CC001-ST772\_118\_AJGE01000058.1[57550:58323]RC (completely identical)

Position: 036-contig\_189: 94652 ... 95426; Length: 774 bp

Sequence:

TTAACTTGTATATAAATATATATCAATATGCATGTTTTTCAGAGTTAATCGTTTTATTATCTC  
TATATATTCTTAATAGTGTATTTGAATTCTGTCCCTTGAGCACCAAATAAATCGTAATTAAC  
CGAAGGTTCTGTAGAAGTATGAAACACGATTAATCCCCTCTGAACCTTCCCATCAAAAAC  
ATCAGAGTTATATAAATTATATTTTTCTGTAAATAACGTCTTGCTTGAAGATCCAACCTCC  
TGAACAGTTACATTTTTCTTATTCGTTTTAACCGTTTTCCAAAGGTTACTGTATTTTGTACC  
GTCTAGCCATAAATTGATTGGCACTTTTTCTCTTCGGTCAATCGATTATTATCATGTAAC  
GTTACACCACCATAACATGCAAGCTGTTTTGTTGGTGTACCACCCGCACATTGATAACCAT  
AATAAGCACCATAAAGTCTACTTTTTCCCTTTATATTTATCAACAATATCCTTTGAATC  
AAAATCTACTAATAAATCGTTATAACCATGAATGATTTGTAAGAAAGCCTTTAAACAATAT  
AGTATGCTGTAAAAATTGATCGTGACTCTCTTTATTTTCAGTTTTAGCTTTTTTCATTGTAAT  
AATAGATTTGTTTAAAGATTGCCTAAAGCTGTCCCTGCAATTCAGACTTTTTTCGCAAATC  
TTTTTCATTTATTTCTTCGCTTTTTCTCGCTACCATTACAAGTGGACTTGTTGTCCACGTTA  
GGCAATGAATAAAAGTAGTATAAATGCTGTTTTTTTCAT

> **minor-phiNM3**

Function: protein coding sequence; bacteriophage minor structural protein (mobile element)

Best match: minor-phiNM3\_CC001\_TCH70-ST1\_ACHH02000016.1[79909:83694]RC

Position: 036-contig\_189: 96751 ... 100537; Length: 3786 bp

Sequence:

CTATCATTCATTTATTAATTCCTCCAGTTTTTCGATTTTTGATTGCTGGTTTTTAATAATAG  
GTATTAATGAACCCAAAGTCTATCGTATGCGATACCTTCGATTTCTCCGTTGTCATCATA  
AATAACAAATTCATTAATCCTAATTCCTCAACCTCTTCCGCTATTAAGCCAGTATGTCGA  
CTAAGTTTAAAAGTATCATCAGATAACTTTTTACCCTTTCCAATTCTTTAGCCATTATTT  
CGATTCATATTTGTCAAACCATGTACGAATTGGAAGCTTTAAAATCTCTTTTGAATGACTG  
AACTGATCGTCTTCATTGATGTATTGGTTTTCGATTGAAATTTTATACTTTTTGGCAGAAG  
TAGCACGCCCAATTGTTCCAGCAGAAGTAATGTGTAAGTTAGCAGGTGCTGAATAAGTAC  
GCTTATAAATAGAATTAGAAGCGACTCTATCGCCAGCATTATCAGAACCTACCGCCAATA  
AATCATAACTTTGAATGCTAACGTAACCTATTTCCATCTCTTCGTTTAACTAAGTTGAATTT  
GCCATACTGATTCAATTGTAGTGTCTCCGCTGTAGCATAGTCACCATTAACGACTTGA  
ACCAATCCTTTATTGCTACGTTTAGAAAATCTTAATCCAGCACCGTACTTATAGTTTTCAT  
CTGAACCAAACATGATATAACCGTCAGTTTCGTATGCACTATCAGCGTTTGATAATGTGA  
ATGCGAATCGGTTTAAACCAGGTTATTTTTGGTGTTCGGAGATAAATATATCGGTGCTTC  
TCTACTTTCAATATTAGCTGAAGCATATGAATCGATAAATTCGGTTGTAGTCAGATGTT  
AAAGCGACTACACCGCCATAAGAATTGATTGTTATGCCATTCATACCACTATCACTGTAA  
GTTTTATCCCACCATTGAATAGTACCGGATGAACCTCCGTCTTCGCTTCTCCATCAATAT  
ATGTTGAAATACCAAATGTGACATATAAAGTGAACCGCCTGCGGTATTATTTCTAAACC  
TTAGATGTCCATCTTTAAGACGTGTGAATATATCATCGGTTGATCGTTTGCCTTTCCAAGT  
TCGTTGTACGATTCCGCCAAGTTCAATAAAATCATTTTGAACCTGTACATAACGGTTAGCA  
TTCCGCCTTTAATACCAATCTATTACATTGATGTCAAGACCTTCATTTGATAAGTTTA  
GGCTATTAACAATGTCATTTTTACCAACTTTGTTATTAATATTATTTGCGACTACATTA  
TTCTCTATTCGCTGTTATATCAACTTTATCGCCACTAATTTTACGCCATCTTTATCAATAG  
TATGTGAAGTAATCGCCCCATTTTCGTCATACCTTAAATAGATGCCTTTCATAGCATTTAC  
AGTGATGTCTGCTAACACTCTTGATAGTGTCTTTTAGAAGCATTAAACTCTTCTTTAGTA  
GTTCTTAATTTGATTTCCCTTACCATTTTGTATAATTTGAGAACCATAGCGAGTCAATGTTTT  
CCTCTGTGCATCTGTGCTTTCTTTGACCTTGTTGTCTGTATAAGCATTAGCTTTCTTTTCAG



CGTTTCTAGCCTTTAGTTCTGCGTTTTGTTTTGCCTCTTCAAGTTTAGCTTGAGCATCTTGT  
ATAGCGCGTTGCTCTTCTTCCGAAATTTACCATCAGCATAACGCTTGCGATTCTTCTCTTT  
AAGATCATCTTGAGCATCAATGTATGATTTTAAAGCTTCTTGCGCTTCTTGATTGCTTGT  
CAATACTTGCTTTAATCTCAGGATTATTGGACAAATCACTTAACTGGTCATCAGTATATTG  
TTTTTGTCTTCCAATCCGTTTTGATATTCGTTAACGTAACCTTATCTTTGATTTACCTTT  
TAAAGTCGTTCTCTCAGCTTCAGCAGTATCTAAACGTTCAACAATACCGTCTTTGTCTGTT  
TTATAGTCCGATGTTTTACATAGTCACGTAATTGTTCTTTTGTGGATTCTCTAGCTGCTTC  
AATAGCTGTTTTAACAACATTAGGTTCTCCGACTAACTGCAAATCTTCATTACCGTTAAA  
CCAAATTTTGTGCTATTATTTCCAACGCTTCTTTATATTTTTCATCAGTGTATTGTGACTG  
TAATAATTTAAATCTATCTGAAATGGCGATTTTAAACATCTTCTACATCTGTATAAACATCT  
TGTAATTTCTTTCTATACTCAAGAAATAAAGCTTGTGTATCTACCAACCGACCAATCGTTG  
CAGTTTCGGGTGTCATAGATTCTAAATATTTTTAATTTGATTATAAACATCAATCACAGC  
GTCTAAACTTGCTTGTAAGTCCGCTTTCAAATCATTATCTACTAAGTACTCGCTATTCAGT  
AATTCTGTAGCTTCTGACAAAAGACTAGCGTGTGTATAGATAAATTAATAAAAAATATTG  
TTAATTCACTGAATAGCGCTTTCTCTCTTGTATACCACCTAATTTTTCAACATCATTTGG  
TGTGCTTCAATCCATCGACCATTCCAATATCTACGCAAGACAGCAACATCAGGGTACTT  
GTATCATACCAAAGCATATCATTGACTGGATTTTCTGGCGGTGTATCACTTTTGTGTATTT  
TGCGTTCAAAGTATTCTAATTCACCATCTACAACATCTTTAACTATAGTGTTGATATTGCT  
AATATTATCGTTAACTTTTGATGTATTATGTTCAATCGCTTGTTAACTCTTCTCGTAATT  
CTGATTCTTTGAACTCTTTAGGTTGACCGAATGTATATGTGCTATTTTCTGAAATTATGTTA  
TATTCTTCGGCAATAACTTCTGCCTCTACATACAATGGCGGGTAAAATCTCTATGTTTTA  
CTCTGACTGTATACCAATTGATATAATCTCGTGC GGATACGTAACCTCCAAATCAGTAG  
AAGTAATCTCATATGACATAACTGCCGACTTACGTTTATTTAACTCTGTTTTGGCTAAAGA  
ACGCAACCGTGTTCATTCATATTTGATCATCTGATTGAGGTTGATATTTCCCAAATA  
TAACGGGTAGGTAAGTTGAATTGACTTTGTGCTTCGTCATCAGTCACAACCTAACTCTAAA  
CGCTTTCTTTGTCATTTTCAGGTCCCACAGCAATTAATGCTGTTTTGATTTCTGACATATC  
AATCTTCTAGTTAAACCAACCAATCTTTACCATACTCAATTTCTTTACCTTTGAATAAG  
CTGTTTTTCTTTTTGAGTACCACATATCTACCTTTGACGGTATTAGAACTAAGCTCTATATA  
AAAATCCAATACCATTTTATAGGTTGTACATAATTGCTTTAAACTTCATATCTAGTTGA  
TAAGAAGTCCATGACGTAGTACGTAAGCCATCGTATTCGGTTTGTTTCAGAACTTCCCAA  
CCTGTATCGCTCAACACATCTTTCAATGCTTCTGAAGTTGTCTTTTTCTCAAATTTGCCTGG  
TGCATACGGTTTAGCTGTTGTTATATCAGCAAGATAAGACGCTATACATTCTATCTGTG  
TAGCCGTCCATCGTATCTTGAACCCAGTTAATAAATAAATTCACGCCATTGTTGTTTGAAT  
CCCTTATAATAACACGATGTCGTTACGGAACCTTTTCAGCTCTTTCTGATGATATGAGCAG  
TTCAAGCATTTCTGAATTGTCATTAACATTACGTTTATGAATCGCTCTAACTAAGGAAGGG  
TCATCAGTAGAAAGGAAATCTATAATCTTGTCGTTAAAATCTAAAACATGTATCAC

> **Q8SDK3-phiNM3**

Function: protein coding sequence; putative bacteriophage protein (mobile element)

Best match: Q8SDK3-phiNM3\_CC001-ST772\_118\_AJGE01000058.1[50939:52423]RC (completely identical)

Position: 036-contig\_189: 100552 ... 102037; Length: 1485 bp

Sequence:

CTATAAATATCTATCTTGCCATTTAACCGTCGTATCAAAGACGTTTTTCAGGTTGTATGATT  
AATTCAGTGTACCCAGAATCAACATTGAAATAATTACTTCCAAACGATTTCTCGCTCAAC  
ATTGGTTCCTCATTGATGACAACACTTTTTGCTTGCATATCTATTTTACTAAATCACCTTT  
TTGTATAATGACATCCCTTGCGCCTTTTCGGTTTTGGTAGAATCTCCGATTGAATGAACCT  
AATCCATTCATCTCCATCCACTTATAACCATTATACTTCGCACTATAGATAGCTATGATAG  
AAGCTGGACGCTGATAAACTTACCGCCATCTATCCACTCTTTCTCATCCATATCAATAGG  
TTTACGTCTATCTGGGTCTTTAATGTGATCAAATTTCCAAGTTTTAATAGAAAATTTATTA  
CCTACTCTTCTGAGCCGCATATAAACAACGATTCTGTCCAAGTTATACATTATCGGTTTAT  
TCTGATAGTCGTATATCTTTTTGGGGTCTCCTTTTTGGTTATACAACGTAACAACAATATG  
TCCTATTTTTCTATCATGATATTTATTTTCATAACCAATAGAAGCAAGTAACTTACCATCA  
CTATCATAAATATGTTGTGCTGTTCTTCCGGCACCTTTACCTTTTTGTTCAACAATACATTT  
ATAGGTAATTTGAAAATCTGTCATCGCTTTAGGGAGCCCTCGTTTCGTGCCAGCACCAAC  
CCAACCTTTTGCATCAGGAAAATTAGTTGCTTTATATCTTCGCCAAGATTGGATATCACA

AAGTCACCGCCGACCTTACCACCTAAATCATTACTTGGAATATCTTCAGTAATCATCTTAG  
TCCAACCTTTGAAATCACGAACTCACTATGATAAACAGGAGGCATGTAATCCTTAACCTT  
CTTTGGTTACCTCATCATCACCAACCATAAAAATAATCTTCATCATTTTTAGTGATCATAAA  
GTAAGTAGATGGTTAATTGCTCGGGCTTCAACAATTAAGGAGTGTGAGCAGTCCCACT  
ATTTACAACCTGAACTTGGTCTGAAATCGCAGTATTTTTATTTCTGTTACTGAATATTTG  
TAAGGGTCTGTTAGTACTACTTTGATAGTGAACCTAACAGGTATTGTAATTTCTTTGTGCA  
GCTTTATTGGTCCTTCAAATAAGCGTTCCAGTACCAATCTTTAGATTTGAATTGTAATTT  
AACTTGTTCCTCGTAGTTAAAAAAGCTTTACTAATTCATTCAAGACGTCATCATATGTTTTA  
ATGCCGTTGTGAGATAAATAGTCATTACGTACCACTAAAGGTATATCAAACTATAAGAT  
TCAAGCCTACGCCCTTATATATAGCCCCGAACGTCCATCTACATTTTCTGTTTTTAAAA  
CATAATTAAGAGGGTATTTCAAACCTCTTTTCGACATACAACCAAGGAATTGTTTTGTT  
GTTCACTTTAATAGTGTCTATCAT

### > **measure1-phiNM3**

Function: protein coding sequence; bacteriophage tail length tape measure protein (mobile element)

Best match: measure1-phiNM3\_CC005\_04-02981\_CP001844.2[2051791:2056320:r]RC

Position: 036-contig\_189: 102033 ... 106578; Length: 4545 bp

Sequence:

TCATTGAATAGCAATTCCTCCTTTTCTAAACTTTACTTTTTGTTGATTCTTGCCTTTCTCGCTT  
TTCTATAGACGCGTTCACCTTTTTATCAAAAGCGTATTCGTCAATAATCGGCTGATAATCT  
TTATCTGCAATCACATCGTTTGATTGCGCTATTTTCAGTAATAAAGCTATTTGTTGTTGCTG  
TTGTTCAATCATTTTCAATAATAAGCTTGGGTCATCAAACCCATTTACACTAGACAATTGA  
CTAGGACGCTTATTTTTACTCGCTTTTCTCCCTCTTACTTCTGCTGCTGCATAATGTAACAT  
CTTCATTGCTTCGTTTTTACGTGCAGGATCAGTAGGAATAACCCACTCTGGATATCCTTCT  
TCTCCTAAGTGGTACAATCCGTTGTAGACTTTGCCACCAGTAGCATATGCGTAATCACCA  
GCGCGTTTGAACGCAGCTCTCCATGAGCCCGTTCTTGGTACCCATTTACCCACAATATATC  
TCATAGCCGATATAGCTTGATGAGTTGGGTTAAGAGGATTATTGTAACCCGACTTTGCGT  
ACGCTCTAAATGAAGGATCTATCATTTGGAACATACCTCTTGAAGGTGTACCAGCTCTTG  
CGTTGCTATCCCAATTATTAAGTGCATTAGCTGTATAATTGGATTACAGTCTTGCTACACG  
CATCATTTTCGTGTGTAATCCAGCTAGCTTTGTATTGACCTCCAAGTATATTTGAGCTGTT  
CTAATCGCTCTGCGCGCATTTTTCAGAACCACTCCCTCCAGGTGAATTCTTTCCACCAGTTT  
TGTCGTTTTTCCGTAACCAAGGAATAGGGTCTGTGCAATACCTATTGGACTCTCCGCTTG  
ATTGACTTGGAAATGTAAATGGCGGTAATTAGTCATAGAACCCTGTATTACCTGATTTACC  
AATTAATTGACCAGCTTTAATTTGTTACCTGTCCTACGCAATTGTTTCAGATAAAGTGCATG  
AACCACAAAAATGTTTCGACCTTTTTGAACAGTAATTGCTTTACCGCCACCATAGTTGTCAT  
ACCAACTTCTAACACGTCCACCCATTGGCGTACGTATAGGGGTACCGGTCGGCGTATCAT  
AGTCAACACCATGATGAACGCCTCCGTTAAATGGATAATTGGGGTTAGGAGGTTTTGGCG  
GTGCTGAATAAGGTTGTAGTATTCTGAACTATCAAACACAGAACCATCTCCCGCTTGGC  
TCTCTAATCCTTCTTTTATCCAATTAATCGCCTTACTTTTAATCTTATTCCAAGACGCTTTT  
GTTATATCGCCAACAATACCCATACCTTTAGTTAGAGAGCTAAAGTCAACACCAAACGCT  
TTGAGCACATAATTTAAAAGCTTACCCGGATTATCAATAAAGTCCATTACATCGCCAACCT  
TTATCGCCAAGCCATTTGGTACCTTTACCTATTTGATCTTTTGTCCAGTTAAATGCCAATG  
ATGCACTAGATTTAATATCTTTCCACATAGTAGTACCGAAATGAAATCTCGGAAGCGTTC  
CGTTTAAACATTGAATAAGTTTGTGCACCGTTGTATACTTTTGAGCCTTTAGGTAAATAAGC  
AGTAGTGTCTGTATTAGGTGTGATTACACGTTTACCGTTAGGGAATTCAATCATTTTCATTT  
CTAAAACCATTTGGACCATTTCCACGTCCTTTATCCCCAACTGTAGCGAATGTATCACGTG  
CAATCTTACCGTTCTTAACTAATCTTGTAGTAGTATGTGTGTGCTCTGTACCAGTGTGTA  
CCTAGGTATTTTCATCCATACCTAACTTACCACCGACCCAGTTTAAAGCCTTCAATTAATTTA  
TTAAGTCCTTTTTTAATAGCATCTACCATACCGCCGATATGATCTTTAATTTTACCAATGA  
TAGATTTTAAACCGTACGCATGTTTCCGAAGATATTACGTACTTTATCCCACAAACGACC  
AGCTATACCTACCGTGTTATCTTTAATAGAGTTCAGATGTTTGACATCCAATTTCTTAAAT  
TTAGTAAATATATCTTTTCGTCGCATTCCATAAACTTGTGAATTTAGACCTTACACCCGTA  
ATAACGAATGAGCCTTGGCGACGGTATTGCTTTTGTATATTATCCACGCATTAGATAACCA  
GTTTTTTCATATTAGTGAATAAGATTTAACAATATTGTATAAGAAACCAAAAAATACTTTTC  
GTTGCATTTCAAATTGCAGATAATGATTTTGTGAAAATACCTTTGACAACACCCAGATA  
CCGGATATTAACCTTTAAGCAATCCACCAAAGTATCTAACAACACCTAGAATCTTACCT

ACAAACCACAGTTGTATTAATTCCAAATTAAGTGCACAGTGCCTTTTAGTATCATCACA  
ATACCGTCCCAAACACCTCGCCAATTACCAGTGAATAAACTTGAAAAGAACTTAATAAAG  
CCAAGTATGATATTTAAAGCACCTTGTATTACTCCTTTTATATTCTCCCAAGTACTGACAA  
TCAAGGCTTTAACCGCCGGCCAAATAAATTGCATCACTTGCCAAATCGCAAACATGATTG  
GTTAATTACAAAATTTAAGATAAATTCAAATATAGCTTTGATAAAAATTGCATATATTTTG  
AAGCGCTTGAACAATAGAAATTCGGTTTTTCATTAAGAATCCATTAATTTGACTCCAAAT  
ATCTTTAGCGAAATCAACGATTGCTGAAACCGCTTGTTTAAAGACGTTTTTAAACGGAATC  
AATGAAAGGTTGGATAAATTGAATGAAATTATTAACGTTTGTTTAACACTGTTAATTGC  
ACCATTAACAAAATTTCTGAATGTTTCAGATTTCTTATAAGCTATTGTAATGCGACTGCT  
AAACCAGCCAGTACACCTAACACGATACCAATTGGACCAGTTAATGCTGTGAAGACTGTT  
CCTAAAATAGGCACCTTTAGTTGATAAAAACTAATCAATCCGTCAGCCTTTGCAATACTA  
GCTAATAATGGAGCTAATACAGTTACTGCGTTGCCAACTGTGCTTATGAATGCACCTAAT  
CCAAAACTACAGGACCAATTGCAGCAGCAATACCACCGAATATAACAATCGACCTTTTA  
GATCCATCACTTAACTTGAAAACCAATCAACTGCTACAGATAGCTTTTTGATTAATTCTT  
CCATGACTGGAGCAAACGCACTTTCAATAGAAGCCATACATCAGCACCTACTAATTTAA  
GTTTATTCATTGCTACTTTAAATCTTTTCGGAGCCACTTTCAGAATCTTTAAATGTCTGATTG  
ACCGTTCCTTGCGAATCTTCGATAGTTTTTAAAGAACTCTTGGTAACTAAAGCGACCGCCTT  
TAATAGCATCTGCTAAATCAGGACCTGCTTTTGCACCAAATGCTTCAATCGCTAAACTTGT  
TGCGCTAGCTATATCCGGTGTCTTTCAATTTCTGCTAATGTCTTCTTAAATCTTCTCTTG  
GGTCTTTACCCGCTTTACCCCAATTGGATATAGCTTTTTTCAAACCATTGAAGGCTATTTTC  
AGTATTAACACCTGATTTCTCCCATTTGAGAGAATAAAGCGATTGATTCTTTCATCTCAAAG  
CCATAGCCCTCATTGGAGCACCGTATTTAGTAATGCTATCAGCTAATGTATCAACACTTA  
TACCGCTAGCCTGTGCTGCTTTTCGCTACCATATCAAGTACACTTTGATACTCATCAGCTTC  
AATACCTGCATCACCCATTGCACGCGTAATTAATTGAACGGCTTGTACGCCGTCAGAACC  
TGTTATGTGACTAAATTTCAAGAATGACTCTGTGGCACTCTCAAGTTCTTTGCCAGTGAAA  
CCTAACCTTGTGTTAACTTCCCCTAAAACACCGCCTACAGTCTCAGCGTCTTCTGGAAAGT  
TGCCATAAACATCTTTAAATGAATTCTGCAACTTCTTAAGCTCTCCGCCGGTTGCTCCTGT  
TGCTTGGGTAACCTGTATCTAAACCTTTATCAACTTCTGCAAAAAGCTTTTCCTGATGCTGCT  
GCAATACCTAAAACAGGTGCAGTTACACCAATCATCAAACCTTTACCAATGGATTTTAAA  
CCATCACCCATTTTTGTAAATTTAGGTCCCATACTTTCAAAAACCTTTACTGGTTTTTCCCA  
GCCACTTTCTGCCATTCTTTGAGCTTCAACTTGAGCTTTTTTGAACCTTCAAACCTCAGTTG  
TTGTTTTTCTAGTTCTTTTCTAAAAAATTCAGCTCATTTGCTTGTGTTATATTCTTGTG  
GTAATTTTTGAGCTTCCGCGCTGTTTTCGCCCTGTTCTTGAGATACCTTGCCATATTGCTTG  
GCTAAATCATCAACGTTTTTCTTATAACCTGTGATAGTTCCATCAAGTTCTTTAATCCTTTG  
TTTGTAACCTATGAGTTGATTTTTCGGTATATTTGAAGTTGTTACCGGTTAACTTTAAGTCA  
GAATTTAAAGTTTTAAAGTTTCGTTTGATTTCTGCAAATGATCTATTTAAATTTGCTGCAT  
CTAAATCCAAACCTATAGATAAACCTTTTATTCTTTCTCCCAT

> **tailL-CC5**

Function: protein coding sequence; bacteriophage major tail protein (mobile element)

Best match: tailL-CC5\_CC005\_N315\_BA000018.3[2024201:2024845:r]RC (completely identical)

Position: 036-contig\_189: 107488 ... 108133; Length: 645 bp

Sequence:

TTACAAAGTTTCTTCGTTACCCTCTGTCACGTTTCCAGTATATTCTTCGCCTAAAATTTCT  
TTAAGAAAGCCTCTTCGCCTTTTTACCGTCTCCATCATGATTTGTCATGTTAGCTGAATC  
AAAGATATACTTACGTAAGTACTGACTTTTTATTATCAACTAAAGGGAAAAGTGCCTCACCTC  
AACCTCTTCACTTGAGAAATCCCAATCTTTCTCAGCCGTTTCTCCATCGATTTTAGGATTT  
GTAAACATAACTTTAGGTAATAAACTGTTCTAAATGTACCGTCTCTACGCTCTTGTCTGA  
ACCATACAGCTACGTAATTGTTTTGTTTACCTTGTCTTCTTCGTAAACGCCATCTTCATCA  
TAATCTTCATTAATAACAATTTTGCGAATCTCTTTAGGGAACGCATGCATTTGTAATGAGA  
TTTTACCTTCTCCGTCTGTATTCCCTGATTCAATTGGACCAGCCATCAGCATAAGCTGTTTTT  
AGTTCTCCACCAGTTTCAACACCAATTTTTGTAATCCTCTTGTTTTTGTAATATCACTATA  
TTTTAATTCGCGCCTTCTTTTCGTTAATTTAGCGAAACCTAAACCAGTAATGTTAATATAC  
GCCTTTGGCGCACTTGCATGTTTTACTGCCAT

> **A0EWZ3**

Function: protein coding sequence; bacteriophage major capsid protein (mobile element)  
Best match: A0EWZ3-phiNM3\_CC005\_Mu50-VRSA\_BA000017.4[2103511:2104656:r]RC  
(completely identical)

Position: 036-contig\_189: 109862 ... 111008; Length: 1146 bp

Sequence:

```
TTATAGTGTTCCTTCGGTACCTTCTAAAGCTGGCTTATGTCCTTTTAAATCTAATTTCCAAA  
CAGCAGCAACTTTATTATCTTTTCGCTTTGCCGTAAGCAAATTGTTTTGCAGTGTATAAATC  
CATATCATCTAACGCAAGTGTTCCTTTAAATTTCTGAACATTAATACCACCAGCTAAATAA  
CCATCATATAAACCTTTAACGTACGTTAAAACCTTACCTGCTTCTTGGACTGTAGACTCGA  
TAACATTCAAATTAATGGTAAAGCAGTAACATATACGCCATTTGCATTTAAATGTGTAT  
ACTGTGCTTGAACCTCAAAGCATCGGACGGATTAACAACCATTGTTACATTACCTTTAA  
CCGCTACTGATTTACCTTTCTCGTTAGTTGAGTGGTATTTAAACACTTGCGTCAATTCATT  
AACTGTAGCGCGCGGATTAGCAAATGTAAGCGTACCTTGTCTTCTTCTCTGGATAAGCA  
CCCTCAGTTACCGATACACCTTTTTGTACTTGACGGTTAAGCCGATTGGTTGGTCTTTAC  
CAGTACCTTTTAAGAACGCAGTTTCAAGCGCCACTGCAAATGCTTCTTCGATTTGAACAC  
GAACAAATCTTTCAATCCACGCAGGACCAAATCATTTAAATCTTTTGGTAAAACAACAA  
ACGCTGTCAATTTATTTGAATTGCTGTTTCTTCACTGAACGCAGCATCTAATTGACCTTT  
AATTTACCATAGATTTTACCCCAAACGGCTACGCCAGAAGTTTCAGATTTTAAGAACTTC  
AAACGCAAACCAGCGTTTTTAATACCTAAATCAGCTAATAACGGATGATTCGTCGTCAA  
TCTTCAAAAATTCTATCAATTGTTTCTTCTGGCAAAGTTTTTCTTCTTTATAGTTAACGTT  
TTTATTGATATCCATGAAGAACTTCTTTGGTTTGCACCTCAAAGATTGTGCTGATTTAGGT  
AAACTAGAACTCTTTCAGCTTCTGCTTTTGCTTGTAAATTTAGTTTCTTCAAATAGTTGGT  
AATCATGTCACCGTACAATTCATTTTGTCTTTCTTGCGGTTCACCGTTGTTTACTGCATTAA  
TAAATTCGTTTTTCGCATTTGCGAATGTTTCCGATAAATTTATAGTCAT
```

> **Q6GF91**

Function: protein coding sequence; putative protease (mobile element)  
Best match: Q6GF91\_CC005\_A9299\_ACKH01000012.1[7311:8048]RC  
Position: 036-contig\_189: 111031 ... 111769; Length: 738 bp

Sequence:

```
TTAAAAAAGGAATCTTGAAAATCCATTTGCTGATACTTTACTATCTGCAACATCGATTTCT  
GATTCCTTTTCTTTCATATTTATTTTTCAATTACTTTATTTGCTATTGCGTCAATATCAATG  
TTAACCTCTGGCGTTTTACTTACCAAAGCTGTTACACGATTTAATACATCTTTCGATAACA  
CTTGTGTATTGCTTGCTACAATTTGCATATTGTCGTTTTCAAACATTTTACTATCCGAAAA  
CCTTGTTCAATGGCTTCATCAGCATTAGCCACGTTCCCTAGCCATCATTCTACAAGTT  
CTTGTGTTGTTTTACCAGCTCTAACCGCATATGCCGCAGCCATTATTTGACCAACATGTT  
TAATGTTTCTGCAGCATGATTTAGATCTTTCGCTTCTCCTTGCGCAATACTTGAAGGATTG  
TGAATCATCATTCTAGCAACCGGACTCATTTGATGTGGTCACCAGCCATTGCGATAAGC  
GATGCCGCACTTGCTGCTATTGCTGTGATACGAACATTCACCTTGCCTTTATGAGCTCTTA  
AATGTGTATATATTTCACTACCAGCTACTAGGTTACCACCATTGAGTTAATTATAATATC  
AACATCTTCATCACTAAATTCTAGTTGTGTTAAAACATCTTTAGGACAAGTCGAATCCATA  
CCAAGCATTTGTAACCCATTTATCTTCGTTGGAAACGATGACGCCTTTAATCTCCGCTT  
TCAT
```

> **portal1-phiNM3**

Function: protein coding sequence; bacteriophage portal protein type 1 (mobile element)  
Best match: portal1-phiNM3\_CC005\_Mu50-VRSA\_BA000017.4[2105401:2106588:r]RC  
Position: 036-contig\_189: 111752 ... 112940; Length: 1188 bp

Sequence:

```
TTAATCTCCGCTTTCATCTTCATCACCACTTTCAAAGTGTTCATCTTTTTCTTTTTTCATC  
ATTTTCACCACTGTTAGCTTTTTTCGTAGTTTTTAGTAATCAGGTATTCGTCTAATTCAGGAT  
TGCTGATGATTCTTCACCTAACATAATCCGCACCTCATTCTTGTAATGAACCAGAACT  
TACAAGTTTGTCAATTGCTTCAGCATATTGAAGTGGGTCTTTTTTATTACACCGACAATT  
TCTATTCTTGATCTTTCAAATACATACTTTGTGTTATGAGTTTCGCGTTAATTCGTTCTG
```

AATCTTTTTTAATAAAGGTGTTAAACAGAACTTCTCAAATACAAGCGTGTTTTTTTCCAAA  
TCAGCTGTTTCTCCGTAATCAAACCTGGAGGTATACCAATCATCAACGCAACATTTTTTA  
TTGCATCTCTCATTAGCTCACTCAATTGAGAAAAAGGCATGTTACTATTCTTACCACCATT  
AGATAATTCCTCATAATCAAACCTTCTATCAAAGGCGCGATTGCTAGTTGATTTTTATTA  
AAAGTATTGAATAATTTATTTGTGAACGCTTGTAATTTTTCTATATTCTTTTCGTCATATGC  
GCTAGAGGCAGATTTCAAATCCCTCTTATTTGATAGTTTTTTAATTGTGCACCTATCATT  
CTTCCGAATATTTTCCCGTAATCTTCGAATAGACTTTCTACAAAGTGTGTCACTTTATTGTT  
GTTGTACTTTAAATATATGACCTCTTGCATTGTGAAAGTACGTTGATAAGTATAATCTTTA  
ACCGTTACATCTTTGAATATATCATCATACAAAGCGTACTCTTCTCTGTAAAAGCTATCTG  
CGATAAGTAATTCTTTGCTGTCACTTACTACGATTAACCTCGTTATCATAAATTAGTTT  
ATATATAACTTGTTGCCAAAACCTATCGCTTGATAAGTCAGTATTTGGTTTTATATTTAAC  
TTGTAGTAAACATCATTCTTTTGAATTCTATTACCTTCCAATACTTTAAAATGACTTTGAG  
CGACAGCTCGCGCAACAAATTCAATACAACCTATCAATCGCTAAACGTTTCACATACGCTT  
GTTGTGATAGATCTTCTATCATATCTAAATCAAGCATATATGTTATATCTTTCCTAGTTTTA  
AATATCTTTTCTAGAATACTCAT

### > terminase-phiNM3

Function: protein coding sequence; bacteriophage terminase (mobile element)

Best match: terminase-phiNM3\_CC005\_Mu50-VRSA\_BA000017.4[2106604:2108265:r]RC

+MANUAL OVERRIDE

Position: 036-contig\_189: 112955 ... 114617; Length: 1662 bp

Sequence:

TTAGAAATCTATACTCATTAAATGCATCAAGCGCTTTAGACATGTCTTTGTCTACTATATCG  
TCTGCTCTATATAATGCGTGAACAAAAGCCATGAACCCATCGGTTTTTCTTCTATTTTCAT  
CTTTTTTAATATATTCTTTATTACCATCGGGTTTAACTTTACTGCAACATTATTAGTAAAC  
CAACGCATCAAAGGATTGTCTCCATATATTACGTTATGTTTCGCAAACATTGTATCGATAC  
GTGGTGCAAGTAATCCATGTATTGCTTTTGGATTTCTAAGTACTTCAAGTTTTATGCCAGC  
ATCCTCAAACGCACGTCTTACAATATCAGTTCTATAATTATCAGCTATGACTTTTTCAAGC  
CCATATTTTTCTCTAGCCTTTAAAAACCAATCAACTATATATTCAATTTCAATGACATCAT  
CATCGACAATGGTCAATAATCCCATTTTTTCCCATTCTTTAATAGGAGGTTCTAATTTGAC  
ATCATCCAAAACCCCTTGTCTTACAAACGAATGTCCTAACCAAATGTAATCATCGTTTTTT  
CGGAATAATAGCCCTACACTTGCAAATCTCGAATGTTTGCAAAGTCTAAACCACCAATA  
CACATTTGATTATCTAAATTTGGTATCTCTCTATTAGTCGCTAGTATTTCTTCCATGGTGC  
TATTACTTTTTCAAGGTCAACTTCAGGCAAATTCATTCGCTTAGTCATGAATTCGGGCTTA  
TTTGAACGGTTGAATGGTAAATCGTTATATTCTTCTTCAATCGTACTTAGCAGTGTTTTAG  
CGTATTCTGATAACGGTTTATGTAACATTGGGTTTCGCCTTTTCCCACGTCTGTCTGTCATC  
AACTTCTTTTGGATCGTCTAACTTACAATAAAAAGCAAACAATCTACTATTTTTAACCTTG  
CCACTTAATACACTTGCAATTTTTGTGCTTCATTGCATCGATATAACCCTCTTAACAAAAC  
CATCAGTACTTATATAAAACGTTCTTCTATTTTTCTTTTTACCTAATCCACCACGTTTGACG  
TTTACCATTTCAAGGACCAAAGAAATAATGAATTCATCAAAAATAACACACCCCTCACGT  
CCACCGTCTTTGGTTTTTGTGTTTGTGTTATATCGAATAACCGATTTAGTTGCACGGTT  
TATTATTTTTGCTTTACTAACTTCATAAGGAGCTTTTGGCGTTTTACCGTCTTATTTGCTT  
TGTTATCCATTAACCGTTCTGATTTTCATCAAACGATGTTTTTGTGCTGATCTTCACTATTA  
GCAACAATGGAGATGTGATATTCTTTAACTCCGTGTAAGGGCGTAGAAAGAAAATCACTA  
ATAGCACTTATTAGACCGTTTTTCCCGCCTCCACGTCCCATGAAAATAGCAAATTCGTAA  
AGAAAGCTTCATCTGTATTTTTATCTATAAGAAATATATTAGCTATGATAAACCTTTGAAA  
TGGTAATGTTGGAAAATACCAATTTTCAATAAATTTGATACAATCCTCGATTTTCTGTTCA  
TCAAAAATATACATCATCTCGTGAATATATATGTTTTTGTAGATAATTAAGAGATCAATTC  
TTTCTTTATTTAAAATTATCTTTCCTTGTTCACAAATTTATATATTCATCAACGTATTTA  
TTACTTATCAT

### > rinB-phiPVL

Function: protein coding sequence; bacteriophage transcript activator B (mobile element)

Best match: rinB-phiPVL\_CC008\_TCH1516\_CP000730.1[2111630:2111779:r]RC (completely identical)

Position: 036-contig\_189: 116263 ... 116413; Length: 150 bp

Sequence:

```
TCACTCACTTACCTCCGCTCGAAAGACGTAATCACTCGGCGCCTCTACATCATCATTAGCC
GTCATCATAATATACTTGCTCAGTTACATACTTACCTAACTCATAACATCGCTAGTAAGA
ATAATAATCTTAGTATTTGCTTAATCAT
```

### > **dut-phi**

Function: protein coding sequence; bifunct protein-dUTP pyrophosphatase and derepression of GI (mobile element)/phage

Best match: dut-phi12\_CC030\_MRSA252\_BX571856.1[2152883:2153425:r]RC

Position: 036-contig\_189: 117277 ... 117820; Length: 543 bp

Sequence:

```
TTACACTCCGCTACTTCCGAAGCCTTTTGCTCCACGTTCTGAAACACTCTCGAATTCCTCC
ACTTGCTTTAGTTCAGGTGTCCATATAGGCACGATAACCAGTTGTGCTAGTTTGTGCGCCTT
TGTTGATTTGGTAAACTCTTCTTATGCCTCTTCCATCTTGTACATAGTTACCTTTTATATCT
AAAATGCTTATTAATCCATCTTCTAATTCAGCGTCTATATCATCATATAAAAAGGGTATTC
CATCACGTTCTTCATCATTCTTAATATTAATCCCTAAATTGCCGTGATATCCGGCGTCTAT
CTTGCCTGTTTCAATCACTAAATGTGTTTTACTACTTACACCACTACGGCTAGTTAATAGC
CCGACATAGCCCTCTGGTATGCTTACAGCTACATCTGTTTTAATCACTGCCTTTTCTTGTG
GCTCAAGTACGACAGTTTCAGCTGAGAATATGTCATAACCTGCATCCGTCTTATGATTTTCG
TTCGGGCATTCTAGCATTCTGATAATAGCCTTACTTGTAATGTGTTAGTCAT
```

### > **sri**

Function: protein coding sequence; staphylococcal replication inhibitor (mobile element)

Best match: sri\_CC008\_Newman\_AP009351.1[1110173:1110331]RC (completely identical)

Position: 036-contig\_189: 120465 ... 120624; Length: 159 bp

Sequence:

```
TTAATATTCGACGATAGCGGGGCGTGTATGACGTTCTGCAAGTTTTTGGATAAATAGGTC
GTACAACCTATTTTCATCGCCCTGTGCCTCATCTATGAGTTTCTGAGCGTACATATCTGAA
CACTCAAGTTTAGTTTTTAAAAATTCTTTGGTTACCAT
```

### > **istB**

Function: protein coding sequence; replicative DNA helicase (mobile element)

Best match: istB-phiPV83\_phage\_FJ713816.1[12631:13404]RC AND istB-phi53\_CC005\_04-02981\_CP001844.2[886487:887266]RC:

Position: 036-contig\_189: 120617 ... 121397; Length: 780 bp

Sequence:

```
TTACCATGTATCTCGCTCCCTGAAATCGTCTCCGATTACTCTTACTTTTTCTTGCATTGTGTT
TCATTCTTGAATTGATACGTTGCCAGTTCATATTTTGATTTAGTTCTTTATCACTAAAGTTA
GTTGTAAGATGTTGTTTTTACCTACTCTGTTATCAACAATGCTGAAAAGTTTATTTAAAG
TGTGCTCTGTGTTTTCTACACCATATCATCTAGTACAAGTAAATCAATATCACTTAGCAA
TCTGACTAGCTCGTCTGTAGTCTCTACTGCATTTTTGTTGTATGTCGCTTTGATACGATCCA
TCAACATTGGTATGTGCATAAAAGCAACCGTATGCCCTTTAGCTTTAACTGCTTTTGCAT
AGCGTATGCTAGGTGGCTTTTACCAGTTCGATGAACCTTGCAATATTAATGATTTTGGC
TCTTTTGTAGAGAAGCCTTGAACGTAATCTATTGCTGTTTGTAGCGTGTACTTGTTTTTTC
ATTTTGTGGCTTGTAGTTTTTACTGTTGCATCTCTTAAAGACGGATTAACGTTTGATTGA
TTGAATATGTTGTTTATCTTCCGTTGCTTGTTCGCTTATATTCCTCATAGATTTACATTT
GCAACCGTCTTTATACTCGTAACCATTCCGGGTGTTTTTTAGTAGGAGCAAATTATATAAG
TCGTATTCACTTCCACATCTCTCACATTTCAATCCTTTTTTCGACATGAGTAGGTTGATATTT
TTCAAGCTTTCGTTTATCTTTTCGCTGAATAGTGGTTTCAT
```

### > **Q4ZAK4**

Function: protein coding sequence; putative bacteriophage protein I (mobile element)

Best match: Q4ZAK4-phiSLT\_CC005\_04-02981\_CP001844.2[885707:886477]RC (completely identical)

Position: 036-contig\_189: 121406 ... 122177; Length: 771 bp

Sequence:

```
CTAATCCCAATAACTTTTCGTCGTAATTCATGCGTTCCAATTGATTCGTGCCAGTTGGTTGT
ATTTTTTGATTGAGGTACCCCTCAAATTTACTGCCAAAAGTGTCTTCTGGTCTAAGGTATT
TATCGCTATCCGTGTTAACCATTACAGCTGTTTTGATATCAATCACCTTTTTAAAATCCTCC
AACCTAAAATCTTGATTCCATCTTGCTTTAATAAAAATCTTTGTTTTAGCTGTATTATGTTT
AAAATGCTTTCCTGCTTTTTTATTTAAGTATTCGATAAATTTCTTTATAGGGAATGGAAGAC
ACCGTCGGGTTGCCCGACAATATACTTCCTTCATTATTAGTATTGTTATTATTAGTTAAAT
CATTATTAGTACTATTATTATTAGTAGTATGCGATTTACCATTAACGGTTTTTCCATTGTTG
GTTTTACCGTTAACGGTTTTTCCAACGTTGGAAAATCGAATGTGGTGCGGTTGCTCATATA
CTAAGTACTCATAACCATTTAACCTACCCTTTTATCACGTTTTCTACTACGTTGAATGTA
TCCAATTTCTCCAGTTCCTTGATTCCACTCTTTAAACCGCTAAGTCCATCAGTTGAATGTT
GCTCTAGTTCTGTTTCGTAATTTGCCAGTTATCAGGTCGACTTAACAAAATAAAGTAGAAT
ACCTTTAGCCTTCCAACCTTATATTAGAATCATGTATAAAAATCTTTGTGTACTGTGACAAAG
TTACCTGATTCTTTGTAAACTCTAAATGTTGCCAT
```

### > **ssb3-phage**

Function: protein coding sequence; putative DNA binding protein (mobile element)

Best match: ssb3-phiPVL\_CC008\_NCTC8325\_CP000253.1[2065949:2066500:r]RC (completely identical)

Position: 036-contig\_189: 123346 ... 123898; Length: 552 bp

Sequence:

```
TTAAAACGCTAAATCTTGGTCGTCATATCCAAATTGGCCACTGCTTTCAAATGGATTGCTT
TGTTGAGACATTGATGTTTGTGTTGTGCCCGTTATTTTCTTCAGCTTTTTGCTTATCTGT
CTTCGGAATAGGTTTGTAAACAACATCATCGCCCTTTTTGTAAGGTTTAATAAATGAAAAA
TCCGTAATAACTTACCTTCATCTTCATTGAATTTCCATTTCAATACCAAGTGACAAAACCT
TACCAATAAGATCATTGGTATCAAAATCTAAGCTAGGAAGATTTAACTTAATACCTAATC
GAGTAACTAATTCAATCAATTGTTTTTCTTGAAATCATATTTATACGGCGGTACAAATTG
ATTATGTTTATATTGTTTGCCTTCATCATTTTCAAATACGATTGTGAAATATCTATTTTCTC
TATCATTGAATTCAATATTTTAACTTTCCTACTGTGAATTCCTCAGCTTGAAACCCTGCTGA
GCCGTTATAAACTTTTCTTGATTTGTTTCTTTAGTAAATTGCGCTTGTCCTGTGATTTTCA
T
```

### > **DUF2483-phi80a**

Function: protein coding sequence; putative bacteriophage protein (mobile element)

Best match: DUF2483-phi80a\_CC010\_H19-ST10\_ACSS01000056.1[6024:6245:r]RC (completely identical)

Position: 036-contig\_189: 124707 ... 124929; Length: 222 bp

Sequence:

```
TCAGTCATGTTCTACCTCCTCATACTCAATTGTTTCTGTCACTGTTTTCTTGATTGCTTTGT
GCTTAGACATATCAATAACAGTTTTGTCTAGTCCGTCGAATTCCTTTCGCTCTCGCATATC
AGTTGAATACTTCACTGTATCGTTCACTTCGGTTGGTTCGGTTTGTAATAAATAGATTTTCA
TCTTTATGCTTGATTAGATAAGTTACAGTCTGCTTCAT
```

### > **ant-phiPV83**

Function: protein coding sequence; bacteriophage antirepressor (mobile element)

Best match: ant-phiPV83\_phage\_AY508486.1[26092:26889]RC

Position: 036-contig\_189: 127131 ... 127929; Length: 798 bp

Sequence:

```
TTAAGATGTTTGTTTTTCTCCTAAAACTTATTAACAAAGTATTGTTGTCCTTTGCCTGTTA
CTTTTGGTGTACGTGATACTTTACTTGAACCATCTGGATTATTAATTATTCGTTTTTTGATA
TCCAAGATTTTTAGATCCATACTCTTTTGAGTTGGTAAGTTATAACTTTCTCCACTCTTTTT
AATGAGATATCCATTATTTCTTAACCATTTGAATAATCTGTTTTGTCCTATATCCACACCG
TTTTGTTTAAAGTATTTTCGCAAGCTCTCCGACGAGTATTGAATTGTCGCTACCAGCTACTG
AGTCAGCGAATAAATACTTTTGGTTTGTAACTTCTACTTGCTGTTGTA AAAAGTAAGTTTTG
```

CTCTTTTTCTTTCTTATACTCAGTCAACACTGTAATGATGTAGTCTGGATCTTTTAATGTTT  
GTTCAATTACATTGTCTGTTGCGTAGATACCGTGTTTGC GAATAGCTGGTAGGACATCTGA  
TGTTACCCAGCGTTTGAATTTTCTAGCGTTTTCTCTAATTTTTTCGTTTTTGGCTTTGTTTGA  
AGCATCGAAGATTAGACTGTATAATCCTGATTCGTTGATAATGATCATATTTCTGTTTTGA  
CCTGATGCACTAAATTGGTGCGTCAGCTTGCCTCGCTATCAACATGATTTCTGATGGCAT  
TGTCTGTCCTTGCATATCCTAAAATCTCAGCAATATCTTTTCTACAAAATAAGGTTTCGTT  
TTCAATTTCCACTGTTCTTACTGGTAGCTCTTTAAAATTAATGTTTGTAATGCTTGCAT

### > **repressor-var3**

Function: protein coding sequence; bacteriophage repressor (mobile element)

Best match: repressor-var3\_phage\_AP001553.1[2342:3070:r] [4\_50ANF10END]

Position: 036-contig\_189: 128338 ... 129067; Length: 729 bp

Sequence:

GTGTTTCAGAAATATGAACAGTTTTTAAGGATAGATTAAAGCAAATTATGTCTGAACGGAAG  
ATATCTCAATCAGAGCTATCAAGAAGGACTGGTATTGGCAGAACTCAATTAGCGATTAT  
TTAAATGGAAAATATGAAGCGAAACAAGACAAAGTCTTTGAACTAGCAAAGGCTTTAAA  
CGTTAACGAAGCGTGGCTTATGGGTTTTGATATTTCTAAGAATAGAAAAATTGAAAATAA  
CGACATCACTTCCATATAACAACAACTCACACCTCCCCGCCAAAAAACGTACTTAACTA  
TGCAAATGAACAATTGGAAGAACAGAATTCTAAAGGAGATAACGTTGTAGATATTAATTC  
ATATAAACAGGAGAAAACCTCCAGTTAACGTCAATGGTTGCGTCTCTGCTGGTGTAGGAGA  
ACGTTTACACGATGAAACGCTATTTACTGAAATGGTTAAAGGACCTATCCCCACACACGA  
TTTAGCGTTAAAAGTAAATGGTGATTCTATGGAACCTATGTTTAAAGACGGTGAAATTAT  
ATTCGTAGAGAAAACCTACAATATAAGAATGGACAAATTGGTATATTCATCATTGAAGA  
AGAAGCGTACGTTAAGAAAGTCTTTGTTGAAGATGATAGATTGACTCTAGTTTCACTAAA  
TAAAGAATACGATGATCTACACTTTTACAGGAACGAAAGTGTGAGGTTAATTGGAAAAGT  
TATTTTATAG

### > **int1-phiPVL01**

Function: protein coding sequence; bacteriophage integrase (mobile element)

Best match: int1-phiPVL01\_CC001-ST772\_118\_AJGE01000058.1[20637:21842:r] (completely identical)

Position: 036-contig\_189: 131132 ... 132338; Length: 1206 bp

Sequence:

ATGTGGATTGAAAAATTTAAAAACAAAAATAACGAACTAAATACAGATACTACGAGAA  
GTACAAAGATCCATACACAGATAAATGGAAACGTGTAAGTATTGTCTTGAACAAAAATA  
CAAAACAATCACAAAAGAAGCTATGTTCCGTTTGAAGAATAAATAAAGAAAAACTA  
AACACAAGTCGTCAAGCGAATTAAAAACCTTTGACTTTTACGCGCTATTAGATGAATGG  
CTTGAATATCATATAAAAACATCAGGTTCAAAGTTGACTACTCTTAATAATATAAAAATA  
AGAATTAAAAACATTAACGATACTGCTCTGAGAAGTTGCTTTTAAACAACTTGATACA  
AAATATATGCAGATATTTATTAATAAATTATCAGATATCTATTCTCAAATCAAGTAACCC  
GTCAACTCGGAGATATGAAAGGAGCTATTAATATGCAGTTAAATTTTACAATTATCCAA  
ACGAATATTTGTTAACTAATGTCAAATACCTAAAAGAAGAAAAACAATAGAAGATATC  
GAAAAAGATGAATCTAAAATGTACAACTATTTAGAAATGAACCAAGTCCTACAGATACG  
TGATCATATACTAAATAATAAAGTTACACAAGCGAAATCGCATTTTAATTGCCAGTAT  
CTTAGAAGTACAGGCTTTAACTGGTATGCGCATAGGAGAATTACAAGCACTTCAGGAAAA  
AGATATAGATTTATTAACAAAACCTATCAATATAACAGGTACAATTCACCGCATTAAATA  
TGAAGAAGGATTCGGATACAAAGATACTACAAAGACTATAAGTTCAAAAAGAAGTATCA  
GCATCAATTCTAGAACCGTAGAAATTTTTAAAAAGATAATACTGGAAAACAAAATGTTGA  
AAAGATGGAATTCTAGCTATGTTGACAGAGGGTTCATATTCACAACAAAAAAGGAAAT  
CCTTTATGTAATAATCAAATTGCCAGTGTGCTTAAGAAAACCTACAAAAGCTTTAATATG  
AATAAGAAAGTTACCACGCACACATTTAGACATACACACATAACTTTATTAGTAGAAATG  
AATGTTTCTTTAAAAGCAATTATGAAAAGGGTAGGACATGTAGATGAAAAACAACAAT  
TCGCATATACTCATGTAAGTAAAGAAATGGATAGAGAAGTAACTCAAAAACCTCGAAA  
ACATTCCAAGTTAG



> **A5IT17, disrupted - downstream fragment**

Function: protein coding sequence; putative protein: disrupted - downstream fragment

Best match: A5IT17-

CC1\_ref\_CC001\_MSSA476\_BX571857.1[1554595:1556757:r]RC#[2\_150ANF&END]#A5IT17#[CDS:putative protein]#[cv:54.602:54.2126] MANUAL OVERRIDE

Position: 036-contig\_189: 132339 ... 134408; Length: 2070 bp

Sequence:

```
CTTAAATCTGCCCTTTTTTTGCCCTTATATTTTTTATAAGCTTTATAAAATGCTTGAAAACA
CTGGCATTAAAGATTTTCTTGGACTAATTATATCATCATAATGTGATGGTTCAAATATCAT
TTGTACAATCAAAGGCTTCATGTTCTTAACAATATCATCTAAATGGTTATCTAAAATTGGT
GACTGCTTTTAAATCATTAAAGAAAAGGCTCCCATTGCTTAAAGTATTATCTAATTCTT
CTAATTTAGTTTTAATATAAATTACAAGTTACATTAGGAATCAGGGACAAAATTCTTTCTT
TTTTACATTTAACATTTCAATTGCATGTCTTAAATTCTTACGTATTTTGGGAATTGTATTAA
TCAAATATTTTATTACATCGACAATTTTCGATGCATATTCATCATATATACCTTGAACATA
GTCTGCTATTTTTTTAATACCATCATCGATATGGTCTTTTAATATTTTCATTTTTCTTCCTAA
ATAATTAGAAGGTAAAGCTAGACCCTGCACCATATTTTCACCGCTATAATTAATTTGATA
ATTTCCATCTAAAATTGTTGCATCTTGTGCTTCATAAATACTTCTAATATCTGCAATTTGCC
TACCATAAATATCATTTTGATTTTTTATTTGCTGAATATTCTGTTTTACTACTTTCAAATGT
TTCATCATTTCTTCAGATACTCCATCCTTGAAGTCATGATCAATATTTTTGAAAATTTCTAA
AATTTCAATTATCTATACTATCATACTTTTTTCTATAAAAGATTTTATACTTTAAACAAC
CATTAATTTCTTTCTTTAATGCATCCAATGCAAAAATCAGGTAATAAGTGTTAACAGCACT
AATACTTTCTATTGTTTCATCTGCAACTTCTTCAAGTGCCTTTATTTTACTAATTAAGTTC
TTCCATTTCTTCTAATTGAAATAAGTTAATCTTATCCTTAAATCCTTCTGATAATTGTTTC
TTTCTATCTGCAAAATTTTTATTTTCATTTTCTGAGATGTTAAAACCTTTCATTTAAAAAGAT
TACGCATTCTGCTAACATAACACTTGTTCACCAGTAATCAGTTTACTCAACGCATCAAGA
TTTTCTAAATTAAGTTAATTAAGTTCCTTTTCCGGAACGTGCAATCGAATCTCCTGTCC
AAACATTTATTGGAATTCGCCATCCATATCTAATGTTATGTTAATAGTCTTTTTTACTTTT
TTCCATTTTAAATTTCTGTATCTTTTACCGACTTAATTTTGATTAGTGGTACAGTATCGTA
TGTGTTATCTTTTCTATTTAACTTCCTTTTATAACCTACATGGCTGTCTATTAAGCATCTA
ACCTGGGCACACCATCACTAATGTTAACGCGTTTTTCTGGCATATCTTTGATGAATGGATC
TTGTAACCATGTTAATAAATCGTTGGTACTATTAAACTAATCATATTATCAAAGCGTGGT
CTAGCAAATTTCTGCCAAGCAGCATAAGGAATCATTGCTGAGTCAGTAGCAACAACCTTTT
TCATTCGGATGTTTCGCTCCTTGATATTTTGCTCCTGCACCACCTTCCGAATTACCACCATC
CGCCACAATTGTTTTGTTTTGTAATTATAAGGTTTAGTTTTGTATTTCTTCTAAATTCAT
TTTCATCAAGAACAGAAGCATCTTTAATTTTTTGTGATAACTATTTGCGAATTCTTCTAC
TTGCTTTAAATAATCTGTGCTTTTCATTATCATTATTCATTAATTTAGCATTTTGGAGCCAAT
CATCTCCAAAACCCGATGATTTTAAATGGATTATTTGGGTAAATTGCCTCATTAGATGTTCC
TTGATAAATTAATTGTCTGTTGACCAGTTGGATTCCCCTGATCATTAAAGTAACTCGTATGTT
TTAATATCAGCAGCACCATTATCATTACTATTATCATTATAATTAATCTATTTGTTT
GAACCGTTTTCCATTTACTTTAAAATCTTTTTTTTCATTTATATCTTGATAAACCCAATAAC
TGCTCAATTCTGCTATGTCCCTATCATTTATTTATTCAC
```

> **graD01**

Function: protein coding sequence; size of CDS enlarged with respect to SACOL1533 (core genome, variable)

Best match: graD01-MW2\_CC001\_MW2-USA400\_BA000033.2[1577011:1577919:r]RC

Position: 036-contig\_189: 134419 ... 135328; Length: 909 bp

Sequence:

```
TTACCCTTCAATTGGATTTATATCGTCATAAAATGGTTTTTTTAGTATTTATACTAGATTTTC
CTAATTGAATAGTAACTTGAGATTTTTGAGGCATATTGGGTTTTTCTTTAATTTATTACTC
AATTCAATCACATCATCTACTGTATTGTCTTTAGTAAAGTTTTTCTTAGTTGAAAAAAGTG
TAGAAACTGCATCAGTATTGGCAGTATAAATCTAACTCTTTTCTAGCTTGTGACATACCTTC
TTTAAATTTCTTTATCATTTTTTATGAATCAACGGTTCGTAATATTTACGATATTCTTTAAGT
TTCTTGATAAATATGTGATATAAAAGTATTCATTTTGATATCCAACGTTTTGTGTCTTGTTA
ATTGCCTCTTTTGTAAAGCCTGTATATTGATATTTCTTTTCATTTTCTTTGAAGAATTTATA
```

TAAGTTATCATACTTTTCTTTTTGCGCTCGATATTCAAAGCCACTCAGCACTGTACCCACC  
ATCATACTCATATCATCACCATTGTCATTACTGCGCATTGATCCTTTTTGATGGATGGCAT  
CTTTGTACAAAGGTAGACTTGCATTAATAACAATGCCATGATCTTCACAATGCACATAAA  
CTTCTATAACCATCATCTTTACCTACAACATTGGTAGCCTTTACCTTCAGTCCAAAGTTGTCT  
TTAAAGAATTGTTCCCCTACTTTTTCAAATTCTTTACGATGCTTCTTCGCAAATTCAATCGC  
ATCTTTTTCTGCAGGCGGTTGGAAGCCTTGGCCTACATATTTGAAGCTTCCATTTCTTCTG  
GTACAGATTTTGTCTGTGTTGTGTCTTTATTTGATTCATTTTCCATCGCGGAACATCCC  
CCTAAAATTAATGTCGTGGTTAAACTGATCCAATGAACTTTTTTCAT

> **srrB**

Function: protein coding sequence; staph respiratory response protein B-sensor histidine kinase (core genome, constant)

Best match: srrB\_CC008\_NCTC8325\_CP000253.1[1511734:1513485:r]RC (completely identical)

Position: 036-contig\_189: 135572 ... 137324; Length: 1752 bp

Sequence:

TTATTCTGGTTTTGGTAGTTTAATAATAAATGTTGTGCCTTTCCCTAATTCGCTTTTAACAT  
CTATGGAACCACCATGCTCTTCGATAATCATTTTACAAATGAACAAACCTAAACCGGTAC  
CTTGTTTACCTCGCTTCTCGCTGCATCAACTTTATAAAAACGATCAAATACTTGTTGTAA  
ATGTTCTGGTGAATGCCTGTACCTGTATCTTTAATGTATAAAATATCTTCGCTTTCATTTT  
CATCACAAGTAATTGCAATTCATCTCCAGGTTTCGTATAACGTGATGCATTATCAATTA  
GTTTCGTTAGTACTTGGTCCATGCGATCCATATCATAACTCCAAACACGCTTCTTACAATAA  
TTAAAAGTCATATTTAGACCTAAATCATCAGCTTGTGGCGATACTTAATTTTCATCTTAT  
CTAGTAACGCTGCAATAGGCTGAACTTCTTTATTTACGGATAACCCTTCAGCATCCATGCG  
TGCGACATTTAACAATTCATTAACCTAAACGATTTAAACGTTTTCGATTCATCAAGGACAAT  
GGCAAGCGATTCTTTTATTTTCATCCGGTTCTGTAACAATACCATCTACAATTGATTCAGTA  
TAACCTTGAAGTAATGATATCGGTGTACGTAATTCATGTGATACATTAGCAATGAAATCT  
TTCTTCATTTGATCTAGATTGTGCTCATTAGTCATATCACGAACTGTCACAACAACACCAC  
TTTTACCTCCCTGTTCAATCTTGTGCGATATAGCTTGTGGTCAACAACAAGAATCGTGCATT  
CATTTCTAAATCGCGCATTTCAGTTTGTGTTTTGATTTAAAAGTATCTTCTATTTGTCTTAATA  
AGAAAGCTTTAGCATCTTCATCAATATTGTCCATAATATCATTCCGCATCTTATTAGATAA  
GATAATTTGTCGACTCTCATTAAATACCTAGGACACCTTCTACCATAGAGTTAATTAAGCTG  
TCTCTAATATTTTTAGATGTGGATAATGCGTCGACATGCTCTTCGATTTCTGTACTCATCTG  
ATTAATGCCTGCGATAATTGACCAATTTTCATCTTTCGTTGTGACAGAAGGTTTATAAGAG  
TAATCCCCTTCAGATACACGTGTAGCTTGGTCTCTTAAACGTCTTAAAGGTTTTGTAATTC  
TTGACGATAAGAAAAACGCAAAGACTGTTGTAATTGTTAAGAAAATAACAGCCGTAATT  
ATGGTGATAATCGTAATAGCATTATTTGTATCTTCGATTGATTTCAAGTCTTTATATATAA  
AGACTCCACTATATTTGCTATGACTATTTCTTCTGTGCTTTTGTGGATAGCCTAACAAAAT  
ATATGTTTGAGATGAGCCCTTTTCTTTAATCGTTACATTTTCGAGTAACAGATTTACCTTTAT  
CAAACACATCGTCAAAAATGGTCGTTGTTGACTACTTCATTCAACATTTGCTTTTTAATATT  
AGAAAGTGAAGCCGTTGATTGACGATGTTTATTATTTATAATCATCAACCCACCAGGATT  
TTCAATTAATGTTTGACTATATTTTATTGCTTCTTCTTTATTATGTGATTGTTTCGACCAGTG  
AACTTATACGTCTAGCATCTTCTCTTATGGCATTTCGTTTCTTGTGTGAAATAGTATTGC  
ATAAAGGTAATTAAGCAATACTTAATAAAAATTAAAACTGTCGTCACTATTAAAATAATA  
GTTAACCACAGTTTAATTACGACACTATTTAGCCGGCTCATCAT

> **srrA**

Function: protein coding sequence; staph respiratory response protein A-DNA-binding response regulator (core genome, constant)

Best match: srrA\_CC005\_Mu50-VRSA\_BA000017.4[1608983:1609708:r]RC (completely identical)

Position: 036-contig\_189: 137304 ... 138030; Length: 726 bp

Sequence:

CTATTTAGCCGGCTCATCATTAGATTTAACCTCAAATTTATACCCAACGCCCCAGACTGTT  
TGAATCATATGCGCAGCTTCGCTAGACACACGATTTAACTTTTCTCTAAGTCGTTTAAACAT  
GAGTATCAACTGTTCTTAAATCACCATAGAATTCATAATGCCAAACTTCTTTAATAAATTG  
TTCACGGTCAAATACTTTATTTGGTGTGTTTAGCTAAATATATTAATAATTCGTACTCTTTAG

GAGTCAAATTAACCTTCTTGATTATCAGCAAGTACGCGATGTGCATCATTATCTATTTCTAA  
ATGTTTAAATTCAATCACATCACGTGCGTGAGGTTTCGCTTTGTTCTACAGTTGTAGATTGC  
GTTCTTCTTAGAAGTGCTTTAACTCTTAAGACTACTTCTCTTGGTGAAAATGGTTTGACGA  
TATAATCATCTGCACCAGATTCAAAACCTTCAACACGGTTTGTTCCTTACCTTTAGCAGT  
CAACATAATAATCGGTGTTTGTATGTTTCACGCAATTTAGTTGCCACCTGGATACCATCC  
ATTTACAGGCAACATTAATCTAGTAGTATGCAAGCATAATTATTCTCCATTGCAAGTTCAT  
AAGCCTCTTGGCCATTACTTGCTTCATGGATTTCAAAAGATTCTCTTTCTAAATACATTTT  
AAGTAATCTTCTGATTCTATCCTCATCATCTACGATAAGTATTTTCGTTTCGACAT

### > **rluB**

Function: protein coding sequence; RNA pseudouridine synthase (core genome, constant)

Best match: rluB\_CC008\_NCTC8325\_CP000253.1[1514324:1515061:r]RC (completely identical)

Position: 036-contig\_189: 138162 ... 138900; Length: 738 bp

Sequence:

TTATTTCCCATGTTCTGCTAAATGACGCATCACTTTTACTTCATGAGGGCGTCAATACACGT  
CCTTACCAGCATTCAAACCGACAACATTTAAAGGCCATATTCAATACGAGACAGTTTC  
GTCACCTTGATGACCAAAATGTTTCGAACATTTCTTCTGACTTGGCGATTACGACCTTCTGTAA  
TTGTAATTTCAACCAATGTTGTGTTTTATCTTTATCTTGTTCCTTAACTTTCACCTCAGCC  
GGTTGCGTCATAACCATCTTCTAATTCAATACCTTTTTCTAGCGCTTTCACCTTCTTCTCAT  
TAAATAACCTTTTAATTTTCGCAACATATTTTTTCTTAATTTGATATCTTGGATGTGTCATTA  
AATTAGTAAATTCACCATCATTTGTGAGTAATAACAATCCAGAAGTATCATAGTCTAAAC  
GACCAACAGGATAAATACGTGCTTCTATATCTTTAAAGTAATCTGTAACCACTGTACGTC  
CTCTATCATCAGATACACTTGTTATCACTTGAGTTGGTTTATGGAATAAAATGTAATTTT  
GTCTTCTAGTTCTATTTAATACCTTCAACTTCAATCGTATCTGATGGCTTCACTTTTGTTC  
CTAATTCAGTGACAGTCGTACCATTCACTTTCACCTTTCCTTCAGAAATTAAGTTTCTGC  
CTTACGTCTTGAAGTATAACCGCTATTAGCTATACGTTTTTGTAAATCGTTCTAATTCTTTAG  
TCAT

### > **scpB**

Function: protein coding sequence; chromosome segregation and condensation protein B (core genome, constant)

Best match: scpB\_CC005\_Mu50-VRSA\_BA000017.4[1610571:1611113:r]RC (completely identical)

Position: 036-contig\_189: 138892 ... 139435; Length: 543 bp

Sequence:

TTAGTCATTATTTTCTCCTTTTTGATTGACTAGATTACTGAAAAAGCATCCATTTCTTCAT  
CGTCTTCTTTCAGTTGTCGGCAAATCTTCTATATTGGAAATACCAAATACATTTAAAAATAA  
ATCAGTAGTAATTAACCTGTTGGCTACGCTGTTCAATTAACCACTTTAGCCTCAACTAGTCCT  
TTGGCAATCAATGTCTTAACTGCACCATCTGAATTGATACTACGAATTAATTCAATATCAC  
TTCTTGATAATGGCTGGTTATAAGCAATAATTGATAGTACTTCCATTGCTGCTTGTGATAA  
TTTCATTTGTGACTTTTGTTCAAATTAATTGTTCAATATACGTTGCCGCTTCTTTTTTAGTCG  
TTAAACATACGTCGTTCCAAATCGTTGTATCATTAATCCATGTGATGAATAATTTTCAAT  
TAATTCACGAGTTGGTCTTTCGACATATCTAATATTTCTAATAGTTGTTTTTCATCTAAAC  
CTTCATCGCCAGCTGTAAATAAAAGCGACTCTAATATACCATGATTATCCAA

### > **scpA**

Function: protein coding sequence; chromosome segregation and condensation protein A (core genome, constant)

Best match: scpA\_CC001\_MW2-USA400\_BA000033.2[1582019:1582750:r]RC

Position: 036-contig\_189: 139427 ... 140159; Length: 732 bp

Sequence:

TTATCCAAAATGGTAGTTCACCTCCTAATAATGTTAATATCTTCAAATTACGTTGTTGC  
TCAATATTAATTATTCCTGCTTTTACATCTCTAAAATAGCTAAAAAGTGAGTGACTACTT  
GTTCAATTGGCTCAGAAAACGTAACAGACTAAAGAAGTTAAAATGATCTTTATCTTTCA  
ATCTCGATGTCACCTTGTCTGTAGCTTGTGAATGGTAAATGTCTTTTTTCGGATTTCAAC  
AGATTTAGGTGTATTTAACTCAACTCTATTTTAACTCTTTGATAAGCTACAATTAATTCA

GTAAATCAATCGTATGATTTGGATTCCAAGATTCATCTGTTTCCAAATGAGATAAATCTG  
TCGGTCTTTTTGTAATAAAAAATCTCTTTCTTTTCATGTCATTTAAAATAGCAGTATAT  
TCTTTATAATTTTGATATTCTATTAACGCCAACTAAATCTTCCCGTGGGTCATCATCAA  
CATCCATATCTGATGTTGATTGTGGTAATAGCATCTTACTTTTAATCATTAAGAGTTCTGA  
CGCTAATACTAGGTATTCACCTTGCAATATTAATTTCAAGCTGTTTCATTGCATGAACGTAC  
TGCATATACTGCTCTGTTAATGCTTGCATAGGAATATCATAAATATCTATTTCAAATTTTT  
GGATAAGATGCAGTAATAAATCTAATGGTCCATTGAAAGCATCTAATTTAACTTCATACA  
T

### > **Q2FY75**

Function: protein coding sequence; putative protein (core genome, constant)

Best match: Q2FY75\_CC001\_MW2-USA400\_BA000033.2[1582842:1583348]

Position: 036-contig\_189: 140250 ... 140757; Length: 507 bp

Sequence:

ATGCAACAGGCACTGATAAATTTCTATTATCAATTTCATACTAAGCAACATTATTTCCCTAT  
GTCATGACATTTTAGAAGATGCATGGAAAGCTGAAAATAACTACAGTAAGCAAGATGCA  
GTTGTTAGTTAATCTTGTGTTGCAACTGCTTGTACCATTATCGCCGCAATAATTTAAAAG  
GCGCCTATAAGTCTTTTAATAAATCTAAAGAAATAATACAAAATGCTAAAGACAGAGATA  
CGTTATACCTTAATTTAAATGATTATCAGTTGTTAATTGAGCAACAGATTGCAAATTTGAA  
TGCAGCAAAGCCTTTTTTCATCTGTTATATTACCAATAACTCCAGACTTTGAACGCATCATC  
AAGGCCAACTATCCAGACTATGATTATAATCAGGAAACATCAACAGATCCTTTTATTGTA  
GACCATCACATGCGGCGTGATCGTTCAGAAGTGATTGCAGCAAAGAAGAAGCGATTCA  
ATTAAGAAAACATAGACGTAATTAA

### > **xerD**

Function: protein coding sequence; chromosomal tyrosine recombinase D (core genome, constant)

Best match: xerD\_CC001\_MW2-USA400\_BA000033.2[1583426:1584313:r]RC

Position: 036-contig\_189: 140834 ... 141722; Length: 888 bp

Sequence:

TTATGCTCTAGGATGAAATTGGTTATACATTTTTCTAATTTGAGATTTTGAAACATGTGTA  
TAGAGTTGCGTAGTAGATATGTCAGAGTGACCTAACATCTCTTGCCTGCTCTTAAATCTG  
CGCCATTTTCCAATAAATGTGTGCGAAAAGAGTGGCGTAACGTATGTGGCGTTAACGTCT  
TTTTAATGTTGCTTTACACCATTTTGTGTTAATCATTTTCCATATTGCTTGTGCTGATAAA  
GGTTTACCATGCATATTTAAAAATAAGACTTCGGTAACAGTCTTTTTTAAAAGTTGCGGTC  
TAATCGTTTCAATATAAGTAGTTAAGTACTCAATGACTGCGTCGCCTAATGGCACAATTCT  
TTCTTTATCGCCTTTACCAAATACGCGTACAAACCCATTATTAAGTTCACGTTCTCTAAC  
TCTAAATGTATCAATTCAGATACACGCATTTCCGTTGCGTACAGAAGTTCTAACATCGTAC  
GATCACGATAACCATTAATTTTAAATCCGGCGTTTCTAATAAAGCCAACACTTCGTC  
AACATTTAAAACGTCAGGCAATTTTTGTGTCATATTTGGTGAATCTAATAATACCGTTGGA  
TCTTTCGCCGCATATTTTCTTATAGCAAATTGATGAAAACACTACGGATTGTTGAAATAA  
ATCGCGCAATAGATTTAGCAGATTGCCCTTGGTCTATTAATGCCCAAACACTCTTGAAT  
TAATTGTCGATCTATAAATCAATATGCGAGATATGATGTTTCAGTCATATAATCTTGATAC  
TTTTTCAAATCACGTCTATAAGCACCAATTGTGTTAGAACTTAGTCCTTTTTCAATTTGTAT  
AAAACGCAAATATTCTTCAATAATTGTTTCCAT

### > **fur**

Function: protein coding sequence; ferric uptake regulator (core genome, constant)

Best match: fur\_CC005\_Mu50-VRSA\_BA000017.4[1613449:1613898:r]RC

Position: 036-contig\_189: 142070 ... 142220; Length: 150 bp

Sequence:

TTTGTCTTTTACTTTCAGATATACGTCCTCAGCACTTAGATGATCTTTTTTCATTTTCAATTA  
GAACTCTAACAGTAGCTTCGCGTTGTGGCGTTAGCTTATATGATGATTGTTGTAATTGTTG  
CTTAACGCGATTAAATCGTTCTTCCAA

### > **nudF**

Function: protein coding sequence; NUDIX hydrolase (core genome, constant)

Best match: nudF\_AF118839.1[1:169]RC (completely identical)

Position: 036-contig\_189: 142324 ... 142493; Length: 169 bp

Sequence:

```
TTATTTAGAATGATTATAATTTAATAATAGGTGTTGCAATGCAATGATAGTCTTCGCATCT
TCTATTTCTTTATTCATTAGCATCGATTTAACATTCTCAATCGGAACTTTAATGACTTCGAC
AAATTCATCTTCATCTAAGTGAAGTGTACCTTCTTCTAAATTATCC
```

## > **Q5HFS2**

Function: protein coding sequence; putative oxidoreductase (core genome, constant)

Best match: Q5HFS2\_CC005\_Mu50-VRSA\_BA000017.41614627:1615535 [4\_50ANF10END]

Position: 036-contig\_189: 142948 ... 143857; Length: 909 bp

Sequence:

```
ATGCAAAAAAATATATTTAAAAAGTGGTATTGCATTATCTGAATTAGGTCTAGGTTGCATG
AGTTTAGGTACAGATTTAAAAAAGCCGAACAAATTATAGATTGTGCTGTTGAAAATGGT
ATCACTTATTTTGATACAGCAGACATGTACGATAAAGGTATAAATGAATCAGTTGTTGGT
AAGGCACTTCTTAAATATCAACAACGCGATGATATTGTCATTGGTACAAAAGTAGGCAAT
CGTTTAAACAAAAGATGGCAGTACAACATGGGATCCGAGTAAATCCTATATTAAGAGGC
AGTTAAAGGTTCACTAAAGCGTTTAGGTATCGATCATATCGATTTATATCAACTTCATGGC
GGAACCATTGATGACCCATTAGACGAAACAATAAGCGCATTGATGAATTGAAACAAGA
AGGAATTATACGTGCTTACGGTATTTCTTCTATTCGCCCAAATGTAATTGATTATTATTTA
AAACATAGTCAAATCGAAACGATAATGTCTCAATTCAATTTGATTGATAATCGTCCAGAA
TCATTATTAGATGCAATCCACACCAATGATGTTAAAGTATTGGCAAGAGGACCTGTGTCT
AAAGGATTATTAACCTCAAACAGTGTTAATGTGCTCGACAATAAATTTAAAGATGGTATT
TTTGATTATTCTCATGATGAATTGGGTGAAACAATAGCCTCTATTAAGAAATTGAAAGT
AATTTATCTGCATTGACATTTAGTTATTTAACATCACATGACGTGCTTGGTTCATCATTG
TAGGTGCAAGTAGCGTCGACCAATTTAAAGAAAATATTGAAAATATCATACTAAAGTTA
GTTTAGATCAGATTTAAACAGCAAGAGCTCGTGTAAGGATTTGGAATATACCAACCATT
TAGTGTAG
```

## > **tx\_Q5HFS2**

Function: rho independent terminator of Q5HFS2

Best match: tx\_Q5HFS2\_CC001\_MW2-USA400\_BA000033.2[1586456:1586530]

Position: 036-contig\_189: 143909 ... 143939; Length: 30 bp

Sequence:

```
GCCTTACTGCTGTTGTTTATGTACAATTCG
```

## > **proC**

Function: protein coding sequence; pyrroline-5-carboxylate reductase (core genome, constant)

Best match: proC\_CC001-ST772\_118\_AJGE01000058.1[6926:7741:r] (completely identical)

Position: 036-contig\_189: 145233 ... 146049; Length: 816 bp

Sequence:

```
ATGAAACTCGTATTTTATGGAGCTGGTAATATGGCACAAGCTATATTTACAGGAATTATT
AACTCAAGCAACTTAGATGCCAATGATATATATTTAACAAATAAATCTAATGAACAAGCT
TTAAAAGCATTTCGCTGAAAACTAGGTGTTAACTATAGTTATGATGATGCGACATTATTA
AAAGATGCAGATTATGTTTTTTTAGGTACCAAACCGCATGACTTTGATGCTCTAGCAACA
CGCATCAAACCACATATCACAAAAGACAATTGCTTCATTTCAATTATGGCAGGTATTCCG
ATTGATTATATTAACAACAATTAGAATGCCAAAATCCAGTTGCTAGAATTATGCCAAAC
ACAAATGCGCAAGTCGGACACTCTGTTACTGGCATTAGTTTTTCAAACAACCTTTGACCCTA
AATCTAAAGATGAAATTAACGATTTAGTTAAAGCATTGTTTCTGTAATTGAAGTATCAG
AAGATCATTTACATCAAGTAACAGCTATCACCGGAAGCGGCCAGCATTTTTATATCATG
TATTCGAGCAATACGTTAAAGCTGGTACGAACTTGGTCTAGAAAAAGAACAAGTTGAA
GAATCTATACGCAACCTTATTATAGGTACAAGTAAGATGATTGAACGTTTCAGATTTGAGC
ATGGCTCAATTAAGAAAAAATATTACCTCTAAAGGTGGTACGACACAAGCTGGCCTTGAT
```

ACATTGTCACAATATGATTTAGTATCTATTTTCGAAGATTGTCTAAATGCTGCCGTCGACC  
GTAGTATTGAACTTTCTAATGTAGAAGACCAATAA

> **rnz**

Function: protein coding sequence; ribonuclease Z (core genome, constant)

Best match: rnz\_CC001\_MW2-USA400\_BA000033.2[1588743:1589663:r]RC

Position: 036-contig\_189: 146151 ... 147072; Length: 921 bp

Sequence:

TTAGACTTTAAAACATCAAAAATCTTTTACAAAATTTAAAATTAGGTGTATCTTCATTTTGT  
ATCAATGTTTGATAAATTTTCATTTATATCTTCTGTATTATAGCGATTGCTCAAATGTGTAA  
TCAACGTACGTTTAAACATTGGCTTCTTTTATCAATGCAAATACGTCCTCAATATGGCTATG  
ATGATAATTGTTGGCTAAATGCTTTTCACCATCTATATAGGTTCGCTTCATGTACCATCACA  
TCAGCATCTCTAGAAATCACACGTTTATTAGAACATGGTTTTGTATCACCAAAAATTGCTA  
CAACTGGACCCTGTTTGGACTCACCTCTAAAATCTTTTGATTGATAAACTTGACCATTATG  
TTCAAATGTATCATGAGATTTTACTTCTTGATATTTAGGACCTGGTTCAAGACCAATGTTT  
TTTAAACGCTTCAACATTGATTGTACCTGTAGTTTCAGGTGCCATTACTCTATATCCATATG  
ATGGAATACCATGATTAAGTAAATGCGCCTCTACAGTAAAACCATCATGATGATATGTCA  
GATGATCATCGATTTCAATATATGTAATTGGATAGTTTAAATGTGACTCTGATAAATTCAT  
AGACATTTCCACATATGCTTTAATTCCTTTTGGTCCAACCAATGTAAGCGGCTTCTGTTCA  
CCGCCCTGAAAAGAACGACTAGAAAGTAATCCTGGCAAACCAAAAATATGATCGCCATG  
CATATGAGTAATAAATATATGTGTCACTTTTCCTAATTTAATTGCATGATGTAATAATTTGG  
TGCTGTGTACCTTCACCAACGTCGAAAAGCCATATGGAATTGGAATATGGTTCTAAATTT  
AAGGCGATTGCTTGTGTATTTCTCTCTTTTGTAGGCAAACCTGCACTCGTTCCAAAAAATG  
TAACTTCCAT

> **zwf**

Function: protein coding sequence; glucose-6-phosphate 1-dehydrogenase (core genome, constant)

Best match: zwf\_CC001\_MW2-USA400\_BA000033.2[1589976:1591460]

Position: 036-contig\_189: 147384 ... 148869; Length: 1485 bp

Sequence:

TTGAGTACTAAAAACAAACACATCCCTTGTTTAAATCACAATCTTTGGTGCAACTGGTGACT  
TAAGCCATCGTAAGTTGTTTCCATCAATATTCCATCTCTACCAACAAGACAATTTAGATGA  
ACATATTGCCATCATCGGTATTGGACGTCGTGACATTACTAATGATGATTTCCGTAATCAA  
GTAAAATCATCAATTCAAAGCACGTAAGATACAAACAAAATTGACGCGTTTATGGA  
ACATGTCTTCTATCATAGACATGATGTTAGTAATGAAGAAAGCTATCAAGAATTACTAGA  
TTTTAGTAATGAATTAGATAGCCAATTTGAATTAAGGTAATCGACTATTCTATTTAGCA  
ATGGCACCACAATTCTTTGGCGTTATTTCTGATTATCTAAAATCTTCTGGTCTTACTGATA  
CAAAGGATTTAAACGCCTTGTTATCGAAAACCATTCGGTAGTGATTTAAAATCAGCCG  
AAGCATTAACAATCAAATTCGTAAATCATTAAAGAAGAAGAAATTTATCGTATTGACC  
ACTATTTAGGAAAAGACATGGTTCAAATATCGAGGTATTACGTTTTGCGAATGCGATGT  
TTGAACCATTATGGAATAACAAATATATTTCAAACATCCAAGTTACATCTTCTGAAATACT  
AGGTGTTGAAGATCGTGGTGGTTATTATGAATCAAGTGGTGCCTAAAAGATATGGTGCA  
AAACCACATGTTACAAATGGTTGCATTATTGGCTATGGAAGCACCTATTAGTTAAATAG  
TGAAGATATCCGTGCCGAGAAAGTAAAAGTACTTAAATCACTGCGTCATTTCCAATCTGA  
AGATGTTAAAAGAAGCTTTGTTTCGTGGTCAATATGGCGAAGGCTATATCGATGGTAAACA  
AGTTAAAGCATAACCGTGATGAAGATCGCGTTGCAGATGACTCTAACACACCTACCTTTGT  
TTCAGGTAAATTAACAATTGATAACTTTAGATGGGCTGGCGTACCATTCTATATTCGTA  
GGTAAACGTATGAAATCTAAAACAATTCAAGTTGTCGTTGAATTTAAAGAAGTACCAATG  
AACTTATACTATGAAACTGATAAACTGTTAGATTCAAACCTATTAGTAATCAATATCCAA  
CCTAATGAAGGTGTATCTTTACATCTAAATGCTAAGAAAAATACACAAGGTATCGAAACA  
GAACCTGTCCAATTGTCTTACTCAATGAGCGCTCAAGATAAAAATGAATACTGTAGATGCA  
TATGAAAATCTATTATTCGATTGTCTTAAAGGTGATGCCACTAACTTCACGCACTGGGAA  
GAATTAATAATCAACATGGAAATTTGTTGATGCAATTCAAGATGAATGGAATATGGTTGAT  
CCAGAATTCCTAACTATGAATCAGGTACTAATGGTCCATTAGAAAGTGATTTACTACTT  
GCTCGTGATGGTAACCATTGGTGGGACGATATTCAATAA

> **graE**

Function: protein coding sequence; putative transcription regulator/AraC/XylS family (core genome, constant)

Best match: graE\_CC001-ST772\_118\_AJGE01000058.1[3010:3876:r] (completely identical)

Position: 036-contig\_189: 149098 ... 149965; Length: 867 bp

Sequence:

```
TTGGACGTTATCAAGCAAATACAACAGGCAATTGTTTATATTGAAGATCGTTTATTAGAG
CCTTTCCATTTGCAAGAATTAAGTGATTACGTTGGTCTTTCGCCATACCATCTTGATCAAT
CATTAAAATGATTGTCGGCTTATCTCCAGAAGCTTATGCACGCGCGCGTAAAATGACAC
TCGCTGCAAATGATGTGATTAATGGTGCTACACGACTTGTAGATATCGCTAAAAAATATC
ACTATGCAAATCAAATGATTTTGCAAATGATTTTAGTGATTTTCACGGCGTATCACCTAT
TCAAGCTTCTACTAAAAAAGATGAATTACAAATTCAAGAGCGATTATATATCAAATTATC
AACTACTGAGAGAGCACCCTATCCATACAGATTAGAAGAGACAGATGATATTTTCATTGGT
TGGATATGCACGATTTATAGACACTAAGTATTTGTCACATCCTTTTAATGTTCCGGATTTT
TTAGAAGACTTGCTCATTGATGGTAAAATTAAGAGTTACGACGATATAATGACGTTAGT
CCATTTGAACTATTTGTTATTAGTTGTCCTCTTGAAAATGGTTTAGAAAATATTTGTAGGTG
TACCAAGTGAACGTTATCCTGCACACTTAGAAAAGCCGATTTTTACCTGGCAAACATTGTG
CGAAATTCAATTTACAAGGTGAAATTGATTATGCAACTAATGAAGCTTGGTACTATATTG
AATCAAGTTTGCAGTTAACATTGCCATATGAACGAAATGATTTATATGTTGAAGTGTACC
CTCTCGATATTTCAATTAATGACCCATTCCTAAAATTCAGCTTTGGATTCTGTAAACA
GAGTCCTTATGACGAAGTTTAA
```

> **malA**

Function: protein coding sequence; alpha-D-1,4-glucosidase (core genome, constant)

Best match: malA\_CC001-ST772\_118\_AJGE01000058.1[1279:2928]RC (completely identical)

Position: 036-contig\_189: 150046 ... 151696; Length: 1650 bp

Sequence:

```
TTAATTTAGTTTCGATAACACATGCTTCATATGGACGTAACCTGTTTTAAATTAACTTTGGCA
TCATAATTAATAGCTTTACTTCTCCATGGCTTAAATCAAATGGTACAGTTAATTCTGCTT
CGTGGTTAGTAAGATTACCTACAATAAGAAGCTTGGCTTTTCATTTAATGTTCTCGTGTACGC
AAAACTTGTGAATTTTCAGCATCTACTAAATCAAATTGACCATATACGTATACATCATTAA
GACTTTCTTAATTGAATTAATCTTTATAAAAATTGTAATACTGAATGCTCATCTTCTAATT
GTTGTGCAACATTGATAGTTTTATAATTCGGATTCACTAGGAACCACGGTTCACCATTTGT
AAATCCTCCATTTAACGTATCATCCATTGCATTGGTGTGCGAGAATTATCTCGGTTCTCA
TCTTTATATTTTCGCAAGTAAAGCGTCTACATCTCCACCTTGAGCTTTCACTATTTGATAGT
CATTTTTAACAGCAACATCGTTAAACGTTTCAATACTTTCAAATGGATAAATTCGTCATACC
AATTTCTTGACCTTGATAAATGAATGGCGTACCTTGTTGCAAGAAATAAACAGCTGCATG
ACTTGTGCTGATTACACCAATACTTGTTCATCGTCACCCACGTCGATACACGTCGTGGT
TGGTCGTGATTTCAATAAACAACGCATTCCAACCTTTATTTTCAAGTTGTTTTTGCCATCT
ATTTAATACAGATTTATACGAATTTACATCAAAGTGAGAATCACCCTATTCACAGTCC
CAAATGTTCAAATTGGAATATCATATTAATTTACCATTTTCTTCCCCGACCCAGTCATCA
GCATCATCAGGACTTACACCATTTCGCTTCACCAACAGTCATAATGTCATACTTACTTAATG
AGCGATCTTTCATCTCTTGTAAACCAAGTTTGTATACCTGGCTGATTATATCTACATCAAA
TGCTGGAGCATATGTTTTATCCTCAGGTACAGGTAAGTCACCCGCTTCAAACGCTTTTTTA
ATATGCGTAATTGCATCTACTCTAAATCCATCAATGCCTTTATCAAACCACCAGTTCATCA
TTTCAAATACAGCATCTCTAACTTCTGGATTAGCCCAATTCAAATCAGGTTGTTTTTTACT
GAATAAATGGAAATAAATATTGCTCAGTATTAGCATCATATTCCCATGTAGATCCATTTAA
GATACTTTCCAGTTGTTAGGTTTCAGAGCCATCTGGCTTTGGATCTTGCCAAATATACCAA
TCGCGCTTTGGATTGTCCTTACTAGACTTAGATTCTATAAACCAAGGATGTTTCATCAGATG
TATGATTTACAACATAAATCTAAAATAAGCTTCATGCCTCTATCATGAACACCTTTTAATAA
ACGATCAAAGTCTTCCATCGTTCCAAATTCATCCATAATCTCTTGGTAGTCACTAATATCA
TAACCATTGTCATCATTAGGTGATTTAAACATTGGACTGAGCCAAATGACATCGATACCT
AAATCTTTAAGTAGTCCAATTTATCAATCATTCCAGGTAAATCCCCAATACCATCGTGAT
```

TACTATCATTAAACTTCTTGGATATACTTGATATGCTACTGCTTCTTCCACCATTGCTTA  
TTCAT

### > **malR**

Function: protein coding sequence; maltose operon transcript repressor (core genome, constant)

Best match: malR\_CC001-ST772\_118\_AJGE01000058.1[244:1263]RC (completely identical)

Position: 036-contig\_189: 151711 ... 152731; Length: 1020 bp

Sequence:

CTATCGCTGTGTTGATTTTCTTATTTTTAATTCTATATCTATAATGACGAGTTCAATAACAT  
CCTGTGCTTTATTTTTTAATATATTTAAAATTGCTGCACCAGCCTGTTGACCTAACATTCG  
AGGCTTGATGTCAATACTGGTTTGAGGTGGTGACGCAATTTTCGGTTAAATAAGAATCATT  
GAACGTTGCTGTCATTACATCTTTCGGAATTTCAATATTAAGTTCATATAGGACACTTAAA  
ATCGCTAAATGTAACACAGCATCTAACGAAATGATTGCCTGTTAATATTTGGGTCCTTCA  
AACGCGTATGTAGATTTTGCATGTAATTTAAAATAACTTCTCTTTCATTACTAGTCTCAAT  
AATTTGATAATTAATTTTATTTTGAGAAGCTATCGTTTCAAATCCTTGAATCCTGTCTTTTCG  
AACTTCAAATCGCCTTTTTCTGTAATAAATATTAATTCATCTACACCTTGTTCAATAAC  
ATGTCGTGTCAAATTTTTCAGAAGCTAATATATTATCATTATCTATATGTGTAAATTGATGA  
TCTATATCCGATGTAGGCTTACCAATCACAATAAATGGCATGCTTTCATCAATTAACATTT  
GTTAATCGGATCATTTTCTTTTGAATAGAGCAGTATAAACGCATCAACCATTCGTTGTTT  
AATCATTTTATAAACTTCATCCATTAATCATTTCATATTATTTGAGACTGTCGTTTGTGTAC  
CATAGCCATGCTGGTTACATGTTTCAGAAATCCCTAGCAATACATTGATGTAGAATGGAT  
TCAGTCGAATAGGCTCCTCAGACCCTTTTAACTAAACCAATTTTATATGTTTGGTTAGT  
AATTAAGTTCTAGCAGCAGTATTAGGAAAATAATTCATTCCTTCCATAACTTTCTTCACT  
TTTGAATTGTCGCTTCGCTAATACGTTCAATTCCTTTTATAACTCTTGAAACTGTGGAAG  
GAGAAACACCGGCTTTTAGTGCAACATCTTTAATCGTAACCAT

### > **repORI-px**

Function: origin of replication of plasmids

Best match: repORI-pUB110-2\_CC705\_RF122-cow\_AJ938182.1[1270028:1270090:r] (completely identical)

Position: 036-contig\_189: 152988 ... 153051; Length: 63 bp

Sequence:

AAGCGCAATTATCTCTATAATTTAAAAGTGCCTAAACAAATAACTAAAGGAGATAATGCGC  
CTA

### > **tnpISSha1-2**

Function: protein coding sequence; putative transposase

Best match: tnpISSha1-2\_CC010\_D139-ST145\_ACSR01000081.1[34410:35725]

Position: 036-contig\_189: 153050 ... 154366; Length: 1316 bp

Sequence:

ATGAATAATGTTATACTAAATACCTTTGATTTTAAAGATAAAAATATTATTTTTGACGGTA  
AACTTGAGAAAATTGAGTATAAAGGGAGAAAGTGTTTCTTTTATTACGCAAACTAATCT  
ATACACCTGAGGTGTGCCAAACTGCAATTGTAAAAACATTAATGGTAATTTAATCAAAA  
ATGGATCTAAGACTTCTAGAATCACTATGCCTAAAATCTCCGAATATCCAACCTTATATCAT  
GTTGCGTAAGCAACGTTTTAAATGTAAAACGTGCGAACGATACTTTACAGCCGAAACACC  
TGAAGTTGATAAATACTGTTTTATATCAAAAAAACACGATCAGCTGTACTTAATAAAGCA  
GCAGAAATTCGTTCTGAAAAATCTATAGCGAAATCCTGCTCTGTGTCAGCTACCACAGTT  
TCTCGTATCATTGATGAGGCCGCTCAATCGCTTCATCAATCGCCGATTCTGCACTTCCTG  
AACATATCATGATGGATGAATTTAAAAGTTTTAAAATGTTTCTGGGAAAATGAGTTTTA  
TATACGCTGATGCACAAACGCATCATATTATTGATATTGTTGAGGATCGTAGATTAAGTG  
AGTTGAAAAAGTATTTTTATCGTTTTTCACTTAAAGCTAGAAAACGTGTAAAGACTGTTT  
CATTGATATGCATGAAGGCTATATGACATTGATTAAGAGATGTTTCCGAACGCTAAATT  
AGTTATCGATAGATTCCATATTGTTCAATTATTAATCGTGCTTTAAATGGTATTCGAGTC  
GCTGTTATGAATGAATTAAGAACGAAGAATCAACCTTTATATAATAAGTTTTAAAAGATAT  
GCGAAATTACTATTAACCTGGAGAAGATTTAGAGGCATTTGAATATCGTAAAGTAGCT



TTATTTAAGGAATGGAAGACACAAAAGGGTATCGTCAAGTATTTATTAGATCAAGATGAT  
TCGTTAAATGACGCCTACCAATATATCAATCAGCTACGATTCAAACCTTAAACATAATGAT  
TATGAAGGCTTTATTCACGAATTAACACATATGCCATTATCCCAAACGCATTGAGTTGTCC  
AACGAGCAATTAAGACACTTAACAAACATGAATACTTTATAAAAAATACATTTGATTATT  
ACAATTTATCAAATGGTCCTTTAGAAGGTATAAATAACAAAATAAAATTAATTAACGTA  
CATCTTTGGTTATGGAAGTTACAATCATTTGCGCAATCGAATATTATTATGTTCAAACCT  
TTACGCTCCAAAAGTAAAAGGAAGTTAAGCAATGTTTAGTTGCCTAA

### > **tx\_sprA**

Function: rho-independent terminator of sprA

Best match: tx\_sprA\_ref\_CC030\_MRSA252\_BX571856.1[1972968:1973028]RC (completely identical)

Position: 036-contig\_189: 154324 ... 154385; Length: 61 bp

Sequence:

CCAAAAGTAAAAGGAAGTTAAGCAATGTTTAGTTGCCTAACTTCCGATATTGAACGCA  
T

### > **gnd**

Function: protein coding sequence; 6-phosphogluconate dehydrogenase/decarboxylating (core genome, constant)

Best match: gnd\_CC010\_D139\_ACSR01000049.1[127014:128420:r]RC (completely identical)

Position: 036-contig\_189: 155019 ... 156426; Length: 1407 bp

Sequence:

TTATTCTTCAATCCATTGTGTATGGAATACGCCTTCTTTATCTTTTCTTTTCGTACGTGTGAG  
CACCGAAGTAGTCACGTTGTGCTTGAATTAAGTTTGCAGGTAATCAGCTGCACGGTAAC  
TATCATAGTAATTAATACTTGATGAGAAACCAGGTGTTGGTACACCATTTTGAACACCAG  
TTGCGACAACATCACGTAACGCATCTTGATATTCAGTAACGATGTTTTTAAAGTAAGGAT  
CTAGCAATAAGTTTTGTAATCCTGGATTATTATCGTAAGCATCTTTGATCTTTTGTAAAGAA  
TTGTGCACGGATAATGCAACCTTCTCTCAAATCATAGCTAAATCACCAAGTTTTAAATTC  
CATTCAATATCTTCACTTGCTTTACGCATTTGCGCGAAACCTTGTGCATAAGAACAAATTT  
TACTCATATATAATGCTTTACGAATTTTTTCTAAAAGTCTTTCTTGTACCATCAAATGA  
TGCTTTTGGACCATTTAATTCTTTAGAAGCATTTACGCGCTCTTCTTTGATTGAAGAGATA  
AAACGTGCAAATACAGATTCAGTAATGATTGTTAATGGAATACCTAATTCTAATGCGTTA  
ATTGAAGTCCATTTTCCTGTACCTTTTTGACCTGCAGTATCAAGAATTTTTTCAACTAATG  
CTTCTTTATTTTCATCTAATTTTCATGAAAATATCACCAGTGATTTCAATTAATAACTTTCT  
AATTCACCAGCATTCCAGTCTTTGAACGTTTGTGCAATGTCTTCATGAGACATGCCTAATA  
ATTCTTTTCATCATAGCATAACTTTCTGCAATTAATTGCATGTCAGCATATTCGATACCATT  
GTGTACCATTTTCACATAGTGTCCAGCACCATTAGGTCCAATATAAGTAACACATGAAGC  
ACCGTCTTTTGCCTTTGCAGCAATTGCATCAAGAATATCTGCAACTTTGTTATAAGCTTCT  
TCTTGTCCACCCGGCATTAAATGACGGACCAGTTAACGCTCCAATTTACCACCAGAAACG  
CCATACCAATAAAGTTGATTGCACCTTTGTGCTAATGCTTTATTACGTCTGATAGTATCTT  
GATAGTTTGTATTACCACCATCAATTAATAATATCTCCATCATCTAATAAAGGTAACAAAC  
TATCAATCGTTGCATCCGTAGCTTTACCTGCTTGAACCATTAATAAAATTTTACGTGGTTT  
TTCTAAAGAATTAACAAATTCTTCCAATGAGTACGTTGGATGAATTTTTCCCTTTTGAT  
TCTTCAACCATTAAATCAGTTTTTTCACTTGAGCGGTTAAATACAGATACACTATATCCGC  
GTGATTCAATATTCCAAGCTAGGTTTTTACCCATAACGGCTAAACCAATAACTCCAATTTG  
TTGTGTCAT

### > **yqjA**

Function: protein coding sequence; YqjA like protein (core genome, constant)

Best match: yqjA\_CC001-ST772\_118\_AJGE01000022.1[78435:79415]RC (completely identical)

Position: 036-contig\_189: 158195 ... 159176; Length: 981 bp

Sequence:

TTAAGCTACTTCACTATGCATTTTCAATGAACCAAATTGCGATTTGATTTGTAAATATTCT  
TCTAATTCATTTAATATTTGAATAATACTTGCTCTCGAGTTAAGCGCTTTGTGTGTTGTTGG

CAATGGAAGTTCATCCAATTTCAAACGCGTCTCATACAAATTGTGTAAACGCATTGCTGT  
ATAGTCATTACTATTCACATTTAGACCAATTTCTTTTCAGCAGTGACGCAACATCATTTAAA  
AGTGGATCTTTATGACAGATACTTTTCGATGAGCGGTTTCATTCTCATTAAACAATTCCACTT  
GCTCTTCTCGCATATCAAATAATGATAGTATGAATTTTCGTTTCTAACAAAATGATTTTT  
AACATCTCGGAACGCGATAGACTTCGCCTTTTTAATATTTAAAAGTAACACTTCAAATTCA  
ATCGCAATGGTATCTTCATATTTTTCACAAATATAACTATATTTACTAAAAATATCAGCAA  
TTTGTGCTCAATTTTACATTTGTATTCGTCTAGTTGTTTGTCTAAACTTGGCATCATTAAA  
TTCATTGTAAATGCAATGCTTAGTCCAATTAACAGTAATAATGTTTCATTAACAATTAAT  
GTGCATCAATTGATTTTGCATTA AAAACATGAAGTAATAACGCAACTCGTAATGACAC  
CTTCTTGTACTTTTAATACGACAGTTAATGGTATAAATAACAATACGATAATACCGAGTA  
CAATTGGACTCTGACCTAATAAACTAAATATTGCTGAACCTAAAAACAATACTAAAAAAC  
ATGATACTAATCTTGAAATAATCGCTTGTAGCGAATGTACTTTTGTATGTTTAATACATAA  
TACGACTAATATGGCGCTTGAAGCATAATTATCTAAACCTAACAGCTTACTAATAATTAC  
ACCTAAAGTCATACCCACTGCTGTTTTTATTGTTCTAAATCCAATCTTGTAAGGATTTAAC  
TTTAACAT

> **bfmBB**

Function: protein coding sequence; branched-chain alpha-keto acid dehydrogenase E2 (core genome, variable)

Best match: bfmBB\_CC025\_21193\_AFEG01000018.1[25570:26844:r]RC (completely identical)

Position: 036-contig\_189: 159977 ... 161252; Length: 1275 bp

Sequence:

CTAATATATATTTGTATTTTCTAAAGTATACTGTTTCGATACGCTGTTAATATGATTCATA  
AATTTACCTGTTTGTAAACCATCTAAAATACGATGATCAATTGAAATACATAAATTAACC  
ATGTTACGAATTGCAATCATATCATTAACTACTGGCTTTTTAACGATTGATTCTACTT  
GTAAAATCGCTGCTTGTGGATGATTTATAATACCCATTGATGATACTGAACCAAATGTAC  
CAGTATTATTTACCGTAAATGTACCGCCCTGCATATCTTCAGCTGTCAATTGCTTATTACG  
CGCTTTCATTGCTAAAGTATTAATTTCTCTAGCTATACCTTTGATTGACTTTTCGTCTGCAT  
GCTTAATCACAGGTACGTATAATTTATTTTCATCAGCAACAGCAATTGAAATATTAATGTC  
TTTATGTAAGACAATTTCAATTTCCCTTGCCAGCTACTATTTAATAAAGGATATGCTTTTAAA  
GCATCTGCTACAGCTTTTACAAAGAAAGCAAAGAACGTTAGATTATATCCTTCTTTATTTT  
TAAAGCTGTTTTTATAATGATTTCTCGTATTCACAAGATTTGTAGCATCTACTTCAATCAT  
CATCCATGCATGTGGAATCTCTGTTACACTATTAACCATATTTTGCGCAATTGCTTTACGC  
ACACCATTTACTGGTATTGTGCTGTTTTCACTATTGTCTTCAGATGATTGGTTACTTGATGT  
ATCTACTGATGTTGATTTTGTGTTGAACCTGTTTGTGAGATTGAGCTGTGGTACCACCATTTT  
CAATAACTGACATTATATCCTTCTTAGTTACACGACCTTCAAATCCACTACCTACAACCTTG  
TGATAAATCAATGTCATGCTCTGAAGCGAGTTTAAATACAACAGGTGAAAAGCGACCATT  
ATTACGTGGTTGATTTTGTGTTAGCAGTAGATGTCTGTTCCACTGTTGCACTAGCTTTTTTTAG  
TAGATTTCTGAGTATGCTCATCCACTTTTGCTTGTATCTCTTCAGTTGTTTCATTTGTCTTTT  
CATCAGCAGTTTCAATTTTACAGATAATTGTATCAATAGCTACTGTCTGCCCCGCTTCAAC  
TAAAATTTCTGTAATTGTTCCCTGATATCGTGGAAGGGACTTCAGCTGTCACTTTATCTGTA  
ATAACTTCACATAATGGTTCATATTCATCAATATGATCACCAACAGAACTAACCATTTGTT  
CAATGGTACCTTCATGAACACTCTCACCTAACTTAGGCATTGTTATTTCCAT

> **bfmBAB**

Function: protein coding sequence; 2-oxoisovalerate dehydrogenase beta subunit (core genome, variable)

Best match: bfmBAB\_CC001-ST772\_118\_AJGE01000022.1[75363:76346]RC (completely identical)

Position: 036-contig\_189: 161264 ... 162248; Length: 984 bp

Sequence:

CTAGAATTCTGCTAATTCACGCATTTTATTTAAGATTTTTTCTGGATTCATCATAATTTTCAT  
TTTCTAATACAGGTGAAAATGGCATAGATGGTACATCTGGAGCAGCTAAACGCATGATTG  
GTGCATCTAAATCGAACAAGCAATGCTCTGCAATAATCGCTGACACTTCTGACATAATAC  
TACCTTCTAAATTATCTTCAGTTACAAGTAAAACCTTACCTGTATGTTTAGCACGATCAAT  
AATTGTTTCTTTATCTAATGGATAAACAGTTCGTAAATCTACGACTTCAACATTGATACCG

TCTGCAGCTAAAATATCAGCGGCTTGTAAGCAATAATTGACCATTAATCCATAACAAAAT  
ACTGTTAAATCTTCACCTTCACGTTTAACATCTGCTTTTCCTAAAGGTACAGTGTAATATT  
CTTCTGGCACTTCTTCTTTAAGAAACGATAAGCTTTTTTATGCTCAAAGTACAATACTGG  
GTCATTTGATTTCGATAGATGATAATAAAAGCCCTTTAGCATCATACGGTGTGGAAGGAAT  
AACAAATTGTTAAACCTGGTGATGAAGCAAATATACTTTCAATACTTTGTGAATGATATAG  
TCCCTCCGTGAACACCGCCACCAAATGGTGCACGAATCGTTAATGGGCATTGCCAATCATT  
ATTTGAACGATAACGCATTTTCGCAGCTTCACTAATAATTTGATTTGTGCGCAGGTAAAATA  
AAATCTGCAAATTGAATTTCTGCAATTGGTCTTTTACCAACCATAGCTGCGCCAATAGCTG  
TTCCGACAATATTTGACTCAGCTAATGGTGTATCGATAACTCTGTCCTCACCATATTGTTG  
TTGCAGTCCTTGAGTAGTACCAAATACGCCACCTTTTTTACCAACATCTTCACCAAGAATA  
AATACATCTTTATTTTGTGTAATGCTAAGTCTTGTGCCTGGCGAATCGCCTCTAAATAAG  
ATAATTTAGCCAT

### > **bfmBAA**

Function: protein coding sequence; branched-chain alpha-keto acid dehydrogenase E1 (core genome, constant)

Best match: bfmBAA\_CC130\_O11-CC130\_AEUQ01000006.1[5327:6319:r]RC

Position: 036-contig\_189: 162247 ... 163240; Length: 993 bp

Sequence:

TTAGTTAAGACTCCCTTCTTCGTACACAAATGCATAGGCTTCTTCGACACTTGGATATGGC  
GCGTCTTCAGCAGCCTTTGTGCGTTTATTGATAATGCTTTTATGTTCTGCTTCTATTTCTGC  
CAACCAAGCATCATCGATAATGCCAGCTGAAAGCAACTCTTTTTTGAACTTTTCATTGCAG  
TCTGCTTTTTTAAAGCGCTTCACGCTCTTCTTTCGTACGATATTGATCGTCATCATCTGATGA  
ATGAGCTGTCATACGACTTGTTACTGCTTCAATCAAAGTTGAACCTTGACCAGAAATAGC  
TCGATCTCTTGCTTCTTTCATCGCTTTATACATTGCTAATGGATCATTACCATCTACTTGT  
CACCATGTATACCGTAACCAAGTGCTCTATCCGATAATTTTTTCAGCTGCGTATTGTAATGA  
ATCAGGTACTGAAATTGCATATTTATTTATAATGACACATAAAAAGGAAGTTTGTG  
TACACCCGCGAAGTTTAAACCTTCATGGAAGTCACCTTGGTTTGTGACTACCTTCACCAAC  
AGTTGCTGTTGCAATTTTCTTCTTACCATCCATTTTTATAGCTAAAGCAGCACCAACAGCA  
TGGGGTATTTGAGTTGCTACCGGTGAACTTTGTGACAAAATATTCTTAGCTCTACTACTAA  
AGTGTGATGGCATTGTGTTTCCACCAGAGTTAACATCGTCTTTCTTTCCAAACGCTGATAA  
AAACGTATCATAACGCTGAGATACCCATATAAGTAACGAAAGCTAGATCTCTATAATAAGG  
CGCTGTAATATCACCTTCTTCTAATGCGTATGCCATCCCAATCTGAGTTGCTTCTTGTCTT  
GACCACTTACAACAAATGGAATTTTACCTGCACGGTTCAATAACCACAGTCTTTCATCTAT  
TTTTCTACCTAAATCCATCCATTTATATATTACTTTTAGGTCTTCTTCGCTAAGGCCTAATG  
ATTTATAATCAATCAT

### > **lpdA**

Function: protein coding sequence; dihydrolipoyl dehydrogenase (core genome, constant)

Best match: lpdA\_CC007\_TCH959-USA300\_AASB02000244.1[30668:32089:r]RC

Position: 036-contig\_189: 163255 ... 164677; Length: 1422 bp

Sequence:

TTATACGTGAATAGCTCTACTTTCTGCTTTCAATCCTAATTCCATCAACACTTCAGAGATG  
GAAGGATGTGCGTGTGTTGTTAGTCTAATTCTAATGCCGAGCCATTCATGAACTGTAAC  
AGTGATGCCTCATTAATCAATTCTGTTACATGTGGACCAATCATATTAATACCCACAATTT  
CTTCAGTTGATTGATCAATCACCATTTTCGCTATACCCTTCGTTTGCCTCATGGCTATCAAT  
CACTGCTTTACCAATTGCTTTAAATGGTACTTTAAAACCTTTTAACTTTCATTCCTCTGCCT  
TTGCTTGTTCATGTTTAAACCGATAGAAGCAATTTTCAGGTTGTGAATAAATACACTTAG  
GCATCATGTTATAGTTTACTGGGATTGGGTTCCCTCAAACATATGATCAACAGCCACAA  
CACCTTCTTTGATCCAACATGTGCCAATTGTAATTTTCTATAACAATCACCAGCTGCATA  
AATATGTTTATCTTCAGTTTGTGAAATTCGTTTAAATATGTCCTGATGTTGAAAGT  
TTTATTTTGTGTTTAAACCAATATCTGATGTGTTAGGTTTCTACCAATCGATAGCA  
ACACTTATCTACTTTAATTATGTCTGAGGAAATTTCAAACGTAACACCATCTTCGTTAAC  
ATTTATATCATTTTCAGAAAGTTTATTCCTCATAGAATTTAACACCACGTGCTGACAAT  
GATTTTTTAAATAGTTGTGAAGCTTGTGTTACTTTTCAGTTGGTAAAATTCTTTCACCTGCTTC

TATAACTGTTACGTCAACACTTAAATCTATCATCAATGATGCAAATTCCATTCCGATAACA  
CCACCACCAATAATACCAATACTTGATGGTAACGTCTTTAATGATAATATATCATCGCTA  
GATAAAATTTTATCATGATCAAATGATAAGAATGGCAACTCTGCAGGCGAAGAACCAGTT  
GCAATTAATACAAATTGGTTGGGTAATAAGTCTGATTCACCATCTTCATATTCGACAGAA  
ATTGTGCCACTTTGAGGTGAAAATATAGATGTACCTAGAATACGTCCCGTGCCATTATAA  
ATGTCAATGTGATTGTGTTGCATTAATGCTTTACACCTTGATACATTTGATTAATAATGT  
CTTCTTTTCGTGCCAACATATTTTCAAATTAACATTAGCATCTTTGACATCAACGCCAAA  
CATTGCTGCCTGTTTTACTGTTTGAATACTTCAGCAGATTTAAGCAGCGATTTAGTAGGA  
ATACAACCTTTATGGAGACAAGTACCTCCTAATAGTTGTCGTTCTACTATTGCCACTTTTT  
TACCTAATTGAGACGCACGTATCGCAGCAACATATCCTGCAGTACCTCCACCGAGAACGA  
CTAAATCATATTGTTTCTCTGACAT

> **recN**

Function: protein coding sequence; DNA repair protein N (core genome, variable)

Best match: recN\_CC705\_RF122-cow\_AJ938182.1[1515551:1517230:r]RC

Position: 036-contig\_189: 164827 ... 166507; Length: 1680 bp

Sequence:

TTATCTACGTCTTTGATTGTGTTGTATCATTTCTCTTGCATTTTCTCGAGTTAAATCAGTAA  
CACTTGCACCTGAAATCATTTCGTGCAATTTTCATCTACTTTATCATCGCCAATTAACTCTTG  
AACTTGTGTTGTTGTACGATCATCTTTTGATGACTTCGAAATTAATAAATGATGGTCGCTC  
ATCGATGCAACTTGTGGCAAGTGAGAAATACAAATAACTTGTATATATTCTGCTATATCT  
CGCATTTTCTCTGCCATTTTTTGTGCGGCTTGTCCAGATACACCTGAGTCAACCTCATCGA  
ATAAAATTGCAGTTTGACCTCTCGATTTAACAAAAATACTTTTTAACGCTAACATAATTCT  
AGAAAGTTCTCCACCTGACGCAATTTTATTTAACTTTTTAATGGTTCCCCTTTATTTGGA  
CTGATTAATAAATTCTACAAATTCGATTCCATCAATATTCGGTTCTTCTAATTTTTTAAATG  
AAATCTCAAGATTTGCGTCTTTCAATTTGTAAGTTTGAATTTCCGATACAATGTGGTCTCTT  
AACTCCCTAGCGACTATACGACGCTGCTTTGATAACGCTTGTCCAACCTCTATAACTTGAT  
TATACAATGCATTTATTTCTTCTCGTAACTGCGATGACTTTGTTTCATAGTTTTCAATTTTA  
TTGATTTCAATTATTAAGCTTTTCTTGATATGCGATTAATTCTGAAATATCTTTCCATATTT  
ACGTTTTAAATTATTCAGCAAATTCATACGAGATTCATACTCGTTAACACTTGTTTCGTCG  
AATTCTGTATTAGCCATTTTCATCATATAACTCATGTTTTGCATCTTCTAAAATGTAATAAA  
ATTGATCAATATCTTCTTTTAATTTGTTCATATTTGTTTGGAACTATATCGTTTATTGTTAAC  
AAATGGTTGCTTAGTTCATACAAACGATCAGTGATAGCATTTCATCCGTTAATGTCATAT  
GTGCGTTATTAAGCGCTAAGCTTAATTTTTCAGAGTTTGAATGCGTTTAATATCTATTTTC  
AAGTTGCTCTATTTTCGCTTCTTTTAGATGTGCTTCAGACAATTCTTCTAATTGGAATTTCA  
TTAAATCTAAACGCTGCAGCAATGCTTGGTCTGCTGATTCTAAATCTTCTAACTCTTGCTT  
TTTGGCTTTATAATTTTGAAGTTTGTGATGATTTTATCCAACAAATCTTGATAACGTGAT  
TCTGCGTAATTATCCAATAATGTTAAATGGTATTTTTGTTTCAACAAAGACTGCGTTTCAT  
GTTGGCCATGAATATCTAATAATTCTTGCATAACTTTTTCGTAAATCTTGTAAGTAAGTGT  
TTGATTATTAATTTTACAAAGACTTTTACCAGAGCTGAAAATTTCCCGTTTAACTAATAAAA  
AAATCTTCATCTACATCAATATCCATATTTTTCAATATATGTATAGCATCTTACTCTCGTC  
AATATCAAATATACCTTCGATGACAGCCTTTTTTTCACCATGTCTTACAAAATCAGATGAA  
GCTCTCATTCCAATTAATTGTCCAATTGCATCTATAATAATTGACTTACCTGAACCCGTTT  
CACCCTTAAAACAGTTAAACCATCAGAAAATTGAATTTCTAACTCTTCAATAATAGCAA  
ATTGCTTGATTGATAAGGTTTGTAACAT

> **ahrC**

Function: protein coding sequence; arginine repressor (core genome, constant)

Best match: ahrC\_CC005\_Mu50-VRSA\_BA000017.4[1638477:1638929:r]RC (completely identical)

Position: 036-contig\_189: 166522 ... 166975; Length: 453 bp

Sequence:

TTATAACAAATTGAAAATCTTGACTTGATTTTCATCACTTGCCTCTTTGCTTCGACAAATA  
ATTAACAAGTATCATCACCAAAATTGTGCCTAGTACTTCTTCCAATTGATTTGGTCTA  
ATATAGCTCCAATAGATTGTGCATTACCAGGTAATGTTTTTAGAACAAGTAAATTATCAG  
TACCATCTATATTAACAAAGGAATCCATTAAATAACGTCCCAATTTTTCTAAAGGATGGA

ATTTTCTATCATTTGGTAAACTATAAACATATTGACCTGAAGGTATAGGTACTTTAATAAG  
TTGTAGTTCTTTAATATCACGAGAAACAGTTGCTTGAGTGACATTTAAATCATAATCGTTT  
AATCGTTTAACTAATTCATCTTGTGTCTCTATCTGTTCAATTTGAAATAATTTCTCTAATTTT  
TATATGCCTAACCGATTTTTTTGGGCAC

> **ispA**

Function: protein coding sequence; geranyltranstransferase (core genome, constant)

Best match: *ispA\_CC005\_Mu50-VRSA\_BA000017.4*[1639361:1640242:r]RC (completely identical)

Position: 036-contig\_189: 167406 ... 168288; Length: 882 bp

Sequence:

TTAGTGATCCCTGCTATAAAAATAAATCAACGATTTCTAATAAGTGTTTTGTATTGAATTGT  
TCATCAATTTGCGTTAGTTCATCCACTGCTGCGTCTCTATGATAAGTCAATTTATCTTCTGC  
GCCATCTTCCCTAATAAACTCACGTACGTACTTTTATTATTTCAAGATCGCTGCCCACTT  
TTTTACCTAACTTTGCTTCATCACCATAGCAGTCTAATAAATCATCTTTAATCTGGAACAT  
CATACTAAATGATAACTATAACTTTCTAAATGTTCTTTAGTTGCATCATCGACATTAGCG  
ATATCTGCTGCACTCATAACCGCAAAAGTTAATAATGCTCCTGTTTTTGTGTGTATCA  
TTTCCAAAGTTTCAAGATCAATTGGTTGGCCTTCGCTTGCATATCTAACATTTGACCGCC  
GACCATTCCAACATGACCACTTGCTATTGACAGCCGTTGTAGAACTTTTATTTTTACTTCA  
TCAGTTAATCTATCATCACTTGAAATAAGTTCAAATGCTTTAGTTAATAAAGCATCACCTG  
CTAATATCGCAGTCCACTCACCATATACTTTATGATTTGTTAATTTCCCTCGTCGATAATC  
ATCATTATCCATCGCTGGTAGGTCATCATGAATAAGTGAATATGTATGAATCATTCTAGT  
GCAATTGCGCTCTTCACACCTAACTCATACTCGGTATTTAGTGAATCTAAAGTGAGTAATA  
ACAGAAGTGGTCGGATGCGTTTACCTCCAGCATTTAATGAATACAACATGCTTCTTCTAG  
CTGAGTATCCATTACTGATTTATTTATCGCAACCGATAATTCATTATTGACTTCATCTATTA  
ATTTATTCATCGGTAGATTTCGTCAT

> **xseB**

Function: protein coding sequence; exodeoxyribonuclease 7 small subunit (core genome, constant)

Best match: *xseB\_CC001\_MW2-USA400\_BA000033.2*[1609352:1609582:r]RC (completely identical)

Position: 036-contig\_189: 168265 ... 168496; Length: 231 bp

Sequence:

TTATTCATCGGTAGATTTCGTCATTTTTTTACATCCTCAGCTTCTTCTTTTATTAAGTCATTCA  
CCTTTTTTTTCGGCATTTTTTTAAAGTTGTGTCACAAGCTGCTGATAGTTTCATACCACGTTGA  
TATAAATCTAATGATTCCTCTAAAGATACTGTTTCATTATCTAATTTTTGAACAATTTGCTC  
TAATTCTTGCATCATTCTTCAAACCTTTGCGTTTCTTTAGTCAT

> **xseA**

Function: protein coding sequence; exodeoxyribonuclease 7 large subunit (core genome, constant)

Best match: *xseA\_CC005\_Mu50-VRSA\_BA000017.4*[1640443:1641780:r]RC (completely identical)

Position: 036-contig\_189: 168488 ... 169826; Length: 1338 bp

Sequence:

TTAGTCATTATTACACCTTACTTTTCGTAACTTTTGCATCTACTAAGCCATCTTTCATTGTTA  
ACGTCAATTGATCATTTTTCTGTTAAATCTTTAGTACTCGTAATGACTTCGTCTTTTTTATTA  
ACAATTGCATATCCACGCAACATTGTATTAGTTGGACTTAAATTGTTAAGTTTTCTACTT  
TATTTTTCAAATCATTTTTATAACTTAATATCTTAGAATTCAATAATTTAACAAGTTGGTTT  
GTCAATTGAAGATTATTTTGTGTTCTTGATTAACACTACTTAGTAATGCTTTTAAATTATA  
ACGTTGTGCAACAGCATTAAATCGATGTCTCTGTTGTTCAAAGTTGCCTGAATTTGTTGT  
TTCAGTCTCTTTTCTAAATCATCTCGACGTTGTATCTGTTGATCATAACAATAAAGTTGGTT  
GTTTAAACTTGTAAATACGATGACAAATGTTCAACATGTTTACGTTGTTGTTCTAAATGTTT  
CTTGATGAAACGAGTCAATGTAAACTGATATTGCTGTATTTGTTGCAGCAATTCATATTGG  
TCTGGTGTGCAATAACAGCAGCTTGAGTTGGAGTCGCAGCTCTGATGTCTGCAGCAAAA  
TCACTTAATGTAAAGTCTGTTTCATGACCTACTGCTGATATAATCGGTGTCTTACAATTAT  
ATATTGCACGGACGACAGCTTCTTCGTTGAAATTCATAAATCTTCTATGGATCCACCACC  
TCGACCTACAATAATGGTATCTACACCTAAACTATCTGCATATTCAATTTTTTCAATAATG

TCGTCTTTTGCTTTTTACCTTGAACCAAAGTACTAATTTGTATTTGTTTCAGCTAATGGAA  
AACGACTATTTATCGTTGAATGGATATCTCGAATTGCGGCACCTGTACTCGCTGTAAAAC  
TGCAATTTTTTTAGGAACTTAGGTATTGATTTCTTATTCGCTTTATCAAACAACCTTCTT  
CAGTTAATTTTTCTTTAATGCTTCTAATTTTTGATATAAGTTCCCTATACCATCTAATTGC  
ATTTTATTTACATAAATTTGATAGTTTCCACGACGTTCAAAAACAGAAACACGTGCTTCTA  
ATAAGACTTCATCTCCTTCTTTAGGTTTCGAAGTTTAATTTAGAAGCACTACCTTTGAACAT  
CATGGCACTTATAACGCTCTCTTTATCTTTCACATTAAGTATAAATGACCACTTGAATGC  
TTTTTGAAATTTGAAAGCTCACCTTTAATCAATACAGATTGGAGATGTGGATCTTGATCAA  
ATTTATATTTAATATATTTTCGTAAAGCTGAAACACTTAAATAATCTGACAT

### > **nusB**

Function: protein coding sequence; N utilization substance protein B (core genome, constant)

Best match: nusB\_CC005\_Mu50-VRSA\_BA000017.4[1641797:1642186:r]RC (completely identical)

Position: 036-contig\_189: 169842 ... 170232; Length: 390 bp

Sequence:

TTATTTTTTTATATTACTCAATACACCATTTATAAATTTATAATGATCATCATCACTGAATT  
GTTTTGTAAATTCAACTGCTTCATTCATTACGACTTTAGCAGGTGTATCACTGTGTAATATT  
TCATATGTTGCCATTCTTAAAATAATACGATCCGTTTTTAATAAACGTGCAATAGTCCAAT  
CTTTTAAATAAGGACTAATTGTCTCGTCTAATACAGGTTTCGTGATCTTTAACGCCAGAAAC  
TAGCCAATGAATAAATTCAAAGTCTAAATCTGGATTATCGTCTTTAATAAACTTATCGCT  
TCATTTATCGTTAAATCACTGTCTTCATTTCTAATTGAAATAAAGTTTGAAAAGCTTGCA  
CTCGGGATTCTTTACGACTCAT

### > **yqhY**

Function: protein coding sequence; putative protein (core genome, constant)

Best match: yqhY\_CC001\_MW2-USA400\_BA000033.2[1611378:1611740:r]RC (completely identical)

Position: 036-contig\_189: 170291 ... 170654; Length: 363 bp

Sequence:

TTACTTTTCAATAACGATTTGTGTAATGTGAATATTAATTTGCTTAGGTTCTATCGCTGTCA  
TATTAGAAATTGAATTAATAAATTGACGTTTGAATTTTGTTCAGTTTTGAAATATTAAC  
ACCATGTTTTAATGCACAATATACATCTATATATATGCCATCTTCTTTACTCTCGATTTTTA  
AATCACGGCTTAAATTTTTACGACTAACTTTTTCTAAATTTGTTTCTTTTAATTCAGCAAAA  
TGGCCAGTGATGCCTTCGACTTCCGAAGTAGCTATACTTGCAATAACAGATAGCACTTCT  
GGCGCTATTTCTACTTTACCTAATTTTGAATTTGAATAATCAGTTACTTTGACCAT

### > **accC**

Function: protein coding sequence; acetyl-CoA carboxylase/biotin carboxylase (core genome, constant)

Best match: accC\_CC001\_MW2-USA400\_BA000033.2[1611755:1613110:r]RC (completely identical)

Position: 036-contig\_189: 170668 ... 172024; Length: 1356 bp

Sequence:

TTAACCTTCATCATTTCATAATGCTATTTTGCTCTAAAAAGTTTGTATTAATTTACCGCTTC  
TAAATATATCGTTATTCAATAATTTAATATGGAATGGAATAGTTGTATCAATACCAAGAA  
CCACAAATTCACTTAATGCACGAATGCCAGCCATAATCGCTTCATCTCGTGTCCGTTTCATG  
TATGATTAATTTTCGCTACCATCGAATCATAATATGGCGGTATCGTATAATTAGTATAACAT  
GCTGACTCTATTCGAACACCATATCCACCTGGTGCAAGATATTGCTCAATTTTACCTGGTG  
ATGGCATAAAGTTCTTGTAAGGATTTTCAGCATTAAATTCTAAATTC AATTGCGTGTCCCTGT  
TAATTTAATATCTTCTTGTTTATACGGTAACACGTCACCCATAGCAACCTGTAATTGTAAT  
TTAACTAAATCAATTCCTGTTACCATTTTCAGTTACAGGATGTTCTACTTGAATACGTGTAT  
TCATTTCCATAAAAATAAAATTTATTATCATTTAAATCATATATAAACTCAATTGTTCCCGC  
ATTTTCATAATTTACAGCTTTTCGCTGCACGCACTGCGGCATTTCCATTTACGACGTGTT  
TCATCATCTAAAATTTGGGGAAGGTGCTTCTTCCACTAATTTCTGCATACGTCTTTGAATTG  
TACAATCACGTTCTCCTAAATGAATTACATTACCATAGCTGTCCCAACAATTTGGATTTTC

AATATGGCGGAAGTTTTTCGATGAATTTCTCCATATAAAGTCCACCATTACCAAATGCAGT  
TTGAGCTTCTTGTCTGTCATTCGGAAGCCAGTTTCAAGTTCTTTTTTCATCACGAGCAACA  
CGAATACCTTTTCCGCCACCACCAGCAGTAGCTTTAATGATGACCGGATAGCCAATTTTTT  
TAGCGATTTTCTTAGCTTCTGAGACGTCTTTCATTAACCATCACTACCAGGAACAACCTGG  
AACATTGGCTTTGATCATTCTGCCTTAGCAACATCTTTGATAACCCATTTTTTTGGATAGATT  
GATAACTTGGTCCAATGAACTTCAATTGGCATGCTTCGCATAATTCTGCAAAGTCAGCATT  
TTCAGCTAAAAAGCCATAACCCGGATGAACGCCATCACAACTGTAGAAGTTGCAATAG  
ATAAGATGTTCCGGAATATTTAAATATGAATCTTTAGACAAAGTGGGACCTACGCAATAG  
CTTCATCAGCAATTTGAGTATGTAGCGCATCTTTATCCCCTTCAGAATAGATTGCAACAGT  
TTGGATGCCTAAATCACGACAAGCGCGAATAATCCTAACTGCGATTTACCCGCGGTTTGC  
AATTA AACCTTTTTTCAT

> **accB**

Function: protein coding sequence; acetyl-CoA carboxylase/biotin carboxyl carrier protein (core genome, constant)

Best match: accB\_CC001\_MW2-USA400\_BA000033.2[1613110:1613574:r]RC (completely identical)

Position: 036-contig\_189: 172023 ... 172488; Length: 465 bp

Sequence:

TTATTTACCTTAAATAACGGTTGGCCATACTCTACCATTTGTCCGTCTTCTACTAAGATTT  
CAACAATTTACCTGAAATTTCTGCTTGAATTTCAATTAATAGTTTCATTGCCTCTAAAAT  
ACACACTGTTGTTTCATTTGAAACAGTGTCCCAACTTGCACATATGCTTCTTCGTCTGGA  
GATGGCGATTTGTAAAATGTACCTACCATAGGTGCATTAATTGTTTTGTGATTATCTGAAG  
TTGGCTTTGGAGCTTCAGTTTTATTGCTATCAGTTGATTGTACTTGAGGCATAGGCATTGC  
CGCAGCTTCAACTGGCATTGTGAGATTTGTGGCGTGATAATCTCAGTTTCTTTTTCTTTCT  
TAAGCGTCACTTTGCCTTTAGTATCTTCAATATTGATTTCCGTTAAAGTTGATTTATCCAG  
AATTTCAATTAATTCTTTGATTTCTTTAAAGTTTCAT

> **efp**

Function: protein coding sequence; translation elongation factor P (core genome, constant)

Best match: efp\_CC005\_Mu50-VRSA\_BA000017.4[1644916:1645473:r]RC (completely identical)

Position: 036-contig\_189: 172961 ... 173519; Length: 558 bp

Sequence:

TTATCCTCTTGAAATGTAGCTTCCATCACCAGTGTTGATAATTA AAAACGTCACCTTCGTTT  
ACAAATAAAGGTACATTTAATGTATAACCAGTTTCAACAGTTGCCGATTTAGTGGCACCA  
GTTGCAGTATCACCTTAATACCAGGTTCTGTTTCAGTTACTGTTAATTCAACAGTTTTAG  
GTAATTC AACACCGATAGTTTCACCTTCGTATGTTTGAATTTGTACTTCCATACCTTCTTTT  
AAGTAATTC AATTCTTCTTTTAAGTAATCACTTGAAAGTTCTGTTTGTTC AAAGCTTTTCATT  
ATCCATAAATACATGATTATCTCCGTCAGCATATAAATATTGCATGCGACGATTTTCAATC  
ATTGCTGGTTCAACTTTTTACCAGCTCTAAACGTTTTCTCTTGAATTGCACCAGTTCTTAA  
ATTACGTAATTTGAACGAACGAATGCTGAACCTTTACCAGGCTTTACATGTTGGAAGTCT  
ATAACTTTCCAAATAGCGTTATCAACAGAAATTGTTAAACCTGTTTTAAATCATTAACCG  
AAATCAT

> **A5IT58**

Function: protein coding sequence; proline dipeptidase (core genome, constant)

Best match: A5IT58\_CC025\_21193\_AFEG01000018.1[39138:40199:r]RC (completely identical)

Position: 036-contig\_189: 173544 ... 174606; Length: 1062 bp

Sequence:

TTATGTTAAAAC TATAAGGTCTTTTTGTGCATTTAGTAAAGACTTGACAACCATTTTCTGTA  
ATTA AAAATATCATCTTCTATTCTTATACCGCCCAAACCTTCTATATAAACACCAGGTTCTA  
CTGTAACACAGTTGTAACTTGAAGTTTATCTTGTATCGTACGAGCCAGCATTGGCCCTTC  
ATGGATTTCTAAACCAATACCATGTCCTAGTGAATGTCCAAATTCTTTCCATACCCTTTT  
GACTCTAAATAGTTTCTTGAATGGCATCAGCTTCTGCACCAGTCATGCCAGGTCTAATCT  
CATTAATTGCTTTCATTTGAGATTCAAGTACTATTTGATATATTTCTTTCAGTTTAGGATCT

GGTTCCTCCAATAGCAAATGTTCTAGTAATATCTGAACAATAGCCGTTATAATATGCGCCA  
AAATCTAATGTAATCATGTCGCCTTTTTCAATAATTTTGTCACTTGCAACACCATGTGGTA  
ATGCACCTCTATGACCAGATGCTACAATCGTATCGAATGATGGTCCATCTGCTCCTAATTC  
TAGCATTTTACTTTCTAATATTGCCTTTAATTCTTTTTTCAGTCATACCTGCTTTTACAACAG  
TTAAAATATATTCATATGTTTCATCAACAATATTAGCTGCTTTTTGAATTAAGCAATTTTC  
GTCAGCATCTTTGACGTCTCTAATTTTATCTACAGTATTAGAAATGCTTATTAATGATATA  
CGACTTTTATTTAATTCAAGGTATGTATCATAACTTACATGATGCCCTCAAACCTACAT  
TTTCAAATTTTCTTGGTGTAGCAATTCTTTAATCTCACCAATAATAGTAGATTACGATT  
AATAATTTCATAATTTGGCGCTTGCTTAGTTGCTTGATCAATATATCTAAAGTCTGTTATC  
AAATATTGTTTATCTTTAGATATGATAAGTGCTCCACTGGTACCAGTAAAACCTGATAAAT  
ATCTTCTATTGTAATCCGAAAGAATGATAATCGCATCTAAATGTTTTTGTCTAAAATACG  
ATGCACTTGTGTTATTCTGCTCAT

### > **gcvPB**

Function: protein coding sequence; glycine cleavage system P/subunit 2 (core genome, constant)

Best match: gcvPB\_CC001\_MW2-USA400\_BA000033.2[1618416:1619888:r]RC

Position: 036-contig\_189: 177325 ... 178798; Length: 1473 bp

Sequence:

TTATTTTTCTGTTTAAAGATTTTCAAACCTTTAATATTGGTTTACGAGCAGCTGTAGCTTCGT  
CTAATCGATCAATCACAGTTGTATGTGGTGCCTTAGCACTTTATCAGGATCATTTTTAGC  
TTCTTCAGCAATACTAATTAATGTATCGATAAAAATAATCAAGTGTTTCTTTAGACTCTGTC  
TCAGTCGGTTCAATCATCATACCTTCTTCAACATTTAATGGGAAGTATATTGTTGGTGGAT  
GTACACCGAAATCTAATAATCGCTTAGCCATGTCTAAAGTACGTACACCAAATTCCTTTTTG  
ACGCACACCACTTAACACAAACTCGTGTTTACAATATTGTTTATAAGGTATTTCAAAGTGT  
TCAGATAAACGTGCTTTAATATAATTCGCATTAAGAACCCTGCTTCAGAAACCTCTTTAA  
GTCCAGTTGCTCCCATAGTTCGAATATACGTATAAGCTCTTAAGTAAATACCAAAGTTAC  
CATAAAATGGTTTTACACGTCCGATAGAATTTTTAATGTCATTATCATATTTAAATTTGTC  
GCCATCTTTAATAACCATTGGCTTTGGTAAGTAACTTGCTAGTTCTTTTACTACACCGACT  
GGACCTGAACCAGGACCGCCACCACCATGTGGACCAGTAAATGTTTTATGCAAGTTTAAA  
TGAACAGCATCAAATCCCATACTCCTGGGCGAACTTTGTCCATAATAGCGTTTAAATTCG  
CACCATCATAATATAATAGACCACCAGCATTATGGACGATTTACGGATTTCCATAATAT  
TTTTTTTCGAAAATACCTAAAGTGTTTGGATTAGTTAACATAATAGCTGCTGTATTTTCATT  
TACAACACGTTTCAAGTCATCAATATCAACTTCGCCACGTTTCGTTTGATTTTACAGTAACT  
GATTTAAATCCTGCAAATGAAGCTGAGGCTGGATTTCGTACCATGCGCAGAATCTGGCACA  
ATGACTTCATCACGATGACCTTCACCATTATTCTCATGGTAAGCTTTAAATATCATCAATG  
CAGTCCATTACCATTGTGCGCCAGCAGCTGGTTGTAATGTCACCTCATCCATAACCAGTAAT  
TTCTTTTAAATTCTTCTTGCAAACCTATAAATAATTTCTAATGAACCTTGAACCTTGATCTTCAT  
CTTGTAATGGATGTGATTCACTAAATCCTGGTATTCTAGCAACCTTTTTCATTAATTTTAGG  
GTTATACTTCATCGTACATGAACCCAATGGATAAAAATCCGTTGTCTACACCGAAATTTTTA  
TTTGAAAGTTCAGTATAATGACGTACTAAGTCTAGTTCAGCAACTTCAGGAAACTCCGCT  
TTGTTTTTACGAATAAATTTATCATCTAACAATGACTCAACAGAATTTGTTTTAATATCAC  
TTTTTGGTAATGAATATGCATATCTGCCTTCACGAGATCTTTCAAAATTAATGGACTTGA  
TTTACTAGTCAT

### > **gcvPA**

Function: protein coding sequence; glycine cleavage system P/subunit 1 (core genome, constant)

Best match: gcvPA\_CC001\_MW2-USA400\_BA000033.2[1619881:1621227:r]RC

Position: 036-contig\_189: 178790 ... 180137; Length: 1347 bp

Sequence:

CTAGTCATTTAACTCACCAGCCTTTTCTACAAATGTATCGATTTTCATCTTTTGTTCCTAATT  
CAGTTACAGCTATTAACATGTGATTTTTAAAGTTCGTCTGAAACAACACCTAAATCAAAC  
CACCGATAATATTGTACTTCACTAATTCCTCGTTAACTTGTGGAATGGTTTGTCAAATTT  
GACTACAAACTCATTGAAAGATGTACCATCTAATACTTCAAACCTTTTTTAAATAAATTTG  
TGTTTAGCATAGTTAGCATGTTCTATATTTTGAACCTGCAATATCATAGATACCTTGTTTAC  
CAAGTGCTGACATTGCAATTGATGACGCTAAAGCATTTAATGCTTGGTTAGAACAATAT



TAGATGTCGCTTTATCGCGTCGAATATGTTGTTACGTGCTTGTAATGTTAATACAAAGCC  
ACGATTACCTTCATCATCTTGTGTTTGACCGACTAATCTACCTGGCACTTTACGCATTAAC  
TTTTTCGTCGTTGCAAAATATCCACAATGTGGCCACCGAATTGAGCAGGAATCCGAAT  
GGCTGAGTATCACCTACAACAATATCTGCACCAAATGAACCTGGAGGTGTAAGTAATCCC  
AATGCTAATGGATTTGCATATACGATAAATAATGCTTTTTTATCTTCAATAAAGCTATGAA  
TCTTTTCAAGATCTTCAATTGAACCGTAAAAGTTTGGATATTGTAAGTGCAAAAGCTGCTGT  
TTCATCATCCACTGCTGCTTCTAATTTTTTCAAATCTGTAACAGTGCCATCTAAATCGATTT  
CCATTACTTCGAATTCCTTACGCGTCTTAGCATAAGTATGAAGTACTTGTAATGCTTGATA  
ATGTAAACCTTTTGAGACTACAATTTTTATTTTTCTTTGTTTGACTAAATGCTAAGATACAT  
GCTTCAGCAAAGCTAGTCATCCCATCATAACATAGAAGAATTTGCTACATCCATATCTGTTA  
ATTCACAAATTAAGTTTGGAACTCAAAAATGGCTTGTAATTCACCTTGAGAAATTTCCG  
GTTGATATGGCGTATATGCTGTGTAATAATTCTGATCTTGAAATCATAGCATCCACAACCTG  
ATGGCGCGTAATGATCATAAACACCAGCACCCAAAAATGATGTATGCGTTTTCTTTAGTGA  
TATTCTTGCTTGCAATGCGATTTAATCTTCTAAGTAACGTTGTTTCCGCTTCGCCTTCAGCA  
ATATTTAAATCTCTATTTAATAAAAATGTCACTTGGTACATCACCGAATAATTCTCCTATAG  
ATTTTGCACCAATTGTTTGTAAACATTTCTTGCTTGTCTTTTTTCAGTTAAAGGTATATAACGA  
TGACTCAC

> **gcvT**

Function: protein coding sequence; glycine cleavage system T/protein component (core genome, constant)

Best match: gcvT\_CC001\_MW2-USA400\_BA000033.2[1621247:1622338:r]RC

Position: 036-contig\_189: 180156 ... 181248; Length: 1092 bp

Sequence:

TTATTTATCAATTTGATTTTTCTTAACAATTTTCGCTTTTAATTGACGCTTACGAACTTGAA  
CAAGTAACTCTACCCATTTCAAACCTCATCTTTTTATCATTGCAAGTGCAATTGATTTT  
CCTGATGATGGAGACTGTGTTCTGAAGTACTTCTCCAATAATTTCCATCTAAATCCA  
TAACTTCATAACCAGTTCTTGCAATTCCTTTTTCAAGTAATTCTAATCCCCTGTTCTTCTT  
GGTGCACCATTTTCTTTTTGATCTTTTAATACAGATTTACCAATAAAAATCAGTATCAATTA  
ATGGTTTACTTGCAAAAGCGATAACCACCTTCATATGGTGTAATTGATTCAGTTAAATCTTG  
TCCATGTAATGGCAATCCAGCCTCTAATCTTAATGTATCACGAGCGCCTAACCCACATGG  
CATAACATTATACTCTAATAAACCATCCCAAATTTTTTTCAGTATCATCGATATTACAATAA  
ATTTCAAACCCATCTTCACCTGTGTAACCTGACTGAGATAAAAATGACGTTTGCTCCAATA  
ATTTGAAACCCTGTTTAAATTCAAACATTTTCATTTTCAGTTACATCTTCATCAACTAATTG  
ATTAATTAATCTCTAGCTTTTGGTCCTTGTATTGCTAATTGACCATATTGGTTTGATACAT  
TTTGTACTTCAACATCAAATTTCTCTTTGTGTTTTAAAATCCAATTAATAATCTTTTTTCAGTA  
TTAGCAGCATTAACAATAATAAATAATTGTCGTCAGCTAATTTATATATACTAAATCAT  
CAATAATACCGCCTTCTTCATTACATAAAGCAGTATATAATGCTTTTTGAAGTAGTTAAATT  
ATCAGTATCATTTGATAATAAATAATTGCACAACTGACTAGCATCTTTACCTGTTACTTCA  
ATTTACCCATATGACTAACATCAAACAGGCCAATTTTCGTATCGAACAGCATTATGCTCCT  
CTTTAATACTTGAAAATTGAACAGGCATCGCCATCCTCCGAATTCCACAATTTTTGCACC  
TCTATCAACATAATTTTGATATAAAGGTGTTTGTTTTTAAATCACTTGACAT

> **aroK**

Function: protein coding sequence; shikimate kinase (core genome, constant)

Best match: aroK\_CC001\_MW2-USA400\_BA000033.2[1622497:1623021:r]RC

Position: 036-contig\_189: 181406 ... 181931; Length: 525 bp

Sequence:

CTAATACTGATCACTCGCTTTTTATTAAATTTAGCAATTCATAATATATTTCTGAAATTGAT  
AGCAAATGACTATCAAATTTCTTGAATGCGATTTTATTATATCTTAAATTCGCGAGCAAT  
ACAAGTCATTTAACTGCTTGATTGTCTTATTATTTGCATTAGGTCGATGTGGGTCATCATT  
GATTTCGACTATATATAATATCAATATTACAATCTAACCAAATAATGTTTTTTTGGATTTTTC  
AAAAAATTAATGCCTTCTCACTTTCAATTATACCACCACCAGTAGCAATTATATCTGCAG  
TGTTAATACATTCTTGCAAACATGTGAACTCTAAATTCCTGAAATATTGTTTACCATGTTT  
ACTAAATATTTCTGGTATTGTTAACTTATACTTCTCTTCGATATATGAATCTATATCAATA

AATGATAAATTTTGTCTCATCTGCAACGTATTTACCAATCGTAGATTTACCGGTACCCATGA  
AACCAATTAATAATTATTGGTGATTTATCATGATTCAT

### > **comGF**

Function: protein coding sequence; late competence protein F (core genome, constant)

Best match: comGF\_CC001\_MW2-USA400\_BA000033.2[1623254:1623751:r]RC

Position: 036-contig\_189: 182163 ... 182661; Length: 498 bp

Sequence:

TTATACATAAATAGTTTTAGTCTGCACATTTGTACCGACTTTAACTGTTATCGTTATTTTAA  
TAATGGATTTATAGTAGATATTTGCAGTAAATGCTGTAACATTATTAATCATTGTTATATT  
TCCTCTGTCATTTACAACCTTTAATAATTTTATTATTTATTAATTTGTATTTCGATCATTTCCTC  
ACCTTTATGTAAAATGATACGCTGTTGCCTAATTTCAATATCGTTTCTATCTACTCCTTTAA  
AATCCTCTAGAATATCTCTTGAGAAAAATTCGAAATCTACAGTTGTTAATTCCTACTTTTC  
AATTAGAAAAGTTTTGCTAAGTCTAATTAAGTCTGGAACAATTAGTAAAGTTATACTTAT  
AACCATCATCGCTACTAACATTTCAATGAGCGAAAAAGCTTTGACATTAATACTGTATAC  
ATGTCTTTTGATAAGAAGTGGTATTTTTTGAATAGCACAAATTTGTTGGTCACTTTGCTT  
AATATCAT

### > **comGE**

Function: protein coding sequence; late competence protein E (core genome, variable)

Best match: comGE\_ST425\_LGA251-cow\_FR821779.1[1602358:1602657:r]RC (completely identical)

Position: 036-contig\_189: 182578 ... 182878; Length: 300 bp

Sequence:

TTAATACTGTATACATGTCTTTTGATAAGAAGTGGTATTTTTTGAATAGCACAAATTTGT  
TGGTCACTTTGCTTAATATCATACTTCCCTATAGTTACCCCTTCTTAAGTTCTTCTTTATT  
AATTTTAGATACAGTCGTCAAATTACTTTAGAAGCATCAATTGTTTGTAGTTTATGGTTT  
ATACTCGCTTGCATTTGATTCATCATTGGTATCAATAGTAATGTAATCAATCCAATTAGCA  
AAAATCCAGCCATACTATCTATTAAGAATGATCCTTTACACTTATAGCTTTTCAT

### > **comGD**

Function: protein coding sequence; late competence protein D (core genome, constant)

Best match: comGD\_CC001\_MW2-USA400\_BA000033.2[1624000:1624446:r]RC

Position: 036-contig\_189: 182864 ... 183311; Length: 447 bp

Sequence:

TTATAGCTTTTCATAACGAATTCTTCCTTTTCAATATGGAATATTATTCTATAAAATTGAAT  
TGTTATTGTCAATTGTTATACTACCAAATTTATTGATATTCCCTTTTTTATCAAAGGCAATA  
ATATCAACTTTTGCAACATTAATTTTGCCTACTTTAATTTTAGAAATCGTATTTTATT  
ATTCTCTATTACTTTAATAGTGTCACTGTTTTCATAAAATCTAACATTGATATATCCTTGAT  
TTGCTATAGCTTGCAGCTTAATATAATTCAATTCAGTAATAAAAGAAATGATATTTGCCTC  
ATCATCTATTACTCTAAGATTGCTTAATCCTTTAGATGTCAATTGTCAAAGTAGAAATATA  
CTGATTAACATCATTACCACAAGCATCTCAATCATAGTAAATGCTGACTGCTTTCTAATTT  
GCAACTGCTTCTCCAT

### > **comGC**

Function: protein coding sequence; late competence protein C (core genome, constant)

Best match: comGC\_CC005\_Mu50-VRSA\_BA000017.4[1655244:1655555:r]RC (completely identical)

Position: 036-contig\_189: 183288 ... 183600; Length: 312 bp

Sequence:

CTAATTTGCAACTGCTTCTCCATTAATAATTGTTATTGTCTCTCCTGATTTACATGTCTTTT  
GTGCTTCTTTATAAAACCATCTGCAATTAAGTCTTCAATAGACGATGGATTTCTATTATG  
TTCAATGCATACGCTTCAATTTGACTATTAACCATTTTACCTGTGCATTACAACCTGTTG  
ATTGTATGTGAGCAGTTTGTGTTAGCAATATTTGGAATGATTAATAATAATAAACTGAT

GATTAATAACACTAATAGCATCTCTATCAATGTAAACGCTTGAGTTTTCTTAAGAAATTTA  
AACAT

### > **comGB**

Function: protein coding sequence; late competence protein B (core genome, variable)

Best match: comGB\_CC001-ST772\_118\_AJGE01000022.1[52927:53997]RC (completely identical)

Position: 036-contig\_189: 183613 ... 184684; Length: 1071 bp

Sequence:

TTATTTTATACTTTGCATCATTTGAAACATTGGTAACATAATTAATAAAATTGCGACA  
ATAAATAAACCTAAAATCAAAAATAAAATAGGCTGTAAAACTGAGTCTGTTTTATCGCT  
TTATCTTCTATTTGTTTTACTAATATTTGCGAATATAACTTTAGTTCTACTTCTAGCTTCCC  
TCTCTTTTCACCTTGTAGCACAACTTAATTAATTGAGGCTTAAAGCATTTTAGTTTTTCTA  
AAATTTGAGGCAAACCATATCCCATTCTGAATAAGTTAATAAGTATTTACCTAGAACT  
GTCTAAATGGATCACTACTATGGTTAATAAACGTCTACTATTGATTGAAGTGAATACC  
ATTTTTATAAAACAACACTAATTCATTAGTTACAAAATAAGTTTTAAATAATTGGAAATA  
GCCTGATATTAGCGGTAGTTTCATCACAAAGTTTATCTTATTGAGCATATTTAAATTGTTA  
TAAATTAATTTCATAATAATAGCCAACATAGATACTATTATGAGCATTACTACAATTATA  
GTAGGTAAGCTGGTAATGAAAAAAGACAATGTTTTTTGAAAAGAGGATAGTTGAATATTC  
ATAGAAGTATATAATTGTTGAACTGTGGAATTACTGTGAGGTTTAATATAATAATCATA  
GCAATAAAAATAGAACTAGTATTAAGGGGTATTGCAGTGTCTTAAACAATCGTTGTTCT  
GACTTTCTATTCACTTTCATATAATTTACGGTTTCTTCTAGAACGTCTATAATATTACCAA  
TCTTTCTGCCAAATATACTTGCATGACGATAGTATCGCTATAACCTATCAGTGATAATATC  
TGATTGCATGGTGCACCATTGAAATTTCACTTAGAATGGTGGCACCTAATTGCTTATTTT  
TATATGCCATTTGAAGATTTAAAAATTGAAAACCTTTGATACAGAGTGAAACCATATTTCA  
ACAAATTACATAAATTTGAAAGTAAGTCGATTTGTTGGGCCTTACTTAATTGTCGCTTCTT  
AGAATGTAGTTTAAATGTATTTATCCATTGTAGTTTCAC

### > **comGA**

Function: protein coding sequence; late competence protein A (core genome, constant)

Best match: comGA\_CC001-ST772\_118\_AJGE01000022.1[51981:52955]RC (completely identical)

Position: 036-contig\_189: 184655 ... 185630; Length: 975 bp

Sequence:

TTAAATGTATTTATCCATTGTAGTTTCACAAATGACACCTGCTTTTTGTCATATCATCAAGT  
TTATCTTCTAAGTTCTTAAATGATGATGGTAATGAATGATTATGGGAAAAGAAATATCGG  
AGTTGTTGCTGAGATAGAATTTACATACTAATTGTCGCTGTTGCTTAATAGTAGTTACAA  
GTCGTTGGTTTATAATTAAGTTAGTTGCCTGTATCAATTCTTGTACAGAAATGCCCATTTT  
TAATAGCCTTAAAATAGCACCTTTACAATCAGTTGCATGCAATGTAGTCAGAACAAGGTG  
ACCACTTAACTAGCCTGTATAACACACTTGGCAACATCTTTATCTCTGATTTACCTATT  
AAAATAACATCAGGATCACATCTTAAAATAGCTTTAAACGAATTTACATAGTTTATGCCA  
GCTTTATCATTACATTAATTTGGACGATACCAGGAATTTGCATCTCTACAGGATCCTCTA  
TAGAAATTACATTTAAATTCAAGGCTTTATTCGCGTATGAGACCATTTGATACATTAATGT  
ACTCTTTCCTGAACCAGTTGGTCCACTAAACAATAGTAATCCTTGTTCCTTATTCATGAGG  
TGTTTAAAATCATTGAATTTATAAGTTGATTTCTGTGGTTGAAAAAATTGAGGTACAATTC  
TGATAACACAACCTTTCTTGGCCAAGTGACAATGGTAAAGTTGATATTCTCAAAAATATA  
TTTTATTGAAAAGGTAACATATCGACCGCTCTGTGCGACTTGTGTGTAGAAACATCAA  
GCCAGCTTGAACTTCATATAAACTAATAACTTTTGATAAATGCTATTCCCAATTTGTTT  
ATACTGCTCCAAGTTATCATTAAATTCTAAATTTAATACTTACTTCATTTTAACTGGAATA  
AAATGTACATCACTCGCTTTCATTTCTATCGCTTTATTAATTAATTTCTTGAATAGAAATCTT  
CAA

### > **glk**

Function: protein coding sequence; glucokinase (core genome, constant)

Best match: glk\_CC001\_MW2-USA400\_BA000033.2[1627766:1628752:r]RC (completely identical)

Position: 036-contig\_189: 186630 ... 187617; Length: 987 bp

Sequence:

TTATTTTACCCCCTCTTTATCTAATACATAGGTCTTGATTAATCCTGCTGCTCCTGTAATAC  
CTGCATCATTACCTAATTTTCGCTTGTACAATTTTCAGTTTCAAATTGAGCAGGTGCAAATGT  
TAAATTATGATATTCTGTTTTAATATTTTCAATTAATAAGGTCTGCAGTAGACATTCT  
CCACCTAGAACGATATATTTTCGGATTACTTGTAACACTAATAATACTACATAAATATCCA  
ATATAGTTTGCACCTTTTTCAGTAATGAAAATACAGAATTGGTCACCAGCTTTTGGCCGAT  
CAAAAACAGCTTTTGTGTAACCTTATTTTCTTTAATCAATTTCTAATATAGAAGATCTAAA  
CGTCAACTTCGGATAGTAGAAGTTAACTAAGTTAAACAACGCCTGTGCTGAAGCAACTGT  
TTCAATACATCCAGAACGACCACAATTACATTTAAATCGTTGATCGAAGTCTGCTCTAAA  
ATGACCTATTTCTGCGCCAGAGCCATTATGACCATGTACGATTTACCATTGAAATAATT  
CCTCCACCTAGACCTGTACCAAGTGTGATGGCAACAACATCATCGGCACCTTCACCAGCA  
CCTTTGTGTTTCTCCCCTAAAGCAGCTATGTTAGCATCATTATCTACATACTGGACAAT  
CAACGAATTGTTCAAAAATCTCACGTACATTAACTTTTCTGGCCAATATAAGTTTACTGC  
TCCATTTACTGTACCTTTTTCAAAGTCAACAGGACCTGGTACACCAATACCTACGCCAAGT  
ACATTTGAAAAATTATAATTATTTTCAATTTACTTTTTCAACAAACGAATCATAAATTCCTT  
TCAAAAGTGTATATCCTGTAATATCAGATGTATCAGTGTGAATAGACCATTTATGTAATTG  
TTCTAATTCAGGTGTGAAAATACCTAATTTACAAGTTCGTCGCCCTACATCAGCTGCTAAA  
ATAATTTTTGTCAT

### > rpmG1

Function: protein coding sequence; 50S ribosomal protein L33/locus 1 (core genome, constant)  
Best match: rpmG1\_CC001\_MW2-USA400\_BA000033.2[1631156:1631305:r]RC (completely identical)

Position: 036-contig\_189: 190020 ... 190170; Length: 150 bp

Sequence:

TTATTTTGTTCACGGTGTAAAGTTTGTGTTTTCACGTGAACAGAATTTCTTCATTTCAA  
CACGTTCTGGATTATTTCTTTTGTCTTAGTTGTAATGTAGTTTCTGTCACCACATTCCGTA  
CAAGCTAAAGTTACGTTTACGCGCAT

### > pbpC

Function: protein coding sequence; penicillin binding protein C (core genome, constant)  
Best match: pbpC\_CC005\_Mu50-VRSA\_BA000017.4[1662238:1664313:r]RC (completely identical)

Position: 036-contig\_189: 190282 ... 192358; Length: 2076 bp

Sequence:

TTATTTGTCTTTGTCTTTATTTTTATCATCTTTACCTAAGTCTTAAAGTAGTAGTTAATTA  
CATCTCTACCTAAGTCTCCACCTGTTAACCATGGTGGTGGTACAGGCTGATTTGTATATAC  
AATTGAAAACGCTAATTTTGGATCATCAATTGGCGCGTATCCTATATAAGTAGAGTTAAC  
TCTTGGCTCTCCGTTTTGGAACACTTCAGCGGTACCCGTTTTACCAGCAGTAGGTA  
GTATCTTTAAACTAACATATCCAGTACCATCTTTATCATTAAATGCCATTTTGAATCCTT  
CTTGAATTTGTTGATTTCCCTTTTCAGTATTATTAACCTTGTTCAAGACAGTGCCATTAAT  
TTCTTCTGAGTGGACCAACCTCATCTTTATTAGTTGATTCATGAATCGTTAATCCAATGT  
GTGGCTGTATTCTATAACCATCATTGCTATAGTTGAAACATATTGTGATAATTGTAATGG  
TGTATAGGTATCATATTGACCAATTGATAAATCTAGATAATTACCTGGATTATTTGTTAAT  
GGTTCGATTTGACCTCTTGTTCATTTGGTAAATCTATCCCTGTTTTACACCTAAGCCTAC  
TTGATTTAATCCTCTTCTAAGCTTTTGGGCAGGTGAACCTTATATCTGAAGGTAAAGCCATA  
CCAGAATAATAAGGGTCTCCCGCTAATTTAATGCTGTTTTAAACATATATACGTTTGATG  
AATGCATCAAAGCTTGCTTATCATTAAATAGATACATGCCCGTTTTTATTGAAGTATGATCG  
TTTTGTCAAACCACCTTGGAATGTAATGGTTCATCGACCATTGTTTCTCCAACCTTTGATA  
GCTTTATTCTGATAACCAGCTAATAATGTTCCACCTTTTACAGAAGATCCAACCGCAAATT  
GAGAAGTAAACGTACCAATGTCATAATCAGTCATTTTACCACTCTTATTAATCTGCTTTCC  
GGCAAGCGCAAGAATGTCTCCATTTTTAGGATTTTGTACAACCATCATAGCATTATCCATA  
TCTTTTGCACCTTGGCTGCGAAGCTTCTTAATTTGTTTATCTAATAATGCTTCTACTTCTTT  
TTGAAGATCTATATCGATCGTTAATTTCAAATCTTGACCGCGAGCGCCAGGATTTAACT  
TCTGAAGATGTAACCTTTACCAGATTTGTCCGTTGTGATTTTCAATTTCTTTCTTACCACG  
CAATACATCTTCATATTGATATTCTAGGTAAAGATTTTCCAACACGATCATTGCGTGAATAT  
CCTTTGGATAAGTAATGTTCTGTCAATTTCTTTTGAATACCTTCAGCAGGTGTCGATACAT

CTCCGAATATAACCTCTTAAAGTATCGCCATATGGATATTTTCTATCCCAATCCATAGACGT  
GTAAACACCTGGTAATTTGGAAAGTTGCTGAGAACTGCTGCATACTCTTTTCACTGACA  
TCTTCATTTTTTATCATTGTGGATCTAAACTGTTCTGCATTCATCTCTCGAAAAATAGC  
TAAACTTGTAATCTTTAGAAGACAATTCATCTAATTGTGATTTTCCGATTTTCGATAAC  
AGTTGTTTATCATATTGATCTTGTTTAATACTTCCATCTGCTAACATAGCTTGTCTTTTGT  
CATCATTGCTTTTGTCTTTTAGGATGCAACTGAATCCAGAAATCTTTCTTATCACGTTCTG  
TAATTTTCTTAGTATCCATCTTGATTAGCTTTGATAACTTTTCAGCCGTATCCAACATTTCC  
GATTGTGTTGTTTTTCGACCCCTAGTATATGTAATAGCCATTTTAGAAGCATTATCAACTA  
AAACTTTCCATTTCTGTCTAAAATACGACCTCTTGGCACAGACTCATTCACTGTAATGTT  
TTCATCATTTTTTATAAATTGTTTATAATGTGAGCCTTGTGCGATTTGTAATAACCTAAAC  
GTAGTACTAGTACTGCAAAAATAAATACAATCACACCAAATATAAAGTTAATTCTCTTGT  
TAATTGTATTTTGAACGATTTTCATCATTGATTTTTCTTTTAGTCTTTTAAACA

### > **sodA-L2**

Function: protein coding sequence; superoxide dismutase/locus 2 (core genome, constant)

Best match: sodA-L2\_CC005\_Mu50-VRSA\_BA000017.4[1664434:1665033:r]RC (completely identical)

Position: 036-contig\_189: 192478 ... 193078; Length: 600 bp

Sequence:

TTATTTTGTTCATTATATAATTCGTCAACTTTTTCCAGTTAACTACATTCCAAAATGCGC  
CAATGTAGTCAGGGCGTTTGTTTGATATTTAGGTAATAAGCGTGTCCCATACGTCTAA  
ACCTAAAATAGGTGTTTTACCCTCAGTTAATGGATTATCTTGGTTTGGTGTAGTCACAATT  
TCTAACTGGCCATTGTTTACGACTAACCAAGCCCAACCTGAACCAAAGCGTGCAGCTGCT  
TTGTCAGCAAATTCTTTTTTAAATTCTTCTAAAGAACCCCATTTGTTCTTTAATTTTTTCTAC  
TACAGTACCTTTTTCTTCTGAGTTTGGTGAAAGTAACTCCCAGAATAATGAATGGTTTAAA  
TGTCACCGCCATTATTACGTACAGCAGTTTGGATGTTAGCTGGTACACTGTCTAAATTAG  
CAACAATTTCTTCAATAGATTTAGATTCTAAATCTGTACCTTCTACTGCAGCATTTAATTT  
CGTAACATACGTGTTATGATGTCTGTGTCATGGTGAATTTCCATAGTTTCTTTGTCAAATGT  
GGTTCTAATGCATCAAATGCGTATGGTAATTTGGTAATTCAAAAGCCAT

### > **zur**

Function: protein coding sequence; zinc uptake regulator (core genome, constant)

Best match: zur\_CC008\_COL\_CP000046.1[1641975:1642385:r]RC (completely identical)

Position: 036-contig\_189: 193353 ... 193764; Length: 411 bp

Sequence:

TTAATCTTGGCAAGACTCACATACACCATAAACTTCAAGTTTGTGTTTGTGAATATTAACA  
CCAGGTAGTGATAATTTTATCTGATCTATTGGACAATAATCTATTACCTTTGTATCTCCAC  
ACTTTTCACAGATAAAAATGATGATGATGATGGTTTGTACAAGCGATTCTAAACTTCATTTT  
ACCATCAAGTTCTGTATTTTCAATAATTCCTAAATCTTTAAATAAGTGCAGGTTTCTATAT  
ATTGTGTCGAATGAAATTCCAGGATAATTTTCATCCATAACTTGTGTATATACTTTGCGT  
TTATATACTTATCTTCTTCGACAAAATATCTAACATATCTTTACGTTTATCTGTATATTT  
AAACCGTTCTCTTTTAAATTTTAAATAGCATCATTGTATTTCAT

### > **mreB**

Function: protein coding sequence; ABC transporter/permease protein (core genome, constant)

Best match: mreB\_CC001\_MW2-USA400\_BA000033.2[1634886:1635719:r]RC (completely identical)

Position: 036-contig\_189: 193750 ... 194584; Length: 834 bp

Sequence:

TCATTTGTATTTCATTGATATTAGCTCCCTTTTTAAACTTCATTTCGCATTTTCTGATAAGCCA  
TTGTAATCATAAGTAAAATAACAAGTAGAACTACAATTACACCACCCGGAGAAATGTCCA  
TATAGAAAGCTAGGACTAAGCCTAATATTACTGATAATTCACCTAAAAATACACTTAGTA  
ATATCAATTGCTTAAAACTTTTTGTATTTCGCATACTTATTGCAATTGGTAACGTGATTAA  
CGCACTTACTAACAGTATCCCTACAACACGCATTGAGGCAGAAATAACCATCGCTACAAT  
ACAATAAATAAAAATTGAATCCATTTAGGAATGCCAATGACTTTACTATATTCCTCATC

AAATGACAATATAAATAATTCTTTATAAAAACAATGTAATAAACAGAACAACACTATGATGGC  
AATGACAATAATCGTTGTAAATCACTTATATTTACTGCGCTTATTGAGCCAAATAGCAAT  
CCAACAATTTCTTGATTGAACCCATCAGCTAATGAAATGAAGATTGCACTCAAGGCGATA  
CCAGCACTCATTATAATTGGAATAGCAATTTCTTGTTAAGCAGTGTATGACGTTCTTAATT  
TTTCAATTAGAAGCGCACCTACTATTGCGAATAAGATTCCAAACCACATTGGATTAATAA  
ATACTAGTGTGGCATAATAGTAAGTAAAAACATACCGAAAGATATACCACCTAAAGTTA  
CATGACTTAGAGCATCAGCTATAAGTGATAGTCGTCTAACACGATAAAAAGCACCGATTA  
GAGGCGCAATAAACCTATCAAGATACCACTAATTAAGAGTACCTCAT

### > **mreA**

Function: protein coding sequence; zinc ABC transporter/ATP binding protein (core genome, constant)

Best match: mreA\_CC001\_MW2-USA400\_BA000033.2[1635791:1636576:r]RC

Position: 036-contig\_189: 194655 ... 195441; Length: 786 bp

Sequence:

TTAATTACAACATTCTCGATTATGCTGATGATCGACAAAACGTACAGGATGTCCATAAAT  
TTTTGAAATTTCAACTTCATCAAGTGATTTAACTCATCAGTTGTACCATGGAAATGCAAA  
TGCTTATTTAAACATGCTACTTCAGTAGCAGTATCTGCTACAACACCGATATCATGAGTAA  
CTATGATAATGGTGATACCTTCTTGTTTTAATTGATCTAAAGTATTATAAAAATTCACCTAC  
ATGTTTTGCATCAATACCATTTCGTTGGTTCATCAAGTACTAATACTGCAGGTTCTGAAATC  
AATGCTCGAGCAATCATTACACGTTGTTGTTGACCACCTGATAATTCTGCTATATTTTTAT  
GAATTAATCACTTATATTCAGTCTTTCTAGTACTTTAATCACTTTTTTCATTATCTTTGCTA  
TTAAATGTTTTGGAAAAGACGTTTTGTCTTTGTTAATCCGCTTAAAACAACCTTCTTTAACAC  
TTGCTGGGAAACCTGAATTAAGGCATTTGCTTTTTGTGATACATAGCTTAATTTAATTGA  
TGTTTTCTTATTTTTAAAATCAATACCTTCAACAAAAATCTCACCACCTTTGTAAAGGTAAT  
AACCTAGAATCAACTTCAATAATGTTGATTTACCAGCACCATTTGGTCCAACAATTGCTA  
AAAATTCACCTTTATTTATTTAATGTTTATATTTTCTAACACTTTTTTATGATCATAGTAG  
TAATTGACATTTTTCAATTCAAAGACTGGTGTCATCGTATTCTCACCTCGCAT

### > **nfo**

Function: protein coding sequence; endonuclease IV (core genome, constant)

Best match: nfo\_CC008\_NCTC8325\_CP000253.1[1570227:1571117:r]RC (completely identical)

Position: 036-contig\_189: 195566 ... 196457; Length: 891 bp

Sequence:

TTATTGTTGCATAACCTTATTTTTTAATTCTGGGTCAAATTGCTGTTGTTTTAACATTTCAA  
TTTCAAGTTTATATGGCGGTTTTTTATTTTTCTTATCTTCACCAACATAAGGTGTTTCTAAG  
ATTTTCGGAATATCTTTAAAACCTATCATGATGCACAATGTAATTTAATGCATCAAAACCA  
ATGTAACCGAAGCCAATATTTTCATGTCGGTCTTTTTGAGCGCCACGGTCATTTTTAGAAT  
CATTGACATGAACAACCTTTGATTCTGTGACTCCAATGATTTTTATCAAATTCATTTAATAC  
GCCATCAAAGTCCTCTTTAACATTATATCCAGCATCATGCGTATGACATGTATCAAAACAT  
ACTGATAAACGTTTCGTTATTATGAACTCCATCAATAATACGTGCTAACTCTTCAAATGAGC  
GACCAATCTCTGTACCTTTACCTGCCATCGTTTTCAAGCGCAATACGTACATTATTGTCATT  
CGTAAAACCTTCATTTAATCCTTCAATAATCTTATTAATTCCGGCATCAACACCAGCTCCA  
ACATGCGCACCTGGATGTAATACAATATCTTTAGCCCCTATAGCTTGCGTTCTTTCAATTT  
CTTGTTGCAAGAAATCTACACCAAGATTAAACGTTTCTGGTTTGGTTGTATTTGCAATATT  
AATGATGTATGGTGCATGAACAACAATATTAGATAAACCATATTTTTCCATCACTTCATG  
ACCTTTAGTTATATTTAAATCTTCAATACTTTTACGGCGCGTGTTTTGAGGTGCACCAGTA  
TAAATCATAAATGTTGTTTACCATATTCATGCGCTTCTATAGCAGAACCTTCTAACATCT  
TTTTACCACTCATTGAAACATGTGATCCTAATAACAT

### > **cshB**

Function: protein coding sequence; DEAD-box ATP dependent RNA helicase (core genome, variable)

Best match: cshB\_CC001-ST772\_118\_AJGE01000022.1[39798:41144]RC (completely identical)

Position: 036-contig\_189: 196466 ... 197813; Length: 1347 bp

Sequence:

CTAACCTTTTTTGTGGTGGCTTACGTTTTTGTCTATTTTGTGCTTACTAAATTGCTTACGCTC  
TTGACGTTTCATTTTTTCAACTTCTTGTAAATTTCTTCTTATAACCTGGTTAACTTTGTT  
TTTAATTTTACTTCGAACTTTGTTCTTCACTTGATTAGTTAAATGGTCATCTTTGCGCATT  
TTGCTTGACGCTGATTGTGCGCTTAACTTCTTTAACTCACCATCTTAAATATCAACAGTA  
TTGAATACAAAACCGCGATCTTCTATTAATGAAATATTGTGTTCTTCATCAGGACTATAAA  
GCGTAATTGCTACACCTTTATAATTCCCACGACCAGTTCGTCCAACCTCTATGCGTAAAGAA  
GTCAATATCATTTGGCACATCAAAATTGATGACATGACTAACACCTTCAATATCAATACC  
ACGAGATGCTAAATCGCTGGCAATAACGTATTGGAATTCTAAATTACGTATACGTTTCAT  
TTGTTGTTTACGTTACGTGGCGTTAAACCACCATGAATCATACCAACTTTAATACCAGCT  
TCATTTAGTGAACGTGCTAAATCATTGTCATTATCTCTACTATTACAGAAAATAATACATA  
AGTATGGATTTAGTATATCAATTAATTTAAAGTTTTTTCAACTTTAGCTGCACCTTTAGT  
AGGTATTA AAAAGAATTCGATGTTCTTTTTATTTGTTTTTTACTGTGACAGCTACATATT  
CTGGATGACTTAAATATTTATTTAAAAATGGTTGTAACGTGTTGTGGAATTGTAGCACTAAA  
CACCGCAATATTTGCATTATCTTCCAATCTTGCAGCAATGTAATCTACATCTTCAATTAAT  
CCTAAGTCAATCATAAGATCCGCTTCATCAATAACTAAATATGATGCTAAGTGCACATGT  
AAATGTCCCGTTTTAGCTAAGTCATTAATTCTAGTAGGGGTGCCTATAATCAATTGTGGTT  
GTGCATTACAACGTTGTCTATCTTTCTCTATATCTGTACCACCAATAAAAACCTTTAACTGA  
AACACCAGCTTTAAATTGGCTTAAATGGTTCGCTGCATCGTATAGTTGTTGTGCAAGTTCT  
CTTGTGGTGCAACTACGATTGCTTGTGGTTCTTTTATTTCACTATCAATTAACTGCATTAA  
TGTAATAAAAATGCATGAGATTTCCCTGTACCCGTTTGAGATTGACCAATTAATTTGTT  
CTCTTTAGTATTCTTGGAAATAATTCGATTCTGAATTTTCAGTTGGTTTTTCAAATTAAGGTC  
TTTCACAGCGTCAATTAACCTAGATTCTAGATTAATTTGTTCGAATGGATGTTTTGCCAT

### > sigA

Function: protein coding sequence; sigma factor A of RNA polymerase (core genome, constant)

Best match: sigA\_CC005\_Mu50-VRSA\_BA000017.4[1671793:1672899:r]RC (completely identical)

Position: 036-contig\_189: 199837 ... 200944; Length: 1107 bp

Sequence:

TTAATCCATAAAGTCTTTCAAACGTTTACTACGACTTGGATGTCTTAATTTTCTAAGTGCT  
TTTGCTTCAATTTGTCGAATACGTTACGTGTAACACCGAAAACCTTACCAACTTCTTCAA  
GTGTTCTTGTTCTGCCGTCATCAAGACCAAATCTTAATCGTAATACATTTTCTTCTCTATCA  
GTTAATGTATCAAGCACATCTTCTAATTGCTCTTTTAAATAATTCATAAGCAGCATGATCTG  
AAGGACTTTGTGCTTCCCTGATCCTCAATAAAGTCTCCTAAATGACTATCATCTTCTTACC  
AATTGGTGTCTTCTAATGAAACAGGTTCTTGCAGCAATTTTTAAATTTTACGAACTTTTTCT  
GCTGGTAAATCCATTTCTTACCAATTTCTTCTGGTGTGCTGGATCTCGACCTAAGTCTGTA  
ATAATTGACGTTGAACACGAATTAATTTATTAATTGTTTTCTACCATATGCACAGGGATACG  
AATCGTACGTGCTTGGTCAGCAATTGCACGAGTGATTGCTTGTCTAATCCACCATGTTGCA  
TATGTTGAAAACCTTAAATCCTTTGTTAAAGTCAAATTTTTCAACAGCTTTAATAAGACCCA  
TATTACCTTCTTGGATTAATCAAGGAATAACATACCACGACCTACGTATCTTTTAGCAAT  
ACTTACAACCTAAACGTAAGTTCGCTTCTGCAAGTCTTGATTTTGTACTTTCATCACCTTGT  
TCAATACGTTTGGCTAATTCGATTTCTTCTTGTGCACTTAATAAGTTAACACGCCCAATTT  
CTTTAAGGTACATACGAACTGGGTCATTTATTTTAAACACCTGGAGGGGCACTAAGATCAC  
TTGGATTACGTTTCTCGTCAGTATCTGAACTATCTTTTTTCAATTAAGTGAATATCATT  
TCATTTAATTGATCAAAGAAATCATCCATTTGATCAGAGTCGATATCAAATTTCTGAAGTT  
TTTCAGCAATTTCTTTCATGACTTAAATGACCCTCTTTTTTACCTTTTTCAATTAATTGCTTC  
TTAACATCTTCTAATGTTAATGTGCGGATCAATTGTTTGTTTTTTAAATTTAACTGTGTTATC  
AGACAT

### > dnaG-var1

Function: protein coding sequence; chromosomal DNA primase/variant 1 (core genome, variable)

Best match: dnaG-var1\_CC001-ST772\_118\_AJGE01000022.1[34644:36443]RC (completely identical)

Position: 036-contig\_189: 201167 ... 202967; Length: 1800 bp

Sequence:

CTACATGCGTTCCTTTATTCTTAGCAACAATTTGCTGTAAATAGTATTTTTGTAATTCTACAT  
CGCCAATCCTTGTAGCTTCCCTTAATTTATGATTCAATGACTCAATTGTTTCTTGTCTTTT  
TCATTAATAACATTGACATAATCATCAATTTTCATTTTCATATGGTTCGTCATTCAAATTAT  
ATTGTTCTAAGCTAATTAGTGTTTCTCTCAACTCATTGGAATTAACATACTGCACAGCATC  
ACTGATATTATATTGATCATTTTCCGCATAAAAATCATGTAAGACTTCGAATACATATTTA  
AAATGCTGATTTGTGAAGTTATCCTTATCAACACTTTCATAATAATTTAAAAATGTATCTT  
TATCTCTCATTAAATGTTTTAAAAATGCTCGCTCCGCTTTTTCTTGACGGCTCAAATTGTCA  
AATTGTGCCATACCAATTGGCTCAGGTTCAATATAACCGCCATACTCATCTTCTGGATAAT  
AATTGGCTGGTGTGATTGAATTGTATTTTCGTTAGCTAACTGCTCAGGACTAACATTGAA  
AAATGGCGCAACATCATTATAGCCTTTTGTGCAAAAATCGATGACTTCATAAGTGAAAT  
GTCATGACTCAGTTCTTTCAAATAACGTTTCATATGAAAGGTCATTATGTGCAATTTTCATCT  
TTTAATACTTACTTTATAATGTGCAAATGACTTTTTGTGATTTTTTACAAAAGTAGTAA  
ATGCGTTCGTTGCCATACTTACCAATGTATTCATCCGGATCCATGCCAGATGGCAATTGTAT  
AACAAATACATTTAGCCCTTGCTGTAACAAAATTTGACCTGTTTTAAGTGTTGCTTCACTA  
CCCGCAAAAATCCCCATCAAACATTAATGTTATATTTGATGTTAACTTTCGTATAAAAAGTAA  
TATGTTTCATCTGACAACTGTGTCCCCATTGTTGCAACAACGTTTTTCAAGCCAGCAGTATC  
AGATTTTATAACATCCATAAAACCTTCTAGTAATACGATTTTCATCTAATTTTCTAATTGAT  
TTACGCGCTTTATCTAAGTTGTATAACAACCTTCTTTTTTGAAGATAGGTGTTTCAGGAC  
TATTTAGGTATTTGGTTCTTGACCGGTATATGTTTCGACCTGAATATCCAACAATTCTTCT  
TGCGCATTTTTCAAAGGAAACATAATACGATTTTCGAAATCTATCGTAATAACTGAAATTTT  
CTTCGTTACGTGATAATAATCCGGCTTCATATGCTAATTCAATATCGTAACCCTTTTTTTG  
AAGAAAATCATGACAAAATGTGAGCTATCGGGTGCAAAGCCAATGCCTCGCTCTTTAAT  
AAGCGCATCTGTA AAAACCACGTTCTTGTAAGTATGTTAATGCTTGTTCGCTTCGACTGTC  
TTTGTTAAAGCGTAATAATAAAATTCTTGATTA ACTCATGCATTTCAATCATTGTAAAT  
CATCAGAAGCAATTTGAACATTTGAGTTAGATTGTGTTGCCTCAATATCTACAGCAACATT  
AACTCTATCACCTAATTCTTTAACCGCTTCAACAAAATGATATGTCTTTAATTTCTTGAGTA  
AATTGAAAACATTGCCACCTTTTTTACAACCAAAAACAATGACAGATTTGTTTATCTTCAG  
AACTGTAAATGAAGGTGTCTTTTCATCATGAAAAGGACACAAACCTATATAATTGCGTC  
CTCTCTTTTCTAGTTTACATATTCACTTACCAAGTCTAAAATGTCGGTTTTATCTTTTATT  
TCATTAATGATCGATTGATCTATTCGCAA

### > **ccpN**

Function: protein coding sequence; catabolite control protein N (core genome, constant)

Best match: ccpN\_CC001\_MW2-USA400\_BA000033.2[1645010:1645633:r]RC

Position: 036-contig\_189: 203856 ... 204480; Length: 624 bp

Sequence:

CTATTCTTTATATAATGCTACTAATAACTTAGCTATTGTTGTTTTGGAAATTCTTCCAATTA  
CTTCATACTTTTGATTATCTTTTTTCTTACAATTGGAATCGAATCAATTTCTTTTTCAATC  
ATTCTATCTGCTGCGTATATGACTAATTCGCTTTCCTCTAAATAAGTGACATTAGGCATAC  
GTGTCATATTTACTAATAGGTA CTGTATGAATATCTGCTCCAATCATTGAAGCTCTTAA  
TAAATCTTTTCTTGAACACACACCAACAAAATCGTTATCTTCATTAATAATAAATAATGTA  
CTTACATCTTCTAAAAAATTGTACAAATAGCGTCATAAACTGTTGTATTCTCTCTTAGCA  
CAACAGTTGAGACATATAGTCCTTAACCTCAAATTGTCGAAGTTTTTCATTA AAAAATTT  
ACCTTTTGATTTACCTGAATAATAATATCCAACCTCGGGGACGCGCTTCTAAAAACCTGA  
CATTGTTAATATCGCTAAATCTGGTCTGAGCGTTGCTCTTGTTAAATTCAACTTATCTGCT  
ATTTGTTACCAGTAATGGGTCTTGAGTTTTAACAATTTTCGATGATTGCTTCTTGTCTTTG  
ACTGAGTTCTAT

### > **glyS**

Function: protein coding sequence; glycyl-tRNA synthetase (core genome, constant)

Best match: glyS\_CC001-ST772\_118\_AJGE01000022.1[31405:32796:r] (completely identical)

Position: 036-contig\_189: 204814 ... 206206; Length: 1392 bp

Sequence:

ATGGCAAAAGATATGGATACAATTGTTTCATTAGCAAAAACACAGAGGTTTTGTGTTCCCT  
GGTAGTGATATTTACGGTGGTTTATCAAACACATGGGATTATGGTCCTTTAGGTGTTGAAT



TAAAGAATAATGTTAAAAAAGCTTGGTGGCAAAAATTCATTACACAATCACCGTTTAACG  
TTGGTATCGACGCTGCAATCTTAATGAATCCAAAAGTATGGGAAGCTTCAGGACACTTAA  
ACAACCTCAACGACCCAATGATTGATAATAAAGATAGTAAAATTCGATATCGCGCTGATA  
AATTAATTGAAGATTATATGCAAGATGTTAAAGGTGATGAAAACCTTCATTGCCGATGGTT  
TAAGTTTTGAACAAATGAAAAAAATTATTGACGATGAAGGTATTGTTTGTCTGTAAAGTA  
AAACTGCTAACTGGACTGAAATTCGCCAATTCAATTTAATGTTTAAAACATTCCAAGGTG  
TAACTGAAGATTCTACAAATGAAATTTTCTTACGTCCTGAAACAGCACAAGGTATTTTTGT  
AAACTATAAAAACGTGCAACGTTCAATGCGTAAAAAATTACCATTTGGTATCGGGTCAAAAT  
TGGTAAATCATTCCGTAATGAAATCACTCCAGGTAATTTTCATTTTCAGAACAAGAGAATT  
TGAACAAATGGAACCTTGAATTCTTCTGTAAACCTGGAGAAGAAATCGAATGGCAAAATTA  
TTGGAAAACCTTTTGCAAGTGACTGGTTAAACAAGCTTAAATATGAGCAGTGAAAATATGCG  
TTTACGTGATCATGATGAAGATGAATTATCTCATTACTCAAATGCAACAACCTGATATTGA  
ATATAAATTCCATTTGGTTGGGGTGAGTTATGGGGTATCGCAAGTCGTACAGACTTCGA  
CTTACGTAAACATGCTGAACACTCTGGTGAAGATTTTCAGATACCATGATCCAGAAACGAA  
CGAAAAATATATTCCATATTGTATCGAGCCATCACTTGGTGCAGATCGTGTAACATTAGC  
TTTCTTATGTGATGCATATGATGAAGAAGGCGTTGAAGGTAGTAAAGATGCACGTACAGT  
TTTACACTTCCATCCTGCATTAGCACCATATAAAGCAGCGATTTTACCTTTAAGTAAGAAA  
TTATCTGGCGAAGCGATTAAGATTTTTGAGCAATTAAGTTCTAAATTCTCAATCGATTTTCG  
ATGAATCACAATCTATCGGTAAAAGATACCGTCGTCAAGATGAAATCGGTACACCTTATT  
GTGTAACATTCGACTTTGATTCATTAGAAGATAATCAAGTTACAGTACGTGACAGAGATT  
CAATGGAACAAGTTCGTATGCCAATCTCAGAGTTAGAAGCTTTCTTAACTGAAAAAACAA  
AATTCTAA

### > **tx\_glyS**

Function: ter ho-independent terminator

Best match: tx\_glyS\_CC001\_MW2-USA400\_BA000033.2[1647392:1647453] (completely identical)

Position: 036-contig\_189: 206238 ... 206300; Length: 62 bp

Sequence:

TATAATTTATAAAAAGAGATACTGGTTAGTAAAATTGCCAGTATCTCTTTTCTATTCGAAA  
A

### > **txbi\_recO**

Function: ter bidirectional rho-independent terminator of recO

Best match: txbi\_recO\_CC001\_MW2-USA400\_BA000033.2[1647439:1647509:r]RC (completely identical)

Position: 036-contig\_189: 206285 ... 206356; Length: 71 bp

Sequence:

TTTTCTATTCGAAAAGGTATTCAAATAAACACATCTATGTGGCTACTTGAATACCTTTTA  
TTATTTTATG

### > **recO**

Function: protein coding sequence; DNA repair protein O (core genome, variable)

Best match: recO\_CC001-ST772\_118\_AJGE01000022.1[30502:31254]RC (completely identical)

Position: 036-contig\_189: 206356 ... 207109; Length: 753 bp

Sequence:

TTATTGTTCCAATCTTTTTAATTGGTTGATTAGTTTCTGACTTTTAAAAAACATACCTGCAT  
ATTACGATATAACATTAATAATGATATCTGACATTTTCATCAATAATTTCTTGATGGATATT  
CAATGAATTCATTTTATCTATTGGTAATTTTTGTAATACATCTAATAAATATAGTGTTTTAT  
TCGATAATATAACTGCATGTACATCTTTAGAAGCCTCTTGCCTTGAAATCGCACCGTCAAAA  
CTTAAACTATAACCTATTAATCTGCTTGTGTGTCATTACCACTCACAGCACAGCGATTA  
AATGATGCAGTAAAACCAAATCGTTTCATACACTTTAACATAACTACGACTGACATTAAC  
TGTGCAGATGTACCTGATTCTATTTTTCAAGAACAAATTGTAATAATTGATAGTTATATG  
GTGCAATGTCACCTTCATCCATTGAGCGCTCAATAGTTTCAGCTGCCAGAGAGGCATAAC  
TGCTTACGTAAAGGTCCATTTGTAATTTATAATGTTGACTAATAACATCTACAGAATTTAA  
CGTTCCCATACCTCGCCACTGATTGTAATAAACAAACCATAAACAAACAATTGCGTTTG

CGCTTGTAACCCCGTCTTAACTTTTTTAGCACGCCTTGCCATAAGTGGTACTTTTGCACCA  
TGCTCATTTAAAATCGTGATAATTTTATCAGATTCACCATAATCAACTGCTTTGATGATAA  
TCCTTTTTGGCGCATTAACAA

> **era**

Function: protein coding sequence; GTP-binding protein (core genome, constant)

Best match: era\_CC008\_TCH1516\_CP000730.1[1679178:1680077:r]RC (completely identical)

Position: 036-contig\_189: 207130 ... 208030; Length: 900 bp

Sequence:

TTAATCTTGGTCTTCAACATAACCAATTTGGCGAATAAAGTTAACTTTGTTTTCGCCAGTCT  
CTTTGAACTTTGACCCATAATTCTAAGTAACTTTAGAGCCTAGAAGCATTCTATATCAC  
GTCTCGCACGTTTTCTACTTCTTTAACTTTTTACCGCCTTTCCAATGACAATTCCTTTTT  
GCGAATCTCTTCAACATATATAGTTGCTTCGATATGAACACGATCTTCGCTTTCTTTAAC  
CATACGGTCCACATTAACACCAATCGCATGAGGGATTCTTCACCTGTAAGATGAAGGAT  
TTTTTCACGAATGATTTACCCACTACAAATTGTTTCAGGATGGTCTGAAATTTGATCATCT  
GGATAATATTTAGGTCCTTCGGGTAAATACGTCTTTAAAACATCAATAAAATGATCGACA  
TTTAGCCCTTCTAATGCTGAAATAGGTACAATCTCTGTAAAGTCCATATAACTTTGATATT  
CTTCAATCTTTGGCATTAATTCATCTGGATGCACTAAATCTATTTTATTTAATACTAAAAA  
TACTGGTGTCTTAAACATTTTTCAACATTTCTATAATATATTCATCGCCTCGTCCAATTTCT  
CATTGGCATTAAACCATAAACATGATTGCATCTATCTCAGATAATGTATTTTTAGCGACTTT  
CATCATATAGTCACCTAATTTGTGTTTAGGTTTATGAATACCTGGCGTATCAATGAATATA  
ATTTGCGCGTCATCTCTTGCATAAACACCTTGAATTTTATTTCTAGTTGTTTGGAGCTTTATC  
GGACATGATTGCTATTTTATGGCCGATCACTCTATTAACAAATGTTGACTTTTCCTACATTT  
GGTCTACCTATAATTGAAACAAATCCTGATTTATGTTCTGTCAT

> **cdd**

Function: protein coding sequence; cytidine deaminase (core genome, constant)

Best match: cdd\_CC008\_NCTC8325\_CP000253.1[1582690:1583094:r]RC (completely identical)

Position: 036-contig\_189: 208030 ... 208435; Length: 405 bp

Sequence:

TTATTCTAAATCCTTTTCTGAAAATCCAAATGGTAGTAACTCTGCGACTGTCATCATAACC  
ATATCTCCTTTATGATTTGTTCATATACACAGGCATATCATCATCACATAATTCCTTCAAAA  
CTTGACGACATGCACCACAAGGTGATGACGGTTTATCTGCATCTACGGTTACAGTTATTG  
ATTCAAAATCACCTGGTCTGTATCCTTGAGAAATTGCCGATACCAAAGTCTCGTTTCAG  
CACATATCGATAATGGATAAGAAGCATTTTCTACATTGGTACCATAAAAAGTTCTACCGT  
CTTTCGTTTTTAAATAAGCCCCTACTTTAAATTGACTGTATGGCGAATATGATTCTTGTTGT  
GCTTTTCTAACTTCTTGAAAATAATGAGGTTGATAACTCAT

> **dgkA**

Function: protein coding sequence; diacylglycerol kinase (core genome, constant)

Best match: dgkA\_CC008\_NCTC8325\_CP000253.1[1583105:1583449:r]RC (completely identical)

Position: 036-contig\_189: 208445 ... 208790; Length: 345 bp

Sequence:

CTAAAATAACGCTATAAAAATGTGGTAAAAATACTATTAACCTATAATAAATGCTAATAT  
TGAAACTATAAGTACACTAAAAGCCGCAATATCTTTAGCGTATTTAGCTAAATCATGATA  
TTCAACGGTCACTAAATCGACAACATATTCAATAGCAGTGTTTAAAGCTTCAACAGTGAG  
AACTAATGCAATAGCAATGAGTATAAATATCCACTCAATCCGATTAATATTTAGTACGAG  
ACCAAAGACAATAGCAACAATCATTGCAAACACATGTAAAAGAAATTTATAGTCTTTTTG  
AATTAAGATTTTCAGCCCATCAAGTGCATATTTAAACCTTTTCAT

> **phoH**

Function: protein coding sequence; phosphate starvation-induced protein (core genome, constant)

Best match: phoH\_CC005\_Mu50-VRSA\_BA000017.4[1681233:1682153:r]RC (completely identical)

Position: 036-contig\_189: 209260 ... 210181; Length: 921 bp

Sequence:

TTAATTCTCTCCTTCATAATGTTCAATGATCTTACTTACCAATGGATGTCTTACTACATCGC  
TCTGATCTAATTTCAATATACTTATACCTTTAACGTTGTGTAACCTACTGACCGCTTCCTTA  
AGTCCACTTTTAAACACCTTTAGGTAAATCGATTTGAGTTTGGTCACCAGTAACTACCATTT  
TTGAGCCAAAACCTAGTCTTGTTAAAAACATTTTCATTTGCGCATGTGTCGATTCTGCGC  
CTCATCAAGAATTACAAATGCATCTTCTAATGTTCTGTCGCGCATATATGCAAGTGGCGCT  
ATTTTCGATAATGCCTCTTTCAATAAAATCGCTCTGTTTGTTCACGCCAAGAACAGTATATA  
GACCATCATATAAAGGTCTTAAATATGGATCTACCTTTTCTTTCAAATCTCCTGGTAAAAA  
TCCAAGTGACTCTCCTGCTTCAACAGCAGGTCTTGTTAATACAATACGTTTAAACAGCACCT  
TTACGGAGTTGCTTTGCTGCATAAACTACAGCTAAGAATGTCTTACCTGTACCAGCAGGA  
CCTATACCAAATACTAAATCATTATTTTTCATGGCATTAAACATATATACGTTGCCCATCG  
TTTTCGCACGAATCGTCTTACCAAATGCATCTTTAGTTATCTTTCATCATATAAAATCTAA  
CAGATGTTGAATTGTGTTATTATGCGCCATTTTAAATAGCTGCTTCAACATCTTTAATTGTA  
ATATTATTACCTAAATCAATAACCTTCAGCAAATTGATTAATACTGATTCCGCTTTTTCTA  
CGTTTTCTATTTTTGTACCTTTAACGGCAACTTCTTGCTCTTGCATGGATGACAACATCG  
AAACTCTCTTCAATTGCTTTTAAATGTTTCATCATTATTTCCAATTAAGCTTGAGATTGGTT  
CAT

### > **rpsU**

Function: protein coding sequence; 30S ribosomal protein S21 (core genome, constant)

Best match: rpsU\_CC001\_MW2-USA400\_BA000033.2[1654314:1654490:r]RC (completely identical)

Position: 036-contig\_189: 213160 ... 213337; Length: 177 bp

Sequence:

TTATTTGAATTTACGTTTACGTGCAGCTTCTGATTTCTTTTTACGTTTTACGCTTGGTTTTTC  
GTAAAATTCACGTTTACGTACTTCTTGGATTGTTCCACTTTTAGAAACTGAACGTTTAAAT  
CTACGTAACGCATCTTCAAGTGATTCATTTTTACGTACTACTGTTTTAGACAT

### > **prmA**

Function: protein coding sequence; ribosomal protein L11 methyltransferase (core genome, constant)

Best match: prmA\_CC005\_Mu50-VRSA\_BA000017.4[1687709:1688647:r]RC (completely identical)

Position: 036-contig\_189: 215736 ... 216675; Length: 939 bp

Sequence:

TTATTCACTCACTTTCTGGCCAACAAGACAAACCCAACCATTGTCATGTTGTTCTGAAATA  
ATTTTAAAACCTACACGCTCCATATGTGACTGTATACCTTCATACTTCTCTTTTATAATACC  
AGAAGTAATAAAATAACCGCCTTCATTTAGAGTATTATAAGCATCTTCAATCATTTCATCA  
ATAATATGCGCTAAAATATTTGCTATTACAATATCAAATTTTTCTGTTTTCGTCTTTCAATA  
AGTTACCTGGAACAGCTTCAATTAACGTTTACAATGATTTCTTCTGAAGTTTTCTTTAGC  
TACACTCACTGCCATTTTCATCAATATCCAACGCTTTAATACGTTTTACACCGATTAGATGA  
CTTGCAATACTTAATATACCTGAGCCAGTACCAACATCAATTACTGAATGCTGTGGCAAT  
ACATATGTTTCTATTGCCTTCAAACACATACTTGTAGTCGGATGATCGCCTGTTCCAAAAG  
CCATACCTGGGTTCGAGCTCAATGCAAAGCTCTTCATCCGCTTCTTTAGCATATGTTTCCCA  
ACTAGGAACTATTGTGAACTTCTTCGACGCTCGGAATGGATGGAAATAGTTTTTCCATTCA  
TTTTCCCAATCCGTCTCTGCAATAATTTGCTCACTGAATTGAATGTTATGTTGATCAAGTT  
CATCTAAATTTAATAACTCATCTTTAATTTGCTGTGCGCAACTTATCATCATAAGTCATTTT  
ATTTAAATAGGCTTTCAATCTTACTCCCTTATCTGGATAATCCTCTTTTTTCAAAGCGTAA  
ATTTACCGTATTTATCTTCTGGTTGGTTAATTAATCATCTGAATCTTCTATCACGACACC  
ATTTGATCCATGATTTTCAAGTATATTGGTAGCCAATTCTACTGCTTCATGATTAATAATA  
ATTGAAAGCTCTGTCCAGTTCAT

### > **dnaJ**

Function: protein coding sequence; chaperone (core genome, variable)

Best match: dnaJ\_CC001\_MW2-USA400\_BA000033.2[1657832:1658971:r]RC (completely identical)

Position: 036-contig\_189: 216678 ... 217818; Length: 1140 bp

Sequence:

TTATTCTCCCTTAAAGAATCTTTTTGCTCTATCTTTAAAATTTCGAAGGTTGTTCAATTAATTT  
CTTCACCATTTAATTGGGCAAATCTTTTCATTAGTTCTTTTTGTCTATCTGTTAATTTAGTA  
GGCGTTACTACTTTAATATCAACATATAAATCTCCGTATCCATAGCCATGAACATTTTTTA  
TACCCTTTCTTTAAGCGGAATTGCTTACCTGTTTGTGTACCAGCAGGGATTGTTAACAT  
AACTTCATTATTTAATGTTGGTATTTTTATTTTCATCGCCTAAAGCTGCTTGTGGGAAGCTA  
ACATTTAATTTGTAATAAATATCATCACCATCACGTTTAAATGTTTCAGATGGTTTAACTC  
TAAATACTACGTATAAATCACCAGCAGGTCCTCCATTCACGCCTGGAGAGCCTTCACCAG  
CTAATCTAATTTGTTGTTCAATTGTGACACCTTCAGGTACTTCACTTCTAATTTAACTGTT  
TTATTTTCAGTACCTTTCCGTGACATGTTGGACAAGCTTCTTCAAATTCCTTGACCACTTCC  
ATTACATTTAGGACAACTTGTTCAGTACGAACTCTACCTAAAATTGTGTTTTGTTCTACA  
GCTACATGACCAGCGCCATTACAGTAACTACAAGTCTTTTTACTTGTTCAGGCTTTGCAC  
CATCACCATGACATGTTTCGCATGTTACATCTTTACGGATTGAAATTTCTTTTGTGTACC  
AAATACCGCTTCTTCAAATGTTAATGTCATTGTATACTGAAGATCATCACCTTTTTGCGGT  
GCATTTGGATCTCTTTGTCTGCCGCCACCGAAGAAAGAGCTAAAGATATCTTCAAACCG  
CCGCCACCGAAGCCACTAAAACCGCCAAAGTCAGAGCCATTGAATCCTTGTCACCAAAA  
CCTTGTGGACCATCATGTCCAAATTGATCATAGCTTGCAGCTTTATTATCATCACTTAAAA  
CTTCATAGGCTTCAGAAATTTCTTTAACTTTTCATCTGCACCTTCTTCTTTGTTAATATCT  
GGATGATATTTTTTCGAAAGCTTTCGATACGCTTTTTTGATTTTCATCTTTTGAAGCATCTTT  
ACTAATGCCTAAAACCTCATAATAGTCTCTTTTGCCAC

> **dnaK**

Function: protein coding sequence; chaperone (core genome, constant)

Best match: dnaK\_CC001-ST772\_118\_AJGE0100022.1[17825:19657]RC (completely identical)

Position: 036-contig\_189: 217953 ... 219786; Length: 1833 bp

Sequence:

TTATTTTTGTGTCGTCGTCTTTACTTCTTTAAATTCAGCATCTTCTACAGTACTATCGTTGTT  
TTGACCAGCATTTGCACCTTGTGCTTGTGTTGCTGTTGAGCCGCTTGCTCATATACTTTTG  
CTGATAATTCTTGAATCACTTTTTCAAGTCTTCTTTTTTAGATTTAATATCTTCTATATCTT  
GACCTTCTAAAGCAGTTTTAAGAGCGTCTTTTTCTCTTCAGCAGATTTTTTATCTTCTTCA  
CCAATATTTTCGCCTAAATCAGTTAAAGTTTTTTCAACTTGGAATACTAGACTGTCAGCTT  
CGTTTCTTAAAGTCTACTTCTTCACGACGTTTTTATCTGCTTCAGCGTTAACTTCAGCATCT  
TTTACCATACGGTCGATTTCTTCGTCTGATAATGAAGAAGTGGATTGAATTGTAATTCCTT  
GTTCTTTATTTGTACCTAAGTCTTTTGCAGTTACATTTACAATACCGTTTTTATCGATATCA  
AACGTTACTTCAATTTGAGGTTTACCACGTTACGCTGGTGAATATCAGTCAATTGGAATC  
TACCAAGTGTTTTATTATCCGCAGCCATTGGACGTTACCTTGTAAATACGTGTACATCTAC  
TGATGGTTGATTATCTACTGCTGTTGAATAGATTTGAGATTTAGATGTAGGAATCGTAGTG  
TTACGTTCAATTAACGTATTCATACGTCCACCTAAAATTTCAATACCTAAAGATAGTGGTG  
TTACGTCTAATAATACTACGTCTTTAACGTACCTGTGATAACGCCACCTTGGATTGCAGC  
TCCCATTGCCACTACTTCGTCCGGGTTTACACCTTTGTTAGGTTCTTTACCGATTTCTTTTT  
TGACAGCTTCTTGTACTGCTGGAATACGAGTTGATCCACCAACTAAGATAACTTCATCGA  
TATCTGAGTTTGTTAAGCCAGCGTCTTTCATTGCTTGGCGTGTAGGTTCCATTGTTCTTCTA  
ATTAATGAATCTGATAATTCTTCAAATTTAGAACGAGTTAAGTTTACTTCTAAGTGAATG  
GACCGTTTTACCAGCTGAGATAAATGGTAATGAGATTTGAGTTTGTGATACACCTGATA  
AGTCTTTTTTAGCTTTTTTACGACGATCTTTCAAACGTTGTAATGCCATTTTATCTTGAGAT  
AAGTCTACGCCATTTCTTTTTTGAATTCTGCAACTAGGTAGTCAATAATTACTTGGTCAA  
AATCATCACGCCAAGTTTGTGTCACCGGCTGTTGATAGTACTTCGAATACACCGTCACC  
TAATTCTAGGATAGATACGTCAAATGTACCGCCACCTAAGTCAAAAACAAGAACTTTTTTC  
ATCTTTATCAGTTTTATCTAAACCATATGCTAATGCTGCAGCTGTTGGTTCATTAATGATA  
CGCTCAACTTCTAAACCAGCAATTTTACCAGCATCTTTAGTTGCTTGACGTTACGCATCGT  
TAAAGTATGCAGGTAAGTAAATACAGCTTTGTCAACTTTCTCACCTAAATAGCTTTACAGC  
TGTATTTTTTAAGTTTTGTAAAATCATAGCTGAGATTTCTTGTGGTGTGTATGATTTACCTT  
CAATATCTACTTTATAATCAGTACCCATATGACGTTTAAATAGATTGAACAGTGTTTGGGT  
TGTAATAGCTTACGTTTACGTAATTTACCAACTTGAAGTTTCTCCATTTTTGAAAGCTACA  
ACAGATGGTGTGTACGTGAACCTTCAGGGTTTTGAATTACTTTTGGCTCATCGCCTTCTA  
ATACTGTTACACATGAATTTGTTGTACCTAAGTCTATACCAATAATTTTACTCAT

### > **grpE**

Function: protein coding sequence; DnaK cofactor (core genome, constant)

Best match: grpE\_CC001\_MW2-USA400\_BA000033.2[1661008:1661634:r]RC

Position: 036-contig\_189: 219854 ... 220481; Length: 627 bp

Sequence:

```
TTATTGGTTTACTTTGACCATTGATGGTCTTAATACTCTATCTTTAAGCTTGTATCCTTTTT
GTAGTTCTTGAGTGATTTTCGCCAGATTCAAAATCAGGGTTATCATCTTGAACACTACAGCTTG
GTGAATATTTGGATCAAATGCTTCACCTTCAGTTTTAATAACTTCAAGACCATTATCTTTT
AGTGCGTTAATCAAACCTTTCATGCATCATTGTACACCTTTTTGAAGAGATTTAAAAGTCT
CATCATCACCTTCAATTTGAAGTGCACGTTCTATATTGTCTATTGCTGGTAAAATATCTGT
TAACACACGTTGTGCTTGATATGTTTTATTTATTTCAATTTCTTTTTGAATTCTACGCTTAT
AATTTCAAACCTCAGCGTAGAGCCTTAAATATTTCTCTTCGTTTTTCATCTGCTAATTGTTGA
AGTTCATTAATTTTTTGGATCTTTTGGATCTATTTCTTCAATAACATTCTCGTCAGACGTTTC
TTCTATTGCTTCATCTTGAAATGACCTTTACTTTCTTCAGCTTGTTCAACTGAATCATCAA
TATTTTGTGTTGACGTTTGTCTTCAACTGTTGATTGAGTGTTTTTTTCAACTGATTCGTCTT
TATTTGTCAT
```

### > **hrcA**

Function: protein coding sequence; heat-inducible transcription repressor (core genome, constant)

Best match: hrcA\_CC001\_MW2-USA400\_BA000033.2[1661666:1662643:r]RC (completely identical)

Position: 036-contig\_189: 220512 ... 221490; Length: 978 bp

Sequence:

```
TTACCAAATTCTATTTAATAATTGAATGACATTTTGATAATGCATAGCTGTAGGTCCAATC
ACAGCGATTTGACCTTTTAAACGTTTCATCAAAATGATATTGACTTGTTACAATTGAAATAT
CACTTAAGCTGTCAATTTCAATTACCAATTTTTACATTAATATTTGGTGAAGATATATC
TTGTAATAATTCTGCAATTCTATTTGATTCTATATATTGTAGAATGGGCTGAATTGAAGAT
ACATTACTTTTCATTCAATGCATCAATAAGTTTAACTTTCCACCCATATAAATGCTATTAC
TTTGATTAGAAATATGATTATTCATCGTATTTAACAATTTATTGATAAATATTTCTTCCTGC
TCTGATTGAACAAAAGAGACAATATCATCTTGTAATTTCTGATTAAACTCAGTTAGTTTGT
TTGTAACAAAATTTGATATTGTATTTAGTTTGTGATTATTAACGGTATGTCTGAAGCAAG
ATGTACATGCTCAACATGACCTGATGAAAATACGATAACCATTATAACTAAATTAGGATT
AGCACGAATCAAGTGTACATTATTGATAAATCTTGTTTTATGATTAGGATGAACAACATAA
AGTTGTATATTGAGATATATTTGATAATTCATCTGCAAAATATGTCAATGCTGATGATACA
TCATATTGATTCTCAACTAACAAATTGATTTAATCGTCTTAATTTATTTGTTTTTTGATGAGA
TGTTTGTTC AAGTAAACGATTGACATAATACCTAAAACCTAATTGTGATGGCGAACGCC
TGAAGAACTATGTGTCTTTTCGATATAGTTTAAATCTTCAAGCTGTTTCATCTCATTCTAA
TTGTAGCAGGACTAACATTCAAGTTATGTCGCTCAATTAGTGTTTTAGAACCAACGGGTT
GTCCAAAATCAACATAATCCTCAACAATTGCGTTAATACTCAATTGCCTATCTGTAAT
CAT
```

### > **hemN**

Function: protein coding sequence; oxygen-independent coproporphyrinogen III oxidase (core genome, variable)

Best match: hemN\_CC001\_MW2-USA400\_BA000033.2[1662744:1663901:r]RC (completely identical)

Position: 036-contig\_189: 221590 ... 222748; Length: 1158 bp

Sequence:

```
TTAATCATTTATTAGGAAAGCTTCAAAAACCTCATTACCTATGACTTTCCTCGCTTTGTT
AGTGCAATCGCATCGTTCTTTTCTACAATTAATTCCTTCTCTTTTAAATTATTTATTGTTG
ACCAAAGACACTTTC AATAGATTGGTCAAACCTCTTTTTGAACCTACTACTACTCACACCT
TCATTTAAACGCAAACCAAGAAACATTTCTTCTTCCATTCTCTCAGTCAAAGAAGGTTTAT
TTGATACTAAAATTGCTTTACTTTCTTTATTTATAGCTTTGATATAATGATTCACTGGATTG
ATATTCGTATAACGCACACCATCTACATAACCACTTGCACCTGCTCCAAATCCATAAATTT
CCTCATTAACCAAGTAAACCTTATTATGTTCTGATTGATCATGGCCATCTAATGCAAAATTAGA
```

TATTTTCGTATTGATGGAAAGGAGATTGTTCTATCTTAGACATCAGCAACTGATACATGTCA  
GCACCTAAATCCTCATTAGGAAGTTTAAAGCAACCCTTTTCTATACATATTATAAAATTGGG  
TTTTAGGTTCAAGTATTAAGCCGTAACCTCGAAATATGTTGAATATCCATATCTAAAGCTAG  
ATCTAAACTTTGTTCAAAAATCTTCAATCGTCTGTTTCGGTAAATGATACATTAATCTAAA  
CTGATTGATTTAATACCTGCGTTTTTAGCATTAAACACCGAAGTGTAATATCTTCAGTAT  
TGTGCGTTCTACCTAAAACAGACAATAACTCCGGCTTGAATGTTTGAACGCCCATGAAA  
TTCTGTTTACTCCATATTTTTCTAATAGTTGGACTTTCTCTTTAGTTAACTCATCAGGATTT  
GCTTCAAATGTATACTCGCCTGTGATTGTAACCGTATCACGTATTGCTTTAAGTAATCTTT  
CCAAGTATTAATAGAAAGGGCCGTTGGTGTGCCGCCACCTACATACATGGTCTTTAAGT  
TCCTATATTTTGTGTAGACATTTCTGTTATTAGTGCATCTAAGTACTCATCTACAGGTTG  
ATTCTGTATAAAATATTTATTGAAATCACAATATGTACATATTCTTACACAAAATGGAATA  
TGTATATATGCACTTTGTACCGTCATTTAATGCCCGCTTCTCAGACTGTTTATCCAA

### > **STAR**

Function: Staphylococcus aureus repeat element

Best match: STAR\_CC001\_MSSA476\_BX571857.1[1643721:1643947] (completely identical)

Position: 036-contig\_189: 222857 ... 223084; Length: 227 bp

Sequence:

GGGAGTGAGATAGAAATAATAAAGAACCACTAATGATTTATTATGTAGTGGCTCTTACAC  
ATTAGCCAGATGTAATATGTCCATAAAAAATAAAATTACATGAGTAAACTCATGCATAAG  
GGAGTGGGACAGAAATGATATTTTCGCAAAATTTATTTCGTTGTCCCACCCCACTTGCAT  
TGCCTGTAGAATTTCTTTTCGAAATTCTCTATGTTGGGGCCCCACC

### > **repeat\_nyS**Agamma

Function: repeat element

Best match: repeat\_nySAgamma\_CC001\_MW2-USA400\_BA000033.2[1841748:1841853:r]

Position: 036-contig\_189: 223047 ... 223077; Length: 30 bp

Sequence:

AATTTCTTTTCGAAATTCTCTATGTTGGGG

### > **Q2FZB6**

Function: protein coding sequence; putative protein (genomic island)

Best match: Q2FZB6\_CC008\_COL\_CP000046.1[1182242:1182414]RC

Position: 036-contig\_189: 223084 ... 223114; Length: 30 bp

Sequence:

CCAAGTTGCACATTATTGTAAGCTGACTTT

### > **lepA**

Function: protein coding sequence; elongation factor 4 (core genome, variable)

Best match: lepA\_CC001\_MSSA476\_BX571857.1[1644144:1645967:r]RC (completely identical)

Position: 036-contig\_189: 223337 ... 225161; Length: 1824 bp

Sequence:

TTATTCGTCATCCATTTTCAATACAGCCAAGAAAGCATCCTGTGGAATTTCAACATTACCA  
ACTGCTTTCATCTTAGCTTTACCTGCTTTTTGTTTTTCAAGTAATTTACGTTTACGGCTTAT  
GTCACCGCCATAACATTTAGCTAAAACGTTTTTACCCATTGATTTAATATTTGTACGCGCT  
ACAATTTTTTGTCTATTGCAGCCTGTACAGGTAATTTCAAATTGCTGTCTTGGAAATTAACG  
TTTTAAGTTTTTCAACTAATGCTTTACCACGTTTCATATGCAAAATCTCTATGAACTATGAA  
GCTTAGCGCATCCACTTTATCACCGTTTAAATAAAATATCCATCTTAACTAAATTACTTTCT  
TTATTTTCGATGAATTCATAATCAAATGATGCATATCCTTTAGTATTAGATTTAAGTTGAT  
CGAAGAAATCAAATACAACCTCAGCTAAAGGTAATTCATAAACAATATTTACACGAATAT  
CATCTAAATAGTCCATATTTATAAATTGTCCACGTTTACGTTGACATAAATCCATTACTGC  
ACCTACATAGTCATTTGGAACCATCATAGTTGCACGAACATATGGCTCAAATATTTTATCA  
ATTTTATCACGATCTGGCATTGTGCTGGGTTATCAACCGTCACTTCTGAACCGTCCCTTA  
AAATACATTGATAAATTACAGATGGTGTGCTGTTGCAATTAATTCAATGCCAAATTCTCTTTC  
AATTTCTTCTGAATTTCCATGTGTAACATACCTAAGAAACAGTTCTATAACCAAAA

CCTAATGCTTGTGACGATTCAGGCTCAAATTCTAATGATGCATCATTCAATTGTAATTTTT  
CTAATGCTTCTCTTAAATCATTATAATTTTTGTTATCTATTGGGAACAGTCCGCAATATAC  
CATTGGATTCATTTTCTTATAACCTTGCAATGGTTCTGATGCAGGTCTACTAGCTAATGTG  
ATGGTGTACCAACCCTAGAATCATCAACATTTTAAATACTTGCAATAATATAACCAACA  
TCACCAACTGTTAATTCATCAACTGGAAGCTGCTTAGGTGTATTAATCCAACTTCTGTTA  
CTTCGAACTCTTTACCAGTCGCCATCATTGCAATTTTATCTCCGGCTTTAACAACACCGTC  
TACAATTCTTATCGATGAAATTACCCCTCTATATGGATCATACTCAGAATCAAATATTAAC  
GCTTTTAGTGGTGGTCTTCTGGGTGCGCCATCTGGAGCTGGCACAACCTTCAACTATTTTCTCTA  
GTATCTCTTCAATTCCAATGTTAGATTTAGCACTTGCTAAAACAACATCGTCTTGGTCTAA  
ACCTATCATATCTTCAATTTCTTGTTCACGCGTTCAGGTTCTGCAGCAGGTAAATCAATT  
TTGTTAATAACAGGCAATAACTCTAACTCATTATCTAATGCTAAATAAACATTTGCTAATG  
TTTGTGCTTCGATACCTTGAGCCGCATCTACTACTAAAATCGCGCCCTCACAAGCTGCCAA  
AGAACGTGACACTTCATATGTAAAATCGACGTGTCCAGGCGTATCGATTAATGGAATGT  
ATAAGTATTTCCATCTTTAGCTTCGTACTTTAAACGAACTGCGTTTAAATTTGATTGTAATA  
CCACGTTCTCTTTCTAAATCCATTGAATCTAGTAACTGATCTTGCATATCTCTTGTTC AAC  
TGATTTGGTATTTTCTAAAATCTATCAGCCAATGTAGATTTTCCGTGGTCAATATGTGCT  
ATAATCGAGAAATTCCTTATATTCTCTCTTTTAAAGCGTTGCTCATTATCCAT

### > **rpsT**

Function: protein coding sequence; 30S ribosomal protein S20 (core genome, constant)

Best match: rpsT\_CC001\_MW2-USA400\_BA000033.2[1666661:1666912] (completely identical)

Position: 036-contig\_189: 225522 ... 225774; Length: 252 bp

Sequence:

ATGGCAAATATCAAATCTGCAATTAACGTGTAAAAACAACCTGAAAAAGCTGAAGCAGC  
CAACATTTACAAAAGAGTGCAATGCGTACAGCAGTTAAAAACGCTAAAACAGCTGTTTC  
AAATAACGCTGATAATAAAAATGAATTAGTAAGCTTAGCAGTTAAGTTAGTAGACAAAG  
CTGCTCAAAGTAATTTAATACATTCAAACAAAGCTGACCGTATTAATCACAATTAATGA  
CTGCAAATAAATAA

### > **holA**

Function: protein coding sequence; DNA polymerase III/delta subunit (core genome, constant)

Best match: holA\_CC001-ST772\_118\_AJGE01000022.1[10818:11792]RC (completely identical)

Position: 036-contig\_189: 225818 ... 226793; Length: 975 bp

Sequence:

TTATAAAGATAGAATGAATAATTCCAGTATTAACCTGTTTATCCATATATGATGATTTAAGT  
TTATAATCAGTTTCCGCACAAGCATCTATAAATTTCAATAATTCATCAAGTTGATAATGTC  
TTACTTGTCCCTAACGCTAATTTTACTCTGTATGGATGTACGCCTATTGTTTTAGCAATTTGC  
TGTCCTACTATATCCTTTTTGACTCAAATCTTACATTGATAAAATAATCGGTAATTAATTG  
TGATTAGTGCAAGTAATTTAATAGGTTCTTCTTTCATAGTTATTAATCTTTTACTAAATG  
AATTGCTTGTCTTTCTTTCTTTCTGAATGTATTCAGTCAGTAAAAATACATTTTGTCTCA  
AACTTCTATTAATAATTTGGTTAACATCCTGCTTATTAATTGTTAGTCTATCGCCTAAAAA  
TAAAATCAACTTTTCTATCTCTTGTGAGACAATATTAAGTTAATACTGTCAACTCAATA  
AATAAATCTAATGCATCTCTTTTGATATCTTTGAAATTCTCATTTAATTTACTTTGAATCCA  
TTTTTTTATTTCTTCTTCAGACATTTGCTCTATTTTTTTAAGCCTTGCAATGCTTTTTT  
TTAGTTAACTTTTTTCTTTCATCAAGTTTATTTTGATATATCTCAAAGACAATCAAATTTT  
CGCCATCATATTTTTCAATAAATTTCTATTAATTGATTTACATTATGAGCCATATCTTTTGGC  
GCTTTTTACCTGTAAATATATATGCATTTTAAACCAAATGCTTTTTTATCTGAAAAGA  
AAGGCAATGTTAATGTTTCTTCAACAATTGGTGCAATCTCTGTTTCGTATAAATTATATTT  
CACAAAGTTAAAGTCATCTCTATCACTTTTCAAATTTGTGATATAAATTTCTGCACTTTGT  
TTTTCAACCAATTCAGGCACATCTCCATAAATAGCTACAATATTGTGCTCAT

### > **comEC**

Function: protein coding sequence; DNA internalization-related competence protein (core genome, constant)

Best match: comEC\_CC001-ST772\_118\_AJGE01000022.1[8560:10761]RC (completely identical)

Position: 036-contig\_189: 226849 ... 229051; Length: 2202 bp

Sequence:

```
CTATAAACCCTTGCATTTCCATAAAGAGTTTGAATCAACTTTTAAATTATCATCTAAGTCA
ATTGTAACCTTGACCGTTTTGTTGACTATTGTAAATGCGACTGCGAATCCTTTGCAATCGTT
TAACAACCTTCTATATTAGGAAGATGATACATATTGTTCTTCCCAGAAGAAATCAAACCTTA
TTTTAGGCTTAATCATCTCTATAAATTCTTTAGAACTACTTGTCTTGCTCCCATGATGACCT
ACTTTTAAAATATCAATCTCCGGCAAGTTATATTTTTTTTAGTAGTAAAGATTCATTATTTTT
ACTAGCATCGCCCATTAATAAAAACCTTTTTTATTTTGATATGTAATCATAGTAATAATCGAA
TACTCATTTTTATCTCGGCTATTTGGAATAAAAACCTATCAAAAAATAGAAAACCTACTATCTC
CAAGTTTAAAACCTACTAACTTGTCTTACATCTATAAGTTTAATGTTGTACTIONTATGGCTTAA
TTTCGATAATAACATCAATGTATTACTACTATATCCCTTATTGTATATCACTATATGTTTAA
TTTTAATATGACTAATAATATATTCCACTTCACCAATATGGTCATTGTGTGGATGTGTTAA
AATTAGATACTCTAATTCATTTATCCCTCTTTCATTTAGCGTTGGTAAAATATGATATTTA
GAAATTGAATAACTAGGTTGTTTAGTATCATCAATCACTTTCCCACCTGTATCAATCAAGA
CATTTTGGTTCTTACCGCCTTCATATAAAAATACTGTCTCCCTGCCCCACATTTAACATTGTA
ATTTTGTGATGTGAATTTGTTGGAAACGTTATTAATAATGTCAGAATAATTATAGTCCAAA
ACGTAACCAATATATATTTACGTTTAGCCAATAACCAAAAATATGTAATAAACAGAAATTA
TAAATATTATAAATATCCAATCATTAAAATTGGGAACAGAAAAATGTGATTGCTTAATTC
TTGTGAATAGGTCTAGTAACCAGTCATGAAAATTAAAAACCTTAGGTCAACCAAGTAATTTA
GCGGCGTTAATCCCACAATAAAAATGACTTGTAAATAAAGAATAAAAATAGATAGCGGAAAC
AATATAATCGAATAGTACGGTACAAAAATCAAATTAGATAAAAAATCCCACCCATTGAAGT
TGATGAAAGTTTGAATGGCAACGATAAATGAAGCTAATTGTGCAATAAACGTAATTATG
AATAATGATTGTAACCTTTGACAATTGCTGTAAAAAAGGAAAAAGTAGCATAATAAAAAA
TGAAATGATGAATGAAAATTGAAATCCAATATCATAAACAACCTAGTGGATTTAAAATAA
ACATAATTATAAATGCAAATGCTAATAGCTGAATACCCTTTATTTTAATTTGCTTAGTAAT
AAGCAGTACAAGAGTTGTCATTATTATAGCTCTTACAGCACTAGGTGCATAATTTGTGTAT
TGAGCAAATAAAGCTAATACAATGATTGTAATTCCTTTAATGACAAATAAAGGTAAATTT
AATCGTTTTAAAGTTTGTAAATTAAGAATACAATTGCAGCTATATGCGAGCCACTAACT
GCCAGCAAATGATATATACCTATCTCTTTAACACGTTCCCTTAAATTGCTCATTAAATTTCTTT
TACGTCACCAGTAATCAATGCCATAATACGATCCGGAACTTAATACCCGAATCATAAAT
TCGATTCATTATAAACTGTTTATGTTTCTCAATTAATTAGACCGGTTTCGATTCTAGGCAG
CTTTGTACAACCTATACTTTGTAATTTAAGAGTTACAACTTATTGTCATTAACCTTTGAATT
GTCCTTTAACAAATACAATTACGACTTTCAATTTCTTTAAATCAAATTCCTTTTTATTTGTT
AAAAGAAAGGATATATTTCAATTTTTTAACTCAACCTACCTTTATATGTGTCACTACCTT
GACGTTGAATTTGGATTACTTGAGCACGCTCATTAACTGAGAATTACGTTCAATATAATT
GATATAATTAATATTGCTTGTGTAATAATGTAAATACCATGAGGAGAAAATGATTAA
AAAGAGAGAAATAGGGGCATAAACGATTTTATTTTTACGATAAGTAATATACAAAAGTA
AAATGAAAAGAAATGTAGAGAGCACTTTGCTAGAATTCCAAAGCACTCCTACAATCATTG
ATAACGCGACATACAGCAA
```

### > **comEB**

Function: protein coding sequence; competence protein EB (core genome, constant)

Best match: comEB\_CC001-ST772\_118\_AJGE0100022.1[8124:8555]RC (completely identical)

Position: 036-contig\_189: 229055 ... 229487; Length: 432 bp

Sequence:

```
TTAACCTTTAGTCAGATATTTAGCAACATATTCTGGTGAAAATGGAATTTTTTTTAAATTCA
ATACCAGATTGTTTGAAGTAATTTAGTTGCATATTCATGGTTATGATAATCTTCTGCATAGT
AGATACGCTTTATACCTGCTTGAATAATTGACTTTGTACAATTTAGGCATGGAAAATGAG
TAACATAGATTGTTGCACCTTCAGTAGATACACCTTGTTTTGCACATTGTAATAAAGCATT
CATTTCTGCATGTATCGTTCTGATACAATGTCCATCTTCAATTAACATCCTTCATCTATAC
AATGCACCTCGCCAGCTACAGAGCCATTATACCCACCAGCAATAATACGATTATCCTTAA
CAATCGTTGCACCTACAGATAATCTTTGACAAGTTGAACGTAATGCTAGCAAATGACTTT
GTGCCAT
```

### > **comEA**



Function: protein coding sequence; competence protein EA (core genome, variable)  
Best match: comEA\_CC007\_TCH959-USA300\_AASB02000245.1[63067:63753:r]RC (completely identical)

Position: 036-contig\_189: 229608 ... 230295; Length: 687 bp

Sequence:

```
TTATGTCGTGAAATAAGATTTTCAGTTTATCAAAAAGTTTTACTTCCAAAACCTTTTACTTTTT
TCAAATCGTCAATTTCTTGAAATGCACCTTGTGGTTGCGATATTCAACAATTGCATTAGC
TTTAGCTTGCCCTACTCCAGGAACAGACATCAATTCTGATACAGATGCCGTATTTAAATTT
ACTTTAGTATTATTTGTGTTCCATTTTTTACGTGCACACTGTTTACTTCAATTTGTGGTTC
AACATTCTTTTGTCCCTTATGAGGTATGAAAATCATTTTTTGTATCTGTAAATTTTTTCAGACA
AATTAATTCGACTTACATCTGCATCATCCAATAATTGTGCTTTATCAAGTAAATCAACTAC
TCTATCCTTAGATGTCATTTTATAAACATTAGGATGTTTAAACAGCACCTTTTACATCGACA
TATACAGGACCTTTATTTTTGGAATTATCTCCATCTTTGACCTGGACATCTTCTAATTTGGA
CAAATAATTTTTCACTAGTGCTTTGTTTCAGAGCAGTATCTTTATTTTCAAATTTCTTG
AAGTATAATCATCTTGTCTCCAGAATATAAAACCAATTAATACCATAATTAACAACAG
CACTTATAATATAAATTCCACTGAGTTAAAAAATCTTTATAGCGTAATAAAAAATTGAT
ACAATAAAACCAC
```

### > **nadD**

Function: protein coding sequence; nicotinate-nucleotide adenylyltransferase (Deamido-NAD(+) pyrophosphorylase) (Deamido-NAD(+) diphosphorylase) (core genome, constant)

Best match: nadD\_CC001\_MW2-USA400\_BA000033.2[1673120:1673689:r]RC (completely identical)

Position: 036-contig\_189: 231981 ... 232551; Length: 570 bp

Sequence:

```
TCAATGTTTCATATAATCCTTCCCCCTTAATATAGTTTTCAACGGATTTAGGAACAAGAACT
TGGATAGATTTCCCTTCACTAACTCTTTGTGCGAATCATTGTGCGAACTTATATCTACCCTAG
GTATCTGAATTGCAATCATAGCATTTTCAACATTTTACTATTTTTGTCTCGATTTACAAC
ACAAAAGTAACCATTTCTTTTAAAGTATTCAATTTGATACCATTTCTCTAGTTGGTTACT
GATCCGTCCCAATAACAAAAGTACAACACTACTGCTTTTGTGTTGCTCCTTGAATGCCTTGAT
CGTGTCATAGGTATAACTCTGACCACCACGTTTAAATTTTCATCGTCGCAAATATCTCCAAAA
CCAAGCTCGTCGATAATCATCTGTATCATTGTTAATCTGTGCTGAACATCTATAAAATTAT
TGTGCTTTTTCAATGGAGACATAAAACTAGGTAAAAAATAAAATTCATCTGGCTGTAATT
CATGAAATACTTCGCTAGCTACTATCATATGTGCAGTATGGATAGGGTTAAACTGACCGC
CGTAAAGTACTATCTTTTTTCAT
```

### > **aroE**

Function: protein coding sequence; shikimate 5-dehydrogenase (core genome, constant)

Best match: aroE\_CC001\_MW2-USA400\_BA000033.2[1673986:1674792:r]RC (completely identical)

Position: 036-contig\_189: 232847 ... 233654; Length: 807 bp

Sequence:

```
TTATTCTCCTTTTAAATTGTTGTAACACTGCTGTTTTTCATAGAATTAATATCAGCATCTTTAT
TAGTCCAAATTTTAAAGCTTTCCGCACCTTGGTAAACAAACATATCTAAGCCATTATAAAT
ATGGTTTCCCTTGCCTCTGCTTCTCTAAAATAGGTGTTTTATACGGTATATAAACAATA
TCACTCATTAAAGTATTGGGAGAAAGATGCTTTAAATTAATAATACTTTTCGTTATTTCCAG
CCATACCCGCTGGTGTGTATTAATAACGATATCGAATTCAGCTAAATACTTTTTCAGCATC
TGCTAATGAAATTTGGTTTATATTTAAATTTCCAAGATTCAAACGAGCCATCGTTCTATTC
GCAACAGTTAATTTGGGCTTTACAAATTTTGTAAATTCATAAGCAATACCTTTACTTGCAC
CACCTGCGCCAAAATTTAAATGTATGCATTTTCTAAATCTGGATAAACGCTGTGCAATC
CTTTAACATAACCAATACCATCTGTATTATACCCTATCCACTTGTTCATCTTTTATCAAAC
AGTGTTAACTGCACCTGCATTAATCGCTTGTTCATCAACATGATCTAAATACGGTATGATA
CGTTCTTTATGAGGAATTGTGATATTAAGCCATCTAATTTCTTTTTTCGAAATAATTTCTTT
AATTAATGAAATCTTCAATTGGAATATTTAAAGCTTCATAAGTATCATCTAATCCTAA
```

AGAATTA AAAATTTGCTCTATGCATAACGGGCGACAAGGAATGTGAAATAGGATTTCGGAT  
AACTGCAAATTTTCAT

> **mtnN**

Function: protein coding sequence; 5'-methylthioadenosine/S-adenosylhomocysteine nucleosidase (core genome, variable)

Best match: mtnN\_CC005\_CF-Marseille\_CABA01000038.1[1580:2267]RC

Position: 036-contig\_189: 235315 ... 236002; Length: 687 bp

Sequence:

TTATAATTGAGACACTAATGCTTCAACAGTTTGACTTGATGATACAGCTGCTTTTTCTAAA  
AATGCTTCGAAGCTCATTTCGGCTTCTCCATTTGCTAAGTCTGAAACTGCACGAACTACAA  
CAAATGGTACATTA AATTGATAACATGTTTGTGCAATTGCAGTTGCTTCCATTTCAACCGC  
CATCGCATTGGAAATGCTTTTTTAATTTTTTGGCGTTGTTCAACACTACCGATAAAGCTA  
TCACCACTTACAATTAAGCCTACTTTAGCTGTTAATTGTTGTTGTTGTACA ACTTGAGATA  
CTTTTTCTATTA AAGGTTTACTTGATTGAAATGCTACCGGCATCTGTGGTATTTGTCCATAT  
TCATAACCAAATGCTGTTGCATCTGCATCATGATATTTTACATCATCACTTATAAGAACGT  
CACCTACATTTAACTTTTCATCTAAAGCTCCAGCAGAACCTGTATTAATAATGACGTCCG  
GTTTAACTTATTAATTAATAATGTCGTAGAAATTGCAGCATTA ACTTTTCCAATGCCACT  
TTGGGTAATCACTACTTCTCTATCTTTTAAAATGCCAGTATAAAAATTTAACATGTGCAACT  
GAAATTTTCGCTTAATTGTGTTAATTTATTTTTTAATATTGTTACTTCTTCTCCATGGCACC  
AATTATACCAATCAT

> **entX**

Function: protein coding sequence; putative enterotoxin homolog (core genome, variable)

Best match: entX\_CC001-ST772\_118\_AJGE01000022.1[120:824]RC (completely identical)

Position: 036-contig\_189: 236786 ... 237491; Length: 705 bp

Sequence:

TTATGATTTGAATAAATAGATATCTAAATGCAATTTGTCACTATTGATAGTTTTATTATCA  
GCATACATTTTAAATACCTCATAACCATACTCACCATTTAAATTATAAAAATCATATTCTA  
CATTTTGTTCATCATCATTATGATATTTAACATAACCTTTAACAATGTCGCCACCTTGTTCCG  
TACA ACTTATACTTCTCATTCAAATAATTTCTTAATTGAACATCTAATTCTTGAATGGTAA  
CAATTTTCTTTTTCGTTTTTACTGCTGTTAATTTCTATTTCTGCTTGATGTCCGTCAATCCATA  
AATTACAAGGTATATTCTTATAATCATCGTATTTATTATTGTCACTTAAAGTAAACACCACC  
ATAACTACATTGCGTTTTATTGGTTGCTCCCCCATGACATTCATAGCTATAGCTTCCAGCA  
AATATATCGATATCCTTATTTATAAATTTCTTTGAAAGTGCCTCATTTTCAAATTCAACTTT  
AAAATCCTTTTTCGAAGCAACATTTACGAACATGTCATGAAATAACAAATCATGCTTCAA  
CAGTCTATCGTTTGTGTTTTTATTTTCAAGCTGAGTTGGATTGATGAATGACATCTTAGCA  
TTACTTAGACGCTTTGAATCAA ACTTACTTTTATGATGTAAGTCTGAATATTCGATTGCAC  
TCGCTGAATTTGTAAAAATTCCTTCTAACAA

> **srtA**

Function: protein coding sequence; sortase A/LPXTG specific (core genome, constant)

Best match: srtA\_CC008\_NCTC8325\_CP000253.1[2611952:2612572:r] (completely identical)

Position: 036-contig\_189: 238737 ... 239358; Length: 621 bp

Sequence:

ATGAAAAAATGGACAAATCGATTAATGACAATCGCTGGTGTGGTACTTATCCTAGTGGCA  
GCATATTTGTTTGCTAAACCACATATCGATAATTATCTTCACGATAAAGATAAAGATGAA  
AAGATTGAACAATATGATAAAAATGTAAAAGAACAGGCGAGTAAAGATAAAAAGCAGC  
AAGCTAAACCTCAAATTCGGAAAGATAAATCGAAAGTGGCAGGCTATATTGAAATTCCA  
GATGCTGATATTAAGAACCAGTATATCCAGGACCAGCAACACCTGAACAATTAATAG  
AGGTGTAAGCTTTGCAGAAGAAAATGAATCACTAGATGATCAAAATATTTCAATTGCAGG  
ACACACTTTCATTGACCGTCCGAACTATCAATTTACAAATCTTAAAGCAGCCAAAAAAGG  
TAGTATGGTGTACTTTAAAGTTGGTAATGAAACACGTAAGTATAAAAATGACAAGTATAAG  
AGATGTTAAGCCTACAGATGTAGGAGTTCTAGATGAACAAAAAGGTAAAGATAAACAAT

TAACATTAATTACTTGTGATGATTACAATGAAAAGACAGGCGTTTGGGAAAAACGTAAAA  
TCTTTGTAGCTACAGAAGTCAAATAA

### > **ldhD**

Function: protein coding sequence; D-lactate dehydrogenase (core genome, constant)

Best match: ldhD\_CC001-ST772\_118\_AJGE01000055.1[24720:25712]RC (completely identical)

Position: 036-contig\_189: 242259 ... 243252; Length: 993 bp

Sequence:

TTAATTTAAACGTGTTTCACATGTACCAGTGTTAATGACAGATAATGCTGCGTTTAAACCA  
CCTTCAACAAGGTTTTGTACTGCTTCATCAGAGAAGAAAGCAATATGTGGCGTTACTAAA  
ATTCTTTCATGTTTCGATTAACTCTAATAATGTTTTATCGTCAATGTCTTTATTAGTCCAGTC  
ATTTGTGAAGTATGCAGCTTCATTTTCATAAGTATCAATCGCAGCACCTAACAAAGTACC  
ATCGTTCACTGCAGCGATTAATCAGGTGTATTGATGACTGCACCACGTGCTGCGTTAAC  
TAAGATTGCACCTTTTTTTCACATGATCAAACATTGCTTTATCGAATAAATGATAGCTTTCT  
TTGTTTCGCTGGAACATGTAAAGAAATAATATCGGCATCTTTAATAGCTTCTTTAACACTAT  
CTTTATAAGTTAAAAAGTCTAAATCTTTATTAGGATAAGCGTCATAAGCTGTAATTGTAGC  
ACCAAATCCTGCATATATTTTAGCTGTAGCAGCACCGATACGACCCGTACCGATAATTGC  
AACAGTCATATTTTTAACTGGTTTAGACATGATTTCTGCTTGCCAAGTAAAATCATGTGCT  
TGTACACGGCGTTCAATATCTGGGAAGCGACGCACTAATTGTAGGGCGATAGAAACAGA  
ATACTCTGCAATTGTTTCAGGTGAATAACTAGGAACGTTAGATATCACAATATTGTGTTTT  
TTAGCTAAATCTAAATCATAATCAAATCCAGCAGTACGTTGTGCAATTTGTTTAATAC  
CGTAAGATTCTAATTTAGGATAAACGTCATTTTCTAACTTACCAAATTGCATTGTAGTTAC  
GCCATCGTAATCTTTAATTGATCGACTGTAGCACTTGATAATAGCTCTTTAGAAGTAGTT  
ACTTCGACATTATTCTTTTTCCCCCAATTTAATGCCATCTCTTTCTCATAATCACGCGTACC  
AAAGAACATAATTTTTTGTCAT

### > **frp**

Function: protein coding sequence; NAD(P)H nitroreductase (core genome, constant)

Best match: frp\_CC001\_MW2-USA400\_BA000033.2[2605185:2605856:r]

Position: 036-contig\_189: 243521 ... 244193; Length: 672 bp

Sequence:

ATGAGCAATATGAATCAAACAATTATGGATGCATTTTCATTTTCAGACATGCGACTAAGCAA  
TTCGATCCACAAAAGAAAGTTTCGAAAGAAGATTTTGAAACAATATTAGAGTCAGGTAG  
ATTGTCTCCAAGTTCTCTTGGGTTAGAACCCTTGGAAGTTTGTCTGATTCAGATCAAGCG  
TTACGTGATGAATTAAGCGCACAGTTGGGGCGCAGCAAAAACAATTAGATACAGCGAG  
CCATTTTGTGCTAATTTTTGCGCGTAAAAATGTAACGTCAAAATCACCGTATGTACAACAT  
ATGTTAAGAGATATTAATAAATATGAGGCACAAACGATTCCAGCTGTTGAACAAAAATTC  
GATGCATTCCAAGCAGATTTCCATATTTCTGATAATGATCAAGCCTTGTATGACTGGTCAA  
GTAAACAACGTATATCGCATTAGGCAATATGATGACGACAGCCGCATTGTTAGGTATTG  
ATTCATGTCCGATGGAAGGTTTTAGTCTGGATACAGTGACAGACATTTTAGCAAATAAAG  
GTATCTTAGATACTGAGCAATTTGGTTTATCAGTGATGGTTGCATTTGGCTACAGACAACA  
AGATCCACCGAAAAATAAAACACGCCAAGCATATGAAGATGTTATTGAATGGGTTGGAC  
CAAAGAATAA

### > **Q5HD32**

Function: protein coding sequence; acetyl-CoA binding protein (core genome, variable)

Best match: Q5HD32\_CC005\_Mu50-VRSA\_BA000017.4[2665096:2665380]RC (completely identical)

Position: 036-contig\_189: 245290 ... 245575; Length: 285 bp

Sequence:

TTAACCAAGATATACATCTTGATATGAATCTTCTTTTTCTAACATATGTTTGGCAAATGAA  
CATGAGGCAATAATTTTTAAATGATTTTCTCGAGCGTGTTCAACAACCTGTTTAACTAGTT  
TTTTGCCAACACCTTGACCACCAAGTTCATCAGATACGCCTGTATGATCAATGTTAATTTT  
ATTATTATCCACAAAACGGTATGTGATTTTCAGCTAAAGCATTATTTTCATCATCACCATA  
TAGAATTTGTTCTCGCCTTGTTTGATTTCAAGGTTACTCAT

## > Q1Y5K1

Function: protein coding sequence; putative phospholipase/carboxylesterase (core genome, variable)

Best match: Q1Y5K1\_CC001-ST772\_118\_AJGE0100055.1[20076:20669:r] (completely identical)

Position: 036-contig\_189: 247302 ... 247896; Length: 594 bp

Sequence:

```
ATGGAACATATTTTTAGAGAAGGACAAAATGGTGCGCCAATACTAATATTATTGCATGGT
ACAGGTGGTGATGAGTTCGATTTATTACCGTTAGGCCGAAGCATTGAATGAAAATTATCAC
TTGTTAAGTATTAGAGGACAAGTTTCAGAAAATGGGATGAACCGTTATTTCAAACGTCTT
GGTGAAGGTGTTTATGATGAAGAAGATTTGGCATTTCGTGGACAAGAATTGTAAACGTTC
ATTAAGAAGCTGCTGAACGTTATGATTTTGATATTGAAAAGCAGTACTTGTGGATTTT
CAAATGGATCAAATATAGCGATTAACCTTAATGTTGCGTTCAGAAGCACCATTTAAAAAAG
CATTGTTATATGCACCGTTATACCCAGTTGAAGTAACGTCAACAAAGGATTTATCAGATG
TCAGTGTGTTGCTTTCTATGGGGAAACATGATCCAATTGTGCCATTAGCTGCAAGTGAAC
AAGTCATTAACCTTGTTAATACACGTGGGGCACAAGTCGAAGAAGTTTGGGTGAAGGGCC
ATGAAATTACAGAACTGGATTAACGGCTGGTCAACAAATACTTGGGAAATAA
```

## > Q1Y5K2

Function: protein coding sequence; putative membrane protein (core genome, variable)

Best match: Q1Y5K2\_CC001-ST772\_118\_AJGE0100055.1[18892:19971]RC (completely identical)

Position: 036-contig\_189: 248000 ... 249080; Length: 1080 bp

Sequence:

```
TTAATCGATATGAGATTTGCCGGTAATACGCTTAATTAACCTTTATAGAGTACAGGTAT
GAGTAAGATGAAACCGAACCAATCCATAATAGGGAATACTTTTCCAATTAATGAAATGA
AACCGATAAATGTACTAATAAAGTGATGACAGCCATTGTAATAATAATGATGAAGTAAC
GTCTGCTGAATGGAACGCTGAAACGTGACGCAAATGCATACATTAATCCAACAACAGTAT
TGTAGATGACAAGTATCATAATGACAGACATAATAATACCAATTGACGGAGACATTTGTG
TCGCTAATTTTAATGTAGGTAGATCTACGTGTTTAATTTTATCGAATTGAGAAATTAACC
TAGATTAATCATCATGAGTAAAAATGTAATGATTAACCAGCAATCAAGCCCCGTATAA
CGTTGAGTCACGATATTTAACTTTACTACCCATCACTGATAAGAAGCTGAAGGCAGCAGC
AATTTGCAAGCTTGCATAGTTAATCGCATCAAACCACCATCCAGGTGATAATGATTTCTG
CTTATGAATCTGAGCATCATTATTAGCGGCAGTAAAATCAAGATGACTTGTGTGAAATA
GTAGACCGCAATCATAATGACAATCGCAATTAATAAATGGGGTAACACCGCCAAGCACAG
CAATTAACGATCGAATTTTAGATACAGTGTGCTAAAATAAAGGCGACTAATATGAGTG
CGCTCAGCCAATACGGTAAGTTGAACTTTGATGAATGGTTGACGCACCACCTGCAGTCA
TAATAATAGCTAAAGACAACATAAACATTGTTAAAATAATATCAAACCTCTTGCAATAG
AGGGGTATAAGAAATAGTTAATTGAATCAGAATGATTTCTGGACTTTAGATGATGACCTG
TATGCATGACAACCATTCCACCTAAAGTAATCAATAGTCCTGTTACAATAATGCCTGAAA
TGCTATATGCGCCATGACTTGTGAAAACTGGAAAATTTCTTGACCAGTAGCAAAGCCGG
CACCAACGACAACCAACAAAGGCAAATGCCACAATAATGGACTCTTTAAGATACGC
AT
```

## > sprA-L5

Function: noncoding RNA small pathogenicity island RNA A/Locus 5 (core genome, variable)

Best match: sprA-L5\_CC008\_COL\_CP000046.1[2589877:2590091]RC (completely identical)

Position: 036-contig\_189: 249274 ... 249489; Length: 215 bp

Sequence:

```
ATAGATACACCAATCCCCTCACTACTCGCAATAGTGAGGGGATTTTTTTTCGGTGTAGCTA
GGTCGCCTATTTATCATCGTGTGTTGCGTAGCCAATGCGTAAACACAGTACCACTAAATAA
GTGCACGATACATGCATCAAATGTCGTCTTTAGTCTAAGTAACGATCATGCATTAACATTT
TCAAATATCTATTTGAGCTTGAAGATCTTTACC
```

## > DR

Function: direct repeat

Best match: DR\_rsaJ\_trunc\_CC001\_MW2-USA400\_BA000033.2[2600053:2600100:r]

Position: 036-contig\_189: 249275 ... 249323; Length: 48 bp

Sequence:

TAGATACACCAATCCCCTCACTACTCGCAATAGTGAGGGGATTTTTTT

### > **fstAT**

Function: Fst antitoxin sRNA, locus 3

Best match: fstAT\_L3\_CC008\_COL\_CP000046.1[2589989:2590065:r] (completely identical)

Position: 036-contig\_189: 249300 ... 249377; Length: 77 bp

Sequence:

CGCAATAGTGAGGGGATTTTTTTTCGGTGTAGCTAGGTCGCCTATTTATCATCGTGTTTGCG  
TAGCCAATGCGTAAAC

### > **fbp**

Function: protein coding sequence; fructose-bisphosphatase (core genome, variable)

Best match: fbp\_CC001-ST772\_118\_AJGE01000055.1[16584:18548]RC (completely identical)

Position: 036-contig\_189: 249423 ... 251388; Length: 1965 bp

Sequence:

TTAGTCTAAGTAACGATCATGCATTAACATTTTCAAATATCTATTTGAGCTTGAAGATCT  
TTACCAATATTGGTATCACGAATCTTCTTACGTTGTAATTCTTTATCTACGACGCGCTTTAT  
AGAAAGTTCATCGATACCTTCGAAAGTATTTTTCTTTAGCGTTAAATTGTTGGTGTGCA  
ACGAGTTGCATACCGAATGAATTATACAATAGTGTATAGCCTGCAATGCCAGTTGTTGAC  
TGATAAGCTTTTGAAGCCACCATCAATGACAAGCATCTTCCATCAGCCTTGATAGGA  
TCTTCGCCATTGATTTCTTCACTGGTGTGTGACCATTAATAATGCGTCCTTCATCTGGATT  
TAATCCGAAATCACTGAGCATTTTACGAACCATATTCACATCTTCACGAAGATGATAGTA  
CGGATTTCTTTCTTTATGAGAAGCTTTATCTGCAATAAAGTATCGCTCAAACGTAGTC  
ATGGCACGTTTACCAAATAGTGACGAATATTTCCAGTCCATAAATACCAAATAAATCC  
GTCGATAAGTCATCAGTATTTCTTTTCATCAAATGATTTACGGACATGATACTCAAACA  
CATCTAATAAATTCTTGGCCGCTGTAAGTATGACCATCAATTTCAAATGATTCATCTCACC  
ATTTTCATCAACTGGAATACAACCATGAATGAGTAAATTACCATTATATGGTAAGTAAAG  
CGAACCTTTACGCATCAAGAAAGACATATGACGACGTAATTTTTTCAGATTGTTGGAATGA  
CAATAATAGTTTATTCATGACTTCTTCTTTCAGGTAGTAATTCTGCTGGATTATTACGAT  
TGATAGTTTGGAAACATGTGTCTTTCAACGGGTATGTATTACCATAAACTGTAATTTTCATT  
TGTATCATAATTAACCTTTTCAAGCACAAGACGTTCTTCCATTTTCGAAATTTGGACGACGT  
TTAATAAATTGGTATTTCTAACTTGAATTGAATCATCGCAATAGCTTGATGAATTTAGTAA  
TTTGACTTTCTTACGTTGAGTTAAACGTTTCGTGTTTGTGAGGTCTTTTTTTAGGCTTAAAA  
GCAGGATTATCTGCGTCATAGTATTTTTCAGCTAAAGTAAGCAGTGGTCTTAAATTAATGC  
CATAAGCGTCTTCGATAAATATCTAAATTATCATAGCGTGCACAAATTCGAAGTAAGTTTG  
CTAAGCATACTTTTGACCCAGCATAGGCTCCAACCCAAAGCACATCATGATTACCCATT  
GAATATCTAGGGAATGATAATTAATCAGTGTATCCATAATTTTATCTGGTTGTGGTCCACG  
ATCATAAATATCACCGACAACGTGTAATGATCGACGACTAAGCGTTGTACGGAATAAGC  
GAGTCCAATAATTAATCATCTGCCTGTTAAGTTCAATTAAGTTGTTAACAAGTGTTCG  
TAATATGATTTTTTATTTTGATATTCATTACTTTTATACAGTAGTTCCTCAATAATATAAAC  
GTATTGTTTTGGCAATGCTTTACGCAGTTTTGAACGCGTATATTTTGAAGAACAATATTTA  
ATCAACTCAATTAATGTTTCGATTGTTGTGATATACCAGACATTAAGTTGACCGCAACTTT  
GGAAATCACTTTTAATCAATTTTAATTTGTCTTCTGGATAGTAGACAAGAGCAGTTAAATC  
ATTAAGCTCCTTAGTTGAAAGTCTCTCTTTGAAAATATCATTGATTTTCGCTCGCACATTC  
CCAGAACCGTTGCGTAATACGTGTTGGAAAGCTTCGTATTCACCATGTAAATCGCTGACG  
AAATGTTCCGTACCTTTAGGTAATTCTAAAATTGATTCTAAATTGATAATTTTCAGTTGCAA  
GTTTTTCTGGAGTATCAAATTTTGGGATAGTAAATCTAAATACTTCTTTTTTAATCTTTT  
TCAGTAATTTGAGTCAT

### > **smp**

Function: protein coding sequence; putative membrane spanning protein (core genome, variable)

Best match: smp\_CC005\_Mu50-VRSA\_BA000017.4[2658142:2658912]RC (completely identical)

Position: 036-contig\_189: 251760 ... 252531; Length: 771 bp

Sequence:

CTAAATATTTTTCTTCTTGAAAATAAATACTACAAGTATTAAGAAAATAGAAATATAAGC  
AATATTACCAATAAACAATTCATGAAGTTCTAATTTTCGTCGACTTACTAAAGCCTTTTTCA  
ACTGTTTGAAGCATAATATTCATCATATTAATAGGATTCCACTTTAGCCAGTCTATTTTTT  
CTAAAAGTGCCGTTTGAATAACTGCTAAAATAGAAGTTGCAAAAATAAAAAACAATACCTA  
CAGCAATGGCTACACCCGTTGAATTAGTTGCAGATGATAATAGCAACGTTAAGCTTAAAA  
CTAACCAAACGCCAACAAATGTACCTAACTAACTAATAATAATTGATTCAATAAAGATA  
ATTGATTACCGCTACTTTCAAATATATTTAAATCATTAAAGAATAAAGACCCAATAACAA  
TTGAAGCAATAATTGTAATAACAAAATAAATTAAGAAATAATAAATAATGTGATGATT  
TGCTAACAAATCATAGTTGTTCTTGAATATTCACGATAGAGTAAATTTTTAATCGTACCGTA  
ATGAAATTCATTGAAATGATTGTACTTGCTTGAATAATTAATAAAAATGCAAACCATGA  
AAAACCATTATAAGCAGATGTGAAAGATTCTGTGGCGTAAAAATTTCAATTGTATTTTGT  
AGCGATATAACCTTGAGCAACCATTAGTAGAATGAAGACAATAGGTGCGATAAAAAGTTG  
ATTTCTTTTTAAATAATTTGAAACATTCTTGTTAATTAAGTTCCCAT

> **stp**

Function: protein coding sequence; putative ABC transporter (core genome, variable)

Best match: stp\_CC005\_Mu50-VRSA\_BA000017.4[2657445:2658140]RC (completely identical)

Position: 036-contig\_189: 252532 ... 253228; Length: 696 bp

Sequence:

TTATGCTTGGTCCTCCCTTTCTATGATTTCTAGTAATACATTTTCTAAATCATTATCTTTAA  
ATTGTTTAAAGTTCTTCTTCCGATGTTTCTGTAACAATTTTACCTTTGTTAATAATAAGGATA  
GAGTTTGTGATTTTAACTAACTCACTTAAAATATGACTCGAAATTAAGAAAGTAACACCT  
TCTTGCAGCTTTTGGACAATCAATTCACGTACATCTCGCACAGCTTTTGGATCTAAGCCGT  
TCATTGGTTCATCTAAGATAATGAATTGAGGTTCAATTTAAAAATGCTATAGCAATTCCTAA  
TTTTTGTTCATACCAAGAGAATACGTTTTAGCTTTTTTATGAATGTATTCATCCATATGAA  
GTTGTGAGACAATTTATCGATATCTTGAGTGTTTTTTGATTCATTCAATAACTTCAAGTTT  
TCATATCCAGACATAAAAGGATATATTCCTGGATTTTCAATCAATGCACCGATATTGCTTT  
TGCTGTCTTTGCTGTTAATAACATTAATAATTTCCGCTTTGGAACTAGAGTAACCTAATAT  
AACTTTCATTAAGTTGTTTTACCTGCACCATTGCTCCAACGAGACCAACTATTTGTCCG  
CGTTTCAGCTTAAATGATACATCTTCGAGAATCGTTTTGTTGCCTATCTTCTTTGTTAAATG  
TTCTATTGTTAAACACCCAT

> **yvmA**

Function: protein coding sequence; putative transporter (genomic island)

Best match: yvmA\_CC009\_21334\_AGTW01000007.1[14685:15848:r]

Position: 036-contig\_189: 253618 ... 253648; Length: 30 bp

Sequence:

GGTGACTTTCAGCTAAAGTATGCCAAATAA

> **dedA**

Function: protein coding sequence; DedA family protein (core genome, variable)

Best match: dedA\_CC001-ST772\_118\_AJGE01000055.1[13615:14226]RC (completely identical)

Position: 036-contig\_189: 253745 ... 254357; Length: 612 bp

Sequence:

TTATTTTACTCTCTTACGTTTGCCAATGTAACGTATAGCAAAGTAAATGACTGCGATAATG  
ATGACAACATACATAATACGTGAATATGTATGAAGACCAGTCATCAACATACCAAAGCTA  
TCGCTCAACGTGCGTCCTAGTAAAATTAACCGAAATTCCAAATTGTTGTACCTATTAATG  
AAATAACGGTAAATGTCACAACATTCATGCGGTTTACACCGGCTGGAATGGTAATCAATA  
CACGTAATACAGGTATGAAACGACAGATAAATACAGCCATACGCCATACTTTTTAAACC  
AATCATTTGCTCGCTTTAAATCCTTACTTTTCAATTTAATCCACTTACCGTGTGCGATCAATA  
AAACGATATAGACGTTCTTCTGAAATCAAACGGCAGATATAATATAAAAATTAACAGCCCT  
ATAAACGATGCGATGGTTGCAATAATAAATAAGGTTAAAATTGATAAATGTGATTTAACA  
GACATAAGGCCAGCAAATGTCAGAATAATTTCCGATGGTACGATAGGTAAAACATTTTCT

AATAAAATTAATATAAAAAATGGCTGCATACCCAAAACGACTAATAAATTCAGTGATAATT  
TGTTCCAT

### > **ywaC**

Function: protein coding sequence; GTP-pyrophosphokinase (core genome, variable)

Best match: ywaC\_CC005\_Mu50-VRSA\_BA000017.4[2650714:2651406:r] (completely identical)

Position: 036-contig\_189: 259266 ... 259959; Length: 693 bp

Sequence:

ATGTATGTAGATCGAAAACCATCACTATATTTAGAGGATTTGCGACATGATTTTAAAAAT  
AGTTTAAAGTAAATTTGAAAATGGTGATGAAGCATTGATACGTTATTAGGTTTCGTAGAG  
TTAGATCATATTTATTCGTCAGCACTAAAGGAAATAAGCACTAAACTGAGTATTTAGAT  
GACAATTTCAATCACATTTATAAACACAATCCTATACATCATATGGAGCGACGTGTGAAA  
GAAATGCGTAGTTTAATAGAAAAGCTTAATCGTAAAGGATTACAGATTAGTGCAGAACT  
GCCAAGAACACATACTGGATATTGCGGGAATTCGCGTAGTATGTAATTACTTAGATGAT  
ATTTATTTGATTGAAGAGATGTTGCTTAAACAAGAAGACGTACAATTGATAAAACGTAAA  
GATTATATTCAGCACCTAAAGAAAATGGTTACCGCAGTTTACATATCGTTGTATCCATTC  
CAGTCTTTTTAGCAGAACGCGTTGAGGTATTGCCTGTTGAAATTCAAATTAGAACGATAG  
GTATGGATATGTGGGCAAGTTTAGAACATAAAAATACGTTATAAAAACAATGCAGAGACG  
GAAAAGTATCGAGATTTACTGAAAGAATGTGCGACAGAGATTACTGAAGTTGAAGATAA  
ATTACAACAAATTCATTCTGAAATAACAGAGTAG

### > **gntR**

Function: protein coding sequence; gluconate operon transcript repressor (core genome, constant)

Best match: gntR\_CC005\_Mu50-VRSA\_BA000017.4[2648952:2649632:r] (completely identical)

Position: 036-contig\_189: 261040 ... 261721; Length: 681 bp

Sequence:

ATGATGTATGGATATCCAGAGAAATGGTTGGAAGGTATGACAACCTGGAGAAGGTATCGC  
GGCAGAATTACGCTTAGGTATTGTGAATGGTCACATAGCTGAAGGTACGTTACTCACTGA  
AAATCAAATGGCAAAGCAATTTAATGTGAGTCGTTCCGAATTCGAGATGCATTTAAATT  
ATTGCAACAAAATCAACTCATCCAATTAGAAAGAATGGGTGCACATGTGTTGCCGTTTGG  
GGAACAAGAAAAGAAAGAAATGTACGATTTGCGACTGATGCTAGAGTCATTTGCATTTTC  
AAGAGTTAAAAATCAAGAGAGACTACCTATCGTAAAAGAAATGAAGAAACAACCTGAAA  
TGATGAAAGTGGCAGTAAAATTTGAAGATGCAGAATCATTTACGAAGCATGACTTTGAAT  
TTCATGAAACATTAATCAAAGCATCTAACCACCAATATTTAAACTCATTTTGGAGTCATTT  
AAAACCAGTAATGATGGCACTCGTTTTAACATCCATGCGACAACGTATGCAACAGAACCC  
GCAAGATTTTGAACGCATACATCATAATCATCAAGTGTATTGATGCAGTGGAAACAATA  
CGACAGTCAAATTTTGAAGGAAGCGTTTCATTTAAATTTGACGATGTTGGTAAAGATAT  
TGAAGGATTTTGGTTGAATTAA

### > **gntK**

Function: protein coding sequence; gluconate kinase (core genome, variable)

Best match: gntK\_CC005\_Mu50-VRSA\_BA000017.4[2647375:2648928:r] (completely identical)

Position: 036-contig\_189: 261744 ... 263298; Length: 1554 bp

Sequence:

ATGAAATATATGATTGGTGTGACATTGGAACGACGAGTACCAAGTCAGTCTTATATGAT  
GAAAATGGAGCTTTTATCATGAAACATCAAATCGGCTATGATTTACACACACCAAACGTT  
GATGTCTCAGAAGAAAACCCAGATGAATTTTATGATGCGGTATTAATGACAATTAATAAC  
ATAATGAGGGAATCGAAAGTTAATCAAGATGATATTAATTTGTGTCATTTAGTGCGCAA  
ATGCATAGCTTGATTGCGATGGATCAGCAACATCAAAGATTAACAAATAATATTACTTGG  
GCAGATAACCGCGCTGCAAAATATGCAACAGTAATAAATGAAGTGCATGATGGCAATGC  
GATTTATCAGCGAACAGGTACGCCTATTATCCTATGTCGCCTTTAGTGAATAATTTTTGG  
ATGAAACATGAATGGCAAGATGTATTTCAACGTAAGTTTGCAGATATTAACA  
TACATTTTCTATCATTTATTTGATACATATCATTGATTATTCAATGGCTTCCGCAACAG  
GGATGTTTAATTTAGAAACATTAGATTGGGATGTTGGGGCATTAGAATTGCTTGGTATTT  
CAAGGAAATGTTCCCGGAATTAGTGCCAACAACGTACGTAATGAAAGGCATGAAAGAAC

GTTATGCAACATTAATGGGGCTTAATGAAGATACACCGTTTGTATTGGTGCAGTGATG  
GGGTCTTTCTAATTTGGGTGTCAATAGTGTGGTAAAGGAGAAGTTGCTGTCACAATCG  
GTACATCTGGCGCGATTTCGTAAGTGTGATAGATAAAACCACGTAAGTACAAAGGTAGAA  
TATTTTGTATTGTCTTAACAGAGGACCACTACGTCATCGGAGGTCCTGTAAATAATGGTG  
GTGTCGATTGAGATGGTTGCGCGACGAGTTGCTAGCGAGTGAAGTCGAAACTGCGAAAC  
GTCTCGGTGTTGATCCTTATGATGTCTTAACTCAAATTGCAAAGCGTGTAAACCAGGTGC  
AGATGGTTTAAATATTCCATCCCTATTTAGCTGGAGAACGTCGCGCCGCTTTGGAACGCAA  
TGCAAGAGGTTCAATTCTTCGGTTTAACTTTATCTCATAAAAAAGAACATATGATTCGCGCT  
GCATTAGAAGGTGTTCTTTACAATTTGTATACCGTCTACCTTGCACCTATTGAAGTAATGA  
ATGAAACGCCTAATATGATAAAAGCAACAGGTGGTTTTGCGAAAAGTGAAGTATGGCGT  
CAAATGATGTCAGATATATTTGACACAGAGTTAGTGGTTCCTGAAAGTTATGAAAGTTCA  
TGCTTAGGTGCCTGCGTGCTTGGACTTAAAGCTGTAGGTGACATTGAAGATTTTCAATCG  
TTTCATCGATGGTCGGTGCTACAAATAATCATAACCGCTTTGAAGAAAATGTCGCTGTTA  
CCAAGAGCTCGTATCCATTTTATCAATTTAAGTCGTTCTTTAACAGAGAATTATGAACAA  
ATTGCAGATTTTCAACGCCAACATATGGCTGAAAATAAAACACAATAA

### > **gntP**

Function: protein coding sequence; gluconate permease (core genome, variable)

Best match: gntP\_CC001\_MW2-USA400\_BA000033.2[2584171:2585529:r] (completely identical)

Position: 036-contig\_189: 263414 ... 264773; Length: 1359 bp

Sequence:

ATGTTTAAACGAAATATGGCCGTTAATCAGTGTTGTTTTAGGTATCGTTATTTTATTAGTAT  
TAATTATTGGGTTTAAATTAATACATTTATTTCAATTAATTATCACATCGATGATTACAGC  
GTTAATGCTAGGTATACCATTGACTAAAATTATGGAGACGATTGAGAAAGGGATGGGCA  
GTACGCTCGGCCACATTGCACTAATATTCGGTTTAGGTGCCATACTTGGGAAATTAATTG  
TGATGGTGGTGGTGCAACTCGAATTGCAGACACGTTGATTCAAAAATTTGGTCAAAAACA  
TGTACAATGGGCAATGCTTGTTCAGCATTATCGTTCGGTATTGCATTGTTCTTTGAAGTA  
GGTTTAGTCTTACTGATTCCATTAGTATTTACAGTAGCAAAACGCGCAAATGTTTCAGTGT  
TAAAACCTAGGACTACCTATGGTAACAGCTTTATCTGTGACACATGGCTTTTTACCACCACA  
TCCAGGACCGGTAGTCATCGCAAAAGAATTAAGGCAAATGTTGGAGATGTATTACTGTA  
CGGTATGATTATTGCCATTCCAGTTACACTCATTGCAGGACCTATATTTAACAAAGTTGCA  
CAAAAATGATTCCGCTCTGCGTATACACGAGAAGGCGATATTTACGCGTTAGGTGCACAA  
AAAGAATTTACGGATCAAGAGATGCCAGGATTTGGTATGAGTTTATTAAGTCAACATTA  
CCAGTCATATTAATGTTAGTGTCTACGATAACGCAACTTGTAACTGGGCACGACAAACCT  
ACAAATCTATTTGAATCTATCATTTATATGATAGGAACAGCAGGGACAGCCATGCTAATA  
GCAGTATTATTTGCAATCGTTACGATGGGATTAATGAGAAAACGTAAGATGAATCATATT  
ATGGAATCAGTGACGAATGCGATTTATCCAATCGGAATGATGTTATTGATTATTGGCGGT  
GGCGGTACATTTAAACAAGTATTAATTGACGGTGGTGTTCGGAAATACAATTGCTAAAATG  
TTTGAAGGTACAGAGATGTCTCCAATTTTACTAGCATGGATTGTTGCAGCTGTGCTACGTA  
TCGCATTAGGTTTCGGCTACAGTAGCTGCGATTTCAACTACAGGTATTGTCTTACCATTATT  
ACAATCATCAGATGTAATGTTGCATTAGTTGTACTTTCGATAGGTGCAGGTAGTGTGAT  
TTTGTCTCATGTAATGACGCAGGATTTTGGATGTTTAAAGAATATTTTGGTTTAACTGTA  
AAAGAAACATTCTTAACATGGTCATTATTAGAAACGATTATTTCCGTTTCAGGTATCATCT  
TCATTCTATTCATCAGCTTATTTGTTTAA

### > **Q2G207**

Function: protein coding sequence; putative protein (core genome, variable)

Best match: Q2G207\_CC001\_MW2-USA400\_BA000033.2[2583837:2584037:r] (completely identical)

Position: 036-contig\_189: 264906 ... 265107; Length: 201 bp

Sequence:

ATGAAAGGCGTTTCAAGACATGTTTTTGTGCGTATTGTACAGGCGATAATTATGAAACAC  
TTAGTATATTGTTTTAAATTAGATAATGATGAATTTAATTTGAAAAATAAGTATAAAAAA  
TACAAGCCTTGTGTGACAAGGGTTTATGATGACTTGAATACAATTTATAGGTATATTTCAA  
ATAATAAAATTATCAATTA



> **fnbA**

Function: protein coding sequence; fibronectin-binding protein A

Best match: fnbA-COL\_CC008\_D30-ST8\_ABF01000035.150:2835:r [4\_50ANF10END]

Position: 036-contig\_189: 265241 ... 268087; Length: 2846 bp

Sequence:

```
GTGAAAAACAATCTTAGGTACGGCATTAGAAAACATAAATTGGGAGCAGCATCAGTATT
CTTAGGAACAATGATCGTTGTTGGGATGGGACAAGATAAAGAAGCTGCAGCATCAGAAC
AAAAGACAACACTACAGTAGAAGAAAATGGGAATTCAGCTACTGATAATAAACAAGTGAA
ACACAAACAACCTGCTACTAACGTTAATCATATAGAAGAACTCAATCATATAACGCAACA
GTAACAGAACAACCGTCAAACGCAACACAAGTAACAACCTGAAGAAGCACCAAAAAGCAGT
ACAAGCACCAAACTGCACAACCAGCAAATGTAGAAACAGTTAAAGAAGAAGAGAAA
CCTCAAGTTAAGGAAACGACACAACCTCAAGACAATAGCGGAAATCAAAGACAAGTAGA
TTTAACACCTAAAAGGTTACACAAAATCAAGGGACAGAAACACAAGTTGAAGTGGCAC
AGCCAAGAACGGCATCAGAAAGTAAGCCACGTGTGACAAGATCAGCAGATGTAGCGGAA
GCTAAGGAAGCTAGTGACGTTTCAGAAGTTAAAGGCACAGATGTTACAAGTAAAGTTAC
AGTAGAAAGTGGTCTATTGAGGCACCTCAAGGAAATAAAGTAGAGCCACATGCTGGTC
AACGTGTCGTATTGAAATACAAATTGAAATTCGCAGATGGATTA AAAAGAGGAGATTATT
TTGATTTTACATTATCAAATAATGTAAATACTTATGGGGTTTCAACAGCTAGAAAGGTAC
CAGAGATTA AAAATGGCTCAGTTGTAATGGCTACAGGTGAGATCTTAGGGAATGGTAAC
ATAAGATATACATTTACTAACGAAATTGAACACAAGGTAGAGGTAACAGCTAATTTAGA
AATCAACTTATTTATTGACCCTAAAACCTGTACAAAGCAATGGAGAACAAAAGATTACTTC
TAAATTAATGGTGAAGAAACAGAAAAACAATACCAGTTGTTTATAATCCAGGTGTTAG
CAATAGTTATACAAATGTAAATGGATCAATTGAAACATTTAATAAAGAATCTAATAAATT
TACACATATAGCTTATATTAAGCCAATGAATGGAAACCAGTCAAACACTGTATCAGTAAC
AGGGACGTTGACTGAAGGTAGTAATTTAGCTGGTGGACAACCTACTGTTAAAGTATATGA
ATATCTAGGGAAAAAGATGAATTGCCACAAAGTGTATGCAAATACATCAGATACTAA
CAAATTCAAAGATGTAACAAAGGAAATGAATGGAAAATTGAGTGTGCAAGACAATGGTA
GTTACTCATTGAATTTAGATAAGTTGGATAAAAACGTATGTCATTATACAGGTGAAT
ATTTGCAAGGGTCAGATCAGGTTAATTTTAGAACTGAATTATATGGGTATCCAGAACGAG
CATATAAATCTTACTATGTTTATGGGGGATATCGTTTAACTTGGGATAATGGTTTAGTTTT
ATATAGCAATAAAGCTGACGGCAATGGTAAAAATGGACAAATTATTCAAGATAATGATTT
TGAATATAAAGAAGATACTGCAAAAGGAACTATGAGCGGGCAGTACGATGCCAAGCAAA
TTATTGAAACAGAAGAAAATCAAGACAATACACCGCTTGACATTGATTACCACACAGCTA
TAGATGGTGAAGGTGGTTATGTTGATGGGTATATTGAAACAATAGAAGAAACGGATTCAT
CAGCTATTGATATCGATTACCATACTGCTGTGGATAGTGAAGCGGGTCACGTTGGAGGAT
ACACTGAGTCCTCTGAGGAATCAAATCCAATTGACTTTGAAGAATCGACACATGAAAATT
CAAACATCACGCTGATGTTGTTGAATATGAAGAGGATACAAATCCAGGTGGTGGCCAA
GTAACAACCTGAGTCTAACTTAGTTGAATTTGACGAAGAGTCTACAAAAGGTATTGTAAC
GGCGCAGTGAGCGACCATAACAATTGAAGATACGAAAGAATATACGACTGAAAGTAA
TCTGATTGAACTAGTAGATGAACTACCTGAAGAACATGGTCAAGTACAAGGACCAATCG
AGGAAATTACTGAAAACAATCATCATATTTCTCATTCTGGTTTAGGAACTGAAAATGGTC
ACGGTAATTATGGCGTGATTGAAGAAATCGAAGAAAATAGCCACGTTGATATTAAGAGT
GAATTAGGTTACGAAGGTGGCCAAAATAGCGGTAACCAGTCATTCGAGGAAGACACAGA
AGAAGACAAACCTAAATATGAACAAGGTGGCAATATCGTAGATATCGATTTTCGACAGTG
TACCTCAAATTCATGGTCAAATAAAGGTGACCAGTCATTCGAAGAAGATACAGAGAAA
GACAAGCCTAAATATGAACATGGCGGTAATATCATTGATATCGACTTCGACAGTGTGCCA
CAAATTCATGGATTCAATAAGCATAATGAAATTATTGAAGAAGATACAAACAAAGATAA
ACCTAATTATCAATTCGGTGGACACAATAGTGTGACTTTGAAGAAGATACACTTCCAAA
AGTAAGCGGCCAAAATGAAGGTCAACAAACGATTGAAGAAGATACAACGCCGCCAACCGC
CACCGACACCAGAAGTACCGAGTGAGCCGGAAACACCAATGCCACCGACACCAGAAGTA
CCGAGTGAGCCGGAAACACCAACGCCACCAACACCAGAGGTACCAAGTGAGCCGGAAAC
ACCAACACCACCGACTCCGGAAGTACCAAGTGAGCCGGAAACACCAACACCACCGACAC
CAGAAGTGCCGAGTGAGCCAGAAACACCAACACCGCCAACACCAGAGGTACC
```

> **STAR**

Function: Staphylococcus aureus repeat element

Best match: STAR\_CC130\_O46-CC130\_AEUR01000011.1[50936:51159:r]RC

Position: 037-contig\_188\_RC: 40 ... 70; Length: 30 bp

Sequence:

AGTGGCTCTTTATCATTCTGTCCCACTCC

> **greA**

Function: protein coding sequence; transcription elongation factor (core genome, constant)

Best match: greA\_CC001\_MW2-USA400\_BA000033.2[1686770:1687246:r]RC (completely identical)

Position: 037-contig\_188\_RC: 7798 ... 8275; Length: 477 bp

Sequence:

TTATTGGATATTAACAATTTTTACGTTCAATTCGCCACCATTAGGTAGTGGAACACGAACT  
TCATCATCTAAACCTTTACCAATTAACGCTTTAGCCATTGGTGATTCATTTGAAATCTTAC  
CATTAAATGCATCTGATTCAGCTGAACCAACGATTTGATAACTTTCCTCTTCATCACCTGG  
TAATTCTACAAACGTTACTGTTTTACCAATTTTAACAACGTTGTTATCTCCAGTATCTTCA  
ATGATTAATGCATTTCTTAACATATGCTCAATTCTTTGAATATCTTGTTTCGATGAATCCTTG  
TTCATCTTTTGTGTCATCATACTCAGAGTTCTCTGATAAGTCACCAAATGAACGTGCAACT  
TTAATTTTCTCTACAACCTTCAGGACGCTTAACTGTTTTAATTCTTCAAGTTCACGCTCTAA  
TTTTTCAAACCTTCTTGAGTCATTGGATATTGCTTTTGATTTTCCAT

> **udk**

Function: protein coding sequence; uridine and cytidine kinase (core genome, constant)

Best match: udk\_CC001\_MW2-USA400\_BA000033.2[1687274:1687897:r]RC (completely identical)

Position: 037-contig\_188\_RC: 8302 ... 8926; Length: 624 bp

Sequence:

CTATTGCTTGCTAACTAAAGACTGAATTTTTGTTGTCATAAATATCTATTGCAACTTTATTGCT  
TCCCACCTTCAGGAATAATTATATCAGCATATTTCTTAGTCGGTTCAATAAATTGGTCATG  
CATAGGTCTAACAACACTTAAATATTGATTGATAACAGAGTCCATTGAACGCCACGCTC  
TTAGTATCTCGTGTTAAACGGCGTAATATTCTCAAGTCTGCATCTGTATCAACATATATT  
TTAACATCCATCATATCACGTAATACCTTATTTTCTAAAGCGAAAATACCTTCTACGATAA  
TAACATCTTTAGGTTTAAAATCAATGGTAATGTCACTTCTTGTATGACTAGCATAATCATA  
TGTCGGTACTTCTACTGCTTTACCATTTTTCAAGTCTTTAAGATTTTCAATTAATAAATCAT  
TATCGAATGCAAATGGATGGTCATAATTGGTTTCTAGGCGCTCGTCGAAAGTCAAGTGCT  
TTTGATCTTTATAATAGTAATCTTGAGCAAGTAAAGCGACACTATGACCTTCTAAGTTTTT  
CATAATTTTCGTTAGTTACAGTTGTTTTTCTGAGCCAGATCCACCAGCTATGCCAATGATT  
GTAGTAGCTTTCAT

> **alaS**

Function: protein coding sequence; alanyl-tRNA synthetase (core genome, constant)

Best match: alaS\_CC005\_Mu50-VRSA\_BA000017.4[1722925:1725555:r]RC (completely identical)

Position: 037-contig\_188\_RC: 13132 ... 15763; Length: 2631 bp

Sequence:

TTATAGATTTTTAATGTAATCTTTAATAAAGCTTAATGATTTTGAGATATTTTCAGGTTGT  
GTACCGCCACCTTGAGCCATATCTGGACGACCGCCACCTTTACCACCAACGATTGGTGCC  
ATTTGTTTGATAAGATCACCGGCTTTAACGTTATTTGTTAAAGATTTAGGGACAGTTGCAA  
CCATCGATACTTTATCATCAACATTACTTGCAAGAATGATAATTGTATCTTGTAGTTTAGA  
TTTAAAATCATCCATTGTGCGAGCGAATTGCTTTCGCATTTGGTACATCCACTTCAGTAACC  
AATACTTTATAGCCATTGATTTCTTCAACTTGATCTTCAATATTACCCATTTTAAGTGATGT  
GATTTCTTTGTACGTTGCTCTAATTGTTTTAATAATGCTTTTTTCTTCATCTTGTAAATTGTGT  
TAACTTTTCGACTACTTGATCATCAGATTTCACTTTCATCTGTGATTTTCATCGTATTAATTT  
TCTCTTGAATATCTTCTAAATATAAGAAAGCTGCTTTACCTGTTAATGCTTCAATACGACG  
CACACCAGCTCCTGTACCTGACTCACTTACTATTTTGAATAAGCCAATTCAGAAGTATTG  
CGGACATGAATACCACCACATAATTCAATTGAAAATGGTGCCATATTTACTACACGCACA

ACATCACCATATTTTTACCGAATAATGCCATTGCGCCCATTTCTTTAGCTGAAGCAATAT  
CCATTTCTTGAATGTTAACGTCAATACCTTTCCAAATTTCTTCATTTACTAAGCGTTCAACT  
TGATCAATTTTCATCATTAGTCATTGGACCAAAATGAGAGAAATCAAACGTAAACGATCT  
GCTTCTACTAGTGAACCAGCTTGGTTAACATGATCACCCAGTACTGATTTCAACGCTGCAT  
GTAATAAATGTGTTGCACTATGGTTCTTTTGAATGTCACGTCGATCATTTTGGTTCACTTC  
AGCAGACACTGTAGCGCCAACATTTACTTGGCCAAATTGTACTACTCCTTTATGCAAGTTT  
TGACCATTTGGTGCTTTGGTTACTTCACTAACAGCAATTTCAAATTTGTCATTATAAACAA  
TACCTGTATCCGCAACTTGTCCACCCTGACTGCATAAAATGGTGTTCCTGTTAACATGAA  
GTATACTGTTTCACCCGCTTCAACTTGTGAACTTCTTCACCATTATATATCAAGTGTGTT  
AGTGGTTGTTTGAGCTGTCGCAGTATCATAACCAACAAAAGTACTTGCAGATGTAATATTTT  
TCAATACTTCACTTTGAACTTGCATTGATTGAGAATTTTGACGTGCTTGACGTGCACGATC  
ACGTTGTTGTTGCATTTCTGACTCAAATGTTGTCATATCAACTTTCAATCCTGCTTGCACGT  
CTATTTCTTCAGTTAATTCAATTGGGAACCCGTACGTATCATAACAATTTAAATGCATCTTT  
CCCATTAATTTCAATTTGTTGTCGCTTTAGCTTTTTTAATTAATTCATTTAAAATCGCTAAAC  
CATCTTCTAATGTTTCATGGAATCGTTCTTCTTCAGACTTTATAACACGCTTAATGAAATC  
TGCTTTTTCTTAACATTTGGATAATATGGTTCCATAATGTCTGCAACAATATCAACAAGT  
TTGTACATAAATGGCTCATTGATTCCTAACGTTTACTAAAACGAACGGCAGGACGTAAC  
AATCGACGTAATACATATCCTCTACCTTCAATGGCAGGTAATGCACCATCAGAAATTGCA  
AATGCAATCGTACGAATGTGGTCAGCAATTACTTTAAATGCCACATCTTGTTCGTTGTTTA  
CTAAATATTGTTTACCTGATACTTTTTCGATTTCAATCATTATAGGCATAAATAAATCTGTT  
TCATAGTTAGTACGTACATTTTGAGAACTGAGGCCATACGCTCAAGCCCCATGCCGGTA  
TCAATATTTTTATTAGGTAATGGTGTGTAACATGATCTTTATTATGATTGAATTCACTAA  
ATACTAAGTTCCATACTTCAAGATAGCGTTCATTTTCTCCACCTGGATACATTTCTTCTGC  
CGGATCGTCTTGTCCATATGCTTCTCCGCGATCATAGAAAATCTCAGTGTTCCGGTCTGAA  
GGCCCTTCACCAATATCCAGAAAGTTACCTTCAATGCGAATAATACGACTTTCTTCAAGCC  
CAATATCTTTATGCCAAATGTTATATGCTTCCATATCTTCCGGATGAATCGTAACGTACAA  
TTTATCTGGCTCCATACCCATCCATTTATCACTCGTTAAAAAATCCCAAGCAAATTCATC  
GCTTCTTGTTTAAAATAATCACCAATTGAGAAGTTACCTAACATTTCAAAGAATGTATGGT  
GACGCGCTGTGAAACCAACATTTTCAATATCATTGTACGAATAGCTTTTTGAGAGTTTAC  
AATCTTGGCTTTTTAGGTGTTTCACGTCCATCAAATATTTCTTTAATGTTGCTACACCTG  
AATTAATCCATAAATAATGTATCATCATCAATTGGCACTAATGGTGCAGAAGGTTCAACCA  
TATGTCCTTTTTCAACAAAGAAATCTAGATATTTTTGTCTAATTTCACTCGCTTTTAACTTT  
TTCAT

> **tbx07**

Function: noncoding RNA T-box leader element (core genome, constant)

Best match: *tbx07\_CC001\_MW2-USA400\_BA000033.2*[1694866:1695043:r]RC (completely identical)

Position: 037-contig\_188\_RC: 15894 ... 16072; Length: 178 bp

Sequence:

AAAAGGGACGAACGTTATCGCGGTACCACCCTAGTTATAAATGCAATTCAACACATTTAT  
CACTTTAAATCGACTATACAGTTGTGCATAAAGTAGCGTTCACTAATGTTTGTGACTTT  
TCACCAACCAGTACATCTCTGATAAACAATCATTAACTACTCATCTTTATACGAAT

> **recD**

Function: protein coding sequence; ATP-dependent DNA helicase/RecD/TraA family (core genome, variable)

Best match: *recD\_CC005\_Mu50-VRSA\_BA000017.4*[1725898:1728375:r]RC (completely identical)

Position: 037-contig\_188\_RC: 16105 ... 18583; Length: 2478 bp

Sequence:

TCAACGTTCTATAAAGTCATACGGCGTGATTTCTCCCATATTAATCATTGGGTCAATTTTA  
AACATTGTAGCTTCCGTTAATACATTTATATCTGTTTTTGTGGAATCAGACGTAACCTTCTCC  
ACTATCATTTCGATGACATTGGCGCTTCTACTTGATCATCTATTGTCGTTTGTGAAGCTCCT  
GTATCATTAGTTGCTGTGTTTTCCAGCATTCTTCATCTTCTGAATTTAAAATAATTTTTCAA  
CAATGTACATAATTGTGTTAAACGCGCTTGACCATTTGTTTTTAATCCAATATCAAATGCT

TCTGGATCACCAAGTAGAACTAAACTCGTTTTTCGCTCTAGTTAAACCAGTATATAATATCG  
GTCTTTGTAACATTCTAAAATACTGTTTAAACAATAGGCATGATAACAATAGGAAATTCTG  
AACCTTGTGATTTATGGATTGATGTACAATAAGCATGTGTTAATTCCATCATATCTTGTTT  
CGTAAATGTAATTTTCATTACCTTCAAAAATCCACAACAAGTACATCTTTATTAAGGGCATT  
TCTTTCGCCCAAAAAATACCAACAATAACTCCTATGTCACCATTGAATATGTTATCATTG  
GCCTATTAACAAGTTGTAATACTTTGTCACCTTTTCTAAAGACTACATCACCAAACCTCAAT  
TTCTCGTGTGCTTTCTTTTTAGGGTTTAAAATATCTTGTA AAAACTTGATTTAAACGTTTAA  
TACCGGCATTTCCCTTTATACATTGGTGCAAGCACTTGAATATCAGCCATAGTATACCCTTT  
ATTAACAGCACTAGTAACTACCTTCTCAACAACCTGTTGGTATTTGGTTTGCCTGACAGTTA  
ATAAACTTCTATCATGAAAACGCTGTGTAATATCAATTTTCTGACCCAATTTTCATTTCGAT  
GTGCTAATTCTATAATGCTTGAACCATCTTGTGACGATATACTTCAGTCAGATTAACCTCG  
TGGTATAGCTTTTCGATTCAATTAATCTTTAAATACTTGACCAGGACCTACAGAAGGCAA  
TTGGTCCTCATCACCTACAAATATCAATTGTGCATCTAAAGGAAGTGCACCTAAAAATTG  
GTGAAACAACCAAGTATCTACCATAGACATCTCATCAATGATTATGAGTCGTGCGTTTAT  
TTCATTTTCTAATATATCCTCTGGCTTTGTGTCTTGATTCCAACCTATTAACGATGAATCG  
TCATTGCTTCTAATCCAGTTGACTCTTGTAGTCTCTTAGACGCTCTTCCCTGTTGGCGCTGCT  
AATACAACCTGGATAATCATCATTGACATAATCATCATAATCTAATGATAAGCCATGAATC  
TCAGCATATAATTCTACAATACCTTTAATTACTGTCGTCTTTCCTGTTCCCGGTCCACCGGT  
TAATAGCATCACCTTAGAATTGATAGCCGTTTGCAAAGCTTCTTTTTGTGAAGCTGCATAG  
TTCATTGATTTCGCATCTTCTATTTACCAATATGCATTTGTAAATCTGACTGTTCAATTTT  
CGTAAGTTTATTTGTATGCGTCTTTATTCTGAATAAGTTTTGAACACTTTTGATTTCAGAAT  
AATACAACCTTGAATTGCAACTTGTTCAATTGTCAATAATTAGTCGTTTTTCTCATTAA  
GTATTGCAACATTTTCGTCTAATTTTTTCAGGTTTCGATGACCTCTTCATCTTGATAATTTAATA  
CATCAACCGTTAAATCTATAACAACATTGATAGGCAAATATGTATGTCCCTGTTAATAC  
ATTCTTCTTCTAACGTATAGAGCAACGCAGCTTTTAAATCGTTCATTATCGTTATAAGCGAT  
ACCAATATTTCTAGCAAGTTGATCTGCTTTATTA AAAACCAATACCTTTAATATCATAAATC  
AATTGATATGGATTTTCGATCTAAAATAGTCAGTGTATCGCCGAGATAAAACTGATAAATT  
GCCATTGAAAGTTTAGGACCAAACCCTAAATCATGTA AACGAATCATTATTTTTTTCAGATT  
CTTGATTTGCTGAAATTTGTTCTGCAATTTGTTTCTGTTTCTTTTTAGATAATCCCGAAACT  
TTTTCTAGCACTGAATGGTCATCTAATATATCATTATCGCATTGTCACCTAATGTATTAA  
CAATATTTGAGCTGTCTTTTACCTACACCTTTAAACAAATCACTAGATAAATAACTTAT  
AATTGCTTCTTTCGTTTGTGGCATTTCTTTTTCAAAGTCTCTGCTTTTAAATTGTTTACCAT  
AACGTGGATGATCAACAACCTTGCCCTTTAAATGTGTAGACATCGCCTTCAACAATATTCG  
GAAGAAACCCTACAACAGTTGGCATTGTATCAAAGTCTTCATTTGTTTCAATAGTATCTAC  
TTTAAGCACTGTATAAAAATTATCACTGTTTTGAAACAATATCGCTTCAACAGTACCTTTG  
ATCATTGAATAATCAAATAGTGTAGGGTCTGACAT

> **mmmA**

Function: protein coding sequence; tRNA-specific 2-thiouridylase (core genome, constant)

Best match: mmmA\_CC005\_N315\_BA000018.3[1653329:1654447:r]RC (completely identical)

Position: 037-contig\_188\_RC: 19833 ... 20952; Length: 1119 bp

Sequence:

TTATACAACATAAATTTAATTGACCTTCATTTTTGAACACATCGTCAATTGTTGCACCACCA  
AGACACACATCACCTTGATAAAAAACAACCTGCTTGTCCAGGTGTGATTGCTCTTACTGGC  
TCAGCAAAAGTAACACGTAGTGCATGGTCGTTTTACGTTTTACAAAAACTTTCGTATCTT  
TTTGGCGATATCTAAATTTAGCTGTACATTCAAACCTTGATCTAAGTCATTATCTTCTGG  
ATTTACAAATGAATAGTCTGAAGCAATTAAGTAATCACTGTATAATGCATCGTGATGGAA  
TCCTTGTCTACATATAAAACATTATCTTTTAGGTTTTTACCGACAACAAACCAAGGATCG  
CCATCTCCACCTATACCTAATCCATGTCTTTGTCCCTATTGTGTAATACATCAAACCACTAT  
GTTTACCCATTTTCTTACCATCAAGTGTATCATATCACCCGGTTGTGCAGGTAATATTG  
TGATAAAAATGTTTTAAAGTTTTTTTCGCCGATAAAACAAATGCCTGTAGAATCTTTTTTC  
TTAGCAGTAACAAGTCCTTGTCTTTCAGCAATTCGACGCACCTTCACTCTTTTCGATGTCGC  
CAATTGGGAACATCACTTTTGAAGTTGTTGTTGAGATAATTGATTCAAGAAGTATGTTTG  
ATCTTTATTATTATCTACACCACGTAACATTTCAACATGACCATCTTCATGACGATGTATG  
CGTGCGTAATGTCCTGTTGCTACATAATCTGCACCTAAATTCATCGCATGATCTAAAAAG  
GCTTTAAACTTAATTTCTTTATTACACATAACGTCTGGATTTGGAGTACGACCTTTTTTTGTA

TTCATCTAAGAAATACGTAAAGACTTTATCCCAATATTCTTTTTCAAATTAACAGCGTAA  
TATGGAATGCCAATTTGATTACACACTTCAATAACATCGTTGTAATCTTCAGTTGCAGTAC  
ATACGCCATTTTCGTCAGTGTCCATCCAGTTTTTCATAAATATGCCAATGACATCATAACC  
TTGTTCTTTAAGACGTGGGCTGTTACAGAACTATCTACACCGCCTGACATACCAACGAC  
AACACGTATATCTTTATTTGACAA

### > **csd1**

Function: protein coding sequence; cysteine desulfurase (core genome, constant)

Best match: csd1\_CC005\_Mu50-VRSA\_BA000017.4[1730859:1732001:r]RC (completely identical)

Position: 037-contig\_188\_RC: 20952 ... 22095; Length: 1143 bp

Sequence:

TTATGACTCCTCCTTAAATTTAAAATATATTTTATGAATTCAGCTACAATTGCATTAATTT  
CATTTTCAGTAGTCAATTCGTTAAAACATAAATCGAATCGAATGATTTGATCGCTCCTCATC  
TTCGAACATTGCATCTAAAACATGCGACGGTTGTGTAGAGCCTGCTGTACATGCAGATCC  
AGACGACACATAGATTTGTGCCATATCCAACAATGTTAACATCATTTCAACTTCAACAAA  
CGGAAAATATAGATTTACAATATGGCCTGTAGCATCCGTCATTGAACCATTTAATTCAAA  
TGGAATCGCTCTTTCTTGTAATTTAACTAAAAATTGTTCTTTTAAATTCATTAATGAATA  
TTGTTATCGTCTCGATTCTTTTCTGCTAATTGTAATGCTTTAGCCATCCCGACAATTTGTGC  
AAGATTTTCAGTACCTGCACGGCGTTTCAATCTTGTTCACCGCCAAGTTGAGGATAATCT  
AATGTGACATGGTCTTTAACTAATAATGCACCGACACCTTTTGGTCCGCCAACTTATGTG  
CAGTAATACTCATTGCGTCGATCTCAAATTCGTCAAACCTTAACATCAAGATGTCCAATTGC  
TTGAACCGCATCAACATGGAAATATGCATTTGTCTCAGCAATAATATCTTGAATATCATA  
AATTTGTTGCACTGTGCCAACTTCATTATTTACAAACATAATAGATACTAAAATCGTCTTA  
TCTGTAATTGTTTCTTCAAGTTGATCTAAATCAATAGCACCTGTATCATCAACATCTAGAT  
ATGTTACATCAAACCTTCTCGCTCTAATTGTTCAAAAACATGTAACACAGAATGATGTTT  
AATCTTCGATGTGATAATGTGATTACCCAATTGTTTCATTTGCTTTTACTATGCCTTTAATTG  
CCGATATTTCGATTCTGTTGCACCACTCGTAAATATAATTTTCATGTGTATCTGCACCAAG  
TAATTGTGCAATTTGACGTCTTGACTCATCTAAATATTTACGCGCATCTCTTCCCTTAGCA  
TGTATTGATGATGGATTACCATAATGCGAATTGTAAATCATCATCATCGCATCTACTACTT  
CAGGTTTTACTGGTGTGGTGCAGCATAATCTGCATAAATTTCCAT

### > **csbD-L2**

Function: protein coding sequence; stress response protein/locus 2 (core genome, constant)

Best match: csbD-L2\_CC001\_MW2-USA400\_BA000033.2[1702814:1702996:r]RC (completely identical)

Position: 037-contig\_188\_RC: 23842 ... 24025; Length: 183 bp

Sequence:

TTATTTTTTAAGTTTATCAATTGCATCAGTTATTTTGTTTTTAGCATTTTCAACAACCTTCTTT  
TGCTTTACCAGTCGCTTTATCTTGCTGACCTTCTTTTTCTAATTCTTTGTTATCAGTAACGT  
TACCTACTGTTTCTTTAACATTTCTTTAAATTGATCGAACTTACTTTTCGTCTGCCAT

### > **cymR**

Function: protein coding sequence; HTH-type transcript regulator (core genome, constant)

Best match: cymR\_CC005\_Mu50-VRSA\_BA000017.4[1734032:1734454:r]RC (completely identical)

Position: 037-contig\_188\_RC: 24124 ... 24547; Length: 423 bp

Sequence:

TTAAATATAAAACATGTATCCGTCTAAATCTTCACTTGTATCTACATATTCGGCTAAATAT  
TTCAATGTTGTATTATCTAAAACATCTCTCACTGCATCTCTCATGCGAATCCATAGTTGTTT  
TTGCGCAGGTGGTTCTGATTCAATACTTTCAACAAATGTAATTGGACCTTCTAACAGTCTT  
ATAATATCCCCTGCTGAGATTTCTTCCGCTGGTACTCTTAATTGGTATCCACCTTTAGCAC  
CGCGTACACTTCGAATTAACCCCGCATTCTTAAAGGACCTACAAGCTGTTCTAAATATA  
AATCACTCAAATTTCTTCTCAGCAATTGACTTTAATGATATACATCCTTGCCCCTCTTTT  
TTAGCAAGAGAAATCATCAATGTAAGTCCATATCTCCCTTTAGTAGAAATTTTCAT

### > **ssrS**

Function: noncoding RNA 6S-RNA (core genome, constant)

Best match: *ssrS\_CC001\_MW2-USA400\_BA000033.2*[1705971:1706202:r]RC (completely identical)

Position: 037-contig\_188\_RC: 26999 ... 27231; Length: 232 bp

Sequence:

```
ATAAAAATACGCAAGACAAAGTCTTGCGTATCGATAGAGTCCGTATTGCCGTAGTTATAA
TAGCTTGATCATTCCGGCCTGTTATATACAGGTGGGTGCCCTGTTTCTTGTTTTGTACGTCCT
TCATATAAGGCGTGTACGCTGCAAGAAAACCCATTGGGCTCCCTTGATCAAAGAGTGTTA
GGCCCAAATTA AAAAGCAAACCTTACGAACA ACTCAGATGACTATCTTATG
```

### > **aspS**

Function: protein coding sequence; aspartyl-tRNA synthetase (core genome, constant)

Best match: *aspS\_CC005\_N315\_BA000018.3*[1660796:1662562:r]RC (completely identical)

Position: 037-contig\_188\_RC: 27300 ... 29067; Length: 1767 bp

Sequence:

```
TTAGTGACGAATTCGCAAAGAAAGTTCTTCTAATTGTTTATCAGAACTTCACCAGGCGC
ATTCGTTAATAAACATGTAGCAGATGCTGTTTTAGGGAATGCGATTGTATCTCTCAAGTTT
GTTCTATTAGTCAATAACATGACTAATCGGTCTAATCCTAATGCAATACCGCCATGTGGTG
GTGCACCATATTTAAATGCATCTAGTAAGAAGCCGAACTGTTCTTGTGCTTGTCTTTAGT
AAATCCAAGA ACTTCGAACATTTTTCTTGTA ACTCACCATCATGAATTCTGATTGAACCG
CCACCTAATTCATAACCATTTAATACTATGTCATAAAGCATTTCCTCAGCTTCTTCTGGCG
CAGTGCCAAGCTTAGCAATATCAGCTTCTTTGGAGATGTA AATGGATGATGTGCTGCAA
CGTAACGTTTCGCATCTTCATCATATTCTAATAATGGCCAATCTGTCACCCATAAGAAGTT
TAATTTTGTTCATCGATTAAACCTAATTCCTTAGCTAATTTGACACGTAATGCACCTAAA
CTTTGTGCAACGACATTTGGTTTGTCTGCAACAAACATTACTAAGTCACCAGCTTCAGCAC
CAGTTAATGTAAGTAATGTTTCAACATTTCTGTTTCAAAGAAACGTCCAATTGGACCTGT
CAAACCATCTTCCACA ACTTTAACCCACGCTAATCCTTAGCACCATAGATGTTTACAAAT
TCTGTTAAAGCATCCATATCTTACGAGTATATTGTTTCAGCTGCACCTTAGCGACAATTG
CTTTAATTTACCATCATTTC AACAGTATCTTTAAATACTTTAAAGTCCATATCACGTCCT
AATTGAGAAACGTCAATTAATTCATTTCAAACGTTGATCTGGTTTATCAGA ACCATAG
CGACGCATCGCTTCTTTATATGTCATGCGTGGGAAAGCGCCATTAATTTCAACGCCTTTAA
CTTCTTTAACAACTTTTTTAAGCATTCTTCACCCATTTGCATCACATCTTCTTGATCTACA
AAACTCATTTC AATATCGACTTGTGTGAATTCAGGTTGACGATCTGCACGTA AATCTTCGT
CACGGAAGCATTTCAGATTTGGTAGTATTTGTCAAATCCACTAATCATCAATAATTGCTT
AAATAATTGTGGTGATTGTGGTAATGCATAAAATTCACCATCATGAACACGAGATGGTAC
TAAATAGTCACGTGCACCCTCAGGTGTTGACTTCGTTAGTACTGGTGTTCGATGTCAAAG
AACCCCTCATCATCAAATATTGACGAATAGAACGTGTAATTTGATGTCTCATTTTAAATG
TTTGCCTAACTCTTGACGACGTA AATCTAAATAACGGTATTTTAAATCGAATATTTTCATC
AACGTTAACATTTTCTTCATTTATAGAAAATGGTGGTGTCTCAGATTTATTAATCACTTTA
ATATTTGTA ACTTGTACTTCAACTTGCCAGTTTTAATTTTAGGATTA ACTGTTTCAGGGT
CACGCTTCGTA ACTGTACCTTGA ACTTCTACAACATATTCAGAACGTA CTGTTTCAGCAAT
TTTCAATGCCTCTTCTGAAAATGCAGGATTA AACACGACTTGTACAATTCCTTCTCTATCT
CTTAAATCAACGAAAATCAATCCACCTAGGTCACGACGATTGTTA ACCCATCCTTTTAAAT
GTAATTTCTTGTCTTAAAATGCTTCAGTAACTAATCCACAATAAGTTGTTCTCTTACTCA
T
```

### > **hisS**

Function: protein coding sequence; histidyl-tRNA synthetase (core genome, constant)

Best match: *hisS\_CC005\_Mu50-VRSA\_BA000017.4*[1738990:1740252:r]RC (completely identical)

Position: 037-contig\_188\_RC: 29082 ... 30345; Length: 1263 bp

Sequence:

```
CTACTTCTTAAAATATTCGACTAATGCGTCTAATTCAATTGTTTCAGATTCACCAGTTGTC
ATATTTTTAACATCGATTTTATTATTTCTAATTCTTGATCACCAATAACGATTGTAAACTT
GGCACCTAACGGTCTGCTTGTTCATTTGTCCTTTAATTTTACGCTGTAAGTAGTCTTTAT
CTGCTTTAATACCATTATGTCTCAAATGATTTAATAACTTCACAGCATATCGATCTGCTTG
```

ATCACCCATTGTAACAATGAATAAATCTAAGTTTTCTTCAATATCTAATTCGATACCTTCT  
TCTTCAAGTGCAAGCAATAATCGTTCTATACTTAGCGCAAAACCAATACCTGTTTCACTTG  
GACCATCTAGCAATTCTAATAAACCATTATAACGGCCACCACCACAAAGCGTTGTAATGG  
CACCATCATAGTTAGGATTATCCATCATTAAATTCAAATGCTGTATGTGTATAATAATCCAA  
TCCACGAACTAAGTTAGGATCTTCAATATATGGAATACCTAAATCATCTAAATAAGCTTTT  
ACTTGTTCAATAATGCCTTAGATTCCTCATTAAAGAAATCAGTGATTCTAGGTGCAGTCT  
TAATCGCTTCTTTATCACGGTCAACTTTACAATCCAAAATTCGCATCGGATTTGTATGCAA  
ACGTGATTGACAATCTGAACAAAATTCATGAATTACTGGTTCAAAGTGTTTCACTAACGC  
TTCGTTATATTCTTTTCGAGACGCCATATCCCCTACACTATTAATAACAAGCTTTAAATGT  
TTTAATCCAAATGATTGATAAATATGCATAACCATAGCTAATACTTCTGCATCTACGCTAG  
GATTTTCAGCACCAATAGCTTCTACACCAAATTGATTAAATTGACGATAGCGCCCTTTTGG  
CTTACGTTTCATATCTAAACATCGGTCCATTGTAATAAAGTTTAAATTGGTTGGTTGGATTA  
CCTTGCATTTTATGTTCAATATATGAACGCACAACCTGCAGCTGTTCCCTCAGGTCTTAATG  
TAATACTTCTATCGCCTTTATCTTTAAATGTATACATTTCTTTTTGTACGACATCGGTTGAA  
TCACCAACACCTCTTGCAAAAAGATCTGTACTTTCAAAAATTTGGTGTTCTTATTTCTTTAT  
AATTATAAAATGTCATTAATTCATCTAATTGATTTTCAATGTAACGCCATTTCTTTGAATC  
TTCAGGTAAAATATCCTGCGTCCCTCTAGGTATTTTAATCAT

### > **lytH**

Function: protein coding sequence; N-acetylmuramoyl-L-alanine amidase (core genome, variable)

Best match: lytH\_CC005\_04-02981\_CP001844.2[1698852:1699727:r]RC

Position: 037-contig\_188\_RC: 30805 ... 31681; Length: 876 bp

Sequence:

CTACGCAGAAAAATAAATTTTAAAGTCCATCAACAATTGCTTGTTCTAAAATTTGTCTATGT  
AATTGATCTTTAATCATCGTTTCATCAGTTGGGTTACTAATATAACCTAATTCTAATAAAA  
CAGCAGGAACTTTTGTGTTGCTTAACTTGATAATTTCTTGTCTTGAACCGCGATTAGA  
AAGTAAACCTTTCTTCTGAATCGTAGCGTCTAACGTATCTGCTAAAGCTCTTTGATTATCA  
TGATACCAATAAACTGTCATTCCATTTGCATTAGATGATTCTAATGCATCATTATGTATAC  
TCAAATAGGCATCGCCTTTGATATCACGATTTTCTAGTGAAACATATGTATCGTCTGTTCT  
TGTCATCTAACAGTTGCGCCTTCTTTTTCTAAAGTACGCTGCAATTTCTTTGCTGTTTTCA  
ACGTATAGTCTTTTTCTAACTTTTATATTTAGTATTGCTTGAAGCACCTGGTCACTACCT  
CCATGACCAGGATCAAGCACTATTGTTTTACCTTGCAAAGGATTTTTCTCCTTCGTATTAT  
CCGCGACAATATCTAAATTTGTGTGCCATCCAGCTATCCAACCTTTTTCTTACTGGATGT  
ATCTTCAACTTCAATCCATTTACCTACTTTACCAATCTTTTTAAAATGGTCACCTTTCTCAA  
CTTTATATATGACTGGATACGCAGCGTTTGGACCTGTACGTAATTCAGTATTTTCAAGTTAT  
CGTGATGTTCCACTATCTTCACTATTGCTATTCAGCAATAAAAATAAAAAGATGATAAA  
TAAGACAAAGGCAATCACTACTATTAGAGTACGTTTATTTTTAAGACCCTTTTTAGATAAC  
CATGCCTCTATTTTTTTCAT

### > **dtd**

Function: protein coding sequence; D-tyrosyl-tRNA(Tyr) deacylase (core genome, constant)

Best match: dtd\_CC001\_MW2-USA400\_BA000033.2[1710649:1711101:r]RC (completely identical)

Position: 037-contig\_188\_RC: 31677 ... 32130; Length: 453 bp

Sequence:

TCATTGAATTTTGCCGTCCTGACTTTCATAAATAATAGTGACTGGACCATCATTATTTATG  
CTAACATTCATGTGTGTTCCAAATTCACCTGTTTTACAGTAAGACCATACGCTCGTAGCG  
CATCATTAATAACTCATAAATTTTACCGCTTGATCAGGATTTTAGAATTTGAGAAACC  
TGGACGTTACCTTTTTTACATCTGCATAGAGAGTAAATTGTGAAACTGATAGTATTTCA  
CCATTCATTTGTTGGATATTAAGTTTAAATTTATTATTGTCATCTTCAAATAATCTTGCATT  
AGCAATTTTCTTTGCAATTACATCTGCATCTTGCTCTGTAGAGTTCTGACCGATACCGACT  
AATAACAATATCCTTTTTTGTATTTGATTATTTAATGTATCATTCGTCACCGATGCTTCTTT  
AACTCTTTGTACAACACTTTTCAT

### > **relA2**

Function: protein coding sequence; GTP pyrophosphokinase (core genome, variable)

Best match: relA2\_CC001\_MW2-USA400\_BA000033.2[1711113:1713302:r]RC (completely identical)

Position: 037-contig\_188\_RC: 32141 ... 34331; Length: 2190 bp

Sequence:

```
CTAGTTCCAAACTCTTGTTACTGTATAAACATCACCAAGTTGTTTGATCTTTTCTACCACA
CGATAAACATCATTACGTTTTTCACCATGACACTAATATTTATTATTGCATTTTTATCAAT
ATCTGAACGTCCTGAAACTTTAATTAATGCCGGCTGTCGAGCTAACAGCTTGTAGTACT
TCATTCAACAAGCCATTTCCGGTCATACGCAGTTACCTCTAAATCAACCTGATATTTTTGAG
TTGCGTCTTTTGATTTTACCCATTCAACATTAATTAGTCGTTTCAGTTTCGTTCTTAATATTT
GGGCAATCAGTGCATGTACTTTAATACCGTGACCTTTGGTGATATAACCTACAATATCA
TCACCTGGTATAGGATTACAACATTTTGACAACCTTGATAAGTACATTTTCTAAACCTTCTA
CATAGACACCACTATCAGTAATGATGTTGTCTTTAATAGGCAATGATTTTCGTAACCTTCTG
TGCTTCATTTAAAGCACGTTGTTTATCTAAAATACGTTGTCTTTCAGTTAATTTATTAACA
ATCTGTAAGGATGTCACGCCGCAAATCCTACAGCTGCGAATAAATCATCTTCATTTGCA
AAGTTATATTTTTCATTAACAACCTGAATATTTTTCTCTGTCAAAATATCTTCGACTCTAA
ATCCTTGCTCTTTTATTTCAACTTCAACCATCATTCCGGCCTTTTTCAATATTAGATGAACGA
TCTTGTTTTTTGAAGAACTTTTAATTTACCTTTGGCACTAGACGATTTAAACAATTTTCAA
CCAATCACGACTTGGTCCATATGAATGTTTACTAGTACGTATTTCAACAATATCGCCTGTT
TGTAATAATATAGTCAATTGGTACAATTTTGCATTACCTTGGCACCAATCATCTTATTAC
CTACTTCACTGTGAATCGCATAAGCAAAATCAATCGGCACAGCACCATATGGCAACTCAA
TAACATCACTCGCTGGGGTAAATGCGTATACTTTGTCACTCTGTAAGTCATATTTAAGGT
TTCCATAAATTTCTTGAGCGTCAGACGATGTATGATCCGCTTCAGCTAATTTCTTTAAACAA
TTTAACTTATTTTGATAAGTTTGATCTTTTTTCACTTACTTTTTTACCTTCTTTGTAAGCCAG
TGTGCTGCAACACCATGCTCAGCAATTTTCGTGCATATCAAACGTTTCGTATTTGGATTTGCA
GCGGGTCTCCATTTGGACCTACTACTGTAGTATGCAATGACTGATACAAATTTTGTTTAGG
CATTGCAATATAATCTTTAAAACGTCCTGGCATCGGTTTCCATAACGTATGCACCAACCCA
AGTATCGCATAACAATCATTAAATAGAATTGACAATAACACGTATCGCCAACAAATCAAAA
ATTTGATCAAATTGTTTTTTCTGCTTCATCATTTTCCGATAAATACTGTAATATGTTTAGG
TCTACCATTATATCGCCTTCGATATTCATTCCGGTCCATTTTCAGTACGTATTCTATCAATAG
CCGTTTCGATATACGCTTCACGTTCACTACGTTTCTTCTTCATTAATGACTATTCTAAAA
TATTGCACATTATCAATATAACGAAGAGCCGTATCTTCTAGTTCCCATTTAATTGTATTAA
TACCAAGACGATGTGCTAAAGGTGCATAAATTTCTAATGTTTCTCGAGAAATTCTAATTTG
TTTTTCACGCGGCATGGCTTTCAAGGTACGCATATTATGTAATCTGTCTGCTAATTTACC
AAAATTACGCGTACATCTTTGGCAATCGCAATAAATAACTTGCGATGATTTTCAGCTTGTT
GTTCTTCTTTTGAGCGGTATTTTACTTTTTTAAAGCTTCGTCACACCATCAACAATTCGAGCA
ACTTCTTCATTGAACATTTCTTTTACATCTTCAAATGTATACGGTGTATCTTCAATTACATC
ATGCAAAAAACCTGCGACAATCGTCCGGTCCGTCTAATCGCATTTCTGTTAAAATACCTGC
AACTTGTATAGGATGCATAATGTATGGTAATCCGTTTTTTTCGGAACCTGACCTTTATGTGCT
TCATAAGCAATATGATAGCTTTTTAAAACATACTCATATTCATCTGCTGACAAATATGATT
TTGCTTTGTGAAGAACTTCATCTGCACTATATGGATATTCGTTGTTTCAAT
```

> apt

Function: protein coding sequence; adenine phosphoribosyltransferase (core genome, constant)

Best match: apt\_CC001\_MW2-USA400\_BA000033.2[1713730:1714248:r]RC (completely identical)

Position: 037-contig\_188\_RC: 34758 ... 35277; Length: 519 bp

Sequence:

```
TTATTCGTCGTATGAGATTAAACTCATAACATCGTAATCTTTAATTTTTTTCAATACCATTTA
AATATTTCAATTCAATTATAAATGCAATACCTACTACGATACCGCCTAATTTTTCAACTAA
TTTTATTGCTGCTTCAATCGTACCACCAGTAGCTAATAAATCATCTGTAATTAACACACGT
TGACCTGGTTAATTGCATCTTTGTGCATTGTTAAACATTTGTACCATATTCTAGGTCAT
ACTCATAACGAATGACTTCACGAGGTAATTTCCCTTCTTTTCTAACAGGTGCAAAGCCAAT
CCCATTGAATAAGCTACAGGACAGCCAATGATAAAGCCACGCGCTTCAGGTCTACAAC
GATATCAACATCTCTGTCTTTTGCATATTCTACAATTTTATCTGTTGCATAGCCATATGCTT
CACCATTATCCATAAATTGTAGTAATATCCTTGAAACTAACACCTGGTTTCGGCCAATCTTG
AACTTCTGATACGTATTGCTTTAAATCCAT
```



> **recJ**

Function: protein coding sequence; single stranded DNA-specific exonuclease (core genome, variable)

Best match: recJ\_CC005\_Mu50-VRSA\_BA000017.4[1745207:1747480:r]RC (completely identical)

Position: 037-contig\_188\_RC: 35298 ... 37572; Length: 2274 bp

Sequence:

```
TCACGACAATTGTGACTTTATCCAATTTTTATTTCTGAAAAATCTTGATATAATAATTGC
TTTTCAACATCCATACGTTGTTGTCTTAATTGATATACTTTGCTGGAATCAATCGATCTTT
ATCAGGTTGTTGATTGATTTCGAATTAACCATCTTCTTGTGTTACAAATTTTAAGTCTAAG
AAAACTTTCAACATGAATTTAAGTGTATCTGGTTTCACACTTAAATGTTGACACAATAAC
ATACCTCTTTCTGGATATTTGTTTCTTGTGTTAGTTATTAATGCTTTATAACACTTTTTAAA
AATATCCATATTAGGTATACCATCGAAGTAAATCGAATGATTATGTTGCAAAACTATATA
AAGTTGAGAAAATTGCAGTTGTTGCAAGGAATTAGACAAGTCTTCCATTGACGTTGGTAA
ATCTCTTAATACTACTTTATCAGTTTGTGTTAATTTCTTCACCATAATAATATTCATTTCG
CATTACTTTATCACTTTTAGGATGAATAAGCACGACAATATTTTCATCATTTTTCTGTAAA
AGGTAAACTTTTTCGCTTACTTCTATAATCTAATATTTGCTGTTCAATTCATCGCAATATCTT
GAATAATTAATTGCGGTGATTGATTACCATTCCATTCGTTGATTGTAACAGATCCTAATAT
ATTAATTGGCTGTTTCATCTTGTAACCTAGGTTCTAAGTGTCCATTTTGCCAAAATAGCGCG
GCGATATTACTTTACCAAGTGTCAATTTTAGATGATTTTTTTGTTGACCGATCGCCTTAA
CTGAAGAACTGATAAATCATCCATTTCAAAAATAGGTCTAGAAAAATCTGTTCCGAAGG
GTCTTAAACGATTCATATCACGAATATTTTTAATCGTTATATCATTTTTCTGTTAATAATAC
GTCTACTGGCTTTACGGGATCTAACGAAGTTGTTTTAGATAAATCTTTCATCCATTTATTTA
AACCTTCAGCTAACGATTCTATATTTCAATATCCATCGTCATACCTGCAGCCATATGATG
GCCGCCAAATTTAGCGATTAACCTTTGATGTGCTGATAGTATTTCAAACATCGACACTTGA
TCAATTGATCTGGCGGAACCTTTTGCATGATTTTGCTCCCTATCAATATTTAAAATTAATG
TTGGCAAAGCAAATGTTTCGACAATTTTCGAAGCAACAATACCTAAGACACCTTCATGCC
AATTTTCTTTTGCTAAAAGTAAAATAAATCTCCCTTTTTAACTTTCTGTTTCTGCCATAGCC
ATTGCTTCTTCTGTGATAGTTGCTACAATATCTTTTCTTTCACGGTTAAAATGTTCAACTTG
TTCTGCTAAAATGCAGCTTCTTCTTCGTCGTCAGTCATCAACAATTCGCAAGCTAATGAT
GCGTCATCTAAACGACCTACAGCATTAAGTCTAGGTCCAATAATAAAACCAATTGTTTCT
TCATCAATATTGTCATTGTATCCCGCTTCTTTTAGCAATGCTTTAACAGAGGTCGGACATT
GATCATTTAAGACTTTTAATCCTTGTTTCACTAATGATCGATTTTCATCAGTTAAGGATAC
TAAATCCGCAATGGTACCTATCGCAACTAATGCTTTAAAATAATCAGGTACATTTTCAATC
AATGCTTGTGCTAATTTGTATGCAACACCTGCACCACACAATTGTTGGAACGGATAATTA
AACGATGGATGCATTGGATGTACGATTGCATATGCTTCTGGTAATGTACTACCAATTTTCA
TATGATCAGTTACAATGACATCAACTCCTAAATCTTGAACCATTTTAATTTTCAATTATGACC
TTGTATGCCATTATCAACAGTTATGATTAATGTTATGCCTTCATCATGAGCATTTCTAAAT
GCTAGTTCGTTTGGTCCATATCCTTCGGTAAAGCGGTTAGGAATATGCCATCCTACTTGTG
CACCTAAAAGTTGTAATGTTGTCACTAAAATTGTAGTTGAGGTAACACCGTCGGCATCGT
AATCACCATAAACTAGGATTTTCTCATCATTCGCTATCGCTCTTTTAATTTCTTTCAATAGCC
TTAGTCATATCGCTCAATTGCAATGCATCATGATTGACATCTGTGTCTGAAATGATGGATT
CAATTGCTTGTTCATCAATAATCGATTTACTTTCTAATATTTTTTTTTACGATTGGCGTTAAC
TTTAATTTTGATGTTAATTCATCACTTATGTATTTCAGCTGGTTTAGTTAATTTCCACTTATA
CTTCGGTTTAATCAT
```

> **secF**

Function: protein coding sequence; protein translocase subunit D and F (core genome, variable)

Best match: secF\_CC001-ST772\_118\_AJGE01000020.1[37615:39894:r]RC (completely identical)

Position: 037-contig\_188\_RC: 37774 ... 40054; Length: 2280 bp

Sequence:

```
TTAAACTAAAATCTTTTCATCGTTTCGATTTCTTTTCTTTATATACAATAATTTGTGTTTCG
GCGATTTTTTCAACTGACGTTTTTTTCAATTATCCCCATAGCGGAACGGCAATGAAGATTGA
AGAGAATACACCAGAAATCAATCCGATAAATAACGCTAAAGTAAAGTTGAATATCGTAG
GAGCACCGAAGAATAGTATAGCAACTACTACTACAATAACTGTTAATACTGTATTAATTG
AACGTGTCATTGTCTGTCTAATTGATCTATTAACGATATCATCAATTTGTTCTGTTGTCGTA
ATCACTTTAACCTTTTGTAAAGTTTTTCACGTACACGGTCAAACGTTACGATTGTATCATTA
```

TTGAATAACCGACAATTGTTAATACAGCGGCGATAAATGTTAAATCTACTTCAATTCTAA  
ATAAACTGAAAATCGCTACTATAATGAATACATCATGTAATAATGCCAATACAGATGAAA  
GACCCATGCGCCATTCAAATCGTAATGATACATAGATGATGATACCTATCGATGCATAGA  
TTAATGCAAGCATTGCATTTTTTGCTAATTCCTGTCCAATAATTGGTGATACAGTATTAAT  
TTGAGGTGTGTCACCGAATTCGATTTAATCTTATCACTCAATTTATTATCTTGAGCACGC  
GTTAAATCGTCTTTAAATTGAACAGTTGCTACTTTATTATCTTTACCATTGATTTGAATTTG  
ATCCGCTTTAAGTCCACTATCTTTTACAACCTTGCTCAACCTTTTGTTGAGTAATTGCTTGT  
TAGATTGGAAATCTACACGTGTACCACTTGAGAAATCAATTCCTAAGTTTAACTTGAAGA  
TATAAAGAATAACTAAACCGACAACCTACAATTAATAACTTACTCCAATTAATGGCTTAG  
CTAATTTAACAAAATTCCATTTCTCGAATGAAGTTTAAAGGTCATGAACATCTACACCTTC  
ATTAATATCATGTGCTTTATTCTTTTTAACACCAAATAACCAAATTTGATTTTTGAATATA  
TTTGATGAAACAAGTAATGATAATAAGAATCTTGATAAGAACACGGCTGTAACAAAGAT  
CATTAGAATACCTAATAATAACATTGTCGCGAAACCTTTAACTGAACTTTCACCGAAGAA  
GAATAATACTGCTGCGGCGATAACTGTTGTTAAGTTAGAATCAAAAATTGTTAGGAATGA  
ACTTTTGTGTTGCTTTAGAAAAGGCTTGCTTTATCGTTCTACCTATTCGAAGTTCATCCTTAA  
TACGCTCATAACATGATAAATTTGGCATCTACAGCCATAACCTACACCTAATACCAACGCCG  
CTAATCCTGGTAAAGTTAGAACCCCGGAAATGAAATTAATGCTACTAACGTTAGATAGA  
TATAAGTTGTCAATGCAATAATCGCTACTAAACCAGGTAATCGGTAGAATCCAAGCATGA  
ATAAATAAATTAATGCTACACCAATAAACGATGCAAACACAGTTTTATCTAATGCATCTT  
GACCAAATTTGGCACCTACTGAGTTTGAATAAATTTCTTTCAAGTCAACTGGTAAAGAAC  
CTGCATTTAACAAATTCGGCGATTTGTTTTGCTTTTTTAACGCCTTCTTGTCCTTTAAATCCA  
CCGAGATTTCTACGCTATCAGAATTGATTGGTTGATCAACACTTGCTGCAGAAATAAAT  
TTAGGGTTTTTCTTTTGTGCTTCTTTTTTATAGCTGTCACCTTTTTTGAATCTAACCAAAC  
AACCATGACATTATCACGTTTCTTAGAGATTTCTTCCGTTACTTTTTTAAATTTGTTTTTGT  
CTTTTACTTTAAAAGTAACTGTAGGCTGGTTTGTTCCTGTTTAAATTTCTGTTTGGCAGAT  
CCCTGTTTAAATATCAGAACCGCTTAATTTTACTTTATCTTCTGCATCGCGAATTGTTAAATT  
AGCTTGAGAAGATAAAAATTTTACGTGCTTCATTCTGGTCTGTTACACCAGCAAGTTGAACT  
CTAATTTCTATTAGGTTCTTCAACTTGAATTTTAGGTTCCGAAACACCTAAAACGTTAACAC  
GATTTTCTAATGTTTGCCTGTTGATTGTAAGGCTTTTTTATCTATTTTGTGCGCTTTATTT  
AAAGGATCGACTTGATAAAGCACCTCAAATCCACCTTGCAAATCAAGTCCTAAATTGACA  
TTCTTTATAACACTTTTATAAGTTGCAGCCATTCCGGCAAACAACAATACGACTAAAAGC  
AAGAACGCAATTATTCTACTACTTTTCTTAC

> **yajC**

Function: protein coding sequence; protein translocase subunit yajC (core genome, constant)  
Best match: yajC\_CC001\_MW2-USA400\_BA000033.2[1719300:1719560:r]RC (completely identical)

Position: 037-contig\_188\_RC: 40328 ... 40589; Length: 261 bp

Sequence:

TTATGAAGGGTCAACTTGTTTAATAGCAGGTTTTTCGAAAGTTAATTCAGTACCATGACCA  
TAACTGTAATAACAACAGTTGTTTCATCTACTGCTTTAACAGTACCTTTAATACCACCAA  
TAGTTGTAATTTCTTTGACCAGATTGAATGTTATTAATCAACTCACGATGCTGTTTCGCACG  
TTTTTGTGTTGGTCTGATCATCAAGAAATACATAACCGCAAAAATTACGACTATATATATT  
AGTAATGAAAATTGCAT

> **tgt**

Function: protein coding sequence; queuine tRNA-ribosyltransferase (core genome, constant)  
Best match: tgt\_CC001\_MW2-USA400\_BA000033.2[1719579:1720718:r]RC (completely identical)

Position: 037-contig\_188\_RC: 40607 ... 41747; Length: 1140 bp

Sequence:

TTAAAAGTTTTTTGGGTTCTCAACATTTAATCCATATTGCTCGAAGAATTCTTCTTTGAAA  
TCTAAAAGACGATCTTCTCGAATGGCTTGCTTATATCTTCCATTAATTTTAGCAGAAAAT  
GTAAATTATGAATAGTAGTAAGACGAATACCAAAGTTTCCTCTGCCTTGATTAATGAC  
GTATATACGCTCTTGAATAGTTTTGACATGTATAACAGTCACAATTCTCATCTAACGGTCT  
TAAATCATCTGCAAATTTTGCATTTTTAATAACTAAACGACCTTGCGATGTCATACAAGTA

CCATTTCTGGCAATACGTGTCGGTAAGACACAATCAAACATATCCATGCCGCGAATACTA  
CATTTCGATTAACGCATCTGGAGATCCTACACCCATTAATATCTTGGTTTATCTTTAGGCA  
TAAACTGCTCTGTATGTTCAACCATTTTATACATAACCGGTTTAGGTTACCAACTGACAA  
ACCGCCGATTGCATAACCAGGAAAATCTAATTCTACTAAATCCTTTGCACTTTGTTCTCTT  
AAATCTTCATATTCGCCACCTTGTATAATGCCGAACAATGCTTGATCTTCAGGTCTTTGGT  
GTGCATCTAGACATCTTTTCGCCAACGTGTTGTACGTTCAATAGATTTTTTTTACATAATC  
ATATTCAGCAGGCATCGGTGGACATTCATCAAATGCCATCATAATATCAGATCCTAAATC  
ATTTTGAATTTGCATTGATTTCTCAGGACTCAAAAATAATTTAGACCCATTAGTATGATGT  
CTAAATTCCACGCCTTCTTCTGTAATTTTACGTAAATTACTTAAACTAAACACTTGGAAAC  
CGCCTGAATCTGTAAGAATCGGACCATCCAATTCATGAATTTATGTAATCCCCCAGCGT  
GTTTGATAATATCATTTCGGGTTGTAACCACAAATGATATGTGTTGCCCAAATGATTTT  
TGCTTCAATTTGTCTTAACTCTTCTGGACTCATTGTTTTAACGGTTGCTTTAGTACCAACTG  
GCATAAACATAGGTGTTTCAAATGAACCGTGTGGTGTGTGCACGATACCTAAACGCGCAC  
CTGATTGTTTACAAGTTTTAATGTGTTTCGTATGTTACTGCAGGCAT

### > **queA**

Function: protein coding sequence; S-adenosylmethionine-tRNA ribosyltransferase-isomerase (core genome, variable)

Best match: queA\_CC001\_MW2-USA400\_BA000033.2[1720741:1721766:r]RC (completely identical)

Position: 037-contig\_188\_RC: 41769 ... 42795; Length: 1026 bp

Sequence:

TTATATAATTAACATTGCATCGCCAAAACCTAAAGAATCTATATTCTAAATTTACTGCTGTT  
TTATAAGCATTTCAGAACATTTTCACGAGTACTAAACGCTGATACTAGCATAACTAATGTT  
GATTTTGGTAAATGAAAATTAGTAATCTGGCCATCAATTGCTTTAAAATCAAATCCTGGA  
TAAATAAATATATTAGTCCAGCCACTCGTTTCAACAAATTTATCATGATCGCGTCGAATTG  
TTTCAAGTGTACGTGTTGAAGTTGTACCAACTGATATAATGCGATGTCCTTTGGACTTAGT  
ATCATTTAATAAATCAGCTGTTTCTTGTGTCATTTGATAAATTTCACTATGCATTTCTGTTG  
CATTACATCATCGACGCTCACCGGTCTAAACGTACCTAACCCAACATGTAATGTAACAA  
ATGCGATATTAACGCCTTTATTTTTAATTTTCAGTTAATAACTCATCAGTAAAATGTAATCC  
TGCTGTTGGTGTGCTGCCGCTGAACCACTTTCTTTAGCGTAAACTGTTTGATAACGATCTGGA  
TCATCTAAACGTTCTTTGATGTATGGTGGCAGTGGCATTTCCTTAATTCATCTAATCTTTC  
TTGTAATAACCTTCATAATGTAACGCATGATGCGTCCACCTTGATCCATTTCTTTTATG  
CACTCAGCTATAATTTTGCCATTACCAAAAATTCATTTATTACCAACTTTAATACGCTTAG  
CTGGTTTCAGTAAGACTTCCCAATCATTACCTTCAATTTGAGTTAACATTAACATTTCAAC  
TTTTGCACCAGTTTCTTCTTTTAAACCAAAAAGTCTAGCTGGCATTACTCGCGTATCGTTA  
AGCACTAATGTATCACCAGGTCTAAAATACTCAATGATATCTTTGAAATGTAATGTTTC  
ATTTACCAGTTTCTCTATCCATGACTAATAAACGACTATGATCACGATCTTTTAAAGGCG  
TTTGAGCAATTAATGATTCTGGTAAGTCATAGTCAAATTCCTTCAATATTCAC

### > **ruvB**

Function: protein coding sequence; Holliday junction ATP-dependent DNA helicase subunit B (core genome, constant)

Best match: ruvB\_CC001\_MW2-USA400\_BA000033.2[1721768:1722772:r]RC

Position: 037-contig\_188\_RC: 42796 ... 43801; Length: 1005 bp

Sequence:

TTATCCTCTCTCCTCATTTCGACTTTGCAAATGTTTCATAAAGCTAATGGTGTGCTTTTCTGC  
CACGTGGCGTACGTTCTAAAAAGCCTTTCTGAATAAGAAATGGCTCATAAACGTCCTCAA  
TTGTAATACGTTCTTCACCAATTGTTACGGCAATCGTATCTAAACCAACAGGTCCGCCATT  
ATACTGCTTAATAATACAGTTTCATCATTTTATGATCAATGTAATCTAGTCCGTGTTGATCA  
ACTTGAAGTAAACCTAATGCGTGCTTCGTTGTTTCAATGTATATTTGTTTCATCTTCATTCAC  
TTGCTGGAAGTCTCTTACCCGCTTCAATAGTCGATTTGCTACTCTTGGAGTCCCTCTAGAA  
CGTTTAGCAAGTTCAATGGCACTTTCTTCATCAATACCTGTGCCTAAAACCTCAGCTGTTT  
TAATAATGATTTCTTTTAAATCTGATTCATTATAATATTCTAATCTTAAAGTGCACACCAAA  
TCGATCCCTTAGTGGACCTGTTAAGCTGCCAGCTCGCGTTGTTGCACCTACCAAAGTGAAT

GGAGGTAAGTCGATACGGATACTTCTAGCCTCATCGCCTTTACCAATGATAATATCTAAA  
AAGAAATCTTCCATTGCAGGGTATAACACTTCTTCAACAACACTACTCAGTCTGTGTATTT  
CATCAATAAAACAAAACATCTCCAGGTTGAAGTCCTGATAAAAATTGCAGCCAAATCACCAG  
GTCTTTCTAATGAAGGCCCTGATACTGTACGTATATTAACCTTCCATTTTCATTGGCAATGAT  
ATTAGATAATGTTGTCTTACCTAATCCAGGGGGGCCAAAAAGCAATACATGATCTAATGG  
TTCATGACGAAGTTTAGCCGCTTTAATAAATACTTCTAAATTACTTTTTATTGAATTTTGA  
CCAATATATTGTCGTAATCTCGTAGGTCTAAGCGACAATTCGAAATCAGTTTCTTCACTAT  
GCATTGATTGATCAACCATACGCTCATTTCAT

> **ruvA**

Function: protein coding sequence; Holliday junction ATP-dependent DNA helicase subunit A (core genome, constant)

Best match: ruvA\_CC008\_NCTC8325\_CP000253.1[1655840:1656442:r]RC

Position: 037-contig\_188\_RC: 43832 ... 44435; Length: 603 bp

Sequence:

TTAAGATAACAATAATTGAAGACCTGCCTTAACAGCTTCATCAACTGAGTCATATTTATTT  
TTATTTAACGTTTTCTCAACTTTTGCAAGCTCTCGTTTAGAATAACCTAATGCTTCTAACGC  
TAACATTGCTTCTTGCACGAATTGATCTTGCACCGTCGAAGTAGCGTCTACTTGTAAATAAT  
GAATCGCTATCTTCTTCAGTGATTTTCACTTTACCTTTTAAATCTAAGACAATCTGTCTTGC  
CGTTTTCTTACCAATTCCTGGGAATTTAGTTAAATACGTATCATTTTCAATTTCAATGGCAC  
GTTTTACTTCATTAGGCGTACTTGTGCGCTAAAATAGCTAAAGCTGATTTTCGGACCAATACC  
AGTAACTTTAATTAACACTCAAGAACATATCTTTCTTCTTCACTACTAAATCCATACAAT  
AATTGTGCATCTTCACGAACAATTAAGATGTATGAATTAACACTTCATGATCTAGATGC  
TTTTGAAAACGATAAGAATTTGGTGTGTTGAATTTTATAACCAACACCAGCAGTTTCAACA  
ACTACGTGTGAGGATATAAATGTGTTAACTTACCTTTGACATACGCGTACAT

> **pheB**

Function: protein coding sequence; ACT domain-containing protein (core genome, constant)

Best match: pheB\_CC030\_MRSA252\_BX571856.1[1788403:1788861:r]RC (completely identical)

Position: 037-contig\_188\_RC: 44448 ... 44907; Length: 459 bp

Sequence:

TTACATACTCATACTAATTAATTCTACTTTTGATACATAATCTAAATTTCTCAAAGCGCCA  
ATAACATCTTCTACTGAAGTTTCTTTAGATTTAGCATTTCAGTGATAATGTTATTGTTGCTTT  
TTCTTCCATTGGAATACTTTGATGAATCGTTAATACAGATAGTTCTAACTTTGATATAACA  
TCTAGTACACGTGCCAACATACCCACAATATCAGTTACATATAAAATTAATGTAAATTCT  
CGATGGTCAAGCATTATATCGTCTACTGGAAATATCGTTTCTTATATTTATAAAAAGCAC  
TTCTAGATAGATCAAACACTGTTAACGGCATCATAAATGGACAATGTCGGATCACTTTTATA  
AGGCATCTTTAATCTTCAATGTTTTAACCACGGATTCAGGCAAGACATCTTCTTAATTA  
ATAAACTTTTTATAATCTTTATTGTCCATCAT

> **obgE**

Function: protein coding sequence; GTPase obg (core genome, variable)

Best match: obgE\_CC010\_D139\_ACSR01000051.1[25341:26633:r]RC

Position: 037-contig\_188\_RC: 44916 ... 46209; Length: 1293 bp

Sequence:

CTATTCAACGAATTCAAATTCTCCTCCAAGAATTCTAACGATATCACCATTTTTACAACCA  
CGTTCTCTAAGCGCATCATCAATACCCATCGAACGCATTTGACGAGCAAATCGACGTA  
GCTGGATCACTGTTAAAGTCAGTCATTTTAAACATTTCTTCAATAGCATTACCACTTACCA  
CATAAGCACCATCATCATCTCTTGAAATTGTAAATTTATCTTGTGACGGTGTATGTTTATA  
TAATACTCGGTTAATGCCAACCGACTCCTCTTCTTCAACTGTGAAGTCAACATCTTTATAT  
TCTTCTAATTTATCTGCTATTGCATATAATAATTGATCAATATTATCACGCGTTATTGTTGA  
AACTGGAATAACTGGCACATCTTCGCCAATTTCTTCTTTAAACAAGATTAAATTATCTTGT  
GATTCAGGTAATCCATCTTGTAGCTACTACGATTTGAGGTCTATCTTCTAAACGTTGCT  
CGTACGCGGCTAATTCTTGATTAATGACTTTATAATCTTCAATAGGTTCTCTACCTTCAGA  
ACCACTCATATCAATCATGTGAACAATAACTTTTGTCTCTCTACATGTCTTAAAAATTGA

TGTCCTAATCCAACGCCATCAGATGCACCTTCAATTAACCTGGTAAATCTGCCATAACA  
AAACTTCGTTGATCAGGTGTTGAAACAACACCTAGATTTGGTTAATCGTTGTAAAATGA  
TATGCCCAATTTTAGGCTTAGCTTTTGAAACGATAGATAATAAAGTCGATTTACCCACAC  
TAGGGAAACCTACTAATCCTACATCAGCTAATAATTTCAATTCTAAAGATACATCTAATTC  
CTCACCTGGTTCACCTTTTTTCACTGAAGTCAGGTGCAGGGTTTCTAGGTGTTGCAAAACGT  
GAATTACCTCGGCCACCTCGACCGCCCTTCGCTACTACAGCTCTTTGACCATCTTCAACAA  
GATCTGCTAACACTTCGTCTGTTTCAACATTTTTAATAATTGTACCAGGTGGAACCTTTTAA  
TACTAAATCTTCCGCATTTTTACCATGCATATTGCTACTTTGGCCATTTTACCTTTGCTTG  
CTTTAAAATGACGTTGATATCTAAAATCTAATAACGTTCTTAAACCTTCATCCACTTCAAA  
TACGACTGAAGCACCTTTACCACCGTCACCGCCAGCTGGTCCACCAAATGGTACATATTT  
TTCTCTTCTGTATGCGGTAATACCATTACCACCATCACCGGCTTTAAGAGATATTTTGACT  
TGATCGACAAACAT

### > rpmA

Function: protein coding sequence; 50S ribosomal protein L27 (core genome, constant)

Best match: rpmA\_CC001\_MW2-USA400\_BA000033.2[1725665:1725949:r]RC (completely identical)

Position: 038-contig\_319\_RC: 311 ... 596; Length: 285 bp

Sequence:

TTATTCAGCTACTGCATATACAGAACTTGTTTTTTGTTCGCGACCTTTACGTTTCGAATTTA  
ACAACGCCGTCGATTTTAGCGAATAATGTATCATCGCCACCACGACCTACATTTTACCA  
GGTAAATTTTAGTACCACGTTGGCGATATAAAATTGAACCACCTGTTACGAATTGACCG  
TCAGCACGTTTAGCACCTAAGCGTTTTGATTCAGAGTCACGTCCGTTTTTTGTAGAACTTA  
CCCTTTTTTAGATGCGAAGAATTGTAAGTTTAATTTAACAT

### > DUF464

Function: protein coding sequence; putative protein (core genome, constant)

Best match: DUF464\_CC001\_MW2-USA400\_BA000033.2[1725961:1726281:r]RC (completely identical)

Position: 038-contig\_319\_RC: 607 ... 928; Length: 321 bp

Sequence:

TCACTTATAATTTAATCTAATATTCTCATTATATTCTTCTTCAATAGTTTGTAAAGACACAA  
GCATTGTTTGAAGAATTAGTTGCGCTTCATCGTTATTTGTATCAACGCTTCTTATATGAAA  
ATGACCACCATTGTCGTCATAATTGATATCTGGTCTCTCAGATGTCAATCCTATAATCGCA  
TTAACTACTACCAAACAATACAGCTGAAGCTCCAGCACAAACGATATCATGACCATATTCA  
CCATGGTCAGCATGGCCATCCATAATAACGTCTGTTACTTTGCCTTCATCATTAACTGTAA  
TATCAACAGTAATCAT

### > rplU

Function: protein coding sequence; 50S ribosomal protein L21 (core genome, constant)

Best match: rplU\_AF349567.1[184:492]RC

Position: 038-contig\_319\_RC: 933 ... 1242; Length: 309 bp

Sequence:

TTACGCGTTGATTTTATCGATTGTTAATTTAGTGTATGGTTGACGATGGCCTTTTTTACGTT  
TTGAATTTTTACGACGTTTGTATGTGAATACAGTAATTTTTTTACC GCGACCTTGTTTATTA  
ACAGTAGCAGTAACTGTTGCACCTTCAACTGTTGGCGCTCCAACCTTAACTGAATCTCCAC  
CTACAAATAATACTTTATCAAATGTAAAAGTATCTCCTTCGTTTACGTCTAATTTTTCAAC  
GAAGATTTCTTGACCTTCTTCTACTTTGATTTGTTTTCCACCTGTTTCAATAATAGCAAACA  
T

### > L21

Function: noncoding RNA ribosomal protein L leader RNA (core genome, constant)

Best match: L21\_leader-var2\_CC025\_21193\_AFEG0100006.1[87810:88063:r]RC (completely identical)

Position: 038-contig\_319\_RC: 1254 ... 1508; Length: 254 bp

Sequence:

```
CTGTATAATAAGTCACGCCATACATAGGTGACATTTTCGTTATTGAGTCAAGCGTTTGCCT  
CTACGTTGTTTCGGTCGCAACTCGAGTCATTTATAAACATAAACTCTTCTCGTTTCTTCCTT  
CAACGCCTTGATTGACAATCGCTTTCTTTCAATAACTTCTGCAAATGAGTCAAGCGTTTGC  
ACTCTGTGGGAAAATCGCTTTCTTCATTAATAAATGTTCTTGAACCTATATTTGAGCGGTTG  
TATGTAGCT
```

### > **mreD**

Function: protein coding sequence; cell shape determinant D (core genome, constant)

Best match: mreD\_CC008\_NCTC8325\_CP000253.1[1659668:1660198:r]RC (completely identical)

Position: 038-contig\_319\_RC: 1534 ... 2065; Length: 531 bp

Sequence:

```
TTACCATTGACGACGTTTCATGTCAATGTCATTGTTTGTTTTTTAAGGAACTTTATAATCA  
ACGGATAAAGCATAATCAACAGTACAAAATTCATAATTAATGTTGGCAATAATCTAAAGA  
CTACAAAATGAATAATATCAAATTGAATGAATCCTAACATACCGTATATTAATGCCACAT  
AGACTTCTAATAATAAGGTGCTGGCTAATATAATAATGAATAACATCGAATGATCTTTGT  
AAAAAATTTTAAAGAATCGATCTATAAGTGCTAAAAACAATATATAGCCAAATAAGTAC  
ACTCCATAAATACTACCAAAGTATACATCAGTCATTACGCCTAAAAATATGCTGAGCAAT  
AATGATACGCCAAAGCCACGATACACTACCATCATTAATAATATACATAAATGTAAGGTGT  
GGTACAAATACAAGTTCAAACCTTACCTATGTGCATTGGAATAAGAAGCCCAATTGCAGTA  
TCTATATAAAATAGTAAAATACCTATCAAAAAATAATACAGTGTACGCAT
```

### > **mreC**

Function: protein coding sequence; similar to rod shape-determining protein (core genome, constant)

Best match: mreC\_CC188\_21340\_AGT01000037.1[31211:32053]RC (completely identical)

Position: 038-contig\_319\_RC: 2064 ... 2907; Length: 843 bp

Sequence:

```
TTATTTATCCCTGCTTTTCATCATCAGGAATTGTTTTAGGATCTCTTTTTGCAACATAAACAT  
GACTCAAATCTGTTAAGTCTGCACCAGTCTTAACCCTAACTTCTTTAGCTAAGCCGATTG  
ATCATTTTGAACCTTAGTCACTTCTCCTATATATAAATTACTTGGTAGTTGATCAGCTAAT  
CCACTTGTAACGACTTTATCACCTTTTGAGATATTATCTCTATTATTAATGTCACTAATTAC  
AAGTTCTGAGTTCTTTTCATCATAACGATCAATTAACCAAATATATTTTTAGAACCGTGT  
TGTATATTTACAGATAATTTACCCGCACGTGTATTAGTTGAGATTAATCAACTTGTGAAG  
AAAATTTATTAACCTTTAGTAACTCTTCCAACAAAACCTTGTGATGTCATCACAGCCATATT  
TGAAGTTATACCTGATTTAGATCCCTTATCAATTACAATTGTATTCATCCACTGATCCGGA  
TTTCTTGCCAAAACCGTAGTAGAAATAGGATCAAATTTTGAAATATCTTTTAAATCAAGCT  
CTTTTTTTAATTTTTCATTTTCCGCTTCTAATTGTTGGTTCTTAGATTCTAACTGGCTAATCT  
TATTTTTAGATTCTTTAGAATCTCCTTTTTTAAAAAAGTCCCAATCGTACCAGCAACAAA  
ATTAACCTGGATAACTCACAACCTCGTTGTCCAAAAGACACAGAATCACCTATATATTGTTT  
AGGAGGTGATTGAGATTGTGAACGTATGGACAGCCCAATTAATGCAATAAAAACGATAA  
TTGCACATAAAACAACAATTAATTTGTTATTTTTAAAAAATTAAGCAC
```

### > **Q5HFB3**

Function: protein coding sequence; putative protein (core genome, constant)

Best match: Q5HFB3\_CC001\_MW2-USA400\_BA000033.2[1728721:1729194:r]RC (completely identical)

Position: 038-contig\_319\_RC: 3298 ... 3772; Length: 474 bp

Sequence:

```
CTATTGATAAGCATTTCGGGTTTTAGTTGTAAATTTTGCCCTAATTCATTAAAGTCTTGTT  
GCATTTCAAATTCAGTATTGTAACACGCATTGACTCATCTCAAATTTATAAAGAATAA  
ATTCGTCTCCTCTTTGACCTATAATATATTGATCATTATAAGCCATGCGATTCAATCCAGA  
CACAGCCATAAACTCTTGTTTATCTATCATTTTTAAATACATTTTTAATTTGGCTTAATGGTA  
CATTCTTTATTAATCATTTTTCTTTAATGAATATTTCTCACCCTTACATAAACATGTTGG  
GCATCATTAGTGGGTTGCGTAACTTGATTCATTTGATCATTATCGTGATTTACAGGATTCC
```

AATCTTGTTCCTTTTAAAAAAGGTGCGTATTTCAAGGCGATATAAACAATTATCACAATTGC  
TATTACTGCTATAATGTTTTTAATCATACTAAATATCAATCTCAT

### > **Q5HFB2**

Function: protein coding sequence; putative protein (core genome, variable)

Best match: Q5HFB2\_CC001\_MW2-USA400\_BA000033.2[1729668:1729952:r]RC

Position: 038-contig\_319\_RC: 4245 ... 4530; Length: 285 bp

Sequence:

TTACTTACGCCCAAATGCGTTAGATAAAAATCGTATCAGCGCGTAGCTACCACTTAGTAA  
AAGGCCCAAACGATTCCAGTAAAAATTGAGCCAATTGCTACACTTAATAAAGGAAAAG  
CTTGTTTCGTAACGATCACACCTGCTAACGCTGTTACTAAAATACCTAACGTAGATAAAG  
CTAATGTTATTAATAGATTGCGCTTTGTTACAGTTTCATTTTTAATATTTAACTGCATGGTA  
TAAACCATTGGCACGAGAACCCCGATAATAATAAATAGAGTCAC

### > **radC**

Function: protein coding sequence; DNA repair protein radC homolog (core genome, constant)

Best match: radC\_CC001\_MW2-USA400\_BA000033.2[1730020:1730706:r]RC

Position: 038-contig\_319\_RC: 4597 ... 5284; Length: 687 bp

Sequence:

TCAATCATTTTTATCAAAGTAACCCGCTTCTACAAGACTGGTAAATCTATTATCACCGATT  
ATAATATGATCCAACAAATCTATCCCTAAAATCAAACCACACTCCTTCAACCTCATTGTTG  
TTATGATATCTTCTTGAGGGCGTTACATCACCGGATGGATGATTATGAACTGCGATAAT  
TGCATTGGCATTCTCTCACCGCAATACTAAAAATTTACGTGGATGTACAATCGAACTA  
TTAATGTACCTTTAAAAACACAGGTTTCTTTAATCACTACATTTTTTTGAATTTAACAATA  
AAATGACAAAATGTTCTTGTGTTAAATCTTTCATTGTTGGAATCATATAATCAGCAACATC  
ACTTGGTTGCGTTATTTTTATACGATTATTTTCAGCTCTTCTCCCCATCCTTTCCCTAGCT  
CAAATGCTGCTTTTAAAGTAATTGCTTTTTGTAATCCAATCCCTTAACTTGTATCAAATC  
GTTAATTGAAGATTTTTCAATTCATTGAGATTGCAAGCAGATTTAAGCAGTTCATTACTA  
ATGTCTATGCTCGAGAATCCTTTTCTCCGGTGTTAATTAATATAGCTAATAATTCTGTATT  
CGAAAGACTTTTTGCACCATGGCTTAACAAACGTTCTCTTGGCATTCTGAAGTTACCATT  
TCTTTAATTTTCAA

### > **Q5HFB0**

Function:

Best match: Q5HFB0\_BM3327\_AF186237.2[9:715]RC

Position: 038-contig\_319\_RC: 5280 ... 5988; Length: 708 bp

Sequence:

TCAAAAATATACGCCTCCTAAAAATTGATGGATATCATTATAAAAAAGTGAATTGATAAA  
AAAGGAAATAAATAAATGGAACAAGGGGTAATAGTTTAAATCGGCTTAAATATCATGG  
TAATTAAGCAACTAAACCAGCAATGACAAATGTAATAAAAATGACATAAATAGTGAAT  
TGGAGAGGGAAAAACAAGAAAGTGACAGATATTAGTAAAACGTCACCATAACCAATATA  
TGCCCGAAATAAAAAGTAGAATATATGCGTGGTCATACTAATAATGAGAAAAGCTACTG  
GATAAATCATACTTAACGAGAGAGAAACGATACAATAAATTATAATTAACGACAATCT  
AACATTAAGAAGTGATATCGGTCATAGTAAAAATAAGCAGAAAAACATATGTAGTTAT  
AAATAGCGTAGCATTACGTATGTGAAATCATACTTAATAAAGACGATAGGTATTAAGC  
AAAGGTTTCCCCTAAGAAATGTGTTAGGGAAATACGTTTTGACAGTTTCGACATCGCCC  
TTTTAATAATAAAAAACTAATAATCGGCATTAATTCATACCATTAAAGTGACGAATTACA  
ATAATCACATTTTCGATCTTCTATGTAAATAATCAAATGACGTTTCTTCTATAGATATAAAT  
TGATATAGAAAACCTAAAAATACAACCTGCAACTATAAGATAACAATACTACCAA

### > **folC**

Function: protein coding sequence; folylpolyglutamate synthase/dihydrofolate synthase (core genome, constant)

Best match: folC\_CC001\_MSSA476\_BX571857.1[1711332:1712603:r]RC

Position: 038-contig\_319\_RC: 6257 ... 7529; Length: 1272 bp

Sequence:

```
TTATAATGCTTCAAAGTCTAATTTTGATTTAACTTCACTTATGAAATACAGACTACCGGTA
ATTACTAATGTATCACCTTGATAATTTTTTATAAATTCAACGTAGTCATCTACTAATTGTA
TTTCATCATTTTTCAATACTACCTACAATTTCTTCTTTGCGTAACGCTTTCGGAAAATCAAAT
TCAGTTGCATAAAACGTATGCGCAATTAACCTTAAATGTTTGACCATCTCGTTAATCGGTT
TTCCGTTTATTGCTGAGAACAAAATATCTACTTTTTCTTTATCATGGTACTGTTAATTGTA
TCAATTAGAGCATCTATACTCTCTGAATTATGTGCGCCATCCAAAATGATTAAGGTTTGT
CATGCACCTGCTCAATACGTCCAGTCCAACGAACCTGATTCAATACCGTCTATCATCTTATT
GAAATCTAATTCAATTAATCCTTGTTCAATTAATTCAATAAGAGCTGTTATGGCTAATGCA
GCATTTTGTCTGATGTTACCTAGCATACTTAAAATGATTGTTTCTAATTCATAATCTTT
ATAACGGTAAGTAAATTCATCATTTTTCGATACAACAACAATTTCTCTATCTAATTCAATT
GGCTTCGCATGTTGTTCAATTGCGCGTTCACGAACATATTTAATGCATCTTCATTTTTAA
CAGCATATATCACTGGAACGTTAGGCTTTATAATCGCGCCTTTATCCCTAGCAATATCTAG
ATAAGTACCACCTAAAATATCTGTATGGTCTAGACCGATACTAGTTAAGATTGATAAAAC
CGGTGTAAGACATTTGTCGAATCGTTCCTTTATACCCAATCCAGCCTCAACAATGACAAA
ATCAACAGGATGATTTACCAAAAATATAAAAACATCATCGCTGTGATTATTTGCAATTC
AGTTGCAACACCTAAATCTGTTTCACGTTCCATCATTTCACTTACTGGTTTAATACGTGAT
ACTAATTCACAATAGCGTCATTTGATATTGGCACACCATTTAGACTAATTCGTTTCATTA
ATGTTTCAATAAACGGCGACGTAATGTACCTACTTCATAACCATTTCAACTAAAGCTGT
TCTAAGGTAAGCAACTGTAGAGCCTTTACCATTTGTGCCACCTACATGAATACCCTTAATG
TTATTTTGAGGATTATTAATTTGTGCTAGCATCCATTCATACGTTTAACACCTGGTTTGA
TGCCAAATTTAGTTCTTTCGTGTATCCAATACAAGCTCTCTAGGTAATTCAT
```

> **valS**

Function: protein coding sequence; valyl-tRNA synthetase (core genome, constant)

Best match: valS\_CC001\_MW2-USA400\_BA000033.2[1732964:1735594:r]RC

Position: 038-contig\_319\_RC: 7541 ... 10172; Length: 2631 bp

Sequence:

```
CTATGCTTTTAATTGTTCAATTCCTTGCCTTCACACCATCATATTTTTCTTGATAATCTTGTTT
TTTACGTTTTTCTTCATTTATAACCTTTTCAGGTGCTTTACTTACAAAGTTTTTCATTAGAGA
GCTTTTTATCTACTCTATCTAATTCGCTTTGAAGTTTAGCTAATTCTTTTCCAAACGGCTG
ATTTCCCTTATCCATATCAATTAGCCCTTCTAATGGTAATACCACTTTACCTGCAATTACAA
CTGATGTCATTGCTTTCTCAGGAATTTCCACGTCAGTGCTAATATTTAAGGTAAGGATT
ACAGAATTTGATTAAATAATCTTTGTTTTGTGATAAAGTTGTTTCAATTTCTTTATCTTTAG
CTTGAATTAATAAGGTATTTCTTTAGACAATGGCGTATTTACTTCTACACGTGATTGTCT
TACAGATTTAATGATTTCAACAAGTTGTTGCATTGTTGTTTACTTTCTTCAAAAATCAAT
GATTCACGCACTTCTGGCCATGAAGCTTTAACAATTGTGTCACCTTCATGTGGTAAACTTT
GCCATATTTTCTCTGTTACAAATGGCATGAATGGATGTAGCATTCTCATAATATTGTCTAA
AGTATAACTCAATACTGAACGTGTAACCTGTTTTTGTCTTCATCATTACCATTCATTGGA
ATTTTACTCATTTCATGTACCAATCACAGAAATCATCCCAAATGAAATTATATAATGCAC
GTCCAACCTTCGCCAAATTCATATTTGTCACTTAGATCAGTAACTGTTGCAATCGTTTCATT
TAAACGTGTTAGAATCCATTTATCTGCTAATGATAAGTTACCACTTAAATCGATATCTTCA
ACTTTAAAGTCTTCACCGATATTCATTAACCTGAAACGTGCCCATTCAGATTTTATTGA
TAAAGTTCCACACTGACTCAACTTTTTTCAGTTGAGTATCTTAAATCATGTCCTGGAGATGA
ACCTGTTGCTAAGAAGTAACGCAAGCTATCAGCACCGTATTCGTCAATAACATCCATTGG
ATCCACACCATTACCTAATGATTTACTCATCTTACGCCCGTCTTCAGCACGAACATAACCG
TGTAATAATACATCATTAAATGGACGACGATCTGTAAATTCTAAGCCTTGGAATATCATG
CGTGCTACCCAGAAAAAGATAATATCGTAACTGTAACCTGTAACCTAAGGCATTTGTTGGGTAGTAT
CGTTTAAAGTCTTCACTTTCTAAATCAGGCCAACCTAACGTAGAGAAAGGCCATAAAGCA
CTTGAGAACCACGTATCTAATACATCTTCATCTTGTGCCAATTTTCAATATCAGTTGGCG
CTTCTTCTCCAACATATATTTTCGCTGTTTCTTTATGATACCAAGCCGGAATTTGATGACC
CCACCATAATTGTCTTGAAATCGTCCAATCTCTAATATTTTCCATCCATTGGTTAAATGTA
TGTTTCGAAACGTTGCGGATAAAAATCAATACGATCATCTGTTTTTTGGTTATCTAATGAAC
GTTTCGCTAAGTCTTCCATGCGCACAAACCATTGTGTTGATAAATATGGTTCAACAACAG
CGCCAGATCGTTCTGAATGACCTACAGAATGAACATGATCTTCAATCTTGATAACTAAAT
CTTGTTCTTTTAAATCTTTAACTAGCTGTTTACGACAATCAAAAACGGTCCATACCTTCGTA
```



TTTACCCGCTTTGTCGTTCAATTTACCATTTTCATCCATAACGATAATATTTTCTAATTGAT  
GTCTTTGACCAATTTCAAAATCATTAGGGTTCATGTGCTGGTGTCACTTTCATAGCACCAGA  
ACCGAAGTCTATATCAACATACTCATCTGCTAAAATAGGCAGTTCGCGTCCTACGATTGG  
TAATATAACAGTTTTACCGATTACATCTTTGTATCGTTCGTCATTAGGGTTAACAACAATC  
GCTGTATCACCTAACATCGTTTCTGGTCTTGTGTTGCAATTTCAATAAAAACCTTCACCAT  
CAGCGTAAGGATATTTAAAATGATAAAACGCACCTTGAACATCTTCATGTATTACTTCAA  
TATCAGATAAAGCTGTACGTGCTTTAGGATCCCAATTTATAAATACGTTCCGCCACGATAAA  
TAATTCCTTTATTGTATAAATCAACAAAACTTTTTTAAGTCTTTACTTAAACCTTCATCT  
AAAGTAAAACGTTCTCTACTATAATCTAAACCTAGACCTAATTTAGCCATTGCGCACGA  
ATAAATGACGCATACTCTTCTTTCCAATCCCATGCCTGTTCTAAAACTTTTCACGACCAA  
GATCATATCTAGTTATTCCTTGTTCAATTTAATTTAGCTTCTACCTTTGCCTGTGTGCAATA  
CCAGCATGATCCATACCTGGTAAGTATAACGTATCGTATCCTTGCATACGTTTCATACGTG  
TAATGATATCTTGTAAAGTCGTATCCCATGCATGTCCTAAATGTAATTTACCAGTTACATT  
TGGTGGCGGGATAACAATTGTATATGTTTTCTTTTGATTTATCTTCTGACGGTTTAAAATAA  
CCATTCTTTACCCATTCTTCATAACGTCCCGCTTCAACTTCACGAGGATCATATTTTGGTTT  
CATTTCCAT

### > **tbox08**

Function: noncoding RNA T-box leader element (core genome, constant)

Best match: tbox08\_CC008\_NCTC8325\_CP000253.1[1668350:1668651:r]RC (completely identical)

Position: 038-contig\_319\_RC: 10215 ... 10517; Length: 302 bp

Sequence:

AAATAGGACGGATATTCCGTGGTACCACCTATATTCAAGAAGGATGATTAATATCAAATT  
CACTCTTTTAAACATAATTGGAATAATCATACCAATACTATCATCGTGAAATTTGAAATGCT  
TCATCTCTTCAAGCACTCTAGATTATGATTAACGCTCAAACACGTCTTAGCCTACTATTAA  
TCACGTTCAAGATACTCTGTGGGCTACCTTCAGTAAAAATCATTTACATACTCACAC  
CAAATCATATGCTCTCTTTAAAATAATTTGAACTTACTCTTCCCAAATCCTATATTTAA

### > **tag**

Function: protein coding sequence; DNA-3-methyladenine glycosidase (core genome, constant)

Best match: tag\_CC001\_MW2-USA400\_BA000033.2[1735997:1736557]

Position: 038-contig\_319\_RC: 10574 ... 11135; Length: 561 bp

Sequence:

ATGAATGAATGCGCATTGTTGGTACTAAAGATCCAGTCTACTTAGACTATCATGATCATGTA  
TGGGGACAACCGCTCTATGATAGCAAGGCATTGTTTAACTTTTAGCATTAGAATCACAA  
CATGCTGGGCTATCTTGGTTAACTATTTTAAAAAAGAAAGAAGCCTATGAAGAAGCATT  
TATGATTTGAAACAGAAAAGGTAGCACAAATGACCGCTCAAGATATCGACCGCTTAATG  
ACTTTTCCAAATATCGTTCATCATCGTAAAAAATTAGAAGCAATTGTTAATCAAGCTCAA  
GGGTATTTAAAATTGAACAAGCATATGGTAGTTTTAGTAAATTTTATGGTCATATGTAA  
ATGGTAAGCCTAAAGATTTGCAGTATGAACATGCTTCTGATCGTATCACAGTTGATGATA  
CTGCAACACAATCTAAAGATTTAAAACAATACGGGTTTAAATTTTLAGGTCCAGTAA  
CAGTATTTTCGTTTTTAGAAGCAGCCGTTTATATGATGCACATTTAAAAGATTGTCCATC  
AAAGCCTAAACACAATTA

### > **abrB**

Function: protein coding sequence; putative ammonia monooxygenase (core genome, variable)

Best match: abrB\_CC005\_Mu50-VRSA\_BA000017.4[1774152:1775225:r]RC

Position: 038-contig\_319\_RC: 11357 ... 12431; Length: 1074 bp

Sequence:

CTAATCTTACGCTTATTCGAACGATATTTTAAAAGTAATTAATTCCTGGTGAATAATA  
AATAGGATGAAAAGATTTCGAAAATATGATAACTCGTAATCATAGCAACATCGGCACC  
AGTAGCTAATGCAACTAAAATCTGATTAACCCCTCCTGGTGTGTCACCAAGAAACAA  
TTCATTAATAGGATTATTATCAAAGAAATGTATGACATAAACCATGATTAGCGCACCAAT  
TATCAACATAATATTTGAATTGTAATTGCGATTGCTAGTCTACCTTTTAAATCTGACAAT  
AAATGCGCAATTTGAACTCCAATTCTAATCATATATATTAGTTGTGCCATGTTCAACAACC

AATGATCTAGTGTAATGTTAAACCTGTAGAAAAATTCCAAACAATTAATACAATGAGTG  
GTGCTAATAATTGAAATGTTGGAACTTTATTTTAGACATAATTAGATAAACTATAAAGA  
TAGCTATCGCTAAAATAACTATTTGCCTTATGTTAATACTTGTGATAAAGGCAAGACTTT  
TGTTAACTTTCCATTCGCATGCATGTTACCATCATGAAAAAATATGAAATGAACGGTAC  
TAAAACAACAACAATATAATTCGTGATGTTTTCGTTAAGCTAACAATAACAATTAGC  
ACGTTTGTCTTGTTCAGCCATGACCAGCATTTGTGTTAGTGCTCCTGGTATAACACTTAAA  
ATAGCTGTTTCCGTATTAATACGTGCAATTTTTTTAAAAATAAATGCCATTACTATTGCAA  
TTAATAATATCGAAATAGATACAACAATAATCGAAAGCCAATTGTCTTTAATATCCATAA  
CGACATTTTTTCGTAACCGTTGATCCGATTTGCACCCCTAATAGTACAATCCCTAATTCCT  
AAGTAAGAATGGCCATTTAATATCAAGTTTGAACACTTTCACACAAATGATTGATGCGAT  
AATAGGACCAACATAAATGGGAGTAATACGTGCGATGAATACAATATAATACTAATAA  
AAAATGATAAAACGAACACAATGAAATTATTTCTATATATCATTGTCAT

### > **tx\_hemL1**

Function: rho-independent terminator

Best match: tx\_hemL1\_CC001\_MW2-USA400\_BA000033.2[1737994:1738046:r]RC (completely identical)

Position: 038-contig\_319\_RC: 12568 ... 12621; Length: 53 bp

Sequence:

ATATACATTTAAAAAGAGCCTGAACAAAGTTCAGGCTCTCAATTTGTCCGTAT

### > **hemL1**

Function: protein coding sequence; glutamate-1-semialdehyde 2,1-aminomutase/locus 1

Best match: hemL1\_CC001\_MSSA476\_BX571857.1[1717701:1718987:r]RC (completely identical)

Position: 038-contig\_319\_RC: 12623 ... 13910; Length: 1287 bp

Sequence:

TTATTTTACAATACGACTTAAAGCCGTATCAAATGCTTGAATCGTTTTTTCAATATCTTCTT  
TCGTGTGTGCCGTAGATAGGAATGTACCTTCAAATTGAGATGGTGGTAAAAACACACCTT  
CTTTTGCCATTTCTCGATACATTTCTGCAAATAATTTCAAATCACTTTTATTTCGCTTGTTCA  
AAATTAGTTACAGGTCCTTCATTTAAGAAATAACCAATCATTGAACCTGCTCTATTTACAG  
TTATTGGTACATTGTGTTTAGCAAATACACGCTTTAAACCGTCTTCAAGTATATCGCCTAA  
CATATTTAAAATACTCATATGTCTCTGGCGTTAATTGGCTTAACGTTTCATAACCACTTGTC  
ATTGCAAGAGGATTTCTGATAACGTACCCGCTTGATAAATATTTCCCTAATGGTGCTATAT  
GATCCATGATTTCTTTTTTACCACCAAAGCACCTACAGGTAGTCCTCCACCGATAACTTT  
TCCTAAGCAAGTTAAATCTGGTGTCACACCAAAGTAACCTTGTGCACAATGATAACCGAC  
TCTGAAACCAGTCATTACTTCATCGAAAATTAGCAATGCGCCGTATTTCAGTCGTAATATTT  
CTTAATCCCTGTAAAAAACCTTCAATCGGCGGTACGACACCCATATTACCAGCAACAGGT  
TCTACGATTACACCAGCAATATCGTCTCAAATTTTTTCGAAAGCGATTTTAAGTGCATCTA  
AATCATTGTATGGAACCTGTAATTGTATTTTTAGCAATACCTTCAGGCACACCAGGAGAAT  
CCGGCAATCCTAATGTTGCCACCCCAAGAACAGCTTTGATTAATAACGAATCACTATGAC  
CATGATAGCAACCTTCAAATTTACAATTTTTATTTCTTCCAGTATAACCACGTGCTAATCT  
TAAAGTATCCAATGTAGCTTCTGTACCAGATGACACCATACGCACTTTTTCTATTGAAGGT  
ACTCGGTCAATAACGAGCTGCGCCAATTTATTTTCAAGTAATGTTGATGCACCAAACTT  
GTACCTTTATCAATTGCTTCATGTAATGACTAATAACTTGAGGGTCTCTATGTCCTAAAA  
TAAGTGGCCCCCACTTAGTACATAGTCGATATACTCGTTACCATCGATATCATAAATTTT  
TGAACCTTTACCGTGATCCATAAAAATTGCTGGTGTATCTACTGATTTAAATGCGCGTACT  
GGACTATTTACACCACCAGGCATTAAGTTTCAGCAACCTTCATTGCTTCTTCTGATTTCC  
TATATCTCAT

### > **hemB**

Function: protein coding sequence; porphobilinogen synthase

Best match: hemB\_CC001\_MW2-USA400\_BA000033.2[1739383:1740357:r]RC

Position: 038-contig\_319\_RC: 13957 ... 14932; Length: 975 bp

Sequence:

TTATTTATCTAAATAGCGACAAATGTCCTTTGCAAATACGTAATAATCATATCAGCACCT  
GCACGTTTCATTGAAACCATTTGTTCCATAACGACACGTTCTTCATCTATCCAACCATTTT  
GTGCCGCTGCTTTAGTCATACTATATTCTCCACTCACATTATATGCAACAACCTGGAACATT  
CGTATGATTTTTAACATCTCGAACTATGTCTAAATAACTTAGAGCAGGTTTAAACAATCATC  
ATGTGCGACCCTTCTTTAAGATCACTTTCTAATTCACGAAGTGCTTCCAAACGGTTAGCAG  
GGTCCATCTGATACGTTTTTCTATCCCCAAATGATGGCGCTGAATCTGCTGCATCTCTAAA  
AGGTCCAAAGAACTTGATGCATACTTGACACCATAACTCATTATAGGAATATTGTAATA  
GCCGGCTTCATCTAATCCACGACGAATTCAGCAACAAAACCATCCATCATATTACTTGG  
CGCAATAATATCAGCACCAGCTTCCACTTGAGAAATTGCTGTTTTAACAGTAGTGGCAA  
TGATTTATCATTGTCAACGTCATGTGTATGGTCATCAATCACACCACAATGACCATGATCA  
GTATATTCACATAAACAAGTGTCTGCAACAATTAATAAGTCATCATACATTTTTTTAGCAA  
TACGTGTTGCCTGTTGAATAACACCATCGTGAATGTATGCACCAGTACCTATATCATCTTT  
TGAGTTTGGAAACACCGAAAAACATAATGGCACGTATGCCTAAGTCATAAGCTTCTTTTAA  
TTCACCTTCAAGTAAATTCAAACCTGATTTGGTATACACCTGGCAATGACTTAATTTCTTTT  
TTCACATCGTCTTTTTCAACTACAAAATTGGATATATTAATCTTCTTTTCTTACATGATT  
CTCTCTAACCATATCTCTCATTGTGCGCTGATGATCTCAATCTTCTATGTCTATCAAATTTCA  
T

### > hemD

Function: protein coding sequence; uroporphyrinogen III synthase

Best match: hemD\_CC001\_MW2-USA400\_BA000033.2[1740360:1741028:r]RC (completely identical)

Position: 038-contig\_319\_RC: 14934 ... 15603; Length: 669 bp

Sequence:

TTAGCCCCTACTTTCTAAAATCTTTTCAATTAGTGATTTCGAGTGTTTGAATTTCTGCAATTG  
TACTGGTTGTTGATATGATTTAATGGTCCGTGCTGTTTGTCTCCAATAGCAAAATACGA  
CTTGAATTTTGGTACAAATCCTTCATTAATAATAACGTAAGTCCGACGAACTTGAAAA  
TGTTAATGCATCGATTTGTTGATGTTCTATCATTCTTTAACATCTTGTATATTTGTTTGT  
AGGCACTGAAGTATATAAATCTATTTTAAACAACCTCATTATCTTTAGATAACGCTGCTAAT  
ACAATGGTCTCGCCAATTCACCTCGAAGGCAAAAGTATTTTTGGTTAGTTTGATTAATG  
ATTTTAAAAATCCTTCTTGAGAAAAGTCGTTTGGCATAAAAATCAACTCGAATGCCAAGTG  
ATTCACAATATTGCGCTGTCTTACTTCCATCACAGCAATGTTATCAACATTAATTCCTTTT  
AGATATTTATAAAGAATTTACAGCATTTTLAGATGAAAAAATAAGCCAGTCATAGCGT  
TGATTTAACAAATGAATATCAAAATTTAGTGGCTTTATATCAATAAAGGGTTTGTGAATA  
ATTGATACTAAATCACTTTGCATGTCATTTGTTTGTGTCATAACTACAACCTGGCTTCAT

### > hemC

Function: protein coding sequence; porphobilinogen deaminase

Best match: hemC\_CC001\_MW2-USA400\_BA000033.2[1741050:1741976:r]RC

Position: 038-contig\_319\_RC: 15624 ... 16551; Length: 927 bp

Sequence:

TTAATGTTGTTTCATTTAAGCGTTTTATAATTTTCATAAGCACCTTGCTCTTTTAAATTTGTTAC  
TCACTGTTTTGCCTAACTCAACCGGATCTGTTCCGTTTCATTGTATATTCAAATCGTTCTTTA  
CCATCTGGGGTCATAATTAACCTGTAAATTCGATTTTCGTTTTGATCTGAGATTGTAGCAT  
ATCCTGCGATTGGCACCTGACAACCTACCATCCATTTCTGCTAAAAACGTTTCGTTTCAGCAGT  
CACACATTTTGAACCTCATCATTATGTACTTTGCTTAATAATGTTAATAGTTCTTCATCGT  
CACTACGACATTCTATCCCTAAAGCACCTTGTCCGATTGCAGGTAACAATGTATCTCTATC  
AAGATAAGATGTTACAATATCATCTGACCAGCCCATTCTTCTTAAACCAGCTGCAGCTAA  
AATAATCGCATCATAATCTTCAGTTTGTAACTTTTCTAATCGTGTATCTATATTACCTCTAA  
TCCATTTAATCTCTAAATTAGGATACTTAGATAATATTTGTGCACCACGACGTAATGAACT  
AGTACCAATAATACTGCCTTCTGGCAATTGGGATAGTGGTGTATGTGTTTTAGAAATATA  
CGCATCAAAAGGTAATTTCTCTATCAGGGATACAACCTAATGTTAAACCTTCCGGAATTAC  
ACTTGGTACGCTTTTAAAGCGAGTGTATTGCCATATCGATATTTTTTTTCAAAAAGTTCATGT  
TGATTTCTTTAACAAATAAGCCTTTGCCTCCGACTTTAGACAATTGCTTATCTACTATAC  
GATCGCCTTTCGTGACAATTTCTTTAATTTCAATTTCTAGATTTGGCTCGACAGCTTTTAAAT

TTATCAATAAATTGCTGGCTTTGTGTTAAAGCTAATTTACTTCTTCTGGAGCCAACGACTA  
ATTTACGCAT

> **hemX**

Function: protein coding sequence; membrane uroporphyrinogen III methylase

Best match: hemX\_CC001\_MSSA476\_BX571857.1[1721670:1722485:r]RC

Position: 038-contig\_319\_RC: 16592 ... 17408; Length: 816 bp

Sequence:

TCAATTCACAAAATGTGTTGCAAAAAATAAATTAATCATATTTAAGCAAAAATAAAATAAT  
GTTATAGTATATTAATAACCTTGAATTCAACCATTTGTTGATTCTAAGCAATATATAACTT  
CCATATAATATTGTAATAATTGAAGAGAGTATTACCTTCGGGTCAATGAATATACGTTCA  
CCAAGTAAATTACACCCCACTGTGTACCTAAAATAATACTAAATATGAGAATTATCCAC  
CCACTTAACGTTGAGTAAACACAATTGATTCAAGTGTAGCAACGCTACCTATTCTAAAG  
TATTTTTGATCAAAACGTTTTTCCTTCAAATTACGGTATTGCATGATATACAGTAATGCAT  
TGACAAAAGCTAAGGCAAAGAAGACATAACTTAACACAGCTAGACCGATATGGACTAAC  
AGTAAGTCTGCTACAACAGCAATTTTCTGAACCTTATTAGTATAATGTGTGCGGTTGAAATG  
TATTCATCCCTAAAAGTGTAAACCCTATTAATCAAGAAAAACACAGAGAAATTCAATA  
CTTTGATAAGGTTAAGAATTAAGAGATTGAAATAATCAGCCAACCTTAAAGTATAGAATA  
CATCTGAAATAGACCCTAATGGAATATGTCTAGTTTGTATAATAAAAAATAGATAAAGAGA  
TTGTTTGTAACCCAAACAATCCCAATAAATATATGCCTAACTTCTAATCTTATGACT  
TTTTTGGACAAAATCATAAAAAATAGCAAATGATACTGATTAAGTATATTAATAATATAAT  
TTCATTGAATCGAATAAACAGGTTTTCTTGCAT

> **hemA1**

Function: protein coding sequence; glutamyl-tRNA reductase (core genome, variable)

Best match: hemA1\_CC001-ST772\_118\_AJGE01000003.1[45337:46683]RC (completely identical)

Position: 038-contig\_319\_RC: 17429 ... 18776; Length: 1347 bp

Sequence:

TTATTCAAAACACTAAAGATACGTCGCGCTGAAATTTCTTGACCTTGCTTTCTTTTTGTTGCT  
TCGCTTGCTCATGAGGACATTCAGCTTCGATATCAAATATATTTTGAAATAGCTCTAATTT  
TTCATTACTTTTTCTTATCACTACTTAATTCTTTGGCCTGTTAATAGGATCTTCAACATTT  
GATTGATGATACTTTTTGTATGTTTAGATATAATTTTACGTTCTCTTTTCGCTTAACCCTGGC  
AATTTACGATCAATACTGTCCATCGTTTTCTGCTTGAATTGTCATAGCTTTTTTCACGTAAAG  
CTCTAATCACTGGAACAACCCCAACATACTAATCCACTCATTGTGTGCATGTATTTCTGC  
AGGAATTTGTTCCGAAATTGTTGCAGCCGCTAATTGTCGCTCACGTAAGTTTGCATCAACT  
AAACCTTTTAAAGTCATCAACATCATAATTAAGATGTTTGTGATGGCACTAATACCAGGT  
TCAATATCTCGAGGAAGTCAATATCAATCAATACTAGTGAATCTTGCTTTCTATTTTCTG  
CAATTTCTTCTATCATTTCATTTGTAATGATATAAGATTGTGCACTCGTTGAACTAATCAC  
AATATCTGCACCTTCAAGTAAATTTGGTAATGATGATAGTTCATCATATTTCACTTGATGC  
TTTGCTGCTAATTTCATAGCATTTCATTTGTTCTATTTACTACTGTAATATCAGTAATTCC  
AGAACCAAGAAGATTTAATAGTGATAATTCATCTATTTCCCTGCACCAATAATGATAGC  
TTGCTTACTTTTTCAATTTGCCAAATACTTTTTTCGCCAACTCGACCGCAGCATAAGACACA  
CTTACAGCATTATCAGCTATATCTGTTTCATTATGTGCTCTTTTTTGCAAAAAGTAATTGCCTG  
TTTAAATAGATGATTAATAAATTGTTCCCTGTCGTACCTGTGCTTTTGCCTAAGAAAAATGCA  
TCTCTTATTTGACCTAAAATTTGAGTTTCTCCAAGTACGATTGAATCTAAACCAGAAGTGA  
CACGCAATAAATGTTCTACTGCTTCGTCCTCCCACTTTTACTTCTGACATTGCTTTAATATCA  
TCTACTTCAAATCCAAATGCACGAGCTAGAAATCGTTGAATATAGTAACGACCTGTGTGA  
ATTTGATCAACAACAGCATATACTTCAGTTCGATTACATGTTGATAAATATGACATTTTCTA  
AAATAGATTTAGTTTCATATAAATCTTCATGGGCAATTCGTAAGGCATCATCTCTAAAAG  
CAACTTGCTCTTAGTGCAACATCAGCTGTGCGATGATTTATACTAATTGCAATAAAATG  
CAT

> **tnpIS431-06**

Function: protein coding sequence; transposase for IS431 (mobile element)

Best match: tnpIS431-06\_circ\_S-epidermidis\_GQ900381.1[43799:43807]RC (completely identical)

Position: 038-contig\_319\_RC: 18076 ... 18085; Length: 9 bp

Sequence:

ATAGTTCAT

### > **engB**

Function: protein coding sequence; GTP-binding protein

Best match: engB\_CC001\_MSSA476\_BX571857.1[1724070:1724660:r]RC (completely identical)

Position: 038-contig\_319\_RC: 18992 ... 19583; Length: 591 bp

Sequence:

CTATGAAATATACGGTTCAATTAATTCATATTTGTTGTTGTTTATTATTTTGAATTGATG  
ATAACTTACAATTGTATCGTCTGGGTCATATCTAATTGTGTCTTAATATTTTAAATATG  
CTTTTGAACTTTACCTTTTGGAAATTTTGTCTTCTTTAGTGCATATAACTAAAGTAGGAATAT  
CAAATGTTTCAAATAATTGTACATTAAGATATCATCTTGTGTTGGATCATGTCTTAAATC  
AACTAATTGAATAACTAATTGCAAATCTCTCTCTTAGTTATATATTCCTCAATCATTTTCC  
CAAATTTTTCACGTTGTGTTTTACTTACTTTAGCATATCCATACCCTGGAACATCCACAAA  
AATAAGTTGTTTCATCTATATTATAAAAATTTAACGTTTGCCTTTTGGCGGGTTGCTGTGAT  
GTACGTGCCATATTTTCTGCCAATCATACTATTGATAAATGTAGACTTACCTACATTAG  
ATCGACCGCTCAGTGCAACTTCAGACAATTCTGTTTCTGGATATTGTTCTTCTTTTACTGC  
ACTAATGATTAATTCTATATTATTAGGATTAACTTTCAT

### > **txbi\_clpX**

Function: bidirectional rho-independent terminator of clpX

Best match: txbi\_clpX\_CC001\_MW2-USA400\_BA000033.2[1745075:1745150:r]RC (completely identical)

Position: 038-contig\_319\_RC: 19649 ... 19725; Length: 76 bp

Sequence:

ATACATTATAAAAAAGCTCCGATCAAAGTTAAACTATTTGAGCGTCAACTTTGATTGGAG  
CTTTTCACTTTTATAA

### > **clpX**

Function: protein coding sequence; ATP-dependent chaperone protease/ATP-binding subunit

Best match: clpX\_CC001\_MW2-USA400\_BA000033.2[1745162:1746424:r]RC

Position: 038-contig\_319\_RC: 19736 ... 20999; Length: 1263 bp

Sequence:

TTAAGCTGATGTTTTACTATTATTAATTAATTAATGCCTTCTGCGTCGTATAGTTCTGGTTCAG  
TTTCTTCATTAATTGTTTGTGCTGTAATAACTACCTTCGTTACATTTTCGTTAGAAGGCACA  
TCAAACATAATATCGATTAACGATTCTTCTATGATTGAACGTAAACCACGCGCACCTGTTT  
TTCTTTCAATTGCTTTTTCACTAATTGCTGATAAAGCTTCTTCAGTGAACCTCTAAATCCACA  
TCATCTAATTCCAGCATTTTAGTATATTGTTTCAAGTGCATTTTTAGGTTGCGTTAAGA  
TGTTTTTCAACGCAGTTACATCTAATGTTTCTAAATTAGCTACAATTGGCACACGTCCGAT  
AAATTCAGGAATCAAACCATAGGCTTGCAAATCTTCTGGGCGAATTTGTGCTAATAATGC  
TTGTTTCGTCATATTTATCAGCTTCATTGCTTGAAGAAACCAATAACTTTTTACCAAGACGG  
CGCTTAATCACTTCTTCAATACCATCAAAGGCACCACCAAGAATAAATAAGATATTTGTT  
GTATCAATTTGAATCATTTCTTGGTTTGGATGTTTGCCTCCCTTGTGGCGGAACACTTG  
CAGTCGTACCTTCTAAGATTTTAAGCAATGCTTGTGTAACACCTTCACCTGAAACGTCACG  
TGTTATAGATGTGTTTTAGATTTACGTGCAATTTTATCAATTTTCATCTACATAAATAATA  
CCTTTTTCGGCTTTATCAATGTCAAAGTCAGCTGCTTGAATTAATCTCAACAAGATATTTT  
CAACATCATCGCTACATAACCAGCTTCAGTTAAACTTGTTCGCATCTGCAATTGCAAATG  
GTACATTCAACGTCTTGGCTAATGTTTGGCTAATAATGTTTTACCACTACCTGTTGGCCC  
AATTAATGCAATGTTACTTTTTTGAATTC AACATCATCTTCTTTTGGTCTAATTGTTGAA  
TACGCTTATAGTGGTTATAAACAGCTACAGCTAAAGATTTTTTAGCTTTTTCTTGACCAAT  
AACATATTCGTTTAAATGATCCATAATTTCTTTAGGAGTAGGTAATTCTGTCATCGCTTCA  
GAAGTGTTTTGAGCTAATTCTTCTTCGACGATTTCTGAGCATAATTCAATACACTCATTAC  
AAATATATACACCACTTCTGCTACAAGTTTTTTTACTTGATCTTGGTCTTTTCCGCAGAA  
AGAGCATTTCAAATTTTCTTCATCTTCATTGAATTTAAACAT

> **tig**

Function: protein coding sequence; trigger factor (core genome, constant)

Best match: tig\_CC001\_MW2-USA400\_BA000033.2[1746575:1747876:r]RC

Position: 038-contig\_319\_RC: 21149 ... 22451; Length: 1302 bp

Sequence:

```
TTAATCTTCTTTAGTTCCTTCAACGAACTTTGCGTTATCTCTTAATAAAATCGATAACTTTTT
GGATACGAACATCATTTTTAATGATATCAGTATTACCTAAAGTATTTTTGATATCTTCAAC
TGAGATATTAATTTGTTTACTCATTTTTTCTAATTCCTTATCGATATCTTCATCAGTAGCTT
CGATTTTTTTCAGCTTCAGCGATCGCAGTTAAAGTTAAGTTAGTTTTAACACGTTGTTCTGC
ATCGTCTTTCATTTGCTCTCTTAATTGAGTTTCATCTTGACCTGAGATTTGGAAGTACGTTT
GTAAATCTAAACCTTGTTGTTGAATTCCTTGTGCAAATTCAGACACCATAACGATCTAATTC
AGTATTAACCATTGCTTCAGGAATATCGATTGTTGTATTATCAGTAGCTTTTGTAAATCGCT
TCTTCTTTTTCAACATTTTCAGCATCTGTAGCTTTTTGTTTCAGCTAAACGTTTACGTAAGTT
TTCTTTGTAAGTCTACTGTATTTGCTTCTGCATCTAATTCATTAGCAATTTTCATCTGTTA
ATTCTGGAACCTCTTTAAATTTAATTTTCGTTAACTTTTTGTTTTGAAAGTTGCTTCTTTACCA
GCTAATTCCTTCAGCATGGTATTCTTCTGGGAATGTTACGACAACATCTTTTTCTTCGTCAA
CTTTCATACCTTCTAATTGCTCTTCGAAACCAGGTATGAATGAACCTGAACCGATTTCTAA
ATCGTAAACCTTCAGCTTGTCACCTTCGAATTCCTTCCGTCAACTGAACCACTAAAGTTCG
ATGTTAACTGTGTCGCCATTTTCAACAACACCATCTTCTTAACTACCATTTCAGCTAAAT
GTCCTAAGCTGTGGTCAATCGCTTCTCGTAACTCATCATCAGATAATTCAGTTTCTTGTTTT
TCAATTTCAAGACCTTTATAGTCTCCTAATTTAACTTCTGGCTCAACTATAACTGTTGCTTC
AAAATGAAATCTTTACCTTTTTCAATTTGAGTAACACTTACTTCTGGTTGTGCAACTGGT
TTAATATCAGTTTCGTCAATTGCTTCACCATAAGCATCTGGTAATAAAAATGTCGATAGCAT
CTTGATATAATGCTTCTACACCAAAGCGTTGTTCAAAAATTGGACGTGGCACTTTACCTTT
ACGGAATCCAGGTACGTTAATTTGTTTAAACACTTTTTTGAATGCTTGATCTAACGCTTTG
TTTACTTTTTCTGCAGGAACAGTAAACAGTTAATAAACCTTCGTTACCTTCCTTTTTTTCCCA
AGTTGCTGTTCAT
```

> **rplT**

Function: protein coding sequence; 50S ribosomal protein L20 (core genome, constant)

Best match: rplT\_CC001\_MW2-USA400\_BA000033.2[1749737:1750093:r]RC (completely identical)

Position: 038-contig\_319\_RC: 24311 ... 24668; Length: 357 bp

Sequence:

```
TTATTTTAAAGCATCTTTAGCTTTAGTTACTAATTGAGCAAATGCTTTTTTCGTCAGAAATT
GCGATTTCTGATAACATTTTACGGTTAATGTCGATACCAGCTTTTTTCAAACCGTTCATTA
AACGTGAGTAGCTCATTTTCATGTTGACGAGCTGCTGCGTTGATACGTGTAATCCATAATTT
ACGGAAGTCACGTTTACGTTGACGACGGTCACGGAAGCATATTGACCTGATTTTCATTAC
TTGTTGCTTAGCTACTTTGTATAATGTATGTTTTGAACCGAAGTAACTTTAGCTAATTTA
ATCGTTTTTTTTACGACGCGCTCTTGTTACTGTTCCACCTTTAACTCGTGGCAT
```

> **rpmI**

Function: protein coding sequence; 50S ribosomal protein L35 (core genome, constant)

Best match: rpmI\_CC001\_MW2-USA400\_BA000033.2[1750140:1750340:r]RC (completely identical)

Position: 038-contig\_319\_RC: 24714 ... 24915; Length: 201 bp

Sequence:

```
TTATTTTTTGTATGCTAATAATTGTTTTACACGTTTCATATCGCTCTTAGACACTAATCTAG
CTTTACGTAATTGACGTTTTTGTGTTAGTGCTCTTGTGTTGCGAATAAGTGAGATGTGAAAGC
TCTTGAACGTTTTAATTGACCTGAAGCAGTTCTTTTAAACACGTTTAGCTGCTCCGCGGTGA
GTTTTCATTTTTGGCAT
```

> **infC**

Function: protein coding sequence; translation initiation factor IF-3 (core genome, constant)

Best match: infC\_CC001\_MW2-USA400\_BA000033.2[1750369:1750896:r]RC (completely identical)

Position: 038-contig\_319\_RC: 24943 ... 25471; Length: 528 bp

Sequence:

```
TTATTTTTTCAGCTGTTGGCGCTAACATGATAAACATTTGACGCCCGTCCATTTTAGGTTTTT
GTTCAACTGTTGCTATATCTTTGCATTTCATCTGCATATTTTTCTAGCACACGTTGACCAATT
TCCTTATGCGTAATGGCACGCCCTCTGAAACGAATAGATACTTTACATTTATCGCCTTTAG
TTAAGAATTTACGTCCGTTTTTCAACTTAGTTTTGAAATCATGTTCCCTCAATTGTTGGACTT
AAACGAATTTCTTTAACATTGATAATTTTTTGTTCCTTTTTCATTTCTTTTTCTTTTTCTGT
TGTTCGAATTTGAATTTACCGTAATCCATAATTCTTGCAACTGGTGGTTTCGCATTTCGGTG
CAACGACCACTAAGTCTAAATCTACACGTTTCAGCCATTTCTAAAGCTTCACGCTTTGATTT
AACACCAATTTGTTCCACCATCTTGACCGATTAACGTAATTCTTTTGCACGAATTTTGTCAT
TTGATTTGAGTTTGATCTTTTGCTATGGTTGACAC
```

## > L20

Function: noncoding RNA ribosomal protein L leader RNA (core genome, constant)

Best match: L20\_leader\_CC001\_MW2-USA400\_BA000033.2[1750925:1751050:r]RC (completely identical)

Position: 038-contig\_319\_RC: 25499 ... 25625; Length: 126 bp

Sequence:

```
AGCAAAAAGGAAGAGCAGGTATAAAATACCCGCTCTTCCTTATACACAGTTATGTGTAAT
GTGATTAACCTGCCAACTGCTTTATGCGTCGCTACAGGTGAGAAGCGGGTGCTTCTACTT
GGTTCCG
```

## > lysP

Function: protein coding sequence; lysine specific permease (core genome, constant)

Best match: lysP\_AC078832.7[17642:19135:r]RC

Position: 038-contig\_319\_RC: 25699 ... 27193; Length: 1494 bp

Sequence:

```
TTAACCTTTTATTTTCATCCATTGACACGTCTTGACGTAAATCTACTTGTTCTAATGGAATTT
TTTTCGTTTTATATCGAAGCTTATGATAAATAAAGAATGCTAAAAATACTGGGATTCCCAT
ATACGTAATTAAGAATCGACTAAAATTAATAATCTCCTGTTTTAATAAAGTCAACATCTTG
ACCAATAATTACTACAATACATAAAAAGCCAGCAAATAATGGTCCGAATGGGAATAATTT
AGCAGTATATTTAATTTAGATTTGTCATAATTTTGTTTATCAAATGCTCTTCTAAATCGAT
AATGACTTACTGCTATACCTACCCAAGCAATAAAACCAGTTAAACCACTTGCTGCAACGA
TATATTCGTATGCACCTTTTTGTAAGGCTTTGTAATACGAAAATTATCACTACAATGATTGC
TGTAACGAGTAACGACATATATGGCACACCGTTTTTATTTGTTTTACCAAATGCTTCAAAC
GCTAATTTATCTTTACTCATTGAATATAGCATTTCGAGTTGAAGCATAACATACCTGAGTTAC
CTGCTGATAACACAGACGTTAAAATGACTGCATTTCATAAATGATGCTGCAAACGCAAATC
CAGCATTTTTAAACACTAATGTGAATGGAGACGTTGCTACATTATCACTACCACCCATTA
ATGCACTACTATCATAAGGAATTAACATACCGATAACAAAATGGCTAAAATGTAAAAT
AATAAAATTTCCAGAATACTTGTTTAATTGCTTTTCGGCACAGCACGTTTCAGGATTTTCTG
ATTCACCAGCCGTAATACCAATTAACCTCAGTACCTTGGAATGAGAAACCAGCGATTAAGA
ATACACCTAGAATTGATAATAAACTTCCTCCTAAGTTGCCACCAAGAATAGGACCTTCAC
CTTTATTAAATATTTGGAATCCTACAACATGACCACCCATGATTCCGACAATCGTTAATAA
ACCAATTGCAATGAAAACAATAACTGTAACCACTTTTATCAATGCCAACCAAGTATTCCT
TTCACCATAGACGCGAACTGATAACGAATTCAGACTAAAATTATAACTAAGAACAACG
CACTCCATGCCAAGCGGGTATGCCTTGCAATGGTGTCCAATATTGAATGACTTGTGCTG
CAATCGTAATATCTGCTGCTACAGTTACTACCCAGTTAAACCAATAGTTCCAACCAAGCG
CAAACCCTAAAGATGGATCAACAAATCTTGTAGCATATGTACTAAATGAACCTGATACTG
GCAAATACGTAGCCATTTTCGCCAAGTGACGTCATTAAGAAAAATAACCATTATTCGATAA
TTGCGTATCCTATTAATGCACCCAAAGCACCTGCATCATGAATTGCTCCACCAGAAGTTA
CAAATAAACCTGTACCAATACAACCCCAATCGCAATCATAGAAATATGACGATCTTTAA
GTCCCCTTTTGACAACATTGTTACTTTTCATTTTGAACCTTTTGACAT
```

## > **Lys\_riboswitch**

Function: noncoding RNA lysine riboswitch (core genome, constant)

Best match: Lys\_riboswitch\_CC001-ST772\_118\_AJGE01000003.1[36600:36775]RC (completely identical)

Position: 038-contig\_319\_RC: 27337 ... 27513; Length: 176 bp

Sequence:

```
ATATAAGGTAGCACATCACATTCTGTGACAGTACAGTTCCTATTTCGAAAACGTCCCAAT
AGATATAATTTATGGTTTATATCTATTTTCGGCATCTTTACCTTTCACCTGTTCAACTTAGGT
ACCATAAATACTTCTGACAAGTTACTAATTAACATGCAACCTCTAACTCAATT
```

## > **thrS**

Function: protein coding sequence; threonine--tRNA ligase (core genome, variable)

Best match: thrS\_CC005\_JH1\_CP000736.1[1838653:1840590:r]RC

Position: 038-contig\_319\_RC: 27618 ... 29556; Length: 1938 bp

Sequence:

```
CTATCTATGTTTTTTTCAAACGAATTTTCATCAACTAGATTCCAGATAAATTCATCTTTTTTCAA
CTGTTTCTTGGTCTTGCATCCATATTGACGCACATTCACCTGATTATTTTCAACTTCCTTA
TCCCCAACTACGATTTGATAAGGTATTTTTTGCATTTGAGCTTCTCTAATTTTATAACCCAT
TTTTTCATTACGGTCATCAATACTTACACGAACACCTTGAGATTTCAATTCATCTTGCAAT
TGGCGCGCATAATCATAATGTAAATCAACGTTAACTGGAATGATTTGAACTTGTTTTGGC
GCTAACCAAGTTGGGAATGCACCTTTAGTTTCTTCAGTTAAAAATGCTACAAATCGTTCCA
TTGTTGATAACAACACCACGATGAATCACAACCTGGACGATGATGTTACCATCTTGACCAA
TATAAGTTAAATCAAACGTTCTGGTAATAAGAAATCAAGTTGTGCTGTTGATAATGTCT
CTTCTTTACCCATCGCTGTTTTAACTTGAACATCTAGTTTTCGGACCATAGAATGCCGCTTC
ACCAATCGCTTCTTCGTACGATAAGCCAAGCTCATCCGCTGCCTCTTTAAGCATATTTTCA
GCTTTATTCCACATGTCATCATCAAAAGTACTTTTCTTTATCTTCAGGGTCTCTATAACT
TAATCTAAAGCTATAATCCTCGAAACCAAAGTCTTTATACACATCAATAATCATGTTTACA
ACGCGTTTGAATTCTTCTTTAATTTGATCAGGTCGAACAAAGATATGTGAATCATTTAAAG
TCATACCACGAACACGTTGTAATCCTGATACAGCACCACCTTGCTTCATATCTATGCATCGT
TCCTAGCTCAGCGATACGGATAGGTAATTCACGATATGAATGTGGTTTTATTCGCATAAAT
CATCATATGATGTGGACAGTTCATTGGACGTAATACCATAGATTTCAGTTTCATCTAACTGC
ATTGGTGGGAACATATCTTCTTGATAGTGATCCCAGTGACCAGATGTTTTGTATAAATCAA
CATTAGCAAGTACTGGTGTATAAACGTTGGTCATATCCCATGCTAACTTCTTTATCAACAAT
GTAACGTTCAATTTACGTTCTAATTGTTGCACCGTTAGGTAACCATAATGGCAAACCCAGC
ACCAACTAATTGGCTATTTGTGAATAGTTCTAACTCTTTACCAATTTTACGATGATCACGT
TCTTTACGCTCTTCTAACATTTGTAAATGTGCTTTCAATTCTTTTTTATCAAAGAAAGCAGT
ACCGTATATACGTTGTAACATTTTGTGTTACTATCTCCACGCCAGTATGCACCTGCTGTA
GATAATAGTTTAACTCTTTAATTTAGCTGTTGATGGAACGTGAACTCCACGACATAAAT
CAGTAAAATCACCTTGACTATATAATGTTACATTTTCATCTTCAGGAATCGCGTCGATTAA
TTCTAATTTGTATTCATCATTGCTGAATAACTCTTTCGCTTCATCTCGTGAAACCACTTTTC
GTTTCGATTTTCATATTTTCGTTAACGATTTGTTTCATTGTTTTTTCAATTTGTTCAAAGTCA
TCAGATGAGATGTTTTGGTCAATGTTCGAAGTCATAGTAGAATCCACCTTCTATTACAGGA
CCTACACCAAATTTAACATTACCATATAACCTTTTAAATCGCGTGTGCCATTAAATGTGCAG
TAGAATGACGTAATACCTCTAACGCTTCTTCACTACCTGGTGTCCAAATTTCAATTGATCC
ATCAGTTTCAAGCGGTTTAGTTAAATCTACAAGTTGCCCGTTAAATTTGCCGGCAACAGCT
TTTTTACGTAATCCAGGACTAATTGATTGTGCTATATCTTCAGTAGTAGTACCTTTATCAA
ACGCTTTTTTATTACCATCTGGAATTGAATATTAATTTGTTCCAT
```

## > **tbox09**

Function: noncoding RNA T-box leader element (core genome, constant)

Best match: tbox09\_CC008\_NCTC8325\_CP000253.1[1687854:1688065:r]RC (completely identical)

Position: 038-contig\_319\_RC: 29716 ... 29928; Length: 212 bp

Sequence:

```
ACAAGGGACGAGATCGTCGTGGTACCACCCTAGTTATCTAATACAATTTATGTATTAAT
ATCTCTGCTTAAGATAACGGTCTTGATCCGGGTATTCATTACAAATACCATAAATGAAGT
```



AGTAATCATCTAATTTATTAACCATATTCTCATCAAACAATGGCTTTCTGTGTAATATTGA  
TTAGATCATCTTGTCTTCAATCATTAAACG

### > **dnaI**

Function: protein coding sequence; primosomal protein (core genome, constant)

Best match: dnaI\_CC008\_NCTC8325\_CP000253.1[1688106:1689026:r]RC (completely identical)

Position: 038-contig\_319\_RC: 29968 ... 30889; Length: 921 bp

Sequence:

TCAATTGTTTCTGAAATTTTCTCCTGATAAAAAGTATGGTGTTGACAAAGATTTGACACGT  
TCAATAATACGTGCTGCTTTAGTCTTCTCTTACCATCACGAGTCATCGCTAAATGATGTT  
CCAATTCACTATAGTCAAAATTAGAACTAAAGAATGTTGGTAATTCATGAACCATTCGAT  
AATGTAGCAAAGGTCCAATTACCTCATCTCTACCCATGGAGTCACTTCTTCAGCCCCAAT  
ATCATCAAGCATTAAAATGTTTGCTTCTCTTACGCGATGTAATTTCTTTTCAAAGAACCA  
TCTTTAAAGCCACCTTTTAATGTTCTAATAAATCCGGTAAATAAATAATTGTCGAACGTA  
CCTTCTTAGATTTGAGCTGATTTCGAATTGCACCTAGAATAAAAGATTTACCTGTCCCAA  
TGGACCATAAAGGTAAAGGCCTTTCCTTGTTCCTTACCTAGTTATTGCTGTACAAATATCA  
TCTGCTGCCATAGCTACATCAAGACGGTCTCGATGATTCATATAAATATCTTTCAATTTGG  
CATTAAAGTATCTCGTTGCATATGATGAGATGTAATTAGCTCAGCTTCAAAGCGTTCTTC  
GTCGTACTTGATTTTACATGGGCATTGTAATAGCGTATTTTAATTCGGTTATTATCAACA  
TATAACTCAGGCACATGCCCTTTACGAAATTTGGACAATCAGCAAATTTATGACCGTCA  
TAATGTTTTTGTGATCTTTATACTCTTGTAACACATTTAAGTCTTCATCAATCATAGCATT  
CGTTAATTCAGCTCGATGCGCTTCCAAAAATTGCTTAACATCTGGGTCATTGATTACTTCT  
TTTTTATCTTTTCTATTCTTTTTTCAAAGTCCTGCGACGTGTTAATTATACTTTTAAATTGC  
TTCAT

### > **dnaB**

Function: protein coding sequence; chromosomal replication initiation and membrane attachment  
protein (core genome, variable)

Best match: dnaB\_CC001-ST772\_118\_AJGE0100003.1[31824:33224]RC (completely identical)

Position: 038-contig\_319\_RC: 30888 ... 32289; Length: 1401 bp

Sequence:

TTATTGACTGTCCTCCTCCCATTTTTTAGATAATTTATCTAGAAATGCTTGTGCGATCTTGCT  
CTAATTGTTGATCATCTACGCTATTATCTTTAGCCGAATCTTCTTCACTAGGTTTATCTCTA  
TTTTCTAACCATTTAGGTGTTTTTTCTTTTGAATACGATTACGCTGCCCATAGTATGAACC  
ACGCTTTTGGTAATTTCCGCTAGAACCCTCATTTTTAGATTGATTAACCTTTTTTAGCGTAAT  
TATATGCTTCTTTAGCTGTCTTAATACCTTTTTTCTTCCAATTTGATGCTATTTCCAAAATA  
TACGCTTTAGGAAGTTTCATATCTTCTTTAACATGACAAATTGCAACAAAATATTAATGA  
CGCCAAAAGACATATTTTACGTTCAATTAATTCTTCAACCATTGTCTTTTGCATATAGT  
TGGTCTGATTTAGACCAAGAAGCTAACATATCAATTGGACTCGTTTGTTCGAAGTAACTCA  
AACCATTCACTTTGTGGCTTTGGATTCACTTCTGAAGATTTACCCGTCGAAGATGATG  
TAGCAGGAGATTTACCTGTAATTTAGGCATTTGATTTTCGTGTTCCATTAAGTAATACGA  
GCGTGCTTGTTTACGCATTTCTTCAAAGGATAACTGTTGTCCACTTGTAATTGAATTTAAA  
ATAACATGCTTCATGCCATCTGCTGTTAAACCATATAAAGTCGCGAGTTGTGTAATTTAAA  
CGCTTTGCATCTTTGGTAACAATGTCTTGACTAATAAAATGTTTACCTAACATTTGTCTCA  
ACATTTCAAAGTCAAAGATTCATTTGATAAATCGATACCTTGGTACGGTTCATTAATCG  
GAATATCACTTGTATCGATATCTATTTTTGTAGACGGCACTTTAAAACATCAGTAAATTG  
TCTTGTTACCTGTTTAAATTCCTCAAATCAATTTGTTGATACTCAAAGTATTTCTTCAACT  
CATGAAATCGACGATGCTCGACTTCACTATATAAAAAGATTGACAACATTGGATCATTAA  
AAAATAAATGTGCTGAAGGCGGTTGAATTAATTGGTAAACAAATTGTGTTTCTTGTTTCAT  
CATGTTTGACAAACGCCTTTAACAATCCAATCGCTTCAAGTAAGTCCATTTGTTGTCTAAA  
CTCTAGTAAATTAATTTAAGTTCATTCATAAAAATATAATGAGAAAGAATCAATGTTTC  
ATTATGACTTTCTTTAACGAATTGAGTCATAAAAATGATATAAACCCACTGCTTGCGTTCCA  
ATTAGCGGTGTATACAGTCGATTCAATACCTCTAAATGATTTCGATTTAAATCAAAGTGTT  
GCATAACTTTGAATTGATCCTTTGGTCTTAAGCCGAATTCGAAGGCTTGTGCTCCCAT

### > **nrdR**

Function: protein coding sequence; transcript repressor of nrdD/nrdG operon (core genome, constant)

Best match: nrdR\_CC005\_Mu50-VRSA\_BA000017.4[1795087:1795557:r]RC (completely identical)

Position: 038-contig\_319\_RC: 32289 ... 32760; Length: 471 bp

Sequence:

```
TTAAGCATCACTCCGTTTGTTCGCTTAAAATCCCTTGCATCGATGCTAACAATTGATCA
ACATCTTTAAATTCCTTATAGACTGATGCAAATCTAACATATGAACTTGATCAACATGCA
TTAACAAGTTCATAACGTGTTACCTATATCTCGTGAAGACACTTCCGTATGACCTTCATC
TCGTAATTGCCATTCAACCTTGTTCGTTATGTCTTCAAGTTGTTGATATCTAACTGGTCGTT
TCTCACAAGAACGCACAAGTCCATTAAGTATTTTTTCTCTTGAAAAGTCTCTCTTGTGCC
ATCTTTTTTCACAACTATAAGCTGACTAACTTCGATATGTTCAAATGTAGTGAAACGTGTT
CCACAATTTTCACATTCTCTTCGTCTTTCGAATGGCATTTAATTCATCGGCATGCCTTGAAT
CTACAACCTTAGATTGTGTAGAATTACATTTCTGGGCATTTTCAT
```

### > **gapB**

Function: protein coding sequence; extracellular glyceraldehyde 3-phosphate dehydrogenase/locus 2 (core genome, constant)

Best match: gapB\_CC001-ST772\_118\_AJGE0100003.1[16775:17800]RC (completely identical)

Position: 038-contig\_319\_RC: 32970 ... 33996; Length: 1026 bp

Sequence:

```
TTAACTTGCACCTACAGTTTCTTTTGATGTCAAAGTGCTCCAATTTGCTCAGCAACATCT
ACAACCTATTTGAATAACCCCATTCATTATCATACCAAGCAATAACTTTTACTTTATTCC
CTGACATGACCATTGTTGATTTTGCATCAATAATAGCTGAATTTGGATTAGTATTAATC
AACAGACACTAGTGGTTGATGTTGACTTCTATGATACCTTCTAAACCTGCATTTTCAAAA
GCTTGGTTTACTTCTTCTGCAGTTACTTCTTTTCTAAATCAACAATAAATCAACGAGCG
ATACATTCTTTGTTGGTACACGTAATGCCATGCCGTGTAATTTACCTTCTAATTCTGGTAA
TACTTCTTTTAAAGCTTTCGCCGCACCAGTAGAAGTAGGAATAATGCTTTCATTACATGAG
CGTGCACGTCTTAAATCTTTATGTGGATTATCAATATTTTTTTGGTCATTTGTAATAGCGTG
AACAGTAGTCATTAACCATTAATACTATTCCAACTGATTATTTAAAACCTTTTGCAACTGGA
CCAATGCAATTAGTAGTACATGAAGCATTACTAAAAATGTCAAATGCTTCTATATCTAAT
TGGTTATCATTTACGCCTTTAACTACCATTTGAACATGTCCACCTTTTGAAGGACCAGTTA
ACAATACTTTTTTGGCACCTGCTTTAATATGTGCGATGGCTTTATCACCATGATTAAATTT
ACCAGTTGCATCTATAGCAATATCGATATCTAATTCCTTCCATGGCAAGTTTTTCAGGATTG
CGATCAGCAACCAATTTAATTTTATGATCACCAACTTGCAATCCATTTTCAATCGGTTCAA
CTTTTAGATTATATTTTCCATGTGTTGTATCGTAATTGATTAAATGTGCAATTGTTTCGGGT
GGATAACTAGCATTATCGCTACTACATTTAAATTTTTATTTTGTAAATGCAATACGTAATA
CCATTCTTCCAATTCTACCCATACCATTAATTGCAATATTCGTTGACAT
```

### > **coaE**

Function: protein coding sequence; dephospho-CoA kinase (core genome, variable)

Best match: coaE\_CC001\_MW2-USA400\_BA000033.2[1759590:1760213:r]RC

Position: 038-contig\_319\_RC: 34639 ... 34789; Length: 150 bp

Sequence:

```
TACTTGAGCTAAACCTTTACTCCCCTTTTTAACAGCTTCCCTGGCTGCTTTATCAGCATCTA
CTACTTTAAAACCGAATACGGATAAGAGTTCTGATACTGTTGATTTTCCTGAGGCGATTCC
ACCTGTTAGACCAATAACTTTCTGGCAT
```

### > **mutM**

Function: protein coding sequence; DNA glycosylase (core genome, constant)

Best match: mutM\_CC001\_MW2-USA400\_BA000033.2[1760229:1761101:r]RC

Position: 038-contig\_319\_RC: 34804 ... 35677; Length: 873 bp

Sequence:

```
TTATTTTTGACATACTGGACAATAATGACTATTTCTTGTTCGCGATGATTTTTGTTTCAATTT
GACTTCCACACACTTTGCATACCGGCTGCTTATATACATTAAGATGCAATTGCATCTCACC
AGTTTTTCCATCAGCATGACGATAATCTGAAATACTTGTACCGCCATATTTAATACCTTCT
```

TCTAGTACTTCTCTAACATAATAAAAAACCATTTCTTGTGTTGGTGTGTTAAGTCTTTTAC  
TTTTTTATCTGGTAAAACACCTGCACGAAACAACGCTTCACATGCGTAAATATTTCCACAA  
CCTGCGATTACTTTATGATCCAAAATCACTTGTGTTGATTGGTTTATTCTTATTAGACTGTTG  
ATGAATTCGATTTAAATAATACATCAATGCTTCATTTGAAAAAGGTTTCAGGCGCTATTTCT  
AAAAATGAAGGATAAGATGCTACAGACGCAACATTTCTAATTTCTCCAAAACGACGTATA  
TCTGAATAAATTAACTTTTTGTCAATTTGACAACTCAAAAATAACATGCCAATGCTTACGAT  
AATTAGGTATCATAATATCTTCAAGTTCATCTACAATGAAAAAACCCCGCCATACCTA  
AATGACTAATTAATGTACGTTGTTCTCGTTTATTATCTAGCTGAAAAACGATATATTTACT  
TCTTCGTTCTACATTAGTAATGGTATAGCCTTCGATAAAGTTTTAAAGTATCTAATTCA  
ATTCCTTTTATAATTGTTTCCTTGCCTTGAGCTTTACCTTCGATTACTTTATCCGAAAATTT  
AACGTGTTCAATTTTTTGATTTATAACGTAGGGTTCAATTCCTCTTTTTACATGTTCTACTT  
CTGGTAATTCGGGCAT

> **polA**

Function: protein coding sequence; DNA polymerase I (core genome, variable)

Best match: polA\_CC009\_21334\_AGTW01000036.1[30951:33581:r]RC (completely identical)

Position: 038-contig\_319\_RC: 35692 ... 38323; Length: 2631 bp

Sequence:

TTATTTTGCATCATAACCAAGTTGCACCATAACTTGAGTCTACTTTTAATGGAACATCTAAT  
TGCAATGCATTTTCCATTATTTCTTCTACAAATTCACTAAATGAATCTACTTCTGACTTAG  
GTACTTCAAAAATTAATTCATCGTGTACTTGTAATAATAGTTTAGCTTGATATGTTGTCTC  
TTTCATTTTTTTGTGCAAATTTAACCATTGCCAGTTAATGATATCTGCAGCACTGCCTTGTA  
TTGGCGTATTCATAGCAGTACGTTTCAGCAAAGCCGCGTAAATTAAGTTACGACTCGTAA  
TATCAGGAATATAGCGTCGACGATGTAGCAATGTTTCCACATAACCTAAAGCTTTGGCAT  
CTTTTACAATATCAGACATATATTGTTTTACACCTGGGAAACTAGCTAAATAATCATCAAT  
GAATGCTTTTTGCTTTTTTACGAGTAATACCTAAACTTTGACTTAAACCATAATCACTTATC  
CCATAACAATTCCAAAGTTAACCGCTTTTGCTTGACGACGCATTAAACTATCGACTTGAT  
CAGCTTCTACACCAAATACTTTCATAGCAGTTGCTGTATGAATATCATCGCCGTTGATAAA  
TGCTTCTTTCATACTCTCATCTTGTGTAATGTGTGCTAATACACGCAATTCAATTTGAGAA  
TAATCTGCTGATAATATAACGCTATCTTTTGAAGTTGGTTTAAAGGCTTTTCTTATTTTACG  
CCCTTCTTCAAGTCTAACCAGGAATATTTTGTAAATTAGGATCTACACTTGATAAACGTCCA  
GTTTGCAGTAAAGTTTGGTTAAAACGTGTATGGATACGTTGATCATCACTAATTACCTTTT  
GCAATCCTTCAACATAAGTAGACTGTAAGTTAGATAAATTGACGATATTCTAAAATATAAT  
CAATGATAGGATGTTACCTTGCAATTGCTCTAAGACATCTACAGCAGTAGAATATCCTG  
TTTTCGTCTTTTTAATAACAGGTAATTGTAATGTCTCAAACAATACAACACCTAATTGCTT  
AGGAGAATTTATATTAATAATCTTACCAGCTGCATCATGGATATTTTGAATCAAGACGTC  
TAATTTTTCTTGAATTTCTTTTTCCATTTCTTCTAAATCATGAACATCTGTAATATAACAA  
TTTCTTCCATTTCACTTAAAATCTTAGCTAGCGGTAGCTCTAAATCAGCTAAGAGTTCTAC  
CTGATTGTATTCTTCTAATTGTTTATCCATATTTGGTTTCGCAAAGTAAATTGCATCAGTA  
ATAGAAGCAACATATGGATTTAAAACATCATCTTTCAGGTACCTTAAATTTCTTACCTTTTC  
CATATATACTCACATCGTCTTTCACAAAACCTTTGACCGTACAATGAAACAACCTGATTGAA  
CATCACTAATCGTACGAGATGGATCAATTATATAACTGGCCAACATAATATCGAAAGAAA  
TATTTTGAATATCAATTCCCAATCTATGTGATGCTACATATGTTTTTTTAGCATCATATACG  
ACTTTTTTCGTATTCGGATTTTCTAACCATGAAACTAGTTTCGGCATAATTATTTATGTCATC  
CGCATTAAATTACAATATGTTTCTCACCTGTAAATAAAGAGAATTTCAAAAATATTATTTTCG  
AAATAGTTACCACCGTCTAATTCGAAATGGATGGCCGCTTCTTTCAATAAAGTAAAATCA  
ATATTATCAAAGACGTTTCAATTTCAAATGTCTTTTCTATTGCATCTTCAACGCTTGCTG  
ATTGATCAATGTCAGCCAACAATTGTTTGAATTCTAACTTCTTAAACAATTTCGATTTTTTC  
TTGTTGTTTCATCTTGATGAGTCATTAACGTATCTTCAAGTTTTACTTCAATCGGACTATCTA  
CATTAATCGTTGCTAATTCTTTACTCATTAAATGCATCTTCTTTGCTATTTTGAAGTTTTTCTT  
TTAACTTTTTACCTGAAATTTTCATCTAAATGTTTCATAGACACCTTCTACTGTGTCAAATTG  
GTTTAGCAATTTTATTGCTGTTTTCTCTCCAACACCTGCAACACCTGGTATATTATCAGAA  
GTATCTCCCATTAATCCTTTTCATATCAATAATTTGATTAGGTGTTAACCCGTTGTATTTTTC  
CGCAATAAAGTCAGGTGTATAATGATCAACATCAGTAACACCTTTTTTAGTGTAATAAAT  
GGTTACATTATCCGTTGCAAGTTGTGTTAAATCTCGGTCTCCCGTAATAATAATTGTCTGA  
AAGCCCGCTTTATCTGCTTCTTTACTTAAAGTTCCGATAATATCATCTGCCTCATAGTTATC

TAATTCATAACGTTTAATATGATAAGCATCTAATAATTGGCGAATATAAGGAAATTGCTC  
ACTTAGTTCAGGCGGCGTTTTCTGGCGTCCACCTTTATATTCATATATTTTTCATGTCTGA  
AAGTCGTTTTACCTGCATCAAACGCTACTAAAAAATGATTTGGCTTTTCTTCTTTAAAAT  
CTTCTCTAGTAACATTGCAAAACCATATACTGCATTGGTATGAATGCCTGCTTTGTTTGGAT  
AACAAAGGTAATGCATAAAAAGCTCTAAAACCTTAAGCTATTACCATCGATTAATACTAAT  
TTATTCAC

### > **Q2YTE9**

Function: protein coding sequence; putative membrane protein (core genome, variable)

Best match: Q2YTE9\_CC001\_MSSA476\_BX571857.1[1743693:1745180:r]RC

Position: 038-contig\_319\_RC: 38616 ... 40104; Length: 1488 bp

Sequence:

TTATGAATCGTCTGAACCAAATGGAATATATTTAACTTTGGTCATTTTCGGTAATTCTTCA  
TAATTATTAACCCTCTTGGTAATTTTTATTGATTGGTGACGGATGATGCATATAATGTT  
CAAACGGCAATGATTCCACTGTATAAACCTCTTGTCTGGATGATCTTTAATTTGTTGTTT  
TAATAACTGAACTCTTTTTTTCATGTTTATAATGAACATAAATAAATGCACTAAGATATATC  
ACAGCTAAAAGTGTGATGCACCTTTAATAAAAATTAACATTGATTGACTTATATTTCCGA  
AATTCTTTAATAAAAATAATTAATAATGATTACATGTATCGTATAACAATCAAAAAATTA  
CCTGGTCTATTGGAGTAACAATGACTAGTGTGACGCGCCGAAACACATATTGCAATAAGT  
AAGGAATATAAAGTGATTTGTGTTTTACGATCATTAAATAGACAAATAAATACCTACAAAT  
ATCGAAAACGCAAAGTAATCACATACAATTACGTTACAAAACCAACCAATCCAATATCT  
GTATTTTTATTTAATAAAAAGTATTGTAATAAATAGTAAATAATAAAGCGGTAAAGTGATA  
AATCCTATCATAATGATACGACGCTTTAATATTGTTAAATGTACATACCGATCACTTCTAA  
GCAGTAGATAAATAATAAGCGCTGCAATCATACTTAAAATTATAATCTGACTGAAAATGA  
CACCATATGGAAGTGACGTTGATATCATTCTGCAAATTTTGAAAAGATACCTTGATTATT  
TGAAACTTGTGATATTCTGATCCTTCAAATAAAAATTTTGCGATAATTTGGATTGGAAAAC  
ATAATGATTGTACCTATAGTAGCAATCATAAATGAAAACAATAATTTATAATTAAGTGTT  
CGATTTGCAGTAAATTCATATAGAAAAGCTAAAATTTAAAATGATACAGTGGAAATAATGTC  
ACATTTCCATAAATAATTGACCGAAGAAGCATAAAACATAGAATAGTACAGTAACACTT  
ACCGGCTGCTTTTCTTTATATATAATTGCATTAATAACAATAATAAATAAAGAGTGAA  
ATTAGTGTTGATGTCGCATAATTATAAAAATCCTGCAAACCAGCCATATGTATCTGCATAA  
ATAGCACTTGGTAAAATTAACATTAAGAAAATGCTAACAAATAATAGCTTGTCCACGCT  
TTACAACGTGTAATGTGCATAATCATCAAATGATGCCATACTAATGAGACCATATGAA  
AGCCAACGTAACCAGCTTACATGTACAGCTATAATTTCAAAGATATTTCCGATATAGCGA  
CCATTAAGTGATGCAAATCCTACTTTTAAAATATCAGTATTATAATTGCTAAACCATTGTA  
AATCATCGTGCATGAGTGGTAGTAAGATACCCATAAAAGTATAAAAACAATAATATCGCA  
ATTAATATCAAAGTTGTCTTGTGTAATTGAATTGTTTTAC

### > **phoR**

Function: protein coding sequence; multi-sensor signal transduction histidine kinase precursor (core genome, constant)

Best match: phoR\_CC001\_MSSA476\_BX571857.1[1745679:1747340:r]RC

Position: 038-contig\_319\_RC: 40602 ... 42264; Length: 1662 bp

Sequence:

TTATTCTTTATAATCTTTTAGAATAACTTTGAACGTTGAGCCTTTGCCAACTTGACTATTCA  
CTTCAATATTGCCTTGGTGGGCTCTACTATATGCTTTGTAATTGATAATCCAAGACCTGT  
CCCACCAGAATCTCTACTTTCGTGCTTTATCTACTCTATAAAAATCTTTCAAAAATACGTTGT  
TGGTCTTCTAATTTAATACCTATACCAAAAATCTTGTACTTCGAAAATGACACGAAAGTCAT  
CTCGATACACACGAACGTTAATATCTCCATCTTCATAAGAATAGTTAATTGCATTCGTTAA  
CAAATTCGTGATAACTTGAGCAATTTTACTTTCTTGTGCTTTAACAATGACATCTTTTTCA  
ATATCAGTATGAATGGAAATATTTTTTTGATTGGCTTGAGTCATCATATTATCAATAATAC  
GCCGCGTTAAATCTGATAAATTCATATAGTCTGTATCTAACTCTGTATGTTGCTCAATATG  
CGATAAATCTAACAAATCTGTTACTAAAGATTCTATTCGATTTGATTCTTTTAAAATTATG  
TTTAAAACATGTCTAATGATTCCGCATCATTTTTTGCACCATCAATAAGCGTTTCAGCAA  
ATCCCTTAATTGAAGTAATAGGTGTTTTTAATTCATGTGAAACATTTGCTACAAACTCACG

TCTTAGATTTTCAAGTTGTTTCAGATTTGTTATGTCATGCATCACAACCTAAAATCCCTTGC  
AAACTTTTTTGAGACCTAGTTAAAATCGGAACGCATGAAATATCAAAGTACTTGGCATGG  
ACTTGGTTTATTGCAACTTCCAATTGTTTATAAATAGGTTTTTCAACTTTAAAACCTTTCTAA  
AATTAATTGCTCAATTTTCAAGTATTAACATAGCCGTGATAGCCTACTTGTTCATATTATGC  
GAGATGTTGAACTGTTTATAAATACGCTTTATTTGCAACAACGATTTTTCCATTTTCGATCTA  
TCATTAATAATAGCACTTGGAAATATTTTCAATCGTTGTTTTTAAACGGTTGGATTGAATTTT  
TTGCTCATTATTAAGCTTTTGAAGGCGTCGTGCTAAATCATTGGTAGACACAAAAAGCGC  
TTTAGTTTCTACAACATTACTTTCAGGTACACGTATGTGATAATAACCATTTGCCAACAAAT  
TGTGTTGCATAAGTAACTTCTTGAATGGGACGGATTAATGTACGCTTAAAACCTACGGCTT  
GCAAATACAGACAAAGGAGTACAACCTAAACATGTCAAATAAGATATTTCCACAACGT  
CCAATGCATTTCTGTAATATCGTTATTGTAACCTTTAATCCATACATGATAACCGTTAACC  
TTCTTATTAATAAATAAAAACGTCCCTTTTTTGAATATAGCTATCACTATTTGGGATAGCTT  
TCAGTTTGGCACTACTAAACACCTTTTTATCATGTTTAGTTATCAATAAATCTATATTTTGC  
TGTTTTACAATTTCTTAACTTTATCAATCTCATTATCTTGGACTAAATAAATATATGATCT  
TGCATCTGTTGCTAGAGCTTGTTCGTGTTTTTCTGATAAAAACATATGTGATGGAAGCGTGA  
ATAATAATGCCTAATGTAACAAAACCTGATAATTAATACTGCTTATCAATAACATTAAG  
CGGTGGTGAAACTTCAT

### > **phoP**

Function: protein coding sequence; alkaline phosphatase synthesis transcript regulatory protein (core genome, constant)

Best match: phoP\_CC008\_COL\_CP000046.1[1774360:1775064:r]RC (completely identical)

Position: 038-contig\_319\_RC: 42263 ... 42968; Length: 705 bp

Sequence:

TCATTGTTCTTTAGGTCTTTCCAATTTATAGCCTAAGCCACGCACAGTTTTAATAAGTTGT  
GGCTTCTTAGGATTATCTTCTAATTTATCTCTTAAATGACTGATATGTACATCAACAATTC  
TTGAGTCTCCTGCAAATTCATAATCCATACCGTATTTAACATATGCTCTCTCGTAATGAC  
TCTGCCTTGTCTTTCTATCAAATAAAGCAAGAGTTCAAATTTCTTTCGGTGTAGCTCCAAT  
AACTCATTATGCTTATATACTTCAAATAAATCGGGTCTAATACGTATCGATCCGATGGTAA  
TATCATCGTCAATCTCTTCTACTTCTTTTACAATGAGAACGTCTTAAAATGGCTTTCAC  
ACGGGCAACAACCTTCTTAGGTGAAAAAGGCTTAGTCATATAGTCATCGGCACCTAATTC  
TAAACCTAATACCCGATCAAATTCATATTTTTCGCCGTTAACATTAATATAGGGACTAAA  
TTTTTATTTGTTCTTACAGTCTTACATACGTCAATGCCATCTTTTTTAGGTAGCATAACATC  
TAAAATAATTAATCTGGCTGTTCACTTTCTACCTTTTCTAAAGCCTCATCACCATCAAAT  
GCGACAACAACCTTATAACCAGCTGTTTCTAAGTTATATTTAAGTAATGTTACGATTGAAT  
GTTTCGTCATCTACTACCAACACTTTTTGCGACAT

### > **citC**

Function: protein coding sequence; Isocitrate dehydrogenase NADP (core genome, variable)

Best match: citC\_CC080\_11819-97\_CP003194.1[1798190:1799458:r]RC (completely identical)

Position: 038-contig\_319\_RC: 43357 ... 44626; Length: 1269 bp

Sequence:

TTATTTTAAATTTTTAATCAATTCATCTGCAAATGCTGATGTAGAACTTCTTCAGCACCA  
TCCATTAAACGGGCAAAGTCATAAGTAACAACTTTTGAAGCAATTGTATCTTCAATTGAA  
TCTGTAATCTTATCTGCCGCTTCTTGCCATCCTAAATGTTCTAACATTAATACAGAACTTA  
AAATTACTGAAGATGGATTCACTTTATTTAAACCTGCATATTTTGGAGCTGTACCATGTGT  
TGCTTCAAAAATAGCATGACCTGTTTCATAATTAATGTTTGCACCTGGCGCAATACCAATA  
CCACCAACTTGTGCAGCTAAAGCATCTGAAATATAGTCACCATTCAAGTTCATAGTTGCT  
ACAACATCATGCTCAGCTGGACGAGTTAAAATTTGTTGTAAGAAAATGTCAGCAATAGAA  
TCTTTAATGATAATCTTGCCTTCTTTTTTCAAGCTTTTTTCTTGAGCAGCATTAGCAGCATCTCT  
GCCTTCTTTTTCAACAATTTCTGCATATTGTTGCCAAGTGAATACTTGATCACCAAATTCA  
GATAATGCTAAATCGTAACCCCACTGCTTAAATGAGCCTTCTGTAAATTTTATAAATATTAC  
CTTTATGAACTAAAGTAACTGATTTACGGTTATTATCGATAGCATATTGTATAGCTGCTCT  
AACTAATCGCTCAGTTCCTTCTTTAGAACTGGTTTAAATACCAATACCTGAAGTTTCTGGG  
AATCGAATGTTTGTGCGACCCATTTCTGTTTTGTAAGAAGTCAATTACCTTTTTAACTTCTGT

TGTACCTTCTTTAAATTCAATACCAGCATAAATGTCTTCAGTATTTTCACGGAAAATAACC  
ATATCAACATCTTGTGGACGTTTAAACAGGTGATGGTACTCCTTTAAACCAACGTACCGGT  
CTTAAACAAGTAAATAAATCTAATTCCTGGCGTAAAGCCACATTTAATGATCTAATACCA  
CCACCAATTGGTGTGTAAAGGTCCTTTAACAGCAATTAATATTCTTTAATTGTATCAA  
GTGTTTCTTGAGGTAACCATTACCAGTTGTATCAAATGCTTTTTGGCCAGCTAGCACTTC  
TTCCATTCAATGCGTTTTTCGCCATTATAGGCTTTCTCAACAGCAGCATCTATAACTCGG  
CTTGCTGCCTTCAAATATCCGGTCCAATTCCATCACCGATAATAAATGGGATAATTGGTT  
CATTAGGTACGTTTAATCCTTCAGTTCCTTGAGTAATTTTTCTGCAGTCAT

### > **citZ**

Function: protein coding sequence; 2-methylcitrate synthase (core genome, constant)

Best match: citZ\_CC001\_MW2-USA400\_BA000033.2[1770098:1771219:r]RC (completely identical)

Position: 038-contig\_319\_RC: 44674 ... 45796; Length: 1122 bp

Sequence:

TTATTTTCTTTCTTCAAGCGGGATATACTTACGATTCGTTTCGCCAATATATTTTCGCTCTAG  
GACGCATAATTCTATTATCTTTATATTGTTCTAAAATATGAGCAATCCATCCTGCAGAACG  
ACTTACAGCAAAGATTGGCGTGAATAAGTCATGAGGTATTTCCATACAGTGATAAACACT  
CGCACTATAAAAATCAACATTAGGAATTAATCCTTTTTCTTCTGCCATACGTTTTTCCATTT  
TCACTGACATTTCAAATAATTCTTCACGACCAGCGTCTTTCGTAATTTGACGGCTCATTTC  
TCTTAAATATTTTCGCTCTAGGATCACCATCTTTATATACACGATGACCGAAGCCCATTACT  
TTATCTTTATTAGCAAATTTTTCATCTAAGTAAGCATCAACATTTTCAATTGACCCAATCT  
CAGATAACATCGTCATAACTTGTTCGTTTGCACCACCATGTAATGGCCCTTTCAGAGAACC  
TACAGCTGCTACAATACCTGAGTACATATCTGACAATGATGATACCGCACAAACGTGCTGT  
AAATGCAGATGCGTTCAACTCATGATCAGCGTGTAATAAAGTGCTTTATTGAAGGCTTC  
TACTTCTATATCTGTTGGTAATCCCCACGTAACATATATAGGAAGTTTGCCGCATAACTT  
AAGTCAGGATTAGGCTTAAGTGGTTCTTTATCTTGTCTTACTCGAGCAAACGCTGTAACTA  
ATGATGCTACTTTAGCCTGTATACGCATTGCTCTTTCATAACGATTTTCATCTGATTCATTT  
TCAGCATCAGGATCGAAATGTGCAATATATGATAATGACGTACGTAATGCTGTCAATTGGA  
TGCACGTGATCTGTAACATACTCCTCAAATGTGTATACACACGAGGATTTAATGTCATG  
TATTGATTTAATTTCCCTTTTAGATGAGCAAGCTCTTCTTCGTTTGGCAATCTATAGTTCCA  
TAATAGGAAAATAACTTCTTCAAATTGCGCATTTCAGCTAGATCATCAATATCATAGCC  
GGCATAAGTCAATTGACTTTCAATAATTGAACTTATTTTAGTCTCCGCTGCGATAACCCCT  
TCTAAACCTCTTTGTAATTCTGCCAT

### > **aapA**

Function: protein coding sequence; amino acid permease-associated region (core genome, variable)

Best match: aapA\_CC001\_MW2-USA400\_BA000033.2[1771567:1772928] (completely identical)

Position: 038-contig\_319\_RC: 46143 ... 47505; Length: 1362 bp

Sequence:

ATGGCTGAAAATTACAAAGGGAAGTGAAGCAATCGCCACATACAATTAATTGCAATTGG  
CGGTGCAATTGGTACAGGCTTATTCTTAGGTGCTGGTCAAACGATTGCATTAACCGGCC  
TTCAATTCTATTAACATACATCATTATAGGATTTATGTTATTTATGTTTATGCGAGGTTTAG  
GAGAAATCATTATACAGAATACTGAATTTAAATCTTTCGCAGATGTAACCAATACATATA  
TTGGGCCTTTTGCAGGATTTGTTACCGGATGGACATACTGGTTCTGTTGGATTATTACAGG  
TATGGCTGAAGTAACGGCTGTGGCAAATATGTTAGCTTTTGGTTCCAGAAATTCCAAA  
CTGGATAAGTGCCTATTTTGTGTACTGTTATTAATGTCATTCAACCTACTTAGCGCAAGA  
CTTTTCGGAGAATTAGAATTTTGGTTCTCTATCATTAAAATAGCGACAATTATTGGTTTAA  
TAGTAGTTGGTTTCGTCATGATTCTATTTGCATTTAAAACCTCAATTCGGGCATGCCAGTTT  
CACAAATTTATATGAACACGGCATATTCGCTAAAGGTGCTTCTGGATTCTTTATGTCTTTC  
CAAATGGCACTATTCTCATTGTAGGAATTGAAATGATTGGTGTACAGCTGGGGAAACA  
AAAGATCCAGTTAAAACAATTCCAAAAGCAATTAACAGTGTACCCATTAGAATTTTAATA  
TTTTACGTTGGGGCGTTAGCGGTTATCATGTCTATTATCCCTTGGCAGCAAGTTGATCCTG  
ATAACAGTCCATTCGTAAAATTTTCGCATTGATCGGTATTCCGTTTGTCTGCGGGCTTGAT  
TAATTTTGTAGTATTAACCGCTGCTGCTTCATCATGTAATAGTGGTATATTCTCAAATAGC  
CGTATGCTTTTCGGTTTATCAAGTCAACAACAAGCACCTCCGAACCTTTCTAAGACGAATA

AATATGGCGTTCCACATGTTGCAATCTTTGCTTCATCAGCATTATTACTTGTGGCAGCATT  
ACTAAACTATATTTTCCCAGATGCGACAAAAGTATTTACGTATGTGACTACCATCTCTACA  
GTGTTATTTTTAGTTGTATGGGGTCTGATTATCATTGCATATATCAATTATAGTCGTAAAA  
ACCCAGATCTACATAAAAATGCTACGTACAACTATTAGGTGGTAAATATATGGGCTACT  
TAATATTTGTATTCTTCATTTTTGTGTTTCGGGTTATTATTTATTAATGTTGATACAAGACGT  
GCAATTTATTTTATTCCGATTTGGTTTATACTTTTAGCATTTATGTACTTAAGATATAAACG  
TATCGCTGCTAAATCAAATAAATAA

### > **pfkA**

Function: protein coding sequence; 6-phosphofructokinase (core genome, constant)

Best match: pfkA\_CC001\_MW2-USA400\_BA000033.2[1775055:1776023:r]RC (completely identical)

Position: 038-contig\_319\_RC: 49631 ... 50600; Length: 969 bp

Sequence:

TTATATAGATAACTTGTTAGCAAGTTCATATAGACTATAATCAAATTTATGATCTTTACCA  
TCAAAAATTTTCATCAAAGATGTTGCTACAATTTTATTGTTCTTAATTCCAACACCCTTAG  
CTGTTTCACCTTGCATTAATAAGTCTACCGCATATCCACCTAAACGTGATGCTAAAACCTCT  
ATCCGCACCTGTTGGGCTACCACCACGTTGAACGTGACCTAACACAGACACTCTATTATC  
AACATTGATGTATTGTGATAATTCTTTTTGACAATCTTGCGCAGTCATACAACCTTCTGCT  
ACAAGAACGATTGAGTGTCTTACCACGTTTAATACCTTGTTCAATTTTATCAGCTATTT  
CTTTAATATCTGTTTTCACTTCTGGAACTACAATTGTCTCAGCACCAACTGATAATCCAGC  
CCATAATGCTAGATCTCCACAATCACGGCCCATTGCTTCAATGATAAATGTTTCGTGCGTG  
ACTTGACGCAGTGTCTCTAATTTTGTGCGACTAAGCCAATAATCGTATTTAATGCTGTGTCA  
AATCCAATTGTAATAATCAGTACCATTGATATCATTGTCAATCGTACCAGGAATACCGATA  
GTTTGAATTTCTTTCATTCTCCTACTGATGCGTTGTGCACCGCGATAACTACCGTCACCAC  
CAATAACTACAAGGCCCTCAATCCCTCTTTTACGTAAGTTTTTCGATTGCAACTTTACGTAC  
TTCTTGCTCCTTAAACTCTGGACATCTTGCTGAATACAAGAATGTACCTCCACGCTGAATC  
GTATCCCCAACTGATCCTAATTCAAGTTTATGAATATCATCATTTAACAATCCTTGGTAAC  
CATGATACACACCATAAACTTCAATTTCAATTGTAAATTGCTGTACGAACAACCTGCTCTTAC  
GGCAGCATTCAATCCAGGTGAATCTCCACCAGTAAACTGCAATTTTCTTCAT

### > **pykA**

Function: protein coding sequence; pyruvate kinase (core genome, constant)

Best match: pykA\_CC001\_MW2-USA400\_BA000033.2[1773276:1775033:r]RC

Position: 038-contig\_319\_RC: 47852 ... 49610; Length: 1758 bp

Sequence:

TTATAGTACGTTTGCATATCCTTCAAAGATTTTACCTTGAGCAGCATCAATCGTAACTAAC  
ATGTTATTGCTTATGTTTTAACAGCTTTTTCTACACCTACAACCTGTTGGAATACCTTTTTTC  
TAAACCAACAATTGCACCTGGTGATGTAATACCATTTTCTTCTGTAATTAAGCCTAAAGCT  
TTTTCTACATAAGGTACAAACGTTTCATCGATTGAGTTAGTAACGATAACTTTGTGAGATA  
AATCTTTACCTTCTAAATCTTTAACAGTTTCAGCAACTAACGTAGTACCAACAACCTGATCC  
ACGTCCAATACCTTGACCATTAGCAATTCGTCACCAACTAGGTGGATTTTCATCATATTA  
GTAGTTCCAGTTTCAACAGCTGTTGCAACTGCATTGTTTAAACAATGCATCTGTACTCTTAC  
GTCCTTTTTTAACTACAGGTTGAACTCCCCAAACAATTGAACATTGACGTGCAGTTTCTTC  
ACTTGGAGTCACCGCAATAATGTCTGAATGTGGACGATATTTAGAGATAGTACGTGCCGT  
TGAACCACTTTCAGTAGCAGCTACAATTGCTTTAACATTTAAGTTTAAAGCTGTATGTGCA  
ACCGAAATACCGATAGCATTCACTAATGAAGTTTCAACTAATTTAGTACGATCTGACAAT  
AACTTTTTGTAATCTTGGGCTGCTTCAGCTGATACAGCAATATTTCTCATTGTTTTAACAG  
CTTCTTCAGGATATAAACCAGCAGCAGTTTACCAGATAACATTACTGCATCTGTACCATC  
ATAGATTGCGTTGGCAACGTCCTAGCTTCTGCACGTGTAGCACGTGGGTTACGTTGCAT  
AGAATCTAACATTTGTGTAGCTGTAATAACTGGTTTACCTAATTTGTTACATTGTCTGATT  
AAATCTTTTTGAACCATTGGTACTTTTTTCAGGTGGAATTTCAACACCCATGTCACCACGTG  
CAACCATTAAACCATCAGACACTTCAAGAATTTCCGCAATATTATCAATACCTTCTTGATT  
TTCAATTTTAGGGAATACTGAAATGTTAGCTTTTTGTTCTTCTAAAATTTACGAATTTCTA

AAACATCACTAGGACGACGTACGAACTTGCTGCAATGAAGTCAACATTTTCTTTAATAC  
CGAAACGGATATCTTCAGCATCTTTTTCTGTAATACCAGGTAACTTACTCTTACGCCAGG  
TAAGTTAACACCTTTTTTGTTTTTAAGCTCACCAGAGTTTAAAATATCACATTTAACTTCTT  
TTTTAGCATGGTCAATATCTTTAACTTGTAATTCAATTAAGCCATCATCAAGTAAAATGTA  
TGAACCTACTTGAACATCGTTAATTAAGTTTTTCATATGTTACTGAGAACTTTTCAGGCGTT  
CCTTCAACTTCATTCATGCTAACAATAACTTCGTTACCACGTTCAAGTTCAATGATACCGT  
CTTTCATATTATGCGTACGAATTTCTGGACCTTTTGTATCTAATAAAAATTGCTACAATTTTG  
TCTAATCTTTTAGCTACTTTACGAATTGTATCAATTCTACCTTTATGCTCTTCATGACTACC  
ATGTGAAAAGTTTAAATCGTGCAACGTTTCATACCAGCATTGATTAATTTCTCAATCATTCT  
TCTGATTCTGAAGCTGGTCCAATTGTACATAACAATTTTAGTTTTTCTCAT

> **accA**

Function: protein coding sequence; acetyl-coenzyme A carboxylase carboxyl transferase subunit alpha (core genome, constant)

Best match: accA\_CC005\_Mu50-VRSA\_BA000017.4[1815186:1816130:r]RC

Position: 039-contig\_321: 160 ... 1105; Length: 945 bp

Sequence:

TTATTCTATATAAGAACCGATATTTCTGAATTTTTCAAAGCGATCATTAGCAATTTTCATCA  
CGTGATAATGACTCAAGTGAATCTAACTGTGCAACAAACGCTGATTTAATAGCTAAAGCT  
TGCTGTTCAACATCTTTATGTGCACCGCCAAGTGGTTCAGAAATGACATCATCTATAATAC  
CTAATTGCTTAATATCATGGGCAGTAATTTTCATTGTTTCAGCTGCAATTTTAGCCAAATT  
ACTGTCTTTCCATAATAATGCCGCTGCACCTTCAGGAGATATAACAGAGTAAGTACTATT  
CTCTAACATCAATACTTTATTGGCAATACCAATACCTAGAGCACCTCCACTGCCACCTTCA  
CCAATGACAATCGCAATAACTGGTACTTTTAGTGAAGCCATCTCAATCAAATTTGTTGCG  
ATAGATTCACTTTGTCCACGTTCTTCCGCAGCTTTACCAGGATATGCACCTTTTGTATCTAT  
AAATGTAAAGATAGGACGATTGAATTTTTCAGCTTGTTTCATTAAACGTAATGCTTTTCGA  
TAACCTTCTGGATGCGCCATACCAAAAATTTTCGATAAATATTATCTTTTGTATCTTTTCCAC  
GTTGTTGTCCAATAACTGTAACAGCACGACCATTTAAAAAGCCAATACCACCAATCATTG  
CTGGATCATCTCTAAAATTACGATCACCATGTAGTTCATAAACGAATCAAAGATATATG  
GAATATAATCTAGGGTCGTAGGTCTTTCTTGCAAACGCGCAATTTGCACACGATCCCATG  
GTTTTAGATTTGTATATATTTTTTTAGTTTCTCGTTCCAATGACGCTTCAAGCATGTCAATT  
TCTTCTTGTAATCCACATCATTTTTATCTTGAGATTCTTTTAAAGATTCAATTTTATTTCG  
AATTTCAAAAAGTGTTTTTTCAAATCTAACAT

> **accD**

Function: protein coding sequence; acetyl-CoA carboxylase/carboxyl transferase/beta subunit (core genome, constant)

Best match: accD\_CC005\_Mu50-VRSA\_BA000017.4[1816130:1816987:r]RC (completely identical)

Position: 039-contig\_321: 1104 ... 1962; Length: 858 bp

Sequence:

TTATTTAGTCACCTCTTGATGGATTTTTAGAAATTCAGACAATGTTTGACGCATATCATT  
CGATGTACAACCTTTATCCAATTGTCCATGCTCTAATAAAAATTCTGCAGTTTGGAAATCAT  
CTGGCAATTTTCGTTTATTGTCTGTTCAATAACTCGACGACCTGCAAAACCTATCAACGC  
TTTTGGCTCACTTAAATTTATATCACCAACTGATGCAAACTTGCAGATACACCACCAGTA  
GTTGGATGTGTTAAATATGATATATATAATAGTCCAGCGTCAGAATGACGTTTTAAAGAT  
ACACTGGTTTTACCCATTTGCATCAAGGAAATAATACCTTCTTGCATACGTGCACCACCAC  
TTGCAGAGAAAAGAATAAATGGTAAACGGTTCTCAGTGCAGTAATCAATGATGCGACAT  
ATCTTTTCACCGATAACCGATCCATACTTCCCATTCTAAAACGTGAATCCATGACAGCAA  
CGCCAAATTTTCATACCATCTAGTTGCGCTGTACCAGTCACAACCTGCTTCTTTAAGACCTGT  
CTTTTGTGGTCTTTTCAATTTTTTCTAAATAACTTGGAAAATCTAATGGATTTCGACAGAG  
GTCATTCCCTTATCGAATTCTGTAAATGATCCTTCATCAGAAATTGCTTCTATAAGTTTAT  
ACGCAGTTAAAGCAATATGATGATCACAATTAAGCACACATTTAAATTTTCAGCTAATT  
CTTTTGTGTACATAATTTTCTTACACTTTGGACACTTAGTCATAATACCTGCAGGCACATC  
ATTATTTTAGAGTCTTGTACTGTAAGATATTTCTTTTTCTTTGTTTCGATTAAAAAATCTT  
TAAACAT



> **maeB**

Function: protein coding sequence; malate dehydrogenase (core genome, variable)

Best match: maeB\_CC001\_MW2-USA400\_BA000033.2[1778288:1779517:r]RC (completely identical)

Position: 039-contig\_321: 2156 ... 3386; Length: 1230 bp

Sequence:

```
TTATTGTAATCTGTAAGTTTCATTGTTTTATCATACACATCTTGCGGATCAACTTCAATCC
TAGCTACTCCAGATTCCATTGCCGCTTTAGCAACATTACGAGCAACTGATGGCGCTACAC
GTTTATCAAACGGTCCTGGGATACAGTAGTCTTCATTTAATTCAGAACTATCGATTAATC
AGCAATCGCTTCTACAGCTGCCTTTTTTCATTTCTTCATTTATATGTGTAGCTTCAACCTCTA
ATGCACCTCTAAAAATACCAGGGAAAGCTAATACATTATTAATTTGGTTAGGATAGTCTG
AACGTCCTGTACCAACAACCTCGTGCACCTGCCGCTTTGGCATCATCAGGTATTATTTTCAGG
ATTTGGATTAGCCATTGCAAATATAAATTGGATTATCTGCCATACTCTTAACCATATCTTGT
GACAGCGCATTAGCTACAGAACTCCGATAAATACATCTGCGTCTTTTACGACTTCTTCTA
AAGACCCTTCAATCTTATCTTTATTTGTCCATTTAGCTACAACATCTTTCGTAGGATTCATA
CCATATGAACGTCCTTCAAAAATTGCGCCTCTTGAGTCACACATAACCATATTTCTTACAC
CATACGCGTATAGTAATTTAACAATGGCTATTCCTGCTGCACCAGCACCATTTAGTACAA
CTTTTATTTTAGCAATATCTTTGTTAACAACCTCTCAATGCATTTACCAAACCTGCCATTGTT
ACAATTGCTGTACCATGTTGATCGTCAATGGAATACCGGAATATTAGTTTCTTTTTTCAATC
GTTCTTCAATTTCAAAACAACGTGGTGCCGAAATATCCTCTAAATTAATACCACCATAATT
AGGTTCTAACAACCTTAACTGTTTTAATGATTTCTTCGGTATCAGTTGTATTAAACGCAATA
GGCACCCCATGATACCAGCGAAGCTTTTGAATAATACTGCTTTACCTTCCATTACAGGA
ATACTTGCTTCAGGTCCAATGTTACCTAAACCTAATACCGCTGTTCCATCAGTAATAACTG
CAACTGTATTTCTTTAATTGTGTAATCATATACTTTTCTTTTATCTTCATAAATATCTTTA
CACGGTTCAGCAACGCCAGGTGAGTATGCTAAACTTAATTCCTCTTTATTAGTAACTTTTA
CATTTGGTTAACTTCTAATTTACCTTGATTACGTTTGTGCATTTCCAATGCTTCATCTCTT
AATGACAT
```

> **dnaE**

Function: protein coding sequence; DNA polymerase III subunit alpha (core genome, variable)

Best match: dnaE\_CC007\_TCH959-USA300\_AASB02000248.1[20452:23649:r]RC

Position: 039-contig\_321: 3835 ... 7033; Length: 3198 bp

Sequence:

```
TTATATAAGCCTAATATCACTAGGGTTAAAGGATTGTATAAAAATTATTA AACATACTATCT
TTTTGATTAATATAGCCTATAGTAGTCATTTGTTTAATCGTTTCATCATAAAAGGATAACA
TAACATCATTAGCATTCTCTTTTCGTAGCTTTAATCATCTCTTCAAACATATCTATTTGTGAT
TTATTTCTAATTATAAATTTGTTTGGCAAATGCTAATTTTTGTTCTTCAAAGTGGCTAATGT
TTGAATCTCATTATAAATTAGTTGCCGTTGTTGCTTTCTATGGTCAAATTTCCCGCTAACTA
TAAACAAGTCATTATGTGATAACAACCTCTTCGTACTTTTTAACTGATTAGGGAAAATCA
CACCATCTAAAGTTTCAATGCCATCATTTAATATGACGAATGCCATATTTTGACCATTTTT
AGTTCGAATTTGTTTAACTTTATCAAACCTGTACTAATATAGGTTTATTATTCTGCGCGTTA
CTCAATTTAAATATCGTTAAATATTGTTTGGCAACAACTTTTTATCTACTGGGTGTTGCG
AAACATAAAATCCTAAATATTCTTTTTTCGTACTGACTAATAAGTGCATCAGGCAATTCTTC
TTTATCTTCATACATCTGTTTTGGCGTTAAAATATCAAATAAAAAACCATCTTGTTCAATG
TTTAAATCGCCATCCAACACTTGATCAATAGCTTGCAACAACGTTGAACGTGTTTTACCAA
AAGCATCAAACGCTCCCACTAAAATCAGTGCTTCAAGTAACTTTCTCGTTTTGACTCTCTT
CGGTATACGTCTAGCAAAATCAAAGAAATCTTTATATTTGCCGTTCTGATAACGTTTCATCA
ACAATCACTTTCACACTTTGATAACCAACACCTTTAATTGTACCAATTGATAAATAAATGC
CTTCTTGGGAAGGTTTATAAAACCAATGACTTTTCGTTAATGTTTCGGTGGCAATATAGTGAT
ACCTTGTTTTTTTTGCTTCTTCTATCATTTGAGCAGTTTTCTTCTCACTTCCAATAACATTACT
TAAAATATTTGCGTAAAATAAATTTGGATAATGGACTTTTAAAAGCTCATAATGTATGC
AATTTTAGAATAGCTGACAGCATGTGCTCTAGGAAAACCATAATCAGCAAATTTTCAGAAT
CAAATCAAATATTTGCTTACTAATGTCTTCGTGATAACCATTTTGCTTTGCACCTTCTATA
AAATGTTGACGCTCACTTCAAGAACAGCTCTATTTTTTTTACTCATTGCTCTTCTTAAAAT
```

ATCCGCTTCACCATAACTGAAGTTTGCAAATGTGCTCGCTATTTGCATAATTTGCTCTTGA  
TAAATAATAACACCGTAAGTATTTTTTAATATCGGTTCTAAATGCGGATGTAATATTGA  
ACTTTGCTTGGATCATGTCTTCTTGTAAATGTAAGTTGGAATTTCTTCCATTGGACCTGGTCT  
ATACAAAGAAGTTACAGCCACAATATCTTCAAAGTGTTCCGGCTTTAATTTTTTTAATACA  
CTTCTTACACCGTCAGACTCTAATTGGAATATGCCAGTCGTATCTCCTTGCAGACAACAATT  
CAAACACTTTTTGATCATCGAACGGAATCTTTTCGATATCAATATTAATACCTAAATCTTT  
TTTGACTTGTGTTAAGATTTGATGAATAATCGATAAGTTTCTCAAACCTAGAAAATCTATT  
TTTTAATAACCCAATACGTTCCGGCTTCAGTCATTGTCCATTGCGTTAATAATCCTGTATCCC  
CTTTCGTTAAAGGGGCATATTCATATAATGGATGGTCATTAATAATAATTCCTGCCGCATG  
TGTAGATGTATGTCTTGGTAAACCTTCTAACTTTTTACAAATACTGAACCAGCGTTCATGT  
CGATGGTTTCGATGTACAACTTTTTAAAATCGTCAATTTGATATGCTTCATCAAGTGTAA  
TTCCTAATTTATGTGGGATTAACCTTGAATTTTCAATTAATGTAACCTCATCAAACCCCAT  
AATTCTTCCAACATCTCTAGCAACTGCTCTTGAAGCAGATGACCGAAAGTCACAATTCC  
AGATACATGTAGCTCGCCATATTTTTCTTGGACGTAATGACCCCTTCTCGGCGTGTA  
TCTTCAAAGTCAATATCAATATCAGGCATTGTTACACGTTCTGGGTTTAAAAACGTTCAA  
ATAATAGATTGAATTTAATAGGATCAATCGTTGTAATCCCAATAAATAACTGACCAGTG  
AGCCAGCTGAAGAACCACGACCAGGACCTACCATCACATCATTGTTTTCGCATAATGGA  
TTAAATCACTTACTATTAAGAAATAATCTTCAAACCCATATTAGTAATAACTTTTACTC  
ATATTTCAATCGCTCTAAATAGACGTCATAATTAAGTTCTAATTTTTTCAATTGTGTA  
AAGACACGCCACAAATATTTTTTAGCTGATTCATCATTAGGTGTCTCATATTGAGGAAGT  
AGAGATTGATGATATTTAATTCTGCATCACACTTTTGAAGCTATAACATCAACCTGCGTTA  
AATATTCTTGGTTAATATCTAATTGATTAATTTCTTTTTTCAAGTTAAAAAATGTGCACCAA  
ATCTTCTTGATCATGAATTAAGTCTAATTTTGTATTGTCTCTAATAGCTGCTAATGCAGAA  
ATCGTATCGGCATCTTGAAGTGTGGTAAACAAACATTTTGAATCCAAACATGTTTTCTAC  
CTTGAATCGAAATACTAAGGTGGTCCATATATGTGTCAATTATGGGTTTCAAACACTTGTAT  
AATATCACGATGTTGATCACCGACTTTTTTAAAAATGATAATCATATTGTTAGAAAATCGT  
TTTTAATAATTCAAACGACACATGTTCTAATGCATTCATTTTTATTTCGATGATAGTTGAT  
ACAAATCTTTAATCCATCATTATTTTTAGCTAGAACAACGTTTTCGACTGTATTTAATCC  
ATTTGTCACATATATTGTCATACCAAAAATCGGTTTAAATGTTATTTGCTATACATGCATCA  
TAAAATTTAGGAAAACCATAACAATACATTGGTGTGAGTTATGGCAAGTGCATCAACATTT  
TCAGACACAGCAAGTCTTACGGCATCTTCTATTTTTAAGCTTGAATTTAACAAATCATAAG  
CCGTATGAATATTTAAATATGCCACCAT

> **repeat\_nyS**Agamma

Function: repeat element

Best match: repeat\_nySAgamma\_CC001\_MW2-USA400\_BA000033.2[1041811:1041923]RC

Position: 039-contig\_321: 8227 ... 8257; Length: 30 bp

Sequence:

GGGGCCCCAACACAGAGAATTTGAAAAGA

> **uspA**

Function: protein coding sequence; universal stress regulator (core genome, constant)

Best match: uspA\_CC001\_MW2-USA400\_BA000033.2[1786083:1786496] (completely identical)

Position: 039-contig\_321: 10008 ... 10422; Length: 414 bp

Sequence:

ATGTATAAAAATATATTACTTGGTGTAGACTCAGTTAAAAAATGAAAAAGCACTAAAA  
GAAGTGTCTAAATTAGCTGGCGAAGGTACAGTCGTAACAGTTTTAAACGCAATCAGCGAA  
CAAGATGCTCAAGCATCAATTAAGCAGGTGTTCAATTAACAAACTTACTGAAGAACGA  
AGCAAGCGATTGGAACAAACACGCAAAGCTTTAGAAGATTATGGTATTGATTATGACCA  
AATAATTGTTGTTGTAATGCAAAAAGAAGAACTATTAACAACTGCTAATAGCGGTAATA  
CGAAATTGTTGTTTTAAGTAACCGTAAAGCAGAAGACAAAAGAAATTTGTACTTGGAA  
TGTCAGCCACAAAGTAGCAAAACGTGCGACTATCCCTGTATTAATCGTTAAATAA

> **pepQ**

Function: protein coding sequence; Xaa-Pro dipeptidase (core genome, variable)

Best match: pepQ\_CC005\_Mu50-VRSA\_BA000017.4[1826417:1827472]

Position: 039-contig\_321: 11590 ... 12646; Length: 1056 bp

Sequence:

```
ATGACAAAAATATCAAAAATAATAGACGAACTGAACAATCAACAAGCTGATGCAGCATG
GATTACAACACCGTTGAATGTATATTATTTTACTGGATACCGTAGCGAACCCCATGAAAG
ATTATTTGCATTATTGATTAAGAAAGATGGTAAACAAGTACTATTTTGTCCAAAAATGGA
AGTCGAAGAAGTCAAAGCATCACCTTTCACAGGTGAAATCGTTGGATATTTAGACACTGA
AAACCCTTCTCACTTTATCCTCAAACAATCAATAAATTACTAATTGAAAGCGGAGCACTTA
ACAGTAGCACGCCAAAAACAATTAACCTCTGGTTTCAATGTCAATTCATTTCGGAGATGTT
GATTTAACAAATCAAACAATTGAGAAATATTAATCCGAAGATGAAATTAGCAAAATACG
TAAAGCTGCTGAGTTAGCAGATAAGTGTATCGAAATAGGTGTTTCTTATTTAAAAGAAGG
TGTGACTGAACGTGAAGTAGTCAACCATATTGAGCAAATCAACAATATGGCGTCAA
TGAAATGAGTTTTGATACGATGGTTTTATTTGGAGATCATGCCGCATCACCTCATGGCACA
CCAGGAGATCGCAGATTA AAAAGCAATGAATATGTACTATTTGATTTAGGTGTAATTTAT
GAGCATTATTGTAGCGATATGACACGTACCATTAATTTGGTGAACCTAGCAAAGAAGCA
CAAGAAATTTATAATATTGTATTAGAAGCAGAAACATCTGCAATCCAAGCAATTAACCT
GGAATACCTTTAAAAGATATCGATCATATCGCTAGAAATATTATTTTAGAAAAAGGTTAT
GGTGAATATTTCCCTCATCGCTTAGGTCATGGTTTAGGATTACAAGAACATGAATATCAA
GATGTTTCAAGTACTAATTCTAATTTGTTAGAAGCTGGCATGGTTATTACAATCGAACCAG
GTATTTATGTACCAGGTGTTGCAGGTGTAAGAATTGAAGATGACATACTTGTCACTAATG
AAGGATATGAAGTATTAACACATTACGAAAAATAA
```

### > **ald2**

Function: protein coding sequence; alanine dehydrogenase 2 (core genome, constant)

Best match: ald2\_CC008-ST72\_TCH130\_ACHD01000037.1[70695:71813]RC (completely identical)

Position: 039-contig\_321: 12961 ... 14080; Length: 1119 bp

Sequence:

```
TTATAATTGTAATGCTTCTTCTACAGATTTATATTCCATTTCAAATGCCTCTGCAACGCCTT
TATTGGTTACATGACCTTTGTAAGTATTTAAACCTAATGATAATGGTTGATTTGATTTAAA
TGCTTCTCTATACCCTTTATTAGCTAGCATGAGCGCATAAGGTAGCGTAGCATTATTTAAA
GCTAACGTGGAAGTACGCGGTACTGCACCTGGCATATTTGCAACTGCATAATGAACCACA
CCATGCTTAATATATGTAGGATCATCATGTGTCGTAATTTTATCAGTTGTTTCAAAAATAC
CGCCTTGATCAATAGCAATGTCAATAATAACTGACCCATTTTTTCATTTGTTTAATCATGTC
TTCTGTTACAAGTCTTGGCGCTTTAGCACCTGGAATTA AAAACTGCACCTATTACTAAATCA
CTTTGTTTAAACATACAACTCAATATTCAACGGATTTGACATAATTGTATGTACACGTCCAC
CGAATAAATCATCTAATTGTTGTAACGCTTTGGATTAACATCTAAAATCGTAACATCTGC
ACCTAGTCCTAGTGCAATTTTAGCTGCATTTGTTCCCTGCTTGACCACCACCGATAATAGTT
ACTTTACCTTTAGGTACTCCTGGAACACCACCTAGTAGAATTCCCATACCACCATTGAGTT
TTTGTAGGAACTCTGCACCAACTTGAGCTGACATTCTTCCCTGCTACCTCACTCATTGGTGA
TAACAATGGTAAAGATCGGTCTGGTAACTGCACAGTCTCATATGCAATACTAATTACTTTT
CTATCTATCAAAGCTTGTGTTAATTTTTCTTCATTTGCTAAATGAAGATAAGTGAATAATA
CAAGCCCTTCTTTAAAATATGGATATTCAGATTCAAGTGGTTCTTTAACTTTAATAACCAT
ATCCACATCCCAAACCTTTTGCTTGTTCAGCAACAATCTCAGCACCTGCTTCTTTGTAATCT
ACATCTTCAAAGAACGATCCTGAACCCGCATTTGTTTCCACTAAAACAGTATGCCCACTTT
CTACTAAAGCGTGCACACCACCTGGTGATAAACCAACACGATTTTCATTATTTTAAATCTC
CCTTGGTATACCAATTTTCAT
```

### > **ackA**

Function: protein coding sequence; acetate kinase (core genome, variable)

Best match: ackA\_CC005\_JH1\_CP000736.1[1876510:1877712:r]RC

Position: 039-contig\_321: 14966 ... 16169; Length: 1203 bp

Sequence:

```
TTATTTTAAACCACCGAATGTCATAACATCACGGGCAATCATACTTTCTTCATCTGTTGGA
ATAACGACAACCTTAACTGGTGAATGAGGATAGTTAATAAATCCTTCTTTACCACGTAGT
AAGTTTTCATTTTTCTTAGGATCCCAGTAAACACCATAAATTCTAAGCCTTCAAGAACTT
```

TCGCACGAATTTCTACTGAGTTTTACCGATACCTGCTGTAATACGATAACATCAACACC  
ATGCATTCTCGCAGCATATGATCCAATATATTTGTGAATTTTAGAAGCAAATACATCTAA  
AGCCATTTGTGAACGTGCTTTACCTGATTCAGCTTCTTCTGATAAGTCACGTAAATCACTA  
GATGTACCTGATAATCCTAATAAACCTGATTCTTTGTTTAAAGATTTCCAATACTTGTTTCAG  
CAGTTTTACCTGTTTTTTCCATAATAAATGGAATTAAGCAGGGTCAATATTACCAGAAC  
GAGTACCCATTGTTACACCAGCAAGTGGTGTGAAGCCCATTGATGTATCAATAGATTTAC  
CGCCATCGATAGCTGCAATTGATGCTCCATTACCAATGTGACATGAAATAATACGTAAAT  
CTTCAATTGGCTTATCTAACATTTCTGCCGCTCTTTGTGATACAAATTTATGGCTTGTACCA  
TGGAACCATACTTACGAATGCCATAATCTTTATAATAATGATATGGCAAGCTGTATAGA  
TATGCTTTTTTCAGGCATTGTTTGATGGAATGCTGTATCAAAAATTGCCACATGAGGGATAT  
TTGGTAATAATTTACGAAAGCACGAATACCCATCAAGTTAGCTGGGTTGTGAAGCGGTG  
CTAATTCGCTTAATTTCTTCAATTTCTTTTCAACCTCATCAGTAATAGCTACTGATTCAGG  
GAATTTTTACCACCATGTACAACACGGTGACCTGTTCCATCGATATCGTTAATATCATT  
ATAATATTGTGCGCTTTAAAAGCATCCAACATGATATCAACTGCCTCAACGTGATCCTTG  
ATATCTTGTACTGTTTTAACTTTTTCCCGTTGACTTCAATTGTAAAAATTGAATCCTTCAA  
TCCGATTCTTTCTATTAACCTTTTGTACTAATTCCTCTTCAGGCATTCTAATTAATTGAA  
ATTTAATGATGAACTACCAGCATTGATAGCCAAGATTAATTTTGACAT

> **tpx**

Function: protein coding sequence; thiol peroxidase (core genome, constant)

Best match: tpx\_CC001\_MW2-USA400\_BA000033.2[1793401:1793895:r]RC (completely identical)

Position: 039-contig\_321: 17326 ... 17821; Length: 495 bp

Sequence:

TTAAATATTTTTGTATGCAGCTAAAGCAGCATCAAAATCTGGGAAATCAGTACCTTCACT  
AACGATTTCTTTATAAACAACCTTTATTATCTGCATCTAATACAAATACTGCACGAGCTAAT  
AAGCGAAGTTCTTCCATAACAACGCCATAGTTTTACCAAATGATAAGTCACGGTGGTCA  
CTTAATGTAATGACATTGTCTAAACCTGCTGAAGCGCACCATCTTTTTTGTGCGAATGGTA  
AGTCTGCTGAAATTGTAAGCACAATCCCCTCTTCTTTAGAAGCATCAGAGTTGAATTTGCG  
AGTCTGCTGATCACAACACCTGTATCAATTGATGGTACCACACTAATTAATTTCTTTTTA  
CCAGCATAATCTGCTAATGTTACTTGATTTAAGTCATTATCTAACACTGTAAAATCAGGTG  
CAAATCACCTTCATTAATTTGTTGACCTTTAAGTGGATTGGTCCACCTTTGAATGTTAT  
TTCAGTCAT

> **thiI**

Function: protein coding sequence; thiamine biosynthesis protein (core genome, variable)

Best match: thiI\_CC001\_MSSA476\_BX571857.1[1774460:1775683:r]RC

Position: 039-contig\_321: 18732 ... 19956; Length: 1224 bp

Sequence:

TTATAAAAAGTCATTTATTAATTGGTTTGTGTTGCTGTTCTTTAATAGTTTTATAATCACTAG  
TTATTTCAAGTGTTTCAATATTTTCAACAGCACGATTAATCATCTCTTCAAATCAAAGAC  
GCTTTCATATTGAACTACCTTATCAAAGTTTGGTTTCGGTTACTGGATTTTTAGGGGTGAAA  
ATTGTACAACAATCTTCAAATGGTTGAATAGATGTTTCAAATGTACCAATTTCTTTCGATT  
TAATAATAATTTCTTCTTTATCGTAAGTTAATAAAGGACGTAATACAGGAGTAGAAGTTA  
CATTATTAATTGCATACATGCTATGAAGTGTGTTGACTGGCTACCTGCCCTAGGTTTTACC  
ATTTACAATAGCTAAAGCCCCTATTTGATGTAATAATTTATCAGCAACACGCATCATCATA  
CGTCTCGTTGAAGTCATTGTATATCTTGGATGTACAACCTTATTTACCTGTTTTTGAATTC  
TGTAATGGTACAATATGCAATTTAATTGGTCCAACACGTTTCAGCTAAAATACGTGTCAA  
TTCAATAACTTTTTCTTTTGCTTGATCACTTGTAATGGTGGACTATGGAAATGAATCGCT  
TCAATTGTTACGCCACGTCTCATCACTTCCATCCCAGCAACTGGTGAGTCTATACCGCCTG  
AAAGCATTAGTAACGTCTTACCACCAGTACCAACTGGTAATCCACCTGAACCCGGAACAA  
CTTCTTCATACATATAAATTGCATCTAATCTAACTTCCACTCGAATTTTCATGATCTGGACG  
TTTGACATTCAGTAAATATTGTCGAAGTGCTTCAATACTGCACCACCCAATTCACGCTGT  
AATTCATACGTATCCATTGGGAAATTTTTATCGGCACGCTTCACATCAATTTAAATGTGC  
TGTTTTCTTCAAATGCTGCGCAAATTTAATTGCCGCTGCACTCATTGCCTCTATTGTTTTT  
TCTACTTTTAATACTGGACTAATAGATTTAATACCGAAAATTTTTGATAATCGATATGTTA

TTTCATTTATATCTGCATGGTCTTCAAGTTCAATATACATACGATCTCGTTTGCCTTTAACG  
ACAAACCCATCAAGTCCTTTTAAATGACTTATTTACATTATTTCTTAATTGATTTACAAATTT  
TTTTCTATTTGAACCCTTTAATGTTAACTCCCCGTATCTAACAAGCAAGTGATCATACTTC  
AT

> **csd2**

Function: protein coding sequence; cysteine desulfurase 2 (core genome, variable)

Best match: csd2\_CC001\_MW2-USA400\_BA000033.2[1796030:1797169:r]RC (completely identical)

Position: 039-contig\_321: 19955 ... 21095; Length: 1140 bp

Sequence:

TTATTTTAGCAACTCCTTAATTTCCATATAAATGATGATAAATATTTCTTTAAACCTTGCTA  
TATCTTCTTAGTTGTAGTAGCCCCAAATGATAATCTTATACTACCTTCAATAGATTTGTCT  
GATAATCCCATTGCAGCCAATACTTCATTTAATTTATTACGTTTAGATGAACAAGCACTCG  
TCGTAGATATCATAATGTCATATTTTAAAAAGCATTAACTAATACTTCACCTTTTACGCC  
AGGAAAATAATATTTAAAACGAATGGTGAACCAGAAGTTGAAGAATTAATATAAACTC  
CATGATATTTATTTAAAAATTGACGGACGTCATTATTTAACACAGTAACAAATGCATTCA  
ATGCTTCAAAGTTTTCATTAGCTATCTTCATCGCTTTAACCAATTGCAATATCATTGGCAA  
ATTAAGTGTCCACTTCTAACGCCATATCTTGACCACCACCATGGACAGTTGGTTCAACA  
TTTTGAATGTGATTTACAAGTAAGACGCCTTGGCCTTTTAAACCATTAACTTGTGTCCAC  
TTAAACTAATACTATCTATGTTATTGAGATCCATTGAAATTTGCCGAATGCTTGAACCGC  
ATCTACATGAAAATGTGCCTTAGGATAATTTTTTATAACTTTAGCCATTTGTGGAATAGGC  
TGTATTTGTCCAGTTACATTATTTACATACATACATGTTACTAAACCGACTTTGTCTGACA  
TTAATTTCTTGAAGTGTCTAAGTTAATACTGCCATCTTTCTTTACATCAACATATTTAACT  
TTAAATCCTTCGTGTGCTTCCAAATATCTTACAACCTCTAATACGGACGGATGCTCTAACA  
CGGATGTAATATTTCTTCGCTGTATCAAATTTACGATAGGCAATACCTTTTAAAGCAAG  
ATTATTGGATTCAGTTGCACCACTAGTGAATACAACATCATAATTTGTTTTGAATTAATC  
ATTGCATTAATTTGGGCTTTTGTGTTGTAGTAATTGATTTGCCTGCAAACCAGCTTTAT  
GCGGACTATTCGGATTATAATACATTGATTGATTTACTTTTAAATAAGTATCTAACACTTC  
TTCAAATGCTTTCGTCGTTGCCGCATTATCTAGATATATCAA

> **ezaA**

Function: protein coding sequence; septation ring formation regulator (core genome, constant)

Best match: ezaA\_CC001\_MW2-USA400\_BA000033.2[1797541:1799235:r]RC (completely identical)

Position: 039-contig\_321: 21466 ... 23161; Length: 1695 bp

Sequence:

CTATTGCTTAATAACTTCTTCTTCAATATGTTTAGTAACACCTGGCTCAACACTTTCAAGA  
GCTTGCTCTGCAATTTCAATCGCACGCTTATAGCGATTATTTTTAAATAATCGTTCAGCTT  
CATTTAAGCTCTTATCAACATTGCTATAGTCCTTACGATATCTATTTCCATATTGAATTAAT  
TTCTCTGCATAAACAGCATTAAACAAGAACATCATTTGCTTCATCTTCAAATGTATTCATTT  
GAATCACAATTTTAGACACTTTATCTTTAACTGTTTAAACGTGTATTGGACGTTCACTAAA  
TTGTTTCGTTAACATCACGAACCTTCATGATCAATTTCAATTTTTCATGATGATAAACCTTTCA  
GGAACGCTTGTTAAGTTAGAAGCAAGTAATCGACGATACACTTCTTCTTTCTTCGATTGGA  
CTCGTAGCAGATTGTCTTCTGCTTCTGCTTCATCTTCACGCAATTGAATCAGATGATTTTGT  
AGCTTTTCTTGTGTTGTCATTAATAACTGTGACATGATCTTCTAAATATTGTAAATTATCCTG  
AACCTCGCTATATCGCACAGCAGATTTAGACATTTCTTTTAAATATCATCATATACAGAA  
ATTAACCTTTGAATTTCAATTTCAAATTGACGAACACTTTGAGCATCAGATTCATTTATAT  
AGTAGTTTTACGTACATATTTCAATTTCTGTTTGAATGTATAATTCATGTCTTTAGCTTTG  
AATAAGTTATCCGTAATGATATCTTTTGTTCCTTCGACATCATTTTTAGCTTTAACTTCATG  
TTCAATTAATCATAACATGTCATCTAACTTATCATTGATATTAGCTAGTTTATCATTAGCTT  
CTTCTAATTCTAAGCGGCTAATTAATGGTTCAACGAACTAAGCTCTGTTTTTAAAGCTTTG  
TAATGTAAGTACTACTTTTACGTGATCCAGATCATAACCCTTCAACTTTAAGATCACGGCAA  
CCATATTTTAAATCTTGGAAATTGACCAGGTAATTTCTTTTTGAGTTTCTCTAATTAATTCTGG  
TATTTCTTCCATATAAGATCTTAGCTGTTTCATTTGTTTCATTCAAGGCAGCTATATGGTTGT

GCGCTTGTACATAATTACCATCAGCTTTTAGTACTTCATATTGCTCTAACCTTGGCTCAAA  
CTTTTCAATTTTCAGTTTCAAGTAGACTTGCTGCCTCACCAAATTGATGACGATTTGCTAAA  
ACATCACGTTTCATTTACGATAATCAACCTTACATTTGTCATATAATTCATCATTATCTTT  
GTATAACGCAATAATTTTCAATTTACATCTTCTAATTGTTGCTGATAGCTTTGTTTCGTAACAT  
CCATCAACTCATTTCGATCATCAATTTCACTTTGAGATGCGTTGAAACTAAATTTATCTAA  
TAAAGCCTCAGCATTATGGATTTTTTCTTCCACAGGAGCTAGATACTTATTTGTACTTTCT  
ACGTTGTCCTTTTTTTCATTGCATCGTATTTTCGTTTTTGTTCACCTTTTAAATTCAACTTAGA  
TAATTGTGCAAGGTTTTGATCAAAAGGTAACGTCTCAATTTTACGTTTCGATTGCT  
TTTTCAATAATTTGTCGTTTATTTGAACGTAAATAGAATAATACACCTACAGCAATCAATA  
TAATCACAATTATTGCCAAAATGATATATAACACCAT

### > **rpsD**

Function: protein coding sequence; 30S ribosomal protein S4 (core genome, constant)

Best match: rpsD\_CC001\_MW2-USA400\_BA000033.2[180080:180682] (completely identical)

Position: 039-contig\_321: 24005 ... 24608; Length: 603 bp

Sequence:

ATGGCTCGATTTCAGAGGTTCAAACCTGGAAAAAATCTCGTCGTTTAGGTATCTCTTTAAGC  
GGTACTGGTAAAGAATTAGAAAAACGTCCTTACGCACCAGGACAACATGGTCCAAACCA  
ACGTAAAAAATTATCAGAATATGGTTTACAATTACGTGAAAAACAAAAATTACGTTACTT  
ATATGGAATGACTGAAAGACAATTCCGTAACACATTTGACATCGCTGGTAAAAAATTCGG  
TGTACACGGTAAAACTTCATGATCTTATTAGCAAGTCGTTTACGCTGTTGTTTATTCA  
TTAGGTTTAGCTCGTACTCGTCGTCGTAAGCACGTCAATTAGTTAACACGGTCATATCTTAG  
TAGATGGTAAACGTGTTGATATTCCATCTTATTCTGTTAAACCTGGTCAAACAATTTCACT  
TCGTGAAAAATCTCAAAAATTAACATCATCGTTGAATCAGTTGAAATCAACAATTTTCGT  
ACCTGAGTACTTAACTTTGATGCTGACAGCTTAACTGGTACTTTCGTACGTTTACCAGAA  
CGTAGCGAATTACCTGCTGAAATTAACGAACAATTAATCGTTGAGTACTACTCAAGATAA

### > **ugpQ2**

Function: protein coding sequence; chromosomal glycerophosphodiester phosphodiesterase (core genome, constant)

Best match: ugpQ2\_CC008\_NCTC8325\_CP000253.1[1735395:1736138:r]RC (completely identical)

Position: 039-contig\_321: 24823 ... 25567; Length: 744 bp

Sequence:

TCACTTAATAAATAATTTCCGATTATCTGTAATTAATCCATCTACACCCATTTGTCTTAATT  
TTTCTCCAGTTTTCAATTTATTAAGTGTGATGGCATAACCTGTAATTGATGATGATGTGC  
TTTATCAACAAATTTTCTGGTCACTAATGCATAAATTAGGATTAACATAACTAGCAATTTGA  
GCAATTCCTTGAAAAGTTTGGCTTTTTATACCAATAAATTACGTTTACTACAAAGCACACCTA  
ATTCATATATACTGCCAATGTGTTTAACTTTTCGATGCATTCGATATCAAAAGATTGTAT  
AACTACTTGTGTCGCATCGACTTTCTTTTCTTCCAAAAATGCCAGCAATTTACATTCTATTT  
CTGGATATAAATTCGGACTTTTCAATTCATCAATAGCTTTTTATCATACTTTAAGCATAA  
TGAAAGTACTTCATCTAACGTGGGTATTCGTTCTCCCTTAAAAGCAACATCTTTATAACTA  
CCAAAATCAAATGATTTTAATTGCGATAATGTGTAATCAGCAATACGCCCTTACCATCC  
GATGTTCTATCAATTGTTTCATCATGTATCACAACAAAATGTTGGTCTTTGGTCAAATGAA  
CATCTATTTCTAACATAGCAACATTGAGCCCCATTACCTCTCGATAACCGACCATTGTATT  
TTCAGGAAAATCACTCGGCAATCCACGGTGCAGAAACAATTTGTAATTCATCTTTCAGTTTA  
TTCAGAGTCAT

### > **serA**

Function: protein coding sequence; D-3-phosphoglycerate dehydrogenase (core genome, constant)

Best match: serA\_CC005\_Mu50-VRSA\_BA000017.4[1843700:1845304] (completely identical)

Position: 039-contig\_321: 27353 ... 28958; Length: 1605 bp

Sequence:

ATGAAGCAATTTAATGTACTCGTTGCAGATCCCATATCAAAAGATGGTATCAAAGCATT  
TTAGATCACGAACAATTCAATGTAGATATCAAACCTGGCTTGCCGAAGAAGCATTAAATC  
AAAATTATACCTTCATACCATGCTTTAATCGTTCGTAGTCAAACCTACGGTTACTGAAAATA

TCATAAATGCTGCTGATTCTTTAAAAGTAATCGCACGCGCCGGTGTGGTGTAGATAATA  
TTAATATTAATGCTGCAACATTAAGGTTATTTAGTTATTAATGCCCCAGATGGTAATAC  
GATTTGAGCTACTGAACATTCAGTGGCAATGTTATTATCAATGGCTCGAAATATTCCGCAA  
GCACACCAATCACTTACAAATAAAGAATGGAATCGAAATGCATTTAAAGGTTACTGAGCTT  
TATCATAAAACATTAGGTGTCATTGGTGCTGGTAGAATTGGTTTAGGTGTTGCTAAACGT  
GCGCAAAGTTTCGGAATGAAAATACTAGCTTTTGACCCTTACTTAACGGATGAAAAAGCA  
AAATCTTTAAGTATTACGAAGGCAACAGTTGATGAGATTGCCCAACATTCTGATTTGCTT  
ACATTACATACACCACTAACACCTAAAACAAAAGGCTTAATTAATGCTGACTTTTTTTGCC  
AAAGCAAACCTAGTTTGCAAATAATCAATGTGGCACGTGGTGGTATTATTGATGAAAAG  
GCGCTAATAAAAGCATTAGACGAAGGACAAATTAGTCGGGCAGCTATCGATGTGTTTGA  
ACATGAACCTGCAACTGATTCGCCTCTTGTTCACATGATAAAATTATTGTTACACCTCAT  
TTGGGTGCATCAACAGTCGAAGCTCAAGAAAAAGTGGCAATTTCTGTTCAAATGAAATC  
ATCGAAATTTAATTGATGGTACTGTAACGCATGCAGTGAATGCACCTAAAATGGACTTA  
AGCAATATAGATGATACTGTAATAATCATTCATCAATTTAAGCCAAACAGTTGGTGAATTA  
GCTATTCAATTAATGTACAATGCACCAAGCTCTATTAATAATTACGTACGGTGGCGACTTA  
GCCTCTATTGATAGTAGTTTATTAACACGTACAATTACTCATATTTAAAAGATGATC  
TTGGTCTGAAGTCAATATTATCAATGCTCTAATGTTGTTAAATCAACAACAAGTGACATT  
AAATATTGAAAATAATAAAGCAGAGACAGGTTTTAGTAACTACTTAGAGGTAGAACTATC  
AAACGATAGCGATCCGTTAAAGTTGGCGCTTCTGTCTTTACAGGTTTCGGTCCAAGAATT  
GTTAGAATTAATAATTTTTCTGTAGACTTAAAGCCAAATCAATATCAAATTGTGTCATATC  
ATAATGATACTCCAGGTATGGTAGGAAAAACTGGCGCATTGTTAGGTAAATACAATATCA  
ACATTGCATCTATGACTTTAGGTAGAACTGAAGCGGGCGGAGATGCGCTAATGATTTTAT  
CCGTTGATCAACCTGTTTCAAACAATATAATTGATGAACTTAAACAAGTTGGTGAATACA  
ATCAAATTTTCACAACCTGAATTGACGGTACAGTCATAA

> **tnpIS1272**

Function: protein coding sequence; transposase of insertion element IS1272

Best match: tnpIS1272\_15653\_EU272084.1[3547:5193]RC

Position: 039-contig\_321: 29013 ... 29043; Length: 30 bp

Sequence:

TTAGGCAATGTAAAAAAGCTGATTTCTATT

> **tx\_universal3**

Function: bidirectional rho-independent terminator

Best match: tx\_universal3\_CC001\_MW2-USA400\_BA000033.2[1397772:1397835:r]

Position: 039-contig\_321: 29015 ... 29045; Length: 30 bp

Sequence:

AGGCAATGTAAAAAAGCTGATTTCTATTAA

> **txbi\_universal1**

Function: bidirectional rho independent terminator

Best match: txbi\_universal1\_CC001\_MW2-USA400\_BA000033.2[1397234:1397306:r] (completely identical)

Position: 040-contig\_241\_RC: 10 ... 83; Length: 73 bp

Sequence:

TGTATAAATAGAGAACAGCAGTAAGATATTTTCTAATTGAAAATTATCTTACTGCTGTTTT  
TTTAGGGATTTA

> **nagE**

Function: protein coding sequence; PTS system/N-acetylglucosamine-specific IIBC subunit precursor

Best match: nagE\_CC001\_MW2-USA400\_BA000033.2[1806419:1807885:r]RC

Position: 040-contig\_241\_RC: 1433 ... 2900; Length: 1467 bp

Sequence:

TTATAAATGTTTTTCAATTTTCATCAGCAACCTGCTGTACGTGTGTACCGACAATAACTTGA  
GTTGAATGTTTACCATTAACAGTAACACCAACTGCACCGGCGTTTTTAATCTTCTGTGAT

CAATAATAGATGTGTCTTTTAACTCTAGACGCAACCTTGTGTCACAATTGGTTAAATTAAC  
AATATTCTCTTGACCGCCTAAACCTTCTAATATTTGTATAGCATGTTGATGATATTTACTTT  
GTTTAATATCATTTTTACCAGGAGCAATATTATCTTTTACAACCTGTTGGATCAACTAATTC  
ATTTTCACCTCTACCAATCGTATTCAAGTTAAATACTTGGATTACTACACGGAAAATCACA  
TAGTATAAGATGAAAAATACAACACCTTGAACAAGCAACATCAATGGATGATTTGATACT  
GGATTAATTAGTGATAACACATAATCTATCAAACCTGCACTAAATGAAAATCCAGCTGTC  
CAATGGAATGTAGCTGCGATAAATAAAGATAATCCTGTTAATAACGCATGAACAACATAT  
AAGATTGGCGCAACAAACATAAATGCAAACCTCAATCGGCTCTGTAACACCAACGAAAAA  
TGCTGCAACTGAACTCGCTAGGAACCAACCGTAAACTTGTTTTTCTGAGTCGTTTTAGCT  
GTATGATACATTGCTAACGCAGCCGCTGGAATACCGAACATCATGATTGGGAAGAATCCC  
GCTTGATAGCGTCCTGTAATACCTTTTATAGCATCTTTGCCACTTTGGAATTTACCAATAT  
CATTAAATACCAATCGTATCAAACCAGAACACACTATTCAGTGCATGATGTAATCCTGTAG  
GAATTAATAATCTATTGGCAACACCATATATGAAAGCTCCAAACGATCCTAAACCGACTA  
TAGATTCACCAAATTTTACAATCCATGAATAAAGTAGTGGCCATAAGAATAACAATATGA  
CAACTAAAAATGTACAGTAAAATGCAGTCATAATTGGAACCTAGACGTTTACCACTAAAAA  
ATGATAATGCTAATGGTAATTCTGTTTCACTAAACTTATTGTATGCATAGGCTGCTATTAA  
ACCTATTACAATACCAACAAAGACATTGCCATTATTCATCTTTTCAAAGCTGAATTTATT  
TCCGAAGCTTTCATTCCCTAATAAAGGCGCTAATTTTCATTGGTGATAATACAACCTGTAAC  
AAAAATATCCTAACGTAGCTGCAAGCGCGACTGCACCATCATTTTTCTTTGCCATTCCCTAT  
AGCTACACCAATTGCAAATAAAATACCTAATTGCTCTAAAATCGTAGTACCTACCGTAGT  
AAAGAACATTGCGATTTTCGGCGTCGCATGAAGTGCATTTAACGTATTACCAATTCCGGC  
AATAATTGCTGCAGCCGGTAAAATGGCAACTGGTAACATTAACGAACGCCCTAAATTTTG  
GAAAAATTTATACAT

### > **tyrS**

Function: protein coding sequence; tyrosyl-tRNA synthetase (core genome, constant)

Best match: tyrS\_CC001\_MW2-USA400\_BA000033.2[1810170:1811432:r]RC

Position: 040-contig\_241\_RC: 5184 ... 6447; Length: 1263 bp

Sequence:

TTATTGATAGTTAACCATGAAGTATTTTTTCTTACCGCGACGAATAATCGTAAATTCGCCA  
TCAATTTTATCTTCTGGTGCTAAAGCATAATTAACATCTTGTTGTCTCTCACCATTAATATA  
AATCGCACCATTGTTAACATCTTCACGTGCTTGTGCTTTAGAAGGAGAAATGCCTGTTTCA  
ATAAGGACTTCAACGATATTTGTTGTGTCATTTGATAATGTCACCTGAGGCACATCTTTAA  
ATCCATCTTTAATTCTTTTCGCTGATAATGATTTTAAATCACCCTAAATAATGCTTGTGA  
AATACGGATTGCATCATTTAATGCATCTTCACCATGAATAAATTTAGTTACTTCTTCAGCT  
AATGTTTTTTGAGCTTCACGTAAATGCGGTGCTTCATTTTTAGATTGTTCTAAGCGATCAA  
TTTCTTCTTTTCTAAGAAAGTAAAGTATTTTAAAGAATTTAATTACATCTTCGTCTGATTGA  
TTAATCCAGAATTGATAAAATTCATAAGGACTTGTTTTTTTCAGCATCTAACCAAACAGCA  
CCTGACTCAGACTTACCAAATTTCTTACCATCTGATTTAGTTACAAGCGGAATAGTTAAAC  
CGTATGCGTCTGTTTGACCATAACATACGACGCATTAATTCAATACCACTTGTGATATTACC  
CCATTGATCTGATCCACCTACTTGAATCTTACAATTCATTTCTCTATTCAAATGACCGAAA  
TCAATAGCTTGTAATAATCGTGTATGTGAATTCTGTATATGAAATACCATGTTCTAAACGAC  
TTTGGATTGAATCTTTACCTAACATGTAATTAACGCCGACGTGTTTACCATAGTCACGTAA  
AAAGCTAATTAATGAAATTTGTCCTAACCAGTCTCTATTATTAACAAGCACTGCACCATG  
GTCTGTTCCAAATTCAAAAATATTGTGCATTTGTTTACTAATAACCTTCGATATTTTTATCTA  
CTTGTTCTTCTGTTTGTAGCACACGTTCTTCTGATTTACCTGATGGATACCAATCATACT  
GTACCACCACCAATTAACGATAGGACGATGTCCATGTTCTTGAAAACGTCTTAATGTT  
AAGAATGGTAGTAAGTGACCAATATGTAAACTATCTGCCGTTGGATCGGCACCGCAGTAT  
AACGTCACCTGTTCTTTATTTAATAAATCTTCAATACCTTGTTCATCAGTTTGTGATAAAT  
AAGACCTCTCCATTTTAAATCTTCAATTAATACATTCGTCAT

### > **tbox10**

Function: noncoding RNA T-box leader element (core genome, constant)

Best match: tbox10\_CC001\_MW2-USA400\_BA000033.2[1811524:1811725:r]RC (completely identical)



Position: 040-contig\_241\_RC: 6537 ... 6739; Length: 202 bp

Sequence:

```
TGTAAGGGCGCGATTGCACGTTACCACCAAACCTTAAACATAATCATAAAGATAATGTTCCAC
TCTATTAATGATACGTTTCATTAATAAACGTAGGACATGTTAGTTATAAAGGTGATTTCATA
TTATTA AAAACACTAGTTCACAGCGACCACTAGCTCTCTGATGATTTCAAATAATATTACT
TGTCCTTTTATCCTATTCTT
```

### > **sgtA**

Function: protein coding sequence; monofunctional transglycosylase A (core genome, constant)

Best match: sgtA\_CC001-ST772\_118\_AJGE01000048.1[6764:7669] (completely identical)

Position: 040-contig\_241\_RC: 6827 ... 7733; Length: 906 bp

Sequence:

```
ATGACGAATCAAGACAACAATCATCAATTGAATCATCGTATATATCATTTTGAAAAGATA
TATAAAGCTATCAAACATGTCATTGTTTTTATATTTATGATTTTCATTGCCATCGTTGCTAT
CGCTGTGATTGCGATGTCTTTATATTTTCATCATTTAACTAAAACGTCCGACTCATTATCA
GATGATGCTTTAATAAAAAAAGTTTCGACAAATACCTGGCGATGAATTATTAGATCATAAT
AACAAAAATTTATTATATGAGTATAACCATTCTCAAACTCACTCATTATAGGCCCTAAA
ACATCAAGTCCAAATGTCATTAAGCATTAACGTCATCTGAAGACACTTTATTTTATAAAA
CATGATGGCATCTTACCAAAGGCGATTTTAAGAGCAATGATACAAGATATTTTAAATACT
GATCAAAGTTCAGGTGGTAGCACAATTACACAACAACCTTGTTAAAAAATCAAGTTCTTACC
AACGAAAAACATATAGTAGAAAAGCAAATGAACTTCGCCTAGCAATTAGATTAGAACA
CCTACTCTCAAAAGATGAAATTATATATACATATTTAAATATAGTTCCCTTCGGTAGAGAT
TATAATGGCGCTAATATTTCCGGAATTGCATCCGCTTCATATAGTTTGTGTTGGTAATTCAC
CAAAAGATTTATCAATTGCACAATCTGCATACCTTATCGGTTTGTGCAAAGCCCTTATGG
CTATACACCCTACGAAAAAGATGGAACGTTAAAATCGGATAAAGATTTGAAATATAGTAT
TCAAAGACAACATTATGTATTA AACGTATGTTAATCGAAGATCAAATCACTGAAAAAGA
ATACAACGACGCATTA AAAATATGATATTAATCACATTTGTAAATCGAAAAAAGCGTTA
A
```

### > **isdH**

Function: protein coding sequence; haptoglobin-binding surface anchored protein (core genome, variable)

Best match: isdH\_CC007\_TCH959-USA300\_AASB02000248.1[53213:55894:r]RC

Position: 040-contig\_241\_RC: 7938 ... 10620; Length: 2682 bp

Sequence:

```
TTATTTAGATTCTTTTCTGAATTTAGGAATGAGTAAAGCTAACATACCTAATAACGCATAT
AAGCCCCACCATGATTGGCTTGAAGTTGTTTCTCCAGTTTTTGGTAGCATTTTAGATTGAC
TAAGTTTGTGTTTCTTTTCGATGGTGTGCCGCTTTTCTTTTGTGTTTCACTGTTTTGTCCACA
GTTTTATGAATATCACTCGGCAGATGTTCAAGTTGCTTTTTTGTGAGTAACTTTGATAGTAC
TGATAGGATGATATTTTCATTGTATCAATGTTTGTTCAGTTCCAGTATTATTAACCTTTATTT
TTATCGGCAATATGAGCAAGCTGTATGACTTTGTCTTTATTTTTATTAGAGTCTTTATCAGT
ATCGACATTCGATGACATACCAACGCTATTATCAACACCCTTATCAGTGTCTTTAGCAATT
TGAGTATCCATTTCTTTTAAATCATACTTATCGAAGTGATTGTTATCCAACATATCGGATA
AATGATCAACATCATGTTGCACATCTTTGTCAACACTACTATCAGTATCTTTAACCATGTC
AGACTCTGGTTCTATCACATCTGCTTTATCAGACGCATCTTTAGGATTTGTTGCAGTGCTG
CTATTTTCAGCTACATCTGTATCAGCAACCTTATCTTCTGTCCCTGTTTGTACATTTAGCGG
TTCACTCGTGTTATTTTGTGATATATCATCATCTTTTGTATTGATATCCTGATTTATAATTC
TGACATGATATTGACCTTCATAACCAATGTTTGCCACAACGACTTTAACAATCGCATTGTA
AACTGCTTTGTGAGGTATATATGGGAAAATCAGCGTTCTAGAATTATTTTTAGGATCTTTA
GAAACAGTAGTGACACGTTTACCTTCTACAATTAATCTTTCCAGTAACTGTCATCCTTTG
TTTTCATCACTACATATTTTTGACCATTTAAAGTTGCTGTATAGAATGGATGTTCAACAAA
GCCGTCCATAACTGACTCACTATTTTCTTCACTTTCAAAAACAACAAAATGCGCTTCTTGT
AAATCTGTTAATTGATCATTGTTAGGTGTAACATTTTCAAATTCGTCAGTCTGATTTAA
CTTGATCAGCTAACTCTACTCTAGTTTGTATCTAATTTCTTTTTATATTCCGCCTTATATTTTT
CTGGCAATTTCTCTTGTAAATTTTCTAATTCATAAACTTGTCTTTCTAACGTTTTAGCTTTG
```

TGATACGGAGCTAATAATTTTTGTAAATTGTATGTTTCTTCATCCACATAGTCGTCTGGGT  
TATTAGTAATAGGCTGTGCAAAGACCATTAGCGTATAATCATAGTCTTCATGGATGTTCTC  
ACCATATTCAATAGATGACACAATTTAACTTCTCTCGTACCATTAGATACTGGGAAACG  
AATATAGGCATAATCTTTATCAGAATCATATGATACTAATTTCGACTGGTAACTTTTTGTCA  
CCTTCATAAACTTCAAATTTCTTCCATGTTGAAGCTGTCTTTAAACCTAATTCAATTATTG  
GTCCTGTTTTTGTAAAAATGACAGTTGCTGGTTCAACAGTACTAGCATAATGATAGAACT  
GTCTTTCACCTTTATCATTTTTTCATTTGAAAATCAATTGGTCGCCAATTATCAGCTGTATGT  
TCTTTATCGATGATAGCCGGGTTTTTAATTGCATCTTGTAGTGATTCATCTGCTGGTGGAT  
ACTGTTGATTAACATCCGACTGATTACTTGACTCATTTCGTTTTATCGTTAGTATTACCATTA  
GAATTTGTTTCATGAGCTGGTTGGCTTGACGCTTGATCTGCATTTCGTTGACGATTTTGTT  
GTGCAGGTTGACTCATATTGGTCGTTGCCTGCGGTTGATTATTAGCATTGTTGATCATTGA  
TGTATTTTATTAGATGATTCGTTGTTTGTGATTACTTGCGACTGAACTTGATTGATCAT  
TCGTTACTACTGCATCATTGTATCTGATTTTACAAGTGAAGGATCGTTATAAATAGGTTT  
AGCAAATACTAATTTAGTATAATCATAATTTGTTTCTTCTCCATCATCAATTTGAGTCGAA  
GAAACAATTTCAATTCTTGTGTGCCATCTGAAACTGGGAATCGAATATAGGCATGGTCT  
TCTGGTACAGGACTATATGATACAAGTCTCACTGGCAGTTTTTGATTGTTTTTCATAGACTT  
CAAACCTTCTCCATGTTGAAGCAGTATTGATGTCTAATTCAACTTCTGCTTTCTTTTTAGTG  
TAATACACATCTGCTGGATCTTTGATGCTGAAAAAGTGATAGTACTGCGTTTTATTGTTTT  
TATCTAATAACTGGAAATTGACTTGTCTCTTGGACCTATATCATGTTCTTTATTTTCTAAT  
GCAGGATCTTTAATTGCATCTTTAAGTGATTCATCCGCTGCAGGATAGTTTTTTCGCAGTGT  
TTGCTGGTTGCGTAGCAGGTTGTGTTTGTATTCCTTAGGTGGCTGAGTTGTAGTTGC  
ATTATTATTTGATTTTCCGAGATTTTATCTGAAGTATTTGTATTTTCTGCTGCTTGTGCTT  
GATGTTGAGAAGTAATTAATAAATAGTGTACTGACAATGACCGATGCAACGCCTAGAGTTG  
ATTTTCTAATAGAATAGAAAGACCTTAATTTGGGTGATGTTTGTTCAT

### > **furbox-isdH**

Function: binding site of ferric uptake regulator next to isdH

Best match: furbox-isdH\_CC001\_MW2-USA400\_BA000033.2[1815633:1815668] (completely identical)

Position: 040-contig\_241\_RC: 10643 ... 10679; Length: 36 bp

Sequence:

TATATTTAATTGATAATAATTATCAATATCAATTAT

### > **rsaB**

Function: noncoding RNA ncRNA of Staphylococcus aureus B (core genome, variable)

Best match: rsaB\_CC008\_COL\_CP000046.1[1824119:1824178] (completely identical)

Position: 040-contig\_241\_RC: 10673 ... 10733; Length: 60 bp

Sequence:

AATTATTAGTGTTAATTGTAGCGCATCCCAATTAATATTGCAACCTATTTTATTAATTT

### > **fhs**

Function: protein coding sequence; formyltetrahydrofolate synthetase

Best match: fhs\_CC001\_MW2-USA400\_BA000033.2[1815943:1817610:r]RC

Position: 040-contig\_241\_RC: 10952 ... 12620; Length: 1668 bp

Sequence:

TTAGAATAACCCAATTGCATGACCATCATCAGTAACATCCATGTTTAATGCTGCTGGTTTTT  
TTAGGTAAACCAGGCATAGTCATGATTGCACCTGTCAACGCTACGATAAATCCTGCACCT  
GTTTTCGCTTCTAATTCACGAATTGTAATTTCAAATCCTGATGGTGCACCTAACAACGTTT  
GATCATCTGAGAATGAATATTGTGTTTTCGCCATACATACTGGGTAATTATCCCAACCATT  
TTCTTTAAATTGTTTTAATTGTTTTTTCGCTTTACTGCTAAACGTTACTTTTGAACCGCCAT  
AGATTTTCAGTCACAATCTTTTCAATCTTTTGTCTCTAATGGTAATTCTAATTCATATAAAGG  
TTTAAATGAATTAGGTTGATCAATGACTTCTAATACTTCATTTGCTAAGTCAACGCCACCT  
TTACCACCTTTTTCCCAAACCTCAGTTAAGGCAATTCGTACGTTATTTTCTTTAGCCCAAG  
ATTTTACATATTCTACTTCTGCATCGGTATCATGTATAAATGCATTAATTGCAACAACCGG  
TTCTACACCGAATTTTTTAATATTATTAACATGACGCTCTAAATTAACAATTCCTGCTTTTA

CTGCTTCTACATTTTCTTCTTTTAAATTATCTTTCGCTACACCACCATGCATTTTAAACGCA  
CGAATTGTCGCAACAACAACGACAGCTGCCGGATCAAATCCTGCTTCACGCGCTTTAATA  
TCCATGAATTTTTCAGCGCCTAAGTCTGAACCAAATCCAGCTTCCGTTACAACGATATCAG  
CTAAATCACGTGCTGTTTCAGTTGCTAAAATTGAGTTACAACCGTGTGCGATATTCGCAA  
ATGGTCCACCATGAACTAATGCAGGTGTCCCTTCAATTGATTGTACTAAGTTTGGTTTTAT  
TGCATCTTTTAAAATCATTGCAAGTGCACCTTCCACTTTTAAAATCTGCAACTGTAACCTGGC  
TTGCGATCTCTAGTGTAACCAATAGTAATACGACTAATTTTATCTTTTAAAGTCTTTAATAC  
TTCTACTTAAACATAAAAATCGCCATAATTTTCAGACGCTACTGTAATATTAAGCCATCTTC  
ACGTGGTACACCATTGTAGGTCCACCTAACCCAACGTTTACATGTCTAAGTGCACGATC  
ATTCATATCTAATACACGTTTCCACTCAATACGTCTTTGATCGATTCCCTAATTCGTTACCTT  
GGTGAATATGATTATCGATAAACGCAGACAATGCATTATTTGCAGTTGTAATCGCATGGA  
AATCTCCGTTGAAATGTAAGTTGATATCTTCCATAGGTAAGACTTGCGCATAACCACCAC  
CAGTCGCACCACCTTTGATACCAATGTTGGTCTAAAGCAGGCTCTCTTAATGCAACCA  
TAACGTTTTTATTTAACTCATGGAATGCATCAGCTAAACCAACTGTAACCGTTGATTTACC  
TTCACCAGCTGGTGTGGGCTCATCGCAGTACTAAAACAACCTTCCCTTTGTTTTCTTTG  
GCGTAATTTTATTAATGTCGATTTTAGCTTTGTAATGACCATAAGGTTCTAATGCATCCTC  
TGAAATACCTACTGATGCAGCAATATCCTTAATTGGTTGTAGTGTTGATTGATTTCGCAATA  
TCTAAATCTGATAAATGAGTCAA

> **acsA1**

Function: protein coding sequence; acetyl-coenzyme A synthetase

Best match: acsA1\_CC005\_JH1\_CP000736.1[1903505:1905211:r]RC

Position: 040-contig\_241\_RC: 13059 ... 14766; Length: 1707 bp

Sequence:

TTATTCATTGTACTTAAATCCCCAGCATCTAAATTTAATTCCCAAGCTTTTAATACACGT  
CTCATAAATTTACCTGACCGTGTTTTAGGTAATTTATCTTTAAATTCGATTTACGTTGGTGC  
TGCATGTGCCGACAAACCTTCTTTAACAATATACGAATGTCTTCTTTAATTCGTCTGTT  
GGTTCATATCCTTTTCTCAGTGCAACAAACGCCTTAATTTTACCAGCGAACCGGATCTG  
GTTACCAATAATTCCCTGCTTCGGCAACTGCTTCGTGTTCAACCAATTTAGACTCAACCTC  
AAATGGTCCAACCTCGTTCACCAGCTGTCATAATTACATCATCAACACGTCCTTGGAAACCA  
GAAGTAACCATCTTCATCTTTATATGCCGAATCACCAGATACATACCAGTCTCCAATAAA  
ATATGATTTATATTTTTCTGGATTCTTCCAGATACGATACATCATTGATGGCCAGCCTTTTT  
TTATAGCAAGGTTGCCCATTCGATTTGGTGGTAATTCATTACCTGCATCATCGATAATTGC  
AGCTTGAATACCAGGTAATGGTTTGGCCATTGAGCCAAGCTTGACGTCCATCGTTGGATA  
GTTAACAATCATATGTCCACCTGTTTCTGTTCATCCACCAAGTATCTAACACCGTTAAACCG  
TATACTTTTTTCGCCATTTTATAACTTCAGGATTTAAAGGCTCACCTACTGATAGAATCG  
AACGTAACGATGACAAGTCATATTTCTCAACAATATCGTCACCAGCACTCATTAACATTC  
TTAAAGCTGTTGGTGCCGTATACCAAAATCGTCACTTTAAAATCTTCAATCATACTATACCA  
CTGTTCTGGTGAAAAGCGACCACCAGCTATACAATTTGTAGCGCCATTTAACCATGGTGC  
AAAAATACCATAAGATGTTCCCTGTAACCCAACCTGGATCTGCTGTACACCAATAAACATC  
ATCTTCTTGTAATCTAATACATATTTTCCAGAAATATAGTGCCTAACATTGCTTGTGTA  
ACATGCAATACACCTTTAGGTTGCCAGTAGAACCTGATGTATAATGTAAAATCAAACCA  
TCATCCGACTTTAACCAATCAATGTCAAATTCATCGCTAGCAGTTTCCATCAAACCTAATGA  
AGTCTATGTAATTGTCTTCTACATCCTCATCTACGACAACAATTTTTTTCAAGTTCGGTAA  
TTTATCTACAGGTAAGTTCGAGGTAACAATGCCTTATTAGTAATTAACACTTTAGCTTCACTG  
TTCTCTAATCTATCCGCAACTGCCTTTTCCATAAATGCTTCAAATAACGGCCCAACAATTG  
CACCAATTTTTAAAACACCTAACCAACGCAAAATATAGTTTCAAGGTGACGCGACATAAATA  
TAAATACTCTGTACCTTTGTCAACTTCTGCATGTTGAGACAAAACATTCGCTGCTTTATT  
AGATAATCGTTGCATATCTTTATAAGTATACGATTTCTTTTCTGTACTCATCTTTGTAATTTA  
ACGCTATTTTATCCCCTAATCCTTGATCTACATGGCGATCTATACATTCATATGCCATGTT  
CATTTTTCCAGTTTCACTCCAAGAAAATGCTTGTCTACGTCTTTCCAATCAAAGTATTA  
TATGTTTCTTCATAATCTTTAAGGTTATGTTTACCTTGCCTCTTTATAAACTTCGACTTT  
CAT

> **acuA**

Function: protein coding sequence; acetoin utilization protein A  
Best match: acuA\_CC001\_MSSA476\_BX571857.1[1799578:1800210]  
Position: 040-contig\_241\_RC: 14934 ... 15567; Length: 633 bp  
Sequence:

```
ATGAATCATTAAAGACGTATCAATCCGAAGATTATTACATTCATGACAAGCAATTTGTT
ATTGAAGGTCCTTTAACATACGAATATTTGAAAGCGCTTACTTTTCGATGCGCATTTAACCG
CATTTAGAGATGCTGAAGATCAGTATGAAGCTTTGTTAGAAATTACAACATTACCAGAAG
GTAGAATTTATGTTGCTCGCCAAGATCAACTCATTGTGGGTTATGTCACCTTCCACTATCC
TGATGAAATTGAGCGCTGGTCTACAGGTAACCTTCCATATTTAATCGAATTGGGGGCAAT
TGAAGTCAGCATCAATTTTAGGCAATTACATCTTGCAGAAAAGCTAATAACAACCTTAGCCT
TTCTACACCAGAATTCGAGGATTATATCGTTATAACTACTGAATATTACTGGCATTGGGAT
TTAAAAAATTCAAAGTTAGATGTATTTGACTATAAAAAATTAATGCAGCGGTTAATGGCA
ACTGGTGGACTTGAAATATTCGCTACAGATGATCCAGAAATAACAAGTCATCCAGCTAAT
TGTTAATGGCAAGAATTGGCAAAAATATTACATTAGAACAGCAACAAGCGTTTGATGAT
ATTCGTTATATGAATCGGTTTTTCTTTAA
```

### > **acuC**

Function: protein coding sequence; acetoin utilization protein C  
Best match: acuC\_CC001\_MW2-USA400\_BA000033.2[1820582:1821751]  
Position: 040-contig\_241\_RC: 15591 ... 16761; Length: 1170 bp  
Sequence:

```
ATGCAACAACATTCATCAAAAACCTGCATATGTTTATTCAGATAAGTTATTACAATATCGA
TTTCATGACCAACATCCCTTCAATCAAAATGCGTTTAAAATTAACAACAGAGCTACTTTTGA
ATGCAAATTTATTGTCTCCAGAACAAATAGTACAACCTAGAATTGCAACAGATGACGAAT
TAATGTTAATTCATAAATATGATTACGTCTGAAGCAATTAAGCATGCTTCACATGGCATTAT
CAGTGAAGATGAGGCTAAGAAATATGGATTAATGATGAAGAGAATGGTCAATTTAAGC
ATATGCACCGCCATAGTGCCACAATTGTTGGAGGCGCTTTAACTTTAGCAGATCTTATTAT
GTCAGGCAAAGTATTAATGGTTGTCACTTAGGTGGTGGATTGCATCACGCTCAACCTGG
TCGAGCTAGTGGTTTTTGTATATACAATGATATTGCAATTACCGCACAACTTAGCTAAA
GAATACAATCAACGCGTTTTAATCATAGATACCGATGCACATCATGGAGATGGTACACAA
TGGAGTTTCTATGCCGATAACCATGTTACTACTTATTCTATCCATGAAACCGGAAAATTC
TTTTCCCAGGCTCTGGTCACTATACTGAGCGCGGTGAAGATATCGGCTATGGACACACTG
TAAATGTCCCCTTGAACCGTATACAGAAGATGCATCATTTTTGGAGTGTTTTAAATTAAC
AGTTGAGCCTGTCGTAAGAGTTTTAAACCTGATATTATTCTAAGCGTAAATGGTGTCTGA
TATACATTATCGTGATCCACTAACTCATCTAAATTGTACGTTACATTCATTATATGAAATT
CCATATTTTGTAAAATATTTAGCTGATTCTTATACGAATGGAAAGGTAATTATGTTTGGTG
GCGGAGGCTACAATATTTGGAGAGTCGTACCACGTGCATGGAGTCATGTATTCTTAAGTT
TAATTGATCAACCAATTCAAAGTGGTTATTTACCGTTAGAATGGATTAATAAATGGAAAC
ATTATTCATCTGAATTATTACCTAAAAGATGGGAAGATCGTTTTAAATGATTATACCTATGT
CCCCCGCACAAAAGAAATTAGTGAAAAAATAAAAAATTAGCTTTACATATAGCGAGTT
GGTACGAATCTACTCGTCAATAA
```

### > **ccpA**

Function: protein coding sequence; catabolite control protein A  
Best match: ccpA\_CC001\_MW2-USA400\_BA000033.2[1821849:1822838:r]RC  
Position: 040-contig\_241\_RC: 16858 ... 17848; Length: 990 bp  
Sequence:

```
TTATTTTGTAGTTCCTCGGTATTC AATTCTGTGAGGTAAAACCTACATTTGGTTCTTCTATCT
TTTCATCGTTCATATATTTTGTTAATAAGCGCATCCCTACTGCACCGATATCATATAATGG
TTGAATAACACTAGAAAGTTGTGGTCTAACCATCTCAACTAAACGTGTATTATTGAAACT
AATAATTTGTAATTCCTCTGGAAC TTTAATACCAGCATCCATTGCACTATGCATAATACCA
ATAGCTTCTTCGTCACTGATACATAATATAGCATCTGGAAGATTACCTTTTCATTTTGGCAA
AAGCTTTTACGCCTTCTTTATAACT TTCAGCACCAGAACAATTCAATGTATCACCTAATTG
AAGACCATTTTTATTTAACACTTCAGTTAAACCTTCTAAAACATCTTCTTGAGCTTTTTTGG
AATGTTCTCCACCTACTAAAGCAAATGATTTAGCGCCTTTTTCAATTAATTCTCCCGTAAT
```

TTCTTTCGCAGCTTCAGTAAAATCAATATTAACCTGATGCTATATGTGCATCCTTACCATT  
GTTCCCTGATACTACTACAGGTACAGATGATTGATTTATCAATTCTTTCATTCTTCAGTAA  
TTGTACCACCAAGGAAAATAATACCATCAACTTGTTTACTTAATAAGTTATTAATAAATTT  
TTTTTCTTTTTCAGGATCGTTATCTGAATTTGAAATAATTGAGTGATATTTATACATTGTTG  
CAATATCTTCAAGTCCACGAGCAAGTTGTGAATAATAGATATTAGATATATCTGGAATGA  
TCACACCTACTGTTGTTGTTCTTTTTACTAGCTAAACCTCTAGCAACAGCATTGGACGATA  
ATTCAAACGCTTAATGACTTCGTAACTTTATTTTTAGTTTCTGCTTTAACATTTTGGTTCC  
CATTAACAACACGCGACACTGTGGCCATAGAGACACGCGCTTCTCTTGCTACATCATATA  
TAGTAACTGTCAT

### > **aroA2**

Function: protein coding sequence; bifunct chorismate mutase/phospho-2-dehydro-3-deoxyheptonate aldolase (core genome, variable)

Best match: aroA2\_CC001\_MW2-USA400\_BA000033.2[1823378:1824469:r]RC

Position: 040-contig\_241\_RC: 18387 ... 19479; Length: 1092 bp

Sequence:

TTATTTTAACTTTTTAGCGTTATATAAATCAGCTAAAGGCTTTAATTCATCATAAAAATGCT  
TGGAATTCATCTAAATCCATTTGTTGACCCGCATCACTAAGTGCAACAGATGGATCTGGA  
TGCACCTCAGCCATAACACCATCAGCACCTACTGCTAATGCTGCTTTCGCAGTTGGTAAC  
ATGATATCTTTACGACCTGTACTATGCGTAAACATCTACCATGACTGGTAAGTGTGTACCTT  
GTTTTAAAATTGGTACTGCTGAAATATCTAAAGTGTTACGTGTCGCCTTTTCATAAGTTCCG  
GATCCGCGTTCACATAAAATAATGTTTTGATTACCTTGTGAAGCAATGTATTCAGCTGCA  
TAAACAAACTCTTCGATTGTAGCAGATAAACCACGTTTTAATAGAATAGGCTTTTTTCGTAC  
GCCAGCTTCTTTAATAACTCAAAGTTTTGCATATTACGTGCACCAATTTGGAATACATC  
TAAATATTCATCGGCTACTTCAAATCATTAGGATTTACAATTTCACTAACTACATTTAAA  
TCGTATTTATCTTTAATCTGTTAAGTATTTAAGTCCTTCAACACCTAGGCCTTGGAAGTC  
ATAAGGCGATGTACGTGGTTTTAAAGCACCGCCACGAATAAACTTTTCACCTTTGGCATG  
TAAATTTTTAGCTACCGCTTCTACTTGTTCAAATGATTCAACAGAGCATGGTCCAAATACA  
AATGATTTGTTGCCATCTCCAATAATACCCCATTTTCAAATGTTACAATCGTATCCTCAG  
GTTTCAACTTACGAGATACGTATAAATGTTTTTTCATTTTCAGATTTTGTAAATCTGTAGA  
GGCTTTGAAAATTTCTTTAAATAATTGTTAATAGTATTATCGTTGAATGGTCCCTTTGTTAC  
TATCGATTAAGTCGTTAAGCATTCTTTTTTACGTTGTGGATCATAGATACGTGTACCTTG  
TTTTAATTTTTCTTCCCAATTTTTTGTGCTAGTTCACCACGTTTAGATAATAAGTCTAAAA  
TTTGATGATTCAGTGATACAATCTCACTTCTGTATGATTCTAATTTATTACTCAT

### > **tx\_universal3**

Function: bidirectional rho-independent terminator

Best match: tx\_universal3\_CC001\_MW2-USA400\_BA000033.2[1397772:1397835:r]RC

Position: 041-contig\_187\_RC: 19 ... 49; Length: 30 bp

Sequence:

TTAATAGAAATCAGCTTTTTTACATTGCCT

### > **Q99TC6**

Function: protein coding sequence; putative protein

Best match: Q99TC6-CC1\_CC001\_MSSA476\_BX571857.1[1804822:1805868:r]RC

Position: 041-contig\_187\_RC: 149 ... 1355; Length: 1206 bp

Sequence:

TTAGTCATTGAATGTACGTTTCTCTATTTTACTATTAGCTTTTTCAACTTTAGCATTGGCG  
TTTTTGATGCATTGGATGATTTAGCATTGTTGTTTTGAAATCTTATTACTAGTTTGATTA  
TTCTTTTGAGTTGACTTACTTGAACACTTTGTTTCTTGCACCTTGTGATGATTTCTTATT  
ATGTTGCTTTTTCTGACCTGAAGTTTTATTTGTAGATGCTTTTGTGATGCATTTTCGTTTATTG  
AAGGTGTTGTTTTTTAGATTGTTTACCTGATTTCTTGTCAACAGCTGTATTATTAGTTGTT  
TTTTCATCAGCTTACGTGTAATAACACCATTTTCAAATTTAGCTTCTTTTTGTTTAAACAGT  
GTCTTTATTATCTATATTAACCTGTCTCTGTCTCTGATACATCATTCTTTTTAGTAACTAATT  
GAGGAATTTCTTTCAAGTCATTTTTAGCAACTGGTTTTTCTGCAAATAACGCTTCAGTTAA

TTGACTCTCTTTTGAACCTGGTGTAAATTTAGCTTGCTTCTGTTTTGCAGCGTTTGCTAATC  
TTTCAGCTTGTGACTCTTCTTTTCGATACCTTTAATGCCACTGCTTTTGATTCTTTATTTGAT  
ACTTCTGCACCTTTTATCTGTTTCTGCTTGTGCTTCTTTTTTAGCTTCTTGAATCTCTTGTGCC  
TCTTGTGATGTATCACTCAAATTTATTTGCACTTGCTTCTTCTTTTATTGCTGCTTGTGTGC  
TTTTAATGCCACTGGTTTTGATTCTTTATTTGATACTTCCGCACCTTTTATCTGTTTCTGCTTG  
TGCTTTTTTCTTCGCTTCTTGAATCTCTTGTGCCCTTGTGATGTATCACTTAAATTTTGC  
ACTTGCTTCTTCTTTTATCGCTGCTTGTGTGCTTTTAAATGCCGCTTGCTCATTTTTAGATTT  
GTTTAAAAATCCTTCAACACGTTCTTTGTAAAGGCAACCGTTTCTTCAAGTTGCGTTTTT  
CTTTCTTCAAACCTTTGCGACAGTTCTTGTCTTTGACTTTTAAATCATCTGCTTTTTGATA  
AACTTTATTTTTAAAATACAAACCTAAAGCTGAACCAACAAGCGCGCCAGTTATAAAACT  
AACAACAAAATCTTTACGGTTGGGTAATGGTTCATTTTGATAAGTGTGTTTATTTTTTAAAT  
GTTCTTTTATTATTTTGTGTTGCGTTCAT

> **yoxC**

Function: protein coding sequence; general stress protein (core genome, constant)

Best match: yoxC\_CC001\_MW2-USA400\_BA000033.2[1826607:1827098:r]RC (completely identical)

Position: 041-contig\_187\_RC: 1428 ... 1920; Length: 492 bp

Sequence:

TTATTTATCTACTCGAGAAGTATAGCTATGATTTGCATCAGTTGCTACATTATTAGCTTTG  
TAATTTGCACTTCCACGACGGTAGTGTCTATTTTGCCATTTGTCTGCAATTTCCATTGCAA  
CATTGACCATTGAACAACCTTGTGAGATTTTATCTTCATTTTGAGAAATATTATGTGTAAT  
TGAATTTGTTACACGATCTACAGAGCTGTTTAAACGTTTGTACTGAGTCACCGATACCTTTA  
ACAGCATCTACAACCTGAGTTTAAACGATCTACTTTACCTTGGATATCCTCAGTTAAACGGT  
TTACTTTATGAAGTAAATCTGTTGTTTACGAGTAATACTTGAACCTTGACCTTCTACACC  
GTCAAGTGTTTTTGCAACATAATCTAAGTTTTTCTTAAACAGAATTTAATACAGCTACGATA  
CCGATACATAAAATTAAGAATGCAATCGCAGCGATAATTCCAGCAATTGGTAAAATCCAA  
TCCAT

> **murC**

Function: protein coding sequence; UDP-N-acetylmuramate--L-alanine ligase (core genome, constant)

Best match: murC\_CC001\_MW2-USA400\_BA000033.2[1827172:1828485:r]RC

Position: 041-contig\_187\_RC: 1993 ... 3307; Length: 1314 bp

Sequence:

TTAAAACGCATTTTTTCATGCCTAATTTATCTAAATATGCATTTTGTAAATTTTTGAATATCAC  
CTGCACCCATAAAATAAAACAACAGCATTATCAAATTTGTTCTAATACATTAATAGAATCTT  
CATTAATTAACGATGCACCTTCAATTTTATCAATTAATCTTGTATCGTTAATGCGCCAGT  
ATTTTCTCTAATTGATCCAAAAATTTACATAAGAATACACGATCTGCTTTACTTAAACTT  
TCTGCAAATTCATTTAAAAATGCTTGTGTTCTAGAGAAAGTGTGTGGTTGAAATACTGCA  
ACAACCTCTTTATGTGGATATTTCTTTTCGTGCTGTTTCAATTGTAGCACTAATTTCTCTTG  
ATGGTGTGCATAATCATCTACAATAACTTGATTTGCAATTGTAGTTTCATTGAAACGACGT  
TTAACACCACCGAACGTTTCTAATGCTTCTTTAATATTTGTAACATCTAGCTTCTCTAAAT  
AACTAATCGCAATTACAGCTAATGCATTTAAACTGTATGGTCACCATATTGTGGAGACA  
GGAAGTGATCATAAAACTCACCATCCACATACACATCAAAAAGCAGTACCTTTATCCGTAA  
TTTGAATATTTTGAGCATAAATGTCATCCGAATCTTTAAATCCATAGTAATAAATTGGAAC  
ATCTGCTTCAATTTTACGTAGATGTTTCATCATCACCCCAAGCAATAATACCTTTTTTAAACA  
TTATGTGCCATTTCTTGGAAATGCATCAAAAACATCATTAAATATCTTTAAAATAATCAGGAT  
GATCGAAATCAATATTTGTCATAATTGCGTAATCAGGTTTATAACTTAAAAAGTGACGTC  
TATATTCACATGCCTCAAAAAGCGAAATAATCACTTTCAGGCAATCCCATACTGTGCCAT  
CACCAATTAAAAATGAAGTTTTTTTTATCACCATTCAATAACATGTGATAATAAACCTGTTGT  
AGAAGTTTTACCATGTGCACCAGTTACAGCTACTGAAGTATATTGATCAATAATCTGTCCT  
AAAAAATCATTATAACTTACAACATCTAATTTCAATTGATGTGCACGTAATTTCTTCAT  
GGCTACTCGCGAATGCATTACCTTGTATAACTACCATATCTTCTTTTATGTTATTAGCATC  
AAATGGTAATATTTTTATCCCCTTATTTCTAAGAGCAACTTCTGTAATAACGTAGTTCTCA

ATATCCGATCCTTGAACCTTCATGTCCTAAATCATGCATGATTTGTGCTAATGAACTCATGC  
CAGAACCTTTAATTCCGACAAAATGATAGTGTGTCAT

> **Q5HF33**

Function: protein coding sequence; cell division protein (core genome, variable)

Best match: Q5HF33\_CC001\_MW2-USA400\_BA000033.2[1828509:1832333:r]RC

Position: 041-contig\_187\_RC: 3330 ... 7155; Length: 3825 bp

Sequence:

TTATTCTTTATTTAAATCTGCTTCCGTAACATAAACATCCCTTGGTTTTGAACCATTAGCAC  
TCGAAACATAACCGAGTTGCTCTAATTGATCGATAATTCTTGCTGCTCTATTATAGCCAAT  
TTGGAAATGTCTTTGGATTAATGATGTTGAAATATGTCCTTCATTAACCATAAATGCACAA  
ACATCATCAAATAATTCATCTTGTGATTGTGTTTGTGTTTTTTCAACAATTCCTTTTTCTTC  
AAATAGATAGTCCGGTCTCTTTGTTGTTTGATAAAATCAACAACATCATCAATTTTCGTC  
TCAGAAACAAATGTACCTTGAACCTAATCGGTTTATTCATACCGCTACCAAGATATAAC  
ATATCGCCATATCCTAACAAAGCGTTCTGCTCCACCCTGTCTAATATCGTTCTCGAATCTA  
CACTTGATGATACCATAAATGCAATTCTTGTGGTATGTTGGCTTTAATTAACCTGTAAT  
TACATTGACAGATGGTCTTTGCGTAGCTACTAACATATGAATACCACATGCTCTCGCTTTT  
TGAGCAATTCTAGCAATAGACTGCTCAACTTCTTGCGGAGCCATCATCATTAATCAGCC  
AACTCATCAATTACAATGACAATTTTTGGCATTCTTTCATCATATGGTGCTTTTTTGTAA  
TGCTGTTATATTACGTACATGGTAATGTGCAAATAACTTATAACGTCGTTCCATTTCTTCT  
ACGGCCCATTTTTAAACTCTGTGTAGCTGCTTTGACATCTGTAATTACCGGTGCAACTAAAT  
GTGGCAAACCATTATAAGGAGCTAATTC AACCATTTTTGGATCGATAAGTAATAATCTTA  
ATTCCTCAGGGTGATTTTTATATAGTAAAGACATCAAATACTATTGATACAAACTGATTT  
CCCTGATCCAGTTGCACCTGCAATTAGTGCGTGTGGCGTTTTAGCAATATCCATAAGTAAT  
GGTTCATTATTAATTCTATACCCCATCGCAACTGTTAATTTAGATTCAGCATTTTTTAAAC  
TTGGAGATTCAATAATAGAACGTAAGTTGACTGTCGTTGGATTTTTGGTTCGGAACCTCAAT  
ACCAACACGACTAGTTCCTGGAATAGGCGCTTCTATACGAATATCTTTCGCTGCCAATGC  
CATTTTAATGTCATCTTGTAAATGCCGTAATCTTGAAACTTTAACACCTTTTTCAACTGATA  
ATTCAAATCTTGTAACACTTGGACCTTCAGTTACATCTTGTACTTCTGCAGGTACATTTAA  
GTAAAATAATGCGTCATTCAGTTCTTTCTTTTTATCTGTAATCCAGTCCTCGTCCGACTCA  
ATAACTTGTGGTTCTTCTAGTAATGAAACACTTGGCAATTTAATATTTGGGCCTTTACGAA  
TCATCGGCTTAGATGTTTGTACAGCTTGATTTGTTGCAACATCTTGTTGGTTCGTCCGAGG  
TCTATTTTCATTAGCTGTATCTTCATTTTGATTTGAAAATGAAGGCTGTAAATCTTTTTGTT  
GATCATCATTATCTTGTGTCCACTAGTATTGTTTGGATGTGTTGTTTCTTCGCTTTCTTCA  
GTTATGTCGCTTACTTCTGAAACTGAAGACGAAGTTGATTGATCAACTTGCTCATTTTCCA  
ATTGATTATCATCTTGGCTTTCTTCAAATATTTCCGTTTGAGTTGAATCAGCAGAAGGTTT  
CTGCTCTGAATATTGTTGTGCATTTTGATAATCATTTTCTGTTTCTGCATGACCAATAAGTT  
GATTGTTCTCAACATTATTTGATGTCATATTATTTATTTTATATGCATTTGTATTTGACTCT  
TGTAATAAGTGCTTGATGATGGTGTGGCTTGACTCGCAGTCTTGCTTTCACTCACAGCTT  
GCTTACTTTGTACAGGCTTCAATTCAGGCACATTGACTTTTGAATGCTTTTTACGATCCAT  
CATACGCTTTTTATCAGATGGCGTCATGACAACATTAAATGGTCTTTTACTTAAAGTTGAA  
ACCTTTTCAGTCTGTTTCTTTGGATTTACGTTTTCAATAGTTTTCTCTTCGACATTTTGTTC  
CTTTCAGCTGTTTCGTTTTGCACATTTTCTGTAATTTCTGCGTTATGCTTTTCTATTTCAATC  
ATGCTTGAATCTTCCACAACATGACCATCATTCACAATATTCGTTTTCAATGAGTTGACAC  
TTAAGTTTGGTTCATCTTTTTATGACGCGGTGCTAATTC AATTCATTATCAACCGTT  
TTATCGATATTATTTACTTGAGATTCAGTTACTGCGTGCTCTTGCGTTTTAGGAGCGTCTA  
CATGTATTTAGACGCGTTTTTATTGGTATTATCTTCGATATTTGAAGTAGTATCCTCATCT  
ACTTCTGTATCATTTAATTCATAAAATTCTGCATCATCGATTTGACTTCTCTGAATATTCTTC  
TTTATTCGTTGCTCCATCTTCTTCTGAATCAGCAATTAATCTGGATTGATTTTTTAGTTCAT  
CTTATCATTTACTTCAACGTTATGTTGTAGTGCTGATTGATGTTGAGACGTTACATTTCGA  
AACCGTAACTTCATCATCTGACAATTGTTTTGTTGTCGATACTTGATTCAAACCTAACTTCC  
TCATAATTGTATGGACTTTCATCTACATGAGAGTCATTAGTGTCTTCATTTTGTATTGACG  
CTTGTTTATTTTCATCATTTGATACAGTTTCATTCTCTATGCCATTTGTATGAAGCTGACTA  
GCATCTGTACTATTATCTGTTAAGTCACTATCATCATTTAATGAACATACCAACATAGC  
GTTCCGCTTGTTTAGCATAACATTTTCATCAATTGCACGTTGTATTGCATCTTGCTCTTCGTTT  
TTATGTTCTTCACGCTTTTTGTTGCAACGCTTTTTTAAATCGACGCTTTTGAAGCACTTTACG

TTCTCGTTCACGTCTAATTTCTTCAACAATTTGTGAAGCATAAATATTTTCAATTTTGATAG  
TATTATCAACTTTTGAATAATTAGGCATTGATTTTGTGTTGATGATACATTTTCATCAGAT  
GATTTAGATGCAGTTCCTTGTGTTGACAACACTATCATTTTGTGTTTTCTTGTCTAATTGTTT  
ATTTTGAGACGTTTGCCTTAGCTACATATTTATCATATTTTGTGTTTATCTGACTCAACTT  
TTTCTGAAGGTTTACTTACAGGGATACGACCATTTTCTAACTTTTAGGTTTCATTGTGCC  
AAAAATAGCTGACGGTACCTCTGAAGTCTTGAAACTTTCTTTGTGATAATCTGGAGTTGA  
ATCTTTAGCACGATGATTTGTATTATTAGAATACATATTATGTGTTTTGACTTGTGCGTTT  
CCTTCTCAATACCATTAATTGCAGAAACATATGTACCTGGCTTATTCGTATGGTAATGTGA  
GTGATCTTTATATTTTATACTTTGCTGTGATATTTAGAATTCCCACGTTGTTCACTATAAT  
TTTGTCTTCAGTTGTTTGATTTCTTCTACGGCGATGTCGTTTTTGTGAACGAGAATCGTGG  
CTTTGTTTGCATAGTCTCGATGGTATTGTTCTTTTTCATCTGAAATAATATCTGCAGATTG  
TTCAACATTTTCATTTTCATAAGCTACGCTCATAGGAAAACGGAATTTTCCCCTCGGACGA  
CTATAAATATCATTATTTGAGGCAGTAATGAGTCATGATCGTTATCTATATTTTGTGATT  
CTTGACGTCTTTTTTTCTTCTATGAATCAAGTCATCATTGAATCATTATCTTCGCCGAAT  
AATTTATCAAACCAGCTCAT

### > **tnpIS431-06**

Function: protein coding sequence; transposase for IS431 (mobile element)

Best match: tnpIS431-06\_circ\_S-epidermidis\_GQ900381.1[43799:43807] (completely identical)

Position: 041-contig\_187\_RC: 6128 ... 6137; Length: 9 bp

Sequence:

ATGAACTAT

### > **pheT2**

Function: protein coding sequence; tRNA-binding domain protein (core genome, variable)

Best match: pheT2\_CC008-ST72\_TCH130\_ACHD01000037.1[27922:28518]RC (completely identical)

Position: 041-contig\_187\_RC: 7175 ... 7772; Length: 597 bp

Sequence:

TTATTCAAAAAATGCTTGTCCAATTTTCATAGCTGTCATTTAATACCATAATACCTTTTTCTT  
CAGGTGCATTAGGTAAATTCAATTCTTTCATTGAACAAATCATACCGCTTGAGGCAACAC  
CACGTAATTCAGCATCTTTAATTACCATACCGCTAGGCATCACTGCACCTACTTTAGCAAC  
AACAACTTTCTGTCCAGCTTCAACGTTAGGCGCGCCACATAACAATTTGTAATGTGTCATTT  
CCAACGTTTACATTTAGTACACTTAATTTATCTGCATCAGGATGTTTGTCTTTAGTTTCAAC  
GTAGCCAACTACAAATTTCCGGTGATAGATCAGCATTTAATTTATAATCAAACCAGCTTC  
TGAAATACGCTTTTGAATACATTTACAAGTTCATCAGTTAATTTAATATGACCTTTTTCT  
TCAATTGTTATATCTTTTGAAGTTTCAAAAATATTATAACCTACAACATTACCTTCATTAG  
TAATTTCAACAACATTACCTTTTTTATTGTAGTTTAATTCACCTTCAACTGGTTCAATTTGT  
AAAAATGCGACATCTCCTACATATTTAGGATTGTAAAATAAATTCAT

### > **Q5HF31**

Function: protein coding sequence; putative protein (core genome, constant)

Best match: Q5HF31\_CC001\_MSSA476\_BX571857.1[1812314:1813171:r]RC (completely identical)

Position: 041-contig\_187\_RC: 7800 ... 8658; Length: 858 bp

Sequence:

CTATTTATCTTTATTAATTTACGACGATTTGCTTCTAAACGCTGAATCACGTTTGGATCTC  
TTTTTTGTTTATTATTTTACCTAAAATAAATATCGGTTCAAGATGACCCTGTTTATATCCA  
AAGGATAATGATGTAATTGGAAGTACCTTTAGTGAAAAATTCCATTGTTAAATGTGCC  
ATCACATCATATCCTGTTTTATTGCGTATATCTGCAATAATTAACACATCTTGGTGTGGCA  
CTGCTACGACATTTGCCTTGACATTGTGCCTCAATTTCAATTTAAAATGCAGTATTTAG  
TATCCTACTTGCATCATACCCGTCATTTGAGTTAATAAAAATAAAAAATATTACCTTTACT  
TCATCAGTCGTATATGAATTTGACAATTTTCTAACATTAACAGAGACATTTCTTATTT  
GTTGTTCAAGTTAACTTCAAATCCTCTAACATGCTTTTCGTCATTTAGACGATATGATTTCC  
TAAATCGACTGCATAATAAACTGCTGTTTCTGCAGTATGCTCATCATAGATAAAAGGAAC  
ACCTTGTTTAGTTTTTTTATCAAAGCTAGTCGCTCTAATGACAGGCATAATTTGACTAGAT



GATATACTCTCAAGGGTTTTATCTGCCATTTGTGCAATAGCTTCATCAACGTAATAAACAA  
TTTCATCTACAATTTTTCTTTTTATCTTCATATTTTGGCGACTATAGCGTTAAGTTTAATC  
GTGATACCTTTGTTATTATCTGTTTCGATAAATACGCAAAGTTTCTTCTTCACGATTAATTT  
AAAATCAACGTCTAAATGGCTTAAACGTTCTTTAATTTATCTCTCATTGAAAGGTATTC  
AT

### > pepA1

Function: protein coding sequence; glutamyl aminopeptidase/locus 1 (core genome, constant)

Best match: pepA1\_CC001\_MW2-USA400\_BA000033.2[1834312:1835388:r]RC

Position: 041-contig\_187\_RC: 9133 ... 10210; Length: 1077 bp

Sequence:

TTATTTATATTGTAATGTTTCTATTTGATTATTATCTAAATTACAAATGGCTTCTGAAAGTA  
AAGATCTAGCTGCAAATAGTCTCTTATATCAAATACTGAGTCTGTACTATGAATATATC  
GTGCACATACACCAATAACTGCAGTCGGAATACCAATATTAGCTTTATGAATTTCTCCAC  
CATCTGTTCCACCTGGTGACATATAGTATTGATGTTCAATGTCATGTGCTTCTACTAECTT  
TAATAAATAGTCTCTAAATACAGGCTTTAAAATCATTGTACCGTCTTTTATGCGAATTAAC  
GTCCCTTTACCAAGTTCACCAGATAATGGTTGGTTTCCTTTAACGTCATTGGCAGGTGAAC  
AATCAACTACAAATGCAACGTCTGGGTCTATCATCTCTGCAGATGCTTTCGCACCTCGTAA  
TCCAACCTCTTCTGAACATTTGCGCCAACATACAAGTCTACATCTAATTCTATATCTTTT  
AATAATTCTAGTATTTCAATTGCCAAGACACAACCATAACGATTATCCCATGCTTTAGCAC  
TATATCGATGTTTCAATAACTGTGTGAATGGCGTGTGAGGTACAATTGTATCTCCTATATC  
TATCCGCGCTCACGCACCTCATCTTCATTTTGTGACCTATATCTAATGTTAAATCTTTA  
ATTTCCGGTGCACCTTCACTACCAGTACGAAAATGTTTAGGTATATTAGAAACAACACCG  
ATAATTTTATCGCCATTTCTATTTTTAATTACTAAGCGTTGTCCTTGCCAAATATCATTTC  
AACACCACCTAAATTTGTGAATTGAATCATTCCATTTTTAGTGATATTTGTAATCATAAAT  
CCGATTTTATCCATATGTGCTGCAATCATTACACGTTTTGCATTTGGATTTTTAGATTTTT  
CACACCAAAAAATCCACCCATACGATTTTCAATAAATTCATCTACGTACAGCGCCATTTG  
CTGAGTCATATAATTTTTTACTTCTTCTTCAAACCTGGTGCCCATGAAGCTCAGTTAAA  
GTTTGAATTTCGTTGTAATGTTACTTTTTTATTTATGTTTCAT

### > Q6G8I0

Function: protein coding sequence; Metallo-beta-lactamase superfamily protein (core genome, constant)

Best match: Q6G8I0\_CC008\_COL\_CP000046.1[1844520:1845362:r]RC

Position: 041-contig\_187\_RC: 10732 ... 11575; Length: 843 bp

Sequence:

TTAGTTATTATCAACTAATGTTTTCACGTAAAATATATGCATCTATGTTTTTACCATCATCG  
CTGTATTTTACAGCAAAGTAGTTTTTCATCATGATAAAACAAGAACCAATATTGTTGCTGA  
ATAAAATATGGTATCATGCGTTCTTTTTCACGAATCGATTGCATAGGATAATCATCATATG  
CCGTTACCCATAGAGGATTTTTATGTGCAGTAGTTGGGAATATATCACCCATATGAACTG  
CTTTATCTCCTTGACTTTCAATCGTAATAATCGTGTGGCCAAAGCTATGACCTCCACTATG  
TTGCATCTTGATACCCGGAACCGGTTCAAATGTTTTTTCGAATAAAATCAACTTGTTACTA  
TAATCGCCTTTATTCTTATCCCAGTAAGTTGATTTACTTCTTATATTAGGTGCAATAAACTC  
ATGCCACTCATCTTGTTGCACAACATGAATCGCATTTTTCAAAAATTGCATGTCCCCTGTA  
TCAGTCAAACCGGCAGCATGATCAAATGCATATGTGTCATTAGCACATAATCAATATCC  
TTTGGCGTTAAATTATAATTTGCCAAATCAGCAATAATATGACTTTCTTCATCTACTCCAA  
AATTACGTAATTGCTTTTCAGATAATTTACCATTACCAATACCCGCATCTATAATCAAATT  
ATATTGAGCCGTTTGAATCAAATTTGGATGTGTGCGTAAATTGATTTGATTTGTTTCATTT  
GCATTGTATTGCTTTGACCACAACGGCTTCGGAACAACACCAACATTGCACCGCCATCC  
ATTTTTGTATTGCCACCATTTAGATAATGAATAGATATATCCCCGATTTTCAT

### > tnpISSha1-2

Function: protein coding sequence; putative transposase

Best match: tnpISSha1-2\_CC705\_RF122-cow\_AJ938182.1[1268707:1270028:r]RC

Position: 041-contig\_187\_RC: 11804 ... 11834; Length: 30 bp

Sequence:  
ATCAAAGGTATTTAGTATAACATTGTTTCAT

> **repORI-px**

Function: origin of replication of plasmids  
Best match: repORI-pUB110-2\_CC005\_Mu50-VRSA\_BA000017.4[1877259:1877321:r]RC (completely identical)  
Position: 041-contig\_187\_RC: 11833 ... 11896; Length: 63 bp  
Sequence:  
TAGGCGCATTATCTCCTTTAGTTATTTGTTTACTTCTTTAATTATAGAGATAATTGCGCT  
T

> **txbi\_trmB**

Function: bidirectional rho-independent terminator of trmB  
Best match: txbi\_trmB\_CC008\_COL\_CP000046.1[1845779:1845844:r]RC (completely identical)  
Position: 041-contig\_187\_RC: 12001 ... 12067; Length: 66 bp  
Sequence:  
TATAGTACGAAAAACACTTATGATTGTATGTGTACATACCCTCATAAGTGCTCTATTTTT  
GTGAA

> **trmB**

Function: protein coding sequence; tRNA (guanine-N(7)-)-methyltransferase (core genome, variable)  
Best match: trmB\_CC008\_930918-3\_ABFA01000009.1[4364:5008]RC  
Position: 041-contig\_187\_RC: 12054 ... 12699; Length: 645 bp  
Sequence:  
CTATTTTTGTGAATGGAATTTTCGCTTCCATACGATAAATACGTGACCCTTTATCCGAAAAT  
TTCTTTTCATATTCTGTTAAAATATTACTGCCATCGTCTTCTTGATGTAAATTTAGATTTAT  
TTTTGTAAAATACATTCCAAATTGAGACATACTTTCTAAACTGTAGGCAAATAGTCCTCTG  
TTATCAGTTTTAAAATGTAAATCTCCTTCATCATTAAAGATTTGTTGATACAACGCTAAAA  
ACGTATGATACGTTAAACGTCGTTTTGCGATGACGATTTTTTGGCCATGGATCTGAAAAGTT  
CAAATAAATACGCGAAACTTCGCCGCTTTTAAAATATTCATTAAATTCAATGGCGTCATTA  
CAAATAATCTTTAAATTTGTTAAACCCATCTCTTTAACTTTATCCAATACTTTATAAACGA  
TACTTTTCTCACGTTCCATTGAAATATAGTTAATATGAGGATTTTGAGCAGCTAATGTTGT  
AATAAACTGCCCCATACCCGAACCAATTTCAATGTGTATCGGTTGCGTTTTATCAAACCAT  
TCAGTCATTTTCCCTGCATGTTGACCGTCCATGTCAACCAATTCAGGATGACCTTTTAAAT  
AATCTTCAGCCCATGGTTTGTATCGAACTCTCAT

> **daaA**

Function: protein coding sequence; D-alanine aminotransferase (core genome, constant)  
Best match: daaA\_CC008\_NCTC8325\_CP000253.1[1773873:1774721:r]RC (completely identical)  
Position: 041-contig\_187\_RC: 14054 ... 14903; Length: 849 bp  
Sequence:  
TTAAATACTGTGTGACTCTATATACTTTTCAAATCCTTCTTGTAGTTGACGTGTAATTGGG  
CCAACCTTACCATCATTAACCTGGTTCACCATCTAATTTAATAACAGGTGTAACCTCAGCTG  
AAGTACTTGAAACAATAACTTCATCTGCGTTTTTCAAGAAATCTACAGTAAACGTTTCTTC  
TTTAAATGGGATGTTATAGTCTTCGGCAATTTTTTTAATTACAATTCGTGTAATACCATTA  
AGAATATAGTTGTTAATCGGATGTGTATAAATCACACCGTCTTTAATTGCATAAGCATTAC  
TTGAAGATCCTTCAGTTACAGTTTACCTCGATGTTGAATTGCTTCAACTGCATTATATTT  
CACAGCATATCTTTTGTAAATACATTTCTTAATAAGTTCAAGCTTTTAAATGTGCAACGT  
AACCATCGGATATCTTCAACGGTAACACCATTCACACCATTTTCTAAATGATCATAAGGA  
CGATCATAACTCTTTGTATAAGCAACAATTGCTGGTTCTACTTCAGGTGTCGGGAAGCTAT  
GATTCCTTTCAGCTACACCACGCGTTGCTTGAATATAAATTGCCCCAGTTTCAATTTGATT  
CATATCAACTAATTTACGAGATAGTTCAATTAATTTCTTCTACAGAATAATTTAAATCTAAA  
CCAATCTCATTGGCACTACGTAAAATCTTTCATAATGTTCTGTTACTGTAATAACTTAC

CATTATATACTCGAATGTATTCATAAATACCATCGCCAAATACGTATCCTCTGTCGTTGTA  
TGAAACCTTTGCTTCACTTGGACTTACAAACTCACCATTTAAAAAAATTTTTTCCAT

### > **repeat\_nyS**Agamma

Function: repeat element

Best match: repeat\_nySAgamma\_CC008\_COL\_CP000046.11850350:1850460:rRC  
[4\_50ANF10END]

Position: 041-contig\_187\_RC: 16572 ... 16798; Length: 226 bp

Sequence:

CGGGGCCCCAACATAGAGAATTTGAAAAGAAATTCTACAGACAATGCAAGTTGGCGGG  
GCCCCAACATAGAAGCTGGCCAATAGTCAGCTTTCAATAATGTGAAAGTTGGGGTAAGG  
GCCCCAACACAGAAGCTGGCCAATAGTCAGCTTTCAATAATGTGCAAGTTGGCGGGGCC  
CAACACAGAAGCTGGCCAATAGTCAGCTTTCAATAATGTGCAAGTTGG

### > **tx\_universal2**

Function: rho indendent terminator

Best match: tx\_universal2\_CC001\_MW2-USA400\_BA000033.2[1842046:1842086] (completely  
identical)

Position: 041-contig\_187\_RC: 16990 ... 17031; Length: 41 bp

Sequence:

CTGAATGAAAATACGCTTGTAACAAGCTTTTTTCAATTCTA

### > **rsuA**

Function: protein coding sequence; pseudouridine synthase (core genome, constant)

Best match: rsuA\_CC001\_MW2-USA400\_BA000033.2[1842616:1843311:r]RC

Position: 041-contig\_187\_RC: 17560 ... 18256; Length: 696 bp

Sequence:

TTATTTATAATTTAATTTGTCAAATCATTTTTAGTTAATAAACGATATTCTCCTGAATCTA  
GATTGCTGTCCAATTCTAAATCAGCAATTTTGATACGTCTTAAATGTAATACCTCATTTTG  
AATGCTATGAAACATTCGTTTAACTTGATGATTTTTCCCTTCATAAATTGTTACGTGTGAC  
GTTTGATTATCAATATAAGTTAAAATTGCAGGCTTAACCTTGCCATCAGACAGTGTTACAC  
CCTCTTTAAAAGCTTGAATGTCGTCTTCAGTGATAGGATTTGCTGAAATAACTTCATATTT  
TTTAGAAACATGTTTGTGGACTCATTAAATTCATGATTAATAATCACCATCATTCGTTATC  
AATAAAAGCCCTTCTGTATCTTTATCAAGACGACCAACCGGAAAAATATTTAGATGTTGG  
TATTCAGGTATTAATCAATAACGGTTTTTGAATGATGATCTTCAGTTGCCGATATATAAC  
CTTTGGCTTATTTAACATAATATAGACATTTTCAACGTATTCTATTAATTCTCCACGAACT  
GTTATCTTATCGTTTTCTGGTTCTATATGTGTTTTTGGTGATTTAATTACTTGTTCGTTGAC  
ATTTACAAGGCCTTTTTTAAGTAAGTGTGACCTCATTACGTGTACCGACGCCCATATTT  
GCTAAAAATTTATCTATTCTCAT

### > **Q1Y9Y5**

Function: protein coding sequence; NAD(FAD)-utilizing dehydrogenase (core genome, variable)

Best match: Q1Y9Y5\_CC001\_MW2-USA400\_BA000033.2[1845376:1846644] (completely  
identical)

Position: 041-contig\_187\_RC: 20320 ... 21589; Length: 1269 bp

Sequence:

ATGTATCAAACAATTATTATCGGAGGCGGACCTAGCGGCTTAATGGCGGCAGTAGCTGCA  
AGCGAACAAAGTAGCAGTGTGTTACTCATTGAAAAAAGAAAGGTCTAGGTCGTAAACT  
CAAATATCTGGTGGCGGTAGATGTAACGTAACATAATCGATTACCATATGCTGAAATTAT  
TAAGAACATTCCTGGAAATGGGAAATTTTTATATAGTCCCTTTTCAATTTTTGATAATGAA  
TCCATCATAGATTTTTTTGAGTCTAGGGGTGTTAAATTAAGAAGAAGATCACGGGCGT  
ATGTTTCCAGTTTCCAACAAAGCACAAAGACGTGGTTGATACATTAGTGACAACTATCGAA  
CGCCAACATGTAACGATTAAGAAGAAGAAGCTGTTAGTAGAATCGAAGTTAATACAGA  
CCAACTTTCACTGTACATACTCAAATAATAGTTATGAAAGCCATTTCGCTAGTGATTGCT  
ACAGGTGGTACAAGTGTCCCTCAAACCTGGTTCAACTGGTGATGGTTATAAGTTCGCACAA

GATTTAGGTCATAACCATTACTGAGTTATTCCCGACCGAAGTTCCAATTACATCAGCTGAAC  
CTTTCATCAAATCCAATCGTCTAAAAGGTTTAAAGTTTAAAAGATGTTGAATTGTCAGTACT  
TAAGAAAAATGGTAAAAAACGCATCAGTCATCAAATGGATATGTTATTTACTCATTTTGG  
TATCAGTGGTCCAGCTGCATTAAGATGTAGTCAGTTTGTTTATAAAGAACAAAAAATCA  
AAAGACACAGCACATTTCTATGGCAATCGATGCATTTCTGAATTAACCATGAACAATT  
AAAACAACACATCACATCATTATTATCGGACACACCAGATAAAATCATTAAAAACAGTTT  
GCATGGTCTAATTGAAGAGCGCTACTTACTGTTTCATGCTGGAACAAGCAGGAATCGATGA  
AAATACCACATCACATCACTTATCAAATCAACAATTGAACGACTTAGTAAATATGTTTAA  
AGGTTTGTATTTAAGGTGAACGGGACATTACCTATAGATAAGGCATTTGTACAGGTGG  
TGGTGTGTCACTTAAAGAAATTCAACCTAAAACAATGATGTCTAAATTAGTTCCGGGATT  
ATTTTTATGTGGTGAAGTATTAGATATACATGGTTATACTGGTGGTTATAATATTACAAGT  
GCACTCGTAACAGGACATGTCGCTGGATTATATGCCGGACATTACTCACATGCATCAATG  
GAATAA

> **sasC**

Function: protein coding sequence; LPXTG-sorted surface protein C (core genome, variable)

Best match: sasC-COL\_CC008\_NCTC8325\_CP000253.1[1781582:1788142:r]RC

Position: 041-contig\_187\_RC: 21705 ... 28266; Length: 6561 bp

Sequence:

TTATGATTCTTTTTCGTTTTTTAGTACGTCCTTAGCTAACAAAGCCGCACCTGTAATCAGT  
GCAAATCTTTCAATGGTAAATCCATTCCTTCAGAACCTGTATTTGGAAGTTCTTTTTCAA  
CTTTGCGCGATTTCATGTGTCTCTCTTTTTTAAATAGGCGTACAAACTTTTGGAGCTGGCTG  
AATTTCTTTTGGTGATACTTTCGTGCTTCAGCTGGTAATTTAATTGCTAAAATTTTCATCAA  
CAATGAATTGCGTGTGTTGTTTGTATGTCATTTAATGTCGCATCTTCATCAATCATTCTATTG  
CCATCTGCAACATATTGATCAATTAATACTTTTACTTTAGCTAATTGTTCTGGTGTGCGA  
TCGCTTTGAATTTTCGCATATGTTTGTGAGCAATGTTATCAATTCGCAGTAAGCTATTTTCT  
TTTTAGTAATTAAGTCTTCTATATCGCTTAATGCAACATTAATCGTTTTAAACTGCAT  
CAACATCAGCATTAGTGCCTGCTGTTTTAATTCCTTCATCCATTTGTAATTTTAAAGCAGT  
TATAGCTTTTAAATGCATCAGCCTTATTACGATTACTTACTTTTCGATAATTTTGCATAAAA  
GCAGTGACGCGTGCAAGATCATCATAATCGTTTTTTTCAGCATCTGGCTTTTTAATAGGAT  
GTACATCTAAATCATGTATTGTTTGTAGATTTAATGATGCTGTTTTATCAACTTGTGCATT  
GCTACGATCTTGATCAATTTGTCCAATAGCAGTGTGCATAAATATTTTGTAACTGTGCTAAT  
ATACTATTTCTTTCTTCTACCGTTGCTTGAATATTCGCTTCAATTGCTTGTTTTTTATCGTTG  
AATAATGTTGTCAATTGTTCTCGAGCAGACGCCTTTCTGTTAATAACAGGTTTCGATTTTAC  
GAATTTTCGTTTTTCTCATCATGCAATAAATATGCCACATCAGCATTAGTCACTGCACTAGC  
AATTTGTTGTTTAGCTTTAATTAATCTTTTTCAACTTGTGCTATTGCAATATTTTGTCTTC  
ATCTGTGCTTCGTTATTTGCTTTAATTAATTAATTTTATTTGTAGCGATATTTTGAATTT  
GTTGTAATGCTGTTGCTTTAACTGTTGTCGCTGGTTTAAATTTTTGAAATAAATTTTGTAGCA  
TTTATACTATCTTGATTAATCTTGGGCAGTCTTATCTGCATGATTGATCTGATCAATAGCCT  
GATTAAGTGCTTGTCTACTAAATGTTTAGCAGCTAGTCTTTCTTCTCAGTTGATAAATC  
GCTTTGATCGATTAGTGCATTTTGTAGCTTCGGCTTTTACACCAACAGATTGACGCGCTGCT  
GGTTTAACTTGAATTTAGGTAAAATCACTTTGATGTTGTCGTTGCCATCAGTCTCAGTTC  
GATCCACTTCTGCATTCGTTTTGTTTTGTGCAATGTCATTTTTAATTGTATTTACAATTTTA  
TTTAAAGTATCAATAGCAACATCTCTTCATCTTGAGTAGTATCCAACGTATTTTCGGATTG  
CATCGAGTTGATTTTTATTATTTTCTTCAATGCTATCAAGCGCAGCTCGTTACGTCTTACT  
TTAGGTTTTATTTGCTCTATTGCCTTGATTGTTTGTATTTCTAACATCAGTAACAGCAGCATC  
TTGATTTGTATTTTCTATTTCTTGTGCGCTTGTGTTGAGTGTGTCGCTAATTAATTGATTTCG  
CTTCATCTAATTCATCAACTGTTGCATGTGGTGTATCTTTTATTGATTCTACTTGATTTTCT  
GCACTTGCTTTTATTGCTTGTGCTTCAGGCTTAAATACAATATGAGGTTGTACACCTTT  
TAGTGTAGCAATGCCATTTGTTTTCAACACGTTTCACATCATTATTTCGCTATTGCTTGATCG  
ATGTTTTGTAATGCACGTTTTTTCATTATTTCGCTAATTGATTTAAAGCAACTTGTTTTTCTTC  
ATCAGTCGCATGTTCCGCTTGTCTCAATTTTCGCGCTTTTTAGCTTCATATTGTTGCTTAACTG  
CATCTCTAGCAGCTGCTCTAACAATATGGTCAGGCGTCACTAAAGCAATGCTATCAAGCG  
CTTGACTTGTGTATCATCAACTTGTGATTTGTTCTATTATTCGTAATATCTGTCATGGCT  
TGATTTACAATTCATTGATTTTATCTAGTGCTACTTGTCTTTCTTCTGCTGTTGCTTCTTTA  
TCCTGATTAATCTTAGCACGTAATTCATTCGCTTTTTGATTGATTTTTTTCAGTGCAGCTGG

TTAACTTTTGTTCAGGTTGAATAATTTTAATCGCTGATACACCATTTGTTGCTGCTTGAT  
TCACCTGACTATTCGTTTGAGCTTGGTCAATAGCTGCAAGTGCTTTTTCTTTTCTTTTGCT  
AATGCTTGTGAAGCAACTTCTTCTCATTATCTGTTGAATCAAGACTATTATCAATTTGCT  
GTTGCTTTTCTTTAACAGCTTTTCAATATCTGCAATTGCCTTTGGTTAATTACTACTTCA  
GCTTCAACATTATCTATAGCATTACCGCTTGATTTGTAGTTGCGTCTACCTGATCATTGTT  
TTGGTTTTGATTAATTTGATTAATGCTTGATCTTTAAGTTGATTGATTGATTAACAGCA  
GCCTGCTTTTCTTCGTCAGTTGCATTAGGTGTTGTTAACCAGCTTCAATACGCTTCGCCAC  
TTCAGCAGTGATTTTATCTCGCGCTGCTTGTTTTTTTACTACGTCAACTGAACAGCATCG  
ATATTATTCTCTGCTACTGTGCGAGCTTGGTCTACTTCTGCATTTGTGTTAGCTTGTTAAT  
ACTTTCAATAGCTTGTGTCTGTCTTGATTTAAAGTATTGATCGCAGCATTTTTCTCATCAT  
TCGTTGCATCTGGTGTAGCATTGATTTAGCTAATTTAGCATTATAATGCTGATTGATTG  
TGCTAATGCTGCAGGTTTTTAAACAATTTGGCTGAATCGCATTAAATTGCTTTTGTACCT  
AATTGTTGCGCTTGATCTACTTCCGCATTTGTATCAGCTTGATTTATATTAAATTGCCGT  
TGCTAACTCTTGATCCACTTGATTTAAAGCCACTTGCTTTTCTTCAGTTGTTGCATTTGTGT  
TTTGATTAATTTCTTGCTTTTTAGCAGTTGCTAAATCATTTAATACACCTGTAGCAGTTTGT  
TTCTTCGTTACATGCGGTTGAACTGCGCCGATTTGATTGACTGCATCATCTCTAATACTAT  
TGACCATCGCAGTAGTAGACGTCACACCAATATCAGTTAATGCTCTATTTTTAAGTGTATT  
GACACGATTTATCGCTTCTTGTTTCTTCTCGAGTCGCGCCAGGTGTTGCATTGATATTTG  
TTATCGCCTCTCGCGCTTATCATTTACAACATTGCGAGCATCCGTTTTAACTTGTGTTGCC  
GGTTGAATCACAACATATTTTTGTGTGCCCTGATCTTTTGCTTGTGCAACTTCTTGATTCGT  
ATCTGCTGCATTAATATTTTGCTTCGCTGTGGCTACAGCTTGATCAAGTAATTGTTGTGCT  
GCTTGTGTTCTTCGAGCGTCGCATCATTATTATAAATATCGTATTATGTTGCGTTTCCGC  
ACTTTTATCAATGGCATTTTTTGCATCTGTTTTACTTTTGTAGCTGGTGTAAATTGCTTGTA  
TTCTTGTATCGCATTGTCTTCACTTGTTCACCTCAGCATTGGTATTAGCGTTTAAAATG  
TTTTGTGTTGCTGCAGTTACAGCAGCATTCACTTTGTCAATTGCTGCTTGTCTTTCTTCTTG  
AGTCGCATCAGGATTAGCATTGATCTCTGCGATATGTTGTTGTGCATCATGTGATACAGCA  
TCCCTTGCAGCTTGCTTAAACAACAGTTACAGGAGCAATTGGATTAATGGCATTAGACCA  
TCTCCTTTGGCGTTATCAACATCAGCATTGTTGTTGCTTGATTGATTGTTCTAAAGCATG  
GTTGGTTGCTTGAGTTAATTCGTTCAATGCTGCATTTTTCTCTCCTGAGTTGCTTCTCTAT  
TACTATTTATTTGTTGTCTTTTCGTTGCTGTTGCTTGGTTAATTGCATCTCTTGACGCTTTT  
TATGAGTTACTTGAGGAACAACCTGCTCCAATAGTATTGATGCCATTATTTTAGCTGTTTC  
AACGTCAGCATTGTAGTAGCATTGTAACATTATCAATAGCATCTGTTTCATCCGTAGCT  
AATTGATTTATGCATCTTGAATCTCGTCTCAGTAGCATCTGGTGTGCAATTGATAATTC  
CCTTTGTTTCGTTGCTTTATCACGTATTGCTTTTTTAGCATTGGTTAACAACCGGTGTTG  
CAGTATCCCCACTTAAGGTCTGTATACCTTGATCTTTGATTCTAGTAACGCCATCATCAGT  
CGTTTGATCACCAATATCACCAATAATATTGCCTTTATGTTCCCTCGATAACTTGTATTGCT  
GCTTGTTTTTCTTCATCTGTGAGTTTCATCATTGTTGATTAACTAAATCTTCCATTTGATCAGC  
TTTTGATTTACTGCATTTTCAGCATCAACACTTCGAATTAAGTATGTTGCATCTGATTA  
GTTAATGTATCAATATCTGCTTGAGATACTCTTTTATTTAATGGTACATTGTTACGATTTTC  
AGCTAAAATTGTTTGTGCACGTTTTTAAAGATCATTAAAGATATCTAATGATGCAAATGTA  
TAATCAGCTTGTGAATACGTCTGTCAACTTCGGCTTGAATGCATCTTTATTCATGATGA  
TATCGATAGTATATGGATTTGTACTTACAGTATGACTTTCTGCAGCTGAATTAATGAAATC  
TTGTGTATATGTTTTATACGTTAATGTATCATTAAATGTTACTGTTCTTGGTGTGCGGTACAT  
TATTAACACGCAACTTATACTTTAAATCCAATTTTTATCAGGCATTAGTCGTGCAGGTGA  
ATTCGTTGTGCCACCACCAGTGCTTTTTAATTGTTATCACTCGATTCCGCCGCATCATATGTA  
ACATTCATATCATTAACATCAACGCCTGAATTGTTACTTGGAAAATCTTTAGTCAATGAAT  
TGTTACATATTCTACCCCTCAGGTAATTGAATTTTATAAACAATTCATCTGTGTCTAA  
AGAAGCACCAGAATTACCATTATTTTTTAGTGATGTTGTAACGTGAAATCTTTATTATTC  
GTTGCTGTGGGTTCCATTGTTTCGCTTTCAACATAAACATGTGACCCAGAATGAAGTCCGA  
TAGAGTCAACAAAGCTATAGTATTTGTAACCATCTTTTAGTTGATAAATGCCACGCGCAT  
CTGTTATTGCGTCATTTTTAGGTACAAATTGAATTTGAGATTTCTCACATTATCAGGTAC  
TTTAAATAAACGCAAAGTTGGACCGCCTTCAACAGTCTTTTTCAGCAATCGTATCATTAGTA  
TCAGCATTTTTGTATAAACATTTGTTGCGCCTTGACCATTTTTAGTTGGCATTGTATTAA  
ATTCAAAGATTAATTCAGAATTTGGATTTACTGTTAAAGATTTTTCAATACCATTAAAATC  
TCCATGATTACTAGCGTCCGTCCCGCTTATACGTCTAATGCAAGTACATTGCCTTGTGCC  
TGATAGGTTCTGTTGCTCCCAGCCTCAAACATACTTGTCTAACCATCGCATGACTTAGCA

CACCTACTTTACCACCATTGATAAGTGTAAGCCTGGTAAATTATCAACAACCTGTTACTG  
ATGGTACAGAACGGTTGGTACTTGGTCTAATACTATTGTCATCAAATGACAGCACTTCGTT  
AGGTGCATTTTGTCTGCATTATTGGCATTAGGATCAGTTGTAGGCGTGTATGGCGCTGTA  
ATTGCAACTGGTGCACCACCGTTTCCTGCCGCTGCAGCCCCTGGATCTGCTGGAGTTGCAT  
TAGGATCTGCCGGTGCCGCACGTCTACTTCTCTTTTTTCGGTCTATTAGATGCTGGTTCAGC  
AATTGCAACTAGCTCTGGTTTATCTGAAGAATGACGAACATCTTCTTGAATTTCCTTTAAA  
GTTAGATGTCCTCCTGAACCATTTTCATTTGTTTTATTTGGTACATTTAATGTGGTATTATT  
CGACGCTACATCATTATTATTAGCGTTTGACACTGTCTCAGTTGCTGTTGTATTGCCATCT  
GTATGATTATTGTTTTGTGCTGAAGGCGTACTTGATTGCACTGATGTTGGCGTAGCTTGAT  
TACTATACTACCATTATTATGATTAACCAATGCTTGATTTCGTTGCTTGATTGGTTGTTGCA  
GATTGATTAGGTGATTCTGCGCACTATTTGCTAAACCTCTATTATTAGCAACATCTTTAT  
CTTGTGAATTTACAGGTGTTGCTTGATTAGTATCGCTTTGTACATTATTATCCGTAGTTAA  
GGCTTGTGCACCATTTGGGTTTGAAAGTAATAAAACTGTTCCGATTAAGTAGAGAATAT  
GCCTACTTTATACTTCTAATACTATATTTATTTTTCTTTAACAAATTCAT

### > leuS

Function: protein coding sequence; leucyl-tRNA synthetase (core genome, variable)

Best match: leuS\_CC001\_MW2-USA400\_BA000033.2[1853980:1856400:r]RC (completely identical)

Position: 041-contig\_187\_RC: 28924 ... 31345; Length: 2421 bp

Sequence:

TTATTTAGCTACAATATTGACTAATTTTTGAGGAACAGCGATGACTTTCATGATGCTTTTA  
CCTTCAATACTCGCTTTAACATTGTCATTAGATAAGGCAATTTCTTGCATTTCTTCTTTTGA  
TGTATCTTTAGCAATTTTAATTTTAGCTCTCAATTTACCATTTACTTGAACAACGATTTCTA  
CTTCATCATCTACAAGTAGTGCTTCGTCATAAGTTGGCCAAGGTTGGTACGTAATAGACTC  
TTCATGTCCTAATTTTGACCATAATTTCCACCGATATGTGGTGCATAGGTGCTAACATT  
TTAACGAAGCCTTCAATGTAAGGTTTATAAACTTCATCAACTTTATAACACTCATTAAATA  
ATACCATTAATTGACTAATAGCAGTATTAATCCTAATGTTTCAAAGTCTTCTGTTACCTT  
TTTAACAGTTTGGTTATAAACTTTATCTAAAGATTTATTATTTGTAGTTACAATTTTTGAAC  
TCAATGTTCCATCTTCATTTACCATTAACGCCATACGCGATCTAAGAATCGACGAGACC  
CATCTAATCCTTTTTCACTCCATGCAATTGCAGCATCTAAAGGTCCCATAAACATTTGCTA  
AAGACGTAAAGTATCTGCACCATGAGACTGTACTATATCATCAGGATTGATTACATTTCC  
TTTAGATTTACTCATCTTCTCATTACCTTCTCCTAAAATCATACTTGGTTAAATAATTTTT  
GGAAAGGTTCTTTAGTAGGTACGATACCCAAATCATAAAGGACTTTATGCCAAAATCTTG  
CATATAATAAGTGAAGAACCGCATGTTCTACTCCACCGATATATAAATCAACAGGTAACC  
AATGTTTTTAATTTTTCAGGATCTGCTAACATATTTTCATTTTTAGGATCGATGTAACGTAA  
ATAATACCAACAACACTACCTGCCATTGTGGCATTGTATTTGTTTCACGACGTCCTTTTATA  
CCTGTTTTTTTCATCTACAACATTTACAAATGAATCAATATTAGCTAGTGGAGACTCACCAG  
TCCCTGATGGCTTGATTTTCATCTGTTTCAGGTAACAACAATGGTAGCTCTTCTTCAGGAAC  
AGTTGTCATTGTTCCATCTTCCCAATGAATGACAGGAATTGGTTCGCCCAATAACGCTGA  
CGACTGAATAACCAATCTCTTAATTTGTAATTAACTTTCTTTTCGCCAGCACCTTTTTGCTC  
TAATAATTGAATAGCTTTAGTAATTGCCGCTTCATTTTCTAAACCATCAAGTTCACCAGAA  
TTAATATGTTTACCTTCACCAGTGTATGCTGCTTCTTCAACATTTCCACCTTCGATGACTTC  
AATGATTGGCAAATCAAACCTTTTTAGCAAATTCATAATCTCTGTCATCATGCGCTGGTACT  
GCCATAATTGCTCCAGTACCATATGTTGATAATACATAATCAGCAATCCAAATTTGTACTT  
TTTACCAGATAAAGGATTAATTGCATATGCACCAGTAAACACACCTGATTTATCTTTTGC  
TAAATCTGTACGTTCTAAATCTGACTTTTTAGAAAGCTTCTGTTTGATAAGCTTTTACTTTTT  
CTTTATATTCATCAGTTGTAATTGAATTAACATAATGCATGTTTCAGGACTTAAGACTAAGAA  
TGATGCACCATAGATTGTATCTGGTCTAGTCGTAATAACTTCTACTTTTCCCTCCGCTTCCG  
TATTATCTACATCAAATGAAACTTTGGCCCCCTCAGAACGTCCAATCCAATTGCGCTGCAT  
ATCTTTTAAAGATTCAGGCCAATCTAAATCATCTAAATCTGCTAATAATTGATCTGCATAT  
TCTGTGATTTTAAAGTACCCATTGTTTCATCGGCTTACGATAAACTGGATGTCCACCACGTT  
CAGAGACACCATCAATCACTTCTTCGTTAGATAAAACAGTGCCTAATGCTGGACACCAGT  
TAACTGCAACTTCATCAACGTATGCTAAACCTTTGTTATATAACTGTATGAAAATCCACTG  
TGTCATTTTATAGTATTCTGGATCTGTTGTATTAACCTTCACGATCCAATCATAACTGAAC  
CCTAATTCCTTAATTTGTCGTTTAAAAGTTTGGATATTTTTCTTTGTAAATTCACGTGGGTC

GTTGCCAGTGTCTAAAGCATATTGCTCTGCTGGTAATCCGAATGCATCCCACCCCATCGG  
ATGTAATACATTATATCCTTGCATTCTTTTATATCTTGAAATGATATCTGTTGCTGTATAGC  
CCTCAGGATGTCCAACATGTAAACCAGCACCTGATGGATATGGAAACATGTCTAAAGCAT  
AAAATTTCTTTTGACCTAAGTTATCATTTGTTTTAAATGTTTTATTTTCGTCCCAATAGTCT  
TGCCATTTCTTTTCAATTTGATTGTGGTTGTAATTCAA

> **rot**

Function: protein coding sequence; repressor of toxins (core genome, variable)

Best match: rot\_CC001-ST772\_118\_AJGE01000022.1[107171:107671:r]RC (completely identical)

Position: 041-contig\_187\_RC: 34559 ... 35060; Length: 501 bp

Sequence:

TTACACAGCAATAATTGCGTTTAAACTATTTTGCATTGCTGTTGCTCTACTTGCAATCGCA  
TCACTGATGAAATTCAACAACCTACTTTCTCTTGTGTAACCTTTTCATTGAAATGAATAA  
TAACTGTTCTTTTCATCGTCAACAGGACGCTCTTTGTAAATCCATTCTAATTCAACTAAATT  
ATTATACGTTCTCGTACGCTTATACGGTTTAACTTCAACAAATCTGTCCATTTCTTTAAGC  
GTCATAGAACCTTTTTGCCATAAAGTTAGTAAAATTAATAATTTCTTCTCTAGACATTTTGT  
ATTGCTTTCAATCTCGCTGAAAATTGAGTTAATGTCACCCAAAAGTGTTTCTAATTGCAA  
AATCCCAAATACAGTGTGCTTATTTACTTTTTTCATGCTAAACATCTCCCAATTAATAATC  
ACATATTTAGCTACCATAACAAGTATTAACAAACATCCCAACAATCCCAAAAACCTTGATGT  
GCTAACTTATGCAT

> **tnpIS1272**

Function: protein coding sequence; transposase for IS1272 variation TCH (mobile element)

Best match: tnpIS1272-COL\_trunc\_CC008\_NCTC8325\_CP000253.1[1795407:1796080:r]RC

Position: 041-contig\_187\_RC: 35518 ... 35548; Length: 30 bp

Sequence:

ATCTTTCAGTTCTTTTTTACGGGTCTGTTT

> **txbi\_universal1**

Function: bidirectional rho independent terminator

Best match: txbi\_universal1\_CC001\_MW2-USA400\_BA000033.2[1175005:1175076:r] (completely identical)

Position: 042-contig\_273\_RC: 6 ... 78; Length: 72 bp

Sequence:

TGTATAAATAGAGAACAGCAGTAAGATATTTTCTAATTGAAAATTATCTTACTGCTGTTTT  
TTAGGGATTTA

> **pldb**

Function: protein coding sequence; lysophospholipase (core genome, constant)

Best match: pldB\_CC008\_NCTC8325\_CP000253.1[1796427:1797254:r]RC (completely identical)

Position: 042-contig\_273\_RC: 99 ... 927; Length: 828 bp

Sequence:

TTAAATTTCTACAATTTTCGTCATCTTCAACAATAAAGCCCATTGTATTGACGCTGTTATTT  
AAGAAAGTCAGAATATAACGCATTACTTCATCACGTTCTGGCTCATTGTGAACCTCGTGG  
TAAAAACCTTGCCAAGCTTTAAAATATAAATCAGGTGTTTGATATTTTCTTTAAACTCAT  
CAATTGCCCTAGTATCAACAATTAATCCTTCGTTCCATACATTAATAGCGTTGGCATTGG  
TTGAATGTCATGAATATGAGCCATCGTATCTTTCATCGTCTCATTAAATTGTATTATACCAA  
TGATACGTTGCTTTTTTTAACATTAACCATCGTTAACTGTTTCTTCAACAATTTCTAAATT  
ACGTGTAAATCTTTTGGTTCTACACCAACATTAACCGTGTGTCTTTTGAATTTTACCT  
ATATTTGAAACAAGTTTATCTTTACGATTTTTTCCATTCTTTTGAAGTTCTAGCATAGGAG  
AAATTAACATCATCCCCTCGATTGGCAATTCTACTTTTTCAAGTAAATTTAATAAAAATCAA  
ACCGCCAAGTCCTACCCCTAATACATAAGTAGGAATTTTATATTCATTAGCTATCTTTAAC  
CAGTCTAGCAAACCTTCGTGATACGTTTGAAGTTTTCAATTTGTCCTTTATTAGCTCTTG  
AAGTTTGACCTTGACCAGGCAAATCTCCATAATCACATGATAGCCATTTCTTCTTAACAT

CGTAATAACATATGCATATCTTCCCGTATGTTCTAATATATTATGAGCAATAACAACGAC  
GCCTTTCGCATCATTTTCAGCTTCCCACTTCCACAT

> **putA**

Function: protein coding sequence; proline dehydrogenase (core genome, constant)

Best match: putA\_CC008\_NCTC8325\_CP000253.1[1797488:1798489] (completely identical)

Position: 042-contig\_273\_RC: 1160 ... 2162; Length: 1002 bp

Sequence:

ATGGCACTATTAAGAATTTTTTATCGGATTATCTAATAATAGTTTTTTAAACAACGCAG  
CAAAAAAGTGGGCCCACGTTTGGGCGCCAATAAAGTCGTTGCCGAAATACAATTCCA  
GAGTTAATTAACAATCGAATACTTAAATGACAAGAATATCGCTGTTACGGTAGACAAT  
TTAGGGGAATTTGTCGGTACAGTTGAAGAAAGTAATCATGCTAAAGAACAAATTTAACA  
ATTATGGACGCGCTTCATCAACATGGCGTAAAGGCACATATGTCTGTTAAATTGAGTCAG  
TTAGGTGCAGAATTCGACTTAGAATTAGCTTACCAAATTTAAGAGAGATTTTACTTAA  
GCAAATACTTACAACAATATGCATATAAATATTGATACTGAAAAATATGCTAGCCTGCAA  
CAAATTGTTCAAGTTTTAGATCGCTTAAAAGGCGAATTTAGAAATGTTGGTACTGTAATTC  
AAGCATATTTATACGATAGCCACGAATTAGTTGATAAGTACCAAGATTTACGATTACGTT  
TGGTTAAAGGTGCATATAAAGAAAACGAATCAATTGCATTTCAATCTAAGGAAGACGTA  
GATGCAAATTACATCAAATAATTGAACAACGTTTGTAAACGCACGCAATTTCACTTCA  
ATTGCAACACATGACCATCGCATCATTAATCATGTAAAACAATTTATGAAAGAAAATCAC  
ATTGAAAAGATCGTATGGAATTCCAAATGCTCTATGGTTTTAGATCAGAGTTAGCAGAA  
GAAATCGCAAATGAAGGCTATAATTTCACTATTTATGTACCTTATGGCGATGATTGGTTTG  
CGTATTTTATGAGAAGATTAGCAGAACGCCACAAAACCTATCTCTTGCTGTAAAAGAAT  
TTGTGAAACCTGCTGGCTTAAAACGTGTTGGCATAATTGCAGCTTTAGGAGCTACAGTTA  
TGTTAGGTTTAAGTACAATTAATAAATTATGCCGTAATAG

> **ribH**

Function: protein coding sequence; 6,7-dimethyl-8-ribityllumazine synthase (core genome, constant)

Best match: ribH\_CC008\_NCTC8325\_CP000253.1[1798611:1799075:r]RC (completely identical)

Position: 042-contig\_273\_RC: 2283 ... 2748; Length: 465 bp

Sequence:

CTATGCTTTTATAGATTTTAAATAAATTAGCCATTTCAATTGCACTTACTGCTGCTTCAGCA  
CCTTTATTGCCAGCTTTCGTACCTGCTCTTTCCACAGCTTGTTCAATACTTTCAGTCGTTAA  
AATACCAAATATGACTGGTACATTAGTTTGATCATTCACTTTAGAAACACCTTTCGCGACT  
TCATTACAAACATAATCATAATGAGACGTAGCACCGCGAATTACGCATCCTAATGTAATT  
ACTGCATCATAATTTCTGATGAGGCTAATTTTTTAGCTACTAAAGGAATTTCAAACGCAC  
CTGGCACAAATGCTACATCAATATTGTCTTCATTAACATCATGTGCGAATCAAAGTATCTTT  
TGCACCTTCAAGTAATCTTCCAGTGATAAAATCATTAAATCGACTAACTACGATTGCAAC  
TTTCAAATCTTTCCAATTAATTTACCTTCAAATTCAT

> **ribA**

Function: protein coding sequence; bifunct 3,4-dihydroxy-2-butanone-4-phosphate synthase/GTP  
cyclohydrolase II (core genome, variable)

Best match: ribA\_CC001\_MW2-USA400\_BA000033.2[1863251:1864432:r]RC

Position: 042-contig\_273\_RC: 2760 ... 3942; Length: 1182 bp

Sequence:

CTATATTAATGACCCATTTTTATTTTTTCGTTTCCATATAATCATGATTATGTACCGTTT  
CTGGTACGATAACTTCAATTCTTTCTGCAATATCAATGCCATATTGTTTTAATCCCTCAA  
TTTACTTGGATTATTACTTAATAAATTGATATGTTTCGATGTTAAAATATTTTAAAATCTGT  
GCAGCAATATGATAATCTCGTAAATCTTCATCAAACCTAATGCTAAATTTGCAGTTACT  
GTATCATATCCTTGCTCAATTAATTCATATGCGCGTAATTTGTTTAAACAATCCTATGCCAC  
GACCTTCTTGAGGTAGATAAATAATCATGCCACCATGTTTCATTGATATACTTCATAGACG  
ATTCAAGTTGAGCACCACAATCACAACGTTGACTATGGAAAATATCGCCTGTAAGGCACG  
CAGAATGTAAGCGTACATTTTCATGTTGTGCGAATTGCACCTTTTGTGAGTACAACCTATCTC  
TTCATCTGTGTATGTCGCTTTAAAACCATACATATCAAATGTTCCGAAATCTGTAGGCATT



TTCAC TTTTGCCTTAAATTCAATTTCTGGTTCTAATTTTTTACGATATTCAATTAATCATC  
AATCGTAATCATCTTTAATTGATGTTTTTCTTTAAACTTTTGTAAATCTTGTCTTTTCGCCA  
TCGTGCCGTCATCATTATAATCTCACAAATGACACCAGCGGGCTTGGCACCAGTAAGTT  
TAGCTAAATCAACAGCCGCTTCTGTGTGTCCATTTCTAGCTAATACGCCTTTATCTTGTGC  
TACTAATGGAAATAAATGACCAGGACGATTAATAATCTTTAGCTTCACTACTAGGATCAAT  
GAGCTTTTTTGGCAGTCAATGTACGTTTATAAGCACTAATTCCTGTTGTTGTATCTACATGA  
TCAATACTCACTGTAAATTGCGTACCAAAGATGTCGGAGTTATCATCAACCATTTGTACC  
AAATCCAAACGTTGTGCAATATCTTTAGACACTGGTGCGCATATTAATCCCCTTGCTTCTT  
TCGCCATAAAATTAATGGTATTATCGTTCATCCATTCAGTGACCGCTACTAAATCACCTTC  
ATTTTCACGATTCTCATCATCTACTACAATAATTGTTTCTCCATTTTTTAAAGCCATTAAG  
CACTGTCAATATTATCGAATTGCAT

### > **ribB**

Function: protein coding sequence; riboflavin synthase subunit alpha (core genome, constant)

Best match: ribB\_CC001\_MW2-USA400\_BA000033.2[1864443:1865075:r]RC

Position: 042-contig\_273\_RC: 3952 ... 4585; Length: 633 bp

Sequence:

CTAAAAACCAAATGCTCTTAATTTATCTACAGATAATTGGTCTTTATCTTTATTTAAAATA  
TTTTCAACATATTTAAACAAAACGTCTGTTTCTAAATGTACTTTATCTCCTAATTTTTTGG  
TGATAAAATCGTTGAACGCCTCGTTTCTGGAATAAGATGAATGTCAAAACTGTTATCATG  
CTTATCAAATACCGTTAGACTTACACCATCCACAGTAATAGACCCTTGCTTAACTAACTGA  
TTATTAATATGTTGGCTACATTGAATCGTAATAATTTTGGCATTGGCTGTTTCATTTATTT  
TGAAACTGTTTCTAGTTCATCTACATGACCGAGGACAAAATGTCCACCAAACCTACCGTT  
ACCACCCATGGCAGCTCTAAATTTACTTCTGATTGTCGCTTAACATCTGCTAAATAGGTT  
TTATTTTCAGTGCCTTTAATTACTTGAACAGTAAAAGATGTCTGATTAATAATCAATCACTG  
TTAAACATGCACCATTAACACTGATGGAATCACCAATATGCATATCTGCCGTAATCTTAT  
GTGCTTCGATTTCAATCGTCCTGACTGATTGACGAATTTGAACACTTTTAACGACACCTAT  
TTCTTCAACGATGCCAGTAAACAT

### > **ribD**

Function: protein coding sequence; riboflavin specific deaminase (core genome, constant)

Best match: ribD\_CC001\_MW2-USA400\_BA000033.2[1865082:1866125:r]RC

Position: 042-contig\_273\_RC: 4591 ... 5635; Length: 1044 bp

Sequence:

TCACTTCTTTCGTAAAGTTAATTTAACATTTTGATTTAATAACTCGGAATGAACAATTTCA  
AATTGGTTCGCATCTGGTATCTCAATCACATCATTTGTTTGATAAAATTGATAATTTCCAG  
ATCCGCCAATTAATTTCCGGGCATAATAGAGAATAAATTCATCTATATAATTAGATTGGA  
GAAATTCTGAAGTAGTGGTTGGACCTGCCTCGACTAGCAAAGTTCCAACCTCCTTTTTATA  
TAAATTGTGAAGAATTGTTGTTAAATCGCAAGACTTCAAGTAAATAATTTCAATATGTGTT  
TGATTGGTTGTTAAATTTGGATTTTCAGTATATATCCAAATTGGTGTTGATTCATCTTGAT  
AAATTTGCTGATTAATAATGAATATTTCCAGACTTAGACAATATTACTTTTATAGGGTTTTT  
TCCATCTTGAATACGTGTAGTATATTGTGGATCATCTAATTCAACTGTACGTCTTCCAGTT  
AACACTGCGTCGTGTCGATTTCTTAACTTATAGACATCTTGTTTAACTCCTTTGTTAGTAAT  
CCATTGACTTTGTCCATTATCATTTCGCTTGTTTACCATCTAACTTGCAGATACTTTCACTG  
TAATTTGTGGCAGTTGCTTTGCTTTTAAAAAAGGCTTGGTATAAATTGTGATGCCCG  
TTCATCATCAACGCATTCAACCTCAATACCGTGAGCCCGTAACGTCTCATCACCATGTGTG  
TCTAACGAATTGTCTTTTGTGCGTATACTACTTTTGTCTATCTTACAATCAATTATTTGTT  
AACACAGGGTGGTGTGTAACCAAAAATGACTACATGGCTCTAACGTAATATAAATCGTCCG  
ACCTTCAGCATTTTGTGTTGTCATATCAAGTGCTTGAACCTCCGCATGCTTGTACCTTTTC  
TCAAGTGTGCACCAATACCAACAATCCTACCTTCTTAACTACAACAGCGCCAACGGGTG  
GATTAACACCTGTTTGACCTTGTACCATATTTGCAAGTTGAATCGCATAATCCATAAATTG  
ACTCAA

### > **fmn-L2**

Function: noncoding RNA FMN riboswitch/locus 2 (core genome, constant)

Best match: fmn-L2\_CC001\_MW2-USA400\_BA000033.2[1866254:1866385:r]RC (completely identical)

Position: 042-contig\_273\_RC: 5763 ... 5895; Length: 132 bp

Sequence:

```
ATTCTTTCTCCCATCCAGACTTTAACTGTCGGCTCTAGAATCTCACTAGATCAGCCACTAA
TATGAAACATATTAGCAGGTCGCAGGCTTTATTTACTGCCGGTTGGGAATTTACCCTGCC
CCGAAAGAAT
```

### > **Q5HF04**

Function: protein coding sequence; pyridine nucleotide-disulfide oxidoreductase (core genome, constant)

Best match: Q5HF04\_CC009\_21334\_AGTW01000033.1[40471:41973:r]RC

Position: 042-contig\_273\_RC: 6115 ... 7618; Length: 1503 bp

Sequence:

```
TTATTGATTGTCACTGCGCTGTTGTTGCTCATTTCGATTCTAAAGCATCATATAAATTGAGAT
ACTGTATGCGCAACTTGTCTACTATCATTTTTACACCATTTTCGTAGTTTATTAACACCGTT
TGTCATTTGACCTATCGCAATCATATTTGTTAATGTTCCAAACCTTGGACTAATAACTTGA
TTGGTTTTCCGGTATGATTTGTATGCCTCCCATTGGGTGTGCTTGTACAATTTGTCTATTTTC
AAGATTTTTAATTAATTGATCATCTTGATCCAATTCATTTAAATGACTTTTTGCACCTGTGCG
CGTTAATGACAACATTATATATGTCTACTGATTCTTGGTTTTTTGTATGAAAAATAATACAA
CTTGCCATCATGTTTCACATCTTCTAAATCTTTTTTCAAATTAAGACTTATTTTCGATTA
ATCAATAATTAGTTCAGCAGTCTTGGAGGCATTGGATTGAATTTAATTGAATCATCTT
TGAGTATTTTTGATTAAATTGATGTTGGTCTTCAATACTTAAGCTATTCCATATCCAATTTA
AATTCTCTTCAAATGTTCAATCATACTTTGGAAAATGCCCATTTCTGTTGGACGCGCTAA
ATCATACTTCAAATCTGCAATATGATTTCTGTACGTCTATGTACTAATTTTTTAAAATCA
ATGTCATATTCAGCACATTCTTTTAAAAATAAAGAACTAAAGTATCAAGCGGTGCATTG
CCGAAATGATGTTTTTTAATGTCATTTAATTTGTCTTTAGTTAAGTACTTGAATGTCACGTC
TATCATTGTACCTCTTACACTTGGTAAATGAGCAGAACGACTCGTCATAGTAATTGGTAAT
TTCGGATGATGAGCAGCAACATAACGGACAACATCTAAACTGGCAAGGCCTGTACCAAT
AATCGCAATATCGTCCAGTTCATTTACTTCGTCTAACGTATTATATGTTGGATAAGGCGTA
GCGATATATCCTTTTTTACCCTTTAAGTTATATGGATCATGGTAGGCAAATGTACCACATG
TTAAAATAACATAATCGTACGCTTGCCATGATTGTTCTGAATTTGTAGTACATATGTAATA
AGTTAAATTCGTTTCATCGATATTAGAATTTGTATAAATCTCTTGAACCTTTATTATAATTA
GTTGATATATTTGGATATTTTTTCGTGAACATAGATAAATAAGATTTTCATATAATGTCCGA
ATACAAATCTAGGTAATATGCAGGTTTCATCAAATTAATAATCAGTTTGTGTTTATACC
ACTTCCAAAATTCAGTCTCATCATCTAAATTTAAACTCATCTTTTTTCGAAGGCATATTAAT
TAGCAGCTCAGAACTATCATTTTGAATGGTACGCCCTGTCCCATATTTACTTTATCATCG
TATAAATCTATATCTAATTGATTAAACTTCGGGTGCTTAACTAACTCTCTCAATACACTTA
CACCAGCAGTTCCCATGCCTATTATTGCTACACGCAT
```

### > **arsR**

Function: protein coding sequence; repressor of arsenic resistance operon

Best match: arsR\_CC001\_MW2-USA400\_BA000033.2[1868631:1868945]

Position: 042-contig\_273\_RC: 8140 ... 8455; Length: 315 bp

Sequence:

```
ATGACGTATAAAGAACTAGCAACATTTTTAAAAGTTTTATCAGATTCAAGCAGATTAGAA
ATACTAGATTTACTTTCTTGTGGAGAGTTATGCGCTTGTGATTTGTTAGCACATTTTCAATT
CTCTCAACCTACACTTAGCTATCATATGAAAGCATTAGTAAAATCCAACCTTAGTTACGAC
ACGAAAAATCGGAAATAAACATTTATACCAGCTCAATCATAATATTTTTGAGTCCGTAAT
TAATAACTTGTCTAAGGTTTCATACCTCTAATCAACGATGTATTTGTCATAACCTTAAGACT
GGTGAATGCTAA
```

### > **arsB**

Function: protein coding sequence; arsenical pump membrane protein (core genome, variable)

Best match: arsB\_AF422190.1[3069:4361:r]

Position: 042-contig\_273\_RC: 8454 ... 9747; Length: 1293 bp

Sequence:

```
ATGATGACAAC TTTAGCGACACTCATTTTTCTAGTAAC TTTATTATTTGTATTATGGCAAC
CTAAAGGCCTAGATATTGGCATTACCGCATTAACTGGTGCCTTTATTGCTGTTACTTGG
TGTGTAAAGTTTTTCCGATGTTTTAGAAGTAACAGGTATTGTTTGGAAATGCTACTTTGACT
TTTGTCTCAGTCATTCTTATTTTCATTAATATTAGATAAAGTTGGATTATTTCGAATGGTCAG
CTATTCACATGCTTCATGCTTCAAAAAGGCAATGGTTTAAAAATGTTTCGTTTATATCATATT
ATTGGGTGCCCTTGTGCTGCATTTTTTCGCAAATGATGGCGCAGCGTTAATCTTAACGCCT
ATTGTATTAGCAATGGTTAAAAATATTGGATTTAATAAGCGCGCAATATTACCATTTATTA
TTGCAAGTGGTTTTATAGCTGACACAACCTTCTTTACCTTTAATCGTGAGCAATCTAGTGAA
TATTATATCTGCTGATTATTTTCATGTAGGATTCGTTTCGATATTTTAGTAGAATGATTATAC
CTAATTTATTCTCACTTTTAGCAAGTATTATAGTATTGTGGTTATATTTTAGAAAAGCGAT
ACCTAAAACGTTTGATGATAATAATAAAGCATCCTAAAGATGCCATTAATGATTTAAA
GCTATTTAAAATTTTCATGGATTGTTCTAGTTATATTACTTTTTCGGCTATCTAATCAGTGAAT
TTACTAAAATTCGGTATCAATTTTCACTGGAATCATTGCTTTTATTTTTCTAATGTTGGCT
CGTAAATCAAATGCTGTAAATATTAAGCAAGTCATTAAGGGCGCACCTTGGAAATATAGTA
TTATTTTCAATTGGTATGTATATCGTTCGATTCCGGCTTAAGAAATGCTGGCATTACTTTAA
TATTGGCTAAAATATTAGAATATATTTCCAATTACGGTCTATTTAGCACTATTTTGGGAAT
GGGCTTCATTTTCAGCGTTTTTATCATCAATAATGAATAATATGCCTACAGTTTTAATAGAT
GCGATTGCTATTGGTCAATCAAATGTCCATGGCATGTTAAAAGAAGGCCTAATTTATGCG
AATGTTATCGGTTCTGATTTAGGTCCAAAAATTACACCGATAGGCTCTTTAGCTACATTAC
TGTGGTTACACGTCTTAACACAAAAAGATGTTAAGATTTCTTGGGGCACATACTTTAAAA
CTGGTATCATCATTACAATTCCAGTACTATTTATAACCCTCATAGGGTTGTATCTAACACT
TATCATATTTTAA
```

### > **arsC**

Function: protein coding sequence; arsenate reductase

Best match: [arsC\\_CC007\\_TCH959-USA300\\_AASB02000250.1\[22664:23059\]](#)

Position: 042-contig\_273\_RC: 9764 ... 10160; Length: 396 bp

Sequence:

```
ATGACTAAAAAACAATTTATTTTATATGTACAGGCAACTCATGTGCGAAGTCAAATGGCT
GAAGGTTGGGCTAAACAAATCTTAGCAGATGATTGGAATGTATATTCTGCTGGTATCGAA
ACACACGGTGTTAATCCCAAAGCGATAGAAGCTATGAAAGAAGTAGGCATTGATATATC
AAATCATAACATCAGATTTAATCGATAATAATATTATTAATAAATTCAAATTTAGTTGTTACA
TTATGTAGTGATGCAGACGTAAATTGCCCTTCTTTACCAACAAATGTTAAGAAAGAACAT
TGGGGATTTGATGATCCTGCAGGCAAGCCTTGGTCAGAATTCCAACGTGTAAGAGATGAA
ATTAATAATCGCAATTGAAAATTTCAAATCACGATGA
```

### > **gad**

Function: protein coding sequence; mannosyl-glycoprotein endo-beta-N-acetylglucosaminidase (core genome, constant)

Best match: [gad\\_CC008\\_NCTC8325\\_CP000253.1\[1806782:1807636:r\]RC](#)

Position: 043-contig\_278: 64 ... 919; Length: 855 bp

Sequence:

```
TTACTTATTCAAATGTTTACTGTTCATCTTTATACACAAAGTATTTGAAGTATTTTCCTTCAG
TCTTCATGTTCTTATAAAAAGTCAGCGATAATTGTTGCATTACTTTCTGCCCACTTAATATCT
GTAGCATATTGATGTTCTCCTGGATTTTTTGGATTCCATCTCATACTATAACAATGTATTTTG
ATCTGTGCTTGATAAGAAGTGCTTATGAATGAAATCAGCACCGCCTGAAATAGCTTTTTTC
AGGTGTATCCCAACCATGCTTTTTAGCATATTCTGCACCTGTTTTAATTGGGTCTTTATCA
AGGGCTCCTACTCCATAGAAATTGTAGTATTTTTTGGCATCAATTCGACTCCATTAGCTA
ATTCATTTTAACTGCGCCAGTTTCTAATAATGCATGTGAAATTAATAAACTTCGTTAAC
GTGCTTATCTTTAGCAGCTTTTAAGAAATCATCCGTATGTTTCAATAACGTTGGTCTATCT
ACTAACATACGTTTAATTCTATTTTTATCAATCCCTTGATACTTTGATAAATCTAAAAATT
GATATTTTTGCTTTTCATTATCGATAAAAGTACCGCTATCCATTGCACTTTTAATTTTCAGTT
GCAGATGCATCTCTCCATGCATCATTCTTTTTATTTGATACCTGTTGACTCGTATAATTATT
```

TATTTGTTTCTTTGCTGCATCGTTTAATGTAACATTTAACTTTTCAATCTTAATGTCGGATT  
TAACATGTTTGA AAAAATATCTGATCGGATATCATTGAGAAAAATAAAAATGAGACAACA  
GCAAAATATGACAACAAGTCCTATTATTCCAAAAATAGAACCTTTCTTGTGTTTATTCAT

### > sigS

Function: protein coding sequence; RNA polymerase sigma factor S (core genome, variable)

Best match: sigS\_CC005\_Mu50-VRSA\_BA000017.4[1911863:1912333]

Position: 043-contig\_278: 1617 ... 2088; Length: 471 bp

Sequence:

TTGAAATTTAATGACGTATACAACAAACACCACAAAATCATAACACCATCTTTTAAAAAAA  
TATAATATTAGCTATAATTATGATGAGTATTATCAACTACTCTTGATAAAAAATGTGGCAAT  
TGAGTCAGATATATAAACCCCTCAAGCAAGCAATCTTTATCCTCTTTTTTATTCACTCGATT  
ACATTATTACCTTATCGATTTATTTCAGACAACAAAATCAATTAAGATGTCATTTTATGT  
GAGAATAATTCACCAACATTA ACTGAACAACCAACTACTTTAATGAACATGACCTTCGA  
TTACAAGATATCTTCAAGCTTTTAAATCATAGAGAAAGACTATGGCTCAA ACTATACCTT  
GAAGGATACAAGCAATTTGAAATTGCTGAAATCATGTCATTATCGCTTTCAACGATTA  
TTAATTAAGATGTCCGTTAAGCGTAAATGCCAACATAATTTTAATTAG

### > tal

Function: protein coding sequence; transaldolase (core genome, constant)

Best match: tal\_CC001\_MW2-USA400\_BA000033.2[1874704:1875417:r]RC (completely identical)

Position: 043-contig\_278: 4443 ... 5157; Length: 714 bp

Sequence:

TTATAGAATAGAAAGACCTGAAGATTGAATATCTTTCGCAAAGCCTTTAACTGTATCTAC  
TGATAATTCGTTAATATCGCGACCTAAGTTTGTATTCACTTTTTTCAACATCTGCAGGG  
CATGTAATAATATCTGCACCAATTTTCATCAGCTTGAATCACATTGAATAATTCGCGGCAA  
CTTGCCCATAATAATTTAACGCCGTCTTACTATGCGTAACTTTTACAGCCTCTTTCATTAA  
TGGTAATGGATCTACGCTGTATCTGCAATACGTCCTGCAAATACTGAAACATATGTTGG  
CACACCTTCAGTTACTGCTTCAGTTATTTCTTTAACTTGTTC AATTGTGTAAACAGCCGTA  
ACGTTTAATCTCACATTGTCAGCTGAAAGCTTTTTAATTAAGGAATCGTTGATTCACCTT  
TTGTATTTACAATAGGAATTTTAAACAAATACATTTTCGCCATATTGTTTTAGAATTGCTGC  
TTCTTTTTCCATAGTTTCTAAATCGTCTGCAAATACTTCAAATGAAATTGAAGCATCTGGA  
ATTTCTTTCACAGCTTCTTCAGCAAAGCTTTGTAATCTGTTACGCCCGCTTTCGCCATTA  
AACTAGGATTTGTTGTAAAACCATCCACTTGTGTTTATAAGCTGCTTTCATTTCTTCA  
ATATCTGCACCGTCCGCAAATACTTCTACATTTAGTTTAGCCAT

### > crcB1

Function: protein coding sequence; protein CrcB homolog 1 (core genome, constant)

Best match: crcB1\_CC005\_Mu50-VRSA\_BA000017.4[1916143:1916586]

Position: 043-contig\_278: 5896 ... 6340; Length: 444 bp

Sequence:

ATGCATCGACAATTTTTGTCGTCGTGTTGCCAAAACCTCTTTTTTAAATTCAA ACTACTTCT  
TTTCGAGGTGAACCAAATGCAATATGTATATATTTTTATCGGTGGTGCTTTAGGCGCTTTA  
TTACGTTACCTCATTTCTTTTCTGAATACTGACGGAGGTTTTCCAATCGGAACACTGATAG  
CCAATTTGACTGGTGCCTTTGTAATGGGATTGCTAACAGCCTTAACAATTGCATTTTTTTC  
AAACCATCCGACCCTAAAAAAGCTATTACGACTGGTTTTCTTGGTGCTTTAACGACTTTT  
TCAACATTTCAATTAGAATTAATACATATGTTTGATCATCAACAATTTATAACTTTACTAC  
TATATACTGTAACAAGTTATGTCCTTGGTATTTTGTATGTTACGTCGGTATAAAACTAGG  
TGGTGGTTTATCATGA

### > crcB2

Function: protein coding sequence; protein CrcB homolog 2 (core genome, variable)

Best match: crcB2\_CC001-ST772\_118\_AJGE01000029.1[22014:22367:r] (completely identical)

Position: 043-contig\_278: 6336 ... 6690; Length: 354 bp

Sequence:

ATGATATCAATCATTTTTAGTCATGATTGGCGGCGGTTTCGGCGCAATTGCTAGAAAGTGCC  
ATTACTGATTATTTTAATCATAAATTTACTTCAAAGTTACCTATCGCAACATTGATAGTAA  
ATCTAGTTGGTAGTTTTTTAATTGGATTA ACTATAGGCTTATCAATTTCAATCTCATGGTTC  
CCTGCGTCTTTGTTACCGGTTTTTTAGGTGGCTTAACAACCTTTCTCAACGTTAGCTAAAG  
AACTTACACTAATGATGACGCCAAAATTTAATATTAACCTTTTTCTCAATTATCACTTTT  
ACAATTCATCATTGGATTTATAGCTTGTATATTGGCTATCATATTTAA

### > **tx\_universal2**

Function: rho indendent terminator

Best match: tx\_universal2\_CC007\_TCH959-USA300\_AASB02000023.1[4549:4580:r]RC

(completely identical)

Position: 044-contig\_322\_RC: 0 ... 32; Length: 32 bp

Sequence:

AAAAGCTTGTTACAAGCGCATTTTTCGTTCAG

### > **metK**

Function: protein coding sequence; S-adenosylmethionine synthetase (core genome, constant)

Best match: metK\_CC001\_MW2-USA400\_BA000033.2[1879411:1880604:r]RC

Position: 044-contig\_322\_RC: 2210 ... 3404; Length: 1194 bp

Sequence:

TTATTTTACTGCGTCTTTTAATTCTTCCACTTTGTCTAATTTTTCCCATGGGAATAAGACAT  
CTGTACGTCCAAAATGACCATAAGCAGCAGTTTGTGTTGTAATTGGTTGTTTCAAATCAA  
GCATTTTAATAATACCAGCAGGTCTTAGGTCAAAGTGTCTTCTAACTGCTTCAACAAGTTG  
CCCTTCAGAACTTTACCTGTTCCAAATGTATCAATTGCAATTGACACTGGTCTGCAACA  
CCAATCGCATATGCCAATTGTACTTCACATTGATCTGCTAAACCTGCTGCAACAATATTTT  
TAGCCACATAACGTGCAGCGTATGCAGCTGAACGGTCTACTTTTGTAGGATCCTTACCAC  
TGAAGCATCCGCCACCATGACGTGCATAGCCACCGTACGTATCAACAATGATTTTACGTC  
CTGTTAATCCTGCATCACCTTGAGGTCCACCGATTACAAAGCGTCCTGTAGGATTGATGTA  
GAATTTAGTTTGTTCATTAATCAAGTTTTCTGGAACAGTTGGATAAATGACATGTGCTTTA  
ATGTCTTCTTGAATTTGTTCAAGTGTACATCCTCAGCATGTTGTGTTGATACGACAATCG  
TATCAATACGTACTGGGTTATCATTTTTCATCATATTCAACAGTGACCTGAACCTTACCGTC  
TGGTCGTAATAATTTAACGTACCATCTTTACGCACATCTGATAAACGTTTTGCCAATTGA  
TGTGATAAATAAATTGCTAGAGGCATATACGTCTCTGTTTCATTCGTTGCGTAACCAAACA  
TTAAACCTTGGTCACCTGCACCTGTTGCTTCAATTTCTTCTTCGCTATCTTTATCACGATAC  
TCTAATGCATTATCCACGCCTTGTGCAATGTCAGGTGATTGTTTCATCAATCGCAGTTAAAA  
TTGCCATTGTTTCATAATCATAACCATATTTTGTCTTGTGTATCCAATTTCTTTAATTGTT  
TCTCTAACAACTTTTCGGAATATCAACATATGTTGTTGTAGAAATTTTCGCCGGCGATCAATG  
CCATACCTGTTGTAACAGTTGTTTACAAGCTACACGTGCATTTGGGTTCGCTTTTTAAAAT  
AGCATCTAATATTGCATCTGACACTTGGTCAGCGATTTTATCTGGGTGTCCTTCTGTAACA  
GACTCTGAAGTAAATAATCGTTTGTATTAAACAT

### > **sam-L3**

Function: noncoding RNA SAM riboswitch locus 3 (core genome, constant)

Best match: sam-L3\_CC001\_MW2-USA400\_BA000033.2[1880710:1880821:r]RC (completely identical)

Position: 044-contig\_322\_RC: 3509 ... 3621; Length: 112 bp

Sequence:

CTCTTATCGTTCAGACCTATTTGTCTGCAAACGGTTTGGCACCTTTCTTTTATAAAAAAAG  
AGGTTGCTGGGTTTCATTGGGTCCATGTCCCTCCACCACTCAGGATAAGAG

### > **pckA**

Function: protein coding sequence; phosphoenolpyruvate carboxykinase ATP (core genome, constant)

Best match: pckA\_CC001\_MW2-USA400\_BA000033.21880976:1882568

Position: 044-contig\_322\_RC: 3775 ... 5368; Length: 1593 bp

Sequence:

ATGTCAGTAGACACATAACAATGAAACAACCTAAAATTGACAAATTACTGAAAAACCAAC  
GTCACATTTTCAACTTTCGACGACACAACCTTTATAATAAAAATCTTAGACAATAACGAAGG  
GGTATTAACAGAACTTGGTGCTGTTAATGCAAGTACTGGAAAATATACTGGTCGTTCCGCC  
TAAAGACAAATTTTTGTCTCTGAACCTTCATATAGAGATAACATTGATTGGGGAGAAAT  
TAATCAACCTATCGATGAAGAACTTTCTTGAAGTTATACCATAAAGTACTAGACTATTT  
AGATAAAAAAGATGAACTATACGTATTTAAAGGCTACGCTGGTAGCGATAAAGATACAA  
TGTTAAAACCTTACAGTCATCAATGAATTAGCATGGCATAATTTATTTGCTAAAAATATGTT  
TATTAGACCTGAATCAAAAAGAAGAAGCTACAAAGATTAACCTAACTTCACTATCGTTTC  
TGCACCACATTTTAAAGCAGATCCAGAAGTTGATGGTACTAAATCTGAAACCTTTGTCAT  
TATTTCAATTTAAACACAAAGTCATTTTAATCGGCGGTACTGAATACGCTGGTGAAATGAA  
AAAAGGTATCTTCTCTGTAATGAATTATCTCTTACCGATGCAAGATATTATGAGCATGCAT  
TGCTCAGCAAACGTTGGTGAAAAGGCGATGTTGCATTATTCTTTGGTCTATCTGGCACTG  
GTAAAACAACCTTATCGGCTGACCCACACCGTAAACTAATCGGTGATGATGAACACGGAT  
GGAATAAAAACGGGGTCTTTAATATCGAAGGTGGCTGCTATGCAAAAAGCAATTAATCTTT  
CCAAAGAAAAAGAACCACAGATTTTTGACGCAATCAAATATGGTGCAATTTTAGAGAAC  
ACTGTAGTTGCAGAAGATGGTTCAGTGGACTTTGAAGACAATCGTTATACAGAAAACACG  
CGTGCCGCTTATCCAATTAATCACATTGACAATATTGTAGTACCATCAAAAAGCAGCACAT  
CCAAATACAATTATTTTCTTAACTGCGGATGCATTTGGTGTTATTCCACCGATTTCAAAGT  
TAAATAAAGACCAAGCAATGTATCATTTCTTGAGTGGTTTCACTTCTAAATTAGCTGGTAC  
AGAGCGTGGTGTGACAGAACCCTGAACCATCATTCTCAACATGTTTCGGTGCACCGTTCTT  
CCCGTTACACCCTACTGTTTACGCTGATTTATTAGGTGAACCTTATCGATTTACATGATGTT  
GATGTTTATCTTGTTAATACTGGATGGACTGGCGGAAAATATGGTGTAGGACGTAGAATC  
AGCTTACATTACACACGTCAAATGGTAAACCAAGCGATTTCTGGCAAATTGAAAAATGCA  
GAATATACAAAAGATAGTACGTTTGGTTTAAAGCATTCTGTAGAAATTGAAGATGTACCG  
AAAACAATTTTAAATCCAATTAATGCTTGGAGCGACAAAGAGAAATATAAAGCACAAAGC  
AGAAGATTTAATTCAACGTTTTGAAAAGAAGCTTCGAAAAATTTGGTGAAAAGTTGAACA  
TATTGCTGAAAAGGTAGCTTCAACAAATAA

### > **tnpIS431-06**

Function: protein coding sequence; transposase for IS431 (mobile element)

Best match: tnpIS431-06\_circ\_S-epidermidis\_GQ900381.1[43799:43807] (completely identical)

Position: 044-contig\_322\_RC: 4085 ... 4094; Length: 9 bp

Sequence:

ATGAACTAT

### > **menC**

Function: protein coding sequence; O-succinylbenzoic acid synthetase (core genome, constant)

Best match: menC\_CC001\_MW2-USA400\_BA000033.2[1884490:1885491:r]RC

Position: 044-contig\_322\_RC: 7164 ... 8166; Length: 1002 bp

Sequence:

TTAATATGGTTGTAATTGAGTTATATCCACTAAAGGGGGGCGAAATTCGAGTCGCCCTC  
TTTTAATATGCCTGAATGCGCCACCACATCTTGTTCAAATAATAACCTGCTGGTGTAAACA  
TCTCCTGGATAATCACCTTACGAGCAAGCATCGCTGTAAAATAGCGGCTTAAACCATAT  
TCGTACATGCCGCCAATAACCACTTTTGCACCATGACTTTTCAAAGTATCAATTGCCGTTT  
GCACTTTATCAATGCCACCTAGACGAAATGGTTTTAATACAACAACCTTTCACATTGTATAA  
TTCTATCAAATTAATTATGTCCGACAATGATGTGCGCTTTTCATCTAGAGCAATCGGAGGT  
ATTGTTCCATCCACTACTTCATCAAGCATGGAGATATCTTTAAATGGCTCTTCGATATAAA  
GAACCTGTTACGCGCTAATAACTGTAAGTGTGTGAAATCTTGACGATTCAAGGACTCAT  
TTGCATCTATAACCAATTGAAAGTGAAAGTCTAATTCTCGTAACACTCTAATTTGATCCAT  
GATTTGAGGTGTCCATTTAATTTAATTCTAGTCGGCTTTGTTGCTTTCAATGACTCTAGTT  
GTTTATTTGATAAGCCGCTCGCTGTCGCTCCATATGCTACTGAAAATGAAGGCAGTACAT  
GAAACATTTGATACAATGCCATGACAATAGTTGCCCTTGCAAGGCGTATTTTCCAATG  
AATCTACTAATTTTAGTGCTGCTTCATACGTTTCAAATGATTTATTTCTATTATCTTCGAAC  
CATTGCTCAATTACATGTTTCACTGAAGCAATTGTTTCATGATCATAACCAATCTGTTTGAA  
AAGCGTTACACTCCCCGAAATATGCATTTCCCTTATCATCAATCAATTCGATAAACAAC

AATCACGATGCATTAATGTGACTTTCGGTGTACAATTTGTGCCTTAAATGGCTCACTATA  
TTTATAAAAATGCAAAGCTGTCAACTTCAT

### > **menE**

Function: protein coding sequence; O-succinylbenzoic acid CoA ligase (core genome, constant)

Best match: menE\_CC005\_Mu50-VRSA\_BA000017.4[1927096:1928574:r]RC

Position: 044-contig\_322\_RC: 8170 ... 9649; Length: 1479 bp

Sequence:

TCATCCTCTATACAACCTTATTTCTCTGTAATTTACCCGTTGATGTATAAGGTAAAGTATCA  
ACCTTTTCAAAGTGTTCGGTACTTTATATTTTCGCTAAATGTTTTGATAAATATGCAATCA  
ATTGTGCCTTTGAAATGTCACCTTCACTGACAAAATATAATTTAGGCACTTGGCCCCAAGT  
ATCATCAGGATGCCCTACACATACTGCGTCACTGATACCTGGAAATTGCTTCGCTACCGTT  
TCAATTTGATATGGATAAATATTTTCACCGCCACTAATAATTAATCTTTACGTCGGTCAT  
AAATCATGACATAACCTTCATAATCTATTTTCAGCAATGTCACCCGTATTAATAAACCATT  
TTCAAACGTATCCGTTAAATCTGTTGGATACAAATATCCATTCATCACATTGGCGCCTTTA  
ATCATTAAATTCTCCATGACCTTCTTTATTAGGATTTTTAACTTTTACATCAACATTGGCACT  
TGGCATAACCAACAGTGTGAGGACGTGCATGCAACATTTCCGGTGTGCTGTTAAAAATTG  
CGAACATGTCTCAGTCATACCAAATGAATTATAAATTGGCAGGTTATATTGTAATGCCGA  
CTCTATCATAGTGGCAGATAATTTAGCACCAGCGAGTAATATTTTTTTGTAATTATAAGGT  
TCATGTAAACCTTGTGTCATAAGCCAATTTAAAGTTTGTGGCACAAGCGAAATGTGCGTG  
ATTCGTTCATTTTTAATCATCGTTAAAATTTGTTTCGGCATTGAATTTATCAACAATGCGCA  
CAGTAAAACCTTCAATAACAGCTCTTAAAAGTACACTGAGACCCGAAATATGATAAATCG  
GCAAGACAGATAGCCAATTAGTGTACGATCAAATCCCAAGCTCTCTTTACATCCGATTG  
CACTGGCATAATGATTACGAAACGTTTGTGGCACCGCTTTTTTGAGGGCCCGTTGTCCCTGA  
TGTAACATAATTGATGCAATGTCATCTAAATTAATGATGTATTTAATATGTTGGACGG  
CGACTCTTTCGGCACCACAGTTTCATTTCGATGTATCATATTGGATACCCATTGTGTTGTCC  
AACAAACCGTTCGTTGTAATATCCCTTCAGCGAATTCAATATCATCCAGCGATACAATTT  
GAAACCCTCGCAATTCCAGTGGCAAGGTACAAAAAATCAATTGTACATCGATTGACCTCA  
TCTGATTCGTATCTCATTAGGTGTCAACCTTGTATTAATCATCGCAATTTCAATATTTGCC  
AACCAACATGCATGTATTAATGATCGATTGAATCGAATTATCTATGTATAGCCCGACA  
CGAGATTGTTGATAAGCCTTGAATCTTTTAGCCAATAGACTCGCTTACAGTATAAATTTT  
GATAAGTATAAGATTCTTGACCGTCTGTTATCGCAATATGATGTCCATTTTGTGCTTG  
TTTATATAACCAAAGTCCAT

### > **Q5HEY1**

Function: protein coding sequence; lipoprotein (core genome, variable)

Best match: Q5HEY1\_CC005\_Mu50-VRSA\_BA000017.4[1928733:1929215:r]RC

Position: 044-contig\_322\_RC: 9807 ... 10290; Length: 483 bp

Sequence:

TCAGTTATTTTTATTTAATTTTAGTGTCAATTCTGTCAATTTGATGTGGTGATTTACCCATTG  
TTGCCACATCATCTGCAATGTCAATTGGTATACGATTCATGTCTTGTAATGCACTTAAATG  
GAATACTTCATCATCTAAATTTTCAATGAGATATACATAATATGTTACCTTGTCCCTTTTAT  
ATTTTAACGTTTTTCCAAAAGTCCGGCTTGCAATTCAATACATTATCCGGAATATATTCAAT  
AAATAAGTAACGTTTGTGCTGCTACTTTGTCTACGAAATATTTTACAGTGCCTTTTTCTATA  
CCTCTTATATGTGCATAGTCTGCTGAAAAGTAAATACTACCTATTGTTTCATTATGTTGTT  
GTATTTCAAATCGTTGGCCTACTATTTTATTATTTGTGCCACAACACTTAAAAAATCAG  
TAGATATAGCATTAAACATATTTTCATCCCCTTGAATTTTAAAAACTTTTTCAA

### > **Q5HEX8**

Function: protein coding sequence; putative protein (core genome, variable)

Best match: Q5HEX8\_CC705\_RF122-cow\_AJ938182.1[1799182:1799806]

Position: 044-contig\_322\_RC: 12366 ... 12991; Length: 625 bp

Sequence:

ATGAAATTCAAAGCTATCGTTGCAATCACATTATCATTTTCACTATTAAGTGCCTGCGGTG  
CTAATCAACATAAAGAAAATAATAGTAAATCAAATGACACTACTAAAAAGACGCAAGAA

ACTGACAACACTACACAGTCAAATACAGAAAAGCAAATGACACCACAAGAAGCCGAAGA  
TATCGTTCGAAACGATTACAAAGCAAGAGGTGCTAACGAAAATCAAACATTAATTATA  
AAACAAATCTTGAACGGAGTAATGAACATGAATATTATGTTGAACATCTAGTCCGCGATG  
CAGTTGGCACACCTTTAAACGTTGCGCTATTGTTAATCGACACAATGGTACGATTATTA  
ATATTTTTGATGATATGTCAGAAAAAGATAAAGAAGAATTTGAAGCATTAAAAAAGAGA  
AGCCCTAAATACAACCCAGGTATGAGTGATCATGATAAAACAGATGGTGAGTCAGAAGA  
CATTCAACATCATGACAATGATAATAACAAAGCCATTCAAATGATACACCAGATCAAA  
AAGCCGTTGATAAAAACGATAAAAATGCTGTTAATAAAGAAGAAAAACACGATAACCGT  
GTAAATAAATCAGCAGAACTAAAGTTAAAT

### > **DUF955-L1**

Function: protein coding sequence; putative bacteriophage protein (genomic island)

Best match: DUF955-L1\_CC008\_NCTC8325\_CP000253.1[1830347:1830916:r]RC

Position: 044-contig\_322\_RC: 14673 ... 15231; Length: 558 bp

Sequence:

TCAAATATGTATTCCTAAATTATACAGCCTTAATCCAGCAGCTACTTTCGAAACTTCCAAC  
TTAATTGATATAAGATTTAATAGTTTGTTCGTTCTTTTTTCAGATAAACCAGAATTTAAAT  
TGATATTATTGACTTCATAAAAATTATAGACTAATGCCTCTATTTGCTTTTTAGGCATAAG  
TAAGTCGACTGAAAACGATTTACGTCGCTTTCATAAATCATTTTCATGTAAATTCTTTAGA  
CTATTATCGTTGTTATCTTTATATTTGTATAAATAACGACCCGAGTTCACGAGCTATTGCAA  
ATCTTGATTATTAATCGAGTGATTATTATTGATATAAATCGTTCTTCCACTTAAATAACC  
CGAAAAATTACCTCTATTTTAATATATTTAACTTTTAAATTAAGTTGAAATAATAGCTTG  
TCTATGTCAATAGCAAAATGTTTCAGAAGTAATAAAAAGTTGATCCATTTTGTCTTTATAA  
ATGGCTGAAATAATCGAACTATTTTTGGTTCTAAAATATCTTCATAATGAACTTTCTCAAT  
AACTTTCAA

### > **DUF1433**

Function: protein coding sequence; DUF1433 family protein (genomic island)

Best match: DUF1433-var1\_CC007\_TCH959-USA300\_AASB02000250.1[47620:48063:r]RC

Position: 044-contig\_322\_RC: 15831 ... 15861; Length: 30 bp

Sequence:

AACTACCACAAATACATATCTCTTTTTTCAT

### > **sprA-L1**

Function: noncoding RNA small pathogenicity island RNA A/Locus 1

Best match: sprA-L1\_CC001\_MW2-USA400\_BA000033.2[1893970:1894188] (completely identical)

Position: 044-contig\_322\_RC: 16261 ... 16480; Length: 219 bp

Sequence:

AGTCGCCTATCTCTCAGGCGTCAATTTAGACGCAGAGAGGAGGTGTATAAGGTGATGCTT  
ATTTTCGTTACATCATAGCACCAGTCATCAGTGGCTGTGCCATTGCGTTTTTTTCTTATTG  
GCTAAGTAGACGCAATACAAAATAGGTGACATATAGCCGCACCAATAAAAATCCCCTCA  
CTACCGCAAATAGTGAGGGGATTGGTGTATAAGTAAAT

### > **ldr\_fst-L1**

Function: hemolytic peptide

Best match: ldr\_fst-L1\_CC001\_MW2-USA400\_BA000033.2[1894021:1894116] (completely identical)

Position: 044-contig\_322\_RC: 16312 ... 16408; Length: 96 bp

Sequence:

GTGATGCTTATTTTCGTTACATCATAGCACCAGTCATCAGTGGCTGTGCCATTGCGTTTT  
TTTCTTATTGGCTAAGTAGACGCAATACAAAATAG

### > **fstAT**

Function: Fst antitoxin sRNA, locus 1



Best match: fstAT\_L1\_CC005\_Mu50-VRSA\_BA000017.4[1934451:1934510:r]RC (completely identical)

Position: 044-contig\_322\_RC: 16435 ... 16495; Length: 60 bp

Sequence:

CCCCTCACTACCGCAAATAGTGAGGGGATTGGTGTATAAGTAAATACTTATTTTCGTTAT

### > **tx\_sprA**

Function: rho-independent terminator of sprA

Best match: tx\_sprA\_CC005\_Mu50-VRSA\_BA000017.4[1934606:1934666]

Position: 044-contig\_322\_RC: 16590 ... 16620; Length: 30 bp

Sequence:

ATGAGTTCAATATCGGAAGTTAGGCAACTA

### > **hsdS-L1**

Function: protein coding sequence; type I restriction-modification system site-specificity determinate-locus unknown

Best match: hsdS-CC25\_ref\_DQ309452.1[1:1224]RC

Position: 044-contig\_322\_RC: 20862 ... 20892; Length: 30 bp

Sequence:

TGGCAAATTTTCTTTTGTGTATTACTCAT

### > **hsdM-Lx**

Function: protein coding sequence; type I restriction-modification system DNA methylase unknown locus (genomic island)

Best match: hsdM\_CC009\_21334\_AGTW01000033.1[72697:74253:r]RC

Position: 044-contig\_322\_RC: 20884 ... 21034; Length: 150 bp

Sequence:

TTACTCATCTTTCAACACCCCAAGTTCTTTCAGGTATGCATTGATTTCTTGTTCAACTTGTG  
CGATTTCTTTGTCGATATTTTCAAATCTTGTGGACTTGATCTAAATCAATTGGCGCTTCT  
TCTTCGAATGTATCGACATACCTCGG

### > **ear2**

Function: protein coding sequence; putative protein (genomic island)

Best match: ear2-118\_ref\_CC001-ST772\_118\_AJGE01000001.1[12657:13238:r] (completely identical)

Position: 045-contig\_58: 319 ... 901; Length: 582 bp

Sequence:

ATGAATACAAAATTTTTAGGTAAAACATTAGTAGCAAGTGCTTTAGTATTAACAACATTG  
GGAACAGGATTACATTCTTCATATTTAGGATTAGATACAAACAAAGTTGTTAAAACAGCA  
AAAGCAGAAGAAAATATGACAGATGGTCAGTTGTGGAAAAAAGTTAAAGATTCATTAAT  
TGATTCAGATATTATTAGTGGTAACCGAGATGAAGAAATAAAAGTAACTTATTCATTAA  
AGATGGTAATTCGCCTAGTGTGACTGCACCTGGAAATGATAGCGGCGATAATTTTAATCA  
AAAAATTGATTTTGGTAGTTTAAAACAAGTTGATATAAGTAAACAAAATATTGGTGAAGA  
AGATTTTAAACAAAAGATTAGATGCGAATAAACTTGGAACACTTTTACTCAAAAATTA  
GGATGCTGGTTTATTGAAAAATGGTCAAAAAGTAACCATTCAAACACTACTAATCCAACAAC  
ATCTTCGACAAACAGTATTACCGGCACAGTAGGTGAAACATTGAATGATAAAAATGCTGA  
TCCATTAGAAAAACGCTTAATCAACAAAATCACAATTGAATAA

### > **sprB**

Function: noncoding RNA small pathogenicity island RNA B (genomic island)

Best match: sprB\_CC010\_D139\_ACSR01000053.1[6042:6510:r]RC

Position: 045-contig\_58: 905 ... 935; Length: 30 bp

Sequence:

TAAACTCAAATTTCTTAATTCATAAAACC

### > **A5ITY2**

Function: protein coding sequence; putative protein (genomic island)

Best match: A5ITY2\_CC005\_N315\_BA000018.3[1867608:1868081]

Position: 045-contig\_58: 1746 ... 2220; Length: 474 bp

Sequence:

```
ATGCATTTGAAACTGAACGATGAAGATTTAAATTATTTAGTAAATATAAGTAAAGAAATA
CTTGAACAATACAATATTAATTTAGACGAACTTGTAAAGGGAGATATTAACATAACATCA
TGTAATTCTGAATACTTTTTCACTTTAAGCTATTTTTTAAAGCCTGGAAAAGCAACTATAA
ATTTTCAGAGAATGCCGTTACAACATAGCTTGTACGTTTAAATCTTAATGACGGTTTTCA
TAAAAACTCTAATAATGAGAAAATAAGGGGAAATAGAATTAATATATTTTCTGAAAATG
AATTTATACAAAAAGCTGATGGCGCAACCCATATGAAAGCATATCCTTTACCTTATAATA
TATTTGACGATAGCTCTGATTTTGTAAAACAATTATTTACTTTGCTTGAATATACAAAAAC
TAATCATAATGATAATATTAATTTGAAACTAATCTATTCATGAGTTGGTGA
```

### > **A5ITY3**

Function: protein coding sequence; putative protein (genomic island)

Best match: A5ITY3\_CC005\_N315\_BA000018.3[1868086:1868877]

Position: 045-contig\_58: 2224 ... 3016; Length: 792 bp

Sequence:

```
ATGCATGACAACACAATTAATCTATTAGCAAAGACTATTTTGATTACTTACAAACAGAA
TCAAAGTTTATCCCATTAGAAAATGAAACTATAGAATTTTATTCACCTATCGTCGATTATT
TTGGTGATTCTATTTCTGTAAATATATCTTTTTTCAGGGGATCGATATAAACTAACTGATCA
TGGTGAAACTTTGTGGAACATGGAACAATTTGGTTTAGATCTAACTAATCATAAAAAACA
AAAAAAGTATCAACTTCTCAATAATATTATACAAAATTACGGTCTAGTCATTGAAAATAA
GCACATAAACTTTTATACAAATAGAATAGACTTATCTCAAGCCATTCATGATTATGTTTTG
GCTATTTCCGAGATTAGTTATTTGGGAATATTAAGAAAGAAAATATTAAGTCATTATTT
AAAGACGAAGTGATGCAATATTTTCTATCAAACAGAAAGATTTATCCTAATATATTTCCC
GAATTTAAGGTAGAGGGGAAATCTAAGTTAATTCATAGTTTCGAAGCAGTATTTCCAGGA
GAAGCTACAGAGTATGTTAAAACAATTAACGAATCGATAAAAACAATGCAAAAAATGT
CCTTTTCGATTGGAATGATGTTGAAGTACATAGAAATAAAAATTTTGATTCTAATGCTAG
ACTTAATATCATTACAGAACAACAAGGCGATATTAACGAAGCAGTATCAACAATGTTGTC
TCAATATAATGTAGAGGTATTTTCATTTGAAAACA AAAAACA ACTTGAAGAAAAGTTTAG
TAACGTATAA
```

### > **sprC1**

Function: noncoding RNA small pathogenicity island RNA C (genomic island)

Best match: sprC1\_CC001-ST772\_118\_AJGE01000001.1[9842:10244]RC (completely identical)

Position: 045-contig\_58: 3313 ... 3716; Length: 403 bp

Sequence:

```
AAAAAATTAATGCTATGATTTAGCCGAATTA AAAACATATATACTTATTTACTATGAAC
TAAAAGTTTATCCTAAAAATAAAAACCATGATTTCGAAGTCTTCATAAACTGAAGCTTC
TACTCTCATGGCAATTTATACTATGATATTCAATTATAATGCCTAGTCTCATAGTAAACGG
CTACTACATTCGCATGTACTTCGTTTTACTGTCCACGCATGTTTCGTTGACTTATTTATATTA
TAATATAAATATTTTGTTTTTCAATACTTAATTTTAAAAATCCCCTATGAAAATGTTGATG
AGCTGCATCTTTAAATCTTATTATACATTGTATGAAATTATATTGCGAGGTAATAATTGA
TAATATACACTTTTGGTTGTGTATGCATCTCACCTATC
```

### > **Q2FXA9**

Function: protein coding sequence; putative bacteriophage protein (mobile element)

Best match: Q2FXA9\_CC001\_MW2-USA400\_BA000033.21921296:1921751

Position: 045-contig\_58: 3786 ... 4242; Length: 456 bp

Sequence:

```
ATGGCTAAACTCGATTTAAATAGTCTTGACGACGAGCACGTAAAATTATTAATAAATGAA
TTAAAATATCCAGAACTCATATCGATGTAAATGAATTA AAAACAATAGTTGCTAGTCGA
ATAAATGAAAGGCAAGAAATAATAAGTTTAAAGTTAGGAATAAAGTACTTATTAACAAT
```

AAAAAGAGGGAACATAGAAAAAGATAGGTTTTCAATTTCAATCATTTTTAAAGATACCTA  
TCACACCCTAGTTAGAATAGATATTAACGGTGGTACTCACGATAATCCAGATGGAACATT  
CGCTCCGAAAAGTCATATTCACATATATAATGATAAGTATGATAAAAAGGATAGGTTTGC  
TTATGAAATTAAGTTGAAAGATTTCCCCGACATCTATAACTTGTATAATGTGTATATGTCTG  
TTTTTAGAGTATAATAATATAAAAAGACCTTGAATAA

### > **Q2FXA8**

Function: protein coding sequence; putative protein (mobile element)

Best match: Q2FXA8\_CC001-ST772\_118\_AJGE01000001.1[8515:9303:r] (completely identical)

Position: 045-contig\_58: 4254 ... 5043; Length: 789 bp

Sequence:

ATGACTACATTTGATGCTAAAAAATTAATAAAAAGAATATCTTGATTGGTATAATCAGACC  
TTAGAGTTTTCTAATTTATCAAACAATGTAGTAAGAATAGATACTCCTTTTAAAGATAATT  
CTTTAGATAATTTAATAATTTACGCTTTATACGATCAGTCCAGAGACATGATTACACTGAC  
AGATGACGGCTATACTATATTTGATTTAGAAAATAATGGTATTTTTTTTAAATAAATCAAA  
AAAACATAAAAAGATTTTTGAAGAGCACCTTTCAGCTTACGGTATTAATATAACGATAA  
AACTCACGAAATTTTTGTTCAAACCTTAAATAAATTTAATAAATCGAAACATAATTTA  
TTACAGTGCCTTATATTTGTTAATGATATGTACTTACTTTCTAATCCTAAGTCACAGAACA  
TATTTACAGAAGATGTTGCAAACAAATTGGATGAACATAACATTTATTACGGAAGAGATT  
TACCTATTATAGGAAGCAGTGGTGTGTTTCATAATTCGACTTTTTTTATTAGCGCTAAGAA  
AAATCAAAAAGAAAATTTATCAATGCTATTTCTAACCCTAATAATTCTATGATTATTAA  
GTCGAAAATAACGGATGCTATGCAAGCAAAAAAATAAAAAGACACAGGCCAAAATGAG  
TTTATTTTTATTTTAAATGACTCAAAAAAAGAAATAAATGAACATAATAAAAACCTTCTTC  
ATGAAAATATATTAGTACTATAGATTATAGCGAATTAGACGAAAAGATAGGTTTATTGA  
TTTAA

### > **Q99T51**

Function: protein coding sequence; putative protein (genomic island)

Best match: Q99T51\_CC005\_N315\_BA000018.3[1874153:1874647]

Position: 045-contig\_58: 5876 ... 6371; Length: 495 bp

Sequence:

ATGAGGAGATTACTCAGTCTATTACTAGCTAGTACAATGATTTTTAGTCGCATGTGGGAAT  
GCTAACAATGAAAATAAGAAAAAGGAAGACGAAAAAATCAGAAGTAAAAAAGAAG  
CTAAGAAAAATAATGATAAACCAAAGAACGAAAAGAAGTCAAGATATAAATAAAAA  
CAATAATGAGCAAGTTCAAATGTCAATAATAACAACCAGTCTTAAATAATAATAGTAA  
TCATAACAATCAACAACAAGCAATAAAAAACAATTACACAGTTATAGAAAACGGGAATA  
CAGTTACAGAAATTTATAATGGACAATCACACACAACCTACAAATAACCCTATTAGAGAAG  
AATATGTAGAGGGAGAAACAGACACGATATATAAAGAGAGTATAAGCATTTTTATACA  
CCTGAAGAAGCTCAAAGAGCACAAGAAAATAGCGACCAAATTTTAAAGAGAAATGGGTCT  
CGAACCAGAAAGATATGAATAA

### > **A6U2S7**

Function: protein coding sequence; putative protein (genomic island)

Best match: A6U2S7\_CC005\_Mu50-VRSA\_BA000017.41952518:1952754 [4\_50ANF10END]

Position: 045-contig\_58: 6448 ... 6685; Length: 237 bp

Sequence:

ATGATTAGGTTTCGATGTTAATGGTAGTGATCATGCAAATCCACCAAATAATGAAAGAATA  
CCTACGCCACATATACACATATATACTGAAGAATATAATAATGGTGGTATTGCGATTCCA  
TTAAAAGATATTGAAGATTTAGAATTAACAGATGAAATTATAGAATCATTAGACTTCTTT  
ATGAAGTATACTAATATAAACACGATAATGTTATAATAGAACAAAGATTACTGTAA

### > **Q7A4X2**

Function: protein coding sequence; putative protein (core genome, variable)

Best match: Q7A4X2\_CC001-ST772\_118\_AJGE01000001.1[6076:6852:r] (completely identical)

Position: 045-contig\_58: 6705 ... 7482; Length: 777 bp

Sequence:

```
GTGAAGACAATCGAAGAAAGAATGAACGAATATTTCAACTGGTTAAAGCAAATTATAT
CTTCAAAGAATTAGATAGTTCTACAGAAATTACTACTCCCTTTAAGAACCATTTGAATGAT
TTTATTAGAATATATGCTGATACACTACCTAATAATGAAATTTGTCTATCAGATGACGGAT
TGACGATTAATGAATTAGAAATGTTGGGTATTGATATAAACACAAAAACGAGAACTAAA
CTTATACAAAATATTTTAAATCAATTTAATTTAAAATTAGTTGATAAAGAAATTACAGCG
GATGTTAAAAATGAGAGTTTTGCTCAGTCTAAACATAATTTAATTCAAGGCATATTGAAA
ATTTATGACCTTACTTTAACTACTAAATCTAACGTTACAAACATATTCTATGAAGAAGTAT
TTGAATTCCTTATATGACCAAGAAATAAGAGGTTTAGCACAAAGTTTCTGTTTCTGGAGAAT
CAGGTTTAAAATATTCTATTGATTATATTGTTTCTGAAACAAAATCACACCAGAAAAAC
TAGTTAACTTTACAAACAACCTTAGATTTCAACAAAATAACTAATGAAGCTTATATTTACC
GTGATATCAAACCAAACAGACCATCCAGAAACAAATTAGAACCCTATCATGTTGATAATTG
TAAATGATGTAGATCATCCGATAAATGAAAGAGCACAAACTGTAGCAGAACATGAAAAC
CTTGAGATATTTAAATGGTCTAATAAATCAAAAATCATTGAAACTTTAACCTCATAA
```

### > entG

Function: protein coding sequence; enterotoxin G (genomic island)

Best match: entG\_CC001-ST772\_118\_AJGE0100001.1[4748:5524]RC (completely identical)

Position: 045-contig\_58: 8033 ... 8810; Length: 777 bp

Sequence:

```
TCAGTGAGTATTAAGAAATACTTCCATTTAATACTCTTAGAATCAACAACCTTTATTATCT
CCGTAAATATTTAAAAACTTATATGGAACAAAAGGTACTAGTTCTTTTTTAGGAAATAAG
TCAAACCAAAAACCTGTATTGTTCTTTTCAGTAAATTTTATATATCCAGATTCAAATGCAG
AACCATCAAACCTCGTATAGCTTTTTTTCTTTAGTGAGCTAGTGTCTTGCTTTGTAATCTAGT
TCCTGAATAGTAACCATATTCTTATTTGTAGTTATTGTAAATCCAAGTGATTGTCTATTGT
CGATTGTTACCTGTACAGTAATTAATTTATCTCTTTTCATTTTCTGAACTATTAATGTAAG
ACCACCATACATAACAACCTCCAAAATTTTGGTTTATATCCGGTTCAGATTTAGGTATT
ATACATGTATAAAAATATGGAACGCCAAAAATGTCTACTTTTTTATCTTTATAATTGTTAG
CTAATTCTGTATTTTCTAATTCAGTTTTAACCTCATTATAACTCTTATACTCAATTGGAAAA
ATTAATCATGAGATAAAAACCTGTCTAGAATTAATAACTCCTCTTCCCTCAACAGGTGGA
GACGTATAAAGATTCATTACATTACCCATAGTTCCCTTATTATTTTTATAATCACTTACTTT
ATTTAGTTCGTCTAATTTAGGATCGGGTTGAGCATTACATAATTCATATTATGAAAAACT
ATTTCTAGAATCAAATAATAATTACAGTAGATAATTTCTTCAT
```

### > entN

Function: protein coding sequence; enterotoxin N (genomic island)

Best match: entN\_CC005\_Mu50-VRSA\_BA000017.4[1955162:1955917:r]RC (completely identical)

Position: 045-contig\_58: 9092 ... 9848; Length: 756 bp

Sequence:

```
TTAATCTTTATATAAAAATACATCAATATGATAATTAGATGAGCTAACTGTTCTATTATCA
CTATAAAATTGAAAAAATCTGTCTCCACTGAACCTTTTACGTTATATAAATCATAATAA
AATGATTGATCTTGATGATTATGAGAATGAAAGAAAATGCATCCTTTTTGTATGTTACCG
GTATCTTTATTGTATATTTTATATAAATTTTCTAATTTAAATCGAACTTTAGTGTCTAATTC
TTGTACTGTTACTTTAGCCTTTTTGGTTTTTATAACAAAACCTTCTTGTTGGACACCATCTT
TAAATACATTAACGCCTATAACTTTCTCTTCATCTAATTGATTCCATCATGTATCGTAACT
CCTCCGTATAAGCATGATGTTTTTTCTTCAGTTAAGCCTACACATTTATTTCCAAAATACA
GTCCATAAATATCTATATTTTTTCTTTAAATTGATTTGCTAAATCTGATGAGTTAAACTC
AACTTTCAAACCTAGAAGTTTTAAGTACGGATATATCAATATTTTTTAAATATTATAGTATTA
TTCAGTAGTTGATCTGTACTAATTTTATTTGACTCGTCTAATTGCCACGTTATATCAGTATA
ATAGCTTGTTAAATTAATAACTTACTACTATCTAGATCAGATTTTTTCTTTAAATCTTTTT
TGCTACTTCAGCATTAACATAAATTATTATTAATAAGACATAATAAAGTTATTATAATTGC
AGCTATGTAGAACAATCTCAT
```

### > entU

Function: protein coding sequence; enterotoxin U/enterotoxin Y (genomic island)

Best match: entU\_CC001-ST772\_118\_AJGE01000001.1[2901:3671]RC (completely identical)

Position: 045-contig\_58: 9886 ... 10657; Length: 771 bp

Sequence:

```
TTATTTTTTGGTTAAATGAACTTCTACATTAATAGATTTACTCTCAACTGTTTTATTATCAT
TATAAATTAGTAAATATTTAGTCGGATAAAAATTTTTTACCAGATTCAGGCATCAAATCATA
CCAAAAAGAATGACCACTTCCTTCGATAAACTTTATATAGCCAGTCTCATAAAGCGAACT
GTAAATTCATATAAAATTTTTATGCTTAAGTAAATAGTTTCTAACTTTATAATCTATTTCTT
GTGCTGTTATGTTTTTCTTATTAGTAGGTATATCAAAGATAATGAATTTCTCTCGTTTTCA
TAACTTTAATTAAGATATTATGAGAGTTATCAGTTGAATTATTTTTATCTATTTGATTTCC
ATCATGCTCGGTCACACCGCCATACATACACGTTTTTTCAATTAATCTACCATCATTTAAT
TCCATATTATCCGATGAAAAATAGCATTGATTATAATAGTTTGTCCCAAACAAATCTACGT
TTTTATTTTTATTTATCCGAAAGGCTTTTATTATTAATTTCTGTTTTTAAAATTTTAGAA
CCATTTATTTAAATAATAAATCATGTTGTAAAACTTTTCTTGGGATTTAATGTTTGTTC
TGATACGTGTTTATCATACATAAAATACCTCATATTATCCATTAGACCAGTGAATTCACCTC
GCTTTATTC AATTGTTCTGGTTTAGGATTGCCATTTAACATAAAATAGTAAGCTGCAAGACT
TAACACATATGAAGATAAAAGCAAATAACTTCAT
```

### > entI

Function: protein coding sequence; enterotoxin I (genomic island)

Best match: entI\_CC001-ST772\_118\_AJGE01000001.1[2019:2747]RC (completely identical)

Position: 045-contig\_58: 10810 ... 11539; Length: 729 bp

Sequence:

```
TTAGTTACTATCTACATATGATATTTTCGACATCAAGATGAAATTTTTTCAGATTCTATTATTT
TATTATCTTCATAAAATTTTCAAAAACTTACAGGCAGTCCATCTCCTGTATAAAAACAAATC
ATATGAAAATGATTTTTTATTATTAAATGAAATAAACTTTCCCATTTATAAAACCTGAA
TAAAATTTAGATTTATATCCATATTTCTTTGCCTTTACCAGTGTTATTATGACCATATATATT
GTATTTCTTCTGAAGATATCTCCTTAATTTAACATCAATTTCTTGAGCTGTTACTAGTTTTT
TATTAGTTGCTATTTTGTTCAGTAGAAATTGTTTTATGTTTGCATTAAACCAAAGATTAAT
AGGGATTTTTCTAGCAGAATTTAAGTATTGTCCTGATAAAGTGGCCCCTCCAAACATGTAT
TTAGATTTACAAGGACCATTATAATCAATGCCAAAAATATCCAGTTTCTTTCTTTAAATT
TACTTATTTTCGTCCTCAATTATTAGATTCTGAGATCAAATCATTGGTACCTGTTGAAAATTC
GAGTTGATTTGCAATAGGTAGATTTTTATCTGTGACGCCTTTTAAATCTATATAATCATGT
TTTGTATAGAAATTTCTTAAGTTACCTACACCAATATCACCTTGAGCATACGTAAGATCTT
TAATGTTAAAAAGTAATATAAAAACTAATATAAAACTATATTTAAATTTTTTCAT
```

### > entM

Function: protein coding sequence; enterotoxin M (genomic island)

Best match: entM\_CC001-ST772\_118\_AJGE01000001.1[1265:1984]RC (completely identical)

Position: 045-contig\_58: 11573 ... 12293; Length: 720 bp

Sequence:

```
TCAACTTTCGTCCTTATAAGATATTTCTACATCTAAATGGAATTTTTTCAGTTTCGACAGTTT
TGTTGTCATTATATATTTTTAAGAACTTTTCAGCTTGTCCTGTTCCAGTATCAAATAAGTC
ATAAGAAAATGATGAACCATCATTCAAATGAAATAATATTTTTCTGCATTAAATCCAGA
ACTAAATTTTGACTTATTACCATAATTTCTTCCTTTATTTGTATCATTAAAGCCATAAATAT
TATATTCTTCTTGTAGATATCTTCTTAATTTAGTATCAATTTCTTGAGCTGTTACTAACTTT
TTATTAGTTGATACTTTGTTCAGTAGATATAGTTTGATGTTCTCCATTAACCAAAGATTA
TAGGAATACGTCTAGATTTCTCTAAATAATCACCTGCTAATGTAACTCCACCGTATATATA
TTTGTTTTTTCAAACAATATCCACTATAACTTAGACCATATACATCTACAGCATGATTTTTG
AATTTCTTTACATCATCAACGTTCTTAAATTCAGCTGTTATTGTGCAATTATCCATAGAAA
AAACTAATTGATGCGAAAGATGATTATTTTCAGGATTAATACTTTGGTGGTCTTCAATTGG
ATAGCTACCATAATAGTTCTTAAGATTCAAACTCCGACATCAGCGGTTGCGATATGATT
TTGCGAATAGCAAACAATAAAACAACAATGATAAGTATTCTTTTCAT
```

### > entO

Function: protein coding sequence; enterotoxin O (genomic island)

Best match: entO\_CC005\_Mu50-VRSA\_BA000017.4[1958644:1959408:r]RC (completely identical)  
Position: 045-contig\_58: 12573 ... 13338; Length: 765 bp

Sequence:

```
TTATGTAAATAAATAAACATCAATATGATAGTCTGATGAATCTATTGTTTTATTATCATTAA  
TAAATTTGCAAATATTGATCTGGTAAATTTCTTTAATATAAAAATAAATCATAATAAAATG  
ATTCTTTATGCTCCGAATGAGAATGAAATTTAATATAACCTTTTTGTACATCACTAGTCAT  
TCTGTCATAACAATTTATATGCATTATTTAATTTTGTCTTACTTTAATATCAAGTTCTTGTG  
CAGTAACTTTCTTTTTATCTGTAGTAACGATAAATGTATTAACATTTACATTATCCTTATAC  
ACAGCTACTCCTATATTTTTAGGCTCGCTTAATTTATTATTTTCATGAGGTGTTACCCACC  
ATATGTACAGGCAGTATCCACTTGATGCTCACCATGACAATGTGCTTTATAGTAAACACC  
ATAAATATCAACAGTCTTTCCTAGAAATTCCTTAGAAATCGCTGATGAGCTAAATCCACT  
TTTAAATCTTTAAATTCAGCAGATATCCATCTAACCAATTAATACTTTTAAATAATAAAT  
CGAAGTCTAAGAATTTTTCTGTAGTTGATACAATTGATTTTACTGTCGTAAATCGATTATT  
TATATAATCATCATTAAATATTATGTAAAGCAATAGGGTCTACACTTGACTTCTTACACAAA  
CTCTCTATTTTAGGATCTTCTTCATTTGCATATGCATTGTTTACACTACATATTGCAATTA  
ATTTAAAATTAATAATAACATTTAACAT
```

### > tx\_tRNAser3

Function: rho independent terminator

Best match: tx\_tRNAser3\_1\_CC010\_H19-ST10\_ACSS01000051.1[11343:11405:r]RC

Position: 045-contig\_58: 13516 ... 13546; Length: 30 bp

Sequence:

```
AAAACCTTAAAATAGCGCTTAAAATGGG
```

### > tRNAser3

Function: tRNA serine

Best match: tRNAser3-Mu50\_CC005\_N315\_BA000018.3[1881844:1881935:r]RC (completely identical)

Position: 045-contig\_58: 13566 ... 13658; Length: 92 bp

Sequence:

```
TAACGGAGAGTGAGGGATTCGAACCCTCGAGACGCTTGTGGCGCCTACACACTTCCAGG  
CGTGCTCCTTCGGCCAACTCGGACAACCTCTCC
```

### > tRNAhis

Function: tRNA histidine

Best match: tRNAhis\_CC001\_MW2-USA400\_BA000033.2[1924191:1924266:r]RC

Position: 046-contig\_53\_RC: 44 ... 74; Length: 30 bp

Sequence:

```
CCGATGTGTTAACCACTTCACCACAACCGC
```

### > tRNAphe

Function: tRNA phenylalanin

Best match: tRNAphe\_CC001\_MW2-USA400\_BA000033.2[1924277:1924352:r]RC (completely identical)

Position: 046-contig\_53\_RC: 84 ... 160; Length: 76 bp

Sequence:

```
GAATGGTTCAGGACAGAGTCGAACTGCCGACACATGGAGCTTCAATCCATTGCTCTACCA  
ACTGAGCTACTGAACC
```

### > tRNAasp

Function: tRNA asparagine

Best match: tRNAasp\_CC001\_MW2-USA400\_BA000033.2[1924369:1924444:r]RC (completely identical)

Position: 046-contig\_53\_RC: 176 ... 252; Length: 76 bp

Sequence:

TGGCGGTCTCGACGGGAATCGAACCCGCGATCTCCTGCGTGACAGGCAGGCGTGTTAACC  
GCTACACTACGAGACC

> **tRNAmet\_ini**

Function: tRNA methionine initiator

Best match: tRNAmet\_ini\_CC001\_MW2-USA400\_BA000033.2[1924466:1924539:r]RC (completely identical)

Position: 046-contig\_53\_RC: 273 ... 347; Length: 74 bp

Sequence:

TTGCGGGAGGCGGATTTGAACCACCGACCTTCGGGTTATGAGCCCGACGAGCTACCGAAC  
TGCTCCATCCCGCG

> **tx\_universal2**

Function: rho indendent terminator

Best match: tx\_universal2\_CC001\_MW2-USA400\_BA000033.2[1924855:1924893:r]RC (completely identical)

Position: 046-contig\_53\_RC: 662 ... 701; Length: 39 bp

Sequence:

AGAAATTATAAAAGCTTGTTACACCGCATATTCTTTCAG

> **A6QI12**

Function: protein coding sequence; putative protein (core genome, variable)

Best match: A6QI12\_CC001-ST772\_118\_AJGE01000032.1[31477:32031]RC (completely identical)

Position: 046-contig\_53\_RC: 818 ... 1373; Length: 555 bp

Sequence:

CTATCGTGTTCATGTAATCTTGCATCCGATCTTGCAACGCTGTAAATGTTTCGAAGCCATCC  
TCTTCTAAGAAGTGCCCTCCATCTTCCACGATTCGCAAGTCCCCTCTAATGCATTCATTA  
AACGCTGGGTTTCTTTATAAGAAACGTATTTGTCAATTTTTAGAACTCAATCCGTAAAAAATT  
GTCAACTTTCTTTTTAATATTATCGTAATCAATGGTTACACTTAAATCAATATCTAAA  
TCTATATTTTCTGCATCTTCTTTAAAGCCCGCTATACTAAAAAAGCCTTCAATCGGCTGAT  
CAATCATTTCAATATATTTTTAAAGCTGTGATTGAACCTAAACCATGTGTTACAAAATATGT  
ATCCTTTTTGCGTACATTAATTTGTTTCGTCATAGCTTCAATCCACTGATCCACTGTCTTCG  
CTTCAGGGGATTCAAATTAATAATGTTACGTCATATCCTTCTAAAGTTAAGTTATGCTC  
CAACCACTGATACCAATGATTTCTACTATTTCCATGCATAGAATGTACAATAATTACATCT  
GTCAT

> **hemY**

Function: protein coding sequence; protoporphyrinogen oxidase (core genome, variable)

Best match: hemY\_CC001-ST772\_118\_AJGE01000032.1[29756:31156]RC (completely identical)

Position: 046-contig\_53\_RC: 1693 ... 3094; Length: 1401 bp

Sequence:

TTACAACCTCTGCGATTACTTCTTCAGCAGCAACTTTACCTTGCCTAATACAATCAGGTAGT  
CCAACCGCTTCAAAGATGCACCAGTTACTCTAAGTCGTGGATATGTTTGTAAATATGTG  
CTTGAATCTGTCTAATTTGTTGAATATGACCGACATGGTACTGTGGCATACTTTTCGGCAA  
ACGATTGACAATTGTAAATTCAGGATCACCTTTAAATGTCATCATTTGACTTAAATCTCTA  
CGTACAATCGATACTAATTCATTATCTGTATGATCATCAACCACAGTATCACCTGGTTTAC  
CTACATACGCACGAATCAAACCTTACCTTCTGGTGTAGTAAATGGCCATTTTTTCGATGT  
CCAAGTACATGCGGTAATGTCTGTATCACTTGTCTCGCAATCACGAAGCCAGTACCATC  
ATAAGTATTTCAATGTCTTTTTTCATCAAATGCCAATACAACAGTTGCAACAGTCGTA  
TCCATCGTTTTAAAGTAATCAAATGCTGGATCTTGCCCGAACCAATTCAAAGACTTGA  
TGTGGTGTGTCATAATATCCATCGAATACATCTTCTTGTGATTACTGTAGACAATTTT  
ATATTGCTTTTGTAGATGTAATAATATCATCCACTGACGTATTGTAGCGTATTGTACACCT  
TTATTTTTAACATCTTGTCTAATGCTTCAATAAATGAGCTTAAACCATGCTTAAATTTGTT  
GAATTGTCCTTTTGGTGCGCCAGGATATAATTGCTTTTGTTCAGACGCTTATTTTTCTCAT  
CCTTCATACCTTTTATCAGACTTCCGAATGCCTCTTCTTTTCTTTAAATTAGGAAACGTA

CTCATCAAACCTTAATTTATCAATATCGGTACCATAAATACCACCCATTAAGGCTCTATTA  
AATTCTCAAGTACCTCATTACCTAATCTTGCTCTGAAAAATGCACCAACAGAAATGTCAC  
CATTCTGCATTTGAGTAGGTTTTTTAATAAATCAAACCCTGCTCTTAACTTTCCAAATGG  
TGAAATTAATTTAGTTGTCACAAACGGTTTGATATCTGTGCGGAATTCCCATAATTGATCCA  
CCTGGAATAGGATACAATTTGTTTTTCGCAAAAATATAAGATTGTCCAGTCGTATTTGTAA  
AAATATCTTGTCTAATCCAATATCTTTGCTAATTCTGTGCATGATTGTTTTTCTACCTAAA  
TAAGATTCAAGGCCCTAGTTCAATCATATAACCATCTTACGATACGATTGAATCTTTCCCC  
CCGGACGATTTCGATGCTTCAAAGATTGTTATGTCAATATTAGGATCCTGCTGTTTTAAAAA  
ATATGCACTTGATAAACCTGTGATCCCCGCTCCTATTATAGCCACTGATTTAGTCAC

### > **hemH**

Function: protein coding sequence; ferrochelatase (core genome, constant)

Best match: hemH\_CC001-ST772\_118\_AJGE01000032.1[28809:29732]RC (completely identical)

Position: 046-contig\_53\_RC: 3117 ... 4041; Length: 924 bp

Sequence:

TTAAAATATGGACTTTATTTTCATCAACAATTGCACCGATAAATAATGGATGTGTATTCCGGC  
ATTTCCGGTCGATAAATAATTCGCACCAATATCATCGCAAACAACCTTACATTCATAATCAT  
TGTCATAAAGCACCTCTAAATGCTCACATACAAACCTACTGGTGTATATATAAAGTTTTT  
ATACTGATGTTTTTCATATAAATCACGTGTTAAATCTTGTACATCTGGCCCTAACCAAGGT  
GTACCTGTATTACCTTCAGATTGCCAACCAATCGCGATATGTTCAATATTAGATTGTTCTT  
TAATTAAGAAGTGCAGTATGTTCTAGTTCTTGTGGATATGGATCATTATTCTTTTCGATTAA  
ACCTTTTGCAAACCTATGTGCCGAAACAATAACCGTGTCTTTATGTTCTCTTCCGGT  
ATTTGAGCTAATGTTTCGTTGACTTTATTCGTCCAATATTCAATAAATTTAGGTTGTTTCATA  
ATAATGTTTCACATGTGTAAGTTGAATACCATATTTTGCAGCTTCTTCATCAGCACGTTTG  
TCATATGATCCTACTGAAAATGAAGAATAATGTGGTGCTAGTACTACAGTAATTGCTTCA  
GTAATGCCATCATTGTGCATTTGTTCAACCGCATCTTCGATAAATGGTGAAATGTGTTTTA  
ATCCTAAGTATAGTTTAAATTC AACATCTGCATATGCTTTATTTAATGCTGAAACTAGCGC  
ATCAGCTTGGTCATCTGTTGTACCTGCTAATGGTGATAAACCCACTATAAATTCATATCTA  
TCTTTCAAATCTTGAAGTTCTTCTTCAGATGGACGTTTACCATGTCTAATATCTGTATAAT  
ATGGCTCTATGTCACTTTCTTTATAAGGTGTGCCATAAGCCATAACTAATAATCCCATTTT  
TTTAGTCAT

### > **hemE**

Function: protein coding sequence; uroporphyrinogen decarboxylase (core genome, constant)

Best match: hemE\_CC001-ST772\_118\_AJGE01000032.1[27714:28751]RC (completely identical)

Position: 046-contig\_53\_RC: 4098 ... 5136; Length: 1038 bp

Sequence:

TTATCTTTGTGTATATGTGTGTACGAATTCGCTTACTTTACGTAACGTCTCTGGTTGCACTT  
CTGGGAAAACACCGTGTCTAAATTAAGATGTGTTTACCGTTCTCCATACCTTGATCTAA  
TATTGGTTTCAATCTCTCTTCAATGACATTCCATGGTGCTAATAAAAATTGATGGATCTAAA  
TTCCCTTGTAATGTTTTAGTAACGCCTAATTGTTGAGCCTGATTAATAGACGTTCTCCAAT  
CTAGGCCTAATACATCAATCGGTAAATCATTCCATTGATTAAATGACTGGCACCTAC  
ACCGAATAAAAATTACCGGCACATCATGTTTTTCTTTAACCTCACTGATTAATCGAATCATA  
TGTGGTTTAAATGTAACGTCTGTAATCCTCGACATTTAATGCACCTACCCATGAATCGAAAA  
TTTGAATCAATTCGGCGCCTGCTTCGACTTGAGCTGTTACATATTTAACAGATACATCAAC  
TAAATGATTCATTAAAGCAAACCATGTTGCTTCATCTCTATACATCATCGCTTTTGTA  
TTGTAATTTTTCGATGGTCCGCTTCAATCATATATGACGCTAATGTAATGGTGCCCCAG  
TAAATCCTATTAGCGGCACATTTAACTTTTCTTCTGTTAAAAGTTTAAATTGTATCTAATAC  
ATATGGTACATCTCGTTCCGGGTCTATTTGAGAAAGTTTCTCAACATCTTGAATTGTTTTG  
ATTGGATTATGAATCACTGGACCAATACCCGATTTAATTTCTACATCGACACCAATTGGCT  
TTAATGGTGTACATAAATATCTTTGTATAAAAATTGCTGCATCTGTATGATAATTATCAACTGG  
TAAATGTGTTACATAAGCGCACAACTCCGGCTGATGTGTAATATCGAATAGTGAATATTT  
TTCTTTCAATTTTCGATATTCTGGTTGCGAACGGCCAGCTTGTGCGATAAACCAACAGGT  
GTATGTGATGTTTCTTCACCTTTGATCATTTTTAAAATTGTATTGTTTTTATTATGCACCTT



### > **traP**

Function: protein coding sequence; signal transduction protein (core genome, variable)

Best match: traP\_CC008\_NCTC8325\_CP000253.1[1870108:1870611] (completely identical)

Position: 046-contig\_53\_RC: 5398 ... 5902; Length: 504 bp

Sequence:

```
ATGAAGAACTATATACATCTTATGGCACTTATGGATTTTACATCAGATAAAAATCAAT
AACCCGACCCATCAACTATTCCAATTTTCAGCATCAGATACTTCAGTTATTTTTGAAGAAA
CTGATGGTGAGACTGTTTTAAAATCACCTTCAATATATGAAGTTATTAAGAAATTGGTG
AATTCAGTGAACATCATTCTATTGTGCAATCTTCATTCCATCAACAGAAGATCATGCATA
TCAACTTGAAAAGAACTGATTAGTGTAGACGATAATTTTCAGAACTTTGGTGGCTTTAA
AAGCTATCGTTTGTAAAGACCTGCTAAAGGTACAACATACAAATTTATTTTCGGATTTGCT
GATCGACATGCATACGAAGACTTTAAGCAATCTGATGCCTTTAATGACCATTTTCAAAA
GACGCATTAAGTCATTACTTTGGTTCAAGCGGACAACATTCAAGTTATTTGAAAGATAT
CTATACCAATAAAAAGAATAG
```

### > **hit**

Function: protein coding sequence; histidine triad cell-cycle regulator (core genome, constant)

Best match: hit\_CC001\_MW2-USA400\_BA000033.2[1932307:1932729] (completely identical)

Position: 046-contig\_53\_RC: 8115 ... 8538; Length: 423 bp

Sequence:

```
ATGTCAGAAACAATTTTCGGCAAATTTTAACTGGAGAAATTCCTAGCTTTAAAGTATAT
GAAGACGATTATGTCTATGCCTTTTTAGATATATCACAAGTTACTAAAGGACATACGTTAT
TAATTCCTAAAAAAGCTTCTGCTAATATCTTTGAAACTGATGAAGAAACAATGAAACATA
TCGGTGCAGCATTACCTAAAGTAGCAAATGCTATTAAGCGTGCATTTAATCCTGATGGTTT
AAACATTATTCAAATAATGGTGAGTTTGCAGATCAATCTGTATTTTCATATTCATTTCCAC
TTAATTCCTCGATATGAAAATGATATTGATGGATTTGGTTATAAGTGGGAAACACATGAA
GACATTTTAGATAACGATGCAAACAACAATGCTGAACAAATTCAAGCACAAATTTTAA
```

### > **gvpP**

Function: protein coding sequence; gas vesicle protein-like protein (core genome, constant)

Best match: gvpP\_CC001\_MW2-USA400\_BA000033.2[1932871:1933236] (completely identical)

Position: 046-contig\_53\_RC: 8679 ... 9045; Length: 366 bp

Sequence:

```
ATGAAAGCATCACGCATTCTATTCGGTATCGGTGTTGGCGTAGCAGCTGGTTTTGTAGTTG
CACTTCAAGGACGAGACGACAAAAGTGTCAAGAACAACACGATCGATCGTACTGCCCT
ACTGGTTCAAATCAGAACTACAACGTGAATTTGAAACGATTAAACAAAGTTTTAATGAC
ATTTTAAACTATGGTGTTCAAATTA AAAACGAAAGTGCGGAATTTGGTAGTTCAATTGGT
GGTGA AATTAAGTCATTACTTGGAACTTCAAATCTGACATTAATCCTAATATTGAACGTT
TACAGTCACACATCGAAAATTTACAAAATCGTGGCGAGGATATTGGAAACGAAATTTCTA
AGTAG
```

### > **prsA2**

Function: protein coding sequence; peptidyl-prolyl cis-trans isomerase (core genome, constant)

Best match: prsA2\_CC001\_MW2-USA400\_BA000033.2[1934731:1935693]

Position: 046-contig\_53\_RC: 10539 ... 11502; Length: 963 bp

Sequence:

```
ATGAAGATGATAAACAAATTAATCGTTCGGTAAACAGCTAGTGCTTTATTATTAGGCGCT
TGTGGCGCTAGTGCCACAGACTCTAAAGAAAATACATTAATTTCTTCTAAAGCTGGAGAC
GTAACAGTTGCAGATACAATGAAAAAATCGGTAAAGATCAAATTGCAAATGCATCATT
ACTGAAATGTTAAATAAAATTTTAGCTGATAAATATAAAAATAAAGTTAATGATAAGAAG
ATTGACGAACAAATTGAAAAAATGCAAAAAGCAATACGGCGGTAAAGATAAATTTGAAAA
GGCCCTTCAACAGCAAGGTTTAAACAGCCGATAAATATAAAGAAAATTTACGTACTGCTGC
TTATCATAAAGAATTACTATCAGATAAAATTA AAAATCTCTGATTCTGAAATTAAGAAGA
CAGCAAGAAAGCTTCACATATTTTAATTAAGTTAAATCTAAGAAAAGCGACAAAGAAG
GCTTAGATGATAAAGAAGCGAAACA AAAAGCTGAAGAAATTCAAAAAGAAGTTTCAAAA
```

GATCCAAGTAAATTTGGTGAATCGCTAAAAAGAATCAATGGATACTGGTTCAGCTAAA  
AAAGATGGCGAATTAGGTTATGTTCTTAAAGGACAACTGATAAAGATTTTGAAAAAGC  
ACTATTTAAGCTTAAAGATGGTGAAGTATCAGAGGTTGTTAAATCAAGCTTTGGATATCA  
TATTATTAAGCTGATAAACCAACAGACTTTAACAGTGAAAAACAAAGCCTGAAAGAAA  
AATTAGTCGATCAGAAAGTACAAAAAATCCAAAATTATTAAGTGCATACAAAGAT  
CTATTAAGAATAACGATGTTGACTTTAAAGATCGTGATTTAAATCAGTTGTGCAAGAT  
AAAATCTTAAACCCTGAAAACTTAAACAAGGTGGCGCACAAGGCGGACAATCCGGCAT  
GAGCCAATAA

> **cbf**

Function: protein coding sequence; replication enhancer (core genome, constant)

Best match: cbf\_CC001-ST772\_118\_AJGE01000032.1[20286:21227]RC (completely identical)

Position: 046-contig\_53\_RC: 11622 ... 12564; Length: 942 bp

Sequence:

TTAATCGAGTGATTCAGGATTGTAGAATCTACGATTTTCAAGACCAAATATTTTATCTGTA  
AACTGACCCTTGTGAGTTTTTTTATATGCCTTTTCAAACATATTCATTCTAGCATCGATATT  
ATCGATATAGCATAAAATTTCTGCTTCTTTTAAAGTATGGCAGTTTGGCGAACCATACTCT  
AACTTACCATGATGAGATAAAATCATATGTCCTTAAACAACATGATTTCTTCTCCTTCAATGT  
TCAATTCACGAGCTGCTTCAACTACTTCATCACTCGCAATCGAGATGTGTCCTAATAAGTT  
ACCTTCGACTGTATACGACGTCGCAACAGGACCACTCAATTCTCTAACTTTACCAATATCA  
TGCAAAATAATACCACTATATAACAACTTTTGTTTAACAATGGATAAATGTCACAAATT  
GATTTTGCAATACGTAACATCGTTAATACATGATAGCTTAAGCCACTCGCAAAGTTATGA  
TGATGAGAACTAGCAGCTGGATATGTGTAATAATCGTTCTTGATATTTTTTCAATAAATGAC  
GTGTGATACGTTGTAAATTAGCATTTCATATCTAGCAAATAATGAGAAATCTCTTCTTG  
TATTTCTGCCGGTGATAAAGGTGCACCATCTACAAATTGTTCTGTTTTTAATTGATCTTCA  
GTTGTGCTAGTCTAATTTGGTTGACTTTCATCTGTTTATTTCCGCGATAGTTTATGATGTC  
ACCTTTAACATGTACAATTTCTTCAGGCTTGATTGTTGCCATATCATTTTTTGTAGCCGTC  
AAAATTTGCTTCAATTTCACTTTTATCTTGCAAATGTAATGTCATATAATCTTTACCT  
TGTGCTGTTACACCCTGTGTAGCTTTATGCACTAAGAAAAAGTGATCAACTGAATCTCCG  
GGATTTAGATTCTCTATATTTCTCAT

> **Q5HET2**

Function: protein coding sequence; DNA double-strand break repair rad50 ATPase (core genome, constant)

Best match: Q5HET2\_CC005\_04-02981\_CP001844.2[1927769:1930705:r]RC

Position: 046-contig\_53\_RC: 12560 ... 15497; Length: 2937 bp

Sequence:

TCATCGTTTCCCGCCTTCTCTATTTTTGTTAATGTAATCACTTCTTTTGATGGAACAATAT  
TATCTTTTACACATGTAAAGTATAGTACTTGATAGTGTCTGATAATGATCGTAAATAATT  
CAACATTTTTTTCAGTACGCTTTTTATCAAATGAACAAATGCATCATCAACAATTAATGGG  
AACGGATAATATGGTCTTAGTACCTTAATTAAGTACGTAAGCTACATAAAGTAAT  
TCTTTTGTAGATTGACTTAGTTCAACAGGATCATATAATTGACCATTAACATGTTAACCG  
TAATTGAATCTTCATTATAGTTAATCATCGTATATCTGCCATCTGTAAATGCTTCAATATT  
TCTACCGCTTCATTAATAACTTGAGGCAAACGTTTATCTTTAATTTGTTAATGTGTTTCATC  
AACTAACTTTGTAAATAACTTAACTTGCCCAATCTTTTGCGATATCATTAAAGTTGATTT  
TTAAGACTGTGATATTCATGTCTTAAATTAGCAAGCGTTGTATCAGTTTCCATGTGATTGA  
TTTGTGCACTTAAATCACTGACTTGTGCTTGCATTTCAAGATATTGCTCATTATATTCGTCA  
ACTTGAGTAGCCAATAAATGATCTTCTTCTTCAAGTTGTGTCAGTTGTTTTTCACTTAAAC  
TAGAACTTAATTCATAAGAATAGTTTTGGTTCTCAAGATATTTAGTTAAATCATTAAAACG  
ACTCAAATTAAGTATAAGTTTGGTAATCTTCATGATGTTGGTAAAAATCTTCTTCAGTA  
CCAACATTGATAAAATCGAATAGTGCTGTAATTTCTTTATTATTTTCTTCAATTGAGCAT  
TTAAATGATTTAATTCATTTGTAACAAGTTTGGTATTTTCAGCATTAAATACGCCATTTTTCA  
TTCGTGTCTTCAGCTGATTTCAACCATTGTTGCACATCGTGGAATAAAGATAATTTGTTGA  
AATAAACAAATTGTGATTTTGTAAACAGCTTCAGCATGATTGTAGAATGTATCTAATCTTG  
AACCAATTGCTGGCGTTGTTGATTTAATCACTGATATGTTGATCTAATGCTTTAATATTC

GCCATTGTAGAAATACTATCAACAATTAATCATTGAAATTTTAGATGATAAGTATAAT  
TCATCCTTAACGTTTTCAACTGTCGATTGTAATTCATCATGACGCCCTTTCGCATCATTTAA  
ACGACCTTCAATATACTGACGTTTCTCTTCTAAAATATCTTTATTTTTCAATGCCTGTTGCC  
AGTGATCACGAATGCGATATTGCTCATCAAGATCAAAATCTAAGTCATAGTTTTTCATCTA  
AAATGGCTAGTTGTGCTTTAATTTCTTCGATTTTCATCTGTGATGGCCTCGCTATAATCTACT  
TCTTTTGATTTAGACATGATGATACCGATAACAAATACTAAAGTTAATACTGCGAAAATA  
ATACCAAACAGCATGTTGTTTGAATAAATGAGAAGGCAGTTAAACCAATACCTACTAAT  
GTTAAAAGAATAAACGTTGTTTCGTAACAATTTTTGACGTTTTTGTCTTGTGCTCAAT  
TTCGAAACGTTCTTTCAATTTGCTATAACAAGTTCTCTTTTTCGTTTAATTCAATGACTTGTT  
GTGAGTATTCTTTTTCTTTTCAAAGTCTCTTCAGGAAGTATTTTTCTTCAACAGAATCT  
AGTTCGCTATGAACCGCATTATCTTCGATTTTATTTTCTTCTAAACTACGTTCTAATTGTTT  
AATGTATGCAGCTTGTCTTGTGTTATTCTTGATTTGCTCACTGACATAACTTTTCATTGCCT  
CTGAACATCTACGTCATGATGCGTTTCAGACCAACCAATATTTGCTTGCAATTCATCTTT  
ATCACGTTGTTTATTCGCAATATCCTTTTCGATTGCAGTAAGTTCAAATTTCTTATTTTTAA  
TTTCATTTTCTTGTGATTCAAATAAAGGGCGTCAATATCAGATTGCTTAACTGGCTC  
TAATTGAGTCGCTTCTTCTTAAAGTTGAGCTAAACGCTCATTTCTTAAACCAATATCTCTTT  
CTAACGATTGCTTATGCGCTCGTGCTTTTTTCGTAACGATCCACACCTTTTTCTGGGAATGT  
GATTGGCTCAATATTTAACTGTTGTTCTAGAGACTTCCATTCTTGTGAATGATCATGTA  
AA  
GCAACCTCTTTTTGTTTTTCTTCATGCATTTTTGATAATTGATTTAAATTATGCTTTAAATT  
CTCTAATCGACGTGATGATTTATCACGATCATCTACTAAGCGATGATATGTTTCTAGTTTA  
GCTTCTTCTTCACGAATTTGACTTTCTAGTTGTTTTAATTGCTCAATTTGTTGATTAATGAT  
CGGATTTTTACCTGATTTTTTATATAATTCATCTTTTTTACGATTAATCACTTCGCGCATTG  
ACGTGAATTCAGTTGATCCTAAAGCCCCTGCTTGAATAAATAATCTTGCAATTTGTTTTTC  
ATTTAGATTTCTATGAATGTCTTGAAGCCCTAGTACATCAAATGAAAAGATACCTTGATAT  
GCTTTTTTAGAAATATAATTAAGTTTCTTTTGTAAACCAAGCATCATCACGCACAGCACCAT  
TAGGTAAATATACTTTCACATCACCTTGAGCACTGCCTTTAATTCGTTCAACTTCAATCTC  
TAAGCCATCATCAAGAATAAGTACTAATTTACCACCGTATTGGTTACCTAGACGTGGTTCT  
AGTCTTGGCTCTTTAGACTTTTTAGTTGGAAAACCAATAATATCGAATGGATGAATGCTT  
GAATCGTCGATTTACCCGCTTCATTTTACCACAAAATTTCAAGTGAAGTTTTTATTAATTC  
AATTTTACGTTGAACAAATTGACCGTAACCATAAATTTCAAGTGATTTAATTATCAT

## > Q5HET1

Function: protein coding sequence; DNA repair exonuclease (core genome, constant)

Best match: Q5HET1\_CC001\_MW2-USA400\_BA000033.2[1939678:1940874:r]RC

Position: 046-contig\_53\_RC: 15486 ... 16683; Length: 1197 bp

Sequence:

TTAATTATCATTTTGTTCACCTCTCATTTTCAGCTTTTAATATTTCTTCAGCACGATTA  
ACTA  
ATGCTGTATGGTCGAATGTTCCATAATCGTCTAGGAAGTTCGATGCCCTTGGATTTAAATA  
TAAATCTGACATCGCTTTATCAAAAACAGTTTGATCGACTAATAATTCCGCTGAAAATTC  
ATTAACTAAAGGTGACTCATCATTTTGTGCATATTGTATTTTTAACTCATCAATATATACA  
AATTGATTTTCGTTTTCTTCATAATCTGTAATCATTTCTTCAACTTGTAATAAATCTTGAGG  
TGAAATTAATGTCTCACTATTAATAACAAGCGTTAAACGATAAAAGGCTTTTCTTCTTCT  
CTCACTTGTCTTTAAAGTTTTGAATGACCTCGTATAAACCTTGCTTAGATGTCTTATCCGT  
TTCAATAGTTGCTTCTTCAAATCTAATATACTGTGTAGGATAAAATTTAGTCTTTAATTTT  
AAGTGGTCACCCTCGATTAATAAGCAACCTTTTTCACCTTGCTCATTAAATGTCTACCTT  
GAATATTACCTGAATAGTTAATTACAGGCATATCACTTAATTGTTGACGTTTCATGTATATG  
ACCTAAAGCCCAATAATGATACAATTTACTGTTTAAATCTTCTAAAATGAACTCGGTATAT  
CTTTCGTTAACTGAAGATTTACTATACGTACCATGCAAGACACCAATATGTATGCCTTTTT  
GGCCTTGACTTGATGGATATTCATCAATCTTGTCTCATAACTTGCTCTATTTTCATAACTA  
AATCCGTGAATATAAATTGTTTACCAGATTTAGTAATTGCTTCATACGTCTCAACTTTAT  
TTGAAAATACAGAAACATTATCTGGCCAGTTTGTGAAATCTTTGATGATAATGGGTCGT  
GATTACCATGACAAACATAAACAAGATTTGTTCAATTTGTAAACGTTCAAATTGCTGTTT  
TAAGAAAATTTACGACAGTAATGTTCTGTTTTCACTATCAAATAAATCACCCGCGATAATT  
ACAAAATCAACATCTTGTGTAATGCAATATCTACAATATTTTTAAAACCTTTCATAAGCAC  
TTTTTTGAACATCCTCAAAAATTTTAGGGCTTATATGACTCTTAGATTTGAAAGGACTATC  
TAAATGTAAATCCGAACAATGAATAAATTTAACCAT

> **tx\_SACOL1902\_1**

Function: rho independent terminator

Best match: tx\_SACOL1902\_1\_CC001\_MW2-USA400\_BA000033.2[1941460:1941522:r]RC (completely identical)

Position: 046-contig\_53\_RC: 17268 ... 17331; Length: 63 bp

Sequence:

TTCAAAATGCAAAAAGGAAGTTAGGACACGTTTACTAGCCTAACTTCCGTTATCAAGCTC  
ATC

> **tx\_SACOL1902\_2**

Function: rho independent terminator

Best match: tx\_SACOL1902\_2\_CC001\_MW2-USA400\_BA000033.2[1941668:1941728:r]RC (completely identical)

Position: 046-contig\_53\_RC: 17632 ... 17693; Length: 61 bp

Sequence:

TCAAAACTAAAAAACTACCCACAAAGTCTCGGACTCTGTCCGCGCAGTCTATTCCTCTATTT

> **xdrA**

Function: protein coding sequence; DNA binding helix-turn-helix protein (core genome, constant)

Best match: xdrA\_CC001\_MW2-USA400\_BA000033.2[1943472:1943936:r]RC (completely identical)

Position: 046-contig\_53\_RC: 19436 ... 19901; Length: 465 bp

Sequence:

CTAGATATGTACTAATTCTTCTTTAGCATTCTGTAAAGTATGTTTCAGCTTCTCTCATTT  
TAGAAGTACCGAAAATTGGTTGGTTATCTGGATTAAATACACGATAAATATTGCTTACTTT  
GTTACTTTGTAAAATGTACCCATTACGAGTCTCAATGTTATTCCAATAAATATCACTTGTT  
GGTGCATGGTTTGGATATGCACAGTGATTTCTTGAAATTGTTTGAACGATTTCTAATGGAT  
CACAGCCAAATGTACTGTTAATACTTCAGAGTCTCTGAATAATGCACAAATTGAAATAC  
AAGTTGTCCAGTTTGGTAATACTCTCTTTTTTCGATTTGTACTAAAGTCTTTTTAGAAAGT  
CCAATTGTTTGCGCCATAGTATCTTGCGTATAACCAGCCTCTATACGAACCATTTTAAATT  
TTGTTTGAATTAATCTGTAAAACCTCTGTCTATCCAT

> **yhcR**

Function: protein coding sequence; DNA-binding response regulator (core genome, constant)

Best match: yhcR\_CC001\_MW2-USA400\_BA000033.2[1944292:1944915:r]RC

Position: 046-contig\_53\_RC: 20256 ... 20880; Length: 624 bp

Sequence:

CTAAATCAACTTATTTTCCATTGCATAAATTGCTGCTTGTGTACGATCGCTAACTTGTAAT  
TTACTAAATATATGACTGACATGTGTTTTAATTGTTTTTTCAGATACAAATAAAGTTTCTG  
CAATCTCTTTATTTGTTTTACCTTTAACCATTTACGTAACACTTCAATTTCTCTTTGAC  
AACTTATTCGTGTAGTGTGGTTTTTGGCTAACTGTTTTCGAATACATCTTGTGCCTTAGGAT  
GTATCATTTTTTACCAGTTCATAACTCGTCTAATAGTTTCAATTAATTGCTGAGGCTCAAC  
GTCTTTCATTTTCATAACCATCAGCACCTTTATTAATTGCTGAAATTACATGTTTCATCATCA  
ACATAACTTGTTAATACCAAACCTTTAATATCCGGATAATGTGCCTTAATATATTCCGTAA  
TTTCAATACCATTATGATGCCAGGCATCACTAAATCTAATAGCACAATATCAGGGTGCTCAT  
GCTCTTTTAAATATTCTAAAAATGTTTCTCCATCTGCAAAGTCTTGTAACACTTCTATGTTT  
TCAATCGTGGATAATAAAAATCGCAATCCTTGTGCGACAATATAATGGTCATCTACTAAT  
ATTACTTTGTTTCAT

> **yhcS**

Function: protein coding sequence; sensor histidine kinase (core genome, variable)

Best match: yhcS\_CC008\_NCTC8325\_CP000253.1[1885345:1886457:r]RC (completely identical)

Position: 046-contig\_53\_RC: 20901 ... 22014; Length: 1113 bp

Sequence:

CTATTTTATAGGAATTGTGAATTGTATTTGTGTACCCTTTGTTGGCTGAGAATGAAAGGTC  
ACTTTACCTCTTAATAATTTAACTCTTTGTTTTATGTTATTAATACCGTGTGATGAAGCTAT  
CTGAACATTATCGATCTCAAATCCTTGACCATAATCAATCACGTCAATATATAGTATATCG  
TTCATTTGTTTTAATGTAAGATCCATTTTATTCGTATCAGCATGTTTCTAACATTATTAAT  
ACACTCTTGTAATGCTCTGTATATGTTTTCTTCGATTTTCATTAGATAAAATCGATTAAACCTT  
CTACATTTACATTTAATTGTATATGCATTAATTTACTATATGCTGTCAAAGCATGAATTA  
ACCTTGCTCAAGTCCAACCTGGCTTAAGTTGCCAAATCAATGCACGCATTTTCATTAACGGC  
ATTTTGACTCGTTTCCTCAATCGTCTTGAATGCTTGTTTAGCGATGGATTTCGTTTGACATGC  
CATACGCAGCATGTGCTGTTAGTTTTACAGAAAATAACATTTGATTTACTGAATCATGTAA  
ATCTCTAGCTAAACGATTACGTTTCATTAATTTTTGCCGCTTCTTTTTACGGTCTGTAAAT  
AAATACGTTTGATGGCTGACCCTAATTGAAATGCGACAGACTCTAGCAACTCTAAATCTT  
CATCGCTATATATTTTCAGTATTTGGAGACGCTACATTTAAAATGCCGAATTGTTCTTGACC  
CGATTTAAGTGGTACCGTTGCATGATGTGTAATATTGTCATTTTGGCTAGGAAATGCTTTA  
GAGGCTAAGTTAATACGAGAACAATTGACGATATTCGACGCTTTCATTAGCCTACGTTGA  
TTAAATGCTTTCACACACCAACAAGACCCATCTTTAATATAGTGACAGTGGTCTGCTGTCA  
AAGATTGTGGTAGAGCCACATGTGATACAAGTTCATGTTACCTACGCTATTGATGAAAA  
ATATCCAGCCTGTCGTGAAATTAAGTCCCTCAATTAATATTTTAAACGCACCTTGGGTCAT  
GCTATACATTTTCAGTTTCTTCGTTTTAAAATTCGGCAATCTCTTTTAAATAAAGCTAGTCGC  
GTCCTTTGTTCCAT

### > **rluA2**

Function: protein coding sequence; RNA pseudouridylylase synthase (core genome, constant)

Best match: rluA2\_CC005\_Mu50-VRSA\_BA000017.4[1982040:1982861] (completely identical)

Position: 046-contig\_53\_RC: 22176 ... 22998; Length: 822 bp

Sequence:

ATGAAATTTAAAATACCAGAAAACCTTTAATGACTTAAGTTTACGAGATATTTTCCAACAA  
CTTAAGGTACCTAAAAAAGATTTACATCATTTAAATATGTCTAAAGATATTACTATTAATG  
ATAAACCTGCGCGATTAATGGATAAAGTGCATACTGGCGACGATGTATTTGTTCCAACCA  
TCGATGAAAAAAGTAATTATGTTCCAAGTTATCGTTATGCACAAATTAATACGAAGACG  
ATGATATGGCAATCGTAATGAAACCTAAAGGTGTTAAGACTCACCTAATGATTTAAAAG  
AAAGCAATACTTTAATGAATCATGTGATTTACACTATTGATAGTGACTATGTGCAACCAA  
TTCATCGACTGGACCAGGAAACAGTAGGATTATTAATTGTTGCTAAAAATCCTTTAATGA  
AAAAAATTCTTGATCGCATGTTAGAAGACAATGATATTACGCGGATATACAAAGCAAATG  
TTAAGGCACTTTTACCTTTAAAACCACAAACGATTGATATGCCAATTGGTAAAGATAAAT  
TCCATTTCGAATAAACGACGTGTGTCTCCTACTGGACAGCGTGCAATTACACACATTTTAA  
CTTCAAAAATGATAAAGAAGCTGTGTGCCAACTTGAAATCAAGTTGGATACTGGACGTA  
CTCATCAAATTCGTGTGCATTTAGCTGAAATTGGTCACCCTGTTATTGGTGATCCTTTATA  
TGGTGATTCAACGTTAAGACAATTAGAACTTGAAAGTTACAAAATAGAGTTTGTGCATCC  
CTTGACTAAGGAAGTCATTTCCGTTTCTTTGGATGACTAA

### > **fumC**

Function: protein coding sequence; fumarate hydratase class II (core genome, variable)

Best match: fumC\_CC008\_NCTC8325\_CP000253.1[1887904:1889289:r]RC

Position: 046-contig\_53\_RC: 23456 ... 24842; Length: 1386 bp

Sequence:

TTAATGAGGATCTACCATATCTTCTGGTTTAAATCCATGCTTCAAATTGTTCTTCTGTAACAT  
ATCCAGTTTGAATTGCAGATTCTTTTAAAGTTAAACCTTCTTTATGGGCTTTCTTAGCAATT  
TGAGCTGCTTTTTTCATAACCAATATGTGGATTTAATGCAGTAACTAACATTAATGATTGAT  
TTAAATAATTATCAATATTCTCTTCGATTGGTTCAATGCCCACTGCACAATTGTTATTTAA  
TGTTTCCATACCATCAGCTAAAAGGTAAATTGATTGTAGTGTATTATGCATAATAACTGGT  
TTATAAACATTCAATTCAAAGTTACCTTGTGAACTTGCGAAGCCAACAACCTGTATCATTAC  
CCATTACTTGGACTGCAACCATTGTTAACATTTACATTGTGTAGGATTAACCTTTACCAGG  
CATAATTGATGAACCTGGTTCAATTTTCAGGGATGGAAATTTCTGCCAAACCAGCTCGTGG  
CCCTGAAGCCAACCATCTCACATCATTAGCAATTTTCATTAAGTCTCCTGCTAGCGCCTTC  
AATGTTCCATGTAGTTGTACTACTTCATCATGTGCTGTTAATGCATGGAATTTATTTTCAG

AAGATACAAATGGATAACCCGTATTTTCTGAAATATAATGTGCCACTTTATCACCAAATT  
CAGGATGCGCATTAAATACCAGTACCAACAGCCGTACCACCGATGGCAAGATTTAAAATGT  
GCTTCTTAGATTACAGATAACATTATTTTCGCAACGGTCAAGCATATAACGCCAGCCACTAA  
TCTCTTGTCTAGTTTGATCGGCGTTGCATCTTGTAATGTGTACGACCAATTTAATAAT  
TGAATCAAATTTGTCTTCTTTTTCTTTCAAAGTATTTCTTAAAAGTTTTAATGCAGGTTCTA  
ATTTTGTTCACCTCTTGATATAATGCAACGTGCATAGCAGTTGGGAATGTATCATTTCGA  
ACTTTGTGATTTATTTACATCATCATTTGGGTGGATACTTTCATCAATTTGATGATCTTTTA  
AATACATATTAGCAACATAACTTACTACTTCGTTTACATTCATATTACTTTGTGTACCGCT  
TCCTGTTTGCCATAACAAGTAGTGGGAAGTGTTCATCTAATTCACCTGATAAAAATTTGATCA  
CATGCGTATACAATGGCATCTTTCTTTGCCTCGCTTAATTTTCCTAAATCAAATTAGCTA  
ATGCTGCTGCACGCTTTAGTTGTGCAAAACCATAAACTACTTCGATTGGCATAACGCTCTTT  
ACCAACTGGGAAATTACGTTTACTTCTTTCTGTTTGAGCACCCCAATATTTATCTGCAGGT  
ACTTCTATTTCTCCAAAAGTATCATGTTCAATTCTTACTGACAT

### > **glnQ**

Function: protein coding sequence; glutamine transport ATP-binding protein (core genome, variable)

Best match: glnQ\_CC001\_MW2-USA400\_BA000033.2[1952764:1953492:r]RC (completely identical)

Position: 046-contig\_53\_RC: 29011 ... 29740; Length: 729 bp

Sequence:

TTATAATACTCTTGCTAAGAAATTTTGTGTTCTTTCATGTTGCGGTTGTTCAAATATTTTCGA  
CTGGTGTGCCTGACTCTACGACAACGCCATCTGCCATAAATATGACTTTGTCACCTTACATC  
TTTGGCAAATCCCATTTTCATGTGTCACAACCACCATGGTCATACCTTCTTTGGCTAGGTCT  
TTCATTACTTTTAATACATCACCAACTACCTCAGGATCTAATGCTGAAGTTGGTTCATCGA  
ATAAAATAACATCTGGATGCATTGCTAAAGCTCTTGCAATTGCTACCCTTTGCTTTTGACC  
ACCTGATAATTGATTCGGATATACATCTGCTTTTTCTTTAATCCCACTTTATCTAATAACG  
ACAATGCTTCCTTATGTAATTCATCGTTATTATCTTTCTTTAATAATTTAGGAGCTAAAAT  
AATATTATCGACAACTTTTTATGTGGAAATAGGTTGAAGTTTTGAAATACCATAACCCATT  
TTTTGACGTAGTTTATCTACTTGTGTCCCTTTTTCCGTTAAGTCATTGCCTTCAAAAATCAC  
TTGACCTTTAGTGGGTACTTCTAATAAATTCATACATCTTAACAATGFACTTTTACCACTA  
CCAGATGGACCTATTATTGCTACTACTTCCCCTTGATTGATTTCAAGATTGATATCTTTTA  
AACTTCATTATCTCCAAAACCTTTATTAAGATTGTTTATTTTAATCACTGGCAT

### > **Q1Y9N4**

Function: protein coding sequence; phosphotransferase system (PTS)/EIIIC domain protein (core genome, constant)

Best match: Q1Y9N4\_CC001-ST772\_118\_AJGE01000032.1[502:1563]RC (completely identical)

Position: 046-contig\_53\_RC: 31442 ... 32504; Length: 1062 bp

Sequence:

TTATTGTTTTGGAACCTCAAATTTATAAATATCATTAGAATATATAGGAATGAATTTTTTA  
CACAATTCATGAACAATAAATGCCGATACAAATGGTATGACAAAATAACCAAGTGATAA  
TAAAATAATATTCATTGTTGGATCACCTGACATTCGGTTAAATGCATTTATTGGGCCAACT  
AATCCTGTATATCCAAATCCAGCAGACAATGGTGTTCCTTTAACTGAAGAACGTAAGCA  
ATGATTCCAGTAATTATTCCATTTATAGTCAATGGTATCGAAATAATTAATTTTTCAAGT  
AACTGGGATCATCATTTTTGCTGCTCCTATGAGTAAACTGCATTTACACCAATAGAATT  
GACACGCAATGAGCCAAATAAGAAAGTAACACAGGCAGCCACTATACCTAGGTTTGCTG  
CTCCACTTCCTAGTCCGTTTTAACTAATCGCAGTTGCAATCGCTACTAACGATATTGGTGT  
TACCATTAATAATGAAAATGCCACACTAATAAGTATAGACATTAACAACGGATTTAAGTC  
TGTAAGAAGAAATGAATTACATTTCCAATTGCTTGAGTAATTTTTCGAATGTAAGGTAATGTG  
ATTAGACCGATACCCCACTAACGATAGGTACTAAAACCTGGTAATATAATTAATTTCAAAA  
GATCCAAGTTTGTTTGTAATAACCATATATATAAGACATGCAATAATAACAACCAAACTC  
GTATTTATAATGTCACCTATACCTTTTTAACATAAACTATTATTGCTATATACAACAGCAC  
CTGAACCAATCATAGCTGATGTACCTACTATAGCAGCACCTGCGCCATTAATTTAAATT  
GATGAGCAGCTAAAACCCCAATAAATAAATGCCATAAATGATTGAATTAGTATCACTAACT  
GATACGTTAATTCTAAAATTTCAATACCCTTTTAAATATTTTAAATACTTCACCTAATAA

AGCATTTCGGAACAAGTGCAATAACAACACCAGCACCAATAGAATTTAAAATCTTACTGA  
AAAACGTGTTTATTATCAGCATTCTTTGCGTTACTCAT

> **tx\_tRNAleu1**

Function: rho independent terminator

Best match: tx\_tRNAleu1\_1\_CC030\_MRSA252\_BX571856.1[2033795:2033847:r]RC (completely identical)

Position: 046-contig\_53\_RC: 32987 ... 33040; Length: 53 bp

Sequence:

AGAGAGAAATAAAAAGAAACCTTGTTTTACAAGGTTTCTAGTACGTTATGTTA

> **tRNAleu1**

Function: tRNA tRNA leucine

Best match: tRNAleu1\_CC001\_MW2-USA400\_BA000033.2[1956800:1956886:r]RC (completely identical)

Position: 046-contig\_53\_RC: 33056 ... 33143; Length: 87 bp

Sequence:

TTATACCGGTGGTCGGGGTCGAACCGACACTCCACAAGTGGAACGGGATTTGAGTCCCCG  
CGCGTCTGCCAATTCCGCCACACCGGC

> **tRNAgly2**

Function: tRNA tRNA glycin

Best match: tRNAgly2\_CC001\_MW2-USA400\_BA000033.2[1956925:1956999:r]RC (completely identical)

Position: 046-contig\_53\_RC: 33181 ... 33256; Length: 75 bp

Sequence:

TGGAGCGGAAGATAGGATTTACACCTATACCTCGTTCCGGGAAGGAACGTGTTCTAAAAG  
TTGAACTACTCCCCG

> **tRNAcys**

Function: tRNA tRNA cysteine

Best match: tRNAcys\_CC001\_MW2-USA400\_BA000033.2[1957185:1957258:r]RC (completely identical)

Position: 046-contig\_53\_RC: 33441 ... 33515; Length: 74 bp

Sequence:

TGGAGGCGCAACCGGATTTGAACCGGTGATAAAGGTTTGCAGACCTCTGCCTTACCAC  
TTGGCTATGCCGCC

> **tRNAtrp**

Function: tRNA tRNA tryptophan

Best match: tRNAtrp\_CC001\_MW2-USA400\_BA000033.2[1957422:1957495:r]RC

Position: 047-contig\_203: 50 ... 80; Length: 30 bp

Sequence:

ACCTCTATTCTACCGTTGAACTATGCCCT

> **tRNAtyr**

Function: tRNA tRNA tyrosine

Best match: tRNAtyr\_CC001\_MW2-USA400\_BA000033.2[1957508:1957591:r]RC (completely identical)

Position: 047-contig\_203: 92 ... 176; Length: 84 bp

Sequence:

AAATGGAGGGGGGCAGATTCGAACTGCCGAACCCGAAGGAGCGGATTTACAGTCCGCCG  
CGTTTAGCCACTTCGCTACCCCTCC

### > **tRNA<sup>thr</sup>**

Function: tRNA tRNA tryptophan

Best match: tRNA<sup>thr</sup>\_CC001\_MW2-USA400\_BA000033.2[1957597:1957672:r]RC (completely identical)

Position: 047-contig\_203: 181 ... 257; Length: 76 bp

Sequence:

TGGTGCCGCGCCAGAGGACTTGAACCCCAACCTACTGATTACAAGTCAGTTGCTCTACCA  
ATTGAGCTAGGCCGCGC

### > **tRNA<sup>phe</sup>**

Function: tRNA tRNA phenylalanin

Best match: tRNA<sup>phe</sup>\_CC001\_MW2-USA400\_BA000033.2[1957677:1957752:r]RC (completely identical)

Position: 047-contig\_203: 261 ... 337; Length: 76 bp

Sequence:

AAATGGTTCAGGACAGAGTCGAACTGCCGACACATGGAGCTTCAATCCATTGCTCTACCA  
ACTGAGCTACTGAACC

### > **tRNA<sup>asp</sup>**

Function: tRNA tRNA asparagine

Best match: tRNA<sup>asp</sup>\_CC001\_MW2-USA400\_BA000033.2[1924369:1924444:r]RC (completely identical)

Position: 047-contig\_203: 355 ... 431; Length: 76 bp

Sequence:

TGGCGGTCTCGACGGGAATCGAACCCGCGATCTCCTGCGTGACAGGCAGGCGTGTTAACC  
GCTACACTACGAGACC

### > **tRNA<sup>met</sup>\_ini**

Function: tRNA tRNA methionine initiator

Best match: tRNA<sup>met</sup>\_ini\_CC001\_MW2-USA400\_BA000033.2[1924466:1924539:r]RC (completely identical)

Position: 047-contig\_203: 440 ... 514; Length: 74 bp

Sequence:

TTGCGGGAGGCGGATTTGAACCACCGACCTTCGGGTTATGAGCCCGACGAGCTACCGAAC  
TGCTCCATCCCGCG

### > **tRNA<sup>ser</sup>1**

Function: tRNA tRNA serine

Best match: tRNA<sup>ser</sup>1\_CC001\_MW2-USA400\_BA000033.2[1957944:1958036:r]RC

Position: 047-contig\_203: 528 ... 558; Length: 30 bp

Sequence:

TGGCGGAGGAAGAGGGATTCGAACCCCGC

### > **tRNA<sup>ile</sup>**

Function: tRNA tRNA isoleucin

Best match: tRNA<sup>ile</sup>\_k2CAT\_CC001\_MW2-USA400\_BA000033.2[1958257:1958333:r]RC (completely identical)

Position: 048-contig\_124\_RC: 14 ... 91; Length: 77 bp

Sequence:

ATATGGACCTTGCAGGACTCGAACCTGCGACCGAACGGTTATGAGCCGTTAGCTCTAACC  
AACTGAGCTAAAGGTCC

### > **tRNA<sup>met</sup>\_elo**

Function: tRNA tRNA methionine



Best match: tRNAmet\_elo\_CC001\_MW2-USA400\_BA000033.2[1958359:1958435:r]RC (completely identical)

Position: 048-contig\_124\_RC: 116 ... 193; Length: 77 bp

Sequence:

TAGTGGCGGTGGAGGGGATCGAACCCCGACCTCACGGGTATGAACCGTACGCTCTAGCC  
AGCTGAGCTACACCGCC

### > **tRNAala**

Function: tRNA tRNA-Ala

Best match: tRNAala\_CC001\_MW2-USA400\_BA000033.2[1958457:1958532:r]RC (completely identical)

Position: 048-contig\_124\_RC: 214 ... 290; Length: 76 bp

Sequence:

TGGTGGAGACTAGCGGGATCGAACCGCTGACCTCCTGCGTGCAAAGCAGGCGCTCTCCCA  
GCTGAGCTAAGCCCC

### > **tRNApro**

Function: tRNA tRNA prolin

Best match: tRNApro\_CC001\_MW2-USA400\_BA000033.2[1958547:1958623:r]RC (completely identical)

Position: 048-contig\_124\_RC: 304 ... 381; Length: 77 bp

Sequence:

ATATCGGGAAGACAGGATTCGAACCTGCGACCCCTTGGTCCCAAACCAAGTGCTCTACCA  
AGCTGAGCTACTTCCCG

### > **tRNAarg**

Function: tRNA tRNA-Arg (core genome, constant)

Best match: tRNAarg\_ICG\_CC001\_MW2-USA400\_BA000033.2[1958630:1958706:r]RC (completely identical)

Position: 048-contig\_124\_RC: 387 ... 464; Length: 77 bp

Sequence:

TAACGCGCCCGATAGGAGTCGAACCCATAACCTCTTGATCCGTAGTCAAACGCTCTATCC  
AATTGAGCTACGGGCGC

### > **tRNAleu2**

Function: tRNA tRNA leucine

Best match: tRNAleu2\_CC001\_MW2-USA400\_BA000033.2[1958725:1958813:r]RC (completely identical)

Position: 048-contig\_124\_RC: 482 ... 571; Length: 89 bp

Sequence:

TGGTGCCGAGGACCGGAATCGAACCGGTACGGTGATCACTCACCGCAGGATTTTAAGTCC  
TGTGCGTCTGCCAGTTCGCCACCCCGGC

### > **tRNAgly3**

Function: tRNA tRNA glycin

Best match: tRNAgly3\_CC001\_MW2-USA400\_BA000033.2[1958824:1958898:r]RC (completely identical)

Position: 048-contig\_124\_RC: 581 ... 656; Length: 75 bp

Sequence:

TGGAGCAGAAGACGGGATTCGAACCCGCGACCCCAACCTTGGCAAGGTTGTATTCTACCG  
CTGAACTACTTCTGC

### > **tRNAleu3**

Function: tRNA tRNA leucine

Best match: tRNA<sub>leu3</sub>\_CC001\_MW2-USA400\_BA000033.2[1958899:1958983:r]RC (completely identical)

Position: 048-contig\_124\_RC: 656 ... 741; Length: 85 bp

Sequence:

ATATGCGGGTGAAGGGAGTCGAACCCCCACGCCGTAAGGCGCTAGATCCTAAGTCTAGT  
GCGTCTGCCAATTCCGCCACACCCGC

### > **tRNA<sub>lys</sub>**

Function: tRNA tRNA lysine

Best match: tRNA<sub>lys</sub>\_CC001\_MW2-USA400\_BA000033.21958987:1959062:rRC

Position: 048-contig\_124\_RC: 744 ... 820; Length: 76 bp

Sequence:

TGGTGAGCCATAGAGGATTTGAACCTCTGACCCTCTGATTAAGTCAGATGCTCTACCA  
ACTGAGCTAATGGCTC

### > **tx\_perR**

Function: rho independent terminator of perR

Best match: tx\_perR\_CC005\_Mu50-VRSA\_BA000017.4[2002305:2002361:r]RC (completely identical)

Position: 049-contig\_251\_RC: 623 ... 680; Length: 57 bp

Sequence:

TAAGCATAAAAAAGAAGTTAAACAACCTTTCATGTCGTTAACTTCTTAAATATTACA

### > **perR**

Function: protein coding sequence; repressor of peroxide operon

Best match: perR\_CC001\_MW2-USA400\_BA000033.2[1965203:1965649:r]RC (completely identical)

Position: 049-contig\_251\_RC: 737 ... 1184; Length: 447 bp

Sequence:

TTATTTATCTTGGCATTCTTTACAACTCCATAAATTTCCATTCGATGATGTGTTACGTCAA  
AGTCAGTCATATGCTGAGCTAATCTTTC AATTTCAATTTA ACTGTGGATATTGAAAATCAAC  
AATCTTACCACATTGTTACATATAATATGATAATGATTATGTGTATTAAGTCGAATCGA  
CTTGATGAGTCTCCATATGTTAATTCTTTTACAATTCCAATATCTTTAAACACTCTTAAGTT  
ATTATATATTGTCGCAACACTTATATTTGGAAAATCAGGTGAAAGTGCTTGATAAATTTCA  
TCAGCTGTTGGATGAGTATGTGAAGAAATTAATAACGTAATATTGCTTGTCTTTGAGGT  
GTAATTCTTACGCCTGCTTGTGCAATGATGCAATTGATTCTTCTAGTTCATGTTCAATTG  
ATTCTATTTCAACACTCAT

### > **bcp**

Function: protein coding sequence; bacterioferritin comigratory protein (core genome, constant)

Best match: bcp\_CC001-ST772\_118\_AJGE0100047.1[2167:2622:r]RC (completely identical)

Position: 049-contig\_251\_RC: 2236 ... 2692; Length: 456 bp

Sequence:

TCACCCCAAATGTTTTTAAGTTCTTCTATTTGTGTTTTAACCTTAACCTTCTCGATAACAT  
CTAATACTTTACCTTGTTTCATCTATTATAAAAAGTCGTTCTTACAATGCCATACTTCTTTG  
CCAAATGATTTTTTCAACTGATATACGCCAGTTTCTTTAGCTAATTTAAAATCTTCATCTA  
CTAATAAATCGAAATTCAATCCGTGTTTCTCAATAAAAATTTTGGTGTTTTTTCTTTGAATC  
ACCGCTTATACCATATACTGCAACATCTAAATCATTGAACATTTCTAAATTGTCTCTAAAG  
TCACAAGCTTCTGTGGTACAAGTAGGTGTATTATCTCTAGGATAAAAATATATAATCGCC  
TTTTTACCTTTTAATGTATCATTGTGAATGACAGTCCGCTTGTGATTTTCTAATTTAAATAT  
TGGAATTGTTCTCCTTTTTTGAACAT

### > **hemL2**

Function: protein coding sequence; glutamate-1-semialdehyde 2,1-aminomutase/locus 2

Best match: hemL2\_CC001\_MW2-USA400\_BA000033.2[1967238:1968527]

Position: 049-contig\_251\_RC: 2772 ... 4062; Length: 1290 bp

Sequence:

```
ATGAATTTTAGTGAAAGTGAACGTTTACAACAACTTTCAAACGAATATATTCTAGGCGGT
GTCAATTCCCCTTCTCGTTCTTATAAAGCTGTAGGAGGCGGTGCACCTGTTGTTATGAAAG
AAGGACACGGTGCATATTTATATGATGTTCGATGGCAATAAATTTATTGATTACCTTCAAG
CATACGGTCCAATTATTACGGGGCATGCACATCCTCATATTACTAAAGCAATTCAAGAAC
AAGCAGCCAAAGGTGTTTTATTTGGTACACCGACTGAACTAGAAATTGAATTCAGCAAAA
AATTACGTGATGCAATTCCATCTCTTGAGAAAATTCGCTTTGTAAATTCGGAACAGAAG
CAGTCATGACAACAATTCGTGTTGCACGTGCATATACTAAAAGAAATAAAATTATAAAAT
TTGCTGGATCTTATCATGGCCATTCTGATTTAGTATTGGTTGCAGCAGGTAGTGGCCCATC
TCAGCTCGGTTCTCCAGACTCAGCTGGTGTTCAGAAAGCGTCGCACGTGAAGTCATTAC
TGTACCTTTCAATGATATTAACGCATATAAAGAAGCAATTGAATTTTGGGGTGATGAAAT
TGCCGCAGTATTAATAGAACCAATTGTTGGTAACTTTGGAATGGTAATGCCTCAACCTGG
ATTTTTAGAAGAGGTTAATGAAATTCGCATAACAATGGGACACTAGTGATTTATGATGA
AGTAATTACTGCATTCCGTTTCCATTACGGTGCCGCTCAAGATTTATTAGGTGTTATCCCT
GATTTAACTGCATTTGGTAAAATGTTGGCGGTGGTTTACCAATTGGAGGCTATGGTGGA
CGTCAAGATATTATGGAACAAGTAGCACCTCTAGGACCTGCATATCAAGCTGGTACAATG
GCTGGTAAACCGTTATCTATGAAAGCAGGTATTGCATTACTCGAAGTACTAGAACAAGAC
GGTGTATGAAAAATTAGACAGCTTAGGCCAACAACCTAGAAGAAGGTTTACTTAAATTA
ATCGAAAAACATAATATCACAGCTACAATTAATCGTATTTATGGATCTTTAACATTGTACT
TTACAGATGAAAAAGTCACACATTATGATCAAGTTGAACATTCTGACGGCGAAGCGTTTCG
GTAAATTTTTCAAATTAATGTTAAATCAAGGTATCAATTTAGCACCTTCTAAGTTTGAAGC
TTGGTTCTTAACAACCTGAACATACAGAAGAAGATATTCAACAACCTTTAAAAGCTGCAGA
CTATGCTTTTAGTCAAATGAAATAA
```

### > Q7A4T3

Function: protein coding sequence; putative ABC transporter ATP-binding protein (core genome, constant)

Best match: Q7A4T3\_CC001\_MW2-USA400\_BA000033.2[1970106:1971842:r]RC

Position: 049-contig\_251\_RC: 5639 ... 7376; Length: 1737 bp

Sequence:

```
TTATAAGTTTTGAATGCTATATAAATGCTCGTAAGCACCTTGTTTTGCAATCAATTCACGA
TGCGTACCTGTTTCAACAATATGTCCATTTTCAATTACGACAATTTTGTGACGATGTGTAA
TAGTGGACAAGCGATGCGCTACGATAAGTGTTCGTTTCGATCTTTACTCAACACATCTAATG
CTTCTTGAATAATGGATTCACCTTCTAAATCAAGTGCACCTTGTTGCTTCATCCAAGATAAG
AATTGGCGGATTATTTAAAAATATTCTAGCAATCGATAATCTTTGTTTTTGACCACCTGAT
AATTTAACACCTCGTTCACCTACTTCAGTGTATATCCCTGTGGCAAGTTCATAATAAAGT
CATGTGCATTAGCCATTTTCGCCGTTCAACTACTTCTTCATCTGTTGCTGTTGGACGACC
AAGTAAAATATTTTCCCTTAACTGTATCAGAGAATAAAAATATTATCCTGTTGCACCAATCCT
ATTTGATTTCTTAAACTTCCCGTTAAAAAATCTTTAATATTGTGACCATCTATTAAAATTT
GCCGAGAAGTTACATCGTAAAATCTCGGTATTAAGTTAATTAATGTTGATTTACCACCACC
ACTCATACCTACGAAAGCAACTGTTTCTCCTTTTTCAATACTCAAATTAATATCTTTTAAA
ATTGGATCTTCGTTATCGTTATATTGAAAACCTAACATGATCAATATCAATACGACCTTGTT
TAATTTCAATAGGTTGAGCACCAACACCATTTTTAATGTCATAATCTTCGTCAATTAATTG
GAATACACGGTCCATTGAAGCAAACTTTGCGTTAAAGTTGTAAATGATGCGACTAAACG
ACGTAAAGGCCCGAACAATAACTCTAAGTATCCAACAATGCTGCAAGTGTACCTACTGT
GATTGATCCAGAAATAGCAAGATATGCACCAACACCGATGACAATAATTGGTCCAATATC
TGTAACCTGTATTAATTGCGGCAAAGGAATAGGCATTCCATCTTGATGTTTCAACGCACGT
GTTAAGAAATTAGTATTCTTTTTATCAAAGTTTTTCGCTTCATTGTCTTCAATCGCAAACT
TTAACGACTGAAATACCTTGAACACGTTTCATGCAAGAATCCTTGAACCTCAGCTAATGC
TTGAGATCTTTCACGTGTCAATTTTCTTAATCTTCCAAAGAAAACGTACACCGTTAAAATG
TAAAATGGGAAGATAAACAGTGCTGCTAAAGTCAATTTACATCTAAAAAGAACATTATG
GATAGTGCAATAATAATTGTTATACAATCTAACCAATATTCAATTAACCCGGTTAAAATG
AAATCTTTTGTGTTTCAACATCATTAACTACTCTAGATATTACTTGACCTACTTGATTATT
AGCATAAAATCTCGCACTTAAAGCTTGTAATGGTTATATAACTTTTTACGTATATCATAC
AATATTTTATTACTTGTCCATTGCGCCAAATATTGACGTATAAATTCAAATGGTGGTCTCA
```

CTATTACAAAAATAAATAATGCGATACCAATGGCAATAGTTAAATGATGAACTTTTTTCAT  
CAGTCGTTAATGCGTGGTTATTAATCACGCCATCTATTGCATATTTAATTA AAAAGTGGTAT  
AAGCATTGGTATACCAA ACTTAATTATTCCAACAATAATCGTTGCAAAAATACGATATTT  
GTATGGCTTAACAAATTGCAAATATCGTTTAATCAT

> **mutY**

Function: protein coding sequence; A/G-specific adenine glycosylase (core genome, variable)

Best match: mutY\_CC001\_MW2-USA400\_BA000033.2[1972977:1974014:r]RC

Position: 049-contig\_251\_RC: 8511 ... 9549; Length: 1038 bp

Sequence:

TTACCCATTTATAAATTGATAAATCTTTGACATAGGTACAGGGAATGTATATTGGTCTCGA  
TCACTTAAATTAACCAAATCATGTCATCTGGTAATGTTTCAATGTTAATTGCTCCTGAAA  
CGGCGTATACTTTAATCTTCCATGTTAAATGAGTAAATTGATGCTTCAACTCAAAAATAG  
GTGTTTCTACTGGTTGAATGTCATGACCGATTTTTTCAGTCATTTTACGTCTAGCATGCTCA  
CTTTCAAACATAGGAAATTGCCACATACCATGCAATAATTTTTTCGCTACGCTTTTGCAACA  
GATATTGACCTTGATTATTTCTAATTA AAAAAGACGGATTGCTCAATTACTTTTTACTTAC  
ATTTTTAGATTTAACAGGTA ACTTTTTCAAATGTACCTTTATCAAATGCCTCACAGTTTTCTT  
GAACTGGACAAAATAAGCATAATGGATTTTTTGGTGTACAAATTAACGCCCTAATTCCA  
TCATAGCTTGATTAACGTTCCAGCTTCTGTAGTAACATACGGTAATAATTCTTGTTTCGTA  
CGATTTCCCTCGTCGATTGTAATTTAATATCTCGATAGTCATCATTCAATCTAGACCATACT  
CGAAAACATTTCCGTCTACAGTTGCTAGTGGTACATTATATGCAATGCTCATTACTGCAG  
CTTGTGTGTATGGGCCAACACCTTTTAAACGCTTTAAATTGATCAGGATCTTTGGGAACTAA  
GCCTTCATATTTATCATGAACTTCTTTAATCGCCGTATGAAAATTTTCGAGCTCTACTATAA  
TATCCTAAGCCTTCCCAATACTTTAACACTTCATCTTCCGAAGCTTGACTCAAAACTTCCA  
CAGTTGGAAATCGTTCAACAAAACGATGATAATAGTCAATAACTGTTTTAACTTGTGTCT  
GTTGTAACATGACCTCACTTAACCAAATATAGTACGGATTGGTCGTTTGTGCGCCATGGCAT  
TTCTCTTTGATTTTCATCAAACCAGTGTATCAAATTTTCTTTAAA ACTAGACTGCTGATAC  
AT

> **recX**

Function: protein coding sequence; regulator of recombination (core genome, constant)

Best match: recX\_CC007\_USA300\_TCH959\_AASB02000001.1[13505:14323:r]RC (completely identical)

Position: 049-contig\_251\_RC: 13607 ... 14426; Length: 819 bp

Sequence:

TCACTCAATTTCTTCTGTTCATCGGCAATACCACTTTCTTCTAATTTAGCTTTAATTTTAT  
CATATTTATATCCTTTTCTCATAAGGCCTTCGATAGTTTTTGAAATTAATTTCTGTTGCGTG  
TACTTCTTTCGATTTTTATTATAAATTTTTCTAAATCTCGTTGTAATAAATCGTCTAAAAC  
CGCTTCATCTTGTGTA AAATCCATTTCAATACAGCATGAATGGTTCCATTTCAAAC  
CCTTTTTGAATTAAGATTGCATTACTTTTTCTTAACTTATTTTGTGGCCCTTTTTTTGTT  
TTAGATATTTTTTCAGCAATTTGGATAATATCATCAAGTTCCTGTTGTTCTCTATAAAGTTC  
TGTA AACATTTCAATGATATTTGGTTCTATACCAAGTTGATATAGTTTTTTGTTGATAAATT  
TTAGGTCCTTATCTGTCGTGCGAATCATTGATTTTTTAACTTTCCGCATAATCTTGATG  
GTCGATTA ACTTTTCGCGATAACAATATCAATCACTTCAGAAATCGCTTGCTCTGATATC  
TCTTCTTTTTGTAAATATTGTATAACTTCTTTTTTCAGTTCTTTTTATATGATAAATATTGG  
ATTGCTTTGTTTAAACCTATGCGATAATGATCATACTTTTGAATCTCTGCCATGTCAGCAG  
CTTCAAGTTGTTGCCCTTTTTTAAATTA AATTTGACTAATGTATCGATATCTATACCCATT  
TCAAATTTGTTCTGCTA AAAAAAGATTA AAACGTTCTTTGTTTTTCTTTTGA ACTTCTATTTT  
AGTAATCTTCGGCAC

> **sgtB**

Function: protein coding sequence; monofunctional glycosyltransferase B (core genome, constant)

Best match: sgtB\_CC001-ST772\_118\_AJGE01000047.1[14617:15426:r]RC (completely identical)

Position: 049-contig\_251\_RC: 14686 ... 15496; Length: 810 bp

Sequence:

TTAACGATTTAATTGTGACATAGCCTGTTGATATTGTGTTTCATTGATATAATTTTGTGCT  
TCATTTTTTCTAAGTTCGTGCTTACACGTTGCGTAAAATTCTCTGACATATTATTGATATTA  
TATACGCTAGGTGCATTGACTTTACTAGCTAAAATAGCGCTTTGTAAAAGTGTATGTGAG  
ACATTGTTGACTATTTTTATTACGGTTGTTCCAAAGTAATGGTTTGCTGCGCCCTCAAG  
CGTATATTGATTATCCCCAAAGTAAATATTATTTAAATAAAAAGCTTAAAATTCGTTCTTA  
TTATATTGTTTTCAACTCGATGAGCTACAAATAATTTCTTTACTTTTCTAGTAAATGAAC  
GATCATTATCATAAAAATAATTTTTGACAACTTGTGTGTAATGGTACTACCACCTTGAC  
ATCTCTGTCGCTAATCGTTGAAAATAAAGCTCTAGTTGTACCTTCAAATCGAATCCATGA  
TGATTGTAGAATCGTTCATCTTCCATTGAAATAAAGGCACCTTAAACATACTCTGGCATGT  
TATCAGCTGACACAAAAGTACTTTTATTTCAATTTTTCTTAGTTCATCCACATTATCGCGT  
GTAGATAAAAAATACATGATACCAATAACAATGCGATAATGATTAGAATGGTTAATAA  
TATTTTTAATAGTATTCGTTTACTTTTTTCTTTTCGGCGGTTTGCCAAGTGGTTGATAAT  
ACGTATTATAGTGAGGTTTCGTGTTTCATATGCTCAAAATGTTCAATTTGAGTTTGAGTACTT  
ATCGCTTCTTTTCAT

### > **pfpI**

Function: protein coding sequence; intracellular protease (core genome, variable)

Best match: pfpI\_CC001-ST772\_118\_AJGE01000047.1[15767:16282:r]RC (completely identical)

Position: 049-contig\_251\_RC: 15836 ... 16352; Length: 516 bp

Sequence:

CTATTGTAATTGTTTAAACGATTTCTCGATTAATAATCATCTAAATCGTCTGGTACTCGACTT  
GTTACAATATTGTTGTCTACAAGTACTGACTCATCAACTACATGTGCGCCTGCATTTGATA  
AATCTTTGCGCACATTTAATACTGCTGTTAACGTACGACCTTTTAAATCGTCTGTATCTAT  
TAGTATTTGTGGCCCATGACAAATGGCAAATGTTGGTACATCATTTTTAGTAAAGTATTTA  
GCAAATGTGCCATATCGACCTTCTGTATCTCCACGTAAATGATCTGGTGAAAATCCTCCA  
GGAATTAATAATGCATCATAATCTTCTGGTTAGCTTCTGCAATGCCTACATCGACAGTAA  
CTTTTTACCGTGTTTACCAACAAGTCACTATTTGCAGTATCTCCAATCACTACAGTATT  
AAAGCCTGCATTCTCTAATGCCTCTTTAGGGCTTGAATATTCTATATCTTCAAATTCGTTT  
GCTAGAATAATTGCTACTTTTTTAGTCAT

### > **Q5HEP8**

Function: protein coding sequence; putative protein (core genome, constant)

Best match: Q5HEP8\_CC001\_MW2-USA400\_BA000033.2[1980946:1981107:r]RC (completely identical)

Position: 049-contig\_251\_RC: 16482 ... 16644; Length: 162 bp

Sequence:

TTACTTAGATACTAATTTAACCTTTTCTTCAAGCTGATCTAACAATCCAATCCATTCATCT  
ATATCTTCAACACGTACTTCATCAGGATTTACATGATCGATATCCTCAATAAACTTATTTA  
AACGCGCTTTTATCTGTTTCGATTGTTTGCTGTTCAATTCAT

### > **attB\_phiSa6**

Function: attachment site for int6-phi11 (mobile element)

Best match: attB\_phiSa6\_empty\_CC001\_MW2-USA400\_BA000033.2[1981330:1981425]  
(completely identical)

Position: 049-contig\_251\_RC: 16866 ... 16962; Length: 96 bp

Sequence:

GATGAATAGCGTCAAATTGAAGCAACCTGTTAGCATTTACAATGATCCATGGGAATCATA  
TAACGATGTTAAAGAACATGGCCAATTAAGTAAAG

### > **A5IU43**

Function: protein coding sequence; putative protein (core genome, variable)

Best match: A5IU43\_CC001\_MW2-USA400\_BA000033.2[1981331:1982482] (completely identical)

Position: 049-contig\_251\_RC: 16867 ... 18019; Length: 1152 bp

Sequence:

ATGAATAGCGTCAAATTGAAGCAACCTGTTAGCATTTACAATGATCCATGGGAATCATAT  
AACGATGTTAAAGAACATGGCCAATTAACTTTAAAGTAACATCGAATTTACAACACTACAAAT  
CTTTGTAATATGCGTTGTAGCCACTGTGCAGTTGGTTATACTTTACAAACTGTCGACCCCG  
AGCCTTTAGATATGGACTTAATTTATCGTAGACTTGATGAAATTCCAAATCTGCGAACGA  
TGCAATTACAGGTGGCGAACCAATGTTTTCTAAAAAGTCTATTAGAAATGTTGTTAAAC  
CTCTATTAAGTATGCACATCATCGAGGTATATATACACAAATGAATTCAAACCTAACAT  
TGCCTCAAGATCGTTATTTAGATATTGCTGAATATATCGATGTTATGCATATCTCACATAA  
CTGGGGAACAACACTGATGAATTCGCAAATGTTGGCTTTGGCGCAATGAAGAAGCAACCAC  
CGTAAAAGCTAAGTTAAAATTATATGAACAAATGATTTCGAATGCACGTACATTATCAG  
ACAAGGAATGTTTGTATCTGCGGAAACAATGCTCAATCAAAGTACGCTACCACATTTAC  
GAAAATACATCAAGAAGTCGTTTCATGATATGAAATGTAGCAGACACGAGATTCACCCT  
ATGTATCCAGCTGACTTTGCAAGTCAATTAATGTGTTAACTCTAGCGGAAATGAAAAAG  
ACAATTCATGATATATTGGATTTTCAGAGATGAAGATATTTGGATGTTATTTGGTACTTTGC  
CTGTGTTTCCATGCTTAAAAGATGATGAAGATCAAAGTTACTATCACGTTTAAAGAACTG  
CTAAAAATGTAACGACTAGAAATGACCCGGATGGCCGTAGTCGTTTAAATGTCAATGTAT  
TTACAGGTAATGTAATCGTAACTGATTTCCGAGATGAAACAGGTACAATTTCGAATATAC  
AAAAAGATAAATTAACAGATGTATTTGATAAATGGTTATCCTCTGATCTTGCTAAATCATT  
AAATTGTCATTGTTCCGAGTTTAGTTGTTTAGGACCAAATGTTCTTGTTAAAAATATGTAC  
TATCCGAATATGGATTTTAAAGATAATGAGCGTCATATGCACAAACAACCACAAATTATA  
CAATTTTAA

#### > **A5IU44**

Function: protein coding sequence; acyl-CoA thioester hydrolase (core genome, constant)

Best match: A5IU44\_CC005\_N315\_BA000018.3[1942162:1942692:r]RC (completely identical)

Position: 049-contig\_251\_RC: 18279 ... 18810; Length: 531 bp

Sequence:

TTAGTCTCTAATATGTTGCACTTGAGCTAAATATTCAATTGTTTGTACTTTCAATGCGAC  
GTGCTTTTCTTCGTTCAACACGTTGTGGTGCTGTATCATAAAACCATTTTCAACATCATCT  
TCTGGATATACACCAGGTACATGTTTAGGTTGCCTTCATCATCTAACGCAACAAATGTTA  
AGTAACTTAATGCAGCTAAATCATGCTTGTTATTAATACATCGTCAATTCTAATTTGAAC  
GACCACTTCCATTGAACTAGTCCCAGCGTATGAAACCATCGCTACGTATTGTAATATGTCC  
CCTGTTTTAATCGGCTTTAAGAAATCTACTGAGTCTGTAGATGCGGTAACACTTTGCGCAC  
CAGCATGTTTCATAGCTGTGATTGCTGCAATTTTCATCAATATTAGCCATCAATGTACCACC  
AAACATTGTATGATGGTGATTCTGATCTTGAGGGAAAACCTTGTCTATTTTTATAACATTTT  
GATTCTGACATAGATTTTCATTGGTCTGTCCTGATTTGTCAT

#### > **pepS**

Function: protein coding sequence; aminopeptidase (core genome, variable)

Best match: pepS\_CC008\_NCTC8325\_CP000253.1[1968999:1970246:r]RC

Position: 049-contig\_251\_RC: 18899 ... 20147; Length: 1248 bp

Sequence:

TTAAAATGTTGATGCCCAATTTCCATTTTCAAATACTAGTTCTTTTGAACCATCTTCGAAT  
ATGCCATAAATAGTCAAATCACTACTACCAATCATGAAATCGACATGTACATTTGAATCA  
TTAATCCGCTTGCAATCTTTTCCTCAACAGTCATTTCCGTTCCACCTTGAATATTAAGG  
CGTAAGCAGATCCAATCGCTAAATGACATGCTGCATTTTCATCAAATAAAGTATTGTA  
AAATGGTATTACGATTTGATATCGGTGAATCATCAGGTACTAATGCTACTTCACCTAATCT  
TCTTGAACCTTCATCAGTATTGATTAATCTTTCAATACCGTTTCACCTTTTTCAGCTGAAA  
AATCAATAATCTCTCCATCTTTAAACATCAATTTAAATTGATCGATAATTGTGCCATTATA  
ACTTAAAGGCAATTTATTAGTAACATATCCATCTACTCTATTTTCGATCTGGTGCTGTA  
ACTTCTTCAGTTGGTATATTAGCAATAAAAGCTTGTTCCTTGCCGTTAACATAACTTGTAG  
CATCTTCCCAGATATGATTTTTTCGCTAAACCTACCGTTAAATCAGTACCTTCAGATACATA  
ATGCAACGCATGGTAATTTTTTTGTTGTAACCTTTTGAGCGTAAACACTTAAATTAGCGATG  
TGTTGACGCCAATTTTCAACTGGATCGTTACCATCAATTCGCACAATATCGAATACCTCGT  
CAATAAACTTAATATATGCTTCTTCTACAGATAGTTCAGGATACACTCTCTTCGCCCAAGC  
TTTAGATGGAAAAGCAGCTACGACCCATGGAAATTGATTTTTTTGTACACTTTCCATATAT

CCTTTAAATGCGCGTGCGTTTTGTTGTTGAAATGCTTGTAAATTTTTGGCTATCGATAACCAT  
CCATTAAATCAGGATCTTCACTAATAAGTGCTAAATTAGCAGCGCCACGTTTAAACGTAAT  
CCATTCTCGCTTCAACATCATATGATTTTAACTCATGATTAGCAAAATGTTCCACAGATTC  
ATTTTCAAATTTTAAAGCGTTTTAAGGTTGGATCGCTATATAACAACACGTACATCTGAAGCG  
CCACAATGATATGCTTCTTCTACAATTAATGCGTTAATTCTAATGTTTCTACTGATGATC  
TAATAAATACTGGCTGTTTTGGTTGAACATTCATACCAACCTTAACTAATAGTTCAGCGTA  
TTGTTGTAACTTTTCTTTGTAATTAGTCAA

> **rbn**

Function: protein coding sequence; ribonuclease BN (core genome, variable)

Best match: rbn\_CC001\_MW2-USA400\_BA000033.2[1985991:1987202]

Position: 049-contig\_251\_RC: 21529 ... 22747; Length: 1218 bp

Sequence:

ATGTCGAAAAGGATCACTCTTCTTCAAATACCTTAATTCTGTAAAGGAAGCGCAAGAG  
GAGTCAAAAAGAAAAATAAAAGTAATCCCAAATTGATGTTGATCGTACATATATTGA  
ACCTCAACAATTCCAATCTAAGAAACCTAAAAAAGATGATCAGGTTTTCTTCTTATCAAG  
ATTAATAAACCTGCAAAATATAAGAAAGACTCTAATTTCTTATCATATCTCATCTATCGC  
ATAGGAAAAGATGATGCCTCAGGACTAGCAGCACAAATGACTTACCATTTTCGTAATTGCT  
ATGTTCCCTATGTTGCTTTTCTATTAACATTATTACCATTTTTCAATATTAAGCAGAGTCA  
AATTAATAATGTTAAGCAATGCACCCGCTGAAACATCTACTCTAATTAAGAGTGTAAT  
TGGTGATATAACTCAAACTCCAGTGGTGGCTTATTATCTATCGGTTTGATTTTAGCAATT  
TGGTCAGCTTCAAATGGAATGACTGCAATTATGAATTTCTTCAATGTTGCTTACGATGTAG  
AAGATAGCCGTAATGGAATCGTATTAAACTACTAAGTGTGTCTTCACTGTAGTTATGG  
GCGTTGTGTTTGTAGTTGCTCTAGCATTACCAACGCTTGGTTCTGTAATTAGTCATTTCTA  
TTCGGTCCACTTGGATTTGACGAACAAGTGAATGGATTTTAACTTATTAGAATTGTGT  
TACCAATCATTATTATTTATCGTATTTATCGTGTTATATTTCGGTTGCACCTAACGTTAAA  
ACGAAGCTTAAGTCAGTATTACCAGGTGCAGTATTTACTTCAATTATTTGGTTAGCTGGTT  
CATTTGGTTTTGGTTGGTATATTTCAAATTTTGGTAACTATTCTAAAACATATGGCAGTAT  
CGCGGGTATCATCATTTTGTACTATGGTTATATATCACAAGTTTTATTATAATTGTCGGT  
GCTGAAATCAATGCAATCATTATCAGCGTAGTGTAATTAAGGTAAAACACCTGAAGAA  
GCAGCATTAGAACATGATGACAATAATAAAAATCATTATAATGAGAACACTAGGTACGA  
ATATGATGAGGATAATAATGCAACACATCAACGTACGTATCATGTTGATGAACATCCTAG  
TGATACCTATCCAGAAGATGATAAAAATATAAAAGACAAAATCGTTGATAAGCTTAAAA  
AAGACTAA

> **tnpIS431-06**

Function: protein coding sequence; transposase for IS431 (mobile element)

Best match: tnpIS431-06\_circ\_S-epidermidis\_GQ900381.1[43799:43807] (completely identical)

Position: 049-contig\_251\_RC: 22853 ... 22862; Length: 9 bp

Sequence:

ATGAACTAT

> **vraR**

Function: protein coding sequence; response regulator protein (core genome, constant)

Best match: vraR\_CC005\_Mu50-VRSA\_BA000017.4[2024537:2025166:r]RC

Position: 049-contig\_251\_RC: 22858 ... 23488; Length: 630 bp

Sequence:

CTATTGAATTAAATTATGTTGGAATGCATAGATGACAGCTTGTGTTCTATCTTGCCTTCT  
AACTTACTTAAAATGTTACTCACATGTGTCTTAAACGTTTTAATAGTAATATGCGATGCAC  
TAGCAATTTCTTGATTTGAGTAACCTTTCGCAATCAATAATAATATTTCCATTTCTCGTTCT  
GTAAGCATTTCATATAACTCTGCGCGCTTTTTTCATACGGTTACGCATTTTCACTAAAACCT  
CCGGTTCAAAAACAGATTCTCCTCTAGAAGTTTTACGAACTGCATCGGCGATATCTTTTGC  
ACTTGTGTTTTTAAAATGTAACCTATCGACACCTGCATCTAATGCACGATATACCTCTTTA  
TCTTCAATAAAAACCTAGTTAATATTAATACTTTAATTTGCGGTAATCTTTTTTAATCTGAG  
TCGTCGCTTCTACACCATCCATGTCATCCATAAGTAAATCCATTAATAATTAATCTGGCTT

CAACTCATGGGCTTTGGCAATTGCTTCTTTACCAGAAGCGCCTTCACCAACTACTTCAATA  
TCACCTTTCGCGTTGATAGATAAATTGAAATTCCTATACGTACCATTTTCATGATCATCCACAA  
ACAATACTTTAATCGTCAT

### > **vraS**

Function: protein coding sequence; sensor protein (core genome, constant)

Best match: vraS\_CC008-ST72\_21259\_AFTS01000001.1[23550:24593:r]RC (completely identical)

Position: 049-contig\_251\_RC: 23477 ... 24521; Length: 1044 bp

Sequence:

TTAATCGTCATACGAATCCTCCTTATTTAAAGGTGCTTTCACCTCGATACGTGTACCTGAA  
TCTGGCAATGATACAATATGGAACGTTGCACCAATTTCCAAAGCTCTTTCACGCATATTTT  
TAAGTCCATAACTTTGTTCTAATTTTTCATCAACATTAACCTTTACCATTATCTTGAATT  
CTCAACAATAAATAATCGTCTTTATTAACAATTCTACTGTCACTTTTGTACCGTTTGAAT  
GACGCAATGTATTCGAAATTGCTTCCTGTGTAATTCTGAACAAATGATCTTCAATACCTTT  
AGGCACTTTAAAATCTTGTATTTTCATGCACAACCTTTCATTGGCACTTTTTTTTGTAAATCA  
ATAACTAAATCTTTAATACCCTCACCTAAAGATTTGTCTTTTAAACCAAGCGGTCTTAAAT  
GTAACAGCAAAGCACGCATTTCTAACTGCGAATCTTGAACCATTTTCTCTAAAATAGGAA  
TTTGTGGTCTAATGGTGGTTCTAACTTCGTTTCTTTGATAGCAGATAGCATCATACTTGC  
CGCAAAAAGTTGCTGACTAACAGAATCGTGAAGTTCTCGTGCTAGTCTTTGACGTTTCATCT  
TCAATAATCTTTTTAACTTTCACATCATTAAATATTATAATTTTTCATTGGTTAAGTTTTGAGT  
TTTAAAGTCGCAACTTATGCAATTCTTGATTTAAAGGTACGAGTGTATGGTATAAATCTAAC  
GTTTCACTATATATTTCTATATTTTGATCATTAAATGCCAACTGTTTCGCCTTCCATTGAACG  
CTCAATTTGCGTCTTAATCCAATCATTGCTGATTGATTTTGTAAAGCGAGTACCGAACCA  
ACAATAATACACAATAATATGATGATGAGATTTAAAAATAAAAAGACTGGTATTCCGAAT  
ATTTGTGTATAAAACATACCTTGAAAATAGATGATATTTACAAAACTTTATCGATGAAC  
AGAAATGCAGCTAGCATGCTATATACTAAGATGAGCATTGAACCAATTGTTCTAATGTAG  
TGGTTCAT

### > **ampM**

Function: protein coding sequence; methionine aminopeptidase type I (core genome, constant)

Best match: ampM\_CC001\_MW2-USA400\_BA000033.2[1990292:1991050:r]RC

Position: 049-contig\_251\_RC: 25836 ... 26595; Length: 759 bp

Sequence:

CTATTCTTCTTCAATTTTTGTGCTTAAAATCGGACCATCCTTAGTCACGATAACCGTATGC  
TCAATTTGAGCAACAAAACCTTTTATCGCTCGTTTCAAAGCCATTCATTTTTACCTTCTG  
TAACAAATGATGCATTTGATGAGATAAACGGTTCAATAGCTAATACCATACCTTCAGTTA  
ATAATGTTTTGTCTTTTGGATCAAAGTAATTAAGTACATGTGCTGGTGCCTTCATGTAATGA  
TAAACCAACACCATGACCTGTTAAGTTTTTAATGACTTTCAAATCATTTTGTCTAGCTGTA  
TTATGCACCGCTTTACCAATGTTACTTAACTTAGTACCCGGTTTTACTTTTGAATTGCATT  
CTCAAATGCCATCGTTGCTACGTCACATACTTTTTGTTTCATTGGATCATCTGATTCTCCAA  
CGACAAATGAAATACCTGTATCTGCATAATAGCCATTCCTTCAAAGCCGATACATCAATAT  
TTACTAAATCTCCTTCACGAATGACACGCTTACTTGGAAATCCCATGTGCCACCTCTTCATT  
GACACTAATACACGTTTGACCAGGAAAATTTTCATCATGAATTGGCGCAGAAATAGCACC  
GTATTCTTCAAATAACTCTTTCGCAATATTATCAAGCTCTTTCGTAGTGATACCTGGTTG  
GTTGCAGCTTGCATTGTATTGCGCACTTTAGCGCATATGTATCCAATTTCTTTTAAACGCTT  
GTAATTCTTCTTCTGTTTTTACAATCAT

### > **Q2FZB6**

Function: protein coding sequence; putative protein (genomic island)

Best match: Q2FZB6\_CC030\_MRSA252\_BX571856.1[2068297:2068469:r]RC

Position: 049-contig\_251\_RC: 26731 ... 26761; Length: 30 bp

Sequence:

ACCCCAACTTGCATTGCCTGTAGAAATTGT

### > **tx\_universal2**



Function: rho indendent terminator

Best match: tx\_universal2\_CC001\_MW2-USA400\_BA000033.2[1991364:1991404:r]RC (completely identical)

Position: 049-contig\_251\_RC: 26849 ... 26890; Length: 41 bp

Sequence:

TATAATTGAAAAATGCTTGTTACAAGTGCATTTTATTTTCAG

### > **tx\_universal2**

Function: rho indendent terminator

Best match: tx\_universal2\_CC001\_MW2-USA400\_BA000033.2[1067981:1068021:r]RC (completely identical)

Position: 050-contig\_246\_RC: 9 ... 50; Length: 41 bp

Sequence:

TAGAATTGAAAAAAGCTTGTTACAAGCGCATTTTCGTTTCAG

### > **furbox-ftnA**

Function: binding site of ferric uptake regulator next to ftnA

Best match: furbox-ftnA\_CC001\_MW2-USA400\_BA000033.2[1995858:1995894:r]RC (completely identical)

Position: 050-contig\_246\_RC: 3042 ... 3079; Length: 37 bp

Sequence:

ATAATTA AAAAATGATATTTATTCTCAATTA AATATCG

### > **ftnA**

Function: protein coding sequence; ferritin (core genome, constant)

Best match: ftnA\_CC001\_MW2-USA400\_BA000033.2[1996034:1996534] (completely identical)

Position: 050-contig\_246\_RC: 3218 ... 3719; Length: 501 bp

Sequence:

ATGTTAAGTAAAAATTTATTAGAAGCATTAAATGATCAAATGAACCATGAGTACTTTGCA  
GCACACGCATATATGGCAATGGCAGCATACTGTGATAAAGAATCGTACGAAGGATTTGC  
AAACTTCTTCATTCAACAAGCTAAAGAAGAACGTTTCCATGGACAAAAGATTTATAACTA  
TATTAACGACAGAGGTGCACATGCAGAATTCAGAGCAGTTTCAGCACCAAAAATTGACTT  
TTCAAGCATACTAGAACTTTCAAAGACAGCTTATCTCAAGAACAAGAAGTAACAAGAC  
GTTTCTATAACTTATCTGAAATCGCTCGTCAAGATAAAGATTATGCAACTATCTCATTCTT  
AAACTGGTTCTTAGATGAACAAGTCGAAGAAGAATCAATGTTTGAACTCACATCAATTA  
TTAACTCGTATCGGCGATGACAGCAATGCATTATATCTTTACGAAAAAGAAGTTGGCGC  
TCGTACATTTCGACGAAGAATAA

### > **dinB**

Function: protein coding sequence; DNA polymerase IV (core genome, variable)

Best match: dinB\_CC001-ST772\_118\_AJGE01000047.1[32901:33971:r]RC (completely identical)

Position: 050-contig\_246\_RC: 4729 ... 5800; Length: 1071 bp

Sequence:

TTATATAAAGTCATATATCGTCATATTTTATAAGTTGATTGTTCTAAATTACCTACAGTG  
ACACCAATAAAGTCGAATTGGTACATCAGGGTCTTTTAAATCGTTATAAAGTAAATATGCA  
ATATTATAAATATCTTCTTCAGAACTAACCGAATCTCTTAAACTCATCTGTTTAGATAGCG  
TTTCAAATTGATAAGTTTTAATTTTAAACCGTTACAGTTTTAGCTGACTTCTGTAATTTATTT  
AGACGTTACAGCTGTTTTACCTGACAATTCCCATACTTTTCTTAAAATCTCTTCATCATCATT  
CACGTCTGTTGCAAATGTGCGTTCAGTCCCTACTGATTTTCTTACTCTTGATGATTTCACTT  
CACTATGGTCAATACCGCGTGCCTTGTTATATAAACCCCGACCTCTTTTTCCAAACAAACG  
TATTAATTCAAATTCCGTTTTCTCATATAAATCTCTACCGTTAAAATACCATTATCATGC  
ATTACTTTTTTGGAAAGCTTTACCTACGCCTGGAAAATCTCCAATATCCAATGTCATCAAAA  
TATCATGGACATTTTGATAATCAATCACAGTCATACCATCAGGTTTATTCATACCACTCGC  
TAATTTAGCTAAAATTTGTTATAAGAAACACCTGCAGATGCTGTTAAATGTGTCTGCTCT  
AGAATATCTTTTCTAATATACTGAGCAATTTTCGAAGCAGGAAGGTCTGGTCTCACTAATT

CTGTAATATCTAAATACGCTTCATCCAATGACATCGGTTCTACCTTATCTGTATAACTTCG  
GAAAATAGACATAATCTGCGCAGATGTTTCTCGGTAAGCACCAAATTACTTGTGACAAA  
GTATCCATTTGGACATAATTTATGCGCTTGTGACATAGGCATTGCTGAATGGACGCCGTAT  
TTTCGTGCTTCATAAGATGCCGTAGAGACAACACCCCTACTGCTTGCTTTACCACCAACAA  
TGACTGGTTTTCCCTTTCAATTTGGGGTTATCTCTCATTTCGACTTGTGCAAAAAAATAGTC  
CATATCTATATGAATAATTCGTCTCTCAGTCAA

> **Q2FZB6**

Function: protein coding sequence; putative protein (genomic island)

Best match: Q2FZB6\_CC705\_RF122-cow\_AJ938182.1[1965427:1965599:r]RC

Position: 050-contig\_246\_RC: 9236 ... 9266; Length: 30 bp

Sequence:

CTACCCCAACTTGCATTGTCTGTAGAATT

> **repeat\_nySAgamma**

Function: repeat element

Best match: repeat\_nySAgamma\_CC030\_MRSA252\_BX571856.1[2078922:2079031]

Position: 050-contig\_246\_RC: 9299 ... 9329; Length: 30 bp

Sequence:

CCAACCTTGCACATTATTGTAAGCTGACAGA

> **gatB**

Function: protein coding sequence; aspartyl/glutamyl-tRNA amidotransferase/subunit B (core genome, variable)

Best match: gatB\_CC001\_MW2-USA400\_BA000033.2[2002605:2004032:r]RC (completely identical)

Position: 050-contig\_246\_RC: 9847 ... 11275; Length: 1428 bp

Sequence:

TTATCTTTTATCTAATTCTTGTTTTAATAGTTGATTTACTAATTGTGGATTAGCTTGACCTT  
TAGACGCTTTCATAATTTGACCAACTAAGAAGCCCATAGCTTTGCCTTTACCATTTTTGTA  
ATCTTCAACTGATTGTTTCGTTATTGTCTAATGCTTCATTTACAAATTTTAGAAGTGTGCTT  
CATCAGAAATTTGAACTAAGCCATTATCTTCCATAATCTGTTTAGCATTACCACCTTTAGC  
TGCTAACTCTGGGAAGACTTTCTTCGCAATTTACTGCTCATTGTTCCGCTTTCGATAAGTT  
TAATCATACCTGCTAAATTTCTGGTGTTAATTTAGTATCTAATAATTCTACTTGATTTTTA  
TTTTAAATATTCGTTTACGCCACCCATTAACCAGTTAGATGTTAATTTAACATCTGCACCGT  
GTTCAATTGTTGATTCAAAGAAATCTGACATTTCTTTAGTCAATGTTAATACGTGTGCATC  
GTATGCAGGTAAACCTAATTCATTTACATACTTAGCTTTACGTTTCATCTGGTAATTCAGGA  
ATTGTCTGACGAACACGCTCTTTCCAAGCATCATCAATATATAAAGGTACAATGTCAGGC  
TCTGGGAAGTAACGGTAATCATCAGAACCCTTCTTTAACACGCATTAAAATTGTTTTACCTG  
TAGATTCATCAAATCGACGTGTTTCTTGTCCGATTTCTCCACCATTTAACAATTCTTCTTCT  
TGGCGTTTTTCTTCATATTCTAAACCTTTACGTACATAGTTAAATGAGTTTAAGTTTTTCAA  
TTCGGCTTTAGTACCAAATTTTTCTTGACCATATGGACGTAAAGAGATGTTAGCATCACAA  
CGTAAAGATCCCTCTTCCATCTTAACGTCTGATACACCAGTGTATTGAATAATTGAACGCA  
ATTTTTCTAAATATGCATATGCTTCTTTAGGTGAACGAATATCTGGTTCAGATACGATTTT  
AATTAGCGGTGTACCTTGACGGTCAAGTCAACTAATGAATACTCACCTTTATGTGTTGAC  
TTACCAGCATCTTCTTCCATGTGAAGACGAGTAATACCGATTCGTTTTGTTTCACCGTCGA  
CTTCGATATCGATATATCCATTTTACCAATTGGTTGATCAAATTGAGAAATTTGATATGC  
TTTTGGATTATCTGGATAGAAATAGTTCTTACGGTCAAACCTTAGATTCTGTTGCGATTTCC  
ATATTTAGTGCCATTGCAGCACGCATTGCCCAGTCTACTGCACGCTTATTAACAACCTGGTA  
AGACACCTGGATATGCTAAGTCGATAACATTTGTATTTGAGTTAGGTTCTGCTCCAAAAT  
GCGCTGGTGATGGAGAAAACATTTTTGAGTCCGTTTTTAACTCTACGTGAACTTCAAGTCC  
TATAACTGTTTTCAAATGCAT

> **gatA**

Function: protein coding sequence; aspartyl/glutamyl-tRNA amidotransferase/subunit A (core genome, variable)

Best match: gatA\_CC001-ST772\_118\_AJGE01000047.1[39459:40916:r]RC (completely identical)

Position: 050-contig\_246\_RC: 11287 ... 12745; Length: 1458 bp

Sequence:

```
TTATAATTTTTTCATAAACGTCATGTAAATTGTATTGTGTTTCATATTGATAAGCGACACGA
TATAACGTTTTTTCATCGAATGGTTTACCAATGAACTGTAAACCGATTGGTCGGCCATTTG
ATTGTCCACAAGGAACAGAAATACCAGGTAATCCAGCTAAGTTTACTGGTGTGTTAATA
AATCATTGGCATAACATTGTTAATGGATCATCAATTTCTTCACCTAAATTAACGCAGTTGT
AGGCGCTGTTGGACCACTACTACATCATAATTTTCGAATACTTTATCAAAGTCATTTTTTA
ATCAATGTTCTAACTTTTTGAGATTTTTTATAGTAAGCATCATAGTAACCTGAACTTAATG
CAAATGTACCTAAGAAAATACGACGTTTTACTTCTTTACCGAAACCTTCAGATCTTGACAT
TTTATATAATTCTTCTAATGAATGAGCTTCTTTAGAATGATAACCATAACGAATTCGGTCA
AAACGAGAAAGGTTTGACGAAGCTTCTGATGATGCAATCACGTAATATGATGGAATACC
AAATTTAGTATTTGGCAATGATACTTCTCAACGACAGCACCTAAAGATTTTAAAGTTTCT
ACAGCGTTTTGAACTGCTTCTTTACGTCATCAGCTACACCTTCACCTAAGTATTCTTTAG
GTAATGCAACTTTAATCCTTTAATATCTTTACCAATTTTCAGATGTAAAGTCTACATCATC
AACTGGTGCACCTTGTAGAGTCATTAACATCTGCACCAGAAATAGCTTCTAATACGATTGC
ATTATCTTTTACATTTTCGAGTCAATGGACCAATTTGGTCTAATGAAGATGCAAAAGCAAC
TAATCCAAATCGAGATACACGACCGTATGTTGGTTTCATACCGACAACGCCACAATATGC
AGCCGGTTGTCTAATTGAACCACCTGTGTCTGAACCTAAGCTAAATGGTACTAAGCCAGC
TGCAACTGCTGCTGCAGATCCACCTGATGAACCACCTGGTACTGCTTTATGGTCAAATGG
GTTAACTGTTTTTTTTGAAATAAGATGTTTCTGTTGAACCACCCATTGCAAACCTCATCCATG
TTTAATTTACCGATTAACAAACGGCATTCTCTTTATGTAGTTTTTCCATTACAGTAGATTTCGTA
AATTGGCACAAAACCTTCTAACATTTTACTTGCACATGTTGTTTCTAATCCGTTTGTAAATA
ATGTTATCTTTTATACCCATTGGAATACCAAATAATTTGCCATCCATTTGATCTTTTGCTTG
TAATTCATCCAATTCTTGCGCTTTTTTGATTGCATTTTCTTTATCCAGCGCTAGAAAAGACT
TAATTGTTGGATCAGTCTCTTCAATTGCATCATATATATCTTTAACAACATCAGATGGTTT
GATTTTTTTGTCTTTTATTAAGTTAATAAATTCTCAACCGATTTCGTAGCGAATGCTCAT
```

## > gatC2

Function: protein coding sequence; aspartyl/glutamyl-tRNA amidotransferase/subunit C (core genome, constant)

Best match: gatC2\_CC001\_MW2-USA400\_BA000033.2[2005504:2005806:r]RC (completely identical)

Position: 050-contig\_246\_RC: 12746 ... 13049; Length: 303 bp

Sequence:

```
TTACGCGTCCTCCTCATTTCATGATTGTAGGCACTTTAAATTGTCCATCTTCTGTTTCTTTGG
CATTTTTCAAAGCTAATTCTTGCAGGAATACCTTTAATTGCTTTATCTTCACGTAAAACGTTT
TGTAATCTAAAACGTGATATGTAGGTTCAACGCCTTCTGTATCAGCGCTATCATTTTGT
TTGCAAAATCTAAAATGCTTTCTAATGTGTTGGCCATTTCTTCCGTTTCTTCAGGAGAAAT
TTGAAGTCTTGCAAGATTCGCGATATGCTCAACTTCTTCACGTGTTACTTTTGTTCAT
```

## > putP

Function: protein coding sequence; proline permease (core genome, constant)

Best match: putP\_CC005\_Mu50-VRSA\_BA000017.4[2043451:2044989] (completely identical)

Position: 050-contig\_246\_RC: 13415 ... 14954; Length: 1539 bp

Sequence:

```
ATGCTTACAATGGGGACAGCATTAAAGTCAACAAGTAGATGCCAATTGGCAAACCTTATATT
ATGATTGCCGTCTACTTCTTGATACTAATCGTTATTGGCTTTTACGGTTACAAGCAAGCAA
CTGGTAACCTAAGCGAGTACATGTTAGGTGGACGTAGTATTGGACCGTATATTACTGCAT
TATCAGCTGGAGCTTCAGATATGAGTGGATGGATGATTATGGGGCTACCTGGTTCTGTCT
ATAGCACTGGTCTATCAGCTATGTGGATTACAATCGGTTTAAACATTAGGTGCTTATATAAA
TTACTTTGTTGTTGCTCCTAGACTTCGTGTTTATACCGAATTAGCTGGAGATGCAATTACA
TTACCAGATTTCTTTAAAATCGTTTAAACGATAAAAATAATGTGTTAAAGATTATTTCTG
```

GATTGATTATCGTAGTATTCTTTACATTATATACACATTCTGGTTTCGTATCTGGTGGTAA  
ATTATTTGAAAGTGCTTTTGGATTAGATTATCATTTTCGGTTAATATTAGTTGCTTTCATTG  
TCATTTTCTATACTTTCTTTGGTGGATATTTAGCTGTATCAATTACAGATTTCTTCCAAGGT  
GTCATTATGTTAATTGCGATGGTTATGGTCCCTATTGTTGCTATGATGAATTTAAACGGCT  
GGGGAACGTTTCATGATGTAGCAGCTATGAAACCTACAAATTTAAATTTATTTAAAGGGT  
TATCATTTATAGGAATTATCTCTCTATTTTCATGGGGATTAGGTTATTTTCGGTCAACCTCAT  
ATCATTGTAAGGTTTATGTCTATTAATCACACAAGATGCTACCTAAAGCTAGACGTTTA  
GGTATTAGCTGGATGGCTGTTGGTTTATTAGGCGCTGTGGCTGTTGGTTTAACAGGTATTG  
CATTCGTACCTGCTTATCATATTAACACTAGAAGATCCTGAGACATTATTCATCGTGATGAG  
TCAAGTACTCTTCCATCCTCTTGTAGGTGGTTTCTTACTTGCTGCGATTCTAGCTGCAATTA  
TGAGCACGATTTCTTCACAATTACTTGTAAACATCTAGTTCACTAACGGAAGACTTTTATAA  
ATTAATTCGTGGTGAAGAAAAAGCTAAAACGCACCAAAAAGAATTTGTTATGATTGGAA  
GATTATCTGTATTAGTTGTAGCAATTGTTGCCATCGCGATTGCATGGAATCCAAACGACA  
CAATTCTAACTTAGTAGGTAACGCTTGGGCCGGATTTGGTGCATCGTTCAGTCCACTTGT  
GCTATTTGCACTTACTGGAAAGGTTTGACACGTGCCGGTGCTGTAAGTGGAATGGTTTC  
AGGTGCCTTAGTCGTTATCGTTTGGATTGCGTGGATTAACCATTGGCACATATCAACGA  
AATATTCGGCTTATATGAAATTATCCTGGATTTATTGTAAGTGTAATCGTTACATATGTT  
GTAAGTAACTTACTAAAAACCTGGTGCATTTGTTGAAACTGACTTAAACAAAGTTCGT  
GACATCGTTAGAGAAAAATAA

### > **camS**

Function: protein coding sequence; bacterial pheromone cAM373 (core genome, constant)

Best match: camS\_CC001-ST772\_118\_AJGE01000047.1[43214:44419:r]RC (completely identical)

Position: 050-contig\_246\_RC: 15042 ... 16248; Length: 1206 bp

Sequence:

TTAATTACTGTAAATATGAACTTGCGGTCTTTGTTCATCTTTTGTCTTACTAATTAAGCAC  
GTGGTTGGTTACCATCTTTAATACGAATTTTCATAGTTATCGATTTTATCGAAATATTTATTC  
GCTTGTTACGTAACGTAAGTGTGTAATACCAATTGTTTCAGCTTGTCCATAGTAATCGATTG  
GTAAATCTACTACTAATCGTTGTGGCTTTTTATCAACAAATTTAACTTTCCCTACTGCTTGT  
GTGAAATTAGAAAAATATGATTGCAAATATCATTAAATTGCTTGAAATTATTATTTAAAT  
TTTCATCATAATCTGCTGCTGTTGAAGAAGGTAATAAAGCTGTTTTTTCATTGATATTATG  
CCATTCATTAAGCTTTGTTTGACTCTTTTCTGCAGTCGCTTGAGTGATAAATTCACCTGGT  
GTGATTGAATCTTCACTTGATTGCTTATAAATTGCAAAATGAATTGGTATATCTTTTAAAT  
CATCATTTTCACGTAACCTTGATAATATCTCACTAGCCATTTGTTTACCTTGCTTTTAACT  
TCGCTATCATCTAGTTTTTTACTAAAAGTCGGTCCATCTTTTTCTTTTTTATAGTAATAAAC  
ACTATTCATAGCTAAACCAATCGTCATACCTTTAATATTCTTACCTTTTGTATCTCCACCAC  
CATAAAAATCTTGCTCTAAAATGTTAGATAAATAGGCTGGTGATTTTTCTGCAATCTTTTC  
AGGATTTGTTTCACCTTCGTGTGATGGATTAAGTCCTAAATTTTCATTTCGCTTTCTTGTCTT  
TTTTATCTTTTTTCAGACATCTTATCGATTTACGTTTTGTATACTTAGGATTTAAATAGGCA  
TTAATTGTTTTCTTGTCCAAAAATTGACCATCTTGATACAAATATTTATCTGTTGGAAATA  
CTTCTTTACTTAAGTTCAATAAACCATCTTCAAAGTCGCCGCCATTATAACTATTTGCCAT  
GTTATCTTGTAAGTCCCTCTTGCCTGGCTTTCTTTAAATGGTAACAATGTACGATAGTTA  
TCACCTTGACATTTTTATCCGTAGCAATTTCTTTTACTTGATTTGAACTATTGTTATGTTT  
TTGATTATCTTTTCCAGCCTGGTCATCCTTATGGTTACCACAAGCAGCGAGTATAAAGATA  
GCTGTAATCAATAATACTAATGTACGCTTCATCGACAT

### > **ligA**

Function: protein coding sequence; NAD-dependent DNA ligase (core genome, constant)

Best match: ligA\_CC001-ST772\_118\_AJGE01000047.1[44426:46429:r]RC (completely identical)

Position: 050-contig\_246\_RC: 16254 ... 18258; Length: 2004 bp

Sequence:

CTAACTATTTAATTCATTTTGTCTTATCTACAAATTGTTGCTCTGTCCAAATTTCAATACCTA  
AACTTTGTGCTTTTGTAAATTTGAACCTGCATCTTACCAGCAATAACGACATCTGTATT  
TTTAGTAACGCTACTTGTAACTTTAGCACCTTGTGATGCAAGCCATTTAGATGCTTCATTG  
CGTGTCAATTTGATGTAGCTTACCAGTCAGTACTATCGTTTTACCACTAAATTCAGGATGTC

CTTCAATATCTGATGTTTTGATACCTTTATAAATCATATTAACATGTTTATCTTTTAATTTT  
TGAATTAAGCACGAATATCTTCATTTTCTAAATAAGTAACTACAGATTGTGCTACTTTAT  
CACCTATATCATGAATTTCTACTAATTCCGCTTCAGTTACCGTTAGTAATCGATCTATCGT  
TTCATATTTTTCTGCTAACACTGGCTCGCTTAAACACCTAAATGCCTAATACCTAGACCA  
AATAATAAATTTTCTAAAGAGTTGTCTTAGCTTGTGAATGGCAGCTAATAAATTATCAA  
CTTTTTTCTGCCCATTTCTATCTAAAGGTAATAAATCTTCTTCTGTTAAATAGAAAATATC  
AGCAACATCTTTAATTAATTCGCTTTGATAAAGCTGTTGAATAATTTTAGTGCCTAAACCA  
TCAATATTCATGGCTTGTCTTGATACAAAGTGAATTAATCCTTCAACAAGTTGTGCTTGGC  
ATTTTGGATTAATGCAACGAAGTGCTACTTCGCCTTCAATACGTACTAATTCATGTCCACA  
ACTTGGACAATGGGTTGGCATATGATATGTGACAGCATCCTCAGGTCTACGTTCTGGAAT  
ACTACGTACAACCTCAGGTATGATGTCACCTGCTTTTTTCACTACAACACTATCACCAATT  
CGAATATCTCTGTATGAATTAATCCTCATTGTGCAAAGATGCTCTTGATACAGTTGTAC  
CAGCTACTTTTACTGGTTCTAAAATAGCAGTAGGTGTGACTACACCTGTTCTGTTCAACT  
TAATTCATATCTAATAATTTAGTTACTACTTCTCAGCTGGAAATTTATAAGCAATGGCC  
CATCTAGGAGATTTTTGTGTGAATCCCATCTCATCTGTTGATCTAAATCATTAACTTAA  
TAACAATCCCATCAATATCATAAGGTAATGACTCTCTTTGGCTTGTCCATTTTTCAATATA  
CTCTAAAACACCATCGATATTATTTACACGCGCTCTATTTTTATTTCGTTGTAAAACCTAAT  
TTATCTAACTCATCTAATGCTTCACTTTGCGAACGCGCATTGAAATCAGTGAAATCATTGA  
CACTATATATAAATACGCTTAGCTTTTCGTTTTGCCGTTAATTTAGAATCTAACTGTCTTAA  
TGATCCCGCAGCAGCGTTTCTTGGATTTGCAAATAACTGCTCATATTTTTTTCTTTTTCTT  
CATTTAATCGTAAAATGAACGTCTCGGCATATATGCTTACCACGAACCTTCTACATTTAA  
TGGTTCTTTCATTTTCAAAGGTATCGCATGAATGTTTTTAAATTTTCGTTAATATCTTAC  
CTGTTGTTCCATCACCACGTGTTAAACCTTGAACGAAGTATCCATCAACATATTTCAATGA  
TACTGCTAAGCCATCAATTTTTAATTCGCACATATATTCAACGTTGCCAATTTGTTACGTT  
ATGCGTTGGTCGAATTTTCTCAAATCATCTTCAATTAATGCATTCCCTAAACTTAACTTG  
GCGTGTTCATGGTTGACTTTATTGAAAGAGGCTTGGGCTTACCAGCAACTCTAACTGTTGG  
AGAATCTACAGTCTTATACTCAGGATGCTCCTCTTCTATTTTAAATCAGTTCATGAAGTAAT  
TTGTCATATTCATCTGTTACAGATGGATTATCCTCTACATAGTATTCATAACTGTATT  
GATTAATAAATCATGTAACCTCGTTCACACGAGACGATAAATCAGCCAT

> **pcrA**

Function: protein coding sequence; ATP-dependent DNA helicase (core genome, constant)  
Best match: pcrA\_CC001\_MW2-USA400\_BA000033.2[2011019:2013211:r]RC (completely identical)

Position: 050-contig\_246\_RC: 18261 ... 20454; Length: 2193 bp

Sequence:

TTAATCCTCCTTTTTTTTCAATTGGTGCAAATTGCGCTAACAAACGTTTTGGCCCTTGTGATT  
TAAAGATAATATCTAGTTCGATTGAGCCATTTTTCTCGTTTACATTACTCACCATGCCTTCT  
CCCCAGGCTTTATGCATCACTTTGTACCTACATTCCAATCAGATGACAATACTTGTTTTT  
TCGTTGACGTTGTTTCGTTGACTAAATCCGCGTTTAGCAAAGGTTTTGCCTTAGGTTGTAT  
CGTTTGTGCTTTGCCACTTGAATGATTTTCTAATAGTGATTCTGGAATTTCTTTAAAAATC  
TGGATGGCATATTTGACTGAGGGCGACCAAATAACATTCTTGATGTCGCATGAGTGATAT  
ATAACACCTCTTCAGCCCTTGTAATTGCTACATAACAAATACGACGTTCTTCTTGCATTTT  
ATGATCATCTTCACTCTTAATCGCTCTAATATGTGGGAATAAAGATTCTTCCATCCCCATT  
ATAAAGACAATTGGAAATTCAGGCTTACGCGAGTGCATCGTCATTAGTGTTACGCCA  
TTTTCAGTATCTGCCTCATCAATATCAGCTACTAACGATAAATCCGTTAAAAAGTTAATTA  
ATGACTGTTCTTCTAATGGGGTATTTTCTCATAGTCTTTTGGTACTGACATAAATTCATC  
GATGTTTTCTAATCTACTTCGAGATTCTAATGTATTTTACGTTCAAGCATTTCTCGATAGC  
CAGACTTTTGTAACTTCATCAACTATTTTATGAATTTCTAAAAATTTCTGTTCTTTTATC  
AAGCTTTGGATTAACCTCGTAAAAATTAAGACACTCTTGTGTCACCTTTTTTGGACAATCCGA  
TAAAATCAGCTTCTCCAAGTGCATCAAACATACTGATATTGTTTTGAAGTGCATAGTTTTG  
AACTTTTTCAACAGATGAAGGACCTACACCTCTTTTTGGAACATTAATAATACGTTGCAA  
ACTAATGTCATCATTACTATTGGCAATTATACGCAAATAACTTAATAAATCTTTGATTTCT  
TTACGGTCATAGAACTTTTGGCCACCAACCATTGTGTATGGCATATTAGATTTTCATGAATG  
TTTCTCAAGTACACGTGATTGTGCATTCGTTCTATATAAATTTGCCATATCTTGATATTTT  
TTACCATTACGTTGATGCTTCATAATTTCTCGTATTACAAATTCGCTTCATCACGTTCCGT

CATTGCTTCATAGTAATGAATTTTCTCACCATTTCGTATTTGCAGTCCACAGTCCTTTTGGCT  
TACGTTTCAGAATTATTTTTAATCACTTCGTTAGCCGCATTTAAAATCGTTTTTCGTCGAACG  
ATAATTTTGTCTAAAAAGATTGTATTTCGCTTCTGGATAGTCTTTTTCAAATGATAAGATA  
TTTTGAATATCAGCACCACGCCAACCATAAATTGACTGATCTGAGTCACCTACAACACAT  
AAGTTTTTAACTTACTTGCTAATAATTTAACTAATGTGTATTGTGCTTTATTAGTATCTTG  
ATACTCATCTACATGAATATAATTGGAATTTGTTCTGATAAATTCTAGAACTTCTGGTACA  
CGCTCAAATAAGTTAATCGTTGTCATAATAAGGTCATCAAAATCTAACGCTTCATTACGT  
GACAATTGGCGTTGATATCCACTATAAACCCTGTTGCTACCATTGCGAGTGATAATCTGTG  
GCTTCTTTTTGAGCATCTGCAGGTGTTTTAAGTTCATTTTTCAAATTACTGATCGCACCGAT  
AAACATACGAGGTTCAAACCTTTTACTATCAATATTTTCATTTTTTAAGACGCTTTTAATA  
ACAGATTTTTGGTCTGTAGGATCAATTATCGTAAAATTGCGTTCTATACCAATTCGATCTG  
CATCACGACGTAATAACGAACACACATTGAGTGGAATGTTGACATCCAAATAACTTCTG  
CTTGATCACCTACTAATTTTTGAACACGTTCTTTCATTTCTCTTGCAGCTTTATTTGTA  
GTAATAGCCAAAACATTGTATGGTGAGACATCTTTTTCGTCTAATAAATAAGCAATTCTAT  
GTGTTAAAACACGTGTCTTCCCTGAACCAGCACCTGCCATAATTAACAATGGTCCTTCTGT  
TGTCTTACAGCTTCACTTTGCTCTGTATTCATATGATTTAATAACGCATTCAT

### > **pcrB**

Function: protein coding sequence; heptaprenylglyceryl phosphate synthase (core genome, constant)

Best match: pcrB\_CC001\_MW2-USA400\_BA000033.2[2013208:2013900:r]RC (completely identical)

Position: 050-contig\_246\_RC: 20450 ... 21143; Length: 693 bp

Sequence:

TCATTTACTAGACTCCTTTATTTTTACTGTTTTTAAAGCTTTTTTAATATCTTTATAAATAA  
TATCACCGACGATAATTGTATCTGCAATAGCTGCCATCTCTGTGCTTGTGTTCTGAGGA  
AATACCGCCACCATAAAAAAGTTGCGTTTTCTGTTAGATGTTCTGAGACAGCTTGAACCTTT  
GATACGTCGCCATAAATGCCACTATACTCTATATACATAACCGGTAATCGATACATATGA  
TTGACCATTTGGGCATATGCTTCTAAATCTTCTGTTGTTAAATCTGTATTTGCTTTGGTATG  
TTTTGCCACTTTGCTATCAGCATTGCACACGACATACCCTTCAAATATTACTTCCCTCAAAA  
TCTATACTATGTCCATATGTTTTAAGCGCTTCTAATAATGTACCATTGTGAAATACAACAT  
CTGTACTGTTCACTACTGTAGGTACAAAATAAAAATCAAACCAGGCATTACACTTTCGA  
TGTTTGATATTTCAAGTACTAAAGGCAATGGGTATCTTCTTACTCTGCTCATTAAATGAAT  
GACATTATCTTCAGTAACGTCATCAGTCCACCAATCATAATTGCATCTGTTGAGACATA  
CAAATCGCATCTAAATCATCATCTGAAATATGTTTAGCTGGGTCTAATTTAAAATATGG  
CGCCATTTTTTAATGTCATACAT

### > **purB**

Function: protein coding sequence; adenylosuccinate lyase (core genome, constant)

Best match: purB\_CC001-ST772\_118\_AJGE01000047.1[49897:51192:r]RC (completely identical)

Position: 050-contig\_246\_RC: 21725 ... 23021; Length: 1296 bp

Sequence:

TTATGCTAATCCAGCGCGTTCGAAAATAGTGTCAACTTGATTCAAATGATGTTTAGGATC  
GAAACATTCATCCAATTCTTCTTTTGTAAAACACTTGTAATAGACTCATCTTGTTCGATT  
AATTCACGGAACGGTGTTCGTTTCCCAAGATATCATCGCTTTGGTTGAACTTTGTCGT  
ATGCTTCTTACGAACCATACCTTTATTAATTAATGCTAATAAGACACGTTGTGAGAAAAT  
CAGACCAAATGTTTTATCTATGTTATTACGCATATTATCTTCAAATACAGTTAAACGGTCC  
ACAATATTTGTGAAACGATTCAATGCATAATCTAGTGCTATTGTAACATCTGGTAACATA  
ATACGCTCAGCAGAAGAATGAGAAATATCTCTTTCATGCCATAATGGCACATTCTCATAA  
GCTGTAGTAATATAACCACGAATGACTCTTGAAATACCTGTGATATTTTCAAGAACCAATT  
GGATTTTCGTTTATGAGGCATTGCAGATGAACCTTTTTGGCCTTTTGCAAATGCTTCTTCAA  
CTTCTCTCGTTTTCGGTTTTTTGAAGGTTACGTATTTCAACGGCAAATTTTTCTAGTGATGTC  
GCGATTAATGCTAATGTGCAATATAGTATGCATGTGATCGCGTTGCAATGTTTGCAGTTG  
ATACAGGCGCTGTGCCAATACCTAAATGTTTACACACATAACTTTCTATTTTCAAGGAGGAA  
TGTTAGCAAAGTACCTACTGCACCACTCATTTTCCCTACTTCAATTTCTTCTTACTTGT  
TTGAAACGTTGTAAGTTACGTTGCATTTCCGTGTACCACAATGCCATTTTGACACCAAATG

TAGTTGGTTCTGCATGCACTCCATGTGTACGTCCCATCATCAATGTATATTTATAATTTTT  
GCTTTTTTCAGCTAAAACGTCGATAAATCTTTCTAAATCTTTTTCAATAATGTCATTTGCTTG  
TTTAATAACGAACTTAAAGCTGTATCTACAACATCAGTAGAAGTTAAACCATAATGTAC  
CCACTTACGTTCTTCACCTAGCGTTTCAGAACTTGTCTAGTAAAGGCTACAACATCATGG  
CGCGTTTCTTGTTCAATTTCTTGTGCACGTTTCGACATTTACCTTTGCGTTTTGACGAATTT  
TTGTACGTCAGCTTTGCGTATATGTCCTAATTCCTCCATGCTTCACATGCTAAAATTTCC  
ACTTCTAACCATGCTTCATAGCGATTTTGATCAGTCCAAATATTAGACATTTCTTCTCTAG  
AATAGCGTTCAATCAT

### > **sspP**

Function: protein coding sequence; staphopain A (genomic island)

Best match: sspP\_CC001-ST772\_118\_AJGE01000047.1[52053:53219] (completely identical)

Position: 050-contig\_246\_RC: 23881 ... 25048; Length: 1167 bp

Sequence:

ATGAAAAGAACTTTCCAAAATTAATAGCTTTAAGTTAATATTTTCTTTAAGTGTTACCC  
CTATTGCAAACGCTGAGAGCAATTCAAATATCAAAGCAAAGATAAGAAGCATGTGCAA  
GTTAATGTCGAGGACAAGAGTGTTCTACTGACGTACGTAATTTAGCGCAAAAAGACTAT  
CTTTCTTATGTTACTTCACTTGATAAAATCTATAATAAAGAGAAAGCCTCGTATACACTTG  
GTGAACCTTTTAAAATTTATAAATTCAACAAAAAGAGTGATGGTAATTATTATTTCCAGT  
TTTGAACACTGAAGGTAATATCGATTATATAGTTACAATTTACCAAAAATCACTAAGTA  
TTCTAGTTCATCTTCTAAATACACAATCAATGTTTCTCCATTTTTATCTAAAGTCTTAAATC  
AATATAAAGATCAACAAATTACTATTTTGACAACTCAAAGGTTACTATGTGGTTACTC  
AAAATCATAAAGCTAACTAGTACTAAAAACACCACGTCTAGAAGATAAAAAGTTAAAA  
AAGACTGAGAGTATACCTACTGGCAATAATGTAACGCAACTAAAGCAAAAAGCTTCTGTC  
ACTATGCCAACTAGTCAATTTAAAAGTAATAATTATACTTACAACGAGCAATATATAAAT  
AACTTGAGAATTTCAAGATAAGAGAACTCAAGGTAACAATGGTTGGTGTGCAGGCTA  
TACGATGTCTGAATTACTAAATGCGACTTATAATACTAACAAATATCATGCAGAAGCTGT  
GATGAGATTTTACACCCAACTTACAAGGACAACGATTCCAATTTACTGGTTAACGCC  
AAGAGAGATGATTTATTTGGACAACTCAGGGAAGAAGTCCACAACCTTCTTAATAGAAT  
GACTACATATAATGAAGTTGACAATCTTACTAAAAATAATAAAGGAATTGCTGTTTTAGG  
TAGTAGAGTAGAATCAAGAAATGGTATGCACGCAGGGCATGCCATGGCAGTTGTTGGGA  
ACGCTAAATTAGATAATGGACAAGAGGTTATAATTATATGGAATCCATGGGATAATGGTT  
TTATGACTCAAGATGCTAAAACAATGTTATTCCAGTATCCAATGGCGACCATTATCAAT  
GGTATTCATCTATTTATGGTTATTAA

### > **sspS**

Function: protein coding sequence; staphostatin A (genomic island)

Best match: sspS\_CC001\_MW2-USA400\_BA000033.2[2017836:2018162] (completely identical)

Position: 050-contig\_246\_RC: 25078 ... 25405; Length: 327 bp

Sequence:

ATGGAACAATTTGAATTATTTAGTATTGATAAATTCAAATGTAATTCAGAGGCTAAGTAT  
TATCTTAATATTATTGAGGGAGAATGGCATCCTCAAGATTTAAATGATAGTCCTTTAAAAT  
TTATTCTCAGTACCTCAGACGATTCTGATTACATTTGCAAATATATAAATACAGAACACA  
AACAACTCACATTATATAATAAAAATAATAGCTCAATTGTTATTGAAATATTTATACCAA  
ATGATAATAAATACTACTAACAAATTATGAACACAGAAGCTTTGGGAACTTCTCCTAGAA  
TGACTTTCATTAAGCAAAGTCATAA

### > **Q5HEL1**

Function: protein coding sequence; putative protein (core genome, variable)

Best match: Q5HEL1\_CC001\_MW2-USA400\_BA000033.2[2018454:2018627:r]RC (completely identical)

Position: 050-contig\_246\_RC: 25696 ... 25870; Length: 174 bp

Sequence:

TTATTGGATTTTCTTACCTACAAAAATGATTTCTTGATGTGATACTTCAACCGTGCCATCTT  
TTTGCTCTTGAAACACGGGTTTTTCAATACGTTTTACCGGCATATACCCTTGCATTTTCATT  
CGTGACAAACAATCAGCAATTGTTTCATTCTCATTACTTTGAATTTTCAT

### > **UPF0316**

Function: protein coding sequence; uncharacterised protein family 0316 (core genome, constant)  
Best match: UPF0316\_CC001\_MW2-USA400\_BA000033.2[2018608:2019210:r]RC (completely identical)

Position: 050-contig\_246\_RC: 25850 ... 26453; Length: 603 bp

Sequence:

TCATTTACTTTGAATTTTCATGTTCTACTACACTTTCCAGTTCTTCTGGTTCATAATCTTTAA  
GCTTTCTACGACGAATGCCTTTAGTCCAGAATCCACCATGTATGTTTTCGAGGTTTCATACGC  
AATGATAAATGCTTTCCGGATCTAAATTTTTTATCGTATCCATCAATTTACGTTTCATATTTTC  
TTGGTGTAAAATTTGCATCACCATACGACTACCATCTCTACCAAACGCAGCATAGTGCG  
TAACGCCATATCCTAAATTTTCGAAGTTCATTTCGGTAAATCTAACTCATATTCTGCTGAAGT  
TACATTTACAACGTATAACCTAATGCCAGTTTTTCTTCTATTTTCATACCAACAATGATA  
CCTATTGAAAAACCAAATGCGTAGGCAATAATTTTTGAATATGGTCTAAATTAGACATA  
ACCAAACCTAAACCAACGATATAAACTAATACTTCTAAAAAACTAACTGATGCAGCAATA  
TAACGATAACCTTTCAACGTTAAAATTGTTTCGCATCGTTAAAAACGTTACATAACAAACG  
TTAATGATAAATATAGTTAGTACCATTAACCATGGATTTTCTGTTACGAATGACAT

### > **nadE**

Function: protein coding sequence; NH(3)-dependent NAD(+) synthetase (core genome, variable)  
Best match: nadE\_CC001-ST772\_118\_AJGE01000047.1[54895:55716:r]RC (completely identical)

Position: 050-contig\_246\_RC: 26723 ... 27545; Length: 822 bp

Sequence:

TTAGGATTTTGGCCACGTGTATCTTGTATATGCAAGTTCACGTTTGTGTGCATTTTCGTATA  
TAATGATTTTCAATTACTTTTTGTTCTTCTGGCGTAACTGGCTTACCTTCTAAATAATTATC  
AATCGCCTCATAAGTTACACCTAATGCATCTTCATCTGGAAGCTGTGGTTTATCATCTTCT  
AAATCAGCAGTTGGCGTTTTTTCATATAATTCCTTTGGCGCACCAAGATACGCTAATAATT  
GACGACCTTGTCGTTTATTCAAACCAATATAGGTGCGATATCTGCAGCACCATCACCGT  
ACTTCGTATAAAAACCAGTTATATTTTCAGCTGAATGATCTGTTCTACTACAATACCTTG  
TCGGTTTGAAGCAATTGAAAATTGTACTTTCATACGTTTCACGCGCTTTTTTCATTTCCTTTT  
GGAAATCTGTAAGAACAATACCGGCTTCTTTTAATGATTGTACACTTTGATCAACTGCAG  
GCTTAATATTGACTGTTACTATTTTCATCTGGTTCAATGAATCGCAAAGCTTGGTCAACTTC  
ATCAGCATCTTTTTGAACTCCATAAGGTAATTTAACTGCAATAAACGTACAATCAATGCCT  
TCTTCACGTAATTCGTTAACAGACATTTGTACTAATTTTCCAACCTAATGTAGAATCTTGTC  
CTCCTGAAATACCTAACACTAAAGATTTTATAAATGAATGTGATTGTACATAATTTTTTAT  
AAATTGCTTTAATTCCATAATTTCTTCAGCACTATCGATACGCTTTTTACTTTTCATTTCTT  
GTACAATAACGTCTTGTAAATTTACTCAT

### > **nadC**

Function: protein coding sequence; putative nicotinate phosphoribosyltransferase (core genome, variable)

Best match: nadC\_CC001-ST772\_118\_AJGE01000047.1[55709:57178:r]RC (completely identical)

Position: 050-contig\_246\_RC: 27537 ... 29007; Length: 1470 bp

Sequence:

TTACTCATTATCTTCTTCCATCTCCTTAACGTGTTCCGCAACTTCAAAAATACGTTTATGTT  
TATTATCCCAACATGCCTTGCTTAAATCGACTGGATATTCTTGTGGATTAAGGAAACGCTT  
ATTTTCATCCCAAATAGATTGTAATCCTTGTGCTAAATATTCACGTGATTCATCTTCTGTTG  
GCATTTGATATACTAATTTACCATTTTCATAAATATTATGATGCAAATCAATGGCTTCGAA  
AGATTTTATAAATTTCAATTTTATAAGTATGCACTGGATGGAATAATTTTAAAGGTTGTTCA  
TCGTATGGATTTTCATTTTCCAAAGTAATAATCGCCTTCTGCCTTACCTGTTTTCTTGT  
TATAATGCGATATACATTTTCTTACCTGGCGTCGTAACCTTTTCAGCGTTATTTGATAATT  
TAATACGATCACTATATGAACCATCTTCATTTTCAATAGCTACAAGTTTATATACTGCACC



TAATGCTGGTTGATCGTATCCTGTAATCAGCTTTGTACCAACGCCCAAGAATCTACTTTT  
GCACCTTGTGCTTTCAAACCTCGTAATCGTTTCTTCATCCAAATCATTAGACGCGATAATTT  
TAGTTTCAGTAAATCCTGCTTCATCAAGCATAACGCTTGCCTCTTTAGATAAATAAGCGAT  
ATCTCCAGAATCTAATCGAATACCTACAAAGTTAATTTTGTACCTAATTCTTTTGCAACT  
TTTATTGCATTTGGCAGCCAGATTTTAAAGTATGGAATGTATCTACTAGGAACACACAA  
TTTTTATGTCTTTCAGCATATTTTTTTGAAGGCAACATATTCGTCTCCATAAGTTTGGACAA  
ATGCATGTGCATGTGTACCAGACACAGGTATACCAAATAAATTTCCCCGCCCTAACATTAC  
TTGTAGAATCAAAGCCCCCGATGTAAGCAGCTCTAGCGCCCCACAATGCTGCATCAATTT  
CTTGCGCACGACGTGTACCAAACCTCCATTAATTTATCATTTGATGCAATTTGACGAATTCT  
GCTAGCCTTTGTTGTAATTAGTGTATGGAAATTTACAATGTTAATAAAAATTGTTTCTATT  
AATTGCGCTTGAATCAATGGTGCTTCTACGCGTAACAATGGTTCGTTACCAAAGCATAAT  
TCGCCTTCTTGCATCGAACGGATGCTGCCTGTGAATTTTAAATCTTTTAAATATGATAAGA  
AATCATCCTTGTAGCCAATAGACTTTAAATATTCCAAATCAGATTCTGAAAATCCAAAAT  
GTTCTATAAAAATCAATGACGCGTTTTAAACCATTAAAAACAGCATAGCCACTATTAATG  
GCATTTTTCTAAAATACAAATCAAATACAGCCATTTTTTCATGAATATTATCATTCCAATA  
ACTTTCAGCCATATTTATTTGATATAAGTCATTATGTAACATTAAACTGTCGCTTCTAATT  
GGTACAC

> **nos**

Function: protein coding sequence; nitric oxide synthase oxygenase (core genome, variable)

Best match: nos\_CC001-ST772\_118\_AJGE01000047.1[57362:58438] (completely identical)

Position: 050-contig\_246\_RC: 29190 ... 30267; Length: 1077 bp

Sequence:

ATGTTATTTAAAGAGGCTCAAGCTTTCATAGAAAACATGTATAAAGAGTGTCAATTATGAA  
ACGCAAATTATCAATAAACGTTTACATGACATTGAACTAGAAATAAAAAGAAACTGGGAC  
ATATACACATACAGAAGAAGAAGCTTATTTATGGTGCTAAAATGGCTTGGCGTAATTCAA  
TCGTTGCATTGGTCGTTTATTTGGGATTCGTTAAATGTCATTGATGCAAGAGATGTTACT  
GACGAAGCATCGTTCCTATCATCAATTAATCATATTACACAGGCTACAAATGAAGGT  
AAATTAAGCCGTATATACTATATATGCTCCAAAGGATGGACCTAAAATTTTCAACAAT  
CAATTAATTCGCTATGCTGGCTATGACAATTGTGGTGATCCTGCTGAAAAGAAAGTTACA  
CGCTTAGCAAATCACTTAGGTTGGAAAGGAAAAGGTAATAATTTGACGTGTTACCACTG  
ATTTACCAATTACCTAATGAGTCAGTTAAATTTTACGAATATCCTACTTCATTAATTAAG  
AAGTACCTATTGAACATAATCATTATCCAAAATTAAGAAAATTGAACTTAAAATGGTATG  
CAGTCCCTATCATTTCGAATATGGACTTAAAAATCGGTGGCATTGTATATCCAACCTGCACC  
CTTTAACGTTGGTATATGGTAACTGAAATTGGCGTACGTAACCTTTATTGATGATTACCGT  
TACAATTTACTAGAAAAGTTGCAGATGCGTTTGAATTTGATACACTTAAAAATAATTCA  
TTTAATAAAGATCGAGCACTTGTGAAATTGAACTATGCTGTGTATCATTCTTTAAAAAAG  
AAGGCGTATCAATTGTCGATCATTGACCGCTGCAAAGCAATTCGAACTATTGCAACGTA  
ACGAAGCACAACAAGGTCGTCAAGTTACCGGAAAATGGTCTTGGCTAGCACCGCCATTAT  
CTCCAACATTGACGTCAAATTATCATCACGGATATGACAATACAGTAAAAGATCCAAACT  
TTTTCTATAAAAAGAAAGAATCAAATGCTAACCAGTGCCCTTCCATCATTAA

> **pheA**

Function: protein coding sequence; prephenate dehydratase (core genome, variable)

Best match: pheA\_CC005\_Mu50-VRSA\_BA000017.4[2060321:2061115] (completely identical)

Position: 050-contig\_246\_RC: 30286 ... 31081; Length: 795 bp

Sequence:

ATGCAATTATATTATTTAGGCCCTAAAGGTACATTTTCATATTTGGCTTGTTCGTCAGTATT  
TTTCTGAAAATGAAGCAACTTTTCAACCAAAGTCAAATTTATTTGAAGTCATCAAGGCAG  
TTGCAGATGATGACACATCGATTGGTGTGTTGCCCTATTGAAAATTCTATAGAAGGAACAA  
TCAACATTGTGGCAGATGCACTTGCACAGCAAGATGTCTTTGCACACGGTGAAATACGTT  
TAGATATTAACCTTTGCATTATATGGTAAATGGAACAGATTCCATTTCTGATATTAATAAAGT  
GTATTCTATTGCACCAGCAATCAGTCAAACAACAATTACATACATCAACATCAATTTGA  
CTATGATTATGTCGACAGTACAATTCAAAGTTTACTAAAATTGAAAATGGCGTTGCAGC  
AATTGCACCTTAGGTAGTGGCGAAGCTTATGGTTTTACACCTATTGATACACATATTGAA

GACTATCCACATAACGTGACACGTTTTTTAGTTATAAAAAATCAGCAGCAATTTGATCAA  
AATGCGACATCATTGATGTTTTTAATTACACCAATGCATGATAAACCTGGGCTGTTAGCA  
AGTGTGCTTAATACATTTGCTTTGTTAATATTAATTTATCCTGGATTGAGTCTCGTCCTTT  
AAAAACACAATTAGGTATGTATCGATTTTTTCGTTCAAGGCTGATTCTGCAATTACAACCGAT  
ATAAAGAAAGTCATTGCTATTTTAGAAACCTTAGATTTCAAAGTAGAAATGATTGGTGCT  
TTTAATTAA

### > **sdcS**

Function: protein coding sequence; sodium-dependent dicarboxylate transporter (core genome, variable)

Best match: sdcS\_CC005\_Mu50-VRSA\_BA000017.4[2061305:2062867:r]RC (completely identical)

Position: 050-contig\_246\_RC: 31270 ... 32833; Length: 1563 bp

Sequence:

CTATTTCAATGGCAGTGGTTGATTTATATCAATACCTAAAACCTATAGGCATTACATAATAC  
ACGACTAAAATAATAATTATTGCACTGATTAAGTTTACCCAGAATCCTACTGATGCCATTT  
GTTTGATAGATATTTTACCTGAACCAAAGATAATTGCATTCGGTGGTGTCCCTACTGGTAA  
CATGTATGCACAGTTAGCCGCCATAGCTGCAGGTGCCATAAGTAGTAATGGATGCACTCC  
AACAGCAACAGACAACGTTGCTAAAATCGGTAATAATCATCGTTGCAGTTGCAGTATTAGA  
TGTCACTTCAGTTAAAAATAAGACAAAGATTGTTATGACAATTACAATAAGAATCGGACT  
AACACCATTTAATGATTTCAACTGTTTCGCCTAACCATTTTGCTAAACCACTTTCAGAAATA  
CCTTTCGCTAATGCTAAACCGCCACCAAATAAAATTAATACACCCCAAGGGAGCTCTTTT  
GCAACTTCCCAGTCAATGATACGGCGATGTTTTTTCAGTATTTTTAGCTGGAATAATAAATA  
ATAATATTGATATAAAAAATAGCAATCGTACCATCTGCAACAGATGACGTAACCTTCCCATT  
TTTTCAGAAGAACTCTCTTGTAAATCCATAATAAGCTGGCAAGTACAAAGATAGTTTGTA  
CTACCTTTTCTTCATACTTCATTTTGCCAAGCTCGTCTAACTTTTGTAAATTAACGTCTGA  
CCACCAGGTAATATTTCAAATCATGTCTAAACGCAACATATCTTAAATAGAGCCAAGTA  
ATACCTAACAAAACAATGACCGTTGGAATCCCTACAATCATCCATTTAGCAAACTAATT  
TCATGTCCAAAATGTTGCATGTATTGTCCTTTTAAATAATTAATGGCGGGGTTCCGATTA  
ATGTACCCAAGCCACCAATCGTACCTGCATAGCCAATTGCTAAAACCTAGAGATTTTTCAA  
ACTTTTGAATACTTGTTGATTCGTATTGGCTTCTTGTAATCATGTGCTTCCCTAATAATT  
GCTAAACCAATCGGAATCATAATCATTACAGCTGCAGTGTTCGATACAAACATAGATAAG  
AATCCTGTTGCCACCATGAATCCAAGTAATATTTTTGAAGTGCTTGCACCAATTAATTA  
TAATAGTCAAAGCTACTCTCGTATGTAAATTCCATCTTCCATTGCAATTGCCAAAATAAA  
TCCACCTAAAAACAAAAGATAATATCATTGCCATATTCGGATGATACTTGTCTGGTGT  
AAGTATGTGACCTAATGGTAATAACACAATTGGTAATAAGCTCGTTGCTGCAATAGGAAT  
TGCTTCAGTAATCCACCAAGTCGCAATCCATAAAGTAATCGCTAAGACATATACGCCTTT  
CCAAGGTAAGTCTTGTGGATGAAAGAACAATAATGTTAATAGGAAAAGTAATGGACCTA  
ATATTAGTCCAATAAGTTGTCCCGCACTAAACGGTTTCTTTTTCTTTGATTTTGAAAAGAA  
TGTTAAATACCTTTTCGATATCATTGATTGATGTTGATTGAAATAAGCCAT

### > **ppaC**

Function: protein coding sequence; manganese-dependent inorganic pyrophosphatase (core genome, variable)

Best match: ppaC\_CC001-ST772\_118\_AJGE01000047.1[63291:64220] (completely identical)

Position: 050-contig\_246\_RC: 35119 ... 36049; Length: 930 bp

Sequence:

ATGGCTAAAACATATATTTTCGGACATAAGAATCCAGACACTGATGCAATTTTCATCTGCG  
ATTATTATGGCAGAATTTGAACAACCTTCGAGGTAATTCAGGAGCCAAAGCATACCGTTTA  
GGTATGTGAGTGCAGAACTCAATTCGCGTTAGATACATTTAATGTACCTGCTCCGGAA  
TTATTAACAGATGATTTAGATGGTCAAGATGTTATCTTAGTTGATCATAACGAATCCAAC  
AAAGTTCTGATACGATTGCCTCTGCTACGATTAAGCATGTAATTGATCATCACAGAATTG  
CAAATTTCGAAACTGCTGGTCTTTATGTTATCGTGCTGAACCAGTTGGTTGTACAGCTAC  
AATTTTATACAAAATGTTTAGAGAACGTGGCTTTGAAATTAACCTGAAATTGCCGGTTT  
AATGTTATCAGCAATTATCTCAGATAGCTTACTTTTCAAATCACCAACATGTACACAACA  
AGATGTTAAAGCAGCTGAAGAATTAAGATATTGCTAAAGTTGATATTCAAAGTACG

GCTTAGATATGTTAAAAGCAGGTGCTTCAACAACCTGATAAATCAGTTGAATTCTTATTAA  
ACATGGATGCTAAATCATTTACTATGGGTGACTATGTGACTCGTATTGCACAAGTTAATG  
CTGTTGACCTTGACGAAGTGTTAAATCGTAAAGAAGATTTAGAAAAAGAAATGTTAGCTG  
TAAGTGCACAAGAAAAATATGACTTATTTGTACTTGTGTTACTGACATCATTAAATAGTGA  
TTCTAAAATTTTAGTTGTAGGTGCTGAAAAAGATAAAGTCCGGCGAAGCATTCAATGTTCA  
ATTAGAAGATGACATGGCCTTCTTATCTGGTGTGTTTCTCGAAAAAAACAAATCGTACCT  
CAAATCACTGAAGCATTAGCAAAAATAA

### > **aldH**

Function: protein coding sequence; carotinoid aldehyde dehydrogenase (core genome, variable)

Best match: aldH\_CC001-ST772\_118\_AJGE01000047.1[64638:66017] (completely identical)

Position: 050-contig\_246\_RC: 36466 ... 37846; Length: 1380 bp

Sequence:

ATGAATATCATTGAGCAAAAATTTTATGACAGTAAAGCTTTTTTCAATACACAACAAACT  
AAAGATATTAGTTTTAGAAAAGAGCAATTAAGAAGTTAAGCAAAGCTATTAATCATA  
CGAGAGCGATATTTTAGAAGCACTATATACAGATTTAGGAAAAAATAAAGTCGAAGCTT  
ATGCTACTGAAATTGGCATAACTTTGAAAAGTATCAAAAATGCCCGTAAGGAACTTAAAA  
ACTGGACTAAAACAAAAAATGTAGACACACCTTTATATTTATTTCCAACAAAAAGCTATA  
TCAAAAAAGAACCCTTATGGAACAGTTTTGATCATTGCACCATTTAACTATCCTTTTCAACT  
AGTATTCGAACCTTTAATCGGTGCTATTGCAGCAGGTAATACGGCAATTATTAACCATC  
TGAGTTGACACCAAATGTTGCACGAGTGATTAACGATTAATCAATGAAACATTTGATGC  
AAATTACATTGAAGTTATTGAGGGAGGAATTGAAGAAACGCAAACGTTAATTCACTTACC  
TTTTGACTATGTCTTCTTTACAGGAAGTGAAAATGTAGGCAAATCGTTTTATCAAGCTGCC  
AGCGAGAATTTAGTTCCTGTGACATTAGAAATGGGCGGTAAATCTCCAGTCATCGTTGAT  
GAAACAGCGAATATTAAGTTGCTAGTGAGCGCATTGTGTTTGGGAAATTCACTAATGCC  
GGCCAAACATGTGTTGCACCAGATTACATTTTAGTACACGAATCTGTAAAAGATGATTTA  
ATCACAGCCCTATCAAAAACGTTGCGTGAATTTTATGGTCAAAAATATACAACAAAGTCCA  
GATTATGGCCGCATTGTAAACCTTAAACATTATCATCGTCTGACTTCATTACTTAACAGTG  
CACAAATGAATATTGTATTTGGTGGTCATAGTGATGAGGATGAACGTTATATAGAACCAA  
CATTGTTAGATCACGTTACAAGTGATTCAGCAATTATGCAAGAAGAAATTTTGGTCCCTAT  
CTTACCGATTTTAAACGTATCAGTCATTGGATGAAGCAATAGCCTTTATTCACCAAAGACC  
AAAACCTTTGAGTTTATATTTATTTAGCGAAGATGAAAATGCTACACAACGTGTAATAAA  
CGAGCTATCATTGGCGGCGGCGCTATTAATGATACATTGATGCACCTAGCGAATCCTAA  
ATTACCATTTGGTGGTGTGGCGCCTCAGGTATGGGACGCTATCATGGTAAATATTCATTC  
GACTTTTTACACATGAAAAAAGCTACATTTTCAAATCTACACGATTAGAATCAGGTGTC  
CATTTACCACCATATAAAGGTAAATTTAAATACATCAAAGCTTTCTTTAAAAATTA

### > **tnpA**

Function: protein coding sequence; transposase A (mobile element)

Best match: tnpA\_CC398\_CC001-ST772\_118\_AJGE01000047.1[67721:68833] (completely identical)

Position: 050-contig\_246\_RC: 39549 ... 40662; Length: 1113 bp

Sequence:

ATGAAAATAGTAGAAGTAAAATCTAAGAATGGTATCAATTTTATGATTTTATAGATGGTAAT  
AATGAACCTATAGTAGATGCAGTAAGATATTTGAAGTATCTGGATAGTGTTAATAAAAGT  
TTAAATACCAAGAAAACCTATGCCTATGCACTAAAAAATTTTTGTTTACTTAGAAAGT  
AAAAGATATGCTATAAAGAAGTTAGTTTTGATAACTTTGTTGATTTTATAAGATGGATG  
AAAACACCTTTTGAATATGAGAATGTCCTCTCTTATCACCGAAAAGGAAAAAGCATTAGT  
CCTAAGACAATTAATCTGACTATTACTGTAGTATCTAATTTTTATGATTATCTCTATAGGA  
GCAAAAAATTAGATGTTAATTTCTATGATTTTATACATACGGAAAGTAAATACTCTAAAA  
AATATAAAAGTTTCATGCATCACGTAAACAAGGACTATGGAATGTTGAAAAATATTTTGA  
AAGTAAAAGAACCAAAGAAAAAAGTAAAGTGTAAACCAATGTTGAGGTTAAGAAATTA  
TTAGGAGCAGCTAATAATATTAGAGATAAATTTCTTAATACAATTATTATATGAAACAGGA  
TTACGTATAGGTGAGGTATTATCATTACGCATTGATGATATCAAATTTGATTTTATAGAAAAG  
GTCACCAAATAGTTTTGAAAAATAGATTTAATAGCAATGGTACTTATTTAAAAACTGGTG

AAAGAAAATATTTATTTCTCAATCGTTAATTGATTTATATGACGATTATGTGTACGAAAT  
AATTGACGAACTTTCCATATGTTCTGATTATCTTTTTGTAAAAATAAAGGGTAGAAATGTA  
GGAGAAGCTATGCATTATAGTGATATATATTCATTATTTAAAAGGCTAAAACATAAAACA  
TCTATAAATGTTCAACCCCATTTATTTTCGCCATACACATGCAACTGTTTTTTATAATGAAA  
CTAAGGATATTAACAAGTTCAAGAAAGACTCGGTCATAGTAATATACAAACGACTATTA  
ATTTATATGTTTCATCCCCTGAAGAAGATATACGTGAAGATTGGAATAAAGTTAAGCATC  
AATTTCAAGTTTTTAATAAAGGGGAATAA

### > **tnpB\_CC398**

Function: protein coding sequence; site-specific recombinase/phage integrase family (mobile element)  
Best match: tnpB\_CC398\_CC001-ST772\_118\_AJGE01000047.1[68836:70899] (completely identical)

Position: 050-contig\_246\_RC: 40664 ... 42728; Length: 2064 bp

Sequence:

ATGTCAATACCAATTAATTTGCCTACAAACAGTACTATGATTAATGAATTATGTACATTAC  
AAAGTAGAACTATAAACATAAAAGGAGAAGTGCTAATAACTGAAATATATGATGATTAC  
TTTTTAAAAAATGATGAATGGCACATTTTCAGCTTTTAACAAGTTTCGAGCAATTTCAAGAT  
AGTATCAAGAACTATAAAGACAAAAGAAAAAATATTTTCTTTAGGATTAAGAGTAAAAA  
TTTGAATTTAGAATTTAAATACCTTTTTTTGAACTTATAGTTAAAGAGGATTGGTCTTTA  
TCTAATGTATTTAATACTGGAGCAGTGAACTTAACAAGATTGCTGAGTTCTTTAATGAA  
GTTTATCCAAATTTAAATTCTTTACTAGATTGTGATATTAATATGTTAGAAAAGTACTGGT  
TTAGTTGGTTGACTAAAAATAATATACCTATAAAAAGAAAATCATCAACAATAGTTTTTG  
GTGATTATGAACATAAAAGTGGACTAGCTTCTTTTTTAAAGAATATGTATATTAATCTAAA  
TAAATTTATTGATAAGCGAGAAGAATGGGAAAAAGATAAATGGGATATTAGAAATTTAG  
AAAAATATGGATTGAGTTATAATAAAACACTAACTGGTAATTATTTGAACTTTGAAAAAA  
TTGAGTCAATTTAAATGCGAGAATTAGCAAAAAAATATTTAAAAAATCGTTTGATAACTG  
GTGATATAGCATTTGCTACAGCAAGATTTTATATAAGAGTTTTGACTAGGTTTTTTCAAAA  
TATATCTAAAAATAAAGAAACAAGGAATAGTTTAAATGAACTAGATAGATGTCATATCG  
AAGCATATATAGAATTTTTATTTGAATATGCTAATAGTAAAAATGTGCAAAGTTCTAGGA  
ACTTCGTTAGAGAAGAATTAAGCAATTAGAAGGTTCTTAAATGATATTGCTAGTCAAA  
ATTATGATATAGCCCCCTCTGAAGATATACGTTTTTTAATTTATCCTCAAGACTTTCCTAA  
GCGCGAAAAGAAAAATAGTAGCCAAATTGATTATATCCCAGATTTTGTATTGGAACAGCT  
TTTTGAGCATATAAATGATTTGCACAAAGATTTAATACCTGTAGTTTGGATAGCTTTTAAA  
ACAGGACTAAGAATTTCTGATGTATTAACATTAATAAATAAATTGTCTTGCAAAGTTAAT  
GGAAAGTTTTCAATAATTACTGATATTGCTAAAACCTTTTGTTAAAGGACATAGGATACCA  
ATCGATAATGAATTAGCTGATATAGTAGCAGTTTTAATAGCCAATTCTAAAATTTAAAGT  
ACAAAAGATAACAACCCTAATAATTATTTTTGCTATTCATAAAGGAAAAAGAAAAGG  
AATGCCCTTTACACAGCATATGGTCAGAGCACACTTAAATCATTTAGCAAAAAACAAAAA  
TATTTCTTGATGAACAAGGTGAAGTCTTCCATTTCAAACTCATCAGTTTAGACATACTTAT  
GCAGTGAAATTGTTAAATGGTGGAGCAGATATATTAACCATAACAAGAATTATTAGCACAT  
TCCTCACCAGAAATGACACTCAGATATGCTAAGTTACTTGATGATACAAAAAGAAAGGCT  
TTTGAATCAGTTATTGATCAAGGGGCTTTTGTGTTGATGTTGACGGTAAATTTAAAAATA  
TACAGCATAGTAGTGAATTATCAGAAAAAGCATTGAATTCTTTATGGCAAGAACATAAAT  
TAAACGCAATGGACAATCCTTATGGTACTTGTGCTAGATTGAGCGGTGATTGTCCAT  
ATATGGAAGCTCCGCCATGCTTAACTTGAATTCTGGGAAACCATGTAAGGATCTAGCTA  
TTGGATTTTCTGATTTAGATGTTGAAAAATATGAATTACATATCAAATCAACGGTCAAATC  
CATAGAATTAGCTAAAAATAATAATAGACAAGATATAGTTGAAAAACATACTAATATATT  
AAATAAATATGAAGAAATATTAGGTAATATAAAGATGGAAACATTATATTCCGGGAGAA  
GTAATAGAATAAAAGTATAG

### > **tnpC\_CC398**

Function: protein coding sequence; transposase C (mobile element)

Best match: tnpC\_CC398\_CC001-ST772\_118\_AJGE01000047.1[70908:71273] (completely identical)

Position: 050-contig\_246\_RC: 42736 ... 43102; Length: 366 bp

Sequence:

```
ATGGGAAAATTTAATAGACAAGAACAATTAACAATTACATGCAGAACGAAAAGTTAA
AACCGAGCAAAAAGTTTCTAAAGCAATAAATGAATTGGTTCGAAAAAATGAAGAAATTA
ACTTTAATATTGTTGCTAAGCATTCAAATGTATCTAAAGCTACTTTATATAATAATAGTAA
AATTTCGAAAGAGAATCGAAGAGTTACGTGAACAAAGTAAAGACATATTTGTACATAAAA
ATAACAGTGACGGTAAAGACGCATTAATTTCTTCATTAATAAAGGAGAGTAAAATCTTTAG
AAAATGAGAAAAAGAGGCTCAAAGATGAAATAAACACATTATATAATAAAATATATGAA
GATATTTAA
```

### > **blaZ**

Function: protein coding sequence; beta-lactamase (mobile element)

Best match: blaZ-3\_CC001-ST772\_118\_AJGE01000047.172026:72871:rRC [4\_50ANF10END]

Position: 050-contig\_246\_RC: 43854 ... 44700; Length: 846 bp

Sequence:

```
TTAAAATTTGTTTATTACATTCTTGGCGGTTTCACTTATCAATTTATCATTAGGTTTATCAC
TTTTATTGTCTTTATTCGTAAAAATGACTAAAATAATAGGTTTCAGATTGGTTCCTTAGGATA
AATAAAAGCTACATCATTCTAGAACATATGTTATTGCTTGACCACTTTTATCAGCAACC
TTATAGTCTTTTGGAACACCATCTTTAATTAAGTGTCTCCGTTTTTATTATTTAACATTA
ATCAAGTAAGAAATTTTTATTTTTTTTGTCTTAATTTTCCATTTGCGATAAGTTTATTTAAAG
TCTTGCCGAAAGCAGCAGGCGTTGAAGTATCTTTTTTGTCTTTTGGTGAATAGTAATTTAA
TTCTATTTTCATATCTAACTGGATTTGTTACTTTATCTCCCAATTTTTTTAAACGTTTTTTAAT
TTTTTTGATTCCACCGATTTGTTTATAATTTTATTGTTTGTCTGTATTATCACTATACTTCAT
TGAAGCTTCAATAAGTTCTTTTAAAGTGATATCTTTTCTACATATTTTTCTAAAATAGGA
GAATAAGCAACTATATCATCTTTGTTAATATGTACTTTTTTTATTTAACTTATTATAAGGTA
CTTGTTCTAACAAAATAGCACTATTTATCGCTTTTGAAGTTGAAGCATAGGCAAATCTCTT
ATCGGCATTAATTTTACTTCCTTACCACCTTTTAGTATCTAAAGCATAAACACCAATATGA
GCATTATATTTTTTTCTAAATCATTTAACTCTTTGGCATGTGAACTGTTTGAATTACATGC
ACTTAAACTAAAGCAATTGCAATTAATAAATACTTTTCAA
```

### > **blaR-pUB101**

Function: protein coding sequence; beta lactamase regulatory protein (mobile element)

Best match: blaR-pUB101\_part\_S-xylosus\_DQ016060.1[1:241:r]

Position: 050-contig\_246\_RC: 44806 ... 45047; Length: 241 bp

Sequence:

```
ATGGCTAAATTACTAATAATGAGCGTAGTAAGCTTTTTGTTTTATATTTCTATTGTTAGTAT
TTTTTAGGTATATATTAACACGCTATTTAATTATAGTTTAAATTATAAAGTTTGGTATCT
AACTGTGCTTGCTGGATTAATTCCTTTTATCCCAATTAATTTCTCTTTTATAAAAATTTAATA
ATGTGAATAATCAATCGCCACAGTTGAAAGTAGGTCACACGACTTGAACCATAACA
```

### > **blaI**

Function: protein coding sequence; beta lactamase repressor inhibitor (mobile element)

Best match: blaI\_CC008-ST72\_TCH130-ST72\_ACHD01000263.1[102996:103376] (completely identical)

Position: 050-contig\_246\_RC: 46553 ... 46934; Length: 381 bp

Sequence:

```
ATGGCCAATAAGCAAGTTGAAATATCTATGGCTGAATGGGATGTTATGAATATAATATGG
AATAAAAAATCAGTATCAGCTAATGAAATTGTAGTTGAGATTCAAAAAAATAAAGAAGT
TAGCGATAAGACGATTAGAACATTAATTACAAGACTATATAAAAAAGAGATTATAAAAC
GATATAAATATAATAATATTTATTTTTACTCATCAATTATTAAGAAGATGATATTAAT
GAAACTGCTAAAACCTTTCTTAATAAATTGTATGGAGGGGATATGAAAAGTTTAGTGCT
TAATTTTGCGAAAAATGAAGAATTAATAACAAAGAAATTGAAGAATTGCGAGACATTTT
AAATGATATTAGTAAAAAATAA
```

### > **tnpIS1272**

Function: protein coding sequence; transposase of insertion element IS1272

Best match: tnpIS1272\_trunc\_CC398\_SO385-pig\_AM990992.1[2480969:2481165:r]RC  
Position: 050-contig\_246\_RC: 47356 ... 47386; Length: 30

TATGCATATAAGATGATTTTTTAACATCATT

### > **txbi\_universal1**

Function: bidirectional rho independent terminator  
Best match: txbi\_universal1\_CC022\_HE681097.1[2006687:2006756:r]  
Position: 051-contig\_201: 35 ... 65; Length: 30 bp  
Sequence:  
AAATTATCTTACTGCTGTTTTTTAGGGATT

### > **A6U330**

Function: protein coding sequence; acyl-coenzyme A 6-aminopenicillanic acid acyl-transferase (core genome, constant)  
Best match: A6U330\_CC001-ST772\_118\_AJGE01000011.1[593:1705] (completely identical)  
Position: 051-contig\_201: 640 ... 1753; Length: 1113 bp  
Sequence:  
ATGACATTCAATATACATACGATTACTATTTATTTACAATATATTACAACCTAAAAAGAAA  
GGGGCCGATGATATGCAACAAGTGACATCAGATATCATGACTTTTAGAGGTTACATTTTC  
GAGTTAGGTGTTAAAACCTGGTAAATGGCTTCAACAAACACCTCTTCTAAAAAATCGAGAA  
AAAGAATGGAAAAAACGTGTCCACGTTTCGATATAGATGTAAATGAACTTATCAAATA  
TTCCAAACATACGCACCTCAAATATGGGAAGAATTAATGGGACTACAAAGTATACTCAA  
ATGCCAACACGCCAAATTTTAACTTTGGACATTATCGTTTTACCGATTTAAAAGAAA  
GTGGTTGCACGGTCTTTCAAGGCAAAGACTTCATGGTTAGAAATTATGATTACCACCCTG  
CAACTTATGATGGTCGCTACTTTATCAACCTACAGATAGCGGTTTAGCTCAAATTGG  
TCCTGTATCAAGGGTAACTGGAAGAATGGATGGTATGAATGAGTCAGGATTAACCTATGGG  
CTATAACTTTATGCACCGGAAGAAACCAGCAAATGGTTTTGTATGTTATATGATTGGTCGT  
CTAATTCTTGAAAATTGCCGAAATGTAACAGAAGCAATCCAATTATTGAAAGAAATACCA  
CACAGAAGCTCATTTAGCTACATACTGATGGACAAATCATTGAACCATGCAATTGTTGAA  
GTGACGCCGAGATCAATAGATGTTCTGTTATGATAATATATGTACAAATCATTTTGAAATA  
TTAACACATGAAAATCGCAATTATACAAAAGAATCTAAAGAAAGACTGGCGCGTACCAT  
TTCACAACTAATGATAATTTAGATATGACTACAGCATTTAAGTTATTCAATAATCCTCAG  
TATGAAATTTACAGTAACTATTCAAAGCTGGTCTGGCACCATCCATACATCAATGTAT  
CACCTGAAACATTAACCTGCATATTTACATTGGGAGAAAATGCGCCACCAGAAATAATA  
GATTTCAAATCATGGTTAGATGGTCAAGACCTTAATATCACTCACTTTACTGGCAATATAG  
ATACCGACTTAACTTTTGCCAACAAATAA

### > **Q5HEJ0**

Function: protein coding sequence; ABC-2 type transport system permease (core genome, variable)  
Best match: Q5HEJ0\_CC001-ST772\_118\_AJGE01000011.1[4492:5232:r]RC (completely identical)  
Position: 051-contig\_201: 4539 ... 5280; Length: 741 bp  
Sequence:  
TTAAATGTCTTTTTTAGCGACATATAAGATATTCAAATGAAGAATATCACTATAGAACC  
TAATGAAATTACCCATTGCCAATTGCTAAAATCAAAGTTAGAGCTAATCATTTTATCAGTT  
AAGTAAGCAAAGGGATATAATCAAAGCATCTAAAACTTTTTCACCGTATCTTGGGATA  
AATGTAATAAAAGGTTAATAAACGGTACAATGAGTACTAAAAATACACCTAATGAAAA  
TATCATTGCTGTTTTTTGTGATGCAAGTGTGATTAAGAATAAAAACAAGCCAAAGAATAA  
TAAAAAGATTAGGAAGAACCATAAATTATCTACATATTTAGAAAACGCCAAATTTTTTCC  
ATTACTAGATGCCTGCACAACAATCAAATCACATAATGAATTAATGCAATAATATTGA  
AATAAAATAAATTGAAATTGTTTTCGAAATAATGTATCCAACGCGTGTTTTAACTTTACTC  
ATATATAGTTGAATTGTACCTTGTGAAAAATCACGCGTAATTGTCTTAACAACAACATT  
AATCCAATTATTAACAATAACCATTTTGTGCTGCAGCAAATACAGATCCATAGACAATAATA  
TGTTTCGGGTTATCCATCGAATTTGCCATAAGTATACTTTGAGTTGCAATCAAACCTAGATA

CGACTAGTATCGCTAAATATGTTAAAGGACTTTTAAATATACTATAAAAATCATACTTAA  
CTAAATTTAAAATTCTCAT

### > **nodI2**

Function: protein coding sequence; nodulation ABC transporter ATP-binding protein (core genome, variable)

Best match: nodI2\_CC001-ST772\_118\_AJGE01000011.1[5232:6104:r]RC (completely identical)

Position: 051-contig\_201: 5279 ... 6152; Length: 873

TTATTTATCACCTCTTTGATTTATATTGAAGTACGTATCACGCAATGAACTTTTACGTGTTT  
CAATATATTTTCGGATAAATATCTAATTCAGATAATGCTTTTAGTATAACTTGATAATTTTT  
TTGTGCATTAATCATTAAATGTCCGTCTGCTTTGTGCGACATTTTGTAAATTGGAATGCTCT  
GCAAGATATTTTTCAGTTCTATCAAAGTCTTTATGATCAACAGTAACTATCGTTGTGTCAG  
ATGCAACACCTTCCTCCATGTTTACATCTTGAACAAAATGTCCGTCTCTTAAAAATACAGC  
TCTATCACAAATTAATTCAATATCTTCTAACTTATGACTTGATATTAGAATTCTCATATCA  
AGTTCATTTACTAAAGACTTAATTGTAGTCAGCACATCAATTGAGCCATCTGGATCCATAC  
CATTTGTAGGCTCATCCAAGATTAATAATTTAGGTTTATTCATTAAGATACTGCAATTGC  
TAACTTTTGCTTCATCCCATGAAATTTCTTAACTTTCTTTTTAATAAAGGTCTCATAAC  
CAAATGCATCTATAATTTTGTCTGTGTATGCTTTATCAAACCCTTACCTAATACTTGTGC  
AAATAATTTCAAGTTATACAATCCTGATTTATTATCATATAATTTAGGATGCTCAATTA  
AAACCGATATTATCTGCATTATCAATGTCTACTTTTCCATCAAATTTAATAATATTACCAT  
TCATCACTTTCATAACGGTTGTTTTACCAACACCGTTTTTTTCTATTAATCCGACAATTCTA  
CTATCGCCAAAGTCAAATCAATATCATTAAAACGACATTTGAGCCGATTTTTTTGTAA  
TATGTTCTAATTTTCAT

### > **nodI1**

Function: protein coding sequence; nodulation ABC transporter ATP-binding protein (core genome, variable)

Best match: nodI1\_CC001-ST772\_118\_AJGE01000011.1[6782:7678:r]RC (completely identical)

Position: 051-contig\_201: 6829 ... 7726; Length: 897 bp

Sequence:

TTAAAAACCTTCTTCCATCAATTTGATGTTTTTCATGATATTTAGGTTTTCTCTTTTCAAGAT  
AAACCATTAAGTTCTCAATAGAAGGTGTAGTGATATTCACTTTATGACCTAAAATTTCTTT  
AAATACTTGCGCATGTTCTGTTAATCCTATAAATCCCGTACGCTTATGTTCTTCATAAATA  
AGTAGAGATGCTAATTCATCATCAAGGTCCTCAATAGCACCCTCACAACCTTGATATCTTT  
GTAACAGTTGTTCTTTTGAACCATTAAAGATAACTTCACCGTCACTTAAGTGAATGATATA  
ATCAGCTATTTTTTCTAAATCTGAGATAATGTGTGTCGACATGAATATTGTTTTATTTTCAT  
CAATTAATTCTTGCTGAATTATCTCCAATAGCTCATTCTAGCTAAGGGATCAAGACCTGA  
AGTAGGCTCATAAAAATATACAATTCAGCATGATGTGAAAATGCAACTGCTAGTGATAA  
TTTCATTTTCATGCCAGTCGAAAATGTTTTTATTGATTTATTGATTGGTAAATCGAACTTTT  
CAAGATAAAATTCAAATACTTGATGGTCCCATTTACGATAAAAAGGGGTAATCATTTTTT  
CAAGTTGCTTCGTAGTCCATCTCTCATTAAATAATTTTCAGAGTAAACAAACCAATTCT  
ATTCTTTAACTCTATCGGATTGAGAGCCATATCCTCTTCTAATACTCTAATAACACCAGTT  
TGTGGTTGATACAAATCCATAATTAACCTTATTATTGTGGTTTTACCAGCGCCATTTCTAC  
CAATAAAACCAGTGACGAATCCTTGAGGAACTTTGAAAGAGATATTCTTTAAATTAACCT  
GATCACTTGAATAATTAACACTTAATTCTATGGCATTTCAT

### > **Q5HEI3**

Function: protein coding sequence; aspartate transaminase (core genome, constant)

Best match: Q5HEI3\_CC001\_MW2-USA400\_BA000033.2[2041987:2043273] (completely identical)

Position: 051-contig\_201: 9078 ... 10365; Length: 1287 bp

Sequence:

ATGAATCCTTTAGCCCAAAGCTTAAATGAACAACTTCAACAGTCAAATGCAACTGCCTTT  
GCAATGTTATCTGACTTAGGTCAAATATGTTTTATCCAAAAGGCATTTTATCTCAATCTG  
CTGAAGCAAAGAGTACAACATATAATGCAACTATAGGTATGGCGACAAACAAAGACGGA

AAAATGTTTGCATCATCTTTAGATGCAATGTTTAATGATTTAACTCCAGATGAAATATTCC  
CTTATGCGCCACCACAAGGCATCGAAGAATTACGTGATTTATGGCAACAAAAAATGTTGC  
GTGACAATCCAGAGCTATCAATCGACAACATGTCACTACCAATTGTTACGAATGCATTAA  
CACATGGTTTATCTTTAGTTGGCGATTTATTTGTAATCAAGGTGACACTATCTTGTTACC  
AGATCATAATTGGGGTAATTACAACTTGTTTTCAATACGAGAAATGGTGCAAACCTTCA  
AACATATCCTATCTTTGATAAAGACGGGCATTATACTACTGATTCACCTGTAGAAGCTTTA  
CAATCATAACAATAAAGATAAAGTCATTATGATTTTAAATTATCCTAATAATCCGACAGGT  
TACACACCTACGCATAAAGAAGTGACTACCATCGTCGATGCAATTAAGCATTAGCTGAT  
AAAGGTACAAAAGTTATAGCTGTTGTGGATGACGCATACTATGGTTTATTCTATGAAGAT  
GTGTATACTCAATCATTATTTACTGCATTATCTAATTTAAATTCAAATGCAATATTACCTG  
TTCGTTTAGATGGTGCAACAAAAGAATTTTCGCATGGGGATCCCGTGTGGGTTTATGAC  
ATTTGGAACGTCTGATCAAACAATAAAGAAGTATTAGAAGCCAAAGTAAAAGGTCTTAT  
ACGAAGTAACATTTCTAGTGGACCTCTTCCAACACAAAGCGCTGTTAAGCATGTATTTAA  
AAATAATAACAATTCGATAAAGAAATCGAACAAAATATTCAAACATTTAAAAGAACGCT  
ATGAAGTCACTAAGGAAGTTGTCTATGCTGATCAATATCATTACATTGGCAAGCCTATG  
ACTTTAACTCTGGATACTTTATGGCAATAAAAGTTCATGATGTTGACCCTGAAGAACCTCG  
TAAACATTTAATTGAAAAATATTCAATTGGTGTATTGCACTTAATGCAACAGATATTCGT  
ATTGCGTTTAGCTGTGTAGAAAAAGAAGATATCCCACATGTATTTGATTCAATTGCTAAA  
GCGATTGATGACTTAAGATAA

> **tx\_map**

Function: rho-independent terminator of map

Best match: tx\_map\_ref\_CC001\_MW2-USA400\_BA000033.2[2043540:2043593:r]RC (completely identical)

Position: 051-contig\_201: 10631 ... 10685; Length: 54 bp

Sequence:

TCTACAAATGTAAAAGGCACCCACGATTGTGAGATGCCTTATTATAAAATTA

> **map**

Function: protein coding sequence; major histocompatibility complex class II analog protein (core genome, variable)

Best match: map-MW2\_part\_CC007\_TCH959-USA300\_AASB02000005.1[6846:7192:r]RC

Position: 051-contig\_201: 10688 ... 11035; Length: 347 bp

Sequence:

TTAGAATTTAAGTTCAATATCTACCTTTTTAATGTCAGTTGCTTTAAATACTCTTTCATCTT  
TATACTCAGTTTTTAAGTCTACATATTTTGACGAACCATTTTTAAAATACACTTTATACAC  
TGCGCGTTCAGCAAGTCCTATGTCATGTTAGTTATCCCTTGATCATTGCGCATTGCTGATT  
TAAGTTTTATACTTAAATCATTAAATTGTAATTTGCTTGCATTATAGAACACAAATTCATT  
TGAAACTATGTTTTCAAATTTATTTATTGTTACTGGGAATTTACATTATTAGATTTATTTA  
TTTTTTTTTTGATTTAGTGTATTGTTTTACATCAATATC

> **map**

Function: protein coding sequence; major histocompatibility complex class II analog protein (core genome, variable)

Best match: map-MW2\_part\_Z262\_LCL\_10042.1[45974:47138]RC

Position: 052-contig\_193\_RC: 0 ... 1165; Length: 1165 bp

Sequence:

ATAAAATTGGTGTGATGTGCCATTTACTGCAATTGTGTATGGTACATATCTGTCCGCTTT  
CGCTTTTGACCCTGTTTTAACAGTAATTTCAATTCTCTTAACATCTTTCGCATGAACTAAGT  
TTGCTGTGTAATTTTTGAATTTAACTGTAAGATTCTTTTACCACCATTTTTAAAATAAACA  
GTATAATAAGCTTTCTTAGCATATTTAAATCTTGTTCACTAATACCTCTATCATGCTTCAG  
TACTGATTTTATTTGACTAGTTAAATTTTTGTAATTTGTCCAAGGTTTATTTGAAAATGAA  
AGATTCGATAAAATGTTTGTAGATGTACCATTTAAATTAATTGAATATGGAACCTTGATAG  
TTTCTTTTAGCTTTATTTTCGATATGTTTTTTGTATCTACGTTAATATTGATACTTTTAATA  
TCACTTGAATTGATTAAATTCGCTGTGTAAATACCTGATTTCAAATCTATAACTTTCTTCG



TTCCATTTTTAAAATTAACCTGTATATTTTCGCTTGCTTCGAAAGTCTTAAATCAACATCAGT  
AATACCTCTATTTGATTCTAAAACCTGATTTAACTTTACCCTCTAAATCTTTGTAACATAATAT  
TTTGATTTTTATTAAATGTTAGGTTTGATAAAATGTTTTGGCTTGTGCCGTTCACTGTGATT  
GTATATGGCACTTGAACATTTGCTTTAGCTTTATCTTTAGGTTGCTTTTTAGTATCTACGTT  
AACACTGATAGCTTTAATGTCACCTGTATTGATTAAGTCAGCTGTGTAGATACCTGATTTCC  
AAATCGATAACTCTTTTTGTTCCATTTTTAAAATGAACCGTATATTCCGCTTGCTTTGAAA  
GTCTTAAATCGATATCACTAATACCTCTATTAAAGTATAAAAACCTGATTTAACTTTATTCTC  
TATATCTTTATAACTAATATTTTGATTCTTATTAATGTTAAGCTTGATAAAATGTTTTGGC  
TTGTGCCGTTACAGTAATTGTATATGGAATCTGGATGTTAGAATGTCCATGGTGTAATGT  
ACTTGATGATTTATCTAATGGCTTAGCTGCGGCAGATGCTTCGTTAGTATTAAGTTTGCT  
CCTGTTGATGCTATAACGCCTAATGCTAATGTTGTTGTAATCAATGACTTAAATTTTCAT

### > **h1b**, disrupted - upstream fragment

Function: protein coding sequence; hemolysin beta, disrupted - upstream fragment (core genome, constant)

Best match:

h1b\_CC008\_COL\_CP000046.1[2063726:2064718]#[2\_150ANF&END]#h1b#[CDS:hemolysine beta]#[cc:72.8598:73.1883] MANUAL OVERRIDE

Position: 052-contig\_193\_RC: 1554 ... 2326; Length: 772 bp

Sequence:

ATGGTGAAAAAACAATAATCCAATTCATAAAAAAGTTGCAACACTTGCATTAGCAAA  
TTTATTATTAGTTGGTGCCTTACTGACAATAGTGCCAAAGCCGAATCTAAGAAAGATGA  
TACTGATTTGAAGTTAGTTAGTCATAACGTTTATATGTTATCGACCGTTTTGTATCCGAAT  
TGGAGACTTTTAAACATAAAATTACTTATCATTCAAAAAGTAAAACAGCATAATATCAAGG  
TTTATAACTTTTATCATTATCAATAATACCCATATAAAAATAAAATTTTAGGGACTTTTTAG  
GGACTTTAAATTTAAAATTACAAGTTTAAATAGAAACATCAAAAATAATCACATGTTTGTGT  
GGAATGTACACCCCAAAGCTAGACTGAAAAATCTATTTTTTGAGGTGTATTTTTATAGG  
TAAATATAATAAATTAGAGTAGACAACCTCAGAATTTCAATTTTATAATAATATTGCTTGA  
CATATCAAACCTAGATAGTACTATTTTGAATATATTATTATAATCAAAAATTCATTGTAAAC  
TTTTAGACAAAAGGAAGTAATAAAAACGTGAAATTTAAAACAACCTAAAGAATGTAAAAG  
TAATAATATCTTTAAAAGAAGTCAAGAAATTAATAATAGAGAAAGTGAAAAGGGTTGTTT  
ATGGGGCATTAGCATGTTGATTCTACTTTTCTTATTGATTCTGTTTGAATAACTGCTTGT  
CATCAAGCATTCACTTTATTAATTAGATTTTTTTACTTGGAGGTATCAT

### > **Q6GFB6**

Function: protein coding sequence; putative membrane protein (mobile element)

Best match: Q6GFB6\_CC008\_NCTC8325\_CP000253.1[2032513:2032821] (completely identical)

Position: 052-contig\_193\_RC: 2326 ... 2635; Length: 309 bp

Sequence:

GTGAAGAACCATACAAATATAATTAATATCTTATTAGTTATAGTCAACTCATTAACTCATT  
TTCTAACTCTAAACACCTCATTTTTTAATAGTTTCAGCATCGGATTTCTGTTTTATCATAGGG  
GCTATATTTTTCTTGATCGGAATTTTTGTTGCAATATACGGTATGAAGCGAGCAACATATT  
GGTTAACTTATTGATTTTATTTACCAATATTTTTTATTTTCTACACTTCTGTGTTTTACTTT  
TGTTAAAATATATAGGATTTAAATTATTTATTTATGAAGGGTGTGTATTGTTATTTACCTA  
A

### > **scn**

Function: protein coding sequence; staph complement inhibitor (SCIN) (mobile element)

Best match: scn\_part\_phage\_U01872.1[3690:3944:r]RC

Position: 052-contig\_193\_RC: 2924 ... 3179; Length: 255 bp

Sequence:

TTTTAATATTTACTTTTTAGTGCTTCGTCAATTTTCGTTATAAATCTTTTGAAGTTGATATTT  
TGCTTCTGACATTTTCTTAAAGTCTTTTGACTTAAGAGCATAACATTGCTTTTAGACCTGAA  
ATTTTTATAGTTTCGCTTATAATAAGTGTTTAACTTCCAGTAGCTAATTCATTAACATTTA

GTTTCATCTAATAACGATTTTAATTCATTAGCTAACTTTTCGTTTTGATATTCATTTCGATGTT  
GGCAAGCTT

> **sprD**

Function: noncoding RNA small pathogenicity island RNA D (mobile element)

Best match: sprD\_CC001\_MW2-USA400\_BA000033.2[2047917:2048058:r]RC (completely identical)

Position: 052-contig\_193\_RC: 3435 ... 3577; Length: 142 bp

Sequence:

GGTAAGCACCGAAATGCTTACCTACTTCCCATAAAACAATATAACACATATACATTGATTT  
GGAAAGCGCAAAAATAAATTTAATACTAGCCCCGAAGGGGAGCAATACATAAAAAAATG  
AAAGGCGCTCCTTGAAAACGCC

> **hlyB, disrupted - downstream fragment**

Function: protein coding sequence; hemolysin beta, disrupted - downstream fragment (core genome, constant)

Best match:

hlyB\_CC008\_COL\_CP000046.1[2063726:2064718]#[2\_150ANF&END]#hlyB#[CDS:hemolysine beta]#[cc:72.8598:73.1883] MANUAL OVERRIDE

Position: 052-contig\_193\_RC: 3578 ... 4713; Length: 1136 bp

Sequence:

AAGGTAATATTAACATAAAAATGGCTACTATTGCATTATCTAATTTTATTTAATTA AAAACAA  
ATATATAGCAAAAAAAAAACTAGCCCCGAAGGCTAGCTTATGAATAGATGAAAATTTGAAC  
ACATTGCTGTGTCTAAAATGATTATAGCATAATTTTAACTATTCTATAATAAATTAATTA  
ACTTCATATGAAACTTTACACACTTTTTTTCAAACCTGCACTAACTTACCAAACTGCTTA  
TTCGGTTGCTGCTATGTCTACCTCTCCGGTCGCAATATAGCGACGTTGTCCACTATTAGC  
AATATAAGTAATCCATCTATGGGGGGCAATATAAACGCGCTGATTTAATCGGACAATCTT  
CTTATATTA AAAATAATGATGTCGTAATATTCAATGAAGCATTGATAATGGTGCATCAG  
ACAAATTATTAAGTAATGTGAAAAAAGAATATCCTTACCAAACACCTGTACTCGGTCGTT  
CTCAATCAGGGTGGGACAAAACCTGAAGGTAGCTACTCATCAACTGTTGCAGAAGATGGT  
GGCGTAGCGATTGTAAGTAAATATCCTATTAAGAAAAAATCCAGCATGTTTTCAAAGC  
GGTTGTGGATTGATAATGATAGCAACAAAGGCTTTGTTTATACAAAAATAGAAAAAAT  
GGTAAGAACGTTACGTTATCGGTACACATACACAATCTGAAGATTCACGTTGTGGTGCT  
GGACATGATAGAAAAATTAGAGCTGAACAAATGAAAGAAATCAGTGACTTTGTTAAAAA  
GAAAAATATCCCTAAAGATGAAACGGTATATATAGGTGGCGACCTTAATGTTAATAAAG  
GCACTCCAGAGTTCAAAGATATGCTTAAAAACTTGAATGTAAATGATGTTCTATATGCAG  
GTCATAATAGCACATGGGACCCTCAATCAAATTCAATTGCGAAATATAATTACCCTAATG  
GTAAACCAGAACATTTAGACTATATTTTACAGATAAAGATCATAAACAACCAAAACAAT  
TAGTCAATGAAGTTGTGACTGAAAAACCTAAGCCATGGGATGTATATGCGTTCCCATATT  
ACTACGTTTACAATGATTTTTTTCAGATCATTACCCAATCAAAGCCTATAGTAAATAG

> **lukX**

Function: protein coding sequence; leukocidin/hemolysin toxin family protein (core genome, variable)

Best match: lukX\_CC001-ST772\_118\_AJGE01000025.1[41511:42527]RC (completely identical)

Position: 052-contig\_193\_RC: 4950 ... 5967; Length: 1017 bp

Sequence:

TTATTTCTTTTCATTATCATTAAGTACTTTTACAACTTCACATTATGTGTCTTCCAATCAA  
CTTCATATAATGCTGATAATTTTTCTTCTTTTTTATCTACATGGTTTTCCACCAGACCAATAG  
CCCCAGAAACCATGACGATTCCAATCTATTTTAACTCATCCATTGATCTTTTATAATGAA  
CAACAAATTTTGATTTACCTTCATCTTTTTTATCATGTGACATAACAGCTAAAAATTCTGG  
ATTA AACCTTCAGAAACAGTTACAGGCATCTTATTCTTAGGCGTAAAATTATCTTTTCGCC  
CATAAATTTCCATTTTCGTGTTAAAGAAAAGATTTCACTTTTAGTTCTATTATCACTATCATT  
AGTTAATTGTCTCGTATGGTCATGTCCCATATTATTTATCAAATGTGCTTCTACTTTCCAAC  
CTACACCTTTATGTGACGTAGATTGATCAAGTAATGTACGATACGATGGTTGTTGATAACT  
AATCGTCTCTGAATAATTACTCTCTTTTGAATATTTCCAGTTAACCTCCACGATTAATC

GAAAAATCTCCACCTGTTTTATAACCATACGTATATTTAACTTCTCTTGATTCATCCTGATT  
TTTTGGTGCAAAGTCAGTCACATTTGTATTGTTGTTGTCATCAACATTTTGAATTGAAACT  
GAATAAGATCCAGGCCATCTTAATGTACTATTCCAATAACCATTTGGGTCTAGAATTCTTA  
AACCACTACCTATTGTTCTTTTCGCTTTAATAAAATACTGTTTCTTTATCATAATTAGGTTCA  
GTTAAGAAGTTAAATTGTAAGCTTTGAGTAATATTTTTTTGACTATCACTTGTGTAGCTG  
TACGTGTATACATTTTAGTATCACCATCAAGATTCTTCTCAGAAACAGCTTTAATTTTCAGA  
ATTAATTTTTGCATAAGAAGTAGCTGGTAATACAGTGAAAGTAGTCGATAGTGCTAACGT  
ACAAATTGTGATATTTTTATATAGTTGTTAATCAT

### > **lukY**

Function: protein coding sequence; leukocidin/hemolysin toxin family protein (core genome, variable)

Best match: lukY-MW2\_Z262\_LCL\_10042.1[40098:41150]RC (completely identical)

Position: 052-contig\_193\_RC: 5988 ... 7041; Length: 1053 bp

Sequence:

TTATCCTTCTCTAAATGATTTATTATCAGAGTATTTATCAACGACTTTAACTGTTTTATTTT  
TCCAATCAACTTCATAAGTGACAATTAATCTTTGACCATCTTTATTTTTTTCTAAAATTGG  
AGGTGCATAATGTATTCCAGGTCTGTTTTTCAAATATCTTGATTTTCGTGTGTATGTTACTT  
CAAATTGCGTTTTTCTCATTTGACTTTTCATTAGATAAATAAGTTAAAAATTCTGGATTA  
GCCACTTCTTACTAATGCTGGGTATCTATTTTTGAAGCAAAGCTTAGTTCAGGGTTTTCT  
ACAGTAGCAATTCTCGTATTTCTATAGAATAATAATTCATCATTCTATTTTTCACTTCTCC  
ACCATACTTCAAGTCATTCGCAATAACTGACCAGTGTACATGCCAGTTATTATTTTTACCG  
CTGGCAATTGTGTCATAATTTGCTGATTATAACTAATCGTTTTGGAGTAGCTATTTGATG  
AAGTTCGTCCAATACCTTTCGTTGAATCGAATTTACCACCTGAGCTATATGAAATGTACT  
GTCTACTTTTCGCAGTTGAAATTTTTATTTTTCGGCAATTGGTCTAATATTTTCAGTTTTACGAT  
TTCTTTTTACTTGAAAATCTACATGGTACTCACTTGGATACTTTAACCAATTTGAATTTTTT  
TCTTCTTTATGAGATTCAAATTTAAATTTGAATGAATTGAGCCTTGTTTTTAACAAGTA  
ATACATTCTTGCATAAGTTGGATCATCGATAAAGTCGAATTTGAAATTTGGAGTATATT  
TGTTTTCTCATATACTGTTTCAGTTCGTTTTGTGATTTTACCGTTTTTCCCAATATCATC  
AGGTACTGTTGAATTTTTATCTTTATTAGTAACATTACGTTTGTCTTTTTGTTGAGACTTAT  
CAACATGTTCTTTCTTATTTTGATCTTTCGAGTCTTTATGAGCTGAATTTGCTTGAGTCGTT  
GCTGCTGATAACAATAAAATTGCACATGATAATGATGACGCTATTAACACGTTTTTTTA  
TTTTTCAT

### > **dapE**

Function: protein coding sequence; succinyl-diaminopimelate desuccinylase (core genome, variable)

Best match: dapE\_CC001-ST772\_118\_AJGE0100025.1[38779:40002:r] (completely identical)

Position: 052-contig\_193\_RC: 7475 ... 8699; Length: 1224 bp

Sequence:

ATGACAACCTTTTAGTGAAAAAGAAAAATTCAATTACTAGCAGATATTGTTGAACTACAA  
ACTGAAAATAATAATGAAATAGACGTTTGTAAATTTAAAAGATTTATTCGACAAGTAC  
GATATTAATCTGAGATTTTGAAAGTTAATGAACACCGCGCCAATATCGTTGCAGAAATC  
GGTAACGGCTCACCTATACTCGCATTGAGTGGTCATATGGATGTTGTTGATGCAGGAAAT  
CAAGATAATTGGACTTATCCCCCTTTCAACTCACAGAAAAAGATGGCAAATTATATGGT  
CGAGGCACAACAGATATGAAAGGCGGTCTGATGGCTTTGGTCATCACTCATTGAATTA  
AAAGAACAATAATCAATTACCTCAAGGAACGATAAGATTACTAGCTACTGCTGGCGAAGA  
GAAAGAACAAGAAGGTGCCAAATTATTGGCTGATAAAGGCTATTTAGACGATGTAGATG  
GCTTAATTATTGCTGAACCAACTGGATCAGGAATTTATTATGCACATAAAGGGTCTATGT  
CATGTAAAGTAACTGCAACTGGTAAAGCTGTCCATAGCTCAGTTCATTTATTGGTGACA  
ATGCAATTGATACACTGCTTGAATTTTATAATCAATTTAAAGAAAAATATTCAGAGCTTA  
AAAAACATGATACTAAACATGAATTAGATGTTGCACCCATGTTCAAATCATTGATAGGAA  
AAGAAATTTCTGAAGAGGATGCAAATTATGCATCTGGTCTTACAGCTGTATGTTTCGATTA  
TAAATGGCGGCAAACAATTTAACTCTGTACCAGATGAAGCTTCACTTGAATTTAACGTAA  
GACCAGTTCCTGAGTATGATAACGACTTTATAGAATCGTTTTTCCAAAATATCATTAATAA  
TGTGGATAGCAATAAGCTTTCACTCGATATTCCAAGCAATCACCGACCTGTAACAAGCGA  
TAAAAATAGCAAATTAATTACTACGATTAAAGATGTAGCTTCTAGTTATGTAGACAAAGA

CGATATATTTGTTTCGGCGCTTGTAGGTGCAACAGATGCCTCTAGTTTCTTAGGTGATAAT  
AAGGACAATGTTGATTTAGCTATTTTTGGACCAGGTAATCCATTAATGGCACATCAAATC  
GATGAATATATTGAAAAAGATATGTATCTGAAATATATTGATATTTTTAAAGAAGCTTCC  
ATTCAATATTTAAAAGAGAAATAA

> **repeat\_nyS**Agamma

Function: repeat element

Best match: repeat\_nySAgamma\_CC001\_MW2-USA400\_BA000033.2[819195:819303]

Position: 052-contig\_193\_RC: 8952 ... 8982; Length: 30 bp

Sequence:

TTCTTTTCGAAATTCTCTGTGTTGGGGCCC

> **STAR**

Function: Staphylococcus aureus repeat element

Best match: STAR\_CC005\_Mu50-VRSA\_BA000017.4[1694829:1695052]

Position: 052-contig\_193\_RC: 9011 ... 9041; Length: 30 bp

Sequence:

TGGGAATCCAATTTCTCTGTGTTGGGGCCC

> **A1JUG1**

Function: protein coding sequence; putative sodium transport protein (core genome, constant)

Best match: A1JUG1\_CC001-ST772\_118\_AJGE01000025.1[36969:38276:r] (completely identical)

Position: 052-contig\_193\_RC: 9201 ... 10509; Length: 1308 bp

Sequence:

ATGAACAAAGTCAACAAACCTTTATATTTTTATTTAATGCTTTTTCTTCTCTACAACATCAT  
AGGTGCTCTTTTATTATATTTACCTTTCCTGGTAAAAAGCCAATATCTTTTTTAGATGCCC  
TATTTATAGCTTCAAGTGCATTTACAGTACTGGCCTATCCCCAGTTGATATAGGATCTCA  
GTTAATATACTGGTGAAATAGTAATACTATTATTAATTCAAATAGGTGGTCTGGGTATC  
GTGACCGTAACCCTATTGACACTAGTATTTTTAAATAGAAAGATATCAATGAAAAATAGA  
TTCTTGATTATGGTTACATGGAATATTGACGAACCTGGTGGTGTATTAAAGCTAATTAAC  
ACTTGGCTATTTATAGTTTAGTCACTGAATTAATTGGTATGATTTGTTTGTGTTTATCTTTT  
ATACCAAATTTGGTATAGGCAAAGGTTTATTTTTAAGCTTATTCACATCAGTATCAGCTT  
TTAATAATGCTGGATTTGCCCTTTTTAAGAATAACTTAATAGATTATTCTAGTGATCCAAT  
TGTCATTATTACAATCTCAATACTCATAATTTGGAGGTATTGGACATTTTGTCTGATGA  
GACTTTATTAATTGTAAAAAATTGAGTAAATTATCTTTACATTCTAAATTAGTCTTAACTA  
CAACTAGTATCCTAATAATTATAGGAGCTATTACATTCTTTTTATTAGAACAGTTTAAATAC  
TATGCAACATATGGGACTAGTTGAAAAAATCGGAAATCTTTTTTCCAATCAGTAAACAAC  
ACGAACAGCGGGTTTTAACAGTATAGATATAGCAAGCATTAAACAAATCTACCGCATTAAAT  
GTTAATGCTACTTATGTTTATTGGTGGTGGCCCTCTCAGTGCAGCTGGAGGAATTAATAA  
ACTACTTTTGCAGTTGCGTTTATTTTTGTACTAAATTATATACGTAAAGAAAATAATGTTT  
CAGTATTCAATAAAGAAATATCTGACAAACATATAAAACTATCTATTGTTACCATTAATA  
TCTCATTCTATTTATCAGCATCATTACTTTTATATTATCGATAATTAATCCGAACATATCA  
TTAATCAAGTTATTATTCGAAGTGGTTTCTGCATTTCGGAACAGTAGGGTTAAGTATGAAC  
CTTACCACAGAATATCATGGTATTACTAAAATAATTATTATATTCGTTATGCTTTGCGGTA  
AAGTAGGACTATTAACCTTTATTAAGAACATTTATACCACCAAAAAGTCCTAAAAAATTACC  
GCTACACTAAAGGACAAATTTATCTATAA

> **txbi\_A1JUG1**

Function: bidirectional rho-independent terminator of A1JUG1

Best match: txbi\_A1JUG1\_CC001\_MW2-USA400\_BA000033.2[2097322:2097367] (completely identical)

Position: 052-contig\_193\_RC: 10554 ... 10600; Length: 46 bp

Sequence:

ATTACATTAAAAAA ACTACCTAAACAGGTAGTTTTTTTATTTATTTT

> **attB\_nySa4-var2**

Function: attachment site of genomic island nySa4 (mobile element)

Best match: attB\_nySa4-var2\_Z262\_LCL\_10042.1[36037:36137:r] (completely identical)

Position: 052-contig\_193\_RC: 11001 ... 11102; Length: 101 bp

Sequence:

GTGCATAATGTAATTTTCTAGTTAGTCAGAACTATAAACAGTTTTACATCATTCTTGGCAT  
GCTACCCATGTTAGGTTGGTCATTATTTTTTTCTGGAATT

> **groL**

Function: protein coding sequence; 60 kDa chaperonin GroEL (core genome, constant)

Best match: groL\_CC001-ST772\_118\_AJGE01000025.1[34817:36433]RC (completely identical)

Position: 052-contig\_193\_RC: 11044 ... 12661; Length: 1617 bp

Sequence:

TTACATCATTCTTGGCATGCTACCCATGTTAGGTTGGTCATTATTTTTTTCTGGAATTGATG  
CTACAACCGCTTCAGTCGTTAAGAACATTGCTGCAACACTTGCTGCATGTTGTAATGCTGA  
GCGTGTACTTTAGTTGGATCAACGATACCTGCTTCTAACATATTAACCCACTCGTTTGTA  
GCAGCGTTAAAACCAACACCTGGTTCTGCATTTTTCAAGCGTTCAACGATGACAGAGCCT  
TCTAATCCTGCATTTTCAGCAATTTGGCGAACTGGTGCAGTTAATGCTTTAAGTACAATAT  
TCACACCTGTTTCAATGTCGCCTTCAGCTTCAATTTCACTTACTTTTTGGTAAACATTTACT  
AGTGCAGTACCACCACCTGCAACAATACCTTCTTCAACTGCTGCACGTGTAGAGTTTAAA  
GCATCTTCAATACGTAATTTACGTTCTTTAAGTTCTGTTTCACTTGCTGCACCTACCTTGAT  
AACTGCAACACCGCCTGCTAATTTAGCTAAGCGCTCTTGTAATTTTTACAGATCAAAGTCA  
GATTCAGTTTCTTCAATTTGAGATTTCAATTTGGCTAACACGTGCATCAATGCTGTTTTCGT  
CACCGTCACCATCAACAACAGTGGTATTATCTTTAGTTACTTCTACTTTACTTGCAGTACC  
TAACATATCAATTGATGCATCTTTTAAATCTAAGCCTAAATCATCAGTAATCACTTGCGCA  
CCAGTTAAAATAGCTAAATCTTCAAGCATCGCTTTTCTACGATCACCAAACCAGGTGCT  
TTTACTGCAACAGCTGTAAATGTACCACGCATGCGGTTTAGCACGATATTTGTTAACGCAT  
CGCCTTCAACTTCATCAGCTACAATTAAGATTGGACGATTAGATTGAACCACTTGTTCTAA  
TAAAGGTAAGATATCTTGGAAAGACGAGATTTTCTTATCTGTTACTAAAATGTATGGGCG  
TTCTAATTCAGCAACCATTTTATCTGAATCAGTAACCATATATGGTGATTGATAACCACGA  
TCAAATTCGATACCTTCAACCACTTCTAGTTCAGTGTTTAGTCCATTTGATTCTTCAATTGT  
AATGACACCATCGTTACCTACTTTTTCCATAGCTTCAGAAATATAACGTCCAATTTCTTCA  
TCTGCTGCTGAAATCGCACCTACTTGGCGCTATTTCAATTTTTATTTTCAACTTTTTGAGAATT  
TTCATGTAATGCTTCTACAGCAACTTTAACTGCTTTGTCGATACCTTGACGTAAACCAACT  
GGGTTTCGACCACTTGTAACATTTTTCAAGCCTTCTTGAATCATTGCTTGAGCTAATACTG  
TTGCAGTTGTCGTACCGTCACCAGCAATTTCAATTTGCTTATTTGCAACTTCTTGAACACTAGT  
TTAGCCCCCATATTTTCATATGGATCTTCTAATTCGATTTCTTTAGCAATCGTTACACCATC  
GTTTCGTAATTAAGGTGCTGTAAACTCTTTATCTAATAACAACATTACGTCCTTTAGGACCA  
ATCGTTACTTTAACTGCATTTGCTAATTTGGTCTACACCACGTAAACATTGCTTGACGTGCAT  
CTTCAGAGAATTTCAATTGTTTAAACCAT

> **attB\_nySa4-var1**

Function: attachment site of genomic island nySa4 (mobile element)

Best match: attB\_nySa4-var1\_empty\_CC005\_04-02981\_CP001844.2[2089669:2089769]

Position: 052-contig\_193\_RC: 11072 ... 11102; Length: 30 bp

Sequence:

TTAGGTTGGTCATTATTTTTTTCTGGAATT

> **groS**

Function: protein coding sequence; 10 kDa chaperonin GroES (core genome, constant)

Best match: groS\_CC005\_Mu50-VRSA\_BA000017.4[2150463:2150747:r]RC (completely identical)

Position: 052-contig\_193\_RC: 12736 ... 13021; Length: 285 bp

Sequence:

TTATTC AATTACCGCTAAAATATCTTCTTCATTTAATACTAGATATGTTTCATTATCTCGTT  
TAACTTCTGTACCAGCATATTGTTGGAACACGACACGGTCCCCTTCTTCACTTCAGGAGT

CACTCTTGTACCATCATTTAATAGACGTCCAGTTCCTACTGCAACGATAACGCCTTCGTTT  
GATTTTTCTTTAGCACTATCAGTTAAAACAATACCACTTTTAGTTGTTTGTCTTGTCTTT  
TTTCTCAATAATCACACGATTTCCAATTGGTTTTAGCAT

### > **Q1Y5R7**

Function: protein coding sequence; putative membrane protein (core genome, constant)

Best match: Q1Y5R7\_CC005\_Mu50-VRSA\_BA000017.4[2150922:2151665] (completely identical)

Position: 052-contig\_193\_RC: 13195 ... 13939; Length: 744 bp

Sequence:

ATGACAAGATTATGGGCATCATTGCTAACTGTTATTATTTATATATTGTCTCAATTTTTAC  
CGCTTCTCATTGTAAAAAATTACCATTTGTACAATATAGTGGCATAGAAGTACTAAAG  
CAGTCATTTACATACTTGTCTATTTTTAATCGCCGCCACGACGATTATTTAATTAA  
TTTAAAAATTAATAATCCAACAAAATTAGAATTAGAAGTTAAAGAACCTAAAAAATATA  
TCATTCCATGGGCATTGCTTGGATTGCATTGGTAATGATTTATCAAATGGTAGTGAGCAT  
TGTATTAACGCAAATTTATGGTGGACAACAAGTAAGTCCTAATACAGAAAAGCTAATTAT  
TATTGCTCGAAAAATACCTATATTTATCTTCTTTGTATCTATTATCGGTCCTTTATTAGAAG  
AATACGTATTCAGAAAAGTAATCTTTGGAGAATTATTTAATGCGATTAAAGGTAATCGTA  
TCGTAGCATTATTATTGCTACAACAGTAAGTTCATTAATATTTGCATTAGCACATAATGA  
TTTCAAATTTATCCAGTTTATTTTGGTATGGGCGTCATTTTTTCATTAGCATATGTATGGA  
CAAACGGCTTGCTGTTCCAATTATTATCCATATGTTACAAAACGGATTTGTCGTTATATT  
CCAATTAATCCTGAAGCTTTGAAAAAAGCCACGGAACAAGCGAATTTTATATATCA  
CATTTTTATTCCATAA

### > **txbi\_Q2YUD5**

Function: bidirectional rho-independent terminator of Q2YUD5

Best match: txbi\_Q2YUD5\_CC005\_N315\_BA000018.3[2075230:2075293:r]RC (completely identical)

Position: 052-contig\_193\_RC: 13933 ... 13997; Length: 64 bp

Sequence:

CCATAATATAAAAAACGAATCACACACGGATTATCGTCGCTGTGATTTCGTTTTTATTTTC  
TTT

### > **Q2YUD5**

Function: protein coding sequence; membrane anchored KP/DP repeat protein (core genome, variable)

Best match: Q2YUD5\_Z262\_LCL\_10042.1[31916:33175]RC (completely identical)

Position: 052-contig\_193\_RC: 13963 ... 15223; Length: 1260 bp

Sequence:

TTATCGTCGCTGTGATTTCGTTTTTATTTTTCTTTTTATTTTCGCTTTACAAATAAGAATAGCA  
TGATTGAAAATACCACCATCATAGAACATAACAATTGCTAGCCAACTTTTACTATATGCAG  
TTGACGCACTTTTCTTATTATCTTCTTGTTTTTTAACTACTGTAAAATCGTCTTTTTTCATGC  
GGTTCAAATGAGCGTTGTTTTGAATCCGGCTTATCTTCGGGCTTTTTCAAATCTGGCATTG  
ATCCAATTTACCAGTAATTAATGCGAGTACTTGTTTCATCTAAATTACGATAGTACCTTTC  
TGATTTCAATGGATTGAAATATTGGAATCTAAAGTAATTCGATTGCTGTTGTAATCCATTT  
AAATATGCATTTCCGCTGAAATTTTGTTCGAATAATATTATAAATGTCTTCATCAGTAA  
CTTCTCCATAATCTTTGCCCAACTTATTAATTTGATTTAAAATATACGGATTATACTTGTA  
AGCCCCATTTGCCAAGGCTAAAATCGTTGGGATACAAAATCATTACCAGTAGGATTTTG  
TGAGTTTCCTTGATTCCCATTTGGTTGCCATTGACCTTGATTAGATCCATCTGAAGCATT  
GGGTTCCATGTTCCCCCATTTTTTCGAGCCACCAGAATGATTGGAATCCCCAGGTTGATCGG  
GATCTGGTGACGGTTAGGATTTGGCTTATTAGGGTCTGGTTTTGGATTCCGATTTGGCTT  
TGGTTTATCTGGATCTGGTTTTGGATCCGGATTTGGCTTTGGTTTATCTGGGTCTGGTTTTG  
GATCTGGATTTGGTTTCGGGTTATCTGGATCTGGCTTTGGATCCGGATTTGGCTTTGGTTT  
ATCTGGGTCTGGTTTTGGATCCGGTTTTGGTTTCGAGTTATCTGGATCTGGTTTTGGATTCG  
GACTTGGGTTTTGGTTATTTGGGTCTGGTTTTGAATCTGTACTTGGGTTTTGGTTGTTTGAG  
TCTGGCTTACATTATTCGAATCAGGATTAGCATCACGACTATTCGAACCTGTTCCCTTCAT  
TACCCGTTTGATTTGATTTCGTGAGGTGTCCAGTCTCATTATTATTCATTTCACTATTTACT

GATGGTGAAGTTATATTATGATTCAAATTAGTAGTTGGTTTTTCTCCATTTAAGTTATCCTT  
TGCTTCAACTGTGTGCGTTGCAAGCCCTAACTACTACTACTTAAAATTAATACTTGT  
GAAAGTAACATTTTCTTAAACCAATGATATGACAT

### > **Q1XYY6**

Function: protein coding sequence; putative nitroreductase family protein (core genome, constant)

Best match: Q1XYY6\_CC001\_MW2-USA400\_BA000033.2[2105308:2105934]

Position: 052-contig\_193\_RC: 15419 ... 16046; Length: 627 bp

Sequence:

ATGGGGCTTATTTAAAAAAGATAAAAAAGCAATGACTTTTGACAATGCAATGGAAGAAAG  
ACGTTCAATATATAATTTGAAAGATTCGATATCAATTAGCGATGACGAATTAGAATCAAT  
GATTGCACATGCAGTTAAACATGTTCCCTTCATCATTTAATTCTCAATCAACTAGAATTGTT  
CTCTTGTTAAATGACAACAATAATAAATTTTGGGATAACACAAAAGCAATTTTAAAAGAA  
GTCATGGGAGAGAATCGTGATTTTCGAGCCAACTGAACAAAAAATTGATAACTTCAAACAT  
TCATACGGTACAATTTTGTGTTTATGAAGATCAAGATGTTGTAAGTGGTTTACAAGAACAA  
ATGCCAACTACTATGATAATTTTGAATATGGTCAACTCAAACAAATGCCATGCATCAA  
TTTGAATTTGGACTGCATTAGCTACTAAAGGCATAGGTGCTTCATTACAACACTATAATC  
CACTTGTCGATGAGATGACTTCAAATGAATTTAATATTCCTAAAAGTTGGAACTTATTGC  
TCAAATGCCATTTGGTGATATTCGTGAAGCTGCTGGCGAAAAAACATTTAATCCAGTGGA  
AGATCGTTTCGTAATAAAAAAATAA

### > **P55177**

Function: protein coding sequence; putative C-N hydrolase (core genome, constant)

Best match: P55177\_CC005\_Mu50-VRSA\_BA000017.4[2154121:2154906] (completely identical)

Position: 052-contig\_193\_RC: 16406 ... 17192; Length: 786 bp

Sequence:

ATGAAAGTCCAAATTTATCAATTACCGATTATTTTTGGAGATAGTTCTAAAAATGAACT  
CAAATAACGCAATGGTTCGAAAAAATATGAATGCTGAAGTAGATGTAGTCGTTTTACCT  
GAAATGTGGAATAATGGCTATGATTTAGAGCATTAAATGAAAAAGCAGATAATAATCTA  
GGACAAAGTTTTTCATTTATTAACATTTAGCTGAAAAATATAAAGTCGATATCGTAGCT  
GGGTCAAGTTTCTAACATTAGAACTATCAAATATTTAATACAGCTTTTAGTGTGAATAAA  
AGTGGCCAGCTGATTAATGAATACGACAAAGTTCATTTAGTTCCTATGTTAAGAGAGCAT  
GAATTTTTAACCGCTGGCGAAAAACGTAGCTGAACCCTTTCAATTGCTGACGGTACTTATG  
TGACCCAACCTTATCTGTTATGATTTACGTTTTCCAGAATTATTAAGATATCCTGCTCGTAG  
TGGTGCTAAAATTGCATTTTATGTGGCGCAATGGCCTATGTCACGTCTTCAACATTGGCAT  
TCATTACTAAAGGCACGTGCAATTGAAAATAATATGTTTGTCAATTGGAACATAATAGCACT  
GGATTCGATGGTAACACAGAATATGCTGGTCATTTCGATAGTTATAAACCCAAATGGAGAT  
TTAGTTGGAGAATTAATGAATCCGCAGATATTTGACTGTAGATTTAACTTAAATGAA  
GTAGAACAGCAACGCGAAAAATATACCTGTATTTAAAAGTATTAATTAGATTTGTATAAA  
TAA

### > **rnaIII**

Function: regulatory RNA III (core genome, constant)

Best match: rnaIII\_CC005\_Mu50-VRSA\_BA000017.4[2155157:2155670:r]RC (completely identical)

Position: 052-contig\_193\_RC: 17442 ... 17956; Length: 514 bp

Sequence:

AAGGCCGCGAGCTTGGGAGGGGCTCACGACCATACTTATTATTAAGGGAATGTTTTACAG  
TTATTTTTTCAATCTATTTTTGGGGATGTTATTAATTATGAAAAAATTTTATTTATCAAAT  
AATGATAAATCGATGTTGTTTACGATAGCTTACATGCTAGAAATAATTATCTGTAATGAT  
AATTAAGAAAAATACATAGCACTGAGTCCAAGGAACTAACTCTACTAGCAAATGTTACT  
CACTTGCTAATTTTACATGGTTATTAAGTTGGGATGGCTTAATAACTCATACTTTTAGTAC  
TATACGAAGATAACAAATTTACAATGAAAGTAATTAATTATTCATCTTATTTTTTAGTGAA  
TTTGTTCACTGTGTCGATAATCCATTTTACTAAGTCACCGATTGTTGAAATGATATCTTGT  
GCCATTGAAATCACTCCTTCCTTAATTAAGATAAAAAATTCTTAAAATTAACAACATCATCA  
ACTATTTCCATCACATCTCTGTGATCT

> **hld**

Function: protein coding sequence; hemolysin delta (core genome, constant)

Best match: hld\_CC005\_N315\_BA000018.3[2079076:2079210:r]RC (completely identical)

Position: 052-contig\_193\_RC: 17791 ... 17926; Length: 135 bp

Sequence:

```
TTATTTTTTAGTGAATTTGTTCACTGTGTCGATAATCCATTTTACTAAGTCACCGATTGTTG
AAATGATATCTTGTGCCATTGAAATCACTCCTTCCTTAATTAAGATAAAAATTCTTAAAT
TAAACAACATCAT
```

> **agrB**

Function: protein coding sequence; accessory gene regulator B (core genome, variable)

Best match: agrB-II\_CC001-ST772\_118\_AJGE01000025.1[28753:29316:r] (completely identical)

Position: 052-contig\_193\_RC: 18161 ... 18725; Length: 564 bp

Sequence:

```
TTGAATTATTTTGATAACAAAATTGACCAGTTTGCCACGTATCTTCAAAGAGAAATAAC
TTAGATCATATTCAATTTTGCAGTACGTTAGGGATGCAAATTATAGTTGGTAATTTTT
TTAAAATACTTGTAAACATATAGTATTTCTATATTCTTAAGTGTATTTTGTTTACCTTAGTT
ACACACTTATCCTATATGTTAATACGCTATAATGCACATGGTGCTCATGCAAAGTCTTCGA
TACTTTGTTACATACAAAGTATTTAACATTTGTATTTGTACCTTATTTTCTAATTAATATA
GACATTAATTTTACTTATTTACTGGCCTTATCTATTATAGGATTGATTTCCGTTGTTATTTA
TGCACCTGCAGCAACGAAAAGCAACCTATACCAATAAAAATTAGTAAAACGTAAAAGT
ATTTATCTATAATTATGTATTTATTAGTTTTGATTCTATCCTTAATAATACATCCATTTTAT
GCTCAATTTATGTTATTAGGAATTTTAGTAGAATCTATTACATTATTACCTATTTTTTTCC
TAAGGAGGATTA
```

> **agrD**

Function: protein coding sequence; accessory gene regulator D (core genome, variable)

Best match: agrD-II\_CC005\_Mu50-VRSA\_BA000017.4[2156442:2156585] (completely identical)

Position: 052-contig\_193\_RC: 18727 ... 18871; Length: 144 bp

Sequence:

```
ATGAATACACTTGTTAATATGTTTTTTGATTTTATAATTAATTAGCTAAAGCAATCGGAA
TTGTCGGTGGCGTAAACGCTTGCAGCAGTTTATTTGATGAACCTAAAGTACCCGCTGAAT
TAACGAATTTATACGACAAATAG
```

> **agrC**

Function: protein coding sequence; accessory gene regulator C (core genome, variable)

Best match: agrC-II\_CC005\_Mu50-VRSA\_BA000017.4[2156615:2157898] (completely identical)

Position: 052-contig\_193\_RC: 18900 ... 20184; Length: 1284 bp

Sequence:

```
ATGGAAACAATAACAACCTTAGCTATGGCCACTTTTCAATTAGTAATACTTTTTACAGTA
GCCAAATTCATTTCTTTGTTAAATTTAATTTAAGGGATTATTTTATTATAGTTGGAATTAT
AATTCCAACCATGTTTTTGTATTACTTCTATGGAAGTAGAGCCGTATTGATTCCAACTTTT
TCATCTATCATATTTTTATTCTTTAAATTAAGTACTATGCAATAGTAACAATTTTAGTGA
CCATGATCATAATGTATTTGAGTAATTTTGAACAGTAGGTTTGTTTTTAACTTTAAGAAA
ATACACTACTGATCCTGCAATACTCTTACCATTATATATACTTTCTTTTTCATCAGTTTCAT
TATTAGCGACATATTTGGTAAGAATATCTCTAAAGAAATTTAAAAAATCATACTTATCTTT
AAATAAACTTATATGATTATAATTTCAATTCGTATTATTTGCAACATTTGCATTTTTTTATA
TTTATTCTACAAATACAAGTTCAAACGGTGATAGCTTAATTCCATATGCACCTTGTATTTAT
AGGATTAATAATTTTTATCTCTGTTGTAATACTTATAATGTTCGCTTTTCACCCTTAAAGAG
ATGAAATACAAACGAAATCAAGAAGAAATTGAGACCTATTACGAATACACATTAAGAT
TGAAGCAATTAATAATGAAATGCGCAAGTTCCGTATGATTATGTCAATATCTTAAACGAC
ACTTTCAGAATACATTCGCGAAGATGACATGATTGGTCTACGCGCTTATTTCAATAAAAA
TATTGTACCTATGAAAGATAATTTGCAGATGAATGCTATTAATAATTAATGGTATCGAGAA
TCTTAAAGTACGTGAGATAAAAGGCTTAATTACTGCGAAAATTTTACGTGCACAAGAAAT
```



GAATATTCCAATTAGTATCGAAATACCCGATGAAGTAAGTAGCATTAACTTGAATATGAT  
CGATTTAAGTCGCAGTATTGGTATTATTCTTGATAATGCAATTGAGGCATCAACTGAAATT  
GATGACCCTATCATTTCGCGTTGCATTTATTGAAAGTGAAAATTCAGTAACGTTTATTGTTA  
TGAATAAATGCGCTGATGATATAACCACGCATTCATGAATTGTTCCAAGAAAGTTTTTCTAC  
TAAAGGTGAAGGTCGTGGTTTAGGTCTATCAACTTTAAAAGAAATTGCTGATAATGCAGA  
CAATGTCTTATTAGATACAATTATCGAAAATGGTTTCTTTATTCAAAAAGTTGAAATTATT  
AACAACTAG

> **agrA**

Function: protein coding sequence; accessory gene regulator A (core genome, variable)

Best match: agrA\_CC001\_MW2-USA400\_BA000033.2[2110092:2110808] (completely identical)

Position: 052-contig\_193\_RC: 20202 ... 20919; Length: 717 bp

Sequence:

ATGAAAATTTTCATTTGCGAAGACGATCCAAAACAAAGAGAAAACATGGTTACCATTATT  
AAAAATTATATAATGATAGAAGAAAAGCCTATGGAAATTGCCCTCGCAACTGATAATCCT  
TATGAGGTGCTTGAGCAAGCTAAAAATATGAATGACATAGGCTGTTACTTTTTAGATATT  
CAACTTTCAACTGATATTAATGGTATCAAATTAGGCAGTGAAATTCGTAAGCATGACCCA  
GTTGGTAACATTATTTTCGTTACGAGTCACAGTGAACCTTACCTATTTAACATTTGTCTACA  
AAGTTGCAGCGATGGATTTTATTTTTAAAGATGATCCAGCAGAATTAAGAAGCTCGAATTA  
TAGATTGTTTAGAACTGCACATACACGCTTACAATTGTTGTCTAAAGATAATAGCGTTG  
AAACGATTGAATTAACCGTGGCAGTAATTCAGTGTATGTTCAATATGATGATATTATGT  
TTTTGAATCATCAACAAAATCTCACAGACTCATTGCCATTTAGATAACCGTCAAATTGA  
ATTTTATGGTAATTTAAAAGAACTGAGTCAATTAGATGATCGTTTCTTTAGATGTCATAAT  
AGCTTTGTCGTCAATCGCCATAATATTGAATCTATAGATTCGAAAGAGCGAATTGTCTATT  
TTAAAAATAAAGAACACTGCTATGCATCGGTGAGAAACGTTAAAAAATATAA

> **frk**

Function: protein coding sequence; kinase/pfkB family (core genome, constant)

Best match: frk\_Z262\_LCL\_10042.1[24892:25851]RC (completely identical)

Position: 052-contig\_193\_RC: 21287 ... 22247; Length: 960 bp

Sequence:

TTAAAATGCTTGTTCAACCTCTTGTAATGTTGGCAAACCTATTAATGGCACCATACTTCGTT  
GTCACTATTGCAGCAACGCGATTGCTAAACGCTAAAATTTCCCTCACCTTCATTTTCAAATA  
ACTGAGTTAAATTTAACACATCGGTTGCTAAAATCCTGCTAATAACTGCACCAATAAAAAG  
CATCCCTGCCCCAGTTGTATCAACAGGTTTTACCTTATAGCCACTATGATAATGATTAAT  
ACCATTTTTCAAATATACGGCAGCACCATCTGCTCCCTTCGTATAAATGACTACAGTAACA  
TTACCTGTAATAAATGATTGAATGGCTTCATTTTCATCATGAATACCTGTAATAAATTCTA  
ATTCTTCATCTGAACTTTTACAATATGCGCCAATGGCAAAAAGGTATGAATAGTTTGTCT  
TAAATCTTCAGCGTTATCCATAATGGCAATCTTACATTAGGATCAAATACGACAGTACC  
ATTTGCATTTAATGTTTTGGTAATCAATTGATAATGTGCATCTCTCATCGGACTATCGACC  
AAATCAACAGAACAAAATGTACTACATCATTTTCATTCACATCAATATCATTACAAAA  
CTTGGTTCAAATAACATATCAGCAGAGGGCTTACGATAAAAAGAAAAATCTCGCTCGCCC  
GCTTCAGTCAAACCTCACAAAAGCTAACGCAGTGTGTTGCTTCATTTCGTGCGATAACTTTTTG  
ATACATCTACACCAATACTTGATATCGTTTCAATAATGCTATCTCCAAATGCATCATTACC  
TAATTGTGTAATCATATACGCTTGTGTCCTAACTTTTGAAGTGTACAAGCTACATTGCAT  
GGCGCGCCACCAATTTGCTTCGTAATGTTTGAACATCTTTTAATTTTCGATTTGTAACAT  
TTGAATAAAAATCAATTAACGCTTCTCCTATTGAAAATAGACGTCTCAT

> **scrB**

Function: protein coding sequence; sucrose-6-phosphate hydrolase (core genome, constant)

Best match: scrB\_CC005\_Mu50-VRSA\_BA000017.4[2159961:2161445:r]RC (completely identical)

Position: 052-contig\_193\_RC: 22243 ... 23728; Length: 1485 bp

Sequence:

TCATTTATGTTTCATCCTTTAAATCATATTTAGTAAATTGTAAATATACTTGCCCTGATTCTG  
TTGATGTTTTAATACCTAGTGCCTTCTGTCGGGAAAATTCGAGATGTCAAAACACGTTT

CCCATCATTACAGAAAATTTCTATACTAGATGTATCAACAAAAATTTGTAATTGCTTTAAT  
GGCGTGTCTAATATCGTACTACGCGTCGTACCTTCAACATTTGTCGGCAATAAACCCTGT  
CGCTGCGATCTAATGTTATTTTATTTTCACGCTTGTATAAGCAATTAATGTTGAAGAAGT  
CTTAGATGTACGTAATTCAAAGTACACTTCGGTAGCATCATTATCCAAAATATCTATGATT  
AATTCATACTGTTTACCTTCATACGGATGTAATTTTCGAGTAAATTTATTTGCGTAGCCTA  
ATGCTGTCTCTTTATTGTGACGTAATTTTCCAACGCTGGATATGGACGTTGCTTAAGTTG  
ACCATTTTCTACATTTAATACACGAGGAATTGTTAAGCAATGGGCCCATCCTTCATTATCA  
GTAGGATATTTCGATTTCCGGTAACCCCATCCATCCAATTAGTACTCGTCGGCCTTTTTTCAT  
CTAAAAATGTTTGAGGTGCATAGAAATCAAAGCCATTATCAAGCTCGACAAAATTTTCAT  
GTTTCATATGTTAACTTTTCAATATCAAACCTTTCCAAGTATATAACCCTTTGATAAATATT  
TTTGAAGTATTGCCTTTTGGTTCAATACCTTGTGGACAAAATAAGTATGACATCTTGATTA  
TCTAAATTAAGTAATCTGGGCATTCCCACATATATCCAAAATCATCTAACTCTGTATTTA  
TTTCACCTAAATAATGCCAATTAATTATATCTTCAGTATTATAAAGTAATAATCGACCTTG  
CTGATCATTATTTTGTGCGCCAATGATTGCATAATATTTCTCACCATATTTAAAACTTTA  
GGATCTCTAAAATGACTTGTATATCCTTCTGGTTGCTGGCTAATTAAGTGGCTTTGGAACT  
TTTCAACTGAACCGTCTTCTTTCAATCGTGCGATCATCTGACTCGCATGTCGTTGCCAATG  
ATTATCTCGATGATTTCCCTGTGTACATATAATATAAATGCCCGTTATATTCAAAGCGCTA  
CCGCTATAAACACCATGGCTGTCATATTTAGTATCTGGATTTAATATTGGCCCTTCAGGTT  
TAAAGTTTATTAAGTCATCACTCGTGTAGTTATACCAATACTTTAAGCCATGTAAGTGGCC  
TAATGGGAACCATTGATGTGAAACATAATACTTCCCTTTATAAAAAATAAGTCCGTTGGG  
ATCATTTAATAAACCTGTTTCTGGTTGTATATGAAATTGTTGACGAAATTTTGATTGATCA  
ACTTGTGTTTAAATGTTTAAAATACTCAGTATCAACGTCCTCGATTGTTGATAACGTT  
CTTCTCTAGTCCATTCGGTCAT

> **scrR**

Function: protein coding sequence; sucrose operon repressor (core genome, constant)

Best match: scrR\_CC005\_Mu50-VRSA\_BA000017.4[2161594:2162544:r]RC (completely identical)

Position: 052-contig\_193\_RC: 23876 ... 24827; Length: 951 bp

Sequence:

CTAAATATTAACATCTACTGTGACGCTATATGGCATAATCTTGCTTTTTAAGCATCTGTTGT  
ATCTCTTCCATCGCGCATTGGCCAGCTTCAAATAAATTATAATGAATTGTTTTTATCGATG  
GAGACACTAATTGTGTCATTGGGTCACCACCAAACCATATATTTGATGTGGTTTCATAA  
CATCATTTTTATCAGAATAAATTTATAGGCAGCTAATGCAATCGTATCAGTTGCTCCAAC  
AACCGCATCTACTTGCTCCACATTTTCAAACATTTGCAACATCTTTTTGTGCTTCCACA  
TAAGTAAAATTTGTTTCATGTATATTAGGTTTAATTTGGTATTTAGCTAACTGGTCAAGTA  
AACCACGTTTTCTATGTATACCAACTGCAATATCTTTTCACTTACACTAAACACTTCAAC  
TTGTTGATATCCCTGTTGACCAATCCATTCGCCTATAATTTGACCTGCTTTATAATCATCAT  
GCACAATACTATGAAGTTGTTTCATGTTGTTGACCAACAATAACGATTGGTACATTCATTTT  
ATTAATGACTTCAATATGTCTCTCTGTTATGTCTGTAGCCATTAACAATAACCATCTACT  
TACTGCGTGCTAATGTTTCAAGCGCTTGTATTTCTGCTTCGATATTTAAACCTGTGTAATT  
TAAAATTAATTGTGATTCATATTTTTGGCATTGTTTTGCCAATCCTTTGATTGTTTCATCTA  
CTGCATATGAATTCATTCTAGGTATAATGGCACCAATAAGGTGTGTTTGTCTCGCTCTTAA  
ACTTTGAGCAAATTGATTCGGTTGATAGTCATGTTCTGCTATAAATTCTTGTTAATTTTTCAC  
TTGTTTTTTTACTGACAGATCCATTATTTAAAAATCTAGATACTGTGCTTTTTGAAACGCCT  
GCCAATTTGGCAATATCAGATATATTTTTTCAT

> **nrgA**

Function: protein coding sequence; putative ammonium transporter (core genome, variable)

Best match: nrgA\_CC005\_Mu50-VRSA\_BA000017.4[2162727:2163977:r]RC (completely identical)

Position: 052-contig\_193\_RC: 25009 ... 26260; Length: 1251 bp

Sequence:

CTAATATCGAATATGTTTTATTGAATCTATTTAGCTCACCTTCAAAGTAAGCATGTTCCACCG  
TGAACAATCTTGTCTAATCCTATATTCGTTTCTTGTTCGGTAACAGATAATGGTGTAAATTA  
ATTTAATTAATTTTCGCAATAATAAACGTCATGACGATACTAAAAATTACAACCTGCTGTTAC  
ACATAATATTTGTACAAGTATAATATGTATGTCACCAGTATAAATAAAGCCATTCTCAAT

GTCAGGATTGGCTTTTTTACTTTGGAAAACCTGCTGTTAAAACAGCACCAATAATACCACC  
AACACCATGAATACCAAATGCATCTAATGCATCATGATATTTTAGTTTTACCTTGATGTAA  
TTAATGACAATATAACAACAGATACCTCCTATTAAGCCATTATTGTTGCACTAAGATAT  
GTTACATATCCTGCTGCAGGAGTAATAACAATAATCCTGCTAATGCACCGAGTAAAAGT  
CCAAGTAACTTGTCTGCTTTTTTAAAAATATATTCTAAAATTAACCAACCTATAGCACCTG  
CACTGGCTGAAATGACAGTATTTGTAATGCAAGCATCGCAATATTATCAAATGTAAAAG  
CACTACCTACATTAATCCATACCAACCAATCCACACGAATATACCGCCAATCAACGTAA  
TGATAAGATTATGTGGTGTGATTGAGAAATGTTTGTTCCTTTTCCAATCATAATAGCTAA  
TACTAAACAGAAACACCTGATGTAATATGAACAACCGTACCTCCAGCGAAATCTAATAC  
ACCGAGTTTATTAATCCAACCGCCGCCCAAACCAATGTGCTACTGGACTGTATACAAG  
AGCAGTCCATATTACTACGAATAATAAATAAGGAATAAACTTCATTTTCTCAGCGATTGA  
ACCAGATAAAATAGAAATTGCAATCGTACAAAACATCATTGAAATAACATAAAACAAAG  
CGAAAGGAATATGTGGGCTAATATCTTCTTGAGTCGAAAACCTACATGATTAAGAAAAG  
TATATTCCCAATTTCCGAACCATAAATTCCTTCCCAAACTAATTGTAAAACCAACTGT  
TATCCATACAAATGTAACAAGCACAATTGCTGCCATACTTTGCATGACAGTATTAAGCGC  
ATTTTTAGATTGAACTAACCCACCATAAAATAAACTTAATCCTGGTGTCAATTAACCAAAT  
ATAATGTACACAAAACATAAATATCGTATCGTTAAGATTCAT

> **Q5HEF7**

Function: protein coding sequence; putative protein (core genome, variable)

Best match: Q5HEF7\_CC005\_Mu50-VRSA\_BA000017.4[2164185:2164409:r]RC (completely identical)

Position: 052-contig\_193\_RC: 26467 ... 26692; Length: 225 bp

Sequence:

TTAAACTTTTTGAATTGTAATTGTCCATGAAGCATTATCAATTTGTTTCATAGTTTGTTATAG  
GATAACCATTTTCTGCAGCCCAATTTGGAATGGCTTCCGTCGCTTGCCTGCAATCAAATC  
AATTTTAAATTCATCTCCAGATTGCAATGTTGCCATTTTCTTTTGCCTTCAATTAACGGAA  
ATGGACATACCATTCTACTGTACCTAATTCGTGTATCAT

> **DUF395**

Function: protein coding sequence; domain of unknown function 395 (core genome, constant)

Best match: DUF395\_CC001\_MW2-USA400\_BA000033.2[2116641:2117720:r]RC (completely identical)

Position: 052-contig\_193\_RC: 26751 ... 27831; Length: 1080 bp

Sequence:

CTATACTATTTGCGTTTGCTGTTAACCTTTGCAGATTGTTGTTGTACTTTTTTTCATTGGAC  
GAACAAAGATAAAAATGACTCATTGTCCATACACCAACTATCATTGATGCTAGCGCAATCC  
ATCCTTGCCAAGTCATCGTTGCTGTTTCAACCAAACCGTTACCGATAGAACAACCACCAG  
CAACTGACGCACCAAATCCCATACATATGCCACCAATAGCACTGTTTCGTATTGTAATCTT  
ATCTGGCAATCGCCATTTAAATTCTCTTGATCCTCTAGCTGCAATATATGAACCAATGAAA  
ATTCTAGAACTAAAAGACACCCCAATCAATAAATTTAGTTTCACCTGTAATCAAAAAG  
TGTAATAAATTTGCTGATGGCGTTGTTATACCTAAACCGTCATTTCTTCCAGTTGATGCAC  
TCATTGGCCAAGCTAAGAGTGCATAAGTCCAATTACAATTGCTGCAATAAATGGATGGT  
ATCGTTTTTTCGAAAAGGTAATATCTAATACCTGTATAACGTTGCTTTAGTTTTGGAACAGC  
AACTCGAACTTTCTTATTATTGAGTGTCTTACAACCTAGAAAAATGGTGATTATAGTTAAT  
ATAACGACTAATCCCCAAAACGGAATGCCAGTTGTTTGAGACATATCACTATTTACATTC  
GTTGGTTGATTAATTTTATCCATTACTGGCTTTAAAATCCCTGTTTTAGTGATTGCTGCAGT  
AACAGCATATAATACTAATGCAATCCAACCTACCAATTAGCCCTTCACCAGCGCGATACCA  
AGTACCTGTTGCACACCCTCCAGCCAATACTATTCCAATTCAAAAAATAAAAGAACCTAT  
AATTGTTCCCAATATTGGAAAACCTATGTGCAGGAATTTTTAAAATATCTGTTGCCGTCAA  
ATCAATAATCCTATACTTTGAATAGTAATAGCGATTAATAATGCATAGAACATCTTATTAT  
TCTTTTGCACATACATATCTCGAAAGCCACCTGTTAAACAAAATCTTGTTCTTTGCATGAC  
AAAACCTAAGAGTCCCCCGACAATTAAGCCACTAAAATCATCCACAT

> **rex**

Function: protein coding sequence; redox-sensing transcript repressor (core genome, constant)  
Best match: rex\_ST425\_LGA251-cow\_FR821779.1[2052020:2052655:r]RC (completely identical)  
Position: 052-contig\_193\_RC: 28134 ... 28770; Length: 636 bp

Sequence:

```
TTATTCACTGTAATTTTTTCATAAAGAATAATAACGACTGTAATTCTATACCTAAGTCAATT
TGATGTA CTTGCACATCTGAAGGCGTATTAATTCTACCAGGAGTGAAGTTTAAAATACCT
TTCACACCAGCTTGGACGAGTTCATCTGCAACTTTCTGTGCAACTCTTTCTGGTGTAGTTA
GAATCACAACATCTATTTCTTCTTCTTCAATGTTGTTATTAATTCATCGTTATCTTTTACA
ATAACGTTCCCTATTTTCTGGCCAATAACATCTTCTTTTACGTCAAACGCTTCTGTAATCGT
CATATCGTCATGTATTGAAAAGTTATATGTGAGCAAAGCTTTCCCTAGGTTCCCAACTCCG
ACAATTGCGATTTTGTATCATGTCCTCTCGCTTAGTTTCAGATTTAAAGAAATCCAATAAAC
TATCTATATTATATCCGTACCTTTTTTACCTAATTCGCCAAAATATGAAAAGTCAACGACG
AATTGTTGCCGAGTCAATTTGTAACGCATCGCTAATCGCTTTTGAATTTACACGATCTATA
CCTTTAGATTTTAATGAACTGACAAATCTATAATATAACGGCAAACGTTTTAAAGTTGCTC
GAGGAATTTTAACTTGGTCACTCAT
```

### > Q1Y630

Function: protein coding sequence; ABC transporter/ATP-binding protein (core genome, constant)  
Best match: Q1Y630\_Z262\_LCL\_10042.1[16188:18116:r] (completely identical)  
Position: 052-contig\_193\_RC: 29022 ... 30951; Length: 1929 bp

Sequence:

```
ATGATACTTTTACAACCTCAATCATATATCAAATCGTTTCGATGGTGAAGATATATTTACTG
ATGTTGATTTTGAAGTAAAACTGGTGAACGAATTGGTATCGTAGGAAGAAATGGCGCCG
GTAAATCAACATTGATGAAAATTATAGCTGGCGTAGAAAATGATTCTGGAAATGTGT
CAAAAATTA AAAACTTAAACTAGGTTATTTAACTCAACAAATGACTTTAAATTCTAATG
CAACAGTTTTTGAAGAAATGTCAAACCATTTGAACATATTAACGAATGGAAAGCTTAA
TCAAAGAAGAAACAGATTGGTTATCAAACATGCAAATGATTACGATAGTGATACATAT
AAAACACATATGTCCCGTTATGAATCTTTATCGAATCAATTTGAACAATTAGAAGGATAT
CAATATGAAAGTAAAATTA AACAGTACTTTACGGGTTAAATTTTAGTGAAGAAGATTTT
AATAAACCTATCAATGATTTTAGCGGTGGCCAAAAACACGTTTATCTTTAGCTCAAATG
CTATTAACGAACCTGATTTATTACTTTTAGATGAACCTACTAACCCTTAGATTTAGAAA
CGACAAAGTGGCTTGAAGATTATCTACGTTATTTTAAAGGTGCAATCGTCATCATCAGCC
ATGATCGTTACTTTTTAGATAAAATAGTTACTCAAATTTATGATGTGGCTTTAGGTGATGT
CAAACGCTATGTTGGTAATTACGAGGAATTTATACAGCAACGGGATTTATATTATCAAAA
ACGAATGCAAGAATATGAAAGTCAACAAGCAGAAATAAAACGATTAGAACTTTTGTG
AGAAAAATATTACCCGTGCTTCAACAAGTGGAAATGGCAAAAAGTAGACGTAAGATTTTA
GAAAAAATGGAACGCATTGATAAACCAATGTTAGATGCCAAAAGTGCAAATATTCAATTT
GGCTTTGACCGGAATACAGGTAATGACGTCATGCATGTAAAAAATTTAGAAATCGGTTAT
CAAACGCAATTACCAACCTATCAGTATAGAGGTCTCTAAAGGCGATCATATAGCAATC
ATTGGGCCAAATGGTATTGGAAAATCGACCTTAATTA AAACTATTGCTAATCAACAAAAA
GCGCTTAATGGCGATATTACTTTTCGGCGCAAATTTACAAATTGGTTATTATGATCAAAAAG
CAAGCAGAATTTAAATCTAGTAAAACGATTTTAGATTATGTGTGGGATCAATATCCGTTA
ATGAATGAAAAAGATATTTCGAGCAGTTCTTGGACGTTTCTTATTTGTACAAGACGATGTT
AAAAAGATAATTAATGATTTATCTGGTGGTAAAAAAGCACGTTTACAACCTAGCACTACTT
ATGTTGCAGCGTGACAATGTACTTATTTTAGATGAACCTACCAACCCTCGATATAGATT
CAAAAGAAATGTTAGAGCAAGCACTCCAACATTTTGAAGGAACAATACTATTTGTTTCCC
ATGATCGTTACTTTATTAACCAATTAGCAAACAAGGTATTTGATTTAACAATTGATGGCG
GAAAGATGATTTAGGAGATTATCAATATTACATTGAAAAAGTTGAGGAAGCGGAAGCG
TTGAAAGCGCACCAAGAAGAACAGTCAGTTAACGTACAAGCACATAAAAAGTCTATGGA
ACAATCGTCGTATCATAACCAAAAAGAACAAGACGTGAACAACGCAAACCTTGAACGAC
AAATATCCGAGTGTGAAAATGAAATAGAACTTTAGAGACTACTATCTTACAAATAGACG
AGCAATTAACCCAACCAGAAGTGTATAACAATCCACAAAAAGCAAACGAATTAGCTATC
CAAAAACAAGATAGCGAACAAAAATTAGAACACGCTATGTCTAAATGGGAAGAATTACA
ACAAAAACTATAA
```

> **mutS3**

Function: protein coding sequence; DNA mismatch repair protein domain-containing protein/locus 3 (core genome, variable)

Best match: mutS3\_Z262\_LCL\_10042.1[14215:15825:r] (completely identical)

Position: 052-contig\_193\_RC: 31313 ... 32924; Length: 1611 bp

Sequence:

```
ATGAGCACAAATCAAACATTTTTAATATTTGTTATAGCAATTATTATACTTACATCGGTAA
TAGGAATTGTTGGACGATACATGAGTCGTCAACGTCTTTTAAAATCTATGGAAACATTAT
GGCAAACGATTTCTCCATTAGAAGCTTTTATCAGACCGAACTCACATTTGACTATGAGT
ATAAGCTCTACAAGGAAAAATTTGAATCACATTCAGTTGATGATAAACTTGGTCCG
ACTTAAATATGAATGCAATCTTTCATAAGATGAATTATAATTTAACAGCTATTGGTGGAA
TGAAGCTATATGCCTGTTTACGTGGAATGCTTTCATTACGAACAAATCATTACTTAGTTT
ATTTAATGATAATGCTGAATTTAGAAAAACGTAACATATCATTTAGCTTTGATTGGTAA
AACTGTTTATCCAACATTTCCAGACCAAATCACACCGGTAAAACGTCAAAATATATTGTT
TCTATGCCCGTTTTTACCAGTTATCTCATTTGCAGTTATATTTATTAATTCACAAGTTGGTA
TTTTATTATTTCTTATGAGTTGCCTATTTAATATCATTTTATCAGCAACTTTAAAGCGTACA
TATGAGGATGACTTAAAATCTATCTTTTATGCATCCAATGTTTTAAAACAAGGCTATACTA
TCTCAAAAATTAACATGCTCCACAACCCGAAGTCAATTTTAAAGCAATTTAGAACAGCAC
GTCATTTAACGAGTGTTTTAGCTGAAGTTAATGATGAAGATATCGGAGCTATGGTAATTA
AACTAGTTAAACTTATTTTCATGCTTGATTATGTTTTATTTCATTCAATTCAAAAAAGTTAT
ACAACACATATGAATGAGCTTAAAAATTGTTTCGATTATATAGCTGAATTAGATAATCAT
TATGCATTAGCAATGTATCGTAGAACGCTAGAATGCTATACTGAACCACAAATTGATGAT
TCAAATGATGGCATAAGTATTCTCTGAGTTAACACATCCACTCATAGCAGATGCAGTAGCC
AATGATTTCTCACTATCACAAAATATACTGTAACTGGGTCTAATGCTTCGGGTAAATCAA
CATTTATGAAATCCATAGCAATAAACATTATTCTTGCATCGGCTATACAAACAGTTACCG
CAAGCAAATTTGTATATCAACCTGGAATTGTGTTACGTCAATGGCAAATGCCGATGATG
TGTTATCAGGCGATAGTTATTTTATGGCTGAATTTAAATCTATTAAGCGTATTGTTGAAAT
TCCAGATAATCAAAAAATATACTGCTTTATAGATGAAATTTTTAAAGGTACCAACACAAC
TGAACGAATTGCCGCTTCAGAATCAGTACTATCATTTTTACATGAAAAATCTAACTTTAGA
GTTATTGCAGCAACACATGATATTGAGTTAGCTGAACTCTTAAAACAACGTTATGAAAAT
TATCATTTCAATGAGGTAATAGAAAATAATAACATACATTTTGATTACAAAATTAAGCCT
GGCAAAGCAAATACTCGTAATGCCATCGAATTATTA AAAATCACTTCATTTCCAGCAAAA
ATATATGAACGAGCAAAAGATAATGTTTCCAATGGTTAG
```

> **tx\_universal2**

Function: rho indendent terminator

Best match: tx\_universal2\_CC045-agrI\_21194\_AGTU01000022.1[11729:11767] (completely identical)

Position: 052-contig\_193\_RC: 32985 ... 33024; Length: 39 bp

Sequence:

```
CTAAATGAAAATGCGCTTGTAATAAGTTTTTTCAATACT
```

> **Q2FZB6**

Function: protein coding sequence; putative protein (genomic island)

Best match: Q2FZB6\_CC008\_COL\_CP000046.1[1182242:1182414]

Position: 052-contig\_193\_RC: 33055 ... 33085; Length: 30 bp

Sequence:

```
AAAGTCAGCTTACAATAATGTGCAAGTTGG
```

> **gcp**

Function: protein coding sequence; O-sialoglycoprotein endopeptidase (core genome, constant)

Best match: gcp\_Z262\_LCL\_10042.1[12875:13900]RC (completely identical)

Position: 052-contig\_193\_RC: 33238 ... 34264; Length: 1026 bp

Sequence:

TTATTCTGCAGAATACTCTTCTAAATCTATATTGCTGTGCCCATTTAATGCTAAATCAGCA  
AATCGACCTTGCTGATACAAATAGTGGCCGCAACGCCTATCATTGCAGCATTATCTGTG  
CATAATTTAGGACTTGGGATAGTTAATTGAATGTCATTGACTTTGCATTGATCCGCTAAAG  
ATTGACGTAATCCTTTATTACTCGCCACGCCACCAGCAACAATTAATCGCTGAACACCAT  
ATTCTTTACAAGCTTGAATAGCTTTAAACGTAAGCACCTCTACAACACTGTTTTGAAAGCT  
CGTTGCTACGTTAGCTTCAATGATTGGAATATTTTTTTGTGCGTTGATTGTGAAGTTGATTG  
ATTACGGCACTTTTCAACCCACTAAAACATAAACTATAACTATCTTTATCCAACCAAACA  
CGAGGGAATGAATAAGTATCTTCACCTTCAGCAGCCAACCGATCAACTTGTGGACCACCT  
GGATAATTTAAACCAATTGTTTCGTGCCACTTTATCATAAGCCTCACCTACTGCGTCATCTC  
GTGTTTCACCAATGACTTCAAATGATAAATGATCCTTCATATAAACTAATTCAGTATGTCC  
ACCTGAAACAATAAGTGCAATTAGCGGGAATGTTAATGGCTCTTCTATGTGATTAGCATA  
TATATGTCCTGCAATATGATGAACAGGAATAAGTGGCTTATCGTAAGCAAATGCCAATGC  
TTTGGCTGCATTAACACCTATTAGTAACGCACCAATTAGTCCAGGGCCTTCTGTAACCGCT  
ATGGCATCAATATCTTCTATTGATACATCGGCATCCACTAGAGCCTCGTTTATTGTTGTTG  
TTATACCTTCAACGTGATGTCTACTTGCCACTTCGGGAACGACACCGCCAAAATCGTTTATG  
ACTTTCAATCTGACTTAAAACGTATTTGATAAAATATCTCTGCCATTTTTTATAACACTA  
ACGCTTGTTCATCACAACTTGTTCACACAGCTAGTATTAATATATCTTTAGTCAT

### > rimI

Function: protein coding sequence; ribosomal-protein-alanine acetyltransferase (core genome, constant)

Best match: rimI\_CC001\_MW2-USA400\_BA000033.2[2123932:2124396:r]RC (completely identical)

Position: 052-contig\_193\_RC: 34256 ... 34721; Length: 465 bp

Sequence:

TTAGTCATTTAAATTCACCCACATAACCATTGCGTCCTCACCTTCACCATAATAATTTTAA  
CGTTTACCACCATATTGAAATCCTAAATTTTCATATACATGTTGTGCCACTTTATTATTAA  
CTCTTACTTCTAAACTCATCACATCACAAGTGTGACTTGCATAGTTTATCCGTATTTTAA  
AAGCATTTGACCTAAACCATAGCCTCTATAATTATCATCGATTGCAACTGTTGTAATTTGA  
GCTTGATCGATAACAATCCATAAACCTAAATAACCAATAATTTGTTGTTCAAATTCTAAG  
ACAAAATATTTTCGCAAAGTTATTTTGTCTATTTTCATGATAAAATGCGTCAATTGTCCAAG  
AACTGTCATTGAAACTCCGACGCTCAATATCAAAGACTTGTGGCACATCTTCTTTAGTCAT  
CTCTCTAATGTTTAATTGTTCTTTTACTGTTGATCCAA

### > ilvD

Function: protein coding sequence; dihydroxy-acid dehydratase (core genome, variable)

Best match: ilvD\_CC001-ST772\_118\_AJGE01000025.1[9480:11168:r] (completely identical)

Position: 052-contig\_193\_RC: 36309 ... 37998; Length: 1689 bp

Sequence:

ATGCGAAGCGACATGATCAAAAAAGGAGATCACCAAGCACCAGCAAGAAGTCTTTTACA  
TGCCACGGGCGCGCTAAAAAGTCCAACCTGATATGAACAAACCATTTGTAGCTATTTGTAA  
CTCTTATATTGATATTGTTCCCTGGACATGTTTCATTTAAGAGAGCTTGCAGATATAGCTAAA  
GAAGCAATTAGAGAAGCCGGTGCCATTCCATTTGAATTCAATACAATTGGTGTGATGAT  
GGAATAGCTATGGGACATATCGGAATGCGATATTCTCTACCATCACGTGAAATTATTGCA  
GATGCAGCTGAAACTGTAATTAACGCTCATTGGTTTGACGGCGTATTTTACATTCCTAATT  
GTGACAAGATTACACCCGGTATGATTTTAGCAGCCATGAGGACAAACGTACCAGCTATCT  
TTTGCTCTGGTGGACCAATGAAAGCTGGCTTATCTGCACATGGAAAAGCATTAACTTTT  
CATCAATGTTTGAAGCAGTCGGCGCATTTAAAGAAGGATCGATTTCTAAAGAAGAATTTT  
TAGATATGGAACAAAATGCCTGCCCTACTTGTGGTTCATGTGCTGGGATGTTTACTGCAA  
ATTCAATGAACTGTTTGTGGAAGTTTLAGGTCTAGCATTACCATAACAACGGTACTGCACT  
TGCAGTCAGTGATCAGCGACGCGAAATGATTCGCCAAGCAGCTTTTAAATTAGTTGAAAA  
TATTA AAAATGATTTAAAACCACGTGATATCGTTACTCGCGAAGCAATTGATGATGCATT  
TGCACTTGATATGGCTATGGGTGGTTCAACAAACACGGTACTGCATACGTTAGCCATTGC  
CAATGAAACTGGTATTGATTATGACTTAGAGCGCATTAATGCTATTGCCAAACGCACACC  
ATATTTATCAAAAATAGCACCTAGTTCATCGTATTCAATGCATGATGTGCATGAAGCTGG

TGGCGTCCCAGCAATTATTAATGAATTGATGAAGAAAGATGGCACGTTACACCCAGATAG  
AATCACAGTTACTGGCAAACGTTACGTGAAAATAACGAAGGCAAAGAAATTAAGAACT  
TTGATGTCATTCCTCTCTTGATGCACCATATGATGCACAAGGCGGTTTATCTATCTTATT  
TGTAATATCGCCCCTAAAGGCGCAGTTATTAAGTTGGCGGCGTTGATCCATCTATCAA  
AACATTTACTGGGAAAGCAATTTGTTTCAATTCGCATGATGAAGCTGTTGAAGCAATAGA  
CAATCGTACCGTTCGTGCAGGCCACGTCGTTGTCATTAGATATGAAGGACCTAAAGGTGG  
ACCAGGTATGCCTGAAATGTTAGCACCTACTTCTCTATTGTTGGTCGCGGCTTAGGTAAA  
GATGTTGCATTAATTACTGATGGGCGTTTTTCCGGTGCCACAAGAGGTATTGCAGTTGGTC  
ATATTTCCCCTGAAGCTGCATCTGGTGGACCAATTGCCTTAATTGAAGATGGAGATGAGA  
TTACTATTGATTTAACAAATCGTACATTAACGTAACCAGCCTGAAGATGTTCTAGCGC  
GTCGCCGAGAATCTTTAACACCATTTAAAGCGAAAGTAAAAACAGGTTATCTAGCTCGTT  
ATACTGCCCTAGTAAGTACGCGCAAATACAGGTGGCGTCATGCAAGTCCCTGAGAATTTAA  
TTTAA

> **ilvB**

Function: protein coding sequence; acetolactate synthase/large subunit

Best match: ilvB\_CC001\_MW2-USA400\_BA000033.2[2127700:2129469]

Position: 052-contig\_193\_RC: 38025 ... 39795; Length: 1770 bp

Sequence:

ATGTCTAAAACCTCAACATGAAGTAAACCAAAATATTGACCCTTTAAAAATGGCTGAATCA  
CTTGAACCTGAACAACCTAAATGAAAAAAGCTTTAAATGATATGCGTTCAGGATCAGAAGTG  
CTAGTAGAAGCTCTACTTAAAGAAAATGTGGATTATTTATTCGGTTATCCTGGTGGTGCCG  
TACTACCTTTATATGACACGTTTTATGATGGTAAAATCAAACATATTTTAGCAAGACACG  
AACAAAGGTGCTGTTTCATGCTGCAGAAGGTTATGCACGTGTATCTGGTAAAACCTGGCGTCCG  
TTGTAGTTACAAGCGGTCCAGGTGCAACTAATGTAATGACAGGTATTACGGATGCACATT  
GCGACTCTTTACCTCTAGTTGTATTACTGGACAAGTTGCTACACCAGGCATTGGTAAAG  
ATGCATTCCAAGAAGCGGATATTCTATCTATGACTTCACCAATTACAAAACAAAATTATC  
AAGTGAAACGTGTTGAAGATATCCCTAAAATCGTACACGAAGCTTTCCATGTAGCTAATT  
CTGGACGCAAAGGTCCCTGTAGTGATTGATTTTCCAAAAGATATGGGTGTTTTAGCTACAA  
ATGTGGATTTATGCGACGAAATCAATATTCCAGGTTATGAAGTTGTTACAGAACCAGAAA  
ATAAAGACATTGACACTTTCATCTCACTTTTAAAAGAAGCGAAAAAGCCTGTCGTATTAG  
CCGGCGCAGGTATTAATCAATCAAATCAAATCAATTATTAACACAGTTTGTAAATAAAC  
ATCAAATCCCAACAGTTACTACTTTACTAGGTCTAGGTGCTGTACCTTATGAGGATACACT  
ATTTTTAGGTATGGGAGGTATGCATGGTTCCTATGCTAGTAACATGGCATTAACTGAGTGT  
GATTTACTCATTAATTTAGGTAGCCGCTTCGATGATAGATTAGCAAGCAAACCTGATGCC  
TTTGCACCTAACGCCAAAATTGTACATGTAGATATTGATCCTTCAGAAATCAATAAAGTT  
ATTCATGTAGATTTAGGTATTATTGCAGACTGTAAAAGATTTTTAGAAATGTTTAAATGATA  
AAAATGTTGAGACTATAGAACACAGTGACTGGGTAAACATTGTCAAATAATAAGCAG  
AAACACCCATTTAAACTTGGTGAAGAAGATCAAGTATTTTGTAAAGCCACAACAACAATC  
GAATATATCGGCAAATTAACAATGGTGAAGCAATTGTTACTACAGACGTGGGACAACA  
TCAAATGTGGGCAGCTCAATTTTATCCATTTAAAATCACGGACAATGGGTTACAAGCGG  
TGGTTTAGGAACAATGGGATTCGGTATTCCTTCGTCAATTGGTGCCAAATTAGCTAATCCT  
GATAAACAGTCGTATGTTTCGTCCGGTGACGGTGGTTTCCAAATGACAAACCAAGAAATG  
GCACTTTTACCCGAATATGGTTTAGATGTCAAATCGTACTAATCAATAATGGAACATTA  
GGTATGGTTAAACAATGGCAAGATAAGTTCCTTAATCAACGCTTCTCACACTCAGTATTTA  
ATGGTCAACCTGATTTTATGAAAATGGCAGAAGCATATGGCGTCAAAGGTTTCTTAATCG  
ATAAGCCAGAACAACCTGGAAGAACAATTAGATGCAGCGTTTGCTTATCAAGGACCAGTTT  
TAATTGAGGTTTCGTATTTCCCTACTGAAGCTGTAACCCCAATGGTTCGAGTGGCAAATC  
AAATCATGAAATGGAGGGCTTATAA

> **ilvH**

Function: protein coding sequence; acetolactate synthase isozyme III small subunit

Best match: ilvH\_CC001\_MW2-USA400\_BA000033.2[2129469:2129723]

Position: 052-contig\_193\_RC: 39794 ... 40049; Length: 255 bp

Sequence:

ATGACAAGAATTCTTAAATTACAAGTTGCGGATCAAGTCAGCACGCTAAATCGAATTACA  
AGTGCTTTTGTTCGCCTACAATATAATATCGATACATTACATGTTACACATTCTGAACAAC  
CTGGGATTTCTAACATGGAAATTCAAGTCGATATTCAAGATGATACATCACTTCATATATT  
AATTAATAAATTGAAGCAACAAATTAATGTTTTAACGGTTGAATGCTACGACCTTGTTGA  
TAACGAAGCTTAA

### > **ilvC**

Function: protein coding sequence; ketol-acid reductoisomerase

Best match: ilvC\_CC705\_RF122-cow\_AJ938182.1[2067727:2068731]

Position: 052-contig\_193\_RC: 40185 ... 41190; Length: 1005 bp

Sequence:

ATGACAACAGTTTATTATGATCAAGATGTAAAAACGGACGCTTTACAAGGCCAAAAAATT  
GCAGTAGTAGGTTATGGATCACAAGGCCACGCGCATGCACAAAACCTTAAAAGACAATGG  
ATATGATGTAGTCATCGGTATTTCGCCAGGTCGTTCTTTTGACAAAGCTAAAGAAGATGG  
ATTTGATGTGTTCCCTGTTGCAGAAGCAGTTAAGCAAGCTGATGTAATTATGGTGCTATTA  
CCTGATGAAATTCAAGGTGATGTATACAAAACGAAATTGAACCAAATTTAGAAAAACA  
TAATGCGCTTGCATTTGCTCATGGCTTTAACATTCATTTTGGTGTTATTCAACCACCAGCT  
GATGTTGATGATTTTTAGTAGCTCCTAAAGGACCGGGTCATTTAGTTAGACGTACATTTG  
TTGAAGGTTCTGCTGTACCATCACTATTTGGTATTCAACAAGACGCTTCAGGTCAAGCAC  
GTAATATTGCTTTAAGTTATGCAAAAAGGTATTGGTGCAACTCGTGCAGGTGTTATTGAAA  
CAACATTTAAAGAAGAACTGAGACAGATTTATTTGGTGAACAAGCAGTACTTTGCGGTG  
GTGTATCGAAATTAATTCAAAGTGGCTTTGAAACATTAGTAGAAGCGGGTTATCAACCAG  
AATTAGCTTATTTGAAGTATTACATGAAATGAAATTAATCGTTGATTTGATGTATGAAGG  
CGGTATGGAAAATGTACGTTACTCAATTTCAAATACTGCTGAATTTGGTGACTATGTTTCA  
GGACCACGTGTTATCACACCAGATGTTAAAGAAAATATGAAAGCTGTATTAACCTGATATC  
CAAATGGTAACTTCAGTAATCGCTTTATCGAAGACAATAAAAATGGATTCAAAGAATTT  
TATAAATTACGCGAAGAACAACATGGTCATCAAATTGAAAAAGTTGGTTCGTGAATTACGC  
GAAATGATGCCTTTTATTAATCTAAAAGCATTGAAAAATAA

### > **leuA1**

Function: protein coding sequence; 2-isopropylmalate synthase/locus 1 (core genome, constant)

Best match: leuA1\_CC001-ST772\_118\_AJGE01000025.1[4729:6258:r] (completely identical)

Position: 052-contig\_193\_RC: 41219 ... 42749; Length: 1530 bp

Sequence:

ATGAGTAGTCATATTCAAATTTTTGATACGACACTAAGAGACGGTGAACAAACACCAGGA  
GTGAATTTTACTTTTGATGAACGCTTGCGTATTGCATTGCAATTAGAAAAATGGGGTGTA  
GATGTTATTGAAGCTGGATTTCTGCTTCAAGTACAGGTAGCTTTAAATCTGTTCAAGCAA  
TTGCACAAACATTAACAACAACGGCTGTATGTGGTTTAGCTAGATGTAAAAAATCTGACA  
TCGATGCTGTATATGAAGCAACAAAAGATGCAGCGAAGCCGGTCGTGCATGTTTTTATAG  
CAACATCACCTATTCATCTTGAACATAAACTTAAAATGTCTCAAGAAGACGTTTTAGCAT  
CTATTAAGAACATGTCACATACGCGAAACAATTATTTGACGTTGTTCAATTTTACCTGA  
AGATGCAACGCGTACTGAATTACCATTCTTAGTGAAATGTGTACAACTGCCGTTGACGC  
TGGAGCTACAGTTATTAATATTCCTGATACAGTCGGCTACAGTTACCATGATGAATATGC  
ACATATTTTCAAACCTTAACAGAATCTGTAACATCTCAAATGAAATTATTTATAGTGCT  
CATTGCCATGACGATTTAGGAATGGCTGTTTCAAATAGTTTAGCTGCAATTGAAGGCGGT  
GCGAGACGAATTGAAGGCACTGTAAATGGTATTGGTGAACGAGCAGGTAATGCAGCACT  
TGAAGAAGTCGCGCTTGCCTATACGTTTCGAAATGATCATTATGGTGTCAAACCTGCTCTT  
AATCTCGAAGAACTAAAAAACATCGGATTTAATTTCAAGATATGCAGGTATTCGAGTG  
CCTAGAAATAAAGCAATTGTTGGCCAAAATGCATTTAGTCATGAATCAGGTATTCACCAA  
GATGGCGTATTAACATCGTGAACATATGAAATTATGACACCTCAACTTGTGGTGTA  
AGCACGACTGAACTTCCATTAGGAAAATTATCTGGTAAACACGCCTTCTCAGAGAAGTTA  
AAAGCATTAGGTTATGACATTGATAAAGAAGCACAAATAGATTTATTTAAACAATTCAAG  
GCCATTGCGGACAAAAGAAATCTGTTTCAGATAGAGATATTCATGCGATTATTCAAGGT  
TCTGAGCATGAGCATCAAGCACTTTATAAATTGGAAACACTGCAACTACAATATGTCTCT  
AGCGGCCTTCAAAGTGCTGTTGTTGTTGTTAAAGATAAAGAGGGGCATATTTACCAGGAT



TCAAGTATTGGTACTGGTTC AATCGTAGCAATTTACAATGCAGTTGATCGTATTTTCCAGA  
AAGAAACAGAATTAATTGATTATCGTATTAATTCTGTCACTGAAGGTACTGATGCCCAAG  
CAGAAGTACATGTAAATTTATTGATTGAAGGTAAGACTGTCAATGGCTTTGGTATTGATC  
ATGATATTTTACAAGCCTCTTGTAAGCATACTAGTAAGCACATGCTAAATTTGCAGCTG  
AAAATGTTGAAAAGGTAGGTAATTA

> **leuB**

Function: protein coding sequence; 3-isopropylmalate dehydrogenase

Best match: leuB\_CC001\_MSSA476\_BX571857.1[2111551:2112597]

Position: 052-contig\_193\_RC: 42751 ... 43798; Length: 1047 bp

Sequence:

ATGACTTATAACATTGTTGCCCTACCTGGTGATGGAATCGGTCCAGAAATTTTGAACGGA  
TCTCTATCATTGCTTCAAATTATAAGTAATAAATACTTTAATTATCAAATAGAGCACC  
ACGAATTTGGTGGTGCCTCTATTGATACATTCGGCGAACCTTTAACTGAGAAAACCTTAA  
ATGCGTGTAAGAGAGCAGATGCTATTTTACTGGGTGCAATCGGTGGACCTAAATGGACAG  
ATCCTAACAAATCGACCAGAACAAGGATTATTAATAATTGCGTAAATCCTTAAATTTATTG  
CAAATATACGCCCCACTACCGTTGTCAAAGGCGCTAGTTCTTTATCACCTTTAAAGGAAG  
AACGCGTTGAAGGCACAGATTTAGTTATAGTCCGTGAATTGACAAGTGGTATTTATTTTG  
GAGAACCTAGACATTTAATAATCACGAGGCCTTAGATTCTTACTTATACAAGAGAAG  
AAATAGAACGCATTGTTCCACGTAGCATTAAATTTGGCCGCTTCAAGACGAGGAAAACCTAA  
CATCAGTTGATAAAGAAAATGTATTAGCTTCTAGTAAATTTGTGGCGCAAAGTCGTAAATG  
AAGTAAGTCAATTATATCCAGAAGTAACAGTAAATCACTTACTTGTGATGCTTGTAGTA  
TGCATTTAATCACAAATCCAAAACAATTTGACGTCATCGTATGTGAAAACCTTATTGGCG  
ATATTTTAAGTGATGAAGCTTCAGTGATTCTGGTTCCTTGGTTTATCACCTTCTGCTAG  
TTTTAGTAACGATGGTCCAAGATTGTATGAGCCTATTCATGGATCAGCACCAGATATTGC  
AGGTAAAACGTTGCCAATCCATTTGGAATGATTCTATCTTTAGCGATGTGTTTACGTGAA  
AGCTTAAATCAACAAGATGCTGCAGATGAATTAGAACAACATATTTATAACATGATTGAA  
CATGGGCAAACGACAGCAGATTTAGGCGGCAAATTTGAATACTACTGATATTTTCGAAAT  
CTATCTCAAAAATTGAATCACTAA

> **leuC**

Function: protein coding sequence; 3-isopropylmalate dehydratase/large subunit

Best match: leuC\_CC001\_MW2-USA400\_BA000033.2[2133486:2134856]

Position: 052-contig\_193\_RC: 43811 ... 45182; Length: 1371 bp

Sequence:

ATGGGTCAAACATTATTTGACAAGGTGTGGAACAGACATGTGTTATACGGGAAATTTGGGC  
GAACCGCAACTATTATACATTGATTTACACCTTATACATGAAGTTACTTCTCCTCAAGCAT  
TTGAAGGACTTAGGCTTCAAACAGAAAATTAAGACGCCAGATTTAACATTTGCAACAC  
TCGATCACAATGTTTCTACTATTGATATTTTCAATATTAAGATGAAATTGCAAACAAC  
AAATCACAAACATTACAAAAAACGCCATAGATTTTGGGGTGCATATTTTGTATGTTGGCT  
CTGATGAACAAGGTATTGTTTACATGGTAGGACCTGAGACAGGACTTACACAGCCTGGCA  
AGACAATCGTTTGTGGTGACTCTCACACAGCAACACATGGAGCATTGTTGGTGTATTGCAT  
TTGGAATTGGAACAAGTGAAGTTGAACATGTTTTCGCAACTCAAACGCTATGGCAAACAA  
AACCCAAAACCTTAAAAATCGATATTAATGGTACCTTACCAACAGGCGTCTATGCTAAGG  
ACATTATTCTGCATTTAATTAACCGTATGGTGTGACTTTGGTACAGGCTATGCTTTGGA  
ATTTACTGGCGAAACAATTAACAACTTTCAATGGACGGTCAATGACTATTTGTAACAT  
GGCTATCGAAGGTGGTGCCAAATACGGCATAATCCAACCTGATGATATAACATTTGAATA  
TGTTAAAGGGAGACCATTTGCCGATAACTTCGCTAAATCAGTTGATAAGTGGCGTGAGCT  
ATATTCTGATGACGACGCGATATTTGATCGTGTAATTGAACTTGATGTTTCAACATTAGAA  
CCACAAGTGACATGGGGAACATACTGAAATGGGTGTTAATTTTCAAGTGAACCATTCCT  
GAAATCAATGATATCAACGATCAACGTGCGTATGATTATATGGGGTTGGAACCAGGTCAA  
AAAGCTGAAGACATCGACTTAGGGTATGTTTTCTCGGTTTCAATGTACAAATGCTAGACTA  
TCAGATTTGATTGAAGCTAGTCATATTGTTAAAGGAAATAAAGTTCACCCAAATATTACA  
GCTATTGTCGTACCAGGTTCTCGTACAGTAAAAAAGAAGCAGAAAAATTAGGTCTAGAT  
ACTATCTTAAAAATGCAGGATTTGAATGGCGTGAACCAGGATGTTCAATGTGTTTAGGC

ATGAATCCTGACCAAGTACCTGAGGGCGTACATTGTGCATCTACAAGTAATCGAACTTT  
GAAGGACGACAAGGTAAAGGTGCAAGAACACATTTAGTATCCCCTGCTATGGCAGCAGC  
AGCAGCTATTCATGGTAAATTTGTGGACGTAAGAAAGGTGGTTGTTTAA

### > **leuD**

Function: protein coding sequence; 3-isopropylmalate dehydratase/small subunit

Best match: leuD\_CC008\_NCTC8325\_CP000253.1[2120679:2121251]

Position: 052-contig\_193\_RC: 45182 ... 45755; Length: 573 bp

Sequence:

ATGGCAGCAATCAAACCTATTACAACATATAAAGGTAAAATAGTCCCTCTCTTCAACGAC  
AATATCGATACAGACCAAATCATTCCCTAAGGTACACTTAAAGCGTATTTCAAAAAGTGGC  
TTTGGTCCATTTGCTTTTGATGAATGGCGGTACTTACCTGATGGTTCAGATAATCCTGATT  
TCAATCCAAATAAGCCTCAATATAAAGGTGCATCCATATTAATTACTGGAGATAATTTTG  
GATGTGGTTCAAGTCGTGAACATGCAGCTTGGGCACTTAAAGGACTATGGTTTTTCATATTAT  
TATTGCAGGAAGTTTCAGTGACATTTTTTATATGAATTGTACAAAAAATGCAATGTTGCCT  
ATCGTTTTAGAAAAAATGCACGTGAACATCTTGCTAAATATGTTGAAATTGAGGTGCGAT  
TTACCAAATCAAACCTGTGTCATCACCAGACAAGCGTTTCCATTTTGAAATTGATGAACTT  
GGAAGAATAAACTTGTAATGGCTTAGATGACATTGCAATCACCTACAATATGAATCAT  
TAATAGAAAAATATGAAAAATCACTTTAA

### > **ilvA2**

Function: protein coding sequence; threonine dehydratase locus 2 (core genome, variable)

Best match: ilvA2-CC30\_CC010\_D139\_ACSR01000065.1[40724:41992]

Position: 052-contig\_193\_RC: 45769 ... 47038; Length: 1269 bp

Sequence:

ATGACAGTCAAACAACAGTTTCTACGAAAGATATCGATGAAGCATTTTTAAAGACTTAAA  
GATATTGTCAAAGAAACACCTTTACAATTAGACCATTACTTATCTCAAAGTATGATTGT  
AAAGTCTATTTAAAACGAGAAGATTTACAATGGGTACGTTCTTTTAAATTAAGAGGTGCT  
TACAACGCTATTTCTGTTTTATCAGATGAAGCTAAAAGTAAAGGTATTACATGTGCGAGT  
GCAGGTAATCATGCTCAAGGTGTTGCCTATACAGCTAAAAAACTTAATTTAAACGCTGTT  
ATCTTTATGCCAGTCACTACACCTTTACAAAAGGTAAATCAAGTAAAGTTCTTTGGAAAT  
AGTAACGTTGAAGTTGTACTCACTGGTGATACATTTGATCACTGTTTAGCTGAAGCTTTAA  
CTTATACAAGTGAACATCAAATGAACTTTATAGATCCATTCAATAATGTTTCATACAATTTT  
TGGACAAGGTACGCTTGCTAAAGAAATGCTAGAACAATCAAAGACTGACAATGTTAACTT  
TGATTATTTATTTGCCGCTATTGGTGGTGGTGGATTAATTTAGGTATTAGTACTTACTTTA  
AAACCTATTACCTACTACGAAAATTATAGGTGTTGAACCTTCAGGTGCAAGTAGTATGT  
ATGAATCTGTTGTCGTAATAATCAGGTAGTCACATTGCCTAATATCGATAAATTTGTGG  
ACGGTGCATCTGTAGCTAGAGTTGGCGATATTACATTTGAAATTGCAAAAAGAAAATGTAG  
ATGATTACGTTCAAGTAGATGAAGGTGCAGTTTGTCTACGATTTTAGACATGTATTCAA  
ACAAGCAATTGTAGCAGAACCTGCTGGCGCATTAAAGTGTGAGTGCTCTTGAAAAC TACA  
AGACCACATTAAGGGTAAAACCTGTTGTTTGTGTCATTAGTGGTGGTAATAATGATATTAA  
TCGTATGAAGGAAATTGAAGAACGTTCTTTATTATATGAAGAAATGAAACATTATTTTAT  
TTTAAACTTCCCTCAACGCCCTGGTGCATTAAGAGAATTTGTAAATGATGTTTTAGGCCCA  
CAAGACGATATTACAAAATTTGAATACTTGAAAAAATCTTCTCAAATAACAGGTACTGTC  
ATTATTGGTATTCAACTTAAAGATCATGATGATTTAATACAACCTCAAACAACGTGTAAAT  
CATTCGATCCTTCCAATATTTATATTAATGAAAATAAGATGTTATATTCATTGTTAATTT  
AA

### > **txbi\_ilvA\_rrf**

Function: bidirectional rho independent terminator of ileV and rrf

Best match: txbi\_ilvA\_rrf\_CC001\_MW2-USA400\_BA000033.2[2136714:2136784:r]RC (completely identical)

Position: 052-contig\_193\_RC: 47039 ... 47110; Length: 71 bp

Sequence:

ACATAGTAAGAAAAACAGTCATAAATTGATTTCTAATTGAAATCATCTTATGACTGCTTTT  
TATTATACTT

### > **tRNAgly1**

Function: tRNA tRNA glycin

Best match: tRNAgly1\_CC001\_MW2-USA400\_BA000033.2[1924102:1924175:r]RC (completely identical)

Position: 053-contig\_55\_RC: 1 ... 75; Length: 74 bp

Sequence:

TGGAGCGGGTGATGGGAATCGAACCCACAACATCAGCTTGGAAAGGCTGAGGTTTTGCCAT  
TAAACTACACCCGC

### > **tRNAleu4**

Function: tRNA tRNA leucine

Best match: tRNAleu4\_CC001\_MW2-USA400\_BA000033.2[2142599:2142684:r]RC (completely identical)

Position: 053-contig\_55\_RC: 93 ... 179; Length: 86 bp

Sequence:

TGATGCGGCCGAGAGGACTTGAACCTCCACGGGATTTCTCCACTAGGCCCTCAACCTAG  
CGCGTCTGCCATTCCGCCACGACCCG

### > **sprL**

Function: protein coding sequence; metalloproteinase/SprT family (core genome, variable)

Best match: sprL\_CC005\_ACKJ01000004.118768:19223RC

Position: 053-contig\_55\_RC: 825 ... 1281; Length: 456 bp

Sequence:

TTATTTCAATTGTTTTTTCATTCTTAATTTTCCATTGCAATGTCCGCAACGCATACGATTTCG  
TATCAACTTTACGGATACGTATATATTTTGCATGACATTTAGTACAATAATATTCATAAATT  
CGCCCGTTGTTGATAGCTTTCAATGCTGTTACAAAATCTAGGCGCTCCAACCTGTTGGCTC  
AATCGTTTAAAATCTTGATCTTTATGTTGATAACCTTACCAGCAATATGCAAGTGATAAT  
GACACAATTCGTGCAGTATAATTTTACAACAGCATCTTCTCTATAATGCTCATATTGTTT  
TGGATTAATTTCAATATCATGGGACTTTAAAAGATAACGTCCGCCTGTTGTACGTAACCTT  
TTATTTAAAATATGCACAATGTCGAAACGTACGTCCAAATTTTTCTTCCGAAAGGTTCTCAA  
CCATTCGCTGAAGTTTGTCAATTATTCAT

### > **yhgF**

Function: protein coding sequence; RNA binding S1 domain protein (core genome, constant)

Best match: yhgF\_CC008-ST72\_TCH130\_ACHD01000014.1[15203:17353]RC

Position: 053-contig\_55\_RC: 1273 ... 3424; Length: 2151 bp

Sequence:

TTATTCATGTGGATCAATCATCGTTAATGATACTTTGTCTTTATTTTTGTCAATACTGTAAA  
TCCAAACGTCAACGATATCACCGACACTGACAATATCCATTGGATTTTTTACGAACTTCTT  
AGAAAGTTTCGAAACATGGACAAGTCCATCTTGTTTAAACACCTATATCTACAAATGCTCC  
AAAATCTACTACATTTCTAACTGTGCCACTCAATTCATTCTTCTTGTAATCTTCAATTG  
ATAGCACATCGGATTTAAGGATTGGTGTTCAAACTCGTCCCTTGGATCTCGATTAGGTGC  
TTTCAAGGATTTAATAATATCCTCTAATGTAGGTACACCGACTTGTAATTCAATCGCCAGT  
TCATCCATATCCAATGAATTTAATTTATCTTTTAAATGCATCACTACCTAAATCATTGCCAC  
CAAATCCGAGTTTATCTAATAACTGATACGTTACTTTATAGCTTTCGGGATGAATCGATGT  
ATTATCCAATGGCTCTGAACCGTCTACTATTCTTAAAATCCTATACTCTGCTCAAAAGTT  
TTAGCACCCAAACGCTTAATCTTGCTTAACTCTTTATTATGCTTTATTGCGCCATTTTCTTC  
TCTATATGCAATTATTTTTTAGCAATTTGCGAACTTAGACCAGACACATATTGTAATAAT  
GATGATGATGCTGTATTGACATCAACACCTACTTGGTTAACTGCTGTTTCAACGACGAAA  
GTTAATGCATTTTCTAGTGCTTTTTGATTAACATCATGCTGGTATTGTCCGACACCAATAG  
ATTTAGGATCGATTTTAACTAATTCATTAATGGATCTTGAACGCGTCGTCCAATTGATAC  
GGCACTTCTTCTCCACTTGAAAATCAGGAAATTCATCTCTAGCAATTTCTGATGCTGAG

TATACTGAAGCGCCCGCTTCATTGACAATGATGAATTGTACTGGCAACTGATGCTTTTTTAA  
TTAAATCTGCAACAAATTGTTCTGTTTCACGACTTGCAGTACCATTGCCAATTGCAATTAA  
TTGCACATCATAACGCTTTAACCATTTGTACAAAATCCTTCTCTGCTGCCTCTTTTTTAGAAA  
CTGGTGGATGCGGATAAATCACACCTTTTGCTATAAAAAGTACCGAATGGGTTAATGACTG  
CTAATTTACAACCTGTTCTAAATGCTGGATCTACGCCTAATATTTGTTTACCTTTCATTGG  
AGGTTGCAGTAATAGATTTCTTAAGTTTTCACTAAAAACATCTATTGCATGATTTTCAGCT  
TTTTCAGTTAAATCAGCATGGATTTACGCTCTATCGAAGGGACAATTAAGCGTTTCAAG  
CTATCTTTAATCGCCTCTAAAATATAACTGCGATTTACATTATTATGATTGATTTCCTTGAC  
GTGCAATGAAATCCTCTACTGATGTCGATCGAATTCAAACCTTACAGATAATACTTTCTC  
TTTTTCACCACGATTAACAGCTAAAACCTCTATGATTAGCAATGCGTTTAATTGGCTCACTA  
TATGCATAGTACATTTCAAAAATACCTTTTTTCATCTTCAGCATTTTTCTTTTTAGATGTAGT  
TAACACACCTTGATGATACATATCTTTTAAAATTTTTGTTCTATATTTAGGATTATCTGAA  
ATTTGTTCCGCAATAATATCTTGTGCACCTTTGATAGCATCTTCAACCGATTGCACTTCTTC  
ATTTATAAATTGTTGTGCTTTTTCTTCAATTGAGACTTCATGTTTACGTGCCTTCATCCATA  
TCGCTAATGGCTCTAACCCTTTACGTTTCGCCTCAGTTGCCCTTGTCTTTTTCTTTTGTTA  
AAAGGCCTATATAGGTCTTCAACACGTTGTAATTTGTTCTGTTTTAAAATATCGTTCTTTA  
ATTCCTCAGTAAGTAATCCTTGCTGTTCTATATTTTTGATAACTTCTTCTTTACGTTTTTGT  
AAATTGACCATATATTGGTATTCGTCATCAATTTGCTTTATTTGAACTTCATCTAGTCCAC  
CAGTTTGCTCTTTTCGATACCTCGCAATAAATGGTACTGTATTTTTTCTTCTAGCAGTGT  
AATACTGCTTCAATTTGTTTTTTACTAAATTGATATTTCTCTATGATTGAATTAATCAATTG  
ATTGTCCAT

### > sigB

Function: protein coding sequence; sigma factor B of RNA polymerase (core genome, constant)

Best match: sigB\_AJ920004.1[2472:3242]RC

Position: 053-contig\_55\_RC: 3857 ... 4628; Length: 771 bp

Sequence:

CTATTTATGTGCTGCTTCTTGTAATTTCTTAATTGCCGTTCTTTGAAGTCGTGATACATGCA  
TTTGACTTAAACCGATACGCTCACCTGTCTTTTTGACTCAAACCTTCAATAAACGTACA  
TTGTATGATTTCTCGTTCGCGATCAGATAATATAGGTAATATTTTTTCTAAAATCATAACGT  
TTTTCAGTTAAGTCATAATGGTCATCTTGTGTCGCCATAATATCTAATAGCGTAACAGTTG  
AACCATCTTTATCAGCTTCAATGGAATGATCAACACTTAACGCATTATAACTTTGTCCCAT  
TTCCATTGCTTCTAACACTTCTTCTTCTGAACTTCTAATCGATCAGCTATTTCACTGATAG  
AAGGTGAACGCTCTAATTCAGCGGTTAGTTCATCGCTCACTTTTTTATTCTTGGCCCAAT  
TTCTTTAATACGTCTCGGAACATGTACACTCCAAGTTTTATCTCGTAGATATCTTTTGATT  
CACCGATTACAGTAGGTACTAAAAGGCTTCAAACCTCCGTTCAAAGGACATATCGAATC  
TATTTATGGCACCTATTAACCAACCATAACCAACTGAACTAAATCTTCGTGATGTGATTG  
TCCTTTAGAATATTTATATGCCAATGACTCAATTAGTTTTTGGTAATGTTTAACTAACTTAT  
CCTGTGCATCTGTATTTCTTATTTTCTTGGTGTCTTTAATCCATTGGTTAATTTGCTCAGGT  
GAAATTCATTAGCTGATTTTCGACTCTTTTCGCCAT

### > rsbW

Function: protein coding sequence; serine-protein kinase (core genome, constant)

Best match: rsbW\_CC005\_Mu50-VRSA\_BA000017.4[2195328:2195807:r]RC (completely identical)

Position: 053-contig\_55\_RC: 4602 ... 5082; Length: 480 bp

Sequence:

TTAGCTGATTTTCGACTCTTTTCGCCATTATTTTCGCACCTGCTCTTTTTTTATATACTTAGTCA  
TACTGATTGTCACACCAGATTCTTTATATACTGTGACTTCATCCATTAAGATTTCGATTAA  
AAATAAACCTAGGCCACCTTCGCGTAAAAGTCTATATTTTCGTCTTTATCGTAAGGACCT  
ATTTTTGATTTAGTTGTTTCATAATCAAACCTGTCACCTTTATCAGAAATAACAATTTTAA  
TTTTATCTTCTAAAATTTCAAATATATGTTAATAATGCCACATTGTTATTTTCTTTGTAT  
GCATGTTTAACTGCATTTGTCACAGCTTCACTAACTGCAATCTTGGCATCTTCAATATCAT  
CATATGTAGCACCAGCTCTCGAAAAACGCCAGAAAGTGTTAAACGAATTAACCTTACAT  
ACTCTGCCGATGCTGGCACGCGCATTTCGATAAAAATCTTCTTTAGATTGCAT

> **rsbV**

Function: protein coding sequence; anti-sigma-B factor antagonist (core genome, constant)  
Best match: rsbV\_CC001\_MW2-USA400\_BA000033.2[2147588:2147914:r]RC (completely identical)

Position: 053-contig\_55\_RC: 5083 ... 5410; Length: 327 bp

Sequence:

```
TTATTCGACCTCCGTTTCCTTCATTAACATGCATTAAATCCTTAAGACCAGTAATTTCAAAT
AGTCTACCGATACGATCTGACACACCTAAAATGTATAGTTCTTTATCATTTTGGTTTAATG
CTTTTAATGTACCTACGAATAAACCTAAACCTGTCTGAATCCATATAACTCACATTTTCTAA
ATTAACATAAATATCACGAGTTCATCTTGTCTCATAGGTGTTAAAACCTCTTCTAATTCA
GGCACAGTATAAACATCTAATTCTCCACCGACTTTAACTTCGTAATAATTTATCTTGAGTGG
TTGTTTCTATATTAAGATTCAT
```

> **rsbU**

Function: protein coding sequence; serine/threonine-protein kinase (core genome, constant)  
Best match: rsbU\_CC001\_MW2-USA400\_BA000033.2[2148033:2149034:r]RC (completely identical)

Position: 053-contig\_55\_RC: 5528 ... 6530; Length: 1002 bp

Sequence:

```
TTAATTTACTCTTTTTATAATCAAATAGTCATATCATCTTTTTTATTTGGGTTTTGAAGCT
TTAAAATTGCTTCATAGATAATTTGAACAATATCTTGTGGGTGCATATGTTTATGTTTTT
AATATATTCTAAAAGTTTTTGTATCTATAAAGGTACCTTCACTATTTCTAGCTTCAGTCA
CACCATCCGTTAAAATGATAATTAATCATCAAGGTATATTGGAATTTCTTGTTGTTGATA
TCGTGTTTGTGAACTGATTCCTAACACTCTACCTCTAACTGAAATTTCTTCGAATTTCTTCT
TTTCAGCGCGATAAATATATCCAGGCTCATGACCAGCTGAACTACAATAAATAAATGGT
TCATTTCTTCATATAAACCATAAAACATTGTGACGAACATATTTTGATTAATATTCTTTTC
ACAACACGATTTAAACGTTTTAAACCATCACTCGGTAATTGTGAGTGTCCATAAGAATC
CATGCCAAACTTTATCATACTCATTGCTAAAGCAGCTGGTATAACCTTTTCCAATGACATCT
GCAACAGCAAAGCTCATTGTGCCATCGTTATGGTCAATTAATTAATAAATAATCTCCACTT
ACTTTTTGTGCCGCACTGAAATAACGCCAATTTGAATACTATCAAATTGTGGAATATCTG
TTTTAAGCATTGTTTGTGTAAGCTAGAAGCTAAGTCTATCTTTATCGTGAACCTTGAAG
TTTATCTACCAATCTTTGATAATCTCGATAACTATAACCAAAGCCTTTAACGATTTCTTGT
AAGACATCTAATGTCTTGAACACATCTTCACGCGTTAAGTTTAACGTCAATATATAGTTTT
TGGAATATCGACAATGTCTTCAGGCAAGACGTCCTTACGAATCACTTCGTCAGTGTATTT
CTCACACTTTTTTATCAATTCTACTTTATCTTGGCAGGTTAAACTTTCATCAATTAACCCT
TATAATGTTGCTTAAATTCTTCCAC
```

> **mazF**

Function: protein coding sequence; mRNA interferase (core genome, constant)  
Best match: mazF\_CC001\_MW2-USA400\_BA000033.2[2149382:2149744:r]RC (completely identical)

Position: 053-contig\_55\_RC: 6878 ... 7241; Length: 363 bp

Sequence:

```
CTAATTTTTCTGGTGAGCTACTGCATTCAGCCCTAAACTAATCATTAGTGCATTATCTACT
TCTTTCATTTTATCATCGGATAAGTACGTCAGTTTTTCTTTCAATCGTTTTTTATCAAGTGT
ACGAATTTGTTCTAATAATAAAGTACTGAGTCTTTATCCAACCTATACTTTTTCTTTTCAATCT
CTACATGTGTGGTATTTTCGCTTTATTAATCCTACCAGTTATTGCCGCAACAATAACTGT
AGGACTATATTTATTACCAGTATCATTTTGAATTATGACTACAGGTCTGACTCCCCCTTGT
TCAGATCCCTGTACTGGTGATAAATCTGCTAAATAAACATCTCCTCGTCTAATCAT
```

> **mazE**

Function: protein coding sequence; antitoxin (core genome, constant)  
Best match: mazE\_CC001\_MW2-USA400\_BA000033.2[2149741:2149911:r]RC (completely identical)

Position: 053-contig\_55\_RC: 7237 ... 7408; Length: 171 bp

Sequence:

TCATTCATTCGTTGAATTAGAAGATAAATATGTTTCGTTGCAATCGCATGCTTCACACTCT  
ATCGGAAAAGCTTCGTTTCGCTAGGGAGAGATTTAAATCAGCCATTTGTGAATATCCTTCTT  
TTAAAGATTGTTCTAAGCTATGACTTCTATTTTACTAAAAGATAACAT

### > **alr1**

Function: protein coding sequence; alanine racemase/locus 1 (core genome, constant)

Best match: alr1\_CC080\_11819-97\_CP003194.1[2171700:2172848:r]RC (completely identical)

Position: 053-contig\_55\_RC: 7492 ... 8641; Length: 1149 bp

Sequence:

TTATTTTAAACAATTCATTTGTTACAAAACGTTGATCACCATCATGATAGATTCGCGGCAAA  
CGTCTCGACAAGTTACAAAGCACTTCATAATTAATAGTATGTTGCTTTTCAGCTACCACCT  
CTACCGACTGTGGACTTTCTCTATGATTATCTATTAATAATCACCGAATCTCCAGCTTTAAC  
TTGATCTGGCACTTTAACAATTGTCTGATCCATACATACGCGACCAATAACTTCGCATTGA  
TGACCATTTACATTTACAAAGCTACCTTGCATTATGCGTAAATAGCCATCTGCATATCCAA  
TAGGTAACAAAGCTATTGTAGTTGGGTGAGTGTATAAGTTGCACCATAACTTACAG  
ACTCACCCGCTTGTAGCGTCTTTGTTTGAACACTACATTAGCAATTAATTGCACACTTGGTTT  
AAGGTGTACTTTAACTTTTGTCTGTACATACTCTGATGGATAATATCCATAAAGGGAAATT  
CCTGGTCTTATTGCATTACAGAATTGGCAATCCATTAATAGAGAGCCTGCTGAGTTCTGAC  
AATGTATATATTCAGGTTTAATTGCTTCATTGACCATATCTTTAAAACGTTGATATTGTTT  
AGTTGTCATATCTCCTGGTTCGTCAGCACAGGCAAAGTGTGTAACACGCCTTCAAATAC  
AAGTTGCTCATATTGTTGAATGATTTCAATCACTTCTTGATACGTATTAGTATCTTTAATA  
CCTAAACGTCCCATTCCTGTATCTAATTTAATGTGCAACCATAACTTTTTCTCTTGCTCACC  
AGAAATGTTTTTAATTGCTTCTTTCAACCACTGTTTAGACGGAACCGTTAAGGCAACTCGG  
TGTTGTATCGCTTTATCAATATCTTTAGCTGGTAACACACCTAAGACTAAAATTTTAGCAG  
TAATCCCATGCATTCTAAGTTCTATCGCTTCATCTAACGTTGCTACAGCAAAAAATGTGGC  
GCCATTTCCATTAATGACGTGCTACTTTAACACTACCTAGTCCATAGGCATTGGCTTTA  
ACGACAGCCATCACTGTTTTATTTGGATGCAATGTAAGTACTTTGAAATTTGATGCAA  
CAGCGTTTAAATCTACATTCATATACGCAGATCTATAATATTTATCCGACAT

### > **acpS**

Function: protein coding sequence; holo-acyl-carrier-protein synthase (core genome, constant)

Best match: acpS\_CC001\_MW2-USA400\_BA000033.2[2151210:2151569:r]RC (completely identical)

Position: 053-contig\_55\_RC: 8706 ... 9066; Length: 360 bp

Sequence:

TTAAAATGCTGACTTTTCTAAAACAACCTTGGCTCATCGCATAATGCTCAGTGTGTGAGATA  
CTAACATGTACGATGAACCCTTCGTAATCAATCTTTGGTTTGCCAAGTTCGTCGTTGTAAC  
AGTCTATATCGTTAAAAGCTACATGTTTTCTAAGCCTGTGCCTAATGCTTTACTGAACGC  
TTCTTTTGTAGCAAACCTGCCAGCTAAAATTTCAATTTTACGTTGCTCATGTGTGAAATTG  
TTGAATTTGTGCTGTTTCAATTTTGTAGTTAAAATCCGCTCAACCAATTTTGGCTGCTTACTATA  
TAACACTTTTATTCGATCGATTTTCGATTAAATCTACACCAATTCCATGTATCAT

### > **A5IUL8**

Function: protein coding sequence; putative protein (core genome, variable)

Best match: A5IUL8\_ref\_CC001\_MW2-USA400\_BA000033.2[2151573:2152064:r]RC (completely identical)

Position: 053-contig\_55\_RC: 9069 ... 9561; Length: 492 bp

Sequence:

TTATTCCTCATTTTTATTGTTTTCTAAATGTCTCTCGTTATTTAACCATCGTTTCAATCTACG  
TGCTTCACTTCTATCTATTAATTC AATTT CAGCTTGACCACCCGCTGTATAAAGGGTCAA  
GTTGCTAATCGATAGCGTCTCATTATAGGACCAACATCGATATCAATATTTTGAATACGA  
AAATATGGTATTACTTTTTTCATCCAAAATAAAAATGCCGTTTCGTACACGCAAATGGTGT  
TTTCAAATGCATATCTGCAGTGTATATCGATATACTGGCGCTATGACAAGCGTGAAAA  
CAGCAACAAGTAATATTATAATCACACTACTAACAATGGATATATTGTTATCTAATATCTC

CCAAAATAGCCAGTTCAAAAATATTAATGCGATTA AAAAGTACAAGCGCTATGGGTATCCA  
AAACAGCACAGCACTTAACCTCATCACTTTTTTAGCGTGTGGTGACATAAAAATTATAATC  
CCTCAT

### > Q9ZAH8

Function: protein coding sequence; putative membrane protein (core genome, constant)

Best match: Q9ZAH8\_CC001\_MW2-USA400\_BA000033.2[2152051:2153634:r]RC

Position: 053-contig\_55\_RC: 9547 ... 11131; Length: 1584 bp

Sequence:

TTATAATCCCTCATCATTTTTACCTCTTAAATACCATGATTTCAATTTATTTGCATCTTCAC  
TTCTTGCGTATTTTAGGTTAATCGATTGGGCTCCCACACCTTTAGCAACAATAAAGCTAAA  
ATTATTTAAATTGTTGCGTTTAAAGTAATGTATGTTGCCAAGTGTCAAATCCTATAATGTGA  
TGCGCTTTAAAATAATAAATATTTTCGTTTCAATAGCTCGAAATTCTGGATAGTAATTTGTT  
CTTCTGTCATTTTAAAACCCGCATGTTTGACATAAAGATATCCTTTGATCACAAATAAACC  
AATAATGACTATTGTTATAATCGTAAATAACAATAATAATTGATTCCAAAAATAACAGCC  
AATACCTGCCATAGCTATGACAATAACTAGGTATTA AAAAGTGTCTGTGGAAACCTGA  
CAAAGGCATACCTTCATTA ACTTGTGATAAGATAAATCTGGTACTAAATTCTGGATAATT  
TGATATGCTTTGTCTCGTTTAAATAAACGGCAATATCGGCACACTACCTGAATCATTGTCAT  
CATCTTCGATTTTTTTATTTTCAAATCACTTGTGATGATAAAAATGTATTGCTGTGTAGCC  
AAATAATCTTCGTATATATGACTGACGTTCAACAACAGCTTGCAATCGTTTCGTTGGTACA  
GTTACTTTCTTCTTGTTAAAGAGACCATATTCAATTTTAAAGTTGCTCATTTTCAAGCATCAC  
CGAAAAGCCATAAAAATCTTATCATCGTTATAATCGTTCCAATAATATATGCCACTATTAAT  
ACTAGTAAAATGATGATTAATACTGAAATACTTACAATTTGAACCCATTGACTAATTTTCA  
GATTTAGCTTCGACCATGGGATCAACTCTCTTACAGCCCCGTAAATCGGTAATAAGCTG  
CTAACGTTACACCAATGGCGCCACTGGTCATTGCCATAAATAGTGATTCTTTAAAATTCAT  
CTGATATATAGGAATGCGTTTATTTTTCTGATTAAGCATACTATCAGTGTTCTGCACTTCA  
TCTAAGCGACCTTCTGCGATGTCTTCCACATTACCTTCAATGTCATGATTACAGTTGTCAT  
TCTTCTCAGCACTAGACTTTTTCGCGCACTTCTGTCTTCAACTCTGTTTGCAATTGATCAATA  
TAGCGTTCAAGATATTCACCTGTTTTTTCGAAATAACACTTAAGACAATACCATCACTTG  
GTGTTTTGATTTGTAAATCCACACCACCAATAATTTGATTGACGACCCCTTGTTGCATATC  
AACGGACTGAATACGTTTTATATTTAATTCTTTACGCTTTTTATTA AAAAATACCTGTTGTTA  
AAATGAAATAATTATCCTCAATCCAATATCGCGTGTTTATAATTCCGACAATTTGAGAAA  
TGTATGATATTA AAAAGAATACAAATACAATACCTATCCATAAATATGATTCCGGGATTCCG  
CATAATCAAATCTTTCAATTGAAAGATAATGAAAATAAAAAGACGACTATGTTTTGTT  
TGATAGCATTGATTATGCCATTA AAAATATGAAATCGGATGTAATTTTTGAGGTTTCAGACA  
T

### > Q9ZAH9

Function: protein coding sequence; putative protein (core genome, variable)

Best match: Q9ZAH9\_CC015\_CIGC93\_AHVD01000025.1[4311:4790:r]RC (completely identical)

Position: 053-contig\_55\_RC: 11123 ... 11603; Length: 480 bp

Sequence:

TCAGACATCACTTTCAACCCCTCTCAAATTCGACATAGTTCTCGCTTCGATTATTTTAAACA  
TCGTCATGAGACATCATCGGTAAATAAATAGTATGACCTGCAGTCATAAATCCAACTTTA  
TACAAATTAAGCACTTTACTAATTGGATTAGATTTAATCGACAAGTATTGTAAACGTTCA  
ATTCGACTCGTTTCTTCTTTATATATAAAAATGATGTACGATATTGTACACTTAGTTGAT  
CAACTTTATAAAAGCGACAATGATATTGCCATAAAGGCTTAATAAATAATTTTAAATGTAC  
TCAGAGCACCTAAAACCAACAAAATATAAAGTAAGTAATGTGGCCATTCAAATCTTAACC  
ATATAAAAATAAAAATGACATACACAGCTACACTCAATATAAATTCTAAGCCATTTCGTAA  
TGTAGTAATACAACAATGCTGACTTAGGACTCTTAGACA ACTTAGTATAATCTGACAT

### > kdpC-chr

Function: protein coding sequence; potassium-transporting ATPase/C subunit (core genome, constant)

Best match: kdpC-chr\_CC001\_MW2-USA400\_BA000033.2[2154315:2154875:r]RC

Position: 053-contig\_55\_RC: 11811 ... 12372; Length: 561 bp

Sequence:

TCAATCTTTCATCTTATCAAGAGCAATATTTAGTTCAAGCACATTCACATAATCATTGTT  
AACACACCACGCTGCTTACGATGTTGAATCAAGTCGGCCACTCTTGAAGTAGATATATGA  
CGAGCATCAGCAATACGAGGTGCTTGCTTCAATGCATTTTCAACCGTAATATGCGGATCT  
AAGCCCGACCCAGAACTTGTTGCAGCATCTATTGTTACATTTGAATTCCCAAATTTAACAT  
GATGTTTCATGCGTGCTATTAATTCGGTGTTCATTTCGATTCATTACTTCCACCTGATGAT  
ACGCCGTTTTTATATAATTTTTCAGGATTCATATTATAATCAACTGCACTCGGTCTCCCGT  
GAAAATATCGTGTCTCTGTCCAGTGTGTCCAATCAATTTTGATCCAACTATACGATTGTC  
ATACGTAATTAACCTGCCATTTGCTTGTGATAAAAAAATATTTGACCAATTAACGTGAT  
AGCTAACGGGAATAAAAAATCCACATAATACCATAGTTATTATCGTTAAACAAATACTATT  
TCTTATCGTATTCAT

### > **kdpB-chr**

Function: protein coding sequence; potassium-transporting ATPase B chain (core genome, constant)

Best match: kdpB-chr\_CC001\_MW2-USA400\_BA000033.2[2154895:2156922:r]RC

Position: 053-contig\_55\_RC: 12391 ... 14419; Length: 2028 bp

Sequence:

TTACACAAAAAATTGTACAATCATATCTATTAATTTAATGCCTAAAAACGGGACGATTAA  
TCCACCTAATCCATAAATCAACATATTATTTATAAAGATTCTATCAATGCTGTAACCCTTT  
ACTTTTACACCTTTCATGGCAATTGGAATTAAGGCAACAATGATTAATGCATTGAATATC  
AAAGCTGATATAATTGCAGATTTAGGTGACGATAAATGCATAAATTTAGTGAAGTCATT  
TCTGGAATTGTTGACATCATTAGTGCAGGTAATAATTGCAAAGTATTTTGTACGTCATTAG  
CCAAACTAAATGTCGTTAATGCACCTCTCGTCATTAATAATTGTTTGCCTATTTTTACAAC  
CTCTATTAACCTTTGTAGGATTCGAATCTAAATCAATTAGATTAGCTGCCTCTTTAGCACTA  
ATTGTCCCTGAGTTCATTGCTAATCCTATATTCGCTTGTGCTAGCGCAGGTGCATCATTG  
TACCATCTCCTGTCATCGCAACAATATGGCCTTTCGCTTGTTCATCTTTGATGACTTTAATT  
TTATCTTCGGGTTTACACTCTGCAACAAATCTATCAACCCCGGCTCCTTTTGAATTGTAG  
CTGCTGTTAAAGCATTATCACCTGTACACATAACTGTTTCAATCCCCATTTTTCTCAATTC  
AGTAAATCGTTCTACAAGACCATCTTTAATCACATCTTTTAAATAAATCACGCCAAGCAT  
GACATTGTTTTCAATGACTATTAATGGTGTGCCACCTTTACTCGATACATCCATACAGAGA  
GACTCAATGTTAAGAGGAATATTGCCTTGTGTTGTTTGAACAAGATTTATCATACTATTAG  
GTGCACCTTTGAATACCGATATTTCAATTTGTAATGATTCCGCTCATTCTAGTTTCAGCTGT  
AAAAGGCTTATATGTGCCATCAATGTCTTTAGGCAGCTCATTTATATACATCTGCTTCGCT  
AATCGTACAATACTTTTTCTTCTGGCGTATCATCGTAGATTGATGACATATAAGCAGCGA  
CTATCAATTTTTCCACATTTGTTGATTCACTGGTAAAAAATTCCTAGCGATTTCGATTGCC  
ATAAGTGATTGTCCCTGTCTTGTCTAAAATCATTACATCGACATCTCCACATACTTCTACA  
GCACGCCCACTTTTCGCTAATACATTGAATTGAGTAACACGATCCATGCCTGCAATACCA  
ATCGCCGATAACAAACCACCGATTGTGCTGGTATTAACATACTGTTAACGCAATGAGC  
ATCGCAATAGGTAAAATTAATGCAGGTAAGATGCTATTGGATATAACGTTACAATAACG  
ACTAAAAATATAATTGTTAACGTTGTTAATAATGTAAAAAGTGCAATTTCAATTTGGTGT  
TATTTCTTTCCGCCCTTCAACTAAGGCAATCATTTTATCTAAAAAAGATGTACCCGCTTC  
ACTCTCAACACGTATTTCTAACCAATCAGATGTTACAAGTGTACCGCCAATGACTCCATC  
AAAATCGCCACCTGATTCTTTTATCACAGGTGCAGACTACCAGTAATTGCAGATTCATC  
AACGGTTGCTAATCCATTTATTACAACGCCATCAGCAGGGATTGTTTCTCATTCTTCTACC  
CGAATATTTTGTCCGGCTTTTAACTCTGTGGCGTTCCTATCCGATACGCACCATTTTCTTC  
TATCAATCGAGCAGTTAAATTTGATTGTGCTTGTCTTAACTATCAGCTTGCCTTTTCCA  
CGACCTTCAGCAAAGGCTTCTGAAAAATTAGCAAACAATATAGTTATTAATAATATGATA  
AAAATTGTAATCAAATAACCTCGCGATAGATAGCTAGTTCCAAATATGTCAGGAAAACAT  
ATTAATATCAACGTTAAATCATTCCAACCTCAACGACAAACATTATCGGATTTTTTATTA  
ATTGTTTAGGATTCAGCTTATAAAAACTCATTTTCAAAGCTTCTATCACCATTGTTTGATT  
GAAATATTTATTTACATGATGCAT

### > **kdpA-chr**

Function: protein coding sequence; potassium-transporting ATPase A chain 1 (core genome, constant)

Best match: kdpA-chr\_CC005\_JH1\_CP000736.1[2234952:2236628:r]RC



Position: 053-contig\_55\_RC: 14437 ... 14587; Length: 150 bp

Sequence:

TTATTTTAAAGTTAAAAATTCACCAATAGGACCAAGTAATAGTACTGGAATAAATGTCAA  
ACCACTTAGTAAAACGATAAATACGATTAGTGATACGCCAAAATAAGGTTTATCAATCGC  
TATTGTATATTTATCTTGATGGTATGATTT

### > **kdpD-chr**

Function: protein coding sequence; sensor histidine kinase (core genome, constant)

Best match: kdpD-chr\_CC001\_MW2-USA400\_BA000033.2[2158889:2161546]

Position: 053-contig\_55\_RC: 16385 ... 19043; Length: 2658 bp

Sequence:

ATGTCAAACACTGAATCGCTAAACATAGGAAAAAAGCGTGGATCTTTAACAATTTACATC  
GGTTACAGTCCAGGTGTTGGTAAAACATTTGAGATGCTTTCAAATGCCATTGAACTATTT  
AAAGTAAACGTTGATATTAATAATAGGATATATTGAACCGCATCAGCGTGATGAAACAAAT  
GCATTAGCTGAACAATTACCTAAAATCACAACCAATTTTACTAAACATGGTAGTCATCAT  
TTTCAATATTTAGATGTGCGACCGCATAATCGAAGAATCGCCGACAATAGTACTTATCGAT  
GAGTTAGCACATACGAATATTTCTAGAGATCGTCATGAGAAACGATATATGGATATTGAA  
GAAATTTTAAATCATGGTATCGATGTTTCATACCCTTTGAACATTCAACATATTGAAAGTT  
TAAGTAGTCAAATTGAACTGATGACCGGTGTACATGTTAAAGAACGTGTACCCGACTATT  
TCATAATGAGCGCCGATGTATTAGAAGTCGTAGATATCTCACCTGAACAATTAATTAAC  
GCTTAAAAGCTGGCAAGGTATATAAAAAGGATAGGCTAGATGTAGCATTAGTAATTTCT  
TTACGTATGCCACCTAAGCGAACTGCGTACATTGACGTTAAGAACAGTTGCCGACTTGA  
TGAGTGATAAAGAAAAAGTCCGACACAATCATAAAACGTCACTCAAACCTCATATTGCTG  
TGGCAATTAGTGGGAGCATTATAATGAAGCAGTAATTAAGAGGCATTCCATATTGCTC  
AAAAAGAACATGCGAAATTCCTGCTATTTATATAGATGTATTCGAAAAAACAGACAAT  
ATAAAGATAGTCAAAGCAAGTGCATCAACATCTCATGCTTGCAAATCATTAGGAGCA  
AAAGTAAAAGTAGTTTATAGCCAAACCGTTGCATTAGGATTAGACGAATGGTGTAAAAAT  
CAAGATGTAACCAAATTAATTATCGGACAACATATTAGAAATAAGTGGCAAGACTTTTTTC  
AATACACCTTTAATTGACCATTTAATGTCCTTTGAACATAGCTATAAAGTCGAAATCGTTC  
CAATCAAACAAATACCTGTTGAATTGAAAATGAACAAATCACCCCTATCGTCCTAAAGGCA  
AACGTTTCGCCATAGATATGTTAAAAATGATTTTGATTCAAATAATTTGTGTAATGATGGG  
ACTGTGGATTTATCAACTTGATAAGCATGAGTCTAGTACGATTATTTAATGATTTTTTCTC  
ATCGGCATCATTGTTATCCATTTGGACGCGATCCTTCATCATTGGCTTTTTAGCAGCAA  
TTATTAATGTATTTGTTTTAATTATTTTTTTACGGAACCTAGATATACATTTGAAGTATAT  
CGCTTTGACTATCCTATTACATTTATCGTTAGCATTTTAACAAGTATTTAACGAGTGCTTT  
ATTAACAACAATTAATTCCAATACTCCATTACTAAAAAGCACTTTATCGTACAGATTT  
ATTATTTCAATTTAATGATTCGATTAACAACAATTATACAGTTGAAAACCTACTAATAAAT  
GCTGGATACCAAATTAATCAATTATTGCAACAATCAATTACTATATACGTTATCAATCAAT  
CGAAAGTAATTAACAACAATACCATTGCAAAACCATATCGATAATACGACTCAACAGCAT  
GAACAAGCATTAAAGCTGGGTAATTAAAAATGAAAGACAAGCTGGTGCAACAACAGATAC  
ATTTCCAGGCATTAATAAATGGTTGATACCAATTGGCACATCTCCGATTAAGGCATTCT  
AGCCATTGATTACCAAAGTTCTCAAGTGATTAATCCATATGATGCATCAATATTAGAATC  
AATGTTAAATGAACTTTCTCTCGCCGTTGAAAATGTGACGTTACTTAAACAACGAGAGA  
ATCCATGTTACAGGCTGAACGTCAACTGACACATTCAAATTTTTTAAGATCAATTTTCGCAT  
GACATACGTACACCGTTAACAACAATTATGGGAAATTTAGATATTTTAGTATCACATAGT  
AAAGATATGTCTATCATAGAAAAGGAACAATTACTTGTGCATAGTTTTCAAGAAAGTCAG  
TATTTATATCTATTAGTGACAAATATTTTATCATTAACAAAATTACAGTCATCCAATGTT  
AGATAAAATTGCAACCTTATCTCGTTAGTGAATTAGTAGAAGAAATCGATATGATTTTAG  
AACGTCGCCATTTAAAAAAGCGTATAACTGTATCATCCTCAGTAGATTTACAGTTTATAC  
ACATTGACAGTAAGTTGATTTTACAAGCTTTATTCAATTTGATTGAAAATGCAGTTAAACA  
CACTTCTACTGACACCAAATCAATTTATCTATTCGTTATGCTAGCGATGAACAAATCGA  
ATTTGCCGTTATAGACGAAGGACCTGGAATTAGTTTAGAAGAACAACAAAAGATATTCGA  
GCCTTTTTACACAGGATCAAATAAATATTTTAAAGATAACCAAAAAGAAAGCATGGGACT  
AGGCTTATATTTAGTACAGACTATCCTACACAAACATCAATCAAACCTTACAATATAAACC  
GAACCAACCACACGGCAGTATATTCTATTTCAATATAGATACAGACTTTAATGAAGGAGA  
CGTATAA

> **kdpE-chr**

Function: protein coding sequence; KDP operon transcript regulatory protein KdpE (core genome, constant)

Best match: kdpE-chr\_CC001\_MW2-USA400\_BA000033.2[2161546:2162241]

Position: 053-contig\_55\_RC: 19042 ... 19738; Length: 696 bp

Sequence:

```
ATGCAATCTAAAATATTGATAATTGAAGATGATCACGCAATCACACATTTACTTGATGTT
GCATTAACCTTTAGATTATTACAATGTAACACTACAGCCGACAATGCCACACAAGCACACTTT
AAAATTCAAATTGATAAACCAGATGTCAATTTTATTAGATTTAGGTTTACCAGATAAAGAT
GGATTATGTTTGATTTTCAGAAATCAGGCAACATACTGACATTCCTATCATTGTAATAAGTG
CAAGACAAGAAGAACAACAATTATTCAAGCTTTAGATAACGGTGCGAATGACTATATG
ACTAAACCTTTTAATGTTGATGAGCTTCGGGCACGAATACGAGTCATCGAGAGAATCGCT
AAGTCACATCAAGAACTAACATTGTATTTACTAACGGTTTGCTAAGCATCGACTTTGGC
TCCAAATCTGTTGTTATTAATAATCAGGAGGTACATTTGACTCCAAATGAATTTAGCTTGT
TAGAACTATTGTCAAATCATAAAGGAAAAGTACTCACTTATGAGATGATATTAACGAA
TATATGGCTATGTTAATAAGACTGAAATGCCTAGTTTAAGAGTGCATATGACATCATTA
GACAAAACCTTTCACAATGTCATGAGGACGCAAAAGATATTATTAACACATCCACGC
ATTGGTTATCAAATGTTGCAGTGGAAGAGAAATAA
```

> **csxA**

Function: protein coding sequence; ATP-dependent RNA helicase (core genome, constant)

Best match: csxA\_CC001-ST772\_118\_AJGE0100006.1[51248:52768]RC (completely identical)

Position: 053-contig\_55\_RC: 20107 ... 21628; Length: 1521 bp

Sequence:

```
TTATTTTTGATGGTCAGCAAATGTGCGACCTTTCATAGGTCTGCTTCCACCGCTGCTCTTCT
CTTTACGGTTCGAATTTTTTTGTACTTTTCTTTTACTTGAGTATCCTTTTGAACGTTTACTCT
TACTGTCAAATTTAGGATTACCACGCTTACTATTTCTGTTACGAGAACCGCTTGGTTTACC
ATTACGGCCTTTGCGAGATAATGGTTTTTCAAAGTTAATTGAACTTCAACTTCATCGTTC
GCTTCTACTAACTCTTGTAAGTGCAGCAACTAAATCAACATCGTTATATTCATTTAACA
ACTCTGTAGAAATACGTTTCAAGCGTGATTCTGACTCTTTAGACATCCAGTTTTCACTTT
TTCTTTGATGTCATCTTCACGTGCTTGAAGTACTTCTTTACGATGAGGTGGACGAAGTGCA
CTCATTTTTTCTACCATTTGCATCTTCAATTTGCTCTGATATAATCCATTTTCGATTGGATTAAC
AAACGTTACAGCGATACCTTCTTTACCAGCACGACCCGTACGACCAATACGGTGAGTATA
GCTTTCAGTATCTTGAGGTATATCAAAGTTATAAACATGACTCACACCAGAAATATCTAG
TCCTCTTGCTGCTACATCAGTAGCGACTAAAATATTAATTTGGTCATTTTTAAATTTCTTTA
ATACTTCTAAACGTTTCGCTTGTGTAATATCACCATGTAAACCTTCAGCTTTATATCCTTTA
GAAATCAAAGCACTTGTTAATTCATCAACACGACGTTTTGTACGTCCGAATACGATTGCT
AATTCAGGTTGATGAACATCTAGGAAATTTGTAAATGTATCAAATTTCTCTAATTCCTTAA
CAATTGTATAGAATCTTCGATTTGTGGATCAGACATTTCAATTATTCATTGTCTTAATGATT
TTTGGTGATTTCAATAATTGTTGTAATAAGCTTGGATTGCTTTAGGCATTGTAGCTGAGA
ACAACATTGTTTGACGTTGTACTGCTGGAATTTTATCCATAATAAATCTCATATCATCGAT
GAATCCCATATTCATCATTTCATCAGCTTCATCTAAAATCAAAGTATGAATTCGGTCAGTT
TTAATGTGCGACGATTTAAATGGTTCGATAACACGCCAGGTGTTCCGACTACGATTTGT
GGGCCTTTTTTCAAGGCTTTAATTTGGCGTTCGATAGGCATACCACCGAATACAGTAACA
ACTTGGACACCTTGTCCACGGCTAAATTTCTCTAATTTGTTTCAGCTACCTGCATTGCCAATT
CTCTTGTAGGTGCTAAAATCAACGATTGAACCCCTTGTTCCTACTACTTTCTCAATTA
AGGAATACCGAATGCTCCTGTTTTACCTGTACCGGTTTGAGCTTGCCCAAGGATATCAATT
CCTTGTAACGCATAAGGGATACTGTCTTTTTGGATAGGTGTGGCTCTTTAAATCCCATTG
ATCAAGTGACTGAACCGTATTATCCGAAATCCCTAGTTCTTTAAATTTTGCAA
```

> **murF**

Function: protein coding sequence; UDP-N-acetylmuramoyl-tripeptide--D-alanyl-D-alanine ligase (core genome, constant)

Best match: murF\_CC005\_Mu50-VRSA\_BA000017.4[2214371:2215729:r]RC

Position: 053-contig\_55\_RC: 22144 ... 23503; Length: 1359 bp

Sequence:

```
CTATGAAATTAAGCATTACAACCTTCTTCTAACTTCATACCACGTGATCCTTTAACTAAT
ACACGGTCATGCGCTTTTAAATCGCTTGTTAAAACCTTCTATCATATCGTCTTTAGAATTGA
AGTGGTTGTGCTTTTTTCGACATGTTGCTGGCCCGAATCATAAATATACTTCGCTTCATTACC
AAACGTATACAACACATCTATATGCTTTTCTTCTAAATAATTACCTACACCGATATGCATT
TCTTTGCTATTTTCACCTAATTCTAAAACATCTCCTAAAATTAGAATGCGACGCCCTGTCA
AAGTACTCAGTGTATCAATAGCTGCTCTCATACTTGTAGGACTTGCATTATAGGCATCATT
TATCACAGTAATATCATTTTCTAATGTATGTTGCTCCATACGCATACCAGTTAAGCTGACA
TTTTTTAAATTTTGATAGATTGTGTTATATGTCAAACCTAATTCATGACCAACCGCAATGG
CAATCGTCGCATTTTTTCATATTATGCTTTTCTAATATTGGTAGATCATAATGTTCTTTATTA
TTAATCGTAAATGAAATACCTGTAGTATCTCTATCATCAACAGAACAACCTAATGCATTA
TCAGTAGCAACACCGATACTAATACATTTTGCATTTTCAACTTCTTTAACATGCGGTTTCA
ATAATGGTTCATCGCCATCATATATAAACGTACCATTATCTTTTAGACCTATTGTAATTTT
AGATTTAGCTTTAGCAATCCCCTCGCGCGAACCTAAATCTTGCATATGTGACTCACCAATA
TTAGTTATAACTGCAATATCTGGTTGAGCGAGGTTTGACAGAAATTCATTTTCATGGAAA
CCTGACATCCCCATCTCCAATATTGATATTTAGTATCATTATCTAATTTCCAAAATAGTTA
AAGGTAAACCAATTTCAATTATTGTAATTACCTTGCGTTTTTCTTAACTTTAAATTCGGTATG
CAATACACTTTCAATCATATCTTTAGTTCGTTGTTTTACCATTAGACCCTGTGACGGCAATT
ACTTTAGGGTTTACATGTCTCAAGTAAGCTTGTGCCAATTGTTGTAATGCCGTTAATGTGT
CTTCAACCCATATAAATAGGCCCGCTTACATTTTTCATCTATAGGTGTTCTCTTTTGATAAAA
AGCAGCTCCAGCACCATCTTGTAATGCTTTAGAGACAAAGCGATGACCGTCAACATTTTC
ACCTTTAAATGGTATAAATAACATATTTTTAGAAATTGCTCGTGAATCAATTGTGACTCCA
TTTATCACTTGATTTAAAATTGATCTTCAATTTTACAAGGAATCCATGATTGAATTTGCT
TTAATGTAACATTAATCAT
```

### > **ddlA**

Function: protein coding sequence; D-alanine--D-alanine ligase (core genome, constant)

Best match: ddlA\_CC001\_MW2-USA400\_BA000033.2[2166020:2167090:r]RC

Position: 053-contig\_55\_RC: 23517 ... 24588; Length: 1071 bp

Sequence:

```
TTAGTCAATTTTGTATTTATTTTCTGTTTATCCTGGTGACGTTCTTTAGCAAGCTCGATAA
GTTTTGTAATCAGTTCTGGATAAGATAAGCCATATTTTCCATAACTTTGGATACATACT
GAAAGCCGTAATCCAGGCATTGCATTTGTTTCATTAATATATATTTGGTTGTCTTCTGTT
ACAAAGAAATCAGCACGGACTAAACCAGAACAACTGTGTCGCTTTGAATGCCTCTAATGCC
ATATTTCTAAGCGTTAATTGAACATCTTCGTCTAAGTCAGCTGGAATTTGTAATTGAACCT
TACCATCTTTATATTTTGTATTTGTAATCGTAAAACGCGACATCTTTTACGACTTCACCTGG
CCATGTGCTTCAGGATAGTCATTTTCTAAAACCTGCTACTTCAATTTACGTCGTTAACG
CCTTGTCTATAACAAGCTTACGGTCAAATTTGGAATGCTTCTTTAATACCTTCTTTAAGTT
CCGCTTCATTATTACATTTACTGATACCTACACTTGACCCTAAGTTAGCAGGTTTAAACAAA
GACTGGGTAATTTAATTTATCATTACTAATTTTAAAATGTTATGTTTCATATTTTTCATATT
CAGAACGTAAGAACTAATATAAGGTAACCTGTGGTAACCCTCGATGTTCAAATAATTGTT
TCATTACAAGTTTGTCCATAGAACTTGCAGCTGACAATACACCATTTCTACATATGGTAC
ATCCAAAACCTCAAAAAGTCCTTGAATCGTGCCATCTTACCATTAGGACCATGTAATAA
TGGGAATACTGCATCGTATGGTTGTCTGAACTACTTTCTTTCAATAGCTGTGAAATCTCA
AGCGCCTCTCCATTTTCTAAATGAAGCTCATCAGTAGATTTAATTTACGCTGTAATATTAT
TTTGCTTTCTCCAATCACCATCATTGGTAATATAAATGATATCAACATGATATTTGTCTTT
ATCTATTGCATTTAATACATTTTGTGCTGTCAGAATCGATACTTCGTGTTCTGCACTTTTCC
CTCCAAAACGATACAAATATTTTCTTTTGTTCAT
```

### > **ftsW**

Function: protein coding sequence; cell division protein

Best match: ftsW\_CC005\_Mu50-VRSA\_BA000017.4[2217132:2218334] (completely identical)

Position: 053-contig\_55\_RC: 24905 ... 26108; Length: 1203 bp

Sequence:

ATGAATTATTCATCTCGTCAACAGCCGGATAAGCATTGGCTTCGCAAAGTAGACTGGGTA  
TTAGTAGCCACTATAGCTGTTTTAGCAATTTTCAGTGTCTGCTTATTAACCTCGGCAATGG  
GCGGTGGTCAATACAGTGCTAATTTTCGGTATCAGACAAATTTTTATTACATTTTAGGTGC  
AATTTTTGCAGGTATCATCATGTTTATTTACCTAAAAAGATTAAACATTATACATATTTA  
TTGTATTTCTTAATCTGTCTATTATTAATAGGCTTGCTCGTTATTCCTGAGTCACCTATTAC  
ACCTATTATCAATGGTGCCAAAAGTTGGTACACGTTTGGCCCTATCAGTATTCAGCCATCT  
GAATTCATGAAAATTATTTAATTTTAGCATTAGCGCGTGTCTGTTTCTAGACATAATCAAT  
TCACATTCAATAAATCATTCCAAAGTGATTTGTTATTATTTTCAAATTTATTGGTGTCTC  
GTTAGTACCAAGTATTTTAATATTACTGCAAAATGACCTAGGAACTACATTAGTATTAGCT  
GCTATTATTGCAGGTGTGATGTTAGTAAGTGGTATAACATGGCGTATCTTAGCACCTATCT  
TTATTACAGGTATTGTTGGTGCAATGACAGTCATTTTAGGTATTCTATATGCACCCGCATT  
AATTGAAAATTTATTAGGTGTCCAAGTGTATCAAATGGGACGAATCAATTCATGGCTTGA  
CCCCTATACATATAGTAGTGGTGATGGCTATCATTTAACTGAATCACTTAAAGCTATCGGT  
TCTGGACAGTTACTAGGTAAAGGATACAATCACGGTGAAGTTTATATACCTGAAAATCAT  
ACTGACTTTATCTTTTTCAGTGATTGGAGAGGAACTTGGCTTTATCGGTTCTGTCATATTGA  
TCTTAATATTTTTATTTTAATCTTCCATCTAATAAGATTAGCTGCGAAAATTGAAGATCA  
ATTTAACAAAATCTTTATCGTTGGTTTCGTCACTTTACTTGTGTTCCATTTTTACAAAATA  
TTGGTATGACAATTCAGTTGTTACCAATCACTGGTATTCCATTACCATTTATTAGTTATGG  
TGGTAGTGCCTATGGAGTATGATGACTGGAATAGGTATAGTCTTATCAATTTATTATCAT  
GAACCAAACGATATGTCGATTTATACCATCCAAAAGTAATTA

### > Q9XBC0-chr

Function: protein coding sequence; putative protein (core genome, constant)

Best match: Q9XBC0-chr\_CC005\_Mu50-VRSA\_BA000017.4[2219084:2219377:r]RC (completely identical)

Position: 053-contig\_55\_RC: 26857 ... 27151; Length: 294 bp

Sequence:

TTAGTCTTTAATCAATTTTTGAAAAGTCACTAATAACTCTTCCATTGCCTCTTCCTGAGCA  
CCTTGATTAACTTTATTCATAATACTTTTCATATGTTGTTCTAATAACTTTATCGCAAC  
ACTGTTTAAACGCCGAACGTGTCGCTCTTATTTGCGTAAGGACATCATCACAATAGACATCT  
TCTTCAATCATGCGATTAATCGCTCTCACTTGCCTTCAATTCGATTTAAACGTGATTTAA  
GATTCGTTTTTATTGTTTCAAGAATGATGTGCATTATCTTGTTTCAATTCAT

### > cls2

Function: protein coding sequence; cardiolipin synthases 2 (core genome, constant)

Best match: cls2\_CC005\_Mu50-VRSA\_BA000017.4[2219543:2221027] (completely identical)

Position: 053-contig\_55\_RC: 27316 ... 28801; Length: 1485 bp

Sequence:

ATGATAGAGTTATTATCCATTGCACTCAAGCATTCTAATATTATTTTAAATTCAATATTTA  
TTGGTGCATTTATTTTAACTTATTATTCGCCTTTACCATTATTTTCATGGAAAGACGTTCT  
GCCAATTCTATCTGGGCTTGGTACTAGTCTTAGTTTTCTTGCCTTTATTCGGCTTCATTTT  
ATACTTACTATTAGGACGACAAATTCAACGTGACCAAATTTTCAAATTTGATAAGGAAGA  
TAAAAAAGGATTAGAGTTAATCGTTGATGAGCAATTAGCTGCTTTAAAAAATGAAAACCTT  
TTCAAATTTCAATTATCAAATTTGTAATAATTTAAAGAAATGATTCAAATGTTGTTATATAAT  
AACGCAGCATTTTTAACAACAGACAACGATTTAAAAATATACACAGACGGCCAAGAAAA  
ATTTGATGACCTAATAACAAGACATCCGTAATGCTACTGATTATATTCATTTTCAGTACTAT  
ATTATTCAAATGATGAATTAGGTCGTACCATTTTAAATGAACTTGGTAAAAAAGCGGAA  
CAAGGTGTAGAAGTTAAAATTTCTTTATGATGACATGGGTTCTCGTGGACTGCGTAAAAAA  
GGCTTACGCCGTTTCGCAATAAAGGTGGACATGCTGAAGCATTTTCCCATCAAATTA  
CCTTTAATTAACCTTGCATGAACAATCGAAACCATCGAAAAATTGTTGTAATAGATGGG  
CAAATTTGGATATGTTGGTGGTTTTAATGTTGGTGTGATGAGTACTTAGGTAAATCAAAAAA  
TTCGGCTATTGGCGAGATACGCATTTACGAATTGTCGGGGATGCAGTGAATGCATTGCAA  
TTACGATTTATTCTAGATTGGAATTCACAAGCCACACGTGACCACATCTCCTATGATGATC  
GTTATTTCCCAGATGTAAATTTCTGGTGGAAACAATTGGCGTTCAAATAGCTTCTAGTGGTCC  
TGACGAAGAATGGGAACAGATTAATAACGGCTATTTGAAAATGATTTTCATCTGCTAAAAA

ATCGATTTATATTCAATCTCCCTATTTTCATACCTGATCAAGCCTTTTTAGATTCTATTA  
TTGCGGCATTAGGTGGTGTGATGTCAATATCATGATTCCTAATAAACCTGACCATCCGTT  
TGTTTTTTGGGCTACTTTAAAAAATGCAGCATCCTTATTAGATGCCGGTGTAAAGTATTT  
CACTACGACAATGGCTTTTTACACTCAAAAACACTTGTATAGATGATGAAATTGCAAGT  
GTGGGAACAGCTAATATGGACCATCGCAGTTTCACATTGAATTTTCGAAGTCAACGCTTTT  
ATTTATGACCAACAAATTGCCAAAAAATTAACAAGCTTTTATAGATGATTTAGCAGTA  
TCTTCTGAATTAACAAAAGCACGTTATGCTAAGCGAAGTCTTTGGATTAAATTTAAAGAA  
GGTATTTCACAATTATTGTCACCTATCTTATAA

### > **A5IUN5**

Function: protein coding sequence; metal-dependent phosphohydrolase HD subdomain protein (core genome, constant)

Best match: A5IUN5\_CC008\_NCTC8325\_CP000253.1[2156888:2157535] (completely identical)

Position: 053-contig\_55\_RC: 28828 ... 29476; Length: 648 bp

Sequence:

ATGCAACAATCAGACGTCATTAGTGCTGCCAAAAAATATATGGAATCTATTCATCAAAAT  
GATTATACAGGCCATGATATTGCGCATGTATATCGTGTCACTGCTTTAGCTAAATCAATCG  
CTGAAAATGAAGGTGTTAATGATACTTTAGTCATTGAACTCGCATGTTTGCTTCATGATAC  
CGTTGACGAAAAAGTTGTAGATGCTAACAAACAATATGTTGAATTGAAGTCATTTTTATC  
TTCTTTATCACTATCAACCGAAGATCAAGAGCACATTTTATTTATTATTAATAATATGAGC  
TATCGCAATGGCAAAAATGATCATGTCACTTTATCTTTAGAAGGTCAAATTGTCAGGGAT  
GCAGATCGTCTTGATGCTATAGGCGCTATAGGTGTTGCACGAACATTTCAATTTGCAGGA  
CACTTTGGTGAACCTATGTGGACAGAACATATGTCACTAGATAAGATTAATGATGATTA  
GTTGAACAGTTGCCACCATCTGCAATTAACATTTCTTTGAAAAATTACTTAAGTTAGAAT  
CTTTAATGCATACAGATACGGCGAAGATGATTGCTAAAGAACGTCACGACTTTATGATGA  
TGTACTTGAACAGTTTTTTTACGGAATGGAATTGTCACGACTAG

### > **txbi\_universal1-var1**

Function: rho independent terminator of oxaA

Best match: txbi\_universal1-var1\_CC001\_MW2-USA400\_BA000033.2[2172406:2172478:r]RC

Position: 053-contig\_55\_RC: 29762 ... 29792; Length: 30 bp

Sequence:

TATTTCAAATAAAAACAGCAGTAGGATGAC

### > **txbi\_oxaA**

Function: rho independent terminator of oxaA

Best match: txbi\_oxaA\_CC005\_Mu50-VRSA\_BA000017.4[2222431:2222513:r]RC (completely identical)

Position: 053-contig\_55\_RC: 29863 ... 29946; Length: 83 bp

Sequence:

TATTGAAGCGAAAAATAATGTGCGCCCTATAAAGTTAAAATTATCTTCAACTTTTAGGGT  
GCACATTATTTGGACTTGCTAAG

### > **oxaA**

Function: protein coding sequence; membrane protein (core genome, constant)

Best match: oxaA\_CC008\_NCTC8325\_CP000253.1[2158348:2159220:r]RC

Position: 053-contig\_55\_RC: 29947 ... 30820; Length: 873 bp

Sequence:

TTATTTCTTTTTCTTTTTAGACACAACCTGTGTGTTTTTGCCTTTTTTTATTGCTGCCGCCGTT  
GTGCTCTCTTTCATACGCTTCAATGAAAGGTTGACTTCTTTTTTTAGCGACTTTTTTCATAAT  
AAATGTTTCGCAAAGTGTGTTTGAACACTACAAGGAACGCCGCACTGACTGACCAGTACAAAC  
CAAGTGCTGATGCTGAGCTTAATGAAATCCAGATAATCATAATTGGTGAAATGACCATCA  
TCATGTAACCCATTTGACGTTGTTTCGTCTGGCATCGTTTTACTTGATACATATGCTTGGAT  
AAAGTATAAAACACCGGCAATAATTGTAATCCAAATATCAGGACGTCCTAAATCGAACC  
ATAAGAAGTGTGGATATTTAAACAAACCATCTACAAGTTGGTCTTTAAGTACAAAGTATA

ATCCCATGATGATTGGCAATTGGATTAGCATTGGTAAACAACCCAACATACTCTTAATCG  
GGTTCATGTCATACTTTTTATATACTTGCATTAATTCTTGGTTTGCAGCCATTTTTTCTTCTT  
GTGTACGCGCACGTTTCACTTTTTCTTGAATTTTTCAACTTCTGGCTTTGCAACTTTCATT  
TTTTGACGCATCATATGACTATTTTTATAGTTTGACAACATGAATGGTAATAAAATAATAC  
GAATTACCAATAACAAGGATAATAATAGCTAAACCATAATTGTCGTTAATAAGTTATTTCC  
CCAACCAATCCAATACATTTTTTCAATTGGATCTACGAATGTATTGTAGAAAAACCCACTAC  
GTTTTTCAGGTTTAGAATAGTCACAACCAGCCAAAAAGACCATAATACCTAAAAATAATG  
GTAGTAACGCTTTTTTCTTCAT

### > **thiM**

Function: protein coding sequence; hydroxyethylthiazole kinase (core genome, variable)

Best match: thiM\_CC008\_NCTC8325\_CP000253.1[2159949:2160740:r]RC (completely identical)

Position: 053-contig\_55\_RC: 31548 ... 32340; Length: 792 bp

Sequence:

TTATTCCACCTCTTGAATACGAATCCGTTGTTGATAGGTTGTTTCATTTAAATGATATAAC  
GTATCAAGCAACAATGGTGAAAACGTACCAGGACCACCACAATTTTCATTTTCAGCAGCT  
ACCTCAGCAGCAATATTAATACGCTTACCGCTTCAATTAACGCTTCTATGTCTGGTTCTG  
TTTCTCTAAATAAAAATCCAGCAATAACGCCTCCTAATAAACAACCAGCTCCAGTTACTC  
GTGCTAATAATGGAGATCCATTAGCTAATACGAAGGCTTTATTATCTTGAACAATAACGT  
CCTCTTTACCTGTGATTACTATTGCAGTTTTATATGTTGCGTAAGCCTTTTTTCGCTATTGCA  
ACCGCATCAAGATTAGCATCACTATCTGTACCTTTCATAGTTGCTGTATCATCAATCAACG  
CTAATATTTTCAGATGCATTGCCTTAAATTACTGATACTTTCGCTGATTTCAATAATAATTTA  
CAAATTTGCTTTTCGATATGTAGAAGCACCAACAGCTACAGGGTCAAATACAATAGGTAA  
GCCTGCCTCATTGCGGTTTGAGCAATCGCAATAATATCTTGTTCAATTTCTGCTGTTAAA  
GTACCGATATTGATTAATAGCGCTTGTGCAACTTTGTAATAATCTTCAGCTTCTTCGGGAG  
CTTCACTCATTGCAGGGCTAGCACCAATACTTAATAAACCATTTCGCTGTAAAATTTTTAAC  
TACATCGTTTGTATAACAAATTGTTAATGGGTTTTCAATACGTATTTTATTTAGATAATTC  
AT

### > **thiE**

Function: protein coding sequence; thiamine-phosphate pyrophosphorylase (core genome, constant)

Best match: thiE\_CC001\_MW2-USA400\_BA000033.2[2173549:2174190:r]RC

Position: 053-contig\_55\_RC: 30905 ... 31547; Length: 642 bp

Sequence:

CTAATTATTAATAAAAATCTTTGAATCGATTAACAGTCTTTTTCAATATTTTCACTTTTAGAA  
ATGGCTGAAATGACTGAAATTCCATTGGCACCTGCTTCTACAATCGGCGCCACATTATTA  
GTATTGATACCGCCAATAGCTACAATCGGTAGTTGCGGATTCATTTCTTTAAACGTTGCAA  
TCATTTTTGGACCTACTGGTATATGCGCGTCATGCTTCGACGGCGTAGGATAGATTGGTCC  
AACACCTATATAATCAACATGAGTTAAATCAGATTTTGCATACTCATCTAAATCACTAAT  
ACTAAGTCCAATAATTTTATCAGTGAAATATTGTGCTATCTCTTTGACTTTCGCATCATCTT  
GACCGACATGTATACCATCCGCGTTAATTTCTTTTGCCAAGGATACATCATCATTAAACGAT  
AAAAGGCACATCATATTGATGACAGAGATGCTGTAATTCTTTAGCTAATAACAAGTTTATC  
GTTTCCTTTTAAAGCTGATTCACCTTTTTCTCGAAATTGGAAAAGTGTAATCCCTGCCTTT  
AATGCTGTTTCTAATACTTCATGAATAGTTTCGATGACTCGGAACATCGGAGGTCCACAA  
ATAAAAATACACATTTAGATACGATTGGTTAAACAT

### > **thiD2**

Function: protein coding sequence; phosphomethylpyrimidine kinase (core genome, constant)

Best match: thiD2\_CC001\_MW2-USA400\_BA000033.2[2174967:2175797:r]RC

Position: 053-contig\_55\_RC: 32323 ... 33154; Length: 831 bp

Sequence:

TTATTTAGATAATTCATCGTCTAATCCCTCTTTCTTTAAATATGCAAAATGATTCACTGGA  
CCTCTACCACGGCCGATTTTCAGGCGTATATTGTATACTCATTGAAATAAACTTTTTAGCCT  
TGTGTACAGCCTCAAATAATCGTCTACCTTTTGCAAGTTCTGCCGTTATAACTGCTGAAAA  
TGTACACCCTGTTCCATGCGTATGTTTTGTTTTAAATCGTTCATTTTCAAATGTTTGAACAC

CTTCGTTAGTAAATAAATAATCTTTTGCTATATCAGTATCATTGAATGACCGCCTTTAAT  
GATGACACCTTTACTACCAATCTCATTAATAAAGATGCGGCCAGCCTGCATAATTTTTCT  
TCACTATCAATGGTTAGTCCCGTTATTTCTTCAGCTTCTGGTAAATTCGGTGTACTATGTC  
AGCTAATGGCAATAACCTATGCTGCAAGTTTTGCTTTGTGTCATTATCCATTAATGAATCA  
CCGCTTTTCGCCAACATAACAGGATCAATTACATATGGAATAGATTCATGTTGCATTA  
TAATGACGAATCGTTTCCATAGTATCTGCTGTAGCAATCATCCCCGTTTAAATAGCATGCG  
GTAAGGTATCGTTGAAGACACTATCAAGTTGTTTCATCTACCCATTGATGATTTAAATTATG  
AATATGTTGTACGCCCAATGTATTTTGAGCAACAATACTTGTAAACGACGCCCATACCATA  
TACACCACATGAATGAAATGATTTTAAATCAGCCATTACGCCGGCACCACCTGTTGGATC  
AGTACCTGCAATGGTTAATGCTATTTTAGGTTAATCAT

### > **tenA**

Function: protein coding sequence; TENA/THI-4 family protein (core genome, variable)

Best match: tenA\_CC001-ST772\_118\_AJGE01000006.1[39040:39729]RC (completely identical)

Position: 053-contig\_55\_RC: 33146 ... 33836; Length: 690 bp

Sequence:

TTAATCATTACTTTTTCTCCAAATTCCTATTGTTCTAGTGTTCATAGCCATATTGAAAAATC  
GACGCTCATGTATGCAACTTTCTAAAAATACTTGCTTTACTTGTTCCAATTCCTTGTGAGA  
CATTGATTCGGCTAATTTATTCATTAATGCCTCAAATACGTTAATTATGTCATCCATTTCA  
GTACTATAAAAATCAAACCATTTTGCCGTATCTTTTTCTCTATTAAGCTTATGATCACTTTG  
AGAGCGCTTAGCTAATTCTGCATAAATATATGGACAAGGTGCCATTGCAGCAATTGTATA  
AATAGCATTTCACGACTATGCGCTTGAAATACATATGTTTAAATGTAATGGTCGCCACTT  
GGAGGCCAAACTTTTGTTTAATGATTTCTTCGTATGATTCACCAACAATTTGCGCTAAAA  
TATCATGCGCAAGTACTTCACCTCAACCATAAATTCTATTTGCTCTACTAAAAATTTTAC  
GTCATTCATGCTATTCATTTTGGAAATTAACAAAGCATATAAGTTTGTGAATTCTTTTAAA  
TAAGCTGCATCAGCTTGTAATAGTGACGTAATGCATCAGCTTGTATATTGCCTAATAAC  
ATTTTTTGAATAAAGTCATCCTCATAAATATCATTAATGATTGGCTTTGCAGCTTGGTACA  
ATTTTTGTGAAAATTCCAT

### > **TPP\_riboswitch\_L2**

Function: noncoding RNA thiamine pyrophosphate binding riboswitch/locus 2 (core genome, constant)

Best match: TPP\_riboswitch\_L2\_CC001\_MW2-USA400\_BA000033.2[2176559:2176661:r]RC (completely identical)

Position: 053-contig\_55\_RC: 33915 ... 34018; Length: 103 bp

Sequence:

TCACTTCAATAACTACTTTTCTACGTTGGTACTAACCAAATCAGGTCATAAGGGTCTGAAC  
AATTCATCTCAGCCATATCATTAGGCTCCCCTAGTAGTTCCT

### > **sceD**

Function: protein coding sequence; transglycosylase (core genome, constant)

Best match: sceD\_CC001-ST772\_118\_AJGE01000006.1[37958:38653]RC (completely identical)

Position: 053-contig\_55\_RC: 34222 ... 34918; Length: 696 bp

Sequence:

TTATGCAGTAACCCAATGTCCAGCGCCACCAGTGTTATATAATTTTACTGCTGCGGCATCT  
TGAACACTTTTACAGGAGCATTGCTGGTGATACACCTTTATATTTAGCAGGTGCTACTGAAT  
CCCAAGTTGATTGTAAGAATTGATACTTACCAGCTGCACCTGATGTTGGATTTACAGCAT  
GAATATTACCACCTGATTCACGTTGAGCAATTTGTTTTAGATGAGCATTACATTTACTGA  
TGAACCTTCTGATGCTTTTATTGATTGAGTTGGTGTGAGTAACCTTGTGAATTGTTTATGAT  
GATGCTTGTGGTTGTTGAGTTTGTGGTGCTTCAACTTCTTGTGATTGTACTTG  
ATTAGCTTGAACAGCTGATGGTGCAACATTATTAGTTGCAGGTGCTTGTGCACTCATGTCT  
GCTCCATTAGCACCTGTTGCATGGTAATTCCAAGCAAAGTGTGTACCATCTGATTCAAAG  
TGATAAGTAAACCCTTCATAGTCAAATGTATAATTATAAGCCCCAGCTTCAATTGGTTTTT  
GATTTAATGTTTGTATCATTGATTGCGCCATTTGCGCTAAAGATGCTTTATTTAAGTCCGC

TTCACTTGCATGGGCTTCGTGACCTGCATTTCTGCTACGATTCTAAACCTACTGCTAAT  
GATGATGCGAGTAATGTTTTCTTCAT

> **ywpF**

Function: protein coding sequence; putative protein (core genome, constant)

Best match: ywpF\_CC001\_MW2-USA400\_BA000033.2[2178676:2179116] (completely identical)

Position: 053-contig\_55\_RC: 35895 ... 36336; Length: 441 bp

Sequence:

ATGAAAACTTTTAAAGCAGTAAGGTTTTCAAATTGTGAATGAACACGGCAGAATTATAGAA  
TATGAATTAGAAGATGGCGTAATAATTAATAAAGAGGAAAGTGGCACGGGTTGGTTGCTT  
GAAATTGTCATTTCTAATGAGCATTATGAAACATTTAAGGAATATCAAGACAATGAACAG  
TTATTGGATATTCGTGTCTGCATCACGCGTCCAGCCAATGATCCAGCTTTATTTGAATCTA  
CTGTGAAAAGTATTAATAAATTTTAAAACAACAATGTCTATCGTATTTGAATGTCATATTTA  
CACTTTACGTCAACAGTATGCTGAAAGTTTATTAGAACAACCTATTGATGATGGATTATCT  
GGTGAAGAATTAATAAATCATTTAATCGAATGATGCAGTCTAAACCAAAGTTAAAGGA  
TGAAAATTAGAAGAGTAA

> **fabZ**

Function: protein coding sequence; beta-hydroxyacyl-(Acyl-carrier-protein) dehydratase

Best match: fabZ\_CC001\_MW2-USA400\_BA000033.2[2179174:2179614:r]RC (completely identical)

Position: 053-contig\_55\_RC: 36393 ... 36834; Length: 441 bp

Sequence:

TTATTTTACATCTTGAATTGCAAATGTAAGTTCACAACACTACAAGCAAGTTGACCATCGAC  
AGTAGCTTTAGCATTACCTTTACCGATTGGTCCTTTAATTTTAGTGATTTCTACTTCCAACG  
TTAAAGTATCACCAGGTACTACTTGACGTTTAAAACGACATTTATCAATACCAGCAAATA  
AAGCGATTTTACCTTTATTTTCTTCACTATTTAAAATAGCTACCGCACCTGTTTGAGCTAA  
CGCTTCAGTAATTAATACGCCTGGCATTACCGCATACTCAGGAAAATGCCCTTGAAAGAA  
TGGTTCGTTTCTGATACTTGTTTAATAGCCACACAACGTTGACCTTCTTCATATTCAACT  
ACTTTATCAATTAATAAATAAATGGCTGTCTGTGAGGTATAATTTGTTTAATTTGGTTATAAT  
CAAAAATTGTTTCCAT

> **murA**

Function: protein coding sequence; UDP-N-acetylglucosamine 1-carboxyvinyltransferase 1

Best match: murA\_CC005\_Mu50-VRSA\_BA000017.4[2229436:2230701:r]RC (completely identical)

Position: 053-contig\_55\_RC: 36867 ... 38133; Length: 1266 bp

Sequence:

TTAATCGTTAATACGTTCAATGTCTGCACCTAATTGCTTCAATTTACCGTGTAAGTCAACA  
TAGCCTCTATCTAGGTGCGTTAATTCAGTAACGCTTGTTTTACCATCAGCAACTAATCCAG  
CTAAAATTAAGGCTGCTGCTGCTCTTAAATCAGTCGCTTTAACTTGTGCACCTTGCAATTG  
ACTTTTACCTTCAAGTTTAGCACTACGACCTTCTACATTGATATTAGCATTACATACGTTTG  
AACTCTGCAACATGCATAAAACGGTTTTCAAAAACAGTTTCGGTTACGACTTTATGACCA  
TTTGCCGTTAATAACAATGCCATCATTTGTGATTGCATATCAGTCGGGAATCCAGGATGTG  
GTAGTGTTTTGATGTCTACAGGTTGTAATTCCCCTTCAGCACGTACACGAATACCATCTTC  
TTGATAGTCCAATTCAACGCCCATTTCTTCTAGTTTATAGACTAAACTCGCCATATGTTCT  
TTGATTGCACCACGTACAAAATATCACCACGCGTTATAGCACCAGCGATTAGTAATGTG  
CCTGCTTCAATTCTATCTGGAATGATAGCATGTTCTACACCATGTAATGATTCTACACCAT  
TGATTGTAATTGTGTCTGTACCAGCACCAGTAATTCTACCACCCATTTCAATTAATGTAGTT  
TGCTAAATCGACAATTTCAAGTTCTTTAGCTGCATTTTCAATTAAGTCTTACCCTTAGCT  
AATGATGCTGCCATAATAATATTTTGTGTTGCTCCTACACTTGGAAAATCTAAATGAATTG  
ATGTACCTTTTAATCCATCTTTAGCATTAGCATAAATATTACCATTTTCAAGATGAATTC  
TGCGCCTAAAGCTTCAAAACCTTTAATGTGTTGCTCAATCGGTCTACTTCCAATTGCACAA  
CCACCAGGCAATGCAACAATAGCATGCTCCTAGTCTTGCTAAAAGAGGTTCCATAACTAAA  
ATACTTGACGCATTTTACTAACATATTCATATGGTGCCTCTTCATTTAGAGTCTTTGTTGC  
ATCAACGACAACAGCATTTTTCGTCTTTTTGTATGTAACGTCAGCATTTAAAGTTGTTAAT



ACATTATTTATTGTTTCTACATCACTTAAAGCTGGAACATTA ACTAATTTACTCGGTTTAT  
CAGAAGCTAATAAAGATGCTGTCAATATTGGTAATACTGCATTTTTAGCACCTTCTACTTT  
AACTTCACCCGTTAATTTATTTCCACCTTTGATTACTATTTTATCCAT

> **STAR**

Function: Staphylococcus aureus repeat element  
Best match: STAR\_CC008\_TCH1516\_CP000730.1[801877:802102:r]RC  
Position: 053-contig\_55\_RC: 38791 ... 38821; Length: 30 bp  
Sequence:  
TGCGGGGCCCAACATAGAGAAATTGGAAC

> **Q2FZB6**

Function: protein coding sequence; putative protein (genomic island)  
Best match: Q2FZB6\_CC030\_MRSA252\_BX571856.1[2068297:2068469:r]  
Position: 053-contig\_55\_RC: 38793 ... 38823; Length: 30 bp  
Sequence:  
CGGGGCCCAACATAGAGAAATTGGAACAC

> **atpE**

Function: protein coding sequence; ATP synthase F1 sector subunit epsilon (core genome, constant)  
Best match: atpE\_CC001\_MW2-USA400\_BA000033.2[2181819:2182223:r]RC (completely identical)  
Position: 053-contig\_55\_RC: 39095 ... 39500; Length: 405 bp  
Sequence:  
CTATTTTAATTCAGCCACACGCAAACGGTTATTTGCTCTCTCTAAAGCTCTTTCGGCTCTA  
TGAATATCAGTATTGTCGTCATCATTTTTCCAAGTGAGACTCTGCTCTTGCTTTGGCTAATTT  
AGCTCTTCAACATCAATTTCTCTTGCAGTTTCTGCAGTCTGAACAATGATTGAACTTTA  
TCTTTTCTAACTTCAACAAAGCCATCGCTTACAGCAATATATTCAGTTCATCGTGAAATT  
TCACTTTTACAAAGCCTGTTTTTAAAGCAGCTACAGTTGGAATATGTCCACTCATGACACC  
TATCTCACCAGCTGTTGTTTGCATAACAACGAGTTCAACATTATCACGATTGTAAACAGA  
ACCATTAGGAGTGACAATATCTAGGTTTAATGTATTCAT

> **atpD**

Function: protein coding sequence; ATP synthase F1 sector subunit beta (core genome, constant)  
Best match: atpD\_CC001\_MW2-USA400\_BA000033.2[2182243:2183655:r]RC (completely identical)  
Position: 053-contig\_55\_RC: 39519 ... 40932; Length: 1413 bp  
Sequence:  
TTATACTTCAACACCCATATCTTTAGCTTTTGAATAAACATCATCCATGCTACCAACTAAA  
CGGAAAGCATCTTCTGGAATATGGTCATATTTACCATCTAAGATATCTTTAAAGTTTGCAA  
CTGTTGTCTTAAACAGGTACATAAGAACCCTTTTTGACCAGTAAATTGTTCCGCTACGTGGAA  
GTTTTGAGATAAGAAGAATTGAATTCTACGTGCGCGTTCAACTGTTTGTATCTTCATCA  
GATAATTCGTCCATACCTAAGATAGCAATGATATCTTGTAATTCACGGTATTTTTGAAGTG  
TTGATTGTACATCACGAGCTACTTCATAATGTTCTTGACCTACAATTGATGGTTCCAATGC  
TCTTGATGTAGACGCTAATGGATCCACGGCTGGATAAATACCCATTCAGTTAATTTACGT  
TCTAAGTTTGTAGTTGCATCTAAATGGGCAAACGCTGTCGCGAGGCGCTGGGTCAGTATAG  
TCATCGGCAGGTACGAATACCGCTTGAATAGAAGTAACTGATCCTTTTGTGTAGACGTA  
ATACGTTCTTGAATTGTCCATTTCAAGTAGCAAGTGTGGTTGGTAACCTACTGCAGAAG  
GCATACGACCTAATAATGCAGATACCTCAGAACCAGCTTGTGTAAATCTGAAAATGTTAT  
CGATGAATAATAACGTCCTTGACCTTGTTCGTCACGGAAATATTCAGCCATTGTTAAACC  
AGATAATGCAACACGCATACGTCACCAGGTGGCTCATTCATTTGCCCGAATACCATGGC  
TGTTTTCTTAATTACCACTGTCACTCATTTTGAAGTATAAATCGTTACCTTCACGAGTA  
CGTTCACCTACACCGGCGAATACAGAAATACCACCGTGCTCTTGAGCGATGTTGTTAATT  
AATTCTTGATTAATACTGTTTTACCTACACCGGCACCACCGAACAATCCGATTTTACCAC  
CTTTAATATAAGGTGCTAGTAAATCTACTACTTTAATACTGTTTCTAAAATTTGAACTTC

TGTTGAAAGTTCATCGAATGCTGGTGCTTGACGATGGATAGGATCGCGGCGAACAGAATC  
ACTAATTTCTTCTTTAAGGTCAATTGTTTCACCTAGTACATTAATAACACGACCTAATGTT  
TCGTCACCAACAGGTACACTAATTTCTTTGCCTGTATCTTTTACATCCATGCCTCTTTGGAC  
ACCATCAGTTGAATCCATCGCAATTGTACGAACAACGTCGTCACCTAATTGCAGCGCAAC  
TTCTAATGTTAGTTGTATTGTACCTTCTTCTTTAGGCACATCAATAACCAAGGCGTTATTA  
ATTTTAGGAACTTCGTTATGTTCAAATCGAACATCAATTACAGGACCCATAACTTGAGTTA  
CACGGCCAATTCCCAT

### > **atpG**

Function: protein coding sequence; ATP synthase gamma chain (core genome, constant)

Best match: atpG\_CC001-ST772\_118\_AJGE0100006.1[31056:31922]RC (completely identical)

Position: 053-contig\_55\_RC: 40953 ... 41820; Length: 867 bp

Sequence:

TTATTC AAGCGCTGCGGAACCACCAACAATTT CAGTAATTTGTTGCGTAATTTCTGCTTGT  
CTCGCTCTGTTATATTCTAATGATAAGTCATCAATAAGTTCAGTTGCATTATCAGTGGCAT  
TTTTCATCGCAGTCATACGTGTGCGATGCTCACTTGCTTTTTCGCTCTAATATTGTTCCGTAA  
ATCAAACCTCTCAACATATTGAGGCAAGATTACACTTAAGATAGATTCTTTATCTGGCTCA  
AATTCATAAGAAGACAAATGACCATGCCCTTACTAGAATCCTCTTGAGATAATGGTAAT  
ACTTGTCTAGATGTAGGCTTGT TTTCAAGAACGCTGACATAATGACTATAGTATATATTTA  
ATTCATCAATTTCTTCTTCACTGTATAAGTCTATAGCATGGTTAGCTAGTGCTTGAACAGA  
TTTGAAAGAAGGTTGATCAGGTACGTCTACTTGAGAATACTCAATGTCATAACCTCTATTT  
TTTAGGAAATCAACACCTTGTGCCCCTAAAAC TACAATACTGTATTTCGCTACTATCTTGAT  
GTTTCGCTTCAATATCAGTAATCAATTTTTTAAGCACGTTTGC ACTATATGCACCTGCTAA  
ACCTTTATCACTCGTGATAACTAAATATCCACTTCTAGTAATTTTACGAGGTCTTAGCATT  
GGATGGTTTTGTATTGCTACTTGCCCCTGCAACTGCAGTAATTGCATCTTGCATTTTATCCA  
TATATGGTGTGAATTGTTTTGTATTTTTTT CAGCTCTACGAAGTTTTGAACTTGATAACCATG  
TTCATCGCTTTCGTAATCTGCTTCATTTTTTTG GTTGATTTTATTCGAGTATCTATTTCTTTA  
AGAGAAGCCAC

### > **atpA**

Function: protein coding sequence; ATP synthase subunit alpha (core genome, constant)

Best match: atpA\_CC001\_MW2-USA400\_BA000033.2[2184574:2186082:r]RC (completely identical)

Position: 053-contig\_55\_RC: 41850 ... 43359; Length: 1509 bp

Sequence:

TTATTCAGATTTGCTAAAGCTTTTTTTTGAATTCGTTAATTGCTGTGTCAAACCTTCTCAGCAT  
CTGGTAAGCCACCAGTTTCTCTGATTTCAATTAACAGTTCAGTAGCATTGATTCTGCCCA  
GTGGTTTAACTCATCTTCAAACGTTGATATCTACAACCTGGAATATCATCTAAATATCCT  
TTTGTTAATGCATAAATAATCAACACTTGGTGTTCGACTGGTAATGGTTTGT TTTGATCTT  
GTTTTAAGACTTCAACAGTACGTTTACCACGTTCTAATTTACTTGCAGTAAATTCATCAAG  
GTCTGAACCGAATTGTGCAAATGATTCAAGTTCTCTGTATGACGCTAAGTCAAGACGTAA  
CGTACCAGCAACTTTCTTCATTGCTTTAATTTGTG CAGATCCACCAACACGAGATACAGAT  
TGTC CAGCATTAATCGCTGGTCTTACACCTGAGAAGAATAAATCAGATTGTAAGAAGATT  
TGTC CATCTGTAATTGAAATAACGTTTGTGTTGGTACATAAGCTGAAATATCACCAGCTTGTG  
TTTCGATAATTGGTAATGCAGTAATTGAACCGCCACCTAAGTCATCGTTTAAATTTGCTGC  
TCTTTCTAATAATCTACTATGTAAGTAGAATACGTCACCTGGGTATGCTTCACGACCTGGA  
GGTCTACGTAATAATAATGATAACTCACGATAAGCTGCTGCTTGT TTAGTTAAATCATCAT  
AAACGATTA AAACATGTTTACCGTTAAACATGAATTTCTCACCCATTGTTACACCTGAATA  
TGGTGCAATATATAATAATGGAGAAGGTT CAGAAGCTGATGCTGCTACAACAATAGTGTA  
GTCTAAAGCGCCTGCTTGTCTTAACTTTTCAACATTTGCTCTTACTGTTGAATCTTTTTGAC  
CAATAGCAACATAGATACAAATCGTACCTTGATCTTTTTGGTTCAA AATTGTGTCAATTGC  
AATTGTTGTTTTACCTGTTTGACGGTCACCGATGATTA ACTCACGTTGACCTCTACCAATT  
GGTACTAAAGCATCAATTGCTTTGATACCTGTTTGT AATGGCTCATCTACTGATTTACGAT  
CCATTACACCAGTAGCTTTTTTCTCTACTGGACGTGTTTTAGTTGTGTTAATCGGTCCTTGT  
CCATCAATAGGTTGTCCTAATGGATTAACA ACTCTTCCGATTAGTTCTTCACCTACTGGTA

CTTCCATGATACGACCAGTACGTTTAACTTCGTCACCTTCAGTAATACCTGTGTATGGTCC  
TAAAATAACCACACCCACGTTTGACTCTTCAAGGTTTTGGGCTAAACCAAGTACGCCGTT  
ATGGAATTCTACTAGCTCACCAGCCATAACGTCATTTAATCCGTGAATTAATGCAATACC  
ATCACCAATTTGTAATACAGTACCTACATCAGTTACGGACATTTCTGACTCATAATTTTCA  
ATTTGTGAGCGAAGTAATGCACTGATTTCTTCAGCTTTTTATGGCCAT

### > **atpH**

Function: protein coding sequence; ATP synthase subunit delta (core genome, constant)

Best match: atpH\_CC001\_MW2-USA400\_BA000033.2[2186104:2186643:r]RC (completely identical)

Position: 053-contig\_55\_RC: 43380 ... 43920; Length: 540 bp

Sequence:

TTAATTAACCTCTTCTAAATTTTCTTTGTAATTGGACAAGATCATTTCTAACACTACCATCTA  
ATACAGTTGTGCCGACTTTAACTCTAAATCCACCAATTAATCTGGATTAATTTTTGTATC  
TACAATAACTTTAGATAACTTCGTTTGTGAGTTACTAGTTTGACAATCTTATCTAACTCTT  
CTTGACTCAATTCATATGTTGACTCAATTGTTGCAAAATCTTGATTGTAGTGTCCGTTATA  
TAAGCTTTGGAACGCCTTGAATACGTCAGCTATTAATGAGATATGTCTATTATCTGCTAAC  
ACGTACATCATATTTTAAATGTATGGATTAATGTCAGTAAATACACCATTAATCAACTCAC  
GACGTTGTTCTGCTGTTTGAAGTTGGATTACTGTCAACCATTTTCAATTGCTCAATTTTATCT  
TTTACTGCTTCATTTATAACTGTTAATTCTTCATTAATAGTCTCTAAATTATTTGTATCTAA  
TGACACGTCAAATAATGCTTTAGCATACTTGTTAGCTACTTTTACCAT

### > **atpF**

Function: protein coding sequence; ATP synthase subunit b (core genome, constant)

Best match: atpF\_CC001\_MW2-USA400\_BA000033.2[2186643:2187164:r]RC (completely identical)

Position: 053-contig\_55\_RC: 43919 ... 44441; Length: 522 bp

Sequence:

TTATTTATCGCCTGCCTCTTTTAGATACTTGTCAACCAATGCTTTTTGGTCTTGTTTCAGAAA  
TTTCTTTTCTAAGAACTTTAGAAGCAATTAACACTGATAGTTCAGATACTTGATTATTAAT  
ATCTGCAATGGCACGTTCTTTTTGGCTATTGATTTCACTTTGTGCTGTTTCAATCATACCGT  
TTGCACGTACGTTTGCTTCATGAATAATTTGTTCTTGCTGTTGACGTGCTTGAACCTTAGC  
ATCTTCTAAAATCTTTTGAAGTTCTTCTTGTTTCTTTAAGTTTTTGTTTATTTTCTTCTTC  
AAGTTTCTGTGCATTTAACTTAGCTTGTTCTGCGTCATCGATATCTCTGTTAATATCTCTTT  
CACGTTTATCCATTACATCTTTCAATGGACCCCATGCGAACTTTTAAAGTAACGCAAGTAA  
CACGATGAAAGTTAGGACCTGTACAATCACAGTACCCCACTCAACGCCTCCAGCTGCACC  
AAGAACGAATAAGTTAGCTGTTTCAGTCAC

### > **atpL**

Function: protein coding sequence; ATP synthase subunit c (core genome, constant)

Best match: atpL\_CC001\_MW2-USA400\_BA000033.2[2187361:2187573:r]RC (completely identical)

Position: 053-contig\_55\_RC: 44638 ... 44851; Length: 213 bp

Sequence:

TTATCCAGCAAATGTCATGAATGCAATTAACACTACACCGATGATAGGTAATGCCTCAACTAA  
ACCTACACCAATGAACATGATACCCATTAATTGACCACGTGCTTCTGGTTGACGTGCTAC  
ACCTTCAACTGTTCTTGAAACGATTAACCGTTACCGATACCTGCTCCTAATGCTGATAAA  
CCAATTGCGATTGCTGCTGCGATTAAATTCAT

### > **atpB**

Function: protein coding sequence; ATP synthase subunit a (core genome, constant)

Best match: atpB\_CC001-ST772\_118\_AJGE01000006.1[27254:27982]RC (completely identical)

Position: 053-contig\_55\_RC: 44893 ... 45622; Length: 729 bp

Sequence:

TTAGTGTTTCATCTGCCACTTTATGTGACATATAAACCATCGAAAGCATAATAAAGATATA  
TGCTTGGATTGTTCTACAAATATTGAAAATGCTTGCCAAACAATTAATCCTGGGATACTA  
ATAATCCAACCCCATGCTGGTTCGTTAAAGAATAAGCCAGCAAGTAATGTTAAAAGTATC  
TCACCTGCAAATATGTTACCGTACAAACGCAGACCAAGCGTTAATGTTGAAGTGAACCTCT  
TCAAAAACATTAATAATTGCCAATGGCCAAAACGGCTGTACATAACCTTTAAGATATTGT  
TTCGTACCACGCATTTTAATCCATAAAAAGTGAGTTAACAGTATTATCGTTGTAGACAACG  
TTAAAGTCACTGTTGCATCAGCTGTTCGGTGATTTCCACCACAATGTGTGATCTTTTCGTTAC  
TATAGAAAACGGAAGACCTAACATATTAGCTATAAAAATGTACAGAATCAGCGTTACTGC  
TAAGAAGTGAATTGACCACCTTTTTTCCAAGCCATGTTACCTTCAATGATTCCCCTCACG  
AAATCAAAAATCCATTCAACGAAATTTTGTTCAGTTGGTCTTTTTTTCAAATTACGCG  
TACAAATGATAGCAAGTAGAAAAACAAGAAACGCCGTAACAAGTATCGTCAATATACTT  
GATAAATTGAAAACGATATCAAACCGAATAAATTCCAACCTCACGAGCGGGGATTTGTG  
ATCCAT

### > **atpI**

Function: protein coding sequence; membrane protein related to F-ATPase (core genome, variable)  
Best match: atpI\_CC001\_MW2-USA400\_BA000033.2[2188365:2188718:r]RC (completely identical)  
Position: 053-contig\_55\_RC: 45642 ... 45996; Length: 354 bp

Sequence:

TTATTTGCTCACCTTTAGTAAAGGACGTATGATAACTACAACATATGAAATCATTAACC  
AATAATTATACCGATGATACTTACATGCGCTTTATTAAGGTACCAAATCATAACAGGCAAT  
AATTGCAACTAAGTATCGCCACATATTTCCAGTTGAAATATGCATAGTGTCTGGTCTTTTA  
GCTTTAGCTAAATAGCATTCAAAAATACATGTGTTGATTGCAGAACCAGTAACACCAATG  
ATTAATCCTAAGATAAATGCATGGTGTGTATAAAGGTATAATCCTCCCAATATTATTATTA  
GATAAAAATAATATTGAATGAACTGTTTAAAAATGTTGTAGAAACGACTCAT

### > **mnaA**

Function: protein coding sequence; UDP-N-acetylglucosamine 2-epimerase (core genome, variable)  
Best match: mnaA\_CC001-ST772\_118\_AJGE01000006.1[25583:26713]RC (completely identical)  
Position: 053-contig\_55\_RC: 46162 ... 47293; Length: 1131 bp

Sequence:

TCAGAAATCGCTTGGTTTTTCAGTGATTAATTCAAATAATACTTAATATGATTAACTATT  
CTTTCTGAAGCAAATCCATCACCGTAAGGATTAGATGCTTCAGACATTTGATGATATAAT  
CTCTCATCATCGATTAATTCTTTTGCAGCTTGATACACATTTTGCTTATTTGTTCCAATGAC  
TTTTAATGTGCCAGCTTCAACACCTTCAGGACGTTCTGTAACGCTTCGAAAACCTAAAAC  
GGCTTATTAATGATGGCGCTTCTTCCTGAATTCCACCTGAATCTGTCAAATAAAAATAA  
GATTTTTTAGCAAATATGGAAATCTACTACGTCCAAGGTTCAATCAATTCAATTCTGT  
CATGACTACCTAAAATCTTTTGAGCCACCTCTCGAACTTTCGGGTTTTTATGCATTGGATA  
TACTAGTGCTAAATCAGTATACTCATCTATTAAGCGTCTAACCGCTTTAAATATATTTTCC  
ATGGGTTGCCGATATTTCTCGTCGGTGTGCTGTCATAAGAATGAATTTTTTGTGATGGT  
ATTTATCCATGATGTTAGATTTATAATTGTCATCAACTGTATATTTTCATAGCATCAATCGC  
TGTATTACCAGTGACAACAACACTTTCTGAATATTTCCCTTCACTTAACAAATGCGATGCA  
GCATTTTTAGTAGGTGCAAAATGTAAGTCAGCTAATACACCAACTAATTGTCTATTCACCT  
CTTCCGAAAAGGTGAATATTTATCATAACTTCTAAGCCCTGCTTCAACGTGTCCAATCGG  
CACTTGGTTATAAAATGCCGCTAAACCACCTGCAAATGTTCGTATCGTATCACCATGTAC  
AAGTACCATGTCTGGTTTTTCTAATTGAACCACTTGTTCTAATTGAGTGATTGATTTAGAA  
GTTATCTCAGAAAGTGTCTGTCTGATTTCATAATATTCAAATCGTATTTTGGTTTGATTC  
AAAGGTACTTAATACTGAATCAAGCATTCTCTATGCTGTGCTGTAACAACAACAATTGG  
CTCGAGCATTTTTTCTTGTTCCAAAGCTTTAACTAAAGGAGCCATCTTTATGGCTTCGGGT  
CTTGTTCCAAATATGGTCATAATCTTTTTTCATCAA

### > **upp**

Function: protein coding sequence; uracil phosphoribosyltransferase (core genome, constant)  
Best match: upp\_CC005\_Mu50-VRSA\_BA000017.4[2239825:2240454:r]RC (completely identical)  
Position: 053-contig\_55\_RC: 47313 ... 47943; Length: 630 bp

Sequence:

```
CTATTTAGTACCAAACAATCTATCTCCAGCGTCGCCTAACCCCTGGTGTGATATATGCTTTA
TCATTTAGCTTTTCATCAAGTGCAGCAATATAAATATCTACATCCGGATGTGCTTCATGCA
TCTTTTCTACGCCTTCTGGTGTGCAATTAACACATGAAGCGAATATTTTTAGCGCCACG
TTTCTTCAATGAAGTAATAGCTTCAATTGCTGATGCGCCTGTTGCTAACATAGGATCAACA
ACAATGATTTGTCTTTCAGTAATATCTTGAGGTAACCTAGCAAAATACTCTACAGCCTTTA
ATGTTTCGGGATCTCGATATAAACCGATATGTCCAACCTCTGGCTGCAGGTAATAACTTA
AAATACCATCAGTCATACCTAAACCAGCTCTTAAAATTGGAACGATAGCTAATTTTTTAC
CAGCTAATCGTTTAGCCGTCATTTTAGTTACAGGCGTTTCAATATCAACATCCTGAAGCTC
TAAGTCTCTAGTTACTTCATATGCCATCAACATACCAACTTCGTCTACAAGTTCTCTAAAT
TCTTTAGTACCTGTATTTACATCTCTAATATAGCTTAGTTTGTGTTGAATTAATGGATGATC
GAAAACGTGTACTTTACTCAT
```

### > glyA

Function: protein coding sequence; serine hydroxymethyltransferase (core genome, constant)

Best match: glyA\_CC001\_MW2-USA400\_BA000033.2[2190693:2191931:r]RC (completely identical)

Position: 053-contig\_55\_RC: 47970 ... 49209; Length: 1239 bp

Sequence:

```
TTATTGATATAGAGGATATTCAGCTGTTAATTTTCGCAACGCGTTCTTTAGCTTGTGTAAT
TTTTCTTCATCTTTACTATTTTTCAATGCTAAACTGATGATTTTTGCAACTTCCTCAAAAGC
TTTTTCATCAAATCCACGCGTTGTTGCAGCAGGTGTACCTAAACGTATACCACTCGTTACA
AAAGGTTTTTCTTGATCGAACGGAATGGTATTTTTGTTACATGTGATACCAACTGAATCTA
AAGTCTCTTCAGCTTCTTTACCAGTAAGTCCTATAGACCCTTTTACATCAACAGCTACTAA
GTGATTATCTGTACCGCCAGAAACAATTCTAAATCCTTCATTAATTAATGCTTCTGCAAGA
ACTTTTGCCTTTTAAACCACTTGTGTTGATACGTTTTGAAATTATTTCTAACGCTTCTCC
AAAAGCAACTGCTTTTGTGCAATAACATGCTCAAGAGGTCCACCTTGAATACCAGGGAA
AATTGTTTTATCTATGTCTTTTTTATATTCTTCCCTTACATAAAAATCATAACCACCAGTGGTC
CGCGTAATGTTTTGTGTGTTGTAGTTGTACAAAATCAGCATATTCTACTGGATTTGGATG
TAAACCTGCCGCTACTAATCCTGCAATATGTGCCATGTCTACCATTAACCTTAGCGTTTACT
TCATCTGCGATTTCTTTAAACTTTTTGAAGTCAATTGTTCTTGAATATGCTGATGCTCCTGC
CACAATAAGCTTAGGCTTATGCTCTAACGCTAATTTACGAACTTCATCATAATTGATTCGT
TCTGTGTCTTTATCTACTCCATATTCAACGAAATTGTAGAATTTACCACTAAAATTAACAG
GCGCTCCATGTGTCAAGTGACCACCATGACTCAAATTCATACCTAAAACCTGTGTGCGCCA
TTTCTAATGCAACTAAGTAAACAGCCATGTTTCGCTTGTGAACCTGAATGTGGTTGAACATT
GACATGTTTCAGCTCCAAACAATGCTTTAGCACGATCAATTGCGATGCTTTCAGTAACATCT
ACAAACTCACAGCCACCATAATATCGGCGTCTGGATAGCCTTCAGCATACTTATTAGTC
AACACTGAACCTTGTGCTTCCATAACCGCTTCCGATACAAAATTTCCGATGCGATTAAC
CTATGTTGCTATTTTGTCTCTGAAATTCTCTCTCGATTGCTTCTGCGATAACTTTATCTTGC
TTGGTGATATAAGACAT
```

### > sua5

Function: protein coding sequence; YrdC/SUA5 multi-domain translation factor protein (core genome, variable)

Best match: sua5\_CC001-ST772\_118\_AJGE01000006.1[21538:22593]RC (completely identical)

Position: 053-contig\_55\_RC: 50282 ... 51338; Length: 1056 bp

Sequence:

```
TCATAGTTCACATCCTTTAATAATGTGATTACCTGCAGCTTTTAAACATGCGATTCATAATT
GCTTCTGTATTATCATTTCAGCTCAAAGCCGTATATACGCCGCTGAAATATTTTCATTTT
CATCAAGTGAATGTAACACATCATAAAGATTATGACTCGCTTGTTTAACATCATTGTCATC
CTGACATAATTGAATGAATTGCGCTTCACTTGGTATAAACGCCACCTTATTACTCGGCACA
ATAAAAGCTATAGAAGACCAATCTTTACCGTCATTTCCAATTTTGTCTCTCAATATCTGTAA
TAATTGTAAGTGGTGTATTGGGTGAGTAATGCTTATACTTCATACCTGGTGAATTTGGCTG
TTCAGTATCATTATAATCAGCATGGGCGATACTATTCCGGAAGTATTTCTGTAATCATTGCT
GCTGTTATAGAACCAGGTCTTGCAATTTTATAAGGAAAAGATGTGCAATCTAAAACCGTA
```

CTTTCTAATCCTTCTTCACTTTGTTTCAGCTTGAACAATACCATCGATACGGCCATTCAAAT  
CTTGATATACATGATTGAAAGTTGTTGGTGAAGGTCTACCACTTAAATTAGCACTTGGAG  
CAGCTAGAGGTTTCATTTATGATTTGTAATAATTGTCTACCTACAGAATGGCTTGGCATTCT  
AACAGCAACTGATGATAAACCTCCAGAACTTTTCGACATAGATAGCCTGGCTTTAACGG  
CAATATAAACGAAATAGGGCCCGGCCAGAATGCCTGCATTAACTTTTCTACGCGTGGATC  
CAAAGTATATGTAATAATCTTTAATTGACCTTTACTGTGTATATGAACAATAAGCGGATTG  
TCAGATGGACGGCCTTTAGCTTCATATATTTAGCTACAGCTTCTTCATCTGTTCGATTG  
CTGCAAGTCCATAAACTGTTTCAGTTGGTAAACCTATTAACCACCGTTTTAAACAATGT  
CTTTTATTTCAATTAATTTAGGATATTGCTGTAATCTTCATTATATTCTCTAACATCCCAA  
ATTTTAGTATCCAACCTTAATCAC

> **prfA**

Function: protein coding sequence; peptide chain release factor 1 (core genome, constant)  
Best match: prfA\_CC001\_MW2-USA400\_BA000033.2[2194958:2196034:r]RC (completely identical)

Position: 053-contig\_55\_RC: 52235 ... 53312; Length: 1077 bp

Sequence:

TTATAATTCACCATTATTAAGTTCTTTCAATTTATCTGTCTGCTCTGATAAAGTCAGTGCAT  
CTATAATTTCTTCTAAATGGCCTTCCATAATTTGCCCTAATTTTTGAAGCGTTAGACCTAT  
ACGATGGTCTGTTACACGGCTTTGTGGATAATTATAAGTTCGAATACGTTCTGAACGATC  
ACCAGTACCGACTGCTGATTTACGTTGTGACGCATACTTTTGTGTTCTTCTTGAACCTTCA  
TATCGTATAAACGTGCTTTTAAACACTTTCATTGCTTTTTACGGTTTTGAATTTGAGACTTC  
TCAGAAGATGTTGCAATGACACCAGTTGGTAAATGGGTAATACGTACTGCAGAGTCAGTT  
GTGTTTACGTGCTGACCACCTGCACCACTTGAACGATACGTGTCGATTTTTAAATCTTCAT  
TTCTAATTTCAATTTCTACATCTTCAACTTCTGGTAAACTGCCACTGTAGCTGTTGAAGT  
ATGAATACGTCCACCTGATTCTGTTTCAGGCACACGTTGAACGCGGTGCGCACCATTTTCA  
AATTTCAATTTACTATACGCGCCATTACCAGAACTGAGAACTAATTTCTTTGTAACCAC  
CATGGTCACTTTCAGACGCTTCTACTATTTAGTTTTGAATCCTTGTGATTCAGCATACTTT  
GAATACATACGCATTAATCACCAGCAAAAATCGCAGCCTCATCACCACCTGCTGCTGCT  
CTTATTTCTACAATAACGTCTTTGTCATCATTAGGATCTTTAGGAATCAATAATATTTTAA  
GCTCTTCTTCAAGATTTGGAAGTTCAGCTTTAATACCATTACTCTCCTCTTTTAAACATTTCT  
ACTTCTTCTTTATCATCAGTCTCACTTAACATTTCTTCAATATCAGCTAATTTCTTCTTTTTTA  
GCTTTATAGTTACGATAAACATCTACAGTTTTTTGTAAATCAGCTTGCTCTTTAGAATATT  
TACGTAATTTATCTGAATCATTTACAACATCTGGGTCACTTAACAGTTCATTTAACTGTTC  
GTATCTTCTTCTACAATATCTAATTGATCAAACAC

> **tdk**

Function: protein coding sequence; thymidine kinase (core genome, constant)  
Best match: tdk\_CC005\_N315\_BA000018.3[2169392:2169991:r]RC (completely identical)

Position: 053-contig\_55\_RC: 53312 ... 53912; Length: 600 bp

Sequence:

TTATAATTCCTCCTTATTATTATCACTAGGTGCTACGATATGGTGC GCGCGACAACGTGGC  
TCATAACTTTTCATTGGCACCTACTAAGATAATCGGATCATCGATTTTAGCTGGTTTACCAT  
TTATTAATCGTTGCGTTCTACTAGATGAAGAACCACAAACAGCACAAACTGCTTGAAGTT  
TCGTTACTTGTTCACTGACAGCCATCAATTTAGGCATTGGTTCGAACGGTTTCGCCCTAAA  
ATCCATATCTAATCCAGCAACAATAACACGGGTGCCATCTGCTGATAGTTTTTCTACTATA  
CTTACAATTTTCATCGTCAAAAAATTGCACTTCGTCTATTCTATAACATCAACATTAGTTA  
AGTTGTGCGTCATAATTTCACTTGCTTTAGAAATATTAATCGCTTCAATGGCATTACCATT  
ATGAGAGACCACTTTTTCTTTATGATATCGATCATCAATCGCCGGTTTTAAATACAACGACT  
TTTTGTTTAGCGTATATACCCCTTCTTAGACGTCTTATTAGTTCTTCGGATTTACCGCTAAA  
CATACTACCTGTAATACATTCTATCCAACCGGAATGGTAAGTTTCATACAT

> **rpmE2**

Function: protein coding sequence; 50S ribosomal protein L31 type B (core genome, constant)

Best match: rpmE2\_CC001\_MW2-USA400\_BA000033.2[2196981:2197235:r]RC (completely identical)

Position: 053-contig\_55\_RC: 54258 ... 54513; Length: 255 bp

Sequence:

```
TTAGTTGTTTGAATTAAGACCAAACCTTTTGTGTTGAAACGTTCCACACGTCCATCCGCAGCA
GCGAATTTTGGACGTCCAGTGTAGAATGGATGTGAATCAGATGAAATATCTAAACGAATA
ACTGGGTATTCTTTTCCATCTTCCCCTCCATCATTTCTGAAGATGTTTTTGTAGAACCGCT
TAAGAATTTGAAGTTTGTAGTAGTATCTAAAAAGATTACTTGGTGATACTCAGGATGAAT
TCCTTGTTTCAT
```

### > rho

Function: protein coding sequence; transcription termination factor (core genome, constant)

Best match: rho\_CC005\_Mu50-VRSA\_BA000017.4[2247142:2248458:r]RC (completely identical)

Position: 053-contig\_55\_RC: 54630 ... 55947; Length: 1317 bp

Sequence:

```
TTAAATTATAGGTCGACCCGTTTTAGTACTTTCTTCTGCAGACTTTTGTAGCTGCTTGAAG
AAATCTTCATTATTCTTAGACCTTTAAGTTTGCGAATAAATCTTTCAGTAAAGTCAGTTG
AGTCAGTGAATAGATTTCTTAATTGCCATAATGTGTCTAATTCAGATTTACTTATTAACAA
TTCTTCTTTACGCGTTGAACTTCTGCCAATATCAATTGCAGGGAAGATACGACGTTTCAGAC
AATTTACGATCTAAATGTAACCTCCATGTTACCTGTTCTTTAAATTCTTCGTAAATCATAT
CGTCCATACGTGAACCCGTATCAACTAATGCAGTTGCAAGTATTGTTAAACTTCCACCCG
CTTCAATATTTCTCGCTGCACCGAAGAATGCTTTTGGTTTGTGTAAAGATGCAGGATCTAA
ACCACCTGATAATGTACGACCCTTGGTGGAATAACTAAGTTATAAGCGCGTGCTAATCT
CGTTATAGAATCCATTAATAAATAATGACATCTTCCCAATTTCTACTAAACGCTTTGCACGT
TCAAGTAATAATTCAGCTACTTTAACATGGTGTCTGGTGGTTTCGTCAAACGTTGAATGAA
CGACTTCAGCAGCTTCTACTGAGCGTTCTAAATCTGTCACCTCTTCAGGACGCTCGCCAAC
TAACAAAATAAATAGCTTTGCATCTGGTTTGTTCGTACTGATTGCATTTCGCTATTTCTTTTA
ATAACGATGTTTTACCTGCTTTAGGTGGCGCCACTATTAACCACGTTGACCTAAACCAAT
CGGTGTTACTAAATCCATGATGCGCGTTGAATAATTTTGTGTTTCTGTCTCTAATTTAATA
CGCTCATCTGGATAAAGTGGTGTCAAAGCTTGGAAATGCGGACGTTTCTTCACTTCTTCTG
CGTTATGGTCATTGACAAAGTCAACTTGTAAATAAGCCATAATATTTTTTCGTTATCTTTAGG
TTTTCTAACTTTCCAGTTACTTTATCCCACGTTTAATTTCAAACGACGAATTTGGCTA
GCAGATATATAAATATCTTTTTCCCCTTTAGAATAGTTCAGTGTCTTAAAAAACCATAAAC
CATCTGGTTGTATATCATCTAAGATACCTTCCATATAATAGTTACCATCTTTTTCCATTTGT
GCTTCCATAATAGCTAGAACAAGTTCTTTTTTATTTAATTTACTATAGTTTCGTCAACTTAA
GAGTTTTAGCTTTTTGAGTGAGTTCCTTGGTAGTATAGTTCTTGTACAATTCGTGGAATGA
TTCATACTGAGGAGATGTACGTTCTTTTCAGGCAT
```

### > aldA3

Function: protein coding sequence; aldehyde dehydrogenase/locus 3 (core genome, variable)

Best match: aldA3\_CC005\_Mu50-VRSA\_BA000017.4[2248705:2250132:r]RC (completely identical)

Position: 053-contig\_55\_RC: 56193 ... 57621; Length: 1428 bp

Sequence:

```
TTATTTAAAATATCCAGCTATAGATTTCACTTCTAAGAACTCTTCAATACCATAATCGCCC
CATTACGACCTAAACCAGATTGTTTATAGCCACCAAATGGTAAATCTGGCTTTCTACCTG
CTTCGTTTATTTCTACTGTACCTGCTTCAATAGAACGAGCTACTTTATGCAATGTTTCTTTG
TCCTTACCAATAACATATCCTGCCAAACCATATTTTGTATCATTTGCAATTTGAATCGCTT
CATCTAAATCGTTATAAGTGATAACTGACATTACTGGCCAAAAAATTTCTTCTTGTGCTAT
CGTCATTTGATTATCTACATTAATAAAAATTGTCGGACGTGCAAAGTATCCTTTTTCAAGT
CCTTCTGGTTTACCAGGACCACCATAAAAATAATTCAGCACCTTCTTCAATACCTTTATTAA
TATAATTTTGTACTTGTATCAAATGTTTTTTACTAATGATAGGGCCTACTTGTGTACCATCT
TCTCTTGGATTACCGACACGCACTTGGCTAAATTGTTCTTTTAATTCAGCTAAGAATGCAT
CTTTAATTTTGTAGGCACTAAAACACGTGTACCAGCTGTACATACTTGACCAGTATTATT
AACAACTTTGCCTGTTGTTGCTTTAGCCGCTTCTTTAATATCTACGTCATCTAGGACGATA
```

TATGGTGATTTGCCACCAAGCTCTAATGATACCTTTTTAAAATCTTTAGCGGCTTTTTCCA  
TAATTTTAGAACCAGTAGGGCCTGATCCTGTGAATGACATCATGCGTACTTTAGGATGTTCC  
AGATAAAGGATTTCCAACACCAGCACCATCACCATTAACAAGGTTAAATACACCTTTAGG  
AACACCGACTTTATCAAAAATCTCAGCTAAAATAACAGCTGCAAATGGTGTTCCTTCAGA  
TGGTTAAGTACAACCTGGACTACCAGCCGCAAATGCTGCTGCTAATTTAATGATGTTTGG  
TTTGTAGGGAAGTTCCACGGTGTAAATTAATCCAGATACACCGATTGCTTCTTTAACAACCTA  
AATCATCTCCGCGGCGTTCTTCAAATTCGTAGTTATCTAATGCGTCTCTCGCTGCAACAAA  
ATGGTTTAGTCCCATTTGATAATGGACACGCTCAGATAATGATAAAGGAGCACCTAATTC  
ATCCGTAATAGCTTGTACAATATCGTCTTTTCTGTTTTTCATATTCTTTTACAATTTTATCTA  
ATAACGCTTGTCTTTCTTTCACAGATGTATGACGGAACTCTAAATAAACATCGTCTGCCGC  
CTCGACGGCTTTATCAACATCAGCTTTATTACCTTTAGCAACTTTCCCGATTACTTCTTCGG  
TTGCTGGATTTATAACTTCTATCGTTTCATTACTATTACTTTCTACCCATTCGCCATTAATG  
TATTGCTTTGTGTAGTCTCTCAT

> **murZ**

Function: protein coding sequence; UDP-N-acetylglucosamine 1-carboxyvinyltransferase 2 (core genome, constant)

Best match: murZ\_CC005\_Mu50-VRSA\_BA000017.4[2250794:2252053:r]RC (completely identical)

Position: 053-contig\_55\_RC: 58282 ... 59542; Length: 1260 bp

Sequence:

CTATACAGTTTCCGTCCAAATATCTGCACCTAAAGCTTTTAAAGTGTCTACAATATCTGTA  
TAACCTCTATAAATATGTTTTACATTGTAAATTGTAGTTACACCCTCAGCAATTAACCAG  
CAATAATTAACAAGCTCCTGCTCTTAAATCGCTAGCATAAACTTCAGCACCATGTAATG  
TTGATGGTTTTATCGTTGCTGTGCCTTCGTCAACTTCAATATTTGCACCCATGCGCTTTAAT  
TCTTCAACATGTTTAAAACGCTCCGGATAAATCGTATCAGTTACAAATGAAGGACCATTT  
GCCATAAATAAATGGTGTAAATAGGCTGTTGCAAATCAGTAGCAAAACCTGGATATACT  
AGTGTTTTAAATATCAACAAATTGATATGGCGCATTATTATTGATGCGAATTCCTTCGTCTC  
TTACATCAACATTCACACCTAATTCATAAATTTAGCAGTTAATGTTTCTACATGTTTCGG  
ACAATATTATTTAATAAATATTTCTCCACATGCTGCAGCGATACACATATATGTGCCT  
GCTTCAATTCTATCAGGTATAACTTGATACTCAGAACCATGTAATTCCTTGACACCATTGA  
TTTTAATTGTTGATGTGCCCGCTCCCTTAATATTAGCTCCCATACTTGTTAAGAAGTTAGC  
AACATCAACTACTTCCGGTTCTTTAGCAGCATTTTCAATTACAGTTTGCCTGTTGCATAA  
ACTGCAGCTAGCATAATGTTAATTGTTGCACCTACGCTAACCATATCTAGAAAAATATGC  
GCACCTTTTAATTCTTTAGCTTCAATTTTCATTGATGTCGTGCTTGATTCAATTTTCAGC  
ACCTAAAGCTTTAAATCCTTTAATATGTTGATCAATTGGACGTGGCCCAAGTGGACATCCT  
CCCGGTAAACCAATCACACATTTTTTAAATCTACCTAACATGGCACCCATCATATAGTATG  
AAGCACGTAATGATTCAACTTTATTATTGGTAATGCAGCATTTTGTATTTAGTTGTATC  
AACTTCTAATTCGGTACCATTTAGTGATGCCTTAATTTTAAATCTTCTAATAAACTCACT  
AAAGTTTTAACATCAGAGATTTGCGGTAACCCTTCTAATTTACATGTCCTTGAGCTAATA  
ATGTTGCAGGAATGATAGCTACAGCACTGTTTTTCGCGCCACTGATATTAACCTCCCCATT  
TAGTGTGCGTCCACCTCTTATTTTTATTACCTCTTGAGCCAT

> **fbaA**

Function: protein coding sequence; fructose-bisphosphate aldolase (core genome, constant)

Best match: fbaA\_CC005\_Mu50-VRSA\_BA000017.4[2252519:2253379:r]RC (completely identical)

Position: 053-contig\_55\_RC: 60007 ... 60868; Length: 861 bp

Sequence:

TTATTTAGCGCGGTTTGAAGTACCGAACTCTTTAATTTTACCTTTAACTGTTTCTTTGATGG  
CTTCACGTGCAGGTCCTAAGTATTTACGAGGATCGTAAACTTCTTTGTCGTTATTTAAAAC  
GTCACGAAGTCTTTTGTGAAGCGATTTGGTTTTTTCAGTGTTCAGTTAATTTTAGCTGTA  
CCAAATGGAATTGCTTTTTGGATATCTTTAGTCGGGATACCAGTACCACCGTGTAACTA  
ATGGTAAACCTGTAGATAAACCGATTTCTTCCATTTCTTTAAATCCTAATTTTGGTTCCACC  
TTTGTATGGACCATGAACTGAACCTAATGCTGGCGCTAATGCATCAATACCAGTTTTTTCA  
ACTAGTTCTTGACATTCCTTAGGATCAGCATAAATGATGCCGTCTGCTACAACATCATCTT  
CTTGTCACCAACAGTACCTAATTCAGCTTCTACAGAAACACCTTTTTTCATGAGCGTATTC



AACTTTTGTGCTACGTTTTCTTCGAATGGGCTGTGTGAAGCATCGATCATT  
ACTGATGTGAAACCAGCATCGATAGCTTCTTTACATTTTTCAAAGCTTGAACCATGGTCTA  
AATGGATTGCTACAGGAATAGTGATGTTAAAGTCATGCATTAACCCTTCAACCATTTTAAAC  
AATTGTGTAGAAACCGCTCATGTAACGAGCAGCACCTTCAGAAACACCTAAAATTACAGG  
TGCATTTTCTTGTGACGCTTCTAAAATTGCTTGAGTGAATTCTAGGTTATTAATATTGT  
ATTGACCTACCGCATAACCATTTTCTTTGCATCAATTAACATTTCTTTCATTGAAACTAA  
AGGCAT

### > **pyrG**

Function: protein coding sequence; CTP synthase (core genome, constant)

Best match: pyrG\_CC005\_Mu50-VRSA\_BA000017.4[2254227:2255837:r]RC (completely identical)

Position: 053-contig\_55\_RC: 61715 ... 63326; Length: 1611 bp

Sequence:

TTATTTATTTGTTGATATTTTAAATGAAGCTTCAATAAATGATTTAAAAATCGGGTGC  
CGATTTGGTCTAGATAAGAATTCTGGGTGGAATTGACAAGCAATAAAGAAATCATTGTC  
GGAATCTCTACCATTTCTACTAAACGTCCATCTGGACTTGTACCAGAAATTACCATA  
TTGCTTCTAATTGTTCTCTATAGTCATTATTAATTCATAACGATGACGATGTCTTTCTT  
ATTTCCGCTTTACCATAAACATCTTGTGCCAATGTGCCTTCTTTAATAGAACATGGATA  
AGCCTAAGCGTAATGTACCACCTAAATCTTCGATATCTTTTTGTTCTGGTAATAAATCTAT  
AATTGGGTATGGTGTGCTGGGTCTAATTCAGCTGAATGTGCGCCTTCAAGTCCTAATACG  
TTTCTTGAAAATTCAACTGTTGCAAGTTGCATTCCTAAACAAATACCAAAGAATGGTACA  
TTGTTTTCTCTAGCATACTTAATTGCACTAATTTTACCTTCACTTGCACGGAAACCAAATC  
CACCTGGTACTAAAATACCGTCGACATCTGCAAGGTATTTCGGCTGCATTTTCATCTGTTAC  
TTCCTTGAATCAATCCATCTAATGTCAATATCTTTGGCAAAGGATATCCAGCATGTTTC  
AATGATTCAACAACCTGATAAATATGCATCTTGTAAAGCTAACATATTTACCTACTAAACCA  
ATTGTAATTTTACCATCTAAATTATTAACGATATCTAACAACTGTTCCATTCATCAAGCT  
GTGTTTCATATTTTCGCGTTTAATTGTAACGTTAATAACGATATCATCCATATTTGTTGG  
CTTAATTGTAATGGAATTTTCGTATAAAGAGTCTGCATCACGACATTCAATAACACTTTCTT  
TATTAATGTACAGAATAATGCAATTTTATCTTTTAAATCTTGTGTCATTTTCATATTCAGTT  
CTTACAACGATTAAGTCTGGTTGAATACCTAAGCCTCGTAATTCCTTAACTATGTTGTG  
TTGGCTTCGTTTTTCATTTCTCCAGCAGCTTTAATATAAGGCAGTAATGTACAGTGAACATA  
CATAACATTTTCTCTACCTAAATCGCTACGAATTTGACGAATCGCTTCAATAAACGGTAAT  
GACTCAATATCACCTGTTGTACCGCAATTTTCAGTGATAACAACGTCTGCATTCGTACTTT  
CCCCTGCAAGTAATAAACGTTCTTTAATTTTCATTTGTAATATGCGGAATAACTTGA  
TCCGCTAAGTAATCACCACGACGTTCTTTTTTCAATACGTGTGAATACACTTTACCGGCT  
GTCACATTTGAAAACCTGTTTAAATTAATATCAATAAATCTTTCGTAATGTCCTAAGTCTA  
GGTCAGTTTCTGCACCATCATCCGTTACGAATACTTCACCATGTTGATAAGGACTCATTGT  
ACCTGGGTCAACATTTAAGTATGGATCGAATTTTTGAATTGTTACATTTAGACCTCTATCT  
TTAATAATCTACCTAGAGAAGATGCTGTAATACCCTTCCCTAATGATGAAACTACGCCA  
CCTGTTACAAAATAAATTTTGTTCAT

### > **rpoE**

Function: protein coding sequence; DNA-directed RNA polymerase delta subunit (core genome, variable)

Best match: rpoE\_CC005\_Mu50-VRSA\_BA000017.4[2256173:2256703:r]RC (completely identical)

Position: 053-contig\_55\_RC: 63661 ... 64192; Length: 531 bp

Sequence:

TTAATCGTTGAAGTCTTCTTCGTCTTCAAACTTCTTCGTCTTCGTCTAGTTCATCTTCAT  
CTTCTTCAATGACTATATCCGAATGATTGATTTCTTCTTCAACCTGCTCATCTTCTGGATCA  
TTTAGTTCTTCTTGATCATCTGTTTGAGCTGGAATATCATCGTCGTCATCCATTTTCATCTTC  
GCCAATAATTTTAAAGTTTGTATCTTCTTCATCATCTGCATCCAGAATATCGAATTTTTGA  
ATAGTTGGTGCATTTTCTTCAATATCATCTACCGAATACCAATCACGTAATCCCCATA  
AATTTTCTCCAACATTTAAAAACGACCATCTGTGTTTAAATCTGTGTAATAATTGTACAAC  
GCGATTTTCAATTTCTTCGTACTCATAATCACCTAACGCTCTAACTCATCGATGATATCA

TATAAGTTCATAGTTTCGCCTTTATCATTCAATAATGTATAAGCCATATCAATAAATGATT  
TTTCATCAACCATTTGTTTTGTATAATCTTGAATTTTCAT

> **coaW**

Function: protein coding sequence; pantothenate kinase type II

Best match: coaW\_CC005\_Mu50-VRSA\_BA000017.4[2258100:2258903] (completely identical)

Position: 053-contig\_55\_RC: 65588 ... 66392; Length: 804 bp

Sequence:

ATGAAAGTTGGCATTGACGCTGGCGGTACACTAATTA AAAATCGTTCAAGAGCAAGATAAC  
CAACGTA CTTTTAAA ACTGAATTA ACTAAAAATATTGATCAAGTTGTGGAATGGTTAAAC  
CAACAGCAAATTGAAAAATTATGCTTA ACTGGAGGTAATGCAGGTGTCATTGCTGAAAAC  
ATCAACATTCCTGCACAAATTTTTGTAGAGTTTGATGCTGCATCTCAAGGACTAGGTATTT  
TGTTAAAAGAGCAAGGCCATGACTTAGCAGATTATATTTTTGCAAATGTTGGTACCGGTA  
CGTCACTACATTATTTTCGACGGCCAATCACAACGTCGTGTAGGCGGTATCGGTACAGGTG  
GAGGCATGATTCAAGGACTCGGTTATTTACTAAGTCAAATCACTGATTATAAACAGTTAA  
CTGACATGGCACAACACGGTGATCGTAACACTATCGATTTAAAGGTTAGACATATTTATA  
AAGATACCGAACCACCCATTTCCCGGTGATTTAACAGCAGCTAATTTTGGTCATGTACTAC  
ATCATTTAGATGCTGATTTTACACCTAGCAATAAATTAGCAGCCGTTATTGGTGTCTGTTGG  
CGAAGTTGTTACGACAATGGCCATTACTGTTGCACGTGAATTTAAA ACTGAAAATATCGT  
TTATATCGGTTCTTCATTCCATAATAACGCTTTATTACGCAAAGTTGTGGAAGATTATACT  
GTGTTACGCGGTTGCAAACCGTACTATGTTGAAAACGGCGCATT TTCAGGTGCTATTGGT  
GCATTATATTTAGGTAAATAG

> **txbi\_coaW**

Function: bidirectional rho-independent terminator of coaW

Best match: txbi\_coaW\_CC005\_Mu50-VRSA\_BA000017.4[2258894:2258970] (completely identical)

Position: 053-contig\_55\_RC: 66382 ... 66459; Length: 77 bp

Sequence:

AGGTAAATAGAAAAAGACCATTTATATGCGCGTTGTTTTAAATAAACGCTATATAAATGG  
CCTTTTATTTTATGGTC

> **tx\_A5IUS7**

Function: rho-independent terminator of coaW

Best match: tx\_A5IUS7\_CC001\_MW2-USA400\_BA000033.2[2210230:2210272:r]RC (completely identical)

Position: 053-contig\_55\_RC: 67509 ... 67552; Length: 43 bp

Sequence:

CTAGAATCGAAAAAGCTTGTTACAAACGCATATTCAGTCAAC

> **A5IUS7**

Function: protein coding sequence; putative protein (core genome, constant)

Best match: A5IUS7\_CC001\_MW2-USA400\_BA000033.2[2210313:2211506:r]RC

Position: 053-contig\_55\_RC: 67592 ... 68786; Length: 1194 bp

Sequence:

CTAATAGTGTTC AAGTT CAGCTAAA AATGCGCGTTCATTCTCCAGTACTGTTTCTTTTGAA  
TCACCATGCCAAATACAGCCAAACCTTGATTTAACTTTATCTTCACCGTACCAATCACCAT  
CATAATAAGATAACGGGTATAAACTACCTTCTTTGACATATTTCAA AATCGTATTGAAGA  
AATGTGTGTTATCACCTTTTGAATGATAACTATAAACTTTTGATATCTGAATTCAACTC  
GTTAGCAAGTAATAACATGCTCGTTGAACCATTTTGTCTAAAGTTTAAATCAATCGCATA  
AACGTTATCATCCTCATCGACGAGTAGGTCAA AACCAGCTACACCAAAGAATCCTTGATT  
CACACCGTTTTCCATAATTTGTCTACCTGCTTCTATAACGTGCTCTGGTACATTAGTAGTA  
TTTTCATTTCCGTTATAAAATCCGTA CTTATCCGTTAATTGCGTTGCCGCACCAAGATATT  
GAATGCCTAGCGATTCCGAGTATGCAA ACTGAACGCAATAATTCGCTTTTTCTTCAATCTT  
CTGTTGATAATAAGCGAATTCGTTTCAGCAGTTGCCTCTTTAATACGCGTTATCGCTTTT

TGTAATCTGCATCATGATAACAAATCATAACGCCATAGCCACCTGCTGTCGGAAGATCA  
TCTCCCGGCTTAATTACTAACGGGAATTCTCAATTCTAATCTCGTTTTCGAATTGCTCAA  
TTTTTACAACCTTTCTTTTTGGTAAAAACTTCCCATTTGTCCATTCAGGTATTCTTGCTTTA  
TTATTTAAAGCAACAAATAACGTTTTATCTAATGCATAAATATTGCTGATTCAAGATTGTTT  
CATCATGAATATATTGAAAATAAATCTTTTTATTTTCCCTTATGTGCCAATTGTTTGATCAA  
GTTTTCGTAAGATTGCTGATTGTTAAATGTAAAAATTGAGTTCGGTACTTCCCTACCAATA  
ACTTGAAATAGCTGATGCAATTTGTCTGTGCGACTAGCTTCGTGAACAATAACAGGTAAT  
TGATTTGCTATTAATAACTCCCTACCAGTTAAAAAATTAGATTGATGTTTCGTCCGGTTTCA  
ACCATGGATTTCGATATATACGAAGGTCTTGACGTATAGACAACATCTTTGTCATATAAAT  
CACTAACGTTAAGTTCGGCTCATTACCATTATTTGTCAT

### > **hmrA**

Function: protein coding sequence; putative peptidase

Best match: hmrA\_CC005\_Mu50-VRSA\_BA000017.4[2261297:2262481:r]RC (completely identical)

Position: 053-contig\_55\_RC: 68785 ... 69970; Length: 1185 bp

Sequence:

TTACTTCCCATTCCCTTTCAAATGCGCATGCTCTTCAATAATGTCTTGATAAACGTCTTGAT  
TTGTAATTAACTCTAACCCCATCAACGCCATTATTTTAGCACCTTAATTAATGCTTCATC  
ACCATGTACACTCGCAGCCGCCTCTCTAAATCTATGCGTATGTCCTACTAAATTACGTGAT  
CCTATTTAATATGAGGATGTATTGTTGGCACAACATGACTTACGTTCCCTGTATCCGTAG  
AGCCATAACCAAAATCATCATCAATAACTGCTTCACCAACTTCTTCAGCATATTTAGCAA  
ATAAATCATCTAATTTTCGGCGTTTTAATGAATTCATTCACACCGTTTTGAATTGGACCAA  
TTCATAATCACAACCAGTCTGTATCGCAGCTCCACGTGCGATTTGATTTACTTTTTCTGTT  
AATATATCCAATTCTTTACGCGTCATTGCTCTAGTATAAAAACGAGCATGTGTATAGTCTG  
GAATAATATTAGCTGCTTTCCCGCCATCTAAAATCACACCATGCACACGTTGATCTTTTTT  
AATATGTTGTCGTAGTTGTGCTACACCATTAAAATAACTAATCATAGCGTCTAATGCATTT  
AACGCTTCATCTGCATTTTCAGAGGCATGAGCACTTTTTCCGTAAAATTTAACATCTAAAA  
CATCCACTGCCAAAGTATCAATCGTTTTATAAGTTTCATTTCCCGGATGAATCATTAAGGC  
AATGTCTATTTGATCAATCACACCAGCCTTGACATAAGAAGCTTTAGCGCTACCATTTTCC  
CCACCTTCTTCAGCTGGACATCCAAGAACGACTACTTTACCACCAATTTGGTCAATCACTT  
GCTTCAAACCAATTGCACCAAGCACACTTGCAGTTCCAATGATATTATGACCACAAGCAT  
GACCAACCTGGCAAAGCATCGTATTCTGCTAAAAACCTATAGCTGGCCCGTCAAGAC  
CTGAATCATATGTCGCTATAAACCCAGTTGCATGCCAGCAATCTCGGTTTCAATTTCAA  
ATCATGCTCTTTCAAACGATCTATTAAGTTTCGAGACGCAAATATTTCTTCATTACCAAGT  
TCAGGACGTTTCATGAATTCTATGACTGATTTTCGATATAACTATATTTATTTGTTTCTATA  
ATCGAGAATTTGTTGTTTTTCACTCAT

### > **luxS**

Function: protein coding sequence; putative autoinducer-2 production protein (core genome, constant)

Best match: luxS\_CC005\_Mu50-VRSA\_BA000017.4[2262792:2263262] (completely identical)

Position: 053-contig\_55\_RC: 70280 ... 70751; Length: 471 bp

Sequence:

ATGACAAAAATGAATGTTGAAAGTTTCAATTTAGATCATACTAAAGTGGTTGCCCCATTT  
ATTAGATTAGCGGGAACGATGGAAGGATTAACGGAGATGTCATTCACAAATACGACAT  
TCGTTTTCAAACAACCAAAACAAGAACATATGGATATGCCAGGACTACATTCATTAGAACA  
TTAATGGCTGAAAATATTAGAAATCATAGTGACAAAGTTGTTGATTTAAGTCCTATGGG  
TTGCCAAACTGGTTTCTATGTATCATTTATTAATCATGATAATTATGATGATGTATTAAT  
ATTGTTGAAGCAACTTTAAATGATGTGCTAAATGCTACTGAAGTGCCTGCTTGTAATGAA  
GTACAATGTGGCTGGGCAGCAAGTCATTCATTAGAAGGTGCTAAAACCTATCGCTCAAGCA  
TTTCTAGACAAACGAAACGAATGGCATGATGTTTTCCGGTACAGGAAAATAA

### > **qrrB**

Function: noncoding RNA antisense RNA (core genome, constant)

Best match: qrrB\_CC001\_MW2-USA400\_BA000033.2[2213319:2213663:r]RC (completely identical)

Position: 053-contig\_55\_RC: 70598 ... 70943; Length: 345 bp

Sequence:

```
AATGATGTGCTAAATGCTACTGAAGTGCCTGCTTGTAAATGAAGTACAATGTGGCTGGGCA
GCAAGTCATTCATTAGAAAGGTGCTAAACTATCGCTCAAGCATTCTAGACAAACGAAAC
GAATGGCATGATGTTTTTCGGTACAGGAAAATAAATCTTAGTCAATCAAGTTAATCAGAAA
AGCAGTCGAACAATGATGTTACAATCGCCATTGTCCAAGTCTTTTTATTATGCTTCAAAG
TCAAAAAATCGAACAAATGAAAAAGTAAATCTTTAACATTTGTCCGATTTATTTGAGAA
CCACTATAATTTCTTAATTAGTCCCATTAACACGAACTGCATAG
```

### > **pdp**

Function: protein coding sequence; pyrimidine-nucleoside phosphorylase (core genome, constant)

Best match: pdp\_CC005\_N315\_BA000018.3[2187346:2188647:r]RC (completely identical)

Position: 053-contig\_55\_RC: 71266 ... 72568; Length: 1302 bp

Sequence:

```
CTACTCTGTAATGATTTTATGAATTAATGTAGGCGATACAACATGATCAGCAATTGTTATG
CTTGAATCTAATTTTTTAACAACATCGTCTACATCTTGGCGATTACTGTGAATCGTTAATA
ATGATTCTCCTTCTTCTACTTTATCACCAATTTTTTTATTTAAAACAATACCAACCGCTAAA
TCAATATCATCCTCTTTTGTAAACGTCCCGCTCCTAACATCATCGAAGCGACACCTATAT
CGTTAGAGACTAATTCAGTCACATAACCTGATTTTTTAGCTTTATATTCAATTTGATATTG
AGCTTGTGGCAAACGCTCTGGATGGTCAATAACAGTTTCGTCGCCACCTTGGTTTTTAATA
AATGTTTTGAATTTTTCTAATGCTGCACCTGAATTAATTGCCTCAATTAGCAACGCTCTCG
CTTCTTCAAGCGTTTCAGCTTTGTTTGCAAGTACAACCATTGAGAACCCTAATGTTAATAC
AAGTTCTGTTAAATCTTTCGGACCTTGCCTTTCAACGTATCAATTGCTTCTTGTAACTCAA
GCGCATTGCCAATCGCACGTCCAAGTGGCTGATTCATATCAGAAATAATCGCCATCGTAT
TACGTCCCACATTATTACCAATACGTACCATTGCGTGCCTAATGCTTCAGCATCTTCTAA
TGTTTTCATAAATGCACCGCTACCAGTTTTTACATCTAATACAATTGCATCTGCACCAGCA
GCAATCTTTTTACTCATAATTGAAGAGGCAATTAATGGTATTGAATTGACAGTACCAGTA
ACATCCCTTAAGGCATATAATTTTTGTCTGCAGGAGTTAAATTTCTGATTGTCCTACAA
CTGCCACTTTATTTTCATTAACCAATTTCACAAATGTTGCTTCATCTATTTCAACATGAAA
ACCATCAATTGCTTCTAATTTATCAATCGTACCACCTGTATGACCTAATCCACGCCCACTC
ATTTTTGCAACAGGAACATCTACAGCTGCTACTAATGGTGCTAAAACCAATGTAGTTGTA
TCTCCTACACCACCTGTTGAGTGCTTATCTACTTTGACACCTTTAATATCACTCAAATCTAT
CATATCACCAGAATTAACCATAGCCATCGTTAATGCTGCACGCTCATCATCATTTCATATCT
TGAAATAAATCGCCATTGCTAAACTTGATGCTTGGTAATCAGGAATATCCCCTTTAACA
TAGCCGTCAATAAAGAAATTAATTTCTTCCGTTGTTAGTGTATGACCGTCACGCTTTTTCT
CAATAATGTCTATCATTCTCAT
```

### > **deoC-L2**

Function: protein coding sequence; deoxyribose-phosphate aldolase locus 2 (core genome, constant)

Best match: deoC-L2\_CC005\_Mu50-VRSA\_BA000017.4[2265358:2266020:r]RC

Position: 054-contig\_56\_RC: 87 ... 237; Length: 150 bp

Sequence:

```
TAGTCGCTCTGCTGCATATTTAACATGCGTTGGATTCACACATACAGATTTAAAATGGTAT
GCTTTCGCTTCATCGATGATTTGATCGATTTGCGTACGTGTTGACTCAGGCTTCAATAAAG
TGTGATCAATCAATTTTGCACCTATTCAT
```

### > **deoD-L2**

Function: protein coding sequence; purine nucleoside phosphorylase locus 2 (core genome, constant)

Best match: deoD-L2\_CC001\_MW2-USA400\_BA000033.2[2216546:2217256] (completely identical)

Position: 054-contig\_56\_RC: 550 ... 1261; Length: 711 bp

Sequence:

```
ATGACAAAAGGTACACCACATATTCAACCAAATGGAGTAAAAATTGCTAAAACAGTATT
AATGCCTGGCGATCCGCTACGCGCAAAATATATTGCTGATAATTTTTTAGAAAATGTTGA
ACAATTTAACGATGTACGTAACATGTTTGGTTACACTGGTACATATAAAGGTAAAGAAGT
```

TTCTGTAATGGGTTCTGGTATGGGTATTCCAAGTATTGGTATTTACTCATATGAGTTATAC  
AACTTCTTTGATGTAGATAACAATCATTTCGTATCGGTTCTTGTGGCGCATTACAAGAAAATG  
TTAACTTATACGATGTTATTATTGCACAAGCTGCATCAACTAATTCAAATTATGTAGATCA  
ATACAATATTCCAGGTCATTTTCGCGCCTATCGCTGACTTCGAGTTAGTAACTAAAGCTAA  
AAATGTCGCTGACCAAATCGGTGCTACTACACACGTAGGTAACGTATTATCTTCTGATAC  
ATTTTACAATGCCGATCCAACATTCAATGATGCTTGGAAAAAATGGGTATTTTAGGTAT  
CGAAATGGAATCAGCTGGTTTATATTTAAATGCGATTCATGCTGGTAAAAAAGCACTTGG  
TATTTTACAGTAAGTGATCATATTTTACGTGACGAAGCTACTACACCTGAAGAACGTCA  
AAATTCATTTACACAAATGATGGAAATCGCTTTAGAAATCGCAGAGTAA

### > **dpsA**

Function: protein coding sequence; general stress protein 20U (core genome, constant)

Best match: dpsA\_CC001\_MW2-USA400\_BA000033.2[2217377:2217820:r]RC (completely identical)

Position: 054-contig\_56\_RC: 1381 ... 1825; Length: 444 bp

Sequence:

TTAGCTTAAGTAAGATTTAAACATCCAATTATGTTTATCTACTGATGTTTGCATACCTATA  
AACATATCTTCTGATACATCATCGCCAGCATTACCAGCAATTTTCGATTGCGTTTTCTAATT  
GTTTTGAGATATTTGTGAAGTCTTGTGATAATTCTTCAACCATTTGTTCTGCAGAGTAACC  
TTTCGCAGCTTCTTTAAACAATTGATTGCTCTAAGCATTTCAGTTAATGTACCTACAGGGTTT  
CCTCCTACCGCTAAAATTCTTTCAGCTAATTCGTCTACATATTGGCTTGCTTCATTATATAA  
TTCTTCAAATTTAACGTGTAATGAGAAGAAGTTAGGTCCTTTCACATACCAGTGGAATT  
ATGTAGCTTTGTGTAAGCTACTGTCCAGTTTGCTACTTGTTGATTCAATTCTTTTACAACAT  
CTTGTTGATTACTCAT

### > **manA1**

Function: protein coding sequence; mannose-6-phosphate isomerase/locus 1 (core genome, constant)

Best match: manA1\_CC005\_N315\_BA000018.3[2194552:2195490:r]RC (completely identical)

Position: 054-contig\_56\_RC: 5200 ... 6139; Length: 939 bp

Sequence:

TTACACATAGCTAATCATCAATGTGAAATCGCCTTCAAAGACACTATCCAAATCTTCAGA  
AGTCAAAATAAAGTTTGTACCAGTAGTCAGTTTGAAAATTTACCACATCGACAATCATTG  
TCCTTCACCTTCCAACACTGTAACTAAACAGAACTCTCTAGGCTTCATATAATTTAACGTG  
CCAGAAATTTCCCATTTAACCAATGTAAAGAAATCATTTCGATAACAATGTGTGTACTACTTA  
TGGTTTTCAATAATTTCACTTTCAGGCAAATATTAGGTAATGGTGCATTGTACTGAATAA  
CGTCTAAAGCTTTTTCAATATTTAACGGTCTATCATTATATTGATTATCTTGACGATTGAA  
ATCATAAAGTCTATATGTAATGTCTGACGATTGCATCGTTTCGTATGCTAATATTCCTGAA  
GAAATAGTATGACTGTTCTGCTGGAATAAAATAGAATTCTCCAGGTTTTACTTTAATAT  
ATCTAAGTATCGACTCTATCGTTCGGTGTGAACATGATTTCGCAACTTCTTCTCTAGACTC  
TGCTAATGTCCCTATAACTATTTCTGCATCTTCTTCTGCATCTATAATATACCAACATTCAG  
ATTTGCCATATTGCCGTTTTTCATGCTCATAAGCATAAGAATTATCAGGGTGCACATGAAT  
AGAAAGTGATTCTTTCATCCACTATTTTAGTTAGAAGCGGAAAATCTTTGCTTGGGAA  
ATCACCAAACAATTCACGATGTTCTGACCAAATACGGTCTAATGTTTGACCTTGATATGGT  
CCATTAATAATCTCGCTCGTACCATTTGGATGTGCTGACACACACCAACATTCCCCAGTTG  
TATCATTGTCTAATTGATATCCAACTCACTTAGACGTTGACCGCCCCATAATTTTGTTTTT  
AAAATTGGTTGTAAAAATAATGGCAT

### > **Q1Y8Q1**

Function: protein coding sequence; putative protein/contains epimerase domain (core genome, constant)

Best match: Q1Y8Q1\_CC001\_MW2-USA400\_BA000033.2[2222571:2223236:r]RC (completely identical)

Position: 054-contig\_56\_RC: 6574 ... 7240; Length: 666 bp

Sequence:

TTAATCCTTTTCAATTTCAAATTGAGTTAAAGCATCTTTAATGTCCTGCTCACCCTAATA  
ATTTGAAACTCTTGGTGATTAATAATGATTGGATGTGACAATTTCTTTAATACTGTGCGAA  
CATCTTCTCTAGGAATTTACCTTTACCATCAAAATATTGTGCAGCTTCTATCTTTCCAGAT  
CCTGCTGCATTTGTAAGTGCCCTGGATGTAAAATTGTATAATTCAAACCTGAACGTCTTA  
AATAGTCATCAGCGTAATGTTTAGCTATTGTATATGGCTTTAAATCACCGCTATCATCAAA  
AGCCTGACGTCTCGAATCATATGTTGAAACCATGACATAGTGTTTAATATTAGCCTCTTTA  
CTCGCAATCATTGATTTAACAGCACCATCTAAATCGACAATAATTGTTTTATCTGCACCCG  
TGTTCCCTCCAGAACCTACTGAAAAGATAACTTTATCGAATGGTTTAAACGTCTCAGTTAA  
AGTCTCTATTGAATCATTTTCAACATCAACAAGAATTGCTTTCATACCTTGTGATTTTAAAC  
GCATTAAGTTGATCTGATTGCCTAACACCAGCAGTAAATGGTACATTTTCTTTTGCTAATT  
GTTGCACTAGTAACGAACCTACACCGCCATTAGCACCTATAACCAAAATATTCAT

### > **czrA**

Function: protein coding sequence; regulator of zink and cobalt transporter protein (core genome, constant)

Best match: *czrA\_CC001\_MW2-USA400\_BA000033.2*[2223388:2223708] (completely identical)

Position: 054-contig\_56\_RC: 7391 ... 7712; Length: 321 bp

Sequence:

ATGTCAGAACAATATTCAGAAATAAATACAGATACATTAGAACGCGTAACTGAAATTTTC  
AAGGCATTAGGCGATTACAATCGAATACGTATCATGGAATTGTTATCAGTCAGTGAAGCA  
AGTGTGGTGCATTTTCACATCAATTGAATTTATCTCAATCAAATGTCTCGCACCAATTAA  
AATTACTTAAAAGTGTGCATCTTGTGAAAGCAAACGACAAGGCCAATCAATGATTTATT  
CATTAGATGACATCCACGTAGCAACTATGTAAAGCAAGCCATACATCACGCGAATCATC  
CTAAAGAAAGTGGGTTATAA

### > **czrB**

Function: protein coding sequence; zink and cobalt transporter protein (core genome, constant)

Best match: *czrB\_CC005\_Mu50-VRSA\_BA000017.4*[2273497:2274474] (completely identical)

Position: 054-contig\_56\_RC: 7713 ... 8691; Length: 978 bp

Sequence:

ATGTCTCATTACATCATCATGACCATATGCATAGTCATGTAAC TACAAATAATAAGAAA  
GTATTGTTTATATCGTTTTTAATAATCGGTCTATATATGTTTATCGAAATCATCGGCGGTCT  
CCTTGCTAACAGCTTGGCATTACTATCTGACGGTATCCATATGTTTAGCGACACATTCTCA  
TTAGGTGTTGCACTTGTTCGCAATTTATTTATGCTGAAAAGAATGCCACAAC TACAAAAACA  
TTTGGTTATAAACGTTTTCGAAGTACTCGCAGCGTTATTTAACGGTGTAAACGCTTTTTGTAA  
TAAGTATTTTGATTGTTTTTGAAGCGATTAAACGTTTCTTTGTTCCCTTCTGAAGTTCAATCA  
AAAGAAATGTTAATCATTAGTATTATCGGTTTAATTGTCAATATCGTTGTTGCATTCTTTA  
TGTTTAAAGGCGGCGACACTTCACACAATTTAAATATGCGTGGTGCTTTTCTACATGTTAT  
CGGAGACTTATTAGGTTT CAGTTGGCGCCATTACTGCAGCTATTTTAAATTTGGGCATTTGGA  
TGGACAATCGCCGATCCTATCGCAAGTATTTTAGTTTCCGTTATTATTTTAAAAAGTGCTT  
GGGGTATCACAAAATCTTCAATTAACATTTTAAATGGAAGGCACACCAAGTGATGTTGATA  
TAGATGAAGTTATAACTACTATTA AAAAGGATTCACGAATACAAAGTGTGCATGATTGCC  
ATGTTTGGACAATTTCAAATGATATGAATGCATTGAGTTGTCATGTTGTTGTAGACCATAC  
ATTGACAATGAAAGAATGTGAATTATTATTAGAAAACATTGAGCATGATTTATTACATTT  
AAATATTCACCATATGACTATTCAATTAGAAACGCCTAATCACAACATGATGAATCGAT  
TATATGTT CAGGAACACATAGTCATTCACATAACCATCATGCTCATCATCACGCGCATGT  
ACATTA

### > **Q9ZB00**

Function: protein coding sequence; lytic regulatory protein (core genome, variable)

Best match: *Q9ZB00\_CC005\_Mu50-VRSA\_BA000017.4*[2274740:2275831] (completely identical)

Position: 054-contig\_56\_RC: 8956 ... 10048; Length: 1092 bp

Sequence:

TTGTTTACTTACTTTAAATCAGCATTTAAAAATGCTAAACCACAATTATTAATAACATTGA  
TATATGCACTTATAGCATTGTGCTGTAATTGCAGTTGTATATTTACTTGCTAATTTCCAGCTT

GCTAAGTATGCACAAACTATTGCAATTTATTCACAATTTGGGCAAAAACCACCAGTAGAT  
GCATATTTAAAAGTTATCGCTGTATTACTTATAGCAGCTGTAGTTTCACTGTTTGTGTTTAGT  
TCAAATTTTTATCGGAATTACAAATGTTATGAAACGAGCAATGAGTCATGAAAAAGTAAA  
ATTTACCGATTTATTTATTGCATTTAAAAAAGGTAATTATTTAAAGAGCGTTCTGATCGGT  
CTTGTATCTATAGCAATGATTATCGTTCTTTCACTTCTGACATCATTACTATACAAATTATT  
TTCTCCAGTATCAGAAATGATTATGAATTCAGTACAATCATCATATGCAGATAGTACACA  
CCTGATTGGTATTGCTATTACAACCTCAAAGCATCATAATCATTGTTGTTTTATTGATTAAA  
GCAATTATTACTTGGTTATTGTTAATACCTATTTTCAACTTTATGACTAGTTTTCGTTGAATC  
AACTAACGATAAAGTAAAAACACACTTAGCTAATGGATTTAAAGCAATGAAAAATGGTC  
AAAAACATTTTTCAAATTTTTTCATTGGAATACTATTATTAACCTAATTATTATTTTATT  
AAAACACCTGTTGGTTACTTGATTTTCATTTAATACGCAATCACTCTCTCAAAGTGTTGCAG  
AAAATATCATAAGAGTTTATACAGTAATGACAATCATTTTATTCGTTGTTATTCATGCAAT  
CATTTTAAATGGGTATCGTTCAATATTACTTAAAACGTGGTCAAAAAATTACTAAAGATAA  
AGTAAAAACAGCTGACAAGGATAAAAAAGTTGTCACTGAACCAAAAAATACAAAAGTAG  
AAAATGGTAAAGTGACAACATCTGTTGAAACAAAAACAGAAAAAGCACAAAGATTCATTA  
AATGATAATACAACAAAAACGATGACTTCAGATAAACAGACAATCAACCAAAATA  
A

> **A8YYB5**

Function: protein coding sequence; putative protein (genomic island)

Best match: A8YYB5\_ref\_CC001\_MW2-USA400\_BA000033.2[2226480:2226560:r]RC (completely identical)

Position: 054-contig\_56\_RC: 10480 ... 10561; Length: 81 bp

Sequence:

TTATTTTTTATGGTCTTGAGTACTAATCAATACTAAACCAATGATTGTTAATACAACCATC  
AGCATTTCAAAATCAGACAT

> **rli28**

Function: noncoding RNA Listeria sRNA rli28 homolog, locus 3 (core genome, variable)

Best match: rli28\_L3\_CC001\_MW2-USA400\_BA000033.2[2226487:2226667:r]RC (completely identical)

Position: 054-contig\_56\_RC: 10487 ... 10668; Length: 181 bp

Sequence:

TTATGGTCTTGAGTACTAATCAATACTAAACCAATGATTGTTAATACAACCATCAGCATT  
CAAAATCAGACATGCTAGTCCCTTCTAGGAGTAACAATAACCATAGGCATCACCCCT  
TTATTAAGAGATTAGCCACCATCTATCCAACCTTGCTCAATAAATATTATAACATGCACAC

> **res**

Function: protein coding sequence; plasmid resolvase pla

Best match: res-COL\_trunc\_CC005\_JH1\_CP000736.1[2306356:2306519:r]RC

Position: 054-contig\_56\_RC: 10682 ... 10846; Length: 164 bp

Sequence:

TCATAGTATAAGTTTTTTTCATTTCTTAATCAACTCGATAAACAGTTGAGTGACATACCCTT  
GTCTAACTAGCTATTTCTTCCCCTGTTATCGTTTGTTCATCATATAAAAATTTAATTTCTCA  
TTTTTTATTCTCTGATAAAGAAGAGCACCAACCTTTTCGGC

> **tnpIS232**

Function: protein coding sequence; transposase for IS232

Best match: tnpIS232\_trunc\_CC001\_MW2-USA400\_BA000033.2[2226890:2227200]

Position: 054-contig\_56\_RC: 10890 ... 11201; Length: 311 bp

Sequence:

AAAGAGAAATCGTCAGTCTATTATTGATAAGTATTATCCTATCCTCGAAAAATTACTTTCA  
GACTAGTGAACAAAAATTTACTATAAGCGTATACTTTGGCAATATTCGAAGGAAAA  
CATGGATTAACCTGTGCATATTATACATTTAGAGCTTATATACTTAAACATGATGAATTA  
CTCCTTATATTATGAAATGTTATCAATAGATGTCGCCTAAAGATACAACAAGATTCGAGA

CAAAACCTGATCATCAAGCACAGTTTGACTGGAAAGAAAGCATTAACTTTAAAACGAAA  
GATAATCAAA

### > **Q6GES5**

Function: protein coding sequence; haloacid dehalogenase-like hydrolase (core genome, variable)

Best match: Q6GES5\_CC005\_Mu50-VRSA\_BA000017.4[2277864:2278733:r]RC (completely identical)

Position: 054-contig\_56\_RC: 12080 ... 12950; Length: 870 bp

Sequence:

TTAATCAGCTAAAAAATGCTTTGCTAAATATTTTGCTGCGCCATCCTCTTCATTCGTGTAT  
GCCGTTACATCTGAAGTTAATGCTTGGATTCAGGGCGTGCATTTTTCATAGCAACTGTAT  
AATGACCAAATTCAAACATTGCTCTATCATTGTGCTATCTCCAATAACTAACGTTTCTTC  
TTGATGAATACCAAATGTGCAATCATTCTTTAATGCCTGTACCTTTATCAGTTTGATAA  
GCCATTGTTTCCGCATTAATCCTTGATGAATTTGAAACACTAATCTGTAGTTGCACATGAT  
TTTGCTTTAATTCATCTCTAAATGCTGTTATTTTTTCTAAATTAGAAGTGAATAGATAAATT  
TTTGAATATTCACCTTCAGGAACTTAGTTACCCAATCTATCTTACCAGCAAGCGCATCTT  
GTCTTGAAGACCATTCACTATGACTTACGCCATTAATAGGATCTTGACTACGAATCATATC  
TCGCATCCATGTTTCATCTTCTTTTAAAGAACTCTATTACCTTCAAAGGAAATACCTCA  
TAATAAATTTGTTGGCGCTTAGCTAAATTAGTAATTTGTTGCACTTGAGCCAATGATAAAC  
CATGCTTGAAGATAATTTCTCCATCTACTTCTCCAATTGTTCCATTTGAACTAATGATGCC  
ATTAACCGCAAATCTTGAGGTACAAGTTGATGTATTTTCAGAATGCGAACGTCCTGTTGC  
CAAAAATACTTTATATCCTTTCTCTCTCAATTGATTAATGACATCTTTCGTATACGTTGATG  
CTTGATTATTTTCATGTAAAATTGTTCCATCCATGTCCAAAATATTGCTTTTACGTTATCC  
ATATTGCCCTCCAC

### > **A5IUU4**

Function: protein coding sequence; putative ABC transporter ATP-binding protein (core genome, variable)

Best match: A5IUU4\_CC005\_Mu50-VRSA\_BA000017.4[2278789:2279571:r]RC (completely identical)

Position: 054-contig\_56\_RC: 13005 ... 13788; Length: 783 bp

Sequence:

TTACTCTAACATTGCCATAGAAAATCGATTATTCCATCTTTGAACTGCTACATTTTTTCTGG  
AAAAATCGTGACATGTTTTCAGATGTCAAATATCATCTATTAATCCTTGTTGTACTACTTT  
CCCCATCTTTTAATAGCAAATTTTAGTAAAGTTACCAGTAATTTCTTCAATAAAGTGCGT  
CACATAAATCATCGCAAGCGTTGGATATGAATCTGACAATGAGTCAAGTATATTCAATAG  
TGACTCACGAGCAATAAAGTCTAAACCAGCTGCTGGCTCATCTAAAATTAACCTGAGG  
TTGCCCCATTAAAGCTCGTGCAATCATCACTCGTTGTTTTTACCTGTAGATAAATAACCA  
ATATATTGTTGCGCTTTAGCAGATATTCCAATAATTTAAGTAAATGATGTGCTTCATTAC  
GTACCTCATCAATATCTTGATAAACACCAATTGATTTAAAAGCACCCTTATCACCAC  
ATCGATTACTCTTTCACCCTCTTGAACTTTTCCAGTAACTATGAGATACAAAACCTATA  
TGTTGTGCTACAGTCTCTGCAGAATACCCTACCTTGCCTGGCATTTTACCAAATAGATTAA  
CACCGCCAGTTGTCGCAGGCTCATATGCATTTAATATATTTAATAGCGTTGTCTTACCAGC  
ACCATTCAACCCATATAATATCCATTTATCACCTTTAGCAATTTGCCAAGAAATATTTTTT  
AAAATTGTTTTTCCTTGCTTCATTGCCCCAATTTGATCTAATTGAATTAACAT

### > **glmS**

Function: protein coding sequence; glucosamine--fructose-6-phosphate aminotransferase (core genome, variable)

Best match: glmS\_CC005\_Mu50-VRSA\_BA000017.4[2279803:2281608:r]RC (completely identical)

Position: 055-contig\_54: 86 ... 1892; Length: 1806 bp

Sequence:

TTATTCTACAGTAACTGATTTAGCAAGGTTACGTGGTTTATCCACATCTAAATCTCTGTGT  
AATGCTGCATAATATGAAATCAATTGTAATGCAACTACTGAACTAATGGTGTCAATAAT  
TCATGTACATGAGGAATGACATAAGTGTGCGCTTCTTTTTCAAGACCCTCCATAGAAATA



ATACATGGATGTGCACCACGTGCTACTACTTCTTTAACGTTACCACGAATTGATAAATTAA  
CGTTTTCTTGAGTTGCTAAAGCAACAACCTGGTGTGCCATCTTCGATTAATGCAATCGTACC  
ATGTTTAAGTTCGCCACCAGCAAAACCTTCTGCTTGAATGTAAGAAATTTCTTTAAGTTTT  
AACGCACCTTCTAAACTTACGTTATAGTCAATAGTACGTCCGATAAAGAATGCATTGCGT  
GTTGTTTTCTAAGAAATCTGTTGCAATTTGTTCCATAATTGGTGCATCGTCAACAATTGCTT  
CTATTGCTGTTGTTACTTTTGCTAATTTCTCTCAATAAATCAATATCTGCTTCACGACCGTGC  
TCTTTTGCAACGATTTGAGACAAGATTGATAATACTGCAATTTGTGCAGTATATGCTTTTG  
TAGATGCAACTGCGATTTTCAGGACCCGCATGTAATAACAATGTGTGGTCTGCTTCACGTG  
ATAAAGTTGAACCTGCAACATTAGTGATTGTTAATGATTTATGACCTAATTTATTAGTTTC  
AACTAATACTGCACGGCTATCTGCTGTTTCACCTGATTGAGAAATATAAACGAACAATGG  
TTTTTCAGATAATAATGGCATGTTGTAGACAAACTCTGATGCAACGTGTACTTCAGTTGGT  
ACGCCAGCCCATTTTTCTAAAAATTCTTTACCTACTAAACCTGCATGGTAGCTTGTACCTG  
CTGCAATAACGTAAATGCGGTCTGCTTCTTTAACATCATTGATGATGTCTTGATCAATTTT  
CAAGTTACCTTCTGCATCTTGATATTCTTGAATAATACGACGCATTACTGCTGGTTGTTCA  
TGAATTTCTTTAACATGTAGTGTGCATAAACACCTTTTTTCAGCATCTGATGCATCAATTT  
CAGCAATATATGAATCACGTTCTACAACGTTTCCATCTGCATCTTTAATAATAACTTCATC  
TTTTTTAACAATAACGATTTTCATGGTCATGGATTTCTTTATATTCGCTTGTCACTTGTAAAC  
TTGCAAGTGGTCTGATGCGATAACATTGAAACCTTCACCAACACCTAATAATAATGGTG  
ATTTATTTTTAGCAACATAGATTGTGTCTTTGTCTTCAGCATCTAATAAACCTAATGCATA  
TGAACCATGTAATAATGACACAACCTTTTGTAATGCTTCTTCAGTTGAAAGTCCTTGATTT  
GAAAAGTATTCAACTAATTGAACGATAACTTCTGTATCTGTTTCTGAAATGAATGATACA  
CCTTGTAAGTATTCACCTTTTAACTCTTCATAGTTTTCAATAACACCGTTATGAACTAGAG  
TAAAACGGCCATTTGATGATTGATGTGGATGAGAGTTTTTCATGATTCGGTACACCGTGTG  
TTGCCAACGTGTGTGACCGATTCCAACAGGTCCATCAAAATCGCTACTATCAGCAACTT  
TACGTAATTCTGCAATACGACCTTTTTCTTTAAATACAGTTGTATTATCATCATTTACTACC  
GCGATACCTGCAGAGTCATAACCTCTGTATTCTAATTTTTCTAAACCTTTTAATAATAATT  
CTTTGGCATTATCATAGCCAATATAACCAACAATTCCACACAT

### > **RF00234**

Function: noncoding RNA glucosamine-6-phosphate activated ribozyme (core genome, constant)

Best match: RF00234\_CC001\_MW2-USA400\_BA000033.2[2232027:2232243:r]RC (completely identical)

Position: 055-contig\_54: 2093 ... 2310; Length: 217 bp

Sequence:

TTCTGGCGATCTTATTAACCTTTGTCCATTAAGTCACCCTAATGTTTTACTTAATAAGCTAA  
CGAATGAGCCACATCCGGGATAGCATCCGCCGATCTATTTCGATCACTATCCTCCTCGTCTA  
CAAATACATATATTGCACTCTATAAAGGCCACTCATATATTAACCTTTAATCTTCAAATAC  
AAATATTTATTTGCACAGGCGCTTTAACTGTACT

### > **mtlA**

Function: protein coding sequence; PTS system mannitol-specific EIICB component (core genome, variable)

Best match: mtlA\_CC001-ST772\_118\_AJGE01000074.1[16584:18122:r] (completely identical)

Position: 055-contig\_54: 2572 ... 4111; Length: 1539 bp

Sequence:

ATGTCCGAAACTGAAGAGAAAAAAGGAATTGGTTCGTCGCGTTCAAGCATTCCGGATCATT  
TTGAGTAGTATGATTATGCCAAACATTGGTGCATTCATCGCTTGGGGTTTCATCGCGGCCA  
TTTTTATAGATAATGGATGGTTACCTAACAAAGATTTAGCTACTTTAGCAGGACCAATGA  
TTACTTATTTAATCCCATTATTGATCGCATTTAGTGGTGGTTCGTTTAATTTATGATTTACGT  
GGTGGTATCATCGCAGCAACAGCAACTATGGGGGTCATCGTTGCATTACCTGATACACCA  
ATGTTACTTGGTGAATGATTATGGGTCCACTTGTGGTTGGTTAATGAAGAAGACCGAC  
CAATTGATTCAACCTAGAACGCCACAAGGTTTTGAAATGTTATTTAATAACTTTTTCTGCTG  
GTATTTTAGGATTTATCATGACGATTGCAGGATTTAAAATTTTAGCACCCTTATGAAATT  
TATTATGCATATTTTATCAGTGGCAGTTGAAGCATTAGTACATGCACACCTACTTCCACTT  
GTAAGTATTTTAGTAGAGCCTGCAAAAATTGTATTTTTAAACAATGCGATTAACCATGGT

GTATTCACACCGCTTGGTGCAGATCAAGCTGCAAAAGCTGGTCAATCAATTTTATACACA  
ATTGAATCTAACCCTGGACCAGGTTTAGGTATCTTACTTGCTTATATGATTTTTGGAAAAG  
GCACTGCAAAAGCAACGTCATATGGTGTGGAATTATCCACTTCTTAGGTGGTATTCATG  
AAATTTATTTCCCATATGTATTAATGCGTCCTTTATTATTTATCGCTGTTATTTTAGGTGGA  
ATGACTGGTGTGCAACTTATCAAGCAACAGGATTTGGATTTAAAAGTCCCGCGTCACCA  
GGTTCATTTATAGTTTACTGTTTAAATGCACCTAAAGGTGAATTCCTTGCACATGTTGCTCG  
GTGTCTTCCTTGCTGCACTTGTATCATTTCGTTGTAGCTGCTTTAATTATGAAGTTCCTAGA  
GAACCAAAGCAGGATTTAGAAGCTGCGACAGCTCAAATGGAAAATACTAAAGGGAAAAA  
ATCAAGCGTTGCTTCTAAGTTAGTATCTTCTGATAAAAATGTTAATACAGAAGAAAATGC  
TAGTGGTAATGTTAGTGAAACATCTTCATCAGATGATGATCCTGAAGCGCTATTGGATAA  
TTACAACACTGAAGATGTTGATGCACACAATTACAATAATATAAATCATGTTATTTTTGCC  
TGCGATGCGGGTATGGGTTCTAGTGCAATGGGTGCAAGCATGTTACGTAATAAATTTAAA  
AAGGCGGGCATTAAATGATATTACAGTTACAAATACTGCGATTAATCAATTGCCAAAAGAT  
GCTCAATTAGTTATCACTCAGAAAAAACTAACTGATCGTGCTATTAACAAAACACCAAAT  
GCCATCCATATTTCAAGTGGATAATTTCTTAATTCACCAAGATATGAAAAAATTTTAAATA  
ATCTAAAAAAGATGATCAAGCATAA

> **mtlR**

Function: protein coding sequence; mannitol operon transcript antiterminator (core genome, constant)

Best match: mtlR\_CC005\_Mu50-VRSA\_BA000017.4[2283862:2285994] (completely identical)

Position: 055-contig\_54: 4145 ... 6278; Length: 2133 bp

Sequence:

ATGTTATTGAGTACACGTGAAAAAGAAATGATAGCCCTATTGATTAAGTACCACAGTCAA  
TATATCACTATAACGACATTGCTCAGCAACTTGCGGTGTCCTCTCGTACTATTCACCGTG  
AATTAAGGTTGTTGAAGCATATTTAACTTCATTTTCATTAACCTTTAGAACGCGCAAACA  
AAAAAGGGCTACGCATTGCTGGCGCAGATTCTGATTTAAACGATTTGAAGCAATCGATTG  
CACAACATCAAACCATTGACTTATCTGTTGAAGAGCAGAAAAGTAATTATTATATACGCTT  
TGATAACAAGCCAAGGAGCCAGTTAAACAATATAGTTTAGCGCAAGAAATTGGCGTTTCTG  
TCCAGACTTTAGCAAAGATGTTAGATGATTTAGAGCTTGATTTAAATAAGTACCAACTAT  
CTTTATCTCGAAAGCGTGGCGAAGGCATTTACTTGGTAGGTAATCAAAGAAACGTTG  
AATTTTTAAGTCAATTAATGGTGAATAACTTAAATAGTACTAGCGTTTATTCAGTAATTGA  
AAATCATTTTTGTCTTTCATTCATTAATCAAATCCACAAAGACTTTGTTGACTTAGAGCGC  
ATTTTTAATGTTGAAAGACTATTAATGGACTACCTAAGTGCCTTACCCTACCAACTTACCG  
AATCAAGTTATTTAACTTTAACTGTCCATATCGTGCTATCCATTTACGTATAAAAAATGG  
AGAGTATGTCGCATTAACGATGATATTTATGATTCTGTACAAAACACATTTGAACACAA  
AGTAGCAAGCGAACTTGCTGATAAACTTGGTCAAATATATGACGTCACGTTAATCAGGC  
AGAAATTGCTTTCATTAATCCATTTACGTGGAGCTAAACGAAAAAATCTTAATGATAC  
ATCATTAAATAATCGTTGTGAAGAAAACAAAATTAAGCGTTTGTAAACAAAGTAGAAAT  
GATTTCCGGTATGACATTTGCAGATTTGGATACTTTAGTAGATGGACTGACGCTACACCTT  
AATCCTGCAATCAATCGTTTGCAAGCTAATATCGAGACCTATAATCCGTTAACAGACATG  
ATTAAGTTCAAATATCCAAGACTATTTGAAAATGTAAGATTAGCTTTAAATGATTGTTGG  
CCTGATTTGATTTTTCCAGAGAGTGAAATTGCTTTTATAGTTTACACTTTGGTGGCTCGA  
TTAAAAACCAAGGTAATCGATTTTTAAACATATTAGTCGTTTGCAGCAGTGGTATGGGAA  
CTAGTCGTCTATTATCAACTCGTCTAGAGCAAGTTTTTAGTGAGATTGAGCGTATTACACA  
AGCATCAGTCAGCGATTTGAAGTCACTAGATTTAAGTCAATATGATGGCATTATTTCTACT  
GTGAATTTAGACATCGACTCCCCCTATTTAACGGTAAACCCATTATTACCAGATAGTGAT  
ATCAGTTATGTCGCACAGTTTTTAAATACAAAGTCTACGTTCCAAGAGACGCATGATAAA  
TCATCAAACATGATTGATAAGGATGATGTTTCATGTTGAAACGAAAGATGTTGATGGCAAC  
ACATCTTTTGAAAATGAACAACTTCATACTTAACTTCAGTTTTTCGAAAAACATTTAAGTG  
ACGAAAAATCAGAACAATTATTGCATCATATGCGTTTCGGGTTTAACTTTGCTTGATTGAGT  
GAAAATAGTTAGTACCGAAGTTAAACAGTGGCAAACATATATCGCAGATTATCTATATCA  
ATGCGATGTAATAAACGATCCAACGTCATTCGCTGAACTACTAGAGCAACGATTGATTGA  
CAATCCAGGATGGATATTAAGTCCATATCCTGTTGCAATACCACACCTAAGAGACAATAT  
GATTAACACCCTATGATTCTAATCACAGTTTTAGAAGAACCGTTAACATTGCCTAGTATT  
CAAATGACAATCAAACAATTAATATATGATTTCCATGTTTATTCTGACAATGATTTTA  
TGGCATCACTGGTAAGTGACTTGTCCGAATTTTTAAGTTGAAATTAGAATCTATTGATAC

TTTTATGGAAAATCCACAGGAACTTGAAACATTATTAAGAAACAAATTTTTAGAACGAAT  
TAAAAACAATTTATTTAG

> **mtlF**

Function: protein coding sequence; mannitol-specific phosphotransferase enzyme IIA component (core genome, variable)

Best match: mtlF\_CC005\_Mu50-VRSA\_BA000017.4[2286006:2286440] (completely identical)

Position: 055-contig\_54: 6289 ... 6724; Length: 435 bp

Sequence:

ATGAGCGAATTATTTAGTAATGACAATATCTTTTTAAATGTAAATGTAAACAGCCAAAAT  
GAAGCAATTGAAAAAGCAGGTAAAGCCTTAGTTGATAGTGGTGCTGTAACAGATGCTTAT  
ATCAAGCAATGAAAGATCGTGAGCAAGTTGTATCAACATTTATGGGAAATGGCTTAGCA  
ATTCCTCATGGCACAGATGAAGCTAAAACAAATGTGATTCACTCAGGTTAACATTATTA  
CAAATCCCTGAAGGCGTTGACTGGGATGGCGAAGTAGTTAAAGTTGTAGTGGGAATCGCT  
GGTAAAGATGGCGAACATTTAGACTTGTTATCTAAAATTGCAATTACATTTAGCGAAGAA  
GAAAATGTGGATCGTATCGTTCAAGCAAATCTGCAGAAGAAATTAACAAGTATTTCGA  
GGAGGCAGATGCATAA

> **mtlD**

Function: protein coding sequence; mannitol-1-phosphate 5-dehydrogenase (core genome, variable)

Best match: mtlD\_CC005\_Mu50-VRSA\_BA000017.4[2286440:2287546] (completely identical)

Position: 055-contig\_54: 6723 ... 7830; Length: 1107 bp

Sequence:

ATGAAAGCAGTTCACCTTGGTGCTGGTAACATAGGTCGTGGTTTCATTGGTTATATTCTTG  
CAGACAACAATGTTAAAGTAACATTTGCAGACGTCAATGAAGAAATCATTAATGCTTTAG  
CTCATGATCATCAATACGATGTTATTTTAGCTGATGAGTCTAAAACAACGACGCGCGTGA  
ATAATGTTGATGCAATTAATTCAATGCAACCTTCTGAAGCGTTGAAACAAGCAATTCTAG  
AAGCTGATATTATTACAACAGCTGTTGGTGTTAACATACTACCTATTATTGCTAAATCTTT  
TGCGCCTTTCTTAAAAGAAAAAACAACCATGTTAATATTGTTGCTTGTGAGAATGCTATT  
ATGGCAACTGATACATTGAAAAAAGCAGTACTTGATATTACTGGCCCTCTTGGTAACAAT  
ATTCATTTTGCTAACTCAGCAGTTGATAGAATTGTACCATTACAAAAGAATGAAAATATA  
TTAGACGTTATGGTTGAGCCATTTTACGAATGGGTTGTTGAAAAGATGCATGGTATGGT  
CCAGAACTAAACCATATTAATATGTTGATGATTTAACACCATATATTGAGCGTAAATTA  
TTAACTGTGAATACAGGACATGCATATTTAGCGTATGCTGGTAAATTTGCAGGTAAAGCT  
ACCGTATTAGACGCTGTAAAAGATAGTTCAATTGAAGCTGGCTTACGCCGTGTTTTAGCT  
GAAACAAGTCAATATATTACTAATGAATTTGATTTTACTGAAGCGGAACAAGCTGGTTAT  
GTTGAAAAAATAATAGACCGTTTCAACAATTCTTATTTATCTGATGAAGTGACACGTGTC  
GGACGAGGTACGTTACGTAAAATTGGCCCTAAAGATAGAATTATAAAACCATTAACATAT  
CTTTATAATAAAGATTTAGAACGCACTGGTTTATTAATACAGCTGCATTGTTATTGAAGT  
ATGATGATACAGCAGACCAAGAACTGTTGAGAAAAATAATTACATTAAGAACACGGT  
TTAAAAGCGTTTTTAAAGCGAATATGCTAAAGTTGACGATGGCTTAGCCGATGAAATAATT  
GAAGCGTACAATTCACCTTCATAA

> **sasB**

Function: protein coding sequence; LPXTG-sorted surface protein B chv

Best match: sasB-CC133\_ref\_CC133\_ED133-shep\_CP001996.1[2253619:2259735:r]RC

Position: 055-contig\_54: 8148 ... 15594; Length: 7446 bp

Sequence:

TTATTCTTCAGTTTGTGGTCTTTCTTAGTGAATCTTCTAATTAAGAATGCCATACCTGCAC  
CTAGAGCTAATTCAGCATATGGTAAATCGTCATTATGTGACATACCAGTATCTGGTAAAG  
TTTTAGCTTGTGTTTAGGCTTATTAACCTTTCTTGTGGTCTGATTTTGCATTTGCTTTGT  
TTTCTTCAGGCTTAGTTACATTAAGCATATCTTGATGCATACTATGACTACCATTTGAAAC  
TGTTGCTGGAGATGCATTGGCACCGTCGTTTTGCGTAGCTTTATTGTTTGCAGCTGAACCA  
ACTGATTTTTGCGTATCATTAGTTTGCATATCTTAGCTTTATTGTTTGCAACTGGGCCAAC  
TGATTTTTGCGTATCATTAGTATCTGCTGTTGCCGTATCATCTTTTTGGCTAACATTAGTTG

AAGTCATTTTATCTTTTGCTTCAGAAGATGCAGATGTTGATGGTTTATTCGAAACTTCAGT  
ATCAGCTTTGCTTGGCGATTTATCTGCTTCGTTAGATGCAACGTTAGTTTCAGACTTAAGT  
TGTCTGCATCAGTTTGATTTGTCGTA CTTTCTTTATCTTTTGATGTATTAGAAGGTAC  
ATTTGGTTCTGTTATGTCTGCTGAAGGCAATGTTTCAGTTGTTGATTCAACCATACTTTGA  
TTTGTTGAATCTCTACCATCTTTTTCTGCCTTAGCTTTATTTTCAGATTTTGGTTGTGCAAC  
CTTGCCATTAGTTGATTGAGATTCAGCACTATTATTTACTTCAGCATTTTGTTTTGAATCAT  
TTACAGATGCATTATCTTTACTATCAGCAGATGATGCTGCTTCTGTGCTCGCAGTTGTTGG  
AGCCGTTGCTGTTGATCCTGTTGGTGCATTCTCGTTTGTGCTGTAGTTGTACTATTGTTAT  
TTGTTGTGCTTTCTGCTGGCGTTGCATTATCTGTTTCTGTTACAGGTTTATCAGTTGTGCCG  
TTATTAGTTGATTCTACTTCTGGTTTACTAGTTACATCGTTATCCATTGTCGGACTGTTTGT  
TGATGCATCTGCACTAGAATTGTTATTAGCTTGCGGTTTATCCTTTGCACCATCAGTTGCT  
GATGTTACTGTTGTTTACCTGTTGCCGCATCACTATTATTTGGTGTGTCGGAGAAGCGT  
CTGCTTTGCCATTATCTGTGCTCTCAGATACGTTAGGTTGTCCAGTGTTTTCTGGTGTGCA  
TTAGCATTTGAATTTGCTGTTGCATCATTATTATCTGTACCATTATTAGTATCATTAGCATC  
TGGATCATTCTGAGGCAATCGCTTCAATTGCAGGTATCGTTACATTTTGAATTCAGCA  
ACCTCTGATTTGTTTGTGTTTATCTAATTTATCAGCAAATCTGTCAAAAATATCTACCTAA  
ATCTGTACGTGCAATTTCTTTCCGCGATGCATCTGCATCTGCATTTTAAATTATTTCTATTT  
GCTTGTTAACCCTTCTCTAATTGCTTCCAAGCATTTTCTTAACTACTGGATTAATACGT  
TGTGCTTTAAGTTGTTCAAGCGCACTATTTTTGACAGTAGCGATTTCTGCATTTGTAGTTT  
GATCAGAAATATCTTCAGTTGCTTTTGATAAAATGTCTTCTAAAGCATTTCGTAAACGCTTC  
TTTTTCTTCAGTTGTAGCATCAGCGTCGACATTTACACCTGCTTCAATCTGGTCTAGTGCA  
GTTTCTAATCTTCGATAGCTTTTTGTTTTCTGTTGAGTCAATTTGAATGTTATCAAATGC  
CTCAAGTCCTTGAGCTTTTCGCTTTTTCAACTTCAGCAGTTGTTGTTGCATCAGTAATACCTT  
GTTTAGCTTGATCTGTAATTTGTTTAAATCATTGCTAATGCTTCAGTTTTTTCTTCAGCAGTT  
AACTGGTCACTATGATCAATTGATTCTTTCGTATCTTCTGCTTTAGCTTCAATAGCTTGGTT  
CGCTTTAGGTTTAAACAGTAGCATCTACTTGAATAGTATCAATTGCTGCTTTACCTTGTGTT  
AATGCATCATCAACGTCACCATTATCCACACCATTATTAATGTTTTCTAATGCAGTTTGAA  
CATTTTGGTCAACTTGCTTAAATTGCTTGTGCTTTTCATCTTGTGTTGCATTAGTGTGAGCT  
GAAATATTATTTTTCTTCTGATCTGCATAAGCATATAAATCTGTTGTAGCTGATTCTTTTTT  
ACCTGTTGGAATTGTGTAATCGTTAATATTATCTAAGTCATTATGAATTTGAACTTCAATG  
TCATCTTTAGAAGTAGCTTGATTAACATTTTGATCCGCAGTTTGTTTTAAATTCAGCAAGTT  
TTTGTTCGCTTCAGCAATTTCACTTGAAGTCGATGCGTTAGAGTTATCCGCTTCGTTTACT  
TTAGCATTATATGCATCTTCAATTTAGCTAAAGCATCTTTTTTGTACTCACTAAATGTTTT  
AACTGCATTAATTTTAGCTTTTCTTCTTAACTGCATTATCAACATATTCATTTGTTGATG  
ATTGATCGACATTTGTTTTCGCTTGATTTAATTCAGTATCAACTTCTTGTTTTGCATCATT  
ATTTCTTGTGTTGATGCATTTGGTGTGTTGTTCTATTTGTGTTTTCTTATCAGCTGCAGCTTG  
ATCTAATCTTTTTTACCTGCTGGTTTCTTAAACAGGATTTGCATGAAGTTGTTGAACTTTTT  
GTACTGCTGTATCTTTAGCAGTAGTTACATCACCTGTAGTAGTTGCTGCATTAATATTATT  
TAAACCTTCTTCATATGCTGCTCTAACTGGTCCAATATCGTTACCTTTTTCTTCATTAGTAG  
TCTCATTATTATTAAGTATTTTCAGTTATTTTATTTTGCATTTTCAGTTAGCAATTCTGCTCTT  
GCATTCGTTTTAACATCTGTTGATGCTTGAATTGGGTCAATTGCTTGAATTGCATTATCTTT  
TGCAGTGTTTACATCATCGATTGACTGTGCATTTTCAATATTTTGATTACCTTGTGTTAATT  
GTGCGTCTACTTGTGATTTGCTTGTCTTTTTCTTCAGTAGTCGCATCTGCAGTTTGTGCA  
ATAAGCGCTTTTTGTTTCGTTTGTGTTGCTAATTCATCTTTCGCAACATCTTAAATTGT  
TGTATCTGCAGTAATACCTTGAATATCAGCAACTGCTTGATCTTTAATTTGCGTAACATCA  
TTAGTTGTTTGTGCATTTAAGATATCTTGATACGCTTTTTCTTTAGCTTTTAAACTAAATC  
TTTTGCTGCATTTTTCTCTTCAGTTGTAGCGCCAGTTGTATTATCAATTGCTTGATTTTGTG  
TTGTCACAGCTTGATCAACTTCATTTTTTCGATTCGATTTAACTGCTGTTGCTGGTTGTGTG  
CTTTGAATTGAATTTCTTCCAGCGTCTTTCGCTGTATCTACACCATTATCATCAGTTGCAGC  
TGTAATATTATTTTTCGCGTCTGTAACCTGCTGTTGCTAATTGTTGAATAGCTGCTTCTTTTT  
CTTCATTTGTAGCGTTCTGATCATTATTGATAACATTTGTTTGCCTTGTGTAATTGATCA  
ATCTCATCTTTAGCCGCTTGTCTTAAACAATTTTGGTGTACCAGCATTAAATTGCTGCTTC  
TGCATTAGCTTTCGCTTCATCAACTTGTGCGTTAGTAGTTGCTGCTGAAATGGCTTGATTT  
GCTTTACCATTTTCAGTATTTGCTTCTGCATCAGCTGCTTGTTTTTCTTCATCTGTTGCATCT  
GGTGTAGCTTGAATCTCTTGCAATTTGTTATTTAAATTTGCTGTGATTTTCAATACGTGCAG  
TTGCTTTTTTATTAAGTGTGGTGTACTTGTATCAATACTAGTTTCACCTGTCGTTTTCGCT

TGGTCTACATCATTGACTATTAGCAGCTTCAATGTTGCTATTTGCTTGTGTCACAGCATT  
ATCTACGTCCGCATTAGCCGCTGCAATTTCTTCAGCAGTAATATCTTGCCTTTGAGCGATT  
GCTGTTTTACGTTCAATCGCTTTCGTAGCAATTGCTTGTTCGCATTATCTTTAGTTGTTGT  
TGCTGGCTGAATCGCTTCAATTTAGCAATTTCTGCATTTTTAGCCGCTTCAACTCCACAT  
TTGAATGAGCTGCATCTATTGCTGCATCAGCAGCCGTTTTTTTCAGTTTGAACCTGTTGTTT  
AGCAGCTTCTTTTTCTTCTGTTGTTGAACCGTTATTAGCATCAATTGCTGTTTCTTGAGCTT  
GTACTTTATCTGCAATTGCTTGTGTTGCTGCTGGTTAACATTTGCATCTGGCGTAATTGCA  
GCTATTGTAGCTTCATTAGTAGTTTTGTCATTATCTACATCTGTATTTGCTGTAGCATTATC  
TATATCAGCGTTTGCAGTAACACTGCTTGATCAACTTTATCTTTTGCAGCTTGTGTTCTT  
CAGTAGTCGAATCATTCAATTGCTTCAATTGCAGTTTTACGTTCACTTGCTTTTTGAGCGATT  
TCCGCTTTCAGCATCCGATTTCTTAGTTGTGGCAGCTTGCCTTGATTAATTGCAGCAATAC  
CATTGTCTTTAGCTGTTGTTACATCACTGTTTGTATTTGCAGCATCAAGATTTGTTCTTGCT  
TCTTGCTTTTTAGCATCTAATTCTGTATATGCAGCTTCTTTTTCTTCTGTAGTTGAAGCATT  
GCTATTTGGATTTCTTGTTACGTTGATTATATGCGTTTTCTACTTCTGTATCAGCTGCAG  
GTTAACTTTTGCCTGTTGTTGAATTGCATTGATTTTATCTAATACTTTTGCCTTAGTATCA  
GCCACTTCTTGTGTGATTTAACAACCTGGATGTCATGTAACCTTCTGTTTGAAGCTGCAT  
CTACTGCTGCATTTGCCTCTGCTACTTCTTCATCAGTTGCATTTGAACTGTAGCATTTTGC  
GCTTTTCTAGCTGTAGCTGCTTGTCTAACTTCTTTATAAGCATCCATTTTAGTTTGAAGTTGA  
ATCCGTAATATTCTCAATTTGAATATTTCTTCGTTTTAACGCGTTCTAAATCTTGTGCAG  
TCGTTGTCGCTTCAATTGCTTTAACACCAGAACTTTAGCTGCATTAATACGTTCAATAGC  
TTCCGCTACTTCTTCATTTGTTGTATCAGGATTTAAAGGTGCTTGATCAATTTGTGCTTGAA  
CAACTTCGTCAAATCTTCAAGAGCTGCTGCTTTAGCTGTTGTAGCAGGTGTAGTTTGATT  
AATATCATTGATTGCTTTTGTGTTAATGGCTTCTACTTGTGCATTTGTTGTTGCTGCATCAA  
TATCTTTAATTGCCTTTGTTTCAATTTACCAATTTTATCATTGCTACATCTTTTTCATCTT  
GTAATGATGCATTTGACTTTTTAATTTGTTGTTACGAGTTGTAACCTGCTTGGATAATATCT  
TGTTTCGCTTGAGGTTAACTGTTGGTGTAAATCACATCTTGTCTAACACTGCGATACCAT  
TATCTTTTTCAGTTGTGACACCTTGTGATGTTGTTGTTTATTAATTTCTGCGATTGCATTA  
TTTTATCATTGTTAATTTAGTCACAAGCGCTGCAACTTCATCTTGCCTAACCTTTTTACT  
TTGTTGTGCTGCTGTAACCTTTTCTTGAGCTTTAGTATCTAATTCAGCAATTGCTGCTTGAT  
TATCAATTAATGCAGCTTGTAAATTTAGTTACTAAACCGTCAATATCCGCTTGAGATGCACG  
ATTTGCAGTTTCAACGTGATTCGCATCTTCATTTAAAATAGTGTCTGCTTGTGTTAAGTT  
TATTGTATTCTGCAATTGATGCTGTTGTGTAATGACTATTATCAACTTGTGAGTTTACTTGT  
TGTTGCAACGCATCTTTGTTCAATTTCAACCGCTACTGAAAATGGATCTGCAGTTAGTGTA  
CTTCTGGTTGCGCATTATTAATTACAACATCTGAAGCAGTACGATATGTTAATTTTTTCATT  
AAAATCAATATTTTAGGTGTATCGATATTCGCAACATTAACCTTTATATGATAATTTAAA  
GATTTATCTGGGAATAAACTTCTTTAGTGTGTGTACCACGTGCCGTTGTCACACCTTGGC  
TTGTAAATGTAACCTTATTTGCAGTTTGTATCATAATTAACAGTCATATTTTTCAATACTGT  
ACTGTCTTCATTACCATTAGGGAATGTTGTAGTTAATGAATCATTAAACGTAAGTTACACCT  
TGTGGTAATGTTACTTCATATTTAAATTGATCTGCTTTAATGAAGCACCAAAATTACCAT  
TGTTACCGATTTCAGTATTAATAGTATATTCTTTATTGTTAGTTGCTTTCGGTGCTAAATCT  
CTATTTTTGACATATAAATGTGATCCTGAGAATAGACCTACATTATCAATGAATGAATAG  
TATTTATAACCATCTTTATTTGTTGTAATTCTTGAAGCATCAGCAACTGCTGTATTGTCAG  
GAATAAATTGTAAATCTAAACGATCAGCATCAGTTGGTACTTTAAATAAATGTGCAGTAC  
CAGTCTTAGCAACATTTACAGTTGCTAATTCAGTATTTTTCTTAGCATCTTTAATAACTAA  
ATTTGTTGCACCTTGCTTACTATTCGTTTGCATAGTAGTAAAGTTAATAATTAATTCTGAA  
TCTGGTTTTACATTTACAGTTTTTGTAAATACCGTTAAAGTTACCATGATCTGTAGAATCAT  
TTGCATTCACACGACCTAATGCAGCCACGTTTCCCTTAGCTTGATAGTTTTGAGGGTTATT  
CTTATCAAACATATCGCTTCGTCTTAATTCTGAGTTAACGAAACCAATCTTACCGTTGTTA  
ATTAATGAATAACCATTTACTTTATCTGTAACAGTTACAGTTGGATCCTGTCTATTCTCAT  
CTGTTGATATGGCAGGATCATCAAATGTTAATGTCGTATTAATACTGCCTTACCAGTATT  
GCTAGCATTGGATCTTGAGTTTGTGCGTTTGTGCTACAGGTGCTGCTGGTTGCGCTGCT  
GCTGGAGCATTTCGCTGGCTGTGTTGATTTGCCGGTGTGCTTATTATTAGGTGTTGCTT  
GGTTATTTCCCTTGACCTGCTTGGTTTGGCGGTGCTGCTTGAATTTCCAGGTTGTGCTTGTGCA  
GCGTTATTCGGATCAGCTTGAATACCTTGTCCAGCTGGTTGTGCTGCTCCTCCTGCTGGAT  
TAGCCTGTCCACCTTGGTTTGTGCTGGCTGTGCTGCAGGATTAGCTTGAAGCACCAGCATTTCG  
GTTAGGCTGTGATTGGCATCAGCTGGTTGTGCTGGTTGATTTTGTGCAGGCTGATTTTGC

TCTGCTGCAGACGCTGTTGTCGGGTTAGTAGATATAAAAAGTAACAGTGGCAATTAAGCT  
GAAAAAATACCGACATTAATTTTTCTGATACTAAATTTTTGTTGTCTGAATAAATTCAT

> **glmM**

Function: protein coding sequence; phosphoglucosamine mutase (core genome, constant)

Best match: glmM\_CC005\_Mu50-VRSA\_BA000017.4[2295588:2296943:r]RC (completely identical)

Position: 055-contig\_54: 15871 ... 17227; Length: 1356 bp

Sequence:

TTATTTATCTAATCCCATTTTATCTTGAACCACATCAGCTATTTGTTGTGCAAATCTTTCAG  
CATCTTCATCAGTTGCTGCTTCAACCATGACACGAACTAATGGTTCTGTTCCAGAAGGCTC  
TACTAAAATTCGACCTTCTCCATTCATTTCTACTTCTACTTTAGTCATAACTTCTTTAACGT  
CAACATTTTCTTCAACACGATATTTATCTGTTACGCGTACGTTAATTAATGATTGTGGATA  
TTTTTTCATTTGTCCAGCTAATTCACTTAGTGATTTACCAGTCATTTTTATTACAGAAGCTA  
ATTGAATACCAGTTAATAAACCATCACCAGTTGTATTGTAATCCATCATAACGATATGCC  
CAGATTGTTCTCCACCTAAGTTATAATTACCGCGACGCATTTCTTCTACTACATATCTGTC  
GCCAACTTTAGTTTTATTAGATTTAATTCCTTCTTGTTCAAGCGCTTTGTAACCACTAAA  
TTACTCATAACAGTAGAAACAATCATGTCATTATTCAATTCTTGATTTTTATGCATTTCTTG  
ACCAATAATAAACATAATTTGGTCACCGTCAACGATTTGACCATTCTCATCTACTGCTATG  
ATTCTGTCTCCATCGCCGTCAAATGCTAACCCTTCACTTTCAGTTTCAACTACTTTTT  
CAGCTAATTTTTCAGGATGTGTAGAGCCACATTTCTCATTGATATTATATCCATCAGGACT  
ACATCCAATTGTTTCAGTATCTGCTTCTAAATCACCAAATAAGAATGGCGCTAGTGATGA  
TGTTGAACCATTTGCACCATCTAAAACAATTTCAAACCTTCAAAGTTAACATCTACTGTT  
GATTTTAAATAGCTCAAATATTTTTGTGCCCTTCAAAGTAATCTGAATAATGTACAATAT  
CATTGCCAACTGGTCTTGGTAATTCTGGATTTTCTTGATCCAATAATGCTTCAATTTCAATT  
TCTTGTTCACTGATAGTTTAAAACCATCTGATCCAAAGAATTTAATACCATTATCTGCAA  
CTGGATTATGAGAGGCTGAAATCATTACACCTAACTCTGCACCCATATCGCGTGTTAAAT  
ATGCAACACCTGGTGTTGAAATAATACCTAATCGCATCACTTCTGCACCAATTGAAATCA  
AACCAGCTATTAATGCTGATTCTAACATTTACCTGAAACTCTAGTATCGCGACCTACAA  
GTACACGTGGGTGTTTTTACCTTTATTATGTGCTAGAACATAGCCACCGTATCTTCCTAA  
TTTAAATGCCAATTCAGGTGTTAGTTCTTGGTTTGGACACCTCTTACTCCGTCTGTACCA  
AAATATTTTCCCAT

> **dacA**

Function: protein coding sequence; cyclic di-AMP cyclase (core genome, constant)

Best match: dacA\_CC005\_Mu50-VRSA\_BA000017.4[2297904:2298713:r]RC (completely identical)

Position: 055-contig\_54: 18187 ... 18997; Length: 810 bp

Sequence:

TTATTTACACCTTTCTTTTGAAGCGTGTGCCAAACCAATGTTTCAGCAAGCAACTCTTCA  
AAAATTTTCGTTTGAATGTCTCGTCGTAATTTTCCATCAAATGTTACCGAAATATCACCAG  
TTTCTTCAGATACAATAACGGTAAATGCATCAGATACTTCTGAAATACCAACCGCAGCTC  
TATGTCTTGTACCCAAACTTTTAGATATCTTAGGACTATCAGACAATGGCAAATAACTTGC  
TGCTGCTGCAATCTTAGTGCCTTGAATAATCATTGCACCATCATGTAAAGGTGTGTTAGGT  
ATAAAGACATTAATAAAAGTTCTTGGCAAATATTTGAATCCATTGCAATACCTGTTTCAA  
TATAATCTTGAAGACCTGTTTCTTTTCAAAGACAATTAATGCACCTATACGTCTTTTACG  
CATATATTGCACAGCCTTTGAAACCGATTGAATCAATTTCTTTCATCTTTACTATACGTA  
TTAGAAGTATAGCGTTTTTAAAAGCTACCTCTACCAAGTTGTTCTAACGCACGTCTAATTT  
CTGGTTGGAATATTACTATTAAGCTAATACCCCCATTGAATAACGATATCGAATAATTT  
AGATGTTGCAGTCAAGTTCAATATCATACTTATCTGCTGACCAATAACAATTACTAATATC  
CCTTTAAGTAATTGTATCGCTTTAGTTCCCTTAAAGACCGTGATGAGAAGATAAAGTACA  
TACCAAATATCAGTAAATCAAGGATACTCGTTACAATTTTTAACGTACTGAGGTTTTGA  
AAAAGTTGGAAAAATCCAT

> **argI**

Function: protein coding sequence; arginase (core genome, constant)

Best match: argI\_CC005\_Mu50-VRSA\_BA000017.4[2298902:2299810:r]RC (completely identical)  
Position: 055-contig\_54: 19185 ... 20094; Length: 909 bp

Sequence:

```
TTATAATAAAGTTTCACCAAAAAATGTTCCAATAATGAAACCGCTTGTTTCAGCAGTATG
ATTATTACTGTCAATCAATGGATTTACTTCAACTAAATCCATTGAGGAAATTAATGTGAT
TGATGCAGTAATTCCAATGCAAAATGGCTTTCTCTATAACTAAGACCACCCAAAACCTCTA
GTACCAGTGCCTGGCGTTTCAAGCGGATCTAAAGCATCAACATCTAAAGATAAATGAACG
CCATCAACATTGCGTGACTTCAAATATTCTATTGTATTTTCAATTACTTCCTTTATCCCTAA
TTTATCAATATCTGACATAGTAAATGTTTTAATATTATGATCTTTGATAAATTGTCTTTTAC
CTTTATCTAAATCTCTCATACCAATTAGTACGATGTTTTCTGGCTTGATTACATTACTATTT
AATTCTAAAAGTTCTTTGGGACCTTCGCCTGTCAAAATCCTTAGAGGCATACCATGAATAT
TTCCACTTGGTGACTCTTCAGGTATATTTAAATCACCATGTGCATCATACCAAATAACACC
TAAATTATTATAATGTTTACTTATTGCTGATACTGAACCTACCGCAATAGAATGATCACCA
CCAAGAAGTAGAGGAAATCTGTTATTTTCAATTGATGCTGAAACCTCTTTATTTAATTTTT
GATTAACATCTATAATTTTCATCATAATTTCTTAATCCTTTTTGTTCACTATGAAATTTTTCA
ATGTTACAGCAGGTACCTTAATATCCCCCTTGTCATATACATCAAGGTCTAATTGCTTTA
ATCTTGAAATTAATCCAGCATATCTAATTGCTGTTGGTCCTAAATCAACACCTAATTTTCT
TTGTCCAAATGTTGATGGTGCACCTATAATATCAATTGCTTTTGTCTTTGTTCAT
```

### > **tRNAlys**

Function: tRNA tRNA lysine

Best match: tRNAlys\_CC001\_MW2-USA400\_BA000033.2[2250231:2250306:r]RC (completely identical)

Position: 055-contig\_54: 20228 ... 20304; Length: 76 bp

Sequence:

```
TAGTGAGCCATAGAGGATTCGAACCTCTGACCCTCTGATTAAAAGTCAGATGCTCTACCA
ACTGAGCTAATGGCTC
```

### > **Q5HDM5**

Function: protein coding sequence; LysR family transcript regulator (core genome, variable)

Best match: Q5HDM5\_CC005\_N315\_BA000018.3[2388202:2389086]RC (completely identical)

Position: 056-contig\_190\_RC: 88 ... 973; Length: 885 bp

Sequence:

```
TTAAAGAGCCTCTAAAAGTCCATATAAATAATCTTGGCATTGTTGTACGAATGTATGTACT
TGTTTCGGAGTGTGTTGCGTTTTTTATGGTAATTGATATAAATTTTTTCGGCCTAAGTTTGAC
GAATTTTTTTATATTCTAAATTAGACGTGTGAAATGATTGGTAATAAAATCTCGGAATGAT
AGCGTAACTAAGCCGAGATGAACAAATCCAACCTGCTGATTCTGAATCGATCTGTTTCTAC
AACGACATTTGGACGAATATTTCTTCTATTAATAAGTCATCTAAGTGTGTTGCGCACTTGA
GAATTTTTGTTTGGTAATATGAGTGGCAAATTTTCAACATCTACCCAATTTTGATTTTTAA
ATGTTTCCTTGGGTGCTAATAAAATGTAAGATTCCTCATATAAAGGAATGGATCTTATATC
TTCGTGGGTTATTTTTTCATTTGTTATAGCTAAATGAATATTAATAATTCAGTAATTGCTCTA
TAGATTGATGTTTGTTCATGTATTTTCATATAAACGATATTGCTGTTTCAGGGTAGTCGGAATG
GTGCTTTCGAATTAATTCGCAATCCATTGATTTCGTAGATTCAAGAGTCCCAATTTTTATC
CTTGGTTCTGATGTAACGCTTAAATCATACATTTTTTCCATCGTGGATCGATATTGTTGAA
CTAATTCGCTCGCATAACGATAAACTGTATTCCTTTTTTCGGTAATCTTGATGTCTTTTGTG
GAACGTGTAAATAAGTCATAACCTAAATCTGCTTCCATTTTTTTAATCGTAGCAGTTAAAG
ATGGCTGGCTAATATGTAATAAATTGTGCAGCTTTAGTAAACTATTATATTTACGATAG
CCAAGAAGTATTCTAACTGAATAATTTTCAT
```

### > **hutU**

Function: protein coding sequence; urocanate hydratase (core genome, constant)

Best match: hutU\_CC005\_N315\_BA000018.3[2386381:2388042:r] (completely identical)

Position: 056-contig\_190\_RC: 1132 ... 2794; Length: 1662 bp

Sequence:

ATGAGAAAAATTCAAGCAAAAAAAGGTTTGGAGTATTGAGTGTAAAGGTTGGGAACAAGA  
AGCAGTACTTAGAATGTTATACAACAATTTAGACCCAGAAGTTGCTGAAAGACCAGAAG  
ATTTAGTTGTTTATGGTGGTATTGGAAAAGCAGCACGTAATTGGGAAGCTTTTGAAGCAA  
TAGAGAAAACGTTACGAGAATTAGAATCAGATGAGACAATGTTAGTACAATCAGGAAAG  
CCAGTTGCTGTATTTAAAACACATGAAGAAGCGCCACGTGTATTAATTTCAAATTCAGTA  
TTAGTGCCTGAATGGGCAAACCTGGGATCATTTTAATGAATTAGATAAAAAAGGTTTAATC  
ATGTATGGACAGATGACAGCCGGTAGTTGGATATATATTGGTTCTCAAGGTATTGTGCAA  
GGTACTTATGAGACATTTGCCGAGCTAGGTAATCAACACTTTAATGGAGATTTAGCAGGC  
ACTGTTACACTGACAGCAGGTTTAGGTGGTATGGGTGGTGCGCAACCGTTAGCAATTACT  
ATGAATCATGGGGTAGCAATTTGCGTGGATGTTGATGAAACACGTGTTGATAAGCGAATT  
GATACGAAATACTGTGATGTTAAAACAGCTGATTTAGATGAAGCATTAAAATTAGCAGAA  
GAGGCGAAAGAACGTGGAGAAGGATTATCAATCGGGTTAGTTGGAAATGCTGTAGACAT  
CCATCAAGCGATTCTAGAAAAAGGATTTAAAATTGACATTACTGACCAAACAAGTGC  
ACATGATCCGCTAAATGGATATGTGCCACAAGGATACTCTGTAGAAGAAGCGAAAAGTATT  
GCGTGAAAAAGATCCGAAAAAATATGTTGAACTGTCACAAGCTTCAATGGCAAAGCATG  
TTGAATTAATGCTTGAATTTCAAAAACGTGGCGCTGTAGCATTTGATTATGGTAACAATA  
TTCGTCAAGTAGCCTTCAATAACGGAGTGAAAAATGCTTTTGACTTCCCAGGCTTTGTACC  
AGCTTACATTAGACCATTATTCTGTGAAGGTAAAGGGCCATTCCGCTTTGCTGCGTTGAGT  
GGTGATCCAAAAGATATCGAGCGTGCGGATGAAGAAATGCGCAAACCTTTCCCAGAAAA  
TGAAAAGTTATTAAGATGGCTTGATTTAGCTGAAGAAAAAATTTTCATATCAAGGACTACC  
ATCACGATTGCTTGGTTAGGCTATGGAGAAAGAGCGAAAATGGGCTTAGCTTTAAATCG  
TCTTGTACGTGACGGTGAATTTACAGACCAATTGTTATTGGACGAGACCATTTAGATGCT  
GGTTCAGTTGCTAGTCCTAACCGTGAAACAGAAAGTATGAAAGATGGCAGTGACGCGGTT  
GGTGATTGGGCTGTATTGAATGCACTATTAACACAGCTGCAGGTGGTTCATGGATTTCA  
TTCCATCACGGTGGCGGTGTTGGCATGGGATATTCACTTCATGCGGGTATGGTTGTTGTAG  
CAGATGGATCAGAGCGTGCTGAAAGAAGATTGGAACGTGTATTGACGACTGATCCAGGT  
ATGGGTGTTGCCCGACATGTTGATGCTGGCTATGACATCGCTATTCAAACAGCTAAAGAA  
AAAGGTATTCATATTCCAATGATTGATAAAGCAGGTGATAAATAA

> **hutI**

Function: protein coding sequence; imidazolonepropionase (core genome, variable)

Best match: hutI\_CC005\_Mu50-VRSA\_BA000017.4[2454643:2455881:r] (completely identical)

Position: 056-contig\_190\_RC: 2793 ... 4032; Length: 1239 bp

Sequence:

ATGAATGATTTAATAATTAATCACATAGCAGAATTAATTTTACCGAAATCAACAGATAAA  
CCTTTGAAGGGTAAGGAATTAGATGAATTAATGTTGTGAAAAATGGTACAGTTGTCATT  
AAAGATGGCAAATTTGTATATGCTGGACAACATACAGATGACTATGATGCGACTGAGAC  
GATAGATGCTAGTGGAAAAGTAGTTTCTCCGGCATTAGTAGATGCTCATACCCATTTAAC  
ATTTGGTGGATCTCGAGAACATGAGATGTCATTAACACGTCAAGGTAAGTCTTACCTTGA  
AATATTAGAAATGGGTGGTGGCATATTATCTACCGTTAATGCTACTAGAGAAACATCCGA  
AGATGACTTGTTTAAAAAAGCAGAGCATGATTTGCTTACTATGATTAACACGGCGTGCT  
TGCAGTTGAAAGTAAGAGTGGTTATGGATTAGATAGAGAAAATGAACTGAAGCAATTGA  
AAGTGTCTAATCGTTTAGCTGAGAAATATGATTTAGACATGAAACATACTTTCCTAGGGC  
CTCATGCTGTACCTAAAGAGGCAAGTTCAAATGAGGCATTTTGAAGAAATGATTGCGT  
TACTTCCGGAAGTAAACAATATGCAGACTTTGCGGATATTTCTGTGAAACAGGTGTAT  
TTACAATAGAACAATCGCAACATTATATGCAAAAAGCCAAAGAAGCAGGTTTTAAAGTG  
AAAATACATGCGGATGAAATTTGATCCGTTAGGCGGACTGGAATTAGCAATTGATGAACA  
AGCAATATCAGCAGACCACTTAGTAGCTTCTAGTGATAAAGGAAAAGAAAAGTTGCGAA  
ATAGTGATACTGTAGCTGTCCTTACCTGCAACGACGTTCTATTTAGGTAAGAAGATTA  
TGCAGATGCGAGAGGTATGCTTGATAATAATGGTGCCATCGCGTTAGCTACTGATTATAA  
TCCAGGCAGCAGTGTAAACGAATAACTTGCAACTTGTTATGGCCATTGCAGCATTAAAATT  
AAAGCTTTCGCCTAGTGAAGTGTGGAATGCTGTTACGGTCAACGCTGCTAAAGCAATAGA  
TATTAACGCGGGTACAATTAACACAGGTGATAAGGCTAATTTAGTAATTTGGGATGCACC  
AAATCATGAATATATTCCATATCATTTTGGTATCAATCACGCAGAAAAAGTTATTAAGA  
CGGTAAGGTCATCGTAGATAACACATTATCTTTTAAAGCATAA



### > **sam-L4**

Function: noncoding RNA SAM riboswitch locus 4 (core genome, constant)

Best match: sam-L4\_CC001\_MW2-USA400\_BA000033.2[2393764:2393859:r] (completely identical)

Position: 056-contig\_190\_RC: 7529 ... 7625; Length: 96 bp

Sequence:

```
CACTTATCTAGAGAGGTGGAGGGACTGGCCCTATGAAGCCTCGGCAACATCTCGAATGTG  
CCAATTCCAGTAACCGTAATGGTTTGAAGATAAGCA
```

### > **nhaC2**

Function: protein coding sequence; putative Na<sup>+</sup>/H<sup>+</sup> antiporter

Best match: nhaC2\_CC005\_Mu50-VRSA\_BA000017.4[2449660:2451039:r] (completely identical)

Position: 056-contig\_190\_RC: 7635 ... 9015; Length: 1380 bp

Sequence:

```
ATGAAAACCTCTTTCCTTCATCGTTTGTGAGAAAGAGGTATTTTTAATTGGAAAGCAGGTA  
AAAAGGATGGAAGTACATAAAAAGAGCAATGCTTGGGCATTATCCCTTGTATTATTT  
GTGGCGTTGTTTTAGGCGTAGGTATTATCACAGGTGATTTACTTCAATGCCATTAAATG  
TTGCAATTACGATAACGGTAATTGTGGCGTTATTAATGAATCGAAAAGAATCATTTGCTA  
AAAAAGTTGAGGTCTTCACGAAAGGTGCAGGCCATTCAAACATTATTTAATGATGTTGA  
TTTTTATTTAGCAGGTGCATTTTCAAATACAGCTGAAAAAATGGGTGGCGTAAAGTCGA  
CAGTTAATTTAGGACTATCATTAAATCCCAGAAAATTTAATTATTGTAGGATTGTTTGTGAT  
TTGTATGTTTGTCTATATCTATGGGGACGTCTGTAGGAACTGTTGCTGCAATAGCACCT  
GTTGGTTACGGATTTGCACAAGCGACAGATGTACCAACTGCGCTAGCAATGGCTACAGTT  
GTTGGAGGTGCAATGTTTCGGCGATAATCTATCAATGATTCAGATACAACAATTGCTGCG  
GTTAGAACAACAACATACGAAAATGAAAGATAAATTCAGAGTAAACTTTAAAATTGTATTG  
CCAGGTGCTATTTAACGATTATTATTCTGTATTTCTTAACGAATGGCATTCTTTAAATCA  
TGCTAAAAACTATGATTATAATCTAATTAAGTTGTACCGTATATTTTAGTATTGGTATTA  
GCATTATTAGGTGTAATGTCATTATCGTATTGATTGGCGGAACATTATTAGCTGGAATCA  
TTGGTCTCATAGATGGTTCATTTCGGTTGGATGGGACTACTAGATGCAGTGTCCAAAGGTA  
TTATAAGCATGGAAGATATTGCTATGATTGCGTTGCTAATTGGTGGTTTAGTCGGTATTAT  
TCAACACAATGGTGGTATTGAATGGTTGTTGCAATTTGTTGCTCTAAAGTGAAATCAAA  
GCGTGGCGCAGAATTAGGAATTGCGAGTTTGGTAAGTGTGCGCAGATATTGCCACGGCAAA  
CAACACCATCTCTATTATTATGTCAGGTCCTTTAGCTAAAAATATTGCAGATGAATATGAT  
GTAGATTCAAGGAAATCAGCAAGTATTCTTGATATATTTGGAGGCTGCTTCCAAGGTTTA  
TTACCATATAGCCCGCAAGTCATTTACAGCGGCTGGTGTAGCTGGTATTTACCATTAAATGT  
TATCCCATACAGCATTATCCTATATTATTAGGTGTATGCGGACTTATTGCGATTTTATT  
AATTTTCAAAGCTAAAAAAGAACAACACTAGTCAAGAAATGAAACATTAA
```

### > **glvC**

Function: protein coding sequence; PTS system/arbutin-like IIBC component

Best match: glvC\_CC005\_Mu50-VRSA\_BA000017.4[2446231:2447835:r] (completely identical)

Position: 056-contig\_190\_RC: 10839 ... 12444; Length: 1605 bp

Sequence:

```
ATGAATGCGATAAAGCGTTTCGGTAGTGCAATGATTGTACCGGTATTAATGTTGCTTTCT  
TTGGGATAGTGCTTGGCTTTGCGACATTATTTAAAAATCCTACAATCATGGGGAGTTTAGC  
AGATCAACATACGTTTTGGTTTAAATTTGGTCAGTGATAGAATCTGGTGGCTGGGTTATT  
TTTACGCATATGGAAGTTGTATTTGTTGTAGGTTTACCACCTTCTTTAGCTAAAAAAGCAC  
CAGGTCATGCAGCGCTTGCAGCATTGATGGGTTACTTAATGTTTAATACATTTATAAATGC  
CATTTAACGCAATGGCCACATACATTTGGCGCTAATTTAGAAAAAGGCGTTGAAAATGT  
ACCTGGTTTAAAATCAATTGCAGGTATTGCCACATTGGATACGAATATTCTAGGTGGTATT  
ATTATTTACGCTATTATTACGTGGATTACAATAGATACTACAGTAAACGATTACCAGAA  
ATGGTTGGTGTATTCCAAGGTTTAAACATTTGTGGTTACAATTTCATTTTTTGTGATGTTACC  
ATTAGCAGCAATTACTTGTGTTATTTGGCCAACTGTTTCAGCACGGTATTGGTTCAATGCAA  
CACTTTATCATCGCTTCAGGCTATATCGGTGTTTGGCTGTACCACTTCTTAGAACGTGTAT  
TAATACCAACAGGATTACATCACTTTATTTATGCACCAATTGAAGTTGGACCAGTAGTAG
```

TCAATCATGGCTTGAAAGCTGAATGGTTACAACATTTAAATGAGTTTGCTAAGAGTACTA  
AGCCATTAAGAGCAATTCCTTATGGCTTTATGCTTCAAGGAAATGGGAAAGTATTTG  
GATGTTTAGGTATTGCTTTAGCAATGTATGCTACGACACCTAAAGAAAATCGTAAAAAAG  
TAGCAGCATTACTTATTCCTGCAACATTAACAGCAGTCGTTGTAGGTATTACTGAGCCATT  
AGAATTTACATTCTTATTCATCGCACCATACTTATTTGTTTTACACGCAGTTTTAGCAGCA  
TCAATGGATACTTTAATGTACGCATTTGGTGTGTAGGTAACATGGGTGGTGGCTTGTTAG  
ACTTTATTTCAACAACTGGTTGCCATTAGGTAAGAACATTGGGGTACTTATGTTGCAC  
AAGTTATTATCGGTCTGATATTTGTAGCGATTTACTTCTTATTTCAGATTCTTAATTTTG  
AAATTTGATATTCCATTACCTGGACGTAAGAAAACAGAAGAGGAAGTTAAATTATTTTCT  
AAGCAAGATTACAAAAATAAAAAAGGTGATAGCGTAGATTCTAAACGTGCTTCAACAGG  
TAATGAATACGAAGACAAAGCTGCGTATTACCTCGACGGTTTAGGCGGCAAAGAAAATA  
TCAAAGATGTTACTAACTGTACAACAAGATTACGCTTAACTGTTTTATGATGAAAGTAAAG  
TTGCGGATACGGAATATTTACGCATCAACAAATGGCACACGGATTAGTAAAGAGTGGTA  
AGAGTATCCAAGTTGTAGTAGGTATGACAGTACCACAAGTTCGTGAAGCATTGAAACAA  
TGGTTGAGGATCAATCGTCCGAAGATAAATAA

### > **proY**

Function: protein coding sequence; proline-specific permease (core genome, variable)

Best match: proY\_CC005\_Mu50-VRSA\_BA000017.4[2441245:2442624:r] (completely identical)

Position: 056-contig\_190\_RC: 16050 ... 17430; Length: 1380 bp

Sequence:

ATGGAGAACAATGAACTACAAAGGGGATTGAGTGCCCGTCAAATTCAAATGATTGCACTT  
GGTGGTACGATTGGCGTGGGGCTTTTCATGGGTGCCACAAGTACAATTAATGGACAGGC  
CCATCAGTTATCCTTGCATATTTAATTGCGGGTATCTTTTTATTTTAATCATGAGAGCAAT  
GGGGGAAATGATTTATTTAAACCCTACAACAGGATCATTGCAACATTTGCAAGTGATTA  
TATACATCCTGCAGCAGGTTATATGACAGCATGGAGTAATATATTCCAATGGATTGTAGT  
TGGTATGAGTGAGGTCATCGCAGTAGGAGAATATATGAAGTTTTGGTTCCCGGAATTGCC  
AACTTGGATTCTGGTGTTATTGCTATTTTATTATTAATGGCAGCGAATTTATTCTCGGTA  
AAAGCGTTTGGAGAATTTGAATTTGGTTTGCTTTAATTAAGTTGTAACAATTATTTTAA  
TGATTATTGCTGGTTTTGGTCTTATTTTCTTTGGTTTTGGAAATGGTGGCCATGCGGTAGGT  
ATTTCTAATCTATGGACAAATGGCGGATTTATGCCAAATGGTATTGTTGGTTTCTTCTTG  
CATTATCAATTGTAATTGGTTCATACCAAGGTGTGGAAGTATGAGGTATTACGGCAGGTG  
AACTAAAGATCCTCAGAAAAATATCGTTAAAGCAGTGAATGGTGTATCTGGAGAATTT  
TAATTTTCTATTTAGGCGCTATTTTTGTTATTGTTTCAGTGTATCCTTGAATCAATTAGGA  
GACATTGGAAGTCCGTTTGTGCAACATTTGCTAAAATCGGTATTACATTTGCAGCTGGAT  
TAATTAACTTTGTGTTAATTAACGCAATGTCAGGATGTAAGTCAAGTATTTTCAGTGC  
GAGTCGTATGATTTATACACTTGCTCATAAAGGTGAAATGCCAAAAATATTTACTAAAAT  
CATGAGAAATGGTGTACCATTGTACACTGTTGTAGCAGTATCTCTTGGTATTTTAATTGGT  
GCTTTATTAACGTAATTTTACCTTTATATATCGATGGAGCGAAGAGTATTTTCGTATACG  
TTTATAGTGCGTCTATTTTACCAGGTATGATTCCTTGGTTTATGATTTTATTTCAGTCACTTA  
CGTTTTAGAAAATTACATCCTGAAGAATTGGAAGGTCACCCATTCAAATGCCTGGTGGC  
GCAGTAACTAACTATTTAACAATCTTATTCTTAATATTAGTATTGGTTGGTATGGTATTTA  
ATGTTGAACTAGAATATCAGTGCTAATTGGTGTATCTTCTTAACGATTGTAACGATTTA  
TTACTTTATTAGATATAATAAAAAATAATGTAAAAGCAAAATAG

### > **Q2FEH9**

Function: protein coding sequence; phosphosugar-binding transcript regulator (core genome, constant)

Best match: Q2FEH9\_CC005\_Mu50-VRSA\_BA000017.4[2439986:2440858]RC (completely identical)

Position: 056-contig\_190\_RC: 17816 ... 18689; Length: 873 bp

Sequence:

TTAATGTTTAAAGTTAATATTTGATAAATGTTTACGATAGTTATCTAAAGCCATTTTAGAT  
TGTGTTATGAAATCTAATGATGCGTGATAATTTAATGCAACATAACGATAATATAAAATA  
TCAATAGTGAACATTTGAGCAAATAATGAAGTTGTTGCTCCCATATGCATCTCATTTTCAT  
CAGTTTTCCATAAGTTAAAACAATATTTGATGCCTGTGCTACGGGATTATCCCTTGTACT

AGTAATTGTAATTATAGGTATATGGTAGTCATCAATAACTTTAACCATTGATTGCATTTCA  
CTTTGCGTACCATTGTTAGTAATAAGAATAAACTGTCGTTTCGAATTGTGAGTTGCTAATA  
ATGTAGCAAAAATATGTGTTTCTTGAACAAGTTGAATATTAAGACCTATTCTTGATAACTT  
TTGGTATAAGTCGGTAGCAACTACAAAAGATGCGCCAAAACCATATATAAAAATCGTCTC  
AGAACGTTTTAAACAATGACATATTTGATCAATAGTTTTATCATTAAATTCGTTATTTGCA  
TGATTAAGTGCGCGTGTAGTACGTGTATGGAGTTTAGTTCTTAAAGATTCTGTGCTTTCGT  
TATTCATTAATTCAACATTGTAAATTGATGATGCTTTAGGAACATATTTAGATATATTTAT  
TTTCAAGTCGTGAAAACCGCCATCAGTAATTTTCTTGCTGAATCGAATGACTGATGATGTA  
CTAATATCTAATAAGCTTGCTAAGTCTTGAGACCTCATTTTAATCACCTTTTGAGGTGAAT  
TTAGTATAAATTTAGCTATCTTTTTTTCATTTTATAGTCATATATGGATATTGACTATCTATT  
TCTGTTAGTACGTTTGACAT

### > **Q5HDP6**

Function: protein coding sequence; helix-turn-helix type 11 domain protein (core genome, constant)  
Best match: Q5HDP6\_CC005\_Mu50-VRSA\_BA000017.4[2437709:2438401]RC (completely identical)

Position: 056-contig\_190\_RC: 20273 ... 20966; Length: 693 bp

Sequence:

TTAGGAATCGATGGGGTTTAAAAATTGATGATAGTTATCAATGGATATGTCTCTGGTTTG  
AATCGTCTTACCGAATGAATACGAAATATCTATAATATTTTCAATTTTCGAGTTCGGCAGTT  
TTGTCTTGAGCAATGTCATAAATGACTGCATGCCAATGTCCATGTTTACACAAAAGGCCA  
ATAAATATAACGTTTTTCAGCTTTAATATTATCATCAACCCTATGATCTACTAACATCACAT  
TTCGTTCTGTACAATAAATTAATAATGTCGGAAAACAGCATTGGGAGTGCATATGTTGTG  
TGTCATCAAATTTAATATAAAAAGTCCATGCGTTTAAAGCAATTTTCTTAAGCGTGTGTTGTGG  
AAGACTTAAACATTGTTTTATAAATTGCGTTGATTTTCGCTTTTATATGGTAATGTCGAGTAC  
GACTGACTTTTCAATTAAGCACTAAAAATAAGGCCGATAATTGTGTTTCAGATAAGTTTAAAT  
GCAATTTTAGATTGTGCTTGTGTTGATTTGGTAACCACCATTTTCCCATAATGCGCATAAAA  
TTTTAACACCTTGATTTTCTAAATCATCAATATCTCTTAAATTTGTGCGTTTGGATACGTTG  
CAATATTTAGCTAATTCTAAAGCGGTCATTTTTTTATTTTGTGGAATTGCAGTAATTATTA  
ATTTGCTTTTCAGCTTTATTCAT

### > **rsaI**

Function: noncoding RNA ncRNA of Staphylococcus aureus I (core genome, constant)  
Best match: rsaI\_CC001\_MW2-USA400\_BA000033.2[2379510:2379653:r] (completely identical)

Position: 056-contig\_190\_RC: 21113 ... 21257; Length: 144 bp

Sequence:

GTAACAGGGGGAGCGATTAAACAAAGGGGTAGAGCTATATAACAGATAGCTTTTAAATCG  
TTCAAGTTACATCACAACATCTTCAATATTTATTAATTAATTAATTAATTAATTAATTAATTA  
GCACGTGACTAGCCGATTTTTTT

### > **suhB**

Function: protein coding sequence; inositol-phosphate phosphatase (core genome, constant)  
Best match: suhB\_CC005\_Mu50-VRSA\_BA000017.4[2436527:2437324:r] (completely identical)

Position: 056-contig\_190\_RC: 21350 ... 22148; Length: 798 bp

Sequence:

ATGACAGATAAAACATTACAGCAAATAGATAAGTTAATATGTTTCGTGGTTGAAACAAATA  
GACAATGTTATTCCGCAATTAATTATGGAAATGACTACAGAACTAAGCGTCATCGATTT  
GATTTAGTTACAAATGTAGATAAACAGATTCAACAACAATTTCCAACAATTTTGTAGCAACA  
CATTTTCCGGAACACCAACTATTAGCGGAAGAAAAAAGTAATGAAATGATTACGAATGA  
AATTAATCATTTATGGATTATGGATCCCATTGATGGAAGTCCCAATTTAGTAAACAGCA  
AGAAGATTATTGTATTATATTGGCGTATTTTTATGAAGGTAAACCAATGTTATCGTACGTA  
TATGATTATCCGCATAAAAAGCTTTATAAAGCAATACGAGGAGAAGGTGCTTTTTGTAAT  
GGAATTAAGATGGAAGAACCACCATCGTTAAAATTGGAAGACGCTATTATATCGTTTAAAT  
GCACAAGTGATGAATCTAGATACGGTGCAAGATTTATTTGACGCCTCATTTAGTTATCGTT  
TAGTTGGTGCTTGCAGGATTAGATTCTATGCGAGTGGCAAAGGTCAATTTGGGGCACATA

TTAATACAAATCCTAAACCTTGGGACATTGCTGCACAGTTTTTTATTTGCAGAACTATTGAA  
TCTAAAAATGACGACTTTAGATGGTAAGGCAATTGATCATTTAAAGGGTGCACCTTTTAT  
TATAAGTAATAAAGCATGTCATGAAACGGTACTTAAAATTTTAAATGCAAATGGTGGTTA  
TCAAAAATACAGATAG

> **fdhL**

Function: protein coding sequence; formate dehydrogenase large subunit (core genome, variable)

Best match: fdhL\_CC005\_N315\_BA000018.3[2362390:2365344:r] (completely identical)

Position: 056-contig\_190\_RC: 23830 ... 26785; Length: 2955 bp

Sequence:

ATGCAAGAACATTTGGTGGTTACACTTGATGGAAAAGATTATCTTGTAGAACCAGGTACG  
AATTTACTTGAATTTATTAATCACAAGATACTTTTGTACCTTCAATTTGTTATAACGAGT  
CGATGGGACCAATTCAAACATGTGATACATGTACTGTTGAGATTGACGGTAAAATTGAAC  
GTTTCATGTAGTACGGTGATTGATCGTCCAATGACTGTAAATACTGTGAACAATGATGTGA  
AAGATGCTCAAAAAGAAGCGCTTGATCGAATTTTAGAAAAGCATATGCTGTATTGTACAG  
TATGTGATTATAATAATGGTATTGTGAAATTCATAATACGATGGATGCATGGGGGCTTC  
AGCATCAAACGTATGAATATAAAGAGAAGCCATATGAAAAGGATTATGGCCCATTTTATC  
GTTATGATCCAAATCAATGTATCTTATGTGGGCGTTGTGTAGAAGCATGTCAAGATATCG  
AAGTGAATGAACTATTAGAATTGATTGGGATCGTGAACATCCACGTGTTATTTGGGATA  
ATGATGTACCAATTAATGAATCGTCATGTGTATCTTGTGGTCAATGCGCAACTGTATGTCC  
ATGTAATGCCATGATGGAAGTGAATATGGAAGGTAATGCGGGTTATATGACTGATACGG  
AACCTGGTTCATTAGCAGCAATGATTGATTTAACTAAAAAAGCAGAACCTGGTTATGGTC  
CACTATTTGCAATCTCAGATTCAGAAGCAGAAATGCGTAAAGAGCGTATTAAGAAAATA  
AAACAGTGTGTACTTATTGTGGTGTGGGTTGTTTCATTTGAAGTTTGGACTAAAGATAGAG  
AAATTTTAAAAGTACAACCATCACATGATTCTCCAGCAAATAAAATTGCGACTTGTGTTA  
AAGGTAAGTTTTTCATGGGGACATATTAATTCAGATCAACGCTTAACTAAACCACTAGTAA  
GGAAAAATGGTGAAGTCCATGAAGTAGAATGGGATGAAGCTTTAAATGTCATTGCAGAT  
AATTTTACATCTATTAAGAAAAGTATGGCCAGATGCACTATCATTCAATTTCTTCTTCTA  
AAGCGACGAATGAAGAATCGTATTTAATGCAAAAATTAGCAAGACAAGTTATTGGCACA  
ATAACGTTGATAACTGTTCAAGATATTGCCAAGCACCTGCAACAAAAGGCTTATTTAGA  
ACGGTTGGACACGGCGGTGACTCAGGTAGTATTGAAGATTTAGAAAAAGCGGCAATGTC  
TGTATTGATAGGTACCAATACAGCCGAAGCTCATCCAGTTATCGCATCACGCATGAAACG  
TGCTCAAAAATTATTTGGACAAAAAATACATGTATTTGATATTAGAAAACATGAAATGGC  
AGAACGTGCGGATCGTTTTTATCAACCTAAACCAGGTACGGATTTAGCGTGGTTAAGTGC  
AGTGACTAAGTATATTATTGATCATGATTTACACGATAAAGCATTATTATTGATGAGTGGGT  
AGATGATTTTGTGATGAATATTACAAATCATTAGAAAACATTTACAATGGCTTTTGTGCTGAAGA  
AGCAACAGGTATTCCTGAATCAGAATTGATTAATTTGCTGAAGAATGTGCTAAAGCTGA  
ATCTGTTGTAATTTGTTGGGCAATGGGTATTACACAACAAGACATTGGTAGTGACTCAAG  
TACAGCGATTTCAAACCTTATTATTAGTAACAGGTAATTATCGTCGTCCTGGTACTGGTGCG  
TATCCATTACGTGGACATAATAATGTTCAAGGATGTAGTGATATGGGAAGTATGCCTGAT  
AAGATTACTGGTTATCAAAGTATTGAAGCGGATGATATTCGCGCTAAATTTGAAAAAGAA  
TATGGCGTTAAATTGAATCCAAAAGCTGGTAAAGATAATCATGAAATGGTAGAAGGTAT  
ACATGACGGAGAAGTACACTCATTGTACTTATATGGTGAAGATACGGGTATTGTGGATTC  
AAATATTAATTTTGTACAAGCTGCGTTTGAAAAATTAGATTTTCATGGTAGTCCAAGATGA  
ATTTTTAACATTCACAGCAACATACGCAGATGTTGTATTGCCAGCAAGTCCTTCACTTGAA  
AAAGACGGTACTTTTACAAATACCGAACGTCGTATTCAACGTTTATACCAAGCATTAGAA  
CCTCTTGGTGAATCAAACCTGACTGGAAAATTTCCAAGCAATTGCTAATAGATTAGGA  
TTTGATTGGAATTACAAGCATCCTAGTGAAATTATGGATGAAGTAGCACGCTTAACACCT  
CTATATGCTGGGGTAAGTTATGATCGTTTAGAAGGATTCATAGTTTACAATGGCCAGTA  
CAACCTGATGGTACTGATGAGCCTATTCTATACTTAGAAGGATTCATTTTGGATAATGGTA  
AAGCAAAATTATTCCCATTATCATTGATAATTACTTTAAGCAAGATGAAATTTATGATAT  
TCATGTAAACAATGGTCGATTGTTAGAGCACTTCCATGAAGGTAATATGACTTATCAAAC  
ACCAATGATTAATAACAAAGTGCCACGTGCATTTGTTGAAATTTCTCCAGAGCTTGCTGA  
AGATAGAGGCATTCATGAAGGTGCAGAAGTTAAGCTGATTTCTGAAACAGGAGAAGCGG  
TATTACAAGTTCACGTGACAGATCGTGTTAAAGGTAAGAAATCTATATTCCATTAATA  
ATGATGCGATGGAATAATGGAGATCTAGGTGCAATTAACCTATTAACCTAATAGTGATGTTG

ATCAATACACGGATACACCATCTTATAAACGTAAGCTAGCTGTCGTTTGGAGGTAATTACGA  
AACGTGGTAAGTCACCGTTGAACCCTAATAATTTCCGTGTCAATAAAAAACGTCATCCGC  
AGTACAGTGTCAAGTACAGAAAAAATGGGAACGTTCAAGATTATGTTTTCCCGGGAAATC  
AGGTGGATAAATAA

### > **lytA**

Function: protein coding sequence; N-acetylmuramoyl-L-alanine amidase (core genome, constant)

Best match: *lytA\_CC005\_Mu50-VRSA\_BA000017.4*[2430158:2430934:r] (completely identical)

Position: 056-contig\_190\_RC: 27740 ... 28517; Length: 777 bp

Sequence:

ATGAAGAAGAATTTCAAGTTACGCATTTCAACGCTACTATTGATAGTTATTTTAGTTGTTT  
TTGCTGTACTACTCATCGTGAATGAACTAAATTGTTTAAAAATGATGTGAATTACTCTTT  
TGATGAGGCTGTTTCAATGCAACAAGGGAAAGGTATTGTACAGACAAAAGAAGAGGATG  
GTAAATTTGTTGAAGCAAATAATAATGAAATTGCTAAAGCAATGACTATTTACATAAAG  
ACAATGATATGAAGTATATGGATATCACAGAAAAAGTGCCAATGTTCGGAATCTGAAGTT  
AACCAATTGCTAAAAGGTAAGGGGATTTTAGAAAAATCGAGGGAAAGTTTTTCTAGAAGCT  
CAAGAAAAATATGAGGTTAATGTCATTTATCTTGTAGCCATGCATTAGTAGAAACAGGT  
AACGGCAAATCAGAATTAGCAAAAAGGCATTAAGATGGGAAAAAACGCTATTACAACCTT  
TTTTGGTATAGGAGCATTGATAGTAGTGCTGTTCTAGTGGGAAAAAGTTATGCTGAAAA  
GGAACAATGGACATCACCAGATAAAGGCGATTATTGGTGGTGCAAAGTTCATTCGTAATGA  
ATATTTTGAACAATCAACTGAATTTATATCAAATGCGATGGAATCCAGAAAATCCTGC  
GCAACATCAATATGCGAGTGACATTCGATGGGCAGATAAAAATTGCCAAATTAATGGATA  
AATCCTATAAGCAGTTTGGTATAAAGAAAGATGATATTAGACAAACATATTATAAATAA

### > **Q8NV79**

Function: protein coding sequence; monooxygenase (core genome, variable)

Best match: *Q8NV79\_CC001\_MSSA476\_BX571857.1*[2349507:2350631:r]

Position: 056-contig\_190\_RC: 28827 ... 29952; Length: 1125 bp

Sequence:

ATGAAGATAGCAATTATAGGTGCAGGCATCGGTGGATTAACAGCTGCTGCATTATTACAA  
GAACAAGGTCATACTATTAAGTCTTTGAAAAAATGAGTCAGTTAAAGAAATTGGCGCT  
GGGATTGGTATCGGAGATAATGTGCTTAAAAAACTAGGTAATCATGACTTAGCTAAAGGT  
ATTA AAAAATGCTGGGCAAATCTTATCTACAATGACAGTGTTAGATGACAAAGATCGCCTG  
TTAACTACTGTTAAATTA AAAAAGTAATACATTGAATGTGACGTTACCACGCCAAACATTA  
ATTGACATTATTAATCTTATGTAAAAGATGATGCAATATTTACAAATCATGAAGTCACG  
CATATAGATAATGAGACAGATAAAGTTACCATACATTTCCGCGGAACAAGAGAGTGAAGC  
ATTTGATTTATGTATTGGTGCTGATGGAATTCATTCTAAAGTGAGACAATCTGTAAATGCT  
GACAGTAAAGTATTATATCAAGGGTATACATGCTTTAGAGGTTTAATTGATGATATTGAT  
TTAAAGCATCCGGATTGTGCAAAAAGAATACTGGGGAAGAAAAGGAAGAGTAGGTATTGT  
TCCGTTATTAATAATCAAGCATATTGGTTCATTACAATTA ACTCGAAGGAAAACAATCA  
TAAATATAGTTCGTTTGGTAAACCTCATTTGCAAGCATACTTTAATCACTATCCAAATGAA  
GTTAGAGAGATCTTAGACAAAACAAGTGAAACAGGTATCTTATTGCATAATATTTATGAT  
TTGAAACCACTCAAATCTTTTGTATGGTTCGTAATTTTACTAGGAGATGCAGCACATG  
CGACAACGCCTAATATGGGGCAAGGTGCTGGACAAGCAATGGAAGATGCTATCGTATTA  
GTAAATTGTTTTAACACATACGACTTTGAAAAAGCATTACAGCGTTATGATAAAATACGT  
GTCAAACATACTGCAAAAAGTAATTAAGCGTTCTAGAAAAATCGGTAAAATTGCCAATAT  
CGTAGTCGTTTAGTTGTTGCAGTTAGAAATCGTATTATGAAAATGATGCCAAATGCATTA  
GCAGCTGGACAAACTAAATCTTATATAAATCGAAAGAGAAATAA

### > **ssaA3**

Function: protein coding sequence; staph secretory antigen A3 (core genome, variable)

Best match: *ssaA3\_CC001\_MW2-USA400\_BA000033.2*[2368506:2369006]RC (completely identical)

Position: 056-contig\_190\_RC: 31347 ... 31848; Length: 501 bp

Sequence:

TTAAATATGGATGTAGTTGTAGTTACCTGCTTCACTTGCAGAAATAGTTCTAGAACTTACT  
GAGAAAGGTCCGCCACTATAATTCATTTCTGAAATTGTAAGTGAACCATCACTGTTTACA  
CTTTCTACATATGCAACGTGACCAAATGGTCCTTCAGAAGATTGTAGGATAGCGCCTTTA  
GAAGGTGTATGATTTACTGTGAATCCAGCACCTTGTGCAGCAGCAGCCCAATTATTAGCA  
TTTCCCAAGTAGAACCGATTTCTCCGCCTACTTTATCATATACATAACCAAGTACATTGTC  
CTGCAGTGTATAAGTTACCAGAATGTGAAATTGATGATGTAGTTGTCGTAGTTGTTGTAGT  
CGTTGTAGTTGAGTCGTGTTGTAGTTATAGTTGTTGTAATTTGTATAATTTTCAGCAGCA  
TCTGCATGATGTGCTTGACCTACTAATGCTGTGCCGATTCTGCTGTTAACGTAGTTGCTG  
TTACTAATTTTTTCAT

### > **nhaC**

Function: protein coding sequence; Na<sup>+</sup>/H<sup>+</sup> antiporter

Best match: nhaC\_CC001\_MW2-USA400\_BA000033.2[2365022:2366422:r]

Position: 056-contig\_190\_RC: 33931 ... 35332; Length: 1401 bp

Sequence:

ATGATGACAAGAAAACCAACCTTTTTAGAATCAATTTGACAATGATTGTAATGGTTATT  
GTTGTTGTAACAGGCTTTGTGTTTTTTGATATTCCAATTCAGTATTATTAATTATTGCCTC  
AGCATATGCCACATGGATTGCAAACGTGTAGGCTTAACATGGCAAGATTTAGAAAAAG  
GCATTGCAGAACGTTTAAATACTGCAATGCCTGCAATTTTAATTATACTAGCGGTAGGAA  
TTATAGTAGGCAGTTGGATGTTTTCTGGCACAGTGCCAGCCTTGATTTATTATGGCTTAGA  
TTTATTGAATCCAAGCTATTTTTTAATATCAGCCTTTTTTATAAGTGCTGTTACATCTGTAG  
CAACTGGTACAGCATGGGGCTCTGCATCAACTGCAGGGATTGCACTTATTTCTATTGGTA  
ATCAATTGGGGATTCTCCAGGGATGGCAGCGGGTGCTATTATAGCAGGGGCTGTGTTTG  
GCGATAAAATGTCACCATTATCAGATACAATAATTTAGCGGCGCTTGTTACTAAAGTTA  
ATATATTTAAACATATACATTCGATAATGTGGACGACGATACCTGCATCAATCATAGGTT  
TATTAGTATGGTTTATTGCTGGATTTCAATTTAAAGGGCATTCAAATGATAAACAGATTCA  
AACTTTGTTATCAGAGCTTGCACAGATTTATCAAATTAACATATGGGTCTGGGTTCCTTA  
ATTGTGATCATTGTTTGTGCTATTTAAAATGGCTACAGTGCCAGCTATGCTAATATCAA  
GCTTTTCTGCCATTATAGTGGGGACTTTTAATCATCATTTCAAATGACAGATGGTTTCAA  
AGCAACATTTAGTGGTTTTAACGACTCAATGATACATCAGTCTCATATTTATCCAGTGTG  
AAAAGCTTGTTAGAACAGGGTGGTATGATGAGTATGACCCAAATATTAGTAACGATATTT  
TGCGGATATGCATTTGCAGGTATTGTAGAAAAAGCAGGATGTTTAGAAGTCTTATTA  
ACTACTATTTCTAAAGGCATCCATTCTGTAGGAAGTTAATATGTATTACTGTTATTTGTTGTA  
TTGCGCTTGTATTCGCTGCAGGTGTTGCTTCGATTGTAATTATTATGGTTCGGTGTGTTAAT  
GAAAGATTTGTTTCGAAAAATACCAAGTCTCTCGTTCGGTTTTATCAAGAACACTTGAAGA  
CTCAAGTACGATGGTCTTACCTTTAATACCATGGGGAACATCAGGTATTTACTATACGAA  
TCAACTTCATGTCTCTGTTGAAGAATTTTTCATATGGACAGTACCATGTTATTTATGCGCA  
ATTATAGCAATTATCTATGGTTTTACAGGGATAGGTATTA  
AAAAGTCATCGAATTCACGTT  
TAACTTAA

### > **ssaA2**

Function: protein coding sequence; staph secretory antigen A2 (core genome, variable)

Best match: ssaA2\_CC001\_MW2-USA400\_BA000033.2[2363780:2364589]RC (completely identical)

Position: 056-contig\_190\_RC: 35764 ... 36574; Length: 810 bp

Sequence:

TTAGTGAATGAAGTTATAACCAGCAGCTTGGCTAGCTGAGATTGTACGTGAAGTTACAAC  
ACCTGGGCCATAACCATAGTTCATTTCTGAAACTCTTACTGAACCATGCTGTTAACACTT  
TCAACGTATGCAACGTGACCGTATGCACCTTGAGTTGTTTGCATAATTGCACCAGCTTTTG  
GTGTATTGTTCACTGTGTAACCAGCTCTTGCAGCTGCGTTAGCCAGTACTTGCATTGCC  
CCAAGTTGAACCGATTTTACCACCTACACGATCAAATACGTAGTATGTACATTGACCAGA  
AGTGTATAAGTTACGTCCTGAAGTATAACCACTTGAGATTGAACGGCCATTTGATGATGG  
AGCCATAGTTGTAGTTACTTGAACATTGTTGCTTGAAGTGCTGTAGCTTGCACCTAAACCA  
CCAGTACGGTAGCTGTTTGTGTTGTA  
ACTATTATAGTTATTGTAGTTATATGATTGATTAT  
TATTTGAGTAGTTGTTGTAACGGCTGTAATTATTGTAGCTATAACCATGTTGTAATTGTT

GTAGTTATAGTTATTGTAGCCATTGTAGTAGTAATAGCTGTAGTAGCCATTATCTTGGTTT  
AATTGACTTGGATGCCAGTTACCTTTCCATGTGTAATGGTAGTTACCTTGTGCATCAATAG  
TGTAAGTATAGCTATATGATGTTGGGTCGTTTGGATTATAACCGTAGTTATCTTGCTCAGA  
AGCATGAGCTTGATTTCTGATGCAATTGCGATTGTAGCGAATCCTGCAGTTGCGATAGT  
AGCTGTAGCGATTTTCTTCAT

> **tnpIS431-06**

Function: protein coding sequence; transposase for IS431 (mobile element)

Best match: tnpIS431-06\_circ\_S-epidermidis\_GQ900381.1[43799:43807]RC (completely identical)

Position: 056-contig\_190\_RC: 35839 ... 35848; Length: 9 bp

Sequence:

ATAGTTCAT

> **iraC**

Function: protein coding sequence; putative transcript regulator

Best match: iraC\_CC001\_MW2-USA400\_BA000033.2[2361215:2363170:r] (completely identical)

Position: 056-contig\_190\_RC: 37183 ... 39139; Length: 1956 bp

Sequence:

ATGACAGATAATTATTCACTACATATTTATAAAAAGTATGAAAATGAGTAGTGTGAAGGAA  
GCGAACTTAAAAATTATATATTGGCTACAAGGTACAGGTGTAGTTTCAATCAATCTACAA  
CAATATGATGTAAAAAGAAATGATGTCACCGTTATTATGTTGAATGATTTGTATCAAATT  
GATGGTCATGATGATAGTGTATGTTGTGTTGTTGAAGTAAGTGCAAAGACATTTTTGAAG  
TTTATGAATGCAAATATATGATGCGTGGCAAGATATTAACAAATGAGGTTGCTAGCACT  
TTTAGAATCTTGATTAAGTATTTAATCTACAGCAAAAATTAACAACAGTCTTATAATGCTA  
ATGATAAGATTATTAATTACATGTGTGTTGAATTAATGTCATTAATACATACGATGGTA  
GTCGTCATTTAGTAGCCGAAGAAGTGCACGATTATTTAACAAACAACCACCATAAAAAGA  
TAAATAGGAAAGATGTCATTAATCAAGTTAGTATTACAAACAAGCTTTAAGTGACATGG  
TTAAAGCGACACCTTATAGTAATTTTATTCAATATTTAAATCATATTAGACTGGAGCATTG  
CTTAATTGATATTTTAACTTCTAAGAAGCCTATTGAAGAAATCGCAAGTAGTCATGGTTTT  
AATCATTATTCTCGTTTTATACACCTCTTTAAAGAAACGTATGGTAACACTCCTAAATTA  
TTAGAAAAAGATATAGTCCAACATCTCATTCAATTAACCATTCCCAATTAGTTGAAATTG  
ATAAAAATATAATTGAATTATTTGATGATACTAATCAAAGTTCTTCAAGTATGCGCGAGA  
TTGATATACCTTTTGAGCCTACAAAAAGGAGTCAAATGTATCAACCTAAAAACATTTATA  
TTAAAGGAAGTAATTTTTATTGGATGGATTATTATACTATTAAACAATCATTCAAAGATT  
AGGTGTTAATCCTGAAAACCTTGCATATAATTGTTACAATCGACACAAGCAATGAGCTATC  
GATTGAACAAATCACTTTATTACTTCAAAAGATAGTGAATTACAATGTAAATGTAGTATT  
TCGTATTAACATGAATATAAGGAATTGTTAACGAGTACTGAAAGAGGCAAGATAGAAA  
AGCTAGTAGCTACAATTTTTAATATGACTTTTGAGAGTAATAGATGTAAGATTGCATTTTT  
AATTAACGACTTAAATACTACTGCAATTCAAAAACCTGAAACGTTTAAATAGATAATTATAT  
AGGAGTATTTGAATTAATATATCATCTGGAACCAAAAGAGTTGAATACGCGCTATGATAA  
AGAAATTGATCATCTAATAGACTATTTTATCTTACCGCTAAGACAAATAGAACAGGTGTC  
TATTGCATGTTCTAAAATTATATGTGATGTAGATTTGATTAATGAGAATAATGACTTAAAA  
GAAAAAATCACAATGTCTGATTTTAATAAGGTTACTGAACTTTTGACAAATTATACAAAA  
TTTCGAGGACTTATTATGCACATGTCAATTATAAGTGAAGCGAGCAAAGAAATAAATTTA  
ACTAGATTATCAATATTCATTTTTATCATAAATATACTTAATCAATTACGAGGGATTGTTA  
TTTATCAAATGACACGATGATTGTAACGAAGTTCAAACATGAAGTACAATGTGTCATTT  
GTTTGCCAGCCGATTGTTAAATGAGAATTCAGACGCTATACGTTTATCGTGTAAGGGTCT  
TCAACAATTTAGCCATGCTAAAACCTAAACAATTTGTTTTAAGTATAGATAAAGATAATCA  
TACTTCCGAAAATGGTGTACTTGTGAATGATATTATGCAACAACACAGTTATTGGAAAGC  
TAATTTTATAGAAAGAAATATTTATGATCATTCAATTAATGGTCTCAAGCAATAGTATTGT  
CATTTGAAATATCATCTTGAGATATAG

> **iraD**

Function: protein coding sequence; putative transcript regulator

Best match: iraD\_CC001\_MW2-USA400\_BA000033.2[2360445:2361188:r] (completely identical)

Position: 056-contig\_190\_RC: 39165 ... 39909; Length: 744 bp

Sequence:

```
ATGTCTAAATTTAAAGTTAAGCGTTTAACTGCACACATACTAATGTTGAAAGTCATTAAT
GATATGTTGAAATATTCATTTTCATCTCACTTTGACTCAAGTGAAACTATTAATCTATTAG
TTAAATATGATAATTCTGATTCCAATAGCGCTTCAATAGATAGTTTATTAATAAAATGAAAG
AAATCCAATCTAAGATGGCCCTTCTTCAAATGTTAAGTTATTTAAACAATCATCAATGGCT
ATTGAAAGGAAGAGATCAAAGGGATCAACGTAAATTGACTATTTGATTAAATAAAATGC
ATATAGATAAAATAGAATATATGAATAATGAGCTTAGTGACTATATTGAACGTTATTTTG
GTCAATATACATTTGATTTTAGTTGTGACTATGTATCGTATTTATTGTGTCGACAGAATT
ATTTTCGAAATCTAAAGTGTTATTTAAATATGTGTCAATTAACATTAGAAGAGTTATACGTT
TTAGGAATATTAATCTGCATAAAGGTCAATTGACGGTTAAAGAATTACAGGGTGAATTC
CATCACCCGATATTTGCGGTTAGCCCGATTTTAAAGTGTTTAAATTTGAAGGGATTAGTTA
AAAAGAGAGATGTGAATTAGATGAAAGGCGTGTTATTGTAACAATCAAGCGAGAAAAG
TTTTCTAAAGTCACTATGCTTATTCAAGCATGTTATAATTATCTTGAAAAGGGAATACAAG
TTAAGCTTAATAATAAATAG
```

### > **rsr**

Function: protein coding sequence; putative protein (core genome, constant)

Best match: *rsr\_CC001\_MW2-USA400\_BA000033.2*[2360055:2360381:r] (completely identical)

Position: 056-contig\_190\_RC: 39972 ... 40299; Length: 327 bp

Sequence:

```
ATGATTTTAGATAATGTGAATCCAATGATTTATTTCCAAGTGAAGGTTCCGTC
GTGCTAGGAATAATTGAGTATAAAGTTCAAGGTGAGAATGAATTTGAAGGGGCATTTATA
GCAACAAATGAAAGATTAATTATGAATGTAGATATGAATGGCCAATTTTATTATAGAAGT
ATTAGTTATAATGAAATAGAGAAGATAGATTATGATGGTCAAACATAATGTTCAAATTT
AATATTGGTAATGTCCCAATGCATGATATTAAGAGTGAACGTTGAAATGTTTGTGAA
TATGTAAAACAACATATGATAGTATAA
```

### > **sarR**

Function: protein coding sequence; staph accessory regulator R (core genome, constant)

Best match: *sarR\_CC001\_MW2-USA400\_BA000033.2*[2359280:2359627:r] (completely identical)

Position: 056-contig\_190\_RC: 40726 ... 41074; Length: 348 bp

Sequence:

```
ATGAGTAAAATTAATGACATTAATGATTTAGTCAACGCAACATTTCAAGTTAAGAAGTTT
TTCAGAGATACAAAAAGAAGTTCAATTTGAACTATGAAGAAATTTATATTTTAAATCAT
ATTTTAAGAAGTGAGTCTAACGAAATCTCATCTAAAGAGATTGCTAAGTGCTCAGAGTTC
AAACCTTACTATTTAACTAAAGCTTTACAAAAGCTAAAAGATTTAAAATTGTTATCAAAG
AAAAGAAGTTTACAAGACGAAAGAACAGTTATTGTTTATGTTACAGATACACAAAAGC
AAATATTCAAAAAGTATTTTCAAGATTAGAAGAATACATTAATAAATTA
```

### > **ureD**

Function: protein coding sequence; urease accessory protein D (core genome, constant)

Best match: *ureD\_CC001\_MW2-USA400\_BA000033.2*[2358255:2359091]RC (completely identical)

Position: 056-contig\_190\_RC: 41262 ... 42099; Length: 837 bp

Sequence:

```
TTAATATTTTCTTAGAAAATCAAGTTTACGATCATAAATATTTTCTGCGATATAGCTTTGG
ATGATTTCAAGTATTTTCTCTATAATTTGTGTGCGATAAGCAAAAATTTCTAACTGCAAAAC
CATGTGTAGGCAATTGAGAAATAGCAACACGACAATCGAATGTATTGCTATAAGAACTA
ATGGTTTCATAAACTGAATCGATTAGTTTTTGGTTAACATCTTCATGTATGAAGTAAGCAG
AGCCGTAATGAGAGTAATGTTCCATATAACCTATTTTCATTGATCGATTGTTTATTAGGATT
CAATAATAAATTATCATATGTGACTAACTCATCTTCAATATAAATTTCAATTTATTAATGC
ATATATTGATACTTGAAGGCTTCGCCAGTTTTTGAATAACCAGGAGTTAAAATATCAGTA
TAAAATAATGAACTAGAATTATTGAGATTGAACGTATTGTGTTGATAAAAATTTAGCATTTT
CATATGCGATGATTGGATCAGCGACATATTCTAAATATGCGTTATCTTTCAAATTAAGT
TTGATACTGCTCAACATGATTGGAAGGTGTCTTGTATATTTTGTGACCTTGAGATGTC
```



AATGTCACCTTTAGCGTTATCTTCGACATTCACATTCATACGGTAACGATCTCCATCTAAAT  
AACCACCACCTACATTTACTATATAAAAATGTAGGAATGGTAGATTGATTTAGATAAACTG  
GACGTATCACTTTAAGTGCTTTTTCAAAGAAAATATCTCTTGATACTGATCGGTTGCCATC  
AAAAAACACTGTAAATCAAGTTGCCAGTCCATTGTTGTTTCATCCAT

> **ureG**

Function: protein coding sequence; urease accessory protein G (core genome, constant)

Best match: ureG\_CC001\_MW2-USA400\_BA000033.2[2357641:2358255]RC

Position: 056-contig\_190\_RC: 42098 ... 42713; Length: 615 bp

Sequence:

TTATGATAATCCTTTGAGTAAAGTGTCGCGTTCAATCCAATCGATAACTTCATCCAAACCT  
TCGTCAGTTTTTAAGTTAGTAAAAGTAAATGGACGTTTACCACGAAATACTTTAGTATCTT  
CAGCCATTTGTTCTAATGATGCGCCTACATAGGGAGCTAAATCAGTTTTGTTAATTATAAA  
GAAATCTGACTTAATCATACCTTGACCACCTTTACGTGGAATCTTTTCACCTGAGCAACA  
TCGATAATATATATTGAAAAGTCAACAAGTTCTGGGCTAAATGTTGCTGCTAAGTTATCG  
CCACCAGATTCTATGAAAATTAGTTCTATATCGTCATGACGTTCTAATAATTCGTCTATTG  
CTGCAAAGTTCATAGATGCATCTTCACGAATCGCAGTATGAGGACATCCACCAGTTTCAA  
CACCAATGATACGACTTTCAGGTAGAACTCCTGAATTTACTAATATCTTTTCGTCTTCTTTT  
GTATATATATCATTTGTAATAACGCCGATACTCATTTCTTTTGAAAGACGTTTACAACCTT  
TTTCAATTAATTGTGTTTTACCTGCACCTACAGGACCACCAATACCAATTTTAATCGGATT  
TGCCAC

> **ureF**

Function: protein coding sequence; urease accessory protein F (core genome, constant)

Best match: ureF\_CC001\_MW2-USA400\_BA000033.2[2356939:2357628]RC (completely identical)

Position: 056-contig\_190\_RC: 42725 ... 43415; Length: 690 bp

Sequence:

CTATGATATGAAAATTCTAACATTGACGTTCTCATGCGCCATTTGATTTAGTTCTAAACCA  
GGCGCTGTCATGCCAAAATCTGCTTCTTTAATTCGAAAATCTGCTTTCTTGTTCTTCTAT  
ATAAGGAATCATGTGAGTAACTATCTTTTGACCAGCAGTTTGTCCAAGTGAATAGCACG  
AACAGCATTTTGAGTTAACTTGAAACATTTTGATATAAATAGTAATCAATAATCGTTTCA  
ATATCTACACCTAAATGATGGCCTAGCATAGTAAAACAAATAGCTGGATTTAACTTTGCT  
TTCTTATCTTGCAATTTGTTGATGATACCAAGCAATCCATGGGCTATTATAAAGTTCTAAAG  
CCAATTTAACCATGCGAGTCCCATTTGTTTTGCACCAACACGTGTTTCTTTAGGTAAGTT  
TTGAACAAACATCAGTTTATCTATGTGTAATACTTTTTGTGTATCATCATTTTCCAATGCAT  
CATAAACTAAACGCATGGCTAAACCATCAGAATAGGTAAGTTGCTCTTGTA AAAACATTT  
TTAACCAAGCAATAAAAGTATGATCGTCATGAATTATATTTTCGTTGAATATATGTTTCAAG  
ACCAAATGAATGACTGAAAGCACCTGTTGGAAACTGTGAATCACAGA ACTGAAATAATC  
TTAAGTGTGTATGATCAATCAT

> **ureE**

Function: protein coding sequence; urease accessory protein E (core genome, constant)

Best match: ureE\_CC001\_MW2-USA400\_BA000033.2[2356494:2356946]RC (completely identical)

Position: 056-contig\_190\_RC: 43407 ... 43860; Length: 453 bp

Sequence:

TCAATCATGAGAATGCCCTATATGTCTGAAAGCCTTATTAACCTTTACGGTCTTCTCGAACA  
TATGGGATGCCTAACTTTTTAATAAATCTTCAACTAAATAATCATATTGTA TAGCATTT  
CAGTCTCTGTAAATTGTGCTGGCAAATGACGATTTCCCTAATTGATGGGCTATATCTCCCAT  
TTCTTGCAATGTTCTTGGTTGAATCACTAAAAGATCTTCTGAATTAACATCCACAATAATC  
ATATTATGGTCATCTGCGTATAAAATATCTCCATATTGTAAGTCAATAGGTTGTTTTAAAC  
GAATGCCTATTTCAAGTGCATGGTCTGTAACGACTCTTTGAATACGTTTAAACAAGATCTGA  
ATTTTCAAGGTATACTTTTTCGACGTGCTTTTTGTTTTCTGAATTTGACAAATTGGCAATAT  
TGCCTTGGATTTCTTCAACAATCAT

> **ureC**

Function: protein coding sequence; urease subunit alpha (core genome, constant)

Best match: ureC\_CC001\_MW2-USA400\_BA000033.2[2354766:2356481]RC (completely identical)

Position: 056-contig\_190\_RC: 43872 ... 45588; Length: 1716 bp

Sequence:

```
CTAGAATAAGAAGTATCTTTGAGTTAATGGTAACTCAGTTGCTGCATTACTTGTAATTTTT
TCTCCATCTACATACTTCATATGTTTGTGGATCAACGTCTAATTTAGGTGTTGCGCTGTT
ATTTTTCATATCTGCTTTAGATAAATTGTCTAATATTTTTAACTGGACGCACCATGCGTTTTA
AATTAATGCACGATTGATACCATTTTCATAAGCAGTTTTAGACACGAATGTCATTGACGT
ACTTGTAAGGTTTCCGCCGATTGACCATACATTTTACGGTACTTCATCGGTTTCAGATGTA
GGTATAGAACCATTTGCATCGCCATTTACGGCAGAGTTAATTAATCCGCCCTTTACAACATA
ATTCAGGTTTAACCCCAAAGAAAATTGGGTCCCATAAAGACAATGTCAGCTAGTTTGCCCG
GCTCGATAGATCCTACATATTCAGAAATACCATGTGTAATTGCTGGGTTAATTGTATATTT
AGCGATATAACGTTTGATGCGATTATTATCATTATGTTCAAATCACCATCTAAAGGACC
ACGTTGTTCTTTCATGCGATGTGCTACTTGCCATGTTTCGTGTAATTACTTCACCTACACGG
CCCATTGCTTGTGAATCGGAACATACTACTGAATACACCCATATCTTGCAGAACATCTT
CTGCTGCAATCGTTTCTTTACGAATACGTGAATCTGCGAATGCGATATCTTCAGGAATAGC
CGCATTAAATGGTGAGTAATCATTACCATATCTAAATGTTTCATCTACAGTATTATGTGTA
TAAGGCAAAGTTGGATTTGTAGATGAAGGTAAAATATTTGAAAATGCAGCTGATTTAATT
AAATCAGGCGCATGACCGCCACCAGCACCTTCAGTATGGTACATATGAAGTACACGGTCT
TTAACAGCAGCCATTGTGTCTTCCATAAATCCTGCTTCATTTAAAGTATCTGCATGTAATG
CAATTTGAACATCAAATTCATCAGCAACATCTAATGCATGACTCAAAGCAGATGGTGTG
CACCCAGTCTTCATGTACTTTTAATCCAATTGCTCCGGCATTGATTTGTTCAATGAGTGC
AGTTGGATTTGTTGCTTGTCTTTACCTGTAAAACCGACATTAATCGGTAAACCTTCGGCA
GCTTCTAACATTCTATGAATATGCCATGGACCTGGAGTTACAGTTGTTGCTTTAGAACCTT
CTGAAGCACCAGTACCACCACCAATATGAGTCGTAATGCCACTTTCTAATGCGACCTCTG
CTTGTTTCAGGATTAATAAAAATGAACATGAGTATCAATACCACCAGCAGTGACGATTTTAC
CTTCAGCGGCAATGATATCTGTTGTTGAACCTATAATAATGTCGACATTATCCATTATATC
TGGGTTGCCGGCATTACCTATGGCGAAAATATAACCATTTTTAATGCCTATATCAGCTTTA
ACCACTTTATCGTAATCGATAATAACGGCATTAGAAATGACAAGGTCTGCAACGTTACAG
TCATCACGTGTTACACGAGGATTTTGCGCCATACCGTCTCTAATAGATTTACCACCACCAA
AAGTAGCTTCTTACCATAAACCGCATAGTCTTTTTCTATTTGAGCAAATAGATTCGTATC
ACCTAAACGAATGGAATCTCCAACAGTTGGACCGTATAAGCTCGTATATTGATTTTGCCT
CATTTTAAAGCTCAT
```

### > ureB

Function: protein coding sequence; urease subunit beta (core genome, constant)

Best match: ureB\_CC001\_MW2-USA400\_BA000033.2[2354359:2354769]RC (completely identical)

Position: 056-contig\_190\_RC: 45584 ... 45995; Length: 411 bp

Sequence:

```
TCATGATCTTTTTCTCCTTTTTTATTCACGTTTTTCAGCACCGTTATCTCCGAATACACCTG
CATATTCATCATTTTCATCAGTTGGGCGATAGACACGTGACTCATCGATAGGACCATTGA
CCATACCACGAAAACCAAAAATTTTACGTTTGCCAGCATATTCAACTAATTGAACTTCTTT
TTTATCCCCAGGTTCAAATCGGACAGCTGCTCCAGCTGGGATATCTAAATGTTTTCCATAT
GCCATTTACGTTTCGAAATCTAATGCTGCATTTGCTTCATAAAAATGAAAATGTGAGCCC
ACTTGAATTGGTCGATCTCCTGTATTTTCAACTTCGATAACTGTTTCAGGATGATGGTTAT
TAATTTCAACCTCTGTACTTTTTGTAATAATTTCTCCAGGTATCAT
```

### > ureA

Function: protein coding sequence; urease subunit gamma (core genome, constant)

Best match: ureA\_CC001\_MW2-USA400\_BA000033.2[2354043:2354345]RC (completely identical)

Position: 056-contig\_190\_RC: 46008 ... 46311; Length: 303 bp

Sequence:

```
TTAAACAATAGGGTGATGTACTGTGATTAACCTTAGTACCATCGGGGAACGTAGCCTCGAT
TTCGATATCTGTAATCATGTGTTTCGACACCATCCATGACATCTTCTTTGTTTAGAATTTGTC
TACCATAACTCATTAACTCTGCAACGGTCTTACCATCGCGTGCACCTTCTAATAATTCATC
```

GCTGATTAAGCTAATGCCTCAGGATGATTTAGTTTCAAACCACGTGCTTTACGACGACG  
TGCAACTTCCGCCGCCACTACAATCATTAAATTTGTCTTGCTCTCGTTGTGTA AAAATGCAA

> **utp**

Function: protein coding sequence; urea transporter (core genome, variable)

Best match: utp\_CC008\_NCTC8325\_CP000253.1[2351097:2352002:r] (completely identical)

Position: 056-contig\_190\_RC: 46570 ... 47476; Length: 906 bp

Sequence:

TTGAAGATAATAGATGTGCTTTTGAAAAATATATCTCAGGTTGTGTTAATTAGTAATAAAT  
GGACAGGATTATTTATCTTAATAGGATTATTTGTAGCCGATTGGACAATTGGATTAGCGG  
CTATTGTAGGTAGCATCATCGCCTATACTTTTGCGCGTTTTATAAATTATAGTGAGGCAGA  
GATTAATGATGGGTTAGCTGGATTTAATCCAGTGCTAACTGCCATTGCGTTAACAATCTTT  
TTAGATAAGTCAGGATTAGATATTGTTATAACAATGATAGCAACTTTATTAACGTTACCA  
GTTGCTGCTGCAGTGAGAGAAGTTTTAAGACCATATAAAGTTCCGATGCTGACGATGCCT  
TTTGTCATTGTGACTTGGTTTACAATTTACTTTTCAGGACAGGTTAAATTTGTAGATACAT  
CGTTAAAGTTAATGCCTCAAACATTGAAACGGTTAATTTTAGCAACAATGATAGAATAC  
ATTTCAATCAGTCATTATTTGAAGGATTCAGTCAAGTATTTATCGAAGCGAGTGTAATTGG  
TGGCGTATGATTTTAATCGGCATATTGATAGCATCAAGAAAAGCAACACTCTTAGCTGT  
TATAGCTAGTTTGTAAAGCTTTATCATTGTAGCTCTATTAGGTGGTAATTATGATGATATT  
AATCAGGGATTATTCGGTTATAACTTTGTATTAATGGCAATCGCACTAGGATATACATTTA  
AAACAGCGATTAACCCCTTATATTTGACTTTTTTAGGTGTGTTATTAACAGTAGTGGTGCA  
ACTAGGTACAACAACATTGCTTGAACCGTTTGGCTTACCTGCATTAACATTGCCATTTATT  
ATCGTGACATGGATTTTATTATTTGCTGGTATTAACATGACAAAGTAGATGCTTGA

> **caiA**

Function: protein coding sequence; acyl-CoA dehydrogenase/short-chain specific (core genome, variable)

Best match: caiA\_CC001-ST772\_118\_AJGE01000021.1[47629:48783] (completely identical)

Position: 056-contig\_190\_RC: 47692 ... 48847; Length: 1155 bp

Sequence:

ATGAATGATATGGATAATTCCTTTTTAATAACAACGGAAATTCAAAGAAAATGGATTGAA  
AAATTCAAAGTAATTAGAGATACATTTAAGGCTAAAGCTGAATATAATGATCAACATAGC  
CAATTTCCATATAAAAATATTGAATGGTTAATTAAGAAGGTTATGGAAAATTAACGTTA  
CCAAAAGCATATGGTGGTGAAGGTGCGACCATAGAAGACATGGTTATTTTGCAATCATT  
TTAGGCGAACTTGATGGTGTACAGCATTATCTATTGGTTGGCATGTGAGTGTCGTAGGA  
CAAATTTATGAACAGAAATTATGGTCTCAAGATATGTTGGAGCAATTTGCTGTTGAAATT  
AATAATGGTGCATTAGTTAATAGAGCAGTTAGTGAAGCTGAAATGGGTAGTCCAACAAG  
AGGGGGAAGACCAAGTACACATGCTGTAAAGCTGATGATGGGTATATTTAAATGGTGT  
GAAGACATATACATCAATGAGTAAAGCACTAACACATATTATTGTTGCTGCTTATATAGA  
AGAATTAGAAAGTGTTGGTTTTTTCTTAGTAGACAGGAATTTGCCTGGTGTGAAATTGCC  
GATAATTGGGACGTATTAGGTATGCGAGCGACAGAAAGTCATGATTTAATATTAATGAT  
GTAAAAGTACCATTAACATTTAGTGGAACAGAGAAAAGTAAAGCGCCAAATGGTTG  
GATATTGCATATACCAAGCTGTTATTTAGGTATAGCACAAGCTGCTAGAAATTATGCTGT  
AGACTTTGCAATCCAACATAGCCCTAATAGTATTGAAGGAACGATTGCAACATTGCCAAC  
TGTGCAACAAAATTTAGGGAAAATGGAAACGCTATTGTTATGTGCGAGACAATTTTTATG  
GAGTACAGCAAAGGGTATCAACAATATAAAGATGACAGTCAGATAAGAAATCCAACAA  
GTGCGAGTAAAGTGATGGTAATGAATCAAGGGCTTGAAGTGATTGATTTAGCGATGAGA  
ATAGTTGGTGCTAAAAGCTTAGAAATGAATCGACCATTACAACGTTACTATCGTGACATG  
CGTGCAGGATTACACAATCTACCTATGGAAGATGCAGCATATACAAATATTGCTAAGAGT  
ATTACAGATACATTTTAA

> **fhuD2**

Function: protein coding sequence; iron compound-binding protein (core genome, constant)

Best match: fhuD2\_CC001-ST772\_118\_AJGE01000021.1[48997:49905] (completely identical)

Position: 056-contig\_190\_RC: 49060 ... 49969; Length: 909 bp

Sequence:

```
ATGAAAAAACTATTATTACCATTAATAATTATGTTATTAGTGTTAGCTGCGTGTGGGAACC
AAGGTGAAAAAATAACAATGCTGAAACTAAATCTTATAAAATGGACGATGGCAAACG
GTAGATATTCCGAAAGACCCTAAACGCATTGCAGTAGTTGCGCCAACATATGCTGGTGG
CTTAAAAAATTAGGTGCAAACATTGTAGCTGTAAATCAACAAGTCGATCAAAGCAAAGT
ATTAAGATAAATTTAAAGGTGTTACAAAAATTGGTGATGGCGATGTAGAAAAAGTTG
CTAAAGAAAAGCCAGATTTAATTATTGTATACTCTACTGACAAAGATATTAAAAAATATC
AAAAAGTAGCACCAACAGTAGTTGTTGACTATAATAAGCATAAATATTTAGAACAACAA
GAAATGTTAGGGAAAATTGTTGGTAAAGAAGATAAAGTAAAAGCTTGGGAAGAAAGATTG
GGAAGAAACAACACTGCTAAAGACGGTAAAGAAATTAAAAAAGCAATTGGACAAGATGCA
ACAGTGTCAATTGTTTGATGAATTTGATAAAAAATTATACACTTACGGCGATAACTGGGGT
CGTGGTGGAGAAGTATTATATCAAGCATTTGGTTTAAAAATGCAACCAGAACAACAAA
GTTAACTGCAAAGCAGGTTGGGCTGAAGTGAACAAGAAGAAATTGAAAAATATGCTG
GTGATTACATTGTGAGTACAAGTGAAGGTAAACCTACACCAGGATATGAATCAACAAAC
ATGTGGAAGAATTTGAAAGCTACTAAAGAAGGACATATTGTTAAAGTTGATGCTGGTACA
TACTGGTACAACGATCCTTATACATTAGATTTTCATGCGTAAAGATTTAAAGAAAAATTA
ATTAAGCTGCAAAATAA
```

### > **bioY**

Function: protein coding sequence; substrate-specific component of biotin ECF transporter (core genome, constant)

Best match: bioY\_CC001-ST772\_118\_AJGE01000021.1[51366:51920] (completely identical)

Position: 056-contig\_190\_RC: 51429 ... 51984; Length: 555 bp

Sequence:

```
ATGACAACAAAACAGTTAGTATATACAGCTTTAATGACAGCGATTATCGCTATTTTAGGA
TTGGTACCGGTAATTCCACTACCATTTTCTTCAGTACCAATTGTACTTCAAACATTGGTA
TTTTCTTAGCAGGTGTGATTTTAGGACGTAAATATGGCACATTAAGTGTTATCGTCTTTTT
ATTATTAGTAGTTGCTGGCTTGCCACTGTTATCAGGCGGTTCGCGGTGGCATTGGTGTATTC
GCAGGTCCTTCAGCAGGGTTTTACTATTATATCCAGTTGTAGCATTTCATGATTGGTGC GA
TTCGTGATAGATTCATCAATGAAATTAATTTCCGGATTTTATTCGTTGGTATTTTAGTTTT
GGTGTATAGCATTAGATGTTATTGGTACATTGATTATGGGCATGATTATTAACATACCAT
TTACGAAAGCTATTTCAATTTCAATTAGCTTATTTGCCTGGTGATATATTAAGCAATTGT
AGCAAGTTTGATTGGTACAGCTTTACTTAATCACTCGCAGTTTCGTCAAATTATGGGATTA
AAATAA
```

### > **fdhD**

Function: protein coding sequence; putative formate dehydrogenase family accessory protein

Best match: fdhD\_CC001\_MW2-USA400\_BA000033.22346555:2347352RC

Position: 056-contig\_190\_RC: 53002 ... 53800; Length: 798 bp

Sequence:

```
TTATTGTTTCAGAATCAATGATACGTTCTGAATGACTGTATATATTAAGCCACCATTTCGA
ATAAATCCAACCTGCCGTAATATTTAGGTCAATTAGCTAAGGTTACAGCAAGCGTTGTCGGA
GCTGATTTAGATAAAAATGACGCCAACCAATTTTTGCGGCTTTAATTAATAATTTCTGATG
AAATACGTCCACTAAAAATTAATACTTTATCTCGGACAGTAATATGTCGCTGAATACAAA
ATCCATATAATTTATCTAGAGCGTTATGTCTACCAATGTCTTGTGCGATGTACAAAAATGT
CAAACCATCGCTTATAGCAGCATTATGTAAGCCACCTGTTTCTTGGTAAATATGACTTGCA
CTTTGTAATCGAGTCATCATGTTAATAATTTGCATTGGAGTTAAAGTGATTTTAGACATAG
ATGTTTTAGCGATAGCAGCATCATTTTTGAAAATAAAACTCACGACTCTTCCACAACAAG
ATGCAATCATTCGTTTTGTGGAATATTGAAAGCGATCGCCTAAATCTTTATTAAGTTCAAC
ATGGGCAAAACCTTTACTATCATCAATCAGCACAGATTTTAATTCATCTCGCTTAAATG
GCACCTTCCGAAGCCAGAAATCCAATGACTAACTCCTCAAGGTTTGTGGACTGCATATA
ACAGTCGCAAATTTCTTACCATTACCATAATTGTAAGTGGAATTTCTGTACATATTGAT
CTGTTGATTGAATAATTTTCCATCTTCATATCTAACAATTGGTTGACCTAAAGATACATC
TTTGTTTCAT
```

### > **modA**

Function: protein coding sequence; molybdenum ABC transporter, molybdenum-binding protein

Best match: modA-COL\_CC008\_NCTC8325\_CP000253.1[2343695:2344477:r]

Position: 056-contig\_190\_RC: 54716 ... 54866; Length: 150 bp

Sequence:

```
GTAAAAGTAATTAAGAAGTAGAACTTAAGAAGCCAATCACATACGAAGCTGGTGCTAC
ATCAGATAGTAAATTAGCAAAAAGAGTGGATGGAATTCTTAAAATCAGATAAAGCTAAAG
AAATACTAAAAGAATACCACTTTGCAGCATAA
```

### > **modB**

Function: protein coding sequence; molybdenum ABC transporter/permease

Best match: modB\_CC005\_Mu50-VRSA\_BA000017.4[2403116:2403787:r]

Position: 056-contig\_190\_RC: 54879 ... 55551; Length: 672 bp

Sequence:

```
ATGCCTGACTTAACACCTTTTTGGATATCAATACGAGTTGCTGTAATCAGTACGATTATTG
TAACGGTTTTAGGTATTTTTATATCTAAATGGTTGTATCGTCGTAAGGGTTCGTGGGTAA
AGTATTGGAAAGTTTATTGATATTACCTATTGTTTTGCCGCCAACGGTATTAGTTTTATT
CTATTAATCATCTTCTCGCCAAGAGGACCAATCGGTCAATTCTTTGCGAATGTACTACATT
TACCTGTAGTGTTCACTTTGACAGGTGCTGTGATAGCATCTGTCATTGTTAGTTTTCCACT
AATGTATCAACATACTGTGCAAGGCTTCAGAGGTATAGACACGAAAATGATTAATACAGC
TAGAACAAATGGGAGCAAGTGAACGAAAATTTTCTCAAATTAATTTTACCATTAGCTAA
ACGCTCTATTTTAGCAGGTATAATGATGAGTTTTGCTCGTGCATTAGGTGAGTTTGGTGCT
ACATTAATGGTTGCAGGATATATCCAAATAAAACGAATACACTACCTTTAGAAATATAC
TTCTTAGTGGAACAAGGTAGAGAAAATGAAGCGTGGTTATGGGTATTAGTGCTAGTCGCA
TTCTCTATTGTGGTTATATCTACAATTAATTTATTGAATAAAGATAAATATAAGGAGGTGC
ACTAG
```

### > **modC**

Function: protein coding sequence; molybdenum ABC transport/ATP-binding protein

Best match: modC\_CC001\_MW2-USA400\_BA000033.2[2344192:2344797:r] (completely identical)

Position: 056-contig\_190\_RC: 55551 ... 56157; Length: 606 bp

Sequence:

```
ATGCTTAAAATCAATGTGAAATATCAATTAAGAACAACCTTTAATTCGCATCAATATAGAT
GATACTGAACCAAAAATTTATGCAGTTCGTGGTCCATCTGGCATTGGTAAACTACTGTTT
TAAATATGATTGCCGATTACGTAAAGCAGATGAAGCTATTATCGAAGTGAATGGGCAAT
TACTTACTGATACGGCAAAAACGTGAATGTTAAAATTCAACAACGACGTATTGGATATC
TGTTTCAAGACTACCAATTGTTTCTAATATGACGGTCTATAAAAATATTACTTTTTATGGC
TGAACCATCTGAACACATCGATCAATTAATTCAAACCTTTAAACATTGATCATTGATGAA
ACAATATCCTATGACATTGTGAGGTGGAGAGGCACAACGTGTAGCACTTGCACGTGCACT
TAGCACGAAACCAGATTTAATTTTATTAGATGAACCTTTTTCTAGTTTGGATGATACTACA
AAAGATGAGAGTATTACATTAGTTAAACGTATTTTCAACGAATGGCAAATACCAATCATA
TTTGTGACACATTCAAACTATGAAGCAGAACAAATGGCTCATGAAATTATTACAATTGGG
TAA
```

### > **moeB**

Function: protein coding sequence; molybdopterin biosynthesis protein B

Best match: moeB\_CC001\_MSSA476\_BX571857.1[2322123:2323127:r]

Position: 056-contig\_190\_RC: 56326 ... 57331; Length: 1005 bp

Sequence:

```
GTGAGTCAAGAACGTTATTCAAGGCAAATTTTTATTTAAACAAATAGGTGAAATAGGTCAA
AGCAAAATAAGTCAAAAATGTGCGTTGATTATTGGTATGGGCGCATTAGGTACACATGTG
GCCGAAGGACTTGTTAGAGCAGGCATTGCTAAACTAATCATTGTTGATAGAGATTATATT
GAATTTAGTAATTTACAAAGACAAACATTGTTTACTGAAGAAGATGCTTTGAAAATGATG
CCTAAAGTGGTTGCAGCTAAAAGCATTGCTAGCGTTACGTAGTGATGTTGATATTGAT
GATTATATTGCCATGTGGATTATTATTTTTTGGAAACACATGGACAGGACGTTGACGTTA
```

TTATTGATGCAACCGATAACTTTGAAACACGACAACCTGATTAATGATTTTGCATATAAAC  
ATCGTGTACCTTGGATTTATGGTGGTGTGTACAGAGTACATATACAGAAGCTGCATTTAT  
ACCTGGTAAAACACCTTGCTTTAACTGTTTGGTACCACAATTGCCAGCATTAAATTTAACA  
TGCGATACAGTAGGGGTCATTCAACCTGCCGTGACGATGGCAACAAGTTTACAATTAAGA  
GATGCGATGAAAGTATTAACGGAACAACCAATTGACACAAAAATAACTTATGGTGATATT  
TGGGAAGGTAGTCATTATTCATTTGGTTTCAGTAAAATGCAACGTTTCAGACTGTACAACCT  
GTGGAGATGTACCAAGTTATCCGTATTTAAACAAGAATGAACAACGTTATGCAACATTGT  
GTGGTAGAGACTGTACAGTATGAAAATGCATCAATTACACACGACATTCTTGTTC AAT  
TTTTAAAACAACATCAACTAAATTATCGCAGTAATTCGTATATGGTTATGTTTGAATTTAA  
AGGACACCGCATTGTTGCTTTTAAAGGTGGAAGGTTTTTAATACATGGCATGACACGCAC  
ATCAGATGCCACACATCTAATGAATTTATTGTTTGGATAA

### > **moaB**

Function: protein coding sequence; molybdenum cofactor biosynthesis protein B

Best match: moaB\_CC001\_MW2-USA400\_BA000033.2[2342481:2342987:r]

Position: 056-contig\_190\_RC: 57361 ... 57868; Length: 507 bp

Sequence:

ATGGGCGAACATCAAAACGTTAAATTGAATCGTACAGTTAAAGCAGCCGTAACCGGT  
ATCAGATACTAGAGACTTTGATACAGATAAAGGTGGTCAATGCGTGCGCCAACCTATTACA  
AGCAGATGACGTTGAAGTGAGTGACGCACATTATACAATTGTGAAAGATGAAAAAGTAG  
CCATCACGACGCAGGTGAAGAAGTGGTTAGAAGAAGATATTGATGTCATCATTACGACTG  
GTGGAACAGGTATTGCACAACGTGATGTGACGATTGAAGCAGTAAAACCACTTTTAACTA  
AAGAGATAGAAGGCTTTGGGGAATTGTTTAGATATTTGAGTTATGTTGAAGATGTTGGCA  
CGCGTGCAATTATTGTCTCGCGCTGTAGCAGGTACAGTTAATAATAAATTGATATTTTCGAT  
TCCAGGATCAACAGGCGCAGTTAAATTAGCATTAGAAAAGCTCATTAAACCAGAATTA  
ATCATCTGATTCATGAGCTTACAAAATAA

### > **moaC**

Function: protein coding sequence; molybdenum cofactor biosynthesis protein C

Best match: moaC\_CC008\_NCTC8325\_CP000253.1[2340197:2340691]RC

Position: 056-contig\_190\_RC: 57869 ... 58364; Length: 495 bp

Sequence:

TTATTGATTTGATTGGCGTTGAAAATCTCCAGATTTACCGCCAGACTTGCTTTCAAGGTAG  
GTTTCGCCAATAATCATACTTTATCAACTGCTTTCGTCATGTCGTAATGGTTAAAGCCG  
TTGCTGATGCAGCGGTTAAAGCTTCCATTTCAACACCGGTTTTGCCAGTTGTAGAGACAGT  
TGTTTGAATGTTTAAAGTATAAAGGGGTGCATTTGTTTCATCCCAGCTGAAGTGAACATCT  
ATGCCAGTCAATGGTAATGGATGGCACATCGGAATAATTGTTGATGTATTTTTGGCAGCC  
ATAATACCAGCGATTTGAGCAGTGTTCAATACATTGCCTTTGGTATTGGTGTATTAGAAA  
TCTGCTTAAAAATAGTTTCATTTACAGTAATGCTTGAATGAGCGACAGCAGTTCTTTTTGT  
AATTTGTTTGTCTGATACATCGACCATTTTGGCGTGGCCTTGTTGATTAATATGAGTAAAC  
TCAGTCAT

### > **moeA**

Function: protein coding sequence; molybdopterin biosynthesis protein A

Best match: moeA\_CC001\_MW2-USA400\_BA000033.2[2340663:2341922:r]

Position: 056-contig\_190\_RC: 58426 ... 59686; Length: 1260 bp

Sequence:

ATGGTAGTAGAAAAAAGAAACCCAATCCCAGTTAAAGAAGCAATTC AACGTATCGTTAA  
TCAGCAGAGTTCAATGCCGGCAATTACGGTAGCACTTGAAAAAAGTCTAAATCATATCTT  
AGCAGAAGATATTGTAGCTACTTATGATATACCAAGGTTTGATAAATCACCTTATGATGG  
TTTTGCAATTCGCAGTGTTGATTCACAAGGGGCAAGTGGTCAGAATCGCATTGAGTTTAA  
AGTGATTGATCATATTGGTGCAGGTTTCAGTTTCTGATAAATTAGTTGGGGATCACGAAGC  
GGTGCGTATTATGACTGGAGCACAAATACCTAATGGCGCAGATGCTGTTGTTATGTTTGA  
ACAAACGATTGAACTAGAAGATACATTTACAATTCGTAAACCATTTTCAAAAAATGAAAA  
TATATCTTTAAAAGGTGAAGAAACAACGACAGGCGATGTTGTTCTAAAAAAGGACAAG

TAATTAATCCAGGGGCTATAGCGGTCCTTGCAACATATGGCTATGCAGAGGTTAAAGTTA  
TTAAGCAACCGAGTGTGCTGTTATTGCAACAGGAAGCGAATTATTAGATGTTAATGATG  
TATTAGAAGATGGAAAAATTCGTAACCTAATGGCCCAATGATTCGTGCCTTAGCAGAAA  
AATTAGGTCTTGAAGTTGGTATTTACAAAACACAACAAGATGATTTAGATAGTGGCATA  
AAGTCGTTAAAGAAGCTATGGAAAAACATGATATCGTTATTACAACGGGAGGAGTTTCTG  
TTGGAGATTTTACTATTTACCTGAGATTTATAAGGCTGTAAAGGCGGAAGTGTATTAA  
TAAAGTAGCAATGCGTCCTGGTAGCGTAACAACGGTTGCATTTGCAGATGGAAAGTATTT  
GTTTGGATTATCTGGAAATCCATCAGCTTGTTTTACAGGATTTGAACTATTTGTGAAACCA  
GCTGTTAAACATATGTGTGGCGCACTAGAAGTCTTCCCGCAAATAATTAAAGCAACATTA  
ATGGAAGATTTTACCAAGGCAAACCCATTACACGATTTATACGTGCTAAAGCAACGTTA  
ACAAGTGCTGGAGCTACTGTAGTACCTTCAGGATTCAATAAATCAGGTGCGGTTGTAGCG  
ATTGCACATGCTAACTGTATGGTCATGTTACCAGGAGGGTCACGTGGTTTTAAAGCGGGG  
CATACAGTAGATATTATATTGACTGAATCTGACGCTGCTGAAGAGGAACCTCTTTTATGA

### > **mobB**

Function: protein coding sequence; molybdopterin-guanine dinucleotide biosynthesis protein B

Best match: mobB\_CC001\_MW2-USA400\_BA000033.2[2340181:2340666:r]

Position: 056-contig\_190\_RC: 59682 ... 60168; Length: 486 bp

Sequence:

ATGATTTTACAAATTGTAGGTTACAAAAGTCTGGTAAGACAACATTGATGAGGCATATT  
GTCTCTTTCTTAAAGTCACATGGTTATACAGTTGCTACTATTAACATCATGGGCATGGTA  
AGGAAGATATTCAATTACAGGATTCAGACGTCGATCACATGAAGCATTTTGAAGCGGGG  
GCAGATCAAAGTATTGTACAAGGTTTTCAATATCAGCAAACCTGTAACACGTGTAGATAAT  
CAAATCTTACTCAAATTATTGAAAAATCTGTTACAATTGACACCAATATCGTATTAGTTG  
AAGGCTTTAAAAATGCTGATTTTAAAAAGTTCGTAGTCTATCGAAATGAAGAAGAGTTGC  
AAGTATTACAACAATTGTCGAATGTTTGTATAGCATTAAATGTAAAGGAGCATGAAGATT  
TTACAGCATTTGAGCAATGGTTATTAATAAAAATTAATAAATGATTGTGATACACAATTA  
CATAG

### > **moaE**

Function: protein coding sequence; molybdopterin-converting factor subunit 2

Best match: moaE\_CC001\_MW2-USA400\_BA000033.2[2339721:2340167:r] (completely identical)

Position: 056-contig\_190\_RC: 60181 ... 60628; Length: 447 bp

Sequence:

ATGAAACAATTTGAAATCGTGACAGAACCGATACAAACAGAACAATATCGTGAATTCAC  
TATAAATGAATATCAAGGTGCAGTAGTTGTTTTTACCGGTCATGTTTCGCGAATGGACTAA  
AGGCGTCAAACGGAATATTTAGAATATGAAGCGTATATTCCAATGGCTGAAAAGAAAT  
TGGCACAAATTGGAGATGAAATAAATGAAAAATGGCCTGGAACGATAACGAGTATTGTT  
CATAGAATAGGGCCATTACAAATTTAGATATCGCTGTATTAATTGCGGTTTCTTCACCGC  
ATCGTAAAGATGCCTATCGAGCAAATGAATATGCAATTGAGCGTATAAAAGAAATTGTT  
CGATTTGAAAAAAGAAATTTGGGAAGATGGTTCAAATGGCAAGGGCATCAAAAAGGG  
AATTATGAAGAAGCGAAGAGGGGAGGAATAA

### > **moaD**

Function: protein coding sequence; molybdopterin converting factor/subunit 1

Best match: moaD\_CC001\_MW2-USA400\_BA000033.2[2339482:2339715:r] (completely identical)

Position: 056-contig\_190\_RC: 60633 ... 60867; Length: 234 bp

Sequence:

ATGAAGGTACTTTACTTCGCAGAAATTAAGATATATTACAAAAGCACAGGAAGATATT  
GTGCTTGAACAAGCATTGACTGTACAACAATTTGAAGATTTATTGTTTGAACGTTATCCGC  
AAATCAATAATAAAAAGTTTCAAGTTGCTGTAAATGAGGAATTTGTACAAAATCGGATT  
TCATTCAACCTAATGATACTGTTGCATTAATTCCACCGGTTAGTGGAGGTTAA

### > **mobA**

Function: protein coding sequence; molybdopterin-guanine dinucleotide biosynthesis protein A

Best match: mobA\_CC001\_MW2-USA400\_BA000033.2[2338876:2339475:r]

Position: 056-contig\_190\_RC: 60873 ... 61473; Length: 600 bp

Sequence:

```
ATGAAAGCAATAATTCTTGCAGGTGGTCATTCAGTGCGATTTGGTAAGCCCAAAGCTTTT
GCGGAAGTGAACGGTGAGACCTTTTATAGTAGAGTAATTAAGACATTAGAATCAACAAA
TATGTTCAATGAAATTATTATTAGTACAAATGCGCAATTGGCAACGCAATTTAAATATCC
AAATGTTGTTATAGATGATGAGAATCATAATGATAAAGGTCCATTAGCAGGAATTTATAC
AATCATGAAGCAACATCCTGAAGAAGAATTGTTTTTTGTGCTTTCTGTTGATACACCAATG
ATTACTGGTAAAGCTGTAAGCAAGTTGTATCAGTTTTTGTCTCATCTTATTGAAAATC
ATTTAGATGTGCGCAGCTTTTAAAGAAGATGGACGTTTTTATTCCAACAATTGCATTTTATAG
TCCGAATGCATTAGGCGCTATAACTAAAGCACTACATTCTGATAATTACAGTTTTAAAAA
TGTATATCATGAATTATCAACGGATTATTTGGATGTCAGGGATGTAGATGCGCCCTCATAT
TGGTACAAAAATATAAATTATCAGCATGATTTGGACGCTTTAATTCAAAAATTGTAA
```

### > moaA

Function: protein coding sequence; molybdenum cofactor biosynthesis protein A

Best match: moaA\_CC005\_Mu50-VRSA\_BA000017.4[2396152:2397174:r]

Position: 056-contig\_190\_RC: 61492 ... 62515; Length: 1023 bp

Sequence:

```
ATGGTAGAACAAATAAAAGATAAACTAGGACGTCCCATCCGTGACTTACGGTTATCTGTG
ACAGATCGGTGTAACCTTTAGGTGTGATTATTGCATGCCTAAAGAGGTATTTGGAGATGAT
TTCGTATTTTTACCTAAAAATGAACTGTTAACGTTTGATGAAATGGCTAGAATCGCTAAG
GTATATGCAGAATTAGGTGTAAAAAAAATACGCATTACAGGTGGAGAACCATTGATGCG
ACGGGATTTAGATGTACTTATAGCTAAATTAATCAAATCGATGGTATTGAAGATATTGG
TTTGACTACAAATGGTTTGTATTAAAAAAGCATGGACAAAAGTTATATGATGCTGGGCT
ACGCAGAATTAATGTCAGTTTGGATGCTATTGATGATACGCTATTTCAATCAATCAATAAT
CGTAATATTAAGCGACTACGATTTTAGAACAAATTGATTACGCGACGCTCTATTGGTTG
AATGTAAAAGTAAATGTTGTTATACAAAAAGGTATTAACGATGATCAAATCATACCAATG
CTTGAATATTTTAAAGATAAACATATAGAGATTCGATTTATAGAATTTATGGATGTTGGTA
ATGATAATGGATGGGATTTTCAGTAAAGTTGTAACATAAGATGAAATGCTTACAATGATAG
AGCAGCACTTTGAAATCGATCCTGTAGAACCAAAATATTTTGGGGAAGTAGCAAAATATT
ATCGCCATAAGGATAATGGTGTTCATTTGGTTTGATTACAAGTGTTTCACAATCATTTTG
TTCTACATGTACACGCGCAAGGCTGTCATCAGATGGGAAGTTTTACGGATGTTTATTTGCA
ACTGTCGATGGATTTAACGTTAAAGCGTTTATTCGTTCTGGCGTGACCGACGAAGAATTA
AAAGAACAATTTAAAGCTTTATGGCAAATAAGAGATGATCGATATTCAGATGAGAGAAC
TGCTCAAACAGTTGCCAATCGTCAACGTAAAAAGATAAACATGAATTATATTGGTGGTTA
A
```

### > repeat\_nySAgamma

Function: repeat element

Best match: repeat\_nySAgamma\_CC001\_MSSA476\_BX571857.1[2756252:2756375]RC

Position: 056-contig\_190\_RC: 62703 ... 62733; Length: 30 bp

Sequence:

```
ACAATAATGTGCAAGTTGGCGGGGCCCAA
```

### > Q2FZB6

Function: protein coding sequence; putative protein (genomic island)

Best match: Q2FZB6\_CC001\_MSSA476\_BX571857.1[1167133:1167311]

Position: 056-contig\_190\_RC: 62712 ... 62742; Length: 30 bp

Sequence:

```
TGCAAGTTGGCGGGGCCCAAACATAGAGAA
```

### > sarV

Function: protein coding sequence; HTH-type transcript regulator (core genome, constant)

Best match: sarV\_CC005\_Mu50-VRSA\_BA000017.4[2395225:2395575:r] (completely identical)



Position: 056-contig\_190\_RC: 63204 ... 63555; Length: 351 bp

Sequence:

```
ATGAGTAATAAAGTTCAACGTTTTATAGAAGCAGAAAGGGAGTTAAGTCAGTTAAAGCA
CTGGTTAAAAACAACACATAAGATTTCAATTGAAGAATTTGTAGTACTTTTTAAAGTGTA
TGAAGCTGAAAAGATTAGCGGTAAAGAATTGAGGGATACATTACATTTTGAAATGCTATG
GGATACAAGTAAAATCGATGTGATTATCCGTAAAATCTATAAAAAAGAGCTTATTTCTAA
ATTGCGTTCTGAAACGGATGAAAGACAAGTATTCTATTTCTATAGTACTTCTCAAAGAA
ATTGTTAGATAAAATTACTAAAGAAATAGAAGTGTTAAGCGTTACAAACTAA
```

### > **fmhB**

Function: protein coding sequence; aminoacyltransferase (core genome, variable)

Best match: fmhB\_CC001-ST772\_118\_AJGE01000021.1[66795:68060] (completely identical)

Position: 056-contig\_190\_RC: 66858 ... 68124; Length: 1266 bp

Sequence:

```
ATGGAAAAGATGCATATCACTAATCAGGAACATGACGCATTTGTTAAATCTCACCCAAAT
GGAGATTTATTACAATTAACGAAATGGGCAGAAACAAAGAAATTAAGTGGATGGTACGC
GCGAAGAATCGCTGTAGGTCGTGACGGTGAAGTTCAGGGTGTTCGCAATTACTTTTTAA
AAAAGTACCTAAATTACCGTATACGCTATGTTATATTTACGTGGTTTTGTTGTTGATTAT
AGTAATAAAGAAGCGTTAAATGCATTGTTAGACAGTGCAAAGAAATTGCTAAAGCTGA
GAAAGCGTATGCAATTAATAATCGATCCTGATGTTGAAGTTGATAAAGGTACAGATGCTTT
GCAAATTTGAAAGCGCTTGGTTTTAACATAAAGGATTTAAGAAGGTTTATCAAAGA
CTACATCCAACACGATGACTATGATTACACCAATTGATAAAAATGATGATGAGTTATT
AAATAGTTTTGAACGCCGAAATCGTTCAAAGTGCCTTGGCTTTAAAGCGAGGTACGAC
AGTGGAACGATCTGATAGAGAAGGTTTTAAAAACATTTGCTGAATTAATGAAAATCACTGG
GGAACGCGATGGCTTCTTAACGCGTGATATTAGTTACTTTGAAAATATTTATGATGCGTTG
CATGAAGATGGAGATGCTGAACTATTTTAGTAAAGTTGGATCCAAAAGAAAATATAGCG
AAAGTAAATCAAGAATTGAATGAACTTCATGCCGAAATTAATAATGGCAGCAGAAGAT
GGAAACATCTGAAAAGCAAGCTAAAAAGCGCAAATATGATTAATGATGCGCAAATA
AAATTGCTAAAAATGAAGATTTAAAACGAGACCTAGAAGCTTTAGAAAAGGAACATCCT
GAAGGTATTTATCTTTCTGGTGCATTAATGTTTGTGGCTCAAATCATATTACTTAT
ATGGTGCCTTCTAATGAATTTAGAGATTTTTTACCAAATCATCATATGCAGTATACGAT
GATGAAGTATGCACGTGAACATGGTGAACAACCTTACGATTTTCGGTGGTACAGATAATGA
TCCAGATAAAGACTCAGAACATTATGGCTTATGGGCATTTAAAAAGTGTGGGGAACATA
CTTAAGTGAAGATTGGTGAATTTGATTATGTATTGAATCAGCCATTGTACCAATTAATT
GAGCAAGTTAAACCGCGTTTAAACAAAAGCTAAAATTAATAATATCTCGTAAATTAACG
AAAATAG
```

### > **Q2YYN6**

Function: protein coding sequence; acriflavin resistance transport protein (core genome, constant)

Best match: Q2YYN6\_CC001-ST772\_118\_AJGE01000021.1[68177:71344] (completely identical)

Position: 056-contig\_190\_RC: 68240 ... 71408; Length: 3168 bp

Sequence:

```
GTGATAAAAAACTATTACAATTTTCTTTGGGGAATAAGTTTGCTATCTTTTTAATGGTTG
TTTTAGTTGTCTTGGGCGGTGTATACGCGAGTGCTAAATTGAAATTAGAATTACTACCAA
ATGTACAAAATCCAGTTATTTCAAGTTACAACAACAATGCCGGGTGCAACGCCACAAAGTA
CCAAGATGAAATAAGTAGTAAAATTGACAATCAAGTAAGATCGTTGGCATATGTGAAA
AATGTTAAAACGCAATCCATACAAAATGCTTCAATTGTAACAGTTGAATATGAAAATAAT
ACAGATATGGATAAAGCAGAAGAACAGCTTAAAAAAGAAATCGATAAAAATTAATTTAA
AGATGAAGTTGGTCAACCAGAATTAAGACGTAATTCGATGGATGCTTTCCGGTTTTAGC
ATATTCATTTTCAAATAAAGAGAATGACTTGAAAAAAGTAACGAAAGTACTGAATGAAC
AATTAATACCAAATTAACAACGGTAGATGGTGTGCAAATGCGCAATTAATGGGCAG
ACGAACCGTGAAATCACCTTAAATTTAAGCAAAATGAACTTGAAAAATATGGATTGACT
GCTGATGATGTAGAAAATCTATAAAAACGGCAACAAGAACAACCACTTGGATTGTTT
CAATTTGGTGATAAAGATAAATCAATTGTTGTTGATGGTCAATATCAATCTGTTGATGCTT
TTAAAAACATAAATATTCCATTAACGTTGGCAGGAGGACAAGGGCAATCTCAATCCCAA
```

GTGACAATAAACAAAATTTCAGCCATGTCAGATGTTAATCAGGCATCACCGCAGCAAATTC  
CAAAGCGTCAGCATCAAATAATATAAGTGGTATGCCGACAGCGAAACTAGGAGATTTA  
GCTGATATTACAGTTGGTGTGTGCGTACTTCTATTTCTAAAACGAATGGCAAGGATGCG  
GTTAATTTACAAATAACTAAAGCTCAAGATGCCAATACAGTTCAAGTAGCCAAAGATGTA  
CAACGTAATAATTGATACATTCGTTGATGAAAATAAAGATTTTAATGTCACAAAAACAATG  
GATACTGCAAAGCCTGTTGAGAAATCACTTTATACGATGGTTGAAAAAGCATCATTAGGT  
ACAATCGTGGCAATTATAGTTATTTTGTCTGTTTTTAAGAAACATTCGTACGACGGCAATTT  
CTATTATATCGATTCCGTTATCACTTCTTATGGCGCTTATTGCTCTGAAATTGAGTGATGTT  
TCATTGAATATACTAACGTTAGGTGCATTAACAGTAGCGATTGGACGTGTGATAGACGAT  
TCGATTGTAGTTGTTGAAAATATTTATCGACGCTTAACAGATTCAGAAGAACAATAAAA  
GGTGAAAATTTAATTATCAGTGCGACAACCTGAAGTATTTAAACCAATAATGTCATCGACA  
CTAGTTACTATTATCGTCTTCTTACCCTTGTGTTTGTATCAGGTTCAAGTAGGCGAAATGT  
TTAGACCTTTTGCATTGGCTATTGCATTTAGTTTATTAGCATCGTTATTAGTGTCAATTACA  
CTCGTTCCAGCGTTGGCAGCTACACTATTTAAAAAAGGCGTTAAACGTCGTAATAAAACAA  
CATCAAGAAGGATTAGGTGTTGTTAGTACAACCTTATAAAAAAGTATTACATTGGTCATTA  
AATCATAAGTGGATTGTAATTATTAAGTACATTAATTTTGGTTGCAACTATTGTATTTG  
GAGGACCGAGACTAGGCACTAGCTTTATTTTCAGCAGGTTGACGATAAATTTTLAGCTATTA  
CTTATACACCGAAGCCTGGTGAAACGGAGCAAGCAGTGTTGAATCATGCGAAAGATGTT  
GAAAATATTTAAAACAGAAAAGCATGTAAAACAATTCAATACTCAGTTGGCGGTAG  
TAGTCCAGTAGATCCAACGGGTAGTACAAATAGTATGGCAATCATGGTTGAATATGATAA  
TGACACGCCTAATTTTGTATGTAGAAGCGGATAAGGTTATTAACATGCAGATGGCTTTAA  
ACATCCTGGAGAGTGGAAAAATCAAGATTTAGGAACAGGTGCAGGTAATAAATCTGTAG  
AGGTTACTGTAAAAGGTCCATCAATGGATGCCATAAAATCAACTGTAAAAGATATTGAAC  
AGAAAATGAAACAGGTTAAAGGACTAGCCAATGTCAAATCTGATTTATCGCAAACATAT  
GATCAGTATGAAATTAAGTTCGATCAAATAAAGCGGCAGAAAATGGTATTTCTGCAAG  
TCAACTTGCAATGCACTTGAATGAAAACCTTACCAGAAAAACAGTTACGACTGTTAAAGA  
AAATGGTAAAACCTGTTGATGTTAAAGTCAAACAAAATAAGCAAACAGACTGGTCAGAAG  
ATAAGTTGAATAATATAACTTTGAAAAAGCCGACTGGTGGTACGATTAATTTGGGAGATA  
TCGCTACGTTAGTTAAAACAACGACACCAAGTAAATTGACGCAAGAACAAGGAGATTAT  
GCAACGACGGTATCTGCTAAAGTAACAAATAAAGATGTGGGTGGCACAACACGACAAGT  
GATGTCTAAAATAAATAATTTGGACAAACCGAATAATGTAAAGGTTAATATCGGTGGTGC  
ATCAGATGATATTAACAATGCAATGACACAATTAGCCTTTGCAATGTTAGCTGCAATCAT  
TATCGTATATTTAATCCTAGTTATTACATTTAAAGGTGGCCTAGCACCATTTACAATTTA  
TTCTCTTTACCATTTACAGTTATCGGTGTAATTATTGCACTATTAATCACAGGAGAAACAA  
TATCAGTACCAAGTTAATTGGTATGCTAATGTTAATTGGAATCGTAGTAACAAATGCCA  
TTGTGTTAATAGACCGTGTATTATAAATGAGCAACAGGGCATGGAGATGAAAGAAGCAT  
TAATCGAAGCAGGCGGTACTAGAATTAGACCGATATTAATGACGGCGATTGCAACAATTG  
GTGCATTAGTTCCTTTGTTATTTGGTCAAGATAGCTCGATTCTTATTTGAAAGGATTAGC  
TGCTACAGTTATTGGTGGTTAATTTTCATCAACTTTATTAACACTTGTAGTTGTACCAGTA  
ATATATGAAATTCTCTTTACTTTAAAAAACGATTCACTAAACGATAG

## > Q1Y7Y7

Function: protein coding sequence; putative membrane protein (core genome, variable)

Best match: Q1Y7Y7\_CC005\_Mu50-VRSA\_BA000017.4[2385421:2386329:r] (completely identical)

Position: 056-contig\_190\_RC: 72453 ... 73362; Length: 909 bp

Sequence:

GTGACAGAACAATTTACTATGATTATTTTATTAATTGCGCTTGGTTACTTTTTGAAGCGCA  
TTAATTTTATAAAGGCAACAGATAGTCAAGTCATTGCTACATTAGTTCTTAATGTCACACT  
CCCATCTTTAGTTATTGTGAATTTAAACAGTGCAGAATTAATAATTGTCATTCTCCATTTTA  
CCAATTTTAATGATTATATATGGTATTGTGGCGAAAATGATTGCTGTCTGGTTTTTTAGAA  
AATATGATAATCACATGCGTGGATCAGTAGGTATGATGACTGGTGCTATGAATATTGGAT  
TGTTTGCATATCCACTAATTGAAGTGATATGGCCTAAAACGGGGCTTATTTATTTTGGTAT  
GGCTGATATAGGTGGTGCCTTTGTGATGTTTGAATTACTTACTTTGTAGGTAGCTACTTT  
AGTGAAGGTAGTGATCAATTCGATTTTAAATATTTAGGTAAGAAATTATTACAGTCAGTG  
CCACTCGTTACATACATTGTAATGTTTATATTGAATATAAATCACATCCATTTACCACATG  
TGGCAATCGATTTCTTTAGCATACTTTCCCATGCAAATATGCCGTTATCAATGATTTTGTCT

AGGTGTTATGTTGAATTTTACTCTGGAAAGAAAGTATATACCTGCTACTATTAATATTTA  
TGTTTGCATTATGGATTAGCATTAGTTGCGGGATTGTTAGTACATGTGTTGTTACCGGTAT  
CAGATGATATGATTAAGACGACATTGTTGGTCACTTGGATGTTCCCGGTTGGTGTGCGAA  
TTATTTCTTATGGTATTCAGTTTAAATATCGAACACTGCCATTTATAGGTATGACGACCAA  
TTTGACAATCATTATTAGTATCATTATTTTGTACGTGTATCAGGCAGTGTGTTGTCTAG

### > **tx\_universal2**

Function: rho independent terminator

Best match: tx\_universal2\_CC001\_MW2-USA400\_BA000033.2[1067981:1068021:r] (completely identical)

Position: 056-contig\_190\_RC: 73539 ... 73580; Length: 41 bp

Sequence:

CTGAACGAAAATGCGCTTGTAACAAGCTTTTTTCAATTCTA

### > **STAR**

Function: Staphylococcus aureus repeat element

Best match: STAR\_CC005\_CF-Marseille\_CABA01000081.1[16587:16794]RC

Position: 056-contig\_190\_RC: 73658 ... 73688; Length: 30 bp

Sequence:

AAATTGGATTCCCAATTTCTACAGACAATG

### > **glcU**

Function: protein coding sequence; putative glucose uptake protein (core genome, constant)

Best match: glcU\_CC005\_Mu50-VRSA\_BA000017.4[2383903:2384766]RC (completely identical)

Position: 056-contig\_190\_RC: 74015 ... 74879; Length: 864 bp

Sequence:

CTATTTCAAATTACCTAGAATTATAGCAGCTATCACGATAATAATAATACCTGCCCAAAT  
ACCCGTCATCTGACGACGATCTTTTCTTTCTCTAAAATGAAAATACCACCTAATGTTGAA  
ACGATAACAAGTAACTGTGATAATGAGAACTTGTAGCTACACCAACTTTTGGTTGAGAA  
TAGAACATGAACAAGTTACCAATTCCCCAAATCACACCTGGCAATAGATTAAGTGCTGTT  
GATTTAAGTGATGTTTTATGATTCATGGATAGGATAAAGCCACCAATTGCCATACCGACA  
GATTGGAAGAACAATGCATCAGTTCCACCAACACCAAAGATGTCACCAAGTACAACGAA  
ACCTACATATCCAACCTGTAGATACAATTAATAATACCCATTGCTTTTTTAAATTCAGGATTA  
TCTGATTGACGTTCATTTTTGGCTTTAAGTGAAGTAAAGTGCTACACCAGTAACTAATAATA  
TCATGGCGATTAAACCAAAGATAATTTGAGTCATTGAAGACCATTACCTAAAAGATAA  
CGCTGAATAATGTTGTACCAACTAATTGCATACCTGTAGAACTGGCATAGTATTTGATA  
CACCGATTAAACTAATAGATTTAAGCTGATTTCGCTTGTCCAAACGCCATAATGCACCAG  
AAATAAGACCGACAATAATTACAGTAGGATTATTGAATTTTGCGAAACCAGTAATAAGTA  
AACCTAATCCAACAATGAGTGCGCCTAGCGTCGTACCACGAATTTGGTTGTAAGGTCCAC  
CGCCGACGAACACATTAATAAGAACGACACTTCCCCAGAATAAAGCAGGTAAGGTCGCG  
ATTAAGAAATCAAGAAATTGCAA

### > **topB**

Function: protein coding sequence; DNA topoisomerase 3 (core genome, constant)

Best match: topB\_CC001-ST772\_118\_AJGE01000021.1[76059:78194] (completely identical)

Position: 056-contig\_190\_RC: 76121 ... 78257; Length: 2136 bp

Sequence:

ATGAAATCTTTAATATTAGCTGAAAAACCATCAGTTGCAAGAGATATTGCTGATGCTTTA  
CAAATAAATCAGAAGCGTAATGGTTACTTTGAAAATAACCAATATATTGTCACGTGGGCG  
TTAGGTCATCTAGTGACAAATGCGACACCTGAACAATACGATAAAAATTTAAAGGAATG  
GCGATTAGAAGACCTTCCAATTATACCTAAATATATGAAAACCTGTTGTTATTGGTAAAAC  
AAGCAAACAATTTAAAACAGTAAAAGCGTTAATTTTAGATAATAAAGTGAAAGATATTAT  
TATTGCAACAGATGCTGGACGAGAAGGTGAACTAGTTGCAAGATTGATTTTGGATAAAGT  
TGGTAACAAAAGCCAATCCGTCGATTATGGATTAGCTCAGTTACTAAAAAAGCTATTCA  
ACAAGGTTTTAAAATTTAAAAGACGGTCGTCAATATAACGATTTGTATTATGCAGCGTT

AGCGAGAAGCGAGGCAGATTGGATTGTTGGGATTAATGCAACGCGTGC ACTAACAACAA  
AGTATGATGCACAGCTATCCCTGGGACGTGTTTCAGACACCAACGATTCAATTAGTAAATA  
CACGACAACAAGAGATTAATCAGTTCAAACCACAACAATACTTTACATTATCATTAACGG  
TAAAAGGGTTTGATTTTCAGCTAGAATCAAATCAGCGATATACCAATAAAGAACTTTAG  
AACAGATGGTTAATAATTTGAAAAATGTCGATGGTAAGATTAATCTGTTGCTACTAAAC  
ATAAGAAGTCGTATCCGCAATCACTGTACAATTTAACAGATTTACAACAAGATATGTATA  
GACGTTATAAAAATTGGACCTAAAGAAACATTGAATACACTTCAAAGCTTATATGAGAGAC  
ATAAAGTCGTAACCTATCCAAGAACAGATTCAAACTATTTAACAACCTGATATGGTAGATA  
CTATGAAAGAACGTATTCAGGCGACGATGGCAACAACATATAAAGACCAAGCACGCCCA  
TTAATGTCTAAAACATTTTCATCAAAAATGTCGATATTTAATAATCAAAAAGTATCTGATC  
ACCATGCAATTATTCCTACAGAAGTGAGACCTGTCATGTCAGACTTAAGTAATAGAGAAT  
TAAAGTTATACGATATGATTGTCGAGCGTTTTTTAGAAAGCTTTAATGCCTCCGCACGAGTA  
TGACGCGATAACTGTAACTTTAGAGGTTGCAGGGCACACATTTGTTTTGAAAGAGAATGT  
AACAACTGTTTTAGGTTTTAAATCTATTAGACAAGGTGAATCTATTACAGAGATGCAACA  
GCCTTTTTTCAGAAGGCGATGAAGTGAAGATTTCAAAAACAAACATTAGAGAACATGAAA  
CAACACCTCCAGAATATTTTAATGAAGGTTTCGTTATTA AAAAGCGATGGAGAACCCTCAGA  
ACTTTATTCAATTGAAGGATAAAAAATATGCGCAAACCTTTAAAACAAACAGGTGGTATCG  
GCACAGTTGCAACAAGGGCCGACATTATCGATAAATTATTTAATATGAATGCCATTGAAT  
CAAGAGACGGTAAAATTAAGTAACGTCAAAAGGTAAACAAATATTAGAATTAGCACCA  
GAAGAATTAACGTCGCCACTTTTAACTGCACAATGGGAAGAAAAATTACTTTTAATTGAA  
CGTGATAAATATCAGGCGAAAACATTCATTAATGAAATGAAAGATTTTACGAAAGATGTT  
GTAAATGGGATTA AAAATAGTGATCGTAAATATAAACACGATAATTTAACAACCACAGA  
ATGCCCAACGTTGTGGTAAATTCATGATTAAGTTAAA ACTAAAAATGGTCAGATGCTTGT  
GTGCCAAGATCCATCTTGTAAGACGAAAAAGAATGTACAGCGCAAAACAAATGCAAGAT  
GTCCAAACTGTAAAAAGAAATTAACGTTGTTTTGGTAAAGGGAAAGAAGCGGTATATCGTT  
GTGTTTGTGGACATTCTGAAACGCAAGCACATATGGATCAGCGTATGAAGTCTAAATCCT  
CTGGTAAAGTATCTCGTAAAGAAATGAAAAAGTATATGAATAAAAATGAAGGTTTAGAC  
ATAATCCGTTTAAAGATGCATTAAGA AACTTGAATTTATAG

> **rpsJ**

Function: protein coding sequence; 30S ribosomal protein S10 (core genome, constant)  
Best match: rpsJ\_CC001\_MW2-USA400\_BA000033.2[2319738:2320046:r] (completely identical)  
Position: 056-contig\_190\_RC: 80640 ... 80949; Length: 309 bp

Sequence:

ATGGCAAACAAAAAATCAGAATCAGATTA AAAGCTTATGATCACCGCGTGATTGATCA  
ATCAGCAGAGAAGATTGTAGAAACAGCGAAACGTTCTGGTGCAGATGTTTCTGGACCAAT  
TCCGTTACCAACTGAGAAATCAGTTTACACAATCATCCGTGCCGTGCATAAGTATAAAGA  
TTCACGTGAACAATTCGAACAACGTACACACAAACGTTTAAATCGATATTGTAAACCCAAC  
ACCAAAAACAGTTGACGCTTTAATGGGCTTAAACTTACCATCTGGTGTAGACATCGAAAT  
CAAATTATAA

> **rplC**

Function: protein coding sequence; 50S ribosomal protein L3 (core genome, constant)  
Best match: rplC\_CC001\_MW2-USA400\_BA000033.2[2319048:2319710:r] (completely identical)  
Position: 056-contig\_190\_RC: 80976 ... 81639; Length: 663 bp

Sequence:

ATGACCAAAGGAATCTTAGGAAGAAAAATTGGGATGACACAAGTATTCGGAGAAAACGG  
TGAATTAATCCCTGTAACAGTAGTAGAAGCTAAAGAAAATGTTGTATTACAAAAGAAAA  
CTGTAGAAGTTGATGGATAACAACGCAATCCAAGTTGGATTTGAAGACAAAAAAGCATA  
AAAAAAGATGCAAAATCTAATAAATATGCTAATAAACAGCTGAAGGTCACGCTAAAAA  
AGCTGACGCAGCACCTAAGCGCTTCATTTCGTGAATTCCGCAATGTAGACGTGGATGCTTA  
CGAAGTAGGTCAAGAAGTCTCAGTAGATACTTTTGTAGCTGGCGACGTTATTGACGTAAC  
AGGCGTATCAAAAGGTAAAGGTTTCCAAGGTGCAATTAACGCCACGGACAATCTCGTG  
GACCTATGTCACACGGTTCTCATTTCACAGAGCACCAGGTTCTGTAGGTATGGCTTCAG  
ATGCTTCTAGAGTATTTAAAGGCCAAAAAATGCCAGGACGTATGGGTGGAAACACTGTA

ACTGTTCAAACCTTAGAAGTAGTTCAAGTTGACACAGAAAACAAAGTTATCTTAGTAAAA  
GGTAACGTACCTGGACCTAAAAAAGGTTTAGTAGAAATCAGAAGTTCAATTAAAAAAGG  
TAATAAATAA

### > **rplD**

Function: protein coding sequence; 50S ribosomal protein L4 (core genome, constant)

Best match: rplD\_CC001\_MW2-USA400\_BA000033.2[2318398:2319021:r] (completely identical)

Position: 056-contig\_190\_RC: 81665 ... 82289; Length: 624 bp

Sequence:

ATGGCTAATTATGATGTTTTAAAATTAGACGGAACTAAATCAGGTTCAATCGAATTAAGC  
GATGCAGTATTCGGTATTGAGCCAAATAATAGCGTTTTATTTCGAAGCTATTAATTTACAAC  
GTGCTTCATTACGTCAAGGTACGCATGCTGTTAAGAATCGTTCAGCAGTAAGCGGTGGCG  
GACGTAAACCATGGAAGCAAAAAGGAACAGGTCGTGCTCGTCAAGGTACAATCCGTGCT  
CCACAATGGCGTGGCGGTGGTATCGTATTCGGACCAACTCCAAGAAGTTATGCATACAAA  
ATGCCTAAGAAAATGCGTCGTTTAGCTTTACGCTCAGCATTATCTTTCAAAGCTCAAGAG  
AATGGCTTAACTGTAGTTGACGCATTCAACTTCGAAGCTCCAAAAACTAAAGAATTCAAA  
AATGTATTATCTACATTAGAACAACCTAAAAAAGTATTAGTAGTTACTGAAAACGAAGAT  
GTAAATGTTGAATTATCAGCACGCAACATCCCTGGCGTTCAAGTGACAACCTGCTCAAGGT  
TTAAATGTTTTAGATATCACTAATGCTGACAGCTTAGTAATTACTGAAGCTGCTGCTAAAA  
AAGTTGAGGAGGTGCTCGGATAA

### > **rplW**

Function: protein coding sequence; 50S ribosomal protein L23 (core genome, constant)

Best match: rplW\_CC005\_Mu50-VRSA\_BA000017.4[2376218:2376493:r] (completely identical)

Position: 056-contig\_190\_RC: 82288 ... 82564; Length: 276 bp

Sequence:

ATGGAAGCAAGAGATATTCTTAAGCGCCCCGTAATCACTGAGAAATCTTCTGAAGCAATG  
GCTGAAGACAAATACACTTTCGACGTTGATACTCGTGTTAACAAAACACAAGTAAAAATG  
GCAGTTGAAGAAATCTTCAACGTAAAAGTTGCAAGTGTTAATATCATGAATTACAAACCT  
AAGAAAAAACGTATGGGCCGTTACCAAGGCTATACAAACAAAAGAAGAAAAGCGATTGT  
AACTCTTAAAGAAGGATCAATCGACTTATTTAACTAA

### > **rplB**

Function: protein coding sequence; 50S ribosomal protein L2 (core genome, constant)

Best match: rplB\_CC005\_Mu50-VRSA\_BA000017.4[2375352:2376185:r] (completely identical)

Position: 056-contig\_190\_RC: 82596 ... 83430; Length: 834 bp

Sequence:

ATGGCTATTA AAAAGTATAAGCCAATAACAAATGGTCGTCGTAATATGACTTCGTTAGAT  
TTCGCAGAAATCACGAAAACCTACACCTGAAAAGTCATTATTA AAAACCGCTACCGAAAAA  
AGCGGGACGTAACAACCAAGGTAAATTGACTGTAAGACACCATGGTGGTGGACACAAAC  
GTCAATACCGTGTTATCGATTTTAAACGTAACAAAGATGGTATCAATGCAAAAAGTTGATT  
CTATTC AATATGATCCA AACCGCTCAGCAAACATCGCTTTAGTTGTATATGCAGACGGTG  
AAAAACGATATATCATTGCTCCTAAAGGATTAGAAGTAGGTCAAATCGTTGAAAGTGGTG  
CTGAAGCTGACATCAAAGTTGGTAACGCATTACCATTACAAAACATTCCAGTTGGTACAG  
TAGTACACAACATCGAGCTTAAACCTGGTAAAGGTGGACAAATCGCTCGTTCAGCTGGTG  
CAAGTGCTCAAGTACTTGGTAAAGAAGGTAAATACGTATTAATCAGATTAAGATCTGGTG  
AAGTTCGTATGATCTTATCTACTTGCCGTGCTACAATCGGTCAAGTTGGTAAACCTACAACA  
CGAATTAGTTAACGTTGGTAAAGCCGGACGTTCAAGATGGAAAGGTATCCGTCCAACAGT  
TCGTGGTTCTGTAATGAACCCTAACGATCACCCACACGGTGGTGGTGAAGGTCGTGCTCC  
TATCGGTAGACCATCTCCAATGTCACCATGGGGTAAACCTACGCTTGGTAAAGAAAACCTCG  
TCGTGGTAAAAAATCATCAGACAAACTTATCGTTCGTGGACGTAAGAAAAAATAA

### > **rpsS**

Function: protein coding sequence; 30S ribosomal protein S19 (core genome, constant)

Best match: rpsS\_CC001\_MW2-USA400\_BA000033.2[2316912:2317190:r] (completely identical)

Position: 056-contig\_190\_RC: 83496 ... 83775; Length: 279 bp

Sequence:

```
ATGGCTCGTAGTATTAATAAAGGACCTTTCGTCGATGAGCATTTAATGAAAAAGTTGAA
GCTCAAGAAGGAAGCGAAAAGAAACAAGTAATCAAAACATGGTCACGTCGTTCTACAAT
TTCCCTAATTTTCATCGGACATACTTTTGCAGTATACGACGGACGTAAACACGTACCTGTA
TATGAACTGAAGATATGGTAGGTCATAAATTAGGTGAGTTTGCTCCTACTCGTACATTCA
AAGGACACGTTGCAGACGACAAGAAAACAAGAAGATAA
```

### > **rpsC**

Function: protein coding sequence; 30S ribosomal protein S3 (core genome, constant)

Best match: rpsC\_CC001\_MW2-USA400\_BA000033.2[2315853:2316506:r] (completely identical)

Position: 056-contig\_190\_RC: 84180 ... 84834; Length: 654 bp

Sequence:

```
GTGGGTCAAAAAATTAATCCAATCGGACTTCGTGTTGGTATTATCCGTGATTGGGAAGCT
AAATGGTATGCTGAAAAAGACTTTCGCTTCACTTTTACACGAAGATTTAAAAATCCGTAAA
TTTATTGATAATGAATTAAGAAGCATCAGTTTCTCACGTAGAGATTGAACGTGCTGCA
AACCGTATCAACATTGCAATTCATACTGGTAAACCTGGTATGGTAATTGGTAAAGGCGGT
TCAGAAATCGAAAAATTACGCAACAAATTAATGCGTAACTGATAAAAAAGTACACAT
CAACGTAATTGAAATCAAAAAAGTTGATCTTGACGCTCGTTTAGTAGCTGAAAACATCGC
ACGTCAATTAGAAAACCGTGCTTCCGTCGTGTACAAAAACAAGCAATCACTAGAGC
TATGAACTTGGTGCTAAAGGTATCAAACTCAAGTATCTGGTCGTTTAGGCGGAGCTGA
CATCGCTCGTGCTGAACAATATTCAGAAGGAAGTTCCTACTTACATACGTTACGTGCTGA
CATCGATTATGCACACGCTGAAGCTGACACTACTTACGGTAAATTAGGCGTTAAAGTATG
GATCTATCGTGGAGAAGTTCTTCTACTAAGAACAAGTGGAGGAGGAAAATAA
```

### > **rplP**

Function: protein coding sequence; 50S ribosomal protein L16 (core genome, constant)

Best match: rplP\_CC001\_MW2-USA400\_BA000033.2[2315416:2315850:r] (completely identical)

Position: 056-contig\_190\_RC: 84836 ... 85271; Length: 435 bp

Sequence:

```
ATGTTACTACAAAACGTGTAATAATCGTCGTC AACATCGTCCTAAAACA ACTGGTCGT
TCTAAAGGCGGTA ACTACGTAACATTTGGTGAGTTTGGTTTACAAGCTACAACAACGTCT
TGGATCACATCTCGTCAAATCGAATCTGCTCGTATAGCAATGACACGTTACATGAAACGT
GGCGGGAAGTTTGGATTAAAATCTTCCCACATACACCATATACTAAAAACCTTTAGAA
GTACGTATGGGTGCTGGTAAAGGTGCGGTTGAAGGCTGGATCGCAGTTGTTAAACCAGGT
AGAATTTTATTCGAAGTTGCTGGCGTTTCTGAAGAAGTTGCGCGTGAAGCACTACGTTTA
GCAAGTCACAACTTCCAGTAAAACTAAGTTTGTAAAACGTGAGGAATTGGGTGGTGA
AACAAATGAAAGCTAA
```

### > **rpmC**

Function: protein coding sequence; 50S ribosomal protein L29 (core genome, constant)

Best match: rpmC\_CC001\_MW2-USA400\_BA000033.2[2315217:2315426:r] (completely identical)

Position: 056-contig\_190\_RC: 85260 ... 85470; Length: 210 bp

Sequence:

```
ATGAAAGCTAAGGAAATTAGAGACTTAACCACTTCAGAAATCGAAGAACAATCAAATC
TTCAAAGAAGAGCTTTTAACTACGCTTTCAGTTAGCTACAGGTCAATTAGAAGAAAC
TGCACGTATTCGTACAGTAAGAAAAACGATTGCACGTCTAAAAACTGTTGCTCGTGAAAG
AGAAATTGAACAAAGTAAGGCTAATCAATAA
```

### > **rpsQ**

Function: protein coding sequence; 30S ribosomal protein S17 (core genome, constant)

Best match: rpsQ\_CC001\_MW2-USA400\_BA000033.2[2314930:2315193:r] (completely identical)

Position: 056-contig\_190\_RC: 85493 ... 85757; Length: 264 bp

Sequence:

GTGAGCGAAAGAAACGATCGTAAAGTTTATGTAGGTAAAGTTGTTTCAGACAAAATGGA  
CAAGACTATTACAGTACTTGTGAAACTTACAAAACACACAAATTATACGGTAAACGAGT  
AAAATACTCTAAAAAATACAAAACATCATGATGAAAACAATTCAGCTAAATTAGGAGACA  
TTGTTAAAATTC AAGAACTCGTCCTTTATCAGCAACAAAACGTTTTTCGTTTAGTAGAGAT  
TGTTGAAGAGTCAGTAATTATTTAA

> **rplN**

Function: protein coding sequence; 50S ribosomal protein L14 (core genome, constant)  
Best match: rplN\_CC001\_MW2-USA400\_BA000033.2[2314530:2314898:r] (completely identical)  
Position: 056-contig\_190\_RC: 85788 ... 86157; Length: 369 bp  
Sequence:

ATGATCCAACAAGAAACACGCTTGAAAGTAGCAGACAACTCTGGTGCTCGTGAAGTTCTT  
ACAATCAAAGTATTAGGTGGATCTGGTCGTAACAGCAAACATCGGCGATGTTATCGTA  
TGTACTGTTAAAAATGCAACACCAGGTGGCGTTGTTAAAAAAGGTGACGTTGTCAAAGCT  
GTAATCGTACGTACTAAGTCAGGTGTTTCGTCGTAATGACGGTTCATACATCAAATTTGAT  
GAAAATGCATGTGTTATCATCCGTGATGACAAAGGCCACGTGGTACTCGTATCTTCGGA  
CCTGTTGCTCGTGAATTACGTGAAGGTAACCTTCATGAAAATCGTATCATTAGCACCAGAA  
GTACTTTAA

> **rplX**

Function: protein coding sequence; 50S ribosomal protein L24 (core genome, constant)  
Best match: rplX\_CC001\_MW2-USA400\_BA000033.2[2314177:2314494:r] (completely identical)  
Position: 056-contig\_190\_RC: 86192 ... 86510; Length: 318 bp  
Sequence:

ATGCATATCAAAAAAGGTGACAACGTTAAAGTTATCGCAGGTAAAGACAAAGGTAAAGA  
AGGTAAAGTAATTGCTACTCTACCTAAAAAAGACCGTGTGCGTTGTGGAAGGTGTTAACAT  
TATGAAAAAACACCAAAAACCAACTCAATTAATCCTGAAGGTGGAATCTTAGAAACAG  
AGGCAGCAATCCATGTTTCTAATGTACAATTATTGGACCCTAAAACAAACGAACCAACTC  
GTGTAGGTTACAAATTTGTTGATGGTAAAAAAGTTCGTATCGCTAAAAAATCTGGCGAAG  
AAATTAATCTAATAATTA

> **rplE**

Function: protein coding sequence; 50S ribosomal protein L5 (core genome, constant)  
Best match: rplE\_CC001-ST772\_118\_AJGE01000021.1[86474:87013] (completely identical)  
Position: 056-contig\_190\_RC: 86536 ... 87076; Length: 540 bp  
Sequence:

TTGAACCGTTTAAAAGAAAAGTTTAACTGAAAGTTACTGAAAACCTTAATGAAAAGATTC  
AATTATAGTTCAGTAATGGAAGTACCAAAAATAGATAAAATCGTTGTGAACATGGGTGTA  
GGTGACGCAGTACAAAATTCTAAAGTATTAGACAATGCTGTTGAAGAATTAGAATTGATC  
ACTGGTCAAAAACCATTAGTAACTAAAGCTAAAAAATCAATCGCGACTTTCCGTTTACGT  
GAAGGTATGCCAATCGGTGCGAAAGTAACACTTCGCGGTGAAAGAATGTATGAATTCTTA  
GACAAATTAATTTTCAGTATCATTACCACGTGTACGTGACTTCCAAGGTGTTTCTAAAAAA  
GCATTTGACGGACGCGGTAACACTTTAGGTGTTAAAGAACAATTAATTTTCCCAGAA  
ATCGACTATGATAAAGTAAGTAAAGTTAGAGGAATGGATATTGTTATCGTAACGACTGCT  
AACACTGATGAAGAAGCTCGTGAATTGTTAGCTAACTTCGGTATGCCATTCCGTAATAA

> **rpsZ**

Function: protein coding sequence; 30S ribosomal protein S14 type Z (core genome, constant)  
Best match: rpsZ\_CC001\_MW2-USA400\_BA000033.2[2313403:2313588:r] (completely identical)  
Position: 056-contig\_190\_RC: 87098 ... 87284; Length: 186 bp  
Sequence:

GTGGCTAAAACCTTCAATGGTTGCTAAGCAACAAAAAACAATAATATGCAGTTCGTGA  
ATACACTCGTTGTGAACGTTGTGGCCGTCCACATTCTGTATATCGTAAATTTAAATTATGC  
CGTATTTGTTTCCGTGAATTAGCTTACAAAGGCCAAATCCCTGGCGTTCGTAAAGCTAGCT  
GGTAA

### > **rpsH**

Function: protein coding sequence; 30S ribosomal protein S8 (core genome, constant)

Best match: rpsH\_CC001\_MW2-USA400\_BA000033.2[2312973:2313371:r] (completely identical)

Position: 056-contig\_190\_RC: 87315 ... 87714; Length: 399 bp

Sequence:

```
ATGACAATGACAGATCCAATCGCAGATATGCTTACTCGTGTAAGAAACGCAAACATGGTG
CGTCACGAGAAGTTAGAATTACCTGCATCAAATATTA AAAAAGAAATTGCTGAAATCTTA
AAGAGTGAAGGTTTCATTA AAAAATGTTGAATACGTAGAAGATGATAAACAAGGTGTA
CGTTTATTCTTAAAATATGGTCAAAAACGATGAGCGTGTATCACAGGATTA AACGTATT
TCAAAACCAGGTTACGTGTTATGCAAAAAGCTAGCGAAATGCCTAAAGTATTA AATGGT
TTAGGTATTGCATTAGTATCAACTTCTGAAGGTGTAATCACTGACAAAGAAGCAAGAAAA
CGTAATGTTGGTGGAGAAATTATCGCATACGTTTGGTAA
```

### > **rplF**

Function: protein coding sequence; 50S ribosomal protein L6 (core genome, constant)

Best match: rplF\_CC001-ST772\_118\_AJGE0100021.1[87676:88212] (completely identical)

Position: 056-contig\_190\_RC: 87738 ... 88275; Length: 537 bp

Sequence:

```
ATGAGTCGTGTTGGTAAGAAAATTATTGACATCCCTAGTGACGTAACAGTAACTTTTGAT
GGAAATCATGTAACCTGTTAAAGGTCCTAAAGGTGAATTATCAAGAACTTTAAATGAAAGA
ATGACATTCAAACAAGAAGAAAACACAATTGAAGTTGTAAGACCATCTGATTCTAAAGA
AGATAGAACAACCATGGTACAACCTCGTGCTTTATTAAACAATATGGTACAAGGTGTTTC
TCAAGGATACGTAAAAGTACTTGAACCTGTTGGTGTAGGTTACCGTGCTCAAATGCAAGG
TAAAGACTTAATCCTTAACGTTGGTTATTCTCACCCAGTAGAAATTAAGCTGAAGAAAA
CATTACTTTCTCAGTTGAGAAAAACACAGTCGTTAAAGTTGAAGGTATTTCAAAGAACA
AGTAGGAGCATTAGCATCTAACATCCGTTCAAGTAAAGACCTCCAGAGCCTTACAAAGGTAA
AGGTATTCGTTACCAAGGTGAATACGTTCCCGTAAAGAAGGTAAACTGGTAAATAA
```

### > **rplR**

Function: protein coding sequence; 50S ribosomal protein L18 (core genome, constant)

Best match: rplR\_CC001\_MW2-USA400\_BA000033.2[2312022:2312381:r] (completely identical)

Position: 056-contig\_190\_RC: 88305 ... 88665; Length: 360 bp

Sequence:

```
ATGATCAGTAAAATTGATAAAAATAAAGTGCGTTTAAAAGACATGCTCGTGTTCTGACT
AACTTATCAGGTACAGCTGAAAAGCCACGTTTAAACGTATATCGTTCAAACAAGCATATC
TACGCTCAAATTATTGATGATAATAAAGGCGTAAACATTAGCTCAAGCTTCTTCAAAGAC
AGCGACATTGCTACTACAGCAACTAAAGTTGAATTAGCAACTAAAGTCGGTGAAGCAATT
GCTAAAAAAGCTGCTGACAAAGGCATTAAGAAATCGTATTTGACCGTGGAGGATATTTA
TATCACGGACGTGTTAAAGCATTAGCTGAAGCAGCAAGAGAAAGCGGATTAGAATTTTA
A
```

### > **rpsE**

Function: protein coding sequence; 30S ribosomal protein S5 (core genome, constant)

Best match: rpsE\_CC001\_MW2-USA400\_BA000033.2[2311501:2312001:r] (completely identical)

Position: 056-contig\_190\_RC: 88685 ... 89186; Length: 501 bp

Sequence:

```
ATGGCTCGTAGAGAAGAAGAGACGAAAGAATTTGAAGAACGCGTTGTTACAATCAACCG
TGTAGCAAAAGTTGTAAAAGGTGGTCGTCGTTCCGTTTCACTGCATTAGTTGTAGTTGGA
GACAAAATGGTCGTGTAGGTTTCGGTACTGGTAAAGCTCAAGAGGTACCAGAAGCAAT
CAAAAAGCTGTTGAAGCAGCTAAAAAAGATTTAGTAGTTGTTCCACGTGTTGAAGGTAC
AACTCCACACACAATTACTGGCCGTTACGGTTCAGGAAGCGTATTTATGAAACCGGCTGC
ACCTGGTACAGGAGTTATCGCTGGTGGTCCTGTTCTGTCGCTACTTGAATTAGCAGGTATC
ACTGATATCTTAAGTAAATCATTAGGATCAAACACACCAATCAACATGGTTCGTGCTACA
```



ATCGATGGTTTACAAAACCTTAAAAATGCTGAAGATGTTGCGAAATTACGTGGCAAAACA  
GTAGAAGAATTATACAATTAA

> **rpmD**

Function: protein coding sequence; 50S ribosomal protein L30 (core genome, constant)

Best match: rpmD\_CC001\_MW2-USA400\_BA000033.2[2311305:2311484:r] (completely identical)

Position: 056-contig\_190\_RC: 89202 ... 89382; Length: 180 bp

Sequence:

ATGGCTAAATTACAAATTACCCTCACTCGTAGTGTTATTGGTCGTCCTGAAACACAACGT  
AAAACGTGTTGAAGCTTTAGGTCTTAAAAAGACTAACAGTTCAGTAGTTGTTGAAGATAAC  
CCTGCTATTTCGTGGGCAAATCAACAAAGTTAAGCACTTAGTAACAGTAGAAGAAAAATA  
A

> **rplO**

Function: protein coding sequence; 50S ribosomal protein L15 (core genome, constant)

Best match: rplO\_CC005\_Mu50-VRSA\_BA000017.4[2368943:2369383:r] (completely identical)

Position: 056-contig\_190\_RC: 89398 ... 89839; Length: 441 bp

Sequence:

ATGAAATTACATGAGTTAAAACCGGCAGAAGGTTACAGTAAAGAACGCAATCGTGTTGG  
ACGTGGTGTTCGACAGGTAATGGTAAAACAAGTGGTCGCGGACACAAAGGTCAAAAAG  
CTCGTTCAGGCGGTGGTGTAAAGACCAGGATTTGAAGGTGGTCAATTACCATTATTCCGTC  
GTTTACCAAACGTGGTTTTACTAACATAAATCGTAAAGAATATGCTATTGTAACTTAG  
ACCAACTTAATAAATTTGAAGATGGTACTGAAGTAACTCCAGCTTTATTAGTAGAATCTG  
GTGTTGTAAAGAATGAAAAATCTGGTATCAAAATACTAGGTAATGGTTCCTTGATAAGA  
AATTGACAGTGAAAGCTCATAAATTCTCAGCTTCAGCAGCAGAAGCTATTGATGCTAAAG  
GTGGAGCACACGAGGTGATCTAA

> **secY1**

Function: protein coding sequence; preprotein translocase subunit secY locus 1 (core genome, constant)

Best match: secY1\_CC005\_Mu50-VRSA\_BA000017.4[2367651:2368943:r] (completely identical)

Position: 056-contig\_190\_RC: 89838 ... 91131; Length: 1293 bp

Sequence:

ATGATTCAAACCCTTGTGAACTTCTTTAGAACAAAAGAGGTTTCGTAACAAGATTTTCTTCA  
CACTAGCAATGTTAGTAATTTTTAAAATAGGGACTTATATACCAGCTCCAGGAGTAAATC  
CTGCAGCTTTTGATAATCCCAAGGTTCTCAAGGTGCCACTGAGTTATTAATACTTTTGG  
TGGCGGAGCCTTGAAACGATTTTCTATTTTGAATGGGTATTGTACCCTACATCACTGCA  
TCAATCGTAATGCAATTATTACAAATGGATATTGTCCCTAAATTCTCAGAATGGGCAAAA  
CAAGGTGAAGTAGGTAGAAGAAAGTTAAATAACGTTACTCGTTATTTAGCAATTTCTTTA  
GCATTTATCCAATCTATAGGTATGGCATTCCAATTTAATAATTATCTCAAAGGTGCGCTGA  
TTATCAATCAGTCAATTATGAGTTATTTATTAATAGCACTAGTTTTGACAGCAGGAACTGC  
TTTCTTAATATGGCTTGGTGTATCAAATCACTCAGTTCGGTGTGGTAATGGTATTTCTATT  
ATCATATTTGCGGGTATTTTATCAACGTTGCCAGCCAGTCTAATTCATTTGGACAAACTG  
CGTTCGTTGGGCAAGAAGATACATCATTAGCATGGTTGAAAGTATTAGGACTTTTAGTGT  
CACTGATACTATTAAGTGTAGGTGCTATTTATGTACTTGAAGCCGTTTCGTAAAATTCGGAT  
TCAATATGCTAAGAAACAACTGCTCAAAGATTAGGTTACAGGCAACTTATCTACCTTT  
AAAAGTGAAGTCAAGCCGGTGTATTTCCTGTAATCTTTGCAATGGCGTTCCTTCTTACTGCCT  
AGAACATTAACGTTGTTCTATCCAGATAAAGAATGGGCACAAAACATTGCGAATGCTGCA  
AATCCTTCAAGTAATGTTGGTATGGTTGTATATATTGTACTAATTATACTATTCACATACT  
TCTATGCATTTGTACAAGTTAATCCGGAAAAAATGGCTGATAACCTTAAGAAACAAGGTA  
GCTATGTTCCAGGCATTAGACCTGGTGAACAAACCAAAAAAATATATTACTAAAGTTTTAT  
ATCGTTTAACTTTTGTAGGTTCTATCTTCTTAGCCGTTATTTCAATTCTACCAATATTAGCA  
ACTAAGTTTATGGGATTACCACAATCAATTCAGATTGGTGGTACAAGTTTACTTATCGTTA  
TTGGTGTAGCGATTGAAACAATGAAATCTTTAGAAGCTCAAGTATCTCAAAAAGAATATA  
AAGGCTTTGGTGGTAGATAA

> **adk**

Function: protein coding sequence; adenylate kinase (core genome, constant)

Best match: adk\_CC001\_MW2-USA400\_BA000033.2[2308892:2309539:r] (completely identical)

Position: 056-contig\_190\_RC: 91147 ... 91795; Length: 648 bp

Sequence:

```
ATGAATATCATTGATGGGTTTACCTGGCGCAGGTAAGGAACTCAAGCAAGTGAAATT
GTCAAGAAATTCCAATACCCACATTTCAACTGGTGACATGTTTCAGAAAAGCTATAAAA
GAAGAACTGAATTAGGTAAAGAAGCTAAGTCTTATATGGACCGTGGCGAATTAGTTCCT
GATGAAGTGACTGTAGGTATCGTTAAGGAAAGAATTTCTGAAGACGATGCAAAAAAAGG
CTTTTTATTAGATGGCTTCCAAGAACAATCGAGCAAGCTGAGGCATTAATAATATTAT
GTCTGAGCTTGACAGAACATTGATGCTGTCATCAATATCGAAGTTCGGGAAGAAGAATT
AATGAACCGTCTTACAGGTCGTCGAATCTGTGAGTCATGTGGTACAACGTATCATCTTGT
ATTTAATCCTCCGAAGGTCGAAGGTATTTGTGATATCGATGGTGGTAAATTGTATCAACG
AGAAGATGATAATCCTGAAACGGTAGCTAATCGTTTGAGTGTTAATATTAACAATCTAA
GCCTATTTTAGATTTCTATGATCAAAAAGGTGATTGAAAAATATTGATGGTTCAAAAGA
TATTAGCGACGTTACCAAAGATGTCATTGATATTTTAGATCATTGTAA
```

> **infA**

Function: protein coding sequence; translation initiation factor IF-1 (core genome, constant)

Best match: infA\_CC001\_MW2-USA400\_BA000033.2[2308481:2308699:r] (completely identical)

Position: 056-contig\_190\_RC: 91987 ... 92206; Length: 219 bp

Sequence:

```
ATGGCTAAACAAGATGTAATTGAATTAGAAGGTACTGTATTAGATACTTTACCGAACGCA
ATGTTTAAAGTAGAATTAGAAAATGGTCATGAGATTTTAGCTCACGTAAGTGGTAAAATC
AGAATGAATTACATTTCGTATTCTACCTGGCGACAAAGTAACTGTTGAGATGTCTCCGTAC
GATTAACACGCGGAAGAATTACTTATCGTTATAAATAA
```

> **rpmJ**

Function: protein coding sequence; 50S ribosomal protein L36 (core genome, constant)

Best match: rpmJ\_CC001\_MW2-USA400\_BA000033.2[2308336:2308449:r] (completely identical)

Position: 056-contig\_190\_RC: 92237 ... 92351; Length: 114 bp

Sequence:

```
ATGAAAGTAAGACCATCAGTAAAACCTATTTGCGAAAAATGTAAAGTCATTAACGTA
AGGTAAAGTAATGGTAATTTGTGAAAATCCAAAACACAAACAAAGACAAGGTAA
```

> **rpsK**

Function: protein coding sequence; 30S ribosomal protein S11 (core genome, constant)

Best match: rpsK\_CC001\_MW2-USA400\_BA000033.22307535:2307924:r

Position: 056-contig\_190\_RC: 92373 ... 93152; Length: 779 bp

Sequence:

```
ATGGCACGTATTGCAGGAGTAGATATTCCACGTGAAAAACGCGTAGTTATCTCATTA
TATATACGGTATCGGTACGTCAACTGCTCAAAAAATTCTTGAAGAAGCTAACGTATCA
GCTGATACTCGTGTGAAAGATTTAACTGATGACGAATTAGGTTCGCATCCGTGAAGTTGTA
GACGGTTATAAAGTCGAAGGTGACTTACGTCGTGAACTAACTTAAATATCAAACGTTTA
ATGGAAATTTATCATACCGTGGTATCCGTCACCGTCGTGGTTTACCAGTTCGTGGTCAAA
AAACGAAAAACAACGCGCGTACTCGTAAAGGACCAGTTAAAACGGTAGCTAACAAGAAA
AAATAATAGGTAAAGGAGGCAAATTTTAAATGGCACGTAAACAAGTATCTCGTAAACGT
AGAGTGAAAAAGAATATTGAAAATGGTGTAGCACACATCCGTTCAACATTCAACAACAC
TATTGTAATCATCACTGATGAGTTCGGTAATGCTTTATCATGGTCATCAGCTGGTGCATTA
GGATTCAAAGGATCTAAAAAATCAACACCATTTGCAGCACAAATGGCTTCTGAACTGCA
TCTAAATCAGCTATGGAGCATGGTTTAAAAACAGTTGAAGTAACAGTTAAAGGACCTGGT
CCAGGTCGTGAATCAGCTATTCGTGCATTACAATCTGCAGGTTTAGAAGTAACTGCGATC
AGAGACGTTACTCCAGTACCTCATAACGGTTGTCGTCCACCAAACGTCGTCGTGTATAA
```

### > **rpsM**

Function: protein coding sequence; 30S ribosomal protein S13 (core genome, constant)

Best match: rpsM\_CC001\_MW2-USA400\_BA000033.2[2307948:2308313:r] (completely identical)

Position: 056-contig\_190\_RC: 92373 ... 92739; Length: 366 bp

Sequence:

```
ATGGCACGTATTGCAGGAGTAGATATTCCACGTGAAAAACGCGTAGTTATCTCATTAACT
TATATATACGGTATCGGTACGTCAACTGCTCAAAAAATTCTTGAAGAAGCTAACGTATCA
GCTGATACTCGTGTGAAAGATTTAACTGATGACGAATTAGGTCGCATCCGTGAAGTTGTA
GACGGTTATAAAGTCGAAGGTGACTTACGTCGTGAACTAACTTAAATATCAAACGTTTA
ATGGAAATTTTCATCATACCGTGGTATCCGTCACCGTCGTGGTTTACCAGTTCGTGGTCAA
AAACGAAAAACAACGCGCGTACTCGTAAAGGACCAGTTAAAACGGTAGCTAACAAGAAA
AAATAA
```

### > **rpoA**

Function: protein coding sequence; DNA-directed RNA polymerase alpha subunit (core genome, constant)

Best match: rpoA\_CC001\_MW2-USA400\_BA000033.2[2306516:2307460:r] (completely identical)

Position: 056-contig\_190\_RC: 93226 ... 94171; Length: 945 bp

Sequence:

```
ATGATAGAAATCGAAAAACCTAGAATTGAGACAATTGAAATTAGTGAAGATGCTAAATT
CGGTAAGTTCGTTGTTGAACCACTAGAACGTGGCTACGGTACTACACTAGGAAACTCCTT
ACGTCGTATCCTACTATCTTCATTACCAGGTGCAGCCGTTAAGTATATTGAAATTGAGGG
AGTTTTACATGAATTCTCAGCAGTAGACAATGTAGTTGAAGATGTTTCTACAATTATTATG
AACATTAACAATTAGCATTGAAAATTTACTCTGAAGAAGATAAAACTTTAGAAATTGAT
GTACGTGATGAAGGCGAAGTAACAGCAAGCGACATTACACATGATAGTGATGTTGAAAT
TTTAAACCCAGAGCTTAAAATTGCAACAGTATCTAAAGGTGGTCACTTAAAAATTCGTCT
AGTTGCTAACAAGGGTAGAGGTTACGCATTAGCAGAACAAAATAATACTAGTGATTTACC
AATTGGTGTAATCCCTGTTGATTCATTGTATTCACCTGTTGAACGTGTGAACTATACTGTT
GAAAATACACGTGTAGGTCAAAGCAGTGATTTTGATAAATTAACATTGGATGTTTGGACT
AATGGTTCAATCACACCACAAGAATCAGTTTCATTAGCAGCAAAAATAATGACTGAACAC
TTGAATATCTTCGTTGGTCTTACTGATGAAGCGCAAAACGCTGAAATCATGATTGAAAAA
GAAGAAGATCAAAAAGAAAAAGTATTAGAAATGTCTATTGAAGAATTAGACTTATCTGT
ACGTTTCATATAACTGCTTAAAACGCGCAGGAATCAATTCTGTTCAAGAGTTAGCTGACAA
ATCTGAAGCTGACATGATGAAAGTGCGTAATTTAGGTCGTAAATCTTTAGAAGAAGTTAA
ATACAAATTAGAAGATTTAGGATTAGGATTAAGAAAAGAAGATTGA
```

### > **rplQ**

Function: protein coding sequence; 50S ribosomal protein L17 (core genome, constant)

Best match: rplQ\_CC001\_MW2-USA400\_BA000033.2[2306131:2306499:r] (completely identical)

Position: 056-contig\_190\_RC: 94187 ... 94556; Length: 369 bp

Sequence:

```
ATGGGTTACAGAAAATTAGGTCGTA CTCTGATCAACGTAAAGCTATGTTACGTGACTTA
GCTACATCACTTATTATTAGTGAACGTATTGAACTACAGAAGCTCGTGCAAAGAAGTT
CGCAGTGTTGTTGAGAAATTAATCACTTTAGGTA AAAAAGGAGATTTAGCTTCTCGTCGT
AATGCAGCTAAAAC TTTACGTAATGTTGAAATCTTAAACGAAGATGAACTACACAACT
GCACTTCAAAAATTATTTGGTGA AATCGCAGAGCGTTACACAGAACGTCAAGGTGGTTAC
ACTCGTATCCTTAAACAAGGCCCTCGTCGCGGTGACGGTGCTGAATCAGTAATTATCGAA
TTAGTATAA
```

### > **ecfA2**

Function: protein coding sequence; energy-coupling factor transporter ATP-binding protein 2 (core genome, variable)

Best match: ecfA2\_CC005\_Mu50-VRSA\_BA000017.4[2362879:2363688:r] (completely identical)

Position: 056-contig\_190\_RC: 95093 ... 95903; Length: 810 bp

Sequence:

GTGGAGGATAAGAATTCAGTTATTGTATTTAAAAATGTTTCATTTC AATATCAAAGTGAT  
GCATCCTTCACATTGAAAGATGTTTCTTTTAATATACCTAAAGGTCAGTGGACATCTATTG  
TTGGTCATAACGGTTCTGGAAAATCTACAATTGCCAAGTTAATGATTGGCATAGAGAAAG  
TTAAATCTGGAGAAATTTTTATAATAATCAAGCTATAACTGATGATAATTTTGGAAAAGTT  
AAGAAAAGACATAGGAATTGTATTTTCAGAATCCGGATAATCAATTTGTTGGTTCAATTGT  
AAAATACGATGTGGCATTGGACTCGAAAATCATGCGGTTCCACATGACGAAATGCATAG  
AAGAGTCAGCGAAGCACTTAAACAAGTTGATATGTTAGAACGTGCAGATTATGAACCTA  
ATGCATTATCGGGGGGACAGAAGCAGCGTGTGGCTATAGCAAGTGTATTAGCACTTAACC  
CCTCTGTCATTATATTAGATGAGGCGACTTCTATGTTAGATCCTGATGCACGTCAA AATTT  
ATTGGATTTAGTGAGAAAAGTTAAATCAGAACATAATATTACAATCATTTCTATTACGCA  
TGATTTATCTGAGGCGATGGAAGCAGATCATGTTATCGTTATGAATAAAGGGACTGTCTA  
TAAAGAAGGCACAGCGACTGAAATTTTCGACCATGCAGAAGAGTTAACAAGAATAGGTC  
TAGATTTGCCATTCCAATCAAATAAATCAAATGCTGGGACACCAAACATCATTCTTAA  
CTTATGAAGGGCTGGTGGATCAACTATGA

### > **ecfA1**

Function: protein coding sequence; energy-coupling factor transporter ATP-binding protein 1 (core genome, variable)

Best match: *ecfA1\_CC005\_Mu50-VRSA\_BA000017.4*[2362022:2362882:r] (completely identical)

Position: 056-contig\_190\_RC: 95899 ... 96760; Length: 861 bp

Sequence:

ATGACTATACGGTTTGACAATGTAAGTTATACCTATCAAAAAGGGACACCATATCAGCAT  
CAAGCTATTCATGATGTTAATACAGAATTTGAACAAGGTA AATATTACGCCATCGTTGGA  
CAAACGGGTAGTGGTAAATCAACGTTGATACAAAATATTAATGCGCTGTTAAAGCCGACT  
ACTGGGACAGTTACAGTTGATGACATTACTATTACACATAAGACCAAAGATAAATATATT  
AGACCTGTAAGAAAAAGAATTGGAATGGTATTTCAATTTCCCGAATCTCAATTATTTGAG  
GACACAGTAGAGCGTGAAATGATATTTGGACCTAAAACTTTAAAATGAATTTAGATGAA  
GCCAAAACCTATGCCCATCGTCTGTTGATGGATTTAGGCTTTTCAAGAGATGTAATGTCA  
CAATCACCATTTCAAATGTCAGGTGGACAAATGCGTAAAATAGCGATTGTATCGATATTG  
GCAATGAATCCTGATATTATCGTGGTTGATGAACCTACAGCAGGACTTGATCCACAAAGT  
AAACGACAAGTAATGAGATTACTAAAGTCACTACAAACAGATGAAAATAAGGCAATTAT  
CCTAATTTACATGATATGAATGAAGTCGCGCGTTATGCAGATGAAGTCATCGTTATGAA  
AGAAGGTAGTATAGTGTGCGCAAACATCACCAAAAGAGCTCTTCAAAGATAAAAAAAAAT  
TGGCGGATTGGCATATTGGTTTGCCAGAAATTGTTCAAGTTACAATATGACTTTGAACAAA  
AATATCAAACAAAATTAAGATATTGCCTTAACTGAAGAAGCATTGTGAAGCTTGTATA  
AGGAGTGGCAACATGAAAAATAA

### > **efcT**

Function: protein coding sequence; energy-coupling factor transporter transmembrane protein (core genome, constant)

Best match: *efcT\_CC005\_Mu50-VRSA\_BA000017.4*[2361226:2362032:r] (completely identical)

Position: 056-contig\_190\_RC: 96749 ... 97556; Length: 807 bp

Sequence:

ATGAAAAATAAATTGATTATAGGGCGATATTTACCAATTAATTCTTTTGTTCATCATCTTG  
ATCCAAGAGCAAAGTTAATGTTTGTCTTTTATTATATTAATATTTTTCTGTCAATTCA  
CCATTAACATATCTTTGGGTGTTTGCCTTATCTTATTCATTATGAGATTAGCAAAAATTC  
AATTATGGTTCCTAATCAAAGGTTTAAACACCAATATTTTTCTTTTAAATCTTCACATTAATG  
ATGCATATATTTTTAACTAAAGGTGGATATGTATTAGTTGAATGGCATGGCATCACGATT  
GAAACTAATGGTATTTTAGAAGGGCTATATATATCATTGCGTTTAAATGGGATTGTGATG  
ATTGCAACAATTATGACACTATCTACAAGTCCAATTGATTTAACAGATGCGTTTGAAGA  
TTACTTGCACCACTAAAGATGTTTAAATTACCAGTTCATCAATTAAGTATGATAATGTCCA  
TTGCGTTACGATTCATCCCGACGTTAATGGATGAGTTAGATAAAAATTTTTGGCGCAAA  
AGTCGCGTGGTTCTGAAATAAGTTCAGGGAACATTGCAACACGTATTAATCATTATTC  
CATTACTAGTGCCACTATTCATCTCAGCTTTCCAACGCGCCGAAGAATTAGCGGTCGCAA  
TGGAAGTTAGGGGTTATGATGCCAATGTTAAGAGAACGAGCTACAGACAGCTTAAATGG

CAATTGAGAGATACGATATCTTTAACCATGATTATCCCAATTGCAATTATTTTATTTCGTAT  
TAAAATATTCAGGAGTGTA

### > **truA**

Function: protein coding sequence; pseudouridylylate synthase A (core genome, variable)

Best match: truA\_CC005\_Mu50-VRSA\_BA000017.4[2360418:2361221:r] (completely identical)

Position: 056-contig\_190\_RC: 97560 ... 98364; Length: 804 bp

Sequence:

ATGCGTATATTAGTAGAAATTGCGTATCAAGGAAATAATTTTCTAGGCTTTCAAATTCAA  
CAGAATGGACGTACGGTACAGCAACAATTTGAAAAGCTATTACAACGCATGCATAAAAAG  
ACATGTGAGAATCCATCCTTCAAGTAGGACTGATAGAGGTGTACATGCGATACAGCAGTA  
CTTTCATTTTCGACACAGAGCTGAATATACCTATGTCACAATGGCAATATGCAATGAACCG  
AACGTTACCAGATGATATTTATGTCAATAATGTAGTTACAGTCGATGACGATTTTCATTGT  
CGTTACGATTGTGTTCGGTAAACGCTATCGATATAAAGTATATCAAGCACAACACCGCGAT  
CCATTTCAAAGTGGTTTGAACATTTATTCCTGAAACGTTGGATTTAGACAAAATGAAC  
AGAGCGGCGCAACAATTCATAGGTACACATGATTTTACGGGGTTTTGTTTCGCAAAAAACT  
GAAGTAGAAAGCAAAGTTAGAACATTATACCAAAGTGAAATCGTAAAGACAGATGATGG  
CTTTGATTATATTGTCACTGGATCTGGATTTTTATATAACATGGTGCGTGTCTTAGTTGCAT  
TTTTAATAGAAGTTGGAAAAGGGCGACATGAAATTTCTGATGTGCCGAAGCTACTTGAAT  
CAAAGAATCGTAAGAATGTTTCCTTTCCTGACCCGGCTGAAGGACTATATTTAGAGAAGA  
TTTATTTAGATGAAAATGAGTTATTAAGACTTTGGCAACGATATAAAAATACATCGCA  
AAAATCATTACAAAATGACTGA

### > **L13**

Function: noncoding RNA ribosomal protein L leader RNA (core genome, constant)

Best match: L13\_leader\_CC001\_MW2-USA400\_BA000033.2[2302211:2302280:r] (completely identical)

Position: 056-contig\_190\_RC: 98406 ... 98476; Length: 70 bp

Sequence:

GGTATTGTTTTATATCCACCCACGATAAGCCCCGAAACTTATTGTGTTACAAGATATAT  
AAGCAGAAA

### > **rplM**

Function: protein coding sequence; 50S ribosomal protein L13 (core genome, constant)

Best match: rplM\_CC001\_MW2-USA400\_BA000033.2[2301646:2302083:r] (completely identical)

Position: 056-contig\_190\_RC: 98603 ... 99041; Length: 438 bp

Sequence:

ATGCGTCAAACATTTATGGCAAATGAATCAAACATTGAGCGCAAATGGTATGTTATCGAT  
GCTGAAGGCCAAACATTAGGTCGTTTATCATCAGAAGTAGCATCTATCTTACGCGGTA  
AATAAAGTAACTTACACACCACACGTTGATACTGGTGATTATGTAATCGTTATTAATGCA  
TCAAAAATCGAATTTACTGGTAACAAAGAACTGACAAAGTTTACTACCGTCACTCAAAT  
CACCCAGGTGGTATCAAATCAATCACTGCTGGTGAATTAAGAAGAATAACCCAGAACGT  
TTAATTGAAAACCAATTAAGGTATGTTACCAAGCACTCGTTTAGGCGAAAAACAAGGT  
AAAAAATTTATTTGTATATGGTGGCGCTGAACATCCACACGCTGCACAACAACCAGAAAAC  
TACGAATTACGTGGTTAA

### > **rpsI**

Function: protein coding sequence; 30S ribosomal protein S9 (core genome, constant)

Best match: rpsI\_CC001\_MW2-USA400\_BA000033.2[2301234:2301632:r] (completely identical)

Position: 056-contig\_190\_RC: 99054 ... 99453; Length: 399 bp

Sequence:

ATGACTTTGGCACAAGTTGAATATAGAGGCACAGGCCGTCGTAAAAACTCAGTAGCACGT  
GTACGTTTAGTACCAGGTGAAGGTAACATCACAGTTAATAACCGTGACGTACGCGAATAC  
TTACCATTGCAATCATTAATTTTAGACTTAAACCAACCATTGATGTAAGTAAACTAAAG  
GTAAGTATGATGTTTATAGTTAACGTTTCATGGTGGTGGTTTCACTGGACAAGCTCAAGCTAT

CCGTCACGGAATCGCTCGTGCATTATTAGAAGCAGATCCTGAATACAGAGGTTCTTTAAA  
ACGCGCTGGATTACTTACTCGTGACCCACGTATGAAAGAACGTAAAAAACAGGTCTTAA  
AGCAGCTCGTCGTTACCTCAATTCTCAAACGTAA

> **budB**

Function: protein coding sequence; acetolactate synthase (core genome, variable)

Best match: budB\_CC001-ST772\_118\_AJGE01000021.1[100365:102029] (completely identical)

Position: 056-contig\_190\_RC: 100427 ... 102092; Length: 1665 bp

Sequence:

ATGACTGATAAAAAGTACACTGCAGCCGATATGGTTATTGATACTTTGAAAAATAATGGG  
GTAGAATATGTTTTTGGTATTCGGGGTGCAAAGATAGACTATCTATTTAATGCTTTAATTG  
ATGATGGTCTGAACTTATTGTCACCTCGTCATGAACAAAACGCCGCAATGATGGCGCAAG  
GTATTGGAAGATTAACAGGCAAACCGGGTGTAGTACTTGTTACAAGTGGCCCTGGTGTAA  
GTAATTTAACGACTGGACTATTAACAGCTACATCTGAAGGGGATCCTGTATTAGCGTTAG  
GTGGACAAGTGAAACGTAATGATTTATTACGATTAACGCATCAAAGTATTGATAACGCTG  
CTTTATTAATAATATTCATCAAATAACAGTGAAGAAGTACAAGATCCTGAATCATTATCAG  
AAGTTATGACAAATGCAATTCGAATTGCTACTTCAGGGAAAAATGGCGCAAGTTTTATTA  
GTATTCGCAAGATGTGATTTCTTACCAGTTGAATCTATGGCGATATCACTTTGTCAAAA  
ACCAAATTTAGGTGTACCGAGTGAACATGATATTAATGATGTCATTGAAGCGATTA AAAA  
TGCATCATTTCTGTTTTATTAGCTGGTATGAGAAGTTCTAGTGCAGAAGAAACAAATGC  
CATTCGCAAGCTAGTAGAGCGTACGAATTTACCAGTTGTAGAAACATTCCAAGGTGCAGG  
TGTAATTAGTCGTGAATTAGAAAATCATTCTTCCGGTCGTGTGGGCTTATTCCGCAATCAA  
GTTGGTGATGAATTATTACGTAAAAGTGATTTAGTTGTTACAATCGGTTATGATCCTATAG  
AATATGAGGCTAGTAACTGGAATAAAGAATTAGATACGCAAATAATCAATATTGACGAA  
GTTCAAGCTGAAATTAATAATGCAACCGAAAAAAGAGTTGATTGGTAATATTGCT  
GAAACGATTGAAATGATTTCTGACAAAGTAGATGAACCATTTATAAATCAACAACATTTG  
GATGAATTAGAACAGTTAAGAGCGCATATTGATCAAGAACTGGTATTAAGCGACTCAT  
GAAGAAGGCATCTTACACCCAGTTGAAATTATAGAATCTATGCAAAGGTATTA ACTGAT  
GAAACAACAGTGACAGTTGATGTTGGTAGTCACTATATTTGGATGGCACGTAATTCAGA  
AGTTACAATCCAAGACATTTATTATTTAGTAACGGTATGCAAACGCTTGGTGTAGCATT  
CCATGGGCAATTTAGCTGCGCTTGTACGCCCTAATACGCAAGTTGTATCCGTTGCTGGCG  
ATGGAGGCTTTTTATTTTCATCACAAGATTTAGAAACAGCCGTACGTAAAAATCTAAACA  
TTATCAACTTATTTGGAACGATGGAAAATATAACATGGTTGAATTC AAGAAGAAATGA  
AATATAACGTTTCATCAGGCGTAGACTTCGGTCCTGTAGATTTTCGTAAAATATGCTGAAT  
CATTTGGCGCAAAGGTTTACGAGTTACTAATCAAGAAGAATTAGAAGCGGCAATTTAAA  
GAGGGGTATGAAACAGATGGCCAGTATTAATTGATATACCTGTAAATTACAAAGATAAT  
ATCAAACTTTCAACAATATGTTACCTGACGTATTTAACTAA

> **budA-L1**

Function: protein coding sequence; alpha-acetolactate decarboxylase/locus 1 (core genome, variable)

Best match: budA-L1\_CC001-ST772\_118\_AJGE01000021.1[102066:102770] (completely identical)

Position: 056-contig\_190\_RC: 102128 ... 102833; Length: 705 bp

Sequence:

ATGGCTAGTGTTTTATATCAACATGGTACATTAGGCACATTAATGGCAGGATTATTA AAA  
GGA ACTGCATCAATAAATGAATTATTGCAACATGGTGACTTAGGTATCGCTACACTAACA  
GGTTCAAACGGTGAGGTAATCTTTTTAGATGGAAAAGCTTACCATGCAAATGAACATAAA  
GAATTTGTAGAATTA AAAGGTGACGAGTTAACACCATATGCAACTGTA ACTAAATTTGTA  
GCAGATACAAGCTATGAAACGAAAGATAAATCTTCAGAAGCAGTTTTTGCAGAAATTA  
GGAAAAGATGTTGAGTGAAAATTTATTTTCAGCAGTAAAAATTT CAGGCTTATTTAAAA  
AATGCATGTACGTATGATGCCGGCTCAAGAACCACCTTATACACGTTTAATCGATT CAGC  
TAGAAGACAACCTGAACAACTGAAACGTATGTCAAAGGTT CAGTCGTTGGTTTCTTTAC  
ACCAGAATTATTCCATGGTATCGGATCAGCAGGATTT CATGTACACTTTGCGAATGATGA  
TCGTAACTTTGGTGGACATGTCTTAGATTTTGAAGTAGAAGATGTTAAAGTAGAAATCCA  
AAATATAGAAACATTTGAACAGCATTTTCCAATTCAAGATAAAGATTTCACTAAAGCAA  
TATTGACTATAAAGATATTGCAGACGAAATTAGAGAAGCTGAATAA

## > eap-L2

Function: protein coding sequence; putative exported protein/locus 2 (core genome, variable)

Best match: eap-L2\_CC008\_NCTC8325\_CP000253.1[2289534:2289959]RC (completely identical)

Position: 056-contig\_190\_RC: 103196 ... 103622; Length: 426 bp

Sequence:

```
TTATTTAACTACAATTTGTATCTGTTTGATTGTACTTGGATCAATTGAATTTTTAGCGTCGT
CATTTTTCTTTAGATTCACTACTTTTTTATTACCATCATTCAAAGTAAGCGTATAAGTTGCT
GTTTGGGCATTATTAATTTTTTCTGTTGTAACACCACGTTGAGAAGCTAATTCATTTTTTAC
TTTACTGTCAATTTCTTGATAAAGAACATTTTTATTTTTCTGGGAAGATAAAGTAAGTTCGA
TGTAATGCAGTAATACCATCTACTGAAATTGTGTAAGGAACAGTGTGATAACCATCCACA
GTCATTTCTTTATAGCCGTTATTACTATCTGCAGATGCTTCGTGACTCGGTAATGCAGCTC
CGACCGTTGATAATAATCCCAATGCTAAAGTGGCAGTAACAAATGATTTTAGTTTCAT
```

## > Q5HE00

Function: protein coding sequence; HAD-superfamily hydrolase (genomic island)

Best match: Q5HE00\_CC008\_NCTC8325\_CP000253.1[2288425:2289240:r] (completely identical)

Position: 056-contig\_190\_RC: 103915 ... 104731; Length: 816 bp

Sequence:

```
ATGTCAAAGCGTCTATTATTGTTTGATTTTGATGAAACATATTTTAAACATAATACAAATG
AAGAAGATTTAAGTCATTTAAGAGAAATGGAAAAATTGTTGGAAAACTAACTAATAAT
AATGAAGTGATCACTGCTGTATTGACAGGAAGTACATTTCAAAGTGTGATGGATAAAATG
GATCAAGTTAATATGACGTTTAAACCATTACATATCTTTTCTGATTTGAGTTCTAAAATGT
TCACTTGGATAAATGGCGAATATGTTGAATCAGAAACATATAAAAAGAAAGTCTTGAGC
GAACCATTTTTATTTGAAGATATTGAAGATATATTACGTCATATTTCTGCGCAATATAATG
TCGAATTTATTCCACAAAGAGCATTGGAAGGTAATGAAACACATTATAATTTTTATTTCAT
TTCAACAGGTAATCACACAATGATAGTCGTATCCTAGAAGCACTTGTGAGATACGCAAA
TGACCAAACTATAACAGCGAGATTTAGTCGAAGCAATCCATTAGCTGGTGATCCTGAAAA
TGCGTATGATATTGACTTCACACCGTCAAATGCTGGAAAATTATATGCTACTCAATTTCTG
ATGAGGAAATATAATATAACAGTAAAATCAATATTAGGTTTTGGAGATAGCGGCAATGAC
GAAGCATATTTAAGCTATCTTGAACATGCATATTTGATGTGCAATAGTAGAGATGAAGCA
TTAAAGCAGAAATTTAGATTAACAAAATATCCATATTATCAAGGGATAACACTGCATGTT
AAAGAATTTGTTGAAGGTAAGTATGATTATTGA
```

## > att\_nyEtd

Function: attachment site of etd genomic island (mobile element)

Best match: att\_nyEtd\_empty\_CC008\_NCTC8325\_CP000253.1[2288208:2288395]RC (completely identical)

Position: 056-contig\_190\_RC: 104760 ... 104948; Length: 188 bp

Sequence:

```
TGCAAATATTAATATTTAAGGGATGATTAGAAAATATGGTGAATCGACTACACTTTAGCT
TTAAAAAATTATTTATATGTTGATTTATCCAATTAAGTGTAGACGATTCAGGTAGCGCAA
AAATGACGCAGGAAGTGGAGAAAGAATTGATACCAAATTAATATAATAGGTTAAGTAT
ATATGAATA
```

## > Q5HE01

Function: protein coding sequence; peptidase/M23/M37 domain family (genomic island)

Best match: Q5HE01\_CC001-ST772\_118\_AJGE01000021.1[104879:105733] (completely identical)

Position: 056-contig\_190\_RC: 104941 ... 105796; Length: 855 bp

Sequence:

```
ATGAATAAAACAACTTTGGGGCTTATTTAAATAAAAGTAAGAGCAGGAAAATATATAA
GATTTTTGATCAAAATTTGAAGCGAGAGTTTAGTTATTGGCAGTTTAGGAACTTTTCAA
TCTTATACAAGGCAGTCTGATGTACATGAATTAAGTGTGTACTCAAATGATGGTACT
ATTGAGCAAATATGGATAGATGAAGCAAATCAATTTGGAGTGTGACTGACTTGGAAAGA
TAATAGTATTATCGGATTTGTTATGCGTCCGTTAATTAATTATGATGCGATTAAGAATGAA
```

ACGACTTTAAAATACGCAGTGCCGACAACAGATTGCTATGAGATTTTTTGGGGTGGAGAT  
AATGAATTATATAATTATCACTATTTATACCCACATCAAAGGTATGCTATTGATTTAGTTA  
TTAAAGAAAATCATAAAACATATAAGAATCAAGGAAAAGTAAATACTGATTATTTTTGTT  
TTGGAAAAGATATCATTGCGCCAGCAAATGGTACAGTTGAAAAAGTAGTGAATGGGGTT  
CAAGACAACAGTATTGGAAGTACGAATGAATCACAGTTTTTAGGAAATTATATTGTAATT  
AAGCACGCAGAAAATGAGTATAGCTTAATAGCTCATTTACACCAATATTCAATCATTGTG  
AATGAGGGGCAAATGTTAAATATGGTGATATCATTGGGAAGGTTGGGAATTCTGGCAAT  
TCTACTGAACTTCATATACATTTTCAAGTAATGAATGATAAGAATATTGAAGCATGTACA  
TCTTTAAAATTCGATTTATAAATAATCGAGAACTTATCAAAGGGGATGTGGTCTGCGGA  
TTACAAGCTGAATGA

### > txbi\_hysA

Function: bidirectional rho-independent terminator of hysA

Best match: txbi\_hysA\_CC005\_Mu50-VRSA\_BA000017.4[2345517:2345579]RC

Position: 056-contig\_190\_RC: 105798 ... 105828; Length: 30 bp

Sequence:

GCGATACTTATAAAATCTCGACACTATAAA

### > hysA

Function: protein coding sequence; hyaluronate lyase-locus unknown

Best match: hysA-CC772\_ref\_CC001-ST772\_118\_AJGE0100021.1[105793:108216:r]RC

(completely identical)

Position: 056-contig\_190\_RC: 105855 ... 108279; Length: 2424 bp

Sequence:

TTATTTAGTTAATTCAAAGTGCACGCCGGATTATTAGAAAGTCGACGTATTTTTGTTTGTA  
ATAGAGTAACCGGTCATTGAAATTTTAGATTCAATATCTGAAGCGGAATTTGTAGATTCA  
GGATTATAGAAGCTACATTCATAAGTGTATCATCTTTCTTTTAAGTATAAACATACCTT  
TGGCTTTAACTTCGACTTTAGTGTGTTAATGTCAAAGTTTGAGTGTCTACTATAAATT  
AACACCAGCCCAAACCGATTATTATCTTTCACAACGTGGAAGTCATCTTCTTGCTTAACG  
ACAGTTACTTCATCTTTTTTTGTCTTAAAGACATCTTTAGATAAGCCTGGATACAACACAT  
ATCCATATTTATTGTCAGAATTAGAATGCTTTTGAGTTACTTCATAATACTCATCAGTTTTT  
TGTGTATCCTTTGACTTTTATTTATTTCTTTCCACTTACCAGTATGACTTTCTTTTTTACA  
GTTATTTTCGGTTTGTTTAAAAAATGATAACCGATGTTCTTTTTGGTATCTGTGGACTCTA  
AAAAGACTGAATTGTTTCCTGATTATCAGAATTGGTTGTTTGTATCGTCTGTATATAA  
CGTATACCCATTTCGCTTTGCGATTTTCAATCGTTGTAAGTGGATTCTTTGATGAATCAGTA  
CTTTAATGCCAGTTCCTAAGAAGACAATTTTATCGTTTAAATATGAAATATGATTTTTTGG  
CAGTTAAAGTTTTGTCCTGATTTTCAAATCCATTCCGATACTAGCATGTTGGTCATCAAC  
TTTTGTTCCGCCAACAAAAGTTTTACTCGACTTTTTATCATCCGTATCTTTAATATTTTAT  
TGCTAAAGTTGTTGTACCTGATAAACGTTTCATATCGGCTGTCACCCAGAAGTTATCACG  
ATAGTGTGACATCGCTGTTATATAAATAAGACATTCCAGCACCAGTGTGCCAACCTTTT  
AAATTCTCTCCGTTGATACTTTTATAGCGTGCTACGTTTTTTCGACGTCATACTTAAACCAA  
ATGCAAAGTCTAAGTCTTTGTTATGATAGGTGACACGATCCATGTCATTATATATTTAAG  
TTGTTGTGTTAATCCATTTTTAGAAATACTGTTATCTGTCATTAAAGACTTCATTTTATCTA  
TGTCGGAATATGAATTTAAATAATCATTTTGTTTATAACTTGAATCTGACTCTACTGAAGA  
TTTGACAATCTTTTATACTTAGCTTTTGTGTAATCATCCATGGCATCACTTAATCTCAACA  
ATGATTTTCACTGTTGCAGATGCTGAGTGACTGGTTTCATTTTACGACTGATAGCTCT  
ACCTCGTGATAAATCCATCATTTTACCTTTATAAATGAGTGGCATAAATCCGTCGTCAATC  
CATGACTTTAAGGTTGTATCATTTTGGGTTTTATCATTAAAGGTGTTTCTTTTATCATCGG  
CATCATTTGAGAAATCCCCTCTAAGAGTACAACGCCATAAGCACCAGTGTATGGAACGTC  
TTGATGATCAATGTAAGAGCCATCTTTATAAATCCATTACGTTCTTTACCAGTGGCAGAA  
TCTTGAACGTAAGTGAAGACTTTATTAATGAATCTATAGACTTTTTTTCATCATATCTTTAT  
CTTCTTCGATAAATACATTCTAAAAGTTTACCTTAGAAATGTCTACTAGATTTCCGCCTTT  
AGCAAGTTCAGCTTTTCTACAGAAGATAATTTTTGTCACTATCTGGGGCGAAAGTTTTTA  
ATAGGGGCAGTGAATTTTTTCTTTTCTTATTGAAAATTGATCATTTCAGCAATATAAGCG  
TATTTGTTAATGCTCTAGGTGTTCCAATTTTATAATCCACCAATTTAAATTGGTATTTCTA



GAAGTTTTATTTTTAAAGTTTGAGGTCAAATCAGCAACTTTTTATCTGGTCTTTTCCATA  
TGCATTTTTATGCAGCCACTCAAGGGCATCTTTCACCTTCTTCTTGTTCATCTGTTTTA  
ATTTAGTATCTTTATGCTTCATCGCTTCTGCGATTTTCTCAATATTACGATAGGTACGAGTC  
ATATCCGCAGACTTCGTATCTAAATCTTTTTCGTTTTCCACAAGTAAGTCCTTCCACTTTC  
AGTTTTCAATTCCTTGAGTAATTTCTCTGCCTCTTCTCCGTAGCATCAAACCTTCTTCTCA  
TATCTGGATTATTCTCATCATACTTATCATAACCATAGTTAACGTCCAACCATGTGTTTCT  
CAACTTTTCATAATCTGGCGTTTGAACATTTCGTATCAGCCACAGCGATTTGATGTTTATCA  
ATACTTCTGAATTCACCACCATTCAAAGTAATCACTCCGGCCATTAATAACGTAATGGTG  
GATAATTTTTGCCATTTCTTCATTTTATATGTCAT

### > **lacR**

Function: protein coding sequence; lactose phosphotransferase system repressor (core genome, constant)

Best match: lacR\_CC001-ST772\_118\_AJGE01000021.1[112450:113205] (completely identical)

Position: 056-contig\_190\_RC: 112512 ... 113268; Length: 756 bp

Sequence:

TTGAATAAACATGAACGTTTGGACGAAATTGCTAAACTAGTGAATAAAAAGGGCACGAT  
AAGAACGAATGAAATCGTCGAAGGTTTAAATGTGTCTGATATGACAGTTCGAAGAGATTT  
AATTGAGTTGGAAAATAAAGGGATTTTAAACGAAGATTCATGGTGGTGCACGCAGTAATTC  
AACATTTTCAGTATAAAGAAATATCGCATAAAGAAAAACATACCCGTCAAATTCAGAAA  
AACGATTTATAGCTAAAAAAGCTGCATCATAATTGAAGATGGGGATACTTTGTTTTTCG  
GACCAGGAACAACAGTGGAACTATTAGCAGAAGAAGTCAATCATCATAACGCTCACAATT  
ATTACGAATTGTTTGCCGGTGTATAAAATTTGTTAGAAAAACAACAGCACATTTTCGT  
GTCTATTTAATTGGTGGTGAATGCGCCATATTACAGAAGCATTGTAGGTGAAATGGCG  
AATGCCATGTTGGAAAACTAAGATTTAGCAAGATGTTCTTTAGTAGTAACGCAGTAAAT  
AAAGGTGCTGTGATGACATCTACATTAGATGAAGCCTATACGCAACAATTGGCACTAAGT  
AATTCAATTGAAAAATACTTGTTAATCGATCATAACGAAAGTTGGCAAAGAAGATTTTACA  
TCATTTTGTGAGTTAAACGAATTGACTGCAGTGGTCATGGACTATGAAGATGAAGAAAAA  
GTAGAAACGATTAACATATATTGAAGTAGTCGACTAA

### > **tx\_lacR**

Function: rho-independent terminator of lacR

Best match: tx\_lacR\_CC005\_Mu50-VRSA\_BA000017.4[2338801:2338867:r] (completely identical)

Position: 056-contig\_190\_RC: 113293 ... 113360; Length: 67 bp

Sequence:

AATATGTATCTATATGCTCATAAGTGAATGTGAATTTGCATTCATTTATGGGTTATTTTTT  
GCAA

### > **lacA**

Function: protein coding sequence; galactose-6-phosphate isomerase subunit A (core genome, constant)

Best match: lacA\_CC005\_Mu50-VRSA\_BA000017.4[2338098:2338526:r] (completely identical)

Position: 056-contig\_190\_RC: 113634 ... 114063; Length: 429 bp

Sequence:

ATGGCGATTATTATTGGTTCAGATGAAGCTGGCAAACGATTAAGAAGTCATCAAATCA  
TACTTATTAGACAATAAATATGATGTTGTTGACGTAACAGAAGGACAGGAAGTTGACTTT  
GTTGATGCAACTTTGGCTGTAGCAAAAAGATGTTCAAAGTCAAGAAGGTAACCTAGGTATT  
GTTATCGATGCATTTGGTGCAGGTAGCTTTATGGTTGCTACAAAAATCAAAGGCATGATT  
GCTGCTGAAGTATCAGATGAACGCTCTGGATATATGACTAGAGGCCATAACAATTCAAGA  
ATGATCACTATGGGATCTGAAATTGTTGGAGACACATTAGCGAAAAATGTCGTTAAAGGT  
TTTGTGAAGGTAATAACGATGGTGGTAGACACCAAATCCGCGTAGATATGCTTAATAAA  
ATGTGCTAA

### > **lacB**

Function: protein coding sequence; galactose-6-phosphate isomerase subunit B (core genome, variable)

Best match: lacB\_CC005\_Mu50-VRSA\_BA000017.4[2337567:2338082:r] (completely identical)

Position: 056-contig\_190\_RC: 114078 ... 114594; Length: 516 bp

Sequence:

```
ATGAAGATTGCATTAGGATGCGACCATATTGTTACAGATACAAAAATGCGTGTATCTGAA
TTTTAAAATCAAAAGGACATGAAGTCATTGACGTAGGAACATACGATTTTACAAGAACA
CATTATCCAATTTTTGGTAAAAAAGTTGGCGAACAAAGTTGTTAGCGGTAATGCAGACTTA
GGTGTGTTGATTTGTGGAACAGGTGTTGGTATTAACAATGCTGTAATAAAGTACCTGGC
GTTTCGTTACGACTAGTACGTGATATGACATCAGCGTTATATGCTAAAGAAGAATTAAT
GCGAACGTTATTGGCTTTGGTGGACGTATTATAGGTGAGTTATTAATGTGCGATATTATCG
ATGCATTTATTAACGCTGAATATAAAGCAACTGAAGAGAACAAAAAATTAATCGCTAAA
ATTAACATTTAGAAACAAGCAATGCAGATCAAGCTGATCCACATTTCTTTGATGAATTC
TTAGAAAAATGGGACAGAGGCGAATACCACGATTA
```

### > lacC

Function: protein coding sequence; tagatose-6-phosphate kinase (core genome, variable)

Best match: lacC\_CC005\_Mu50-VRSA\_BA000017.4[2336622:2337554:r] (completely identical)

Position: 056-contig\_190\_RC: 114606 ... 115539; Length: 933 bp

Sequence:

```
ATGATTTTAACTTTAACATTAATCCATCCGTTGATATTTTCATATCCATTAACAGCATTGA
AATTAGATGATGTTAATCGTGTTCAGAAGTAAGTAAAACAGCTGGTGGTAAAGGTTTAA
ATGTAACAAGAGTACTTGCACAAGTAGGCGAGCCAGTCCTTGCAGTGGTTTTATTGGCG
GTGAATTAGGTCAATTTATTGCTAAAAAATTAGATCATGCCGACATCAAGCATGCATTTT
ATAACATTAAGGGTGAAACACGAACTGCATTGCAATTTTACATGAAGGGCAACAAACA
GAAATTTTAGAGCAGGGACCGGAGATTGATAATCAAGAGGCTGCAGGATTTATTAACA
TTTTGAACAATTATTAGAAAAAGTTGAAGCAGTTGCTATTTTCAGGTAGCTTACCTAAAGG
ATTAATCAAGATTATTATGCACAAATTATTGAACGATGCCAAAACAAAGGTGTGCCTGT
GATATTGGACTGCTCGGGTGCAACTTTGCAAACAGTTTTTGAAAAATCCATACAAACCAAC
AGTCATTAACCAAACATTTCTGAACATATCAATTGCTTAACCAGCCACTTGATGAAAG
TTAGAAAAGTTTGAAACAGGCAGTGTCAACCCCTTATTCGAAGGGATTGAGTGGATTAT
TGTGTCTTTAGGTGCACAAGGTGCATTCGCTAAGCACAATCATACTTCTATAGAGTGAA
TATCCGACAATAAACGTATTAATCCGGTTGGTTCAGGTGATTCTACAGTTGCTGGAATT
ACTTCAGCAATTCTCAATCATGAAAACGACCACGATTTACTAAAAAAGCTAATACTTTA
GGCATGCTGAATGCGCAAGAAGCACAAACAGGATATGTCAATTTAAATAATTATGATGA
ATTATTCAATCAAATTGAAGTTTTAGAGGTGTAA
```

### > lacD

Function: protein coding sequence; tagatose 1,6-diphosphate aldolase (core genome, variable)

Best match: lacD\_CC005\_Mu50-VRSA\_BA000017.4[2335638:2336618:r] (completely identical)

Position: 056-contig\_190\_RC: 115542 ... 116523; Length: 981 bp

Sequence:

```
ATGTCAAAATCTAATCAAAAAATCGCATCAATTGAACAATTAAGTAATAACGAAGGTATC
ATTTCTGCATTAGCATTGACCAACGTGGTGCTTTAAAACGAATGATGGCTAAACATCAA
ACGGAAGAGCCAACTGTCGCTCAAATTGAACAATTAAGTATTGGTTGCGGAAGAATT
AACACAATATGCGTCTTCAATTTTATTAGATCCAGAATACGGTTTACCAGCATCTGATGCA
CGTAACAAGATTGTGGATTATTGCTAGCTTATGAAAAAACTGGTTATGACGTAATGCT
AAAGGTCGTTTACCTGACTGTTTAGTAGAGTGGTCTGCAAAACGTTTAAAAGAACAAGGT
GCAAATGCTGTTAAATTCTTACTTTACTATGATGTTGATGATGCTGAAGAAATTAACATTC
AAAAGAAAGCATAACATTGAAAGAATCGGTTTCAAGATGTGTTGCAGAAGACATTCCTTTCT
TCTTAGAAGTATTAACATACGATGACAACATTCCTGATAACGGTAGTGTGAAATTCGCAA
AAGTTAAGCCTAGAAAGGTTAACGAAGCAATGAAATTATTCTCAGAACCACGCTTTAATG
TTGATGTATTGAAAGTTGAAGTACCAGTAAACATGAAGTATGTAGAAGGCTTTGCTGAAG
GTGAAGTGGTTTATACAAAAGAGGAAGCGGCACAACACTTTAAAGATCAAGATGCAGCA
ACTCATTTACCATACATTTACTTAAAGTGTGCTGGTGTCTGCGGAATTATTCCAAGAACTT
```

TAAAATTTGCTCACGAAGCTGGTGCTAAATTCAACGGTGTACTTTGTGGCCGTGCTACAT  
GGTCTGGTGTGTTCAAGTATACATTGAACAAGGTGAAGATGCTGCTCGTGAATGGTTAC  
GTACAACTGGTTTCAAAAATATTGATGACTTAAATAAAGTATTA AAAAGATACTGCGACAT  
CTTGAAACAAAGAAAATAA

### > **lacF**

Function: protein coding sequence; lactose-specific phosphotransferase enzyme IIA component (core genome, variable)

Best match: lacF\_CC005\_Mu50-VRSA\_BA000017.4[2335305:2335616:r] (completely identical)

Position: 056-contig\_190\_RC: 116544 ... 116856; Length: 312 bp

Sequence:

ATGAATAGAGAAGAAGTCCAATTATTAGGTTTTGAAATTGTTGCATTTGCAGGGGATGCA  
CGTTCTAAGTTTTTAGAAGCATTGACAGCAGCTCAAGCTGGAGATTTTGCAAAGCAGAT  
GCATTGATTGAAGAAGGAAACAATTGCATTGCTGAAGCGCATAGAGCACAAACAAGCCT  
GTTAGCTAAAGAAGCGCAAGGTGATGATATTGCATACAGTGTAACGATGATGCATGGTCA  
AGACCATTTAATGACAACAATTTTACTGAAAGATTTAATGAAGCATTTATTAGAATTTTAT  
AAAAGAGGGTGA

### > **lacE**

Function: protein coding sequence; PTS system lactose-specific EIICB component (core genome, variable)

Best match: lacE\_CC005\_Mu50-VRSA\_BA000017.4[2333587:2335305:r] (completely identical)

Position: 056-contig\_190\_RC: 116855 ... 118574; Length: 1719 bp

Sequence:

ATGACAATGATGCAAAAATTGATCGCACAAATTGAAAAGGGGAAGCCATTTTTTCGAGAA  
ATTATCACGTAACATATATTTAAGAGCCATCCGTGATGGATTTATTTCTGCAATGCCTGTC  
ATCTTATTCTCAAGTATCTTTCTATTAATTGCATACGTGCCAAATATATTTGGTTTTAAATG  
GGATAAAGGCATGGAAGCCATTTTAATGAAACCATATAACTATACGATGGGGCTTGTAGC  
ATTTTTAGTAGCAGGAACGACAGCGAAATCTTTAACAGATTCATTTAACCGTAAGCTAGA  
AAGTACAAATCAAATTAACCTTTATTTCTACAATGCTAGCAGCGATGTGTGGATTCTTGTC  
TTAGCTTCTGATCCAGCCAAAGATGGTGGATTCTTAAGTGCATTTATGGGAACTAAAGGT  
TTATTAACAGCATTTTTATCAGCATTTGTAAGTGTATTGTTTATAACTTCTGTGTGAAGCG  
CAATATTACAATTA AAAATGCCGAAAGAAGTACCGCCGAATATTTCAACAAGTATTTAAGGA  
CTTAATTCATTTTCAGCGGTAATCATCATTCTTTATGCATTAGATTTAGTCATTTCGCAAC  
AGCTTTAAATCAAATGTAGCGGAAGGTATTTTAAAATTATTCGAACCATTATTTACAGCA  
GCAGATGGATGGATTGGTGTCAACAATTATCTTTGGTGCCTTTGCATTATTCTGGTTTTGTAG  
GAATTCATGGTCCATCAATAGTAGAGCCAGCAATTGCAGCCATTACATATGCGAATATCG  
AAGCGAACTTCAAGTTGCTTCAAGCTGGAGAACACGCAGATAAAAATTATTACATCAGGTA  
CACAAATGTTTATCGTTACTTTTGGAGGTACGGGTGCAACATTGGTCGTCCCCTTCATGTT  
TATGTGGATGACGAAATCTAAACGAAACAAGCGATTGGACGTGCATCAGTTGTACCAA  
CATTCTTTGGTGTAAACGAACCAATTTTATTTGGTGCACCACTAGTATTGAATCCTGTGTT  
CTTTATTCCATTTGTATTAGCACCAATTGTTAACGTATGGATTTTCAAACCTTTTCGTTGAAG  
TGTTAGGAATGAATAGTTTTAGTGTAATTTACCTTGGACAACACCAGGTCCATTGGGCA  
TTATCATGGGTACAGGTTTTGGTTTTATGGTCATTCGTAAGTACTAGCTATTACTTTGATTGTTGTA  
GATATTATTATTTACTACCCATTCCATAAAGTTTATGATAGTGAAATTCCTTGATGAAGAAG  
AAGGACGTAAAGAAAGTAATTCAGATTTAAAAGAAAAAGTTGCAGCAAACCTTTGATACG  
AAAAAAGCTGATTCAATTTTAGCGCAAGTGGTGTATCAGACGATGCAGCTAAAGCTTCA  
AATATCACAGAACAACAATGTCTTAGTACTTTGTGCCGGTGGTGGTACAAGTGGATTA  
TTAGCCAACGCACTTAATAAAGCAGCTGAAGAATATCATGTGCCAGTGAAAGCAGCAGC  
TGGCGGATACGGCGCACATATGGACATTATGAAAGAGTACCAATTAATCATTTTAGCGCC  
ACAAGTTGCGTCTAACTATGAAGATATTAAGCAAGATACAGATAGATTAGGTATTAAT  
AGCGAAGACTCAAGGTGCTGAATATATCAAATTGACACGAGACGGCCAAGCAGCCCTTG  
ATTTTCGTTCAACAACAATTTGAAAATTA

### > **lacG**

Function: protein coding sequence; 6-phospho-beta-galactosidase (core genome, variable)  
Best match: lacG\_CC005\_Mu50-VRSA\_BA000017.4[2332157:2333569:r] (completely identical)  
Position: 056-contig\_190\_RC: 118591 ... 120004; Length: 1413 bp

Sequence:

```
ATGACTAAAACATTACCTGAAGATTTTATTTTTGGTGGAGCAACAGCAGCATATCAAGCA
GAAGGTGCGACAAATACAGATGGTAAAGGTCGTGTTGCATGGGATACGTATTTGGAAGA
AAACTATTGGTACACTGCAGAACCAGCGAGTGATTTTTATAACAGATATCCAGTGGATTT
AGAATTAAGTGAAAAATTTCGGTGTAAATGGTATCCGTATTTCAATTGCATGGTCACGTAT
CTTCCCAAATGGATATGGCGAAGTTAACCCCTAAAGGTGTTGAGTATTACCATAAGTTATT
TGCAGAGTGTCTATAAACGTCATGTTGAACCATTTGTAACATTGCATCATTGATAACCA
GAAGTGTTACACAAAGATGGCGATTTTCTAAATCGTAAAACGATTGACTACTTTGTAGAT
TATGCTGAATATTGTTTTAAAGAATCCCGAAGTAAAATATTGGACTACATTC AATGAA
ATTGGACCTATTGGTGTATGGTCAATATTTAGTAGGTAAATTCCCTCCAGGTATTAATATG
ATTTTGAAAAAGTTTTCCAATCACATCACAATATGATGGTTGCTCATGCAAGAGCAGTAA
AATTATTTAAAGATGGCGGCTATCAAGGAGAAAATTGGTGTGTACACGCATTGCCAACAA
AATATCCGTTTCGATCCATCAAATCCTGAAGATGTTTCGTGCAGCAGAATTAGAAGATATCA
TCCATAATAAATTCATCTTAGATGCAACATATTTAGGTAAAGTATTCTCGTGAAACGATGG
AAGGTGTGCAACATATCTTATCTGTTAATGGCGGTAATAATAATTACAGATGAAGATT
ATGCCATTTTAGATGCAGCCAAAGATTTAAACGACTTCTTAGGTATCAATTACTACATGA
GTGACTGGATGAGAGGTTACGATGGAGAATCTGAAATCACGCATAATGCGACAGGTGAT
AAAGGCGGTTCTAAATACCAACTTAAAGGTGTCGGACAACGTGAATTTGATGTGACGTA
CCTCGCACAGACTGGGACTGGATGATCTATCCTCAAGGTTTATATGATCAAATCATGCGT
GTTGTTAAAGATTATCCTAACTATCACAAGATTTATATCACTGAAAATGGTTTAGGATATA
AAGATGAATTTATTGAATCTGAAAAAACAGTTCATGATGATGCACGTATTGATTATGTAA
GACAACATTTGAACGTTATTGCAGATGCTATTAAGATGGTGCAAATGTTAAAGGTTACT
TTATTTGGTCATTAATGGATGTGTTCTTGGTCAAATGGTTATGAAAAACGATATGGTTT
ATTCTATGTGCGATTTTGAGACTCAAGAACGTTATCCTAAGAAAAGTGCTTATTGGTACAA
AGAGTTAGCCGAAACAAAAGAAATTAATAA
```

## > Q5HE19

Function: protein coding sequence; putative zinc binding alcohol dehydrogenase (core genome, variable)

Best match: Q5HE19\_CC005\_Mu50-VRSA\_BA000017.4[2328501:2329508:r] (completely identical)

Position: 056-contig\_190\_RC: 122652 ... 123660; Length: 1008 bp

Sequence:

```
ATGAAAATGATAGGATTTGAAAAGCCCTTTAAATTGGAAGAAGGAAATTTATTTAAAGTA
TACGAACAAAGAAAGCCAACGCCAGAAAACGATGATATCTTAGTCAAAGTAAATAGTAT
TAGTGTAATCCTGTAGATACAAAACAACGTCAAATGAAAGTCACTCAAGCACCTCGTGT
ACTTGGGTTTGATGCTATTGGTACTGTTGAAGCTATCGGACCAGACGTTACATTATTTAGT
CCGGGTGACGTTGTATTTATGCTGGATCGCCAAATAGACAAGGATCAAATGCGACATAT
CAATTGGTGTGAGAAGCTATAGTTGCAAAGGCACCACACAACATAAGTGCTAATGAAGC
GGTTAGTCTACCGCTAACTGGTATTACGGCATATGAAACGTTTTTTGATACATTTAAAT
TCACATAATCCTTCTGAAAATGTAGGTAATCCGTGTTAATCATTAAATGGTGCCGGTGGT
GTAGGCAGTATAGCCACTCAAATTGCTAAACGGTATGGTTTAACTGTCATTACAACAGCA
TCACGACAAGAAACAACAGAGTGGTGTGAAAAGATGGGCGCAGATATCGTATTGAATCA
TAAAGAGGATTTAGTGCGTCAATTTAAAGAAAAAGAAATTCATTAGTAGATTATATATT
TTGCACTTATAATACAGACTTGTATTACAATACTATGATTGAACTGATAAAACCATTAGG
GCATATTACGACTATCGTAGCTTTTAAATGAAGATCAAGATTTAAATGCATTTAAATTTAA
AAGTATAACATTTACACATGAATTTATGTTTGC GCGTCCAATTCATCGAACGCCTGATATG
ATTAACAACATGAGTATTTAGAAGATATTACGAAAAATATAGAATTAGGGCATTACCAA
CCAACAACGACACAAGTTTTTGAAGGTTTATCACCTGAAAACCTTATATCAAGCACATCAA
TTGTTGAAAAACAATCAATGATTGGGAAATTAGTAATTAATATATAG
```

## > opuD2

Function: protein coding sequence; glycine betaine transporter 2 (core genome, variable)

Best match: opuD2\_CC005\_N315\_BA000018.3[2257131:2258693:r]

Position: 056-contig\_190\_RC: 123967 ... 125530; Length: 1563 bp

Sequence:

```
ATGAAAAATAAATCAGTAAGTCTAGTGTGTTTTGGGTATCTTTAGTGATATGTACGATATTTG
TTGCTTTTGGAGCAATATTTCCGAAACAATTAGAAAAACTCACGCAAAACATTACTACAT
TTATTGCGCTACATTTTTCTTGGTATTATTTATTGCTCGTTTTAGTTATTTTTATTTGTCTGTG
TGTATATTTTTATTTTCGAGATACGCAAACATTACATTAGGTGAAGAAGGCGAAGATCCTG
AATTCTCATTGCCGTCTTGGTTTGTCTATGTTATTTAGTGCTGGTATGGGAATAGGACTTGT
GTTCTGGACAACGGCAGAACCAATCAGTCATGCCTTCAAATTAACGCCTATTCATAAAGC
TGGCACGCAATCTGCAATTAATGATGCAATGCAGTTTTTCATTTTTCCATTGGGGGATTCAT
GCATGGGCAGTCTATGGTATTGTCTGCGCTTGTGTTTGCATATTTTAGCTTTCATAAAGGAT
ATCCTGGCTTAGTCAGCGCTACATTGACGCCTTTATTAGGTGAAAAGGCAATGCGTGGAC
CTTTAGGTGGTGCCATTGATGTATTGGCAGTCATAGCTACAGTAACAGGCGTTGCTGCAA
CATTAGGTTTTCGGTGCATTGCAAATAAACGAAGGTTTACATTTTTTTATTTAATGTACCGAG
TAACTTCACGATGCAAGTAATCTTGATTGTCATTGCAACCATATTATTTACTTGGTCAGCA
TGGTCAGGTATCGATAAAGGTATCAAAACGTTGAGTAATATCAACATGTTACTTGTCTTT
GTAGTACTTATTGGTCTTTTTATTGTTGGGCCAACGCTTTACATTTTAAATACATTTACAA
ATGGTCTAGGTAATTATATTGCAAATTTCTTTAGTATGAGTTTAAAGTATCCGTCAGGCGG
TCAAAAATTCCAATGGTTACAAAATTGGACAATCTTTTACTGGGCATGGTGGATATCTTG
GGCACCATTTGTAGGTATATTTATTGCACGTGTGTCAAAGGACGTACGATTAAAGAATT
TATTCTAGGTGTACTTTTTGTCCCGCGTTAGTTTGTCTTTATATTCTTTGCGGTATTCGGCG
CGTCAGCAATTTACTTACAAGATAATCATATTGCCGATATTGCTAAAGCAGCGACAGAAA
CAGCAACTTTTGAACGCTACAACATTACCCACTAGGTTTTGTATTAAGCTTAATTACTTT
ACTTGTTATTATGATTTTTCTTTGTTACATCAGCGGATTCGGCAACTTATGTTTTAGGTATGT
TGAGTTCAAGAGGTGATATTAATCCGAAGTCATTGTCAAAGTGAGTTGGGGTATCATTAA
TGGCATTATTTGCAATTATCATGATCTACACAGGTGGTACTCAAGCGATTCAAAAATTTATT
AATCATTGCTGCGTTACCATTTTCCGTGGTCATTATAGCGATGATATGGTCGCTTTTAAAA
TCTTTAAGTGAAGAAAACCTAGAAATAGTAATAAGGTTTTAATTAACATCGTGACCCA
GATATTTTAGAATATCGTTCTTCAAAACATATTGACGAAAATTA
```

### > **asp23**

Function: protein coding sequence; alkaline shock protein 23 (core genome, variable)

Best match: asp23\_CC005\_Mu50-VRSA\_BA000017.4[2325096:2325605:r] (completely identical)

Position: 056-contig\_190\_RC: 126555 ... 127065; Length: 510 bp

Sequence:

```
ATGACTGTAGATAACAATAAAGCAAAACAAGCATAACGACAATCAAACCTGGTGTAAACGA
AAAAGAAAGAGAAGAGCGTCAAAAACAACAAGAACAAAATCAAGAGCCTCAATTCAAA
AATAAATTAACTTTCTCTGATGAAGTTGTTGAAAAAATTGCTGGTATCGCTGCACGTGAA
GTTAAAGGTATCTTAGACATGAAAGGTGGCTTAACTGATACATTCACTAATGCATTCTCA
AGTGGAATAACGTTACTCAAGGTGTATCTGTTGAAGTTGGTGAAAAACAAGCTGCTGTA
GACTTAAAAGTAATTTTAGAATATGGTGAATCAGCACCAAAAATCTCCGTAAAGTAACT
GAATTAGTTAAAGAACAAGTTAAATATATTACTGGTTTAGATGTTGTTGAAGTTAACATG
CAAGTTGATGATGTAATGACTCAAAAAGAATGGAAACAAAAACACGAAAAAATAATGA
AAACAATAACCAAGAAAGACAAGGTTTACAATAA
```

### > **tnpIS1**

Function: protein coding sequence; transposase for IS1

Best match: tnpIS1\_trunc\_CC001\_MW2-USA400\_BA000033.2[2269234:2269265]RC

Position: 056-contig\_190\_RC: 133418 ... 133450; Length: 32 bp

Sequence:

```
TCAAATTAAGTGCAACAGTTCGTCACATAAAA
```

### > **htsA**

Function: protein coding sequence; iron compound ABC transporter/iron compound-binding protein (core genome, variable)

Best match: htsA\_CC005\_Mu50-VRSA\_BA000017.4[2317468:2318451:r] (completely identical)  
Position: 056-contig\_190\_RC: 133709 ... 134693; Length: 984 bp

Sequence:

```
ATGAGAGGTCTAAAACTTTTAGTATATTGGGATTAATAGTTGCCTTACTTTTAGTTGCAG
CTTGTGGTAATACGGATAATTCAAGTAAAAAGAATCATCAACTAAAGATACTATTTCCG
TAAAAGATGAAAATGGTACAGTAAAAGTACCTAAAGATGCAAAACGTATCGTTGTATTA
GAGTACTCATTTCGAGATGCATTAGCAGCATTAGACGTTAAACCAGTTGGTATTGCTGAT
GATGGTAAGAAAAACGTATCATTAAACCAGTTAGAGAAAAAATTGGGGATTATACTTCT
GTAGGTACACGTAAACAGCCAACTTAGAGGAAATTAGTAAATTAACCCGGATTTAATT
ATCGCTGATAGCAGTAGACATAAAGGTATTAATAAAGAATTAACAAAATTGCACCAAC
ATTATCATTAAAGAGTTTTGATGGAGACTACAAACAAAATATTAATTCGTTCAAAAACAA
TGCTAAAGCTTTAAATAAAGAAAAAGAAGGCGAAAAACGTCTTGCTGAGCATGATAAAT
TAATCAATAAGTATAAAGATGAAATTAATTTGATAGAAATCAAAAAGTGCTTCCAGCAG
TAGTTGCTAAAGCTGGTTTATTAGCACATCCAACTATTCATATGTTGGACAATTTTTAAA
CGAACTAGGATTTAAAAATGCATTAAGTGACGATGTAACAAAAGGTTTAAAGTAAATATT
GAAAGGACCTTACTTACAATTAGACACTGAACATTTAGCTGATTTAAATCCAGAGCGTAT
GATCATTATGACAGATCATGCTAAAAAAGATTCTGCTGAATTCAAGAAGTTACAAGAAGA
TGCAACATGGAAAAAGTTGAATGCAGTTAAAAATAATCGCGTGGATATTGTTGACCGTGA
TGTTTGGGCAAGATCTCGTGGCTTAATTTCTTCTGAAGAAATGGCTAAAGAAGCTTGTGA
ATTATCAAAAAAGAACAAAAGTAA
```

### > htsB

Function: protein coding sequence; iron compound ABC transporter/permease protein (core genome, variable)

Best match: htsB\_CC005\_Mu50-VRSA\_BA000017.4[2316425:2317456:r] (completely identical)

Position: 056-contig\_190\_RC: 134704 ... 135736; Length: 1032 bp

Sequence:

```
ATGGCTATAAAAGAAATAAGTAGCCAATCTGCCATAGATCATAAAAGAAAAAGACGCAC
AACACTCACGTATATAGTGAGTTTGTGCTTTCTTTTTATTTGTATATATTTAAATATGGCG
ATTGGTTCTTCGAAAATTAATTTTAGCGATATCATTCACTATGTTACTGGTCATACAGATA
CGAAAGCAACGTTTTTATTGCATAATGTACGTATGCCAAGGATGATTGCAGGGTTATTTA
TTGGCGGTGCATTAGCGGTATCTGGTTTGTAAATGCAAGCAATGACACGCAATCCGCTAG
CATCACCTAAAATTTTTGGTGTGAGTTCTGGTGCATCGTTTTTCATTGTATTTGTGACGATT
ATCATTCCATCATTAGAATATTATGCATTATATTTAGGTGTGATAGGTGCATTTATAGGTG
GTTTAACTGTTTATACACTTTCAGGTGCTACGAAAGGTATGACACCCATTAATTTAGCATT
GGCTGGTATGGCCATCCATTTGTTTTTTAGTAGTATGACTGAAGGTATTATTATTTTGAAT
GAGAATTCAAACGAACAAGTGATGTTTTGGCTTGTGCGTTTATTATCCAGTATGAAGTGG
GATGAAATTTTAAACCATTTTACCATGGATTATTGGTGTCTTAATTGTAACGATTTTTATTG
GACGTCAACTAACGATTATGGAAGTACGATGACATTGCTAAGGGATTGGGTCAAAAT
ATAAATAAAGTTAGAATTATCATTGGGCTATTAGTCATTATTCTTACAGGTATGTCGGTGT
CAGTGGCAGGACCAATTGGATTTGTTGGCTTAATCGTACCGCATATAGTCAAACGCTATG
TGAGTAAGAATTATTTAGTCATGATTCCATTAACATTTATTATAGGTGCAGATTTGTTACT
ACTATCAGATGTATTAAGTCGTTTAATCACTTATCCTTACGAATCACCTGTAGGTATTGTG
ACATCATTTCGTAGGTGCATTTACTTCTTATTTATAACGATTAAGGGGTGAAAAGAATA
TGA
```

### > htsC

Function: protein coding sequence; iron (Fe<sup>3+</sup>) ATP binding cassette transporter/membrane protein (core genome, constant)

Best match: htsC\_CC005\_Mu50-VRSA\_BA000017.4[2315460:2316428:r] (completely identical)

Position: 056-contig\_190\_RC: 135732 ... 136701; Length: 969 bp

Sequence:

```
ATGATGACAACGAAAATTATACGTCGTTATAGTTTAAATCACAATCCTTTTTAATTGTGAGTA
TATTCATAAGTTTATGTGTAGGGTCTGTCATGATTCATCCGATTGATGCTATTAAGGGAAT
CTTACACAAGATGATTTTATTTAAATGAGTATCGTATACCTAGAACATTACTTGGTATT
```

ATTATCGGTAGTAGCTTGGCTATATCAGGTGCAATTATACAAGCTGTAATAAGAAACCCG  
TTAGCCTCACCTGATGTTATAGGTATTTCTAAAGGTGCCAGTTTAGCTGCTGTAATTATTA  
TTATGATCTTTCCAACAGCACCATTGTTTGTTTTACCTATAGGTTTATTCTTAGGTGCCTTT  
GCAGTAAGTTTATTTTTATCATTTTTAAATTTCAAATATGATGTTAAAGGTTCAAAGCTTG  
CCTTAATTGGTTTAGCAATAGGCGCAATATGTACGGCGATTGTGCAGTTCTTATTAATCAG  
AAATCCACTGGAAGCAAACAAAGCGCTTGTGGTTGACAGGTAGTCTATATGGACATGA  
TATGTCGAATATTTATACTATATTACCTTGGTTTTTAATAACGATACCAATCATCATTTTAT  
TGAGTTATCAATTAGATGTATTGAATCTAGGTGATGCTGTTGCAACCGCACTCGGTTTAAA  
AGTTAAAATATTAATAATGCTATTGCTAATTTTAGCAGTAATATTAGCAGGATCCGCAAT  
TTCAGTTGTCGGTGGTATTAGCTTTTTAGGATTAATTGCACCTCATATTGCGAGACAATTA  
ATAGGAAATAAAACATTACACGTTATTATCATGTCCGGGGTTAATTGGTGCTATATTGTTA  
ACATTTGGAGATGGTTTAGCCCGTGGCATTATCCGCCACTGGATATTCCTGTAGGGGTTA  
TCATTGCAATTATCGGTGCACCATACTTCTTAATATTATTACGAAGAATGAAATAA

### > **hIII**

Function: protein coding sequence; channel protein/hemolysin III family protein (core genome, variable)

Best match: hIII\_CC005\_Mu50-VRSA\_BA000017.4[2310900:2311583:r] (completely identical)

Position: 056-contig\_190\_RC: 140640 ... 141324; Length: 684 bp

Sequence:

ATGTCCAAATCAACTAAAAAAGTAATGACACAATCGTAGAAACATTTAAGGATATCATC  
CCTTTATCATTGGGAGAAGAAATTGGTAATGCGGCATCTCATGGTGTGCAGCTTTGTTAA  
CATTATTAGTGTTACCCTATGCGGCTGTGCACAGTTATATTGCACATGGTACGCTTGCGTC  
TGTGAGTATGTCTATTTATGTTATTTCTATCTTTATGATGTTTATTTATCTACTATTTATCA  
TTCTATGCAAAATGAAACACCTCATAAATATATTTAAGGATTATCGATCACAGTATGATT  
TACGTAGCAATTTCTGGTACATATACGCCTATTTGTTAACAGTTGTAGGTGGTTGGATAG  
GTTGGACAGTATTTATTTTATTATGGGGAACGACACTTTGGGGGATTTTATATAAATCCAT  
AGCTGTCAAAGTTAACCAAAAGTTAAGCTTAATTGTCTATTTAGTGATGGGCTGGGTAGG  
TATTATCTTGTTACCAATTATTTTATTCGCACATCATGGATATTCATATTATTCATTTTCT  
TAGGTGGTGTGTCTTATAACAATTGGTGCATGGTTTTATGCACAAAAGAATAGACCATATTT  
TCATATGATTTGGCATATTTTATTGTAATAGCATCACTATTGCATTTAATTGCGATCTTAT  
ATTTTATGTAG

### > **sdrM**

Function: protein coding sequence; multidrug efflux protein (core genome, variable)

Best match: sdrM\_ref\_CC005\_N315\_BA000018.3[2239880:2241223:r] (completely identical)

Position: 056-contig\_190\_RC: 141500 ... 142844; Length: 1344 bp

Sequence:

ATGCGATTAAAGTCAATCATAACTGTTATAGCTTTAATATTAATTATGTTTATGTCAGCGA  
TTGAATCATCTATTATTTTCGCTTGCATTACCTACAATTAACAAGATTTAAATGCAGGAAA  
TTTAATTTCAATTAATTTTACAGCGTATTTTATCGCATTAGTAATTGCCAATCCTATAGTGG  
GAGAATTACTTTTCGAGATTTAAAATTATTTATGTGGCAATTGCAGGATTACTTTTATTTAG  
TATAGGTAGTTTTATGTGTGGTTTAAAGTACTAATTTACTATGCTAATTATATCACGCGTG  
ATACAAGGTTTTGGATCAGGTGATTGATGTCATTATCGCAAATTGTTCCAAAGTTAGCAT  
TTGAAATCCGTTACGATATAAAATTATGGGCATAGTTGGCAGTGTGGGGTATTTTCGA  
GTATCATTGGACCGCTTCTAGGTGGTGGTATATTAGAATTTGCAACATGGCATTGGTTATT  
CTACATAAATATAACCGATTGCGATCATTGCCATTATATTAGTTATATGGACATTTTCAATTT  
CCAGAGGAAGAAACAGTTGCTAAATCAAATTTGATACTAAAGGGCTCACGCTATTTTAT  
GTATTTATTGGATTGATTATGTTTGTCTTTATTAACCAACAGCTATTACTTTTAAATTTCTT  
GAGTTTTATCTTAGCTATCGTTGTGGCAATGTGTTTATTTAAAGTAGAAAAACATGTTTCT  
TCACCATTTTTACCTGTGGTTGAATTTAATCGTTTCGATTACTTTAGTTTTTATAACGGACCT  
TCTAACAGCTATTTGTTTAAATGGGATTCAATTTATATATTCCAGTCTACCTTCAAGAACAA  
CTAGGATTATCTCCATTGCAAAGTGGATTGGTTATTTTCCCTTATCTGTAGCTTGGATTAC  
ATTGAATTTTAAATTTACATCGAATTGAAGCAAACACTATCAAGGAAAGTTATTTACTTACTA  
TCATTTACATTGTTACTAGTAAGTAGTATTATCATTTTCAATTTGGTATTAATTTGCCGGTACT

TATAGCATTGTGTTAATTTTGGCAGGATTAAGTTTTGGATATATTTATACGAAAGATAGT  
GTAATTGTCCAAGAGGAAACTAGCCCATTACAAATGAAGAAAATGATGTCATTTTATGGA  
TTAACTAAAAATCTTGGGGCATCAATAGGTTCAACAATAATGGGATATCTTTATGCGATA  
CAATCAGGAATCTTTGGTCCAACTTACACAATGTGTTAAGTGCTGTTGCTGTAATTAGCA  
TTGGGCTTATTGTTTTATGGGTCGTATTTTTTAAAGAACAGTCATCTCAATCAAAGAATA  
G

### > **sepA**

Function: protein coding sequence; staph efflux pump A (core genome, variable)

Best match: sepA\_CC005\_Mu50-VRSA\_BA000017.4[2309028:2309495:r] (completely identical)

Position: 056-contig\_190\_RC: 142948 ... 143416; Length: 468 bp

Sequence:

GTGAATTATCTTAAACATAAGTTTTATAACTTGTTAACTACAATGATTGTTCTCTTTATTTT  
TGTACTTTCTGGTGCATTTTTTTAACATTTCTAGGGTTTGGTTTATATGGATTAAGTAGA  
ATACTTATTTATTTTAGGTTGGGTGACTTTACATATAATAGAAGTATGTACGATAACCTAT  
TATATTATGGCAGTTATATAATCTTTGGGTACTTCATCATATTTGCAGTCGAGCATTAAAT  
GGATTATTTTAGAAAAATGTTGCCTGAAAATGCATATTTTAGAGGGCGGACTTTTCATTTG  
ATTTCTTACACAGTTGCAACAACGTTATTTTATTTTCATTCATTTAAATTATGTTTATAT  
CAATATCGATTTTTGGGTCATCATGGTTATTATAGGGTTCCTATATGTTTGTAAAGCTTCAA  
TTTTACCCTGAAAGTAAAAATTTAAATAATAGAAAATAG

### > **lmrS**

Function: protein coding sequence; lincomycin efflux pump (core genome, variable)

Best match: lmrS\_CC005\_Mu50-VRSA\_BA000017.4[2307263:2308705:r] (completely identical)

Position: 056-contig\_190\_RC: 143738 ... 145181; Length: 1443 bp

Sequence:

ATGGCTAAAGTTGAATTAACAACCCGGAGACGAACTTCATAGTTGCTGTTATGTTGATT  
AGTGCGTTTGTAGCTATTTTTAAATCAAACATTATTAATACAGCGTTACCTAGTATAATGA  
GAGAATTAATATTAATGAAAGTACATCGCAATGGCTAGTTACTGGGTTTATGCTTGTTA  
ATGGCGTCATGATACCTCTGACGGCATACTAATGGATAGAATTAAACTAGACCTTTAT  
ACTTAGCGGCGATGGGGACATTTTTATTAGGTTCTATTGTTGCAGCCTTAGCTCCGAATTT  
TGGAGTTTTAATGTTAGCACGTGTAATTCAAGCGATGGGTGCAGGCGTACTTATGCCCTT  
AATGCAATTTACGTTATTTACATTGTTTACGTAAGAACAATCGAGGTTTTGCAATGGGACT  
AGCAGGTTTAGTAATTCAATTTGCACCAGCAATAGGCCCTACAGTTACAGGATTAATTAT  
TGATCAAGCGAGTTGGCGAGTACCATTTATTATAATTGTAGGAATTGCTTTAGTTGCCCTT  
GTTTTCGGCTTAGTTTCAATCTCAAGTTACAATGAAGTGAAATATACGAAATTAGATAAG  
CGCTCAGTAATGTATTCAACTATTGGATTCGGGTTAATGCTATACGCATTTAGTAGTGCAG  
GAGATTTAGGATTTACAAGTCCAATAGTAATAGGTGCGTTGATAATAAGTATGGTTATTA  
TCTATTTATTTATACGTAGACAATTTAATATTACTAATGTACTTTTTAAATTTAAGGGTTTT  
AAAAATAGAACATTTGCATTATGTACGATTAGTTCAATGATTATAATGATGTCAATGGTT  
GGACCTGCGCTGCTTATACCGCTATATGTTCAAAATAGTTTATCTTTATCTGCCTTGTTATC  
AGGACTTGTTATCATGCCTGGTGCAATAATAAATGGTATTATGTCAGTTTTTACAGGTA  
TTTTATGATAAGTATGGTCTTAGACCATTGATTTATACTGGTTTTACAATTTTAAACAATTA  
CTACAATTATGTTGTGTTTCTTGCATACAGACACATCTTATACGTATTTAATAGTCGTATA  
TGCAATTAGAATGTTTTAGTTTTCTTACTCATGATGCCGATAAATACTACAGGAATTAAT  
TCTTTGAGAAATGAAGAAATCTCACATGGCACGGCTATTATGAACTTTGGTCTGTGTAATG  
GCTGGTTCACTAGGCACAGCTTTAATGGTTACATTAATGAGTTTTGGTGCAAAAATATTTT  
TATCTACATCGCCATCGCATTTAACTGCAACTGAAATTAACAGCAATCCATTGCTATAG  
GGGTGGATATCTCATTTGCTTTTTGTAGCTGTGCTTGTATGGCAGCTTATGTGATAGCACT  
TTTTATAAGAGAACCCTAAAGAAATAGAAAGTAATAGAAGGAAATTTTAA

### > **Q1Y5S5**

Function: protein coding sequence; putative ATP-binding protein/Mrp/Nbp35 family (core genome, variable)



Best match: Q1Y5S5\_CC001\_MW2-USA400\_BA000033.2[2256291:2257355:r] (completely identical)

Position: 056-contig\_190\_RC: 145328 ... 146393; Length: 1065 bp

Sequence:

```
TTGTTAACGGTAGATCAAGTGAAAGAATTGGTAGGAGAAATTAAGATCCTATTATAGAT
GTGCCTTTAAAAGAAACAGAAGGTATTGTTGAAGTTTCTATTAAGGAAGAAAAGAACA
TGTGAGTGTTAAATTAGCAATGGCACAATTAGGTGGTGCACCGCAATTAGATTTACAGAT
GGCTGTTGTTAATGCATTAAGAAAACGGTGCGAAAACGGTCGGTATACGATTTGAAAC
ATTGCCGGAAGAAAAGTAAATCAATTTAAACCAAAGAAGAAAATAAACCTAAAACGA
TAGAAGGCCTATTATCTCAAATAATCCAGTCGAATTTATTGCAATAGCCTCCGGTAAAG
GTGGTGTCCGTAATCTACTGTTGCAGTAAATTTAGCCGTTGCCTTAGCTCGTGAAGGGA
AAAAGTCCGATTAGTAGATGCCGATATATATGGATTTAGTGTACCAGATATGATGGGTA
TTGATGAAAAGCCTGGAATTAAGGGAAGGAAGTAATTCCAGTTGAACGTCATGGCGTT
AAAGTTATATCAATGGCCTTTTTTGTGGAAGAAAATGCGCCAGTTATATGGAGAGGGCCA
ATGTTAGGTAATGTTGACGAATTTCTTTACAGAAGTTAAATGGGGAGACATTGAATAT
TTAATACTCGATCTTCCACCTGGAACAGGAGATGTAGCTTTAGATGTTTCATACGATGTTAC
CTTCAAGTAAGGAAATTATTGTAACGACACCTCATCTACAGCAGCATTGTTGCAGCTC
GCGCAGGTGCGATGGCAAACATACGGATCATTCTATTCTTGGCGTAATTGAAAACATGA
GTTATTTTGAAGTAAAGAGACGGTAATAAAGAATATGTCTTTGGCAAAGGTGGCGGTA
CTAAGTTAGCTGATGAACCTAATACTCAATTACTTGGGGAATTACCTTTAGAGCAACCAT
CTTGAATCCAAAAGATTTTGCACCGTCAATATATCAATCAGATGATCGTCTAGGTAAAA
TTTATAGCTCGATTGCACAAAAGTTATAGCTGCTACAAATAAATAG
```

#### > **rrs**

Function: rRNA 16S ribosomal RNA

Best match: rrs\_AC025951.19[21040:22158]

Position: 056-contig\_190\_RC: 146848 ... 147967; Length: 1119 bp

Sequence:

```
TTTTATGGAGAGTTTGATCCTGGCTCAGGATGAACGCTGGCGGCGTGCCTAATACATGCA
AGTCGAGCGAACGGACGAGAAGCTTGCTTCTCTGATGTTAGCGGCGGACGGGTGAGTAA
CACGTGGATAACCTACCTATAAGACTGGGATAACTTCGGGAAACCGGAGCTAATACCGG
ATAATATTTTGAACCGCATGGTTCAAAGTGAAAGACGGTCTTGCTGTCACCTTATAGATG
GATCCGCGCTGCATTAGCTAGTTGGTAAGGTAACGGCTTACCAAGGCAACGATGCATAGC
CGACCTGAGAGGGTGATCGGCCACACTGGAAGTGAACACGGTCCAGACTCCTACGGGA
GGCAGCAGTAGGGAATCTTCCGCAATGGGCGAAAGCCTGACGGAGCAACGCCGCGTGAG
TGATGAAGGTCTTCGGATCGTAAACTCTGTTATTAGGGAAGAACATATGTGTAAGTAAC
TGTGCACATCTTGACGGTACCTAATCAGAAAGCCACGGCTAACTACGTGCCAGCAGCCG
GGTAATACGTAGGTGGCAAGCGTTATCCGGAATTATTGGGCGTAAAGCGCGCGTAGGCG
GTTTTTTAAGTCTGATGTGAAAGCCCACGGCTCAACCGTGGAGGGTCATTGGAAACTGGA
AAACTTGAGTGCAGAAGAGGAAAGTGGAAATCCATGTGTAGCGGTGAAATGCGCAGAGA
TATGGAGGAACACCAGTGGCGAAGGCGACTTTCTGGTCTGTAAGTACGCTGATGTGCGA
AAGCGTGGGGATCAAACAGGATTAGATACCCTGGTAGTCCACGCCGTAACGATGAGTG
CTAAGTGTTAGGGGGTTTCCGCCCTTAGTGCTGCAGCTAACGCATTAAGCACTCCGCCT
GGGGAGTACGACCGCAAGGTTGAAACTCAAAGGAATTGACGGGGACCCGCACAAGCGGT
GGAGCATGTGGTTAATTCGAAGCAACGCGAAGAACCTTACCAAATCTTGACATCCTTTG
ACAACCTAGAGATAGAGCTTTCCCTTCGGGGGACAAAGTGACAGGTGGTGCATGGTTG
TCGTCAGCTCGTGTGCTGAGATGTTGGGTTAAGTCCCGCAACGAGCG
```

#### > **fosB**

Function: protein coding sequence; fosfomycin resistance protein (genomic island)

Best match: fosB\_CC005\_Mu50-VRSA\_BA000017.4[2458828:2459247] (completely identical)

Position: 057-contig\_266\_RC: 189 ... 609; Length: 420 bp

Sequence:

```
ATGTTAAAATCTATTAATCATATATGCTTTTCAGTCAGAAATTTAAACGATTCAATACATT
TTTATAGAGATATTTTACTTGGGAAATTGCTATTGACTGGTAAAAAACTGCTTATTTTGA
```

GCTTGCAGGCCTATGGATTGCTTTAAATGAAGAAAAAGATATACCACGTAATGAAATTCA  
CTTTTCATATACACATATAGCTTTCACTATAGATGACAGCGAATTTAAATATTGGCATCAG  
AGGTTAAAAGATAATAACGTGAATATTTTAGAAGGAAGAGTTAGAGATATTAGAGATAG  
ACAATCAATTTACTTTACTGACCCTGATGGTCATAAGCTAGAATTACATACTGGCACACTT  
GAGAACAGATTAAATTATTATAAAGAGGCTAAACCACATATGACATTTTACAAATAA

### > **hutG**

Function: protein coding sequence; formimidoylglutamase (core genome, variable)

Best match: hutG\_CC005\_Mu50-VRSA\_BA000017.4[2459503:2460438:r]RC (completely identical)

Position: 057-contig\_266\_RC: 864 ... 1800; Length: 936 bp

Sequence:

TTATTTTAAAAAATGATGCACTAAATTAGCAACGAGCTTAGCAGTTCTATTGTCAGCGTC  
ATATGTTGGATTTCATCTCAGCAATACTAAGACACCTTATCACTTGGGAATAATACG  
TTTTGCTAATTCAAGAACAGTATGTGGATACAAACCTAACACTGCCGGCGCACTTACCCC  
AGGCGCAAACGCACTATCAATGACATCCATACAAATCGTAAACATAATGACATCATGTT  
ATGTACAAAACGTTCAATCATATCTTTAATTGTTGGTGATACGTGACTCAATAATTCATCT  
GCAAAGACATAATCAATCTTTTTCTCTTTAGCATAATCAAATAAACTTTGCGTATTACCAC  
CTTGAGCAATACCAAGCACTAAATAATCTGTGTTTTTCATCTTCTTCTAAAATTTGTCTAAA  
GCTCGTTCCAGATGTAGATTGTTGTTTCAGCACGTGTATCAAAAATGCGCATCAATATTTATC  
ACACCAATAGATTGTGTTGGATAGACTTTACGTGTTGCTAAATATTGAGCATAACGCAATA  
TCATGTCCACCACCTAATAAAAATGTTTGTCTATGATTAGCAATTGACTTCGCTGCAAGCA  
TAGCAAATTTCTTTTGAGTATCAATTAATTCCTCATGATCATGATAAACATTTCCGTAATC  
GACTAAAGTTTCACATTGATTCAAATCCGGCAAACCTGCAAATGCTTGTTAATCGCATCT  
GGTCCTTCTTTTGCACCAATGCGCCCCTTGTTTAAAGCAACACCTTTGTCAACAGCATAGC  
CTAATATACCGACCCCTGATGGCATACTACTCTTTTCCAGCTTAGACAAATCTTCAAATGT  
TACTGTTTGAAAATGTCTAAATTTTTTCGGGTCTGTTTCACTATCTAACCTTCCAGTCCATA  
AATTTGGTTCACCTTGCTTGACAC

### > **lyrA**

Function: protein coding sequence; lysostaphin resistance protein A

Best match: lyrA\_CC005\_Mu50-VRSA\_BA000017.4[2460728:2461987] (completely identical)

Position: 057-contig\_266\_RC: 2089 ... 3349; Length: 1260 bp

Sequence:

ATGAAGAACAATAAAAATTTCTGGTTTTCAATGGGCAATGACGATTTTTCGTCTTCTTTGTCA  
TTACAATGGCGTTATCCATTATGCTCAGAGATTTCCAGTCTATAATTGGTGTCAAACACTT  
TATATTTGAAGTTACAGATCTAGCACCATTAATTGCTGCAATCATTGTATACTCGTTTTTC  
AAATATAAAAAGGTCCAACCTGCAAGTTTTAAAATTCTCAATCAGCCTGAAAGTAATTGAA  
CGTCTATTGCTAGCTTTAATTTTACCTTTAATTATTCTAATTATTGGTATGTACAGCTTTAA  
TACATTTGCAGATAGCTTTATTTTATTACAATCAACAGGCTTATCAGTACCTATTACACAC  
ATTCTGATTGGACATATTCTGATGGCGTTCGTAGTAGAATTCCGATTCCGTTCACTTAC  
AAAATATTGTTGAAACGAAAATGAACACGTTCTTTGCAAGTATTGTTGTTGGTTTGATGTA  
TTCAGTTTTCTCAGCAAATACAACCTTATGGTACAGAATTTGCTGCTTATAACTTCCTTTAT  
ACATTCTCATTCTCTATGATTCTTGGTGAATTAATTAGAGCGACTAAAGGACGTACAATTT  
ATATTGCAACGACATTCCATGCTTCAATGACATTCGGACTTATTTTCTTGTTTAGCGAAGA  
AATCGGCGATCTATTTTCAATCAAAGTCATCGCCATTTCAACAGCAATCGTTGCAGTAGG  
ATACATTGGTTTAAAGCTTAATTATCCGAGGTATTGCATATTTAACAACAAGACGAAACCT  
TGAAGAACTTGAGCCTAATAATTATTAGACCATGTCAATGACGATGAAGAACTAATCA  
TACTGAGGCTGAAAAATCTTCTTCAAATATTAAGATGCTGAAAAACAGGTGTAGCTAC  
TGCATCAACGGTTGGTGTGCTAAAAATGATACTGAAAATACAGTGGCTGACGAACCAAG  
CATTCATGAAGGTACTGAAAAACAGAACCTCAACATCACATAGGTAATCAAACCTGAAT  
CTAATCATGATGAAGATCATGACATCACTTCGGAGTCAGTAGAATCAGCAGAATCAGTTA  
AACAAGCACCAAAAGTGACGATTTAACAACGATTCAAATGAAGATGAAATAGAGCAA  
TCATTAAGAAGACCTGCGACTTATAAAGAAGACAGACGTTTCATCAGTTGTAATTGATGCA  
GAAAAACATATCGAAAAAATGAAGAACAATCTTCAGATAAAAAACAATAA

### > **rpiA**

Function: protein coding sequence; ribose-5-phosphate isomerase A

Best match: rpiA\_CC001\_MW2-USA400\_BA000033.2[2404343:2405029:r]RC (completely identical)

Position: 057-contig\_266\_RC: 3414 ... 4101; Length: 687 bp

Sequence:

```
TTATTTTTCTAAAATTTTAACACCCTCTTGAGTGCCTACAATAACTTGATCTGCCATATCTA
AGAAGTATCCTGTCTCAAACACACCTGTCAGATGAATTAATACTCATGGAACTTATATG
GGTCAATTCCTTTTGGTAACTTACAATCTAAAATATAAATTGCCATTATCAGTTATAAATGC
GACATCTTCGTTTACACGACGTTCTACTTTTATATCAGCGTATGATTCAATTTTACGTAAT
ATGTGATAACCAGTTAAATTTATCCACCTCTACTGGTAACTTAAACGTCTCACCTAAGTATT
GAACTATTTTCGTTTCATCGACAACCACAACAAAACGCGATGCCATTTTCATCTATAACTTT
CTCTCTGAACAGCGCACACCACCGCCACCTTTAATTATATTTAAAGATGGATCTACTTCATCA
GCACCATCAATTGCTAAGTCGATATGATCAACATCATTGATTTTCACATATTTTAATACCTA
ATTCTTTTGGCTAAAATGCAATTTTATTAGAAGTGCATACACCTGTAATATTGTAACCAGC
TTCTTTAATTAGTTGCGCCATTTGAGGTAAGAGTAATTCCATTGTACTTCCTGTACCAATT
CCCAGCGTCATGTCACCATTGATTTGACTTAAAACATCATTTAATGTCATTAACCTTGAGTG
CTTTGACATCTTTCAT
```

### > **galM**

Function: protein coding sequence; aldose 1-epimerase (core genome, constant)

Best match: galM\_CC008\_NCTC8325\_CP000253.1[2404505:2405524:r]RC (completely identical)

Position: 057-contig\_266\_RC: 5163 ... 6183; Length: 1020 bp

Sequence:

```
TTAATCATTTTCTACTTTTTCTTCGATACGGAACTTGTTTTCGAATTGAACACTTCACCAG
CTTTTAAAATTGACGGTGCTTTTTACCATATAAATTAATATCATTGGTAAAATTGTGT
TTCTAATGTAAAGCCAGAATGTGGTTTATAAATATTAATGGACTATCCCACCTCATCAGG
CTGGTTAAAAGTAAAGAACAACATGAGGCATATCTGTATCGACCTCTAACATAAATTC
ATGATTTTCAACATACATTTTATGTTCCACCACTGTAAATGGGTGATCGAGACCACAAA
ACGTGTCATTTGTTGGCTTAATTGCGCATGTTGTGATGTAAAATATCACTCAATTTTATC
TTGTTATCTTCAAACACTTCATGTAAATCTAGAATATCACCTGTAACAATATTTTCGTCAT
CTAATACATACATATCTAATTGATTACTTGAAATGCGATGATTATCAACGACATTATTATC
TCGATTCAAATTGAAGTACACATGATTCGTAGGACTAAACAATGTGTCTTCTGATGCAAC
TGCTTCGTATTCAATCGACCATTGGTGATCCGCATCATAAATATGTGTAATCGTCACATCG
ATATCACCCGGGAAATGATCATCAGCTGATTTCAACACCGTCTTAAATATAACTTTAATTT
GAGCAATTTTCATTTCTAATTTCAATAAATAACTTATTGTCCAAACCATGACATCCACC
ATGTAATGATGTTCCACCGTTGTTTTTTTCTAACTGATATTCTTTACCTTTCAACTTAAATT
TAGCATTATCAATTCTACCGCTATATCTTCCTATAGAAGCACCAAATTTAAAAGGATTACT
ATGATAAAATTCATCCGCTTCAACAACATTTCCAAGAACAATATTATTATCATGATATTTT
CAAGACACTACTCTTGCTCCATAATTCGTAAAATAATTTTAGTTTCATCATTATCAATTT
TGATTAATCTACACCTTGCTTTGGTGCTCAACTTCAACTATCAT
```

### > **ynfA**

Function: protein coding sequence; putative membrane protein (core genome, variable)

Best match: ynfA\_CC001\_MW2-USA400\_BA000033.2[2407141:2407467:r]RC (completely identical)

Position: 057-contig\_266\_RC: 6212 ... 6539; Length: 327 bp

Sequence:

```
TCAAGCTCTGCTGGGTAGCAACACTTAAACACCTACAATACAAATGATTGCACCGAT
AACATCATATTTATCTGGCATTGTTTATCTACGACCATCGCAAAAATCAAACCTCATGATG
ATAAATACGCCACCATATGCTGCATATACTCTCCGAATGATGGAAATGATTGAAATGTC
GCAATGACACCATATAACATGAGTATCGCACCGCCTATTAGCCCAACAAGTGAAGACTGT
CCTTCCCTAAGCCACAGCCAAATCAGGTATCCCCACCTATTTACATAAGCCAGCTAAT
ATAAATATAAAAATCGGATATAACAT
```

> **gltS**

Function: protein coding sequence; sodium-glutamate symporter (core genome, variable)

Best match: gltS\_CC001\_MW2-USA400\_BA000033.2[2412004:2413212]

Position: 057-contig\_266\_RC: 11075 ... 12284; Length: 1209 bp

Sequence:

```
ATGATAGAACTTAATGCAATTACAACATTATGTTTAGCTTGTATCCTTTATTTACTTGGTA
AGGCTATCGTTAATCACGTTAATTTTTTAAAACGTATTTGTATACCAGCACCAGTGATTGG
CGGCTTAATCTTTGCTATTTTAGTTGCGGCTTTGGATTCATTTGGCATGGTTAAGATTA
TTAGATGCTTCATTCATTCAAGATTTCTTCATGTTAGCATTCTTTACGACAATCGGTCTTGG
TGCATCATTGAAATTATTTAAATTAGGTGGCAAAGTCTTGCTATTATACTTTATGTTTTGT
GCTATCATTTCAGTCATTCAAAACATAGTTGGTGTATCACTAGCAAAAAGTATTAATATTA
AACCTTTGTTAGGATTAACAGCAGGTTCCATGTCTATGGAAGGCGGTCATGGTAATGCTG
CTGCTTATGGTAAGACAATTCAAGATTTAGGTATTGATTCGGCACTGACAGCGGCTCTTG
CAGCTGCAACTTTAGGTCTTGTATTTGGAGGGCTTATCGGTGGTCCAGTTGTAAAATTTTT
AATCAAACGTTATAACTTAAAGCCTCAACATAGTGACGATACATTTAAAGATTATAGCCA
AGTAGCATATAACGAACATTTACATAGTAAATTTAATGCCACTGAAGTATTCTTCATTCA
ATTTACAATCGTTGTATTCTGTATGGCAGTTGGAAGTTATTTAGTCATTTGTTTACAGCT
CAAACAGGGATTAATGTTCCAATTTACGTTGGCTCATTATTTGTAGCTGTTATTGTCCGAA
ATATCTCTGAAAGTTTTAATTTAATATTGTAGATTTAAAATTACTAATCAAATTTGGCGA
TGTCGCATTAGGTATTTTCTTATCTCTTGCCTAATGAGCATTCAATTAATCGAAATTTAT
AACTTGCTATACCTCTTATTATTATCGTTTTAGTTCAAGTTGTCGTTATGATTTTATTTGC
TGTTTTAATTTTATTTAGAGGTTTAGGAAAAGATTATGATGCTGCAGTAATGGTAGGTGGT
TTTATCGGGCATGGGCTTGGTGCAACGCCAAATGCCATGGCAAATTTAGATGTTATTACT
AAAAAATATGGAACTCACCTAAAGCATATTTAGTTGTACCTATTGTTGGTGCATTCTTAA
TCGATTTAATTGGTGTATAGTCATTATGGGATTCATTCAATGGTTTAGTTAA
```

> **txbi\_idi2**

Function: bidirectional rho-independent terminator of idi2 (core genome, constant)

Best match: txbi\_idi2\_CC008\_NCTC8325\_CP000253.1[2411654:2411713:r]RC (completely identical)

Position: 057-contig\_266\_RC: 12285 ... 12345; Length: 60 bp

Sequence:

```
CACCAAACCTCATAAATAAAAGAGGAGGCCTTCGCTCCTCTTTTATTTATCCTCGATGTA
```

> **idi2**

Function: protein coding sequence; isopentenyl-diphosphate delta-isomerase (core genome, constant)

Best match: idi2\_CC008\_NCTC8325\_CP000253.1[2411700:2412749:r]RC (completely identical)

Position: 057-contig\_266\_RC: 12331 ... 13381; Length: 1050 bp

Sequence:

```
TTATCCTCGATGTATATTCAAGTTACGTTGTTCTATCCATGACAATATTTCCGGACTAAAT
ACGATTTGTTTTTGTGTTAAGTCGTCAATATTTTGTAGCATCTAACATCGTCATTATTGATTT
CATGTGTTCAATAAATGATTCTACATAAGCTACTGTATGTGCAATGCCATTATTTTCAACT
TGATTTAAAACGGACGTGACATAACCAGTTGCCTTTGCACCAAGTGCTAAACTTTTAATT
GCATCGAGTGGTGTACGTAAACCACCACTCGCGAAAACCTGAAATTTGCTTTGATAAGCC
GTTGTTTCAAGTAATGACTCAACTGTAGACTGTCCCATGATGATAAGTAATCCATATCTT
TATTTGCACGACGTTTCAATATCTACAAAGTTAGTACCACCTTTGCCACTAACATC
GACATACTTGACGCCTATTTGTTGTAAGTCATGCATTAATTCTTTGCTCATAACCAATCCA
ACTTCTTTTATAATGACTGGAACAGACACTCGTGATAACAATCGACGCTATATTATCTAACC
AAGTCACAAATTCACGATTCCCTTCAGGCATAACTAATTCTTGAGGAGAATTAACATGGA
TTTGTAACGCTTGTGCCTCAAGTAATTCAACTGCTTCCAAAGCCTTTTCTACTGGTACGTC
CGCACCAACATTGCTAAAAATCATGCCTTCAGGATTCATTTTTTCGCGCAATCGTAAACGTC
TCAGCCATGCGTGGATTTCTCAATGCCGCATGTGTTGATCCAACCTGCCATCGCTAAGCCA
GTTTCTCTTGCAACTACAGCTAGCTTTTCATTGATGTTTTTCGTCCACTCGCTACCACCCGT
CATTGCATTAATAAACC GGATATGCCATCGTTAAGTCAGGCGTCTGTGATGTCAAATC
GATATCATTACATTAATTGATGGGATAGAATGATGCACAAAACGCATCTTATCAAATC
```

TGAATGCATTGCGTCAGATTGGGCCATTGCTATTTCAACATGTTCAATTTTTCTCTGTTCTC  
TTTGAAAATCACTCAT

> **corA**

Function: protein coding sequence; magnesium and cobalt transporter (core genome, constant)

Best match: corA\_CC025\_21193\_AFEG01000021.1[170392:171339:r]RC (completely identical)

Position: 057-contig\_266\_RC: 13411 ... 14359; Length: 948 bp

Sequence:

TTAAAACCATTTTTACGTCTGAAAAAGATGATTAATACGACAGCTATAACAAACATTAC  
AGCTAAGCAAATATAATATCCATAATGTAATGTAATGCCGGCATATTTACAAAGTTCAT  
ACCATAAATCCCAGCTATGAATGTTAACGGTGAAAATATAACTGATACTAATGTCAGTAC  
TTGCATAATACTATTCATTCTAAATGACGTGTATGACTCAAATTTTTCTCGTATTTTCGTTG  
TCATTTCTTGAGCAGTACGAATGATATTACGTTGCTTAATCAAGTGGTCATCGATATGTTG  
AATGTATAGCGAATGTTTATTATCTATAATCAAATCACCATTTTGTTCATTGTATCAATT  
AGCTCTTGCATAGGAAACAGTACACGTTTTACTTTAATCAAATCCGAACGTAACCTAAAG  
ACACTATCCATGACCATTTTATTAAAGCGATCATCTACATGGCGGTCCTCAAATGATAA  
ACACTATCTTCAAGTGCATATACAAAGTTGAAATATTTATCAACCATCATATCTAAAATTA  
ATATGACGACATCTGCACAATCTAATTCTGCATCTAATGTATTCATATACTTATAGACTAC  
TTTATTTAATGATTCCAACGTTTGATGATGATATGTTACTAATACATTGTCTTGATAAAA  
ATATTTAGTGCTATTGGTGAATAGTTTGACCCCATATACTATGGAATACTAAGTATTGAT  
AATCTTTATAAGATTTATATTTAGCTCGTGGCATAACCGTTAATTGCATCATCCACTTCTAA  
ATCATTAAAATTAATGTGCTTTAAACCATTCAATTTCTTGTTTCATTTCGGTTCATCAAAA  
TCATACCAAACAATAGTCGCATCTTTGGTATCTCTTTGATATCATCAACTACTTTAAACG  
GTTTCATATGTAGTTTGATACCGTATCTTTAAAGCCAT

> **semB**

Function: protein coding sequence; EmrB-like protein (core genome, variable)

Best match: semB-Mu50\_CC005\_N315\_BA000018.3[2406617:2408548:r]RC

Position: 057-contig\_266\_RC: 17483 ... 19415; Length: 1932 bp

Sequence:

TTATTCATGATTGTTATTTGAGCTTGCTTCTAACTTTTGAGCTGTAGCTTTTGCTTTTTTATT  
ACTTTGTAAAAATAAACATAAAATTAAGGCGATGATGCTAAATATCGTTGCAACTATAAA  
TGCATCATTAAATACCTTCAACCGTTGCTAGTTTATTTACAAATTGTAGTAACACTTTCATT  
GCGCCTTCTTGACCACCATATTGCGATGCTAATTCACGCATATGATCTTGTAACAACAGGAT  
TCGTTTTATCTAACTCTTCCCCAAAAGCTGATAAATGTTGTGTTGTTTGTGTTGTCATAAC  
AGTAACTAAGATTGCTGTACCTATAGAGCCTGCTAATTGACGCATCGTATTTAAGAAAGC  
ATTACCATGAGAGGCAAGTCGTCCCGGTAACGCATTAATGGCTGCTGTTACCATTGGCAT  
CATAATAAATGCCATACCAAATGAACGTAGTACATAGATGCCCATGATTGTCATATATGG  
CGTATCCATATTCAATTTAGTTAATTCCCAAGTTGCATAAGTCATGACAGCAATACCAA  
AATGGCTAAAGGTTTTAAGCCAATCGTGTCTAACAACCTACCAGCAAATGGTCCTAGTAG  
ACCCATAATTAGAGAACCAGGTAATAATAACAATCCGGAATCTAATGCTGAGAAACCAC  
GTAAATTTTGTAAGTAAATTGGTAATAAAATCATACCACCATAACAAGCTCAACATTACAA  
CCATATTAATTAATGTTGTTAGTGTGAATGTTGGAAATTTCAATACTTCTAAATTCACAT  
CGGTGCTTTCATTCTTAATTCTTATTACAAATAGAATAATAAAGATAATACCAATCGCA  
AACATTGTTTCTATCTCAACAGAACCCAGCCTTTGTTCCCCGCTTCTGAAAAGCCATATA  
ACAAAGCACCGAAACCAATCGTACTAAAGATAATACCTGGGATATCAGCTTTAGGGTTTG  
TTGTATATTGATATAACTTAAACCATACAAAACCAACTAAGATTGCAATAATACCGATAA  
TGAACATACCGTAAAACATCACATTCCAATGGTAATTTTGTACAATATAACCTGATAATG  
TTGGACCAATTGCAGGTGCTAAAATCATTGCGATACCCATTGTACCCATGGCAGCACCAC  
GTTTTTCAGGTGGATAAATTGTAATAATAACAATTGAACCTAATGGCATTAGTACACCTG  
CACCAATGGCTTGTAATACACGTCCAACCATCATGATTGGGAAATTCATTGAAATCGCAC  
AGATTAATGAACCAATTGTAAAGAGTACTAACGCAACTAAAAATAATTTTCGATATGAAT  
ATTTATTAATAGATACGCCGTTATTGGTATTTAAATACCGTTTACTAACATAAATCCTGT  
CATCAACCATTGCCCTGTTGAAGCGGAAATATTAACCTCTGTATTAATCTTTGGCAAAGC  
AACATTTAATAATGTTTGGTTTAAATCGCAATAAACATACCGAATAATAATGCCGCTAA

TATTTTACCGCGTGAAACACCTTCACCAAAAATAAAGTTTTTATGTTCTTTTTTTATTTTTT  
CATTCACTTTATATTCTTCTGATTGAGGATTTTTAGCAGCAACTGCTTCCTCATCATTATTA  
TTAGTGAATGCTTCTTGATCTTTCTCAGACCCCTTTGTGTAACCATTTAGACTAACTTGGCT  
ATGATCATCTTGATTGTCAACACGCAATTCTTCATGAGTCATACGTTGTGTGCGATTGATCA  
GTTGTTTTGTCTAAATCACTAGCTTTAAATTTAGATTGATTTGATTGACGTGTGCGTAAATT  
GTTGTTCCTTTTGTGGCGTTTGCCTTTTTTTCTTGATCTTATTAATAAATAAATTGATAACC  
CCAACAATAATGAGCGCTAAAATAATGTAGCTAATAATGAAGGTCGTAGTCAT

> **semA**

Function: protein coding sequence; multidrug resistance protein A (core genome, variable)

Best match: semA\_CC022\_HE681097.1[2427219:2427866:r]RC

Position: 057-contig\_266\_RC: 19427 ... 20075; Length: 648 bp

Sequence:

TTAATTTTTATGAATTTTTACTTCAGCGTTCATTCCAGGAACAACCTTGTTTAGACGGTCTG  
ATTCTAGAGTAATTTAACAGGTATTACTTGAGAACTTTAGTGTAGTTACCATCACTATT  
TGATGATGGCATTAAATGAAAAGCTTGCAGCAGTTGCTTTTCCAATACTATCAACTTTACCT  
TTAATAGAAGCTTTTTGACCGTCAATAGTCACATCAACATCTTTACCTACTTCAACATCTT  
TAATATCTTTTTCGTCAATATTTGCTGTTACATATAAATCATCTAAATTGTATGCATAAGC  
GATTGGGTTACCAGCTTGCACCATTGAACCTTCCATACCATCTAATTTGGCAATTGTACCT  
TTTTGAGGCATTTTAAGATCCATATCTTTCGTTTCGCCATCTTGACCTTGTACAGTAACAG  
TTGCTACTTTGTCACCTTTATCGAGTTTGTACCTTGTTAACATTAAGTGATTTAATTTGT  
CCAGATGCAGGACTTGCTATTTTAATTTGATCGCCATTTACTTTTGCATTATCAGTTGTTAC  
ATAGCTTGTTGTTTTATTCCAGAAATAAAAAGCCAGCAATCCCAATTGCTAACAGTACAAC  
AACCGTAATGACATTAATTAATATCATCTTTTTTCAT

> **tcaB**

Function: protein coding sequence; teicoplanin resistance associated membrane protein B (core genome, constant)

Best match: tcaB\_CC001\_MW2-USA400\_BA000033.22421904:2423112:rRC [4\_50ANF10END]

Position: 057-contig\_266\_RC: 20976 ... 22185; Length: 1209 bp

Sequence:

TCATCGATTTGTTTTAAATACCTTCATATTATAAATCTGTAAAATAATTAATATAACTGCT  
GTAGCTATAATAATAATTATGTAAGGTATAGGATTATCTTCACCTTTACCCCCACTAATG  
GCGATGCAACACCACCAAATAAAAAGTGCATAAACCTAATAAACTTGATGAACTCCCTC  
TACCACTACTACTTTTCATCCATAGCTATAGTAAAACCAAGTGTCGCAACACCTGTCACTG  
GTGCTATTAATAATGATAAATCCTATCGCTAAAATCCAAAAGTTCCAATGATTAAGCAATA  
CAATCGTCACTAAAATTACACCGATAATCTGAATCATCGTCATGCCTCTCATCAATTTTTG  
TGAGTCTATAAAATCAACAAGGTACCCAGTAAGTTGACTTGATATAATGAGCGTAATACC  
AATTCCTGCAAACATCCAATAAATTGTATTGCAGTCATGCCATAAATTTTTGAATAATA  
AACGGAGACGCAGAAATATAAGTAAATAATATTACAAATGTCATACCTTGAATGAGCATT  
GGTAATACAAAACGTGGCGTCTTCAATAATTTTTGAAGTTTTTAAACATTGTCTTTAATC  
CACTACTTGACTCACGATTTGTCACTGTTAATGATTCAGGTACTTTTAATAAAGAACCTAT  
GACCATGACGAAGCCAAAGATAGTCAGAATGACAAAGACCATACGCCAGACAGAATAAT  
TTAAAATTATGCCCCCTATTGTTGGCGCAACAACTGGTGCAATACCATTAACAAGCATCA  
ATAATGCCATAAACTTAGTTAGTTCAATTACCACTATACATATCACTTGCTATAGCTCTTGA  
ATAACTGCTGCTGCGCCACCTGTCACTCCTTGAAGAAATCTTAATGCAACCATCAGCCA  
AATATTATGTACAAAACAATACCTAACTTGCTAATGTAAAATAATCATAGCTATAAT  
AAGCGGCTTTCTGCGCCAGTTGAATCTGAAATTGGACCAGCAAACAATTACCAAACGC  
TAAACCAATCATAAACATCGATAATGTTAATTGTGCGTTAGACGTCGTTGTTTAAAATC  
ATGTCTAATATCTGGTAATCCAGGCAAAAACATATCTATTGATAATGCTCCAATGGCAGT  
CAAAGATCCTAAAATAATAATAAATATCGGTGAACGCTTGTTAAAATACGTAAATCATT  
CAT

> **tcaA**

Function: protein coding sequence; teicoplanin resistance associated membrane protein A (core genome, variable)

Best match: tcaA\_CC001-ST772\_118\_AJGE01000005.1[22380:23762:r]RC (completely identical)

Position: 057-contig\_266\_RC: 22453 ... 23836; Length: 1383 bp

Sequence:

```
CTATTTTTCTGATGTCTTGATTAATTGCAAGCGGTCTTGCGAGCCTTGTTCAAGCTCATATT
CTTTATCTACTTGCTTACCGTTTTCAATTTATTAATCTTACGGTTGCGGTAATCTTATCACCA
TGTTTTTCAGCATCTATAATTTGTGGTGAACATAATCATCATTAAACTTCCTTTAGATACAC
GCTTCTTTACATCATCATAAAAAGATGATCCTTTTTTTATATATGACGATACAAAATCAA
ATCCGACTGATTAACGCAGCATTATTCGCTAAAGAATATCCAGCAAAGAATTCTATCAA
TTTGTTCTTCAAGCTATTTTCTTCTTTTTCTTTCTTTTCAACATAGTCTTCGATATCTTCACT
GTCAAATTCAAAGTTATCTCTGTATTGATTTTAAATCGCTGGCTTTAATCGTCTTCGTCT
GTGTTGTAAATGTTTTATCTTTCGCTTTACCTGAAGCTGAAATGGTAATATCTTTATTTTGT
GGATATGGACCATACGTTTTGGAACCTGAAAATGCCATTTACGGTCATTTATAGTTACTT
TTTTAGAACTATCATTTAATTTTGTATCACCTTTTAAAGTTACAGTTATATTTGCTTCTTCA
AAATCTTCAGTAACATCTACCGTTTCAGAATTACTTTGTCTAAAATCAAATTTTAAATAGC
CTGCAAATCACCGTTATCAGTTGATTTCATAGCTGGAATTCTATATGTCCCCGGTATAAA
ATTACCTATTGGCGTCACTTTATTTGCTTCAGCTATAACCATCTTTTTCTTACCACCAGATT
TAAACTCATATTTTGTTTTTTCTTTCGGTTTAAACAATTGGTTGCTTGGTAGGTGCAGTAAA
GCTCATATTATCGAAAAAGATATAACGCGTGCCATTTTTACTTACACGTAATATATTTTGA
CCAGATCTGGTTTGAATATAAGAAGCTACGCTGGTCTTACTCTTATTCAATTTATGTACCG
TATTTTTAAGGTCGCTGACAAATTGCTTAAGCCCAACTTCATCTTTGATATAGTTAATGTA
TACTTTCGCTTCTCAGAATCTACTTTATTATCTTTAGTACTTAATAATGTTGCTACTTTTT
GTTTATCATTATTCTCAATCGCATTCACTAATATTTTAGTTTGCCTTCAGGTGAATTGAA
GTTTCTTAGTAAAAAGAACAATATAATAATTAAGATTAAAATGAAAAACCAATTGCCCA
AGGCACCATTTTTCTCATCTTGATGTTATTAGTTTGTATATCTTCATCGGTTGACTTTCTAT
ATAATGCTTGACGACTATCAAATTTATGTCCACATTGTGTACATATCTGTACATCATCTTG
TGCTTGTGTCCGCACTTCGGGCAAGATTTTCAT
```

### > **tcaR**

Function: protein coding sequence; transcript regulator of teicoplanin resistance operon (core genome, constant)

Best match: tcaR\_CC001\_MW2-USA400\_BA000033.2[2425003:2425458:r]RC (completely identical)

Position: 057-contig\_266\_RC: 24075 ... 24531; Length: 456 bp

Sequence:

```
CTATTTATGATTGCTATATGTTTTAATGCGATGATTGATGACTTCTAATACTTGCCTTACAT
TTTCAATATCTTCAGAATTTAAATCATTAGTAATATCTTGCGCAATATCTGTCATAATCGC
ATTACGTTCTTTCAAATATGCTCTACCTTTGTGAGTTAAGGTTATGAATTTCAAACGTTGA
TCAATATTTAAATTTGGTTTATCTAACTTAACTAATTTAGCATCGATTAACCTTTTAAATTCG
TCGGCTTACTGCGGCCTTATTTACACCTTGTCTTTGCGTGATTTCACTAATTGTCAAAGGTT
CTTTATTTAACATACCTAATACGTTAGACTGCTCTAATGAAATTTTCATATTCATTTTGTAA
ATCTTTCAACATTTTTGCAGTTAATGCGTTAACGTTATTTATAAACTGCTCTAAAAATTGA
ATATGGTCTTGAAATGTTTTACCAT
```

### > **hrtA**

Function: protein coding sequence; heme efflux system ATP binding cassette transporter

Best match: hrtA\_CC001\_MW2-USA400\_BA000033.2[2426852:2427517:r]RC (completely identical)

Position: 057-contig\_266\_RC: 25924 ... 26590; Length: 666 bp

Sequence:

```
CTAATCAGTTATTTTGCCATCTTCTAATTCAATCACTCGATCTGCATATTCAAATAATCTTC
GATCGTGTGTAATCATAAATACCAATCATTTGTTGTTCTTTAATTTGTTGACGTATCATCTCA
ACAACCTTTGTTGCTCTATCGGCATCTAACTTGCTGTGGGCTCATCTGCTAAAATGATTT
TCGGATTATTCATAAATGCTCTCATAATCGCAACACGTTGCTTTTACCAGGCAAGATAACTG
```

ATGCGGATATACATTCAAGCGATCTTCTAAACCAATATTTTTCAAAGTTGTATTGCTCTT  
GTTGAACTTTGTTGTTTGGTCATTCCCCTTCTTGACCTACGAGTGTCAATTGCTCTATCAC  
TTTTAAATAAGGAACTAAATGTGAAGATTGAAAAATAAAACCAATATCTTCCAATCGTAA  
ATCACTAGGACGATGCTGTTTATCAAACAATGGCGCATCATTGTAAAGCACTGTACCACT  
CGTTTACTTAACAATCCGCCTAATATCGTTAGCAATGTTGTTTTCCAGAACAGAGGCA  
CCATTTAAAATGACAAATCCCCTTGTTCCTTCAAATAAATACCTTTTTAAAACCTTTG  
TTTCAGACAAACCTTCTCCGAAATTTTTGACGATATCTTCAACGACTAATGCCAT

### > **hrtB**

Function: protein coding sequence; hemin transport system permease protein

Best match: hrtB\_CC005\_Mu50-VRSA\_BA000017.4[2485223:2486278:r]RC (completely identical)

Position: 057-contig\_266\_RC: 26589 ... 27645; Length: 1056 bp

Sequence:

TTATTCTGCACCTCCAATTGCTTCGATAGGATCCACTTTAAATAATTTGATAAATGATAGT  
GAGGCACCTAAAATCGCTACTAATAATAATATCCCCACCATTAATAAAAATATTTTGCGTT  
GTAAAGTAAAAAGGCATCGTTACCGGCATCATAAATGATAGTCCTACTATGATGATCACA  
GCAATACCTACCCAATTATTGTTAGTGTTAAAATTTGTAAAACCTAACGCACTCAATAAA  
TGCTTGTCTTAATAACCAATTGCTTTCAAAATGCCAATTTGTGATATTTTTGAATCGTCAT  
AACATAGAAAAATGCACTTAGAACGATTGCTGTAATAGCAAACAACTAACAATCATCA  
TATTTAACGGTGCTTGCTCTGCTTGATAACTCGCAATATTACCTGTTAAATCTTTTTCACTC  
ACAACCTGAACGTCATTTATTTTATTAAGCTCATCACGTTGTTGTTGTGTTAAATTTTTCAC  
TGGATAAAATGCCGTATTAACCTTATTCAATGCATTAAATCCGTTATCGTTCAATAGCACA  
ATGGAACCTATGCGCATAACATTGTGTCGTTTAAAATACCAGAACTCTATAACTAGTTGAA  
TTATTTTTAAAATGTAATCTATCCCCGACTCTAATGTTGTCTGCAGCTAACTTATCATTAAAT  
AGCGACCTCATGAGCATTTTTAGGATAATCACCTTTTTTAAGTTGTATGCGTTGTTGTTA  
ACGTCATTCATTGTAATCACATCTTGTCTTTATTAGATAATTTCAATGTTTGAATATTCAT  
TTTATATGGTTCTTGATGAATTACCTTTTTAATTTGATTCTGTTGCGTATCACTAAGTTGCG  
ATTTCTCAATTTGCGGCTCTTTCATTTTTGAACAACATATTCATCATTATCAAAGTGTTCA  
AATAACGAAATATTCTCCCTACCAAGCCCTTGAGCTAAACCACTAATAAATAACACCATA  
ATACTTAATAAAAAGAATGATTAATGTGATTAATAACGAAATTTGTAACATAAATC  
TCTTTATCGCTAATTCAT

### > **hssR**

Function: protein coding sequence; DNA-binding response regulator (core genome, constant)

Best match: hssR\_CC001\_MW2-USA400\_BA000033.2[2428708:2429382] (completely identical)

Position: 057-contig\_266\_RC: 27780 ... 28455; Length: 675 bp

Sequence:

ATGGTGCAATGTCTTGTTGTCGATGACGATCCTCGAATCCTAAATTATATAGCTAGCCATT  
TACAAACAGAGCACATTGATGCATACACACAACCAAGTGGTGAAGCTGCATTAACCTTT  
TAGAAAAACAGCGTGTGATATTGCAGTGGTAGATATTATGATGGATGGTATGGACGGCT  
TTCAATTATGTAATACATTAATAAATGATTATGATATACCAGTTATTATGTTAACAGCGCG  
GGATGCACTTAGTGACAAAGAGCGTGCGTTTATAAGCGGTACTGACGATTATGTAACCAA  
ACCCTTTGAGGTTAAGGAACTTATTTTTAGAATTCGTGCGGTATTACGTGATATAATATC  
AATTCAAATTCAGAAATGACTATTGGCAACTTAACGCTAAACCAATCCTATTTGGAACCTC  
CAAGTATCTAATAAAACGATGACGTTACCGAACAAGGAATTTCAATTATTATTATGCTT  
GCAGCACGTCCTAAGCAAATCTTTACACGTGAACAGATAATAGAAAAAATTTGGGGCTAT  
GATTATGAAGGAGATGAACGAACAGTTGACGTTCAATTAAGCGACTACGCCAAAGATT  
AAAAAAATTAATGCCACACTTACAATTGAAACAGTAAGAGGACAAGGCTATAAGGTGG  
AGAATCATGTTTAA

### > **hssS**

Function: protein coding sequence; sensor histidine kinase (core genome, constant)

Best match: hssS\_CC001-ST772\_118\_AJGE01000005.1[28374:29747] (completely identical)

Position: 057-contig\_266\_RC: 28447 ... 29821; Length: 1374 bp

Sequence:



ATGTTTAAAACACTCTATGCTAGAATTGCGATTTATTCCATTACGGTTATTTTATTTAGTG  
CATTAATAAGTTTTGTATTAACAAATGTTTACTATCATTATAATTTAAAAGCATCTAATGA  
CGCGAAAATCATGAAGACGCTTAAAGAAGCAAGACAATATGAACAATCAGCTAAACCAA  
CGCACATTCAACAATATTTCAAACATTTAGGGCAAATGAATTACCAAATATTGACCGTTG  
ATCAAAAAGGTCATAAGACATTTTATGGGGAGCCATTTAGAGAAGATACTTTATCACAAA  
ATGCTATTAACAACGTATTAATAATAAAGATTACCATGGTATTAAGATAAACCATTTCG  
CATTATTCGTAACCTGGATTTTTTCGACAATGTAACAGATAATACTGTTGGTATTAACTTTAA  
GACAAAAGACGGTTCAATAGCAGTATTCATGCGTCCAGATATTGGAGAAACATTTAGCGA  
GTTTAGAACATTCTTAGCCGCTCTTGTTAATGTTGTTATTATTTATCTCGATTTTCATTAGTTA  
TCGCATCAACCTATTCAATCATTTCGTCCAGTAAAAAAGTTAAAGCTAGCGACCGAACGCT  
TAATTGATGGTGATTTTGAACACCTATCAAACAAACACGCAAAGATGAAATTGGAACAT  
TACAGTATCACTTTAATAAGATGAGAGAGTCATTGGGACAAGTTGATCAAATGAGGCAGC  
ATTTTGTACAAAATGTATCTCATGAAATCAAACACCATTAACACATATTCATCATTATT  
AAGCGAGTTACAACAACTTCTGATAAAACATTAAGACAACAATATATAAATGATATTTA  
TACCATTACAACGCAGCTGAGCGGATTAACAACCTGAATTGTTACTCTTATCCGAATTAGA  
TAATCACCAACATTTATTATTCGATGATAAGATTCAAGTCGATCAACTCATTAAAGATATC  
ATTCGACATGAACAATTTGCTGCTGATGAAAAGTCGTTAATCATTTTAGCTGACCTAGAA  
TCAATCAATTTCCCTAGGAAATCAACGTTTGTACATCAAGCATTGAGTAATTTATTAATAA  
ATGCTATTAAGTATACAGATGTTGGTGGTGCCATTGACATCGCTTTGCAACATAGTCACA  
GCAACATCATTTTCACAATAAGTAATGATGGTTCACCAATTAGTCCACAAGCTGAAGCAC  
GTTTATTTGAACGTTTTTATAAAGTGAGCAAACATGATAATAGCAATGGTTTAGGTCTTGC  
AATTACAAAATCCATCATTGAATTGCATCATGGTACAATCCAATTCACACAAAGTAACGA  
GTATGTAACCACCTTTACTATTACACTGCCAAATAATTCACTTTAA

### > **lytT**

Function: protein coding sequence; LytTr DNA-binding region-containing protein

Best match: *lytT\_CC001\_MW2-USA400\_BA000033.2*[2430911:2431354] (completely identical)

Position: 057-contig\_266\_RC: 29983 ... 30427; Length: 444 bp

Sequence:

ATGATGAAACTCAATTTATTTATCAATGCAAAAAGAGACGGAATCTTATATTGATATACAT  
GCACCTAAAATGAATGATCACGTTCAAAGTATTATTAATGCAGTCAATGATTTAGACAAA  
TCACATACATTAGTCGGATACATAGACAAAGAAATCCATATCATTAAATGTATCAGATGTT  
ATAACATTCCAAGTTATTAATAAAAATGTAACAGCCATTACAAGCAATCAAAAATTCAA  
CTAAAATTACGACTTTATGAACTAGAAAAACAGTTACCACAACATTTTCATTTCGCATTTCC  
AAATCAGAAATCGTCAACAAGTATTACATTGAAAAATTATTATTAGAGCCAAATGGACTT  
ATACGTATGTATCTTAAAGATGCACACTACACCTATTCTTCTAGACGTTATTTAAAATCTA  
TAAAGGAGCGCTTATCAATATGA

### > **mqaA**

Function: protein coding sequence; putative malate-quinone oxidoreductase 1

Best match: *mqaA\_CC008\_NCTC8325\_CP000253.1*[2431151:2432629:r]RC

Position: 057-contig\_266\_RC: 30944 ... 32423; Length: 1479 bp

Sequence:

TTATTTAACTTGTAATACTTAGTFACTTCTTCATTAATTTTATGATATAAATCCTCATGAT  
CTGTAAAGCGATAACCAAATGACGGCACCATTTCTTTAATCTTTGGTTCCCATCCTTTGAA  
TTCATCACGATAGCATCTCTGTAAAACATCAAACATAATATCTACAGCTGTTGACGCACC  
AGGTGATGCACCAAGTAATGCAGCTAATGTGCCATCATCTGACGTAATGACTTCGGTACC  
AAATTGTAAGTTACTTTTAGACTCCTCAGTATCCTTGATTACTTTGGACACGTTGCCCTGCT  
GTAATCACTTCCCAATCTTCATTTTTAGCATTTGGGAAAAAGACTCTTAAATCATCCATAC  
GCTCATCATTAGATAACATCAATTGTGACACTAAATACTTCGTAAGACTCATTTCTTTGAT  
ACCTGCAGATAACATCGTCACGATATTATTTGGTTTAAACCGATTTAATTAATCCATATGT  
GAACCTGTTTTTAAAAATTTAGGTGAGAAACCTGCAAATGGACCAAATAACAATGAACGC  
TTGCCGTCTACAAAACGTGTATCTAAGTGCGGCACTGACATTGGTGGCGCACCCACTGCT  
GCTTTTCCGTACACTTTAGCATGATGACGATCAATCACTTCTTGATTTGTACAGCGCAGGA  
ATAATCCACTTACCGGGAAACCACCAATATGTTTTGATTGTTAATTCCAGTCTTTTGGAG

TAATGGTAAACTCGCACCGCCAGCACCAATAAATACAAAATCAGATTCATATGTTGTCGT  
TTCGTTAGTTTCTAAATCTTTAACTTTAACTAGCCATGCCCCAGATTTCTGTTTCTTGATGT  
CTAATACATTCTGCTTATATTGAATCCCACACCACGTTGCTCTAAATTATCAAATAACTT  
TGCAGTTAACGCACCAAAGTTAACATCTGTACCAGTTTCATCATAAGTTAAAGCAATTGG  
TTCATCAGACTTACGACCTTCAATCATTAACGGTACCCAAGATTTCAATTTCTTCTCATCTT  
GCGATAATTTCAATTTTTTCGAATAAAAACACTTTTCTTTAACGTTGCAACACGACTCTTTAT  
AAAAGCTACATTATCTTCGCCAATGACAAAACCTCATGTGTGGCACCCTTGAATAAAGCG  
ATCTGGGTTATCTAATTGTCCTGTTTTAACTAAATATGCCAAAACCTGTTTTGAAATTTGG  
TACTGCTCATTTATCTTAATTGCTTTACTACAATCAACTGTGCCATCCTTACCTTCTTTTGT  
ATAGTTCAACTCGCAAAGTGCTGAATGCCCTGTACCGGCATTATTCCATACATTTGAACTC  
TCTTCGCCAGGTTGTGCTAATTTTTCAAACACTTTAATATTTTTCTCAGGTGATAATTTCTT  
AAGTAATGTTCTAATGTTGCACTCATAATACCGCCACCAATTAAGATGACATCTGTTTTG  
CTATGTTGTGTTGTCAT

### > **lctP-L2**

Function: protein coding sequence; L-lactate permease (core genome, variable)

Best match: lctP-locus2\_part\_CC005\_MR1\_ACZQ01000017.1[32720:33938:r]RC

Position: 057-contig\_266\_RC: 32803 ... 34022; Length: 1219 bp

Sequence:

TTATAATAATGACAAGATGAAAGTCCAAATACAGATGAATATTAGTAAACATACACTGTA  
TTTCAATGTCATTTTTAATAATTCTGATTCCTTACCAACTTGTTTTACTGCTGCAGTTGCAA  
TTGCAATTGATTGTGGTGAAATCAATTTTGCCGCTACACCACCAACTGTGTTAGCAGATAC  
AAGAAGTGAACCACTTGTTCCAATTTGTTGTGCAACAGAAGCTTGAATTGGTGCAAATAA  
TGAGTTGTTATTTACAACCTGATCCTGTCATAAACACACCTATCCAACCTAAGATTGGTGAT  
AGAAGTGGGAAGACATTACCTGCTTTAGCAATACCTTGACCCATTGCTGCACTTAAACCA  
CCATAAGTTGTGATTTTAGAAATTGCTAAGATGAAGCAAATTGTAAGAACTGGTAACCAC  
AACTCTTTAAATGTAACGCCGAATAATCTACCTGCATCTTTAAAGTTAACCTTTTTAGACA  
TTAAAATTGTAATAATAATAGTTAATAAAAATAGCTGTACCTGTTTGTCCAATAATATTTAA  
AGTCAATACTAATGGTTTATGCGTAACTTCGCTGATTGTTCCAGGTAAGTTGAATTTAAAT  
ACTAATGATGATAAAGCACCATTTGGTAAGAATAAGTTTTTAAAGAATGGCGCACTCCAA  
ATCATTACAATGACTGTTAATACAATAAATGGACTCCATGCATGTAATACTGCTTTTGCAG  
AATGTGCTTTTGCAGGTTCAATTTCTTCATCTTTATTAACACGATAAATGTGTTTTGGTTGG  
AATTTTTTAGAAAATACTGCTAATGCTAACATTGTTAATAACGGTGGAATAATATCTGCTA  
ATTCAGGACCACTGAATACAGTTAATAATCCTTGAGTAAGTGTATAAGTGATTGAAACTA  
CTAAAATTGCTGGTAATGTTTCTTTAACACCTCTAAAACCATCAATAATAAAGATAAGTA  
AGAATGGAATAATGAAATTTATGATTGCCAATGTTAAAGTTGCTGATTGAGAAACACCTA  
ATACTGAAACATCTCCAGGTAATTTCAACGTTTCTACAACACCTACAGGGATACCAATCG  
CACCAAAGCACCAGACGCTGCATTTGCGACTAAACATAACATCGCAGCTTTTAAATGGAT  
TAAATCCTAATTGTGTTAATAAAAAGTGCACAAATTGCAATTGGTACACCAAATCCTGCTG  
CACCTTCT

### > **A1KWX9-var2**

Function: protein coding sequence; zinc-containing alcohol dehydrogenase superfamily protein (core genome, constant)

Best match: A1KWX9-var2\_CC001\_MSSA476\_BX571857.1[2418212:2419216]

Position: 057-contig\_266\_RC: 38194 ... 38224; Length: 30 bp

Sequence:

GTGATAGAAACATTTAAAGCATTGTAATT

### > **fnr**

Function: protein coding sequence; ferredoxin-NADP reductase (core genome, constant)

Best match: fnr\_CC007\_TCH959-USA300\_AASB02000014.1[59707:60741:r]RC

Position: 058-contig\_243: 448 ... 1483; Length: 1035 bp

Sequence:

CTAGTATAAATGTTTATTTACAATAGTCTTATTCGCTTCTTTAAACACTTCATGATGACTTG  
AAACATAACCCTCTGCATTCGCATCTGGTTGGATATATGTTTTAGCAAGGTTTCGCTGCATT  
TGCACCATCACTAAATGCACTTGCAATTAGATGTGATTTTGCATCATGATAAACAATATCT  
CCACACGCATAGATAACCAGGTATACTAGTTGTCGTATTACCAAATCCTTTAACACGACAA  
TCATCATGCATATCTAGCTTTGAAGATGTTTCACTCAATAATGTATTACAACGATCAAACC  
CATGACTAATAATGACATCGTCAAATTTAACTGTATGCGTATCGCCACTTTCAACATGTTT  
CAAACAACACTTCACTTATATGCGTTTCATCATCATTGCCGACCAAGTATTTAATACGTGTT  
TTTGGGCATAGTTTACATTTAAATCTGTCCACCAACGTTTTCATCGCTTCATGACCACTTA  
CATCTTCTTTTCGATAAACAACACTGTCACGCTTTTAGCAATCTTGCCAATATCATGCGCCCA  
ATCTAATGCTGTATTTCCCTCCACCTGATATTAATACATCTTTATCTTTGAAACGTCTGTAAC  
TTTGTACAACATAATGTAAATTAGTTAATTGATATCTCTCTACACCTTTAACATCTAATTG  
TTTTGGATTAATAATACCCGCACCAATTGCAATGATAACTGCTTTCGATGTATATATTTCT  
CCCGCTTCTGTTTCAACTTCGAAATGACGTTCTGCCTTTTTCTAATATCTACCACACGTTT  
ATTCAAATGAACTTCCGGTTTAAAATATAATCCTTGCTTAATTGTATCTTTTAAAATTTCA  
TGACAAGGTTTTGGCGCAATGCCGCAATATCCCAAATAATTTTTTCAGGGTAAAATTTCTCA  
TCTTACCCCCTAATTCAGATTGAACATCTATCAATCTTACAGACATATCTCGCAATCCAGC  
ATAAAAGCTTGCATACAAACCAGACGGACCGCCACCAATGATTGTAACGTCTTTCAT

> **pip**

Function: protein coding sequence; putative membrane protein (core genome, constant)

Best match: pip\_CC001\_MW2-USA400\_BA000033.2[2444218:2445495:r]RC

Position: 058-contig\_243: 2352 ... 3630; Length: 1278 bp

Sequence:

TTATGACGGCACTTCAGTACGTTTTGTGCTATGTTTTCTAACAATAGCTGAAACTAAACTT  
GATACAGCGCCAAAAATCATAAACCCCTATAAACATCCACATTGTAATTTAATTCAATA  
TGATGATTCAGTATAAATAGTTCTTACACTTGTTGCATAGTGTGTGAATGGATTCCAAT  
CATATACATATTTTTGATAACTTTCAGGCAACATTTGTTTAGGTAACGTTACAAGTTGCAT  
ACTAAAGAACATTAATAATGAAGAAAATTGGAACACTGACTTCATACCTAGCCATACCATAAC  
ACCTAAAATAAGGCCACGAAACCAAGAATCGCAAATGCTACAAAATTGCGATACGAT  
TTGGATGGTCAAAATCAAATCCTTGAACGCCTTGATGAAATAAATAAACAAGCTAC  
CTGCAAATGCTGCAACAACACTGCAAATATCATCTGTCCAATTGAAGCAATGATACGATGTT  
GCACGACGATATTGTTACTAGTTCTAAATGCAAAGAACAATAAGATAGACGTTACGATTG  
AACCTATCCAAATTGGCATAAACATTAGGAATGGTGCATTACCACCTGCTTGGTGATCTTT  
AACTTTATTAAGTTTTTTCATTATCCACTTTTACTGGATTTCGTCAAACCATTGATGTCCGCG  
GCATTGACTTTAACATTTTACTCGTTAATGTTTCCAAACTTTGCTTCGTAATTTGAGCATT  
AATATTATCACCCATACCAGTTAACACAGCTGATGCAATTTGTGAACCTTGTAAGCTTGAT  
CCTTCACTTACAATCGTTTTAAATTTAGCCTGCTTAACCTCTACTTGTGATTCCCCATTTT  
TTGTTTCATTTGTTGAACCACTTGTGGCGGAATTTACCTGAAGCAACTTTTTGTTGCATTT  
CTTCTTTTTTACTATCCATAACTACTTTTTGTGTTTTACTCATAGCATCTTTTGAAAAGTCT  
TTATCAATAATAGCTACTCCAAAGATTTTTTGATCTTTCAAATCTTTTTCAAGGCTTTTTTC  
ACTATCAACCTTAACCCATTTAATTTTATTAGAATCACTATCTAATAATTTATCCTCTAATT  
TTTTACCAATGTTAATATTTTTATCTTGAATCGTTGTACCTTTATCCTCGTTTAATATACCA  
ATTGGTAAATCTTTTGGTTTAGGATTATATGCAGGATAAAAAGCTAAAGAAAAGATTACC  
AAGATAATCATAGTTGCTATTGGTGCAATCCATAATAATTTATTTTTAAATATATTCAT

> **cobI**

Function: protein coding sequence; magnesium and cobalt transport protein (core genome, constant)

Best match: cobI\_CC005\_Mu50-VRSA\_BA000017.4[2502311:2503255] (completely identical)

Position: 058-contig\_243: 4459 ... 5404; Length: 945 bp

Sequence:

ATGATTACTTCATTCAGACATTCTGAAGATATAGATAAACATATTATAAAAACACCATTA  
GATCATAACAGCGTCATGGATTAATGTAGTAGAACCAGACCGAGAAGAAATTGAAAATCT  
TATGGAACAATATAATATACCTGAAGACTTTATACGTGACCTTTGGACTCAGAAGAAAG  
TTCCCGTATTGAATATGACGAAGATACTGGTTACTCATTAATCATTATTGATTTACCTATC  
GTCAATTCAACTAATCGTAGCGTTCTATCTTTTGTAAACGATTCCATTAGGCATTATTATTG

GCAACGGTATTATCGTAACAGTTTGTGACGCTGAAAATGAATTTTTAGAAAATTTACCTA  
AGCGTGATATTAATTTAAAATTTACAGCAGATTTGCATTAGAAAATTTAACTACTATTGC  
CGACCATTATAATCGTAACTTACGATTACTTAATAAAAGTAGAATTCGTATTGAGAAAGA  
ACTAAAAAATAACATTACTAACAACAACCTTTTCAAATTAATGGAAGTTGAAAAAAGTTT  
AGTATACTTTTTAGCTGCCTTAAAAGGTAACGATACAATTATTA AAAAGTTATTCCGTTTA  
CCTGCAATTAACGTTTTGAAGAAGATGAAGAATTACTAGAAGATTTAATCATTGAAAAT  
AACCAAGCCATCGAAACAACAGAATTACATCAACGTATCTTAGAAAAGTATCACAACATC  
ATACGCTTCCTTATTATCTAATGATATGAATACGATTATGAAGACATTAACACTTTTCACG  
GTACTATTAACGTTACCAACGCTCGTATTTAGTTTCTTCGGTATGAATGTCCGTTGCCAA  
TTGATGACCATAGTTATATATCTTGGATTATTGTGGTAGGTATTTCAATTAATTCTTGTGTA  
ATTGTTAGTATTTCTTATGGCGTAAACAGAAATTATAA

> **scrA**

Function: protein coding sequence; PTS system/sucrose-specific IIBC component (core genome, constant)

Best match: scrA\_CC005\_Mu50-VRSA\_BA000017.4[2503340:2504782:r]RC

Position: 058-contig\_243: 5489 ... 6932; Length: 1443 bp

Sequence:

TTATTCTACAACCTTCTTTATTTGCTTTTCTTTTCGATAAAAATTAAGTAACCTGTTATGGCAA  
CGATGAATGATATTGTCATACCAACAAAGTAGTGTAACCATCCTGCATGTACTGGATTGA  
TTGAAATAAATCCAGGCAATCCAGCAGTTCCTAATGCGATTGCTTTAACCTTGAAGAAAG  
CAATATATGCTGAACCAATACCTGATCCAACGATAGCGCCAATAAATGGATATCTTAGTT  
TTAAGTTAACACCAACATAGCCGGTCTGTAAATACCAAGTAATGCTGAAATACCTGCGG  
CAGATGCCACACCTTTTAACTTTTTATTTGTTAATAAATAAAGAACGCTGCAATTGCTGC  
ACCACCTTGTGCAACATTAGACATTGTCGCAATCGGGAATATAAATGATCCACCCGTTTT  
AGTGGCATCTGCAATTAATGTCGTTTCTACAGCTATAAAGCTATGATGCATACCTGTAATA  
ACAATTGGAGCATAACAATAATCCGAATATTAATCCACCAATTGCACCACCAAAATTCATAA  
AGCCATGTTAAACCATCTGATAACCAGTAACCTAATTGTCGAGTGATTGGACCTACAAAT  
GAAAATGTTAGAAAATGCTGTTATAAAAATAGATAACAATGGTGTTAACAAATTATCTAAC  
ACCGTTGGAATAACTTTGCGTAACCCTTTTTCAATTGAGGCTAAGATATAAGCTGCTACA  
AGCATAGGTAACACTTGCCTTGATAACCTACTTGATTAATATGCAAACCAAAAACATCC  
CAATATGGAATAGCCTTACCTGCTTCAACTGCTTTTGGGAAATCGTATGCGCTCATTAGCG  
ATGGATGAACTAGTATCATACTAATGCAGCACCTAAAATGGATTGCCACCAAAAGCGTT  
TTGCTGCACTAAATCCAATTA AAAATTGGTAATAATGTAAATGGTGCATTGCAAAAACAT  
TTATCATTTTCAGCTAATCCAGCAAATTGACTATATACATCTATCAATGATTTACCTGAAAA  
GAATAAATCTTTCGCAGTCAAAAATGTTATTTAACCCCATTAATAAACCACCAGCAACGAT  
GGCTGGTATAATCGGAACAAAGATATCTGAAAGCATTTTTACAAATCTCTGTAACGGATT  
CATATTTTTAGCAGATTGTGCTTTGACTTCCGAAGTGTTGATGCTTCTTTTCCAGTTAATT  
TTTCCAGTTCACTAAATACTTTATTGACTGTACCAGACCCAATAAATTTGGTATTGTCC  
CCCAGTAGAAAACGTCCCTTAACTACATCCATATTGTTTAGCGCCTCTTCATTTACTAAA  
CTTTCATCATTTAAAACATAATCGTAGTCTCGTTGCACAATGCGCCATTGCATCTAAATTCT  
CTTCTCCGCTATCGCGTTCAAATATCTTCTGCGGATTGCTTATAATTCAT

> **DUF1722**

Function: protein coding sequence; putative protein (core genome, constant)

Best match: DUF1722\_CC001-ST772\_118\_AJGE01000007.1[7159:7542] (completely identical)

Position: 058-contig\_243: 7114 ... 7498; Length: 384 bp

Sequence:

ATGAAAGAACGTGGCTATATCGAACAGCTTTGGCGTGAGGAAAAATATCATGTATTGTTA  
CACAGTCAACAGTCTTACCAAATGATAAGGAATGCTTTAAAACGGATTTATCAATTCAT  
CAAGTCCAACAAATGATTGATGATGCTTTGTTAATTGAACCGAGTATAGGAAGTGTATGT  
AATGCTTTTGTATCATATGTGGGGGATTTTTAAAAAATGTGCGAATGAAGAAGAAAGACAA  
CAATCAAACTACTTAAAGCTGATTTTATTAATGGTAAAATCGACACCCAACTTTATTA  
GATTTTTTAGCAGAACTTGCTAATAAATATGATGTTCAATATTTACTACAAAGTCGTGTTT  
TAAACACAAAAGAAAGAGATAG

> **ssr42**

Function: noncoding RNA small stable RNA 42 (core genome, constant)

Best match: *ssr42\_CC005\_Mu50-VRSA\_BA000017.4*[2506868:2507746:r]RC (completely identical)

Position: 058-contig\_243: 7497 ... 8376; Length: 879 bp

Sequence:

```
GATTGAAACTTTAGTTGTAACGGACAAATAGTAGTCATTGGAGTTCAGCAATTCATACTT
TGTAATAAGTTTACTATAATCTATCTCTCAAGGTTTAAATGTACATATCTATATTAAGAT
GCGTTTCATGATGTTAGAAGATACCATACACATTTAATTAGTTACAGCATAAATCAATTTA
TACCCTTAATTATTACATTGTTTATATTTTAAATTCGGGGGAGTAATTTAAGTAATATCTT
GTTGCTGCTAATTCTATTGTTAATAAATTGATATTAGATGTAGAAATTGAGTGTGAAAGTT
AATAATAGATGATTTAGCTAGTAACATAATTAATTCATATATAGTCAAAAAGTTCTGTTA
GATACTGTTCTTGATGAATATTCTTTGATGTTAGGTGTTAGCTATTCTAGATGAGTTTCTTA
GATGTGGATGCCTGTCTTGATGAAGTTATCTATGATGTTAATATAATACTTGATGTTGATT
CTTAGATGTTAGTGCGATTTCAAGATGCTGATTCTTTGTTGTTGCACTATCTTGGTGACGT
TTCTAGTTGTTTATAGTTATCGCATCTCTTGATGTAAAATCTAAGATGTTTATGCATTTCTA
GATGTTAATTCTTCGCTGCTTAAGAATTATCTTGATGGTAAATCTAGTTGTGCCATGCATT
TTCTCATGATGAATCTAAGGTGTTAATTCATTGATGTGTGCTGTTTCTTGTTGCTTCATTAT
CTTGATGGTGAATTTGTTGCTAATGCACCTTTTCAAATGATTATTCTAATTGTTACGGC
AATAACTAGATGGATTTTCTTAGATGTTCACTTTTCTAGATGTTTATACTTATCTTGATGTT
TTCTAAACAGAACTTTTAAACG
```

> **araC**

Function: protein coding sequence; transcript regulator (core genome, variable)

Best match: *araC\_CC001\_MW2-USA400\_BA000033.2*[2450850:2452955]

Position: 058-contig\_243: 8985 ... 11091; Length: 2106 bp

Sequence:

```
ATGACATGCCAACTTAAAATACATCATAACATTATCGACAATACCCAGTCGTAATATTAAT
AATATTATGGTGCTATTTTCACTTACAAGTAAACTCAATATTACGATTAATGGTGAAACCA
AAGACGTAAGTAATTATATTATCTTAATTAACCATGGTGATATTTATAATATTAACCACGG
CGAAAATATAATCGAATTAATGATACCCGTTTTTTATTTTATCAACAAGATGATGATTTT
TTTAATGGTTATTTAGATCGTCATTTATTACAATCAAGTAATTATATTAAGTCATTAATTG
CCGATTTAATCAGTACACCAACAAGTTCTTCTTTAATGGGGAAAAATATAGGTCAAAGTA
TTATAGACACTTTACTTAAAGAAGCTTTTATAAGAATAGATCATGAATATTTACCAAATAT
TGCTTTAAGCAATCCGGTGTTTCATAGACTGTGTAAACTATATTCATGACAATATTGATGCG
CACTTGTCTTTAAAAGATATAGCGATGCATTGCAACATCTCTGAATCATATTGTTCTAATC
TTTTGTTTCGATATTTGAGTATGAATTTTAAAGATTATTTTACAAGTATTAACCTTGTTAAC
GCCATCAATTTATTACTTTCTACAAAACATTCTATTACAACCTGTTTCTGAATTGGCCGTT
TTAACAGTCATACAAATTTTGCAAATCAATTTAAGAATTACTTGCAATTTAGTCCTAAACA
GTTCCGTTCACTCGTTTCCAAGATTACTGAACCACCACAAATACATTTCCAACAAGATAA
CGTATCACAATTCAGTGAATTTCAACAATTGATTTAACAGCTCAACTGGCTACAAAT
ACAACAGATATTCATATAGATGATTTTAAATCCGAAAGATCGAAGTCAGCGTGCCAAAGTA
TTTGTTTCGATTTAGTAATTTCAATGAACTATTTCAATTTATTTTCAATGAATATTACGATAT
TAACTTTGAGCACTTACCAAACCTGTCGTTTTTATTGACGATATTCACGATATTGAGATT
AGCCAAACGAATTACAACCTGTTAAATAGATGTTTTGAAAAGCTTTTTCGAAAAAATATA
GGTTTAGCAATCGCTATTAATCAACACAACAATTCGAAACGATGAAGCAATTAATACTC
ACATTTTACAAGGCAATCAAGACTATAAGACAAGCAAGAAATTAGTTAAATTTATGCTC
GTATTTTGCTCTAATTCTATGACAGCAGAAGAAATTCATTTATGTCATCTTAAAATTAATA
ACAAAAATAAAGAAATTAATATAGTGTGACAGTCGATGGCTTTTTAGAACTTATTCAA
CCGTGGAACAAGTTTATGATGTCATGCAGCGTCTTAAATTCATTATTACTTTATTGATAT
TGAAAATTCAAAACACTGCAACACATCTTATCACTAAAACCAACACTATCATCAAACCTGA
CACTCATTTTGAACAGTATAAGAAATTTATTTTAGATTTCAGGTATATCATCAACACAATTT
GTATATAATAACCTGTCTGTAAGCGGATTTAAATATACTAATGATGGTAAGAATCCAATT
CAATTATCTGACATAGTGTATCACTTAATCGCATTATTACGATATGGCGGTGGCATTAGCT
ATCAATTATTAGATGACCATTCAAATTATATTTCTTGTACAACAAATATGGTAGTCCCCT
```

ACCATTAATGCATTTATATAAAAATGTTTAGACCTTTTGTTAATGAAGATATTGAAATTACA  
AATAATTATGTATTGAGTCGTAAAGATAATAACTACCATTTCTTATTATTCAATAAAAATTA  
ATGATCGATATATGTCAGACGTAACAAGATTTTCATTTTCCATAATGAATTACCTCAAG  
ACTCTTTGATGATTATTAACAATTGAATCATGAACATGGTTCAATTCAACATTTGCTTCC  
AATAAGCGATCAACTTGTATATAGAAAAAGAAATTTTAGATGAATTAGACAAAACGA  
ATTACCTAAAACGGAGCTTGCAGTTCAAGAAGAACTGGTCGTACATTTGAACTCAAGT  
TAAATCACGACGAGGTAAATATATTTGCTTTAAACCAAGCTAA

### > **tnpIS431-06**

Function: protein coding sequence; transposase for IS431 (mobile element)

Best match: tnpIS431-06\_circ\_S-epidermidis\_GQ900381.1[43799:43807] (completely identical)

Position: 058-contig\_243: 9919 ... 9928; Length: 9 bp

Sequence:

ATGAACTAT

### > **gltT**

Function: protein coding sequence; (proton or sodium)-glutamate symporter (core genome, variable)

Best match: gltT\_CC001\_MW2-USA400\_BA000033.2[2454279:2455556:r]RC

Position: 058-contig\_243: 12728 ... 14006; Length: 1278 bp

Sequence:

TTAAATTGATTTTAAATATTCTTGACCTTTTGCTTTGTCATATACGTTTTCCATTTAGCTA  
TAACGATTGTTGATAATGCGTTACCAATAACGTTTACACATGTACGTACCATATCTAAGAT  
ACGGTCAACACCAATAATTAATGCTAAACCTTGTGCCGGTAAGCCCATGGCACCTAATGT  
TGTTAATAAAACAACGATTGAAGTTCCTGGTACTGCCGCCATACCTTTAGACGTAATCATT  
AATGTTAACATCAACACAATTTGCTCTGATAATGTTAAGTGCATTCCATACATCTGTGCAA  
CGAATAATGCTGCAATAGATTGATAAAGTGCTGATCCGTCTAAGTTAAACGTATAACCAA  
TTGGTATAACAAAAGAAGTAATTTCTTTTGGAGAACCGAAGTTTTCCATTTTCTTCATCAT  
TACAGGAAGTACAGCTTCCGAACCTGAAGTAGAAAATGCTAAAAGCAATTCATTTTCAA  
GATTCTAATAATATTCATGATATTAATACCACACATCCATGCAACTAGTCCTAGTATAGCG  
AATACAAAGAACACCATTGCAAAGACAACAATACTAATTTAATAGTGGAATAAAT  
GCGGATGCACCAAATGTAATAATTGTAGTACAAATGAATGCAAACACTCCAAGTGGTGCT  
AATTTTAAAATTTTATTAATCATCCAGAACACAGCTTCAAGCGATCCGCTTAAAAATTCTT  
TAACTGGTTCTGCTTTTTTACCTACAGCAGCTAATCCTAATCCAAAGAATACTGCGAAGA  
AGATAATAGGTAATAATTCACCCTTATTTAAAGCTTCAAAAAAGTTTGTGCGGAATAAAT  
GTACAATGGTATCAATAAAATGATTTCCATATGTAGATTGTTCTGCTGCATGTGCAGTTGA  
TTGATATTTAGAAATATCACCTTTAGGTAATTTTGTGGGTCTAATCCAGCACCTGGTTTA  
AATAGGTTACCGAAGATAATCCCTAAACCTATTGCGATTGTTGTAATAATTTCAAAGTAT  
AAAATTGTTTTCCAGCCATAACGCCCTACAGTTTTCGATTCCCCAACGTTTCGAAATAGAA  
AGCGCTAGTGAGCAAAATACAACCTGGTATAACGATCATTTAATTAATTTAAAAATACG  
TCACCAAATGGTTAATGTAATTTGCTACGTTTTCTGTCCATATAATAAAAGTCCTACGA  
CAACACCTAACACTAATGCAATAACAACCTTGCATAGGTAGGCTAATTTTCTCTTGAATA  
GAGCCAT

### > **sarZ**

Function: protein coding sequence; HTH-type transcript regulator (core genome, variable)

Best match: sarZ\_CC705\_RF122-cow\_AJ938182.1[2395729:2396175] (completely identical)

Position: 058-contig\_243: 14950 ... 15397; Length: 447 bp

Sequence:

ATGTATGTAGAAAACAGCTATCTTAGCAAACAGTTGTGTTTTTTATTTTATGTTTCTTCAA  
AAGAAATAATTAATAAATAACACAACTATCTTAAGGAATATGATTTAACCTATACTGGTT  
ACATTGTTTTAATGGCGATTGAAAATGATGAAAACTTAACATCAAAAAATTAGGTGAAC  
GTGTATTCTTAGATTCTGGAACACTGACACCATTACTAAAGAAATTAGAAAAGAAAGATT  
ACGTTGTTTCGAACACGTGAAGAGAAAGATGAAAGAAACCTACAAATTTCTCTAACAGAA  
CAAGGTAAAGCAATAAAAAGCCCTCTTGCTGAAATTTCTGTAAAGGTCTTTAATGAATTC

AACATTTTCAGAACGAGAAGCATCAGATATAATTAATAATTTGCGGAATTTTGTCTTCTAAA  
AATTTTGACTATTCCGACAGAAAGTAA

> **narK**

Function: protein coding sequence; nitrite transport protein

Best match: narK\_CC008\_NCTC8325\_CP000253.1[2455468:2456637:r]RC

Position: 058-contig\_243: 16147 ... 17317; Length: 1170 bp

Sequence:

TCAACCGTTTTTCAATGAGCCATATTCTTTTTGGTATAAATGACGCATGGTAAATAATGCA  
ATACATCCAAATACCGCTAAGAAAATAAATGCTAAATGACTTGATCCTGTTAAATTAGCT  
ACGTACGTGATTACTAGTGGTGGGAAGAATCCTCCTAAACCACCCATCATTGATACGATA  
CCATTTGCGGATCCCGCTTCATTTAAGAAGTATGATGGTACTAATTTGAAGATTAAGCCGT  
TACCAATACCTGCACAAATACTTATTGTTAAACAGCCTACAGTGAATAATGCGATATGGT  
CTGAAATACCTAAAATAATGGCTCCGATAATCATAACAACAAAATCAATCATCAATACTT  
TAACTGCATTAATTTATCACCTAAAATGCCACCTATTGGTCTTAAGAATGTTGCCAGCGC  
AATGAATACACCTGATCGAATACCAGCATCTACTTTGTCAATTCCAAATGATTTACTAA  
GTAGTTAGGTAAGAAAATACCAAATGCTACAAAAGCACCAAAGTAATGAAATACCAAT  
AACTTAAGTAATATAATTTGTAGTTTTTAGATAATGTTTTTCATTTGTGCCATTAATGGCAC  
TTTAATTTTACGTTCTTGTGTATCACCAAAAATAAACATAATTAATGCAAATAAAGCGAT  
AATAATTAAGTAACCTTCTAACAGTTGTTTGCCAACCAATAATACCCGCAATTGGCGGTGC  
TAAAAATGAAGAACTGCTGTACCGATATTTCCCATACCATAAATGCCATTTGCTAGACC  
TACTTTTTCTTTAGGGAAATATTTAGGAACTGATGTAACACCAACTGAGAAAATTGCACC  
ACCTACACCAAGGAAAAATCCTGACGCCATTAACATACCCGGTGTGTTGTGCTTGGCTTAA  
GAAAAATATCGGGAATAACAATACGATAAAACTAGTAAAGAATACCCATTTAGCGCCAA  
CAATGTTTGTAAATAACCAAATGGCACACGGAGCACCGATCCCAAATAACTGGTATCG  
CTAAAATGATTGATATTTGACCTTCAGTAACATTGACATCTTGTTTAATAAAGGGCATTAA  
TGGCGCAATTATACTCCAAGCCATAAACCCAACCACTAACTTAATGTTTGTAAATGTAAG  
TTGAAAGCCACCTTTTGTGTTTGTACAT

> **nreC**

Function: protein coding sequence; oxygen regulatory protein (core genome, variable)

Best match: nreC\_CC088\_21343\_AHKV01000051.1[33164:33817:r]RC (completely identical)

Position: 058-contig\_243: 19576 ... 20230; Length: 654 bp

Sequence:

CTAAAACCTAATAATTTCTTTTTCAATGCATATTCAACTAGCTCAGGTTTACTCTTTAAG  
CCAAGCTTTGTCATAATATGCGTCTTATGTGCTTCTACTGTTTTTCACAGATACAAATAATT  
TCTCTGCAATTTCTTTATTCCCGTAACCTTTGGCAATAAGCGGCAATATTTCTAGTTCTCGT  
TTTGATAAGATTTTAAAAGGATCTGTTGTGTTTGCAGTGCCTGATTTGAATTAGATACAA  
ATTCATTCACTAAAGATGTTGTAAGTTTCATATCTACATATGTTTCACCTTTATATACAGTT  
CGAATAGCTAACAATAATTGTTTCATCAGGTGCATTTTTCAATATGTAACCTTTTCGCACCAT  
TACGCAACACATGGAACAAATACTCCTCATCATCAAACATTGTTAATATTAGTATTTTAGT  
TTCAGGAAAACCTGTCAGCAATTTTACTCGTAGCGATAAGACCTGACTCACCTGGTGGCAT  
ACTTAAATCCATTAGTAACACATCAGGTTTATAATCCATTACTTTTTGGTAAGCTTTCGACG  
CCATCTGCAGCCGTTGCAACAACTTCCATATCATTTTGATAATTTAAAATCATAGAGAACC  
CCGTACGGACAACAGCGTGATCATCGGCAATGACTATTTTCAA

> **nreB**

Function: protein coding sequence; oxygen sensor histidine kinase (core genome, variable)

Best match: nreB\_CC001-ST772\_118\_AJGE01000033.1[87574:88608]RC (completely identical)

Position: 058-contig\_243: 20252 ... 21287; Length: 1035 bp

Sequence:

TCAAATTGGAATGTTCAATGTAACATTGGTACCCTCACCAATTTTCGTTTCAATATTGACG  
CTACCGCTGACTAACTCAGCTCGCTCATTCAATCCATATAAACCGAGTCCAGAACCTTTAG  
GCTTAGAACTTGGATCAAACCAATTTCCCGCATCTATCACTTCTGCTACCAAATGGCGCCC  
AGTTTGACGGATACCTACATTTATTTCAATTTACATCAGCGTATTTCAACGCATTTAGAATA

GCTTCTTGCACACTACTCGATAAACAACCGTTTCAATATCACTATCAAAGCGAGTATTTTTAA  
TATTTGATGTATATATGATTTTTATTCCATAATTTCTTCAAACCTGTTAAAATATGATTTA  
AAAGCTGCTTCAAGGCCTAAATCATCCAAAGAAGCGGGTCTTAATTCAACCGACATATTA  
CGTATATCATCAATTAATTTAGCGACAATATATTCAATATTTTCTGCGTCTTCCAAAAGCT  
TAGTTGTATCTTCTTGATTTTTAATAATCTCAATTGAACATCTACATTGAGCATTCTTGA  
ATCACACTATCATGAACTCTCTAGAAATTCGCTTTCTTTCATTTTCTGGGCTGAGATTGT  
TTACGCATCATAACGTTGTTGATGTAATTTCTCTTGCTGTTCAATTTGTGATGAAACATTTT  
GAAGCGTAAATGCATGAATCCCCTGTCTTGATCAATCAACTGATATGTTGCTGTAAATG  
GCATCACTTTTTGATCTTTCGTCTTCATAAATACTTGGAAATTCGTAGCTTGTACTTGCATC  
GATTCTAAGAAACAGTCTTTACATGATTGCACATCATAGGCATTTGTATACCCTTCACATC  
TGTGACAAATCGCATTTCGCCACAGCACTGTAATTATCTTCTTCAGATAATATATCTTTAGC  
AGCATCATTCAATTGCAATAATTTACCGTTATCATCAGCAAAAACCTATCTTTTCGATTGAA  
TGCTCATAATATTTTTTCAATAAAGTATCTAACTGTATACTGTCTCCTCATTAATCAT

### > nreA

Function: protein coding sequence; oxygen-responsive nitrogen regulation system protein A (core genome, variable)

Best match: nreA\_CC080\_11819-97\_CP003194.1[2492791:2493243:r]RC (completely identical)

Position: 058-contig\_243: 21310 ... 21763; Length: 453 bp

Sequence:

TTATTTATCATCATTGAAAATACCAAACCTACGTTGAATATCATCATTATCAAATATTTTT  
GGTAAAGGACGACCATCTCTTTGACCAAATAATAGTACGCCATACACTTGATTCTTATAC  
CAAAGCGGCACTGCTAAAACCTGCTGTTAATGATTTCGCTTAATAAAAATTGGATAGTCAATC  
TTTTCTTCAGGCCCTAAAGCTAAACCAACATTGGCTATTACCATACGCTTTCCTGTTTTCA  
TAACAGTTCCAGCTAATCCACGACCTTTTCTTAAAATAATCAATTTAAATCGATTATTTTT  
ATTACCTGAAACATAGTGCCATTTTATTGGAGATGATGGTTTGTAGATTTCATAGAAAGC  
GATTGCCGAAAATCATAACCCTCTTCTTTGCGTATTTTATCTAATGTCTCTTGAAATCTA  
CGATCTTCAATTATTGCTTCTGGTGTCAA

### > narI

Function: protein coding sequence; respiratory nitrate reductase/gamma subunit

Best match: narI\_CC001\_MW2-USA400\_BA000033.2[2463334:2464011:r]RC

Position: 058-contig\_243: 21782 ... 22460; Length: 678 bp

Sequence:

TTACACTTTATTCTTACGGTAAATAATATATCTGCGATTTATATATGTCAAAGGTACACTC  
CAAACATGCACCAAACGTGTAAATGGCCAACAAGCCATAATAGTGAAACCTAACAATAT  
ATGCATTTTAAATGCAATCGGCACACCACTCATCAATGACGCATCTGGTTTTAACATAAA  
TAATTGTCTAAACCAAATTGATAATGAAGTTCTGTAGTTAAAATCTGGATGTTGTATATTG  
GTTACTAATGTTGCGTAAACATCCCATAAATACGATAAGTAATAATAAGAAATTTACAAAT  
ATATCCGACGCTGAACTTAATCTTTCGAATACTTTTCGTAGTAACACGCTCTCGCTGTTAATA  
AAAACATCCCTATCAAAGTTATTATACCAAAGATGCTACCAATATAAACAGCGCCTATAT  
GATATAATTGCTCAGATACCCCACTGCATCCATCCATGGTTTCGGTATTAACAATCCAAC  
TACGTGTCCAAAAAACACTGGAATAATACCTAAGTGAAATAATAAACTTCCCCACATCAA  
CCTTTTTCTTTCTATTAATTCCTAGATTTAGCTGTCCAAGAAAATTTATCATAACGATAA  
CGTGCAATATGACCTGTGACAAAGACAACCTAAACATAAATACGGAAATATAACCCATAA  
AAACTGATTAAGCAT

### > narJ

Function: protein coding sequence; respiratory nitrate reductase/delta subunit

Best match: narJ\_CC001\_MSSA476\_BX571857.1[2443170:2443760:r]RC

Position: 058-contig\_243: 22452 ... 23043; Length: 591 bp

Sequence:

TTAAGCATGATGTTTCACTCCTTTTGGTGATGTCAAACATAATTTCAATGTTTTTCTAAGT  
GCTTGAATCAGATAGGCATATGGATTGTTATCTTACCAAGTACATTCGCCATCAGATATG  
TTCCATCCTCAATAATCATAATGATTAATTGAATATTCTCTTCAGCTCTTGGATCATTTCGC



CATTCTGCCACTTGCAAAAATTGAAGCATCAACGGTAGATAATCAGAAAGTTCATTATCT  
ACCATTTCTAGTCCAAACATTTTCATATAATACCTTTAATTTAGCTAACATTTGCCACGTT  
CTTTTTGCGTATCAAATTTGTTATACGTCATATATAATGGTGCTTTTTTCGTA AAAATCAAAT  
GTATCTGTATAAAATCGCTTTGATTTCTGATAATGAAAATGTCATCATTACATTTCTAAATG  
CTACTAAATCTTCATATGCTGGATGATCTGTGCGAAATTGTTTCTTCAAAGTTTTTGGATG  
AAAAGTTAATTTTTCTGGAAAACATAACTGTTGTGCCATATATCCAAAACTTTCTTGATAT  
TTTTTAAAATTATCGAAATTAATCACGGAAAATCCCTCCAT

> **narH**

Function: protein coding sequence; respiratory nitrate reductase/beta subunit

Best match: narH\_CC001\_MW2-USA400\_BA000033.2[2464572:2466131:r]RC

Position: 058-contig\_243: 23020 ... 24580; Length: 1560 bp

Sequence:

TTAATCACGGAAAATCCCTCCATAGAAATTCTCATTATAAATTTCTTGACCAGTTTTCCCT  
GAACCTACTGCAACGCCACAGCCTTCACAGTTATCTCCAAAATGCTCGCCGCCGTAATTA  
TATCCTGTACTACCTTGTGCGTGATACGTATCTAAATAGGTTTCTTGTGTGATGTTGGAA  
TAACAAATCGATCTTCATATTTGGCTAGTCTAATAAACGATACATGTCTTTAGTTTGGCG  
CTCCGTTATACCTAATCGCTCTAATCGAGACGTGTCAAATGGCTGTTGAGTAACTTGAGAT  
CTCATATAACTTCTCATCATTGCCATACGTTGTAGGGCTCCTTTTACTGGTTCTGTATCTCC  
TGCAGTGAAAATATTAGCTAAGTATTCAATAGGTAAACGCATTTCTTCAATGGCTGGGAA  
AATCGCATCTGGATTTTGTAGTTGATTTTTTACCTTCAAATAGCTCATAATTGGGCTAAGT  
GGTGGGCAATACCAAACCATCGGCATCGTTCTAAATTCAGGATGTAACGGAAATGCAAGT  
TTATATTCAATTGCTAACTTATAAATTGGAGAGTTTTGTGCAGCTTCAATCCAATCATAAC  
CAATACCATCTTTTTTACGCTTGAGCAATGACTTCTTCGTCAAATGGATTTAAGAATATATC  
TAATTGTTTTTTCGTATAAATCTTCTCGTCTACTGCTGAAGCCGCTTCATGAACTCGATCTG  
CATCATATAATAAAACACCTAAGTAACGCATACGTCTGTACAAGTTTCAGAGCATAACCG  
TAGGCATACCCGCCTCGATTCTCGGGAAACAGAAAGTACACTTTTCAGCTTTGTTTCGTTTT  
CCAATTGAAGTAACTTTCTTATATGGACAACCTGTCATACAGTAACGCCATCCACGACA  
TGCGTCTTGATCAACTAATAACAATGCCATCTTCATCACGTTTATACATAGCACCTGAAGGA  
CACGATGCAACGCAACTTGGATTCAAGCAATGTTACATAAACGTGGTAAATACATCATA  
AAAGTTTCGTCAAATTGGAATTTAATATCTTCTTCTATTTTTTGGATGTTAGGATCTTTTGG  
ACCTGTAACATGACCACCTGCTAAGTCATCTTCCCAGTTAGGTCCCATTCAATTTCAATG  
TTATCCCCTGTAATTTCTGAATACGCTCTAGCAACTGGCGAATGCTTCCCTGATTTTCGCAG  
TTGTTAAATGTTCATAATTATAGTTCCATGGCTCATAATAATCTTTAATTAATGGCATATC  
TGGATTATAAAAAATTTTACCTAAAGCAATTTTTGAAATTCTACTTCCAGATTTTAATTCA  
AGTTTCCCTTTACGATTTAGTACCCAACCACCTTTGTAGTGTCTTGGTCTTCCCAACGTTT  
CGGATACCCTACACCTGGCTTCGTTTCTACGTTATTGAACCACATGTACTCAGCACCTGGA  
CGATTTGTCCAAGTGTTTTTTACATGTCACACTACCGTATGGCATCCTATGCATTTATCTA  
AATTTAATACCATCGCAACTTGCCTTTAATCTTCAA

> **narG**

Function: protein coding sequence; respiratory nitrate reductase/alpha subunit

Best match: narG\_CC001\_MSSA476\_BX571857.1[2445287:2448976:r]RC

Position: 058-contig\_243: 24569 ... 28259; Length: 3690 bp

Sequence:

TTAATCTTCAAGCCAATTAACCTCCTTCATCTTTCTAACTGCTACATATAAATCCCTTTGGT  
TCCCAATTGGTCCATAATAATTAAGTGATAACTAATTTGTGCGTATCCTCCGACTAGTTG  
TGTTGGTTTCAAATGGATTCTAGTCGGCGCGTTGTGTGAACCACCACGTGTATCTGTAATT  
TCTGACCCAGGCGTTTGAATATGTTTTATCTTGTGCATGATACATAAACATTGTACCTTTAG  
GCATACGATGCGAAATAACTGCTCTTGCCGTTACAACACCATTACGGTTATACACTTCTA  
GCCAATCATTATCTTGGATATCGTGTTTTTTACGCATCTTCATTTGATATCCAAACCGTTGG  
ACCACCTCTAAATAGTGTCAACATATGCTTATTATCTTGATACATTGAGTGTATATTCCAT  
TTCCATGAGGCGTTAAATAACGCAGTACCAAAGCATCTGTACCACCTTTAATTTTTCTTAT  
CTCTATTCCCAAATACCATTTGGCGGCAATGTCCGTTTATATACTGGTAAGCTCTCCCCAAA  
TTGTTGGAAAACCTTCGTGATCCACATAATAACTTTGACGTCCTGTTAATGTTCTAAAAGGT

ACTAGACGTTCTATATTCGTTGTAAATGGTGAATATCGTCGACCTTGTTTATTTGAACCTG  
GGAATACTGCTGTCGGTATTACTTCTCGTGGTGTGAAGTTATATTTAAAAACGAAATTTT  
CTCAGCAGCGCGTTCGCTAGAAATATCTTTTAACGGCATTCCAGTTTGTTCCTCGAGATCT  
TCATATGATTTTTGTGATAATTTACCATTTCGTAGCAGATGAAATACTTAGTATTGCATCAG  
CTACATTACGTGCTGTATCAATACGTGGACGATTTCGCTCTCACAGAATCATCATTTGTATC  
ACTCCACGTACCTAACATACTTTTTAATTCTTCATATTGTTCACTGACACCGAAACTTACA  
CCATGTGCTCCAACCTTTCCCTTTTTCAAGTACAGGACCAAGCGTGACATATTTGTGCTAAA  
TTTTAGTGTAGTCGCGTTCTACAATTGCAAAGTTAGGCATTGTACGTCCAGGTACCGCTTC  
AATTTACCCTTCGACCAATCTTTCCTACTACGCCGTATGGTGTTGAAATTTCTTGCTTTGTAT  
CATGACTAAGCGGAGTTGTACACAACATCTTTAAACGTTCCAGGTAAATAGTCTTTTGCCAT  
TTCTGAAAATGCTTTTGCCAACGTTTTATAAATATCCCAGTCTGAACGCGATTCCCATAAT  
GGATCAATAGCTGGATTAAGGATGTACATATGGATGCATATCTGTAGATGATAAATCA  
TGCTTCTCATACCAAGTCGCTGCTGGCAATACAATGTCAGAATATAAAGGTGTTGCTGTC  
ATTCTGAAATCTAAAGAAACGACTAAATCTAATTTCCCTGTTGTTTCCCTCACGCCACGTAA  
TTTCTTCTGGCTTTTCATCTTCATTTGGTGTAGCTAATAACCCTGATTTTGTGCCAAGTAAA  
TGCTTCATAAAGTATTCTTGACCTTTTGCAGAACTTGAGATTAGATTTGAGCGCCATATAA  
ACAGTGATTTCCGGATGATTCTTTTCAAATCCGGATCTTCTATCGCAAATTCGTTTTGTTTT  
GACTTAACTTCATTTATCGCTCGTTTTAAAATTGCCTCATTTCGACTCAATGCCTTCATCTTT  
AGCTTCTTCTGCAAACAACAACACTATTTTTATTAATTGTGGATATGATGGTAACCAACCA  
AGTCTAGCTGCTAAAACATTATAATCAGCTGGATGTTGATGCTTTAACTCCTCTGTTTTAG  
CTAATGGAGATTTTAAACGATCTACATTTGACTCTTCATATTTCCATTGGTCTGTTGCAAA  
ATAGAACCAACTTGTTCGGTTTTGCAAACGTGGTGGTCCCTGCCAGTCTTTCGCAAATGCG  
ACAGTACTCCATCCTTCAATCGGACGACATTTTTCTTGTCCACATAGTGAGCCCAACCGC  
CACCATTACACCTTGACAGCCACATAACATAACTAAGTTTAAAGATTGAACGATAAATCG  
TATCTGAGTTAAACCAATGGTTAATACCCGCACCCATGATAATCATTGAACGCCCTTCAG  
TATCGATAGCGTTTTGCGCAAATCTTTCGCTACTTGAATGACAACACTTTGTTTTACGCC  
TGAAATGGCTTCTTGCCAAGCAGGTGTATTTTTGATTCTGCATCGTCGTATCCTTTTGAT  
TCTAATTTATGATCAAACGACGCACGCCATATTGACTTGCCATTAAGTCAAAAATTGTA  
GCAATACGGACTTTGTACCATTGCTAAAGTGACTTGTGCGAGTTGGAATTGGACGATTG  
AATATCCCATCTCCATCACTATCAAAGTATGGGAATTGAATTGTTTCTAATTCGTATCCAC  
CTTCTGTCAATTGATAATGTAGGGTTAATTTAGAACCATCTTCTGTTTCTAGTTTTAAGTTC  
CACTTCTTACCTTCTTCCCAACGTTGACCCATTGTGCCATTAGGTACTACTAACTATCGT  
TGATTGCATCATGAATAACTGGCTTCCATTTCGCTTGTCTGTTGTTTGACCTAAGTCACT  
CGCTCTTAAAAATCGACCCGCTTTATATCCATTTTCATCTTCATCCAGCATGATAATAAAC  
GGCATATCTGTATATTGTTTGGCGTAATTTATAAAGCGTTCATTAGGTTGATTAACATAAT  
GTTCTTGTAATAACATGCGTCATTGCTTGTGCAATTGCAGCATCTGAACCAGGATTCG  
GTGCTAGCCAGTTATCTGCAAATTTACATTTTCTGCGTAATCTGGTGCTACTGAAATGAC  
TTTTGTACCTTTATAGCGGACTTCAGTCATAAAATGTGCATCCGGAGTACGTGTTAAAGGT  
ACATTAGAGCCCCACATAATAATGTATGCTGCGTTATACCAGTCACTTGATTCAGGCACA  
TCTGTTTGTCTCTCCCCAAATTTGTGGAGAGGCAGGTGGTAAATCTGCATACCAGTCATAA  
AACTAAGCATTTCACCACCAAGCAAATTGATGAATCGAGCACCTGCTGCATAACTAATC  
ATTGACATCGCTGGAATAGGTGTAAATCCTGCGATTTCGATCTGGACCATATTTTTTTATTG  
TATACAGTAATTGTGCTGCGATTATCTCTGTAACGTCTTTCCAATTTGAACGCACGTGCC  
TCCCATACTCGGGCTTGCTTATATTGTTTGGCTTTGTCTTCATTTTCAACAATAGAAGCCC  
ATGCAGCCACACGATTACCATTGTTTTCTTCTAATGCTTCAGTCCATAAATCCCAAAGCTT  
CCCACGAATATATGGATATTTGATTCGAAGCGGACTGTATTCATACCAAGAGAATGACGC  
ACCTCGTGGACATCCTCTCGGTTTCGTATTCAGGCATATCCGGACCACAACCTGGATAGTC  
AGTTTGTGATTTTCCCAGGTAATCACACCATTTTTTCAAAATACTTTCCAAGAACATGAG  
CCTGTACAGTTAACACCATGTGTTGTTCTTACTTCTTTATCGTGGCTCCAACGTTCTCTGTA  
CATTTTTTCCCATCTCTACTTTTACTTTCTAGGATCGACCAATTCCCATTAATTTTTCTG  
TTGGCTTAAAGAAATTC AATCCAAATTTTCCCAT

> **tx\_nasF**

Function: rho independent terminator

Best match: tx\_nasF\_CC001\_MW2-USA400\_BA000033.2[2470040:2470110:r]RC (completely identical)

Position: 058-contig\_243: 28488 ... 28559; Length: 71 bp

Sequence:

TGGCACAACGACAAATAAGGCTTCAACACGAATATATTCTCTCGGTTGAAACCTTACTTA  
TTCATTTATTT

### > **nasF**

Function: protein coding sequence; uroporphyrinogen-III C-methyltransferase

Best match: nasF\_CC005\_Mu50-VRSA\_BA000017.4[2527730:2528707:r]RC

Position: 058-contig\_243: 28566 ... 29544; Length: 978 bp

Sequence:

TTAGTGACATAACACTGTATTAGCATCTGCACGATCGGTTGAAATATATGTTACATTTTCT  
TGCTGCTTAATAAATGCATCATAGTAATCATATTGCGACGAATGATATGTGCCATTCGAT  
GTATCATTTGGGTTTAGCAAACAGCCATAACCTTCGTCATATAAATGTTACAGAGCATA  
AGGGCGTCATGTTTAGAACCACTTACTACATAAAAATTGCTTCATAGGATCATATGATTTA  
GGAGTGTTTTAGTATAATCAACAACCTCCCTATAATACATATACCTGGTTTCGCCTCAA  
TTGAATAGTGTTGCAATTTTGAATAAATATTACTTAAACGCCCTTTAACGACGAATTCATT  
AAAACAAGATGCTTGAAAAACAATCGCTATCGGATAATCAATATCTGTGTACTGTTGTAT  
CTGGGCGATAATTTCCCTAAACGTTTAACTCCCATATATATCGCCAACGTGCCACCATT  
ACTAAGGAATTGACATCCACTTCATTTTCTTCTGAATCTTTAAAGTGACCTGTAGAAAATG  
TCACACTTTTAGCAACTGTACGCATTGTCAAACCTGTCTGCATAGTAGCAACTGCTGCGCT  
CGCTGATGTCACCCCTGGTACAATTTCAAACGCAATATGATGTTTATTTAGTGTGTCGACT  
TCTTCTTGACACGACCAAATATCGCTGGATCGCCACCTTTAAGTCTAACAACCTTGTTAT  
ATCGACGCGCTGCTTCCACGATACAGTCATTTATTTTTCTTGCTGAATATGTTTTGCATAC  
GGCTTTTTACCAACATCGATAATTTCAAGTAGTCAAATTCGCATATTGTAATAAACGGAT  
TACTAATCGATCATATAGAATGACATCCGCTTACGTATTAACGCTCAGCCTTTTTAGT  
CAAATAATTCGGATTACCTGGTCCCGCACCTATCAAGTAAACCTTGCCATATTTATCTACA  
GACAT

### > **nasE**

Function: protein coding sequence; assimilatory nitrite reductase small subunit

Best match: nasE\_CC005\_Mu50-VRSA\_BA000017.4[2528698:2529012:r]RC (completely identical)

Position: 058-contig\_243: 29534 ... 29849; Length: 315 bp

Sequence:

CTACAGACATATATACGTTCCCGTCTGTAACCTTCTACCTCATAAACATCTACACAACCT  
TCATCAGGTTCTTGTACAATCCCAGTATTTAAATCAATCTTTTGATCATGAAGTGGACAGA  
ATACATATTCACCACTCACTGTTCCCTCTGACAATGGTCCTTGTTTATGCGGACAAATATT  
GTGAATCGCGTGAATTGTACCACCTTTCAGTTAAAAACAATCCTACCTCTTTGCCTTTGACA  
ATAACCTTTTTTCCAATTAGGGGTGTTAATTCATCTATAGTTGTCACCTTAATTTTTCTTT  
TGTTTCCAT

### > **nasD**

Function: protein coding sequence; assimilatory nitrite reductase large subunit (core genome, variable)

Best match: nasD\_CC001-ST772\_118\_AJGE01000033.1[76603:79008]RC (completely identical)

Position: 058-contig\_243: 29852 ... 32258; Length: 2406 bp

Sequence:

TTACACCTTCTCCACTTCAAAAATTTTACGTGCTTGCGCATTGCTAGTTATTGCTTCCCAA  
GGTTCAGCTTCGACTGCTTTTTTAGCATCCATAATGCGTTCAAATAGTTCATTTTGTCTTTC  
TGGGTCAAGTAAGACTTCTTTTACATTTTCAAATCCAAGTCTTCTTAACCATGGCGCTGTT  
CTTTCAGCATATATACCTGTTTCGCGATAATATTGCATCAAAGCACCACATAATTTGATTA  
CTTCATCTTCTGTTTCTACAGTTGTTAAAAATTCAGCTTTTTTCGACTTCTGTACCACCATTA  
CCACCGATATAGATTTGGAATCCATTTTCAACTGAGATAATACAAAATCTTTAACACCT  
GATTCAACACAACCTTCTTGGGCAGCCTGATACACCCATTTTGAATTTATGAGGTGTATCGA  
TGTATTCAAATGTTTTTCTAAACGAATGCCAAGTCGTGTCGTGATTGCGTACCAAATCG  
ACAAAACCTTTTACCAACACAGCTTTTAACTGAGCGTGTTTTCTTACCATAAGCTGATGCT  
GAACGCATACCTAGGTCTTCCCATATATTTGGTAATTCTTCTTTTTTAACTCCATACAAAC

CAACACGTTGCGAACCTGTCACTTTAACTAGTGGCACATGATATTTCTTAGCCACTTCTCC  
TAGACGAATCAGTTGGTCTGCATCTGTAACACCCCCACGCATTTGAGGTATAACAGAAAA  
TGTACCATCATTTTGAATATTCGCATGGTAACGTTTCGTTAGCAAATCTTGATTCTCTTTCAT  
CTTCATGATCATGTGGATAAACCATGTTCAAATAATAGTTAATCGCAGGTCGACATTTTG  
GACATCCACCTTTGTTTTTAAAGTTTAAACATGTGCAACTTCTTTAGATGTTTTTAAACC  
TTTCGCTCTTATTTGCGTACTATTTGATCGCGTGTCAAATCAGTACAACCACATATACCA  
GCAGGTTTTGCGGCAACAAAGTCATCTCCTAAGGTGTGCTGCAATATTTGAGCAATTTGC  
GGTTTACATTTACCACATGAATTCCTCCGCTTTTGTTTTTAGCCGTTACTTCTTCAACTGTTGT  
AAAGCCATTTCCGTAATCGAATTTACTATAGTACCTTTATCAACACCATTACAGCCACAA  
ATTGTTTCATCATCAGCCATATCAGCAATTGATAGCGATGCCTCTTCTCCACCTTTAGTAA  
GCAATGATACAAGTGTGTAATCTTCAGTGGATTCACCTTTTTTCATCATGTTATAAAAGCG  
TGAACCATCATCGATATCACCATATAGTACTGCACCAACTACATTACCGTCTTTTTAAAA  
GATTTTTTATAGTTATTATCAACACTATTAATATTTCAATACCTTTAATTTCTGCATTTT  
CTACAATTTGACCAGCACTATAAAGTCACACCAGAACTTTTAAATGACGTAATGTTG  
TTGATCCCTTGTATCCGTTTCGTTTCTTTATTTGTTAAATGATCAGCTAATACTTTACCTTGT  
TCATATAGTGGTGCAACGAGTCCATAAACTTTGCCGTTATGTTCTGCACATTCACCAACTG  
CATATACATTTGCTATCACTTGTTCATCACATCATTGACAACAATACCACGATTAACATC  
TAGACCTGATTCCTTTGGCTACTTCTGTGTATGGTCGTATACCTACTGCCATAACAATAAG  
TCTGCCGGAATCTCGCGTCCATCAGCCAATTTAACACCTTCAACATCATCTTCTCCTAAGA  
TTTCAGTTGTGTTGGCTTGCATTTCAAACCTTCATACCTTGCTTTTCTAGATCTGCTTTAAGC  
ATATTTCCAGCTTTACGGTCTAGCTGCATTTCCATCAACCATTAGCTAAATGTAACACCG  
TTACTTCCATACCTTGATCTAATAAAACCACGTGCACACTCTAAACCTAGTAATCCTCCACC  
AATTACAATTGCTTTCTTTTTAGTCTTAGCAATGTTTCATCATTTGTTTCAGTATCATCAATCG  
TTCTCCAACCAATTACACTCGGTAATGTGCAACCTGGAACCTGGAATGACGAATGCTTTAG  
AACCTGTCGCAAAAATCAATTTATCGTATGATACTTCAATACCATTTGCAGTAGTAACTG  
ATTGATTTGCTCTATCTACTTCAATTACAGGATCATTGTGTAATTAACCTCGATACCATGTT  
CTCATACCACTCATATGGATTCATAATTGTTTCTTCAACTGTCATTTTATTTTGTAATAAT  
TTGAAAGCATGATGCGGTTATAGTTTGGATAAAGTTCTTTACCTATTACCGTAATATCATA  
TAAATCGTTGGCGCGCTCTAATATTTCTTCGATTGTTTCGAATGCCCGCCATACCGTTACCA  
ATCATTACTAGTTTTTTGCTTTGCCAT

### > **nirR**

Function: protein coding sequence; nitrite reductase operon transcript regulator (core genome, variable)

Best match: nirR\_CC001\_MW2-USA400\_BA000033.2[2473875:2474606:r]RC (completely identical)

Position: 058-contig\_243: 32323 ... 33055; Length: 732 bp

Sequence:

TTATATTTTCATCGGAATCATTAAGCTTTCTAATCTATCGTTAATGATTTGCTTTAAAATTG  
GGTCGAAGTTAATTGAAGGTGTGATGTGTATATCTGTATTAATAACCATGTCATTCATTTG  
CTGCTTCACTTTGTTAACAAGCCTTCCGTCGTATAAAAATAATGGTACGACAATCAATTTT  
TGATACCGTTTCGAGATGCTTTCTAAATCATGTGTAAACTAATCTCTCCATATAGCGTTC  
TCGCATATGTCGGCTTGCTAATTTGCAAATTTTGAGTGCATATTTGTAACCTCTTCGTGTGC  
CTTAGTAACTTTCCATTAATATTGCCGTGTGCAACAACCATAACTCCAACCTTGTGTTCT  
TCACCTGCTAATGCGTCACAAATACGTTGTTCAATTAATCGTCTCATTAAAGGATGTGTGC  
CAAGTGGCTCGCTTACTTCTACCTTTATGTCTGGATACCGTCGTTTCATTTTCATGAACGAT  
ATTCGGTATATCCTTGAGATAATGCATTGCACTAAAGATTAGCAATGGTACAATTTTAAA  
ATGGTCAACCCCACTTTGAATCAACGTCGTCATTACCGTCTCTAAATCCTGATGCTCACTT  
TCTAAAACGCAATATCATAGTGATGTATATCATCTTTTACTAATTCAGAAATAAATGCTT  
CTAACGCTTGATTCTGTGCTCCGTGCCTCATGCCATGTGCAACAATGATATTCCCATTAC

### > **nirC-L2**

Function: protein coding sequence; formate/nitrite transporter/locus 2

Best match: nirC-L2\_CC001\_MW2-USA400\_BA000033.2[2475606:2476430:r]RC

Position: 058-contig\_243: 34054 ... 34204; Length: 150 bp

Sequence:

TTATTGTTGCTCTAAACGATTACGCTTACCATTTAAGAAAGCATAAACGAGACCTACAAA  
AATACCGCCACCGACAAAGTTACCTAAGAAAGCAAAAACGATATTTTTTAAAACGTGTAA  
CCATGAAACTGCATCAAGGTTAAAGAATAC

### > **zinT**

Function: protein coding sequence; zinc-binding ABC transporter/substrate-binding protein (core genome, variable)

Best match: zinT\_CC001-ST772\_118\_AJGE01000033.1[71294:72844]RC (completely identical)

Position: 058-contig\_243: 36016 ... 37567; Length: 1551 bp

Sequence:

TTAATGCGCTAACATTTCTTCTTTGATTTGGTCTTTATTTAATTTTGAAGGATAATATGTTG  
GCCAGTTATCCATTTCTTTAATAACGCGTCATTATCATTACCCATAAAGATATGGAAGTG  
TTCTGCCTTTTTAGGTGCAATGTTGTGATCGCTAAATTGGATGAATTTTCGGTAAGTCTTTA  
TCATTACCATCGACCAATTTAAACATAAATCTCACGCCACGGTTACCTTTAGGATATTTCA  
ATGTTTTCTTACCATTGTATTCATATTTACCAGTGTGTTTCTTACCATCTTTAGTAAATGTA  
ATTTCAATTTCTTTTATATCAATGTTAGTAATATCAGTTTTATATCCTTTGTCATAATAAGC  
TTTTAAATCTTTAGCAGATTTCTTAGGATCATTTTCAGCTTTATGTTCCATCACTTCATCAA  
GCGTACCGTCTTTAAGTAAGGGTAAACAGATTGCCATTACCAGCATAATCGCTTAATT  
CACGGTCTTTAACTTGCTCATCTTTAAAATACCCATCAGAAATTGCTTTATCGTGTTTACTT  
TCAGCTTTGTCGTCTTTCACTTTAACACCACTGTCTAAAGCTTTACCGATATTTCAATATT  
CGATTTCAATTAATGATTGATACGTAATATTATCTTTTTTCTGTGTGTTCTTTATTTAAAGACT  
CCATGTTGTAGAATTTTAAAGGCTTCGCATCTGTTTCTTTACGAATTGTTTCAGTCACTTTA  
TTCGCAACATTATCTTCGTAAGAATATATTTAGCATTGCTATCTCTAATTTCTTTAACAA  
TTTTAGTTAATTTCTTTTTGTGATGGATCTTCAGCATTATTTTTGAATACCTTTTTGAACA  
AAACCATAACGATCAGCTAAGTATCCAATTGATTCATGTGAAATGAATACTGCATTACCT  
TGCTTATCTTTTGAACCTTGCTTCATATCGTTATCAATTTTCTTAAGATCGTCGTTAATTT  
TTGTAGTTTTTCTCATAGTCATCTTTATGTTTTGGATCTTTTTTCACTAATTCATCTTTAAT  
TTCTTTAGCGAAAGTTTGGTTAATTTTAGGATCTAACCATACGTGTGGATCATATCCACCA  
TGATGATGATGATGTTCTTTCTTCATGATCATGTCCCTCATGTTTCATGCTCTTCACCATG  
CTCGTGTGATCAGTTAAAAGCTTTGCTTTATCTAATTTATCCTCTAAAGACAGTTTTTTAT  
CTTTATCTTTGATAGTAGATGCAACTTTCTTAGCAACCGGATCTAAATTATCCCCTGTATA  
CATAACAAGTCTGACTTGCTTGCACTTAATATATCTTTTTTGTGTTGGTTCATAGCTATGT  
AAATCTGTCCCTGCTGGATAGATTGATGATACCTTCACGTGTTTTCCACCAATTTGCTCTG  
CAAATGATTGCAATGGATAAACTGTCGTTTTAATTGTTACCTTGCCATCTTTATCTTTTCCA  
TCATCATTCCCACATGCGGCTAATGATAAAGTTACGGCTGGTACAAGAAGTAACATACCT  
AATTTCTTTTTTCAT

### > **dsbA**

Function: protein coding sequence; putative protein-disulfide isomerase (core genome, constant)

Best match: dsbA\_CC001\_MW2-USA400\_BA000033.22480197:2480796:rRC [4\_50ANF10END]

Position: 058-contig\_243: 38650 ... 39250; Length: 600 bp

Sequence:

CTATTTTATTTTATCTTTTAAATAACTTCTCATAACTTTTCATAATCATATGGATCTTCAACTT  
TCTCGCCATTAATAAATGCAGTTGGTGTGCTTTTTATATGATTATCTTTTCGCTATTTTTTTA  
TCTTTCTCTACAGCTTTCCAAGACTTGCTATCTTTTGTCTTGTAATCTTTTATAATTTTATTT  
TCCGTCTCTTTATCTAAATGCAGTTGTTAATATGTTTTATCTAATAGTTCTTTTGTAAACCA  
TTCTTTATTTTTCATCTTGCTGGGCAGCAAATAAATTGCTTTTGAATAATCTAAAATGATTTA  
GGTGCATACATCAATACTGCATGACTCGCACGCGAACCAACAATTGAGTCTTTACCTAAG  
AAAGCTAAATTGACAAATTGGTATTCCACTTTGTGATTATCTATATAATTTTTACGCAACT  
TTGGCATGACTTTTTTCATCTAATTTTACAATAAGGACATTTATAGTCGCCATATATGAC  
AACTAATGGTTTGCCGTTTTTCGAAGATGTCGTTGCTGATTCTTTTTTACCGCAAGCTGTT  
AAAATTAACATGCTCACTATAAATAATATTAGTAATTTTTTTAGTCAT

### > **fmhA**

Function: protein coding sequence; femA-like protein (core genome, variable)  
Best match: fmhA\_CC008-ST72\_TCH130\_ACHD01000031.1[91695:92945:r]  
Position: 058-contig\_243: 39885 ... 41136; Length: 1251 bp  
Sequence:

```
ATGAACTTTGTAACGTTGACTTCGGATGAGTTCAATGCGTTTACAACAAAGCATTTCAC
ATTACACACAATCAGCTATTCATTACAATCATAGAGTTGATTTAAAAGGCGATGTGCATC
TTGTAGGGGTTAAAGATGACAATGGTCAAGTGATTGCAGGATGCTTATTGACAGAAGCAC
ACACACTTAAATTTTTCAAATATTTTTATACACATCGCGGGCCAGTGATGGATTATACAAA
TCAATCATTAGTAGCATTTCCTTTAAAGCATTAAACGTCATATTTAAAGAAACACAATTGT
TTATATGTCCTTGTAGATCCATATTTAATTGAAAATTTACGCAATGCAGACGGTGAAATTG
TTAAATCTTATGATAACCGAGCATTGTTAGAACAAATGGATAAATTAGGTTATAAACACC
AAGGTTTCCCTGTAGGTTATGATTCAATGAGCCAAATCCGTTGGCTGTCAGTGTTAGATTT
AAAAGATAAGACTGAAGACCAACTTTTAAAAGAAATGGATTATCAAACGAGACGTAATA
TTAAAAAACATATGATATTGGTGTCAAACTAAAACGTTAACGATTGATGAAACGCAA
ACTTTTTTCGACTTATTCCATATGGCTGAGGAAAAGCATGGTTTCAAATCCGTGAGTTAC
CATACTTTGAAGAAATGCAAAAGTTATACGATGACCACGCCATGTTAAAGTTGGCGTATA
TTGATTTAAACGAGTATTTAAAACGTTACAATTAAGCAACAACAATTAACAGCTGAAC
TCTCAGGTGTTGAAGAAGCATTGGAAGAAAGTCCTAATTCAAAGAAAAATAAAACGAAA
CGCACACAGCTAGAACAACAGCTAAATAGCAATAAGCGTAAAATCGACAATACAATAGA
ACAAATTGAACAAGATGGTGCAGTCTTAAACTTAGCTTCTGCTTTATTTATCTACAATGAG
CATGAAGTTTATTACTTATCTAGTGGTTCAAACCCTAAATATAATGCTTATATGGGTGCCT
ACCATTTGCAGTGGGAAATGATTAAGTTTGCTAAAGCGCATCATATTGATCGCTATAATTT
TTATGGTATTACCGGTGACTTTTCAGAGTCATCAGAAGACTATGGCGTCCAACAATTCAA
AAAAGGTTTTAACGCACATGTAGAAGAGTATATCGGTGACTTTATTAAGCCTATCAAACC
AATGTTTTACAAAATTCAGCAGTATTTAAATCATAAACGTCGTTAA
```

### > **A5IVJ1**

Function: protein coding sequence; polar amino acid ABC transporter/ATP-binding protein (core genome, variable)  
Best match: A5IVJ1\_CC001-ST772\_118\_AJGE01000033.1[66897:67628]RC (completely identical)  
Position: 058-contig\_243: 41232 ... 41964; Length: 732 bp  
Sequence:

```
TTATTCCTTCATTTATAACATTTAAGAAACGTCTTAATTCTTCTGTTTTTCGGACGGTTGAACA
TCTCTTCTGGAGCCCCTTGTCTCCGATCATACCTTCATGAATAAATAACAATGTTATTAGA
TACTTCTTTAGCAAACGCATTTTCATGTGTCACAATGACCATTGTCATGCCTTCATTAGCC
AAATCTTTAATAACCTTTAAAACATCATTACAAGTTCAGGATCAAGTGCAGATGTTGGT
TCATCAAACAACATCACTTTAGGGTTCATTGCTAGTGCTCTTGCAATAGCAACACGTTGTT
GTTGACCACCTGATAATGCATGTGGACGTTGATCTTTGACATGTGTTAAACCAACTTTCTC
AAGTAACTCAAGTGATTTCCCACGTGCCTCATCCTTTTTCAACTTTTTAACTGTGATAAGA
CCTTCCATTACATTTTCTAATGCCGTCTTATGCGGAAAAAGGTTATAACTTTGAAATACCA
TACCAGACTGTTTACGAACTTCTATTTGTGATTTTTTATCTTTAGATGTATATGTTTTGCCG
TTAACATAAACTGTACCTTCAGTTGGAATTTCTAATGCATTAATCATACGTAACAATGTTG
TTTTACCTGAACCAGATCGACCGATTAAGGTTACAACCTCACCTTGTTCAACAGATAAAT
CAATACCTTTGATGACTTCAACATCATTAAATGATTTATGGATATTGTTCAATTGAATCAT
```

### > **mdeA**

Function: protein coding sequence; multi drug exporter A (core genome, variable)  
Best match: mdeA\_CC001\_MSSA476\_BX571857.1[2464276:2465715:r]RC  
Position: 058-contig\_243: 43560 ... 45000; Length: 1440 bp  
Sequence:

```
TTATTGACGAGAATCAACTTCTTTTTCTTCCCTTGTAACATAAATGAACAAAAGAAACTA
ATAACTGTAATCAATAATGCAAATAAAAATCCAGCGTGATAACCATGCAACATCGTATCA
ACTTTAATTTGATTCATCATATCAATTTTGTTTCATGCCATTATAGTCTGACATAGTTGGAG
AAAAGTTTTTGCTTGCATGAGATAAAATAGTAATTAATGCAGCTGTTCCGATAGAACCAG
CAATTTGTTGTAAGTGTGTTTGTGCATAGATGAACCATGTGCATTCATTTCTGGCTTTAATTG
```

ATTCATCGTATGGGTCATTACTGGAATTAATCCTAACGCGATACCAACCATTTCGAATCGC  
ATAAACTGTTGCCAACATGATTGTTGATGTTTGTTCATCCATTACAACAAAATAAGCCGTA  
GTAATAACAACAATCGCCATACCGACTAAAGCCAATTTTCTTGGACCAAACCTTTTCATAT  
AAAGCACCCGAAGTCATCGACATAAATGCCATAACAATTGCTCCTGGTAATAAAGTTAAC  
CCAGAATCTAAAGCTGAACGATGCAATAAATTTTGCACAAAGATAGGTAAAATCGTTTCC  
GAACCAATCATCGATACCATTGTGACACCCATAATAATGATACCAACTGTAAATTGTTTA  
TTTTTAAATACTGCAAAATTTAATAATGGTGTGATAGCCGATATTGACGTAATACAAAT  
AATGCGACTAAAACAACGCCTCCAATCATAGATACTAATACGATAGGATTATCAAAAACCT  
TTTTCTGAAATTGAACTCGTTCCATACAATAACCCGCCGAAACCTAGTACAGAAAAAATG  
ACAGAAATAAAATCAATAGGTACTTTAATTGTAGTTCCAACATTTTTTATCGTTTTAAATC  
CAATTA AAAATGTAACAGCTGCAATTGGAGCGACAACATGGAAAAGCGATCTCCAGTTA  
AAATATTCAACAAGGTAACCTGAAAGAGTAGGTCCAATAGCTGGTGCTAAACCAATTACC  
AAACCAATATCCCATATATTTACCGCGTTCATGCGGTTGGAAAACATCCAAAATCGTT  
GTCATCATCAATGGCATCATAATACCTGCGCCTAACGCCTGAATAATTCTAGCAACTAAT  
AATGTTGCAAAGTGCGGACTCAAGCCGCCGAGTAATGTACCTAAGAAAAAGATAGAAAT  
ACCCACTAAAAACACTTGTCTTGTGTATAACGTTGTATAACAAGCGCGGACAAAGGAAT  
ACAATCCCATTAGTCAATAAAAAAGCTGTTGTCAGCCATTGAACTTGTGTATATGAAAT  
TTCAAAGTCTTTCATAATACTTGGTAAAGCCGTCCTAATAAGTGTTTCATTTAATAATCCA  
AAAATCCACCCATCAGCATAGTAATAATCATCGTTAATTTTTGTTTCTTCGACAT

> **gpmA2**

Function: protein coding sequence; phosphoglycerate mutase (core genome, constant)

Best match: gpmA2\_CC008\_COL\_CP000046.1[2474088:2474774:r]RC

Position: 058-contig\_243: 45431 ... 46118; Length: 687 bp

Sequence:

TTATAAGTAGTATTTATCTATAACTTCTAAATCATCCGTTAATTCATAAACAAGCGGTGCA  
CCTGTTTTAATTTTCATAATTAATGATATCTTCATCTGACACATCTTCAAGATATTTAATCA  
ATGCGCGAATTGAATTTCCGTGTGCAGAACTAATACCGTTTGACCATCTAGCAAATATT  
GTGAAATATGATCTGTCCAAAATGGTATCACTCGAACTAAAGTATCTTTCAGACTTTCAG  
AATAAGGCATCATAACGTTTATCTAAATGATTATATCGACGATCAGCTAAGTAAGCTTCAC  
GTTGTTCTTCGGTTTCAGCAGGCGGTTTCACATCATAAGAACGACGCCAAATATGTACTTG  
TTCTTCTCCAAATTCTTTTCTAGCATCATCTTTATTTAAGCCTTGCAATCCACCATAGTGGC  
GTTCAATTAACGCCAGCTTTTATATACAGGAATCCATTGTTGTTTAGATTTCAGTTAAAAT  
ATAATGCGTTGTATCTAAAGCACGTGTTAATAACGATGTAAAAGCTACATCGATGGCAAT  
GTTATTTTCTCTTACTTTTTACCTGCTCTAGTCGCTTCATTAATACCTTGTTCAGATAAAT  
TAACATCTTCCCATCCAGTAAATAAGTTTTTAGCATTCCACTCGCTTTGTCCATGACGACA  
TAAAATTAATTTTGGCAT

> **cdf**

Function: protein coding sequence; cation diffusion facilitator family transporter (core genome, constant)

Best match: cdf\_CC005\_Mu50-VRSA\_BA000017.4[2545604:2546470:r]RC (completely identical)

Position: 058-contig\_243: 46444 ... 47311; Length: 867 bp

Sequence:

TTATAGATGGTCTGGTTCTGGGTGAACGTATACTGAGGAAATACCTTTTTTGTGCAAATGA  
TGTTTCGACATTGTCACAAATTTGATGCGCTTCTACTAAGGAAAGGTTAGCATCTACAACA  
ATTGTGACATCAATAAACACACTACTTCCATGGTAACGCCCTTAATACTTTTAACTTCTT  
GTACTTCATCAACTTCTAAAATATCATTGCGATACGCTTCTAATTCAGTTTCATTGAAACC  
ATCACTCAACATAAAAATTGCTTCTTTAAAATAACAAAACCAGTATAAACGATTAGTAA  
GCCTAGTAATGTTGCTAAAATAATATCGACAATTGGGAAACCGATTTGCGTAAAAATTA  
TCCTATCGCTGTTCCAATGCTGACTAACTATCTGATAAATTATCTTTGGCAGCCGAATTT  
AAAGAACTACTTTTCGTTCTTTTCGCTAGTCTTTGATTGACTGCAAATACAATCAACATTA  
CAAGACCACTGATTAAGCTGACGATAATTGTTATTGCGTTAGGTACAACGTCATCTTCTTT  
GAACAAACGAGGTGCATTTTGAATAACTACTTGGATACCTACAAACATAATGACAAATGA  
CACCAATAATGAAGAAATATTTTCAGACTTCAAATGGCCATAAGGATGATTTTCGATCGGC

AGGTTTAATTGAAATTTTCAATCCAATAATAACAGCTAAAGAAACGATAATATCTGTCAT  
ATTGTTTAATGCGTCGGCTCTTACAGCTGCAGAGTTAAAGACAAAACCCGTGACATACTT  
ACAATAGATAAGATTATATATAACAATTAAGTCAAATAAGCACCGCGTTGCGCCAATTT  
AAGATTTTCATTATGAGACAT

> **sbi**

Function: protein coding sequence; staph IgG-binding protein (core genome, variable)

Best match: sbi-MW2\_CC001-ST772\_118\_AJGE01000033.1[59607:60920:r] (completely identical)

Position: 058-contig\_243: 47940 ... 49254; Length: 1314 bp

Sequence:

ATGAAAAATAAATATATCTCGAAGTTGCTAGTTGGGGCAGCAACAATTACGTTAGCTACA  
ATGATTTCAAATGGGGAAGCAAAAGCGAGTAAAAACACGCAACAACTTCAACTAAGCA  
CAAACAACCTCAAACAACCTACGTAACAGATCAACAAAAAGCTTTTTATCAAGTATTACA  
TCTAAAAGGTATCACAGAAGAACAACGTAACCAATACATCAAAACATTACGCGAACACC  
CAGAACGTGCACAAGAAGTATTCTCTGAATCACTTAAAGACAGCAAGAACCCAGACCGA  
CGTGTTCACAACAAAACACTTTTTACAATGTTCTTAAAAATGATAACTTAACTGAACAA  
GAAAAAATAATTACATTGCACAAATTAAGAAAACCCCTGATAGAAGCCAACAAGTTTG  
GGTAGAATCAGTACAATCTTCTAAAGCTAAAGAACGTCAAAATATTGAAAATGCGGATA  
AAGCAATTAAGATTTCCAAGATAACAAAGCACCACACGATAAATCAGCAGCATATGAA  
GCTAACTCAAATACCTAAAGATTTACGCGATAAAAAATAACCGCTTTGTAGAAAAAGTT  
TCAATTGAAAAAGCAATCGTTCGTCATGATGAGCGTGTGAAATCAGCAAATGATGCAATC  
TCAAATTAATGTAAAAGATTCAATTGAAAACAGACGTTTAGCACAACGTGAAGTTAAC  
AAAGCACCTATGGATGTAAAAGAGCATTTACAGAAACAATTAGACGCATTAGTAGCTCA  
AAAAGATGCTGAAAAGAAAAGTGGCACCAAAAGTTGAGGCTCCTCAAATTCATCACCAC  
AAATTGAAAAACCTAAAGCAGAATCACCAAAAGTTGAAGTCCCTCAAATCCAATCACCA  
AAAGTTGAGGTTCCCTCAATCTAAATTATTAGGTTACTACCAATCATTAAAAGATTCATTTA  
ACTATGGTTACAAGTATTTAACAGATACTTATAAAAAGCTATAAAGAAAAATATGATACAG  
CAAAGTACTACTATAATACGTACTATAAATACAAAGGTGCGATTGACAAAGCTGTATTA  
CTTACTTGGCGATGGTTCTAAATCTTATATCCAACCATTGAAAGTTGATGATAAAAATGG  
CTATTTAGCTAAATCATATGCACAAGTAAGAACTATGTAACCTGAGTCAATCAATACTGG  
TAAAGTATTATATACTTTCTACCAAAACCCAACATTAGTAAAAACAGCTATTAAGCTCA  
AGAACTGCATCATCAATCAAAAATACAATAACTGGATTATTTAACTCATTCTGGAAATA  
A

> **Q2YVZ3**

Function: protein coding sequence; putative protein (core genome, variable)

Best match: Q2YVZ3\_CC001\_MW2-USA400\_BA000033.2[2491088:2491270:r]RC (completely identical)

Position: 058-contig\_243: 49472 ... 49655; Length: 183 bp

Sequence:

TCAGCTCAACTTTATTAACTTCAAATTTTCACAACTATTGCGCAATCCATTCTCTTCCA  
CTACAAGCACCATAATTAACAACAATTCAATAGAATAAGACTTGCAAAACATAGTTATG  
TAGCTATATAAACGCCTGCGACCAATAAATCTTTTAAACATAACATAATGCAAAAACATC  
AT

> **tx\_tnp13k**

Function: rho independent terminator

Best match: tx\_tnp13k\_CC008\_TCH1516\_CP000730.1[681117:681194:r]RC (completely identical)

Position: 058-contig\_243: 49992 ... 50070; Length: 78 bp

Sequence:

ATTCGCTTAGATTAACCTATATTAATTGACGGGTTTCGTGCCTCACACAGTCATTTAATATA  
GGTTCACAATTTTGTGT

> **tnp**

Function:



Best match: tnp\_traG\_CC005\_CF-Marseille\_CABA01000108.1[4022:5042:r]RC (completely identical)

Position: 058-contig\_243: 50013 ... 51034; Length: 1021 bp

Sequence:

```
TTAATTGACGGGTTTCGTGCCTCACACAGTCATTTAATATAGGTTCAACAATTTTGTGTGCTT
ACATGGTACTTTAGCATTTCCTCACTCGATTTATAGTCAAATATCATTTCGAGGCCGTGCAT
TAATTTGTTTAAACAGCTTCATCTAATGACTTTTGTGTTATATTTGCAAAAATCCGTACCTTTA
GGATAATACTGTCTTAAAAGTCCATTTGCATTTTCAATGGAACCACGTTGATATGGACAA
CCCAAATCACTAAAATAAATACTACAATTCAATTCATCTTCTATTTGTTCAAATAGAGCGA
ACTCCTTACCTCTATCCATAGTTATACTTTTGGGTAATAATGGTTTCATAAATTTATAAATC
TCATTACAAACTACATTGGATTTACGTGTATTTAATCTACTAGCATATAAATATCTTGTGTT
TTCTTTCAATAATAGTTAACAAGCAATATGTTGATGGTCTAACACTCCAAACAGTATCAAT
TTCATAATGCCCAAATTCTTCACGATTATAACTTTTTGAGCCGATACTTTATAACACG
AGACCCTACGTCTAATTTGCCACGTTTTTCAGAAGACTTATTATATTTCTTGCTGCTTGTG
TCATATCACGCTTAACATCAACTTTTACCAATCCATTGCGAATATATCTATATATAGTAGG
ATAACTTATATAATGCCCTGTATCTTTTTCAATTTGACTTGCTATCTGTCTAGGAGACCATT
TTAATGAAAGTTTTTCTTCAATATATGCTTTTTGTTTCATCATTCAAACGTCTACGTTTAGCA
ACTTGTTTCATCTGAAATACTACGCGATTTTATAGCATCTTCCTCAGCTAATAAAGGATTAT
AAACACCATCAACAGAACGCTTATTTACTTCTCTATAAAGAAGTGCATCATCACGACCTA
AAATCTTAGAAATCTGAATGATGTTTAAACCATCATTTAAATACTTTGCGATAGCTAGAC
GTGTTTTATAGTCTAATCTTTACGTTTTTTTTCTTTTTTTCAT
```

### > **A8Z128**

Function: protein coding sequence; putative lipoprotein (mobile element)

Best match: A8Z128\_CC008\_A5948\_ACKD01000006.1[75679:76035:r]RC

Position: 058-contig\_243: 51142 ... 51484; Length: 342 bp

Sequence:

```
TTATTTTTTCATATTATTTTCTTCATAAACTGGTTTATGATTACTTTGATATTCTTTTTTCGTT
CATATCTTCAACTTTTACATATTTATCTGTTGTCTCATTTTTTTTTATATAAACTTGTCCACA
CTGTACCATCTTTATCATAAAACAAAAGAAATAGTTATAAATTTACCATCTTCATATACTTT
AAAATCACTATTACTTTTTTCAGGCTTCTTAAAAGAAGACTCACTCATACTTTTTCTTTCA
GAATTTAAAACGTCATCAATCTCTTTATCATATTTCTGACCACATGCAGATAATAATATAA
CTAATCCTAAAATTAATACAAACCATCGCCTCAT
```

### > **A8Z129-var1**

Function: protein coding sequence; putative protein (mobile element)

Best match: A8Z129-var1\_CC005\_A9299\_ACKH01000035.1[233166:233756]RC (completely identical)

Position: 058-contig\_243: 51539 ... 52130; Length: 591 bp

Sequence:

```
CTAACGTCCTAGAGGTTTTAAATTGAAACGTTTTAAATTATCAATACGCCAACCTTCAGCT
GTACGAACTAAATCCAATTGTGCAGATGTTTGACGATGTTCAATTTTATCATCTCCATCTG
TTTCAATACGTTTCGTCGAACTGAACAAAAAATTTATAACTATCTTTTTTAGGGTCATACGT
ATCAAAATAAACATGAATATCATTAAACGGTTATATCATCATATAAATCATATTTATCTTTA
GAATCCTTAAATAATGTATCGTAATAATCCTTTGTAACATAAAGGCTTTATTTGTGGTGCTT
TTGATTTAAAAGAAGAATCTTTTTTTCATTTCAAACATCTGTTTAAACAAAATTTGAAGAAAC
TTCACGATTTTGCTTTTTCTTCATCAGAAATAACTGTTTTTGATTGTCTTTTTACTAGTTTATT
TAACTCTCCATTTTTATCTCTTAATATACGTTGTTCTTCCTGTAAATCTTCAATTTGATTTT
GTTTCATTTTAACTTGTGTTTAGGAATCTGATAACCAATTAACAGCACAAAATAATAT
TACTGTTACAAGAGTAAACATAATAATTTTTTGCTTCAT
```

### > **traG-tnp13K**

Function: protein coding sequence; putative transposase

Best match: traG-tnp13K\_CC001-ST772\_118\_AJGE01000003.1[20201:21247:r]RC (completely identical)

Position: 058-contig\_243: 52136 ... 53183; Length: 1047 bp

Sequence:

```
TCACTCCTTATCATGAATAAACTATATCCATCAGTCATTTTCAATGTACGTTTCATTA  
TTAAAAGCACCTTCCCAATTCATTTCTGTTATTCTAAATGTTTTACCACCATCACTTACACC  
AATAACAACAGCCACATGACCATAATGCCCATCATGACCGCCTGCACCTTGTTTCAGCAAT  
AAATAATGCACCAGGTTCCGGATTTTTATCAACTTTATAACCCTCAGCCTTAGCCCTATCA  
TTCCATTTATGTGCATCATGCCAATAAGTTGATACAGGTTTACCCATTTTTTTGACGCATAC  
CGTATGCATACCAAGTACATTGACCAGCAGTGTATAAATTACCTTTTCCAGGGTCATCATT  
TGACCAATGTGGCAATTTACCATTAACTTTATAGACTTTCCTTTACCATTACTACATGAC  
GTTTTAGCTTCTGAACCGCCTAAATCTTTCATAATTTTTTCAACTGTTGGTATCCAACGGG  
CATTCATATTATTAGGGTCATTTGACGCACCAACAGGCGCATATTTGGGACCTATTTTTTT  
AGGAGTATCTAAACCTTTAGAAATATAAACATCATACAAATTTTTAGCTCCCGCATTAAAG  
ACCGTCTTCAATAGTTGGATATGTTGAATCATGAATCGATTTTGAACCCATAACAGACAA  
AGGATTATTTGTCTTGTCTGCATTTTCTCCTTTACCCCATTTGCGATTCACTCGCAATAATAG  
CCATAAAAATATTCACAGGTAATTTATTTTTTCTGCAATTTTCTGTATTTCTTTTCTTTA  
CCCTCTAATTTTCCACCTTTAGCATTTTCATTAACTTATCAATACCATTGCGGAAACATT  
ACCGCCACTAACAGTACAACCAGCATCATCTTTATCTTTATTTGAATCAGGCGCTAACAA  
AAACATTACAATTACTGGAAATGTAAAAAAGCCACCACACAAAATGATGATGACTT  
TCGCTAATTTCAATTTAACACCTATTGGCGTTTTACCTATTACTTTTTTAGCAATATCTTTT  
TTATTTACCAT
```

### > A8Z131

Function: protein coding sequence; putative membrane protein (mobile element)

Best match: A8Z131\_CC005\_A9299\_ACKH01000035.1[230276:232123]RC

Position: 058-contig\_243: 53172 ... 55020; Length: 1848 bp

Sequence:

```
TTATTTACCATGCTTATTGATATCCTTTTGCTCTTTTAGACGGTCTTTTACTGAGAATTAC  
GTGTAATAGGTTGATTACGATTTCCAGATTGTCTACTTTGTTGATTCTGTGTTGCATTTTGT  
ATTTGTCGTTTTTGAACATCAGTATCATAAGCAGTTTGAAGTACTTCTGTTCTTTACGATT  
TATTGAATGATTCTCATTATTTAATGGCTGATTAACCACTTGTGGCGACCTTTGTATATCTT  
TTCGCTGCTTGTCTCGTACTTGATGCTCTTGCTGTGATGCTTTTTTGTGGTTGTTTAGAA  
TAATTATTTGCATTTGATTCAACAGAAGCAGATTTTACATCGTTACCATTCAATTGACTCTT  
GTTGTTCTCTTCGCTTATTACCATTTTTTTGATTATCTTTATTTATAAATAAAGGCATTGGT  
TTATCCTGCTGCCTTCTTCTTAAATCATTATCATTTTGAAGTGGTGGGGCGGGTTCATCTCT  
TTGATTTTCTCGCTTAGCTTTCTTATTTTGCCTTGTTCATGACGAATCTTATTTAAAACGTT  
CTTGTTGTTTCGATTCATCACACCAGCACCAATTGCACTAGGAGAAAACTAATATTACCAC  
GACTTACAAAATTGATAATTTGAGCCCGTTTTTTATACATTACAAACAATATTACAATTAT  
AAATATTGAATTTAAAAAATAAGCATTCTGACTATCCGGTTCAATAAACTATTTGCAAG  
CTTGATACACAAACCAACTATCACAAATAAGAATGTCATACAGGCACTTAAAATAATATA  
GCCTAACGTTTTTGCAAACGCAGAGAAAACAGATAATTCAAATCCTGGTATAAACTCAC  
TATCCAACCTGAATACTAAAAATAAAAAATAAAAAATAAAGCAAATGTAGAAAAAATCAACT  
TCGCAAAACTAATTGATAAAAAATACAATTGACATAAAAAACAGTAATAATAAAGCCAATC  
ACTGAAATAGCCAACCTTTGAAATACATAACCTTGCCTCATATATTTATTATCTTTTTTCTC  
AACCTCATTTTTTACAATTTTATCAATCTCATCTTGTCTTTTTTTGAAAAATCTTGTTTTA  
AAATGTTATCAATACGGTCTTTACCTTTTGTCTTTATCTTTTTTTCGTCTACAGTTCCATAA  
TTCATTACTAAATATGTTCTATATATCGTCATATCAAATAATTGATTACGTATATGATTCA  
TACCTGAATTCTCATGAATATAATCAATATTCCCATCAATAGTAGATGTACTATTCATAAT  
TATATTATCAAATCCTTACCAATATTGTTTGTACCACGTATAATATTACCTGCATTTCGCA  
AGTATACCAACACCAAAACCAATTAACACATAATTA AAAACGCTCGTTTTAATGCTTCT  
CTTGCAATTACCTTGTACACTAAAAATAATAAATGCGTTAAAAACAACAATAATAAATAAT  
GTTATTGCCAAATTACTCAATAACTTTTTGATATATATCGCCAACAAAATCACCGATTTTAT  
CCGCAAAATCATTAAATAACATCTAGTTGAAATAAATTTTCAATCGCATAATCTGTAACAC  
CTGCTAAAATCTTAGTCATAGAAAAGAAAAAATCTGACACATTATTAATTTGTCTGTGAAA  
TTTCTTCTTGACCAACGGATTCCAGTCGCCTTTTTCACTATATATTGAACGATAATGTGA  
TAAATCATACTTTTCAATTTTTTGGCTTAACTGCATGTGAGGGCTCTCCAACCTGGATTAGAA
```

ACAGCGTAAGCACTCACAGATGTTAAAAGCAGAATAGGCAAAATTA AAAAGCATAAAAG  
ATACACACTTTTATGCTTCAT

> **Q6GHC0**

Function: protein coding sequence; putative conjugative protein (mobile element)

Best match: Q6GHC0\_CC001-ST772\_118\_AJGE01000003.1[23089:24447:r]RC (completely identical)

Position: 058-contig\_243: 55024 ... 56383; Length: 1359 bp

Sequence:

TCACTCCTTATTTAATATTTGTTTCACATCTTCCACAAAATCATATTGTTCCATTAAAGGTG  
CATCAATAAAAATTGGTTCATTATATTGTCCAAGTATAGAAATATAACCTCGACCGATGT  
CACTATCATGAATCGTTTGAAATCCTTTATCAGTTTGACCAAAGGTCATACGATAACCATC  
ATTTGACAAATTACCTAAAGACACACGTAACCCTAATTGGTCACGCACATTACCTTTAAT  
CACATCTGCATCTGGTCTTTGTGCTGTTAAAACATAAATACACCAGCTTGACGACCTTTC  
ATAATAATATTAATTAATAATCATTCAATTTCTTGTAATTCTTTTTTATCTAAAGTTGAAGT  
AAAAGCCGTTACCTCATCAAAAATAATGAAATAGGGGCGCATATCAAAATTACGGAAAT  
CATTCCCGATTTTATAATCCGAACTATCATTCAATTAATCTAAAACGCTCTTCCATTTCATT  
TTAGCTTCTCTCAATTGTTTTAATATTTGACCTTTAGTATCTGCAACTTTATCATCACCAAT  
AACGCGCTTCATAAAGCTCAAATCTGAAACTTTTGGATCTAATAAACGTA CTTCTGAATG  
TCTACGGAATAACTCACGAATCACATAAAAATAAAAAATATGTTTTACCACCTCCGGTTAT  
ACCTGTAACCAATCCATGAGGTGCTTTCACAAAATCCCAAGTAATTTGATGCGTAATAGC  
AATTTTTGTATCATAAAAAATTGTATTTGATTCTTGTTCCGCAATTCATAACAATACGCTTTT  
TATATTTAAGTGGCATAAATTCATATCTCAAATAACGACCAATATGCTTTTTTTTCTACTAA  
TTCAGAATTAACATTGGTTCAATAATCGTTTCTAACTCTAAATAATTATCTTGAAACCTC  
GAACCGTCTTTTTTAATATGAATAACAAAAGTTTTTTTACCACGTTTATAAACATTGTTG  
GATAATAATCATATTCAGTTTGTTTATAATCAATAGGGATATACTCAGTTGTTTTCTTGAT  
TACTGTACGATTATGAAAACCTTGTGTTTCAATCATTTTACGCCAAATCTTTTGTTTTAAAA  
CGTATTA AAAACTGAGCAATAAGCTTACATATCACAAATATAATTGCTGTACCAATTAAT  
AAATACAATAAATGCGGTTTAAAATATGCAAACAACGTCAATATATCCAATTTTTTATTA  
ACTGATTTATAATCAATAAACAAAATGTATATACGATATACCAAAAAAATAAATGCTAAT  
ACACCTGCAAACATAAAATCAATATACTTCTGATAAGGCTGTATACGTACGCCTTTAAAT  
AAAGCAATTTCAATTCATTGCCAT

> **yddE**

Function: protein coding sequence; conjugal transfer protein/ATPase

Best match: yddE\_circ\_879R4RF\_GQ900429.1[1:1530]RC

Position: 058-contig\_243: 56436 ... 57966; Length: 1530 bp

Sequence:

TTACATCGCAAATTTTTCTTCAGCTTTAGAGCTTGCAGAATCTTCTTGTGTTCTAAATGCTT  
CAGTCATTTCTCAAATGGACAATGTACAACCATTTTTCCAACACGTCCATAAAAATCACT  
AAATATACATTGACCTTTCTTCAAATCTTTCAACATTTCCATATTTTACAGGAGATTCTTTTG  
AATATTCTAAGCCTAAAGATTTTAAAATATCCTCACGTTTCTTTTTCATCAAATGCAAA  
ATGACAACCAAAGTTACCACCATCATCATCTGCTTTATCTTTTACCGATTGTGTAATAAAT  
ACAAGTGAATTATTCTCAGAACGTCCCGTTCTTTTTATACGCTTACCAACTTTTTTACCTTG  
TCTTGAAGCACTAAAAGCCCAACCCTCATCAATAAATATAGTCGTTTGAACATCTCTACG  
AGAACCGAATTTCTCTAAAACCTTACCAATTAATAACATTAATGTAATCCCATTTTTTCTCA  
CTTGTTGAATAACTTGATGTATCATCATCTGCTTTAGGCATATCTAAACCTTTAACCTGTA  
AAATAGTTGCTTTTTCTTGAATATTTAAAGCTGGATTCGTACCATCACTAAAAACAAGTTT  
TAAAATATTGTTTTGCGTTTTTTCAAATAAATAAATCGCCTGCATTTTTTACATGCTCATCTT  
CATTATTCTGTAATTTTTCAATTACATTTAATGAACCAACTTTTTTACCATTTTACGTTCT  
TCAACCGTATCAGAAATAGCTTGATAAATTGCCGTTTCAATATGATGATAATTTTCAAAA  
GATTTAATTTTCAACAACTGATTTCAACATCTCATTAGCTTCAATACCATCTAAAAATA  
CAATAGGGTCTAGACAACCATAATTGGTTGAATCTTCAATAATTCAATGTTACATATTTAA  
TGTTTTTAAATGATTAATAAATAGGGGATACTTTTCTGCAATTCCTTACTTTCTGTTACTC  
TGTCAAACCATTTCTGCAAACCTCAGATTTTGGATCCCAGTACAACATTTGACCTTTAAAAA

ATGATGTATAAATCCATAATAATTTTGCTAAAAATGATTTACCTTTACCAGTTTGACCAGT  
AATTAACACATGCGGACTATCACTGACAGCCCCTTTAATACCTTTTGCAGCCAACAATAA  
ACTAAATAAAATTATATCCCTTGAACCTGCAACAGCTTCCTCACGTGAAACAGAACGAAT  
AAATTTATCAATACGCCCTATATAAAAACCTGTTTTTGTCCCAAACCTTTGAGACACACCA  
AATAAATTTTCTGCTATACCTGTTGCCGTAGTCTTTGTAACCAATACTTATTAATAAATA  
AATCATTACCATGTAAACACTGATAAAACAATTGTAACCTGGTCAGCTAATGGATTAACCTG  
CATATATTTGAGTTTCCCTTAATCGTTTCATCAAACGCTTTGCTTTACGTTTACAGTCTCTA  
TAATCATCACTTTTAATTACAAACATAAATACCCACTCAATAAATACACCTGAGCCAGTC  
ACTTC

### > **Q6GHB6**

Function: protein coding sequence; putative protein (mobile element)

Best match: Q6GHB6\_CC001-ST772\_118\_AJGE01000003.1[27691:28746:r]RC (completely identical)

Position: 058-contig\_243: 59626 ... 60682; Length: 1056 bp

Sequence:

TTAACCTCCAATAGAATTAGTCATATTTTTAACGTAATATTTACCATCTTTTTTCGTTATAT  
CTAATGTGTAATGTTCCAAATTCTCCAAAGGAGAATCTTTATCTTTCATCAAATTTCAAC  
TTTAGCAACATAATCATCGCCTTTTGGATATAACCTAATTTCTCTTATTTGAGAACTTCT  
CTAGTTCCTTCTAATCCCTCAGGATTATCCATTAATAAGCCATATCATCAGGCTTACTAG  
AAGCATATTTATTAAGAAATCCTCAATAAATGCTTTTGGCTTTTCGGATTATCTTCACGTTT  
ATTATCTTTCAGTTATCCTCAACCATCTTAGCTTTATTTAATTGACTATCAGGAATTGGA  
GTAAAATAAGGATATTCAACAACAACATACTTATTATTCTCACTCTTAATAGGTATATTA  
TTAGAATATTTTGATTTACTTTACGTTGCTTTTCTTCTGTTTTTGTTCATATTCATCTTTAT  
CTTTATCATTTTTCTTTTTCTTTACTTTAACTTCTTTCTTTTCAGTAATATTCACATCAT  
AATTAACAATATACTGTATAATCGTTTGTATCTTTACGTTAATATTATAAAATTCCTTA  
CTATTTAATTTACGTTTCAGTATCTGATGTTTTTCTTCAGGCTTTTATAATCTGATGGAAA  
ATATTTCAATAACTCTTTTTCTCTAGATTCTAATTCCTTTGAGTCTTTAGAAATATTCATAT  
ACGTATCAATAAATTTATCAGCATATAACTTTAATTTAGGACTATACTGAACTGTATTCGC  
ATTATCTTCATACTTTTTTTGAATCATATTCGTTTTATTAACCTGCTTCTTTACTATCATTATT  
TGCTCTTGTAGCTTTAATAAAAAGAAGCTAATAAAAAGAAATTAACAAAATAGCTAATAATGA  
GTAAAACAAATTACAATCATCTTACGACGATTTTTAAATTTTGGAACTACTCGGCGTTGT  
TCTTTAGGAATATCAAATGCTTTCGGTTTTTAGAAAATCGTGTTAAAATGTACTTACTTA  
TTATTTTCAT

### > **rstA**

Function: protein coding sequence; bacteriophage replication initiation factor family protein (mobile element)

Best match: rstA\_CC001-ST772\_118\_AJGE01000003.1[28807:29898:r]RC (completely identical)

Position: 058-contig\_243: 60742 ... 61834; Length: 1092 bp

Sequence:

TTAACACTTATCTTTTGATAAGTGCTTTTTTTGTTTTAAAGCCTCCAAATAATGATTAATTC  
TATTCGTATGCTCATCATTAAATTGTGAATGCGCTAAAATTTTATCTAAAAAATCAGTATC  
TGTAAGCAACCCCTCAGATTGCGCCACTTTTCGGCAGTTAAACTGTATCTAAAGTAGT  
AGCAACTTGTTTACATAACCAATCAAGATTATCCTCAATGGATTTAATGTTGGTCTAGTA  
GTTAAATTCAATTTTTTTCAGTATCTTTAATAAATAACGCCAAGGTCTATACAATGGCCACC  
GCTTACGATTTTTATCATTTCATCTTTAGGAGGGGAGATAAAACGCAAATATTATGCAA  
TATAGACTTTACAATTTTCGCTTATATTATCTGTTCTACTCAAACTTTTCGCACAATTA  
GCTATATGCTTTTCGCATTTGTATTTTACATAACGATTCCATAACCCAATGTCTTCGACATCAC  
AATGACGTTTTAAACGCTTGTTCATAATTCTTTTCATAAAATCGACAATATAAATTGCTTTG  
TTTGAACCAATATAAAAAGTAGCGCCTTTACTTCTTCCGTCTGATAAATTAACCGTTT  
ATTGCGCTTCCAGCTCTAAAACGTGAAACACACTCAGCTTTTTTCAGCCTTTTTAATTAATA  
AAGGCACTTTTAAATATGTTTTATAATCATCAATTGCAATATCAATTCTTGTAATAATTTGC  
ATTAACCTGATAAACATTTATCAAAAAAATCTTGCCAAGTTTTATTCAACTGTTGTAATGA  
TGTTCAAACCTCTACAACCTGTACCAGTTAACTGTAAGTGAATGCCATTGATTCATCAT

CACTTGAATAATACAATTTAATGTTTGAAAATTCATAACCGCGATTATAAAAAGTAAATGC  
CACTATTTTCGTTTTTTGAACAACGTTATAGGCAAACCGATAACGTCCTCAATTACTGCTGA  
AATAGGGGTTATATGGAAAGTGACCTGAACCCAGTCAACAACCTGCCTCCACGGCACTTTT  
ATTTGTACGCTCTACCCCTATTAGTAAGGGGGGTACACTGGTTTTTTAAAGTCAT

### > **A8Z139**

Function: protein coding sequence; putative protein (mobile element)

Best match: A8Z139\_CC008\_21232\_AGTY01000037.1[15789:16109:r]RC (completely identical)

Position: 058-contig\_243: 62324 ... 62645; Length: 321 bp

Sequence:

TTATTTTTGTTTAAAGTGCATTATTAGAACCAACTACTTTAATATCTTCTGCATTCCAGCTAT  
ATGCGATAGTTCCAAAATCGCCTGACATTTGAACATACATTTTAACGTCTGGTTCAACTAA  
TTCGCATTCTTGTAATAGTCTAATTCTACTTTATTAGGCGTTTTAACAGTAATTTGTTTCGC  
CTTGTTCTTGACTCGCTAATTTATATGCATAAACAGTTTTATCAGTACGCTCTCCATTTTCA  
TATTTATATTTTTTCATCTACACCTAAAAAGTTTAATTGTCCTAAAGTTTTTTAATATCCAA  
TACTGGTTTCAT

### > **Q6GHB2**

Function: protein coding sequence; putative protein (mobile element)

Best match: Q6GHB2\_CC007\_TCH959-USA300\_AASB02000002.1[6283:6567]RC (completely identical)

Position: 058-contig\_243: 62795 ... 63080; Length: 285 bp

Sequence:

CTATCGGTTTCATCACCTCAAAAAATTCTAAGTCTTCAATTGAAATATGATACATCTTACAA  
ATAAATGTATTAGACACACCATATTGTTTTAAAAATTTATAATCCTTATAAGTAAATCGAT  
AATCATTCTTTTTTGCCATTTCAAACTTCTAATATACGAAAATATGCAAATTATACAT  
TTTACAAATTTTTCTTTTAGAAACACCATGAAATCTTAAATTACAAATTTACGATAATTT  
AATTGATTTGAACCATCAAAAAAAGGTGTAAACTCAGTCAT

### > **hlgA**

Function: protein coding sequence; hemolysin gamma component A (core genome, constant)

Best match: hlgA\_CC001\_MW2-USA400\_BA000033.2[2491405:2492334]

Position: 058-contig\_243: 63911 ... 64061; Length: 150 bp

Sequence:

AACATGGATGCTACATATGCTTACGTGACAAGACATCGTTTAGCCGTTGATAGAAAACAT  
GATGCTTTTTAAAACCGAAACGTTACAGTTAAATATGAAGTGAACCTGGAAAACACATGA  
AGTAAAAATTTAAAGCATCACACCTAAGTAA

### > **lukS**

Function: protein coding sequence; hemolysin gamma component C (core genome, variable)

Best match: lukS\_CC001\_MW2-USA400\_BA000033.2[2492902:2493849] (completely identical)

Position: 058-contig\_243: 64627 ... 65575; Length: 948 bp

Sequence:

ATGCTTAAAAATAAAATATTAGCCACAACCTTTATCTGTGAGCTTACTTGCCCCTCTTGCCA  
ATCCGTTATTAGAAAATGCTAAAGCTGCCAACGATACTGAAGACATCGGTAAAGGAAGC  
GATATAGAAATTATCAAAAGGACAGAAGATAAAACAAGTAATAAATGGGGCGTGACTCA  
AAATATTCAATTTGATTTTGTGAAGGATAAAAAATATAACAAAGATGCTTTGATATTTAA  
GATGCAAGGATTCATTAGCTCTAGAACAACATATTACAACATAAAAAAACTAATCATGT  
TAAAGCTATGCGATGGCCATTCCAATATAATATTGGTTTTAAAAACAAATGATAAATATGT  
TTCTTTAATTAATTTTACCTAAAAATAAAATTGAATCTACAAACGTGAGTCAGACATTA  
GGATACAATATCGGTGGTAATTTCCAATCAGCCCCATCACTCGGTGGTAATGGATCATTT  
AACTATTCTAAATCGATTAGCTATACACAACAAAATTATGTAAGTGAAGTAGAACAACAA  
AACTCAAAAAGTGTTTTATGGGGCGTCAAAGCGAATTCATTCGCCACTGAATCAGGTCAA  
AAATCAGCATTGATAGCGATTTATTTGTAGGCTACAAACCTCATAGTAAAGATCCTAGA  
GATTATTCGTTCCAGACAGTGAGTTACCACCTCTTGTACAAAGTGGATTTAACCTTCAT

TTATCGCCACAGTATCTCATGAAAAAGGTTCAAGCGATACAAGCGAATTTGAAATTACTT  
ACGGAAGAAACATGGATGTCCTCATGCCATTAAAAGATCAACGCATTATGGCAACAGTT  
ATTTAGACGGACATAGAGTCCATAATGCATTTGTAAATAGAACTATACTGTGAAATACG  
AGGTCAATTGGAAGACTCATGAAATCAAGGTGAAAGGACAGAATTGA

> **lukF**

Function: protein coding sequence; hemolysin gamma component B (core genome, variable)  
Best match: lukF\_CC001\_MW2-USA400\_BA000033.2[2493851:2494828] (completely identical)  
Position: 058-contig\_243: 65576 ... 66554; Length: 978 bp

Sequence:

ATGAAAATGAATAAATTAGTCAAATCATCCGTTGCTACATCTATGGCATTATTACTTTT  
CTGGTACTGCTAATGCTGAAGGTAATAACACCAGTCAGCGTAAAAAAGTCGATGAC  
AAAGTTACTTTATACAAAACAACAGCCACAGCAGATTCTGATAAATTTAAAATTTACAG  
ATTTTAACATTTAATTTTCATCAAAGATAAAAGTTATGATAAAGATACTTTAGTACTTAAAG  
CTACTGGGAATATTAACTCAGGCTTTGTGAAACCTAATCCTAATGACTATGACTTTTCAA  
ATTATATTGGGGAGCTAAATACAATGTATCTATAAGCTCACAATCTAATGATTCAGTAAA  
CGTCGTTGATTATGCACCAAAAAATCAAATGAAGAGTTTCAAGTTCAAATACTTTAGG  
CTATACATTTGGTGGTGACATTAGTATCTCTAATGGTTTATCTGGTGGACTTAATGGAAAT  
ACAGCTTTTTCTGAAACAATTAATTATAACAAGAAAGTTACAGAACAACATTAAGTCGC  
AACACAAATTATAAAAATGTTGGCTGGGGAGTTGAAGCACATAAAATTATGAATAATGG  
TTGGGGACCTTATGGACGAGATAGCTTCCACCCAACATATGGTAATGAACTCTTCTTAGC  
TGGCAGACAAAGCAGTGCATACGCTGGCCAAAACCTTCATAGCGCAACACCAAATGCCAT  
TATTATCTAGAAGTAACTTCAATCCAGAATTTTTAAGCGTACTATCACACAGACAAGATG  
GCGCTAAAAAATCTAAAATTACAGTAACTTATCAACGTGAAATGGATTTATACCAAATTC  
GTTGGAATGGCTTCTACTGGGCAGGCGCAAATTATAAAAACCTTTAAAACCTAGAACATTTA  
AATCAACATATGAAATTGATTGGGAAAATCACAAAGTGAAATTGTTAGATACAAAAGAA  
ACTGAAAACAATAAATAG

> **bioX**

Function: protein coding sequence; putative membrane protein (core genome, variable)  
Best match: bioX\_CC001\_MW2-USA400\_BA000033.2[2494880:2495347:r]RC (completely identical)  
Position: 058-contig\_243: 66605 ... 67073; Length: 468 bp

Sequence:

TTATCTTAGTAAGACTGCCATTCTTTTTCTCAATGTGAGATATAAAGGAATAGCTACAATT  
AAAGTGAATATTACGCCTGGAATCGCGTTTAAACAACACTACCCACACAGGTAAATTTAAA  
ATAATAGATAATAGTAGCCTAGATACCAAACCTGCCTAATACACTTGCTAAAACCTAATGAT  
AGTACATTTATTTCAATAAATAAACAACCTGCAATAGCTATAACTCTAAATATAATAGAA  
ATAATCACATTAATTGGATTAAATACGCCAAATACTAGTAATAATAGGCTAGATAATAAT  
CCACCTAAAAAGTACTTTTTAATCCAAAGAAAGCTAATATCAATAATGCTGCCGGTGCA  
GATAATTGAAAATCTAATCCTGGTATAATGGACGGTATTTTCAAAGCTGCCAAAATGGTT  
AAAATCGCAGCAATGACACTAATTTGAGTAATATCTTTTGATGTTCAT

> **bioW**

Function: protein coding sequence; 6-carboxyhexanoate--CoA ligase (core genome, constant)  
Best match: bioW\_CC001\_MW2-USA400\_BA000033.2[2495358:2496050:r]RC (completely identical)  
Position: 058-contig\_243: 67083 ... 67776; Length: 693 bp

Sequence:

CTATACCCTTTCATAAACAACCTTGCTTCGGTGTGCTTTCTAAAAATGATATGTAATGATTT  
AAATCAATACGATCGTCCACAAATATTATTCTGCCTCCATATCTCGTATTAACCTGGTTTAA  
TATCAAATAATCGATGGTAACCAATTTTAGCAGAGGCCAAAATAACCTGTCGTATACGTTA  
AGTCATCTGACACACAAAGTTCTCCTTTGACATAAGGATGCGCATTGATACAACCTAGCAA  
TTGCTAAGGCATCAGTCACTCTTTCATTAAGATCACCTTTATTATTTATATCTTCAAACGA  
AAAATGTGTTGCCCTAATCCCCCTTTGTCCAAATGAATCTAAACGTTTACCAGATATAGCA

GATAGAATAATAGCTCCTGTATAAACCGTTTCATTTTTAATATATATGTCATCCCTTGATTTA  
GCGCTTGTTGAGTGACACCACATTCTTGTGTTAAATGTTGGAGATTTGCTTTATCATCCTC  
AATAATTTGTAATGCTTTTATTTGTTGAATCGGTTCCATGATTTTTTTGTATTTTTATATTGA  
GAAAATCCGGTTGCCCATTTTCATGAAAAAACCTTTATTATAAACCTTTGTACCGTCTG  
TTCTATTTTGTCAAACCTCACAATCGTTTCAGCACCCTAATATGAACATCTTGATTGCTA  
GAACGCATTTTTATACTATACAT

> **bioF**

Function: protein coding sequence; 8-amino-7-oxononanoate synthase (core genome, constant)

Best match: bioF\_CC001\_MW2-USA400\_BA000033.2[2496061:2497176:r]RC (completely identical)

Position: 058-contig\_243: 67786 ... 68902; Length: 1116 bp

Sequence:

TCAATCTTCTTGATGCAAAATTTCAAACAACCTATCTATATCTTGTTCAGTATGAAAATAC  
GACAATGATATTCTTAACATTGGCTTAGTCACAGTTGGATACCTTAAATAACTTGTAAC  
ACATGATGCTTTAATAATGTTTGATGAATGTTCTCAGCCGCTTCTATGTCATCAAACCTCAA  
TAAACTTAATCGGCGAGTTTGAACATTATAATTAACATTGAGTGCTTTTAACTTTTGGTT  
AAAATATTTACTCAAACCTATTTAATTTAGTGCGTCTATCATCAGCATTTATTAACCTTTCA  
ATGTTTCTTTTTATAAAATACAAATTATAAATTTGGCAAACCTACTTGAGTAGATGAGTGGTC  
TACCGTGATTAATTAACATATCCTTCACATCATTTGAACTTAAAATCACACCCCGTATGC  
ACCACATGCTTTAGATAAACTAGAAGTGAGTATATCTACACCTTGATAATTCGAGTAATT  
CTCTATTCCAAAACCTATGTGAAACATCGAGTATCAGTGTTGCGTTATATTTATGCTTTAAT  
GAGACTAATTGACCAATATCCACAACGTCGCCATTGTTGAAAATGCACTATCAGATATG  
ATTATTTTTGGTATATTTTGATTAGGGTATTTCTCTAACCTTTTTTCTAAATCAGCAATATC  
TAAATGCTTATATATCACTTTTTCTAAACCACTTAACTTAATACCGTCAATAATACTCGCA  
TGATTTTCTTGATCTGAAAACACGACACAATTTGTATTTTTGAAAATATTAATAAACGCCA  
AATTAGCATCATAACCACTATTTAAGATAGTACATGCACTATATCCGAGCCAACCTGCTA  
ACATTGTTTCAATTTCTTCATAAGCTGTGCAACTTCCACTAATTAATCTTGAACCTTGATAA  
GTGATAACTATACTTCCGCATAAAATCTTTCGAAATCATCCTTATCAAACGCTATTTGACCT  
AATCCTAAATAATCATTAGATGTATAGTTCGTACATCTCTTATTTTCTACTTCAATATACT  
GTCTATCTATATACCCTACCGATTTAAGCGACCGATATAACCCTTTCTGTTGTAATAAATC  
AATTTGCTCTTGAAACATCAT

> **bioB**

Function: protein coding sequence; biotin synthase (core genome, variable)

Best match: bioB\_CC005\_CF-Marseille\_CABA01000005.1[167992:168999:r]RC

Position: 058-contig\_243: 68879 ... 69887; Length: 1008 bp

Sequence:

TCAATTTGCTCTTGAAACATCATTCTTGTTCCTTATTTTCACAAGTGTCATAATCAATTT  
CAAAGCCCAAATCATTAAATCATATCGTAGTCTAATTGGTTCGGTTGCCACCAGTAATTA  
GATAATCACCGACAAATATTGAATTCGCCGCTTTTAAATGCTAATGGCTGTAACGAACGTA  
AGTTGACCTCTCTTCCAGCAATACGAATTTCTTTCGTAGGATTGATTAATCGGAATAA  
TGCTACGATTCTTAAACATTTCAATTGGTGTAAATCATCCATGCTTCCAAACTTTGTGCCTT  
TGATTGGATGCAAAAAATTAATCGGAATACTGTCGGCATCCATTTCTTCAAAGCAAATG  
CCATATCAACAATATCTTGATTAGATTCTCCATACCACAAATCACGCCAGAACATGGTG  
ATATATTATTCGCTTTCATTAGTTCTATCGTATCTGTTCTATCTTTATAACTATGCGTTGTC  
ACGACGTTATCATGGTAATTTTCACTTGATTAATATTGTGGTTATATCTGTCTACACCAG  
CTGACTTAAGTTTCTTAGCTTGTTCGTCATTCGTTAATCCTAAACATGCACATATTTTTAGT  
TGCGGGTGTGAGATTTAATCGTTCCTTACAGTGTTACTAATATGATCAACTTCTTTATCGC  
TCGGTCTCTACCACTCATAACAATACAATATGTTCCAATATGATTATCATGTGCCACCTT  
TGCTCCATCGATAATTTGTTCTCTGGAATTAAGCATATCGCTGTTTTTGTTTAATATCTC  
GTGATTGTCCACAGTACCACAATTCTCAGGACATATACCACTTTTAGCATTTAAAATCAT  
GTTTAATTTTACTTTTTTACCAAATAATGTTTTTCTTAAAATGTACGCCTCATTTAATAAAT  
CTAAGGTATCAATATTAGTATCCTCATAAATTTTCAATACAGTCTCTTTTGTTAATTGTCC  
CCTTGTAATATGCGTTTAGCCAAATTCAT

### > **bioA**

Function: protein coding sequence; adenosylmethionine-8-amino-7-oxononanoate aminotransferase (core genome, constant)

Best match: bioA\_CC007\_TCH959-USA300\_AASB02000015.1[30718:32076:r]RC (completely identical)

Position: 058-contig\_243: 69888 ... 71247; Length: 1359 bp

Sequence:

```
TTAAACTTCCTATCTAAAATGTTATGTACTGCCTTTTTAAAAATACGTACCATCGTTTTTC
ACTTCTTTATTTGACATACTTAACACTGGCACAACGTAATGACATTTTCTAAATTTCTAA
TCATTAGCCCGTTTTCTTTACAATTACGTACAATACGTTCAACTTTTTCAATTTCTAACGGC
GTTTTACTATCTTTATCTGTAACATAATTCAACTCCAAACATTAAGCCTCGTCCTCTTACATC
ACCAACATTTTCGATGACGCTTCAGCGCATGTAACCTGTTTCTCAAGTGTGATGATGTCGTT
TCAATATGTGACAATAACTTACGTTTTTCATAAAGTCTTATATTTTCTAATGCAACCGTAC
AAACGATTTGATTTCCGGTGTATGTATGACCATGGAAAAAGGTATTCACACCATGCGAAT
CACTTAAAAATGCATTGTATATTTTTTTGAGATGTCAATGTAGCTGCAAGTGGTAAGTAGC
CACCAGTAATCGCCTTACCTAAACACATAATATCCGGTTGAACATCTTCATGATTGCATGC
AAACATCTTTCCAGTTCTCCCAAACCAACTGCTACCTCATCACAATTAATAAGACATC
GTATTTTTTTGCACAATTTCTCGACTTCTTTCAAAAAGCCTTTAGGATGAACAAACAAGCCT
GTCGCACCTTGAATCAACGGTTCCAATATAAACCCCTGCGATTTTCATCATTTCCTTTCAATTA
GAATTTGCTCTATATTCGTTAAAATAGCTGTCATCATTTCATTTTTCAGTATCGTAATTACTG
CGATAGAAAGATGGGCTTTCTACTTGAATATTCTCAAATATTAAGTCTTTAAATATTTTAT
GAAAGGTCTTGATAACCACCAACACTTACCGCACCAATCGTATCCCCATGATAACCGTGAT
TTAGCGTTATAAACTTGTTTTTCTTGGCATATTTTTCTCTATCAATATTTTTCCAATACTGA
TATGCCATCTTTATTGCGATTTCAACAGACGCACTGCCTGTATCAGAATAAAAATACTTTTC
TTAGATTACTTGGCGTGATTTTCGATTAATTTTTCCGCAAGTTCTATTGACGGAATATTTGA
TGATCCTAGCAGCGTAGAATGGGCAATTTTATTGAGTTGCTTTTTAATTACCTTATTCAAG
TATTTGTTATTATGACCATGCACATTGACCCACAACGATGCATAACCATCTAAATATTTAT
TGCCATTCGTATCGTAAAGGTAACCTTTTCTTTTTCAATGATGATTGCTTCTTCTTTG
CTATATACACCCATTTGTGTAATGGATGCCAAACATATTCTGAGTCTTTTTGTTTAAGTT
GTTGTGTGTAATTCAT
```

### > **bioD**

Function: protein coding sequence; dethiobiotin synthase (core genome, constant)

Best match: bioD\_CC025\_21193\_AFEG01000021.1[251267:251953:r]RC

Position: 058-contig\_243: 71224 ... 71911; Length: 687 bp

Sequence:

```
TTAAGTTGTTGTGTGTAATTCATTTTTAACTCCTATTAATTGTTTTAAAAATGCTTCTGAGA
AATTTTCATACGTGGCATGTTCTTCAAATGTATAGACTGTTTTATTTGTTAATTTTCCAATC
GTAATTTGATTGCTTTTTTCAATATAGCTGTCTGTATAGCGATTCAATTAAAAAATTAC
TCGCCGATACATTCTGATTAACATAATCTTGGTGAACAATGGCATCGCTAATAGCACCTA
ATTTTGATGGCAACACACTGATGACACAATCTGCACAATCATTGATTAATCTTTAGTCAT
GTAGAAATCATCTGTACCTTCATATATTGGTACGGCAATCCCCCAGCACCTCAATTAAG
ATAAAATCAAATTCCTTATCTAAAACCTTTACCTTATCTAATACACGCTGCTTATTTAGAA
AAATTTGATCTGTCATTTTAAATGCAAGGTGTGGTGATACAGGTTGCTTAAAAGTATAAA
GTGACGTTATGTCATAGCTTAAATCACATTCATTTTTAAATACTTCTAAATCTGGAAATGT
CCCGTCTTGGCGTTCCTCAGTTTCAAATGGTTTAAAAATACAACTCGATGACCACGTGTT
TTCAAAGCATGGTATAAATGCTTTGTAACATAGGTTTTGCCTACATCAGTATTCGTAATTTG
TAATAAAAATCCTCAT
```

### > **rsaJ**

Function: noncoding RNA ncRNA of Staphylococcus aureus J (genomic island)

Best match: rsaJ\_CC001-ST772\_118\_AJGE01000033.1[49905:50191:r] (completely identical)

Position: 058-contig\_243: 72011 ... 72298; Length: 287 bp

Sequence:



ATAACTATAAAATTTTGGCAAATTTTGGACCTTGCTATTGAAATGACTAAGACTTCTTAAGG  
AATTTGGGCAGATATAAACAGCGATTTCGTTAAAATATGTCAGTTAAAATTAATAATTGCA  
TTATTTCTTAATAAAAAGACATCCTAGCTTTACCATCTTGTGAAACAATCCATTAATTGTA  
ATATTACGTTAAGCGCCTTGTTTCATCAATGCTATAAATTAGTTACATAATAAATTGAACATC  
TAAATACACCAAATCCCCTCACTATTGCCCTAGTGAGGGGATTT

> **DR**

Function: direct repeat

Best match: DR\_rsaJ\_CC001\_MW2-USA400\_BA000033.2[2500491:2500576] (completely identical)

Position: 058-contig\_243: 72216 ... 72302; Length: 86 bp

Sequence:

ATCAATGCTATAATTAGTTACATAATAAATTGAACATCTAAATACACCAAATCCCCTCAC  
TATTGCCCTAGTGAGGGGATTTATT

> **A5IVK8**

Function: protein coding sequence; putative ABC transporter/ATP-binding protein (genomic island)

Best match: A5IVK8\_CC001\_MW2-USA400\_BA000033.2[2500638:2502371:r]RC

Position: 058-contig\_243: 72363 ... 74097; Length: 1734 bp

Sequence:

TTATAATTTCCAGCCTGCTGATTTACTTTTTATTCTTATAAAGTCTTGATACATTCTGGTT  
TTCGAATTAATTCATCATGACTACCTTTTTGAATTATTTACCTTCATTGAGCACTATAATC  
TGATCTGCATTTTAAATAGTTTCAAGTTTATGTGCAATTGTAATTACTGTTTTGCCTTTACT  
TAATTCATTAATTGCCGTTTGAATCAGCTGTTTCATTTTCAGGGTCAATACTTGCAGTTGCT  
TCATCTAAAATAATTATTGGTGCATCTTTTAAATATCGCCCTAGCAATAGAAATCCTTTGCT  
TTTCTCCGCCAGATAAATACTACCTTTTTTCATTTAGCATTGTTTGATATCCCTCAGGTAAT  
GACATGATGAAGTCGTGGCAACATGCTTGCTTCGCTGCACGAATAATTTCTTCTTTTCGTTG  
CACCTGGATTGCCAAACAATATGTTATTTTCAATCGTATCATTAAATAAATACACCTTTTG  
AAATACTGCACTAATTTTCGACATTAACGTACTTAATGTCATATCTTTAATATCAACACCA  
TCGATGCGAATATTTCCATCATCGATATCATAAAAGCGCAAGAGTAAGTGACATAATGTA  
GATTTCCACTTCTGAAGGTCCAATTATTGCTGTTGATGTTTGTGTAGGTATCTCAAAT  
TCACATTCTTATCACTGTTTATCATCATATGAAAAATTCACGTTTTGAAAAGCGATATT  
TTCATTTTAAATCGTCAAATTTTTTCCATTCTCATCCAGTTCTGGAGCATTTTTTATCTTTTC  
AATATCATCTATCGTCATATCTATCATTTCAAGTACGTGTGCAGCACTATTAATATTTTCA  
ACACTATCAAATATCACAATGAAAAAATTGAAATCATAATAAGGGTAGGTAAATCAAT  
ACTATGATTCATATATAATAAGCATGCAACTAATAACAATCATTATTGAAACAACCTTTTAA  
ACTAAGTAAATGCAATAAATTGAATGGGATATATTGCATTTCTATTTTTGTATTTATACGT  
TTACTTTTCATTGACTGCTTGGTTAAAACCTTTAAGACTCGTATTTTCTTTCGCGAATGATTT  
TATTACTTGAATACCACGAATAACCTCCAATACCTTTTCCACTAATTGGTTTTGTACATTA  
TGATACGCTGGCGCATTTTGTGACTCTTTCTTCTAATAAATTGAATCGCAAAAAATGATA  
GTAATACGCCAATGCATGCTAATAATGATACTTGCCACGAAACTACAAGTAGAGACAATA  
TGAGTACTGTAATTAATATGTATCCATTAACAACAACGTCCACCATTTTCATAGCAAAGTT  
TTCTAAAAGGTTAAATCTGTTGTTACTATTGTTGTTAACTCATTGGAATGATGCGAATTA  
AAATAACCTAACCTTACATTTTCAATTTATCCCCTATATCTAAACGTTCTTTCGCACTCAT  
TTCATAAGCGATGCTCTCATGGCTTTTGCTTTTGAAATATGCTGTAATAAATCGTCCAATC  
ACTAATAAAACCATGATAATTACAACATTCAATATATCTTTCATATAAATAGGTTTATGA  
GATAGCACATTATTAATATTTTTGCAGCTAAAAGATAGGTGACGCAATAAAAATAGCA  
TTTAAAATGACATGCTAAATCCTAAAATCATTCTTGCTTTATATGGTCTTATCCAGTTTA  
AAATTTTAAATGTAATTTGAAACAT

> **abc**

Function: protein coding sequence; ABC transporter ATP-binding protein (genomic island)

Best match: abc\_perm\_CC001\_MSSA476\_BX571857.1[2481564:2483327:r]RC

Position: 058-contig\_243: 74121 ... 75885; Length: 1764 bp

Sequence:

TTAATTATGTCCAGTATTGATTCCCCAATCTTTTGTATGCATGTGCGTATCCCACATTTTCT  
TATAATTACCGTTTAATTTTAGCAATAAGTGATGTGACCCTTTTTCTAAAATTTGTTGTTA  
CCTAAAACAATAATTTGATCTGCATGTTGAATCGTAGATAACCGATGTGCAATAACAATC  
AATGTTTTATCCTGCGTCAACACATTTAATGCTTCTTGAATTTTTTGTTCGTTGTCTGGATC  
AACGTAAGCAGTCGCTTCATCTAATACAATGATAGGCGCATCTTTAATATCATTCTTGCA  
ATAGTGACTCGTTGTTTTTACCACCAGACAATTCATCTCCCACTGTACCAACATTCGTAT  
CATATCCATCTGGCAACTTTTCAATAAATTCATGACATTGTGCTAACTTGGCAGCTTTTTTC  
AACTGCCTCATCCGTAGCTTCTGGATTGCCAAGTTTAATATTTTTCTTTAAAAGTAAGATTT  
AATAAAAAGTTATCTTGTCCAACAAAACCAACTAAATCGTTAAGTTGTTTCGATTCAATA  
TCTTTTATATTTATACCGCCAATCGTAATTTACCTGAAGTCACATCCCAGTATCGTGATA  
TAAGCTTGGCAATGGTTGACTTACCGCTACCAGATGCCCGACGATAGCTGTGAAATTAT  
TTTCTGGTACTGTAATGATAAATGCTTAAAGACCAGATCGTCCTTATCTTTGTTATATGA  
AAATCCAACATTATTAAGCAATTTCAATAATGTTGAGGCTTCTTAAATTTTGTGACAAT  
ACTAACTCTTCTAGACTTAATATTTGATTCACCTCAGTTAATGCGTATTGTATAGACTTTA  
AATGATTTACATAATTAGTAAAATTCTTAATCGGTGCTACTACACCTAAAGATAATACGA  
TGCATAGGAAAAATTCCGCATAGTTTAATTGGTTGATAGATATCAAATACATGCCGACCG  
GTAAAATCCCTAAAAATGTTGAAGGTAATACACTAGCTCCTAAATTCATATACCCCCATG  
TATTTTTAAACCAATTCAAAGTGTGAATCTTATAATTATCTACTGCATCTTTATATTTTTTA  
TATGAACTTTGAGATTGATTAATGTTTAAATTACCTCAATGCCTTCGATAAACTCTACAA  
TCGCGCTATTCATATAATTATTCGATTTCAATTTGTTTCAGCATATGTCTCATTAAATCCAGA  
CATAACTTTTTTAAAAGCGAAAATTGAAATTGGTATCGTTACTAATAAGGCACTAGCCAT  
ACGCCAATCAATGAGCATTATGTATAAAAAGATAGCAGCTGACAAAAGTAAGTTTCCTAT  
AACTTCAGGAATCATATGTGCTAAAGGTAATTCTATTGTTTCAACCTTATCGACAAATATA  
TTTTTTAATTCACCTATTTTCTTAGATTCCACTACGCCTAAAGGGAGACGCATTAATTTTTG  
AGCTAATTTTTTACGAATTTTACGATAAAAATTTTATATGCCGTAATATGTGATAGCATCGTT  
GACGCTCCAAAACAACACACTTGTGAAATATAAGCGATTAAAGCAATAAAGATATAAAC  
CATAATCGAATTAATCGTATATGCATTGTTAATCATCATTAAAATAATTTTAAAGACTGCC  
CAATATGGAACATAATCCAGAAAAGACACTGATGATAGACAACAAAATTGATAACATAAT  
TTTCCATTTACTATCAGAAGCAAATCCGCTGAGTATCTTTATCCAATTTGTCTGATTGTTC  
AT

### > **STAR**

Function: repeat Staphylococcus aureus repeat element

Best match: STAR\_CC005\_Mu50-VRSA\_BA000017.4[2562058:2562287]

Position: 058-contig\_243: 76083 ... 76113; Length: 30 bp

Sequence:

GGGGCAGAAATGATAAAGAGCCACTAATGA

### > **Q2FZB6**

Function: protein coding sequence; putative protein (genomic island)

Best match: Q2FZB6\_CC008\_COL\_CP000046.1[1182242:1182414]RC

Position: 058-contig\_243: 76203 ... 76233; Length: 30 bp

Sequence:

CCAACTTGACATTATTGTAAGCTGACTTT

### > **repeat\_nyS**Agamma

Function: repeat repeat element

Best match: repeat\_nySAgamma\_CC705\_RF122-cow\_AJ938182.1[2700866:2700976]

Position: 058-contig\_243: 76209 ... 76239; Length: 30 bp

Sequence:

TGCACATTATTGTAAGCTGACTTTCCGCCA

### > **SAS2320a**

Function: protein coding sequence; peptide within regulatory RNA (core genome, constant)

Best match: SAS2320a\_CC008\_NCTC8325\_CP000253.1[2502476:2502583:r]RC (completely identical)

Position: 058-contig\_243: 76457 ... 76565; Length: 108 bp

Sequence:

TTATTGTAATATTGCAAAAATACATTGCACACCTTGTTTCATCAATGCTATAATTAATTACA  
TAATAAATTGAACATCTAAATACACCAAATCCCCTCACTACTGCCAT

### > **sprA-L7**

Function: noncoding RNA small pathogenicity island RNA A/Locus 7 (core genome, constant)

Best match: sprA-L7\_CC001-ST772\_118\_AJGE01000033.1[45451:45665]RC (completely identical)

Position: 058-contig\_243: 76537 ... 76752; Length: 215 bp

Sequence:

ATACACCAAATCCCCTCACTACTGCCATAGTGAGGGGATTTATTTAGGTGTTGGTTATTTG  
TCACCTTTTTTATTGTTGCGCGTTCGTAACCAATGTGCAAAAAACGCAACAAGACAGCCG  
CTTAAAGCTGAAGTCATGATGTCAATTAATAAATTGAACATCCGTCATACACCACCTCTCT  
GCGTTAAAGTAACGCCGAGATGTTAGGCGACC

### > **fstAT\_L2**

Function: Fst antitoxin sRNA, locus 2

Best match: fstAT\_L2\_CC001\_MW2-USA400\_BA000033.2[2504811:2504907] (completely identical)

Position: 058-contig\_243: 76559 ... 76656; Length: 97 bp

Sequence:

TGCCATAGTGAGGGGATTTATTTAGGTGTTGGTTATTTGTCACCTTTTTTATTGTTGCGCGT  
TCGTAACCAATGTGCAAAAAACGCAACAAGACAGC

### > **ldr\_fst-L2**

Function: hemolytic peptide

Best match: ldr\_fst-L2\_CC001\_MW2-USA400\_BA000033.2[2504843:2504950:r]RC (completely identical)

Position: 058-contig\_243: 76591 ... 76699; Length: 108 bp

Sequence:

TTATTTGTCACCTTTTTTATTGTTGCGCGTTCGTAACCAATGTGCAAAAAACGCAACAAGA  
CAGCCGCTTAAAGCTGAAGTCATGATGTCAATTAATAAATTGAACAT

### > **gtrA**

Function: protein coding sequence; glucose translocase (core genome, constant)

Best match: gtrA\_CC001\_MW2-USA400\_BA000033.2[2505084:2505470:r]RC (completely identical)

Position: 058-contig\_243: 76832 ... 77219; Length: 387 bp

Sequence:

TTAATTACTATCTTTTAAAATCCATTTAGATAAATACAAATGTGATGGGTATCGTAATCACT  
AAACCTGCAAATGGCGCAATTTCCGCTGGCAAATTTAGCCAGGATACAAAAACATATAAT  
AAAAGTGTGTAAGCTTACGTTGACAATCTGCGTAATTGGAAAATAATGAATTTCTCC  
AAGTAGTTTTACCTGTAAACAAAATAACAATTCAAATAATACGAAATCACAAAAGCG  
ACTAGAAATCCGGTAATATGACTAATCATATATTCAATGTGTAATAATTTAACAGCAAT  
AAATAGACAACATAAATAATTTAACGTATTAATGCCGCCAACAAATGATAAATTTAAAATT  
TCAGCATGCGTTTGTGTTAGTTTCAT

### > **glxK**

Function: protein coding sequence; glycerate kinase (core genome, variable)

Best match: glxK\_CC001-ST772\_118\_AJGE01000033.1[43584:44726:r]

Position: 058-contig\_243: 77476 ... 78619; Length: 1143 bp

Sequence:

ATGCAATTACAAAAAATTGCCATCGCTCCTGACTCATTTAAGGAAAGTATGACCGCACAG  
CAAGTTGGCAATATTATAAAACAGGCATTTACTAATGTTTATGGGAATACCCTTCATTATG  
ATATCATTCCGATGGCTGATGGTGGTGAAGGTACCACAGATGCTTTAATGCATGCAACAG  
GTGCCACTAAGTATACAGTCATCGTTAATGACCCTTTAAATGCGACCTATTGAAGCATGTTA  
TGCACGCGCAGACGAACAACAATTGCAATTATTGAAATGGCGGCAGCGTCAGGTTTGG  
ATTTATTAGAAAAAGAGGAACGTAATCCTTTATACACATCATCATATGGTACCGGTGAAC  
TAATTAAGATGCATTAATCATGGTGCTAAGACCATTATTTTAGGGATTGGTGGCAGTG  
CAACAAATGACGGTGGTACAGGTATGCTAAGTGCCTAGGCGTAAAGTTTACTGATGTAA  
ACGGGGACTTATTACAAATGAATGGTGCTAATCTTGCTCACATTGCACAAATCGATATAA  
CCAATCTAGATTTCGCGATTAAGAGGGTGACCTTTAAAGTGGCCTGTGATGTTTCAAATC  
CTTTATTGGGTGAAAATGGTGCTACCTATATTTATGGTCCTCAAAAAGGCGCTGATGCAA  
AGATGATACCAAAGTTGGATTTTCGCAATGTCGCATTATCATGATAAGATAAAAATGTGCA  
CAGGAAAGTCCGTTAATCAAATACCAGGTTCTGGTGCAGCTGGCGGTATGGGCGCAGCAT  
TATTAGCGTTTTGTGAGACAACCTTTAACAAAAGGTATTGATGTCGCTTTGACATTACAGA  
TTTTCATCAAAGAAATTAAGATGCAGACCTCGTTACTGGAGAAGGACGCATGGATTA  
TCAGACCATCTTTGGTAAAACACCCGTAGGCGTTGCGTTAGCTGCAAAAACAATATCATAT  
TCCTGTCATCGCGATTTGTGGCAGTCTAGGCGAAAATTATCAACATGTTTACGATTTCCGT  
ATTGATAGTGCCTATTCTATAATCTCTTCACCTAGCACTTTAGAAGATGTCCTACAAAATA  
GCGAACAAAATTTATTAAACACTGCAACTGACATTGCTCGTATTCTGAAATTACAATAA

> **bcr**

Function: protein coding sequence; putative transporter protein (core genome, variable)

Best match: bcr\_CC001\_MW2-USA400\_BA000033.2[2507771:2508982]

Position: 058-contig\_243: 79519 ... 80731; Length: 1212 bp

Sequence:

ATGCAATCAACGAAAACCAAAACGAAGCATTTTTTCATTTTTATTGCTAATTACGTTAGGC  
GTCATGACCGCTTTTGGCCCACTAACTATAGATATGTACGTACCATCATTACCTAAAGTGC  
AAGGTGATTTTGGTTCTACTACATCAGAAATTCAAATTAACATTATCATTACAAATGATTGG  
TCTTGCACTAGGCCAATTTATCTTTGGACCTTTATCCGATGCTTTTGGTCGCAAACGGATT  
GCTGTATCCATTTTATCATTTCATTTTGGTATCAGGTTTGTCTATGTTTGGTGGATCAATT  
GCCATTATTCTTAACTTTACGATTTATTCAAGGTTTAACTGGTGGTGGCGTCATCGTGATT  
GCCAAAGCCTCTGCTGGTGATAAATTTAGTGGCAACGCCTCGCTAAATTTTTAGCATCTT  
TAATGGTAGTTAATGGCATCATCACTATTCTTGCACCATTAGCTGGTGGATTAGCTTTATC  
CGTAGCAACATGGCGTTCTATTTTACAATTTTAACTATTGTGGCACTCATCATTTTAATT  
GGCGTCGCTTCTCAATTACCTAAAACATCTAAAGATGAATTAAGCAGGTGAATTTTAGT  
AGCGTCATTAAGACTTTGGAAGTCTATTGAAAAAACAGCGTTTATTATTCCAATGCTA  
TTACAAGGTTTAACTTATGTAATGCTATTTAGTTATTCATCTGCATCGCCATTTATTACTCA  
AAAATTGTATAATATGACACCCCAACAATTTAGTATCATGTTTGGTGTAAACGGTGTAGGT  
TTAATCATTGTCAGTCAAGTCGTTGCTTTATTAGTAGAAAAATTACATCGCCACATATTAT  
TAATCATTTTAACTATTATACAAGTGGTGGGTGTTGCTTTAATTATCCTGACACTTACATT  
CCATTTACCACTTTGGGTCTTACTCATCGCATTCTTCTTAAATGTGTGTCTGTGACGTCAA  
TTGGACCCTTGGTTTACAATGGCTATGGAAGAACGAACAGGTGGCAGTGGTAACGCAT  
CAAGTTTACTTGGCTTATTCCAATTTATCTTAGGTGGCGCTGTTGCACCATTAGTTGGCTT  
AAAAGGCGAATTTAATACATCACCATATATGATTATTATCTTCATTACAGCCATTCTATTA  
GTCAGTCTACAAATCATTTACTTTAAAATGATTA AAAAGCAACATGTTCGCATAA

> **aapA3**

Function: protein coding sequence; amino acid permease locus 3 (core genome, variable)

Best match: aapA3\_CC009\_21334\_AGTW0100020.1[62323:63732:r] (completely identical)

Position: 058-contig\_243: 83250 ... 84660; Length: 1410 bp

Sequence:

ATGGCAAGAAAATTGCATAGAGAGTTGAATAACAGACACATCCAATTGATAGCAATTGG  
GGGCGCAATTGGAACCTGGGTATTCTTAGGATCAGGTCAAACAATATCTTTAACTGGTCC  
ATCACTGTTATTACATACATGATTATTGGGGTTGTAATTCGCTTTTATGCGCGCATTAA  
GGCGAATTGTTGTTGAGCAATACAAGATTTAATTCATTTGTTGATATTGCAAATGAATATT

TAGGCCCTTTTGGTGGCTTTGTCATTGGCTGGACTTACTGGTTATGTTGGATTGTATCAAG  
TATGTCAGACCTAACTGCGATGGGACAATACTTTGCATTTTGGTATCCACAAGTCCCAA  
TTGGATTACCGTGCTATTTATTGTTTTAATCTTGATTAGCTTCAACTTATTAGGTGCCAGAT  
TATTTGGTGAACCTGGAGTTTTGGTTCTCTATTATTAAGTTGTCACAATTATTGCGATGGT  
TATCGTTGGTCTTGTATTAATCTTTTTCTCATTAAAACACATTATGGACATGCATCATTCA  
CAAACCTAATCAGTCACGGTGGCATGTTCCCTGGTGGAACATTTGGTTTCTTAATGTCATT  
CCAAATTGCTGTATATTCATTCATTGGTATTGAACTTATAGGTGTAACCTGCTGGTGAACG  
AAAGATCCTGAAAAACCTTACCGAAAGCAATTAATAATGTACCTATCCGTATTTTATTA  
TTCTATATCGGTGGTCTATTAGTAATTATGTCAGTCATACCTTGGAAATGATATCGATCCAA  
ATAGTAGCCCTTTTCGTTAAACTCTTTACATTAATCGGCGTGCCATTTGCAGCAGGTGTCGT  
TAACTTTGTCGTGCTAACTGCCGCGGCCCTCTGCTACAAATAGTGGTATCTATTTCGAATAGT  
CGTATCTTATTCGGACTGTCACAACAAGGGTTAGGTCCTAAAGTTTTAAATAAAACGAAT  
AGTCATGGCGTGCCTTATTTATCAATGTTAGTTTCATCAATTGCATTACTTATAGCAGCCT  
TGTTAAACTACATTTTCCCTAATGCAATCAACTATTCATATACGTTACAACGTTATCAAC  
TGTGTTGTTTTAGTTGTTGGGCAATGATTATTGTCGCTTATCTAATGTATTTGAAAAAG  
CATCCTGAGGCACATAAAAACAGTAAATTTAAGTTGATTGGTGGTAAGCCTATTGCTTAC  
ATTATTCTAGCGTTCTTCTTTGTTGTTGTTGTTGTTGTTGTTGTTGTTGTTGTTGTTGTTG  
AGCTATTTATATTTCCGCTTCTGGTTTATATTTTTATTTTTCTTTTATAAAAAATACAAA  
CGAATGCTGAAAACTCGCGTATGAACAACGACAAAATGACAGCGGTCATTTTCAGATAT  
GACAATCAATAA

### > Q5HI38

Function:

Best match: Q5HI38\_L2\_CC007\_USA300\_TCH959\_AASB02000016.1[8522:10600]

Position: 058-contig\_243: 84797 ... 86876; Length: 2079 bp

Sequence:

ATGGCACTATTAGAAGCATTTTTAATTTTTATTTTTGCTGTGATTATTAGTTCGGTTATCAA  
TAATCGATTCCCACAAATTCCTACTGCCTTTATTCAAATTGCATTAGGTGTGCTTATTTTCA  
TTATTCCAATACAAGTTGATTTCCAATTCATTTCTGAAGTATTTATGTTTGCCGTTATCGC  
GCCACTACTTTTTGTGGAAGGTACCCACGTCTCTCGAACAAAATTATTAGAATATCGTAA  
ACCTATACTATTAATGTCAATGGCACTAGTGTTTGAACCTGTAGTCGGTGTGGCTATTTT  
ATACATTGGATTTGGCCTGCCTTACCAATGCCAGCCGCTTTTGAATAGCAGCAATTTTAT  
GTCCTACTGATGCAGTAGCAGTATCTGCTATTACACGCGGAAAATTATTACCTAAAGGTT  
CTATGACGATTTTAGAAGGTGAATCTTTACTCAATGATGCAGCAGGTATCATTTCATTTAA  
AATTGCTGTTACTGCATTAGTAACTGGTACCTTTTCATTATTCCAAGCTGTTGAACAATTT  
ATCATTTCACAATACTAGGTGTACTTATTGGTGCAATTATTGGATTGCTTGTGCTTAGAA  
TACGTATAGACTTAACCGCTAATAAAGGTTTAAAAGATAACAATACCTTAACCTTTATTC  
AATTATTAACCTTTTTGTCGTATACTTTTTAGCAGAAGAAGTTCATGCTTCAGGTATCAT  
TGCAGTTGTAATCGCAGGTCTAATCCATGGTTTAGAACGCGACCGTTTAATTAGAGCACA  
AACGGAAC TACAAATGAATTACCATCAAATTTGGAACACATTTAGTTATGCCTTAAATGG  
TTTTGTATTTGTTGTATTAGGTTTTATGATTCCTACTGTAGTCATAGATATTTTCCAAACAG  
AGCCTGACAACCTTTTCATTTTTAATAGTGATCACTATATTAATCGCTATTGCAATTTATGC  
ATGTCGATTTGTTGGGTTTATTTCTGGTACAAAGATTTTTATTTCCCGAAAAATATACAA  
TCTTATCTAGACGAGGAACATGATTCACATGAAACACAACCTTCTCGTGTGCGTTACGCA  
TTTATTATGACCATGTGTGGTATTCACGGTACAATTTCACTTTCAATGGCACTTACATTAC  
CATTTATCATTACAAAAGGACAAGCATTTCGAATACCGTAATGATTTATTGTTTATTGCATC  
TTTCATGGTATTAATTAGTTAATCTTAGCGCAAATGTTTTACCTTTAATTACACCATCTG  
CCGAAGATACTACTTTTAAAGGTATGACTTATCAATCTGCCAAAATTTTCATTGTTCAAAA  
AGTGATCCAGCATTTTAAAAACGAAAGTAAAAAAGACAAAAGCGATACAAATTATCGCC  
CAGTATTAACCAATACTATGGAGAATTGTTATTTTTATTAATTCAGAACCTGATAATCA  
AAATACAAAAGA ACTCAAACGTTTAGAAGATATTGCAAAAAGTAATCGAAACATCTACAC  
TTGAGCGTTTAATTGATAAAGGTAAGGCAACATATCAGGATATTAATAATTACCGCAATA  
TTGTCGAATTAACAGAGACACACCGTACTGCTTCATTTGTTGAAAAATTTGCAAACCTTCTT  
CAAGATGTTATGGCTTAGACTTAAAGCGATGAAGCACTACAAAGCCTTAAACAAAAGAAT  
CTAAGAAGCAAGAATTTGAAAATTCATTCAAAGATGTTCAAAAAATTATGCGTATTGTGA  
ATCACAATATTATTTTACGCTTAAAAGAAGAACAAAATAGTACAAATGTACTTGAAGTTA

GCTTAGTCATTAATCATTACTATGATATGAGTCGCTCATTAAGTGGCGTGCACAACGTC  
GAAAAGAACGTCAAGAAAACAGCAATCAAATCATACCGCAAGCTATGTTCCATAACCAC  
AAATTGGAAGCATTGTACTTACAACGTCATCTTTTAGATGAATTAATTCGCAAAAATAAA  
ATCAACAATATCGTTGCAGCTCAAATTCGAGAAAATATCAATTACAACGAAATTGTCTTG  
TCTTTACAGTCCAAACATTA

> **flp**

Function: protein coding sequence; fmtA-like protein

Best match: flp\_CC001\_MSSA476\_BX571857.1[2496496:2497992]

Position: 058-contig\_243: 89075 ... 90572; Length: 1497 bp

Sequence:

ATGACTACTAAAAAACTGTATTTTCTATCCATTTCTATTATCATTTTAGTCGCCATTTCAAT  
TGCTATACATATAACATTAATAATAGCAATACGAAGACACGGTTAACCAATGATTTCGCAACA  
ACAAATAGATACAATTATCGAGCATGATTTACAAAAGGGACACATTCCTGGAGCATCAAT  
TTTAATAGTAAAAAATGGCAAAGTTTTTTTAAATAAAGGTTATGGTTATCAAGATGTTGA  
TAAAAAAGTCAAAGCTTCTCCACAACAAAGTATGAAATTGCTTCTAATACTAAAGCTTT  
CACAGGTCTTGCAATTTTAAAATTAGCTCAAGAAGGTCGATTAACTTAAATGATGACGT  
ATCCAAACATGTGCCTCATTTTAAAATGAACTATAATGGTCAAATGAACTATTACGAT  
TAAGCAACTTTTGGCTCAAACAAGTGGTATACCTAGTGATATTACAAGCGAAGACGCCGT  
AACAAATAAAAAATAATCGTTTAAATGATGTAACCCGTGCAATTATGGGTGATGAATTACA  
TCATAAGCCCGGAGAAGAATTTGAATACTCAAATATGAACTATGATTTATTAGGTTTAAAT  
TATCCAAAACGTTACGAAGCAATCCTATACAAAATATATTACAAATTCATGGCTCAAGCC  
TTTGCATATGACACATACATCATTCAAACAAACCAATAACAAATCAAACATGATGCTAT  
TGGCTACGAATTACAAGGTTTCGACACCTGTCGCTCTCTAAACCTGAATTTAACCTTTGGGAT  
ACACCATCAGCATATATGATGACATCAACTGAAGATTTGGAACATTGGATAAAAATTCCAA  
CTTAATCCACCTGATAAATACAAATCATTAGTTCAACAATCACATAAAAATTTATCATCA  
ACAATTGGTGAACCTAATGCCAATGCATATGCTTCGGGCTGGTTTACCAATAATGATGAA  
CATTTAGTGTTCATTCAGGAACGCTCGATAACTTTTCATCATTTATTTACTAAATCCAA  
AACAAAATTATGGAATTGTTGTGCTTGCAAATCTAAATTCGGAATATGTACCCAAATTAG  
TTGAGCATCTTAATACACAAATTGTAATCACAAGCGATATTCGACGGTTGCGTCTATAC  
TCAATCAATATAAAGACCAATTTAATATTGTTACCGTTTTGATGACAACACTTATTTTATT  
AGCATTTATATTCTCAGCTTATCGTGCTTGGCAAATGCGCCATGGTCAAATTCCTTTTGCCT  
AGATCAAACCGGATTGCTGTATTGAGTTGGCTAACTTTATGTTTATGTATCGCTATAGCGC  
TCATATTATATGCATTACCATATCTCATTCTCGGTAGCAATAATTGGTCTTTTGTACTGACT  
TGGCTACCAATAGAAATTAATTAGCACTAATCACAAATTAATTGCATTATTCAGTACA  
TTAATTGTAATTCTGTTATTCCTTCATACAAAAGATAACGAAGACATAA

> **tx\_panE1**

Function: rho independent terminator of panE1

Best match: tx\_panE1\_CC001\_MW2-USA400\_BA000033.2[2519948:2520018:r]RC (completely identical)

Position: 058-contig\_243: 91694 ... 91765; Length: 71 bp

Sequence:

ATCAATCAAGAAAACAGCACCAAGATCATTTCATTTGAAAGTACCTTACTGCTGTTCT  
TTATTTATTAC

> **panE1**

Function: protein coding sequence; 2-dehydropantoate 2-reductase

Best match: panE1\_CC705\_RF122-cow\_AJ938182.1[2459278:2460213:r]RC

Position: 058-contig\_243: 91836 ... 92772; Length: 936 bp

Sequence:

TTAATCCTGTGCATGTCGCTGACTTTCTTTAGTATGAATTAATCAGTAATAAAGCGATTG  
ACTGGCGCTTCAATATGACGTTGTTTACCTAATGTTGCAACTGCGCCATTAATATAATCAA  
TTTCAGTTTTTCTATTATTAACAATTAATCTTGATACATGGATGGATAATGCGCACCAAC  
TTTTTCATTTAAATCAACTAAATATTCAAATACTTCATCAACATTTAAATGAACATTATCA

ATCGTCGCTACATGCACTATTTCTTGCGTTAATTTATAAATCAAACACTTCGCATAACTAC  
TTTCATTTCAGTGATGCCATATTACACTCCAATACTGTGCTTAATGCATTTGCCGTACCATT  
AACACAAATCTTTTTCCAAATCGATTGGTATAAATCTTTACTAATGACACCATTCAATTCC  
GCTTCGTAAAGTAAATCAGCAACTTTTATAACATTTTCTTTACCTTCATCCACTAGTTCACC  
TATTTCAACTGGTCCACTACCAAGTAAATGACTGTGTCCAGGGCTTTCAAGACCTGCCGTC  
CAAGTCGTAACACCTCTGACAATTTGTGATTGAGCAACATACTGCGCAATGACTTCTTCAT  
GCTTCAGACCATTTCATCGTACATACGACGATCGTTTCATTATCAATATGTGGCTTCATAGC  
TTCCATCACTTCTTTAATTGCATAGACTTTGGAAATAGAAAGACAACATCGTAAATGCTT  
TCGTCCGGTTGATCATTAAAATGATACATCGGAATGTTTAACTCGAATGCCTCTCCATTAA  
TCGTTATATTTAATCCATGTTGCTTAACCGCTTCAACATGAGATGTATATCCGTCAATAAG  
TGTGACATCATATCCTGCTTGAAATAGTTTGGCACCAAAGCCACTACCTAATGCACCCGA  
TCCAGCAATTGCAATTTTCAT

## > Q2YW11

Function: protein coding sequence; transmembrane efflux protein

Best match: Q2YW11\_CC005\_Mu50-VRSA\_BA000017.4[2578981:2580381:r]RC

Position: 058-contig\_243: 92997 ... 94398; Length: 1401 bp

Sequence:

TTACAAATTCGTTTGATTTTTAGGAACTAATAGTAAAATGACTAAAAATGCAACAATTGC  
TAGCAAGGCATTAAACATCATACTGTGAAACCACCTAAGTTCAAATTTAAATTAGCTGC  
TAACACAGTATAAACTGTACCAGATACTGCTACTCCAAATGCATTTCCCTAATGATGACGC  
CATTTTATATACGCCTGAAGCAACACCCGACTTATCATCTGGCGCACTAGCAACTGCTGT  
ATCAGTTGATGGTGTAGCATATAATCCTAAACCAGTACCAAACAATAAATATCCAACAT  
ACTAGATATGATATACCACACTTCTGGTAAAAATGTTAACGACAATAAGATTAACCCAAT  
CACTGTAAAGCCACTTCTAGTAATAGTGGGCGCTTCGGACCATGTTGAGATAAAATCTT  
TTCACCTACACGAATCATTGACAACACTGCTATTAATAACGTTAATGAAATATAACCCGT  
TTGCGAAGAATTAATCCTAATTGTTGTTGATAATACGTGTTAATAACGATAAGTGCACC  
ACCTGCTACACCATTTAATAAGAAGTTTGAAATAGTTGCACCACTGTATCCTCTATTTTA  
AAAATTGAAAAATCAACAAGTGGATGCTTTATTTTATTTTCGTAATATACAAAACCAACT  
AATGAACAGATAAACACAACAATTAACCTAGAATTAACGGTGAAACTAAACCAAAATG  
AGACGTCTGTGTGATGATTACATTTAACTTAACATCGTCACTACTAAAATGACTAAACC  
AATAACGTCAAACTTTTAGCTTCTGCTTTCATACCTTTGATTGGTTCTGCTTTAGTCTCAG  
GTGCATGTTTGATTAAGTACATTGCTAATAATGTTAATAGAATTGAAACAACAAATATTG  
AACGCCAACCTATATATGTAGCCATTAAGCCACCAAACAACGTACAAATACCACTACCAC  
CCCAAGAACCAATAGACCAATAGCTTAAGGCACGTTGTCTTCTTGTACCAATATAATATT  
CGTTAATAATAGCAAGTGTGGATGGCATAATACATGCTGCAGACAAACCTTGAATTATTC  
TACCTATAATTAATAAATGCTGGCAAGGGTGTAAATGATGATGAGTAATGAACCTACAACAT  
TTAATATCAATCCTACATAAGTAATTTTGACGCGACCAAATTTATCAGCAACATCACCAG  
CACCTACGATAAACAAACCAGCAAATAAGGCAGATAAGCTAACAGCGATTTTATCGTTC  
CAACGTCACTACTATATGTTGATTGTAATGGGACAACAAGATTAACAAGTGACTGCGCGA  
ATAGCCAAAAGGTAATAACCCCTAAAACGATACCCAAAAGCAATCGGTTGTCACCTCTAA  
ATTGTTTTGATGTGTCCAT

## > opuCD

Function: protein coding sequence; amino acid ABC transporter/permease (core genome, constant)

Best match: opuCD\_CC005\_Mu50-VRSA\_BA000017.4[2580675:2581370:r]RC

Position: 058-contig\_243: 94691 ... 95387; Length: 696 bp

Sequence:

TTACATATTAATACTTTGCGGCCGATGATTAGATTGATTTTTACGATGTCGTGTTGTTGGG  
TCTAATCGTTTTTCTAAAAATCTTAATAGTACATCAATGACGATTGCAATGATAGCAATCG  
GAATCGCACCTGCTAAAATAAACGTTGTGCCATCCGTCGCATTTGTACCACGAATCACAA  
TGTCACCAAGCGTAGGTGCTCCTATAAATGATCCAACGGCAACAACACCTATCGCAACAA  
CCAAGGCAATGCGAATGCCACCGATAATAACCGAAACAGATAACGGTAATTCAATCATT  
CGTAGCACTTGATTGCGTGTTCATCCCATACCTTTGCCAGCATCCTTAATATTCGCATCAA  
CACTAGCTATACCAGTATAAGTGTTTTTTATAATTGGAAGTAACGCATATAAAAACACTG

TTAAACTACTGTTTCTGAACCTAAGCCCATGACTAACATTAATAAGCTAACATTGCAA  
TGACTGGAAGTGTGTTGAATTATATTTGCAATTGTAATTACAAATCCAGAAAGTTTTGTGTA  
TCTTGCAAGCAAGATTCCCAATGGAATACCAATTAAGCTGCAAACAGCACACCATAGAC  
AGACATTAATAAGTGTGTTGAAAAATAAATCCCATAGATAACCAAAGTTCGTAACATAATA  
ATTGAATAATTGCTGTAATAAATTACCTTCCAT

### > **opuCC**

Function: protein coding sequence; amino acid ABC transporter/amino acid-binding protein (core genome, variable)

Best match: opuCC\_CC005\_Mu50-VRSA\_BA000017.4[2581370:2582311:r]RC (completely identical)

Position: 058-contig\_243: 95386 ... 96328; Length: 942 bp

Sequence:

TTACTTATGACCACCTTTCTGTTTATCAAATAGTGGTGTGTTTTTCAAAAATTCTTCTGCGA  
CGACAGCAGGTTCTTTACCTTTACCATCCGCTTCATAATTCAAGCGTTGCATCTCTGAAGT  
CGAAATCTTTCCTGTCAACTTATTAATCGTCGTTTTAAGTTCTGGGTGTTGCCGTAATAAT  
TCATTTGTTGCAACAGCACTCGCAGCATAAGGTGGGAAAAATTGTTTATCATCTTTAAGT  
ACTTTCAAATCATACGCGGCAATTCGACCATCTGTAGAATAACCTAATGCAACGTCTAAC  
TTCTCTGTGTTTAAATGCGTCGTAGACTAGACCTATTTGCATTGGTCTCACTGTACCAAAGT  
CAAAACCATACTCTTTTTTAAATCCTTCATAGCCATCGCCTTTACGATTCATCCATGAACT  
ATCCATACCTAAACGTAAATCTTTACTATGCTTTGCTAAATCTGAAACTGTCTCTAAATGA  
TATTTTTTAGCAGTTTCCTTCGTTACCATGAATGCATACGTATTCGCAAACCATAACGAAT  
CAAAAACGTTTGATCAAATTTCTTTTTAAATCCTTGTTGTGTGGCTATCATTGCTTTCTTA  
GGATCTTTAATTGGTGCTTCCTTCAAAGCTCCCGTTAAATCTGTGCCATTATATCTAACAC  
CTGATATATTAGCATCCCCATTAATTAAGGCATTATGTTGAATCGTACTTGACCCTAAATT  
ATTTACTAATGTTGGCTTTATCTTACCATGTGTATCATGCTCTATTAACAACCGTAACATA  
TGTGAAATAAATTTGCGATTCGCTTGTGATAATGCTGTAATTTTGACATCATTTTTCGTGCT  
CTTACTACCTAGTCCGGGCAAACCTACATCCAGATAATACGGTAAGCGATAAGACAAACAC  
GACAAGTATATATTTAATTTTCTTCAT

### > **opuCB**

Function: protein coding sequence; amino acid ABC transporter/permease (core genome, variable)

Best match: opuCB\_CC008\_NCTC8325\_CP000253.1[2522375:2523010:r]RC (completely identical)

Position: 058-contig\_243: 96344 ... 96980; Length: 636 bp

Sequence:

TTATCCAGATACTTTTAAAGCCTTTGGGAACCTACCCATTTTTCAACTAAAGCTAATAAGGCA  
TCAACACCTAATGCTAGTGCAGTAACGAGTACCGTTGCAGTTACAATCATCAGTGGATCA  
TATAAATTTAAACCATTGAAAATGAAATCACCTAATCCACCCGCACCTACATAACTTGCA  
AGTGTAGCCCAACTAATTACATACACAGATGACAAACGAATGCCACCAATGATAAGCGG  
CAATGCTAACGGCAATTCAACATCCTTCATCAATTGAAATTGTGTCATTCCCATACTTTTT  
CCAGCTTCTTTAATGTTGCTATCAATATTTGAACACCGAGTACCGTGTTATTTAAAATAG  
GTAATAATACATAAATAAATAGCGCTACAATTGCAGGCGTTTTACCAACACCAAAAATCG  
GTATCATAATAGCAAGTACAGCTAGTGTGGAATAGTTTGTAAGACACCTGCCACAGTTA  
ATACAATATTGGCAGTTCGCTTTGTTTTGATAATAAAATGCCTATAGGTAAGTACTGCAACAAT  
GATGGCAAGTAATAATGCCACTATAGAAATATAGAAATGTTCCAGTGTTTTCGACATCAA  
CTGTCCACCATGTTTCATGTAGGAACCTCAATCAT

### > **opuCA**

Function: protein coding sequence; amino acid ABC transporter/ATP-binding protein (core genome, constant)

Best match: opuCA\_CC001\_MW2-USA400\_BA000033.2[2525229:2526461:r]RC

Position: 058-contig\_243: 96976 ... 98209; Length: 1233 bp

Sequence:

TCATGATTTATCATCTCCTATGTCACGTACTTTGACATTAGTAGTGTGTTGCTCATGCACTT  
TTGAGGACGCAGTGTCTTCCCCACATGTTCTGCTTGCCTGTATCCTCACTATCGCCCCA



AATCGTGTCCATAAACAATGTCAACAACATTGGCACGCGTAATCAGTCCTACTAAACGTTG  
CTTATCATCTACGACAGGTACATTCCCTAACGTTTCTTTTTAAAATCGTACGTACAGAATCT  
TGTAACCTGGAATCAATTTGAACGGGTGAAATATGTTGTTGCATGGTATCTTGTAACTTT  
TGTGTCCACGTATACCCTGATTTATATCTTCAATGTCTAAGAAACCTAGTAAATGGTTATC  
CCTATCTACTACAAAAATAGTATCAACACGTTTTTGTCTCATAAATATGAACGGCGTCATTC  
AGTGTGCTTCTGCCTGTATCGTGATTGGTTAATCATTACACCTTCTACAGTCTTGTTCATT  
GGGACGGTCTTGAATCAGTCTATTTTGTCTATAAAAATCACGTACAAAATCATTGCGGG  
ATGTCTTAAAATATTGTCTGGTGTATCAAATTGCACCACCTTACCTTCTGACATAATACAA  
ATTTTGTCTGCTAATTTAATCGCTTCATCCATATCATGTGTTACAAAGATAAACGTCTTGC  
CTAATTTTCGTTGTAACGTTTTAACTAAATCTTGTAAACGTATCTCTCGTAATAGGATCCAA  
TGCACCAAAAGGTTTCATCCATTAATAAATATCTTGTTCGGCCGCAAGTGCTCTTACGAC  
ACCGATACGTTGTTGTTGCCACCTGATAGTTCTGCTGGATAACGCTCTAAAAATGACTCC  
GGTAAATCCACAAGTTTAATTAATTCCTTTGCACGTTTATCCTTTTCTTCTTTAGTCCATTT  
CAACAATTTGGGTACCAATACAATATTCTCTTTAATCGTCATATGAGGCATTAACCCAATT  
TGTTGAATAACATAACCAATATTTCTACGTAATTCGACAGGATTCATACTCCGAACATCTT  
TACCATCAATTTCAATTTGTCCTTCTGTGCTTCAATCATAACGGTTTATCATTCTTAAATCA  
GTTGTTTTACCACTTCCACTGGTTCCAATAAATGCGATAAATTCGCCAGATTGAATATCTA  
AAGAGATGTCATCTACTGCCTTTTTATTACCAGAATAAATTTTCGTTAAATGCTTAATACT  
TAACATAATCAT

### > **pnbA**

Function: protein coding sequence; carboxylesterase/type B (core genome, constant)

Best match: pnbA\_CC005\_Mu50-VRSA\_BA000017.4[2587581:2588933] (completely identical)

Position: 058-contig\_243: 101599 ... 102952; Length: 1353 bp

Sequence:

ATGAAGATTAATACTACAGGTGGTCAAATTCATGGTATTACACAAGATGGTTTAGATATC  
TTCTTAGGCATTCCTTATGCAGAACCACCAGTTCATGATAATCGCTTTAAACATTCTACGT  
TAAAAACACAATGGTCAGAGCCAATTGATGCAACTGAAATACAACCCATCCCACCGCAA  
CCAGACAACAATTAGAAGATTTTTTCTCCTCACAATCTACAACTTTTACTGAACATGAA  
GACTGTTTATATCTAAATATTTGGAAACAACATAATGATCAGACGAAGAAACCTGTCATC  
ATTTATTTTTATGGTGGTAGTTTTGAAAATGGTCATGGTACAGCCGAACCTCTATCAACCGG  
CACATTTAGTACAAAATAACGACATTATCGTTATTACATGCAATTATCGTTTAGGCGCATT  
AGGATATTTAGACTGGTCATATTTTAATAAAGATTTTCATTCCAATAATGGACTTTCAGAT  
CAAATCAATGTCATAAAATGGGTGCATCAATTTATTGAATCCTTTGGTGGCGACGCTAAT  
AACATTACTTTAATGGGTCAGTCTGCAGGCAGTATGAGCATTTTGACTTTACTTAAAATAC  
CTGACATTGAGCCATACTTCCATAAAGTCGTTCTACTAAGTGGCGCACTACGATTAGACA  
CCCTTAAGAGTGCACGCAATAAAGCACAATATTTCCAAAAAATGATGCGCGATTATTTAG  
ATACAGATGATGTTACATCATTATCGACAGATGATATTCTTATGCTGATGGCGAAGCTAA  
ACAATCTCGAGGACCTTCTAAAGGGCTTGATTTAATATATGCGCCTATTA AACAGATT  
ATATACAAAATGATTATCCAACAACGAAACCAATTTTTGCATGTTATACAAAAGATGAAG  
GCGATATTTATATTACTAGTGAACAGAAAAAATTATCGCCGCAACGCTTTATCGACATTA  
TGGAATTAATGATATTCCTTTAAAATACGAAGATGTTTCAGACTGCGAAGCAACAATCTT  
TAGCGATTACACATTGTTATTTCAAACAGCCGATGAAGCAATTTTTACAACATCTTAATAT  
ACAAGATTCAAACGCACAACCTATGGCTTGCTGAATTTGCATGGCATGATACTTCTAGCGC  
ACACTATCGCAGTGCTTACCATATTCTAGATATGGTATTTTGGTTCGGAACTTACAAATA  
TTAGCAGCACATCAATATCCAACAACCTGCTCACCTTAAATTTTTAAGTCGACAAATGCAA  
AATGATTTAGCTAATTTTGTAAAAGCGGTA AAAATGCCTTGGCCGATGTATCATAATGAA  
CGTCGCTATTATCGCACATATCAATAA

### > **pepA2**

Function: protein coding sequence; glutamyl-aminopeptidase/locus 2 (core genome, variable)

Best match: pepA2\_CC005\_Mu50-VRSA\_BA000017.4[2592257:2593333:r]RC (completely identical)

Position: 058-contig\_243: 106275 ... 107352; Length: 1077 bp

Sequence:

TTACCACATGATATTTTTATAACTTTCATCATTCAATGAACGGACAATTCAGTAACAAGA  
CGGATAGAATTTTCATAATCATCTACATTGAGCACTGAAACATTAGAATGCATGTATCGC  
AGCGTAACACCGATTGTCATCGTTGGAATACCTTCATTTGCGACATGAATACTCCCGCAT  
CTGTACCTCCACCTGGTGTTCGTATCCCATTGTA CTTCGATGTTATGTTCCCTTAGCTACATCT  
TTAATATGCTTACGCAAACCTTGGTGAGCAATACTTGTAGCATCCATCATAATGACAACT  
GGACCACCGCCTAGTTTACTATCGCTCGTTTGACCTGACATACCTGGGGTATCATAAGCA  
ATACCTACATCGACAGCTATCGCCAAATCTGGTTTAATTGTATTTCGCTGCCACTTTCGCAC  
CACGCAAACCAACTTCTTCTTGCCTGTGGCACCCTGTATAAGTTAATTCCAATATTTTC  
ATCTTTTAAACGTTTTAATACCTCAACAGCTAATGCACAGCCATAGCGATTATCAAATGCT  
TTCGCAGTTAAATATTTATCATTGCAAGCACTTCAAATTCCTATATGGCGTTACCATAT  
TGCCTACTTCAACGCCAGCTTCTTCAGCTTCTTCCTTGCTACTAACACCAATATCTATAAA  
CATATTTTGTATTCCATTGGCTTTTACGTTCTTCAGGCGTTAAGACATGTGGCGGTTTAG  
AACCGATGATACCTCTAATTTCTTTGCCGAATCTGTTGTAATCGTTACTTTTTGAGATAG  
CATGACTTGATTCCACCATCCACCAACTGGCGTAAATGAAATAAAACCATGTTTATCAAT  
CTTTGTTACCATAAAACCAACTTCATCCATATGACCAGAAATCATAATTGAGTATTGACC  
ATTCTCAGCATTTTCTTTCCAAAATGCCACCCAAGTTATCTTCAATAATTTGATCACTG  
ACAGGCTCTATATAGTTACGCATTGCTTCTTTAACTTGCATTTTCATAACCAGCAATGCCGT  
TTACATCTGTTAAATGTTTAAAGTAATTTGACTGACTGATTCAT

> **A5IVN7**

Function: protein coding sequence; addiction module toxin/Txe/YoeB family (genomic island)

Best match: A5IVN7\_CC005\_Mu50-VRSA\_BA000017.4[2593688:2593954:r]RC (completely identical)

Position: 058-contig\_243: 107706 ... 107973; Length: 267 bp

Sequence:

TTAATCATAATGTGACCATGCCGATAGTATTAATACTTCTTTATTTTCGATCATCTACGGTA  
TAGACGACCTGTGCTGATGGTTAATTCTTCTTGAATATCGCTCTAAATATTTAGGCTCTA  
ATTTTTCAAAGATTGTGTTATTTTATACGGATCATTTTTTAAAGTCTCAACAATTTCTAA  
AAATGACTTCTTTAAATAAGAATGTTTTATTTTCCTTAAATCTGATTTTCGCTGAATTTTTAA  
TCTTAACCGTGTAATTGCTCAT

> **stbD**

Function: protein coding sequence; prevent-host-death family protein (genomic island)

Best match: stbD\_CC001\_MW2-USA400\_BA000033.2[2536222:2536479:r]RC (completely identical)

Position: 058-contig\_243: 107972 ... 108230; Length: 258 bp

Sequence:

TTAAAGATTATCCCAATCAATATCATCTATATTTGTTGTACCACTATTATCTTTTTCTCTTT  
CTCTTACTTTGTCCATTGTACCAGTAGATTCAAGATATATTGTCTCTTGTATACTTTTCCAA  
TCTTCTAAACCTATAATCACAGCATTATTTTCGGCATTATTGCCACTAATATAAATTGGTT  
CGTGATTATTAAACATTTTTTAGTAATTGATAAAAATCTTTTCTCGCTTCTGTAGGGCTA  
GTGATAATCAT

> **Q5HD92**

Function: protein coding sequence; putative lipoprotein (core genome, constant)

Best match: Q5HD92\_CC005\_Mu50-VRSA\_BA000017.4[2594570:2595025] (completely identical)

Position: 058-contig\_243: 108588 ... 109044; Length: 456 bp

Sequence:

TTGAAAAAATTATGTTCAATTAATTGTAGTAGCATTAAATTTGTATCATTGCATTATCAGCTT  
GTGGTAAAGAACAACCAAAACATATGAAGGTGATGTTAGTGGTAAACATGTACTAACT  
TCTATCACATATAAAGATGATAAGGTTTTAAACAGTCTACAATCAACACAATTAATAT  
GACGATCTAGGTATGGATAAAGACGAAGCCAAAAAGTTATTCGCCAAATCTGAAAGTAT  
TTTCAAAGACCTTAAAGGCGTAAAATACAAAGTAGACTATAAAGATAAAAAAGCAATTG  
AACACTTAGACATAGATTACACAGAAGTTGACATGAAAAAATTAATAAACGCTTGGGT

TTTCAACTAAAGAAAATAAAGATATTAGTTTTGAAAACTTGAAAAGCAATTAAGCACA  
GAGGTTTTAAAAGAAAAAGATAAAATGGACGACAAATAG

> **yerD**

Function: protein coding sequence; putative membrane protein (core genome, variable)

Best match: yerD\_CC005\_Mu50-VRSA\_BA000017.4[2595193:2596770:r]RC (completely identical)

Position: 058-contig\_243: 109211 ... 110789; Length: 1578 bp

Sequence:

TCAACTAATCAATTTCAATTTATAATCATGTATCGTTTTGTAACCTCACCATCGACTTTTCGA  
TATACAATATGATCAGCAGTAATTTCTGTAGGACTGGATACGCCAACAGCTGCTGCAATA  
TTGAATAAGCCTTCATGCAAACCTTGTTACATAGTTTTGTGACACGATATTGCTTTTCTCCAA  
CAATCAATGCTTTTTCTTTTTTCGCATCTGTTCGTTGCAACACCTACAGGACATGTATTCAT  
ATGGCATTGTTGACTCATAATACAACCGACACTAATCATCATGCCACGTGCGATATTTAC  
AAAATCTGCACCTAAACCTAGTGCAATCGCAATTTTATCTGGTGTCTACTAACCAGAT  
GCCGCCAATTTCACTTTATCTCGAATACCATATTTTTCTAACATGCCAGACACAATAGGTA  
GAGCTGTAAATAGCGGTAAGCCAACACCATCTTGTAATTCTTGGAATGTTGCACCAGTAC  
CACCTTACCACCATCAATCGTAATAAAGCTTGGATACTTATCTAGTCCACCATCGTACG  
TACAAGTGTTCAATTTCTGAACTTTGCTTACTACAATTTTGAATCCTACTGGTTTTTGAC  
CTAATTGCTGCAACTGATCGACGAAACGAATCAAATCTTCAGCATTATGAATAAATTCGT  
AACGGTTAGGTGAATTGATTGTTTTATAAGGTTCAACATTTCCGGATTTTAGCAATTTCTTC  
GTTTACCTTTTTCAGCTTCCATATGACCACCACGAGTCTTAGCACCTTGTGCCAACTTCAGC  
TCAAATGCGCGTACGTTAGATAACTGTGCGACCTCTTTAAATAAACCTTCACTAAAATTA  
CCTTCTTTATCACGAACACCAAATAAACCGGGACCAATTTGGAAAATGATATCCCATA  
CCTTTTAAATGATATTCTGATAAGCCACCTTCACCTGTATTCATCCAAGTGCCCGCTTTAG  
CTAGACCTTTAGATAAAGCTGTAATGGCATTTTTTCTAAAGCGCCATAACTCATAACAG  
ATTGTCCTACGATACGTTTTTAAATAAATGGATGTTTTAAATGTTACCTAATTTTATTGC  
ATGGTCATCACTTAAGTAATACGGATCAATCTTGTTCGGTACACGATATTCTTCACGACTA  
AATAAACGCTCATTTCGCGATTTTATAAATGAATGTTGATAACAATGTTGTATTATCTACTG  
AAATCTCATTACGTTGCATCGGAAACATTGTGTTCTGTATGTAAAAGCCGTCTTGATAATC  
TTTAGTAGTACCGAAGCTGGTCATACGAGAGTTATATTTCCAGCCAAAACGATATTTTAA  
TAATCATTACGTGAAAAAGGTTTCCCTTCATTATCCCCAGAAAATAAATACTGACGTAAT  
TCCGGTCCCATTTTTTCTGAAATATATCTAATACGTGCTAGTAAAGGATAATTCCTTAATA  
CACTATGTTGTGATTGTCTTTTATCTTTAATTAACCAAATAAGCCCGATAACAATAACCGT  
AAGCAGGAAGCCTACAACGATAATGTTAACTATAAATTGCATGACTGTAAGAAACGTCAT

> **opp1F**

Function: protein coding sequence; putative oligopeptide transporter ATPase domain (core genome, constant)

Best match: opp1F\_CC005\_Mu50-VRSA\_BA000017.4[2599281:2600030:r]RC (completely identical)

Position: 059-contig\_269\_RC: 1361 ... 2111; Length: 750 bp

Sequence:

TTAGAATGATAGTTGTTTTCTATTAATTCTCTTGATAAAGCATTGTCACCTTTTATGCAATG  
CGCTTGTCGGAATTTGTTCTTCTATTTTTCCGTTTTTAAAAATAATTAATTGATCACATAAA  
TACGTGGCAGCTTGAATATCATGTGTGATAAAAATATAACTCAACTGACGCGTTTCACGT  
AAATGAATCAATAAATCTAATATTTGTGTTTGAATTGACATGTCGAGTGAACATAATGGCT  
TCATCAAACAAAATATATTTAGGGTTAATACATATTGCACGCGCAATCGCAACACGCTGC  
GCTTCTCCACCTGATAACATATTAGGATATTTATCCATGTATGCCTTAGATAGACCGACTT  
CTTCCAACAATGTAATTGCTTGGACTTCCATAACTTCTTTAGGTTGTCCATCACATTGACA  
CATCACTTCAAATAAGATTTCTCTAACAGTCTGAAATGGGTGTAATGATGACGTATAATC  
TTGAAATACAGCACCAATTTGATGACGTCTGACTTTCTTCTTATGCATCGGTAGATCATT  
AAGGTTACACAGCCTTTATCCGGTTTTCTCAATACCTAATATCATACGACTCAACGTCGATT  
TACCGCTACCACTTTCTCCGATAATCGCAATCGTCGCACCGATTGGACTCAAATGACA  
CACCTTTCACGATAGGTGTTTCGACGACGCTTAAAAACATGTGCGCTTTGATATGATTTTTC  
AACATCTGTAACCTTAATCAT

### > opp1D

Function: protein coding sequence; (core genome, constant)

Best match: opp1D\_CC005\_ED98-hen\_CP001781.1[2545581:2546396:r]RC (completely identical)

Position: 059-contig\_269\_RC: 2103 ... 2919; Length: 816 bp

Sequence:

```
TTAATCATGTACATCACCCCTCATCACATGTTTAAAATGATCATTAATCTTCTTCTTCGTTG
ATAATAAATACTTCGTATAAACATGTTCTGGATGATGCAAGACTGATTCACGTGTACCAT
GCTCTATCAGTTGACCATTTTTTCATCACAACAACACGGTCTGCAATCTTGTTAATAACCGT
TAAATCATGTGAAATGAAAATCATCGCACAGTCAAAGTGTTTTTTAATATCTATAAATGC
TTCCAGTACATCATATTGTGTAATTGTATCTAAAGCCGTTGTCCGGCTCATCAGCAATGATT
AACTTTGGTTTCAAAGCTAACGCTAAAGCAATCATCAATCGCTGTAACATTCCCTCCTGATA
ACATGTAAGGGTATGATTTTAATATACGTTTAGGATCTTTCAAACTTAAATAATCCATATA
TTCAATCAATGTCTTTTCAATTTCTTGTGTAGACATTGACGTATGTACTTTCATAGTCTCAA
ACATTTGTTTACCGACAGTAGTTGATGGGTCAAAGGCACGACTACCTTGTTGCATGACCA
TCGCAATATCTTTACCACGGTACTTTTTTCAGTTGCGATTTCAGATAATGACAACATTGATGT
ACCATCAAAGATAATTTACCTGTCAACCCGAGTCGTTCCGGGATTCAAACCAATAATCGA
TTTGCATGTAATTGATTTACCGCTACCACTTTCTCCAATAACGCCTAAAGTTTACCCTTA
GTAAATGTAAAATTCACATCACTCACGAGTGGTTGATCTGTCCAGGTATCTGTAATCGTCA
AATGCTTAACTGTTAACAATGTCAT
```

### > opp1C

Function: protein coding sequence; oligopeptide transporter putative membrane permease domain

Best match: opp1C\_CC005\_Mu50-VRSA\_BA000017.4[2600835:2601704:r]RC (completely identical)

Position: 059-contig\_269\_RC: 2915 ... 3785; Length: 870 bp

Sequence:

```
TCATGATTGCACCACTCCTTTTTTACAGAACGAAGTTTATCTTTAGAAGAGATGCGGGG
ATCAATAGCAATTTGTAAAGCATCGGATAAGAAGTTAAATGCCATCACTATAATCACTAT
GGCAATACCTGGCGCAAACATCATTTTCAGGATGTGTAACATCACTTTTCTAGCTTCGTTA
AGCATCATGCCCCACTCTGCAGTAGGCGCTTTGACACCTAATCCTAAAAATGAAAAGCCA
GATATTTGCAAGATCATTGAACACATCGAACTACTAGAGATGATAGCAATATCTGCTAAT
GTAAACGGCATAAATATGTTTGTGAATAATTTTCATATCATTTCATACCGATTGTTTTAGCAA
ATCTGACATGGTCAGAAGCAGTGTACTGCATAACACTTGTACGTATAACACGACAGAACC
ATGCCAACCGCTCAAATAAATGCCATGATAATATTTTCGGCACCCATTCCAAACAATG
CAATTAATGCTAACGTTACAACATAACTTGGGAATGCCAACATAACATCACACGCACGCA
TGATTAAGGCGTCAACAAACCCTTGAAATATCCTGATAAGAATCCTAAAATAGATCCAA
TAAGTACAGAAACAAATAGCGCAACAAAGACATATAACAAACTTGGTCTAATCGCATAA
ATTAACCTAGTTAAAATATCTCTACCTAAATGGTCAGTACCTAGTAGATGTTGAAAACGTG
ATGCCAGCAAATTTGTTTGTGTATCGATATGGTTAGGATCATAAAATGTCACAAGTGGT
GCTGCTAATCCTAAAAGACATATAATACAATAATGCCTAAAGCAATTACTGCACCTTTA
TCTTGTAATAATCGTTTTTAAAATTATCAT
```

### > opp1B

Function: protein coding sequence; oligopeptide transporter putative membrane permease domain

Best match: opp1B\_CC001\_MSSA476\_BX571857.1[2523138:2524073:r]RC

Position: 059-contig\_269\_RC: 3781 ... 4717; Length: 936 bp

Sequence:

```
TCATCGTGCGCCCTCCCTTAATCTTGGATTAAATAGCGCATTAAATGATATCTGCTAATGTA
TTAAATACAATAAATAATACCGCTACAATTAATACATATGCTTGAATGACTGGAAAATCG
TGTTCAAGTATTGCTTTTAAACTTAATTGACCTAGTCCAGGCCATGCAAAGATATATTCGA
TAACAACCTAGTCCACCCATTATCATTGGTATAGACATACAAAAGATTGATACCGCAACTT
GTATAGCATTACGCAACACATGCAACATTAATGTGATAGATTTACACCCGCTTGCTCTTA
AATAAAGTACATAATCTTCATTTAATTGTTCCACCATCGAGCGTCTAACATTTCTAAAGTA
AATACCAGCATAGGCAATCGTAATAACGATCACTGGCAATATGTAACCTTTCTGGACCTGT
```

TAATCCAGAAGTCGGCAATATGTTTAACTTCACTGAAACGTAAATAATAAGTATTGAAGC  
TATCCAATATGATGGTAATGCAGTTAGAAAGAAAGCCACTGAACGTATCGCACGATCAGT  
GAACTTTCCTCTTTTTAATGCACTAACTACACCTAAAATAATTGATGTAATCATCACCATA  
ACACTTGAAATTATTGTTAATTTCAATGTATTTCATAAATGCTGGACCAATACGTTTCAGCAA  
CTGGGTCACCTGTAATGTAGCTTGTACCAAAAATTAATTGCATCGCTTCAAGTAACCAATT  
TTTATATTGAATTAATAATGGATCATTGAAACCGTACTTCTCATTTCGTTTCTGCAATCAAC  
TCTGGTGTACATTTGGCGTTCCTTGTGCATGTAAAATTGTCACAGCTGGATTTTCATTTGT  
AATATACGTCAATAGAAATGTCATAAACTTACTACAATCATCAATGGAAACATGAGCGC  
AATACGTTTTAAGATAAATTTGAACAT

### > opp1A

Function: protein coding sequence; oligopeptide transporter putative substrate binding domain

Best match: opp1A\_CC001\_MW2-USA400\_BA000033.2[2544918:2546516:r]RC

Position: 059-contig\_269\_RC: 4729 ... 6328; Length: 1599 bp

Sequence:

TTATTTATACTGCATTTTCATTGAATGGTAATTCATACTGTGATTGTGTGAATGATACTTTTT  
CTAAATCTTTTGGCGCAACAACCTGTCATACTACCGTGTGAAATAGGGATAAAGATACCTT  
CATCATCAATTTGTTTCAAATGTTTTTATAAGCGTCTGAACGCTCTTTACCGTTTTGGATT  
TTAAATGCGTCATCAATGCTGTTGTATATTTTATCTTTGTTCTCAATGCCTGATGTTGCACT  
TTCATAACCATTTTTCGCTTTAAATGCTGCAATAGTACTTTGTGGATCGTACAATAATCCC  
CAAGTTTGGTTGAACATTAAGTCATAATCACCAGAAGTACGACGTTTCAGCAATTTTATCT  
GATGTTTCGCCATTGATGTTTAACTTAATACCCATTTTCTTAAATTCTGCTTGTAAGTATTC  
TGCTTGTCTTTTTGACTTGAAGAACCCTTGTGCATAGTACATTGCCATTTCAAGGTTTTTAC  
CATCTTTTTGACGAACATCACTGTCTTTACCTTTCTTCCAACCAGCTTCATCTAATAATGAT  
TCTGCTTTTTTAAGGTCATACTTACGTGTTGGCATAATCGAAATTAATGTCTGTTACATTTTT  
CGCAAATAATTGAGTTGCTGGTTTTCTTGACCATCTAAAATTTCTTTGGCAATTTTATCTC  
TGTTTACCATATGACCAATCGCTTGTCTGACTGTTTTGTCACTGACAGCGTTATCTTTTTTA  
CCAGAATTGACAACATAACATTTTCGTATTCATAGGTTGACTACGCTTAACTTGATAGTCAC  
CTGTATCTTTCAATTGTTTTAAAGAGTCTTTGTCTAAGCTATCTGTACCTCTATCATCTGTG  
AAGGCAAAGTTCGTTTCACCTTTTTTCATTGATAGGAATGCTGTTTCACCAGCAGGCATTA  
CTTTGCTTGTACTTTGTTAAGTTTAGACTTTTCGCCCCAGTATTGATCATTTTTGTTAAAG  
TCTGCAGACTCATCTTTTTTGTGTTACCTAATTTAAATGGACCAGTACCATCGAACTTTTT  
AACGCCATCTTTTGTGTACCGTTTTTAAAGTCTTTTGGAGACACAAATACATATGGACGA  
GGCATCGCTAATTCAGCCAATGCAGGTTGATATGCTTCTTTCAAATTCATTCACCCGTTG  
ACTTATCTTTAACTTTAACATTTGTCATTAATGTTGAAATCTTTAACCAAGAATGCAATTT  
TTTATTTTGTGTAACCGCATCAATATTTTCTTAACTGCGTCAGCATCAAATGTTGTTCCAT  
CATGGAATTTACATCATCTCTTAAATGGAATGTATAAGTCTTCCCATCTTCAGACACATC  
CCATTTTTTAGCTAGTAAAGGCTTAAATACCATCTTTTCGTGTTACGTACAAGCGGCTCGTAT  
ATCATACTTTACAGCAGACATTGATCCACCGTAAACATGCGGATTCATATCACCGATATCTT  
TAACCGTTCGTATACGTTAATTGCTTGTTTTTCTTTTTCTCCTCTAAACCTTTATTACCGCCA  
CAACCAGTTAAAATTAGCCCTGATGCAAGTAACATTGCACTCATTTTAGTTAGTTTTCTCA  
T

### > fmrO

Function: protein coding sequence; ribosomal RNA methyltransferase (core genome, variable)

Best match: fmrO\_CC001-ST772\_118\_AJGE0100033.1[1682:2500]RC (completely identical)

Position: 059-contig\_269\_RC: 7764 ... 8583; Length: 819 bp

Sequence:

TTAGACATCCGTAATACCTACCTTTATAGCTGCTTTTTTATAAAGTGCTATATCAAAAATT  
TGCTGTGGTCTCATATGTTTATTCACACATTGCCACTTATCTTCCGCTGTTTCTTGTGACGG  
ATAATTAATATTGCTTTGATGCCATCACAAAGCGCATTGCAACTACGACATTTTCATTT  
GTAAATCATATAATTCTTCTAAAATGCTGTACTTTAAAGGAATTGTCGAGCTGAATATGA  
TATGCGTCACATCTTTGATATCTTTAAGTTCAGATACCTTTTGGATCCGTAATTGTTATATCT  
TCATTTGGTGCTAAGACGTTAACGATTCTACGTCCTAGGTCAACGGCTTGTGGATCAATAT  
CAATACCGATAACTGAAGCACCTGTTTCTTTTGGTACTTGAATTAACGTCATTGGATATGC

ACCTGAACCAACTAACAATAATTTGTCATTGCTAGCTATACTACATTGTCCAAACTCTTCA  
TCAATACAATGTTCTATATTGTCAAAGTAACCTGTGGTAGACGCCTGTCCGTCTAATAGAC  
GTCTAGCTCTAATGACTTCCACTTGTTTAACACACTGCGCTGTAATATATTGCAGTGATTT  
TATTAATTGTGCTTTTTCTTCAACGTCACGCCAAGCATTAAATTGTTGTTTCATAAATAGGA  
TTTAAAATAAATTCACTATAGTCATCCATCAATGTTTCTAATGCTTCGATATATTGATCGT  
CTTGTAATACACGCTCGTAATGCGCTTCAAACCTTTTCTAAATATTGTTGTAATATCAATTT  
GATTCATTATTAAGTTATTCAT

> **dapF**

Function: protein coding sequence; diaminopimelate epimerase (core genome, variable)

Best match: dapF\_CC001-ST772\_118\_AJGE01000033.1[850:1671]RC (completely identical)

Position: 059-contig\_269\_RC: 8593 ... 9415; Length: 822 bp

Sequence:

TTATTCTATATATGCTTTTCCTGTAGCTACAGTTGTAACCTGTCCTTTAATTGAAGTTTGAT  
ATCCCAATTGATGACATCGCTTTGATGTCACTAAAATACTGCCCCCTGGCTGATGACTGT  
AAAATCTTTGCATGCGTCATTACGTTGATAATTATTA AAAAACCCTAATTGATGCTGTACCA  
GAACCACAGCTATTTTCCCAAATTA AACTTTGAATTTCTGGTATATAGATTAATGGCTGTA  
AAAATTGACGTTGTTTCATCAAAAAGCATCATACCTACTGTTTTATATTTGTGACTCCATTG  
TTGCTCACGCACAAACGCTTCAACCAAATGTTGAATTTCTGTTGTTACTTGTTTAACTGGA  
ATCACATAATGTACATATGTTTCATAAATAAATTTCTATTGCTTTCCATGAATGATTACCCA  
TATTAATTGTTGTTGGCACAACACGATGGGCTTGTGGCATTGAACTTCATAGTATTGGCA  
ATCATGAATTGCGCATTGCACTAAATCCGAACAGCCAGACACCTTCACCTTAAACTGTTG  
GTCTTTAAGCAAATGACTTTCTGCAAATGATGTATATATGACATCGTCGCATTACCGCAA  
AATTCATTACCGCTCATAACTAAGTGAAAATCATTACCATCATCATTTTGTGTTGATTCTA  
TAAAGCCTACCTGTTCAACACATACATGTGTTGCGGCCATCAACTGATTGGCGATAGATG  
CATATTCACTAGCATCATGTTTTGAATGAACAAGTATCGTCATATTCCCCGAAGGATTATA  
CTTAGAAAATTCTATAACCTGCCGATTCAT

> **Q5HD80**

Function: protein coding sequence; putative protein (genomic island)

Best match: Q5HD80\_CC001-ST772\_118\_AJGE01000033.1[444:575]RC (completely identical)

Position: 059-contig\_269\_RC: 9689 ... 9821; Length: 132 bp

Sequence:

TCATGCTAATCCGCAAAGTGGAAGCATGACTTAGTAATCGGTTGTTGCATCAACATGCA  
ACCGTAAACCTTATTTAAAGTTGCTTCTTGTGGCTCTACAAGTGAATGCAGTTGTCCGTTA  
ACTTCATTCAC

> **txbi\_universal1**

Function: bidirectional rho independent terminator

Best match: txbi\_universal1\_CC001\_MW2-USA400\_BA000033.2[1397234:1397306:r]RC

(completely identical)

Position: 059-contig\_269\_RC: 10248 ... 10321; Length: 73 bp

Sequence:

TAAATCCCTAAAAAAACAGCAGTAAGATAATTTCAATTAGAAAATATCTTACTGCTGTT  
CTCTATTTATACA

> **tx\_universal3**

Function: bidirectional rho-independent terminator

Best match: tx\_universal3\_CC008\_COL\_CP000046.1[2415294:2415357:r]RC (completely identical)

Position: 060-contig\_275\_RC: 2 ... 66; Length: 64 bp

Sequence:

ATACATATCAAAAAAGCTGATTTCTATCAAATAATTAATAGAAATCAGCTTTTTTACATTG  
CCT

> **tnpIS1272**

Function: protein coding sequence; transposase of insertion element IS1272

Best match: tnpIS1272\_15653\_EU272084.1[3547:5193]

Position: 060-contig\_275\_RC: 38 ... 68; Length: 30 bp

Sequence:

AATAGAAATCAGCTTTTTTACATTGCCTAA

### > **Q5HD79**

Function: protein coding sequence; putative protein (genomic island)

Best match: Q5HD79\_CC001-ST772\_118\_AJGE0100023.1[11789:12154]RC (completely identical)

Position: 060-contig\_275\_RC: 108 ... 474; Length: 366 bp

Sequence:

TCATTGTTTTAATGAACTAGCCATATCAGATTTTATTTTCGTTTGCTAATACTTGTAATTCAG  
GGAAATAATTATTAGCAAAGCCAATTATTATTTTATTTTTTACAAACGTGTTAATCTCTCG  
ATCTTCTGGAATCGTATTTTCTATTAATTCAAAAGCTCACTATGACTTATGTTCTCTATAC  
TTACTGTATTTAAATATTTTAAAATCGCAAGATACAATTCATCAAATACTTCATGTTCAAA  
ATCAAAGTCCAATAATAATAAACTAACGGAATTAGTTTCTAACTGATTATCTCCAATTTTA  
TCTGCAATCTCTTTATAGCTTGATATAGCAATCTAAAACCTTTCTTTTTCTTTTAACAT

### > **fabG2**

Function: protein coding sequence; 3-oxoacyl-acyl-carrier protein reductase (core genome, variable)

Best match: fabG2\_CC001-ST772\_118\_AJGE0100023.1[10707:11525]RC (completely identical)

Position: 060-contig\_275\_RC: 737 ... 1556; Length: 819 bp

Sequence:

TTATTCCAATGTCCGCTTCCACGAATCATCACTCAACATCTCGCCAGGCCATGTGTAAGCC  
ATAACACCACCGTCAATGCGAATTGTTTACCAGTAATAAATGAACTGTCATCAGATGCT  
AAGAAGACTACTAATTTAGCAACTTCTTCTGGTTTACCTAAACGTCCAGCGGAGTCATC  
CATTTTTGATTTTCTCTGAATGTTTTGCCTTCTTATCTTCGCTAGTACCTGTCAGTTTATCT  
ACTAACGGGGTTTCAATTGTACCTGGTGCAATTGCATTGGCTCGAATGCCATCACGGCCA  
TACTCAATTGCGATTGATTTTGTAAAATTAATCACTGCGCCTTTCGCAGCATTATATCCTG  
AGCGATACAAATCTGCTGCCTGTCCTGAAAATGAAGACGTATTAACAATAGAGCCACCTT  
GAGCCATCATTAAGGTAACATCATTTTTCGTCATTAAAAATGTTCCACGCATATCTACATT  
CATAATCTTGTCATACACATCTAACGAGTATTCATGAATTCTACCAGCAGCATTGTCTACG  
CCGGCATTATTAATAACACATCAACATGCCCAATCTGTTCTCTAATTTCTGATGCAAAAT  
TGTC AATTTGTTGTTGCTTGC AATATCCACATTATACGCCTTCGCATTGTCACCATTACTT  
TTAATTTTATCGACAGTCTCCGATACCGCTTCAGCTATGTCTACCGCCAATACATACGCAC  
CTTCTTGAGCTAAAGCGATTGCAGAAGCTTGTCCGATACCTGTACTTGCTCCTGTTACGAC  
TGCAACTTTATTTTCCAAACGTTTCAT

### > **Q5HD78**

Function: protein coding sequence; aminobenzoyl-glutamate transporter (core genome, variable)

Best match: Q5HD78\_CC001-ST772\_118\_AJGE0100023.1[8936:10474:r] (completely identical)

Position: 060-contig\_275\_RC: 1788 ... 3327; Length: 1539 bp

Sequence:

ATGACATCAAAACATCAACAAAAGGGGTCTATCGTCAATCGTTTCTTGAATAGTGTTGAA  
AAAATCGGAAATAAATTGCCAGATCCTAGCGTCTTATTCTTTTTAATGTGTGTTGGCTTAG  
CCATTATGACATGGGTTATCTCATTATTTAATGTATCTGTTAAGCATCCAGGTACGCATCA  
AACCATTTATATTAATAAATAAATTAGCCATGATGGATTTACGATGATAATGAATGATAC  
GATTAATAAATTTCTCAGAGTTCCAGCATTAGGCTTAGTACTAGCAGTGATGATTGGTATT  
GGTGTGTCAGAGAAAACAGGATACTTCGATAAGTTAATGATTTCTGTTGTGAATCGCGCA  
CCACGTTTCTTAATTTTACCGACTATTATATTAATTGGTATTTTAGGTAGTACAGCCGGCG  
ATGCTGCGACAATTATCTTGCCGCCGCTTGCAGCAATGCTTTTTTATAAATTTGGCTATCA  
CCCTATTGCTGGTTTAAACGATGGCATAATGCTTCCGCTGTTGGAGGATTTGCAGCAAATATA  
GTTGTTGGTATGCAAGATGCTTTGGTCTATTCATTTACAGAACCGGCAACACGTATCGTTT  
CAGATTCTATTAATAAACAACGTTGCTATGAACTGGTACTTTATCGCAGCGAGTGTCTGTTGT  
ATTACTTCTACGATATTGCTAGTTACAATAAGCTCATTATTCCTAGATTAGGAAAATAT

GATGACAGTTTAATGCATGATGACCATGAAGAAACATCTTCACATATTACTGACAAAGAA  
GCACATGCTTTAAAATGGGCAAATATCAGTTTCATAGTCACAATTATTTTATTAATTATTA  
CAGCCATTCTGAACATAGCTTTTTAAGAAATGCTAAAACAGGCAGCTTACTAGACGATG  
CGCCATTAATTAACGGTATCGGATTAATTATCCTTGTCGTATTTTTAGTACCTGGATTAGT  
TTATGGGATTTTAAGCAAAGAAATTA AAAAATACAAAAGACTTAGGTGAAATGTTTGGCGA  
TGCTGTAGGATCAATGGGAACATTTATCGTTATTGTGTTTTTGCAGCACAGCTACTTGCG  
TATTTAAAGTGGAGTAATTTAGGAATTATCGCTGCTGTTAAAGGTGCCAAATTATTAGAA  
CATAAAACGGCATTGTATTGATACTAGGTATTATTGTACTAAGTGCAATGGTCAACATG  
TTAATCGGAAGCGCATCGGCTAAATGGGGTATTTTAGGACCGATATTCGTGCCAATGTTA  
ATCCTTATCGGCTTTCATCCCGCATTACACAAAGTCATTTACCGTGTAGGCGATTCAATTA  
CCAATCCAATTACACCGATGATGCCGTACTTACCTTTATTATTAACCTTATGCACAAAAATA  
CGATAAACGCATGAAACTCGGAGCCTTACTTTCTAGTTTAATGCCGTATTCAATCGCGCTA  
AGCATTGTATGGACAGTATTTGTCATCATTTGGTTCTTATTAGGTATCCCTGTTGGACCAG  
GTGGACCGATATTCGTTAAATAA

### > **aphD**

Function: protein coding sequence; alkylhydroperoxidase (core genome, constant)

Best match: aphD\_CC001-ST772\_118\_AJGE01000023.1[8402:8824]RC (completely identical)

Position: 060-contig\_275\_RC: 3438 ... 3861; Length: 423 bp

Sequence:

TTATAGTCTATCACTAATAATATTTAGTCTGTTCCAACCGTTAATTTGGTTTACAACAAAG  
ACAAGATCAATAATTTGTTCTTCATCATAAAATGATTTTAGCCGGTCAATAATTTCAAAC  
TCTTAAAGTCTTTGATTGAATTTAACATTTCTGCAAATTC AAGCGTCACTTTTTCTTGATCA  
GTAAATAAATCTAAATGTCTAAAACCTCAAGACTTCATCAATTTTCATTTGTGTTACACCCA  
ATTCCTTTAATTTCTTTTTTATGGATATCAACACAATAATGACAACCGTTAATTTTTGAAAT  
TAATAACTTAATCAATGCACTAAGTTCATCATTAAACGGGTGATTGATGAATAAACTTTTCA  
CCTTGGCTCATTACAGACATTAACCTCTCCATTTTGTTCCTTGTAATTATACGGCAT

### > **Q5HD74-var3**

Function: protein coding sequence; putative protein (genomic island)

Best match: Q5HD74-var3\_CC001-ST772\_118\_AJGE01000023.1[7531:7950]RC (completely identical)

Position: 060-contig\_275\_RC: 4312 ... 4732; Length: 420 bp

Sequence:

CTAGTGGCCTTCTTTTTTGTCTAATTTCTTTGATTTTCGTCAGGTGATTTTAATTGATTTG  
CTGTTTTAGTAACTCACTTAATCTTTCACTTTCTATCATAGCACCACCAAACCTGATAATT  
ATGTTCTGGAGACCCATATGCAACAAAATCAGCTTTTTTGTTCATTGATGTAACCTTCA  
ATTACGGCATCGCCATAGGTCCTCTTTTTAACTTGTGAAATGCACAGATTTAATCGTGT  
TTGGTTCTTTAGTATTATGCTTGAGATAAAGTGTAATACGCTCCTGTTGTTCTTTATAGTA  
AATTGCTTTTTGTTTTCTTTTTCGTCATATTTCACTTTTAAATAAATGACTGTAGCAACTA  
TACATATACATAATATGACACCAATAATTACAAAACATGTTTTTTGTTTCAT

### > **bdhA**

Function: protein coding sequence; NAD- or NADP-dependent oxidoreductase (core genome, variable)

Best match: bdhA\_CC001-ST772\_118\_AJGE01000023.1[6585:7280]RC (completely identical)

Position: 060-contig\_275\_RC: 4982 ... 5678; Length: 696 bp

Sequence:

TTATACAGGACGCACTGTAATTTCACTCACGTTAACGTGACTCGGTTGTGTTAATGCATAC  
AATACCGCTTCTGCAATATCTTGTGGATCAAGCTTTTTACGATCACTTGGATTATATGCGG  
CAGTTATTGCTGTATCTACCATTCTGGTGAAATGCTTGTTACTTTAACACTTGTCTTTGCC  
AACTTTTTTCTAATCCTTGAGTAATAGTGTGAACTGCTGCTTTCGTCGCACTATAAATCG  
TGCTGCTTTTCGTTACTTCAAAGCCAGAAATAGATGCAATGTTAATAAGATGGCCACTTG  
ATTGTTCTAACATAGTTGGTAATGCAGCCTGTGCCGTATATAAAGTGCCTTTGATATTCAC  
ATCAATCATACTATCCCACTCATCTACTTGATAATCAGTAATCTTAGACGATAACATTTGT



CCCGCACTATTGATAACAATATCCAAACCACCGAATGTTTGTATGCAATTTTTATCAATT  
CATCGACTTCTTCTTTTTTCGTTACATCTGTTGGCACTACCTTCACACTATCTTGAGCTAAT  
TGATTCGCCACATTTTGTAGTTTATCTTTATTTCTACCGGCTAAGACAACCTTCGCCCTTC  
TTCATGTAGTAATGTTGCAATTGCTTCTCCAATACCACTACCTGCACCTGTAACACTGCT  
ATTTTATCTGTTAATACTGTCAT

> **lpl**

Function: protein coding sequence; tandem lipoprotein-like (genomic island)

Best match: lpl12-CC398\_CC075\_MSHR1132\_FR821777.2[2493966:2495321:r]RC, lpl-  
SAS2374\_delta\_CC001\_MW2-USA400\_BA000033.2[2559975:2560766:r]RC ,,MANUAL  
OVERRIDE

Position: 060-contig\_275\_RC: 7239 ... 8313; Length: 1074 bp

Sequence:

AGGTTTTATTTGATATTCAGTTTGACTCATAACTTGTACCCTCACTTGGAGTATATTGTAC  
AGAATCTGTAAAATAAATGTTTTCTTCTTTATTTTCTACAAAGGTAAATTCTAGATTTTTTG  
ATCCTACTGATGAACCTTTTAAATCTCCATCACCTTTTATTAATAAATTCGGAGCTTTGTTG  
GTTGGAATATTATATCTTTTTCGAAGTTGCTTCACATTGTAGTCATCGTTTTTCAATTGATA  
TTTTGCGGAATAACTTGGAACATTAGGATTATATGAAATGTCACCATCTTTATAATCATT  
ATATCTTTAAAGTCACCGTATTGTACAAAAAACTTAAAGTCTTCAATTTCTTTTCTTAATTT  
ATCATCAGCTATCGGTTTGGTTGGAATGATTCTATTATGTTCCATTTTCACTGGATATTTTG  
TATCTTTACTATGTGAATACCCTTACTATCCTCGGTTATTTCTCTAACAAACAAAATTACCT  
TTCGTTGTTCTAGTATTACGATTTATATAGAGCACCATTCTCTAGATTCCATATTGCTATT  
ATTTGTCTCAATAATCATTTTAGAGTGAATTATCCAAGTGCCTTTGTCAACCTTTTCAAAC  
TCTTCATCTCGAAAACCTTCTTATCATAAAAGTCTTCAATATTTTTGGTTGGATACAAGC  
TCAATGTTTTGTTGAAATTTCTTTAATTTGTTTATCTTTACTACTTTCTTCTTTTTTTCATTC  
CGCAAGCGCTATAAAAACAGATAGTATTATCAGGCATAGACACAATTTAACCTTTTTG  
AATGAATCATCTTTCTCCACCTTATTTTTTAATACTGACTCAATCTTTAATTTATACATT  
TAAAGCGAAAAATTTTTAACACTTTATGAAATTTTCAATCCAAACTTCTATTAACCCTAT  
TTAGTTTGACTCATAACTTGTATCCTCGCTTGGAGTAAATTC AACCGAATCTGTAAAATAG  
ATATTCTCTCTTTTATTTTGTACAAAGGTAAATTCTAAGTCTTTAGAGCCTATGGATGAAC  
CTTTTAAATCGCCATCACCTTTCAACAA

> **lpl**

Function: protein coding sequence; tandem lipoprotein-like (genomic island)

Best match: lpl-SAOUHSC\_02789\_CC008\_COL\_CP000046.1[2550060:2550761:r]RC

Position: 061-contig\_272: 77 ... 3154; Length: 3077 bp

Sequence:

CTATTCAGTAGTTTTGAAATTAATACTATCCGTA AAAATAGATGTTTTCTTTTTTATTTCTTA  
TAAAGTTAAATTCTAGTTCTTTAGAACCTACGGATGAGCCTTTTAAATCACCATCACCTTC  
ATACAGTTTGAAGTCATATTTATCAATTGTAAATGACGACTAGATGATATATAGTTCAAG  
AAACATCAAAATTCGTTAAAACATAATCAAATTTTATTATGTTCAAAACTTTATTTTCCAA  
AAATTA AAAAAGAAGTTAAACAAAGATTGGTTGCTTAACTTCCATTATTGAATTCATTAG  
TCCGGTTTGACATAGATCCCGAAAAATAATGGCTGATAGCCACTCATAGTTGAAATTACG  
ACAATATAATTTATTTATTATAAATAGATTATATACTTATTGTGTTTCTTAATACCTTTT  
TATACTTTAATATCTTGAATTTTTCTAAATCATTACTAATATCTTTTAAATTTCGTCTGTGGC  
ATTTTTACCCAAGCCCCTTGTGCCGCATTTTTAAATCATCTTCAAATTTTTGAAATGA  
CTTACCATTTGGTCAAGTAATATTTTCTCATCACTTTTCAGCTTATTTGATGATCATGATG  
CATACGAACATGTTTCAGGCGCAATAACCTCACTAATCTGTTCTTTTTCTTCAATTTGTTCC  
AATACTGCTAAATCTGGTAAACCACTAAAATCAAGTCCACGCTTATTCATCTCCTTCAAT  
TCTGTCAGATTGTTTTAGATATTCTCTTCTTAACTCATCTTTATAATCTTCTAATTTCAATTC  
GTGATGTCGGATACGTTGATTCGTTTCTCTATCGAAAGATTCTATAAATACGTGTCATCCTG  
ATCATAGCGTCTTCACTATAATTCATTTTATGTTTGGAGATATAAGAAATGATCATAACATTT  
GTTACATTTCTTGCCTGTTTGTGTTTCAATTCATCAATTTGATTGAATGCATCATTCAAT  
TGTTTTCTTTCTTCAATCATAGGCATTTTCAAGTTCATTAATTTTTTATAACGTAGTAAACAT  
TACATCATCCCATCAATCTGGCTCGCTAACATTTGGTCAATTAGAAACAATTGCTTCGATAC

TCTGTTTAATTTTTGCGATATAGCCATTACAATTTTTATAAACATCATTTAATTTCTTTATC  
TTATCATCAATTTTTCTTTGGGATCTGTTTCAAGTTTACTTTCATACGCGCCACCTTTTCT  
TAATTCATCTATAACCTCTTCAGAGGTTAATTTTTACCAATTTCAATTTCCAACCTTCTTGCG  
TTTTTTCCAGTTGTCTCCAAATTTATGTGCCATCGCGTGATACATTTTTTTCAAATGTTGG  
CTTTCTTCATCACTAATTGATTTAAGCCTTCGGCAATGGTTAGTGCTGTTAAAGCTTCTA  
ATAATTGTTGTTGGGAGGAAGAGAGTGATCCACCCGTTGTTTGAATCCAATTCGCTCTTA  
ACGTCTCTACTTTATGTAATCTATGCCTCGTTTGTTTACGAACGGATTTAATGATTTATTA  
TTTTCGTCTTGATAGCCTTTAACTTTGTTTAAATTCGGCTAAGATTATAGCCTGTGTTCCGCT  
TATTA AAAAACCCTCATTGAATGGCCTTCTCCATTTTTAAGTACTATTTTTCCCAGCA  
GTTTCATATAAATGATTGCGGACATCTGCATCTAATTCGTCTTCATCAGACACGAATCTTA  
CAATGTGACCATCGTACTTTTCAATCAATTTTTAAGTTCTTCTTGATCGGCATAAAGGCC  
GCTCACATCTTTGATCGCTAATGGAGCTGGATTATACACAACGATATGTTAATATCATT  
CTCATACCTAAAATCATCGCATCTCTACCGCCAGCGAATGTCCGGTAATAATATCAATA  
TCATAGTCTTTTTGATATTTTTGATAAAGTCTTGGGTATTTTTATAATGTGGATCTTTATC  
TGTGACGGAATGAAGGCCAATATTGACATCGGCCCAATATCCTTTAGCGTTTCACTCGC  
ATCTCTATTGTCTTGAGAAGAGGCAATACCCAATGTTTTTTAAATATGGCGTCTTTGTGT  
ACATTAGTACCTGTCATACCTAAAGTGACTTTCCCTGTCTCTTATTTAAAAAGCGCTTG  
TAGTCGTACCTGTTTTGGGGTCAGTATAACTATCGACATATTTTAAATTTTTGGAACTT  
ACTTTTTCTTTAAAACTTCTATTTGTGTATCAATTTACGTTTTTTCAAACCGCTATTAT  
TTGCGTTTTCTATTTCATAACTAATTTGGATATAGTACTCGTTTCTTCAGAATTACTCGTT  
ATATTATCGGGTTTAAATTTGATATTCAGTTTGACTCATGATTTATCAACCTCGCTAGGAGT  
AAATTCAACTGAATCTGTAAAAAAGATATTTTCTTCTTATTTTCTACAAAGGTAAATTCA  
AGACTTCTAGAACCTACGGATGAACTTTTAAATCTCCATCGCCTTTCAATAATAGTTTCG  
GCGCTTGTGGTTGGAATATCATATCTTTTTCTTAACTGTTGGACATTATAATCATCATT  
TTCAATTGATATTTGCGGAATAACTTGGTACATTAGGATTATATGAAATATCACCATCTT  
TATAATCATTAAATATCTTTAAAGTTGCCATATTGTACAAAGAACTTAAAGTTTTCAATCTC  
TTTTTTAACTTCTCGTCTTTTATAGGTTTTGTTGGGATAATTTGATTATGTTCCATCTTGA  
CAGGATATTTTTATCTTTATCATGTGTATATCCCTTTTTATCTTTAGTTATCTCCCCTACTA  
TAAATATCCCTTAGCTGTTCTAGTGTTACGATTGATGTAAAGTACCATCGCTCTGGATTT  
TAAGGCTCCTCCTTTTAAATTGGATGTTTATTCCAGAATTAATAATCCAAGTACCTTTATCT  
CTTTTATCAAACCTTTGATCTCGAAAGCCTTCTTATCATAAAAGTCTTCAAGATTTTTAG  
TTGGATACAGGCTCAACGTTTTGTTGAAGTTTTCTTTAATTTGTTTATCTTTACTGCTTTCT  
TCCTTTTTCAT

> **tx\_lpl**

Function: bidirectional rho-independent terminator

Best match: tx\_lpl\_CC005\_Mu50-VRSA\_BA000017.4[2617686:2617742:r]RC

Position: 061-contig\_272: 344 ... 374; Length: 30 bp

Sequence:

AGATTGGTTGCTTAACTTCCATTATTGAAT

> **lpl12**

Function: protein coding sequence; tandem lipoprotein-like (genomic island)

Best match: lpl12\_CC005\_Mu50-VRSA\_BA000017.4[2618487:2619812:r]RC

Position: 061-contig\_272: 1118 ... 1268; Length: 150 bp

Sequence:

TTACATCATCCCATCAATCTGGCTCGCTAACATTTGGTTCATTAGAAACAATTGCTTCGATA  
CTCTGTTTAAATTTTTGCGATATAGCCATTACAATTTTTATAAACATCATTTAATTTCTTTAT  
CTTATCATCAATTTTTCTTTGGGATC

> **sauUSI**

Function: protein coding sequence; type IV restriction endonuclease (genomic island)

Best match: sauUSI\_CC001-ST772\_118\_AJGE01000069.1[1324:4185:r]RC (completely identical)

Position: 061-contig\_272: 3531 ... 6393; Length: 2862 bp

Sequence:

TTAATTTGTTAGATAACGATATATATCATCTCTTACAGCTTTATCCAGTGCTAAATCCATC  
GTTACTACGTTTGAACCATTCGGCATTTTATCTTGCTTTTCTGAACCTTCTATATATCCAGC  
AGTTCCTAAATAATAAAAATATATACCATCATCATCTTTTTCTGTACAAAAATATACATT  
TTAATTCCTTTTGTCTATGGGGCAAAAATTTCTGAACTTCTTTTGATTCTAGCGTTCTATT  
AGATTTAGTAAACCATTTTAATTCATCTTGACTTAAAAATTCATCTTCATATTTTGTGCTAT  
CACTTATATCCTCATGCTTATCATAAGTGATAAAATATTGGCATTCTTGGCTTTTTATCATG  
TATCCCATGATTACAGACGAACCATTTTTATTCCAATTAATATTTTACTAAAAATCTTCTC  
TTGAATATTTATTATATAAAAATCAGTCCATTTTTACCTTTTTGGTATTTTTTCATTGTTATAC  
TTTGATAATTCAATAAGATCTTCTAAAAACATATTAATGTTTGATTACTTAGAGCATTAG  
TAAATGCATCGCTTAGTCTTATCATTCTTTCATTACGTTCTATAATGGGACTTCCATAGATT  
TTTTCAATTCCTGCGTTGTAAAATGAAAAATCTAAAATCTTAATGAAGTATCTATATCAT  
CTTCTGTTATATCCTTAACTTCGTTCAACATTTTATTTTTAATTCATCATATGTTAATTCAT  
TTTTTAAAAGTTCTTCTAAAACATAACTATCGATTCTTTTCAATCCAGGTGCTATTTGCCTT  
GAAAAGAAAACCAGATTTTTAGATTCATTTTCCGTCATAAATGTATCTATTTTTTTATATC  
TCACTAAGAACTCGTAATAATTAATAAATTTAGAAAATATAACGCTTGGATCTATAGAAT  
GTTGTTGTATGAAATCCATTAGTAACGGCATGTGTCCCAATCTATTTTCAACTTCTTCATA  
AGCTTTTAAATATTAATTTATTTGATTAAATGATACTGCATCCAATGAATTGTAAATCTGTT  
TTTTAGCAACTTCTTCAAAATTAATTGTAGATACTCCATTAATCGAATCGTTATTCGTTAA  
AACTTCTTATAATTATCTTTATTTTGGCATTGATCCCCAGAAAGCGCAATCGGAATTA  
TAATTTGTCTTATAATTACCAATAAAAATCAATTACTGTAACATACTCTTATTTGAACTTTT  
TCTTAATCCTCTACCAAGTTGCTGAATGAATATAATACTAGACTCTGTTGGTCTCAACATT  
ACAACCTGATTGACTTCTGGAATATCAATACCTTCGTTAAAAAGATCTACAGTTATAATAT  
AGTTAATCTTACCTTCTTTTAAATTTTCTATTACAATTTGGCGATAATTAACACTATCATCT  
CCTGTTAAAGCAACACTTTTAAATCCCTTTTGAACCTTAGTTTATCCGCTAAATCATAAGCTT  
CTTTTTTGCTACTCACAAAATTAATCCTTGTAATAATTTACCTGAATATCCATAGTAATC  
TGTCTTTGAATAATATAATTAACTCTTTCATCAGAAGTTAAATATCTCAGTTTAGTTACA  
TCATCTTCTTAAATACCTTGATGTACATAATCAGTCACACCAAAAATAATGAAATGGACAT  
AAAATATCACTTTCTAACGCTGCTTGTAACCTTATTTTCATATGCAATATTATAATCAAACA  
GTTCAATATACTTAAATTCATCTGATCTTTCTGGTGTAGCAGTCATTCCCAGCATGAACTT  
AGGTTTGAAGTAGTTAAATACTCGTTGATAAGTAGATGCAGCAGAACGATGTGCTTCATC  
AAAACAATATAATCAAATTCATTTTCATCAAATTGCTTAAAATTATCATCTCTAGATAAT  
GTTTGAATGGTTGCAAATAAATATTTGGCATCGACATCTCTATGTTTTCTGTCAACAATC  
CAAATCACTATCATTTTTTATAGGTAATACTTTTTTAAATTTCTTCCCTAGCTCTATTTAAA  
ATCCCCTCATTATGAACAATAAATAAAAATTTATTAGGGTTTACTTCTTAACATCTAATG  
CACATAAAATCGTTTTACCTGTACCAGTTGCAGATATTATTAACGCCTTATCTTTGGTTTT  
ATCCCTAATAGCTTTTAAATGACCTTAATGCTTCTGCTTGCATTAAATTTGGGTACAATTTCC  
ACTGATTTTTTACCTTATCAGCTAGCAGCATTGAGTTTGTTC AACCTCCGCTAATTTTTC  
TAAGGAACGGTACTCAAATGATTCTTTATATGAATTAATCCATTGCTCAGTAAGTGGGGT  
ACTTTTTGCCATAACAAGTCAAATTCATTTTTTACACTATTAATACTAAATCGCCATTTTTCA  
TAGTAGACAGTAAAACATTATGCTCATAATTAACCTTTAACGCATTAGATGTTAAATTAG  
AGCTTCCCTATTACCATAGAACTATAATCCTTATGTTCAAAAATATATCCTTTGGCATGGAA  
TCCAGCAATATCGGTTAATCTTACCTCTACATTTTTTAAATTTAAGTAATTCTCCATACATTT  
TAGGACTATTAACCCTAAGTAATTAGATGTTAATATTTTCCCTTTAACACCCTTATTTCTT  
AAATCTAATAGTTGAGCCTTTAAGCTGGCTAAACCGCTTTCTGTTATAAAAGCCACAGAA  
AAATAGAACGTTTCACATTTTTGAAGTTCATCTATAATTGTTGAAAGAACTTTTTCATTTT  
TATTATTTACTAAAAGCTTCGGTGTATAATTACCTTTATGAGAAATATCTTTGTCTATAAA  
CCCTTTATGTAAAGATTGATTGAAATCATTTAGTAATCTACTCAT

> **nudix**

Function: protein coding sequence; nucleoside diphosphate hydrolase (genomic island)

Best match: nudix\_CC001-ST772\_118\_AJGE01000069.1[4187:4579:r]RC (completely identical)

Position: 061-contig\_272: 6394 ... 6787; Length: 393 bp

Sequence:

TTATCCCTCAGTCATAATTTTATTAACGGCTGGTATATCCGCTGGGGCCCAATTTAATTTA  
TCAAGTTCGTTTATTGACAACCATTC AATACTCTTATGTTTCAGTTAGAGTTGGTAACTCTT  
TGTTTAAAGTACATTTGTATGTTGTTAACCTAACAAATCCAAAATCATATTCATGTTCTGT

AGTTATAACTTTGTCTCCAACAATTAGATCACATTTTCATTTCTTCTCTAATTTCTCTAATCA  
AAGCGTCTTTTTTCAGTTTCATTCTTTTCAATCTTACCGCCAGGAAATCCCACATTAAGG  
TAGACTCATTTCTTCACTTCTCTGTGCACAAAGAATTTTGTATCAGAAAAATAATAGCT  
CCTACTACATTGATTACTTTTTTTCAT

> **pgcA**

Function: protein coding sequence; phosphoglucomutase (core genome, variable)

Best match: pgcA\_CC001-ST772\_118\_AJGE01000069.1[4882:6519] (completely identical)

Position: 061-contig\_272: 7089 ... 8727; Length: 1638 bp

Sequence:

ATGGATAAAGAATTATGGATAGAACGAGCTAATGATAGTTTGTAAACATTTTTATGAG  
CAGCAATCTGACATTGAACAGCGAGAAGGTTTTGAAAGTAAATTAACATTTGGTACTGCG  
GGTATACGCGGAAAATTCGGTCTTGGTGAAGGTCGACTTAATAAGTTTACTATTGAAAAA  
TTGGCATTAGGTTTAGCGGTTATTTAAATGCCCAAACAAACAGTCCAACAATAGTCATT  
CATTATGATATTAGACATCTTTCAACTGAATTCGCCCAAATAATTGCTAATGTATTAGCAA  
ACCATCAAATAACAGTTTATTTACCTGATACATATAAAACGACACCGGAATTATCGTTCG  
CGGTGCGCAATCTTAATACTACTGCTGGCATTATGATTACAGCAAGTCATAATCCGAAAG  
ACTATAACGGCATCAAAGTATATGGTCTGATGGTGCAGCAATTATCGACTGATGCATCTG  
AGCTTGCAAGTCGTTATATCGAAGAAGTTGGCGATCCATTACAGATTGATATACCTATTT  
TAAACAAAATACATCTTATATCAAGCCTTTTCCGAAATCTGTAAGTACTGACTATATGAA  
ACACATTCAAATATGATTGGCTATATTCCTAAATCTGATTTACAAGTTGTGTTCACTAGT  
TTACATGGTACAAGTGTTCGATTGTACCTGAGTTATTACAATCTTTGAATTTCAATCAAT  
TTAATCTTGTAGAAGCACAATGTAAACCTGATCCGAATTTAGCTCAGTTCAAAGTGCTA  
ATCCTGAAGATCATCGCGCTTTTGATCAAGCAGTCGAACCTTGCAAATAAAAGTCATGCAG  
ACTTATTAATATCAACTGACCCTGATGCGGATCGTCTTGGCATTGCTGAACGTGATGCAC  
ATGGTCATATCACATATTTAATGGCAACCAAAATGGTGCAGTTGTTACTTAATTATCGTAT  
TCAACAAACGTCTCAATTACGTCATCGCTTAATGATTCAATCTATTGTAAGTAGTGAGTTA  
ACAAAGTCATTAGCACGCTATAATAATGTTGAATACAAAGAGGTGCTTACGGGCTTTAAA  
TTTATTGCTCAGGAAATAAGACAACCTGGACGATCATCAAATATGATTTTTCGCTTTGAA  
GAGAGTTACGGTTTTCTATCAGAGCCTTTTGTACGTGATAAAGATGCCGTACAAATTGTG  
CCACTCATTATAAAATACGCTTCTGAGTTAAAATTATATGGCAAACATTGAAAGATAAA  
TTAGAACAGATTTATCAAACCTGTTGGTAGACATGAGGATACATTATTCTCGCATACGCTA  
GATGGATTAGAAGGTAAGAAAAAATTGAATCAATCATGACACATTTCCGTTCAAATCCA  
CCGCAAGAGATTCAAGGACTGAAAGTGAAAGCAATTGAAGATTATTTAACTAGCGAGGT  
TTATCATTTGGATAAAGATACAACGTACAGATTAATTCTCCTAAATCAAATGTTATTCGT  
GTCTTATTTGACGAAGGATTTATCGCTTTACGTCCTTCTGGTACTGAACCTAAAATTAAT  
TATATGTGTCGTTAAAATGTCGGAATTTTGATGATGTAGCTCAAAAAATTAATGCGATGA  
TTTTTAGCTAA

> **Q5HD60**

Function: protein coding sequence; putative protein (core genome, variable)

Best match: Q5HD60\_CC001\_MW2-USA400\_BA000033.2[2567426:2567692] (completely identical)

Position: 061-contig\_272: 9010 ... 9277; Length: 267 bp

Sequence:

ATGAAAGGCTCTAAACAAATACTTTTGATTATGGGCATTATATCTCTTATTGTTTTATTTA  
TTTTTACACTATTCATCATGGCGCAATATGCAAACATTATGAACAAAAATCCGACAGTT  
CCAACGCACATACTTTAAATTCATCATCAGCCATAATTGAGCAACATACTATGTCGAATTT  
AGCGTCTCTAGATTTATACGCTCCTGTTCTGTAACATTACTTCTAGTCGTGATATTCATCCC  
ATTTATTTTCATGACAAAAGATTAA

> **Q5HD59**

Function: protein coding sequence; putative protein (core genome, variable)

Best match: Q5HD59\_CC001-ST772\_118\_AJGE01000069.1[7209:7517] (completely identical)

Position: 061-contig\_272: 9416 ... 9725; Length: 309 bp

Sequence:

```
ATGACCGTCAACATCGTAGTTTCTATCGTATTCTGCATAAGTATGGTTATATTAGGCATTT
ATGTCGCAATAACTAAAGATTTCCACACTAATTTCTTATATAAATCAAACGACCATTGCAG
ATAAACGCAAGAACCAAATTGCATATATATTTGCGTTATGTATCAGTTTGAGTGCAGTAT
TTTTAATGTCTTCAATTCTATGCTTTGAATATGATTTTATTGTATTGGCATTCTTATTTTAA
ACTATAGCATTATTACTTATCGCATTATTCTATGTGTGCTTTTATAAAAATTACAAAATATC
CATAA
```

### > **A8YYP8**

Function: protein coding sequence; major facilitator transporter/cation symporter (genomic island)

Best match: A8YYP8\_CC009\_21334\_AGTW01000020.1[1526:2719]RC

Position: 061-contig\_272: 10046 ... 11240; Length: 1194 bp

Sequence:

```
TTACATAGACTTCTTAAAAAACTTTAACCCCGATAAGCTAAGCATTGAAATAAATTGCACC
TCCTGATATAAATATATTACTTAAGCTTAGTAAAGGTATAATTAACCTTATCAGTCCTAAA
GATAATGTATCCGCTGCGTAATTCGATGTAGATGAGATACTAAATACTTTCCCCATCAAA
TGATTTGGCGTTTTTATTTGAATGGCAACTGATCTTGTTAGTCCCTCTATAGATTGTCCAA
GTCCCACTAAAGTTGCACCTATATATAGTATCTCCAACTTGGAACACATTAATTATCG
ATAAGCCAATCCCCAACTAAAACACCAATACTAAATTTAAAGATTAATCGTTTTTCTG
ACAGTAAACCATAATCAATGACATTAATAAAGACGCTATACCTAAACATGATGTAGCTA
GTCCATATACACCAACGCCCTCTTTTAAATATATTGGAAATAAACAATGGTAATGCAACAC
GCCAAAGGCCAGTATTAATCAATATGCAGGCAAATTGAATGATTATAATAAATGGAATTT
CTTTAGATTTTTTCAAGAATCCCAAGTTTCAGAAAAATCTTCTTTTGAGTGTCTATCAAT
CATGTTGTTATTTGTATATTTTAAAAGTGCATTAATAAATAAATCCTAAAAATAGCAATATA
CTGCAAATAAAAAAGACGCCAACATTACCAACTAGTATTACAATGACACCAATTAAGC
AGGTAAAATAATATTTGAGCCTCTTTGCAAATATCGATTAACGCATTACTTGTGCTAAA
TGCTCCTCATCAATAATTTTCAGGAAGAATTGCCCTAACGCAGGATCCGTATAGCAGTTA
ATAATGGTGATAGCTGTAGATATGGTTAGAAGCGTCAGATAATTTAAATTTGATGTTATT
GCAAGTAAAGGAATAATTATTATAATCAAACCTTAGTATAAAGATCAGATAGATAAAGTATT
TTCTTTTTATTATGTTTATCAGAATATGCGCCACCGAAAATACCAAATATAATAAATGGTA
GTGTTTGACTCATAACCATCATTGATAATTTTAAAGATGATTGGTTTGTCAATTCAACAGT
AAACCAAATTATTTGTAACGAAAACAGCACAAAGCAACTCCGACGTAAGAAATTACCAA
TCAATAAATATGTAAAGTTTCTATTTTTCAAACCTTCTAAGTACAACAT
```

### > **sasG**

Function: protein coding sequence; Staphylococcus aureus surface protein G (genomic island)

Best match: sasG-MW2\_CC001\_MSSA476\_BX571857.1[2549359:2553474:r]RC

Position: 061-contig\_272: 11622 ... 11772; Length: 150 bp

Sequence:

```
TTAATTTTTTCTTCTACGTGCCAATAACATTAATCCAGCAATTCCAATTATACTACTAAAG
ATCAATCCTTTTTGTGTGCTTCTGCACCTGTTTTTGGTAATTCTGCTCGTTTTTCTCTTGA
TTAGCTACTGATTTTTTAGCAATTTT
```

### > **sasG**

Function: protein coding sequence; Staphylococcus aureus surface protein G (genomic island)

Best match: sasG-COL\_delta\_CC008\_FPR3757\_CP000255.1[2622904:2626250:r]RC

Position: 062-contig\_323\_RC: 1239 ... 1389; Length: 150 bp

Sequence:

```
TGCTTCTGCCTCTTGTTGAGTTCCTCAAATACATTAGTGAGCCAATTAATAAGATGCTGTT
CCAACCTGTAAATTTCTTATTGAATATTTATTCAATTTATTTGATAGAAAATCTACTCTTTT
ATTTACCGGTCCTTTCTTATCTCTCAT
```

### > **sarT**

Function: protein coding sequence; staph accessory regulator T (genomic island)

Best match: sarT\_CC001\_MW2-USA400\_BA000033.2[2574462:2574818:r]RC (completely identical)

Position: 062-contig\_323\_RC: 1693 ... 2050; Length: 357 bp

Sequence:

```
TTATGTTTCATTAATATTTATTTCACTCAAAAAGATTTTTAATATAAATTGTGTTGTTTTACAG
AAACAACAATGATTACATTTCTACTATCATGTGGGTCTCTACATTTATTCAAGTAACCCTT
TTTTGATAATTCTTTTACGCTTTTAAACAATTCTAGATTGGTCTATACCGATATAACTTATAA
TGTCTCTCATAAAAATATTTACCTTCATCATTTTTAAATACATCTAAATATGCTAATACTAA
ATAATTATCTAATGTAAGACAAAAATATTTTTTTAAATATTTACGCAGCTCATATGTAGTT
AATACTCTTTTCATTAATTTAATATTGCTCTTGCTTTTCAAATCATTTCAT
```

### > sarU

Function: protein coding sequence; staph accessory regulator U (genomic island)

Best match: sarU\_CC001\_MW2-USA400\_BA000033.2[2575142:2575885]

Position: 062-contig\_323\_RC: 2373 ... 3117; Length: 744 bp

Sequence:

```
GTGGACTATCAAACCTTTTCGAAAAGGTCAATAAATTCATAAATGTAGAAGCGTACATATTT
TTTCTCACTCAAGAGTTAAAGCAACAATATAAATTATCATTAAAAGAATTGTTGATATTA
GCATATTTTTATTACAAAAATGAACACAGTATTTCACTAAAAGAAATCATTGGTGACATA
CTTTACAAACAATCTGATGTTGTTAAGAACATTAAGTCACTATCTAAAAAAGGATTTATA
AATAAGTCTAGAAATGAAGCAGATGAACGCCGTATTTTTGTTTCAGTTACTCCAATACAA
CGTAAAAAGATTGCTTGTGTTATTAATGAGTTAGATAAAAATAATTAAGGATTTAATAAG
GAAAGAGACTACATAAAATATCAATGGGCTCCAAAATATAGCAAAGAATTTTTTATACTT
TTTATGAACATTATGTACTCAAAGATTTTTTAAATATCGATTTAATTTAACATTTCTTG
ATTTATCTATCTTATATGTAATATCATCTCGAAAAAATGAGATACTAAATTTAAAAGATTT
GTTTGAAAGTATTAGATTTATGTATCCTCAAATTGTTAGGTCAGTTAATAGATTAATAAT
AAAGGTATGCTAATCAAAGAACGATCCCTTGCAGATGAAAGGATTGTGTTAATCAAATA
AATAAAATACAATATAACACTATTAAGCATATTCACAGATACTTCCAAGATTCTCAA
CCAAGAAAATTTTTCTTTTAA
```

### > gtaB

Function: protein coding sequence; UTP-glucose-1-phosphate uridyltransferase B (core genome, variable)

Best match: gtaB\_CC001-ST772\_118\_AJGE01000038.1[535:1401]RC (completely identical)

Position: 062-contig\_323\_RC: 3327 ... 4194; Length: 867 bp

Sequence:

```
TTATAACCCTAATTCTTTAATAAATCGTGTTAATTCTTCTCGCATACTGTCATCTTTCAATG
CATATTCTATGGTAGTTTTAACGAAGCCTAATTTTTCTCCAACGTCATAACGTTTCGCCTTC
GAAGTCATATGCATACACTTGGTTATCATTATTCATACGTTCAATCGCATCTGTAACTGA
ATTTCTGTTACCTGCGCCTTCTTTTTGCGTTTTTAAATAAATCGAAAATTTTCAGGCGTTAATAC
ATAACGTCCCATAATAGCTAGGTTTGATGGTGCCGTACCTTGTGCTGGCTTTTCCACAAAC
TTTTTCACTTCATACTGACGTCCGTTTTTAGTTAATGGATCAATAATTCCATAACGATGAG
TATCTGCTTCTGGAACCTTCTTGGACGCCTATAACTGAGTGCCAGTTTCTTCATAAACGTC
AATCAACTGTTTCACTGCTGGTACTTCAGATTCAACAATATCGTACCTAATAACACCGCA
AATGGTTCATTGCCGATAAATTGACGCGCAGAACTAATCGCATGCCCCAAACCCTTTTGT
TCTTTCTGTCTTACATAAAAAATATTCGCAAGTTCGGTTGAATACTGAACTTTTTCTAGTA
ATTCAGATTTACCTTTTTCTTTTAAACACCATTTCTAATTCTTTTTGACTATCAAATGATCT
TCAATCGCGCGTTTTGTGGCGACCTGTCATAATAATATCTTCAATTCAGCTCTTGCAG
CTTCTTCAACGATATATTGTATTGTGGGTTTATCTAAGATAGGAAGCATTTTCTTTGGCAT
CGCTTTAGTTGCTGGTAAAAATCTAGTCCCTAAACCAGCAGCGGGAATGATTGCCTTTTTT
ATTTTTTTCAA
```

### > fnbA

Function: protein coding sequence; fibronectin-binding protein A chv

Best match: fnbA-ED133\_ref\_CC133\_ED133-shep\_CP001996.1[2595824:2598955:r]RC

Position: 062-contig\_323\_RC: 4373 ... 4403; Length: 30 bp

Sequence:

TTATGCTTTGTGATTCTTTTTATTTCTACG

### > **fnbA**

Function: protein coding sequence; fibronectin-binding protein A chv

Best match: fnbA-Mu50\_CC005\_04-02981\_CP001844.2[2585364:2588480:r]

Position: 063-contig\_60: 31 ... 61; Length: 30 bp

Sequence:

CGCAGAAATAAAAAGAATAACAAAGCATAA

### > **Q5HD52**

Function: protein coding sequence; putative protein (genomic island)

Best match: Q5HD52\_CC001-ST772\_118\_AJGE01000066.1[2552:2674:r] (completely identical)

Position: 063-contig\_60: 458 ... 581; Length: 123 bp

Sequence:

ATGTATGCTTTAGTATATTGCTTTAAATTAGATGAATTTGAATTTAATTTAAAAAATAAGT  
ATAAAAAATACAAGCCTGTTATATCAAGGGATTCAAGAGTTTTGCATGCAATATATATGT  
GA

### > **fnbB**

Function: protein coding sequence; fibronectin-binding protein B (genomic island)

Best match: fnbB-Mu50\_part\_AM076047.1[1:1287]RC

Position: 063-contig\_60: 1021 ... 2290; Length: 1269 bp

Sequence:

AAGCACCAACAACCTGTGCAAGCACCAAAAAGTAGAAACCGAAATGAAATCACAAGAAGAT  
TTACCATCAGAAAAAGTTGCTGATAAGGAACTACAGGAACTCAAGTTGACATAGCTCA  
ACCAAGTAACGTCTCAGAAATTAACAAGAATGAAAAGATCAGCTGACGTTACAGCAG  
TTTCAGAGAAAGAAGTAGCGGAAGAAGCTAAAGCGACAGGTACAGATGTAACAAATAAA  
GTGGAAGTTACTGAAAGCTCTTTAGAAGGACATAATAAAGATTCGAATATTGTTAATCCG  
CATAATGCTCAAAGAGTAACTTTAAAATACAAATGGAAATTTGGAGAAGGAATTAAGGC  
AGGAGATTATTTTGATTTACATTAAGTGATAATGTTGAAACACATGGTATATCAACACT  
GCGTAAAGTTCCGGAGATAAAAAGTTCAACAGAAGATAAAGTTATGGCAAATGGTCAAG  
TTATAAATGAACGTACAATTCGCTATACATTTACTGATTATATAAATAACAAAAAAGATT  
TAACTGCTGAATTAACCTTAAACCTATTCATTGACCCAACAACAGTGACAAAGCAAGGGA  
GTCAAAAAGTTGAAGTCAAATTTGGGTAGAAAATACAGTTAGTAAAACATTTAATATTCAAT  
ACTTAGACGGTGTTAAAGATAGAATGGGTGTTACTGTTAATGGTTCGAATTGATACTTTAA  
ATAAAGCAGATGGAAAATTTAGCCACTTTGCGTATGTAAAACCTAACAACCAGTCGTTAA  
CTTCTGTGACAGTAACTGGTCAAGTGACATCTGGATATAAACAAAATGTTAAGAATCCAA  
CAGTTAAAGTATATAAGCATATTGGTTCAGACGAATTAGCTGAAAGCATATATGCAAAGC  
TTGATGATGTCAGCAAATTTGAAGATGTGACTGGGGAACCTAATTTACAATATACAAGTA  
ATGGTGGTTATTCTTTAACTTTAATAATTTAGATCAAAGTAAAAATTATGTAATAAAGTA  
TGAGGGAGACTATGATTCAAACGCTAGCACCTTAGAGTTTCAAACGCATCTTTTTGGTTAT  
TATAACTATTACTATTATAATAACAAGTAATTTAACTTGGAAAAATGGTGTTCATTCTACT  
CTAACAACGCTCAAGGCGACGGTAAAGATAAACCAATGATCCTATCATTGAGAAGAGT  
GAACCAATTGATTTAGACATTAATCAGAGCCGCCAGTGGAGAAGCATGAATTGACTGGT  
ACAATCGAAGAAA

### > **tx\_universal2**

Function: rho indendent terminator

Best match: tx\_universal2\_CC008\_COL\_CP000046.1[2601614:2601654:r]RC (completely identical)

Position: 064-contig\_271\_RC: 24 ... 65; Length: 41 bp

Sequence:

TTGGGGCCCAAAAAGCTTGTTACAAGCGCATTTTCGTTTCAG

> **sdaA**

Function: protein coding sequence; L-serine dehydratase/iron-sulfur-dependent/beta subunit (core genome, constant)

Best match: sdaA\_CC001\_MW2-USA400\_BA000033.2[2612240:2613139:r]RC (completely identical)

Position: 064-contig\_271\_RC: 510 ... 1410; Length: 900 bp

Sequence:

```
TTAATTATTTTAAACCATATCTTCAGCTGTGCCAAAGATTTTACGTTTAATTGCTTCGCCAG
TTGGTGTGCCTGCTAGTCCACCCAATCCAGTTTCACGTAATGATGCAGGAAGGTTACGAC
CAACCTTATCCATTGCTTCAATAACTTCATCAACAGGGATTCTACTTTCAATACCTGCTAA
TGCTAAATCTGCTGAAATTAAGCGTTACCCGAACCAATTGCATTTCTCATAACACAAGG
AATTTCAACAAGTCCGGCTACTGGATCACAACTAAACCTAATAAATTACTTATCGCTAA
TGCCATAGCGTGCCCGGATGCTTCTGGTGATCCTCCGAATATAGCTACTGCTGCAGCTGC
GGCCATTGCAGATGCTGAACCAACTTCAGCTTGGCAGCCACCTGTTGCACCAGCTACACT
TGCATTGTTTGTACGACACGCCAAACAATGCTGAAGTGAATAAGAAATCAATCATTTG
CTCTTCTGTAAATCATGTGTTTTTTCTAATTTAAAAAGTGCACCGGGAATGGTACCCGAG
GAACCAGCTGTTGGCGTTGCACAAATAATACCCATCGCAGCATTGACTTCATTTGTTGCA
ATGGCACCTTTGACTGCGTCAATCATTTTCATATCCAGACAAAGCATGATGTGTTTCATTAT
AATCACGTAGTTTAGCAGCATCATGACCAGTGTAGCCCGTTACACTTTCAACCCCATCAC
CTGTTCGTCCTTTGATTACTGCGTCTCGCATGACATCTAAATTTGTTTCATTTGCGCTCGC
ACTTCATCACGTGATTTACCGCTTAATTCCATTTCTTCTTTAACCATGATATCCGCAAATG
ACATATTATTTTCTACGGCATAATCTATAGTCTCTCTAATTGAATCAAACAT
```

> **sdaB**

Function: protein coding sequence; L-serine dehydratase/iron-sulfur-dependent/alpha subunit (core genome, constant)

Best match: sdaB\_CC001\_MW2-USA400\_BA000033.2[2613153:2613833:r]RC (completely identical)

Position: 064-contig\_271\_RC: 1423 ... 2104; Length: 681 bp

Sequence:

```
CTAATTTATATAGGAAACGTTTACGTCACTGTATTTCTCTTTAATTGTATTTAATGTTGATT
CTGAGATTGCTTTATTTAATGGTATTACAACCAAGCATTATCTTCATCTATCTTAATAAAA
TTCATCTTTACAGTCTAATTTTCATATCGTTGATATCATTGATGAAATGATTTACTTGTGCTT
TAGTCATATTTCCGTCAACAACATAAAATTGGTAATCCATGATTTAAATCTACTTCTAGTCC
ATTTATATGAATACCTTTAATTTAATTGTACCACCACCGATTGAAATACCGATAATTTCA
ATGTAGCGACCATCATTACGAGATGATTTGATATAAGCACAGTTTGGATGTTGACCAATA
CTATCGCCTTCTTCTTCGATGATATCTATTTAATACCATCATCAGCTGCAATTTCTAATGA
AGATTTAATTCGGTTATCAAATGTTGAATATCCATTGCTCCACCCACAATAGCGACATCT
GTACCATGTCCCTGGTGTGTTTGAGCAAATGATTCATAATAATGTATTTCAATATTTTGTAG
GAATATCTCCAATATTGCGCGTGTGAATTCCAATCTTTACTGCACCAGCCGATGAGA
ACTTGAAGGGCCCATCATAACTGGTCCGATAATATCGAAAGCACTTTGATAATCATAGCT
CTTTGCCAT
```

> **aes**

Function: protein coding sequence; esterase (core genome, variable)

Best match: aes\_CC005\_Mu50-VRSA\_BA000017.4[2677701:2678669:r]RC (completely identical)

Position: 064-contig\_271\_RC: 5101 ... 6070; Length: 969 bp

Sequence:

```
TTAATTAATAATATTTTCACTTGGTATAAAAAGCGTCGGCGCTCTGGTATCGGAAATACT
GGATAAATATGGAATTGGTAATATCCAGGTATAAAGTCATGTTGATACCTTTTGCACCTC
AACAATTGCGATAAGTTCAAAGCATCTGGGTACAGTACTTCTTTTGTGCCAACAGTTAAT
GTAATACGACCTAAACCATCTAAGTCACCATTAATTGGTGATACTTTGTAGTTATCTAAAG
GTGTGTCCCCTGCCATTGTTTCAGCTAAGAACACACTGCCATCCACACCTACCATTGGGTC
TTTCTTTAAGTAGTCAGGAATTTCAAGGATGCTGCATCGTTGCATCTAAAACCTGGTGAAT
AATACAATATGTCCTGGTTGCACAATATGTTTTTCTTTAACAATTGAGCAAATGATAAAG
```



CAATTTGACCGCCCGCAGAGTCACCCATTACAACGATTTGTTTAGAATCTGCTACTTGATT  
CAATAAATCATGGTATAACTTTTCAAAAAGCACATACGTTCGTTGATAATCTTGATGCGG  
AATCTTCGGATATACTGGCATGATGACTTTAGCATTGAGTGTCTGCAAGTTCATCAATA  
AATTCGAAATGAATTTTGAGTGGGTCTTGGAACCATGCGCCTCCATGTGCGTATAATACA  
ACGCGTTGATGCTTATCTTGTATCATTAACGTTATAAACGTTGAACCGTAGTGCTTAT  
CCACTGTTACTGGCATCTTAACTGATAATTGGTGCCTCATATTCACCTGCTGTCTGTGG  
CGCCATTTTTTCTAATGCTTTCATCGCTTCTTCTTTATACATAAAAACGACGCTTAGCTCTAG  
ATAATCGTATACCTTGTCTAACATATAACTTTTCACACTGCGTTTTTCTTTAATTCTAATA  
TGTGCGTATGCTGCTACTAAAAATCCAAACGCAAGTGTAGACCATTTTTTACGCAT

### > **glcB**

Function: protein coding sequence; PTS system/glucose-specific IIABC component (core genome, constant)

Best match: glcB\_CC005\_JH1\_CP000736.1[2708209:2710275:r]RC (completely identical)

Position: 064-contig\_271\_RC: 7378 ... 9445; Length: 2067 bp

Sequence:

TTATTTGACTGTCATAATTAGCTTACCTGGATCAGCATCTTGTACATCTTCAATGACAAGT  
TCTTTATTTCAAGATTTGTAATAATCATTGGTGTAAACGATGCTTGGTGCCTGTGCTTTCA  
AGTATGCTAAATTCACCTTTCATTAATGGTTGGCCTTGTGTTACTTTTTTCATCAACGTTAATC  
AGACTTTCGAATCCTTCACCATTCAGTTTCACTGTATCGATACCAATATGAATAAGTACTT  
CGACGCCACTTTCAGATTCTAATCCTATCGCATGTTTCGTAGGGAAGATTGTTTTCACTGT  
ACCATCAAACGGTGCTACAATTTACCTTTTTTCAGGGATAAAGCCAATACCATCACCCAT  
CATTTTACCAGCGAATACTTGATCAGGTAATCTGATAATGGAATGATTTGACCGACACCT  
GGTGCATAGATGTCTGTTGTTCCAAGTGCTTCTACGTGAACTGGTTCATCTGACATTTCTT  
CAGTCACTGTCGTTTCACTTGGTTTCGTAATTTACCACCTCATAATCTTGGCCATATCATGT  
TTAATTTGATCTGATTTTGGACCAAAGATAGCTTGCATATTGTTTCCAACCTTCTAATACAC  
CTGATGCGCCTAAAGCTTTAATACCTGCTACATCTACTTTTGATTTATCAACCCTTCTAC  
GCGCAGACGTGTAATACATGCATCTAAATGTTAATGTTTTCTTTTCCACCCATTGCATCT  
AAGACATCAAATGGTAATTTTGCAGACTAGAGTTACGAATTTCACTTCTTCATCTTCAC  
GACCTGGTGTTTTCAATTTAACTTACGAATTGCAAAGTCGAATAAGAAGTAATACACGA  
TAGCATATAACAATACCGACTGGAATAACTAATAATGCGTGTGAACGATCCCAGTTTAATA  
AACCATATAAAATATAATCTATGAAACCACCTGAGAATGTCATACCAATTTTAACGCCTA  
ATAAATGCATTACTAAGAATGATGTACCAGCTAATAATACGTGAATTCATAAAGTACTG  
GTGCTACAAATAAGAATGAAAATTCTAATGGCTCAGTGATACCAGTTAAAAATGCAGTTA  
ATCCTGCTGATAACATTAACCACCCACGACTTTTTTGCCTTCTGGTCTGTCATTTTTATA  
AATAGCAAATGCCGCCGCTGGTAAACCAAACATCATAAATGGATATTTACCAGTAGTAAA  
TGCACCAGCAGTAAATGGTACGCCATCTTCAATTGTGCCATCCAAATACGTTGGTCAAC  
ACGAACTAATTCACCTGCGTGATTTGTATAACTTCCGAATTCAAACCAGAACGGTGAATA  
GAAAATATGATGTAAACCAAATGGAATTAATGAGCGTTCAATAATACCGAATATAAACG  
TTGTTAATGTTAAATTTTTATTTAATAAGAAATTCGATAAACTATTTAATCCATCTTGAAT  
TGGTGGCCACGCAAAGCTTAAAAGCACACCTGTTGCGATTGCTACGACCGATGTCACAAT  
CGGTACAAATCGTTTACCTGCAAAGAATCCTAAAAATGGTGGTAGTGTAAATATTATAAAA  
TTTGTGTAACACCATGCGGCTAAAGCACCCATGATAATACCACCAAACACACCCGTTTG  
TAACGTTGGAATACCTAATACTAAAGCATGTGCTGGTCTTTTCGCTGCTTGACTTAATTCT  
TTTGCCCTTTGGCATATGAGAAAATGTCATCAATTGTAATGTGCAACACTTTCCCCATTG  
TTGCATTCATAATTAAGTAACCTACTAGCGCTGCTAATGCTGCAACACCGTCTCCTCCTGC  
TAATCCAAGTGCTGTACCAACTGCAAATAATAATGGCAAGTTATCAAATACAACCTTGTC  
TGCTGCTTCATGACCGACGAAATCATTACAATGATATCGTTTTTTAACCATGGTGAAT  
TCTACTAATTGTTTCGTTGTGCATTGCGTTACCAAACGCTAATAAAAATACCAGCTGCTGGTA  
AAATCGCAACAGGTAACATTAATGCTTTACCGATACGTTGCAATTGTCCAAACAATTTCTT  
AAACAT

### > **cidC**

Function: protein coding sequence; pyruvate oxidase (core genome, constant)

Best match: cidC\_CC005\_Mu50-VRSA\_BA000017.4[2682345:2684084:r]RC (completely identical)

Position: 064-contig\_271\_RC: 9745 ... 11485; Length: 1740 bp

Sequence:

```
TTATAAGAAACGTTTTGCTGCAACTGAAATAGGTGGAATTTGATCTAAATCTAAATATTT
ATCTTCAGTAATAGATCTAAATGCCATTTACCATAACCAAGCGCTTCTTCATTTACAATT
TTACCTGGTAATGGCGCAGCATTAGGATCAACATATACATCTACAATCGTTGGTACATCTT
GTGCTAATGCCTCTTCGACTATAGCATCTACTTCGCTAGCACTCTTAATTGTATAACCTTT
ACCACCTGCTGCCTCAGCAAATTTTGCATGATCCATATCAGAAAAATCAACTGCATATTCT
AATTCACCAGCTGCTTGTGTTTCATATTTAATAAATGCTAACTGTTTGTATTAAAGTACAA
ATACAGTTAAAGGTAAATCATATTGTACTGCTGTAGCGAAGTCTTGCATTACCATTTGGA
ATGCACCGTCACCAGCAATGGCAATCGCTTGTCTATTTGGATATGCAATTTTTGATGCCAT
AGCTCCTGGAAGACCGCAACCCATTGTACCTAACCAACTTGAAATGATGAACTTGTTGTT
CACACCAAGATTTAAATAACGTGTAGACCAAACCTGTTGCAGTACCAACATCTGCTGAAAT
TACTGCATCATCTTTAATAAATTTGTTAATTGATGCCATTAACGTTCTGGACGTAATGGT
TTGCTATTATTATTTTTATCTTGTCCATCCATTTATCCCAAACCGCTTTACGTTCTAACGT
TTTGTTTAAAAATGGTCTTTCCGCAACATGTTTAAATTTTTTCAGTTAACTGATGCAATGCA
ATTTACTGTCTCCAACAATTCCTACATTAATATTAACGATGTCCGATATTTTTAGGAT
TTGTGTCGATTTGGATTGCTTTAATATTTTTCTTAGGTAAGTAATCCACATATGGATAGTTT
GTACCAACCATAATTAATAAATCCGCTTCCTGCATTGTTTGATAAGATGTTTTGGTACCAA
TTTTACCTAAGTTACCGATACTATATGGATGATCATCCGGCAAGATTGTTTTAGCTGGTAA
TGAATGAATGACAGGAATTTTAGCCATTTCAATAAATTCACGTAGCTCATCTTTCGCATGT
TTTGCACCTACACCAATTAACATGACAGGCTTTTTACTTTTTATTAATTAGTTAAACCGCTT
TTTGATGTCTTTATATTTTTGGTGATACAACTGTTGGTCTTGATGTATCTACTGGTTTATTTCG
TTGTATCTTTAATTTTTTTCAGTTAATAAGTCGTTAGGACAAATAACAACAGCGACACCTTT
TTGTTCATATGCCGTACGAATTGCTTCGTTAACGATTTCAAACACATTGTCACCTTTTTCA
ATTTGGTGATTATAAACGGCTACATCTTCACATAATTTTTGTAAATTTGTTTCTTGAAATG
CTTTCGTTCCAAGTGCTGTACTATTCGTTTGTCCAGATAATATTAATTGCGGTACATTATC
CATTTTGGCATCGTACATAACCATTTAATAAATGAATTAACCAGGGCCACCGATACTTAA
TGCCACACCGATTTTACCAGTTAATTTTTGTGTAACCAGCAGCCGCTAAGCTTGCTACTTCT
TCATGACGTACATGATAAAATTTAAATTGATCTCTCACTGTACGTAAACTATCGACAACCT
GCGTCGATTGAGTCTCCTGGAATACCATACAAGTGATCTATATCCCATGCTTGTAATGCTT
TAACTAATGCTTCATTTGCTTTTTATTTTTGCCAT
```

### > **cidB**

Function: protein coding sequence; pore forming protein (core genome, constant)

Best match: cidB\_CC001\_MW2-USA400\_BA000033.2[2623246:2623935:r]RC (completely identical)

Position: 064-contig\_271\_RC: 11535 ... 12225; Length: 690 bp

Sequence:

```
TTAATAGAATAATAAAAATTAGAACAGGTATTAACACTGAACTAATAACTGCAGTTAAAAT
CATCCCAATTGAACTAAATGCACCGGATTCAATATCCATTTCTAGTGCTTTAGCTGTGCCA
AATGCATGTGACGCATTCCCATACGTTAAACCTTTGGCGATAGAAGATTCAAATCTTCCA
AATCTTAATAACATCGAACCTAAAATACTACCGATTAAACCCGTTGTGATAATAAAAAGT
ACGGTCATCGTATCTGTACCACCTAGTTCATGTGACACTTCGATACCTACTGCGGCTGTTA
TAGATCGGGGCAATAACGTTACAATGACGTCTTTAGAATAGCCAAATGCTTTAAGTGTTA
AGAACACTAACATGAAATTCAGCATGACGCCAGTTAATACACTTGCAAAAATGATAGAG
ACATTGTCTTTAATTTTTCTCTCTATTTTTATAAAGTGGGTACGCTAAACATACGACCGTTG
CGTTTAAAATATGGTTGATCCAACCTGCCACCTTTTCATATACCCGTTATAACTAATTTCCAAA
GATAAGTAAGACAAAATAATTCCTAAAGATGCAATTAATGCTGGATTCAAAAATGGGTT
CGGATATTTTTGTTGTAACCTTTTAGCGAAATAATAAAAACGACAGTCAACAAAATCAT
TAATAAGGCTTGCACGTAATCATTAT
```

### > **cidA**

Function: protein coding sequence; pore forming protein (core genome, constant)

Best match: cidA\_CC005\_Mu50-VRSA\_BA000017.4[2684817:2685212:r]RC (completely identical)

Position: 064-contig\_271\_RC: 12217 ... 12613; Length: 396 bp

Sequence:

TCATTCATAAGCGTCTACACCTTTACGATGTTTATGTTTAAACAGACATTTTTTTCAGCAATA  
TAACCTGAAGATAATGCAACGATACATGTTCTATAATAATGACTGCGAAAAAGAGTATA  
TAATTTAGCGTAATTTTCGGAAGCAACATCCATAATACCTACAACCTGACGGTATGAAGAAA  
AAGACCATCGTCTTTAATAAAAAAGTTTGCACCGTCTTCTACCCAAGTTAGCGGTACAATCT  
TAAATTGTAATAGTAAATAAAAAATAGACCAACAATACTGCCGGCTAAGGGAAGA  
TGAAAAATCTTTTGAATTTCTGTGCCAATAAAGTAATCACAATGATGATTCCTAGTTGTA  
GTAGTAGTTTGATTATTAATTGGACTTTGTGCAT

### > **cidR**

Function: protein coding sequence; regulator of cid operon (core genome, constant)

Best match: cidR\_CC005\_Mu50-VRSA\_BA000017.4[2685425:2686303:r]RC (completely identical)

Position: 064-contig\_271\_RC: 12825 ... 13704; Length: 879 bp

Sequence:

TTAGCCTAAACGATCTTTCAAAAATTCTATCCATTTTCGTTGTGGCATGACTTAATTGTTTA  
TCCTTCTTCCAAACAACACCTAATTCCCAATGTACATGCGCATCTTCAATGCGTAGCAGCT  
TCACATCTCCATTTAGTTGCTCTGAAATTGATGTTGGTAAAATACTAATACCTAATTCATT  
CGTAACTAAATCTTCTATAACATGCCATTGTGAAATTTGCGCTACAGTATTCGGAACAAA  
GCCAACGTTTTTAGCATTTCATAAATTTTATCATTCAAGTAAAAGTCTTTATTAATAAAA  
ATGAAGTCTTCACCTGCTAAATCTTCGAGTTTAAACAGTTTCATATTTTGCAGTTCGATGCT  
CTCTGCTCACGATAAGTCGCAAATCTTCCTTATCTAGGGTAGTATAATCGAAAATATGAT  
GATCGACTGGCAAAGTGGTCACGCCTATATCTACTTCATCATTGATAATTTGCTGCTCAAT  
CGTTTTGCCGCCATTTTCTATTAATTATATGTAACATTTGGATATTGCTGATGGAATGCA  
CCAAGAATATTGATAAGAATCTTCATATTCATGACTGCCGACATGCCCATGTTTATATGCC  
CTGTTTCCAGTCCATTCAAGCGTTCCATTTTCAGATGGTAAATAATCATAACAGTGCAACAAT  
TTCTTTACTTTTCTCATAAAAAATTTGACCTGCATCGGTAAGTATTAATGTCTTTTACTTC  
TATCAAATAAGGGCGTGCCCATTTTCATTTTCAATATCTTTAATTGCTTTACTAATTGTAGG  
TTGTGCAATATATAATGATTTGGAGGCATTAGTCATGCCTCCTTGCTTAAACGACTTCAATA  
AAATATTTTCATATGTTTGATATCCAC

### > **ssaA4**

Function: protein coding sequence; staph secretory antigen A4 (core genome, variable)

Best match: ssaA4\_CC005\_Mu50-VRSA\_BA000017.4[2687078:2687509] (completely identical)

Position: 064-contig\_271\_RC: 14478 ... 14910; Length: 432 bp

Sequence:

ATGGAATATAAAAAGATACTAATTCGTTTATTAATTGCTTTTGCAGTACTTTTCTCAGCAG  
ATTTCACTTATCAATCCGTCGAACAACGCATCAATCGCATGCCGCAGTTAATTATTATAG  
TAAAACCAATGTACATGGTGGGCATTTAAACGTCGCGCACAAGTCGGCAAACCTGTTTC  
TAATAGATGGGGCAATGCTAAAAATTGGTATTACAATGCACGTAAATCAAATATGCGAC  
TGGTCGTACACCAAGAAAATTTGCTGTCATGCAATCAACTGCAGGATATTATGGACATGT  
CGCAGTTGTTGAACAAGTATATAAAAACGGTAGTATTAAGTTTCAGAATACAACCTTTTA  
TCGCCCATTAATAACAATACACGTGTACTAAGCAAAAAGGCAGCACGTAACCTTTAACTA  
TATTTACTAA

### > **mvaA**

Function: protein coding sequence; hydroxymethylglutaryl-CoA reductase/degradative (core genome, variable)

Best match: mvaA\_CC008\_NCTC8325\_CP000253.12630037:2631314:rRC

Position: 064-contig\_271\_RC: 15048 ... 16326; Length: 1278 bp

Sequence:

CTATTGTTGTCTAATTTCTTGTAATAATGCGTTCAGCTACTTGTGTATTTCGCACGGGGTTCTT  
GCTTCAATGCTTCAGCTACTTGCGCAATTTTCATCACCTTTTGCACCTACAACAATAGCTAA  
AGATTTATATTGCAAGTCATATGGCCTTGCTGGATACCTTCGGAAACGAGCGCGCGACA  
TGCTGCAAAGTTCTGTGCTAAACCAACGGCAGCAACTACATGACCTAATTCTTGTGCTGA  
ATCTACATTTAGCAATTCTAAAGAAGCTTTAGCAATTGGTAATACTTTTGTACCACCGCCA

ACGATTGCCAATGTCATAGGCACCTTCTATTGTACCAATTAACGTTGACGTTTTTGTATCGT  
ATCTCCATGTTGCAATACCACGATACTGTCCGTCACGACTCGCGTATGCATGCGCACTTGC  
TTCTGCACCACGCGTATCATTTCCTGTTGCTAAAACAACGGCATGTATGCCATTATAACA  
CCTTTATTATGTGTTGCAGCACGATGAATATCAACTTGTGCCAATACAGAAGCACGTTCC  
ATTCGTTTGGCAACCTCTTCTCCAGTTCTCTCGCCCCTTGCTAAATCTTTAACGTCAATTC  
GCCTTGAACCTTTAACAACGGACGCTGTTGCATGATTGGATAAAAATACTCATTAAAATGTC  
GCTTTGCGGAAATTCATTTTTTAAAAATGCAGTTATGGCCTCTAAAATCGTATTAAGCATA  
TTAGCGCCCATAGCATCTTTCGTATCAACAAATACTTTTTAAAGATAGTAAGTGTGCTCAG  
GAAATGTATCAATCGCTATACGTTGGTAACCACCACCACGCGCTTTAATAGAAGGATATG  
CCTCATCCGCAATTTTATGAATTTGCTTTTCTAAAGCTTTAATGTCTGCTGATAATTTTTCA  
GTATCGTCAACGCCATCAAAGACGATTTGACCTATCATAATACGTTTCAAGATACCGTT  
TTAAATCCGCCAGTCTGATTCAGCTTTGCACCATAACTAGCTGCAGCGACAACCTGAA  
GGCTCTTCCACCATCATAGGTACAACATATGCCTTATCGTCCACAATGATATTCGGTAATA  
ATCCAACGGGTAATGCACCTTGCAGGATGACATTTTCAATTAACCTATTGGCTACTTCTTC  
ATCGATTAATGGATGATTCAGTAAAATGTCGAATTGTTCTTCTGATAACCATTGCTTATCA  
ACCAATTGTTGTAACTTTTCTTTACGAGATAAATGTCGAAAATTCCTTATCTAAATTTTGCA  
T

### > **mvaS**

Function: protein coding sequence; 3-hydroxy-3-methylglutaryl coenzyme A synthase (core genome, constant)

Best match: mvaS\_CC001-ST772\_118\_AJGE01000055.1[46775:47940] (completely identical)

Position: 064-contig\_271\_RC: 16579 ... 17745; Length: 1166 bp

Sequence:

ATGACAATAGGTATCGATAAAAATAAACTTTTACGTTCCAAAGTACTATGTAGACATGGCT  
AAATTAGCAGAAGCACGCCAAGTAGATCCAAACAAATTTTTAATTGGTATTGGTCAAAC  
GAAATGGCTGTTAGTCCTGTAAACCAAGACATCGTTTCAATGGGCGCTAATGCTGCTAAG  
GACATTATAACAGACGAAGACAAAAAGAAAATTGGTATGGTAATTGTGGCAACTGAATC  
AGCAGTTGATGCTGCTAAAGCAGCCGCTGTTCAAATTCACAACCTATTAGGTATTCAACC  
TTTTGCACGTTGCTTTGAAATGAAAGAAGCTTGTTATGCTGCAACACCCGCAATTCAATTA  
GCTAAAGATTATTTAGCAACTAGACCGAATGAAAAAGTATTAGTTATTGCTACAGATACA  
GCACGTTATGGATTGAATTCAGGCGGCGAGCCAACACAAGGTGCTGGCGCAGTTGCGAT  
GGTTATTGCACATAATCCAAGCATTTTGGCATTAAATGATGATGCTGTTGCTTACACTGAA  
GACGTTTATGATTTCTGGCGTCCAACCTGGACATAAATATCCATTAGTTGATGGTGCATTAT  
CTAAAGATGCTTATATCCGCTCATTCCAACAAAGCTGGAATGAATACGCAAAACGTCAAG  
GTAAGTCGCTAGCTGACTTCGCATCTCTATGCTTCCATGTTCCATTTACAAAAATGGGTAA  
AAAGGCATTAGAGTCAATCATTGATAACGCTGATGAAACAACCTCAAGAGCGTTTACGTT  
AGGATATGAAGATGCTGTAGATTATAACCGTTATGTCGGTAATATTTATACTGGATCATT  
ATATTTAAGCCTAATATCATTACTTGAAAATCGTGATTTACAAGCTGGTGAACAATCGG  
TTTATTAGTTATGGATCAGGTTTCAAGTTGGTGAATTTTATAGTGCGACATTAGTTGAAGGC  
TACAAAGATCATTTAGATCAAGCTGCACATAAAGCATTATTAATAACCGTACTGAAGTA  
TCTGTTGATGCATATGAAACATTCTTCAAACGTTTTGATGACGTAGACTTTGACGAAGAA  
CAAGATGCTGTTTATGAAGATCGCCATATTTCTACTTATCAAATATTGAAAATAACGTT  
CGAATATCACAGACCAGAGTA

### > **txbi\_mvaS**

Function: rho independent terminator of mvaS and adaB

Best match: txbi\_mvaS\_CC001\_MW2-USA400\_BA000033.2[2629481:2629551]

Position: 064-contig\_271\_RC: 17769 ... 17799; Length: 30 bp

Sequence:

AATATAACCTAAAAACAGCAGTAAGACAGC

### > **adaB**

Function: protein coding sequence; putative methylated-DNA--protein-cysteine methyltransferase (core genome, variable)

Best match: adaB\_CC008\_NCTC8325\_CP000253.12632904:2633425:rRC

Position: 064-contig\_271\_RC: 17916 ... 18438; Length: 522 bp

Sequence:

```
TTACGGCTTCGTA CTGTGTTTAGGTATATAAAGCTTTGACATATCGATATTCTCCA ACTCT
AACAGCTTAATTTTATTATTAATCGTTCCACCGAATCCTGTTAAGCTACCCGTTTTACCGA
CAACACGATGACATGGCAGGATAATTGATAATGGATTACTTCCGACTGCACCTCCAACCG
CTTGGGCTGACATTTTTGGCTTATCAAGCACCTTGCCTACTTTTTTGGCAATAGCACCATA
CGTTGTTAGAGTCCCATAAGGAACCTGTCTTAATTCATTCCAAACACACTGTTGAAAATG
ACTACCTGTTGGCTTTAAAGGTATTGTGATTTTCAGGATTGTCACCTTTAAAATACACGTCT
AACCCTGTGTCGCCTCTCTAAATATCGCTAAAGACGTATTTTCTTCCCTAGTACCATCAC
CTTGTTGATTTTCAAACAAAACAGCGGTACAGACTTACCCATCACTCAAAGTTCCAATC
GTCCTACAGGCGAATCATAGTAACTCTTATACTCCAT
```

## > clpL

Function: protein coding sequence; ATP-dependent Clp proteinase chain L (core genome, variable)

Best match: clpL\_CC005\_Mu50-VRSA\_BA000017.4[2691441:2693546]

Position: 064-contig\_271\_RC: 18846 ... 20952; Length: 2106 bp

Sequence:

```
ATGAATAACGGTTTTTTTCAATAGCGACTTTGATTCAATTTTTTCGAAGAATGATGCAAGATA
TGCAAGGTTCAAATCAAGTCGGTAACAAAAGTACTATATTAATGGTAAAGAAGTTTCAC
CTGAAGA ACTAGCGCAACTCACACAACAAGGTGGCAATCACTCTGCTGAACAAAGTGCG
CAAGCTTTTCAACAAGCAGCACAAAGACAACAAGGGCAACAAGGTGGCAACGGCAATTA
TTAGAACA AATTGGTCGTAACCTTACGCAAGAAGCACGTGACGTTTTATTAGATCCAGT
CATTGGTCGTGATAAAGAAATTC AAGAACTGCTGAAGTTTTAAGTAGACGAACTAAAA
ACAATCCTATATTAGTTGGAGAAGCTGGTGTGGTAAA ACTGCGATTGTTGAAGGTTTAG
CACAGGCAATCGTTGAAGGAAATGTACCAGCAGCAATCAAAGACAAAGAAATTATTTCT
GTAGATATTTCA TCATTAGAAGCTGGAACGCAATATCGTGGTGCTTTTGAAGAAAATATT
CAAAAATTAATCGAAGGTGTTAAATCTT CACAAAATGCCGTA CTATTCTTTGATGAAATC
CATCAAATTATCGGTT CAGGTGCCACAGGAAGTGATTCAGGTAGCAAAGGGTTATCTGAT
ATTTGAAACCTGCATTAAGTCGTGGTGAGATTTCTATTATTGGTGCAACAACACAAGAT
GAATATCGAAACAATATTCTTAAAGATGCTGCATTAACGCGCAGATTTAATGAAGTACTT
GTTAATGAACCAAGTGCTAAAGATACTGTTGAAATTTTAAAAGGTATTCGCGAAAAATTC
GAAGAACACCATCAAGTAAAATTACCAGATGACGTATTA AAAGCATGTGTTGACTTATCA
ATTCAATATATTCCACAACGATTATTACCAGATAAAGCAATCGATGTGTTAGATATTACA
GCAGCACATTTATCTGCGCAAAGTCCAGCTGTCGATAAAGTTGAAACTGAAAAACGAATT
TCTGAATTAGAAAATGATAAACGTA AAGCGGTAAGTGCTGAAGAATATAAAAAAGCTGA
CGACATTCAA AATGAAATCAAATCATTACAAGATAAATTAGAAAATAGTAATGGTGAAC
ATACTGCTGTTGCTACAGTTCATGATATTT CAGATACTATTCAACGATTA ACTGGTATTCC
AGTTTCTCAAATGGATGATAACGATATTGAACGTTTAAAAAATATTTCTAATCGTTTAAAG
AAGTAAAATCATAGGTCAAGATCAAGCTGTAGAAATGGTTTCACGTGCAATTCGTCGTAA
TCGTGCTGGGTTTGATGACGGCAACCGTCCAATTGGCAGTTTCCTATTTGTTGGCCCTACT
GGTGTGGTAAAACAGAGCTTGCTAAACAATTAGCAATTGATCTATTTGGTAATAAAGAT
GCACTGATTCGACTTGATATGAGTGAATATAGTGACACAACAGCTGTTTCAAAAATGATT
GGTACA ACTGCTGGTTATGTGCGTTATGATGATAATTCAAATACGTTA ACTGAAAAAGTA
CGCCGTAATCCATACTCAGTCATTCTATTTGATGAAATCGAAAAAGCAAATCCACAAATT
TTAACATTGTTATTACAAGTAATGGATGATGGTAATTTGACTGATGGTCAAGGTAATGTC
ATCAACTTTAAAAATACAATTATTATTTGTACATCAAATGCTGGCTTTGGCAATGGCAATG
ACGCTGAAGAAAAAGATATTATGCACGAAATGAAAAAATTTCTTCCGCCCTGAATTCCTTA
ACCGCTTCAACGGCATCGTTGAATTTTACATTTAGATAAAGATGCATTGCAAGATATCG
TCAACTTATTATTAGACGATGTACAAGTTACATTAGATAAAAAAGGTATTACGATGGACG
TTTCTCAAGATGCGAAAAATTGGTTAATTGAAGAAGGCTATGATGAAGAATTAGGTGCAC
GTCCATTAAGACGTATTGTTGAACAGCAAGTACGTGACAAAATTACAGATTATTATCTAG
ATCATA CAGACGTTAAACATGTGGATATAGATGTTGAGGATAACGAATTAGTCGTA AAG
GTAAATAA
```

> **A8Z3E9**

Function: protein coding sequence; putative protein (core genome, variable)

Best match: A8Z3E9\_CC001\_MW2-USA400\_BA000033.2[2632732:2632902:r]RC (completely identical)

Position: 064-contig\_271\_RC: 21013 ... 21184; Length: 171 bp

Sequence:

```
TTATTTCCCTGGAAAATGATTCGCTGTGTGCTGTTCTGTTCCACAACAATCACGATTAATG
TCACATGTACCACATTTTCCTTGTTCGAACGTTTGAAAAATTTCACTAGTGTATACAAGG
CATATCCGAAAATTGCTAAAAAAATTTAAAATGTTAATAATGACTGACAC
```

> **feoB**

Function: protein coding sequence; ferrous iron transporter B (core genome, variable)

Best match: feoB\_AC074026.144845:6839:rRC [4\_50ANF10END]

Position: 064-contig\_271\_RC: 21196 ... 23191; Length: 1995 bp

Sequence:

```
TTAAACAAATAAATGTCCGACTTGATAAAAAATGAATGTTAAGACATATGCAGTGACTAG
AGGATAGGCAACTGCAAGTGCCGTCCATTTCCATGAATAAGTCTCTTTACGGATTGCTGC
CACTGTAGAAACACAAGGAATATACAATAGTATAAATATCATAAATGCATACGCAGATA
GCGGTGTGAATTGATTTTGAATCACATTAACAAGGCCTGCATCACCTGATGAATAGATAA
TCGCCATCGAACTTACGATAACTTCTTTTGCTAAAAATCCTGGCACTAACGTAGCACCTGC
TTGCCATGTTCCAAATCCGAGCGGTTGCACTAACATACCAAAGAAACTACCAACCATATG
TAAAAAACTTTGATTGATATTCACATTGATACCATGTGGCCCTACATAACTTAATAGCCA
AATGACTACTGAGCCGCCAAAAATAAATGTACCTGCTTTACGAACAAAGCCCTTAGCCTT
TTCCCAAGTACTACGCCACAACGTTTTAATGGAAGGCACACGGTATGTTGGCAATTCCAC
AATAAAGATTGCATTATCATTTTTTAAAACCGTCTTAGTAAGTACTGTAAGTACTGACTAAAAT
GCCATAATAATACCTAAAACATACAAGCTTAATACTACTAAAGATTGATTCTCTTTGAAA
AAGATACCTACGAACAACGCATACACTGGCAGTCTAGCAGAGCATGACATGAATGGTGC
AATTAATATCGTTGTTAAACGCTCTTTTTTCATTTTCAATACTGCGCGCAGCCATAATACTC
GGTACATTACAACCAAAATCCGATAATCATCGGTATAAAAGACTTCCCGCTTAAACCGAAC
GATTCCATAAATACGATCCATTAACCAACGCAATACGTGCCATATAACCTGAATCTTCTAAT
AAAGATATAAAGAAAAAGAGCACAACAATTTGTGGTACAAAGACTAATACTGATCCTAC
ACCAGCAATAATGCCATCTGTAATTAATCTTGTAATAAATGGTATAACGCCAAGATAATT
CATAATCGTCTTCACACTATCTGTAATGTACCACCTATAAATGCATCGAGTTGATCCGAC
AAAGGTGTGCCAATCCATGTAATGTAGTTTGAAAGATCAACCACATAATCGCTAGAAAG
ATAGGCATCCCTATATATTTATGTGTTAATATCTTGTCTATTCTAGAGCTGAAATATTGCT
TATCTTCATCTGAATACGTTACCACGTCTTGCAATAACGTCTCAATATAATGATTGCGTAT
ACGCTCCATCTCTCGACGAACAGATACAGCCTCTACTTGTATCAACTTGATCACGTAAA
CTCGACAATTTATTTACAACCTCTGAATTAAGTTCGTTTGCAATTTGCATGTTATTTAATA
AGAATTGAATCGCAATAAATCTAGCTTGATATTTATCATGAGATGTCTCTGCCATTATTAT
TTGACACATATTTTAAATTGTCTCTTCAATCTTCTCACCATAAATTGATTTTAAAATGCGGTT
GATACCTTCCCCTAGATGCTTTATTTGCGCAAGTAAATGTTTAGTTCCCTTGCCTGTACGT
GCCACAACCTGGAAAAATAGGTGTTTTTAACTTTTTTCATCAATTTATGATAATCGATTTTAA
TCCCAGCTTTGTAGCTACATCAATCATATTTAATCCGATGTATATTGGTTGATTAAGTTC
TAACAATTGACTGTTAATTGCATATTTCTTTTTAGTTGACTCGCATCAACAATGTTAATG
ATTCTGAAAATGAATCGTTTAAATAAATAGTCTGTCACTACAGTTTCATCTTTAGAAATCG
GCGATAAATCATATGTACCTGGTAAATCAATTAATTGTCCTACATTTTCTTTAAGCTTCCC
TACTTTTTTCTCTACCGTTACGCCACTCCAGTTGCCTATATATTCATACGAACCAGTTAAA
GCGTTAAACAAAGATGTTTTACCAACATTAGGATTTCCAAAAATACAATAATTTTCCAT
```

> **feoA**

Function: protein coding sequence; ferrous iron transporter A (core genome, constant)

Best match: feoA\_CC001\_MW2-USA400\_BA000033.2[2634921:2635148:r]RC

Position: 064-contig\_271\_RC: 23202 ... 23430; Length: 228 bp

Sequence:

CTATTCTTCTAATGCAATAGAACAAGCATCGCAATGTCTAATACTTAACTGTTGTCCGTTT  
ACTTCAATAATGCATGGCCCTTTAAATAAACATTTTTGTTTAATCGTTATGATAGCGTCAT  
CTGTTAACCCAAAGGCACTTAGACGATACAACATATTCTCATTAGCAATATCCATTCGCTT  
TATTTTATAAGCCTTATTCATTTCCACCATTTTTAATGTTTAAACAT

### > tx\_mmpL

Function: rho independent terminator of mmpL (core genome, constant)

Best match: tx\_mmpL\_CC005\_Mu50-VRSA\_BA000017.4[2696176:2696246:r]RC (completely identical)

Position: 064-contig\_271\_RC: 23574 ... 23645; Length: 71 bp

Sequence:

CTTCCATGCAAAAACCTCCGCTTCAAATGTCATTGATAGACATTTAAAGCGGAGGCATG  
TACATGTTATT

### > mmpL

Function: protein coding sequence; putative efflux pump (core genome, variable)

Best match: mmpL\_CC001\_ATCC51811-ST1\_ADVP01000043.1[80712:83201]RC

Position: 064-contig\_271\_RC: 23645 ... 26135; Length: 2490 bp

Sequence:

TTATGATTTATTTTCGTAGATTTTTTTCTAACAATTGATTGAGCTTTTCAATATTTTTATTCA  
ACTGTTCTATATTCGTTACTTGTTGTTTTGAATTTAGTTGATGCTTGTTTTGATAATCTATT  
AAAGCATCATATAAGAAAAATGAACTTGCTGATTGCTGTTTCACTTCTTGGTACAATGCC  
ATCGTTTTATCATCTAGTACTATTGAATGTGCATCATCTTGCCCATGTACATCTTGATGTTT  
CGATACATTTGTTGCACCTTGTGGATATACTTTAAAGGTTGTGTCGTATGTTTCCCTTACTAT  
CTTTGGCTTCAGATTCCTGTGATTCAACCGTTTTATTTTTTCAAGTGCATGTCCCTTCAATA  
TCAACTCGTGGAATAATGCGATTCAACCATGCTGGTAAATACCACGAACCTTTTCCAAAC  
AATTTAGTTAATGCAGGAATTAACATCATTCTGACTACGAAGGCATCAAAGAGTACACCA  
AACGCTAATGCCATAACCATTGATTTAATCATGACATCTTCTTGGAATACAAATGCAAAG  
AAGACACTAAACATGATTAATGCAGCTGCTACAATAACAGGACCGCTTTCTTTCAATCCT  
ACTTTGATAGAATAATCATTATCCCCTGTTTTACTATATTCTTCATGAATTCGCGACATAA  
GGAAGACTTCGTAATCCATTGCTAAGCCGAATAGTATACCAATTGTAATAACCGGCAAGA  
AGGCCAGCATTGGTCCTGTCGTTTCAATAACCAAACAGACCTTTCATAAAACCATCTTGAT  
TACTAATGTTGTAATCCTAGCGTTGCCATTAATGACAAGACGAATCCTAAAACCTGCTTTT  
AACGGTATTAGAATTGAACGGAAGACAATCATTAAATAAGAAAAATGCTAATACAACAAT  
GACTGAGGCAAATAAAGGTATCGCCTCATTTAACTTTTTAGACATATCAATATTAATGAC  
ACTTTGTCCCAGAAATCTCCGTTTTGAACCCATATTTATCTTGTGCATCTTTATGATAATCTC  
GTAAATCATGCACTAAATCATTGTACTCTCTGCATTAGGCCCTTGCTTAGGTATCACGAC  
CATCAAAGCGTAATCATTATCTTTACTCATTGTGGTGGCGTAACGATATCTACATTTTTC  
TTATCTTTAATATCTTTATATACAGACTGTAATCTTGTGTAATCCTTGTGGATCATCCTT  
TTTATCTTTACATTTATCAACATCGGTATTTGGCCATTAATCCTTACCAAATTTATCCG  
AGATAATATCGTAAGCTTTTTTCTGTGTAGAATCTGCTGGTTTAAACCCGTCATCTGGAAT  
ACCAAGTCGCATATGACTAACTGGTATTGCAGCTGCTACTAATATGATTAACCTAGTAA  
TACTGCCGCAAGTGCATTTCCCTGTAATAAATTTAGACCATGGCGTATCAATATCTTTTTTG  
AATTTAGACTGTAATTTATTCATTTAATGCGTTTTATGGAAAATGCTTATTAATGCAGGTA  
ATAAAGTTAAAGCGCTAAGTACTGCAAAAACAACACTAATTGCCGAAGCAAATCCCATT  
ACCGCTAAGAAGTCAATGCCTACTAATGATAAACCACATACTGCAATTACAACCTGTTACA  
CCAGCAAAAACAACCTGCACTACCTGCTGTTCCCTATTGCAAGACCAATGCCTTTAATGTAA  
TCTGTTTCAGTTTTTCACTAATTTGTCGATATCTGAATAAAATAAATAATGCATAATCGATAC  
CAACTGCTAGTCCAATCATTACGGCTAATGTCAGTGTGACATTTGGTATATCGAATGCAT  
AAGTTAACAAACTGATAATACCTACACCAGAGGCTAGACCAATCAATGCACTTATAATTG  
GTAATCCTGCAGCAATGACTGAACCGAATGTGATTAACAGTACAACAATGCAACAATA  
ATACCAACTAGTTCAGAATTACCGCCTACTTCTGTAGATGTCATTCCTGTACCAGTTAACT  
CTGTTTGTACATTATGATTGTCACGTAAGTCTTTCAAATGACTTTTAAACATTATCTCTAGA  
GCCATCTTTTAAAGATGTTTACTAACGTCATATGTGATATCTGCAAATGCAGTTGTTTTA  
TCTTACTAATTTGCTTATTTTCATAAGGATCTGATATTTTATCAATGTGCTTGTGCATCTTT

TTTAATATCATCTAACGTTTTCTTAATATCTTTAGTAATGTTTCGGTTGCACAATACCATCAT  
CTTTAGTCGTCTTAAAGACAACACGATTTTGTGCCTTTTCACTATCTTGATTAATAATGTTTT  
TCAATCTTTTTATTTCGTATCTAACGACTCTAATCCTGTCATTTTAATATCATTGTCAAATTT  
CGGTGCATTTGTAGCAAGTGGTATCAATATTGCAGCTACAATCACTATCCATGCAATGAC  
CGCGGACCATTTATGTTTTGCGATGAATGTCCCCATCTTATATAAAAATTTTGCCAA

> **break**

Function: integration site of chromosomal replacement

Best match: break\_ST239\_1\_CC001\_MW2-USA400\_BA000033.2[2637384:2637433] (completely identical)

Position: 064-contig\_271\_RC: 25665 ... 25715; Length: 50 bp

Sequence:

TTGTCACGTAAGTCTTTCAAATGACTTTTAACATTATCTCTAGAGCCATC

> **Q8NUR3**

Function: protein coding sequence; TetR family transcript regulator (core genome, variable)

Best match: Q8NUR3\_CC007\_USA300\_TCH959\_AASB0200023.1[30787:31335] (completely identical)

Position: 064-contig\_271\_RC: 26279 ... 26828; Length: 549 bp

Sequence:

ATGAAAGAGACTGATTTACGAGTTATAAAGACAAAAAAGCATTGTTCGAGTAGCTTGCT  
ACAATTGTTAGAACAGCAATTATTCCAAACGATTACTGTCAATCAAATTTGCGACAACGC  
ACTCGTACACCGCACAAACATTTTATAAACATTTTTATGATAAATATGATCTTCTAGAGTAT  
TTGTTCAATCAATTGACTAAAGACTACTTTGCTAGAGATATCAGTGACCGTCTTAATCATC  
CATTCCAAACGATGAGTGATACGATTAATAATAAAGAGGATTTGAGAGAAATCGCAGAA  
TTCCAAGAAGAAGACGCTGAATTTAATAAAGTATTAATAAATGTCTGCATTAATAATTATG  
CATAACGATATCAAAAATAATAGAGACCGTATCGATATTGACAGCGACATCCAGATAAT  
CTCATATTTTATATTTATGACTCGTTGATTGAAGGTTTTATACATTGGATAAAAGATGAAA  
AAATTGATTGGCCTGGCGAAGATATTGATAACATTTTCCATAGATTAATCAATATTAAGA  
TTAAATAG

> **Q5HCZ7**

Function: protein coding sequence; putative protein (core genome, variable)

Best match: Q5HCZ7\_CC705\_RF122-cow\_AJ938182.1[2566709:2566876:r]RC

Position: 064-contig\_271\_RC: 26904 ... 27072; Length: 168 bp

Sequence:

CTATCGTTTTTTATTTTTATCGTGCTTATCGCTATTAATAAATAACTGATACACAACACATAA  
ACTATGAAGAAAAAATAAATCCGCTATCTAAATGACTTTGACTCAGTTGTTTAAATGAC  
CAAATTGCTAATACAATTGCCATGATTATTAATAAATAACGTATCTCAC

> **rocA**

Function: protein coding sequence; 1-pyrroline-5-carboxylate dehydrogenase (core genome, constant)

Best match: rocA\_CC005\_A6224\_ACKE0100031.1[78708:80252]RC

Position: 064-contig\_271\_RC: 27183 ... 28728; Length: 1545 bp

Sequence:

TTAGAACATTTCTGAAACAACCTTTTTGTTCTAAGAAGTGTAATAAGTAGTCTGGGCTACCT  
GTTTTAGCGTCCGTACCTGACATTTTGAAACCACCAAATGGATGGTATCCAACAACCTGCT  
GAAGTACAACCTCTGTTAAGGTATAAATTACCTACATCAAATTCGTTTACCGCTTTAATCC  
AATGCTCGGATTATTTGTAATCACTGCACCAGTTAAACCGTAATCTGTATCATTTGCAAC  
CTCAATTGCTTCATCAAAATCGTTAACTTTACAAAGCCAACAACCTGGACCAAAAATTTCT  
TTCTTGCATGATTCTATCTTTAGATTTAAGTCCTGAAATGATTGTTGGTTCTACAAAGTAA  
CCTTTTGAATCATCAGTGCCGCCACCTTGTCTAATTTACCTTCTTTACCAATCTCAAT  
ATAATTTTTAATCTTATCAAATTGTTTTTTATTAATAACTGGGCCCATATACGTATTGTCTA  
CAGTATTGCCCAACGTTAATTCCTTTTGTAGTTTGATTGACTTTTCTAATACTTCGTCATAA  
ACGTCTTTATGCACAATTGCACGTGAACATGCTGAACATTTTTGACCAGAAAAACCAAAT



GCTGACGTTACAATAGCTTCTGCTGCCATATCTGTATCAATATTTTCATCAACTACAATGG  
CATCTTTACCACCCATTTTCAGCGATAACACGTTTCAAGAAGTTTGGACCTTCTTGAACAAC  
GGCACTACGTTCAATAATTCTAGTACCTGTGCGACGTGATCCTGTAAATGTAACGAAATG  
CGTATCTTTATGATCAACTAAGTAATCACCAATTTCTTTCCGGATCACCAGGAACAAAGTTA  
ACTACGCCTTTTGGTAATCCTGCTTCTTCTAAAATTTCCATTAATTTATAAGCGATATAAG  
GTGTATCCTCAGCAGGTTTCAATAACACTGTATTACCTGCCACAACCTGGTGCTAAAGTTGT  
ACCAGCCATAATCGCAAACGGGAAGTTCCACGGCGGAATTGTAACACCTGTACCAATTGA  
TTTATAGAAATATTTATTGTGTTACCTTCACGATCAAGTACTGGCTTACCTTGAGCCAAG  
TCCATCATTGAACGTGCATAGTATTCAATAAAAATCAATACCTTCAGCTGCATCACCAACT  
GCTTCATCCCATGGCTTACCTGCTTCATAAACCATTAATTGCTGCAATTTCCGCTTTTCGAC  
GACGAATAATTGCCGAAACACGTAACATAAGCTCTGCACGATCATTTGCTGACCATGTTT  
TCCAAGATTTATAAGCTTCGTTTGTGCTTTAAAAGCATCTTCAACATCTTGTTTTGTGTC  
TTTGATGCATTTGCAATCACTTGTGATGTGTCTGCAGGATTGATTGATTTAATTTTGTGCATC  
TTTGAAAATCTTCTCTCCATTAATCACTAATGGTATGTCTTGACCTAATTTCTTTTCCACGT  
CTTTCAATGCTTTCTTAAACATATCCACATTTTCTTGGACTGAAAAATCGTAACCAGGTTT  
ATTTTTAAATTCTACTACCAT

> **maa**

Function: protein coding sequence; maltose O-acetyltransferase (core genome, variable)

Best match: maa\_CC001\_MW2-USA400\_BA000033.2[2640635:2641234:r]RC

Position: 064-contig\_271\_RC: 28917 ... 29517; Length: 600 bp

Sequence:

CTACTTTATCGTTTCGTCATTTAATGTTTCCGGATGGTAGGTCATTATCAATTTTACGAACG  
ACTTTACAAGGGTTTCCAACCGCTAAGCTGTGTGGCGGAATATCTTTAGTGACAACACTA  
CCAGCACCAATCACACTGCCTTCTCCAATCGTCACCCCTGGTAACACGGCTACATGACCG  
CCAAACCAAGTATTACTGCCAATATGAATGGGTCCGGCTTTTTCAAACCTTCATTTCTAT  
GATAAAAATTAAGTGGATGTGTTGCTGTGTAGAATCCACAATTAGGTCCTATAAAAACAT  
TATCGCCAATTGTAATCTGTCCACCATCCATAAAAATAACAATTGGTGTTTACATAGACATT  
TTTTCTAGTTTAAACGTTCCAACCATAATCTGTATCAAAAAGGAATCGAAATACTTACATTG  
TCTGTTGTTGTTTGAATAATTGATCAATTAATTCCTTTCTTTTATTTGTAGCACTCGGTCT  
TGTATGATTTAATTCAAAGCAAATATCTTTCGCTCGTGCACGTTTATTGATTAAGTCTTGA  
TCAAAGTTTGCATCGTACCATTTTCTGCTAACATTTTTTCTTTTTTTCAGTCAT

> **cwrA**

Function: protein coding sequence; cell wall stress response protein (core genome, variable)

Best match: cwrA\_CC007\_TCH959-USA300\_AASB02000023.1[34263:34454] (completely identical)

Position: 064-contig\_271\_RC: 29755 ... 29947; Length: 192 bp

Sequence:

ATGAGAATATTAATTACAGGCACAGTTGCTATCTTAATCATTTTAGGTTTGGTCAAAAACG  
ATACAAGATTACGAAATGACAAACGACACGAGTCGTGTCAGTTGTCAGACAACAAAGATGA  
TGATAAAGTCATCCATCTTAATAATTTTAAAAATTTACATGCGAAAGAATTTAACCCATCT  
GATTTCTTTTAA

> **copA**

Function: protein coding sequence; cation-transporting ATPase (core genome, constant)

Best match: copA\_part\_AB035451.1[1714:2196]

Position: 064-contig\_271\_RC: 30186 ... 30669; Length: 483 bp

Sequence:

GTGGCTAATACGAAAAAACAACATTAGATATCACTGGTATGACTTGTGCCGCATGTTCA  
AATCGTATCGAAAAGAACTGAATAAACTTGATGACGTTAATGCCCAAGTGAATTTAACT  
ACAGAGAAAGCAACTGTTGAGTATAACCCTGATCAACATGATGTCCAAGAATTTATTAAT  
ACGATTCAACATTTAGGTTACGGTGTGCTGTAGAACTGTGCAATTAGACATTACAGGT  
ATGACTTGTGCTGCATGCTCAAGCCGATTGAAAAAGTGTTAAATAAAATGGACGGCGTT  
CAAAATGCAACGGTCAATTTAACAACAGAGCAAGCTAAAGTTGACTATTATCCTGAAGA

AACAGATGCTGATAAACTTGTCACTCGCATTCAAAAATTAGGTTATGACGCGTCTATTAA  
AGATAACAATAAAGATCAAACGTCACGCAAAGCTGAAGCGCTACAACATAAATTGATTA  
AGCTT

### > **STAR**

Function: Staphylococcus aureus repeat element

Best match: STAR\_CC005\_CF-Marseille\_CABA01000081.1[16587:16794]RC

Position: 065-contig\_242\_RC: 15 ... 45; Length: 30 bp

Sequence:

AAATTGGATTCCCAATTTCTACAGACAATG

### > **copZ**

Function: protein coding sequence; copper chaperone (core genome, constant)

Best match: copZ\_CC001\_MW2-USA400\_BA000033.2[2644661:2644867] (completely identical)

Position: 065-contig\_242\_RC: 122 ... 329; Length: 207 bp

Sequence:

ATGTCACAAGAAATTTAAATGTTGAAGGTATGAGCTGTGGTCACTGCAAAGTGCTGTT  
GAATCTGCATTAATAATATTGACGGTGTCACTTCAGCTGACGTTAACCTTGAAAATGGT  
CAAGTAAGTGTTCAATATGATGACAGTAAAGTTGCTGTATCTCAAATGAAAGACGCAATT  
GAAGATCAAGGTTACGATGTCGTTTAA

### > **ddh**

Function: protein coding sequence; D-isomer specific 2-hydroxyacid dehydrogenase (core genome, constant)

Best match: ddh\_CC001-ST772\_118\_AJGE01000055.1[63727:64725:r]RC (completely identical)

Position: 065-contig\_242\_RC: 418 ... 1417; Length: 999 bp

Sequence:

TTAATTTACTCGTAACCTAGTATCTCCAGTCTGCAATACATCTAATGTTGCATCTAATGCA  
TCGACAATTAGATTTTTAACTGCAGCTTCAGTATAAAACGCAATATGTGGTGTTAATATG  
ACATCTTCCCTGTCAATCAACGATTCTAACAATGGATCGTTCAATGTTTTGCCCTTTGAT  
CACTTGGGAAAAGTTTGC GTTCAAATTCATACGTATCAAGTGCTGCACCTTTAATCACACC  
ATTGTCTAATGCGTCTAATAACGCCTTAGTATCTACTAAAGAACCTCTCGCACAATTGACA  
AATACTGCGCCCTTTTTAAAATGTTTAAATAATTCAGCATTAATAGATAATGATTATATT  
TCGTTGCAGGTACATGTAATGTCACGATATCAGCACCTTCAACCGCTTCCCTCAATCGTATC  
TTTGTAATCGACATACGTTGCAATTTAGCATTAGGAAACGGGTTCGTATGCGACCACATC  
ACTTTGATAACCATTGGCAAATATATCGGCTACTACACGGCCAATTCGACCTGTACCAAT  
AACAGCTACTTTTTAAATCTTTAATGGATTTTCGATAAAAATAGTAGGTTCCCATCTAAAATCA  
TGCTCTCGCACTTTTCGTTTGAATTTGATTA AAAATGACGAACCACATTAATAGCCTGGTTCA  
CAGCAAACCTCCGCAATTGAATTCGGAGAGTATGACGGCACATTTGACACAATCAAGTTAT  
ACTTGTTTGCTAACTCCAAATCATATGTATCAAATCCAGCACTACGTTGTGCGATTTGTTT  
AATACCTAGTTCATTTAATCGTTTATAAACATGCTCTGATAATGGTATTTGTTGTGATAGC  
GATAAGCCATCATAACCAGCGACACCTTCAACATTGTCATCAGTTAATGCTTCTTTAGTAA  
TATCTACCTCAACATGATGTTTCTCTGCCACGCCTTGATATAAGGCATATCTTCATCAG  
TACTCATGATTTTTAATTTTTGTCAT

### > **ywfG**

Function: protein coding sequence; LL-diaminopimelate aminotransferase (core genome, variable)

Best match: ywfG\_CC707\_21235\_AFTQ01000032.1[88757:89911:r]RC

Position: 065-contig\_242\_RC: 1439 ... 2594; Length: 1155 bp

Sequence:

TTATTCATATAAATATGCTAGTTCTGTAAATCTTATTGCAGCTTCGTCTAATTTCTGGTCAT  
CTAACGCCAATGAGATTCTCACATAACGATTACCATTCTCTCAAATGGTTTTCCCTGGAGC  
ACAAGTATTGACTTCTTTCACTAAAAATTGCTCAAATTGCTCGCTGTCATAACCAGAC  
GGTGGTTCCAACCATACATATATGCCACCTTTAGCATGAACAAATGGCAAATCAGCTTTT  
GCAAGCATGGCTTCGAATCGGTCACGACGTGTTTAAATACATTGCTTTGTTCTTCTAAAA

AATCATCATAATGATTCAAAGCATATATTGCGGCATCTTGTAATGCACCAAACATCCCAG  
CATTTGTGTGCGTTTTGGTACTTTTTCAAAGCTTGAATCATATCTTTATTACCAACTGCAAA  
ACCGACTCTAAAACCTGACATGTTATAACCTTTAGACAAGGAATAAATTTCAATCGCAAC  
ATCTTTCCATTTTCCGAAGCAAGTATACTAGGATTTTTAGCGTCGAAACCGAAAGCACC  
ATAAGCAAAATCATGCACGATTTTAGTGTCTGTATCTTTAAATTTAGCTATCGCTTCATCA  
AAAACCTCTTTCGTAGCTGTCGATCCAGTTGGATTATTTGGATACGTTAAATAAATGAGTT  
TTGTTTTATCTATTATTTGTGAATCAACTTTGGACCAATCTGGCAAATAATGTGGCGGTTT  
TAAATTAAGCGGAACAGGCTTGCCATCAGCTAAAAGTACACCTGCTAAATAATCCGTGTA  
GCCTGGATCAGGTAGTAATACATAGTCTCCTGGATTGATAACACATGTTGGTACTGCCAC  
TAATCCATTTTTTGTACCATATAAAAATGCATACTTCATCTTCTTTATCTAACGTACATTAT  
ATTGTCTTTGATAAAAATCTACAATAGCTTGCTTGAACGCTTCTTTACCATGAAAAGCACC  
ATATTTTTGATTTTCAGGAATAGTTAGTGCTTGTGAAAATGATCAATAATACCTTGTGGC  
GTGGGCCCATCAGGGATTCCAACCTGCCATATTAATTAATGGCAATGGTCCATGTTTCGATTT  
TACGTCCCATCGTTTTCCCGAAATAACTATCAGGGATATTTGCTAATTTGTTAGAGATCAT

### > crtN

Function: protein coding sequence; dehydrosqualene desaturase (genomic island)

Best match: crtN\_CC007\_TCH959-USA300\_AASB0200023.1[40281:41789:r]RC

Position: 065-contig\_242\_RC: 3020 ... 4529; Length: 1509 bp

Sequence:

TTACACGCCCCGCTCAATATCTTTAATCATTTCGTCTACAGTTATTTTTCGCACTCGTTAAG  
ACAATAGGAACGCCTGCACCTGGATGCGTACTTGCACCTGCAAAATATAAATCTTTATAA  
TCTCGGATACATTTTGTGGACGATAATAATTACTTTGCGCTAAAGTTGGCATTAAACCAA  
ATGCCGAACCAAATTTTCGCATGATACGTTTGTCTCAAATCATTGGCGTAAAGATTGTTTC  
TGAAACAATATGCGATTTTATATCTTCAAATACTTCAATCGTTGCTAATTTACGATAAATA  
ATTTCTTTATTTGTTGCGTCAAAGCTTCATCTGACCAATCGATTCCGCTACCTGTTTTAAG  
TTCCGGCGTCGGCATTAAACACATAAATACCAGTTTTGCCTTCTGGCGCAAGTGATTTATCA  
ACGACCGCTGGTACATACATAAATAGAAGGATCATATGATAAACGCCCTCAAATATT  
TCTTCAATATTGCCTCTAAAGTCATCTGAAAAAATAACATTATGAAGTCTCACTTGATCTG  
TCACATCAATATCTATACCGATATACATTAATAAATGCTGAACAAGAGTAATCTAAGTCTG  
CAATTTTATGTGGTGGATACTTTTTAATAGGTGCAAAATCTGGCATTAAATGATTCCGCAAC  
ACTAGGGAAATCAGCCGTACATAAAATTTTATCAAATTTTCTTATGTCACCATTCACTTTT  
ATCGCATCGGCCCGTTTGAATTTAGGATCAATAATAAATTTGCTCAATTTACGATTTAGTT  
CAATATTAACGCCTAAGTCTTTATTTAATTGCGCTAGCCCTTGAGCCATGCCATACATACC  
GCCTTTAATAAAATGCACACCAAACATCATTTCATCATAGGAATAATTGAATATAGTGA  
CGGGCCTCGTTTTGGATCAATTCCTATGTATAACGTTTGAAACGCTAAAAGCTTTTGTATC  
TTTTCGTTATCAATATAATGTTCAATTAGCTGATCTGCATGATTTAACGTTTTTAACTTAGC  
ACCTTGCACAAGTGACGTCATATTATAAAAGTCACTCGGTTTTCGATACGTTCTTTCTAAG  
AAATAGCGACGTGCAATTTTATATTTTATAAACATCCGTTAAAAGGACATAAAACCA  
TGCGTTGAACCAGGTTCTATACTTTCTAGCATTGCTGTAATTCAGCTAAATCTGTAGGCA  
CCGTTATACGATCATCGTGGTCAAATAACACATCGTAAATATAACGTAATTGTCTCAATTC  
AATATAATCTTCATAATTTTTACCACACGCTGTAATAACATCTTTATAAACATCTGGCATC  
ATGACAATTGTGGGACCCATATCAAATGTAAAGCCGCTTTCTTTAATTGATTCATACGCC  
CGCCTACATTATTATTTTTTTCAAATATCGTCACTTCATGACCTTGAGAAGCAATACGGGC  
TGCCGCTGCTAATCCTGTGACACCTGCACCAATTACTGCAATCTTCAT

### > crtM

Function: protein coding sequence; dehydrosqualene synthase (genomic island)

Best match: crtM\_CC007\_TCH959-USA300\_AASB0200023.1[41801:42664:r]RC

Position: 065-contig\_242\_RC: 4540 ... 5404; Length: 864 bp

Sequence:

CTATATTCTATGATATTTACTATTTATTTTCATGAAACAACCTTTGCTTTTTTCCGCTTATCCA  
CAAAAACACGTTTCATGTAATGTATAGTTAGCCTGTCTCACTTCGTCCAGTATTTCAATATA  
TATACGTGCTGCTAATTCTATGATTGGTTGTGCTTCAATACTAAATACTTTGATTTGATCC  
ATAACATCTTGAAAATCTTTTTCTGCGATAGCTGCATAAATATCCATAAGTCAATATAAT

GATTATTAACACCATTTTGGTACACTTCAGCAATATCAACTTCATATTGCTTTAATCGTTG  
CTTACTAAAATATATCCGTTCAATTTTCAAATCTTCACCGACATCTCTTAATATATTAATC  
AATTGCAACGATTCACCAAGTCTTCTTGGCAGATCGTATGTCTGATGTGTTTCATGATCAC  
TTAAAATCGGCGTCAATACTTCACCTACTGTACCAGCAACACCATAACAATATCCGAATA  
ATTCAGCGTCCGTTTCAAACATTGTAATAATGTTGATCTTTATATACAGTATCAATGAGATT  
ATAGAAAGATTGAAAGGCGATATTTTTATGTTGTGCGACATGCTGAAGTGCCATCATGAT  
TCTACGATCACTTTGAAAGTGATGATGTTTCATATGGGTATTTTTCAATAGATTGTATATCT  
TCTTTTATTTGATTTAAAATTGAATATCGCCATAAACATCTATACTGTCATCAATTTTAC  
GACACACAGCATAAATTGCCAAACCGCTTTTCTTTGATCTTCTGGTAACAAGTCAAAG  
CGTAAGAAAAGCTTTTTGAATGTTTCTTCATGATTTTATGACAATATTTAAAATTCATATC  
CATCATTGTTCAT

> **crtQ**

Function: protein coding sequence; glycosyltransferase (genomic island)

Best match: crtQ\_part\_X73889.1[1:192]RC

Position: 065-contig\_242\_RC: 5602 ... 5632; Length: 30 bp

Sequence:

ATAAATAAATTGTGTAGTATAGCTCAAGTA

> **crtP**

Function: protein coding sequence; mixed function oxidase (genomic island)

Best match: crtP\_CC008\_NCTC8325\_CP000253.1[2654320:2655813:r]RC

Position: 065-contig\_242\_RC: 6573 ... 8067; Length: 1494 bp

Sequence:

TCACTTCTATTCTTCGCTTCTCGCGCGTTTATTTTGTCTGCGACTTGTTGCCCACTTAATG  
TAACCATTGGCATGCCACCACCAGGATTTACTGATCCACCTACAAAGTACAAGTTTTCAA  
AATACTGACTTTCTTTAGGAAATTTAAACCCTTTGTTTTTCTTTTTATCTGCTACAACACCA  
TATATTGCACCACGATTAGAACGATAATTTTTTTCAATATCCTCCGGTGTCCAAACATCTT  
CATAAATAATGTGTTTTCTTAAATCAGTAAGTCCCATTTTTTCTAATTTATCCAAAATTTTA  
TCCCTAAACTTCGCATAATCTTCAGTTGTAAGGCTGATCTTGAATATATGGAATATGTG  
GTAAGACTTTGATATTTTCATAACCTACTGGCGCTTGTGTGTGATCAGTTTTATTCGTATTT  
ACTAGATAAATGGTCGGATCATCTGGCAATACCTTTTCATGAAAACTTGTTGATAATTG  
AGATAAGCATTTTCCGTAAAAAAGAAATTATGATGTGCTAATTGCGGGTATTGGCAAGCA  
ACACCTAAATGCATCACATATCCTGAGCTTGCTGGCTCAAATCCCGCTCTAATTTGTTTA  
ATCGTTGAGTATCAAGGTGAAGTAAATATTTATAAGTAGGTATGACTTCCATATTTGAAA  
TAATATAATCTGCCTTTACAAACTCACCTGTATCTAATCTGACACCCGTCACACATCTTTG  
ATATGTTTTAATATTGTCCACACGTGTACCTGTATGAATTGTGACACCTTCTTCACGCGCT  
AGATTTTCCAAGGCATTGGCTAAATGATGGATTCCACCTTCTACATACCAAAGGCCTTGCT  
CTTGTTGCATATGGAATAACATAGATAAATACAGCTGGCGCATCGTATGATGAAGAACCTA  
CATATTTGATAAAATAGCCTAACATTTGTGCAAGTATGGATTGAGATACGCTTGTCTAT  
GGCCTGTTGCATAGTATGTACATAATCATAATTAATAAGAGCATTTAATGGCCATGAAA  
TTAATAATTTGAGATAGTGTATCTAAACCATAGTTAAAATACCCTTTTTTCAGTAATACGA  
TCGATTGCTGTTGATAATTTCAAATAATTTGTCAGTTCCCTCTATATCCTGTTTCGACAATAT  
CGCATTATGCTGACCTGTTTCTTTAATACCTTCATACAAATCGATAGTCGTTCCATCTGGA  
AAAAAGCTACGCCATTGATGTGGCAATCGCTTGATTGTAACGTAGTCTGACATTTGCTTCT  
TGCTATATTCGAATAATTTTTCAAATAATAAGGCATCGTTAAAATAGATGGACCTAAAT  
CAAAGCCAAAGCCATCTGATTCATGACGATTCACCTTGCCTCCTATATGATTATTTTGTTC  
ATATAATGAGACCGAATAGCCACTTTGTGCCATTTCGAATTGCTGCAGAAATCCACCTAA  
GCCACCACCAATAACGATGATATGTTTAGTCAT

> **crtO**

Function: protein coding sequence; acyltransferase (genomic island)

Best match: crtO\_CC001\_MW2-USA400\_BA000033.2[2652598:2653095:r]RC

Position: 065-contig\_242\_RC: 8059 ... 8557; Length: 498 bp

Sequence:

TTAGTCATGACGTTACCTCTTCGTTTTAATATGCGTAGTAACTGCGTTAATCTCGGTCGA  
TTATAGCGTTGCACAATAATGATTGGAACATTAGCTATCATTGCATAGAAAATATTTATAT  
ACTTTACTAAACGAGGGCCTTTATTGAATATGATGACTGGAAGTATCGATATCCAATGAA  
TCAACTCTGCCCTCTTTGTCTCTATAATCATTATTTCAATTTTCATCAGTATTGATTGTCATT  
AAATGACGCTGATCATATATATTTTGGATTAAGCTGATGACCATCTAAAATCTTATGTTTCC  
ATTTTCTTACGTAAAACCATTTGTTCCAAAATTTTCCATGCTTCTCAAAGTTAAATGATTT  
AAATATTATGTACTTCTGACGAAAATACTTATCAGGAATTCTTGTACCTAAATTTGCTATA  
TTAGTTGAACAATTAACCAATACATACTACAAAAAATGCTGTTTTAATATATTTTTTCA  
TGGTTTTTCAT

### > **ssaA1**

Function: protein coding sequence; staph secretory antigen A1 (core genome, variable)

Best match: ssaA1\_CC001\_MW2-USA400\_BA000033.2[2653261:2654028:r]RC

Position: 065-contig\_242\_RC: 8722 ... 9490; Length: 768 bp

Sequence:

TTAATGAATGAAATTATATGAACCTGCTTGGTTTTGCTGAAATTGTACGAGACGTAACCAC  
ACCAGCACCATGTCCATAGTTCATTTCTGAAACACGAACAGAACCCTTGCTGTTAACGCC  
TTCAACGTAAGCAACATGACCGTAATAGCCTTGTGTTGTTTGCATGATAGCACCACCTTTT  
GGTGTATTGTTCACTGTATAGCCAGATGATGCAGCTGCGTTAGCCCAATTACTTGCCTTAC  
CCCATGTTGAACCAATTTTCCCACCAACACGATCAAATACATAATAAGTACATTGTCCTG  
AAGTATATAAGTTACTTCCCTGATGCATAACCATTAGAAATTGAACGACCATTTGAAGATG  
GCGCTGCAGTTGTAGTCACATGAACATTATTACTTGTGTGCTATAACTTGCACCTGAACC  
ACCAGTATAAATAGTTATTTGTTGCTGTTGGCTATTGTTTGTATAGTTATTGTATTGATATG  
AATGATTATAGTAGTTATTGTAAGATGCATTGTTATAACTATAAGTATTGTAGTTGTTGTA  
GTAGTATGTGTTGTTTTGCGTTAATTGACTTGGATTCCAATTTCTGTCCAAGTGTAATGA  
TAATTACCTTGTGCATCAATTGTATACGTATAGCTGTATGATTGAGCGTCATTAGAATTAT  
ATCCATTGTTATTTTGTCTGCAGCTTGTGCATCATGTCTGCAAATGCGATAGTGGCAAG  
TCCTGCTGTAGCGATTGTAGCTGTAACGATTTTTTTTCAT

### > **tnpIS431-06**

Function: protein coding sequence; transposase for IS431 (mobile element)

Best match: tnpIS431-06\_circ\_S-epidermidis\_GQ900381.1[43799:43807]RC (completely identical)

Position: 065-contig\_242\_RC: 8797 ... 8806; Length: 9 bp

Sequence:

ATAGTTCAT

### > **oatA**

Function: protein coding sequence; O-acetyltransferase (core genome, variable)

Best match: oatA\_CC001-ST772\_118\_AJGE01000055.1[73159:74970:r]RC (completely identical)

Position: 065-contig\_242\_RC: 9850 ... 11662; Length: 1812 bp

Sequence:

TTATTTCTTATTTGTAGCATGTGTTTCCATCGTTTTTACAATCAAATCAGTCAGCGCTTTAC  
TACCTGCATATTCTAAGTGAATACCGTCATATGCAAAGTACTCCGGATGACCTGCAGAAG  
CTTTATACCAATCGACTAGATGTACATTAGAGCGCTTTTCAGCTGCCTCATAAATTAATTT  
ATTTATTCTACCTTCATAATCTCTAGGTACTCTAATAGAACTAAATATATGTCTGCTTTTTC  
CAAACTATCCAATAGTTCATTTAATTGATCTTTTCGTAATGCCCATTTGTACCAAGCTC  
TACTACAACCTTTTTGACCTTTTTTAGCATAGTCTTTATATTGCGATTTACAAATTGGTGTAG  
CATCAACGAGTTGCCGTCCAACCTTACCATCAATTTGTGCATTTGGTATTTTCTTAGTAAA  
GACATTACCAATATCCACCATGACCGAGTCACCAATTAATAGTGGTGTGACTTTTTAAT  
ATCCTCTTTGCTATTCGCTGTCTGCTTATCCTCTTGCTTATCTTTTTTAACGACTTTTTTCTT  
CGTTGTTTTAAATTCCGTCTTCTTCTTCTTCTTCTCGGCTTCATGTTGTTTGCCAAGTGCAT  
CAAACGTCCACTGAGCACAACGATAGACGGAACCAATAATAGGATAACTAACACTGTT  
CTAGCAAATTGCCCTTCTTTTTAGGTAAAAATGCAAAGCTTTAAATCCTTTTTTACGTA  
TAGGTGTTTCAATAAAGCGATACGAAATTTAGCCATTAACGCTGTTAACAAAATTTCTA  
TAATATAAACGTATACCGGTATTTGTCTTGTACGTAATAACTGTTACAAAAACAATGA

TAGGATAATGCCATAAATAAGCTATATGATCGTTTACCTATAAATTAGTAAAGGTTTCAT  
ACTTAAAAATTTAGCAAATAAACTAGAAGGATGTACCGCAATTGCAATAATGAATAAAG  
TTGCAAATGATATAATGTAAAATCCTCCATTATAGATCCATTGATCTTGGTCTCCAACAT  
AAAGAACAAAGTCATTAGAACCGCAAACCAGATATCCCTATAATATCTAATGATACGA  
CAACCTTTTTAGAAATATCTTTTTTCAAAGCAAACGGAGGCCAAATAAATGCTAATATAC  
AACCAAGCAATAAAGTTTGCAGTCGTGTATCTGTCCCAAATAACACACGTGAATTATCTC  
CAGTGATGAAATGAATCACTATCATAAGTCCTAAAGAAATCAACGATACAATAAATAGC  
GTTTGAATAATATTTCTCGGTTTAAATCTATGTAATAAGAACGTGATAACCAATGGGAAA  
AGCAAGTAAAATTGTTCTTCAATGGCTAAAGACCATAAATGTTTGAGTGGTTCAATAGCA  
AATTGGTTAAAATAATCTACATTCTGTGAGATGTACCACCAGTTTGAACATAGAATATA  
GCTGCAATAGCATCTCGTTTCATTTGTATAATCAATTCCGGTTTAAATATCAGTGTGAACG  
TAAGCACGACACAAATTAATAAACAACACTGCCGGAATGAGTCGTTTCAATCGTCGCTTCC  
AAAACCTAGCAAATCGATTTTTTGCCTCCGATAATACTCACTTATCAACAACTTGTAT  
TAAATAACCTGAAATAACGAAGAATGTATCTACTCCTAAAAAGCCCCACTTAACCATTG  
TGCATTCAAGTGATAAATAATGATTCCTATAACTGCGAATGCCCTCAATCCATCTAATCCG  
GGTAAGTATCGCGGGGAATACATTTTTTCTAAACGTTTAAAGTCTTTTGTATCCAT

### > **isaA**

Function: protein coding sequence; immunodominant antigen A (core genome, variable)

Best match: isaA\_CC008\_NCTC8325\_CP000253.1[2660684:2661385:r]RC (completely identical)

Position: 065-contig\_242\_RC: 12348 ... 13050; Length: 702 bp

Sequence:

TTAGAATCCCCAAGCACCTAACCTTGTGCTTTGTATGCTTTAACAGCTGCGTTGATTTGT  
TGGTCAACAGTGTGTTGGACCCCAACCTGGCATAGTTTGGAAATAAACCTGAAGCACCT  
GATGGGTTGTAAGCATTACTTGACCATTTGATTCACGAGCGATGATTGCAGCCCATGTA  
GAAGCTGAAACACCAGTACGTTGAGCCATGATTTGAGCTGCTGATGAACCAGTAGCACCT  
GCAGTATTACCATTGCTTAATCTCACTGAACTTGAAGTAGTTGAAGTGCTGTAGTTATGGT  
AAGTTGGAGCTGAAACAGCTTCAACGTTTGAAGTACTTGATTGTGCATTGTAGCTTACTGA  
TTGTACATTTGAACCTTGGTTGTATGAAGTAGTGTAGTCTGCACCTGCAACGTTTGAAGAA  
CCAGCAGTTTGAACATTAGCTGCTTCATAGCTCCATGACCATGTAGTACCATTTGAAGTGA  
AGTTATATTGGAAACCATCTTTTACAAAGTGGATGTCATATGCACCATCTTTGATTGGAGC  
TGCATTTAATTGATCTTGGTGATTATGCGCTAAGTCAACTAAGTGTGCTTGTATCAACGTTT  
ACTTCAGCAGCGTGTGCTTGTATGCTGTACCTGCTGCGTAACTGTTACACCTAATGCCA  
CTGCTAATGATGATGCCATAATTGTCTTTTTTCAT

### > **acrA**

Function: protein coding sequence; TetR family transcript regulator (core genome, variable)

Best match: acrA\_CC001-ST772\_118\_AJGE01000055.1[78430:78999] (completely identical)

Position: 065-contig\_242\_RC: 15121 ... 15691; Length: 570 bp

Sequence:

ATGATGGAAAGTAAATCTATAGATCCAAGAATCGTTAGAACCAAACAATTGCTTGTTCGAT  
GCTTTTCTTAAAATTTCTAGAGAAAAGAAATTATCTCAAATTACAGTTAAAGATATCACT  
GATATTGCTACGCTAAATCGTGCAACATTTTACGCTCATTTCACTGATAAAGAAGACCTCC  
TAGACTACACATTATCTGTAACCATTTTAAAAGACTTGAATGATAATTTGAGCATTCTAA  
TGTCATTAATGAAAAGTTCTGCGTAATATTTTCATTTCAATTGCGAGTTATATCAAAGAT  
GCTGCAAAGTCTTGCGAATTAATAGTGAAGCATTTTGAACAAAGCACATCAACGTATT  
AATAATGAATTAGAAGATATTTTTGCGATTATGTTAGAAAACAGCTATCCGGAGCATCAA  
CGAGATATCATTGTAATAGTGCAGTTTTTTAGCAGCTGGTATCTCAGGCTTAGCATTAC  
ATTGGTTTAAACACGAGTCAAGAGACAGCCGATGTGTTTATCGATCGCAACCTTCCATTTT  
AATTCATCATATAGCACATTTTTTAA

### > **nrmA**

Function: protein coding sequence; ActVA 4 protein (core genome, constant)

Best match: nrmA\_CC001\_MW2-USA400\_BA000033.2[2662524:2663345:r]RC (completely identical)

Position: 065-contig\_242\_RC: 17383 ... 18205; Length: 822 bp

Sequence:

```
TTACTTATTATAGTTTTGGACTTTAAGCCAATCACTTAATGATAATCTTGTGGATTTATTT
CAGCCATTAATTCAAAGTCTACTTCATAACCTTTTTCTTCCAACCATTGCTTTTCTGCAACA
CCACTAACAAATTCTCCTTCTATAACAGTAGATTTACCTGTCACCTTCACTAAAAATTGTTG
CTGCTTCACTTAATGTAACCTTCATCGGAACCAATCTCTATTGATTGATGCGTAAAGCTTTG
TGGATGTGCAAAAATATACGATGCAATTTTAGCTATATCAATAGAAGAAATCATTGTGAA
TTTTATATTCCGGATTAATAAATTCTGGTAATGTAATACGTTTCATCTTCGACTTTAGCAATG
CGTAAAAAATTATCCATAAAGAATGATGTTTTGATAACTGTTGCATTTATATTAGATTCCA
TTAATCTATTTTTCTATTTTTGCTAGTACTTCAAAGTGTGGGCCAGTTCGATTTTCGATTAACC
CCTCCCGCAGTACTATACACAATATGTTGAATATTTTCTTGCTCAGCTATTTCAATTATCTT
CATACCTTGTCTTAATTCTTCGCTAACATCATCTTTAACGATTGGCTGAATACTGTATAAG
CCATACTTACCTTTCATCGCTGATTGCAAACATAACATTATCACTCAGATCACCTTCAACGA
TTGATAAATGCGGATGTCCTATGTCTGAAAGTTTACGATTATTCTTATTTCTAGTTAATGC
ACTTACATACCATCCATCCTCTAACAACTGTTTTACAACCTGCATTACCTTGCTTCCCTGTTG
CGCCTATTACTAAAATATCTTTTCAT
```

### > **Q5HCX0**

Function: protein coding sequence; amidohydrolase 2 (core genome, variable)

Best match: Q5HCX0\_CC001-ST772\_118\_AJGE01000055.1[83315:84325] (completely identical)

Position: 065-contig\_242\_RC: 20006 ... 21017; Length: 1011 bp

Sequence:

```
ATGAAAAGTATTACGTTTGAAGAACATTATGTCATTGAAGATATTCAAAAAGAAACGATG
AATGCGATATCAGCAGATCCTAAAGGTGTACCGATGAAAGTAATGTTAGAAGGCCTTGA
AAAAAAGACAGGTTTTACAAATGCCGACGCATTATCACATCATGATGAACGTATCCAATT
TATGAATAATCAAGACGTTCAAATTCAAGTCTTATCTTATGGAAATGGGTCTCCTTCAAAT
TTAGTTGGTCAGAAAGCCATTGAATTATGTCAAAAAGCAAATGATCAATTGGCAAACCTAT
ATTGCACAATATCCCAATCGCTTTGTAGGCTTTGCAACTTTACCTATCAATGAGCCTGAAG
CCGCAGCGCGAGAATTCGAACGTTGCATCAATGATTTAGGATTCAAAGGTGCGCTCATT
TGGGACGTGCACAAGATGGTTTTCTTGATCAAGACAAATATGACATTATTTCAAACAG
CTGAAAATTTAGACGTACCGATTTATCTACATCCCGCGCCAGTTAACAAATGACATTTATCA
ATCATACTATAAAGGAAATTATCCTGAAGTAACTGCGGCAACATTTGCTTGTTTTGGTTAT
GGTTGGCACATTGATGTGCGGTATTCATGCAATACATCTAGTATTATCTGGTATTTTTGATC
GTTATCCAAAGTTAAATATGATTATTGGACATTGGGGTGAGTTTATCCCATTCTTCTTAGA
ACGTATGGATGAAGCTTTATTCGCTGAACATTTGAACCACCCTGTAAGCTATTACTTTAAA
AATAATTTTTATATCACACCGAGTGGCATGTTAACGAAGCCACAGTTTGATTTAGTCAAG
AAAGAAGTAGGTATTGATAGAATTCTTTATGCTGCTGATTATCCATATATTGAGCCTGAA
AAATTAGGTGATTTTTAGATGAACTGGGTTAACAGATGAAGAAAAAGAGAAAATAAG
TTATACAAATGGTGCTAAATTATTAGGTTTATCACCTAACAAATTA
```

### > **cobW3**

Function: protein coding sequence; cobalamin biosynthesis protein (core genome, variable)

Best match: cobW3\_CC001-ST772\_118\_AJGE01000055.1[85322:86212:r]RC (completely identical)

Position: 065-contig\_242\_RC: 22013 ... 22904; Length: 891 bp

Sequence:

```
CTACTGTTCCAAACATTGATAGTCTTCTTTTGAATACCCTTTCCGATAAGCACCAAATAT
TCTGGCACTTTTTTTGAAAATGCTACAGGTGTTAATTCATATTGTCCTTGTGTAAATTGAA
TGAGATACGTATGTGCGGTGTCTTCAAATGTCATAAACCTTTCAACCTATAAATATGAG
ACGGAAGGCATGCTAAACGTTTTATAAACTCTGCTTTAGTACATTTGACTGGTGATTGCAC
AAATTGATGATTAATCATTTGATGTAACGACTTATGTTTTATTGTCAGAAGTTGCTGTCATT
TGTCTAACTGATATTGGCAAAGTGACGCTGCCATGCATACCGACTTGTATATCGGCCTCTG
GGTTAATAACTTCTAAATCTTTCAATAGTTTGTCTGTTGTTTCAACATCTGCTGAATCTATT
TTATTAACAAATAAGACAGAACAATATGCTAATTGCTCATAAAATAAGCCTTGGATGTCT
TTAGGGAATGATTTAATGTGTTTATACATGCTTGCCTTATTACACCAATCATATGTGTAA
TTGTTGTAAACGGAGCTAAAATAGGCGTTAACAAAGCATCTAAAACAGAGACCGGTTCTG
```

CAATCCCCTACTACATTCAATAAACACAATGTCTGGTTGCTCTTTTAAATATAAATTGATGTAA  
CTGTTCTGATACATCTGCTTTTCATTGCGCAACAGATACACCCCTCTGTCAGTTCACCTAAA  
GGTATGTCTTCAGATACTAAGGCACCATCAACACTCATTTTCCCAAATTCATTCATGATGA  
CTGCTGGTTTCAGCGATTCTTTAATGATTGAGCGAGCAAATGATTTAAGACAGTCGTTTT  
ACCGCCACCTAAAAACCCACCTATAATAACTATTTTCAT

### > **pyrD**

Function: protein coding sequence; dihydroorotate dehydrogenase (core genome, constant)

Best match: pyrD\_CC022\_HE681097.1[2688838:2689902]

Position: 065-contig\_242\_RC: 28327 ... 29392; Length: 1065 bp

Sequence:

ATGTACAAATTAATTAACCTTTCTTATTCAAATCGAACCCGAAAAAGCACACGGACTA  
ACTATCGATGCATTAATAAACGTTACAAAAATTTCCGGTTTTATTCCCAGTCGTCGATAAAC  
TATTTACTTATAAGAATCCAACGTTATCACAAACGATACAAGGTAATACGTACGACAATC  
CAATTGGCTTAGCAGCTGGTTTCGACAAATCTTGCGAAGTACCAAAGCATTGGAACACC  
TTGGATTCCGGTGCTTTAGAATTAGGTGGTATCACACCTAACCTCAACCGGGTAACCCCTC  
AACACGCATGTTTAGATTATTAGAAGATGACGCCTTGATAAATCGAATGGGCTTCAATA  
ATATTGGTATGAACAAAGCACTAAGTCATTTGCGTAAAAATGCTTATCAAGTACCTGTTG  
GTATCAATGTTGGTGTGAATAAAATGACACCTTATGAAGCGCGTTATCAAGATTATATAA  
AGGTTATTGATACGTTTAAACACGACGTTTCATTTTTTCACAGTCAACATCAGTTCTCCAAA  
TACTGAAAATCTTCAAACCTTCCATGATAAAGATGAATTTTCAATGTTATGCCAAGCTTTA  
ACAGCATTTAAAAACAACATGATGTAACAGTGCCAATTTATTTAAAACTAACGTCTGAT  
ATGGATTTTCGATGGCTTAAAAGCACTATTACCAGCGATTACTGAGACATTTGACGGTATC  
ATCTTAGCAAACACAACGCGACAACGAGATGGTTTAACTTCTGCTAATAAAGTCGAAGAA  
GGCGGTTTGAGTGGTTCGTCATTATTTGAACGTAATTTAAAATTGATTAAGTATGCTTATC  
AGCAAACAAATGGTGAATTTTAAATTATAGGTACAGGCGGCGTATTCAGTACTGAAGATG  
CAATCAAATGATGCGTCACGGTGCCTTATTCAAATTTATTCATCACTTGTATTGA  
AGGCCAGGTTTAACTAAGAAAATGAACAAAGGCATCGCACGTTACTTAAAAGATCATC  
ATTTTGACAATGTCAGTGATATTATAGGACTAGATGCCTAA

### > **Q7A3B2**

Function: protein coding sequence; putative DNA-binding protein (core genome, constant)

Best match: Q7A3B2\_CC001-ST772\_118\_AJGE0100055.1[94922:95509:r]RC (completely identical)

Position: 065-contig\_242\_RC: 31613 ... 32201; Length: 588 bp

Sequence:

TTATTGTATATTTTAAATTATCGTTGCTGGCCCTTGATTGACAATCGTATTAATAATGCCTTA  
TTAAGTCAACTTTGTCTATACGGTTTGGATCTTCTACCCAATGTCTTATCAAAGACAATCC  
CGCACCTGAAACATAACTCATGAAATAGGAAAATGGTATACCATTAATTTGATCGTTTTT  
ATTTTTATAACGTTGTAATGACACATAATTAATCATAAAGTTTTTCGTGGATATTTGAA  
TCTTTACCCATACGAAACATCAATTGATAAAATGCGATGTCTTTTTCTATCATTTCTATTA  
AAACGGTCATAATTTGATGTATGTTATCCGTGGATAACTTAACTGCTCCATTTAACTTCTC  
ATCATGAATGAAGTCTTATTTCTCCAACCTGCTGGTCCCTCTAATTTTTCAAGCAAATCA  
TATTTATCATAATAATGCGTATAAAATGTAACGTTAACATCAGCTAAATCTGCAATTT  
GTTGCACAGTAATCTTCTAATTGGTGTGATGTAAGTTCAATAAATGCATTTCTCAT  
TGCAACTTGTGATTTTCTAATACGTGCATCTATAGTCAT

### > **pepX**

Function: protein coding sequence; Xaa-Pro dipeptidyl-peptidase (core genome, constant)

Best match: pepX\_CC001\_MSSA476\_BX571857.1[2656607:2658289]

Position: 065-contig\_242\_RC: 32343 ... 34026; Length: 1683 bp

Sequence:

ATGAACCAACATTTACTAGGAAATCCAAAATTAAGTGAATCATGTCAATGAAGTGAAA  
GCCGGTATTAACCACATCGTTGTGCGACAGTGTTCAATATGGAAATCAAGAAATGATTATG  
GAAAAAGATGTCACTGTGGAAATGCGCGATGGCGAAAAATTATATATTAATATTTTCAGA



CCAAATAAAGATGGCAAATTCCTGTAGTTATGTCTGCAGATACTTACGGTAAAGATAAT  
AAGCCTAAAATCACAAATATGGGTGCCCTTTGGCCAACATTAGGCGCCATTCCGACATCT  
AGTTTTACACCTGAAGAATCACCAGACCCAGGATTTTGGGTGCCAAATGATTATGTTGTA  
GTTAAAGTTGCATTACGCGGTAGTGACAAATCAAAGGGCGTCTTATCTCCATGGTCAAAA  
AGAGAAGCGGAAGATTATTACGAAGTGATTGAATGGGCAGCAAATCAGTCATGGAGTAA  
TGGAATATCGGGACAAATGGCGTTTCTTATCTTGCGGTGACTIONAATGGTGGGTCGCATC  
ATTAAATCCACCACATTTAAAAGCAATGATTCCTGGGAAGGCTTAAATGATATGTATAG  
AGAAGTAGCCTTTCACGGAGGTATACCGGATACTGGCTTTTATCGTTTCTGGACTCAAGG  
TATTTTTGCGAGATGGACAGATAATCCAAATATCGAAGACATGATTCAAGCACAACAAGA  
ACATCCTCTGTTTCGATGATTTTTGGAAACAGCGTCAAGTGCCATTATCACAAATTTAAAC  
ACCTCTACTAACATGTGCTAGTTGGTCTACACAAGGTTTGCACAACCGTGGCTCTTTTGAA  
GGATTTAAACAAGCTGCATCTGAAGAAAATGGCTATATGTGCATGGACGTAAAGAGTG  
GGAAAGTTACTACGCTAGAGAAAATCTCGAACGCCAAAAATCATTCTTTGATTTTTACCT  
TAAAGAAGAAAATAACGATTGGAAAGATACGCCATCATGTCATTTATGAAGTTAGAGATC  
AATTTTATAAAGGCGAATTCAAATCAGCGTCAGCGTTCCTTTACCTAACACAGAATATA  
CACCATTGTTTTGAATGCTGAAAATCACACATTGAATCATGCAAAGATTAGTAGCGCGC  
ATGTCCGACAATATGACTCTGAAGATAAACGACAAGATGTAAGTTTTAAATATACGTTTG  
ACAAAGATACTGAGTTAGTTGGAACATGAACTTAAAATATGGGTAAGCACTAAAGAT  
TCAGACGATATGGATTTATTTGCAGGTATTA AAAAGTTAGATCGTCGTGGTAATGAAGTT  
AACTTCCCTGATTTTAATCATATTGAAAATGGTCAAGTAGCTACCGGTTGGTTACGCGTAT  
CACATCGTGAATTAGATCAAGAAAATCCACAATTGCGCAACCTTGGCATAAACATGAA  
ACAGAATTAAGTTGTCACAAGATGAGATTGTACCTGTTGAAATCGAATTGTTACCTTCA  
GGCACGCTATTTAAACAAGGCGAAAACATTGGAAGTTGTTGTA AAAAGGTAGTGAAATTGTA  
ATTGGTAATAGTACCCCTGGCATGAAAACGCGTTATGAACATGAAGAAACCGTAAATAA  
AGGCATGCACATGATTTATACTGGTGGTAAATATGATTCACAATTAATCATTCTATCGTT  
AATTGA

> **txbi\_A5IW19\_panD**

Function: bidirectional rho-independent terminator of A5IW19 and panD

Best match: txbi\_A5IW19\_panD\_CC001\_MW2-USA400\_BA000033.2[2678984:2679047]

Position: 065-contig\_242\_RC: 34100 ... 34130; Length: 30 bp

Sequence:

AAACCAAGGTGTGGCCCTTTTTATTATTGA

> **sasK**

Function: protein coding sequence; LPXTG-motif cell wall anchor domain protein (genomic island)

Best match: sasK\_CC005\_04-02981\_CP001844.2[2683217:2683852:r]RC

Position: 065-contig\_242\_RC: 34123 ... 34759; Length: 636 bp

Sequence:

TTATTGATGGCTATTTAATTTTATAAATCTTGTCTCTAACTTACTACAAGCAATATTTAAA  
CCACTAAATAAAGCCATAATTGCTGTATTACTTTTCGTTGTTTACTCCTGTTTTTGGCAATTC  
TTTCAATTGTTGCTTATGTCCTGACTTGCTCTTGCTATCCAAATGAATACTTTGTTGTTTAG  
CCATTTGTTTATTACTTTTTGTGTGAGTATCATTTGCTTTAACCTTGGATTTACAGCACCA  
TTATTCGATGTTACATTTGCGTTTTTCAACTGCTTGATAACTTTAGGATCTTTTCGTGCCATC  
CATTAAATTATCTGGATGTTTTAGTAAATGTCTACAATCCGATACTATTCCAGATTTTTTT  
GCCTTTACCGCATTATTCTGCACCTCATTATCATCTTTCAACTGCTTGATAACATCTGGATC  
TTTCGTGCCATCTATTA AATTATCAAGTTTTTTT CACACGTGCTATGTCACTAACTGGCCCA  
GGATAATTTGCATCCGGTTGTCTAACTGGTATTA AATTGCTGTTTTT CATTACACCTTCAG  
GCTTGTTATTTTTCGGCGTTTCGCATTATCCGTA AAAAATCAACACTGATAAAAATTGCAACAA  
ATAAACTTATAACTTTTTTCAT

> **A5IW21**

Function: protein coding sequence; putative peptidase (genomic island)

Best match: A5IW21\_CC121\_21269\_AFTU01000046.1[125757:126833:r]RC

Position: 065-contig\_242\_RC: 34774 ... 35851; Length: 1077 bp

Sequence:

```
CTATTTTACTACCTTAATATCATTGCTATTAAGTAACCCATCCATCTATTTTTTCGTCGT
ATAAAGAGTAATATTTATACCCATTTGGAATATTGTAATAGAGTTTAGCTGTGTACGCTTT
ATCTTTTTTAATTAATTTATTATCACCCTTTTTTGTAATTTCAATGTTTTTCCAATATATATA
CTTACTTTTAATTAATTTCACTTTCTTATTATATGGATGACTTCTGTACTTACCTATCCAAT
AATTTATGTAATCTAATTTTAAATCATTATTCTCACGCCTGAATTATGATTATATCTGCCG
TATGCATGTAATCCGATGATATTGTTTTTTGAATCTCTTATCGCACTACCACTTTGTCCTGA
AAATGTGTCTACCGTATAATACATTTTCATTCTCATCAAACTTTCTAATTTCCCTTTACCTT
TATATTGTCTGTTGTCTGACTTGTCTCCTGGAAATCCAGAAATTTCAATATTTTCACCTTTG
CTAATGCGTGTGTTCAAAGTTAAGTAACCTGTTTTATTTCCTAAATTACTATTCAACTTAA
TAATTGCTATATCTTCTTTTGTGGGAGCATTATTAATCCAAGATTTAGATACAAAAAACTT
ATGCGAAAATGTCTTTCCTATTGTATATGTTTGCCCATTTACTCCAGCATAGACATCAATC
TTTTTAGCCCAACCTTTATCGTCTTTAGAATAGACATTATGAGCCGCTGTCAATACAATAT
CCTTACCAATCATAGTACCGGTGCCTTTATATACACGGTTATTTGAAAACGTCATATTTAA
TAATACAGTCTGCTTATAAGGTCTTTGTAAAATATTATTAACAACCGTTCTTTGATCTTTA
CCGAAAACCTCGCTCAGTTAAGGGCGTACTATAATCACCTACTTCATAAAGCTCATTTTGTAT
TACGTTCAATTGTTCCCTGATTCAAAAATTATTACTACTACCATTTTCTGAATTGACGATAGG
ATTATTATCAGCTAAGACAAAATTTTCACCATAATAACTGGAAACAATTACTACTAACAA
AATCAAAAATGATATTTTAAAAATTTTGTGCAT
```

### > panD

Function: protein coding sequence; aspartate 1-decarboxylase

Best match: panD\_CC705\_RF122-cow\_AJ938182.1[2606953:2607336:r]RC

Position: 065-contig\_242\_RC: 36194 ... 36578; Length: 384 bp

Sequence:

```
TTATAACACTATCGTATTTTCTTTTTTCATGAATCATTTCATAAATGACATTGTCTTCATTCA
TTACTGCTACTTTAGGTGCATGGTGTTTAATTTCTTCTTCATTCAACTGTGCATAAGTCATG
ATTATGACTACATCGCCTACTTCAACAAGTCTTGATGCTGCACCGTTTAAACAAATTTTAC
CACTACCTCTTTCACCAGCTATTACGTATGTTTCAAACGTCACCATTTATTATTATTCAC
GATGGCTACTTTTTCAATTTGGCAAGATGTCTACCGCTTCCAATATATCTGAATCAATCGTA
ATGCTACCTACATAATTTAAATTTGACTCAGTCACTCTTGCTCTATGAATTTTAGCATTCA
TCATTGTTCTTATCAC
```

### > panC

Function: protein coding sequence; pantoate-beta-alanine ligase

Best match: panC\_CC030\_MRSA252\_BX571856.1[2761706:2762557:r]RC

Position: 065-contig\_242\_RC: 36579 ... 37431; Length: 852 bp

Sequence:

```
TTATTCAGCTCCAATTATTATATTATCTATTAACGCGCTTTTGAAAATTTGACAGCTAAC
GAGATAAATATGCGTCCAGTTATTTTCGTGTTGTTCTACTAATTGAGGATAACTATAAACA
GCAACTTCTTCAATGCGTCCACTTATATGTGATTCAAGATATTGAGTAACCTTGTCTATAA
TTACTTTACTTTGACGTTCCACCGTCTTGATACAACGCTTGTGCTAATAGCAAATTTTACTT
AAATGTACCGCTTCTTGTCGTTCTTGCTCCGTTAAATAAACATTTCTTGAATTTTTCGCCA
AACCATCTGCTTCTCGAACGATATCAATACCAATAATTTCAACGGCATGATTGAAGTCTTT
TACCATTTGCTCGACAATAGCCAATTGCTGGGCATCTTTTTTACCAAATAAGCATAATCC
GGCATAACAATATTAATAGCTTATTAACTACTGTTACCACCCCATCAAAATGCCCTGGA
CGCTTCGCTCCTTCTAACACATCAGCTAATGGACCTACTTTGACATCAATACCTAATTCAC
CTGGATACATATCTTCTACTGCAGGATGAAAAACAATGTCCGCTCCTACTTCTGATACTAA
TTCTAAATCTTTATCAATTTGTCTCGGATAAGCATCGAAATCTTCGTTTGGACCAAATTTGT
AATGGATTAACAATACTCACAATTGTAATATCATTTGTACTAACTGATTTCGCGTACC
ATCGTTAAATGTCCATCATGTAAGGCACCCATTGTTGGGATAAAACCAATCGTTGTGCCT
GAGCGTTTGGCTGCTTTAACAATGTGTTGCATCTCTTTTACCGTAGTAATCAGCTTAGTCA
T
```

### > panB

Function: protein coding sequence; 3-methyl-2-oxobutanoate hydroxymethyltransferase

Best match: panB\_CC001\_MW2-USA400\_BA000033.2[2680987:2681805:r]RC

Position: 065-contig\_242\_RC: 37423 ... 38242; Length: 819 bp

Sequence:

```
TTAGTCATTGTTATTAACCTCATTTCATAATTTTCTTTTTATACGTATATTCTTCTGATGGAA
ATGCACCAGATTTAACTTCTTGATCGTATTGTTTTAAACCATCTACACCAACACTAAAATC
AGCAAATTGCTTCACAAATTCGCTTTATGTTCAACACCATAATTTAACATATCGTGATAA
ACCAATACTTGACCATCTGTACCTTTTCTGCACCAATACCAATGACTGGAATTGTTAAAT
GCTTGCTAATTTCTTCTGCTAAATCATTGGAATTGCTTCAAGTACTAACGCAACTGCACC
AGCTTGTTCTACATTTTTCGCATCTAAAATAAGTTGCTCAGCTGCTTCTTTTCGTTGCACCTT
GTAATTTATATCCCATAACGCCAACACTTTGAGGTGTTAACCCTAAATGTGCAACAACAG
GAATACCAATTGCCGTTGCTTTTTCAATAAATGGTGTAATATGCGCTCCTTCTGCTTTAAT
TGCATTTGCACTCGTCTCCTGATAAAGCTTTAGAGCATGATTTAAGTCTTGTGTCATAGAG
ATGCCTACTGCACCAATCGGCATATCAACAACACTACAAATGATTTGGTGCGCCTCTTCTTA
CTGCACGACCGTGATGAATCATATCTGCTAACGTCACCTGTACGGTACTTTCATAACCTAA
TACAGTCATAACCAAGTGAATCCCCAACAGAATCATATCAATACCCGCTGCTTCCACTTG
TTTAGCACTTGAAAATCATAAGCTGTTACCATAGAAATTTTAGTTTGCTTTTGTTTCATA
TCTATTAATTGACTTACTGTTTTCAA
```

### > panE2

Function: protein coding sequence; 2-dehydropantoate 2-reductase

Best match: panE2\_CC705\_RF122-cow\_AJ938182.1[2609073:2609933]

Position: 065-contig\_242\_RC: 38314 ... 39175; Length: 861 bp

Sequence:

```
ATGTTATCAGTTGCGATTATCGGCCAGGCGCTGTCGGTACAACACTATTGCCTATGAATTAC
AACAAATCATTGCCTCATAACAACGCTTATCGGGAGACACGCCAAAACAATAACATATTATA
CTGTACCACATGCACCTGCACAAGATATTGTTGTGAAAGGTTATGAAGATGTCACAAACA
CATTGATGTTATTATTATTGCAGTCAAAACACATCAACTTGATGCAGTTATTCCTCATT
AACTCATCTTGCACATGAGGACACGCTCATTTTTAGCCCAAAATGGTTATGGTCAACT
CGAACATATTCCATTTAAAACGATGCAAGCAGTTGTCTATATAAGTGGTCAAAAGAA
AGGCGATGTTGTTACGCACTTCAGAGATTATCAATTACGTATACAAGATAATGCATTAAC
TCGACAATTTAGAGATTTGGTCCAAGACAGTCAAATCGACATTGTACTAGAAGCAAATAT
TCAACAAGCTATTTGGTATAAATTGTTAGTTAACTTGGGCATTAATTCTATCACAGCACTC
GGTAGACAGACAGTTGCAATCATGCATAATCCTGAAATACGTACACTGTGTAGACAGCTA
TTACTAGATGGTTGTCGTGTTGCACAGGCAGAGGGGTTAACTTTTCAGAACAAACTGTC
GATACTATTATGACTATATCAAGGTTATCCCGATGAAATGGGAACGAGCATGTATTAC
GACATTGTGCATCAGCAACCTCTTGAAGTCGAAGCGATTCAAGGCTTTATTTATCGACGT
GCACGTGAACACAATCTTGACACCCCATATCTTGATACTATTTATAGCTTTTTACGCGCGT
ATCAACAAAATATGTAA
```

### > budA-L2

Function: protein coding sequence; alpha-acetolactate decarboxylase/locus 2 (core genome, variable)

Best match: budA-L2\_CC398\_SO385-pig\_AM990992.1[2736345:2737049:r]RC (completely identical)

Position: 065-contig\_242\_RC: 39260 ... 39965; Length: 705 bp

Sequence:

```
CTATTCAGCTTCTCTAATTTCTTCTGCCACATCTTTATAGTCTATTTTCGCTTTAACAAACG
TCTCGTTATTTACCGGGAAATGTTGTTGGAATGTTTCAAAGTTTTGTATCTCAACGACAAC
GTCATCCACTTCAAAGTCAAGAACATGTCCACCATAAGCTCTTTCATCATCCGCAAAATG
TATATGAAAACCAGCAGACCCTACGCCATGAAATAATTCTGGTGTAAAAAATCCAACAAT
GGCACCACGAATATCTTGTCTTTTTCTCAGGTTGTCTGCGTGCTGAATCAATCAAACGT
GTATATGGCGGTTGCTGAGCAGGCATCATTTCGTACATGCATATGTTTAAATGTGCCATAA
ATTTTAAACAGCCGAAAATAAATTCTCACTTAAACATTTTCAATTTTTAATTTTTGCGAATACAT
CATCTTGTGATAATTGTTGCAATGGAAATGTCTTACTCGCTTTAAAATAGTAATCGATGC
ATACGGTACTTCTCATCACCTTTTAATTCTATAAATTCTTTATGCTCGTTAGCATGATATG
```

CCTTCCCGTCTAAAAATATTACTTCGCCATCAGACCCTGTAAACGTTGCAATCCCTAAATT  
TCCATGTTCTAACAAATTCATTAATTGTAGCTGTTCTTCTAGTAAGCCAGCCATTAACGTA  
CCTAATGTACCATGTTGATACAAGACATTCGTCAT

### > **ldh2**

Function: protein coding sequence; L-lactate dehydrogenase 2 (core genome, variable)

Best match: ldh2\_CC001-ST772\_118\_AJGE01000055.1[103551:104510:r]RC (completely identical)

Position: 065-contig\_242\_RC: 40242 ... 41202; Length: 960 bp

Sequence:

TTAGTCTTCTAATAAAATATTTAATTGAATCAAATGTATCTTCTAATGTTTTAACAGATTTAT  
CGAACAAACGCTTGTTCTTCGGCACTTAATGGCATTTCATAAAATTTAACTGCGCCATGTTG  
GTTAACTAATGTTGGTACACCTAGGTAACGCCTTTGTGACCACCATATTGACCATCTAAT  
TGTATAGAAACATTTAAGACATTATTTTCATTATTTAAAATGGCTTTTGAAATGCGCATCA  
ATGCTAATGCAATACCATAGTATGTTGACCCTTTAGCTTGGATAATTTTCATAAGCAGCGTC  
ACGTGTATTTACATAAAATTTCTTCCGCTTTAGCTTCGCTACCAGTTTGTTCTTTTAAATGTGT  
CATATACTGAAATACCTGCTACATTTGCTTGTGACCAAACCTGCAAGTTCAGTATCACCATG  
CTCACCAATAATACTAGCGTCAACACTTGAAGGTGCAACACCAAGTTCTTGGCTAATTA  
ATATTGTAAACGTGCACTGTCCAATACAGTACCTGAACCGATAACACGCTCTGCTGGTAA  
TCCAGTATATTCTTTTACAAATCTTGTTAAAATGTCTACAGGGTTTGCCGCGATTAAGAAA  
TATCCATCAAAGCCGCTATCCATAACACTCTTAAACAATGCTCTTCATAATCTTAGTATTTT  
TTTCAACTAATTGTAAACGTGTTTCACCTGGCTTTTGAGGTGCACCAGCTGTAATAACAAC  
TAAATCTGCATCTTTACAGTCTTCGTATTCACCTGCTTTCACATCAACTGGTGAAGGACTG  
TGGACTGTACCATGGTTTAAATCTTGAACATCTGCTTTTACTTTGTCTTTTGCAATGTCAAT  
AATTACAAATTCATCAGCAACACCTTGCCTAACCATGCAAAGGCATAGCTTGATCCTAC  
AGATCCATCTCCGATTAATACAACCTTTTACCAAATGTTTTTCAT

### > **fda**

Function: protein coding sequence; fructose-bisphosphate aldolase class 1

Best match: fda\_CC005\_Mu50-VRSA\_BA000017.4[2751721:2752611]

Position: 065-contig\_242\_RC: 45551 ... 46442; Length: 891 bp

Sequence:

ATGAATAAAGAGCAATTAGAAAAAATGAAAAATGGAAAAGGCTTTATTGCCGCATTAGA  
CCAAAGTGGTGGTAGTACACCAAAGCACTTAAAGAATATGGTGTAAACGAAGATCAAT  
ATAGCAATGAAGACGAAATGTTCCAACCTGTTACGATATGCGTACACGTGTGGTAACTT  
CAACTTCATTCTCACCAGATAAAAATTTTGGGTGCTATTCTTTTTCGAACAAACAATGGATCG  
CGAAGTAGAAGGCAAATACACTGCAGATTACTTAGCTGATAAAGGTGTTGTTCCGTTCTT  
AAAAGTAGACAAAGGTCTTGCTGAAGAGCAAATGGTGTCAATTAATGAAACCAATCG  
ACAACTTAGACAGTTTATTAGACCGTGCAAACGAACGTCACATTTTGGTACAAAAATGC  
GTTCTAACATTTTAGAATTAATGAGCAAGGTATCAAAGACGTTGTTGAACAACAATTTG  
AAGTTGCTAAACAATATTGCTAAAGGTTTAGTGCCAATTATCGAACCAGAAGTTAATA  
TTAATGCAAAGACAAAGCTGAAATTGAAAAAGTATTAAGAGCTGAACTTAAAAAAGGT  
TTAGATAGCTTAAATGCTGATCAATTAGTAATGTTGAAATTAACAATTCCTACTGAACCA  
AACTTATACAAAGAGTTAGCTGAACATCCTAATGTTGTTTCGTGTCGTTGTATTATCAGGTG  
GTTACAGCAGAGAAAAAGCAAATGAATTACTTAAAGATAACGATGAACTTATCGCAAGT  
TTCTCACGTGCATTAGCTAGTGATTTAAGAGCTGATCAATCTAAAGAAGAATTCGATAAA  
GCTTTAGGTGATGCTGTAGAATCAATCTACGACGCATCTGTAAACAAAAACTAA

### > **mqoB**

Function: protein coding sequence; putative malate-quinone oxidoreductase 2

Best match: mqoB\_CC005\_Mu50-VRSA\_BA000017.4[2752805:2754301:r]RC (completely identical)

Position: 065-contig\_242\_RC: 46636 ... 48133; Length: 1497 bp

Sequence:

TTAGTTTTCGTAGTAACCTAATTCTAAGTCTTTTGAAGTTTGTTCACGGATTTTTCTCATT  
ATTTTTCGTCTTCAATTAATGATTCACCGTATGATGGAATCATTTTCTTGATTTTAGGTGCC

CATTCAGTTTTGTATTACAGGGAAGTTACGTTCTAATACTTCTAACGCAACTGAAACTGAAG  
TTGAAGCCCCTGGTGATTCACCTAATAATGCAATTACAGTGTGGTCTTGTGAGTTAACCAC  
TTCTGTACCGAATTGGATGAATCCTTTACCGTGTTACAGGTGTATCTTTGATAACTTGTACA  
CGTTTACCAGCAGTGTATAATTGCCAATCTTCATTACGTGCTTCTGGATAGAAAGTACGTA  
AGTGGTTCATACAACCTTCTTTTGTGATAATCACTTGATCAAATGAGTATTTAATTAAGG  
TAAGTTTTTAACTGCTGCTGCTAATAAAGTTGTAATGTTGTATGTTTTAACAGACTTGAAT  
AAATCTAAGTTAGAACCATTTTTCAAGAATTTAGGTCCAACATTAGCAAATGGTCCAAT  
AATAATGTTCTTTGACCATCAATGTAACGCGTATCTAAATGAGGTACAGTCATTGGTGGT  
GTACCAGGTGGCTCTTTACCATAAACTTTGGCATCGTGTGTTCAATAACTTGTGGGTTTG  
TACAAGCTAAGAATTGACCACTGATAGGGAATCCACCCAAATGTTTACTTTACGGGATAC  
CTGTTTTTTGTAATAATGGAATCGCTCCACCGCCAGCACCGATGAATACATAGTCAGTTAC  
TTGTTTGAATTTCTCACCAGTTAGGCGATTTTTAACAGTAACTTCCCATTGACCATTTGAT  
AATTGTTCAAAATCAACAACCTTCATGGTTAAATTGCACTGTAGCATTTGGATGTGCTTCAA  
TGCTTTTAGCCATTTTACGTGTTAATTCACCGAAGTTTACATCTGTACCTTCGTCAATTTTA  
CTTGCCGCCATGATACCAGGGTTATCTTCACGGCCTTTTCATCATCAATGGAATCCATTTTT  
TCATTACTTCGATGTCTTCAGTATATTCGATATTATCGAACATAGGGAAAGCTTTCATCGC  
TTCGTAACGATCTTTAAGAATTTAACATTGTTTTTACCTCTAACATAACTGATGTGTGGT  
AATGGATTGATAAATTCTCTTGGGTTCTCGATGCTACCGCTTTTCTACTAAGTGACCCAGA  
ATTGTTTTGAAATCTCAAACCTCTCGTTAATCACTTTTCGCTTTTTTCGATGTGATAGAACC  
ATCAGGTTGTAAACTGTGTAGTTCAACTCACATAATGCTGCATGACCCGTACCAGCATT  
ATTTCTTTTCGTTTGAACCTTCGATTGCAGGACGATCCAAGCGTTTCGTAAACGTGGATATTC  
CAGTCTGGCTCAATTTCTTTAACATTGAACCAAATGTTGTGCTAAGTACACCGGCTCCAA  
TTAAAACGATGTCTTTACTATTAGACTTAGCCAT

> **acsA2**

Function: protein coding sequence; acetyl-coenzyme A synthetase

Best match: *acsA2\_CC001\_MW2-USA400\_BA000033.2*[2692379:2693977:r]RC

Position: 065-contig\_242\_RC: 48817 ... 50416; Length: 1599 bp

Sequence:

TTATTGATTGCTATCTTTTTGTTGTTGCCATTTGTCTATTTACAGCATCTCGTAGTTCAACAC  
GACGAATTTTACCTGAGTTTGTGTTTTGGTAAGTCGTCAACGAATTCATCTCTCTCGGATA  
TTTATATGGTGCAACTTCATTTTTAACAAATTGTTGTAGTTCTTTAACTAACGTATCATCAC  
CCGAGTATGGTCCTGTAAAATAACGAATGCTTTAACAAATATTTCCCTCGTATATCATGAG  
GCTTTGCTACTACAGCACATTCTTTAACGGCTGGATGATTCGTTAACGCATCTTCAACTTC  
AAAAGGCCCAATCGTATAGCCTGAACTAATAATAATGTCATCTCGACGTCCTTCAAACCA  
GAAATAACCATCATCATCTACATGAGCTAAGTCACCAGTGATGTAGTATTTACCTGTTTGC  
GCTTTCGCCGTACGTTCTGGCTCTTTATAAATACCCTTTGAAAAGTGCTGGCAAATCAAGTG  
GTACTGCAATATTCCTTTTCGTATTAGCAGGTACGCTATTCCCCTCATCATCTACTACAGT  
GACCGAACTACCCGGAATGCCTTTACCCATTGATCCAATCCTCTGTGGTGTATCTTTTTAAA  
AAGCCTATAAGCAAGGTACTTTCAGTCTGTCCATATCCATCTCTTACAGTTAAATTAAGT  
ATTTCTTGAATTGTTCAACTACTTCTCGATTTAGTGGCTCACCTGCAGAAACGGCACTATG  
TAAATGCGTTAAGTCATAATCATTTAAGTTCTGTAATTTAGCCATCATACGATATTCTGTC  
GGTGTACAACATAAAACATTAATTTGATATTTTTGAAGCAATTCTAAGTATGTTTCAGGAC  
TGAATCTTCCATTAATAACAAAAGCAGTTGCACCTGAACCTAATACAGATAAAAAAGGAC  
TCCATACCCATTTTTGCCAACCTGGTGCTGCTGTTGCCCAAACCTAAGTCATCTTCATTAAT  
ACATAACCAATGTTTTGGTGCCATTTGTAAATGTGCAAATCCCATCCATGACAATGTGTA  
ACGGCTTTAGGATTGCCAGTTGTACCAGATGTATATGACAGAATCGCCATATCATCACGC  
GTCGTATCTGCCATTTCTAGTTTGTACTTGCCTTTTCTTTTTTCAGCTTCAAGTGAAATCCA  
TCCATCTTTTTGACCGGCAATAACAAATTTAGTTAACGCATCATATTTCTTTAATTTTTCAA  
ATTCAACTGTGAATGGCTCTAATGCAATGACTGCATTTATTTACCGTGAGTGATACGGTA  
TTGTAAATCTTTAGTTCTTAGCATTTTCAGAACATGGAATGATTGCAACACCTAATTTTTAAA  
GCAGCAATATATAATTCATACGTCGCAATAGATCGTGGCATCATAATGAGTACTTTATCG  
CCTTTAGATAAACCGTGCGATGCTAAAACATTACCTACTTTATTAGACTGTTCAATGAGCT  
GTTGGTAAGTGACTGATATATCTTCGCCTTCAGTATTATGATATAGAATTGCCTTTTTATC  
TGGTATGTGGCTATATTTTTCGATTTCCGAAATAATGTTATATTTTTTCAGGCGCGAATAGA  
GCTGACTTTTGCAT

> **betA**

Function: protein coding sequence; choline dehydrogenase (core genome, constant)

Best match: betA\_CC005\_Mu50-VRSA\_BA000017.4[2757991:2759700:r]RC

Position: 065-contig\_242\_RC: 51822 ... 53532; Length: 1710 bp

Sequence:

```
TTATTTAGCGTATGGTTTTACTTCGATTGCACCTTCATTTTCATCATGAACACCATGCTTAT
AATAATCAATATATTGTGGCTCTAAAGGCTTTCTGCCACGTATAATGTCTGCTGCTTTTTTC
AGCTAACATTAACAGGTGCATGTATATTGCCATTTGTCGTACGTGGCATAGCTGATGC
ATCAACTACACGTAAATTTTCCATACCGTGGACTTTTCATTGTTAACGGGTCAACTACTGCC
ATTGGATCTGAAGCAGGACCCATTTTAGCACTACAAGATGGGTGTAATGCTGTTTCACCA
TCTCTACGAACCCAATCAAGAATTTCTTCGTCTGTTTGCACCTTCTGGTCCCTGGTCAAATTT
CTCCACCATTGAATGGATCCATTGCTTTTTGAGACAAGATATTTCTTGCTACACGAATTGC
TTCTACCCATTCTTTTTTATCTTCTTCTGTTGATAAATAATTAAGCGGATACTTGGTTTTT
CGAATGGATCTTTAGATTTGATTTTCAAGCTACCACGAGAGTTTGAATACATTGGTCCTAC
GTGAACTTGATAACCATGTGCGACCGCTGCCTTTTGACCATCATATCTTACAGCTATTGGT
AAGAAATGGAACATTAAGTTAGGATAATCAACTTCGTTATTTGAACGTACAAATCCGCCA
CCTTCAAATGGTTAGATGCTGCTGCACCTGTACGTGTGAAAATCCATTGTAACCAATA
AATGGCATGCGCTTGATATCTAAGCTTGGCTGTAATGATACAGGTTCCCTTACATTTATGTT
GAATGTATACCTCTAAGTGATCTTCAAAGTTTTACCCACACCAGGTAATGAACACGTG
GCTCAATGCCTTTTGATTTTAGGAACTCTGAATCACCGATAACCAGATAATTGTAGTAATTG
TGGCGTATTGAATGCCCCACCAGACAAAATGACTTCATTAGCATCGATGGTATGTAGTTT
GCCATTTTTCTTATACGTAACACCAGTTGCTCTTCTACCTTCATAATGAATTTCAAGTTACA
AAGGCACGTGTTTCAACGGTTAAGTTTTTACGCTTCATAGCTGGATGTAATATGCTCTTG
AAGCTGACATTCGGCGACCACGATGTACTTGACTATCGAACGGTCCAAAACCTTCTTGTC
TAAATCCATTCACATCAGGTGTTTTATGATAGCCTGCTTCAACACCTGCATCAAAGAATG
ACTGGAATAAAGGATTCGTTGCTGGCCCTCGTTTTAACTTAATTGGTCCATCATGGCCTCT
AAATTTATCATAAGGCGCTGCACCGTATGTTTTTTCTAATTTTTTAAAATACGGTAAACAG
TGCGCAAAATCCCAAGTTCCATACCTTCTGGTTCTGCCAACCTTCATAGTCCATTGGAT
TACCACGTTGATAAATCATGCCATTAATCGAACTCGATCCACCTAAAACCTTACCTCGGG
CATGTGCTACTTTACGACCGCCCATATGTGGTTCTTCATCTGTTGAATAAATCCAATCGTA
AAATTTATTGCCTGAAGGGAACATTAACGCAGCAGGCATTTGGATAAATAAATCCCAAAA
ATAATCACTGCGACCCGCTTCTAATACTAAGACTTCTTTATCTTTATCTTCACTCAGACGA
TTACCTAGTACAGAACCTGCACTGCCTCCTCCAATGATGACATAATCATATGATTTATTTT
TGTTACTCAT
```

> **betB**

Function: protein coding sequence; betaine aldehyde dehydrogenase (core genome, constant)

Best match: betB\_CC001\_MW2-USA400\_BA000033.2[2697354:2698844:r]RC

Position: 065-contig\_242\_RC: 53792 ... 55283; Length: 1491 bp

Sequence:

```
TTATTTGCTAAACCAATTCACCTAATTGTGGATTTGTATTTGTTAAAATGTGTTTTGAAACA
AGGTAATCTTCTAAGCCTTCTTTGCCTAATTCTCTACCGATACCTGATTGTTTGTATCCACC
CCATGGCGCTTGTGCAAAATATGGATGGAAATCATTAAATCCACACCGTTCCAAGTTTCAA
CTTGTTAGCAACGCGTTGTGCTTTTCCAATATCTTTAGAAAATACAGCACCTGCTAAACCA
TATATAGAATCATTTCGCTAATTGAATCGCTTCTTGTTCAGTTTCAAAGCCTTCTACAGTAA
CGACAGGTCCGAAAACCTCTTCTTGTACAATACGCATTGACGTATCACAATTTGTAATGA
CTGTTGGCTCGAAGAATAGACCATCTTTTAAATCATCTCTATCTGGACGTTTACCACCAAT
AGCAATTGTTGCGCCTTCTGCTTTAGCTACATCCATATAAGATTCGATCTTATTACGATGT
TCTGTTGAAATCACTGGTCCCATTTCCGGTATCAGCATCAAACCATTACCTAATTTGATTT
TTTTACGCGATCAATAAGTGCTTGTCAAATTTGTCTTTAATACTGTTTTGTACTAATATT
CTTGATCCTGCTGAACAACTTGACCTGCATGGAAATATCCACCATTAAACGCTTGGTCTA
CTGCCAATTCAAATCAGCATCATCAAAGATAATGTTTGGATTTTTACCGCCAAGTTCCA
AGGCAATATTCGTAACATTATTAGCAGCATTTTTTCATAAATATGCTTACCAGTCTCAATGCC
ACCTGTAAATGATACAAGGTCAACCTCTTTATGACCTGACATTACGTCACCAACTTCAGA
```

ACCTGCACCTAGAATAAGATTAATTGTTCTTTAGGGAAACCAACTTCTTCCATTAATTCA  
AAAACACGTATTGTTGTTAATGGTGAATTTCACTTGGTTTCATAACTAGTGAACAACCCG  
TAGCAAGCGCTGGCGCAATTTCCATGATGCTTGTAAATAACGGATAATCCAAGGTGTAA  
TTTGTGTAACCTACACTGTTCTTTAAACAATTTGCTTTCTGTATCTGGAATTGGTGAA  
TCAATCATTTTCGCCACCGTCTTTATCTGCTAATCCAGCAAAAATACATAAACACATTATGAA  
TATCATCCATATCTGCATATGATTCTTCTAACGTTTTTCCAGTATCTAATGTTTCTAATCGT  
GCTAACGCTTCGCGATGTTCTTTGATCTTGTCCGCGATGGCACGTAATTTTTTACCTCTTGT  
TTCAGCAGTTTCTTGGCACCATTACCAGACTCAAACGCACGTCTTGCAGCTAAGATTGC  
ACGTTCTGCATCCTCTTTCGTCCTTCAGAAACCGTAAATATCACTTCTTGATTGTAAGGA  
TTGATAATATCTCTTGTATTTTTATTTCGCGCTTCAACCCACTCACCATCAATATATTGACG  
CTGAGATAAATGTTTTAAAAGTTCCAT

### > **A8Z5A6**

Function: protein coding sequence; putative protein (core genome, constant)

Best match: A8Z5A6\_CC005\_Mu50-VRSA\_BA000017.4[2761520:2761615] (completely identical)

Position: 065-contig\_242\_RC: 55351 ... 55447; Length: 96 bp

Sequence:

ATGAAAAATGTGTCAATTTACAAAACAACTCAAGAATTAAGTTTTGTAAGTTCGTTAGAT  
TTTTATTTAACGAAACATTTAACTTTAATGCTTTAA

### > **Q79ZX2**

Function: protein coding sequence; putative transcript regulator (core genome, constant)

Best match: Q79ZX2\_CC001\_MW2-USA400\_BA000033.2[2699097:2699660]

Position: 065-contig\_242\_RC: 55535 ... 56099; Length: 564 bp

Sequence:

ATGACTCGTTCTCAGAACAAACAGCAACAATTAGAACAAGCAAAAGATATTGTAATTAAT  
TCAATTGGACAAACAATGGATTTGTATGGCACTAATAGAAGTGTAGGAACTTATATGGC  
ACTATGGTGTGTTGAAGGCAGTATGACGCTTGATGAAATGCGTCATCAATTGCAAATGAGC  
AAACCAAGTATGAGTGCTGGCGTTAAGAAATTGCAGGAATTTGATATTGTTAAACAACAA  
TTTACGAGAGGAAGCCGCAAACAACATTTTATCGCCGAGAAAGACTTTTTTCATCTTTTTCC  
GAACTTTTTTCACTAAAAAATTTAGCGTGAAATTGACATCAATGTCGAAGCAGTAAAAG  
ATGCTCAAGCTATTATCAATCCATTACTTGAAAGCAGTGATTTAACTGAAGCTGAAACAC  
AAGAGGCACAAAAAATTAAGCTCAGCTTGATCATAACATGTTTATTACGAATGGTTAG  
AACAGTTAACCGAAGCGATTGAAAGCGGTGAAATTTCAAATATTTCCCAATTCCAGAAC  
AGCCTTCTGATTCTGAAAATTAA

### > **txbi\_cudT**

Function: bidirectional rho-independent terminator of cudT and Q79ZX2

Best match: txbi\_cudT\_CC001\_MW2-USA400\_BA000033.2[2699714:2699777] (completely identical)

Position: 065-contig\_242\_RC: 56152 ... 56216; Length: 64 bp

Sequence:

GGTCCACGAAATAAACGGTAATTTCTATCTCAATAAATAGAAATTACCGTTTTTGTTTTAT  
ATG

### > **A6QKA2**

Function: protein coding sequence; putative protein (genomic island)

Best match: A6QKA2\_CC001\_MW2-USA400\_BA000033.2[2699848:2700534:r]RC

Position: 065-contig\_242\_RC: 56286 ... 56973; Length: 687 bp

Sequence:

TTAGCTATTCTCGCCCTCACGTAATCTATCAATAATTTTTGTATTTGTTACGTTTTTCAT  
ATTCATTTTTCTACAAAATAAACTAACGGTTCATCTTTGATAGTAACCCAAGGTACAAGTA  
CATCAAAATCTAATTCTTTAACCATCTCTAACTTTGAATAGATTTTTCTCTATCACTTGA  
ACCTAATAACTGTACGCCATCTCTCCCTTCAAACATATAAAATCTCCAGTAAATAA  
GTAACGATGATGACCATCATCCATAAAAACAGTGTCTGTCCTGGTGTATGTCCAGGCGC

GGGAATAACTTCTAAATCCTTATCCAACATTACACGATTACTAAATTGTTTTTGAACAGAA  
ATCTTATGTTTCAGTGCAGCCACATCATTTTCATGTATAAAGTAAGGAGCTTCAACTTGAT  
TAGAACCTCCTATAGATTCATGATCATGATTCATCAACTTTTGAACACCACCTAATGA  
TGCAAAGTCTTGTTGGGAGTCACCTAAGTGTCCGGAATGATAGATAACAATATTACCTGT  
TTCACGTTTTAAATAAAAAGATTTAAATAGAAATCGATTATCAAAGGCAGTCCGAAGT  
AGGTGTCGCATATAAGTTTTTTGTGATGGATTCTAAACTGTCATGTAATTTGGACTGTTTA  
TTTTAAATTGATTAGTCAT

> **cudT**

Function: protein coding sequence; putative betaine transporter (core genome, constant)

Best match: cudT\_CC001\_MW2-USA400\_BA000033.2[2700793:2702415:r]RC

Position: 065-contig\_242\_RC: 57236 ... 58859; Length: 1623 bp

Sequence:

TTATAAATTATCGTCTTGTTCTTCTTCTGATACTTGAACGATTTCGCAATGAACGACGTTCA  
ACTTCTTTTAATTTTTTTCAGCACGCGTTTCAAGTTTAATTCTATCGCGCCCTAAAATGATTA  
AAAATGATATCATCATGAAAATAAAAATAACAATTAATGGCACACTTGCCAGTATTGAAG  
CAGTTTTCAATACTTCTAATGCACGTTTCGCCACCAACTAGCATCAATGAAAATGGCAATA  
AGCACAATGCAAATGCCCAGAATAAACGATTGGCACGTAATGGTTTCGCTACCACTTTTT  
TCTGAGATGCTGCCGCTAAAATATATGAACCCGAATCAAATGTTGTTGCTAAGAATAAGA  
AAGCAGATACTAAGAATAGTACAATCATCAATGATGGGAATGGTAAATGATGCACCACT  
TCAATAATGGTTGCCTCTGTACCATGTGTATTTAAATATTGTGTTACATTAACCTGTCCAG  
AAATTTGTAAATACACAGCATAGTTACCAAAAATACCGAAGAATAATACGCATCCAAGC  
GTTCCATAAATAAATTGTTCCCTAGCACGACTTCTTTAAGGCGTCGACCTTTTGAAATTCTAG  
CAATAAATAAACCGATAAATGGCGCATATACTAACCACCATGACCAGTAGAATATTGTCC  
AGTCTTGTGGGAAATTCGTTTCTTTTCGACCTTTAATACCACCGAATGGTTCTAACCATGT  
TGCCATATGGAAAAATCTCTCAACATATTTCCGAACCTGTCACTGTCGTTCCATAATA  
AAAACAGTCGGTCCAATAAATAAATAAAAGGCTAAAAGTACAAATGATAACCAAACGTT  
GATATCACTTAACCTTTTGAATACCTTTTTTCAATCCTGTATATGAACTAATGGCAAATATA  
ACCGTGATTGTTAATAAAATGGCCGAACGTAAAATCATATTTTTACCATCTAAACCAGTT  
AATCTTTCTATGCCTGCAGAAATTAATGGCACACCTAACGCTAGTGATGTTGCCGCACCA  
CCTAGCAATCCAAAGATAAATAAGATATCTACAACCTTACCTACAAATTTATCTGTTTGAC  
CTTTTAAAATCGGGCGACAAGCTTGACTAATTTTATACACCGGTTGTTTTTAAACAAATAC  
TAAATAACCAATTGGTAATGCTGGTAGAACATAAATAGCCCAAGCAATTGGTCCCAGTG  
GAACATAACCATATTGCGTCGCATATTGGAGTGCTTCATCACTCATACTTTTCGCGCCATTT  
GGTGGTACTTGATAGTAAAAGCCATTCAATAACGCCCCAGTATAAAATATCAGAGCCT  
ATGCCTGCACAAAACAGCATTGCCGCCATGTAAATGTATTAATTTCTGGTTTATCACTTG  
CTTTACCAAGTGTGACATTACCATATTTACCAAATGCGATATACATTACAAAGCAAAAAA  
TCGCCAGCCCCATAAATAAATATATCGAACCAATTGAATCAGAAATGGCACTATTAATAC  
CAGTGATGATATCTTCACTTGCTTTTGGAAAAGCCATCATAGGTATAACTGCAAAAAGAA  
GTACAGCTACTGTCCCTATAAAGGTCGTCCAGTCCATAACTTTCTTTTTTTCAA

> **nrdG**

Function: protein coding sequence; anaerobic ribonucleotide reductase/small subunit

Best match: nrdG\_CC030\_MRSA252\_BX571856.1[2783529:2784065:r]RC

Position: 065-contig\_242\_RC: 59378 ... 59915; Length: 537 bp

Sequence:

TCAACTAACAATATATTCAATCATACGCGCATGCGAGAGTGATTGTTGTACATCTATAAT  
GCGTTGATTTAAAGAACCCTTTATATGGTAAATCAGGTTTGAATAAGTGTGATAAATAG  
CCCATCTACTAAAACGTCAATGTATGATAATAACTCTCGACGTTCTGTACAATCATTGCT  
AAATATTCATATAAAAATCCAGTCCATACCCAAAGTGTCTTTGTATTTCCAAAACGTGCTC  
GAAATGCTTTGACAAGATTTAATGTAATATCCAAATTACAAAATGGTTTCGCCACCTAATA  
GACTTAGCCCAGATATATAATCATGATCGCAATCATCTAATATTTCTGCTAATATTTTCATC  
AGTGTATTTCTCGCCATATCTGAACTTTTGTGAGGCTTTGTTGTAACATCCAACACAATTA  
AATGGACATCCTGATACATAAACACTGCATCTTACTCCTTCACCGTCAACAAAGCTATTTG  
ATTCTATTTTAGCAATATAACCTTGCCCTTGTTAATGTCTAAAAGTGCAT



> **nrdD**

Function: protein coding sequence; anaerobic ribonucleoside-triphosphate reductase

Best match: nrdD\_AJ292926.1[313:2163]RC

Position: 065-contig\_242\_RC: 59911 ... 61762; Length: 1851 bp

Sequence:

```
TCATTCTTTAGGCGCTTTCATATGTTTTACTCGTGCGCAAATTTCTTTATGACGGCCTTTAA
TTACTGGACGTTGCACTGGATTGCCTAAGTAACCACATGTTTCGTTAACGACATCAACTGT
TTTAGGATTATCATTGCCACAGTTCGGGCATTTAAATCCTTTTTTCAGTTGCTTCAAATCT
CCATCGTAATCACATTCATAACAATGATCAATCGGAATATTTGTACCTAAGTAACCAACT
TTGTCATAAAGAGTAGTCCCATACCGCTTCTAGTGCTTTCAAATTGTGTTGCAGTTTCGGAT
ACTCACAATAGTGAATGAAACCACCCTCGCATAATAAGGATAATCTTTTTCAAATCTA
ACTTTTTCAAAGGTGTAACATCTTTACGTACATCATAATGGAAAGAGTTTTGGTAATATCC
TTTATCTGTAATGTCTTTAATATCTCCAAATCTCTCTTGGTCTAAACGACAAAAACGATCC
GTTAGCGATTCACTCGGCGTACTGTAAATACTGAACCAAATGTCATATAATTCTGTCCATT
TCGTTTGATAACGTTTCATTTCTTTAAGAATTTCAAGCGTAAAGGCTTTTGCTTCTTGAGA
TGTTTCCAGTCTGGACCATAGAAAACAGTAGCTGTTTCATACAACCCTATATAGCCCATT
GAAATCGTTGCACGTTTATTTTTAAATAACTCAGCAACATCATCTGTTTCTTTAATTTATA
GTAAATGCGCCACTTTTATATAAAAATCGGTGCATTATTCGGCACAGCATCTTTTAAACGG
TGAATACGATAAAGTAATGCATCATGTAACACATCCATGCGTTCATAAAAAGATTTCCAG
AATTCGTCATATTACCAGCAGATTCTAATGCCATTCTAGGTAAATTAAGCGTTACAACAC
CAAGATTACAACGACCATTATTTTCAAATGTCTTCCGCATCTTTCCAACCTGGTAAAAA
TGAGCGACAACCCATTGGCGCTTTGAAATCACCTAATATTTCTACGAGTTTGCATAATTT
AATATATCTGGATACATACGTTTCGTTGAACACTTCAATGCTAGTTGCTTAATGTCATAAT
TCGGATCTTGAGGTCTAAAGTTGGTTCCTTTTTTAATTGAAAATACAAGTTTTGGGAAAAT
CGCTGTCGTGCGGTCTTTTCCCTAAGCCTTTGATACGAGTATTTAAGATAGCTTGTGAAAT
TTGCGACTTAAATGATCTGTACCTAAGCCGAATCCTAATGTTACAAAAGGTGTCTGTCCAT
TAGATGTATATAAGGTATTAATTTTCATATTCTAACTTTCAATCGCATCATTGATGTCTTT
AGTGACTTGTGATCAACATAACGGTTCGATTTTCAGATTTCTTTGACAAATTGCTTTGCGATA
TTCCTATGTTGTTCTTCATTATGTCGTGCATATGTAATAAGTAATTCGTCAACGCGGTC
CCGTACAGCCACCATATTGACTGCTAGAAACATTGGCTATAATTTGTACAAGCTGCGCTG
ATGCAGTTTGTATTGATTTTGGTGAAGTTACATTCGCGTTGCCTATTTCAAATCCATTATG
TAGCATATTTTAGCATCTATTAACAACAGTTTGTAAACGGTTGGAATGGATGATAATCT
AAGTCGTGAAAATGTATGTCCCCTCTTTGATGTGCATCTGCAACGTGCTTTGGTAATAAAT
GATTTAATGCGTAAGATTTAGAAACGATACCTGCTGTTAAATCTCTCATTGTTGAAAATGT
ATCACTATCTTTGTTGGCATTTCGTTAACAATAGCAGGATCTTTAGAAATCAAACCCGTT
AATGCTTCTTCGATTTGATTCAT
```

> **citM**

Function: protein coding sequence; putative magnesium citrate transporter

Best match: citM\_CC001\_MW2-USA400\_BA000033.2[2705563:2706933:r]RC

Position: 065-contig\_242\_RC: 62007 ... 63378; Length: 1371 bp

Sequence:

```
TTAAATCGTCACAATGCCCATCAACATTGCAATTAACATAACGATGGCGAATCCCCA
AATCCAAAAGAATGCATACTTAATATACGTGCCCATGTTTGCCTCTGCTAAACCAATTGC
CAACCATAAGGCTGGTGAACGACTGACAAATGTACCTATAATATCCCTATAACCAT
TGAATAAGCTGTTGATACAGACGGTACACCAAATTGCCCTGCTGTTTGTTCGACGATCGG
TAACACAGCAAAATAATAAGCGTCTGTGCTAGTTAGTAAATCTAATGGTACGCCAAGTAA
ACCTACAATAATATGCAAGTATGGTCCTACTTCTGCAGGAATCACTTTGATTAATTCGTC
GCAATCGCTTTAAGCATAACCGTTTTCAATTTAGTACACCTAAAAACATACCTGCTGCAATA
ATCACTGCAGCCATCATTAATGCATTCGGCGCATGCGCTCTTAATCGCTCCATTTGTTTCAT
CCACTGATTTAAAATTAATAACAAGCGCCAATGAGACACCTATCATGAATGCAAATTCAG
GTGGCGCAATATTTATTAACATCGCTAGAATAACAGCTAAAGTTAAAGCTGTATTCACCC
ATTTTATCCATGGTTTTGTTTCGTGCACGTCCTTTTACAGGAAACCTTACATCTTGATCTCGT
TCATATACTTCAACTAATTTATGTACATCTATATCTTGTGTTTGGCGTAATTCATTTCTCTC
```

TATTGCTTTTTTAATACGCTTTTGTTCCTTTAAATCCAAGATATAACCGCAAATAACATAACA  
AGAATGAAACCTATTATTTGAATAGGTATTAATCCATACCATAAATTCATTGACACTTTTGG  
CTTTTAACACTGCAGCTACACGAGCCATTGGACCTCCCCAAGGTACCATGTTCATAATCG  
CCGCGCTTAATGCTAATAGTAGAATCAATAAATATTTATTCATATTTAACGCTTTATATAA  
AGGTAATAATGCAGGAATAGAAAGCAAAAATGTTACCGCACCGGCACCATCTAATTGGG  
CTATTGTGCCAATTAAGCTGTCATTGCACAGACAATAACGACATTGCCTCGTGTCTATTA  
ATATTAAGCGTTTGACAAGCGGCTTGAATAAACCACTATCGTTCATGATGCCAAAGAAAA  
TAATGGCAAAGATAAACATAATAACAACGTTGATGACTTGATCTAACCCCTTTAGCAAAAA  
ATCCAACCAAATCTGTCACACTATATCCTAAAATCATTGCCCTAAGCAAGGTATGATTG  
TCATACCAACAACCTGGATTTATCTTTTTGGCAATGAGTAAACCTACAATTGAAATAATAA  
TAATGAGCCCCATTACTGTAAACCACATATTATCACTATTCAT

### > **cysG**

Function: protein coding sequence; precorrin-2 dehydrogenase (core genome, variable)

Best match: cysG\_CC010\_D139-ST145\_ACSR01000078.1[68421:69026:r]RC

Position: 065-contig\_242\_RC: 63853 ... 64459; Length: 606 bp

Sequence:

TTATTTTTTATCTAACCATGCCAAAAATTGAGCTTGTTTAGTATCGTTTAAATATTCTTTTCG  
TCACTATTTGTGATAACAATTGCTGCTTTTCGCTGTGATTTCATATCAAGTACTTTTATTTTC  
TGTCGGCAAGTATATAAAAAGTCGATATACGAACTGTATGATGGTGGATATAACGCCTCA  
AGCTCTGCCATAATTGATTTTGTCAACTTAGGACTCGCACCATCAGTTGATACACTGATAG  
TTAGCTTGTGCGGGTGTAGTGCACCTTGAAATACAACATTACCATTTGATGCATCTCCTAC  
ATTATTA AAAAGGGCATGCTCAGGTAAGGCTTGTTTTACCGCTTCATTTACACGTGGCTCA  
TTGGTTGCTGCAATAACTAGATACGCGTCTACAATATCGCTTGGTTCAAACCTTTTTTCTT  
TCCATATGACGACACCGTTATCTACCATATTTTGAAGTTTTTCTGTGATTGTGCGGACTGAT  
GACCGTCATATGTTCAATATATTGACTTAATGTTTGTGCCCCGACGACTTGAACGACGCCT  
CCACCAACTATGACGACATTTTTATTTGTTAAATCTATCATTAATGGCATATTCAT

### > **cysJ**

Function: protein coding sequence; sulfite reductase (NADPH) flavoprotein/alpha-component (core genome, variable)

Best match: cysJ\_CC001\_MW2-USA400\_BA000033.2[2708077:2709957:r]RC

Position: 065-contig\_242\_RC: 64521 ... 66402; Length: 1881 bp

Sequence:

CTAATAAACATCACGTTGATAGCGTTGTTGCTGTTTCATTTGACGCAATAATAACTCTGCT  
TCTTCTTGAGAAATATGACGTTCTTTTACCAATACATCTTTAATGGCTTGATGGACATCTT  
TCGCCATACATTTTTTCATCGCCACAAATATAGATTGCTGCGCCTTGCTCAATCCATTCATT  
GAAACGTTCACTTTCTTCCATTATACGATGCTGTACATATTCTTTGTGTTCTTGGTCTCTTG  
AAAATGCTAAATCTACGCGTGTTAAGTTTCCATTTTCAAGCCATTCTTCTATTCTTCTTCA  
TATAAAAAGTCAGAACTACGGTGTTGATCACC AAAGAACAACCATGTTTTTCCAGTCATA  
CCAAGTTCTTACGTTCTTGTAATATGCTCTAAAAGGAGCAATTCCAGTACCTGGTCCAA  
TCATAATAACCGGTATATCTTGCTTCATCGGAAATTTGAAGTTTCGGATTTTTCTTCAAATA  
AATTGGTACTATATCGCCTGGTTAATTCGCTCAGCAAAATGAACCGAGCATAACCTTTT  
CTCTCACGTCCATGTGCTTGATAACGAACCGTACCAACGGTAATATGCACTTCATCTGGC  
GTTGCCATAAACTACTGGAAATCGAATACTCTCTTGGTGGTAATTTTCTAAGGATTTGAT  
ACATATTCTCAGGTTGTAATTCTATAGTTGGAAAATCTGTTATTAATCTATAAAGTCCCG  
ATTTATAACATATTCACGCGCCCATGACTCATCTTGAATACGTTTCAGATAATTCTTCATTG  
TCAAAATAGATATCTGCATTTTTCAATAATGGCAATGTTAATTTAGTAAATTCAAAATGTG  
ATGTTAGTGCTTCAACAATAGGAACTGTATCACCATGATCATTAATTGGCACCGGAGATT  
GCGGATCCCAACCTAACATGGATATTAGTTTTTCAACCAATTCAGGGTCGTTTTGCGGTAA  
TGCTACTATAACAATCTCCTGGTTCATATGATTCACTAAAATCATCAAGTAAAAATTTCTATA  
TGTCGTGTTTCTTTATTTGAATCGGTACCATTTAAATTGATATTCGCTAAAACCTTCTGCTTG  
GTATGGATTTGATTTAGAATATTTCTTTTCTTTGGCAGACTTAATTGATTCACTTATCACCG  
ATTCACTTTGAATACCTTCTGATGTGGTATCAATAATATTAATGATGTCTGCCATCCACTT  
TTCTGCGTCTTCTTCATAATCAATATCACAACTACACGCTTACATATACGCTCAGCGCCT

AGATTTTCCAGTAAAGCATCTACATCTTTACCGGCTTGACAGAAAAATTCATATGTTTGTGAT  
CACCTAAAGCTAGTACTGAATATCTCACATGATTAAATTAGGTGCGTTATCGTCTTCTAA  
AAATTCAAAGAAATCCCATGCATTATCAGGCGGTTCTCCTTCACCATGAGTAGACGTAAT  
AATAAATAAATCTTCTAACTGCGCGATGTTTGTGCGTATCATATTCATCCATTGACATCAA  
ACAACTTGATGTCCGATATCACTTAAACGTTCTGAAAAAATTCAGCTAAACGCATGGCA  
TTACCTGATTCAGAACCATATAGCACTGTAACATGCCGCTGATTAGCTTCGATATGTGGCT  
CTTTATTTTGTAAACATATACGTTGTTGAAGTTGCTTGTCTTCTGATATTTGTGATTGTTGC  
CACACTTCTGTCTCTAATTGTTGTTGATTACTATCACTTGTGCGTATCGTTACTATTAGCTAG  
TAAAAAACCCTAAGCCACTGTTGTTGGCTCTCTGTTAATGTTTGCAGCAGATTGTTAATC  
TCTGTGACTTGTTTTTCTGTAATGGACTATTAGATGTATTTAATTTCAA

### > **gpxA-L2**

Function: protein coding sequence; glutathione peroxidase locus 2 (core genome, constant)

Best match: gpxA-L2\_CC001\_MW2-USA400\_BA000033.2[2710352:2710849:r]RC

Position: 065-contig\_242\_RC: 66796 ... 67294; Length: 498 bp

Sequence:

TTAAGATGAAGATTCTTGCAATAATATTTCTATATTTGTGCGATATATCCAATGGATCTTCC  
ATTGGCAAGAATCGATTTACAACATTGCCTTGTGCGATCGATTATAAATTTTGTGAAATTCC  
ATTTTATTGGGGACCCAAAGATTCCTGGTTGTTTCTTTAAATGCGTAAATAACGGATG  
TTCATCGTTCCCGTTCACAGATATTTTAGCTAACACTGGAAATGTTACACCAAATTTCTCA  
CGACTAATTTCAAGATTTCTTATTAGAACCTGGTTGTCGATTGTCAAATTTATTATTCG  
GAAACTCAACACTACAAACCCACGATCCTTATATTTTGAACAAAGTCTCTAGTTTTTT  
CAATTGTTGCTATATATACATTCTGTTGCAGTATTAACAACCTAAAATCACTTTACCTCTA  
AATGCTTCTAATTTATAAGTTAAGCCTTTATAATCACTTACTTCGATATCATACACATTTCT  
ATTATTCAT

### > **nsaB**

Function: protein coding sequence; ABC transporter/permease (core genome, variable)

Best match: nsaB\_CC001-ST772\_118\_AJGE01000055.1[132026:134026:r]RC (completely identical)

Position: 065-contig\_242\_RC: 68717 ... 70718; Length: 2001 bp

Sequence:

TTAATTGCGTTGTTGATGAATAACTTTAGCATAAATATAGGAAGTTATTTTGTACATCGCC  
ATATATAGAAACGAAATTATAATGACAGCTAGTACGTAACCTTGTTAAAAATATATGATGG  
TTATTAATACCTATCATATTTAGTAACGTATATACAATGTTACTAGAAATTAATGTGTGAA  
TCAGTGCTACTGTTATTGGTATTGCGAACAAGAAAGTCATTTGATTTTCGTGTTATCTTTGC  
TATTCTTCCATTATCTAAACCAAGTTTTTTTCATAATGTCATAATTGTGCTGATTTGCATAGG  
CTTCTGAGACTTGTTTATAGTACATCATTAGAAATATTCCAATGACAAGTACAATTGATAC  
TACGCCACCTACAAATATTAGTCCACCTGTCAAACGATCCCAAACCATTAGCATTCTGAT  
TTAGAATTTATTGACGCATCGTATTTTTTCGATAGCTTTTGTATTTGTGATGTTGTTAATTT  
CGTCTTTCCAAATACATTAAGTTTATCGATATTGTCGAATCCTTTTGTTCATGTGCATAA  
AATCCTTTTACTTTTTGTAATTGATTGTTATCTTTAACAATTAACCATACTATCTTGAAT  
CATCATCAAATTAACGCATGTGCGTCAAGTTGTTTCACTTTAAAGACTTCATTATTAAGA  
CCGACCTTAGACTGCTTTTTAAAAATAGGTACATTCGTAATCATACCTATACTTTGATTGT  
CTAAGTGTAATTTGTTTTGGTGATATCGATTATAATCTTGTGCGTAAAAGCTGTAATCAT  
TACTGATTGTCTTGAATAATCGCGCCTTCATTACCAATGAAGTCTATTGGAATATCATCA  
CTAGCCTGTTTTAACTTGTAAATAAGCACGATTCTTTTCTAAAGAAGCTCTAAATAATGTCG  
TTTCATATACTTTGAAGTCTTTTGCATTAACCGAACCCTGTATATCACGTTAATATTCTCA  
ATTGTTTGTGACGTTCTATTTGTGACTTAGAATTGTGCGCTAAATGACAAATCATAATCAT  
TCGTAATCAATTTGTAATGGTATGATTCATATCACGATAGGTTGTTAATGTCATTGTGAG  
CGTTACAATCAAAAATGTACACAGCAAAGTGATTGTTGCAAGACTGACTGCATTCATTTT  
AAGACGTACACGCATCCCAACTACCACAAAAAATAACCGTGGATGATAGTAACTTTTGA  
TACCTGCTGCAATATACTAATAATTATTTCACTTATACCTACAAAAAATGCATAAGTACCG  
ATAATAACTAATCCTATGACAATCCATATTTTAAAAAAGGCACCAAACGTCGATCTTGT  
TGTAATGCAATAAAGTAGCCTAAATATAGTGCTGCGCTTCTATAATAATTAACCGTAA  
CGCAACCATCGTGATATGACACTAGAATCGGAACGATGTTGATAAGTTATCGGTCGTTGA

AAATTAATACTGAACAAGTTGAATATAAGTAGCATGCCCATTAATACAGCAATGATAATC  
AAAGTAATAAACATCGCTACAAAGTCAAATGGATAATACCTTAACGTCGCAACTTCACTG  
CCCATTATTTTCTGTATAACAAGAAAAATATCGCACCAAGTAAGTATCCGCCGGAATA  
CTAACGACTGAAATTATTATAAATTGTAAGATAGTTTCCATCACTACAATTAACGCATA  
CTTTTCTTGGTCATGCCCAATGTCATAAAAAATGCTAAACTCTTTTCGTCTTTGTGACATCAT  
AAAGTGATTTGCATAGAAAATAAAAATAAAAGTTAAAAGCGCCATAAAAAAATTAGCTA  
TGATAATAAATGGTACTAGGAAGTCATTCTTCTGTTTTATGTAGCTATTTAACCCAATTGA  
CACAAGCGTATATTCAATCATGAATAGTACACTTACCGCTAAAATGAATGGAATGATTAC  
AAGTCGCTGCGTAATAAATTGACGTCGCACTATGTGCCATAACAATCTTAACTTCAT

### > **nsaA**

Function: protein coding sequence; ABC transporter/ATP-binding protein (core genome, variable)  
Best match: nsaA\_CC001-ST772\_118\_AJGE01000055.1[134023:134787:r]RC (completely identical)  
Position: 065-contig\_242\_RC: 70714 ... 71479; Length: 765 bp

Sequence:

TCATATATTGACACTTCCCTCCATTCAACAAGTGCTAAGCTATCTGTTATTCGTTGTTGAAAA  
GCTAATTGACTTTCTTCACCACGATATATTTTCATGATATAGACGCCCATCTTTAATAAAAA  
TGACTCGCTCTGCATAAGACGCATCGATATTTGAATGAGTTACCATTAAAATTGTCTGTTC  
CAATTGATGAATCTCTTGAAATAACATCATCAATGCCTTTGATGTTTTTGAATCAAGTGCA  
CCTGTAGGTTTCATCGGCTAGTAAAATCGTCGGTTTAGTAACATAATGCACGTGCAATGGCA  
ATGCGTTGCTTCTGACCCCCGAGATTTGAGAAGGATACTTGTTTAAGAATCCCTCTAAAT  
GTAATTGACTGCCAACTGATGTACCCTTTGTTCTATATCTTTTCGTTTAGCACCAGCTAA  
AATTAATGGCATCATTATATTTTCTTTATTCGTCATTGTTGGTAAAAGATTAATAATCTTGA  
AAAACAAAACCTACCATTGTTGACGATACAATGCTTTACTTTTATTTTTCATATTATTTA  
AATGTGCGCCATCCACAATAATGTCACCTTCAGTTAGTCCATCAAAAAGAAGCAATTAAT  
TTAGTAGTGTAGACTTCCCTGACCCAGACTCACCCATAAATTGCAACAAATTCACCAGCTC  
CAACTGATAAATTCATTTGATTAAGTGCTGTCGTAGCATTCAAACCTTTACCATAAACCTT  
TTTTACATGTTTTCACTTCTAGCAACATGGCATGCAC

### > **nsaS**

Function: protein coding sequence; sensor histidine kinase (core genome, constant)  
Best match: nsaS\_CC001\_MW2-USA400\_BA000033.2[2715133:2716020:r]RC  
Position: 065-contig\_242\_RC: 71577 ... 72465; Length: 888 bp

Sequence:

TTATTCATCTGGAAATTGAATCGTAAATGTTGTACCCTCATTTTGTTTAGATACGACTGAA  
ACAGGATGGTTTGTGTGAGTTGAAATTTGTTTTACGATAAATAAGCCAATCCCCTTGAG  
TTACTTTGACGCTGGCCATTATAACCTGAATAGCCCTTATCAAATATTTTAGGCAAGTCCG  
CTTCACTAATACCGATACCATTATCTTTTACGTATAATTGATTGGATTGCTCATCAAATTC  
AATCCATATATCTTTACCTCTCGCATACTTAAGTGCATTATTTATTAATTGTTCTATCATT  
AAGAGGTCCATCTAACGTCAGTTAATACTTCGTAATGACAAGGTTTATAATGGATTTTTGT  
TTTTGATCAATAAACTGTATTGAATATTTTATAAATAATTGGGCGAATGATATTATTAATC  
GAAATTTTAGTGACAGAAATATCAGAAGTTTCATTTAATAACTTTAAATAACTAAGTGCT  
AACTTGTATAGTTATCAATTTGAATAACCTCTTGACGAACACGATTCACAACATTAGGC  
TCATCTCTTCAAGTAACAGTTGTGCTGCAGTAATGGGTGTTTTTCATTTGATGTACCCATG  
TTAAAAGTAGCTCTCTACATCATTTTTTATATTCAATTTGTTTCATTTTTAAGCTGATACAAC  
GCAGTTTCTAAGTTTTCAATTTGTTGTTGTTGGCTTATAGTTTTTACAAAACCTTAAATATTT  
AATACCTATGAATATGAGTAATAATAATAAAAATAACGCCAAGTGCTAGTAAATATGCTTC  
TAATGGCAAATGATACAGGTAACATTAAGCCAAATAAAGCAAAAATAACTATGACTA  
TTGCTATTTCTGAGTAATACTTTTAAAGAAAGGTCAT

### > **nsaR**

Function: protein coding sequence; DNA-binding response regulator (core genome, constant)  
Best match: nsaR\_CC001\_MW2-USA400\_BA000033.2[2716031:2716696:r]RC  
Position: 065-contig\_242\_RC: 72475 ... 73141; Length: 666 bp

Sequence:

CTATACTTTATATCCGACATTTTTCTTTGTAATGATAAAAATCATTAAACGCCAATAGTATTT  
AATTTTTTACGCAGGCGTGTTCATGTTAACAGCTAATGTGTTATCATCTATGAAGTTTTCTG  
ATCCCAACATTTTTCAATTAAGCAGTTCTACTTACATATTTATCTTCATTTTGAAATAAT  
AACTTTAATATTTGTAATTCAGTCAAAGATAGCTGTATGTTTTGTTCTTGATACACGACTT  
TTGCTTCATCTAATATTAATGTACAACCTTTAACCGTCAATGAATCATTAGCTACTGACAA  
GTCATAAGTTCGTCTCAATAATGCTTGTATTTTGGCAATCGTTAATGACAAGTTAAATGGT  
TTTTCGATAAAAATCATCTCCCCCATTTGTATTGCCATAATTTGGTCCATATTATCAATAC  
GGGAACTAATAAATAAATTGGCACATTAGATGTTTTTTCGGATTTCTTGACACCAATGAA  
AACCATTTAACGTTGGCAAATTAATATCTAGCAATACAAGCTGAGGTTGATGTTGGTTAA  
AGATAGACAGTATATCATCAAATTGTTCAACGACAATAACACCGTAATTCCATTTTTTAA  
GTTTCAGATGCTAAACTTTCTGCTATAACAAAATCATCTTCAACAATTAATATTTTCAT

## > **Q5HCS2**

Function: protein coding sequence; putative protein (core genome, constant)

Best match: Q5HCS2\_CC030\_MRSA252\_BX571856.1[2797350:2797550:r]RC (completely identical)

Position: 065-contig\_242\_RC: 73166 ... 73367; Length: 201 bp

Sequence:

TTATCCTTTGTTATCTTTTTGTTCTTTAGCCTGCTGCAATGACGGCTCTTGATTTGAACTTT  
CCGTGTCATTTGTATTTGATTTAGTGTATTTGCTTTTTCTTTCTCGAGTTGCTTTTTCTTCG  
TACGTTTACGCTCTTCTAAAATAGACAACACTATAAAGAATATGATTAATAATGGAGATA  
ACATTACTAGTATCAT

## > **phoB**

Function: protein coding sequence; alkaline phosphatase 3 (core genome, variable)

Best match: phoB\_CC059\_M013-ST59\_CP003166.1[2682655:2684079]

Position: 065-contig\_242\_RC: 73564 ... 74989; Length: 1425 bp

Sequence:

ATGTTATCAGTTAAAAAAGCCACAAAATTTGCAGTTGCTAACCTTATTATCGTGTCAACA  
GTTTTTCAGTTCTGTCACACCTGCAATTGCGCAATCCGATAAAAAGTTCTAAAGATGAAAGT  
TTCGCGGTTGGTAATACTAAAAATCCAAAAAATGTTATCTTTTTAGTTGGCGATGGTATGG  
GTCCATCATTTAACACAGCTTATCGTTATTATAAAAATGATCCGCATGCCAAAGAAATGA  
CCCCTACTGCTTTTTGATTCATATTTAAAAGGCACAAATCGTACATATTCAAATGACCCAAA  
ACAGAATATTACTGATTCTGCAGCTGGCGGAACAGCCTTTAGTTCTGGTCATAAGACATA  
TAATGGTGCCATCGGTGTTGACAGTAACAAGCAGAAAGTAAAGACGGTGCTTGAACGTG  
CAAAAGAAAAAGGTAAGTCGACTGGTCTTGTTC AACAGCTGAATTAACAGATGCAACA  
CCAGCAGCATATGCTGCACACGTGACTTCTAGAGATGATAAAAACGAAATCGCTAAACA  
ATTTTATAAAGATAAAAATCAACGGAAAGCATAAAGTTGATGTTTTATTAGGCGGCGGCGC  
TAAATATTTTCGGTAAAAGTAATGGCAATTTAGATAAAAAAATTCAAAAATGATGGTTACGA  
CCTTGCCACAAACAGTAAGGAGTTATCAAAATCTGATAAAGATAAAGTTCTTGGTTTGT  
TGCAGATAAAAATATGCCACTTGCAATAGATGCTTCTAAAGATGAACCATCATTAGCTGA  
TATGCAACAAAGTGCCTTAGTAAGCTTGAGCGTAATAAAAAAGGATTCTTTTTAATGGT  
CGAAGGTGCTTCTATAGATAAATCAGCGCATTCCAACGATATTACAGGCGTTATGTCTGA  
AATGGAAGGTTTTGAAAAAGCATTGATGACGCCATTCAATATGCTAAGAAACATAAAG  
ATACACTTGTGCTTGCAACAGCAGATCACTCTACTGGTGGTCTAACAATTGGTAAAGATA  
AAGGATACGAATGGAATCCTCAACCGATTAAATCGATGAAACACTCTGGATCATATATGA  
CAGAAAAAATGGCTAAAGGTGAAGACCCTGAAAAAGTTATTAATGAAGTTATGGCTTT  
GAATTTTCACAAGATGATATGAAAAAGGTTAAAAAAGAGAATAAAAAGCTAAAAAGACT  
ACTTAAAAAAGAAAAAGACGAAAAATCCGCAAAAGTAGAAACGCAAAACAAAAGCCCTA  
CAACACGCTATTCAGAAGCCAGTAAATGATAAATCTTATACAGGGTGGACTTCCGATGGA  
CATAACAGGCGAGGATGTTAATACCTACGCTTATGGACCTAGATCAGAATCATTTAGTGGT  
AATATCGAAAATACAGAAAGCGCAAAAATAATATTTGATATATTCAAGTAA

## > **slyA**

Function: protein coding sequence; transcript regulator (core genome, constant)

Best match: slyA\_CC001\_MW2-USA400\_BA000033.2[2718827:2719282:r]RC (completely identical)

Position: 065-contig\_242\_RC: 75271 ... 75727; Length: 456 bp

Sequence:

```
CTAGCTTTCTTTTTTCATCTTTCAAATGCTTAATAAAAATCAAAGCCAGGTCGCCCTTTAGCC
AATGCTTCCATCACATCATACCAATCCGAACCGACTTGTTGATATATATTTTGCAATAATT
CATCTTGCGCCTTGTTCAATTCAGCAATGAGTTGATCGCCTTTATCCGTCGAATATAATTT
TTTGACACGTCGATCAGTCTCTAAAACCTTTTTCAATAATGAGACCTTGCTCTTTTAATTTTT
GAAGTGTTCATGTGATCCTTGTTAGAAATTTCTAATATTTCTAGTAATGATTTAATAGT
AATACCAGGTAATTTATTGATAAAAAACAAAAACGATGATGCTGACGGCTCATACCATA
CTTCTCTATAATTTTCATCAGCGGTAGTAATAAACGTTTTATATGCAAATAAAAACAACAT
ATGCTCATAATCGTTTTTATTGGTTCGACAT
```

### > **estA**

Function: protein coding sequence; putative esterase (core genome, constant)

Best match: estA\_CC001\_MW2-USA400\_BA000033.2[2719527:2720288:r]RC (completely identical)

Position: 065-contig\_242\_RC: 75971 ... 76733; Length: 762 bp

Sequence:

```
TTAATCATTACCATCCATGTTATAGCACGCTTAATCGCTTGGTCCCAATATGCATAATCA
TGATCTCCTGGTCCATCTTCAAATTGATAAGGAACATTTTTACGTGATAAATAATCGATAA
AATCTAAGTTGTCTTGATATAAAAAGTCTTGTTTACCACACATAATGAGCAATTTTGGAAAT
TTGTTTATCTTCAGCTACAGCTTTGTCTAGCAAATAATACGGATCATGTTTCAGTTCCTTTA
ACACTTGAAAGATTGCCAATTATGGCCTCTTTTGAAAAATCATTCCACTCTAGATCCATTA
AATTTTGGCGCTTCAAACACAGCAGATAATGGTACAGCTTTGGCAAATTTATCCCCTTGTTG
TAATGCAAATTTAATTGTGCCATATCCTCCCATAGAGTGACCTGCTATAAAAATTGTCATCA
CGCTTTTTGGAAAGTGGAAATATTTGATGAACATAATCATATACTTCCAAAATATAATCA
TAATAGCTATGACCATATGCCATGTTAGCATATGCGCTATGATCCACATTGGGCATAATC
ACAGCTAATTTGTGTTTCATTCGCATACCTTTCTATGCTTGTATATCTCATATATGTCGTTTC
ATCACTTGATAATCCATGTAACAACATTAAGTTTTTAATGGTTTAGCAGTTATATCGTTA
TTAAAGAAGCTTTGATCTTCCGGTAAAATGACTGTCAAATTTTATGATGCATACCAATTGTTG
GTGAATGATAGTTTAAATGAAATATAAGCCAT
```

### > **clfB**

Function: protein coding sequence; clumping factor B chv

Best match: clfB-COL\_AJ224764.1[28:2769]RC

Position: 065-contig\_242\_RC: 76848 ... 78918; Length: 2070 bp

Sequence:

```
TTACGCTTTTTCTTTATGATCTTGCTTGCGTTTTCTAAACAATAGTAATGATCCTAATAATG
CCATCATTGCACCAAATAAAGTTGCATTTGTGTTTTCGCTCTTATCTCCTGTTTCTGGTAAA
GCATCAGTTTTGTGTTGTTTTGATACCTTATTAGAATGGTTTACTTCACCTTAGGATTTGA
TGGTGCTTTCTGTTTCAATTTTGGTGGTGTAACTCTTGAATCGGAGTCACTATCTGAATCC
GAGTCGCTATCCGAGTCTGAGTCGCTGTCTGAGTCTGAATCGCTGTCTGAATCCGAATCG
CTATCTGAACCTGAGTCGCTGTCTGAATCCGAATCCGGATCCGGGTCTGGGCTTGGTTCTG
GATCTGGCGTTGGTTCCGGATCCGGGTCTGGACTTGGTTCTGGGTCAACCGGTGGCCCTG
GAGTTGGGTCTTTCCGATTTACTGCTGAATCACCATCAGCACTTCCACCACCATAACGTAC
AACATTCTCATTATTCCAACCGAAAATACTGTAGTCTTTACCTGTCGCTGGGTCAATATTT
TCTTGAATAACCTGTGTTTTCAAGTTTTTACCAGTATTATCATAGTGACCTTCCACTAATA
CAACATACGTTTTAGTAATATCGCCAAAATTAATACTTGCTACATTTTGGTATTTATAAGT
GATTTTATCCTTAAACTCATTTCGTTACTTCTTTAAGGTTAGAGTCATTTGGATCTGCATAGT
AGCTATCTGATAATTTAGATGTATCATTCACTTCAAAAATTCTCAGTTTTGTATCTGTAGC
ACTTACTTTACCGCTACTTTCTTCGATTTTATCTTGGTAACTTTAATATACACCCATGTAT
TACCTAAAACCTCGTTGCTTAGGGTTAAACAATACTGTTTGCTTGTATGTGTTTTGACCTGA
AGCTGTATCTACACCAATAATTTGAGAAGAAATGTTTCGCGCCATTTGGCTTATCAATTCCT
GCAATTGGCGAACTATAGTTATAAGTAATTTTATTATTAACATTTTCATCCGCAATATTAA
```

TATTTGCATCATATGTTCCCTGATTTAGGTGCCTTTGCTCTGTCTGTAAATAATGGTAATGA  
AAATTTCCCATTAATATTTTGCTTATCATTACATAATCTGTAAAGACAAATGTATATGTC  
TTAGTCAAAATATCATATGTCGCTTTTGCTACAACCTTCATTTTTACCGTTTACTATATCTGC  
AATTGGCATCGTATTATTGAATTAGAGTAATCCACGTCTCCATTACCAGTTACACTATCT  
GGTAACTTCGCTGTAAAATAATCCCCTGATTTCACTTGTCCAGTCACTGTAAAGTTTGCCG  
CCATAAAAGTATTACCACTTTGGTTAGGGTCAAATGTAGTCTTTTCTAATTGAAAATCTTT  
TGCCGTAACCTTTATCATTACATTTGTACCTTTAGCATCAGCAGCATTACTACAGGTTCA  
GCAACTGCAAGACTACGTACAGCTCTCGTTCTAACACTTGGTTTACTAGTTCCCTTGCGCAT  
TGAAATTGTTTGTGGTGATGATTGTGGTAAATCTAATGTTTGAGGATTTTAAAGCTCACT  
GTTTGTGCTATGCTATTAGCATCATTTCGTTGTTTATTATCTACTTGAGAATTTGCTTCTT  
GAAGAACAGTTTGATCTTGCATTTTTGCAGCAGTTGCTTGATCTTTAATTGCCGTCGGTTG  
AGGTGTTTCATTTGTTGAAGCTGGCTCTGTTGTAGTGGTATTGCTCGTTTGTGTAGACATT  
GGTTTTGCTGTGCTATCTACATTCGCACTGTTTGTGTTTGCCTAATATCAGATGTATCATT  
AGCCGTTGATTTAATTGAGGTGTTTCTATCATATTGTTTTTTTCGGAATCTGCACCTGCAT  
TATTTTTCGAAGATTGCGTTGTATCGTTGATTGTTCTGAAGCTTGTGCTTGATGATTGCCT  
ATCCCAAATAGTATAGTTGCCCTACTATTACTGATGTGGTACCTACTGTAAAACGTCTAA  
TCGAATACTTATTCTGCTTATTTCGACAAATAATCAATTCTTTTTTTCAA

### > **arcR**

Function: protein coding sequence; putative transcript regulator (core genome, constant)

Best match: arcR\_CC008-ST72\_21259\_AFTS01000029.1[185553:186257]RC (completely identical)

Position: 065-contig\_242\_RC: 79266 ... 79971; Length: 705 bp

Sequence:

TTAAACACATACATCATTGAATAAATGTTTGCTTACTAACCAATTTTTATGATCTTTAACA  
ACAAGTTTTTCATCTTTAAGTTCATGAATAATATGACCAGCTGTTTCCCGGGAAATCCCAG  
CCATATCACTCATGAGTTGAATAGTTAAAACTGTTTGATTTCATAAAATTCATCTTGATC  
GTACCCTACTGTCTGACATAGATGACATAACAATTTAATAATTCGATCTTTAGCAAATTTA  
CTTGTTAATGCCATGTTATAGTTTCATGTGTTGCTGCTCATTATCATTATTAATGCAAAAA  
GTGTCAAAAATATATCATCATTAGCTTTGCACAAAAAGGCCATCAATTCTCTAGGCAATC  
CAAGAACTGTACAATCGGTTAATGCTGTACACAATTCGTTAACCTCTTTCGGATGAAATA  
AGTTACTGATTGGAAATAATACTTGTCTTTATTAATAAATAACGATATACATCTCCATTTTG  
ATTGTAATGTTCTCTAATAATGTTACCTTCAATTAATAAAGTAAATATTGCTACTTTCTTGT  
GGCGAAAAATAAATAACTTGGCCTTTCGTATAATGTCTGACAAAACATTCACTTTGATAT  
GGTTGTAATATACTATATGGGATATTAATGTAATCTGCTAATGCCTTTAGTTCATGTTCTA  
ATTTATTATTTCTACCCAAAATAAAGTTTTCTGTCAT

### > **arcC-L2**

Function: protein coding sequence; carbamate kinase/locus 2 (core genome, constant)

Best match: arcC-L2\_CC001\_MW2-USA400\_BA000033.2[2724280:2725221:r]RC (completely identical)

Position: 065-contig\_242\_RC: 80069 ... 81011; Length: 942 bp

Sequence:

CTACATGTGAATGTGTGTACCTTTATTACCAATCAAAGCTTCGTATGCCTGCTCTAAATTG  
GTAATGATAACTTTTTTGTTTTCCCACTTTCAACAAATCGTATCGCAGCTTCTATTTTTGG  
CAACATCGATCCTTCCGCAAACCTTACCTTGTGCCGCGTATTTTTTCAGTGTGCTACATCA  
ATATCATCGATTTGTTGTTGATTAGGTTCAATAAAGTTAATAAATACATTTTCTACATTCG  
TAAGAATCATTAAAGGTATCTGCTTCAATCAGCGTTGCTAATTTCTCACTAGCAAATCTTT  
ATCTATAACCGCTTCAACACCTTCATAGGTATTTCTTTTTTTATAACTGGAATACCGCCA  
CCACCGCATGCAATGACAATATTTTTACCGTCTGCTAAAGTTCGAATTAAGTGGTGTCTA  
GTATAGATTGAGGTAGTGGTGACGCAACTACTTTTCTATAACCACGTCCTGCATCTTCTTT  
AAAGACTGAGTCTGGCTGTTCTTTTTGTAATTTCTCAACTTCTTCTTTCGTATAAAAAGGA  
CCAATTGGTTTGGTTGGGTTATTGAATCGTGGATCATCTTTATCTACTTCCACACGTGTAA  
CGATTGTGCCCTACAGTTCTATCACTATTCATTTTCAGTTAAAATGCGATTGATTTTCAGTTT  
CAACCAATAGCCTATCATACCCTGTGACATTGCACCACAAGTATCCAATGGCATTGCCGG  
CGTTGTGCTACTGTTTCGATTTAGCTTGTGGATTAATAAAGTTCCTCAATTTGTGGGCCATTA

CCATGTGAAATGACAATACGCGCTGGTGAATCAAATAAAGGTTTAAGGTTTTGCATCGCA  
CGTCTAATAGCTGTTTGTGTGCTTCAGCTGTTGCTTCTTTTGTCTGTATCGCATTACCGCC  
TAATGCAATGACAATTTTCTCTTTCAT

### > **arcD-L2**

Function: protein coding sequence; arginine/ornithine antiporter (core genome, constant)

Best match: arcD-L2\_CC001\_MW2-USA400\_BA000033.2[2725238:2726668:r]RC

Position: 065-contig\_242\_RC: 81027 ... 82458; Length: 1431 bp

Sequence:

TTAAAAAACATTTATCGTTCCCATCAATAACTTAATTAATCCGATAACTGCAAGTACGAT  
ATAATCATAAAAAGAATATAGTCTGATTTAATCAAACGTGTCTGATTATTCTTTTGAACG  
ATTGAATAACAAGAAGAGCTGGAATATAAAGTAACATCGTCAATAATAAGTAATTGAT  
ACCTGCTGCATATATAAGCCATATAGCATAAATTGAGGCTATGATGCCAATCGTCCATTG  
CTTAGTAGTTGCTTGCTGTGATGCTCTAAAGTGTATTTAACTTGGTAAAATGCACTGAAC  
ATGTAAGGGTATAAAATAGCACTTGATGCTAGTGAAAATGCAAATTGATACGCACTCTGT  
GTAAATAGCATACTTATTAATAAATAATTGTACTAATATATTGGTAATAAGCAGTGCATTT  
ACAGGTGCTCCATTTTTATTTTCTTTAGCAAACCACTTTGGAAATAATCCATCTTTTGCAA  
CAATGAAAGGTAATTCACCAGCAAGCAATGTCCATCCTAACCATGCACCTAGTACCGAAA  
TAATTAACAATATTTACAAGTGTAGATCCCCAACCACTACAATAGTTGCAAGCACCT  
GTGCCATACTTGGCGAATCTAATTGCGAAATATGATTTTGCAAAATCACGCCTTGAGCTA  
ATACAGTTAATAAGAAATAGATAATTAACCGATATAAGTCTATAACCGTGGCACTAC  
CTACATCTTTTTTATTTTTAGCTCTACTAGAAAAAATTACTGCACCTTCGATACCGATAAA  
CACCCAACTGTCACTAGCATCGTACTTTTAACTTGGCTCATTGTGCTCGCCCACTAAAT  
GGCAATACACCCTCTGACGTCATACCGAAAAAGCCTGTTTTAAAAGTGTCAAATTGAAT  
GCAATTATCATGCATATGATTACAAGTAAAATCGGTATTAACCTTTGCAACAGTAACAATA  
CTATTGATAAATGCTGCTGTTTCAACGCCTTTTAAAATCAAGAAATGGACACCCCAAGAGT  
AGTAACGAGGCGACAATAACTTGGTAATGTGTTGCCTCCTTTAAAATCGGGAAAAAG  
TTACCTACTGCTGACATCAATAGTGTTCATAGGCAACATTGCCTAAAAACGCTGAGAGC  
CAATATCCCAAGCACTGATAAATCCTACAAAATCGCCAAATCCTGCTTGAGCATAACTA  
TAAATACCACCGTCTAGCTCCGGCCGTTTATTGGTTAAATTTTGAATAACGAACGCTAAT  
GAAATCATTCTATAGCTGTAATAATCCAACCAATAATAATGGCTAATCCACCGGCTTTA  
CCGCCCATATCAGACATTATATTGAACGCACCGCCACCAATCATGGATCCTATAACTAGT  
CCAATTAAGAAGATTTACTGAGTTTGTATCTCCTGATTTCGTTTCAT

### > **arcB-L2**

Function: protein coding sequence; ornithine transcarbamoylase locus 2 (core genome, constant)

Best match: arcB-L2\_CC007\_TCH959-USA300\_AASB02000025.1[5681:6691:r]RC

Position: 065-contig\_242\_RC: 82548 ... 83559; Length: 1011 bp

Sequence:

TTAACTTCCCAATGTTGCTGCCATTACTGCCTTAATTGTATGCATTCTATTTTCAGCTTGAT  
CAAACACTTTTGAATGTTCACTTCTAAATATTTGGTCTGTAACCTCCATTTTCAGCTAATCC  
ATATTTTTCATAAATTTCTTGCCATAAAGTGTATTTGTATCATGGAATGCTGGTAAACAA  
TGTAAGAATATCGTTGAATCTTTACCTGTTAAATCAAACATCTGTTGATTCACTTGATAGT  
CTTTTAATAAATTAATACGTTGTTCAAATTCACCTTCTTCACCCATCGATACCCAAACATC  
TGTATATATAGCATCTGTATTTCAACTGCTTCTGCAATATTATCCGTAATCATGACTGAA  
CCACCATATTGACTCGCTTTTTCTTTTGAATATCAACATATGCCTCTTTTGGATTTAATGA  
TTTAGGTGTACAAATCTTACATTAACACCTAACATAGCACCTGCTACCATTAATGAATGC  
GCAATATTATTACGTCCATCTCCAACGTAAGTTAAGTTTATTCCTTCTAGATATCCAAAAT  
TCTCTTTTATTGTCATAAAATCAGCTAACATTTGCGTAGGATGCCAATCGTCTGTTAATCC  
ATTCCACACCGGTACACCAGAGAACTTCGCTAAATCTTCAACAGCTTGTTGTGAAAAACC  
ACGGAATTCAATACCATCGAACATTCTACCTAATACTTTCGCAGTATCCTCTACAGATTCT  
TTTTTGCCTAATTGAATATCATTTTTCCCTAAAAATTCTGGATGCGCACCTAAATCAATAG  
ACGCAACTGTAAACGCTGCACGCTTCTCGTTCGAATTTCTTTTCGAATAGTAGTGAATATT  
TTTTCCAGATAAGTAGTGATGCTTAATACCGTTTTTCTTATACTCTTTTAATGTAATTGCAA



AATCAATAAGTCCTTCGAATTCTGCTTTGGTAAAATCACTTTCTTTTAATAATGATCTGCC  
TTTTAAATCATACGGTTTTTTGAATTTCTGTCAT

> **arcA-L2**

Function: protein coding sequence; arginine deiminase (core genome, variable)

Best match: arcA-L2\_CC001-ST772\_118\_AJGE01000017.1[67601:68836]RC (completely identical)

Position: 065-contig\_242\_RC: 83591 ... 84827; Length: 1236 bp

Sequence:

TTAAATGTCTTCTCTGAATAGTGGTTGACTCATACATCTAGGGCCCCCACGTCCACGTACC  
AGCTCGCTACCAGATATTTCAATGACTTTTTATGCCTTTTTGTCTCAATAAAATCATTTCGATA  
CATAGTTTCTATCGTAAGTCACTACAACGCCTGGTCTTATACATAATGTATTTGAGCCATC  
ATTCCATTGCTCTCTAGCACCATCAATGACATCACCATTTCCCTGTTGGAATGAATTGGATA  
TCATCTATACCTAGTACGTCTTCTAAAGTATCTTTTAAATGACTAGATTGTTTGATGGCAA  
TATCTTTATTTACGTCATCATATTCAATAAATAAATATATTTCATATTGCCTTCTGCCTTTAAA  
ATGGCTGAATGCATTGTAAATTTGTCATAATCTATCATTGTAAATACTGTATCTAAGTGCA  
TAAAAGTTTCGACTAGTTGGAATTTCAATTGCTACTACTTTTTTAAACGTCGCCTGCGGATT  
TTCAAAAATACGTCGCGCTAACTTTTTCAATAGCTTGTGCAGATGTACGTTCTGAAACGCCT  
ATAGCCAAGACATCTTTAGATAAAAACAAGTTCATCGCCGCCTTCAATATTGAATGGGCAA  
TCTCGATCTAACCAGATTGGAATATTCGCATCTTTAAATCTAGGATGATGCTTTACAATAT  
ATTGAATAAATATTGATTCTCGTCGTCGTCTCCAGAACATCCGATTGATTGTTATAACC  
GTGTCCTATTGAGGCTTGTGGATCTCTAGTAAAATAAAGGTTTGGCATTGGATCTAAATA  
GAATGGATACTTATCATCCATATACTCTACTAGATGTGTACATTTCCGATTAATTTCTTCC  
TTACGTACCCTGACATTATTTTATCTACAAGTTCCTTGATTAGAAAGTGTGCGAAAATAATG  
CCTTAATTTCTTCTTCATGACCTAATATTGTTTTTTTAGACTCTGCTAATACATCATCAATA  
AATTCACCTTCTTACTTGAGGATTTTCAATACTTTCAGCTGCTAACTTCTCAAGGTAAGTA  
CTTCAACACCCTCTTCTCTTAGCACCTGTGCAAAAATGGTCATGCTCTTTTTGAGCTACTTCT  
AAATATGGAATATCATCAAATAGTAATCCATCTAAATAATCAGGTAATAATTTTCTAAT  
TCTTTTCCAGGACGCTTAAGTAACACAGTTTTTAAAGCTCCAATTTTCGCTATTTACTTTAA  
TTGGACCATCTGTCAT

> **argR-L2**

Function: protein coding sequence; repressor of ornithine operon (core genome, variable)

Best match: argR-L2\_CC012\_21266\_AFTT01000014.1[8206:8655:r]RC (completely identical)

Position: 065-contig\_242\_RC: 85173 ... 85623; Length: 450 bp

Sequence:

CTATTTAAATAATTTTGCATATACGTATTCTGCCATATCATTTGAGGCAGTTAAGATTAAT  
GTAGTGTCAATTTCCACTCACCGTACCTAATATCTCTTCTATATTTAGCTGATCGATAAAAT  
AGTTTATGCCTTGGGCGAAACCAGGTGAGGTTTTGACGATAATGTATGAACCATTGATGA  
TTGAACTTAGAACTTCATGTTTACAATAGTGTCTAAACTTTTCTCTCATCTCTTGTCTGTT  
TGATTATTAATAGCTTTATAAATCCATGTTTACAATCGATAGGGACACGATATATATTA  
GTTCTTTCAAGTCTTTAGCAATTGTTGTTGCACTATATCTTACACCAAATATTCTTCAATA  
TATGAAATGATTTGTTCTTTTTATAAATCTTATGCTTTTTAACTATTGTAGAAACAATTC  
TAATCGTTTACTTTTCTTCAT

> **tx\_aur**

Function: rho indendent terminator of aur

Best match: tx\_aur\_CC001\_MW2-USA400\_BA000033.2[2730074:2730143:r]RC (completely identical)

Position: 065-contig\_242\_RC: 85863 ... 85933; Length: 70 bp

Sequence:

CTAATTACAAAGAGAGGGTATACCTACAAAGTCAATTATCAATGTAGGTATACCCCATAT  
ATAAGCTGTA

> **aur-g1**

Function: protein coding sequence; aureolysin/super group 1 (core genome, variable)

Best match: aur-g1\_CC001-ST772\_118\_AJGE01000017.1[64909:66438]RC (completely identical)  
Position: 065-contig\_242\_RC: 85989 ... 87519; Length: 1530 bp

Sequence:

```
TTACTCCACGCCTACTTCATTCCATGCTTCATACACCTGTTTCAGCTGTTTGCTCGTCATATA
AATCTTTAGCCGCTTGGTATAATGCATCTTTACAATCTTTGAAGTTTGAATTACTTGTTAA
GTATTCCGTTAATGCTCGGTAGTAAATTTGTTCTGATTTAGATTTCCCTATTGCTTGAATCA
CGTTATAAGCTGCTTTATTTGGAATTCCAGAATTCGTATGTACGCCACCATTATCTTTTTTC
AGTGAATACATAGTCTTTTCATATGAGCTGGTTGACCAAATTGTTCTGGGTTTGACATGCTG
CGTAAAGCGTCCCCCTCTTTTCCAGGTGTGTAGACATCTTCACCCATTAAGAAATCCTCGT
CATCTACAAAGTATCCAAAAACATCTGAAAAGCTTTCATTTAGAGCGCCTGACTGGTCCT
TATATTCTAAGTTCGCAGTCTCTTGTGTCACACCGTGTGTTAATTCGTGTGCCACTACGTC
ATTTGCACCCGATAAACTTGTGAATGTGCGACCATCACCATCACCATAGATCATTTTTGTCA
CCAATCCATGCGGCATTATTTCTGTTATCTTGACCACCGTAGTTATTAACATGCGTTAATG
AAACAATTGGACTACCTTGGTTGTCATATGATTCACGACCAAATGTGTCTTTGTAATAATC
ATATGTTTGTAGCGTAATAATTTGCATCTACGCCAGCACGTTGCTCATCTTTTACGAAG
TTTTCATCTTCATTAGTAATCAATGTTGCTTGACCTGTTTGATCATTAAAGCTAAATGCTG
ATAATTTACCTTGATGCGTTAAATCTTCTAGGCTAAATCCACCGTCAATACTATTGATATT
GATATCTTTTGTATCGCCAAGTACACCTTTTCCCTTACCAGTTTCTGCAGCTTCTTTAACTA
AGTTCATTTTTTCTAAAATTTTCGCCAGTTTGAGCATCAATTTTAACTTTCCAATGTGAAATT
TCTGGTGTCACTGTAATTAACCAACATTATAAACGTATTTATTACTGTCACCATCGATTT
CAACTTTGTTTTCTTTAATGACTTTATCTTTAAGATTTTTTCGCTTTATGCTTATCAATCTTA
ACTGCTTTAAATGCTTTGTGCGGCTGCGTCATCTTTACTTAATGTCACTTTATTCGTTGGCTT
TACTTTCTTCGCATCAGTATCGCCATTGATTAACGACTTTCCCTGATTTGTCTGCGTGT
ACTTTCACTTCTTTGTCAGGTGCATGAACACCATCAACACTCGGTTGCAATGTGTAATGCG
TAAATCCCTTTTTATCAGTTTTTACATCAGTAACAGCGTAATCTTGATAAATATTTTTTACA
TTTTCGGATTTAGGCAATTCTTTAATGCTTTGACCGCATCACTCTTTTGTAGTACCTCAAA
TTTAATATCAGAATTAGCTGGTTTATTGTTTGAATCAATCGCTAATGCTGCTGGTGATAAA
GTGCTCAACAATGTTACTGCTGCCATACTTGTAATGCATATCTTGAAAATTTCCCTCAC
```

### > tx\_isaB

Function: rho independent terminator of aur

Best match: tx\_isaB\_CC001\_MW2-USA400\_BA000033.2[2732087:2732151:r]RC

Position: 065-contig\_242\_RC: 87876 ... 87906; Length: 30 bp

Sequence:

```
TTATTTAATAAAAAAGACTAGAAATGCGGTA
```

### > isaB

Function: protein coding sequence; immunodominant antigen B (core genome, variable)

Best match: isaB\_CC001\_MW2-USA400\_BA000033.2[2732153:2732680:r]RC (completely identical)

Position: 065-contig\_242\_RC: 87942 ... 88470; Length: 528 bp

Sequence:

```
TTATTTACTTGTGTTTGTATGGTGTATGTCCAACCTGTTACTTCGACAACCTCTATTATGATCAA
CGACAAACCAGATGCCTAATGTCTTTTTAGCATTTTGATAGTAAAAAATACCGCTATCAG
CTTCCTTTGTTTTACCATTTTCTTTTTTCAAGTCCTTGCCATAAGCTTTTTGGATATCTTTTA
ATGAAATATTATTTTTAACTACAAATTGCAATTGACTTGCTTCGTTTCCTTTTGCAGAAAC
ACCTTTAAAAGTTTGATCATATTTCTCTACTTTTTTTATCGTATTCGTTTTAGCTAATTTAA
TACCATTGAATTTACATTATCATACTTAATCGCGTTAATAAAAATTCTTATCCAGAATAAA
ATTAGCATTATTACCAATATAACCATTATAAGTATAATATGGGGTTATTGCTGCCTGTGCC
TGTTTACTTGTGGCGCCGAATTTTCAACAACCTGTTACTCCAATCAGTGTGCCCAATGCTA
ATGTTGCTGCTACACAACTTTACTGGTTTTATTCAT
```

### > Q6G635

Function: protein coding sequence; putative protein (core genome, variable)

Best match: Q6G635\_CC001\_MW2-USA400\_BA000033.2[2732938:2733396]

Position: 065-contig\_242\_RC: 88727 ... 89186; Length: 459 bp

Sequence:

```
TTGAAAAAATTCTTATTACCATCGTAATTATCGTATTAATCGGAGCACTTGGGTTTCGCAA
TTTATGCTGCAATAAATCATTCTACATCATCAAGTAATAACCAAGAACAAGAAAATAAAG
CTACGCATAAAAAGACAGAAACCGAAGAAAATGATCAACAAGATGATAGTGCAAACAA
AGCAGATAAAAATCAAATAAATGGCAATAACGATACTAATGACAATCAACCATCTTCAC
CGTCAAATGTTCCCTAACAACCATTCAACAGTACCATCGAATACGCAACCAGCTCAGCCAA
AAGACTCAAATTCAAATAAAAATAATACTCACGATGGTGGCAGTCAATCGTCAACAAAC
AACCAAAATAATCAACAACAGAACACACCACCTGCTAATAAATCAAATAATACCAATAC
GCCTTCTAAACAACACCTCAAGCACAATCACCTAAAAATTA
```

### > **txbi\_Q6G635**

Function: rho independent terminator of Q6G635

Best match: txbi\_Q6G635\_CC005\_Mu50-VRSA\_BA000017.4[2794946:2795016:r]RC (completely identical)

Position: 065-contig\_242\_RC: 89220 ... 89291; Length: 71 bp

Sequence:

```
ATAAATTCAGAAAAACAGCAGTGAGATATTTTTCTATTTGAAATATCTTACTGCTGTTCTT
TATTTGCATA
```

### > **manA2**

Function: protein coding sequence; mannose-6-phosphate isomerase/locus 2 (core genome, variable)

Best match: manA2\_CC001-ST772\_118\_AJGE01000017.1[58148:59086:r] (completely identical)

Position: 065-contig\_242\_RC: 93341 ... 94280; Length: 939 bp

Sequence:

```
ATGGCATTATTTTTACAACCCGTTTTTAAAAACAGAATTTGGGGCGGTCATGCATTA AAA
GCATTTAACTATGATATCCCTAATGAAACA ACTGGTGAATGCTGGGCAATTTCTGCACAT
CCAAATGGTCCTAATAACAATTATCAATGGTCCATACAAGGATATGACCCTAGATCAACTT
TGGTCACAACATCGTGAATTATTCGATAATGATTCACGAGATAGTTTCCCTCTGCTAACTA
AAGTATTAGATGCCAATGATAAATTATCTGTTCAAGTTCATCCAGATGATGACTACGCTTT
AAAACACGAAGGCGAACTAGGTAAAACAGAATGTTGGTATATTTTAGATGCAGCCCCAG
GTGCTGAAATTATATATGGCGTACATGCACATAATAAACAGACGTTAATCGACATGATTG
ATAATCATGAATTTGACAACCTTTTCAAACGTATACCTGTTAAGCCCGGTGACTTTTATTA
TGTTCCCTGCTGGCACTGTCCATGCCATTGGATCGGGTATTTTAATTTTAGAGACACAACAA
TCATCCGATACGACATACCGTATTTATGACTATGATAGACGAGATCAAAAATGGTCAATTG
CGTGATTTGCACTTAGAGCAAAGTAAAGATGTGATTGAATTAGGCAATCATGAACCAAT
ACTACTCCTATAACA ACTCACATCGACACACACTGTA ACTCAATTTGTAGATAATCAA
TATTTTGCAGTATATAAATGGGATATTCATGGAGATTTAAAATTCAATAAACACATGCTT
ATTGCTTAGTTACTATTATCGATGGTACTGGTACTTTAACAGTAAACGATAAGCACTATGA
CATCCAAAAGGTTCTAGCTTTATTTTAACTACGGAAGACGAGGATATTCATTTGTCCGT
AATATTAGTGCTATAGTAAGTCATCCTGGATAA
```

### > **txbi\_yhgE**

Function: bidirectional rho-independent terminator of yhgE

Best match: txbi\_yhgE\_CC001-ST772\_118\_AJGE01000017.1[58031:58095]RC (completely identical)

Position: 065-contig\_242\_RC: 94332 ... 94397; Length: 65 bp

Sequence:

```
CTAAAAACATAAAAATCCACACATTAAGGAGCTATAACCTAATGTGTGGATTTAATTTTT
ATTCT
```

### > **yhgE**

Function: protein coding sequence; membrane protein involved in phage infection (core genome, variable)

Best match: yhgE\_CC001-ST772\_118\_AJGE01000017.1[55065:58037]RC (completely identical)

Position: 065-contig\_242\_RC: 94390 ... 97363; Length: 2973 bp

Sequence:

```
TTATTCTGTAACGTTACTTTGGTCAACTTTTTTCAGATACGCGCTTCATCAATGGATCTGTTA
CAGGTTTTAAAATTAACCTACAACGAAGAATCCTATGCCAAATAACGTTAATATAATTA
ATTTTGTAATTAGGATTTCCGGAACAATACCGCCTACTGTTTCACGTAATGAATCAATTGC
ATACGTAATGGTAAGTATGGCGAAATGTTTTGGAAAAATTGTGGCGTAGTTTGAATTGG
GAATGTTCCCTCCACCACCTGCAATTTGTAATACAAGCAATACGATTGCAATGGCTTTACCT
GGATTACCAAGTAATGATACGCACGTATATACGATTGAGTTGAAAATAATCGAACAGAA
AATCGTTATAAGTACAAATAATACAGGTGACTCAACTCCTGCTTTTAGGATTAACAAATC
TCCAACCGATACAATGAGTGCTTGCAACATACCAAGCATTATAAAGAATCCTGCCTTACC
TAAGAACACTTGTCTTGTCTGTTAAGACTGACTCTAGACTCTTATGTTTATTATCAACCGTT
AATAAACTTACCATCAAGAGTGCACCTACCCATACTGACAGTGCAGTATAGAATGGTGTG
ATACCTGAACCATAATCCTTAACTGGGAAAACATCAACAGTCTTCTTATTAATAGGATTT
GCAATAATACCCGCTTGCTTTTTCAAATCATTCTTAAAGTGTGTGCGATTAATTTGTGCGACTG
CATCATCTTTGTCTAATTTCTTGAAAATTTTATTTCGCTTTTTTCAAATCTTTTTCAACATCA
GGCAATTTATTTTGAGAAAAATCAGCTAAATCTGATAAAGCCTTTTTTCGCTTGTGGCTGAT
TTTTATTTAGTAATCCTACCGCTTGATCATAACCATTTAATAACGTTGGTAAATTTTTATTTC
ACACTTGCTGTGCGCATTAGTTAATCGCTGTTCCAACCTGTGGTAAGTCATTGCGCACAAAGT
TAGCAGCTTTAGCTACATCACTTTTCACTTTCGGGAAGTTTGCTTGAGCATTTTTAACAGC
ACTAATGTATTGTTGTTCAATACTTGGTAATACTGTTTGTAAAGCGATCAATACGTGTTTTA
CCATTTTTTAAAATAGCTTGTCCACTGTTAATGACTTGATCAATTGTATTTAATTTAGACT
GAACATTGGATAATGCAGTTTGCCTTTGTTCAATTCATCCATAATACGTTGTGATATTGA
TACTAAAGAGCTGTTAAGATCTTTTTTAAACATAATCTCTAAATGATGATAATGATGAATCT
AGTTTTGAAAGTTGATCTAGTAATTTAGTAGCTTCAGCAGTTCCTGAACTACCATTCTTTA
ATGCATTGCTTAATTGATTAACCTTAATGATTCATTAATTCGATTATTAGCTGCTTTT
ACCTTATCAATTTCTTTTGATAAATCAACATTTTCATTCTTCTCAATCTCTTTTAAATGTATC
GATAAATTGTTGATTATATTGCGTTGTGTATTCTAAACCGGACTTAAACATTATCTAAAGAC
TCTCTAAAATCAGAAGGCTTGCCGATGCTAAAATGCCATACGAAATATTACGTAATGTC
TGACTATCTTTTTGTGCGGCTTTCGCTTGGGTATCTAAATTATTTGATAATGATAATAAAG
AGCCCGTTAATGCCGCTTCCATTGATTTAACATCTTTATCTGTAATGTTTTGTGTGTTCTCG
TTAGCTGTGCTGACTTGTGTTGTTGTTATATCTGCAAACTTTGACCATCTTTTTTCCCGCT
TGTACTTTGTGGTGTAGTCGATACAGGCGCATTATTACTATTTGGTGCGGTATTTTGCGGA
ACATTATTATTTGGTGCAGTATCGCCACTTGGTGGCGTGTGATGCTACACCATTACCAGCTG
CAGGTGCACTATTTGATGTTTCGTTGTTGCGCCGCGCTATTTTGAGGAATCTGTTGCTGGTT
TCTTCGATTTAAATCTTGCGCGCGTCGAATTGCATCTTGATAATCACCGACTCTACTTCTA
ACTTGTGTGACTAAGCCTTTGGCATCATTTAACTGTCCATTAGCTTGATCAATACCTTGAC
TCGCAATGTTAAGTCCTTGATTAATTTTAGGGAACCTGCGCTGGCACGTCATCAGCTGCAA
AATTTAACGCTTTTTCAATTTTCGGCATATAATTATTTAAAGCTAATATCAACTTAGCCTTT
TCATTAAGTTGCGGAATAGCACCATTGACTTCGTTAATTTTTTCTGAGCATCTAAAATAT
CACCTTTATAATTTCTAGTTTTCTAAAATCATTGGCATATTTATCTAAATCCGCTTGGTGG
TTATTCAAATATAACAATTTTATTGCAAAGTCATTAATCTTAGGTAAGCTTTATCTGCTG
AATATACCGCATTTTTTATCTTGTTAATTGTCGGCACATTTTCTTCAATAGTTAAACCTGCT
TTGTTAGCTTCTTCTAATAATGCTCGAGTACTGTTTTATTAATTTGTTCAATTCGCTTTTTTC
AACGACAACCTGACGAACCAGTATCTGTTAGCTTAGACGCAACAGCGTTAATCTTCTGATT
CACCTTAAATTTCTACATCTGCTTTTTGAGGCTGCTTACGTAGTGTCCCGGTAATTTTCATGT
GTAAACTTAGATGGGATGTAAATACCTGCAAAATATTTACCCATTTTTATCTCATGATCAG
CTTCTCTCTACTTACAACTGCCAATCAAACTTTTTATTTTTCTTGAGTGTATTAACCATC
GTATTACCGACATTAACCTTTTTTCCCTCTGATTGTGTGCGCTTTATCTTCATTAACGACTGC
GACCTTGATGTGTCCCGTGTGCCATATGGATCCCACATTGCCCATAAGTTAAACCAAGC
GTAGAACGATGGCAAAATAGCTAAGCCTGCTAAGATAATCCACACAGCTGGCGTCTTAGC
TACTTTCTTCAGATCCATTTTAAATAATTTAAATGCGTTCCTTCAT
```

### > Q5HCQ3

Function: protein coding sequence; secreted N-acetylmuramoyl-L-alanine amidase (core genome, variable)

Best match: Q5HCQ3\_CC001-ST772\_118\_AJGE01000017.1[52995:54854:r] (completely identical)

Position: 065-contig\_242\_RC: 97573 ... 99433; Length: 1860 bp

Sequence:

```
ATGCCTAAAAATAAAATTTTAATTTATTTGCTATCAACTACGCTCGTATTACCTACTTTAG
TTTCACCTACCGCTTATGCTGATACACCTCAAAAAGATACTACAGCTAAGACAACATCTC
ATGATTCAAAAAAATCTAATGACGATGAACTTCTAAGGATACTACAAGTAAAGATACTG
ATAAAGCAGACAACAATAATAACAAGTAACCAAGACAATAACGACAAAAAATTTAAACT
ATAGACGACAGCACTTCAGACTCTAACAATATCATTGATTTTATTTATAAGAATTTACCAC
AAACCAATATAAACCAATTGCTAACCAAAAATAAATACGATGATAATTACTCATTAAACAA
CTTTAATCCAAAACCTTATTCAATTTAAATTCGGATATTTCTGATTACGAACAACCTCGTAA
TGGCGAAAAGTCAACAAATGATTCGAATAAAAAACAGTGACAATAGCATCAAAAATGACA
CTGATACGCAATCATCTAAACAAGATAAAGCAGACAATCAAAAAGCACCTAAATCAAAC
AATACAAAACCAAGTACATCTAATAAGCAACCAAAATTCGCCAAAGCCAACACAACCTAA
TCAATCAAATAGTCAACCAGCAAGTGACGATAAAGCAAATCAAAAATCTTCATCGAAAG
ATAATCAATCAATGTCAGATTCGGCTTTAGACTCTATTTTGGATCAATACAGTGAAGATG
CAAAGAAAACACAAAAAGATTATGCATCTCAATCTAAAAAAGACAAAAATGAAAAATCT
AATACAAAGAATCCACAGTTACCAACACAAGATGAATTGAAACATAAATCTAAACCTGC
TCAATCATTCAATAACGATGTTAATCAAAGGATACACGTGCAACATCATTATTCGAAAC
AGATCCTAGTATATCTAACAATGATGATAGCGGACAATTTAACGTTGTTGACTCAAAAGA
TACACGTCAATTTGTCAAATCAATTGCTAAAGATGCACATCGCATTGGTCAAGATAACGA
TATTTATGCGTCTGTCATGATTGCCCAAGCAATCTTAGAATCTGACTCAGGTCGTAGTGCT
TTAGCTAAGTCACCAACCATAATTTATTCGGTATCAAAGGTGCTTTTGAAGGGAATTCT
GTTCCTTTTAACACATTAGAAGCTGATGGTAATCAATTGTATAGTATTAATGCTGGATTCC
GAAAATATCCAAGCACGAAAGAATCACTAAAAGATTACTCTGACCTTATTA AAAATGGTA
TTGATGGCAATCGAACAATTTATAAACCAACATGGAAATCGGAAGCCGATTCTTATAAAG
ATGCAACATCACACTTATCTAAAACATATGCTACAGATCCAAACTATGCTAAGAAATTA
ACAGTATTATTAACACTATCAATTAACCTCAGTTTGACGATGAACGCATGCCAGATTTAG
ATAAATATGAACGTTCTATCAAGGATTATGATGATTCATCAGATGAATTCAAACCTTTCC
GCGAGGTATCTGATAATATGCCATATCCACATGGCCAATGTACTTGGTACGTATATAACC
GTATGAAACAATTTGGTACATCTATCTCAGGTGATTTAGGTGATGCACATAATTGGAATA
ATCGAGCTCAATACCGTGATTATCAAGTAAGTCATACACCAAACGTCATGCTGCTGTTG
TATTTGAGGCTGGACAATTTGGTGCAGATCAACATTACGGTCATGTAGCATTGTTGAAA
AAGTTAACAGTGATGGTTCTATCGTTATTTCAGAATCCAATGTTAAAGGATTAGGTATCAT
TTCTCATAGA ACTATCAACGCATCTGCCGCTGAAGAATTATCATATATTACAGGTAAATA
A
```

> **sasF**

Function: protein coding sequence; Staphylococcus aureus surface protein F (core genome, variable)

Best match: sasF\_CC022\_21310\_AFP01000033.1[23533:25440:r]RC

Position: 065-contig\_242\_RC: 100427 ... 102335; Length: 1908 bp

Sequence:

```
TTATGCTTTATTTTTCAACTTATTGCGTCGTGATAACCAAATCATTAGTACACCCATTGCA
CCAACAATTACAGATATCGGCAACCAATGTTCTTTTATCGTTTCCCCCGCTTTAGGCAAAG
ATACATTACCATCAGCATTTAATAATCCACTTAACAATCCATTACCTTTACCAAGTGTTAA
CGTCTTTTCTGGCTTTGGTGTGGGTATATCTGGAATACTGTCTAATAAATTTGATCCTTGA
TTCATTAAATTTGCTAACTTATTTAAATCTGTCTGTTTTCCATTTTTATTCAATCGATCTAG
TAAACTTGACGATTTACTATTGGTGATAAAAATATAGTCTATATCTTTTTTTCGTTTGATTG
AGTCTCTTTTGTAATTCATAAATCATCCGCTTTACCATTCAATGCCGATTTAACTAAAT
TAAAAATTTTTATTTTGATCTGTTTCTATTTTAGTAATTAATCTGCCAGTAATTTTGCCTTT
TGCTTTTCTATACGTGTTGCTAAAATCGTTTCAATTGCTTGTTTTTTATCTTTGGCATTATT
CAAAATTGCTTTTAATATATCATCTGAAGACGTGTCGCCAGTTGATGCAAAAATGTTTCTTC
AATTGGTCAACGATTTGGCGATTTGATAATCCTTTATTCGTCCAATCTTTAGCCAATTTAT
CTGCTTCAGATTTTCCCTAATTTCTGTTTGTAAAATTTGAGAAATCAATAGCGACTTATCTTG
TGATTGATCAATCAATGACGTTAATAAATCATCACTCGTTGTCAGAGATAGTTGATCAAT
ATGACGAGTAATTTGATCTGCAATTTGTTTATCCGTTTTACCATCAACACGTATATCTTTT
AGAATTTTATCTGCCTCGTCTTTATTAATATACTTTCTAAAATGCTTTTGTGTAGCATACTT
TTTATCATCAGTACGTGCAAGTTCTTCCAAAATAAATTTTCGTTGACTTTTTATACGCTCTT
```

TCGTCTTATTTACTTCGCTCATTAAAGTCTGATTTTTGATTTTTAGGAAGTTGCGTATTTGCA  
ATACGTTGATCTAAAGATTGTAACGTATTTAGTTTATGATATGTGTAATGTTGCGTTGAGG  
CATTACTTTTAGCCAATTTTTCAATCATAGCATGATTAATTTATCGCTTCCTTGTAATTTA  
TCAGTGAGTCGATTACTATGGCTTTGATTCTCTTCATTTGAAAGAAATTTATTTAACACAA  
CATGTCCAGAACCATCATTATTTGGCGTTTTAGCTACTTCATGATTATTATCTGTTGTAGA  
CACTGCTGGATCTTCCGATGTATCTTTCAATGCATCTTTTCGATTTGTGTATTTGCTGATTCA  
AATGGTCTAGGTCTTCTAACGCCTTATTTACCTTTGCTTCATCATTTTTTATCATCTTTTTCTC  
CATGTTTTGTTGTAGCCGTTTGTGACATATCATTTTTTATTGCATTAAGATTGTCCCTCGCCA  
CTTTGTTGACTCCTATCAACATTTGAAGAAACCTCATTTAAATCTTTAAGCAATTGATCTA  
ATTTACTGTCTATATCACTTTGACCGTTCAATTCAGTGTGAGAACTTTTATTGTCTTTGCTA  
TCCAACCTCATTAGCTCGTTTTATGATTTTCATCTATTTGCGATGCTGTTTTCGCTTCATTTAG  
TTGTGCTTTATAATGTGCTTTAGATGAAGCCGATAACTGTTTTAATTGCTCAATTTGACGA  
ATTGCTTTGTCAACTTTGTCTAATAAATCTTGCTTAGATAATATCTCTTTTCAAATTTTCAGT  
ATCCTTTTCAGATGCAGCTTGGGCATCGTACGGCAAGATATTCGTTAAAATGATACTTGTG  
GCCATCATTGTCGAACACGATAACTTTACATATAATTGAAACGGTTTTCCCTCGATATTTAG  
CCAT

> **gtfB**

Function: protein coding sequence; glycosyltransferase B (core genome, variable)

Best match: gtfB\_CC005\_Mu50-VRSA\_BA000017.4[2808310:2809668:r]RC

Position: 065-contig\_242\_RC: 102575 ... 103934; Length: 1359 bp

Sequence:

TTAGCTTTCGAGCGCCTGTTTAAAACTTGCTCGAATTGTTACGCGAGATTTTCGTGTGCA  
TGTGCTTTTTGTGCTAATAAAGCATCTCGAAACTGTTGTTGATCTTTCAAACCTCTCTAACA  
TTTGTATTAATTGGTCTTTACTTTCCATTGTTATCTCATCATTATGCTCAAATAAGTGCTCT  
GATAGTGTTACTTTAGCATGGTGTGCTGTTTGACGATAACCTAAAATCAACAACCTCATAG  
TCAAACGCTTGTCCACCGCATTTAAAATTTCAATTACCCTCATTAAATATCAAGATAAATAT  
CACATAACTGGTATAGTTCATTTACCCTATCTATATTAATAGATGGGTATAAATGCACATT  
AGCATATTGATCAAGTTGCATTAGCTTATCAGACATCTCTGTAATAGCAGCGATGTGAAA  
ATTAATACTGGTAAAGTTTCAACCAATACCTTGATGTTACGAAGTTGATCCGAGTTAGTT  
AATATTACAATTTCTTTAGTATATCTATTACTACTACGATAGTTATATAGATATCCGCCTT  
GTAAAATACGAGATTGAACCTTTGCGTCTGCTATATTGAGCATCGTTTCATATTTTCGTTTTT  
ATCTGGAATAATAATATTACAATGTCGTTTCATATCACCTTTACACATCAATTGCATATTT  
CCCGGGACATTACCATTACAGTGTTCTTGCCATACCAAACATCACTACCTTTTGATGGCA  
AATTATATAACACTGAAAATGGTAGGGCTAGTGAGTTAATAACGAAATGATGTTCCGTAA  
TTTCAAGTTGCTTGATAAAAAATAATACGAATGCGAGCTTTGAAGGGAAAAAGTAAGACT  
TCCCTTGCCAATCCAATATGACATCCGATGTTACAAAATTTTCATAAATCACTTCTTTACC  
TTCTGCTGTCATATATTTCTTCAAGATCGCTTTACGATTTAAATCGTAAACAGTTTGTGCA  
AATTTAATACCATTCTTAGAATAATAATCGACAAATCGGACACGTTGTTGGTCATCAAAC  
CATTCGACACGACTAACAATTCTAGGGCGCTCTCCACTTTGATAAAAATATTTTGCTCGTA  
GACGTCCCATATCATTAAATTGTAGCCGAATTGTTGTTACCTTTAATTTCCCAAAAAGCTGG  
TACAGTAACCTGATTAAAAAATCGTGGTTTCATATTTTCTGAATTATGATTATCTGCAAAA  
AATTGATACGGTGATATAACATCGTCCGGTAAAAAGCCGTTGTCATTGAGTACAATTGTT  
AAATCTTCCTCCAACCTTACTGGCTTTAAAAGACTCATATAACTTTTCGTGAATGATCGTTAA  
AGTAATCAAATAATTTAATCAT

> **gtfA**

Function: protein coding sequence; glycosyl transferase A (core genome, variable)

Best match: gtfA\_CC007\_TCH959-USA300\_AASB02000025.1[27069:28577:r]RC (completely identical)

Position: 065-contig\_242\_RC: 103926 ... 105435; Length: 1509 bp

Sequence:

TTAATCATGCAGCACCTCTTGAACATAATGTTTCCCATTTTTAAAATAATATCTTGAGTCATA  
AATTGCTGTGCCACTTCATAAGAGATGTCATGTGGTGTCTGGGGACCATTGTTAAAATAC  
ATTACAATGGCATGAGCTAGTTTTGCGACAACATCATCCACACTATCTTCATCGGTATCAA

AAGGTACCAAGTAGCCATTTTCCCCATCTCGAATAAAGGTTGGGTTACCATAAATTCACAT  
TTAATCCAATCATACTAGTCCTGAGCCTACCGCTTCCATTAGTGTTAACCCAAAACCTTC  
GCTAGTTGATGCAGAAAGAAATAACTCATAATCATTATAAATTTTCATCAAGTTAACATG  
CCCTAGTAAACGAATATAATCTTGTGCGCGGTGTGTATCAATAATTTTACGCAGTCGCGTC  
TTCTCGCTACCTTCTCCATAAATATCAAATGTTAATTCTGGCACTTGTGCTTTAGCCACGA  
TAACCGCTTTGACAAGCCAATCAATATGTTTCTCATTTCGCTAAACGAGATGCACTAATCAT  
CGCATATGGCTTTCTTGATAATGTTGGATATGATAATGCATCAATGCTTCCCACAGGAATA  
GTATAAACACGTGGGCGATAACCTTGATATTGCTCAAATTGTCGACAAACCATATGATTT  
TGAATATCTGTTGCTGTAATAAAGAAATCAATGTATTTAGCTTTTGAAAATTGATATTCAT  
AATAATTGTTCCATAGTATATGCTGCTCACTCATCATATTATTACTATAATGATCAGCATG  
AATCACAACACCAACTTTACTATCACCTTTATGCTGCAAAACAGCCTGACCAATATCAGA  
AGCGCGGTCTAATATGACAATATCGTCTCGGGTTAAATTCAATCGTTGTAAAAAGTATGC  
AATAAATCCGTTTTGTTATACAACACCGCATCTTCAAACACATATATAGAGCTGTCTCCA  
TCAATATATTCGTTATAAGCGATGGAACCATCTTCATTATAGAATTGTCGCATATATAATT  
TCGCTTTATTATCAGCTGGTGCATAATACTCAGAAAATATACGCGTATAACTATAAAAAT  
CTTTACGTAATAACTACTATTAATTACAAATCTGCACGATCCACAACATCTTTTTGTTC  
ATTTTGTAGATAACATGTTACAAATGATGATTTCCCATTAATAATAGACGGACTATCTTA  
CCATTTCTTCTCTAAAATAATTTTCATGACCAAGCTCACGTTCAATGTCATCTAACGTGT  
ACGTTGTTGGTGCTATAGAAATATCACTAAAATACTGATACAACCAAATAACTTCTTGAT  
CTTTAAACCAATGTTTTGCGTTAATGTCTGTATGTTCTCTGACTGTATAAAATCTAAAAA  
CACAAATTTAGTGTCTTGATTTGTACGTCTCAATAATTTAGCACGGTAAGCTTGTGCATAT  
TCAACACCGCTACTCGCCAGCCTATACCAAAGTTTATATTATATATTGTCAT

## > **secA2**

Function: protein coding sequence; accessory secretion system translocase subunit SecA2 (core genome, variable)

Best match: secA2\_CC005\_A6224\_ACKE01000033.1[101327:103717]RC

Position: 065-contig\_242\_RC: 105452 ... 107843; Length: 2391 bp

Sequence:

TTATGGAAAATGTATAACTGGCATAACCCTCTTTATCAAATGTAATCATGCTTTGACAAATA  
TTTTTCACCATTCTTTTTTTGATATTTGCTGTCATAACTTCAAATGAATCTAATGCAACTCT  
ATGGTATTCAAAAATAGCGTTACGTTGCCATTTTGTGCTTGATTAACGCTTGCTTTAAT  
TGTTGTAAATAGTCGACTTGTCTAACCAACATGAATCAATTGCTTTCAAAAAGACTTTTT  
GAACGAAAATATTATAATAATATGCACTTTGCATGTTTTTACGATTCAAAGCTAATTGCTT  
TTCAAATTGCTCTAATAAAAATGTCACTACTGCTTGCTTATCTTTAAAATTAACACAAGCC  
ACATCTTTATTAATTTGGAACTTAAATTTTGTAAATATACTCGACAACACGCGATTTTG  
TTAGCACCTTTTCCTCATTACAAACATTTCAAATACATCTTTAGCTAACGCTTTAAAATC  
TTGATTCTCAGCATCATCTATTTCTAAAACCTCGATTGCGTTCCCTCGTATAACAAGATCTCGC  
TGTATACTAATGCTTTTTTTCAAATTCATTAGCCATTTACGAGCTTTAACCCCTTGTTCTTC  
CGAGATACGCTGCGCTTTAACTACAATTTGCTTAACTTTGCGATTAAACAAATTACTTTGC  
GATAATCGTTGTGCATCTAATGAATATAATTGATTATTTCCGCTAAATTAATCTATCGCTCC  
ATCGCTTAACTAAATAATCATCTAGTGAATATATATAACAAGATGATCCCGGATCCCTT  
GTCTACCAGAACGACCACGTAATTGCCTGTCTACACGGCTATTTCCATATGTTTCATGAAT  
AATAACAGCTAATCCACCTAATGCTTCGACACCTTCACCAAGTTTAAATATCTGTGCCTCGA  
CCTGCCATACTAGTCGCAACAGTCATGGAACCAATTTGCCCTGCTTCAGCTATCATCTGCG  
CTTCTTTTGCAACATTTTGCGCAATGAGTAAATTATTAGGAATATCCATTTGGAATAATAC  
TTTCGAAAAGTATTCAGCCGCTTCAGCAGTTCTCGTTATGAGTAAACCGGTGCCCCGTT  
TCATGAAGTTCAACTATATCATGAATCATCGCGATGTTTTTCTCATCAACTGAACGAAACA  
CTTTATCTGGTTCATCGATACGTTGAATCGCTTTATCAGTTGGTACTTGTACGACTATTTTT  
GAATACAAATCAAAGAACTCTGATTCGCCATAATTTTCCCTGTAGCTGTCATACCTGAAAAT  
GATTCAAAAAGTTTAAATAAATTTCTGGAAGGTAATTGTTGCCATAACACTTTTATCTGTTG  
AAACCTCCATACCTTCTTTGCTTCAATAGCTTGGTGAAGTCCAGCTTGCAACTTAGTTCC  
CGGTAACATACGACCTGTAATACGGTCAATTAACAATATCACCATTATATACAAAGTA  
ATCGACATTAGATTCAAACAAATATTGTGCGCGCAGTGCTAAATTAATATTACGCACTAG  
GACCATCGCTTGTTCGCTATATAAATCTTCAACATTAAGTATGATTGTGCCGCTTCAATA  
CCTTGATTTAACAGCCATATTTCTTTTTTGGTCTTCTTCATTTTAAAATGCACGTCTTCAAT

CAATGTATCTACAAACTCTTTCACAATATGAAATAGATTTGATTGTAATCTTGGTGCACCC  
GAAATAACTAATGGTGTGTTGAGCAGCATCTAAAATGATTGAATCCACTTCATCAATAATA  
CCGTAATTTAATTGTGGTAAAAATTTCCCTTCCGCACTATCAGCCAAATTATCAATTAAT  
AATCAAAACCGAGACGTCCATTAGTTGTATATATAATATCATGTTTCATATATATTACGTTT  
TTCCCCTTTTTGATACTCATAATCCACAATATCAACAAAACCTAATGAAGCAGTTAAACCT  
AACCATTTCATATAATGGTTGCATCTCTTCAAAATCTCGCTTCGCTAAATAATCATTTCGTTG  
TAATTAATATGTTTCCTTTTCCCGAAAGAGCATTTAAATATAAAGGCATCGTTGCCGTTAA  
TGTTTTACCTTCGCCTGTTTGCATCTCCGCAATGTTACCTTCATGCAATACAATCGCTCCG  
ATTAAGTGAACCTCTTTAGGATACATACCTAATACTCTCCAGCTCGCTTCACGTGCCACTG  
CATAAGCTTCAGGTAACAATGTATCTAGTGTATCAACTCCTGATGCTAAACGTTCTTTAAA  
TTCTATTGTCTTTTGTTTTAAACGCATCATCAGAATATGATTTAACTTCATCGCTCCATGTAT  
TGATGCGTTTCACTATTTTTCTAATCGACTTTAGTCTTAATTTCGTTTATCGTAACATCTAGT  
TTATGTTTCAT

### > asp3

Function: protein coding sequence; accessory secretion system subunit Asp3 (core genome, variable)

Best match: asp3\_CC001\_MW2-USA400\_BA000033.2[2752054:2753013:r]RC

Position: 065-contig\_242\_RC: 107832 ... 108792; Length: 960 bp

Sequence:

TTATGTTTCATTTACTTCCCCACCATTTCAGTTTCGATACATCTAAGTAATCTAAAAATCGT  
ACTGGATTCATTAACGTGACATATAATTTAGATGTTTGTCTTGCTCTTCTTTAAAATAAA  
CCTCGACATTTGTATCTTTTAGTTCATGATTTCCCTGGGACATGTTCTGTAAGCCATCCTTTT  
AAATCATCATCTTCATGGCTTGTACGATACACTTTGCAATCCAAATGCTGAGCGACATAA  
GTTGCAAAAACATTTGACTTTGACCCATAACTAATCAAATTAATAGCCGTTAGGGTATCTT  
GACTTTGCAAATCATCCTTTAGTTGCTTAATATTTCCCTCGATATTGTCGTCCATCCAACGT  
TCAACGAGCCAAACATGACCAACAGTTTCAAAAAATCATTTCGAAATAGTTGGATAGGT  
GTCAGATGGTTCTGCAATAATGACATTGATCATATCATTTCCATATTGGTCATCGCCTATC  
TTCGTCACCCGCATGCTTTTATACTCTAAATCATCTTGATGCGTCATCTCTGTGATTGTTAA  
ACATCTAAATATAAGACTCGTCGATGCTGCATTCATCATTTTTATTTATAAGCATAGGCT  
TCATCAGGATATTGAATCGTAATACTATTTGACTTTACAATCTCAGTACTTAGTTTTGTGC  
CATTTTTATTATAAAAAATGATGATAAAAATACACTGAACCAGCAGGCGTTGCATCAAAAT  
CAAAATGCAATTTATAATGCTGTCTCTACGCAAAATTGGTAAACTTGGCGCACTTTTATA  
TTTTGAAAATTGCTTTAACATCAACCACTCATGAATCGGTAATCCAGAGGGCATCAAAGA  
ATTTATAAAAGTCACTTCACCATTTGAAAATGATACTTTAGAGCCATACATAAATGTAGTT  
TGTGAAATATAATCCAAGTAACTTTAAATGTTTTTGTTCAGCAT

### > asp2

Function: protein coding sequence; accessory secretion system subunit Asp2 (core genome, variable)

Best match: asp2\_CC001\_MW2-USA400\_BA000033.2[2752991:2754559:r]RC

Position: 065-contig\_242\_RC: 108769 ... 110338; Length: 1569 bp

Sequence:

TTAAATGTTTTGTTTTTCAGCATGTTGAACTCTCCCAAACCTTGTCTTCCAAAATAATGTTGT  
AAAAATTAACAAACCAACTTGCAATGGTAGGTGAATCATCATTATGTCGCCCAGGAATAC  
TGCGATTCATCACTCTTGCTTGGTGTGCTGTCAATACAGGTAATAGCTCTTGAAATGCATG  
TGGATCATAATCATCATGTTGCATATATGCTATGGCAAAAACAGTTTGTGACAATGATTTT  
TTTTGAAATGTTTGCCAAAATTTTTGATTTAATGCCTGTATCGACGCTTGAGATGTATCAC  
CTTCATTAGACACCAGGACGTCTAATGCTGTACCGAACTCTTCTGGTCTAAGTAATCGCAT  
ATGTTTCAGCAATCGTTCCAATATTAACAAGTGGTTTACCAACAATAATTGCCTGAGGATTT  
AACTGAGCACCATAATACAAGGCACCAATGAACCCATAGATAAACCAGATAATATTA  
TTCATGTGATTTAAAATTCAGCTTTTCTAATGTCTCGTCAATAACATTGATAATACCTTGTT  
CATATTCAGATGAACCGATATAAAAACCTTCAACACGAGGATCGCCGATAAGTA  
AAAACGGTGCATTCATACGTTTCATCATATAATATCCTTCGAAACCTTCCGCTGTTTCGATA  
ACCACTAAAATATACGTTTAGTGGCGGTTTCATATCACCAGGGTGGAAATAATAAATAAA  
TTCCTGTCGTTGACTATCTACGAAACGACTACCACCAAGTAAAAATTGACCCATGTCTAA  
TCTAGACCATCGTTTGTGTATAGGTCCTAAATGTACCGTCCCGTTCACGCGCCTTAACA



GTTACACTTATATAAGCATCAAATGGTTTCGCAGGTATCTCTAAAGGACTGTCTAACATAT  
CATCAGTCAATACGATTTGTTCAATTAATGCACCATCAGCGCCAGTCTGAATCAATCTAA  
ATGTATATTGCAACTCGACCGCACCATCAATATCAAATTCTGGCCATATTTGAATGACTTT  
ATCTTTATCGTAAACGAGATTATTTTGCCAAGATGCGATAGGTTTAAATTCTTTTCCAAAT  
TCTCCACTCAATGTGAGCTCTGAATTACCTTGGTAAACGACATCTCCTTTAAAATTTCGGAT  
GCACAAGTGCTAACTTAGGAGAAACCTTATCTCCATACTGTCCTGAGAAGCTAACTGCCT  
CTAATTTATTATTACGTTCTTCAATATTCCGGTAATGTAATGGTTGAACAACGTATTTTTG  
GACATTTTCGTCCTTGTTTCATATTCAACTGACCAAAATGATTCATCAACATACGTATTGTAT  
GGTTCACTTATCATTTGTAATAAATTCGTTAATGTCTCCGAGTATGGTGCTTGAATATAGA  
TAAATCAAAGCGCCCTTCTGCTTCAACAATCGCTTCAATAGCCTCTACATAACCACTATC  
AAATTCAAACAATCCAATATCGAAGTAATCCCAACTCACACCTTTTTGTGTTGAAAAAT  
AGGTTCTAAATCGTCTCCTCCAATTTGCAAACTCTAAATTTACGTGGCAT

> **asp1**

Function: protein coding sequence; accessory secretion system subunit Asp1 (core genome, variable)

Best match: asp1\_CC001\_MW2-USA400\_BA000033.2[2754549:2756102:r]RC (completely identical)

Position: 065-contig\_242\_RC: 110327 ... 111881; Length: 1554 bp

Sequence:

TTACGTGGCATCATTTTTACCTTCTATTAACTCATCGAGCTGATTAATAATATTCTTAGAA  
GCATATGCATCTATTAATTTTAAAGAATAGGCGTACGCATAAATCCAATTTTTCAAATAAA  
ATAATAATAATTTAACGCATCATCTAATTCATCAACTGTATTTATAATACGGCCATTGTC  
ATAATCAGAGACGTAATCTGTTTGTGACCATTAATTTGTGGAATCCCAGCGCTAATTGCA  
CTAATTTGTAATAACAAGTCAGGTTCTTTGACATATCTATCACAAGTCGCAACGTCCGCA  
ATGCTTCTACAACATCATGTTTCAGCATGTATCGTCTTAACAGCAATGATGTCATCTTGATC  
TTCAGGTGTCATTAATGCTGAAACATTAACATCCGCATTCTGTTTAGCTTGGTATTCTCA  
TTTACCGACGTAATACATTCACGAAGCCACATCGGTATGTCATTTTGATGGCGCGATAAT  
AAAATTAACGGTAATAATCTTCTGTGCGATATAATCCACAAGTCGTTGCATCATTTGTT  
GCAAATCAGCGTCACTCATACCATCTATCCATACACCTATAAATGTTCCATCAATTGACT  
ACTTATATTAGGTGATTGTCCTCGTTTCAAATGGTGTGATTTCGAATCATTGTATTCTCCCGC  
TGATACTTCTTIGATGACTAATTAATCACGTTCTAGTTGCACACTATCAACAATTAAT  
GGGCATTCTTTACGATAGATTGATATTCCTCATCTGACACAGTTTCATTTCTATTTTTAAA  
AATGAATAACTTAATGATTTTCGCTGGAATATGATTGGCTATTTGTGCGATTGTGCCTAGCA  
TCTGAAGCCACAATCACATGATCATCTTCATGTATTTGTTGTGCAATCATTGCTTGAATTT  
TTTCTTCAATTAGTTGAGCCATATTGTTATATTCTGTTTGTGATAGTGATGTTGATATCTT  
TTTGAAACAGTGAATCTGCCATTTTTCAAATCTTCATGAAGTACACAATCTCCATTAATCG  
TTAAATATTCTTGGTAAGAAGCCTCTCCCTGATCATCAAATAACGTATCGCTGATAAAT  
AACCTCTGTCATCAAAAATATAACGCCGTTGTAAGTATCTTTCAAATTTCTTCAAACCA  
AATTGAATACCCTTCTTGACTAAAATAAATATTTGTATAGGTCTGTTCACTCGTCACACAT  
TTAATAAATACGGTGTGTACACAACTCAACATCATCCGGCCATTTTAAGTGATGATAA  
TTAATCGCTTGTGGCGCATGGTGGCTGAATCCTTGAATTTTCATCAAACACAGACGAATAC  
TTTGTCTCATATAAGTCATATCGATGTAAAAATGTTCTTAAATTTGGTGCATGATTGAGAA  
CAATCAGTTGATAATCTAAGTCATTTTCAAGGTGCATTCCCATTAATACTAATCATATCGTC  
AAATTCGCTTATTTTGTAGTTGATAATACGGCACAGTCGTGTCTTGCCACCATCGTTGG  
TCATCGTACCAAGCTGGAATAAAGTATTTTCAT

> **secY2**

Function: protein coding sequence; accessory secretion system translocase subunit SecY2 (core genome, variable)

Best match: secY2\_CC001\_MW2-USA400\_BA000033.2[2756113:2757324:r]RC (completely identical)

Position: 065-contig\_242\_RC: 111891 ... 113103; Length: 1212 bp

Sequence:

TTACCAATACTGGCTTAAAAATGGCTTATATTTATCAAATATAAATATGTACGAATTGTT  
TCTGCAATATTAATACTGATGTAACTAATACAATTAGTTGTACTGAGAAATAAATTTCA

GTAGATAAATGCGGTACAAACAATGTGAAATAAAGCGGTATACCAATAATGATTGTAAC  
TAATGCCGATCCAAACCAACATACGCGTCGTGCTTGATAATTTAAATAACGTTCTGTATCC  
TTACCAGGTTTAACTCCTGAAAAATAATTGCCACTCTTTAAGAAATCTTTGGATTTTTGTT  
TAGTATTGATTA AAAATCTCGATAAAAAATAACCCAATAACATTTGAATCACTAAATACA  
CCGAAATACCAATTGGACTATCAAATGTCAGCATTGGCATGTCATCTGATATGCTTTTATT  
AAACATAGATAAAAATAAAATGAATGCCACTTTTTAAGAAAACAAAAGCTGAAATGCTCA  
TCATTAAGTAATACTGCCTGCAGGGTTAACTTTCCAAGATAAATAAGATTTTCATATTTGT  
TGCGGAAACGTTTCATTAATCGATATATGGTATTCTCACTTCTACTAATTCAATAAATAAT  
AAGATAACAATGTGATTATCACAAGGATGATTAACAACGCAATCACAATATGACTTGCA  
TCTATATATTCCATTTTTTGTATGCATCATTGATTTAATAATGCTAACCAATTACAATCGGCA  
TTGGTCCTGCAATGCCGTAACGACTATTTTTGTGAGCTAACCAAATAATAACATCGTTCC  
AGTAACCAAATCAATATTGTTAAGTAAATATTGTCTTGATGAACACGTTCTTTCGAAAC  
ATATTCATGAATCACAAAATAACTTTGAATAACACTTAAAATTAATGTTAAGATGCGCTC  
TTTATAATGCTTCTCAAGACTTGTGTTGTTTCATGTATTTATCCATATTCCGATAAGAAATCA  
GCATCAAGATAATCATTGATGTTAACCACGGACCTAATCCTAAAGTAAAATGTTTAAAG  
TATTAACGTCTCCACCCATATTAGAAATAGCTATTTTAAAAAATGACTCATGTTTTACTTG  
CATATCGTTATAGGAAACGATGGAAATGTTTGTGCCTAATATATAAATAAACAAGATAAA  
ACATGTGTATAGCATACGTTTATATATAATTTTATATTCGTATTGTTGTAAGTTTTAAC  
AT

> **sasA**

Function: protein coding sequence; Staphylococcus aureus surface protein A chv

Best match: sasA\_CC005\_JH1\_CP000736.1[2847070:2853885:r]RC

Position: 065-contig\_242\_RC: 113232 ... 118392; Length: 5160 bp

Sequence:

TTATGCTTGAGAATCATCTTGATCATTTCATCTTTCTTTTTCTTTCTTTCATTAAACCTAA  
ACCAACTAATAATGTCATAACGCCACCTAGTAATCCATTTTGTGTTTATTGAGTCACCTGTA  
TCTGGCAATCTTTTTTCACTTTGTGCTGGCGTGCCATTATGTTTAGTCACTTCAGATGTTGC  
ACTTAATGTAGACTGAGATTCCTCGTGCTCGTTGTTGCTTCACTTGATAAGCGAGATGTG  
CTCGTGCTGTGAGTATGATGCATACTCATTGAGTCTGACGGATGCATTGAGTTAGATTCA  
GATGTACTTGTGAGCCGGACATACTTGTGATGTCGAGTCAGAAATGCTTTGTGAACCA  
GACATAGATGTACTCAGTGATTCGGATGTGCTTGTGCAATCGGATGTGCTCAATGACGTT  
GATGTGCTTGTGACACTGATTCTGAGTCGCTCACTGAAGTCGAGTTGTACGTTGAGCCG  
GACATACTTTGTGACATTGAAACACTTGTGAAATCGGATTCCTCATTGATGTTGAGTCAG  
ATACGCTCGTTGAACCTGAACCAGACGTAATGATTGAGATATGCTTGTGAAAGTTG  
AACCCTTGTGAGTCCGATGTACTTGTGATGTCGAGTCTGAATCTGATGTACTCAATGA  
TTCTGAGTCACTGATAGAAGTTGAATCACTTGTAGATTCTGATTCTACTGTACTTTGTGAA  
CCACTGATACTTATTGAAGTAGAATCACTGATACTGTCTGATGTTGATAATGATGTCGAC  
ACCGATGTGCTTTGTGATGACGATGTACTAGCACTCATTGACATTGATGTTGATATCGATG  
TACTTAAGGAACCAGATGCACTTGTACTTGTGACTGGCTTTGTGACATTGAATCACTTAA  
TGATGTAGATGTGCTTGTGAGCTCGAGTCACTTAACTTGTGAACTGATATTGAGTCA  
CTTAACTTGTGATGTTGAACTGATACGCTTCCGCTCATTGAGTCAGATGTTGAAAGTG  
ATGTACTCGTTGAATTTGATCCACTGATGCTAGACGAATCACTTGTAGACATTGAGTCGCT  
TTCTGATGCACTGATGCTCATAGAGTCAAATTGACTATTACTTGTGAGCTTGACTGCGAA  
TCGCTCACACTTGTGACGTTGATTCTGATCCACTCATACTTTGCGAGCTACTCAATGATT  
TTGAATCACTTAAATGAATCCGAAGTGCTAAGACTTGTGGAACCACTTAAAGATATTGATC  
CACTTAAATGAGTCGGAGTCACTTGTACTAGTAGAATCACTCATTGATATTGAATCACTTAG  
CGAGGTAGACTCGCTTACGCTTTCTGAACCACTTAAATGATGTTGAGGTACTCAATGAACC  
AGATGTACTTGTGAAAGTCGAACCACTTGTGCAATTTGAATCACTTAAATGAATCAGATTCA  
CTCACGCTTTCCGAACCTTCTTAGTGACGTCGATACACTTAAATGATGACGAATCGCTTGTGC  
TTACTGAATCGCTCATCGATTGTGAGCCACTCAATGAACTAGACTCGCTTACACTTTCTGA  
TTTTCTTAAATGACGTTGAGACGCTCAATGAGCCAGAATCACTTACGCTTGTGAAACCACTC  
ATCGATTTTGTGAGTCACTTTCAGAATTAGATTGCTTACACTTTCTGAATCATTTACAGATT  
CTGACATACTTTGTGAATCAGATATGCTTGTGCTCATTACTTCACTAGCCGATGTTGATGT  
GCTTGTGCAATCACTTAAACGATATAGACACACTCATCGAACCAAGATGTACTCGCACTTGT  
TGAGTCTGATGTTGAATCACTAACACTATCAGATAATGACGTTGAATCACTCATACTTGT

GATGTACTTGTGAAAGCGACATACTTTGTGAATCACTAGTACTTGTACGCATCGAAGTA  
CTAGTTGAAGCTGATGTACTACGAGAGTCACTTGTGATGTTGATGTACTTGTGATCCTG  
ATGCACTTGTACTTCTTGATGTGCTTTGTGAATCGCTTAATGATGTTGATGTTGAATCGGA  
TTCCTTGTACTTTCTGATGTTGAGCCAGATTCTGATGTACTTACCGATGTAGATAAACTT  
GCAATGGTCGACATGCGGTTTGAAGTTGATGTACTTAGCGAATCACTTAATGATGCTGAT  
GTGCTTTGTGAATCGGATTCCTGCTTTGCATTGACGCAGATGTTGAATCACTTAAAGATG  
TTGACGACGAATCGGATTCCTGCGCTTGTGACGTACTGAGCGATGTTGACGTACTTGT  
ATGATCCTGAGTTACTTGTACTTGTGAGTCACTGAGTGTGATGTTGACGCACTTTCTGATGT  
TAATTCCTTGCCTTGTGAGATACTTTGTGAATCAGATTCCTCTCTGAACCACTTAAT  
GATGCTGATGTACTAGACGACCCTGATATACTCGTTGATAAGCTTTGTGACTTAGACAAG  
CTTCTGATGTACTCATACTTAATGAGTCACTGAGTGTGATGTTGATGTACGCAATGAATCAG  
ATGTACTTGTGATAGACTTTCGGATTTTTCAGTACTGCTAGAGTTCGAAATAGAATCGCT  
TAATGATGTTGATTTACTAACTGAACCTGACATGCTTGTGATACACTTTGTGAATCCACT  
AACTTGTGCTTGTGAGCTTGTACACTATTACTTTCAGATGTGCTTAATGACTTAGATG  
CACTCACAGAATCAGATAGGCTTACACTTGTGCGATTTGAGGTTACTAGCTGATGTAGATA  
CCACAATCGATCCTGATGTGCTCGTTGATGCACTTTGTGAGTCAGCTTTACTTGTGACAC  
ACTTTGGGATTGTTGTGACTTCTGATGTTGATACGGAATCACTCATGCTATTTCTTGTTA  
CTTCATATTTAAAAGTTGTTGTGCTTTTGTACCGCTCGCATCTGTAGAAACGATTGTTAT  
AGTACTTGTACCAATGTTTGTGTTGGTGTACCACTAATGGTATTATTTGTACTATCGAATGTT  
AGTCCAGATGGCAATCCAGTCACTGTATTCGTACCCGATTTCCACTGTTGTCCTGCGTAG  
CAATTTTAATCGGTGATATTGGTGAATACACTTCTGATGATTGATCTCCTATTGGTGTAC  
TGTTGGTGTGCTGTCGATCCACAACATTTATTGTAAGTTGTCGTCGATTTGTTATTTGCTT  
GGTCAGTAGACACAACCTGTCACTGTTGATTGACCAATTTTGTGGTGTCCCAATGATTGA  
ATTCGTTGCACTATCGTAACTTAATCCGCTTGGTAATCCTGTAACCTGTAATTTGTCACAGTC  
CCAGTACCATTATCCGTTGTAGTCAATACAATAGGATTCATTGTTTTACCCACTTCTATGG  
TTTGATTGCCTACAGTTACAGTTGGTGTCTTTACATCAGTAAAATAATATGCACTGATTG  
TCCAGCATTTCGTCAATTTTACAGTTTTATTGTATCATTATAAGTTGACGCATATGAACTAT  
CGACGGACGTGTAGTTATATCCTTTAGCAGTCAATGCAGATTGCTGATTATCGATTGTCAC  
GACTTGATCAACATTTCTGAATATGTTTTTGGTGAATAATATCTTTACCTGTTGTTACA  
TCAACGTATCTCACTTGTGTAACAGCAGACTCTGTATATTCGAATGTTCCAAATTGTA  
GTTGTAATTTGTCGCGCCACCTGTTGAGGCTGTCAATTGATAATGAAAAGTTGGTGTGAC  
ACTTTTCGCAATCCAATCTGAAATATTACGTGTCCATGTTTGACCTGCATATTTGACAGTC  
ATAACCTTTGCATCACCATTATAGTTAATATCAAAATCTTGGAACGTGTTATTTGTAGGTT  
GAACATTTAACTTCGCAGCATTATCAGCTGTTGAACTTGATGTATACGTTGTGCGCAACACC  
ATAACTATCTGTTGTTACAAATGCACCAACGCACCTCCACCAGCTACATTAGATGGGTC  
AGCATTTCGCTTTGCAGCTGAATTTGGTTTAGATGTATTGTGATACGTATCCAATTTGAAG  
CCAAATGCGTTACTTAAGCCACCAATACCTACTGCGGCACCGTTTAACCTGTTTCACCTA  
ATACACCTGGTAAAAGGCCAAAACCGATACCATCTCCACCATTCCATGCCCTTCATATTT  
GTTACCTAAATTTACTTTTCCAGAAAATGAAAACCTTATTAGAGTCAATACGTGTTCCCT  
AATGTAATGGCACCTTTTGGCTTGTGATCTTGCCTAACGTTACGACCCCTGTACTTT  
GGTCATAAGTGGCATTTCCTGAAGTTGTATATATTGCTTTAAGTTATCTTTATTA  
AATTGTATTAGCAGTTACTGCAGTTGTCGTCGCTGCTGACGCAAATGTTGACATAGCTAA  
GCGACTGAAAGTTCGAAGTTTTACTGGTGCCTGCTAGTTGACGTTGTGCTAGTTTTGTTT  
AAGTTGACCGAAGATGGCGTTGTGCTTTGTGAAGTGTATTTGATGCAGTACTTTGATTTG  
TTGATGTATTAATTGGTTGTTCTGTACTTGAAGTTGAAGCTATAGATTTAGTATCAGA  
ACTTGATGTAGTATTCTTTGAGGATGTTGATTCTGATGTAGATGTCAATTTTTCTTGTG  
TTGACTATTAGTTGTCGAAGTGACCTTTTTCAGACTTTTCACTTGTGACTGTGCACTATTT  
GATGTTTGTACCGAATACTATTTTTCGTTACACTTGTGGAATCGGCTGTTGATGTTGATG  
CTTCGATTGTGCTTGTGAGTTTTGATTACCTACTGTTTCACTTTGTGTTGTTAATTCAGA  
AGTTAATGGTGCATCAGAAGCCGCAAAAGCTTGTGTCATGCAACATATTTACCGTGAATGCA  
CCACCAATAACCGCCGTAGTTTTTCAGTCCGTATCCCGTCATTTTTTTACTAATGCTTTG  
ATTCTTTGACTCACTAACTATGACTAATAAATGGTAGCCCCATAATTTGAACATTTCTATT  
TCTTTAATTCGGATTTTACCCAATTTTTTCCAGATTTATAAAGTCTTACTCTTGTTTTTTC  
GTTTGCTAAGCTGTCATGAAATGCTTTCTGTCTTTACTCAT

> A6U540

Function: protein coding sequence; putative protein (core genome, variable)  
Best match: A6U540\_CC005\_Mu50-VRSA\_BA000017.4[2826326:2827018:r]RC  
Position: 065-contig\_242\_RC: 118936 ... 119629; Length: 693 bp  
Sequence:

```
TTATCTCTTTTCATCTGATTGATTATCGAAATTTCTTCCTTCTAAACCTGCTAACTCTTCTTT  
AGAAGCTGCAGGTGCTTTTCATTTCAAATATCTCATTCACTACTGTGTAATCGTAATATCCT  
AATCTGGCAATAGGTTTAATCGACTTAATGTCCAATTTACCATTATCAAGAATAACCTTAT  
CGTCAATATGAACTTGGGCAACTCTTCCTATAACAATATCTACGGTAGATACTGGGTCTCC  
TGTCGGAATACGAATCGTTTGAACGTACTCACATTCAAATGTACTGGCGATTCTTTGACT  
CGATAACCTGGTGCTTCTATACATGCTTCTTTTCGTCACACCTGCATATTCAAATTCATCCT  
CTTCAGGTGGTAGTGCCTTCGACGATAAATTAACAGCTTCTCTTAAATCATACTGGCCAT  
GTTCCATACAAACCACCCTGTCTCTTCTGCATTTTTTTACTGTATCTTTACGCTCATGATCAC  
CAAGAACAGATTGATTTGCTGCGAACATAACCATAGGCGGATCCCAAGTTAAGTTTTGAT  
ACTGACTATAAGGCGCTAAATTATCTTTCCCATCTTTTCGATACAGTAGAGATCCACCCTAT  
TGGACGTGGTACTGTACTACTTTTAAATGGATCGTGCGGTAACCATGACTTCTTACACCT  
TGTTTTGGCGAATAATTCAT
```

### > **ywrF**

Function: protein coding sequence; putative FMN-binding flavin reductase (core genome, variable)  
Best match: ywrF\_CC001\_MSSA476\_BX571857.1[2747002:2747613:r]RC (completely identical)  
Position: 065-contig\_242\_RC: 121744 ... 122356; Length: 612 bp  
Sequence:

```
TTATTTTTCTGGTCTCTTTATCGTAAATATTCCCCCTAATTTAGCATAATCATTTCGGGCTA  
AACGAGAAACAGCCTGTAATGCGTGTGGATTGATTTTTAAAATCACCCCTATAAATACTGT  
CATCAATATGATAAGTTACAATTTACCTATTATTAATCAGCCCCATCTAATACATCTCC  
AAGCAATATCATTTCGATAGTTTACATTCGAATCTCATTTCGCATCTTTAATTCCTGGC  
GTCTTAATCGTTGTAGATGTTAAAAGTGATAATTCTGTACGACTCAACTCACTGTCACCAT  
ATGCTAACGGCGCTGCAGTCTCATTAAATATCTTGAACATTATCTTCGTCTGTAATATGCAC  
AACAAAGTCTCCAGTCCGTTCTATATTTAATGCAGTATCTTTTCTTACCTCCTGCACGTT  
GAACTGCAATAGCAATCATTGGCGGATGATTATTAACAATATTAATAAAGCTAAATGGTG  
CTGCATTTACTGATGCATCTTGATTTAATGTTGTAACAAAAGCTATAGGTCGTGGAATAAT  
TGAACCAATTAATAATTTATAGTTTTCTCTAGCAGTTAATGATTGTGCATCAAACGTATAC  
AT
```

### > **msrA3**

Function: protein coding sequence; peptide methionine sulfoxide reductase A3 (core genome, variable)  
Best match: msrA3\_CC008\_NCTC8325\_CP000253.1[2770252:2770728:r]RC (completely identical)  
Position: 065-contig\_242\_RC: 122434 ... 122911; Length: 477 bp  
Sequence:

```
TCACTTGTATTTATTTAGCAAATCTTTTGAAATATGACACATATGCATATCTTCTGGATAT  
TTTTCTAAATGTTGCTGATGTTCTTCAGCACTTTTAATGTAGTTAGACAGCGGTAAGACTT  
CCACTGCAATTTGATCTCTGTCTTTACGTCGTTCAATGAACTGACGCGCTTCAATTAAGTG  
GTCATCTACACA ACTATATAAACCCGTTTCGATACTTTTGTCCAATATCATTTCCTTGTTGA  
TTCACACTGTAAGGATCAATGATTTCAAATAAATAATTCATAATGTCTGTAATTGTTAACA  
TACGATCATCGAAATGAAGTTTGACACATTCAGCATAACCATCATACGGACCGTCTAATT  
TAGAGCTTCTTCCATTTGCTCTTCCTGCTTCTGTATGTATAATTCAGGTATTGTTGCAAAA  
AATGCTTCAACACCCATAAACATCCTCCTGCTACATAAACA ACTGCCAT
```

### > **txbi\_capC-L2**

Function: bidirectional rho-independent terminator of capC-L2  
Best match: txbi\_capC-L2\_CC001\_MW2-USA400\_BA000033.2[2769507:2769558:r]RC (completely identical)  
Position: 065-contig\_242\_RC: 123589 ... 123641; Length: 52 bp  
Sequence:

AAGCATACTCAAAAAGACTGGTACATGTATACCAGTCTAATTCGAAAAATA

### > **capC-L2**

Function: protein coding sequence; capsular polysaccharide biosynthesis protein C/locus 2 (core genome, variable)

Best match: capC-L2\_CC008\_NCTC8325\_CP000253.1[2771466:2772233:r]RC (completely identical)

Position: 065-contig\_242\_RC: 123648 ... 124416; Length: 768 bp

Sequence:

```
TTAAAACCATTTCAAAAACGACTTCACTTTTCCTGGCTTAGTCCGGTCTGTCTAAATAAACA
AAATTATCATTGATTACTGAACTGGCATTTCGAAGTAATGCTTCAATATCATTTCGAATATT
TCTTCAATTTATGATTGTGAAATAATTCTTGCATCAAAAATGGTCTTTGGTCCACATGAATG
TGCATCTGAAGCTACAAAATGAGCCAAATTACATTCTATAAATTGTAATGATAACTTTTG
AATGTTTTTACCAAATCCACCAACTAAAGAACTCGATGTTAATTGACTCAGTGCCCCATT
GCAACCAATTCATATAATATTTCCGGATTTTTGGCGATACTTCTATTTCTTTCAGGATGTG
CAATGATTGGTATGTAACCTCTCGATTGTATTTCAAAAAACAATTGTTTTGTATAATGTGG
TACTTCGCCCGTTGGAAATTCAATTAATAAATATTTCGAACGATTAATACCTTGAATACTA
CCATTATCTAAGCCTTTCAGAATCGAATCTGTAATTCTAATTTCTTGCCCGGAAATAATT
TAATATCCAATGCTTGAACCTTCTGGATGCGTCTTAACTCCGCCAATTCACAAGCACTTG
TTGAAATGTATTATCATATCTCGGATGCAAATGATGAGGTGTCGCTACAATACTTGTTACA
CCTTCATCCTTAGCTTGTAAATAGTGCAATACTCTTTTCAATTGTTTTAGGACCATCATC
TATATCAACTAATATATGGTTATGAATATCAATCAT
```

### > **capB-L2**

Function: protein coding sequence; capsular polysaccharide biosynthesis protein B/locus 2 (core genome, variable)

Best match: capB-L2\_CC008\_NCTC8325\_CP000253.1[2772230:2772922:r]RC (completely identical)

Position: 065-contig\_242\_RC: 124412 ... 125105; Length: 693 bp

Sequence:

```
TCATGATTCATCAGTCCCATAATATGCATAGTAACTAGCACTTTTATCTTTAGGCATTCTA
TTTAAGACTACACCTAATAATTTAGCACCTGTTGCTTCAATAAGTTCTTTTCCTTTTTTAAC
TTCATCTCTATTATTATTTCCGAATTAACCTACGTAGACAACATTGCCGGTAAACTTTGAA
AATAATTGCGCATCTGTAACCTGTGTTCACTGGTGGCGTATCGATAATTACAAAGTTATAAT
TCATCAATAATGTGTCATACAAATTTGCAAATGCCCTTGATGTAATTAACCTGACGGATT
CGGTGGGATTGGCCAGACGTCAAGACGTCTAAATCTTGAATTTAGTTGAGATAAACT
GTCTTGATAAGTTGACCAATTTAGCAATAAACTTGATAGGCCTTCATTGTTTGCCAAATTA
AAAATATAATGCTGCGTAGGTTTACGCATATCCCCGTCTACGATTAGTGTTTTATAACCTG
CTTGCGCATATGCAACTGCTAAATTTGCTGCAATTGTAGACTTACCTGCGCCTGGTGCCTC
TGAAGTGATTACAATGCTTTGAACTGCACTGTCAGGATTTGCAAACATAAATTTGATCTT
ATGCCTCGAAATTTCTCGCTAATAGGTGACTTTGGTTGTTTCATGGACAATTAACCTTGATG
TACTTCTTCGTGTATTTCGTCAT
```

### > **capA-L2**

Function: protein coding sequence; capsular polysaccharide biosynthesis protein A/locus 2 (core genome, constant)

Best match: capA-L2\_CC001\_MW2-USA400\_BA000033.2[2771039:2771701:r]RC (completely identical)

Position: 065-contig\_242\_RC: 125121 ... 125784; Length: 663 bp

Sequence:

```
TTAAAATTTTTGTATTGAACCTAAAATAGGTAATCCTAGTTGCGATTCAACATCTTCTTCT
GTCTTAATACGCTTATCTAATAATTCTTTTAAGAAAATAATCAATATTGCTAAAACAATAC
CAACAATAATGCTGATAACTAAGTTGACAGATACTATTGGAGATACTTTTACAGCATTAT
CATGTGCTGAGGAAAGTATCGTAACATTATCAACACTCATAATTTAGGCATGTCATGAG
CAAAAACCTTAGATATTTTATTAACAATTTTGTGTCAGATTCAGATTTATTCCCAGTGGTAAC
```

TGATACAGTAATAATTTGAGAGTTTGTGGATTGGTTACTTTTAAAAATGAATTCAACTCA  
GCTGTTGAATACTGACCATCAAATTCTCTAGATACTTTATCTAGAATTCTAGGACTTTTGA  
TAATTTCCGTATATGTATTAACAGACTGCAAACACTTTTGAACATTTTGGAAAGCTAAATC  
ACTTGAGGACTTTTTTCATGTTCACTAATATTTGAGTAGAAGCAGTATATTTGTCAGGCATA  
ACAAAAAGGTTAATGCCGCACTTACTACAAGACATATTGCCGGTAAAATAAGCAATAA  
TTAATATTCTTCTTTAGAATATTTAATAGTTTTACTAAATCAAACCTTTTCTTTCAT

### > **icaR**

Function: protein coding sequence; transcript regulator of intercellular adhesion protein operon (core genome, constant)

Best match: icaR\_CC001\_MW2-USA400\_BA000033.2[2772550:2773110:r]RC (completely identical)

Position: 065-contig\_242\_RC: 126632 ... 127193; Length: 561 bp

Sequence:

TTATTTCTTCAAAAATATATTTAGTAGCGAATACACTTCATCTTTGAATTGACTTTTACTTT  
CTTCCACTGCTCCAAATTTTTGCGAAAAGGATGCTTTCAAATACCAACTTTCAAGAAACA  
GCAATATTAATTTCTGAAAGTCTTCTTTTGTCACTTTATCTTTGATTCATCATAGAATTTT  
GCTATCTCTTTACTTAATGATTGATTTAAATCTTGTATTTGTCCGTAAATATTTCCAGAAA  
ATTCCTCAGGCGTATTAGATAATTGAACGTACATTCTAATATACCTTTCTTCGATGTCGAA  
AATAAACTCAAATAAGAATTGATATAAAGCATCAATTGAATAGTTCGATTTATTTTGATT  
CATCATAATAATATTATTAAGGTAATCAAACAACATTTAACACTTTGTTTCGTAAATACTT  
TTTTTCGAGTCAAATGGTAATATAAACTCGCTTTCTTTATATTTACTTTTAGCTATATC  
ATCAAGTGTGTACCGTCATACCCCTTCTCTGAAAATAAGGTTATTGCGTTATCAATAATC  
TTATCCTTCAA

### > **icaA**

Function: protein coding sequence; intercellular adhesion protein A (core genome, constant)

Best match: icaA\_CC008\_NCTC8325\_CP000253.1[2775174:2776412] (completely identical)

Position: 065-contig\_242\_RC: 127356 ... 128595; Length: 1239 bp

Sequence:

TTGCAATTTTTTAACCTTTTTGCTTTTTTATCCTGTATTTATGTCTATTTACTGGATTGTCGGT  
TCAATTTATTTCTATTTTACCAGAGAAATTAGATATTCATTGAACAAGAAGCCTGACATAA  
ATGTGGATGAATTAGAAGGCATTACATTTTTACTTGCCTGTTATAACGAAAGTGAAACGA  
TTGAAGATACGTTGTCTAATGTTCTTGCCTCAAATACGAGAAGAAAGAAATATTATCA  
TTAATGATGGAAGTTCAGATAATACAGCAGAACTCATCTATAAAATCAAAGAAAATAAT  
GACTTTATTTTCGTCGATTTACAAGAAAACAGAGGTAAAGCCAACGCACTCAATCAAGGC  
ATTAACAGGCTTCATATGATTATGTAATGTGCTTGGATGCAGATACTATCGTTGATCAA  
GATGCACCATATTATATGATTGAGAATTTCAAACATGATCCAAAACCTTGGTGCAGTTACA  
GGTAATCCTAGAATTCGAAATAAGAGTTCTATTTAGGTAAAATTCAAACGATAGAATAT  
GCAAGTTAATTGGCTGTATTAAGCGAAGTCAGACACTTGCTGGCGCAGTCAATACTATT  
TCGGGTGTCTTCACTCTATTTAAAAAAGTGCAGTTGTGCGACGTTGGCTACTGGGATACTG  
ATATGATTACCGAAGATATTGCAGTTTCTTGGAAATTGCATTTACGTGGATATCGTATTAA  
GTATGAACCGCTTGCCATGTGTTGGATGTTGGTTCCAGAAACATTGGGAGGTCTTTGGAA  
GCAACGCGTGAGATGGGCTCAAGGGGGACACGAAGTATTACTACGAGACTTTTTTAGCAC  
AATGAAAACGAAAAGGTTTCCTTTATATATTTGATGTTGAGCAAATCATCTCGATTTTA  
TGGGTATATATAGTGCTTCTATATTTAGGCTATTTGTTTCATAACAGCAAACCTTCTTAGACT  
ATACATTTATGACATATAGTTTTTCAATATTTCTACTATCATCATTTACTATGACTTTTATA  
AACGTTATTCAATTTACAGTCGCACTCTTTATTGATAGTCGCTACGAGAAAAAGAATATG  
GCTGGACTCATATTTGTAAGTTGGTATCCGACAGTATACTGGATTATTAACGCAGCAGTA  
GTTCTTGTGCGCATTTCCAAAAGCATTAAAACGTAAGAAAGGTGGTTACGCAACATGGTCA  
AGCCCAGACAGAGGGAATACCCAACGCTAA

### > **icaD**

Function: protein coding sequence; biofilm PIA synthesis protein D (core genome, constant)

Best match: icaD\_CC001\_MW2-USA400\_BA000033.2[2774476:2774781] (completely identical)

Position: 065-contig\_242\_RC: 128558 ... 128864; Length: 306 bp

Sequence:

```
ATGGTCAAGCCCAGACAGAGGGAATACCCAACGCTAAAATCATCGCTAAATATTGTAAG
AGAAACAGCACTTATCGCTATATCTTGTGTCTTTTGGATATATTGTTTAGTTGTTCTACTCG
TTTATATTGGTACTATATTTGAAATTCATGACGAAAGTATCAATACAATACGTGTTGCTTT
AAACATTGAAAATACTGAAATTTTAGATATATTTGAAACTATGGGCATTTTCGCGATTATC
ATTTTTGTATTTTTTACAATTAGCATATTGATTCAAAAATGGCAGAGAGGAAGAGAATCG
TGA
```

### > **icaB**

Function: protein coding sequence; intercellular adhesion protein B (core genome, constant)

Best match: icaB\_CC001\_MW2-USA400\_BA000033.2[2774778:2775650]

Position: 065-contig\_242\_RC: 128860 ... 129733; Length: 873 bp

Sequence:

```
GTGAAGTATAGAAAATTTATAATTTTAGTGTTGAGTATCTTGATCATATTGCCTGTAAGCA
CACTGGATGGTCATCATATTGCAAATGCAGATGACGATTCACCTAAAAAACTGAAATATA
AAGAAAATAGTGCTCTGGCATTAAATTATCACCGTGTAAAGAAAAGTGAATTTTCTGAATA
ATTTTATTTACTTCTTTTCTAGTAGTAAAGAAATTAATAATATAGTGTTAGTCAATCACA
ATTTGAATCTCAAATAAAATGGCTAAAATCACATGATGCTAAATTTTTAACCTTGAAAGA
ATTTTTATATTACAAGAAAAAAGGTAAGTTTCCAAAACGAAGTGTATGGATTAACCTTGA
TGATATGGATGAAACTATTTATGAAAATGCTTATCCAATCTTAAAAAAATATAAAATACC
GGCAACTGGGTTTATTATCACAGGTCATGTTGGGGAAGAAAACCTTCACAACCTCGATAT
GATTAGTAAAAAAGAACTAAAAGAAATGTATAAAACTGGGTTATGGGAATTTGAAACAC
ATACCCACGATTTGCATAACTTATCTAAAAATAATAAGTCAAAATTAATGAAAGCTTCTG
AAGCTACAATCATAAAAGATTTAAACAAAAGTGAAAAATATCTAACTAAAAACTTTAAA
AAGTCGCAGAAAACCTATAGCCTATCCTTATGGCTTGATGAATGACGATAAATTACCGGTA
ATCAAAAAGCTGGGTTAAAATACGGTTTTTTCATTAGAGGAAAAAGCAGTCACTCCGAAC
TCCAATGATTATTACATCCCTAGAATATTAATTAGTGATGATGCTTTTGAGCATTTAATTA
AGAGATGGGACGGATTCCATGAAAAAGATTAG
```

### > **icaC**

Function: protein coding sequence; intercellular adhesion protein C (core genome, constant)

Best match: icaC\_CC001\_MW2-USA400\_BA000033.2[2775637:2776689] (completely identical)

Position: 065-contig\_242\_RC: 129719 ... 130772; Length: 1053 bp

Sequence:

```
ATGAAAAAGATTAGACTTGAACCTCGTATATTTACGTGCTATTATATGTGCAATTATTATTA
TCACACATTTACTTACACAAATTACTTTAAAACATGAAAATATGGAGGGTGGATCCTTAG
TGTTACAATTTTACATTCGTAATATTGTGATTTTTGGTACACCTTGCTTTATTATCTTGCA
CAGTTACTGACAACCTTGAATTACCAAAAAGTCACCTATAGATACTTAACTACACGCGTA
AAATATATACTTATTCCTTACATATTAATGGGATTGTTTTACAGTTATAGTGAATCATTAT
TAACAGATTCAAGTTTCAATAAACAATTCATTGAAAATGTCCTATTAGGTCAATGGTATG
GCTATTTTATCGTTGTTATCATGCAATTCCTTATTTTGAGTTATATCATTTTTAAAATTAAC
TATAACCTATTCAACAGTAAAATATTATTATTGTTATCTTTATTTTACAGCAATCATTTTT
ATATTACTTTACGAACAACACAGCGTTTACGATACCGTGCTACACTATTATCCATTAAGT
GAAAATACTATAATATTCGGATGGATTTTTTATTTCTTCTTAGGTGCATATATGGGTTATA
ACTACGAACGTGTATTAATTTCTTAGAACGTTATTTAGTTATTATGATTGTATTAGCTGT
AGCTACTTATTTTGTGTTTATTGCGTTAGCAAATGGAGACTATTGGAACGTTACCAGCTTT
TCATATTCATTAACACCATATAATAGTATTATGTTTATTGTTATCTTGGGTATTTGCACGC
ATTTTAAAACAATGTTATTTAATACGATTCAAATGATTAGTGCTTTCTCATTCTTTATTTAT
TTATTACATCCAATCATTCTAGACTCATTGTTTGCATATACAAATATATTTGAGGATAATA
CAATGGTCTTTCTAGCGATATCACTACTATTCATTTTAGGATTATGTATAGGTGTCGGCAT
GATATTGCGTGAATTCTATATCTTTAGGTTTATTATTGGAAAACAACCATATAAATTGAAC
ATTAATGCTTATTA
```

### > **repeat\_nyS**Agamma

Function: repeat element

Best match: repeat\_nySAGamma\_CC008\_COL\_CP000046.1[2766913:2767025]

Position: 065-contig\_242\_RC: 130950 ... 131119; Length: 169 bp

Sequence:

CCAACCTTGCACATTATTGTAACCTGACTTTCCGCCAGCTTCTATGTTGGGGCCCCGCCAAC  
TTGCACATTATTGTAAGCTGACTTTCCGCCAGCTTCTTTGTTGGGGCCCCGCCAACTTGCA  
TTGTTTGTAGAATTTCTTTTCGAAATTCTTTATGTTGGGGCCTCGCC

### > Q2FZB6

Function: protein coding sequence; putative protein (genomic island)

Best match: Q2FZB6\_CC008\_COL\_CP000046.1[1182242:1182414]RC

Position: 065-contig\_242\_RC: 131006 ... 131036; Length: 30 bp

Sequence:

CCAACCTTGCACATTATTGTAAGCTGACTTT

### > lip1

Function: protein coding sequence; lipase 1 (core genome, constant)

Best match: lip1\_CC001\_MW2-USA400\_BA000033.2[2777135:2779180:r]RC

Position: 065-contig\_242\_RC: 131218 ... 133264; Length: 2046 bp

Sequence:

TTATGCTTGGCTTAGTATCAGTCAGCTTTTCAGTTTTCACTAAATCGTCTGCTAAATGATGC  
CAAAAATCTTGTAATTCTTCTCTTGTGCGCACTGTATCAGAACTGTCTTGTCTTACAAAGT  
CAACATGATCCCAATCATGTTTTGTAGGCGTCACTTGCCAAATGCCTTTTTGAATTTTATC  
TGTCGCTTTTGTATAAGCTTGATTAAATGGATGTTGAGAAGAAATAACGGATACTAAACC  
ATCGTTTTCTCGCCATTCTTTTTCAGTAGCTTTACCGATTAAGTTACCAGTAATCACAAAT  
GGGAAAACATATTTAAGTCTGCTTTTTGTCTATCGCTATTTAATGCTTTGTGCGTTGCTTC  
ACCAGTGTATGTTTTATACACAATGTTAGGGTTCAACGACGTTTTACGATTTAAATCTGTT  
GCACCCTCACGCGTCAGATCGTAAAATCCATTATCTTTTGATTTCCATAAATTAGATTGTT  
TAACGCGTTTGACATAATCAATATATGATTCATTTGGCTTCTGTTTTAGACCCCATTTGAGC  
CAACCCGAAGTCTACTCTTGAATTTTTATTACCAAACATTTTACCGATATCAAATACGATT  
TGCTCTACTAAAGCTTCATTACCAGCTAAATCTGATGCGTGTGTACCATTATGTGGTGTTC  
CTAAAGTAGTAATTGATGAAATCATATTGTCATGATTACCTTTGAATAGTGGAGAAATTT  
CGCCACCATGTTTCTTTTGATACTCTATTTCTTCACGATTACCATTACGCAGTAATTTCTTCT  
AGTTGACCTATCGTTTGACCGCCATACTATGTCCAAGTGGTGTACCTTCTGTCTGCTGTT  
TCCAGTCTTTGTAAATTCCTTCGTATGTTTTTCCATAACGTTTCATGTCCATATTTTGTGCA  
TGTGCTGCACCATAATCTACACGACCGCCTTTGATATAATAATAAAGTTCAACTGCGCGG  
TCATAGTTACTTCCAAAAGCACTTATACTTGTCTCATAAGCTTTGTAACCATTTTCTTCTAA  
ATCTTGGCGAATGTTCAATTTTATTACCGCCCAATAATGAGCTAACACTGAAGGATTAAT  
ATCATCTGTAAACCCATTGAAACCATGCCTAAAACGATAGGATCCTGATTTTTTATACTG  
CCCTTGTGTTGGCAACTTTATTCGTTTGTATCATCTTTTCGCTTTTGCAGTAAGTTCCTTTGTCC  
CTTTGTTTGGTAACGTTGCTACTGCACTACTTTTTAATAAATTTAATCCATTTTTCTTGTC  
TTGTCCTTTGTTGGTTCTACTGGTGTATTTTTGATTGTTTTTAAATCTGAAACTGATAGTGT  
TTTTTCGCTTTTTGAGGTTTCACTTCTTGTTCATTGTTAAAATTGTAGTTAGTAATTTTATC  
ATTCGCTTGATTATTTTGTGTTGTGGTTGTACTTTCTCTATTTCTGTCTCATTAAACAATTTCTCG  
TTGACTTGTGTTGATCTAACTTATTTAATGATGGTGCTTCCTTTATTTGACTTTGTGAAGGTA  
GATTGTTATTAGCGTTTGAATCTTGACTATTATCTGCCTCTTTTACTGTTGCTGTGACGCC  
ACTTTACTTTGTTTACCATCATTAAATAGCCTGTTCTAACCTTGATTTACATCGCTAGGATT  
AGCATTGTTATTTTTTGTGATACAGTTGAATATTTTTATTATTAAGCGATGATTTTTTAT  
CATCCTTTAGTTGATCTTTATTCAAATCATCTGTTTTACGATGATTTTCTTCTGATATTGTT  
TTATCATTATGCAAGTTCTTAGTTAAATTTTCAGTATGTTGCTGTTTCGTCAACACCGTTTTTC  
ACGTTGATAATTAGCATTTTCCCTAGTTTGTGATCCCCAATAGATTGTGCTGTAACCTGTA  
TCCTCCTGTGAATTTCCCATATTCCTTGTCTCAGCTGCTTGTGCTTGTCCACCACTTAA  
AAATAGTAATGTAGCTATTTAAATGGAAGATGCACCTACACTAAATTTACGAATACTATA  
CTTATTTTACTTTTTCATCAT



### > **hisI**

Function: protein coding sequence; histidine biosynthesis bifunct protein (core genome, constant)  
Best match: hisI\_CC001\_MW2-USA400\_BA000033.2[2780270:2780902:r]RC (completely identical)  
Position: 065-contig\_242\_RC: 134353 ... 134986; Length: 633 bp

Sequence:

```
TTACCACTGTTTCGATATTTTGTCTGTTTCGCTTTAAAGTTATTGCGCTTATGATGTCTACGCG  
CTAATTCTGCCTCAATTTCTGAAAAATCGACGCCTAGCGCATGCATCAAGACAAATAAAT  
GATAAAGTTCATCTGCTACTTCACTTACAAATGCTTTTTTGTACCTTTAATTGCTTCAATT  
ACGACTTCAAAGCTTCTTACCATATTTTTTCGTAATCTTTTCTATACCTTCTGTTAATAA  
ATATTTTGTATATGACTTTTCATTATTGGATTGGGCACTATCTTGAACGTGCTGCGCTAAT  
GTTTGCCTGAAAATGGAACCTTCTGTGTTGAAACAACCTTGGACTGCCTGTATGACATGTTG  
GTCCATTTGGTATGACATCAATTAATAAGTATCATTGTCGCAATCTACATGAATATCTTT  
AACACGTTGCGTATGACCAGATGTTTCACCTTTTGTCCATAGACGTTGTTTCGACCGCGAA  
TAGAAACATACTACACCATCTTCTATCGTTTTATCAAAGCTTCTTGATTCATATAACCCA  
ACATCAATACTTGTGTTTGTGTTGATTATCTTGTAATAATTGCTGGCACTAAACCTTTGCTAAA  
ATCAATTTTGTAATTGGTCAT
```

### > **hisF**

Function: protein coding sequence; imidazole glycerol phosphate synthase subunit F (core genome, variable)

Best match: hisF\_CC001\_MW2-USA400\_BA000033.2[2780899:2781657:r]RC

Position: 065-contig\_242\_RC: 134982 ... 135741; Length: 759 bp

Sequence:

```
TCATCTTACTGCTATACCTCCTTGCCGATCACTTCTTTAATAGATTGAACCGTCGTTTCTC  
GATCATGTAATACTTGCAGCTAAACCTGCAGAAACATCCGTCTGATCAAATAATTCTA  
CAAAGTGGTGTGCATTGCCACCACCAGAAAGCAATGATTGGAATATTTACAAGAGACT  
TAATATTTGCTAGGTGTTCAATATCAAATCCTTGCTTCATACCATCATGTCCCATACTTGT  
AATGAGGAGCTCACCTGCACCTAACTGTTCTACTTGTGTACCCAGTCATATACTTTAATA  
TTTGTCACTTTTTTACCACCATGCGTACAACAATAATGTGCTTTTTCTTTCAGGATCATAAT  
AGCTATCAATTGCTATACAGATGCATTGTCTACCGAATTTATCACTCGCTTGTTTAATGAG  
CTGTGGATTTTTTAAAGCACTTGAATTTAATGATACTTTATCTGCACCATGATTTAACAAT  
TGGGTAATATCATCGAGACTTTGAATCCCACCCCTACAGTAAGAGGGATAAACAAGCGT  
GACGCTGTCTGTTCAATCACTTCTAGCATTAAAGCTATGACCCTCTTCCGTCTTAGAGATGT  
CTAAAATACTAATTCATCAGCACCCGCTTCATTGTAATACATTGCTAAATCAACAGGAT  
TCCCAATATCCCTTAATCCTTTAAATTGAATCCCTTTAACGACACGACCATCTTTGACATC  
TAAACATGGAATGATACGTTTTTTAATCAT
```

### > **hisA**

Function: protein coding sequence; phosphoribosylformimino-5-aminoimidazole carboxamide ribotide isomerase (core genome, variable)

Best match: hisA\_CC001\_MW2-USA400\_BA000033.2[2781654:2782358:r]RC

Position: 065-contig\_242\_RC: 135737 ... 136442; Length: 705 bp

Sequence:

```
TCATTTTAGCCCCTCCCAAAAAGATGCTTGATGTGCAGCCTTTCCTATAATAGCAGCGTGA  
ACATTTAGCGACGCTAATCGTTGAATATCTTGCTGATGTCTAATACCACCGGAAGCAATG  
ACAGGAATCGTCGTTGCCTTTACTAATTGACCAGTTAATTCAAAGTTAGGTCGGGACATTT  
TGCCATCTTTAGCAATATCAGTATATATAATGCCTCCAAGAGGTATATCCGATAACTGTCT  
CACAAAATAAATAAATTTAACTCTGTGTCTCTTCCCATCCGTTCACTTTAATATCTTCTC  
CATAAGCATCAACAGATAAATAAATGCGACCTGGAAATGTATGTGCCATCACTTTAAGCC  
AATCAGTATCTTGAATGCCTTTCGTTCCAATATGCAATAATTAATCCCTGCGGCAAAGTA  
GTCCATGATTTGTGACTTCGTACGAATGCCACCACCTACTTCAATATCTTTGGTTGTTAAT  
CTCCTCAATGACTTAATATAATCAAATCTCGGGCATGCTGTGCCTTAGCACCTATCAAGT  
CGACGATATGAATACGATTCACACATTCAAATTGACTATAGTAAGCAATACTTTCTTTCAG  
CCGAGCGTGACATTTTTTCTTCACTATCATATTTACCCTCTGTAAACCTCACACTTGTTGAC  
CCAATCAAATCAATCGCTGGCCATAATTCAATCAT
```

### > **hisH**

Function: protein coding sequence; imidazole glycerol phosphate synthase subunit H (core genome, variable)

Best match: hisH\_CC001\_MW2-USA400\_BA000033.2[2782351:2782929:r]RC

Position: 065-contig\_242\_RC: 136434 ... 137013; Length: 579 bp

Sequence:

```
TCAATCATTATATAAATCCCCCTTGTATTGCCTGACGCAAATTTGCAACCCATATGTACCG
CTTTTTTCAGGATGGAATTGAATACCAATATAATTGTTAAATTGAACAATTGCTGGAATAT
CAGTACCATACTGCGCATATGCAATGACATTTTCTGACATCGGCGCTTGATAAGAATGTA
CGAAATAAACATCTTGATTTAACATAGGGTGCTTACTCACTAAATTATTCCAGCCTAAGT
GTGGCACTGGGTATTCTGTTTGGATACGCGAAATATTTCCCTGGGATAAACCCCTAATCCAG
ATGCATCGCCTTCATCACTATGCTCATACTAATTGTCATGCCTAAACAAATACCAATCAT
CTTCTTATCAGTATTCTTAGCCAATATTGCATTGAGATTTAATCGTTTTATCTCTGACATCG
CATCTTTAAAATGGCCGACACCGGGCAATATGATTGTTTCTGCTTGATCGATTATTTTTGA
GGTATTTGAGACAACCACCTCATACCCTAAATGTTCAATAGCGCGTTTTACACTAATA
TTCCCTAATCCATAATCAACGATGACAATCAT
```

### > **hisB**

Function: protein coding sequence; imidazoleglycerol-phosphate dehydratase (core genome, variable)

Best match: hisB\_CC005\_Mu50-VRSA\_BA000017.4[2843752:2844330:r]RC (completely identical)

Position: 065-contig\_242\_RC: 137009 ... 137588; Length: 579 bp

Sequence:

```
TCATTCAATCACACCTTTTCGATGACGGCACACGCTGATCATCAGTTGCAGTTAGCGCTATG
CCTAATGCACGGGAAAACGCTTTGAATATAGCTTCAATTTTCATGGTGTGTATTACCTCCAC
GAATTAATCAATATGCGTTGTTAATCTTGCATTGATTACGACCGCTCTAAAAAATTCTTC
TACTAACTCCGTATCAAACGTACCAACTTTTTCTTTACTTAATGATGCATTGAATGATAGG
TATGGGCGCCACTTATATCCACAACGACACGTGCTAATGTTTCATCCATTGGAATGTAC
ATCGTTCCATAACGAACGAAATGCTTTTTATCTTTAATCATTTCAAGTAACAATTGGCCAA
TGACAATGCCGATATCTTCAGTTACATGGTGATCATCTACGTCAATATCACCTTGTGCCTC
AATGTTTAATGACAGACCGCTATGAAATGTAAACAATGTTAACATATGATTTAAAAAGCC
CACACCTGTATTAATATGCGATGGTGACTGGTCATCTGATATTGAAATATTTAGTTGTGT
TCAGCTGTGTTTCGTTGTTTTTGATAAATCAT
```

### > **hisC1**

Function: protein coding sequence; histidinol-phosphate aminotransferase locus 1 (core genome, variable)

Best match: hisC1\_CC008-ST72\_TCH130\_ACHD01000027.1[77805:78818]RC (completely identical)

Position: 065-contig\_242\_RC: 137556 ... 138570; Length: 1014 bp

Sequence:

```
TCAGCTGTGTTTCGTTGTTTTTGATAAATCATATTTTGCCTCCATTCTTTAACAATTTCTT
CTAATTGCTTTAACTGCGATGCTGTTGCAATTGAGTATCTTACATAGCCCTTCATCACCGG
CTCACCATAAAAAGCGAGGTTTAAATCCTTGTTTCATATACGTATTGTCCTAATTGTTGCGCT
GCTGAACCTTTAGTAAGTACAAAATTGGCATTGATGGGAATACTGACATTTTATCTGCA
ACATGTGTATCAAATATTTGTTTTAACTGCTCAGCTAACTGTCGTTGCATCGTTAAAAATA
CTCTTGCTCTTCTCTATGTCTAAAAATATAAGTCGCAATATTTAGCGTAAATACATTTAA
TGGATATGGATGTTCTATTTTTTTGAATATGCTTTATCGTTCCAGCAGTACTAATTAAGACA
CCTAATCTTAAGCCGGCAATTCCAAACGCCTTTGATAATGTACGCATTCTTAAGATGTGTG
GTGCCAGTTCCACGTATATGCCGTACCATAATCTAAATATGCTTCATCAATGACAAAGT
ATCCGTTTAATGCTTTCATCTTATCTGCAATAGCTGTTAAAAATGCCGTATCAAATTGCTT
GCCTGAAGGGTTATGTGGATTACTCATAATAAAAAATGATGGTTGTACTTCATCGATTTTC
GTTAAAAATGGTTTCAAATCAAACGTTAAATCTGATCCTGCATCTACAAATGCAATTTAC
GATTTACTTGTGCCGCATATGCTTGATACATAAAAAAATCAGGATTTAGCGTTAATGCCG
GACCTTCTGGCATGATCAGCATTAACTTTTGAATCAATTCATCAGATCCATTTCTGCAAT
```

AATTTGTTTCAGGCGATAATCCGTAAAACCTTAGCATAAGCTTCCTTGAATTGTTTCATATGCT  
GCATCAGGATATAAATTATATGGCGTTGCACTAATAATAGACGTCATTGTTTTTTCATCCA  
ACGGCGTAACTGGACTTTCATTTTTATCAATATAAATCAT

### > **hisD**

Function: protein coding sequence; histidinol dehydrogenase (core genome, variable)

Best match: hisD\_CC025\_21193\_AFEG01000009.1[450253:451509]RC (completely identical)

Position: 065-contig\_242\_RC: 138585 ... 139842; Length: 1257 bp

Sequence:

CTAAGACTGACGTATTAATAATAGACTGCTGGTGATTGTATAATGCTTCAACATGAGCAAT  
ATGTTGTGCTGAATCAGCAATTTGTTCAAACGTATCTTTTGATAAATGGATGACCGTGTTC  
CGTGTTAAGAAATCATTGACCGATAACCCATTGGTAAATCTAGCTGTTCTATTTGTAGGTA  
ATACATGACTTGGACCTGCAACGTAATCTCCTATGACCTCTGGCGAATAATGTCCAATAA  
ACAATGCACCCACATATTTCACTTTTTCAATATATGGTTGAGGATTTACTGTTTGAATCGA  
CGCATGTTTCAGGCGCGATTGTATTCATGACATGGCATGCTTCATCAAATAACTAGCATG  
GATAAGATAGTGTGATTAGCGATACTTTTAGAAACAATGTCGTATCTGTCCACATTAGG  
CAATGCTTTAGCAATACGTGATTCTAAATCTTTAAGGACTTGCGCATCTTCACTAATGACA  
TATGTACGTGCTAATTCATCATGTTCTGCTTGCGCAAATACATCATATACGATGGCATCTA  
AATCTGCGGTGTCGTCATAAATCAGTGCTATTTCTGTTGGTCCTGCAATTTGATCAATACC  
TACCTGTCCAAATAAATAATTTTTTGGCATATGCAACAAATTGGTTACCTGGACCTACAATC  
TTATCAACTTTAGGTATCGTTTCTGTTCCATAAGTCAATGCAGCAATACTTTGAGCACCAC  
CAACTTGAAACACTTGATTAACTTGCCTAATAACATGCAGCTAATACCTCTTGGGATA  
CTCCGTTAGGTTGAGGTGGTGTCAACAACAATAATTTTCTACACCTGCTACTTGTGCTAA  
AGTCGCTGTCATTAGAACCGTTGATGGATAACTTGCTTTGCCACCAGGCACATAAATACC  
CACACTTTCTAGTGGATGGTATATTTTATAACACTCCACTGATTCTTCTAACTGTTGATT  
GTCTGTTAATACTTTCTTGATATGCTTTAATTCTTTTATAACTTTGTTGTAATGCTTGT  
TTTTTTTCATCTAATGTGTCAAATGCTGCTTTAATTTGTTTCATGACTAATTTCTAAATGATC  
TGTTTTCGTATGATCGAATGTTAGATTATACATTTTCAAAGCCTTATCTCCATGAACCTTA  
ACTTCCTGACAAATATCGCGAATAATTGGATACAATGACTCATCTAATGGTGCTTCTAAT  
GAAAATTGATTTAAAATTGTTGTGCATTAAGCATTGGCAA

### > **hisG**

Function: protein coding sequence; ATP phosphoribosyltransferase (core genome, variable)

Best match: hisG\_part\_CC008\_930918-3\_ABFA01000732.1[1:60]RC

Position: 065-contig\_242\_RC: 139828 ... 139888; Length: 60 bp

Sequence:

TTAAGCATTGGCAATAGACACCTCCAAAGAGCGAATAAATTGCTCTATTAATTGTGATTT

### > **hisZ**

Function: protein coding sequence; ATP phosphoribosyltransferase regulatory subunit (core genome, constant)

Best match: hisZ\_CC007\_TCH959-USA300\_AASB02000026.1[9364:10182:r]RC

Position: 065-contig\_242\_RC: 140460 ... 141279; Length: 819 bp

Sequence:

TTAAAGTGTTAATCCTAATCCAAACCCTTCGATGCTTCCTTTGTAATAACCACCTGTAAA  
ACTCGAGATTCATTTTCAGCAAAAATGACATTGAATAAATAAACCTGTGTAATAGGATCTA  
GGTGGCTGCGCAGTAATATCTAAATGGATGTCTTTGTAACCTTGTGTATGTAACCAACGTT  
CCCATATTTTTAATTCAACGAGTGCTGGATGGTCATTTGGAATATAGTGTTCCAATACATT  
TAATTGTTGTTGCGTATTCTCTTTCAAGATTTGCACGATTGGATGTTTCAGTCGACAAATAT  
GTAACCAGTCCCGATAAATTACGTTCCCTCAATCATTGATAGTATGTCTGGTGTGTTGTAACG  
ATTTATCGAGTAAGGCATCAAGCAATTGATAATGTCCCAATACAACAAAATGCACGTTGT  
CTCTCAACTGCTGTTGAATAAACTGAATAAATAGCTTTAAGCTCTGTTGTACATTTCGCTAA  
TGATGGTGCATAGTTTTCCAAACCCACTTGTACAGCCGCTTCATTATTCCGAATGATTTAA  
CCTGTGTATGCCACTTTTGTGCTGCAGTTGGATACATTGAGTAATAACGCAATAATTGAT  
CTGTAATAATCATTTTCGAAGTGCATAAATTTGATGCTCATGTTGCCAAAATTTTCGCTCACC

CATCTGCTGCAAATCCTCATGGTTCAATTGTTTCCAGTCCAACCTTTTCAACCACACTAAAA  
TCAACTAACTCATAATCCGCTTTATTAATAAATATTTTAAAAATGCTGTTTCCGATTCTTTTA  
ACGCAATTAATTGTTCTGAATTATTCAC

> **cbiQ**

Function: protein coding sequence; ABC transporter/permease protein (core genome, constant)

Best match: cbiQ\_CC001-ST772\_118\_AJGE01000017.1[8225:9058]RC (completely identical)

Position: 065-contig\_242\_RC: 143369 ... 144203; Length: 834 bp

Sequence:

CTAATACCACGGGTTGAAATATCGACTATTATTTAAAAAGAATAATGTAACACTAACAT  
CAGAAGTATTAACGTCAAACACAAAACAACATAATCATCTTTTTTTAATTGTTTTTTGACG  
TACCAGGTTCTCCTTTTATACTGTCCGAATTGTCTTAACTCCATAGCAGTACTAATAGTGT  
CAATTCCTTCGATACTAGAAAATATTAAGATAACACAATGCGTTTGATACCTTTAACAC  
GGCTAGTAAATTCGCCTTTTTCGAATTATCATATCCTCTTGCTTGTGCGCTTGTGAAATA  
TTAAAATATGTTTCTTGAATATCTGGAATATACCTTAATGCTAGTGAGACTGCGTAACTGA  
TTTTATAATTCACACCTAGCTGATTTAACTTGCAGCAAAATGACTCGGATTCGTTGTGAA  
TAAAAATATTAACGCTAAAGGAACTGTACTAATATATTTTAAATATTAGATTA AAAAGATA  
GAATAATTCCTGTGATGTTAGCGTAAATCGACCAATACCATTGATTA ACTCTGTACGCTG  
ATTATAAATCTTCACACCATATTCAGGATCAAATATGTATACGGCAATAATATTTAATATT  
GTGAAAAACAGAATGAATTTAACAACAAAACGAACTTGTTCATTCAATATGAGCATAT  
TTGAACAATAAAAATAGATGAAACACTAATTA AAAATTAATATCTTGTGTCATAAGTCACC  
ATTGCAGAAATAGAAACA ACTAATAAGAATAAAAAGTTTAAACAGTCTCATTTAATTGATGA  
ATACGACTATTTCCCGGGTGAAAACCTATAGTATTATATTGATTCAT

> **ccmA**

Function: protein coding sequence; ABC transporter/ATP-binding protein (core genome, constant)

Best match: ccmA\_CC001-ST772\_118\_AJGE01000017.1[6516:8228]RC (completely identical)

Position: 065-contig\_242\_RC: 144199 ... 145912; Length: 1713 bp

Sequence:

TCATTGGCGTCTCACCTTCTATCATGGTTAATAAATAATTGTACTAATTTCTGTGGCTCG  
CTAATCCCTATATATTCGGCCATTTCAAATAGCGATGTTTGTCTCAATGATGCAATCTCAC  
AGATTTTTTTATCATTAAACCAATACTGGCGTGGTATCAGCAACGACTTGACCTTTTGA  
TAATAACA ACTGTTCTTGA ACTATACTCAGACAATAAATGCATATCATGCGTAATCATAAT  
AATCGTCTTCCCTTGTCTGTTTAGCTCAATTA AAAATGACATTATCTCATTATAATGATAG  
AAATCTTGACCAGCAGTCGGTTCATCCAATATGATTATTTCCGGATTTAAGACTAAAACA  
GATGCTATAGTGACCCTCTTTTTTTGACCATAGCTTAAAGCTACAATTGGCCAATTCCGAA  
ATGCATAAAGTCCGCATATTTT GAGCACATTCTCTACCCGTATCTTTATATCTGATTCTTTC  
ATACCTCGTGCTCTTAACCCTAATGCTACTTCATCGTAAATCATTTTTTTCGGAAATCATAT  
GATTTGGATTTTGCATCACATAACCTACGAATTCAGATCGTTCGCTAATTGACAATTGATT  
AAATCCCCTATTACAAAATTGGATATTACCTGTTATATCTAAAAATCCACAAATTGCTTTA  
GCAAGTGTTGATTTGCCGGCACCATTGTGACCAACTATACTAAGCATTCTCTTTCTATAAAA  
CATTTAATTGAACATTATTAAGTACACTATTACTATAGTCACTATATTGAACACATACTC  
ATTTAATTCTAATAGCGGTT CAGATTTGACTTATTATCATTATTTGCAGATGTTTCATCTA  
TCCATTTTTTCACTTTAAATTTAACATGTTCACTCATACAAACGTCACGTA AATTCGCTAA  
GTTATCAATGGATTCGACATCTACTTCTGCATATTTAAGCGCTGTACAGTATAATGGTTCA  
CGTATGCCTGCTTCTTTAAGCTTAGATGATTTTAGCAAATCACTAGGCGTTGTATTAGCGA  
TGATTTTTCCATCTTTAAAAAGAAGAACTCTATCAAACGTATCATCTAATGATTCTTCTAA  
TCGATGTTTCGACAATAATCATCGTTGACTTTGTTTCTTCATGAATATTGTTTAAACAATCTC  
AGCGTTTCATGTCCTGTGCGCAGGATCTAAATGGCCAGTGGCTCATCCAATATTA AAAATA  
GGCGTACGATGGATTAATATACCACCTAATGAAACGCGTTGTTTTT GACCTCCAGATAAA  
TCTTGCGGTTCGGTGATTTAAATGTTCTATCATGCCAACTTTTT CAGCCCAATAACTTACAT  
TTTTCTTCATATCATCTTGTTC AACACAATTATTTTCTAATAAAAAGGCCATATCTTCAGCT  
GCTGTTAAGCCTATGAACTGTCCATCTGTATCTTGTA AAAACTGTACCAACAACATTAGATC  
TATCATGTAAACA ACTAACGGTTGCATCTTGATTATTTATATATAGTTCCCGGTTATGTT  
ACCTTTAGTTTTAAATGGAATTAATCCGTTTATGCAATTTGCAAAAAGTCGATTTACCACTA

CCTGAAGCACCAACTACTAGCACTTTTTCTCCTGGATAAATATCAACATTTATATTCTGTA  
ATGTAGGTGTTGCTTGACTATGATATTGAAAACCTAAAGTCTTTGAACGAGATAATTGGTT  
CAGTCAT

### > **yceI**

Function: protein coding sequence; lipid/polyisoprenoid binding protein (core genome, variable)

Best match: yceI\_CC001-ST772\_118\_AJGE01000017.1[4137:4652:r] (completely identical)

Position: 065-contig\_242\_RC: 147775 ... 148291; Length: 516 bp

Sequence:

ATGACTAACTTTACTTTTTGATGGTGCACACAGTAGTTTAGAATTCCAAATTAACATTTAA  
TGGTTTCTAAAGTGAAAGGTTCAATTTGATCAATTTGATGTAGCTGTTGAAGGAGATATTA  
ATGACTTCAGTACTTTGAAAGCTACTGCAACAATTATTCCAAGCTCAATTAACACTAAAA  
ACGAAGCACGTGATAACCCTTAAAATCTGGTGATTTCTTTGGTACTGACGAATTTGATA  
AAATTACATTTGTGACAAAATCAGTATCTGAAAGCAAAGTTGTTGGTGATTTAACAATTA  
AAGGCATCACTAACGAAGAAACATTCGATGTTGAATTCAACGGAGTAAGTAAAAATCCA  
ATGGATGGTTCTCAAGTAACAGGTGTTATTGTTACTGGTACAATCAATAGAGAAAACCTAC  
GGCATTAACTTTAACCAAGCACTTGAAACTGGTGGCGTAATGCTAGGCAAAGATGTGAAA  
TTCGAAGCATCAGCTGAATTCTCAATCTCAGAATAA

### > **drp35**

Function: protein coding sequence; lactonase (core genome, variable)

Best match: drp35\_CC001-ST772\_118\_AJGE01000017.1[3017:3988]RC (completely identical)

Position: 065-contig\_242\_RC: 148439 ... 149411; Length: 972 bp

Sequence:

TTATTGAAACTGAAAACCTTTGATGACCTTTTGCAAAGCCATTAAGTGTATAAAGCATAGA  
TCCTCCGCCCATTTCTATATCATTGGAACAAATGATGAGTTGATTTGTTCCAGGTATAAAT  
TGCGGATGAGTAGAACGTAACATATGCCCTTCATCTCGGCCTGGTATCAATATTTGTCCTA  
TTGATAACCCCTTTTATTAATAAACTAACACTCGACCTTGACCATACATTGCTACGTATAA  
ATTATCGTCACTATCAATACAACATGAGTCTGGTCCTTCATGACCTGTAAAATAGTACGGT  
ATAGTAGCTCCAAATGGTTGTATCGTCACACCATCATCTTCAAGTGCAATGCGATGTAAT  
CGATTGGCTGTAGTTTCTGTTACCCATAGTACTTTTTTCATCTGTACTTAAAGCAATACCAT  
TTGCTACGCTAATATTTTGAATGATAGGCGTCACTGTTCTAAAGTCCGGCGCAACATAAT  
AAACGCCCCCTAGTGGATTGGTAGAGTATCCTCTAAAATCTGTAAAATAAAATCCACCTT  
TAGAATCAAATACCATGTCATCAATACAATAAGTTGTTGAAAAATCTTCAATAATATCTT  
GTATGTTGTCACCATTTTCTGTAGCTGCAAAAATGCCTCCTGTAGATTTAAAATCTCCTAA  
ATAACAAACGAATAATCGGCCATCTTTATGTATTTTGATTGCTGCAGGATTCGCTTTATGG  
CTTACAAAAGGTCGTTTGATTTCCCTTCGTTTCAGGATTGATTTTGAAAATATTGCCTTCGA  
ATACATCCAATAAAAAGAGTTGTCCCTGCCGATCAAAGTTCAATCCTTCTAGCTGCAATC  
CTTTTTTGAAATTTCAAGCCATGGTTTCAGCTGTAATTGTTTGAATTCACTTTCAGATAT  
AATTGGAACAGCACTATTGGACTTCCCGCTATAAAAATAATGTAGGTAATCTTGTTGTGA  
CAT

### > **Q5HCK8**

Function: protein coding sequence; rhodanese domain-containing protein (core genome, variable)

Best match: Q5HCK8\_CC001-ST772\_118\_AJGE01000017.1[1817:2773:r] (completely identical)

Position: 065-contig\_242\_RC: 149654 ... 150611; Length: 957 bp

Sequence:

ATGAACTATCAAGTTCTTTTATATTATAAATATACGACGATTGATGACCCTGAACAGTTTG  
CTCAGGATCACTTAGCGTTTTGCAAAGCACACCATTTAAAAGGTAGAATTCTTGTTTCTAC  
AGAAGGTATTAACGGCACATTATCTGGTACAAAAGAAGAAACCGAACAATATATGGCAC  
ATATGCATGCCGATGAACGATTCAAAGATATGGTGTTTAAAATTGATGAAGCTGAAGGAC  
ATGCTTTTAAGAAAATGCATGTACGTCCTCGAAAAGAAATCGTTGCTTTAGATTTAGAAG  
ATGACGTCGATCCAAGACACAACTGGCCAATATTTATCACCTGTAGAATTTAGAAAAG  
CTCTTGAAGATGATGACACAGTCATTATTGATGCACGTAATGATTATGAATTTGATTTAGG  
TCATTTCCGAGGTGCAATTCGTCCAAATATCACGCGCTTTAGAGATTTGCCTGACTGGATT

AAAGAGAATAAAGCGTTATTTGCAGATAAAAAAGTGGTTACGTACTGTACTGGTGGCATT  
CGATGCGAAAAATTTTCTGGATGGCTTTTAAAAGAAGGTTTCGAAGATGTAGCACAACCTT  
CATGGCGGTATTGCTACATATGGTAAAGATTCTGAAACAAAAGGTGAATATTGGGACGGT  
AAAATGTACGTATTTGATGACCGTATCAGTGTTGATATCAACCAAGTTGAAAAACGATT  
ATTGGTAAGGATTGGTTTGGATGGCAAACCATGTGAACGTTATATTAATTGCGCTAACCCA  
GAATGTAATAAACAAATATTAGTTTCTGAAGAAAACGAAACTAAATATTTAGGTGCATGC  
TCTTATGAATGTGCTAAACATGAGCGTAATCGTTATGTTCAAGCAAATAATATTAGTGAT  
AATGAGTGGCAACAACGTTTAAACAACTTTGATGATTTACATCAACATGCTTAG

### > **pcp**

Function: protein coding sequence; pyrrolidone carboxyl peptidase (core genome, variable)  
Best match: pcp\_CC001-ST772\_118\_AJGE01000017.1[1027:1665:r] (completely identical)  
Position: 065-contig\_242\_RC: 150762 ... 151401; Length: 639 bp

Sequence:

ATGCACATTTTAGTAACAGGGTTTGCGCCTTTTGACAATCAAATATTAATCCCTCTTGGG  
AAGCTGTGTCTCTACTCGAAAATATTATTGGCACACATAACAATCGATAAATTAACACTAC  
CAACCTCTTTAAGAAAGTAGATACTATGATAAATAAACGTTGGCATCTAATCACTATG  
ATGTTGTAAGTACTAGCTATAGGACAAGCTGGTGGTAGAAATGCCATTACCCAGAACGTTGTCG  
CCATTAATATTGATGATGCACGTATCCCAGATAATGATGCCTTTCAACCTATTGATCAAGC  
CATTCATTTAGACGGTGCGCCAGCTTATTTTTCAAATTTACCAGTTAAAGCAATGACTCAA  
AGTATTATTAATCAAGGACTTCCTGGAGCACTTTCAAATAGCGCAGGTACGTTTCGTATGT  
AATCACGTACTTTATCACTTAGGCTATTTACAAGATAAGCACTATCCTCATCTTCGCTTTG  
GATTTATCCATGTGCCATACATACCAGAGCAGGTCATTGGTAAACCCGATACACCATCTA  
TGCCATTAGAAAAGATAGTTGCAGGTTTACTGCAGCCATTGAAGCTATTTCTAATGATG  
AGGATTTACGTATAGCTCTAGGCACAACGGAATAG

### > **Q2FUS3**

Function: protein coding sequence; putative protein (core genome, variable)  
Best match: Q2FUS3\_CC001\_MW2-USA400\_BA000033.2[2797751:2798215] (completely identical)  
Position: 065-contig\_242\_RC: 151504 ... 151969; Length: 465 bp

Sequence:

ATGACTACAAAAACGGTATTTGATGTCATTGATATGGGTTTAGGATATTTAGTAAATGTG  
TATGATACTTGGAAAGTTGAAAAGATACTTGATGATTATCATAAGCCTTTTTCTAATACCA  
TTCATTGGCAATTTGGGCATGTATTAACAATTTTTGAATCAGCCTTAGCTGTTACTGGTAA  
AGAGAATATTGATTTAAATATATATAGACCTTTATTCGGAAATGGTTCGTCTCCAGATGA  
ATGGAAGGGCGAAGTACCGAGTATTGGAACGATTTTAGAAGGTCTTCAAACATTACCTGA  
ACGTGCACGAAAATACTGAAGATGATTTAGCAATTGAATTGAAACAACCAATTGTTGG  
TTGTAATAACTTAGAAGAGTTATTAGTATTAATGCCATTCATATCCCACTTCATGCTGGT  
AAAATTGAAGAAATGTCTCGTATATTAATAAAATTTAAATAA

### > **txbi\_Q2FUS3**

Function: bidirectional rho-independent terminator of Q2FUS3 and cna  
Best match: txbi\_Q2FUS3\_CC012\_21266\_AFTT01000014.1[76022:76071] (completely identical)  
Position: 065-contig\_242\_RC: 151969 ... 152019; Length: 50 bp

Sequence:

ATATTAGCTTATTAACCGTTAACAACACGTTAACGGGTTTTTATTTGTTT

### > **cna**

Function: protein coding sequence; collagen-binding adhesin (genomic island)  
Best match: cna\_CC001\_ATCC51811-ST1\_ADVP01000042.1[125333:128884]RC  
Position: 065-contig\_242\_RC: 152128 ... 152278; Length: 150 bp

Sequence:

TTATGAGTTAAATCTTTTTCTTAAAATTAATACAATCCCAATATACCTATAAATACCCAT  
GTAATCCATGAAGTTATAATCTTCATACCAGTTTTTGGTAATTCTTTTAGAGGATTTTCAG  
GTTTGGTTTTATTATCTTTAGGTTGATC

> **cna**

Function: protein coding sequence; collagen-binding adhesin (genomic island)

Best match: cna\_part\_CC030\_58-424\_ACUT01000078.1[1:860:r]RC

Position: 066-contig\_195\_RC: 2 ... 301; Length: 299 bp

Sequence:

```
TTTGCTTTTTCATCTAATCCTGTCCACGTATGTGTCCAGTTATTAGATTCATTTAATGTTGC
TGTTTTTCCTGTTGCTTTTCCATCTTGATATAACTCAACTTTGATTTTCAGTTGGTCGTTTTCC
GTCTTGGTTATTATTGTCATCCCAATTTTTTGTACTGTTGCCGATGTCTCTCCTGGTGTAT
ACTTGTTGTTATTGTTCGTACCGTTGATGTCTGTTGTGTAGTCTTTTACGTGATCTTCGGTC
ACTGTATATTCTATTTTCTTTCCCTTCATCATACTTCGGTAAGTCTTTAAA
```

> **Q7WS08**

Function: protein coding sequence; sodium-sulfate symporter (core genome, constant)

Best match: Q7WS08\_CC012\_21266\_AFTT01000014.1[79549:80967] (completely identical)

Position: 066-contig\_195\_RC: 2424 ... 3843; Length: 1419 bp

Sequence:

```
ATGGAAAACACGGTTAAATATCGTAAGTTTATACTCCCTATCGTTGTAGGTCTCCTTATTT
GGGCACTTACACCTTTTAAACCGGATGCTGTGGATCCAACAGCATGGTATATGTTTCGCAA
TATTCGTCGCGACAATCATTGCTTGTATTACACAACCGATGCCAATTGGGGCCGTCTCTAT
AATTGGATTTACAATCATGGTACTCGTTGGCATTGTTGACATGAAAACGGCTGTCGCTGG
TTTTGGTAATAATAGCATTGTTAATTGCTATGGCATTTTTCATTTTCGAGAGGATTTGTG
AAAACAGGTCTTGGTAGACGTATCGCACTTCATTTTCGTCAAATTATTTGGTAAAAAAACA
TTAGGCTTAGCATATTCTATCGTCGGTGTAGATTTAATTCTAGCGCCTGCTACACCAAGTA
ATACCGCGCGTGTGGTGGAAATCATGTTCCCAATTATCAAATCACTTTCTGAATCATTTGG
TTCGAAACCGAAAGACGGATCAGCACGCAAAATGGGTGCATTTCTTGTTTTCACAGAATT
CCAAGGTAATTTAATTACTGCAGCTATGTTTTTAACTGCAATGGCCGGTAACCCCCTTGCA
CAAAATTTAGCATCTAGCACATCTAATGTTTCACATTACATGGATGAATTGGTTCCTAGCTG
CTTTAGTTCCCTGGACTTGTTCCTTAATTGTTGTACCTTTTATTATTTATAAAATTTATCCA
CCAAGTAAAGAAACACCAAAATGCTAAGAGTTGGGCTGAAAATGAATTAGCGACTAT
GGGTAAAATCGCTTTAGCTGAAAATTTATGATTGGTATTTTTTGTCAATTGCTCTAACACTA
TGGATTGTCGGAAGTTTCATTCATATTGATGCAACTTTAACGGCCTTTATTGCGCTAGCAT
TGTTATTATTGACAGGTGTCTTAACATGGCAAGACATTTTAAACGAAACAGGTGCTTGGGA
ACACATTAGTATGGTTCTCAGTATTAGTGTTAATGGCCGACCAATTAACAAGCTTGGAT
TTATTCCTTGGTTAAGTAAATCCATTGCTACAAGTCTTGATGGCTTAAGCTGGCCTATAGT
ACTGGTCATTTTAAATATTGTTCTACTTCTATTACATTACTTATTTGCAAGTTCTACAGCAC
ATATCAGTGCATGATATGCAGCATTACTAGGCGTTGCCATCGCAGCCGGTGCACCACCAT
TATTCAGTGCATTAATGTTAGGTTTCTTCGGTAACCTATTAGCTTCAACAACACACTATAG
TAGTGGTCCAGCGCCGATTCTATTCTCTCAGGTTACGTGACTCAAAAACGTTGGTGGAC
AATGAACTTAATATTAGGTTTCGTCTACTTTATTATCTGGATTGGTTTAGGATCACTTTGG
ATGAAAGTAATTGGTATATTTTAA
```

> **txbi\_Q7WS08**

Function: bidirectional rho independent terminator of Q7WS08

Best match: txbi\_Q7WS08\_CC001\_MW2-USA400\_BA000033.2[2803722:2803778] (completely identical)

Position: 066-contig\_195\_RC: 3841 ... 3898; Length: 57 bp

Sequence:

```
AAAATATTTAAATTAGCGCTCGAATCTCATTGATTTGGGCGCTTTTAAATTTGTATT
```

> **rarD**

Function: protein coding sequence; putative membrane protein (core genome, variable)

Best match: rarD\_CC001-ST772\_118\_AJGE01000046.1[7081:7989]RC (completely identical)

Position: 066-contig\_195\_RC: 4244 ... 5153; Length: 909 bp

Sequence:

TTATAGGGTTTTTGCACCGGATGTTTCTTCAATTTAATGTATTGAGAAAGACTATATAAC  
ACAATACCTGTCCAAATAAATATAAACGTAATTAATTGATCTATACTAAAAGGCTCTTTG  
AAAACAAATATGCCGAGTACAAACATTATTGTTGGTCCAACGTATTGAATAAATCCTATT  
AACGAAAGTGGAATACGTTTTGCCCGGCTGAGAATAGGATTAGTGGTATTGCCGTAATA  
GCACCAGAAAATAACAACCAAAATGATGACATGTTCAATCCAAATGACATCTGATGTTGC  
TGCCATAAATAAATAACGTATATTAGTCCAGCAGGTGCGGTAACAATACATTCAATCGTA  
ATACTGCTGATGGCATCAATATGTACTACTTTTTTCAATAATCCGTATGTACCAAAGGATA  
ACGCTAATATAATAGAAACGATTGGGAATTCTCCAATCTTGAGCGTCATATATAATACAC  
CGATGAATGCGAATAAAATGGCTAGCCATTCAAATTTATTGAATCTTTCTTTTAAAAAGA  
TAAGTGCGAGCAAAATGCTAACAAGTGGATTTATATAATAACCTAAACTTGTTTGTAGGA  
CGTGACCGTTCGTTACAGCCCAAATAAATGTACCCCAATTTAATGTAATGACATAGCCTG  
CTACAACAATTGCTAATAGCTGAATGGGCTTGCCTAACAATTGATTCATATCTCGTTGAA  
ATGCATTGCGTTGTTTTGTCCAACCGCGAGTATGAAAATCATGAATATTGCTGAAAATAT  
AATACGAAAGGCTAAAATTTCAAATGCGCCTATTGCATCAACGAACTGCCAATATATAGG  
TAGTATGCCCCACAGAATGTATGACTAAGTGCTAAAAATATACCTTTTTTATATTCTGTA  
TTCAC

### > **Q5HCK1**

Function: protein coding sequence; putative DNA-binding protein (core genome, variable)

Best match: Q5HCK1\_CC001-ST772\_118\_AJGE0100046.1[6284:6859:r] (completely identical)

Position: 066-contig\_195\_RC: 5374 ... 5950; Length: 576 bp

Sequence:

ATGACTTTACCTAAAATTGGAAAGCCTGCAACACGCGCGCTAAATTCACAAGGTATATAC  
ACATTAGAAGCAGTATCACAATATACGAAGTCATCTCTAATGGAGATGCATGGCGTTGGT  
CCTAAAGCTATATCAATATTGGAACAAGCTTTATTTACAGCACCAACTACATTTTAAAACG  
GAAGTTCAGTCATCATTACCTTTAAGTTAACAGGAGATGTGTCATGCAATCATGCGCCT  
AAACGTCAACAAATGATAGATTTTATAGTTGCTACAGCAGCATTAGATATTGAATTATTA  
CGTTCCTGGTTACAACAGAATTTATTTGGTCTGTGCCTGGACACTTTGACATTTATGGAC  
CTCAAATTTTAAATTCAAGAACTATCTAACTATTACAATCAGGTTGCTAGTCTCAATATCCA  
TTCCAGCATCACACATGGGTGCTTAGGTTCCATGCATGGTATTGAAATATTTAAAACCTGG  
TAAAGAGATTCATTTTGCTCATTTTTTTGAATTTGAAAATCATAAAAAGGATGCCAAGTTA  
AGCAAAGTGACATCTTACATTGTTGTTGGTTAA

### > **nixA**

Function: protein coding sequence; high-affinity nickel transporter (core genome, constant)

Best match: nixA\_CC001-ST772\_118\_AJGE0100046.1[5103:6119:r] (completely identical)

Position: 066-contig\_195\_RC: 6114 ... 7131; Length: 1017 bp

Sequence:

TTGACTGTTTTTAAAATGAGCGCTTAAGCTGGTTACCATACATAGCTATTGTCATTTTGT  
TACACGTTATTGGGTTTAGTTTTTATGGATTGCTGGAAAAGACCATCATATCTTATTTGG  
TATGGGGATTCTTGCATATACATTAGGTTTACGTCATGCATTTGATGCAGATCACATTGCT  
GCAATAGATAATACGGTTCGCAAATTATTACAGCAACGCAAAGATCCATCTGGTGTGGT  
TTCTACTTTTCAATTGGACATTCATCTGTTGATTTTTTAATGGCTGTTTTTTTAGGGGTGTC  
TGTAATGAGGCTAAAGATGAATTACCACATTTCCAAGATATTGGTGGAACGATTGGTAC  
ACTAGTTTCAGGTTTCTTTTTAGTGCTTATCGGTGTGTTGAATCTAATTATTTAATCTCTT  
TAATTAACCTTGTTTCGCTAAATTACGTCGTGAACACATTGAAGAAGCTGAAGTCGATGTAT  
TACTTGAATCTAGAGGATTTGTTTCTCGATTTGTAGGACCTTATTTCAAGTTAATCACGCG  
TAGTTGGCACGTATTGCCACTTGGCTTTTTATTTGGACTTGGTTTTTGATACAGCTAGTGAA  
ATTGCGTACTCGCTCTTTCTTCAGGCGCATCACACAAGCCATTTCAATTTATCGGAATCT  
TATCTTTACCAATTTTATTCGCATCAGGTATGAGTTTATTGGATACATTAGATGGTGTGT  
AATGAAGTATGCCTATAATTGGGCATTCTTCAATCCTATTCGCAAAATCTATTACAATATA  
ACGATTACTGCGATATCAGTCATGGCAGCATTAGTGATTGGGATGATTGAATTGCTACAA  
ATTCTTGCTGATAAGCTAGATTTACATGGTGCCTTTTGGGCATTCATTGGTTCGATCGAAT  
TTGATTATTTAGGCTATATTTTAGTTGCATTATTTTTAATTAATTAATTTGCTTATTTCAAGTTA  
ATTTGGAAGTTTGGTTCGCATAGAACACAAATGGTCTAAATAA



## > **Q5HCJ9**

Function: protein coding sequence; N-acetyltransferase (core genome, variable)

Best match: Q5HCJ9\_CC001-ST772\_118\_AJGE01000046.1[4087:4881:r] (completely identical)

Position: 066-contig\_195\_RC: 7352 ... 8147; Length: 795 bp

Sequence:

```
ATGAATATTGCGAAGTTAGAGAATTATTTACAAATTGATTCATCTCGTTATAATCGACCG
AGTATTGAAGCATTAAATTATTATGCAACACGTTTTATGTTAACTGTACCTTTTGAAAATA
TTGATGTTCAAAATAGTAAGCCGATATCTATAAAATATCGATGCACTTTTTAATAAAAATTGT
TCATGATAAACGTGGTGGTTTTTGTATGAGTTAAATACATTTTTCAAAGCCTATTTACAA
CAAAAAGGATTTAATCCTGAATTAATGTCAGCTACTATTCACACACCCGGTGGCGGTCGT
AGTCTGAACGGTTCACATGCTTCACTTGTGTTTCTATAAATGATGTATTCTATGTAAC TG
ATGTTGGCTTTGGAGACTTACCTCTACATGCCATTCCCTATTACTTCATCTGAGCATA CACA
ACCAATTACTGATATCAGTGGTACATTCCGCGCTATTTTTAACAACGAAGACAAGGATAT
TTTCTATGTTCAAAAATTCGAAAATGATCATTGGCATAACAAAATATGAAGCTGAATTCAA
ACCTAAACAAATAGAAGATTTTAATAGCAACATCGAATATAATCAAACGCATCCAGATTC
AATATTTGTACAGCATTTATTAATTACAATGCCACAATCATTTGGCCGTGCTACAATGTCT
GAAAATCATTTAACTTTAACAAGGAATGGTAGCTCAGAAAAATTTGATGTCACTAAAGAT
AACTATAAACATTTTTTTAGAAAAATATTTTGGACTAAATGTAACTATTAATCGTATTGAAA
ACAATAA
```

## > **tx\_hdeD**

Function: rho independent terminator of hdeD (core genome, constant)

Best match: tx\_hdeD\_CC001\_MW2-USA400\_BA000033.2[2808126:2808184:r]RC (completely identical)

Position: 066-contig\_195\_RC: 8212 ... 8271; Length: 59 bp

Sequence:

```
TAAACACAACAAAAAGGATATGACACAAACTTCATGTCACACCCTTCTTTTGAACCGCT
```

## > **hdeD**

Function: protein coding sequence; putative membrane protein (core genome, variable)

Best match: hdeD\_CC005\_Mu50-VRSA\_BA000017.4[2866111:2866623:r]RC (completely identical)

Position: 066-contig\_195\_RC: 8280 ... 8793; Length: 513 bp

Sequence:

```
TTAAGCAAGTGCATCTACAACATAAATGACACCTACGAATACAAATGCAATAGCAATCAT
CGTCGAAATAAAGACGATACCCATTAATGGATTAATAATAAAAATGACACCGAAAACAA
TACCTAATAAATTA AAAATCACTGAAATTAGTTTTAAGCTACCACTACCCGTAAACGTAA
ATAATCCTGCAATAGA ACTAAAAATGAACCAGAATGCAAACATGTAGATAAAAAATGCC
GAGCTAGCGCCAACATTA AAAATGACAATAAGACCAAAGAGAATATCTACAATCCCAT
AAACAGAATCCAATTTTGGTTACCACCTACTAAAGCTTTTGCTTTTCTACGGTAAATGATT
TGAATCACACCGTTAATTAATAACAAACAGTCCAATCAACCAGGTAATAGCATAAAAATTT
TCAATTGGAAATGTAAAAATAACGACTGCCAACATTAATAATAATACACCATTATTA AA
CTAGACCATTTAATACCTTGATTTCCCTTTTCCAT
```

## > **vraD**

Function: protein coding sequence; ABC transporter ATP-binding protein/up-regulated in vancomycin-resistant strains (core genome, constant)

Best match: vraD\_CC001\_MW2-USA400\_BA000033.2[2808989:2809747] (completely identical)

Position: 066-contig\_195\_RC: 9075 ... 9834; Length: 759 bp

Sequence:

```
ATGACAATATTATCAGTGCAACATGTTTCAAAAACATACGGTAAAAAGCACACATTTCAA
GCACTTAAAGATATTAAC TTTGACATACAAAAAGGCGAATTCGTTGCGATTATGGGGCCT
TCTGGATCAGGTAAGACAACCTTATTAATGTACTAAGTTCAATTGACCAAATTTCTAGC
GGTAGCGTGATTGCTAACGGACAAGAGCTTAATAAACTTAATCAAAAAGCACTTGCCAA
ATTCCGTAAAGAATCATTAGGTTTCATCTTCCAAGATTACAGTATTCTGCCGACATTA ACT
```

GTAAAGAAAACATTATGTTACCTTTATCTGTTCAAAAAATGTCGAAGGCAACAATGGAA  
GAAAATTACAAAGCGATCACGACAGCATTAGGTATTTATGACCTAGGAAATAAATACCCT  
AGCGAATTATCTGGTGGTCAACAACAAAGAACTGCAGCAGCGAGAGCATTGTTCACAA  
ACCACAAATCATATTTGCAGATGAGCCAACAGGCGCACTCGACTCGAAAAGTGCAAATG  
ACTTATTACAACGTTTGGAAAGAAATGAATAAATCGTTTGATACAACACTATTGTCATGGTTA  
CACATGATCCGGTTGCAGCAAGTTTTGCAGAACGTGTCATCATGCTAAAAGATGGCCAAA  
TTCATACACAACCTTTATCAGGAAGGACGTTCTAAACAGGCCTTTTATGAAGACATTGTAC  
ATCTTCAATCAGTATTAGGTGGTGTCTCAAATGACATTTAA

> **vraE**

Function: protein coding sequence; ABC transporter permease/up-regulated in vancomycin-resistant strains (core genome, constant)

Best match: vraE\_CC005\_ED98-hen\_CP001781.1[2813529:2815409]

Position: 066-contig\_195\_RC: 9823 ... 11704; Length: 1881 bp

Sequence:

ATGACATTTAACCATATCGTTTTCAAAAACCTTACGACAAAACCTTAAAACATTATGCAATG  
TATTTATTTTCATTATTTTTTAGCATCGTCTTATATTTTCAGTTTTACAACCTTACAGTTTACT  
AAAGGTGTAAATAATGACGACTCGATGGCCATCATTAAAGAAAGGTGCTTTAGTCGGATCA  
ATATTTTTATTTATCATTATTGTCATCTTTTTAATGTATGCCAATCATTATTCGTGAAACG  
CCGTACACGTGAATTTGCGCTATTTCAAGTTGATTGGTTTAAACACGACAAAACATTTTGAAA  
ATGTTAGCACTTGAACAAATGATTGATTTTTAATCACAGGTGTTGTCGGTGTATTATGTG  
GCATTGCAGGTGCACAATTATTGCTTTCCATAGTATCTAAATTGATGTCGTTATCGATTAA  
CTTATCGATACATTTCGAACCTATGGCCCTTGTTTTAACTATTTTCATGCTAATTATTGCGT  
ATGTACTGATTTTATTTCAAAGTGCTTTATTTCTAAAAAGACGTAGTATCTTATCAATGAT  
GAAAGATTCAATTAACCTGATGCCACAACCTGCTAAAGTAACGACTGCAGAGGTTATTTTC  
AGGCGTATTAGGTATTGCTATGATTGCACTAGGCTATTATATGGCGACAGAAATGTTTGG  
TACGTTCAAAGCACTAACTATGGCTATGACATCACCGTTTATCATTATTTTAAACGGTT  
GTAGGCGCCTATTTATTCTTCAGAAGTCCGTGTCACTTATTTTTAAAACATTGAAAAAAT  
CAAAAAATGGACGCGTATCTATTACCGATGTTGTATTCACATCGTCTATTATGTACAGAAT  
GAAGAAAAATGCGATGTCTTAACTATCATTGCAATTATTTCTGCAGTTACAGTAACTGTA  
TTGTGTTTTGCGGCATTATCTAAATCAAATACAGATCAAACCCTTACATCTATGGCACCAA  
ATGAATTTAACGTGGTCGCTACTCAAGATGCTAAACAATTTGAAACTAACTAAGCCAAC  
AACAAATTACATTTTCTAAAAATGCTTACGAACTATTACTGTAGATAATGTTAAAGATC  
AGGTTATTACTTTGGAAAATGGTAGTGATTTCAGGTCGCACGAATTCTATTTTAAAGTGCAA  
ATAACAAGTTAACAGGCAACAATGCCATCATTACAAATACAAAATCGCTGCCTAACGTGA  
TTAATATTCATTTAAACAAAGATTTAGTAGTAAAAGGTACAAAGAATGAGACTTTCCGTG  
TTACACAAGAAGACAAAGACAAGGTTTATCCTTTAAATCTAAGCTTCAACTCACCTGTCA  
TCGAAGTAAGTCTGAAAAGTATCAGCAGTTGAAAACACAAAATAACGTTTCATACTTTTT  
ATGGATATGATATTAACAAACATCACAAAAGGAAAAAGCTCAAGCAATTGCAAAACAG  
TTTGGAGACAAAGTCATCACGTATGATGAAATGAAAAAAGAGGTCGATGCTACTAACGG  
TATTCTAATATTTGTTACATCATTTTTTAGGATTAGCATTTTTTAGTAGCAGCTGGATGTATTA  
TTTATATTAACAAATGGATGAACTGAGGATGAACTAAGTAACTTCAGAATATTAAAAC  
GCATAGGCTTTACGCATACAGATATGCTTAAAGGATTATTATTAAAAATTACTTTCAACTT  
CGGTTTACCATTATTGATTGCTATATTACATGCAGTATTCGCCGCCATAGCATTATGAAA  
TTGATGGGTAATATTTCTTCATGCCGGTTATTGTAGTAATTGTTGTATACACCCTCATTTA  
CATTACTTTTGCTTTAATTGCTTTTGTACATTCAAACAAATTGATTAAGAAAACCATTTAA

> **cspB**

Function: protein coding sequence; cold shock protein B (core genome, constant)

Best match: cspB\_CC001\_MW2-USA400\_BA000033.2[2812294:2812494] (completely identical)

Position: 067-contig\_254\_RC: 501 ... 702; Length: 201 bp

Sequence:

ATGAATAACGGTACAGTAAAATGGTTTAAACGCAGAAAAAGGTTTTGGTTTCATCGAACAA  
GAAAATGGCGGAGACGTATTCGTACATTTCTCAGGTATCGCTAGCGATGGCTACAAAAC

TTAGAAGAAGGTCAAAAAGTTACTTTCGAAATCACTGAAGGTCAACGTGGAGACCAAGC  
AGTTAACGTACAAACTGTTTAA

> **noc**

Function: protein coding sequence; nucleoid occlusion protein (core genome, constant)  
Best match: noc\_CC001-ST772\_118\_AJGE01000004.1[39539:40378]RC (completely identical)  
Position: 067-contig\_254\_RC: 2782 ... 3622; Length: 840 bp

Sequence:  
CTAACGTTTATATATTCGAATTTTTATTTTCATAATAATCTTCATGATCTTTGTCTTTATGCT  
CAACATGTAATCCTGTTTGTGAATCGCTTGGATACTTTTGCCTACCTCATCTCGTGCTTG  
AGTGACATCTTGTGCAAAGCGAAGGTTTTGTGCTTTGACTTTTTTCGGGCCCGTTTTTGG  
CGTACTCTATCTTCAGTCTGTTTCACATTTAGCTTTTGTGCAATGACTTGTCAATCAACGC  
TTCTTGTTTCGCTATCAGACAATGATAATACCGCTCTCGCATGGCGTTCAGTAATTTTACCT  
TCTCTTAAGCGAAGTAGTACTTTTCGGCGCCAACCTCAATAAACGCAACTTATTTGCAATA  
AAGCTTTGACTTTTACCTAAACTTTTTGCCAATTCACTTTGCGTTGTATCACCAATTTCCAA  
TAATTTCTTATAGGCTTCCGCTTCTTCAACAACAGACAAATTTTCTCTTTGAATATTCTCAA  
TTAATGCCACAACAGCCGTCTCTTCATCATCCATATCACGAATAATAACGTCTGCTTGAGG  
TAAATTTAGTGATTGTATTGCTCTAAATCGGCGCTCTCCAGCAATAATTTCAAACATATCT  
TCTTCAATCGGTCTTACAACAATAGGTTGTAGTAAACCATGTTTCATGTATTGATTCAGCAA  
GTTCTTTAATTTTATTTGGTTCAAACACCTGTCTTGTTGATAACGGTTGGGAACGATACG  
TTCAATTTGAATGGATTCAACATTACTATTGCGATCTTCTTCAATATGTCCAATGATGTCA  
TCTTTGTTTTTCAAACCAAATAATTTTGAAAAGGTTTTTTCAT

> **gidB**

Function: protein coding sequence; glucose-inhibited division protein B (core genome, constant)  
Best match: gidB\_CC001\_MW2-USA400\_BA000033.2[2815456:2816175:r]RC  
Position: 067-contig\_254\_RC: 3664 ... 4384; Length: 720 bp

Sequence:  
TTATTTTTCAAGTAAAGGAGTCTTATTAGGCGTCCCTGGTTTTCTTGGATACTTTTTTCGGCG  
TCTGTCTTTTTTATCAATAATGAACATCTGGCGCTCTCCAGCATCTTCTGGCAATTCAAA  
GGTATGTGTTTCTGTAACATTACCACCTAACACACTAATTGCAAATTTTGCTTCTTCTAAT  
TCTTCTTCACCTTTTGAAGATTTTAATGCAACAACTGTCCACCTTTTTTAACTAGCGGTA  
AACACAATTCACTTAAACACGGATAATCTAGCTACTGCTCTTGCAGTAACAACATCATAAG  
ACTCCCTGTAGACACCCTTACCAATGTTTCTGCTCTATCGTGTATAAAGCTGACATCCTG  
TAATTGTAATTCTGACGCTAAATGGTTTAAAAATTGAATACGCTTATTTAATGAATCAACA  
ATCGTCACTTTTAACTGCGGAAACATTATTTTAAACGGAATACTTGGAAAACCAGCTCCA  
GCGCTACATCACATATACTTATAGGCTGATTAATAAATCAAATAAAAACTAGGTGCAATG  
GAATCATAAAAAATGTTTCAAATATACATCGTGTTCATCTGTAATACTTGTCAAATTCATCT  
TTTCATTCCATTCAACAAGTAAACGATAATATGTTTGAACCTGTTGTTTTGAGTCTCAGT  
TAATTC AATATTATGTTCTTTTAAATTGTTCTGCTAACCATTCTACAGTCAT

> **gidA**

Function: protein coding sequence; glucose-inhibited division protein A (core genome, constant)  
Best match: gidA\_AC025948.16[37833:39709:r]RC  
Position: 067-contig\_254\_RC: 4383 ... 6261; Length: 1878 bp

Sequence:  
TTAGTCACTCACCTTTGGAGTTTACCTTGTCTAAGTAAATCAATAATATAGATATGTCT  
GCTGGATTTACCCCTGATATTCTAGAAGCTTGTGCAATATTTAAAGGTTTTACTTCTGATA  
ATTTTTCTCGCGCTTCAGTCGCCAACTATCAATCTTACTATAATCTAAGTCTTCTGGAAT  
TTTCTTCTTCCATACGCTTAACTTTCTCAACTTGTGTAGTGATTATTGATATAACCTT  
CATATTTGTTTTGATTTCTACTTGTCTTCAACATCTGCATTCAATTGATGTTCTTCTTCTA  
AAATTTCTAAAATTATATCGTAAGTCATTTTCAAGTCTGCGTAATAAATCGATAGCTAAAA  
TACCATCTTTTAAAGCGAGAACCACCATGTTGTTCAATAATCGCTTGCATGTTTCGTTTGG  
TTAATACGAATATCTGATAAACGCTTAAATTTCCGCATCAATTTGCTGACGTTTTTTCATTA  
AAACGTGCATATCGTTCTTCAGAAATCATACCAAGTTCATATCCCATATCCGTCAATCTCA

AATCAGCATTATCATGACGTAGTAACAAACGATATTCTGCACGTGATGTTAGTAAACGAT  
AAGGTTTCATTAGTACCTTTAGTTACAAGATCATCGATTAAGACACCAATATATGCATCTG  
AACGACTTAATATCTTTTTCGCCTGTGTTAAACACTTTACCTGCAGCGTTAATACCTGCCAT  
CAATCCTTGTCTGCTGCTTCTTCATAACCAGATGTACCATTAATTTGACCTGCAGTATAT  
AAGTTTTTAATCATTTCGTTTTCAAGTGTAGGCCATAACTGCGTTGGCACAATCGCATCAT  
ATTCAATTGCGTAGCCGGCACGCATCATATCTGCTTTTTCAAGACCTGGTATCGTCTCTAA  
CATTTGACGTTGCACATGTTCAAGGAAGACTTGTAGACAATCCTTGCACATATACTTCATTT  
GTATTACGACCTTCAGGCTCTAAGAAAAGTTGATGTCGCGGCTTATCATTAAATCGAACA  
AATTTATCTTCAATTGAAGGGCAATAACGTGGCCCGTTTCCTTTAATCATCCCTGAATACA  
TTGCAGATAGATGTAAATTATCATCGATAACTTTGTGTGTTTCAGCATTAGTATACGTTAG  
CCAACATGGCAATTGATCTAATATATATTCTGTTGTTTCAAAGCTGAATGCACGACCTACA  
TCGTCACCTGGTTGATTTTCAAGTCTTCAAGTCAAGTCAATTGTTTTTGAATTTACACGCGGTG  
GTGTACCTGTTTTAAAACGAACAATATCAAAACCAAGTTCTCTTAGATTATCTGATAATGT  
GATTGATGGTAATTGGTGATTTGGTCCACTTGAATACTTCATATTACCTAAAATGATTTCA  
CCACGTA AAAATGTTCCCGTTGTAATAATTACTGCTTTAGATAAAATACTCTGTACCAATAT  
TTGTACGTACACCTTTAACTTCATTATCTTCTATAATAAGTTTCGTCTACCATACTTGCATT  
ATATGCAAATTTTCTTCATCTTCAATCACGCGTTTCATTTCTTGTGATAAAGTACTTTATC  
TGCTTGCCTCTTAGTGCTCTTACAGCAGGTCCTTTACCAGTATTTAACATTCTCATTGTA  
ATGTGTGTTTTATCGATTGTTTTTGCCATTTGTCCACCTAAAGCATCAATTTACGAACAA  
CGATACCTTTAGCTGGTCCACCTACAGATGGGTTACATGGCATAAATGCAATATTATCTA  
AATTTATTGTTAGCATTAAATGTTTTAGCACCACGTCTTGCAGATGCTAAACCTGCTTCTAC  
ACCTGCATGTCCCGCACCTATAACGATTACATCATATTCTTGAACCAC

> **trmE**

Function: protein coding sequence; tRNA modification GTPase (core genome, constant)

Best match: trmE\_CC001\_MW2-USA400\_BA000033.2[2818119:2819498:r]RC

Position: 067-contig\_254\_RC: 6327 ... 7707; Length: 1380 bp

Sequence:

CTATTTACCTAAGCAGAATTGACTGAATAACTGATCGATGAGTTCATCACTTGCAGTCTCA  
CCAATAATTTCTCCTAATATTTCCCAAGTTCTAGTTAAATCAATTTGTACCATATCCATAG  
GCACACCAGATTCTGCTGCATCAATCGCATCTTGTATCGTTTGTCTTGTCTGTTTTAATAAT  
GAAATATGTCTTGAATTAGAAACATAAGTCAATATCTTGATTTTGTACTTCTCCACCAAAGA  
ACAAATCTCGAATTTGTATTTCTAATTCATCAATACCTTCTTGTTTTAAACATTGAAGTTTGA  
ATTAATGGCGTATCACCTATCATATCTTTAACTTCATTAATATCTATGTTTTGCTCTAAATC  
CATTTTATTAACAATTACGATTACATCTTCATTTTTTAACTACTTCATATAATGTGTAATCTT  
CTTGAGTCAATGCTTCGTTATTGTTTAAATACAAATAAAATTAAGTCTGCTTGGCTAAGAGC  
CTTTCTAGAGCGTTCAACACCAATCTTCTCTACTATATCTTCTGTCTCACGTATAACCAGCA  
GTATCAACTAATCTTAATGGCAGCCACGAACATTGACGTACTCTTCTAAGACATCTCTA  
GTAGTACCTGCTACCTCAGTTACAATCGCTTTATTATCTTGTATTAAATTATTTAACATCG  
ATGATTTACCTACGTTTGGTTTACCAACAATAACTGTAGATAAACCTTACGCATAAATTTT  
ACCCTGCGCACC GGATCTAATAAACGATTAATTTCCCTGTTTGTATTTCTTTAGACTGCTCT  
AAAAGAAATTCAGTAGTCGCATCTTCAACATCATCGTATTCAGGATAATCAATATTCCT  
TCCACTTGAGCGAGTATCTCTAATATAGATTGACGTTGTTTTTTGATTAAGTCACTTAGAC  
GACCTTCAATTTGATTCATCGCAACTTTAGAAGCTCTATCTGTCTTCGAGCGAATAAAGTC  
CATAACTGCTTCAGCTTGAGATAAATCAATACGACCATTTAAAAGGCACGTTTTGTAAA  
TTCACCTGGCTCAGCCATTCTAGCGCCATATGTCATAGTAAGTTCCAGCACTCTATTAATC  
GTTAAAATACCACCATGACAATTAATTTCTATAATATCTTCGCGTGTAATGTTTTTGGCG  
CTCTTAACACAGACACCATAACTTCTTCAACCACTTCTTTAGATTCTGGATCAATAATATG  
ACCGTAATTAATCGTATGTGATGGAACATCATTTAAAAGATGTTTTTCTTTATATAATTTG  
TCAGCAATTTCAACGGCTTGGCGTCCAGACAATCGAACAATTCCAATTGCCCTTACCC  
ATTGGTGTTGAAATACTCGTAATTGTATCTAAATCCAT

> **rnpA**

Function: protein coding sequence; ribonuclease P protein component (core genome, constant)

Best match: mpA\_CC001\_MW2-USA400\_BA000033.2[2819637:2819984:r]RC (completely identical)

Position: 067-contig\_254\_RC: 7845 ... 8193; Length: 348 bp

Sequence:

```
TTACTTAATCTTTTTATTAAAACTTTGGCAATTTTAAGTACGTGCTCAAGACTATTCTGT
ATTTGTAAAGTCGTCATATCTTTAGCTGGCTGTCTTGCTATTACAATAATATCTTTGGCCA
ATATATGCGACTTATGTACTTTGAAATTTTCACGTATTGCTCTTTTAATCTTGTTTCTTAAC
ACTGCATTACCTAGTTTTTTTAGAAACACTAATACCTAAGCGAAAATGGTCTATTTCTTTAT
TATTACAAGTGTATACAACAAATTGTCTGTTGGCTACAGAATGACCTTTTTTATATATTCT
CTGAAAATCTGCATTCTTTTTAATTCGGTAAGCTTTTTTCAA
```

### > rpmH

Function: protein coding sequence; 50S ribosomal protein L34 (core genome, constant)

Best match: rpmH\_CC001\_MW2-USA400\_BA000033.2[2820111:2820248:r]RC (completely identical)

Position: 067-contig\_254\_RC: 8319 ... 8457; Length: 138 bp

Sequence:

```
TTATGCAGATAAACTTTACGGCCTTTACGACGACGGCGCGCTAAAACCTTTACGGCCATT
TTTTGTGCTCATGCGTTTTCTGAAACCATGAACTTTACTATGTTTACGTTTATTTGGTTGAT
AAGTACGTTTTACCAT
```

### > Q9FDP9

Function: protein coding sequence; bacitracin ABC ATP binding cassette transporter, membrane protein pla

Best match: Q9FDP9\_CC001-ST772\_118\_AJGE01000063.1[220:957:r]RC (completely identical)

Position: xx1-contig\_57: 198 ... 936; Length: 738 bp

Sequence:

```
TTAACTTATATCAGTTTTTTTTAAAGTATGAGAATAATATAATTACACTGAATATAGATGTA
ACAATTATGATAATTAAGATAATAGAAATGGATAAGTATTAGGTAATGTTCTCTAGAT
ATGTCTCCAAGTGCAGCCCAAGGAAATAATCCTCTATGTTTCAAGATTAGCAGTCATTA
TTTATCAAAGTAATTATTATGGTTAAAACAATTGTGGGAACATAATTTTTAAAATATATCG
ACAAAATAATTATTGGTGGAGATAATATCCATAATAACACTCCGCCAATAACAAATGTAA
AGAATGAATCAATTATTAACCTCTGGCTTAACCCCTGAAAATGCAATAGCATACTAGCA
TTAAAGTTAGCAACCATGCAATAACAGATAGTGTGTTGAATCCACAAGAATAATAATTA
TTTTACTTACTAAAAAACTTTCTCTAGATATAGGTATAATTAATAAGTTTTTTAAAGTATC
TTCTATATATTCTCTTCCAAACAAATAGGCTATTATAACCCCATATAGAGGAGGTCCAATA
ATTAGCATATGATATAAACTGACTTCTTCAAATAACTGTTTAAATACAATATTAGGAGTC
GGTACTTTCGTCCGCATACTAATAAAGAAGCTACAACCACATAAAAGGTGCTACGCAT
GTACCTAAAATACTTATTAGAAACATATATGATCTTTTTAACTTAATAAATTCTGTACGGA
GTAGATTATCCAA
```

### > Q9FDP8

Function: protein coding sequence; bacitracin ABC ATP binding cassette transporter, ABC protein pla

Best match: Q9FDP8\_CC001-ST772\_118\_AJGE01000063.1[950:1870:r]RC (completely identical)

Position: xx1-contig\_57: 928 ... 1849; Length: 921 bp

Sequence:

```
TTATCCAATTGTGCCACCTCCTACTAAGTCTTCGAAATAAGTTTCTAGATTATCTTCTATC
ACTCTCATCTGGAAAACATCAATATTGTTAATACTAATAATCTATTAATTTCTTGTTGTCT
ATCAATATGTGAATAAATTTTAAATTCGCCATTTTCTTTAATTTTATAGTCATAAATTCGG
AAGTTAGTTTCCAACAAACATGCAACTTTTTCTTCATCTGATACTGATATACTTATAAATT
GTCTGTTCTTTTTTTTTTAAATCTTCATACATAATTTCTTCTAACAAAACCTCCGTTATGAATA
ATACCCACCTTGTCTACTAAGTCTCTATTTCTGACAATATATGACTTGAAATTAATGTTG
TTATATTTCTAGATTGAGCCAGATCCTTAATCAACTTTCTAATTTCTTTTATGCCAATAGG
ATCTAATCCATTCGTCGGCTCATCAAGTATCAATAATTCGGGATTGTGCAATAAAGCTCTC
GCAATCCCTAAACGTTGCTTCATACCTAAAGAATAATTTTTAAACAATTTTACTTTTTTTCAG
```

AAGCTAGTCCTACTATTTCTAACACTTCTTCAATTGCATTTTCTTTTTGTATACCTAATATT  
TTAGCATTTATAGTTAAGTTCTCTTTAGCTGTCAAATTACTATAAAAAACCTGGCGTTTCAA  
CCATAGCACCAATATTTTTTAAAATTTTCAGTTTTATTACTTTTCGAACTCTTTTTCAAATATT  
TTAATATTACCTTTCGTAGGTTTAATTAAGCCTAAAAGCATTCTTATAGTAGTTGTTTTGC  
CTGCACCATTTCTTCTTAAAAAACATAAATTTGTCCACTTTCAACAGTTATACTCAAATT  
ATTAAGTCTATCTGACTTCCATATTGCTTTGTAAAGTTATTTATTTCAATTATATTATTCA  
A

### > **Q7WU33**

Function: protein coding sequence; putative acetyltransferase/GNAT family protein pla

Best match: Q7WU33\_part\_X53952.1[1342:1406]

Position: xx2-contig\_61\_RC: 8 ... 38; Length: 30 bp

Sequence:

TAATATGGTTTTTGATATTGATAATTTAAA

### > **aacAaphD**

Function: protein coding sequence; bifunct enzyme Aac/Aph pla

Best match: aacAaphD\_CC005\_CIG1165\_AHVE01000013.1[1014:2453:r] (completely identical)

Position: xx2-contig\_61\_RC: 378 ... 1818; Length: 1440 bp

Sequence:

ATGAATATAGTTGAAAATGAAATATGTATAAGAACTTTAATAGATGATGATTTTCCTTTG  
ATGTTAAAATGGTTAACTGATGAAAGAGTATTAGAATTTTATGGTGGTAGAGATAAAAAA  
TATACATTAGAATCATTAAAAAAACATTATACAGAGCCTTGGGAAGATGAAGTTTTTAGA  
GTAATTATTGAATATAACAATGTTCTTATTGGATATGGACAAATATATAAAATGTATGAT  
GAGTTATATACTGATTATCATTATCCAAAACTGATGAGATAGTCTATGGTATGGATCAA  
TTTATAGGAGAGCCAAATTATTGGAGTAAAGGAATTGGTACAAGATATATTAATTTGATT  
TTTGAATTTTTGAAAAAGAAAGAAATGCTAATGCAGTTATTTTAGACCCTCATAAAAAT  
AATCCAAGAGCAATAAGGGCATAACAAAAATCTGGTTTTAGAATTATTGAAGATTTGCCA  
GAACATGAATTACACGAGGGCAAAAAAGAAGATTGTTATTTAATGGAATATAGATATGA  
TGATAATGCCACAAATGTTAAGGCAATGAAATATTTAATTGAGCATTACTTTGATAATTC  
AAAGTAGATAGTATTGAAATAATCGGTAGTGGTTATGATAGTGTGGCATATTTAGTTAAT  
AATGAATACATTTTTTAAAACAAAATTTAGTACTAATAAGAAAAAAGGTTATGCAAAAAGA  
AAAAGCAATATATAATTTTTTAAATACAAATTTAGAACTAATGTAAAAATTCCTAATAT  
TGAATATTCGTATATTAGTGATGAATTATCTATACTAGGTTATAAAGAAATTAAGGAAC  
TTTTTTAACACCAGAAATTTATTCTACTATGTCAGAAGAAGAACAAAATTTGTTAAAACG  
AGATATTGCCAGTTTTTTAAGACAAATGCACGGTTTAGATTATACAGATATTAGTGAATG  
TACTATTGATAATAAACAAAATGTATTAGAAGAGTATATATTGTTGCGTGAAACTATTTA  
TAATGATTTAACTGATATAGAAAAAGATTATATAGAAAAGTTTTATGGAAAGACTAAATGC  
AACAACAGTTTTTTGAGGGTAAAAAGTGTATTGCCATAATGATTTTAGTTGTAATCATCTA  
TTGTTAGATGGCAATAATAGATTAACCTGGAATAATTGATTTTGGAGATTCTGGAATTATA  
GATGAATATTGTGATTTTATATACTTACTTGAAGATAGTGAAGAAGAAATAGGAACAAAT  
TTTGGAGAAGATATATTAAGAATGTATGGAAATATAGATATTGAGAAAGCAAAAAGAATA  
TCAAGATATAGTTGAAGAATATTATCCTATTGAACTATTGTTTATGGAATTAATAATATT  
AAACAGGAATTTATCGAAAATGGTAGAAAAGAAATTTATAAAAGGACTTATAAAGATTG  
A

### > **msrA**

Function: protein coding sequence; energy-dependent efflux of erythromycin (mobile element)

Best match: msrA\_CC001-ST772\_118\_AJGE01000057.1[7708:9174:r] (completely identical)

Position: xx3-contig\_202: 405 ... 1872; Length: 1467 bp

Sequence:

ATGGAACAATATACAATTAATTTAACCAAATCAATCATAAATTGACAGATTTACGATCA  
CTTAACATCGGTCATCTTTACGCTTACCAATTTGAAAAAATAGCACTTATTGGGGGTAATG  
GTACTGGCAAAACCACATTACTAAATATGATTGCTCAAAAAACAAAACCAGAATCTGGA  
ACAGTTGAAACGGTTGGCGAAATTCATATTTTGAACAGCTTAACATGGATGTGGAAAAT

GATTTTAACACGTTAGACGGTAGTTTAATGAGTGAACCTCCATATACCTATGCATACAACC  
GACAGTATGAGTGGTGGTGAAAAAGCAAAATATAAATTAGCTAATGTCATATCAAATTAT  
AGTCCGATATTACTTTTTAGATGAACCTACAAATCACTTGGATAAAATTGGTAAAGATTAT  
CTGAAAAATATTTTAAAATATTACTATGGTACTTTAATTATAGTAAGTCATGATAGAGCA  
CTTATAGACCAAATTGCTGACACAATTTGGGATATACAAGAAGATGGCACAATAAGAGT  
GTTTAAAGGTAATTACACACAGTATCAAAATCAATATGAACAAGAACAGTTAGAACAAC  
AACGTCAATATGAACAGTATATAAGTGAAAAACAAAGATTGTCCCAAGCCAGTAAAGCT  
AAACGAAATCAAGCGCAACAAATGGCACAAGCATCATCAAAACAAAAAACAAAAGTA  
TAGCACCAGATCGTTTAAAGTGCATCAAAACAAAAAGGCACGGTTGAGAAGGCTGCTCAA  
AAACAAGCTAAGCATATTGAAAAAGAATGGAACATTTGGAAGAAGTTGAAAAACCACA  
AAGTTATCATGAATTCAATTTCCACAAAATAAAAATTTATGATATCCATAATAATTATCCA  
ATCATTGCACAAAATCTAACATTGGTTAAAGGAAGTCAAAAACACTGCTAACACAAGTACG  
ATTCCAAATACCATATGGCAAAAATATAGCGCTCGTAGGTGCAAATGGTGTAGGTAAAGAC  
AACTTTACTTGAAGCTATTTACCACCAAATAGAGGGAATTGATTGTTCTCCTAAAGTGCA  
AATGGCATACTATCGTCAACTTGCTTATGAAGACATGCGTGACGTTTCATTATTGCAATAT  
TTAATGGATGAAACGGATTCATCAGAATCATTGAGTATGAGCTATTTTAAATAACTTGGGT  
TTAAATGAAGCACTTGATCGTTCTTGTAATGTTTTGAGTGGTGGGGAAAGAACGAAATTA  
TCGTTAGCAGTATTATTTTCAACGAAAGCGAATATGTTAATTTTGGATGAACCAACTAATT  
TTTTAGATATTAACACATTAGAAGCATTAGAAATGTTTATGAATAAATATCCTGGAATCA  
TTTTGTTTACATCACATGATACAAGGTTTGTAAACATGTATCAGATAAAAAATGGGAAT  
TAACAGGACAATCTCTTCATGATATAACTTAA

### > mpbBM

Function: protein coding sequence; macrolide 2'-phosphotransferase II pla

Best match: mpbBM\_CC001-ST772\_118\_AJGE01000057.1[6710:7609:r] (completely identical)

Position: xx3-contig\_202: 1970 ... 2870; Length: 900 bp

Sequence:

ATGACTCGACATAATGAAATTATTAATGTGCAGAAAAATATCAATTACACATCCAACCT  
CAAACAATCTCATTGAATGAATCGGGACTTGATTTTCAAGTTGCATTTGGAAAAGATAAA  
CATGGAGTAGAATGGGTTTTGAGACTACCAAGAAGACCTGACGTTTATAAACGAACAAA  
ACCCGAAAAACAAACGGTAGACTTCTTACAGAAGAATGTTTCATTTGAAATACCGAAGTG  
GAAAGTACATGCAAAAGACCTTATTGCTTACCCAAAACCTTACAGGTAAACCCGCAGCCAC  
AATAGATCCAGAAATACAAAATTATGTATGGGAAATTGAACACAAACCATTACCAGAAA  
ACTTTATTAACACATTAGCTGAAACACTCGTAGATTTACACAACATACCAGAAGAAAACA  
TTAACGTTTCAGCATATAAATATCAAAACCATACAAGAAATAAAAAATGACTTTCAAAGA  
AGAATGAATAAAGTTAAAGAACTTATGGCGTATCAGATGAATTATGGAACAGATGGAA  
ACAATGGTTAGAAAACGACGAACTATGGCCTCGACATGCGACCATGATACATGGGGACT  
TACATCCAGGACATATAATGGTAGATAACCAAGCAAACGTCACAGGTCTCATAGACTGG  
ACTGAAGCAACCCACTCCGACCCATCAATGGACTTTATAGGACACCATCGTGTATTCGAC  
GACGAAGGATTAGAGCAACTTATAACAGCATACGGTAAAGCTGGAGGTGAAATATGGCC  
ACGAATGAAAGAGCATATAATAGAACTCAATGCAGTATCCCAATGTTTATCGCTGAGTT  
TGCTATGGAATCAGGAGAATCGGCGTATGAAACGATGGCATTGAAAGAGTTAGGTATGA  
AAGAGTAG

### > txbi\_blaZ-2

Function: bidirectional rho-independent terminator of blaZ

Best match: txbi\_blaZ-2\_ref\_CC001\_MW2-USA400\_AP004832.1[4907:4963:r]RC (completely identical)

Position: xx3-contig\_202: 3330 ... 3387; Length: 57 bp

Sequence:

TAATAAATGAGAAAAGCAACGCACTATATTAATGCGTTGCTTTTTCTATTATCGA

### > P18179-Tn552

Function: protein coding sequence; ATP-binding protein P271 (mobile element)

Best match: P18179-pWBG756\_BX571858\_MSSA476\_BX571858.1[10560:11375:r]RC

Position: xx3-contig\_202: 3380 ... 4196; Length: 816 bp

Sequence:

```
TTATCGAATACCTATAACTAACTATCTCTAGCTGTTTCTACAACCTTCTGTACTTATTTTAT
CTAAACCATTATATCCATAATTCTGTCTATCTGCGCAAATAAACGATGAATCAGCCTAA
AATTCCCTTTTGTAATTTTAATAATCGTCGTTATTGCTCATAATCAGTAAAGTCTTCGAG
TTTTAAATCAAATCCTAAGTCTTGCCACTTACATTCTAATATATGATGCGTCTCATCTTTAC
TTAGATTATCAAATTCATGCGCAAACCTATACGCGAATATAGTTGAGGATAACGAGATA
GTTTTTCTCTATACCCGGCATAACCAATAAATATCATTGCTAAATTATGTTTCATCATAAAT
AGCTCTTAATTGCTCTAAATGTTGCACTTTAAGGCGATCAATCTCATCTACTATAATTA
TCAAATATATTTAAACATATCACTATAATGTTTACTATGTTTCATGTCCATACTTATTTACAA
CATGTAATTTTTGACCCAAATCAATGATTGCAGTAATACTATATAAATCATTCCTTAATTT
AGTTTGTTTTTCTGCTGGTGCATTATAAAATATTTTATCCACCGATAGTATGTCATCGGTC
GTTTTACTAGCTAAATCTTCCCAACCTCTATGGTAACTTGTTTTTCAATAGTATCCCAATT
TGTGTAATACCTAGACGATAAAGTTTTTCCGACACCAGGTTGACCATAACATATACCAAT
ATACTGATATTTAATACAAGCATCACAAAATTCAGCAAAGCGTTTATACTCTTTCGTTTCA
ATGAAATTTTGATTTTTAGTCAT
```

### > **tnpTn552-2**

Function: protein coding sequence; transposase for transposon Tn552 (mobile element)

Best match: tnpTn552-2\_CC001\_AP004832.1[5765:7208:r]RC

Position: xx3-contig\_202: 4188 ... 5631; Length: 1443 bp

Sequence:

```
TTAGTCATTACGATATCTCTTTAATTTTTTGACGTTTTTGTGAGGTGAATAAC
CACAATTTTTTCTTCCTTAATTAATTCCGTGGTACTTGGACTAGCAATATTTTGTTTAAG
TGTTTTCTTCTCTGACTACGAGCGTGCTGTATGTCTTTTATATCTATGGAGTAATCAGCTAT
TTCTGGACATATAGCAGTACAAAGAAATTCATCTCTATAAAACATACGTATTTTCAGCCAT
ATCATTGGGGTATAACGAATCAGTACATATTCACCTACATAAGCTTCTAGATTAGTATTA
CTGTATCGAAAACCTTGAAAATGAATGCCATCTGAATGAACTTTTCTAGATTTAGGTATTT
CCAACAATAAATAAATCAAGTTGTTCTAAGCTACTTGGCATATTAGGGAAAAAGTGATTAC
TATCCAATGACTGATAGGCGTGGTATGAATAGTACTATGTTCTTTTTGATTATAATCTTC
AATAAAAAGTAACGTAATTTTTCTTCAAATTTGTGAAAATTTATTAGATTACTAGGAGT
ATCATTATTGTTTATATATCCAGGCAGTTGTTCTAAGAAAGTTTGATTAAGTGTCTGAAAG
AATCGTTCTATTTTTCCACGACCACGAGGAACACCAACTTTCGAAAACATCAAGTTAATTT
TCAAATCAATAGCGACTTGTTCATATGATGTGAAGTAAAGTCACTTCCATGATCTGTGTA
GAATTTTTCGGGTATACCACACACTGGCCAATTGGTATCATTTTTATTCCATATTGCTTGG
TGTAGTGTTAATGCTGTGTTTTGAGCATTGGGGGCATCAAACCTTAAGAAATAGCCTGCA
ATTGCACGACTATAGTCATCCATAATAATAGTTAGCCATGGTCTATTGATATTACCTTTTT
GGTCTAATAAAGATATCTAGCAAAGTATGGTCTGCTTGCCATATTTCAATGGGTCTCGA
GGATTCTCTAATTTGTATTAATCGTACTTATTTTTGATAGTATTTTTACCCTGATGAGAG
AAATCAATAACAGACTTAGGCATCGCTTAATAACACTATAAATTTGTTTATAACTTGGTA
TATCAAATTTATTTTTCTTTACAGTAATTAGTGATTTTCCATGAATTGTGGCTATACTATTT
CTTTTATTCATAAGCGCAAGGCGTTCAATTTTCATCAATTATCTTTGGTTCTATTTTACGTGT
TCCTTTATCAGCTCTTGTGCGCATAGATTAGTCCTTTAAGTCCTTGTCTTTATATGACTTAT
TCCACCTATAAAGGGTGCTTAACGCAATCCCTTTACTTTTAGAAATACTTGATAAAGATTG
TTCGCCTAGGATAAAAGGTTTTATAATATTGTACTTTTGAGTAGCTTTTTTACGTTTGGCTT
CAGAAAAATTAGTTAGATACTTCTCCTTGTTTTTTCAT
```

### > **res2-Tn552**

Function: protein coding sequence; plasmid resolvase (mobile element)

Best match: res2-Tn552\_CC001\_MW2-USA400\_AP004832.1[7180:7773:r]RC (completely identical)

Position: xx3-contig\_202: 5602 ... 6196; Length: 594 bp

Sequence:

```
TTAGTTAGATACTTCTCCTTGTTTTTTCATCTTCCTTGTCCCTCCAATTTATTGAGGTAACGAT
AAATTGTTGTACGTGAAACATGCCACTGTTCTGCAATTGTCTTAATTGGCGTGCCATTATC
ATAAAGGGTCTTAAGTAAGTTAAATCTTTTTGATTTAATTTTTCTGGTCTGCCTCCATATC
```



GGCCTCTAGCACGTGCTGCAATTCGGCCAGCTGAAGAACGCTCTAAAATTAATTACGTT  
CAAATTCTGCAAATGCTGCGAATAAATGAAATAATAATTGTCCAGTTGAACTTGATTTAT  
CCATTGTTATATTTTCTTCTAAACTATGGAACTTACACCTCGTTTCGTTAAGCTCATTA  
AATGTGATTAAATCCTCCATATTACGTCCCAATCTATCTAATCTCCAAACAACAATCGTAT  
CTCCTGACCTCGCAAATTCAATTGCTTTATCTAAACCAGGTCTTTTACTTTTTGAACCACTC  
ATATGGTCATTAAATATCTTTTCAACAACCATATGTATTTAATCGATCCTCCTGTAAATTA  
AATTTTGTAATCCAGTTGAAACTCTTGCATAACCTATTTTCAA

> **tx\_blaI**

Function: rho-independent terminator  
Best match: tx\_blaI\_CC001\_MW2-USA400\_AP004832.1[7888:7955]  
Position: xx3-contig\_202: 6310 ... 6340; Length: 30 bp  
Sequence:  
ATTTAGACATAAAAGAAGAGTGTACAGAAA

> **blaI**

Function: protein coding sequence; beta lactamase repressor inhibitor pla  
Best match: blaI\_CC005\_21172\_AFEF01000030.1[1352:1732:r]RC (completely identical)  
Position: xx3-contig\_202: 6459 ... 6840; Length: 381 bp  
Sequence:  
TTACTTTTTACTAATATCATTAAAATGTCTCGCAATTCTTCAATTTCTTTGTTATTTAATT  
CTTCATTTTTTCGCAAAATTCAGCACTAAACTTTTCATGTCCCTCCATACAGTTTATTAAG  
AAAGGTTTTAGCAGTTTTTCATTTAATATCGTCTTCTTTAATATTTGATGAGTAAAAATAA  
ATATTCTCTGATTTGTATCGTTTTATAATCTCTTTTTTATATAGTCTTGTGATTAATGTTCTA  
ATCGTTTTATCGCTAACTTCTTTATATTTTTGAATTTCAACTACAATTTTCATTAGCTGATAC  
TGATTTTTTATCCCATATTATATTCATAACATCCCATTTCAGCCATAGATATTTCAACTTGCT  
TATTGGCCAT

> **blaR**

Function: protein coding sequence; beta-lactamase regulatory protein pla  
Best match: blaR-MRSA252\_S-haemolyticus\_AJ400722.1[1112:2869]RC  
Position: xx3-contig\_202: 6829 ... 6979; Length: 150 bp  
Sequence:  
TTATTGGCCATTTAAAACACCCATTTCTTTAATATTTTTTCACTGATTAATTCAGCATTTT  
TCCCAGACGGCTTTCCATCTGATAAATGTGTAGCAAATAATACTTATCATGATTTGTAAT  
TACGTAACCTACAAACCACCCATTATT

> **aadE**

Function: protein coding sequence; streptomycin aminoglycoside 6-adenyltransferase pla  
Best match: aadE\_trunc\_TCH1516\_CP000731.1[15611:16247:r]  
Position: xx4-contig\_279: 80 ... 717; Length: 637 bp  
Sequence:  
GCTATTTGATGATTACAATAAAATTGATCTTACCTTATTGCCCTTGGAAGAGTTAGATAAT  
TACCTAAAGGGCGATAAATTAATAAAGGTTCTAATTGATAAAGATTGTAGAATTAAGG  
GACATAGTTCCGACTGATATAGATTATCATGTAAGAAAGCCAAGCGCAAGGGAGTATGA  
TGATTGCTGCAATGAATTTTGAATGTAACACCTTATGTTATTAAGGATTGTGCCGTAAG  
GAAATTTTATTTGCTATTGATCATTTTAATCAGATTGTTTCGCCATGAGCTGCTGAGAATGA  
TATCATGGAAGGTCGGCATCGAAACAGGCTTTAAATTAAGTGTAGGCAAGAACTATAAGT  
TTATTGAAAGGTATATATCCGAGGATTTGTGGGAGAACTTTTGTCCACCTACCGGATGG  
ATTCCTATGAAAACATATGGGAAGCATTATTTCTATGCCATCAATTGTTTCAGGGCGGTATC  
CGGTGAGGTGGCGGAAAGGCTTCATTATGCCTATCCGGAGTATGATAGGAATATAACAA  
AATATAACAGGGACATGTATAAAAAATACACTGGTAAAACCGGCTGCCTGGATAGCACA  
TATGCCGCTGATATAGAAGAGAGGGCGGGAACAGTGA

> **sat**

Function: protein coding sequence; streptothricine-acetyltransferase pla

Best match: sat\_CC001-ST772\_118\_AJGE01000034.1[1090:1613:r] (completely identical)

Position: xx4-contig\_279: 725 ... 1249; Length: 524 bp

Sequence:

```
ATGAAAGCAGGGCACCTGAAAGATATCGATAAACCCAGCGAACCATTTGAGGTGATAGG
TAAGATTATACCGAGGTATGAAAACGAGAATTGGACCTTTACAGAATTACTCTATGAAGC
GCCATATTTAAAAAGCTACCAAGACGAAGAGGATGAAGAGGATGAGGAGGCAGATTGCC
TTGAATATATTGACAATACTGATAAGATAATATAATATATCTTTACTACCAAGACGATAA
ATGCGTCGGAAAAGTTAAACTGCGAAAAAATTGGAACCGGTACGCTTATATAGAAGATA
TCGCCGTATGTAAGGATTTCAAGGGGCAAGGCATAGGCAGCGCGCTTATCAATATATCTA
TAGAATGGGCAAAGCATAAAAACTTGCATGGACTAATGCTTGAAACCCAGGACAATAAC
CTTATAGCTTGTAATTCTATCATAATTGTGGTTTCAAATCGGCTCCGTCGATACTATGT
TATACGCCAACTTTGAAAAAGCTGTTTTCTGGTATTTAAGGTTTTAG
```

### > **aphA**

Function: protein coding sequence; 3'5'-aminoglycoside phosphotransferase pla

Best match: aphA\_AY701528\_C-jejuni\_AY701528.1[18315:19109] (completely identical)

Position: xx4-contig\_279: 1341 ... 2136; Length: 795 bp

Sequence:

```
ATGGCTAAAATGAGAATATCACCGGAATTGAAAAAACTGATCGAAAAATACCGCTGCGT
AAAAGATACGGAAGGAATGTCTCCTGCTAAGGTATATAAGCTGGTGGGAGAAAATGAAA
ACCTATATTTAAAAATGACGGACAGCCGGTATAAAGGGACCACCTATGATGTGGAACGG
GAAAAGGACATGATGCTATGGCTGGAAGGAAAGCTGCCTGTTCAAAGGTCCTGCACTTT
GAACGGCATGATGGCTGGAGCAATCTGCTCATGAGTGAGGCCGATGGCGTCCTTTGCTCG
GAAGAGTATGAAGATGAACAAAGCCCTGAAAAGATTATCGAGCTGTATGCGGAGTGCAT
CAGGCTCTTTCACTCCATCGACATATCGGATTGTCCCTATACGAATAGCTTAGACAGCCGC
TTAGCCGAATTGGATTACTTACTGAATAACGATCTGGCCGATGTGGATTGCGAAAACCTGG
GAAGAAGACACTCCATTTAAAGATCCGCGCGAGCTGTATGATTTTTTAAAGACGGAAAAG
CCCGAAGAGGAACTTGTCTTTTCCCACGGCGACCTGGGAGACAGCAACATCTTTGTGAAA
GATGGCAAAGTAAGTGGCTTTATTGATCTTGGGAGAAGCGGCAGGGCGGACAAGTGGTA
TGACATTGCCCTTCTGCGTCCGGTCGATCAGGGAGGATATCGGGGAAGAACAGTATGTCGA
GCTATTTTTTGACTIONTACTGGGGATCAAGCCTGATTGGGAGAAAATAAAATATTATTTTA
CTGGATGAATTGTTTTAG
```

### > **tnpIS431-04**

Function: protein coding sequence; insertion sequence IS257e (mobile element)

Best match: tnpIS431-04\_CC005\_CIG1165\_AHVE01000014.1[1655:2329]RC

Position: xx4-contig\_279: 2368 ... 2398; Length: 30 bp

Sequence:

```
TTAACTTGCTAGCATGATGCTAATTCGTG
```
