# Supplementary material for: Genome sequencing and molecular characterisation of Staphylococcus aureus ST772-MRSA-V, “Bengal Bay Clone”
Source: BMC Res Notes. 2013 Dec 20;6:548. doi: 10.1186/1756-0500-6-548 (PMC3878137; doi:10.1186/1756-0500-6-548)
Supplement: Additional file 2 — Raw sequences of 70 contigs of isolate 07–17048. [file 1756-0500-6-548-S2.pdf]

CAATGATTGTTATTGTCTTAAGCGTAGTTACAACACCAATTATAGGTATTCCAGCTGGTTTATTAGGTGGCGCTTATTATTTAAAAAG  
CCGTGAAGAAAAAGGTAAATAAGCACATTCCATCGGCATATAACATTGCTATGACCTTTCAAGTCAGATTTTAATATCAACAAGTA  
GCATTATCGCTGCTTGTGTTTTATGAATTGCTTATAAAATCGTCATGTTTAAACGTTATGTCACCTTTGAAAACCTAGCAAACACCATA  
AAAGACTACAATTTTTTATTATTAACCCCTTTAAATCAACGTTTCTAAGGTTTTTAAAAATCTTTTTAAATTTATTTTCAAAAAAC  
ACTGTACATTATGCCAATATGAGCGTATAGTTGGTCTTACGTAATAAAAGCTCGTGAATTAATTTGTAGTGTATTTGTTTAGAATATC  
CTCTTTTTAGTTATGAATTTGTTACAAATATTAAGTGCAAAAGCACATGGAGGTTTTCTATATGAATAACGGTACAGTAAAATGGT  
TTAACGCAGAAAAAGGTTTTGGTTTCATCGAACAAGAAAATGGCGGAGACGTATTCGTACATTTCTCAGGTATCGCTAGCGATGGCT  
ACAAAACCTTTAGAAGAAGGTCAAAAAAGTTACTTTCGAAATCATCTGAAGGTCAACGTGGAGACCAAGCAGTTAACGTACAAAACGTT  
TAATCTTACAAAATAAAACGACTCATTATAAATGAATCGCTTTGATTACCAACAAGGTTCTAAATCTTGTGTGGTATTTTTTTATGCTA  
TTTTGGATAATATGAGACGATACGATGATGATTTATAAAAACTTATTTGCCATATACATACTAATCAAAGCTATAAGAATGATTGCA  
CTAACAAATGCTATGAAAGAAAGTACACTTGTTTTTATTTCTAGCTTTAGTCGTTTGTACTTCACTAGGATCTTTTCCATTCATAA  
AAGCAACAATTCGATCGTAGTTATCCATTTTATGCACTTTTTTAAAAATCTTCTATTTTCATAGCTGCATAATAACCTATTCATATATG  
ACTGCCACCGTTATACCCCAAGCCCAATTCCAATAAACAATTAAGGTCTCTGTTAAAAATTGCAGCTAATGTATGAAAAATAAGCATC  
ACATATGTCCATAAGTTAAGACTTCTGTGCGCTTTAATATCAGGTACAAATGGAATGGTCCCTTTTACTAAATCATCTAAAGTTACAT  
TGAACAATTCGCACATCATTAAATAGTTATGTATGTCTGGTAAGCTTTTGTCAATTTCCCAATTAGAAATACTCTGCCTAGATACATA  
TAACCTTTTCAGCAAGATATTCTTGTGAATAACCATCTCTGTTCCCTATATTTTAAATTTGTTTACTCAGATTCAATTACATACGCCTC  
ATTCAATTAGTACAATCATTACAATCAGACTATCAGATAAAGTTAAATCAAGTCACCTGTATGATTGACTAAATGTTTTGACATACG  
ACAACATCGGGGTTTGAAGACTCCCTTAAGACAGACCTGTATGATTACGCACTTGTAAATTTTCTCAATGCCAAGTTGAATTTCACTT  
ATTAATGATGCAACTTTTCCATGCTATTCAATGCTTGCAGGTTAGTCTAGTTAAGAGATTACGTTACACTATTTACTATTCGATT  
TTCCAGCTTTTCCAACTATGCTTTTCTAATCTTTTTGTGCTATAAAATCTACTGCTTCAAAAATACATACTGCCTGATGAACCAGCTT  
AGGAAACCAACAACAATGCTAATCAACCACATGTGCGTCATATGTAACATCATCCATGTAACATAAAATACAACTAATACCCTGT  
CATACCAAACTGCGCCACGACTTACATGCACAGCGACTTTATCACCATATTGCATACCTGTAATAAACATAGACACTAAAAATAC  
TGCCGGAAACGTTGCAAAATATACCGCCAAATCTTTCCAAGGTAGTGTACAGATACAATATAAATTAATAACTGCAAAATCCCC  
CACAAAAAATTTCAATTAATGTTAATTTTCATGATGTTCTGCTCCCAATAATTTTATTTACTTAATAACTGAATACAACTAATTATCAGCA  
TTTTCCAACTATAAATGTCTAATACTGAATATTGCGAGGGAATAACAACCAACAACCAACCGTGAATATTGCGCTTTTCCGATA  
ACCTTTATGCTTAATGTAGAGAGATGTCAAAAATACAGTTAATATACAAGACAGAATACCGACAATTGCTCCAGTACTAAGATTTCAT  
CGACATCTCCACTAATTGCGTACCAGGATGATCTAAAGCTAATGCGATAATAGCCGCAAGAAAGACTGCCGGCATAGTAGCTATAA  
TACCTCCTAACTTACCACCTACCTTATCAGCAATAATTGAAGCTAATGCAACAGCGATACCACCAATGACAAAATGAAGAATTGCA  
CTTCCAATTGAAAACATCTTCAACGTACCTTTCTATAATTAATTCAATACAAAACGTATCATTACACAAAAGTGTAAGCTTAAATTT  
TCTACTGTAAAGGCAACTCAAGCGATGTTCAATAAGCTTTTCATGATACTTTTCAATAAGCTAGCAATAAAGGGTTCAAAATGAAAGTATA  
TCCAGCTCAAATTTATGAAAATTTACCATTAACGTGAATTTTCAAATCAACATATAAATATAAATTTTATGTTTACAGTAAAAACAAA  
AAAAAGACAAAGCTGTTATGATCTTAGCTTTGCTTTTATGTGTAGTCATCATGTATACGACATCTACTACTAATCAAGCTTTATATTT  
CGAATTTTTATTCTCATATAAATCTTCATGATCTTTGTCTTTATGTCTCAACATGTAATCCTGTTTGTGTGAATCGTCTGGATCACTTTTGCC  
TACCTCATCTCGTGCTTGAGTGACATCTTGTGCAAAAGCGAAGGTTTTGTGCTTTGACTTTTTTCCGGGCCCCGTTTTTTGGCGTACTCTAT  
CTTCAGTCTGTTTCACATTTAGCTTTTTGTGCAATGACTTGCTCAATCAACGCTTCTTGTTCGCTATCAGACAATGATAATACCGCTCTC  
GCATGGCGTTACAGTAATTTTACCTTCTCTTAAGCGAAGTAGTACTTTCGGCGCCAAGTTCAATAAACGCAACTTATTTGCAATAAAG  
CTTTGACTTTTACCTAACTTTTGGCAATTCACCTTTCGCTTGTATCACCATAATTTCCAATAATTTCTTATAGGCTTCCGCTTCTTCAAC  
AACAGACAAATTTTCTTTGAATATTCTCAATTAATGCCACAACAGCCGCTCTTTCATCATCCATATCACGAATAATAACGTCTGCT  
TGAGGTAAATTTAGTGATTGATTGCTCTAAATCGCGCTCTCCAGCAATAATTTCAAACATATCTTCTTCAATCGGTCTTACAACAA  
TAGGTTGTAGTAAACCATGTTTCATGATTGATTACAGCAAGTTCTTAATTTTATTTGGTTCAAACACCTGCTTGGTTGATAACGGTT  
GGGAACGATACGTTCAATTTGAATGGATTCAACATTACTATTGCGATCTTTCTTCAATATGTCCAATGATGTCACTTTGTTTTTCAAA  
CCAAATAATTTTGA AAAAGGTTTTTTTCATTATCCATTGCTCCTTTTTATGTTAGTTGTAAGGATTATGCATTATTTTTTCAAGTAAAG  
GAGTCTTATTAGGCGTCCCTGGTTTTCTTGGATACTTTTTCGGCGCTGTGCTTTTTTTATCAATAATGAACATCTGGCGCTCTCCAGCA  
TCTTCTGGCAATTCAAAGGTATGTGTTTCTGTAACATTACCACCTAACACACTAATTGCAAAATTTGCTTCTTCTAATTTCTTCTTACC  
TTTTGAAGATTTAATGCAACAACTGTCCACCTTTTTTAACTAGCGGTAAACACAATTCACCTTAACACGGATAATCTAGCTACTGCT  
CTTGCAAGTAAACAATCATAAGACTCCCTGTAGACACCCTTACCAAATGTTTCTGCTCTATCGTGTATAAAGCTGACATCCTGTAATT  
GTAATTCTGACGCTAAATGGTTTAAAAATTTGAATACGCTTATTTAATGAATCAACAATCGTCACCTTTAACTGCGGAAACATTATTTT  
TAACGGAATACTTGGAAAACGACTCCAGCGCTACATCAGTAACTTATAGGCTGATTAAATCAAAAATAAAAACCTAGGTGCAA  
TGGAAATCAATAAAATGTTTCAAATATACATCGTGTTCATGTGAATACTTGCAAAATTCATCTTTTCACTTCCATCAACAAGTAAACG  
ATAATATGTTTGAAGCTGTTGTTTTTGGAGTCTCAGTTAATTCATTAATGTTCTTTTAAATGTTTGTCTGCTAACCATCTACAGTCAATTA  
GTCACCTACCCTTTGGAGTTTACCTTGTCTAAGTAAATCAATAATATAGATATGTCTGCTGGATTACCCTGATATTCTAGAAGCT  
TGTGCAATATTTAAAGGTTTTACTTCTGATAATTTTTCTCGCGCTTCACTGCGCAAACTATCAATCTTACTATAATCTAAGTCTTCTGG  
AATTTTCTTCTTCCATACGCTTAACTTCTCAACTTGTGTAGTGAATTTATTGATATAACCTTCATATTTTGTGTGATTCTTACTTG  
TCTTCAACATCTGCATTCAATTGATGTTCTTCTTCTAAAATTTCTAAAATTTATATCGTAAGTCATTTTCAGGTCTGCGTAATAAATCG  
ATAGCTAAAAATACCATCTTTTAAGCGAGAACCACCATGTTGTTCAATAATCGCTTGCATATGTTGTTTGGTTTAAATACGAATATCTG  
ATAAACGCTTAATTTCCGCATCAATTTGCTGACGTTTTTCAATTAACAGCTGCATATCGTCTTTCAGAAATCATACCAAGTTTCATATC  
CATATCCGTCAATTCAAATCAGCATTATCATGACGTAGTAACAACAGTATTCGACAGTGTATGTAGTAAACGTAAGGTTCACTT  
AGTACCTTTAGTTTACAAGATCATCGATTAAGACACCAATGATGCATCTGAACGACTTAATATCTTTTCGCTGTGTTTAAACCTTTA  
CCTGCAGCGTTAATACCTGCCATCAATCCTTGTCTGCTTCTTCTATAACCAGATGTACCATTAATTTGACCTGCAGTATATAAGT  
TTTTAATCATTTTTCGTTTCAAGTGTAGGCCATAACTGCGTTGGCACAATCGCATCATATTCAATTGCGTAGCCGGCACGCATCATATC  
TGCTTTTTCAAGACCTGGTATCGTCTCTAACATTTGACGTTGCACATGTTTCAAGGAAGACTTGTAGACAATCCTTGCACATATACTTCA  
TTTGTATTACGACCTTCAGGCTCTAAGAAAAGTTGATGTGCGGGCTATCATTAATAACGAACAAATTTATCTTCAATTGAAGGGCAA  
TAACGTGGCCCCGTTTCTTTAATCATCCCTGAATACATTGCAGATAGATGTAAATTATCATCGATAACTTTGTGTGTTTACGATTAG  
TATACGTTAGCCAACATGGCAATTGATCTAATATATATTCTGTTGTTTCAAAGCTGAATGCACGACCTACATCGTCACCTGGTTGTAT  
TTCAGTCTTGAATAGTCAATTGTTTTTGAATTTACACGCGTGGTGTACCTGTTTTTAAACGAACAATCAAAAACCAAGTTCTCTTT  
AGATTATCTGATAAATGTGATGATGTAATTGGTGATTTTGGTCCACTTGAATACCTTCATATTACCTAAAAATGATTTCACCAAGTAAAA  
ATGTTCCCGTTGTAATAAATACTGCTTTAGATAAAATACTCTGTACCAATATTGTACGTACACCTTTAACTTCATTATCTTCTATAATA  
AGTTCTGCTACCATACCTTGATTATATGCAAAATTTCTTCATCTTCAATCACGCGTTTCATTTCTGTTGATAAAGTACTTTATCTGC  
TTGCGCTCTTAGTGCTCTTACAGCAGGTCTTTACCAGTATTTAACATTCTCATTTGAATGTGTGTTTTATCGATTGTTTTTGCCATTT

GTCCACCTAAAGCATCAATTTACGAACAACGATACCTTTAGCTGGTCCACCTACAGATGGGTTACATGGCATAAATGCAATATTAT  
CTAAATTTATTGTTAGCATTAAATGTTTTAGCACCACGCTCTTGCAGATGCTAAACCTGCTTCTACACCTGCATGTCCCGCACCTATAAC  
GATTACATCATATTTCTTGAACCACAATATAAACCTCCTTATTTGATATCTTACTAGCCTTCTTAAAGACGGTATTCCGCTCTATTTCAATT  
ACTATTTACCTAAGCAGAATTGACTGAATAACTGATCGATGAGTTTCATCACTTGCAGTCTCACCAATAATTTCTCCTAATATTTCCCA  
AGTTCTAGTTAAATCAATTTGTACCATATCCATAGGCACACCAGATTCTGCTGCATCAATCGCATCTTGTATCGTTTGTCTTGTCTTGT  
TTTAATAATGAAATATGTCTTGAATTAGAAACATAAGTCATATCTTGATTTTGTACTTCTCCACCAAAGAACAATCTCGAATTTGTA  
TTTCTAATTCATCAATACCTTCTTGTTTTAAACATTGAAGTTTGAATTAATGGCGTATCACCTATCATATCTTTAACTTCATTAATATCT  
ATGTTTTGCTCTAAATCCATTTTATTAACAATTACGATTACATCTTCATTTTTAACTACTTTCATATAATGTGTAATCTTCTTGAGTCAA  
TGCTTCGTTATTGTTTAAACAAAATAAAATTAAGTCTGCTTGGCTAAGAGCCTTTCTAGAGCGTTCAACACCAATCTTCTCTACTATA  
TCTTCTGCTCACGTATACCAGCAGTATCAACTAATCTTAATGGCACGCCACGAACATTGACGTACTTCTAAGACATCTCTAGTAG  
TACCTGCTACCTCAGTTACAATCGCTTTATTATCTTGTATTAAATTATTTAAACATCGATGATTTACCTACGTTTGGTTTACCAACAATA  
ACTGTAGATAAACCTTCACGCATAATTTTACCCTGCGCACCGGTATCTAATAAACGATTAATTTCTGTTTGATTTCTTTAGACTGCT  
CTAAAAGAAATTCAGTAGTCGCATCTTCAACATCATCGTATTTCAGGATAATCAATATTCACCTTCCACTTGAGCGAGTATCTCTAATA  
TAGATTGACGTTGTTTTTTGATTAAAGTCACCTAGACGACCTTCAATTTGATTTCATCGCAACTTTAGAAGCTCTATCTGTCTTCGAGCG  
AATAAAGTCCATAACTGCTTCAGCTTGAGATAAATCAATACGACCATTTAAAAAGGCACGTTTTGTAAATTCACCTGGCTCAGCCAT  
TCTAGCGCCATATGTCATAGTAAGTTCCAGCACTCTATTAATCGTTAAAAATACCACCATGACAATTAATTTCTATAATATCTTCGCGT  
GTAATGTTTTTGGCGCTCTTAAACAGACACCATAACTTCTTCAACCACTTCTTTAGATTCTGGATCAATAATATGACCGTAATTA  
TCGTATGTGATGGCAATCATTTAAAGATGTTTTTCCTTTATATAATTTGTCAGCAATTTCAACGGCTTCCGCTCCAGACAATCGAAC  
AATTTCCAATTGGCCCTTACCCCATTTTGTGCTCATGCTGAATTGTATCTGAAACCATGAACCTTTACTATGTTTACGTTTATTGGTTGATA  
AATACATTTTAAAGTAAGTTATTATAACCCTAAGGTTAGTCTTACGTTTGTCTTAGGTAAGACTTCGGGATGTGTTGAGTGGTTAATG  
TTTTCTTCCCTACCCTATCCTTACTTAATCTTTTTATTA AAAA ACTTTGGCAATTTTAAAGTACGTGCTCAAGACTATTCTGTATTGT  
AAAGTCGTCATATCTTTAGCTGGCTGTCTTGTCTATTACAATAATATCTTTGGCCAATATATGCGACTTATGTACTTTGAAATTTTCAC  
GTATTGCTCTTTTAATCTTGTTCCTAACACTGCATTACCTAGTTTTTTAGAAACACTAATACCTAAGCGAAAAATGGTCTATTCTTTA  
TTATTACAAGTGTATACAACAAATTTGTCTGTTGGCTACAGAATGACCTTTTTATATATTCTCTGAAAATCTGCATTCTTTTAATTCG  
GTAAGCTTTTTCCAATAACATCACTCGCTTATTTATCGTTTTTATTTGAAGCTATATTTAACTTCTATTGAGCTTATAACATAAATTT  
CTATTTATTTCTAATTTAAACGAAAAAAGATCACTGATGAGTCAGTGATCTTATGCAGATAAAAACCTTACGGCCTTTACGACGAC  
GGCGCGCTAAAACTTTACGGCCATTTTTTGTGCTCATGCGTTTTCTGAAACCATGAACCTTTACTATGTTTACGTTTATTGGTTGATA  
AGTACGTTTTTACCATGCAAAAACACCTCCATCTTTATACAGTTATCTAATATACCAGATTATGCAGACTCTGATCACTTTAATAGATAA  
GATTTTGCCTTTCTTAGATTAAAAATTCCTGATTAGCTCATTGATTATCTAGTCATAATTCAAGCAACTACTACAATATAACAAAATC  
CTTTTTATAACGCAAGTTCATTTTATACTACTGCTCAATTTTTTTACTTTTATCGATTAAAGATAGAAATACACGATGCGAGCAATCA  
AATTCATAACATCACCGTGAGTTTGGTCCGAAGCATGTGTGTTACAATGTTTGAATACCTTATACAGTTCCTTATACATACTTTATA  
AATTAATTTCCCAAGCTGTTTTGTATACACTCACTAACAGATATCTATAGAAGGAAAAGTTATCCACTTATGCACATTTATAGTTTTCA  
GAATTTGTGGATAATTAGAAATTTATACACAAAGTTATACTATTTTTAGCAACATATTCACAGGTATTTGACATATAGAGAAGTAAAA  
AGTATAATTTGTGGATAAGTTCGTCCTCAACTCATGATTTTATAAGGATTTATTTTATGATATTTACATAAAAAATCTGTGCATACTAA  
TAAGCAGGATAAAGTTTATCCACCGATTGTTTAACTTTGTGGATAATTTAATACATGGTGTGTTTAGAAGTTATCCACGCTGTATT  
TTTGTGTATAACTTAAAAATTTAAGAAAAGATGGAGTAAATTTATGTGCGAAAAAGAAAATTTGGGAAAAAGTGCTTGAAATTTGCTCA  
AGAAAAATTATCAGCTGTAAGTTACTCAACTTTCTTAAAAAGATACTGAGCTTTACACGATTAAAGATGGTGAAGCTATCGTATTATC  
GAGTATTCCTTTAATGCAAATTTGGTTAAATCAACAATATGCTGAAATTTATCCAAGCAATCTTATTTGATGTTGTAGGCTATGAAGTT  
AAACCTCACTTTATTACTACTGAAGAATTAGCAAATTTAGTAATAATGAAACTGCTACTCCAAAAGAAAACAACAAACCTTCTACT  
GAAACAACCTGAGGATAATCATGTGCTTGGTAGAGAGCAATTCATGCCCCATAACACATTTGACACTTTTGTAAATCGGACCTGGTAAC  
CGCTTTCCACATGCAGCAAGTTTAGCTGTAGCCGAAGCACCGCCAAAGCGTACAATCCATTATTTATCTATGGAGGTGTTGGTTTA  
GGAAAAACCCATTTAATGCATGCCATTGGTCATCATGTTTTAGATAATAATCCAGATGCCAAAGTGATTTACACATCAAGTGAAAAA  
TTCACAAATGAATTTATTAAATCAATTCGTGATAACGCAAGGTGAAGCTTTACAGAGAAAGATATCGTAATATCGACGCTCTTATTATC  
GATGATATTTCAGTTCATACAAAACAAGGTACAAAACACAAGAAGAATTTTTCTATACTTTTAAATGAATTGCATCAGAATAACAAGCA  
AATAGTTATTTTCGAGTGATCGACCACCAAAAGGAAATTTGCACAATTAGAAGACCGATTACGTTTCACGCTTTGAATGGGGGCTAATTGT  
TGATATTACGCCACCAGATTATGAAACTCGAATGGCAATTTTGCAGAAGAAAATTGAAGAAGAAAAATTAGATATTCCACCAGAAG  
CTTTAAATTATATAGCAAATCAAATCAATCTAATATTCGTGAATTAGAAGGTGCATTAACACGTTTACTTGCATATTCACAATTATT  
AGGAAAACCAATTACAACCTGAATTAACCTGCTGAAGCTTTAAAAGATATCATTCAGCACCAAAATCTAAAAAGATTACCATCCAAG  
ATATTCAAAAAATTTGAGGCCAGTACTATAATGTTAGAATTGAAGATTTTCAGTGCAAAAAAACGTACAAAAGTCAATTGCATATCCG  
CGTCAAAATAGCTATGTACTTGTCTAGAGAGCTTACAGATTTCTCATTACCTAAAATTTGGTGAAGAATTTGGTGGGCGTGATCATACG  
ACCGTCACTTACGTCTAGTAAATAATCTTAAAGATTTAAAAGAAGATCTTATTTTAAACAAGAAAGTAGAGAATCTTGA AAAAGAA  
AATAAGAAATGTATAAGTAGGAAACTTTGGGAAATGTAATCTGTTATATAACAGCAGCTAATGATAACAATCTTTTATCAATTTCTA  
TATGCTAATGTGGCAAGATGAGCAAAACTCATTTTGTGGATAATGTTTAAAAAGTCATACACACCATAACACAAGTTATCAACATGTGT  
ATAACTTCGCCAAATCTATGTTTTTAAAGACTTATCCACCAATCCACAGCACCTACTACTATTACTAAGAACTTAAACCTATATAATT  
ATATATAACGACTGGAAGGAGTTTTAATTAATGATGGAATTCATTTAAAAGAGATTATTTTATTACACAATTAATGACACATT  
AAAAGCTATTTACCAAGAACAACATTACCTATATTAACCTGGTATCAAAATCGATGCGAAAAGAACATGAAGTTATATTAACCTGGTTC  
AGACTCTGAAATTTCAATAGAAATCACTATTCTTAAAACTGTAGATGGCGAAGATATTGTCAATATTTTCAAGAACAGGCTCAGTAGT  
ACTTCCTGGACGATTTCTTGTGATATTATAAAAAAATTACCTGGTAAAGATGTTAAATTTATCTACAAATGAACAATTCAGACATT  
AATTACATCAGGTCATTTGAATTTAATTTAAGTGGCTTAGATCCAGATCAATATCCTTTATTACCTCAAGTTTCTAGAGATGACGCA  
ATTCAAATTGTCGGTAAAGTGCTTAAAAACGTGATTGTCACAAACAAATTTTGCAGTGTCCACCTCAGAAACACGCCAGTACTAACT  
GGTGTGAACCTGGCTTATACAAGAAAATGAATTAATATGCACAGCGACTGACTCACACCGCTTGGCTGTAAAGAAAGTTGCAGTTAGA  
AGATGTTTCTGAAAACAAAAATGTCATCATTCCAGGTAAGGCTTTAGCTGAATTAATAAAATTTATGTCTGACAAATGAAGAAGACA  
TTGATATCTTCTTTGCTTCAAACCAAGTTTTATTTAAAGTTGGAAATGTGAACCTTTATTTCTCGATTATTAGAAGGACATTATCCTGA  
TACAACACGTTTATTCCTGAAAACCTATGAAATTAATTAAGTATAGACAAATGGGGAGTTTTATCATGCGATTGATCGTGCCTCTTT  
ATTAGCACGTGAAGGTGGTAATAACGTTATTAATTAAGTACAGGTGATGACGTTGTTGAATTAATCTTCTACATCACCAGAAATTTGG  
TACTGTAAAAAGAAGTTGATGCAAAACGATGTTGAAGGTGGTAGCCTGAAAATTTTCATTCAACTCTAAAATATATGATGGATGCTTT  
AAAAGCAATCGATAATGATGAGGTTGAAGTTGAATTTCTCGGTACAATGAAACCATTTATTTCTAAAACCAAAAGGTGACGACTCGG  
TAACGCAATTAATTTTACCAATCAGAACCTACTAAAAATAGATATAAATAAAGGATGACGTGATTAATTTAAACAGTCATCTTTATT  
TTTTGGCAAAAATAATTTCTAGATGCGTATGTAATAATAAATTTGACAGCATTTTAAACAGCAAAATAAAGCAGCCAAATTAATTTATG  
ACAAATATATCCAATTTTAAATAAGTGTGCTTATATGCCCTCTAAATTTAAATTTTAAATAGTCAATAACAAGTTGAATATAAAGT  
TAAACGCCGTTAAATAGCGTTAAAAAATTGAAAATGACAGTATTGCCAAAAAATAAGAATTAATTTATATGTAAACGGTTTCTA

CCTCTATTTTAAATGAAATTTGTGACAAAAAAGGTATAATATATTAATGACATACAAAGAAATGGAGTGATTATTTTGGTTCAAGA  
AGTTGTAGTAGAAGGAGACATTAATTTAGGTCAATTTCTAAAAACAGAAGGGATTATTGAATCTGGTGGTCAAGCAAAATGGTTCT  
TGCAAGACGTTGAAGTATTAATTAATGGAGTGCCTGAAACACGTCGCGGTAAAAAGTTAGAACATCAAGATCGTATAGATATCCCA  
GAATTACCTGAAGATGCTGGTTCTTTCTTAATCATTCATCAAGGTGAACAATGAAGTTAAATACACTCCAATTAGAAAATTATCGTA  
ACTATGATGAGGTTACGTTGAAATGTCATCCTGACGTGAATATCCTCATTGGAGAAAAATGCACAAGGAAAGACAAAATTTACTTGAA  
TCAATTTATACCTTAGCTTTAGCAAAAAAGTCATAGAACGAGTAATGATAAGGAACTCATACGTTTAAATGCTGATTATGCTAAAAATA  
GAAGGTGAGCTTAGTTATAGACACGGCACGATGCCATTAACAATGTTTATAACTAAAAAAGGTAAACAAGTCAAAAGTGAATCACTT  
AGAGCAAAGTCGTCTAACTCAATATATTGGACACCTCAATGTGGTTCTATTTGCGCCAGAAGATTTGAATATTGTAAAAGGCTCTCC  
TCAATAAAGACGACGCTTTATAGATATGGAGTTGGGCCAAATTTCTGCTGTTTACTTAAATGATTTAGTCAATACCAACGTATTTTA  
AAGCAAAAAGATAAATTACTTAAAGCAGTTACAATTAGGCCAAAAAAGGACTTAACAATGTTGGAAGTATTAATCAGCAGTTTGC  
TGAATATGCAATGAAAGTAACTGATAAACGTGCACATTTTATTCAAGAGCTAGAGTCGTTAGCTAAACCGATTTCATGCTGGTATCAC  
AAATGATAAAGAAGCGTTGTCGCTGAATTTTACCTAGTCTTAAATTTGATTATGCTCAAAATGAAGCGGCACGACTTGAAGAAAT  
TATGTCTATTCTTAGCGATAATATGCAAAGAGAAAAAGAACGAGGCATTAGCTTATTTCGGACCACATCGAGATGATATAAGTTTTG  
ATGTGAATGGCATGGATGCTCAACATATGGTTCTCAAGGACAGCAACGTACAACGGCTTTGTCCATTAAATTAGCTGAAATTGAGT  
TAATGAATATCGAAGTTGGGGAATATCCCATCTTATTATTAGACGATGTACTCAGTGAATTAGATGATTCCGCTCAAAACGCATTAT  
TAAGTACGATTACAGCATAAAGTACAAACATTTGTCACTACGACATCTGTAGATGGTATTGATCATGAAATCATGAATAACGCTAAAT  
TGTATCGTATTAATCAAGGTGAAATTATAAAGTAACAGAAAGCGATTGGTGACTGCATTGTCAGATGTAACAACACGGGATAATTAT  
GGTGCTGGGCAATACAAGTATTAGAAGGTTAGAAGCAGTACGTAAAAAGACCAGGTATGTATATAGGATCGACTTCAGAGAGAG  
GTTTGCACCATTTAGTGTGGGAAATTTGTCGATAAATAGTATCGATGAAGCATTAAGTGGTTATGCTGAAATCAAAATGAAAGTTGTTATTG  
AAAAAGATAACTGGATTAAGTAACGGGATAACGGACGTGGTATCCAGTTGATATTCAAGAAAAAATGGGACGTCCAGCTGTCTGA  
AGTTATTTTAACTGTTTACATGCTGGTGGTAAATTCGGCGGTGGCGGATACAAAGTATCTGGTGGTTTACATGGTGTGGTTCATCA  
GTTGTAACGCATTGTCACAAGACTTAGAAGTATATGTACACAGAAATGAGACTATATATCATCAAGCATATAAAAAAGGTGTACC  
TCAATTTGACTTAAAGAAAGTTGGCACAACTGATAAGACAGGTACTGTCAATTCGTTTTAAAGCAGATGGAGAAATCTTCACAGAGA  
CAACTGTATACAACATGAAACATTACAGCAGCGTATTAGAGAGCTTGCTTTCTTAAACAAAGGAATTCAAATCACATTAAGAGAT  
GAACGTGATGAAGAAAACGTTAGAGAAGACTCCTATCACTATGAGGGCGGTATTAATTCGTACGTTGAGTTATTGAACGAAAAATA  
AGAACCTATTTCATGATGAGCCAATTTATATTCATCAATCTAAGATGATATTGAAGTAGAAATTGCGATTCAATATAACTCAGGATA  
TGCCACAAATCTTTAACTTACGCAAAATAACATTCATACGTATGAAGGTGGTACGCATGAAGACGGATTCAACACGTGATTAACGC  
GTGCTTAAATAGTTATGGTTTAAAGTAGCAAGATTATGAAAGAAAGAAAAAGATAGACTTTCTGGTGAAGATACACGTGAAGGTATG  
ACAGCAATTATATCTATCAACATGGTGATCCTCAATTCGAAGGTCAAACGAAGACAAAATTAGGTAATTCTGAAGTGCCTCAAGT  
TGTAAGATAAATTATCTCAGAGCACTTTGAACGATTTTATATGAAAATCCACAAGTCGCACGTACAGTGGTTGAAAAAGGTATTAT  
GGCGGCACGTGCACGTGTTGCTGCGAAAAAAGCGCGTGAAGTAACACGTCTGTAATCAGCGTTAGATGTAGCAAGTCTTCCAGGTA  
AATTAGCCGATTGCTCTAGTAAAAGTCTGAAGAATGTGAGATTTTCTTAGTCGAAGGGGACTCTGCCGGGGGGTCTACAAAATCTG  
GTCGTGACTCTAGAACGCAGGCGATTTTACCATTACGAGGTAAAGATATTAATGTTGAAAAAGCACGATTAGATAGAATTTTGAAT  
AACAATGAAATTCGTCAAATGATCACAGCATTTGGTATACAGGAATCGGTGGCGACTTTGATCTAGCGAAAGCAAGATATCACAAAAT  
CGCATATTAGCTGATGCGGATGGAGTGGGATGAGCATATTAGAACATTGTTATTAAACATTCTTATCGATTATGAGACCTTAAAT  
GAAGCAGGCTATGTGTATATTGCACAGCCACCGTTGTATAAACTGACACAAGGTAAACAAAAAGTATTATGTATACAATGATAGGGA  
ACTTGATAAACTTAAATCTGAATTGAATCCAACACCAAAATGGTCTATTGCACGATACAAAGGTCTTGAGAAATGAATGCAGATC  
AATTATGGGAAACAACAATGAACCTGAGCACCGCGCTCTTTTACAAGTAAAACCTTGAAGATGCGATTGAAGCGGACCAAAACATT  
GAAATGTTAATGGGTGACGTTGTAGAAAACCGTAGACAATTTATAGAAGATAATGCAGTTTATGCAAACTTAGACTTCTAAGCGCT  
GTGAACGTGAACTTTGAAGGAGGAACCTTTGATGGCTGAATTACCTCAATCAAGAATAAATGAACGAAATATTACCAGTGAATGC  
GTGAATCATTTTATAGATTATGCGATGAGTGTTATCGTTGCTCGTGCAATTGCCAGATGTTCTGTGACGGTTTAAAACAGTACATCGTCTG  
TATACTATATGGATTAATGAACAAGGTATGACACCGGATAAATCATATAAAAAATCAGCACGTATCGTTGGTGACGTAATGGGTG  
AATATCACCTCATGGTGACTTATCTATTTATGAAAGCATAGGTATGGCTCAAGATTTCAGTTATCGTTATCCGCTTGGTTGATGG  
CCAAGGTAACCTTGGTTCAATGGATGGAGATGGCGCAGCAGCAATGCGTTTACTGAAGCGCGTATGACTAAAAATCACACTGAAC  
TGTTACGTGATATTAATAAAGATACAATAGATTTTATCGATAACTATGATGGTAATGAAAGAGAGCCGTCAGTCTTACCTGCTCGAT  
TCCCTAACTTGTAGCCAATGGAGCATCAGGTATAGCGGTAGGTATGGCAACGAATATTCCACCACATAACTTAACAGAATTAATCA  
ATGGTGTACTTAGCTTAAGTAAGAACCCTGATATTTCAATTGCTGAGTTAATGGAGGATATTGAAGGTCTGATTTCCCAACTGCTG  
GACTTATTTTAGGTAAGAGTGGTATTAGACGTGCATATGAAACAGGTCTGGTTCAATTCAAATGCGTTCTCGTGCAGTTATTGAAG  
AACGTGGAGGCGGACGTCAACGTATTGTTGTCACTGAAATTCCTTTCCAAGTGAATAAGGCTCGTATGATTGAAAAAATTGCAGAG  
CTCGTTCTGTGACAAGAAAATTGACGGTATCACTGATTTACGTGATGAACAAGTTTACGTACTGGTGTGCGTGTGCTTATTGATGTG  
CGTAAGGATGCAAAATGCTAGTGTCATTTTAAATAACTTATACAAACAAACCTTCTCAACATCATTTGGTGTGAATATTAGATGCA  
CTGTGAATGGTAAAGTCGAAGCTTATTAATTTAAAAAGACGCTTGGTACATTATTTAGAGCATCAAAAGACAGTTGTTAGAAAGC  
TACGCAATACAACCTTACGTAAAGCTAAAGATCGTGCCACATTTTGAAGGATTACGTATCGCACTTGACCATATCGATGAAATTAT  
TTCAACGATTCTGTGAGTCAGATACAGATAAAGTTGCAATGGAAGCTTGAACAACGCTTCAAACTTTCTGAAAAACAAGCTCAAG  
CTATTTTAGACATGCGTTTAAAGACGTCTAACAGGTTAGAGAGAGACAAAATTGAAGCTGAATATAATGAGTTATTAATTTATATTA  
GTGAATTAGAAACAATCTTAGCTGATGAAGAAGTATTACTACAATTAGTTAGAGATGAATTAACAGAAATTCGAGATCGTTTCGGT  
GATGATCGTCTGACTGAAATCCAATTAGGTGGATTTGAAGATTTAGAAGATGAAGATCTCATTCAGAAAGAACAATTTGAATTAAC  
ACTAAGCCATAATAACTACATTAACGTTTGGCGGTATCTACATATCGTGCTCAAAACCGTGGTGGTCTGGTGTTCAGGTATGAA  
TACATTGGAAGAAGATTTTGTCAAGTCAATTTGGAACCTTAAAGTACACATGACCATTGATTTGTTCTTACTAACAAGAGTCGTGATA  
CAAACCTAAAGGTTATGAGTGCCTGAGTTATCAAGACAGTCTAAAGGATTCCTGTAGTGAATTTGAAGTAACTGAAATGAAATGATG  
AGTCATTAGTACAATGATTGCTGTTAAAGACCTTGAAGTGAAGACAACCTTCTTAGTGTTTGCAACTAAACGTGGTGTGCTTAAACG  
TTCAGCATTAAAGTAACTTCTCAAGAATAAATAGAAATGGTAAGATTGCGATTTCTGTTAGAGAAAGATGATGAGTTAATTGCAGTTCTG  
CTTAACAAGTGGTCAAGAAGATATCTTGATTGGTACATCACATGCATCATTAATTCGATTCCCTGAATCAACATTACGTCCTTTAGG  
CCGTACAGCAACGGGTGTGAAAGGTATTACACTTCGTGAAGGTGACGAAGTTGTAGGGCTTGATGTAGCTCATGCAACAGTGTG  
ATGAAGTATTAGTAGTTACTGAAAATGGTTATGGTAAACGTACGCCAGTTAATGACTATCGTTTATCAAAATCGTGGTGGTAAAGGTA  
TTAAAAACAGCTACGATTACTGAGCGTAATGGTAATGTTGTATGTATCACTACAGTAACCTGGTGAAGAAGATTTAATGATTGTTACTA  
ATGCAGGTGTCATTTATCGACTAGATGTTGCAGATATTTCTCAAAATGGTCTGTCAGCACAAAGGTGTTTCGCTTAATTCGTTAGGTG  
ATGATCAATTTGTTTCAACGGTTGCTAAAGTAAAGAGATGCAAGATGAAACGAATGAAGATGAGCAATTACTCACTCAACTGTA  
TCTGAAGATGGTACTGAACAACAACGTGAAGCGGTTGTAATGATGAAACACAGGAAATGCATTCATACTGAAAGTGAATGATTGATTC  
AGAAGAAAAATGATGAAGATGGACGTATTGAAGTAAGACAAGATTTTCATGGATCGTGTGGAAGAAGATATACAACAATCATCAGAT  
GAAGATGAAGAATAATAAAAAAATAAGACTTCCCTATATGTAGGGGAGTCTTATTTTTATGCTAGAAAGTAATGCTGTACTATATTC

AATGATTAGTAATAATTAACCTTTCTAATTGTTTCATTGCGTAAGGTATTTTCATTGATAAGTCTTGATGGTGGTACCACATACATATCT  
TTTGCAAGGTTTTTCGCCAATAAAACTATGTGTATATGTGGCACTCATAACCGCTTCTTTTAAGTTATCAAATTGACCGACAAAACCTTG  
TAATCATACCAGCAAGGTATCGCCCATACCACCAGTCGCCATTGCTGGGCTACCGATTGTTAATTTAAAGTCTTCATCTTTAAAGA  
AAATTTACGTACCATGTTTTTTAAGTACAACAGTTGCACCTAAACGATCAACTGCTTCACGATTACGCTCATATGTCTGTTCTCAAT  
AGGAATACCCTTAATCGTTCCCATTTCTTTGAGGTGTGGAGTAAAGATCACACGACATGTAGGTAATTGCGGTTTCAGTTTACTAAA  
GATTGTAATCGCATCGCCGTCTACGATTAAATTTTGATGCGGTTGTATATTTGTAGTAGGAATGTAATGGCATTATTTCTTTGAAA  
TCAACGCCAAGACCTGGACCAATTAGTATACTGTCACTATTTCAATCATTTTCGTCACACATTTTCGTATCATTAATATCAATAACCA  
TCGCTTCTGGGCAACGAGAATGTAATGCTGAATGATTTGTTGGATGTGTAGCTACAGTGATTAAACCACTACCGCTAAATACACATG  
CAGGAGCCGCTAACATAATGGCACCACCTAAGTTAGCAGATCCACCAATTAATAAAAAATTTGCCATAATCACCTTTATGTGAATCTT  
CTTACGCTTAGGAATGTTAATAGAAATTTAACGTTTCCATAGTGATATAACCTCCCATGTAAAAGCCTTTTCCGAATTTATTCAATTT  
TAAAAATATATAGTAACTTTTAACAAAAATGTATTATAAAATTTCTGAATTCATTATTATTTGTGCTTAAATACAATAGAAAAACTATA  
CCTGTATATGCAATTCGTCAATAGATAAAATTATTAATATGCTTACAACAATCTTAATATCCTTTAACGCACTACAATAGTGCTCTGA  
TAATAGGTTATAAATGTACGTAAAACCATTTGTTTCAATAAAAAATGAAAACGTATACTTCAAGAAGGATGGGTTACTTAAATATAAAC  
AAGGGGGTAACATATATGACTTTATATTAGATGGTGAACACTAACAATTGAGGATATTAAATCATTTTTACAACAACAATCAAA  
GATTGAAATTATTGATGATGCGTTAGAACGTGTCAAAAAAAGTAGAGCGGTAGTTGAACGTATTATTGAAAATGAGGAAACGGTTT  
ACGGTATCACTACAGGTTTTGGGTTATTTAGTGATGTACGTATAGACCCGACGCAATATAATGAATTACAAGTGAATCTGATACGCT  
CACATGCCTGTGGACTAGGTGAGCCATTTTCAAAAGAAGTAGCATTAGTCATGATGATTTTACGATTGAATACATTATTTAAAGGTC  
ATTCAGGTGCCACTTTAGAAATTAGTGAGACAATTACAATTTTTATAAATGAACGTATTATACCGATAATCCACAACAAGGCTCTC  
TCGGTGCATCAGGAGATTTAGCGCCATTATCACATTATGACATTAGCATTAAATGGTGAAGGAAAAGTATTGTACAGAGGGGAAGAA  
AAGGATAGTGACGATGTATTAAGAGAATTAATAGACAACCTTTGAACCTTCAGGCTAAAGAGGGTTTAGCATTGATTAATGTTAC  
GCAAGCTATGACAGCTCAAGGTGTCAATTAGTTATATAGAAGCAGAAGATTTAGGTTACCAATCTGAATGGATTGCTGCATTAACGC  
ATCAGTCTCTTAATGGCATTATAGATGCATATCGACATGATGTGCACCTGTTCGTAATTTTCAAGAACAGATTAATGTGGCAGCGC  
GTATGCGTGATTGGTTAGAAGGATCAACATTAACGACGCGACAAGCAGAAATACGTGTACAAGATGCATATACGTTGCGTTGTATA  
CCACAAATCCATGGCGCGAGTTTTCAAGTATTCAATTATGTTAAACAGCAATTAGAATTTGAAAATGAATGCGGCTAATGATAATCCA  
CTTATATTTGAGGAAGCAAATGAAACGTTTGTATTTTACAGTGGTAACTTCCATGGACAACCTATTGCTTTTGCATTAGATCATCTTA  
AATTAGGTGTAAGTGAATTAGCAAAACGTATCGGAACGTGCTATAGAGCGACTAGTAAATCCTCAATTAATAGGTGATTACCAGCA  
TTCTTAGTCCAGAGCCAGGATTGCAAAAGTGCGCGATGATTATGCAATATGCTGCTGCAAGTCTCGTTTCTGAAAAATAAACTTTA  
GCGCATCCAGCGAGTGTTGATTCTATCACTTCATCTGCGAACCAAGAAGATCACGTATCTATGGGAACTACAGCTGCTAGACATGGT  
TATCAAAATTATTGAAAATGCAAGACGTGTGTTGGCAATCGAATGTGTTATTGCATTACAAGCAGCAGAGTTGAAAGGTGTCGAAGG  
ATTATCACAAAAAACACGTGCTAAATATGAGGAGTTTCGAAGTATCGTGCCATCCATTACACATGACCGTCAATTTTATAAAGATAT  
TGAAGCGGTTGCACAGTATTTAAAGCAATCAATTTATCAAAACGACTGCATGTCACTAAATCGACATGAGTGATGTTGAAAATCGTTA  
CTTGAAAAAGCAAATATAGTTTGCTATATTAATAAATTAACCTTAATAAGACATTGTTCTGATAGGACAAGTAATATATAGTGTTTCGATATC  
AGAGAGCTTGTGGTTAGTGTGAACAAGAATCAACATATATGAATCTACCTACTTAATTTAAAAAGAACAAATCGGTGATAACCGTT  
ATTTTAGTGAAGTGCAATTTAGGTTTAGTTTATCTTTATAACTTAAATTTGTAATAGGGTGGCAACCGCTAGACCACGCTCCCTTGTA  
GTTTCTAGTGTGCTCTTTTTATTTTCTAAAAAATAAAGACGTACGCTATCCATAATAAATGATAATTATTGGGAAAGGATGAAGGTT  
AATGTTAGACATTAGATTATTCAGAAATGAGCCTGACACAGTTAAGAGCAAAATGGAATTACGTGGAGATGATCCAAAAGTTGTAG  
ATGAAATTTTAGAATTGGATGAGCAACGACGTAAATTAATTAGTGCAACAGAAGAAATGAAAGCACGTGCTAATAAAGTAAGCGA  
AGAAATCGCATTAAAAAAACGTAATAAAGAAAAATGCTGATGATGTGATTGCTGAAATGCGCACATTAGGTGACGATATTAAGAA  
AAAGATAGTCAATTAATGAAATTGATAATAAAATGACAGGTATCCTTTGTCGTATTCCAAATTTAATAAGTGATGATGTACCTCAA  
GGTGAATCTGATGAAGATAACGTTGAAGTTAAAAAGTGGGGTACACCACGTGAGTTTTCATTTGAACCAAAAAGCACATTGGGATAT  
TGTAGAAGAATTGAAAATGGCTGATTTTGATCGTGACGCAAAAAGTTTACAGTGTGCGGTTTTGTATATTTAACAAATGAAGGTGCGCA  
ATTAGAGCGTGCTTTAATGAACATATGATTACAAAACATACAACACAACATGGTTATACAGAAATGATGGTACCACAGCTTGTGA  
ACGAGATACACCTTATGTTGACAGGTCAATTACCTAAATTTGAAGAAGATTTATTTAAAGTAGAAAAAGAAAGGATATATAGCAAT  
CCAACGTCTGAAGTACCATTAAACGAATTTCTACCGTAATGAAATTATTCACCAGGTGTACTTCTGAAAAATTCAGTGGTCAATCT  
GCATGTTTCCGTAGTGAAGCAGGATCAGCAGGTAGAGATACAAGAGGATTAATTCGTTTACATCAATTCGATAAAGTGGAAATGGT  
ACGTTTTGAACAACCTGAAGATTTCATGGAATGCTTTAGAAGAAATGACAACAATGCAGAAGCAATTCAGAAAGGTTAGGTTTAC  
CATACCGTCTGTTATTTTATGTACAGGTGATATTGGATTTAGTGCAAGCAAAAACATATGATATAGAAGTTTGGTTACCAAGCTACA  
ATGATTATAAAGAAATTAGTTCATGCTCAAACTGTACGGATTTCCAAGCGCGTCTGTGCTAACATCCGCTTCAAGCGTGACAAAGCAG  
CTAAACCAGAATTAGCACATACATTAAATGGTAGTGGTTTACGAGTTGGACGTACATTTGCTGCTATTGTTGAAAATTACCAAAATG  
AAGATGGAACAGTAACAATTCAGAAAGCATTAGTACCATTTATGGGTGGTAAAACACAAATTTCAAAACCAGTTAAATAAAGGCTT  
TAGCTACAAGCTTTAAAAAGTATATATTCTACGTATACTTAAAGCAAGGCGAAGATACTTTAAAAATATTTTAAAAAGTGGTGACG  
AAGCTGTCCGCAATTTTTTTGTGCTGTAAGAGTATAATAGTGAGCCAAATGCACATAACAACAATAAATTAAGTTTGTGGTTAATGG  
GGTGAACGCATTTTCATTATAGCAACAATACGGGATAAATTATGATGAACATAAACAATCTAAAACGTAAACAATTTTGAGCATCACTA  
TTATAGGAAATTAAGTGATAAAAAACTGATTTTCGTTGATGTAGTATGAGTAATATCGATGGAGTAGGGTAGGGGGAGAGGATGATG  
ATTATAAGGGAGTGTTACATGAATCAATATCCAGACTCATCTAGATATAAAAAATTATAAAATTAGTACTTAAAAACAACCTAC  
AAATCCGTAGAAAAATATGGAGGTAGTCTTAAATAAAAAATTGAAAATTATCAAAAAATAAAAAAGTTGATATGAAGATGATTGAAGAC  
GCCAGTATGTCTAACCTCAGACAAAACCTGGTGTCTAATGTTATTGCTTAGGGTATAGAAGTGTATTAGACTAGGTATATTATTTTTTCG  
TAATTATATAAATAAAGGTGGCAAGGAGGTAATTGAGATGGCAACACATTTAAGTTTATAGACAAGGCGTACAAGAGGTGATCCC  
AACATTATTTGGGTTATCCCGGTGTTGGTATTTTATTTGGTATTTGTTGCTTCGCTCAAAACCTTAGTATTTTGAAGAAATATCTTTGTTAT  
GCTTGTATATATGCGGTGCTGCGCAATTTATATTGTGCGGTTGTTTATAGCAGGTACACCGATATACAGGATTGTACTAAGTCTG  
ATTTATCGTAAATTCAGAATGTTTCTTTTAAAGTATGTGCTGTGCACCAAACTTCAAGACATATGGGTTTTGGAACCGTGTTGGATTA  
GGTTCATTAGTAACTGACGAAACGTTTGGCGTGCCTATTACACCTTATTTAAAAGGAGAAGCTATCAATGATCGTTGGATGCATGGT  
CTTAATATCACAGCATATTTATTTTGGCAATTTTCATGTGTAGCTGGGGCTTTATTTGGCGAATATATCTCAAAATCCGCAACGCTAG  
GGTTAGATTTTGTATCACGGCTATGTTTATCTTTTGGCCATTGCGCAATTTGAATCAATTACTAAATCGCGATTAAAGAATTTACAT  
AGTACTCATTATTGCCGTCATAGTAATGATGTTATCGCTAAGTATGTTTATGCCTTCATATCTAGCAATATTAATTGCAGCCACAATT  
TCAGCAGCGTTAGGAGTGATGATGGAACGATGATAACTCATATGAACATGTTAATACTTATTTTATTGTGTGGTATCGTAACGCTAT  
TAATTTCGAATTATACCTTTTATCATGATTTCAAAAAGTGCAATTTGCCTGATTTGTGTTGTTGCTGATGGCTATCATTTATCCCAATCACACT  
ATTATCGGCACCTTGTATTGACAGCATTAATTCACAGACGCTCATGGTGAGGGGTATACATTAACATCCCTTACATTATTCGCGCT  
CATTTCCGACGGTTATTTTATCTATAATCACGCGTAGTTTAACTATTACAATTATTAGTGGGATTGTTATCATGGCAACATTACGATTT  
TTCTTTTAAAAATAACTGAAAATCATTGAACAGATATTTAAACCTTAGGTAAACTGTTAGTAATCAGAAAAATCTGATATACAAATCG  
TCTATGGTATGACTGGGAATCGTATACACGAAAGCGATTTGGCTAACGTATGACAATGATAACAATATTTTAAATGATAAAAGTAA

TTCATCACTGAATCTCAACTAACACATAACAATTTTCATATTTCTTATTGTGAGAAGTTGAGGGACTTGCCCTGTGATACTTCAGCAA  
CCGACTTTATAGCACGGTGCTAAAACCAACGAGTTACTCGAATGATAAGTATAAAGACTTCTTACTTTTCAATAGGGTGAGAAGTTT  
TTTTGTTTAAGGAGGAAAAGAACATGACAAATTACACAGTAGATACTTTAAATCTAGGGAAATTTATTACAGAATCTGGGGAAGTC  
ATAGATAACTTGCCTTTGAGATATGAGCATGTTGGTTATCATGGACAACCATTAGTTGTAGTTTGTGCATGCATTAAGTGGCAATCATT  
TAACATATGGAACAGATGATTATCCGGGTTGGTGGCGAGAAATTATTGATGGGGGATATATACCCATTACAGATTATCAATTTTTAA  
CATTTGATGTTATTGGTAGTCCTTTCGGTTCAAGTTCACCTTTAAACGACCCTCATTTCCTAAAAAATTACATTAAGAGATATAGT  
CAGAGCGAATGAACGAGGTATACAAGCCCTTGGTTATGATAAGATTAATATTTTAATAGGGGGAAGTCTTGGAGGTATGCAAGCAA  
TGGAACACTTTTACAATCAACAGTTTGAAGTAGATAAAGCCATTATCCTTGCTGCAACAAGTCGAACATCATCTTATAGTAGAGCTT  
TCAATGAAATTGCAAGGCAAGCCATTATCTTGGTGGTAAGGAAGGTCTAAGTATTGCACGCCAATTAGGTTTTTGGACATATCGAT  
CATCAAAAAGTTATGATGAACGTTTCACGCCGGATGAAGTAGTCGCATACCAACAACATCAAGGTAATAAAATTTAAAGAACATTTT  
GATTTGAATTGTTATCTGACACTGCTAGATGTATTGGATAGTCACAACATTGACCGAGGTCGCACAGACGTAACGCATATTTTTAAA  
AATTTAGAAACGAAAGTCTTAACGATGGGGTTCATAGATGATTTGCTATATCCGGACGATCAAGTTCGTGCATTAGGTGAACGTTTT  
AAATATCATCGTCATTTCTTCGTGCCTGATAATGTTGGACATGATGGATTCTACTAACTTTAGTACCTGGGCACCTAACTTATATC  
ATTTCTTAAATTTAAAGCATTTTAAGCGTAAGTAATAATGTATATATTTTTAAAGAATGAAGCTACTAAATCAGATTATCATATTCA  
AAGACATCTAGAGTACATGAGAGTGGAAATGAATTGTAAATCTAAATCAAGCTTGATTGCTATGTAGTGGGATTAATAATCATGT  
TGAAATGAAAGCACACAAAAGCGATTCAAATGAGTATGTTAATTACTTATAAAACATGAAAGTTATTTCAATTAATGAAATA  
GAAGCATACAATCTATAAATTGTTAATTTCCATTAAAGAGGTTAAAAATAAGCTATAGTAAAAAATGAGGAGTGGCTTATGTGTT  
TTCAAAAATACAACCTAAAGCAACAATAATTGCAACGATTACGTTGGTATTGTCGCTTTAGCTTTATAGTCTAGTGCCTGGTTGGG  
ACTAATATTTGCAATTTATTGCAACCATACCAGGTATCGTTTTATGGAATAAATCAATACAATCTTTCCGGGGTTAGTGCATTATTACA  
GTAATTATAACAACGTTTTTAGGTAATACTTTCTGTTTTAAGTGCCATCATATTAGTCTTAATTGCAAGTTAATTATTGGTCAATTGCT  
CAAAGAAAGAACGTCTAAAGAAAGAAATGTTATACGTAACAACAGTAGCGATGAGCTTAATTTCAATTAATCGCTTTTTATGTTACTACA  
AACATTCGGAAGGATTCCACCATCAGCGAGCATAGTAAAACCTTCAAGCAAACATTACATGAAGCGATTACGATGAGCGGTGCCG  
ATGCGAATATGACCCAAATATTAGAAGAAGGGTTAGACAAGCGACCGTTCAATTACCAGGTTTCATCATTATCATTACATTTTTAA  
TTGCTTAATTAACCTAATCGTTACATTTCCGGTTTTACGAAAAATTTAAATCGCTACACCTGTATTTAAGCCACTTTTCGCGTGGCA  
AATGAGCGGTATTTTTATTATGGATATACATTATTGTTATCATATGTTTATTATTTACAGGTCAACCGAGTGTGTTCCAGAGCATTCTT  
TTAAACTTCCAATTGTGTTATCATTAGTAATGTATATTTCAAGGTTTAAAGTGTATTTCATTCTTTGGTAAAGCGAAAGGTTTGGCGA  
ATGCAAGTAACGATTTTACTATTGATTATCGGTACAACTACTGACACCTACGACACATATTGTAGGACTACTTGGTGTTATCGATTTAA  
GTTTGAATTTGAAGCGAATCATGAAAAATAATTCTAAAAAGTGAATAGAGGTGGAATAATGAATCGGCAGTCCACTAAGAAAGCTT  
TACTAATACCATTTGTGCATCATGATCATCACAGCAATTGTTTTAATGGGTGTATGGTTTATCTTTAATAGTCTTATAGCATTAAATGC  
ATCTATCGTTCTTGTGCTGATGATTATTGTTAGCATCTTTTATTTCAGACAAGCTTTAATGAAAATGGATAGTTATGTAGATGGTTTG  
AGTGCTCAAATTTCAACAACAAATAATAAAGCAATCAACATTTACCAATTGGTATCATTGTTTTAGATGAAAAATGATCACATCGAA  
TGGGTAAACCAATTTATGACAAATCATATGGAAGCAAATGTCATTTCTGAATCTGTAAATGAAGTATTTCCAAACATTTTAAAGCAA  
TTAGATAGAGTGAAATCCGTTGAAATAGAATATAATCAGTATCATTTCCAAGTACGTTATTTCTGAGAATGATCATTGCCTCTATTCT  
TTGATATAACTGAACAAGTACAACAATGAACATAATGAAAATTTAAACCAATCATTGCGACATTATTTTTAGATAAATCAGATG  
AGATTACTACAAATATGAATGATACGCGAGCTTCGAAATCAATTTCAATGGTAAACGCGTGTATTAGTCTAGTGGGCAACTGAGTAT  
AATATATTCTTTAAAGGTATAGTTCGGATCAATTCGTAGCCTATTTAAATCAAAAAATATTAGCTGACTTAGAAGAATCTAAATTT  
GATATCTTGAGTCAATTACGTGAAAAAAGTGTGGTTATCGTGCCCAATTAACATTAAGTATTGGTGTGGTGAAGGTACTGAAAAAT  
TTAATCGATTTAGGTGAATTATCACAATCAGGCCTAGACTTAGCATTAGGGCGCGGTGGCGACCAAGTTGCAATTTAAAGATTAAT  
GGTAATGTGCGTTTCTATGGCGGTAAGACTGACCCGATGGAGAAACGTACTCGTGAAGAGCACGAGTGATCTCACATGCGTTAAA  
AGATATCCTTGACAGAGGGTGACAAAGTCATTATCATGGGACATAAACGTCCTGACTTAGATGCAATTGGTGCAGCAATCGGTGTGT  
CTAGATTTGCAATGATGAATAATTTAGAAGCATAACATCGTATTAATGAGACTGACATTGATCCAACATTACGACGCGTGATGAAC  
GAAATTGATAAAAAAGCCAGAGTTAAGAGAGCGATTATAACATCAGATGATGCTTGGGATATGATGACATCTAAGACAACCGTAGT  
GATTTGTGATACGCATAAACCAGCACTGTTTATAGTGAATAATGTCTTAAATAAAGCAACACCGTAAAGTTGTTATCGCATCATAG  
ACGTGGTGAAAGCTTCATCTCTAATCCATTGTTGATATATATGGAACCATACGCAAGTTCAACAGCTGAATTGGTAACAGAGTTACT  
GGAATATCAACCAACAGAACAACGTTTAAACACGCTTGAATCAACAGTGATGTATGCAGGTATTATTGTAGATACAAGAACTTTA  
CATTACGAACAGGATCAAGAACATTGATGCAGCGAGTTATTTACGTGCACATGGTGCAGATACGATTTTAAACGCAACATTTCTTAA  
AAGATGATGTGGATACCTACATTAATCGATCTGAATTAATTGCAACTGTAAAAGTTGAAGATAATGGCATAGCCATTGCGCATGGTT  
CAGACGATAAAATTTATCATCCAGTAACAGTTGCACAAGCAGCAGATGAACGTGTTAAGTTTAGAAGGTATTGAAGCATCATATGTT  
GTTGCGAGACGTGAAGATAATCTGATTGGTATATCTGCGCGTTCACTCGGTTCAAGTAAATGTTTCAAGTTAACAATGGAAGCACTTGGT  
GGCGGTGGACATTTAACCAATGCTGCAACACAACCTAAAGGTGTGACAGTCAAGAGGCGATAGCACAATTACAACAAGCAATTAC  
AGAACAATTAAGTAGGAGTGAAGATGCATGAAAGTAATTTTACACAAGATGTTAAAGGTAAAGGTAAGGTAAGGTAAGGTAAGG  
AAGTACCAAGTAGGTTATGCAAAATAACTTCTTATTGAAAAAGTAATGATGTGTAAGAAAGCAACACCGTAAAGTTGTTATCGCATAG  
TTACAGAAAAAACGTGCAAAACAAGAACGCCAACAAGAAATTGAAGATGCTAAAGCATTAAGAAAGAACGTTATCAACATTGAAG  
TTGAAGTATCAGCAAAAACTGGTGAAGGTGGTAAATGTTTGGATCAGTAAGTACAAAACAAATTGCCGAAGCACTAAAAGCACAA  
CATGATATTAATAATTGATAAACGTAATAATGGATTTACCAATGGAATTCATTCCCTAGGATATACGAATGTACCTGTTAAATTAGAT  
AAAGAAGTTGAAGGTACAATTCGCGTACACACAGTTGAACAATAAAGTTGGATTGAAATAAGAGGTGTAACCATTTCATGGATAGAA  
TGTATGAGCAAAATCAATGCCACATAACAATGAAGCTGAACAGTCTGTCTTAGGTTCAATTATTATAGATCCAGAATTGATTAATA  
CTACTCAGGAAGTTTTGCTTCTGAGTCGTTTTATAGGGGTGCCCATCAACATATTTCCGTGCAATGATGCATTAATGAAGATA  
ATAAAGAAATGATGTTGTAACATTGATGGATCAATTTACGAGGAAGGTACGTTGAATGAAGCGGGTGGCCCGCAATATCTTGCA  
GAGTTATCTACAAATGTACCAACGACGCAAAATGTTTCAGTATATACTGATATCGTTTTCTAAGCATGCATTAAGCATAGATTGATT  
CAAACGTGAGATAGTATTGCCAATGATGGATATAATGATGAACCTGAACTAGATGCGATTTTAAAGTATGACAGCTGAAGTTTAA  
GAGCTGTCATCTTCTCGTGAAGCGATGGCTTTAAAGACATTGAGACGCTTATAGGACAAGTGTATGAAACAGCTGAAGAGCTTGA  
TCAAAATAGTGGTCAACACCAAGGTATACCTACAGGGTATCGAGATTTAGACCAATGACAGCAGGGTTCAACCGAAATGATTTAA  
TTATCCTTGACGCGCTCCATCTGTAGGTAAGACTGCGTTCGCACCTAATATTGCACAAAAAGTTGCAACGCATGAAGATATGTATA  
CAGTTGGTATTTTCTCACTAGAGATGGGTGCTGATCAGTTAGCCACACGTATGATTTGTAGTTCTGGTAATGTTGACTCAAACCGCTT  
AAGAACGGGTACTATGACTGAGGAAGATTGGAGTCGTTTTACTATAGCGGTAGGTAAATATCACGTACGAAGATTTTTATTGATGA  
TACACCGGTATTTCGAATTAATGATTTACGTTCTAAATGTCGTCGATTAAGCAAGAACATGGCTTAGACATGATTGTGATTGACTA  
CTTACAGTTGATTCAAGGTAGTGGTTCAGTGCGTCGATAACAGACAACAGGAAGTTTCTGAAATCTCTCGTACATTAAGAGCATT  
AGCCCCGAATTAGAATGTCCAGTTATCGCATTAAGTCAGTTATCTCGTGGTGTGAACAACGACAAGATAAACGTCCTAATGATGA  
GTGATATTCTGTGAATCTGGTTCGATTGAGCAAGATGCTGATATCGTTGCGTTCTTATACCGTGATGATTACTATAACCGTGGTGGCG  
ATGAAGATGATGACGATGATGGTGGTTTCGAGCCACAAACGAATGATGAAAACGGTGAAATTGAAATTATCATTGCTAAGCAACGT

AACGGTCCAACAGGCACAGTTAAGTTACACTTTATGAAACAATATAATAAATTTACCGATATCGATTATGCACATGCAGATATGATG  
TAAAAAAAGTTTTTCCGTACAATAATCATTATGATGATAAAATTGTACGGTTTTTATTTTATTCTGAACGGGTTGATATATGTTAAGT  
TTGTGTATTGAAAGTGATAAATTAGTACTGTCAACGCCCTCTGTTAAAGGGTTTTTAGGACGTTGAAGACGATTGTGTTAAATGATTTT  
TCTTTTAAAAAGGTCGAAAATCAATGTTTCGATTTTTATTGTCATTATGGTCTCGATATTGGTAGAATATCAAATGGTTAAATGAGAA  
AAACTTGGAGGTGCTCACATGTCATCAATCGTAGTAGTTGGGACACAATGGGGAGACGAAGGAAAAAGGAAAAATAACGGATTCTT  
GGCAGAACAGTCAGATGTTATCGCGCGTTTTTCAGGTGGTAATAATGCAGGCCATACCATTCAATTTGGCGGAGAAAACATATAAATT  
ACATTTAGTACCATCTGGTATCTTTACAAAGACAAATTAGCGGTAATCGGTAACGGTGTCTGTTGTTGATCCAGTTGCACTATTGAA  
AGAATTAGACGGATTAATGAACGTGGCATTCTACAAGTAATTTACGTATATCTAATCGTGCACAAGTGATTTTACCATATCACTT  
AGCACAGATGAATATGAAGAACGTTTACGCGGTGACAATAAGATTGGTACAACATAAAAAAGGTATCGGTCCAGCATATGTAGAC  
AAAGTTCAACGTATCGGTATTCGTATGGCAGATTTACTTGA AAAAGAACATTTCGAAAGATTATTA AAAATCAAACATTGAATATAA  
ACAAGCATATTTCAAAGGTATGTTTAAACGAAAACATGTCCATCATTTGATGATATCTTTGAAGAATACTATGCTGCAGGTCAACGTTT  
AAAAGAATTTGTAACAGACACATCAAAAAATCTTAGACGATGCATTTGTAGCAGATGAAAAGGTACTTTTCGAAGGTGCGCAAGGTG  
TAATGTTAGATATCGACCATGGTACATACCCATTCTGTACATCAAGTAATCCAATTGCAGGTAACGTTACTGTTGGTACAGGTGTAG  
GTCCTACATTCTGTTCAAAGGTAATTGGTGTATGTAAGCTTATACATCACGTGTTGGTGTATGGTCCATTCCCTACTGAATTATTCTGA  
TGAAGATGGACATCATATTAGAGAGGTTGGTCTGTAATACGGTACAACAACAGGACGTCCACGTCTGTAGGTTGGTTTGATTCAG  
TTGTATTACGTCACTCTCGTCGTGTAAGTGGTATTACAGATTTATCTATTAACCTCAATCGATGTTTTAACAGGCCTAGACACAGTGAA  
AATCTGTACAGCTTATGAATTAGACGGTAAAGAAAATTACTGAGTACCCAGCAAACCTTAGATCAATTA AAAACGTTGTAAACCAATCTT  
TGAAGAGTTACCAGTTGGACAGAAGACGTAACAAGTGTGCGTACTTTAGAAGAATTACCTGAAAATTGACGTAATAATTTAGAGC  
GTATTTTCAGAAATTATGTAATGTACAAATTTCTATCTTCTAGTTGGTGGTCAGATAGAGAACAACAAACCTATTA AAAAGAATTTGGT  
AGAACTTTATATAAGTCATACGCAATGATTATAAATACATGAGCCTTCTATCTTTATTGGTAGGAGGCTTTTGCTTTGTTGCTTCTG  
TATCGATTTCGATTATTTAGATAAAAAATTACTAACGTAAAGGTGATTTTGCTAGTCATAATTTAAAAGATTAGATGATATTTAACGA  
AATTAAGAAGAAATACTTGAATGTAATAAGTCTGATGTGCAAAAATAGCTATTA AAAATAGAGTAGACGTAAGTGTAAATGAAAGTAC  
CTAAAATAGAAAAATTTCAA AAAATAGCGTAATTATTATAATAAATAGACTGCCAATA AAAATGCAATTTTTCACITATAACATTCTTC  
AAAAAATAATAGCAAAAATTATGTA AAAAATATCTTGTCTATGGCAAGATTGGCTGTGCTATAATCTATCTTGTGCTTAAGAACGGCTC  
CTTGGTCAAGCGGTTAAGACACCGCCCTTTCACGGCGGTAACACGGGTTTCGAGTCCCGTAGGAGTCACCATTTTTTAGGTCTCGTAG  
TGTAGCGGTTTAACACGCCTGCCTGTCACGCAGGAGATCGCGGTTTCGATTCCCGTCGAGACCGTACAATAGCCTATCCAAGAGGAT  
AGGCATTTTTTTGCGTTTTAATATTATATTAATAAAAGATATATGGACGAATGATAATCATATTGATTATCTGTTCTGCTCCATTTCTTT  
ATAATGTATGAACCTCAAGTAACCTTAGTGGTTGGATATGAAAAGATAAACGTAGACAATA AAAATCTTTATTAGACGTACAAACATAT  
GCTACTGTCAACATATTTCTTCGTTGTGATATGCCACCAATCTCCATAACATCAATTGTTAAAGTAACGAATAATGATATTTATTTT  
CTGAGCAATGACGTGCAACTAGAAGTTGCCATTACCCTAATTTTATTATTGGAATAGAGACCTCATCATTGTGTTAAATATCATTGTG  
ACAATCCGCCGTGAGAACTAATAAAAAATATTAATATATAAGTTTATATTGGAAAATAGAATTAATAGCTTATAAATGGTAAATT  
ATATAATAGGTTACTATACGTTATAAGACGGAAAAATGCGCACATAAACA AAAAATAGTAAGCGACATCCTGTGATTTTTTACACAAA  
CATAAACGATAAAGAACA AAAAATGATA AAAAATATTAATGATTTAAGAAAAAGAGGTTTTATGCAAAATGGCTAGAAAAGTTGTTGT  
AGTTGATGATGAAAAACCGATTGCTGATATTTTGAATTTAACTTAAAAAAGAAGGATACGATGTGCTACTGTGCATACGATGGTA  
ATGATGCGAGTCGACTTAATTTATGAAGAAGAACACAGACATCGTATTATTAGATATCATGTTACCTGGTCGTGATGGTATGGAAGTAT  
GTCGTGAAGTGCGCA AAAAATACGAAATGCCAATTATAATGCTTACTGCTAAAGATTGAGAAAATTGATAAAGTGCTTGGTTAGAA  
CTAGGTGCAGATGACTATGTAACGAAACCGTTTAGTACGCGTGAATTAATCGCACGTGTGAAAGCGAACTTACGTCTGCATTACTCA  
CAACCAGCACAAAGACACTGGAAATGTAACGAATGAAATCACAATTAAGATATTGTGATTTATCCAGACGCATATTCTATTA AAAA  
ACGTGGCGAAGATATTGAATTAACACATCGTGAATTTGAATTGTTCCATTATTTATCAAAAACATATGGGACAAGTAATGACACGTGA  
ACATTTATTACAAACAGTATGGGGCTATGATTACTTTGGCGATGTACGTACGGTCTGATGTAACGATTCTGCTGTTACGTGAAAAGAT  
TGAAGATGATCCGTCACACCCTGAATATATTGTGACGCGTAGAGGCGTTGGATATTTCTCCAACAACATGAGTAGAGGTCGAAAC  
GAATGAAGTGGCTAAAACAACCTACAATCCCTTCATACTAACTTGAATTTGTTATGTATTACTGATTATCATTTGGTATGCAAAATTAT  
CGGGCTGATTTTTACAATAACCTTGA AAAAGAGCTGCTTGATAATTTTGAAGAAGATATTACGCAAGTCGCAAAACAAATTAGAAA  
TTAGTATTGAAAAAGTATATGACGAAAAGGGCTCCGTAAATGCACAAAAAGATATTCAAAAATTTATTAAGTGAGTATGCCAACCGT  
CAAGAAATTGGAGAAATTCGTTTTATAGATAAAAGACCAAAATTATTATTGCGACGACGAAGCAGTCTAACCGGAGTCTAATCAATCA  
AAAAGCGAATGATAGTTCTGTCCAAAAAGCACTATCACTAGGACAATCAAACGATCATTTAATTTTAAAAGATTATGGCGGTGGTA  
AGGACCGTGTCTGGGTATATAATATCCCAGTTAAAGTCGATA AAAAGGTAATTGGTAATATTTATATCGAATCA AAAAATTAATGAC  
GTTTATAACCAATTAATAATATAAATCAAATATTCATTGTTGGTACAGCTATTTCAATTATTAATCACAGTCATCCTAGGATTCTTTA  
TAGCGCGAACGATTACCAAAACCAATACCCGATATGCGTAACCAGACGGTTGAAATGTCCAGAGGTAACCTATACGCAACGTGTGAAG  
ATTTATGGTAATGATGAAATTTGGCGAATTAGCTTTAGCATTTAATAACTTGCTAAACGTGTACAAGAAGCGCAGGCTAATACTGAA  
AGTGAGAAACGTAGACTGGACTCAGTTATCACCCATATGATGATGTTATTATTGCAACAGACCCGCTGGACGTATTCGATTCGTC  
AATGATATGGCAGTACTTAAGATGCTTGGTATGGCGAAAGAAGACATCATTTGGATATTACATGTTAAGTGTAAATAGTCTTGAAGATGA  
ATTTAAACTTGAAGAAATTCAAGAGAATAATGATAGTTTCTTATTAGATTTAAATGAAGAAGAAGGTCTAATCGCACGTGTTAACTT  
TAGTACGATTGTGCAGGAAAACAGGATTTGTAACCTGGTTATATCGCTGTGTTACATGACGTTACTGAACAACAACAAGTTGAACGTGA  
ACGTCTGTAATTTGTTGCCAATGTATCACATGAGTTACGTACACCTTTAACTTCTATGAATAGTTACATTGAAGCACTTGAAGAAGG  
TGCAATGGAAGATGAGGAACTTGCGCCACAATTTTATCTGTTACCCGTGAAGAAAACAGAACGAATGATTTCGACTGGTCAATGACT  
TGCTACAGTTATCTAAAATGGATAATGAGTCTGATCAAATCAACAAGAAATTTATCGACTTTAACATGTTCAATTAATAAAAATTATTA  
ATCGACATGAAATGCTCTGCGAAAAGATACAACATTTATTTCGAGATATTCCGAAAAAGACGATTTTTCACAGAATTTGATCCTGATAAA  
ATGACGCAAGTATTTGATAATGTCTATTACAAATGCGATGAAATATTTAGAGCGGATAAACGTGTGCGAGTTCCACGTGAAACAAAA  
TCCAGTTTATTAACGATTTCGTATTAAAGATATTAAGCATATGGCATCGTATTTCCTATCAATAAAGTCGATAAGATATTTCGACCGATT  
CTATCGTGTAGATAAGGCGCGTACGCGTAAAATGGGTGGTACTGGATTAGGACTAGCCATTTTCGAAAGAGATTGTGGAAGCGCAC  
ATGGTCGTATTTGGGCAAAACAGTGTAGAAGGTCAAGGTACATCTATCTTTATCACACTTCCATGTGAAGTCATTGAAGACGGTGATT  
GGGATGAATAATAAGGAGCATATTAATCTGTCTATTTAGCGCTACTTGTCTTGATGAGTGTGCTGATTGACATATATGGTATGGAAC  
TTTTCTCCTGATATTGCAAAATGTCGACAATACAGATAGTAAGAAGAGTGAAACGAAACCTTTAACGACACCTATGACAGCCAAAAT  
GGATACAACTATTACGCCATTTTCAGATTATTCATTTCGAAAAATGATCATCCAGAAGGTACGATCGCGACGGTTTCTAATGTGAATAA  
GCTGACGAAACCTTTAAAAAATAAAGAAGTGAAGTCCGTGGAACATGTTCTGCTGTATCATAAATTGATGATTCCTGATTTGAGCA  
GTGATTTTACATTTACGATTTTACGTATGATTTACCGTTATCAACATATCTTGGTCAAGTACTGAACATGAATGCGAAAGTACCAAA  
TCATTTCAATTTCAATCGTTTGGTCATAGATCATGATGCTGATGATAAATATCGTGCTTTATGCTATAAGCAAAAGTACGCCACGATTAC  
GTAAAAATTAACAACCTACAACGAAAAATGATCATTTTTTAGATGCATTAGCAGCAGTGAAAAAAGATATGCAACCATACACAGATAT  
CATCACAACAAAGATACAATTGATCGTACGACGCATGTTTTTGCACCAAGTAAACCTGAAAAGTTAAAAACATATCGCATGGTAT  
TTAACACGATTAGTGTGAGAAAATGAATGCTATACTATTTGACGATTCAACCATCGTTCGTAGTTCAAAGAGTGGTGTACTACTT

ATAACAATAATACAGGTGTCGCAAACTATAACGATAAAAAATGAAAAATACCATTATAAAAAACCTGTCCGAAGATGAAGCAAGTTCC  
AGCAAAATGGAAGAAACGATTCCAGGAACCTTTGATTTTATTAATGGTCATGGTGGTTTCTTAAACGAAGACTTCAGATTGTTTAGT  
ACGAATAATCAGTCAGGCGAGTTAACATATCAACGTTTCCTTAACGGTTATCCAACGTTTAATAAAGAAGGCTCTAATCAAATTCAA  
GTCACTTGGGGTGAAAAAGGCGTCTTTGACTATCGTCGTTGTTATTGCGCACCAGCTGTGTGTTAAATAGTGAGGATAATAAACG  
TTGCCGAAATTAGAGTCTGTACGTTCAAGCTTAGCGAACAATAGTGATATTAATTTTGAAAAAGTAACAAACATCGCTATCGGTTAC  
GAAATGCAGGATAACTCAGATCATAATCACATTGAAGTGCAGATTAACAGTGAACCTGTACCGCGTTGGTATGTAGAATATGATGG  
CGAATGGTATGTTTATAACGATGGGAGGCTTGAATAAATGAACTGGAAACTGACAAAGACACTTTTCATTTTCGTGTTTATTCTTGT  
CAACATCGTGTTAGTATCGATTTATGTTAATAAAGTCAATCGTCCACACATTAATGAAGTCGAGAGTAACAATGAAGTGAATTTTCA  
ACAAGAAGAAATAGGGTGCCAGCCAGTATTTTAAATAAATCTGTTAAAGGCATACAATTAGAACAATTTACTGGACGATCAAAAAG  
ACTTTAGTTCAAAAAGCTAAAGGTGATTCTGATTTATCCACATCAGATAGTGGAATAATTATTAATGCGAACATCAGCCAATCGGTAA  
AAGTTAGTGATAATAACTTAAAGATTAAAAAGATTACGTTAAACAAACGCGTATTTAAAGGTGCTGAATATCAATTAAGCGAGATT  
AGTTCAGATTCTGTAAAAATATGAACAAACGTATGATGATTTTCCAATTTTAAATAACAGCAAAGCGATGTTGAACTTTAAATAGAA  
GATAACAAAGCAACTAGTTATAAACAGTCAATGATGGATGACATTAAGCCGACTGATGGTGCAGATAAGAAGCATCAAGTTATTAG  
TGTGAGAAAAGCAATCGAGGCATTATATTATAATCGTTACTTGAAAAAAGGTGATGAAGTCATTAATGCTAGACTCGGTTACTACTC  
AGTCGTGAATGAAACGAATGTTCAATTGTTACAACCAACTGGGAAATTAAAGTGAAGCATGACGGTAAGGACAAAACGAATACTT  
ACTATGTCGAAGCGACAAATAATAACCCTAAAAATTATTAATCATTAAATGATCGTAATAAGCTAGCATTGCAAGCTCATCATATG  
TGAGAAGCGGTGCTAGCTTTTGTGCTGGTACGGTTTATTATGGCTGACAGGCGACATTTCTGCGTCTTAACGTGCGCATTTATTCTA  
TTTTAAGTAGAACCAGCATTGTAAAAATTAACGTAACGTATTTTAAAACTTTAGTATTTGTCTAATCATGATTGTTATAAATTAAGAA  
ATTCTATTGCAGTGATTATCAAAATTTAATTATAAGAGACCGGTGATGCAATGAAGTTACATAAATAGGAAAGGTATACAAAACAG  
CTAATATACTGATAGTTTCTGTAGGGAAAAATCGTATATTTGTACTGATGTATATTGTAGTCATATAGAGAGATTGACTGCTTAAATA  
GAAAGGATGAGCCGCTTGATACGCATGAGTGTATTAGCAAGTGGTAGTACAGGTAACGCCACTTTTGTAGAAAATGAAAAAGGTAG  
TCTATTAGTTGATGTTGGTTTACTGGCAAGAAAATGGAAGAATTGTTTAGTCAAATTGACCGTAATATTCAAGATTTAAATGGTAT  
TTAGTAACCCATGAACATATTGATCATATTAAGGATTAGGTGTTTGGCGCGTAAATATCAATTGCCAATTTATGCGAATGAAAA  
GACTTGGCAGGCAATTGAAAAGAAAGATAGTCGCATCCCTATGGATCAGAAATTCATTTTAAATCCTTATGAAACGAAATCTATTGC  
AGGTTTCGATGTTGAATCGTTTAAACGTGTCACATGATGCAATAGATCCGCAATTTTATATTTCCATAATAACTATAAGAAGTTTACG  
ATTTTAAACGGATACGGGTTACGTGCTGATGATGATAAGGTATGATACGTGGCAGCGATGCGTTTATTTTGGAGAGTAATCATGAC  
GTCGATATGTTGAGAATGTGTCTGTTATCCATGGAAGACGAAACACGTATTTTAGGCGATATGGGTCATGTATCTAATGAGGATGCG  
GGTCATGCAATGACAGACGTGATTACAGGTAACACGAAACGTATTTACTTATCACATTTATCACAAGATAATAATATGAAAAGTTTG  
GCGCGTATGAGTGTGGTCAAGTATTGAACGAACACGATATTGATACGGAAGAAAGTATTGCTATGTGATACGGATAAAGCTAT  
TCCAACGCCAATATATACAATATAAATGAGAGTACCCTATAAAGTTCGGCAGTGTGTGAGACGACTTTATCGGGTGCTTTTTTATG  
TTGTTGGTGGAATGGCTGTTGTTGAGATTAAGGGGTCTAGTTGAAATGTGGAATAAATTCGATATTAATGTAATTTATAAATA  
ATTTACATAAAATCAATCATTTTAAATATAAGGATTATGATAATATATTGGTGTATGACAGTTAATGGAGGGAACAAAATGAAAGCTT  
TATTACTTAAACAAGTGATGGCTCGTTTGTCTTTTGTAGTGAATGGGATTATACCATGTCTCGAACGCGGCTGAGCAGCATACAC  
CAATGAAAGCATGCGTAACAACGATAGACCAAGCAGCAACAGATAAGCAACTAGTAACGCCAACAAAGGAAGCGGCTCATTA  
TTATGGTGAAAGAAGCGGCAACCAACGTATCAGCATCAGCGCAGGAAACAGCTGATGATACAAACAAAGATTAACATCAACGAA  
CCATCTAATAAACCATCTACAGCAGTTTCAACAACAGTAAACGAAACGCGCGATGTAGATACACAACAAGCCTCAACACAAAAACC  
AACTCACACAGCAACATTCACATTATCAAAATGCTAAAACAGCATCACTTTCACCACGAATGTTTGTGCCAATGTACCACAAACAAC  
AACACATAAAATATTACATACAATGATATCCATGGCCGACTAGCCGAAGAAAAAGGGCGTGTATCGGTATGGCTAAATTAATAA  
CAGTAAAAGAACAAGAAAAGCCTGATTTAATGTTAGATGCAGGAGACGCCTTCAAGGTTTACCCTTCAAACCAGTCTAAAGGT  
GAAGAAATGGCTAAAGCAATGAATGCAGTAGGTTATGATGCTATGGCAGTCGGTAACCACGAATTTGACTTTGGATACGACCAAGT  
GAAAAAGTTAGAGGGTATGTTAGACTTCCCGATGCTAAGCACTAACGTTTATAAAGATGGGAAACGCGCGTTTAAACCATCAACGA  
TTGTAACAAAAATGGTATTCGTTTGGAAATTATTGGCGTAACGACACCAGAAACAAAGACGAAACAAAGACCTGAAGGCATTAA  
GGTGTGAAATTTAGAGATCCATTACAAAGTGTGACAGCAGAAATGATGCGTATTTATAAAGACGTAGATACATTTGTTTATATCA  
CATTTAGGGATTGATCCTTCAACGCAAGAAACATGGCGTGGTGATTACTTAGTGAAACAATTAAGTCAAAATCCACAATTGAAGAA  
ACGTATTACAGTTATTGATGGTCATTACATACCGTACTTCAAAATGGTCAAATTTATAACAATGATGCATTAGCACAAACAGGTAC  
AGCACTTGCGAATATCGGTAAAGATTACATTTAATTACCAGCAATGGAGAGGTATCGAATATTAAGCCGTCATTGATTAATGTTAAAGA  
CGTTGAAAATGTGACACCGAACAAGCATTAGCTGAACAAATTAATCAAGCTGATCAAACATTTAGAGCACAACTGCAGAGGTAA  
TTATTCAAACAATACCATTGATTTCAAAGGAGAAAGAGATGACGTTAGAACGCGTGAAACAAATTTAGGAAACGCGATTGCAGAT  
GCTATGGAAGCGTATGGCGTTAAGAATTTCTCTAAAAAGACTGACTTTGCCGTGACAAATGGTGGAGGTATTCGTGCCTCTATCGCA  
AAAGGTAAAGGTGACACGCTATGATTTAATCTCAGTATTACCATTGGAAATACGATTGCGCAAATTTGATGTAAAAGGTTTCAGACGTC  
TGGACAGCTTTTGAACATAGTTTAGGCGCACCAACAACAAAAAGTGGTAAGACAGTATTAACAGCAATGTTGGTGGTTTACTACA  
TATCTCTGATTCAATCCGTTTACTATGATATGAATAAACCTTCTGGCAATTAACGTAATTAACGTAATTTAAATTAAGAGAC  
AGGTAAGTTTGAATAATTGATTTAAACGTTGATATCACGTAACGATGAATGACTTCACAGCATCAGGTGGCGACGGATATAGTA  
TGTTCCGTGGCCCTAGAGAAGAAGGTATTTCAATTAGATCAAGTACTAGCAAGTTATTTAAAAACAGCTAACTTAGCTAAGTATGATA  
CGACAGAACCACAACGTATGTTATTAGGTAAACCAGCAGTAAGTGAACAACCAGCTAAAGGACAACAAGGTAGCAAAGGTAGTGA  
GTCTGGTAAAGATGCACAACCAATTGGTGACGACAAAGTATGATGATCCAGCGAAACAAACAGCTTCAGGTAAAGTTGTGTTGTTAC  
CAGCGTATAGAGGAACGTGTAGTAGTGGTAGAGAAGGTTCTGATCGCGCATTGGAAGGAACTGCTGTATCAAGTAAGAGTGGGAAA  
CAATTGGCTAACAAAGTCAGCGCCTAAAGGTAGCGCACATGAGAAACAGTTACCAAAAACCTGGAAGTATCAAGTTCAAGCCAG  
CAGCGATTTTGTATTAGTAGCAGGTATAGGTTTAAATGCGACTGTACGACGTAGAAAAGCTAGCTAAAATATATTGAAAAAATA  
CTACTGATTTTCTTAAATAAGAGGTACGGTAGGTTGTTTTTATGAAAAAAGCGATAACCGTTGATAGGATAGGATAAAAAACGG  
GGATAAGTAATAAGACATCAAGGTGTTTATCCACAGAAATGGGGATAGTTATCCAGGATTGTGTACAATTTAAAGAGAAATACCCA  
CAATGCCACAGAGTTATCCACAAATACACAGGTTATACACTAAAAATCGGGCATAAATGTCAGGAAAATATCAAAAACCTGCAAAA  
AATATTGGTATAATAAGAGGGAACAGTGTGAACAAGTTAATAAATCTGTGGATAACTGGAAGTTGATAACAATTTGGAGGACCAAA  
CGACATGAAAATCACCATTTTAGCTGTAGGGAAGCTAAAAGAGAAATACTGGAAGCAAGCCATAGCAGAATATGAAAAACGTTTA  
GGCCCATACACCAAGATAGACATCATAGAAGTTCCAGACGAAAAAGCACCAGAAAAATATGAGCGACAAAGAAATCGAGCAAGTAA  
AAGAAAAAGAGGCCAACGAATACTAGCCAAAAATCAAACCAACATCCACAGTCATTACATTAGAAATACAAGGAAAGATGCTATC  
TTCCGAAGGATTGGCCCAAGAATTGAACCAACGCATGACCAAGGGCAAAAGCGACTTTGTATTCTGTTATTGGCGGATCAACCGGCC  
TGCAACAAGTGTATACAGCAGTAACACGCACTATTCAGCAAAATGACATTCACATCAATGATGCGGTTGTGTTAA  
TTGAACAAGTGTATAGAGCATTTAAGATTATGCGAGGAGAAAGCGTATCACAATAAAACTAAAAAATAGATTGTGTATAATATAAA  
AGGAAGGGATTATATTTAAATTTTGAATTCAAAAATTTTGAAGGGAAGCTACCTTAGAAATTTGAATCTATGGCCACTAATACAT  
TGAAAAATAAACCCAGACATTAATCTTACTATACAGAAATGTCTTTCGATGGAGAATTGGAAGTGTATGATCTGAAAAATTTGAATA

AAAAATTCGTTGGAAAAATACAAGTTCAAGTTAAAGGAAAAAGAAGTAGCTAAAAAGAGGAGGTAAGATTATTCGTCGAAGTAATG  
GGTTCTGTTGCAAAGTAAAAAATATAGCTAACCCTAATTTATCATGTCAGTGTTTCGCTTAACCTTGCTAGCATGATGCTAATTTCCGT  
GGCATGGCGAAAAATCCC

>002-contig\_329\_RC

AATAGTTTCATACAGAAGACTCCTTTTTGTTAAAAATTATACTATAAAATTCAACTTTGCAACAGAACCCTATTATGGAATAGAGATGTT  
GGTAACATTTTATACAGGATCATTATACTTAAGTTTAATTTTCGTTATTACAGAACCACACATTCCAACCAGAAGAGAAAGTATGTCTA  
TTAGTTATGGTTCAGGAGCAGTAGGAGAAATCTTTAGTGTTCAATCGTTAAAGGATATGACAAAGCATTAGATAAAAGAGAAACA  
CTTAAATATGCTAGAATCTAGAGAGCAATTATCAGTCGAAGAATACGAAACATTCTTTAACAGATTGATAATCAAGAAATTTGATTT  
CGAACGTGAATTGACACAAGATCCATATTTCAAAAAGTATACCTTATACAGTATAGAAGACCATATCAGAACATATAAGATAGAGAAAT  
AAACTAGTGCCGATTGTGCTTGATGAGCTTGGGACATAAATCCTAACTCGAAATAAATAAGCATATCACTAACTGATTTTTTAA  
GTTTACAGTGATATGCTTATTTTTTATCTTACGATTTTGTACGTGCATGCTTGCCTAGGGGTATGGCTCGAGCCA

>003-contig\_276

GGCTGGAGCCATTAGTCTCTCGCACATACTATTCCCTCAGGCGTCAGCACTTACAAAATCGGTTGTAATTTTCATTTTTATACGCATT  
CTTACTGAGATTATACTAATAAGAGGAATAGTAAAAGCAATTCTAAGTAAAATTGCAGATAAGAGGTTTGTAAAAGCAGTTCTCA  
GTAAAATTACAGATAAGAGGTACGTTAAAAGCAGTTCTAAGTAAAATTGCAGATAAGAGGTTTGTAAAAGCAGTTCTAAGTAAAA  
TTGCAGATAAGAGGTACGTTAAAAGCAATTCATGCAAAAATTGCTGATAAGGGGTAAAGTTAAAAGCAGTTCTCAGTAAAATTGCAG  
ATAAGAGGTACGTTAAAAGCAGTTCTAGGCAAAAATGCAGATAAGAGGTGCGTTAAAAGCAGTTCTCAGTAAAATTGCTGATAAGG  
GGTAAGTTAAAAGCAATCCTAAGTAAAATTGCAGATAAGAGGTAAGTTAAAAGCAATCCTAAGTAAAATTGCAGATAAGGGGTAC  
AGAAAACTAGACTTGATTACAAAATGGAGCTTGGGACATAAATGATTTTTTAAAAATGAGATGAGACGTAGATTAACCTCCATAAT  
CAATACGAATCTATCGACTTCTTTATTTATGATATTCATCTCTTTTAAATGGAATAAAAAGTGCAGTAAATGTGATAATACAGTTACG  
TTAATTAATAAAAAATAAAAAATGCAAGGAGAGGTAATATGCTAACTGTATATGGACATAGAGGATTACCTAGTAAAGCTCCGAAAAAT  
ACAATTGCATCATTAAAAGCTGCTTCAGAAAGTAGAAGGTATAAACTGGTTGGAGTTAGATGTTGCAATTACAAAAGATGAACAACT  
GATTATCATTATGATGATTATTTAGAACGGACTACAAATATGTCCGGGAAAAAATACTGAATTGAATTATGATGAAATTAAGATGC  
TTCTGCAGGATCTTGGTTTGGTGA AAAAATTCAAAGATGAACATTTGCCAACTTTTCGATGATGTAGTAAAAATAGCAAATGAATATAA  
TATGAATTTAAATGTAGAATTAAGAGGTATTACTGGACCGAATGGACTAGCACTTTCTAAAAGTATGGTTAAGCAAGTGGAAGAAC  
AATTAACAACTTAAATCAGAATCAAGAAGTGCTCATTTCAGCTTTAATGTTGTGCTTGTAAACTTCGAGAAAGAAATCATGCCAC  
AATATAACAGAGCAGTTATATTCCATACAACTTCGTTTCGTGAAGACTGGAGAACACTTTTATAGATTACTGTAATGCTAAAATAGTAA  
ACACTGAAGATGCCAACTTACTAAAGCAAAAAGTAAAAATGGTAAAAGAAGCGGTTATGAATTGAACGTATGGACTGTAAACAA  
ACCAGCAGTGC AAAACCACTTGCTAATTGGGGAGTTGATGGTATCTTTACAGACAATGCAGATAAAAATGGTGCAATTTGTCTCAATA  
GAAAGTTAGAGGTGAGTCTTACGTTTCAGTGACGGTAGACTTACCTTTAACATGTTACATACTAAAAAATTAATTTGAATAAGAAAG  
AGAGACATATATGAAATACGATGATTTTATAGTAGGAGAAACATTCAAAAACAAAAAGCCTTCATATTACAGAAGAAGAAATATCC  
AATTTGCAACAACCTTTTGATCCTCAATATATGCATATAGATAAAGAAAAAGCAGAACAAAGTAGATTTAAAGGTATCATTGCATCT  
GGCATGCATACACTTTCAATATCATTAAATTATGGGTAGAAGAAGGTAAATACGGAGAAGAAGTTGTAGCAGGAACACAAATGAA  
TAACGTTAAATTTATTAACCTGTATACCCAGGTAATACATTGTACGTTATCGCTGAAATTACAAATAAGAAATCCATAAAAAAAGA  
AATGGACTCGTTACAGTGTCACTTTCAACATACAAATGAAAATGAAGAAATTTGATTTAAGGGAGAAGTAACAGCACTTATTAATA  
ATTCATAATAAAACAGTGAAGCAACCATCGTTACGGATTGCTTCACTGTTTTGTTATTCATCTATATCGTATTTTTTATTACCGTTCTC  
ATATAGCTTCATACACTTTTACCTGAGATTTTGGCATTGTAGCTAGCCATCTTTATCTGTACATCTTTAAGATTAAATAGCCATC  
ATCATGTTTGGATTATCTTTATCATATGATATAAAACCCCAATTTGCTTGCAGTTTCTCCTTGTTCATTGTTTATCTGCACTGACC  
GGATTTGCCAATTAAGTTTGATAAGATCTATAAATATCTTCTTTATGTGTTTTATTACGACTTGTGTCATACCATCAGTTAATAGA  
TTGATATTTTCTTTGGAATAATATTTTTCTTCCAACTTTGTTTTCTGTGCTTTTAATAAGTGAGGTGCGTTAATATTGCCATTATTT  
TCTAATGCGCTATAGATTGAAAGGATCTGTACTGGGTTAATCAGTATTTACCTTGTCCGTAACCTGAATCAGCTAATAATATTTTCAT  
TATCTAAATTTTGTGTTGAAATTTGAGCATTATAAAATGGATAATCACTTGGTATATCTTCACCAACACCTAGTTTTTTCATGCCTTTT  
TCAAATTTCTTACTGCCTAATTCGAGTGCTACTCTAGCAAAGAAAATGTTATCTGATGATTCTATTGCTTGTTTAAGTCGATATTAC  
CATTTACCACTTCATATCTTTGTAACGTTGTAACCAACCCCAAGATTTATCTTTTTGCCAACCTTTACCATCGATTTTATAACTTGTTTTA  
TCGTCTAATGTTTTGTTATTTAAACCAATCATTGCTGTTAATATTTTTGAGTTGAACCTGGTGAAGTTGTAATCTGGAACCTTGTGAG  
CAGAGGTTCTTTTTTATCTTTCGGTTAATTTATTATATTCTTCGTTACTATGCCATACATAAATGGATAGACGTATATGAAGGTGTG  
CTTACAAGTGCTAATAATTCACCTGTTTGAAGGTGGATAGCAGTACCTGAGCCATAATCATTTTTCATGTTGTTATAAATACTCTTTT  
GAACTTTAGCATCAATAGTTAGTTGAATATCTTTGCCATCTTTTTTCTTTTCTTATTAATGTATGTGCGATTGTATTGCTATTATCG  
TCAACGATTGTGACACGATAGCCATCTTCATGTTGGAGCTTTTTATCGTAAAGTTTTTCGAGTCCCTTTTTACCAATAACTGCATCAT  
CTTTATAGCCTTTATATTCTTTTTGTTTTAATTCCTCAGAGTTAATGGGACCAACATAACCTAATAGATGTGAAGTCGCTTTTCTTAGA  
GGATAGTTACGACTTTCTGTTTCATTAGTTGTAAGATGAAATTTTTTGCAGAAATCTCTTAAATATTCATCCATTTTTTTAACGGTTTT  
AAGTGGAAACGAAGGTATCATCTTGTACCCAATTTTGATCCATTTGTTGTTGATATAGTCTTCAGAAATACTTAGTTCTTTAGCGATT  
GCTTTATAATCTTTTTTAGATACATCTTTTGAACGATGCCATCTCATATGCTGTTCTGTATTGGCCAATTCACATTGTTTCGGTCTC  
TAAAATTTTACCACGTCTGATTTTAAATTTTCAATATGTATGCTTTGGTCTTTCTGCATTCCCTGGAATAATGACGCTATGATCCCAAT  
CTAACTTCCACATACCATCTTCTTAAACAAAATTAATTTGAACGTTGCGATCAATGTTACCGTAGTTTGTTTAATTTTATATTGAGC  
ATCTACTCGTTTTTTATTTTTAGATACTTTTTTTATTTTACGATCCTGAATGTTTATATCTTTAACGCCTAAACTATTATATTTTTTAT  
CGGACGTTCACTTCTACTTCACCATATCGCTTTTAGAAAATATAACTGCTATCTTTATAAACTGTTTGAATTTTTTATCTTCAA  
TTGCATCAATAGTATTATTAATTTCTTTATCTTTTGAAGCATAAAAAATATATACCAACCCGACAACCTACAACCTATTAATAAGTG  
GAACAATTTTTATCTTTTTCATCAATATCCTCCTTATATAAGACTACATTTGTAATATATTACAAATGTAGTATTTATGTCAAAATAA  
TGTTATAATTTTTGTGATATGGAGGTGTAGAAGGTGTTATCATCTTTTTTAAATGTTAAGTATAATCAGTTTATTGCTCACGATATGTG  
TAATTTTTTTAGTGAGAATGCTCTATATAAAATATCCGGTTCTGTTGCAAAGTTGAATTTATAGTATAATTTTAAACAAAAGGAGTCT  
TCTGTATGA

>004-contig\_253\_RC

TAAAAGGTATTGAATGTATTTACGGTCTATATAAAAAGAACCGCAGGTCTCTTCAGATCTGCGGATTTTCGCCATGCCATGAAATTA  
GCATCATGCTAACAAAGTTAACACAAAGTATTATTTTAAATTTGAGATTAGACATTTATTTTTCACTTTGCAGCAGAACCTAATTTTT

TCTCTTTGTAATAAATGCAAAGAGATACCATAAGGATCTCTTACATAACCATAACCTTCAGTATAGAATTCTGGACTAAATGTTTT  
CAATACCTCACTGCCTTTTTCTATTAACTGGTCATATACATGTTTAGTTTCTTCTACTTGGTCAAAAAGTGAGACAAAGAGATATATTA  
TTACCTTGTGTATGGGCAAACCTTCAGTGTCATCTGCGATCATAATTTTTATATCTCCAAATTGAAGTACACATTGATCAATTTTAT  
TTAAATCATTTCGTCAATATTAAGTTGCTTATCTATAGGTCTATCTTTAATACGTTGAATATACAGTGTTTTAGCGCCAAACAGCTC  
TTCATACAACCTTTTTTAAACCCTCTGCATTTTGAGTGATTAAAAAATATGGACTTACTTGAAATTCATGTTTTTCTCTCTTAGATTT  
GTTATAAATAGAGTATATACTTAATTAGTGTCATCTATTGACACTAAAAGGAGAATAATAATGAAAAAATCTGTTAGATTATATAAT  
ATGATTGAATATTGTAATGAAAATAGGAACTTCAAATTAATGATTTAATGTCAGAAATTTAATTTCTCGTAGTACCGCTTTAAGG  
GATATAAAAAGAAATTGAAGCATTAGGAGTACCTTTATATAGTAATCCAGGGAAAAATGGTGGTTATACGATCATAGGTAATCGAGA  
CCAAACGAAAAATAGCAATCTCAGATGAAGAGTTGAAAGCTTTAGTATTTACACTTTCGAGTATTTCAAATGTGAGTAATCTACCTTT  
TCAAACAGAATATCAAGAAATATTAATAAATTTATATAATACTCGAATAAAAAAGAGTTAATAACCAATATAATGATCTATTTT  
AATATTTTAATGAAGATAAGTATCAGTTCAAAAAGTTATAAGTTATTTAATGAAATCATTAGATTGATAATTGAGAATAAGTCTTTTG  
AAACCTGTTATTACAAAACTATATTAAGAACAATATAAAGGTATTGGCATTATGTATAAAAAATCATCAATGGTATTTTGTGTAG  
CTAATATAGAATCAAAGTTAGTGAATCTATTAATATTTTCAAAAATAAAGAAGTATATGAAATGGGAGAGACTCAAGAGTGAAT  
GATATAACTATGCAGAAATTTTCAACAGTTCATGGTTAAAAATGAAACAGCTATTGATATTCTTATTAGAAGCAATGTTATGGGATTG  
AATATCTTGAAAGGCTACCTGTGGAGTGAATATGATTGAAAAATATTGACGAAGAGACATATTTATTTAAATCAAAAGTGAACGC  
GAAAGATATAGATTTTATAGCTAAGTTAATTGTCACAGGTGGTGTCAATGTAAAAAGTAGAGACCCCTAATAGTTTGAAAAATGCTGT  
TAAAGTTGAATTAATAAAAAATTAACATGTATTAAATAGTAATTTAATCATAAATTGTAATAACAAAAAGATGACAACATTAACA  
ATTTAAATTTTACAAAAAGCATTACCAAATTTAAAAATTTGGGTAGTGGTACAGCATACATAAGTTATAAGTTATAAATAA  
AGATGGGTCAATGAAGGTGAATTAAGTGAATAAAAATATTACAGCTCTAAAAATCTACTGAAAAATACATATATGACAGTATACGG  
TTCATATCGATGATCAAATTATAAATAATATAAAGAGTGTACCAAAAAGTTTAAAAATTTGCCTATGGAAGATAAAATTCCATTAT  
CACCGTTGTTACAACCAGAATATGCAGGAGAGGTACAAGATTTTATTAGTACATATGAGCAGTTTATGATTAATTTTGGTAAAGTAA  
TATTGGATAGTCAAGGCATAAAAAATACAGTTTGAAGTGAATCATTAAAGTAGTATTCAACGAGGCATTCAAGAACATTGTTACTTA  
AATGAGCGAACAAATGACATTGATGTGACTAAAGAAATGGTATTTATGCAAATTTTCAAATCAAACATTAGAAGAGGATAAAAAATCA  
ATTGTATAATGCTTTAAAGCAACTCATGAATGATTTCAAAAATAAAGCAAGCTTTTCAAGAGGTGTTTAAAGGTTTCATATTGATAT  
TTATCTCTACAATAAAGAAAAATCTGAATATAAGTATCAAGTATCTAGTTATTTCAATCTTGTAAGAAAAATCCTAAAAATACTTA  
TAAAAAAGACATTTACAAGAGAAACAAGGTGTCAAGGGTACAACCTTTCACGAACAAATTTAAATTTATTGAACAAAATGTATGGTG  
TAGATGTTGCAAAATATCAGCCATTTTATAATTCTAATAATCTGAAATATGAAAGAGGTCAATTTGGTGAAAAGATACATTTCTCAAA  
GATCTAACTATGAATTTAATAGACTTCAATATCAAATTATAGATATGTTATCGAAAAATCTTGATAAGCATCCATTACCAAAGTCAG  
ATAATAATTATAAACATATTCCAATATTGAAAAAGCAATATTAAGTGGGGATTCTCATAGTTTATGAGTATTTTGAAGATATAA  
TGAAAGAAATTATAAGTATGAAAAATTCTTCTTTAAAGGAAAAATTATTGACTGATTTTACATATCAATCTCAATGTAGATGGTACT  
CTGAAAGTGAAAAATTAATTTGCAACTTGAAAGTTTATGCATAAAGTTTGGAGAGCAATTATTATGAGGGTAACAAATATATAT  
AGAATGTTGTCTCATGCAATTGAAGAAACAATCAATGAGGCTGATGAAGATAAGGTTCAATTTCAATTTATTTTAAAGATTATTTTGT  
ACAGACGGTGGGGTGAAGAATTGGGAGCAGATTAGCGAGAAAAATTACTGAATTCAATGGTAAAGTTATTAACGATATCCAAAATG  
AATATAATAAGATTCAATTTAATAACGCAAAATCGAAATCAGAACTAAACCTTTAATTTATTTATACCATTGCTTTGAGTTTAGTAATA  
ACTTAGTAAAAGCAAGGGTAAATGGAAATAGAGTTACATTTTATATTTGTAGATAAAATATAAATGAAAAATGAAAGTATTAATTTTGGATC  
AATTATTAATCAATTTATTTGAATCAAGAAATAGGTCAGGAAAGTATTAATTATAATATGCAAACATTGTTTGAAAAAGAAAGATAT  
GATAGAAGTAGTACCATTGAAAAATTAGTAGCAACAAGCAAAATTTAAGTATGAAAAAGATGATTTCAGATTTATTCAAACAACCTTTT  
CAATGATGTTGAAAATTCAATAGACAGATTAGGTATTTACTTACTAAATAATGGTATAAATTCGAATGATGAAAAATGCAAGATATTA  
TAGATCGTTTTTAAAGGAACCTAGTAGAATAAAAAAGTAAATTAACGCCATTTTCTCTTGAAATAAGTAAGTCTAGCGGAAGAGAGC  
AACATTATCCTGATGATGCTATTGTATGATAAAGATGAGAGAAGAAAAAATAAAGAAGAAACATATCATGCTTTTGATGATAAAAGC  
GATATTGACTCCAAATTAAGAATAAAATAAATGTTTCTATCGATAAATTTATTGTGAGTTAAAAATTAAGAGCAATTTGTATGATATT  
AGTCCAAATACAAAAAACAATAACTATAATGAGCCAACTCAAGAATGAGTTGGCTTTTAAATTGTAATTTTACGCTTCCATTACAG  
GAATCAATGTTATGGAAGCCATTAAGCAATTAATTATGATGCTTTTATAGTATAGGTACAACGTTGTGATGTTACATGATAATACGC  
CCGGGAGATTATTGTGTAATAAATCTTATAGAAGGAGCAAAATCACCATGTATCAAGCAAATATACGTGATTTAATTACAAATTTGCCTC  
AAAGCAATAAAACAGAACACTTTTTAATGAACAAATTTTCAAATCAAGATAAAGTTTCAGCAGCTACAAAGACAAATTAGCCAACAG  
CTAGATCAACAATATAATGAGCTTTTGGCTAATGAAAAAGCTAAGCTAGACCAATACGTGGAAGTACACCATAATTTAGAACCATTT  
AAAGAAAGAGATTGAATCAGAATCTATTAACCTTGATACCGATAAATTACCTGATATCAAAGCGACAATGCTTGAAAAGGCTAAGA  
ACGATGAACATTTTGATAAAATCGAACAGCTATTTGATAGATTAGATCAGTCATTAATGGTACGAATCGATTATATACGCAATTAT  
CGTTGATTGGCACACGAACACATCGGATCACAACGAAAAGATTTAATGTTCAAGGCTTGCTTAAATTAGTCCAACAAATGATTTTAC  
CTTCGCAATTTAAAAAGGTTTATACAATAGATTTTAAATCATTTCGAACCATCAGTTGCTGCGTATATGACACAAGACGAACAACCTGA  
TTGACTACTTGAATCATGAAGAAGGGTTATACGATGACTTACTGAGAGACTTATCTTTGTCAAAAAGAGAAGCGCGTGAAGTGAA  
CGTGACTTTATAGGTCTAATTTCTTTTGGCGGTGCTTATAGTGTAGCTCTAAATTCAAAATCAATCAAGAGGTAGTGAAATTAATCGG  
CTACAAGTAATGAGCAAATTCAGAAGGTCATTGAATTTAAGGAGCAAGTCGAAAAATATAAAAAAATGCCTACGCCTTACGGCAT  
TGAACATGATATGAGCGCATTTCAAGGTAGTAGTATTATGGCAATTTATGTACAAACGGTAGCAAGCTATATTTTCAAGCACATTTT  
GTTGGAAGTGTACAAAGCACAGTGCAGAAAAAAGCTTCAAGATTATAGTGCCGATACACGATGCGATTATGATTGAATGTAATG  
ATAAGGGGATTGCACAAAATGTAGCACAGCTCATGAAAGATACAGCTAATCAACTGTTAATGGTGAATTTGCACATGTGACAGTG  
GAAGCTTTAGGAGGTATAGACAATGAATAATGATAGAGGAAAAAGTCTTCAAATTTCCCAAAAGTACATTGTTAAAAAGAAGGATCTA  
TATACGTTGCTACGTTACATTTCTGTGTACGAGAAGAACTTCTCAGGTGATATTAACATCAGTTTACGTATGAAGTAGAACTTAACC  
AAGAAACGCACTATGTAATCGCAATATTACCGTAAAAATCTATGAGTACCAATTTCAATTTGCTGATTTGATTGAAATACGTCACAGTA  
ACTATAACGTAAACCATAATTAATTATGATCTCATATGATGAAACATTTTGGTCTTGTAGGGCAATATAACGGAATTAATTATA  
TTCAAGATGTAGCACCATTAGATGAATTTGGAGGGGTATTGTAATGAATCATATTTTAGAAATGTTAATAAAATTTATTAAGTGGG  
TATGGAGGCAATCGACCGTAAAGGTCTGATTGCCATCCTAACAGTAGTATTGGAAATGATGAAATGGATGATTCTGAACAAGCTG  
TAATGGTGTATAACGAGCTTATCGATAAGCTACAGCTTAACATTTCTAAAGATGTGCGACTATAGACCTAACATATACAGTTATTTTG  
GTATTCAAAAAAGCCAAATGACACAATATTAGTGAAATGATGATATGTATTTTCATATCAAGCGTTTTGATTTCAGAGTTGTTTG  
TTTTCAAAGATAAAGGTTGGCAAAAGGTAAGTGAAGATGAATTGCAAGGGTTGATATCTAAAAATGATACAAGTGTGCTAGTTGAT  
TATAAACCTTCACTAAGTACTTTGAAAAACGTAGTAGATGGCATACAGAAATCAACGGACATAGAAAAACTTGTGAGCATAGACA  
GTACATTTGGTTGTGGACGAAATATGTTCAATCTAAAGACCTTTAAAGTGGTTGATAATGACCTTGAATATTTCCCTAAAAACAGCTT  
AGATTGGAAATTAGATATAAATGACAGATTACGGACAAGTACCCCGAAATTTCAACAATATATGTTAGAGTTGGCGAATTATG  
ACCATGATTTACAATATTTCTTTTCCAACATATGGCAGTGTATTGACGGCAGATACTAAACTACGTCGTGGACTTTTTTGTATGG  
AACTGCAAAAAATGGGAAATCGGTCTATATTAATTAAGTTAAGTCATTTCTTTATAGTAATGATATCGTATCTAAACACTTAATGA  
ACTTGGCGGGCGTTTCGATAAGGAAAGTCTAATTGGTAAACGAATTATGGCAAGTGTGAAGTGGGGAAAGCTAATATTGATGAAG

CAACTGTGAATGATTTCAAAAAATTACTATCTGTTGAACCAATTCATGCTGACCGTAAAGGAAGAACGCAAGTAGAAGTTACTTTA  
GATTTAAAACTCATTTTTAATACGAATGCTGTACTCAATTTTCCATCATCACATGCAAAAGCATTAGAGCGTAGAATTGCTGTTATTC  
CATGTGAATATTATGTTGAAAAAGCTGACCCTGACTTAATTGAAAAAGTTACAGGATGAAAAAGAAAGAAATCTTTCTTTACTTGTATGT  
ATGTGTATAAGCAAATTGTAAAAAATGATATCGAGTACCTCCAAAATGATCGTGTACTGAAATTTCTCATGATTGGTTAAATTTTG  
GATATGAATTTGTTTCTAGTAAATCAGCAAATATTGCACATCAGAAAGCGTGTATTAATTTACTCAGAAAACCTTATAGAAATCAAAC  
CAGGGTCACGTATCAAAGTGTCTAGGCTAAATGAGGTTATTAGAGATGAAATTAAGTAAGCTCTCAAGTTATTAATGATTTGGTTC  
AAGCTAACTTTAATGTACAAAGTAGACTAAATAATGGTTATAAGTATTGGGTCGATTTAGGATGGAAAAGAACTGATAAAAAAGAT  
GACATGATTTTCATTCGATAAAAAATGAGAAATGTAACAGATGATGAATTTCTTATACGAAGATGATTTGAACTTAGGTTGGGAGGACTTT  
GACGATGAATAATGAACAAATTGAAGCATTGTGTAAGTGCTTTGTGCCTATCATAGAAGAACGTATCAATAAAGGTAAGTAATCTA  
ATTACGTACTACAGGCAGTTGCGTGTAGTACTCATATGATTAAGTGGTAAAAGTGATAAAAAATGAAACGAAATTATAAATATATATT  
ATCTATATGTTGTTACAAGACCGATGGTCTGTAGCAATAATCTAATAAAAGGAGCGGTATGATATGAAGGGTAAAATTGCACCTTTAT  
TCACGTGTTAGTACGTCTGAGCAGTCAGAACATGGTTATTCTGAAAAGGAGCAGGAACAACCTACTCATCAAAGAAGTTATGAAAAA  
TTTCCAGGTTATGACTATGAGACATATACTGACTCAGGCATTTTCAGGTAAAAATATTGAAGGTCGTCGGCAATGAAACGTCTATT  
ACAAGATGTTAAGGATAATAAAATCGAAATGGTATTAAGTTGGAATTTGAATCGTATTTCTCGTCAATGAGAGACGTGTTAATAT  
TATTCATGAATTCAAAGAACATGACGTAGGGTATAAATCGATTTCTGAGAATATTGATACATCCAATGCTTCTGGAGAAGTACTCGT  
TACAAATGTTTGGACTAATAGGATCTATAGAACGCCAGACTTTGATTTCCAATGTGAACTTTCTATGAATGCTAAGGCAAGGAGCGG  
AGAGGCAATCACCGGTCGTGTTTTAGGCTACAAATTCACCTAATCCATTGACACAGAAAAATGATTTAGTTATTGATGAAAAATGA  
AGCTCATATTGTACGGGAAATCTTGATTTATATTGAATCACAATAAAGGATTTAAAGCAATCACGACAATTCTAAATCAAAAAGG  
ATATCGTACCATTAAATCAAAAACCAATTTTCAGTGTGTTGGCGTGAATCAATTTTGAATAATCCAGTCTATAAAGGCTATGTACAGATT  
CAATAATCATCAAAATTTGGGCTGTTACGCGAAGAAGTGGTAAAAGTGATAAAAAATGATGTGATATTGGTCAAAGGTAAGCATGAAG  
CCATTATAAGTGAAGATGATTTGATCAAGTTCATGAGAACTAGCTTCTAAAAAGTTTTAAACCGGGTCGACCTATTGGTGGAGATT  
TCTACTTACGTGGCCTTATTAATGCCCAGAATGCGGAAAATAATATGGTATGTGACGGACGTATTATAAAACGAAAAAGTCCAAA  
GAACGCACAATCAAACGCTATTACATTTGTTTCATTATCAATCGCTCAGGAAGTTCGCTGTCATAGTAATGCGATTAAATGCTGAA  
GTCGTCGAACCGTAATCAATGTTCAATTGTAATCGTATTCTTTCAACCTAATGTTATTAAGCAGATTGCGTCAAGTGTGATAGAA  
GAACTGAAAACAAAAGCATAGTAAACAAAACAGAAATAAATATGATATTAATAGTCTAGAAAAACAAAAGCAAAAGTTAAAACAC  
AACAAGAACGATTATTGGAATTGTTCTTAGATGATGAAATGGATAGCGAAATGTTAAAAGCTAAACAAAGTGAAATGAATCAACAG  
TTAGAAGTATTAGACCAACAAATTAAGGAAGCAAAACAAAGCAAAATCAATCAGGATGATATACCCAATTTTGATAAGTTAAAAGC  
ACGACTCATTTTGTATGATAACACGATTTCAGTGTGTACTTAAGAAAGGCTACACCCGAAGCTAAAAATCAACTTATGAAAATGTTAAT  
TGATTCAATTGAAATTACGAAAGATAAACAAAGTGAACCTCGTAAGGTATAAAATTGACGAAAGTCTTATCCCTCAATCTTTGAAAA  
AAGATTGGGGGTCTTTTTTTATACCTAAATTTAACTTTGTGATAAATGTCACAAAGAAAAATAGGATTGAAAAATTTATCACTTTTACC  
ACTTTTTTAGAGTGACAAAAGTGGAGGAGTTTTGAAATATTTTATAAATATATATTTTATTTATGGAAGTACACATTATTAATTAAGGA  
GGTCATTATAATGACGCTAAGCAAAACAACTTAAAACGTATATCACTGAACGATTTAAATTAATTAAGCAAACTTGGGCTTGTGA  
AACCATAGATGCGGTGGCTGAAGATGTATTACCTGAAAAATATATTAATAATAGTCCACTTGAACATAAAAAATTTAAATACTTTTAC  
CTATTACAATGATGAATCATGAAATCAGCATTACCCCTTTTATGTTATCTAGATAAGGAATTAGTACAAATAGGTTATTTAGAT  
AATTTTGTATTAGACTTTATATTTTTAAATGACACTCATCAAGTTATTATTGATGAACGCTACTTGTGTAACAAAAGGGGCCAGTAAT  
TATGAATTGGATCAAGGTCGCTCAACTATCTGTACAGTTATCAATGAAGTCATTGAGATCATGAAAGAAAAACAGAGTGGAGGAA  
AATAGTATGAACATCAATCGATACATCACAAGAGGAATTAATGAAAGTATTCCACTAGACCTTCAAATCTTACTTTGGCACATGGTA  
GAAGAAAAAGATAACCAGCCTCATACCGATTACCTACACATTTTCAAACCTACAAGAAGATGATAATATGTTGTCAATTAACATGA  
ACAAGAACAGCCCGCATACAAGTTAGAATATCACTATACAACTATGAAAAAAATCAAAATGCATTACCTAAGAAAAGTCTACGTCA  
TTCGTGAAGATGGCGTAGACGCTTTTTATTATGTGATGCTTTTACCAGAAGAATACTAAAGGAAGTGATTATATATGAATACAAT  
CAAAAATACGATATACACAGAAGCTATATTTAGCAAGGATGAAAAACACCGCTATTTACTCAAGAAAACATGGGATGAAAAAGAA  
CCTGCTTGTACAGTGATAACGATGTACCCTCATTTAGATGGTGTATTACTCTCGATCTCACAACGTCTTATTCTTAACCAATTAG  
CGAATTTCTGAACAATATGGTTCTGTATATCTTGTAAATCTATTCTCTAATATTAATAACACAGAGAACCTTAAACATTAACAAAGC  
CTTATGATGAGCACACAGATATACCTTAATGAAAGCGATAAGTGAAGTGACACAGTGATTTTAGCCTATGGTGTATTGCAAAAG  
CGTCCCGTGTGTGTCGAACGTGTTGAGCAAGTGATGGAATGTTAAAACCTCATAAAAAGAAAGTAAAAAGGCTCATAAATCCAGC  
AACGAATGATATTATGCATCCGCTTAATCCTAAAGCGCGTCAAAAATGGACATTGAAATAAAGGAGGATTATCTATGAACCATGAA  
ACTAAACAATCAGATTGGCATAACGGTTGCTAATTGTTTGAATCGCAAAATTAATCATCGATCGTAAAAGGATTAGTACATCATTTT  
ACAGCGATTGAAGATGAAGAAATCTTGATAAAATCTATGATGATTTTATGAATGATGACTCTATAACAACGGTACTTAACAATGA  
TTTACAGATAATTATTAATCATTACCTATCAAAATGAACATTATATTACTTACAATAAAAAATAGAGCATCTTTCACTTTGGCGTGAG  
GGATGCTCTTTTAGTTTATTTTTTATTGGTTACTCGCCATAAGCTCTGCTTGTCTACGACTTGCTCTACAGCCATTTTTTGTAATCT  
GGTGGATAGCCATATTTTTAAGCAATCTTCTAACAGCTACGCGCATTTTAGCTTTTGGCGTATCAGTTTGTAGACCAATCAACACCA  
TGTTTTCTTTCATGTTTATGTTAGTCTATGAGCAATCGCAGTGTCTTATGCTTCCCATGGCTCTTTTGTGTTTTCATGTGAAGCT  
AAAGCATCGTAAAACGCAATCTCATCTGAATTCAGGCCTAATTCTTTTCTCGTTGTTGTTCTGTTTGTATCTTTAGCGAGTTGAA  
TAAGTTCTTCAATCACTTTAGATGTTTCAATGGAACGACTATTATATTTAATATCGAGTTTCTCAACATTTTCAGAGAAACGCTTAGA  
TACTGTGCGGTTCTGTTTTCATTAATGATTTGACTTGGCCTTTGAGTAATCGATTTAATAATTTCTACTGCAACATTTTTTTGTTTCAATC  
CTTCCACGTCTTTAAGAAATCATCTGATAGGATTGATAAATCGGGTGTTCAGAACCTAGCGTTTGATAAACATCAATGACATCTT  
CAGTCACAACAGATTGTGACACAAGTTGATTAATCTCTGCTTCAACTTCTGCAGGTGTTTTACGTATTTTTCTTCTTTTGGCGGTTGT  
AACAATTTAACAAGTCTGCTTTAACCCTTTAAGGAAGGCAATTTATCATTTGAGTTCTTGGGCTGTTGGTTTCAGTCGCACAAAAGA  
GCAAAGGCTTTACCTAATCTGTGACCGTTTTAATAAAACGTTGACGTTTCATCTTACCTAAACCAATCAACATAATCCATCGTATTCTG  
ATATTGTATAATAACGTTTCAATTTTTTATTGAATTAATTTAGAATTAATCAAGATTATATAACATCATCTTGAATATACATCATCTT  
CAATAACATCAATTCACCGCTTTATCTGTATCTATCGCTGTTGAGCTTGATCAGATTCTGTATACTCTTTAAGTGCTTCTTTCAAAC  
TTTCGGCAATACCCACATAATCGACAATCAATCCACCCGGTTTATCTTTAAACACTCGATTAACTCGGGCAATTGCTTGCATCAAAT  
ATGGCCTTTTCATTGGTTTATCAATATACATCGTATGCATAGAAGGAACATCAAAACCTGTCAGCCACATATCTCGAACAATCACGAG  
TTGTAATTCATCATTACATCTTTCATACGTTTTTCTAATAAATTACGACGTTTTTTAGGACCAATATGTCTTTGGAAGAAAGCTGGG  
TCACTAGAGGAGCCCGTCATTACCACTTTAATGACCCCTTTATCATCATCATCTGAATGCCATTCTGGTTTTAGACGAATGATTTTCAT  
CATATAAATCAACAGCAATTCGACGACTCATCGTTACAATCATTCCTTTGCCTTTTCATCGCTTGTGACGTGTTTCAAAGTGTGGAT  
GATATCTTTGGCTAGGGCTTCGATACGAGGTTTTGACCTGCTAAGGCTTCAATTCGTGACCATTGATTTTAAACGCTGTTTTACA  
TCCTCTTCTGGTCTTGTAAATGTCAATTATGCTTCATCTAAATTTGGGGTAGATTTAATGGAATTAACGACTACGACTTTTCATA  
GTAAATTTTAACTGTACTTCCATCAGCTACAGCTTGTGTATGTCATAAACATCGATATAGTTTCCGAAAACCAATTTGTGTATTTTA  
TCCGTTGAAGCTACGGGTGTGCCCGTAAATCCGACGAATGTTGCATTCCGTTAAAGCATCTCTTAAATATTTAGCATAACCATATTTA  
ATGCCCTCACCTTTATCATTTACTTTGCATTAAGCCATATTGTGTACGATGAGCCTCATCTGCCATAACAATCACATTTTTACGTT

CTGTTAGGGCAGCCATGGTCGTTTCATTTTGTTCAGGTTCAAATTTTGCATTTGTTGTAATACAATACCACCCGACTCAACAGATAA  
TAACGATTTTAATTCTTTACGTGTTTCAGCTGTTTTGGCGTTTGTCTTAATAATCCTTTACCAGAACGTCCTTTTGATTTAACAAATG  
TACTGTATAGTTGGTTATCTAAATCATTACGATCTGTAACAACGACTAAGGTAGGATTATTCAGCATTTGAATTAATTTCCAGAGA  
AAAAGACCATGGTTAACTTTTACCAGACCCCTGGGTATGCCAAATAACGCCCGCTTTACCATCACCCGGCCAGATGAAGCTAATA  
AAGCTCTATCAACAGCTTTATTAACAGCATAGTATTGATGATATGCTGCTAGAATTTTACTGATATGCCCTTTACCATCATCTTGAA  
TAATACAAAATATCGAATTAAATCAAGTAGAGTATTAGGATTAAACATCCCATGAATCAGTACGCTAAGCTAGCTAAACTTGACG  
AAGATTCTGTTTCTCCATCTTTAGAACGCCAAGTCATAAAACGATCATAGTTTCGCAGTTAGTGAAGTGGCTTTAGTATTAATACCATC  
ACTTGTAAACAAGCACTTCATTAATGTAAATAATTGTGGAATACGCATCTTATACGTTTCTAATTGATGATAACCATCTTCGACGCCT  
ACGGTTTCATTGGTTGAATTTTAAAGTTCGATCACAACGATAGGCAAGCCATTGATAAAGAGGACAATATCGGGACGTTTGTATAG  
TCTCCGTTAATGACAGTGAATTGATTGACTGCTAAAAAATCATTGTTTGTGGATGTTCAAAATCAACGATTTTAAACAAATTTCTACTA  
CCGATTGTCCTTCGTCATCATAGTCTTCGATTTCATACCATTGATCAAATTTTCATGAAAGGTAAGGTTATTTTCTAAAAGATTGGG  
CGACTTCTCTAAAGTTAGTTCATGTATGGCTTTTTCGATAAAACGATGATGAATATCTGAATTAATCTTTCTTAATGATTTTCTAATC  
GTTTCATGAAGGACAACATCTTTATCACTTTTACGTTCTGGCGCTAGACCTGTCATACTAATCTCATTACCTTTTGTAGTCATAGCC  
CAGTGATTGTAGCCATTCTAATGCGACTTGTCTAAATCATCTTCACTAAATGAAAGCTCATCTTCATTACCTCGATATCATCAGG  
TATCTCTATTTCCCCGACATTAATTTTGGTAGTAAAGTATCTCTTAATTGTGTAGTTTGTGGTTTCTATATTTTTTGGTCCATCAT  
TTTTAAAATATGATTATTTTCTTTTGTATGTTGATAGCAAAGTTTCATTAGTTGGCATTGCTACTTTAGTGTCTTAATATCTTTTT  
GAGATAATAGAGGTTGTGTAGAACCTCTATTCAATGATATATAGTCTATACTTTTAAAGTACTTGATATATAATGCTTTCAAAATCACT  
GATTATTACAAAAGTATTATCTGATGGCCATGTTCTGTAGAAAATCTTGGATTACCATGAGTTCCTACTCTTCAATTAATAA  
ATTTTTCTATTATATAAATAATCATTGGTATAACCCATTATTTTAACTAGCAAAATTAATGGCACCACATTTCTATATCTTTTTATC  
AACTTTATTTTATAGGTTCTTTTACCACCTTTTATTTTTATATAATTTCTAATTCATCAACTTTCCAACCGCTAGGTATCTCACCTAGTTC  
ACTATCAATCATCTCGCCACCCTTGATTGTACGGATTTCCTATTTTCATCTGGGAATTCAAAATCAACAAACCAACGTTTGAACAGT  
GTTTGTGATAGTTCTCTAGGTTTGTCTATGATTCTTTTATTAAGTCTATTTTTTATCTAAAAATTTTAAAAATAGAAGTTATAATAGT  
TCTTTTCTTTTGTCTTTTAGGAGAATAAAATTTCTAAATATCTAGTATAGGTTTTGTGAGATATTTAGTAGCACTACCTATTGATTGCG  
AACGTAACCAATTCATTTAAATTTAAGATAATAATATAAATAATCAATATCTATGACGTCAAATTTAGGTTTATAATATATGTCC  
TTTGATAAGCGTCAAATTTTCCATTGAATCTATTATATGGAAAATTCATTAGCATTATTGCCAGCAAGTAAGATTACATCATCATC  
ATATGAATAAGAATTAATGTGTTAAAGGATTAGGAGCACAAGTGAAGAAATTTATATTTGCCATTTTCAATCGCAGCATAGAAATTAAG  
TCGACCTGTCTTATAAATCGCTTATTTTCAGATAAAAGATATTTTTTAACTCCATAGCCTAATCCCTCCAATGATTTGCGGATTGGTT  
TTCAAGTTCTTTGATTTCGCAAAATGTTTCGCTTAATTCAGAAAGTAATGCGTTCCATTTTGTCTCAAACGGTTCTTTATCTTCTTCAA  
CATCAGTTAAACCTACATAACGTCCTGGCGTTAAATATATTCATTATTTCTTAATTTCTTCAAGGTTAGCTACTTTACAAAACCCAGC  
TATATCTTCATAGGATTGTGCTGTTGTACCTTTCCACGCATGATACGTTTGTGCTACTTTTGAATATCTTCATCTGAAAATTTCTTTTA  
ATGTTCTAGATACCATATGACCGATTTCACGAGCATCAATAAATAAAATTTCAATTTTACGTTCTTTTTTACCATTTTGACCTTTATTA  
TTACTAATGAACCAAGACATACAGGTATTTGTGTTGAATAAAAGAGTTGACCTGGTAAGGTAACAATACATTCCACTAAATCTTGT  
TCGATAAGATTTTTTTCGGATTCTAATTCATCTTTTCCACTTGTAGACATTGAACCGTTGGCTAATACAAATCCTGCTGTACCATTAG  
GTGCTAATTTGAAATCATATGTTCAATCCATGCATAGTTGGCATTACCTTTTGGCGGAATACCAAAATGCCAACGGTAATCATCAA  
GTAATCGTTCTTGACCCCACTTGCGTTAAAGGAGGATTGGCTAATATGTAATCTGCTTTTAACTCTTTATGTAAATCGTTATG  
GAATGTATCAGCATTTTCGTTACCTAAGTCATTATCAATACCACGAATCGCTAAGTTTCATTTTAGCTAATTTCCAAGTTGTAGGATTA  
GATTCTTGCCATAAAATCGCAATATCGTCTAATCGACCTTGATGTCTTTCAACGAAGCGTTCACTTTGTACAAACATCCCACCTGAAC  
CACAGCATGGATCGTAGATACGACCTTTATAAGGTTCAATCATCTCAACCAATAATTTTACAATTGATGAGGGGGTATAGAAGTCTC  
CGGCATTTTCCCTTCAGCGCTTGCAAACTTAGCAATAAAATACTCATACACTCGGCCTAATACATCTTGCTTACGACTTTTCAGTATC  
GCCTACCTTAAAGTAATAAATCAATAATATCGCCTAATTTTCTTTATCTAACGCAGGGGCGCGCATATCTTTAGGTAACACACCT  
TTTAATGATTCAATTTCTTTTCAATCGCAATCATGGCTTTATCAATAATTTGTCCAATTTCTGGTTTTTTCGCATTATCATTAATATAT  
TGCCATCTTGCTTCTTTTGGCACCCAGAAAATATTTCTGCTAAATATTCATCTTGATCCTCTTCATCAGCATAAGGATCTTGCTTCAA  
TTCTTCATACCTTTCTTCAAAAGAAATCTGATACATATTTTAAAGGATTAAACCTAATGCTACGTTCTTATATTCAGCAGCATCCAA  
CTTCTCTTAATTTATCGGCAGCTTGCCATAATTTTCTTCAATCCGATTGTGCGCATTTATATTACACCTCTATATTATCTTTATA  
CAAATATAGCAAATATTAATCTTTATGTGACTTTTCTTGTGATTTTCTTTGTGAAAAATATTGTTTGTGTATTATTTAAGTAATATT  
AAGTAGCTAATTATAAAAGTACAGATTATTATATAGTTAACTGAGTATGAATGGGGGAGCAAATTTGTTATTTACTGAAGAACAA  
TTAAATATATTTCTAAACCATTTGTCAGAATCTGAAAAAGAAAAGTGTGAAAATGCAATAAGAATTATTCAAGAATCTCTGGAGTC  
ATTAGGATATGAAATAAAAAAGGGTATACATAGAAACAAATGAAGATACGCTATCATATCAAATTAATGACTAATTCATCGAAAG  
ATTATGAACCTAAGTATATTTGTGAAAGGTTTCGTATGCAACAAATACCAATGTAAGACAAAATAGTGACGTTGATATTGCAGTGGTA  
AAAGAAAGTGAGTTTTTTGATAAATATAGAGAAGGTAAACTAGAGAAAATTTATAAATTTATTTCTAGTAATAAGCCTCCGTATTAT  
TTTAAAGATGAAGTAGAAGAAGCTTTGATTGAAAAATTTGGAAGAAGTGAGGTAAGAAGAGGTAATAAAGCAATTAGAATCAATG  
GCAATCTTACCGTAAAGAAACAGATTGTGTACCTTGTTTATAGATATAGAGATTATAGTAATGATTATATGGATGATCCAAATAATT  
TCATTGGAGGAATCACAATTTATTCAGATAAAGGTGAACGAATTATAAATTTCCGGAACAGCATATAAATAATAGTGTATATAAA  
AATAACAATACAAATTATAAATATAAAAAGATGGTTAGAATAATAAAGGAAAATAAGATATCAATTAATAGATAGTAAAAATAGAA  
ACGCGGAACAAACTTCTTCATTTGGAGTTGAAGGTTTGTTTTGAACATACCGGATTACAAATATAGCAATGATGAAATGTTAGGTG  
ATACATTTAATGCATTAATTGCATTTTAAATAGATAATATAGATAAAATTAAGTGAATTTAAAGAACCTAATGACAGATAAAGTCCGT  
ATAATTGTGTA

>005-contig\_59

ACACACAATCAATTGCAGAAGCACAAGCACTACTAGATGAATTTGAAGCCAAATGGACGAAGACGTTAAAAATTGAATTATAGATG  
TAATAAGGGGAAAGGAGGAATTTAAGTTTCTCTCTTTTTTGTGTTGTTTAAAGACTAATGTACCTACTTTTTAAAGAAGTAATTA  
AAAGCAACTTTTCCAAGTCGCTTTAATTCATTAAAAATTTTTATTTACTTTAATCTAACCATATATTATTATTGATAAGTTGCTCTAT  
GTCTACTTTTTAGTTAAGTGCATTTCTATTCCGTTTGGCTGATTCAACTGTTTCATTACCTCGATATATCATCAAATATTTAGACTG  
AGTAAAGCCAGGGTCTGGCATCATATCATACCAATAATATCGATTACCATTTTCTATAAAATTTAATGTATCCCGTTTCATATGAAGTG  
CCACCTAAATGGTATAAATTTGATTTTAGAAAATTAATTTATTTCTCACTTTATAATCTAACTCTTGAATAGTTACAGTCTCTTTATCAAT  
ATTGATATCAAAAGAAAGAGTAACACTGTCATTCTCGTAACTTTTACAACAATAGGCTGAATCTATTATTGGTATTGTTCTCATTT  
AATGTTATACCACCATACATACAAGTTTTTTTACTTCCAGCTCCTTGATTACTATCACACTGTATATTTTCATTTGAAAAATAGCATT  
GATCAAAATAATTGACGCCAAAAATATCGACTTCTTTCCCATCAAATGAACAGCCATTGTACTGTCTTTAACTCAGTTTAAACATA  
GTCATAATGACCAGGGTTATTTATTGGAACAATGAAGTCATGACTCAAAAATTTGTCACTTAGCTTTATTTTTTATGCAATTAAGTGA  
TCGCTATTATATAAATACCATATATTATGCCAAGAACCCGTATATTGACTAGATTTGTTAATTCATTATATTGGATCATTTTGTGT

CTCTGCTCTAGCTTCCAACAAAGAATAGCTACTGTAACCAAAATAACAAAGTGATTAGTATAAATACTTTTCTCATATTACTCCTTTTG  
AATATATAATTAATTTAGTTGACCTTTATCAACCATCGCTATTTTATAACATATATTTCATTTAATGTAACATAAATTTTTTAAATTTAA  
TTATTATATTACAACAAATTCACCTTTAATAATCCTCTTATATTTTTAATGACTGTCCCTACGTCAACTTTTAATATAGTATATATGCTT  
TTTTATAATTATCTTGAAATTCACCTTTAAACGATACGGAAATAGAATTTATATCCTTCTCTTCAACGAAAGCTTCAGCAATTAATAAA  
AGCAACTTTTCCAAGTCGCTTTAATTCATCAAAAGTTTGTACACCAAGCATATTCAAATTTAATAAATATTCGTCTTGCTGTATTCCA  
TCATATTTTCATTTATTTAAAAGCGATTTTACGAAATAAGTTCATTTGTAATTTCTTTCTCATTTATTAATTGCATGAAGAATTTGTATTGTC  
AGTTCTCGTGTAACATACATACCTTCAAGTGAAAGGTTTTTAGCGATTTGTTTTATTAATCTTTGAATCAATAGTAATCATGATATCGC  
CTCCTATATATCACTTTTGTATCTTTTATCACTTAAACAGGGTTATTTATGCCTTACCTAATAATCTTATTTAAAAATTTGGTCATACAAC  
TTTAAAAATTAACTTTCAAAATTTGCAATTACAGTTATACGACTAATCACTTTTAAAGACTTACGTATCTATTTTCGCTAATAAACTTTTG  
AAAATGATGATTTAAACAAATGCACACTTTTGATTGTTTAAACATGCTATTTTAAAAATTTATTTTAGATATAAAATGCGAATTTTGAAGT  
TGCTACTCTTTAAGGTTTTACTAAAAATAAAGTTTTATATAAAGAACTTGAACATGAGAACAAATAAACTAAATTTATGACAATCTT  
AAACCTCTAAAAAACAACATTTTGAACCCTAATCATAATTAATATCTTTATAATTTTAAATCTTTAATATTATTTTAGTAAAAATA  
TATCATTAACATATCCCATTCAACTGTTTTTTAATAATAGTAAAAATCAGATTCAAATCTAATGTCTTAATAATGATTTGACTACCACT  
CATATACTCAGTTTTATAAAATCATGAGCTTCCAAATTAGAATTTAACCATATATTGGAAATTTTTTCTATTGATTTCATAATCTAAA  
TTGTCTAATTTCTTTATCACTATATTCAACTCTTATTTAAACCATTTCAAAACATTATTAACCTTAATCAATCATACCTGACTTAATC  
CATTCATCAAATTCGTAAATACAATATTTCCATGGTAATATGTACCGTTTTGGTAATCATGATTTTTTTCCACCAATTTTTTGAATT  
TTCATTCTCTCAACATCAATATAATTAGTGTAAGGTTCCGTGACATTACAATGGGACAAATGCCCTCTTTATTACCAAGATCTGCT  
AAATTTGACGCTGTGTTACTGCTTTTCCAATCCATCAAAAATCTTATACCTGAACCTTTCTACCTGCCCTCAGCTGCCAAATTTTT  
ATCTGCAGCAAACCAATACCTGCTTTGATATTTGGAAGATTTCTTTTCATCTAATAATTTTATCAACATTTTAAATAGGTATTAAATG  
TAAACTGCACGTTGGTAGACATCATATATTTCTTCTTTGCTAGCAGTTGAATATACAGCAAATACGCAATCTCCCCTAATACCAATTT  
CTTTCAATTCATTATCTTGAGTATCCTTTTGTAAAATCTCTATAAATTCAGACGTAAAGCCTCTAATCACCTTGGCAACATCTACTTC  
ACTATTTTCTGTGAATAATTTAGTAGAATTTCTTAAATCTATAAAAAATTGCACTAAGCCAAGCTTTATAACCATTCTCATATGTAAAA  
TTACCATTATTAGGGAATCTTTTCACTTCATTTATAAAATTAGTATTCTTAAGATTTCTTCAACTTTTTCTTTCTTGACTTGTAAATCA  
TAGCCTCTTATTTTCATATTTAAAAACCTCCCGCTTTAACTAAAAATAATACCGATAGAATGCAAAGTTAAAAATTCCTAAAAATCCCC  
AAAGTACCAATGCTAATCCTTTCTTATAAAAAATGATTTTTTTTGTAGATATTTTTGAATTTATATAAATCTGTGATAAAAAATCATG  
GATTTCTTCTGTGATGTTCTATTAATTTCTTGTCTTTTATACTCAGAATAAGTCTTGCTTGAAATGCTTTCAAAAAATATAAGGAGT  
CATTTTCTATTTCCGTTATATGCCTTAACAGATTTTCTTAACTGGGAAAAAGCACCTAATTATATTAATACTCCATCAAAAAATAA  
AAAATAGACCGCTCCTTCAAAATATTAATAAAATTAATTCGAAAAATTTATATTGTTCAATGCGTTTTAATACTATTTCTTTTTGACTA  
TCTAAGAATAGTTTAGAAGAAATAGTAACAATAAAAACTCCTAACATTGCTAAAACAATTGAAGCTTTTGTATCACAACCTCTTTATC  
CACTCTAAATGCCTATCTAACTCGTTTAAAAGCTCATTTTTTAAATTTGTTGTTTTCCATCAGATTAATCATCCTTTTGAATTATAAAAA  
ATTAAAAACTAATATTTTCATAATTTAAATTTCTATTTTACAATCTACTTTATTATGAAAACCTTATTACAAATAATTATAACAAAT  
CAAGAACCTACGTTCTCTATATATTCTAATTTCTTAAGATATAAATATTTAAAAATGAGAAATGGATTATTTGATGAACAGCAATTG  
GAGACGTGGTTGCAAGCAATAATTGGAATATGGATACGAAAGATGTAAAAGATGTGAATCGTCTACACTTAATTGGACAAATTTCT  
ATGAGAATAGATATTGTTAATTTAAGAAAGTAGGCGGTTTTATTATGACAAGAGAAATAAGATCATTTAGTTCAGAGTTTAAAGTTAC  
AAATGGGTAGATTATATAAAAAATGGTAAACCTAGGAAATCGATAAAGCAACATCAAAACACTGGTTAATCAATCATCAAGATAAC  
CTATCAGATGAAGAAAAAGAGCTGATTAAATTACGCAAAAGAGTCCAACATTTAAGGATAGAGAACGATATTTTAAAGCAAGAAG  
CGCTGATCATGGGACGAAAAAAGTAGTCATTCTACTAATGAAACACCTAATAATGAAAAATCAATCGAATCAAAATTCAAAATAATAG  
TCAAGATCAATCTAAAACAGAAGAAAGATACAAATGATGAACAAAAAGTAAGTAGAGATAATGTTTTTGTATTACGCTATTGACATGA  
AGTAGGAGATGCTGATTTATTAAAGTTCATAAAACCGGAATACAATGGTTCAAAATGGACAATTAATGTAATAATAAATCAGGTA  
TTGAGGCTAATACCATCGTAGTTAAAGATGATGAAACAGTTCAAATATGGAATGGATTTAAACATCTATGAATCATGAACTAAA  
ATTTGAATTGTAGAAAGAATTAATGAGACATCAAGTATACTAATAAACAATGCGGTCTATATAAATATATGATAAGAATCAAA  
GAATTAATACTATAAACAGCGCATTTTCTACTTTTTGGAGTAGGAAATGCTCTTAAATTAATATTTTTTGTATTGTTATTTACATTTTT  
TAATGTCTAAATGTTAATTTAATAGTTGATTGTTAAACTGATCCTTAAATTTCTTTTGTGTTAAATCAGATAAGTAAATGACATAA  
TCCTACTAATCTAACATCATTATTTTTCAGCAAGTACTTCAATATCATGTCTTTTATTCAATGATAACATAAATGCTCTTTCCATTAT  
CATTTAATAATAAATGTTGACCTTTAGGTTCTACAAATACTTGATATGTGTATTTCATTATCTTTTAAGTACAACAAGAAGTCAGGCAT  
AAAACCTCTCACACCATCTATTTCTCTAACTTAATTTTACGTTGCTTACGTATTAATAAACTTCTTCGTATTTATTTTGTAGATCTT  
CCATCATGTTATTGATTAAGTCAATCAAAATCACTCTCAAGACCATTACAATAGCTTTATCATAAATGTACCAATCATGTTGTCCCAT  
ATTTTTAGGTCTCTTCTGATCATCTAAGTCTGTTACATCTCTATTGACATTATTCACCTCGACAACATAATCATCGATTAATTCTGAAA  
GTTTCATACCTTCAAAAAATAGTTGTACCTTTGACTTTTTCAGATAAATATTTTAAATTTTGTTCCTAAATTAATCAATTTCAAT  
ACAGACAACCTTTAGTTTAGGTGTGATACCTAATATCCATCTCTTTGGTATAGTTACACTGATATCTAAATCTCCTAAAAAATCTT  
TTGACTTTATAAATGTCTGCATCTTGTGATACTAGTACATACTCTTTTAAATTAGAATATCTAAAGAATGGATTACTTCTTAAAGC  
TTTTTGTAAATAATGGTTTTATTAATATTAACTTATTTCTTTACGATCTTCAGCTTAAGCTTTAATACCTTGAAGTTAAATTTGACTAC  
TAACCTTGAATAGCTCCTTTTGTATTTCCCTAGATGCGTTATAATTTTCTAATTTCTTGTAGTCTCAGCAGTTGTTGGCACTGTTTTG  
TTAACATATATTTTTTCAAATTTGAAAAGGTCAGTTTTTTTTAAATTTATTTTTCACCTTTTCTTCGTGTATCTCGCTTATATCAGCATTT  
ATTTGAACCTTTTGTCTCTGTTAAAGATTGGTGTAATTTTAAATATAAGAAGAGTCATTAATCGTATGATAATGTAACGTTTCGATTG  
ATTTTAAATCACTAAATTCATTATCAAAATCTACGCTTATACGATTTTTCTTCTTCATAAATAAATGGATAATATCTAGCTCCTCGACC  
GATGAGCTGCGCTTCTGCATTCTGCGGTTTTTGTGACCTTTTTCTTCTCATCTATTTTGACAATATCGAAAAGATTTAAGACGTCCC  
AACCTTCATTAAGTTTGACACTGCAAAAGATAGCTCTTATAGGGTTATCTGGGATCTTCTAGATTATTCAGTAATTGAGCATTTTTCTC  
TTTTCTTTATCATTATTTACATTTAATGTCTGTTTGTTCATTAATCCCATTTCAAGTCATCTAACACTTTTACTATATTTGTCTGCTT  
ATAAAACTGAAGACTTACCAAAATACTATTTTGACACTGTAAATTTAAACCATTATCAATTAATGTTTCTTCTTAAATTTGCTCTATAA  
GTTAATTGTTCTAAACGGTCAAGCATCATTTGATGTATTTCTTGTGAGCCTTTAATAGAAGTCGATTGAAACATGATAACTGGCTTAA  
GCGTTATATGGTTTTTATCAGCTATATAATTTTTGTATTCACTCATTAATAAAGCATGTAATATTTTATGTTTCAATTTCTTCACTCGCA  
TGCAAAAGTGTACGTTTTTTGAATAACCTTGTGTCATAAATTCCTTTAAATCATAGCGATAAAGAATTTCTATCTTTATATTTTTCAA  
AAATATCATCTTCTAACTGTACCGTAGCTGTAAATTTCTAACAATTTATTCTTTTGTGTTTGTCTCATAATCCTATCAACAGTTACTTCC  
CAGTTAGTTTCTCAATTTGCTGAGTAGTTTTTTTGCCTTTTTTCTTTGTGCTGACATTTAGATGATGAGCTTCATCAGCTAATAACAC  
AATAGGAAATTTGAGCTAAATCTTCATAAGTAATTTTCAATTTCTTCTTGGATAATTTAATTTATCATGCAATGCATTAATCGTTGTTAAT  
TTAAGGTAACCATGATTTTCTACAGGTAACCGGATAATTTCTACTACTTGAATTTTCAATTTTACCATCAATGACAATGACCTT  
CTGGATTAACCAATCTTACTAGATGACGTGTTGGTTAAATTTGATACGTTTATTTGACAATCGCAGTACTATTAACAAAAACA  
AGAAATTTTGATAACCTTTTTTCTTTAAATAAATAAATACGTATGACGCTAAAACAAGGTTTTTACCAGAACAGTTGCCATATTAA  
ACATCAATTTGTTGTATAAATTTACCTTCATCTTGCTCTTCAAGATACATTAATCTTTGCACAGCTTCTTCTTGATATGGTCTTAAATGA  
TGATTTAAATTTATCAATAATATAATTTAGGTATATCTGGATACTGTAAAAACAGTTGATTTTCTATACGATCATGTAGCATTTCTGACA

TAATTACTCACCTCCGTAGAAGCTATGGTTAAATGCTATTTTCATCTTCTGTGAAATTATATGCTGAATCTTCAATGTCAGAGTAATTA  
ACATATAATTGATTATTATCTAACAACTCTAATTAGCACTTCTTTTTGGTCTTCAAGTTCTAATTCATGAAATCTTTTTTAGTACTTGT  
AAACTTATCAAAATCTACTTCATAATTAAGAACTCCATCATTTAATAATTTATCGATTCTGTTGACTTAATTTCTTTTTGTCCACAAT  
TTATAAGACTTTCAACGATTTCTTGATTTTCTTTTTGCCAATTCAACATATACAAAAGAACCACCACCTTGCCAATCTAAATCAGTTGA  
AACACCGCCTTGCTCACCTCAATAACTTTTTGTAACCTTGGGATAGATACAGTATTAATGTAGTCCATTTGTTCAACACCAATATAT  
TGACGATTCATTTTATGTGCTACCGCTTGAGTAGTGGCAGAACCCATAAAGAAATCTAATACAAATATCATTTTGTGAAGAAGTAATA  
TCTACTAAACTTTTAATTAGTTTTCAGGCTTAGCAAAATTAATACTCTCTATTAAAAAGTTTATTTATTTTCATTAGCTCCTCTTTG  
ATTAGTTCCAAATTTCTATACCCCAAAATCATTCGGTATCTGTCTTTAGTATCATCTAGATATATTTTTACATAAGGTTGGCCATCA  
CCTCTTGTGTCCAATATATTTGCCTTCATTATCTAATTTCTCTATTTCTTCCTTTGTTTTCATCCAC

>006-contig\_274

TTCCCAATGTGCATCTACTTTACTAATGCGTTTGATAAAAACTTAAATAATATTAATTCAGTCATCAGTGGCGTTAAATCTTTTATCA  
TTTTTAGTTATAGTTGATAAAATTTATATTTATAAGCATATATGGATATTTTCATCAAAAAATTTTATTCATATAAAATCCGAACCTGCATA  
CATATTTGTTGAAATAAGAGGTATTTATTTTCGGGAAATTTGCTGTCTGAGTTATAAGTATTAGTTTTATAAAATGAGTTGAACCTATAG  
CAAAAACGATTAATAACTGATAATCCATTTTGTATTATGTTAGGGACTTTTTTACTTAATTTTAACCCATTGGAGCAAATATAAT  
ACTCCCTATTATAAGGAATAAGGCGTCATATAAAGGGATATAACCTTGAATAAGTTTGATGACAAAAGCACCATTGAAGATATAA  
AAGCAATTACTATACTATTAGCGACTACAGTATTCATTGGTAATTTGAATAAAAACCAATAATATAGGAATAATAATGAAGGCCA  
CCTGCACCTACTATACCTGAAATAATACCAATGAAAAGGCCAATGATAACTAATAAATATTTATTAATGAAGACTTTTCGGAACCTA  
GGTTTCACTTTAATAAACATTAATGTTAATGCAAGTAAAGCAATAATGATATATACCGTATTTACAAATGTAGCATCAAATAAATTT  
GCTAGAAATGCACCTAACATACTCCCTATAATCATGCCGCCACCCATATAAAGAACTAATTGTGGCGAGAAGCTCTGTTTTTTTCGA  
GCTTTAATGAGCCACTTAATGTACTGAAAAAGACTTGGCTAGAAGTAAGACCTGATGCGATATATGCGCTATATGCAGGGGCTCC  
GAATAATGGTGGTAATAATAAAATAGCTGGATAAATAATGATAGCACCACTACGCCTACTAGACCAGATATGAACCCGCCGAATA  
CCCCAATGAGTAACATGATAACTATATTAACAATATCCATTACTTTTACCAATAAGTTTACAGCTTCATTAATTAACCTCTTGG  
GAGCTTTCTTATCATCATCCGAGCTGCTTTTACAGCTTCTATTAATAATTTCTACTAATAATGATACCCATCAAGCGTTGGAGTGAACCT  
TTGATGCACTTATTTGTGTAATGACATCTTTACAGTCTTTTCTTCTCCATCATTTTAATAAATTTCCATTTAGTTGCCCTTGATTCTAT  
TAATACGATTAATCATTTTTTTATCATAATTCATAGTCATACCTCCACTTTTAATTGAATAAAAAATATATTAATAGATAAAACACAAAT  
GTGTCAAATACCCCTAGAGGTATTTGACAAGTTCCATTCAACTGTTTAGAATACCCCTACAGGTATTTTGGGAGGTTATTATGAA  
ACAATACGGAGAAAAGTTTATCGATGAATTTAGTAAAGCAGAATTGGAAAAACTAGCCAAGCAAGGGCAATTAATTGATGTTAGA  
ACAGAAGAGGAGTATGCATTAGGACATATCAATGGTTCATACCTTCATCTGTTGATGAGATTGAGTCATTCAATAAAGAAAAAAA  
TAAAACCTATTATGTAATCTGTAGAAGTGGTAACAGAAGTGTAATGCTAGTAAATATTTAGCTAAACAAGGTTATAACGTTATAAA  
TCTTGATGGTGGTTATAAAGCTTATGAAGAAGAAAACGATAGTTATGATACACAAGAAGAAATATAAAGTATAGAAATTAAGCAG  
ATCGTAAACAATTTAACTATCGTGGTCTTCAATGTCCAGGGCCAATTGTAAAAATTTAGTCAAGAAATGAAGAATATTGAAGTAGGT  
GACCAAAATGAAGTCAAAAGTCACAGACCTGGATTCCCTAGTACATTAAAGGTTGGGTGAAACAACCAAGGCATCTTTAGTTAA  
GCTTGATGAAAATAACAATGGAATTAATGCGATTATTCAAAAAAGAAAAAGCAAAAGATTAGATATAAATATTCTGCTAAAGGTA  
CTACAATTGTATTATTTAGTGGAGAATTAGACAAAGCTGTAGCAGCATTGATTATTGCAAATGGCGCTAGAGCTGCTGGAAGGAT  
GTAACATCTTCTTTACTTTTTGGGGGCTTAATGCATTAAAAAAGTGCAAAACAGTTAATGTTAAAAAGCAAGGTATTGCAAAATG  
TTTGATTTAATGTTGCCCAAAAAGAAATATACGAATGCCTCTTTCCAAAATGAATATGTTGGTTTAGGAAATATGATGATGCGCTAC  
GTAATGAAAAAGAAAAATGTTGATTTCATTACCAACACTTATCAATCAAGCTATTGAGCAAAATATCAAATTAATCGCTTGTACGATG  
AGTATGGATGTCATGGGTATTCAGAAAGAAGAACTTAGAGATGAAGTTGAGTACGGTGGTGTAGGCACCTTATATTGGTGCTACTGA  
AAATGCGAATCATAATTTATTTATCTAATTAATCTATTAATAAAAGGAGTTGTTATCATGTTTTTAAACAGTTTACGATAATCAT  
TTATCTCAAGCATCATATTTAGTGGGTTGTCAACGTACAGGAGAGGCAATAATAATAGACCCTGTTCTGATTTATCGAAATATATA  
GAAGTTGCAGATTCTGAAGGTTTAAACAATTACACAAGCTACAGAAACATATTCATGCTGATTTTGGCTTACGAAGTTCGTGATGTG  
GCTAAACGTTTAAATGCAAAATATATATGTGTCTGGCGAAGGTGAAGATGCATTAGGGTATAAAAAATATGCCATCAAAAACACAATT  
TGTTAAACATGGAGATATCATTCAAGTAGGCAATGTTAAATTAGAAGTTCTGCATACTCCAGGGCACAGCCTGAAAGTATTAGCTT  
TTTACTCACTGATTTAGGCGGTGGTCAAGTGTCCGATGGGATTATTTAGTGGTGACTTTATTTTTGTTGGTGATATAGGTAGACCT  
GATTATTAGAAAAATCTGTTCAAATAAAGGGTTCTACAGAAATTAGCGCGAAACAAATGTATGAGTCCGTTCAAATATTAATAAA  
TTTACCAGACTATGTTCAAATCTGGCCGGGTATGGTGCTGGAAGCCCTTGTGGTAAAGCATTAGGTGCCATACCTATATCTACAAT  
AGGTTATGAGAAAAATTAATAACTGGGCATTTAATGAAATTTGATGAGACTAAATTTATTGAATCATTAAACATCAAATCAACCAGCAC  
CACCAGCATATTTGCAAAATGAACAAGTTAATCAGTTTGGTATGAATTTATCAATCATATGATGTTTATCTAGTTTATAGATAA  
TAAGAGAGTAGGATTGATCTCTGAGCAAAAGAGGCCTTTACCGTGGCCACACAAAAGGAACAATCAATATACCATACAACAAAA  
ACTTTATTAATCAAATTTGGTTGGTACTTAGATTTTGAAAAAGATATAGATTTAATTGGAGATAAATCTACTGTTGAGAAAGCGAAAC  
ACACTTTACAATTAATTTGGGTTTGATAAGGTAGCAGGCTATCGTTTTGCCAAAATCAGGCATTTCAACCCAGTCCGTTTCATAGCGCTG  
ATATGACAGGTAAAGAAGAACATGTATTAGACGTACGTAATGATGAAGAGTGAATAATGGACACTTAGATCAAGCAGTTAATATT  
CCACATGGTAAATTAATAATGAAAATATTCCTTTAATAAAGAGGATAAAATATATGTACATTGTGTCAGTCAGGTGTTAGAAGTTCA  
ATTGCAGTGGGTATATTGGAAAGCAAAGGTTTTGAAAATGTGGTGAATATTAGAGAAGGCTATCAAGATTTTCCAGAATCATTA  
ATAATTTAAGGATGTGGAAAAAATGAATAAGCATTATCAAATTTGTTATTATTGGTGGCGGTACAGCAGGTGTTACCGTAGCATCAA  
GACTATTAAGAAAAATCAAACTTAAAGAGAAAAATAGCAATTTATAGACCCAGCAGACCATCATTAACCTAACCATTATGGACG  
TTGGTTGGTGAGGGGTCTAGTTTGAAAAAGTTCTCGTAAGATATGGAAGGTGTTATACCTGGAAGGTGCTCAGTGGATAAAACA  
GGCTGTTTCAAGTTTCAACCTGAAAAATAAGCGTTATTTTAGGAGATAATACAGTCGTTTATTATGATTTTTTAGTAGTAGCTCCA  
GGATTACAGATTAATTGGTCTTCAATTAAGGACTAAAAGAAAAATAGGTAAAAATGGTGTGTTGCTCAACTATTCACCTGACTAT  
GTTAACGAAAACCTGGAACCAAAATTTCTAATTTTAAACAAGGAAATGCCATTTTACGCATCCAAACACCCCTATAAAGTGTGGAGGT  
GCGCCTATGAAAATTATGATTTAGCTGAAGATTATTTAGGAAACATAAAATCCGTTCTAACGCTAATGTGATATATGCAACGCCA  
AAAGATGCTTTATTTGACGTAGGAAAAATATAATAAAGAAATTAGAGAGGATTGTTGAAGAAAGAAATATAACAGTCAATTATAATTA  
TAACCTTGTGAAATCGACGGTGACAAAAAAGTGGCTACATTCGAACATATCAAAACATACGATAGAAAAACAATAAGTTATGATA  
TGTTACATGTAACACCACCTATGGGTCCCTTAGATGTAGTAAAAAGAAAGTACACTTTCAGATAGTGAAGGTTGGGTAGATGTTAACC  
CAACCACATTACAGCATAAAAGCTACTCTAATGTATTGCACTTGGTGTGCTTCAATGTACCTACTTCAAAAACAGGCGCAGCTA  
TTCGTAAGCAAGCACCTATCGTCGCTAATAATTTATGCAAGTGATGAATAATCAAAATGTTAACGCATCATTTATGATGGTTACTT  
CATGTCCTATTGTTACTGGATATAATAGGTAAATACTTGCAGAGTTTGATTATAATAAAAAATACTAAAGAAACAATGCCGTTAATC  
AGGCCAAAGAACGTAGAAGTATGTATATTTAAGAAAGATTTATTACCTAAAATGTATTGGTACGGCATGCTAAAAGGATTAATA  
TAATAAAGTACAGAAAAAATAAATTTTTAATGAAAAATCTTTTACTATAAAATATTAAGTATTTAAATGACGTGTCAGTGTGTGT

TTATATGTCGTGAATTTTTAGCTCTAAATAGTAAAAAGATTGAAAAAGTTGTTACTGTTTTAAATGATCGCGATGAAGTCATTCAATA  
AGAATGATTATGAAAATAGAAACAGCAGTAAGATGTTTTCTAATTGAAAATCATCTCACTGCTGTTTTTTAAAGGTTTTATACCTCA  
TCCTCTAAATTTATTTAATAATAATTAATGGTATTTGAGCAAGTTTAGCGACTTTATGACTGACATTACCAATTTCCATTTCTTGCCAG  
ATATTTCAAACCACGTGTACTIONATAATGATAGCTTGGTATGTACCTCCAATAGTAATTTCAATAAATTGCTGTGTTGAACACTAAGAG  
CAATTTTAATATCATAATGTGTGTAAACATTTTTTTGATTGGAGTTTTTTCTGAGTTAAACGATATCTGATGTATTTTAATTTTG  
CACCATTTCCAAAAGGATAAGTGACATAAGTAAAAAGGCATCATCGGGAGTTATCCTATCAGGAAAACCAAGATAATACCTAAGTA  
GAAAGTGTCAATCCGTGTTAAATTGGGAAATATCATCCATAACCTTTATTACACCTATAATTCTATTTAACGCTCTTCGTCCATTTG  
GGCTTCAAATTCATCGAGTAGTGCTCGTGCTTCTGCAATTGATTGTGTGTTCAATTTGATGGCGAAGTTCGCTAGCGCCTCTTATG  
CCACGCACATAGATTTTAAAGAATCTACGCAAGCTCTTGAATTGTCGTATCTCATCTTTCTCATATTTGTTAAACAATGATAGATGCA  
ATCTCAACAGATCTAATAGTTCTTTGCTTGTGTGTTACGTGGTTCTTTTTCAAAAGCGAATGGATTGTGGAAAATGCCTCTACCAAT  
CATGACGCCATCAATGCCATATTTTTCTGCCAGTTCAAGTCTGTTTTCTATCGGGAATATCACCGTTAATTGTTAACAATGTATTT  
GGTGCAATTTTCGTACGTAAATTTTTAATAGCTTCGATTAATCCCAATGTGCATCTACTTTACTCATTTCTTTACGTGTACGAAGAT  
GAATAGATAAATTGGCAATGTCTTGTTCGAAGACGTGCTTCAACCAATCTTTCCATTTCATCGATTTCATAGTAGCCAAGGCGTGT  
AACACTTACCGGAAGCCACCTGCTTTAGTCGCTTGAATAATTTCGGCAGCAACGTCAGGTCTTAAGATTAAGCCGGAACCCCTACC  
CTTTTTAGCAACATTTGCTACAGGACATCCCATATTTAAGTCTATGCCTTTAAAGCCCATTTTAGCTAGTTGAATACTCGTTTCACGG  
AACTGTTCTGGCTATCTCCCATATATGAGCGACCATCGGCTGTTTCATCTTCGCTAAAAGTTAAGCGTCCACGCACACTATGTATGC  
CTTCAGGGTGGCAAAAGCTTTCAGTATTTGTAATTCAGTGAAAAACACATCCGGTCTAGCTGCTTCACTTACAACGTGTCGAAAGA  
CGATATCTGTAACGTCTTCCATTGGCGCCAAAATAAAAAATGGACGTGGTAATTCACCTCAAAAAATTTCTTCAATAATATTTATA  
CCCTCTTTATAATTAGTATCTCGATTTTTATGTCATGTGATATTACCAAAAAACCTAACTTATAACAAAGATATAATTTAGTTGGTAT  
AACCATCCGAAAGGGAAGTCTACGAGTAGTCTAAAATGAATGTTGTGGTAAGTTGATCAGTATATAAATCAAGGATTATCGTATTA  
GATAGTTCAATTATTAATGATACACTACTTATGAATATGATTGAGAATTTCTTTGGCTACTTTTACAGTAAAGCGATTTTTAGTTATC  
TTATAACAAAGACAAATTTATAAAGGTGATATTATGGAAGATTAAAGCATTCTTTAAAAAGTTTAAAGTTGGTGGGATTTATTTTT  
GCGATACCTATGTTTCTACTATTCGCATACCTTCCAAACTATAATTTATAACGATATTTCTTAACATTGTTATCATTATTTCTTTTC  
CATAGTTTGATTTTAACTACGCATATAATTATAGATAAAATTAAGAGCAACACGAAATGAATCATTAAATACGAATGTGATTAAAC  
ATAAACTGAAGGAGCGATTACAATGGCGACTAAGAAAGATGTACATGATTTATTTTTAAATCATGTGAATTCAAATGCCGTTAAA  
ACTAGAAAAGATGATGGGAGAATATATTATTTATGATGGTGTGTTTATAGGTGGTTTGTATGATAATAGATTATTTGGTCAAGGCG  
ACTAAAAGTGCACGTCAATCAATTTCAAGATAATACATTAGTATCGCCGTATCTCTGGTGCTAAAGAGATGATATTAATTTCCAGATTTT  
GACGAAGCAACAAATCTCACTGATTTATTTAAGACCATAAAAAATGATTTGAAAACTAATCATTAAATTGCCATACTCAACTATTTT  
GAAAATCATCAATTTTCATATTGTCAATTTATTGAGTATCTCGATTTATTGTTATACACAAACAGTATTTTTGTTATCATAGAGTTAAT  
AAATATAATAAATTGAATAAGTAACCTTTACAAACCTAGAATGATTTAATTCATCACAATTATTTGAAAATAGAGGTGAGCAGGTG  
AACGATATGTTAATTAGTCTTGTAAATCCCAGTTTTGCTTTGTAGTTATTGGTGGTATTATTTGGATGATTATAGAAGGTATAGTAC  
ATATTTCAAAAAAGAATAAAGCAATTGATAACTTTTTTAACCAAGTTAATAAAGTAAGTGAGACATATAAATTCGCTACTACTTTTT  
TATTTCTAATCTTGGCTACGGCTGGTATTTCTCAATTTTATCTATATTATATAGTATCAGCGTTTCTTTTTTGGCTTGTCTACTTACCT  
TTGGCATTTGCAGGTATCATTTTTTAAATGCCATATGGATTATGTTTTCTACCGTTTTATAAGCAAAAAAGAAAAACAGACATTTA  
AAAAATACAGGTTTTACACTACGATTGGTTGTCAATTTGTCTAGGCTTATCTCTAGTTTTGGTTACACTACGAAATTTTATATGGA  
CGAAGGTGGCGTAAGATACTATTACGGTAGTTTTGTAATGAAACAAGCGGGCGGTTATGCTTATTTAGCTTTAGCGGTACTTTCAAC  
GTTGTTAATTGTTGCGAAAAAGCTACAAATAAAAAATAAAGAAATCGAAACCGTCGACAATACAAATATAACGGAAAGATAATTA  
AGGGAGTGCTCATTACAGGAGTGCTCTTTTTGATGTCCAAATTTAGTTGCAAAATGAAGGCATAGAAGAAATTTTTATAGTCATTTATT  
GGATAATGAATTATGGTCATATCGATTAATTTTATAGTGAGGATTTTACAAACATTGTTGAATAAATATGGTAATGATAATATAT  
GAATATTTTTGAAAAACACTAATATGATTAAATTATTGTTAAAAATAGCATTAAAGTAAAAAACAAACAGGGAACAAGGTGGGATT  
TCATGAGTCAATTGCTAAATGATACGTTATCGGCTTGGTTGTTAATTGAATCTTTAAGTGCAGGAGAAGTAAATTTTACAGCGGAAG  
ATATACTCTCAGCTGAACATTTTAAAAATGGTACAAAGCAAGCACAGCTTCAAAGTTTGTATGAATATTTTGAAATATGGAACGATG  
AACGTTTTATTGTGTGAGAAGAAAACTAGAGACTGGGGAACCTATATTTAAATTTTATAGACATTTGCTCCGCTATAATGAAATTA  
ATTTGAAAATTCAAGATATTTTTGAAAATCACTCTGATATTCAATAAATGGAACACACTGTTATGTTTACACATTTAAACACAG  
ATAAACACCGCAAGGTGATAGTTGATTCTATACATATTCGGATGATTATGAGTGCATTAAAAGAAATTGAAAAGAACAAAAATGCC  
AATATAGAAGAAAAATTTAATGATTCTGTTGAAAAATTTGTTCAAAAAGTAAAAGAAATTTAGCAGATGAACCAATTAATGAATT  
TAAATTGAAGAAGATGGACAAAGCTTATGATGAGTACTTTTCTGTATTAATTCAAAGAAAGATGGATTATTTGGACATTATGTAGC  
AATAGAATATGTGAAAGATAGTGATTTACCACAGCCGGAATTTAACAGTTTCTTCATAAGTGATATTGAGAAAGCAAGAAAAATCTC  
CCAACCAAACTTTAATTGATTACATTGAAGGTGTAGAAGAAAGTCAGCGCATAGAAGTAGATGAAAATAAAGAAATGTTTGACAAA  
TTTTTACATCCTTCACGTTTGCTGATGGACGATGGCCATCAGCAGACTGAGTTTAGATTGTCTTTAATGCAACAACCTTGCTGTAAACC  
AAATTACGAGTGGTAATGAAGAATAAAGTTCAGTTAATGGGCCACCGGACAGGTAAGACTACTTTTATTAAGATATATTTGCT  
CACTTAGTAGTTGAAAGGATGAAAGTTAGCTAAACTAAATAAATCCTAAAGATGCATTTGTCAAAAACAAAATTCATGAAACGGA  
TGATAAATACGTATACTTACTAAAGGAATCTATTGCCAAATATAAGATGGTAGTCGCATCTAGTAATAATGGAGCTGTTGAAAATAT  
ATCTAAAGATTTACCGAAAATTGAAGAAATTATAAGAAATCCCGAAAAATGTAAATTCCTAAATATGAACAGAATTATGCAAAAT  
TAGCACATGAATTAAGAGATTTTGGCTGAAATAGCTGAAGGTTTGAATTGGTGAAAGTGCTGGGGCTTATTTCTGGAGTATTTGGAA  
AAAGCAGTAACATTAATAAAGTATTGGAGCACATGCTAAAAAAGATGGGAATGATATTGGCTTTGCTAAATTAACAAAAATGAG  
AATAATCGTATGAGTTATAACGAGTTAATGAGTGAATGGCAATCACATCAACGTGCATTTTTAGAAGAGTTGAGGCATGTTGAAAT  
GTTAAAAAGAAGATCTATTAGAGCATATGATGTTTATAAAAAATTTGTGAGTCTTTCTCTAAGATTGAACAGGTTATTGAATAGTAAAA  
AACAAGTATTGAAGAACAGGTATATCATTTAGATAATGAACGTTACGAGACAATAAAGAAATAGAAGATTATTGATAATTCGAATTA  
ATTATATTGTTAAGCAAAATGAAACTTTAAATGAGTTAATTAATCCATAAAGAAAGCAACAAAGGTTTATTAAACAACTGAA  
GCGATGTTTAATTCAGAAGAAGATGAAAGCTATAAAGATCATAATAAAGAGAAGCAACAATTATTAACACAACAGTTAGAGTTAG  
AGAAATGTAAGAAAAAACAAACATGAAGACCTTGTAGCAAACTAAAAGAAAAAGAGAAATTAATTAACAAATTAATAAGTACA  
GTTGCAATTAGACGAGTTAAATTCACAGTTACAAGAGTTAGAAGCATATCGTATTGAGTCAAAAATTACAATTCAGAAAAAGATT  
TTTGGAGTGACAACAATTATGATGAGCGCAAGTTACTAATCTGTGGACGAGTGACGAACCTTCAATACAGACGTGCCATGCTCTTTT  
TAAGAGCAATGATATTGCATAAATTATTATTGATTGCTAATAATACAACATTTTATTATGCGATTAAATGATTTTTAAAGATAGAAGGA  
AATTAATTGATGCAATCCAGATAAAGTACACAACGCATGGAATGTGATGCATTTAATTTCCAGTAGTTAGTACGACGTTTGCAA  
GTTTTAAATCTATGATGAGGGGCATACCAAAAGATTTCATAGACTACTTATTTATTGATGAAGCAGGACAAGCAATACCTCAAGCAG  
CTGTGGGAGCATTATATCGTTCAAAAAAGTTGAGCTGTAGGTGATCCGATTCAAATAGAACCGGTTGTGACTTTAGAAAGTCATT  
TAATTGATAACATTCGTAAAAATTATCATGTTCCGGAATATCTAGTTTCTAAAGAAGCTTCTGTGCAGTCTGTTGCAGACAACGCCA  
ATCAATATGGTTTTTGGAAATCTGATGCTACTGATAGTAATCAAAAAACCTGGATAGGCATACCTTTATGGGTGCACAGACGATGTT  
TAAACCTATGTTACGATAGCTAACCAATCGCTTATAATAATAAATGGTGTGGCAAGTAATATTACAAAAGTAGGTAACAA

GGTTGGTATGACGTTAAAGGAAACGCAGTTCAAAAACAATTTGTGAAAGAGCATGGTGAAAAAGTAGTGGGATTATTAGCTGATGA  
TTGGATTGAAGCAATTAAGGAAGGTAAAAATGAACCGAGCTCATTTGTAAATATCGCCTTTTTTCAGCAGTACAGCAACAGATTAAAC  
GTATGTTAAAGCAACAACCTACCGACTAGAAATTGATATTGAACGTACAAAAATTAATCAATGGGTCGATAAAATCCATTGGTACTGTTT  
ATACTTTTCAAGGTAAGAGGCTCAGAAGGTGATTTTTGTAAATAGGTACTGATAATACCCAAGATGGTGCTGTGAACTGGTCATGCG  
AAAAACCAAACCTGTTAAACGTTGCAGTGACAAGAGCTAAGAAAGAGTTTTATGTAATTGGCGACATGCAAGAATAACAGATGAA  
ACCATTTTATGAGACGATTTTTTAAAGAAAGAAATGTAAATTAACATACAAAAAGTATATAGAGGAAGTTATACATTTTAAAGGA  
GCAAAATTGAATAATGGAGAAATTTAACAACCTGGATATTAATGCAATAAGTGGATCTCAAAACAGACAAGAATGGAACAACTAAA  
GAATTAAGGGGCAAAATTTATCATTTTATATGCATATTCAATGCTCGTTTTGCTTGGCTTAGTAATTTCTAACATATTCATTACACA  
TTTTGGAGCCTAACTATCAATCACCCTCAAATCATCATCGTTTTGATTTTAATTGAAGCACTAATTGGACTGCGTTTCTTGAAAGC  
GTACGATGTTAAGCGTGGCAAAGATAAAAGAAAATAAGAAAAATAGTAAGGATTTTCGTTAACTAAAAATCAATTTTAGTAGCAATTT  
TATTTACATCATTGGCGCTGACAGCAGGTACTGTAGCTGATATATACGGTTTCTACTGACTTAGGAAATACTAGAAGTGATTTAATCG  
TTTGGAGCATAGGTGGTATTATATTTGGCCTCGTATGTTACACAATGGAAGATAAAAGATAACGATAAGGAGCTGGCGATTATAAA  
GCTAGCTCCTTTTTTAACTTATATATGTAAAGAACTATCCTAAGGGTTTTTAAATCATATGTCAATAATTTCTATAATACATTATTA  
ACATCAATTAATAAGTTTTTAAATTTTACACATATTTTTATTAAAAAAGATGTATAATTAATGTATTAAATATAGAAAAGAGTTG  
ATATTATGAAAAAGTGATTAAGACTTTGTTTTTAAGTATCATTTTAGTAGTGATGAGTGGTTGGTATCATTACAGCATGCGTCAGA  
TTCGTTGAGTAAAAGTCCAGAAAATTGGATGAGTAAACTTGATGATGGAACATTTAACTGAGATTAATATACCGGGTTCACATG  
ATAGTGGCTCATTCACTTTAAGGATCCATTAAAATCAGTTTGGGCAAGACTCAAGATAAAGATTACCTTACCCAAATGAAGTCG  
GGAGTCAGGTTTTTTGATATTAGAGGTAGAGCAAGTCTGATATATGTTTCAGTTTCATCAGGCATCGTTTATTGTCATGAA  
TTAGGAAAATTTCTCGATGATGCTAAATATTACTTGAGTGCTTATCCAAACGAAACAATTGTGATGTCTATGAAAAGGACTACGAT  
AGCGATTCTAAAGTTACGAAGACATTTGAAGAAATTTTTAGAGAATATTATTATAATAACCCGCAATATCAGAATCTTTTTTACACA  
GGAAGTAATGCGAATCCTACTTTAAAAGAAACGAAAGGTAAAATTGTCCTATTCAATAGAATGGGGGGTACGTACATAAAAAGTGG  
TTATGGTGCTGACACGTCAGGTATTCAATGGGCAGACAATGCGACATTTGAAACGAAAATTAATAATGGTAGCTTAAATTTAAAG  
TACAAGATGAGTATAAAGATTACTATGATAAAAAAGTTGAAGCTGTAAAAATTTATTGGCTAAAGCTAAAACGGATAGTAACAAA  
GACAAATGTATATGTGAATTTCTTGAGTGATGCGTCTGGAGGCAGCGCATTTAATAGTACTTATAACTATGCATCACATATAAATCCT  
GAAATTGCAAAACGATTAAAGCAAAATGGGAAAGCTAGAACGGGTGGCTGATTGTTGACTATGCAGGATATACGTGGCCTGGATA  
TGATGATATCGTAAGTGAATTTATAGATAGTAATAAATAAGGATTCATAATATGATATTAAGACGAGTATGAAAATAGTTAGATTCT  
AATTATTTTCACTACTCGTTTTTATTTTGAATAAAGTAATAATCAACAATATTATAAAATTGAACAGATTGTTTATGGAATTTTTGA  
TAATATTAAGTGAAAAAGTGTTATAAATTGATAAATATATGTAAATTAACAAAAACAATCATTTTAAAAAGAAGAGAGTTGTAAG  
ATGATGAAACGATTAAACAAATTAGTGTTAGGCATTATTTTTCTGTTTTTAGTCATTAGTATCACTGCTGGTTGTGGCATAGGTAAAG  
AAGCGGAAATAAAGAAAAGCTTTGAAAAACATTGAGTATGTACCCTATTAATAATCTAGAGGATTTATACGATAAGGAAGGCTAT  
CGTGATGATCAGTTTGATAAAAAATGATAAAGGTACATGGATTATAAATTCTGAAATGGTTATTCAACCTAATAATGAAGATATGGTA  
GCTAAAGGCATGGTCTATATATGAATAGAAATACCAAAACAACAAATGGTTACTACTATGTGATGTGACTAAGGACGAGGATGA  
AGGAAAACCGCAGCAATGAAAAAGATATCCGGTTAAAAATGGTCGATAATAAAATCATTCACAAAAAGAAATTAAGATGAA  
AAAATAAAAAAGAAATCGAAAACCTTAAAGTTCTTTGTTCAATATGGCGACTTTAAAGATTTGTCGAAGTATAAAGATGGAGACAT  
TTATATTAATCCAGAGGTGCGGAGTTATTCAGCCAAATATCAATTAAGTATCAAAAGATGATTATAATGTAAAAACAATTACGTAAAAAGATA  
TGATATACCAACAAATAACGCGCCGAAGTTGTTGTTGAAAGGTACAGGGAATTTAAAGGTTTCATCAGTTGGATATAAAGATATTG  
AATTTACGTTTTGTAGAAAAAAGAAGAAAACATTACTTTAGTGATGGGTAAATTTTTAAACCAAGTGAGGATAAATAATCATGA  
CTCGATTAATAATATGAAATCAATCCAGGAAAGATAATAAAGAATAGGATTGTGAAATTATGAAACGATTAAACAAATTTGGTATT  
GTACATTAGTTTTTTGATATTAATCATTAGTATCACTGCTGGTTGTGGCATAGGTAAAGAAGCGGAAGTTAAGAAAAGCTTTGAAAA  
AACATTGAGTATGTACCCTATTAATAATCTAGAGGATTATACGATAAAGAAGGTTATCGTGATGACGAATTTGATAAAAAATGATA  
AAGGTACATGGATTATTGGTTCTGAAATGGCAACTCAAAATAAGGGGGAAGCTCTGAAAGTTAAAGGTATGGTCTTATATATGAAT  
AGAAATATCAAAACAACAAAAGGATTTACTATGTTAATGCAGTAAAGAAAGATGAAGATGGTAGACCTCAGGATAATAAAATAG  
AATATCCGGTGAAAATGGTAGACAATAAAATCAATCCAAAGTAAAGTATCAAAAGACGAAAAACATAAAAAAGAAATCGAAAAATTT  
TAAGTTCTTCGCGCAATATGGCAGCTTTAAAGATTTGTGCAAGTACAAAGATGGAGATATTTCTGTAATCCAGAGGTACCGAGTTA  
TTCAGCTAAATATCAATTAATACTAATGATGATTATAATGTAAAACAATTACGTAAAAAGATATAATATACCAACGAATAAAGCGCCAA  
AGTTATTGTTGAAAGGTTTCAGGTAACCTAAAAGGTTTCATCAGTTGGATACAAAAAATTTGAATTTACTTTTTGTAGAGAAAAAAGGG  
GAAAACACATACTTTACTACTAACCTACATTTTAAACCGAGTAAGGATGAATAATCGTGACTAAAAATGAGTATAAAATCGATCCC  
GGAAAAATAACTAGTAATACAGAAGCAACTAGCGCAATAGCTAATATTAGTTATGAAATTGAAAATGCAATGATAATGGTTTAGA  
AAAAGAAAAAATTAATGGGCAGATTAATAGTTTGAAAAATGATGGGGATTTTCTAAAACTTAGACTACATAGATAGTTACACAG  
ATCCCAGTACGGGGACCACGGCAACGGCATTTTTAAATAAAGATACAGGTAAGGTTACTGTTGGAATGGCTGGTACAAACTTTTAC  
GGCGATCAAGCTTAAAGAGTAGCATTAGTTTCGATGTCTCCGTTATTATCCACCCTTAAGCAAGATATGAGAGATGACGAGGC  
ACTATGAAGATTGGTGAGCGGATTAGCCATTGGAGTAGGGAATGATTAATAAAGGAAACATTTTGCAAAATACACAGCAGTT  
TATTGAGAATTTACAAAAAAGTACGAAATTGATACAGTTACTGGTCATTTCTTAGGAGGGAGAGATGCTATCTTTCTTGGGCTTCG  
TTATAACATCAAAAATGTTGTGGCATACAATCCTGCTCCGTTAGAAGTAAAAAGCATTCTGTGATAAATTTGGTGGTCAATTGTTTAG  
AAATACGACATTTCCAGATGAAAAATATTTAAAAGAGTTAATGGATAATTATGATGGAGATATTACTAAGGTTATAACTCAAAAGG  
ATGGATTAGACTATTTAGTGAAGCGTACAGATCATTTAACTTGTTGGTGATGTGTTACGTATAAACAATGGTCAGGCCATGCGATGG  
AGAATTTTTTAGGAGAAAAAGAAACAGTGAATAATCGAAGAATAATGTTAGTAAAAGGATATCGCGATGCAATGACAAAAGC  
ATTTAAGGCTTTGAAAAAAAATACTGAGAAAAAATCGGTAAAAATAGATGAAATCAATCGAAGTTACTGCAACGAAACGGTGGC  
GCCCTCTGCTCTCTCAACAAAAATGCTTGAAACTTTAGTGGCATTTTCGGTAGCTGAAGGACTAAGTAAAAAGGTTGACCAAGAA  
CTTCAGCAGTTGAAAAATATGTTCAATCTTAGGATGAGAAATTTGAAGCAAAATTTGAAAAGACGCAAGCAAGCTAGTGATTGT  
AGGTAACATCTTTTATACCCAGAAAAGGTAAGTGCATTAGATAACGGTGGTGTCAATGAAAGTAAACTTGCTACCGAACCACATA  
ATGAAATAAAGACAACTAAATAAAATTACGGACTTATCTAAGAAATATAATTCGTATTTACAGCAATCGAAAAAGTATTAAT  
GAAATAGTTGCTAAGGATCAACAATTGGCAGGGCAAAATAGGTGATTTAATATGATGTTTGAAGAATACAAGAAAATAGATGATCTT  
GAAAATGCATATGAAATAGAGTTGAAACGATTGAAAGGGATATACAAAACTTAGTGATTAAAAATATCACCTTAGAAGAGAAAA  
TGAACAAAGTTATGATGCATTTTGTATTTAAAGAATAAAATGAAGTATAGTGAAGAGTCAATGCTAAGGTGAGACGACTAGTTG  
AAGAATTTGATTATGAAGCAGATACTTATATTAGACAAAAAGAGTTAAAGTTAGAAGATTATAAAGAAGAAATAAGAAGAGAATA  
TATACAGCAATCTGAAAAAATAATGGAGGCGAAGTAGCTTATGGGAATCCCTGATCCGTTATCTAATCCTATGCTGATCCTTTACT  
AGGAGATAGTTGGATGGTAGTTTGAAAAAAGACAGGAAAAAATAATCAACAGTCACGACATCGCACCTGAACATGATGAA  
AAGCATCGTGAAAAATAAAGTAAAAATGAAAAAATCTGAAAAGCAATTGATCAATCAGTTAATTAATCATGGTCATACATTTAAGAG  
TGATTTTAAAAATGTAGCTAAAGGTGATTGGGTTAATAAAGCCATGCAAGACTTAGATAAAATTAGGCAATGAGCTTAAAAAATAA  
TGAATTAGTTGAATTGTCACATACTTTTTCAAACCAACAACGAATAAAAAATCTATATAAATATGATTAAAAAGAGTCATAACCAT

TCGTAAGGATGGTTATTTTTAATAGTAAACAAAATTGCTGCTAACTTACATCTTGAACCAAGTGAGGATAAATAACCTCCTGCCTC  
CTACACGATTCAACACGAATTTCAAATATATTGCTGTAAAATAATGTAAAATAAACGTATTCATATTACTGAATTGAGGGATAGTAT  
GCAACGTGATTATTTAATTCGAGTAGAACTGAGAGTATGTCAGATTTCAAAGGCTCAATGGTTAATGATTGGTTTTGTATTAA  
AGGTGAGGCGCATATTTATGATGAAAATAATATGACGCAATACAACAGTGGCGACATTTTCATCATTAAACCACCGGACTTGTATCG  
ATTTCAACTTCAACAAGAGGGCATCATATGTTATATCCAATTCCAAATGAAATATTTAGCAGACAAGTTTGTATGATGCGCATTGTCT  
ATATTTTCACTTAACAGATGCGACCACAACCAAGAATATACATCAACTGAGAAATATAATGGCAAGACTGGTTTCAACACACATTC  
GACATAATGAGTTGTCTAAATGACTGAGCAACAACCTGTGATTGCTTATGCATATGATTTCATTATGTCCCGCTACATATCA  
TTCGAACCAAGTATCTTAAATGATGATAAAGTGAATCAAGTATGCGACTATATCGAGTTACATTTTCATGAAGATTTAAGCCTTTC  
AGAATTAAGCGAATACGTTGGGTGGTCAGAGAGCCATCTGTCTAAAAAGTTTACAGAATCGCTAGGTGTAGGATTCCAACATTTCTT  
AAATACGACGCAATTGAGCATGCGAACTCGATTAAACATACACAGATGAAACGATTACTGATATTGCATTGCAAAATGGCTTTT  
CAAGTGCAGCGAGCTTTGCGGAGAACATTTAAACACTTTACGCATCAAACGCCTAAACAATATCGAGGTGATCGTCCAGCAATCACT  
GAAAACCAGCAATCGTTACAACATAATTATCACGACCGTGAATTGATATTACTTTTAAATGACTACATTGAAGAAATGAATCATTTT  
ATTGAAGATATTGAAAAGGTGAACTATAAAGAGATTGCCTTTAAACCAACTAATCAACAATAATCAATTTAATCATATTATTCAA  
GTGGGCTATTTGAGGAATTTGCTCAATACACAGTATCAATCACAGTTACTTACATGCCATCATGATTTTCATGTCAATGAAGTATTA  
GCATATGATGTGATGCCATATATTATGAAAAAGCTCAATGCGCCATTACGTATGATGCAGAGATTTTGAATATATTTTATGATATC  
GATTTGTGTTTACTTTTTATTAGATCATAACTTTAGTTTGACAATGCATTTGGATCAGTATGACTCACGTGATTATATCGATGCAT  
TCAAAGTATTTATCCATCACGTTGCCCTGCATGTCAGTACATAGAAAAGATTGAAGTTCAACTTGTATGTGACGACATTGCACAATT  
CTTTGATTGAAATGATTATTTTAAAGCATTATTTCCCAATGGTGGCTGTACGTTCACTTAGATCAAGCTACGGAAAGACATCT  
ACCATTTGTTGAAACGACTTGAGCCACACATCGACCATTTTGTATTTGATGCCAATTCAAATGACGCTGTTGATTTTAAATAAAATGAA  
TGATGATGAATTTAAACCGCAAGTCAAATGATTATTAATAAAACGAATTACCTTATCGACTTAATGCATCGCCATAACCTAAAGCG  
TCCACTCATTTTACTCAATTGGAATACATTGACGGGTGATACATTTATTACAAACGGCGAATATTTTAGAGGTGGTATCATCATTGA  
GCAATTATTAATAAATTAAGTTCTAAAGTAGAGGTATCGGGTATTGGTTGAATTATGATTTGCACGTGATCATTGTAGAAATGAACG  
GGATTATATGAATCTATTGAACGTGTTTCATCAATATAATGGAACCGTCCGGTCTATTTACGGCATTTGCTATTTAATAAATTAACA  
AGTAATATTTTATATTCTGATGATACATGTATTGTACGCGGAAGTGAATTTTCAAATATTTGTTATATGATGCAAAAGCATTFTA  
ATCCGTACTTAGCGTTGGACAATCAAATGAATATGCGTGCAACGGAATGATCCATTTGAACATTAATGCCTTGAAGAAGGATG  
TATAAGATTAAACATTTTACCTTAGATAAAGAAAATGGTGCCTTATTTAATCTTTGGCGCAACATCATACGATACATGGCATGGAC  
AAGGACTCTATAGATTACGTTAATCGAATGAGTTTCCGAAATTAGAAGTATATGATATAGATATCACGGACACACTGGCATTAAAC  
ATTAATAATGATTACGAATGGGATTCACCTAATTGAAGTAAACGTTACCCAAGTTCATAAAATGATCACAATACAAAATTTTGATA  
TACATAATTTGTGATTTTTTATATTCAAAGCTAAAATTGCAAAAAATTAATGGTTAACATCTCTGTTGTTGGCAATATAAATAATGAT  
TAATCATTTATGATGTAACATAAGGAGATGAAGGATATGAATCAACAATTAATTGAACTTTAAATCTAAAGAAGGCAAAATGATT  
GAGATCAGACGTTATTTACATCAGCATCCAGAATTATCTTTTCATGAAGATGAAACGGCGAAATACATCGCTGAATTTTACAAAGGT  
AAAGATGTGGAAGTAGAAACGAATATCGGACCACGTGGAATTAAGTAACGATTGATTACGGGAAACCTGGTAAAACATTAGCAA  
TCCGTGACAGACTTTGATGCATTACCTATTACTGAAGATACAGGATTATCTTTTGCATCACAATAAAGGTGTTATGCACGCATGTG  
GTCACGATGCACATACAGCATACATGCTTGTATTAGCAGAGACGCTTGTGAAATGAAAGATAGTTTACAGGAAAAGATCGTTGTG  
ATACATCAACCAGCTGAAGAAAGTACCACCGTGGTGCTAAAGCAATGATTGAAATGGTGTATTAGACGGTGTGATCATGTATT  
AGGTGTACACGTATGAGCACAATGAAAACAGGTAATGTGTATTACAGACCTGGTTATGTTCAAACAGGACGCGCATTTTCAAATT  
GAAAGTTCAAGGTAAAGGTGGTCATGGTTTCATACCCCATATGGCCAATGATGCCATTGTTGCAGGTAGCTACTTCGTCACAGCGTT  
ACAAACAGTTGTATCTAGACGACTAAGTCCATTTGAAACCGGTGTTGTCACAATCGGTTTCATTGACGGTAAAGGTCAATTCAATGT  
CATTAAAGATGTTGTTGAAATTGAAGGTGATGTACGTGGATTAACAGATGCTACAAAAGCAACAATTGAAACAGAAATTAACGTT  
TATCAAAAGGATTAGAAGCATTGTATGGTGTAACTTGACATTAGAATATAACGATGATTATCTCTGCATTATATAATGATCCAGAGT  
TACTGAGTACGTGGCTAAGACGTTAAAGAAGCAAACTTGATTTTGGTGTGCAAAATATGTGAACCACAACCACCTTCAGAAGAC  
TTTGCACTACTATGCTAAAGAAGCTCCAAGTGCCTTTATTTATACAGGTGCAGCTGTGGAAGATGGTGAATTTACCCACATCATCAT  
CCTAAATTTAACTTTACAGAAAATCATTACTTATTTTCGCGAGAAGCTGTAGGGACAGTTGTTTATAGCATACCTTAAAGATGATAAC  
TAACATGAATGAAACGTATCGCGGGGGCAACAAGTTAATCTTAGGTATTGTATTAGGTGTTATTACATTTTGGTTGTTTGCACAATC  
ACTTGTAAATGTTGTACCAAATTTACAACAAAGTTTGGTGCAGACATGGGAACAATTAGTATTGCGGTAAAGTCTAACCGCACTATT  
TTCAGGCATGTTTGTGTTGGAGCAGGCGGCCTAGCAGATAAAATTTGGGCGGTGAAAATGACGAATATCGGTTTATTGTTAAGTAT  
TATTGGTTCAGCATTAAATTATTATTACGAATTTACCGGCATTATTAATTTTAGGTGCTATTATACAAGGCGTATCAGCAGCGTGTATT  
ATGCCTCCACATTGGCCATTATGAAAACCTATTATGAGGGTGTGAACGTGACGCGCCTTAAGCTACTGGTCTATCGGTTCTTGG  
GGTGAAGTGGTATCTGTTCACTCTTCGGTGGGGCAGTTGCGACAACATATGGGTTGGAGATGGATTTTCATCTTCTCAATTATCGTTG  
CCGTACTTTCAATGTTACTCATCAAAGGGACGCCTGAAACGAAATCAGAAGTTACCAATACACATAAAATTTGACGTTGACGGGCTA  
ATTGTTCTAGTATGTTGCTAAGTTTAAACGTTGCTACTTAAAGGTGACGACTTGGTTACACATCATTATGGTTCTTTGGTT  
TAATTTGCAATCGTAATTGTAGCATTTCTTTATTTTCTTAAAGTTGAGAAAAAGTAGATAATCCGCTTATTGATTTTAAATTTTGA  
AAATAAACCATATACAGGTGCAACGATTTTGAACCTTCTTATTAACCGGTGTTGCAAGGTACATTAATTGTAGCGAATACATTCTGTGA  
ACAAGGTTTAGGTTATACAGCATTGCAGGCAGGATACTTATCAATTACTTATTTAATCATGGTGTATTGATGATTGAGTTGGTGA  
AAAATTATTACAAAAAATGGGTTCTAAGCGACCAATGTTATTAGGTACATTTCATTGTGGTTCATTGGTATTGCACTTATTTCAATTAGTA  
TTCTTACCAGGCATATTTTATGTTATCAGTTGTGTCGTAGGATATTTATGTTTCGGACTAGGCTTAGGTATTTATGCAACACCTTCTAC  
AGATACAGCTATTTCAAATGCACCGTTAGATAAAGTTGGCGTTGCTTCAGGTATTTATAAAATGGCTTCATCACTTGGTGGTGCATT  
CGGTGTCGCAATTAGTGGTGCAGTATATGCCGGTGCAGTTGCTGCAACGAGCATTATACAGGTGCGATGATTGCACTTTGGGTTAA  
CGTATTAATGGGAATCATGGCATTATCGCAATTTTATTTGCGATTCTTAATGATGATAAACGTGTCAAAGATGCGAAATAATAACG  
ATGACACGCGGCTTTTGATAATGATTAAATGAAAGCAAAAGCAAAATTAATGAGGAAATGTATAGAGCAAGTGCATATAGATAA  
ATCTATGATTGGATTAAACACTAATATAAATATAAATGAAAAACCATCCACTTAACTTTTGATAAGTTAGGTGGATGGTTATTTATT  
GCGTTGTTCTAAAAATTTGGACATTTATATGGAAGAAGTATATATAATGTGAAGGTTATGGCAATTCGCTTCAATGAAGGCGACGT  
GTAAAGTGTATATTAATGATTTCGAGGTGAGACTCCGAGAACAGTGTCCGTCATGCTTACCGCATACTAATGAAGCATCATTATAT  
CAGTGTATTATAGCCGATTAAAGATAATAAAGTTTGCTAAATATAAAGAGCTTGGGACATTCAATAAAAAATCGAATTATCATCAATA  
AGATTTTGCTTTAAACATTGACTATGAAACTGGATAAAATAAAGATTCAATTAATGCATCAGTATTAGGATT

>007-contig\_191

TCAATACGAAGTATTGTATAAATATAGAACAGCAGTAAGATATCTTCTAATTGAAAATTATCTTACTGCTGTTTTTATAGGGATTTATG  
TCCCAGCCTGTTTTACATGCATCTGAATCTCTAATTTTAAAAAATATGAATATAAATAAGACAGTAAAAATTAATTTTCAGTTGTT  
GCAATTTCTTCATCTGTAGGTACATCATCGTTAAGGCCAACAAAGTGCTTCAGAAACATTTCTGTAATGATAACCGATACGTTCAAGA

ACACCAATCATATCGATATATAGTAATCCGCCTTTTGTGTACATTCACCACGATTAAGGCGTTTAAATATGACCTTTGCGTAGTTTAT  
GTTCAATATTTAAATGATTCTCTACTACGTTCTACAATTTCACTTTTTTTCGTTTTTGTCAATAACATCTAACATGTCGATGGCTTTATCA  
AATGACTCAGCAACATGGTTGAATAATTTATCCATACCGCGTTGTGCATCTTCTGTAATGCGAATATCTTCATCATGTTGGCGTTTTA  
ATTGAGCGACATACTCTTCTGTTAGCTCTGCTACTTTTTAAAAATAGAGCGATTGACATCAAAACATAACTGCTAAACGCTCAACGTCAG  
CCTTCGTTATGGCTTTTGTAGAAATTCTAACTAAATAATTTTGAATGCTATCATTGATTGTTTCAACAGCTTGGTGCTTTTGTTCGAAGC  
TTTTTGATCAATTTTTTATCGTCTTTTGTAAATTCGCGAATGCTTCTCAAACATTGATAAGACAATCTGACCAACATTTTGTAAATCTTT  
TTGAGTTTCTTGTAAATGCAACACCGAGTGCGTGATAAAACAAGATCTTTGTTTAAAGTGCTGAGGTTTATAGTCATCAGCAATATCTTTA  
CCTGGGACAAGCTTTGTAACAATCCATGCTAAACCTGCTACAAATGGTAATTGAATCAAAGTATTTGTTATGTTGAAGATACCATGT  
GATACTGCAATCGTCATCGCTGGTTTTAAGTGCCATACATCTTGTAAACAACTAATCAAATGAATCACAACCTGGCAAGAAAAATTGTG  
AAGATAATTACCCCGATTAAGTTAAAGATGACGTGTACAAGCGCCGACGTTTTTGCAGCGATTGAGCCGGCTAAACTAGCTAAGAT  
AGCTGTAATCGTTGTACCAATATTATCGCCTAGTAACACAGGGATTGCTGCGTTTTAAGCTAATTAATCTTGTGATAAAAAATCTTGT  
AAAATACCAATCGTCGCACTTGAACCTTGAAGTGTGCTGTTAACCTGCGCCGACAATGACAGCAAGTATTGGATTGTAGACATA  
TCAAGCATTAAATTGCTTAAATCCATCTAATGATGCTAAAGGTTTAAACGGCATCACCCATAAATTTCTAGACCGAAGAATAGAGAACC  
GAAACCGAATAGTATGCGGCCAATGTTATTGATTTTAGAGCGTTTAAAGAAAAAGATTAAAAATGCACCTAATGCTAAAAATTGGCA  
TTGCATATTGCGCTAAATCTATACCGATAATAAATGCGGTTACCGTTGTTCCGATATTGGCACCCATTATCACTCCAATAGCTTGTTT  
TAACGTCATAAATCCAGCTGTTACCAGTCCGATTGTGATAACGGTCTGACCTGAACCTACTTTGTATTTAAAAATAGTTACAACGATACC  
TGCAATAACACCTAATACTGGATTTGATGTAAATTTGTTTAAAAATATCTCGTAGCCTGTCTCCTGCTGATGCTTGAAGCCCGTCTCCC  
ATGATTTTTTAAGCCGTAAGGAAAAATACCTAAACCACTAAAAAGGAGAAAAATGACTCTGTAACCCGACATTCTTCATTATTTCCCT  
CAATAAGCTTTTATATTTAGATTATCGCTTATAATTGTAAATTTAATGTTAAGATTAGGTAAAAATTTTAAACAATATATGTTATTGT  
TATATGACTTGTAAAAATATCGTCACCTATTATGTAAATTTTCAAGTGTGAAATGGCGGGTTTGAATCACTTGTTTAACAAAAATGATGC  
AATCAATCATGTAATTATGTTTCATCAAAAAATCATGTGAGTGGGATAACGAAAATAAGTTTGTGAACATATCACTTCTATCCCAC  
TCCATGATTTGAAATCACCATATAGACAGATTTAATGTGCCTCGTTATAACAATTTGTGTTCTTTTAATAATGTCTCAATGTACGTAC  
CTTTTACCTTTTAAAGGAATCCAGCTAATGCGAGTTTTTGTATTTTCGAATCTTTAGTAATCTCGCGCAAACTCTTGATGGTCATTGAGT  
TCGTATACGGCATCCATTAAGACGCGAAGATCAAATGTACTATTGATGACCTCTGGAATACCACGATCTATATTTAGTAATTGATAA  
ACAGCTTCCATGGCAGTACGAACCGAATATTCTGTTGTAAATACAGTGTCTCGCTCTGTTTCTGCAAAGTTACCAATAAATGCTAAA  
TTTTGTGATTGATGCGGAACGACTAAAGGTCTGTGCGCGATAGCAGCGTCATGAAATAAGAGGTAATATATGGCATATAAACAGG  
AATCGTATTAGATGCATGTTTTTGTAAAGTCTTCAATTTTGTGACGTTGGTACACCTAAGTGATATAGCCATTCTTGACATATTTTCATTA  
CCACTACATTCTGTGATTGGCTTTTTAATATAATCGCGGTTTACATCTGAATATAAAGCATAAATCCACGTAGATATTTTCATTTTTAG  
GTTGGTCTTTAACTGTTGCTGACGATTGATTGTAAACTGATTTGCCATGCAGAATCATTGATTGTAATAATTCGCCAGTAACCGT  
TTTGCCTGCAAGAGGGTACGTTTACAAATGCTTTCTATTGTATCGATAATATCTTTATTGTTTGTGTCGATGTTGCAGAAACAAAC  
CAACTCTTTTGAGGAATATTTTGGCAAAACTTATCAGGATTACCAAAATTCAGGACTTTGTGCGGCTAAATTTTCCATAGTGCCAAC  
TACCACCTAATTCGTCAGTTGGTGGTGCTGGTGTATCATTATCACCATACGTAGAGCTTTCCGTAATACTACCGTTTGTGCACAAAGAC  
AAGATCATCTACAGTCAGTTTAAATTGACTCTGCTTTGCCATGTGCGGTGAATTAATATTCTCGGGCAATTTTTTGACTTGTGCTAACA  
TCTACTTTAATATCTTCTACTTTTACATCGTATTCAAATTTGAACCCCATGCGATTTTAAATATTCAACCATAGGTAATACTAAAGATT  
CATATTGATTATTTAGTGAATTTTAAAGCTGAAAAGTCTGCGAGACCACCAATATGATGAACGAATCGCATTAGATAGCAGCGC  
ATTTCCATAGCAGAATGCCACGGTTCAAATGCAACATCGTTTTTCCAGTAAATACAAAAGTTTGAATTAAGAAGTCATCGGAAAA  
TACATCTGTTATTTTGACATCATCTAAATCTTCTTCATTGTTAAGCATAAATCTAAAAATTTCTTTAATCGCTTTTTTGGTCAAAGTGA  
AGTCTCCATCGGTAACATAACGTTGACCTGTTTTTCAATAACTCGACAGCGAGAATAGTTAGGGTCTTCTTTGTTTAGCCAATAGA  
ACTCATCTAATACAGACGCGTTATCGATTTCTAATGAAGGGATAGATCTGAATAAGTCCACAAACATTCAAAGTGGTCTCCATT  
CACGACCACCTCGGACAACATAGCCTTTTAAAGGCATATTTTACCATCAAGACTACCACCTGCTTTAGGTAACCTCTTCTAAAAATAT  
GAATCTTCGAACCTTCCATTTGACCATCCCTAATTAAGAAACAAGCTGCCGCAAGTGAAGCTAACCCAGACCCGATTAAATAAGCA  
GATTTGTTTTCTACATTTTCAGGTTTTTLAGGGCGCGCAATGCTTCATAATTTCCATAACTGTAATACATATCCACCAAGTCTTTTCG  
TATTAGATACACTACAGATACCCCTTTGTGAATTTGCAAAATAGTATTATTTATATTGGTAAATTTGAGCAAAATAGATCAATCTAGTTA  
TATTTTTGATTTTTTAAATTTTATCACTCGAATGTTTTTGGATTCTGAGTTCGCGGACTTGAATAATTCGAATCATTATGTGGCATG  
TTAAACAGCTAAATATAAGCTATACACATTTAACAAGCGGATACTCCTGACGCAATTATAGTATCATTACATATTGTTTAAATCGTTT  
GGGGTAATGTAATTAAGGTAAAAATAGGCAGAGTGTATACACAAAATGTAAAGAAAGAGGCGATAGAATGTCTAAAATCAGGT  
CTTTTACAATATTAAGTCTACTTATTTACTTAGCTATGATGTGCTATACAGTAGTGACCTATTCAAATTTACCAACCAAGTACCTAT  
TCATTATAATTTAGCAGGGGATGCTGATAACTTTGCTGATAAATGGGTACTGCTTTTGATAAATAGCGCATTTATAGTGATTTGGCTT  
ATATTTTTTCAATTGCAGGTAGATACTATGAACGATTTGCCAAATGGTCACATTATAATCATACACCACGTGAAATTCGAGCGATTAAA  
TTATTTTTAAGTACGTTAAATTTAGAGATTATGAGCTATATGTCTATCTTCACAGTATTAGAAATTTGGCAAATACAACACCATCATC  
AATTAAGATTTACTATGGTTTTAATATGATATTTATCATTATGCTATTTGAGCGTTTGCATATTTTGTCTTCTACAATTTACAAAA  
ATTGAGATTTCTCAATAAAAATATAAACTGTCATGATGCATTTTTGAAGCGGATTCCTGAGATTATTATAAATATACTAGTATTT  
ATAATTAATAATGATATATTATTTATTATAGTTAAATATTGTGTATATTTTGTGAACTTTTTGTAAAAAATTCGATTGCCTGTCACATAT  
AGGAGTGTTACATTTTAAATATGTGATCATCGCAAAATATAAGTTGAAATAGGTTGTAGATTAATCAGAATGATAAATATTTTATAT  
AAAGAGAGGGAGTCATTATGACACTACTTACTGTAAATCCATTGCGATAATGTTGGATTATCAGCCTTAGTTGCAGCAGTACCTATTA  
TTTTATTTTATTATGCTTAACCGTTTTTAAATGAAAGGCATTTATGCGCATTGACAACCTTTGGTTGTACATTGATTGTGGCTTTA  
TTTGTATTTGAATTACCAGCGCGTGTATCAGCAGGTGCGATTACAGAAGGCGTTGTTGCCGTTATTTTCCCAATAGGATATATCGTTT  
TAATGGCAGTTTGGTTATATAAAGTTTCTATTTAAAAACAGGACAATTTTCTATTATTCAAGATAGTATTGCAAGTATTTTCAGTGGACCA  
AAGAATCCAACATATTATTAATTGGATTTTGTTCACAGCATTTTGAAGGTGCGAGCAGGATTTGGTGTGCCAATTGCGATTGTCGA  
GTATTATTAATCAACTGGATTGTAACCATTAAGACAGCGATGTTATGTTGAATTGCTAATGGTGCGCGGGTGGCTTTGGTGA  
ATTGGTTTACCAGTTAGTATTATTGATACGTTTAACTTAAAGTGGAGGCGTTACAACATTAGATGTTGCGAGATACTCAGCATTAACA  
CTTCCAATTTTAACTTTATTATTCCATTTGTTTTAGTATTCTATTGTAGATGGTATGAAAGGTATTAAAGAAATTTTACCTGTCATTTT  
AACAGTGAGTGGTACATATACTGGATTACAATATTATTAACAATATTCCATGGTCCAGAACTAGCAGACATTATTCCATCACTAGC  
AACAATGGTGGTGTAGCATTTGTTTGTGCTGATAAATTAACCGGAAAAACATTTTTCAGATTGGAAGCGTCTGAACATAAAATTCAAAA  
ACGAACGCCTAAAGAAATTTGCTTTGCTTGGAGTCCGTTTCGTAATTTTAACTGCCTTTGTATTAGTATGGAGTGCACCATTTCTCAAA  
AAATTATTCCAACCTGGAGGTGCACCTTGAAGTTTGTAGTAATAAAATTTGCCAATTCCAATACTGTGAGTGATTATCGCCTAAAGGA  
ATTGCGTTGCGTCTCGATTTAATTGGTGCAACTGGGACAGCGATTTTAAACAGTAATTAACAAGTATTATTACAATTTTAAATACGAAGTTAAAT  
GGAAAAGTGCAGGTGCTTTATTGGTGAAGCAATTAAAGCAATTATGGTTACCGATCCTTACAATTTTTCAGTATCCTAGTATTTGCTA  
AAGTTATGACATACGGTGGTTTACTGTAGCAATTGGACAAGGTATTGCTAAAGCGGGAGCAATTTTCCCATTTCTCTCCAGTAT  
TAGGTTGGATTGGTGTGTTTATGACGGGTTTCAAGTTGTAATAACAATACTTTTATTCGCACCTATTCAAGCGACAGTGGCACAACAAA  
TTTCAACAAGCGGTTTCACTTGTGGCAGCTAACACTGCAGGTGGTGTAGCAGCGAACTTATTTCACCACAATCAATTGCCATTG

CGACTGCAGCTGTTAAAAAAGTTGGTGAAGAATCTGCATTATTA AAAATGACGCTAAAAACAGTATTATATTTGTTGCTTTTATTT  
GTGTTTGGACGTTTATACTAACGTTAATATTCTAAATATAAAATAATGTTGTCACTTGGATTCAAATGACATTTTAAATCTAATTATTC  
ATGAATCGAACTAGTACGAAATGCATTGAGCATCTTGTCTAGTTCGATTTTTTAATGTCTAAAAATGTCGTATATGTAATTAGAGTA  
GAAAGTGTGAGGCGTTTCAGAAGTTGTTAGAAAAGTAAGTAAAAATAAAAAATGCACTGAGCAACAAAAGATGTTGCTAGTGCAT  
TTAGATGATTCTTATCATTTCAAATAAGAATGTGTTAATCAACGTATATAAGTTAAAAATTGGTTTGGATAAAAATGATATCTATCGTTG  
TGTATTGTTTGTGTTTTATAGTTCGCGACGACGTCCAGCTAATAACGCTGCACCTAACGCTAATGATAATCCACCAAATACAGTTGTAC  
CGATGAATGGATTTTCTTACCAGTTTCTGGTAATGCTTGAGCTTTGTTAGCATCTGCATGGTTTGTGGTTGCTTCTTATCAACAAC  
AAGTCTTGACCAGTTTGATCATGTTTTATCAGCTAATTTGTTATCTGCAGCAATTTTGTGAGCAGTAGTGCCGTTTGTCTTTTGCAA  
TGTCATTTACTGTATCACCAGTTTAAACGACATGTACTCCGTTGCCGCTCTCTTTACCAGGTTTTTGTGTCTTCTTTGCCAGGCTTG  
TTGCCATCTTCTTACCAGGTTTTTGTGTCTTCTTTACCAGGCTTGTTGCCGCTCTTCTTTGCCAGGCTTGTTGTTGTCTTCTTTACCA  
GGTTTGTGCGCTCTTCTTTACCAGTTTTTGTGTCTTCTCTTCTTTGGTGCTTGAGCATCGTTTAGCTTTTTAGCTTCTGCTAAAAAT  
TCTTTGCTCACTGAAGGATCGTCTTTAAGGCTTTGGATGAAGCCGTACGTTGTCTTCAGTTAAGTTAGGTAAATGTAAAAATTCAT  
AGAAAGCATTTTGTGTCTTTTGTGAAATTGTTGTGACGCTTTTGGTGCTTGTGCATCATTAGCTTTTTAGCTTCTGCTAAAAGGTTA  
GCGCTTTGGCTTGGGTCATCTTTAAGCTTTGGATGAAACCATTGCGTTGTTCTTCGTTAAGTTAGGTAAATGTAAGATTTTCATAGA  
AAGCATTTTGTGTCTTTGTGAAATTGTTATCCGCTTTCCGTTGCTTGAGATTCAATTAACTTTTAGCTTCTGACAATAGGTTAGCA  
CTTTGACTTGGGTCATCTTTAAGCTTTGGATGAAACCATTGCGTTGTTCTTCGTTCAAGTTAGGCATGTTCAAGATTTTCATAGAAA  
CATTTTGTGTTCTTTTGTGAAATTGTTGTGACGCTTTCCGTTGCTTGAGATTGTTAATTTTTAGCTTCACCTAAAACGTTAGTGCTT  
TGGCTTTGGATCGTCTTGAAGACTTGAATGAAACCATTGCGTTGCGTTGCTTTAAGTTAGGCATGTTCAAAAATTCATAGAAGGCG  
CTTTGTTGATCTTTGTGAAGTTATTTGTGCGCATCAGCTTTTGAGCTTGAGAGTCAATTAAGTTTTAGCTTCACTAAAACGTT  
AGCACTTTGGCTTGGATCATCTTTAAGGCTTTGGATAAAACCATTGCGTTGATCAGCATTTAAGTTAGGCATATTTAAGACTTGATA  
AAAAGCATTTTGTGAGCTTCATCGTTTGCAGCATTTGCAGCAGGTGTACGCCACCAGATATAAGTAATGTACCTAAAGTTAC  
AGATGCAATACCTACACCTAGTTTACGAATTGAATAAATGTTTTCTTTTTCAAATTAATACCCCTGTATGTATTTGTAAAGTCATC  
ATAATATAACGAATTATGTATTGCAATACTAAAATCTATATTTATAAATAAATTTAAAGGTAAGTTTACAACCTATAAAAATAAATA  
TTTTGCTGAAAGATTTATTCAGGGAGTAAAAGGCTTAAACC CGCAAAATCACGCTATTTGATTAATAAAAACAGATAAAAATATAG  
AGATATTTTTATAATGAAAGCGGTTAATACATATGAGTTGAAAAATATTTTTAAGAATAAAGTGGGGCTTTGAATGTGCTGAGGT  
TTAATTTCCGAAATGGTTTTAAGTGATATAGAAAATAGAAAGTTGTTCAATATGTGCTGAGGTTTTATAAAAAATAGAAAACACAA  
GTGCACTTTAGAATACAGCACACTTGCCTAATAGAGATATTATTCAAAAACAAGATGTAATGATCTTTATCTGCTAATAAATTGATT  
CACTTGAGCTAATAATTGTTGAGCATGGTCTTGCTGCGCGTCATCCATATGAATTAATAATTTTTCTTTTATCTTCAGTTGAGCGTTCTT  
TTATTAGATAGCCTTGCTTTTTTAAATTTAGAGAGCTCTAACAGTTTGAGGGTATTTATGGTGGATTGTTTCAATTAATCTTTAAG  
AAGAACGATGTTTTATTTTGAGAAAGTGAATAAGCTAGAAATGTGAATCTACAAAACCTAATGTTAGATGTTTTTGATAATATTC  
TTGAAATACATTGTATACATCATCAAGTTTAGAAATCTTTACTATCTTTTGGTATCATCTGTGATTCACTTTGATCTGCAAGGTTAA  
ATTGTTAATGATTGATCAAACAATGTAACACGTTCTGCAATTTCTCTCGTTGTTCTTCAGATATTGAAATGTAAGTATTACGCTC  
ATCAATTTTACTTCGAACCTTACTAATATATGAATGTTTCAACAAGTACTTTTATATGCTGTACTAAATCCGATTGTTTATAACATAAA  
TCTGAAACAATCTTCTTAAATGGAAGTGTGTTTTCTTGCTGATGAAATAAAGTCAGTAATATAAATCTTTTATAGTCATATCGA  
CTTCAGGCTTGACTTTTTTCTTAAACGAAACATATATAGCTTCAATGATTATAAAATCTCTAATTTTGTCATGGTTATTATATTTCATT  
GTTTTATCTCCTTGATATGCACTTTATTTAATATAACACAATATAATAAGAAAAATAATCCATAATTTACAATTAAAAAATAATATG  
ATATTTCTATTAATAATTTGTGTTTTTGAATAAATGACATTATCAACAATATATTTAAATAAGAAATAGTTATCGATATTTGAAAAAT  
CGAAGAATATTGATTGATATTATAGAATATGAGTCGGTGTTATTTGTATATAAAGTATTAATATGTAATTAAGAAAGTCGACGCTTG  
TTAACAATAACAACAACCTATATGTATAAAAAAACCTCGCAACTGTAGTTAACTGAATCATTAGCTAACTTCGTTGTGAGGTCATT  
TTGTTTTAATAATATCGTTATAACTTTTTACGGTTAATAATAAGTATATGAAGAATGGGGCACCAAAAGCAGCAATAAATACACCT  
GCTGGCACTTCTTTAGGCAAGAATAAGGTACGCCCAATTAAGTCTGCAATAACAATTGATATGGCACCAATCATTGCTGACATTAGT  
AATTTTTAGCATAACTTCCGCGAACGATTGTTTTCGCGATATGTGGTGCGATTAAACCGACAAACCAATGTTACCTACTAAACTG  
TTGCCATAGATACGAGTATAGTAGAAGTGATTAATGCGATTGTTTCATACGTTGATAGCCTAAGCCATCTGCTACGAGG  
TCATCAAGTATAGATATTTTCATTTTGGTATAACAAGAAATAACAACGGCACAACAGCTAAAAATAACCATAACCCAAAATGATTGTA  
TCTTTAAACGTAGCACCGTAAAGACTTCCGACTAGCCATGTATAAGCTTTGGCAGCAGATAATTGCTTCGTTGTAATGAGTAATCCT  
TGGACAAGCGCAATAAACAACGTTTGCATCGAAATACCGATGATTATGAGTGTTGTCGGGCGTATTTGTCTTTTCGTTTGAAACACT  
AATAGTATCATCTTGCAACTGCGCCACCTAATACTGCAAAATAGTGAAAGTAAATGTATCGTTAAATGGCTGAAAAATGCAATAAA  
GACAACAGCACTTAAGCTAGCACCACTGTGATACCGATAATATCAGGTGAGGCAATTGGATTTTTTAATACATTTTGCAACATTAA  
ACCACTCATTCCTAGTGCGGCACCTGCTAAAAATCGCAAGTGAATGCGAGGTAAGCGTAATACTTCTAAAGTGAATTGATCCATACT  
GTCATTTGGATTATAAAGTACATCAGTACGCGTTGTAATGGTATAAAGCTTGAACCAATCATCATACTTACCACCTGAAACGATGGC  
TAAAAAGATATAACGCGAAGATGAGATGGTAATGTCTTTTTTATTAATCTTTTCGGTCATAAGCGTTGACGCTCTTCTTCTATAAT  
AGATTAAGACAATAAGCGCAATGACAGCGGTAACTGACACCGGTAAGCTAGGCAACTCTAGTGGCTTAATATTATACGAGCAACAATGTCT  
GAAATGATCATTAGGATTGCTCCAGCTAATGCAGTAAAAGGAATTAAATACTTATAGTTTGGTGGAATAATCGTTTGCTAATATTC  
GGTACGATAAGACCCACAAAGACGATTGATCCAGCTACGGCTACCGAAATACCGGCTAACATACTGATGAGCATAATAATCATCCA  
TTTGATTAATTTTATGTTTTGACCGAGGCGGTTGCAATGTCGTCCTTGTATCAAGATGTTGATGTGTGCAGCCATGCTAAATGCA  
ATTAATAAAGTATCAATACAAGCGGAATAATCCATGGGATATCCCAAATATTACGTAATGAAACGGAGCCACTTAACCAAAATAA  
TAGGCCTTGTAAGTCTGTTTCGTTTCTAATAAAGTATGCCTTGAGTAAAGGCTGTAAATAGCATCGCAATCGCAGCACCTGCCAAAAT  
GACACGGTGAGGTGAGAATAGTGTGTTGTCTAAACATACCTAGCGCAACAATAATATAGTAACAACAATGGCACCTAAAAATGCAA  
TAACTACAATCATTTTAAAGATTGAATTTGGATAAATGTAATACTAAAAATGACAAAAAATATGCGCCTGCATTGACACCGGAAA  
AGCCCTGGTGAGGTTATGGGTTTCGTGAAGTCTTGTCATACAAACCTGAGACAGCAAGGCGACCGAGTCAACACGAAT  
GATTGTTCTCGACGCCCGTGACCAAGTGACAACATCATGTAATCGTTTTCATATCAAAGTTGAATAACGCCTGTATCACCGTACC  
TGGTGACACAAGCGTATTTCCAATCATTAACCTAAGATAGCTACTATTGCAAGACATAAACCAGCAATAACGATTTGGTATTTTGG  
TTTAAGTAGCATCGTAAAACCTCCTTAATATTTTGATTGTTTTTCAATATTTAACTTTTCATATAAATCGTCAATAAGTTTAAATGAAG  
ATTTATATCCGCCAGCTAAGTTCCAAGTGATTTCATCTAAATCATCAGATACTTGGTTGTTTTAACTGCGTCTAAATTTTCCACTCT  
TTACTTGAAGTCCATTTCGTTTTCAGTCTTTTAACTAATGCAGCATCTTTCGCAATTTGGATCTGATTTTACTACAAAAATATGATCAG  
CGTTCATTAATGGAATGCTTTCTTTAGATGTAAGTTGGATAATATCTTTACCATTATCAACTTGTTTTTGAAGTCTTTATTACGTTTG  
AATCCTAAATCATTTAAGATTTACCAGCATATCCACCAGCATAAATCTTGTATGATCAGCAGGAAGTTAACTGCAAGCTTTC  
AATGCCCATGCATCTTTATACCTTTGCTTTTGCATCTTTTGAATGTCAGTACTTTATCATCGTACTTTTAAAGTAAATCTTCAGCTTC  
TTTTCTTTCCCTAAAGCTTTCCCATTAACCTTAGTTGTATCTTTGAATTTGAAAACTGTATCAGTAAAACTGTTGGTGCAATTTTGA  
ATAATTGATCGTAAACTTTTTTCGTTTCTAACTTTTGACGCGACAATTAAGTCCGGTTTTAATTTAGAGATTTCTCTAAGTTAGGTGC  
AGGTTCTTGACCTACAATCTTAGTATCTTTTAAATCATTTTTTATGTATTCGAATTCGGTTTTTGTGTCCATGATTCTACAGCACCTA

CAGGTTTAAACACCTAAAGATACAGCGACGTCAGTGGCACCTTGATATAGCGTAACAACACGCTTTGGTTTCCCTTTAATTTTCAGTTG  
TACCCATTGCATGTTTAATTGAAGTTGTTTCCCTTATCTTTGTTATCAGATGATTGCTTATTTGAATTTCTCACTACATCCTGCTAAAAACA  
AGTAGGAAAAGCAAGCGTAACAACAAGCATTTTAATTACTTTATTCATTGACTAATTAGCCTCCTTCGTGATGTATGACAATGAGAAT  
CATTATCACGGTTTAGTATGAATTAATTTTTTTCCTAAGTCAATAAAATATTTATGATTTACATGCAACTTATAATTTATTTGACATAT  
AAATGCATAAAAAATATAATCCTAATTACTTGATAGTGAGAATCATTATCAATTAGGTAACACACAATATTATAGAATTTTAAATTT  
GAGGAGGAAGCGCTTTTGATTGAAAAAAGTCAAGCATGTACAGATTCAATTGTTAGATTCTGTAGGGCAAAACACCTATGGTTCAACTT  
CATCAACTATTTCCGAAAACATGAAGTGTTTGCAAAGTTAGAGTATATGAATCCTGGAGGCAGCATGAAAAGATCGACCTGCCAAGTA  
CATCATTGAACATGGTATTAACATGGTTTAATCACTGAGAATACACATTTAATTGAAAGTACTTCTGGTAATTTAGGCATTGCGTT  
GGCAATGATATCTAAAATCAAGGGATTAAACTCACGTGTGTGTTGATCCTAAAAATATCACCACAAATTTGAAAAATTATTA  
GTTATGGTGCCAATGTAGAAATGGTTGAAGAACCTGATGCACATGGGGGTTATTTAATGACTCGTATTGCAAAGGTGCAAGAAATG  
TTAGCCACTATTGACGATGCATATTGGATTAATCAATATGCGAATGAGTTAAATTTGGCAATCCCATTATCATGGTGCAGGCACAGAG  
ATTTGTTGAAACAATTAAGCAACCTATAGATTATTTTGTGCGCCAGTCAGCACGACAGGTAGCATTATGGGTATGAGTAGAAAAAT  
AAAAGAAGTGCATCCAAACGCACAAAATTGTTGCTGTTGATGCGAAAGGGTCAGTCATTTTGGTGACAAACCTATTAATAGAGAAT  
TACCTGGTATCGGTGCTAGTCGTGTACCCGAAATATTGAATAGATCAGAAATTAATCAAGTGATCCATGTAGATGATTATCAATCTG  
CTTTGGGCTGTGCAAACTGATTGATTATGAAGGCATATTTGCCGGAGGTTCAACAGGCTCGATTATTGCAGCGATTGAGCAGTTGA  
TAACGTCAATTGAAGAAGGTGCAACAATTGTCACGATTTTACCAGATCGAGGCGATCGTTACTTAGATTTAGTTTATTTCAGATACAT  
GGTTAGAAAAAATGAAATCAAGACAAGGAGTTAAATCAGAATGAATAGAGAGATGTTGATTTAAATAGATCAGATATTGAACAA  
GCGGGAGGTAATCATTCACAAGTTTATGTGGACGATTAACAGAGAAGCATTAAACAGCCATGCGCACAATGATTTTGTACAACCGCTT  
AAGCCGTATTTAAGACAGGATCCTGAAAATGGACACATCGCAGATCGAATTAATTGCAATGCCAAGTCATATCGGTGGTGAACACGC  
AATTTTCAGGTATTAAGTGATAGGTAGTAAGCACGACAATCCATCGAAACGTAATATGGAGCGTGCAAGTGGTGTCTATTATTTTGA  
ATGATCCAGAAACGAATTATCCAATTGCAGTTATGGAAGCAAGTTTAATTAGTAGTATGCGTACTGCAGCAGTTTCAGTGATTGCAG  
CTAAGCATTGCGCTAAAAAAGGATTTAAAGACTTAACAATCATTGGATGCGGGCTAATCGGAGACAAGCAATTACAAAAGTATGTTA  
GAGCAATTCGATCATATTGAACGCGTGTGTTGTTTACGATCAATTCCTGAAAGCATGTGCACGCTTTGTTGATAGATGGCAACAACAG  
CGTCCGGAATTAATTTTATTGCGACAGAAAATGCTAAAGAAGCAGTATCAAATGGTGAAAGTAGTCATTACATGTACCGTAACGGA  
TCAACCATACATTGAATATGATTGGTTACAAAAGGGTGCATTTATTAGCAACATTTCTATCATGGATGTGCATAAAGAAGTCTTTAT  
TAAAGCTGACAAAGTCGTAGTAGACTGGTCACAATGTAATCGAGAAAAAGAAAATATTAACCAATTGGTGTAGAAAGGTAAAT  
TCAGCAAAAGAAGCACTTCATGCTGAAGTACGACAACCTGTGACAGGTGACATACCAGGACGTGAAGACGATGATGAATCATATTA  
CTTAATCCGATGGGTATGGCTATCGAAGATATTTCAAGTGCTTACTTTATTTATCAACAGGCACAACAACAAAATATTGGGACAACA  
TTGAACCTATATTAAGAATGCGAGGTGTCTGAACATTGCAGAATCATACAGCAGTCAATACAGCACAAACGATAATATTAAGAGAT  
TTAGTTGATGCATTATTATTTGAAGATATAGCCGGTATTGTATCGAATAGTGAGATTACTAAAGAAAATGGACAAACCATTTTGATA  
TACAAACGTGAAACACAGCAAAATAAGATACCTGTTATTTTATGTGCTTTAAATATGTTTCGTTATGAAAGTTCACAACCAATTACG  
ATAGAGGGAAGGCTGTCTAAGCAACCTTTAACGGCAGCTGAATTTGGCAAACAATTGCTAATATGAATTGTGATTTAAGTCATGA  
ATGGGAAGTGGCTCGCGTTGAAGAAGGACTGACTACTGCTGCCACACAGCTTGCTAAACAATTATCAGAATTAGATTTAGCGTCAC  
ATCCTTTTGTGATGTGAGCAGTGTGCAAGTTTAAAGATCGTCCATTTTCATCCATTAGCTAAAGAAAAAGAGGATTAAAGAGA  
GTGGATTATCAAGTGTATCAAGCTGAATTAATATCAATCTTCTTTAATGGTTGACGAGTAAAGAGACACATATGATTCTATGGC  
GATACTGCAAAATATCGATGAATTAGAAAATTTGACAGCACCTATAAAAAAGAACAGCGACAGACATGTTAAATGATCAAGGGTTATC  
AATAGATGACTATGTACTATTTCCAGTACATCCTTGGAATATCAGCATATTCTGCCGAACGTCTTTGCGAAAGAGATTAGTAAAA  
GTTGGTTGTACTATTACCGTTAAAAATTTGGAGATTATCTGTGCTCTTCAAGTATGCGTTTCAATTTGATATTGGCGCACCGTATAAC  
CATGTCAAAGTACCATTGTCAATGCAGTCATTAGGCGCATTAAAGGCTAACGCCCTACGCGTTACATGAAAAACGGAGAACAAGCAGA  
ACAATTATTACGTACGTTATAGAAAAAGATGAAGCACTAGCTAAGTATGTCATGGTTTGTGATGAAACAGCTTGGTGGTCATATAT  
GGGTCAAGATAATGATATTTTCAAAGATCAATTAGGTCATCTAAGTGTTCAGCTAAGAAAAATATCCCGAAGTGCTAGCCAAAAATG  
ATACGCAACAGCTAGTGCAATGGCAGCACTCGCGCAAAATGATCGCACTTTATATCAAAATGATTTGTGGAAGAGATAATATTTCTA  
AAAATGATGTATGACGTTATTTGAAGATATCGCACCAAGTCTTTTAAAGGTAAACAGTATCATTTATGCAATACGGCGCATTTACCA  
AGTTGCATGGTCAAAATATATTGTTGTCATTTGAAGATGGACGTGTACAAAAATGCGTGTACGTGATCATGATACTGTCAGAAATTT  
ATAAACCATGGCTAACAGCACATCAGCTTTCATTGCCGAAGTATGTCGTCAGAGAAGATACACCTAATACGCTAATTAATGAAGAT  
TTGGAACATCTTTTGCTTATTTTCAAACATTAGCTGTATCGGTAAATCTATATGCCATTATTGATGCAATTCAAGATTTATTTGGTG  
TAAGTGAGCATGAACCTATGTGCTGTTGTTAAAAACAAATTTTAAAAAATGAAGTGGCAACTATTTCTGGGTTATAACTGATCAGCTAG  
CTATCAGACACATTTTATTTGATAAACAGACGTGGCCATTCAAACAAATTTTATTACCATTGCTATATCAACGTGATAGTGGTGGAG  
GTAGTATGCCTTCAGGTTTAACTACCGTACCAAAATCCAATGGTGACATATGATTAATCAGTCTATATGGCGCAGTAACCTTTCGCATTT  
TATGGCTCAGTCAGTTTATAGCGATTGCTGGACTGACAGTACTTGTGCCATTATTGGCAATTTATATGGCATCACTACAAAAATCTATC  
AGTCTAGAAAATACAGTTGTGGAGTGGTATAGCGATTGCTGCTCAGCTGTAACGACGATGATAGCTTCGCGCATATGGGGCAAGC  
TAGGTGATAAGATGACGCGCAAAATGGATGGTGTAAAGAGCGTTACTTGGTTGGCGGTATGCTTATTTTAAATGGCATGTGTACGA  
CACCATTACAGTTTGTACTTGTGAGGTTATTGACAGGGACTATTTGGTGGTGTGTTGATGCATCAAGTGCCTTTGCGAGTGCAGAGG  
CGCCAGCTGAAGATCGTGGAAGGTATTAGGAAGACTGCAAGTTTCAGTCAGCGCAGGGTCTCTTGTGGGGCCATTAATTGGCGGT  
GTTACAGCTTCGATATTAGGTTTATAGTGCCTTACTGATGAGTATTGCCGTTATTACTTTTATTGTCTGTATTTTCGGTGCATTAATAAT  
GATTGAAACGACACATATGCCAAAAATCACAACACCAAAATATTAATAAAGGTATTGCGCGTTCAATTCAATGTCTATTATGCACACA  
ACAAACATGTGCTGATTTATTATCGTTGGCGTTTTAGCAAACTTTGCTATGTATGGCATGCTAAGTGCATTATCACCACCTTGCTTCATCA  
GTGAATCATACAGCGATAGATGACCGTAGTGTGATTGGATTTTTACAGTCCGCAATTTTGGACGGCTTCGATATTAAGCGCGCCTTTA  
TGGGGACGCTTTAATGATAAATCATATGTTAAATCAGTATATATATTGGCCAGATTGCATGTGGTTGTAGTGCATGATGCAAGGT  
TTAGCGCAGAAATATGATGTTTAAATGGCTGCAAGAATATCTAAGGATTAACATATAGTGCATTTGATCAAGAGTGTCTAGTTGTT  
GTCGTGAATGCGTGTATCAACAACCTTAAAGGCACATTTGTTGGAACGACGAACAGTATGTTAGTTGTTGGTCAAATATTGGCAGT  
CTTAGTGGCGCTGCCATTACAAGTTTACTACACCAGTACTACGTTTATTGTTATGGGCGTAGTATTTGCAGTAAGTAGTTTATTTT  
TAATTTGTTCAACCATCACTAATCAAAATCAACGATCACACATTAATGAAATATATGGGAGTTGAAACAAAAAGTGCAAAATAAAGA  
ATTAATACAACATGCAGCGTATGCGGCTATCGAACGCATTTTAAATGAATATTTTAGAGAAGAAAAATTTATATCAAGTACCACCTCA  
AAATCATCAATGGTCTATACAATTATCAGAGCTCGAACTTTAACGGGTGAATTTGCTATTGGTCTGCGATGGGGCATCATATGTA  
TCATCCAGAGGTATGGCTTATCGATGGAAAAAGTAAAAAATAACAACCTTATAAAGAAGCAATTGCGCGTATTTTGCAACATATGG  
CTCAAAATTCAGATAATCAAAACGGCAGTGCAACAACATATGGCGCAAAATATGTCTGACATCGATAATAGCATTCATCGCACGGCG  
CGTTATTTGCAAGTAACAAATAGACTACACAGAAGATCGTATATCGTTTCAGAACATTTCTATACCTTAGGTCATCCATTTTCATC  
CGACTCCTAAGAGTGCAAGTGGGTTTTCAAAAAGCAGATTAGAGAAATATGCACCCGAATGTATACATCATTCATTCCAATTGCATTATT  
TAGCTGTGCATAAAGATGTTCTGCTCACGCGCTATGTAGAAGGTAAAGAAGATCAGGTTGAGAAAGTGTGTATCAATTAGCAGAT  
ATAGACATATCAGAGATACCCAAAGATTTTATTTTATTACCAATACATCCTTATCAAAATCAATGTGTTGCGACAGCATCCACAGTAT

ATGCAATATAGTGAACAAGGTTTAATAAAAAGACCTTGGCATTTCGGTGATTACAGTGACCCGACGCTCTTCGGTTAGAAGTGTATTT  
TCAAAAAGCATTAAACATTTATTTAAAAATTACCGATACACGTTAAAAATTACTAATTTTATACGTACGAATGATCTTGAACAGATTGAA  
CGGACAATCGATGCCGCGCAAGTTATTGCATCAGTCAAAGATGAGGTTGAAACACCCCATTTTAAATTGATGTTTGAAGAAGGATA  
TCGTGCATTGTTACCGAATCCGTTAGGGCAAACAGTTGAACCTGAAATGGATTATTAACAAATAGTGCCATGATTGTTTCGTGAAGG  
GATACCGAATTACCATGCTGATAAAGATATTCATGTATTGGCGTCATTATTTGAAACGATGCCTGATTACCGACCTCTAAGTTATC  
ACAAGTGATTGAGCAAAGTGGTTTAGCACCAGAAGCATGGCTTGAATGTTATTTGGATCGTACATTATTGCCGATATTAAAGCTGTT  
TAGTAACACAGGCATTAGTCTAGAAGCACATGTACAAAATACATTAATTGAATTTAAAGATGGCATAACCCGACGTGTGCTATGTCA  
GAGATTTAGAAGGCATTTGTCTATCTAGAACGATTGCTACTGAAAAACAGCTTGTGCCAAATGTTGTGGCAGCATCAAGCCCTGTTG  
TATATGCACATGATGAAGCATGGCATCGTCTTAAATATTACGTTGTAGTAAATCACTTAGGACATTTAGTATCAACTATTGGTAAAG  
CGACTAGAAATGAAGTTGTATTATGGCAAATTTGTAGCGCATCGTCTTATGACATGGAAAAAAGAATACCGGAATAACGCAGTATTT  
GTTGACTGTGTAGAAGATTTATATCAAACGCCGACCATTGCGGCTAAAGCGAATTTGATGAGTAAATGAATGATTGTGGTGCAAA  
CCCTATTTATACACATATACCAAATCCAATTTGTCATAACAAGGAGGTATCGTATTGTGAATCAAACAATTTCTTAATCGTGTAAGA  
CTAGAGTGATGCACCAACTGGTATCATCACTTATTTATGAGAATATTGTTGTGTATAAAGCGTCATATCAAGACGGGTGTCGGTCATT  
TTACAATAGAAGGACATGATTACAGAGTATCGTTTTACTGCTGAAAAGACACATAGCTTTGATCGTATACGTATCACATCACCATTG  
AGCGTGTCGTAGGAGATGAGGCAGATACAACAACAGACTATACACAATTATTGAGAGAGGCTGTATTTACATTTCTAAAAATGAT  
GAAAAGCTAGAACAATTTATTGTTGAGTTATTACAGACAGAATTTAAAGATACACAAAGTATGCAGTATCGAGAATCAAACCCACC  
AGCAACACCTGAGACATTTAACGACTATGAATTTTATGCGATGGAAGGGCATCAGTATCATCCAAGTTACAAATCACGTTTAGGATT  
TACGTTGAGTGATAATTTGAAATTTGGTCCTGATTTGTACCAAACATTAACCTGCAGTGGTTAGCTATCGACAAAGGTAAGTAA  
AACCGCGGTATCAAGAAATGTTGTAGTTAACGAAATGTTACGTTCAACAAGTTGGCGATAAGACTTATGAACATTTTGTACAGCAA  
TTGAAGCGTCTGGCAAACATGTAAATGATGTTGAGATGATACCTGTACACCCATGGCAGTTTGAACATGTCATCCAAGTTGATTGG  
CTGAAGAAAAGGCTTAATGGCACAGTACTATGGTTAGGGGAAAGTGATGAGCTATATCACCTCAACAATCGATTCTGACGATGTCG  
CCAATAGACACGACAAAATATTATTTAAAGGTACCAATAAGTATAACGAACACTTCAACGAAACGAGTGTTGGCGCCTCATACAAT  
TGAAAATGTCAGCGCAAATTACGGATTGGTTAAAGCAGATACAGCAACAAGATACGTATTTAAAGATGAATTAAGACAGCTTTTC  
TAGGGGAAGTCTTAGGACAGTCTTATTTAAATACACAACCTTTCGCCTTATAAACAACTCAAGTTTATGGTGCGTTAGGTGTTATAT  
GGCGTGAAAATATATATCACATGTTAATCGATGAAGAGGATGCGATACCATTTAATGCATTTATGCAAGTGATAAGGATGGTGTA  
CCATTCATTAATAAATTTGGATTAAACAATATGGTTCTGAAGCTTGGACAAGCAATTTTAGCTGTAGCGATTCTGTCGAATGATTCAT  
ATGCTTTATTATCACGGTATTGCTTTGAATCGCATGCACAAAATATGATGCTCATTCATGAAAATGGTTGGCCTACACGATTGGCCT  
TAAAAGATTTCCATGATGGTGTTCTGTTTAAAGCGTGAGCATTTAAGTGAAGCTGCTTCACACCTGACATTAAAGCCAATGCCAGAAG  
CACATAAAAAAGTGAATAGTAATTCATTTATTGAAACAGATGACGAACGTTTAGTACGCGACTTTTTACACGATGCATTTTTCTTTA  
TTAATATCGCCGAAATCATCTTATTTATTGAAAAGCAATATGGTATCGATGAGCAGCGACAATGGCAATGGGTAAAGGCATCATC  
GAGGCGTATCAAGAAGCATTTCAGAGTTGAATAACTATCAACATTTTCGATTGTGTTGAACCTACGATTCAAGTTGAAAAGTTAAACG  
ACACGTGCGATTATTAAGTGACTCCGAGTTAAGAATTCATCATGTTACAAATCCATTAGGTGTAGGAGGTATCAATGATGCAACAAC  
ATCTCTGAAACATAGATTAAACAATGGTGATTACGTTTATGGCATTTTAATTCATACCCGACCCATTGATGATCGAGGTTATCGC  
AGCAAGCGGGTATGACTTTGTTGTGATTGATACAGAACACGTGGCGATTAAATGATGAGACACTAGCGCATTTAATTCGTGACGCTG  
AAGCAGCGCATATTATACCAATTTGACGTGTCACGTGATGATAGATAGATATCATTAAAGTGTGGATGATTGGGTGCGGAGGTT  
ATTATTGTGCCACACGTTAAAGATCGTGAGACAGTTGAGCATATTGTGAAATTAAGTCGTTATTACCCGCAAGGATTAAGAAGTTTG  
AATGGTGGTCGATGGCAAGATTTGGACGTACACCATTACTTGATGCAATGGAGATGGCTAATGAGCATATTATGGTGATTGCCATG  
ATAGAAGATGTTGAAGGGGTTATGGCCATTGACGATATAGCTCAAGTCGAAGGTTTAGACATGATAGTCGAAGGTGCCGAGATTT  
ATCGCAGTCACTTGGCATACCATGGCAAACGCGTGATGATCAAGTAACATCACATGTTCAACATATTTTGAAGTTGTGAATGCACA  
TGGTAAACATTTTGTGCATTACCACGTGAAGATGAAGATATTGCAAAATGGCAGGCACAAGGTGTACAAACATTTATTTTAGGTGA  
TGATCGCGGAAAAATATATCGCCATTTAAGTGCATCTCTAGCGACGCTTAAACAGAAAGGGGATGAAGGCTAATGCGTATAGTTCA  
ACCTGTTATTGAACAATTTAAAGCACAAATCTCATCCAGTTTGTCTATTATCTATGATTTAGTCGGACTGGAACATCATTGCAACAT  
ATTACATCGTCATTGCCCAGTAATTGTCAAATGTACTATGTACATGAAGCAATAGTGAACGAAAAATCCATAGATACAATTAGTCA  
GTATGTTGAAGGATTCGAAGTTGCATCTCAAGGTGAAATAGCAAAAGGTCCTTGCTTTTAAACCAGCAAAATCATATTATTTTGGTGG  
CCCTGGTAAGACAGACGAGGAACTAAGATATGCAGTAAGTGAAGGTGTTACAGCGTATTCATGTTGAAAGTATGCATGAATTACAAC  
GGCTAAATGCCATCTTAGAACATGAAGATAAGACACAACACATTTTATTGCGTGTTAATTTAGCAGGACCATTTCCTAATGCAACGT  
TGCATATGGCAGGACGCCAACACAATTTGGTATTTCTGAAGACGAAGTTGATGATGTCATTGAAGCTGCGCTCGCAATGCCAAAG  
ATTCATCTAGATGGATTCATTTTCATTCTATTTCTAACAATTTAGACTCGAATTTACATGTCGATGTAGTGAAACTTTATTTTAAAA  
AAGCAAAGGCATGGTCTGAAAAACATCGATTTCCTCAACATATCAATCTTGGTGGTGGCATAGGCGTTAACTATGCAGATTTA  
ACTAACCAATTTGAATGGGATAATTTTGTAGAAAATTTTAAAAACACTTATCGTTGAGCAAGAAATGGAAGATGTGACATTGAACTTT  
GAATGTGGGCGCTTTATTGTGGCACATATTGGTTACTATGTGACAGAAGTGCTAGATATTAAGAAAGTCATGGTGCTTTGGTATGCC  
ATTTTAAGGAGGAGTACGCAACAATTTAGACTGCCGATCTTGGCAGCATTAACCATCCTTTTGAATTTATCGTTATTAAGGACAAT  
CCATATTCTATTGAAAAAGTTTCAATTTTCGAGACAGGACACAACGTTAGTCGGTCAATTATGTACACCGAAAGATGTCTTTGTAGA  
GAAGTGCAGATAGACTCAATCAGTACAGGCGACGTTATTGTTTTCAAATATGCAGGTGCATACGGATGGTCTATTTACATCACCGAT  
TTCTTAAGCCATCCACATCCTGAATTTATTTATTTAACGCAAAACAAGGAGGATGAATAACTATTGAATCATATTCATGAACATTTA  
AAATTGGTACCAGTAGATAAGATTGATCTTCACGAAACATTCGAACCTTTAAGATTGGAAAAGACGAAAAGTAGTATTGAAGCAGA  
TGATTTTATACGTCATCCTATTTTAGTGACAGCGATGCAACATGGTAGATATATGGTTATAGATGGTGTGCATCGGTATACAAGTTT  
GAAAGCGTTAGGATGTAAGAAAGTTCCAGTGCAAGAAATCCATGAAACACAATATTCAATTAGTACATGGCAACATAAAGTTCCAT  
TTGGTGTGTGGTGGGAAACGTTACAACAAGAACATCGTTGCCATGGACTAGAGACAAGACAAGAGCCGCTTTATTACGATG  
TGTCATGGTGATACAGAACAAATTTGTATACAAAAGCTTAGGCGAAGACATTTTCAAGTATGGGAAAAGGTTGTCGCAAGTTA  
TAGTGGTTGTTGTTCTGTAGAGAGAATTGCACAAGGTACATATCCTTGCTTTTCTCAACAAGATGTACTCATGAAGTATCAGCCATT  
GAGTTATAAGGAAATTTGAAGCGGTTGTTTCATAAAGGGGAAACTGTGCCAGCAGGTGTGACACGCTTTAATATTTACAGGACGATGTC  
TTAATCTTCAAGTACCACTGGCATTACTTAAACAAGATGATGATGTTGAACAACCTGCGCAATTGGAAGCAGTTTTTAGCAGATAAGT  
TTGCCAATATGAGATGCTATACTGAAAAAGTATACTTGGTGGAGCAATAGTTTTACTGTGATGTTGAGGGAAATATGATGATTTAGC  
GTATTGATAGCGAAAAATATAATAAAACAATATAGTGTGGAGAACTTTTGATATTTTATAAATATTGAAGTTCTCCATTTTGTATTT  
GCATATAAAAAATTAATAAAAAAAGGTATATTAAGGTAAAGTATAAATTTTAAATAAATGGGGAATGAGTATGAGCTCAATTTATAG  
GAAAAATAGCAATTTGGATAGGCATCTAGCTCAAATATATTTAGTGTGCTTTTGTAGGATGATATCTATTAATATTGCTGGAG  
GATCTATTACGAATAATTTTTATTAGGATTAATATTGGCTCTTTTCACTGTTTTTACCAACCATCTTACTGCGATTTATGATGGAA  
AGTTACTCTGTAATCGGAGGTTGCATTTTTATTGTTTATGTCTATTATGCACTGTGTTTATATAATTTCCTTTCGTCAATTTTATGGCT  
GATTTGGTGGTATTTTGTGATTTTGAATAAATACTCAAAAAGATGAATCGACAGACGAAAATGAAAAGTTGATATTGAAAGTACAG  
AGAATCAATTTGAATCTAAAGATAAAATCACTAAAGAATAAAGAGAATATTTAAGGCGGAGTATAAATATTAATAAATGGGGAA

TAGACATGGAAAAAATGTAGAAAAATCATTTCATAAAGATAGGTTTATATTTTCAAATAGCTTATATAGTACTCATGGCTATAACTT  
TATGTGGGTTTGTAAATTTGCTATGGACTAATTTTCGGCCTTTTCTATTATTATCAGGTAGCAAAGTTGATTATTTAAATAGTAACAAT  
AGTTATATCGGCAATAATTTCTATATTTGTAATTATACTTTCAATCGTACCTGTCTATCGTATTGGCATCTGACTTATTTAAAGAAAGG  
ATTTCAAAGGTGTCATATTAATTTGATTGGCTATTATTGCTTTAGTATTATGCAACTTTGTATCTGCAATACTCTGGTTTGTTCAGC  
CATATCTATTTTAGGTAGAAAAAATTAGTAGCTGCAGCAGATACTACCACTATTCAAAAAAGTAAAGGGAACGCAAAATCAAGCAT  
CACATAAAGACACGTGTAAAAAGGAACCTTGATAGTCAAGACATGATGGAACATCCTGAGGTTAAAAATCCCACGACTAAAAACCTT  
GAAGGATTTAACGAAGAAATACATAAAGATGAAGCTACAACATAAAGTTGTCAAGTATAACACGGAAACCGCCGATTGAATCAAAAAG  
ACCATGTCTCGAAAAAAGATTGATGACAACTAATCGAGAGACTTAAAAAATAATATTCACATAAGAACTTTTAAACGACATT  
TAAACGCATTGCCAATCACTAATGGTAGTGCCTTAACTATACCTTAAATATCTGAATATTTGTAAATGGAGCTACCTTTGTTGTA  
CTATTCAAAATGAAGAGGAGTAAAAATGTAATTAAGGAAAGAAATTTGAGGAGTGATCTTTATGACAAACAACAAAGTAGCATTAGT  
AACTGGCGGAGCACAAGGGATTGGTTTTAAAAATTGCAGAACGTTTGTGGAAGATGGTTTCAAAGTAGCAGTTGTTGATTTCATG  
AAGAAGGGGCAAAAGCAGCTGCACCTAAATTATCAAGTGATGGTACAAAAGCTATTGCTATCAAAGCAGATGTATCAAACCGTGAT  
GATGTATTTAACGCAGTAAGACAACTGCCGCGCAATTTGGCGATTTCATGTCTATGGTTAACAAATGCCGGCCTTGGACCAACAACA  
CCAATCGATACAATTACTGAAGAACAGTTTAAACAGTATATGGCGTGAACGTTGCAGGTGTGCTATGGGGTATTCAAGCCGCACA  
TGAACAATTTAAAAAATTCAATCATGGCGGTAAAAATTATCAATGCAACATCTCAAGCAGGCGTTGAGGGTAAACCCAGGCTTGCTTTT  
ATATTGCAGTACAAAATTCGAGTGCGAGGTTTAAACACAAGTAGCCGCACAAGATTTAGCGTCTGAAGGTATTACTGTGAATGCATT  
CGCACCTGGTATCGTTCAAACACCAATGATGGAAAGTATCGCAGTGGCAACAGCCGAAGAAGCAGGTAACCTGAAGCATGGGGT  
TGGGAACAATTTACAAGTCAGATTGCTTTGGGCAGATTGTTCTACAGCAAGATGTTTCAAATGTAGTGAGCTTCTTAGCTGGTAAA  
GACTCTGATTACTTACTGGACAAACAATTATTGTAGATGGTGGTATGAGATTCCGTTAAATAATCATCCACTAATGATAAAATCAATC  
CTTATTGTTAAGTTTAATCACTTAGCAGTAAGGATTTTTTGTGCACTTAGAAGGGGGTGTATTGGTAGAAAAATTAATAAGCGAAGT  
TCTTAAGTGAGTTATGATGTCACAGTCTAATGCATCAGTTGAAAGCATTATTAGTATTAACACACCCAAGATATTATAAACATCAC  
AAAAACACCACTATCTAATTTATCTCAATAAAAAATTCACAAAGTTATCTCATTTTTATTTTATAAATAAAAAATATCGATAAAAAAGC  
TTACAATACTTTATGTTTTTATGATATATTTTTAATGTATAAATGAGGTGGAAGATTGGAAGAGTTTGTATAACTGGTGGGGCTGG  
TTTTATTGGGTGCGCATTTAGTAGATGATTTACAACAAGATTATGATGTTTATGTTCTAGATAACTATAGAACAGGTAAACGAGAAAA  
TATTAAGAGTTTGGCTGACGATCATGTGTTGAATTAGATATTCGTGAATATGATGCAGTTGAACAAATCATGAAGACATATCAATT  
TGATTATGTTATTCATTTAGCAGCATTAGTTAGTGTTGCTGAGTCGGTTGAGAAACCTATCTTATCTCAAGAAATAAACGTCGATGC  
AACATTAAGATTGTTAGAAATCATTAAAAAATATAATAGTCAATATAAAACGTTTATCTTTGCTTCGTCAGCAGCTGTTATGGTGAT  
CTTCCTGATTTCCTAAAAGTGATCAATCATTAACTTACCATTATCACCATATGCAATAGATAAAATATTACGGCGAACGGACGACA  
TTAAATATTGTTTCGTTATATAACATACCAACAGCGGTTGTTAAATTTTTTAAATGTATTGCGCAAGACAGGATCCTAAGTCACAAT  
ATTCAGGTGTGATTTCAAAGATGTTTCGATTCAATTGAGCATAACAAGCCATTTACATTTTTTGGTGACGGACTGCAAACTAGAGATT  
TTGTATATGATATGATGTTGTTCAATCTGTACGCTTAATTATGGAACACAAAGATGCAATTGGACACGGTTATAACATTGGTACAG  
GCATTTTACTAATTTATTAGAGGTTTATCGTATTATTGGTGAATTATATGGAAAAATCAGTCGAGCATGAATTTAAAGAAGCACGAA  
AAGGAGATATTAAGCATTTCTTATGCAGATATTTCTAACTTAAAGGCATTAGGATTTGTTTCCTAAATATACAGTAGAAACAGGTTTAA  
AGGATTACTTTAATTTTGGAGTAGATAATATTGAAGAAGTTACAGCTAAGAAGTGGAATGTCGTGAAAAATGACATTTGAAGCTGT  
CCATAATAAAGGTTATGCTATCAAAAGAAATTAGACAAACTAGAAGAAGTGAGAAAAAGCTTATTACCAATTTAAACGTCGCG  
ATTGACTTAATTTAAGCATTGTTTTATTATTTTTAACTTTACCGATTATGGTTATATTCGCCATTGCTATCGTCATAGATTGCCCAGG  
AAACCCTATTTATAGTCAGGTTAGAGTTGGGAAGATGGGTAAATTAATTAATAATACAAATTACGTTTCGATGTGCAAAAAACGCAG  
AGAAAAACGGTGCGCAATGGGCTGATAAAGATGATGATCGTATAACAAATGTCGGGAAGTTTATTCGTAAAACACGCATTGATGAA  
TTACCACAATAATTAATGTTGTTAAAGGGGAAATGAGTTTATTGGACCACGCCCGGAACGTCGGGAATTTGTAGAATTATTTAGT  
TCAGAAGTGATAGGTTTCGAGCAAAAGATGCTTGTTACACCAGGGTTAACAGGACTTGCGCAAAATCAAGGTGGATATGACTTAAC  
ACCGCAACAAAAAAGTAAATATGACATGAAATATATACATAAAGGTAGTTTAAATGATGGAACCTATATATATCAATTAGAACATTGA  
TGGTTGTTATTACAGGGGAAGGCTCAAGGTAGTCTTAATTTACTTAAATAGTTCAAATAAAAGTTATATTTTAAAGATTGTGACCAA  
TTGTTACAGTATAACGAGGAATCCCTTGAGACAGTATCAAAATGGCATTAGAATAAGAAATATGTGCCATCATTTGCTATGGCTATAAAT  
ACTATTATCTGATGAGATAGCCATGTTAAGAAATTGAAGTATAGCATTAAAGGGGTTTGTAAACAGTTGAAAATTATATATTGTAT  
TACTAAAGCAGACAATGGTGGTGCACAAACACATCTCATTCAACTTGCCAACCATTTTTGCGTACACCATGATGTTTATGTCATTGT  
AGGCAATCGTGGACCAATGATTGAACAACCTAGATGCAAGAGTTAATGTAATTATCTCGAACATTTAGTAGGTCCAATTGACTTTAA  
ACAAGATATTTAGCTGTCAAAGTGTTAGCACAGTTATTCTCGAAAATTAAGCCTGATGTTATCCATTTACATTCTCTAAAGCTGGA  
ACGGTTCGGACGAATTGCGAAGTTCATTTCGAAATCGAAAGACACACGTGTAGTTTACTGCGCATGGATGGGCTTTTACAGAGGGT  
GTTAAACCAGCTAAAAAATTTCTATATCTAGTTATCGAAAAATTAATGTCACGTATTACAGATAGCATTATTTGTGTTTCAGATTTCG  
ATAAACAGTTAGCGTTAAAAATATCGATTAAATCGATTGAAATTAACCACAATACATAATGGTATTGCGAGATGTTCCCGCTGTTAAGC  
AAACGCTAAAAAGCCAATCACATAACAATATTGGCGAAGTAGTTGGAATGTTGCCATAATAACAAGATTTACAGATTAATGACCCCG  
ACAAAGCATCAATTTGTTATGATTGCAAGATTGCTTATCCAAAATGCCACAAATCTAATCGCGCAATAGAGATATTGAAATTA  
CATAACAGTAATCATGCGCATTTTACATTTATAGGCGATGGACCTACATTAAATGATTGTCAGCAACAAGTTGTACAAGCTGGGTTA  
GAAAAATGATGTCACATTTTGGGCAATGTCATTAATGCGAGTCATTTATTATCACAATACGATACGTTTATTTTAAATAGTAAGCAT  
GAAGGTTTGCCAATTAGCATTATAGAAGCTATGGCTACAGGTTTGCCTGTTATAGCCAGTCATGTTGGCGGTATTTTCAAGATTAGTA  
GCTGATAATGGTATATGTATGATGAACAACCAACCCGAAACTATTGCTAAAGTCTTGAAAAATATTTAATAGACAGTGATTACAT  
CAAAATGAGTAATCAATCTAGAAAAAGTTATTTAGAATGTTTTACTGAGGAGAAAAATGATTAAAGAAGTGGAAGACGTTTATAATG  
GAAAAATCAACACAATAGTAAATTACTAACATTGTTACTTATCGGTTTACGCGTTTATTCAGCAATCTTCGGTTATTGCCGGTGTA  
ATGTTTCTATAGCTGATTTATCACATTAATAATTAGTTATTATTTACTGTTTTTCGCTAACCATTTTAAAGGCAAACTATTTTAA  
CAGTTTTTCATTATTTTGTATACATATCGTATGATTATTACGCTTTGTTGCTATTTTGTGATTGATTGATTATTTTACCGTTAAGGA  
AGTCTTGCATCTACAGTTAAATATGCATTTGTAGTCATTTATTTCTATTTAGGGATGATCATCTTAAAGTTAGGTAATAGCAAAAAA  
GTGATCGTTACCTCTTATATTATAAGCAGTGTGACTATAGGTCTATTTTGTATTATAGCTGGTTTGAACAAGTCCCTTTACTAATGA  
AATTGTTATATTTTGTGAAATACGTTCAAAGGATTAATGAATGACCCTAACTATTTTCGCGATGACACAGATTATTACATTGGTAC  
TTGCTTACAAGTATATTACATAATTACATATTCAGGTCCTTGATGTGGTATTTTGTATGGTCTTTAACTACAACGGGGTCTAAGAC  
TGCGTTTATCATATTAATCGTCTTAGCCATTTATTTCTTTATTAAGAAAGTTATTTAGTAGAAATGCGGTAAGTGTGTGAGTATGTTA  
GTGATTATGCTGATATTACTTTGTTTTACCTTTTATAATATCAACTACTATTTATTTCAATTAAGCGACCTTGATGCCTTACCGTCATT  
AGATCGAATTGGCGTCTATTTTGAAGAGGGGTTTGCATCATTAAATGATAGTGGATCTGAGCGAAGTGTGTATGGATAAATGCCAT  
TTCAGTAATTAATAATACATTAGGTTTGGTGTGGCTTAGTGGATTATGTACATATTGGCTCGCAAAATTAATGGTATTTTACTGTT  
GCCCATAAATACATATTTGCAAAATTTTGGCGAATGGGGCATTTTATTCGGTGCGTTATTTATCATATTTATGCTTTATTTACTGTTTGA  
ATTATTTAGATTTAACATTTCTGGGAAAAATGTAACAGCAATTGTTGTAATGTTGACGATGCTGATTTACTTTTTAACAGTATCATTT  
AATAACTCAAGATATGTCGCTTTTATTTTAGGAATTATCGTCTTTATTGTTCAATATGAAAAGATGGAAGGGATCGTAATGAAGAG

TGATTCTACTAAAAGAAAATATTATTTATCAAGGGCTATACCAATTGATTAGAACGATGACACCACTGATTACAATACCCATTATTTCC  
ACGTGCATTTGGTCCCAAGTGGTGTGGGTATTGTTTCATTTTCTTCAATATCGTGCAATACTTTTTGATGATTGCAAGTGTGGCGTTC  
AGTTATATTTTAATAGAGTTATCGCGAAGTCCGTTAACGACAAAACGGCAATTGTACACAGCAGTTTTGGGATATCTTTGTCAGTAAAT  
TATTTTTAGCGTTAACAGTTTTTGGCATGTATATGGTCGAATTACTATATTTATTGATGATTACTATCTTATTTTCTACTACAAGGA  
ATCTATATTATAGGTGCAGCACTCGATATTTTCATGGTTTTATGCTGGAAGTGAAGTTTAAAATTCCTAGCCTCAGTAATATTGTTG  
CGTCTGGTATTGTATTAAGTGTAGTTGTTATCTTTGTCAAAGATCAATCAGATTATCATTGTATGTATTACTATTGCTATTGTGACG  
GTATTAACCAATTACCTTTGTATTCTATTTAAACGATACATTAGCTTTGTTTCGGTTAATTGGATACACGCTCTGGCAATTGTTTT  
GTTTCGTCATTAGCATACTTATTACCAAAATGGACAGCTCAACTTATATACTAGTATTTCTTGGCTTGTCTTGGTTTTAGTAGGCACATA  
CCAACAAGTTGGTATCTTTTCTAACGCATTTAATATTTTAAACGGTCGCAATCATAATGATTAATACATTTGATCTTGTAATGATTCCG  
CGTATTACCAAAATGTCTATCCAGCAATCACATAGTTTAACTAAAACGTTAGCTAATAATATGAATATTCAATTGATATTAACAATA  
CCTATGGTCTTTGGTTTAAATTGCAATTATGCCATCATTTTATTTATGGTCTTTTGGTGAGGAATTCGCATCAACTGTCCATTGATGAC  
CATTTTAGCGTACTTGATTAATCATTCTTTAAATATGTTGATAAGCAGGCAATATTTATTAATAGTGAATAAAATAAGGTTATAT  
AATGCGTCAATTACTATTGGTGGGTAATGAATTTAGTATTATGTCTTGTTTGATATATTTTTATGGAATTTACGGTGCTGCTATTGC  
GCGTTAATTACAGAGTTTTTCTTGCTCATTGGCGATTATTGATATTACTAAAATCAATGTGAAGTTGAATATTGTAAGTACGATT  
CAATGTGTCAATTGCTGCCGTTATGATGTTTATTGTGCTTGGTGTGGTCAATCATTATTTGCCCCCTACAATGTACGCTACGCTGCTATT  
AATTGCGATTGGTATAGTAGTTTATCTTTTATTAATGATGACTATGAAAAATCAATACGTATGGCAAATATTGAGGCATCTTCGACA  
TAAACAATTTAAGTATCGGTAACGCTATACTTTAGAAATTTAAGATTAGAAGAAAAAGGCAATTTCTTATTGAAAAATGGAAGTT  
GTCTTTTTTAATCTCTTTAAAGCGGGAACAAAAGCAGTTAAATGCCTTTTTGCATTCAATATTAAGTATTATATCAATTTTGAATA  
TTTAAATTTTATATAAATTGGATATAACAAATAAATAAATAATTGCAAAAACACCCGAAATTAATATTATAAAAGTATATTTCAT  
AAAAGGAGGAATATACTTATGGCATTTAAATTACCAAAATTTACCATATGCATATGATGCATTGGAACCATATATAGATCAAAGAAC  
AATGGAGTTTCATCAGCAACACATCACAAATACGTACGTGACGAAATTAACGCAACAGTTGAAGGAACAGAGTTAGAGCATCAAT  
CATTAGCGGATATGATTGCTAACTTAGACAAGGTACCGGAAGCGATGAGGATGTGAGTCCGTAATAATGGCGGTGGTCAATTTAAC  
CATTCATTATTCTGGGAAATACTATCACCTAATTCTGAAGAAAAAGGTGGCGTAATAGATGACATCAAAGCGCAGTGGGGCACTTT  
AGATGAATTTAAAAATGAATTTGCAAATAAAGCAACAACATTATTTGGATCAGGTTGGACTTGGTTAGTTGTTAATGATGGCAAAT  
AGAAATTGTGACAACGCCAAACCAAGATAATCCATTAAACAGAAGGCAAAACACCAATCTTACTATTGATGTTTGGGAGCATGCC  
ACTATCTGAAATATCAAAAATAACGTCCAGACTATATGACTGCATTTTGGAAATATTGTTAACTGGAAAAAAGTTGATGAATTAACC  
AAGCAGCAAAATAATATAACATAATATAAATTGAGGTGGAGCATCTACAAGGTGTTCCACTTTTTGTACTTAATATCTTTACTTATTT  
GTTTTTGTGTAATGGGATAGCACGTAAAAAGTGGCAAAAATAAAGATAAAATTTCAAACCTCGAAATACCTTATTATTGTTGACTAAAA  
CGATGACTTAAATGTTATATACATTAGACAACACTATTAATTAATCAAGATATTGTCATTAAATAAATTGACAAAAATAAGTAATTAT  
TATGAATCTAAAGTGAATTTTTATAAAAAATTGTAATGATTCAAAAATTTTGTGCTATTCTTTTGTAAATCATATGATAATGTAAAT  
GTAATCAAATTGTAATATAAGGGGAAAAGACAATGAAAAAATTAGCAACAGTAGGTTCTTAATTGTAACAAGCACTTTAGTATTC  
TCAAGTATGCCTTTTCAAATGCGCATGCCGACACAACCTCAATGAATGTGTCGAATAAACAAAGCCAAAAATGTACAAAATCATCG  
TCCTTATGGCGGAGTAGTACCACAAGGAATGACGCAAGCACAATATACTGAATTAGAGAAAGCTTTACCCCAATTAAAGCGCTGACA  
GTAATATGCAAGACTATAATGAATTTGATGATGCGCAGCAAAATTTGCTGATAAAATACAATGTGATAATTACAACATAATGTA  
GGGGTATTTAAACCACATGCTGTTAGAGATATGAATGGCCATGCGTTACCTTTAACAAAAGATGGCAATTTTTATCAAACGAATGTA  
GATGCAAATGGTATTAATCATGGTGGTAGTGAAATGGTGCAAAAATAAAACAGGTCATATGAGTCAACAAGGCCATATGAATCAGAA  
CACACACATGAACCAACAGCCACACATGCAACAAGGTCATATGCAATCATCAACCATCAAATGATGAGTCCAAAAGCAAAATATGC  
ATTCATCAAATCATCAAATGAACCAAAAGTAACAAAAAAGTTTTACCAGCTGCTGGTGAAAGTATGACATCAAGTATTCTTACTGCA  
AGTATTGCCGCACTACTATTAGTATCTGGGTATTCTTAGCATTTAGACGACGTTCAACAAATAAATAAACATAATACGATTAATAA  
TAGAAAAATCGTGTGATTATCTGAGCGAGCCTAGGACATAAATCAATGTCTTAGGCTCGCTAATGTTATATTGGCAGTAGTTGACTG  
AATGAAATTGCGCTTGTAAACAAGCTTTTCCATTTCTTGCTCACTTCCTAAATAGTCATCACAAAATTTCTTATATTTCAATAATTTTAA  
TAATCCGATTGTCTTATACGTGTCAGTGTTAATTCAGAGATTTCTGTGGAATATACCACTTATTAATCATAATTGGATAAGGTGTTT  
GTGCGTACAAATGTTCAATAATCAGCAACAATGTGATGTATCACCATCAACACGCTGACTATGATTTTTGAAGTGGGGCGCTTTGGTAA  
TAGACATTTTTAAATCTGATTGATGATGCTATTGTTATGAATCGTTTGCTCAACGAACGCTCTTCATGTGCTCTTCGTTTTGTGATTCACT  
TTAAATGTGTCAATGACATTTAACGGTATAAAGGTAAACAAAATGCATCAGCTTGCTTAGAATGATTGTCCTTTTTTTGATAATAG  
CGTTCCATTGCAATGACGGCAGAAGGATGGTTTGCAAACAAATGATTTGTATATTCATTTCTAAATCAACACGATAATTAATTGAT  
GACATAGATACGCGAGCTAGCAATATTTGATCAAGTGGATGCTTAAATTGATCCATACTTGAAGCGTGTGGGCATTGTTTGTGGA  
ATAACAAAGTGTCCCTTCCCTCTGTACTCTACGATGCCATCTTCGGCTAACAAATTTTATAGCTTGGCGCAAAGTCATGCGACTGA  
CATCAAAGCGCGCACAAAGTTCCTTTTCAGTAGGTAATGCATGGCCACTCGGATATTTTCTATTTGAATTTCTTTATATAACGTATT  
ATAAATCGTTAAAAATTTTGGTTGTGTTTGGCTCACGTAGACAACTCCATAAAGTTACTTAATCACTCTCATCATACAATAATTTTT  
ACTCGAATTGGAAAAATATAAAAAATTAATATAGATAGGCTTTGAAAAATTAGTTTTATACAAGGTTAGAAGCTATACTGTAAAA  
TGTTCTTAATATTGTCAAATGTAATGCTTGAAGCGCTTTTAAAAAATTATTATATACATGGTTAGACAAATGACAAATCACT  
ATACAAATATTGGGAGGAATATTTATGAAATCAACACCACACATTAACCAATGAATGACGTGCAAAATTGCAGAAACGGTTCTAT  
TGCCAGGAGATCCGTTAAGAGCTAAGTTTCAATGACAGAACTTATTTGGATGATGTGGAACAGTTCAATACAGTGCAGAACATGTTTG  
GTTTTACCGGAACATATAAAGGTAAAAAAGTTTCTGTCTATGGGTTCGGTATGGGTATGCCATCTATTGGCATTTACTCTTATGAATT  
AATTCATACATTTGGTTGTAAAAAATTAATTCGCGTTGGCTCTTGTGGCGCGATGCAAGAAAACATTGATTATATGATGTGATTATT  
GCACAAGGTGCCTCTACTGATTCAAATTACGTTCAACAATATCAATTACCAGGTCAATTTTGCGCCAATTGCTTCTTATCAATTATTAG  
AAAAAGCAGTTGAAACAGCACGTGACAAAGGTGTACGTATCATGTAGGTAATGTGTTATCAAGTGATATTTTCTATAACCGGGAT  
ACAACAGCGAGTGAACGTTGGATGCGTATGGGTATTTAGGTGTAGAAATGGAATCAGCTGCATTATACATGAATGCAATTTACGC  
TGGTGTCAAGCATTAAGTGTGTTTACAGTGAAGCATTTTAACTGAAACAGTCAACAACACCTGAGGAAGGGAACGTCAT  
TTACAGATATGATTGAAATTGCACTGTCAATTGGTGTAGATGATTATGAATGTTGAATATTCTAAAATAAAGAAAGCAGTACCTATTT  
TATTATTCTTATTTGTATTTCAGTTTGGTTATAGACAACCTATTTAAATTGATTTCTGTAGCCATTGCTGATGACTTAAACATATCTGTA  
ACGACAGTAAGTTGGCAAGCGACATTAGCCGGTTTAGTAATTGGTATTGGCGCTGTAGTATACGCTTCATTATCTGATGCCATTAGT  
ATACGCACACTATTTATTTATGGCGTGATATTAATCATTATCGGATCAATTATTGGTTACATTTTCCAACATCAATCCCATTACTTTT  
AGTTGGACGTATTATTTCAAACCTGCCGGTTTAGCTGTGCGAGACATTATATGTGATATATGTTGCAAAGTATCTTTCTAAAAGAGGA  
CCAGAAGACTTACCTTGGCTTAAGTACGAGCAGTTATTCCTTGTCTATTAGTTATCGGTACATTATCAGGTGGATTTATTTCTACGTAT  
TTACTGTGACAAATATGTTTTTAATTGCATTAATCGTAGTATTTACGTTGCCATTCCTATTTAAATATTACCAAAAGAAAAATA  
CGAATAAAGCTCATTTAGATTTTGTGGCTTAATTCTAGTGGCACTTGTACAAACAGTCATGCTGTTTTATTACGAACCTTAAATTG  
GTTATATGATTGGTGCCTTAAATTGCGATTATCGTTTTTGGCGCTATATTATAAAATGCGCAACGCTCCATTAGTAAATAAATCATT  
TTCCAAAATAAACGTTATGCTTCATTTTTATTATAGTATTGTAAATGTATGCTATCCAATTGAGTTATATTTTTACGTTCCCATTCAT  
AATGGAGCAAAATTTATCATCTGCAACTAGACACAACATCACTGTTATTAGTACCGGGTTATATAGTAGCAGTCATTGTTGGTGCAC

AAGTGGTAAAAATCGGCGAATATCTGAATTCAAAACAAGCGATTATCACAGCAATTATTTAATAGCACTGAGCTTGATTTTACCTGC  
ATTTCAGTAGGTAATCACATTTCAATCTTCGTCATTTCTATGATATTCTTTGCAGGTAGCTTTGCTTTAATGTATGCACCTTTACTTA  
ACGAAGCCATTAACAATAGATCTTAATATGACAGGTGTGGCTATTGGTTTTTATAATTTAATTATTAATGTGGCGGTATCTGTAG  
GTATTGCGATTGCTGCGGCTCTAATCGATTTTAAAGCATTAAATTTCCAGGCAATGATGCATTAAGTTCACATTTCCGGTATTATTTT  
AATTATTTTAGGTTAATGAGTATTGTCGGATTAGTTTTATTCGTCAGCTTAAATCGTTGGACACAATCTGAAAAATAAATAGATATA  
AATTCGCGAGATATATTTCGTATTTATAGTAAAAATTAATAAAGAGATTATATAACACGAGGAGTAGTAAGTATGAAATTTGAGAAA  
TATATAGATCACACTTTATTGAAGCCTGAGTCAACACGTACGCAAAATCGATCAAAATCATCGATGAAGCGAAAGCATACAATTTTAA  
ATCTGTATGTGTGAATCCAACGCATGTTAAATATGCAGCAGAGCGACTAGCTGATTTCAGAGGTGCTCGTTTGTACGGTAATAGGATT  
CCCATTAGGTGCGTCGACAACCTGCAACGAAAGCATTGAAACAGAAGATGCAATTCAAAATGGTGCAGATGAAATTGACATGGTCA  
TCAACATCGGCGCATTAAGATGGACGTTTGTATGATGTACAAACAAGACATTGAAGCAGTGGTGAAAGCTGCGAAAGGTCACACA  
GTAAAAGTGATTATTGAGACGGTATTGTTGGACCATGACGAAATCGTAAAAGCGAGTGAATTAACAAAAGTGGCTGGTGGCGACTT  
CGTAAAACTTCAACAGGTTTTGTCAGGTGGCGGTGCGACTGCAGAAGACGTTAAATTAATGAAAGATACAGTAGGTGCTGATATAG  
AAGTAAAAGCATCAGGTGGCGTACGTAATTTAGAAGATTTCAATAAAATGGTTGAAGCAGGTGCGACACGTATTGGTGGCAGCGCA  
GGCGTTCAAATTATGCAAGGTTTAGAAGCAGATTTCAGATTACTAAT

>008-contig\_256

AGCAGATTTCAGATTACTAATATATGTAAATTTTGGGAGTGATAGCTATGACAAGACCATTTAATCGTGACATTTAATCGTAATGGA  
TTCAGTAGGTATTGGTGAAGCGCCAGACGCAGCTGATTTTAAAGATGAAGGTTTCACATACTTTAAGACATACCTTAGAAGGTTTCGA  
TCAAACCTTTACCAAACCTTGAAAAGTTAGGTCTAGGGAACATCGATAAATTACCAGTAGTAAATGCAGTTGAACAACCCAGAAGCAT  
ACTATACTAAATTGAGTGAAGCTTCAGTTGGTAAAGATACAATGACTGGTCACTGGGAAATTATGGGATTAAATATTATGCAACCTT  
TTAAAGTATACCCTAATGGATTCCCTGAAGAGTTAATTCAAACAAATTGAAGAAATGACAGGTGCTAAAAGTTGTTGCTAACAAACCG  
GCATCGGGTACGCAAAATTATCGATGAGTGGGCGAGCACCAATGAAAATGGTGACTTAATTGTTTTATCAAGTGCAGACCCAGT  
ATTGCAAAATTGCTGCACATGAAGACATTATCCCATTAGAAGAGTTATATGATATTTGTGAAAAGGTTTCGTGAGTTGACAAAAGACCC  
TAAATATTTAATTGGTTCGTATTATCGCACGTCCATATGTTGGTGAACCAGGAACTTTACACGTACATCTAATCGACATGACTATGC  
GTTAAAACCATTTGGTAAAACCTGTCTTAGATCATTTGAAAAGACGGTGGTTATGATGTTATTGCCATCGGTAAAATTAATGACATTTA  
TGATGGTGAAGGTGAACAGAAGCGGTTTCGTACGAAGAGTAACATGGACGGTATGGATCAATTGATGAAAATTGTTAAGAAAGATT  
TCACAGGTATTAGCTTCTTAACTTAGTAGACTTTGATGCATTATACGGTCACTGTCGTGATAAACCAGGTTATGCACAAGCAATTA  
AAGATTTTCGATGATCGCTTGCCAGAACTGTTTAGCAACTTAAAAGAAGACGATTAGTAATTATTACAGCAGACCATGGTAATGACC  
CGACAGCGCCAGGTACGGACCATACGAGAGAATATATCCAGTAATTATGTACAGTCCGAAATTTAAAGGTGGTTCATGCACTAGAA  
AGTGATACTACATTCAGTTCTATCGGTGCAACTATAGCAGATAATTTCAACGTAACATTACCAGAGTTCGGTAAAAAGTTATTTAAAG  
GAATTGAAAATAGAATAAATTTAGATATAATAAAAAACAGCAGTGAAGTTAACTATAACAATAGTTTTCTTCACTGCTGTTTTTATTAT  
AATAGAGAAACGTAAGACGGTAGGACCTCTTATTTAGGAGTATCCTGATTTAATGTTAAACAATACGTTTTTCGGATTGAACCGGAA  
ATTAATCTACAATTGCGACCATTAGTACTAAACCGATTAAATATAATACCTACACGGTCCCAAGAACGTTGTTGAATGGCAAAATAG  
AGTGGTGTCCCAGTACCACAGCCCCAATTAGCCCCAGTATAGAAGCTGAACGTAAGTTTAGTTCAAAGCGATAAAGTATGAGAGA  
TAGAAAGGCAGGCATAATTTGTGGTATGACTGCAAAATACGAGTGTTTTAATCTTATTTGCACCACTGGCCTTTAATGATTCTATAGC  
ACTGAAATCTAGACCTTCAATATCTTCAGCTAAAAGTTTCCCAAGCATACTACAGAATGGATACCTAAAGCTAATACACCTGAAAA  
TGAACCTGGGCCAACAGCTTTGATAAATATAAGTGCCATTACAATTTCTGGGAAGACACGTATAACACTTAAATAAATTTGCTAAC  
ACCTGAAACCGGGCGTAACCTTACCATATATTTGCACCTAGAAATGCTAATGGAATACAGATAATTGCGGCGATGAAAGTACCTA  
CAACGGCTATCGCAAAGGTTTCAAGTAAACCACGTAATAAGTCTTCGCCATCTGGTATATAGATATAGCTGATGTCAGGATGGAAT  
AATCCGCTGAATATGGATTTTAAGATTCTAATGATTACTTTTAAGTTCTAACTTGGTACACCTGCAAAATGCCAGATGATAATAG  
CTAAGACGACAATTGCAATAAGCCATCTTTAATCAATTTTCGTTTGTGTGCTTTTGTGTGAACATTATATTTTGTCTATTGCTGTGTC  
ATGGAGATGTGCCCTCACTTTCTGACTGATGTAATCAATGACGACGACGATAAACTAAAGTAAATAAATAATCGTTGCTGTTTTTG  
GATATTGAAATAAACCAAGTGTGTTGATCATAAAACAATCCAATACCGCCAGCGCCGACTAATCCAAGAACAGCTGAAGCACGTATA  
TTTACTTCAAATGCATATAATACGTATGACATAAATGACGATATGGCTTGTGGTACAACACCGAAAAACAATCCATTTTATTTTATTA  
GCACCAACAGCCGTCATTGCTTCCATTGGACCTGGATCTATCGTTTCCAATGATTCATATAATAATTTCCAATAATACAGATAGTTA  
AAATAAACAATGCTAATATCCCTGGAATTTGACCGATTCCAAATACCGCCACAAGATTGCTGCTAATAGCAAATCCGGTATAGTA  
CGAATCTATTTTAAATAAAAACGCGAGGGTATTGAAATCCACTTTTGATGAACGATATTGCTAGCACATAATAACGCAATTGGTATT  
GAAACGATGCTACCTAATACTGTACTTACGATAGCCATTGCAATGGTATCTAACATTGGCGTTGTAATTTGTTGTAATACTCGAAA  
TCAGGTGGAATCATTTGTTGAATAGATCACCTATTGAGGTATTCCTATCATTAATCTCCAAAATTAACCCCGTATAAATGAAG  
CTCCAAATGATAAGCACGATGATTAACATGAAGTGAAGTAAACCTGTTTTTAAAGAAACCTTTTTCTTTAAAGGGAGTGCATAGTTGTA  
GGTGTCTTAAAGGCATGTTAGTTCACTCCTAGCTTTTCATCTTCTTTAATTGTACGTCCATATATTTCACTAAATACGTTCATCTGTTG  
CTTCAGATGCAGGACCATCATAGACAACCTCACCATCACGTAAACCAATGATGCGTGTGCCATATTCTTTTGCCAAGTCAACAAAAT  
GTAAATTAATTAATAATGTAATGCCTAATTTCTGGTTGATTTTCTTAAATCATCCATAACCTGTTTCGTTGTTAATGGGTCTAATGA  
AGCAACTGGTTTCATCTGCAAGAATAATTTTCGGATTCTTGGCATAGCGCACGTGCAATAGATATACGTTGTTGTTGGCCACCTGATAA  
TTCATCAGAGCGTTGATTATATTTATCTAAGATGTTGACCCGTTCTAGTGCATCCATTGCTTTAATTTTGTCTTCTTTTGAAATAAAAC  
CTAATACCATTTTCCAAGTAGGGTGATAACCTACACGTCCACTTAGTACATTTTCGTAATACACTTGACCGTTTAACTAAATTTAAAT  
GTTGGAAAATCATACCTATATTTTCGGCGCATTTCTAATAATGCTTTTACCATGGGCTTTAGTGATTGATTTACCTTGGATGAAATTTTC  
ACCTGACGTGATATGATGCAAAAGATTACAGACTTTAATGACCTGATTTCAGCAGCAGATAGTCCGACAACTGCAAAATTC  
ACCTTTTTCAATATTTAAGTTAATATTTTCAAGCCTACATGACCGTTAGGATAGACTTTACTGACGTTTTTAAATTCGATTTGACTCA  
TGTTTGACACCTTTCTTTAATAAAGAAAAGCCAAGGTAACCTGAAATATCATAGACATTGGGTTTCTGTGTACAAATGGTTTCAAAAT  
GTACAGCGACACCTTTCTATATCTGTTTCAGTTTAGCGCTAGCTTTTCAATATTAATCTAGAATATATCTATTGAACGAAAGCTTTT  
AATACCAAAATTCGCTAATGATTCATTGGTTAAATAATGATTATTTTCATATCTTTAACTAATTTTCGTACTCTCTTACAATGTCGAAA  
TTGAATCTTTTCGTTTCTGTGTATCCTTCATGTGAATAAATTCGCTAATAATTTTGTGACCTCTTTTGATTAGCAATGCTATATAAA  
AGCTTTTTTCAATTTTTCTTGAAAATCTTTATCCATATCTGGTCTTACAGAAATTGTGTCATTGGAATAGCTTGTGTTAATTTTAAAA  
TTCGTGTGCTTTTAAATACATTTTGGTTGGTCTTTTTTTCACAGTATTCAGTGCATCGTTAAATACAGCTGCAGCATCTACATCTCCATTT  
AATAATGAGATAACTCTGGTTCATGACCTTTAACATTTCAAAATTTTCATATCTTAGTTGCATTAATACCTGCTCTGTTTTTAACTAT  
CGCAAGTGGAATGTATATCCAGCAGTTGATGTTACATCTTGTAAGGCAATTTTCTTACCTTTTAAATCTTTCAAGCTTTTAAATTTTT  
GAGTCTTTTTTAAACAAGAATTTCTGATTTATAGCTATCTACAAGTTCTTTACTTGCTGAACCATCTTCTTTTACACCGAAACGTTGTGC  
TTGTAATAATAAATCAGCTGCTTTTTGATCATGTGCTAATGTGTATGCCGTTGGTGGTAAGAAACCAACATCAACTTTTTTAGACTTC  
ATAGCTTCAACAATTGTATTGTAGTTAGTTGATACAGACACTTAACTGGAATCCCTAATTTCTTTAGATAGTAATTTTCTAATGGTT

TTGCTTTAGCTTCTAATGTTCCAGCATTTTTCGGAAGGTACAAATTGAACGGTTAATCTTTAGGTTTGTATCCTCCTGATTAGAATC  
CGAATCATTACTAGCGTCTTTTGGATTATCTAAAGAACTTGAATTTCCACATGCTGCTGCAAAAACAATGACTGCTAACATTAATAC  
AAATAAACACTTAAAAATTTTCATTTGATAACTGTCCCTTCACATTCTTAATCGTGTAATATGTATGCAATGAAATTACACTTATAG  
CGTACCACATTTAAATGAGAAAAAGTATTTATAAAAAATGAATTTTAATAACTTTCTTTAAGAGTTTGATAAGGTTTTGTAAATTTT  
TCGTTAAATTGCCCATTTCAAACATATTTTATCCTATAATTCAAGAACAAATTTATTTTAAAAAGGAGCCTCACAAAATGAAAAAA  
TATATAAGTCATTAACTGTCTCTGCAATTGTTGCAACGGTATCATTAAAGTGCTTTACCGCAATCTTTAGCTATAACGCATGAATCGCA  
ACCTACAAAAGCAACAGCGAACGGTATTATTCGATCGTTCTCATGGTCAAACAGCTGGTGTGTCAGATTGGGTTAGTGATGGTGCATT  
TTCAGATTATGCGGATTCAATACAAAAACAAGGTTATGACGTTAAAGCTATTGATGGTCAATTCGAACATAACAGAAGCAAGTTTGA  
AAATTTCCAAAAATATTGTAATTCCTGAGGCTAACATTCCTTTCAAAGAATCAGAACAGGCAGCAATTGTTAACTATGTGAAACAAG  
GTGGCAATGTTGTCTTTATTTACAGATCATTACAATGCTGACCGAAAATTTAAATCGTATTGATTATCAGAGGCAATGAATGGTTATC  
GACGTGGAGCGTATGAAGATATGTGCAAAAGGTATGAATGCAGAAAGAAAAAGTTCTACTACAATGCAAGGTGTGAAAAGTTTCAGA  
TTGGTTATCTACAAACTTTGGCGTACGTTTTTCGATATAATGCACTAGGTGATTTAAATACGAGCAATATTGTTTCTTCAAAAGAAAGT  
TTCGGTATTACTGAAGGTGTGAAATCTGTCTCTATGCATGCCGGATCGACATTAGCAATTACTAATCCAGAGAAAAGCAAAAGGTATT  
GTGTATACACCAGAACAAATTGCCAGCGAAAAGTAAATGGTCACATGCTGTAGATCAAGGTTTATAATGGGGGCGGTAAAGCAGA  
AGGCCCTATGTAGCAATTTCTAAAGTTGGAAAAGGTAAAGCAGCATTTATCGGTGATTATCATCTTGTGGAAGATAGTTTCGCCCAA  
ATATGTAAAGAGAAGATAATGGAGAAAAAGAAGAAAACATATGATGGTTTTAAAGAACAGACAACGGTAAGCTATTAATAATATA  
ACGGCTTGGATGTCTAAAGATAATGATGGGAACTACTTAAGGCGAGTGGCCTAACATTAGATACAAAGACTAAGTTGCTTGATTT  
TGAACGACAGAGCGTTCAACTGAGCCTGAAAAAGGCCATGGTCACAAACCGCGAGTGGTTATAAATGGTATGATCCAAACACAT  
TTAAAGCAGGTATGATGGCAGCGAAAAAGGCGCAGATCCTCAGCCAAACACACAGATGATCATACACCACCAAAATCAGAAGCA  
AAAAGTAACATTTGATATCCCGCAAAATGTTTCTGTAAATGAGCCATTTGAAATGACAATACATTTAAAAGGATTTGAAGCAAAATC  
AAACACTTGA AAAATCTTAGAGTTGGTATTTACAAAGAAGGCGGACGTCAAATCGGACAATTTTCAAGTAAAGATAACGATTATAAC  
CCACCAGTTACAGTACTTTGCCAACAGTTAAAGCAGATGAAAACGGAAATGTCACAATTAAGGTCAATGCTAAAGTACTTGAAG  
TATGGAAGGTTCAAAGATTTCGTTTAAAACCTCGGTGACAAAACCTTGATTACAACAGACTTCAAATAAATATATAATAGAAATAAGA  
AAGATGTTTGTGATTGAAGGAGTGAGTGAGGATGTCAAACATAGCATTTTATGTCGTGAGTGACGTACATGGTTATATTTTCCCAAC  
AGATTTTACGAGTAGAAATCAATATCAACCTATGGGATTGTTACTAGCGAATCATGTTATAGAACAAGACAGAAGGCAGTATGACC  
AAAGTTTAAAAATAGATAATGGTGATTTTGTCAAGGGTACCAATTTTGTAAATTAATCTTAATCGCGCATAGCGGCAGTAGCCAGCCTT  
TAGTTGATTTTATAATCGAATGGCATTCAACTTTGGTACGCTTGGTAAATCATGAATTTAATTTATGGATTACCATACTTAAAAGACAC  
TTTACGCAGACTCAATTATCCAGTTTGTGCGCTAATATTTATGAAAATGATAGTACATTGACTGATAACGGTGTGACGTATTTTTCAG  
GTTGGAGATCAAACGGTTGGTGTGATAGGTTAACGACACAATTTATCCCCATTGGGAACAACCAGAGCATATTCAGTCACTTACG  
TTTCATAGTGCTTTTGAACACTTCAACAACACTTACCTGAAATGAAGCGACATGCAGATATCATTGTGGTTTGTACCATGGTGGA  
TTTGAAAAGGATTTAGAAAGTGGTATGCCGACCGAAGTGTTAACGGGTGAAAATGAAGGATATGCCATGTTAGAAGCATTTTCTAA  
AGATATAGATATCTTTATTACGGGTCACCAACATCGACAAATTGCTGAAAGATTTAAGCAAACGGCTGTGATTCAACCTGGTACGA  
GAGGTACAACCTGTAGGCAAAGTTGTCTTGAGTACTGATGAATATGAAAATGTATCCGTTGAATCATGTGAATTACTTCTGTTATAG  
ATGATTCCACATTTACTATTGATGAAGATGACCAACATTTACGAAAGCAGTTAGAGGACTGGTTAGATTACGAAATTAATCAATTTGC  
CATATGATATGACGATTAATCATGATTGAGGCAGTGTGGCACCGCATCTTTTACTAATTTTATGAATTAACGTTTATTAGAAAA  
AAGTGGTGCAGATGTTGCTGTACAGCTTTGTTTGTCTGTAGTGGTTTCAAGCAAGTCGTGACGATGCGAGATGTTATTAACAA  
TTACCCATTTCCAAATACATTTAAAGTTTTAGCTGTAAGTGGTGCCAAACTTAAAGAAGCCATTGAACGATCAGCAGAATATTTTGA  
CGTGA AAAATGATGAAGTAAGTGTGAGCGCAGACTTCCTTGAACCCAAACCCCAACACTTTAATTATGATATATATGGTGGCGTAA  
GTTATAACATTATGTTGGAAGGCCAAAGGACAACGTGTGAGCAATATGATGATCCAGGGCACGCAGTTGATTTAAAGCAGACA  
TATACAATTTGTGTAAATAATTATCGTGCAGTTGGCGGTGGTCAGTATGATATGTATATCGACGCGCCAGTTGTAAAAGATATTCAA  
GTTGAAGGCGCACAACTTACTTATTGATTTTTTATCAAATAATAATTGATGCGCATCCCGCAAGTTGTTGATTTTAAAGTTGAAAAGT  
GACGGATATATGTA AAACCTTACTTGATTTTAAATGGGTAATTTTTTGTTTTTGTTTAACTAACCCTTAAACGTCATATACTTTA  
AGAAAAATGTTGATTTTCAAAAAATGAGGCTTATATTTTATATAACTTAAATATGAGTGATAATTTGGAAACAATTAACAA  
GAAGTAAGAGAATCTATTGTTAAAGGAATTATCGCGGGATATAAGGACTATGTTAATGAGAGAAATGAAGTCAAGAAACGTATGGT  
GATTAGTGATGCCTATGCCTTACTAAATCTAATCATATTGAAAGTCAAGTTGCTAAGCATTTGGAAAATTTTGTAAAGTATATTA  
GAAAATGCTGGACCGTCATGGAAAGTATTTAAAGTTTATATTTAATATGGATGAAGAGAAAAATAATATCATGTTTATATTGAAAAT  
GAAGATTACTTTGATGAAAAAATGTAAGCGTAGGGAAGAGTTTAGTTGCCGATAAAAAATCAAAAAAGTAAAAACTATCTAGAGG  
GACTTATGGCTAAGAATAGGGACATTAATTTTGATACTGTTGAAGAAGATTTTAAATTAGGCATCAAATGACTGCAGATAGTATAT  
TATTTAATATAAAAAGAGGCAGTAATAGAGATATCAATTCCTATTTTTTAATTATTACATATCGTATTGATAAAGAATCAAAGCAAT  
TAGCTGCAATCAACAATGGTTACCAATCCAGAAACAAATTCGCAATTATGGTTGATGATTTGATAGAGTTGATAGAAAAGTA  
ATAGTAGAAAGAGAAGATTATCATATTGACGAAGAAGAGTTAGAAGTACTTAAAAACGATGGAGAGTTAGAAGTATAGATAGTTGG  
AACATGCAATTTGGTATCAGTATCGATGAAGTAACGATATGATTGAAAGTGAAAGGTGAAGTTAATGTTTATTGGCAAGAATTTAG  
AATACGTGAGAAAGCTTAATGCTCTAAGTAGAAAAGAATTATCAGAAAAAATAAATGTGAGTGAACAAGCAATTTGGCAATATGA  
AACAAAAAATATGATGCCAGAAATTAGTAAAATTTATGATATGACATCTATTTTTAATGTTAAATCTAGCTACTTTATTAGCGAGCA  
GCCGGAAGAGCTCCTAATAAATCTGTGCGATAAACATAGTATAGCTTTTAGAGCAAAAAAATTATAAAGTATCTACGAAACTATTA  
ATAAGCAATATTATCAAGCAATGTATTATCTAATTTAACTAACTACTTATTTTCTTTGTAAAGATACCGGATAATATTATTTATC  
GTTAATAAATAATTTAGATGACTTGTGAATGGCAATTTAGAATCACTAAATAAAAAAGAAAGCATAAAAAAGAACTGCTAAAGTTG  
TGAGGGCTAAAAATCTTCAAGACGAAAGCAATGAAGCATATTATTTATGCTTGAAAAAGCGGGTATAGTTATATACGAAAAGCGA  
ATTAATGATAGCATAGACGCATATAGTTTTTGGAGTAAGATCTGACACCTTTTATTACTGGGTACAAAATAGGGGGTAGCAGTT  
AGAAGGAATTTGATCTTGCACATGAGCTGGGACATCTGTTCTACATCTGCATATTTCAATTTCGACTTATTATCTTGAAGAATA  
AGACAATTGAACATGAGGCAGATATTTTCGCCTCTGAATTTTACTACCTGAAGAAGCGTTTAAAAAGACTTTGATCAAATGACCA  
AAAAATCAAATCCTGACTATTTAGCTGTATTGAAAGAAAAATGGTATGTTTCTATACAAGCAATTGCAATGAGAGCGTATTATCTAG  
GCCTAATGTCTAGTACTCAGTACAGATATTTTGGGCATCATTAATAAAAAAGGCTATAAAAGTAAAGAGCCTTTAGACGACGTG  
ATTGAAATGTCACGTCTGTCAAATGAATAGTTTATTAAGTTGTATTTGATAGAAATTTACTGACACCACAAAAAATTATTGAAT  
TATTTAAAAGTCGATGAAACATTTTGAATCATCTAGCAGGTATTAATTTAAAACCTCTTAAGGATTATGTTAATGAAAAATAGAGAA  
TATAATATAACGAATCTATATAAATAAGGCACCAATATTTAAAACCTCGAGCTGAAAAAGATCATCATTTTCAGTTTCGAGTTTTTTGTG  
TAACATCTGTTGATAGGTAGCGACAAGGACCTTTAATGTTGTGTTTTGTGCGATATAACAAGCTTTTTAGGCTATTAAGAATATTC  
AGAATTAATATATAAATTATGAATAAATTATGTCAATTTGAAAAAATATGATTATAAATCATTTCAAAAAACCCGAAAAACAATG  
ATTTATGAAAAACATTTATTTTAAAAATTTGATATTTGTTCAAATAATATTCGAAATTAACCTTTTGTATAGAATTTCTTTATATCC  
TGAGAGACATGTACTATAATGTTTGTGAAATAATTCACAAAGTATAAAGGAGTGGTTGTATATGTTAACTATACCTGAAAAAGAAA  
ATCGTGGATCGAAAGAACAAGAAGTGCCAATTATGATTGATGCTCTAGCTGACAAAGGGAAAAAGCATTAGAAGCATTATCTAA

AAAGTCACAAGAAGAAATTGATCATATTGTTTCATCAAATGAGCTTAGCAGCTGTTGATCAACATATGGTGCTAGCAAAATTAGCAC  
ATGAAGAACTGGAAGAGGTATATACGAAGATAAAGCGATTAAAAATTTATACGCTTCTGAATATATATGGAATTCAATAAAAGAC  
AATAAGACAGTAGGGATTATTGGTGAAGATAAAGAAAAAGGATTAACGTATGTAGCGGAACCAATTGGTGTTATTTGGTGGTTAC  
GCCAACACAAATCCTACGTCGACAACATTTTTAAAGCGATGATTGCAATTAAGACAGGAAATCCAATCATTTTTGCATTCCATCC  
AAGTGCACAAGAATCGTCGAAGCGTGCAGCAGAAGTTGTATTAGAAGCGCAATGAAGGCAGGTGCACCTAAAGATATTATTCAGT  
GGATTGAAGTGCCTTCTATCGAAGCAACAAAACAATTAATGAATCACAAGGTATTGCATTAGTTCAGCAACAGGTGGTTCGGGC  
ATGGTTAAGTCTGCATATTCAACTGGCAAACCGGCATTAGGTGTGGGACCAGGTAACGTGCCGTCTTACATTGAAAAACAGCACA  
CATTAACCGTGCAGTAAATGATATCATTGGTTCAAAAACATTTGATAATGGTATGATTTGTGCTTCTGAACAAGTTGTAGTCATTGA  
TAAAGAAATTTATAAAGACGTTACTAATGAATTTAAAGCACATCAAGCATATTTTGTTAAAAAGATGAATTACAACGCTTAGAAA  
ATGCAATTATGAATGAACAAAAACAGGTATTAAGCCTGATATTGTCGGTAAATCTGCAGTTGAAATAGCTGAATTAGCAGGTATA  
CCTGTCCCCGAAAATACAAAACCTTATCATAGCCGAAATTAGCGGTGTAGGTTACAGACTATCCGTATCTCGTGAAAAATTATCTCCA  
GTATTAGCCTTAGTAAAAGCCCAATCTACAAAACAAGCATTTCAAATTTGTGAAGACACACTACATTTTGGTGGATTAGGACACACA  
GCCGTTATCCATACAGAAGATGAAACATTACAAAAAGATTTTGGACTAAGAATGAAAGCTTGTCTGTACTTGTAAATACACCATC  
AGCGGTTGGAGGTATTGGTGATATGTATAACGAATTGATTCCGTCTTTAACATTAGGTTGTGGTTCCTACGGTAGAAACTCAATTC  
ACATAATGTTAGTGCGACAGATTTATTAACATTAAACGATTGCTAAACGACGTAATAATACTCAAAATTTTCAAGGTGCCTGCTCA  
AATTTATTTTGAAGAAAAATGCAATCATGAGTCTAACAACATGGACAAGATTGAAAAAGTGATGATTGTCTGTGACCCTGGTATGG  
TAGAATTCGGTTATACAAAAACAGTTGAGAATGTATTAAGACAAAGAACGGAACAGCCTCAAAATAAAAATATTTAGCGAAGTCGAA  
CCGAACCCATCAACTAATACAGTATATAAAGGTCTGGAATGTAGTTTCCAACCCGATACAATCATTGCCACTTGGTGGTGGT  
TCACGCGTAGGATGCTGCAAAAAGCAATGTGGATGTTCTTTGAACACCTTGAGCATCATTCCTTCGGTGCTAAACAAAAGTTCTCAGAC  
ATCGGTAAACGTACTTATAAAATAGGCATGCCTGAAAAATGCGACGTTTCATTTGTATCCCTACGACATCAGGTACAGGTTCCAGAAGTA  
ACACCATTTCAGTTATCACAGATAGTGAACAAATGTAAATATCCGTTGGCTGATTTTGTCTTAAACCTGACGTTGCAATTATT  
GACCCTCAATTTGTGATGAGTGTGCCAAAAAGCGTTACAGCAGATACAGGAATGGATGTACTAACGCATGCAATGGAATCATATGT  
ATCTGTAATGGCTTCAGACTATACAAGAGGTTTGAGTCTACAAGCGATTAAATTGACGTTGCAATATTTAAAAATCATCTGTTGAAAA  
GGGTGATAAAGTTTCAAGAGAGAAAAATGCATAACGCATCAACTTTGGCTGGTATGGCATTTCGAAATGCATTCTTAGGTATTGCACA  
CTCAATTGCACATAAAATTTGGTGGCGAATATGGTATCCGCATGGTAGAGCGAATGCGATATTACTACCGCATATTATCCGTTATAA  
TGCCAAAAGACCCGCAAAAACATGCATTATCCCTAAATATGAGTCTTCAGAGCAGATACAGATTATGCAGATATTGCCAAATTCCT  
AGGATTAAGGGAATACGACAGAAAGCACTCGTAGAATCATTAGCTAAAGCTGTCTACGAATTAGGTCAATCAGTCGGAATTGAAA  
TGAATTTGAAATCACAAGGTGTGTCTGAAGAAGAATTAATGAGTCAATTGATAGAATGGCAGAGCTCGCATTTGAAGATCAATGT  
ACAACGTCTAATCCTAAAGAAGCACTAATCAGTGAAATCAAAGATATCATTCAAACATCATATGATTATAAGCAATAATCTATCTG  
ATAATAATCATATAACTCACCTGAAATTACAAAAGTAAAAAATGCCACATAAACTTTAAGTCGATAATCATTATACGGTTATCGGCT  
TTTATTTATTGCCAAATCTTCAGAGAGATACAACTAGACAATCATTTTTTTAAATAAAGAAAAATTAAGATTGATACTCATTTAC  
AACTATTACTACTTTAGAGTATAATTATTTTAATTTTCATATAAAATAAAGGCGAAAAATAATGCGGTTTAAAAAGTAATTAATTGT  
TTAAACGATATGTAATATGTAAATACTATATATATAATACCAATTTTAATGAAAAATTTTAAGGGAGGTAAATAATGGAAAGTACAT  
TAGAATTAACAAAAATTAAGAAGTATTACAAAAAATCTGAAGATTTTAATTTTACCCTATTATTTTAATTTATAGCGCTAT  
TGTTACATTTTTCGTTCTATCACCTAAATATCAAGTAATCAACTCAAACTTCTAGTGAATCAAACTAAGGTGCAATCCTCAGTTATG  
GCACAAGAGGTTCAAAGTAATATTCAACTTGTAAATACGTATAAAGAAATTTGTTAAAAAGTCTAGAAATTTTAGATGAGGTGTCAAA  
GGACTTAAATGATAAGTATTCACCATCTAAATTTGTCGAGTATGTTGACAATTACAAACCAAGAAAAATACGCAACTTATCAACATCCA  
AGTTAAAAAGTGGTCATAAACAAGATTCGGAAAAAATTTGCGAATAGCTTCGCTAAAGTTACAAGTAAACAAATTCGAAGATTATGA  
GTGTGGATAACGTATCAATTTTATCTAAAGCAGACGGTACAGCAGTTAAAGTCGACCAAAAACTGTAGTGAATCTAATCGGTGCA  
TTCTTTTTAGGATTAGTTGTGCGCTTATATATATCTTCTTCAAAGTAATTTTCGATAAGCGAATTAAGATGAAGAAGATGTAGAG  
AAAGAATTAGGATTGCCTGTATTGGGTTCAATTCAAAAATTTAATTAAGGATGGTTGCTACTTATGTCAAAAAAGGAAAAATACGAC  
AACACACTATTTGTATATGAAAAACCAAAATCAACAATTAGTGAAAAGTTTCGAGGTATACGTTCAAACATCATGTTTTCAAAAG  
CAAATGGTGAAGTAAAGCGCTTATTGGTACTTCTGAAAAGCCTGGTGAGGTAAAAGTACAGTTGTATCGAATGTAGCGATTACTT  
ATGCACAAGCAGGCTATAAGACATTAGTTATTGTGCGGATATGCGTAAGCCAACACAAAACTATATTTTAAATGAGCAAAAAAT  
AATGGACTATCAAGCTTAATCATTTGGTCTGAACGACTATGTCAGAAGCAATTACGTCGACAGAAATTGAAAAATTTAGATTTGCTAAC  
AGCTGGCCCTGTACCTCCAAATCCATCTGAGTTAATTGGGTCTGAAAGGTTCAAAGAATTAGTTGATCTGTTTAAATAACGTTACGA  
CATTATTATTGTCGATACACCGCCAGTTAATACTGTGACTGATGCACAACATATATGCGCGTGCTATTAAAGATAGTCTGTAGTAATT  
GATAGTGAAAAAATGATAAAAAATGAAGTTAAAAAAGCAAAAGCACTTATGGAAAAAGCAGGCAGTAACATTCTAGGTGTCATTT  
TGAACAAGACAAAGGTGATAAATCTTCTAGTTATTATCACTATTATGGAGATGAATAAGTATGATTGATATTCATAACCATATATT  
GCCTAATATCGATGACGGTCCGACAAATGAAACAGAGATGCTGGATCTTTTAAACAAGCGACAACACAAGGTGTTACAGAAATCA  
TTGTAAACATCACATCACTTACCTCTGATATACCACCTATAGAAAAAGTGAAAATCATGTTTAAACCATATTGAAAGCTTAGAGG  
AAGTACAAGCACTAAATCTAAAGTTTTATTATGTTGTCAGGAAATAAGAATTACCGATCAAAATCTTAAATGATATTGATCGAAAGTTA  
TTACCGGTATTAATGATTACGCTATTTACTAATAGAATTTCCATCAAATGAAGTTCCACACTATACTGATCAATTATTTTTCGAATT  
ACAGAGTAAAGGCTTTGTACCGATTATTGCACATCCAGAGCGGAATAAAGCAATAAGTCAAAACCTTGACATACTATACGATTTAA  
TTAACAAAGGTGCTTTAAGTCAAGTGACAACGGCGTCATTAGCGGGTATTTCCGGTAAAAAATTAGAAAATTAGCAATTCAAATG  
ATTGAAAAAATCTGACACATTTTCATCGGTTTCAGATGCGCATAACACAGAAATCAGACCGTTCTTAATGAAAGACTTATTTAATGAT  
AAGAAATTACGTGATTATTATGAAGATATGAACGGATTTATTAGTAATGCGAAGTTAGTTGTTGATGATAAAAAAATTCCTAAACG  
AATGCCACAACAAGATTATAAACAGAAAAAGATGGTTTGGGTTATAAACAGCAAAATGAGGGGTTTTATGGCACATTTATCTGTGAAA  
TTGCGGCTTTTAACTAGTATTAATCGATTCACTGATAGTGACATTTTCAGTATTCGTAAGTTATTACATTTTGAACCGTATTTC  
AAACATATTCTGTCAAATATTAAATATTGGCAGCTATATCACTATTATCGCATCATATTTTACGATTTTAAATATTGATATCAT  
CGAGCGTGGGAATATGCCAGTGTGAGTGAATTGATTTTAAATTGTTAAAGCTGTGACGACATCTATCGTTATTACGATGGTGGTCTG  
ACAATTGTTACAGGCAATAGACCGTTTTTTAGATTGTATTTAATTACTTGGATGATGCACTTGATTTTAAATAGGTGGCTCAAGGTTAT  
TTTGGCGTATTTATCGGAAATACCTTGGAGGTAAGTCATTTAATAAGAAGCCAACCTTTAGTTGTTGGTGTGGTCAAGCAGGTTCAA  
TGCTGATTAGACAAATGTTGAAAAGTGACGAAATGAAACTTGAACCGGTATTAGCAGTCGATGATGACGAACATAAACGCAATATC  
ACAATTACTGAGGGTGTAAAAAGTCCAAGGTAAAAATGCGGATATTCAGAACTAGTGAGGAAATATAAGATTAAAAAATCATCAT  
TGCAATTCCAACTATTGGTCAAGAGCGTTTGAAGAATAAATAATATTGCCATATGGATGGCGTTGAGTTATTGAAAAATGCCAAA  
TATAGAAGACGTGATGCTGGTGAGTTAGAAGTGAACCAACTTAAAAAAGTTGAAGTAGAAGATTTACTAGGCAGAGATCCTGTTG  
AATTAGATATGGATATGATATCAAAATGAATTGACGAATAAACTATTTTAGTTACGGGTGCAGGTGGTTCAATAGGATCAGAAATTT  
GTAGACAAGTTTGTAAATTTCTATCCAGAACGTATTAATCTACTTGGCCATGGTGAACACAGTATTTATTTAATCAATCGTGAATTCG  
AAATCGCTTCGGAAAAAATGTTGATATCGTTCTATTATAGCGGATGTGCAAAATAGAGCGCGTATGTTTGAAATTATGAAACGTA  
TAAACCATACGCAGTTTATCATGCAGCAGCACACAAGCACGTGCCGTTAATGGAAGACAACCTGAAGAAGCAGTACGTAATAATA

TTTTAGGTACGAAAAATACTGCTGAAGCTGCTAAAAATGCAGAGGTAAGAAAATTCGTTATGATTTCTACGGATAAAGCCGTTAAT  
CCGCCTAATGTCATGGGCGCTTCAAAGCGAATTGCAGAAATGATTATTCAAAAGTTTAAATGATGAAACGCATCGAACAAATTTTGTT  
GCAGTGAGATTTGGTAATGTACTTGGATCGAGAGGATCTGTGATTCCACTTTTCAAAGTCAAATTTGAAGAAGGTGGGCCAGTTACT  
GTGACACATCCTGAAATGACACGTTACTTTATGACAATTCCTGAAGCTTCTAGACTAGTTTTGCAGGCAGGGCATTAGCAGAAGGT  
GGCGAAGTATTTGTGCTAGATATGGGAGAACCAGTGAAAAATTGTTGATTTGGCACGTAATTTAATTAAGCTAAGTGGTAAAAAAGA  
GGACGACATACGCATTACTTATACAGGGATTAGACCCGGCGAAAAAATGTTTGAAGAGCTTATGAATAAAGATGAAGTTTCATCCTG  
AACAAGTATTTGAAAAAATTTATCGTGGCAAAGTACAACATATGAAATGTAATGAAGTTGAAGCCATTATTCAAGACATCGTCAAT  
GACTTTAGTAAAGAAAAAATTATTAACATATGCCAATGGCAAAAAGGAGATAATTATGTTTCGATGACAAAATTTTATTAATTACTG  
GGGGCACAGGATCATTCCGTAATGCTGTTATGAAACGGTTTTAGATTCTAATATTAAGAAAATTCGATTTTTTTCACGCGATGAGA  
AAAAACAAGATGACATTCGAAAAAATATAATAATTCAAAATTAAGTTCTACATTGGTGATGTGCGTGATAGTCAAAGTGTAGAA  
ACAGCAATGCGAGATGTTGATTACGTATTCATGCAGCAGCTTTAAACAAGTGCCGTCATGTGAATTCCTTCCAGTTGAGGCAGTG  
AAGACAAATATTATTGGTACAGAAAATGTCTTACAAAGTGCTATTTCATCAAAATGTTAAAAAAGTCATATGTTTATCTACAGATAAG  
GCAGCGTATCCTATTAATGCTATGGGTATTTCAAAGCAATGATGGAAAAAGTATTCGTAGCCAAATCAAGAAATATTCGTAGTGA  
ACAAACGCTTATTTGTGGTACAAGATACGGTAATGTGATGGCTTCAAGAGGATCAGTAATACCTTTGTTTATCGACAAAAATCAAAGC  
TGGAGAACCTTTAACGATTACAGATCCTGATATGACAAGATTTTTAATGAGCTTAGAAGATGCGGTAGAACTAGTTGTTTCATGCATT  
TAAGCATGCAGAGACAGGAGATATTATGGTTCAAAAAGCACCAAGCTCAACGGTAGGGGATCTTGCGACCGCATTATTAGAATTTGT  
TTGAAGCTGATAATGCAATTGAAATCATTGGTACGCGACATGGAGAGAAAAAAGCAGAAACATTGTTGACGAGAGAAGAATACGC  
ACAATGTGAAGATATGGGTGATTATTTAGAGTGCCGCGACTCCAGAGATTTAAATTATAGTAATTATGTTGAACCCGGTCAACGA  
AAAGATTACGCAATCTTATGAATATAACTCCGATAATACACATATTTTAAACGGTGAAGAGATAAAAGAAAAAATCTTTTAACTAG  
AATATGTTAGAAACGAATTGAATGATTATAAAGCTTCAATGAGATAGGAGAGATTGACGTTGAATATTGTAATTACAGGAGCAAAA  
GGTTTTGTAGGAAAAAATCTGAAAGCAGATTTAACATCAACGACAGATCATCATATTTTCAAGTACATCGACAACTAAAGAGGA  
AGAATTAGAGTCAGCATTGTTGAAAGCAGACTTTGTCGTGCATTTAGCGGGTGTTAATCGACCTGAACATGACAAAGAATTCAGCTT  
AGGAAACGTGAGTTATTTAGATCATGTACTTGATATATTAAGTAAAGTACGAAAAAGCCAGCGATATTATTATTGCTTCAATACA  
AGCAACACAAGATAATCCTTATGGTGAGAGTAAGTTGCAAGGGGAACAGCTATTAAGAGAGTATGCCGAAGAGTATGGCAATACG  
GTTTATATTTATCGCTGGCCAAATTTATTCGGCAAGTGTTGTAAGCCGAATTATAACTCAGTGATAGCAACATTTTGTACAAAAAT  
GCACGTAACGAAGAGATTTCAAGTTAATGATCGGAATGTTGAACTAACGCTAACTACGTGGATGATATCGTCGCTGAAATAAAGCG  
TGCTATTGAAGGAACCTCAACGATTGAAAAATGGTGATCTACAGTACCAAAACGTTATTTAAAGTGACATTGGGAGAAATTTGATATT  
TATTATACAAGTTCAAAACAGTCACGCTCGATCGAACATTGCCGAAATTAGATAAATTGTTTGA AAAAGATTTGTATAGTACGTATT  
TAAGCTATCTACCTAGTACAGACTTTAGTTATCCCTTACTTATGAATGTGGATGATAGGGGTTCTTTTACAGAATTTATAAAAACACC  
GGATCGTGGTCAAGTTTCTGTAAATATTTCTAAGCCAGGTATTACTAAAGGTAATCACTGGCATCATACTAAAAACGAAAAATTTCT  
AGTCGTATCAGGTAAAGGGGTAATTCGTTTTAGACATGTTAATGATGATGAAATCATTGAGTATTACGTTTCTGGCGACAAATTAGA  
AGTTGTAGACATACCAGTAGGATACACACATAATATTGAAAAATTTAGGTGACACAGATATGGTAACTATTATGTGGGTGAATGAAA  
TGTTTGATCCAAATCAGCCAGATACGTATTTCTTGAGGGTATAGCGCATGGAAAAACTAAATTAATGACAATAGTTGGTACAAGG  
CCTGAAATCATTGTTTATCATCAACGATTAAGCATGTGATCAATATTTTAACTCAGATATTAGTACACACTGGTCAAAATTTATGATT  
ATACATTGAATGAAATTTCTTTGATGATTTGGAATTGAGACAACCGGACCCTACTTAGAGGCAGTTGGAAGTAACTTGGGAGAAA  
CGATGGGGAATATTATTGCGAAGACATATGACGTTTTATTACGCGAACAACAGATGCACTTTTAATTCCTTGGTGATACAAATAGTT  
GTTTAGCAGCAGTATCTGCTAAACGATTAAAGATTCTGTGTTCCACATGGAAGCGGGTAATAGATGCTTTGATCAGAATGTACCTG  
AAGAAATCAATCGTAAAATTTGTTGACCATGTCAGTGATGTGAATCTACCTTATACGGAACATAGCAGACGTTATTTATTAGATGAAG  
GCTTCAATAAAGCGAATATCTTTGTGACAGGATCACCGATGACAGAAGTGATAGAAGCGCATCGAGATAAAATTAATCACAGTGAC  
GTTTTAAATAAACTAGGATTAGAACCACAACATACATTTAGTATCTGCGCATAGAGAAGAGAATATCGATAATGAAAAGAAATTT  
TAAATCATTAATGAATGCGATAAATGATATTGCCAAAAAGTATAAAATGCCTGTGATTTATTC AACGCATCCAAGAAGTTGGAAGA  
AAATTGAAGAAAAGTAAATTTGAATTTGATCCATTAGTTAAACAGTTAAAGCCATTTGGTTTCTTTGATTATAATGCATTGCAAAAAG  
ATGCATTTGTTGTGCTATGCAGATAGTGAACATTGTCGAGAGAGTCGTCTATTGGAAGTTCCCTGGTGTCTTATTCAGGATCCAC  
AGAAAGACCGGAAGTACTAGATAAAGGTACGGTTATTGTAGGTGGTATTACCTATAACAATCTAATCCAATCCGTTGAACTAGCAA  
GAGAGATGCAAAAACAATAACGAACCGATGATTGATGCTATTGATTATAAAGACACTAACGTTTCGACAAAGGTAGTTAAAAATTATT  
CAAAGCTATAAAGATATTATCAATCGAAATACTTGGAGGAAATGACGATGAGGATAGCGATTGAAAAGATAATTGGTTTGTCTGAAA  
AACCAGTCTCTAAAGAAATCGAATGTTAAGATTCATCGCTTGGCGTATATTACAACTCAAAATTTGATGGCAATAACTATATAGAT  
AGATGGTGTAATAATCAGGAATTCTCACATTGGTGAATACAGTTATATTGGATTGGTAGTGATTTTAATAATGTAGAAGTAGGAAGA  
TATTGTTGATATCTTCGGATGTAAAAATTTGGGTTAGGAAAACATCCTACACACTTTTTTAGCTCATCACCGATTTTTTATTCTAATA  
ATAATCCATTTAACATAAAGCAAAAAGTTTATAGACTTTAATGACCAACCAAGCCGTACAACAATTAATAATGATGTGTGGATTGGT  
GCAATGTAAATATTATGATGGTGTAAACAATAAATAGTGTGAGTATAGCAGCGGCTAGTTGTTACTAAAAATGATAGGAGC  
ATATGAGGTTGTTGGTGGGTTCCGCAAAAAGTGATTAAGAACGCGATTGACAAATAAACAATTTGAAAAAATTTGGGAAAGCAAGT  
GGTGGGAGAAAAACGCCTGATAAACTAAAAGGATTTTCGGTTGAATATTTAAATAA AAAAGGATACTTAATGATATGAGAATTTTAAA  
TATTGTATCGAGTAATATTGTTCAAGACCCAAGGGTACTTAAACAATGGAACAATTAAGACGTTACGGATGATTATAAAATTTG  
TTGGAATGAATAATTCACAAGCTACTAATAAGCGATTGGA AAAATTTAGATTGTAATTATCGTTTGTAGGTAGCAAGGTAGATCCAA  
AAAATATTCTTTCTAAATTAATTAAGCGTATAAGATTGCAACAGGTGTTATCCGAGAAATTAAGGCTTATAAACCTGACGTGATTC  
ATGCAAAATGATTTGACGCTATTATTAATGGTCTATTTAAGCAATTATAAAAAAGCTAATATTGTTTATGATGCGCATGAAATATATG  
CGAAAAATGCCTTTATTAATAAAGTTCCACTTATTTCAAAGTTTGTAGAAAAGTATAGAAAAACACATAGTAAAACATCGTGTTAATG  
CCTTCGTAACAGTAAGTCATGCAGCAAAAAGATATTATCAATCTAAAGGATATAAGAAGGAAGCGAATGTTATTACGAATGCACCT  
ATTTTAAATGATAGCAGAGAATTTAAAGAAATCGAAAACTTTAAAGAAATTTGATATCAAGGTCAAATTTAGCAGAGAGATA  
TGAAGAGTTTATTATTGCTTCATCAGCTTTTTAAACA AAAATGCTCCTTCATTACATAATTCGAGGGTTTGGTCCGCATGAAGAAGTGATA  
AAAGAAGTATTAGTTATAACTCGGAAAATATTAGGTTGGATAAACCAGTTGAAGTAAAAAGAAATTTGGTTGATAAGTTAGCAGAAAG  
TAATGTTGGTGTATCTTGACGAAACCTGTATCTATTAATTTTGAATATACAGTATCTAATAAAAATTTTGAATGTATACATGCTGGT  
TTACCAGTAATTTATCTCCTGTCAAAGAGCATATTTATCTCAATGAAAAATATAAAATTTGGCATTGTTTTAAAGGAAGTTACGCCGT  
TAGAAAATGAAAAGGCGGTTAGAAAATTAAGAGATAATCACGATTTGTTTAAATCATTTACGTCAAAATGCAATTAAGGCGTCTAAA  
ATTTTGAATTTGGCAAAATAGAAAAGTGAACGATTAGTAGAATTTATATAAAATTTTAAAGAGAGGTAAACTATGAAATTTTTTGTACTTTG  
TGCAATTTACAGCATGAACATATTTATAGTAATCTCTACATTTACTAAAGAAGTATTAGGGTCCCTATAGAGCCGGTGTATTACTCT  
ACCATGGTTGGTATGATTAATTAATCTACGGTGTGTTGCTATTTATAAGATAATTTGTCACGCAAGAAATCCGCGAGGGTTAAATTA  
TTAATTGCTATATGTTTGCTTATCTAGCTTTTTTATTATTTTACCAGATAAGGAAGAGAAACTAGCTAAAAATAATATTCTATTCTT  
TTTAAACATGGGCAGTTCCAGCGGCAATTAGTGGTATTTATATTAATATATAAACAAGGCTACGGTAGAAAGATTTTTTAAATTAGT  
ATTTTTCATATTTTCTATTTTCATTTATTTTTGTAATTTTAAATACCAAACTTACAGGTGAGATACCTAGCTATATCAATTTTGACTTA

TGAACTATCAAAACGCTTCGTACCTTTACGACATTTACTGCCGATTAGGCATTTATTTCAATTATGAAAGGTTTCAGTGAAACATAAGT  
GGATATATGTTCTATTTACAATAATTGATATCCCTATTGTGTTTATACCAGGAGGCGTGGAGGTGCTATTTTATTAATTCCTTACGG  
CTTATTTGCATTTATACCTTATTACGTTTAAAAAGAGGAATACCTATTGCAGTAAAAAGCATTATGTATATTTTGCATTAAGCATATCT  
AGTGTATTGATTTACTTTCTTTTACAAAAGGTTTCAATACTAGAACATTTTCATATCTACAAGGTGGAACACTTAATTTAGAAGGTA  
CTTCTGGAAGAGGACCGATTATGAAAAAGGTATTTACTTTATTCAACAAAGTCCGTTATTAGGCTATGGGCCATTTAACTATTATA  
AACTAATCGGAAATATACCACATAACATCATTATTGAGTTGATTCTATCATTGGCTTATTAGGGTTTTTATCATAATGATTGCGAT  
TTTGCTACTAGTTTATAAAATGATTAGGAACATATGATCCAAACACTATAGATTTACTCGTTATGTTTATAGCAATCTATCCAATCACA  
TTATTAATGTTTAGTTCAAATTTATTAGTTGTAAGTGAATTTTGGTTTGTGTTGTTCTATTTTATTACAAAAGGACGGCGTCATCATGG  
TTAAGAAAAGTTTTATTATGGATAGCGTAAAGACAATAATTGGTACGTTGCTTATAGCTTTAGGATTACAATTTTTAGCTTATCCAAT  
TATTAATCAACGAGTAGGTAATGAAGCGTTTGGTTCTATTTTAAACGATTATACAAATAATAACAATCACGAGTGTGTATTAGGCAA  
TACGCTTAACAATATACGATTAATTAATATGAATCTATACAAATCCAATCATTACTACTGGAAAAATTTGTGTCGATACTTTTAATTTCA  
ATTCTGATTGAGAGTATAGCTTTAATTATTGTATTTCTTTACTTTTTTAATTTGAACACCATCGATATTATCTTTTTAATTTCTACTTAAT  
ATTTTAATGTGTTTAAAGGATTTATCTGAATGTATTTTTTAGGATGACTTTAAAAATATAATCAGATTTTGTATATTGCTCTTATTCAATT  
TTTAGGTTTGTGATAGGACTATTCTATATTATTTAATCCAAAACCTGGATTGTTTGTGTTTATTACCAGTGAATTGTTTGAACGATAT  
ATACATTGGTTAAATTACGGGGATTAACCTATAGGCGAGTATCAAAAGTGAAGATAATAATGTGGTCAAAGATTATGTGATGCTACTG  
AGTACAAATAGCCTTAATAATTTGAATCTCTACTTAGATAGATTAATCTTATTACCAATTATAGGTGGAACAGCTGTAACATATATCA  
TTCTTTTCAACATTTATTGGGAAAAATGTTAGTACATTTCTGTATCCGATTAATAATGTAGTACTTTCATATATTTCTGTAAATGAAA  
GCGCAATATAAAGAAGCAATATTTGAAAACATACTTTGTCTATAGCTGCATATGTTTAGTCAATGATTATATGTTTATCCAATTA  
CATTAATATTGTCTCTTTACTGTATAACATTTGATCAAGTTTATATTTCGAAGTTTATTATTTTAGTGAATATAGGTGTTTTATTCAAT  
GCAGTGAGTATTATGATCCAAACCTTTAAATACAAAACACGCATCAATAACATTACAAGCGAATTATATGACGCTTCACACGATTAC  
ATTTATATTCATAACTATTTAATGACAATTGCGTTTGGTCTAAATGGATTCTTTTGGACAACGCTGTTTCAGCAACATTATTAAGTAT  
GTGATTTTAAATATTATAGGTTTAAAGTCTAAATTCATTAATAAAAAAGGACGTCGATTAGATGAGTGAAAAAAGATTTTGATTTTA  
TGTCAGTATTTTATCCGGAATATGTATCTTCTGCGACGTTACCAACTCAATTGGCGGAAGATTTAATTGCGAATCACATTAATGTCTG  
ATGTCATGTGTGGATGGCCATATGAATATAGTAATCATAAACAGGTTTCTAAAAACCGAGATGCATCGTGGTATTCGCATTTCGACGTC  
TCAAGTATTCGAGGTTTAAATAACAAAAGTAAAGGTTGGAAGGATCATCAATTTCTTTAGTTTATTTTCAAAATTCGTGATTAATATACC  
TAAAAATGTTGAAATATGATCAGATTTCTGTTTACTCTAATCCACCAATCTTGCCATTAATACCAGACGTTTTACACAGACTGCTTAAG  
AAAAAATATTTCTTTGTGTTGATGATATAGCACCTGATAATGCGATTAAAGACAGGTGCAACTCGTCCAGGTAGCATGATTGATAAG  
CTGATGCGTTACATTAATAGACATGTCTACAAGAATGTGAAAAATGTCATTGTCTTGGTACGGAAATGAAAACTACTTACTAAAT  
CATCAAAATTTCTAAAAATGCTGACAATATCCATGTGATTCTTAAGTATGACATGCGTCAATTACAAGACAATCGTATCTATAAT  
GACACATTTAAAGCTTACCGTGAGCAATACGACAAAATTTTATTGTATAGCGGTAATATGGGGCAGTTACAGGATATGGAGACACT  
TATCTCATTTTAAAAATTAATAAGGATCAGCCTCAACGTTAACAATACTTTGTGGTCATGGTAAGAAATTTGCAGATGTCAAAAC  
GGCAATAGAAGACCATCGTATTGAAAAATGTTAAATGTTTGAGTTTTTAAACAGGTACAGACTATGCTGACGTATTAATAATGCGG  
ATGTATGTATTGCATCGCTGATTAAAGAAGGCGTCGGTTTAGGCGTGCCGAGCAAGAATTATGGCTACCTGACGCTAAGAAACCG  
TTGGTATCTATCATGGATAAGCAATCTGATATCGTTCAACATGTTGAACAATATGATGCGGGTATCCAAATGATAATGGCGATGCA  
CATGCCATTTATACTTCACTCAACACTCAGTCGATTAAGGAATGAGACAGATGGGTGAGCGCGCACATCAACATGTTTAAAGATAA  
ATATACGAGAGAAATTAATACTATGAAGTATTACAATCTGTTGAAGTGAGGAGATAATTATGAAGCGATTATTCGATGTAGTGAGT  
TCAATATATGGTTTAGTAGTTTTAAGTCCGATTCTGTAAATTACAGCATTACTAATTAATAATGGAATCACCTGGACCAGCCATTTTCA  
AACAAAAAAGACCGGACGATTAATAATGAATTTGTTAATATTTATAAGTTTTAGATCAATGAAAATAGACACACCTAATGTTGCAACT  
GATTTAATGGATTCAACATCGTATATAACAAAGACAGGGAAGGTCAATCGTAAGACCTCTATTGATGAATTGCCACAATTATTGAAT  
GTTTTAAAGGAGAAATGTCAATTGTAGGTCCTAGACCAGCGCTTTATAATCAATACGAATTAATCGAAAAACGTACAAAAGCGAA  
CGTGACATACGATTAGACCAGGTGTGACAGGACTAGCTCAAGTGATGGGGAGAGATGATATTACTGATGATCAAAAAAGTAGCGTATG  
ATCATTATTACTTAACACATCAATCTATGATGCTTGATATGATATCATATATAAAACAATTAATAATATCGTTACTTTCAGAAAGGTG  
GCATCTACTAATGAGAAAAATTTTTAATTACAGGCGTTCAATGGATATATCGGTAATGTTTAAAGATAAAGCTATTGAAACAAGG  
ACATCAAGTAGATCAAAATTAATGTTAGGAATCAATTATGGAAGTCGACCTCGTTCAAAGATTATGATGTTTTAATTCATACAGCAGC  
TTTGGTTTACAACAATTCACCTCAAGCAAGGCTATCTGATTATATGCAAGTGAATATGTTGCTGACGAAACAATTGGCACAAAAGGC  
TAAAGCTGAAGACGTTAAACAATTTATTTTTATGAGTACTATGGCAGTTTATGGAAAAGAAGGTCAGGTTGGTAAATCAGATCAAA  
TTGATACACAAACACCAATGAACCCTACGACCAACTATGGTATTTCCAAAAGTTTCGCTGAACAAGCATTACAAGAGTTGATTAGT  
GATTCGTTTAAAGTAGCAATTGTGAGACCACCAATGATTATGGTGCACATTGCCAGGAAATTTCCAACGGTTAATACAATTGTCA  
AAGCGACTGCCAATCATTTCCAATATTAACAATCAGCGCAGTGCAATTATATATTACACATCTGACAGCATTATTGATCAATTAATA  
TCATTAGAAGTGACAGGCGTGTATCATCTCAAGATAGTTTTACTTTGATACATCGTCAGTAATGTATGAAATACGTCGCCAATCA  
CATCGTAAACCGGTATTGATCAACATGCCTTCAGTTGTTAAATAAGTATTTTAAATAAGTTGTGCGGCTTTAGAAAAATTTTGGCAATT  
TAATATACAGCAATACGTATATGATAATAATAATGCATCTGAAGTTATTTCTGGAAAAATGTCACTTGTTATTGCGGACATCATGG  
ATGAAACGCAACCAAGATAAGGCATAAGTCATCTATTAATAAAAAATCAACATACAAATCGTTTTATTGAGGTTTATAGTATGA  
AGTTAACAGTAGTTGGCTTAGGTTATATTGGTTTACCAACATCAATTATGTTTGCAAAACATGGCGTCGATGTGCTTGGTGTGATAT  
TAATCAGCAACAGATTGATAAGTTACAAAGTGGTCAAATTAGTATTGAAGAACCTGGATTACAAGAGGTTTATGAAGAGGTACTGT  
CATCGGGAAAAATTGAAGGTATCTACAACGCCAGAAGCATCTGATGTTTTATCATTGCCGTTCCGACGCCGAATAATGATGATCAGT  
ACCGGTCATGTGACATTTGCTAGTTATGCGTGCATTAGATAGTATTTTATCATTTTTAGAAAAAGGAAATACTATTATTGTAGAGTC  
GACAATTGCGCCTAAAACGATGGATGATTTTGTAAAACAGTCATCGAAAAATTTAGGATTTACAATAGGTGAAGATATTTATTTAGT  
GCATTGTCCGAAACGTGTACTGCCAGGAAAAATTTAGAAGAATTAGTTTCATAACAATCGTATCATTTGGCGGTGTGACTAAAGCTTG  
TATTGAAGCGGGTAAATGTGTCTATCGCACATTCGTTACAGGAGGAAATGTTGAAACAGATGCACGTACTGCTGAATGAGTAAGC  
TAATGGAAAAACACATATAGAGACGTGAACATTGCTTTAGCTAATGAATTAACAAAAATTTGCAACAACCTAAATATTAATGTATTA  
GATGTGATTGAAATGGCAAAACAAACATCCGCGTGTAAATATCCATCAACCTGGTCCAGGTGTAGGCGGTCATTGTTTAGCTGTTGAT  
CCGTACTTTATTATTGCTAAAGACCCTGAAAATGCAAAGTTAATTCAAACCTGGACGTGAAATTAATAATTCAATGCCGGCCTATGTT  
GTTGATACAACGAAGCAAAATCATCAAAGCGTTGAGCGGGAATAAAGTCAACAGTCTTTGGTTTAACTTATAAAGGTGATGTTGATGA  
TATAAGAGAATCGCCAGCATTTGATATTTATGAGCTATTAAATCAAGAACCAGACATAGAAGTATGTGCTTATGATCCACATGTTGA  
ATTAGATTTTGTGGAACATGATATGTCACATGCTGTCAAAGACGCATCGCTAGTATTGATTTTAAAGTGACCACTCAGAATTTAAAAA  
TTTATCGGACAGTCATTTTGATAAAAATGAAGCATAAAGTATTTTGATACAAAAAATGTTGTGAAATCATCATTTGAAGATGTATC  
GTATTATAATTATGCAATATATTTAATTTATCGACAAAATAAAGTGTGCAAACTAGGGCATACATGATTAAAGGAAAGATAAGCTG  
TCATGTGTTTGAACCTCAGAGAGGATAATGTTATGAAAAAAATATGGTTATTTTCGGTACGAGACCCGAAGCAATAAAAAATGGCA  
CCATTAGTAAAAGAAATTTGATCATAATGGGAACCTTTGAAGCGAACATTGTGATTACAGCACACATAGAGATATGTTAGATAGTGT  
GTTAAGTATATTTGATATTCAAGCTGATCATGATTTAAATATTATGCAAGATCAACAAACGTTAGCGGGCCTTACGGCGAATGCGCT

TGCTAAACTTGATAGCATCATTAATGAGGAACAACCGGATATGATTTTAGTACATGGTGATACTACAACGACTTTTGTAGGAAGTTT  
GGCAGCATTTTATCATCAAATTCGGTTCGGACATGTAGAAAGCTGGACTTCGAACACATCAGAAATACTCACCATTTCCTGAAGAGTT  
AAATCGAGTCATGGTAAGTAATATTGCTGAATTGAATTTTGCGCCAACAGTAATTGCAGCTAAAAATTTACTTTTTGAAAACAAAGA  
CAAAGAGCGTATCTTTATTACTGGAAATACAGTTATTGACGCATTGTCAACAACAGTTCAAAATGATTTTGTTCACAGATTATTAA  
TAAACATAAAGGCAAGAAAGTTATTTTACTAACAGCGCATCGTCGTGAAAATATTGGGGAACCGATGCATCAGATTTTTAAAGCAG  
TAAGAGATTTGGCAGATGAATATAAAGATGTTGTCTTCATTTATCCAATGCATCGTAATCCAAAGGTAAGAGCGATTGCCGAAAAA  
TATTTATCTGGGAGAAATCGGATTGAATTAATTGAGCCATTAGATGCGATTGAGTTCATAATTTTACAAATCAATCGTACCCTCGTG  
CTGACAGATTCTGGTGGTATTCAAGAGGAGGCTCCTACATTTGGAAAACCTGTGTTGGTATTAAGGAATCATACAGAGCGTCCCGA  
AGCGGTTGAGGCGGGAACATCGAGAGTAATTGGCACAGATTATGACAATATTGTTGAAAATGTGAAACAATTGATTGAGGATGATG  
AAGCGTATCAACGTATGAGTCAAGCGAATAATCCATATGGTGATGGACAAGCATCAGACGTATTTGTGAAGCAATAGAATATTAT  
TTTGGATTGCGCACAGACAAGCCGGATGAATTCGTACCTTTACGTACACAAATAATAAAAAACCCCTAATCATGAAGTTGGTTTAGAC  
AACCAGCGGTGACTAGGGGTTTTTAATATATTTATTTTGTAGTGGTAGCCAATATCATATTTGAATACTTTATTTGATAATATTGG  
ACTTTGCTGTCCATCGTCATCACTTTTTAAACGTACATTTTATGAGCTTCTTTAAATACATCGGAATTCAACCAATTATTAAGCTA  
TCTTCAGATTCCCAATAGTTAAGATTTTAACTTCGTCTGTATCCTCGGTATTTAATGTTTTAGTGACAAACATTTGTTGGAAGCCTT  
CAATAGTTTCAATACCTTGTCTATTGTA AAAACGTTCAATCGTTTCTTCCGCACTGCCTTTTGTAAATTGTAATCTATTTCTGCCATA  
AACATGGGCAATCACTCCTCTATTTTATGATTTGATTTGGGTAATGTTTTTACAAATGTAAAGAGTACAGCGGTTTGTATGATAACCA  
TTATGATTAATCCTACACGGAGTCAAGAACATCCACCATATAAAATTGAAAAACCTATTACAATGTACAAGCTAATTAATAATTTTAA  
TTTTCTGTTGAGCGTGTAGCCTCGATGTAAATAAAAGTTTCTACATATTTCTTATAAAATTTTGTATTAATAAGCCAAATTGTA  
GCGATCTGAACCTCGAGCAAAAACAAAAAAGTGTACGAGTAAAAAAGGGGTCGTTGGCAGTAAAGGTAATACGGCACCTGCAATA  
CCAAGCGCTGTAAATATTAAGCCAATGACGATTAATAATAAGTCGCATTGAAAAAAGTCCATTCTAGTACTAATGCGCATGTAATATT  
GTTTTAGTAATATAACTCATGCTAAATATAATGTGTATGATAAGTGAATGACTCAGTAAATGAAACGTTGTTGAATTTATCTTGT  
CCCATTAACGCATTTTAAGCGCGACTTTCATAACAACCAAACCTATTTAATGAGAATTATTCTCAAGTATTATAGTTATATTATGTGTT  
TTATTTTTGAAAAGTGCAATATGTTTTCGAAAAATAAGATTATTTTTATGTGCAAAAACGACGCAAAAGTTTAAAAATGAGACTTCT  
GTGAGCTGATTATTTATAAAATGTAAACGCTTACTATATAATGTGAATCATATCGTTTAAAAAGCATTATTAATATGATGCTAAGA  
GATTTATATTATAGCCAATAAACAAAGGAGAGATAATATGGCAGTAAACGTTTCGAGATTATATAGCAGAGAATTATGGTTTATTTAT  
CAATGGGGAATTTGTTAAAGGTAGCAGTGACGAAACAATCGAAGTGACTAATCCAGCAACTGGAGAAACACTATCACATATTACAA  
GAGCAAAAGATAAAGATGTGATCATGCAGTCAAAGTGGCGCAAGAGGCATTGTAATCATGTTCAATTAACCTTCAATCAGAACCT  
GCACAAATGTTGCGTGATATTGGTGATAAATTAATGGCACAAAAAGATAAAATTGCAATGATTGAAACATTAAATAATGGTAAACC  
GATTCGTGAGACAACAGCAATTGATATTCATTTGCTGCAAGACATTTCCATTATTTGCAAGTGTTATTGAAACAGAAGAAGGTAC  
AGTAAATGATATCGATAAAGACACAATGAGTATCGTACGACATGAGCCGATTGGCGTCGTAGGTGCTGTTGTTGCTTGGAACTTCCC  
AATGCTATTAGCTGCATGGAAGATTGCGCCAGCCATTGCTGCAGGTAATACAATTGTGATTCAACCTTCGTCTTCAACACCATTAAAG  
TTTATTGGAAGTTGCTAAAAATTTCCAAGAGGTATTACCTAAAGGTGTTGTCAATATACTAACGGGTAAAGGTTTCAGAATCAGGTAA  
TGCAATTTTCAATCATGATGGTGTAGATAAAATTATCATTTACGGGCTCAACTGATGTAGGTTATCAAGTTGCCGAAGCTGCAGCAAA  
ACATCTAGTACCCGCTACATTAGAGCTTGGTGGTAAAAAGCGCAATATCATATATAGATGATGCTAATTTAGACCTTGCAGTTGAAGG  
TATTCAGTTAGGTATTTTATTCACCAAGGTGAAGTATGTAGTGCAGGTTCTCGATTATTAGTTTCAGAAAAATTTATGATCAATTTG  
GTGCCACGTTTACAAGAGGCATTTTCAAATATTAAGTTGGAGATCCACAAGATGAAGCTACACAAATGGGTAGTCAAACCTGGTAA  
GGATCAATTAGATAAAATTCAATCATATATTGATGCAGCAAAAAGATCAGATGCACAAATTTTAGCAGGCGGTATCGCTTAACTG  
AAAATGGATTAGATAAAGGGTCTTCTTTGAGCCGACATTAATTGCTGTGCCAGACAATCATCACAAATTAGCACAGAAGAAATA  
TTTGGACCAGTGTTAACAGTTATTAAGTGAAGGACGATAAAGAAGCAATTGATATAGCTAATGATTCGAGTATGGTTTAGCAGG  
CGGTGATTTTCTCAAAATATCACACGTGCATTAATATTGCTAAAGCTGTACGTACAGGACGTATTTGGATTAACACTTACAACCA  
AGTACCAGAAGGCGCACCATTTGGTGGTTATAAAAAATCAGGTATCGGTGCGAGAACTTATAAAGGTGCGTTAAGTAACATCAAC  
AAGTTAAAAATATTTATATTGATACAAGCAATGCTTTAAAAAGGTTTGTACTAGAATAAATATCGTTTCTGAAGCGGTGTTTGTAGGCA  
GTCTAGCGGTAAAGTCTTAGCATGTTTACGGAGTTGTTAGATTTTAAAGCAAAAATATATAGGAACACGATCATGATATTAGG  
ATATAATGACTAAAATAATAGCAGTAGGATGGTTTTTAATTGCAAAATCATCTTACTGCTGTTTTTAATTATGCTAATTTGCGATGCGG  
TTATTATAAGGACAGAGTTGTTTATTAATTATGGTGATTTAGAAATATGAAGTTCGATATGCAAAGTCATCGTTTGTTTTAATATGTG  
GAACAATCATTAAGTTATTGTGATTTTTTGAACCTAATGAACTAAACAATAAATTTGAGATACTTTTTTGTCAATTTTATGTAACCT  
AACACAATAATCTCGTACATTATTAATAATTTCTATATGATAGGGATAAAGCAAGCGCGAGTGTGCTGTAAAAGTTTTTCCAAGGT  
GATATTACATAAAGATATAAAGGGTAAAGATTAATGAGTTGTCATGTAAATGACGATGATGTATAAATCATGGTTAATTACGGAAG  
CATTAATATTAACCTGAGAAGCTATAAAGAATTATTTTTAAAAGCGACAATATTAATACGACGCATTTATTTAGGAGTGGCAAACG  
TATGAATGGGAAAAAGGCGAATACGATAAACAGATACAAATATTTTCATCATGTCAATCATCAAAAAATTCAACAAAGTTCTAAAA  
AGACGCTGTGGGCATCACTTATCATCACATTGTTATTACGGTGATTGAAATTTGTCGGAGGTTTAGTATCTAATTCATTGGCATTACT  
GTGAGATTTCATTTATGCTTATGCTGATGATTAGCATTTAGCATTTGTTTATCTATGTTGGCCATTATTTTGAAGATAAGAAGCCGATGCA  
CGATACACATTTGGATATTTAAGATTTGAGATATTAGCTGCATTTTAAATGGTTTAGCATTAAATTGTAATTTCAATCTGGATTTTAT  
ATGAAGCTATTGTACGTATTATTTATCCGCAACCAATTGAAAGTGGCATTATGTTTATGATTGCTAGTATTGGTTTACTCGTTAATAT  
TATTTTGACAATTATCCTTGTAAAGTCTTTAAAAACAAGAAGACAATATCAATATTCAAAGTGCATTATGGCATTTTCATGGGAGACTT  
ATTGAACTCTATTGGTGTATCGTTGCAGTTGTATTGATTTACTTTACAGGATGGCGCATCATCGACCCAATCATTAGTATTGTAATT  
TCACTCATCATTTTACGTGGTGGTTATAAAATTACGCGTAATGCGTGGTTAATTTTAAATGGAAGGTGCGCTCAACATTTGGATACTG  
ATCAAATTATGGCAGATATTA AAAACATAGATGGCATATTAGATGTACATGAATTTTCATTTGTGGAGTATTACAACAGAGCATTATT  
CATTAAGTGCCCATGTTGTGTTAGATAAAAAATATGAGGTTGATGATTATCAAGCGATTGATCAAGTATCATCTATTGTTGAAAGAAA  
AATATGGCATTTGCATTTCAACGTTGCAAAATTGAAACTTGCAATTGAAATCCATATAGATGAGCCACTACTTCGACAAATTAACATAAA  
TAAAAACATTGTAGCGCTAAAAACATTAATCTATGTCATAGGCGCACGTTTCGTTTTTACTTATGTTGCATCATTTAAATGATTTTCG  
TCAATTTCTTTGATGCTATCTACATCTAACACGACATCTTTAGGTTTCAAATATGAATATGTTTTTCATCATTTGTATGTAAAATGC  
GTTCTATGATGTACCTTTGACCGGCCATTGTTTCTACAGCAATCTTTTTGTTTCTAGCTAAACTTGCTACGACAGATTCTTTATCCATA  
ATGATAGCCCCCTATATATATGTTATTTACTTATACCCTAACATGATTTTTATACTCTTTGAAAATATATTTTACAGAAATTTATCTA  
AATATTTAAAAAATAGCTTAATATCCTTGTAAATCCGATAAGAATTATAGTAATATTTTTCACCAATTGTTATAGGAGGTCTTATTA  
ATGACATTATTTTATTAGAAGCTAACAATCTTGATTTTGCATCAACGAAAGAAGAACTAGAAGCAAAGGCAGCATCACTATCTACG  
AAGACAATTTCAACATTAATTGAAGTACAAGTACTGAAAATTTAACTCATGGTTATTTTATTGTGGAAGCAATGACGAAGCAGA  
AGCTAAACAATTTTAAACAGAAGCAGATATTAGTATTCAATTAGTCAAAGAAGTACGCTTAGTTGGTAAGATTTAGATGAAGTTA  
AAAATGGTGATGCACATGTTGATTACCTGTAACTTGGAACTTCCGGAAGGCATTACGATGGATCAATATTTAGCACGTAAAAAG  
AAAAATCTGTTTATTATGAAGAAGTGCCAGAAGTTGAATTTAAACGCACATATGTATGTGAAGATATGTCTAAATGTATTTGTTTA  
TACAACGCACCTGATGAAGAAGCGGTACGTGCGCGCGAAAAAGCAGTTGATACACCGATTGATGGCATCGAAAAACTTTAATAAGA

CAACAAGTTGATGAGATATATGTATATAGGTTTGACGTGGATTTTCGATTGCAGTTAATTAGAATAGCTCAATGCTATAAATGTAAGT  
GGTTGATATGACGAACTAATGAACTAAATGCAAGTATTGTCTAAAAACAATCATTTTATTGAAATTTAGTAGAGCTGAAATTAATAT  
AACGTCGTTAATTGAATAACGCTTATGTTATAAGAGCACTCATACCAAACCATAATCATCTATAGATATAACAATTCACGATATAAG  
GGCTGTGTTTGGCATAGCCCTTTAGATATACACTTAATTCCTATTAATAATAGTAGGGATTAAAAGGGGGCTTGTGCATGATTAATAAT  
CAACAATTACAACATCACTTTGGATCACATAAAGTAATTCATAACTTTAATTTGGACATTAGCAAGGGAGAAATAGTCACTTTTCATA  
GGGAAAAGTGGTTGCGGAAAGTCTACTTTACTCAATATTATCGGTGGATTATTTCATCCATCGTCTGGTCTGTGCATTATTGATAACG  
AAATTAACAACAGCCATCTCCAGATTGTTAATGTTATTTCAACATCATAATTTGCTGCCATGGAAAACGATTAATGACAACATTA  
GGATTGGATTTCACAGAAAAATTAGTGATGAAGAGATTAACGCACAGCTTAAATTTAGTTGATTTAGAAGACAGGGGAAAGCATTTT  
CCCGAGCAACTGTCCGGGGGTATGAAACAACGTGTGGCACTATGTGCGAGCGCATGTGCATAAGCCTAACGTTATATTGATGGATGA  
GCCATTAGGTGCATTAGATGCATTTACACGTTATAAACTTCAGGATCAACTAGTGCAACTAAAACATAAAACGCAATCAACTATTAT  
TTAGTGACGCATGACATTGATGAAGCTATTTATCTTTCTGACCGCATTGTTCTGTTAGGTGAAGGGTGCAATATTATTTCTCAATAT  
GAAATTACAGCATCACATCCACGCAGTCGTAATGATAGCCACCTACTTAAGATTTCGTAATGAAATTATGGAACATTTGCATTGAAT  
CATCATCAAGTTGAACCTGAATATTATTTATAAGGAGTGAGTGACGATGAAAAGGTTAAGCATAATCGTCATCATTGGAATCTTTAT  
AATTACAGGATGTGATTGGCAAAGGACGTCTAAAGAACCCTGCTAAAAATGCCAAAATCAGCAAGTGATTAAAAATGGATATTTGC  
CGATTACACATTCAGCTAATTTGATGATGACTAAAAAATTATTATCACAAATACAATCATCCGAAATATAAACTAGAAATTAGTTAAAT  
TCAATAATTGGCCAGATTTAATGGACGCATTAACACAGTGGTCGTATTGATGGTGCATCAACTTTAATAGAGCTAGCGATGAAATCAA  
AACAGAAGGGCTCAAAATATAAAGGCTGTGGCATTGGGCCATCATGAAGGCAATGTCATTATGGGACAAAAAGGTATGCACCTAAAT  
GAATTTAATAATAAATGGCGATGATTACCATTTTGGTATACCAACTCGTTATTCAACACATTATCTTTTACTTGAGGAATTCGTAAC  
AATTAAGATTAAACCGGGGCTTTTAGCTATCATGAAATTGTCGACGAGAAATGCCAGCAGCCGATTTAGTGAAACACAGAATTACA  
GGGTATTCTGTAGCCGAACCATTCGGTGCACCTGGGTGAAAAGTTAGGCAAAGGTAAGACTTTGAAACATGGTGATGACGTTATACC  
TGATGCGTATTGCTGTGTGCTAGTACTGAGAGGGGAATTGCTTGATCAACACAAGGATGTAGCGCAAGCATTTGTACAAGATTATA  
AAAAGTCTGGCTTTAAAAATGAATGATCGCAAGCAAAGTGTAGACATTATGACGCATCATTTTAAACAAAAGTCGTGACGTTTAAACA  
CAGTCAGCGGCATGGACATCCTATGGTGATTAAACAATTAAGCCATCCGGCTATCAAGAAATTACGACATTGGTAAAAACACATCA  
TTTGTTTAATCCACCTGCATATGATGACTTTGTTGAACCGTCATTGTATAAGGAGGCATCGCGTTTCATGACACGTCACACATAAC  
AAATTTATATTACCTATTATCACATTTATTATTTCTTAGGCATTTGGGAAATGGTCATTATTATTGGGCATTACCAACCTGTATTGTT  
ACCTGGTCTGCTCTTTGTAGGAAAAAGTATATGGACTTTTCACTGGAGAAATTTTCCAACATTTAGCAATTTAGTTTATGGAG  
ATTTGTAGCGGGCTTTGTTGTGCGATTGTTGGTTGCTATTCCATTGGGCTTCTTACTTGGAAGGAATCGTTGGCTATACAACGCTATC  
GAACCGCTATTTCAATTGATTAGACCGATATCTCCGATAGCATGGGCACCATTTGTTGTTCTATGGTTTGGTATTGGTAGTTTGGCCAG  
CGATTGCGATTATTTTTATCGCTGCTTTTTTCCCAATTGTGTTCAATACTATTAAAGGCGTTAGAGACATTGAACCTCAATATTTAAA  
AATAGCGCAAATTTAAATTTAACTGGGTGGTCATTGTATCGCAATATATTATTTCCCGGGGCATTTAAACAAATCATGGCTGGGAT  
ACATATGGCGGTAGGAACAAGTTGGATATTTTTAGTTTCTGGTGAAATGATTGGTGCACAATCGGGATTAGGTTTTTAAATCGTTGA  
TGCACGAAATATGTTGAACCTTAGAAGATGTTTTAGCAGCAATATTCTTTATCGGATTATTTGGTTTTATTATTGATCGATTTCATTAGT  
TATATTGAGCAGTTTATACCTTAGAAGATTTGGTGAATAAGGAGAGATGATGATGACTTTAGAAAACGCTTATCAAAGAACAATTAGA  
TCCTCATTTAGTAGAAAGTTGATGAAGGGACGTATTATCCGAGAACATTTATTCAACAATTTATTGTAGATGGTTATTTCCGGTAGGGC  
GGCATTTAGAAAAGTAAAGTAACTGAAGCTGATATCGCAGCTTGTGTTGACCAACAGGATTTGTTTATAGGTTGCCAATTAGCTTT  
TTCAACGTATTTAGAAAAATGCCACGCAGCCACATTTAAATAATGACTTACAACAGCAATTGTTATCTGGAGAAATATTAGGTGCTAC  
CGGATTGTCTAATCCGATGAAGTCATTTAATGATTTAGAAAAGTTGAACCTTGAACACACTTATGCTGATGGACAATTGGTTGTCAG  
TGGACGTATGCCAGCTGTAAGTAATATTCAAGAAGACCATTATTTGGTGGCATTTCGAAACATGAATCATCAGATGAATTTGTCAT  
GTTCAATTCTACGTGCCAATCAAGATGGTATCACTCTCGTTGAAAAAACAACTTTTTAGGAGTAAATGGCTCGGCTACGTATCAAAT  
TACTTTGAATCAAGTCGTAGTGCCACAATCACAAATTATCACGCATGATGCGAAGCAGTTTGCGGCAACTATTCGCCCACAATTTAT  
TGCTTATCAAATTTCAATAGGATTAGGCTCAATTAAGGTTCTTTAGAGTTAATTGATGCATTTTCAAATGCGCAAAACGGAATAAA  
TCAATATTTAGAGTATGATGTTGAAGCTTTTTAAAAACGTTATCGTCAACTTAGAGAGGAATATTATGCAATATTAGATGACGGTAA  
CTAATCTTACATTTAAGTGAAATTAATATCATTTGAAGAAGGACATTGGCTATTTATTGCTAGATGTAATTAAGGCTTCTGTTGCAAT  
GGTGGTTCAAGAGCGTACACCCATATTCGCCACAAGTTCGCAAGTTAAAAGAAGGATTCTTCTTTGCAGCATTGACACCAACATTA  
AGACATTTAGGTAACTTGAAGCAGAGTTGAAGGGTAAGTGTGATAAGCTGATTTTTTGTGTTAGATGCGTTTGTGAAACATTTTT  
TTAAAAATAATATAAATCTTAGTTTATAAACATTTTCTGTAAATTTGTTATATCCTTTTAACTAGGAAAATATACATTTTCGTAATAATA  
ATAATCGTTATCATTTGAAAAAGTGTTAATAAGGTGTATAATGAAAATGTGAACAATTAATGAACCTCTTATTTTAAAGAAGGTGAAT  
ACTATAGATACGCATACTAAAGAACAACAATTTCTCGAATCTAGTAAGATCTTATCGTAAAGAATACGTGGGTAAAGGACCCAAATAG  
TATTCGAGTGTCTGTTTAAAGATAATTGGGCGATTGCACATATGACAGGTGTTTTGAGTAAAGTTGAGAGTTTTTACCTAAACGACAA  
ACGCAATGAATCGATGCTCCATTATACACGCACAGAGAAGATTTAAACAGATGTATAAAGAAATAGATGTAAATGAGATGGAAAGT  
CTTGTAGGCGCTAAGTTTGTAAAAATTATTTACAGATATTTGATTGAAATGATGAAGTCATTTTCAATATTTGTTTTCGATAAGTCAA  
TAGAATAAGTGTGTTGTTGAAGGTACACGGTGCTGTTGTCTAACTTCGCTTTGAAATTTAACAATAATTCAAGGGGGTGGTATGTC  
AAACGGTGCCGTTTTTTTTGTCATATTTTTAAAAACAAGCAACATGCAACACGTACTTTAAGGAAGTCAAAATTTATCATTTAGGAGAG  
ATGGATATGAAAATCGTAGCGTTATTTCCAGAAGCAGTAGAAGGTCAAGAAAAATCAATTACTTAATACTAAAAAAGCATTAGGATT  
AAAAACATTTTTAGAGGAAAGAGGACATGAGTTCATTATATTAGCAGATAATGGTGAAGACTTAGATAAACATTTACCAGATATGG  
ATGTGATTATTAGTGCGCCATTTTATCCTGCATATATGACTCGTGAACGTATTGAAAAAGCACCGAAGTTGAAATTAGCAATTACAG  
CAGGTGTAGGATCTGACCATGTAGATTAGCGGCAGCAAGTGAACACAATATTGGTGTGCTTGAAGTTACAGGAAGTAATACAGTT  
AGTGTGGCAGAACATGCGGTTATGGATTTATTAATACTTCTTAGAACTATGAAGAAGGTATCGTCAATCAGTAGAAGGTGAATG  
GAACCTGTCTCAAGTAGGTAATCATGCGCATGAATTACAACACAAAACAATTTGGTATTTTGGATTTGGTCAATTTGGACAACATTTG  
TGCTGAAGAATTAGCGCCATTTAATGTAACATTACAACACTATGATCCAATCAATCAACAAGACCAATAAATGTCGTAATTTGTAAG  
CTTTGATGAACCTGTTTCAACAAGTGATGCGATTACAATTCATGCACCATTAACACCAGAAAAGTGAATACTTATTTGATAAAGATGT  
TTTAAGTCGTATGAAAAAACACAGTTATTTAGTGAATACTGCACGTGGTAAAATTTGTAATCGCGATGCGTTAGTTGAAGCGTTAGC  
ATCCGAGCATTTACAAGGATATGCTGGTGATGTTTGGTATCCACAACCTGCACCTGCTGATCATCCATGGAGAACAATGCCTAGAAA  
TGCTATGACGGTTCATTTACAGGTATGACTTTAGAAGCACAAAAACGTATTGAAGATGGAGTTAAAGATATTTTAGAGCGTTTCTT  
CAATCATGAACCTTTCCAAGATAAAGATATTATTGTTGCAAGTGGTCGTATTGCTAGTAAAGTTATACAGCTAAATAGAATAAGGA  
TGCTGGGCTAGCGATTAAACGCTTCAATTTTATATAAATGAATCATATAAGCACTACTGCTGTTGTAAGATGGCAGTAGTTTTTTA  
TGATTACATCTAAGTATAGTCACGGCTATGTTAGGACATGATTTTAACATTTACGCACATATGTGTTCACTTACGCAATTTAGTATAA  
ATTTCACTTATTGGAATAATATAGTCATATAGTGCTAATTTTGTGAGGCAATTATATGAAGATGCATTGTAAGTCGATGCATT  
TGTTTGTAAATAACTTTGTATAACTAAAAATCTTTGTTTCAACGTATAAATCAATAATAGATTTTATATAAATGGTAGTGTGTATA  
TATGTGGAAGGGGTGTAGTTAATGAACGCTTAAGTACGACTTTGAAAGTACGATTGATTAGCAATTTTTTACAGCTAATTAT  
TACGACAGCATTTATACCGTTTATAGCACTATATTTAACAGATATGTTAAGTCAATCAATTGTCGGTATATATCTTGTGTTTAGTG

GTTCTAAAAATTTCCATTGTCCATTATATCTGGTTACCTTATTGAGATATTTCCGAAAAAGTTGCTAGTACTTATTTATCAAGCGACGA  
TGGTGATAATGCTTGTGTTTCATGGGCGTATTTGGGTCACATCAATTTGTGGCAAATTATTGGTTTTTGTGTTGCATATGCCATATTTAC  
AATCGTTTGGGGATTACAATTTCCAGTTATGGACACATTAATTATGGATGCAATTACCGAAGACGTGGAACATTATATTTACAAGAT  
TAGCTATTGGATGACAACTTATCGGTAGCTATTGGGGCATTGTTAGGTGGCTTGATGTATGGCTACAGTATGTTACTACTTTTCTTA  
ATAGCAGCTTGATATTTTTAATTGTACTCTTTATTTTATATATTTGGTTACCTCAAGACCGAAATCAAGTAAAGCAAAGTGATGACA  
AGAGGCATGCAAGTCGTTATCAAAAATTACAAAATAATGAATATATTTTCGCAGTTATAAATTAGTTTTGAAAGACCGTAATTATATGT  
TATTGATTTTCGGGGTTCAGTATCATCATGATGGGTGAATTTTCAATCTCCTCATATATTGCTATTAGACTAAAGGATCAGTTTGAAC  
AATAAGTATAGGTTTCATATGATATTACAGGTGCTAAGATGTTAGCAATCTTGCTAATGATTAATACGGTCGTCGTCATTTTACTCAC  
GTATTCAATCTCGAAAAGTTGTATTGAAAAATAGATTTTAAAAAAGCTTTAATCACTGGTTTGCTGATTTATATTGTTGGCTATAGTGGT  
CTAACCTATCTTAATCAGTTTGGCTTATTAGTTGTTTTATGATAAATTGCGACTGTAGGTGAAATTATTTATTCGCCATAGTTTCAGA  
ACAACGCTTTAAAAATTATTCCTAAAGCTAAAAAGAGGAACATATAGTGCAGTTAATGCATTAGGTATTCATTTTTCAGAAACACTAGC  
TAGGTTAGGGATTGTGTTGGGTGTTTTCTTAACGTCATTACAAATGGGACTGTATATGTTTATCGTTTTAAACAATTGGTGCTAGCATG  
CTTGTTGCTGGTGTATTTGGGGGACAAAAACAAGTGAATACAAATTGAATTTATTTAAATATTTATTTTATGCATCTTTTTATATGGA  
AAACCTATTAATTTGGTTCGTAATTAATAATAGAGATAAATTATTAAGAATTGTGTTAAAAATTAAGGATAACAATTGTTTTATGCGAG  
TTGTTTGTATAATATAAACTTGCTTCATGGATATTTTGTAAACAACAATATTGAGTTTGCAATGAGATGTGAACAACAGAAAGTGATT  
AACGAGTTGTAGTGTCTATTTATCGAAGATGTATGTAATTTACATTGAAAAATATACCAATTGTAACGATGATACAAGATGTATTT  
TAGGGTAGAATATATCGCTCATATGTTGCGAATGGTGTTTATATTAATCATTACATAACGAGTTAATTAACATTTTCGTCGGTTATCA  
TATCATCATGCAATTTTCAGTAAGTAATGAGTATTATGATATGAAAGAAGGACTTTTATGATTATGGGTAAATTTGAGATTTCAACAG  
GAATATTTTCGTATATACAAAAATAATACAGAATCAACGACACACCGTAATGCGTATTGGGTTAAACTCGCTAAAAAATGTTGAAGC  
TACTAAAAATGATGTATGCATTATCGACAATTGTGCAACAACATGCATCTATAAGACATTTTTTTTGTATGTTACTACCGATGACAATTTA  
ACAATGATACTTCATGAATTTCTGCCTTTTATTGAGATAAAACAAGTTCATCTTCTTCGCAAACTATGATTTAGAAGCTTTTTTTTA  
AGCAAGAATTAAGTACTTACCATTTTAAATGATTCACCTTTATTCAAAGTTAAATTTGTTTCAGTTCGCTGATGCTGCATATATACTATT  
AGATTTTCATGTGTCCATTTTCGATGATAGTCAAAATTGATATTTTCTTGATGATTTATGCAATGCATATCGTGGCAATACTGTTATTA  
ACAATACTCGACAGCATGACACATATAAATAGAAATGATGATAAAGACAATCAAGATGCATCGCATATAGCATTAGACTCAAACCTAT  
TTTCGGTTAGAGAATAACTCTGACATCCATATTGATAGTTATTTTCCAATTAAGCATCCATTTGAACAAGCTTTATATCAAACGTATT  
TGATTGATGATATGACATCAATAGATATGGCATCGTTGGCTGTTAGTGTGTATTTAGCTAATCATATAATGAGTCAACAACATGATG  
TCACATTAGGTATACATGTACCATCACATTTACCAAATGATTTACACGGAAATATTGTGCCGTTAACTGTTAAACAATCGATGCAAAAAG  
ATGTATGTCAACGTTTTACAACAGATTTTAATAAATGTGTGTTGCAAAATATGTGCGCAATTACAGTGCGCGAAGTCTTCGCTTTCACT  
AGAGACTATTTTTCATTGTTATCATCATATGATGTCTTGTTGTAATGATGTTATTGAGGATGTACATCAAATACATGATGCACATACA  
TCTTTAGCGGATATTGAAATTTTCCACATCAACACGGGTTCAAAATATATATAACAGTGCAGCATATGATTTGCTCTCAATCGAG  
ACGCTGAGTGACTTAGTTCGAAATATTTATTTGCAAATTAAGTGAAGAAAAATGGAATAAACGAACAACCTGTAGATGAACTTAATTT  
GATGACAGAACGTGATATTCAATTATATGACGATATCAATTTAAGTTTGCTGAGATAGATGATGCGCAAAACAGTTGTTACCTTATT  
TGAGCAACAAGTTGAAGCAACGCCGAATCATGTGCTGTGCAATTTGACGGAGTGTTTATAACATATCAAAACATTGAATGCACGCG  
CGAATGATTTAGCACACCGTTTGAGAAACAGTATGGTGTGAACCTAATGATCGTGTGCTGTCATAGCTGAAAAAATGATTTAGG  
ATGATAATAGCGATGATAGGTGTGTTGAAAGCTGGTGGGGTTACGTTGCAATTTGATGCCAATTGATGCCAATTCCAAGTATCGTACAGGTA  
CATTTTAAAAGATGCAACGCCTAAAGTTGTAATAACGTACCAAGCTTTATATGAAAAATGGTAAACAAAATATTAATCACATTGATTT  
GAATAAGATAGCGTGGAATAATTTGATAATCTTTCTAAATGTAACACGTTAGAAGATCATGCTTATGTTATTTACACGTCGGGGAC  
AACTGGTAACCCTAAAGGGACATTAATTCGCGACCGAGGTATTGTTGCTTGGTCCATCAAAATCATTATGTACCATTAAATGAAGA  
GACGACGATTTGTTATCAGGAACCTATAGCCTTTGATGCTGCAACATTGAAATATATGTTGCATTGCTCAATGGTGGAAAGTTGAT  
TGTGCTAAAAAAGAACAATTATTAATCCAATAGCGTTAGAACAATTAATCAATGAAAAATGACGTTAATACTATGTGGTTAACCTC  
CTCATTATTTAATCAGATTGCTAGTGAACGAATAGAAGTATTGGTACCCTTAAAGTATTTATTAATTTGGTGGAGAAGTATTGAATGC  
TAAGTGGGTGGATTTGCTTAATCAAAAACCGAAGCATCTCTCAAAATTAATATGGTTATGGACCAACTGAAAAATACAACATTTACAAC  
GATGATAATATACTTAACAAAGTTCCAATTTGATTCTCTATTGGTAAACCGATTCTTGGTACTCATGTTTATATCATGCAAGCCGAG  
CGTCGATGTGGCGTTGGTATTCTCGGAGAATTATGTACAAGTGGCTTTGGGTTAGCTGCAGGTTATTTAAATCAGCCAGAATTGACA  
GCAGATAAAATTTATCAAAGATTCAAATATAAATCAGCTGATGTATAGAAGTGGTGATATCGTTTCGTTTGTACCCGATGGCAACATA  
GATTATTTATATCGAAAGGACAAACAAGTTAAGATTGAGGGGTTAGGATTGAGTTGTCAGAGGTTGAGCATGCGCTCGAGCGTAT  
ACAAGGTATTAATAAAGCAGTTGTTATTGTTCAAATCATGATCAAGATCAGTATATCGTTGCTTATTATGAAGCGATGCATACATT  
ATCACATAATAAGATTAAATCACAATTACGTATGACCTTACCGGAGTACATGATACCAGTTAATTTTCATGCATATTGAGCAAAATCC  
TATTACTATTAATGGGAAATTAGATAAGAAGGCATTGCCTATCATGGACTATGTGCATACGGATGCCTATGTAGCACCGAGTACAG  
ATACCGAACACTTGCTATGCCAAATTTTTGCAGATATTTTACATGTGAATCAAGTAGGTATTCATGATAATTTCTTTGAATTAGGTGG  
CCATTCATATAAAGCAACGTTAGTGGTGAATCGGATAGAGGCATCTACTGGGAAACGATTACAAATTTGGTGATTTATTACAAAAGC  
CAACTGTATTTGAAGTACGACAAGCGATTGCTAAGGTTCAAGAACTCAAACTATGAAGTGATTGTTCCAGAACTATAGTTAAAGATGAT  
TATGTGCTGAGCTCTGCACAAAAGCGTATGTATTTATTATGGAATCAAACCATAAAGATACGGTGTATAACGTACCTTTTTTATGG  
CGGTTATCATCAGAACTTAATGTAGCTCAATTGCGACAAGCAGTGCAGCGTTTGATAGCGCGACATGAGATTTTACGAACACAATAT  
ATTGTTGTAGATGATGAGGTTGACAACGTATTGTGGCAGATGTTGCAGTTGACTTTGAAGAAGTTAACACGCATTTTACGGATGAA  
CAAGAAATCATGCGCCAATTTGTAGCACCTTTTAAATTTGGAAGGCAAGTCAAAATAGAGTGAGATACATTAGAAGTCCCTTACAT  
GCATACCTCTTTATAGATACACATCATATCATTAAATGACGGTATGAGTAATATACAATTAATGAATGATCTTAACGCACCTTTATCAA  
CATAAATTATTGTTACCACCTTAAATTGCAATATAAAGACTATAGTGAGTGGATGTGCGATCGTGATATGACGAAACATAGACAATAT  
TGGTTATCTCAATTAAGATGAAGTACCTATTTTAAGCTTACCAGCAGACTATGTTAGACCAAAATTTAAAACGACAAATGGAGCA  
ATGATGTCTATTTACAATGAATCAACAAATGAGACGACTTCTCAAAGATGTAGAAAAGCATCAAAATTAAGTATTTTATGTTCTTT  
ATGAGTGTGGTCATGACGTTGTTAAGCAGATATGCTCGAAAAGATGATGTTGTTGTCGGTAGTGTGATGAGTGCGCGTATGCATAAA  
GGCACGGAGCAAAATGCTAGGCATGTTTGCTAATACGTTGGTATATAGAGGGCAACCGTCACCTGATAAAATGTGGACACAGTTTTT  
ACAAGAGGTTAAGGAAATGAGTTTGGGTGCATACGAGCATCAAGAATACCCATTCGAATGTTTAGTAAATGACTTAGATCAATCAC  
ATGATGCCTCACGGAATCCATTATTGATGTCATGTTAGTACTACAAAACAATGAAACGAATCATGCTCATTTTGGGCATAGTAAAT  
TAACACACATTCAACCAAAATCAGTGACGGCGAAAATTTGATTATCTTTTCATCATTGAAGAAGATCGCGATGACTATACAATCAATA  
TCGAGTATAATACCGATTTATATCACTCAGAAACAGTTCGTCACATGGGTAATCAATGTATGATTATGATTGATTATATTTGAAGC  
ATCAAGATACACTACAAATTTGTGATATACCAAACGGTACGGAGGAACCTCTAAATTTGGGTCAATACGCATGTTAACGATCGAATG  
CTTAATGTCCCGGAAATAAATCTATCAAGTTACTTTAATGAAGTGTCTACGACAAGGTAATCATGTTGCGCTAGTCATGAAT  
GATTTGACAATGACGTATGAAACATTACGCAACTATGTGGATGCCATTGCGCACATGCTCCTATCAAAATGGTGTGGGCAATGGTCAA  
CGGGTTGCCCTGTTTACAGAACGTAGTTTTGAAATGATTGCGGCGATGTTGGCGACAGTTAAAGTAGGTGCATCTTATATACCTATC  
GATATTGATTTTCCGAATAAACGACAAGGTGCAATTTTGGAGGATGCTAAAGTAACTGCAGTCATGTCTTACGGCGTTGAAATTGAA

ACGACATTACCAGTCATTCAATTGGAAAAATGCTAAAGGCTTTGTTGAATCAAAGGAAAAATGAACAATATGATGATTTACATGGCAA  
TCAACTTGAAAACACAGCGATGTTAGATAAATGAGATGTATGCTATTTACACATCTGGTACGACCGGGATGCCTAAAGGGTTGCCA  
TACGACAACGAAATTTGTTGAATTTAGTGCATGCATGGTCAACTGAATTGCAATTAGGCGACAATGAAAGTATTTTGAACATGCAA  
ATATTGTTTTGATGCATCAGTTATGGAGATTTATTGTTGTTTGTAAATGGTCATACGCTTGTGATTCCAGATAGAGAGGAACGTGT  
TAATCCAGAACAGTTACAACAACCTCATTAATAAGCATCGTGTGACGGTTGCGTCGATTCCGTTACAGATGTGTAGTGTATGGAAGA  
CTTTTATATTGAAAAGTTGATTACAGGCGGGGCAACTAGTACGGCATCCTTTGTTAAATATATTGAGAAGCATTGTGGCAGCTATTT  
CAATGCCTATGGACCATCTGAGTCAACAGTCATCACATCGTATTGGTCCATCATTGTGGTGATTGATACCTGAGACGATTCCAAT  
TGGCAAAACCTTATCTAACATCCAAGTGATATTTATGTCAGATGGTTTGTATGCGGTATTGGTATGCCAGGCGAGTTGTGTATTGCA  
GGTGATAGTTTAGCGATAGGATATATTAATCGTCCAGAATTAATGGCTGATAAATGGCAAAATAATCCATTTGGTAAAGGAAAGTT  
GTATCATAGTGGTGATTTAGCACGTTATACATCTGATGGTCAAATTTGAATTTTTAGGAAGAATAGATAAAACAAGTAAAGTTAACG  
GGTACCGTATTGAACTTGATGAAATTGAAAAATGCAATATTAGCTATTCGTGGTATATCTGATTGTGTGTAACAGTAAGTCACTTTG  
ATACGCATGATATATTGAATGCTTATTATGTTGGAGAGCAACAAGTGGAGCAGGATTTGAAGCAATATTTAAATGATCAGCTGCCTA  
AGTATATGATTCCCTAAGACTATAACGCATATCGATTGTATGCCATTAACCACGAATGACAAGGTGGATACTACGCGTTTGCCAAATC  
CATCACCTATACAACAGTCTAATAAAGTGTATAGCGAACCCTCTAATGAAATTGAGCAGACATTTGTTGATGTATTTGGAGAGGTAT  
TGAAACAAAATGATGTCGGTGTTGACGATGATTTCTTTGAACTTGGTGGTAACTCATTAGAGGCGATGTTAGTTGTCTCGCATTTAA  
AACGATTTGGCCATCATATTTCAATGCAGACATTATACCAATATAAAACCGTGCAGACAGATTGTTAATTATATGTACCAAAATCAAC  
AATCATTAGTTGCATTACCGGATAATCTTTCCGAATTACAAAAGATTGTTATGTCTCGTTATAACTTGGGTATTTTAGAGGATAGTCT  
AAGTCATCGACCTCTAGGAAATACACTATTGACTGGCGGACAGGTTTTAGGTGCTTATCTGATTGAAGCACTACAAGGATACAG  
TCATCGCATTTTATGTTTTCATACGTGTGATAATGAGGAATAAGCATGGTATGAAGTATGACGAATTTAAATGATTATTTTCAGA  
AGAGACGGTTGAAATGATGTTATCAAACATTGAAGTCATTGTTGGTGATTTGAGTGTATGGATGATGTTGTTTACCAGAAAACAT  
GGATACGATTATTCATGCAGGTGCTCGTACAGATCACTTTGGTGATGATGATGAATTTGAAAAAGTAAATGTTCAAGGTACTGTTGA  
TGTCATACGTTTGGCACAACAACATCATGCAAGGTTAATATATGTGTCTACGATAAGTGTGGGAACTTATTTGATATAGACACAGA  
AGATGTGACATTTTCAGAAAGCGGATGTCTATAAAGGGCAACTACTAACATCACCATATACACGGAGCAAAATTTATAGTGAATTA  
AAGTATTAGAAGCTGTAAATAATGGCTTAGATGGTCGGATTGTACGTGTTGGTAAATTTGACGAGTCCTTACAATGGAAGATGGCATA  
TGAGAAATATAAAGACTAACCGTTTTCAATGGTAATGAATGATTTGTTACAACCTGGATTGTATCGGGTTAGCATGGCTGAAATGC  
CTGTAGATTTTTCTTTGTGGATACGACTGCAAGACAATTTGCTGCATTAGCACAGGTCAACACACCACAAATCATTTACCATTTGTC  
TATCACCTAATAAAAATGCCGGTGAAATCTTTGTTAGAATGCGTTAAGCGCAAAGAAATTGAACCTCGTCAGCGATGAATCATTTAATG  
AAATTTTACAGAAACAAGACATGTACGAAACGATTGGATTAAGTGTGACCGTGAACAACAACCTAGCAATGATAGATACAACA  
TTAACATTAAAAATAATGAATCACATCAGTGAAAAATGGCCAACGATAACTAACAATTGGCTGTATCATTGGGCACAATATATCAA  
AACAATATTCAATAAGTAAGTAGGGAAAGTTATGACAGTATTTGTAATGCAATTACAGAGTAACCTGAAAAAGTATTGAAGAATTA  
TATCACAAGATCGTTGGTCATATAAAAAACCGCGTACAGTCAACTATAGATACAATCAAGATAAACTCATGCACAGATTGGGAGAT  
ATTTTAGTGCAATATGGAATTCAACATGACACAGGTTTATTACCACATGAATGGCATTATCACATTTGCCACGAGGTAAGGCAGAT  
ATGTTCAACACAATCGTGATGGACAGCCATCTATGTGAGCTTATCATATAGTTATCCTTATATCGTGTGTGTTGTCGATAAAGAAC  
CAGTTGGTATTGATATCGAAAGATATCAACAGCTTTAGACTGGCGTACGTTAGTGACGTGTTTCTCTACAAAACGAAGCATCAAA  
TATGTAGTTTAAATGATTTTTATCAAAATATGGACACAAAAAGAAAGTTTTACAAAATTGATTGGTGAAGGTTTAAATCAAGGATTGG  
ATATTTATGATATGACACAATCACACTTTTATCAATCACGTGAAGTGAAGTTCAAACAATTTATTTTTGATCAGTTTATGGTACAGGT  
ATGTTTCTTAGGAGAGGCACCCTGGGGTTATAAAAAAGTGTCTGTATTTAGTATTGAGTAGTTAATATGACGTCTGACAGTATCA  
TTGCGCAGTGATTTTAACTATACTGCCTAAATGTTTACTGTTAGATGTTTTTTTATTGGAAAAACGAAAGGTGAATACACGATGGC  
ATCATTCAAAATCATGACGAGATTAAAGTAAGTGATAAGGTGAAAAATATACTGAGCAATATTGAAATTACCGAAAAATAATAGTTG  
TTGCGACGCATTGAGACTTTAATGCTCACGTAAGTTGGCTGGAATCATATCATGTACGTTAATAAAATAACGTGAGCATCAATCAT  
CATACTCAAACGATGATTTAAAACCTACGTTAATGTTAGTCAGTGTATTAATTTAATTTATAGCGATAGACAAAATGTTGTCGCACT  
AATTCAATTGTCATCATCCAGACGATATGGCCAAAGAATTCTGACAGATGCTCTTGGAAATGGTTGATCCACACAGCAGGTACAGTA  
TATGATGTGCAATATGATAAGGTGGAATAATACCAATAGCAATAACCAAAAACAGCACCTTGTCCCATTTGCTAAGTAAGCGTA  
TTTTTTAACTAATATGCAGTAAATAATTGCAATGACGATAGAAAACTAAAGTGGACAATAAAGCTTACCCAAGGCAATTCATATT  
TGAAAAATGTATATGTTTGATGCGTAAACTCACTACTAAATCCTAATTGTTGCAATAACTCTTGAGGTGGGTTGCTTGCAATTACGTTCT  
GGTGTGCGAGGTGGAACATGACCTCCCAACCTAATTTTACAATTCCAGATAACAAGCCACCGATAATTCCAGCATAAATGAATAT  
ACCCATTTGTCGTTTTCGTCAACTTAAGGACTCCTCTCTATTACTATCCTCATTATAGTATTTTGTGAAAAATAATCACAATAAAAAGC  
TTTGCAAAACTTAAAAATTTTGATAAAACAAATTTGTAAGGTTATTAGTTTTTACATCTCATATTGTATCGTACTGTATTCAAAA  
TTGTTAACGAGATGAACGGTAAATAAATGTTTTAGCGCAATGGATAATCGAACTGGAATCATTGCGTGTCAAACTTGTAGGCCTT  
AATTTCATAGTTATGAATTAAGGATTGTTGTGCCAACAAAAATCATTATTGTAAATAGATTCAATGATATTTGGCTTGTTCCTGATGC  
AATGATAACTTTAGGACAGCCATTTTCAATCGCATTTTGGCATCTAGCACCTTTGGGAATCATACCTCCATAAATATACCATGTTCA  
ATATATTGATGAATATCGACTAATGGCAATTGAGGTATAACCATATCATTTGATGAGTACACCTGCAATATTACTTAATACATATA  
GGCGCTTTTAAATGATGATGCAATAAAATAGGCAAGCGTGTACGATTAATATTGTAAAAATTCTCCATCATGGTTATTGAAACCAATC  
GAATTGATGATAGGTACAAATTTAGTACATATATACTGTAAAGCATCCTTATTTAAAGCGGTGCGGACACCGACATATCCATATTGT  
TGATCAAAACGTTTAAATTTCAAATAATTGAGCATCCAAACCACATAAGCCTATCGCAGAACATTGGTGCTGGTTAAATTGAGCTACT  
AATGCAGTGTTAACGTCTGCAATGAGCGTGTGTTAGTAATGGTCATGGTTGCTTTATCAGTCACTCTTAGGCCATTAAACAAAGTGT  
GGCTCGATTTGCTGGTTTGATAATGCATCATTAATAAATGGGCCACCGCATGAACGATAATAGGGTAGATGTTGTTAATCGTAAA  
TGCTTAATATTGTTAATAATTGATGGATGCATGTCATAAGTGTACTGCCACCAATTTAATGACAATAAATTTTATCTAACCAACAC  
CACCTTATGTTTCGATATGATGCGTTGATACGCACATAATCATAGGATAAATCACAACCGTATGCAGTGCCTGACGCGTTACCTAAAC  
CAAGTGAACGTCAATTGTGACATTTTCATGAGTTAATGTATTGCATAGCTTTGCTCATCAAAATAGTACAGCCATACCTTTATCAA  
CGACAGGTATTTGGTTCAGTTGAACATATGTGCAGTTAGGATCAATTTACATCCGCTGTAGCCAATAGCTGTAATGATTGACCAAA  
AATTGGCATCTTCGCCAAAAATAGCTGATTTTACTAGATTGAACTTACGATAGTTTTACCGATTTTTCTTGATCTGATATTGATTT  
AGCGCCTGACACATTGACGCTGATTAACCTTTGTTGCGCCTTCGCCATCTCTGGCTATAGCTTTAGCTAAAAATGTACAGACAAAATT  
GAATGCATCAACAAATGTTTCCATTGTGGATGGTCTTGACTAAGTATTGGTGTCAACTTGGTGATTGGCATGACTAATACCATTG  
TCATTTGTACTTGTATCGCCATCAACAGTAATCATATTAATGTATGGTCAGTCGAAGATTTTAAATAATTGATGAAGTGTATTGATT  
CAATCGATGCATCGGTTGTTATAAAGCAAGCATGGTAGCCATATTTGGGTGAATCATACCTGAACCTTTGGTGCTACCACCAATTG  
TAACGGTTTTACCATCGATTTTTAGTGATACAGCATATGTTTTGATCAGGTATCAGTTGTTAAAAATGCCTCGTTAAACGACACCTGG  
CGTTGCAAAATAGCATCCTTAATATGTTCCGTTCCAGTCTTAATTTTATCCATAGGCAAAATATCCAAATGACCCCAAGTTGAAGC  
AACAGAACATGCTCAGATGGTATTTGAAGTTGTTGAGCAACCCATGTTTGTTGTTTGTGCTGCATCATCTATGCCTTGTGACCGGTA  
CAAGAATTTGCATTAGCTGAATTAACAACAAGTGCTTGAATTTTCTTTAGACTTTTGTAAAGTGTCTTCAGTGACAATAAGTGGTG  
CAGCTTTAACTGATTTAAAGTATATACGGCAGCTGCACTTGCCAAAGACGATGAGTAAATCCACCCAAAGTCTTTTTTGTAGCGC

GTAAACCGATGTGCATACCACCAGCCGTGAAGCCTTGAGGTGTACTGATATCGCCATGTTTAAATTAATTGAAAAGTTATATTGTTGTG  
ATGTCGTTTCTTGATGTTTTCATTCTAACACCCCTTATGGATAAACTGGTGATTGATTTAGGCCAGTCGTCACCTCAAAATCATATAAT  
ATATTTAAATTTTGAATGGCTTGCCCACTTGCGCCTTTGACAAAGTTATCAATCACTGATACTAAAAATTGCTGTTTGCCTGTTTCAT  
CTACATAGATGCCGATATCGCAGTAGTTACTACCGAGTACTTCTTTTGTGGTTGGAAAAAGTCCCAATATCTCTAATTCTGACAAATG  
GCTGATTAGCATAATAAGAGGTCATTAATTTATGTAATGATTGAGTCGTATATTGAGATGATAATTTGACATATATTGTTGATAAAA  
TACCTCGTGTCAATTGGTACGAGATGTGGTGATAATGACTGATACATCTTGACCCGCAATGATAGATAAAATATTGCTCGATTTCGG  
GTTTGTGTTTATGGTTTCCGATTGCATAAGCGCTTAGATTTTCATTCAATTCTGAAAAATGAACACGTTGTGATAATGAACGACCAGC  
ACCTGACACGCCGGTCTTAGCATCAATAATAATAGATGACAAATCTACTATTTTTTCGCTAATAAGTGGATGTAATGCTAATAATGT  
TGCTGTAGGGAAACAGCCAGGATTAGAAATGAGCTTCGTTCCATTGTTATCAAAACGATTGCCATTCTGAAATGCTGTAATAGCATG  
ATTCAAATCATCTTGTGCTGCAGCAGTTTCTTTGTAATATGCTTCATATATTTCACGATTCTTAATTTCTAAATGCGCCAGATAAAATCG  
ATAACATGAATACCTTTTTCTACTAAGGGAGGGATACATGTTTTACTTACGGGTGCTGGTGTGCGAAAGAAAAATCACATCACAGTCA  
TTATTGTCCACTGTAAGTGCTTCGAAATGTTGCATAATATGTTGTAATGTGGAAATGTTAATTTCAACGGTTCATCTACTTTTGAAT  
GTGAGTAGATGTGTGCAATCGTTACATGAGGATGTGTTTGTAAACAATCGAATTAATTTCAATTGCGCCATAACCGCTACCGCCAACGA  
TACCTACTTTAATCATCATGAATCCCTCCTATATCATATATAAATGATTAATTTGTTAATTTTTAAAAACGCTTGAAAAGCTGCAACA  
ATTTGATGGATTTCCTCTTTATCAATGACTAGAGGTGGTGACAATCGAATGATAGTACGATGCGTGTCTTTGCACAAGATTCCACGT  
TGAATCAGTTGATCCACAAAAGGTGCAGCATCTGTGTTAAGCTCTATGCCTATAAATAAACCACGACCTCTAATTTCTTTAATACTA  
GGATGTTTAAAGTTGAGCAACGCTTTTAATAAAAAATGAACCTAAGCGTTCTGATCGTTCAACCAAGTTGTTTCATCTTTAAGTACATCA  
AGCGCTGCCGTCGATATTGCAATGGCTAAAGGTTTACCACCAATGTGCAACCATGTGTACCTGGTGTAGAACACGCATGACATC  
ATTATTTGCAAGTACAGCAGATACAGGGTATAAGCCGCCACCAATGCGCTTACCTAAATATAAATGTCTGGAACAACCTTGCTCCCA  
TTCCATCGCAAACCATTTCCAGTTCTACCAAGACCAACTTGAATTTTCATCTGCAATCAATAATATTGATATTTATCACATAGATGA  
CGCACAGCTTGAATATATCCTTTTCGGTGGTATATTAACGCCACCTTCACCTTGAATTGGTTCCAAAAATAATTGCTGCTGATTTTGGTG  
AAATAGCTTGTGTTAATTGTTCAATGTCTCCAAAATCTACAGTTGTAGTGCCTTGAAGTAGGGGGGTGAAATCTGCTTTATATGCGTC  
GTGGTTAGATAGTATAATGAGCCAAGTGTACGACCGTGAAAATTTGTTATTCATAGCGATGATTTCAACTTGCCGTCAGTAATGCC  
TTTAACTTCAGAGCCCCATTTTCTAGCAATTTAATGGCTGCTTCAACAGCTTCAGTACCAGAGTTAAGGGGGAGTACTTTGTCTTTC  
TTAGCAAGATGACAAATTTTTCTTCCATTTCCCGAGATTGTCATAAAGGACACGTGAAATGATAGACAACCTTTGAAGCTTGT  
TCTGTCTCGCTTTAACAATTTGTTGGATGACAATGGCCTTGGTTTGAACCTGAAAAACCCGAAATGCAATCTATATATTGTTTGGCAT  
CAGTATCCCAAACTTTGACACCTTTACCTTTAGAAATGACAAGCTTAAGTGGTGATATAATTATTAGAGCTATAATAATCAGTTAAT  
CAATGATTGAATTCATCGGTCTCCCTCCTTTATATTTATACAATTTAAAGAATTAATATTAATATATTACAGTTGTTCAATATAAGTG  
TCAATGTAAATTTAATAATATAAAGATAAGGTTGTGTTTGTATTAATGTGATTTGTAATAAGTAAAGTACTAATATTTTTTGTGGATA  
ATCATTGATATGTATGTATACGATTGCAGTTTAAATGTAGTATGAATAAAAAATGCCACAAGCATATGTTTAAACATATGACTGTGGCA  
TAGTATTATGCTTGTGGAATTTACGATGCTTAATTTTATAAATAATGAAGCCGATAATGAAACCAATCAAACTGAGAACAACCCAG  
CCCATACCAATGTCTGATAATGGTAAATATTTTTGGCTGAAATTAATCAAAAGTTTGTGAGAATGATGTGCTTGAAATGAACCTGGA  
CTAGCTTTTAATCCATCTACTAATGCAGCAATCATTGTAAAGAAAATGGTACATTGATAAATAAGTTTTGAATGATGGAATTTGCTA  
CTAAATAATGTAGTACAATCAAGGCAATTGCTAATGGATATAAGAACATTAACACTGGGACTGAGTACATAATAATCTTAGTTAA  
ACCAACATTCGCGAATTAAGAACGAAATAAAGCTTACAACCTGTGTCATCGTAAAGTTAATTCATTTTAGGGAAGGTTGTCGAATG  
TTTCTGAAAATGCCGTAATCAAACCGATGGCTGTTTTTAAACAAGCAACCATAACGATAAGTGACAACAGGACGATACCGTAGTTA  
CCTAAGTAGTATTGAGTAATTTGCGCTAAGGCAATACCACCATTTTCACTAAGTTTGAATGACCAATACTTAATGTACCCATGATT  
GCTAGTAGGGTATAAATGATCCCCATCATAATGATACTGATAGTACCAGACTTAATTTGTTCTTTAGCGATATCAGTTGGATTTTCGA  
TACCTAATTTTTAATCGTTGCAACAATGATAATACCAATGCCAATGACGCTAGCGCATCTAAGGTATTGTATCCATCTAAAAAGC  
CGTAAATAAAGGCATGTGATTGATATTGTTTACTAATAGGTGCATCAGATATGCCACCTAATGGATGGATAAAAGCAAATAATAAA  
ATAATTGCTAATAATACTAAGAATACCGGATTTAAAAATTTACCGATATATTCTAAAAATCTTGATGGCTTTCTCGCAAAAAACCAT  
GCAATCACAAGAAGACGAAGCTAAAAATAAATAAATATAAAGTGATTGCTTTGGTGATAAAAAATGGCGAAAAATGCAATTTCAA  
ATGATGTCGGTGGCATGTGAGTAAGGCGAAAAATGCTCCGATACTAGATATAAGGCAATCGTGAAATCGTGAATAAGCATATGCTTTTA  
TTAACACGCGATGCAATTTCAAATAAACAGATGTCTTTGAAATGCCAATAGCAATGATACCTAGAAATGGTAAGCCAATTGCTGT  
AATTAATAAATCCTAAGTTAGCGATAAAAAACGTTAGAACCAGCAGCTTGACCAAGTGTATTGGGAAGATAAGATTGCCGGCACCAA  
AGAATAAACCAATAACATAGAACCTATAAACATGTTTTCTTTAAATGTTAGTTTCTTCTTCATATATGTATTTGTTCTCCTTTTGA  
ACTTATAAAAAATCTACTTAATTAAGATAATATCAAAAAATTAACATAAAGTGATACATAATTTTGAATAAATACTAAATTTTTTGA  
AAATTCGGGAATAAATACTGTTTTTATGTAGTAGGGGCGTAAGTTAAGAACGATTTAACAGATATAGAATAAGTTATAGATAGG  
AGGTTAGACAACCCGACGTATTAATACTTTGTGAAATAAAGATCCCCCTCAACATGATCGAAGGGGGGAGTATATGTTTAGTTCA  
ATATATTTAGTAATTCGCTTGTGGTTACTGTTTGCCCATTAATAGGGAATACATTATCTATTGGAAATGATGTAGCGTTTCGTTTTGT  
GCACTCATCATATCTGTAACAAAAACTGATTGTAGTTTGAATGATAGGCATCTCGCGTGTGCTATCTACGCAATATGCGTTGCG  
ACACCACCAAGAAATCGATCAATTCCTCGAGTCGTAATTTGTAAGTCCAAATCTGTTCTCTACAAATGCAAAATGATGCTTTTGA  
TCTATGACAAAAATCGTCATCTCTTGTCTAATAAATGATGGAACGACTGTAGTCGTCGCCCTTCTTTTGGTGGTAATGAGATCATTG  
CATTTGGTTGCAATACATCTTTACCATCATAGAAATTCACGCGAACAAAAGCGATAAAAGCCATTGTTTTTCTAAAAACATCTATTA  
ATTTATTAGCGTTTTGAACGACATTTTCAGCTGTATGTGGCGCATAATCCATCTTAAGTATACCTTCTTGCAGGTGCGATTAACACTAA  
AGCGGTTTTATTAAAAATTAATCATCTTATATCAGAGTCCTTTTCGTTTAAATAAGTATTGCTTAAACTTATACCCTGTTTACGATGA  
AATTTATTTATTTGTTGTGAAAAAGCTTTAGCGATATCGATGAGTTTCTTCGGTGCGTCTTCGACAGACATTTTGACTTCGACAAAAT  
GCATCACATCGGGATGACCATTAAATGCAATTAACACGTGCTTGTAAATCTTTTGATGATTCAACGTCATGAATTTCAACATTTTTACC  
ACCAATACAGCTGGTAAAGCTTTATAATCCCACTGTGAATTTTCAATTAAGGTTTACATATGCGCTGAATAAGTCTGTTTACCCTG  
ATAGCGCTCATTTATTAATACAAATAATACCGGTTTAAATGCTGTCTAATCATAGTTGAAATAGCTGGAACAGTTAGTTGCAATGA  
GCCATCACCAATTAATAATAAGTTACGACGATCTTTGTCTGCTAATTTGTGAACCTAATGTTGACAGGTAATGTATAGCCGATAGAACC  
CCATAACGGTTGCCCTATAAAAGTATTGTTTTGTATAATGCTAAATCATAAGCACCAAGAATGATGTACCTTGATCAGCAATAAT  
GACATCATTTGGTTTTAAGAAATTTTGCATCATTTTAAATAAAGTTTGTGTTGTTAATGGTTCTGTGCCAACTGTATAATCGGGTGAT  
GTTGGACGATGATACGACAGGAACGTTGCGTTATTCGTATGTGAAATATTGGATAACTGTTTAAACAATGATGGTAGAGATATTCA  
TCATTTGTAACATCGTCAATTTTGATATTGTGATGATTTAACATAACGACATCATCGATATTGAATTGGTATGAAAAACCTGCTGTTG  
CTGAATCTGTTAATTTGGCTCCAATATTTAAAAATTAATCGCTGTTGTCCACATAATCTCGTATTTTATCTTCGGCAATTTTCCCATCG  
TAAATACCCATATAATATGGATTTTCTCATTTAAAGACCTTTTCTCAATGAAAGTTGTGCTACTGTTATCTGTGTTTGAATTAACA  
AATCTTCTAATTTTGATGAAGGTGAAAACCTGTTAATTTTCATGTCCAGTAATGATGATAGGCTGCTGATTGATGCAATTTAGATGT  
TAATAACTCTATATATGTTGATGCATCCGTATCTTTGGCTGCCGTTACTTCAAAATGGTGTGCGTATCTCAATTTTCAGAGATTGCGACA  
TCGATTGGTAAATGTAATGAACCTGGGCGCTTTTCGGCGATTGCTGTATTAATTAACGTTGGTATTTTCGGTTGTTGCATTTTCAGGTG  
TGATATAACCTTGTGCAACGGTTATATGTGCAAAACATTTTTCGGTAGTCGTCAAATGTACCTTACCAAGTGAGTGATGTACATATTT

ACCGGCATGTTCAACAGCACGTGTGCGCGCACCTGTAATCGCAATGACAGGTATGCGTTCAGCATATGAACCTGCGATACCGTTGA  
CGGCACTTAATTTCGCCAACACCAAATGTAGTAACTAATGCAGCGAGTCCATTAAAGACGGGCATAACCGTCCGCTGCGTAACTTGCG  
TTTAATTCATTTGTATTTCTACCCAATCTACATTGGGATTGCTGATAATATCGTCTAGAAAAAGCGAGATTAATAATCACCAGGAACA  
CCAAAAATTTTATCGACGCTGCTCGATGAATAGCGTCAATTAAGTAAGCTCCAATGCGTTGTTTCATAAAAAAACACCTTTTCTC  
TATATTTACACTTAAAATGATAGCCTCGAATATAGTGAAGGTCAAGGAAGTTGACTTTGTTGTGAAAACGCTAACAAATAGTGAACA  
ATTAATATTTTTTAGGAAATGAGTATGAAGGGGGGCTTTAATTGATGATCTTAAAAATTCAAAATTAAGGGGAGAGCGAACTATCA  
ATGATGCTGCAAAATACAATAGCAAAGAAAAAACAGGCGCGTCACATTATGAAGGTATACGCACCTGTTTATAGTAAGCATTATTT  
AGCTTCAAAATAATTGATCGCCAAATGAAATGTTGCCATGTTACCTTGTAAAAATCAAGGTTTGTAAATGTTTCCTTGTGTCACGATA  
ATAGGCGTAATATCACTCTTTCATGATTGCGGATGTAAGTCTAAATCAAAGTTGATTAATAAATCACCTTGTAACTTCTTGACCTT  
CCTCAACATGTAAAGTAAAGCCTTCTCCGTTTAATTTAACAGTGTCTAAACCGATGTGGATTAATAGTTCTAAACCACCTATCTGATA  
CAAGACCAATTGCATGTTTTGTTGGGAAAAATCATTTGACTTTACCGTTGAATGGTGCACGAACTTCACCTTGTGAAGGTTTGATAG  
CGATACCGTCACCCATCATTTTTTCGCTGAACACTTGATCAGGCACCTTCTGATAAAGGTGTTACTTCACCAGTTAATGGTGCATGAAC  
GATATGGCTCAATTCGCTTGTGTCAGATTTATCTTCTGCAACAACAACAGTTTCGTCCTTTATCGTCTTCCATAGTAGTAGGGTTTTCT  
ACTACTTGACCATTCTAATCTGTTGCATTTCATGTTTGATTGGTCAGATTTAGGACCAAAAAATGCTTGCATATTATTGCCGACTT  
CTAATACACCAGATGCGCCTAAATCTTTCAAACCAGGAACATCAACTTTAGATTTGTCGTTAACTTCAACACGTAGACGTGTGATAC  
AAGCGTCTAAATGTTAATGTTTGTCTTGGCACCATAGCTTCTAATACTGCATATGGTAATTCAGTTGCTGAAGCAGTAGCCGCTTG  
TGATTGTTTATCTTCACGACCTGGTGTGTTGATTTTAAATTTTACAATTAAGAATCGGAATACGAAGTAGTAAATACTGCGTATACA  
AGACCTACAGGAATGACTAACCACTTGTGTCTTATTAGGTAGTATACCGAGTAAGAAGTAGTCGATGAAACCACCTGAGAAATGT  
ATAACCTAGATGAAGATCTAATAAGTACAATGTATAAGAATGATAAACCATCAAGTACTGCGTGAATAAAGAAATAAATAGGTGCTA  
CAAATAAGAATGAGAATCTAATGGTCTGTAATACCAGTTAAGAATGATGTTAAAGCAGCAGAACCCATTAAACCTGCTACCACT  
TTCTTATTTTCAGGTTTAGCTGTGTGATAAATTGCTAAAGCTGCTGCAGGTAAACCGAACATCATAACAGGGAATTCACCTTGCATG  
AATTTACCAGCTGTCAAAATGTGCGCCTTCACGAATTTGTTGATAAAGATACGTTGGTCAACCGTGAATAATTCACCAGCTGCATTTT  
TCCATGAACCAAACCTCGAACCAGAACGGTGCCTGGAAAAATGTGATGTAGACCGAATGGAATTAATAAACGCTTGATGAAACCAAAT  
AAGAATACGGCAACACCAGTATTTGAATCTAATAATCCTGTACTGAATGCATTTAATCCTGATTGAATCGTTGGCCAAATTAATGCC  
ATTGGGAATGCTAAAAATAATGATGTTGTAGCCATCATAATAGGTACGAAACGCTTACCAGCAAAGAAACCTAAATAAGATGGTAA  
GTTAATGTTATAGAAGCTGTTTATAACACCAAGCTGCCAGGGCCCCGATAATAATACCGCCGAACACACCTGTTTGTAAATGTTGGAAT  
ACCTAAAAATGCTAGCGTAACCACTCGCTGGATCAGTAACATTTTATAGGTGTAACCTTGTAAAAAGTCGCCCATTTGTTTGTTCATGATT  
ATGTAACCGACGAATGCTGCGATAGCTGCTACGCCATCACCGCCAGCTAATCCGATTGCGACACCTAATGCGAAAAATCATAGGTAA  
GTTTTCAAAAAATAACTACCGGCAGCTGTCATTAATTTAGCGACATTTTGAACGCCACCATTTGTATAAACGGCAAGTAGTGTTG  
TAATGCTTCGCCTTGATAGCTGTACCGATAGCTAATAACAGACCCGCTGCTGGTAAAATTGCAACAGGTAACATTAGCGCTTTACC  
AATACGTTGCAATTGACCGAAAAAGTTTCTCCTCACTTGTCACCTCCAAAGTTGTATGTAATATTTAAGATTCAATAAAAAAGAC  
ACGAGCAAATAGACTGTGTTGGTAACCATCACAGCTTAATTTAACTCATGCCATAATCTTACTTAGTAACACGTTGGTGTATGTAATT  
AATGTAAAAAGAAGCAATTGACTAAGTAGTATATAAACTGATACGTTAGTTTATCTAGCTTACCATCACATCTTATTGAATCTTATTT  
GTTTGCAGACTCTATTTAGCATGGTGAAGTATGCGTTTCAATACAATTATTAATTTCAATTTCAAATCTCTTAAATGTTTCACAGC  
TATTATTAACACATAATATAAGATAATCCTGAATAAAATGTTATAAAAGTTGTTGTAATAATCCAGCAGTAGACGCTATTATCAGCAC  
TTAAAAAGAAAGGATAATCTTTGATGGTGTAAATAATTAAGTTGTGACAGAAATATGTAAGATTATTACAATGAACAGGCTTTAACTGA  
TTAATATTGTAATGTGTTTTCTCTTATAGTAAAAATGTAAGCGATTACACAACCTCACTATATTTTCTAATAATTATATTGTTAAGGA  
GGGCTACTTTGACAGGCTTTTCAGTGTATTTAGGACAACCTTTAGATGAAGCGTATATTAAGCGAATGATTAAACAAGGTTACCAAA  
TGATTTTACATCTGTACAAATACCAGAAGAAGATGACGAGACAAAATATCATTATTTACAAAACTACTCAATTTATTAACCATG  
AACAAGTGACTTACCTCATAGATGCTAATCCATCTATTTTAACACCATCTTTTTATGAGCATCTTCGACAATATGATGCACAATTTAT  
GATTCGTATCGATCATAGTACATCAATTGAGGCAATCGAAGCGATAATGGCACAGGGTTTAAAGTGCTGTTTGAATGCAAGTATTAT  
TTCCCGGGAATTGTTAACAAGCTTACATCAACAATTGAATGATTTTACATTACTTTTCAATTTTGTGATAACTATTATCCAAGACCAGAT  
ACGGGATTATCTGTTGACTATGTTCAATAAGAAAAATGAACCTATTATCAATTTAATCCAAAGGCACAAATAGTGGTTTATGTTA  
GGGAGTGATTTGCGAGGTCCTTTGCTAAAAAGGCTTGCCAAACAATTGAAGCAACGAGACATAGTCATCTGTGCTGACGCTAAATTA  
TTACAAGAACTGGTGTATCTGAAGTGTTAGTTGGAGACTCATTGATTGAAATGAGGCAGGCAAAACAACCTTATAGATTTTTGCAA  
GCATAGGCATTTACAGTTATGTATTGAAGAAGTGTTTGATACGACAGTGACTTACCTTTTCGATATGTGTCATAAAGTACGTCCGGA  
TAATCCGGAAAAATGTCATTGCTTCGGAACGTCAGACAAATATGTCCGCATTGATTCAACCACAGTTTACGACGCAACGACGCA  
TTGGTTTCAGTAACCGTTGATAATTGAATAACGGACGTTATCAAGGTGAAATGCAAAATTGTGAGACAAACGCTTAGTGACATGAC  
AATGTGAATGTTGTTGCACAAATATTAAAGAAGACTTACCACTGTTAAGTTGTATCGAGCCTAATGATACATTTGATTTTCAAAAA  
ACTAGGGAGTGTAAGAAGTGATGGAAAAATAGTACGACCGAAGCAGCTAATGAAGCGACGATGCATCTTGTGAAATGACTGTGGA  
AGAGGCTTTAATTACGATGAATAAAGAAGATCAGCAAGTCCCGTTAGCAGTTTCGAAAGGCAATACCACAATTGACAAAAGTAAATTA  
AAAAACAATTGCACAGTATAAAAAGGGTGGACGATTGATCTATATCGGTGCAGGTACAAGTGGAAGATAGGTTGCTTAGATGCA  
GCGGAGTGTTGACCTACATTCAATACTGACCCTCATGAAATTATAGGTATTATTGCTGGTGGACAACATGCTATGACGATGGCTGTA  
GAAGGTGCGGAAGATCACAAAAAATTAGCGGAAGAAGATTTGAAAAATATAGATTTAACATCAAAAGATGTCGTTATAGGAATTG  
CCGCGAGTGGCAAAACGCCATATGTTATAGGCGGTTTAACTTTGCTAACACAATCGGTGCTACAACAGTATCTATTTTCATGCAATG  
AACATGCAGTTATAAGTGAAATTGCGCAGTATCCAGTAGAAGTTAAAGTTGGTCCAGAAGTATTAAGTGGTTCAACGCGTTTAAAG  
TCTGGTACAGCACAAAAATTAATTTTAAATATGATTTCACCATCACAAATGGTTGGTGTGCGAAAAAGTTTATGATAACCTCATGATT  
GATGTTAAAGCAACCAATCAAAAACTGATCGACCGTTTCAAGTGGTATTATTTCAAGAAATATGTGCTATCACATATGATGAAGCAAT  
GGCGTTATATCAGGTATCTGAGCATGATGTGAAAGTTGCGCAGTTATGGGTATGTTGTTGCAATTTCAAGGAAGAAGCAACAAGAC  
GGTTATTAACAATGGTGACATTGTTAAACGAGCAATGACAGATAGACAACCTTAGGAGGGATTTAAATGACCAAAAGCAACAACA  
CTTGACAGAACGAATATTGCTGACGATAGGTGGTATGGATAATATAGATAGTGTATGAACTGTATGACACGTGTGCGTATTAAAGTA  
TTAGATGAAAAATAAGTAGATGACCAAGAATAAGGCATATTGATGGTGTATGGGTGTTATACACGATGAACGCATTCAAGTTGT  
GGTTGGACCTGGTACAGTCAATAAAGTGGCTAATCATATGGCGGAATTAAGTGGTGTAAACTAGGTGACCCAATACCACACCATC  
ACAATGATAGTGAAAAAATGGACTATAAATCATATGCAGCTGATAAAGCAAAAGGCGAATAAAGAAGCACATAAAGCAAAACAAAA  
GAATGGTAAAGTTGAATAAAGTATTGAAATCAATTGCCAATATCTTTATACCGTTGATTCTCTGCATTTATTGGAGCTGGATTAATTGGT  
GGTATTGCAGCAGTACTGAGTAACTTAATGGTGGCAGGCTATATTTCAAGGTGCTTGGATTACGCAACTTATAACAGTATTCAATGTC  
ATTAAGACCGGTATGTTAGTCACTTAGCTATTTTCTAGTTATTAATGCGGCTAAAGAATTTGGTGGCAGACACCAAGGCTGGTGGC  
GTGATTGGTGGTACAGCTTATTAAACGGGTATTGCTGTGTAATAATTTTAAATGAATGTTCTTCACTGGAGAACCATTTGCAACCTGGA  
CAAGGTGGAATTATTGGCGTTATTTTGGCGTTTGGATTTTAAGTATTGTGCAAAAGAGATTGCATAAAAAATTTGCCAAATGCGATT  
GATATTATTGTAACGCCGACTATTGCATTGTTGATTGTAGGACTATTAACCTATCTTTATCTTTATGCCATTAGCAGGTTTTGTTTCAGA  
CAGTTTAGTTTTCAGTAGTTAATGGAATTATTAGTATTGGTGGCGTATTTAGTGGATTATCATTTGGAGCAAGCTTCTACCATTAGTT

ATGTTAGGGCTTCATCATATTTTTACGCCAATTCATATAGAAATGATTAACCAATCTGGTGCTACTTACTTATTGCCAATTGCAGCGA  
TGGCTGGTGCTGGACAAGTAGGGTGCCGCATTAGCACTTTGGGTAAAGATGTAAACGCAACACAACATTACGTAATACTTTAAAAAGGT  
GCATTGCCAGTTGGTTTCTAGGTATCGGAGAACCATTAACTATGGTGTGACTTTGCCATTAGGTCGACCTTTCTTAACTGCTTGTA  
TTGGCGGTGGTATTGGTGGCGCTGTAATAGGTGGAATTGGACATATTGGTGCCAAAGCAATAGGCCCAAGTGGTGTGCTACTATTAC  
CATTAATCTCAGATAATATGTATTTAGGTTATATTGCAGGATTACTTGCTGCGTATGCTGGTGGATTCTGTTGTACATATTTATTTGG  
AACGACAAAAGCGATGCGACAGACAGATTTGTTGGGTGATTAATGATGACAAATATTTATATCGCATTGATAAGCAGTTGAGTGGA  
TTTTACGAAGACAGAAAAAGATAATCGCTGATTACATTTTAAAGAATCCACATAAAATCATTGATATGACTGTGAATGATTTGGCAGA  
TGTTACGAATGTTAGTACAGCATCAATTGTTAGATTTAGTCGGAAAAATGACACATCAAGGTTTTCAAGAGCTAAAGATTGCGATATC  
TCGATACTTACCCGAAGATATTGCAACCAATCCACATTTAGAATTGATTGAAAAATGAATCTGTAGAAACTTTGAAAAATAAAATGAT  
TGCTAGAGCAACGAATACGATGCGATTTGTAGCTACTAATATTATGGATGCGCAAATTGATGCAATTTGTGATGTGTTGAAAAATGC  
CAGGACAATATTTTTATTGGATTGGCGCATCGAGTTTACTATTGGTGATCTTTTTCAAAAGTTATCTCGTATTGGCTTAAATGTC  
AGGTTATTACATGAAACGCAATTTACTTGTGTCAACATTTGCGACGCATGATGATAGAGATTGCATGATTTTTGTGACGAATCAAGGT  
AGTCATAGTGAATTGCAGTCAATTGCACAGGTGGCCACACATTACAGTATTCCCATCATAACTATATCTAGTACAGCTAATAATCCA  
GTGGCTCAAATTGCAGACTATGCATTGATTTATGGCAGAACTGATGAAAATGAAATGCGTATGGCGGCTACAACGCTCACTATTTGCA  
CAGTTATTCACGGTAGATATATTGTACTATCGATTTGTAGCATTAAATATCATGCGGATTCTAGATTGTATAACCCAATCGAAAAATG  
GCACTTGATAATTACAGGAAGCATCTTGCGACGATAGATTTTAAACATTAGATTAATATAAAGTTAGTTGCAACGTAAACAATTGAA  
GTTTTGTATGTGATTCAAGTTGCTTGATGAAAAATTGTTGCTACAAGTTTGTAAAACCTGGCATAGAGGCTATTTGAAAAATGATAAAG  
CGTGACAAATTAAGCAAGTTTCAAGTTTGGCTTTTTCATAGATGGAATTAATGAGCTAAAGAAATTAATTTAATGCTAA  
ATGAACCTAATACGAAGGTCTAAAAAGCAATTTATCAATTAAGTATGATGAATGAAATGTTTAAATCGTTTGGCTTGGCTGATTTT  
GGGACTTTTATAGAGTAGGTAGTAGTACATAAAGAGTATGGCTGCGAACATGCCGAATATTGAAGTGAAGTTACCTACAGTGACTG  
CCATGTAATGATTTAAAGTTAAATAGTAACTTAGACTAATAATAAAAAATAAAATGATTTGATAGGTAATTAACACCATTCAAGTCC  
CTCCATTAATCGTAGACAAAAAATTTATCAATGATTTGATTATTTGTATTCAAATTTTAGTATACGACTTACCTCAAAGACAAATATT  
AAAAAATAAGACAATAAAATTAGAATAAAATTTACGTTTGAAGATAAAAAACAAACATTTTTCATTAAAGTTTATGATATATTTAGA  
GCAATAGAAAAGTGTATGGAAGGGGATATGAATGGCATACCAAAGTGAATACGCATTAGAAAATGAAATGATGAATCAACTTGAAC  
AATTGGGTTACGAAAGAGTAACAATACGTGATAATAAGCAATTGCTTGATAATTTAGAACGATTTTAAATGAGCGTCATGCGGAC  
AAATTAGAAGGCAATCCCTTAACAGATAAAGAATTTCAACGCTGTTAACGATGATTGATGGGAAAAGTATTTTCGAGAGTGCCCCG  
TATTTTACGTGATAAAATTACCACTTAGACGTGATGATGAGTCTGAGGTTTATTGTGCGTTTTTAGATACGAAAAGTTGGTGAAAAAT  
AAGTTTCAAGTGACGAATCAAGTATCTGTGAGGATACATATAAAGCACGTTATGATGTAACGATATTAATCAACGGACTACCCCTT  
GTCCAAGTTGAATTGAAACGTCGAGGTATTGATATTAATGAGGCGTTTAAACCAAGTAAACGTTACCGCAAAACAAAATTACACAGG  
CTTATTCCGCTACATACAAATGTTTATCATTAGTAATGGTGTGAAACGCGATACTTTCTAATAATGATAGCGAACTATTGAAGAG  
TCACATGTTTTATTGGAGTGATAAACAAGATAAACCGAATCAATACATTACAATCGTTTGTGAGTCTGTTTATGAGACCTTGCAATT  
AGCTAAGATGATATCGCGCTATATGATTATTAATGAAACAGATAGAATACTGATGGCAATGCGTCCGTATCAAGTGTATGCGGTAG  
AAGCACTTATTCACAAGCGACTGAGACAGGGAATAATGGATATGTATGGCATACAACCTGGAAGTGGTAAGACATTGACTTCTTTT  
AAAGCGAGTCAGATTTTATCAGACAAGATGACATTAAGAAAGTTATCTTTTGGTTGACCGTAAAGACTTGGATAGTCAACACAGA  
AGAGGAATTTAATAAATTTGCTAAGGGTGCTGTAGACAAAACCTTTAATACCTCGCAACTGGTACGCCAACTAAATGATAAAGATT  
GCCACTTATTGTAACGACGATACAAAAATGGCTAAAGCGATTCAAGGTAATGCCCATTTATTAGAACAGTATAAAACGAATAAAG  
TTGTATTTATTATTGATGAGTGTATCGCAGTCAATTTGGTGACATGCATCGTCTAGTTAAACAACATTTCAAAAAATGCCAATACTT  
TGGATTCACTGGTACGCCACGTTTTCCAGAAAATAGTAGTCAAGATGGTAGAACAACTGCAGATATTTCCGGTAGATGCTTACATAC  
GTATTTAATTAGAGATGCCATTATCATGATGGTAATGTACTTGGTTTCTCAGTTGACTATATTAATCTTTTAAAAATAAAGCTTTAAAA  
GCAGAAGATAACAGCATGGTTGAAGCAATTGATACGGAAGAAGTATGGTTAGCGGATAAACGTGTGGAATTAGTAACACGACATA  
TCATCAATAATCATGATAAATATACACGTAATCGTCAATATTCAAGTATATTTACAGTCCAAAGTATTACACGCGCTTATTAATATT  
ATGAGACATTTAAGCGCACTTAACAAAAAGTTGGAACAACCGTTAACGATAGCTGGTATATTTACGTTTAAACCTAATGAAGATGAT  
CGTGATGGTGAAGTGCCATATCATTACGCTGAAAAATTAGAGATAATGATTAGCGATTATAATAAAGATTTCGAGACGAATTTTTC  
AACAGACACAATAATGAGTATTTAATCATATTTCAAAAAACGTTAAAAAGGGCGTTAAAGATAGTAAAAATTGATATCTTAATCG  
TTGTTAATATGTTCTTAACTGGTTTTGATAGTAAAGTACTGAACACTTTATATGTTGATAAGAATTTAATGTATCATGATTTAATTCA  
AGCGTATTCACGTACAAATAGGGTTGAAAAAGAATCAAGCCATTTGGTAAAATTGTAACTATCGTGACTTGAAAAAAGAGACAG  
ACGATGCACTGAGAGTATTCTCACAAACAAATGATACGGATACAATTTAATGCGCAGTTATGAAGAGTAAAAAAGAATTTATG  
GACGCTTATCGTGAGCTTAAATGATTGTGCCGACACCACATGGTTGATGACATTCAAGATGAAGAAGAGCTAAAGCGCTTTGT  
TGAAGCTTATCGTTTATTAGCTAAAAATAATATTACGTTTAAAGCATTGACGAGTTTGAGTTTACAATTGATGAAATTGGAATGGA  
TGAACAAGAGAATGAAGACTATAAAAGTAAATATTTAGCTGTGTACGATCAAGTAAAAAGAGCGACGGCTGAGAAAAATAAAGTA  
TCCATTTTAAATGATATTGATTCGAAATAGAAATGATGCGTAATGATACGATTAAATGTAATTATATTAATGATATATTGAGACAA  
ATTGATCTTGAAGACAAACGCGGAACAACGTCGTAAACGAAGAATAATGATGACGCAATTTAGATCATGATGATCCGACATTGAG  
GTTAAAAACGAGATCTAATTAGAGAATTCATCGACAATGTTGTACCTTCTTAAATAAGGATGATGATATCGATCAAGAATATGTTAA  
TTTCGAAAGTATTAAGAAAGAGCGGAGTTCAAAGGATTTGCTGGAGAGAGATCTATCGATGAACAAGCCCTAAAAACAATTTCAA  
ATGACTACCAGTATAGTGGTGTGTAACCCACATCACCTTAAAAAATGATTGGTGATTGGCCATTGAAAGAAAAGCGTAAAGCA  
AGAAAAGCCATTGAATCTTTCGTGGCAGAAACAACTGAAAAATACGGTGTGTAATGATTACGCCCCCTCGCTAGATTAGTGTAGGG  
GGCATTATTATTTCTATCTTTGTAAAGTTATCATGTATTTGGCAATCATCACTTGGTTTCAATACAATTTTATCATCGTATGCGTATA  
GAAATAATGTCTATAGGCATTTAAATAGTTTATAATATTAACAGGATAAGTATTAATGTATGTTGAAGGAGGTGCGTAGCTATGG  
ATAATAGAAATATGATTAATCGTGTTTTATGTCAAAAGATATTACATCAAAATGCAATCAAAAAATAAAGTGAATGTTGTTGATGAGG  
CATATGATTTTTATATACAGGGACCTAAAAATATCAATGTAATACAGAAGATGAATCTTTATATAATTATTAAGTTTAAAGAGCTTATC  
GTAACGAATATTTTACAAAAACACAATACTTAATAAACTCCTTCTAGGACGACATTCTATTAATACAACCTACTGCATTCTCTGAGA  
TGCCCATAGGGAAAAGTATTGCTGATTTTATATTGTTAAACGGCAAAGGCGTTGTCTATGAGATTAAACAGAAATTAGATAAGCTG  
GATAGATTAGATAATCAAATTAATGATTATTAAGTGTTTAATTATGTAGTAGTTATTACAAATGACAAACATCTGAATAAAGTT  
ATGGCTAGATACAAAGATACACAGTTGGAATTTAGTGTTAACTAGAAAATACACTGAGTGAAGTTCAAAAACCTAAAGAAAA  
CAATAGTCTCTTAAACACAAAAGCGATGTATAACTTTTACGAAAAGAAGAAAGAAAAAGAGTTATTGCACAAAATCATATGGATG  
TGCCAACTTATAATGATTTACAGAGTATGATGTGTTATTTGACGTGTTTAAAGAAATACCAATGACGAACTGCATAACAATATGA  
TTTCTGAGTTGAAAAAAGAGGCAACATGAAAGAATACAAAGATGAATTTTACGAGCGCCGGCTGAAATTAAGTTCTTGTTATAT  
TTCGCAAAATGACAAAGAAAGATAAAAAATAAACTATCAATTTTCTTAAGGAGGATTAATATGATTATTCCTTATTTGCGTGGGAA  
ACAAAATGAACATTATTGCAATTAGAGAATTGTTAGAGAAGGTTTGATTGGTGATTGATTCAACCTATAATTGAACCGGATTAAGTA  
TACAACCACGTTTAAAAATGTTTTGAAATATTGTGGTGAAAAAGAATTTCTGTATAAATTTAGTAGTAAATTCGAAGTTAACTGAAGA  
AGAGATTAGTAACGAACTGTTGAAGACTTAAGCGAAATAATAACAAAAACAAAAGTGTTATTCAAAAAGCTTACTTGGGTCCTT

CTGATGAAGGCGATGATAGGTTGAAACAGCAATTTTCAAGTAATAGTTTAGCTATTTTAAACAAGTGATAGTACTGGGAAATGTTTG  
GAGATAAAAATAAACTTGAAATGGTTTTTGTACCAGATGATAGACACATTAAACGTAAATTGCGTAATATTCCAAACAAAGGCATC  
ATTATGGATCCTTTTAATAAACTAAGTCGTAATGTTGATTATTTAGATAATGATGACGAGTTTTATAGCGACGATCACCTTTATTATA  
AGGAAGATGGATACGTAGCATTTTCAGACTATTCTGTTATAGGTGGAGAATATGTAGACGGTGGCTTTTCGCCATTAGCTATTGCGA  
TACATATTGTCTATTTTGATGAGGCTAATGAGTTAAGAGTTAAACATTTTGTCTCTGATTCTAATAACGATAGATTAAATCCAGCTAA  
AAAGTTTTTGGAGGCTGTAGATAAATTAGTAACCTGGTCTAAAACTTAGATAATAAAAAATAGATCTTATGCAATCGGACAATTTGA  
AGAATTTAAATGAAAATAATAAGTATCCAGGATTAGGTTTAAATTTAAAGGTTATCTATCATGCATCATCTAGAAATTATGAATAGATA  
CTTGGAGTCTCAAAATGAAAATATGTGAAAAATGTTTTAATAATACTGAAATCGTAGAAATCATTGTAAATGATAATAGCAAATTTG  
ACAATTGTGATATTGATAACGATCATCTTGGTGTAAAAATTTTGATACGACTCGACACATAGATAAATTAGAGCAGATTAGAGATT  
ATTTAAGACCAGCGTTAGAATTATATGATATTAGTATAAATTTACCAGATACTTTTAGCCAAAAAGGTAAAAAAATTGAAACA  
GCATTAAGAGATGATTGGAGTATATTTAATGTTGAAGAAGCTCAAATAAGTTGTATTTTAAATGAACTTTTAAAGATGATGAAAAAT  
ATAGATAGACGGGTGTTGGAAGGTTTAGTAAGCGCTAAAAATCATTAAAGATAAAAAATATACAAATGAAAATCTAATTGTAGCAAA  
TAATGACTGGGATGGATTTTGTGAGAGCTTGAAGTATAAAAAATAGATTTTCATAATAATATGATCAATTTAGAGAATTTAGCGTTCTT  
TCTCGATATCACTACTAATTACTATAGTATTGAGGAATTTAGAGAAAGATTTGAACCATTATATAGATCTAGAATAGTTAAGTTCAT  
TACAGAGAAAAAGTGAACATAATGTCACCACCAAAGGGATTTGCAACGGCAGGAAGATTGAATCTAAATGGATAAGCGTATTATACC  
TTAGTACAAAAGAACAGGTCAGTATAGAAGAAGTTAAACCTAAGCATAATGACATTATTTATATAGGTAAGGTTAAGTTACAAAAA  
AACGTTACAAAAGAGAAATTTGAAAATTTGCGAATTTAACTAATTTAACTAGTAATGCAATCAAAGCTGGCGATGATGGATTTAGAAA  
GTATTTTGTAACTACCAACATTAAAAAAGATTCTAAGGATAAACAATCCAAAGCGATGAACAAGGAATAGATTATTTGCCAT  
TTCAATATTTAGCTGATTATTTGGAAGCCTTAAATATGACGGGATAAATGTATGAGAGCATATTGCAAGATGGTATCTTTAACTTTGT  
GTTTTTTGATCAAAAATTTATTTGAATGTGTTAATTATGAAAGAAAAAGAGTAAGTGATGTTAAATATACATTGACTAAGCTAAGTTG  
ACACACTCGGAAATCTGAATATTCTAATAAAAATATAAATAATCCCCCGCACTTCACATAGTGGCGGGGGATTTATTCTGGCGTTAAA  
ATGCCCAAAGTATGGGGGTGACTCTTAAATCATGGCAAAGCACCTAAAACTTGATATGGTGCCGAGCCCTAACTTAGCACAAATATA  
GTTAGTATGACAAAGTCATCTAACATAACACATCAGAGATTGCCTGATTTATTCAGACCATACAGTGATACAGTTGCACAACGCAT  
GACTTTTATTTAGCAATAACTGCTACTTCTGAAATAAGTTGCTTTGCATAGTCTGATTGCGGATGTTTGATAATATCTTCTGTGTTATT  
CAGTTCAACGATTTTCGCCATTTTTCATAACTGCTACGCGATCACATATTTTCATTGATAACACCCATGTATGTGTGATGAATAAATAA  
GTGATGCCGAAGTCTAAGTGAATTTGTTTAAATACTCGATGATATCTTTTGAATTGAAACGCTAAAGCGGACACTGCCTCGTCG  
CAACAATAGATGTTTCTGACTACAGCAAGTGCTCTCGGATACCTTACACGCTGACGTTGCCACCAGAGATAATTTCGTGTGGATAGCGA  
TATAAGAAAATTTGATCTAGGCCAACTTTTTCTAACAACGATACGACAGTTTTAATAATGTCATCATTATCTTTGACTTTCCCATGAA  
TGATTAGTGGTCGTTAATCACAATCAATGACTTTAAATCTGGATTAAATAGATGCGAATGGATCTTGAAAAATCATTGTATCTCTTG  
TCGTAAGATTTCAATTCATCATCTTTAAATAAACTTAATGGTAATTCGTTATACCAAATAAAGCCTTCTGACACTTCCTTTAGACCG  
ACGACCGTCTTAGCTAATGTCGATTTCCTGACCCTGATTCACCGACAATGCCTAATGTTTCGCCTTTTCTAATACCCAAGTTAATAT  
CATTAAGTCTCGGTATAGGCTGCCACTCGGTGATGTGTAATCCACGCTCACGCGATCGAATTTTAAATAAAATATCATTGTTTAAACG  
GTCTTGGCGGACGCGTTTGATGAATATCAGGAATCGCATCTATTAAGCGTTTTGTATAGGTATGTTGTGGCGATTTAAAAATACTTTC  
AACCCTGCCACTTTCAACGCACTTCCATCTTTTACATTACAATCAGATCTGTCGCAAAATTGATACACAGCGCCTAAATCGTGAGTGAT  
AAAAATAATAGATGTTTCTGTACTCATAAAGGGACTTCAATACTGCAAGTAATTGATTTGTGTACTGCGCATTAATGCGGTGTT  
GGTTCATCTGCGATTAAAAATTTGTGGCTTTAAAAATCAATGCCATTGCTATCATGACACGTTGACGCATACCACCAGAAAGTTCATGT  
GGATAAGCATCAAATTTGTCGAGTTGCATGTTTTATACCTACTTTTTCTAAAAATGTCATTATTGTCATCGACTTTGCTTCAGATTTAGATA  
CACGTTTATGTTGAAAATAGTACTTCTGTAATTTGTTTGCCAAATCGTTAATCTTGGATTCAACGAAGAGAGTGGATCTTGAAAAATCAT  
TGAAATATCCTTACCTCGAATTTGTTGTAACGCTGAAGTTGATAAATTATTTAACGATTGCCATTAAAAATAATTTCTCCTGTTAAT  
GTGTGATCTGGATAATCTGGTAGTAGCCCTAAAATAGATTTAGCAGTAATACTTTTTCTGATCCTGATTCACCAACAATACCTAGG  
ATATGTTTTTTTCGTAATTCGAAAGAGACATTTTTTACCGCTTGAAGTGTAGTTTCATCATAATTGAATTTGATACATTACAGACTGTTGA  
CTTCTAATAAAATTTGACAGTATGTTGTGCCTCCCTATTACAAAATGTGTAATTTATTCTATACTTTTGTATATCATAGTAATCTACTC  
AAGATTATTTTACAGGAGTGATTATCATAATTACTTATTTAGAATCTTTTAAATGATCGTTGTATCACAAGGCATTTTACAAGTTGTAT  
TATCGGTATTAAGCTTGCCAATATTTTTATATGCAGTGATAAAGTTTCTTTTCTGCTAAGAGAAAAAATTTTACGCTAATAATTTC  
TGAAATTTACAGAAATTTGAACGAGCGTTACATCAAAAATATAAATATTTATCGCAGCAAAAGTCATCCACACAAATACATAAAGAA  
CATTAATAATATTTCAAGGCACAAAGTTCTAATACGAGTTCAAAGAATATTGAACAAGCACATTTTTTCAACATACTTTGAAAATTTAT  
TATTTACATAAGTTCATCATGATCAAAGTAATATTGGCCTTGCCGATGTTTCATCTTATTGACTATTTATTACAGCCATTAGTTAGATA  
TATTTTTGAGAGAAATGTCATGGCTGTGATTGTCATCATTTGGTGTATTGTCAGTGTGTTACCATTCTGTATTTTTCACCGCTTGATG  
CGGCTTATAGCATACTGGGACAAAATGCAACAAAGGCACAGATACATCAATTCATGTATTACATCATCTTAACGAACCTTATTTTA  
TTCAATTTGTTGGGATACCATCAAGGGTGTTTTTACCTTTGACTTAGGTACGACTTACAAAGGGAATGAGGTTGTGACTAAAGCAGTTG  
CGGAAAGAATTTCCAATTAGCAATAATTGTGCGAGTATTGACGCTAATTGTTGCTGATTAATTTGCAATACCAATTTGGTATTATCAGTG  
CGATGAAGCGAAATTTAGTGGCTGTATATCAGTTAATGATAATTGTTAATTTGTTTATCTATTCCAAAGTTTCTGGCAAGGCTATT  
ATTCATTTTAGCGTTCTCATTGAAAATTTGGATATTTTGGCACCATCTTATATGCCAGAACATCCAATATCGTTGATTTTACCTGTACTTG  
TCATTGGAACAAGTATTGCTGCTTCTATCAGCGTATGACAAGGTCTTCTGACTTGAAGTAATGCGCAGCGATTATGTTTTAACTGC  
TTATGCAAAAAGGATTATCGACGACACAAGTTGTTATTAACATATTTTGAAAAATGCCATTATTCCAATTGTAACGTTAGTTGGTCTT  
CTAGTGGCAGAGTTACTAGGCGGTTACGAGTGACGGAACAAGTATTTAACATTAATGGTATCGGGCGTTATATCGTCCAAAAACA  
ACTAATACCTGATATCCCAGCAGTCATGGGTGGGGTCTGATATATATCAATTGTAATATCTTTAGCAAACTTAATTATTGATATATTT  
TATGCTTTAATCGATCCAAAATTTACGTAGTGAATTAACGAAAGGAAGTGAGGCATATGGTAAAACCTTACAACAAAGATAGCTTCC  
TTAAAACTATTTCGAAGTTATGCTATAGCAACTTATATTTTAGTTATATTAACGAGTGCATTAATCTTTTTAAAGGTTATGTGGCCG  
ATACGTTCTATATTGCTGAACATTGTCTAATCGTTTTAACCATCATTTTAAATATCATTTTAAACAACGGAACCAAGATGGAAGCATCA  
TGACTTATGGCGACGTATCGTCAAGTGTGTTATTGTTGATGACATTAACAGGCAACGTATTTACATTATTAATGTTTGAAGTATT  
AGACGTTACCAACGTACATCGCAAATACATAGTTATAACGGGTGGGAATCGTTTATACGAAAACTACTAGACATCGTATTGCGAT  
TATCGGGTACTTATTTTAGTCTACATGCTGACATTATCAATTGTGTCACAATTTACATTTGATACGACATTGGCTACTAAAAATCAG  
TTCAATGCAGTGTACATGGACCGAGTCTAGCCTATCGTTTGGTACTGATGATTTCCGGTAGAGACTTATTTACACGCGTAGTTGTAG  
GAACGAAGCTGACATTTTCAATTTCAATATTTTCAGTAGTTATTGCAAGTATTTTGGTGTGTTACTAGGCACTATCGCAGGTTATTT  
TAATCATATTGATAATTTAATAATGCGAATTTTATAGTGTAGTGTGCAATTCATCATTATTGTTAGCGGTGGCAATTTATGTCATCA  
TTTGGAGCAAGTATTTCAAAATTTAATTATTGCTTTAAGTATCGGTAATATACCATCATTGTCACGGAATCGGTGCCAGTGTGTTT  
AAATTAACGCAATGGAATATGTAGATGCAGCATCTAGTGTGAAACACTTGGAAATATCATATGGCGTTATATTTTACCGAATG  
CGATTGCGCCTATGATTGTACGTTTTTTCATTAATATAGGTGTGGTGTATTAACAACAAGTAGTTTAAAGTTTCTAGGACTTGGTGT  
TGCACCTGATGTAGCTGAATGGGGCAACATTTTACGTACCGGTAGTAACACTTGGAAACGCACAGTAATTTAGCTATTGTACCTGG  
TGTTTGTATTATGTTCTGCTGTTTTAGCATTTAATTTTATAGGTGATGCAGTGCCTGATGCACTAGATCCAAGAATTCATTAAGGTT

AGGGATAGATGTGAAGAAAATCATTAGTATCGCAATTATAGTTTTAGCGTTGGTATTAAGTGGTTGTGGTGTCCCTACGAAATCAGA  
AGTGGCTCAAAAAGTCATCGAAAAGTTGAAGTGAAAAGCGGAGCGACCAACAATACATTTCCCTAGGACAAGCAAGTTATGAAAATGAT  
ATGAATATCGTTAAAGATCAATTGGAAAATGCAGGATTTAACGTGAAGATGAATATCCAACCAGATTATGGTAGCTATCGTACACA  
ACGTCAAGCCGGCAATTATGATATCCAAATTGATGACTGGATGACAGTGTGGTGACCCGAACCTATGCTATGACGGCATTATTTAG  
TTCTACAGGATCAAATAGTTTATTGAAAAGATAAACATGTAGACCAGTTGTTAAATAAAGCTTCTACTCAAAATGAAGCAGATGTTAA  
ACAAACATATAAGCAAATTGAAGATGAAGTTGTATTTGATAAAGGGTATATGGCGCCTTTATATGGATCAAAAAAGAATTTAGTAT  
ATGACAATAAAGTGTTAGATAAAAAATAGTGTGGATTGCCAAATTCACGTGCATTAATATGGCAACAATTTGATTACAACAATAGT  
AGAGAACGAGATACGCGGCCACTTGTGATGACACAACAAGATGGTGAAATTCCTACATTGGATCCAATACGTTCAATTGCGCCGTC  
AGTATATTCAATTAATATGAATATGTACACAAGGTTATTATTATAGATGAAAAATGATCACTTAACAACGAAAGGTTCTGTTAAGTCG  
TGATTATGCTGTGAATAAGGACAATAAAGCATTTTATTCTTGTTAAGAGATGATGATTATTTTGTGAAAGTGGTCAATGGACAAGC  
ACGTAATACTGGAGAGCGTGTATCGGCTGAAGATGTTAAGTTTCTTTAGATAGAGCACGTGATAAAAAAGTCTGTGCCTAACAAATA  
ATACTTACAATATGCACAAACATATAAATGACATCAAGATATTAAGAAGATGAGGACATCGATCAGTTGCGTAAAGAGAAAGACAA  
GGACGATAAATCAATCTATGATAAGTTGATTAAAGCTTATAACGTCAAATCGTTAACGACAGATGGTCAAAAAGTAAATAATAAAG  
ACGGTATTTATCAAATTGTTAAAATTACGACAGATCAATCGATGCCTCGAGAGGTAAATTACTTAACACACTTCTCGGCAGGCATT  
TATCTAAAAAATTTGTTAATCAAGTAAATCAAGAATATCCAAAAGGATATGGGGATAGCAGTACAATTCTCTGCAAAATTCAGATGGG  
AAAAATGCGCTGTATGCAAGTGGCGCATACATTATGACACAGAAAAATGCATATCAAGCAACGTTTCAACGTAATCCAGGATTCAA  
CGAAACAGAAAAAGGTAGTTATGGACCAGCTAAAATTAATAATTACATTGAAGTTTAAATGGTGACCCGAATAATGCATTGTCAG  
AACTTAGAAATCATTCAATTGATATGTTGGCAGATGTAATCAAAAACATTTGATTAAATTAAGTCGGTAAAAATTTAAGCATTA  
TTCGCAAAAAATGGACGCAAGTCAGTCTTTTAAATGCTAAATATTAATAAAGGATATTTAAGACGCATCCAACTTGAGACAAGCA  
GTAGTTAATGCGATAGATCAGGATCAATTTAAGTTTATCGTGGCGATAAAATTTAAATTTGCATCACCGATTACACCACTTGTG  
GATACTGGTAACGAGCAACGTCAGATATAGAAAAAGTAGAAAAAGCCATTAATCAATAATGTTTTATATATTTAACAGAAAGTAG  
GAGGATATAGTATGGTCATTAACCTAAATGACAAACAGACAAAAACATCTAAAGAAGGGTTAATTTCCGTATCACATCCTCTTGGC  
GCTAAAATTGGTAAGGATGTATTAGATCAAGGTGGCAACGCCATGGATGCAGTGATTGCAATTCAACTGGCATTGAATGTGGTAGA  
ACCATTTGCATCAGGTATTGGTGGTGGCGGGTATTTGCTATATTATGAGCAAAGTACTGGCAGTATAACTGCTTTTGATGCGCGTGA  
GACAGCCCCTGCACATGTAGACAAACAATTTTATCTAGATGATTCAGGCGAATATAAATCATTTTGTGATGACTACACATGGTAA  
AACTGTCGCTGTGCCAGCAATTTCAAAGCTGTTTATTGATTATTTACAAGCGTTATGCTAAGTTGTCATTGGAAGATTTAATTAATCCT  
GCAATTGAAGTACGTATTGAAGGTCTATGACGCAATTCGCTAATTTGGGCTACTGAAAAAATATTCGCGCCAGCAACACGCACGATTGACAAAGTA  
TCATGAAACGGCACAAGTATTTACGCATGAAAAATCAATATTGGCGTGAAGGTGATTGGATTGTACAACCCGAATTAGGTAAAGACAT  
TTCAAATATTAAGAGAACAAGGGTTAATGCATTTTATAAAGGTGACATTGCGAAACAATTAGTCAATGTTGTTAAAGCATGTGGTG  
GGACAATCACTTTAGAGGATCTAGCCAATTATGACATTCAGATTAAGCGCCAATCAGTGCGACATTTAAAGACTATGACATTTATT  
CAATGGGACCATCTAGTTCTGGCGGTATCACGGTCATTCAAATATTGAAGTTATTAGAACATGTCGATTTACCATCTATGGGTCCAA  
GATCTGTCGATTACTTGCATCATTTGATACAAGCGATGCATTTAGCATATAGTGATCGCGCGCAATACTTGGCGGATGATAATTTTC  
ATGAGGTGCCTGTACAGTCATTAATTGATGACGATTATTTAAAGCACGCAGTACGCTCATTGATAGCAATAAAGCAAATATTGATA  
TAGAGCATGGTGTGTGCTGATTGTCATTAGTCATACAGATGTTGAAGAAAAATCATACCGAAACAACCTATTTTGTGTGATTGATA  
AGGAAGGTAATATTGCTTCAATTTACGACATCAATCGGTATGATTTACGGATCAGGATTACGATTCCAGGGTACGGCGTGTATTGA  
ATACCACAATGGATGGTTTTGATGTAGTAGATGGTGGTATTAACGAAATTGCACCATATAAACGACCACTAAGTAACATGGCTCCA  
ACGATTGTGATGCATCACGGGAAGCCGATATTAACAGTAGGTGCACCTGGTGCCATAAGTATCATTGCTAGTGTGCGCAAAACATTA  
ATCAATGTATTAGTGTGGCATGGATATTCAGCAGGCTATAGATGAACCTAGAATTTATAGTAGCCATCCTAATCGCATTGAATGG  
GAGCCTCAATTTTACAATCTACAATATTAGCATTGATTGCACGTGGACATGCAATGGAACATAAACCAGATGCCTATATTGGAGAT  
GTACATGGGTACAGGTGACTTGAATACACGTGACGCGTCGGGAGGTGCTGATGATACGAGGGAAGGCACAGTGATAGGTGGCG  
ATGTATTATCAATTAGAAAAACAACCATTACCTAGTCCGAAAAATATACGATAATGACACCCATCGAGTATATTTCAATGATATGCAGT  
TGCCATTATATGCTGAACAAGTGCGGTGGATGCATGACAAATATTGGGTGATGAAAAGTGTATTAGAATCATTTTCCCTGAAGTTA  
GTGTCATATTGAAGATTTAAGAAGTTATGAAATCGCCGGAAAAAATTTATATAGATATTGCTGGTTGGCAGCGGAAGAAAGTTAT  
CAAGTTACCTTAAAGGATGACAGTTTATACTTAACTGATGAAACATATCATTCACTGAAAGCAAAACACAAATGCATACTATAGATA  
TGATCGAGATAGTATCACAAGATAATTTATGTATTTGATATATAGTTTGAAGTGGAATTTTGATTCTTGTGTAACGAAAGGTTTCGATT  
TCAAACCTTTAGAGTGATGCTTGAGTGTAGTAATGTTGAAGTTGTTATAAGAAACGCTAGTCGCTTTGTAAAAATATAAAACGCCCA  
CAAATTCGTTTTTGATGTACACCACAATAGTTAGTCTAAAATCTAACTTGATGTGATTCGGTACAATTAATGAATGATGTGAGGCG  
TTTTTATAATGTGTGATTTAATAAATGATTGGTTATTTCTATAATTACATCATAAGTATTAATGTTCACTTAATTTATTATAAGTAA  
GGCTTTCTTTGTATATAATTTGGTCTTTTCCAGGACTTGAAAAATAAAAAATAAAGTTTCTGATCTTGATGATTATTGCCTTTTAAATC  
ACTCATTCCCTTTAATTCACCTTTGTTGATGCATTTCTGGGAATATTATATCTACGTTTAAATTTGTTAACGTTTGGATTATCATTG  
ACAATTTACCAGATAAATTAATAATACAGTGGTAGGATCAGTGTGACTTTCAAAATCATGTCTATTTAAAAATGCTTTGTTAAATCAC  
CACTTTGAATCAAAAAATGATTGTTTTGATTTTTCAGCGCGGGATCTTTTACGCTTTTGTGAAACAGTATTTATTATTAACCT  
ACTTTTACTGGATAACTTTTGTATGTGAGTCAGTAGCATTTTCTATCGTTTGTAGTTGTGTCATATTCACCAGTTATTTTATGTGT  
GTTCTTATCTACCTTTAACAACATACGGTCTTCTTTTAAAGCTCATCTGATCCAACAACCTGAATAAGAGGATTCTATATACCATGTG  
TCTTGATCATTATTTTCATAATGGGGATTATCGTGACCATCAATTCATAAAGCGTTTCTAAGTTTTAATAGGATACGTACTTAGTA  
CTTTTTAAGACCATCTTTCAAATGAATTTGTCCCATTCAATTGCCAAAAACATACCGCCACTGACTACAATTGAAATAATAATAAT  
TGCTGCTAAGTTTAAACCAGAAAAATTTATGTGCTTTCATACATTTCCACCGTTTCTCAAAATACTTCATTAACACTATAATAATATAT  
TTTGA AAAATATTTACATCAGTATTAAGTGAATATCAAAATTTTAAATTTATGAAAATAATAGATATTTATAAAAAAGCGGAAAAAGA  
GATACAATAAAAAACTGCATGACGTTGAGGAGTCACACAGTGAATTA AAAATTTA AAAATGTAGTTGCTAATTTTTCAGCATATTA  
ATACAGTTAGTTCAATTTCTCAGTCTTATGAGGTTACAGATTTGTGCTTCAATAATGATTGTTTATATGATTTTTCAGCAACCTAAGA  
ATGTCATAATTGTTCTTAAATAACGGTCAACCATTTCAAAATCAGCAGCAGGTCTTCAGTATAATATCCACCACGTGATTGAATGT  
GTAATACTTTTTTGTGAGTTAACAAACCTTGAGGTCTTCAGCAGAATATTTAAAGTTTTTACCTGCAATTGAAATAGCATCAATATA  
TGCTTTAACTACAGGTGGGAAAGAAAGGTTCCACATAGGCGTTACAAATACATATTTATCTGCACTTAAAAATTTCTTCTAAAATGTC  
ACTCAATCTTGAAACTTTCAATTTGTTTCATCATCAGTTAACGTTTCGCCATTACTCATTTTCCCAACAGTTAATACATCTTTGTCAA  
TAACTGGAATATAAGTTTCAAAATAATCAATATGTTTCACTTCATCATCAGGATGTTGTTGTTGATATGTTTCGATAAATGCTTTACC  
AGCCGCCATAGAATTTGATACCAGTTCAATTAAGGGGTGTGCTGTAATATATAACTTTTGCCATTTGAAAAATTTCTCTCTGTTTCT  
GTTATTTCTTGAGTATAATTATATATAGATATAAAAATTTGATATCAATAAAAAATTTCAAATACCACATTTTCTTCATCTATAT  
TTGGCAGTACTACTAAAGTATGAGTGCATTTAATTTAGAAATAGTTGATTAGAAATATATACTTAATACCCAAATATATGAAGGAT  
GGATGCCACTATGACAAAGCGACCAAAACGTATTTGGCAACAATTATCATTTTCTTCACTATTATTACGATTATTTATATAGAT  
GACATTCAAAAAATGGTTTAAACCAATATACCGATAAATTGACACAAAATCATAAAGGACAAGGACACTCAAAATGGGAAGACTTTTT  
TAGAGGGAGTAGGATTACTGAGACTTTTGGCAAAATATCAACATTCACCATTTGATGGTAAGCATTATGGCATTGATTTTGCATTGCC

AAAAGGTACACCAATTAAGCGCCGACGAATGGTAAAGTAACACGTATCTTTAATAATGAATTAGGCGGCAAGGTATTACAGATTG  
CCGAAGACAATGGAGAATATCACCAAGTGGTATCTACACTTAGACAAATATAATGTCAAAGTAGGTGATCGAGTTAAAGCAGGTGAT  
ATTATTGCATATTCAGGCAATACAGGTAAACAAACGACAGGCGCACATTTACATTTTCAAAGAATGAAGGGTGGCGTAGGTAATGC  
ATATGCAGAAGATCCTAAACCGTTTATCGATCAGTTACCTGATGGGGAACGTAGCCTATATGATTTGTAGTTATAGAAGAGTGCCCG  
CAGTCTAAAAAATTAAGCAATCATTGTGTGAGTATGATACTTACATAATGGTTGCTTTTTTCAATGAAAATCGTAATGCTAAGTCAT  
ACTTGTGTTGATTAGATATTACTTAAAAATGTAAGACAAGGTTGTTTGCATTGGCAGTGAAATATCGCACATAAAAAAACATTATTGT  
CACACTAGAAAAATAGTTGTGCACTATATCAATTTTCTGTATAAAAAGTTAATTCTGACAGTAATGTAACGTTTACAATTTATGATTG  
ACATTAATAATGACTGAATATATGATTTATGTAAGTATTTGTGCAACGTTTTCACAAAAGTGTATTGCACAATCAAACGTGTAACAA  
AGTATGGGAGGCATAACATGGCAGAACTAAAGTTAGAGCATATTAAGACGATGATAACAACAATACTGTAGTGAAAAGATTTT  
AATCTACATATTACTGACAAAGAATTCATTGTATTTGTTGGACCATCGGGATGTGGTAAATCAACAACATTACGAATGGTTGCTGGA  
CTAGAGTCTATCACATCTGGAGATTTTATATTGATGGGGAACGCATGAACGATGTTGAACCAAGAATAGAGATATTGCGATGGT  
ATTTCAAAACTATGCATTATATCCACATATGACTGTTTTTGAAAAATATGGCATTGGGCTAAAGCTACGTAAAGTAAATAAAAAAGA  
GATTGAACAAAAAGTTAATGAAGCAGCTGAAATATTAGGATTAAGTGTGATCTTGGTCGTAACCAAAAGCGTTATCTGGCGGAC  
AGCGTCAACGTGTTGCTTTGGGCAGAGCTATTGTTAGGGATGCGAAAAGTCTTTTAAATGGATGAACCATTATCGAATCTTGATGCGA  
AGCTTCGAGTACAAATGCGCACAGAAATATTGAAATTACATAAGCGACTTAATACTACGACAATTTATGTTACACATGATCAAAC  
GAAGCATTGACGATGGCTAGTCGAATTGTGTTTTGAAAGATGGCGACATTATGCAAGTCGGCACACCTAGAGAAATATATGATGC  
CCCTAATTGCATATTTGTGGCGCAATTTATCGGCTCACCAGCAATGAATATGTTGAATGCTACAGTTGAAATGGACGGATTGAAGGT  
AGGAACACACCAATTTAAATTACATAATAAAAAATTTGAAAAGTTAAAGCTGCTGGCTACTTAGACAAAGGAAATTTTATGGTA  
TTGAGCTGAAGCAATTCATGAAGAACCAATATTTATTCAAACTTCCAGAGACACAATTTGAATCTGAAGTAGTTGTATCCGAAC  
TGTTAGGTTTCAGAAATTATGGTACATAGCACATTCCAAGGAATGGAATTGATTTCTAAATTAGATTCAAGAACACAAGTGATGGCG  
AACGACAAGATTACACTAGCATTTGATATGAATAAGTGTCACTTTTTTGATGAAAAAACAGGAAATCGTATCGTCTAAGGGGGAGT  
ATTCATGTCTAAAAATTTAAATGTGTCACGTTAGCCGTGGTAATGTTATTAATCGTAAGTGCATGTGGCCCTAATCGTTCGAAAGA  
AGATATTGATAAAGCATTGAATAAAGATAATTCTAAAGACAAGCCTAACCAACTACGATGTGGGTGGATGGCGACAAGCAAATGG  
CGTTTTATAAAAAAATTACGGATCAATATACTAAAAAACTGGCATCAAAGTAAAGCTTGTAATATTGGTCAAAATGATCAACTA  
GAAAATATTTTCGCTAGACGCTCCTGCAGGAAAAGGTCCAGATATCTTTTTCTTAGCACATGATAATACTGGAAGTGCCTATCTACAA  
GGCTTAGCTGTGAAATCAAATTATCAAAAAGATGAGTTGAAAGGTTTCAATAAGCAAGCACTTAAAGCGATGAATTATGACAATAA  
GCAACTAGCATTTGCCAGCTATCGTAGAAACAACCGCACTTTTCTATAATAAAAAAATTAGTGAAAAATGCACCGCAACGTTAGAAAG  
AAGTTGAAGCTAATGCTGCCAAGCTAACTGATAGTAAAAAGAAACAATACGGTATGTTATTTGATGCTAAAAATTTCTATTTTAATT  
ATCCGTTTTTATTCGGCAATGATGATTATATTTTCAAGAAAAATGGCAGTGAATATGATATTCATCAGCTAGGACTAAATTCAAAAC  
ATGTCGTCAAAAATGCTGAACGATTACAAAAATGGTACGACAAAGGGTATCTTCCTAAGGCAGCAACACATGATGTCATGATTGGT  
CTTTTTAAAGAAGGAAAAAGTAGGACAATTTGTCACTGGACCGTGGAAACATTAATGAATATCAAGAAACGTTTGGTAAAGATTAGG  
AGTAACAACATTACCTACAGATGGTGGCAAACCTATGAAACCATTCTCGGTGTACGTGGTTGGTATTTATCTGAATATAGTAAACA  
TAAGTATTGGGCTAAAGATTTAATGCTGTATATCACTAGTAAAGATACATTACAAAAATATACAGATGAAATGAGCGAAATTACTG  
GACGTGTTGACGTGAAATCATCTAATCCAAATTTAAAAAGTGTGTTGAAAAGCAAGCACGTGATGCAACCGATGCCTAATATCTCTG  
AAATCGGACAAGTTTGGGAACCGATGGGCAATGCAAGCATATTTTCTCAATGGTAAAGAACTCTAAACAAGCGTTAGATGAGGCG  
ACGAATGATATAACGCAAAATATTAAGATTCTTCATCCATCACAAAATGATAAGAAAGGAGATTAGTTATGACGAAACGTAACCCCT  
AAATTAGCGGCATTATTATCTGTTATACCTGGTTTGGGACAGTTTTATAATAAAGACCCATTAAAGGTACGATATTTTTTATCTTTT  
TCATCAGTTTTTATTTCTGTATTTTATAGCTTTTTAAATATTGGTTTTTGGGGATTGTTTACATTAGGGACAGTACCTAAGTTAGACGAT  
TCTCGTGTCTTACTTGACAAGGTATTATTTCTATCTTACTCGTTGTTTTTGCAATCATGCTATATATCATTAATATTTTAGATGCATA  
TCGTAATGCTGAACGATTTAATCGCAATGAAGAAATAAAGGATCCGAAGGCACGTATGGTTGCAACATGGGACAAGACGTTCCCAT  
ACTTATTAATCTCACCAGGTACATTTCTATTGATATTTGTAGTTGATTTCCATTAATATTTATGTTTGGAGTAGCATTTACAAATTAC  
AATTTATACAACGCGCCTCCGAGACACACATTAGAATGGGTGGTTTAGATAACTTTAAACGTTATTACAAATGGCGTTTGGCGT  
AAAACATTTTTAGTGTATTACTTTGGACATTAGTATTGGACGCTTGTGGAACGACACTTCAAATGCAATGATAGGCTGTTTTTGGCAA  
TTATTGTAAATCACCTGTCTGCAAAAGGTAAGAAATTTATCCGTAAGTGTGTTAATCTACCTTGGGCTGTACCATTATTTGTGACAAT  
TTTAATATTTGTAGCGTTATTTAATGATGAATTTGGTGGGATAAAATAATGATATTTTGCAACCTTTATTAGGTGTAGCACCAGCATGG  
TTAAGTGATCCGTTTTTGGGCAAAAGTGGCATTATCGGCATTCAAGTATGGCTTGGATTCCCATTTGTCTTTGCACTGTTCACTGGAG  
TACTGCAAGTATTTATCATGATTGGTACGAAGCAGCAGATATGGATGGTGCCTAGTTGGCAAAAGTTAGAAACATCACATTCC  
CGCATGTCAATTTACGCCACAGCGCCATTGTTAATTTATGCAATATGCAGGTAATTTCAATAATTTTAACTTATTATCTATTATAAA  
AGGCGGTCCACCAGTGTACAGGGCAGAATGCTGGTAGTACAGATATCTTGATATCTTGGGTGTATAATCTGACATTTGAGTTTAAACA  
CTTCAACATGGGTGCAAGTTGTGTCTTAATATTGGATTTATGTTGCTATTGTGCGATTTATTCAATTCAGACGTACAAGTACGTTT  
AAAGATGAGGGAGGTTTTATAAGATGACAAAGAAGAAAAACATATTAAGGAACAATCGGTATTTACGGTTTTATAGCGATGATGTTT  
TCATCATTTTTATCTACTATGTCGACATTGGCATTGGCTTTCCCTTAATCCAGTACGAACCTGTATGGTGCCAAAAATGATACGACAA  
TGCAACATTTAAAAATTATGCATTTCTACTATTTCGATGACAGTAGTCAATACCTGACTTGGTATAAAAAATACGCTTATCGTAGCATCT  
GCAATGCACTGTTTAGTGTGATATTTGTACGTTAACAGCATATGCTTTTTCTAGATATCGCTTTGTTGGTCGTAAATACGGGCTGA  
TTACATTTTTGATTTTACAAATGTTCCCTGTATTAATGGCAATGGTCGCAACCTATATTTTGCTAAATACAATTGGATTATTAGATTCT  
TTATTTGGACTAACACTGGTATATATTGGTGGATCAATACCGATGAATGCCTTTTTAGTGAAAGGTTACTTCGATACGATTCCAAAA  
GAACTTGATGAATCTGCCAAAAATTGATGGTGCAGGGCATATGCGTATTTTCTTACAAATTATGCTTCCATTAGCTAAGCCGATTTTA  
GCAGTTGTTGCTTTGTTCAATTTTATGGGGCCATTTATGGACTTTATATTACCTAAAAATACTATTAAGAAGTCTGAAAAATTCACAT  
TAGCAGTTGGATTGTTCAACTTTATTAATGATAAGTATGCAAAATATTTACAGTGTGTCAGCAGGGGCAATTTAGTATTGTCAGTAC  
CTATAGCAATCGTATTTCTGTCTTGCAACGCTATTAGTATCAGGTTTAAACAGAGGTGCGACAAAGGTATAGTTTGAAATAGGA  
GCGGGACAGAAATGATAAAGAACCCTAATGAATTTATTGTGTAGTGGCTCTTGGGAGTGGGACAGAAATGATATTTTCGCAAAAT  
TTATTTTCGTCGTCACCCCACTTGCATTGTCTGTAGAAATTGGGAATCCAATTTCTCTATGTTGGGGCCCCGCCAATTTGCACATT  
ATTGTAAGCTGACTTTTCGCCAGCTTCTGTATTGGGGCCCCGCCAATATAACACTGTATAGCCTAGAACGTTGATTGATGTTAAGG  
CTCGACATACGCACTAATGACGATAAAGATTAAGAGGAGGACGTTATGATGACGATTAAAGTTGGAATCATTGGGTGTGGTGGTAT  
TGCGAATGGCAAGCAGATGCCAAGTTTACAAAAAGTTGAAAATGTTGAAAATGATCGCATTTTGTGACGTAGACATTTCGAAAAGCAG  
CGAGTGGCGGCAGAAGCATACGGAAGTGAATGCAAAAGGTTTATGATGATTACAAAGCATTGTTAAAAAGATGACACGATTGATGTT  
ATCCATGTTTGTACGCCAAATGACTCGCATTTGTGAATTTACTGTAGCAGGGTGCATGCCGTAACCATGTGATGTGAAAAACCA  
ATGGCTAAAACGACAGCAGAGCTCAAAAAATGATAGATACAGTAAATCAACAGGTAAAAAATTAACAATAGGTTATCAAAATC  
GCTTCAGACCAGATAGTCAATTTTATATAAATCAGCGCAACGTGGCGACTTAGGAGACATTTACTTCGGAAGGCACATGCCATT  
GTCGTCGAGCAGTACCAACATGGGGTGTCTTTCTAGACGAAGAAGCTCAAGGTGGAGGACCATTAATCGATATCGGTACACACGCT  
TTAGATTTAACGTTATGGATGATGGATAATTATGAGCCAGAATCAGTGATGGGTTCAACATTCCATAAATTAATAAACAGCATCAT

GCGGCAAACGCTTGGGGTTCATGGAATCCAGATGAATTTACAGTTGAAGATTCTGCGTTTGGATTTATTAATAAATGAAGAATGGAGC  
GACGATCATTTTTAGAAATCCGCTTGGGCGATTAATTCCTTTAGAAGTGGATGAGGCCAAAATGTTCAATTATCAGGAACTAAAGCAGGTGC  
TGATATGAAAGATGGTCTACGTATTCATGGTGAAGACATGGGTACACTTTATACCAAACACGTTGAATTGGAAAACAAAGCGCTCG  
ACTTTTATGAAGGTAATGAAGTGGATGAAGCTGAAGAAGAAGCAAAAGCTTGGATTGATGCAGTTGTATATGATACTGAACAGTT  
GTGAAACCGGAACAAGCAATGGTAGTTACAAAAATCTTGAAGCGATTATCAGTCTGCAAAATCAGGCAAAGCAATTTACTTTGA  
ATAACATCATACGGTAAGGAGGCACATCATGACAAAATTAAGGTTGGTGTGATAGGTGTTGGTGGTATTGCACAAGACCGTCATA  
TTCCAGCATTGCTGAAACTCAAAGACACAGTCTCATTAGTTGCAGTACAAGATATTAATACAGTGCAGATGATTGATGTTGCGAAGC  
GCTTTAATATACCTCATGCAGTTGAGACACCTAGCGAGCTGTTTAACTTGTGATGCGGTGGTCATTTGTACACCCAATAAATTC  
ATGCTGATCTTTCTATAGAAGCATTGAACCATGGTGCCATGTTTTATGCGAAAAGCCAATGGCAATGACGACGGAAGAGTGTGAC  
CGCATGATTGAAGCGGCTAATAAAAAATCACAAATTAACCTGCTGCTTATCATTATCGCCACACAGATGTGGCAATTTACTGCTAAA  
AAAGCAATTGAATCAGGTGTGGTTGGTAAACCTTTAGTAGACGTGTACAAGCGATGCGTAGGCGTAAAGTACCTGGGTGGGGCGT  
TTTTACCAATAAAGCGTTGCAAGGTGGCGGTAGTTTAATCGATTATGGTTGCCACTTGTAGACTTATCTTTGTGGCTATTAGGCAAA  
GATATGGTGCCGCATGAAGTGCTAGGAAAAACATATAATCAATTGAGTAAACAACCGAATCAAATTAATGATTGGGGAACATTTGA  
TCATACTAAATTTGATGTCGATGATCATGTTACTAGTTATATGACATTTGCCAATCGAGCAAGCATGCAGTTTGAATGTTCTGTGGTCT  
GCAAATATAAAGGAAGATAAGGTACACGTTAGTTTATCAGGCGAAGATGGCGGTATCAATTTATTTCCATTTGAAATATATGAGCC  
CCGCTTTGGAACATTTTTTGA AAAACAAAGCTAATGTTGAGCATAACGAAGACATTGCTGGTGAGAGACAGGCGCGTAACCTTTGTCA  
ATGCGTGTTTAGGGATAGAAGAGATTGTGGTGA AACCGGAAGAAGCACGCAATGTAAATGCCCTTATAGAAGCGATTTATCGTAGC  
GATCTTGATAACAGAGACATACAACTTTAATGATTATTATATAATAACAAATTTCAATATAAAAAAGAGGAGTGCTTTTCAATG  
AAAATAGGTGTATTTTCAGTATTATTTTACGATAAAAAATTTGAAGATATGTTAGATTATGTCGCAGAAATGCGATTGGATGATTGATT  
GAAGTTGGAACAGGTGGTAACCCAGGAGATAAATTTTGAAGTTAGATGAGTTGTTAGAAAAATGAAGACAAGCGACAAGCATTAT  
GAAGTCAATCACAGACAGAGGCTTACAAATAAGTGGTTTCAGTTGTCATAACAATCCAATTTCTCCAGATCCGATAGAAGCGAAAG  
AAGCCGATGAAACGTTACGTAAAACAATCCGTTTGAAGCAATCTATTAGACGTGCCAGTTGTTAATACATTTTCTGGCATTGCAGGGT  
CAGATGATACCGCTAAAAAGCCTAATTGGCCTGTTACACCTTGGCCAACAGCCTACTCTGAAATTTATGATTATCAGTGGAAATGAAA  
AGTTGATACCATATTGGCAAGATTTAGCTGAGTTTGCAAAAAGAGCAAGATGTAAAAATTTGCCATAGAGTTACATGCAGGATTTTTA  
GTTTCATACCATATACGATGTTAAAGTTACGTGAGGCTACAAATGAATATATCGGTGCTAACTTAGATCCTAGTCATTTATGGTGG  
CAAGGTATTGATCCAAATTGCTGCGATTTCGCATATTAGGCCAAGCAATGCAATTCATCCTCCATGCTAAAGATACGTATATTAAT  
CAAGAAAATGTAAATATGATGTTGGTCTAACTGATATGCAACCATATGGTAACGTTGCGACAAGAGCATGGACATTCCGTACAGTTGG  
TTATGGACATAGTCCATATGTATGGGCAGATATCATAAGTCAACTTATTATTAATGGATATGATTATGTATTAAGTATTGAACATGA  
AGATCCTATTATGTCAGTAGAAGAAGGTTTCCAAAAAGCTTGTCAAACCTTTGAAATCTGTTAATATTTACGACAAGCCAGCAGACAT  
GTGGTGGGCATAATACGAACTCGAGGTTAGTCTGAAGTTTGTCTGAAGTAAGACTGGTGGCAGTGTGTAATAAATGCATATGTCGC  
CAAGCCATTGCCAAAAATTTACACCTTAAATCATGTCATTGTTTGTAAGAAGGTGTACTTTATATAAGTGTTTAGCGATGGTCAT  
ACCCATTACAGTAACAATCCTCACCATTGAAAAGAGTATATAACCTTTTCGATAGTGAGGTATATGATAATAAAAAAGCCTGTTG  
TCACAATGGTCATAGACACGACATACTTTAAAGGCTTCTGAATATAATATTTCAGAACGCACCTTTAAAGATGGACGTCGATGTCGAC  
TAATGTGATGACAGGCTTTTCATCTTTTAAATATTCATTAATTTCTCTCTTGTGTTAATACGTACATATAAGAAAATACGCATACGGTA  
CTAATAAAATAGTTGTATATGTTGCGTGTGTTAATAATAATACACCGATTAACTTCAGGAAATGATGTTTAAAGAAATTAATTTGGGTGT  
TTGTAATTTTATATAATCCAGATTTAATAATAGGATGGTTAGGTA AAAATGAATAATTTAATGTCCAAATACCACCTAAAGTTTAAAT  
AACCATAAAATAACATGATATAAGCAAAGATTAATAATACTAAGCCAATACCATTGCAAAGCTAAATGTATCTTTATTAATAAATGC  
CTCTACACCAGCCAATACATAAATTAACAGCTGTGTTATTGCTAAAACTTCGAATTTTAAACGCCATATTCAACTGCACCGTCTGCT  
TTTAATTGTTTTGAGTGATTAATAGATATCTTTAAGCTGACAAGTCTGATACAGAAAAAGATAAGTAATATAGATAGAATCATGATG  
TCCTCCGTCATTATGTCATATGTATAAGCGTTGATTTTGACAACATAAAGTATTTTATAGATAAACTTGTCAAATACTATTAACCTAT  
TTATTAATTTTAGTACATAAATATGTTTCTAAGTATGTGTTATGTTTCAGTATTTTGGATAATTTAATAATTTTAAGGATATTAAGCGC  
TTACACCGACGTGATATATTGGCTTAACGAAAAATGATTGAGGTGACAGAGATGAACCTTTTGTATCCATAAGATTCCGAACAAA  
GGCATTCCATTATCGGTACAACGTA AATATGGCTTAGAACTTCAAGATGACAGAACTTTCTTGTAGTGTTCTTTGTTATATGCGTATGT  
ATTTAATTCGAAACAACCTTAAGGCGGCCAACCGTTTTTAAAGAGGAAATTTGGATTATCTACATTAGAACTTGGTTATATCGGAT  
TAGCATTTAGTATCACGTACGGTTTAGGGAAAACATTACTTGATATTTTGTGATGGACGTAACACAAAACGTATTATCTCGTTCTT  
ACTTATCTTATCTGCGATTACAGTTTAAATTATGGGATTTGTTTAAAGTTACTTTGGTCTGTAATGGGATTATTAATTGTACTTTGGG  
GACTTAACGGGGTGTTCGAATCAGTTGGTGGACCTGCAAGTTATTCAACGATTTCAGATGGGCGCCAAGAACGAAACGTGGCCGA  
TACTTAGGATTTTGAATACATCACATAATATCGGTGGTGCCATTGCAAGTGGTGTGCACTTTGGGGTGCTAATGTATCTTCCATG  
GAAATGTTATAGGGATGTTCAATTTCCCATCGGTGATTGCATTACTTATTGGTATCGCAACATTATTTATCGGAAAAGATGATCCGG  
AAGAATTAGGATGGAATCGTGCTGAAGAAATTTGGGAAGAGCGGTCGATAAAGAAAATATTGATTCTCAAGGTATGACGAAATG  
GGAGATCTTTAAAAATATATCTGGGAAATCCTGTTATATGGAATTCATGTGTTTCAACGCTTTGTGATACATTGTACGAATCGGT  
ATTGATAACTGGGACCGGTATATGTTGTCAGAGCATTTACACTTTAGTAAAGGCGATGCAGTTAATACGATATTTCAAGTTGAAAT  
GGTGCATTAGTTGCAAGTTTATTTATGGGGCTACGTATCAGACTTATTA AAAAGGTGCTGCTGCAATTGTAGCTATTGGCTGTATGTTA  
TGATTACATTTGTTGCTTATTCTACACAAATGCTACAAGTGCATGATGGTTAACATTTTCATTGTTTGCATTAGGTGCGTTAATCTTT  
GGTCCGCAATTATTAATTGGTGTATCATTGACTGGTTTTGTTCTTAAAAATGCCATCAGTGTAGCAAACGGAATGACAGGTTTCTTC  
GCGTATCTATTCCGTGACTCAATGGCGAAAGTTGGTTTGGCGGCTATTGCTGATCCAACACGTAACGGTTTAAACATCTTTGGATAT  
ACATTAAGTGGATGGACAGATGTTTTCATCGTCTTCTATGTTGCATTATTCCTAGGCATGATTCTATTAGGAATCGTTGCTTTCTATG  
AAGAAAAGAAAATTAGAAGTTTAAAAATCTAATATCAATCGGATTA AAAAGTATCGCCAAATTTATTGCAGTATAGTTGGCAATCCTG  
CCCCGACGGCATGTGCGTGAAGAGATGAAGATACTGCTTACCCTTGCAAAATATATCATCTCTATGCTCGGGGACAGATCATAAT  
TCCCTGTTATGAAGTATCTTATTGCCCCGACTTAGGGTGACTCAATGAATTTACTCTTACATAAAGAGTACTTAGGATAGCGGTGTCATA  
TTGTAGGGAGTATTGTTTTATATTTAACTCTCTAAAAAGCGGACTGAAAAGAAAAGTGA AAAACTTCTCTATCAGTCCGCTTTTTCAT  
AGAACAAAATGTAGGCGCCATAATCATTAGTTATGTGCTAATCTATTTTGTCTGCTTACAATAATCACTTGGCGACATTTGTAAATAT  
TTTTTAAATGATAGCTAAACATTTTATACTCTGAAAAGCCTACTTTGTCTGCAATTTTCATAGTGTGTAATGTCGATCTAACAAAT  
GCAGAGATTGTAAAATACGATAGCGATTTAAATAATCGACAATTGTAATACCAACATGATCTTTAAATGTTTCGATCGCATACGATT  
CACTAACATCGATATGTTGAATTAATCTGAAACAGTCACTTTTCGTTGATAAGATTGCTTAATTTGATCAACAATCTGATTTACATA  
ATAATCATCGTATTTCTACTTTTAAATAGTGGTTGGAAGGCATCATGACAAGATGCTAAGCTACGGCCGTTCTGTGATTGTTGCTCTAAT  
AAGGTACGGACAAGTCTTCTAAAAATACTTCTAATTTGTGCTACTGCTTTTAAATAAATAACAAGACATGATGTTGAATA  
CCGGTCTTCATATATTCAAAGTCACTCGTAACCTGATAATATGATGACATTACAATCTAGATGCGCAATATCATTGAGTAAATCGACG  
CCATTCTTACGTGCGCATACGAATATCAGTAATTACTAATTCTGGCTGATGTTGTTGAATTAGTGATAATGCTTCAACACCATCTTAG  
CAGTGATATTGTATTGAAATGATAGTCTCCCCACGGAATGATTTGCTTTAAACCTTCTCGAATAATACGCTCATCATCAAAATAA  
CTACCTTAAACATCTACATTTCCCCCTTGAAAGTGGTATTTTATAACAAATTAACGTACCTTGATTACGCTTTGAAAAAATATGGAGTC

GTGCATGTGAACCATATTGAATCATTGCTTTATTATGTAAATGATTTAATCCCAAATGCTTAGTATCAAATACATCATTATTAAGAGA  
TTGGCGTACATATTGCAGGCGAGATGACGACATCCCAATACCATTGTGCGAAAACATAAATCTGACGTGCCAATGTCA  
GGCGTATAGTAATGTCCAATGACTCAGTATCTCTACCATTGTTAATAGCATTCTCTATGAGTGGCTGAAGCATCATTTTACCAATTGT  
CTGGTGACGCGCTTCTTCAGAACTTTCGATATGGAGCTTAATCATGTCATCAAAACGGATGTTTTGTATCGCAACATACTGTTCAATG  
TAGTTCAACTCTTCGTTTAATCCACTGTATGTGAGTTGTACGTAATGAGTAACGTAACATTGCGATAATTGTTGGACCACAGTTT  
GTGCTAATTTAGGAGATAACGTAATTAATATTGTATTGTTTGCATCGTATTGAATAGGAAATGAGGTTGGAATTGGCGCTCTATTT  
CCTTTAACTGAATATCACGCAAGCGACGTTCTGTATGCTCGATAGAATGGATTAGTTGCTCATTTGATTCAAATAAATCGTAAATAT  
AATTATTAATTTCTTCTAGTTCACTGTTGTTTTTAAAGGCGTATATGTACCTAGATGACGATTTTTGGCATAGTAAATTTTTGAATA  
ATCGTTTCGATATCTTTTGTGTTAGCCATATTATCTGCGCTAATGAAACCAAATATTACTAGTAAACAAAGAACTACGGCCA  
TAACAATTAACAACGTGATACCATCTCAATGTTTTTCATGTATATCTTTATAAAATAATGAGACGATGGTCAGCATGGTTTAATTTTAC  
AGATTCATTTCATAAATCCGAATTGTGCGGTCTATACTTTTACCTATAGTAAACCGTCATCGTTGGCGTATAAAATATTGTCATAT  
TGATCAACGATAAGTGCGAATTGTGCGGTATCTTTCTTAATTTCACTTAAACGTGGGGTGTTAGCCATATAAATTTTAAGCATATATG  
TACTATTATTGAATTTAAGCTGATGCGTTGAAAATAAATACATATTTTTAGTGTTTAAATGTTTCAATTTATTGGTTATAAACTGATT  
TGGTCCAGATAATTCATAATAAAGTGTGCGGGCTGTTGGTGTATTAATTTTAATAATTCACGTTTGTAGCGGTAACATCATGATGA  
TTTGTTAAATCGAGCTCTTGAACGAATTATTATGCTGTGTAATAATGTCTGAATCTGCTTTTCAAGTGTGATGTAAGATGACTGAC  
TTTCATCAACATGTTGATGAATCGTACGATGCTCAATCCAAATATAGATGGCATAGAAGCTTACTAGTCCAATAAATGACTAAAA  
ATACTGGAATAATAGTAGACGCAAAATAACGATCGTCTCAATTGATGTCTATAAGGTTTGTATGCCGTCATTGAATCATCTCCAAAA  
TTATGATGTGGAATGTCCGGTAATTTAGATTTTCGTTAATGAGTATGTTCTTAAAGATTTTCGATAGACTGATCGCTTTGTTCTACTA  
ACATCTTTTCGAATTGACTTGGCATCGAACTCTGCAACTAAGTTGATTGATGATACGGAATAAACTGTTAAATATTGCACATACTTTTAC  
GCTTAGGATGAGGGTGTGCATTTTTAACTAAAGCAATACCATCAACATTTAAACATTGTTTCTTCAATTGGATAAACGATTGATACAG  
GATAACCTTTGTTTTTCCATGTGCGTGCATCTTGTTCGTAGCTTAGACCTGCGTAATATTTACCTTTTGAACATCTTCAATGACTTTA  
GACGCTTTGACAGTTGCATCGCATGGTTTTGGAATTGATGCACATCACTTACTCGATGATGCATGCTATAAATAGCGCGCATATGT  
TGATAGCCTGTCTGTTGTATTGATTGAGTTGAGTACGCAATTTTACCTTTAAGTATAGGTTGTAATAAATCTTGATAACCTCGAATCT  
TAATATCTCCTTGTAATCTGAATTCACTACTATAAATGTTGGCATTAAAGAAAAGTAAACATATTTATTGTTTCGAGCGATAATC  
CTCTAATGTCTGTGTACAGATGTATCTTGATAGGGAACAAAATCTTCTGGATGATCAATTGTTTCTGATAACACACCACCCATAAA  
GACGTACCCACGCTCCGAAAAATCTTCGTTATGCAAGTTTGAAGCAGTACTTGAAGTAGATCCATGTTTGATTTCATTTTGACATG  
CTCTGTTTTTCAAATTCATTTAAATTTGACGAATCAAGTTTGTATTGATGATACGGAATAAACTGTTAATACATTTTATCTGATTCA  
GAGTGACGCGTATTAGCGCATGCTGATAAAAAAATGAGAAATAATAGCAAGATATAAATTTTTGATTTTCATGATATCCCATCAATTC  
TATGTATATTTTAATACAATAATTTTAGCAATAAATGACGCATAAGTAATGTTAAATATTTAGAAATGTTTATAGATGACTTGTTAA  
GACGTTGCAAAATGTTGTGATAGCACAAAATTTTTGTTGTCAAGACGATTTACCGAGGCTGTAATAAATCAAAGTGTATATTTTATTTG  
TAGCTGTTATATAAAAAATCGGCAAGATATTGAACGGTTCAAAAGTGAATTTTTACGTCAATAAAAGTATTTAATCCAGTCTCTTCAT  
ATATAAAAGTAAATCTTTCTAAGTGTTGATTTAACGCTTATCAACAATCATTTTTTTATAAAACAAATATATACTCTAAATTAACTTTT  
AAAGCAATGAAAAATAGTGAACATTATAACTGTTGTGTGAACAGAATGCAATTAGCATATTACTGTTACACAAATAGTACAGTTTCTA  
TGTTTTGACATACATTTGATGAAAAATGTACATAATTTATGTGAAAAAATCACAACAACATGCTACAAATGACTATGAAAAAGCTTA  
ACATACGATTTTCAAATTCATAACATTATACAGATGGAGGCTTTAGTATGTTAGAAACAAATAAACTGTTAATACATTTTATCTGATTCA  
GGATTTAAAAATGGAAGATGGAACAGACACGTAGATGTAAGAGAGTTTATCCAATTAAACTACACTCTTTATGAAGGTAATGATTC  
ATTTTTAGCAGGACCAACAGAAGCAACTTCTAAACTTTGGGAACAAGTAATGCAGTTATCGAAAGAAGACGTGAACGTGGCGGCA  
TGTGGGATATGGACACGAAAGTAGCTTCAACAATCACATCTCATGATGCTGGTTATTTAGACAAAGATTTAGAAACAATTGTAGGT  
GTACAAACTGAAAAGCCATTCAAACGTTCAATGCAACCATTCCGTGGTATTCTGATGCGGAAAGCAGCTGTGGAAGCTTACGGTTA  
CGAATTAGACGAAGAACTGAAAAATCTTTACAGATTATCGTAAAACACATAACCAAGGTGTATTTCGATGCATATTCTAGAGAAA  
TGTTGAACGTGCCGTAAAGCAGGTGTAATCACTGGTTTACCTGATGCATACGGACGTGGACGTATTATCGGTGACTATCGTCGTGTAG  
CTTTATATGGTGTAGATTTCTTAATGGAAGAAAAATGCACGACTTCAACACGATGTCTACAGAAATGTCAGAAGATGTAATTCGTT  
TACGTGAAGAATTATCAGAACAATATCGTGCATTTAAAGAATTAAGAACTTGGACAAAAATATGGTTTTCGATTTAAGCCGTCCA  
GCAGAAAACTTCAAAGAAGCAGTTCAATGGTTATACTTAGCATACCTTGCTGCAATTAAGAACAACAAAGGTCAGCAATGAGTTT  
AGGTCGTACATCAACATTCTTAGATATCTATGCTGAACGTGACCTTAAAGCAGGCGTTATTACTGAAAGCGAAGTTCAAGAAATTAT  
TGACCACTTCATCATGAAATTACGTATTGTTAAATTTGCTCGTACACCTGATTACAATGAATTATTCTCTGGAGACCCAACTTGGGTA  
ACTGAATCTATCGGTGGTGTAGGTATTGACGGACGTCCACTTGTACGAAAACTCATTCCGTTTCTTACACTCATTAGATAACTTAG  
GTCCAGCACCAGAACCAACTTAACAGTATTATGGTCAGTACGTTTACCTGACAACTTCAAAACATACTGTGCAAAAAATGAGTATTA  
AAACAAGTTCTATCCAATATGAAAATGATGACATTATGCGTGAAAGCTATGGCGATGACTATGGTATCGCATGTTGTGTATCAGCGA  
TGACAATTGGTAAACAAATGCAATCTTCGGTGCACGTGCGAACTTAGCTAAAACATTACTTTACGCTATCAATGGTGGTAAAGATG  
AAAAATCTGGTGCACAAGTTGGTCCAACTTCGAAGGTATTAACAGCGAAGTATTAGAATATGACGAAGTATTCAAGAAATTTGAT  
CAAAATGATGGATTGGGTAGCAGGTGTTTACATTAACATACTTAATGTTTACTACTACATGCAGGATAAATACGCTATGAACGATT  
GAAATGGCATTACATGATACAGAAATTGTACGTACAATGGCAACAGGTATCGCTGGTTTATCAGTAGCAGCTGACTCATTATCTGCA  
ATTAATATGCACAAGTTAAACCAATTCGTAACGAAGAAGGCTTGTAGTAGACTTTGAAATCGAAGGCGACTTCCCTAAATACGG  
TAACAATGACGACCGTGTAGATGATATCGCAGTTGATTTAGTAGAACGCTTCATGACTAAATTACGTAGTCATAAAACATATCGTGA  
TTCAGAACATACAATGAGTGTATTAACAATTACTTCAAACGTTGTATACGGTAAGAAAACGTTGTAACACACCAGACGGACGTAAG  
CTGGCGAACCATTTGCACCAGGTGCAACCCAATGCATGGCCGTGACCAAAAAAGGTGCATTATCTTCATTAAGTTCTGTAGCTAAGA  
TCCCTTACGATTGCTGTAAAGATGGTATTTCAAATACATTCAATCGTATCGTACCAAAATCATTAGGTAAAGAACCAAGATCAAAACC  
GTAACCTAACTAGTATGTTAGATGGTTACGCAATGCAATGTGGTCACCATTAAATATTAACGTAATTTAACCGTGAACATTAATAG  
ATGCAATGGAACATCCAGAAATATCCAGATTAACAATCCGTTGATCTGGTTACGCTGTTAAGTAAATTAACACGTGAAC  
AACAATTAGATGTAATTTCTCGTACATTCCATGAAAGTATGTAACAAAAATTAAGGTGGGAGCACTATGCTTAAGGGACACTTACAT  
TCTGTGCAAGTTTAGGTACTGTGATGGACCGGGATTAAGATATATATTTTACACAAGGATGCTTACTTAGATGCTTGTATTGC  
CATAATCCAGATACTTGGAAAAATTAGTGAGCCATCAAGAGAAGTCACAGTTGATGAAATGGTGAATGAAATATTACCATACAAACC  
ATACTTTGATGCATCGGGTGGCGGTGTAAACAGTCAGTGGTGGCGAACCATTGTTACAAATGCCATTCTTAGAAAAATTTATTGACAG  
ATTAAGAAAGAAATGGTGTGCACACTTGCTTAGACACATCGGCTGGATGTGCTAATGATACAAAAGCATTTCAAAGGCATTTTGAAG  
AATTACAAAAACATACAGACTTGATATTTATAGATATAAAACATATTGATAATGACAAACATATTAGATTGACAGGAAAGCCTAAT  
ACACACATCCTTAACCTTCGCGCGCAAACTGTGATATGAAACAACTGTATGGATTTCGACATGTCCTTGTGCCTGGTTATTCTGAT  
GATAAAGACGATTTAATTAACATAGGGGAATTTATTAATCTCTTGATAACGTGAAAAAGTTGAAATTTCTGCCATATCATCAGTTA  
GGTGTTCATAAGTGGAAGCAATTGGGCATTGCATATGAATTAAGAAGATGTCGAAGCGCCCGATGATGAAGCTGTTAAAGCAGCCTA  
CCGTTATGTTAACTTCAAAGGGAAAAATTTCCCGTTGAATTATAAATACAATTCAGACCGAAAAAGAAAGCATATGCAACTTCAAGAGT  
GAAGGGGCATATGCTCTTTTTCAATTGAGTATTGAGTATTAGCAAGACGTAGTAAGTATATGAGACAACCTTCAATGGTTGAAG

GAAGACGTTTTTTGTAAGTAGCTATGCTGATAAAGAATGTGATGTCTTGTTAAAGGTGGGGTTCCAATATCATCATTTAGCTGATGTT  
GAATGGGTTATTATTTGCTACTTGCATATGAATATGAGTCTTTTCAAATTTTATTGACCCTGAGTAATGAAAAATATTAAGATGAAA  
CTTAATATTAAGCAATGCGGAGCGTGATTATGAAGAGAATTAGTAAAGATATATGGGCAGTATTTAAATTACTGTATCAAAAATAA  
AGGGCGTTTTAGCATTAATGCCTTACTATTGCAGTTAATCATGATTTTTATTAGTAGTACATACTTAATTTTACTATTTAATATGATGT  
TAAAAGTAGCTGGGCAAAGCCAACTTACGATTAACAATTGGACGGAAATCATAAGTCATCCTGCCAGTGTGATACTTCTTATTATAT  
TCATATTAAGTGTTGCTTTTCTGATTTATGTAGAGTTTTCATTTGTTAGTTTATATGGTTTATGCCGGCTTTGATCGACAGATTATTACA  
TTTAAATCCATTTTTAAAAATGCCTTTGTAATGTGCGTAAACTCATAGGTGTACCAGTTATTTTCTTTGTCATTTATTTAATGTTAAT  
GATACCCATTGCCAACCTAGGACTAAGTTCAGTATTAACAAAAAATATTTACATACCTAAATTTTTAACGGAAGAACTTATGAAAAAC  
GACGAAAGGTATAATCATTTACGGTACCTTTATGATTGCTGTATTTATTTAACTTTAAATTAATTTACCTTACCCTTAACGATT  
TTAAACCGTCAGTCGTTATTTAAAAATATGAGACTAAGTTGGCAAATACGAAGCGAAATAAGTTTCGACTTGTTATAGAAAATAGTT  
ATATTGGAACATCATATTGGTGCGATTTTAACATTAATTATTTTCAGGAGCAACATATCTTGCTATTTGTGTAGATGAAGAAGGAGAT  
AAGTTTTTAGTCTCATCAATTTTATTTGTTGATTGAAAAGCGCATTGTTCTTCTATTATTTATTTACGAAATTATCATTAAATCAGTGT  
GTTAGTACTGCACTTAAAAACAAGAGAATGTATTAGACCAACCGGGCTTAGAATTTAAATACCCAAAACCGAAACGGAAGTCTAGGT  
TCTTTATAATTTCAATGGTGTGCTGACGTGTTTATCGGTTATAACATGTACTTACTTTACAATAACTATCAATACAAATAT  
CTCCATTATTGGCCATCGTGGTTTCGAAGATAAAGGCGTTGAAAATCTATTCCGTCATTGAAAGCTGCTGCAAAAAGCGAATGTCGA  
ATACGTTGAGTTAGATACAATTATGACGAAAAGATAAACAATTTGTTGTTAGTCATGATAACAATTTGAAACGTTTAAACAGGTGTTAA  
TAAAAACATTTCTGAATCTAATTTCAAAGATGTCGTCGGTTTGAAAATGCGTCAAAATGGACATGAAGCAAAAACCTTGATCCTTAGA  
CGAATTTATTGAAACGGCTAAACAATCAAATGTGAAGCTATTAGTAGAGTTAAAGCCACATGGTAAAGAAGCCAGCAAAATATACAC  
AACGTTGTTATTGATATTTTGAAAAAGCATGGTGGTGAACATCAATATCGTGTGATGTCATTGGATTATGATCTACAAAGCCTTGATGT  
AAAAAGAAGCGCCATATCTCAAGTGTGGTTATATCATTTCCGTTGCAAGTTTGGTCAATTTTAAAGAAACATCATTAGATTTCTTTGTCAT  
CGAAGATTTTCTTATTCCGCAAGACTTGTTAATCAAGCGCACTTGGAAAATAAAGAAGTCTATACTTGGACTATTAACGGCGAAGA  
AGATTTAACGAAATACTTACAAACCAATGTTGATGGTATTATCAGATGACCCAGCATTAGCTGATCAGATTAAAGAAGAAAAGA  
AAGACGAAACATACTTCGATCGTTCTATAAGAATTTTGTGTTGAATAATAAACAAGACCTCTAAAGTTATCAAGATGATACCTTC  
AGAGGTCTTTTTAACGTTGCCATCTATGGGATAGGCAATCGTTTCATTGTTTATATTCATATGACAAGTATTTGTATGGCAATTTGG  
CGTCACAAAACACTTACATGATTTATTGGTGAATTTAATTGTTTTGTGAATGCAAAGGGTTAGAAATTGAATCGTAAATACTTTCTA  
ATCTATGTTTCGCTTTAGTCATTTGATCCAAAATTTTGTAGTGCATAACGGATTTTGCAATATAATGTGCAGCTAAAATATCGCGTTT  
TTGATAAGCGTCTAAATTTAGGTACGATAATTTATTTAAGTCAGTGTGTTGCTATTATTAATTCATGTAATTGATCTACAAGCCTTGATGT  
TGATACGTATGTGATGTAGTTTCAGATTTGCTTGCTAATTTAATACCAGTCGTATCAAGGAGCGCCGCTTAAATACCAGCAACTAAA  
TATGTTTTGATTTTCATTTGTGTTGTCATGCTTTGTTACTCCTTTGATGTACATTAATCAAAAAAATTATACACTATTGTATATTGCAA  
AGCTAATTAACATAAACAAGAGATAGTTAATGCTTTGTTTATTCTAGTTAATATATAGTTAATGTCTTTTAAATATTTGTTTCTTTAA  
TGTAGATTGGGCAATTACATTTTGGAGGAATTAATAAATATGAAAAAGCAAATAATTTTCGCTAGGCGCATTAGCAGTTGCATCTA  
GCTTATTTACATGGGATAACAAAGCAGATGCGATAGTAACAAAGGATTATAGTGGGAAATCACAAGTTAATGCTGGGAGTAAAAAT  
GGGACACCGATTTCTAATGGTTACTTTTGGGGGAAAATCGATAGTCTAGAATCACAATTTTCTAAAGCATTAGCAATAATTGAAGAG  
TATCAATATGGTGAGAAAGAATATAAAGATGCAAAAGATAAGTTTATGGATAGAATTTTGTGAGAAGATCAATATCTTTTGGAGAA  
AAAGAAGCTCTGTATGAGAAATATAAAGAGTGGTATAAAGAGCACAAGAGATAAACCCAACTTATCCAAAAATGCAAAACATTC  
CATGAATTTAGTGTATATAATCTAACTATGGAAGAATACAATGAGATTTCTAAATCTTTGAAAAGATGCGGAAGAAGAGTTTCGTAA  
AAATGTAAGAGAAGTTCAAGAGAAAGAAGTCAAATTAACAAACATATAGCGAAGATGAAGAAGAAAAGGCAACTAAAGAAGTATA  
CGATCTTGATAGCCGAAGTTGATACTATATATGTATCTTATTTTGGACATGATAAACATGGTCAAAGTGCTAAAGAATTGCGTGCGAA  
ATTAGATTTAATAATTGGAGAGGAAAAAACGCTTTCGTATTACTAATGAACGTATAAAAAATGAAATGATTTATGACTTAAATTC  
TATTATTGACGATTTCTTTATGGAAACTAACCAAAATAGACCGGAAAATATAACAAAATTTGATTGGGATAAGCATGATTATAGAA  
ATAAACAGAAAAACAAAGCAAATTTTGGGGCTCTAGTTAAAGAACTAAAGGTGCGGTCGATAAGGCAGATGATTTCTTGGAAAAC  
AAAACGTCAAAAATTTACGGTGAATCTGAAACAAAATCGCCAGTAGTAAAGAAGAGAAGAAAGTTGAAGAAGCTCAAGCACCTA  
AAGTTGATAACCAACGAAGTTAAAGTAACTACTGCTGGTAAAGCTGAAGAAACACAAACCAAGTGGCAGCCATTAGTAAGAAAT  
TCCACAAGGAACAATCTATGGTGAACCTGTAAAGGTCCAGACTATCCAACATGGAATAAATAACGTTACAAGGTGTAATTGTTT  
AAGGTCCAGATTTCCCAACAATGGAACAAAGCGGCCCATCTTAAGCAATAATTATACAAACCCACCGTTAACGAACCTATTTTA  
GAAGGTCTTGAAGGTAGTCTATCTAACTTGAAATAAAACCACAAGGTACTGAATCAACGTTAAAAGGTACTCAAGGAGAATCAAG  
TGATATTGAAGTTAAACCTCAAGCATCTGAAACAACAGAAGCATCACATTATCCAGCGAGACCTCAATTTAACAAAACACCTAAAT  
ATGTTAAATATAGAGATGCTGGTACAGGTATCCGTTGAATACACGATGGAACATTTGGATATGAAGCGAGACCAAGATTCAATAAG  
CCATCAGAAACAAACGCATACAACGTAACGACAAATCAAGATGGCACAGTAACATATGGCGCTCGTCCAACACAAAAACAAGGCAA  
GCAAAACAAACGCATATAACGTAACAACACATGCAACCGGTCAAGTATCATACGGAGCTCGTCCGACATACAAGAAGCCAAGCAA  
AACAAATGCATACAACGTAAACAACACATGCAATGGTCAAGTATCATATGCGCTCGCCGACACAAAACAGCCAAAGCAAAACA  
AATGCATATAACGTAACAACACATGCAATGGTCAAGTATCATACGGAGTCTCGCCGACATACAAGAAGCCAAAGCGAAACAAATG  
CATACAACGTAACAACACATGCAAAATGGTCAAGTATCATATGGCGCTCGCCGACACAAAAAAGCCAAGCGAAACAAACGCATA  
TAACGTAACAACACATGCAGATGGTACTGCGACATATGGGCCTAGAGTAACAAAATAAATTTATAACTCTATCCAAAGACATACAG  
TCAATACAAAGAATTATGTATCTATACAACAGTAATCATGCATTCTATGATGCTTCTAACTGAATTAAGCATCGAACAATCGGAAG  
CATATTTCTAAATATTTATTCATTATAGTCTTAAACATAACATGACCTAATATATTACTAACCTATTAAAAATAAACACGCACATCT  
AAGTGATATACGACAATCACAGCAATAATAATTGCTTTAGAAAGTCGTACCGAACTGGAACTTACAAGTCTAGTTTGAACACACAC  
TGATGTGAGTGGTTTTCTTTATTTTAAACATGAACAATCAGATAAGTTACTAGCATTAGCAAAATATTATTAATCAAAGGGCTTCGA  
TTCATAAAATTTAAACAATGATTAAAAATAGACGTGTAAATGTTAAATTTCAAAAACGGAATAAACCCATCCCTATTAACCACTT  
TTTTGTCAATCACTATATTTACACAGCTTCTAATAAAGAAATGCTTCAACCCGCTTCAACTTACGCTTACGCTTCTTCACTTAATA  
ACCTAACGAATCCGCTTCATCCAAAATCAACCATTCTAACGCACATACTCAAAATATAGCAGTGCACCCATGCCGACACCAATACAC  
ATCGTAACCATGCCGTAACGGCTATCGGGACGTCTACCCATTTCTAATTAAGTAAACGCGCGGTTAACATTGCCCTGTAGCACCTAAT  
GGATGACCTAAAGCAATAGCGCCACCATTACATTCGTACGTGATATATCTAGACCTACTTCTTAAATAGATGCAATCGTTTGAGAA  
GCAAATGCTTCGTTCAATTCGATCAAAATCAATGTCTTCAACAGATAGATTGCTGAGTGACAATACTTCAGGAATCGCATATGCAGGC  
CCAATACCCATAATTTTCGGGTCAACGCCTACTGCCTTATAACCAACGAATCGTGCAATAGGTGTACAGCCTAGTTCTTTCACTTTAT  
CTCCAGACATTAAACTACAAATCCTGCACCATCAGAAAGTGGGGCAGATGTTCCCGCAGTCACAGTGCCGTCAGCTTTAAATACT  
GTACGTAATTTGGCTAATGCCTCCATCGTGGTGTACAGGCGCTATAAATTCATCTTGGTCAAAGATATTGTTGTGATCTTTGGTCTCTG  
CGTTGTATATTCAACTGAGTTTACCCGTATTGGAAATTTTCACTTTTGAAACCGACCATCACGTTGTGCGTCATAGGCACGTTGATG  
ACTTCTGACAGCATAAGCATCTTGATCTTCGCGTGATACGTCAAATTTGGGATGCTACATTTTCAGCAGTTAAACCCATAGGATATGA  
CGCACCTATATCATCATATTGTAAGGTTGGATTGTTTGTGGGCTCGTTGCCACCCATTGGTACGGCACTCATCAATTCACGCCACCA  
GCTACAAGTATATCTCTTGACCAGCCATAATTTGATTGGCTGCAATCGCGATGGTTTGAATCCTGATGAGCAGTAGCGATTCACT

GTTTGACCCGGTACCGTGTGTCAGATAATCCCGCACGCAATGCAATCGTTCGTGCAATGTTTTGTCTTGTAACTCTTCTGGAAAAGCC  
GTACCAACAATGACATCTTCAATCATATCTTATTGAATTTTCCGTCAATACGTTTCAATACGCCTTGTAACTCTTGGCTGCGACAT  
CATCAGGTCTTTCTGTGGAATAATGCGCCTTGCTTTGCTTTGCTGCGGCTGAACGCCCATAAGCTACAATGTATGCTTCTTGCATGGT  
TATCATCTCTCTTAATGACTATCTTTAATTACGTAATGGCTTACCAGTTTTTAACATATGTGCAATTCTTTCATATGATTTTTTAGA  
TTTTAGTAAGTCAATAAAGCCAATTTCTCCAACGATTGAATGTAACGTTGATTTATAAATGTATTTCTTGGTAAATCACCACCCGCT  
AAAATTGTGGCGATATTTAAGGCGATATGATAATCATGGTCGCTAATAAAATGCCCCGCTTTGCGCATCTAATTGTCTTGGATC  
AATGCTTTGAAGTCTTACCTAAAGCGATATATTGATGTCTAGGATTCGGAATATAGTTTGTCTTCTGCTTCATATTTTCGCACGTTTGA  
GCGCAACTTCGACACGTTGTGCTGTATTGAAAAATAATCGTATCTGTATCACGTAATAAACCATAACGACGTGCCCTCAAAGGCATTTG  
TAGAGACTTTTCGCAATGCGATATTCGTACGTAATTTGTCTGGAAGCTTGTGTTGTCATCAAACTTATGCGATGTGCGTAATATGCG  
AACAATAGGTGAGTAAAGTACAAGCTCACAGCCACCGCTAAGGCACGACCTTGAACAGCTGTGACTACTGGTTTCAAACATACT  
TCAAACGATTAAAGCTATAATGTAATTTATCAATTGATTGTGCAACGACATCATCTACAAGACCGTCTTCATGCGCCTTTTTTCATTAA  
GAAAAGGTTAGCACCCACACTGAAATTATTACCATCTGCATAAATGACCATACTTGTGTAATGGTCATTTTCCAGTAAATCAATGGC  
ATCAACTAACGCATCGTTGAATTCATCGGTAATGACATTATTTTTACTTTGTAATTCAGTAACAGTTGATCATCATGAGTTACGGAA  
AGTTTGGCATCACCTTTATCCCAAAGTTTCATCTTTACGAAGTGAGAAAACAGGTGTTGCATATTCGATGGTCTCATCTTGTTTATAAA  
AGCCACCATCTAAATCACTAATCCATTGTGGTAAGTCTCCAATTTCTGCTTCCATACGTTTAAACACGTTTCATATCCCATTTGCATC  
CCATAATTGGAATGGACCAAGTTTCCAGTTGAACCCCCAGACAAGCGCAGGCTCTATGTCTCGGAAATCATCGGTAGCTTTAGGTAC  
ATTGATAGCAGAGTAATAGAAAATTATTACGTAATGTCTCCCAAAAAATGATCCCCGCTTTCGCTTTCGCTTGAATATGACATCAAG  
GTTATGCACTAAGTCTTTATTAAATTCATTTAAATTTGGTAATTGTGGTTCGATACAGGTACATAAATCTTGTTTTCAACATCGTAA  
ACAAGTCGAGCTTTAGTTTCTTTATCCTTTTTGTAAAATCCTTGTTCGTTTTACGTCCGAGTGCGCCATTGTCAAACAACGATTTTAC  
AATTTTGACATCATGAAAATAAGGCGTTTCTTCAGGTACTTGTTCATGCGCTTTAATTACAGACACTGCAATATCTAAACCGACTAG  
GTCAGATAGGGCATATGTACCTGTTTTAGGACGACCAATCGCTTGCCAGTTAAAGCATCCACATCTACAATGCTTAACTTGTGTTG  
CTCGCGCGATACATAATATCATTCATTGTTTGCCTGCGGACTCTATTTGCGACAAAGCCAGGCACATCTTGACGACAATGACACC  
TTTACCTAACACATTTTGCGCGAAATTTTTTACATCTAATATGATAGATTCTTTCGTGTGTGACGTAGGTATTAATCCACTAATTTT  
ATAATACGTGGTGGTTAAAGAAATGTAGACCAAGAATCGTTCCTTGATCCTTCTCGTTAAATGTTTGAGCAATCGCATTAATTGGA  
ATACCTGATGTATTTGTAGCGAATAAAGCATCTTCTTTAGCATTTGTGTAAGTCTTGTGCAAAACAGCATGCTTAAATTTCAATATCTT  
CTTTAACTGCTTCGATATATAAAATCAGCATCATCTTTACCAAGTCATCATCAAAATACCATATGTTAAATGACTCGGTAGATTTAA  
GTCGAATAGTAGCGGCCGTTTCTTATCTGTAATTTATCGTAAGATTTTTTCGCAATGAGATTTGGATCGTTTTTGTCCACTACAATA  
TCTAATAGTTTTACTTTAAGTCCAGCATTACAAAAGAGTGCTGCCAGTTGAGCGCCCATCGTGCCTGCGCCAAGAACGGTTACTTTA  
TTAATTGTCATAGTGATTCTCTCAATTTAGTTGAGGATAAGATAACCATTAAGATAAATTGGAATAACGTTGCTATTTTTATAAAATTA  
ATTAAGTATCTTTGACAGTCATCTTAGCCTCTTATTTAAGGAAAAAGCTTTATGCTTAAATAAGTCTTTTTTTAGTGATATTACTGC  
ATCTCATATAATTTCTTTGCTATTTATACGAAAAGCAGAATCTCCAGTCAAAGCGCGTCCAATTACTAAGGCATTAATTTTCATGTGTACC  
TTCGTACGTGTAATCGCTTCTGCATCAGAGAAGAAACGTGCAATATCATAATCGTCAGCTAGTATGCCATTACCACCTGTAATACC  
ACGCCCCATAGCTACTGTCTCAGCAAAACGTAAGGCATTGCATCTTTCGCGTTGAAGTTGCAACCTCGCATATTTACCATTGTC  
TTGCAATTAGCTAATTGAGCACATGTTGCCATTGCTTAGCTAAATGATCATCAATTTGCTGATTCATTGCTAGCTTTTCTGTATTAACTGATATT  
TACTAATTGGTTTGCCGAATTGCTTACGCTCAGTGACATAATCTAATGTGGCACGTAAAGCGCCAGCCATACCACCTGTAGCCATAT  
AAGCAACGCCTGCTCTCGTTGAATAAAGAATTTTGGCAATATCTTTAAAGCTTGTATGTTTTGTAAGCGATCCGCTTCATCTACTTT  
GACATTAGTTAATTTAATTAGGGCGTTAGGAACAATGCGAAGTGCGATTTTATTATCAATGACTTCAATATCGACGCCATCTTGTCT  
GGTCTGACTACAAAGCAATGGGGTTTGCCAGTTTCTTATTTACTGCGAATACTGGAATGACATCAGATACATGTGCACCACCAATC  
CATTTCTTTTACCATTGATAACCCAAGTATCGCCCTGGCGTTCAGCGACTGTTTCAAGACCTCCCGCAACGTCCGAACCGTGTCTG  
GTTCAAGTTAAAGCAAAGCATGTACGCAGTTTCATGTGACTGTAATTTAGGTACATATTTTCGCAATTTGTCTTTGCTACCTCCGAAATA  
GAAAGTGTTATGCCCTAAACCTTGGTGAACACCGGAGTAGGCTAGCTAAGGAAATATCAAAATCGCGCGAGTAGGTAAGACATGAAA  
AACTGAAATAGTTGACTAGCAGCATTTTGGCGTTTGGACGATCCTTGTGAAAGTAATGGATTGTTAAATTAATTTATCTCCGACATCTT  
TAAAAATAGTCTCGGGTACAGTAGCGTCTATCCAATGTTGATTAAATTTTACCGTACTTACTTTCTAGCAATGAATCTACTTGTG  
TAAAAATTCGACTTCACCGTCTGTTAAACCTTTAGCAATACTAAGTACATCTTCAGGAAATAATGTTTTTAAAGACCGTTCTTTTTCA  
AATGTCATATAAATTCCTCTTAAAAATAATATGAATACTAATGTGAAATGCATTTAATTCAAAAACAACACGCTTTATTTGTAAACG  
CTTACACTAAATGTCAAAAATTTTTATCACCTTTAAAGTGTTGTGAGACTTTGTCTATTTCATCTTTGTGCAATCGCAAGTTTATCTG  
GTTTCTGCGTACTGTTTAAACGGCATATGTGTCACTGGTACATACATCTTGGGACTTTATAACCTGCTAAACGACTTCGCATATGTTG  
ATCTAAAATTTACGCGTAATGAGGTTTCATCTTCGCGAAGTATAATGGCTGCAGCAATTGATTACCATATTTTGGATGATCATAGCC  
AACGACCACACACCGGTCTACTAGTGGATGCTCAGCTAAAGCATTTTCGACTTCGGATGGTAAGACATTTTCGCCACCGATTATGAT  
TAATTTCTTTTGGCGTCAATAATAATATATCGCCATCTGCTGCTTTCGCTAAGTCACCAAGTTAATAAATAACGACCATGAAAT  
GCTTTGGCAGTCTCTGCTGGTTTATTCCAATATCCTGGCGTGATCATTTTGAAGCTTAAATGCAAGTTGCGCAATCTCACCAGTAGGTA  
CTTCTCACCCTTATCATCAAGGATACGTGCATCAACGAACATGACTGCTTTACCAATACTCATTGGCTTACGTTTGAATTTTCCGG  
TGTATTAACAAGTACAAGAGGTGCTTCAGTTAAACCATAGCCGTTAATAATGTTTATGCCATATTGTTTAAAGCTGCTTGGATACT  
TGGTAATGGTTGTGAACACCTTGGATGATATAATCCATAGCTTTAAAAATTTTCAGGATTAATAATTAAGTACGAGTACGCTACTATA  
ATACATTGTCCGAATCATGATAATAAATGTAGGGTGATATTGTGCAATCATGTCAATTCAATCTTCGCCGTTAAAGTAACGTTGAAG  
AATAAGTGTGCCACCTGACATCAATACTGGTAATACAGTATCGTTAAACCCTAAAAACATGGAACATTGGTGTTGATACAATCGTAAT  
ATAGTTTGAATTGAACCTTATACGTCAGCTCTAAGTTTGACCGTTATGAACAAATGATTTCATATGAGAACATCACACCTTTAGGTGA  
TCCGGTTGTACCACTTGTATAAATAATGCTGCAAGATCTTGTGGTTGCGACAGGTGTTGCTTGAAAGGTTGGTGATAATCTGGATTT  
ACGATTTTCATATTTGCGCTACATCAATATCCATATGCAATAAGTTTGTGCAATATCGGTGAGTGAATTAAGTATTTTCAGCAT  
AGAAGAGCAGTTTTAATTGTGCATCTTCCACAATGGCTGCAATTTCTTTGGGTTAAGCCGCCAATTCAATGGTAAAAAAACCGCAC  
CTGTTTTTAAACAAGCAAAACAATAAATCTAATATTGCAATATCATTTGGCGCAAAAATACCGATAACATCGCCTTTTTTAAACACCTT  
GAGATGTTAAATAATGTGCCATATTATCAGCGCGTGCAATTGAGTTGTTGGTATGTCCAAGATGTTTGTGTTTGGCTGATCAATAACGG  
CAGGCTGTGCATCATCGAAGTCTGAACGCGTTTTTATCCAATCGAAATTCATTAGTATACCCCTTTAGCTTCACTTTCATACCTTAT  
GAATTGATTGTTTAAAGTTGTCCCATTTTTCTTTGTAATGCTGGTATCAATTAATTTTAAATGATCAGCAATAATTGGTTTAAAAAGC  
CATTTGATTCAAAATATCTTTATGCAAAATCAAGACCTGGTGCAATTTCAATTAGTTTCAAGCCTTGATTGGTGAGTTTCGAATACTGCA  
CGCTCAGTAACAAAATAGACTTCTTGTCTGAGTGAATTTGTAATTTGTGCATTAAGTCGATATGGCTCACATCTGATACAAATTTT  
TGGTTTTGTCTTCAGTTCAATGTTTAACTGTTGATTATGGCATGAGACATGACTGCCAGCTACAAAAGTACCTGAAAGATAATTT  
TATTTACAGATTGCGTAATGTCTATAAAGCCACCACATCCATTTAGTCCGTCATTGAAGTAAGACACGTTGACATTGCCGTATTGAT  
CAACCTCAGCAAGCTAAGATAGGCAACTGATACACCATTGTTATAAATAAAATCCCATGCTCGATCATGAGGCATGCGCACATCT  
GCATTGTAATTCATACCAAAATGTTACGACTCCCAACGAATCCACCGAAAATGCCAACATCTAAAAATCGGTTGCACATCATGTTCA

ACACATTCTTCGTGCAATAAATTAGAGAGTTCATTATTGATGCCATAACCGATGCTAATTGTATCGCCATAAGTTAAAAACTGAGCA  
GCACGTCGGAGAATCAATTTGCGACTATTAAAAAGGTAATGCGGGTTCAGGTATCCCATCAATTCGTTCTTCCAGACAAGGCTGGT  
AAATAATGACTCTGAATTACTTGGCGGTGATTCTTTTCATCTTCTGTGACGTATACATAATCGACAAGATTTCTCGGGATAACAACCTT  
CATTCGGTTTTAGTTGATATCCGTCAACTAAAGCTTTAACTTGTACAATAACTTTCCCATGATTGGCTTTTCGCGTTTAATGCGACATG  
ATAACACTCGCTCAAGTACGCTTCTTGAGTTAAATAAATGTTACCTTGTGATCTGCGTATGTTCTCTCAGTAGTGCCACATCAACG  
CTAGGGAATGTGTAATGTAAGTATGTTTCATCGTTGATGGTTACTAAAGAACTAAATCATCAGTTGTTCTGTTGATTTACTTTACCGC  
CACCGTATCTAGGATCAACAGCTGTGTTAATCCGATTTTAGTAATAACTCCAGGTAATAATTGATTACTCTGACGATAATGAGTTG  
CAATGATACCTTGTGGTAAAAAATAAGCTTCAATGTCATTATTTTCATTGCTTGTGCCGTTTTGGAAGAAGCCGTTAAAAATGCTCAT  
AATGACACGTTTAATCATGCGACGTTCTATAAAATCATCTAAATCCGGTGCAGCACCTAACTATGGATATCATTGCTAATATAAA  
CGTTAAATCTTTGGGCGTATGATATGTGTCATGTTGCGCTAACACAGCACGTAGAACCTTCGCGGGTAAGTTGGCTACAGCTAATGC  
TGGTAAACCAATCACATCACCATCTTTAATGATATGTTGTAAGTCGTGCCATGTGATTGTTTCAAGCAAGTCACCTCCATCACATTT  
GATAAAATATAGCGTTTTTACACTTTGTGTAACCCCTTACAAGAAATATAACATAACGACGTTTAAAAATCAATTAGAAATATCTTTT  
TATTCTGATAATAGACACAGTATAGACACATTTTGATGGTTGATAACAATTGTAATATCAAGGGTTTGTAATGAATTGAATATCATT  
AAAATACTTATATAAAAAATATTGCTCGGAATATAAAAAAGTTAAATAGGTTTTGATTTTTAAATATGAAATACAAAGCGCCCAATCGA  
ACAAAGTATTTATATTAATAATATGGAATAATCCATCAATATTAATAAATAGTTTTATTATGAAAAGTGAAAGTAGGTAAGTCTAT  
GGAAGGTCTTAATCATCGAAGAAATACAGAAAAAGAGACAAACACAAACGCAATCAGTTGCACCTAATACAGGTGAAGAGGGG  
ATGTCATCAGCAAGTACACAATCAACTAAGACGTCCGACATACATAATGAATCTATCAATAAACAAATGGAAGCCAAAGCGCATGA  
AACAGCGCAAAATGCAAGTTTAAAAACCGAAGCAAGAAGTTATTTGATAATGCAACCAAAATCAGTCGGTAGACTAGCCGGCAATG  
ATGAAAGCTTAAATCTTAATTTAAAAAGATATGTTTTCTGAAGTATTTAAGCCGCATACTAAAAACGAAGCAGATGAAATATTTATAG  
CGGGTACTGCTAAACTACGCCAGCAATTTGTGACATATCAGAAGAATGGGGGAAGCCATGGCTCTTTTCTCGAGTATTCATCGCTT  
TCACAGTAACATTTATTGGATTATGGGTCATGGCAGCGATTTTAAATAACACTAACCGGATTCCGGGTCTCATTTTTATAGGGGCTTT  
AACAGTACCATTATCGGGTTTGTCTCTTTTATGAATCAAATGCGTTTTAAAAATATTAGCATTTTTGAAGTTATTATCATGTTCTTTA  
TTGGCGGCGTATTTTCATTACTAAGTACGATGGTATTATATAGATTTGTGCTTTTTAGTGATCAATTCGAAAAGGTTTGGTCTTTAAC  
ATTTTTCGATGCATTTTTAGTAGGATTAGTTGAAGAAACTGGAAGGCACTCATTATTGTTTATTTTCGTCAATAAATTGAAAACAAA  
TAAGATTTTGAATGGATTATTAATCGGTGCTGCTATTGGTGCAGGGTTCGCAGTTTTGAATCAGCAGGTTATATTTTGAATTTTCGT  
TTAGGGGAAAAATGTCCATTATTAGATATTGCTTTCACACGTGCGTGGACTGCGATTGGTGGTCAATTAAGTTTGGTCAGCGATTGTTG  
GTGCTGCAATAGTTAATTGCGAAAGAACAGCATGGCTTTGAATTTCAAAGATATTTTGGATAAACGCTTTTTAATATCTTTTTATCAGC  
CGTTGGTTTACATGGCATTGGGATACATCTTAACTGTACTTGGCAGTGATACGTTGAAAAATATTTATTTTAAATCGTTATTGTGTGG  
ATACTTGTATTCATTTAATGGGGCAGGTTTAAACAAGTGAATTTACTGCAGAAAGAATTTAAAGAACAACAGAAAAAAGTAGG  
CGAATAATAATTAAGCTTATGTTGCTCATATGTTGTGACATAAGCTATTTTTATAATTTGTCTTTAAAGAGTGGAATAGGAATAC  
TTTTCGGAGTTAAAAAAGTGTTTACGTTAAACAAATAGTGACAATTAGGTTTATATAAAATGAACATGATTCAGTAAAGTATGTA  
ATAATCATTTTTATTGAAAATCATCAAAATAGAAATTAATACAATCATATAAGCAAAATTAACCACGCCATAATCATATTGGATGATT  
CGGCGTGGTTTTTATAGTTGAAGCAGGGCTGAGACATAAATCAATGTCCACACTCCCTTATCGTTCAATCGTTGTTTCGATAATCGA  
TTAAATAGATACCTTCAGGTGTTACTTTATAATTTTAACTTAGAGTTAGCAGCGACTATTTGATCGTTGTAAGCAATATAACTGTT  
TGGTACATCTCGACTTGATAATTTAATAATATCATTAGAAATATTATGACGTTTCTTAACATCTACAGTATGATTCAATTGATTAATT  
AAATCATCAACGTTGCTATTATTGTAGTCTCCTTTATTAATAGCACCATCTTTTTATATGCTTGATTAAAGAAATAGCCAGTATCTC  
CACGAGGAATTGTTCCGAAACTATACATCGTTGCATCCCATGCAGAACGGTCTTTAAGTAACCTTCTATGTCATCAACACTTTTAAT  
GTCGATTTCAATATTTGCTTTTTTAGCATCTGATTGTAATACTTGCAGCAATTTTCGATAGCTCTGGACGACCGTCATACGTAATTAAC  
TTAATTTTTAAAGGTGTTCTTTGTATAACCATCTTAGCTAATAACGTTTTGCTTGTTCGATATTTGTTTGTCTTAAGTTAGGTTCT  
TTAATATATGGAATTTTATCATTAAATGGACTCGTTGCAGGTTTCGCATAACCTTGATAAATATGATCTGCAATACCTTGTCTATCAA  
TGATATGATCTAATGCTTCACGAACGGATTAGTCAATTTTTTATTAGTATGATTATACATAAGTAAAGAAGTTCTAAATCCAGATTC  
TTTTGACACTTTTAAATTTTGATTATTTCTATGTCACGAACCTTTATTAACCTGGGACATCAGTTATTAATCATCTTTTTGAGATTCTA  
AATTTCTGACGCGATTATTGCCGCTTCTTGGTACGTCACAGTAAATATGATCAAGTTTCGGTTTACCTTGCCAAATAGTCTTAAAT  
CGACAATGATATTTTCGAGATTGCTTATAATCTTTTATTTGGTAAGGGCCTGTACCAACAGGAGTTTGATTAACATCTGATTTAGCA  
TCTGTATCATAAATTGCCATAAAAGGATTAGCTAATTCAGATACAAGTTCAGGGTAAGCGGAGTTGGTTTTAATTGTGAGTTTTTGA  
CCTTAGCGGTAATTGATGATATTGGTAATGAATATTGACCAAGTCGCTTTTTTTCATGCTATTTTCAAGGCTAGATTTCACCTTTTTC  
TGCAGTCAATTTTTGACCGTTTTGAAATTTAATATTATCTTTAATTTCTATATCTAACGTTGTATCATTTGGTTGATGATACGATTTC  
CTAATGCTTTTTCTATTTTTCTTGATCATTGTTTTAATAATGATTCTGCAGCACCATCTTAACCTGGTACATCTGTTTCATAAGGT  
GCAATAGACTTTGTTTTAACGGTAACGAAATATTTAAGTCTTTGCCAGATGAATGCATTGAGCCACATCTCTGATAACACTAATACT  
GCTGAAAAATATAGTTGCTAGTCTTTTAACTTCATTTCATTAACACTCTCTTTCTAATTACTATGTAAACCCCAACAATTAATATTTT  
AAAACCTTTATTTTGAAGTAAAAATATTGTTCAAGTTTAGTAATCAATTAATTAATTAATTAATTAATTAATTAATTAATTAATTAAT  
AAATATTAGAAATGAAGTTAGCAACATTTATAGTATTCAGTAAACATATATACCTAAGTATTGAGCAACTGCTGTAGTACTAC  
GCTTGGTTATGTTTAGTATCTTTGCTGCATATAACAATAGAACATGATTATGCTGATTTACAATATCTTTAATTTTTCAAAAGCAT  
CTTTTTGCGCATCTGATCAGTAATCTTTTTTCATATTTTTCTTTAAAGCTCCAAAAAGTTTAGGATCATGTTGGAACCATTTGTCGC  
AACTCAGTAGAAGGGGCAATGTCTTTTAAACCAATAATCTAGGTTAGCAGTTCTTTTCGAAATACCTCTCGGCCAGACTCTATCGACT  
AGGATACGAATAGCGTCGGTATTATCTTTATTGTCATAAATCCGTCCAATATCTACGGTCATCTTGTGAACCTCTTCTTATGAAAT  
CAGTGAGCATACATCAATGCATGTTGTGGTGGGACGACCAAAATAAATTTTGGCAAAATATCATCTCTGTCTACTCCCAATTA  
ACAGCCATGACAAAGTAAAGTCATAGCTGTTTTGGTATAGATGTCATTTATTTTTACGTTTAGTTAAATACTTCAAACCAACTGCAA  
AGACCGTGTACCCGGCTATGGTTTGTATCAATGTTTAAATTAATTAATTAATTAATTAATTAATTAATTAATTAATTAATTAATTAAT  
ATATAATGCAAAATCTTTACGTAACGTTGATTAAAGTTTATATGACGACTAAACCTCTTTTCTCAATTAATTAATTAATTAATTAAT  
TGGAATAAATGTTTCGTAAGTGTACGCGATCCATATCGTAATTTAAAGATTAAAGTGCTTCGATCATAGATTGTAAGAATTTGTACC  
ACCACAGATATAAATTCAGGTTTATTGCTAAAAATACTTGAATTTCTTCAGCGCCAATATAGCCTTGTATTCTTTAAGTGAGTA  
TATAACTTAGCGTTGTCATGATGGCTTGCAGTACTGTTGAAGTTGTCTTTGAAAGGTAAATGTTGTTTCAATTTTCAGCAACTTGAACCA  
TCTGTGTATCTAAACCTTTGGCAGAGGCAGCTTCATACATAGCTACTAAAGGTGTAACACCAATACCTGAACCTAAGAAAAGTTGTG  
GTTCAAGTCGATTCTCTAATACGAATCCACCTACAGGTGCAACTAAATTAATCATATCGCCTTCTTAATCTCATCGTGTAATTTGT  
TGAAACTTCGCCTTCATGTTCTGTTGTGACATCAGTTTAAACGCCAAAAGTTAAATGGTTTTTATCACCTGATACGATAGAATAGTGA  
CGTTAGCTCTATATGGAAGTTTATCACTAGAAACATCAACTGTGATGATTGGCCTGGTATAAATCACTAAAGCATATTTCTCAG  
TTTCAACTGTAAATGATTAATGTCTTCAGATTCTTGTTAATATTGGTAATTTTGAATGGTTTAAACCAATTAACCATCATTTGATC  
ATAAATTTCTTTTCAATTTGGATGAACACGTCGCCAATAACGCCATATGCTTTCGCCCAAGCTTGAATGACAGGGTCATTTCTCT  
AATCTGTACATCTTGAATGGCTTTAATAAATTTCCCCACAATTGGATAATGTTTCAGCATAAACTTGTAGTGCGCAGTGTTTAT  
ATGCGACTGGCATAATGACTGGTTAATAACACTTAAATTATCGATATTAACCGCTGCAGCCATTACAGCTTGTGCTAATGCTGAAG

ATTGCATGCCTCGTTTTTGGTTTCGTTTGATTAAACATGTTTAAAAAGTTTCAGGATGCGCTTTAAACATTTTTGGATAAAAAGATTGACGT  
AATTCTGTCCCTTTCTCTTTAAGTAAAGGCACCGTTTGGTTGATAATGTCTTTCTCTTTGTTCTGTAATCATGATACTCCTCCTTTAATC  
TGTCTATTTTGATTATTCTACTAAAAATTCGATATTCAATTAATTGGTTTGAGAAAAATATAAAATAAAATGGCAAATTTGATAATTGT  
ATGACATTTTGGATTTTTTAAATACTTATCAATAAGCATTGTGTACAATTGTCTGTTTGCACACCGACGATTGCGCGCATTTATTTGA  
CTAATTCAAAAAACATTGTTGTTTCTCTAGAAAAAGTAAACATGATAATAAAAAATGTGAAAGTGTAATAATCACTGGCGAAGTA  
CGAAGACTAAAGACATCTAAGATGTAATCGTATACAAATTA AAAAGGTGTAAAAATTA AAAATAAAAATGTGAAATAAATCACAATTT  
AATATTGACCCAGTACTTAATGCATGTTACATTTTATATGTGAAATAAAATCACAACTTAAAAAGCGGATGACACATGACCTTTTAAG  
TTATGCGTTGAAAAATAAAAGAGATGTTTATTTGCTTTTGTATCGTCAATAAGCAGCATTAAACTAACATATTTGAAGCTACACGTAT  
GTTAGTGAATTAATCATAAGGGAGTTTTGTAAATGAACAAATTTAAAGGGAACAAAGTTGTATTAATAGGTAATGGTGCAGTAGGT  
TCAAGCTACGCATTTTCATTAGTGAACCAAGCATTGTTGATGAATTAGTCATCATTTAGACACTGAAAAAGTTTCGAGGAGAT  
GTTATGGATTTAAAAACATGCTACACCATATTCTCCAACAACAGTTTCGTGTGAAAGCTGGCGAATACAGTGATTGTCATGATGCGGAT  
CTAGTTGTCATCTGTGCTGGTGTGCACAAAAACCTGGAGAAAAACGTTTATAGTTTAGTATCTAAAAACTTGAAAAATATTCAAATCA  
ATTGTTGGTGAAGTAATGGCATCAAAATTTGATGGTATTTCTTGGTAGCTACAAATCCTGTTGATATTTAGCGTATGCAACATGGA  
AATCTCTCGTTTACCTAAAGAACGTGTTATAGGTTCTGGTACAATTTTAGACTCTGCACGCTTATAGATTATTGTTAAGCGAAGCGTT  
CGATGTTGCGCCACGTAGCGTCGATGCTCAAATTATGGTGAACATGGTGACACTGAATTACAGTATGGTCACACGCTAATATTGC  
GGGTCAACCTTTGAAGACATTACTTGAACAACGTCCTGAGGGCAAAAGCGCAAATTTGAACAAATTTTTGTTCAAACACGTGATGCAG  
CATATGACATTATCAAGCTAAAGTGCCACTTATTATGGTGTGCAATGGGATTAGCTAGAATTACTGAAGCGATTTTCAGAAATG  
AAGATGCCGTATTGACTGTATCAGCATTATTAGAAGGCGAATATGATGAAGAAGATGTTTATATTGGTGTCCAGCAGTCAATA  
GAAACGGTATTTCGAACTGCTGAGAAATCCCATTAACACGAGAAGCAAAAGCAAGTTTCGCACATTACGTAAAAACATTAAAAAGAT  
ATTATGGCTGAAGCAGAAGAACTTAAATAACTTTTTATAAAATCTATACCATTCCAAAAATTTGTA AACCTTACCCCAAAAAATTTGT  
ATAAAGGGCTATTTGATACAACATATATGTGTCGAGTAGCCCTATTTTTAATGTAGTGAAAGTCGTTGTTGAAATTA AATTCAAATCT  
GGCACTTAAGCTTTAATCATAGCATTAAAGATGATTGTCTAGCAGAGGGCGATTGCGGGCTCACTACAGTGTATGATGAACCTTAATGC  
TTCAAATGTAACATTAAAAATAAAAGCAACGATGTCACCTCTACTTCGTACATCGTTGCCATTAGTTCGTGATATTTTCGGTTAGT  
CTTAATCCCCGAGCAATTCTTCAATCTCATTTTTGATAACTGTAACGTGAGGCCATAAAATTACTTGACACACAGTGCCTTGCTGGAT  
TACACCTTTGGCACCAGTACTTTTCGAGTAATACTTTATCGACTTTGTCTATTTGATGAAGTGTGACGCGTAGTCTCGTTGCACAACAG  
TCAACGATTTCAATGTTATCCTTGCCCTCCCAAAACAGCAACAATAGTTTGTGCTCTTTCAGTAGCCTCAACTGTTGTGCTGCAGCTT  
TATCTTCTCGACACAGGTGTTTTGAAATTA AATTTTCGTAATTAAGAATCTGAAAACGATGTAATACAAAACAGAACACACAATTCCAA  
TAGGTATGACGTATAGGTAGTTTGTTTACTATTACCTTGTAGCACACCAAAAAAGTAAGAAATCGATAAAGCCTCCACTGAAGGTTT  
GACCAATTGTAATGTTGAAAATGTCTGCCATCATAAATGCTAATCCATCAAAGAAGGCATGGATTACATAAAGAATAGGTGCGACA  
AACAAGAACTAAACTCTAAAGGTTTCGGTAATACCTGTTAAAAATGAAGTGAGTGCAGCGGATAACATTAAACCGCCGACAACCTTT  
TTTATGTTACAGTTTAGCTGTGTGATAAATTGCAAGTGCGGCACCACATAAGCCGAACATCATCGTAATAAAACGGCCTGACATAAAA  
GCGTGACACACCTGAATAATACTTCGTACATCTGGATCACCAAGTTGAGCAAAGAAGATGTTCTGCGTACCTTGAACCTAAGTGCCC  
TTTGACTTCTAAAGTACCACCAAGTGCCGTCTGCCAAAACGGTAAGTAAAAAATATGGTGTA AACCGAGTGACCTAACAACTCTTA  
AGATGAAGCCATAAAACAAAAGTACCGATGGCAGCTGTTTTCGTTACAAATCCACCAACATGATAAATGCCGGCTGTGATGCTTGCC  
AATGAAAAACATCAATACACCTAAAAAGATTGCGGCAATGCTGTGACAAATAGGGACAAATCTAGAGCCACCAAGAAACCTTAA  
ATACGGTGGAATACCCTTTGTGATATTTGTTGTGAAGTATTGCGGTCTATAATACCTGTGATAATCCCGCCAAAAACACCGGTTTC  
AACCGTTTGTATACCGAGCACCATGCCTTGTCCATTTTGTGCAAGCTGATCTTTTGCCAATGTGCCCGTGATAGTTAATAAGCCATTC  
ATAGTTACGTTTCATAATTAAGAAACCGAGCAGCGCAGCTAAACCTGCAGTACCTTTATCGCTTCTAGATAATCCGATTGCGACACCA  
ATGGCAAAGATGACCGGTAAATTTTGAAAAACAATACTACCTGCAGCTGACATTAATGTA AAAAATATTTTGTAAATAAGGTAATATCT  
AAAATAGGGTATGCTTTAACGGTGTTTGGATTACTTAATGCACCACCGATACCCAACAATAGACCTGCAGCTGGTAAGATTGCGATA  
GGTAGCATAAAGGACTTGCCGAACCTGCTGTGCTTTTTCAAATAAAGATTTCATCAACATCCCTCCTAATTATTCTCAATATAGCTTTT  
GAGAAATTTAATATCAATATATATTCTGTGTATGAAAATATTTTTCATAAAAATTTGTTGAATCATGTAACAATCATATAAATTTGCTG  
TTTATGTTGTTGTGAAAATGAGTTGACAAAAGTCGGTAGATATGTGATAGCATTCTATTTTAGCGAGGTAGTTGATAAGGCATAT  
CGGATAAATTTATAAGCCATAAAATAGATAAATAGTGTGTTGTATCCAAAAATATGAGAAAAGTTAAACTATTTTTCAAATAAACA  
TGATTACCACATAAAATAAATATACATAAGCTATCGATAACAACCTTAAGAAAGGTGGATATATAAATGAAAAAGAAAGATTATTATG  
GATTGTGATCCAGGACACGATGATGCAATAGCATTAATTTTAGCGGGGGCAATTGACAGTCCACTAGAGATATTAGCTGTAACAAC  
AGTCGCAGGTAATCAATCAGTTGACAAGAATACGACAACGCCTTGAACGTATTGGATATTATGGGACGCCAAGATATAGCAGTAG  
CGAAAGGTGCGGATAGGCCGTTAATTAACACAGCTGCCTTTGCTTCTGAAATACATGGGGAATCTGGATTAGATGGTCCGAAACTA  
CCGTGCACACCATCACGTCAAGCAGTTGCAATGCCAGCATCAGATGTGATTATAAACAAAGTGATGACGAGTGATACACCTGTAAC  
AATTGTAGCGACAGGTCTCTTACGAATGTAGCAACGGCATTGATTCTGTAGCCAAAGAATCGCTGAGCATATTGAATCTATTACTTT  
GATGGTGGTGGTACATTGGAATTTGGACGCCTACAGCAGAATTCAATATTGGGTAGATGCTGAAGCAGCGAAGCGTGTTTTTG  
AAAGTGGGATTACTATAAATGTGTTTGGTCTAGATGTAAACATCAAGTTTAGCCGACAATCAGTGAAGTATTGATGAACTTTGAAAGTA  
TCAATAATCCTGTTGCACAGTTCGTCGTAGAATTATTGCAATCTTTAAGAAGACATACAAGACTCACTTTAATATGGATGGTGGTC  
CAATACATGATGCTTGTACAATTTTGTATTTGTACAACCAGAATTGTTTACAATGGTACCCTTAATATCGACATTGAACATCAAA  
GTCCACTAACTTATGGCACTATGGCTGTGATTTAAATCATGTTACAGGTAAGCCTGTCAATGCTTATTTTGCTACAGCAGTTGATGT  
TGAAGAAGTGTGGAACCTGATAGATTATAAGTTACGTACTTACGAATAATAATACTTAATTAATAAGATACAGTTAGCCCTAAGGC  
GCCTGATATAAGCGTCCTTAGGGTTTTTGTATTGGATTACATTGGTCATGACAATTTGATAATGATTGAGATATGTATGTTAAAAATG  
CTTCAAAAAACATAAAACACAAAAACATATGTA AAAATTTCAATTGCTTTATTTTAAAGATTAAAAATCACAAAAAATATAGATAT  
AATTGAAATGTTGTTAAAAACATCACAATGATGTACATGCTCATTTTGA AAAATATGTGTTCAAAGTGTGTACATCGGTGTACGAGTATG  
ATGATAAATGAGCTAGCTACAGTACGTAAGGAGGATCGAACATGAACGGGGAATATCAGCAAATACCTAGAGAAATTTGATTGAATCC  
TACTATTCTATGGTAAAGAACTTGAATCGATATTTGGTTTGTCTCGTAGACAACCTAGGATATCGCATTCAAAAAATCAATTTGTGGCT  
TGAACAAGAGGGTTATCCAAAACTTGAAAGAACAAGCCAAGGAAATTTTATTGTAAGTTCTGAAATCATGACGTTATTCAAGCGAG  
ATGTATCGGAGCAGCAATGTTAAACGGCAACAATGTCATTTTATGATAGAAACACGTCGTTATTATTTAATGCTCATGCTTTTTTA  
GTAAGGAAAATGCAATGTCTCTAAACCATTTTCAATTGATTTACAAGTCAGTAAAAATACTGTCATTACGATATAAATCATGTGA  
AAGAGCAATTGGAAGATCATGGTTTGTCACTTAAGTATTTCTCGAAAGCATGGTTATGAAATTGTTGGTGATGAATTTGAAGTTCCGC  
GTTTCTTCATTAAGTTGATTGATCAAAGGTTGAATCATGATATTACTAAAAAGTGAAGTTTAAAGGCGCTCAACTTAACATTTCGAAG  
ATATCGCATATCAAAAAAGACAAGATCAAAACAGGTAGAACAATTTTGAAGAGTCGCTTTATAGACAAATCACTTAGTTTACCTTGCCTT  
ATGTCCTTTGTGTGATTCTGATGACGAATTTCAAAGTGGTCAATGTAATGACCTTAATAATTAATCAGTATTTGAGGGATACGA  
AAGAATATCAAGCAACGGAGATTATGACGCAACATGAGCCGGATTGCGCAGAAGCGGAAAAAGTTATATTGACATTACACTTACTT  
TCAACAAGTGTGCAATGGACTGATTTGCAGGAATCAGATAACATATCGAATTTAACGATGGCCATCGCTCAAATGATTACCACTTTT  
GAACAAATCACTTTTATTAACATTGAAGATAAGGAGAAATATCACAGCAACTCTTGTTACATTTAACGCCTGCTTTTTATAGGATT

AAATATAACTTAAACGGATCGTGATGAATTAATAAAATCCTTTACAAGGAAATTATCAATCCTTATTTTCATATGGTGAAACAATCATGT  
CAATCGTTAACTGAATATTTTCGAAAAATCGTTGCCTGATAATGAAATAGCATATTTAACCATGTTGTTTCGAGGTAGTTTGAGACGT  
CAAGATGAAAACTTCGATGGCAAGATAAAAGCTATTATCGTGTGTACACAAGGCACGTCAGTATCACAAATGATGTTATACGAGTT  
GCGAAACTTATTTCCAGAAATATTTTCTTAGATGCGATTTCACTTAGAACATTTGAAAAATTACACATTAGATTATGACATCGTCTTT  
TCACCAATGTTTGTCTAACACATAAAAAATTATTTATCACAAAAGTAGCTTTATCTGAAAAATGAGCAACGAAAGTTACGTAAAGAT  
GTGATGAAGTACATTAATAAGGAATCGGCTGACATTGATAAGGAAATAAACAAAGTTAATGGCATTAAATTGAACGCACAACGACAGT  
TAATGACATTACAGAACTACGTGATGGTTAGAAGATTTATTGGCAATTATAATTCAATTTCAACCATTAATGGATCGATTGTCAC  
ACAAAATAAGACATTAGATTTAGCTGACTTGATACCGCAAGGCACGTGAAAAAGATGCATCATGTTGAAAAATATTGATGAAGCTA  
TTGCTAAAGCAAGTGATGTGTTAGTTGCTAATCATTTTATTGATATTAATATATTTCATGAGATGCAACAGGTATTTGATGATTTCGTA  
TATGTTTATCATGCAAAATATTGCTATTCCACATGCATACTCTGAAAAGCATGTACATAAAACAGCGATGAGTATGTTGATATTACA  
AGAACCAATATACATGTGATGCGACAGCAATCCATATTATTGTACCTATTGCTGCTGTTGATAAAGTGACACACTTAAGAGCGTT  
ACTACAATTGAGAGATGTGGCGCAAGACAATGACGCAATTAAGCGCATCATACAAAGTCGCAAAAAATTCTGATGTAAATGAGATTT  
TAAAAAATTATTCAAATAAAGAAGCGAGGGAAAAATGGATGGGACAGCAATTAGTGCATAAAGAAAAATATAATGCTCAATTTGTCG  
GCAACTGATAAAGAATCCGTATTGTCACAAATGTCAGATGTGTTATTTCAAATGGGTTCTGTAAGTCAACGTTTAAAGATGCAGTC  
ATCGACAGAGAAAAAGAATTTGCTACTGGTTTACCAACGCATCTATGTTCCGTCGCTATACCGCATACAGATGTCGAACATATTAAC  
CATAGAACGATAGGTGTGGCTGTTCTAGAAAAAGAAGTGCCGTTTATTGAAATGGGAACACTTGATCAACAGACAGAAAGTGAAAAAT  
CGTTTTTATGTTAGCAATGGATAAAGTAGATGATCAACTTAAGCTGTTACAACAGTTGATGCAAAATTTTCAAAGTGAAGAAAAAT  
GGAGCAGATTCTACAGACGAAAGATGAAACAATTTAGCAACAATAATCAATATTATTGGAATAATACTAAAAATTAATTTGGAG  
GAATGAAAAATGAAACAAGTATTAGTAGCGTGGTGCAGGTATTGCAACGTCAGTAAAGTAAATGCAATTGAAGAAATGGC  
AAAGGAACACAATATTAAAGTAGATATTAACAATAAATTAACAGAAAGTTGGACCTTATGAAGACACTGCAGATTTATTAGTTA  
CAACTGCAATGACAAAAAAGAATATAAATTTCCAGTTATCAACGCACGTAATTTTTTAACTGGTATTGGTATTGAAGAAACAAAA  
CAACAAATCTTAACAGAGTTACAAAAATAACGGAATTGATATGTAACGTGGGTCAATAACATATAAATATATGCAAATTCATATA  
AATGACTATCACGACAAATGATTGTTGATGACATAGAAACGCAGTGACTGTAATTCAAAGGGAGTGACGTCGAATGTAGCAAGGGT  
TGTCGTTGAAATGACCGTAACGTCAAATGTAATCACAATCGGAAAGTATCGTGACAATGCATATATAACAGGGAGGGTTTAAATAT  
GAGTTACTTCACTGATTTTGTAAAGGGGATTTTAGATTAGGTGCAACTGTTATTTTACCGGTTGTCATATTTCTGCTTGGCCTATTCT  
TTAGGCAGAAAAATGGAGCGGCATTTAGGCTGTTTAAACAATAAGGTGTGGCTTTTGTAGGGATTTCTTAGTCATCGATTTATTAGT  
TAAAAAATTTAGGGCCAGCAGCACAAGCGATGGTTAAAAAATTTAGGCGTCAGTCTGAATGTGATTGATGTAGGTTGGCCAGCAACAT  
CATCTATCGCTTGGGCATCATCTGTCGAGCATTATTATTCCACTCGGAATCATAGTTAACGTTGTATTGCTAGTAACTAAAGTGAC  
AAAGACGATGAATGTAGATATTTGGAATTTTGGCATTATACGTTTACAGCAGCAATGGTTTATGCCGTATCAGGCAGTATTGGCA  
AGCGTTATTAGCAGCAGTATTTTCCAAGTTATCTGTTGAAAGTAGCAGATTGGACAGCACCGATGATGAGTGAGTTCTTTGATTT  
ACCAGGTGTATCGATTGCTACAGGAAGTACAAATTTCTATGCACCAGGTATTTACTTAGTTAAATGTTACAAAAAGTACCCGCTCT  
GAATAAGTTAGATGCTGATCCTGAAACAATTCAAAAAACGTTTGGCGCATTTGGAGAGTCTATCTTTGTCGGCTTAATTTTAGGTTTAA  
GGTATTGGTGTGTTAGCAGGTTACAAACCTGGAGACATCATTAAATTTAGGAATGTCAATGGCTGCAGTAATGGTATTAATGCCTAGA  
ATGGTAAAAATCTTAATGGAAGGTTTAAATGCCAGTTTCAGAGTCTGCAAGAACATGGCTAAATAAACGTTTGGCGCAACGTGAAAT  
TTATATTGGTTTGGATGAGCAGTACGATTAGGTCATCGAGCGTTTATTCGACAGCATTAAATTTAGTACTTACCTATCAGTCTTTTATTA  
GCCGTTATTTTACCAGGAAACCAAGTACTACCTTTTGGTGACTTAGCAACGATACCATTTGTTGTCGCGTTTATTGTTGGTGCAGCAA  
GAGGAAACATTATTCATTCTGTCTATTGTGGGTACGATTATGATTGCAATTTCACTATATATTGCAACAGACGTAGCACCTATTTTAC  
AGATATGGCGAAAGGTACGAATGTACAAATGCCAAAAGGTTTCATCTGAAATTTCAAGTATTGATCAAGGTGGTAATATCGTTAACT  
ATCTTATCTTTAACTATTTAGTCTATTCAATTAATAATCGAGGTGTTTGTGGTGAAAGCTTTAGTAAAAACAAGAGAAGGACATGG  
CAACTTAGAACTTCTTGATAAAGAAGTTGCAACACCGCTAGATGATAAAGTAAAGATTAAAGTACATTATGCAGGAATTTGTGGCA  
CAGATATTCATACTTATGAAGGTCATTATAAAGTTAATTTTCCAGTGACATTAGGTCATGAATTTTCTGGTGAAATCGTTGAAGTTGG  
AGCAGACGTTAAAGATTTTAAAGTTGGTGACCGTGTCCTCTGAAACGACATTCTATGTTTGAATGAGTGTAATACTGTAAATC  
AAAAGTACTATAATTTATGCAACCATCGAAAAGTTATTGGAACACAAGTTGATGGCGCATTTACTAATTTAGTGCATTGCACGTGAAG  
AAAGTTTGATCATATTTCCAGATGAAGTATCGTATCAGTCTGCAGCTATGACAGAACCATTAGCATGTGCACATCATGGCGTTTCTA  
AGATTCAAGTCAATTCAGGCGATGTAGCAGTTGTAATGGGACCTGGGCCAATCGGATTACTTGTAGCACAAGTGTTAAAAAGTAAA  
GGCGCAACTGTTGTGGTAACTGGATTGGACAATGACAAAGTCAGATTAGATAAAGCAGAAGCATTGCACATGGATTATGTAGTCAA  
TTTACAACAAACAGACTTAAAAACGTATATCAATGGAATTACAGACGGTTACGGTGACAGATGTTGTTGTTGAATGTTACAGGTGCAGT  
TCCAGCAGCAGCACAAGGTTTGATATTTACGCAAAAAAGGTTTCTACAGTCAAATAGGTATTTTAAAGGATGCTGAAATTCATT  
TGATATGAAAAAGTGATTCAAAAAAGAAATAACAGTTGTTGGTAGTAGAAGTCAAAGCCAGCAGATTGGGAACCTTCATTGCAAC  
TTATGGCGGATGGTTTAGTAAATGCTGAAGCTTTGGTGACAAAAATATATGATATTTGAAATGGGACGAGGCGTATCAACATTTAA  
AATCCCGCGAAGGTATTAAGCATTACTTAAGCCGCTCGATTAGATGAAAAATGAAGGAGAGAATTAATATGTTAGAATCAATGCT  
AACTTTTATGCTTGGGCCATTAAAGCAAAATCACTGATTTTATATGGAACATTTACTCGTAAGTAAATTTCCATTGTCATTGCAGGTAT  
TTTGCGCAGAGGTATTTTAAAAAGAAAAAAGTTGTGAATTAATCAAATTTGAGGTGATTTACAAGTGAAAGCATTGAAATTATATG  
GCGTGGAAGATTTACGGTATGAGGATAACGAAAAGCCAGTCATTGAAAGTGCGAATGACGTTATTATTAAGTACGAGCGACTGGC  
ATATGTGGTTTCAGACACGTCACGATACAAAAAATGGGGCCATACATTAAGGTATGCCATTTGGTCATGAATTTTACAGGTGTAGTA  
GATGCCATTGGAAGTGATGTTACGCATGTTAATGTGGGCGACAAAGTGACAGGTTGCCAGCAATACCTGTTATCAATGCGAGTAT  
TGTTTAAAGGTGAATATGCACGATGTGAAAAGTTATTCGTCATTGGCTCATATGAACCTGGATCGTTCGCGGAATATGTCAAATTG  
CCAGCGCAAAATGTTTAAAGGTTCCAGACAATGTTGATTACATTTGAAGCAGCAATGGTTGAGCCATCAGCCGTTGTTGCGCATGGG  
TTTTATAAATCGAATATACAACCTGGTATGACTGTGACAGTAAATGGGTTGTGGCAGTATAGGTTTGTAGCTATTCAATGGGCAGCA  
ATATTTGGTGTGCACATCATCGCTATAGATATGATGCGCATAACTAGTATTGCAACATCACTATTGGGCGACATCAACAAATC  
AATTCAAAAAGAAGAAATCTTGAGAAATTCATCGAAAATCATTACGCCAATCAAATCGATTAGCTATAGAATCATCAGGTGCTAA  
AGTTACGATTGGTCAAATATTGACGCTACCTAAAAAAGGTGGCGAGGTGGTATTACTCGGAATACCATATGATGATATTGAGATTG  
ATCGCGTTTCAATTTGAAAAAATTTCTGCGTAACGAGTTGACAGTATGTGGCTCTTGGAACTGTTTGTCCAGTAATTTTCCGGGCAAG  
AGTGGACGCAACCTTACATTATATGAAGACGAAAGATATTAATGTAAAGCCTATTATTTCTCATTTTTTACC GTTAGAAAAAGGCC  
CGGAGACATTTGATAAATTAGTTAACAAGAAAGAACGATTTGATAAAGTCATGTTTACGATTTATTAGTATGCACCTTTGAGGACGA  
AAACACTGGTATAGTTATAGCTATGAAAGTGCGAATGCCGCTGGTCTACAGATACTATCGAAATAACTCATCTTCGAATATACGTT  
GCTAAATAGCCGGTTTACTTGTGTGAAATATGCTTGTGAATCGGTTGTTTGTGATTTTGTATACTTAAAAATGAGATGGCAATATTGA  
TAATTTTTAAAGTAAAAATCAAGTGACGCACTTAATAAGATAAATTTATTATAATATATGTTGAATATGTTGAGGCAATGAATGAAT  
TTGAAAAAGAGTAAACATTAATACTTTAACAATTTAATATTGTGAGTTAATGATTAACTGCATGGCAAAACACTTAGAATGGT  
CAGTTACAAAAATACATTTTTATAAAAAATATCACACTATTGTGACAACTATCTTTGGATTAATAAAAAGAGGCAAGTGAGCAATAG  
GTTAGGCTTATGTGCGGACATAGGTCAGTAATGTATAAATGGAAATGATGTAATGACAGAATGGAGGACAACATGATTTATGCAGG

TATTTTAGCAGGAGGTATTGGTTCGAGAATGGGGAACGTGCCATTACCAAAAACAATTTTATAGATATTGATAATAAACCGATTTTAAT  
CCATACAATTGAGAAGTTCATTTTAGTGAGTGAATTTAATGAGATTATTATCGCAACGCCAGCACAGTGGATTTC CATACACAGGA  
TATTTTAAAAAATATAACATTACAGATCAACGTGTCAAAGTAGTTGCAGGTGGTACGGATCGAAACGAAACAATTATGAACATTA  
TCGACCATATTTCGCAATGTAAATGGAATTAATAATGATGATGTGATTGTAACATCATGATGCCGTAAGACCATTTTTAACCAACGTA  
TTATTAAGAGAACATTGAAGTAGCAGCAAAATATGGTGCAGTAGATACAGTCATTGAAGCAATTGATACGATTGTAATGTCTAAA  
GATAAACAGAACATACACAGTATCCCTGTAAAGGAATGAAATGTATCAAGGCCAAACACCACAATCATTTAATATTAAATTATTACA  
AGATAGTTATCGCGCCTTAAGTAGTGAACAAAAAGAAATCTTATCAGATGCATGTAAAAATCATTGTGCAATCTGGATATGCAGTTA  
AATTGGTACGTGGAGAATATACAACATTTAAAGTGACAACACCGTATGATTTAAAAAGTAGCAAAATGCCATTATTCAAGGTGATATT  
GCCGATGATTAATCAAGTATATCAACTCGTTGCACCGAGACAGTTTCGACGTCACATATAATAATGTTGATATTTATGGTAATCATGT  
CATCGTAAGACCTTTATACTTGCTATTTTGTGCAGTGATCAAAGGTATTACACAGGTGCAAGAGATGAAAATGTACTGCGCAAAAA  
ATTGCCAATGTCATTAGTTCATGAAGCTGTTGGTGAAGTTGTATTTCGATAGTAAAGGCGTATTTGAAAAAGGTACGAAAGTAGTAAT  
GGTGCCGAATACACCTACAGAGCAACATCATATTATTGCGGAGAATTACTTAGCCTCTAGTTATTTTAGATCTAGTGGTTATGATGG  
TTTTATGCAAGACTACGTTGTGATGGCACATGATCGTATCGTTCCGCTGCCTAATGCCATTGATTTGAGTACGATTTCATACACAGAG  
TTAGTGTGAGTAAGTTATCATGCTATACAACGATTTGAACGTAAATCTATACCTTTGAAAACCAGCTTTGGTATTTGGGGTGATGGT  
AACTTAAGTTATATTACTGCTATTTTGCTACGTAAAGTTGTACCCAGAAGCTAAAAATTTATGTATTTGGTAAGACAGACTATAAATTA  
AGTCATTTTTTCATTTGTAGATGCATCTTTACAGTAAATCAAATACCAGATGATCTTAAAAATTAATCATGCATTGGAATGTGTTGGAG  
GTAAAGGAAGTCAAGTTGCACCTTCAACAAATAGTTGAACATATTTACCAGAAAGGCAGTATTGCTTTGTTAGGCGTAAGTGAATTAC  
CCGTGGAAGTGAATACAGTATAGTACTTGAAGAAAGGATTAACATTGATTGGTAGTAGTCAAGCGGCTCTAAAGATTTTGAGCAA  
GTTGTTGATTTATATCGTAAGTACCCAGACATTTGTTGAAAAGGACATAAAGCTTCATTGAAAAGTAGAAGTTCTTATTAAAGCTAT  
GATATCGTCCAAGCGTTTGAAATGGATTTATCGACATCTTGGGGAACAGTATTGAAATGGACGATTTAATAAACCGGATGGGGG  
AATAACAATGACAAAAACGAAACAAGCAATACATATTGATAACATATACTGGGAACGTGTTTCAGTTATATATTGAAGGACATAGTG  
AAGGTGTCGATTTAACATCAGGACAATTTGTTCTGAGGAATTTAACCAGAAACAAAAACATTAGAAGCAAAATGAAATGAAAATAGAC  
GGTAATACATTTATATGTAGATTCAACGTGCAATATTAGACGATGGGTATTATTTACCAATGGATAAATATTATTGTTTATCATG  
ACCAGTTAGAGTATATTGGACAACCTTAATCCAAATATTATTGATCAAGCTTATGCGGCATTAAATGAAGAGCAAAATTGAAGAATAC  
AATGAGCTGACTACAAAAATGGAAGTGAACCTATTATTAGCGTATGATGCTAAAGTTTTCCGTAAAGGTGGCGTATCACAACA  
TACGGTCTATACCTACTCCGAAATAGCAAGTGACGTTAACGAATTTGTATTTGATATTGAAATCACCTTACCTCAAGAGAAATC  
AGGGGTCAATTGCGACAAGCGCACACTGGCTTCATAAAACAAGGACATAAAGCTTCATTGAAAAGTAGAAGTTCTTATTAAAGCTAT  
TTTTAATATTACAAAGTTACTACATATTAAAAGAAGCAAAACAATATTATTCACATCAGATTCGCGTCCGAATTTATCAGGGAAATTT  
CAAGTATGTATATGATGAGTTACTTCGCCAAAAAGTAGATTTTGATTATGATATTAACCGGTATTTAAGGCGAATATTACGGATAG  
ACGTAATGGAGAGACAAGTTTAGATTGCCATATTTACTTGGTAAGGCAGATTATATTTTGTGATGATTTCATCCATTAATTTAT  
ACGGTTCGCTTTAGACCATCACAAAGAAATATTCAAGTGTGGCATGCCGTTGGTGCTTTTAAACAGTTGGCTTTAGTCGTACAGGA  
AAAAAAGGTGGTCCGTTTATCGATTCAATAAACCATCGTAGTTACACGAAAGCATATGTTTCATCAGAAACCGGATATTCCATTTTAT  
GCTGAAGCATTTGGAATTAGAGAAGAAAAATGTTGTACCAACAGGTGTACCACGTACTGATGTACTATTGATGAAGCTTATGCAAC  
ACAAATTAACAAAGAGATGGAAGATGAATTGCCAATTATAAAGGATGAAGAAAGTTATTCTATTGCAACCGGACATTTAGAGGTAATG  
GTCAGGTACGCGCACATTATCCATTTTAAAAATTTGATTTTGAACGTTTAGCAAGATACTGCGAGAAGCATTAATGCAGTTGTGTTAT  
TCAAAATGCATCCGTTTCGTAAAAAATAGACTTAATATTTCACGTGAACATAGACAATACTTTATCGATGTGTGAGATCATCGTGAAG  
TTAACGATATTCTCTTTGTTACAGACTTGTGATTAGTGATTATTCATCTTTAATATATGAATATGCAGTATTTAAAAAGCCGATGAT  
TTTCTATGCATTTGACTTAGAAGATTACATTACGACGCGTGATTTCTATGAACCATATGAATCATTTGTTCCAGGTAAAAATTGTACAA  
TCCTTTGATGCATTAATGGATGCTTTGGACAATGAAGATTATGAGGTTGAAAAAGTTGTGCCATTCTTAGATAAACATTTTAAATAT  
CAAGATGGTTCGCTCAAGTGAACGTTTAGTCAAAGATTTGTTTAGACGCTAATGTTGGCATATATTACTTGCCATGCAATGAGTCAT  
AAGGCATAGTTTCAAGAAGGGTTCGTGACAATGAAGTGAGCAACATGTCATGATGAGAAGCAGGACTATACAATGAGAATAACCTT  
TTAATTTTTCATGCATAAGGCGATTCAATCAAAAGCAATCACCTTCCAACCTGAATTGTCATTTTGTAAAAATAAATATCGATCCAA  
TCGTGTAATTCATACAAATGTGTAACACATACGTTGATGAATGGTAAACGATTTTGTATGTGTTAAAGTGTACATTAATGAGTGA  
TTTCGTATGATAATTAACGACAAGTGAATGGTTAAATGTATTTTATGATGAAATGCTATAATAGGCATGGTTACAATGAGCTTGCT  
CATACATATTAATATAATTACAAAAACACGTGCGAGGTACGACATGATTAAAAATACAATTAAAAAATTTGATAGAACATAGTATAT  
ATACGACTTTTAAATTACTATCAAAATTTGCCAAACAAGAATCTAATTTATTTTGAAGCTTTCATGGTAAACAATACAGCGACAACC  
CCAAAGCATTATATGAATACTTAACCTGAACATAGTGATGCCCAATTAATATGGGGTGTGAAAAAAGGATATGAACACATATTCCAA  
CAGCACAAATGTACCATATGTTACAAAGTTTCAATGAAATGGTTTTAGCGATGCCAAGAGCGAAAGCATGGATGATTAACACACG  
TACACCAGATTGGTTATATAAATCACCGCGAACGACGTACTTACAAACATGGCATGGCACGCCATTGAAAAAGATTGGTTTGGATA  
TTAGTAACGTTAAAAATGCTAGGAACAAATACTCAAAATTTACCAAGATGGTTTTAAAAAAGAAAGCCAACGTTGGGATTATCTAGTG  
TCACCTAATCCATATTCGACATCGATATTTCAACATGCATTTTCATGTTAGTCGAGATAAGATTTTGGAAACAGGTTATCCAAAGAAAT  
GATAAATTATCACATAAACGCAATGATAGTAATATTAACGTTATTAAGACAAAATTAATATTTCCATAGATAAAAAAAGTGAT  
TATGTACGCGCCAACCTTGGCGTGACGATGAAGCGATTTCGAGAAGGTTTCATATCAATTTAATGTTAACTTTGATATAGAAGCTTTGCG  
TCAAGCGCTGGATGATGATTATGTTATTTTATTACGCATGCATTATTTAGTTGTGACACGTATTGATGAACATGATGATTTTGTGAAA  
GACGTTTCAGATTATGAAGATATTTTCGGATTTTACTTAAATCAGCGATGCGTTAGTTACCGACTACTCATCTGTCATGTTTCGACTTCG  
GTGTATTAAGCGTCCGCAAAATTTCTATGCGTATGACTTAGATAAATATGGCGATGAGCTTAGAGGTTTTTACATGGATTATAAAA  
AAGAGTTGCCAGGTCCAATTGTTGAAAATCAAAACAGCACTCATTGATGCATTTAAACATATCGATGAGACTGCAATGAGTATATT  
GAAGCACGAACGGTATTTTATCAAAAAATCTGTTTCATTAGAAGATGGACACGCGTCACAACGAATTTGCCAAACGATTTTAAAGTGA  
TAACCTTAACAAACAATAAAAAATATAAATTAATGTTAAGTGATATAAATAAATAACGAAATGTTTGGCTTGATGTTTAAATATTGTT  
GTATGAAAACGTCGTGATATAATGTAATATAGGTTTAAACGAATATGCTAAAAATATAAGCAAAATATGTAATTTTAAAGTAATAC  
ACAGACATTTAGAGTTTGTATTTAAAAATGAGTTTCAATTGGAAAAATGCAACGAAATTTAAATAATTAATATAGATATAGTTGAA  
TGGAGGAAGTATTTTATGAAATACGCTGGTATTCTAGCTGGAGGTATAGGCTCAAGAATGGGTAAACGTACCTTTACCTAAACAATTT  
TTAGATTTAGACAACAAACCGATTTTAAATCCATACATTAGAAAAATTTATTTAAATTAATGATTTTGAAAAAATTTATTCGCGACG  
CCACAACAATGGATGACGCATACGAAAGATACACTTAGAAAAATTTCAAAATTTCTGATGAAAGAATTGAAGTCATTCAAGGTGGTAG  
CGATCGTAACGATACAATTATGAATATCGTTAAACATATTGAATCAACAAATGGTATTAACGATGACGATGTTATTGTGACACATGA  
TGCAGTTAGACCATTTTAAACGCATCGTATTATTAAGAAAAATTTCAAGCTGCTTTAGAGTACGGTGCAGTAGATACAGTGATTGA  
TGCTATAGATACGATTGTTACATCTAAAGATAATCAACAGCATGTGCAATTCCAGTGCGTAATGAAATGTACCAAGGTCAAAACAC  
CTCAATCGTTTAAATTTAATTTAATAAAGAAAGCTATGCACAGTTGAGTGAGCAAAAAGAGATTTTTATCTGATGCTTGTGAAGA  
TTATTGTAGAAACAAACAAACCGGTTTCGACTTGTAAAAGGTGAGTTATATAACATTAAAGTAACAACACCTTACGATTTAAAGTA  
GCGAATGCTATTATTCGAGGTGGTATTGCCGATGATTAATCAAGTATATCAATTAGTTGCACCTAGACAATTTGAAGTTACGTATAA  
CAACGTAGATATTTACAGTGACTATGTCATTGTACGTCCTTTATATATGTCAATTTGTGCTGCCGATCAAGATATTATACTGGTAGC

CGTATGAGAATGTCTTATCTCAGAAATTGCCAATGTCTTTAATTATCATGAAGGTTGTTGGTGAGGTCGTAATTTTGACAGTAAGAGGTTGT  
TTTAATAAAGGTACAAAAGTAGTTATGGTACCGAATACGCCGACAGAAAAAGACGATGTCATTGCTGAAAACATTTTAAAAATCGAG  
CTACTTCAGATCAAGTGGACATGATGGGTTTATGCAAGATTTTGTGTTGCTAAATCATGATAGAGCTGTACCACTACCTGATGATAT  
TGATTTAAGTATTATTTTCATATACAGAGCTTGTAAACAGTAAGTTTGCATGCTATTTCGTCGTTTGTGAAAAGAAATCTATTTCAAATAAA  
AATACATATTTGGTATTTGGGGTGATGGTAACCTTAGGTTACATTACAGCCATTTTATTACGTAATAATATCCAGAGTCTAAAAATATATG  
TCTTTGGTAAAAACAGATATAAATTTAGTCAGCTTCTCATTTGTTGATGATGTCCTTTTATTAATAAAATACCTGAAGGCTTAAACAT  
TGATCATGCAATTTGAGTGTGTGGGTGGTCGGGTAGTCAATCAGCCATAAAATCAAATGATGCTATTACATTTACCAGGAAGGAAGCAT  
TGCAGTGTAGGTGTAAGTGAGTTCACAGTAGAAGTTAATACACGTCTAGTATTGGAAAAAGGACTAACGTTGATTGGTAGTAGTCG  
AAGTGGTTCAAAGATTTTCCAAGATGTTGTAGACTTATACATTCAATACCCAGATATTGTAGATAAAATTAGCGTTGTTAAAAAGGTCA  
AGAATTTGAAATTGCAACAATTAATGATCTTACAGAAGCTTTTGAAGCAGACCTGTCTACATCTTGGGGTAAAAACAGTATTTAAATG  
GATTATGTAATAGAAAAAGGATGAATTAACGTTGGTTAAAAAGTAAGATATATATAGATAAAAATCTATTGGGAACGTTTCAGTTAT  
TCGTTGAAGGACATAGTGAAAACCTAGATTTAGAAGATAGTAATTTTGTATTAAGAAAATTTAACTGAGACACGTACAATGAAGGCG  
AATGATGTCAAAATAGATGGGAATCAATTCGTTTGTGCTGTTCAATGTAGCTATCTTAGATAATGGTTATTACTTACCTGAAGATAAG  
TACTTATTAGTGAATGAGCAAGAAGCTTGATTATTTGACAGCTTAAACCCAGATGCTGATTAATGATGCATCAAAAATCTAAAGCCCA  
AAACAAGAAGAAGAAATACAACGAATTAGAAACACAAAATGGTAAAACTCAATTTCTATTGACAGACTTACCTAAAAAGAATTTAGAA  
AAGGCGGCATTTCAAAGAAAACGTTTATACTGTTACACCTGAAATTTCTAGCGATGTTAATGAATTTGTCCTTGATGTTGTTGTAA  
CGACTCCGGAAGTTAAAAGTATTTATATCGTTTCGTAATATAAAAGAATTACGTAAGTATTTCCGCAACAATCATTTAATACAAGAC  
AATTTATTTTAAAGCGATATTTAATACGACGAAATTTTCCACTTGAAAAAAGGGAATACGGTGTGTTTCACATCAGACTCTAGAC  
CAACGATGTCTGGAACTTTGAATACATCTATAACGAAATGTTACGTCAAAAATTTAGATAAAAAAGTATGATATTCACACTGTTTTTA  
AAGCGAATATTACAGATAGACGTGGCATCATCGACAAGTTTAGATTGCCATATTTACTTGGGAAGGCAGACTACATCTTTGTTGATG  
ACTTTCACCCATTGATTTATACAGTGCGTTTTAGACGTTCTCAAGAAGTTATTTCAAGTATGGCATGCCGTTGGTGCCCTTTAAAAACAGT  
TGGCTTTAGTCGTAATGGTAAAAAGGTGGACCATTTTATGATTGATCTAAATACCTGCTAGCTATACAAAAGCTTATGATCATCTGA  
AACCGATATTTCACTTACCGTGAAGCATTTGGTATTAAAGAGAAAAATGTAGTGCCATCAGGTTGCCAGCTTACCGTACTGATGTA  
TGATGAAACTTATGCGACACAGATCAAAACAAGAGATGGAAGATGAATTACCAATTATTTAAAGGTAAGAAAGTCATTCTTTTCGCAC  
CAACATTTAGAGGTAGTGGTCATGGTACAGCACATTACCCATTTTCAAATTTGATTTCGAACGTTTAGCAAGATATTGCGAAAAAA  
ATAACGCGGTTGTATTATTTAAATGTCATCCATTTGTGAAAAATAGACTTAATATTGCAGACAAACATAAACAATATTTTGTGACG  
TTCTGACTTTAGAGAAGTTAATGATATACTGTTTCATAACAGATTTATTAATTAGTGACTATTCATCTTTAATATATGAATATGCAGT  
ATTTAAAAAGCCAATGATTTTCTATGCATTTGATTTAGAAGATTATATTACGACGCGTGATTTTATGAACCATATGAATCATTTGTT  
CCAGGTAAAAATTTGCAATCATTTGACGCAATTAATGGACGCCCTGGACAATGAAGATTATGAAGGAGAAAAAGTCATTCCATTCTT  
AGATAAACATTTTAAATATCAAGATGGCCGATCAAGTGAAGCTTTAGTCAGAAATTTATTTGGTAGATAAGTTTATAGTAGTACGA  
AGTGGGAGAGGTATAATGATGAAATTTTCAAGTAATGTTTCCAACATACAATTCAGAAAGTATAGAACAGAATTACTTAATAGCCT  
TGCGAAAAAAGATTTTCCGAAAACCTGAATTTGAAGTGTTGTAGTTGATGACTGTTCAACAGATCAAAACGTTACAAAATAGTTGAAA  
AGTATCGTAATAAAATTGAACCTGAAAGTAAGTCAACTCGAAACAAATTCGGTGGTCCAGGTAAACCTAGAAATGTGGCGTTAAAA  
CAAGCAGAAGGTGAATTTGTATTATTTGTGGACTCCGATGACTATATAAACAAAGAGACTTTAAAGGATGCAGCAGCATTTATTGAT  
GAACATCACTCAGATGTCTTGTGATTAAAAATGAAAGGTGTTAATGGTCGTGGTGTACCACAACTCTATGTTTAAAGAAACAGACCT  
GAAGTTACTTTGTTAAATTTCAAGAATTATCTATACTTTAAAGCCCAACTAAAAATCTATAGAACAGCATTACTAAAAGATAATGACATT  
TATTTTCCAGAAGAAATTAAGAGTGCAGAGAATCAATTAATTTACAATGAAGCATATTTGAATGCAAAATCGAATCAGTGTGTTAAGT  
GATAAAGCGTATTATTATGCTACAAAAGCGTAGAGGTGAACATATGAGTAGTGCTGATGTTTCACTGAAGCATTTTACGAAGTCATG  
AGATTGATTGCTGTAGAAATATTTAAATGCAGATTTAGAAGAAGCTCATAAAGATCAAACTTAGCAGAATTTTAAATCGTCAATTT  
AGTTTTTCTCGTACGAATGGCTTCTCACTTAAAGTTAAACTAGAAGTCAACCGCAATGGATTAATGCTCTAGGAGACTTTATACAA  
GCAGTTCAGAACGTTGATAGTGCATTGGTGATGAGTAAATTACGACCATTGTTGCACTACGCGAGAGCGAAAGATATAGACAAC  
TAGAACTGTAGAAGAAAGTTACCGTCAAGGTCAATACTACCGTTTTGTATTTGTAGATGGTAAATTAACATTCAATTCAATGAAG  
CGAACCATACTTTGAAGGCATTGATATCGCTAAGCCAAAAGTGAAGTGAACAGCATTTAAATTTGATAATCATAAAATTGTTACAG  
AGCTAACGTTAAATGAATTTATGATTGGCGAAGGACATTATGATGTCAGACTTAAATTACATTACAGAAACAAGAAGCACACAATG  
TATGTACCTTTAAGTGTCATGCGAATAAACAATATCGTTTTAACATTATGTTAGAAAGTATTAAGCGTATTTTACCTAAAAGAAAA  
ATTTGGGATGTTTTCTTAGAAGTCCAAATAGGTACGGAAGTATTTGAAGTGGCTGTTGGTAAATCAACGTAATAAATATGCATATACT  
CGAGAAACAAGTGCATTAAATTCATTGTAATGATTTTATGATTAAACACCGTATTTCACAAAAGACTTTAATAACATTTTCGTTAT  
ACTTTACAGCTATTACATTAACGATTCAATCTCAATGAAGTTAAAAGGTAAAAAACAAAATCATTTTAACTGGTCTGGATCGTGGTT  
ATGTATTTGAAGAAGGTATGGCTAGTGCTGCTAAAAGACGACATGATTATGGGAATGTTAAGCCAAACGTCAGAAAACGAAGTG  
GAAATCTTACTTAGTAAAGATATTAAGAAGCGAGACTTCAAAAATATTGTTAAGTTAAACACTGCACATATGACTTACTCGCTAAAA  
TAAATAATAAATGCCCTCAAATCTATGTGAACCTAACATGATTGAGGGTTTTATTTTACTATTATGAAATGATTATGACATTTCCT  
GATTTTCATTTTCATATACATTAATTTGTATACACTGAAAATGAGGAGGTGCTCTATAATGATAAATAAAAAATGACATAGTAGCAGA  
TGTAGTAACAGATTATCCGAAAGCAGCAGATATTTTAGAAGCGTAGGTATAGACTTTTGTGCGGTGGACAAAGTAAGTATAGAAG  
CAGCATCTTATGAAAAGAAATATGTAGATTTGAACGAATATTACAGCGTCTCAATGACGTTGAACAAACGAATACACCGAGTTGC  
CTTAACCCATAAATTTTAAATGTTTTCGTCACCTATTTCATTAATATTACAGCAGCATATCATGAACCTTAGAGAAGAAATTTAAAT  
TAACACCTTATGTGACGAAATATCGAAAGTACATGGACCTAACCATCCATATTTAGTCGAGTTAAAAGAAACATATGATACATTTA  
AAAAATGGCATGTTAGAGCATATGCAAAAAAGAAGATGATGTTGATTTTCCAAAACCTAATTAATATGAACAAGGTGAAGTAGTAGAC  
GATATTAATACAGTGATTGATGATTTAGTATCTGATCACATTGCAACAGGACAATTGTTAGTGAAAATGAGCGATTTAACATCTAGC  
TATGAACCACCGATAGAGGCATGTGGTACGTGGCGACTCGTTTTATCAGAGATTAAAGCACTTGAAGTGTTAACACATGAGCATGT  
TCATTTAGAGAATCATGTTTTATTTAAAAAAGTATCATAAATAACGCGATTAGAAAACCTGTTGGCAAAGTAATGTCAGCAGTTTTTCG  
CTATACCTTAACAGAAATTTAGTGACATGAACGACATTTTGAAGTGAAGAAAAATGGTCAACTTAGCATAAAAAATTGATATGAAAT  
TAATGGTATAGATAATTAATAGTAGCGTGTTTTTAAATAAATTTGATGAATTTTACATGCACTATTATGATAAATAAATACATAA  
TATAATTCATGAGGTGCTATCGTGCTATCGCTAACAAATGTTATTACTTGAGCGTGTAGGTTTAATTATTTTGGCCTATGTGTT  
GATGAATATTTCCATATTTTAAAAAATTAATGAATCGTCGACGTACATGGAAAGCACGTTGGCAATTATGTATTATTTTCAGTTTGT  
GCCTTAATGTCTAATTTAACTGGTATCGTCATCGATCATCAACATAGTTTGTACAGGAAGTGTGTACTTCCGTTTAGATGATGATGTAT  
CTTAGCTAACACACGTGTATTAACGATAGGTGTGCGAGGATTAGTTGGTGGTCCTTTGTAGGTCTATTTGTTGGCGTTATTTTCAGG  
TATTTTCAGAGTGATATGGGTGGGGCGGATGCACAAGTTTATCTTATCTCATCTATATTTATCGGTATAATTGCTGGTTATTTTGGC  
TTACAAGCTCAAAGACGCAAGCGTTACCCGAGTATTGCGAAAAGTGCCATGATTGGAATTTGTTATGGAAATGATTCAAATGTTGAG  
CATTTTAAACATTTTCCACGCAAGCAATGATGCGGTTGACCTCATATCATTAATTGCACTACCAATGATTATTTGTAATAGCGTTGGT  
ACGGCGATTTTTATGTCTATTATCATTTTCAACATTTAAAGCAAGAAGCAAAATGAAGGCTGTCAACACACATGACGTACTGCAATTTG  
ATGAACAGACATTTCCGCTATTTTAAAGAAGGATTGAATAGAGAATCGGCACAGCAAAATTCGCGATGATTATTAATAAATTTAATGA

AGTATCTGCCGTAGCAATTACAAGCAAAAATGAAATCTTATCGCATGTAGGTGCAGGTAGTGATCATCACATACCAACAAATGAAA  
TATTAACAAGTCTGTCTAAAGATGTATTGAAATCAGGAAAAGTTGAAAAGAGTTCTACTAAAGAAGAGATTGGTTGTAGTCATCCG  
AATTGCCCGCTTAGAGCAGCTATCGTGATACCACCTTGAGATGCATGGTTCTATCGTCGGTACATTGAAGATGTATTTTACAAACCCCT  
AATGATTTAACTTTTGTGGAACGTCAACTTGCGAGAAGGATTGGCAAATATTTTTAGTAGCCAAATGAACCTGGTGAAGCCGAAACG  
CAAAGTAAGTTATTGAAAGATGCTGAGATTAAGTCATTACAGGCACAAGTGAGTCCACATTTTTTCTTCAATTCAATTAACACGATT  
TCAGCTTTAGTTAGAATAAATAGCGAAAAGGCACGAGAGTTACTATTAGAATTGAGTTATTTTTTCAGAGCGAATTTACAAGGCTCA  
AAGCAACATACGATTACTTTAGATAAAGAGTTAAGTCAAGTGCGTGCATACCTTATCACTCGAACAGCACGTTATCCAGGAAGATT  
TAATATCAATATTAATGTTGAAGACAAATATCGCGATGTGCTTGTACCACCATTTTTAATTCAAATTTTGTGAAAAATGCCATCAA  
ACATGCGTTTACGAATCGAAAAGCAAGGTAACGATATTGACGTGTCAGTGATTAAGAAAACTGCAACACATGTACGTATTATTGTAC  
AAGATAATGGTCAGGGTATTCTAAAGATAAAAATGCATTTGTTGGGAGAAACATCTGTAGAATCAGAATCTGGAACCTGGTAGTGCT  
TTAGAAAAATTTAACTTACGCCTAAAAGGATTATTTGGAAAAATCCGCAGCATTACAATTTGAATCGACATCGAGCGGTACCACTTTT  
TGGTGTGTACTTCTTATGAAAGACAAGAGGAGGAATAAATATGAAAGCATTAAATCATAGATGATGAGCCATTAGCACGTAATGAA  
TTAACATATTTATTAATGAAATGGTGGTTTTGAGAAAAATTAATGAGGCAGAAAATGTAAGAAACATTGGAAGCACTACTGAT  
CAATCAATATGACATTATATTTTATGATGTCAATTAATGGATGAAAAATGGGATCGAATTAGGAGCTAAGATTCAAAAGATGAAAG  
AGCCACCTGCGATTATTTTTGCAACTGCACATGACCAATACGCAGTACAGGCATTTGAATTAATGCGACAGACTATATTTTGAAC  
CGTTTGGTCAAAAACGTATTGAACAAGCAGTCAATAAAGTGCGTGCGACTAAAGCCAAAGATGATAATAACGCAAGTGCAATTGCG  
AATGATATGTGCGCGAATTTTGATCAAAGTTTACCTGTTGAAATTGACGATAAAATTCACATGTTAAAGCAACAAAATATTATTGGG  
ATTGGCACACATAATGGTATTACAAACCATACATAACAGATCAATAATACGAAACAAACAGAGCCATTGAATCGTTATCGTTAAACG  
ATTGAATCCCACCTATTTTTATACGTATTTCATCGTTTATATTAACTAAACACATTAAAGAAAGTGCACAACTGGTTTAACTAC  
ACTTATATGGTAATATTGACAAATGGTGTCAAGATGCAAGTTGGACGTTTCTTATGAAAGATTTTAAAGCGTCGATAGGATTACTT  
TAACAGTAATCCTTTTTTTTATGCATTTTACCTATGATATTTTGTATTTTCGGACTAAAAATCACGCAATCGAAGTGAGCCATCTATA  
CTTTAGTTAAATCAAACGTAGGAGGCAATGGTTCGTGAAACAACAAAAAGACGCATCAAAACCAGCACACTTTTTTCACCAAGTCAT  
TGTAATTGCTTTAGTACTCTTTGTATCGAAAAATAATTGAATCATTTATGCCAATTCCTATGCCTGCATCAGTAATCGGTTTAGTATTA  
TTATTTGTATTATTATGTACTGGTGTGTTAAGTTAGGCGAAGTCGAAAAAGTAGGAACGACACTAACAATAACATTGGCTTACTC  
TTCGTACCAGCCGGTATCTCAGTTGTTAACTCTTTAGGTGTCATTAGCCAAGCACCATTTTTAATCATTGGACTAATAATCGTCTCAA  
CAATACTATTACTTATTTGTACTGGCTATGTACACAAAATATTATGAAAGTTACTTCGAGATCTAAAGGTGACAAAGTCACAAAA  
AGATCAAAATAGAGGAGGCACAAGCTCATGATTAAACCCTTAGCACTAAACACACCTTACTTCGGAATACTGTTATCCGTTATACCA  
TTTTCTTAGCGACCATATTTTGAAAAACTAATCGTTTCTTATTTCGCACCGCTATTTGTCAGTATGGTATTTGGTGTGGCCTT  
CCTCTATTTAACAGGCATTCCGTATAAGACTTACAAAATAGGTGGAGACATTATTTATTTCTTCTAGAACCGGCAACAATCTGTTTT  
GCGATTCCGTTATATAAAAGCGTGAAGTGCTTGTTAAACATTGGCATCGTATCATCGGAGGTATTGGCATCGGTACAGTTGTAGCG  
TTATTAATTATTTTAACTTTTGCGAAGTTAGCACAATTTGCCAATGATGTTATTTATCAATGTTACCTCAAGCAGCAACTACAGCGA  
TTGCGTTACCAGTATCAGCTGGTATCGGTGGTATAAAAGAATTAACATCATTAGCAGTTATTTAAATGGTGTCAATTATTTATGCCCT  
AGGTAATAAATCTTGAAGCTTTTCCGAATTACTAACCTTATGCCCCGAGGATTAGCACTTGAACAAGTGGTCACACATTAGGTGT  
AGCACCAGCCAAAGAATTAGGACCTGTAGAAGATCAATGGCAAGTATAGCTTTAGTGTTAGTTGGTGTAGTTGTTGTAGCAGTTGT  
GCTGCTTTTGTAGCAATTTCTTCTAAAACGAAAAACCTAAGCAAGATAATAGCAATTTGAGCCATTGTTATTCGTAAAAAAG  
GTCTATACTCCGGTTATAACTGGGATATAGACGTTTTTATGTATGTATTACTTTTTACTAGGAATATGGTATTTAGCCGTTTCGCTTTA  
TGTATTGCCGCTTTTGA AAAATGATAGAACGAATTAATTTAAACAAGAATTAATGTAAGTTATATCATTTGTGAAATTTCAATTA  
AATATTTTTCGACAAATCTTGA AAATTAATGTGCATCAACACTTTATAAAAAACGGCGTATGCTTATATGTAAGAATGCAATT  
AAGAGGAGATTTTATAAATGAGTATGCAAAGTTCATATAAACGTTTAGTTAAAGTGCTACTAACGATTTTAGTGATTGTGTTTCAA  
TTTTACTAGTAGGTGGTGGTATATTTTTAAAAATGAAGCACCTCGTCCAACAAAGATAGTAGATCAACAAGGTCATACGCTTGTTA  
CAAAAGACGAGCTGATCAGTGGGCAAGCGATATATGAGAAATATGGGTAAACAGATTATGGCTCCTACCTAGGCAATGGTCTTAC  
TTAGGCCAGATTATACAGCAGAGGCATTACATCTTACCTGATTGGTATGCGTAAATATTATGCACAAGATATTATCATAAGCAA  
CTTCATAAAATTAATCATGCAGAGTTAGCCGTAGTTAAAGATAAAGTGATGAAAGAAATACGGTAATCTGTTACTGAAAAAGA  
AGATCAAACTTGATTAAACGCCAGGACAAGTATACGGTCTAAAAATTTTGAAGATTATTATAAAGAAGAGTTTGTTAATAACCTAA  
ACAAGTAGGGTTAAATGAAAATATGATTAAACAGTTTCAAAATGATGATTATATGGTTCGAGGAAATAAAGTTGAACATTTAAGTC  
AATCTTTTTCTGGGGTGCTTGGCTATCGTCAACAGATAGACCTGGAAAAACATTTTCATATACAAATAATTGGCCATACGATGTGG  
ATGCAGGAAATACGTTGCCTAGTGCAGGGATTTTATGGACTGCTATATCTGTAACATTACTGATTGCAGGCTTGGCATCCATTATAT  
ATATTCAAAAGCGTTATCAATTTGACATGAAGCCGACGTATGAGTCGGAACGGGAACACCAAAGAGTGAAGTGGATCGTAAATC  
ACTGATAGTCAACGAAAAGTTGGGAAATATTTAGTCGTTGTCATGTTACTATTTTTGGTTCAAATATTATTAGGCGAATTACTGGCA  
CATTATTATGTAGAGAATAAATTTTTTGGTATAGAAATACAAAGGCTCTTTCCATTTAATATTGCGAAGACATGGCATGTGCAATTA  
GTTATTTTCTGGGTGCTACGACTTGGTTAGCAGCAGGAATATACATTTGTAACCTAAAGTATTGGGCAAGAACCAAGAAACAAAGG  
CGTATTAGTAGATATTGTTTGGGCCTTAATCATAGTTGTGATGGGCAGCATGATTGGAGAATGGGGTCTATTTTAGTTGGAT  
TGATTCTCATTTGGTGGCTATTCGGGCACCTTTGGTTGGGAATATATAGAATTAGGTAAATTTTGGCAAATATTATTTATAGTAGGTATG  
ATCTTATGGGTTATCATTTCTTTGTGAGGTTTTTACCAGCTATTTCGCAACAAAGTACAAGTGAATCATGATAAACGTCACCTATTGA  
CGCTATTGTTTGTGGAGCAATTGCAATTCGGTTATTTTATCTTGCATCATTATTTATAATGCCGAATTCACATGTGACGTTTGGCGAT  
TACTGGCGATGGTGGATTGTTCACTTATGGGTTGAAGGTATATTTGAAGCATTGCGGTAGTGTTGATTGGTTCTTAATGGTTAATA  
TGAAATTAACCTACCATTGAAACGACGATTTCGTGCATTATATTTTCAATTAATCTTATTACTAGGTACAGGTATTGTTGGTATGGGTCA  
TCATTACTATTGGCAAGGTGATCATTCCATATGGCTAGCACTGGGTTCTTGTTTTTCAGCATTAGAAGTCGTGCCGCTTTGTTTATTA  
ATTTGGGAAGCATACACACACTATCGCTTATATAAGAATAGTGACATCGCTTTTCTTACAAAGGTACATTTATTTTCTTGCTCAA  
CAGGATTGTGGAATGCAATGGTGTGGAGCATTAGGCTTTTATAATTAACACACAGCAGTTAACTACTTTGAACATGGTACGCAAT  
GGACTGCAGCACATGCCCATGGTTCTATGGCTGGCGTGTATGGTATGTTCTCAATTGCAATTGCGTTGTATGTTTTAAAAATATTAC  
TAAAAAAGAATTTTGGACACCGAAAGTTGAAAAATGGATAAAAAATATCATGTTGGGCTTTAAATATTGGCTTGGCAGGTATGGTTTT  
CGTTACATTAATGCCAGTAGGTTATATCCAACCTAAAGATGCATTAGAACATGGTTATTGGCATTCAAGACTAACGTCATTTTATGA  
ACAACCACTTGTAAGCAATCATGTGGGGGAGAAATGCCTTGGGACATTATATTCACAGTAGGTGTCATTATATTAGTAGTTATTTT  
TATAAGGGGATACAGACACTTAAACCAAAAATACAGAGTATAGATCATCATATTACCGAGTGATTTTAGTGTGTTTTAACGTTTGA  
GGGAAGAGATATCATACAATAGGATTCAAACTATAAGTTCTTAGATCATGTAAACATAAAGAACAGTATAAAGTAATTTTCTGATT  
AAAAATGTACTTCTCACTGTTTTATAGAAATTATGCTTATAAAAACGCTATACTCCGTTTATACTGGAATATAGACGTTTTGAT  
GTATGTACTACTTTTACTTTGGAATATAAAACGTGTGCATGACGATAATGAAATACGATGTCAGACGAATCAAAGGTTTGGCAGTCA  
TTGTATAAAACGTTTGGTGATAACGTAACATGGTTCGCTGCAGATAATTGTAGTAATGTCGCTTCACTTGAAGTGAGTTTATCTA  
CATTAAGAAAAATATCTGAAAAACCAATACGAAGTTTCATGTTTGATTCTAAATAATCGAAGATAGAGCCCTTAGCAATATCATCAT  
TTAAATATTTACGATTTCCTTATGATAATAAGAATATTCGATACATAAAACATCATCGTCCACGAATCTTAATCGCTCTAAATAGTA

GACGGTATCATCTGCATTTAATTGGAGTTCATCTTGTACAGATTTAGGTGGCGTTGCCATCTCCTTAAAAACAAGTACCTTACTTGTCT  
ATTCGATGTTACCTAAACTTTTAGAGAAACCATTAGTCTTAAAGACGTTGATACGATTGGCATCTGCAATATTTCTACATAAATA  
CCACTGCCTTGTGCTTGATAGATCAAACCATCTTGTCCAATAAGCCTAATGCTTTAATGATAGTACTCTTACTTACTTGATAACGTT  
CTTTAATTGCGTCACGCTTGGCAATTTATCACCGGGTTTGAATTTAGATTGATGTATAAACGCATTAAGTTGCTTAGCAATATGTTT  
ATACTTTAACAATATTCTGTCTCTGTTTCACTTTGTCTGTAATTATTATAGCACAAAATATTATAATTGTATCGGCGTTTACAAATTG  
AACCAGTACAATTATAAATTGGAGGTAAGTAAATACATTTTCTATTCTACTATCAAGTTGAGGGGGTAATATTTATGAGCAATAAATAT  
AAAGAACAAGCCCAAGACATTTCTACAGCTGTAGGTGGTGTGCAAAACATTGTTGATGCAACGTATGATACGAAAGTGCATTACAAT  
TCATATGCAACATACAATTCCTTCTACAGCAATGAAGTGAACAAAATAGTTGATGTGACATCTGTAGCAGAAAAATGATGCGCAGT  
TAGTTATAAAATTTAAATGGAAATGTTGATGAAGTGTATCAGCAATTACAGCGATTAATTAAGAATGCTAATGTGCAAGAGAGTGA  
AATACTGACAATATTAATAGCCAAGATACAAGTTATACACCTCAAGTAAAAGTAAACACCAATTTTAGTGAAAGCACCAATCGC  
TGGTCGTCGTATTTTACTTAAAGAAAGTAAGAGATTCAATTTTTAGAGAGAAAAATGGTAGGCGAAGGCTTGGCAATCAAAGCTCATG  
AAGAATCCAAAGTAATCGCACCGGTTCAATGGTTTAGTATCTATGATTGTACCAACTAAGCATGCAGTTGGTATTCAATCAGAAGACG  
GTGTGGACATAGTCATTATCATATTGGCGTGAATACAGTTGACTTGGAAAGGTAAGGGTTCAAGTGCTTTGTAAAGCAAAATGATCGT  
GTTGAAGCAGGGCAAACGTTGTTACAATTCGACCAGCAATATATACAACAACAAGGCTACAATGCTGACGTTATTGTCTGTTATTAGC  
AACTCTGCCGATTTAGGAAAAAGTAGAACTGACAATGAATGAAATCATTACGACTGAAGATGTTATTTTAAAAATATTTAAAAACTA  
GGAGTGTGTTGTAATAATGACAAAATTACCGCAAAATTTTATGTGGGGTGGCGCACTTGGCGCAAAATCAATTTGAAGGTGGATATG  
ATAAAGGTGGTAAGGGTTAAGTGAATTGATGTTATGACGAGTGGTGCACATGGCAAAAGCAGTGCAGATTACAGAATTTATAGAT  
CCCAATCACTATTATCCAAATCATGAAGGTATTGATTTTATCATCTGTATAAGGAAGATATTGCCCTTGTTTGAAGAAATGGGATTG  
AAATGTTTACGTACGTGATGGCGTGGACACGTATCTTTCCGAATGGGGTAGAAGATGTGCCAAACGAAGAAGACGTCGCCTTTTAT  
GATCGTATCTTTGATGAATTAATTGCACAAGGTATTGAACCTGTTGTGACGTTATCACATTTTGAGATGCCACTTCATTTAGCGAAAC  
ATTATGGTGGATTTAGAAATAGAGAAGTTGTCGATTATTTGTGCATTTTGCAGCTGTTGATTTGAAAGATATAAAGATAAAGTTA  
CATATTGGATGACGTTAATGAAATTAATAATCAGATGGACACATCAAATCCTATCTTTTATGGACGAATCTGGGGTAGCATTGA  
CAGAAAAATGATAATCCTGAAGAAGTCTTGTATCAAGTAGCACATCATGAACCTTTAGCCAGTGCTTTAGCAGTTCGTTGGTAAAG  
AGATTAATCCGAAGTTAAGATTGGAACAATGATTTACATGTACCCATTTATCCATATTCGTGTCATCCGAAAGATATGATGGAAG  
CACAAATTGCGAATCGCTTACGTTTCTTTTCCCGGATGTCCAAGTGAGAGGTTATTATCCAAGCTATGCTAAAAAAATGTTGGCAC  
GAAAAGGATATGATGTTGGATGGCAAGAAGGGGACGACAGTATTTTACAGCAGGGCACGGTTGATTATATTGGCTTTAGTTATTAC  
ATGCTACCGCTGTAAACATGATGTTGATACTACAGTTGAAACAACATCGTCAACGGTGGTTTGAATCATTTCTGTGGAGAATCCG  
CATATCGCAACGAGTGATTGGGGTGGGCGATTGATCCAGATGGCTTAAGATATACATTGAATGTGTTATATGATCGTTATCAGTTA  
CCACTTTTTATTGTGGAATATGGTTTTGGTGCAGTTGATGAAGTGGTAGATGGACATATTCATGATGATTATCGCATTGAATATTTAA  
AAGCACATATTACAGCAGCGATAGAAGCAGTTGATCAAGATGGTGTAGATTTAATCGGTTATACACCGTGGGGAATCATTGATATT  
GTTTCATTTACACCGGTGAAATGAAGAAACGCTATGGTTAATATATGTTGATCGAGATAATGATGGTCATGGCACGATGGAACG  
CTTGAAAAAAGATTCTGTTCTATTGGTATCAACAAGTGATAGCATCAAATGGAGATAAATTATAAAGGTATATTATAAGTATTTTAGG  
GTTAGAGCCCGAGACATAAAATTAATATAGTAGGACCTACAGTGTATATTGGCGGGCCCCAACACAAAGAATTTGAAAAGAAATTT  
CTACAGGTAATGAAGTTGGCGGGGCCCCAACATAGAAGTGGCGGAAAGTACAGCATAACAATATGTGCAAGTTGGCGGGGCCCC  
AACACAGAGAATTTGAAAAGAAATTTCTACAGGTAATGAAGTTGGGGAAGGACAGAAATAAATTTTGCAGAAATATCATTTTGT  
CCTACTCCCTTTAACATTTCTGTTCCAATCCCGTGATGTTAAAAATTTTAAAGAAAAATAATGCCACTAACTAAGTATGTATAGTGT  
AATGTTTGAGTGTTTATGAAAGTCTTTAACCAAAATTTGATGACTTACTAATCAACGATAACGATATTGTTAAGTAGATGATTAGTGT  
CACAAAGAAATTTAAAGTAGCAGTCAAACATAGATACAAAGTACAGTTAGTGGCATTATATTAGTGCTCTTTTTTAGCGACAAAAG  
TAATATAATTCATATCTTTACGCAATTTAGTCATCGTTTTAAACATTTTACAAAACATTGGTCGATTTTCTTTTTTAAAGCATTGTTG  
ATAATCTTTATAGTTCCAACAATACCTTCGTCTATAAATTAACCTTTTGGTGTCTATTAACTCATTGGACCAGTATGATAATGCACAT  
GATTAACCAGCTTGATTATATAAATCTAACAGCCAAGTTTCGTCTCGGGTGAGACATTGACATTAATTGCTGCAGATAATGATT  
TAACATCATGTGTGGCATGTGATTATTAACGATGACAATATCATGTGTTAACAAGATACCCCGAGCTTTAAGACTCGGTAGTACT  
TCGCTAATGCTTTTTCTTTATGGCGATGGGTAACTTTGTTAACATTTGCTTCAATTTTAAACGATATCGAATGATTGTCATCAAAGG  
CAATTTAACAGCATTCGCTTGTGAACTTGAATATATGATTCAAGACCTGCTGCTGAAATATTTTCTGTGCTTTTCTAATGCTTTCT  
TATTTATATCAACGCTTGAATGTGACAGCCATATGTATGAGCTAGATAAAATAGATGTTGTGCACATATTACATGCCACTTCTAACA  
CTTTTTTATCTGTGAAAAATGCCCTTGTGTATTAACCAATCTGTTGCTGCTTTACCACCGGGGCGTAGACGAGTTTTTCTAATTTA  
GCTAAAAATGTATGACCAGCTTCTTTGGACATAGCATAACCTCCTGTAATTGATAATTATTATCATTAAATATAGCATATTTATATGC  
GATAATTTGGAAGTTAGAAAGACTACAAAAATTTGTCACTTCATTTATAACTAAACATGAATCATCAAGCATAGGTTTAGTGGA  
ATTATTTCTAATAGATGATGTTTATAAAGATAAAAAAGCACAGCCATGATATACGAATGTTGCAAGTTATATGCTAAACCTTCGTA  
ACATAGCTGTGTTTGATTCAATTTACACTTGATTACTTCTTCTAGTAGAGGAATAGATGCTTGGCGCGCGTGTTTTTGTACAGTGAGT  
GAGCTCGCTTTATTACCAAAATCAATAGCATCTGTAAAGTATCTTGGCAGCTGTTTAAAGCAGTACACAAATGACCAATAAATGTG  
TCGCTGCAGAGTTTCTTATCGCATTTACTTTTATAAGTTTCGATGTGTTGGCTTTGATTTTAGTAGCAAAATATGATTTACATTTGCT  
TACCTAGCGTAATCAAAACAGTCTTAATGCCTAAAGATAAAAAAGTAATTGGCATTGTCTTTCATAGATTGTTTCATTAGTTACTTTAAT  
CCCAGATAACAATTCGGCTTCTGTTTCGTTTGGCACAATAATATCGATTAATGATAATAATTCATTAGGTAATGCTTTTCGCTGGTGC  
GGATTTAATACTGTCTCACACCATGTGCCTTGGCAATTTCAAATGCAGATATAATAGCCGGATGGGTACTTCTAATTGTGCAACG  
ACAAAGTCTGCATTGATTATAGCGTCTTTGCGTTAATAACATCTTCAGGTGTCATCGTCATATTTCGCACCACCATAAACATAGATG  
GTATTTTGTCTTCTGCAATTCACAGTGATAAAGGCTTGGCCCGTTTTTGTCTCAGTTGATTGATAATATATGATGTATCAATATGAG  
CTGCTTTAAATCTTCTAAGATGAAATCAGCAACGCCATCAGTGCCAATTTTAGTAATAAATGTTGTGCTGCTTGCATGCGTGCAG  
TGGCAATAGCCTGGTTGGCACCTTTACCTCCGCCAATGCTTTTTGTGCTTCTTCAACATGTAATGTTTTCGCTGGTTGTCATATCTT  
TCAACTGTTAAAAATGATGACATTCGTTGAACCTAAATAACAACCTTGTGTCATGTGTACGCTCTTCAAGTTAAGTTAATCACTTTT  
AAAAAGTAACATTCGATTCTAATGCAATATTAGAGTAGGGCGTTGTTTACCAGTACGAATATTACCTTTATTTAATGGGTGAGCTA  
AGTTACTTTTCTTCTCGTGAGGAATGAAATGATTTTCGATTTCCGATGAAATCAATTGTTAATTTGTTGCAATTGTGTAGGGTT  
ATGTTCTTTTATTTCTTCTGCTAAGTATATTTTTGTATTTCCATTTCTTCTAACACTGTAGCTAAGACATCAATAAAGCGTGGTAAGT  
TTTTAGTTACAGCTAGGTGATACGACGATGATCATTGGAATTGGCATGCCAGCGTCATTAATCGTTAATAGATCAAAATGACCAA  
TTGTGCGGATTGCTTTTGAATATGTTCAATTTAAACAGCTGTTTTTTTCATGACATCTACACTCCTTATTTTATAAATACTGTAACAG  
AAGCGGCTACTAAATGAGTACTAAGCCGATGATTGTAATAACCATTTCTTTTGTGCTTTTATGTTGTTTAAAGAAATAAATACCAG  
TTAATGTAGCAAGCACACCGGATGTTTGAGAAAGAAATAAATCCAGTTGCTAAACCATTCATATTAGTTGTGCTGAAATAAGATAT  
GTTAAGGCACCAAAATGCAAAAGAAACCTGAAATAATTTGTAACCCAGTAATTTTATACGGAATGGATCTCTGCTTTCATATTC  
ATAAAGCCATAAATGACTGCAACAATACCATACCCATTGCTTGAGGTAAAAAGGCAGTTAGGCCATCAATAGAAAGTTGCTTGCGG  
TGCAGCTGAATATAACAGTATCCAAATTCACCAATTAACAGAAGTACCAGTGCACGACGTAATTTTTGGCGTTACTTGCTTCTTT  
GCGTTCACTCCAACTGTCTACGCGCACCAATTAGAATAACGACTAAAGCTGTAATCCAATGATTTTATGACCAATGCCTGGCCA

ATTTCCTAATGCAAAGACACCCCATAAAGATGCGCCTAATAATTGGAATGCTGTTGTGACTGGCATGGCACGAGATGAGCCGACTA  
ATTCGAACGCTTTAAATGTAATGATTGTGCCGAATCCCATCCTGCACCTGATAATAAGGCGAATAGCAAATTTGGTTCCAGTAGGGA  
AGCCACTTGATGTGACTACGGCTAATATAATAGCGAAGATTAACGTACCTACAGTAGCACCGATAAATTTGATGTACAGGTTTACCAC  
CAAACCTTTGAAGCGACTGTTGGGAAGAAGCCCCAGCCAATTAAGGGGCTTAACCCGATAAGTAATGCAACAATGCTCATGTTATAC  
ACCTCACGATTTGTTTTAGTAAACGTTTTACCAATGCCATCGTACCATTTTTATTGCAAAATGCATGCGTTTTTCATAAAAACTGA  
AAACGTTTAAATCATATTTAAAAATTCATACATTATTTTTAATTTCTTAGTGAAATAATTATGATTAAAAACCCCTCAGCATTTAAAG  
CAACGCTAAGGGCCTAACATGATGAGTATATTTCGGAAGATACGTAGTTAGTTTGAAAAGATGATAGCCAGTTGTTGCACGAATTTT  
TAAAGTCGTTGGTAATTCAATCATATCAATGGATTTATCTAAGTGCTGTAATCGTTGAAGTAATAAGGTTAAAGATGTTTTGCCAAT  
ATCAGTTATAGGTTGTGCCACAGTAGTTAAAGGTGGCGAGACGTACGCTGCATAATCAATGTCGTCATAACCTATTAATGAGATATC  
TTTCGGAATACTGATGCCATGTTCAATTAGTCCTCGTAAAAATGCCAATAGCGAGTTTCATCGTTAATAGCGAAGATTGCGAGTGGCAGA  
TTGAACCATGATGTCATCAACAATGGTTAGCCCACCGCGCTTAGATAATTCAAGTATGGACGATTGTGGTTCTGGCAATTGATTGCG  
GCGCAAAGTATCAACAATCCAGCGACACGAGTCGACATATTCGCCATCATGTCATATGGTGCAACAATCATCATATTGTTGTGACC  
GAGTTCTATTAATGTTGTGCTGCAAGTTGTCCGCTTGATATTCATTTGTCCGAACAAAATCTGTATAGCCTTGATGGTCATTTTGA  
TCCAGTACGACATAAGGTACATGATGTTCTTTAGATAGTTATTTAGGGCGTCCGGGGATGAAATGTATTGTGCGATAATTAATCCG  
TCAATACCTCGATCAATTAATGTTAATATTGTCATACAAATCAGTTGCTGTAGATGTTAAAAAGCATAAATCAACATCAGATGGT  
TTATGGTCATGAATACTTTGCATCAGTGCTGAGAAAAACGGATTTGTTAAGCTAGGCAAAATGACGCCAATAGTTTGAATTTTACTG  
CCGCGCAATTTGTTTGCATGTTTATTAGGGGCATAGCCTAAACGTTCTGAAACAGCATGTACGTTTTTTATCGTTGTTGCGGAAAAAC  
GACTATCATTATGATTAAAAATGTGACACAGTTGTAAGTATACACGAGTTCTCTAGCAACATCTTAAATGACACTTTTTCTCAT  
ATTATATTCCTTCTCTTTATTGTGTAATTAATCATACAGTTATATACCCGATTATTATATTATCATCATCATGATAAACATTGATGAC  
ATATGAAGACGTGAATGACTTTTATTGTCTACAAACAGACGTCTGAAGTATACGATTAAGGTTGAGACGAGAGAATATATTATTAA  
GGTTAATACCTTTAATGATTATGATAACAAGAATTTTAAATGTTTATTGTGATTAAAAATACAAAAGTCATTATTTTAAAGAATA  
AAATATTTGTTTTGAACAAAGTATTAAAAAACATAACGAAATGATGTATATTGAACATGTGATTGAAAAAATTTTAAATTAAGGC  
TTGTTAAAACTTAAGAGAGGATGTTTTTAAATGCAATTCAAAATTAAGAAGAGAGATTATTAGTTTTTGAATTGAAATATCCA  
GAAAAAGAGTTCGAATATGGTCGTTTGTTAGTTGGACAACATAAACGTCATGATTAGATGTTTATTACTTTGGTGATACGTTTTTA  
ATGTGCACGATTATTTCAATCAAGACATTTGAAATTAAGAAACAGTAGAATTATCATATGATGCTGTTAATCGTATTGTGTTAAAA  
GATGGATGGTTATTGAAAAATGAGAATAGAAACAATGCAAAAAGTGTTAAAAATACGGTACATCTAAATTAATGTTAACTGATTT  
TCAAAAAGAGAATTATAATAATATATTCAAGGTGAGAAACAACGCGTGATATTTGAAAATGGCCATTTTGTCTAATTGATAGTGA  
ATATAATTAGAGTAAGCGAAGAACAGAGAAAAACGTTCTTCGCTTATTTTTCTTGAATTTCTGTATATCATTTTTAAAGTGATAAAG  
ATATTTGAAACATAATGCTTCTATTATATTTAAGATTTAACTGTTTTTGAATGATCATGTATGCAGACAATGAGCCAAGGATCATC  
AATACAATGCTGACTATAAATGTTACGGTTGCAGCTACACTAGGCGTATAGTTTGTGTTAACATACTGAAAACGTAGTACTTATT  
GCTATACCAAAGGCGCCACCTAGTGTGCCACTCATTTTATATAATCCTGTAGCTAAACCACTTTTTCATTTGGCATACTGAAAATTG  
CAATTGTAAGGCCGGGTGTTGCGACTAAACCATTTCCAATTGCGCAAATGACAAACCAATAACAACGCAATGATATATTGTGAT  
GGTTGAAGTGATGTCATGCTAATAATAGTGATGCCGATGACAGGGAACAACGGACCAATGATGAGCATCAATTTGCCACCGAAACG  
TAATGTTGCTTTTTACCTTAAACGAATCATCGCAATGCCACAATGGCAATGTAAACAAGTCCAGATTGCGCAGCTGATAA  
ACCAAGGTGTGTTTTAGCAAAATATGAAAAAGACCATTGTTACGCTAGACCATTATTAACCAACAGGTTTAAAAATGCAACAA  
TGAACGGACGGTTGCGTAATACTGAGAAATCAATAAAAGGTACTTCATGTGACGTTTCGATGATGATGAATATTAATGTAGTGATG  
ATAAAAAATGCTCAGACAAATGAATGAAAATGTACTAAACCAACCTTGTTCGAATCCTTGTGTTAACAATAATGTAAAGCTACCAAT  
CATAACAGCGAAAAATCGACATACTTTGTAATCGAATGGATGACGGTGGCTATGTTGACTTACTTTTTTCAGGTGTGCCTTTTGAAG  
CAATATGGCAATGAAAGCAATGACTATACTAATGATGAAATTCGTTTGGCATCCGAAATTTGTGCAATTAACCCGCGGATAACAC  
CAGCTAGGCCGATGCCACCAACAGTACTAATCATTAGATAACTAATCGCTCGTCTTAAATGATCTCCTTTAAATTGATTATTTAAAA  
CGCCAACTGTTGAAGGTAACAAGATAGCTGCTGATAGACCTTGTAATAATCTACCGATGATGAGCAGTGCAGTGATGTCGGATATA  
ATTAATAGAAGAGATGCAACATACTGATTATGAGACCATGTATGTCAATTCAGTTGTCCTATTTTATCAGCAATATCACCTGCA  
GCCACCATGAAGATACCTGTGGCGAAGGAAGTTAACTAATGATAGATAAAATTTAACACGGCAGGAGGTTTGTACATGTTTGACCAAC  
GAGAGGTCTATATTAATAAATGATTGTGCAAAACAACCAATATGTTAATGCAGACAACATAATCGCAATAAATATTACTGCGTG  
GTGAAGATTGTGTGTTATTCACAGATGTCACTCCTTGTAATAAATTAATATAGAAAGTCATGAGATGAAGTGAACGGATGTATAGA  
TGATCGTTCACTCACACATAAGTCATGATTTCTTACATATCATACCACAGTTATTGAGAATGAATATCAATTAATTGCTTGTATAAT  
TGATTTTTTATAGTATGTTAAGTGAACAGCTTTATTTGAAAGTGATTAAAGTAAATGAAGGTACAGAGGAGTGAGAACAATGTGC  
ACAGGATTCACAATACAACTTTAAATAATCAAGTACTTCTTGACGCACGATGGATTATGATTATCCATTAGATGGTTCGCCAGCA  
GTGACGCCTAGAAATTCGTTGGAATCTCGCACTGGCACGACAGGCCAAACGCAATATGGCTTTATTGGCACAGGAACAGATAT  
GGAAGGTTTTTTATGTTGTTGTTAATGAACATGGCGTTGCCATTTCAACACAATATTTCCGAGGTTATAGTTTCATATGGATC  
AACACACAAAGCGGACGCGATGAATATTACGCAAAATGAAATTTGTACATGGATTTTGGGATATACAACAATGATTGAAGATGA  
AACAACAAGCATCCCAATACATGTTGTAGCTGTATATTATTAATGACATCGGTGAAGTTCCGCCATTGCAATTATGATGTTCCGATG  
CAACTGGACATTCACTCGAAGTTTCATTTAAAGAGGGTGAAGTGTTTATAAAAGATAATCCTATTGGTGTCTTAAACAAATCATCCAG  
ACTTAGATTGGCATTATAGTAATTTAAGACAATATATCAATATTACTCCTTATCCAGCAACAGCAAAAGTTATTGGAAGGTGTAACGA  
TTGAACCTTTAGGCAATGAAGCAGGTACATTTGGATTGCCAGGTGGATTTACTTCAACTGAGCGCTTTGTGAGAATGGCATTATGA  
AAGCAAACATTGCTCAAAACAAATGATAAAGAAATGGATTAAATGAATGCATTTTATTATTAGATGCGGTAATATACCGATTGGA  
ATTGTACGTCCGCATGATGCTGACAATCACTATACGATGTATCAGACCGTAATAAATTTAACTACAAGAACGTTATATATTAAGTAT  
TATGGCAGCAATGAATTAGTAGCATTAAAGCTCAGAGATGATTAATTAATAGAAAAGATATGACGATTTTTAAGCCTGAGAAGCA  
TATCACTGTTAGAAAGTTGAATGACAATCAATAGCAGATTGAGAATGGAATTTGGTGTATGATGATTGATGGATGATTACTGATAC  
ATTAGCGTTGAAGCGCGAATGATGATGATTAGTTGTTGATTTTGAATAATTAATAAAGGTTTAAACAGATGATGATGATGATG  
TCATTTTAATATCAATGTATGGCTATTTTGTAAATGACAATGTAATGAGTTTAGTAAAAACATTTCCGGGAATATTAATAGTTGAAAA  
TGAGAATTAATCCTTTACTCAGTTGTCTAATTTCTTTTAGTATGTGCAGTACAGTTTAATTGAAAACTAACTTTAACTTTAATGGAGG  
ATGTTTTATACATGAAAAAATTAACAGCAGCAGCGATTGCAACGATGGGCTTCGCTACATTTACAATGGCGCATCAAGCAGATGCA  
GCAGAAACGACAAACACCAACAAGCACATACACAAATGCAACACAATCACAAGACGTATCTTATGGTACTTATTATACAATTGA  
TTCTAATGGGGATTATCATCACACCTGATGGTAACTGGAATCAAGCAATGTTTGATAATAAAGAATATAGCTATACATTCGTAGA  
TGCTCAAGGACATACGCATTATTTTTATACTGTTATCCAAAAATGCAAAATGCCAATGGAAGCGGCCAAACATATGTGAATCCAG  
CAACAGCAGGAGATAACAATGACTACACAGCGAGTCAAAGCCAACAGCATATTAATCAATATGGCTATCAATCAATGTAGGTCCA  
GACGCGAGCTATTATTCATAGTAACAACAACCAAGCGTATAACAGCCATGATGGTAATGGAAGGTTCAATCCCTAATGGCAC  
GTCTAATGCAAAATGGCGGATCAGCAAGTAAAGCGACAGCTAGTGGTCATGCGAAAGACGCAAGCTGGTTAAACAAGTCGTAACAA  
CTACAACCATATGGACAATATCACGGTGGTGGTGCGCATTACGGTGTGCACTATGCAATGCCTGAAAAATTCACCAGTTTACTCATTA  
ACTGATGGTACAGTAGTACAAGCAGGTTGGAGTAACATATGGTGGTGGTAATCAAGTAACGATTAAAGAAGCGAACAGTAATAACTA

CCAATGGTATATGCATAATAATCGTTTAACTGTTTCAGCTGGTGATAAAGTCAAAGCTGGTGACCAAATTGCATATTCAGGTTAGTAC  
GGGTAATTCAACAGCGCCTCACGTACACTTCCAACGATGTCTGGTGGCATCGGTAATCAATATGCAGTAGACCCAATGTCATACTT  
GCAAAGTAGATAATACAGAAAAATCCCAAGTTGCGATATCATACGCAGCTTGGGATTTTTTCGTTTTAATAATAGGTATAAGTCCATT  
GTTTGTCTCTAAAAACATGTTGATAAAAAAGGATCTTGGCCAATTAACCTTGATATCATCTGCAAGTGCTTCAACTTCATCTAAATGATG  
GGTAGTTAATATAATTAACATTTAGATTTTCATAATGTTAAGTAGTTGGTGGATGTCATGTCTAGATTTTAAATCAATACCAACTGTC  
GGTTCATCTAAAATGAGAATTCGAGGTTTACCTAGTAAACCTACTAATATATTAATTTTACGTTTATCCCACCGGACAATGTAGAT  
ACTTTGGCAGACGTATCATCAAAGTTTAATTGCTGTAAATATTCGTTGATAGTTGTATCGTTAATTGGATTTTTACAAAAGTGATTTAA  
AAAAATTAATGTTTTCAGCCACTGTCATGTGTTCAAATAACGCAATGTCTTGTGGCACATAACCGATGTGATTTTGTATTTGTCTTTG  
ATTCCATTTTTCGCCGAAATAGTTGATAGTTCCATCATTAGCTTTTTCATACCAGCGATCATACGAAGTAATGTTGATTTTCCAGCG  
CCATTATCACCAAGTAATACGGTTAAACGATTACTATCAAAGGACATAGTTAAATGATTGAAAATCTGTTTGTACGGTAACGCTTT  
GAAAGATTATTAATTTCTATCATCAGTTACGCTCCTTTACATGAAAAATAATCAAGTATACGATACCCATAGCAAGTGCATATATAAAA  
TGTCATGAATAATCGATGACTTATTGTTTGAATATGGAATAATATAAAGACGATACCTATCTCATAAATCAATATAAGTAACAGTGA  
TTTTAAGTAAAAATATTAAGCTGAGTGGTTGAGACAAATATAGACTAACTGCCAATAGTACCAACAATAACAAGATCGTATGTGTCA  
TTACATAAGTACTATATAGTTTGAAACGGCTTAAATGATATTGTGATAATCGTTGCAATGCTGCTGTTTGGTTTAAACGATAATGAA  
TTACTACTTGAACAGCGCTAACAAATAAAATCACCGCAAAGATTAAGCTAATTGAAATAGAGTGTTGTGCTTGTATTAGTAAGCGAC  
ACAAATTTGATTTTAGATTACAGGTGTATGTTTATGATAGGACTTGTGATAGCATCGATGGATTGATGCTGTTTCATATCCTCAAGGT  
GTTTCATAAATAATGTTAGGAATTTGCTGTTTCATATAATGAACACTACTAACAATTTCTACAGCAATACCACCTATAAAGTCATCTCACC  
ATATAACTGTATCGTTCTTTTAAACGGTTCTCTTTAATTTTGAAGAAAACCTTTAGGAATTTGCATACCTTTAAATAGCTTCTCTTT  
TAGTAACCTCATCTTCAATATAGCTTTTCATCTCATCGACTTTTAAATAGTTACATAGTCAGATTGTTTAAATTTATTGACGAATGAT  
TTTGATGCAGTGGTTTGGTCTAAATCTTGAATGGTAATCGGTATTTTGAAGTTGTCATGTGCTACACGGTAACCGATACCAATAAGT  
ACGAGTGCATGACAATGGTTGTTACGAGCAAGATGTATTGTAACCATTTGCTTGAACACAACAAGTTGATATAAGGCTTCATTGAC  
GATACCTCCAAACCAATACAGTTAAATTAATTATCAAAAGTGCATGGAGCTAAGATAGAACTAGGGGTGATGTTCTAAAATGTAG  
TTGTTTAAAAATAATTTCTAACAATTGATTTGTACAACCTGCGAACGGTTGAATATTGAAAACGCCATTGCTATATGTTGTAACAAAA  
ATCGTAGGTATTGTTAAACCAGATAACACCAGGATGACAATAGCTAATATGACTTTACTAATACTATTCAATAAGCCTGTTGTTAAA  
AGTTTCGATGAGTAATAACCACAGTATTAATAAGGTAACATAATAGCTTAAATGAATGGCTAACGTTGGCCAATTATATAATTCAAA  
GGTATTCGGAATACTGAACACAATCCAACTACACCAACGATACTCCATAACATAGTATAAAAACCATGTAATCAACGCACGAATGA  
TTAACAAACGCTCTTTAGAAAAATGAAACATTTTCAATCGCGCTTTCAATACAGTATCTTGATTCTTTTCAAAACCTGTAAATAAAG  
ATAGTGCAAAAGATGAATACCGTTGCTAAAAATCCTGTAATTGCATAATAACTGCCCGTATCGTATAAATGAATCGGTTCTAAGTTAA  
ATGCACCTGAACGGTTTAATCCTGTAATCAGCAATCAGTCATAACATTGATACTGTCAGAATGTGATGCTTTCGGTGCTAAGTCTT  
GAAAAGCTAAGATGCCACCCATTGATCGCATAAGACGTTGGTAAACAGAATCTGTTAGCTGAGATAGCACGACACTTTTCATGGAT  
TGTTGATCATATGTATATACTGAAATTGGTAGTTCGCCCTGTTTATAAAATGCCTTGGTCATACCTTTATCAAAAACAAAATAGCCTT  
GAAGTTTCTGCTGTTTTAGCAAATCGTGTGCTTTCTTTTCATCATAACCTTTAATGCTCACATTTTACCTAGGTTACTCCCTTTACCA  
ATAGAGTTTAAGATCAATTTTCGTTTCACCTGATTGATCTTTATCTACGACACCTATATTAATAATGATTGTCATCTTCTGTTACATGTTG  
GATCGTCGTTAATGTAATAAGGAGTGCCGCTAATAATAATAGTAAATAGATAATCAAAATACCACCTTTTCAATAAAAAAGAGTGGT  
AGATGCGAAACAAATGATTTGTTTTCTAATTAACCACTCCTCCAAATGAAGATTGAAAGGCAAGATGACCTTCCAATGTTATTTTAT  
ATTTAGTTATTTAGATGCCTTTTTTAAATGATTCAAACATTTTGGCCGCAATTTTTCGATTCTTTTTTCAAGTTTTTCACGGTCTT  
TTGAAGATAGACTATTGAAATCTTTCGCACCACTATCATCAAAATCAATATCTGCTTTCAATTTTGTGCTAGATTTTAAATGAAATT  
AATTGGTTCTTCAGCATATTTGATGCCGATATTTAACGTAGATTTCTGAGTGTTATTTTTTACGTCAGAATCTATATTATTTTCAAAAG  
TGAATTCATTTTCGTCGCTATATTTATCTAATGCGACAGTAATTTTACCTTTATCTTGACGTTTTGTGCCATCTACTTCTCTTGGTTAT  
CTAATTTGATTTTGATTATCATATTTCTGTCTTTTACCAAATTCGTATTTATCACTGTATTTATTGTCTTTTTCTTGAAGATACGC  
CTTTAATTGTATATTTTCGTTTCAGCATACGTGATTTATCTTGATCGAAATCAAGTGCGTAATCTAGTTTTAACTTATCGTCTTCTAAA  
GTATTAGTACCTTTGATTTTAGTTTATTATTTTCTTGTCTGTAATAGTAATTTCTCGTTTACAATCGTATGTTTTTCGGTATAAATT  
TTAGATTGAATTTTATGCAAAATTCACCTTTTAGTTTCTTGACATCGTCAATTTGCTTTTTTGTAGTCTTTTTTCAAAAGCTTTTGTAGCA  
CCTTGTTCTTCCATTAATTTTTTAAAGGTCTTTATCCTTTTAGCTTCTTCTAATACAGCTAATGTAATTTTTTATGTTGTCAGCTCTGCTA  
AGTGTTAACGTGACAGGTCTAACTTTGTACTTTTACCATTAACTTAAATTTCTTCTTTTTTACCTTTATCAAAATTATCGTCACTAA  
TTTGTGACAATAAGTTTCGGAATATTTTTCGGCAATTTTGTGCTGATGTCATTTGTTGTGCTTGAGCATTACTAAAAAGAGTATTTAAA  
TTAGTTGTTGGTTTGAATACCATTTTCTTTTGTGCTTTCTTCATCTTCACTGTAAAGTTTGAATAAGTTGATAATAAATCAGAATT  
ATTAACACTATATTTCCCTTTAAATAATGGTGATTGCAAAATAATGCTTATCTTTATCTGCAGTAACTGGAATTTCCCTAATGCAGAG  
TCTGCGATTGTTGGTTCAAGATTAATCATTGATTTCTCTTTTTTAGGATCATGTCCATATGACATTTTAATTTTCGATGCATTAACAAC  
AGATTTAGGAATGCCAAGCCCTTTAACAATTTTCATCTGATGCATCTGCGCTTAATTTCTAATGAAGATAAAAAACGAATTATCTTTTCAT  
CTTTTCTGGAACTTCATCTATTTTCAAAACGGTCATTAATAAATCTTTATACATTTTTCAGTTTGTGTTTCTACTTTTTTAAAGTATG  
TATTTTTCGGTGTGTTTGCAAAAAATGCATAAACTCCCCATGCGATTCCACCTATTAATAAAGACAATAAATAGGAATTTATATAA  
TTTTAACTTTTTAGACATTTTGTCTCTCCCAATTATTTATGAGTTAATCATATCAGAACAATACATTTTATTAATAGGTTTATTTTA  
AATTTTGTTTAAATTAATAGAATTTTAGTTATAATAATGTTTAATAAGTTATTGAAAATCTAATAAACTACAAAAAATATTTTGATTA  
CATAATGATTATTTAAAAATGTGCGTTAACTTTAAGGTGACAAGTTATTGCAATTTTGAAGGTAGACATCATATTTTATAATCGAAT  
AACATACAAAAATAAGCGACCAATTTTGCAGTGTTACGAATTGTAAGTGCAGAACTGGTCGCTTTTATTGATGTGATGATTAATTT  
AATGGATGTAATTATATGATGAAACTTCTGAAGCAGAGATGGTTCTTGATGAAACGATATATTCACCGATCCAATTCATTTCTGAAA  
TTAGAATGCTTCCATCAATATTAACCTTTTTCAACGTAGGCTACATGACCAAAATGGACCGTTTACTGTTTGTAAAATTGAACCTCGTGT  
TGGTGTGCTATCTACTTTGAAGCCATTGCTTGAAGCTTGGCCTGCCAGTTTTTAGCATCTCCCCAAAATGTACTAATCGTGTGCTCA  
TCTTTGCGACGTTTATCAAGACATACCATGTACATTGTGTCAGCAGATATAAGTTGTTCTTACTTGATGATAAGGCTGATCAATG  
ATTTTACCGTTACCTAATGCTAAAGGTTTACCGTCAGCAGTCTTTGCTTTGTCATTAATTCGGCGATTGTAATTCGTCATACAATT  
CGTCTAAATCGATGCCTGTAATAAGCCCTTTGTTATCTTTTGA AAAAGCGTTATTTAATTCATCGTCATTGTCTTCGACATTCCGTTATT  
GCTGGTGTCAAAGGATTGCTTGGTGACGTTTGAGGCGGTGTGTGTAATCAATTGCGTCATTAATGTGCGTATACTGACCACTTAAT  
GAAGAATGGTACTGATTGTTGTTAAGATCAGTTGATTGCGGTGTTGATGATTGTCGTTGTACGTGACTGGTTTTGATGATTGTTGT  
TTGGCGTGTTGTTTTGTGTCATATGTATAAGTATACGCGCCGGTGCTTTATTCACCTTGAAGTGTGCGTTTGGGTGTGCTTTCTTGTCT  
TCTTCTAATGTTTTGCTATCATTCGTATATGCTTGAGCCGAGTTAGGCGACATACTAAATAAAGTAAGAGTTGTATCGTCAGTAAA  
ATTGTTTTCTCATAATAACCATTTAATCCTTTATGTATTTAAGTTAATTTTAGTATACACATTTATATTACAAAAATGAATGGTTAAT  
TAAAAATATATGGGTATATTTCAATATATTTATTTAAAAAAGCTAAAAAATCTTAAAAAATATATACATACTAATAAATTTATAT  
ATTATTTGAGTAAGGAGCACTTTTTTCAAAAAATAGTGCCCTAAAAAAGTTTGTATAAACTAAAAATATTACGAGAGTTTCTAGTTAT  
GGCAATGATTAAGATGAGTCCAGAGGAAATCAGAGCAAAATCGCAATCTTACGGGCAAGGTTTACAGACCAATCCGTCAAAATTTTAT  
CTGATTTAACACGTGCACAAGGTGAAATTGCAGCGAACTGGGAAGGTCAAGCTTTTACGCCGTTTTCGAAGAGCAATTTCAACAACCTT

AGTCCTAAAGTAGAAAAATTTGCACAATTATTAGAAGAAATTAACAACAATTGAATAGCACTGCTGATGCCGTTCAAGAACAAGA  
CCAACAACCTTTCTAATAATTTTCGGTTTGCAATAAGCATTCTGAAATTTGGCAAAGTCACATTTTCTAATGTGGCTTTGCTTATCATTTT  
TTAAGAAAACAACTGAAAGGAAATAAGCATGAAAAAGAAAAATTTGGATTTATGCATTAATTGTCACCTTAATTATTATAAATTGCCA  
TAGTTAGTATGATATTTTTTTGTTCAAACAAAATATGGAGATCAATCAGAAAAAGGATCCCAAAGTGTAAGTAATAAAAAATAATAAA  
ATACATATCGCAATTGTTAACGAGGATCAACCAACGACATATAACGGTAAAAAAGTTGAGCTGGGTCAAGCATTTATTTAAAGGTT  
AGCAAAATGAGAAAAACTATAAATTTGAAACAGTAACAAGAAACGTTGCTGAGTCTGGTTTGAAAAATGGTGGATACCAAGTCATGA  
TTGTTATCCCAGAAAACTTTTCAAAATTTGGCAATGCAATTAGACGCTAAAAACACCATCGAAAAATATCGCTACAGTATAAAAAAGCT  
GTAGGACAAAAAGAAGAAGTAGCTAAAAACACAGAAAAAGTTGTAAGTAATGTACTTAACGACTTTAACAAAAACTTAGTCGAAA  
TTTATTTAACAAGCATCATTGATAATTTACATAATGCACAAAAAAATGTTGGCGCTATTATGACGCGTGAACATGGTGTGAATAGTA  
AATTCCTCGAATTACTTATTAATCAATTAACGACTTCCCGGAATTATTTACAGATACGCTTGTAATTTCAATTTCTGCAAAACAAG  
ACATTACAAAAATGGTTCCAAACATACATAAATCATTATTGAGTGCGAATTCAGATACGTTACAGGTGAACACAGATTATAATGTTT  
CGACTTTAATTGAAAAACAAAATTCATTATTTGACGAGCACAATACAGCGATGGATAAAATGTTACAAGATTATAAATCGCAAAAA  
GATAGTGTGGAACCTTGATAACTATATCAATGCATTAACACAGATGGACAGCCAAATTGATCAACAATCAAGTATGCAAGATACAGG  
TAAAGAAGAATATAAACAAACTGTTAAAGAAAACTTAGATAAATTAAGAGAAATCATTCAATCACAGAGTCAACATTTTCAAAAG  
GTATGATTGAAGACTATCGTAAGCAATTAACAGAATCACTGCAAGATGAGCTTGCAATAACAAAGACTTACAAGATGCGCTAAAC  
AGTATTAATAATGAACAATGCTCAATTTGCTGAAAAATCTAGAAAAACAGCTACATGATGATATCGTTAAAGAACCAGATAAAGATAC  
AACATTTATCTATAACATGCTCAACAAGACTTTATAGCTGCAGGTTTAAATGAGGATGAAGCTAATAAATACGAAGCAATTTGTCAA  
AGAAGCAAAACGTTATAAAAAACGAATATAATTTGAAAAACCGTTAGCAGAACACATTAATTTAACAGATTACGATAACCAAGTTG  
CGCAAGACACAAGTAGTTTGATTAAATGATGGTGTCAAAGTGCAACGCTACTGAAACGATTAAAAAGTAATGATTATAATCAATTA  
GTTGCAACAGATCCTCATTTTAATTTTGAAGGCGACATTAATAATGTTGTAATAAATATGACATTAAGGATCAAAAGTGTTCAACTC  
GATACATCTAACAAGGAATATAAAGTTGAAGTCAATGGCGTTGCTAAATTTGAAAAAGGATGCTGAGAAAGATTTCTTAAAGATAA  
AACAATGCATTTACAATTGTTATTTGGACAAGCAAAATCGTCAAGAAGAACCAAATGATAAGAAAGCAACGAGTGTGTGGACGTAA  
CATTGAATCATAACTTTGATGATCGCTTATCGAAAGATGCATTAAGCCAGCAATTGAGTGCCTTATCTAGGTTTGATGCACATTATC  
AAATGTACACAGATACAAAAGGCAGAGAAGATAAACCATTTCGATAACAAACGTTTAATTGATATGATGGTTGACCAAGTTATCAAT  
GACATGGAAAAGTTTCAAAGACGATAAAGTAGCTGTGTTACATCAAAATGATTCAATGGAAGAAAACTCAGACAACTGATTGATGA  
CATTTTAAATAACAAAAAGAATACAACAAAAATAAAGAAAGATATTTCTAAGCTGATTGATCAGTTAGAAAAACGTTAAAAAGACAT  
TTGCTGAAGAGCCACAAGAACCAAAAAATTTGATAAAGGCAAAAAATGATGAATTTAATACGATGTCTTCAAATTTAGATAAAGAAAT  
AGTAGAATTTCTGAGAAAAAGTACGCAATTGCTATCAGATACACAAGAATCAAAAAACAATTGCAGATTTCAGTTAGTGGAACAATTA  
TCAATTAGATAATAATGTGAATAAACTACATGCGACAGGTGAGCATTAGGCGTAAGAGCGAATGATTTGAACCGTCAAAATGGCTA  
AAAACGATAAAGATAATGAGTTGTTGCTAAAGAGTTTAAAAAAGTATTACAAAATTTCTAAAGATGGCGACAGACAAAACCAAGC  
ATTAAGAGCATTTATGAGTAATCCGGTTCAAAAGAAAAACCTAGAAAAATGTTTATAGCTAATAATGGTAATACAGACGTGATTTACC  
GACATTATTCGTATTATTGATGTATTTACTATCAATGATTACAGCATATATTTTCTATAGTTATGAACGTGCCAAAAGGACAAATGAAT  
TTCATTAAGATGATTATAGTAGTAAAAACCATCTTTGGAATAATGTCATTACGTCAGGTGTTATTGGTACAACCTGGTTTGGTAGAA  
GGATTAATGTTCGGTTTAATTTGCAATGAATAAGTTCCATGTATTAGCTGGCTATAGAGCGAAATCATCTTAATGGTGATTTTAACTA  
TGATGGTCTTCGTACTTATTAATACGTATTTAAGACAGGTAAAGTCAATCGGTATGTTCTTAATACGATGTCTTCAAAATTTAGATAA  
CTTTGTAGCTATGAATAATTTGAAAGCGGCTGGACAAGGTGTGACTAATAAAATTTACCATTTGTCTTATATCGATAACATGTTCTTC  
AATTATTTAAATGCAGAGCATCCTATAGGCTTGGCGCTAGTAATATTAACAGTACTTGTGATTATTGGCTTTGTACTGAACATGTTTA  
TAAACACTTTAAGAAAGAGAGATTAATCTAATGTTGATGAATAGCGTGATTGCTTTAACTTTTTTAACAGCATCTAGCAATAATGG  
CGGACTTAATATTGACGTGCAACAAGAAGAGGAAAAAGCGAATCAATAATGATTTAAATCAATATGATACAACGCTATTTAATAAAG  
ACAGCAAAGCGGTTAATGATGCGATTGCTAAGCAGAAAAAAGAACGACAACAACAATAAAAAATGATATGTTCAAAATCAAGC  
GAGTCACTCGACTCGCTTGAATGAACTAAAAAAGTGTTATTTTCCAAATCTAACTTAGAAAAAGACTTCGGAGAGTGATAAAAGCC  
CCTATATTTCAAAACAAGCAGGAGAAAAAATATTCCCGTACATTTTGATGTCTGTAGGGGCTTTTTTGACTTTAGGATTTGTCAATTT  
TTCAATTCATAAAGGGAGACGAACGAAAAATGAATACAGCAAGTAAAGTAACATTTTGATTCTTAATTAATTAACGGCAGATAT  
GACTTAGCAGTACCAGCATATTTACCGATAAAAAATTTAATAGCTTTAGTATTGGATAGTTTGGACATTTCAATATTTTGATGTCAAT  
ACACAAATTAAGTGATGACGAAAGGTCAATTACTTGTGAAAAATGATCGACTCATTGATTATCAAAATCGCTGATGGAGATATTTTG  
AAGTTACTATAGGAGGAAAAATAGATGGTTAAAAATCATAACCCTAAAAATGAAATGCAAGATATGTTAACGCCCTTTAGATGCTGA  
AGAAGCAGTAAAAACAAATACGCTTAGATATGAGAGAGATTCTAAGTCTTCAATTAACCAGAACATTTTCATTAAATGTACTT  
ATTAGAACAACATTCTCCATATTTATAGATGCTGAATTAACGTAACGATACGTGATAGTTTCCAAATACATTATGACATTAATGACAA  
TCATACACCTTTTGATAATATTAATCATTACTAAAAATGAAAAATTACGTTACTTACTCAATATCAAAAAATTTAGAAGAAGTAAA  
TCGTACACGCTACACATTTGTGTTGGCACCAGATGAATATTTTTCACAAGAGATGGATTACCAATTGCTAAAAACAAGAGGTTTACA  
AAATGTTGTTGACCCATTACCGGTGTCAGAAGCTGAATTTTAAACAAGATATAAAGCACTGGTATCTGTGCATCTAATGAGAAACA  
ATCATTTGATGCTTTTAGTTGAAGGAACTTAGAATTAATTAAGGAACGCCATTTTGAACCTAAAGTTATTGAAGCGCAACGTTAG  
ATTTACTAACGGCATTTTATAGATGAACAGTATCAGAAACAAGAACAAGATTATAGTCAAAATATGATATGTACGCAAGTAGGG  
CATACCGTTTTTAAATGGGTTGCTATCGGTATGACAACGTTAAGTGTTTTATTAATTGCATTTCTAGCCTTTTTATATTTTTCAGTAAT  
GAAGCATAATGAGCGCATTGAAAAAGGATACCAAGCATTTGTAAAGGATGATTATACGCAAGTACTAAATACGTATGATGATTTAG  
ATGGTAAAAAATAGATAAAGAGGCATTTACATTTATGCCAAAAGTTATATCCAAACAAATAAACAAGGTTTAGAAAAAGATAAG  
AAAGAAAAATTTACTTAATAACGTGACACCAAAATTCAAATAAAGACTACTTATTATATTGGATGGAATTAGGACAAGGACATCTTGA  
TGAAGCGATTAATATTGCCACTTATTTAGATGATAACGATATTACAAAGTTAGCGTTGATTAATAAGTTAAATGAGATTAATAAATAA  
CGGAGATTTATCGAATGATAAACGTTCTGAAGAAACGAAAAAGTATAACGATAAATTTGCAAGATATTTTAGACAAAGAAAAACAA  
GTTAAAGATGAAAAAGCGAAATCTGAAGAAAGAAAGCAAAAGCGAAGATGAGAAATTAAGCAACAAGAAAGAAACGAAAA  
GAAACAAAAAGAACAAGCACAAAAAGATAAAGAAAAACGCCAAGAAGCTGAAAGAAAAAATAGTATAGGACTGAGGCAAGA  
CAATGCATAAATGATTATAAAATATAACAAACAATTGAAAAATGCTCAATTTGCGAGATGGTAAGACATATACTATTAGCGAAGAC  
GAGCGTGCAGATATTACGTTGAAATCGTTAGGCGAAGTCATTCTTTAGAACAAAATAATCAAGGTACTTGGCAAGCGAATCATAC  
TTCATTATAAAGGTGCTTGTTAGAAAAGGTGACCTTGATGACATTACATTACAACCTTATACAGAAGCTGATTATGCATCATTTGCT  
TATCCTTCAATTCAAGATACGATGACAATTGGGCCAAATGCGTATGATGATATGGTTATTTCAAAAGCTTGATGAATGCCATCATTATT  
AAAGATTTTCAATCAATACAAGAATCACAAATACGTACGCATTGTGCAGATAAAAAATACAGATGTGTATTAACATGAACTACA  
AGAGCAATTAACAACAAGCTTACATTGGTGATCATATTTATGTTGAAGGATATGGCTCGAAGTACAAGCTGATGGTTTAAATG  
TATTGAGTCAGAATACAGTGGCATCGTCAATTAATTCGTTTAAACACAAGAGATGCCACAGGACAGATGATTACAAATACGTAC  
CATCGTTCCGAAGGATTATTCACCGTGAACCGACCGATGATATTAAGATTGAAAAGACCACACGCAATACAGAAGAACAATAC  
AGTGATATGGCGTTCCATTATACCGCCATTAGTAATGATTGCTTTAACTGTTGTCATCTTTTTAGTGAGACCAATTGGTATTTATATT  
TAATGATGATTGGTATGAGTACAGTAACGATAGTATTTGGTATTACAACGTATTTCTCTGAAAAGAAAAAGTATAACAAAGATGTTG

AAAAACGAGAGAAAGATTACAAAGCTTATTTGGGATAATAAATCTAAAGAAATTAATAAAGCGATTAAAGCACAAACGTTTTAGTTTG  
AATTACCATTATCCAACGGTTGCTGAAATTAAGATATCGTTGAAACGAAAGCACCAAGAATATATGAAAAAACATCGCATCATCA  
CGATTTCTTACATTATAAGTTAGGTATTGCGAATGTAGAAAAAGTCATTCAAATTAGATTACCAAGAAGAAGAAATTAACCAACGTCG  
TGATGAACTATTCGACGATGCTAAAGAATTGTATGAATTTTACACAGATGTAGAACAAGCACCATTAAATCAATGATTTAAATCATGG  
ACCAATTGCATATATTGGTGCACGACATCTCATTTTAGAAGAATTGGAGAAAAATGCTAATCCAATTGTCAACATTCCATAGTTATCA  
TGATTTAGAGTTTCTATTTGTGACACGTGAAGATGAAGTTGAAACATTGAAATGGGCACGTTGGTTGCCACATATGACATTGAGAGG  
GCAAAACATTAGAGGATTGTGTTACAATCAACGAACACGTGACCAAATTTTAAACGTCAATCTATAGCATGATCAAAGAACGTATCC  
AAGCTGTGCGTGAACGCAGCAGAAGTAATGAGCAAATTTTTCACACCGCAATTAGTGTGTTGTCATTACAGATATGTCATTAATTA  
TTGATCACGTCATTTTAGAATATGTAAACCAAGATTATCAGAATATGGTATTTTCAATTAATCTTTGTTGAAGATGTGATTGAAAGTTT  
GCCAGAGCATGTAGATACCAATTATTGATATCAAGTCTCGTACTGAAGGCGAACTGATTACGAAAGAAAAAGAAATTAGTTCAATTGA  
AATTTACACCGGAAAAATTGATAACGTCGATAAAGAATATATCGCGCGACGTTTGGCGAATTTGATACACGTCGAACATTTGAAA  
AATGCAATTCCTGATAGTATTACATTTTATAGAGATGTATAACGTGAAAGAAGTAGATCAGCTTGATGTAGTTAATCGATGGAGACAA  
AACGAAACATACAAAACGATGGCAGTACCTTTAGGCGTAAGAGGTAAAGATGATATTTTATCATTGAACTTACATGAAAAAGCACA  
CGGGCCACATGGTTTAGTTGCTGGTACCACTGGTTCAGGGAAATCTGAGATTATCCAATCATACTTTTATCTTTAGCTATTAATTTT  
CACCTCATGAAGTTGCATTCTATGATTGACTATAAAGGTGGGGGTATGGCGAACTTATTTAAAGATTAGTCCATCTAGTTGGT  
ACGATTACAAACTTAGATGGCGATGAAGCGATGCGTGCCTTAACATCAATCAAAGCCGAATTGAGAAAAACGTCAACGTTTATTTCGG  
AGAGCATGATGTTAACCATTATTAATCAATACCATAAGTTATTTAAAGAAGGTGTTGCGACAGAACCAATGCCACATTTATTCTATT  
TTCCGATGAGTTTGCCGAATTAATAACAGAACCTGATTTTATGAAAGAACTTGATCAACGCGACGTTGATCAACGCGATTTGGACGTTT  
TATTCATTTAATACTTTCGACACAAAAACCATCGGGTGTGTTGATGACCAAAATTTGGTCTAACTTAAATTTAAGTTGCGATTAAA  
AGTACAAGATAGACAAGACAGTAATGAAATTTTAAAAACACCAGATGCAGCAGACATTACATTACCAGGTCTGCGCTATTTACAAG  
TTGGTAATAATGAAATTTATGAATGTTTCCAATCTGCATGGAGTGGAGCAACATATGACATCGAAGGCGATAAATTAGAAGTTGAA  
GATAAGACGATTTACATGATTAATGACTATGGTCAACTGCAAGCGATCAACAAAGACTTGAGTGGACTTGAAGATGAAGAAACGAA  
AGAAAACTCAAAGTGAAGTAGAAGCGGTTATAGATCATATCGAATCTATTACAACACGATTAGAAATTGAAGAAGTTAAGCGTCCAT  
GGCTACCACCATTGCCAGAAAAATGTGTATCAAGAAGATTTAGTAGAAAAAGATTTTGAAGAAATTATGGTCAGATGATGCAAAAGAA  
GTGGAATTAACATTAGGACTTAAAGACGTACCAGAAGAACAATATCAAGGACCGATGGTATTGCAATTGAAAAAGCTGGGCACA  
TCGCGTTAATCGGAAGTCCAGGATATGGTAGAACAACTGTTTACACAACATATTTTCGATGTTGCAAGACACCATTCTCTCGATC  
AAGCACACATGTACTTGTTCGATTTCGGGTACCAATGGTTTGTATGCCAGTCCACAGATATACCACATGTCTGCTGATTACTTTACAGTAG  
ATCAAGAAGACAAGATTGCTAAGGCGATACGGAAGATACATGATATTTATTTCTGAGCGAAAAAGACTATTAAGTCAAGAGAGAGT  
AGTTAATATAGAGCAATATAATAAAGAACTGGAAATTCATTTCCAATGTTTTCTTAATTATCGATAACTACGACACGGTGAAAG  
AATCACCATTTATGGAAGAATATGAAGAAATGATGTCTAAGGTGACACGTGAAGGTTTAGCATTAGGGGTATACATCATTCTTTTCAG  
GATCAAGATCAAGTGCAATAAAATCAGCTATATTTACTAACATTAATAACAAGAGTTGCACTATACCTCTTTGAAAAATAATGAATTAA  
CAAATATTATTGGTTCTTATAAAAAAGGTGTGAAAGATGTTAAAGGTAGAGCTGCAATAAATGATGATAAATTTCACACAGTTCCAA  
ATTGCGCAACCATTTGAATTAGCAGAAGGACAAACATATAACGAGCGCATTAATAATGAAGTAGCACAATGAAAGAATTCTATGT  
AGGAGATTATCCAAAACATATCCCAATGATGCCAGATAAGGTATTAATGGATGATTTCAAGAAACATATGATTTGGAAAAATCA  
TTCATGAAGAAGACAAATTTACCATTAGGATTAGACTTTTGAGGATGTGGAATGATGCTTAGCTTAGCTGCAAGTTCTTCGATTGTAA  
CAGCAATTAACCAACTGAGATGGAAGAAATGAATGATGTTATAATGTCTAGTTTATCAGTATATAGTAAAAACCAATTTGTTATCT  
TGGTTGATGCAGAAGATAATATGAGCCAGTATGCAGAAGATGTAACCTCTTATTATTCAGCACCATCAGATTTGAGCAACATTAGAT  
TAGGATTTAAGCAAGAAATAGAAGCAAGGAAAAATGGCGAGAAAAAGTATAGAGGAATGCAAGATTGTATTTATAAATAATATTA  
ACGATTCAATCAATTAAGTGAATGACAGAAGATGAAATTCGTGTGTTATTTAATGAAGGTCAAAAAGTTAATATTATCATTATTGC  
AAGTGGACTATACTCAGATACAATTGGTGCATTTGATAGAGAAAAGTAAATGATGGTAAGAACTATAAATCAAGCTTTGATTAGTC  
ATAAGATATCGGAACAAGAATTTATAAGAGTTAAAGATCGATTTGGTGAACCAGAATTAAGTGGGAGAAATGTATTACATTAAT  
AATCAAGAATATCAAAAAATAAACTAATGGAGGGATAGAGTTGATAAAGTTAAACCAAGCCTCTGTGAGCAAGAAATTTCAAG  
CATTGCAACAAATAGGCAAGGCTTAAACAACTAACCTGGGAATGTAAATTTAAGTAAACGAATCTCGTTATTTTAAAGAAATATG  
TAAATATGTTTGAAGATTATCAATCAGCTCTATCTAATTATGAAAACATAATTGAACAAGATACGACGGCTATGGATACAACGGTA  
ACAGAAATTGTTGAAAACGATAGAGAAATAGCAGGACAAATTAATAAATAATTAAACAAGACGGGTGAGAAAAATGAGTAATAAG  
GGAGAAATAAGAAGGCAATTTGCTAATAAAGAAAGAGAAAAAGCAAGTAAAGAAGCACAATAACAGATTTAAAGAGGATTTA  
AGAAGGTTGAAAGACGCTTCGAAAAAATTGGATACAGCAGGAGAAGATTTTAACAAAGGACAGAGTAGTTATAACAAAGTAGAAA  
TTAGTACTTCAGATTGGAAGGAGAAAGAAGGACTAAAAAGTGACAGCAAAAAGAAAGATGTCGATTCTGAATTAAAAAAAGTTGA  
ACAAGACTTTGATGATGCGAAGAAGGCTATTAAAAAAGATATTCAGGATAAAGAAGGAGAAATCAAGGGAGTCGAAGGAGAAATC  
AGTACTATAAATGCAGCTATAGATGCACCTAAATCAAATTTATAATAATAGAGAGGGAAATTTATTATGGGGTACAAAGTTGATAT  
GTCTGAAGTGCACAATATGCAAAAGTCTATTGATTCAAGCTTAAGTGCATAAATAACAAAGGTTAGCAGCCTTAGCAGTATGCAATAA  
ACAACTTATAAATCTGAAGGATTGCAAGGTGACAGCAAGTAGTGTCAAAAACTATAGTAAGACGATTTTCAATTTACAATTAATA  
AAAAAGATTGAAACAATAAACAAAGATTTTAAATCAGATATTGCGAAATCTATACGTAATTTCAAAGTGAAGTTGATAATAATGC  
TTCAGCTATATTGGATGAAGACGAAATAAAAAAATACAAAAAAGATATTGATGATGCATTAAAAAGATGTTTTCAAATCTTCTAAAG  
ATGCAACCGGAGCTATTTTCAGATGTTTCAGATTTAACAACAGCCAAAAAATAAATACAGAAAACTGGCCAATAAATGGGAGA  
CTTTAATAAAGATATTGATCAACCGGTGGAAAGATTAAACGAATTCGACGCCAACAAATCTATAGATGGTGATAAGACAGATAACT  
TAATAACTGAATTAAGTGGTGTGAATTCATATGTCAAAAAACATGAAGCCAAACCGTGCAAGAATTAGTTCTACAAGTGGAAAAAT  
GAAGGTGCAATTGCAAGGCATAAAAAAGTGAAGAGTTAGTAAGATGGCAAACTTATATGGAACGTTAAGTGAAGTCTTTATAA  
AACACCGGTCTAAGTAAAGCAGCTTCTGACATAATTACCAAGCTGGACGCGAGTACTATGCTATCAAAGCTGTAGGGAATGGCA  
GTGCTTTAAGAGGATATAAAGAATATCTGAAACACGAGATTAATAAATTAAGTAAACAAATGATAAAGAACTAATTAAGAAAG  
AATGTCATTGGTATTAAATACAGATAGAGGTAATATTAATAAATAAATAATGCAGTAAAAATGGCAAGTGAATTTGCCCGTAATAATC  
CATTTAAAAAAGGTAACCTTGGTAAATTTGGATGAGCAAGTCCAAGGTATCAAAGTGAAGTGCCCAAGTATTAAAAAAGGGTTG  
CAAGATAAGAACTTTAAATATACATTTGGAGATGCAAGAAATTTTGTGATACAGCTGAAATGAAAAAGCAGCAGTTACAGAATT  
TAAAAATACCTTTGTACCTCAAAACATAAGGGAAACATTCCTTAAGAAAGAAATATAACATCCAAGACAGATTAAAGAAAAATA  
TGAGCAAATTTGGAATGAAGATATCAAGGGAGGAATCAAAGAGTTTAAATTAGACTTTGCTAACAAAAATATCATTGGTAAACTT  
GGTAAAAATGTTGAACTAGGAGGGAAAGCTCTAAAGCCACTAGCATTTGTTACTGCAATTACAGATAACATAGGAAAGAAATCTTT  
GCAAGAACAATTAGTGGGTATGGGTGTAGATTAGGTGCTATTGGTCTAGTGCAGCTGCCGGTGCAGCTATTGGAACGGCAATAC  
CATTACCTGTAGTAGTACTTTAGTAGGAGCATTAGCTGGAACAGCAGAGGTATACCTTTTAGATAGTAAATAGCAGGTATGAGT  
AAATCACTAACCAGACATGCTAAAGACGGAATAAACTCGGGTATTAATAAAGTTAAAGTTGGATTTCGGAAAAATAAATTCAGGATT  
TAAATCAGTATTTGGTTAAGAGAGGACTATTATAATGAATTTAAGAGAAATTTAGGAAATATAAAAAAGACCGTATTTAACACCAC  
TAATAATATTTACGATTTAATCTCGCTTTTTTTTTGATGCAATTATGTTTTTAAACAGTAAGCTATATGATAAGTTACCTATATATTTA

GTCATATTTTTAGTTTTTGGAAATATTAGTGTCTAGTGTGCTGTATATACAAGAAAAAGGTGAAAAGATAAAAGTTGAGAAAAAAA  
TGTGAATTGGTATTGACATTAATGTTATAGCAGGTTATTCAATGCCATTATTATTACATCTGGTTATGTAGTTGGAGCAACAGTT  
TATGGGACAGATGTTTTAAATTATTGGTGTGGAATAATTTTGACATTATTTGTTTCGTGGTTTGCATTATTTTTATTTATAAAAAATGA  
GTTTGATAGTGAAGTCCAAACAAAGCAGTTAATGTCATAGCAATTATTATAAAGTTATCTGCTTTAGGATTAATATTTTATATTAGT  
ATTATTGCACCTAGTGTGGAAGATGAAAAAACTTTATTTTTGTAAGTATTTTAATTAATATAGCTGTCGATGCATTACTTGTAGAT  
CATATTTAACTATGCATTATATAAGAGTGTAAAAAAGATATCGAAAAACGGGGTGGATGATTAATGGAAGTAGGAATGTTAATTA  
TGCCGTTTTGTGTGAAGATTACATTTGAAATTGATAAAAAATGATAATTGGTTAAATGCATTAGATACAGTAAATGAATTTTTTATGG  
ATAAAGATATATATCCTACTGGACCTATAATTTCCAAAGAGAATTAGCAGGTTTGGGTGAATATAAATATACAGCATATATAGCTC  
TTAATGATGAACCTCAAGATATACCTGAATTGAACATTAATATATTGATTGTTTAGAGGTAGGACCTACGTTATCAACTAAGTGT  
TTGAAGAAGAGGAATTTGAAAGAGCCTATAAAGAAATGAATATGTAGTAAACGAAAAATAATATTAAGATTCTAAATCAACCATAT  
TATCATGTAATGGTGGATTATTTTGGTGGTACGGCTTTTGAAATTTATGCTCAAGTAGATTGGATGAGAGTGAAGTATATGGATAA  
AAATGGATACTCATATATTATGATGAAAAATGTAGCTTATAAAACCTTATTTGATGTGACTATGGAAGACTATGAAGATATATTA  
AGACTTTACAAATCTTGAATTTCTAAAGGTAACAATTACAGGGCCATTAACCTTTGCAGTCACGCAATAGACTTGCAAAAA  
GGATGAATATTGATTTGTTTATTTCAGTTGAAAAATGTTTTAAATCAAATGAAGAACTATCATATAGAACATATTTTTGTCTAGATAA  
CATGTTACATGGTCGTATCATTCAAAACAATTTTATAATAGATGAAATAGCGTTACTTGAGGATATGAACGAATTTGCTTCTGACAA  
CAATTTAACGTTTACTTCGCCTTATTATCACACAATTAGAAAAAATTTAGCGGTGAACAAGGTTGGATTGATGTAAAGTCAAAAGT  
ATATGAAAAATGATTAAATTAATCAATAGAGGATAAAAATATGATAATTTTTATTTAATAACAATATTTGCTATTTTATATAGCT  
ATGATTGCTAGTTTGTTTAAAAGTGAAGGTTTTCAATAATAGGTTAATATTTGGATATAGTTATTTTGACAACGTTAATTTTTTATT  
ATTTGTAGGTGCGCGTTTTGTGTATGATTTTAAGCAACTTTTAGCATTTATGCAATTTGGGTTTCATTTGTGTATATTTACTTTGCA  
ATTAAGTGTATTATGGGTGAAACCTAAGGTAGTAAATATTATTGATTGCAAAAAGAATTGGATGAATCTAAAGAGGTCAATGAAGAGCA  
GGAATTAGATTTACAGACATCAAGATAAGAGGTATCTACTTTTCATTATTGCAGTAGTGATGTTAATTATTGCTAAATTAAGGAT  
GCAACCAGAATTACAAGTAGATGCGTTATCAATGAATCCAGTTTTTATTTTATAGGAGTTATTATCATCTTAATTTGGCTAGTACTG  
GATATATATCGTAAGAAAAAATACGGTATATTCTTATTCAAGACGATAGTGCCATTAGTTGTACGACTTGGATTATTATAGCTACT  
ATTGTAATTTGTAAGAAATTTCAATATTTTATTTTGGTTATAATTGTTGATGGATATTAATTAATCGATAGAAAAATCTTAATG  
GTTTTCAAAAAAATACGTAAAAAGTATATACTATTAATATCTTTTTTACTATAATTATAAATAGTTAAATAAATGAAAGACAAAAT  
AATGAGTAGGAGTTAATGAGATGGAAAAACCAAAAACAGGCAATGGCTTAAAAATGCAACATGGGTATTTATTGTATTAACAGTA  
GTTACACCGCTATTTGGTATTGGAAGTATTGTTGTAGTATTAATACAAAAAATACGATGCAGAAAAAGGTTGGAAGTTATTGAAA  
ATTGCAATTATCGTAACAATAATTGTTTTGTTTTAAATTTATTAGCATATTTAGGTTTAAAGATAAGTAAAACGAATTTGAAGAAGCA  
TTAAGCGACATTTGGGTGTTGTTAATGCTTTTTATTTAACGGAATAAGTGTAGAGAATAAATTAATAGTTTAAATCAAGAGATATT  
TCGAACACATAGGGGAGATAATATGACTTTCGAAGAGAAGTTAAGTCAAATGTACAACGAGATTGCGAATAAAATAGTAGCATGA  
TACAGTAGAATGGGAAAAGGTATATACAATGGCTTATATAGATGATGGAGGAGGTGAAGTATTCTTTAATTATACTAAAAATAAAC  
AGCGATGAATTGAATTATTACCCGATATACCTAAGGAGTATAACATTTCTGTGCAAGTATTTGATGATTTATGGATGGATTATAT  
GATTTGTTTGAG

>009-contig\_245\_RC

TCATGTGAATTTGACTTTACAAGAGACGGCAAATTTGAATGTTTCATTTGATTATATTGATTGGGCGAATTCAGAGTTTGGACAAATG  
GGAAGAGAACATTATTACATGTATAAAAAATTTGGAATTTGGCCTGAAAAAGAATATGCCATAAATTTGGGTAAAAAAAATAAAG  
ATTATGTTAAAGAGCAAGATGAAGCTGAACATATAGGGGCGATAATATGACTTTCGAAGAAAAGCTAAGTCAAATGTACAATGAAAT  
TGCAGATGAAATCAGTGGAAATGATACCAGTTGAATGGGAAAAATATATATACAATTGCCTATGTAACGTATCAAGGTGGAGAGGTCA  
TTTTAATTATACTAAACCAGGTAGCGATGAATTGAATTATTACACGGATATCCCTAGAGAGTATAATGTCTCTGAAAAAGTATTTT  
ATGATTTGTGGACGGATTATATAGATTGTTTAAAGAAGTTAAGAGAACTTTTAAAGAAGAAGGGCTTGAACCATGGACATCAAGT  
GAATTTGACTTTACAAGCGAAGGTAAATTAAGGTTTCATTTGATTATATTGATTGGATAAATACAGAGTTTGATCAATTAGGCCGT  
GAAAACTATTATATGTATAAAAAAGTTTGGTGTTTTACCAGAAATGGAATACGAAATGGAAGAAGTTAAAGAAATCGAGCAATATAT  
TAAAGAGCAAGATGAAGCTGAACATATAGGGGCGATAACATGACTTTCGAAGAAAAGCTAAGTCAAATGTACAATGAAATTGCAAA  
TGAAATCAGTGGAAATGATACCAGTAGAATGGGAAAAAGTATATACAATTGCCTACGTAGATGATGAAGGTGGAGAGGTTGTTTTTA  
ATTATACTAAACCAGGAAGTGAAGATTGAAATTATTATTCAGATATTCCTAAAGATTGCAATGTCTCAAAAGATATTTTTAAGAATT  
CATGGTTTAAAGTTTATCGAATGTTTGATGAGTTAAGAGAACTTTTAAAAAAGAAGATTTAGAACCGTGGACATCATGTGAATTTG  
ACTTTACAAGAAAGGGAAATTTAAAGTATCATTGATTATATAGATTGGATTAAATTAGGTTTGGCCCATCAGGAAAGGAAAAAC  
TACTATATGTACAAAAAATTTGGTATTTTACCAGATATGGAATATGAAATGGAAGAAATTCGAGAAGTAGAGAAGTATGTTAAAGA  
CCAAGAGTAGCATATATGTTATAGAAGGCTGTGCAAAAATCACCTCGTTTTTACATTTGACTCAAAGAAGAAGGTTAAACGATAAGAT  
TATTTGCAACTTAAAAAGTCAATTAGCTTATCGGTATCCATACATCATGGATAAATGAGTTTAACTAATTAATAAATCACGATATAA  
ATTTAAAAATTGCCATTAATTGAAAAGGTTATTGTAGTGTATTTTATAAAGTTGATGCACATCGACTTATTTTTTAAACCTTATATCAA  
AAAAATATGAGAAAAAGTATATACTATTAATAATGTTTTTACTATAATTATAAATAGTTAAATATTTGGGAATTAATAAATATATAG  
GAGGCAATTTTTAGAGATACATAGCAATGTAAAGGTATCAAATAGTTATTGCATAATTTATTATGATGACATAATTTTCAGTAGATA  
GTTGTAAATTAACACTGAAATAGATGTTTATATTAAGAAGACTTTAATATCATAATTAATCAAAAATCTTGCCTCAAAACATTTAAACG  
AATTTTAAAGTTGATAACAATTGGCAAAACATTGTTCAAACATCAATGATAAAGCGTATTATCAGTATTGTAGTGTGTGGAAGT  
ACAGCCATCTAAGGAGAAAAATGATGAAAAAGAATATTGGTAGTATTTTAAATGTTAGCAATTATATTGGCAGGTTGTTCTAATAAAG  
GTGAAAGATATCAAAAGATATTGATAAAGTGTACAAAGAACAGAAATCAAATGAATAAATTTGCTCGAAAGTACAAAACACTAT  
TAAAAACAGCATTAACAAGAAGACAGTAATACACATGTTTATAAAGATGGTAAAGTCATTGTTATTGGTATTCAATTATATAAAG  
ATCGTGAAAAAATGTATTATTCGCATATGAAATAAAGATGGTAAGGCAGAAATCAATAGAGAAATAGACCAATTAAGTATATG  
AAAGACCATAAAGCAGATTATGAAGATGAAAATGTAGAAGTGGAAAAAGATTAACGTATGCTTCTTTTAAACCTTTTAAACGCTT  
CAAAAAATAAATGAGCTTTAGCGACAATAATTTTTTAAATAAACACGATATAAATTTAAACATTTATATAAGAACACAAACGTA  
AGTTTGTAATAATAATAAAGGAGTAAGTCAATGGAAGAAATCGATCAAAATAATGACAATAATAGGAATTGTGATTCAGGGTTTAG  
CAACGGTATTTAGTTTACTATTGATGGTTTTAGCAGCATCAGGTGAATGACTACAGATGTGTCAACAACAGTTAATGGTGAGGTTG  
ACCCAGTTGATGCAGAAACAGCAGCAGCAATTTTCACTGTATTATTCCTATCCCTATTCATATTTGGAATCAATTTCAATTTATTTAGG  
TGCAATCGGTATGTTTAAAGCATCTAAAAACAAAAAATGAGTGGTATATTGTTGATTATTGGAGCTGTAATAAGTGGTAACATAAT  
TACATTTGCTTTATGTTTAGTCAGTGTATTAACCTCTTACTAATAACAAGCCTAAAGATGAAATAAGCGACTTATCATAAACATC  
GTATATTGAAATTTCAAGATTTCTTAAGTAATTAATAAAGTGCTCTCTTAGAAGTAGATTTTCAGTCAATAACTGCTTTTAAAGAGA  
GCATTTTGATTTGATAATGCTCATAGCATCGGATAAAAAACATTGACGAACTTAAAAAATACGTTAGACAATGCACCTTCTAAATA  
TTAAAGGCATCGACTAACGCATTGTTCAAATATAGTTAATTTTATAAATTTGATGATGATCATTCAAGTAAGCATAGAATAAA

CCTATAATGAGTCCGCTCCAATATAGTTACCGATAAAAGCCGACGATATTCGAAATAGCTGGTATGAAGTGCAATGTATCAACT  
TGATAAATTAACCACCCATAAATAAGCAACTGTTGTAAACGACATGTTTCATAACCCATAAAGGCGAATATGGTAACACCGAACAT  
CATGACAAAACATTTTTGCGAGTACATCGTCAATTTGTCATGGCAATAACTAATGAAATATTGATAAAAGAAATGGCGAATATCGCTTT  
CATTAATATACTTACAAAACCAGTAGACAACGTTTTATGCTCTATAACTGCTGATAACTGATTTAACATATCTGGCGTCATTACATTT  
GAAAAACGCATGAACTAAATAAAATAGCAGCACCTAAAAATTTCTGCAAAGCACAATAAAAAATTTTCAATACTCTAGTCGG  
TTTAATTACTTTATAATACAGGCCTACAGTAAAGTACATGAAGTTACTGGTTAGTAGTTCGGAGTTTGTAAATAAAATGAGTACTAA  
CGCAAACTGAATGTAATGGCGCTGGCCATATTCACAATGCCTGGCGGTAAATCTGGTTCTGTGTGCTTTAACTGATAATACGAA  
GACCGTAATAATCCCGATAAATAACCTGCCATCATAGCGCGTAATAAATAACGTTTTAAATAAACGCTTTGTAATATATCTTTCTG  
TCTTATCGTTTCGACTACGTTATTTACCGAGTCGTCGCCATAAAAAATCTTATCCCATTAAATATGTTTCTCCTTCACAATGACATCCT  
CGCTTTTCATTGTAAATCAGAGTATACTATGAATCGTCTATTGTGGAATAATTTACAAAAATTAATTTTAAAACTAATATTTTTG  
AATAACAGCTAGGATTTTTTAAACAAATCATTTATTTTAAAAATAATTAATCGTCAGTTAGTATCAATGAATAAAATACAGATTTTCATGC  
AAAAAACCTAGTAATGATGCGACGATCATTACTAGGAGGTTATGCGTCTATTAAGTTGTCGCTTGTTCGGACGGCGTATAACTAC  
ATCGATGATGAAACCTATGATTGCCAAAAGAATGAATGGTACAAGCCAAGCTAAATCGATATCTGCTAAAGGTAACATCATAAACC  
ATTTCAAAATAACACCGTGTAATAAGTTGAAACTATTTAGTATTTGTAAATTGAAATAATCAATGTAATAACAGTTGCGAGTCGAT  
AGGCCAACTGAATCTGAATGTGCTAAACATGTTAGCAAATGATATCAGTACAAGTGCAATAGACACGGGATATATTAATGTCAAC  
AATGGTACAGCAATTTTTAAAAATCATTTCTAAACCAAGTGTGTAAATAAAGAACCTATGATAGAGAAAAATAAGTGCGAATATTTTA  
TAAGAAAACTTAGGTACGTGTTCTTAGTAAATGTGGCGCAAGCATTGACGAGTCCTATACATGTTGTTAAACATGCAAGTATCACT  
GTCATACCAATCATATGTGTGCCAAATGAACCAATACGCTAATGAATTGACGTCAATATATCAGTACCATTCTTAAAGTTTCTCT  
GGAGCTGTTGACGCACTACATATGCCAACGCAAAAGTAACTATACCAAGTAATATAGCTGCAATAAATCCTGAAATAAGCAGACATA  
CTTTAATATTTTCATGCGATCTGTGAGGCCTTTAAACTTATAGCCATTGACAATGACTACGGAAGAAAGCTAACGCAGCAACAAGATC  
CATTGTAAATAGCCTTCCAACTTCTGAAATGAAAGGATGTGTTATATATTTATCCTTAGGTGCACTTAGTGCAGATTCAGGGTT  
GAAAATGACAGCAATACTTAATAGAGCGACCATTAAATAGTAATAACGGTGTTAATAATTTACCTAAATATCAACGATTTTCGATGG  
ATTTAAACTAATCCAGTAAACGATGGCAAAAAAGACTGCTGCGAATATAATTAAGTCCATTGGTTGTGCACAGGTAAATGTGTC  
TTGTACCAATTTCTGACGCGACATTTGACGACGTGGAATACCGTAAAAATGCTCCGATAGACATGTAAATCAGCAGCAAAAAATA  
AACCCGAACCATGGATGTATACGATTGCCCTACACTTCAACACCTTCATCATAAAATGCAACAACAATAACAGTAATAAAGGGGAG  
TAATATGCCTGTAAGGGCAAAGCCTAACATACCAATCCACATATTTGACCTGCTGTATGGCCAAGCATGGGCGGGAATATTAATTT  
TCCGCTCCAAAAATAGTGAAAAATAACATGAGGCCCGAAATAATAAATCTGTTTTTCAATGTAATTTCTTCTTCTAAACCTAGATAT  
TCATAATAATTTAAAAAATCTGAAAAATAAAAAACGTTCTTACTTTATCTTTAAATGACAATACTATGATTCTATTATTTTAAAAA  
GATTGCAATAATAACGCTTGTCTATTATTGGATAATGACAATTAAGTGTCTTTTTATGAATTAATAAGGTGGAAGTAAGTTGGA  
AATACGTTGGAGCGTTGTGATTTTTATGAGAAATTGTAAGAGTGAGGACTGCTATTTATAAAGGTAAGTATGGATGAGTTTATGG  
TTGTTCCAATAGGTAAATAAGAGATAGCACACTGTACACATAATGATACGTGGATGAGTGAATATGCTGATAGGAAGGCCTAGTC  
ACTGAAATGAATTCAGTTTATTACGTGATAAATCACAAATCTCTCTCATGTGATAGGTCTCCCATTAATCATGCTTATATGAAAT  
GTTACATATTTGTTAGCTTTTCAAGAAATAATATTAATATCTTTTCATAGTATAGCAATATTAATAAATGCATTTATAATTTTAA  
CTGTATTTTAAATATTAATCATGAGGTGATAAGATGAATAAAATTTCAAGTATATTGCAATAGCATCATTATCGGTAGCGGTTACA  
GTTTCGCGACCACAAACGACAAATTTCTACAGCTTTGCCAAAGTTCTAGTGAAGTTCAACAAACACAAGCTTCTATACGAGC  
ATCACAAGAGGCGAATCTTGGTAATCAAAATATTATGGCAGTGGCTTGGTATCAAAATTCAGCTGAAGCAAAAGCATTATATTTAC  
AAGGTTATAACAGTGCAAGACTCAGTTAGATAAAGAGATTAAAAAGAATAAAGGTAAACATAAGTTAGCTATTGCTTTGGATTTA  
GATGAAACAGTTTTAGATAATTCTCCATATCAAGGCTATGCATCAATACATAATAAACCTTTCCAGAAGGTTGGCATGAATGGGTA  
CAAGCTGCTAAAGCTAAACCTGTCTATGGCGCAAAAGAATCTTGAAATATGCTGACAAAAAAGGTGTGATATCTACTATATTCT  
GATAGAGATAAAGAAAAAGATTTAAAGGCAACACAAAAGAATTTAAACAACAAGGTATCCCTCAAGCTAAGAAGAGTCATATTT  
TACTAAAAGGTAAAGATGATAAGAGTAAAGAATCACGCGACAAATGGTTCAAAAGGATCATAAACTTGTATGCTATTTGGAGAT  
AATTTATTAGACTTTACAGATCCAAAAGAGCTACAGCTGAATCTCGTGAAGCATTAATTGAAAAACATAAAGACGATTTCCGTTAA  
GAAATATATCATTTTCCCTAACCAATGTATGGTATGTGGGAAGTACAAATTTACAACAATAACTATAAAGCAAGTGACAAAGCAA  
AAGATAAATTACGTAAAAATGCTATTAAGCAATTCGATCTTAAAAAGCGCAAGTTAAATAATATATGAATTGGACGTCTACATGT  
ACTTAAAGGTATATGTAGGCGTTTTTAAATTTGATCCTTAAATTTTAAATGTACCGTACAAAAATAATAGACAATTAATTGCATTTTCC  
ATAAATTTGCTTTTAAATATAAAAAAGTTCCGGGTATAATGAAGGATAAGTGTATGTATAACATTACAGAGCGCAACACGACGTACGTG  
CATCTAAGAATATAAACAATGTTTAAATCATAGTAGTAGGAGAGAAATGCATGTTTTTAGCTTGAATGAAATACGGCGCAACAA  
ATTGAAGTTTGGACTAATTATTGGTGTGTTAACGATGATTAGTTACTTGCTATTTTTATTATCTGGATTGGCGAATGGTCTTATCAAT  
ATGAATAAAGAAGGCATTGATAAGTGGAAGCAGATGCCATTGTTCTAAATAAAGATGCCAATCAAACCTGTGCAACAATCTGTTTT  
TAACAAGAAAGATATTGAAAAATAACAGAAGCAAGCTACTTTGAAGCAAAACAGGGGAAATTTGTGCTAATGGCCATCAAAAA  
GACAATGTTTGTAGTTTCGGTGTGAAAAGTCAATCTTTAGTTCCGAGTTTAAATAGAAGGCGATAAAGCGCTAAAAAGATGAAG  
GTGTTAGCTGATGAAACATTTAAAAATAAAGGATTTTAAATTTGGCGACACATTATCACTATCTCAATCAGATGAAAAATTTGCATATC  
GTAGGTTTTACAGAAAGTGCAAAATATAATGCGTCAACAGTCATTTTACGAATGACGCTACCATTTGCAAGATCAATCCTAGATTG  
ACTGGAGATAAAATTAATGCAGTTGTTGTACGTGATTCAAAATTTGAAAGACAAAAAATTAACCAAGAGCTTGAAGCGGTAAGTAT  
TAATGACTTTATTGAAAAATTTACCAGGTTATAAACCGCAGAACTTAACATTAACCTTTATGATTTTATTCTTATTGTCTATTTACGT  
ACAGTTATAGGCATTTTCTTATATGTCTATGACATTACAAAAACAAGTTTATTTGGCATATTAAGGGCTCAAGGATTTACGAATGGC  
TATTTAGCGAACGTAGTTATTTTCGACAGCGCTCATATTAGCATTATTTGGTACGGCATTTGGCTTACTGTTAACAGGCGTTACAGGTG  
CATTTTTACCTGATGCAGTACCTGTCAAATTCGATGTACTAACATTGCTCGTATTTGCAATTTGTGTTAATGATTGTCTCTGTATTAGG  
AAGTTTATCTCCATTTTAAACATTAGAAAAATAGATCCGTTAAAGCGGATTTGGGTAGGAGGTGATGCAAAATTTGAAATTTGAAA  
ATGTAACAAAGTCATTTAAGAGTGGGAATCGTAAGTGAAGCGTTTAAAGATACAAATTTTGAGATACAAATTAAGGATGATATTATA  
GCATTTGGTTGGACCTTCTGGCTCTGGTAAAAAGTACATTTCTAACTATGGCAGGTGCTTTACAAACGCCGACATCTGGGCACATTTTA  
ATCAATAACCAAGATATTACGACAATGAAGCAAAAGCATTGGCAAAAGTTAGAATGTCTGAAATAGGTTTTATTTTACAAGCTAC  
AAACCTTGTGCCATTTTAAACGGTAAAGCAACAATTTACATTATTGAAAAAGAAAAATAAGAATGTTATGTCTAATGAAGACTATCA  
GCAACTTATGTCACAATTAGGGCTAACTTCATTGCTTAATAAGTTACCTTCAGAAATTTACAGGTGGTCAGAAACAACGTGTGGCGAT  
AGCTAAAGCGTTATATACGAATCCGTCGATTATTTAGCGGATGAACCTACCGCGCGGTTAGATACTGAAATGCGATTGAAGTCAT  
TAAATTTCTACGTGATCAAGCAAAACAAGAAAGAAAGCATGTATTATTGTTACACATGATGAACGACTTAAAGCATATTGTGATC  
GTTTCATATCATATGAAAGATGGCGTCCTTAATCTTGAAATGAAACAGTAGAATAGTTTATTAAGCCGTTACATCATGTGCCGGTA  
TTTTATGTTTATGTAATAATTTGTAATAAACTTTCACATTCAAATTAATAATTAATTCGAAAAATTAGAAATTTCCGTTCAATGATA  
ATATTTTTTGTAGTAAATGGCCTTAAGTATTCATATTTTAAATATTTGGGATTTGAATATAAAATTAATCGTAATGGGGGTGATGGT  
TATGGATTTATTGATAGGTACTTTATTTTTATTTTTGGTCTTAGTGATTTTTACATTATTTACATATAAAGCACCTAATGGTATGCGTG  
CCATGGGAGCATTAGCTAATGCAGCAATCGCAACATTTTTAGTAGAAGCATTTAATAAATATGTTGGTGGCGAAGTATTCGGTATTA

AATTTTTAGAAGAGCTAGGAGACGCTGCGGGAGGTCTAGGTGGTGTGCTGCGCTGCCGCTGGATTAACAGCATTAGCTATCGGTGTGTCA  
CCAGTATATGCATTAGTTATAGCAGCCGCGTGCGGTGGTATGGATTTATTACCAGGTTTCTTTGCGGGTTATATGATTGGATATGTGA  
TGAAATATACAGAGAAATATGTGCCGGATGGTGTGCACTTAATTGGATCGATTGTGCATCTTAGCGCCATTAGCTCGTCTTATTGCAG  
TATTATTAACGCCAGTAGTGAATAGTACATTGATTTCGAATTGGTGATATTATCCAAAGTAGTACGAATACGAATCCAATTATCATGG  
GTATCATTTTTAGGTGGTATTATTACGGTTGTGCGCACAGCGCCATTGAGTTCGAATGGCATTGACAGCATTATTAGGTTTAAACGGGTG  
TACCTATGGCTATTGGTGCCATGGCAGCATTTAGTTCGGCATTTATGAATGGGACGCTATTCCATCGCTTAAAAATTAGGTGATCGTA  
AGTCTACGATTGCAGTAAGTATTGAACCTTTATCACAAAGCAGATATTGTATCAGCCAATCCAATTCCAATCTATATTACAAATTTCTT  
TGGTGGTGCGATTGCTGGTTTAATTATTGCTATGTACAGGTTTAATTAACGATGCGACAGGTACAGCTACACCGATTGCAGGATTTTT  
AGTTATGTTTGGATTAAATCATCCGACGACAATTGTGATTTATGGTGTAGTAATGGCGATTGTAGGTGCGCTTGCAGGTTATCTTGGT  
TCAATTGTATTTAAAAAATATCCAATTGTTACTAAGCAAGACATGATTAATCGAGGTGCGTAGACGCATAGCATCATCATTTTGAA  
TAGTAAAAACAAATAAACATAGTAACGTGATTTCAGTCGATGTAACAGTCGATAATGAGTCACGTTTTTTATAGAAAAATATAAG  
ACATAAAAAATGTCATAATTTATAGTCGACAAATATCATACTGTATAAACATTTATCATTTTTCTCGGGTGCCTTTTACGCGATGGAATG  
AACTTACTTTTTACGAAATTATGCGTATTTTTATAAACAAATATCATTGATATAACGGTAAATGTAAGCGTTTACAACAGAAATAACT  
GCATGCTACGATATTTTTGTAAATTCAGTATTCAAGTATTTTAAAGTCAATATGAGGAGGGATGTTATGAGCGATTCTGAGAAAAGAA  
ATTTTAAAAAGAATTAAAGATAATCCGTTTATTTTACAACGTGAACCTTGCTGAGGCAATTGGATTATCTAGACCCAGCGTAGCAAAC  
ATTATTTTCAGGATTAATACAAAAGGAATATGTTATGGGAAAGGCATATGTTTTAAATGAAGATTATCCTATTGTTTGTATTGGCGCA  
GCGAATGTAGATCGTAAGTTTTATGTGCATAAAAAATTTAGTTGCAGAAACATCAAATCCTGTAAACGTCAACACGCTCTATTGGTGGC  
GTAGCAAGAAATATTGCTGAGAACTTAGGTAGGCTTGGCGAAACGGTCGCTTTTTATCTGCTAGTGGACAGATAGTAAGTAAATGGGA  
AATGATTAAACGATTGTCCACACCATTTATGAATTTGAGTATGTTTCAACAATTTGAAAATGCGAGTACAGGTTTATATACAGCTTT  
AATTAGTAAAGAAGGCGACATGACATATGGCTTAGCAGATATGGAAGTATTTGACTACATTACGCCTGAATTTTTAATTAAGCGTTC  
ACACTTATTGAAAAAGGCTAAGTGCATTATTGTGCTATTGAATTTAGGCAAGAGGCATTAACTTCTTATGTGCCTATACCACGAA  
ACATCAAATCAAATTAGTTATCACCACGTTTCTTCCCCAAAAATGAAAAATATGCCTGATTACATTACATGCTATTGATTGGATTATC  
ACGAATAAAGATGAAACAGAAACATACTTAAATTTAAAAATAGAATCTACTGATGATATAAAAAATAGCTGCTAAACGCTGGAATGA  
TTTAGGTGTTAAAAATGTTATTGTGACAAATGGCGTGAAAGAACTCATTATCGAAGTGGTGAGGAAGAAATCATCAAGTCAGTTA  
TGCCATCAAATAGTGTGAAAGATGTTACAGGTGCAGGTGATTCTTGTGCTGCAGTAGTGTATAGCTGGTTAAATGGGATGTCTA  
CTGAAGATATATTAATTGCTGGTATGGTTAACGCAAGAAAAACGATAGAAACGAAATATACAGTTAGGCAAAACCTAGATCAACAG  
CAACTTTATCAGATATGGAGGATTATAAAAAATGGCAAAATTCACAAAAGTATATTGAGTATTCTCGAGAAGTTCAGCAAGCACGGG  
AGAACAATCAACCGATTGTAGCATTAGAATCAACAATTATTTTCGCATGGTATGCCGTACCCACAAAATGTTGAAATGGCAACAACA  
GTAGAGCAAATTATCAGGAATAATGGTGCCATTCCAGCAACCATAGCCATTATAGATGGCAAAATTAATTTGGTTTAGAAAGCGA  
AGATTGAGAAATACTGGCAACTAGTAAAGACGTTGCTAAAGTATCTAGAAGGGATTAGCAGAAGTTGTTGCGATGAAGTGTATTG  
GTGCTACTACTGTAGCGACGACGATGATATGTGCTGCAATGGCTGGTATTCAATTTTTTGTACAGGAGGTATTGGGGGCGTCCATA  
AAGGTGCAGAACATACGATGGACATTTACAGCAGACTTAGAAGAACTGTCTAAAACAAATGTCACTGTTATCTGTGCAGGTGCCAAA  
TCAATTTTAGACTTACCTAAGACGATGGAGTATTTAGAAAACAAAAGGCGTTCCAGTTATTGGATATCAAACGAATGAATTGCCAGC  
ATTTCTTCTCGCGAAAGCGGTGTTAAGTTAAACAAGTTCCGTTGAAACGCCAGAACGACTTGCTGACATTCAATTAACAAAACAGCA  
GTTAAATCTTGAAGCGCGCATTTGTTGTGCTAATCCAAATTCATATGAGCATGCCTTATCAAAAGCATATTGAGGCAATCATATAAA  
TGAAGCTGTTGTTGAAGCGGAAAAATCAAGGTATTAAGGTAAGGACGCCACACCGTTCTTGTAGGGAAAAATTGTAGAAAAAACGA  
ATGGTAAAAAGTTTAGCAGCAAAATATAAACTTGTGTAACAAATGCGGCGTTGGGTGCTAAAATTGCTGTGCTGTTAATAAATTAT  
TGTAGGTGATGATACATGAATATTTTATTCGCTATCACAGGGATAGCATTGCACTATTTGTTGCGTTTTTATTCAGTTTTGATCGTA  
AAAACATAGACTTCAAAAAGACGTTAATAATGATATTTATCAAGTGTTGATTGTGTTATTTATGATGAACACAACGATTGGTTTAA  
CAATCTTAACTGCATTAGGCTCATTTTTTGAAGGGTTAATAAATGTTAGTAAAGCAGGTATAAACTTTGTTTTTGGAGATATACAAA  
ATAAAAAATGGCTTTACGTTCTTTTTAAATGTGTTGCTGCCATTAGTGTTTCTGTTATTAATAGGCATTTTTAATTATATTAAGGTA  
TTACCATTTATTATCAAATATGTAGGTATCGCTATTAATAAAATAACGAGAATGGGGCGCTTAGAAAAGTTACTTTGCTATTTCAACA  
GCAATGTTTGGACAACACAGATATATTTAACAATAAAGATATTATTCCAGATTATCTAGAGCAAAATTATATCAATATTGCGAC  
GTCTGGTATGAGTGTGTTAGTATGCAATGTTGGGTTCATATATGCAAGTATTGAGCCCAAGTTCGTATTATACAGCTGTAATGTT  
AAATATTTTTAGTGCCTTATCATCGCCAGTGAATCAATCCCTATAAATCTGATGATAGTGTGTTGAAATTGATACTTAACTAA  
ATCAACGGAAACGAAATCAGTGAATGGAAAAACAGGAAACCTAAGAAAGTTGCCTTTTTCCAAATGATTGGTGATAGTGCATGG  
ATGGGTTTAAATCGCTGTTGTAGTAGCCGTGATGTTGTAGCGTTTATTTCAATTAATGGAAGCAATCAATATCATTTTTTGGTAGTGT  
TGGTTTGAATTTTAAACAGTTAATTGGTTATTTGTTTGCACCTATCGCATTTCTTAATGGGGATTCTTGGAGTGAAGCTGTTCCAGCT  
GGCTCTTTAATGGCTACAAAATTAATTACAAATGAGTTGTAGCAATGCTAGATTTTAAAAATGTTTTGGGTGACGTATCAGCTAGA  
ACACAAGGTATTATCTCAGTTTACTTAGTGAGTTTTGCTAATTTCCGTTACTGTTGGTATCATCGTTGGTTCAATTAAGGAATTAGTG  
ATAAGCAAGGAGAAAAAGTTGCATCCTTTGCAATGAGGTGCTACTTGGTTCAACTCAGCTTCAACTATTTTCAGGATCAATTTATG  
GCTTAGTATTGTAATTAATCGAAGTATCTAAATTAAGTTATGCGCAATGAAAGCTTAAACCCCGTCAACCAAGTTGGCGCAACAGCGCATCA  
TAACCTTAGTGACGGGGTTTTATCATAACAATCTACTTTTTCGTAGCCGTTTTTGAATGTATGTTGATGGTTTATCTTTTTTCAAAAATT  
GTTAATCCCGTTATATCTTTTTTATGTTTTGAAGGGACAATGAAGCTAAGTATATAAGCAAAGACAAAAGCAACTGTAAATGAAATG  
GTAGATACATAGAAAGGTGAGTTACCTTTGCCAACACCATTATAGATATAAGCAAAGATGATACCCAATATTAATCCACAAATAAC  
ACCGAATGTATTCTGACGTTTAGTGAAAATACCAACTGCAAAATACACCAGCTAATGGAACACCGAATAATCCAGTTACAAACAAGA  
ATAAATCCCATAAGTCATTTGAATTAGAAGCAATTAAGTATAGTGACATTTCCAAAACCGAAAATACCTGCAATGATGATAATCAAA  
CGTGCAAAAGTTAACTTCGTGTGCTCGCTACCTTTTCCGAAGAAGCGTTGCTTAATGTGCGATTGAAATACAAGCAGATATAGAATTT  
AACTAGATGAAATGGTAGACTGTGACGCGCGCAAAATGGCTGCAATAGTAATCTGCTACAAATGGTGGCATCTCAGTCAAAAT  
GAAATATGGCAGTACAGATGATGATTGAAGCTTTTTGGTAAAAACGCTTCAATGTGTATATAAAATGAATACAGCATTTGTACCCATACC  
ATAAAATAAGGGTGTGAAATTAAGGCTAGGATACCATTTGTCCATAACGATTTATTTGTTCTTTTTAACTATCAGAAGCTTGATA  
ACGCTGCACGACGCTTACTGCTGTGATTGATACAAGTTGTTGAAAAATATTTCTAGGAAAAATAATTGGAATGGCAGCTGCCGC  
AGTGTTTAGCTTCCAATTATCTGCACTAATTAATTTTTTGTGCTCAATCGCATCTGCAAAGACAGTGCCAAAACCGCCTTAAATGTTT  
ATAACACCTAGATAATAATAAATACTAAAGCGCCGCTAATAAAATGACGCTTGAATGAAATCACTCCAAACCACACCTTCGAATCC  
ACCTAAAAATGTATATAAAATACATAGTAAACCAACGAGTGATGCAACGATATAAGGGTTCATGTCTGATACAGATGTGATTGCTA  
ATGTTGGTAAGTAGATAACGATTGCAACACGCCCTAAATGGTAAACGACAAATAATAATGAGCCAATAACACGTATGCTAGGGCCG  
AATCTAGCTTCTAAATATTCATATGCGAGATGTTACCTTTTAACTTTTTAAGAATGGAACATAGAAATAAATGAGTAATGGAATAAT  
GCTACGATAGCGATGTTTACCTGCAATATATGACCAATCTGTTAAAAATGCTTTCTCTGGTGATAGACATAAACAGTAATGCACTTAAT  
GTAGTAGCATAAATGAAAAACCAACTACCAAGATGGCAAGCGACCATTGCGGTAAAGAACTATTTCGTACTTTGACTCGCCGC  
CTTGGTAAAAATAAACGCCAATGAGTAACATAGCTAGTAGATAAATGATAACGGCAACCCAGTTTAGTGTGCCAAATCCAATCTTTT  
CATGGGCAACATCCCCCTTACAATGTATTGATCTTTGATGTCTATAAATCGTATTTTGAATGAGTTGATCTAATGTTTGTGCTGATG

GCTTCGTTAAAAAGGTTTGAAGGTCCTTTTCGGTAATCCTGCATCAATGCCACGATGACGTAATATTTCTTTCAATGTTGGATAAATCC  
CCATTGATAAACTGTTTCGATAAATGTCGTTTGAATCATGTTGTAGTTGGTAAGCTTCTTGAATTTGACCTTGCTTGCTAAGTCGAA  
GATTTTTCTAGCGCGGCGACCATTAAACGTTATATGTAGAACCAATTGCACCATCTACGCCAGAAATCGTAGCTTGAACCTAACATTTT  
ATCAAAGCCAGATAAGATTAATTTGTCTGGGAATGCTTTTCTAATACGTTTCGAGTAGGAAGAAGTTTGGCGCTGTATATTTAACACC  
AACAATTTTTTCATGATTAATAGCTCGCTGAATTGTTCAATAGAAATATTCACACCTGTTAAATCTGGTATTGCATAAATAATCATA  
TTGTTCTGAGTTGCTTCGATAATATCGAAATAGTAATCTCTAATTTCTTCAAAGTAAATGGATAGTAGAATGGTGTACGGCGGAA  
AGTGCATCATAACCGAGTTCTGTGGCATATTTTCCAAGTTCAATGGCTTCATTTAAATCTAACGAACCTACTTGAGCAATCAATTTCA  
CTTTATCCCCAACTGCCTCTTTGGCAACTTTGAAAACCTTGCTTCTTCTGCTCTGTATTTAATAAAAAAGTTTTCGCCTGAGCTACCATTT  
ACATAAAGACCGTCTAATTTCTCAGTTTCAATGGCATTTTGAGCAATTTGTTTGAAGTCCTTGTTCATTTACTTGACCATTTTCATCAAA  
AGGAACGAGTAACCGTCATATAAACCTTTTAAATCTTTGTTCAATTATGAAGTCCCTCCAAAAATCATTGTGATAATATAGTTTACAG  
CTATAATTGTAAACGCTATCATAAAATGTAACAATATCTTTTTGAAAATTGTAGTCATATTTATGTATAATTAATGAAAATGTTTTTC  
AAAATCAATAGAAATGGAGTGAGTAAGGTGATTACATCGCAATCGATATTGGAGGCACTCAAATTAATCGGCAGTTATTGATAA  
GCAATTGAATATGTTTGAATCAACAAAATCAACGCCGACAAACAAAAGTGAGCTTATTACTGACAAAAGTATATGAGATTGTAA  
CAGGATATATGAAGCAATATCAGTTGATCCAACTGTCATAGGTATTTATCAGCAGGCGTTGTTGATGAACAAAAGCGGAAATT  
GTATACGCAGGGCCAACCATTCGAATTATAAAGGTACTAATTTTAAGCGATTATTAATACTACTGTCTCCTTATGTCAAAGTAAAA  
AATGATGTAAACGCTGCATTACTAGGCGAATTGAAATTACATCAATATCAAGCAGAACGGATCTTTTGTATGACGCTTGGTACAGGC  
ATTGGGGGTGCGTACAAGAATAATCAAGGTCATATTGATAATGGTGAGCTTCATAAGGCAAATGAAGTTGGGTATTTATTGTATCGT  
CCAATGGAATAACAACGTTTGAAGCAACGTGCTGCAACGATGTCATTGAAAAGCGCATGATTGCGGAGGATTAGCAGAGAAGCAC  
ACATGTGCCAGTATTGTTTGAAGCAGCTGAAGAAGGTGATGATATTGCAAAAACAAATATTGAATGAGTGGCGAGAAGATGTAGCAG  
AAGGGATTGCCAAATACAGGTCATGTATGATCCAGGGCTTATATTAATTGGGGGCGGTATATCTGAACAAGGAGATAATCTCATT  
AAATATATCGAGCCGAAAGTTGCACACTATTTACCAAAAGACTATGTTTATGCACCAATACAAACGACTAAGAGTAAAAATGATGC  
AGCATTATATGGCTGTTTGAATGATAGTTGAAAGAAGGAGTCATTCTAAAATAGAATTTGAAACCGTTACGAGAGATGAGAGCTG  
TTGTTAGTTCCACACATCACACTCTATCTAGGACCAATCTAAACTATATCAACCAACAGTGTGCCACAGACATATTAAATTGAAGAA  
GCTGAGATATTAATAATTTAGAAAAAGAAAAAATATTTGGTATTGAAATTAAGAACACCTAGCAACTCGTTGGGACAAATCACG  
ATGATTGTCTACAGTTGCAGGTGGATTGAAATATACTACTAGTTATTTGTTGCTAGGATAATAGATTTAGTATGTTGATAAGTTTGA  
CTCAGATTGCTATTTCTAATAAATGATAACTCAGATATCGATTAAAAAGAGTGTGCAATTTGTGTGTTGATAAATGTATGGTGC  
GTATTACGCGATTGATCCGTTGTTAAAAAGTACTAAATCTGCACAATCTGTAAGTTTACTACCTTCAAATTTGTGATGGCAACGACA  
TATGCACCATGAGATTGGCGACTTCCGCTGCAGAAATTAATTCGAAGTATTACCCTATTTGACATAGCAATAAACATATCCGAA  
TGAGATAGTAGGGATGCCGATATTTTCATTAATGTGAATCGGTAGTAACATTACCTTTAGCCCCATACGAATCATACGATAATAA  
AATTCAGTCGCTGATAAACAGAGCTACCTAGTCCAGCAAAGAGTATATGTGCACTTGATTGAAGTTTGTGCGATAAAGGTTTGGATA  
ATGTCGTTATCAATAAATTCACCAGTTTGTGAATGATTGTTGATGATATTATGAATCTTTGAATAATTGGGCTATTTTCAATAA  
CTGTCTCTGTCAATTTCTTGTGAATATTAATTTTAAATCTTGAAATTTCTCATAATCCAGCTTATGACTAAAGCGTGTATCGTTGCT  
GGTGTATGTACCAATCGCATAGGGCTAAGGAGTTAATCGTTGAAAAGGCATCGCTATAACCATTTTGTCTTATATAATTGACGATGCGT  
TTATCAGTTTGTAAATAAATGTTGATAACGTTGAACAGGATTTCAAATTTTCAATTTGTGTGTCACCCCTTCACTTAAATGATTACTATTA  
TATATGAAAAATATTTTCAAGATAGTAAAAAGCATGATAAAAAATTTACTTAAATGATATATTGATAATGACTTTACGTGAAAAAACG  
ACTTATGGAGTGAGGAATAATGTTACCACATGGATTAATAGTATCTTGTGCAAGCACTACCAGATGAACCATTGCAATTCATCTTTTAT  
TATGTGCAAAATGGCATTAGCTGCGTATGAAGGTGGTGTGTTGGTATTCGCGCAAACTAAGGAAGACATTTTAGCAATTAAG  
AAACGGTAGATTTACCAGTTATTGGCATTGTGAAACGTGACTATGATCACTCAGATGTTTTCATTACTGCAACGTCAAAGAAGTTG  
ATGAACGTGATAGAAAGCCAATGTGAAGTCATTGCATTGGATGCAACGTTACAGCAACGTCCGAAAGAAACGTTAGACGAATTAGTA  
TCATATATTAGAACACATGCACCGAACGTTGAAATCATGGCTGATATCGCGACCGTTGAAGAAGCTAAAAATGCCGCACGACTTGG  
CTTTGATTATATTGGCAGCAGCTTACATGGCTATACTAGTTATACGCAAGGACAATTACTTTATCAGAATGACTTCCAATTTCTAAAA  
GATGTACTACAAAGTGTGATGCAAAAGTTATTGCGGAAGGTAATGTCATTACACCGGATATGTATAAACGTGTGATGGACTTAGG  
CGTTCATTGTTACGTGTTGGTGGTGCAGATAACACGACGAAAGAAATACGAACCGTTTGTGTCAGGATTTAGGAATTAAGATGAT  
AACGATAAAAAAACGAGATGACCATCATTAATTAAGGCACCTAATTATCTTAGGTGGCTGAATGAATGAATGGGTTCTCTCGTT  
TTGTTTGTATGATAGTGATTTTATTTTCAACTTTATCCAAAAATAAGTAAAGCGACGGGGATGGTGATTAATAGCGACAACGCCA  
CGCGTAAAAACCAATGATGATGAGTTTCCAGACAGGTATTTTAAATTCAGTTGCTAGTATACATGGCACTAATGCTGAGAAAAAG  
ATAATGGCTGATACGTTACTACACCGACGACAAATTTAGTACTCATTGCAGCTTTAGTTACTAACAAGATGGTAGAAACATTCT  
ACAATAGAAATCGCTGACGCTTTTGAAGTACAGCCTGATCAGCAATTGGGAAGATATAAATAAATGGATAGAATATATAGCCAA  
CCAATCAATGAATGGTGTATAGTTCGCTACAATCAGTCCTAAAAAACCAATCGATAATATAGAAGGTAATAACCAACAGTCATTT  
CTAAACCGTCTTTCAAATTTGCCAAACGTTCTTACGAGAGATGGTGTTAATGCATTTTGTATCATCGCTCTGCATATGCAGTTT  
CAGTCTGCTTCTTCAATAGCAACTTCTTGTCTCTTCTTGTGCTGTTAATAATCTGTTGATTCTGTTGTTGCGGTGAGCCATG  
CAGTAATTGCACTGACGACAAATGTGATGACTAAAGTATTCCAAAGATAAATAATTCGAATGCGGCATTAATCCTAAAGTTTATGACAA  
CGATAATCATAAAAGTTGCTGAAACTGTTGAAAAGCCAGTCGCAATAATCGTGGCTTCTCGTTTGTGTACATCCCTTGCTTATAGA  
CACGATTAGTAATCAATAATCCTAAGGAATAACTGCCGACAAACGAAGCCACTGCATCGACAGCGGATTTTCTGGTGTTTTAAAA  
ATAGGTCTCATAATAGGCTCCATATAAACACCGACAAATTTCTAATAAGCCATAGCCCACTAATAAAGAAAGCGCAATTGCACCTAC  
TGGAATTAAGATACCTAATGGCATCATTAATTTTCAAACAAAAACGGACCATAGTTAGCTTTAAATAGTATTGATGGACCGATTTT  
AAATACATACATTATACCAATCATTGCACCTGCAACTTTAAATAATGTAATGACCAAGTTTGTGATTGAAGTCATAAAAGTACGTCT  
CACTATTGGTAACGCTGTACCAATTAATAATCATAATCAGTGCAACATAGGGCATAAGTGGACCTATGATTGAGCGAATGGCTAGAT  
GAACATGATCGACGAAATAGTGTGTTACCATTAATCGTAAAGGAATAAAGAAACATAGTATGCCCACTAAACTATAGACAAAA  
AAACGCAATGCACTTGGTTGTGTCATTGAATGATATGATTCAATTAAGACAAACCCCTTTGTTTAAATGAATACACAAAACTGTA  
TGATGCATCTTCCCTTAATGAGATGAATCATTAATTTTAAATTTAGAAAAATCTGAAAACCTTACTATAATTGTATAGTTTGAATATTT  
TCATACCAATACAAATTAACCTAATTTATATATAGATTGAACTATATTACTTAATAAAATATTTATCTTAAATGTTGTTGTGTTGATTC  
AACGCCACAACCTAAAAGTGTATATAAATTTTGGAAATGCACATATTTGTAAATGATTAGTATCGATTAAATATCGTATTATTA  
TTTTATTAATTTTGTAGTCTTAATCAAAAAATAATATATGTCATGTTATATTGAAGGTGCAGTTGTTTTTCTATTCTCAAGAGGGGGT  
CAAAAAATACTTTTGAGGTGATTATATGTTAAGAGGACAAGAAGAAAGAAAGTATAGTATTAGAAAGTATTCAATAGGCGTGGTG  
TCAGTGTAGCGGCTACAATGTTTGTGTGTCATCACATGAAGCACAAGCCTCGGAAAAAACACCAACTAATGCAGCGGCACAAAA  
AGAAACACTAAATACACCGGAGAACAAAGGGAATGCGATAACGTCACATCAATGCAGTCAGGAAGCAATTAGACGATATGCAT  
AAAGAGAATGGTAAAAGTGAACAGTGACAGAAGGTAAAGTAAAGTCAATCATCGAAGCATCAATCAACACAAAAATAGTAAAA  
CAATCAGAAGCAGAAATGATAATCAAGTAAAGCAAGATTCTGAACGACAAGGTTCTAAACAGTCACACCAACAAATGCGACTAA  
CAAACTGAACGTCAAAATGATCAGGTTCAAAATACCATCATGCTGAACGTAATGGATCACAATCGACAACGTCACAATCGAATG  
ATGTTGATAAATCACAACCATCCATTCCGGCACAAAAGGTAATACCAATCATGATAAAGCAGCACCAACTTCAACTACAACCCCG

TCTAATGATAAACTGCACCTAAATCAACAAAAGCACAAGATGCAACCACGGACAAACATCCAAATCAACAAGATACACATCAAC  
CCGCGCATCAAATCATAGATGCAAAGCAAGATGATACTGTTCCGCAAAAGTGAACAGAAAACCAAGTTGGCGATTAAAGTAAACAT  
ATCGATGGTCAAAATTCAGAGAAAACCGACAGATAAAAACTAGTATAAACAACCTAATCAAAAGATGCGCTTCAAGCGCCTAA  
AACACGTTGCGACTACAAATGCAGCAGCAGATGCTAAAAAGGTTCCGACCACTTAAAGCGAATCAAGTACAACCACTTAAACAATATC  
CAGTTGTTTTGTACATGGATTTTTAGGATTAGTAGGCGATAATGCACCTGCTTTATATCCAAATTATTGGGGTGAAAATAAATTTAA  
AGTTATCGAAGAATTGAGAAATCAAGGCTATAATGTACATCAAGCAAGTGTTAGTGCACTTTGGTAGCAACTATGATCGTGCTGTAG  
AACTTTATTATTACATCAAAGGTGGTCGCGTAGATTATGGTGCAGCACATGCAGCTAAATACGGACATGAGCGCTATGGTAAGACA  
TATAAAGGAATCATGCCTAATTGGGAACCTGGTAAAAAGGTACATCTTGTAGGGCATAGTATGGGTGGTCAAAACAATTCGTTTAAAT  
GGAAGAGTTTTAAGAAATGGTAACAAAGAAGAAATTGCCTATCATAAAGCGCATGGTGGAGAAAATATCACCATTATTCAGTGGTG  
GTCATAACAATATGGTTGCATCAATCACACATTAGCAACACCACATAATGGTTTACAAGCAGCTGATAAGTTTGGAATAACAGAA  
GCTGTTAGAAAAATCATGTTTCGCTTTAAATCGATTATGGGTAACAAGTATTCGAATATCGATTTAGGATTAACGCAATGGGGCTTT  
AAACAATTACCAAATGAGAGTTACATTGACTATATAAACCGCTTAGTAAAGCAAAATTTGGACATCAGACGACAATGCTGCCTA  
TGATTTAACGTTAGATGGCTCTGCAAAAATTGAACAACATGACAAGTATGAATCCTAATATTACGTATACGACTTATACAGGTGTATC  
ATCTCATACTGGTCCATTAGGTTATGAAAATCCTGATTTAGGTACATTTTTCTTAATGGATACAACGAGTAGAATTATTGGTCATGAT  
GCAAGAGAAAGTGGCGTAAAAATGATGGTGTCGTACCAGTAATTTTCGTCATTACATCCGTCCTCAATCAACCATTTGTTAATGTTACG  
AATGATGAACCTGCCACACGAAGAGGTATCTGGCAAGTTAAACCAATCATACAAGGATGGGATCATGTGATTTTATCGGTGTAGA  
TTTCCTAGATTTCAAGCGTAAAGGTGCAGAACTCGCCAACCTTCTATACAGGTATTATAAATGACTTGTTCGCTGTTGAAGCGACTGA  
AAGTAAAGGAACACAATGAAAGCAAGTTAAATTCATATTCTGTAATTTAATATGCTATGTATTTCTGGTCTACTAATATGCACAGCA  
GATATAAGTAGCATCACAGTGTGAATTTAAAAATAGTAAAGTGAAATAAAGCGCCTGTCTCATTAGAGAAAATAAAGGGACAGG  
CGTATCTGTTTATGAGCTTAATAAATTTGTATGAATAATATGGTTGATCGAATAACTGTTTATCATGATGATAAATTGAGTTTTTAAA  
ATAATGATATATTACATCATTGTTATAGCGTTTAAAGAAATCAACAACCTTACGATAAATAGTGATTGCTTCGTCATTAGGTCTACGAT  
CAAAATCATGCTCGTTTTTATTACGCGTTCAAAATGTTGAATGTGGAACATGATTCATGATATGTTTCGCTTTCTCAACGGGAACATC  
ATAATCGCCATTACAATGCGTAATGAACACCGGGGGAAGTGTTTAAAGTTCATATGGTGCAATATTATATTTTGAATCAGTATAATC  
AGCAATGTTAATCATATTTATCCATTTACCTGTGCCACGTGCATAAACGTAAGTAAAAAACGTTGTGCGATTTGATCTTGAACAAC  
CGGTGTTGGTGAAGTGAGTTGTGCAATCATTGTTTCGTTTACGCTTTGAGCTATTTTGGCGTAATAACTATTAGTTGTTTTAAAGGT  
TCAGTGTGTGATCGGACTATAACCATAAAAAATCAATAACACCATCAATATCTCTGTCTCGTGCAATTAATAGACTTAAATATGCACCT  
GATGATCTGCCAAAGGTAAAAATAGGGCAATTAGAATATTGTGATTGAATCGCATCGAATGATGCGTAGACATCCTCAATAATGCA  
ATCGAGACTTACTTCTGGTAATAAACGATAAATAGTTGAATTAATCGTAATGTTCCGTAAGGATATCGATATACTGTGGGGATAA  
ATCGTTAGCTTTACCGAACATTAATCCACCACCGTGGATGTAGACAATAGCGCCTTTTGTGGTTGATTTTTTGTCTTAATAATTGTG  
TAAGGTAATGCAAATGCATCTTTAGTAATTACTTTATCTTTAATTTTCAAGTACGATTTAATAGGCTCCTTATTTTGTATTTGATGTCA  
TTATAACACTGTCTTAAATTTCCATGAAAAATAGTCTTAAGACGATGAGTCATGATAATTCTGTTCCAAATTGACGTAAAGCGTCACG  
GGTATGCTTCTTTAGACCTTCCCCATAATCCATCATTTTTACAATATCTTTAAAAAGCAGCATGTGGAATGGCTAAATCTTCTAAATCT  
GCCATAGAAAATTCAGATTGATATCATGTGGTTCGCTGTTTCAGCAAGTTTATGCACAAAGTCAGGTTCTGTGACAAAAGGCGAAGA  
CATGCCGACCATTCTGCATGTTGTAAGCATCTAAAGCAGACTCTGGAGAATTAATCCCGCCACTTGAATTTAAAGGGATACGAC  
CTGCTAAATGTTTACGACAATTTGGTTAACTGGTGCACCGAAATGATCACCCTGGTGTACGAGCGTATTTTGAATAATATGTCGAC  
CCCAGCTAGCGATTGCTAAAGTATTGGATGTTTGAACGTCCTATGACCCAATCGATTAATTGGTTGAACCTCGTAATGGTATATCCTA  
AATCACTGCCTCTGGTTTCTTCTGGCGTTGCTCGAAATCCTAAAAATAAATTTGTCAGGTGCTTCTTTATCAATCACTTCTTGTACCGC  
ACGCATAACTTCTAAACATAATCTTGCACGATTTTTTAATGAGTCGGCACCGTAATGGTCTGTACGTTTATTCGAAAAAGTTGAGAA  
AAATGTTTGAATCAGCAAACGTTGTGCAATCGAAATTTCCACACCATCAAAACCTGCTTTAATCGCGCGTAATGTAGCATCGCGATA  
CTGCTGAATGATGCTATTGATTTTCTCATGAGACATGGCGATAACATCGTGTTCAATCGGTGAATGCAAAGTCATAGGACTTGGTCC  
ATACACCTTTCCAAAATTTAAAAATGGCTTGATTTGAAAAACGACCAGCATGCGCTAGCTGGATAATAGCGAGGCTACCATGTTGTT  
CATCGTAGATGCCATGTAGTTAATCCAGGGATACAAGCATCATGATCAATATTAAGGCCATATTCAAACAATTGACCATAAAGGTTT  
AATGTAAGCAGCGCCGTGACTTGCATTCCAGCTGAATTAGAGCAGCTGACGATGAGCAGATAAGCCAAGTCTGCTTTTGAATAATAGCCTT  
TTTTGTTGATGTGTTTACGGTCATTGGTGATAATACAAAGCGATTTCGAAATTTTGATGCCATTAGGTAAGTGGATTGATTGTAAAG  
TGGTTTGTATCGGTACATACTATGATTCCTTTTCTATTCAATATTGTTTTCAAAGTACCATGGAAAGAATGAATAATCAATGATGAAC  
AGTCTTGATAGAATAGAATTGGTACATGGAAAAACATTTTTAAAAATTGAACCTAATGAATGGCATTGTAGGTCTGAAAAATATGAATAT  
GGAAAAGAAAAATAAAGGCGAAAAAGATATAAAAGTTAATTGAAAAACGTTATCATATACGTGGGTATATGAAGAGGGAATGGTAT  
TAAGAACGCTAAAATGTTATGTGATTTGACATGACAGGATAAGTTTGGAGATGACGGATTGGTTAAATTAAGCGTATTAGACTAT  
GCCTTAATAGATGAAGGTAAGGATGCACAAAAGGCATTGCAAGATTCAAGTGACACTTGCAAAATAGCAGATCGACTTGGCTTTAA  
GCGAATTTGGTTTACGGAACATCATAATGTACCAGCGTTTGGCGTAGTAGTCCAGAACTTTTGTATGATGCATACATTGGCGCAGAC  
AAATCAGATCAGGATTGGCTCTGGTGGTGTGATGTCGCCGACTATCGACCTTATAAAATTGCTGAGCATTTTGAAGATATGGCAGC  
GTTATATCCAAATCGTATTGATTAGTTAGTTAGTTAATAATCCAGGTACTACTATGGTAAAGCAAGCTTATAGTAATAAATCTTAC  
ATATGATAGTTACGATGAATCGATTTCGTTATTACGTGATTATCTTACAATAAAGGATAAAACCAAGTGCAGATACGTTAGGTGTCCA  
ACCACACATTGATCATTTCAGAAATGTGGTTATTAAGTAGTAGCGCAACATCTGCCAAAATGGCTGCCGAACCTAGGTATAGGGCT  
TTCTGTTGGAACATTTTTGCTACCAGATATAAATGCGATACATGCAGCGAAGGATAACATTGATATTTACAAAAAACATTTCCAAGC  
ATCAACGATTAAAATGGACGCAAAAGGTGATGGCATCTGTATTTGTCATTGTAGCTGATAACGAAGCGGAAGTAGCAGCATTACAAC  
ATGCCTTAGATGTTTGGTTATTAGGTAAATTACAATTTGCAGAATTTGAAGATTTTCCTTCAGTAGACACAGCACAAAAGTATAAGC  
TTAATGATCGAGACAAAGAGATGATTCAAGCACATCAAGCAGCATCATTTGCAGGTACACAAGAACAGGTTAAAGCACAATTAGAT  
GATTTTCATTGCTACGTTTGAAGTTGATGAGGTGTTAGTAGCAGCCTTATTCAGGTATTGAACAGCGTTGTAACCAATTAATAATTA  
CTCGCGGAAATTTTATTTGAGCTTTTAAATAGAGTAAAGGATGAAGATAAGATAAGTGAAAAAGTTAGCCAATTTATTTATGGGTAGA  
AAAAGTAGGAGATTTGTATGTGTTTAGTATGACACCTGAATTGCAAGATGATATTGGGACAGTAGGTTATGTTGAATTCGTAAGTCC  
AGATGAAGTTAAAGTGGATGATGAAATTGTGAGTATCGAAGCATCGAAAACGGTCATTGATGTGCAAACGCCATTGTCAGGAACGA  
TTATTGAGCGAAATACAAAAGCGGAAGAAGAACCGACAATTTTAAACTCTGAAAAAACAGAAGAAAATTGGTTGTTCAAATTGGAT  
GATGTCGATAAAGAAGCATTCTAGCATTACCGGAGGCTTAAATGGAACGTTAAAAATCAAATAAAGCGAGACTTGAATATTTAAT  
CAATGATATGCGTCGAGAGAGAAAATGACAATGACGTATTGGTAATGCCATCTTCATTTGAAGATTTGTGGGAATTATATCGAGGCTT  
AGCAAATGTCAGACCGGCATTACCTGTAAGTGATGAATATTTAGCTGTACAAGATGCTATGTTAAGTGATTGAAATCGTCAACATGT  
TACGGATTTGAAGGATTTGAAGCCGATAAAAGGTGACAATATCTTTGTTGGCAAGGTGATATCAGACGTTAAAAATCGATGCTAT  
TGTTAATGCTGCAAAATGATCGTTTCTAGGATGTATGCAAGCTAATGACTGCATTGATAAATATTATTCATACAAAAGCGGGTGT  
TCAAGTTCGACTTGATTGTGACAGATCATTCGACAACAAAGGCGCAATGAAGGTGTAGGTAAAGCCAAAATAACACGTGGATATA  
ATTTGCCAGCAAAGTATATAATTCATACGGTTGGTCCGCAAAATACGTCGATTGCTGTTTCAAAGATGAATCAGGACTTGTTAGCTA  
AATGTTATCTTAGCTGTCTTAAATTTGGCTGATCAACATAGTTTAAATCATGTGCTTTTTGCTGTATATCTACAGGTGATTTGCTTTT

CCTCAAGATGAAGCAGCAGAAATTGCTGTTCTGAACAGTAGAAAGCTATCTCAAAGAAACAAATTCAACATTGAAAGTCGTGTTCAA  
TGTATTTACAGATAAGGATTTACAACGTGTATAAGGAGGCATTTAACCGTGATGCAGAGTAGTAATTGGAATGCAATGCTCTGTATA  
TGGATGACAAGACAAAGCAGGCTGAAGTATTGCGTACTGCGATTGATGAAGCAGATGCGATAGTGATTGGAATTGGTGCAGGCATG  
TCTGCATCTGACGGATTTACATATGTAGGAGAGCGTTTTACGGAAAAATTTCCAGATTTTATTGAAAAATATCGCTTCTTTGATATGT  
TGCAAGCGAGTTTACATCCTTATGGCAGTTGGCAAGAATATTGGGCATTGAGAGTCGTTTTATTACATTAACCTATTTAGATCAAC  
CTGTAGGTCAGTCTTACCTCGCTTTAAATCCTTGGTGGAAGGTAAACAGTACCACATTATAACTACGAATGCAGATAATGCTTTTCG  
ATGTAGCTGATTATGATATGACTCATGTATTTTCATATACAAGGGGAGTATATACTGCAACAGTGTAGTCAGCATTGTCTATGCTCAAA  
CGTATCGCAATGATGATTTAATTCGTAAAAATGGTTGTTGCGCAACAAGATATGCTTATACCTTGGGAGATGATTCCAAGATGTCCAA  
AATGTGATGCCCCAATGGAAGTGAATAAACGTAAAGCGGAAGTTGGGATGGTTGAAGATGCTGAATTTTCATGCGCAACTACATCGT  
TATAATGCTTTTCTAGAGCAACATCAAGATGATAAAGTGTGTATTATTGGAAATTGGAATTGGTTATACTACACCACAATTGTGGAAG  
CATCCTTTTTCAGCGTATGACACGTAAAAATGAAAATGCACCTTTATATGACGATGAATAAAAAAGGCATATCGCATTCCGAATTCAATT  
CAAGAACGTACCATACATTTAACTGAGGATATCTCAACATTGATTACAACAGCACTCCGGAACGATAGCACAACGCAAAATAACAA  
CATTGGAGAGACAGAAGATGTACTTAATAGAACCGATTAGGAATGGAGAATATATTACTGATGGTGCGATTGCACTCGCTATGCAA  
GTTTATGTTAATCAGCATATCTTTTAGATGAAGATATTTTATTCCCTTATTATTGTGATCCAAAAGTGGAATTTGGACGTTTTCAAA  
ATACTGCTATAGAAGTGAATCAAGATTATATAGATAAACACAGTATTCAAGTAGTTCGCCGAGATACTGGTGGTGGCGCTGTGTAT  
GTTGATAAAGGTGCCGTTAATATGTGTGTATTTTGAACAAGACACTTCAATTTATGGTGATTTTCAACGATTTTATCAGCCAGCTA  
TAAAGGCGTTGCATACATTAGGTGCAACAGATGTGATACAAAGCGGTAGAAATGATTTAACATTGAATGGTAAAAAAGTGTCAAGC  
GCCGCAATGACATTAAGCAATCGTATTTATGGCGGTTATTGCGTATTACTTGATGTTAATTGAAGAATGGATAAAGTGTAA  
AAGCTAATCGAAAAAGATTGTCATCGAAAGGATTAATCTGCTGTCACGTGTTGGTCATCTTAGAGAAGCACTGGATGAAAA  
GTATCGTGATATAACAATTGAAGAATTTAAAAATTTAATGGTGACGCAGATTTTGGGAATCGATGACATTAAGAGGGCAAAACGAT  
ACGAATTATCTGATGCAGATTGGGAAGCGATTGAAGAATTGGCGAGTAAAAAGTATAAAAAATTGGGATTGGAATTATGGGAAGTCA  
CCTAAATATGAATATAATCGAAGTGAAAGATTATCATCAGGTACGGTAGACATAACAATTTCTGTTGAACAAAATCGTATCGCAGA  
TTGTCTGATTTATGGGGATTTCTTTGGACAAGGTGATATAAAAGATGTGGAAGAAGCATTACAAGGAACAAAAATGACAAGAGAAG  
ATTTAACGCACCAGTTAAAGCAATTAGACATCGTTTATTATTTTGCCAATGTTACGGTAGAATCATTGGTTGAGATGATTTTAAGTTA  
ATATTGTTTAGGCGTTAATGTCACACCCTCAATGAATATGTGTATTTGCTTTTAAAAATGGTGACTATGTAGTTATGTAATTTGATCAT  
ACGATTGAAAAATGAATTTAGTTAATTAGCAAGACATCATATTTATAGCGTTTGTGTTTATTAGTGATTGGGTATTTGAAAAATGGTT  
AATGATAGTTTTTAAAGGAATAAATTCATTTTCATTTATATAAGTAAGATTAAATACTAGCTACTAAAGTCTATTTATATACGTCAAA  
ATATAATGACTGCTATAATGAGTAATCAATAGACACAAAGAGGAGATTATGTGATGAATAATAAAGTATTAGTAACCGGTGGTACA  
GGGTTTGTGGCATGCGAATTATTTACGATTATTAGAACAAGGTTATGAGGTACAAACAACGATACGTGATTTAAGTAAAGCTGAT  
AAAGTAATTAACAATGCAAGACAATGGCATTTCACAGAGCGATTAAATGTTTGTGGAAGCGGATTTATCACAAGATGAACATTG  
GGATGAAGCAATGAAAGATTGTAATATGTCTTGAGTGTAGCATCTCCGGTGTTTTTCGGTAAAAACAGACGATGCAGAAAGTGATGG  
CGAAGCCTGCCATTGAAGGCATACAACGTATTTAAGAGCTGCAGAACATGCTGGCGTGAAGCGTGTGGTGATGACTGCAACCTTT  
GGTGACGTTGGTTTGAACAATAAGATAAAAAATTCATCACAAATGAAAGTCAATTGGACAAATGAAGATGAACCGGCTTATCAGT  
ATATGAAAAATCAAAATTTGTAGCTGAAAAGCGAGCGTGGGATTTGTTGAGAATGAAAAACAACAGTAGAATTTGCCAATCA  
ATCCAGTTGCAATTTTGGGCCATCATTAGATGCACACGTTTCAGGAAGCTTTTCATTTATTAGAAAATTTATTGAATGGTTCAATGAA  
ACGTGTACCGCAAATTCATTGAATGTGTGTTGATGTGAGAGACGTAGCTGAACTACACATTTTGCCAATGACAAATGAACAGGCTA  
ATGGCAAGCGATTTATTGCTACAGCTGATGGACAAATTAATTTGTTGGAATTTGCAAAATTAATTAAGAAAAGAGACCTGAAATA  
GCTCAAAAAGTTTCTACTAAAAAATTACCAGACTTTGTTTTGAGTCTAGGTGCTAAATTTAATCATCAAGCTAAAGAAGGTAACTT  
TTATTAGATATGAATCGAAATGTAAGTAACGAACGAGCAAAAATACTTCTTGGTTGGGAACCGATTGCGACACAAAAAGAAGCAAT  
TTTAGCAGCTGTCGATAGTATGGCTAAGTATCATTTAATATAATACAAAACACCGTCCATAAGTAAGTGGCTTTCTCTTGATAAAA  
GAGGCATTCACTCAATATGTGACGGTGTTTTATATATTTACGTTAACACTATTGCTGTGGCTTTTGACGGCCTTTTAATAAAATTTGCT  
GTCGCACCTACGATAATAATAAATAGAATCGCACCAATAATCCCATATATTTTACTGCGTTACCGAACACGATACCGACAGTTAAA  
AAGCTGTATCTGAGAATGTTTGTGACGACCACTAATTCGCTGATAAAAGTGGCAAGAATAATAATGGTAAAAACGTTAGTAGGAT  
ACCATTTAGAGCGGCGCCAGCAACGACACCTTTAATACCGCTCTTGCAATTACCGAATACAGCAGCCGTTGCACCTAAGAAGAAGT  
GTGCAACTACGCCAGGTAATAATGACGACGCCACCAATAAGAATAAGATAAACATACCGATGACACCTGTAATAAAGCTGACAAA  
GAATCCAATTAATACTGCATTTTGTGCATAAGGGAACACAATAGGGCAGTCTAATGCAGGTTTAGAATTTGGTACAAGCTTTTCAGA  
AATTCCTTTAAATGCTGGGACGATTTTCAGCTAAGATTAAACGAACGCCCGTTAAAATAATAAATACACCAGCAGCAATGTCACAC  
CTTGAATTAAGAAAAAGACAATAAAGTTTGGACCATCACTAATAGATTCTGTGTACATAACTAACGCCCCGCAATAAGCATGCGATG  
AAGTAAAGTAATGCCATCGTAATCGAGATACTAATTGTACTTTCTCGTAAGAACTTAAGCCTTTTGGAATTTAATCTCTTCCGTTG  
ATTTAGACTTACCTTTGAATAATTGACCTACAGCACCTGCGGCAAGTAACTGATTGAGCCAAAATGACCTAACGCTACTTGGTCAT  
TCCCTGTAAATTTTGCATTTGAGTTGGAGTAATGCAGGTAAGTATGATGATTAATCCTAATACGAGTGCGCCGATACAACATCG  
TTAGCCAGCCTTTAATATGACTGACTGTTAAAAATGATTGCTAAAAACGCAAGCCATGATAAATGTATGATGCTTTAAAAAGATAT  
ATTTTAAATTAGTGAAGCGGGCAATTAATAATTAACAATCATGCCACAGACCATGATGAGTGCAGCTGTTGTTCCAAAAATCTTTTA  
AGGCTAGTGAGACGATAGCTTCGTTGTTAGGTACGATACCTTGACACCAAAATGCGTGTTGGAATATTTTGCCGAATGGTTCAAGAG  
ATCGAACGACGACATCAGCACCTGCACCTAAAAATTAAGAAGCCTAATATCGTTTAAATGGTTCTGAAAGTGATCGTTGCGGCAGGTT  
TTTTCTGAACGATTAAACCTATAAAGCAATCAGTGCAACAGAATGGCTGGTTGACTTAAAAATATCGACTATAAAATTAAGGATT  
GCTTGCATAGGTGCTACCTCCTTTAAATCATGTTAAGTTGTTGTAATTTTCTGAGAGCTTTTGTGTGAATTCAGCTTTGTCTAAAATA  
TTATCAAGAATAAGACATCCCCTAGACGTTTCGGCATTTTCAGCTAAATCTCTACCAAAAATAAACAAGTCAGCCATCTCTGGACTT  
GCTGTCAATATGTCATATGTTCAACTTCGATATCAGATGATGATTAAGTTGCTTAAGTGCTTACTACCAAGATAATCCCTTCAGTGAA  
AACTACTTCTTAAACCGTGGCCACATACTACTAAAAATTTTCATATAATCATGCTCTCTTTAAAAATGTTTTTATGTCTGTGCGTTGT  
TGCAGTTAATAGTTGCTGGACTGTTTGGTTATCGCCAGTATGGTTGCTAAATTTTGAATACAGATAAGTGTGAATGATTGTGCGATG  
GCACTCAATACAAAAATGAGTGATGCGTAGTGATCTTCATCACAGAATGCCACATGTTGGTTCAACTTTAATAGACTTAAACCAACT  
TGATGTACGTCATTGTTCCGTTCTGTCATGTGCAATTGCAATTTCAAGTGCGATAACGATATAAGGTCCAAGTTCATTAACGCTATCA  
ATCATGTCTGAACATAGCCTTGTTCAATAATTTGTTCTGTAGTAATGGCTGAGAAGCTATAGTTATAGCTTCAGTCCAATCATTTA  
CTTGTTCTTTTACAATGATGCGTGTTGTTGACAAAATGTCTAATGACACGTTATTAAGCCTCCTTTGTCATAGTTAAAGCAATGTGTT  
GTTTAATTTTAAAAATATTCCCATCTAAGAAATCTTGTCGATATAAGTCGTTGCTTAAGCATTTCGCTTAAGTGCCCAATGCCTTTAA  
ATGTGCAATTTGGGTTGGTCCGTTGCTAATGTAATTAAGGTGAACGGGATCGTTAGCTTTACTACCAAGATAATCCCTTCAGTGAA  
ATATGTTAGTGCAGAACTGACACCATCACTGATACATAATCAGTACCAGCTGAATAAGTGCAATATGTGGACTAATGACCATATATGA  
CCCGAATTGTTCAAAATGTTTTAAAAATTCAGCTGTATAATTTGAATAGACAATGCCATCATTGATTAAAGGTTGCACAGCCACTGC  
AATTGCGGATTCAATTGATAATGGTTGTTTATTTATAATGATGCGATGTTTCAGGCAATAAAATCTGCGAGTGACTTGCCATCAGTTGC  
CATTTTCATGACTCGTTGTTCTCTTGAGTCATTGATAATTTGATTCAATTTTTCAGGAGATTGTTGATTGATAAATGGATCGACATGA

ATAACTGGTACAGCTGATATTTCAACAAGGTACTGTTGAAATGACATAATCAATGTTATCTTGCAATAATCGACTTTCTTCCAATTGAT  
AAATGGAATAGGCATCCCAAATGTGAAACTCAGGATACAGGTGATTAGTTTTGATTTTAAAAGTTGCGACGTGCCTATACCAGAA  
CCACATAGTAAGACAACCTTAATCATTGATTGTTTTATGTGTTGCAACACGCTCTATACTTGATGCGAAGTGAATTGTAATGTATGTTA  
ATTCATCTTCGTTGAAGCGAATAGCAGCATCTTGTTCAATTGGGCTAATATGCTTGCTAACGGCTTCAATGATTTGAGGATAGCGAC  
GCATAACTTCTTGCTCAAAGGATTAGGTTGTAGCATATCATATTTAATACGATGTATAGCTGGTTTGATATGTGTGATCAGACTGGT  
ATGTAACCTGTTGTCTTTTGACATATCAATGCCTAATCTTGGCTAACACAAGTGATTAATTCATGTATATTTTGCATAAAATCATGG  
TATTCAAAAGGCAATTGAAGACGCTGTATGTTCCGGTCATTTAGAGCCTAGTAAATGTAACGTGATAAAGATAATTTACAGACTCTGGA  
AATGTGACATTACAACACGTTCTAAGTTTTCTATCATTTTTGAAGCAATAGCATACTGATTAGTATGTGCGCCATTTATCAATTTTCAT  
TGATAGGTATATCGAACGAAAAATTTTCATTTAGACGCTGAATGGCAATGAGTATATGATAGATTAAGCCATCGATAGCCGACTGA  
ACTAAATGATAATTTTCACTATTTAATGTCTTAATAATGGCACGGCGAACCAATGCGATTGATTCTGAATTAAGATATCCGCCTCT  
ATAAAAAGGTGCAGCTTGTTTCATATATTGATGTATAAAGTGTGCATACGCTTTACGATAGTGATCTTCTCACCATAAATATTGAATC  
CTTTATTGTGGACATAATTTAACTTTAAATGGTATTGATCTAGTTGGGCTTGAATCATTTTAAATATCATCTGCAATTGTCCGACGCGA  
AACATTAGCATCTTGCGCAAGTTGCTTTGTTGAAACAGGATCGGTTGTTTGAATAACTTTAAAGCGATATGTGTGAGTCGTTTCATCT  
TTTGAAAAATGAATTTGATTGTTAGATTGTGCTCTAATTCATTTAATAGTGTGCGGTGAGCTGTTGTTACTTTGATGCCTGCAGCTTT  
ATTACGGCTGACTTGGTAATGATAAGTTTCAGCATATTGCTCAATATATGCTATATCATATTGAATGGTACGAGGTGATACACCAAG  
TTGATTAGCAATGGTATTGATTGGAATAAACGTTTGCTCATGAATTAAGATAACAAATTTTCGATTGTCTATAACTTAAACAACGT  
AATATCCTCCTATTTGTAATTGTAAGCGATTCTTAAAAACGTAGATATGCAATCTCTTCATATTTAATCCGAAAAATTGCATATC  
AAAATGTTTATGGCGCAAGATTTTATAGGAACCTTTAAAAATAAATTAGATTTTCATGTTGACAATTTAAAAATGTCGAGTATTTT  
AGTTAGACATCTAACGAAATGGTGGTGCAATAAATGGAATCTACTTATTCGATTTTATTAGAATGATTAGTCATGAGATGAAACAA  
AAGGCTGATCAAAAGTTAGAGCAATTTGATATTACAAATGAGCAAGGTCATACGTTAGGTTATCTTTATGCACATCAACAAGATGG  
ACTGACACAAAATGATATTGCTAAAGCATTACAACGAACAGGTCCAACGTGTCAGTAATTTATTAAGGAACCTTGAACGTAAAAAGC  
TGATCTATCGCTATGTGATGCACAAGATACGAGAAGAAAGAATATAGGGCTGACTACCTCTGGGATTAACTCGTAGAAGCATTTC  
ACTTCGATATTTGATGAAATGGAACAAACACTCGTATCGCAGTTATCTGAAGAAGAAAATGAACAAATGAAAGCAAACTTAACATA  
AATGTTATCTAGTTTACAATAAATGATAAGTGTGACTGGTAGAAATCAGTCACTTTGCTTTAATATTATAGTTAGATATCTAATTTGT  
TAGTAAGCTAATTATTGGAAGACAAAGGAGTATTGAACAATGAAAGACGAACAATTATATTATTTGAGAAATCGCCAGTATTTA  
AAGCGATGATGCATTTCTCATTGCCAATGATGATAGGGACTTTATTAAGCGTTATTTATGGCATATTAATATTTACTTTATAGGATT  
TTTAGAAGATAGCCACATGATTTCTGCTATCTCTCTAACACTGCCAGTATTTGCTATCTTAAATGGGGTTAGGTAATTTATTGGCGTT  
GGTGCAGGAACCTATATTTACGTTTATTAGGTGCGAAAGACTATAGTAAGAGTAAATTTGTAAGTAGTTTCTCTATTTATGGTGGT  
ATTGCACTAGGACTTATCGTGATTTTAGTTACTTTACCATTGAGTATCAAAATCGCAGCAATTTTAGGGGCGAGAGGTGAAACGTTA  
GCTTTAAACAAGTAATTATTTGAAAGTAATGTTTTAAGTGCACCTTTTGAATTTTGTCTTCATATTAGAACAATTTGCACGTGCAA  
TTGGGGCACCAATGGTTTCTATGATTGGTATGTTAGCTAGTGTAGGCTTAAATATTATTTAGATCCAATTTTAAATTTTGGTTTGTAT  
TTAAACGTTGTTGGTGCAGCTTTGGGTACTGCAATCAGTAATGTTGCTGCTGCTCTGTTCTTATCATTTATTTTATGAAAAATAGTG  
ACGTTGTGTGCTAGTTAATATTAACCTTGCGAAACCTAATAAAGAAATGCTTTCTGAAATCTTTAAATAGGTATTCCTGCATTTTAAAT  
GAGTATCTTAATGGGATTACAGGATTAGTTTTAAATTTATTTTAGCATTATGGAACCTTCGCGATTGCAAGTTATGGTATCTCA  
TTTAGACTTTGTGCAATTTCCGAACCTTATTATCATGGGATTATGTGAAGGTGTTGTACCATAATTTGCATATAACTTTATGGCAATA  
AAGGTCGTATGAAAGACGTTATCAAAGCAGTTATCATGTCTATCGGTGTTATCTTTGTGTATGTATGATTGCTGTATTTACAATTGG  
ACATCATATGGTTGGACTATTTACTACTGATCAAGCCATTGTTGAGATGGCGACATTTATTTGAAAGTAACAATGACATCATTATT  
ATTAATGGTATAGGTTTCTTGTTTACTGGTATGCTTCAAGCAACTGGTCAAGGTCGTGGAGCTACAATTATGGCTATTTTACAAGGT  
GCGATTATCATTCCAGTATTATTATTATGAATGCTTTGTTGGACTAACAGGTGTCATTGGTTCATTATTAATTGCTGAGTCACTTTG  
TGCAATTTGCTGCAATGTTAATTGTCTATTTATTACGTAATCGTTTGACAGTTGATACATCTGAATTAATAGAAGGTTAAATATTTCTG  
ACACTTCTGACTGAGTATATTTCCGTCGGAAGTGTATTTTTCGAAAAAATAAATATATGATACGATTATGAAAAAATAAAGTGAG  
AATGGCATATGTATAAATCTAAAATACTGTTGAAATATATTTTATGTAAGAATCAGAAGTTAAAGACTTAACTGAAGAAAAATAT  
AATCAAGATTACGAACATTAAACATTTAGCTTTTAAAGAGGAACATATCAAAAGTAGGTTAGCTAAGAAAAACCCGATCAAAACAG  
GGTATTTTGTACATGTTGGACAAAAGACGAGAACAATTGCAATCAACCATACTCAAAAGAGGCATTTGCAGATTACTTAATGATTA  
TAGTTATTGATGAAGAATTAAGCGGTTATTTCTTATTTCTAGGGAATTATTGGTAGAAAAAGGCATCTTAACTACATTTGAACATA  
AAGGTAAGATAGCTTTTATAGGTTTATCCTAAGTGGTGAATCAATTGAATAAAACAGCAGGGCAACACAAAAAGTGGCAATGTAAA  
TATTTTTTGAATACTAATAAAAAAGTCATATGGTTGAACCTTATAAGAGATGAATATATCATCTTTTCGATAAGATAACCCTATGACTTT  
ATTTTTTATCATTTAATGATGAACGGTTTCTGTCTACTTTATTTCAAGTGAGGATAAAGCTCAACATTGCAACACACTGATTGCT  
GTTAATAAAAAATAAACCGACATCCCATCCGAATTTATCAACTACAGCACCTAAGACGATGTTGGCCATTACAGCACCAAAACAGATA  
ACCAAATAATCCTGTTAATCCAGCTGCTGTGCCAGCTGCTTTTTTAGGTACATAATCTAATGCTTGTAAACCAATTAACATAACTGGT  
CCATATATTAAGAAACCAATGGCAATTAATGAGACATTGCTTAAACCAAGCATATGCTTGGAGGATTTAAACCAATAAATTAACAAA  
TACTGTGACACCTAACATGAAGAAAGAAACCTGACGTTCCACGACGACTTTGAATAAATTTATCAGAAATAATTTATCAACACATAAATG  
TACCAGGAATTCCAGCCCATTCGTATAAGAAGTATGCCAACCTGATGCTTTTAAGTCGAAATGTTTTTCTTCACTTAAAGTAGACTG  
GCGCCCAATCAAGTACACCATAACGCACGAAATAAAACAAATATATTTGCAAAGGCAATTGCCCATACCCATTTATTGTTTCAGTACAT  
ATTTAAATAAAAATTTCTTTTGTAGTTAATTTCTGTTTCTAATGTTTTCTTATCGCTTGTAGCAAAGTCATTTTTATAAATTTTCGATTGGA  
GGTAAACCTTGAGATTGAGGTGTGTCTCTAATCAATACGTATGAAATTGCGGCAATGATAAGTGCTAAGAGTGCAGGGTAAATGAA  
TACACCTTCAAAACCTTTTAAATAACCAAAAGTTGATAAATGCTGTTGTTGTAATACCCCAAGCAGCAATAGGTGCCATAATACCTCC  
ACCAACATTATGCGCAACGTTTCAAAGGGCAGTCTTACTTCCGCGTTCACTTACACTAAACCAAGTGAACGAGAACACGGCCTGAAG  
GTGGCCAGCCCATACCTTTGAAACCATCCATTTAAGAATAATAGGACAAACATAATACCGATACCTGTATGAAGAAACGGTACAAAT  
CCCATTAAACAATGACGATGAGTGCATTAATAAGAACTAAGAATAATCCGAGCATTGCTCCGATCTGCTACAGTACATCCCAT  
AAAGAACTTACTAAATCCATATGCGATGGAAACAGCAGAAAGTGCAAAACCTAGTTCCGCTTTTGTAAACCTTGCTCTTGCAATGC  
CGGCATCGCTAATGAAAAGTTTTTACGTAATAAATAGTACCCAGCGTAACCGATGAAAAATACCAAGAAATACTTGGAGACGTAATC  
GTTTATAGGTATCATCTATCTGATTTTCTGGCAAAGGCTTAATATGCTTTGCAGGTTTAAGAAAATTCATAAAATCCTCCTTAATATG  
TATTTATATGCATTTTGTGCGATAAACTTATATTAGACATGTATGAAAGCGTTGTCAATATACCTTTGTGAAATCTTGCATATTTAGT  
TATTGAAGTATTTTATAAACATTTAGAAAAAATAAATTGCTACACATAAAATTTATAATTATGCAATTATTATGTGCTTATACATACTA  
GCTGTGTATCTACGAATGAGTACAAACATATTTTTATTTGCAGAAAAGGGGTAAATGGCATATAACTATCTTTTTTATGTAAGCTGG  
TATAAAATTTTACTAACAGGAGGGATAGTATGAATATAGTAGGGCATATCACATATCCATGTATACAAAAGATGCAAAACGTAA  
TAAGGATTTTTACACAATGTCTTTGGATTACGATTAGTTGAAAAGTCGGTTAATCAAGACAATCCTTCAATGTATCATTTGTTTTAT  
GGGGACGAAGTAGGTACAGCCGGAACAATTTTAAAGCTTTTTTGAAGATTCCCAATGCGGGTCATAAGCAGCCAGGTACTGAAACGAT  
TTATCGATTTTCATTATTAGTACCAATCAAGCGGCACTTCATTATTTTTGAAAAACGTCTTGAGAATAATGGTATTACGTCTGAACGT  
TTGTAATCTTGGACAAGAAGGTGTTGTCTTTAAAGATGAAGACGACTTAGAAAATCATATTGCTTGTTAATGATAGTTTTGAAGTA

CCACATCAATGGCAACATAACGCTTATAGTGAAATACCTCAAGCATATCAAATTTTAGGAATAGGGCCAGTCGAATTAAGAGTTAG  
AAATGCAGCGCGTACGGTAGAATTTTTGGAAAAATGTCTTAGGTTATCGCAAAAGAGATAATAAATCATTCGATGTGCTGACATTAG  
CACCACAAGGTTTATATTCGGATTTTGTAGTTATTGAGCAACAGGGACAACGTGAAAAGACCTGGACGAGGTTATATCCATCATATTG  
CAGTTAATACACCACAAATGAGTGACTTAGAGGCAATTTACAAGAAATTACAACAACAAACACAAAGTAATTCAGGTATAATTGAT  
CGCTATTTCTTTAAATCATTATACTATCGCCATAATTCAATTATGTATGAATTTGCGACTGAAGCGCCTGGATTTACTATTGATACAC  
CTCTTGAACAATTAGGAAGTCAATTGAACTTGCCTGACTTTTTAGAAAGCAGAACGTGAACAAATTGAAAAGTAAGTTACACGAAATA  
TAAAGGAGAATGTTTAAATGGCCAAATTAGAAATGAATAAAAAATACGCCCTCTTGAGTTTGGTTTGTATTCTTAGGTGATCATTTATT  
GAATCCATTGAAAGGTGAAAAAGTTAGTTATGAGCAACGTATTAATGAAATTATTGAAGCAAGTAAATTAGCAGATGAAGCAGGTA  
TTGATGTTTTTGCAGTTGGTGAAAGTCATCAGGAGCATTTTACAACACAGGCACATACGGTTGTGTTAGGTGCAATTGCCAAGCGA  
CAAAGCATATTAAGTTTCAAGTTCTTCAACGATTATTAATGCAACAGATCCTGTAAGAGTATTTGAAGACTTCGCGACATTAGATT  
TGATTTCTCATGGTAGAGCCGAAATTGTAGCTGGCAGAGCATCAAGAACAGGTATTTTTGACTTGTTTGGCTATGATTTAAAAAGACT  
ATGATGAATTGTTTGAAGAAAAATTAGGTTTACTTTTAGAGTTAAATAAAACTGAGCGTATTACTTGGTCTGGAAAAATATCGTCCAG  
AACTTAGAAATATGAAAAATTCCCAAGACCAATCGATAATATATTGCCAATATGGCGTGCTGTTGGTGGTCCACCTGCAAGTGCTA  
TTAAAGCGGGAAAAACAAGGTGTGCCAATGATGATTACAACCCTTGGTGGCCAGCAATGAACTTTAAAGGTTCTATAGATGCTTAT  
CGTCAAGCGGCAACTGAAGCAGGTTTCGATGCTTCGCCTAAGTCTTTACCAGTAAGTACAGCGAGTCTGTTTTATACAGCTGAAACA  
ACTCAGGATGCTATGAGAGAATTTATCCACATTTGAATACAGGGATGTCATTTATTCGTGGTGTGGTTATCCGAAACAGCAATTT  
GCTAATTCGTCAGATTATCGAGAAGCGCTAATGGTTGGAAGCCCGCAACAAATTATTGAAAAGATATTGTATCAACACGAGTTGTA  
TGGTCATCAACGTTTTATGGCACAGCTTGATTTTGGCGGTGTGCCATTTGAAAATGTTATGAAGAATATTGAGTTAATTTGGCAACGA  
CATTATACCGCGCATTTAAAGACATTTATCAAAATAGGAGGGCGTCATCATGAATATTGTATTATTGTCAGGTTCCACAGTAGGTT  
CTAAAACGAGAATTGCTATGGATGATTTAAAAAATGAACTAGAAAGTCATCAATGAGGGACATCAAAATAGAGTTGATGGATTTACGA  
GAACTTGAATTAGAATTTAGCGTTGGAAGAATTATCTAGATACTACAGGAGATGTATATAAATTAACGACGTCGTTAATGCAGGC  
TGATGTGATTTTTATTGGTTTTCCAATTTTCAAGCTCCATCCCTGGTGCTTTGAAAAATGTGTTTGATCTACTCCAGTCAATGCGT  
TTCGTGACAAGGTAATAGGACTTGTAGCGACAGCAGGTTCTAGTAAACATTATTTAATTCCTGAAATGCATTTAAACCAATATTGA  
GTTACATGAAAGCACATACGATGCAACGATGTATTTATTGAAGAGAAAGATTTTTCAAATCAACAAATTGTCAATGATGATGTTG  
TATTTTCGGTTAAAGCGTTGGCACAATCCACAATGCGAACTGCCAAAGTACAACAACAGTGTTTGAAGAAGAAAAACAACCAATAC  
GACTTTTAAAGTATAAAAAATAAGACGCTCGGCACACTAAATTTGTAAGTGTTTGAGCGTCTTTTCATATTACTATATAGCCAATGA  
ACGACGATAAAGGCAAGTGATGACAAGCATATTGAGGTAATAATGATTGTGCATAAGCGGTTTAAAGTGCGCGATTTTTAAGATCTTT  
AAATGCCACATTTAACCCTAAAGCAACCATGGCCATTAATAAGCAAAATTGTTGATACAGTATTTAAAAATATTTAGCAATGCTGACGG  
AATAGTTACATATGTATTTACTAAGGCCATAATGACAAATCCAATTAAGAAAGTATGGAATGCTTATTCGACCCTTGCTAGATGATTC  
TGATGAACGGAAACGCATAATTAATAAAGTACGATGGTTAATGGAATCAGTAAGAATACTCTACCAAGTTTGCCAGAAAGTGCAA  
TTTTAAGTGATCACTACCACCAAAGCCACCAGCTAAGACAACGTGTGCAATTTTCATGAAGACTAACACCAGACCAAGCGCCATAA  
ACATTTGTCGTCATTGAAAAGATAGCGTAGATAGCTGTATATATAAGTGAGAAATATCGTACCAATCAATGCGATGATACCGATACTA  
ATAGCTGTATCCTTTTCACGTGATTTGAATATTGGAGCTACTGCGACCAATAGCGGCAGCACCACAAACGCCTGTACCTACACCTAGT  
AATAATGCGATGTTTTTGTACCATTGAACAGTTTGTGACAAAGAGCATATTACAATACTAAAAATAACGACACCTACATCGATG  
GCTAATAGTCTACTAAGCTTGACCGATAATATCGAATATATTGAGTTTAAAGTCCATAGGATGATTGCAAAATCTTAATAAATATTTA  
GATGAAAACGTAATACCTGAGCTATATTGTTTCAGGATATCCTCTAAAGTGACGATATAGAATAGCGATTAATATCGCGATAGTTAAT  
GCGCCAACCTTATCTAAGATTGGCAATTTAGCTGCTAAAAAGCTAAATAATGCGACTATAAATGTTAATGATAGTCCAATCATAAAA  
TGCTTATTTTTCAATGATGCCATGAGCAGTGCCTCCTTTAATAGCATTTTAGCACTGTTTTGTGCTATTTTTAAATATAAATTTGGAAT  
GAATAATAAAGTAGTGATTAATTAAGTTGTGTGATAGGAACTTGGACATCAATCAAAGTAATAGGCACTACAACGCTTATTGGC  
GGGGCCCCAACAAAGAAGCTGACGAAAAGTCAGCTTACAATAATGTGCAAGTTGGGGATGGGCCCCAACAAAGAGAAATTGGAAC  
CACAATTTCTACAGACAATGCAAGTTGGCGGGGGCCCCAACAAAGAGAAATTTCGAAAAGAAATTCTACAAGCAATGCAAGTTGGCG  
GGGCCCCAACAAAGAGAAATTTCGAAAAGAAATTCTACAAGCAATGCAAGTTGGGGAAGGACAACAAATTAAGATACAATGCGTA  
ACATTAATATGTTATTATGATAATTTACAGAATTATATGAGTTTAAAGTGAATGAGGATGTGATGGTATGTTTGAAGTAAAGTGAAT  
GAACAAATAACATTAATAAATTTTGAAGCTCATGACACAGAAGCGCTTTTCAATTTAGTCAATCGTTCAAGAAATTCACCTAGGGA  
ATGGTTACCTTGGGTAGATGCAACTGAGCAACCATCAGATACGCGTGCATTTATCAAAAGAGGACTTTTGCAATTTGCTGATGGTAA  
TGGATTTCAAGTGTCATTTGGTATGAAGGAACGTTAGTTGGTGTATCGGTTTACATGAAATTAATCACATGCACAGAAAACTTC  
ATTAGGGTACTATTAGATAAAGAATTGAGGGTTCATGGGATTATGACACAAGCAGTTGAGGCATTGATAAAGTATTGTTTCGAAG  
AGCTTGACTTAAACCGAATTGAGATTAGTGCCGAGTTAATAATGAAAAAAGCCGGGCTATTCTGAAAGGCTGGGATTTACTAGA  
GAAGGTATGTTACGTGACAATGAATTACTAAATGGTATTTATTCAGCGAGTTACATCTATAGTTTATTAATAATCAGAATACGACCAA  
AAATGACAAATTAGACTTACAAAAGAGTGATGACATTTAAAAATGGCAGCGCTCTTTTATTTAATTTTGAAAAATAAAGGTTGTTGA  
CAGTATTTTATAACAATATAATGATTTTGAATATTATTAACACTAGATAAGTTTCATGGGAGGATGCCTTAAAAATCATAATTT  
AAGAGCCACGTATTATCTTGGCATTTAGGGAGTGTGAGATGATCAAGATGAGGGCATGCTATGGGGATGTTTGAAGTAAAGATTTCTATAAT  
GAGGTGTCAAAATGAAAAAGTTAACAACGCTATTATTAGCATCAACGTTATTAATTGCTGCATGTGGGAACGACGATAGTAAGAAG  
GATGATTCAAAGACATTGAAAAAAGATGATGGTGTTAAAGCAGAATTAACAACAGCAACAAAGCATATGATAAATATACTGATG  
AACAGTTAAATGAATTTTTAAAAGGTACAGAAAAATTTGTTAAAGCGATTGAAAATAATGATATGGCCCAAGCAAAAGCGTTATAT  
CCAAAAGTTCGTATGTATTATGAACGCTCTGAACCAGTTGCAGAAGCATTGGAGATTTAGATCCTAAAATTGATGCACGCTCTTGCA  
GATATGAAAAGAGAGAAAAAGGAAAAAGAAATGGTCAGGATATCATAAGATTGAAAAAGCATTATACGAAGATAAGAAAAATTGAT  
GATGTGACTAAAAAAGATGCACAACAATTATTGAAAGATGCAAAAGAAATTGATGCCAAAGCTGATACATTAGATATCACACCAAA  
ATTAATGTTACAAGTTCTGTGGACCTATTAATGAAGTTGCAACTTCTAAAAATCAGAGTGAAAGAGAAATTTATCATAACAGA  
TTTATATGATTTTAAAGCGAAGTTGAAGGCGCAAAAAATTTATGACTTATTTAAACCTATTTTAGAAAAAATTAAGTAAAAAAT  
AAGTGATGATATTCAAATGAACTTCGATAAAGTGAATCAATTATTGGATAAATATAAAGATAACAACGGCGGTTATGAGTCATTTG  
AAAAAGTATCGAAGAAAGACCGTAAAGCATTTCGGGATGCTGTTAATGCATTAGGAGAGCCACTAAGTAAAATGGCTGTGATTACT  
GAATGACAAATTATGAACAAGTTAACGATAGTACGCAATTTTCAAGACGTACATTTTGAATGTTAGGTATTGGCGGTGCCGGTG  
TTGCAATTGGCGCAAGTGGTGTGGTAGCATGTGGTCTTCAATCAATGTTCAATACACCAGAAGATCCGGAAGAAAGATGCGTAT  
GAATTTTATGGTAAAGTGCAACCAGGCATTACCACACCCACGCAAAAAACATGCAATTTTCGTTGCGTTAGATTTGAAGTCAAAAAGA  
TAGAGATGCAATTAAGGCAATGTTTAAAAAGTGGACGGTTATGGCTGATCGTATGATGGATGGTGATACAGTTGGCAAGCCGAGTA  
ACATTCCTTTAATGCCACCAGTAGATACCGGTGAATCCGATAGGATTAGGTGCAAGCAAGTTAACGATTACCTTTGGGATTAGTAAGT  
CTTTGATGAAGAAAAATTGGGTTATCTAGTAAAAATCCCGATGCCTTTAAAGATTATACCGATTTTCCGAATGATCAGTTAATAGACG  
ATTACAGCGATGGTGATATTATGATTTCAAGCATGCTCAAAATGATTTCGCAAGTATCCTTTTCATGCGGTTCAATAATTTAGTTCGTCATT  
TCGAGATATTGTTAAGGTACGTTGGGCGCAATCTGGTTTTATCTCTGCTAAAGGTAAGGAAACACCTAGAAATTTAATGGCATTTAA  
AGATGGAACAATTAATCTAGAAAAAGTAATCAACTTAAAGATTATGTGTTTATTGATGACGGATGGGCGAAACATGGAACCTATT

GTGTTGTGCAGACGTATTCAAATACACATTGAAACGTGGGATCGTACTGCACTGGAAGAACAAGAGGCTACATTTGGTCGGAAACGA  
CATAGTGGTGCGCCGTTAAACAGGTGGGAAAAGAGTTTGATGAAATTGACTTAAAAGCGAAAAGATAGTCATGGCGAGTATATTATTGA  
TAAAGATGCCCATACGAGACTAGCGAAAGAAGCAAATACGTCAATTTTACGTAGAGCCTTTAATTATGTTGATGGTACGGATGACC  
GCACAGGTAACTTCGAAACAGGCTTGTTGTTTCATTGCTTTTCAAAAAGCGACAAAACAATTTATCGATATACAAAATAATTTAGGTA  
GTAATGATAAAATTAATGAATATATTACACATAGAGGTTCTGCTTCATTTTATGATTACCAGGTGTTAGTAAGGGAGGATACCTTG  
GTGAAACATTATTTGACTAAATTTGTAGCAATGCTAACTGCTGCTATGGTGTGTAGCTTTGGGTTACTGAAAAGTCAGGCAGCA  
GAACAACAAAGTATTAGTGATGTATATAGTGTGATAACGGATGCGAAATCTGCACTTTCTAATAATTTCGATATCGAATGACAATAA  
GCAGAAAGCAATTGAGCAAGTGGTAAGTGCAGTTAAGAAATTATCGCTTGAAGATAATAGTGAAAAGTAATGCTGTCAAATCAGATG  
TGAGAAAGCTTGAAGATGCAAAAGCGAATGATAATCAAAAAGATACACTTTCGCAATTAACGAAGTCATTAATTGCTTATGAAGAG  
AAATTGGCTAGTAAAGATGCGGGTTCTAAAATTAACATATTGCAACAGCAAGTCGATGCCAAAGATGCAGTAATGACAAAAGCGAT  
TAAAGATAAAAAATAAAGCAGAGCTAGAATCGCTGAACAATAGTTTGAATCAGATTTGGACAAGTAATGAAACGGTAATTTCGCAATT  
ATGACGCAAAATCAATATGGACAAATTGAAGTCGATTACTGCAACTTAGAATCGCAATTCATAAGTCGCCATTAGATACAGCGAAA  
GTGTCACATGCTTGGACAACCTTTTAAATCAAATATTGATCATGTCGATAAGAAAAGTGATACGCTGCAAAATGATCAATACCGTGTA  
TCACAATTAATGATGAGTTAGAGAAGGCGATTAAAGCTATCGACGACAATCAATTGTCGGATGCTGATGCTGCGCTTACACATTTT  
ATAGAAAATTTGGCCGTATGTTGAAGGTCAAATTCAACTAAAGACGGTGCTTTGTATACGAAAATTGAAGATAAAATACCATATTA  
TCAAAGTGTATTAGACGAACATAATAAAGCACATGTGAAAGATGGTTTAGTAGATTTAAATAACCAAATTAAGAGGTTGTTGGCC  
ATAGTTATAGCTTCGTCGATGTGATGATTATCTTTTACGTGAAGGGCTAGAAGTGTGTTAATTGTAATGACATTGACTACCATGAC  
CGTAAATGAAAAGATAAGAAAGGGACTGCAAGTGTGATTGGTGGTCAATTGCCGGACTGTGATGAGTATTATCTTTCAGTAATTA  
CGTTGTAGAAAATTTAGGGAATAGTGGCAATCTTCTGCTGAAAGTATGGAAGCGGATAGGTACTGTTGCGTATATTAATGTTTA  
TCGTTGGTGTGTTGGATGCACAAACGTTCAAATGCAAAACGTTGGAATGACATGATTAAAAATATGTATGCTAATGCGATTAGTAATG  
GTAATTTGGTATTGTTAGCGACGATTGGTTTAATATCTGTGTTGCGTGAAGGTGTTGAGGTTATCATTTTCTATATGGGGATGATAGG  
TGAGCTAGCGACAAAAGATTTTATTATTGGTATTGCTTTAGCTATCGTTATATTAATTATCTTTGCGTTATTATTTAGATTATCGTCA  
GATTGATACCTATATTCTATATATTTAGAGTATTGTGCGATCTTTATTTTATTATGGGATTCAAATGCTTGCGCTAAGTATTCAAAA  
ATTACAATTATTAGGTGCGATGCCGAGACATGTTATCGAAGGATTCCCAACGATTAACCTGGTTAGGATTCTATCCAAGTTATGAACC  
ATTGATAGCACAAAGCTGCCTATATTATGGTAGTTGCTATCTTAATCTTTAAATTTAAAAAATAAAAAACAGGCCGAGTGCCGTGTTTT  
TTTGTGCGATGTTGGAATAATTCGGTATTGCGATATAACGATAATCACAGCATAATTCTTATAAGATTAAATGTGTTGGCGGTTTGC  
CTCGGTATGTAATTTAACGATGAACGTAAGTAACTCAAGAGCAATATGAGTGGCAATGTGAGTAATATATTTAATGTTAAATCG  
GGTGGTGCAATGATACTTGCTAATACAAAGCAAGCGAAAATAATATATTTTCGATAATGCTTCAATGATGTGGTATCTATAAGACCG  
AATTTTGCAAGTCCTATGAATAATATTGGCAATTGGAATAAAATGCCAAAAGTGAAAAGCCAACGGATAAGTTCAACTAAATACGC  
TTTAAAGCCAATGACAGGCGAAATGTTTAAAGTTAATGATAATTTTAAACGCAATTGAATGATCATTGAAAAGCTAACATAAAATG  
CAAAAGCGACGCCAGCACAGAATAATAACACGCTGAAAAAACTATATTTATAAATAAATTGGCGCTCATTATTATGCAAAACGAGC  
GCAACAAACGCCCACAATTGATAAAACATAACCGGTGAAATGAGACAAAACGCGATGAAAAATATAATCATCACGTATATTTGGAT  
CATTTCTGTGAATGAAAATGCATGTAAGGACACATGTGCACGGGTAAATATACGTTATGAATGGTGTGATCCACCAAAATGATGAAA  
CATATACGACGATGACCGTAATGACGAACGACAATAAAATTTTACTAACCGATGGCGTAGTTCGCTAAAGTGAACCATTAATGTA  
TCATCAGTACTAATTGCTCTCGCTGTTGCTTCGATTCTTACTGGTGTATGCTGAGACTCTTTATCTAAATCTTCTGTGACGATTAA  
ATTCTTTTAAAGTAGAACCGATAGCACGACCAAAATTGTGGTAATTTTTCGACCAAAAAATAATTAAGCGATAATGCTAATGACGA  
CAAGACTTGTGGACCTGTGATGCCTAAAAATAAAGTGTTAGTTATCATGATAATCAACCTCACTCATAAGTAGTATATAGTATTTA  
CTTTATACCGAACGATAATGATTATCAACAAATTTTATATAATAATTAATAATATTGCTATAAACACAACCTACTGAGGTATTAATCT  
GAAATAATAGCTTGTTCTTGCAAGTCGATATAAGTACAAGTACCAGATTGAATATCGATATGCCATTTATAAATGCCAGCTTCAGCC  
ATTCATCACAAAATGTTTCGAAATCTGTTTGCCCTTGTTGATGTCTTGTTAAGACGCTTGAACTATTGTTTTGTTGATTTTTGAGC  
AACAGGAATCGTACTTTTCACAGATGACGTAACGATATCATCTTCTGATTGATGTACGTATGTTGCAGTGCCATCTTGAATGTTGAC  
GATATTGTAAGTCATCCCCATATCTTTAAAGCTTTGAATAGTTTGGAAAGTCAACACCAGTAAATTGTTGATGTGCTTGTGTAATT  
GCAGATAATGTAATGCCATAATAATCTCTTTGATAGTTTGGTATTGATTAGTGAAAATGCGTGCATCATAAAATAGAATTGACTGTT  
AATTATGCAGGAAGGTGTAACGAAAGTAACAATAATGACTTGTAGGCGTTGAGGTGTTGTTTCAAAATGCTATACATAGGTGGAC  
AATCATATTTTTTTGTGTAGATTGACAAATATAGTTGTCAAAAAGACAAAATATCATTTACAGTAGGACTAAGGAGTTGATGCGATG  
TGCGTAATCGATTGAAAGAGTTACGAGCACGAGATGGCTTAAATCAAACGCGAGCTTGCCAACTAGCTGGTGTTCAGACAAAACC  
ATTTGCGTAATTGAGCGAAACAATTTTATGCCATCAGTATTAACGGCAATAAAGATTGCTCGCATTTTCAATGAAACGGTGAAACG  
GTTTTTATTATTGAGGAGGATGAGGCATGAAAATACTAAGATATATCGGATATCTTTTACTGGGTGGACTTGATAGGTGGTATCATAG  
GTGGAATTTTAGGTAACCTTTGATGGATTGGGTATTGAGAACTTGACGTTTTCGACATATAACAATGTGCTTGAATATCGATTGTTG  
CGACTATTATTATCATATTGGTAGAAGCCATTGTTTTGATGAATCAAAAGACGTGCATTGAAGTATAAGCGACTTGTAGATGAAGAGG  
TAGATATCGATGCAACGATCAATATGAATTGCTTGGCAATCGTTATGCTTTTAAATGGAAGTATATTAAGTATTCTGACAGATTA  
TTGCTTTTTTAGTTAGTTCTTATTGTTGGTAGGGCAGCTGGAAGCAATGTTAACTACTATTCTTTTAAACCAATTTTGTAGTGTCT  
ATTTTCAATACACAATTTACTGTTTAAATAGAAGGTTTGTGACAGAATACCAAAAAATTGCAGATAAGAATTACTGAAAAGCG  
ATTGGAATATTGGATGAAGGTGAACGCCATATAGAATTAATTGCATTATTTAAAAACATATGCGATCAACTTATCAATATTGATACT  
AGCCATTGTAGTAATTGGGCTTTATTCAATTACTACTGGAATTAATCAAAGCTTTAGTTTGTCTACTTATCATTTGCTATTTTCATATATA  
ACGCTTTTAGTTATTTATTGAAGAGAAGACGTTTTTATTAAAAATTAACAAAGAGGAGCATGGATATGACAACATTGTTAAACGTAG  
ATAGTGTGAACAAACAATACAAAGATTCCGATTTTAAATTGCAAGATGCATCTTAAACGATTCTACTAATGAGACAGTTGGATTAA  
TTGGGAAAAATGGCTCAGGTAAATCGACATTAATTAATATTCTAGTAGGCAATCGACATAAAGATAACGGTAGTATCACATTTTTTG  
GAGAAGAACATACCGTGGATGATGTCGAATATAAAGAACACATAGGTGTAGTGTGTTGATGATTGAGAGTGCCATAATAAATGACT  
ATTAAGATATTGATAAAGTATTTCAATCTATTATGACTTGGAAATAGTCAAAAAATCTTTGATTGTAATCAAAATTTTCGAGTTAC  
CACTACAAAATAAAATTTAAACTTTTTCAAGAGGGATGCGAATGAAGATAGCTTTAAACAATTGCGCTTTCTCATGATGTGAAGTTAT  
TAATCTTAGATGAAGCAACTGCAGGTATGGATGTTTCTGGACGAGAAGAAGTAATGGAATATTAGAAGATTTTGTGCTCAAGGT  
GGAGGCATCTTAATATCATCGCATATTTCTGAAGATATAGAACATTTAGCTGATAAATTAGTGTATGAAAGATGGACGAATGATT  
TTAACTGAACAGAAAGATATACTTTTAGCACAAATATGGAATTGTTACGACAGGAGATAAAGATGTTGAAATTCCTAAGCATTTAATC  
ATTGCTTCTAGATTGTCAAAGGGGAAATATCAAATTTTAGTTAAAGATTATGCAGAAATTAATAATGCAGAACCTTTAAAAACACATT  
GATGACGCTACGAAAATCATAATGCGAGGTGAAGTATAATGAAAGGTATGTTCCCTAAGTAGTTTTTATGCAACGAGAAAGCAAACA  
TATATTTATTTATAGTCGCTATCATAGCTGCGGGATACTTGCAGTATTTAATCCGTTGATGAGTTGCGCAATGGCTGGGTTATGT  
TAATCACACCCATTACTGATAATATTAACATGAAAAGACTCAAGATGGATGATTATGTATCTACTTTACCGTTAAACGTAATG  
ATTATATTAAGTCATACTTTGCCTTTTATTTAATCTTATTCCGGTGCAAGTTAATGATTGGATTAGTTGTGACTACAATCGTGACCCA  
AAGTGTGATGATTGGTATTATGTCAGGTTAATGAGTTTTGGTATCATAGGGGCATACTCTATCATTTTCCCATTGACATTTAAATTT  
GGCGTGAAAACCTCTAATGTCATTATGATATGTGCATCTATACTACTACTTATTTCTTTTCGTTGCTTTTTCTTTATATATGGTATGGT

TAGTGGTGCATCTGCATTAGAATTTGAAAAAATTAGCACTGAAGGATGGCTAGTTGTCATAGCATATGCGGTCATTGGTATAGTTAT  
AACGAGCGTTTCTTATATATTGTCTATTTAAAAATTTTAAACAAACAAGAACTATAATCAATATTCTTGGTGTGAAGCTAGTCTTGAAA  
TAATATTTAGAGCAGGTGATAAATCAATACGATTATCATCTGCTCTTTTTGGTGTGGAATGAAATGCAGGGTGATAAGTATAGGTGA  
CATATCTAGATTGATTCATTTGTTTTGAGGTGGTTATGTTGTGTGGGAATTTATTTCTTTTAGATAGTGGGGATTAGAGGATATATGT  
TATTTATAAGTATCATTGTGATGATTGTATAGGCTAACGATTTCCTCGGAAATATTTAAAAACCTCGATCATGTAGCATAACTGAAGC  
TTGTCACAAAAGTATAATGTGAAGTTCGACACTTTTGGATTTCAGTTCAAATACTTTGACCGAGGTGAATACTATTTATTCATGTTTAT  
TACGTAGACGTTGATTTTTAAAAATAATCAGCATGATGCGAGAAAGTCGCAACGGATACCGAGATAATCATTACTTGGTCATGCCCT  
TAAAGATAAGGCTGATGATATATGATACTACAAGTATGCCTAGTGAAGAAGAAATATATTTTGCCTTTGTCAGTTCATTATGGAAT  
AAGGCGTGATTAACCATATCAATATAGAATATTTAAACACTGATATACATCATATTAATTTCAAACAAGTCATTTAGTTTATTGT  
TATTACTAAAAACAATTGCAGCATTAATCACACCTAAAGCGATATTGATTAATAGATGCGTATACGATAAACCGAAACCGGATAGAT  
GACAATTTATGATTAATGTAATTTTCAGTAATGATCCAATATACACCGAAAAAGACTAATTAATCATAAATTGGAATATATAAATG  
TAACTAAAAATGATCAATGCTAAATGATGACGAAGCTAAACCAACCGTACCTCGCCAAAGATAATAATTGTTAGTAACGAAAAACG  
TTCTACTAAATGCATCATATTAACAGGTGATAATACAAGATATTTCTGAAATGGAATAAGTCTGTGCTGCAATGAATACGCCTAA  
AAATCCAGGGATGTAATGGATACTTTGTGGTAGTACTAATGATAGAAATGATAAAAAATGAAATCACAAGGCTACGCTCGCAAAAG  
CTTGACATGTACGCTTATCGCCATAATCTAACCTGTACGTATATGTAATAAATACTGTAATCCGATACTTAAATACATAATTGCCAC  
GCATAAGAAGAATGGGAAGAATGTCTTTCAAAGTCCGGATATAGGCTGTTAGATAGGAAGACCATGATGAACATATTAACATCA  
TAAACGAGACGCTCTTTGAATGTAACCTTGACCAAAATCGAATTTGTAAAAAATGTTTGATGAGACCACATTAACCATAAAGAACAAC  
ATGACGATGATTTGAAAAATAAATCAGTGAATGGAACCGTTTTGTGTTGTTAAAAATCAGTGTGCAATTTTTGAATGGCATAAG  
ACGAAAAATTAATCAAAGAACAACTCATGGAATCTGACGCTTTTCAGCTAAATGTTTTGGTGTAAATGCATTAACCATAAATTT  
TAACTCCTTTAAGATGTGTAATTAATTTACTAAGTATACTATTTATTTTTCTAGTGAATAGGGGCAGATTTGGCGATGAAGTGAAG  
GAGAGGTGACTGCATGGTAATTGCGGAATTAACAATCATCAGCGATTTAATATTTGACTAGAGACGTAATGGTAATAAAAAATTGA  
TGAGAAATTGATGGTGAAACAGCTGTGAATAGCGATGCAATGATAGATAGAATTTAATTAGAGTCATTACGCGAAATGATTAATG  
ATAATTTGTGGTAAATCAAAGCATAATTTGTACTATAGATGAGGATGATAGAGCATATTTAAGAGTGTGAAATGTTAAAGTGAAA  
CCGTTTACGTTTCCGATTGCCAAAACAAATTACATCATTGTATAATATGATTTGTTAAATGCATAACAAGAATGAAAATGTAAACATA  
CGTAGCAATTGGTTTCATAAATTGGATGTTAGTGGCGTATTGGTTCATTAGACGTATTAGTAATAAAATTGTATATATCATAAAGGAG  
ATGAATATGACATGACGAGAGTCGTATTAGCAGCAGCATACAGGACACCTATTGGCGTTTTTGGAGGTGCGTTTTAAAGACGTGCCA  
GCCTATGATTTAGGTGCGACTTTAATAGAACATATTATTAAGAGACGGGTTTGAATCCAAGTGAGATTGATGAAGTTATCATCGGT  
AACGTACTACAAGCAGGACAAGGACAAAAATCCAGCACGAATTGCTGCTATGAAAGGTGGCTTGCCAGAAACAGTACCTGCATTTAC  
AGTGAATAAAGTATGTGGTTCTGGGTTAAAGTCGATTCAATTAGCATATCAATCTATTGTGACTGGTGAAAATGACATCGTGCTAGC  
TGGCGGTATGGAGAATATGTCTCAGTCACCAATGCTTGTCACAACAGTCGCTTCGGTTTTAAAAATGGGACATCAATCAATGGTTGA  
TAGCATGGTATATGATGGTTTAAACAGATGATTTAATCAATATCATATGGGTATTACTGCTGAAAATTTAGTGGAGCAATATGGTAT  
TTCAAGAGAAGAACAAGATACATTTGCTGTAAACTCACAACAAAAAGCAGTACGTGCACAGCAAAATGGTGAATTTGATAGTGAA  
ATAGTTCCAGTATCGATTCTCAACGTAAAGGTGAACCAATCTTAGTCACTAAGGATGAAGGTGACGTGAAAATGTATCAGTCGA  
AAAATTAAGTCGCTTAAGACAGCTTTCAAAAAAGACGGGACAGTTACAGCAGGTAATGCATCAGGAATCAATGATGGTGTGCGA  
TGATTTAGTCATGTGACAGAAGACAAAAGCTAAAGAATTAATATATCGAACCATAGGTCAGTGGCTTGAGGCTTTGGAAGTCATGCGCTA  
GATCCTTCTATTATGGGTATTGCACCAGTTGGCGCTGTAGAAAAGGCTTTGAAACGTAGTAAAAAAGAATTAAGCGATATTGATGTA  
TTTGAATTAATGAAGCATTTGCAGCACAAATCATTAGCTGTTGATCGTGAATTAATAATACCTCCTGAAAAGGTGAATGTTAAAGGT  
GGCGCTATTGCATTAGGACACCCTATTGGTGCATCTGGTGCTAGAGTTTTAGTGACATTATTGCATCAACTGAATGATGAAGTTGAA  
ACTGGTTTAAACATCATTGTGTATTGGTGGCGGTCAAGCTATCGCTGCAGTTGTATCAAAGTATAAATAAAGAAAACAGGTTATCA  
CAACAGTATTAATTACATGTTGGCATAACCTGTTTTTATTTGTTTATGGATTATTGGGTAATATTAGTCATTTGATGGTTAATTGCA  
AATGCTCTAACAGGGAACCCAGGTGCATCTTTTGGTTTAGGGCTGATAGCGTAAATGATGGCGCCACGAGTTGGTAATTGATCTAAA  
TTAGTTAATAACTCGACTTGGTATTTATCCTGACCAAGAATATAACGTTTCGCCAACTAAATCACCATTTTTTACAACGTCCACAGTG  
CATCGGTATCGAATGTTTCATGACCAACAGCTTCAACACGCTTCTTAAGTAAAGTAACTTCAAGCATTTCAACCCCAACCCGGT  
CATGTTGTTGTCCGTTTCGCATCTTTGTTTCAAACCTTTCAATATTAGGCCAACGTTTGACCAATCGGTACGAAGTGCAACAAAAGT  
GCCAGGTTCAATAGTACCATGCTCTTTTTCCCATGCTTCTATATGCGCACGTGTTACAATGAAATCATTGTTGTTTCGCTACTTCTGTTG  
AAAAGTCTAATACAATTAACGGCAATACCAATTCTTTTAAATCAATGTCTTCTAAATAACGTTTATTCTCGACAAAGTGAATTGGTG  
CATCAATGTGAGTACCATATTGCGTTACAATATTCCAACGTTGCACATAGAAACCATGATCTTTAACCGTGAATAAAGTTGAAACTT  
CGCCTTTTTCAAACCTACTAAAACGTGGTATTTCCGGATCAAATGTATGCGTTAAATCAACCCAAAGTTGCTTGTTTTAAAGTATTTAA  
TTGTTGCCATAAAGGATATTGTGTCATAAAATCACCCGTTTTTATGTTTATATGATAAATGCTGCGATTATCTTGGCGTTTAGCT  
TTAACAGCATTACAAGCACAGTCAATGCATCTTTAACTTCTTCTTTTTTCGCGTTTTCAAACCACAGTCAGGGTTTACCCAGAATA  
ATGAGCGGTGATTTGTTGTAGTGAACGATTGATGCTGTAGTAATTTCTTCTTTTGGTGAATACGTGGACTATGAATATCATAAC  
ACCTAGCAATAATCAATTAATATATCTTCAAGCTTTTAAATCAACCATAGGCTACGAGATGTTTCAATTGAATGAATAAC  
ATCAGCATCTAAGTCATGAATAGCATGAATGATTTGACCGAATTGAGAATAACACATATGTGTATGGATTGAGTTTCATCACGAAC  
TGAAGACGTTGCAAGTTTAAATGATAAAACAGCATCTTTAAGATATTGTTCTGTGATATTCAGAGCGTAATGGTAAGCCTTCACGTAA  
TGCAGGTTGCTCAACTTGGAATACTTTGATTCTGTCAGCTTCAAGTGCTAATACTTCTTCGTTGATTGCTAAAGCAATTTGATCTTGA  
ACGACTTTACGTGGTAAATCAACACGTTCAAATGACCAGTTTGAATGTTACAGGTCCAGTTAACATACCTTTAACTGGTTTATCT  
GTTAAGCTTTGTGCATAAACTGTTTCATCAACAGTTAAAGGCGCTGTCCATTTTACATCACCATAAATGATTGGTGGTTTTACGGCAC  
GTGAACCATATGATTGCACCCAACCGAATTTAGTTACTAAGAAACCTTGTAAATTTTTCTCCGAAGAATTC AACCATGTCATTACGTTT  
AAATTCACCGTGAACATACATCTAAGCCAATGTCTTCTTGAATTTAATCCATCGAGCAATTTTCATTTTTTAAAGATGTTTCATAT  
GCTTCGCTGTAAATGCGTTTTGTTCTTCCAATCTGCACGGTATTTTTCGAACCTTCTCGGCTTTGTGGGAATGATCCAATAGTTGTTGTTG  
TAAATCCGGTAAGTTCAAACGTTTTTGTGTTGTTTCAATACGTTGCGCGAATGGTGATTGTCTTGAAGTACGCACGCTTTCGAAATCA  
TAATCTAAGTTTTTGAATGATTGATTTTGGAAACGCTCATAACGTGCTTTTAATTTATCATATTTAACACTATCGTTTTGATTAAATA  
GGCGACGCAATGCATCTAATTCGTCTAATTTTTCAGTTGCAAAGCTTAAAGCCTTCGCCAACACTTGTATCTAATGTTTCATCATCTAA  
AGATACTGGAACATGTAATAATGAAGATGATGGTTGAATGACAAGTTCATTAGTGTGTGCTAACAATTTATCGATTAAAGACTTTTTT  
AGCTTCAATGTCACTTGCCACACATTACGACCATCAATAATTCCAGCGTATAATGTTTTTATTATCAAAATCTCCAGCTTCAATT  
TGTTTAAAGGTTATAGCCATTATCATGGACAAAGTCTAAACCTAAACCACCAACAGGTAAAGAATTTAAGAATTTAAGATGTGCACG  
TTCAAAGTATGTTGAATGACTAATTTTTTAGCAACACAGCTTTTTCGAAATAGTCATAAGCTTCACGTGTAATATTTTCATAGCTT  
TCGGTGTGCTGTAACTAAGATTGGCTCATCAATGAATGTACTGACACCTGCATCAATTAATGATTTCAAAACACTCTTTTATAAA  
GTGGTAATAACGTTTTTAACTTTTTCTTCAAAGCTTTGGTGACCGCTTTTGATAATTTAAACAAAAGTAATCGGACCAACAATGACAG  
GGTGAGCGTTAACGTTTAAAGATTGGGCATATTTAAAGCGATCTAATAATACATTGCGACTCACTTTAGGCTCAACATTGTCCCAT  
CAGGTACGATGTAATGATAGTTAGTGTTAAACCATTTTATAAGTGCACCTTGCAACATGGTCTTTATTACCGCGAGCAATATCAAATA

ATAAATCATCATCAATAGTTCTTCTTGGAAACGTTACAGGGATGATGTTGAATAATAATGACGTATCTAATATATGGTCATATAAAG  
AGAAATCACCAACTGGGATGCTATCTAAGTGATAGTACTTTTGAATAATAAATTTTCTTTATGTAGATCAGTTAATGTTTGATCTAA  
TTCTTCTTTAGAAAATCTTCTTTGCCCAATAAATTTTCGATGGCTTTTTTCCATTCTCTTTTTCTACCTAATCTTGGGAATCCTAAGTTTGA  
TGTTTTAATTGTTGTCATAATATTGCCTCCTTGTGAGCAGTAATAGATTTTGAGTATGCTGCAAGTTCTAATGAATCTTCGACATTTT  
GAAACGGTGTGATAATGTATAAACCATTAAAAATTTTCATGAACAGTATCGATTAAATCCTTTGAAAAGCTTAAGACTTAGTTCTCGTG  
TTTTGGCTTTATCATCTTTAACTGCTTCAAATTTGTTGTAATAATTTTCATCTGACATCTTGATTCCCTGGCACTTCATTATGCAAAAAGAGT  
GCGTTTTTGTAACTTGGCATAGGCATAATGCCTATGAAAAATGGTTTTGTTCAAGTGCTTAGTGGCATGGTAAATTTCAATGATTTTTCT  
CTTTGCTGTACACGGGTTGTGTTATAAAAATAAGACATTCCGCTTTCTATCTTTTTCTCTAATCTTTTGACGGCACCATCTAATTTACGA  
ACATTAGGGTTAAAGCGCCAGCGATGTTGAAGTGTGTACGTTTCTTCAGCGCATCACCGTCAGTGTTAATACCTTGATTAAATCTT  
AGAGCGAGTTCAGTTAATCCTTTAGAATTAACATCATAGACATTGGTTGACCTGGTAAGTGACCAACTTTTGAAGGATCACCAGTT  
ATGGCTAATATTTCGTTAACGCCAATGAGCGATAATCCAGTAAATGGGACTGCAAGCCGATTAAAGTTTCGGTCTCGACATGTAATA  
TGTACGAGTGGTTCAATATTGTAATATTGCTTAATTAAGCTAGCAGCAGCAATATTGCTAATTTCTGACAGTTGCCAATGAATTATCT  
GCGAGTGTACCAGCATCTACATTAGCTTTATCAAGTTTAGCGATATTTTCAAAAAATCTATCCGTGTCTAAATGTTTCGGTGTATCCA  
ATTCGATAATAACGGTTGGACGTTCTTGAACCTTAGATGTTAATGATTGTCTAACTTTATTTTGAGATGGATTGAAAAGTGCTTTCTGT  
TGGTATCGGAATCACTTTTTTGTCAATTAACAGGTTTAAAGTGTCTGAATAGATTCTTTAATAAAATTTGATGTGCTCTGGCGTTGTACCA  
CAGCAACCACCAATTAACAGAACACCTTCGCGAATTAGATTTTGAGCAACTTGACCGAAATATTGTGCATTGTCACTATACTTAAAT  
TCACTATTTTCAATATCTAATAAGCTGGCATTGGGATAACAAGATAAGAATGCGTGCTCTGGTAATTTCAATATGTGTGAAAGACTCT  
TGCATATGGTGGCGGCATGATGACAATTGAGTCCCAGTATTTGACCCAGTGAAGTGTGTTTAACTCTTATGTTTAACTCTTATGTTGCT  
GACCATTAATAAGTAATTTGTGTTGAAGCGGTTAATGTAGCAATGATTGGAATGTGCTATTTCTCTCGTTCTGAAATGACATT  
TGTTAACTCTTCTAGGTGCTAATACGTTTCGAAAAGTAGCGCGTCAACGCCCTTCTCAATTAAGGTGTCTATTTGAATTTTCAGTATGA  
TAAAGAATAGTTTGTAAAGCTGATATCCTCTTGTGTTGATACCTTAAACCCACCAACTGTGCCTAATATATACGTATCTTTATTTGCTG  
CTTTTTTTCGATGCGAACGGCGGCTTGATGTATTGCTTTAACTTTATCTTCAAGACCGAATCGTTTTAACTTTTCAAAATTTGCACC  
ATAAGTATTGGTTTGAATGACATCAGCACCGGCTTCAATATATGAACGATGGATGCGTTCAACTTTATCTGGATGGCTAAGATTATA  
TGCTTCTGGACAGGTGTCTAATCCTTCAGAGTATAAAATGGTTCCTATAGCGCCATCAGCTACTAAAACATTATCTTTCAATTTGTGTG  
AGGAATTGACTCATTTGAATGCCTCCTTTAATGCGTATTGTATGCTGCAATGAGTTCATCAGGATCTTCGAGACCAACACTTAATCG  
GAATAGACCGAAAGTGATACCACGTTCTTGCTCCTCACTTCTCAGGTAGTGTGCGTGAGACATTGTTGCTGGGTGCGAAAGATTGT  
TTCCACACCACCTAGACTCACTGAAACGAGTGGAATGTGCTAGTGCATCGACAAATTTGTTGTGCTTTAGACTCATCAGCTAAACGTAA  
GCCAATAACGGCACCGCCATTTTTAGCTTGTCTTAAATGAGATGCAGTAAGTCCCGGATAATAAACTTCTGAAATTTTCATCTTGCTTT  
ATTAATAATGACACGATTTTTTTCGCGGTTTCGACAGATTGTTTAAATCTGATTGGAAATGTTTTTAAATGTTTAGCAAGTGCCAGC  
TATCTTGAGCAGATAACATATTGCCTGTACCATTTGTATTAAATAAAGAGCTTCACTAATTGCCTCATTATTAGTAATGACAGCACC  
AGCAATTAATTCGCTATGTCCACTTAAAAATTTTGTAGCACTATGAATGACAATATCAGCGCAAGTAATAAAGGTGATTGACCTAA  
CGGTGTCATGAATGTATTGTCCACAGCTACCAGTAGTTCATGCTTTTCGGCTATTTTAGAAAACAGCTTTGATATCAGTAATTTTAAAA  
CAGGGATTTCGATGGTGTTCGATATAAATTAATTTTGTGTTGATTGAATGGCACCTCGATTGTTTCGAGCTTGGTAGTATCTACGG  
TTGTAATTTCAATATAAATCGATTCAAAAATTTGCTCAGTAGGCGCAAAAGTACCGCCATATACATCAGGTAAGATTGATCATGAT  
CACCAGATTTGAAGTCAAAAGTACTGCTGAATTCGACGAATACCTGATGCAAAAAGCAAAAGCAATTTCCCTGTCTTCAATCGT  
GCTAACTTCTCTTCTAAAAGTTCACGGTTAGGGTTGCCACTTCGTGCATAATCATATTTAATCATCGCCACCAAGACTTGTGTTGATGGA  
ATGTTGAAGAATCATAGAGTGGTGGGTTAGCTGAATGATATCCACACCTCTACGCCAATCGAATATCACTTCTGTCTCTTTTGA  
GTGTCATACAATCTCTCAATCTGAGCTTTATCTAATGCTTGGATGATATCGCGTTTCGATGTCTTCATAATTTTCAACACCTAGTGAT  
AAGCGGATTAAATACTCATCAATGCCACGTTTATCTTTTCAGCATCTGGCATATCAACATGTGTTTGGGTGTAAGGGAAGGTCACT  
AATGTTTCAGTACCTCCTAACTTTCTGCAAAAAATGCAAAATGTCTAAATTTTTTAATAATTTAGCGACGCTATAGGCCTTGTTAAGTC  
TTAAACTAAGCATGCCAGTTTGCCCGCTATATAGTACTTCGTCAATTGCTTGAAGTGACTGACATTTTTTAGCAAGTTTTCTAGCGTT  
TGATTGCGCACGCTCAATGCGTAAATGCAAAAGTTTAAAGTCCACGTAACAACAATAAATCTATCTATTGGTGAAAGTGTGCGCCAGT  
CATGTTGTGAAAATCAAAACACTGTTGCGCGAGTGATTGCTTTCAGCGTTACGACACCTGTAGTACCATCATTTTACCTTCACTGAT  
ATATTTCTGAGCTGAATGTAAGACTATATCAGCACCTTCTGCTAATGGTGTGTAAGATAAGGTGTTAAAAATGTATTGTGCGATAAT  
TGACAATAAGCCTTTAGCTTTACAAAGTTGATAGTACGGCTTTACATCAATAGCAATCATTTGTGGGTAGATATTGGTTCAATGAA  
TAATGCAACTGTTTTATCAGTGATTCTTTTTCAACTTGTTCATAATCTGTAAATCAACGTACTTAAATTTGATATTGTATTGTTGCT  
CATAAAATTCAAATAATCTAAATGTGCCGCCGTATAAATCGAATGAAACTAAAATTTTCATCGTGTGGTTTAAATAAATTACATATTA  
ATTGAATGGCTGACATTCCACTTGATGTAGCGAATGATGCAATACCATTGTCGAGTTTGGCAAAAACAGGTTTCAATGTTGAGCGTG  
TAGGATTTTTAGTACGTGTATAATCAAAACCTGTCGATTGTCTAGTTTGGATGCTTGTAGGCAGTAGATAAATGGATTGGATTTCG  
CTATAGCACCGGTTGAATCATCGGTTAATGTGATTGGGCTAACTGTGTATCCTTCATATTAAGACCTCCTATAAGAAAAAATAAA  
AAAAGTTCCGCTTCGTAACCCGAATGAATCGGATAAAAAGGACGAAAGCTTATGTTTCGCGGTACCACCTTTATTTGTTATTTCA  
TCGCTGAAATAACCTTATTCAGTACGCATTAAGAGTAAATGATTGCTTACGAAATTAATATCAAAATTAAGTCAAGTAAGGATAT  
AGTAATGTGCTATCCCATACTTATTAACAAAAAATCGTGCGTAAAGAATCCAGTACGCCATTTAACATCAATGTTAATACTGTATCG  
CTATAACGGGCGAACCCTGAGACACCTCATATTGGCATCAACACTCCAAGGCCATTTTCAAAACAGCTTTCAAAATCTTCTCTCAGC  
TACTAAAGACTCTCTGTATAAGCAGGGTGTGTTTTACTTTCCTCTTTATTGTGTTTACGTTTCATTAACTGTTATAAGATATTAATTA  
GCTTACAGAGTAAAAAAGATTGTCAACAATTATTACAGAAAATTTTGATTAAAAAGTTAATTTGTTTGTGAAATTGTAATTTGGTAT  
CTTGAAAGTTGAAAAATGAATTATTTTTTAAATAAAGTGTGGTTAATGGTTGTCTGACTCATTTAGAATACATAAAATATATTTAACTG  
TTGTTATCAATAAAAAAGTGATGTGAGTGAATTGTCAAAAAGTGAAGATCAACGTATTACTAAAACAAAAGATGAACAAATTAAGC  
AAATAGATATATCGGATATAAACCCGAATCCGTATCAGCCCCGAAAAACTTTTCGATGAAAATCATTTAAATGATTGGCAGATTCA  
ATTAAGCAATATGGAATTTTGAACCAATTGTGCTTGAAAAAAGCAAGTTCAAGTTATTACATTGTAGTTGGTGAAAGAAAGTTTGA  
GCTTCGAAAAATTTGCTGGTCTAAAATACGTATCAGCGATTATCAAAAGATTAAACAGATGAAGATATGATGGAACCTGGCGGTATCGA  
AAATTTACAACGAGAAGACTTAAATGCGATTGAAGAAGCTGAAAGTTATCAACGTTTGTATGACAGATTGAAAAATTACACAACAAG  
AAGTAGCGAAGCGATTGAGTAAGTCGCGCCCGTATATAGCGAATATGTTGAGGTTATTACATTTGCCGAAAAAGATTGTGACATG  
GTAAAAGATGGGCGACTGACAAGTGCACATGGACGAACGTTATTGGCAATTAAGATGAACAACAATGCTTAGGTTAGCGAAAC  
GGGTTGTAAAGAAAAGTGGAGTGTAGATATTTAGAAAACCATGTTAATGAATTAATAAATGTTTCGTCAAAAGTCGGAACAGAC  
AAAGTAGATATAACTAAGCCTAAATTTATAAAGCAACAAGAACGACAGTTGCGGAGAACAGTATGGTACCAAAGTAGATATATCAAT  
AAAAAATCGGTTGGTAAAAATCTCATTTGAGTTTGATTCAACAAGAAGATTTTCAAGAATAATTGAACAATAAATCTGATGATTG  
TAAATAGTTACACAATTTTATATAAATACTTTGTGTCAGTGTAAATAAATTTGAATCACTGAGTGAACATTGATTCTAGATATATTGAG  
ACTTTCGTAGGTTGGAAAGTATATAAAAAATGAATACAATATTGATATATCATATAGAAGGGAGTAACGCTTATCATGAATCAAGTC  
ATGAATATTATTTTCATCTCTATTTGAGCCATTAACAAAAATAGAAACATATGAAAACATTGCAACTAAAATCGCTATGATTGTTATT  
TATATTATCGTAGCCCTCATAGTTATTAATAACTGAATAAAATGATTGAACAGGGATTTAAGATTCAAAATAAGAGTAAAAAGAG

TAACAAAAAGCGCTCTAAAACCTTAATATCTCTTGTTCAAAAATGTAGTGAAGTATATCGTTTGGTTTATAGTTATTACGACGATTTTA  
AGTAAATTTGGCATTAGTGTTGAAGGTGTTATTGCAAGTGCTGGTGTCTAGGTTTAGCAGTAGGTTTGGTGCTCAAACCATTTGTT  
AAAGACGTTATTACTGGATTTTTTCATTATATTTGAAAGTCAATTTGATGTAGGTGATTATGTTAAAAATAACAATGGTGGTACGACT  
GTGGCAGAGGGAACGGTTAAATCAATAGGACTTCGTTCAACACGAATCAATACAATTCAGGAGAATTAACAATTTACCAAAATAG  
TAGTATGGGTGAAATAACGAACTACTCAATTACAAATGGTACAGCTATCGTTAAAAATTCAGTGTCTGTGCAAGAAAACATTGATA  
ATGTTTGATAAAAAACTAAACAACTATTTACTTCTTTACGTAGTAAATATTACTTATTTGTTAGTGATCCGGTTGTTATTGGTATTGA  
TGCTATTGAAGATACAAGAGTAATATTGAGAATATCTGCAGAAACAATTCAGGTGAAGGATTTGCTGGAGCTCGAATTATTCGCA  
AAGAAGTACAAAAAATGTTTTTACAAGAAGGTATTAACACCTCAACCAATTATGACTGCTTATAATCATAGTGAAAAACGGTGTT  
TAGTAGTTTATAATACATGGAGGTCATATTTAATGGCGTCAAAAATATGGAATAAATGATATAGTAGAAATGAAAAACAACATGCG  
TGTGGACAAACCGTTTTAAGATTATTAGAATGGGTGCAGACATAAGAATTAATGTGAAAATGTCAAAGAAGTATTATGATTCC  
ACGTCAAAACGTTTGATAAAAAAACTTAAAAAATCATCGAATCTCATGATGATACAAAAAGATAGGAGAATGATTAATGGCTTTAAC  
AGCAGGTATCGTTGGATTGCCAAACGTTGGTAAATCAACATTATTTAATGCAATAACAAAAGCAGGTGCTTTAGCAGCGAACTATC  
CATTGCTACGATTGATCCTAATGTAGGGATAGTAGAAGTGCCAGATGCTAGATTACTTAAATTAGAAGAAATGGTTCAACCTAAA  
AAGACATTGCCGACTACATTTGAATTTACAGATATCGTGGTATTGTGAAAGGTGCTTCAAAGGAGAAGGGTTAGGTAATAAATT  
CTTATCACATATTAGAGAAAGTAGATGCGATTTGTCAGGTGCTTCGTGCATTTGATGATGATAACGTAACATCATGTTGCTGGTTCGAGT  
AGACCTATTGATGATATTGAAGTTATTAATATGGAATTAGTACTAGCGGACTTAGAATCTGTTGAGAAACGTTTGCCTAGAATTGA  
AAAATTAGCAGCTCAAAAAGATAAGACTGCTGAAATGGAAGTACGTATTTAACAACATTAAGAAGCTTTAGAAAAATGGTAAAC  
CCGCTCGTAGTATTGACTTTAATGAAGAAGATCAAAAATGGGTGAATCAAGCGCAATTACTGACTCTAAAAAAATGCTTTATATCG  
CTAATGTTGGTGAAGATGAAATTTGGTGATGATGATAATGATAAAGTAAAGCGGATTTCGTGAATATGCAGCGCAAGAAGACTCTGAA  
GTGATTGTTATTAGTGCAAAAATGAAGAAGAAATTGCTACATTAGATGATGAAGATAAAGAAATGTTCTTAGAAGATTAGGTAT  
CGAAGAACCAGGATTAGATCGATTAATTAGAACAACCTTATGAATTATTAGGATTATCAACATATTTTACTGCTGGTGTGCAAGAAGT  
ACGTGCTTGGACATTTAAACAAGGTATGACTGCACCTCAATGTGCTGGTATCATTCTACTGATTTTGAACGTGGATTTATCCGTGCC  
GAAGTAAACAAGTTATGACGACTATGTAATAATGTTGGCGAAAGTGGCGCTAAAGAAGCGGGCAGACAACGATTAGAAGGTAAAG  
AATATATTATGCAAGATGGCGATATCGTTTCAATTCAGATTTAATGTATAAACGATAGAGTGAAGTTAATTAATAGTATATATGGAG  
AAGAGGCGGAATCAATTGTTTCGCTCTTTAATTATGCGTATAATTTATTAAGAAGTGAATAATTTTACTCGCGTTAATAATATCT  
TGAGTGCTGAAAAATGTTTGCCTTCGCCAGTATAAGCAGGCTCTAAAAACAAGATTAGCCTTTGCACAATAAAGCCATTCCAGGATGA  
ATGCCACTATTAAGTATCTCTTGAATTCCTTGAAAAATCTTTAGACCAATCAATATTTAATTCATTCCTTACCACCTCAACATTA  
TAGAACACGTGTTTCGCTTTTGTGAAGTGTATTTTAAAAATATCATAGAAAAATTTCAAATGAATTAATGTCAAAAAATGATATGAAGA  
GTAGTTTGAATTATTATTGTAAAAAGTAATGGCGCATGATATAATTCCTTTATTGTGAGTAATGAAAATTATTCCTTGCTTATCTGTTT  
TAAGATTGATAAGCCGTATAGACCACAAGGAGGTGCAAAATATAAAATGAGAACATATGAAGTTATGTACATCGTACGCCCCAACAT  
TGAGGAAGATGCTAAAAAAGCGTTAGTTGAACGTTTCAACGGCATCTTAGCTACTGAAGGTGCAGAAGTTTAGAAGCAAAAGACT  
GGGGTAAACGTCGCCTAGCTTATGAAATCAATGATTTCAAAGATGGCTTCTACAACATCGTACGTGTTAAATCTGATAACAACAAA  
GCTACTGACGAATTCAGCGTCTAGCTAAAAATCAGTGACGATATCATTTCGTTACATGGTTATTTCGTGAAGACGAAGACAAGTAATA  
ATTAGAGGGGGCGTTTAAATGCTAAATAGAGTTGTATTAGTGGTCTGTTTAAACGAAAGATCCGGAATACAGAACCACTCCCTCAGG  
TGTAGTGTAGCACATTCTACTCTTGCAGTAACTGTTACGTTACGTAATGCTCAAGGGGAGCGCGAAGCAGATTTTATAACTGTGT  
TGTTTTTAGAAGACAAGCAGATAATGTAAATAACTATTTATCTAAAGGTAGTTTAGCTGGTGTAGATGGTTCGTTTACAATCCCGTAA  
TTATGAAAAATCAAGAAGTTCGTGTTGTTTGTACTGAAGTTGTATGTGATAGCGTTCAATTCCTTGAACCTAAAAATGCGCAACA  
AAATGGTGGCCAACGTCAACAAAAATGAATTCGAAGATTACGGTCAAGGATTCCGTGGTCAACAATCAGGACAAAACAATTCGTACA  
ATAATTCATCAACACGAAACAATCTGATAATCCATTTGCAATGCAACCGGACCGATTGATATAAGTGATGATGACTTACCATTCT  
AATAAAAAATTAACGAAATTAAGCGGAAAAAATTATCAAAGGAGGCACACAATCATGGCAGGTGGACCAAGAAGAGGCGGACGTCTG  
TCGTAAAAAAGTATGCTATTTACAGCAAAATGGTATTACACATATCGACTACAAAAGACACTGAATTATTAACGTTTATCTCAGA  
ACGCGGTAAAAATTTACCAGTCTGTGTAACCTGGTACTTCAGCTAAATATCAACGTATGTTGACTACAGCTATCAACGTTCTCGTCA  
TATGGCATATTACCAATGTTAAAGAAGAACAAATATATAATTTATTGTCAAAACCCGTAGGCATAGGCTTACGGGGCTTTTG  
TGTTTTGGGGTATAGAAAAAGGGCAAAAAAGGATGATGTGAATGTTTTGTGTTCCGAATTTGCACAAGATATGTTTATATTGCAAA  
AATAATATGAATTTAGATGCATAAAAAAAGAACTACGCATTTTAAATAAAATGCATAGCTCTTCTTTTCTTGCATACGAATTA  
TAACTCGGAGACCTATAAGTCTCTTCTCTACTAGATAGTTTATACTTTTGGTCTGTTGAAGTCAATAATTTTATCTAAAGCTATAA  
AAAATCTTTTGATAGCTAATGCATTATTATAATAGCTTTTCGTTCTTTTATATCGCTTTTGAAGTTGGTCCAAATCGTGATATCTTGCT  
TGGATAATTGCATTACTACAACTTGATTATGTAATCTAGCGTAGCGAAAGTATCTATGAAATTTTATTCCGAACATGTTTCTAG  
ATATGCCTATATTATCCCTTTTCAAATAAAATATTGAGGAGATCTACTGTCATAATTTAGATTTGCTATGATGGGTGGTTATGAGC  
TGATTTGTTTCTTATATTTTAACTAAAGGCATTAATAATATTAGCAACTCTCAATTTCTCGTCATTGTACTTCTGTAATAGAAGTTGA  
GAAACGAACGAATTTGACCTAGTTGCATGAATTCGAATTCGAATTCGAGGTTGATAGTATTGTTTCACTTCTGTTTACCTTCGGGTGA  
GTTCTCTCGTTATTCATATGCTTGAATATTTTCGTTTATTTTATGTTTTCGTTTCCATAACTTCTCTGTTGTCTTGAATTTGTGT  
CAAAATTTGAATTGCTATATGATTTATCAATACATAAGAACTCATCTATTATTTTATAACCATCTTCTGGTTATTTTCTGTTATTAGT  
TTTAAGACTAGACACTTTAACTATGTTCAATATCTAAAGTTAAATGCAACATTGTGTATCTTAATTTTCATATCTATAGTTGCTAAAT  
CTGATAAATAAGCAAATTTCTATGAAATAGCCGCCATTCTTTTTTCGAAATTTTTCGAAATAAGCTAGTTTGAAGAAGTAATTATT  
TTTTCTAAGAATTTCAATTTGCTTTTTTCGGTGTCAATAATATTAATAAATATATTCATCTGTTTTAATTTTCGCTATTGCTCATCAAAAT  
TGAGCATAGGCTTAATTTCTGCTAGTGTATCATCTTTTTCCAATTTTAACTCCCCAATCGTTCAAATTTATTCATCATATCTTTCCGCA  
TCTGATTAGTAACATGTGTGATATCTCTAGATTTTTTTTATAATCTGAATGACCTACATGCTCTTGCATTGCTTTTAAAGTTAATTCCT  
AATTGAGCAAGTGTAGATATATGCAATGATGTAATGTATGCGTCGTTATAGGTTTCTTAATAGAACTAATATACGCGCCCCCTTT  
AATAATGTGGCTAATTTTGTTCGAGTCGATAGGCTACCGCGTATTTGTGAATATGTAATCTCTCTATCAATAAATATCATCTCAA  
GCATAAGTGTCTTAGTAAGTCGATGCTTTGGGTAGTGAGCCCTATGGCCTTATAGCTATTACTTCTTTCAGTTGTCTCTTTACTCCG  
AATGCTCCCGTCTTTTTTCAGTTATCCAATTAATTGTACCATCGATATCTAGCGTTTTATCTTCATAGTTTATATTTTCTCTTTATTG  
CAAGTAGCTCACCGATACGCATGTCAATTAGCAATTTGAACTGTACCATAGCTTTTACCATTTTATAATTACGTTTGTGCTGGGATA  
TTTTTATACTTAATTACATAGTCGAAACAATCCAGTAACCTCTTATCTTCATTATCTTCTAAAGTGTTATTACGTTTAGCTAGTAACGC  
ATCACTATAGGGATATCTATTTTATCTATTACACATATAACTTTGAATTGCTTACTATTTTAAATTAACAAATTTCTATTCTTTAGATT  
TAGTCCAATTATGTGTAGACGATTTATAGTTATTAATTCAGAGTGGTAGCAAAATTAAGTTAATCAAGAGTTAAGATGAATTTAAT  
TCATGAATACGCTTATTTTATAATTTAGCAAAATAAGCTTTATCATCAAGGAGGTAATTAATATGTTCAAAAAACATCATTC  
TAAAAATCAATTTGATTAAAAATTTCTATCGCTAGGTATCATCTATGGGGGAACATTGGAATATATCCAAAAGGAGACGCGTC  
AACACAAAATTCCTCAAGTGTACAAGATAAACCAATTCAAAAAGTTGAAGAAGTACCAATAATTCAGAAAAAGCTTTGGTAAAA  
AACTTTACGATAGATACGCCAAAATACAATAAACGGAATCTAATAAATCTAGGAATTGGGTTTATTCAGAGAGACCTTTAAAT  
GAAAAATCAAGTTTCGCATACATTTAGAAGGTACATACAGTTGCTGGCAGAGTGTATACACCTAAGAGGAACATTACTCTTAATAA

AGAAGTTGTCACCTTTAAAAAGAATTGGATCATATCATAAGATTGCTCATATTTCTTATGGCTTATATATGGGAGAACATTGCGCTAA  
AGGTAACATCGTCATAAAATACAAAAGATGGCGGTAAATATACATTAGAGTCGCATAAAAGAGCTACAAAAAGATAGGGAAAAATGTA  
GAAATTAATACTGATGATATAAAAAATGTAACCTTTGAACTTGTGAAAAGTGTTAATGACATTGAACAAAGTTTGAAATTAAGTTAA  
ATTAGTATATATAGTGTTTTATCGCTAATACTTTGAAAGTTAGGTATCCGAAGATGCCTAACCTTTCTTTGTTATGATTAGCACCATCA  
TATAGAAAAATCTTTAATGATGTTTATGCCGAAATCTACAAAAATAATTTCTCTTTTATGGTTAATCAATATGTTTTATATTCGACA  
ACCTTAAAAATTAACCTCTTTCAATTCCATAATAAAGTCTCTATAAAAAAATTAAGTTTAAAAACGATTTCGTATCTTTTCAGATTCAAAAT  
ACCATCATTTTCTCCTAATACTTACACTTTAATTACAATTATGTAAGTTGTTTTTCAGAGGCATCCTATTTTATATTTTGTGAGAGGTGA  
TCTTTTGAACGATTTTAAAAACAATAACATATCTTGCACCTTACTATCATTGGCGCTTATGCTGCTTTATTCATTTTAAAAACAATA  
GACTCTCATGGTATAACAGATCAATTTAACCCATTAGTAAAGGAAGATGATTCTTATGTTAAAAACGACAGAGGTGTCTACTAGAATG  
GATGATCAACTCCGAAGTTATACTCAAAGTGCTTTTAAATAAAGAGGGAAGAAACGCAATTAATGTATACTGCTACATTGTGATGTT  
AAACCGCATAGATACTTGAAAAATTACACATAAAGGTCATCATGTAGAACTTTTGAAGAAAGTTGAAAAGGAAGAAGTACCTAAAA  
AAGCATTAGACAACTGAGTCGATAATAGCATGCTTATATTACATGGTTCAATTATAAATGAGTACGAACGAAAGTAACACATGA  
TGATTAATTTAAAAATATTTGTAATAATTATGAATAAAATTAACAAGGGTAATACAATCTATATAGCATATAAGCTTTTTGTTA  
TGAGTTTCAAAAAATAGGAAGAGAGAGTGATATTATGAAATTAATAATCATTAGCAGTGTTATCAATGTCAGCGGTGGTGCTTACTGC  
ATGTGGCAATGATACTCCAAAAAGATGAAACAAAAATCAACAGAGTCAAATACTAATCAAGACACTAATACAACAAAAAGATGTTATTT  
CTTTAAAAAGATGTTAAAAACAAGCCAGAAGATGCTGTGAAAAAAGCTGAAGAAACTTACAAAGGCCAAAAAGTTGAAAGGAATTTT  
ATTTGAAAATTTCTAATGGTGAATGGGCTTATAAAGTGACGCAACAAAAATCTGGTGAAGAGTCAAGAGTACTTGTGCTGATAAAA  
ATAAAAAAGTGATTAATAAAAAAGACTGAAAAAGAAGATACAGTGAATGAAAATGATACTTTAAATATAGCGATGCTATAGATTA  
CAAAAAAGCCATTTAAAGAAGGACAAAAAGAAATTTGATGGTGATATTAAGAATGGTCACTTGAAAAAGATGATGCGCAAACTGTGTT  
ACAATATCGATTGAAAAAAGGTAATAAAAAACAAGAAGTTACTGTTGATGCTAAGAACGGTAAAGTATTAAAGAGTGAGCAAGA  
TCACTAAAAAGATTCTGTCATTAACGCTTGTAATAATGCTTAATTCATATTAATTAATAAAATACCCTCACACGTAATGTAATAT  
ATCCAGTATAGATTGAAAGGATATATGCCAAACGTGTTGTGAGGGTTTATTTGCATCTATTTATCCATGCGAATATCGACTTCTTCT  
AAATGTTTCTGATATCTTTAACCTTACTTTCTAAAAACATTTTCATATGGTGCATCAAAGAAGTCAGCTAAATGCATGGCATCTTTAA  
ATTTAGGTTTCATGGTGATGATTCTCCCATTTCCCAAAATTTGATGTGCTTCATATTTAGTACCATATTTCTCATTTAATTGCTGTGCTAAT  
TCGTCAATTTCTAAATTATGTTTAGTTCGTAAGTTATATAAAATATGCATATTCATTGTTTCAATTAACCTCGCTTCTTGATTTAAAAATC  
AAAGATGCTCTAATAATATGTGTATATTCTAGTCCTATAACATAAAAAATCAAGCTATGAATTCGGCAGAAAAAATAATGTATATG  
ATATTGCGGTACAGAGACTTTAAATAACGATAGCTACATTGAATAAAATGATATTCAATTACTACTTTTAAAAAATATTTGGATAA  
AAATAATTTGAATTTGTTTTAGAATTGTAAATAAGGGGTACTACTTGAATAACGCAAAATAAATAGAAAAAGGAGACTGAAAATT  
ATGTTTGGATTTATTGGAATGTTAATTATCGGTGGCTTAATTGGATGGGCTGCTGGTGCTATTATGGGTAAAGATATCCAGGTGGT  
ATTTTAGGCAATATTATCGCAGGTATTATTGGATCATGGGTAGGTGGCAAACTATTCCGACAATGGGGTCTGAATTAGGAAGTATT  
TACATCTTGCCAGCATTAATTGGTTCAATTATCTTAATTGCAATCGTAACGTTAATTTTAAAGAGCTGTTCGTAAAAAATAAAATATTC  
AACTTAGGTTGAATTGAAATAAAGATGGCATTCAAGTTGTCATCTTTTTTATTTGCGTGAAAAATGGTCAATATGTATTATAATATTGA  
AAATGTAGATAAGATAGGATTAAAAAGTAATAAATTAATATGAGGAGAGGTTGGAATAAAAAAGCAAGTATTTGATAAATAAAA  
AAAGGATGACGTTGGGTTGCGTCATCCAGGAGTATTATGTTTCATGAATATAAAAGACTGTGTAGTCATTTAAGAATACACCCATAT  
AGTAACACATCACTTGTATTAAAGACAATACTATTTTATAGTGCTAATTAATTTAAATATGAATTAATTTTTTTAGAATAGAATATT  
AAGATTGATATCGAATTAGTAGTCAAAGTGTTATGGTAGATATGAAATACATAAGGTGAGGAGTAATATTATGACGATTTATTTAGT  
TAGACATGGCGAATCAAAATCGAATTATGATAATAAACATTTTAGATCTTATTTTTGTGGACAATTAGATGTGCCGTTAACGGATAC  
TGGCACAAAAAGTGCGGACGATTTATGTGATTATTTTTAAAGAGAAACAGATTAACATGTATATGTTTCAGACTTATTAAGAACAC  
AGCAAACGTTTGAACATATTTTTCCATATGACATTGCATCAACGACTACGCCTCTATTAAGAGAACGTTCACTTGGCGTATTTGAGG  
GTGAATATAAAGATGAAATCAGTGCGAATCCGAAATATGAAAAATATTTCAATGATTCAAACTTTAAAGACTTTCGTCATAGTTTTT  
CACAAAAAGCGCTGAAGGAGAAAGTTATGAAGATGTATATCAACGCGTAGAACATTTTATGAATCATGTTGTCAATGAAGATACA  
CAAAAAGATGATATTGTCATTGTTGCACATCAAGTTGTCATTGCTGTTTAAATGGTTTATTTTAAACGTTTCACGGGAAGAAGCTG  
TGGATTTAAAGAGTTGAAAATTGCAAAACCATATATCATTGATAGTAAGATTGAGGTTCTGAAAAGCTGTGTTTTATAGCGGCCTTCA  
GAACCTTTTTTGATTTGGAATTTAATGGGAATCATTCTTATCAACAGACTTACCACCAATAGCTAATGTGATAAATTGTGCTTGCAGAA  
CAAAATAATTGAAGTTATAAATGACGCTAATGTAAAAGGTGTAAATTGTGTGAGCGATAATATCAATGATAAAAAAGAACCAAGAG  
ACAGCCCCTAGAAATTGTAATAATAGCAGAAGAAATTCTAAAACCTCATATAATCATATATAGCTAAAACAAGTGAAGGTAATGCGAC  
TAATACCATTATAATGATGTTGAGGGTGAATAAATATGGCTGTTCAAAAGTTACTGTGTTTGGTCTGTTGGATGCATGGCTGCTAA  
GAACAAGCAACAATCGTCGATAAAATTGCTAAAAATAATAAAGTAATTTCGAACCTTCATCATGATCATCCTTTGTTTATAGAGTCA  
ATATAAGTATGGAATATGTTAGGGATATAGTCAAATGCGTCAACTAATGGGTGATTTTGGCATAGATAGAGAATTTAAGGCAATTA  
AAGAAGCATCAACAGTAATATGCTGCTTGATGCCAAATGATGACTTTAGCTAAATTGATTAGTCACTTTTAAAGATAAAGAATTG  
TCATGAATTAAGACACATGTAATGATGTGTTACATGTGCAATGATGGCTTACAGTTATTTATCGATAACATCACTCTTGATACCTTT  
AGATTTTAAAGAAATCTTTAATTTTATCTTGTTGCTTTTTTATTAACATCACCAGGATATTTTGTGGCAGCTGACGACATCATGATTTTAT  
TTTGGCGTTGATAGCTAAGCTTTTCAATATCTTCATCAACATTGGCGATTGTACTATTTAAAGCTTTGAAGTAATTCATCATTAATTC  
AACGGGTTTCTTATATTCTTTAGGAATATTGTTTTTCACTGACAAAATTTCTTGAAATGCAAATCGTTTTTAAACAGCTAAGTTAGATAAG  
TGGCTAAGTGTTTCTGCTTGTTTTTTCACTACTTTTGTGTTGACTGTCAATTTGTTTATCTAGTTTATGTTGCATAATATATTGTTATCA  
AGTATATCGCTATTTACAGACAAATACTTTTCTATAGCTTGCTTCATCTCTGCATCACTAATATCACTATTTTCTTATCTGAGTTAAA  
GATATCTTTTGTCTAATTTTTTAGCGCTTTTAGGTGCATGGATGCCAGTACTTGTATGATGATCTTCGTTATCAGATTGATCGGACG  
CGCAACCTGTAAGAATTAATGTCGATGCTAAAAATGTACTTAGTAGTAATCTCTTTTTTCAATGTAATATAAATCTCTTAGTTTATCT  
TTAATTGAAAAAATATGTATTATGTTTAAATAGAGTAACATTGAATAGTTTGGAAATGTCACGATGACCTTGCAATTGACCATAGACG  
TAAATGATTACGTGCATGAGTTACTTTTCTATCAATAATGCGTCGTTTTTGAACATTGTTAAGGATAGCAATCTATATAAATAACTGC  
ATAATTGGTTGTATCAATTTAGAGGTAGGTATCGTACGTAAAAAGCATAATGATTTTCTGTTACATACTTTTCTCTCAATATCATTTT  
TCATATTGATTTGTTTGGAGAGGTACATACTTTAAGCATTATCGCACACCTCGTTGTATATATTAAGTTTATCATAACATGATTTTA  
TGTCGGGATAAAAAAATAACAGCATCTTAACAAATGTAAGATACTGTCAGTGAATGAATGAAACTTTAGTTTCTGATAATATAGT  
CAAAGGCATTTAATGCTGCATTTGCACCAGCGCCATTGAAATAATAAATTTGTTTGTCTTCTGATCTGTGACATCGCCAGCAGCAA  
ATATTCAGGTACGTCAGTATTATGTTACGATCAATAACAATTTACCACGTTTCGTTAATTCAACAGCATCTTTAACCATGATGT  
GTTTGAAGTAACCAATTTGAACAAAGATACCATCTAAGTTAAGTAGATGTTCTTCGCCGGTGCTCATGTCTTCGTAACGTATACC  
TGTAACATGGTCTTCTCCGACAACCTTCAGTAGTTTGGCATTGTTTTGATATCAACATTTGATAAAGAAGGTAACGATCTTGTAAC  
ACGTTGTCTGCTTTTAAATTCGTAGCGAATTCGAATATGTAACATGATAACGATACCGAAGGTAATTTGCTGCTTCAACCCCA  
GAGTTACCGCCACCGATAACTGCTACGCTTTTATTTTCAATAGAGGTCCGTCACAGTGAGGGCAGAATGCAACACCTTTTATTAATC  
AATTGCTCTTCACTGGAATGTTTAGCTTACGCCAACCTGCACCAGTAGCAATAATGACTGTTTTTACTTTCTAAGACAGCACCCTTT  
CTAACGTAACCTTTAATTGCTTCGTCAGTCTTTTCGATATCTGTAGCACGTATACCTGTCATTGCATCAATGTCATATTGATCAATGTG

CGCTGCTAAGTTAGAAGAAAATTCAGAACCAGTTGTTTCTTTAACAGTAATGAAGTTCTCAATACCAGCAGTATCATTAACTTGGCC  
ACCGATACGATCAGCAACTATACCAGTACGTAACCTTTACGTGCTGTGTAAATCGCTGCACTACCAGTACGAGGACCACCACAA  
CGATTAAGACATCATAAGGTTCTTTATTTTCAAACCTCAGATGCATCTGCCGTACTGCCGTAGTTTCGAAAAGAATATCTTGGATTGTCAT  
ACGACCATTGCCAAATTTCTCGCCGTTTAAAAAGACAGCAGGACTGCCATGATGTTTTTCAGATTCTTCACGGAACTGCACCATC  
AATCATAGAATGCGTGATGTTAGGGTTGATCACACTCATTAAAGTTAAGTGCTTGAACGACATCAGGACATTTTGGACACGTTAAACT  
AATGAATGTTTCAAATGGAATGAACCTTCTAAGTTTTAATTTGGTCAATAATTGACTGTTTTCTTTAGGTGCACGACCCTAAACC  
TGTAATAATTGCTAAAAACAAGTGAGTTAAACTCGTGACCTAATGGAATTCCTGCAAATGTTACACCTGTTTTCTCGCCAGGACGGTTG  
ACTGAGAAACTTGGTGTACGTTTTTAAAGACTTTTCAGAAAAGTGAAAGTCTAGGTGACATATCAGAAATTTCTGTTAATAATTCTTTG  
AGTTCTTAGATTTTTCATCTGAACCAAGGCTGGCAACGAATTCACGTTGCCCTCCATTAGTTCTAATAATTGTTAAGTTGTTGTT  
TTAAATCAGCATTAAAGCATGGTTGTAATGCCTCCTTAGATTTTACCTACTAAATCTAAACCAGGTTGCAATGTTTTAGCGCCTCTTC  
CCATTTAGCTGGGCATACTTCGCCAGGTTTTTACGAACATATTAGCTGCTTTGATTTTTGTGAGCTAATGTACTAGCGTCACGGCCA  
ATTCCGTCAGCGTTAATTTTCAGATGCTTGTACAACACCGTCTGGGTGCGATAATGAATGTACCAGTTGAGCTAAACCAGTAGCTTCA  
TCTAATACATCAAAATTACGAGTGATTGTTTGTGATGGGTACCAATCATAGTGTAAGTGATTTTGCTAATTGCATCTGAATGGTCAT  
GCCATGCTTTGTGTACGAAGTGAGTATCAGTTGATACTGAGAATACATTACGCCTAATTTTGTAAATCTTCATATTGGTTTTGTAA  
GTCTTCTAATTCAGTTGGACAAACGAATGAGAAGTCAGCAGGATAGAAGCATACTACGCTCCAAGAACCTTTTAAATCTTCTGTGT  
AACTTCTTTAAATTGATCTTTTTTGGATCGAAAGCTTGCCTGTAAATGGTAAGATTTCTTTGTAAATTAATGACATAAATATCTTC  
CTCCTAAGAATTTAAGTATGAATTAGAACTATCAATTGATTGTGCTTAATTATAATAATTCTAATCTCTTAGTTAGCATTATTACATT  
TTGATTCAGAATAGTCAACTGGATAACTTTGTAAGTGAATGATTACTTTTAAAAATAGAGAAAGATAATATAAAGTCTTTGATAAT  
GGATTTTGTAGTTGATGATTTAAAAAGGTTGTGTCTATATTTAATATCTTGATTTTAAATGTAAGAAAAATGAAAAAGAGATTGTA  
TTCTCAACTAAGTCAACCTTATTGATAATGGTGTGAGAATATTTGTTGAGATGGATGAAGGTGATGCATGAGAACTGGATTTTTTC  
AAGTGCAGACAATATTTTTAAAAAGTTCAATTATTAACCTATAAGCAAATAATTGCTATAAAAAAGTTGTACGTGTACAATTGCAA  
TATGAAGATTTTTAAATTAATTGTAAAGTATCGAGGAGTGGGTAACTGTCAGAACATGTATATAATCTTGTGAAAAAGCATCATTCT  
GTTAGAAAAATTTAAGAATAAACCTTTAAGTGAAGACGTTGTTAAGAAATGGTAGAAGCTGGACAAAGCGCTTCGACGTCAAGTTT  
CCTGCAAGCATACTCAATTATTGGTATCGACGATGAGAAGATTAAAGAAAAATTTACGAGAAGTTTCTGGACAACCTTATGTTGTAGA  
AAATGGCTATTTATTCGCTTTTGTATTGATTATTATCGTCATCATTTAGTTGATCAACATGCTGAACTGATATGGAAAAATGCATAT  
GGTTCAACGGAAGGTTTGTAGTAGGTGCAATCGATGCAGCATTAGTTGCCGAAAAATATTGCGGTAACTGCTGAAGATATGGGGTA  
TGGCATTTGCTTTTTTAGGATCATTAAGAAATGATGTTGAACGCGTTCCGAGAAATTTAGACTTACCTGACTATGCTTCTCCCGTATT  
GGTATGGCAGTAGGGGAACCCGCAGATGACGAAAATGGTGCAGCCAAGCCACGCTTACCATTGACCATGCTTCCATCATAATAA  
GTATCATGCTGATAAGGAAACACAGTATGCACAAATGGCAGATTACGACCAGACAATCAGCGAGTACTATGATCAACGTACAAACG  
GGAATCGCAAGAAACATGGTCGACGAAATGAGATGTTTCTAGGAAACAAAGCAAGATTAGATATGTTAGAACAATTGCAAAA  
ATCAGGCTTAATACAGCGATAGCAAGATACCAAAATAACCCGCCCCCTCTAGCTTAAATGATAAGTATAGCTAGAGGGGGCGGG  
TATTTCTTGCAATGAATTAGTGTGAAGTTAATGCAGCATTATCATTTGAATCGAAAGTATCTTTATCCCAATGTTTAGTTAACTTGGC  
GGTACCTGTACCAGCTAGCATTGAATCGTTACGTTAATGCTGTCTACCCATGTCAATCAATGGTTCAACGGAGATGAGCAGCC  
GGCTAAAGCGACTGGCAAGTTTAACTGTTGACAACCAATATGGATGCAAAATGAGCCCCGCCACCGCAGCCGCAACGCGCAATG  
AACTAATAATCAGCAGCGATTAACGTTACAATAAATGTAATCAATTTCTACATTAGCGACGGGTGCGACCATAATTGCAAGC  
ATGGCAGGGTAAATGCCTGCACAACCATTTTGTCCAATCGACAATCCAAATGTCGACGCAAAATGGCAATACCTTCTGGCACGCCT  
AGACGCTTGTGTTGTGTTGTACATTCAATGGTAAGGCACCCGCGCTTGAGCGTGATGTGAATGCAAGATTAATACTTCCAAAGTC  
TTTTTAACATAGCGAATTGGGCTAATACCTAACAGGCTTAAAAATAATTAAGTGAATGATATACATCGTAATTAATGCAGCGTACGAT  
GCGATTAAGAATTTTCTTAAAGTCCAAATGGCGCCAAAGTCACTTGTGCTAATGTGTTGGCCATAATTGCTAATACACCGTATGGC  
GTTAAACGTAAGACGAACGTCACAATCGCCATTACTAGTGAATAGATAGCGTCAATCGCACGCTTAAGCAATTCACCATGATCAGG  
TTGTTTGGCTGTACGCGTAAATAAGCAAAATCCTATAAACGAAGCAAAATATCACGACAGCAATCGTGGAAAGTTGCACGTTGTCCAG  
TGAAATCTAAGAATGGATTTTAGGCAATAATTCCAAAATTTGTTGTGGTAACGATGTGCTGTTAAATCTTTCGCTTGTTTAGCAAT  
TTGCTTCCAGCTGCTTGTTCAGCGTTACCAAGGTTAATTGTTGTGATGCATTTAAACCAACACCAAGGCATACCAACACCAAT  
CGCAGCAATGGTGACAGTGCCAATTAAGGATAAAATGAGACTACCAATTTTAGCAAACTTTTCTCCGATTTGAATTTTAGTGAA  
TGCAGCTACAATAGAAATGAAAATTAAGGCATAACAATCATTTGCAACAATGCAACGTAACCTTGTCCGACAATGTTGAACCAGT  
CACTTGTGATGTAATAACATTTCGAATGTGTGCCATAAATAAGATGCAATAACACACCGAATACTATACCAATCCCTAAAGCTGTAA  
ACACACGTTTTCGCAAAAGATATATGTTTGGCAGCCATCATGTGCAATATTACGATGAAAATCACCAATACAATAATATTAATCAGTG  
TAAGAAAAGCATTTCATGAACGTCACCTCTCAAATTTTGAATATAATTCCGACTAGTATGCTAAGAATAATATTAATTTTAAATAT  
TTCAAGAGGGCATTTCGAATTAATGTAAACATGATGAAATTCGACCGTTGGCATAAGGGGATTGTAAACAAATCGTTTTGAATTC  
AGTAGTGATAGGTGGAAGGGTAAATAGTGTGATGAGCTAGTCGATTAAAGTTAATATTTGAAAATGAAGCAGGGCATTAAATGCA  
ATAAATTAATAAGTTGTGATTAAAGCATTAATAATAGAAATGATTTTAAACAGGAAAAAGTGAATGATTAATTTGGAAGATATAT  
ATCGTGCACTGTCTGAGATAAGATATGAGAAAAACAAATTTATCTTGAATCGAGATGTGGCTATGCGCGTTGATGAAAAATTG  
CTAACCTCATATTTATTGAATGAAAAGATAATAATGATCAACCTTGAAAAGACGCTTCGAACAAACACGTTGTAAAAAATTCTGT  
GAATCAAAATTAGCATCTTTTGAAGTGTTCGTGTGTGCAGGTGGTAGTTCAAAAGCTACCGTAAACAAATATTTTGTGTTGAGCAAAA  
AGGCGTTTGTAGTAAATGTGAATATGAGTGTGCACTTGTGCGATTCTGTCAGTTACTAACACAGCCAAACATTTAAATTGAATGGACT  
TATTAAGATGAATCTATTTAGAAGTACACAGAAGCCATCCATTTAAAAGTAACTATAAAAAATTTATTCAAAATTCATATTA  
ATCATAATGAATAATTAAAAAACCTGAAACAAATAGTTTGTATGCTCTCTTCAAAGTAGATATTGAATGGAGTATATCAGCTTGT  
TTCAGGTTTTATGAATTGAGTATTAAATTTGAAAAGTAAATACAGTTCTATAGGTTTATAAAAAATCAGTTTTTAAATCAAAGCTATAT  
ATGAATTTGAGTATTAATTTGTGTTCAAAATCACAAGTTTACAGTTGTAATAAACGTCGGAAGAACCTTTTTCTCTTCTTGAAGTTT  
TGGTTCTGACATTTCTGACTGTGAAGCTGTGCTGTCTATTTCTGCTTTCCGTAAGTGAATCGTTGAAATCGTTGTTTGAAGCTT  
CTGCATGGGCTTCTGCTACTTGTGTTTCAGCATCATGTTGCGCTTCTGCATCTACTGTAGCTTCTTTATTTGAAGTCTCAGCTGCATTG  
TCATTTTTAGACTGCTCAACGCTGGCTTTTTCAATTGCTTCAGTTGCAGAAATTTGATCCTCTTTATCTACTTTAGTAGCAGTGCCATC  
GCCTGCATTTTCTGCTTTAGTATCCGCTTACGCTCTGTTGATGTATTCCTCCAGCAACCTTCGAATCTTTACTGTCAGCTTTATCTT  
CAGTAACAGCATTCTTTCAACTTATTTGTTGATTCAGCTAATGCTTTTGTGAGAGGCTTGCCTTCTTGGATAGCCTCTTGTGAT  
GTTTGGATGGCTTTAAGGATTTCGTATTTGAATCGATTTTAGATGTAAGTTGATTTTGAAGTCTTTTAAATCTTGTGTTGCTGATG  
TACTTGATTATCATTTGACCAAGTAGGTGACGTTCTTCGCGCATTTTCTGGATTTCTAGGCGTAAATCTTCTACTAGTTGAGCGACA  
TTTTGATTAGTAGGTAAGTTTGTGCATCGTTTTGACAATGACTTGCAGGAAGTCTTTTTCTTTTTCTAATTCATCAAAACGCTAGATC  
ATAACTATTTGTTGTTTACTTTGTGCGCAATGTCTTTGAAAAGCTCGATCTTCTTCTTTGAAATCAAGTCTTACGACCAGCAT  
ATTCAGTCTTGCTTAGTTGGTAACACGTTCTTCTAATGTTGAACAATTTTACGTAAGTCTTCTACTTAGTTCTACGCGTTGTGCA  
AATTTCTTTAGTTAACTACTTTTAAAGTCTTTCTGCATATACTTTATGTATACTGACGTTTGTCTACGGGCAGTGAAACGTCAGTCTT  
GCTTCATACATAGTTTAAACGTTATTGTTAGTGATTTCAAGTTTGTTTAAAAATGGTTTACGTAAATCCATTTCTTCTAATAAAGCATA

AATAATTTACGTGCGATACCATTTGGCAAATACATACTTCAAAAATATAATTTGATTTAACACTTGTACCGTAGATATCCTTTGTCAGT  
TTAATATTTTTCTTTAAAAATAAGTCCACTTTTTAGTGTGACCATCATTAGTTGGATGAATGTAATCAATTTACAGTTTGCTTTCAAAA  
TTGATGTTTCGTATAAAAACTGTCTACGGTGTTCATAATGAGGCCGTATCTTGTGTTAAATCTGCAGGTTCTTTAGGGACTTCCATC  
ATTAaaaaAGTTAATACTTCTAGAATGAACAAGGTTTGATAATAAGTTTAGTTCATGTTCAATTTGATGTAATGTTTGCCTACCTAACT  
CATCATGGTTGGGTAGGTCTTTTGCGAATAAATAAAATAAAAATGCTGAATGGTTGTGGCTTCATAATGTGCAGTTGCTAGACTGA  
CAACAACATCGTTTTCTAAGCCTACGATAAAGACATAATCGTTTTCGGTTTTGTTGTTTTCTAATGAGCGTTTGATGATACGTTTATC  
TTCAGTTAAAGATAAAATTTAACTTAGTATCGTAAAGTTAAGTGCTTCGTTGTAATGTGGATCTTTGACAGATTGAATGGTTTTAAAT  
TCCATAAGAACACCTCCCCAATTTAAATAATATTATAGCATAATCGCCTGCTGTAAAAGACTGTTTCATAAACTTTTAAATGGTATAA  
AAAACTGTACTATCTTAAATTAGACAGTACAGTAATCTCATTTTGAATTCAGTGTGATAACTAAGCTTTGGGACCTTTAGATGCTTCA  
GCAAAATGTGTAATATCAATCTCTTCATAAGCTGAATTTTTCATGCACCTTGTGATGTGATGATTTGTACGACGAACCGCTACAAC  
ACATTTTATCGTCTAAAAATAAGTTGTTTATATTTTTCTAATTCATCAGGCGCTAAGTTGTAGCGTGATAAACTGCATGTTACCATC  
TTCTCCTGTTAAACAGTTTAGTCATTCTATCACTAAATGTCCACTTGTGAGATAAGGGAGATTTAGAGTCGTGTAAGTCATTTAGG  
TGTAATTTACTTTTACTAATAATTTGTTAGCTCTGATTCTAAATAACCTTCAGATTTCTTTTGTGATTACGTTGTATAATTCGCCAGT  
GTCATTTACTACAGTAATATCTGCCATAGTTGTGCCCCCTTTAAAAATTTGTTATTTAATCTTTTACCCTTCTTATTATAAAGTAAAA  
CCCTTACATTATTAAGTTATAAGTCTTCATTTCGCATTAAACGCTCTGTACATTTATAAACTATTAAAAAGATTACCTAAGCAGTTAT  
TGAAAAAATGCCGAAAAATTTGCTATTATCGTTAAATAATTTACATAAACTCATATAATCTAAAGAATATGGCTTTAGAAGTTTCTAC  
CATGTTGCCTTGAACGACATGACTATGAGTAACAACACAATACTAGGAGTAGCTTCAGCCATTAATTTGAACCATGGTGGGTGATT  
TATATCACTTTATATGATGTTGTCAGAGTTTATTGTGAACTCTTTTACATTGATGTCATGACAAATTCGTTATGTCATTCGTTTAC  
TCATAAACCTTGAACACTATTATTAGTTTGGGGATTTTTGTATCTAGCACAATTTAAGAGCAAAATGTTTACACAAAACTGTAGG  
AGGTTTTAAGAGTGGAGTTACTAGGACAAAAAGTAAAGGAAGACGCGCTTGTCAATTGATGAGAAGATTTTAAAAAGTCGATGGATTT  
TTAAATCATCAAAATGATGCAAAGTTAATGAATGAAGTTGGTCGCACCTTTTACGAGCAATTTAAAGATAAAGGGATTACTAAAATC  
TTAACCATTGAAGCTTCCGGTATCGCACCTGCAATCATGGCTGCACCTGCATTTTGTGATGCCATGTTTATTTGCGAAAAAAGCAAAA  
CCTAGCACTTTGACCGATGGTTATTATGAAACATCTATTCATTCTTTACTAAAAATAAAAAAAGTACGGTCATTGTTTCAAAAAGAG  
TTTTATCAGAAGAAGATACTGTACTTATCATCGATGACTTTGTAGCAAAATGGTGTATGCTTCATTAGGATTATACGATATCGCACAG  
CAAGCGAATGCTAAGACAGCTGGTATTGGTATTGTTGTTGAAAAAGAGTTTCCAAAATGGGCATCAACGTTTAGAAGAAGCAGGTTT  
AACAGTTTCTCTCTCTGCAAGGTTGCTTCACTAGAAGGAACAAGTACATTTGGTGGGAGAAGAATAATGAAAAATTTAATCCT  
AAGTGTTCACATCTTTTAGCTATGTACGACGGTGCTATCTTAGTTCCAATCATTGTTGGTACAAAGTTTGAAGTTTACACCTGAACAA  
ATCGCTTACTTAGTTACAGTAGATATATTTATGTGTGGGGTTGCCACATTTTACAAGCCAATAAAGTAACAGGAACAGGATTACCA  
ATCGTTCTTGGATGTACATTCACGGCTGTTGCGCCCATGATTTAATTGGTCAAACGAAAGGAATAGATGTACTTTATGGTTCGCTAT  
TTTTATCAGGGATATTAGTTATTATCATCGCGCTTTCTTTTACATCTTGTAAAAATCTTCCCACCAGTAGTAACGGGTAGTGTGTT  
ACTATCATTGGTATCAATTTAATGCCAGTAGCAATGAATTACTTAGCTGGAGGTCAAGGTGCAAAAGGACTATGGAGATGTTAAGAA  
CATTTTGTAGGTTAATGACATTAATCATTATCTTGTTTTACAAAGATTACAACTGGATTATTAAAGAGTATTGCCATATTAATT  
GGACTCGTTTTAGGAACGATAGGTGCTGGCTTACTTGGGATGGTCGATATTAATCAAGTCAATCATGCCGTTGGTTAGGCATCCCA  
GTGCCGTTTAGATTCTCGAGTTTAGCTTTGATGTGACATCGACGTAGTGTCTTTATTGTAGCTATCGTTAGTTTAAATTGAGTCA  
CAGGTGCTATCATCTGTTTAAAGTGAAATTACCGGTAAAGAGTTAGAAGAAAGAGATTTTCGTAAAGGTTTACTTCCGGAAGGTCTA  
GCGATAGTGTAGGTTCTATATTCAATTCATTTCCTGATACAGCCTATTTCGCAAAATGTAGGACTTGTCTTTTATCCGGCGCTAAGA  
AAAACAATGTTATATACGGCATGGTCGTGTTATTACTTATATGTGGTTGTATACCTAAGCTTGGCGCATTAGCAAATATCATACCGC  
TACCTGTGTTAGGCGGTGCGATGATAGCTATGTTTGGCATGGTAATGGCATATGGTGTAGTATATTAGGACATATCGATTTTAAAA  
ATCAAAACAATTTATTAATTATCGCTGTATCAGTAGGATTAGGTACTGGTATAAGCGCTGTACCACAAGCATTAAAGGTTTAGGTG  
AACAATTTGCATGGTTGACTCAAAACGGAATTTGTTTAGGCGCAATCTCTGCAATTATCTTAATTTCTTTTTAATGGAATAAAGTA  
TAAACAAACGGAAGAAAATGTGAAATAATATACTAATTAATTTGAAAAATGGAGGCTGTTTTAATGTGGGAAAGTAAATTTGCA  
AAAGAATCATTAACGTTTGATGATGTGTTATTAATTCCAGCACAATCTGATATTTTACCGAAAGACGTTGATTTAAGCGTACAATTA  
TCAGACAAAGTTAAATTAATATTCCAGTTATTTTCTGCTGGTATGGATACTGTAACCTGAATCTAAAAATGGCGATTGCTATGGCTCGT  
CAAGGTGGTTTAGGTGTTATTATCAAAAAATATGGGCGTTGAAGAAACAAGCGGACGAAGTTCAAAAAGTAAAAACGCTCAGAAAAATG  
GTGTCATTTCAAACCCATTTTCTTAACGCCAGAAGAAAGCGTTTATGAAGCAGAAGCATTAAATGGGTAAATACCGTATTTACAGGTG  
TACCAATTTGTTGATAATAAAGAAGATCGCAACTTAGTAGGTATTTTAAACAAACCGTGACTTACGTTTTATTGAAGACTTCTCGATTA  
AAATTGTAGATGTAATGACGCAAGAAAATTTAATTACAGCTCCAGTGAATACAACACTTGAAGAAGCAGAAAAAATCTCCAAAAA  
CATAAGATTGAAAAGTTACCATTAGTTAAAGACGGACGTCTAGAAGGTCTTATTACTATTAAAGATATTGAAAAAGTTATCGAATTC  
CCTAATGCAGCAAAAGATGAACATGGTCGTCTACTTGTAGCCGACGAATTTGGTATTTCAAAAGATACTGATATTCGTGCTCAAAAA  
TTAGTCGAAGCAGGTGTGGATGTCTTAGTTATCGATACAGCACTGGTCACTCTAAAGGCGTTATCGATCAAGTGAAACATTAAG  
AAGATTACCCAGAAATCACAATTAGTAGCTGTGAACGTAGCAACTGCAGAAGCAACAAAAGATTTATTGAAGCGGGTGACATAT  
TGTTAAAGTTGGTATTGGCCAGGTTCAATTTGTAGCAGCGGTGTTGTAGCAGGTGTTGGTGATACCAAAATACAGCAATTTATGA  
TTGTGCAACTGAAGCACGCAAAACATGGTAAAGCTATCATTGCTGATGGCGGTATTAATTTCTCAGGAGATATCATTAAAGCATTAGC  
TGCTGGTGGACATGCGGTTATGTTAGGTAGCTTATTAGCAGGTACTGAAGAAAGTCCAGGTGCTACAGAAATTTTCAAGGTAGAC  
AATACAAAGTATATCGCGGTATGGGTTCTTTAGGTGCGATGGAAGAAAGGTTCAAACGACCGTTACTTCCAAGAAGACAAAGCGCCT  
AAGAAATTTGTACCTGAAGGTATCGAAGGACGTACAGCATATAAAGGTGCTTTACAAGATACAATTTACCAATTAATGGGCGGAGT  
GCGTGCTGGTATGGGTTATACTGGTTACACAGATTAAAGAGAATTACGCGAAGAAGCACAAATTCACACGTATGGGTCCTGCTGGTTT  
AGCAGAAAGCCACCCACATAATATTCAAATACGAAAGAATCACCGAATCTACTATTCTAATTAAGATAAAGGAGAACGACAATA  
TGGAATGGCAAAAAGAACAAGAGTTAATCCTTGTCTTAGACTTGGTAGCCAATACAACCAATTAATTACAGCCGAATTCGTGAA  
ATGGGCGTTTATAGTGAATTACACGATCATGAAAATTTCAATTGAAGAAATTAAGAAAAATGAATCCAAAGGTATTATCTTATCAGGT  
GGTCCAAATTCAGTTTATGAAGAAGGTTCAATTTACAATTGATCCGGAATATATAATTTAGGAATTCAGTACTTGGTATTTGTTAC  
GGCATGCAATTAACCTACTAAATTATTAGGTGGTAAAGTTGAACGTGCCAATGAACGTGAATACGGTAAAGCAATCATTAATGCGAA  
GTCAGATGAGTTATTGCTGGCTTACCAGCAGAACAACTGTTTGGATGAGTCATTCTGATAAAGTTATTGAAATTCAGAAGGCTT  
TGAAGTTATCGCTGATAGCCCAAGTACAGACTATGCAGCAATCGAAGATAAGAAACGTCGCATTTATGGTGTCAATTCATCCAG  
AAGTACGTCATACAGAATATGGTAATGATTTATTAATAAATTTTGTCCGTCGTGTTGTGATTGTAAAGGTCAATGGACAATGGAAA  
ACTTTATCGAAATCGAAATTTGAAAAGATTTCGTCAACGAGTAGGAGACCGTCGTGTATTATGTGCGATGAGTGGCGGCGTAGATTCA  
TCTGTTGTTGCTGTATTATTGCATAAAGCAATTTGGGGTCAACTAACATGATATCTTTGTAGACCATGGCTTACTTCGTAAGAGGTGAA  
GGCGACATGGTTATGGAACAATTCGGTGAAGGTTCAACATGAATATTATTCGTGTTAATGCGAAAGATCGTTTTTATGAATAAATTA  
AAAGGTGTTTACAGTCTGAACAAAAACGTAATAATCGTAAATGAATTTGTATATGATTGTAGATGAAGCATCAAAATCGAA  
AGGTGTAGACTTCTTGTGCAAGGAACACTTTATACAGACGTTATCGAATCAGGTACCAAGACAGCACAAACAATCAAATCACATC  
ACAATGTTGGTGGATTACCAGAAGACATGGAATTCGAATTAATCGAACCAATCAATACATTGTTTAAAGATGAGGTACGTAATTA

GGTATTGAATTAGGTATTCCAGAACATTTAGTATGGAGACAACCATTCCCAGGACCTGGTCTTGGTATTCTGTACTTGGAGAAATT  
ACTGAAGATAAACTAGAAAATCGTTAGAGAATCAGACGCAATTTTACGCCAAGTGATTAGAGAAGAAGGTCTTGAAAGAGAAATTTG  
GCAATACTTACAGTGTTACCAAACATTCAATCAGTAGGTGTTATGGGAGACTACCGTACGTATGATCACACAGTAGGTATCCGTGC  
AGTAACATCTATCGACGGCATGACAAGTGATTTTGCACGCATCGATTGGGAAGTCTTACAAAAGATTTCAAGTCGTATCGTAAACG  
AAGTAGACCACGTTAACCGCGTAGTCTATGACATTACATCAAAACCACCAAGCACAAATTGAGTGGGAATAATTATATATAGCAAAAT  
GATAGGCTGGAGTTACCGTTACTATGCGGTTTCCAGCCTTTTTTGGTGTGCTTGGCATGGGCAACATCATGACGTGAAATAATGGGAA  
TCATCTCTTTCTTATATTTTGGAGACGGAGATGATGAGAAGTTAGACAAAAATGTAGAAGAAGTATTTAACGACAATCCTAGTCATAC  
AATGATTGTAGATGATATCCGTTAGAGGAGTGAGAGAAAAATTTATTTGTTACTAAGAGACAAGAGTTTTAAATAAATATCTTTTGT  
CTACATAAAAAGAAAGTGGTCTTATCATAGAATATTTGGCGATAAGGTAATCTGATTATGTTAGAACCTATATTTATTGATGATTT  
AGTGAGGTTTGGAGAAGACAAGAATGATTGAATTACAATTGACAATTGACACCCCTTAGATTAATATTAATTTATTAGAAGTCAACTA  
ACGCCTCTTAGCAATGCGAAAAACACAGTTGGCCTTTTTTTTGTAAATAGGAGAATTTATAGTTATGGATAAATCACTTGAAATTAACCT  
AAAAGAATTAGAAGGCATAATGTATAAAGAAAAAGTAATCGACGTTAAAGAGTATGATAATTTAAAAAGTAACCTTTGAGACACTAA  
ACGATGCTCCTAAAAGTGAAATACCCACTCCCTTTACAATAGAACAAATGTTATATAAATTAGAACTAAAAATTTATATTTTCTG  
AAATTAAGTCAAAAAGAAAAATGTGTGGAGCTTTTACATAGTGTGGCTATTATAATTTGAAGCATTTTATGTATAATGAATTTGGTA  
AAGATGAGCCGAAAAATTTTGATGAAGTATATATACTTTATAAAATTTGATAGATATTTATTGAAACAATTATTTAGTTTAGTAAATA  
TGTTGGAAACTCATATAAGAAATATTTATTTAGAAGTATATATGTTAGAAATTTGAGTATAATAACAAGCCTTCGACACTGTTCTATT  
TAGATAAAAGATTTATATTTGAGAAAGTTAATGATGAGTATAAATATTTCTGCCAAAAAGCTAAAAGAGTTCAATAGGTTACAAAA  
GTTTTTTGGAGAGCTATGAAAAAAGAAAAAGTAAACGATAACGTTAAACATAATATTAATAAATACAAATTTACCAGCTTGGGT  
TTTATTCAAAAATTTTAGTTTTGGAGATTTGTCTACTTTTTATAGAACCTACATTACCAACTTATAGAAAATAAGTAAGCGAATT  
GAAAAATTAATAGAAAAAAATACTGGTATAAGCATAAAACTTCCAGAAAAAGTTATTGTGTGCATGGTTGAATAGTATCAGGTTTTTG  
AGAAATAGAATAGCTCACACAGATATAATTTATGGAATTAATTTACAAACACCTGTGCAAAACATCATAGTGATGAGGAAATGTA  
TGTAATATAGAAAAGTATAAATATCAGCAAAGGTTAGTTACATTTTTATTAGCTATGAAGAAAAATTTTATGAGTATGCCAGAAA  
ATAATATTATTGAATGGAATGAGACTCTAACTAAGATAGAGAATAAATGTTTCAGAACATAACTTTATTAACCTTTCTAGGTTAGGAG  
TTATTGAAAAATAACCTTTCTTACTTTAAAAATACTAAATAAAAAATAGCGCACACTAATAACTAAGTGATTGTCTTTTTACGCTGAA  
TAATGCCCTGTGTTGTAGTTAGAAAAGATTTTCAAATAACACTATATTTATAAAAAATGTTGAATTATAATATGGTCGGTTTATTTTATA  
GGAGTAAATAAAAAAGCATTTATCTTTATCCGCCACAAAAATGATGAGTAAATGTACCTTGCTTTCAATGTTGATATTTTACAACCTTGTA  
GAGTTGATTTGATATATCATCTCATACGTTGTAGGCAATGAATACGTAATTAATGTCAGTGACATGAACCTGTTGTGAAGTATAGAGCA  
TTAAAAATCTTGATATATCAATAGTTATAAACTGGTACAAATTAACGAAAAAGTACTCTTGTCATCGAGTGGGAATAATTATATATAG  
CAAATGATAGGCTAGAAGTACCGTTATTACGCGGTTTATAGCCTTTTTTGGTGCAGTTGGTATGGGCAACATCATGTGATGAAATGA  
TGGGAGTTATATCTGTAGAAATTTGGCGTACCAATTTCTTTATGTTGGGGCCCCGCAGTCAACTACTGCCAATAAAGATTGTAGAGC  
CTAGGATTTTGATTTTATGTCCTGGGCTCGTTTCTTATTTAAATAGTATTTAAAAATCTATACTATTTATATTGAAATTTTAT  
TTATGGTTATGCCATAACTACTTTGTATTTCCGGTACTAACTTTTGAATATTGGGTAATAGTTATTAGCGAAACCAATAATAATGGA  
ATTAATCACATTGATACTAAGTCTTTATCTTCAGGTAATGCATTTTCTATTATTTTGATTAAGTCTATATATTTTATTTTCATCAGAAT  
TTTTATGTCTAAATACTTCAATAAAATCAGTTTGCACCTTTTCGAAAAAGCTATATCTTAAGTCCATTTGTACAAATTTAAGCTGAC  
AGTTTTAGTTTTCGAATTTGACCTTGACCCAAAACCTGACCAAGTCTCTTCTATTGATTTGATATAGCAATCTGATATCGCCGCTATCTCA  
AGCATATGAAACACTCCTTTATCATTTTAGAATAACCATGCAATGGCTTCTTTGACTACAGTTGAGATTATTCCAGCATCACCTATAC  
TTAGACCGGCATTTATTGCGCCTCGTTTAAACGCATCACCGACAGCGTTAGCTGGTACTTCTGACCATTTTAGCAATGGTTTCAATTC  
TTTTACAATACCTGAATACCCCTTTATCAAAAAATAGTTGCGAGCTGTCGATGGAAGTCTAACCGATGGAGCCACTTTCTGCTAATATTGT  
AGGAATGATACCATGAAATATTATTTAATAAATGGGTTTGTGTTGCTTATTTTTAGTAATAATATCATGGGTGATAATTAGTATAA  
AATTTGATAATATCAGCACGATGCAAATATTAATTTCTAAACTGTTTATATTTATTGCTTATATACTATATTTAGTTAAGTTCATTTCGT  
TTCAAAAAAACAGTGCGCATCATTAACAAGTATAAAGAAAGTCGATTTTGTCTTTCTCTCGAACATATATAAGTTTATATAGATGT  
AGAACTAATTTTTATTGTAAATGTTTTGTGATTGGAATGAGTATGAAAAATGTTCTCCAATCAACAGAGTATGCTTTGGAAGAAA  
TCTATTATACCTTATGTGAATAAGTCATAATGTCAGACATACATAAATAAGACGAATAGATTGTAATAGCTTTTACTCTAATTTAGTTT  
AGGCGGCCCTTTGTTGGTTCGCATTTTATAAAAAATATAAATGACCAAAACCACAGCACCTATTAATTTAAGAGTGAGGTCATTTT  
AAAGGTAAAAAAGGAGTAATTTTATATATTAATAATGATATATAAAAAAAGTAGTATTAGTATGTTGTGAATTGTTATAGAATTTGAC  
TTGTTAGCAATTTTCGTAGCTATTGTAATAGCAAGTACTGTATGGTTGTATTTTTTAAAGGTAGTGAATGATATTGGATTTTGAAGTG  
GAATATTGTAGGTGGTTACAACGAAGCATATTAGAATTACAAAAGGAACGATGAAATTAATGTCCATCATTCCTTATGCCTAGTC  
GTTTTTTAGTTAATATATTTAATTGCTAACTATTATTAGGGTCTCTTTCAAGAATTTTATTGCGACCAATTGAATATTCTCATGTGA  
AATCATATCAAAGTCTGGTTCTCCAAGGATTTCTAAAAATTCGTATAATAAATTAGCATTATTAATTTGCGAAATCTCTAACGATTG  
CCAATAATGATAGTATGCTAAATCATAGGCATTATCTATGTAATTGAAATGAAAGTGATAGATGCTTGGCACCATTTCATGATATTC  
AATTGTATTTATTGTATCGCAAGATTTGATAAATATGATAACTAATTTTCATCTGAAATTTTCGACATAAAGTATGTTAGATAA  
TTCCTCATATCTTTATCTCTAACATATTTTTTAAATGACTTGTTGTAATAAATTAAGTAATGTTAAGCTTTTACTCTTATTTAATCA  
TCCATTGATATATATTGCCATTTTTTTCGTGTATAAGTTATGACTACAGTTCTACCCTCATACAAGTGTTTTTTGGTATGCGGACTT  
TTTGTATCGGCTTTGCTTTCCATACCTCATAACATGCGACATTACTTTAGAAACATCTTTCCAATTGTTTTTAGTAACCTTTATTTCAAT  
TATGTTTACTAGCAAGAATATGTTTTCTTTTATTAGCTCCTAGATTGGCTACAGAAGGTAAAACCTTTACCAAACTCTTTGTTTTGAT  
AGCGGTTTGAGTTGCTTTTTTCCATATGTTTTAATTGCATAGTTTATCCGTATCTAGCTACAGCAGCTAATATTACTAATGGCAAT  
GCAGAAGATTTAGCTTCAATTGAGTTGAATTTTATTATTTCGCCAGTTTCTTTGTGCATAAATGTAGCTTCATATTCTGTATTTTCAAA  
TTGCTTTACGAAAACGTCATAATCTTTATTTATTAGTTTTCATTTTCATCGACGTATCTGCCCTTAAACATCCATGGAGTTAGTATTTA  
AATCATTTGAATATTGCTTTTAAATCAATATCTTCTTAGATTAAATTCATTTGTTGGTTTCGAATTTGGTACTGTTTATCAATAAT  
TTTACTTCAATTTGGGATTTTGTAAATATTTTATGTAATCTTCTGTGTTATTCTTTTATAAGAAGTTCGCTGTCATTAACATTTCTA  
GTTTCAATCACTCCTGTACAGAAAGTAATGGTTAATACTAAGACTAGTATTCGAATAAAGTTTTTAAAGTGATATAATTTTCAATTTACT  
ATCTCCATTTGTGACTTTTTATTTGAAATCTTTGAAATATTAGAATAAGAATTTAAGGTATATGAATTTAATTTCTTATTGTGACTGCT  
TCATTTTGATAATTTCAATTTGTGGTTAAAGCTGTGGCGAAAGAATTTCCGCTAAATAATCTCTTTTTCTTGTATTATTAATGGACTCT  
ATATTTTCGCTTAAATATATATGTCTATTTTTCCTGAAGAATATATCTCGATATTTTGAAATCTTTGCTTAAACCACCAACAGATAT  
AATATTTGATTTTGAAGCTGGGAAGTCACTTTTTCCGCCTAAATTTGTTGCCAGAAGAAGCGATAACAATTTGTCCATTTTCAATTAAT  
TTATCTAACTTTTTAGAAATTTTGAATTTATTTAGGAAACCCAAAGCTTATATTCACAATATCTACGTTGTGTTAATACACCAAT  
CAATAGCCTGTTCAACATTAGAGGGTGTACTTTCCGCATTTATTTCTAATACTTTTAAATGATAGAGATTTGCTTTAGTAATGTTCTG  
GATTACTAAATTAAGTATTGACAGTACCGTGATTGACTATCTTTGTATGTTTATCAGCAGAAAAAGTTTATTGTTGTTATATTTTGT  
TGATGTGCTCAGTATTGACCCCACTATCTAAAATGCGCATTAATCTCTTTTATTATTTTCTCAATTGTAAAAATATACCAATATACT  
ACTTACTAAAATAAATGAGAAAAATCCAGTTTTTTCAAAATTCCTCCTCCTTATATATAAATATAAATAAACAATTAATGAATTTATA  
ACTATATAATTTTAAACATTTATGAAATTTTCATTGAACAAGAGAGAGTAATATTGAAGTTAGTTAATATGAATTTGATGAAAAAC

TAAAAAGTGTAATAATCATTCTGACTTAAATGAAGGCTGATGCTTAAATATTTTCAACAAAAAGAAACGTTGTTTAAATCTAATTAT  
CATTTCACACGTTGCAAGTAGTAAATACGCTAGTATAAAATGATGTGAATTTATGAGAAATATAGAACATTAATAATCTTGATATAT  
CAATAGTTATAAACTGATACAAATTAATAAAAAAGCACTCATGTTATCGAGTGCGGAATAATTATAAAAAATAAACTACCTGTTTACAC  
GGATGGTTTTTAAATTTGAGTAGTAGGGATAATAAAATTTGAATGTGTGAATTTATGTTTGTATTGCTTCTTATTTACCCAAAAATATAA  
TTTAATATATTATTACATAACGATATAGCCCTCATTCTATATGCGGCATGGCTATACTTTTATAGGAATCAACATAAAGGATAGATT  
AATTGAGGTGAACCATGAGATCAGACAATGATATTATTAATACAATTTTAAAGTGTGGCCAAAAATAATGAAAAATATAAGACTAGTA  
TGTATGAATGGGTCTAGAGTCAATAATAAAGTTGATTATGATCAGTACCAAGACTTTGATATTGCTTATATTGTTAATGATTTAAAA  
GAACTAACACATAATTTGTCCTGGATCAATAAAATTCGGAACATTATAATGATGCAGTTGCCAGATAATCAGGATTTATATGAAAAAT  
CAATCAGTCGATAGTTTTCATATCTTAATGCTATTTGATGATTATAAAGAATAGATTGACTTTAATCACTAAAAAGTATCTATCAG  
AGTATTTGAGTAGCGATTCATTATTAATAAAATTTTATTAGATAAAGATAATGTAGTTGATAATAATTTTCGCCAGACGATTCAAAAAT  
ACTGGTTGAAAGAACCATATCAAAAAATTATTTGATGAATGTATAAACGAGTTTTATTGGGTTTCTACATACGTGATGAAAGGATTAT  
GGAGAAATCAGTTACTGTATGCTTTTGACCATTTAAATATTTGTAGGGAAATGTTACTTCTAATGCTTGCATGGGACAAAGGACATC  
TATTAGATTATAAAGTAAATTTTGGTAAGAATTATAAGTATTTAACAAATCACATGTCTAAATCTGAAGAAAAACAATCTTATTTCAA  
CATACCCCACTTTAAATAGTAGTGAGATTAAAAAATCTTTATATAAAATGATTATATTCTTTGATGATATTACCAAATCAGTTAGTG  
ATAAGTGTGACTTAATTTACGATGGAAAGCAATATTTAGAAAGTGAAAAAGTATATAGGATTTGACTATATTAATTAGATTTAAAAAT  
AGAAGAAAGAACTTATTCTAAGTTCTGATTTATTTATAAGACGGATTTAAAAATACAAGAAGCTGGAAAGTCTACTCCTCTCTATAA  
CTATAAAAAATAGCTATTAATAAATCTATCGTCATAGATTTCTTCATAGCAAACTTAGCTAATTAAGGTCCTGAGGAATAAATTTT  
ATCAAAATATTTGAATAAAAAATTAATATGATACGATTTCTGCGGATGTTAATAAGGGATTGTTAATTTCTGAATAAGGAGTTT  
TACAAATGTACATGATTAAAAAATTCAGAAATAATAAAAGGTTTCGTTGCTTTGCTCTTGTTCGTCGTTGATTGTATGTTCCAGGTTA  
ACTAGTGAGCATTCTTATGCAAAAGAAAAATAATGTCTATGCATGCATCTGCAAAATAGTTCAGGTGAAATCGTTAAATTGAATGATAAT  
ACCGCTAGAATTGATTGAAAAAAGGTATTGATTATAGTGTGACAAAAATGGAGTGGCAACACTAAAAGATGTAAAGACTGGTAA  
AAAGGAAATTTTGCCATCACTGCAAAAGATAAAAAATGGTAAAAATGTTACGTTAATTTATTTTGAAGAAAGACGGTAAATTAGGTT  
TTTATGTGCAGAAAAACAAAAAAGAACGTGGAGTAGGGAAATGCGTTTCTGGTATAGCGGGTGGCGCAGTGACAGGAGGCACTAC  
TTTAGGTCTTGACAGGTGCAGGAGTAGGAACAGTTACTATTCCAGTAATTTGGGACAGTTAGTGGAGGCGTAGTTGGAGCTGTTGGTG  
GTGCTGTGCGGCGTGGTCTAACCGGTGGAGCCACATTCTGCTAATAGTGTAGGAGTGATACCATGGAAAAATTTAATATATAGGG  
TGTGTTTGTCTTATTTTAGTAATAATATCATGGGTGATAATAGTATAAAAAATTTGGTAATATCAGCAGCAGCAGCAATTAATTTTC  
AAATCTGTTTATATTTATCGCTTATATACTATATTTAGTTAAGTTTCATTCGTTTCAAAAAAAGATGAAAAATAGGTTTGTGACCAAAA  
CCTAATTGTGATAGCATATGAAAAATGAGTAGTTTATCATTTTTTAGTCTAATATACTACAAAAATTTTACTTATGAAGCGAAAAATA  
ACGTGCAAGTAACGTGCAAAATAAAAAAACGACCTAAATCCCTTTAAAAACAAGGATTAGGTCGATTTTATTTGATACTGAAATTG  
TCTAACGAAAAATAACATGCAAGTAACGTGCAAAATAAAAAATCAAGAGTAATATGATATATATTATATGCCTAGGTAAAGTTTACGAA  
CCTACAGATTTGAAATATTCTTCAGCAACTCCGCTCTTTATAATTCTTGAAATAACTGAGGTTTTTATTTTACGTTGTTTTGAATTGT  
CTAAAAATAGTCATACATAATCTGTTTAAACCCCTTACTTAAGCTTGTAAAAATGCGGAAATAAGTTTTCTTTTTTAGTTATTTTTCTTG  
GTATATTTTAAATCCACAATTATTGCAATAAAATTTCTTCAAATTCCTTATATCATACCAATCAACACAAACATGTCTTAGTGCAGTA  
CGATCATAAAATTTCAGAAGCAATAGATAAGGCATAGTCCATTACAATTTCTCTGGTATATGCTTTTTGTGTTTACTCGCTCTACCTA  
ATTTAGTTTATTAATAATTCTGAAATTTCTCCATCTTTTTTAGCATCAGACGAGATTTTTCTTTTTTCTGTTTTTCTACTAACGCTTTTTT  
AAGCTTTATATTACAATTTTTTAAGAAGAAGTATCCCATTTTCAAGGTCTGATTATCTATAATTAATACGTACGTAAGGAATTT  
TGATCGTTTCATTGTTATTGCTTTATGTTTTAGGGAATGTGCTATTGAAGGGTTTAAAGATGTTTGAATGTCTTGGTTTCTTGACTTAT  
ATAGTTATGAAAGAGGGCGTTGCTCTTATAGCATTCTGAGATTAGAAATGCTATAAATAAAGTGATTAAGATTTTTGTGTTTCATG  
TAATTTAAGAAATGGATTGTTTTTGTGGGTTATTTTTAATTCTATTCTTAAATGGTTTGAATTTGCGATTGCAAAATATGATAGCTG  
CTTCTTTTGACAAAAGTAATAGAACCTTTTTCTCTGGTACCATGATAATCACTCCTTGTGCAATTGGATTAAATATTATAAAATAAT  
TTTACTACACAAAAATATATTGTGTAATAAGTTTCTTATTGTTACCAAATAATATGTTTGAAGCGTTATGTAATGCCAATCAACACCG  
AAGTTCTCATGCTCTCTTTCTTTTACGACTACATATATTGTTAATAATATTGAAATAATAAACTGATAGTGATAATTTTATTTAAC  
TGATCCATGAGAGTAGGAACCCCATCATACGGGAATTTTCGAAATCATGGGTTTTTGTGTTTAAAGGATTGATGCAATAGATAAGGAAT  
GCCATTCTAATATATGGAGTATTTATCAGCTGAAAAATTAATCAGATATGGGTTTTCTTCATTAATAATTTTTCTATAAGGAAACAG  
AGGCAACGCTACTGTCACCTCTGCTTGAAATAAATTAGGATGAAATACTCTGAGTCTAAAGTCCACACACAATTCGCTCAAATCCTCC  
AAACCTCCGACTACATCTCCAACCCCCCAACACCAATACTTACCAAAGCATTGATATGAGTGCCAATACTGGCAATGTGCCTTGTT  
TGAAAAAGATACTAATATTGCTTGAAAGGCCACCATAAATAGCAACGCCAATGATATACACTAAAATAGCTGCGCATATTTCTTTTG  
GATTACTGCTGATAAACAAACCGTATATTAGCAAACTCCGATTAAACCGTTATATACGCCTTGGTTCTTCAAAAAGTAGGTTAATAT  
TTTTGTCTTTCAATTTATCGACGCTTATATTAATGTCTCGCTAGTCTTTTTGGAAGTTGTAGCAATCGTTTCAAGGTACATAATATAG  
AAAACTCTAATGCCACAAATATGATTAAAAATTTGTTGAGATGATATTCACTATAACGCTCCTTTATTATTAATAATTTTCTTGTA  
ATGATTGCAAGTCTGTGTTGATCATTGACTAATTGTTGGAATCATTTGGATTCTTGGTCTAATAGTCTCTGTCTGCTGCTGCTGTA  
CATTTAGTCCAAATGACCAAAAGCCTTAGTTGCTTCGTATCATTTCTGCAAAATGTCTCTAATGAACGGGCTCATATTTAATTTCT  
GTGCTGATGCCTCAGATAAAATTTGCAGCAAGTTCTTTTCATATCATAACTGTAGCCTGATAATAAGTAGCGTTTGCCCCAAGTATCT  
GGATTTTTAATAATAGCAATGACACCTCTAGCAATATCATTTCTAGTAATATAAATTAATACGACCATCGCCAGCTGGATAAATCAGT  
TTATGCATATTCATCAATTCTGGTAAATATGGTTAAGTGGATCCATGTACATTGCCATTCTTACATACGTATAGTCAATGCCACTTG  
TTGCCAATAGACGTGCTGCATAACCAAAATAAGGACTCATATGGAATGGATTATTATGCTGATCTGCGTAATAACCTATGAAAATG  
ATATGAGCAACGCCGCTCTGCTTTGCCGCATATACTAAATTTTCCACTTCAGGAATACGTTTGAATGATGGATGGATAATACTTGGA  
ATAAACACAACGGTATCCATTCTTTAAATGCTTCTACCATGTCTTCTTGATTAAAAATAATCTAATTGTGCAACAGGAACCTTTCCGC  
GCCAATCTTCTGGAACCTTTCTCAACATTTCTAACCAATGTGCAAAATGATCTATGTGATTGCAATGGCTGATTGTAATATATGTG  
GCCTAAATGACCTGTAGACCTGTTAACATAAATACCAATTCACCTTCACTCTCCTAATCTTTATATACATAACATAATTAATTTGATG  
GTTTTCAAAACATTTGATTTTATAAAAAATTTCTAATCTGTATTATTGTCGACGTGTATAGTAAATACGTAAATATTATTAATGTTGA  
AAATGCCGTAATGACGCGTTTTAGTTGATGTGTATCACTAATATCATTGAAAAATTTAATCAGGTACTACGACAATATGATGTCTGTT  
TTGTGTCTGAAAGTTTACAGTTTTTAAAAATAAAAAATGGTATAAAGTGTGATTTGTATAAAAAAGAGTCTCGACGGATAAGAATTGA  
TTAATAACAGTTAGCATTTTATTAATTACCTTAACAATGATTCAAGTTTAGTTAAATGAGGTTTAAATTTGAAAGGGGATAGCGCCTC  
AATATAATGTAGGTAGATTGTTTATATTACGTAATTGAAAAATCAAATTTAAATAGATTGGGGCTAAAAAATTATGAAATTTAAAGCG  
ATAGCAAAAAGCAAGTTTAGCATTGGGAATGTTAGCAACAGGTGTAATTACATCGAATGTACAATCAGTACAAGCGAAAGCAGAAGT  
TAAACAACAAAGTGAATCAGAGTTAAACACTATTATAATAAACCAATTTTAGAGCGTAAAAATGTGACTGGATTTAAATATACTG  
ATGAGGGTAAACACTATTAGAGTCACAGTAGGGCAACAGCACTTCTGCAATCACTTTACTTGGATTCTGATAAAGATAAAATTTAA  
GACGGAGAAAACTCAAATATAGATGTGTTTATCCTTAGAGAAGGTGACAGTAGACAAGCAACAAATTAATCTAATTGGTGGCGTTAC  
AAAATCAAATAGTGTGAGTATATTGATTATATCAATACGCCAATTTTAGAAATCAAGAAAGATAATGAAGATGTACTTAAAGATT  
TTTACTACATTTCAAAAGAAGACATCTCATTAAAGAAGTTGATTATAGATTAAGAGAACGTGCGATTAAACAACACGGCTTGATT

CAAATGGTCTTAAACAAGGTCAAATTACAATTACAATGAATGATGGCACAACACATACAATCGATTAAAGTCAAAAACTTGAAAAA  
GAACGTATGGGTGAGTCAATCGACGGCCTAAGATTAATAAAATTTCTAGTAGAAATCAAATAACTTTCTAACAACAAAAGCGCTA  
TGTTGAATAGTGCTTGTTATGGAAATATATGGAAGTTAAGCGACGTACTGTTGCTTAGCTTCTTTTTTTGAGGGGAAAAAGTTACAAA  
ACTCACACAAAACAGTCGCACCACGCATTATCTTTTGCTTAAATACTTAATCATATTTTATGAATAGTTAAAAGCAGGTTAATGTGA  
ATATCTGAATACAGCTCCTATAATATGGGTGTATGATTCAAATTACGTAATAAAACAATCTAATTATTATAGATTGGAGCATACAAC  
TATGAAAATGAAATCAATTGCAAAAAATAAGTTTGTTATTAGGAATATTAGCAACAGGTGTAAACACTACAACGGAAAAACCAGTTC  
ATGCCGAAAAAGAAACCTATTGTAATAAGTGAATAATAGCAAAAAATTAAAAAGCTTATTATAATCAACCTAGTATTGAATATAAAAAAT  
GTGACAGGTTATATCAGTTTCATTCAACCAAGTATTAATTTTATGAATATCATAGATGGTAATTCGTGTAATAATATTGCTTTAATTG  
GCAAAGATAAGCAACATTATCATACGGGTGTACATCGTAATCTTAATATATTTTACGTTAATGAGGATAAGAGATTTGAAGGTGCA  
AAGTACTCTATTGGGGGTATCACGAGTGC AAACGATAAAGCTGTCGACCTAATAGCAGAAGCAAGAGTTATTAAGAAGATCATAC  
TGTTGAATATGATTATGACTTTTTCCCATTTAAAAATAGATAAAGAAGCGATGTCATTGAAAGAGATTGATTTTAAATTAAGAAAAATA  
CCTTATTGATAATTATGGTCTTTACGGTGAAATGAGTACAGGAAAAATTACAGTCAAAAAGAAATACTATGGAAAGTATACATTTG  
AATTGGATAAAAAAGTTACAAGAAGACCGTATGTCCGATGTTATCAATGTCACAGATATTGATAGAATTGAAATCAAAGTTATAAAA  
GCATAACACATATACTTGATGACGAAATAAGTTGAAATTGAAATAGAGAGGTTAAGTGACGATCAAACGTTGCTTAACCTCTTTTTTA  
ATGCTTAAAAATCATTTCAAAGGCACATAGAAACGCTATATTAACCTCATAATCACTCATTATTTTTTGTCTTAAATTACTTAATAATA  
CTTCAATAATTGTTAAAAGGGGTTTAAATGTGATTATCTTAGAATGCCATCTATAATGATGTTGTATGATTCAAATTACGTAAAAAGA  
CAATCGAATATAATATAGATTGGAGCATACAATTATGAAAATGAGAACAATTGCTAAAACCAAGTTTAGCACTAGGGCTTTTAAACA  
CAGGCGCAATTACAGTAAACGCAATCGGTCAAGCAGAAAAAGTACAATCAACTATAGTTGACAAAAGTACCAACGCTTAAAGC  
AGAGCGATCAGCAATGATAAACAACAGGTGCAAAATCAGGGGCAACGCAAGCAGCTAACACAGAACAAGAACGACGATGCCT  
AAACTCGAAAAAGGCACCAATACTAATGAGGAAAAAACTTCAATTTCCAAAAATAGAAAAAATATCACAACTAAACAAGAAGCGC  
AGAAATCGCTTAATATATCCACAACGCCAGCGCCTAAACAAGAACATTACAAAACGACAACCGAATCCACAACGACGACAACTAA  
AGTGACAACACCTCCATCAACAAACACGCAGCAAACTAAAGTGACAACACCTCCATCAACAAACACGCCACAACCAATGCAATCTA  
CTAAATCAGACACACCACATCTCCAACCATAAAAACAAGCACAACAGATATGACTCCTAAATATGAAGATTAAAGAGCGTATTAC  
ACGAAACCGAGTTTGAATTTGAAAAGCAGTTTGGATTATGCTCAAACCATGGACGACGGTTAGGTTTATGAATGTTATTCCAAAT  
AGGTTTCATCTATAAAATAGCTTTAGTTGAAAAAGATGAGAAAAAATATAAAGATGGACCTACGATAATATCGATGTATTTATCGTT  
TTAGAAGCAATAAATATCAATTAATAAATATTCTGTGCTGGTCATCGAAGACTAATAGTAAAAAAGTTGATCACAAGCAGA  
ATTAAGCGTTACTAAAAAAGATAATCAAGGTATGATTTTCATGATGTTTTCAGAAATACATGATTACTAAGGAAGAGATTTCTTGAA  
AGAGCTTGATTTTAAATTGAGAAAGCAACTCATTGAAAAACATAATCTTTACGGTAACATGGGTTACAGGAACAATCGTTATTAAT  
GAAAAACGGTGGGAAGTATACGTTTGAATTACAAAAAACTGCAAGAGCATCGTATGGCAGATGTCATAGAAGGTACAAACATT  
GATAAAATTGAAGTGAATATAAATAATCATGACGTTCTCTAAATAGAAGCTGTCATCGGAAAAACAAGAAGTTAAGTGACAACGG  
TTTACATGTTGCTTAGCTTCTTTTATTATGCGCAATGATGTAAAAAGACGAATATTCATTTGTTGTAAAAGTGGCATTTCATATGTCTT  
AAAAGTGACGAAACTTCAAATGTGCCAAGTGTTGAATCACATCAAAATCATTTTTATTTAACGAACATTATGGATTTCCTAATTTAC  
TTAACGATGATTCAAATATAGTTAAACAAGGTTTAAATGTGAATGGAGCAATACGCCATCTATAATAAAGCTGTATGATTCAATGAAT  
GTAATCGAACAATCTAATAATTACGAATGGAGCATACAATGAAATAAACAACGATTGCTAAAAACAGGTTAGCACTAGGCCT  
TTTAAACAACAGGTGTAATCACAACGACAACGCAAGCAGCAAAAGCGTCAACACCATCTTCCACTAAAGTGAAGCACCACAATCAA  
CACCGCCCTCAACTAAAGTAGAAGCACCGCAATCAAAACCAACGCGACAACACCATCTTCCACTAAAGTGAAGCACCGCAACA  
AACAGCAATGCGACAACACCTCCATCAACAAACACGCCACAACCAATGCAATCTACTAAATCAGACACACCACAATCGCCAACCA  
CAAAACAAGTACCAACAGAAATAAATCCTAAATTTAAAGATTTAAGAGCGTATTATACGAAACCAAGTTTAGAATTTAAAAATGAA  
ATTGGTATTATTTTAAAAAATGGACGACAATAAGATTTATGAATATTGTTCCAGATTATTCATATATAAAATTGCTTTAGTTGGTA  
AAGACGATAAAAAATATGGTGAAGGAGTACATAGGAATGTCGATGTATTTGTCTGTTTGAAGAAAAATAATTACAATCTGAAAAA  
TATTCTGTGCTGGTATCACAAAGAGTAATAGTAAAAAAGTTGATCACAAGCAGGAGTAAGAATTACTAAGGAAGATAATAAAG  
GTATAATCTCTCATGATGTTTCAGAATTCAAGATTACTAAAGAGCAGATTTCCTTGAAAGAACTTGATTTTAAATTGAGAAAAAC  
TTATTGAAAAAATAATCTGATACGGTAACGTTGGTTGCTCAGTTAAAGATTTGTTATTAATAAGTGAAGAACGTTACGTTTGA  
TTGCACAAAAAATTACAAGAAAAATCGCATGGCAGATGTCATAGATTGGCACAATATTGATAACATTGAAGTGAATATAAATAATC  
ATGACATTCTCTAAATAGAAGCTGTCATCGGAAAAACAAGAAGTTAAGTGACAACGGCCTACATGTTGCTTAGCTTCTTTTGTATG  
TTCGATGATTTGAGAACCCGAATTTTCGATGGGTCCAAATATGACGTGGAAGAGTCTGAATTTATCTGTAATCCCTATCTATCGG  
GTGTGGATCACAACGGAATCAGTTTTATTTAACGAACATTATAGATTCTTAATTTACTTAATAATGATTCAATGATTATTAACATG  
GTTAATGTGAAAGGTCAAATACGCCAATAATAAAGCTGTATGATTCAATAGACGTAAGCGAACAATACTAATAATTACGAAT  
GGAGCATACAATAATGAAAAATGACAGCAATTGCGAAAGCAAGTTTAGCACTAGGTATTTAGCAACAGGAACAATAACATCAACGC  
ATCAAACTGTAAATGCGAGTGAACATGAAGCAAAATATGAAAATGTGACAAAAGATATTTTTGACTTAAGAGATTACTATAGTGGC  
GCAAGTAAGGAACCTAAAAATGTTACTGGTTATCGTTATAGCAAAAGGTGGCAAGCATTACCTTATCTTTGATAAAAAATGAAAAATC  
ACAAGAGTACAGATATTGGTAAAGATATTGAAGGATTTAAAGCAGCAAAAAATCCGGGATTAGACATATTGTTGTTAAAGAAC  
GGAAACCGTAATGGCACAGTGTTTCATATGGTGGTGTCACTAAGAAAAATCAAGACGCTTATTATGATTATATAAACGCACCAA  
GATTTCAAATCAAGAGAGATGAAGGTGACGGTATTGCTACGTACGGTAGAGTACACTACATTTATAAAGAAGAGATTTCACCTAAA  
GAACTCGACTTTAAATTGAGACAGTATTTAATTCAAAAATTTGATCTGTATAAAAAAGTTTCTAAAGATAGTAAGATAAAAGTGATA  
ATGAAAGATGGCGGCTATTATACGTTTGAACCTAATAAAAAAATTACAAACAAATCGCATGAGTGATGTCATTGACGGTAGAAATAT  
TGAAAAAATAGAAGCCAACATTAGATAATTCATGAAATATGGATAATAGTAAAAATATGGATAGTATAGAGGAGTTAGGCAACAT  
AAGTTGCTTAGCTTCTTTTTTGTGTTGGAGAGATGAAAAATGAAGCGGGTTCATGATCAAACTTGTGGAATAGTTGATACTTATAG  
ATGCGTGATGTCGCTTTAGTGACATGAAACAATGTGGAACCAATAAATTAAGTGAAGGAAAGTGTGAATAGTTAAAAAATAGCAT  
TGTTGTATAAAAAATAATTAATACGTGTAGGATTTGATAAATACTTAACCTTAAAGTGGTTCAAAAAATAGTTAAAGAGGTTAATTTCAT  
AGCGCAGTATCTCGCTTATATAATGATAGTAGATTGTTCTGATTACGTAATTGAATTAATCATATAAAAAATATATTAAGACAAAATT  
TATAAATAGATTGGGAGAATAGTACTATGAAATTAACCGTTAGCTAAAGCAACATTGGCATTAGGCTTATTACTACTGGTGTG  
ATTACATCAGAAGGCCAAGCAGTTCAAGCAAAAGAAAAGCAAGAGAGAGTACAACATTATATGATATTAAGACTTACATCGAT  
ACTACTCATCAGAAAGTTTGAATTCAGTAATATTAGAGGTAAGGTTGAAAAATTATAACGGTCTAACGTTGTACGCTTTAACCAAG  
ATGGTCAAAATCACCAATTATTCTTATTAGGAGAAGATAAAGCTAAATATAAACAAAGGACTTCAAGGTCAAGATGTCTTTGTGGTA  
AAAGAATTAATTGATCCAAACGGTAGACTATCTACTGTTGGTGGTGAACGAAGAAAAATAACCAATCTTCTGAACTAATACACC  
TTAGTAGTTAATAAAGGTGATGGAGGAGATTACATGCATCAATTGACTCATTTCATTAATAAAGAAGAAGTTTCACTGAAAGA  
ACTTGATTCAAAAAATGAAAGCAATTAGTTGAAAAATATGGTTTATATAAAGGTACGACTAAATACGGTAAGATCACTATCAATTT  
GAAAGACGAGAAAAAGGAAGTAATTGATTTAGGTGATAAATCGAATTCGAGCGCATGGGTGATGTGTTGAATAGTAAGGATATTC  
AAAATATAGCAGTGACTATTAATCAAATTTAAATTAACAATCAATGACTTTAAAGTAATAAATTTGAAGCAGCTTAACGATGAAA  
TGTTGAATAAATACGTACATCTCCAAAAAGGGCGTATCTAAATCAACAGTGTCTGTTAGGCTGTTTTTATGTTTTATAACGACGGG

TATGAGCGTACTAAAAATTCACATTACTTCTGAAAGTGATGTCCATTGAATATTAATTAGTTCTTCATTAACCATGATTTAATTTTAA  
TTAAACGAGTGTTAATGTCTAGTCTGTCTCAATGCCCTTTATAATAAATGTGTATTATTCAAATTACGTAATAAAAGCAATCCAATAT  
ATTAAGATTGGAGCATATGAATATGAAATTTACAGCGATAGCTAAAAGCGATATTTGTATTAGGAATATTAACAACAAGTGTAATGA  
TAACAGAAAAATCAATCGGTTAATGCAAAAGGAAAGTATGAAAAAATGAACCGTTTATATGATACAAAAAAGTTACATCAATACTAT  
TCAGGACCTAGTTATGAGTTAACAAATGTTAGTGGCCAAAGTCAAGGTTATTATGACTCTAACGTTTTGCTTTTTAACCAACAAAAT  
CAAAAGTTCCAAGTATTTTTATTGGGAAAAAGATGAAAATAAATACAAAGAAAAAACACATGGTTTAGATGCTTTTGCGGTACCAGA  
ATTAGTAGATTTAGATGGAAGAATATTTAGTGTTAGTGGTGTAAACGAAGAAAAACGTAAAAATCAATATTTGAGTCTCTAAGAACGC  
CGAECTTACTAGTTAAAAAATAGACGATAAAGACGGTTTTTCTATTGATGAATTTTTCTTTATTCAAAAAGGAAGAAGTGTCATTGA  
AGGAACCTGATTTTAAAAATAAGAAAACTGTTGATTAAAAAATACAACTGTATGAAGGGTCAGCTGATAAAGGTAGAATTGTTATT  
AATATGAAAGATGAAAAATAAGTATGAAATTGATTTAAGTGATAAAATTAGATTTTCGAGCGTATGGCAGATGTCATTAATAGTGAACA  
AATTAAGAACATCGAAGTGAATTTGAAATAATCAATGATATATAGAATAAAAGCTTAAGAAGCGGTTTAAATAATCCCATGTTAAT  
GATTTTGATACGTGTTTTAATAATAAAAAACATATCGAACATTGACTACGTTATTAAGCTGCTTTTTTGACACTTTGTATCGAATAAC  
TTAAGATCTAAACTAATCGGAAAGAACAATGATTCCCCAAAAAATTTATGTTGCTATTAAAAAATCAGTTAATACGAATGTTAA  
AATACGTTTGATTTTCATTAATAATGATTCAAGTTTATTTAAATGAGCGTTAATGTCAGTCTGTTTTGATGCACCTTATAATAAGAC  
AGATAGTTCAAATTACGTAATCATAACAAATCCAATATATCAAGATTGGAGCAAATAAATATGAAATTGACTGCATTAGCAAAAAGCA  
ACATTAGCATTAGGAATATTAACCTACAGGTGTGTTTACAGCAGAAAGTAAAGCTGTTACGCGGAAAGTAGAAGCTTGATGAGACACA  
ACGCAAAATATTATCAATATGCTACATCAATACTATTCTGAAGAAAGTTTGAATCAACAAACATTAGCGTTAAAAAGTGAAGATTA  
CTATGGTTCTAACGTTTTAACTTTAACCACGAAATAAACTTTCAAAGTGTTTCTGCTTGGTGACGATAAAAAATAAATAAAGAA  
AAAAACACATGGCCTTGATGCTTTTGACGTACCTGAATTAATAGATATAAAAGGTGGCATATATAGCGTTGGCGGTATAACAAAGA  
AAAATGTGAGATCAGTGTGTTGATTGTAAGTAATCCAAGTCTACAAGTTAAAAAAGTTGATGCTAAACATGGCTTTTCGATAAATG  
AGTTGTTCTTTATTCAAAAAGGAAGAAGTATCGTTGAAGGAACTGGATTTTAAAAATAAGAAAAATGTTAGTCGAAAAATATAGATTG  
TATAAAGCGCGTCAGATAAAGGTAGAATCGTTATTAATATGAAAGACGAAAAAGAAATATGTAATTGATTTAAGTGAAAAATTAAG  
TTTTGATCGTATGTTTGATGTAATGGATAGTAAGCAAAATAAAAATATTGAAAGTGAATTTGAATTAGTTTGAGTTAATAGCATAATA  
GCTTAAGAAGCGACTTAACGACAAAAATGTGAATTGACATCTGTGTCCTTATATAAGGAACTGTGTTAAATACATTACTGTTGTTAAG  
TTGTTTTTGAATTCAAAGAGCAGAACAGAGTAACATCATCAGTTGTAGTAAACGATAATCCAGTAAAAACAATAATGAAATAAT  
GAAAGTCATTTAACCTGAACATTAATAATATTTGTTTTTCATTAAGAATAATTCAGTATATTTAAATCGAGGTAAATTATCGTATG  
AAACGATGCACGTTATAATAAAAAATGTATGATTCAAATTACGTAATGAAAAACAATCCAATATATTAAGATTGGAGCAAATAAATAT  
GAAATTAACAGCGATAGCTAAAGCTGCATTAGCTTTAGGAATTTTAAACAACAGGAACTTTAACAACAGAAGTTTCATTACAGGTCATG  
CAAAACAAAATCAAAAGTCAGTAAATAAACATGACAAGGAAGCATTATACCGATACTACACTGGAAAAGACTATGGAATGAAAAA  
TATTAGTGCTTTGAAACATGGTAAAAACAACCTACGTTTTAAGTTTAGAGGTATTAAGATTCAAGTTTTACTGCCTGGAAATGATAA  
AAGTAAATTTCAACAGCGTAGTTATGAGGGGTAGATGTTTTCTTTGTTCGAAGAAAAAGAGATAAGCACGATATATTTTATACGTG  
TGGTGGTGTAATACAGAATAATAAAACATCTGGAGTTGTCAGTGCACCAATATTAATGTTACAAAAGGAAAAAGGTGAAGATGCTT  
TTGTGAAAGGGTACCTTATTATATTAAGAAAAAGAAAAATAACATTAAGAGATTAGATTTTAAATTGAGAAAGCATCTAATCGAA  
AAATATGGACTTTTATAAAACAATCTCAAAAGATGGTAGGGTTAAATTAGCTTGAAAGATGGCAGTTTTATAACCTTGATTTAAGA  
CTTAAATTAATAATTAATATATATAGGGGAAGTCATAGAAAGCAACAAATTAAGATATTGAAGTTAACTTAAAGTAAATAAATTAC  
GAATAATTAAGTAATTGAAGCGGCTTAACGGTGAAATGTAAATTGGTGCGCATAGCTTATACAAAAAGGAGGCATCAATCGATA  
TCGTCGTTAAGCCGTTTTGGTTTTGCGTTTCATAAATCTATTCCAATCTCTATGAATATAAAAAATTTCCACCACCAACATCAA

>010-contig\_255

TTTAAGCGATGCCCAAGTCGAACGTATTATAGACGCATATAAGCGTAAAGAAACGATTGATAAATATAGCTACAGCGCGACATTAC  
AAGAGATCGCCGATAACGATTACAACCTTAAACATACCGCGATATGTTGATACATTGGAAGAAGAAGCGCCAATTGATTTAGATCAA  
GTCCAACAAGATTTGAAAAATATCGATAAAGAAATCGCAGAAAGTTGAACAAGAAATCAATGCATACCTGAAAGAACTTGGGGTGT  
GAAAGATGAGTAATACACAAAAGAAAAATGTGCCAAATTGAGATTCCCAGGTTTGAAGGCGAATGGGAAGAGAAGCAATTTGC  
TGATTTTACTAAAAATAATCAAGGATTACAGATTGCTATTAATGAACGTAAAACCTGAATATTCTCCAGAGTTGTATTTTTATATAAC  
AAATGAATTTTTAAGACCAATAGTCAAACTAAATTTTTATCGAAAATCCCCCTCAATCAGTAATTGCAAATAAAGAAGATATTTT  
AATGACTAGAACAGGTAATACTGGAAAAAGTAGTAACTAATGTATTGGAGCGTTTCATAATAATTTTTTAAAAATTAATTTGATAA  
AAATCTGTATGATAGATTGTTTTAGTAGAGGTTTTAAATTCATCTAAGATACAAAATAAAAACTATCTTTAGCAGGATCTTCGAC  
GATACCAGATTTAAACCATAGTGATTTTTATAGTATTAGTCTTCTTATCCGCTGCTTAGAGAACAGCAAAAAATAGGTAAATTCCTC  
AGCAAACTCGACCGACAAATGAATTAGAAGAACAAAAGCTTGAATTACTTCAACAACAGAAAAAGGCTATATGCAGAAAACT  
TCTCAAGGAATTCGCAATTTAAGGACGAGAAATGGAATGATTATCCGGATTGGGAGAAAAAGAACTGAAAGAAATAGCTTGTGTT  
TATACAGGAAACACGCCAAGTAAAAAAGAAAAATATATATTGGAATAAGGGTGAATACGTTTGGGTTACACCTACTGACATTAATAA  
TAGTAAAAATATTTATGAAAGTGAAAACAAATTAACCCAAGAAGGCTATAAAAAAGCAAGACAATTACCAGAAAATACACTATTG  
GTTACGTGTATAGCTAGTATAGGAAAAACGCAATATTGAGAAAACAGGGCTCGTGTAATCAACAAATAAATGCAGTAGTTCATT  
TGAAAAATATAAATATAGATTATCTTTATTATATTCTGATTCAATTATCAACGTTCATGAAATCTATTGCAGGAAAAACGGCTACACA  
AATAGTTAATAAAAAACACTTTGCAAAATTTGCAAAATTTATTTAGCTCCTTTTGAAGAACAGAATAAAAAATAGCAGATTTAATTAGCTC  
ACTAGAAGAATTAATTGAAAAAGCAAGCATCGAAGTTAATTAATGAAGAGTCGTAACAAGGAATGCTTCAAATAATGTTTATTT  
AAGAGTAAGAAGAAATTAACATTTTGTATAAGGCGAATTGATTTAATGATTGCGTCGAGTTAAAAATATAGTAAAAATAATTCGAA  
ATAAATACGAACATAAATTTAGACACTGTGATAGTACGGTGTCTTTTTGTGTGCAAAATGTGTACAGAAATAAGTAGTTAAATAA  
GATTAAGTTGAGATAAAGTGTTATTCGTAATAAAGAGAGTAGATCGATAGGAATTGAATGATATTAGTTAACTATTTATTAATTT  
ACTTAATAATGATTAATTTTTAGTTAAAGTAAGTTAATGTGAAGCACGACCATTGCTCATTATAATGAATGAGGATTGTTTCGTATTG  
CGTAATAGAATAAATCAAATAGACTAAAAATTTGGGAGCATAGAATTATGAAATTAAAAAATATTGCTAAAGCAAGTTTAGCACTAG  
GGATTTTAACAACAGAGATGATTACAACCTACTGCTCAGCCAGTAAAAGCAGACGAAGCTAGTAGCAGATTATCAGTTACTTCAAAA  
GATACACAAAATTTAAAGACGTATTATACCTGGAGCAAGTTTTGATCTTAGAGGATTAAGCGGATATAAAGAAGGAGATAAAGTAAT  
ATTTCTCAAAATGGTCAACAAATTTGATGTTACATTAACAGGTAAAGAGGGAGACGTGGTTCAATCTAATGACGACGTTACAAATG  
TTGATGTGTTTGTCTGTTCCGTAAGGTACAGGTCGTTCTGCCATAATGACTACAATTTGGTGGGATTACTACACCAAACTCAAAAGT  
ATAAAGCACTACAAATAATGTGAACCTTAAGAGTATCAAAAGAGTACAAGTCCCAATACCATATCTGTGCTGTGTAATAAATAATGAT  
ATTTTTAAAGAAAAATTTTCATTAAGAACTTGATTTCAAAATTAAGAAAGCATTTAATTGATAATCATGTCTTTATAAAAAAGAA  
CCTAAAGACAGTAAATTTAGAATTAATATGAAAGATGGCGGCTACTATACGTTTGAATTAATAAAAAAGTTACAAACTCATCGTAT  
GGGTGACGTAATTGATGGTACTAAAATAAAGAAATTAATGTTGAATTAATAAATAAATTCGAGGGAGCATATCATGAGGGAAAAAT  
TTTAAGTTACGTAAAAATAAAGTCGGTTTAGTATCAGTTGCAATTACAATGTTATATATCATAACAAACGGACAAGCAGAAGCATCT

GAAAATCAAAATATAGAATCTAAAAATCTTCTAGTAATATAGCATCACAGCCAAAAACAAATTAATGAGAATTATACAGGACATAA  
AGAAAATGAAAAAGGTGAAGATCAAAAATAAACCTGCTAACTTTGTAATAATTAGGAAGTGTTAATCCTGGAGATACATCTGTCAAAG  
GTACAACATTACCACATCAAATTATACTTTTTAAATATTGATAAAACAGAGTGTAGAACCAGTGGAAGATAATAATGGTGGATTGTGTA  
ATGTCGGATGAAAAAGGAGAATTTGAATATAAACTTAAAGATCGTAAAAATAGTTCATAACCAAGAAATAGAAGTTTCATCATCTTC  
CTTAGATGGATTAGAAGAGGATGACGAAGAGGAAGAAATTGAAAAAAAATCTTCGGATAACAAAGGTGAAAGTATAGAATCACCT  
ATAGAGAAAAATGAAGAAGTTGAAGAGTCAAGTAATGATGCTACAGCTACATACACTACACAAAGATACGAAGGTGCGTATAAGA  
TTCTGTATAAGCAATTAGAAAAAGAAAGGCGATCATCACCAGATTTTGTGGAACCTATTACTGAATGGACAGGCATAATTTAAAGGA  
CATACTTCAGTGAAAGGAAAAAGTTGCATTATCAATTAATAATAAATTTATTAATTTTGAAGAAAGTGGTAAAAGCAAAAAAACTTT  
AACTGAAGAAGAAGGTAAATCAAGAATTGAAGGTATCTGGAAGCACATTGATGATAAAGGATATTTTGATTTTGATTTCAAAAAGA  
AAAGATTGTATAATTTAAACTTAAAGAAAGATGATATTGTTCTTTGACATTTTTACCAGAAGATGAAGATGAGCGCTTAAACCAA  
TTATTTTCAAAACAAAAAGTAACAAGCTTTGATAACATTGCTTCTGCATATACAGAATATAATCCTGAAAAGGTAGAAAAAGTAAAA  
ACTCTAAATAATGGTTTAGAGGACTTGAATGTCAAAGATATTTATGGTTTTGTATACGAGAGTGAGCGTGGTATTGGTATCCGCAA  
GCAAATAATAACGCCACTAAAGTAATTGAAGGAAAAACGAAATTTGCCAATGCTGTCGTAAGGTTTACTCAAGTTTAGGGGATGG  
GCAAGAATTCCTGATTACAAGTAAATGAAAAAGGAGAATTCAGTTCGACTCTTTGATGCAGGTTATAGGTTATACAATGGTGA  
GAATTTAAACTTTACTGTTGTGATCCTGTTACTGGTAAACTATTAAGCAAATTTGGTAACTAAAGAAATTTGATATTTAAGATCACCT  
GAACAAAAAGCAGACCGTGAATTTGATGAAAGACTTGAAAAATACACCTGCTTACTACAAGTTATATGGTGATAAAATAGTTGGTTT  
CGATACTAATGATTTCCCAATTACTTGGTTCTATCCATTAGGTGAAAAAGAAAGTTGAACGTAAAGGCACCAAAATAGAAAAATAAT  
ATAAAAAATAAACAGCTTAAATGATACGATGAACTAGTGACTTAATCACTGACTCAACGTCATTGAGCTGTTTTTGTGCTTTGTT  
ACAAAGCATATTGAATTTATTTACGTGTTTCATATTTTGAAACATCAAAGCCGCTTTGCTTAGCTTTGTTGATAATATCTTTGATTG  
AATGTAGTCCTTTATCGGCGAAGTATGATCTTAAGTTGTCTTTTGTAGCTTGGTCAGCATTCTTATCTAATAACACATCGATATAACT  
TAACCTGTTCTAAGAAGTTTTCGTCATCATGTAGTACGAGTCCATTTTGAGAATACACTTTCGCATCTGCTTGATTACCATATCCA  
ACAACGCCAGTTGCTAAAAACCTACCATTGCCGTAGCTACTAAAACCTTTTTAAATTTTCATATCTATCACTCCTCTAAAAATTGTAA  
CTCTATCATAACACTGAATATTAAGAAAATTACGTTTATTAAGTCGATTTAATAATTTTAAATAAATAGTTAAAGTGCAAAATATTG  
CTAAAAAGCAATTAATCTTTAGTGCGATGCTTGTGTTCTTAGTATTGAGTAGTAGATTTCGAAGATATTTTAATTCAAATGAAACA  
ATAATAAAAAAATGATGCAACATAATAATAAGTGCAAATTTAATTAATAAAATTAATTTGATTGTACATGTATATTTTGGTAACGTAA  
AAGAGAAATATACAAAATAATTAATTTATATGAAAAGAGAATATAAATGAAGTATAAAACAGAGAGACGTGAAGCGATGGGA  
TATTTAAAAAGGTTTACATTGTACATAAGCGTTATGATTTTAATATTTGCGATAGCAGGTTGTGGCAAGGTAATG

>011-contig\_288\_RC

AATGGCGACGTGTCAATAAATTGGAATGTCCAAGTTATGACGTGGAATATAAAAAAGCAATAAAGATGAAAAATGTTAAGCAATT  
AAGAAGTCGTTATAACATTCTACTGATAAAGCTCCAATGTTAAAAATGCATATTGACGGTGACTTAAAGGTAGTTCTGTTGGATA  
TAAAGGTTAGAAATAGACTTTTCAAAAGAAGATAGGGATATTTTCAGTCATTGATTATTTAAGTTAAGCCAGCGAAAAAATAGT  
GTTGATAATTAATATTAGGGTGTGAAAATGATGAGATATTTAAAAAGAGTTGTACTGTACATAAATTTGTTAGTTGATTGTTT  
TAATAGGTTGTGATAAATCAAGCGATACTTCAGAAAAGCCAAAAAGATTCAAAAGAAGCACAAATTAAGAAAGGTTTGTCAAA  
AACGTTAGACATGTATCCTACTGAAAATCTAGAAGACTTTTATGACAAAGAGGGATATCGAGATGGAGAATTTAAAAAAGGTGACA  
AAGGGACTTGGCTAATTAGATCTGAAATAGTTAAACAGCCAAAGGGCAAAGTGATGAAAACAAGAGGTATGCAATTATATATTAAT  
AGAAATACCAAAACAGCCAAAGGTTCTTTGTTTTGAAAGAAATAAGTGAAAATAATAATCGTGTAATAAAGATAAGGAGGAAA  
AATACGAAGTGAAAATGGTAGGAAATAAAATATTCTACTGAACAAATTAATGATGAGAAAATAAAAAAGAAATTGAAAACCTT  
CAAGTTTTTTGTGCAATATGGAACTTTAAAAATTTGAAAAATACAACAATGGTGAGTTTTTCATATAATCCTGAAGCACCAATCTA  
TTCGGCTAAATATCAATTACACAACGACGATTACAATGTAAAGGCAACTACGTAAGATATGACATTTCAACAAAAGAAACACCGA  
AGTTACTTTTGAAGGTGGAGGAGATTTAAAAAATTCCTCAGTTGGTCAAAACGATATTGAATTTACTTTTGTGAAAGAAAAGGTG  
AGAATATTTATTTTAACGATAGTTGAATTCATACCAAGTAAGTAAAGTTAAATTAAGTGTGTTAGATGAAATGATCAAATA  
TCAAAAAATGTGCAAGAGATGTGACAAGATGAAGTTTTTTCAGAAATTATACATATTTATATTAATTTTAATCGTATTAATGGCAG  
GATGCGAAAAGTAATAAGATCACTGGAGATTCGAAAGAAACACAGATCAAAAAGAGCTTTGCGAAAACATTAGATGTATACCTAC  
GAAAAATCTAGAAGGTTTTTATGACAAAGAAGGATATCGAGATGGCGAATTTAAAAAGGGTGACAAAGGGAAGTGGGTTATTAGA  
TCTGAAATGACAACAGAACTGAAAAATGAAAATATGGTATCTAAAGGTATGGTCATACGTTAAATAGAAAATAGTAGAACATGCAC  
TGGTGAATATTTTGTGAGGATAGTTAAAGAAAGACAGTGAGGGCAAGGTATATACTGATGAACGAAAATATCCAGTGAAAATGGAA  
AATAATAAAATCATTTCCATTAACCAATCGATGATAAAAAAGTAAAAAAGAAATTGAAGAATTTAAATTTCTTTGTACAATACGG  
GAATTTCAAAGAATTGGAAAACTATAAAGACGGAGAAGTGACATATAACCCAGAAGCACAATATACTTGCACAATATCAATTGA  
AAAAATAGTATAGTATAGTGAACAACACTAGTAAGCGATATAATATACCGAGAAAAAAGCGCTAACTTAATTTATTGAAAGGGTCA  
GGTAATCTAAAAGGCTCAACAGTCGGATATAAAAAATATTGAATTTACCTTTGTTGAAAATAAGGAAGAAAAT

>012-contig\_282\_RC

TATAAATCCTCGAGATTCTTAATAGGATACATATCTAACGTTTTTGCAAAAGCCCTTTTTGATTTGGTCTTCTTTTGAGTCTTCTTTTGA  
GTCTTCTTTTGCTTTTTCAGCAGTAACACTAGATTTATCAGAGCTTATTAATAAAATCTCAAAGCCATAATGCTTATGTACAATACG  
TCTCTCTTTAAATTTCTCATTATTCACATCTTTCTTGCTGATTTTTATTGAATCTCTACTGATTATCTTTTGATGGGTTAAATTTA  
AAAAATCACTGACAGAAATTTGGTTATCTTTTTGCTTTGAAAAGATATATCCACTTTTTATATCCTATCGAGCTACCTTTTATATCC  
CCATCTATATGAAATTTTAAAGTTGGCGATTCACTGGTTGTAATTGGATAAAACATTCTAAGTTTTTTTACATTTCTATCACTATTTTC  
TATTTTGTACTCTGCTTCATAATATGGAACATTTTCATTGCTCGATATTTCCCGTTTTGATAATTTTCAAGTCTTTAAAAATCTGCAT  
ATTGCCCAAAAAATTTAAATTTTCTATTTTATGTTTGGTGTTCATCTTCTACTTTATCTAAAAGGACTATTTTATTATTTTATAGTT  
CAATACGATAATCTTCTTTGCGGCATCTTATCCTCTCGTTATAAGTTTTCTTACAAAGTAATATCCTTTAGCCGTCCGCGTATTT  
CTATTCAAATGTAATACCATACCTTCACTATCCAATTCACCCGCTTTATTACTTTTGGCAAAATCTGTATATATCGTCCACGTCCCTT  
ATCACCTTTTTCAAATTCGCCATCTCGATATCCTTCTTTGTCTATATAAATCTTCAAGATTTTGGATTGGGTAAATATCTAATGTTTTCG  
CAAAGCTCTTTTAAATTTGGCCTTCTTTGAGTCTTCTTTGATTTTTGCTTTGCAATTTCTCGTTGAACATTACAACCAATTAATAAATA  
CTCAACACCATAATGCTTATGTACAATACTACTCTTTTGAATCCCTCAATTTTCACTTCTCTCTATCATGTTAATGTTTGTGAGTA  
CTATCAACCTTTGTGTTATTTTATGTCACCTTGAATTAAGTTAATCCATCTGAAAAATATATATTTTCTTTTTTATTTTCTATAAATA  
TAAATTCAAATTTCTTATATCCAACCTGAAGACCTTTCAAATCCCCCGAACCTTTCAACAACAATTTAGGCGCCTTTTCTGTTGGAAT  
ATTATATCTTTTTCGTAATTTCTTAAACATTATAATCATCATTTTTTCAGTTTATATTTTCGCTGAATAAATAGGAGCTTCAGAATTATAGG  
AAATGTCACCATTTTCATAATTTCTTATTTCTTTAAAACTGCCATATTGCACAAAAAACTTAAAGTTTCAATTTCTTTTCAACTTT

TCATCTTTTATCTCCTCAGTTGGAATAATTTTATTGTTTATCATTTTCACAGGATACTTTTTCTGTTTCTCTTTTCATCAAGGCTTTTT  
CTTGAATCTATTCTTCTATTGAAAAATAACCGGTTGTGGTCCTAGTATTCTATTTCATGTATAATATCATGCCCTCTGAAAGTTAAACT  
TTTACCTTTTGGTTGAATTATCATTTTCAGATCTAACAACCCACGTCCCTTTGTCTCCCTTTTTAAATTTCTCCATCTCGATATCCTTCTTT  
GTCATATAAGTCCTCGAGATTCTTAATTGGGTACATATCTAACGTTTTTCGCAAAGCTCTTTTTGATTTGTGTTTCTTTTGAATCTTCAG  
GAGTGTCAAATACACCACTGCAACCTGACACTAATAGAATTAAGACTGACGTACCTATACACAACGCGTATTGCCTAAAAATTATTC  
TTGTTCCGTATCCCCCTTTTTTCATCATAGTTAATAGTCTCCTACTTGGGGTAAACTCCAAACTATCAGTAAAAAATACATTCTCTTCT  
TGATTCTCAACGAAGTAAACTCAATGTCCTTATGTCCGATTGATGAACCTTTTAAATCTCCAGTACCTTTCAACAACAATTTAGGAC  
CTTTTTTGGTTTGAATGTCATACATTTTACGTAATTGTTTTACATTATAATCATCATTACTTAATTGAAATTTAGCAGAATAAGTAGGT  
GCTTCTGAGTTATATGAATAATCACCATTTTGATAATCTTTAATCCTTTAAAAATCACCATATTGTGAGAAAAACTTAAAGTTTTCAA  
TTCTTTTTTTACACCTTTATCATTAAATTGGATCAATAGGTACTATTTTATTATTCACCATCTTACTGGATAACGTTTTTCTTTATCCT  
CTGTCTTTTTTAAAGTATCATTACTTGTTCATCTACAATAAAATATCCTTTTGCGGTCTTGTATTTCTATTAAAAATAGATACATC  
CCTCTTGATTTCATAATTTACCTTTTGGCTGTTTAAACCATTACTGAACTGATAACCCATGTCCCTTTGTACCTTTTTTAAATTCGCC  
ATCTCGATATCCTTCTTTGTCATATAAGTCCTCGAGATTCTTAATTGGGTACATATCTAATGTTTTTCGCAAAGCTCTTTTTGATTTGTA  
TTCTTTTTGAATCTTCTTTTGTTCATTACCTTTGCCACAACCTGCTACAATAACTATTAATAAAGATACTTATGTACAATGCAAA  
ACTTTTTAAATTTCCCATCATTTTCGCGTCTCTCTGTTTTAGAAATTTTCTACATCTAATAAACTTTAGCTATCTTCATCAGACGCCCC  
AAAATTCACAAAATCTCTTACAGCTGTTTCTTGGTCTTTTACTTTTGAATAATTTATTTCTATATTTTATAACCAACTGAACTTCCTT  
TTATGTCGCCATCTATATGTAATTTTAACTGGCGACTTTTTGGTTTGTGATTTGGATAAACTTCTCTAAGTTTTTTACATTTTTATCC  
GTATTACTTATTGATATTGTCATCGTAGCTTGGCACATTATCTGATCTGATATATTCCATTTTATAATTTTAAAGTTTCTCAAAA  
ATCAGCATACTGACTAAAGAAATTTAAATTTTCTATTTTATTTTGTGATTTGGATCTTCTACTTTTCAAAAAGACTATCTATTAT  
TTTTAAATTCACATGATATTTTTTTTGTGATCTTTTTTATTAAATTCATCATGAACCTTTGCTTATGTAATAATATCCTGTTGCTTCT  
TTGATTTTCTGTTAAGAAATAAAACCATACCTTCGTCATCTATCTCGCTGGTTTGTACTTTTAGCAAACTTGTGAGTAAAGTCCA  
TGTCCTTTTATCGCCCTTTTTAAATTCGCCATCTCGATATCCTTCTTTATCATATAAATCTTCAAGATTTTTGATTGGGTACATATCTA  
ACGTTTTTCGCAAAGCTCTTTTTGATTTGTGTTTCTTTGAATCTCTTTTATTTTATTATCTTTACCACAACCTACTATCGCAAAATATTA  
AAATCATAACGCTTATGTACAATGCAAAATTTTTTAAATTTCCCACTTTCACGTCTCTCTGTTTTAGATTTATTTCTACATCTAATA  
AACTTTAGCTATCTTCATCAGACGCCCCAAAATTCAAATAATCTCTTAATGTTGTCCTTGATCTTTAACTTTTGAATAATTTATTTCT  
ATTTTGTGATCCAACCTTCTTTTATATCACCATCTATATGTAACCTTTAATGTTGGAGCCTTTTTCGTTGTAATTTGGATAAAT  
ATCTCTAAGTTTTTTTACATTTGTATCACTATTATTCATTTTGTATTTCTGCTTCATAGCTCGGTACATTTTTCATTAGTTGTATACCTC  
ATCTTGATAATTTTTTAAATCTTTAAATTCGGCATACTGACTAAAAAATTTAAATTTTCAATTTTTTGTTTAAGTTTTTTCGCTTCTA  
CATTATCTAAAAGAACAATCTTATTATTTTTAAGTTCAACACGGTATTTTTTCTCATTCTGATTTTTGCTAATATCATCATAAATTTTA  
TTTACAAAATAATAACCTGTTGCCCTTTTTGGTATTTCTATTTAGATATAAAACCATGCCTTCGTCATCTATTTACCCGGTTTGTACT  
TTTTGAAAACCTTGTGAGTAAAGTCCAAGTCCCCTTATCGCCCTTTTTAAATTCACCATCTCTATATCCTTCTTTGTC

>013-contig\_317\_RC

CAGATTTTGTCTTCAATAATAAACTGGAGAATTAATAAATGAAGGGATGGTTTTAAATCTAGATAGAAAATAATAGAAAAGCTGAA  
GGATACTATTTTGTAGATACTTTATATGATAAATGAAAAAATAAGAGCAAAAAATATAGAGTTGAGATGAAAAATAATAAAAT  
TATTTTATTAGATAAGGTAGAGAATGAGGCACTAAGACAAAAAATAGAGAATTTAAATTTTTAGCCAATATGCAAAATTTAAGG  
ATTTAAAAAGTTATAAATAATGCTAGAATAACAAGTAATGAAAATGTACCCACTTATGATGCAGAATATAGACTTGGTAATAAGAT  
TATAATGTCAAGCAATTGAGAAGTAGATATAATATAGTAAGTATAAAAAACCTTTATTGAAAATGCATGTTGATGGAAATCTTAA  
GGGAAGTTCTACAGGCTATAAAAAAGATAGAATATGACTTTTCAAAAAGAAAGAAACAGTGAGTTGTCTGTGGTTGACTCATTAACAT  
ATAACTTCAAAGGAGTATAAATAATGGCAGATAAGTATAAAATAAATCCTGGGGAGCTTAATAAAAGCACTGAAGAAACAACAG  
CTGTTTCTAAAATTAGTTATGAAATCGAAAATGCAAAATATAAATGATCTAAGCAATAGAAGCATAACAAGACAAATGAATATTATC  
AGGAAAAATGGTAGATTTCCTTCAAATCTTGAATATTTAGATAGTCACACAGATAAAAAAGTACGGTGTGACAGCATCAGCTTTCCTA  
AATAAAGATACTGGTAAAGTAGTTATTGGCATGACTGGTACAAATTTCAAAAAGGAAGCTCTTGCAAAGCGATATTCGGGAAACGG  
AGACAAACAAGATAAAATAGACTCAGATGAGACTGAAAAGGATTTAATTTCCGATTTTCGAAATTTGGAATATCTCCTCCGCTGATA  
AAAGCAACATTATGAAGAAACACAAGAGTTTCATCAAAAAAATAAAAAATAAGTATGACATTGATTTTATTACTGGGCATTCCTA  
GGTGGTAGAGAAGCGGTAATATTAGGAATGAGTAATGGTATTCCGAATATTGTTGTTTATAATCCAGCTCCTATTTCATATTTAAT  
TTGAACCCTAATTTCCCGGAAGGAAAACGTTTATTAGAATTATATAAGAATTATAAAGGTAATATTACTAGGTTTGTGTCAGAAAAAT  
GATGAATTGACAGAAAATCTGAAGAAATATAAGCATTTTATGTTTTTGGTAATGATATAGTTCTTAAAGATGGTAAAGGTCATTCA  
ATGGATGGATTCTTAAGTGAACAAGAACAAAAAGCCATTAAAAAAGAACTTAAAAAAGTACAAGGTTATGTAGAAGAAAAATAA  
AGTCTGTTTCGTAATAAATGCTATGTCTAAATAGCTAGTATAGAAATTACTTAGAGCCAATATGATGACTGCGAATGGTG  
GTTGGTTATCTTCTTCAACAGAAAAGTTTTAGAAAAGTTTAAACAGCTTTAAACAATTGCACAGTCATTCAATCAACTGATAGAAGACG  
AAATTAATCAAAATCAAAAAATGTATAATGAAAAGAAAAAGAAATTTGAAAAAATTTGGGAAGACGCACAAAAAGCTGGGAACG  
CTGTAGGAAAAGATATAACCGTGAGTGAAGTGCTAGAAGCTTTAAATGAAGGTCAAGTGAATGAAAGTAGTATGGTAGGAGATCCT  
GAACAAATGATATCTCTAAATGAAAGGCACTTTCAATGATAGAATCTTCTATATCAAAATTATTTCTAAGAGTTAGATTTAGTATT  
AATGAAATCGTTGATAAAGATCAAGTGCTTGCATCTCAAAATAGGTGGATTACTATGATGTTTAAATCAAAATTAATAAAAAATGAAT  
TAGAAGAATCATATAATTCTGAGAAAAAACGTATAGAGAATGAAGTCAAAATTTGAATGAACTTAGGCATAGAGCTCGAAAAAGA  
AAATGAACGTAGTTATGATGTTTTTCAATATTTGAAACGCGAAATGAATTATAGTGAAGATGCACAAAGGAAATGACGAGAAATA  
TAGAAGCGTATGAGCAAGAAATCAATGAGATAAATTAGAAAGCAAGAATTGAAATTAGAAGAATAAAGAAAGACTTAAAAAATC  
TTATGAAAACAGTTAGATAAACTAAGTGATTGATAATTTGGAGGAGATTATATGAGTCCAATGATAGGACAGTTATAGGACCGG  
ATATAGTACCGGACATAGAACCAGCTATAGTACCAGACATAGGACTGGATATTTCTGTTAAGGAAAAAAGATGCTCAAAAAAATC  
ATTCGCACAGTTATTGCACCTGAACATAAGCATAAATACAAAGATATTGAAAACGGATTAAGAGGTGAAGAAAAAGTATTAATTGA  
ACAAATGGCGCAGCATTGCGAAGCTTTTTAAAGCTAATTTTAAAGGCGCAGCTCAAGGAGATTGGGTTAAAGTGCTATGTCTGAGA  
TTGACAGCATTAAGGATGACCTGAAAAAATTAATAGCTAACTACATATCATATTAATAAATAAAGCTCCCTTCAAAATTTTCATT  
TTTTCAATGTCTACTTTGGAGGGAGCGCTTCAAGTGATTTCACAACTGACACTAGGCCGCTTCTTTTTAATTTATTTTATTTCCCATGTAA  
AGTAATTCGAACCGAATGGACATATCACACTCTCAATTGTAACCAACACAACATAAATTAATGTCCCGCATTAACATATCCCACTTC  
CAACAGCAACAATCAAAATCTCAAGTACCAAAAGCTATGACCATTTTATCAAAATCAACGCAAGTCAACATCAACCGAAGTACT  
TGCCATAAATCATCTTCACTTACAAACCATAAAGCGCTGCAGTTAAGTATTGAATGGCATAGCCAAATTGAAATGAAATAGCAAT  
CGTTATAATAGCACTACCAATGGTATATAACGTATGTTTCGTAGATAATCCTTCAGTCTTTGAACCAAAAAACACTGAGTAGAATAAA  
TGCAATGCCAATGACATATAAGGCTAAAATGAAAAATAACATGTTTATACACCTCGATTCTCTCTCGTGATATATATCTTTGTCTC  
CATTATAAAGTAAAGTGCTCAATAATTTAATTAAGTATACTATTTTTTTATTATCGAAGATTGCGAAAAGAGGAAACGCTCCTATATA

ATGTAAAACGTAATTATTCCTATTTACAAAATAAATTGAAGTGAGGGTATATATATGGCTAAAATTCCAGTTACGGTATTAAGTGGTT  
ATTAGGCTCGGGGAAGACAACGTTGTTAAATCATATTTTACAAAATCGAGAAGTTCGACGTATCGCGGTAATTGTAATGATATG  
AGTGAAGTCAATATCGATAAAGATCTTGTCGCAGATGGTGGGGGACTATCGCGTACAGATGAAAAATTAGTCGAACTTTCTAATGG  
TTGTATCTGTTGTACACTTAGAGACGATTTATTAAGAAGGTTGAGCGTTTAGTGAAAAAAGGTGGCATCGATCAAAATTGTTATTGA  
GTCAACAGGGATTTTCAGAGCCAGTACCTGTTGCACAACTTTCTCATATATTGATGATGAACTTGGCATTGATCTTACAGCGATTTG  
CCGTTTAGATACAATGGTTACAGTTGTGGATGCTAACCCTTCGTACATGACATCAACTCAGAAGATTTATTGATGGATCGTGATCA  
AAGCGTTGATGAAACAGATGAGCGTTCGATTGCTGATTTATTAATTGACCAAGTTGAATTTTGTGATGTATTGATTATTAATAAAAT  
TGATTTAATTAGTGAAGAAGAACTAGCGAAGTTAGAAAAAGTGTTAAGTGCATTGCAACCGACTGCTAAAATTATTAAGACAACAA  
ATTCTGAAGTAGATTTAAAGAAGTCTTAAATACGCAGCGTTTGTATTTGAAAAAGCGAGCGAGTCAGCAGGATGGATCAAAAGAA  
CTTGAGTCTGGTGGTCATGCATCGCATACGCCTGAAACAGAAGAATATGGCATATCATCATTTGTATATAAAACGCTCTACCTTTC  
CATGCTAAAAGGTTCAATGATTGGTTAGAAAAGCATGCCAAATATGTCGTTGATCAAAAAGGTATCGTATGGTTAGCACAAATACAA  
TCATGTAGCATGTTTATTATCTCAAGCAGGGTCATCTTGCAATATTCATCCAGTTACATATTGGGTGGCTAGTATGTCTGAAGCGCAA  
CAAACACAAATATTAGCAGAACGTCAAGATGTCGCAGCTGAATGGGATCCAGAATATGGCGATCGTCATACACAATTTGTCATTAT  
TGGTACAGAATTAGATGAAGAAAAATTAACAAAAGAACTCGACGCATGCTTAGTCAATGCGCAAGAAATTGATGCAGATTGGCAA  
CAATTTGAAGATCCATATCAATGGCAAATTAGACCAGCACGATAAGTTGAATGAAGTATAATCATTTTTGAATTGTGGCTTAATTGT  
TTGCAATTTATGACAATTAATAAAAAAGTTAAGGTGTTCTTAGGATCTTTTTGTTTTCAATCTATCTAAAGTGTGATAGTTTTGATAAA  
GCAGAAATTTGCATTTATCCATAGGGCTAGGACATGTATGTGCTTAGTCCTTTTATATTTACGTTGATGAAAAATGGCAAAACC  
ATCGTACCAACTGTTAATTGAAGGTACAATCATTTGTTAAACGATCAAAAAAGTGAAGTAAATGCGAATATGCAATGTACTATTA  
ACATCTACGGTCAACGAGTGTTCAGTCTAAACGTGCAACGCAATTCGCCACGTGGCCAATATATCTTGGCGTAGATCATGAAAT  
CATTAAGATTTGCGACGCCAAATCATGAATGTCTCAGACCTCGAGTATCAAAACATAAAAGACGCCACAAAAATATAACGCGTCAGA  
CTACAAAGATCACGAATATTCCGTACGTCCACGAAGAACATCCTATACAAAAAACAGACCATTTATTTGCAACAACTAACAA  
GACTAACCTCACATCAATAAATCAACACAAAGCAAAGCCACCATCCCTATTGGCATAAGTGGCCTGAGAATTTAAGTATTCAATTG  
CTTAAATTTATTTGCGAAAATGTCGATAATTGCTTTGATGATTTAATGATAGTACCTACAATAGCCATCGTTTTGTCCTCCTGTATG  
TTGATTTAACATAGTGATGAGTTGTTGATCGTTAATGTTTGAGATTAGTTGTTACCTAAAAATTTACCAAGTAAATCTTTAAAGAATT  
TGAATAATTTTGCTACGAATCCCATGTGAATGGCCCCCTTCAATAAGATGTTTCATATCTATGAGATTTTTATACTTACTTACCAGT  
GAATTTCTCAATTAATCTTTAATGAATTTAATGATTCTTGCAATGATACCCATGTGAAAGACCTCTTTGTTGTTATGAAATCTTA  
TTTACCAGTGAATTTGTCGATTAAAGCTTTTGATAACTTTAATGATGCGACGATGATACCCATTAAGATTACCTCCTTTGCTTATGAG  
TTAACTTCATTGTACATAGTTATCTTGTCGTAATTGATTTTTTTCCTAACTTGAATTGTTATAATCATAACTGCGAATTTTTTATTTT  
AAAAGGACGGGAAATACTGCCTAACTGTACAGGTGCATTTACAAAATCTTTACAATCATTGGTTTAATAGAGGTTAAGCTCATGAAT  
TTGACATGAAGCAGAAATTAATTATATTTTATGTTATAAGTTTAAACGAATAACACGTTAGGTCTCGTCTAGGCAAAGCATATTT  
ATGAAGATGAATTGAACAGACAGAAGTAACATTTATATACATATGTGCATGGGAGCACGCTTAAAGAGAACACTGCAACAAGGTA  
TATCAACGTACCGTGATGCAGTGTCTAGTTAAACTGAAACCTGCAATAGTAAATTTTCTGCCATTATGTACAGAATCTACTATTGTA  
GGTTTTTATTTTTATACATAAGCAATTATGCGAGAGATTAGAAATAAGGAGGTTATGCAGTGTTAAGTTTTCAATTGCTATTTTCACT  
GTTTGTATTGCGCTTATCATTGTCATTGATAAGTGGCTTGTTGTTTTAGCACCAGTTATGCCAATGAGATATTAATAATTACATTTAT  
ACATAGTACGATGCCAGTATTATTGTCAGTCAATTGGCTTTTTCGGTATTCTAGTCAACATGTTCTTAGGTCCATTTAAAAATAGATCG  
TTTATCTTGTTATTAGCTGGCTTTGTAATGGCGCTTGTTTATTATTCAAAAGTTTTCAATGCGATATTTACTAGGTGATCATCATT  
ATAGACATTACTTTCCATTGTTCACTGCGATTACGTCGTTGTCATCTTACGATGGATGTCTGAAGACTTAAGACTGATGGCACTCTG  
CTGGGGTATGACATTATTATGTTTAAACATTGCTGATGAACGTTAATCGTTTTTGAAAAGTGCCACGTGAGTCTGCGAAATTATCAAG  
TATGACATTTTTATGTGGTTGGCTTGCATTGCTTGGAGCAATTGTAACATTTATATTGCGACTGGCGAGTGGCGCGTGCCTCAACAT  
ATGCTAATTCGACATGGTCATTGTTGACGAATGTACTACTTGTATTAGCTGTCATGATACCGGCAGCACAAATTCCTTTTTCATCGAT  
GGTTGATTGAATCTGTAACGGCACCAACGCCAGTATCGGCAATTATGCATGCAGGAATTGTGAATGCAGGTGGTGTATTCTAACTC  
GTTTTGCGCGGATATTTGATAATGGATTGCGTTATCATTATTACTTATCTTTTCTAGTATTTCTGTATTGTTAGGATCGGGTATTAGC  
TTAGTTCAAGTTGACTATAAACGCCAATTAGTGGGCTTACGATGAGTCAAAATGGGCTTTATGTTAGTCAATGTGCATTGGGTGTA  
TATTACAGCAGGATTATTCATTTAATATTGCACGGTATTTTTAAAGCAACATTATTTTTACAATCAGGTTCTATCGTGAAGCGATTCA  
ATATTCCAAAACAAGCATCTGCTAAAGACGCTTATGGCTGGATTGTCATGGGACGTGATTAGCTATTATCGTGGCATTCTGTTTTG  
GATGAGTAGTGACAGAAGTGCATATGAAGTGTTAAGTGCACCTATTCTAGCTTGGTCATTACTTGTATCTTGAATCAAATGGTAGC  
CTTAGTAAAGGACGCATGGCACGCTTGTGTTGGTATGATTTTGATTGCAATTGTGACATTATCTACATCATCACACATAATTATTTT  
TACGATGTATTGCGAAATATAACAACACATGCGACAACACCGCCTACAGTGAGTGTGCATCATTAGTGTGTCATTTAATCTTTGGT  
AGTTTATTAAGTATTTGGGTGGCGCGTCATCGATACTCTAAGGGTTTTGCGGTATTGTACGTGTGGTTAGTTAATCTAGGTGAAGCA  
CGCTCGAAAGCGATAGAAAGTCATCCGAATTATTTGAAGAAGTATTTATAGGAGGTGAAAGGTATGACAACACAGATTAAATATCAA  
TTCAGTCATTGAAAAATGCGAAACGTTGTTATTACACCTATTACCCAGTTTCGATTTTTGCAGCACGAAATCCATGGGAAGGATTAGA  
AGCGGATACGTTTGAAGTGTGCAAAATGGTTACGTCAGCTTCGAGATGGGATATTTTCCCAAATAAAGCATTAAATAGAAAGCG  
CTGTGGCACGTGGTGAATTAGATGAAAGTGTCTTTAATCAACTTGTTACTGATATGTTACTTGAACATTACTACAATATCCCGCAAC  
ACTACATCAATCTTTATATTGATAACATTAACAACTTAAAGACGTACCTGCATCATATATGGATCATTCAAATGTTGATGTTGTTGC  
TGATCTACTATTAGAAAAATCAAAACGTGATATGGCTGAATCATATCATCACTATGATGTACGTCCGATGAGTGTGCAATAATAGA  
TGAACAAGGTGAGCCACTTAGCGAACAAGTGAATCGTCAAATGATTAAATGGACGAAACTTTATATCGATCAATTTCTATCGAGTT  
GGACAATGCCGAAGCGTGAGCAAAGTTTTTACCATGCATGGTTGCATTTAGCGCAACATGACCATAGTTTTACTAAAGCACAGCGC  
CAAGTGATTAAAGGCTTACCCAATGATCTGAAATGACGATAGAGTCAGTATTAACCTCATTTTTCAATAGATCAGGAAGACTACCA  
AGCTTATGTTGAAGGACATCTTTTGGCGTTACCGGGTTGGGACGGTATGTTATATTACCGTTCACAACAGCATCACTTTGAACAACA  
TTGTTTACGGATTATTGGCAATTTCGGTTAGTTGTGCAACAATGCTAGTTGATGAGTTTAAAGTGAAGTTTAAAGTGAAGTTTAAAGCTT  
AAGTAGATCGGAAAAATTGGTTAAGCAAACTGTTGCATCATGGTGTACTACAGTGATATGCCTAGCGATGTATTACTACAACATGA  
CGTCCATGAAATTCAAACATTTATTCATTTTGCAGCAATTATGAATAAAAAATGTATTTAAAAATTTATGGCTAATTGCCTGGGAAAT  
GACATACGAATCTCAGTTAAAAACAAAAAATTAAAGCAGGTTCATGAAAGTGTGGCGGGCGCATTAGATGTAACCAAGTAAATGTCT  
CAGAAAAATGATAACGTTAATCAGCCACATTCAGTATTGTTAAATGACACACAAGCAGTTGATGAAAATAATAGCGAGCTAAATCAG  
GTGGGCACATCAACGAAAGCGCAAATTGCATTTGTATAGATGTTTCGTTTCAAGACCATTTCTGATGACATATCGAAGCAGCAGGGCC  
CTTTGAAACGATTGGTATTGCAGGCTTCTTTGGATTACCTATTCAAAAAGATGCCGTGCGACGAACAATTCAAAACATGATTCAATACC  
TGTCATGGTAACGCCGGCATATCGCATTAAAGAAATTTGCAGACCGCTACGATATGAATGTTTATCGACAACAGCAACAGACAATGT  
CATCATGTTTTACAAATTTAAATTTGATGAAAAATAATGTTTATGCTAGTCTGTTTATTGCCTGAATTAAGTGGGCCATTTTTAAAGCTT  
GAGTACCATTGTCAATTCGATTATGCCTAGAAAAAGTCGCGCGTCTTTACAAAAAATAAAACAAAAATGGTTGAAAAAGCCTGAAA  
CAAAGTTAACGATTGATCGTGAGTTTGACCGAACATCAGATTTACCTGTGGATTACTGAGCAAGAGCAAATGATTTTCGCGTTAC  
AAGCGTTGAAATTGATGGATTAAACCGAAGCATTTGCGCCGTTCTGTTGTTAGCAGGTTCATGCTAGTCATTCTACAATAATCCAC

ATCATGCATCACTTGAATGTGGGGCTTGTGGTGGCGCATCAAGCGGTTTTAATGCTAAGTTATTAGCGATGATATGTAATCGTCCAA  
ATGTCAGACAAGGATTAACAACAAGCAGGCGTGTATATTCCAGAGACAACCTGTTTTTGCGGCAGCAGAACATCATACATCTACTGAT  
ACGTTGGCATGGGTATATGTGCCAGACACATTATCAGCTTTAGCTCTAGATGCATATGAATCATTGAATGACGCGATGCCGATGATT  
TCTGAACAATCGAATCGGAACGTTTTGGACAACTGCCAACGATTGGTCGTGTGAATCATCCAGTGGAAGAAGCGCAGCGGTTTTGC  
GAGTGATTGGAGTGAGGTACGTCCAGAATGGGGCTTGGCTAAAAATGCATCATTTATAATTGGACGACGCCAATTAACAAAAGGTA  
TTGATTTAGAAGGGCGGACATTTTTACACAATTATGATTGGCGTAAAGATAAAGATGGCACATTATTAAATACCATCATTCTCTGGTC  
CAGCGCTTGTGGCACAATGGATTAATTTACAATATTATGCGTCGACAGTTGCGCCGCATTTTTACGGAAGTGGAATAAAGCGACAC  
AAACCGTCACGTCAGGTGTTGGTGTATGCAAGGTAATGCGAGTGATCTGATGTATGGCTTATCATGGCAATCTGTTATGGCTGCTG  
ATCGAACGATGTATCATTGCCAATTCGTTTGTGTTGTTATTCAGGCACCCGACTATGTTGTAGCTAGACTACTCGGAATAATGA  
GCATTTCGCTAGGAAGGTGTCTAATCATTTGGCTGCGTTAATGAGCGTTAATGAGGAAGGGCGTTTTAAAAAGTTGGATTTAACGATG  
AAATGTTGCGATGCTAAGTAACTAATATATCATCATATCTACAATGTTCTAGCTTCTTAAAAATATTCTAAAAATGATAAACTTAATGT  
AATGGTTGATGTCGTGATAACGATACAAAGATGAAGTAATCAATTTTAATATTATTGGAGTTAGTGATATGAAAAGAACGAAAAGGT  
GAAATCGAAGCTGAAATCAGTAAAGCCATTACGCAATGGGAAAAAGATTTCTTGGCAGAGGTTCTTGTGCGTTAAATCAGACAT  
TTTAAGAGATATGGTGATTATTAGTTTACAAGGTATCTTAACGCCAGCAGAATATCGTGTGTGTAGTACGAATGAAGGATTACTAAA  
TATTAAACGAACACGTTCTGAATTAGTTGAATCCGGTGAGCAAGATTTGAATGATATCATTTCTTAAAAATTACAGGTATCAAAGTGAT  
GAGCTTCCACAGTGATTAAAGTACAGTTACAGGTGAACGTATTATCGTATTCAAACCTTGAGGATAATTTGGAAAAAGCATATTTAAGA  
AGGTTAGGTATGCTTTTGTGGCTTATTAAGCTATAGAAGTATGTTTGGTTAAACAGCGCAACGCCATATATTTGGGTGTGCTGTTT  
TCTATTATATGATGTGTTTATTACGTGGATGAATGCGTGGGTCTGAATATGACCCGTGAAAGGCGTATGTCTACAAAAATTTGCCAAT  
GGTGACAAGTCGACGCAAGCATATTTGTTGCGAGACATGCCCATATCTTTTACATAAAGAGTATGTGTGTCAGCTAGGCATATAA  
TCGATAAAGTATTCCTAAAAAATTAGGTATAATGACCATTGTTGCAATAAGTTTTTCGGCCTTGAAACCGATAACGCATAGTATAAT  
AGGAATAAAAAATAATACAAATATCCAGTAAATCAAATTTGAAAACGATGGATGAATAGGGGTAAAGAATCTAACTAATGTAATG  
ATTAACGCTATATAGACAAAAATAACTCTATTGATACGCCTTACCCCTCTGTATAATAAATATAGATCGTACTAAATTGAAAAATAG  
CAAAATATTGTTATTTCATTAACAATGTTTTATTGTCAATATACATAACAATATGAACCTTTATAATTTTGATATTGTGCGGTAAAGT  
GAAATTTGTGGCACATTGATATTATGGATAACATTTGTAATAATGAAAATGATGATACGAGGAGATTGTAAGATGATAGATAAAAAA  
TTAACATCACCGAAAAATGACAGTGCCCTTATTTTTAATCGCGCTGATTGTATTTATAGGTATGTTTTACAGTGTAGTGACAAATCAAG  
AATGGCTTAAAAATATAGATATGGGATCATTAAACATGGTTTACAGATTATTTCCGTGAGCCACAACGTCAGTATGTTAAACAATTTAT  
TTAATTACTATATGACGTTTAGTGCGGAAATTGGAGATGTCAAAGGTGTCGTGTTGATTTCATTATCGTCACAATCGTACTGTTTAT  
TAAACAGAGGCATTTAGCGGTTTGGTTTGTGACATATTTGGTTTCAGGCGTCATCATGAACAAATTAATTTAAAGATACTGTTTTACG  
TCCAAGACCATATAATCATTTAGCCGTTGATACAGGCTTTTCATTCCAAGTGGACATTCCAACGCCAGCACATTATTATATTTCCGCC  
TTAATGATCATAATTATTTCACTTGCTGCTAAGACAATAACAAAAGTGTGAGTGCGCTAGTTATGGGAATATTATGGCTTAGCATA  
TTATTTTGTGCGCTTTATTTTCATGCGCATTACTTTTCAGATGTCAATTGGCGGCACGTCACTAGCAATCATTTGGGTAGCGTTATTCTT  
AATGGTATACCCATACTTTATTAATCATCGACGACAACGCGTTTAGCAAACATCTTTAGACATAGTGGAGGTATATAGAAAAATGA  
GAATTAACACACCGAGTCCATCGTATTTAAAAGGCACAAATGGACATGCGATATTATTATTACATTCATTTACAGGTACAAATCGGG  
ATGTGAAGCATCTTGCAGCTGAGTTAAATGACCAAGGATTTAGTTGTTATGACACCAATTTACCGGTATGTTTATTGTTGAAAG  
ATTCGATGACATATAATGTAGATGATTGGTGGGAAGTGAAGTGAAGTACCAATTTTATGTAATGAAGTTATGAAGTTATGAATCATCA  
GTGCAACGGGTGTGCTTTAGGTGGATTAATGACATTAATAATGGCACAACACTATCCTTTGAAACGATATCGTGTGTCATGTCAGCAC  
CAAAGGAAAAGAGTGATGATGGTTAATAGAACATTTAGTTTATTATAGTCAACGCATGTCGGATATTTTAAATTTAGATCAGCAAG  
CATCGAGTGCGCAATTAGCAGCAATTGATGATTATGAAGGTGAAATTACGAAGTTTCAACATTTTATTGATGATATCATGACAAATT  
TAAATGTTATTAATAATGCCAGCTAATATATTATTTGGTGGTAAAGATGCGCCATCCTATGAAACAAGTGCACACTTTATTATGAAC  
ATTTAGGATCAGTAGACAAAAGAAATTAATGGTCTGAAGGATTCCGCATCTTTAATGACGCATGGAGAAGGCAGAGATATTTAGAA  
GAAAATGTTATTCGCTTTTCAATGCTTTAACATAATTGAAGATTTTAAAAATCAACACTTGAGTGACGATGTTATTATATTTGTCAT  
TTGAGTGTTTTTGTGGCGTGATAGTATAGGGAACCTTAGCTAAAGTTAATTTGTAGTGTAATGTCGTGGAAATATGATGGAGTTATA  
CCGAAGTTGATTGTATTGTAATGTGCTGGAAATTTATGGGCATTGACACCTGCAAGTTATGATGCCATTGCTGTTGTCTTTTTAAT  
CGTCATTGTGATTAAAGTCTTTAACATTAGATGGCGCCTTAGAAGGTGTGAAATTTATTTTACAACCAAGAGTATCAGAGATTACTGC  
TGATGGCATCTTGTGTCGTAGGTCAATCATTTCTTTACGTTATCATTAGGAACACAGGTATGATTACTTATGCGAGTTATGCCTCT  
AAAGACATGACGATTAAGTCATCAGCTATTTCTATCGTTGTTATGAATATCTTTGTATCTGTATTGGCAGGTCTAGCTATATTTCCGG  
CTTTACATAGTTTTGGCTATGAACCACAAGAAGGGCCTGGATTATTATTAAAGTACTGCCAATGGTCTTTAGTCAAATGCATCTAG  
GCACATTATTTCTATTTGGGATTTCTAGTGCTGTCTTATTTGCGGCTTTAACGTCATCTATTTCTTTATTAGAATTAATGTTTCTAAC  
TTCACGAAGAATGACAATACAAAACGTAAAAAAGTCGAGTGATCGGTAGTATTTTAGTATTTATCATTTAGTATTTCCAGCAACCTTA  
TCTTTTGGTATCTTAAAAGATGTAAGATTCCGGTCGGGAACGATTTTGAATAATATGGATTTCACCGTTTCTGAATGATTATGATGCCAT  
TAGGGCATTAGGTACTACGCTTGTGCTAGGACAATTTATAGATAAAGTATTACAAACAATTTATGGAATAAGATCGAGTTAGAT  
TATTCAGTGTTGGTATTACTTAAATTAAGTATGCGATGCCTGTCGTTATTATTTTAGTCTTTATCGTGCAATTTATTAGTTAATATATA  
GAAGCATCTGACACACAAGTATTTGTGTTGCTCAGGTGTTTTTTGTTTGGAAATTGAAAATTTAGTACTGGTCTGAATTAATCGAAAC  
TTAGATAATTGCAAAATAACAAAATGTAGTTTATAATTTCTTATCTGAAAAGTAAGGATTAATAATTTAGACATGAAGAAAGGTTTCA  
TTCATTTGATCGGCATGTCAGATGAGGTGTCATCTATGATTACTTATGATTTAATTGGCAATACGCCATTAGTACTGTTAGAACATTA  
TAGTGATGATAAAGTTAAATTTATGCCAAGCTTGAACAATGGAATCCTGGAGGCAGTGTTAAAGACAGACTCGGGAAATATTTAG  
TAGAGATGGCAATTCAAGAAGGGCGTGTGCGTGCAGGTCAAACCTATTGTTGAAGCGACTGCTGGCAATACAGGCATAGGGTTAGCT  
ATTGCAGCAATAGACATCATTTGAAATGTAAGATCTTTGCGCCGTATGGTTTTTTCAGAAGAAAAGATTAATATTATGATAGCGCTT  
GGTGAGATGTTTTTCAAGAACGAGTCAGTCTGAAGGTATGATGAGGGGCAACATTAAGTCTGCACGTTCTATGCTGAAAAATATGGTGC  
CATTTATATGAATCAATTTGAATCCGAACATAATCCGATACATATTTTCATACATTGGGGCCCCGAATTGACTTCAGCATTACAGCA  
AATTGATTATTTTGTGGCTGGTATTGGCTCAGGCGGTACATTTACAGGTACCGCACGTTATTTAAAGCAACATCACGTGCAATGTTA  
TGCCGTTGAGCCAGAAGGGTCCGTGTTAAATGGAGGGCCAGCTCATGCACATGACACTGAAGGTATCGGTTCTGAGAAATGGCCGA

TATTTCTAGAGAGACGCTTGTAGATGGTATATTTACGATTAAAGATCAAGATGCCTTTCGAAATGTCAAAAGTTTGGCTATAAATG  
AAGGGTTGTTAGTAGGCAGTTCTTCAGGTGTCAGCATTACAAGGTGCATTGAATTTAAAAGCGCAATTATCTGAAGGTACGATTGTTG  
TCGTATTTCCAGATGGTAGTGATCGCTATATGTCTAAGCAAATATTTAATTATGAGGAGAATAATAATGAACAAGAAAACTAAATTA  
ATTCATGGTGGGCACACAACAGACGATTATACAGGTGCCGTTACAACACCAATTTATCAAACAAGTACATATTTACAAGATGATATT  
GGTGATTTACGTCAAGGATATGAATATTTCTCGTACTGCGAATCCAACAAGAAGTTCTGTAGAAAAGCGTTATTGCGACATTAGAAAAT  
GGCAAACATGGCTTTGCAATTTAGTTCAAGGTGTTGCAGCAATCAGTGCAGTTGTTATGCTGTTGGACAAAAGGAGATCATATTATTTTA  
AATTCAGATGTATACGGCGGTACTTATCGCGCATTGACAAAAGTATTTACACGATTGGCATTGAAGTGGATTTTGTAGATACAACG  
CATACAGATTCAATTTGTACAAGCGATACGCCCAACAACAAGATGTTGTTTATTGAAAACACCTTCTAATCCATTATTACGTGTTACT  
GACATTA AAAAGTCTGCTGAAAATTGCGAAAGAACACGGTTTGATTTCAGTTGTTGATAACACATTTATGACACCTTATTATCAGAAT  
CCATTAGATTTAGGTATCGATATTGTCTTACATTCTGCAACGAAATATTTAGGTGGACATAGTGATGCTGTTGCTGGTTTAGTTGCAA  
CATCGGATGACAAGCTTGCAGAACGTTTAGCATTTATTTCAAATTCACAGGTGGCATTTTAGGACCTCAAGATAGCTATTTACTTG  
TGAGGGGTATTA AAACATTAGGTTTACGTATGGAACAAATTAATCGCAGTGTATTGAAATTTAAAAATGTTACAAGCACATCCAG  
CTGTGCAACAAGTGTTCATCCAAGTATTGAAAGTCATTTAAATCATGATGTCCATATGGCTCAAGCGGATGGCCATACAGGTGTGA  
TTGCAATTTGAAGTAAAAATACAGAAAGTGCCAAACAATTGATTAAAGCAACATCGTATTACACATTAGCTGAAAAGTTTAGGTGCA  
GTGGAAGTTTAATTTCAGTACCTGCATTGATGACACATGCATCCATTCCAGCAGATATTCGAGCTAAAGAAGGTATTACAGACGG  
ACTTGTGAAGAATTTCTGTAGGTATTGAAGATACTGAAGATTTAGTCGATGATTTAAAAACAAGCACTAGATACGTTATAAAATAATAGC  
AGCACTGGCATATATTTTGAAGTTCAACGTTTGTGTTCTTGAATATGCTAGTGCTTTTTTGTGCGATGTTAATATTTAGTAATTCGCTT  
GTGGAGGATGTTAGCATTTTTTATCTAATTTAATTCAGATAATGTCAATAGTACTCACAATTCGTCACTTGCACATGAATTCGCTTAT  
TTTTTAATTTT TAGAAAAATTCGGCAAATTTGATTGACGATATATGCAATTTTACATATAATGCTCTTATTCTAGTGGATTAAAG  
AATTTGTAGGAGGGGCGATGATGATTGAGTTTCGACAAGTTAGTAAATCATTTCAATAAGAAAAGGCCAAACAATAGATGCTTTGAAG  
GACATATCATTTACGGTCAATCGCAATGATATTTTTTGGTGTGATTGGATATAGTGGTGCAGGAAAAAGTACGTTGGTAAGACTCGTG  
AATCATCTTGAAGCTGCCTCGAATGGACAAGTGATTGTAGATGGACATGATATTACGAATTATAGCGAAAAAGGCATGCGAGAAAT  
TAAGAAAAGATATCGGTATGATATTTCAAGCATTTCAATTTATTAATTAAGCTACCGTATTTAAAAATGTAGCAATGCCACTCATTTTA  
AGTAAGAAAAGCAAAACAGAAATTAAGCAACGAGTAACAGAAATGCTTGAATTTGTAGGATTGAGTGATAAAAAAGACCAATTTTC  
CTGATGAATTATCTGGTGGGCAGAAAGCAAAGGGTGGCTATTGCAAGAGCGCTTGTACTAATCCGAAAATACTCCTATGCGATGAA  
GCAACAAGCGCATTTGGATCCAGCAACGACTGCTTCGATATTGACGTTATTAAAGAATGTCAATCAAACTTTGGCATTACAATTTATG  
ATGATTACACATGAAATGCGCGTTATTAAAGACATTTGTAATCGTGTGCTGTAATGGAAGGGAAGGCAAGTGGTTGAAACAGGAAC  
TGTTAAAGAGGTGTTTAGTCATCTAAAAACGACGATTGCTCAAAATTTTGTGTCTACAGTTATACAGACTGAGCCAAGTACATCATT  
GATTCGTCGATTGAATGACGAACAAGTTGACGATTTTAAAGATTATAAAATCTTCGTCGAGGAACTCAGGTGACACAACCGATTA  
TAAATGACTTGATTCAAATTTGTGGCAGAGAGGTTAAATTTTATTTTCATCTATGTCAGAAATACAAGGTAAACCCGTATGTTATA  
TGTGGCTTCGATTAAATATAGATCAACAATTTGATGACACGGCAATAAATCAATATTTCAAAGAGAAAAATATTCATTTGAGGAG  
GTGCATTAACATATGTTTGGTTCTGATTTAGACAGTGCAAAAGTTATTACAAGCATTGTACGAAACGTTATATATGGTATCTATTGCTT  
TATTTTTAGGAGCAGTGATTGGTATTCCATTAGGTGTCTTATTGGTAATTACTCGAAAAACAAGGCATATGGCCCAATATAGTGATAC  
ATCAAGTTTAAATCCTTTAATCAATATTTAAGTGCCTACTACCATTTATTTATTTGTTAATTGCGATTGTGCCATTCAAAAATTAGTA  
TAGGTTACTCAATTTGTACGACTGCTGCCATCGTGCCTTAAACAGTATATGTGGCACCTTACATTGCAAGAGCTTGTGAAAACTCA  
TTATTGGAAGTAGACGAGGGGATTATTGAAGCAGCGAAAGCGATGGGCGCTTACCACCTACAAATCATTAGATATTTTTTAATTCCT  
GAAGCTTTAGGTTTCGTTAGTATTAGCAATTACCACTGCGATTATTGGACTTATTGGAAGTACGGCGATGGCAGGAGCTGTTGGCGGT  
GGTGGTATAGGAGACTTAGCTTTAGTGTATGGATATCAAAGATTTGATACGACGGTCATTATTATTACCGTTATTGTATTAGTCATTA  
TTGTCCAAGTGATTCAAACGCTAGGGAATGTTCTAGCTAGATTACATACGTAGACATTAATGATATATAGTGAAGATTTTGAAAGGAA  
TTGATAGAATGAAAAGATTGATTGGGTAGTTATCGTAGCACTTGTATTATTAGCAGCGTGTGGTAGTAACAATGATAAAAAAGTA  
ACAATTGGTGTGCGATCAAATGACACTAAGGCTTGGGAGAAGGTTAAAGAATTAGCTAAAAAAGATGATATTGATGTGGAGATTAA  
GCATTTCTCCGATTACAATTTACCGAATAAAGCATTAAACGATGGTGATATTGATATGAATGCATTCCAACATTTTGCATTTTATAGAT  
CAGTATAAGAAGGCACATAAAGGAACAAAGATTTCAGCATTTAGTACAAACAGTTTATAGCACCGTTTGGGCATTACTCAGATAAAAAT  
TAAAGATATCAAAAAGGTTAAAGATGGTGCTAAAGTTGTCTTCCAAATGATGTATCAAACCAAGCACGTGCACTTAAACTATTAG  
AAGCAGCTGGTTTAATAAAAAGTGA AAAAAGATTTCGGATTAGCAGGTACAGTGAAAGATATAACGTCAAATCCAAAAACATTTAAAA  
ATTACTGCAGTAGATGCACAACAACTGCACGTGCTTTATCTGATGTCGATATTGCAGTTATTAATAACGGTGTAGCAACTAAAGCG  
GGGAAAGACCTAAAAATGATCCGATATTTT TAGAAAAATCAAATTCAGATGCTGTAAGCCATATATTAATATTGTTGCAGTTAAT  
GACAAAGACTTGGATAACAAAACATATGCTAAAAATCGTAGAATTGTATCATTCAAAGAAAGCTCAAAAAGCGTTGCAGGAAGATGT  
CAAAGATGGAGAGAAACCTGTTAATTTATCTAAAGATGAGATTAAAGCAATAGAAACGTCATTAGCAAAAATAAATTATATTGCGTC  
CTACAAGCAAAGTTTATGCTTATGTTTGTAGGGCGTTATTGTTGGAGAATAAAAATTATTTCCAATAGAGAAAGGGATTGTAATCATT  
TTATAGTGAATATTATGAAATTTGTAATAATTTAGATATTGTAATAATCTAATAAGTTGTAATAATTTAAGGGTAATTAATAAAT  
TGATGATACAGTATATGATTTTTTTGTAATCATAATGTCATTCAAACATCAACCTATTATACATAATTAATAACGTAATGATGATGTA  
TTCATAAATTCGGATAAAAAGATGTTAGGAAAAGTTAAGCAAGAGGAGGATTTTAAAGTGCAAAAAAAGTAATTGCAGCTATTATT  
GGGACAAGCGCGATTAGCGCTGTTGCGGCAACTCAAGCAAATGCGGCTACAACCTCACACAGTAAAAACCGGGTGAATCAGTGTGGG  
CAATTTCAAATAAGTATGGGATTTTCGATTGCTAAATTAAGTCATTAAACAATTTAACATCTAATCTAATTTTCCCAAACCAAGTAC  
TAAAAGTATCTGGCTCAAGTAATTCTACGAGTAATAGTAGCCGTCCATCAACGAACCTCAGGTGGCGGATCATACTACACAGTACAA  
GCAGGCGACTCATTATCATTAATCGCATCAAAATATGGTACAACCTACC AAAATATTATGCGTCTTAATGGTTTAAATAATTTCTTTA  
TTTATCCAGGTCAAAAATTTAAAGTATCAGGTACTGCTAGCTCAAGTAACGCTGCGAGCAATAGTAGCCGTCCGTCAACGAACCTCA  
GGTGGCGGATCATACTATACAGTACAAGCAGGTGACTCATTTGATTAATTCGATCAAAAATATGTTACAACTTATCAAAAAATATTG  
AGCTTAAATGGCTTAAATAATTTCTTTATATATCCGGGTCAAAAAATTAAGATCAACTGGTAATGCAACATTTCAAACTCAGGATCT  
GCAACAACGACAAAATAGAGGTTACAATACACCAAGTATTTAGTCAACAAAACTTATATACATGGGGTCAATGTACATATCATGTATT  
AATCGTCGTGCTGAAATTTGGTAAAGGTATTAGTACTTATTGGTGAATGCTAATAACTGGGATAACGCAGCGGCAGCAGATGGTTA  
CACTATCGACAATAGACCTACTGTAGGTTCTATCGCTCAAACAGATGTAGGTTACTATGGTCATGTTATGTTTGTAGAACGTGTAAA  
TAACGATGGTAGTATTTTAGTTTCAGAAATGAATATTTCAGCTGCACCAGGTATTTTAACTTACAGAACGTTACCAGCTTACCAAGT  
AAATAATTATAGATATATTCACTAAAGCTTACGTATATAAATATATAATGAATTCCTATTACATTTCAAGCTGAAAAGTTGGAT  
TGAATCCTAAACTTTATGGCGGGGCTATCAAAGTCGTGAATGTTGTAATAGGAATTTTGTATAAGAAAAAGGATTGGTCAATGA  
ACTTCATGTTCTATGTTCCACCAATCCTTTTCTGAATTAGTATTATGCTTTACTTTGCGAATGCTGTAAATAATCTAGCACCGTTTG  
TTATTAAGTAACAACCTGCCACTGCTTTTTTGAATTTACGTGGTGACTTAATTGAAATGTAAAAGTCAACAGGTTCTCAGTGCT  
TAAACCTAATGAAAGATATACTAATTTTTTATTTTAGCATGATATTATAGCCATTGTAGCCGTGCGACTATGAAACCTGCGACATTT  
AGTAAACTTGATAAACGTTGTGATTGGAACGTTTTGCCATAATAATAATCCCCCTAATATCTTCTGTTTATATGAAAAGTTGGGTG  
CGCTGAATTGCTAACGTTTTGCGCTATAACTACTCATATATGATAACATAATTGTACAGTATAATTTGAAAAATTGATTTCAAAAG



ACAGAAGGGTTACAAGGCACCGTTGTCGATAATGTGAAGACATATACGGATGTATTGTCCGAAGGTGTCATTAAAGTAATGGCTAA  
GATGGGAATTTTCGACAGTGC AAAAGTTATCAAGGTGCACAAATATTTGAAGCGATTGGCTTGCTCATGATGTGATTGATCGTTATTT  
TACTGGGACACAGTCTAAGTTATCGGGTATTTTCGATTGATCAAATTTGATGCTGAAAATAAAGCACGTCAACAAAAGTGATGATAATT  
ATCTTGCATCAGGTAGTACATTCCAATGGAGACAACAAGGTCAACATCATGCTTTTAATCCGGAATCTATTTTCTATTGCAGCACG  
CATGTAAAGAAAATGACTATGCGCAATTTAAAGCATACTCTGAAGCGGTGAACAAAAATAGAACAGATCACATTAGACATTTACTT  
GAATTTAAAGCATGTACACCGATTGACATCGACCAAGTTGAACCGGTAAAGTGACATTGTCAAACGCTTTAATACAGGGGCGATGAG  
TTATGGATCGATTTACGCGGAAGCACATGAAACGTTAGCACAAAGCCATGAACCAATTAGGTGGAAGAGTAATAGTGGTGAAGGTG  
GCGAAGATGCAAAACGTTATGAAGTACAAGTTGATGGAAGCAACAAAGTAAGTGCGATTAAACAAGTTGCTTCTGGGCGTTTTGGT  
GTAAGTAGTGATTATTTACAACATGCCAAAAGAAATTCAAATTAAGTTGCGCAAGGTGCAAAAGCCTGGTGAAGGTGGTCAATTACC  
TGGTACTAAGGTATATCCGTGGATTGCGAAGACAAGAGGGTCAACGCCAGGTATCGGTCTGATTTCCACCACCGCCACATCATGATA  
TTTATTCAATAGAAAGATTTAGCGCAACTGATACATGATTTGAAAAATGCGAATAAAGATGCGGATATCGCGGTAAAAATTAGTTTCG  
AAAACAGGTGTTGGTACCATTGCATCTGGGGTGGCAAAAGCATTGTCAGATAAAATTTGCATCAGTGGTTACGATGGTGGTACAGG  
GGCTTACCTAAAACGAGTATTCAGCATGCCGGTGTTCCTTTGGGAGATTGGTTTAGCAGAAACACATCAAACATTTAAACTAAATG  
ACTTAAGAAGTCGTGTTAAGTTAGAAACAGACGGTAAGTTATTAAGTGGTAAAGATGTAGCGTACGCATGTGCGCTTGGAGCGGAA  
GAATTTGGATTTGCAACTGCACCATTAAGTGGTGTGGGCTGTATTATGATGCGTGTATGCCATAAAGATACATGTCCAGTAGGAGTT  
GCAACTCAAAAACAAAGATTTACGTGCTTTATATAGAGGTAAAGCACATCATGTTGTTAATTTTATGCATTTTATTGCACAAGAATTA  
AGAGAAATTTAGCATCTTTAGGTTTGAAACGTGTAGAAGACTTAGTTGGAAGAACTGATTTATTACAACGATCATCAACATTAATA  
GCGAATAGCAAAGCGGTGATTTGATGTTGAAAACTGTTATGTCCTTTTCGATGGGCCAAACACAAAAGAAATTAACAAAACTA  
TAATCTTGAGCATGGATTGATTTAAACAAATTTATAGAAAGTGAAGCATGTCGTCGTTAAAGTTATTCCTAAAGATTATCAAGGTAGCTT  
TACAGTAAATAATGAACAACGTGATGTAGGGGTATTACAGGTAGTGAGATTTGCAAAACAATATGGAGAAGCAGGACTTCTGAAA  
ATACAATTAATGTTTATACGAATGGTCATGCTGGTCAAAGTCTTGCAGCATATGCACCGAAAGGCTTAATGATTCATCATACTGGAG  
ATGCGAATGACTATGTTGGTAAAGGATTATCTGGTGGTACGGTCATTGTCAAAGCACCTTTTGAAGAACGACAAAATGAAATTATTG  
CTGGTAACGTCTCATTTCTATGGTGCGACAGGTGGTAAGGCATTTATTAACGGTAGTGACAGGAGAAAGATTCTGTATTAGAAATAGTG  
GTGTAGATGTTGTCGTTGAAGGTATCGGCGACCATGGATTAGAGTATATGACTGGTGGACATGTCATTAATTTAGGTGATGTAGGTA  
AGAATTCGGTCAAGGTATGAGTGGTGGTATTGCTTACGTTATCCCGTCTGATGTAGAAGCTTTTGTGAAAAATAATCAACTAGATA  
CGCTTTCTGTTTACAAGATTAAACACCAAGAAGAAAAAGCAATTCATTAAAGCAAAATGCTGGAAGAACATGTGTCACACACGAATAGT  
ACGAGAGCGGATTCATGTGTTAAACATTTTGATCGCATTTGAAGATGTCGTCGTTAAAGTTATTCCTAAAGATTATCAATTAATGATG  
CAAAAAATTCATTTGCACAAATCATTACATGACAATGAAGATGAAGCGATGTTAGCTGCATTTTACGATGACAGTAAAAACAATCGA  
CGCTAAACATAAAACAGCCGTTGTGTATTAAGGAAAGGGGAGATACGATGGGTGAATTTAAAGGATTTATGAAGTATGACAAACA  
GTACTTAGGTGAATTATCACTGGTAGACCGTTTGAAGCATCATAAAGCATATCAACAACGATTTACTAAAGAAGATGCCTCTATCCA  
AGGTGCGCGATGTATGGATTGTGGAACGCCGTTTGTGCAAACCGGACAACAGTATGGTAGGGAAACAATAGGTTGTCCAATTGGAA  
ACTACATTCCTGAATGGAACGACTTAGTGTATCATCAAGATTTTAAACTGCTTATGAACGCTTAAGCGAAACAAATAACTTTCCTG  
ACTTTACAGGGCGTGTATGTCCTGCACCATGCGAAAGTGCTTGTGTGATGAAGATTAATAGAGAATCGATTGCGATTAAAGGTATTG  
AACGCACGATTATTGATGAAGCTTTTGAAGATGGTTGGGTTGAGCCGAAAAATTCGAAGTCATCGTAGAAATGAAAAAGTTGCAATC  
ATTTGATGGTCCGTGCAGGATTGACTGCCGCTGAAGAACCTGAATTTATTAGGGTACCAAGTGACAATTTATGAGCGGTGCTAGAGA  
ATCAGGCGGTTTATTAATGTATGGTATTCCAAATATGAAGCTTGATAAATATGTCGTTGTCGTCGTTATTAATTAATGGAAGAAGC  
GGGCATAACTTTTATTAACGGCGTTGAAGTAGGTGTTGATATTGATAAAGAACTTTAGAATCTGAGTATGACGCTATTATATTATG  
TACTGGGGCACAAAAAGGTAGGGATTTACCTTTGGAAGGTGCGATGGGTGAAGGTATACATTTTGCTATGGACTATCTGACTGAAC  
AAACACAACTTTTAAATGGTGAAATTTGATGATATCACTATTACAGCAAAGGATAAAAAATGTCATCATTATTGGTGCTGGTGATACAG  
GAGCAGACTGTGTAGCAACGGCATTAAGAGAAAACCTGTAATCGATTGTTCAATTTAATAAATATACGAAATTGCCAGAAGCAATT  
ACATTTACAGAAAATGCATCATGGCCTTTAGCAATGCCGTTGTTAAAAATGGACTATGCGCACCAAGAGTACGAAGCTAAGTTTGG  
TAAGGAACACGTCATATGGTGTTCAAACAATGCGTTACGATGTTGACGATAAAGGACACATACGTGGTTTGTATACTCAAATTTT  
AGAGCAAGGGCAAAAATGGTATGGTCATGAAAGAAGGACCTGAAAGCTTTTGGCCTGTGACCTTGATTATTATCAATCGGCTTCG  
AAGGTACAGAACAACGTGTACCGAATGCTTTTAACATTAACCGGATAGAAATCGAATCGTGGCGGATGATACAAACTATCAAAC  
AATAATGAAAAAGTATTTGCTGCTGGAGATGCTAGACGTGGTCAAAGTTTAGTTGTATGGGCGATTAAAGAAGGTAGAGGCGTAGC  
GAAAGCAGTAGATCAGTATTTAGCGAGTAAAGTTTGTGTATAATCTTTGTATGGAAATGGTGGTTACGTTGACGTTGTGGCATGCTG  
AATCGAGTTTGAATAATCTAGTATCTATCAACGTCACATGCTATCTTTGTAACCTAAAAACAAAGGTTTGTAAAGACAACAAATAGA  
TTAATTATAAGTAGTATTTTACATTCGTTTATAGGTCAACTGTAGTGGAAGACAATGATTTGTGGTAATCATGTAATGCTTAAAA  
ACAATATTGACTTTTACAGAACGTTTATATATGATAAATATTGTGTTTAGGAGGAATACCCAAGTCCGGCTGA

>014-contig\_260\_RC

CATATCAAAAAAGCTGATTTCTATCAAATAATTAATAGAAATCAGCTTTTTTACATTGCTTAAGAACTTAATGTCCCAAGCCCTTTTT  
TATTTGCTTTGAATGGCTCGTAATTTTGTATAATAGAAATGATAAGGCATTGAGATTGGAAGGGCATTGGCTTGTGCAATATACA  
TAGCTAAATGTCTTTTTTGTTTTGTGAAATATGATGGATGGCTTGTGTGGACAAGTTTGCTATTTATAGATATGCATTTTCAATTTAG  
GAGTTGGCCATGCATCTACACTTTATAATGGTGAGAGCGTGGTGAGGTATTGTTAATAACGCAATTGTAGCGAGGAGTTATTGCTAC  
ATATGTCGTTATGGCTCATTGATTTTCTGAAATGGCTACCCCAGATAATTGTGACAAAAATAAAAAATATTTCTTTGAAAGCCTTTACAT  
AACTTGTCTAGACAAGTTATACTCATTTTAAGACATTAAGGAGTGAATATATGGCTGTAAAAAGAGAAAGATGTAAAAGCCATCG  
TAACCGCTATTGGGGGAAAAAATCTTGAAGCTGCAACGCATTGTGTAACACGATTACGTTTAGTGCTGAAGGATGAAGTAAGTAAA  
GTTGATAAAGACGCATTAAAGTAATAACGCGTTGGTCAAGGGGAGTTTAAAGCAGACCATCAATATCAAATTTGTCATTGGTCCAGG  
AACAGTCGATGAAGTGTATAAGCAGTTTATTGATGAAACAGGTGCTCAAGAAGCTTCGAAAGATGAAGCGAAACAAGCAGCTGCG  
CAAAAAGGGAATCCAGTACAACGTTTGTATCAAATTAATGGGGGATATTTTATACCAATATTACCTGCGATTGTGACAGCTGGTTTG  
TTAATGGGAATCAATAATTTACTAACAATGAAAGGTTTATTTGGTCCGAAAGCACTTATTGAGATGTATCCACAAATTGCTGATATT  
TCAACATCATTAATGTGATTGCGAGTACGGCATTTATTTCTTACCAGCATTAATTTGGTTGGAGTAGTATGCGTGTATTGGTGGTA  
GTCCGATTCTAGGCATAGTCTTAGGTTTGAATTTAATGCATCCGCAATTAGTATCTCAGTATGATTTGGCAAAAGGGAATATTCCGA  
CATGGAACCTTATTTGGCTTAGAGATTAAGCAGTTGAATTACCAAGGTCAAGTGTGCCAGTTTAAATTGCAGCTTATGTTCTAGCTA  
AAATTGAAAGGATTAATAAAGTCGTTACGATTCGATAAAAAATGTTGGTCGTTGGCCCCGTAGCGCTTTTAGTTACTGAGTTT  
TAGCATTTATTATCATTGGACCGATTGCATTATTGATTGGTACAGGAATTACATCTGGTGTACATTTATATTTCAACATGCAGGATTG  
GCTTGGCGGAGCAATATATGGATTGTTATATGCACCACTTGTAAATTACAGGACTACACCATATGTTTTTACGAGTAGATTTCGAATT  
GATGGGTAGCAGCTTAGGTGGTACGTATTTATGGCCAATCGTTGCGATTTCGAATATTTGTCAGGGCTCTGCAGCATTTGGAGCATG  
GTTGTCTATAAACGTCGTAAAAATGGTTAAAGAAGAAGGCTTGGCATTAACATCTTGATTCTGGTATGTTAGGTGTTACTGAACC

AGCTATGTTTGGTGTGAACCTTACCTCTGAAATATCCATTTATCGTCTGCGATATCAACGTCTTGTGTATTGGGGGCAATCGTTGGTATG  
AATAACGTGCTTGGAAAAAGTTGGTGTGGTGGCGTGCCAGCATTCATTTCAATTCAAAAAGAATTTTGGCCAGTATATCTTATTGTG  
ACAGCTATTGCTATTGTTGTACCATGTATACTAACAATTGTGATGTCTCATTTTGTAGTAAACAAAAAGCGAAAAGAAATTGTTGAAGAT  
TAATAAAAATAAAAAAGGGGCGTTCGTTATTTGGACGTCTTTATTACGTTATAAGGTGGTAATTGTGTGTGCGAAAAGAAATAGATTGG  
AGAAAATCCGTTGTATATCAAAATTTATCCTAAGTCGTTAATGATACGACGGGGAATGGTATAGGAGATATCAATGGAATTATAGA  
AAAATTGGATTATATCAAGTTATTGGGTGTTGATTATTTGGTTAACACCAGTGTATGAATCACCGATGAATGATAATGGCTATGA  
TATCAGCAATTATTTAGAAAATCAATGAAGACTTTGGAACGATGGATGATTTTGAAAAGTTAATCAAAAGTTGCGCATCAAAAAAGACT  
TGAAAAGTGATGTTAGATATTGTCATTAATCATACGTCGACGGAGCATGAATGGTTTAAAGAAGCCCGTAAATCTAAAGATAACCCCTT  
ATAGAGATTATTACTTTTTAGATCATCTGAAGACGGGCCGCCAACAAATTGGCATTCTAAATTCGGTGGTAATGCATGGAAGTATG  
ATTCTGAGACAGATGAATATTATTACATTTATTGATGTCAAGTCAAGCTGATTTAAATTGGGATAATCCGGAAGTACGTCATTCGT  
TATATCGCATAGTCAATCATTGGATAGACTTCGGCGTTGATGGTTTTCTGATTTGATGTCAATTAATTTCTAAAGGTGAATTTAA  
GGACTCTGACAAAATAGGTAAGAATTTTATACGGATGGTTCTAGAGTGCATGAGTTTCTGCATGAATTAATCTGCAAAACGTTTGG  
TAACACTGACATGATGACTGTAGGAGAAATGCTTCGACGACGATTGAAAATTGTATTAAGTATACACAACCAGAACGCCAAGAAT  
TGAATAGTGTTTTAAATTTTCATCATCTAAAGGTTGATTATGTTGATGGTGAAGTGGACAAATGCGAAGCTTGATTCCATAAGTT  
AAAGAAAATCTGATGCAATGGCAACGAGGTATTATGACGGTGGTGGATGGAACGCGATTTCCTGGTGAATCATGATCAGCCAC  
GGGTAGTGTCTAGATTGGTGATGATACGTCGGAAGAGATGAGGATACAAAGTGCTAAATGTTAGCTATCGCACTGCATATGTTG  
CAAGGGACGCCATATATTTACCAAGGGGAAGAAATTGGTATGACGGACCCACATTTTACATCAATAGCACAATATCGCGATGTTGA  
ATCGATTAAATGCTTACCATCAGTTGTTAAGTGAAGGGCATGCTGAAGCGGATGTTGTTAGCGATTGTAGGACAGAAGTACGAGACA  
ATTCGAGAAGCGCTATGCAATGGAGTGATGATGTTAATGCTGGATTACAGCTGGTAAGCCTTGGATTGATTTTCGGAAAATTATC  
ATCAGGTCAACGTTAGACAAGCACTTCAGAATAAAGAGTCTATTTCTATACGTATCAAAAAATTAATACAATTAAGACATACGCATG  
ATATTATTACGTATGGAGACATTGTCCACGTTTTATGGATCATGATCATTTATTGTTTTATGAACGTCATTATAAGAATCAACAATG  
GCTAGTAATTGCGAATTTCTCAGCATCGGCTGTTGATTGCCAGAAGGATTGGCTAGAGAAGGTCGTGTTGTGATTCAAACAGGCAC  
AGTGGAAAATAATACGATAAGCGGGTTTGGTGCAATTGTAATCGAAACAAACGCGTAAATTAATTTGAGTGGATGCGTTTATATGG  
CGAAACAAAAAAGTTTATGAAGATTTATGAGGCGTTGAAAGAAGATATATTAATGGGCAGATTCAATATGGTGAACAAATTCCA  
TCTGAACATGATTTGGTGCAATTGTACCAGTCATCTCGAGAGACCGTGCGTAAGGCATTAGATTGTTGGCATTAGACGGCATGATT  
CAAAAGATTCAATGGTAAGGGTCACCTTGTCATTTATCAGGAGGTTACAGAGTTTCCATTTCTGAACCTGTTAGTTTAAAGAAATG  
CAAGAAGAAATGGGCGTCGCATATTTAACTGAAGTTGTTGTGAATGAGGTTGTTGAAGCGCATGAAGTTCCAGAAGTTCAACATGC  
TTTAAACATCAATTCTAGTGAATCACTCATTCATATTGTTAGAACTCGTCGGCTTAACCAACATGTGAAGATTGTTGATGAAGATTAT  
TTTCTAAAGTCGATTGTTTCAGATATAGGTAATGATGTTGCGAGTGATTCTATTTATGATTATTTGGAAAAGGTATTAAATCTTAATA  
TTAGTTATTCAAGTAAGTCTATTACTTTTGAACCGTTTGTATGAACAAGCATATCAATTGTTTGGTGATGTATCGGTGGCTTATTCAGC  
AACAGTTCGAAGTATTGTGTATTTAGAAAATACAATGCCGTTTCAATATAATATTTCAAAACATCTTGCAAATGAATTTAAATTTAA  
TGACTTCTCAAGACGTCGTACAAAGTAAACAATGATATAAATGATTTATACCTTGCAATTAACATTTAAATATAGTAATATATATCT  
TGCCGTGCTAGGTGGGGAGGTAGCGGTTCCCTGTACTCGAAATCCGCTTTATGCGAGGCTTAATTCCTTTGTTGAGGCCGTATTTTG  
CGAAGTCTGCCCAAAGCAGTAGTGTTGAAGATTTCGGTCTATGCAATATGAACCCATGAACCATGTCAGGTCCTGACGGGAAGC  
AGCATTTAAGTGGATCATATGTGCCGTAGGGTAGCCGAGATTAGTAAACGACTTTGGTTACGTTCTGTAATTCAGTTCAATGCTGCT  
TAGGTGCACGGTTTTTTATTTTAAATATTAAACCGATTATTAAGAGTTGAAAATATATATTTATAGAAGCTACTTTCTGAAGACA  
ATTCAGCGTATTATACGTGGAACATGTTTGTGGGAAGTAGCTTTTTTATATGTGAAGTTTGATTCAAGTGAACCTCGATGCGCAGTTTG  
AATGATTTTTGTGTCAATGAAAAGTAAGAAGTTATTATTTGATGATAAAGAAATGATGGTGAATGAGGGGAGTATCTTACAATA  
GAATTATTAATGAGATACGTTATGATTATTGACAATCAATGCCTACGGAGGACATATGCAAATATATTTAAGTACTTTAACAGAGT  
TAGATTATGATAAATCTTTAAATAGTATTGAAGAAAGTTTGTATGATAATCCTGAAACGAGTTGGCAAGCACGTGCGAAAAGTAAAA  
CATTTAAGAAAATCTCCTTGCTATAATTTGAATTAGAGGTAATAGCGAAAAATGAAAATAACGATGTCGTTGGACACGTTTTATTA  
ATTGAAGTAGAAATTAATAGTGATGATAAGACGTATTATGGTTTGGCGATTGCCTCTTTATCAGTTTCATCTGAATTACGTGGACAA  
AAATTAGGTCGTGGCTTGGTTCAAGCAGTAGAAGAGCGTGCCAAAGCCAGCAGAGATAGTACGGTTGTTGTAGACGATTGTTTGA  
CTACTTTGAAAAGTTGGGTTATCAAAATGCTGCTGAGCATGACATTAATTAAGAATCTGGTGATGCACCGTTACTTGTAATAATTT  
ATGGGATAATTTGACGGATGCACCACACGGAATCGTAAAAATTCCAGAACATTTTTATTAATTGTTCAATTAAGAAGTAAAGGTATT  
ATCATGCTATAATGAGAGGTAATTGTTTATGGAGGTGCTAACTTGAATTATCAAGCCTTATATCGTATGTACAGACCCCAAAGTTTC  
GACGATGTCGTCGGACAAGAACATGTCACGAAGACATTGCGCAATGCGATTTCGAAAGAAAAACAGTCGCATGCTTATATTTTATAG  
TGGTCCGAGAGGTACGGGAAAAACGAGTATTGCCAAAGTGTTTGCTAAAGCAATCAACTGTCTAAATAGCACTGATGGAGAACCCTT  
GTAATGAATGTCATATTTGTAAAGGCATTACGCAGGGGACTAATTGAGATGTGATAGAAATTGATGCTGCTAGTAATAATGGCGTTG  
ATGAAATAAGAAATATTAGAGACAAAGTTAAATATGCACCAAGTGAATCGAAATATAAAGTTTATATTATAGATGAGGTGCACATG  
CTAACAAACAGGTGCTTTTAAATGCCCTTTTAAAGACGTTAGAAAGAACCTCCAGCACACGCTATTTTATATTGGCAACAGACAACCA  
CATAAATCCCTCCAAACATCTTTAGGGCACAACGTTTTGATTTAAAGCAATTAGCCTAGATCAAAATTTGTTGAACGTTTAAAA  
TTTGATGACAGATGCACAACAAATTGAATGTGAAGATGAAGCCTTGCCATTTATCGCTAAAGCGTCTGAAGGGGGTATGCGTGATGC  
ATTAAGTATTATGGATCAGGCTATTGCATTTGGTGATGGTACGTTAACATTGCAAGATGCGTTGAATGTCACAGGTAGCGTACATGA  
TGAAGCGTTGGATCACTTGTTTGATGATATTGTACAAGGTGACGTACAAGCATCTTTTAAAAAATACCATCAGTTTATAACAGAAGG  
TAAAGAAGTGAATCGCCTAATAAATGATATGATTTATTTGTGAGAGATACGATTATGAATAAAACATCTGAGAAAGATACTGAGT  
ATCGAGCACTGATGAACCTTAGAATTAGATATGTTATATCAAAATGATTGATCTTATTAATGATACATTAGTGTCGATTCTTTTAGTGT  
GAATCAAAACGTTTCAATTTGAAGTGTTGTTAGTAAATTAGCTGAGCAGATTAAGGGTCAACCACAAGTGATTGCGAATGTAGCTG  
AACCAGCACAATTTGCTTCATCGCCAAACACAGATGTATTTTGAACCGTATGGAACAGTTAGAGCAAGAACTAAAAACACTAAAA  
GCACAAGGAGTGAGTGTGCTGCTGTTTCAAAAAATCTTCGAAAAGCCCTGCGAGGGCATACAAAAATGCAAAATGCAATTTCAAT  
GCAACAAATTGCAAAAGTGCTAGATAAAGCGAATAAGGCAGATATCAAAATTGTTGAAAGATCATTGGCAAGAAGTGATTGATCATG  
CCAAAAATAATGATAAAAAATCACTCGTTAGTTTATTGCAAAATTCGGAACCTGTGGCGGCAAGTGAAGATCACGTACTTGTGAAA  
TTTGAGGAAGAGATCCATTGTGAAATCGTCAATAAAGACGACGAGAAACGTAGTAGTATAGAAAAGTGTGTATGTAATATCGTTAA  
TAAAAACGTTAAAGTTGTTGGTGTACCATCAGATCAATGGCAAGAGATTGCAACGGAATATTTACAAAATCGTAAAAACGAAGGCG  
ATGATATGCCAAAGCAACAAGCACAACAAACAGATATTGCTCAAAAAGCAAAAGATCTTTTCGGTGAAGAACTGTACATGTGATA  
GATGAAGAGTGATACATGACAAGCGATATAATCGTATGTATAATGAAAAGAAACATCATTTTATTGATAAAATTTTATTGATTTTCAA  
GGAGGAAATGGAATATGCGCGGTGGCGGAAACATGCAACAAATGATGAACAAATGCAAAAAATGCAAAAGAAAATGGCTCAAG  
AACAAGAAAACTTAAAGAAGAGCGTATTGTAGGAACAGCTGGCGGTGGCATGGTTGACGTTACTGTAACTAGGTCATAAAGAAAGTT  
GTCGACGTTGAAATCAAAAGAAAGCTGTAGACCCAGACGATATTGAAATGCTACAAGACTTAGTGTTAGCAGCTACTAATGAAGC  
GATGAATAAAGCTGATGAGCTTACTCAAGAACGTTTAGGTAAACATACTCAAGGCTTAAACATCCCTGGAATGTGATCATAGATGC  
ATTATCCAGAACCTATATCAAACTTATTGATAGCTTTATGAAATTGCCAGGCATTGGTCCAAAGACAGCCCAACGTCTGGCTTTTC

ATACCTTAGATATGAAAGAAGACGATGTTGTTTCAGTTTGCCAAAGCATTAGTAGATGTTAAGAGAGAATTAACATATTGTAGCGTAT  
GTGGTCACATTACTGAAAATGATCCATGTTATATTTGTGAAGATAAGCAAAGAGATCGTTCAGTTATTTGTGTTGTGGAAGATGACA  
AAGATGTCATAGCTATGGAAAAAATGAGAGAATACAAAGGTTTATATCACGTTTTACATGGGTCTATTTTCGCCTATGGATGGCATTG  
GACCAGAAGATATTAATATTCCTTCATTGATTGAACGCTTGAAAAACGATGAAGTTAGCGAATTAATCTTAGCTATGAACCCGAAC  
TAGAGGGGGAATCTACAGCCATGTATATTTCTAGATTAGTTAAGCCTATAGGTATCAAAGTGACGAGATTAGCACAAGGGTTATCG  
GTAGGTGGCGATTTAGAGTATGCTGACGAAGTAACATTATCTAAAGCAATCGCAGGTAGAACAGAAATGTAATGTCTTCTATTTAA  
CATTTTTGATTTTAATACTATAGTAAGAAAAGTCACAGTGAATCATTGTGGCTTTTTTTATGGTGTGGTGTGATGTACTACTTTATTT  
GCGGTGTGGCGGTGGTATGGTTTACCTAGTTTTACTGAGGGATGGGTAATCTTTAGGAAGCAAGCCGTTGGTTGTGATTTGTTACTT  
CTAATAGTAATGATGTGAATTGGATTATCGAAGTAGGAATACCGTTGTGGTGTGTTGATGTTATTAATTTGATAAATGCGGTTGATG  
GTTAATGACTATGCAAAATGAAATTCCTTTGTAAATTGAAATGATAGATGCTGGCTTAGTAGTTGTACTTCTTTGGTCTAAAGCTTATTA  
AATCAGCCTGTATAGCGGTGTTTTGAGAGGTTATTTAAAACTGTAAATTTATTTTAAATTTCTGGTAAAAAAATAAAGTTCTGTTTT  
GCGGTTTTTTTGTATTGATATGGTTAGAGAAAAATCTGTTTCTGTTCTAAAAACGTACTATTTATAAGTAGGAATTTTTTAAGTTTCG  
ATTTTTAGGATAAGGGCGTTCAGTATAGATAACAAAGGTGAATTTTTACTGTTGTTAAGCAGTTTGAAAGCCTGTATAGTATTTATT  
TGTTGAGGCAAAACAAACAACTCAACTTAAGAAATAACTTGAATTACTAACGAAAATTAATTTTAAAAAGTTGTTGACTTAAATGTT  
AATAAAATGT

>015-contig\_316\_RC

TAAATGAGTAAGCGAGAGCCGAAGAAGAGGAAAAGCAAGCGATTGTCACAAGTCAAGAAAAGTTCTTAGCGAGGATGGTAGCT  
AACTTACGTTCCGCTAGAGTAGAACGTTGCTAGGCAAGAAATGAATGCGATGAGCCGCATTGAGTGTGAAATTGATATTTTAAATA  
TGTGCACTTTTGATTATTTAAATCTGTGACTAGAAGTATAAGTGAAGACATTCAGAAGTATTATAAAAAAGTGAACAGCAGTAAGAT  
AGTTTTTAATCATAAATCATCTTACTGCTGTTTTTAGATTTTATGTCTAATATCTTTTAAATCGAAGTACAAAAAGGAAATTAATTAT  
TATACAATAGACAAGCTATTGCATAAGTAACACTAATCTTTGTCAAAGAAGTGTTACTATATAATTAATACTTTTGAAAGTAACTAA  
TTCCAAAACAGTGTAATAAAGGAAGCGTATATCATGAAGCAACCTATTTTAAATAAATTAGAAAGTTTAAATCAAGAAGAAGCGA  
TTCTTTGCGATGTTCCGGGTCATAAAAAATGACTATTGGTCAATTTATCTCAATTATCAATGACAATGGATAAACTGAAATACCTGG  
ATTAGATGATTTACATCATCCTGAAGAAGTCATTTTGGAGAGTATGAAGCAGGTGGAGAAGCATTACGATTATGATGCTTATTTCTT  
AGTGAATGGCACCCTTCAGGAATATTATCTGTCTATCCAGTCTTTTTCACAGAAAAAAGGCGATATCTTAATGGCAAGAAATGTACA  
TAAATCTGTATTACATGCGCTCGATATTAGCCAACAAGAAGGGCATTTTATTGAAACGCATCAAAGTCCGTTAACGAATCATTATAA  
TAAAGTTAATTTAAGCCGTTTGAATAATGACGGTCACAACTTGCTGTGTTGACTTATCCTAACTATTACGGTGAAACATTTAATGT  
AGAAGAGGTTATCAAATCTTTGCACCAATTAAATATTCCTGTACTCATTGACGAAGCACACGGCGCGCACTTTGGATTGCAAGGATT  
TCCAGATTCTACATTAATTTATCAAGCTGACTATGTTGTTCAATCTTTTCATAAAACGTTACCAGCTTTAACGATGGGCTCGGTACTT  
TATATTCTAAAAATGACCTTATAGAGAACTATTATAGAATATCTAAGTACTTCCAAACATCTAGTCCTTCGTATTTTGATTATGG  
CTAGTTTAGAGTCAGTGCCGAGTTCTATAAAACATATGATAGTACCGTGTTTTTTGATAAGAGAGCGCAATTAATCGAATGTTTGG  
AGAAGAAGGGTTTTGAAATGCTTCAAGTTGATGATCCGTTGAAGTTGCTGATAAAATATGAAGGTTTTACAGGTCATGATATTTCAA  
ATTGGTTTATGAATGCACATATCTATTTAGAATTAGCGGACGACTATCAAGCATTAGCGATATTGCCGTTATGGCATCATGATGATA  
CGTATTTATTTGATTTCGCTTTTACGTAAAAATTGAAGATATGATTTTACCGAAAAATCAGTTTCTAAAGTTAAACAAACACAACCTTTT  
AACAACCTGAAGGTAACATAAAACAAAACGCTTTGAATATGTTACTTGGTGTGATTTGAAAAAGGCAAAAGGTAAAGTTCTGGCGC  
GACATATTGTCCGCTATCCGCCAGGGATTCTTATTATTTTCAAAGGAGAAACAATAACTGAAAAATGATAGAAATTGGTAAATGAAT  
ATCTGGAACCTGGAATGATAGTTGAAGGAATTAATAAATAATAAATTTTAGTTGAGGATGAATAAAATGTCAGCTTTTATAACTTTT  
GAGGGCCCAAGAGGCTCTGGAAAAACAACCTGTAATTAATGAAGTTTACCATAGATTAGTAAAAAGATTATGATGTCATTATGACAAG  
AGAACCGGGCGCGCTTCTACTGGTGAAGAAATACGTAAAATTGTATTAGAAGGCAATGATATGGACATTAGAACTGAAGCAATGT  
TATTTGCTGCATCTAGAAGAGAACATCTTGATTTAAAGGTCATACCAGCTTTAAAGAAGGTAAGGTTGTGTTGTGATGCGCTATA  
TCGATAGTTCAATTAGCTTATCAAGGTTATGCTAGAGGGATTGGCGTTGAAGAGTAAGAGCATTAAACGAATTTGCAATAAATGGA  
TTATATCCAGACTTGACGATTTATTTGAATGTTAGTGCTGAAGTAGGCCGCGAACGTATTATTAATAAATTCAGAGATCAAAATAGA  
TTAGATCAAGAAGATTTAAAGTTTCACGAAAAAGTAATTGAAGGTTACCAAGAAATCATTCTAATGAATCACAACGGTTCAAAAAG  
CGTTAATGCAGATCAACCTCTTGAAAAATGTTGTTGAAGACACGTATCAAACATCATCAAATATTTAGAAAAGATATGATATAATTG  
TTAGAAGAGGTGTTATAAAATGAAAATGATTATAGCGATCGTACAAGATCAAGATAGTCAGGAACTTGACAGATCAACTTGTTAAAA  
ATAACTTTAGAGCAACAAAATTGGCAACAACAGGTGGGTTTTTAAGAGCGGGTAATACAACATTCTTATGTGGTGTCAATGATGAC  
CGTGATAGATGAAATATTGTCTGTGATTAATCAAACGTGTGGTAATAGAGAACAGTTGGTTTCACCTATTACACCTATGGGAGGCAGT  
GCGGATTCGTACATTCCATATCCAGTTGAAGTTGAAGTTGGCGGTGCTACTGTATTTGTTATGCCAGTTGATGCATCCATCAATTTT  
AATTCTATAATACATACTCAATTAAGGATGATAAATAGAGATACTTAAATAGTGTATTAATAAGTTATTAAACAATTTTGGGTTGCTTGCGACTA  
GTTTCAGATGCCAATAGATTTGATTTTGTGGTTCTAAAAATAATCACAATCATGGTTCGCTATTGTTGCAGTAATTAGTTGCTCTTTG  
GCAACCTTTTTATATAAAAGCAAAAGGGAGTTTGAATGAATGGATGAACAGCAACAATTGACGAATGCATATCATTCAAATAAAT  
TATCGCATGCCTATTTATTTGAAGGTGATGATGCACAAACGATGAACAAGTTGCGATTAATTTTGCAAGCTGATTTTATGTCAAA  
CAGATAGTCAATGTGAAACAAAGGTTAGTACATATAATCATCCAGACTTTATGTATATATCAACAACCTGAGAATGCAATTAAGAAA  
GAACAAGTTGAACAACCTTGTCGTCATATGAATCAACTTCCTATAGAAAGCACAAATAAAGTGATCATCATTGAAGACTTTGAAAA  
GTTAACTGTTCAAGGGGAAAAACAGTATCTTGAAATTTCTTGAAGAACCACGGGACAATACGATTGCTATTTTATTGTCTACAAAACC  
TGAGCAAAATTTAGACACAATCCATTCAAGGTGTGAGTATGTTTCAAGCCTATTGATAAAGAAAGTTTATAAATAGATTAGT  
TGAACAAAACATGTCTAAGCCAGTAGCTGAAATGATTAGTACTTATTAATTAATTAATTAAGTATTAAGCAATGCTTTAAATGAAGAAT  
TTGATTTATTAGCATTAAAGGAAATCAGTTATACGTTGGTGTGAATTGTTGCTTACTAACAAGCCAATGGCACTTATAGGTATTATTGA  
TTTATTGAAACAGGCTAAAAATAAAAACTGCAATCTTTAACTATTGCAGCTGTGAATGGTTTCTTCGAAGATATCATACATACAAA  
GGTAAATGTAGAGGATAAACAATATATAGTGATTTAAAAAATGATATTGATCAATATGCGCAAAAGTTGTCGTTTAAATCAATTAA  
TTTTGATGTTTGATCAACTGACGGAAGCACATAAGAAATTGAATCAAAATGTAAATCCAACGCTTGATTTTGAACAAATCGTAATTA  
AGGGTGTGAGTTAGATGCCAAATGTAATAGGTGTTTCAGTTTCAAAAAGCGGGAAAAATTAGAATATTATACACCTAATGATATACAA  
GTAGATATAGAAGACTGGGTAGTTGTGCAATCTAAAAGAGGCATAGAGATAGGTATTGTTAAAAATCCATTAATGGATATTGCTGA  
AGAGGATGTTGTGTTACCTCTTAAAAATATTATTCGATTTGCTGTGACAAAGATATTGATAAATTTAATTGTAATGAACGAGATGC  
TGAAAAATGCATTAATACTATGTAAGACATTGTAAGAGAACAAGTTTGGACGATCGCTTTAGTCAATTGCGAATATACATTAGATA  
AATCGAAAGTTATTTTAAATTTTACGGCGGATGATCGTATTGATTTTGAATAATTAGTAAAAATATTAGCGCAACATTTAAAAACAC  
GTATCGAGTTGAGACAAATTGGTGAAGGGATGAAGCCAAATGCTTGGCGGTATCGGACCTTGTGGTAGGTGCTTATGTTGTTCTA  
CATTTTTAGGGGATTTTGAACAGTATCGATTAAGATGGCTAAGGATCAAAATTTATCATTAAATCCAACCTAAAAATTTCTGGTGCAT  
GTGGTCGTTTGTATGTTGTTTAAAAATATGAAAATGACTATTATGAGGAAGTACGTGCACAATTACCTGATATTGGTGAAGCAATTG

AAACGCCTGATGGTAACGGGAAAGTAGTTGCTTTAAATATATTAGACATTTCTATGCAGGTGAAGCTTGAGGGACATGAACAGCCA  
CTTGAATATAAATTAGAAGAAATAGAACTATGCATTAAGGAGGCATTATTACATTTGGATCGCAATGAAATATTTGAAAAAATAA  
TGCGTTTAGAAATGAATGTCAATCAACTTTCAAAGGAACTTCAGAATTAAGGCACTTGCAGTTGAATTAGTAGAAGAAAATGTA  
GCGCTTCAACTTGAAAATGATAATTTGAAAAAGGTGTTGGGCAATGATGAACCACTACTATTGATACTGCGAATTCAAAACCAGC  
AAAAGCTGTGAAAAAGCCATTACCAAGTAAAGATAATTTGGCTATATTGTATGGAGAAGGATTTTCATATTTGTAAAGGCGAATTAT  
TTGAAAAACATCGACATGGTGAAGATTGCTGTTCTGTTTAGAAGTTTAAAGTGATTAATCAAGCACACTCAAATAGTGTTATAATT  
ATAAATGAATATGGTTTGGATAAGTCTGAGACAATGCATGTTTCAGGCTTTAATTGTGTATAAAGTTTTGGTGATTGCATAAGAGAT  
GGCGTACTAAATGTTATTATTAAGTGTGCACGCAGTATCATTAGTTATAAATGTAGCTGTTAAAAGTCAAAAAATACATCGAATGT  
AGTTAGGCATATAATATAAAGAGATTTTCAATTACTCAATAGAAAAAGGTTGCTTCATAGGAGTTAAAAATGTTAAAAAGAGAAT  
GAACGATTTGATCAACTAATCAAGAAGATTTTAGTATTATTCAAAATGATGATGTTTTTTCATTTTCAACGGATGCTTTGTGTAG  
GGCATTTTACAAAACCTAGAACAAAAGATATTGTGTTGGACTTATGTTACAGCAATGGGGTGATACCCCTGTTATTGTTTGCGAAAC  
ATCCACGACATATAGAAGGTGTTGAGATTCAAAAAACACTTGTGATATGGCGCGACGCACATTTCAATTCAATGATGTTGATGAAT  
ATTTAACAATGCATCACATGGATTTGAAAAACGTTACTAAAGTATTTAAACCTTCACAATATACTTTAGTAACGTGTAATCCGCCTT  
ATTTTAAAGAGAATCAGCAACACCAACATCAAAAAAGAACACATAAGATAGCGAGACATGAGATTATGTGTACACTTGAAGATTGC  
ATGATTGCAGCCCGTCATTTATTAAGAAAGGTGGCAGGCTAAACATGGTACATCGTGCAGAGAGACTAATGGATGTCTTGTGTTGA  
AATGAGAAAAAGTGAATATTGAACCTAAGAAAGTCGTTTTATATATAGTAAAGTAGGGAAAAACAGCAGACAAACGATAGTAGTAGAA  
GGTCGAAAAAGGTGGAATCAAGGTTTAGAAATCATGCCCCATTTTATATTATAATGAAGATGGTAATTATAACGAAGAAATGAA  
GGAAGTATATTATGGATAGTCATTTGTATATATTGTAATAATGTAGTATGGAAGTTTATATACAGGATACGCTAAAGACGTTAATG  
CAAGTGTGAAAAACATAACCGAGGTCAAGGACCAATATACGAAAGTAAAGAGCTCCGGTGCAATTTAGTTTATCAAGAAATGTAT  
GAGACAAAGTCTGAAGCATTGAAGCGTGAATATGAAATTAAACTTATACCAGACAAAAGAAATTGCGATTAATTAAGGAGCGAT  
AGTATGGTTGTATTATATTTAGTGGGCACACCAATTGGTAATTTAGCAGATATTACTTATAGAGCAGTTGATGTATTGAAACGTGTT  
GATATGATTGCTTGTGAAGACACTAGAGTAACTAGTAAGCTGTGTAATCATTATGATATTCCAACCTCCATTAAAGTCATATCACGAA  
CATAACAAGGATAAGCAGACTGCTTTTATCATTGAACAGTTAGAATTAGGTCTTGACGTTGCCTCGTATCTGATGCTGGATTGCC  
TTGATTAGTGATCCTGGATACGAATTAGTAGTGGCAGCCAGAGAAGCTAATATTAAGTAGAGACTGTGCCTGGACCTAATGCTGG  
GCTGACGGCTTTGATGGCTAGTGGATTACCTTCATATGTATATACATTTTATAGGATTTTGGCCACGAAAAGAGAAAGAAAAAAGTGC  
TGTATTAGAGCAACGTATGCATGAAAAAGCACATTAATATATACGAATCACGCATCGTGTGACAGATACATTAACAAATTTG  
CAAAGATAGATGCAACACGACAAAGTATCCTAGGGCGTGAATTGACTAAGAAGTTCGAACAAATTTGAACTGATGATGTAACACAA  
TTACAAGCATTGATTCAGCAAGGCGATGTACCATTGAAAGGCGAATTCGTTATCTTGATTGAGGGTGCTAAAGCGAACAAATGAGAT  
ATCGTGGTTTGATGATTTATCTATCAATGAGCATGTTGATCATTATATTCAACTTCACAGATGAAACCAAAAAAAGCTATTAAAAA  
AGTTGCTGAAGAACGACAACCTTAAACGAATGAAGTATATAATATTATCATCAAATAAATTAATTACTTTATCGATTATATGAAAT  
TTTAAACGATTTTATAAACGCAAGCTGTAATTTTAAATGGTAAGTTATCATTGTCATTGATACTGATAAAATGATGTTGACTATGAT  
AAAAAATGATGACATCGACGTTTTTAAATGTAAAAATAAATACATTGAAAGTAATAAATACCTTAACATTGAATAAGATGAAAAATG  
AGATGACGAGATAAATGTTCCGCTCCGTTGAAATGCATAGAAATCTTAGATATTATTTGAAGTGAGACATTACGAGGAGGAACAGT  
TATGGCTAAGAAGAACTTTATATAACAACCCCAATATACTATCTGATGGGAATTTACATATAGGACATGCATATTCTACAGTGGC  
TGGAGATGTTTATTGCAAGATATAAGAGAATGCAAGGATATGATGTTGCTTATTGACTGGAACGGTGAACCGGTCAGAAAAAATTC  
AAGAAAAAGCTCAAAAAAGCTGGTAAGACAGAAATTGAATATTTGGATGAGATGATTGCTGGAATTAACAAATTGTGGGCTAAGCTT  
GAAATTTCAATGATGATTTTATCAGAACAACCTGAAGAACGTCATAAACATGTCGTTGAGCAAGTGTGTAACGTTTATTAAAGCAA  
GGTGATATCTATTTAGGTGAATATGAAGGTTGGTATTCTGTTCCGGATGAAACATACTATACAGAGTCACAATTAGTAGACCCACAA  
TACGAAAACGGTAAAATTATGGTGGCAAAAGTCCAGATTCTGGACACGAAGTTGAAGTAAAGAAAGAAAGTTATTCTTTAA  
TATTAGTAAATATACAGACCGTCTATTAGAATTCTATGACCAAAATCCAGATTTTATACAACCACCATCAAGAAAAAATGAAATGAT  
TAACAACCTTCATTAAACCAGGACTTGCTGATTGGCTGTTTCTCGTACATCATTTAACTGGGGTGTCATGTTCCGTCTAATCCAAAA  
CATGTTGTTTATGTTTGGATTGATGCGTTAGTTAACTATATTTGAGCATTAGGCTATTTATCAGATGATGAGTCACTATTTAACAAAT  
ACTGGCCAGAGATATTCATTTAATGGCTAAGGAAATTTGCGATTCCACTGAATTTATTGGCCCTATTTATTGATGGCATTAGACTT  
ACCGTTACCTAAAAAAGTCTTCGCACATGTTTGGATTGTTGATGAAAGATGGAAGAAATGAGTAAATCTAAAGGTAATGTCGTAGACC  
CTAATATTTTAAATTGATCGCTATGGTTTAGATGCTACACGTTATTATCTAATGCGTGAATTACCATTGTTTCAGATGGCGTATTAC  
ACCTGAAGCATTGTTGAGCGTACAAATTTGATCTAGCAATGACTTAGGTAACCTAGTAAACCGTACGATTCTATGGTTAATAA  
GTACTTTGATGGCGAATTACCAGCGTATCAAGGTCCACTTCATGAATTAGATGAAGAAATGGAAGCTATGGCTTTAGAAACAGTGA  
AAAGCTACACTGAAAGCATGGAAGTTTGCATTTTCTGTGGCATTATCTACGGTATGGAAGTTTATTAGTAGAATAAAGTATA  
TTGACGAAACAACGCCTTGGGTATTAGCTAAGGACGATAGCCAAAAAGATATGTTAGGCAATGTAATGGCTCACTTAGTTGAAAAAT  
ATTCGTTATGCAGCTGATTATTACGTCCATTCTTAACACATGCGCCGAAAGAGATTTTGAACAATTGAACATTAACAATCCTCAAT  
TTATGGAATTTAGTAGTTTAGCGCAATATGGTGTGTTACTGAGACAATATGGTTACTGGGCAACCTAAACCTATTTCCCAAGATT  
GGATAGCGAAGCGGAAATTCATATATACAAAGAATCAATGCAACCCGCTGCTACTGAAAGAGGAAAGAAAGATTTCTCAGCAAA  
CCTCAAAATTGATATTAAAGACTTTGATAAAGTTGAAATTAAGGCAGCAACGATTATTGATGCTGAACATGTTAAGAAGTCAGATAA  
GCTTTTAAAAAATTCAAGTAGACTTAGATTCTGAACAAAGACAAATTTGTATCAGGAATTGCCAAATTCTATACACCAGATGATATTAT  
TGGTAAAAAAGTAGCAGTTGTTACTAACCTGAAACCAGCTAAATTAATGGGACAAAAATCTGAAGGTATGATATTATCTGCTGAAA  
AAGATGGTGTATTAACCTTAGTAAGTTTACCAAGTGCAATTCCAAATGGTGCAAGTGATTAATAAAGTATTTTAAAAAATTAGGAG  
AGATAATTATGTTAATCGATACACATGTCCATTTAAATGATGAGCAATACGATGATGATTGAGTGAAGTGATTACACGTGCTAGAG  
AAGCAGGTGTTGATCGTATGTTTGTAGTTGGTTTTAAACAAATCGACAATTGAACGCGCGATGAAATTAATCGATGAGTATGATTTTT  
TATATGGCATTATCGGTTGGCATCCAGTTGACGCAATTGATTTTTACAGAAGAACACTTGAATGGATGTAATCTTTAGCTCAGCATC  
CAAAAGTGAATTTGATTGGTGAATGGGATTGATTATCATCTGGGATAAATCTCTGCAGATGTTCAAAAGGAAGTTTTTAGAAAG  
CAAATTGCTTTAGCTAAGCGTTTGAAGTTACCAATTATCATTCTAACCCTGAAGCAACACAAGACTGTATCGATATCTTATTGGAG  
GAGCATGCTGAAGAGGTAGGCGGGATTATGCATAGCTTTAGTGGTTCTCCAGAAATTGCAGATATTGTAACCTAATAAGCTGAATTTT  
TATATTTCAATTAGGTGGACCTGTGACATTTAAAAATGCTAAACAGCCTAAAGAAAGTTGCTAAGCATGTGTCAATGGAGCGTTTGCTA  
GTTGAAACCGGATGCACCGTATCTTTGCCACATCCGTATAGAGGGAAGCGAAATGAACCGGCGAGAGTAACCTTAGTAGCTGAACA  
AATTGCTGAATTAAGGCTTATCTTATGAAGAAAGTGTGCGAGCAAAACACTAAAAATGCAGAGAAATGTTTAATTTAAATTCAT  
AAAGTTAAAGTGAGAAAGATCACCGCCATAAATGTAACAGATGCTATATTCGTTTAAATATGCTATGGTCTTTCTCGCTTTTTTAA  
ATTAATAATATCGTGCATGTGCAATACGTACGATAGAGATGGTTAGAGCTTTGAAATTAAGAATTGTAGGAAGGCGTTTTAAATGAA  
ATCAATGAGTTTATAGTTGTAGAAGGACGAGATGATAGCTGTTTAAACGAGCTGTTGAATGTGATACGATTGAAACGAATG  
GTAGTGCCATCAACGAAACAACTTTAGAAGTAATTAGAAATGCTCAACAAAGTCGAGGCGTTATTGTATTAACAGATCCAGATTTT  
CCAGGAGATAAAATAGAAGTACAATTACTGAACATGTCAAAGGTGTTAAACATGCGTATATTGATAGAGAAAAAGCTAAAAATA  
AAAAAGGGGAAATTGGTGTGAACATGCCGACTTAATTGATATTAAGAAGCGTTAATGCATGTTAGTTTACCCTTTGATGAAGCTT

ATGAATCAATTGATAAATCTGTGCTTATAGAGTTGGGGTTAATTGTTGGGAAAGATGCAAGGCGCCGTAGAGAAAATTTTAAGTAGA  
AAATTGCGAATCGGCCATTCCAATGGTAAGCAGTTATTGAAAAAGTTAAATGCATTTGGTTATACCGAAGCGGATGTAAAGGCAAGC  
TTTAGAAGATGAATGAGGAAGTGA AAAATGTTGGATAATAAAGATATTGCAACACCATCAAGAACGCGAGCGTTGTTAGATAAATAT  
GGCTTTAATTTTAAAAAAGTTTAGGACAGA AACTTTTTGATAGATGTGAATATCATTAAATAATATCATTGATGCAAGTGATATTGAT  
GCACAACTGGGGTGATTGAAAATTGGTCCAGGTATGGGGTCGTTGACAGAACAATTGGCCAGACATGCTAAAAGAGTATTGGCATT  
TGAAATTGATCAACGTTTAATACCTGTATTAAATGATACACTATCACCTTATGATAAATGTGACGGTGATTAATGAAGATATTTTAAA  
AGCGAATATTAAAGAAGCTGTTGAAAATCATTTACAAGATTGTGAAAAAATAATGGTTGTTGCAAACTGCCGTA CTATATTACGA  
CGCCAATTTTATTAATTTAATGCAACAAGATATACCAATTGATGGCTACGTGGTGATGATGCAAAAAGAAGTGGGCGAACGCTTA  
AATGCTGAAGTAGGTTCAAAAAGCATATGGTTCGTTATCAATTGTCTGTAACAATACTATACAGAGACTAGTAAAGTATTAACGGTACCT  
AAATCTGTATTTATGCCACCACCTAATGTTGATTCAATAGTTGTAAAACCTGATGCAGAGAACTGAACCGTTAGTAACAGTAGATAAC  
GAGGAAGCATTCTTTAAGTTAGCAAAAAGCAGCATTTCACAAAAGAAAGAAAGACAATTAACAATAACTATCAAAAATTATTTTAAAGA  
TGGTAAACAACACAAAGAAGTGATTTTACAATGGTTGGAACAAGCAGGTATTGATCCAAGACGTCGCGGTGAAACGCTATCTATTC  
AAGATTTTGCTAAATTGTATGAAGAAAAGAAAAAATCCCTCAATTAGAAAATTAAATGATTGACAAAAGCAAGCACTATTGTAA  
AATTTAAATTTTGTGTTGACGAAAACGCTGCAAAATATGGTATTATGTAACCTGTAGCGAGGTGGAGCAATATGCCAAAATCAATTTTG  
GACATCAAAAATTCTATTGATTGTCATGTAGGAAATCGTATTGTACTGAAAAGCCAATGGAGGCGCTAAGAAAAACAATAAAACGTTT  
TGGAATTTTAAAGAAACATATCCGTCAGTTTTCATTGTTGAGTTAGATCAAGACAAAACACA AACTTTGAGAGAGTATCTTATACATA  
CACTGATGTGTTAACTGAAAATGTTCAAGTTTCATTGAAGAGGATAATCATCACGAATCAATTGCACACTAAAATAAGACATATAGA  
GATGTTAGACGTTTCTTAGTATAAGAAAGTAAATATTATGATAATTATTTGAGTGTGGGCATTATGTTCAACTCTTTTTATTTACA  
AAATGTTTTAACACTGATGTTTCGCTTATAGATTTTTCAGTAAATGGATACTTGTATTTTATAAACACAAAATACAAGTAAATAACAGT  
AATTAGATGGA AAAAATTACTTTTTTATTA AAAAAAACATAAAAAACA AATTA A AATGTCAAATATTAATCTCTTTATGTTAAAAAT  
CATCATATTAAGATAACGAAAAGAGGGCGGAAAATGATATATGAAACGGCACCAGCCAAAATTAATTTACGCTCGATACACTTTT  
TAAAAGAAATGATGGCTATCATGAGATTGAAATGATAATGACAACAGTTGATTTAAATGATCGTTTAACTTTTCATAAAAAGAAAAG  
ATCGAAAGATAGTTGTTGAGATTGAACATAATTATGTGCCTTCTAATCATAAAAATCTCGCATATCGTGCAGCGCAACTATTATTG  
AGCAATATCAACTAAAGCAAGGTGTAACAATTTCTATCGATAAAGAAAATACCTGTTTCTGCTGGCTTAGCTGGAGGTTCCGGCTGATG  
CAGCAGCAACGTTAAGAGGATTGAATCGACTTTTTGATATAGGGCGAGTTTGGAGAATTGGCTCTACTAGGCAGTAAAAATCGGG  
ACAGATATTCGTTTTGTATTTATAATAAACTGC ACTATGTACTGGAAGAGGAGAGAAAATCGAGTTTTTAAATAAACACCTTCA  
GCTTGGGTGATTCTTGCTAAACCAAACTTAGGCATATCATCACCAGATATATTTAAGTTGATCAATTTAGATAAAGCGTTACGACGTA  
CATACGAAAATGTGTTATGAGGCCTTAGAAAATCGAGATTATCAACAATTATGTCAAAGTTTGTCTAATCGATTAGAGCCAATTTCT  
GTTTCAAAACACCCACAAATCGATAAATTAAAAAATAATATGTTGAAAAGTGGTGCAGATGGTGCGTTAATGAGTGGAAGCGGACC  
GACTGTGATAGGGCTAGCAGCAAAAAGAAAGCCAAGCAAAAAATATTTATAATGCAGTTAACGTTGTTGTAATGAAGTGACTTAG  
TTAGACTATTAGGATAGAAGGGTTGAAAAGATGAGATATAAACGAAGCGAGAGAATTGTTTTATGACGCAATATTTGATGAACCA  
TCCGAATAAATTGATTCCATTA AACTTTTTTGTGAAAAAATTTAAACAGGCGAAGTCTTCAATAAGTGAAGATGTCCAAATTATAAA  
AAATACATTCCAAAAGAAAAGTTAGGTACAGTAATTACTACTGCTGGCGCAAGTGGTGGTGTTACGTATAAACCAATGATGAGTA  
AAGAAGAGCGCATGAAGTTGTTAATGAGGTCACTACTATTAGAAGAGAAAGAACGTTTGTACCTGGCGGGTATTATTTTTAT  
CAGATTTGGTAGGTAATCCATCGCTACTAAACA AAGTTGGTAAGTTAATGCCAGTATTTACATGGAAGAAAATTAGATGCTGTTG  
TTACCATTGCGACAAAAGGTATTTCAATTGGCAAATGCGGTTGCTAATATTTTAAATTTACCAGTAGTAGTGATTAGAAAAGACAACA  
AGGTGACTGAAGGTTCTACAGTTTCAATTAATTACGTTTCAGGATCTTCAAGAAAAATAGAGACAATGGTACTTTCGAAGAGAACTT  
TAGCAGAAAATTCAAATGTTTTAGTTGTCGATGATTTTATGAGGGCTGGTGGCTCTATTAATGGTGTATGAATTTAATGAATGAGTT  
TAAAGCCCATGTAAAAGGGGTATCAGTACTTGTAGAATCAAAAGAAAGTTAAACAAAGATTGATTGAAGATTACTTCCTTAGTGA  
AATTATCTGATGTAGATGAATATAATCAAGAGTTTAACTGTAACCTGGCAACAGTTTATCTAAGTTTTTCATAAAAGGAGTTTTAGT  
ATTATGAAAATCATTAACACAACAAGATTACCGGAAGCACTTGGACCATATTCGCATGCAACAGTTGTGAATGGTATGGTTTATACT  
TCTGGTCAGATTCCATTGAATGTTGATGGGGAATCGTAAGCGCTGATGTTCAAGCACAGACAAAACAAGTTTTAGAAAATTTAAA  
GGTTGTTTGGGAAGCAGGATCTGATTGAAATCTGTTGCGAAAGGACCACTTTTTCATTAAGATATGAATGTTTCCAAAAAT  
AAATGAAGTGATGGTCAATATTTTATGAACACAAGCCAGCGCTAGTTGTGTAGAGGTTGCGCGTTTGCCAAAAGATGTGAAAAG  
TAGAAATTGAATTAGTAAGTAAAATTAAGGAATTATAATTTTCGATTAATATGTTTAAATCAAGCTTCTAAAATAAAACAGAGAGATAT  
ATACTATAGGGGGGCTCACTACATGAAAGTGACAGATGTAAGACTTAGAAAAATACAACAGATGGACGAATGAAAGCACTCGTT  
TCCATTACATTAGATGAAGCTTTCGTAATTCATGATTTACGTGTAATTGAAGGAACTCTGGCTTGTTCGTTGCAATGCCAAGTAAA  
CGTACACCAGATGGTGAATTCGCGCAGATCGCGCATCCTATTAATTCAGATATGAGACAAGAAATCAAGATGCAGTGATGAAAGT  
ATATGATGAAACAGATGAAGTAGTACCAGATAAAAACGCTACATCAGAAGATTGAGAAGAAGCTTAATCAATTTTATATTTAGCGA  
TGTAATACATTTGCAATAAGTTGATTTGATACTGTGATAAAGCATAAAGCTTTGTGCGCAGTTTTTTTTAGTTTGTATTAATGTTTTT  
TTTTTTAATGAAAAGCAATAAATATATACGTTTAAACAGATTATGATGATAGAAAATTATTGATTCATTGCTGATAAAAAATTGTGT  
TTGAATGATGCTCGTATTTTTGAAGTAAGAAAAAAGTTGTTTTTAAATTAACAACGAATTA AAAAACAATGCTTTTATATGTTGAAA  
GAGTATTGCAGATTAAATTATAATAATGACGGAAGTGTA A AATTTAATGGGGGTTAATGTTTCATGCGAAGACACGCGATAATTTTGG  
CAGCAGGTAAAGGCACAAGAATGAAATCTAAAAAGTATAAAGTGCTACACGAGGTTGCTGGGAAACCTATGGTCAACATGTATT  
GGAAAGTGTAAGGCTCTGGTGTGATCAAGTTGTAACCATCGTAGGACATGGTGTGTAAGTGTA A AAGGACATTTAGGCGAGC  
GTTCTTTATACAGTTTTCAAGAGGAACA AACTCGGTACTGCGCATGCAGTGCAAAATGGCGAAATCACACTTAGAAGACAAGGAAGGT  
ACGACGATCGTTGTATGTGGTGACACACCGCTCATCACAAAGGAAAACATTAGAAACATTGATTGCGCATCATGAGGATGCTAATGC  
TCAAGCAACTGTATTATCTGCATCGATTCAACAACCATATGGATACGGAAGAATCGTTTCGAAATGCGCTCAGGTCGTTTAGAACGCAT  
AGTTGAAGAGAAAAGATGCAACGCAAGCTGAAAAGGATATTAATGAAATAGTTTACGGTATTTTTCGTTTAAATAAAAACGTTGT  
TTGAAAAATTAACAAAGTAGAAAATGATAATGGCAAGGTGAATATTACCTCCCTGATGTATTGTCGTTATTTTAAATGATGGCG  
GCATCGTAGAAGTCTATCGTACCAATGATGTTGAAGAAATCATGGGTGTAATGATCGTGTAATGCTTAGTCAGGCTGAGAAGGCG  
ATGCAACGTCGTACGAATCATTATCACATGCTAAATGGTGTGACAATCATCGATCCTGACAGCACTTATATTGGTCCAGACGTTACA  
ATTGGTAGTGATACAGTCATTGAACCAGGCGTACGAATTAATGGTCGTACAGAAATTGGCGAAGATGTTGTTATTGGTCAGTACTCT  
GAAATTAACAATAGTACGATTGAAAATGGTGCATGTATTCAACAGTCTGTTGTTAATGATGCTACGCTAGGAGCGAATACTAAGGT  
CGGACCGTTTGCGCAATTGAGACCAGGCGCGCAATTAGGTGCAGATGTTAAGGTTGGA AATTTTGTAGAAATTA AAAAAAGCAGATC  
TTAAAGATGGTGCCAAGGTTTCACATTTAAGTTATATTGGCGATGCTGTAATTGGTGAACGTACTAATATTGGTTGCGGAACGATTA  
CAGTTAACTATGATGGTGAAAATAAATTTAAAACTATCGCTCGCAAGAGATTCATTGTAGGTTGCAATTGTTAATTTAGTAGCACCTG  
TAACAATTTGGTGATGATGATTGGTGGCAGCTGGTTCACAATCACAGTACCAATGACAGTTTACGTGTTGCGCAAGAGCA  
AGACAAAACAACAAAAGGATATAGGAAATAATCATTTACGTATTTAAATGACTAGGATAAAAAGGATAATCCTATGTAATATTA  
ATGTAATCTTTATGATTTAATGATTCGCATAGTAATGGAGTTACATTTTATATATAATAGTAATTGCGTAAGTAAATAATTGGAGGA  
CTATAAATGTTAAATAATGAATATAAGAAATTCGTCATTA AAGATTTTTTCATTGAAAGGAAACGAAGCATTAGCGCAAGAAAGTTGCT

GACCAAGTAGGAATTGAACTAGGTAATGTTACAGTTAAACGTTTTAGTGATGGAGAAATTCAAATTAATATCGAAGAGAGTATTCCG  
TGGTTGTGACGTATTTATTATTCAACCAACATCATATCCTGTGAATCTACATTTAATGGAATTATTAATTATGATTGACGCTTGTA  
CGTGCTTCTGCAGCAACAATCAATATTGTAGTGCCATATTATGGATATGCAAGACAAGATAGAAAAAGCCCGTAGCCGTGAGCCAA  
CACAGCTAAATTAGTTGCAAACTTAATCGAAACAGCTGGCGCAACTCGTATGATTGCGTTAGACTTACATGCACCACAAATTCAAG  
GATTCTTTGATATTCCAATTGACCACTTAATGGGTGTGCCAATTCTTGCTAAACATTTCAAAGATGATCCGAATATTAACCCAGAAG  
AATGTGTCGTTGTTTACCAGACCATGGCGGTGTTACAGTGCACGTAAATTAGCTGACATTTTAAAACTCCAATTGCAATTATAG  
ATAAACGTCGCTCTAGACCAAAATGTTGCTGAAGTGATGAACATTGTTGGTGAGATTGAAGGACGTACGGCAATTATTATTGACGAT  
ATTATTGATACAGCAGGTACAATCACTTTAGCTGCACAAGCATTAAAAGATAAAGGTGCTAAAGAAGTATATGCTTGTGTACACA  
CCCTGTTTTATCAGGACCGGCTAAAGAACGTATCGAAAATTCTGCTATAAAAAGAAATTAATCGTAACAACTCAATTCATTTAGATGA  
AGATCGCAAACCATCTAACACTAAAGAATTATCTGTTGCTGTTTTAATCGCACAAAGCTATCATTCGTGTATACGAAAAGAGAATCAGT  
TAGCGTATTATTGACTAATATTAAAAAGGCGTTTGACGAACATATCCCAACCGTGTATAATAGTTTCGTTCTGTGATTATACGAATA  
AATAAACACTTGCAAGCAACGATTATGTTGATGGGTAAAGTGAGGTGCTCGTTTTGAGCAAAAATGAAAGGTGGAATGAGAATGGC  
TTCATTAAAGTCAATCATCCGTCAAGGTAAGCAAACACGTTCAAGATCTTAAACAATTAAGAAAATCTGGTAAAGTACCAGCAGTAG  
TATACGGTTACGGTACTAAAAACGTGTCAGTTAAAGTTGATGAAGTAGAATTCATCAAAGTTATCCGTGAAGTAGGTCGTAACGGT  
GTTATCGAATTAGGCGTTGGTTCTAAAACTATCAAAGTTATGGTTGCAGACTACCAATTTCGATCCACTTAAAAACCAAACTACTCAC  
ATTGACTTCTTAGCAATCAATATGAGTGGAAGACGTACTGTTGAAGTACCAGTTCAATTAGTTGGTGAAGCAGTAGGCGCTAAAGA  
AGGCGCGTAGTTGAACAACCATTTTCAACTTAGAAGTAACTGCTACTCCAGACAATATCCAGAAGCAATCGAAGTAGACATTA  
CTGAATTAACATTAACGACAGCTTAACTGTTGCTGATGTTAAAGTAACTGGCGACTTCAAAAATCGAAAATGATTACGTGAATCAG  
TAGTAACAGTAGTTGCTCCAACCTGAAGAACCACTGAAGAACAAAGCTAAGCTATGGAAGGCGCAACAACTGAAGAACCAGA  
AGTTGTTGGCGAAAGCAAAGAGACGAAGAAAAAACTGAAGAGTAATTTTAACTCTGTTACATTAAGTTTATACCTTTGTTTAAACA  
AGCACTGTGCTTATTTAATATAAGCATGGTGCTTTTTGTGTTATTATAAAGTTAATTAACCTTTATTACTTTGTACTAAAGTTAAT  
TAATTTTAGTGAGTAAAGACATTAAACTCAACAATGATACATCATAAAAAATTTAATGTACTTGATTTTAAAATACATACTTACTA  
AGCTAAAGAATAATGATAATTGATGGCAATGGCGGAAAATGGATGTTGTCATTATAATAATAAATGAAACAATTATGTTGGAGGTA  
AACACGCATGAAATGTATTGTAGGTCTAGGTAATATAGGTAACCGTTTTGAACCTACAAGACATAATATCGGCTTTGAAGTCGTTGA  
TTATATTTTAGAGAAAAATAATTTTTCATTAGATAAAACAAAAGTTTAAAGGTGCATATACAATTGAACGAATGAACGGCGATAAAG  
TGTTATTTTTCGAACCAATGACAATGATGAATTTGTCAGGTGAAGCAGTTGCACCGATTATGGATTATTACAATGTTAATCCAGAAG  
ATTTAATTGTCTTATATGATGATTAGATTTAGAAACAAGGACAAGTTTCGCTTAAGACAAAAAGGAAGTGCAGGCGGTACAATGGT  
ATGAAATCAATTATTAATAATGCTTGGTACAAACCAATTTAAACGTATTTCGATTGTTGGTGGAAGACCAACGAATGGTATGACGGT  
ACCTGATTATGTTTTACAACGCTTTTCAAATGATGAAATGGTAACGATGAAAAAGTTATCGAACACGCAGCAGCGCAATTGAAA  
AGTTTGTGAAACATCAGGATTTGACCATGTTATGAATGAATTTAATGGTGAAGTGAATAATGACAATATTGACAACGCTTATAAA  
AGAAGATAATCATTTCAGACCTTAATCAGGTATTTGGACAAGCAAACACACTAGTAACCTGGTCTTCCCGTCAGCTAAAGTGAC  
GATGATTGCTGAAAAATATGCACAAAGTAATCAACAGTTATTATTAATTACCAATAATTTATACCAAGCAGATAAAATTAGAAACAG  
ATTTACTTCAATTTATAGATGCTGAAGAATTGTATAAGTATCCTGTGCAAGATATTATGACCGAAGAGTTTTCAACACAAAGCCCTC  
AAGTGATGAGTGAACGTTATAGAAGTTAACTGCGTTAGCTCAAGGTGAAGAAAGGTTATTTATCGTTCCTTTAAATGGTTGTAAAA  
AGTGTTAACTCCTGTTGAAATGTGGCAAAATCACCATAAGTACATTACGTTGTTGGTGAGGTTATCGATTGCGGCAATTTCTTAAACA  
AATTAGTTAATATGGGGTACAAACGGGAATCCGTGGTATCGCATATTGGTGAATTCTCATTGCGAGGAGGTATTATCGATATCTTTC  
CGCTAATTGGGGAACCAATCAGAATTGAGCTATTTGATACCGAAATTGATTCTATTTCGGGATTTTGATGTTGAAACGCAGCGTTCCA  
AAGATAATATTGAAGAAGTCGATATCACAACGTCAAGTGATTATATCATTACTGAAGAAGTAATCAGCCATCTTAAAGAAGAGTTA  
AAAACGTGATATGAAATACAGACCCAAAATAGATAAATCAGTGCAGCAATGATCTGAAAGAAACGTATGAAAGCTTTAAATTATT  
CGAAAGTACATACTTTGATCATCAAATACTACGTCGTTAGTAGCGTTTATGTATGAAACACCTTCGACAATTATTGATTATTTCCAA  
AAAGATGCAATCATTGCAAGTTGATGAATTTAATCGTATTAAAGAAACTGAAGAAAGTTTAAACAGTAGAGTCTGATTTCGTTTATTAGC  
AATATTATTGAAAGTGGTAATGGATTTATAGGACAAAGTTTTATAAAATATGATGATTTTGAACATTTGATTGAAGGCTATCCTGTC  
ACTTATTTTTTCAATTATTCGCTACAACAATGCCGATAAAAACATAACTATTAATTAATTTTCATGTAAACCTGTCCAACAAATTTTATG  
GGCAATATGACATTATGCGTTCTGAATTTCAACGATATGTTAATCAAACTATCATATCGTGTTTTGGTGCAGAACCGAACTAAAG  
TTGAACGTATGCAAGCGATGTTAAGTGAAATGCATATTCATCAATAACAAAATTGCATCGCTCAATGTATCGGGCAAGCAGTG  
ATTATTGAAGGCAGTTTATCTGAAGGATTGAACTACCTGATATGGGATTAGTTGTCATTACTGAGCGTGAGCTTTTTAAATCAAAA  
CAGAAAAAGCAACGAAAACGTACGAAAGCTATCTCAAATGCTGAAAAAATTAAGTCTTACCAAGATTTAAATGTGGGAGATTATAT  
TGTTTCATGTGCATCATGGTGTGGTAGATATTAGGTGTTGAGACGCTCGAAGTGGGGCAAACGCATCGTGATTATATTAATTTGCA  
ATATAAAGGTACGGATCAACTATTTGTTCCAGTAGATCAAAATGGATCAAGTTCAAAAAATATGTAGCTTCGGAAGATAAGACGCCAA  
AATTAATAAACTCGGTGGCAGTGAATGGAAAAAACAAAAGCTAAAGTTCAACAAAGTGTGAAGATATTGCTGAAGAGTTGATT  
GATTTATATAAAGAGAGAAAATGGCAGAAGGTTATCAATATGGGGAAGACACAGCTGAGCAACAACTTTGAATTAGATTTTCC  
ATATGAACCTTACGCTGACCAAGCTAACTCATGATGAATTAAGATGACATGCAAAAAATCGCGTCCAATTGGATCGCTTGCTAT  
GTGGTGATGTTGGTTATGGTAAACTGAAGTTGCAGTGAGAGCAGCATTCAAAGCTGTAATGGAAGGAAAGCAGGTTGCATTTTA  
GTTCTTACAACCTATTTTAGCTCAGCAACATTATGAGACGTTAATTGAGCGTATGCAAGATTTTCCTGTTGAAATTCATTAATGAGTC  
GTTTTAGAACGCCTAAAGAGATAAAACAACTAAGGAAGGACTTAAACTGGATTTGTTGACATAGTTGTTGGTACACACAAATTA  
CTTAGTAAAGATATACAGTATAAAGATTTAGGGCTGTTGATTGTAGATGAAGAACAACGATTTGGTGTACGCCATAAAGAGCGTAT  
TAAACATTAATAACATAATGTAGATGTACTAACATTGACTGCAACCCCAATACCTAGAACATTGCATATGAGTATGCTAGGTGTGC  
GCGATTTGTGCTAGTGATTGAAACGCCGCCAGAAAATCGTTTCCAGTTCAAACATATGTATTAGAACGAACATGAGTTTTATCAAAG  
AAGCTTTAGAAAGAGAATATCCCGTGATGGCCAAGTGTTTTATCTTTATAATAAAGTGCAATCCATTTATGAAAAACGAGAACAA  
CTCCAGATGTTAAGTCCAGATGCTAACATTGCGAGTTGCTCATGGACAATGACAGAGCGCATTTAGAAGAACGATGTTAAGTTTT  
ATCAATAATGAATATGATATTTTAGTAACGACGACGATTATTGAAACAGGTGTCGATGTCCAAATGCAAACTTTGATCATTGAA  
GATGCAGATCGCTTTGGATTGAGTCAGTTGTATCAATTAAGAGGTGCTGTTGGTGCCTCAAGTCGATTGGTTATGCATACTTCTTAC  
ATCCAGCAAATAAGGTACTAACTGAGACTGCAGAAGATCGATTACAAGCGATTAAAGAATTTACGGAGTTAGGCTCAGGATTTAAG  
ATTGCGATGCGTGATTGAACATTCGTGGTGCTGGTAATTTGTTAGGTAAACAACAGCACGGCTTTATTGATACAGTTGGATTGAT  
TTGTACAGTCAAATGTTAGAAGAAGCTGTAAATGAAAAACGTGGTATTAAGGAACCAGAATCTGAGGTGCCAGAAGTCGAAGTTGA  
TTTAACTTGGATGCATATTTGCCGACAGAATATATTGCAAAATGAACAAGCTAAAATTTGAAATTTATAAAAAGCTACGAAAACTG  
AAACATTTGATCAAATTATCGACATTAAGATGAATTAATGTATCGTTTTAATGATTATCCTGTTGAAGTAGCACGTTTGCTTGATAT  
AGTGGAATAAAGATACACGATTAACCTCAGGTATCAGTTGATTAAAGATAAAGGGAAAAATGATGATCATTTTATCTGTAA  
AAGCCACTGAAAAATATTGATGGCGAAGTGCTGTTCAAAGCAACACAACTTTAGGTAGAACAATGAAGGTTGGTGTTCAAAATAAT  
GCAATGACAATTACTTTAACGAAACAAAATCAATGGCTTGATAGTTTGAAGTTTTTAGTTAAGTGCATTGAAGAAAGTATGAGAATC  
AGTGATGAAGCATAAAGAAGCATTTAATGGCGTTGCTGTTAACTGCTGCATTAATTGTCATTAATAATCTGAGTGCTGTATATCG

AATTCCATATCAAAATATATTAGGTGATACAGGTTTGTATGCATATCAACAAGTGTATCCAATTGTAGCATTAGGAATGATATTATC  
GATGAATGCCATTCTAGTGCAATTACACAAAATATAGGGAAAGTATCATAGTGACGAAGCATATGCAAAAAGCGGTGCTTATATAC  
AATTAGTTGGTATATTATTATTTATTGCTATTTTTGTGTTTGGCAACAATATTGCACATATGATGGGTGATAGCCATTTAACACCAAT  
GATTCAAGCAGCAAGTTTAAAGCTTTATATTTATAGGTATGCTTGGCGTGTAAAGAGGTTATTATCAATCTGCAAATAATATGACAGT  
TCCGGCTATTTCCAGGTTATAGAACAAAGTTATACGAGTAGGTATTATCATTGTTACTATTGTTATTTTTGTAGACAGAGGTTGGACG  
ATATATGAAGCGGGAACAATTGCTATTTTAGCATCAACGATTAGGTTTTTTAGGTTCTTCAATTTATTTAGTAGCGCACCGACCTTTTA  
AGTTTAAAAATGGTAAATAACACTGCAAAGATTGTTTGGAAACAGTTCGCACTTTCGGTTTTGATTTTCGCTATCAGTCAATTAATCGT  
AATTTTATGGCAAGTGATTGATAGTGTTACTATTATTAAGTCACTTCAAGCGATACGCGTGCCATTTCGATGTTGCCATAACTGAAAA  
AGGAGTCTATGACCGTGGTGCATCATTTATTCAGATGGGATTGATTGTAACATAACATTTAGTTTTGCGCTCATTCCTCTGTAAAGT  
GACGCAATCAAAATGAATAATCAGGTACTTATGAATCGTTATGCAAAATGCGTCATTAAGATTACGATTTTAAATAAGTACAGCAGC  
GGGAATAGGATTAATTAATTTATTGCCCTTAAATGAACGGTGTGTTTTTAAAGACGAATGATTTAACCTTAACGTAAAGTGTATATG  
ATTACGGTCATTTGTGTATCGTTAATTATGATGGATATGGCTTTATTACAAGCGCAACATGCTGTGAGACCTATTTTTGTTGGTATGA  
CGGCAGGATTGGTTATTAATTTTATACTTAATATCATTTTGATTGCTTTAAGTGGCATTATTGGTGCGAGCATTAGTACTGTTGTATC  
ATTAATTATATTCCGTACGATTATCCATATTGCTGTGCACGAGAAAAATACCATTACATGCGATGAGACGATTTTTTATCAATGTTGTT  
TTAGGTATGGTATTATGTGCTGTTGTTCAATGCGTGTAAACATAGTGACAACACACGGTAGATTCACTGGACTCATTGAATTAT  
TATGTGCAGCAGTATTAGGTATCATTGCATTGTTTTCTATATTTTTAGATTTAATGTTTTGACATATAAAGAGTTAACTATTTACCA  
TTTGGTTCAAAGTTGTATCAAATTAAGAAAGGAAGACGTTGATGGCACATACCATTACGATTGTTGGCTTAGGAACTATGGCATTG  
ATGATTTGCCGTAGGGATATATAAATTTTTAAAGACACAAGATAAAGTTTATGCAAGAACGTTAGATCATCCGATTATAGAATTG  
TGCAAGATGAATTAACATTTTCAGAGTTTGACCATGTTTATGAAACACATGACCAATTTGAAGATGTTATGCTATAAGTATTGTGGCGC  
AATTGGTTGAAGCTGCTAATGAAAAAGATATTGTCTATGCGGTTCCGGGTCATCCTAGAGTTGCTGAGACAACACTACAGTGAAATTAC  
TGGCTTTAGCAAAGGACAATACTGATATAGATGTGAAAGTTTTAGGTGGTAAAAGCTTTATTGATGATGTGTTGAAGCAGTTAATG  
TAGATCCAAATGATGGCTTCACACTGTAGATGCGACATCATTACAAGAAGTAACACTTAATGTTAGAACGCATACATTGATTACGC  
AAGTTTATAGTGCAATGGTTGCTGCTAATTTGAAAACTCACTTTAATGGAACGATATCCTGATGATTACCCTGTTCAAATTTGTCACTGG  
TGCACGAAGCGATGGTGGGATAACGTTGTGACATGCCCATTTATATGAATTGGATCATGATGAAAAATGCATTCAATAATTTGACGA  
GTGTATTTCGTACCAAAAAATCATAACATCGACATATTTGTATCATGACTTTGATTTTGAACGGAAGTGATTGATACTTTAGTTGATGA  
AGATAAAGGTTGTCCATGGGATAAAGTGCAACGCATGAAACGCTTAAGCGTTATTTACTTTGAAGAAACATTTGAATTTGTTGGAAG  
CTATTGACAATGAAGATGATTGGCATATGATTGAAGAAGTACGAGATATTTTATACAAGTGTATTGTCATACCTAGTATTGGTAAAA  
AAGAAGGGTATATCGACATTAAGAAGTGATTACAAGTCTTAATGCTAAAAATGATTCGTAGACACCCACACATATTTGGTGATGCC  
AATGCTGAAACTATCGATGACTTAAAAGAAATTTGGTCTAAGGCGAAAGATGCTGAAGGTAAACAGCCAAGAGTTAAATTTGAAAA  
AGTATTTGCAGAGCATTTTTTAAATTTATATGAGAAGACGAAGGATAAGTCATTTGATGAGGCCGCTTAAAGCAGTGGCTAGAAA  
AAGGGGAGAGTAATACATGAGATTAGATAAATATTTAAAAAGTATCACGGTTAATAAAGCGACGTACGCTAGCAAAAAGAGTAAGT  
GATCAAGGTAGAATTACAATAAATGGTAATGTTGCTAAAGCTGGATCGGATGTTAAAGTTGAAGATGTGCTGACGATTCCGCTTTGGT  
CAAAAATTAGTAACAGTTAAAGTAACTGCATTAATGAACATGCATCTAAAGATAACGCGAAGGGCATGTATGAAATCGTTGAAGA  
GCGTCGACTTGAAGAAGCGTAAATTTGGAGGTGACAAGCAATGAAAAATAAAGTAGAACATATAGAAAACTAGTACACGTCGCAAG  
AGAACAAGAAAAACAACGTCAAAAAATGAAAATGCGTGTGTTCTGATAGGCGTATTACAGTATTTTGCGGGCGTATTACTTGGCATA  
ATTGTTGTTTTATCAATCTTGCTTGTGTCCAAAAACATCGCAATGATATCGATGCACAGGAGCGAAAAAGCGAAAGAAGCACAGTTT  
CAAAAGCAACAAAATGAAGAAATTTGCGTTAAAAGAAAAGTTGAATAATCTGAATGACAAAGATTATATTGAAAAAATTTGCGCGTG  
ATGATTATTACTTAAGCAACAAAGGTGAAGTGATTTTTAGGTTGCCAGAAGACAAAGATTTCGTCTAGCTCAAAATCTTCGAAAAAA  
TAAATCCAAATTGATTCAAAATTATCCGAGTATAGACATTGTGAAAAAATCCAAACAAGGATATAATAAGGGAAAATCGAATCAAA  
TCGGGAGGATTTATTTAACATATGTCAATCGAAGTTGGAATAAGCTTAAAGGTAAAAGTCACTGGTATTAATAAAGTTTGGTGCATT  
GTAGAATTACCTGAAGGAAAAAGTGGTTTAGTTCACATTAGTGAAGTGCAGATAAATTATGTTGAAAAACGTAGAAGAGCACCTTTC  
TGTTGGTGATGAAGTAGACGTAAAAGTATTATCTATTGCTGATGATGGAAAAATTAGTCTTTCAATTAAGAAAGCTAAAGACCGTCC  
ACGTAGACAACATACAGATAAACCAAGTCAATAAACCAAGTGCAAAAAGCCGAAGATTTTGAAAAAGCAATTAAGCAATTTCTTA  
AAAGATAGTGAAAGATAAATTAACCTCAATCAAAAGTCAAAACAGAATCTAGACGCGGTGGCAAGGTTCAAGACGTTAATTAATAA  
AATAAAGACTGTTTCGATAAGGAATATATTTAGAATGATGCGTATCGAATAATCGATTGCAGCGTTAGACAATCTAAGACTGTTTCT  
TAAATAAGGAGCAGTCTCTTTTATTGTAAATGATATAACTAAGACTTATACCATTTTTGAAAATTGTAAAAGTGAGGTGATGTTATG  
CAGTTAAATAGTAATGGTTGGCATGTTGATGACCATATTGTTGTGCTGTTTCTACAGGTATTGATAGTATGTGTTTATTGTATCAAC  
TACTAAATGATTATAAAGATAGTTATAGAAAACTAACATGCTTACATGTCAATCATGGCGTTAGGTCAGCTTCAATCGAGGAAGCC  
AGATTTTTAGAAGTATACTGCGAACGTCATCACATCGATTACATATCAAAAAGTTAGATTTGTGCGCATAGTCTCGACCGAAATAAC  
AGCATTCAAGATGAAGCTCGAATTAACGTTACGAATGGTTTGATGAAATGATGAATGTATTAGAAGCGGATGTATTGCTAACGGC  
GCATCATTTGGACGATCAATTAGAACTATTATGATGCTGATTTTTTAAAGGAAATCGACGCGTAATAAACTAGGATTTGATGAGTT  
ATCGAAGCGAAAAAGGTTATCAGATTTATCGACCTTTTACGTGCTCTAAAAAAGAAATAAACTCAAGAGAGATATGCATATA  
TTCCATATTTTGAAGATGAATCTAATAAAGATAACAAATATGTTAGAAATGATATTTCGTAATAGAATTATCCAGCTATTGATGAAA  
ATAATCAACTTAAAGTATCGCATTTATTAATAAATAAACAATGGCATGATGAACAATATGATATTTTGCAATATTTCAGCTAAACAAT  
TTATTCAAGAATTTGTGAAGTTTGATGAACAGTCAAAATATTTAGAGGTTTCTAGACAAGCTTTTAATAACTTACCAAACTCATTAA  
AGATGGTTGTGTTGGATTGCCTATTATCAAAGTATTATGAGTTGTTAATATTAGTGCTAAAACATACGAAGAGTGGTTTAAACAAT  
TTAGTAGTAAGAAAGCACAAATTCAGTATTAATCTCACGGATAAATGGATAATTCAAATTCATATGGTAAATTAATAAATAGGCTA  
AAAATAATGGCGATACATATTTTAGAGTTCAAACATTTGAAAAAGCCAGGTAATTATATTTTAAACAAATATCGATTAGAGATACATT  
CTAATTTACCAAAATGTTTATTTCGGCTTACAGTGAGAACACGCAAAAGTGGCGATACATTTAAACTGAATGGGCGCATGGTTATA  
AGAAAGTGAAATCGCTGTTTATAGATTGTAAGTGCAACAGTGGGTTCGGGATCAAATGCCAATCGTATTGGATAAACAACACGCGC  
ATTATTGCGGTAGGAGATTTATATCAACAACAAACAATAAACAATGGATTATAATTAGTAAAAATGGAGATGAATAGCGTTATGC  
ATAATGATTTGAAAGAAGTATTGTTAACTGAAGAAGATATTCAAAATATCTGTAAGGAATTGGGAGCACAAATTAACAAGGATTAT  
CAAGGTAAACCATTAGTATGCGTGGGTATCTTAAAAGGCTCAGCAATGTTTATGTCAGATTTAATTAACGAATTGATACCCATTTA  
TCAATTGATTTTCATGGATGTTTCTAGTTATCACGGAGGCACTGAGTCAACTGGTGAAGTTCAAATCATTAAAGATTTAGGTTCTTCTA  
TTGAAAAATAAGACGTATTAATTATTGAAGATATCTTAGAGACTGGTACTACACTTAAGTCAATTACTGAATTATTACAATCTAGAA  
AAGTTAATTCATTAGAAAATAGTTACTTTATTAGATAAAACCAACCGTCGTAAGCGGACATTGAAGCTAAGTATGTAGGTAAAAAA  
ATACCAGATGAATTTGTTGTGGTTACGGTTTAGATTATCGTGAATTATACCGAAACTTACCATATCGGTACGTTAAAAACCTGAA  
GTGTTATCAAATTAATTTTTTAATCAATTTTCAATTTTACTATTGCTGTTTGAAGAAATAAAGTGTAGACTCAAAAATGAAAAAT  
GTATTTTCATATATATTTAATTTTAGACAAGACATATGTCTTGAAAAAGTTGAAAAATATAGAGATTGATAAACTAATACGGATGTGA  
ATGACATTGATGTTAAGCTCAATTAAGCTTATAAAAAATGTATATGTTACAATTTTTGTTAGTTTTATTATGGGAAGTAGGAGGA  
AATGACGCATGCAGAAAGCTTTTCGAATGTGCTAGTTATCGTAATAATAGGCGTTATTATTTTTGGTCTATTTTCATATTTAAACGG

TAATGGAATATGCCGAAACAGCTTACATATAATCAATTTACTGAGAAGTTGGAAAAAGGTGACCTTAAAACTTTAGAAATCCAAC  
CACAAACAAAATGTCTATATGGTAAAGTGGTAAAAACGAAAAATGATGAAGACTATTTCATCAACTATTTTATATAACAACGAAAAAGAA  
TTACAAAAAATTACTGATGCTGCTAAAAAGCAAAACCGGTGTAATAATTAAACGATTAAGAAGAAAGAAAAACAAAGTGTCTTTGTGA  
GTATACTTTCAACATTAATTCAGTTGTAGTCATAGCGTTATTATTTATTTTCTTCCTAAGCCAAGCACAAAGGTGGCGGTAGTGGCGG  
TCGTATGATGAACCTTTGGTAAATCTAAAGCAAAAAATGTACGATAATAATAAACGTCGTGTTCTGTTTCTCTGATGTAGCAGGGGCAGA  
TGAAGAAAAACAAGAATTAATTGAAATGTTGATTTCTTGAAAGATAATAAAAAATTCAAAGAAATGGGATCTAGGATTCTCTAAAG  
GTGCTTACTTGTGGACCTCCAGGTACTGGTAAAAACATTACTTGCTAGAGCGGTTGCAGGTGAAGCTGGCGCACCATTCTTCTCTAT  
TAGTGGTTTACAGCTTTGTAGAGATGTTTGTGGTGTGGTGGCGAGCCGTGTTCTGTGACTTATTCGATAATGCTAAGAAAAACGCGCC  
TTGTATCATCTTTATCGATGAGATTGATGCTGTTGGTCTGCAACGTGGTGCAGGTGTTGGTGGCGGTCATGATGAACGTGAACAAAC  
CCTAAACCAATTATTAGTTGAAATGGATGGTTTCGGTGAAAAATGAAGGTATCATTTATGATAGCTGCTACAAACCGTCCTGATATCCT  
TGACCCAGCCTTATTACGTCCAGGTGCTTTTGATAGACAAATTCAAGTTGGTCTGTCAGATGTGAAAGGCCGTGAAGCAATTCTTCA  
TGTTTCATGCTAAAAACAAACCATTGATGAAACGGTTGATTTAAAGCAATTTACAACGTACACCTGGTTTCTCAGGTGCTGATTT  
AGAGAACTTATTAATGAAGCATCTTTAATTGCTGTACGTGAAGGTAAAAAGAAAATTGACATGAGAGATATCGAAGAGGCAACG  
GATAGAGTTATAGCCGACCTGCTAAGAAATCTCGAGTTATTCTAAGAAAGAACGTAATATTGTTGCTCATCACGAAGCTGGTCAT  
ACAATTATCGGTATGGTACTTGATGAGGCAGAAAGTAGTGCATAAAGTTACTATTGTTCCACGTGGACAAGCAGGTGGTTATGCAAT  
GATGTACCTAAACAAGATCGTTTCTTAATGACTGAACAAGAGTTATTAGATAAAATCTGTGGTTTACTTGGTGGACGTGTATCAGA  
AGATATTAACCTTTAACGAAGTATCAACAGGTGCTTCAAATGACTTCAACGTGCAACACAAATCGCACGCTCAATGGTTACGCAAT  
ATGGTATGAGTAAAAAATTAGGACCATACAGTTCGGTCAAGTATCAAGTATTCCTAGGTAAGATATGCAAGGTGAGCCT  
AATTATTCAAGCCAAATCGCATATGAAATGATAAGAAAGTTCAACGAATCGTTTAAAGAACAAATACGAACGTGTGTAACAAATTTT  
ATTAGAGCACAAGAACAATTAATTTAATTGCTGAAACATTATTAACAGAAGAAACATTAGTTGCTGAACAAATTCATCATTATT  
CTACGAAGGTAAATTACCTGAAATTGATTATGATGCAGCTAAAGTTGTTAAAGATGAAGATTCTGAATTTAATGATGGTAAATTCGG  
TAAATCTTATGAAGAGATTCTGTAAGAGCAATTAGAAGATGGACAACGTGACGAAAGTGAAGATCGTAAAGAAGAAAAAGATATT  
GCTGAGGATAAAAAAGAAGCTGATAAATCTGATGAAAAAGATGAACCAGCACATCGACAAGCCCCAAATATCGAAAAACCTTACG  
ATCCAAATCACCCAGACAATAAATAATCGATTATATTCAGTACCTCTTCTATGATAAAGTTATAGAAAGAGGTACTTTTATCGTTTT  
TGAAAATACGTATTAGATTTTAAAGTCGTTGAATTGTTATAGCAGAAAAATAATTGTAACAAGTTACTTCATTATTTAGAATGATGG  
GTGTAGAATAAGTACAATTGTTGCATTTTATGAAGTAAAGTAATTTTTTAAATATAGAGTAATAGAGGAGATTGAAATAATGACAC  
ACGATTTATATTGTTAAAGCATTAGCATTTGATGGGAGATTAGGGCTTATGCTGCTTTGACAACCTGAAACTGTTTCAAGAAGCACAAA  
CGAGACATTATACATGGCCGACAGCATCTGCTGCAATGGGAAGAACAATGACAGCAACAGCTATGATGGGCGCAATGTTGAAAGG  
TGATCAAAAAATTAAGTGTACTGTAGATGGCCAAGGACCTATTGGACGAATTATTGCCGATGCAATGCTAAAGGCGAGGTGCGTG  
CTTATGTAGACCATCCACAACTCATTTCATTAAATGAGCAAGGTAACTTGTATGTAAGACGAGCAGTAGGGACAAATGGATCT  
ATTATGGTTGTTAAAGACGTTGGAATGAAAGACTATTTCTCTGGAGCAAGTCCAATTGTTTCAGGAGAAGCTGGTGAAGATTTTACT  
TATTATTATGCTACAAGTGAACAAACACCTTCATCGGTAGGTCTTGGTGTATTGGTAAATCCTGATAATACGATTAAGCAGCAGGA  
GGATTTATCATTTCAAGTTATGCCAGGTGCCAAAGATGAAACAATTTCAAATTAGAAAAAGCAATTAGTGAATGACACCAGTTTC  
TAAATTAATTGAACAAGGATTAACGCCAGAAGGATTACTAAACGAACTTAGGTGAAGACCATGTGCAAAATTTAGAGAAATAAC  
CTGTTCAATTTGAATGTAATTGTAGTCATGAGAAATTTTTAAATGCTATTAAGAGGATTGGGCGAGGCTGAGATTTCAAATATGATTA  
AAGAAGATCATGGTGTGAAGCAGTATGTCAATTTCTGTGGAATAAAATATAAATATACTGAAGAAGAATTAACCGTGTGTAGAA  
AGTTTAGCGTAATTTAATTTAAATCAATACGCTAAAATGTTTATTTTTAGCGGTTTAGTGAATGTAGAATAAATAGTTGTATAATC  
CTTAGTGATTTTGTGTTGCTTTCTAGAATTTATTTGATAAAATAATTCTATATCCGATAAATAAACTAAGATTTCACAACTAACTAAA  
AAGGAGTGTCTTAATGGCACAAAAACCAGTAGATAATATTACTCAAATATTGGCGGTACACCGGTAGTCAAATGAGAAATGTA  
GTAGATGACAATGCAGCAGATGTTTATGTAAAATTGGAATATCAAAATCCAGGTGGTCTGTAAAGGATAGAATTGCTTTAGCAAT  
GATTGAAAAAGCAGAGCGAGAAGGCAAAATTAACCTGGCGATACAATTGTAGAACCAACAAGTGGTAATACAGGTATCGGTTTA  
GCATTTGTATGTGCTGTAAAGGATATAAAGCAGTATTTACTATGCCGAAACAATGAGCCAAGAGCGTCGTAATTTATTAAGC  
ATACGTTGCGGAAATGTTTAAACGCCCTGGATCAGAAGCGATGAAGGTGCAATTAAGGATTAAGAAATTAAGGAAAGAAACAAT  
GGTTACTTCGAGCCACAACAATTTGAAAAACCCTGCGAACCTGAAAGTTCATGAGTTAACTACAGGTCTGAGTTATTACAACAATTT  
GAAGGGAAGAACTATCGATGCGTTTCTAGCTGGTGTGGTACTGGTGGTACGTTATCTGGTGTAGGTAAAGTCTGAAAAAAGAATA  
TCCTAACATCGAAATGTTGCTATAGAGCCTGAGGCTTCTCCAGTATTGAGCGGTGGTGAGCCAGGTCCACATAAATACAAGGTTT  
AGGTGCTGGATTTATTCCAGGCACCTTGAATACAGAAATCTATGACAGTATTATTAAGTAGGAAATGATACAGCGATGGAATGT  
CTCGTCGAGTTGCTAAAGAGGAAGGTATTTAGCAGGTATTCATCAGGTGCTGCGATTTATGCTGCCATTCAAAAAGCAAAAGAAT  
TAGGAAAAGGTAAACAGTAGTAACAGTATTGCCGAGTAATGGTGAACGCTACTTATCAACACCTTTATATTCATTCGATGACTAAT  
TAATGTCATTTAAAGAGTGAGTTATCTTTTTGAGATAACTTGCTCTTTTTTCTACCATGTATAATTTAAAAATATGAGCGTTAAA  
TTAAACATTTTTCTGATAAAACATCCAGTGAATGATAAGATAATAAAGCTACATACTAATACTAGTAATAGCAGGAGTAATTT  
TTATTAGAGTTAAACATAACATAAATTAAGGGTGTTTAACTAGCTAATAAAGCAAAATTTATGGCATATTAACAGCTCACAGCAGATT  
CATTTCTCAGATGGTGGAAAAATTTAATAATGTTGAATCAGCTATAAATAGAGTGAAAGCCATGATAGATGAAGGTGCTGACATTATA  
GATGTTGGAGGTGTTTCAACGAGACCCGGTCATGAAATGGTTTCATTAGAAGAAGAGATGAACAGAGTATTACCTGTTGTTGAAGC  
TATTGTCGGTTTTGATGTAAAAATTTCAAGTCGATACATTTCAAGTGAGGTTGCTGAAGCATGTTTAAAAATTAGGCGTTGATATGATT  
AATGATCAATGGGCGGGTCTGTATGATCATCGTATGTTCCAAATTGTAGCTAAATATGACGCGGAAATATTTTAATGCATAATGGA  
AATGGTAATCGTGATGAACCGGTTGTGCAAGAAATGTTAACATCTTTGTTAGCACAAAGCACATCAAGCTAAAAATAGCTGGTATACCT  
TCAATAAAAATTTGGCTAGATCCAGGTATAGGTTTCGCTAAAACTAGAAATGAAGAAGCCGAAGTTATGGCAAGACTGGATGAACT  
TGTTGCAACAGAATATCCAGTGTTTTATAGCGACAAGCCGGAACGTTTCTACTAAAGAGATGATGGTTATGATACAAACACCGGTTG  
AAAGAGATGAAGTAAGTACGCTACGACTGATATGGTATTGTAAGGCGTTAGAGCAGTACGCGTTTATGATATGTCGAGTTGAAT  
GCTAAATTAGCTAAAGGTATAGATTTTAAAGGAGAATGAAAAATGCAAGACACAATCTTTCTTAAAGGTATGCGCTTTTATGGATA  
TCATGGTGCTTTATCAGCTGAAAAATGAAATAGGGCAAAATTTCAAAGTGGATGTAACCTTTGAAAGTAGACTTAGCTGAAGCTGGGC  
GTACTGATAATGTTATTGATACAGTTTATTATGGTGAAGTGTTTCAAGAGGTTAAATCAATTATGGAAGGTAAAGCCGTTAATTTAC  
TTGAGCATCTAGCTGAACGTATTGCAATCGTATAAATTCACAATATAATCGTGTAATGGAAACGAAAGTGAGAATCACTAAAGAA  
AACCACCGATTCCGGGTCATTATGATGGAGTAGGTATCGAAATAGTGAGGGAGAATAAATGATTCAAGCATACTTAGGATTAGGT  
AGTAATATTGGTGATAGAGAAAGCCAGTTAAACGATGCTATAAAGATTTTGAATGAATATGATGGTATTAACGTATCTAATATTTCT  
CCGATTTATGAACAGCAGCAGGTTGGGTATACTGAGCAACCTAACCTTTTTAAATTTGTGTGTTGAAATTCACAAACACTCACAGTA  
TTACAATGTTGGAATGTTGTTGAAGACAGAAGATGTTTACACCGTATTAGAAAGGAACGATGGGGTCTAGAGCTTTAGATGT  
GGATATTTTGTGTATGGAGAAGAAATGATAGATTACCAAACTGTGCGGTGCCACATCCGGAATGAATGAACGTGCATTTGTTTT  
AATCCCATTAATGATATAGCAGCAAATGTCGTAGAACCAGTTCGAAATTGAAAGTGAAAGATTTAGTTTTTGTGCGATGACAGTGT  
AAAGAGATATAAATAATGCATTGTTGAGAACATTATATTTATTGGGAATAGATGATTGATTATTGGAGATGTTTCCGCATTTTGTAT

TATCTCTAAATGCATTTGATTTCGAATTAGTATATGATGATTTAGTATGTGTTAGAATTAAGTTATTTTCATAAAATCAAAGTAAGCAA  
TATTTGATAAAATGCTGTAATTTATTTGGGCTTTTGTGGAAGTTTGTGGAAGATAATTTTATACATTTACTTAGGGTTGTATTAATGA  
TAATCGTATTTTAAATGAATAAGTAATTCATAAACGAAAAACAGAAATGCTTTATTACATTTACAAGCTCTTGTAATAATAAAAAG  
TGATAAAATTTGATGTTATGAATATAAGAAAAACATGCCACATCATAACTTTAAGGTGTAATGGTTAATGATAAAGTATTAGAAACAT  
CGAAAGAGATGTATGTTGAGCAAAAATGTCTGATATTTTAAAAACTTTAAAGGAAAAATGTTTGAGTGTACCAGTTGGAATACTAA  
AGGATTACAACAAGTTAAAGGAGAGAAAAGTTATGTCAGAAGAAATGAATGACCAAATGTTGGTTTCGACGTCAAAAAATTACAAGAA  
TTATATGATCTTGGTATAGACCCGTTTGGTTCTAAATTTGACCGTTTCAGGTTTATCTAGTGATTTGAAAGAAGAGTGGGACCAGTATT  
CTAAAGAAGAATTGGTAGAAAAAGAACGGGATAGTCATGTCGCTATAGCTGGACGATTAATGACTAAGCGTGGTAAAGGTAAAGC  
AGGATTTGCACACGTTTCAGGACTTAGCTGGACAAATTCAAATTTACGTTTCGTAAGATCAAGTTGGCGATGACGAATTTGATTTATG  
GAAAAATGCTGATTTAGCGGATATCGTTGGTGTGTAAGGTGTAATGTTTCAAAACAAATACTGGCGAAATATCGGTTAAAGCGAAGA  
AATTCACGCTACTAACTAAATCATTGCGACCATTACCGGATAAAATCCACGTTTACAGGATATTGAACAGAGATATCGTCAAAGAT  
ATTTAGATTTAATTACGAACGAAGATAGCACTCGTACATTTATTAATCGTAGTAAATCATTCAAGAAATGCGTAATTTATTTAAATA  
ATAAAGGTTTCTTGGAAAGTAGAAACACCTATGATGCACCAAATGCTGGTGGCGCAGCTGCTAGACCATTGTAAACACATCATAATG  
CATTAGATGCAACGTTATACATGCGTATTGCTATTGAGTTGCATTTAAACGTTTAAATGTGCGGTGGACTTGAAAAAGTATATGAAA  
TTGGTAGAGTATTCGTAATGAAGGTGTATCAACTAGACATAACCCTGAATTCACAATGATTGAATTATATGAAGCATATGCAGATT  
ATCATGACATTATGGATTTAACAGAATCTATGGTGAGACATATTGCCAATGAAGTATTAGGTTCTGCAAAAGTACAATACAATGGG  
GAAACGATTGATTTAGAATTTGCTTGGACTCGTTTGCATATTGTTGATGCTGTAAAAGAAGCTACTGGTGTAGATTTTTATGAAGTTA  
AAAGTGATGAAGAAGCTAAAGCTTTAGCTAAAGAACATGGTATTGAAATTAAGATACAATGAAATATGGTCATATTTTAAAGTAA  
TTCTTTGAGCAAAAAGTTGAAGAAACACTTATTCAGCCAAAGTTTATCTATGGTCATCCGACTGAAATTTACCTTTGACGAAGAAA  
AATCCTGAAGATCCTAGATTTACTGATCGTTTTCGAATTGTTTATTGTAGGTAGAGAGCATGCAAATGCATTTACTGAATTAATGAT  
CCTATTGATCAAAAAGGTCGTTTGAAGCGCAACTTGTGAAAAAGCGCAAGGTAATGATGAAGCGCATGAAATGGATGAAGATTA  
CATTGAAGCGTTAGAATATGGTATGCCTCCGACAGGTGGTCTTGGTATCGGTATTGACAGATTGGTTATGTTATTAAGTACTGCTCC  
ATCAATCAGAGACGTGTTATTATCCCTTATATGAGACAAAAATAAATGACGTTGATTGTTAGTAAGAGCTCTCGTGTATACAACAT  
GTGTATGCGAGGGTTTTCTTAATTATGATAATTAGTTTCGTGTTGAATGTTTTTGATAGTAATAGTTAACGATAGTGGTGCTATTTT  
GACTGTTAAACAAGGTAGTTGGCTGATAGATGAAAATGACGATATAGTTCCGATGAGAAATGTTAACGATAGACATTGAGATATCT  
TATAACAAAAATTTGCTATATTAGTATAATTTATCTTAATCAGCTATAAAAGTACTTTAAATTTGTATAGAATGTGTATGGTTTTGTAC  
ATATGTGTATGATAGAAATACGAAAAGTGTATGAATTAGAGAGCACGAGAAATGTCAGTTTGAAGAATAAAAAAGTTGATTAAAA  
GTGTTGACTTTTATCAATTGAATGAAGTAATATATAAAAGTCGTCAAAAACAGACGAAAACACACTAAAAGCTGATGTGACAAAGTTC  
ACAACAAAGTGTAATAAATACTATTGCACCTTATTAATTAAGCGTGTATCATAAATAAGTAAGTTATTTTGTCTGGTGACTATAGCA  
AGGAGG

>016-contig\_250

CTTACGTTCCGCTAGAGTAGAACGTTGCCAGGCAAAAAATGGATGCGATGAGCCGCATTGAGACCGTGAGGTCCTCTTTTTTATGTCT  
AAAACGTCAAAAATAAAGTTAACACAAAAGAAAATGGCTTGACGAAGTGAAAACGTTTGAATCTGACGAAAACGAGAAAAGAGCGCA  
ACGAGTTTAGTAGAGCTAAATGAGTAAGCGAGAGCCGAAGGAGAGGAAAAGAAGCAAGCGATTGTCACAAGTCAAGAAAAGGTTCTT  
AGCGAGGATGGTAGCCAACCTACGTTCCGCTAGAGTAGAACGTTGCCAGGCAAAAAATGGATGCGATGAGCCGCATTGAATTTTAG  
AAATAATAATTTAATAATGTGCACCTTTGATTGTCTAAGTATGTACAACCTTTAATTTTGTGTTATATAAATTTAAATGATATCATC  
GAAAACAAAATATTGTATAAATAGAGAAGAGCAGTAAGACGGTATCTAATTGAAAATGATCTTACTGTTCTTTTATATACTTTATTG  
AAATACAAAAAGGAAATTAATTATTATACAATAGACAAGCTATTGCATAAGTAACACTAACTTTTATCAAAAGAAGTGTTACTTTATA  
ATTAATGATTTTATTAGAGCGTCTACATGCGGTTTTAAAGCATCATCGTCTATACCGCCAAAGCCTAATATAAATTTAGGGGTTTTCT  
TATAGTCTTGATCATCATCAAAATTATAAACTTGTAATTTTAACTTTACTTTGTTGCTCTATCAAGACACTCTTGTAATGTTAATCCA  
TTTTTTACTGTAATTTGAAAAATGCATACCCGTTTCAGCACCTTGAATATCAAGCTGCTCTTTGTAAGGTTTCAATCTTTTAAATATA  
GGTTAGTTTTCTACGATAAAATTCGTCTCATTTTATTTAAATGCCTTTCAAAACCACCGGAAGATATAAACGTTGCAATAAGGTTTTGC  
ATATGAACAGGTACAGTGTGCTTCAATGTGATTTTGAGAATGATATTTTTCATTATAGAATAGGGTAACACCATATATGCAACT  
CGACAGCTAGGAAAAATAGACTTTGAAAATGTACTGATATAAATCACTTTTTCTCTCTTGAATATAGACCTTGAATTGCTGGAATG  
GGTTTGCCGAAATATCTAAACTCGGAATCATAATCATCTTCTATAATAAATCGTTCTCTTTTCTTGAGCCATTGTATTAATTGAG  
TTCGCTTTTTTAAGTCCATCATATCCAGTTGGAATTTGATGGGAAGGCGTTATATATACTATATTTTTTTGTGATTTAATAACTTC  
ATCTACGTTTATTCATTATCTTCAACTTCAATTTGTTTCATATTTCAACTTGTTTTTATCTAAAAATATTTTTGATTGGTGGATAACTAG  
GTTTTTCGATAATAAATGTTGAAGTATAAAGTAAATCGACTAATTGATTACTAATTGTTTCGGTAGATGAGCCAAATTAATAATTTGATT  
AGTTTACAAAATTACACCAGATTAGTAAATAAATAAGATGCCAGTTGAAATCTTAAATGTAATTCCTCTCTGAAAAATGTCCTCTACG  
TAATTGATTTAAATGATTTGTATCATAAAGATCTTTGGAATACTTTCTGAAAAGTCTATAGGGAATGTTTCGTATCTATTTTCATCC  
AAATTAAGAGCATAATCATAAGCTTCATCACTCGCTTTTGGTTTTATGAATCATCATCAAAAAGAGAGGGGATAGGTTGATTGTTT  
AAAATTGTTAAAGATTCAATTTCCGACACAAAATATCCAGAGCGAGGTCTTGAATAAATGTAACCTTCGTCTAATAGAAGTTGATAT  
GCATGCTCTACGGTTGTTGGCTGATAGACAAATGTTGCTTAATTGTCTTTTGAATAAAAATTTATCGCCTCTTTAAATTGACCTTC  
AATTATTTGTTTTTTAATTTTTTCATAAAAGTTGATGGTATAAAGTGTTTTTCAATTTTATAACTGACCTCCTAAATTTATCTTATTTGT  
ACCTTTTTAAATATCAGTTTATACATTACAATGTATTTAATCAACTTGAAAAGGGGTTTTATGTATAATGAGTAAAATTATTGGATCA  
GACAGAGTCAAAAAGAGGTATGGCTGAAATGCAAAAAGGCGGCGTTATTATGATGTGCTTAATGCTGAGCAAGCAAGAATTCAG  
AAGAAGCTGGCGCGTAGCATTATGGCATTAGAACAGGACCTTCTGATATTAGAGCTGCTGGTGGCGTTGACGTATGGCAAAC  
CCTAAAATTGTAGAAGAAGTAATGAATGCTGTTTCTATTCCAGTCATGGCTAAAGCAGTATTGGTCATATCACTGAAGCAAGAGTA  
TTAGAGGCGATGGGTGTTGACTATATTGATGAATCAGAAGTGTTAACACCAGCAGATGAGGAATATCACTTAAGAAAAGATCAATT  
TACAGTACCATTTGTATGTGGATGTCGTAATTTAGGTGAAGCTGCGCGTAGAATTGGTGAAGGTGCTGCTATGTTACGTACTAAAGG  
TGAACCAGGTACAGGTAATATTGTTGAAGCTGTAAGACATATGAGACAAGTTAATTCAGAAGTTAGTCGTTTGACTGTAATGAATG  
ATGATGAGATTATGACTTTTGCGAAAGATATCGGTGCGCCTATGAAATTTTAAACAAATTAAGACAATGGTCGTTTACCGGTAG  
TTAACTTTGCAGCTGGTGGCGTTGCGACTCCTCAAGATGCTGCTTAAATGATGGAATTAGGTGCCGACGGTGATTTCGTTGGATCAG  
GTATTTTTAAATCAGAAGATCCAGAAAAATTTGCTAAAGCAATTTGTTCAAGCAACAACACATTACCAAGACTATGAGCTAATTGGA  
AGATTAGCAAGTGAACCTTGGCACTGCTATGAAAGGTTAGATATCAATCAATTATCATTAGAAGAAGCTATGCAAGAGCGTGTTG  
GTAAGATATAGAAAATAGGTGTATTAGCATTACAAGGTGAGTACGTGAACATATTAGACATATTGAATTAAGTGGTCAATGAAGGTA  
TTGCAGTTAAAAAAGTTGAACAATTAGAAGAAATCGAGGGCTTAATATTACCTGGTGGCGAGTCTACAACGTTACGTCGATTAATG  
AATTTATATGGATTTAAAGAGGGCTTTACAAAATTCACCTTTACCTATGTTTGGTACATGCGCAGGATTAATAGTTCAGCGCAAGAT  
ATAGTTGGTGAAGAAGGATACCTTAACAAGTTGAATATTACTGTACAACGAACTCATTCCGTAGACAAGTTGACAGCTTTGAAAC

AGAATTAGATATTAATGTATCGCTACAGATATTGAAGGTGTCTTTATAAGAGCGCCACATATTGAAAAAGTAGGCCAAGCGTAG  
ATATCCTATGTAAGGTTAATGAGAAAAATTGTAGCCGTCCAGCAAGGTAAATATTTAGGCGTATCATTCATCCTGAATTAACAGATG  
ACTATAGAGTAAGTACTTTTATTAATCATATTGTAAAAAAGCATAGCTTAATGTATGCTAAATCAACGAATTATTGATATTTA  
TAGATTTGTTGAGAAGACAATATCTCCTTCAAACCTAGCTTTGGAGGAGCTATTTTTTATGTCAAAATTAATAATGATAAAAAATA  
AAGATATACATAAAAAAACCTTCAAAGAGACTGAGAATAGTCAAAATTTTGAAGGGGTAAATTCGATGTTGATGTATTTGTTAAA  
TAAAGAAATCCAGCGATTGCACTGAAATGAAAGATACTAGTGTGCACCGAATAATAGTTTCAAACCAAAGCGGGCAACTGTATCT  
CCTTTTTGTCAATTAAGTGATTTAATCGCACCTGAAATAATACCAATAGAGCTAAAGTTAGCAAATGATACTAAGAATACAGATGTA  
ACACCTTTTGCCTGTTTCAGATAAATCACTAAGTTTACCAAGTGCTTGCATTGCTACAAATTCGTTAGATAATAGTTTTGTGCGCCATAA  
CTGAACCGGCTTGAAGTGCATCTTGCCATGGCACACCGACTAAGAATGCAAATGGTGCAAAGACAAAACCAATTAATGTTTGAAAA  
TCCCAAGAAATAGCGCCACCTGAAACTGTACTAAAGATATTGCTTACAATTCATTTAATAGAGCGATAATAGCAATGTATCCGATT  
AACATTGCGCCTACAATGACAGCTACTTTAAATCCATCTAAAAATATATTCTCTAGCATTTTGAAGAATGATTGTTGCTTTCTTCAG  
TTTCTTCACTAATAATTTGTCATCTTCTTCAATTTATAAGGGTTAATAATTGAAGCGATGATGAAACCACCAAATAAGTTTAA  
GACAACAGCGGTTACAACATATTTAGGTTCAATTAAGGTAAAGTATGCACCGATAATTGAAGCAGAAACAGTCGACATTGCTGAAG  
CTGTTAATGTGTATAAACGTTGCTTAGGTATGTATGGTAATTGTTTTTAAATGAAATAAATACTTCAGATTGCCCCAAAATTGCTGC  
AGCAACTGCATTGTATGATTCTAAACGTCCCATACCATTAATTTTAGAAATTAAGAATCTAAAACATTAATGATTAAAGGTAAAAAT  
CTTTGTGTATTGAAGGATACCGATAATCGCTGAAATAAATACGATAGGTAATAATACACTGAAGAAGAATGGTGGTTGCTTAGGAT  
CGATATATTGAATACCACCGAATACAAAGTTAACACCATTGCTGCTTTTAATAATAAGTAGTTAAAACCGTTTGAATACCACCAA  
TAACCTTGATTCCCATTTGTAGTTTAAAGCAAGATAAATGCAAAAGATAAGTGAATGCAAGTAAATTCCTACATATTTCCAGCAA  
TATTTTTCTGTCTGAGCTAAATGAGAACGCAAGTGCTAAAAAGAAAGATAATTCGGATAATCCCAATTAGAATATGCATATATTTCT  
CATTCCTTTAGTTTTTCTACAATCTATCATACAATAAAATGGAAGGGCTAACATCATAAAATTTTGAATAATAAAAAACAAATTA  
TTGAAAAAGGTCAAATAGGTCATATAATATAGTCAAAGAAGGTCAAAAAGGGGTGATATACATGCACAATATGCTGACATCATA  
GAACAATACATCAAACGTTTATTTGAAGAGTCGAATGAAGATGTCGTTGAAATTCAGAGAGCGAATATCGCACAGCGTTTTGATTG  
TGTACCATCACAATTAATATGTAAATCAAACACGATTCACTAATGAACATGGTTATGAAATCGAAAAGTAAACGTGGTGGTGGTG  
GTTACATCCGAATCACTAAAATTGAAATAAAGATGCAACAGGTTATATTAATCATTTGCTTCAGCTGATTGGACCTTCTATTTCTCA  
ACAACAAGCTTATTATATTATTGATGGGCTTTTAGATAAAATGTTAATAAATGAACGTGAAGCTAAAATGATTCAAGCAGTTATTGA  
TAGAGAAACGCTATCAATGGATATGGTTTCTAGAGATATTATTAGAGCAAAATTTTTAAAACGTTTGTACCAGTTATAAATTATTA  
CTAAATGAAATGAGGTGTTGAAGTGCTTTGTGAAAATTTGCAACTAATGAAGCGGAATTAAGAAGTTAAAGTTACAAGTAAAAATA  
AAACAGAAGAAAAATGGTGTGTCAAACTTGTGCTGAGGGGCACCATCCGTGGAATCAAGCTAATGAACAACCTGAATATCAAGA  
ACATCAAGATAATTTGGAAGAAGCATTGTTGTTAAGCAAATTTTACAACATTTAGCTACGAAAACATGGCATTAAATTTTCAAGAAGT  
AGCGTTTAAAGAAGAAAAACGTTGCCCATCATGTGCATATGACTTTGAAAGATATTGCACATGTTGGTAAATTTGGGTGTGCTAATTG  
TTATGCAACATTTAAAGATGACATCATTGATATCGTCCGCAGAGTTCAGGTGGACAATTTGAGCACGTTGGAAGACACCACATT  
TTCACATAAAAAAGATAGCTTTAAAGCGAAAAATCGAAGAAAAAGAATGAATATTTGAAAAAATTTATTGAAATCCAGATTTTGAGG  
AAGCAGCCATTGTTAGAGATGAAATTAAGCACTAAAAGCTGAGAGTGAGGTGCAACATGATGACGCATAATATTCATGATAATAT  
CAGCCAATGGATGAAAGTAATGAAGAAACACCAATTGTTATGCTTCTAGAATTCGGTTAGCGCTAAATTTGAAAAATCATGTGC  
ATCCACTAATGTATGCTACTGAAAATGATGGATTGAGGTTATAAATGAGTTACAAGATGCTTGCCTGCAATTTGAATTAATGCGTC  
TTGATCAAATGGATCAACAAAGTAAAATGAAAATGGTTGCAAAGCATTGATTAGTCTTGAACATAAAAAACACCAGCAGCCGCA  
GTATTAGTGAATGATGATGAATCTTTAAGTGTCATGATAAATGAAGAGGACCATATTCGTATTCAAGCTATGGGAACGACACGAC  
ATTACAGGCTTTATATAATCAAGCTTCATCAATTGATGATGAATTAGATCGAAGCCTTGATATAAGTTATGATGAACAACCTGGTTA  
TTTAACATCATGTCTACCAATATAGGTACTGGTATGAGAGCAAGCGTGATGCTACATTTACCAGGTCTATCTATTATGAAAAGAT  
GACACGGATTGCTCAAACCATTAATCGTTTTGGATATACAATCAGAGGTATTTACGGTGAAGGTTTCGCAAGTTTATGGACATACCTA  
TCAAGTATCCAACCACTTACACTTGGTAAATCTGAGTTAGAAATCATAGAAACATTAACAGAAGTTGTTAATCAATCATTCATGA  
AGAAAAACAAATACGACAAAAGTTAGACACTTATAATCAATTAGAAACACAAGACCGTGTTTTTCGCTCGCTAGGTATTTTACAAA  
ACTGTGAATGATAACTATGGAAGAGGCTTCTATAGATTAAAGCAAGTTAACTTGGTATAGATTAAATTTACATTTGACATAAAA  
ACTTTAAATTTAATGAATTGATGGTAGCTATACAGTCACCATTTTATTAGATGAAGAAGATGACAAATCTGTAAAAAGAAAAACGA  
GCAGATATACTAAGAGAACATATAAAGTAGGAGGTCATTATTTATGTTATTTGGTAGATTAACTGAGCGTGCACAGCGCGTATTAGC  
ACATGCACAAGAAGAAGCAATTCGTTTAAATCATTCAAATATAGGAACAGAACACCTATTATTGGGACTAATGAAAGAACCTGAAG  
GAATTGCTGCAAAAGTATTAGAAAGTTTTAATATCACTGAAGATAAAGTAATTGAAGAAGTTGAAAAATTAATCGGACATGGTCAA  
GATCATGTTGGTACATTGCATTATACCTAGAGCTAAAAAGTTATTGAATTATCGATGGATGAAGCTAGAAAATTACATCACAAT  
TTTGTGGAACGGAACATATTTTATTAGGCTTGATTCTGTGAAAATGAAGGTGTTGCAGCAAGAGTTTTTGCAAATCTAGATTTAAAT  
ATTACTAAAGCACGTGCACAAGTTGTGAAAGCTTTAGGAAACCTGAAATGAGTAATAAAAAATGCACAAGCTAGTAAGTCAATAAA  
TACTCCAATTTAGATGTTTAGCTCGTGACTTAACAGTCAATTCGCAAGACCGGTACATTAGATCCTGTTATAGGACGTGATAAAGA  
AATTACACGTGTAAATTGAAGTATTAAAGTAGACTACGAAACAAATCCTGTACTTATTGGAGAGCCAGGTGTGGTAAAACTGCTA  
TTGCTGAAGGTTTAGCGCAAGCCATAGTGAATAATGAGGTACCAGAGACATTAAGATAAGCGTGTTATGTCTTTAGATATGGGA  
ACAGTAGTTGCAGGTAATAATATCGTGGTGAATTTGAAGAGCGTCTGAAAAAGGTTATGGAAGAAATCCAACAAGCAGGTAATGT  
CATCCTATTTTATTGATGAGTTGCATACTTTAGTTGGTGTGGTGGTGTGAAGGTGCTATCGATGCTTCGAATATTTTGAACCGGCA  
TTAGCACGTGGTGAATTACAATGTATTGGTGCTACTACATTAGATGAATATCGCAAAAATATTGAAAAAGACGCGGCTTTAGAACG  
TCGTTTCCAACCTGTACAAGTTGATGAACCTTCAGTAGTAGATACAGTTGCTATTTTAAAAAGGATTAAGAGATCGTTACGAAGCACA  
CCATCGTATTAATATTTTACAGACGAAGCTATTGAAGCAGCTGTTAAATTAAGTAACAGATACGTTTCAGATCGTTTCTTACCAGATAA  
AGCAATTGAAATTAATGATGAAGCAAGTTCTAAAGTAAGACTTAAGAGTCATACGACACCTAATAATTTAAAAGAAATGAACAAG  
AAATTTGAAAAAGTAAAAATGAAAAAGATGCCGAGTACATGCTAAGAGTTTGAATGCTGCTAACTGCTGATAAAGCAAAAC  
AAAACCTGAAAAAGCAATATGAAGAAGCTAAAAATGAATGGAAGAATGCACAAAATGGCATGTCAACTTCATTGTGAGAAGAAGAT  
ATTGCTGAAGTTATTGCAGGATGGACAGGTATCCCATTAATACTAAAATCAATGAAACAGAATCTGAAAAACTTCTTAGTCTAGAAGA  
TACATTACATGAGAGAGTTATTGGGCAAAAAGATGCTGTTAATTCATCAGTAAAGCGGTTAGACGTGCCCGTGCAGGGTTAAAAG  
ATCCTAAACGACCAATTGGTAGCTTTATCTTCTTGGACCAACTGGTGTGGTAAAACCTGAATTAGCTAGAGCTTTAGCTGAATCAA  
TGTTTGGCGATGATGATGCGATGATCCGTGTAGACATGAGTGAATTTATGGAAAAACACGCAGTGAGCCGATTAGTTGGTGCTCCTC  
CAGGATATGTTGGTCATGATGATGGTGGACAATTAAGTAAAAAGTTAGACGTAAACCATATTCTGTAATTTTATTGATGAAATTG  
AAAAAGCTCATCCAGATGTATTTAATATTCTATTACAAGTTTATAGATGATGGACATTTGACAGATAAAAAGGACGTACAGTTGATT  
TCAGAAATACAAATTATCATAATGACATCAAAACGTTTGGGCAAGAAATTACAAGATCAACGATTGCTGGATTGCTGGTTCAAGT  
GATGGACAAGATTATGAAACAATTGCAAAAACGATGTTAAAAGAAATTAATAAATTCATTCCGTCCAGAATTTTAAACCGTGATAGA  
TGATATCATTGTATTCCATAAACTAACAAAAGAAGAAATTAATAAAGAAATGTAACAATGATGGTTAATAAATTAACAATCGATTAT  
CTGAACAAAACATAAATATTATTGTTACTGATAAAGCGAAAGACAAAATCGCAGAAGAAGGATATGATCCAGAATATGGTGCAAG

ACCATTAATTAGAGCGATACAAAAAACTATCGAAGATAATTTAAGTGAATTAATATTAGATGGTAATCAAATTGAAGGTAAGAAA  
TTACAGTAGATCATGATGGTAAAGAGTTTAAATATGACATTGCTGAACAAAACCTTCAGAACTAAAACACCATCGCAACCATAATTA  
TAAAAACAGTCCAAAACAAATTTAAAGTTTTGGGCTGTTTTTTTAGTAGCATTGAACTATAGAAAATTCGTGAAAGTATCCATCAACGAA  
ACAATCTATAAAACAATCATCAAAGGATAGTTAAGAATTATATGTAAACAAGTTAATGAGCCTACAGCGATAGCATAAAGGTATGAA  
TTTTTATAAAGGTTTTTTGTTGAAGATACTAGCAACTTACGTCAAAAATAAAATAGGTCTATATAATATTGTGATAAATCTAGAGAA  
AAGAGTTTACTAAGAAATTTATTAAGATTTTATCTTTGAAAGATACCGACTATCAACATGATGTAAGTTTATTTTATAATATTCATAAA  
AAATAAATCTGGTAAAACAGTTTGCCTAGTAGTCATGTTAAAAATACAAACAAATGTAACCTCACATTTAATTTGTCATAATGGGAAT  
GTGCGTTTTAAATAGATTTGTTCAAAGGAAAAGTGGAGGTGCAATTTTGGCCAAGAAAAAAGTGATTTTTGAATGTATGGCTTGTGGT  
TATCAATCTCCTAAATGGATGGGAAATGTCCTAATTGTGGCGCTTGAATCAAATGGAGGAAATTTGTTGAAAAAGCAGCCAATCC  
TAAACATGGAGTTAAAACCAAGGAATTAGCAGGTAAAGTACAAAAATTTAAATAGTATTAACATGAAACAACGCCGAGAGTGTTA  
ACAGATTACAGAGAATTCAACCGTGTATTAGGTGGAGGTATTGTGAGCGGATCGTTAGTACTTATTGGTGGGGATCCAGGTATTGGT  
AAGTCAACGTTACTTTTACAAATTTGTGCATCGTTATCTCAAAAGAAAAAAGTACTATATATTACTGGAGAAGAAATCGCTTAGTCAG  
ACTAAATTACGTGCAGAGCGATTAGATGAAGATTCAAGTGAATTGCAAGTATTAGCTGAAACAGATCTTGAAGTTATTTATCAAAC  
AGTAAAAGAAGAACAACCTGATTATTAGTAGTGGATTGATTCAAACAATATATCATCTGAAATCAGCTCTGCGCCAGGTTCTGT  
TTCACAAGTTTCGTGAAAGTACACAAAGTTAATGAATATTGCTAAACAAATGAACATTGCAACTTTTATAGTGGGTCATGTAACGAA  
AGAAGGTCAAATTTGCTGGCCCAAGATTGCTAGAACACATGGTTGATACTGTGCTTTATTTTGAAGGCGATGAACACCACGCATATCG  
AATTTTGCAGCTGTTAAAAACCGTTTTGGTTCAACGAATGAAATGGGAATCTTTCGAAATGAAGCAAAGTGGATTAAAAAGGTGTA  
ATAATCCATCTGAAATGTTTTAGAGAACGTTTCAACAAATGTTCCAGTTTCAACAATTTGTGCAACCATGGAGGGAACACAGACCA  
CTTTTATAAGAAGTTCAAGCGCTGGTAACCTCCAACGACTTTTAAACAATCCGACGAATGGCAACAGGATTGATCATATAATCGATTA  
AGTTTGTGATGGCTGTTTTGGAAAAAGAAAGAAATTATCTATTACAACAACAAGATGCTTATATCAAAGTAGCTGCGCGGTGTAAA  
GTTAACGGAGCCAGCAGTTGATTAAAGTGAATTGTAGCAACTGCATCTAGCTTTAAAGATAAAGCTGTGACGGATTAGATTGCTA  
TATTGGAGAAGTTGGTTTAAACGGGCGAGGTACGTCGTGTATCTCGGATAGAACAACGCGTGCAAGAGGCTGCAAAACTAGGTTTCA  
AACGTGTAATTATTCCTAAAAATAATATAGGCGGATGGACATATCCTGAAGGTATACAAGTAATAGGTGTAACCTACTGTACATGAA  
GCATTGTCAATTTGCTCTTCATTCATAAAACATCAAGAAAGGAGGACATTGTGTGAATATCGTTAAACTAATGGTTATTATTATTTACT  
TAATTATTGGGAGCGCATTAGGAATAATTATTATTCCTGAAATTGCAATGATCTTGGATTACAAAACCTCCAGCTTTTTAAAAAATC  
ACTATGTAGATGGCATTATCGGTAGTATTTTTATGTTCTTAATTTTTGGTGTATTTATTAGACGAGTTACTAACGCTATAAAAGGTTT  
AGAACATTTTTATTATGCGTAGAAGTGCTGTTGAAATACTATTCGCAACAATAGGTTTAAATAATCGGATTACTTATTTCTGTTATGGTG  
TCGTTTATATTAGAATCAATTGGTAACTCTATTTTTAATCATTTTCTTCTGTCATAATTACGATATTACTATGTTATTTTCGGTTTCCA  
ATTTGGCCTTAAAAACGAGATGAAATGTTAATGTTTTTACCTGAGAATATAGCGCGTTCCATGTCACAACATACTAAAAGTGCTAC  
GCCAAAAATTATCGACACAAGCGCAATTATTGATGGTCGTATTTAGAAGTCATTCGTTGCGGTTTTATCGATGGCAATATTTTAATT  
CCACAAGGTGTTATTAATGAATTACAAATTTGTTGCAGATTCAAATGACAGTGTTAAACGTGAAAAGGGTAAAAAGAGGCTTAGATAT  
TTTAAATGAATTGTATGATTTAGATTATCCTACAAAGGTTATACATCCAACCTAAAACACATAGTGATATTGATACAATGCTATTA  
GCTAGCTAAACAATATCATGCAAGTATTATTACGACAGATTTCAACCTAAATAAAGTTTGTATGTACATGGTATCAAAGCATTA  
TGTTAATGATTTATCAGAAGCAATCAAACCTAATGTACATCAAGGTGATCAACTGCATATTTTACGTGACAAAAATGGGTAAAGAGC  
CTGGTCAGGCAGTAGGATATCTAGATGATGGTACGATGGTGGTTGTGATGCTAAAAATCTTATTGGCAGTCATGTCAATTTAG  
AAGTAGTCAGCTTATTGCAAAACATCTTCAGGAAGAATTGTTTTGTCTAAAAAATCGAAGATACAGTATCATTATAAAAACTGTAGT  
TGACGAAAAACAAATAGATATTAAGGATATGAAATGGCGAAGTTTGAATTTGAAGTATAACTATAAATAAATGCAAAACATA  
TTAGTTATCAAAAAATACAAATAGTGCTAATATATCATTGAAACAAGTTCATTAAGTGTTAAATTTTAGATATTAATAAAGTTATTC  
TTATAGCAATCAAGACATACAAATTAGAATCAATTTTAACTGATTTGAATAGTTAATTTGAAGTTTAAATTCACAGTACATAATAT  
TCATTTTTAAGTCGTTGAAATGTTTATGTAGTGCAGTCTTGATTCTTAGGGATAGCTTTTTTAAAGTGTTGAAAAAACAACCTGCTTC  
TATTTAAATTTAAGCATATTACCCAGGGAATTATGTTATGATTAACAATGAAATATTTTAAAGGTCATGTTAAAAAGCATTGTTTC  
GTTTTAACAATAAGACGAGTTAGACATTTGTTATGACGGTCGAAGATAGCAATGAACAATTTATATGAACCTAAGTTGAAAACTG  
ATATTTAATTTAGGAGTGAAAAAATGAGCGATCGTATAAGAGTAAAGATGACACCAAGTCCAATGTTTCTTCATATTGGTAAT  
GCAAGAACAGCATATTTCAAATTACTTGTATGCTAAACATTACAACGGAGATTTTGTGATTGCAATTGAAGTACTGATAAAAAACGT  
AATTTAGAAGATGGAGAAACATCACAATTTGATAATCTTAAATGGTTAGGATTAGATTGGGATGAGTCTGTAGATAAAGACAATGG  
CTACGGACCATATCGTCAATCTGAACGTCAACATATCTACCAACCATTAAATAGATCAGTTACTAGCAGAAGATAAAGCATATAAAT  
GCTATATGACAGAAGAAGAAATTAGAAGCTGAACGTGAAGCGCAATCGCTCGTGGTGAATGCCTCGCTATGGTGGTCAACATGCG  
CATTTGACTGAAGAACAACGTCAACAATTTGAAGCAGAAGGACGCCAACCATCAATTCGTTCCGAGTACCTCAAAACCAAACGTA  
TTCATTTGATGATATGGTAAAAGGAAATATTTCAATTTGATTCAAATGGTATTGGTGACTGGGTTATCGTAAAAAAGATGGCATTCC  
AACGTACAATTTTGCAGTAGCTATAGATGATCATTACATGCAAAATTCAGATGTAATTCGTGGTGATGATCATATTTCAAACACGCC  
TAAACAAATTTAGATTATGAAGCATTGGCTGGGAGCCACTGTTTTGGTCTATATGTCATTAATTTGTAATGAAGACGTAAGAAA  
GTTAAGTAAACGTGATGGGCAAAATTTTACAATTTATGACCAATATCGTGACTTAGGTTATTTACCTGAAGCGTTATTTAATTTTATT  
GCGTTATTAGGTTGGTCTCCTGAAGGTGAAGAAGAAATCTTTCTAAAGAAGAATTTATCAAAATCTTTGATGAAAAAGCGTTTGTCA  
AAATCACCAGCATTTTTCGATAAGCAAAAAATTAGCATGGGTTAATAACCAATATATGAAACAAAAAGATACTGAAACAGTATTCCA  
ATTAGCATTACCTCATTTAATTAAGCAAATTTGATTCCTGAGGTGCCGTCAGAAGAGGATTATCTTTGGGACGCAAAATTAATTGC  
GCTTTATCAAAAAGAAATGGGTTATGCCGGTGAATTTGACCTTTATCAGAAATGTTCTTAAAGAAATGCCAGCTCTTGGTGAAGA  
AGAACAACAAGTGATTAATGGAGAGCAAGTACCAGAGTTAATGACGCCTTATTTCAGTAAATTAGAAGCACTTGAACCATTTGAAG  
CGGCTGAAATTTAAAAAGACAATTAAGAAGTTCAAAAAAGAAACAGGAATAAAAGGCAAGCAATTTATATGCCTATTTCGTGTGGCT  
GTAACAGGCCAAATGCATGGTCTGAATTAACCAATACAATTTGAAGTACTTGGTAAAGAAAAAGTGCTAAACCGTTTAAACAATA  
TAAGTAATGAAATAGACATGAAGTCAAGGTAGTATACTTGAATTTATAACGTAAACCATATGATAAGTTGTATTATAACAAATTAC  
AACAATATGAATAAAGTATTTTATATAAAACGAAGGATTAGTAATTAATTTTATACGATGCAGAGAGTGACGGTTGCTGTGAGTA  
CAACGTAGAAATTAATGAATGCACCTTCGTAATAATGAATTAATATATAATGAGAGTGATGAGCATTAAAGTTGACTTAGTTTCCTTG  
ATAATTTGGAAGCGCCCGCAATATTATTAATGTTATTCGCTAAATTCAGAGTGGAACCGTGCGGAAGCGCCTCTAACAATACAATTT  
GTATGTTAGTGGTGCTTTTTTGATATTTAATTTTCGAGGTACTTCAATTAATGTATTTACGTAGTTCAATCATTGAGGAGGAAATGATC  
TTGTTAAAAAGAATGAGAGACGATATAAAAAATGGTATTTGAGCAGGATCCAGCGGCACGTTCAACATTAGAAGTCATTACAACGTA  
TGCAGGTTTACATGCAAGTTTGGAGTCATTTGATTGCACATAAGTTATACAACCAAAAAAATATGTTGCAGCACGCGGATATCTCA  
AATTTCAAGATTTTTTACAGGTATAGAAATCCATCCAGGTGCTAAAAATGGAAAGCGTCTATTTATAGATCATGGTATGGGCGTTGT  
AATAGGAGAAACATGTACAATTTGGTGATAATGTGACAATCTATCAAGCGTGACACTTGGTGGGACGGGAAAGAAAGAGGAA  
AGACACCCAGATATAGGAGACAATGTTTTAATAGCAGCGGTGCGAAAGTTTTAGGAAATATTAATAAATTTCAAATGTAATAT  
TGGTGCAAAATTCAGTTGTTTTACAATCAGTTCCAAGCTATTCAACGGTTGTTGGTATACCAGGACATATTGTTAAGCAAGATGGTGT  
TCGAGTTGGAAAAACATTTGATCATCGCCATCTACCTGATCCAATTTATGAACAAATTAAGCATTTAGAACGACAACCTTGAAGAGAC

TAGGAATGGAGAGATTCAAGATGATTACATTATATAATACGCTTACACGTCAAAAAGAAGTGTTCAAGCCTATAGAACCAGGAAAA  
GTAAAAATGTATGTATGGTCTACTGTATATAACTACATTCATATTGGTAACGCAAGACCAGCAATTAATTATGACGTAGTGAGA  
CGTTACTTTGAATACCAAGGATATAATGTAGAATATGTATCAAAATTTACAGACGTAGATGATAAATTAATTAACGTTCTCAAGAA  
TAAATCAGTCTGTTCCCGAAATTCAGAAAAATATATCGCAGCTTTTCATGAAGATGTTGGTGC GTTAAATGTTAGAAAAGCGACT  
TCAATCCAAGGGTAATGGACCATATGGATGACATTATTCATTTATTAAGAGTTGGTGGATCAAGGTTATGCATATGAAAGTGGT  
GGCGATGTTTACTTTAGAACACGTAAATTTGAAGGTTATGGTAAATTAAGTCATCAATCCATAGATGACTTAAAGTGGGTGCTCGT  
ATAGATGCAGGAGAGCATAAAGAAGATGCATTGATTTTACATTGTGGAAAAAGCGAAGCCTGGCGAGATTAGTTGGGATAGCCC  
ATTTGGTGAAGGTAGACCAGGATGGCATATAGAATGTTCTGTAATGGCATTTCATGAGCTAGGACCTACAATTGATATACATGCGG  
GTGGTTCAGATTTACAATTTCCACATCATGAAAAATGAAATAGCACAATCAGAAGCACATAATCATGCGCCATTTGCTAATTATTGGA  
TGCATAATGGTTTCATTAATATTGATAATGAAAAAATGAGTAAATCAGTACGCAACTTTATTTAGTTCACGATATTATTAAGAAG  
TTGATCCAGATGTACTAAGATTCTTTATGATTAGCGTACATTATAGAAGCCCAATTAATACTAGAAATTGGTAGAATCAGCAC  
GTAGTGGACTAGAGCGTATTTCGCAATAGTTATCAATTAATTGAAGAGCGCGCACAAATTGCTACTAATATTGAAAAATCAACAGACA  
TATATTGATCAAAATGATGCGATTTTAAATCGTTTTGAAACAGTTATGAATGATGATTTTAATACAGCTAATGCAATTACAGCTTGGT  
ATGATTTAGCAAACTTGCGAATAAATATGTACTAGAGAACACAACATCAACAGAAGTAATTGATAAATTTAAAGCAGTTTATCAA  
ATTTTCAGCGATGTTTtaggtgtaccgttaaaatctaaaaatgcagatgaattattggatgaagatggtgaaaaatataatcgaagag  
cgtaatgaagcaaggaaaaacaaagattttgcacgagcagatgaaattcgagacatgctgaaatcacaaaaacattatattagaag  
acacacctcaaggggttagatttaaactgtgataatcaacaagataatcacattaaattattgaatccattgacctagcatatattg  
ggagcgcagctcttagatcaatatgtacgtacctattctgttttaaagctaaaaagtaagcctaataaaactacatcaaatgtctaaa  
aaatatgtatctgccaaaagtcaggcgcaaacgttagaataatttaattggagcaagaatgggtttacagacgcaagaataatggatatttt  
gaagcagaggcgtaacgcgaaaaagtcatactaaagctaaaaaactgatgtttcaaacatatcgtaaaaagttcagcgatagaagca  
gtgatagggttttctttatttagaaaaaagagaagaacgattagaggcattattaaataaaataataacaatagtaaacgaaaggta  
gtgacgatgtggaagatacgggttattgttggtaggcattgctgttagagaagcgattattactgggcattccgataaataagatattg  
attcaagaaggattataaaagcaacaaatataatgaaattttaaaaaattgcaaaagatcaaaaaatcattgttcaaaactgtaccaaa  
atctaaattagattttttagcaaatgcaccacatcagggtgttgcagcgcttattgcaccatattgaatatgctgacttcgatcaattt  
ttaaaacagcaaaaagaaaaagaaggtttatcgacagtaacttatattagacggcttagaagacccacataaacttgggatcaatttt  
aagaacagccgatgcaaacgggagttgatgggtgttatttcttaaacgctcggttcagttactaactacgcaaacagttgcaaaagcct  
caacaggtgcaattgaaacatgtaccagttattcgagtgacaaaatttagctaaaaactatcgatgaactaaaagataatggcttttgg  
gtagctggcactgaagctaataatgcaacagattatagaaatctagaagcggacatgtcattggctattgttaattggtagcgaagg  
acagggatagatgcgcctagtaagtataatgcgatttttatattaagattccaatgggttgacatgtaaacagtttgaatgcttc  
ggttgcagcaagtttaattgatgtacgaagtatttgcaaaaagacatgatgttggagaaaataatgaaagaacgttacttaatcat  
tgatggatataaatatgataaggacaatcaccacgctaagcgccatttgcaaaagagaatttagaagaagctagaatgcaattaata  
gatgcaattgcaaaattataatgcagttatttcagatgaaattatttgtgttttcgatgcttatgaccaatcgggtgttgaaaagagaa  
tacaatgtatcatggcgttaaaacgatttttaccgaagaaaaagaaaacagctgatagtttcatagaacggttatgtttatgaactttat  
gacaactactaagcataattacagttgtacaagtgatgatgtagtgagcaacatgctatctttggatcaggtgcataatagaatc  
atctcgcaaatgtggagagatttaaaagaaaaatgaaattgagtgagtaaaatcattagatagataaagataaaacaaagccaaga  
actcgaattccggttatcttctgaaatccttgcagaatttgaaaaaatacgaagagacatcataagaaatgacatttccgctcatctt  
gaaattttgaatgtaacaatattaaactaaccttaaattttagatagaaggggttagtttaatacttgaaatcagatttgacaactc  
aagacagtacaatcaaacgtaacaatgcaataaatgataaagacttcgaaaaagttagtaaatggatctaaaaccattaattattcga  
cgcatcaaaacatttggatttaatcattatgatttagaagacttatatcaagaaatacttatacggatgtataggtcggtccaaaca  
tttgatttttagtgagagcagcctttcacaaattatgttcaatgtttaattacgtctgtaaagtatgattatttgagaaaaatatttag  
ctacaaaataaagaatggataatttgatttaattgaatatagagttacgtatccatgtgcaataaagcgttatgatgttgaaaaacaat  
tatttgaatcaattagcaattaaagagttgatttcgtcagtttaagtatttgagtgcatgttgaaaaagatgtcatgtatttaattgtgtg  
aacaatataagccgagagaaattgctcaactgagtgcatgttaaaagagaaaagtgatttataatggcatacaacgatgtaaaaaataa  
aataaaaacgttattttcaaaatgatttgaaaaagcgcttaggacgtgaattgaattagaacgtgttacttactgatgggttgacattt  
gttataaaattttatgtatagtatactgggtattataatgaataaagggtgaattattgtgagaaaaatacctttaaattgtgaaagcttg  
tggaatagaaattataatgttccctaagcaagaaggctcggcaacaagattaaccttaaaagaaatattgtccaaaatgtaacgcg  
acacaattcataaagaatcgaaataaatacattcgaaataatactttgataatatgttcaaaggatttgaggaggtgagcagatggc  
taaaaaagaaaagtttcttttaaaggcggttaagtctgaaatggaaaaaacaagttggccgacgaaagaagagctatttaaatatactg  
taattgtagtttctactgttatattcttcttagtcttttctatgccttagatttaggaattacagcattgaaaaatttattatttgg  
tagaggagtgaagacatgtctgaagaagttggcgcaaaagcgttggtatgcagtgcatatattctggatagaaaaataaagttaa  
aaagaatttagcaaaagagtagaattctatgaatatgactgaacaaatctttagagtagtcataccggaagaagaagaaactcaa  
gtaaaaagatggcaaaagctaaaaacgactgttaaaaaaaactttccctggatattgttttagtggaattaatcagacagatgaatc  
gtatgtggtaagaataacaccaggtgttactgggtttgtagggtctgcaggtgcaggggtctaagccaaatccattgttaccagaaga  
agttcgcttcattcttaaaacaaatgggtcttaaaagaaaagactatcgatgttgaactcgaagttggcgagcaagttcgtattaaatc  
aggtccatttgcgaatcaagttgggtgaagttcaagaaattgaaacagataagtttaagctaacagttattagtagatatgtttggcc  
gagaaacaccagtagaagttgaattcgatcaaatagaaaagctttaatttaacaattaaaagttattaaactaaccaaaagataaaaa  
agagtattgattttttaattagaaaagtgtaaaattatgtggtcgcgcttttagagcgcccatttcgctacgaaatgttaagagtg  
ggagggcaaaaactgagccctgtgaccacatcacgatatacaggagggtgcacatcggtggctaaaaaaagtagataaagttgttaatt  
acaaattcctgcaggttaagcgaattccagcaccagcagttgggtccagcattagggtcaagcaggttggaacatcatgggattctgt  
aagagttcaatgcagctactcaagatcaagcaggtttaattattccggtagaaaatcagtggtttatgaagatcgtgtttattacattta  
ttacaaaaaactccaccggctccagttacttataaaaaagcagctggattgaaaaaaggttcaggcgcaacccaaacaaaactaaagtt  
gctacagtaactaaagatcaagtacgcgaaattgctaacagcaaaatgcaagacttaaacgctgctgacgaagaagcagctatgc  
gtattatcgaaggtagtcacgtagtagtggtatcgtttagaataaattttacgaatattaaatttgattacatgattttaaacgatg  
aagcagataacagagataataatgatgaattataaatataatctgaatgactagattaatgattgatttattcataagattaattct  
tctgttgcctgctttaaacttgcatatagcaagtaattgtgggaggaatttccgctaaaaccactaaaggaggaactataaatggcta  
aaaaaggtaaaaagttatcaagaagcagctagtaaaagttgaccgtactcagcactacagtggtgaagaagcaattaaatttagctaa  
agaaacaagatttgctaactttgacgcttctgttgaagttgcattccggtttaggaattgtatcacgttaaaaatgaccaacaaatccg  
tggtgcagttgtattaccaacggaactggttaaatcaciaagtgatttagtattcgttaaaggtagacaaaattgctgaagctgaag  
cagcaggtgctgactatgttaggtgaagcagaattacgttcaaaaaatccaacaaggttggttcgacttcgatgtagtagttgctaca  
ccagacatgatgggtgaagttggtaaaataggctcgtgtattaggacaaaaggtttaatgccaaaccctaaaactggaactgtaac  
aatggatgttaaaaaagctgttgaagaaatcaaagctggtaagtagaataccgtgctgaaaaagctggatcgtacatgcataca

TTGGTAAAGTTTCATTTACTGATGAACAATTAATTGAAAACTTCAACTCTTTACAAGATGTATTAGCTAAAGCTAAACCATCATCTG  
CTAAAGGTACATACTTCAAATCTGTTGCTGTAACCTACAACAATGGGTCCTGGAGTTAAAAATTGATACTGCAAGTTTCAAATAATAAA  
TGATATAAAACAATTACAGGCTGAAAGAAATATCTTTTACGTCTGTAAAAATATATTGACAATAAGTAATTTCCAAGTTATATTACTTA  
TTGTGATTATTTTACCTAAGACAGTAGGAGTTATTTATAACTTAAAACTTATCTGCGGAGGCTAAAAATTGACTTGAACGTGATGAT  
CTATGATCTTTCAAGCACTTTTGGCGTGGGTAGAAAGTGCTTTTTTTATTAATTTTAAAAAAGCACCAAAAAATTTAAATGGAGGT  
GTCTGAATGTCTGCTATCATTGAAGCTAAAAAACAAGTAGTTGATGAAATTGCTGAGGTACTATCAAATTCAGTTTCAACAGTAATC  
GTTGACTACCGTGGATTAAACAGTAGCTGAAGTTACTGACTTACGTTTACAATTACGTGAAGCTGGTGGTGGAGTATAAAGTATACAAA  
AACACTATGGTACGTCGTGCAGCTGAAAAAGCTGGTATCGAAGGCTTAGATGAATTTCTTAACAGGTCTACTGCTATTGCAACTTCA  
AGTGAAGATGCTGTAGCTGCAGCGAAAGTAATTTCTGGATTGGCTAAAGATCATGAAGCATTAGAAATTAATCAGGCGTTATGGA  
AGGCAATGTATTACAGCAGAAGAAGTTAAAACTGTTGGTTCAATTACCTTCACACGATGGTCTTGATCTATGCTTTTTATCAGTATTA  
CAAGCTCCTGTACGCAACTTCGCTTATGCGGTTAAAGCTATTGGAGAACAAAAAGAAAGAGCGCTGAATAATTTTTAGCGTAAAA  
AAATTAATAAATGAGGAATTATAAATGGCTAATCATGAACAAATCATTGAAGCGATTAAAGAAATGTCAGTATTAGAATTAA  
ACGACTTAGTAAAAGCAATTGAAGAAGAATTTGGTGTAACTGCAGCTGCTCCAGTAGCAGTAGCAGGTGCAGCTGGTGGCGCTGAC  
GCTGCAGCAGAAAAAAGTGAATTTGACGTTGAGTTAACTTCAGCTGGTTCATCTAAAATCAAAGTTGTTAAAGCTGTTAAAGAAGC  
AACTGGTTTAGGATTAAAAAGATGCTAAAGAATTAGTAGACGGAGCTCTAAAGTAATCAAAGAAAGCTTTACCTAAAGAAGAAGCTG  
AAAAACTTAAAGAACAATTAGAAGAAGTTGGAGCTACTGTAGAATTAAAAATAATTCAAGTATCTTAACTTAATAATCAAAGTTTT  
ATAGCAAGTATTGCTATAATATAATGATTCTTTGAGAAGTTAAAAACCCGTTATTTTGATAACGGGGTTTTATTCTTTAAAGACTGA  
GTGAAATGTTTATAATTATAAGTACGAGTTACAAAGTGAAGTAGGTTGGAATAATGAGTCATTATTACGATGAAGATCCAAAGTGA  
ATTAGCAATGAACAACGTAATTCAATTAACACCTACATAAAATTGAATTTAATAACTGATAATGAGGTGTTTTTCGAAAGATAAA  
GTAGATTATGGTTCAGATGTTCTTGTTCAACTTTTTTAAAAAGCGCATCCACCTGGTCCAAGTAAGCGAATTGCCGATGTTGGTGTG  
GTTACGGACCAATTGGTTTGATGATTGCTAAAGTATCACCATCATTTCAATTACAATGCTAGATGTTAATCAGAGCGCTAGCCT  
TAGTTGAAAAAACAATAAATAAATGGTATTGATAATGCGATCGTAAAGGAAAGTGATGCTTTGTCTGCTGTGGAAGACAAAAGT  
TTTGATTTTATTTTAAACCAATCCACCAATAAGAGCAGGGAAAGAAACCGTGCATCGTATATTGAGCAAGCATTACATAGATTAGAC  
TCGAACGGTGAACATTTCTGTTGAATTCAGAAGAAGCAAGGTATGCCATCTGCAAGAAAAAGAAATGAATGAACTTTTTGGAATGT  
AGAAGTGGTAAATAAAGATAAAGGATATTACATTCTGAGAAGTATAAAAGCTTGAAATGAAATGGATATTCTGTTATAGTTATATA  
ATGTAAAAATTTATGTTTCAATAAGTGTGACTTTTACGTTAAATAGATAAGTTAATTAAGAATAAATATAGAATCGAAAAATGGTGT  
ATCATTAGTGTTGCCGTTTTCTTTTGTCTTTTATTAATATGCTTATGATATTTAGCTAAAAGCGGATCACATAATTTTTGAGGGGTG  
AATCTGTTTGGCAGGTCAAGTTGTCCAATATGGAAGACATCGTAAACGTAGAACTACGCGAGAATTTCAGAAGTATTAGAATTAC  
CAAACCTAATAGAAATTCAACTAAATCTTACGAGTGGTTCTAAGAGAAGGTTAATCGAAATGTTTAGAGACATTTCTCCAATTG  
AAGATTTTACTGGTAATTTGTCATTAGAGTTTGTGGATTACCGTTTAGGAGAACCAAAATATGATTTAGAAGAATCTAAAAACCGTG  
ACGCTACTTATGCTGCACCTCTTCGTGTAAGAGTGGCTCTAATCATTAAGAAACAGGAGAAGTTAAAGAACAAGAAGTCTTTATG  
GGTGATTTCCCATTAATGACTGATACAGGTACGTTCTGTTATCAATGGTGCAGAACGTGTAATCGTATCTCAATTAGTTCGTTACCAT  
CCGTTTATTTCAATGAAAAAATCGACAAAAATGGTCGTGAAAACTATGATGCAACAATTATTTCAAACCGTGGTGCATGGTTAGAA  
TATGAAACAGATGCTAAAGATGTTGTATACGTACGTATGATAGAACCGTAACTACCATTACAGTATTGTTACGTGCATTAAGGT  
TTCTCAAGTGACCAAGAAATTTTGGACCTTTTAGGTGACAAATGAATATTACGTAATACCTTTAGAGAAGACGGCACTGAAAACT  
GAACAAGCGTTATTAGAAATCTATGAACGTTTACGTCCAGGTGAACCACCAACTGTTGAAAATGCTAAAAAGTCTATTGTATTACG  
TTCTTTGATCCAAAACGCTATGACTTAGCAAGCGTGGGTGCTTATAAAAAACAAAAAATTACATTTAAACATCGTTTATTTAAT  
CAAAAATTAGCTGAGCCAATTGTAAATACTGAACTGGTGAATTTGTAGTTGAAGAAGGTACAGTGCTTGATCGTCGTAATTCGA  
CGAAATCATGGATGACTTGAATCAAATGCAACAGCGAAGTGTTGAATTGCATGGTAGCGTTATAGACGAGCCAGTAGAAATTC  
AATCAATTAAAGTATATGTTCCCTAACGATGATGAAGGTCTGACGACAACGTGAATTGGTAATGCTTTCCCTGACTCAGAAGTTAAAT  
GCATTACACCAGCAGATATCATTGCTTCAATGAGTTACTTCTTAACTTATTAAGCGGTATTGGATATACAGATGATATTGACCATT  
AGGTAACCGTCGTTTACGTTCTGTAGGTGAATTACTACAAAACCAATTCGTTATCGGTTTATCAAGAATGGAAAGAGTTGTACGTGA  
AAGAATGTCAATTAAGATACTGAGTCTATCACACCTCAACAATTAATTTACCTGACCTGTTATTGCACTTATTAAGAATCTTT  
GGTAGCTCTCAATTATCACAATTCATGGACCAAGCAAATCCATTAGCTGAGTTAACGCATAAACGTCGTCTATCAGCATTAGGACCT  
GGTGGTTTAAACACGTGAACGTGCTCAAATGGAAGTACGTGACGTTTACTACTCTCACTATGGCCGTATGTGTCCAATTGAAACACCT  
GAGGGACCAAAACATTGGATTGATTAACCTATTATCAAGTTATGCACGTGTAATGAATTCGGCTTTATTGAAACACCATATCGTAAA  
GTTGATTTAGATACACATGCTATCACTGATCAAATTGACTATTTAACAGCTGACGAAGAAGATAGCTATGTTGTAGCACAAGCAAAC  
TCTAAATTAGATGAAAAATGGTCGTTTCATGGATGATGAAGTTGTATGTCGTTTCCGTGGTAACAACACAGTTATGGCTAAAGAAAA  
ATGGATTATATGGATGATCGCCGAAGCAAGTTGTTTCAGCAGCGACAGCATGTATTCCATTCTTAGAAAAATGATGACTCAAACCGT  
GCATTGATGGGTGCGAACATGCAACGTCAAGCAGTGCCCTTTGATGAATCCAGAAGCACCATTGTTGGAACAGGTATGGAACACGT  
TGCAGCAGCTGATCTGGTGCAGCTATTACAGTATAAGCAGACAGGTGCTGTGTAACATGTTGAATCTAATGAAATCTTTGTACGTG  
TCTAGTTGAAGAGAAGACGGCGTTGAGCATGAAGTGAATAGATCGCTATCCATTAGCTAAATTTAAACGTTTCAAACTCAGGTACAT  
GTTACAACCAACGTCCAATCGTTGCAGTTGGAGATGTTGTTGAGTATAACGAGATTTTAGCAGATGGACCATCTATGGAATTAGGAG  
AAATGGCATTAGGTAGAAACGTAGTAGTTGGTTTCATGACTTGGGACGGTTACAACCTATGAGGATGCCGTTATCATGAGTGAAAGA  
CTTGTGAAAGATGACGTGTATACTTCTATTTCATATTGAAGAGTATGAATCAGAAGCAGTGATACTAAGTTAGGACCTGAAGAAAT  
CACAAGAGATATTCTAATGTTTCTGAAAGTGCACCTAAGAACTTAGACGATCGTGGTATCGTTTATATTGGTGCAGAAGTAAAGAA  
TGGAGATATTTTAGTTGGTAAAGTAACGCCTAAAGGTGTAAGTGAAGTTAACTGCCGAAGAAAGATTGTTACATGCAATCTTTGGTGA  
AAAAGCACGTGAAGTTAGAGATACTTCATTACGTGTACCTCACGGCGCTGGCGGTATCGTTCTTGATGTAAAAGTATTCAATCGCGA  
AGAAGGCGACGATACATTACCTGGTGTAAACCAATTAGTACGTGTATACATCGTTCAAAACGTAATAATTCATGTTGGTGATA  
AGATGTTGAGGATCGAGTGTGAACAAGGTGCTATTTCTAAGATTGTTCTTGAAGAAGATATGCCTTACTTACGACGCGACGTCGGA  
TCGATATCATGTTAAACCTCTTGGTGTACCATCTCGTATGAACATCGGACAAGTATTAGAGCTACCTTAGGTATGGCTGCTAAAA  
ATCTTGGTATTACGTTGCATCACCATGATTTGACGGTGCAAACGATGACGATGTATGGTCAACAATTGAAGAAGCTGGTATGGCTC  
GTGATGGTAAAACGTGACTTTATGATGGACGTACAGGTGAACCATTCGATAACCGTATTTTCAAGTGGTGAATGTACATGTTGAAAC  
TTGCGCATATGGTTGATGATAAATTACATGCGCGTTTAAACAGGACCATATTCATTGTTACACAACAACCACTTGGCGGTAAAGCGC  
AATTCGGTGGACAACGTTTTGGTGAGATGGAGGTATGGGCACCTGAAGCATATGGTGCTGCATACACATTACAAGAAATCTTAACTT  
ACAAATCCGATGATACAGTAGGACGTGTGAAAACATACGAGGCTATTGTTAAAGGTGAAAACATCTCTAGACCAAGTGTTCCAGAA  
TCATTCCGAGTATTGATGAAAGAATTACAAAGTTTAGGTTTAGATGTAAGTTATGGATGAGCAAGATAATGAAATCGAAATGAC  
AGACGTTGATGACGATGTTGTAGAACGCAAGTAGATTACAAACAATGATGCTCCTGAAACACAAAAAGAAAGTACTGATT  
AATACGCAATTTACAAAAACAGGCAAAAAGATACTAAGCTGAATTTTATTGATGATTACGTTTAGTACTTTAAGCCATTTTAAATAAA  
TGCAATCAATCAATAGCACAGCTAATCTAAATTGAAGGAGGTAGGCTCCTTGATTGATGTAAATAATTTCCATTATATGAAATA  
GGATTGGCTTACCTGAAAAAATCCGTTCTTGGTCTTTTGGTGAAGTTAAAAAACCTGAAACAATCAACTACCGTACATTAACCT

GAAAAAGATGGTCTATTCTGTGAAAGAATTTTCGGACCTACAAAAGACTGGGAATGTAGTTGTGGTAAATACAAACGTGTTTCGCTA  
CAAAGGCATGGTCTGTGACAGATGTGGAGTTGAAGTAACTAAATCTAAAGTACGTCGTGAAAGAATGGGTCACATTGAACCTTGCCTG  
CTCCAGTTTCTCACATTTGGTATTTCAAAGGTATACCAAGTCGTATGGGATTATTACTTGACATGTCACCAAGAGCATTAGAAGAAG  
TTATTTACTTTGCTTCTATGTTGTTGTAGATCCAGGTCCAACCTGGTTTGAAGAAAGAAAACCTTTATTATCTGAAGCTGAATTCAGAGA  
TTATTATGATAAATACCCAGGTCAATTCGTTGCAAAAAATGGGTGCAGAAGGTATTAAGATTACTTGAAGAGATTGATCTTGACGA  
AGAACTTAAATTGTTACGCGATGAGTTGGAATCAGCTACTGGTCAAAAGACTTACTCGTGCAATTAACCGTTTAGAAGTTGTTGAATC  
ATCCCGTAATTCAGGTAACAAACCTTCATGGATGATTTAGATGTACTTCCAATCATCCCACCAGAAATTCGTCCAATGGTTCAATTA  
GATGGTGGACGATTGCAACAAGTGACTTAAACGACTTATACCGTCGTGTAATTAATCGAAATAATCGTTTGAACCGTTTATTAGAT  
TTAGGTGCACCTGGTATCATCGTTCAAAACGAAAAACGTATGTTACAAGAAGCCGTTGACGCTTAAATTGATAATGGTCGTCGTGGT  
CGTCCAGTTACTGGCCCAGGTAACCGTCCATTAAAATCTTATCTCATATGTTAAAAAGGTAAACAAGGTCGTTTCCGTCAAAACTTA  
CTTGGTAAACGTGTTGACTATTACAGGACGTTTCAAGTTATTGCAGTAGGTCCAAGCTTGAATAATGTACCAATGTGGTTTACCAAAAGAA  
ATGGCACTTGAACCTTTAAACCATTCGTAATGAAAGAATTAGTTCAACGTGAAATTCGAACTAACATTAATAATGCGAAGAGTAA  
AATCGAACGTATGGATGATGAAGTTTGGGACGTATTGGAAGAAGTAATTAGAGAATCCTGTATTACTTAACCGTGCACCAACAC  
TTCATAGACTTGGTATTCAAGCATTGAAACCAACTTTAGTTGAAGGTCGTGCGATTCTGCTACATCCACTTGTAAACACAGCTTATAA  
CGTGACTTTGACGGTGACCAAAATGGCGGTTTACGTTCTTTATCAAAAAGAGGCACAAGCTGAAGCAAGAATGTTGATGTTAGCAG  
CACAAAACATCTTGAACCTTAAAGATGGTAAACCTGTAGTTACACCATCACAAAGATATGGTACTTGGTAACTATTACCTTACTTTAG  
AAAGAAAAGATGCAGTAAATACAGGCGCAATCTTTAATAATACAAATGAAGTATTAAGCATATGCAATGGCTTTGTACATTTA  
CACTAGAAATTTGGTGTACATGCAAGTTTCGTTCAATAATCCAACCTTACTGGAAGAACAACAAAGATTTGTCTGCTACGTAGTA  
GGTAAATTTATATTTCAATGAAATCAATCCAGATTCTTTGCTTATATTAATGAACCTACGCAAGAAACCTTAGAAAGAAAGACACC  
AAACAGATATTTATCGATCCTACAACCTTTAGGTGAAGGTGGATTAAAAGAATACTTTGAAAATGAAGAATTAATTGAACCTTTCAA  
CAAAAAATTCTTAGGTAATATTATTGCAGAAGTATTCAACAGATTTAGCATCACTGATACATCAATGATGTTAGACCGTATGAAAGA  
CTTAGGATTCAAATTTCTCATCTAAAGCTGGTATTACAGTAGGTGTTGCTGATATCGTAGTATTACCTGATAAGCAACAAATACTTGA  
TGAGCATGAAAAATTAGTCGACAGAATTACAAAACAAATCAACCGTGGTTAATCACTGAAGAAGAAAGATATAATGCAGTTGTTG  
AAATTTGGACAGATGCAAAAGATCAAATTCAGGTGAATTGATGCAATCACTTGATAAAAACTAACCCTAATCTTCATGATGAGTGAT  
TCAGGTGCCCCGTGGTAACGCATCTAATTTACACAGTTAGCAGGTATGCGTGGATTGATGGCCGCACCATCTGGTAAGATTATCGAA  
TTACCAATCACATCTTCATTCCTGGAAGGTTTAAACAGTACTTGAATACTTCACTCAACTACGGTGCACGTAAGGTCCTTGGCGATA  
CAGCATTTAAACAGCTGACTCAGGATATCTTACTGTCGCTGTTGTTGACGTGGCACAAGATGTTATTGTTCTGTAAGAAGACTGTG  
GTACTGATAGAGGTTTATTAGTTTCTGATATTAAGAAGGTACAGAAATGATTGAACCTTTATCGAACGTATTGAAGGTGCTTATT  
CTAAAGAAAACATTCGTCATCTGAACTGATGAAATAATCATTGCTCCTGATGAATTAATTACACCTGAAATTGCTAAGAAAATTA  
CAGATGCTGGTATTGAACAAATGTATATTCGCTCAGCATTTACTTGTAAACGCACGACATGGTGTGTTGTGAAAAATGTTACGGTAAAA  
ACCTTGCTACTGGTGAAGAAAGTTGAAGTTGGTGAAGCAGTTGGTACAATTGCAGCCCAATCTATCGGTGAACCAGGTACACAGCTT  
ACAATGCGTACATTCCATACAGGTGGGGTAGCAGGTAGCGATATCACACAAGGTCTTCTCTGATTCAAGAGATTTTCGAAGCACGT  
AACCCTAAAGGTCAAGCGGTAATTACGGAATCGAAGGTGTCGTAGAAGATTAATAATTAGCAAAAGATAGACAACAAGAAATTTG  
TTGTTAAAGGTGCTAATGAAACAAGATCATACCTTGCTTCAAGTACTTCAAGAATTTGTAGAAATCGGTGCAACCGTCAACCGTG  
GTGAAGTATTAAACAGGTTCTATTGAACCTAAGAATCTTATCTGTTGCTGGATTAAACCGGACTGAAAGCTACTTATTAAAAAG  
AAGTACAAAAAGTTTACCGTATGCAAGGTGTAGAAATCGACGATAAACACGTTGAGGTTATGGTTCGACAAATGTTACGTAAAGTT  
AGAATTATCGAAGCAGGTGATACGAAGTTATTACCAGGTTTATTAGTTGATATTACATACTTTACAGATGCAAAATAGAGAAGCATTT  
AAACACCGTAAGCGTCTGCAACAGCTAAACCAGTATTACTTGGTATTACTAAAGCATCACTTGAACAGAAAGTTTCTTATCTGCA  
GCATCATTCCAAGAAACAACAAGAGTTCTTACAGATGCAGCAATTAAGGTAAGCGTGATGACTTATTAGGTCTTAAAGAAAACGT  
AATTATTGGTAAGTTAATTCAGCTGGTACTGGTATGAGACGTTATAGCGACGTAAAATACGAAAAACAGCTAAACCAGTTGCAG  
AAGTTGAATCTCAAACGTAAGTAACGGAATAACAAGTATATAACAGAGGCTAAGTCTTTAGCCTCTTGTATTATTTATGTAAATTAT  
TTGATTTAATGTTGACGAATTTCTTGTTCATGTTAATATATTAAGGTTGATGCAAGCAGAATTTGGAGGATAAATTATTGTCTA  
AGGAAAAAGTTGCACGCTTTAACAACAACCATTTTGTAGTTGGTCTTAAAGAAACGCTTAAAGCAGTAAAGAAAGATCAAGTTACA  
TCTTTGATTATTGCTGAAGACGTTGAAGTATATTTAATGACTCGCGTGTAAAGCCAAATCAATCAGAAAAATATACCTGTATCTTTTT  
TCAAAAGCAAAACATGCTTTGGGTAAACATGTAGGTATTAACGTCAATGCGACAATAGTAGCATTGATTAAATGAGAATTAGTAAGT  
GTTTTACTTACTAAATTTTATTAACTAAAAATGAACCACCTGGATGTGTGGGATTAAAAAGTGAAGAGAGGAGGACATATCACAT  
GCCAACTATTAACCAATTAGTACGTAAACCAAGACAAAAGCAAAATCAAAAAATCAGATTCTCCAGCTTTAAATAAAGGTTTCAACA  
GTAAAAAGAAAAAATTTACTGACTTAAACTACCCACAAAAACGTGGTGTATGTACTCGTGATAGGTACAATGACACCTAAAAAACCT  
AACTCAGCGTTACGTAATATGCACGTGTGCGTTTATCAAAACAACATCGAAATTAACGCATACATCCCTGGTATCGGACATAACTTA  
CAAGAACACAGTGTGTTGACTTGTACGTGGTGGACGTGTAAAAGACTTACCAGGTGTGCGTTACCATATTGTACGTGGAGCACTTGAT  
ACTTCAGGTGTTGACGCGTAGACGAAGTCGTTTCAATTAACGGAATAAGAACTAAAGAACTAAGAATTTAGTTTTTAAATTAAT  
CTTAAACTTAAATATTATTAATAAGGAAGGAGGAGTTTACATTAATGCCTGATAAAGGATCAGTACCTAAAGAGACGTTATACCA  
GATCCAATTCATAACTCTAAGTTAGTAACTAAATTAATTAACAAAAATATGTTAGATGGTAAACGTGGAACAGCACAAAGAATTCTT  
TATTCAGCATTCGACCTAGTTGAACAACGCAGTGGTCGTGATGCATTAGAAGTATTGGAAGAAGCAATCAACAACATTATGCCAGT  
ATTAGAAGTTAAAGCTCGTCGTGTAGGTGGTTCTAACTATCAAGTACCAGTAGAAGTTTCGTCCAGAGCGTCGTACTACTTTAGGTTT  
ACGTTGGTTAGTTAACTATGCACGCTTTCGTGGTGAAGAAACGATGGAAGATCGTTTAGCTAACGAAATTTTAGATGCAGCAATA  
ATACAGGTGGTGCCGTTAAGAAACGTGAGGACACTCACAAAATGGCTGAAGCAAAACAAAGCATTTGCTCACTACCGTTGGTAAGAT  
AAAAGCTTTTACCTGAGTGTGTTCTATATTAATGAATTTTTCATTAAGCGTTTCATGCTTAGGGCATCGCCATATCTATCGTATTTATT  
CAGTAATATAAATTTGAAGGAGAAAAATACATGGCTAGAGAATTTTCAATTAGAAAAAACTCGTAATATCGGTATCATGGCTCACA  
TTGATGCTGGTAAACAGCTACGACTGAACCTATTCTTTTACTACGTGCGCTATCCCAAAAAATTTGATGAAACACGAAGGTCGCTT  
CACAAATGGACTGGATGGAGCAAGAACAAGACCGTGGTATTACTATCACATCTGCTGCAACAACAGCAGCTTGGGAAGGTCACCGT  
GTAAACATTATCGATACACCTGGACACGTAGACTTCACTGTAGAAGTTGAACGTTTCAATACGTGTACTTGACGGAGCAGTTACAGTA  
CTTGATGCACAATCAGGTGTTGAACCTCAAACGTTTGGCGTCAGGCTACAACCTTATGGTGTTCACGATCGTATTTGTGA  
AACAAAAATGGACAAATTAGGTGCTAACTTCGAATACTCTGTAAGTACATTACATGATCGTTTACAAGCTAACGCTGCTCCAATCCAA  
TTACCAATTTGGTGGGAAGACGAATTCGAAGCAATCATTGACTTAGTTGAAATGAAATGTTTCAAATATACAAATGATTAGGTACT  
GAAATTGAAGAAATTTGAATTCCTGAAGACCACTTAGATAGAGCTGAAGAAGCTCGTGCTAGCTTAATCGAAGCAGTTGCAGAAAC  
TAGCGACGAATTAATGGAAAAATATCTTGGTGACGAAGAATAATTCAGTTTCTGAATTAAGAAGAGCTACCGCCAAGCTACTACTA  
ACGTAGAATTTTACCAGTACTTTGTGGTACAGCTTTCAAAAAACAAAGGTGTTCAATTAATGCTGTACGCTGAATTTGATTACTTAC  
CTTACCAGTACAGCTTAAACCAATTTATGGTACCCTGCTAGCAACCTGAAAGAAGAAATTCGCGAAAGCAGACGATTACGCT  
GAATTCGCTGCATTAGCGTTCAAAGTTATGACTGACCTTATGTTGGTAAATTTGACATTCTTCCGTGTGATTACAGGTACAATGACAT  
CTGGTTCATACGTTAAGAAGCTTACTAAAGGTAAACGTGAACGTGTAGGTGCTTTATTACAAATGCACGCTAACTCAGTCAAGAAA

TCGATACTGTATACTCTGGAGATATCGCTGCTGCGGTAGGTCTTAAAGATACAGGTACTGGTGATACTTTATGTGGTGAGAAAAATG  
ACATTATCTTGGAAATCAATGGAATTCCAGAGCCAGTTATTCACCTTATCAGTAGAGCCAAAAATCTAAAGCTGACCAAGATAAAATG  
ACTCAAGCTTTAGTTAAATTACAAGAAGAAGACCCAACATTCATGCACACACTGACGAAAGAACTGGACAAGTTATCATCGGTGG  
TATGGGTGAGCTTCACTTAGACATCTTAGTAGACCGTATGAAGAAAGAATTCAACGTTGAATGTAACGTAGGTGCTCCAATGGTTTC  
ATATCGTGAAACATTCAAATCATCTGCACAAGTTCAAGGTAAATTCTCTCGTCAATCTGGTGGTCTGGTCAATACGGTGATGTTCA  
CATTGAATTCACACCAAACGAAACAGGCGCAGGTTTCGAATTCGAAAACGCTATCGTTGGTGGTGTAGTTCCTCGTGAATACATTCC  
ATCAGTAGAAGCTGGTCTTAAAGATGCTATGGAAAAATGGTGTCTTAGCAGGTTATCCTTTAATTGATGTTAAAGCTAAATTATATGA  
TGGTTCATACCATGATGTCGATTTCATCTGAAATGGCCTTCAAAATTGCTGCATCATTAGCACTTAAAGAAGCTGCTAAAAAATGTGA  
TCCTGTAATCTTAGAACCAATGATGAAAGTAACTATTGAAATGCCTGAAGAGTACATGGGTGATATCATGGGTGACGTAACATCTC  
GTCGTGGACGTGTTGATGGTATGGAACCTCGTGGAATGCACAAGTTGTTAATGCTTATGTACCACCTTCAGAAATGTTCCGGTTATG  
CAACATCATTACGTTCAAAACACTCAAGGTCGCGGTACTTACACTATGTACTTCGATCACTATGCTGAAGTTCCAAAATCAATCGCTG  
AAGATATTATCAAGAAAAATAAAGGTGAATAATATAAATTGTTTTGACTAGCTAGCCTAGGTTAAATACAAGGTGAGCTTAAATG  
TAAGCTATCATCTTTATAGTTTGATTTTTTGGGGTGAATGCATTATAAAAGAATTGTAATAATCTTTTTGCATCGCTATAAATAATTT  
CTCATGATGGTGAGAACTATCATGAGAGATAAATTTAAATATTATTTTTATTAGAATAGGAGAGATTTTATAATGGCAAAAGAAA  
AATTCGATCGTTCTAAAGAACATGCCAATATCGGTACTATCGGTCACGTTGACCATGGTAAAAACAACATTAACAGCAGCAATCGCT  
ACTGTATTAGCAAAAAATGGTGACTCAGTTGCACAATCATATGACATGATTGACAACGCTCCAGAAGAAAAAGAACGTGGTATCAC  
AATCAATACTTCTCACATTGAGTACCAAACTGACAAACGCTACTACGCTCAGGTTGACTGCCAGGACACGCTGACTACGTTAAAAA  
CATGATCACTGGTACTGCTCAAAATGGACGGCGGTATCTTAGTAGTATCTGCTGACGGTCCAATGCCACAAACTCGTGAACACAT  
TCTTTTATACGTAACGTTGGTGGTACCAGCATTAGTAGTATTCTTAAACAAAGTTGACATGGTTGACGATGAAGAATTATTAGAATT  
AGTAGAAATGGAAGTTCGTGACTTATTAAGCGAATATGACTTCCCAGGTGACGATGTACCTGTAATCGCTGGTTCAGCATTAAAGC  
TTTAGAAGGCGATGCTCAATACGAAGAAAAATCTTAGAATTAATGGAAGCTGTAGATACTTACATTCCAACCTCCAGAACGTGATT  
CTGACAAACCATTCATGATGCCAGTTGAGGACGATTCTCAATCACTGGTCTGGTACTGTTGCTACAGGCCGTGTTGAACGTGGTC  
AAATCAAAGTTGGTGAAGAAGTTGAAATCATCGGTTTACATGACACATCTAAAACAACGTTACAGGTGTTGAAATGTTCCGTAAA  
TTATTAGACTACGCTGAAGCTGGTGACAACATTGGTGCATTATTACGTGGTGGTCTCGTGAAGACGTACAACGTGGTCAAGTATTA  
GCTGCTCCTGGTTCAATTACACCACATACTGAATTCAAAGCAGAAGTATACGTATTATCAAAGACGAAGGCGGACGTCACACTCC  
ATTTCTTCAAACTATCGTCCACAATTCTATTTCCGTAAGTACTGACGTAAGTGGTGGTCTTCACTTACCAGAAGGTACTGAAATGGTA  
ATGCCTGGTGATAACGTTGAAATGACAGTAGAATTAATCTGTTCAACCTCGCATTTGAAGACGGTACTCGTTTCTCAATCCGTGAAGGT  
GGACGTACTGTAGGATCAGGCGTTGTTACTGAAATCATTAAATAATTTCTAATTTCTTAGATTTTATATAAAAAAGAAGATCCCTCAA  
TCGAGGGGTCTTTTTTAAATGTGTAAATTTTGAATGGCTATTCGATTTAGAAGAACAAATAATTGATGAAAGATTGACTAATAAAAC  
TTATAACTGATAAATACTGTTTAAATAAAATTGTTGAGTCTTGGACATTGTAAAATGCTCCCTCAAAGTTTTCATTTTTCAATGTCT  
ACTTTGAAGAGAGCATTTCATTAGTTTATGTCTCAGATTTCATATCTTTCAATTAATTTAAATGCTTAATTTGTTTTAAATACTTGCTCT  
AATTCAATGATTTTTAAAAATACAGCTACAGCGTATTTAATGATTTTTTCATCAATATCAAATTTGGGATTATGGTGTGGCGCTGTAA  
TACCTTTACTTTTCAATTACCACAACCCAGTCAGAAAGAATGCACCTGGTCTGACTTTTCAAATAATGTGAAAAATCTTCTCCAATCATCAT  
TAAATCTGATTCAATAAAGCGTACATGTAAGTCATTGTTGCTTCTTAAATAACTTGATATGCTTTCTCGTTATTATTGGACAGGCAAA  
TACCTTTAATATAAATCAATCATAGTTAATATCATTTGCTATTGCTTAAACCTTGTAAGAGCTTATCCATTTTGCTCATTTACATGATT  
CTGTATATCTGAATCGAAAGTTCTAACTGTACCTTTACAAAATGCTTGATCAGGAATAACGCTATCTGTGGTGCCTGCTTGAATCATT  
CCAAATGAAAGTACAGCTTGTTTAACTGGATCGATCGTACGTGAAATATTTTTTGTGCATTTAAATGAACTCTGCCATGATTACT  
ATTGGGTCAATGGTTTCATGAGGTTTGGCACCATGACCACCACGACCTTTAATTGTGACGCTAAATTCATCTGGAGAGGCCATGATT  
GCCCCCGCACGTGAATGAATAGTTCAGTAGGATAACCACTCCATAAATGTGTACCGTAAATTCATCTACATTTTCCAGACATCCA  
GCATCTATCATTTCTTGAGAACCACCTGGCATGATTCTTCACCGTACTGGAATATTAATGCAACATTACCTTCTAATAAATGTTTAT  
GTTTCATCTAAAAATCTCTGCTACAGTAAGTAAATTTGCTGTATGACCATCATGCCACACGCGATGCATACATCCTGGATTTTTAGACTT  
ATAAGGCACATCGTTTAAATTCCTCGACAGGTAACGCATCAAAGTACAGCTCTTAATGCAATGGTAGGTCTGTGCCCAAGCCTTTAAA  
GTGGCTTTGATACCATTTGCGGCCGATAGGAGTTTCAATATCACAAGTATGATGAGTGGCTTAATGGTTAAACATAAATCATGTTGTTG  
AAATCTTCAAAGATAAATCAGGATATTGGTGTAAATAACGCTCTGAGTTGAATTGTTTTATTTTCTTTATTATTGCTAGTTGGAAC  
CAATCTAACACCCTTATCACTACTTTCTAAAATAATGTTTATAGTATAACATTTTATGAAATTATCGTACTAAATGATTGCTTTGAGA  
TATTTTATCTATGAATGATAAGGCTTTCAAGTTATGTAGAATTACTGTATGATAAAGGTATTACCAACAATACTTAAGGGGGATTA  
TATACTGTGGTTCAATCATTACATGAGTTTTTAGAGGAAAATATAAATTATCTAAAAGAAAAATGGTTTGTATAATGAAATAGATACA  
ATTGAAGGTGCAAACGGACAGAAATCAAATCAATGGGAAATCATACATTAACCTATCTTCAAATAATTATTTAGGACTAGCAAC  
AAATGAAGATTTGAAATCAGCTGCAAAAGCAGCTATTGATACACATGGTGTAGGTGCAGGCGCTGTTTCGTACAATCAATGGTACAT  
TAGATTTACACGACGAATTAGAAGAAACACTAGCAAAATTTAAAGGAACAGAAGCTGCAATAGCTTATCAATCAGGATTTAATTGT  
AATATGGCTGCTATTTACAGTGTGCATGAATAAAATGATGCTATTTTATCAGATGAGCTTAATCATGCATCAATTAATGATGGATGTC  
GCTTATCAAAGCTAAATATTTCGAGTTAAACCTTACAGATGAGTATGTTTACGTGCGAAAGCAAAAGAACGTTGATTCATCAGGT  
CAATACAATAAAGTGATGTATATCACTGATGGCGTTTTTATGATGGATGGTGTATGGCTAAATTACCTGAAATTGTAGAAATTGCA  
GAAGAATTTGGTTTATTAACCTTATGTTGACGACGCTCATGGTTACAGTGTTATGGGTAAAGGCGCTGGTACGGTTAAACATTTTGGT  
TTACAAGATAAAATCGATTTCCAAATAGGTACGCTTTCTAAAGCAATTGGTGTGCTGGCGGTTATGTAGCAGGTACAAAAGAGTTA  
ATAGATTGGTTAAAGACAATCACGACCATTCTTAATCTCTACATCATTAGCACCTGGGGATACCAAAGCAATAACTGAAGCAGTT  
AAAAAGTTAATGGATTCAACTGAATTACATGATAAATTATGGAACAATGCACAATATTTAAAAAATGGATTGTCAAAATTAGGATA  
TGATACAGGTGAGTCAGAACTCCAATTACACCAGTAATTATTGGTGATGAAAAACAACCTCAAGAATTTAGTAAGCGTTTAAAAAG  
ACGAAGGTGTCTATGTGAAATCTATCGTTTTTCCCAACAGTACCAAGAGGTACAGGACGTGTAAGAAATATGCCTACAGCTGCACAT  
ACAAAAGACATGTTAGATGAAGCAATTGCGGCTTACGAAAGTAGGAAAGAAATGAAGTTGATTTAATATTATTATTTATTTCCAC  
GGCAAAATATTGTCGTGGACTTTTTTAAATGTTTAGTTTATTAACAGTAAGTTCTTATAACAATGTTTAGTGCTCCCCAAAATTGAAGT  
TTGAATTTTTAAAGCATCTTGTAGAATTTAGTTGTATTTTTTACAAAGAAATTCATTTTGATTATTTTGTATAATGAGCATTTTAATAG  
TAATACATGTTTATAGTGTGTAGTATATGTCTATACTAGTAGTAAGTATATAGAGAAAGTAGGAATAAACTATGTCACAAGATGTAA  
ATGAATTAAGTAAGCAACCAACGCCAGATAAAGCAGAAGATAACGCATTTTCCCATCACCATATTCCCTTAGTCAATATACAGCA  
CCTAAAAACAGATTTTGATGGTGTGAAACACAAAGGTGCCTATAAAGATGGTAAATGGAAAGTATTGATGATTGCTGCTGAAGAGAG  
ATATGTATTATTGGAAGAAATGGAAGAAATGTTCTCTACGGGTAATCATCTGTTGAAATGTTATTACCTTTACATCATTTAATGGAAGC  
AGGTTTTGACGTTGATGTTGCGACATTATCTGGTTATCCAGTTAAATAGAATTATGGGCTATGCCAACTGAAGACGAGGACGTTAT  
AAGTATTATAAATAAATTTGAAGAAAAAATTAACACGCCAAAAAATAGCAGATGTGATTAAAAATGAATTAGGACCTGATTTCAG  
ACTATTTATCTGTCTTTATCCAGGCGGACATGCTGCAGTTGTTGGTATTCTGAAAGTGAGGACGTTCAACAAACATTAGATTGGG  
CATTAGACAATGACCGCTTTATAGTTACATTATGTCATGGACCAGCAGCACTACTTTCAGCAGGGCTTAACAGAGAAAAATCTCCAT  
TAGAAGGATACTCTGTTTGTGTCTTCCCTGACTCATTAGATGAAGGTGCAAAATATTGAAATAGGTTATTACCTGGACGCTTGAAT

GGTTAGTTGCTGATTTATTAACATAAACAAGGATTAAAAAGTAGTTAACGACGATATGACAGGAAGAACGTTAAAAAGATCGTAAATTA  
TTAACAGGTGACAGTCCTTTAGCTTCAAATGAGTTAGGAAAAATTAGCAGTTAATGAAATGTTAAATGCAATACAAAATAAATAATT  
AAATATTAATTAGAGGAGCCCCATATGTAATGTATGAGGGCTCTTTTTTTGGCAAAATTTAAGTGATACTTGTAATAAGAACCTA  
TTATGAGTATGATTTAAGAAAACGCTTGCAAACTAATAACCGCACTAGCGATATGGAGGAAACATGATGCTCTTATAGCATTGGA  
ATTGATTATGGAACAGCTTCAGGCCGTGTGTTTTTAATTAATACAACCTAACGGTCAAGTAGTATCAAAAATTTGTGAAACCATATACA  
CATGGTGTCAATTGAGAGTGAATTAATGGTTTGAAAATACCACATACATATGCACTTCAAAAATAGTAATGATTATTTAGAAATTATG  
GAAGAAGGAATATCATATATAGTACGTGAATCAAAAATAGATCCAGTCAATATAGTAGGTATTGGTATAGACTTTACTTCATCTACT  
ATTATTTTTACTGACGAAAACCTTAACCCGGTACATAATTTAAAAACAATTTAAAAACAATCCACATGCGTATGTGAAACTTTGGAAA  
CATCATGGTGCATATAAAGAAGCAGAGAAATTATATCAAACTGCTATTGAAAATAATAATAAGTGGTTAGGCCATTATGGATATAA  
TGTTAGTAGTGAATGGATGATTCCCAAAATAATGGAAGTCATGAATCGAGCACCAGAAATTATGGAAAAACCGCTTATATTATG  
AAGCGGGCGATTGGATTGTAATAAATAAATAAATAAATAAATGTACGCTCGAATTGTGGATTAGGTTTCAAAAGCATTITGGGAAGAA  
GAAACAGGGTTTCATTATGATTTATTTGATAAAATAGACCCCAAAATTATCAAAAGTAATTCAGATAAAAGTATCTGCACCGGTTGTT  
AATATTGGTGAAGTAGTAGGAAAACCTGGACGATAAAATGGCACAGAAATTAGGATTATCAAAAGAGACTATGGTAAGTCTTTTTAT  
TATTGATGCCCATGCTAGTTTATTAGGTATTGGGTCTGAAAAAGATAAAGAAATGACTATGGTGATGGGAACAAGCACATGCCATC  
TTATGTTAAATGAAAAAGCAACATCAAGTGCCAGGTATATCAGGTTCTGTAAAAAGGAGCAATTATCCAGAATTATTTGCTTATGAAG  
CGGGGCAATCAGCAGTAGGTGATTTGTTTGAGTATGTCGTAAGCAAGCACCAGTCAATATGTAGATGAAGCAGCAAAATAGAAAT  
ATGACTGTATTTGAATTAATGAATGAAAAAGATAAAACATCAAAATGCCAGGTGAAAGTGGGCTCATTGCTCTTGATTGGCATAATGG  
AAATCGAAGTGATTAAGTGATAGCAATTTAACAGGTTGTATTCTTTGGATTAACCTTTACAACTAAGCATGAGGATTTATAGAGC  
ATATTTAGAAGCTACAGCATTGGTACTAAGATGATTATGCAACAGTATCAAGATTGGCATATGGAAAGTAGAAAAAGTATTGTCAT  
GTGGCGGTATACCTAAAAAGAAATGCTGTTATGATGGATATCTATGCGAATGTACTGAATAAAAACTAATTGTTATGGATAGTGAG  
TATGCACCAGCAATAGGCGCAGCAATATTAGGTGCAGTCAGTGGTGGCGCACATAATTCAATTAATGATGCAGTTGATGCTATGAA  
AGAGCCAATTTTATACGAAATTAATCCAGAAAGCGGAAAAAGTACAAAGGTATGAAACATTATTTAAAGCTTATAAGGCTTTACATG  
ATATCCATGGTTATAAAAAAGCTAATATAATGAAAGATATCCAGAGTTAAGAGTTGAGGGATAAAAAATTTAATTTGACAGTAAT  
TAGCAATAATAAACGCTATAAAATTACTAAAAATCAATTAATACAACCTAGAAATTTCCATTTACAGAAATATCAGCAACATGTACATGTC  
ATATATACAAGAAAGCGCTTTTATATTATAATTATTATGAAAATGAATATTATGTCGCTTGTTGATGGACTATAGCTATATAGAAGA  
GACAAAGGAGATATTTCTAGAAAAAAATGATTACTGGTGCATTAGGACAAATTGGTACAGAATAGTTGTTAAGTGACAGAGA  
AATTTATGGGACAGATAATGTTCTTGCTACAGATATTAGGGAACCTGAAGCAGACTCACCTGTACAAAATGGACCATTGTGAATTTT  
AGACGTAACAGATCGTGACCGCATGTTTGAGTTAGTTAGGGACTTTGAAGCGGATAGTCTAATGCATATGGCAGCATTATTATCAGC  
AACTGCAGAGAAAAATCCAATTCTAGCTTGGGATTTAAATATGGGTGGATTAATGAATGCATTAGAAGCTGCAAGAAGCTTATAATT  
TGCACTTTTTCACACCAAGTTCAATTGGTGCATTGGAGACTCAACTCCTAAAGTTAATACGCCACAAGTAACGATTACAGCAACCTA  
CGACAATGTATGGTGTAAATAAAGTAGCTGGAGAAATTATTGTGTCAATACTATTTCAAACGTTTGGTGTAGATACAAGAAGTGTTA  
GATTTCCAGGTTTAACTCTCGCATGTTAAAGAGCCAGGTGGCGGTACTACAGACTATGCTGTTGAAATATACCTCAAAAGCAGTAAGA  
GAAGGTCAATTATACAAGCTTCATAGATAAAGGCACGTATATGGATATGATGTATATGGATGATGCAATTGAAGCAATTATTAACCTT  
ATGGAAGCAGACGACGCTAAATTAGAACTAGAAACGGTTATATATTTGAGCGCAATGAGTTTGTATCCAGAGATGGTAAAAAGAAG  
CAATTCAGAATACTATCCCAATTTTACATTAGATTACGATGTTGATCCTATTAGACAAAGGTATCGTAAATGATTGGCCGATTTCTAT  
TGATACAAGCTGTTACAGTGCGAATGGGGATTGATCCTAAATATGATTAGCGAGCATGACTAAATTAATGTTAGAAGCTATTGA  
ACAAAAAGATACTGTTAAAAATAATACTAATCATTTCCATTACCTTAAATACACGGAATGATATTTTAAATTACTCTTTATTTTAAAT  
AACTAGTGCATGAATTTCTAATATTATTATTATACATATTGAATTCGCGAGCTTAGTTTCATTTTAAAGTAAAGAGTTTTTGTATGT  
AAAGTATATTAGTAAACACAGATTACTTGTCTCTGTGAAATTAATACGTTTATACTAAAAGATATAGTCTTCTAGAAAATCTGTT  
AATTAATTTTGAATTTTATAGAAAATTTATTGAACAGCAAAATATGGATTGTTATAATTTAAGTTAAACAAATCTTATACAATATTAT  
TAGGAGGCAATCACCATGTCACAAGCAGTTAAAGTTGAACGACGAGAAACATTAACAAAAACCAAAATACATCTCACTAGGTTT  
TGGTAAATATTTTACTGATTATATGTTGAGTTATGATTATGATGCAGATAAAGGATGGCATGATTGAAGATAGTACCTTATGGTCC  
TATTGAAATTTTCACTGTCACAAAGGTGTTCAATTATGGTATTCGAGGATTAAGAGATTAAGAGCATATAAGAGCATATGAGGGAAG  
TTGCATTTTTCCGTCCTGAAGAAAAATTTAAGCGTCTTAATAACTCGTTAGCACGATTAGAAATGCCTCAAGTAGACGAAGCAGAAT  
TGTTAGAGGGGCTAAACAAATTAGTTGATATAGAAAGAGATTGGATTCTGAAGGGGAAGGTCAATCATATATTCTGCCATTTG  
TTTTTGCAACAGAAGGGGCACTTGGCGTTGGTGCATCACATCAGTATAAATTATTAATTTATTTATCTCCTCAGGTGCATATTATGG  
TGGTGAGACTTTAAACCAACTAAAATCTATGTAGAAGATGAATATGTGCGTGCTGTTCTGTTGGCGGTGTAGGCTTTGCAAAAGTTGC  
AGGTAACATATGCGGCAAGTTTATTAGCACAAACAAATGCAATAAATTAGGTTATGACCAAGTATTATGGCTTGATGGTGTGAAC  
AGAAATATATCGAAGAAGTTGGTAGCATGAATATTTCTCTCGTTGAAAAATGAAAAAGTAATTACACCAGAGTTGAATGGCAGTATT  
TTACCTGGTATTACACGTAATCTATTATCGAATTAGCTAAAACTTAGGATATGAAGTCGAAGAGCGCCGCTTTCAATCGATGAA  
TTATTCGAATCATATGATAAAGGTGAGTTAACAGAAGTATTTGGTAGTGGTACTGCAGCAGTATTTCACCTGTGGGTACATTGAGA  
TACGAAGATCGTGAAATCGTTATTAATAATAATAGAGACTGGTGAAATTTACTCAAAAATTATACGACGCTCATAGCTGGTATTGCAAAAT  
GGTACTTTAGAAGATAAAAAATGGTTGGAGAGTCGTTGTACCAAAATATTAATAAAAAATTGAATATAATCATGAAAACAATATGTAA  
AAGTTAATCATGACTAAAAATCCCTTTCAATGAAGCGAAGCATGGTAATAAATTAAGTTTACAATGTTTATTGTTAAGTATTGAAGGG  
GATTTCACTTATTATTATTTAATTCAATATTTAAAAAGAACAACTACTACGAGTTCAATTTTCAAGGAAATAACGAACATCATAGAA  
TCAGCATAATACGAAATAAATAAATAGGAGTATTGATATTAATGGAATGGATATTATTTGATAAAGATGGCACGTTAATTGAATTTG  
ATAGAAGTTGGGAAAAAATAGGGGTACGATTTGTACAATCATTTGCTTGAGACTTTCCAGTACATAATAAAGAAGCTGCTTTAAGA  
CAACTCGGTGTCATTAAGAATCTATTGATCCAAAAATCAGTGATGGGTTTCAAGGATCTTTACAACAAATTTATCCAAGCATTTAATGAT  
GTGACGGGACAAGATAACCCGACTGGTCCAAGTCAACAAAGTCAAAAGCTGGTAGATGAACGTATCTCTGAAATTAATTTGGGTAGA  
AGGTGTTAAAGAAGCACTTATCGATTGGAAGCAAAAGGCTATCACTTGGTATTGTTACGAGTGATCTAATAAAGAGGTTGAGAAC  
AATTTTTAGCACATACCAATGCTACCTCGTTGTTCGATTGATCATTTCTACCGAAGCGGATGCCTATGAGAAGCCAAATCCTAAAG  
TATTATCGCCTTTATTTGAGCAATATAATGTAGATCCTCAGAAAGTAGCTATAGTAGGAGACACTGCTAATGATATGAAGACAGCAA  
GTAATGCAAATTTAGGTATGGCAATAGGTGATTAACAGGTATTGCAACAAAAGAAGAAATTACATGAAGCTGATATTATTTTAAAT  
AGTGCAGCAGATATTTTGAAGCTTTAAATTAAGAAAGAAAGACATAGTGATATGTGAATTAATGTATTTCGATAGAAATTGATAAAA  
TAATCGATAATATCTATGGAATATACATTGAATATAAACATATACGCTATGTCTTTTAGTCTTTTATTGTGTATCTACTTGTGATATG  
TTTGAATAATTCGAGCAATTTTGTATCATAGGATTTAAAGATTTCGGGGTCTTTATGGATATCATATTCATTAATATTGATACGTAC  
AACTGGACATGCATTAAGCTATTAATCCAATCGTCATAGCGTTTAAATAGCTTTTTCCAGTATTACAGGCTGTGATTAATTTCCATT  
TCGGCACCAGTTCAATAATACGATCAATGACCTCATATGATTAAGTCAATCTAAATAAATCATTATACAGGTTTAGGAAATTAAGGT  
GTCATGACCATGGCATTAAATAAGTCTGAATATGTTTGAAATCTTCTTTACTCATTGTGCCTTCTTCTCATGCATTTTTCAGAAAAAT  
ATCAACATCTTCATAAATTGATCGATCTTGGACAAAGCCACCACCATATTCAAACATACGCTTTTGTCTTTTAAACGTTTCAGCTAA  
GAAGTAAATTTGCAATGGAACTCCATCGTTCAAAATCGCTGTAAATTTATCTAAATATGGATTATGTTTCGACATTTTCAAAAAGA

CGTTTAAAGTTTAATTTATCTGCAAGTGCTTGCCTTAGTGTGATTTTCCAACACCAACTGTACCTGCAATGGTTATAATGGCATT  
TGTGGAATACCGTAATTATTCAATTGGTAATATCTCCTATCATAGGTAATATAAATATGTAATATATCTTCGTAATCTTGTCATTTTTAA  
GAAAATCAATAGAAAGTTGTATCGATTAAACTACATTTGAACCATTACTTTGTAAGGACTCATAATACTCACGATAATCTTTTTTTA  
ACTTTAACAGATATTCATCTTCTATTTGATGCTCAAACTACGGTTACGTTTAGCAATTCTAGATTTTAAACACATCAAGGTCTGCATC  
TAAAAAGATAATCATATTCGGCATAATCATATCTTCAGTTAAAAATATCATAAATTTTACTGAATTTCTGAAATTCAACAGAACTCAA  
AGTATTTTTAGCAAATATCTTATTTTTATGTATATGATAATCACTAACTACACCTTGATTAGTTGTGTTACATCTTGAAATTGCTTAT  
ATCTATTGCATAAAAAAGAACATTTTCAGTTGAAAACTCCATTTAGAGATATCTTCATAAAAAAGTCTGATAAAAAATGGATTTTCTGTGA  
TGATTTCTTTTTCTTCATAAAAAATCTAAAGTTTGACTTAATTTGTGTGCAAGTGAAGATTTACCTACGCCAATAGGACCTTCAATTGC  
TATAAAAGGTTTGTTCATATTCACATCTCCAAATGTTAAAAATAGACATTGAGTATTGTACCATAAGTGAGGTATCTGGACATAAATG  
ACAAATGATATATATTTTATGACATTAGCGATTGAAGAAGCTAAAAAAGCAGCTCACTAGGCCAAGTACCTATAGGTGCTATCAT  
CACTAAAGATGATGAAGTTATCGCTAGAGCACATAATTTAAGAGAAACACTACAACAACCAACGGCGCATGTGAAACATATTGCAA  
TTGAACGTGCAGCCAAAGTGTTAGGTAGTTGGCGTTTAGAAGGTTGCACATTATATGTAACCTTAGAACCATGTGTCATGTGCGCAG  
GAACAATTGTAATGAGTCGCATTCCAAGAGTCGTCTATGGCGCAGATGATCCTAAAGGTGGTTGTAGTGGCAGTTTAATGAATTTAT  
TGCAACAATCTAATTTTAATCATCGTGCAATTGTTGATAAAGGTGTACTTAAAGAAGCATGTAGCACATTATTAACAACATTTTTTA  
AAAACTTAAGAGCCAATAAGAAATCCACCAATTAGACGATAGTACATACTAATTAATAATTTGTTAGAAATTACATTATATGATAAAT  
AATGACAATATAAATGTTAATAGAAAAGTATGTGCGCTGAGTATATATCTTATTTAAGAACAAGATTTTAAATTTACGAAACGAGG  
TAACATAATGATAAACTAATAGCCACTGATATGGATGGCAGCTACTTAATGCAGCACATGAAATTTCTCAACCTAATATATGATGC  
GATTTAAATACGCTCAAGAACAGGGATAACGGTTGTTATCGCGACAGGTGCAGCATTTTATGAAGCACAAGCACCAGTTGCTGACA  
CAGATTTAACAGTACCATATATTTGTTGAATGGTGCTGAAGTACGTGATGAACTTTCAATGTAATGAGCACTTCACACCTTAATA  
AATCGTTAGTACACAAAATTACAAATGTTTTAAAGATGCAGGTATTTATTATCAAGTATACACGAGTCGTGCGATTTTACTGAAAG  
ATCCACAAAAGAGATTTAGACATTTACATAGATATTGCTGAGCGTGCAGGTCAACATGCAAACGTTGAGCGTATTAATAATGGTATT  
CAAAGACGCATAGATAATGGTACGTTGAAAGTTGTTGATAATTATGATGCTATTGAAAACATACCTGGTGAATTAATTATGAAAAT  
ATTAGCATTTGATGGAATTTAGAAAAAATTGCAAAAGCTAGTAAAAATTTAGCTGAATCTCCGAATTTAGCTATATCATCATCTTC  
GAGAGGAAATATAGAAATAACGCATTCAGATGCACAAAAAGGTATTGCGCTAGAAAAAATTGCCGAAAAGATTAGGGATTGAAATG  
AAAGAAGTCATGGCAATAGGTGACAATTTAAATGACTTATCAATGTTAGAGAAAGTTGGCTATCCAGTTGCGATGGAAAATGGTGC  
AGAAGAAGTTAAAAAATAGCGAAATATGTCACAGATACGAATGAAAAATAGTGGTGTGGAAAAGCTATTATGAAATTTATACGTG  
AACAACAAGTTTAAATAAAAAAAGAGGGGTCAAATATGAAAGGATTAATTTATTGGCAGTGCACAAGTGAATTCACATACAAGTG  
CACTAGCAAGATACTTAACTGAGCATTTTAAACACATGATATTGAAGCGGAAATATTCGATTTAGCAGAAAAAGCCGTTAAATCAA  
TTAGATTTTTCAGGAACAACACCGTCTATTGATGAAATCAAACAAAATATGAAAGATTTAAAGAGAAAGCAATGGCGGCGGACTT  
TTTAATATTAGGAACGCCAACTATCATGGTTCATATCTGGAATATTGAAAAATGCATTAGATCATCTAAATATGGATTATTTTAA  
AATGAAACCTGTAGGCTTAATAGGAAATAGTGGTGGTATTGTTAGTTCAGAGCCATTGTCACATTTAAGAGTAATCGTCAGAAGTTT  
ACTAGGCATTGCTGTACCAACTCAAATAGCAACACATGATTCTGATTTTGTCTAAAAATGAAGATGGTTCATATTACTTAAATGATAG  
TGAATTTCAATTACGAGCAAGATTATTTGTGATCAAATTTGTATCTTTTGTGAATAATAGTCCATATGAACATTTAAAAATAATTTAA  
AAAATATGTAATATACATTAATAAATAGGTATGTAGCTTAAGGTATTTTATTGAGAATGCTTTTAAAGTCACATGCCTATTTTTGTTC  
TAATGCACCAATAGTAAGCCTTTGAGATTACTATTGTGAGCAATGTTATTAATTAATAAAGATGTAATAGCGAATTGAAAACAAG  
CTTAGATTAAAAGTGAGTTTTTAAAAATATAGATAAATAATTTAAAGCAATTAAGAAAAAAGTATTAAAAATTGCAATTTCTTAAA  
CTGTGATTATATTAATATTTGTAGCAAATAACATTGTAAAATAAAGAAAAATAATTAAGTATTGCATTTTATTGAAATTTATATT  
ACGATAGTAATGCAGAAATTTATATATGCAAAATATTATATTTATCAAATTTTGATATTTTAAAGGAGTATTATTAATGAATAATA  
AAAAGACAGCAACAAATAGAAAAGGCATGATACCAAAATCGATTAAACAAATTTTCGATAAGAAAGTATTCTGTAGGTACTGCTTCA  
ATTTTAGTAGGGACAACATTGATTTTGGGTTAAGTGGTCATGAAGCTAAAGCGGCAGAACATACGAATGGAGAATTAATCAATC  
AAAAATGAAACGACAGCCCCAAGTGAGAATAAAACAACCTGAAAAAGTTGATAGTCGTCAACTAAAAGACAATACGCAAACTGCA  
ACTGCAGATCAGCCTAAAGTGACAATGAGTGATAGTGAACAGTTAAAGAACTAGTAGTAACATGCAATCACCACAAAACGCTAC  
AGCTAGTCAATCTACTACACAACTAGCAATGTAACAACAATGATAAATCAACTACATATAGTAATGAACTGTTGAAAAGTA  
ATTTAACACAAGCAAAAAACGTTTCAACTACACCTAAACAACGACTATTAACCAAGAACATTAACCGTATGGCTGTGAACACA  
GTAGCAGCACCACAACAAGGTACAAATGTTAATGATAAAGTTCATTTTTCAAATATTGATATTGCTATTGATAAAGGACATGTAAAT  
TCAACAACCTGGCAAACTGAATTTTGGGCGACTTCTAGTGATGTTTTAAATTTAAAGCGAATTACAAAATCGATGATTCTGTTAAA  
GAGGGCGATACATTTACATTTAAATATGGACAGTATTTCCGTCCGGGTCTGTGAAGATTACCTTCACAACTCAAAATTTATATAAT  
GCCCAAGGTAATATTATTGCAAAAGGTATTTATGATAGTACAACAAACACAACAACATATACTTTACGAACTATGTGGATCAATAT  
ACAAATGTTAGCGGTAGCTTTGAACAAGTTGCATTTGCGAAACGTGAAAATGCAACAACCTGATAAAACAGCTTATAAAATGGAAGT  
AACTTTAGGTAATGATACATATAGCGAAGAAGTCATCGTCGATTATGGTAATAAAAAAGCACAACCGCTTATTTCAAGTACAACT  
ATATCAATAATGAAGATTTTACGAAATATGACTGTTTATGTAATCAACCTAAAAAATACATATAAAAAAGAAACATAGTAACA  
AATTTAATCGTTGTTAATTTAATCCAGATGCTAAAACTTTAAATTTATGAAGTAACTAACCAAACTAGTTTGTGGTAGTTTC  
ACCCAGATACTTCAAACTTACAGATGTCAGTATAAATTTAAATTTACATACAGTAATGATAATAAGACGGCGACAGTTGATTTA  
TTGAATGGTCAATCTAGTAGTGATAAACAGTACATTATTCAACAAGTTGCTTATCCAGATAATAGTTCAACAGATAATGGGAAAATT  
GATTATACTTTAGAAACACAAAATGGAAAAAGTAGTTGGTCAAACAGTTATTCAAATGTGAATGGTTCATCAACTGCAAAATGGCGA  
CCAAAAGAAATATAATCTAGGTGACTATGTATGGGAAGATACAAATAAAGATGGTAAACAAGATGCCAATGAAAAAGGGATTAAA  
GGTGTATTATGTCATTCTTAAAGATAGTAACGGTAAAGAATTAGATCGTACGACAACAGATGAAAATGGTAAATATCAGTTCACTGG  
TTTAAGCAATGGAACCTTATAGTGTAGAGTTTTCAACACCAGCCGGTTATACACCGACAACCTGCAAAATGCAGGAACCTGATGATGCTGT  
TGATTCAGATGGTTTAAACAACAACAGGTGTCATTAAAGACGCTGACAACATGACATTAGATAGTGGATTCTATAAAACACAAAAT  
ATAGTTTAGGTGATTATGTTTGGTACGACAGTAATAAAGATGGTAAACAAGATTTCGATGAAAAAGGAATTTAAAGGTGTTAAAGTT  
ACTTTGCAAAACGAAAAAGGCGAAGTAATTGGTACAACCTGAAACAGATGAAAATGGTAAATATCGTTTCGATAATTTAGATAGCGG  
TA

>017-contig\_194\_RC

ATTTACACTTGATAACGGATACTTCGAAGAAGATACATCAGATAGCGACTCAGATTCAGATAGCGATTTCAGATTCAGATAGCGAC  
TCAGACTCAGACAGCGACTCAGATTCAGACAGCGACTCAGACTCGGATAGCGATTTCAGATTCAGACAGTATTTCAGATTCAGACAG  
CGATTTCGGATTTCAGACAGCGACTCAGACTCGGATAGCGACTCAGACTCAGATAGCGACTCAGATTCGGATAGCGACTCAGACTCAG  
ACAGCGACTCAGATTCAGACAGCGACTCAGACACAGATAGCGACTCAGACTCAGACAGCGACTCAGACAGTATTTCAGACTCAGAT  
AGCGATTTCAGATTCAGACAGCGACTCAGACTCAGATAGTACTCAGATTCAGATAGTACTCAGACTCAGACAGTATTTCAGACTC  
AGACAGTATTTCAGATTCAGATAGCGACTCAGACTCAGATAGCGACTCAGATTCAGACAGCGATTTCAGACTCAGATAGTACTCAG

ATTCCGACAGCGATTACAGACTCAGATAGCGACTCAGATTCAGACAGTGATTACAGACTCAGATGCAGGTAAGCACACACCTGTAAAC  
CCAATGAGTACTACTAAAGACCATCACAATAAAGCAAAAGCATTACCAGAAAACAGGTAATGAAAAATAGCGGCTCAAATAACGCAA  
CGTTATTTGGCGGATTATTTCGCAGCATTAGGATCATTATTGTTATTTCGGTCGTCGTAATAAACAAAAATAATAACAGCTTATACC  
AGGTCCTGTAGGCTGGTTTTTTTATTTCAAATTTATGAAATGTATCTTATGTTTGTAGATTAAATAGTGCAATTTTTTAAAAAATATA  
ACATAAAATCAACATAAAATTTAATTCATCTTTACATTAAGAGTACAAACGAATAAGAAAAGCAATTAACACAGTATCAAACCATTT  
AAAACAATTGATATAAAAGACAAACGAATAATTAATAATTAAGTAATAATTTATTCAAACCAAAGTGTAATAACAGTCTTAG  
ATAAAATAAATTTATTTAAAGTATTGTGCTTTATCTAAAAATGTATTACGATGGGAATACAAATTTTTATATGTAAAAATATTAATTTT  
TTGCAAAATATTGATATTTTAAAGGAGATTTATATGATTAACAGGGATAATAAAAAAGGCAATAACAAAAAGGGTATGATTTCAAAT  
CGCTTAAACAAATTTTCGATTAGAAAGTATACTGTAGGAAGTGCATCGATTTTAGTAGGTACGACATTGATTTTGGTCTAGGGAAC  
CAAGAAGCTAAAGCTGCTGAAAAACACTAGTACAGAAAAATGCAAAAACAAGATGATGCAACGACTAGTGATAATAAAGAAGTAGTGT  
CGGAAACTGAAAAATAATTCGACAACAGAAAAATAATTCAACAAATCCAATTAAAGAAAAGAAACAAATACTGATTACACAACCAGAAGC  
TAAAAAAGAATCAACTTCATCAAGTACTCAAAAAACAGCAAAATAACGTTACAGCTACAAGTAAAGCTCAAAACATTGAAA  
AAGAAAATGTTAAACCTTCAACTGATAAACTGCGACAGAAGATACATCTGTTATTTTGAAGAGAAGAAAGCACCAAAATAATACA  
AATAACGATGTAACACTACAAAACCATCTACAAGTGAAATTCAAACAAAACCAACTACACCTCAAGAATCTACAAAATTGAAAATTC  
ACAATCGCAACCAACGCCTTCAAAAAGTAGACAATCAAGTTACAGATGCAACTAATCCAAAACAAACCGGTAAATGTATCAAAAGAA  
GATCTTAAAAATGATCCTGAAAAATTAAGAAGATTAGTTAGAAGTGAAAAATAACACTAATCATTCAACTAAACCAGTTGCTACAGC  
ACCAACAAGTGTGACCAAAAAACGATTAATGCGAAAAATGCGTTTTGCAGTTGCACAACCAGCAGCAGTTGCGTCAAATAATGTAA  
ATGATTTAATTACAGTGACGAAACAGACGATCAAAGTTGGCGATGGTAAAGATAATGTGGCAGCAGCGCATGACGGTAAAGATATT  
GAATATGATACAGAGTTTACAATTGACAATAAAGTCAAAAAAGGCGATACAATGACGATTAATTATGATAAGAATGTAATTCCTTC  
GGATTTAACAGATAAAAAATGATCCTATCGATATTACTGATCCATCAGGAGAGGTTATTGCCAAAGGAACATTTGATAAAGCGACTA  
AGCAAATCAGATATACATTTACAGATTATGTAGATAAATATGAAGATATAAAAGCACGTTTAACTTTATACTCATATATTGATAAGC  
AAGCAGTACCTAATGAACTAGTTTGAATTTAACGTTTGCACAGCAGGTAAAGAACTAGCCAAAACGTTTCTGTTGATTATCAA  
GACCCAAATGGTTTCATGGTGATTCAAACATTCAATCTATCTTTACAAAAGTTAGATGAAAACAAACAACTATTGAACAAACAAATTTAT  
GTTAATCCTTTGAAAAAAACAGCAACTAACACTAAAGTTGATATAGCTGGTAGTCAAGTAGATGATTATGGAAATATTTAACTAGG  
AAATGGTAGTACCATTATTGACCAAAATACAGAAAATAAAGTTTATAAAGTTAACCCTAATCAACAATTGCCTCAAAGTAATAGAA  
TCTATGATTTTAGTCAATACGAAGATGTAACAAGTCAATTTGATAATAAAAAATCATTAGTAATAATGTAGCAACATTTGGATTTTG  
GTGATATTAATTCAGCCTATATTATCAAAAGTTGTTAGTAAATATACACCTACATCAGATGGCGAAGTATGTTGCTCAAGGTA  
GTATGAGAACTGATAAATATGTTTATTATAATTATGCAGGATATTCAAACCTTCATCGTAACTTCTAATGACTCTGGCGGTGGTG  
ACGGTACTGTAAACCTGAAGAAAAGTTATACAAAATTTGGTGACTATGTATGGGAAGACGTTGATAAAGACGGTGTCCAAGGTACA  
GATTCGAAAGAAAAGCCAATGGCAAACGTTTTAGTTACATTAACCTACCCAGACGGTACTACAAAATCAGTAAGAACAGATGCTAA  
CGGTCAATTATGAATTCGGTGGTTTGAAGACGGAGAACTTATACAGTTAAATTCGAAACGCCAGCTGGATATCTTCCAACAAAAG  
TAAATGGAACAACTGATGGTGAAAAAGACTCAAATGGTAGTTCTGTAACCTGTTAAAAATTAATGGTAAAGATGATATGTCTTTAGAC  
ACTGGTTTTTATAAAGAACCTAAATATAATCTTGGTGACTATGTATGGGAAGATACAAATAAAGATGGTATCCAAGATGCTAATGA  
ACCTGGTATCAAAGATGTTAAGGTTACATTAAGATAGTACTGGAAAGTTATTGGTACAACACTACTGATGCCTCGGGTAAAT  
ATAAATTTACAGATTTAGATAATTGGTAACTATACAGTAGAATTTGAAACACCGCAGGTTACACGCAACCGTTAAAAATACTACA  
GCTGATGATAAAGATTCTAATGGTTTAAACAACAACAGGTGTCATTAAGATGCAGATAATATGACATTAGACAGTGGTTCTATAA  
AACACCAAAATACAGTTTAGGTGATTATGTTTGGTAC

>018-contig\_252

ACACCTGTTAAACCAATGAGTACTACTAAAGACCATCACAATAAAGCAAAAGCATTACCAGAAAACAGGTAGTGAATAACCGCT  
CAAATAACGCAACGTTATTTGGTGGATTATTTGCAGCATTAGGTTTATTATTGTTATTCGGTCGTCGCAAAAAACAAAACAAATAAT  
ACAATATGACCCAGGTCTTGTGGCCTGGTTTTTTTATAATTACACATGCAATAGATGTATTTTTCATATAAAATAAACAATAAAGA  
TACGGAATAAACTTATATGAGGCGATAATATGAATTACATTTTAGGAACAATTTAGAAAGTAAATTTACAGGTGTAGAAAAAGC  
GCAAATAAATAGATTGAAGTTGTTCAAACAACACGGCATATCTTCAAAATGTGTATATGTTAAATGGAATCCTTATTCATACACATA  
TGCGAAGCAACATCAGATTGAAAATGATGTATTTACAATGTATGACTATTTTCAAAAAGCAATCAATTATAAAAAGACAAAAGCAAG  
TTAACTGGATACAGTATTGGGAAAAGTCATGTAGGTACACATTGAAATTTGTGGAAAATTCAAATGATGTCAGAATATATGATGAA  
GAGCAATTTATAATGTATGCTCATTTTTTAGATAAAACAGTATCATCTTTAACTATGTGAATTTTGTATCATAAAGAAGAAAA  
GTAAACCGCAATTGTATGATGGAAGAGGCTTTTTAAGTTGTTCTCGAATTTTAGGTGAAGGACAACGGATTGTACTCGAAAATTAC  
TATACACCTAATGGGGAATCGTCATCCAAAATATTTTCAGCATATAAAGGGGAAAAACACGCTCACAAAGGTTATCTTAAATGA  
AGATACAGCATCAACAATTTTTGTATACAGAAGATGAATTAAGTTCAATATTTCTCCATCAATTATGTAAAAATAATGATCAAAATCAT  
ATTAGATCGTCTCATGAATTAGGAAATGTTATAGCGGGATTAATCAAAGTATTCCAGTTGTTGTTGTGCTCCATAGTACACATTT  
ATTCGGTACCGGTAATGGTATAAAAAGTTTTTATAAAACAGTATTTAATAATTTAACACGTTATAAAGCGATTGTTGTATCAACAGA  
AAAGCAATGCCAAGATATTTCAATATATTGAAAATAAATACCAGTTATCAATATTCCGGTTGGCTACGTGGCAAAATTTAAAGTA  
TCAATTTGACATCAATCAAAAGGAGAAAAATCATATCATATCAATTGCTCGCTCGTTGAAAATAAACAATTAACATCAAAATTG  
AAGTGATCAAGCAATTAGTAACAAAACATCCCAATATTCAATTGAATATTTATGGACATGGAATGGTTTGTGAGAATATCGACAA  
CTTGATAGAAGATTATCATTTATCGGAACATGTTAAATTTTCATGGTTTTAAGACGCATATTAATGAAGAGATTGCTAAAGCAGAAGT  
ATGTTATCGACAAGTAAAAATGGAAGGTTTTGGCTTAGCAATTTTAGAGTCGCTTTCAGTAGGTACACCAAGTATCATGTTATGATGTA  
GATTATGGTCCATCAGAAGTATTCAAGATGGATTAAATGGCTAATTTAGTACCTCAAGGTGACATCAATCAAAATGGTTGAAAAGGTC  
GACCAATTACTAAATAACTCAAAAATTTGCAACAGTTTTTCAATTAATAGCATAGAATCTGCACAACAGTACAATGCAACTACTATC  
AGTACAAAAGTGCAAAATATTTTAACTAAGTCAAAAAGAAAAGAGCATTTTCTAGAAATCATCTATTTAAACAAACCTCGTTCATACA  
AACTTACATGTTTATGTTAAATGACATAGGAAAACGCTTTTTTTTATAAAAATAAAGGTGAAGTACATTTATATAAGACGAACAAAT  
GGTCCCATTGTTAATTAACGACGCTTTACTATATTGTTGTGCTTTTGCCAAACTACCTTTTGACAGTCGTTGCTGTACTTCAGGATG  
ATCAATCACATATTTACTTTATCAAAATAGGGCATCTTCATCATTTTTAGTAATTAATAACCATTGAAATCTGAAGTAATCAGTTTCG  
TTAGGTCCATATTTAATATCATAACTAATAACTGGAACACCATGTGCTAAAGATTCAAGTAGCGCTAAAGAGAAACCTTCCATGTTA  
CTTGTTATTAAACTCAAATAGGCATCGCTATATCTTGGTCTAGATTGCTTAAAAAGCCGCGTAAGTAAACATGATTTTCCAATCCAT  
ATTTTTGTATCAATTCATTAATTTTTTACTTTTCAAGCAAAACCATACATATGAAGCTTATTTTTGGGACATACGATACATAAGCG  
TTTAATTAATCAATTTGTTGATGTAATTTTTCAGGTGAATAACGAGCAACGGAATTAATTAACACTGCGCTGATCTAATGTT  
TGGACTGGTGTATCAATTTGTTTCACTATAGCCGACAGGAATATTAACAACCTGGAATAGTATGGTTAATACGTTTTTCAACATCTAAT  
TTTTGCTGCTCAGTAGAAACGATAATTGCACGATATCGAGATAAATTTTCAACATCGCTTTATATACATTTTTAAATGGCGATGAA  
TCTAATGCATCAATATTTTTAATGTGTGACTGTGAAGCACAGCTACTACTGGGATTGACTCAGGCGTTAAGTTGAAAATAGGTGCT

GTGTACACATTACGATCACTGAAAAATAAATCCCCATGTTGATATAGTTGTTTAAATGAAAAATGCGCCTAATTCGGTTTCATTATTA  
AAGAAATATTGTTTGTAGCATAGTAAACAATAATTTTTGTACTTCTGGTTTGCCATCCTTGTAAGAAAAATACTTTTCTAATTTTG  
TGTCACCTTCTGGATTATAGAAAAATTCACATAATGTTTGTGTTTATCAACAAGAATCCTACTACAACCTAAAAAGCCACGCACAT  
CATAAAAAATCAGTTTTACTTTTCGTCCTTGACTATCAAAATGATTCACATAATCTAATATACGATATTTAGGATCTTGAAAAATGGGC  
ATACATTAAGAAACGCTCTTGATCATATATTCTAAAGTCATGACTATTTTCAACATGTTTTAAAGTATAATGACATTCATCAGTCCAA  
TACGACAACCGATCAAATGGTTTCATTGCGTCTCTAAATATGTTGCTTCTTGGAAGAAATCATACATATTAATATAGTCAGAACTAGTA  
ATATAATTTTGGGCATTTCTATATAAATATCTATTCCATGACAGAAATACACATTGCGCTGGTCTTCCCATTCTTTAAATAAATTTA  
AACGATTAATAAATGCTTTCTCTATCCCAGTTAAATTAACACCTAAACTATTACCTACAAAATAATTCATTTACAACACCACTTATAT  
CTATTTTTTATAATTATATCACAATAATTTAATTACTTCTTTTAACTGGAAGATGTGTTTATTTATAAAAACAACAAATTTTGATATTT  
ATAATGATAGTAGTTATTCAACTCACTACGACCAATATATCATTTGTAGAGCTTAGGATATTGATTTATGACTCAAGCACATCAAATG  
AGAAGATTTATAAAAGAGATATACAACCTCTAGAAGGTATAATAAAAAACGCGCAACTAATGTTACGCGTTTGAATTAATCATATGAT  
ATTATTTGCGATACTTTAATTTAGCGAAAGCATCATGTTGATGGATAGACTCTTCATTACGACATTGATATCGAAACCGTCTAACC  
AATCAAATTCAACTAAGTCCGCGGCAATTAACGAATTAAGTCTTCGACAAAACGTTGGATTTTCATATGCACGCTCTGTACACGTT  
TTTCATCAGGACGTTTTAAATAGGGTATAGAATTGAACCTGTCATTAGCTTCCATTGCATCTAAAATTTTATTTTATAGTCATCAAC  
TATGTCTTGATCTTTATTAATATATGTTTTAACAGTGACAACACCACGTTGGTTGTGCGCTGAATACTCACTTATTTCTTTGAACAA  
GGGCATAGCGTTGTGACAGTTGCTTCAATAGTAAGTCTTTACGTGTAACCTTTATCACCGTCAATTGCTAATCCATAAGTGACATCG  
GCATTGCCAATGCTTTAATATTTGTGGTTGGACTATAGCGATCAAAGAACCATTTCAGAAACATCAACGCCTGCCGCATTTTGT  
TTCATATTGCTTTGTAAGTGGCGTAACACCTGATAAAGTGATTAATTTCAAGTTCAATACCATTATCATAGTGTCTTTTCAACACTTT  
CAATTATACGGCTCATATTAATACCTTTTTCGTCCTTTTGTAAACTTGTGAAAAACTAAATGTGCCAGCTGTTTGATACTGGTCAAC  
AAGTACAGGGTACACTAAGTTTTAATACCAACTTCTTCTATTTCAAATAAAAAATCTTTATGTGTACTTTGTAATCTGTCAATTCG  
TTCTTAGTAGTAGGTTTCGTGCCCTTCAATAGGATCTACGGAACCAAAGTGTTCACACGACCTTCTCGTGTGATAAATCAAATTC  
GTCATTTTTTCTCCTCCGTTAAGATTTAAAGTGATATGTCCAATATGGTTCGACTGTTAAAAAGCTGTGTTGTTTACCATCGATTCAG  
GACTTGCTAATTGTTTTAAAAATGGACCTGTTTGAGAAGCATGTGCTTCAAATGCCTTAATTTTTAAGTCTTTAAAAATCTGTAATATC  
ATTTTGAATATCAGGTTCTCCAAGAGCTTCGGTTGCATCATTACTGAACGCAACTAAAGTTAAACGAGGGCGTTCTTCTTTAGGCAT  
GCGTTCAACCGTTTCAATACAGCGTCTGCTGTTGCTTCGTGATCAGGATGTACTGCATATCCAGGATAAAATGAAATAATCAATGA  
TGGATTTGTATCATCGATTAAAGATTTAATCATACCATCTATATGTTTCATAGGGTTCAAATTCGACAGTTTGTGTCAGTAAACCCATT  
TTTCTTAAATCAGTAATACCGATAACTTTACAAGCTTCTTCTAGTTCACGCTCACGAATACTTGGTAATGATTCGCGTGTGCAAAATG  
GGGGATTACCTAAATTTCTGCCCATTTGTCTTAGGGTTAAACATGCATATGTTACAGGTATGCCTTTTTGGATATAATTTGCTAATGT  
GCCTGCAGATGAGAAGGTTTCATCATCAGGATGTGGAATATTACTAATACATGTCTTTTCGTCAGTCATGTTGATGCCTCCTCTATA  
AATTAATGAGTTCGCTCACTAATTTGAAAGTGTGTCAGCGAGTTGACCTTCGTAATTAACCTGCAATTAATAATTCATCATGTTTCAT  
TGACCTCAAAATGCGTTAGACCTTGTACATAAAACCAACACCATTGATAGTTTAAAGACCAATGCGATAAGGTTCTTTATTACCAC  
CTTTAGTTGTGCATGCGTATATGTTATTTGTATGTTTCTTAAAAAAGTACCAGCATTAAAAACACGTTGATCGAAATGGTTTCGCATA  
GGCCCCATTTGTCGTTTCAACATGCAGATACACAGGTTTATGTTCAAAAAGAAGCAAGTAAATCTATAACTTCTTGTCTTTAATTGGT  
TCCAACACGTTCACTCCTTACACTATCAATGTGTTTACTTCTATTTTACTAAAACTATTCAATAATTGTATACGATTGCTCAATTA  
TTTATAAATTAATTTTCATGAAGGTAATTACTACAGGATTACGGAATCATACAGCATTAGTTTCTTAAAAATCAAAAATTTTG  
TTGGAATTTGAAAAGTGTTAAACATTAATAATGATGCTATATTAATGGTGTATGAATGAATTCATAAGTTTAAAAATGTATTAAAT  
TTGTGGAGGCATGTAAACAATGAAAGTATTAAACTTAGGATCGAAAAACAAGCATCTTCTATGTTGCATGTGAGTTATATAAAG  
AGATGGCATTTAATCAGCACTGTAAACTTGGTTTAGCAACTGGTGGTACAATGACAGATTTGTATGAACAACCTGTTAAGTTATTAA  
ATAAAAAATCAGTTAAACGTAGACAATGTATCCACGTTTAAATTTAGACGAATATGTAGGTTTAACTGCATCACATCCGCAAAAGTTATC  
ACTATTATATGGATGACATGCTTTTCAACAATATCCTTATTTAATAGAAAGAACATTCATATTTCAAATGGAGATGCCGATGATA  
TGAATGCGGAAGCGTCAAAATATAATGACGTTTTAGAACAAACAAGGTCAACGTGATTTCAAATTTAGGTATTGGAGAAAAATGGT  
CATATTGGATTTAATGAACCTGGTACGCCGTTTGTAGCGTTACTCATATCGTTGATTGACTGAAAGTACTATTAAGGCTAATAGTC  
GATATTTTGAAAACGAAGATGATGTTTCCAAAGCAAGCCATTTCAGTGGGACTTGCTAATATTCTTCAAGGCAACGTATCATTTTAC  
TCGCATTTGGTGAAAAGAAACGTGCTGCTATTACACATTTATTAATCAGGAAATTTCTGTTGATGTTCCAGCCACATTACTTCACA  
AACACCCGAATGTTGAGATATATTTAGACGACGAAGCTTGCCCGAAAAATGTTGCGAAAAATTCATGTGCGATGAAATGGATTGATTG  
CAATGTTTAATTAAGAAATGCCTCGGGAAGGTTTCCAATAGAAAGATAAAAAAGCATTGGAAGGATGATTTTTAGTGGAATTACAAT  
TAGCAATTGATTTATTAACAAAGAAGACGCGGCTGAGTTAGCAAAATAAGTAAAAGATTATGTAGATATCGTAGAAATCGGTACG  
CCAATCATTTACAACGAAGGTTTACCAGCAGTTAAACATATGGCAGACAACATTAGTAATGTAAAAGTATTAGCAGACATGAAAAAT  
TATGGATGCAGCTGATTATGAAGTTAGCCAAGCAATTAATTTGGCGCGGATGTAATTACAATACTAGGTGTTGCAGAAGATGCAT  
CAATTAAGCAGCTATTGAAGAAGCTCATAAAAAATAAACAATTACTAGTTGATATGATTGCTGTTCAAGATTTAGAAAAACGT  
GCAAAAGCACTAGATGAAATGGGTGCGGATTATATTGCAGTACACTGGTTATGATTACAAGCAGAAGGCAATCAACATTAGAGA  
AAGTTTAAAGAACCGTTAAATCTGTTATTAATAAATTCTAAAGTTCAGTAGCAGGTGGAATTAACACAGATCAATTAAGATATTGT  
CGCTGAAAGTCTGATCTTGTTATTGTTGGTGGCGGAATCGCAATGCAGATGATCCAGTAGAAGCTGCAAAACAATGTGCGCGCTG  
CAATCGAAGGTAAGTAATATGGCTAAATTTAGTGACTATCAATTAATTTCTAGATGAATTAAGATGACTTTGTGCATGTTGAAGCG  
GATGAGTTTCAACTTTTGCATCCAAAATACTACATGCTGAACATATATTTGTAGCTGGCAAAGGACGTTCAAGATTCTGTGGCGAAT  
AGTTTTGCAATGCGCTTAAATCAGCTCGGCAACAGGCACATGTTGTTGGAGAATCAACGACACCTGCGATTAAGTCGAATGATGT  
ATTTGTAATTATCTCTGGTTACAGGTTCCACGGAACATTTAAGATTATTAGCAGACAAAGCAAAATCAGTAGGTGCTGACATCGTATT  
AATTACTACAAATAAAGATTCTGCAATAGGCAATCTAGCTGGGACGAACATCGTTTTGCCTGCAGGTACAAAATATGATGAACAAG  
GCTCGGCAACCACTAGGAAGTTTGTGTTGAACAAGCATCTCAATTTTATAGATAGTGTGTAATGGGATTTGATGATGAATGA  
ATGTTACGGAACAACAGCATGCAACAAAATCATGCTAATTTAGAATTAATAAGATAGTCGATAATATGATGCTTAGGCAAGAAATA  
TTATCGATTATTTTTTATTTAAATAATAAATTATAGTATAATATAAATAATAAACGAATAGGGGTGTTAATATTGAAGTTTGACAAT  
TATATTTTTGATTTTGATGGTACGTTGGCAGACACGAAAAATGTGGTGAAGTAGCAACACAAAGTGCATTTAAAGCATGTGGCTTA  
ACGGAACCATCATCTAAAGAAATAACGCATTATATGGGAATACCTATTGAAGAATCATTTTTAAAAATAGCAGACCGACCATTAGA  
TGAAGTAGCATTAGCAAAGTTAATCGATACATTTAGACATACATATCAATCTATTGAAAAGGACTATATTTATGAATTTGCGGGTAT  
AACTGAAGCCATTACAAGTTTGATAACCAAGGGAAAAAACTTTTCGTGGTGTCTAGTAAGAAGAGTGATGTATTAGAAAGAAATT  
TATCGGCTATTGGATTAATCACTTGATTACCGAAGCTGTTGGATCCGATCAAGTAAGTGCATATAAACCAAAATCCTGAAGGCATAC  
ACACAATTTGTGCAACGCTACAATTTAAATAGCCAACAAACGGTGTATATTGGTGATTCAACGTTTGTGATTGGAGTGGCACAACGTG  
CTGGTATGCAATCTGCAGTGTCACTTGGGGTGCACATGATGCAAGGTCATTACTTCATTCAAATCCGGATTTTATTATTAATGATCC  
ATCAGAAATTAATACCGTATTATAAAACTTGTTAAACAGAGAATACCATTGGTTAAATGCATATTCATAAATATTAGATTATACTT  
AGAAATATTTTCGCTTTAGATTAGGAATTTAAATAAATATTTATTAACATTATGAATTTTTAAAGAGTAATGTCTGACTCGTTGATA  
ATTTATTTTTGTAAAAATAAATTAAGTAATGACAAAGTTATTGAAGTAAATGAGTATAAACATTTAAATACGATGTGCAAAATGG

CGATAGCATATCACTTACATGAAGTTGTGTGCTATCGCTATTTTATAGTTATAAATCCAAAAAGTTAATCGTTTCGATGATTTAAGAATT  
ATTATTGTTTAAATTCAAATGTATGAGGGTATAAAATCATTGAATTTAATTCGATAAAAGCGAAATTTTGAACAAACATACCTTTGTAT  
TTATATAAAAAGTTTAAATTCCTTATAAAATTTGACAAAACCTAATTAACCTCCGTATAATTATGAAACATACAAGAGGGAGTGTATGAATT  
CATGAATTTTAAATAAGAGAATATTAACATGGTGGATGCAAAGAAAGCTAAAAAAACCGTTGTTGCAACCGGTATCGGTAATGCAA  
TGGAATGGTTTCGATTTTGGTGTCTATGCATATACAACCTGCGTACATTGGAGCGAACTTCTTCTCTCCAGTAGAGAATGCAGACATTC  
GACAAATGTTGACTTTCGAGCATTAGCCATTGCGTTTTTATTAAAGACCAATTGGTGGTGTCTGATTTGGTATTATTGGTGACAAATA  
TGGACGTAAGTTGTATTAACATCTACAATTATTTAATGGCATTTC AACATTAACCATTTGGATTATTGCCAAGCTATGATCAAATT  
GGACTTTGGGCACCAATACTATTATTGCTTGCAAGAGTACTACAAGGGTTTTCAACAGGTGGAGAGTATGCGGGGGCAATGACATA  
TGTTGCCGAATCATCTCCAGATAAGCGTCGTAACCTATTAGGTAGTGGACTAGAAAATTGGGACATTATCAGGTTACATAGCTGCTTC  
AATTATGATTGCTGTATTAACATTCTTTTTAACAGATGAACAAATGGCATCATTTGGTTGGAGAATCCCATTTCTACTCGGTTTTATTC  
CTAGGATTATTTGGCTTATATTACGTCGTAAGCTGGAAGAATCACCAGTTTTTCGAAAATGATGTTGCAACACAACAGAAAAGAGAT  
AACATTAACCTTTTTACAAATCATCAGATTTTTATTACAAAGATATATTTGTATGTTTTGTAGCTGTTGTATTCTTCAATGTTACAAACTA  
TATGGTAACTGCATATTTACCAACCTATTTAGAACAAAGTTATTAATTAGATGCAACGACAACAAGTGATTAATTACTTGTGTCAT  
GGCAATAATGATTCCATTAGCATTAAATGTTTGGTAAGTTAGCGGATAAAATAGGTGAAAAGAAAAGTATTCTAATTGGTACTGGTGG  
GCTAACATTATTTAGTATCATCGCATTTATGTTATTACATTCACAATCATTGTTGTAATAGTAATCGGTATATTTATATTAGGATTTT  
TCTTATCAACTTACGAAGCGACAATGCCAGGGTCGTTACCAACGATGTTTTACAGTCATATAAGATATCGAATTTATCAGTAACAT  
TTAATATCTCTGTTTCGATATTTGGTGGTACGACGCCATTAGTTGCAACATGGTATGTTACGAAAACCTGGAGATCCATTAGCACCTG  
CGTATTATTTAACAGCAATCAGTGTATTGGCTTTTAGTTATTACATTTTACATTTAAGTACAGCAGAAAATCTCTAAAAGGTTT  
GTATCCAAATGTAGATAACGAGCAAGATAGAGCTTTATTATGCAAGACATCCAAAAGAAGCATTTAGTGGGTTAAAGAACGTAAG  
AATTAGAGATTTTAAATAAAAAAGTATAAATCAATCGTATATAAGCACTTTAAAGCTAGTAGGTTCTGCTAACTTTAAAGTGCTTTTTTA  
AATTGAGAACTGTAATTAGCCGTAATAAAGTTTTTGTATATACATAAACCCCACTGCAATGATTATCGCAATGGGGGAAAGAGGG  
GACTTAAAGCATATGTTTAGCTTTGAATACTTAAAATCTCTTGTCTATTGAAATGTTAGGATGTAATATGTCTTAGAGTATTTTGTCT  
CAACGCAATTAATATTGAGACTCTAACCTTCAATATTATTATAGAGAACACAACTTAAATAGATTGGGTGACTTATTTGTGTCAAGT  
TATTGCGATTGCGATAACTTCTTTCTCTATATACATATAGTAACGTCTTATCTAATAAAAAACATGGTACTACAGTATCAAATTTAT  
CTAGGGCTTAAGTTTGATTTTTATAATAGGCAGGTTTACCTGATAAAAAATCTTATTCATTATATAATGTTAACAATATGTATTTTAA  
AGTTTACATTGAGTGAGGGATATTGATGAACGTAATTTTGAACAGTTGAAAACACATACTCAAAATAAACCTAATGACATAGCAT  
TACATATAGATGATGAAAACAATTACATATAGTCAACTAAATGGCCGCATCACTAGCGCAGTTGAATCTTTGCGAGAAATATTCACTTA  
ACCTGTCTGTTGCTATTAATATGAAATCATCGGTTCAAAGTATTTATTTGTTATTTAGCTTTGCATCGTGTACATAAAGTGCCTATGAT  
GATAGAAGGTAAATGGCAAAGTACTATACATCGTCAATTGATTGAAAAATATGGTATTAAAGATGTAATTGAAGATACAGGTCTCA  
TGCAGAGTATAGACTACCGATGTTTATTGATGCAACGCAATTACAGCACTACCCCAATTTATTACATATTGGTTTTACTTCAGGGA  
CAACTGGACTGCCAAAAGCATATTATCGTGATGAAGATTATGTTGGCTCTTTTGAAGTTAATGAAATGTTGATGTTAAAAAATG  
AAAATGCAATAGCAGCCCCCTGGACCACTATCGCACTCGTTAACATTATATGCGTTATTGTTTGCTTTAAGTTCGGTTCGTACTTTTAT  
AGGACAGACCCTTTTCATCCTGAAAAGTTACTTAAATCAATGTCTGTAATAATATCATCATACAAAAGTTGCTATGTTTCTTGTTCCAACG  
ATGATTAAGATCATTATTGTTAGTTTACAACAATGAACATACAATCCAATTTTATTTTAGCAGTGGAGATAAGCTGCATTCTCTATTT  
TTAAAAAGATAAAAAATCAAGCAATGACATAAATTTGATTGAATTTTGTGTACATCGGAAACAGTTTATCAGCTATAACTATGTA  
ATCAGCAAGCACCAGTTGAATCAGTAGGTGTGCTATTTCCAAATGTGGAATTGAAAAACAACGAATCACGATCACAATGGTATAGGA  
ACTATTTGTATAAAAAAGTAATATGATGTTTAGTGGCTATGTAAGTGAACATGTATAAATAATGATGAATGGTTTGTACTAATGAT  
AATGGCTATGTAAGAGAGCAGTATTTATATTTAACGGGACGTCAACAGGATATGTTAATTATTGGTGGTCAAAATATATATCCAGCA  
CATGTTGAACGCCCTTTAACGCAATCTTCGAGCATTGATGAAGCAATTATCATCGGTATCCAAATGAGCGTTTGGTCAAAATAGGC  
GTATTGCTTTATCTGGTGATGTGACACTTACACATAAAAAATGTAAAAACAATTTTAAAAAAGAAAGTGAAACGCTATGAAATTCCA  
TCGATGATTCATCATGTAGAAAAGATGTATTACACTGCAAGTGGTAAAAATTGCTAGAGAAAAAATGATGTCGATGTATTTGAGAGG  
TGAATTATAATGAATCAAGCAGTCATAGTTGCAGCTAACGAACTGCATTGTTGGGAAATATGGTGGCATTAAAAACATTTAGAG  
CCAGAACAAATGTCTTAAACCTTTATTCCAACTTTTTAAAGAGAAAGTATCCAGAGGTAATATCTAAAATAGATGATGTTTATAGGT  
AATGTTGTTGGGAATGGTGGCAATATTGCAAGAAAAAGCATTGCTTGAAGCGGGGCTTAAAGATTCAATACCTGGCGTCACAATCGA  
TCGGCAATGTGGGTCTGGACTTGAAAGTGTTC AATATGTCATGTGCGATGATCCAAGCCGGAGCTGGCAAGGTATATATTGCAGGTG  
GTGTTGAAAGTACAAGTCGAGCACCTTGGAAAAATCAACGACCCGATTCTGTGTACGAAACAGCATTACCTGAGTTTTATGAGCGT  
GCATCATTTGCACCTGAAATGAGCGACCCATCAATGATTCAAGGTGCTGAAAATGTGGCCAAGATGTATGATGTTTCAAGAGAATT  
ACAAGATGAATTTGCTTATCGAAGTCATCAATTGACAGCGGAAAAATGTAAAGAATGGAAATATTTCTCAGGAAATATTACCTATAA  
CCGTTAAAGGAGAAATATTCAACACTGATGAAAGTCTAAAATCACATATTCGAAAGATAACTTTGGCCGATTAAAGCCCGTGATC  
AAAGGTGGGACCGTTACCGCTGCGAATAGTTGTATGAAAAATGATGGTGCAGTTTATTGCTTATTATGGA AAAAGATATGGCATA  
CGAATTAGGTTTCGACTATGGTTTTATTATTTAAAGATGGTGTTACGGTAGGTGTTGATTCTAATTTCTCGCATTGGTCCAGTACCA  
GCCATTTCCAACCTTACTAAATAAGAAATCAATTAACGATAGAAAATATTGAAGTCAATTGAAATTAACGAAACGCTTCAGTGCACAGGT  
AGTTGCCTGCCAACAAAGCTTTAAATATTTCAATACGCAATTAATATATG GGGGTGGTGCATTAGCATCAGGTCATCCATACGGTGC  
AAGCGGTGCCCAATTAGTGACTCGATTATTTATATGTTTGACAAAGAGACTATGATTGCATCTATGGGGATAGGGGGAGGTCTAGG  
AAATGCAGCATTATTTACTCGATTCTAACCAGCGATTAAATGTGTCAATTTCTAAGGATAGTGTGGCTGCATATTATCAGTGTTTTAA  
CCAACCTTATAGAAAAGAAAGTACCACCATTAAATGTGTGCGTCATTATGGCCAAAATTTGATTATTTAAAAAATATGCAAAATAGCGA  
ACTGATTTTAAACAAAATCAGCAATTAATCAAACTCAAAAGATAGAAGTAGACACAATATATGTAGGGCATTTAGAAGATATTGAAT  
GCCGACAGACTCGCAATATCACACGTTATACAATGGCTTTAACATTAACCTAAAAATGATCAACATGTCATAACGGTTACACAAACTT  
TTATTAAGGCGATGAAGTAGAGATGAAGTTTATAGATATGGATAAATGAATATTTGGCGCTCGTAAATGATGATAATCCAATAC  
ATAATGAGATTGTGCCAGGACAATTAGTGAGTCAAAATGATGCTGATGGCTATGTCAATTAGAGACAAACAGGTGTCAAATTAACATC  
GTTAAACCTATTTTAAATAAATGAAAATATCGAATTCATTGAACAACACGAACACGAAATTATAGCAATTAATGACGATGGAGAGAT  
TAAAAATAAAAAATTTCTTTGAGCACAAAAAATAACCGATATTAGCTGCATGAACGCATATTAATTAGGAGATGAAAGGACAGCTAA  
TATCAGTTATGTATTGTTATTATTATTGGGAACAGAGATGAATATAGGTTACGTTTCTTTCTTTGACAGGGGATGCATTAATCTAAAA  
TAATAATAACAACATATCAATGTTTAAATAAATCTGGATTATTGGAACGATTAGTCAATTTAACTAATTTTCATATGATCTATATCG  
TCTTGTAATAAAGAGAGCAATTTGAATATTTAGTATCACTAAATGAATCGTCACTTAAATTTGAAACATGCTGAAACGTTTTGGTT  
ATAATTTTCATAAACTGGTGCGCTTCATGGTGATCTGTCGATAAATAATCATAACCTATATTACCTCCTTTGCTACTCTATGGTTAT  
ATTATAAAATACATTTTTATGTGTGACATCAACCTTAAGTATCAACTTTTTATCAGACATAGAACGTATGATTTACTAAGCATTTTA  
TGTATAAAAGTTCTAAATAAATATATATTTATAGATCGCCTGGCAGTCATTTGGGAAATATAACATATGATTAGAGAGGCATCT  
ATCGCAAAAAGAAATGATAATGATAGAGGTATTGAGCATATAGATGAGTTTAAAGTTTCTTTGAAATAAAGGGTTATTTAGTCAATAG  
ATGTAGATGTATAGGAAATATTTGTATGTATTGTTTCGATATGTATGAAATTTTCAATAAAAGCTAATAACGCTTATATGTAACCTTCA  
AATTTAAATTATATACAGAGCATGATGATTATAAAAAAATAACCCATCATCATAAATTGAGTTCATACCCAATTTAAGTGGTGTGGA

TAATAATGTTGATTATATAGATGAACCGCCTAATCGTTAAACCTCTGTTACTTCAACATCGATATGTTCAATACGGTTGTATGCACCGT  
GATCCACAGGACCAACAAAATCATTCATTTTCCAACCGTTTTAATAGCAGAAGCGACGAAAGCTTTCGCGCTAATCACAGCTTCTT  
TCGGTGACTTACCGTTAGCTAAATATGCAGTTGTTGCCGACGAAATGTACAACAGCACCATTGTTATAACTTTGTTGGAACATGT  
CTGTTGTTAGTTGATAAAATGTTTGACCATCATAGTATAAGTCATACGATTTATCTTGATCTAAAGCTTTGCCACCTTTAATGATGAC  
ATGCTGTGCGCCTTTATCAAAGATAATTGTTGCAGCCTTTTTCATATCTTCAATTGAATTTAATTTACCTAATCCTGATAATTGACCC  
GCTTCAAATAAGTTTGGTGTCACTACCGTTGCTTTAGGTAGTAAATATTTAATCATCGCCTCAGTATTTCCAGGATTAAGCACTTCAT  
CTTCGCTTTTACAAACCATGACAGGATCTACTACAAAATATTGTGCATTAGATGCCTCATATACTTCTCCAGCAGCTTTGATTATCTC  
CTCAGTACCTAACATACCTGTTTTAATAGCATCAGGTCCGATTGATAAAGCCGTTTCAAGTTGTTTTTCAAATACATCCATTGGTAAT  
GGTGTAACATCGTGTGACCATGTATCTTTATCCATAGTAACGATGGCAGTTAAAGCGACCATGCCATACGTATCTAATTTCTTGAAC  
GTTTTCAAATCTGCTTGCATACCTGCGCCAGCACTGTGTGCAGAACCGCAATTGTTAAAACCTTTTAAAGCCATTGAGCTTCACT  
CCTACATAATAATATTGTATTTCATCATATCATTTTTTAACCTAATTGAAAAATATTAAGCATTCAATATTTGATGATTGTTGAAATGAA  
TCATTCATACTATTGTAACTTTTGAAAAATGTCATTCACCTTTAGATAAGTGTGATATGTTAAAATATGTCCTGAGGTGAGATTGAATGG  
AATGGTCGCAAATTTTTTCATGACATAACAACGAAACATGACTTTAAAGCTATGTATGATTTTTTAGAAAAAGAATATTGCACTGCAA  
TCGTATACCCTGATAGGGAAAAATATATATCAAGCGTTTGATTAAACACCGTTTGAAAAATATCAAAGTTGTTATATTAGGACAAGACC  
CGTATCATGGTCCAAACCAAGCACATGGATTAGCATTTTCAGTGCAACCTAACGCAAAATCCCTCCATCTTTACGTAATATGTATA  
AAGAATTAGCAGATGATATTGGATGCGTTAGACAAACACCGCATTTACAAGATTGGGCAAGAGAAGGCGTCTTGTTATTGAATACA  
GTTTTAACCGTAAGACAGGGTGAAGCAAATTTCTCATCGTGATATTGGTTGGGAAACATTTACTGATGAAATATTAAAGCAGTGTCT  
GATTATAAAGAACATCTGTGCTTTATTTTGTGGGGAAACCTGCACGCAAAAAATAAGCTTATCGATACATTAACCATTTGATTT  
ATAAAAACAGTGCATCTGTGATCCACTGTCTGCATATAGAGGATTTCTTGATCAAAACCGTATTTCCAAAGCGAATGCGCTATTAGAG  
TCAGTAGGAAAAATCACCATTAAATTGGTGTGAAAGTGAGGCGTAGATGTTGAATAGAGAACTTTAATAGCACGAATTGAGCAAGA  
ATTAGTACAAGCAGAGCAGGCACAGCATGACCATGACTTTGAAAAACATATGTATGCCATACATATATTAACATCTTTATATGCTTC  
AACATCAAATACACCACATATTGGTGAACAACAAATGAATCGTCGTATTGCTAACCATAAATGCCACAATCACAAATAACGC  
AGCCAACTCATCAAGTGACAGCTGCTGAAATTTGAAGCGATGGGTGGTAAAGTAAATACGCATTCAGCACATCATATAATAAGTCA  
TATTCACAACCTTCAAACCAACAACAAAGATTAGCGACAGATGATGACATTGGCAATGGTGAATCCATATTTGATTTTTAAAAAGC  
AACATGAAACATAATTACTTAATAGCTTGTAAAGTATGTAGGTTAATAATCAAGACGCATATACTTATATTTCGAGTGTTCGGATT  
AAACATTTATTAATACTGAATTAATAAGGAGAGGTAGCAATGAAATATTTATTTAGGTGCATTAACGCGATGATGGCTGT  
CGGAACAGGTGCATTTGGTGGCATGGTTTACAAGGAAAAATAAGTGATCACTATTATCAGTATGGGAAAAAGCAACGACGTATC  
AAATGTACCATGGCTTAGCATTATTAATTATAGGTGAATTAGTGGTACAACCTCAATCAATGTTAACTGGGCTGGCTGGTTAATAT  
TTGCTGGTATTATTTCTTTAGTGGATCATTATATATTTAGTATTAACCTCAAATTTAAAGTTTTAGGTGCGATTACGCCAATTGGTGG  
CGTATTGTTTCATCATTGGATGGATAATGTTAATCATTGCGACATTCAAATTTGCTGGTTAAATTTTAAAACTTTAGATTACCTATGTA  
ACTAAACATTAATTTTAAATAAAAAAATCAAGAAAAAGAGTTACAACTCATCTTTGGGTATAGAATACCTTCGAGGTGAGTTT  
TTATTTATGGAAAAAAGAATAAGCAAATAGATAGAGGCGATTTAAAAACAAAACCTATCTGAAAAAGTTTGTATGGGCGATTGCATA  
TGGTTCATGTATCGGATGGGGCGCATTCATCTTACCAGGAGACTGGATTAAAGCAGTCAGGTCCGATTGCAGCATCAATTTGGTATTGT  
TATTGGTGCATTTAATGATATTAATTCGGGTGATTGATGGCGATTAGTAGAGAGATTTCAGTATCAGGGGGCGCGTTTGGCTTT  
AGTTTCTTAAGTTTCGCGAGATATGTGAGTTTCTTCTCATCATGTTTAACTTTTGGTTATGCTGTGCTGTGCTTTAAATGCGAC  
CGCATTCAGTTTACTAGTTAAATTTCTTATTGCCAGATGTCTTAAATAATGGGAACTATACACCATTTGCGGGCTGGGACGTTTATATT  
ACGGAAATCATTATTGCGACCGTATTACTACTTGTATTATGCTAGTAACGATTCTGCGCGCAAGTGTATCTGGATCATTACAATATT  
ATTTCTGTGTGGCGATGGTAATCGTCGTATTATTGATGTTCTTTGGTTCATTCTTTGGTAATAATTTTGCATTGAAAAATTTACAACCG  
TTAGCTGAACCTAGCAAAGGATGGTTAGTGTCTATTGTGGTTATTGTATCCGTGGCACCATGGGCATATGTTGGATTGATAATATTC  
CACAAACAGCAGAAGAGTTTAACTTTGCACCAAAACAAGACATTTAAGCTTATCGTGTACAGTTTATTAGCAGCATCATTAACCTTATG  
TTGTCATGATTTTATACACTGGTTGGTTATCAACAAGTCATCAAAGTTTAAATGGGCAAGTTGTGGTTAACAGGTGCTGTTACACAAA  
CAGCATTGGTTATATTGGATTAGGTGATTAGCAATTGCAATTATGATGGGTATATTACTGGTTTAAATGGATTCTTGATGAGTTC  
AAGTCGTTGTTATTTCTATGGGACGTTTCAGGTATTATGCCAACCAATGTTTAGTAAATTACATAGTAATAACAAAACACCATTTGT  
CGCAATCATATTCCTAGTAGGTGTGTCGTTAATTGCACCTTGGCTAGGAAGAAGTGCATTGACTTGGATTGTAGATATGTCATCTAC  
AGGTGTATCCATTGGCTACTTTATTACATGTTTGTCTGCTGCGAAATTATTCAGTTATAACAAACAAAGTAATACGTATGCACCGGTT  
TACAAAACGTTTGCTATTATCGGCTCATTGTATCATTCATTTCTTAGCGTTGTTATTAGTGCCAGGTCTCTGCAGCACTGACTGC  
ACCGTCTTATATTGCATTACTTGGATGGTTAATCATCGGTTTAAATTTCTTTGTGATTTCGATATCCTAAATGAAAAATATGGATAAT  
GATGAATTAAGTCGTTGATTTTAAATAGAAGTGAAAATGAAGTTGATGATATGATTGAAGAACCTGAAAAAGAAAAAACTAAATA  
ATAAAAGAATCGCACAATATACCTTCTTCATTTCGGAGGCGTATCGTGCGATTTTTTGTATTATAAATTGACATTTAAACGAGGCAG  
CTGAACCTTATATATAATTGCTAAGAGTTTGGGCTGAGCCATTTCTAACAATATTTATAATCGTTTAAAGATTTCACGAACCCAGA  
AACAATTAATTGGAAATTTGGTTCGGCGAATAAATCACTAATGCTAGTGGCTCCTGCAATAAGTGTAACCTCTAGCATGGTATTGAT  
TGCTGTACTGAAATTTAATAATACTAAATTTTCTGTTGCATCTGAAGTAAATCCCTGGTACTAATGGGATGATACCGTTACCATA  
AAAATGATGGCAGGTCTTTTGTGTTACGAGCCATATAATGACTTAAACAAGCCTAATGCTAAACTACCAAAGAACTAGAGTATATA  
GTGTGCACATTAAAGCCGTTGAAGAATAAGGTGTAAACCATCCATCCACATGTACCAACGAAACCACATGATAGATATAATTTTCT  
AGGTGCATCAAAAATGACGCAGAAGAACATTGAAGCTAAAAAGCTAAAGATAAAGTTTAAAGATCCAAAACATAGTCTGATACTCCT  
ATACTAAAATTAATACGCTACCAACGCCAGCACCGATGCCAAACGCAGTAACCAATGCTTCTAATGATTTCTGTTGTGAACATCAACA  
TGTGTCCACCAAATAAATCTTGTATTGCGTTTGTATTAAATACACCAGGAACAATAGGCATGACTGCCGCAATGATAATAGTTGCCA  
AGTCACCTGTTGGAATAAGTGTATGTCCAATAACGGCGATAATCCCAATAACTAATGAACCAATGAATTTCTGGGATAAACTGTGCG  
TGTAACCTTACGATCTAAAATCTCAGTGACTAGGTATCTGACTACACTGTCTAATATCGCAGTTAAACATCAATCAATCTACCACCT  
TGTAATAATAAGAACTATTGCAATCTATTGCTGCAGCAAAACCTTTAAAGGAAGACTGCTGTACCGTTAGCAACATATATTTTT  
TCAAGTTGCGTTTTTGTCTCGGCTAAAGAAATTTCAATTATTGTAAATTTGACGCGAAATTTTATTAGCTTGCAGAAATTTTATTAAGTT  
TGTATCTCGAGAGGTAATTCTAAATATTCTAGGAAACGATTCCGAATGTAACTGAACTGGATGACAGTGTGTTGAACAAAGCTGTT  
ACTTTCACTGTAAACCAAGTTTTTTTGAATACGTGTCATGGTATCTTCTACACGCGTACCTTCTGCACCAGATTCTAATAGTATGCGA  
GCAGCAAGCATGACAACGCTTTGATAAGTACCTCTTGTGTTGATTTCTGTAATTTATGTCCATTTTCATCACCATTGTTTATAAGAA  
TTTAATACTCATTATAGTTTATACACTATAAAAAAACCACATGAGCTTTTTGATAAGTTGTTATTGATTTTAAAAAACTAATATTGTA  
TACTATTGTAATAATAATCATCGGAATTTATAGTAGTTAAAAATCTCTTGAAGTATAAAAAAGGAAAAAATTATTGAAAAAATTCGACA  
AAAAATAGTTTCAAATATTTCAAATAGGTTAAAAATAATAGTTAAACCATACAAAAATTTGATAGAGTAGCGACTGTATAATTTCT  
TATTGAGGTTAACGTTTATATTAGTGTAGTAGTTAAAGTTCTCCCAAGGAAGACTACTCGGGTACACTTGGCTATGAGCAAAAGTG  
TACTTTGTTATTGATAATACATTAGCACATATATAAAGTTTAAACATACAGATTTCAACTATTTACCAAATCACGCTTATGTATAC  
GGGAATATACTGAAGATAAACGAAAAATTCGAAGCTTAAACCGATAAGCTTGAATTTTTTTTATTAATTTATAAACGTACCAATGTA  
TTAAGAAATCGCAAAGAATTGATCGAATTCGTTTGTGTTAATAATATGTCTACAAAGAACTACCGAATTCACCGTATCGTGTCTGT

TGTTTCATCAAAGCGCATTTTCGTATACAATTTTTTTGAATTGTAATACGTCATCTGAGAACAATGTTACGCCCCATTCGAAATCATCA  
AACCCCTACAGAACCAGTAATAAATTGTTTGATTTTGGCAGCATATTTTCTACCAATCATACCATGGTCATACATTAATTTTTTGGCGTT  
CTTCCATAGTTAACATGTACCAGTTATAAGTTTCATTACGACGTTTGTTCATTGGATAGAAAACAAATATAATCAGAATGTGGTAATT  
CTGGGTATAATCTTGTCTTGATATGAGGGTCTCATAAGGATCTTCATCAGATTTACCAGCTAAATAATTGCTCAATTCAATGACTGA  
TACATATGAATATGTAGGGATTAAGAAGTCAGCAATGCGCAATTTGTTAAATTCATTTTCAATATGATTTAAAGACTTCATTTCAGG  
ACGTAAGAACCATAATAACAAATCTGCTTTTTGACCAGTTATATTATAAATAGCTTGATCACCAGATTTTGATGATCTTACAGTTGCT  
GTATTTTCTAAAAATGATTGAAATTCAGTGACAAGTGCATCGCGTTCGTCCTTTGGAACTATACGTAATGATGCCCAATCAACTGCA  
TAAAAATAATGTAGACTATACCAACCATCTAATGTTTCGGCTGCTTGACTCATGTTTATCGCTCCTTTTCAAAAATCATCAGTTCTTT  
ATAAATTTTATCATAAAGCAAAGGGGTAACGATAAAATTATGATTACAAATTGGTGACGTGGCATTATGAAATAAAATGGCGTATA  
ATTATACCGTGAATGATTAATAAGATTATATTACAGGAGGACATTATGGCTGATTTATTAATGTATTAAAAAGACAAACTTTCTGG  
TAAAAACGTTAAAAATCGTATTACCTGAAGGAGAGGACGAACGTGTTCTAACAGCTGCACACAATTACAAGCAACAGATTATGTTA  
CACCAATCGTGTTAGGTGATGAGACTAAGGTTCAATCTTTAGCGCAAAAACCTTGATCTTGATATTTCTAATATTGAATTAATTAATCC  
TGCGACAAGTGAATTGAAAGCTGAATTAGTTCAATCATTTGTTGAACGACGTAAGGTAAAGCGACTGAAGAACAAGCACAAGAAT  
TATTAAACAATGTGAACACTCTCGGTACAATGCTTGTTTATGCTGGTAAAGCAGATGGTTAGTTAGTGGTGCAGCACATTCAACAG  
GAGACACTGTGCGTCCAGCTTTACAAATCATCAAAACGAAACCAGGTGTATCAAGAACATCAGGTATCTTCTTTATGATTAAAGGTG  
ATGAACAATACATCTTTGGCGATTGTGCAATCAATCCAGAACTTGATTCAACAAGGACTTGCAGAAAATTGCAGTAGAAAGTGCAAAA  
TCAGCATTAAGCTTTGGCATGGATCCAAAAAGTTGCAATGTTAAGCTTTTCAACAAAAGGGTCTGCTAAATCAGACGCGATGACAAA  
AGTTCAAGAAGCTGTCAAATTAGCACACAACAAAAAGCTGAGAAGAAAAAATTAGAAGCAATCATGATGGCGAATTTCAAAATTTGATG  
CTGCGATTGTACCAGGTGTTGTCTGAGAAAAAAGCGCCAGGTGTAATTAACAAGGTGATGCAAAATGCTTTGTATTCCCAAGTTTAG  
AAGCTGGTAATATTGGTTACAAAATTGCACAACGTTTAGGTGGATATGATGCAGTTGGTCCAGTATTACAAGGTTTAAATTTCTCCAG  
TAAATGACTTATCAGTGGCTGCTCAATTGAAGATGTATACAATCTTTCAATTATCACAGCAGCGCAAGCCTTACAATAACGATGGA  
TTTAGCGAGTAAATATTTAATGGCGTCAACTGGCGATATATCGATCATCTTCTGATTAGAACCTATGCAATCTTTCGCATTTCGAT  
GATACATTTTGCGAAAAGTGTGGGCAAGATATATCAGATAATGTTGTGCGTACTTGATTATCAACATACTGTTATTCTTGGTATTCT  
ATGATTCAAGATTGCCGTTTTTAAAAAGATGGCATTGATTATTTAACGAATGAGATTGGTTATAATGCCATTGTTAGAAATTTCTGGTG  
GCTTAGGTGTGCTTCTAGATCAAGGTGATTAAATATATCGCTGATGTTCAAAGGACAAACAGAAAACACGATTGATGAAGCGTTT  
ACTGTGATGTACCTCTTAATTAGCAAAAATGTTTCGAAAATGAGAATGTTGATATTGATACGATGGAAATGAACATTCTTATTGGCCA  
GAAAAATTTGACTTAAGTATCGATGGTAAGAAATTTGCAGGCATATCGCAACGAAGAGTTAGAGGCGGTATTGCTGTACAAAATTTA  
TCTTTGTGTTGAAGGCTCTGGTTCAGAACGTGCATTGATGATGCAAAACATTTTATGAACATGCTTTAAAAAGGTGAAGTGAATAAT  
TAAATATCCTGAAATTGAACCATCTTGTATGGCCTCATTAGAGACATTGCTTAACAAAACGATTACTGTTCAAGATGTAATGTTTTTA  
CTATTATATGCAATCAAAGATCTTGGCGGTGATTAAATATGACGCCAATTACTCAAGAAGAATGGCAAAGATACGATACGTATTTT  
GATAAAATGATTGAAAGAAAACAAGAAAATGATAGATCAAATGCAATAGTTAAATATTTAACAGCCCTTTCAAGTTATCGTTTGGG  
GCTGTTATTTTGAAGATATCCATAAAAAAGCATAAATATGTTATTGACCTAATATTTAAATTTGAACATCATTAATTTAAAGTAATG  
ATATGATGGAAATAATAAATTTAATAAGAAAAATTTATGTTTACGTATTAAATAGATTGAGAATAGGGTATATATAATGCGTATGA  
CTATGAAAGAAAACGACCTTCTATTGAAATGTTCTAATACTTTAGTAGTAATCTATATATTCCAATTATTATTGTTAGTATTATAGTT  
AGGGTGGAAAATTATAAATTGTAGGGCTATTTTATAAAAAAGATAAAGAACTGAAAATATCACTCGATAAGATTAAACTTTGAAGT  
AAACGAAAGTTAGTTTTATACTAATCAAGTTAAGTCAAATATAAATTCAAAAATAAAGATTATACATAATATGAATAATGTGAGATA  
AAGACTGCAATGAAATTTAACGCGAATGCGTATGCAACTTAGAATATGATGCTTTTTACTAATAAATAAATAATGAATCAAGTA  
TAGGATAAATATAAAAAGGTGATATTGACATGACAAGAAAAGGATATGGGGAATCGACAGGTAAGATTATTTAATAGGAGAACAT  
GCTGTTACATTTGGAGAGCCTGCTATTGCAGTACCGTTAACGCAGGTAATCAAGGTTTAAATAGAAGCCTTAGAGAGCGGGAA  
CTATTCGTCTATTAAAAGCGATGTTTACGATGGTATGTTATATGATGCGCCTGACCATCTTAAGTCTTTGGTGAACCGTTTTGTAGAA  
TTAAATAATATTACAGAGCCGCTAGCAGTAACGATCCAAACGAATTTACCACCATCACGTGGATTAGGATCGAGTGCAGCTGTGCG  
GGTTGCTTTTGTGCTGCAAGTTATGATTTTTTAGGGAAATCATTAACGAAAGAAGAACTCATTGAAAAGGCTAATTGGGCAGAGCA  
AATTGCACATGGTAACCAATGGTATTGATACGCAAAAGCTGATTCAGGCAAAACGATTGGTTGCCAAAAGGTCATGCTGTGAAA  
CGTTGAAAACGTTAAGTTTAGACGGCTATATGGTTGTTATAGATACTGGTGTGAAAGGTTCAACAAGACAAAGCAGTAGAAGATGTT  
CATAAACTTTGTGAGGACCCTCAGTACATGTCACATGTAAAACATATCGGTAAGTTAGTTTTACGTGCGAGTGATGTGATTGAACAT  
CATAACTTTGAAGCCTTAGCGGATATTTTTAATGAATGTCATGCGGATTTAAAGGCGTTGACAGTTAGTCATGATAAAATAGAACAA  
TTAATGAAAATTGGTAAAGAAAATGGTGCGATTGCTGGAAAACCTACTGGCGCTGGTCTGGTGGTGAAGTATGTTATTGCTTGCCAA  
AGATTACCAACAGCGAAAAATATTGTAAGAGCTGTAGAAAAAGCTGGTGCAGCACATACTTGATTGAGAAATTTAGGAGGTTAAT  
GCGTTGATTAAAAGTGGCAAAAGCACGTGCACATACGAATATTGCACTTATAAAATATTGGGGTAAAAAAGATGAAGCACTAATCAT  
TCCAATGAATAATAGCATATCTGTTACATTAGAAAAATTTTACACTGAAACGAAAGTCACTTTAAACGACCAGTTAACACAGGATCA  
ATTTTGGTTGAATGGTGAAAGAGTTAGTGGCAAGAAATATAGAGAAAAATTTCAAAATATGATGATTTGTCAGAAATAGACGTGGCA  
TCGATTGGTATGCAAGAAATGAAAGCGACAATTTTGTACCAACAGCAGCAGGTTGGCTTCATCGGCAAGCATAGCAGCTTTTA  
GCAGCAGCTTGAATCAAGCGCTAGACATGCAGCTGTCAGATAAGGATTTATCGAGATTGGCGCGAATTGGTTCCGGTTCTGCGTGC  
CGTAGTATTTATGGTGGATTGTCAGAATGGGAAAAAGGGTATAGTGATGAGACGTCATATGCCGTTCCACTTGAATCGAATCATTTT  
GAAGATGACCTTGCCATGATATTTGTTGTGATTAATCAACATTCTAAAAAGGTACCTAGTCGATATGGTATGTCATTGACACGAAAC  
ACATCAAGGTTTTATCAATATTGGTTAGATCATATTGATGAAGATTAGCTGAAGCAAAAGCAGCGATTCAAGACAAAGATTTTAA  
ACGCCCTTGGTGAAGTAATTGAAGAAAAATGGTTTGCATGATGCCACGAATCTAGGATCAACACCGCCGTTTACATATCTTGTGCA  
AGAAAGTTATGATGTCATGGCGCTTGTTACGAATGCCGAGAAGCGGGGTATCCGTGTTATTTTACAATGGATGCGGGACCTAATGT  
GAAAATACTTGTAGAAAAAGAAAAACAAGCAACAGATTATAGATAAATTTAAACACAGTTTGATAATAACCAAAATTTTATGATGTG  
ACATTATTGCCACAGGAATTGAAATAATTGAGTAAGGAAGAGATAAAATGATTAGGTCAGGTCAAAGCACCAGGAACTTTTATATTGCT  
GGAGAATATGCTGTAACAGAACCAGGATATAAATCTGTACTTATTGCGTTAGATCGTTTTGTAACCTGCTACTATTGAAGAAGCAGAC  
CAATATAAAGGTACCATTCAATCAAAAGCATTACATCATAACCCAGTTACATTTAGTAGAGATGAAGATAGTATTGTCATTTTCAGAT  
CCACATGCAGCAAAAACAATTAATTTATGTGGTCACAGCTATTGAAATATTTGAACAATACGCGAAAAGTTGCGATATAGCGATGAA  
GCATTTTCATCTGACTATTGATAGTAATTTAGATGATTCAAATGGTCATAAATATGGATTAGGTTCAAGTGCAGCAGTACTTGTGTC  
AGTTATAAAAGTATTAATGAATTTTATGATATGAAGTTATCTAATTTATACATTTATAAACTAGCAGTGATTGCAAAATATGAAGTT  
ACAAAGTTTAAAGTTATGCGGAGATATTGCTGTGAGTGTATATAGTGGATGGCTAGCGTATAGTACTTTTGATCATGAATGGGTAA  
GCATCAAAATGAAGATACTACGGTTGAAGAAGTTTAACTCAAAACCTGGCCTGGATTGCACATCGAACCATTACAAGCACCTGAAA  
ATATTGAAGTACTTATCGGTTGACTGGCTCACCGGCTCATCAACACACTTTGTTAGCGAAGTGAACCGTTTGAATCAGATCCCTT  
CATTTTACGGTGACTTCTTAGAAGATTCACATCGTTGTGTTGAAAAAATTTATTCATGCTTTTAAAAACAAATAACATTAAGGTGTGC  
AAAAGATGGTGCATCAGAATCGTACAATTTCAACGTATGGATAAAGAAGCTACAGTTGATATAGAACTGAAAAAGCTAAAATAT  
TTGTGTGATATTGCTGAAAAGTATCACGGCGCATCTAAAACATCAGGCGCTGGTGGTGGAGACTGTGGTATTACAATTATCAATAAA

GATGTAGATAAAAGAAAAAATTTATGATGAATGGACAAAACATGGTATTAAACCATTAAAAATTTAATATTTATCATGGGCAATAAAAT  
GATTGTAGAGGGGAGCAATCATCTAATTTAATTAGAAGATAAATGCTCCATTTTTTATTGTCAGCCGTTTACGTATCTTGAAAAAA  
ATATTAAGAAAGAGTAAATAGATAGAGTTAACGAAAAAATTAATGAAATCGACGATATAGATATGATAAAAGAAAGGTGGGTAGCA  
ATATGAAAAATACATTCCTTATTGTGATGAATGTCAGGCAGTCAATATAAGAACGTTACAAAAGAAGTTGGAAAAATTAGATCCC  
GATGCTGAAATCGTGATAGGTTGTCAATCTTATTGTGGACCTGGACGCCGAAAAACATTCACCTTTTGTTAATAACCGCCCACTGGCT  
GCGCTTACTGAAGAAGAAATTAATCGAAAAAGTTTCTCAACAATTAAGAAACCACGTGATCCTGAAGAAGAAGAGCGTTTAAGAA  
AACGACATGAAGAACGTAAACGTCGTAAAGAAGAACAAGATAGAAAGCTTAAAGAAAAATTAGAAAAAGCGAAAAGCACACAAT  
AAAACCTGATGGCAGCATCATTCAATGCGTGCCACCAGGTTTTATGTTTTGTCTAGAAAATTAATAAATCATTAAATGATTTCGGCC  
ATCGTAGGATGCGTATAAATATTATCTCGTAATACGGTATATGGAATGTTTTGATCAATCGCAAGTTTTAATTATATTAATTAATCTT  
CAGATTGCTTACCATATAATGTAGCACCTAAAATCATATTATTTTCATTATTAATGACTACTTTAAATAAACCTCTTGGATCATTGTT  
AATTTTGTGACGAGGTATAGCACTTACTAAAAAGTTGATGTTTCAAGTGAATCATAATGTTGAGCGGCAGCTTCTTTACCAGTTAATCC  
AACACGTGATAATGGTGGATCTATAAATACTGTATAAGGCACGTGCTCTATTGTCAGTCGTACGTGACTGATTACCATATAACGC  
TGATTTGATAAATTCGATAATCATCTAAAGATATATACGTAAATGGAAGTCCGCTTTAACATCACCTGCAGCATAAATATGCGGCAC  
AGTTGTTTGAAGATGAGCATTGACTTTAATTTTCGCTCTGTGCGCTAATTCGATATCAGTATTTTCTAAAGCTAAATCCGTATTCCGGT  
TTGCGACCGATAGCCAAAAGTACTGCATCAGCCTCAAAGTTACCAACGTTAGTATGGACTGTTGTATGATGATTGTCAGATGACAAT  
TCAGTCGTTTCAACATTTGTATACAATGCAATGCCCTTATTTTCTAAGTCAGTAATAGCATGTGCAACGACATCTTGATCTTCACGTG  
GCATAAATGATTACCACGTTCTAATACTGTAACCTTACTACCTAAATTCGCAACATTGAAGCAAATTTCTAAGGCGATATAACCGC  
CACCTACAATAACGAGGTGCTTAGGTTGATAGCTAATTTAATAAACCTGTGCAATCGAAGACGTGTTTAGCTGATCAAGGCCTT  
TAATGTTAGGAATGACAGAGGTAGCACCGGTATTAATAATGATAGAGGTGCAGTAATACTATCGACGATATCGTCATGTTGATCTA  
ATAAATTCACCTCAGTATTAGATTTAAACTGCGCTTTAAATCCAGTACATCAATGTTGTTATCGTCTGCTAATAAGTGGTAATTTTT  
ATTGTTTAGCGCATTGACAACATCGTTTTACGGTTATAACTTGCTTCAAAGATTGCTTCTAATCCATCATGTACAAGTGTCTTC  
GAAGGTATACATCCTATATTTATACAAGTGCCTCCATACATTTTCGAAGATTGTTGATAACTGCGACGTGTTGACCTGTTGATGCA  
GCGTATTTTCGCTAAAGTTTTACCAGCTTTCCCAAATCCTATTACAATTAATCATATGTTTTCATGACATAAATCCTCCTTTGAATGT  
CTTCAATGACATCTTTGATTGTTTTCCATTATAAAAAATTAATAATGATATCTGTTCTGCTGCTGATAATGTGACATGGTAGTTGC  
AATATTACGAGCAATTTGACAGTGACTGCCTTCGTCGCCAGTAATAGACGTGTGTGGTGTCTTTCTCTAAGACAAAATGTTTATA  
TAATGTTGCTAGAGACATCAGCACTTTGATCATTGCTAAATAACCGCCATCTTTACCTCGTATTGTGTCAATCATTTTAAATCG  
ACAAGTTGAGTCGTCACGCGTCGTAATTTGAACAGGATTTAAACAAGTTAATCTGCTAATGAACACTACTATTGAATTTTTCTGAATGA  
TGCTTAGTTAAAAAAGCTAATACATGCACGGCAATGTTAAATTCTAAATTCATGTTTCTCACCTCATAATTGTAAGTGTATTAGTTG  
CAATTAATAATCATTTTGCTCAATGTGTCAATACTTATGTTTGAAAAAGTGTGAATTAGGTGTGGTTATTGTGATGATTTATTGTTTG  
AAAGTTGATGCATTAACGGTGAGATTGCACAATTGAAATTTAATTATGTATGAAGTATAGATATGAAATGAATATTGAAATGA  
GAGCAATAAATTTTGAATGATGATGTTGTGTGATTGTATAAACTTATTCGTATTTAGATACGTTTGTATTTTCGCATGATGAGGA  
AATACTTTTAACACTGATGACATATTTAATAGTGAATATATTTTGAGATATTAATATATTTAATGTTAAGGATGTTGTGCGCAATAA  
AATTAATAATTTGAAAGATAATTTTATTGATTAATTGCGAATATACAAAGACACCATTATATCCATATGCTAAAAATAAGAAAAAA  
GGCGACATGTTATCTCAATTTACCTGCATCTAGACTCCTTTACATAAGAAATAATCATCGCCGAGTTTAAAAATTTACAACCTTTGTA  
GATGTAAAAAGCATGTTTAAATAGTTTGAAAAATCATATATTTTGAAGAAAGGAGCATGCGGATGAGTATTGACATGATTTAG  
ACAGATCTCGAAACCAAGCTTCAAGTGTGGGAATTTGAGTCAACAATGAATTCAAATTATGATGCGTTTGGAAAAAGCAATTACT  
CAATTTATTAATGATGATGCGCTTAAAGGGAAAGCGTATACGTCAGCTAAGCAATTTTTTAGTACGGTGTAAATTCATTATCAACA  
AGTATGAAAAACATTGAGTGATTTAACGAAGCAAGCTTGCGATAATTTTGTGTACGTTATACGAGTGAGGTTGATAGCATATCTTTA  
AAAGAATCAGAGCTTGAAGAAGATATCAGATCATTAAAGTCAACAAATTACGCGATATGAAAAATTTGAATAACAAATTTGAAAAAGCA  
TGCTTCCGATAATCAGCAAGCCATTTATCGAACCAACAAATAATACGAACATTAGGTCAACAAAAACATGAATTAGAAGAGAAGC  
TACGCAAAATGCGTGAGTTTAAATCAAAAAATCACCAGAAATATTTAAAGAAGTTGAAGAATTTCAAAAAATTTGTCCAACAAGGACTT  
ACCCAAGCGCAGAAATTTTGAACCTTTTCAACAAATCAATTTAATATACCTTCAGGTAAGAACTTGATTGGGCTAAAGCAAGTCAT  
GAAAAATTTTGAAGTTGCTATGCGTAAAGTTGAACATAAAGCAGAGAAAGAACTTTAAATAAGCAGACTTTGCTGTTATGATAA  
GGCATATGCCAAAGAGCATCCGAAGACGATATCCCGAAAAAGTATACTGAAATATATAAATGACAAATAAAGACAGTATTAAGA  
GATATAGGATTAGATATCACTTCAACACTTTTAGAGCAAGGCGGTATAAATGCAAGTAAATTCGGTGTATTTATCAATACAGCAGGT  
GGAGTGAAGGCGCCAGCAGGTCCAAATTCATTTGTGGAAGTCAAACGTACATCAGGTAATGTGTTTATAGAAAAATGGTAGTAAAT  
TGCAAAAGGCGGAAAAATACCTAGGTAAAGGTGTTGCTGGTGTAGGATTGGTATAGGTATGTATGATGACCTTGCAATGATGATA  
AAACATTTGGAGAGGCATTATCGCATAATGGTATGACGCTTCGACGTGGATCTGCAATGGGGACTATTGTGTCTGTAGGTATACTA  
TGCTGGCAAGTAATCCAGTAGGATGGGCGGTTTTAGGAGGTTTTGCTGCAGCAACAGGTTTTGCAATAGCGGCTGATTGGGCATATG  
AAAATAATTTGTGGGGATTAAAAAGATGAAACAGACTGGGTAGGACATAAAATAGATGACGGTATCGATGTTGTAAAAAAATCTAC  
AAAAAAGGCTGTTGATAGTGTAGAAAAAGCTGTGGTGAAGCTACAAAAAGTATATCTAATCATATAAATCCTATGAATGGAGCT  
GGTAAAAAGTGCTATGCGAATCTAAAAATTGCAATAAAGCCAAATATCGAATTAATAATGAATGTTGTTGTAATCTAATGTTG  
GATATAATAAGCACTTGGATTAGTTTATTTTTTCTTTTTATTAATTGGTTTCATCCCCAAAAAGATACGTCAAAATTAGTAGAGAAGAGT  
TTGAAAAATTTAAATATTGTTAAACCTGCTAAAAAGAATGTTTTTTGGCCAGTTGCAGGTATCTCTACTTTTATTCGCAGTTACATTAA  
AAAGTATACGCATTTACTTGACACTCAACTTGATAAAAAATAGTTATTGCCATATGTTGTATCACATTATAGGGATTTTAAATATTT  
TATGTACGCCTAATTAATAAATCATCTTTAAATATTATATAATACTAAAAATAAAGGTCGAAAAATCATCTTAATACCAACACTAAAA  
AATTTTTGTTTACATTTGTTTCGGATATGTTTTTTAATTTTTTGGACATTGATTTTCTCATATGCTCTATTATCAATGAGTTATCAAAA  
CATAATAGTATATTTTGTGGATTACAGCAATAATGGGTTTTTTCTAGTGAATATAGCTTTAATTATAGATAAAAAACATTCATGTC  
ATACTTAAAAATTAAGTGAAGTACTAAATTCAGATTAATAATGAAAAATCAGTTAATAAAACCTTTGATGACAGTAACTTGA  
TAGTATTGAAATGCTTTTTGAAGTATCGAAAAATGTATTACACATAAATAAAGGATGTTGAGACATTTGCTTTGCGAATCTAAAG  
TTATTAATAAAAAACCTTAAATATCGAATAATCAAAATACGATAGTGAATATTTAATGATTGATTGGCAAGTAATTGGATTGTCTTCT  
TCTTTCCATTTATTAACCTGGCTCATACCGAAAACATATGTCAAAATCACTAAGAATGATTATGAAAAATTAATATTGTCAAACCAG  
TTAAAAATAAATCGATAGGATGGACCATATTCGCGGGTATTGTGTTACTTGGTGGTACTGTAAGAAGAAATACCTTATTTATTGATT  
TTCAATTAGAAGAACTAATTGTTTGGAGCAGCTGTTTCATTGGGTTTTTAGAGATTATTTTTTTTATTGTTATCTAAATAAGAAATT  
AACATTAATATTTTATAATGAAAGTAAAAATAATGAACCTTAAATTAAGATTATTACCCTCCTTAAAAATATTGTTTCACAATTTTT  
TATTACCTATTTACTGGTTTCATGCTTATGGGGCATTTTACTTGTGGTATTGAAAAATGTGCAAAATTTAATCTTATATGTTTCTTG  
GCTTTTCATGACTATGCTATTTATGTTTATGAATATGCATCAATATAGATAAAAAAGTACATATATTCTTAAAGTCTAATAAATAG  
TTACAAATTTAGTTAGTTTCAATTTGTTAATTAGGGGTGTTAAACAGTGTCTTTGTTGAATCTAGACAAATTTATAAAAAATCCTAATAT  
CGAGTTATTAGATATAATAAGTAATTTTCATGGTCGATTTTAGTAAGTACTTGGATTACTTATTTTTTCCCTATGATTAATTGGTTTTT  
GCCCAAAAAATACGCAAAAAATAGCGAAAAATGAATTTGAAAGGTTAAATATAGTCGAGCCTGTTAAAAATAATGTTTTTTGGCCGG  
TTGCAGGAAGTTCAAGTTCTATTTGGAATTATATTGAGAAAGTACGGTAACTTCTTTAATGTTCAAGTTTGAACAACTAGCAATCA

CTGTATTTTTTATCATGTTAATAGGGATGTTAATTTTTTATTTTTATCTAAATAAAAAATTAACATTAAAAAATTTTTAATACCAACGTG  
GTTAATAAGAATAGAGTTGTATTAAATACCGACTTTCAAACAAGGATTGTTAATAGTTTTTGCCTACTTTTTTTAGGAAGCGCTTCAA  
TATTTACTTTAACCATTCTTTGACGACAGAGTCACAAAATATAATAATATTTTTAACTTGGGTTATTATCACGATGTTTTCTTTTTA  
GTGAATATGGCTTCGATAGGTAATAAAAAATGTTTCATGTTATTTTTAAGAATAAACGAGTAGTAAAAATGATCGAAATTGGTAGTATC  
GCATATTTAAACGGTGGTTCAAAAAAATATAATCATATCTTAAATCAGGAAAAATAGATAGTAATGTTTGAATATACCAAGTGAAAA  
TGCCCATTTGTGATTGATAAAGGAAAAAATCGTTTTAATTTAAAAATGAAATATAGAGCGTGTATTGTTGATGATAGCTCTTATAAC  
ATTGGCGTTTTTAATCCAATAGTATGGACGGTTTTAGCTGGTTTTGTTGCGGAATCTGTTTAGACAATTCCTAAAAAATTGGACTTTTC  
ATACTAATAAAATTTGGATTAAGAGATAAACTAATTGGATAAGACATTAATAGACGCTGTTTAAAAATACCACAGAAAAAGCTGT  
AGATAGTGTGGAACGATAGTTGGTGAAGGTACAAAAAGTATTGGGGATCATTAAAACTAATGAAACGGGAGTGGTAAATGTTGC  
TTTGCATGTCAGAGTCATTTATAAAAAATCCGAAATACAAAGTCATTCAACATAACGGTGAATACTTATTAGTCGATTTAGTAAGCA  
CTTGGTTTCGTGTAATTTTTCTTTTCATTAATTGGTTCATTCCAAAAAAGTACGCGATAATTAGCGAAGAAGAATTTGAAAAATTTAAA  
TGTTGTTAAACCAAATAAAAAATATGTTTTCTGGTCAGTTATAGGAAGTTCGGTTTTGTTTGGAGTTACTTTAAGGAAATACATACAT  
GTTTTTGATGTTCAATTAGATAAGCTAGTTGTAATGATATTGTGTGCTCTCGCTTTAATTTGTGTTATAGTTTTTTATTTAACTTAAA  
TAGAAAGCTTAAGTTAAAGTGTTTGATACAAATATTGAAAAAATAAGAGAGTTATATTAATACCAACGTTTAAACTTGGCTGTTT  
TTAGTTTTTCGATATATTTTCGCTGGAAGTTTTTCAATATTTTCATTAATTGCCCTTATGACAATCGAACCTCAAAATATAATAATAT  
TTATTTATTGGATTATGATGACAATGCTTTTCTTTTTGTTAAATATGACTTCGATAGGTAATGAAAAAGTTCGCGTTATAATGAAAA  
TAATTGATTACATTTAAAAATATTCTAAATGTTGTCGACACAATCCTTTAAGACGCTAGTAGAATTTAAATGACTTCTAATGTATATG  
AAAGTGTATCAATATAAAACCAATTGAAAAGAAGTGGAGACATTGCTTTGTGAAACTGAAAAATTAATAAGAATCCCAAAATATAG  
AATTATACAAATACAAAGATGAATATTTGATGATTGATTTAGTAGAATGATGTTAGCAGTCTTTTTCCCAATGATTAATTGGCTGATT  
CCAAAAAAGTACGTCAAAATCAGCGAAAAAGATTTTGAACTTTAAACATTGTGAAGACAATAAAATCAATTTCTTTTTGGCCAGT  
GGCAGGAAGTACGGTCTTATTTGGTGTATGTTAAGAAGGTATTCCCATTTATTTATCGTTAAATATGAATATAGTATAGTAATTTTA  
ATTTGTTGCATCATAATACTAGGTATTTTTCTGTTTTTTTTATATTTAAATCAAAAGTTAAAGTTACAAATCTATAATGAAAAACAAA  
ATAAAAGCAATAAGATAATCATATTTCCCACTTTAAAGAGTCTTTGTTTATCAATAGTTTTATATTTATTTAGGTGGTGGTTCATT  
CTTTACTATTTATATGTTATTGACGATTGAAGTTCAAAAATATAATATTATTTATAAATTTGTTTGTAAATATTTTTGTTTTCTTATTTT  
AAATATGTGCTCACTATATGACAATAAAGTTCATGTATTATTTAAATCAAAATGGAATTGAAAAGTTTTAATAGGAATAATAAACAAA  
GGAATGGTAGTGATAAATATTGCTATGTGAATCTAAAGTTATCAACAAAAATCCTAAGTATAGAGTTATTAATATATGTTGATGAAT  
ATTTAATGATTGATTTAGTAAGTACCTGGTTAACTTTATTTCTTCTATGATTAAATGTTGTTAAATTTCAAAAAAATATGTCAAAAATCAG  
TAAAAAAGAATTTGACGATTTAAACATTGTCAAACTGTTAAAAATAAAGCTTTTTGGCCAGTTGCAGGTAGTACTATTTTGTTCGG  
AGTTACGTTTAGAAAAATATTTCTTCACTTAATATTCAATTAGAGAAAAACATGGTGATTGTAATATGTTGTGCAATATTTCTGGGT  
GTTTTAATACTTTTTTTATTTCTGAATCGTAAGCTAAGGTGGAAATTTATAATAAATCTAGTAAAGGGAAAAATAATTTTATTTT  
CTTCATTAAAAAAATCTTTGTTTCACAATATTTTATTATTTTTATTTGGCGGTCTTTCAATAATGGCTCTAAGTATGTTATTAACCTTA  
AATCCTCAAAATATAATAGGCTTTATTGGTTGGTTGGTAATGACTGCAGGTTTCTTTCTGTTAAACATGTATCGATTATTGACAAAA  
AAATTTATGTATTATCTAAAACCTAACACGGTGGAAAAATGATGGTTTAGCTGGATTTACTGCAGGTTCTATTTTCGGCAATACTTGTA  
TATTGGACCAATCAAAAAATGAATTTGGAATAAAAGATAAAAAACGATTGGATAGGACATAAACTAGACGTTGGTATAGATGCTGT  
AGAAAAATCTGCAAAAAAAGTACGATGGTGGTTGAATAATGTCATGGTGAAGCTTCAAAAAAGTATTCTAATCATATAAAGCCATAA  
GAAATGGAGCTGGTAAATGTTGCTATGCGAATCTAAAATCATCAATAAAAAACCCAAAAATATAGAATTATTAATATAATGATGAAT  
ACTTAATGGTCGATATAATAAGCACTTGGATTAGTTTATTTTTCTTTTTATTAATTGGTTCATCCAAAAGAATACGTCAAAATTAGT  
AGAGAAGAGTTTGAACCTTAAATATTGTTAAACCTGCTAAAAAGAATGTTTTTGGCCAGTTGCAGGTAGCTCTGCTTTGCTGGGA  
GTTGCATTAAGAAAAATATACACATTTACTTGACATTCAACTTGATAAAAAAATAGTTATTGCCATATGTTGCATCACATTTATAGGG  
ATTTAATATTTTATGTACGCCTAATTAAAAAATCATCTTTAAATATTTATAATACTAAAAATAAAAGGTCAAAAAATTTTTTTAATAC  
CTACACTAAAAAATGTTTGTTCACATTTTGGATATTTTATTTGGCGGATTGACTATGCTATTCTAGATGCACTATTATCAAT  
GAGTTATCAAAACATAATAGTATATTTGTTTGGATTGCAGTTAATGAGGTTTTTTCTAGTTAATATAGCTTTAATTTATAGATAAA  
AACTTTCATGTCATATCTAAAAACCAATAGAAATTAACCAATTAAGATTTGCAAGTATGAGTATGAGTATGAGTATGAGTATGAGTATGAGT  
TTCTGATTCAAAAGTACATGTAATTTAAAGGTCAACGAGCAATCGCGTATATGCATATCAATTTAAGCAATACTTATTTAACTG  
AGTTTTATATAACGTTTTCTTATTACACCGCTTAAATTCAGCTCTAATTTCTAACATTTGGAAGTTGTATTAAATCATGATAGTGTGA  
TAGTGGAAAAAGTTATAAAGATAAGGAGCTGGGTCTAATGAAGCAATTTGTAACCTTAGGTAAATCTGATGTTGAAGTGTTCCTAAT  
CGCACTTGGGACGAACGCAGTAGGTGGGCATAATTTATATCCGAACCTTAGATGAAGAACAGGAAAAAGATGTTGTTTCGTCAAGCCA  
TTAATCATGGTATTAATTTATTAGATACGGCATATATTTATGGGCCAGAACGATCAGAAGAATTGGTTGGAGAAGTTGTTAAAGAAT  
ATCCGCGAGAGCAAAATTAATTTGCTACGAAAGGGTCTCATGAATTTGATGAAAAATCAAGAAGTACATCAGAACAATCAACCGGA  
ATATTTAAAAACAACAAGTTGAGAATAGTTTGAACGCTCTACAACTGATTATATCGATTTATATTATATTCATTTCCGGATAACAA  
CACTCCGAAAGATCAAGCAATTGCAGCATTACAAGAGCTTAAGGAACAAGGGAAGATTAAAGCAATTTGGTGTATCAAAATTTACAT  
TAGATCAACTTAAGAAGCAATAAAGATGGTTACGTTGATGTTGTACAGTTAGAAATATAATTTATGCAATGAGTATGAGTATGAGTATGAGT  
GTATTACAATATTGTGTTGATCACCAAATCACATTTATTCCATATTTCCCATTAGCATCCGGTATTTTAGCTGGAAAAATATGATGAGA  
ACACTAAATTTAGTGACCATCGTACTACACGTCGTGATTTTAAACAGGTGATTTTGAAGAAAAATGTGCGTCGCGTAAAAAGCTTTGG  
AAAGCATAGCTGCAGCACATCAAACTTCAATTGCGAACATTGTATTAGCATTTTATTTAACGAGACCAGCTATCGATGTGATTATTC  
CTGGTGCAAAACGTGCAGAACAAAGTCGTTGAAAAATATTAAGGTGCAGATATCGTTTTATCAGATGATGAGATTCAATATATCGAT  
GAACTGTTTCCGATTGAAGACTAAATGAATTGTATTAAATGGTGATATATGTATCTAATTTTCATCATGAATTAGCCCCGTATCACAA  
ACGACGTTATATAAGGCATGACGAAATTTTCGTCAAAATTTATATAAAAGTTGTAAGCGTTTTACTATTCCGTAGGCAAAAGCTTTATGAT  
AGTATAAATTAGGTAACGAAAAACACAGATATTTATTAATCAAAAGTGAGGTTAGGCTAAAAATGATTACTGTTTTGTTGGTGGGAGT  
AGACCAAAACGGTAACGATGCAAAATTAACAAAATTCGCTTTGCAAGATTAGAGTATCAATGGATTAGCTGACACACAATCAAGTT  
TAAACCGATACGTGACGTGAGACATACAGCAGAGACTATTACTTCATATGACGATGACTATTTGCCGATTCTAGATAAAAAATATTGGC  
TAGTGATACAATATTTTTGTCATCACCAGTGTATTGGTATAGCATTTTCAGCACCATTGAAAGCATTTATCGAACATTGGTCAGAAAC  
ATTACAAGATAAACGATATCCTAATTTAAGGCACAAATGGCCGAAAAAGGATTTTAGAGTTATTTTAGTTGGTGGAGATTGTCCAAA  
AATAAAAGCGAAGCCAGCAATTACGCAAAATGAAATATAGTTTAGACTTTTTAGGTGCCACTTTAAATGGTTATATTATTGGAAGTGC  
TGAAAAAGCCTGGTGACATCATGAAAGACAATAATGCCTTAGCACGTGCAACTGAGTGGAAATAGTATATTGCAATAAGACATACCTC  
ATACTAAACGAAGTGATTTTTGCTTCGTTATTTTTATTTTTAATTTTAAACGAAAAATATAAATATATAAATGAATAGACAATCAT  
TGTTTATTAAGTATTGAGCAAGTTGTGGTATAATGCCGTTATTAACCTTGTTAATAAGGGGAGAAAGTCAATGTTCAAGGTAAGACA  
AGCAACTGAAAAAGATGTTGTTCAAAATTAGAGATGTGCAACTAAAGCTTGGTTAATAACATACTTAAATATATACGCTGCGACAA  
CAGTTAATCACTTGTAGAAAGTTCATATAATGAACATCATTTAAAGAAAAAGACTTCAAGAACAAATATTCTTAGTCTGTTGAAGAA  
GTAATGACATCGTTGGCTTTGCTAACTTTATTTACGGTGAAGAATTATTTTATCAGCTCATTTATGTTAAACAGAAATCGCAACATAC  
AGGTTATGGTACAGCATTGTTAAATGAAGGATTATCAGTTTTGAAGATAAATTTGAAGGTGTTTACTTAGAAGTAGATAATAAAAA

TGAAGAAGCAGTAGCTTACTATAAAGAGCAAGGTTTTACAATCTTACGCTCTTATCAGCCAGAAATGTATGGCGAAAAGTTAGACT  
TAGCACTTATGTACAAAGCATTTTAAGTAAATTAATATTTATTAACGAAAAAGGAGGGGAATAATGACTAACGCATATGTAGGT  
TTAAAATTAGTAGAAGAAAAAGTTTTTAAAGACCCGATACATCGATATATTCATGTTGAAGATCAATTGATATGGGATTTAATTA  
ACTAAGGAATTCCAAAGGTTACGTGCAATTAGACAACCTAGGAACACTGTACCTATCTTTTCACACAGCAGAACATAGTCGCTTTGGA  
CATTCTTTAGGTGTGTATGAAATAGTTAGACGATTAATTGATGAGTCATTTATTGGTCATGATGCATGGGACAATAAAGATAGACCG  
TTGGCATTATGTGCTGCATTATTACATGATTTAGGACATGGTCCATTTTCACATAGTTTTGAAAAAATATTTAATACAGACCATGAAG  
CATACACACAAGCGATTATTACTGGAGATACTGAGGTGAATGCTGTATTACGTAAAAGTGTGCGCTGAGTTTCCAAGAGAAAGTTGCG  
GAAGTAATTAATAAAACGCATCATAATAAATTGGTCATTTTCGATGATTTTCGTCACAAATCGATGCGGATAGAATGGATTATTTACAA  
CGTGATGCGTATTTACAGGTGTATCATATGGTGCTTTTGATATGGAACGTATTTTAAGATTAATGCGACCTTCTAAAGATGAAGTA  
CTAATTAAGAAAAGTGGTATGCATGCAGTTGAAAACTTTATTATGAGTCGTTATCAAATGTATTGGCAAATTTATTTCCACCCAGTT  
AGTCGTGGTGGAGAAGTGCTGCTTAATAATTGTTTTGAAACGCGCAAAACAGCTTTATAATGAAGGCTATGAATTTAAGTTGCATCCA  
CATGATTTTTATTCCATTTTTTTGAAGAGACAGTTACGATTGAACAATATGTTGAACTCGATGAAGCGGTAGTTACGTATTATTTGGAA  
AATGGACAAAAGAAGATGATGCCATTTAAGTGATTTAGCAAGTCGATTTATTAATCGAGACTTATTTAAATATATTCCATTTGAT  
GGCTCAATTATTACAATATCAGAACTGCAAGAAGCTGTTGAAAGCAGGTGGTATTAATCCAGATTATTATTTGTGAGTGAAGCATT  
TCGGATTTGCCATATGACTATGATCGACCTGGGTCAAAATCGCAAACCGATTTCATTTATTAAGACAAGATGGTACGATTAGAGAAATA  
AGCAATCAATCTTTAGTCATTATAGTATTACAGGCATTAATCGCCAAGACTATAAATTATATTATCCTAGAGAAATGGTTGCAAAAG  
ATTAAGATAAGACAATTAGAGAAAGCTATTGAAAAATTTGATTAAATGAGCTTAATTAAGAGGGCTAAAATTGTTATCGTTAAATAT  
GGAGTTATATCATTTGTGAGAAAAAAGGCTTTAATTTAATATCAAAAAATGACCCTCTAGATGGTCATAAAGGTACAATAT  
TGGTTCAATTAGCTTAGACAATATTGCACCAGTTTTTATCGATGTTGCTAACAAAGAAGCATTATTTAGTATTGGAGGCATGCGATGC  
TCGCGCCAAAGTTGAAAAAGGCGTGAAATGGATTACTGATAAAGCTGCTGTTGAAGGCGATGAAGCTAAAGAATATTGGTTGTGTT  
GGGTAAACAACAGAACGTAATGAACAAGGACCATATTATGCTGGTTTAAACAGCGTGCTATTTATTAGTGAATAAAGCAATTCGTCGT  
GGTTATAAAGTATGCCTGAACATGTTAATATGATGGATAAATCAATGAAACATCATATTATCATAGATCAAATTTGGTGACGAGAA  
TAAAGCTATTTTAAAGACTTTTTAATGAACCATGATGAAGGTATGTGGAAGCATTCTCTGATGCTTTACATCAAGCATTTAATTA  
AATATTAGAACTAAAATTTCCCAATTAATCTATAAAGATATGATTCAATTTCTCAATGACGACGTAAATCGTGAGGTGAAAAAATG  
TCTTAGATTGATTGGGAGTTTTTTTTAATTTTTTTGAAATTAATTAATCTGTAGTTAATAAAAAATTTGAATAACTGACACATTTTT  
TGATCATAGCTATATACTTTGTGAATTAATTCACATTATAAAGAGTGAAGATAAGAGTATTATAAATTATCTTTAAATAAATATA  
TGTGAAGTAAAAATTACACGTTAGCATATCGATTATGTCATTTCTTTAAACATATTAACTAGGGAAACGTTAAAAAGTTAACGGTTGA  
TATCTAACTAAAAACAAGGTCACAGTAGTATGTTTTAATCTGGCGTCTATTACAAATAAAAAATTACATCTATAATTATTCGTTTTCTT  
TTTTGAAAGTAATAGCCAATTAATATCATACATACTGGAGTGACTATAAGGAGGACATTATTATGAGAGCAGCAGTTGTAACGAAA  
GATCACAAGTAAGTATTGAGGACAAAAAGTTAAGAGCTTTAAACCTGGTGAAGCGTTGGTACAAACCGGAATATTGTGGCGTTTG  
TCATACCGATTTACATGTTAAGAATGCTGATTTTTGGTGATGTTACAGCGCTTACTTTAGGTCATGAAGGTATTGGTAAAGTCATCGA  
AGTTGCGGAAGATGTAAATCATTAATAAATTGGAGACCGTGTGCTATCGCTTGGATGTTGCAAGCTGTGGAAGATGTGAATATT  
GTACAACAGGTCGTGAAACACTTTGCCGTAGTGTGAAAAATGCTGGTTATACAGTAGATGGTGCAATGGCTGAACAAGTTATTGTT  
ACTGCAGACTATGCTGTGAAAGTACCTGAAAAATAGATCCAGCAGCAGCGCTCTTCTATTACATGCGCAGGTGTGACAACTTATAA  
AGCTGTAAAAAGTAAGTAATGTAAAAACCTGGACAATGGTATAGGTGTTTTGGTATAGGTGGTTTAGGAAGCATTGTTACAATATGC  
TAAAAACGTTATGGGGGCTAAAAATTGTTGCCTTCGACATCAATGATGATAAATTAACATTCGCGAAAAGAATTAGGTGCAGATGCTA  
TTATTAATTCTAAAGATGTTGATCCAGTTGCAGAAGTTATGAAATTAACGTATAACAAAGGATTAGATGCAACAGTGGTAACCTCAG  
TTGCTAAGACGCCATTTAACCAAGCGGTTGATGTTGTAAAAAGCTGGTGCAAGAGTTGTTGCCGTTGGTTTACCTGTTGATAAAATGA  
ACTTAGATATCCCAAGATTAGTGCTTGACGGTATTGAAGTAGTAGGTTCACTTGTTGGTACAAGACAAGACTTACGTGAAGCGTTTG  
AATTGTCTGCTGAAAAATAAGTAACACCTAAAGTTCAATTAAGAAAAATTAGAAGAAATTAATGATATTTTTGAAGAAATGGAAAAAT  
GGTACTATAACTGGTAGAATGGTTATTAATTTTTAAAAATATCAACTGACTATATAGATAAAGAAGGTAGTGCTCTGAACACTATCA  
TTATAATCAAAACACGAGGTTTTTCATGAAAGATAGTGAATCTCGTGTTTTTTGGTTTTGAGGTGTTGTTGATTTTATAAAAAATGG  
TTACATATATGAAGCGTTGATTAAAGTATGGAATTGTTAATTAATTGAACCTATTAGCTTTAAGAAGGCATAACAAGATGACCTTA  
TTTTATGCTATAATATTTCTATTATGCGAAGATTAAAGGTGAGTAGTAAATTTGGATAAAAAAAGTAAGTATTCACAAAGCAAGTGTT  
GAAACAGCACAAACGAAAAAGAAAAATTTGAATTTACTACTGAAGGAACTTGGCAACAAAGGCAATCTAACTTTATTCGGTATGTAG  
AACAAATTGAGGATGCAACAGTTAATGTTACAATAAAAGTGGATGATGATAGCGTTAAGTTGATTTCGTAAGGCGACATTAATATG  
AATTTGCATTTTGTGTAAGGACAAACGACAACAACCTTTTTACGATATATCGGCTGGACGAATCCACTAGAAGTTAAACATTACGC  
ATTTTACATTTTCGTAAGTGGAGACGGTGGCAAGCTAAAGATTCAATTATGAATTATATCAAGATAATGAAAAAATGGGTTCTTATCAA  
TATGAAATTAACTATAAGGAGATAGGCGAATGAATATTATTGATCAAGTGAACAAACATTAGTAGAAGAAATTGCAGCAAGTATT  
AACAAAGCAGGATTAGCAGATGAGATTCCTGATATTAATTTGAAGTTCTCTAAAGATACAAAAAATGGAGATTATGCTACTAATAT  
TGCGATGGTACTGACTAAGATTGCAAAAGCGTAATCCTCTGTAATTTGCTCAAGCGATTGTTGATACTTATGATACTGAAAAAGCAC  
ATGTAAAAACAAATTGACATTTGCTGGTCCAGGATTCATTAATTTTTACTAGATAATCAAGTATTAAACGCAATTATTTCTGGAAGCAA  
TTGAAAAAAGGTGATCAATTTGGACATGTAATGAATCAAAAGGGCAAAATGTATTGCTTGAGTATGTTTCAGCTAACCCCTACAGGA  
GATTTACATATTTGGTCATGCTAGAAATGCAGCAGTTGGTGATGCTTTAGCTAATATTTTAACTGCAGCTGGCTATAATGTAACACGT  
GAATATTATATTAATGATGCTGGTAATCAAATTACTAACTTAGCGCGTTCGATTGAAACACGTTTCTTTGAAGCTTTAGGTGACAAT  
AGTTATTCAATGCCAGAAGATGGCTATAATGGTAAAGATATTATTGAAATAGGTAAAGATTTAGCAGAGAAACATCCTGAAATTA  
AGATTATTCTGAAGAAGCACGTTTGAAAGAAATTTAGAAAAATTAGGCGTAGAATACGAAATGGCTAAACTGAAAAATGATTTAGCAG  
AGTTCAATACGCATTTTGATAATTGGTTTAGTGAACATCTTTATATGAAAAAGGCGAAATCTTGAAGTTTTAGCAAAAAATGAAAG  
AATTAGGTTATACGTATGAAGCTGATGGCGCTACATGGTTACGTACAAGCTATTTTAAAGACGCAAAAGACAGAGATTATTAATTA  
AATGACGGTACATAGATGATTTCTTACCAGATATTGCGTACCCTTCGATAAAGTTAAACGTGGTAAATGACATTTTAACTGATTTAT  
TTGGTGCTGATCATCATGTTTATTAATCGTTTGAAAGCATCTCTTGAAACGTTTGGTGATAGTAAATCGTTTAGAAATTCAAAT  
CATGCAAAATGGTTCGTTTAAATGGAAAAATGGTAAAGAAGTGAAGATGAGTAAACGTACTGGTAATGCGATTACATTAAGAGAAATTA  
TGGACGAAGTTGGCGTTGACGCTGCACGTTATTTCTTAACTATGCGTAGTCCTGATAGTCACTTTGATTTTGATATGGAATTAGCGAA  
AGAGCAATCTCAAGACAATCCAGTTTACTATGCTCAATATGCACATGCGCGTATTTGTTCAATTTTAAACAAAGCGAAAGAGCAAG  
GAATTGAGGTAGCTGCTGCGAATGATTTTACAACGATTACAAATGAAAAAGCGATTGAATTGTTGAAAAAAGTAGCTGATTTGCAA  
CCTACAATTGAAAGTGCAGCTGAGCATAGATCAGCACATAGAATTACTAATTATATTCAAGATTTAGCTTCTCATTTCCATAAAATTC  
TATAATGCTGAAAAAGTGTTAACAGATGATTTGAAAAAACAAAAGCACATGTTGCTATGATTGAAGCGGTGAGAATTACATTGAA  
AAATGCATTTGGCAATGGTGGTGAAGCGCACCTGAATCAATGTAAAGAACATTTATATACACTCCAAGCTAGAGTTTCTCGAAAGA  
TACTTTGTGTTGGAGTGTTTTTTTATTAGGTATGTGACATATTGAGGAATGCTTAGTATGTGAATAAGGTTAAGAGGAACACAGTTG  
GATGCTCTGCACAACTGCATAAGAGAGCCTGAGACATAAATCAATGTTCTATGCTCTACAAAGTTATAATGGCAGTAGTTGACTGA  
ACGAAAAATTCGCTTGAACAAGCTTTTTTCAAT



CATAATCCACAATCAGCCCAGATTTTTTCATTAATTATATGGATATTATTAGTAGTTCTAGTTATATATTTTCACAATTAGATTATCTTC  
ACGTACAAGATTATAAAATATGATAAAACTATTCACCTTGATTAAATTGTATTAAATTGAGATGAATAGTTTTTTTATTGTTGGAATAACTT  
TTGGTAATTTATAAAATAATTTAAAAAAATTGTTTATAAAATGGAAGCGTATATAGAATGAAGGTTGGGTATATAGTTTATTGAGGGA  
GGTGTCACAATGAATAAAGTCACAATTAATCCTCAAATCCAATTAACCTTATCAAATGAAGGTAAGGGGATCCTATAATATTACTT  
CATGGATTGGATGGTAATTTAGCTGGATTGGAAGATTGCAACATCAACTAGCATCATCATATAAAGTACTTACTTACGATTTAAGA  
GGTCATGGCAAGTCTTCTAAAAGTGAATCATACGATTTAAACGATCACGTTGAGGATTTAAAAATTCTAATGGAGAAAGTAAATATT  
CATGAGGCACATATTTCTAGGACATGATTTAGGTGGGGTAGTTGCTAAGTTATTTACAGATAAAATATGCTTATCGTGTAATAATCATT  
ACTACCATTGCATCGAAGAAAGATGACTTAATACACAGCTTTACTCAATTGTTAATACAATATCAAGATGATATAGCGGGTTTTAAT  
AAGTCTGAAGCGTATATTTCTTTTATTTCTAAATTGTTTAAAAATCAAGAGAAGACGATGAAATGGTATCAAAAAACAAAGAATATAT  
AGCATTAAAGTCTGAGGATGATAGTGCGGTGGCTATTTCGTTCAATTAATTTTGCATAAAGATGAACCTATGTATTTAAAAAAACGTACA  
TGTGTACCTACTTTGTTAATTAATGGGGAACATGATCCTTTGATTAAAGATAAAAAATCATTTTAAATTGGAAGCGCATTTTTTAAATG  
TTACGAAAAAAATCTTCGAACATTCAGGACATGCACCGCATATTGAAGAACCAGAAGCATTTATGAATTATTATTTAAATTTTTTAA  
AAAGCGTATCATAATATGTGATATATAAACCTAGGGTATAAAGTCCTTAGGCAATGTGAAAAAGCTGATTACTATTCATTATTTGAT  
AGAAATCAGCTTTTTTTGAAATGTATTTGATATATACTGCTCGTTATGCGGCTATCTTCCTTATATTAAGTGCCATTAGTGCAAAACC  
TCTTAACAATTAGGTAAAAAGAGCATAAAAAAGGAAGTTTAATAGAATGTATCATCTATCAAACCTCACCAAATTGCGCTAAACA  
AAATTATAGTTCATTTTCGTTGTTTGCTTCAGTGATTGCTTTATTTACTCGACTCAATAATGATTCGATTTTTTTACGTTGTTGTGCAT  
TAACAAGAATTATACAGTTCCTTCATCATGCTCATTACGTTTTTATCGAAGTAATCTTCTTGAGATAAAATTTAACTGCTTTAAC  
AACTTGTGGTTGTAGTTTAAATGATTAATAATATCTTTAAGATAGTATCTTCTTCTTTGTTTTCGCTGATGTATGCTAATACAG  
CGAATTCTTCAAAGCTAATTGATAAATTCCTTTTTTAATTAACCTTTTAAATTGTGTCAGCATAAGTGACCAATTGATAACAACTCAAAGCA  
ATCATTGATTTTTGTAATTGCCATGTTTAAAAACCTCCCTATTTGATGCATCTTGCTCGATACATTTGCCCCGATAATATATTGATATCTA  
ATCTTTATTTATTATAGATATGTTAGTCATAATTTTGCATTAAATAAGTTTTATTAATATATTTAATGCTCTATTATTTAGTTAATTA  
TAACTAATTAATAAATGAGAAGTAAACAAAAAAGTGTTTATAAAACAAATTATTCATTAGACACAGTGATTGTATTTCTGGGTAGC  
ATTTGGTTTTAGTCAAAAAATATCAGCATTTTTTATAATTTACCTTAATTTAATCGACAATACAAGGTAATTTATTTAATGAAACGATTT  
AGCGCAATTAATGTTTCGATATTCATGTGTGCTAAAGAGATTCTTTGTTATAGCTTAACTCTTCCAAGTTAACTTCTTCTACTATT  
TATACCCATTTTTCAGAATTTTATCACTAAAAATGAAAAATTTTTATAATTTTATTAATTTAGTAATTTCTCAGTGACGTTTTAATGATA  
CGAAAAACACATTAATTTAGTGATTAACCAATCTGTAGCAGCTTAAAGTGCTATACGTTATTCGATTGATAACGGGTAACAAA  
TAATAGAAAGTACGATAATTTGATCATGCATTAAGACACCTTTATTTTCAAACCTCGACTCAATGAATTATAAAAAAGTTGTGCATTTT  
GACTTATTTTTAATTAATTGAATAACCAACTATGAAATATTAGCACGAATAACATAATTTTTGCTATTAATTTGGTGTAATTTATTA  
AAAATAACATTAATTTAGGTCTTAAGAATGAGTTGACTATCGAATTTGCTAAATTAATAATTTGTTGTGTCAAAGCATACTACCCAAA  
TCAACGCTTTTCTAAAGATTTTTAGACCACAAAAAATAGCTTATCACTTTTAAAAATAATTACAAGTTAAATGATAAGCTAAAAAG  
TTAATTTAAAAATAATCTTAAAGTATAATGCCTGTCAAAATACATAATAGACCAATAGTTTTTCTGGATGTCATTGCTATTTTAGGTG  
AACCAATAATCCAAAGTGATCTATCAATATGCCCATTAGAATCTGGCCAAACATCCCAATAAGTGTTGTTAATGCTGCACCCATAT  
GAGGCATTAAGATAATGTTAGCTGTTACAAAAAGCCATGCCAAGTATACCGCCAGTAAAAATAGATAGGCTTTAATTTACCGAATTTTA  
AATGACTTGTTTTGTAGTTTAAAGAACGATTAAAAATAGCGGTTAAAAATCAATAGCGCTATTGACCAATGTAAATGATACTAATG  
ATGCAAAAGCTGGTGAATGAGTATGACTTGCTAAGACACCTTAAATTTGCTGTTTGAATAGGTGGAAGAAACAAAAATAAATCTCT  
AAGAGAAGCCAAAAACAGTAAATACTTTTGATCAGTTAGTAATAAATTTATCTTGTGTTAAATTGATTTCATTATGACGATGCCGATAATG  
AGTAACAATACTCCAATTGCTTTAATTAATAATTAATAATCATGAATTGTAGCGCCAAATAAGCCCAATGTATCAATAATGACACCCATA  
ATAATTTGACCCGCAACTGTTGCAATTACAGTTAATGTTGCACCTAATTTTGGCAATAACAATAAATTTGCCAGTTAAAAAGCTAACCC  
CCAAGCAAAACCACCGACTACCCATGTGTAGTTAAATGATTGATTATTGTAAAAGTGAATAGTAAATACTTCTGGATTGATAATGATA  
TTTAAAAATAATTAACAAATTTGTTCCAACGTAAATGAAATGAATGAAGTATAGAAAAGCGGATTTAGTATACAGTGATAGCTTTGA  
ATTGACAGATGTTTGGATAGGAATAAGCATTCCAACCTAGGACACCAATGATATAGAAAAAGACATATGAATAAAGTCTCACTTTC  
CAAAGTTAATAATAAAATCATATATTTACATTATCATTATAGAGAAAAATACAACTCATTTACAATAATGTTGAAAAAAACAGGA  
CATTATTACAACAAAACCCCTAGACAAATCATGATGAAAGTCTAGGGTGTTAGTATTTTACTAAATTAATTTGCGCTTTCTTTATAT  
CTATTTCTTATCTTCAAATAAAAAACAGTTGTTGTTTTATCAATAATTTGAGCAGAATGTACTTTGGTGATAGTACCCTATTGACTTT  
ATAATATTTAAATCTACTAATGCATTACACTATCACGTGCAACTTGCTCGGTCACTACGTTGTTAATTGTGATAATTGCAGTTTTA  
CAGGCTTGTCTAGTGAAGATTTAAACTTAATTCAGTGTTTTAGTCATGAATATGTCCTCCTGATTAAATTGATAAAGATTTGATGA  
GTTTCGATATTGCTATATGTTTCTCCAGTAAGTCGCTCAATAAGTTTGTGTAATGTTTAAATTGGTTCGTTTGTGTCATCAGGGTTAAT  
GTTAGCGAATCGACGCTTAAATTCGTTGTTTGGCGTTAGCGTCTACTTTAGTAAATGATAATACAATAGTGATGTGGTTTATTTTA  
CTCATATTTTAAACCTCCTTTCACACTATATATCGAAACAAAATAATAAAATGGCTAATTTTATTTTCTATGTTTAAATCTATAAA  
AAAGGCAATAGATATATGTAACATAAATAATATAGCTATGATTAAGACACTTAAAGCAAGGGGAGGTTGAGTAATGAATAAAGT  
AGAAGCGATTAATTTAATGATGATATTGTTAAAAATGTGAAGCGCTCAAGTACATAAAATCTGAACGTGACTATTTATCTTTAAGTT  
AGCTATACATAGTGGATTGAAAGTATCGAATTAACAATTAACAGTCTCTCAAGTTAAGAGACTTAAAGTGAAGTGAAGTGAAGTGAAGT  
AGAAATGTGTAAAGCACATTTTCATTCGTTGATTAAAAATTAGGTTACCAGAAAACATTATCGAAAGAACTACTTCAATATATAGAGGA  
CAGGAGTCTTTCGAATGAAGACGTTCTTTTCAATCACTACGAACAAATCAAGTATTATCTAGACAGCAAGCATATCGAATAATTCA  
CCAAGCATCAATTGAAGCTGGTATAGATAATGTAGGACTAACGACATTGCGTAAGACATTGTCATATCATGCTTATCAAAAAGGTA  
TACCTATACCAGTCAATCAAAAGTATTTAGGGCATCAATCTGCTATTGAAACACTAAATTTATCGGTTTAGAAAATGAGTGTGAAC  
ATAGTATTTATATTTCAATTACAATTATAGAAACAAAGGAGGCTAATAATGAGTTTGGTTTATTTATTAATTGCTATACTTGTGATTAT  
GGCGATGATACTTCTAATGTCTAAACGTAGAGCATTGGCTAAATATGCCGGGTACATAGCGTTGGTTGACACCTGTAATTTCTATCTAT  
CTATTTTTGATTCAAAATACCATCAGTAGCTAACTGCAATATCTTCTACCTCATTTCCATGGATTAAAGCATTAGATATTAATTTA  
GATTTACGTTTAGATGGTTTTAAGTTAATGTTTCTCTTATATTATTTCACTTATTGGAATTGCAATTCTTCTATGCAACTCAATTTT  
ATCCTCTCGAAAAGACAATTTACCAAGGTTTTATTTTTATTTAACGTTATTTATGTTTCAGTATGATTGGTATTGTATTATCAGACAAT  
ACGATATTGATGTACATTTTTTGGGAATTAACGAGTGATCATCATTTTTTATTGATTTTCATATTGGTATAACAACGGAGATAGTCAAT  
TTGGTGCGATGCAATCATTTATGATTACAGTATTTGGTGGTTTGGCATTATTAGTTGGTTTTATCATGTTGTATATTATGACAGGAAC  
GAATAACATCACAGAGATATTAGGACAAGCAGATTATATTAAGAATCATGGATTGTTTATCCCTATGATTTTTATGTTTTTATTAGGT  
GCATTTACAAAATCAGCACAATTTCCATTTTCATATTTGGCTACCTAGAGCAATGGCTGCACCTACACCTGTAAGTGCTTATTTACATT  
CAGCCACGATGGTAAAAGCTGGTATCTTTTTATTACTTCGATTTACACCATTATTAGGTCTTAGCAATATGTACGTATATATCGTTAC  
GTTTGTGGTTTAAATAACAATGTTATTTGGTTCAATTAACAGCTTTAAAAACAATGGGATTTAAAGGTTACCTAGCGTACTCTACAATC  
AGTCAACTTGGGATGATTATGGCTATGGTGGGTATAGGTGGCGATATGCTCAACACCAACGAAGCAGCAATAGCATCTATTATGT  
ATTTGTATTATTTGGTGCGCTATTTTCATCTAATGAATCATGCCATCTTTAAATGTGCGCTTTTCATGGGAGTAGGTATTTTAGATCAT  
GAAGCAGGTTCAAGGGATATACGAATTTTAAAGTGAATGCGTCAACTATTTCTTAAATGAATCTAGTCATGACGATAGCGGCTCT  
ATCTATGGCTGGAGTACCATTTTTAAATGGATTTTTAAGTAAAGAAATGTTTTTAGATGCATTAACACAACTGGACAATTATCCCA

ATTTAGTTTGATTTC AATGATAGCTATCGTGTGTTGTTGGTGTATTGCGAGTGTGTTTACATTCACATATGCACTATACATGGTAAAA  
GAAGTATTTTGGACAAAATATGATTCTAAGGTTTTTACTAAAAAAATATCCACGAACCATGGTTGTTTAGTTTACCATCTCTTATAT  
TAATGGTGCTAGTACCTGTAATCTTTTTGTACCAAATATATTTGGGAAGGGGATTATCGTTCTAGCATTAAGAGCTGTATCAGGTG  
GTAATCATCAAATTGATCAATTGGCACCACATGTTTCGCAATGGCATGGATTAAACATACCGCTTCTTTTAACCATCATCATTATTTT  
ATTGGGTAGTGTACTAGCAATCAAAGTAGATTGGAAAAAAGTGTTCACAGGTA AAAATTAGACAGATTTTCAAGTTTCAAAAAGCTATG  
AGATGGTATATCGACATTTTGAAAAGTTTGCTACGAAGCGATTTAAACGTGTTATGCAAGATCGTTTAAACCAATACATTATTATGA  
CCTTAGGCATATTTATGATTATCATTGGATATGGTTATATTCGAATTGGACTTCCTAAAGTACATCAGTTACATGTTTCTGAATTTGG  
GGCATTAGAAAATTATATTAGCAATCGTAACTGTCACAATTGGTATTTCTTTAATTTTTATACGTCAACGACTGACAATGGTCATTTTA  
AATGGAGTCATCGGATTTGTTGTGACCTTATTTCTTTATAGCAATGAAAAGCCCTGATCTAGCATTGACTCAGCTAGTAGTTGAAACA  
ATAACGACGATACTATTATTGTCAGTTTTTCAAGATTACCAAACGTGCCAAGATCTAACGCTAACAAAAAAGAGAAAATAATTTAA  
AATTTCTGTATCACTCTTGATGGCATTATTGTTGTATCATTAATTTTTATTACACAACAAAACAGATGGTTTATCATCAATATCAGAC  
TTTTATTTAAAAAGCTGACAACTAACAGGTGGTAAAAATATTGTAAATGCGATACTTGGTGACTTTAGAGCATTAGATACATTATTT  
GAAGGATTAGTGTTAATTATTACTGGGCTAGGTATTTACACATTATTAATTTATCAAGATCGGAGGGGACAAGATGAAAAGAGAATG  
ATGTCGTGTTAAGAACGGTCACGAACTTGTGTATTTATTTTATGACTTTCGGATTCTATGTCTTCTTCGCAGGTCATAATAATCCT  
GGTGGTGGGTTTATTGGTGGTTAATATTTAGTTCAGCGTTTATTTAATGTTTCTGGCTTTAATGTTGAAGAGGTTTGAAGAGTTT  
ACCGATTGATTTTAGAATTTTATGATTATTGGAGCATTGGTATCATCTATTACTGCGATAATACCTATGTTTTTTGGAAAACCATTT  
TTGTCTCAATATGAAAACACTTGGATACTTCCAATTTTAGGACAAATTCATGTAAGTACAATAACACTTTTTGAATTAGGTATTTTAT  
TCTCAGTTTGTGGTGTATTGTGCAGTGATGTTGTCGTTACGCCGAGGTGTCATGAAATTTAATTATTACTAGTTATAGGATTT  
TTAGTGTGTTATGGAACATATATGATTTTATCAATTAATTTAATTCGTATTGTAATCGGAATTTCAATATATACATCATGCTGGTAATC  
TCATTATTATGAGTATGGGAACGTATGTTTCTAGTAGATCAGAACCCTAATAACTGGTGGAAACCAATTGTTTGTGATCCCTTGT  
TACAAGCTATTGTACTAACTGCAATAGTTATAGGGTTTGGGATGACTGCGTTTTTACTTGTACTTGTTTATAGAAGTTATAAAGTAAC  
AAAAGAAGATGAAATTGAAGGCCTAAGGGGGGAAGATGATGCTAAGTAACCTATTGATTTTACCAATGTTATTACCATTCTTTGTG  
CCTTAATCCTTGTATTTTAAAAAATAATGATCGTATTTCTAAATATTTATACTTAGGTACAATGACTATCACCAATATTATTCATT  
AATGCTATTAATTTATGTTACGCGTCACCGTCCAATTACGCTAGACTTTGGAGGATGGTCAGCGCCCTTTGGTATACAGTTTATAGGA  
GATTCTTTAAGTTTAATTATGGTTACAACCGCTTCGTTTGTGATTACTTTAATTATGGCATAACGATTGGGCGTGGCGAACATAAAG  
CAAATCGTTATCACTTGGCATCGTTCATATTATTTAAGTGTGGCGTGATAGGCTCTTTTCTAACATCAGATTATTTAATTTATAC  
GTCATGTTTGAAATTTATGTTACTAGCGTCATTTGTACTCATTACACTGGACAATCTGTAGAACAATTACGTGCTGCAATTATTATG  
TTGTCTTGAATATTATTGGTTCATGGCTATTCTTATTAGGTATAGGTTTACTTTATAAAACAGTAGGTACATTAAACTTTTTCACATATT  
GCAATGCGTTTGAATGACATGGGAGATAATCGCACTGTTACAATGATTTTCAATATCTTCTTAGTCGCATTTAGTGCGAAAGCAGCG  
CTGGTCCTTTTATGTGGCTACCCAAAGCCTACGCTGTGTTAAATACTGAGCTTGCAGCATTATTTGCAGCGTTAATGACCAAAGTA  
GGGGCCTATGCATTAATTCGATTCTTCACTTTACTATTTGATCAACATAATGATCTCATACATCCATTGCTAGCAACTATGGCTGCTA  
TAACTATGGTCATCGGCGCTATAGGTGTCATTGCTTATAAAGATATTA AAAAGATTGCAGCTTACCAAGTCATAATCTCAATAGGAT  
TTATCATTTTAGGTTTAGGAACAAACACGTTTGCAGGTATTAATGGTGCAATATTTTATTTGGTAAATGACATTGTTGTAAAAACATT  
GCTATTTTATTTATTTAGTTAGTTTATGTTTACATTACAGGCTATGCAGATAATCAATATTTGAATGGCTAGCTAAAAAAGAACTTTA  
TTGGAGTTGCGTTTATTATAATGATTTTTGCTATTGGCGCGTGCTCCATTTAGTGGCTTTCCGGGGAAGTACTTATTTTCCAAG  
GTGCATTGCAAAATGGCAATTATATTGGACTAGCGTTAATGATTATTACTAGTCTAATTGCAATGTACAGTTTATTTAGGATACTTTT  
TTATATGATTTTGGAGATAAAGATGGGGAGGAAGTTAATTTAAGAAAATCCCGCTATATCGAAAAAGAATTTTAAGTATTTTAGT  
AGTTGTGGTTATCGCAATCGGAATTGCTGCACCTGTGTGTTAAATGTTACAAGTGATGCAACTGAGTTGAACACGAGTGATCAATT  
ATATCAAAAACCTGTAAATCCGCATTTGAAAGGAGAGGACTAAATGAATCAAATAGTTTAAATATTATCATTGCATTCTTATGGGT  
ATTATTTCAAGATGAAGATCATTTTAAATCTCGACTTCTTTTCTGGATATCTAATTGGTTAATTGTCATTTATATATTACACAGGT  
TTTTCAGCGATGATTTTTATGTTAGAAAAATATGGGTAGCTATTTAAATTTTTAGGTGTTTATTTATATCAATTAATAACATCTAGCAT  
TAGCACGATTAATTATATTTCTTTTTAAAACAAAAGATATGAACCTGGATTACTTTTCATATGAAACAAGACTAACAAGTGATTGGTC  
AATAACATTTTTAACAAATTTAATTATATAACTCCAGGGTCTACAGAAGCATTACAATACGATGTGAAAAACGAGAAGAGCATCTGAAGAAATGGTATC  
AGTATCGACGTGTCAGAAAAAGAAAAAGATAGTTGTTAAGAAGTATTAAGCATTATGAAGACTTAATATTGGAGGTGTCGCGATG  
ATACAAACAATAACACATATTATGATTATTAGTTCACCTATTATTTTTGGAATTGCATTAATCATCTGTTTATTTAGATTAATCAAGG  
GACCTACAACAGCAGATCGTGTGTTACATTTGATACAACAAGTGCTGTGTAATGTCAATTGTGGGTGTGTTAAGTGTACTTATGG  
GCACCGTTTCTTTCTTAGATTCAATCATGCTCATTGCCATTATATCTTTGTGAAGTCTGTTTCAATATCACGCTTATTGGTGGGGGG  
CATGTGTTTAAATGGAATAACAAAAGAAATCTTTAGTCTTATTGCTGCTGTGATGTTGTTAGGTAGTTTATTGCTCTTATTAGT  
GCAATAGGTATCGTGAATTTCCAAGATGTTTTCTTAAGAAGTCACGCTGCGACAAAAAGTTCAACTTTATCCGTGTTATTAACCTTTA  
ATCGGTGTTAATTTATTTTATTGTGAATACAGGATTTTTTTCAGTGTGCGTTTATTACTGTCACTTGTTTTTATTAATTTAACCTTACC  
AGTCGGCATGCATTTAGTCGCTCGCTGCTTATCGCAACCGCGCTTATGTATCGAAAAAATGATGCTCACACAGCATGCATGCATTAAT  
ATTATTAAGTTCCAAATGAACAACTCTACAGAAGCATTACAATACGTGTGAAAAACGAGAAGAGCATCTGAAGAAATGGTATC  
AAAACGATTGAAGTGTGGCTAAATTTGTTAAGCATAACAATGCTTTTGA AAAATCTGTTTTCAAAAATTAATCATTA AAAAGAGTACTTT  
GAAATTGGTTAGTCGATTTTAAGGTGCTCATTTTTTGTATTATAAGTTAATGTTGTTATGTGAAAGCAAGTTGTTTATTTATACAAAC  
AATTAGTGATAAAAATAAAATTAATAATTGCAAATTTAAGTACTGCAATCGTAGACATATATCTATATTAAGTGCTTTTGTGGTCTG  
CTAACTCAATTTATCCTCTAAAGTATAATTACAACGAGATGTGATACTTAATTTTCAATTAACAATACTTTTTAGAGAGGTGAAAG  
TTTGGAAATATTTGAAACAATTTCTATATTTATAGCTGTTGTGATACTAAGTTTCGTTTGTCCATACTTTTCATACCTAAAGTACCCCTA  
GCATTTATACAAATTTTCTTGGGCATGTTACTATTTATACCCCAATCCCTGTTCAATTTAATTTTGATTCTGAATTTGTTTATGGTAAC  
AATGATTGCGCTTTGTTTATTGTGAGAGGTGTTAATGTTTCTAGAGTCCATTTAAGGAAATATATTAAGCCAGTGATGATGATGGC  
ATTAGGATTAGTCATTACTACTGTGATAGGTGATGTTTATTTATTCATTAGGATTTGGCCAGATTTACCTATTGGAGAGCATGATTGCA  
ATTGCTGCCATTCTTTGTCTACTGATGCAGTAGCAGTGCAAGCAATCACTAAAGGAAAGGTCTTGCCAAAAGGAGCAATGACAAT  
TCTTGAAGGTGAGTCATTATTGAATGATGCTGCTGGTATTATTTCAATTTAAATAGCTGTTGGAGTATTAGTTACAGGTGCTTTTTCA  
CTTGTGATGCTGTTTCAAGTTGTTTTAATTGCATCAATTGGTGGCGCAGTGGTTGGTTTACTTATAGGTATGGCATTAGTAAGGTTC  
GATTAACATTGATGCTGCGAGGATATGAAAACATTAATATGTTTACAATTAATCAATTGTTAACACCATTGTTACGTATTTAATTGC  
TGAATTGTTTACGCATCAGGAATCATTGACGAGTAGTTGCAGGACTTGTACATGGTTTTCGAACGTGACAGAATTATGCAAGTACG  
TACACAACCTGCAAATGAGTTACAATCATACATGGAATATACTAGGTTATGTTTTAAATGGCTTTGTTTTTCAATATTAGGATTTTAT  
GTACCTGAAGTTTATTTAAAAATTTCAAAAACAGAACCCACAATTTAATCTTTTTAATAGGCATCACTATTGTTGTTGCTTTTAGCTG  
TCTATCTAATTTAGATTTGTTGGGTTTATGTCTTATATCCTTATTTTATTAGCCATCAGTCCATTTCAAAAATGATGACTAAAAAT  
GATGATGATAATCCAACGACTGAGAAACCACCAAAGCGAAGTTTATACGCTTTAATTATGACGTTATGTTGGTGTGCATGGAACAAT  
TTCTTTAGCAATCGCATTAACGTTACCGTATTTTTTAGCAGGGCATCATGCTTTTACGTATAGAAACGACTTATTATTTATGTCATCT  
GGTATGGTTATTATTAGTTTGGTAGTTGCGCAAGTATTATTGCCATTATTAACGAAACCTGCACCTAAAAACAGTAATTGGCAATATG

TCGTTTAAAGTTGCTAGAATTTATATATTAGAACAAGTTATTGATTATCTAAATCAAAAATCTACTTTCGAAACAAGTTTAAATATG  
GTAACGTGATTAAAGAATATCATGATAAATTAGCATTTTTAAAACTGTAGAGAAAGATGATGAAAACCTCTAAAGAATTAGAACGT  
CTACAAAAAATTGCTTTTAAATGTAGAAACAAAAACATTAGAGTCTTTAGTAGATGAAGGACAAATAACGAATAGTGTACTTGAAAA  
CTATATGCGTTATGCTGAAAGAACACAGGTATATAGACAAGCATCATTAAATAAGAAGAATGATTGTATTATTACGAGGTGCTTTATT  
AAAACGAAGAGTACAAACGAGAGTGAACCTCCGCATCTTCACTTAGTGTACGGATAACTTAATGGAATTAATAAAAAATTAATAAAT  
TAGTCCATTATAATGTGGTTAGTCGTTTGTCTAAGGAAACAACAAAAGATAATACACTTGAAGTTGGAATGGTTTGTGACGGTTATT  
TAATGCGAATTGAAAACCTTAACACCATCAAAATTTCTTCAACTCAGCAAGTGAAGATACGATTACTAAAAATTAATTAATGCATTGA  
GAGAACAACGTCGCATTTTACGTGAGTTGATTGATACAGATGAAGTATCAGAAGGTACAGCGTTAAAACTAAGAGAAGCCATCAAT  
TACGATGAAATGGTTATTGTAGATAGTATGACGTAGTTCCTAATTATGCTAAAAGGGATTGATGAAAAACTGAAGGGCTTTTCATCA  
ATCCCTTTTATTTATGGGAATTGAATAGATAGTTTTAAACTATACGAATTATTAATATTTGAGATTTAATTGAAATAAGTTTTAAAA  
ATTGGAGGAGATAGATTAAAGCGAAGTCATTTAAAGGTGAAGTTAAGTGTATTACAAAAAATAGCCACACTCATATGACATCGGAT  
GAGTGTGGCTTAAGGATCTATGGGGGGAGGAAACCATAGATGTTTACTTTGATAGCCAGATTAATATCAAAGTATGCGATTATTT  
ATAGCTTGATGCAAAAGTGGTATGCCTATTAAGGTTACTGCACATAGCTTTTAATATTCCGTTCAAAGGAAAGGGGCATACAATTG  
AACAATCTGTAATAGTACTTTTAAACCAGCTATGCTAAAAGTCTAGTAGGGAGAACAGTTGTCCAATCACATAAGAACCTCTAAGTTC  
GTTAGTACGATTAAGAAAAGCTTTTATGTTAGTATGTAATACAATTTATTGACGCGCGTGAATCTCTTTTATAAGAGTGTGTAGGGA  
ATGGCGTTGTATAAATTGTATTAGAAGAACTTCAACGCATCTCTGTGGTTAAAGAGATGAAGGGAACGACAGTTTAAATAAAAAC  
TGCATAAGAAGTCTAGCTTTTCTCTCTCGTTCAAAGAGAAGCAGCTGTTTCGAGTTTAAATCAAAACCACATAAAGCTTTTAAAC

>020-contig\_263 RC

CCACATAAAGCTTTTAACTTTACTCTTTGATTAAAGAGTGACAAATGTTTACAGTTTAAATAAAACTGCATAAGAAGTCTTAAGTTC  
TCTCTTTCGTTCAAAGAGAAGTTCTAATACCACCATATCGTGCAGTCGGGAACGGTATATATTAATAGGAGGGTAATATATATTT  
AACGCACGATATGGGACTATTAGCCTTCGACTTTGTTATGTTGATGTGTGGCCTAAAAATATTGGAGATACCAATATTTTAGGTTGCA  
TCAACATCAATTCATCTTACTTCATTAACACAGCGTGTATTTTCATGCTTCCGTGTACAGTTTCAATATTTGATTTCATCATTTTGT  
AGTAAGAGTCACTTTAGTGCCTTCTTTACCGATGAATCTGTGTACACTTACCAAGAGATATCTTCTTCGTTTCTTCAGATAAACT  
TTCCATTGCTTTCTTATCAACACTTGTCTTCTACTAATAAGTGTTTTAATTTGTGCTTTTAAACAACTCAATAGCTTGTCTCATTTGTT  
AGGTGTACCTTGTTTTTCAGTGTAAATTTCCCAAATATAACCTGGTGTAATACCGTATTGTTTGAAGAGTACTGAAGGCACCTTCA  
CTTGTAATCATGGCACGTTGTTCTTTTGAATGTCATTAATTTGTCTTTACTGTCTATTATTTAATTTTCCAATTGAGCAATGTATTT  
GTTACCTTGCTTTTCATAATCTGCTTTATGTTTTTGTGCTTATCGATAAATGTTTGTGAATTGTTTTACGTATTTAATACCGTTATC  
TAACTTAACCATGCGTGTGGATCTGTTTATCTTTGTTGCTTCTTACCGTTTAAATAGATAGGTTTAAACATCTTTTGATACGCGA  
TAACTTTTTTATCTTTTAAATGATTTACCAGCCTGTTCTAAGGCTTTTCAAACCAACCGTTACCAGTCTCTAAATTTAATCCGTTGTAT  
AAAATAACGTCAGCGTCAGTTAACTTTTAAATATCTTTAGGTTTAACTTCATATTTCATGAGGATCTTGACCAACAGGTACAATACTAT  
GAATATCGAGCTTGTCTCCACCAACATTTTACCGATCATATAAAATGAATTCGTCGTTACTACTTTTAAATTTGCCATTGACTT  
TACTCTGCTTTTGTACCAACGATACCACATGCACATAGAGAATAAAGGCTAATAATAAAGGTAATTAATTTTTCATGTTTAA  
CTTCTCGTTTCTTTCTATTTCGTAATTTTGTGAAAAATAATGTGATGATATAAATTACAAACGTACAAAGTACGATTGTGCGACCAC  
TAGGAATGTTGTAATATAGCTGTAATAAAGTCCGACAATTGAACCTTATGACACTTATTAACCTTGCTATAATCATCATTTGAGTATA  
GTTTTTTACTAATTAATAAATGCTGTAGATGCAGGTGAATTAATAATGCAACTACAAGAATAATACCTACCGTTTGAATACTTGCTA  
CTGTTACTAATGAGAGTAACAACATCACAAAGTAATGTAATAACGTCGTATTTAGACCACTATTCTACTAAACGTTGGATCGAATG  
TAGAAATCATTAAATGGACGATAGAAAATAATGATTAGAATAAGGACGATTGAACCAATCACAAATAGTTGTTAAAAATGCATATTT  
GTGATTGCCAGTAAATTACCAACAGAAATATGGTACAAATCTGTCGTAGTGTTTATTAAGCTAATAATAATATCCCGAAGCTAAG  
AAAGCGGTAATAAATTCCAATAGCGGGCGTCAGGTTTCGTTTACTACTAGATGTGATATAACCGATAAAAAACTTGGCATCATA  
CCAGTTATAAGTGCAGCTACAAACATTGGAATACCAATAAGAATGATAGGGCAACACCGGTAATACCTGCGTGACTCATTTGCATC  
TCCATTAAATGAAAGACCGTAATACAAATTAACCTACCAACTGTACCACAACTATCCCTACAAATAATTGAAGTTATCAATGTCTCG  
ATTCAAGAATTGATATGTAATAAATGTTTCGACAACTCTAACATGTTATATTGCTCTTTGACTAGGGTCACTACAGTCACTGCTA  
CTCATAAATGTTTCGTTTAAAGCGAGTGACACTCATAGCCTCTTCACTATCACCAAAAGTATCGTAATGTTTGATTTAATAGAATAATGC  
GATCAAAGTATTGCTTTGCTTTTGTAGATCATGGTGGATGATAAGAATAAGTTTTCTTGTGTTTAAAGTTCTCGATTTTGTCTATG  
ATTAATTTTTCGCTACTAAAAATCAATTCCGACAAACGGCTCATCTAGAAAATAAACTTCACTTTCGGACATCAATGTTCTTGCTACTA  
GCACACGTTGTAATTGTCCACCACTTAATTCTGAAATTTGTGATGACGTAAAGATTCTAATTCTAAATCGCTTAATAACTGTTTGAG  
TTTATCCCTTGCTGATTTATTAGGTCGTCTAAACCATCAATTTCTTTGTAGCAACCTGATAAAATCACTTGTTCACACTTATAGGA  
AAATCTAAATCAATATGTGCTTTTGTGGAATATATGAATATTTGTCAGTTGTTGTATAGGTTTGTATATAACAATTTAGTAC  
CGGTAGCATTAATTAACCACTGATTAAGAGACTGTAGAAAGAGATTTTACCAGCACCATTCGGGCCCATACCAATTAATTTGCGCGC  
GTACTGGTATCGATAAGGAAATGTTTTTAAAGTACATGCTTATTACCTAAAAACAGATTTAAATCTTTTGTGTTTCTAACAAACGTTTATA  
CCTCTAATTAAGGTTTAGGCTAACCTAATTAAGTGTATAATAAACTGAGAAATTTTATCATGTCAAGTAAATTCGTGATATAATA  
TAGACAATGTATGTGAGGTGAAAGTATGTTAACTGAAGAAAAAGAGGACTATTTAAAGGCAATCCTTACGAATAATGGCGATAAAA  
ACTTTGTGACAAATAAAATCTTATCTCAATTTTAAATATTAAGCCTCCATCTGTAAGTGAATGGTAGGACGCTTGAAAAAGCAG  
GCTATGTTGAAACAAAACCATACAAAGGTGTTAGATTAACAGAGGATGGTTTAAACGCATACGCTTGATATCATTAAGAGACATCGA  
CTATTAGAATATTTTTAATAGAAAATTTGAAATATAATTTGGGAAGAAGTACATCAAGAAGCAGAAATTTTAGAACATCGAATTTCA  
GATTTATTTGTTGAAAGGCTGGATAGCTTGTAAATTTCCAGAACTTGCCGACGCGGTGTGATTTCTAGAAATAATGAATAT  
AAAGAGAAATATAAGCAACGATATTGAATATGAACCTGGCGATTCGTTACAATCAAAACGTTGTGAGAGATAAGACCGATTGCT  
AATATATTTGTCTAGTAAAGATATTCTATTGGTAATGAAGTGGAAATTGTATCGAAAGATGAAATGAATAAAGTAATTATCATTA  
ACGTAATGATAATGTAATTATTGTGCTAGTTACGAAAATGCAATGAACATGTTTGTGCTGAAAAATAAAATAAAGAACCCATAAAGATAT  
CCATGATTGAAGTATAAAGACATATGGATAATTGCTTTAGGCTTCTTTTTTATTAGTTAATTTATCAAGTGAGTATATTTGAGTAAA  
ATATTCAGTGCATAAAGATTGAAGATAATCCAGATTGTACTATAAATGAAGATAGGTACATGACTGAGTCTTTAAGTGCCTACCA  
TCCCACTGTGGACTCGGACGCTGGAAAGTCAATTTAGCAATCGTCCAAGTATGTAAGTTCGCTAATAATACACCTAAAATA  
TATTGATAACTCATTGTGACAAGTAGTTGAATTTCTACTATATTTTATCTTTTAAATATAAAAAACAACATGATAGAAATTAAGTTA  
TAACAACAATGGGTGAGCCTTTTCTAGATGTTAAATTAATAAATAAATAAATATCAATAAATAGGTAATAATAAAGAACTAGGT  
ATCTGATAATGGCTCGACGCTAAACCTATCAATAACATAATAGGAGGACATAAAATACCACTAATCGTTGAAGCCATTGGCCTGC  
TAGATTGTCTAGATTGTGTAATTGCGAATCCTTGTGTAATGTCTGTTGTGCTCTCTGTTGACTTGTACAATGACTAAATCTTTTGCA  
CGGCCACCAGCGAGTTTATTAACAGTACATGACCAAAATTCATGTGTTAAACAGGGATATAGTTTAAATGACATCTAAATAGTTT  
AAAACAGGCTTATGTCTATATTGATGAATAGCAATATAACAAGCTGCAACAATAACGATAATGTATATTAAGTTGAATTGTCTGTA  
TTAAAAAAGTTTGATAAATAATTCATTGTTAACCTCATATAAGATATTAATTTAAAGTTTGTCTAGCACTTATTATAAATGATATTGG

CATCAATAGCGTTAGACTTTAGACTTACCTTAGTTAACTAATTTTAATTTTTTGAAAAAGGTGAATATGTGTTAAAAATAAAGCAAAAT  
CATTTTCGATATAAAATAGGATGAATATAAAATACTGTTAATATTGATTACACTAACATAAATAATGAAAATAAGATAGGAGATTCTGTTA  
TGACTGTTGAAGAAAGATCCAATACAGCCAAAGTTGACATTTTAGGGGTCGATTTTGATAATACAACAATGTTGCAAAATGGTTGAA  
AATATTTAAACCTTTTTTGCAAATCAATCAACGAATAATCTTTTTATAGTAACAGCCAACCCTGAAATAGTGAATTACGCGACGACA  
CATCAAGCGTATTTAGAGTTAATAAATCAAGCGAGCTATATTGTTGCTGATGGGACAGGAGTAGTCAAAGCTTCGCATCGTTTAAAG  
CAACCTCTAGCGCATCGTATACCTGGTATTGAGTTGATGGATGAATGTTTGAAAATTGCTCATGTAAATCATCAAAAAGTATTTTTG  
CTAGGGGCAACTAATGAAGTTGTAGAAGCGGCACAATATGCATTGCAACAAAAGATATCCAAACATATCGTTTGACATCATCACGG  
TTATATTGATTTAGAAGATGAGACAGTAGTAAAACGAATTAACCTGTTTAAACCTGATTACATATTTGTAGGTATGGGATTCCTAA  
ACAAGAAGAAATGGATTATGACACATGAAAACCAATTTGAATCTACAGTGATGATGGGCGTAGGTGGTTCTCTTGAAGTATTTGCTG  
GGGCTAAAAAGAGAGCGCCTTATATCTTTAGAAAAATTAACATTGAATGGATATATAGAGCATTAATAGATTGGAAACGTATTGGT  
AGATTAAGAGTATTCTATATTTATGTATAAAATAGCCAAAGCAAAAAGAAAAATAAAAAAGCGGAAAATAATCATGATGACAAA  
AATAAAACCGAGGAAATCCTTAAATGGAGATTCTCGGTTTTTTCGGTTTATTTAATAACGAAGCGGGACTCATCGAGTTTGTCTTA  
AATTTCTTTTTGTTTCGGCTTTGGATTTCTTTTTAAAAATCGTTAAGGAAAGCTTCATATTTAGGTAATACATCATCAAGTTCACCGTAAT  
CTTTAACTTTCCCGCTTCAATCCAAGCAATCTTAGTACAAAATTGCTCTCACTTGTCTTAAGTTATGACTAACGAAAAAGATGGTTTT  
GTTTTGCTCTTTAACTCGTAAATTTTATCTAAACATTTTTGTGCAAAAGTTTGGTCACCTACAGATAAAGCTTCGTCAATGACTAAG  
ATATCTGGATTAACTGTGATATTAATTGAAAAACCAAGTTTTGCACGCATACCACCTTGAATACTTTTTAACTGGTTGATAAATAAAC  
TCACCAAGTTCACTAAAATCAATAATCTTAGGTGTCATCGCTTTAATTTCTTTTCGCTTAAAGCCCATACATAACATTTTAAATTCGA  
TATTTTCAATCCCTGTAAGTTGTCTCACTCAAGCCAGCAATAATTCGATGATGACTTCACCATGACTTCACCTTTGCGAACAGT  
AGGCGCAAAAGAACGCCAATGATATTGCTCAACGTTGATTTGCCGGAACCATTTGATGCCAACAAACCCCTATGACGTGCGCTTCAT  
ATGCTTTTAACTAATGTCATCTAAAGCGAAAAATGTTTTGTTTTATGTTTGGGAATGAGCGCATCTTTTCATACGTTCTTTATTTGTA  
CGATAAATACGATATTTCTTTGTACATTTTAAATGTTTACCGAAACGTTTCAATTTGTAGACCTTCCTTATTCACATTTATCTAGATTAT  
AATATACTACTCAACAGTTGTTAAATTTTAAACCTGTTGTAAAGTGTATAGAAGATTTTGTATTATCAGAGTGGGTGTTTTGACAC  
AAAATGTTAATCATCAATGATAACAATGATATTTAAAAACTAAACTTATTTCAACTTACATGATTGTATACTATAATGTATTTGTAAT  
AACTAATATTTTAAAGAACTAGACAATAATTTTGATAGCATCCATGTATAGTGATAGTATTTACAACAATTATTATAATACTATTT  
AGTTAAGTAGAGAAATAGTTAAACATTTGAAAGTGTGGTTTAAATGGAATGTCAGCAATAGGAACAGTTTTTAAAGAACATGTAAAG  
AACTTTTATTTAATTCAAAGACTGGCTCAGTTTCAAGTTAAAAATTAATCATAGTAAGTATTTAGGTGTGGCTTGGGAATTAATTA  
ACCTGTATATGCAAAATATGGTTTACTGGATGGTTTTTGGATTAGGAATAAGAAGTAATGCACCAATTCATGGTGATACCTTTTGTTTA  
TTGGTTATTGGTTGGTATCAGTATGTGGTTCTTCATCAACCAAGGTATTTTGAAGGTAAGCAATTACACAAAAGTTAATCA  
AGTATCGAAAATGAACTTCCCGTTATCGATAATACCGACATATATTGTGACAAGTAGATTTTATGGACATTTAGGCTTACTTTTACTT  
GTGATAATTGCATGTATGTTTACTGGTATTTATCCATCAATACATATCATTCAATTATTGATATATGTACCGTTTTGTTTTTCTTAAC  
TGCCTCGGTGACGTTATTAACATCAACACTCGGTGTGTAGTTAGAGATACACAAATGTTAATGCAAGCAATATTAAGAATATTATT  
TTACTTTTACCAATTTTGTGGCTACCAAAGAACCATGGTATCAGTGGTTTAAATTCATGAAATGATGAAATATAATCCAGTTTACTTT  
ATTGCTGAATCATACCGTGCAGCAATTTTATATCACGAATGGTATTTTCATGGATCATTGGAAATTAATGTTATACAATTTCCGGTATTG  
TTGCCATTTTCTTTGCAATTTGGTGCCTACTTACACATGAAATATAGAGTCAATTTGCAGACTTCTTGAATATTTTATATGACGAA  
ACCCCGCTAACCAATTAATAAGTTGGAAGTGGGTTTCAATTTTGTTTAATTTAAGTAAATAACATATTAATGTTGGTATTATGAAC  
GTTTTAATAAAGAAATTTTATCATTGGTAGTTCGAATACTTTCTAAAATGATTACGCCTCAAGTGATTGATAAACCGCATATCGTAT  
TTATGATGACTTTTCCAGAAGATATTAAGCCTATCATCAAAGCATTAAATAATTCGTCGTATCAGAAAAGTGTTTTAAACAACACCAA  
AACAAGCGCCTTATTTATCTGAACCTAGCGACGATGTTGATGTGATAGAAATGACTAATCGAACATTGGTAAAACAAATTAAGGCTT  
TGAAAAGCGCGCAGATGATTATTATCGATAATTATTACCTATTACTAGGTGGATATAATAAGACTTCTAATCAACACATTGTTCAAA  
CGTGGCATGCAAGTGGTGCATTAATAAACCTTTGGCTTAAACAGATCATCAAGTCGATGTGTCTGACAAGGCAATGGTTCAGCAGTAC  
CGTAAAGTTTATCAAGCGACGGATTTTACTTAGTGGGTTGTGAACAAATGTCACAATGTTTTAAACAGTCTTTAGGTGCAACAGAA  
GAGCAATGCTGTATTTTGGGCTTCCGAGAATTAATAAATATTACACAGCTGATAGAGCAACGGTTAAGGCAGAGTTAAAGGATAA  
ATATGGAATTAACAATAAGTTGGTATTATATGTACCAACATATAGAGAAGATAAAGCAGATAATAGGGCTATTGATAAAGCTTATT  
TTGAAAAATGTTTACCAGGATATACACTGATTAATAAATTACATCCATCAATTGAAGATTACAGACATTGATGACGTATCTTCAATCG  
ACACGTCTACATTAATGCTAATGTCAGATATAATTATTAGCGACTATAGTTTCGCTGCCAATAGAAGCTAGCTTGTTAGATATTCCAA  
CTATATTTTATGTGTATGATGAAGGAACATATGATAAAGTGAGAGGCCTGAATCAATTTTACAAAGCAATACCGGATAGCTACAAA  
GTGTATACTGAAGAAGATTTAATAATGACGATACAAGAAAAAGAACATCTATTAAGTCCGTTATTTAAAGATTGGCATAAGTATAA  
TACTGATAAAAGTTTACATCAGCTACAGAATATATAGATAAGATGGTGACAAAATGAGGCTTACGATAATCATACCTACATGTAA  
TAATGAGGCAACAATTCGACAATTGTTAATATCTATTGAGAGTAAAGAACACTATAGAATCCTTTGTATTGATGGTGGTTCTACTGA  
TCAACAATTCCTATGATTGAACGGTTACAAAGAGAATCAAGCATATTTTCATTAATACAATTACAAAATGCTTCGATAGCTACGTG  
TATTAATAAAGGTTTGTATGATATCAAAATGACAGATCCACATGATAGTGCAGCATTTATGGTCAATAAATCAACATCAATCGTATT  
GCCAGGTAAATTAGATAGTTAGTTCAGCTTTCAAAAATTAATGATAAATGATATGGTAATAGGGCAGCGAGCTTACAATTACC  
ATGGTGAATGGAATTTGAAAAGTGCTGATGAGTTTATTAAGATAATCGAATCGTTACATTAACGGAACAACCAGATTTGTTATCA  
ATGATGTCTTTTGACGGAAGTTATTCAGTGCTAAATTTGTTGAATTACAGTGTGACGAAACTTTAGCTAACACATACAATCACGCA  
ATACTTGTCAAGGCGATGCAAAAAGCTACGGATATACATTTAGTTTCACAGATGATTGTCTGGAGATAACGATATAGATACACATGC  
TACAAGTAACGATGAAGATTTAATAGATATATCATAGAAATTTATGAAAATAAGACAACGAGTCATGGAAATGTTACTATTACCTG  
AACAAAGGCTATTATATAGTGATATGGTTGATCGTATTTTATTCAATAATTCATTAATAATATTATATGAATGAACACCCAGCAGTAA  
CGCACACGACAATTCACCTCGTAAAAGACTATATTATGTCTATGCAGCATTTCTGATTATGTATCGCAAAACATGTTTGACATTATAA  
ATACAGTTGAATTTATGGTGAGAATTGGGATAGAGAAATATACGAATTGTGGCGACAAAACATTAATTCAGTGGGCATTAATAGG  
CCGACTTAATAAAGATTCTTGATACAACCTTAAAGGGAGAAAGTTGCACATCGAACAAAATCAATGTTAAAACGATAACCTGATACA  
TTGATGACCATAAACTGCAATCCTATGATGTGACAATATGAGGAGGATAACTTAATGAAACGTGTAATAACATATGGCACATATGA  
CTTACTTCACTATGGTCATATCGAATTGCTTCGTCGTGCAAGAGAGATGGGCGATTATTTAATAGTAGCATTATCAACAGATGAATT  
TAATCAAATTAACATAAAAAATCTTATTATGATTATGAACAACGAAAAATGATGCTTGAATCAATACGCTATGTGATTTAGTCAT  
TCCAGAAAAGGGCTGGGGACAAAAAGAACGATGTGCAAAAAATTTGATGTAGATGTTTTTGTATTGGGACATGACTGGGAAGGTG  
AATTCGACTTCTTAAAGGATAAATGTGAAGTCATTTATTTAAACGTACAGAAGGCATTTTCGACGACTAAAATCAACAAGAATTA  
TATGGTAAAGATGCTAAATAAATATATAGAATATCGATACTAAACGATAAATTAACCTTAGGTTATTATAAAATAAATAAATAAAC  
GGACAAGTTTCGACGCTTATAATGTGCAACTTGTCGGTTTTTATGATGTTTTTCTTTTCTAAATAAACGATTGATTATCATAT  
GAACATTTAGTGCTAATCCAGCAGCAAGGCATGCCAACCAATGATAGTGAATAATGGATGTTCTGCCCAACATCTTTTAGCAACA  
GTATTTGCTTTTGAATAATTGGCTGATGAACCTTCTACAGTTGGAGGTCCATAATCTTTATTAATAAATCTCTTGGATAGTCCGCGT  
GTACTTTACCATCTTCGACTACAAGTTTATAATCTTTTTTACTAAAATCACTTGGTAAAACATCGTAAAGATCGTTTTCAACATAATA  
TTTCTTACCATTATCTTTTGTCTCACCTTTAGACAATATTTTTACATATTTTACTGATCAAAATGAGCGTTCATTAATGCATTCCCCA

TCATATTACGTTGCTTCTCGCCACCAAGGTTTTATAGTCTCCCGCACCCATGATAAAGTTGATTAATTTCTAAATTTACCTCGTTTGGTA  
GTAATCGTATGGTTGTAATTTGCTGTATCACTTGATCCAGTTTTTAAACCATCTGTACCAGTCAAACCTCATTTTTGCACCTTCCAATG  
AAAAGTTGAATGTGTAATACGTAAGTGCATGCGTTGTTGGTGCTAACTGCTTTGTAAAGTCTAATATTTAGGTGTCTCTTTAATCAC  
GTGTAATCTAAATGGCGTAGTCTCTAGCAGTCGTTACAGTACGTTCTTGGTCTTTATACCTTTGTTGGTGCAAATGTACGTAATCTT  
GAATTTTCAGCACCCGTTGGATTGACGAAATGTGTATTTTCATTCCGATAGCTTTAGCTTTGTTATTTCATTAATCAACGAAATCGC  
TGGTGTTTTTTGAAACCTTCTTAGCTAAAATTAATGCCGCGGCATTACTAGAATTAGATACTGTAATTTGTAATAGGTCTGCGATTGT  
CCATACTTGTCCAGGATATAGTTTCGTATTACTCAAACTCAGGTAGTGTAGACATAATATATTCTTTGTTTCGTCAATTGTGACAGTGTCA  
TCAAGTGAAAGCTGCCCTTATTTACAGCTTCCAATGTTAAGTACATTGTCAATTAATTTAGTCATAGACGCTGGATTCCACTTAGTAT  
CGATATTGTATTGATACAGTAATTTGCCAGTTTGACTTACATTAACAGCACTCGTCGGTTTCGTATGCAGCTGACAAACCTGCATAAC  
CATATTGATTTGCTGCTTGTACAGGGGTTACGTCAGTGTAGCAGCTTGTGCATATGGTGTCAATACTTAATGTTAAACATAAAAT  
GATGATAATAGATATTAATTTTTTCATAAAGCGTTAATCTTCCCTTTTCCAATTCTTAAATATTCCTAAAAAGCAATGGTTATTCCTA  
CTTACGGAATCATTTGCTAATTCACCTTACCTTAATTAATTTGTTGAAAATAAAGTTTTCTGCAGTTAATTTGAAAAATAATGCAAAT  
ATATTACGTGTGTAGCTAAAGGTGTTATAATGTTTGTACGAAGAGCAAACCTTACTCAAAGCGATTAAATTTTCATGTTTTAATAA  
AGACTTTGAGAAGTTATTACAAAAATGCAATAGAAATATTCTATCATATAAATGTTATGAGCGGTATTTTGGGGCAACACTTTATT  
TGATTTTTAAAGTTTTGTTGGGAGAAAAGTATATGATAGAAATGCATGTATCTATCTAAATGAATTAACATAAATTTCAAACAGAAAG  
AGGTAAGTATGAAACGAGAAAAATCCATTGTTTTCTTATTTAAAAAACTATCATGGCCAGTGGGTCTTATCGTTGCAGCTATCAC  
TATTTTCATCACTAGGGAGCTTAAGTGGACTATTAGTGCCACTGTTTACTGGTCGAATTGTAGATAAATTTCCGTGAGCCATATCAAT  
TGGAATCTAATCGCATTTTGGTGGTATCTTTGTTAATCATGCTTTTATAAGCGGATTAGGTTTATTTAAGTAAAAATTTGGTG  
AAAAAATTTATTTATCGCATACGCTCAGTTTTATGGGAGCATATCATACAATTAATAATGCCATTCTTTTGACAAAAATGAAAGTGGTC  
AATTAATGAGTCGATTAACTGACGATACGAAAGTGATAAATGAATTTATTTTCAAAAAAGCTACCTAACTTATTACCATCAATCGTTA  
CATTAGTTGGGTCACTAATCATGTTATTTATTTTAGATTGGAAAAATGACATTATTAACATTTATAACGATACCGATATTCGTTTTAAT  
TATGATTCCTCTAGGTGCTATTATGCAAAAGATATCGACAAGTACACAATCTGAAATTGCAAACCTTCAGTGGTTTGTAGGGCGTGT  
CCTAACTGAAATGCGCTTGTAAAAATATCAAATACAGAGCGCTTGAATTAGATAATGCACATAAAAAATTTGAATGAAATATATAA  
ATTAGGTTTTAAACAGGCTAAAATTTGCGGCGATTGTACAACCAATTTTCAGGTATAGTTATGTTGCTAACAATTGCAATTATTTTAGG  
TTTTGGTGCATTAGAAATTTGCGACTGGTGCAATCACTGCAGGTACATTAATTGCAATGATATTTTATGTTATTTCAGTTATCTATGCC  
TTAATCAATCTTTCAACGTTAGTTACAGATTATAAAAAAGCAGTCGGTGCAAGTAGTAGAATATACGAAATCATGCAAGAACCTATT  
GAACCGACAGAAGCTCTTGGAAGATTCTGAAAAATGTATTAATTGATGACGGTGTATTGTCATTGAAACATGTAGACTTTAAATATGAT  
GTGAAGAAAAATATTAGATGATGTGCTGTCCAAATCCACAAAGGTCAAGTGAGTGTCTTTGTAGGTCTTCTGGGTCTGGTAAAAAGT  
ACGATATTTAATCTGATAGAACGTATGTATGAAATTGAGTCAGGTGATATTAATATGGCCTTGAAAGTGTCTATAATATCCCGTTA  
TCTAAGTGGCGACGCAAAATTTGGATATGTTATGCAATCAAATTCGATGATGAGTGGTACAATTAGAGACAATTTTTATACGGAATT  
AATCGTCATGTTTCAGATGAAGAATTTAATTAATTATGCTAAATTAGCGAACTGTCATGATTTTATCATGCAATTTGATGAAGGATAT  
GACACGCTTGTAGGTGAACGAGGATTGAACTGTCTGGCGGACAACGTCAACGTATTGATATTGCTAGAAAGTTTTGTTAAAAATCCT  
GATATTTTGTACTTGTATGAAGCAACAGCTAATCTCGATAGTGAAAGTGAATTGAAAATTCAGAAAGCTTTAGAAACATTGATGGA  
AGGTAGAACAACGATTGTCATTGCGCATCGTTTGTCTACAATTAATAAAGCCGGTCAAATTATATTCTTAGACAAAGGACAGGTAA  
CAGGTAAAGGTAGCATTAGCAACTGAGCATGACATGCGAAGTATAAAAACTTTGTAGTGTCTCAAAAAATTAACGATTAACTTTT  
ATATATAAGTAAGCTTGGAGCAAAATACACATATACCATCGAGGAAATTAAGTGTGGCACATTGATGGATATAGATGTTAATAAAT  
TGCTTCAAGCTTTTGTCTATTTTAAATCATTTGAGAAGTTACGACATAATAATTCTTAAATTAATGAAATCGATATTTTAAAGAAAAA  
ATGCTCATGGTATAATACAAGTTATAAGCAAAACATACATATTAATAACTGTAGCCACGAGTCATAATCTTTCATATTTTACATAG  
CAATTAAGTATTTTAGAGTCCATGGTACAGAAGTTGATATTTCAATGTTTCTAAATTTTTAAAAAATTAATCATAGGTGGGTGC  
CAAATGTTTTTATTAATCAACATTATTGGTCTAATTGTATTCTTGGTATTGCGGTATTATTTTCAAGAGATCGCAAAAAATATCCAAT  
GGCAATCAATTGGGATCTTAGTTGTTTTAAACCTGTTTTTAGCATGGTCTTTATTTTATTTTGAATTGGGGTCAAAAAAGCAGTAAGAGG  
AGCAGCCAATGGTATCGCTTGGGTAGTTTCACTCAGCGCATGCTGGTACAGGTTTTGCATTTGCAAGTTTGACAAATGTTAAATGAT  
GGATATGGCTGTTGCGACCTTATCCCAATATTATTAATAGTGCCATTATTTGATATCTTAATGTACTTTAATTTTACCGAAATTT  
ATTGGAGGTATTGGTTGGTTACTAGCTAAAGTAACAAGACAACCTAAATTCGAGTCATTCCTTTGGGATAGAAATGATGTTCTTAGGA  
AATACTGAAGCATTAGCCGTATCAAGTGAGCAACTAAAACGTATGAATGAAATGCGTGTATTAACAATCGCAATGATGTCAATGAG  
CTCTGTATCCGGAGCTATTGTAGGTGCGTATGTACAAATGGTACCAGGAGAACTGGTACTAACGGCAATTCCTACTAAATATCGTTAA  
CGCGATTATTGTGTCATGCTTGTGAATCCAGTAAGTGTGAAGAGAAAGAAAGATATTATTACAGTCTTAAAAACAATGAAGTTGA  
ACGTCAACCACTTCTCTCATCTTGGAGATTCTGTATTAGCAGCAGGTAAATTAGTATTAATCATCATCGCATTGTTATTAGTTTT  
GTAGCGTTAGCTGATCTATTGATCGTTTTATCAATTTGATTACAGGATTGATAGCAGGATGGATAGGCATTAAAGGTAGTTTCGGT  
TTAAACCAAATTTTAGGTGTGTTTATGTATCCATTGCGCTATTACTCGGTTTACCTTATGATGAAGCGTGGTTGGTAGCACACA  
TGGCTAAGAAAAATTTACAATGAATTTGTTGTTATGGGTGAAATTTCTAAGATATTGCATCTTATACACCACCACTCGTGGG  
TTATTACAACATTCTTAATTTTCAATTTTGCAAACTTCTCAACGATTGGTATGATTATTCGGTACATTGAAAGCAATTTGTTGATAAAAGAC  
ATCAGACTTTGTATCTAAATATGTACCTATGATGCTATTATCAGGTATCCTAGTTTCATTATTAACAGCAGCTTTTCGTTGGTTTATTG  
CATGGTAATATGTCGAAGAGTGACTATGATAATACATTTTAACTAATAAATATGTCCAGGCATGTCGTCTATTGATATAGGTGAGAT  
GCTTGGACTTTTTTATTATTGATATAAAGGTATTTAAATATTTTTAAAGTTACCGAAATTGAAGCATTATAAAAAACCAAGTGCACAT  
GGTAATACACTTGGCTTTTATGGGAAATGAATATTATTGTACATATGACAGTAAGGACTAGGTACAGTCATAGTACTTCGAGCAAAA  
TTTGTTTTGTATTATAAAACAACACAAAGGAGATAACTTCTCTATTGAAGAAAGTTAAAAACATTATAGCAGACAATGAAATGAAAGT  
AAATTAATAATTCAGAATATTTTAAATATTATATTGTGAGTGATATTTATTAGGGAAAGCTATTCTTCATATAAATTAGTTAAATAG  
TAAATCTTTGTTAGAAGCTTTCCATAGAGTTGTGACAGCATTTTTGTTGTGCTACTATTTTTATAGTCTAATAAATATATAAAGGGG  
ATGGTTTCGTGAATAAAACGGTTAAAGATTAACTAGTTGTCTTGGTCTATTATCTTTGCTGCAAGGTGATAAATGCAATTTATTAT  
TTCTGGTAACCTTAGGTGAAGGCGGGGTTACAGGTTTAGCAATTATTTTATATTATGCGTTTCATATTTTACCAGCCATCACTAACTTC  
TTGGTCAACGCAGTATTGATTGCCATTGGTTATAAATTTTTGAGTAAGAGAAAGTATGTACTTAACTATTCTTGTAAACAATTCTTATTT  
CAATATTTTTGAGTTTAAACAGAATCATGGCAAGTAGAACTGGAAACAGCATTGTGAATGCCATTTTTTGGTGGTGAAGCGTTGGAC  
TAGGAATCGGAGTAATTATCCTTGCAGGCGGTACAACAGCAGGTACAACAATTTTGCAAGAATTGCAACGAAATACCTCGATGTA  
AGCACGCCATATGCTTTGCTTTTCTTCGATATGATCGTTGTGCAATTTCACTTACAGTTATTCCACTTGATAAAGTATTAGTAACAG  
TAATATCACTTTATATAGGAACAAAAGTGATGGAATATGTCATAGAAGGTTTTAAACATAAAAAAGCTATGACGATTATTTCAACT  
AATCCCGACAAACTTGCCAAAGCAATAGACGAGCAAAATGGAAGAGGTTTAAACATTTTAAACGGCAGTGGCTATTATACGCGTG  
AGAAAAAGATGCTTATACGTTGTTATTCTTAAACACAAGTTTCAAAAGCAAAGCGATTAAATTAACAAATCGATAAAGATGCAT  
TCCTCGTAATTCATGATGTAAGAGATGTCTATGGTAATGGTTTTCTTGACAGATGAATAAATAAATGGTATGAGCACACATACTTAAA  
TAGAAGTCCACGACAAGTTTTTGAACATGAAGACTTATCTGTGGCGTTTTTTTATTTTATAAAGTAATATACAAGACATGACAA  
ATCGAGCTATCCAATTTAAAAAGTAATGTTAGTCAATAAGATTGAAAAATGTTATAATGATGTTTCATGATAATCATTATCAATTTGGG

ATGCCTTTGAAAAATTGATAATTTAAAAATAGAAATTATTTTTATAAACAGAAAGAATTTTATTGAAAGTAGGGAAATTATGAATCG  
TTTGCATGGACAACAAGTTAAAATTGGTTACGGGGATAACACGATTATAAAATAAATTAGATGTTGAAATACCAGATGGCAAAGTGA  
CGTCAATCATTGGTCTAACGGCTGCGGGAAATCTACTTTGCTAAAGGCATTGTCACGTTTATTGGCAGTTAAAGAAGGCGAAGTAT  
TTTTAGATGGTGAAAAATATTCATACACAATCTACGAAAGAGATTGCAAAAAAATAGCCATTTTACCTCAATCACCTGAAGTAGCA  
GATGGCTTAACGTGTGGGGAATTAGTTTCATATGGTCGTTTTCCACATCAAAAAGGATTGGTAGATTAACTGCTGAGGATAAGAAA  
GAAATTGATTGGGCAATGGAAGTTACAGGAAGTGATACATTCCGACACCGTTCAATCAATGATTTAAGTGGTGGTCAAAGACAACG  
TGTTTGGATTGCAATGGCATTAGCACAAAAGAACTGATATTATCTTTTTAGACGAACCAACAACATATTTAGATATCTGTCATCAATT  
AGAAATACTAGAATTAGTTCAGAAGCTAAATCAGGAACAAGGTTGTACAATTGTCATGGTTCTTCATGATATCAACCAAGCGATT  
GTTTCTCAGATCATCTTATTGCGATGAAAGAAGGGGATATCATCGCTACAGGTTCAACAGAAGACGTATTAACACAGGAAATATTA  
GAAAAAGTTTTAATATTGATGTTGTTTTAAGTAAAGATCCTAAAACTGGAAAAACCTTTACTGGTAACCTATGACTTATGTCGCAGA  
GCTTATTCTTAATTAAGTAAGTTAATATGATAAAAAAGGACAATTAACATGACAAAAAGAGAGAACCCAAACGCCATTGAAGTTTTTAT  
CCTATATTATAGGTTTAAGTATGATACTACTAATCACACTATTTATTTCTACATTAATAGGTGACGCCAAAATTCAAGCCTCTACAAT  
TATAGAGGCTATTTTTAATTATAATCCTAGCAATCAACAGCAAAACATCATCAATGAGATTAGGATTCCCAGAAATATAGCAGCAGT  
AATTGTAGGTATGGCGCTTGCAGTTTCTGGTGCGATTATACAAGGTGTTACTCGTAATGGTCTTGCTGATCCGGCGCTCATTGGTTTA  
AATTCAGGTGCTTCATTTGCTTTAGCATTAAACATATGCAGTTTACCAAACACTTCATTTTTAATATTGATGTTTGTGGATTTTTAGG  
TGCTATTCTAGGAGGTGCTATTGTATTAATGATAGGCCGATCTAGACGTGATGGATTTAATCCGATGCGTATTATTTTAGCGGGTGC  
AGCAGTAAAGTGCTATGTTAACAGCGCTAAGTCAAGGTATTGCATTAGCTTTTAGACTAAATCAAAACAGTAACATTTTGGACTGCTGG  
AGCGGTTTCAGGCACACAATCGTACACCTTAAGTGGGCAATTCCTAATTAATGGTATTGCGTTATTCCATTATATAACAAATTAAGTA  
ACAACTTACCATTTTAAATCTTGGTGAATCATTAGCTAAAGGTTTAGTCAAAATGTAACAATGACAGGCAATATGTTTAAATTAT  
TGCTATGATTCTAGCAGGTATTGCAGTTGCTATCGCTGGACAAGTTGCATTTGTAGGTTTGATGGTACCTCATATAGCAAGATTTTTA  
ATTGGAAGTATTATGCTAAAAATCTACCATTAAACAGCCTTGTAGGTGGGATACTCGTGCTTGTGGCGATGTGATAGCAGCATAT  
TTAGGAGAAGCGCCTGTTGGTGCAATCATTTATCGGTGTTCTTACTTTTTATATTAGTTAAAAAAGGAGGACGCTCAATAT  
GATTAGTTCAAATAATAAACGCAGACAATGGATTGCACTGGCTGTTTTAGCATTCTACTATTTCTAGGTTGTACTTGGAGTATTACC  
TCAGGTGAATACAACATACCTGTTGAAAGATTTTTCAAACCTTTAATTGGACAAGGTGATGCCATTGATGAGTTAATCTTATTAGAT  
TTCAGATTACCTCGGATGATGATTACTATTTTGGCTGGCGCAGCGCTTAGTATTAGTGGTGCAATAGTGCAAAAGTGTACGAAAAAT  
CCAATAGCTGAACCCGGTATATTAGGTATTAACGCAGGTGGCGGATTGCAATTCGCATTATTTATGGCAATTGGTAAAAATTAATGCT  
GACAACCTTGTATTATGTAAGTCCGTTAATAAGTATACTAGGTGGTATCGCCACTGCAATGATTATTTTTATTTTCAGTTTAAATAAAA  
ATGAAGGTGTTACACCTGCGAGTATGGTATTAATAGGTGTAGGTTTACAAACAGCATTATATGGTGGCTCAATTACAATTATGTCAA  
AATTTGATGATAAGCAATCTGATTTATCGCTGCTTGGTTTGCAGGTAATATTTGGGGTGACGAATGGCCATTTGTCATTGCATTTTT  
ACCGTGGGTGTTGATTATTATTCCTTACTTACTATTTAAATCGAATACACTAAATATTATTCATACGGGTGATAATATTGCACGAGGT  
CTAGGTGTAAGGTTAAGCAGAGAACGTTTAAATATTATCTTTATCGCAGTGATGTTATCATCTGCTGCTGTAGCAGTAGCAGGTTCG  
ATTCGTTTTATCGGATTAATGGGTCCGCATATTGCCAAACGTATCGTTGGACCACGTCACCAGTTGTTTTTACCAATTGCCATTTAG  
TAGGGGCATGTTTACTTGTATAGCTGATACAATTGGCAAAATGTATTACAACCAGGTGGGGTTCCAGCAGGTATTGTCGTAGCAA  
TTATTGGTGACCGTATTTCTTATATTTAATGTACAAAACGAAAAATGTATAGTGTCAAAGGACACAACCTATTGCTATGAAGGCA  
CTTATTATGAAGGCTTTTCTATAGCATTTTTTATTTAATGAGCCACTCAAGACTATTTATTTTTTCAAAATGAACCTTAAGTTATCAA  
GAGGATCTTATCAAAAATATATTTGATAACGGTATCAGGTTAATCTTTATGATAGCGCATTCTATTATTCTGTTTTATACTATGACT  
GATAATACCAAGGAGGTACAACATGATGAAAAAGTTAATCAATAAAAAAGAAACATTTTTAACTGATATGCTTGAAGGATTGTAA  
TTGCGCACCCAGAGTTAGATCTGATTGCTAATACAGTTATTGTAAAAAAGCTAAGAAAGAACATGGTGTAGCAATAGTCTCTGGA  
GGTGGAAGCGGACATGAACCTGCGCATGCCGTTTTGTTGCAGAAGGTATGCTAGATGCAGCGGTTGTGGCGAAGTATTACATC  
ACCTACACCTGATAAAATATTAGAAGCTATTAAGCAGTAGATACTGGTGATGGTGTATTACTAGTTGTAAAAAACTATGCAGGTG  
ACGTGATGAATTTCGAAATGGCACAAGAGCTTGCAGAAATGGAAGGTATAAATGTTCAAACCTGTTATTGTTCTGTCGACGACATTGCT  
GTGACAAAACGAAGTACAACGTCGTGGTGTTCAGGAACAGTGTGTTGTTTATAAGCTTGCCGGTTATCTTGCTGAAAAAGGTTATTTCA  
TTAACAGAGATAAAAATCGCGTGTAAGAAGCGTTGTACTGTAATTAAGGATTTAGGATGGCAATTGAGCCACCGCTTGTTCACACT  
ACTGGAATAATATGGCTTTGATATTGAAGACGACAAAATGGAATCGGTATTGGTATACATGGTGAAAAAGGTATTTCATAGGGAAGA  
AGTAAAGGATATTGATCATATTGTTGGAACATTGTTAGACGAATTGTATAAAGAAGTTACTGCCAATGATGTCATATTAATGGTAAA  
TGGTATGGGTGGTACGCCGTTATCTGAATTAATATCGTAACATAATATATTCAACAAAATTTAGCTGCAAGAACGGTTAATGTTGC  
TAAATGGTTTGTGGTGATTATATGACATCTTAGACATGCAAGGTTTTTCTATAACTATCGTGCCTAATAAACCAGAATATTTGGAA  
GCATTTTTAGCACCAACAACAAGTCAATACTTTAAATAAGAAAGTGAATATGAATAAATATACATTTATGAGGTGGCACAAATGAAA  
GTGAATGATATGAAAGCACGTTTATTAATTTAGAAGAAACGTTTAAAAAACATGAATCTGAATTAACCTGAATTAGATCGAGCAAT  
TGGTGATGGTGACCACGGGGTTAACATGGTTCGTGGGTTTAGTAGTCTTAAAGACAACTTGATGATAGCTCAATGCAATCATTGTT  
CAATCAACTGGTATGGCATTGATGTCAAAATGTGGGGTGTCATCGGACCATTGATGGCTTAGCTTTGTTAAAAATGCTGCGAGT  
CACCAAGATGATATGGATAATCAAGATTTCACTACTAATTCAGGCATTGTTCCGAAGCGGTTGAATCAGCTGGTAAAGTTACTTT  
AAATGAAAAAGACAATGTATGATGTAATAGCGCGAGCAGCAGAGAAGCTTAAAAATGGTGAAACCTTAAACATTCAATGATTTACAGC  
AATTAGCAGATAATACAAAAGATATGGTAGCAACGAAAGGTAGAGCTGCATATTTGGAGAAGAATCAAAAGGTTATATTGATCCA  
GGTGCTCAAAGTATGGTTTATATTTTAAACGCTTTGATTGGAGATGAAGATAATGCCTAAAAATTATACTTGTAGCCACAGTAAAGA  
AATTGCAAGTGGTACAAAATCTTTGTTAAAGCAAATGGCAGGTGACGTTGATATTATACCAATCGGGGGATTACCAGATGGTTCAA  
TTGGAACCTTCATTTGATATCATCCAAGAAGTTTTGACTAAATTAGAGGATGATGCATTGTGTTTTTACGATATTGGATCTTCAGAAAT  
GAATGTAGATATGGCAATTGAAATGTATGATGGTAATCATCGTGTGTTAAAAAGTTGATGCACCAATTGTTGAAGGCAGTTTTATCGC  
AGCAGTAAAGCTATTAATCGGCGGTTCAATTGATGATGATAGCATTAGCAGAAATGAAACAATCATTTTAGTTAAAAATTTACTAATAATGA  
AAAAATGAAAGCTTTTTTCAAGTAAACTTTATAAAAAATATACATTTATAGTAGTATATGTAATATGTTTAAATAAATCTGGGAATAGGAG  
GACATTGCCATGCAACACCTTATAAAAAAACATGTATTGAATGGCGAGTTTGATTAGTACGACAATTGATGTCCGAAAACAGATTTT  
ATGGAATTTGAAGAAGCATATATTTCAAGTGCGCATGAAGTAGAAAAGTATGATGTTTTATACATGTATTTTAGATATGATTAAGTAC  
GAAGAATCATCTGAAATGCATGACTTAGCATTTTTATTGCTTGTGTATCCACTAAGTGAATATGAAGGTGCTTTGGATTCTGCTTATT  
ATCATGCAGACGCTTCCATAAACTTACTGACGGCAAAGAAGTTAAAGGTTGTTACAAATGTTATTATTGATGCGGATACCAACAC  
CTGTTATTTTCAAGATAAGAAGGCTTTTGATATCGCCAAGCAAATTTTAAAAATTAGATCCTAATAATAATGTTGCTCGTAACGCTCTTAA  
AAGACACTGCCAAACGTATGGACAACGTTGTTGTTGATATAAATGAATTACCAACGTAATGCACGTTAATTACATTTCAATTATA  
TTAGCTTAAATAATAGTTTTAACATTTGGTTGGGTTGGGACATATGTTCCAGCCTTTTTTAATCTTAAAACTAACGAAGTATACCTG  
TGTGCACAAATGGTTTTTATACAAACATTTTATAAAATATACATTTTAAATAAGAACATACGATAGATGGTTTTAACCTTGTTAACCTG  
AGAAATTTTGATATGTATTCTTCGAAATTTAACTAAATATACGAAATTCAGGAAGCACAATAAATTAATCATTTTTCCTATACAAAAG  
TTCGTATGACTGCATTATAAAAGCATAAAATTTATAATTTTTTAAATGTCATTGAACGTGATAATGTGAATGGATTGAGCAATTTTGA  
AAAAGTGAAAAATAACCTATGCGACTTGCAATTAATTTTCAGTACGTTATAATGCACACTGTGCAAAATTAAGGAGGTCTATTATTC

ACATGATGATGAATAAAGAAGCAACAAAAATTGGATTGCGCTACGTCGGCATTGTAGTGGGCGCAGGATTTTCAACAGGACAAGAA  
GTTATGCAATTTTCTACTAAATATGGCTTGTGGGCTTATTTAGGTGTCATTATATCTGGTTTATTTTAGCTTTTATTGGGCGCCAAGT  
AGCAAAAAATTGGTACTGCCTTTGAAGCGACAAACCATGAATCAACATTACAATACGTATTCGGTGAAAAGTTTAGTAAAGTCTTTG  
ATTATATTTTAACTCTTCTTCTTATTGGTATAGCTGTAACCATGATAGCTGGTGCAGGCGCAACATTTGAAGAAAGTTATAACATACC  
TACATGGCTAGGTGCTTTAATTATGACATTAGCGATTTATATTACGTTGCTATTAGACTTTAATAAAATAGTACGTGCACTTGGTATC  
GTTACACCATTTTAAATTGTTTTAGTTGTATTAATCGCTGGCGTTTATTTATTTAAAGGTCATGTTTCATTAGCAGAAAGTTAACCAAGT  
AGTGCCTGAGGCAAGTATTTGGAAGGGAATCTGGTTTGGTACAATATATGGTGGATTAGCTTTTTCTGTAGGTTTTAGTACCATCGT  
AGCAATCGGTGGGGATACTGAAAAGCGTACAGTGTACAGGTGCAGGCGCGATGTATGGTGGTATTATCTATACTGTATTACTAGCATT  
GATCAACTTTGCATTGCAAAGTGAATATCCAACATTTAAAAATGCCTCAATTCCAACATTGACATTAGCAAATAATATCCATCCTTT  
AATAGCAACAGTGTTATCTGTTATTATGCTGGCGGTTATGTATAAATACTATTCTAGGACTAATGTATTCATTTGCAGCACGTTTTTACA  
GAACCATACAGTAAAAATTATCATATCTTTATTATTATAATGATGGTAGCAGGTTATTATTAAAGTTTCGTAGGATTGTCTGAATTAA  
TTAATAAGTTATATACAATTATGGGATATGTAGGCTTATTTATTGTAGTAGCTGTAATTATTAATATTTCAAACGTAAAAATGCGG  
ATAAAAAACATATTGCTTAATATCATATGATGGATATCCGAAACTTTACAATTGAATCACCTTTGTTTTAACCTTAAAAGCAATTCGTC  
TCTACTCTTATCGGGCGAATTGCTTTTTATATTTATTCAGTCTATTAATATGAGCGTCTAACAAATAGAGAGGTACGATGTAATGAAT  
AAAGATAATAAATGGACGATGATAACTGCGCTTTTTATATCTGTAATCAGTGTATTGTTAGCATTTCATCTGAAACAACATTATGAC  
CAAATTACAAATGAGAACCATGCTAATAAAGACAAAATTAATATTAATAAATAAAGTGTGCGCATTTATCAAAAACCTTACATACAA  
TAGAGTTTTCCCTAACAGTAAATTAGATATTATTACACCTGTTGATATGCTTCTAATGCCAACTGCCAGTTATTTTTGGATGCAC  
GGTGGTGGTTATATTGCGGGTGATAAGCAGTATAAAAAACCCATTATTAGCGAAAAATTGCTGAACAAGGGTACATTGTTGTGAATGT  
AAATTATGCATTGGGCGCCACAATATAAATATCCCAACCATTAATTCAAAATGAATCAAGCAACTCAATTCATTAAAGAAAAATAAAA  
TGAATTTACCTATTGATTTTAAATCAAGTAATTATTGGCGGTGATTCTGCAGGTGCTCAATTAGCTAGCCAATTTACGGCAATACAGA  
CGAATGATCGCTTAAGAGAAGCTATGAAATTTGATCAGTCATTCAAACCATCGCAAAATTAAGGTGCTATACTATTGGTGGTTTTT  
ATAATATGCAACAGTTAGAGAACTGAGTTTCCAAGAATACAGTTATTTATGAAAAGTTTATACTGGCGAAGAAGATTGGGAAAAAG  
AGCTTTAAAAATATTTACAAATGTGACAGTAAAAACAATCGACAAAAAATTATCCACCAACATTTTATCTGTTGGAGATAGCGAT  
CCATTCGAAAGTCAAAATATAGAATTCAGTAAGAAATTACAAGAATTGAATGTACCAGTAGATACTTTGTTTTATGATGGTACGCAT  
CATTTACATCATCAGTATCAATTTACCTTAATAAAACCTGAATCGATAGATAATATCAAAAAAGTGTTACTTTTCTTAAGTCGTAATA  
CATCTTCTAGTGGTATTTCAAACCTGAAGAGAAACCAAAATAGAAAAATCCGAGTAATGAATTACCGTTAAATCCTTTAAACTAATGAT  
AAACAGTAGTAATTTTATCTTAAGCAACATTTAAGATCTTCAAAATTGAAAACGAAGAATTTAAACATGTGGGGCTAATGTGTAA  
GAGTCTGAGATATAATAAATTGTTAGCGGTTCTTTATCATTCTATCTCACCCTATTATGATGTGACATTTATTTTACAACTAATTTG  
TTTTGAACCTGAAAATAACTTTTTACAACATAATTGTGCAAAAACAGTGTGTACATGATATAATAAATTTATAAATTGAAAAGAATT  
CAAAAGAAAAATAAAATATAGATTGAGCACGAAGTGATTGAAATAAGGTTGTGAAAGGGAATGACAAGGTCAGCATTAAAAACC  
ATTTAAAAATAAACCGCTTATGGTTACTGGACGTATACAACGTGTTTTGTTTAAAAATTATTTAGATAGACATAGCACATTTAAGCC  
GAATGTAAGGATATTATTAAGAGATGATTTGTTTCAGGTGTATCAATAGATCATTATGTTTATATGAGACAAAATAAATACTATGC  
ATTGGCAATGGAACCTTATTCATCAACGAGTAAAAATTTAGTGCATGTTGTACCATATTACAAAAATAAATAGAAATAATAATTTATT  
CGTACAAGATTATGGAATTAAGCGTAAAGGTAGGTTAATTCTGAAGAAAGCTTACAATCAAAAACATCAGTATCAGGATAAGATAT  
ATGAAAAATTACCGGATATAGATTTTAGACTCGAAGATTTTATAGTGAAGAAACTAAACAACATATAAAGACACCATAATCG  
TAGTTGATAGTTGATCAATTACACATTAGTGGTGTCTTATTTTGAATTTAAATTTGATAAATGAATAAGAGTATACGCATTCAATTAA  
GATTAGATGACATTGATAAGTATGAGTAATGTATTAGGTAACCATTAATTCGTTGTTATGCGATTCTGATACAAGATTATGATAAA  
ATAGCTTTAATTAAGAATTTTAGCCATCATATAGTCATCGTAATATTTACCATCGATAAATAACTTATCTTTTAAAACGCCTTCGATT  
TGAAAATCGGCACCTTTAAAAAGCTCGAGGGCAGGTTGGTTATTGAGTGGTACATTGCTTCAATTCGGTGTATTGATTGTTTAAA  
CACCAAGCCATAATGGCATCAAGAAGTGCTTGCCCAATTCCACGATGTTGATATAATTTCTTTACACCTAAATCAATTTTAGCAACA  
TGTTAATGCGTTGAAATGGTGTCTGATTAAACAAAGGCAAGGCCAACGAGTTGTTTCATCACTTTACGCAACAAAGATGACTTTATGT  
GGAGAAGTGATATATCTTCTAATTGTTTACTAGCCGATGTGACGCTAGGATCATATTTCTCTGGTGTGTAGAACATATACGGAGAT  
TCGTGCTATATTTTCGATACATTTGAAATGAAATTTTCTACATCTTTGATACTAATAATGCGGCTAATAATGGGCGCTAATAAGACCTCC  
AGTATTTTGAATTTTAAACATTTGCTACTATTATAATATATATGTACTAAAGGTGGAGTAATATGTTTTTGGTTACAGTTTAA  
AGGAGTATTTTAGATGAAACCTAAAGTTTATTAGCAGGTGGAACAGGATATATTGGTAAGTATTTAAGTGAAGTGATTGAAAATG  
ATGCTGAACTTTTTACTATATCAAAATATCCAGACAATAAAAAAACAGATGATGTTGAAATGACTTGGATTCAAGTGTGATATATTT  
ATTACGAACAGGTTGTTGCAGCAATGAATCAATAGATATTGCTGTATTCTTTATCGACCAACAAAGAATTCTGCCAAAATAACAC  
AATCATCAGCAAGAGATTAAACATTAATCGCAGCAGATAATTTGGTTCGAGCAGCGCTATTAATCAAGTAAAAAAGTAATCTAC  
ATACCTGGGAGTCGTTATGATAATGAAACAAATTGAACGCCTAGGTGCATATGGTACTACTGTAGAAACAACAAATTTAGTTTTTAA  
CGTTCTTTAGTTAATGTAGAATTACAAGTTTCAAAGTATGATGATGTTAGATCAACGATGAAGGTAGTTTTACCAAGGGGATGGACA  
TTAAAGAAGCGTTTGAACCATTTTATGTCATGGATGGGTTACACTAAAGGAACCTTTTGTAAGAACAGAAAAATACATGATCAATTT  
AAGATATATATTAAGAATAAGGTGCGACCGCTCGCATATTTAAATAGAGAAGAACAGCTGACGGAATAATAACTTTAATTTATT  
GAGTGGAAAGTTTAGTGAAAAAATACACAGTTAATCAAGGGAAGTTAGAATTTAGATTAATCAAAAGAGTCGGCAGTCGTTTATATAC  
ATCTATACGATTATATCCCTCGATTATTTTGGCCGATTATTACTTTTACAAGCACCAATGCAAAAAATGATGATTTCATGGCTTTGA  
AGTTGACTGCCGATTAAAGATTTTCAAAGTCGATTAAAAATCAGGAGAAAAATATGAAATATACTAAATGATATTGGGTGATATGGA  
TGCAAATACTACTAGTAGAAGATGACAATACTTTGTTTCAAGAATTGAAAAAAGAATTAGAACAATGGGATTTTAAATGTTGCTGGT  
ATTGAAGATTTTCGGCAAGTAATGGATACATTTGAAAGTTTAAATCCTGAAATTTGTTATATTGGATGTTCAATTACCTAAATATGAT  
GGGTTTTATTGGTGCAGAAAAATGAGAGAAGTTTCAAACGTACCAATATTATTTTATCATCTCGTGATAATCCAATGGATCAAGTG  
ATGAGTATGGAACCTTGGCGCAGATGATTATATGCAAAAAACCGTTCTATACCAATGTTAATTGCTAAATACAAAGCATTTATCGT  
CGTGTCTATGAGTTTACAGCTGAAGAAAAACGTACATTGACATTGGCAAGATGCTGCTGTTGATCTATCAAAAGATGATATACAAAA  
AGGTGACGATACGATTTTCTATCCAAAAACAGAAATGATTATATTAGAAATTTCTTATTACCAAAAAAATCAAATCGTTTCGAGAGA  
TACAATTATCACTGCATTATGGGATGATGAAGCATTGTTAGTGATAATACGTTAACAGTAAATGTGAATCGTTTACGAAAAAAATT  
ATCTGAAATAAGTATGGATAGTGAATCGAAACAAAAGTAGGAAAAGGATATATGGCTCATGAATAATTTGAAATGGGTAGCTTAT  
TTTTGAAATCTCGCATGAACCTGGATATTTTGGATATTGTTTTTAACTTGCCTATGTTAGGCATTAGTCTAATCGATTATGATTTTCC  
AATAGACAGTTTATTTTATATTGTTTCTTTGAATTTAAGTTTAAACAATGATTTTTCTTATATTGACATATTTTAAAGAAAGTAAATAT  
ATAAGCATTTTGACAAAGATAAAGAAATAGAAGAAATTAACATAAAGATTTAGCGGAAACGCCATTTCAACGTCATACAGTTGAT  
TATTTATATCGTCAAAATCTCAGCGCACAAAGAAAAGGTTGTTGAGCAACAGTTACAATTGAACATGCATGAACAAACCATTACAGA  
ATTTGTGCACGACATAAAACACCTGTGACAGCCATGAAATTTAATTGATCAAGAAAAAATCAAGAAAGAAACAGGCATTAC  
TATATGAATGGTCTCGTATAAACTCGATGCTGGATACACAGCTGTATATTACTAGATTAGAATCTCAACGCAAGATATGATTTTG  
ATTACGTGTCACCTAAACGCATGGTCATTGATGAAATACAATTAACAAGACATATTAGTCAGGTTAAAGGTATTGGTTTTGATGTTG  
ACTTTAAAGTGGATGATTATGTTTATACAGATACAAAATGGTGTCTGATGATTATTAGACAGATTTTGTCAAACGCATTGAAATATA

GTGAGGAATTTTAATATTGAAATGGGACAGAAATTAATGATGATCAACATGTTTCGTTATATATTTAAAGACTATGGCAGAGGATTAGTA  
AAAAAGATATGCCGCGAATATTTGAACGAGGATTTACGTCAACGGCTAACAGAAATGAAACGACGTCTTCAGGTATGGGCTATAT  
TTAGTAAATAGTGTAAAGGATCAATTAGGTATTCACCTGCAAGTCACGTGCACTGTTGGTAAAGGGGACAACCTGTCAGATTGATTTTC  
CCATTACAAAAATGAAATTGTTGAACGCATGTCGGAAAGTGACAAATTTGTCATTTTAAACATGCGGTTTTGTTACTTGAATTGATACA  
TCAATGCGAGCTTCAACGTTATAAATAGATAGATGTTAGTCATATGTTAAATGAAGATACAAGTGCCAAAGCCTAAAGGAAATGAA  
GTTAAGATAAATATAGGAGTGTTAAAGTGCCAATTTTGAAGTAAAAACAATATAGCAACTAAAAAATGGCGACA  
AGAAGTGTTCGAGATATCAATATGTCTATTGGAAGAAGCGAGTTTATTGCTATTATGGGTCCCTCTGGATCTGGGAAAAACGACATT  
ATTAATATGTTTTAAGTTCATTGATTATATTTACAAGGTTCTATTACATTTAAAGGAAAAAAATTAGAAAAAGCTTTCAAAACAAGGA  
ATTATCTGATATACGCAAGCATGATATTGGTTTTATTTTCAAGAGTATAATTTACTGCATACATTGACTGTTAAAGAAAAACATAATG  
TTACCACTAACCGTTTCAGAAGTTAGATAAAGAACATATGTTAAATCGTTATGAAAAAGTAGCAGAAGCATTAAATATATTGGATAT  
TAGTGATAAATACCCCTTCGAATTGTCTGGTGGACAAAGACAACGAACATCTGCTGCAAGAGCGTTTATTACATTACCTTCTATTAT  
ATTTGCTGACGAACCAACAGGTGCACTGGATTCTAAAAAGTACTCAAGATTTATTAAAAAGATTAAACAAGAATGAATGAAGCATTTA  
AGTCTACAATTTATATGGTAACGCATGATCTGTGTGACGCAAGTTATGCCAATAGAGTAGTGATGCTAAAAAGATGGTGCAAAATTTTCA  
CTGAATTATACCAAGGGGATGACGATAACACATACCTTTTCAAAGAAATAATACGTGTACAAGGTGTTTTAGGTGGCGTTAATTATG  
ACCTTTAACGAGATAAATATTTAAAAATTTCCGTCAAAATTTATCACATTATGCCATCTATCTTTTTTTCATTAATTACGAGTGTAGTAT  
TGTATTTTACGTTTGTAGCATTAAAAACGCGCATAACTAAACATGACAGAGTCATATCCAATTATAAAGGAAGGCTCACAAAGTCG  
GAAGCTACTTTCTATTTTTCATCATAATTGCATTTTGTATATGCCAATGTGTTATTTATTAACGACGAAGTTATGAGCTTGCATTA  
TATCAAAACATTAGGTTTTATCTAAATTCACATTATTTATATACTAATGCTCGAACAATTACTAATATTTATAATTACGGCAATATTAG  
GTATTATTATTGGTATTTTGGTTCGAAACTGTTATTAATGATTGTCTTTACATTATTAGGAATTAAGAAAAAGGTTCCAATTATTTTT  
AGTTTGAGGGCGGTATTTGAAACATTAATGTTAATCGGTGTGCTTATTTTTAACATCTGCTCAAAATTTTATATTAGTGTTCAAAC  
AATCTATTTACAGATGTCAAAGAATAAACAGGTTAAAGAAACAATCATATAAAAAATACATTTGAAGAGGTTGTTTTAGGCATCT  
TAGTATAGTATTGATTACCACAGGATCTATCTATTGAACATTTGTTCAATATTTATGATTTCTTACGTTACTGTTATGTTATTTTA  
TGTCAACTGTGATTGGGGCATACTTATTTTTAAAGCTCTGTTTCTCTAGTTTTTAAAAAGGTTGAAGAAGTTTAGAAAAAGATTGA  
TAAAGTGAAATGATGTCTGTTCTCATCTATTTATGTATCGTATTAAGAAAAATGCTTTTTCACTTACGGTCATGGCAATCATTTTC  
AGCGATTACTGTTTCAGTTCTTTGCTTTGCTGCTATAAGTAGAGCGTCTTATCAAGTGAAATAAAATATACTGCACCACACGACGTT  
ACAATTAAGACCAACAAAAAGCTAATCAGTTAGCAAGTGAATTAACAATCAAAAAATTCCTCATTTTTATAATTATAAGAAGT  
AATTCATACGAAATTGTATAAAGATAATTTATTTGATGTAAAAGCGAAAGAACCATACAATGTAAACATTACTAGTGATAAATACA  
TCCCTAATACTGATTTGAAACGTGGGCAAGCTGATTTATTTGTAGCGGAAGGTTCTATCAAAAGATTTAGTGAAACATAAGAAGCATG  
GTAAAGCAATTTATAGGAACGAAAAAACATCATGTTAATATTAAGTTACGTAAAGATTAATAAAAAATCATTTTATGACAGATGTTG  
ATTTAGGTGGACCAACGTTTGTCTTAAATGACAAAGACTATCAAGAAATAAGAAAGTATACAAGGCAAGCATATCGTCTCTCAA  
TTTTGGATTGATTTGAAACATAAAAAAGATGCTTTAGCATTAGAAAAAGCGAAAAATAAAGTTGATAAATCTATTGAAACAAGAAG  
TGAAGCGATAAGCTCAATATCAAGTTAACCGGAATATTATTTATTTGTAACATCATTTTTAGGTATTACATTCTTGATTGCTGTATGT  
TGCATTATATACATAAAGCAAATAGATGAAACCGAAGATGAGTTAGAGAATTATAGTATTTTGAGAAAGCTTGGATTACACAAAA  
AGATATGGCAAGGGGACTAAAGTTTTAAATATGTTTAAATTTGGGTTACCTTTAGTTATTGCACTATCACATGCATATTTTACATCA  
TTAGCATATATGAAATTAATGGGTACAACGAATCAAAATACCGGTTTTCATAGTAATGGGATTATACATTGTATGTATGCTGTTTTG  
CAGTGACGGCTTATAATCATTTCCAAGCGAACAAATTAGACATTTCCATATAAAATATACAGATGGCTTTTCACTAGAGTAGTGGATTCTGA  
ATTCACGAACATACTAGTGAAGCTTTTTATTATATAAGTGAAGAGAAGTTATTTTTAGCATGTTATAGTTGAATACTGGGTTAAATAC  
CATATTAATAATGAAGTAAAGGTATGAGTGATTGAAAGTGTTTTGAATGAAATATATTTAGGTGATGCTTTTTAATTTGAAAG  
ATTAACAGGATTCAACTTTGTAATTTGATTTAAATGTAGAGAAAAATAAAGTATATTCAATTGAGAGATATATGAGTCAATGATGCTTT  
TAAACAAGATAAGTGATTTTAAATATGTAAGGTTATGTAATAAAATATTGTATCGTTGCAAAATTTCCCAACTATATTTCATTTACAATT  
TTTAGAGTTGTATAGATAAAAAATTGCTATACAATAACTTTTTCAAACAACATGCCTACTACTATTTAAATTTTATGTAAGGTTAA  
GTTTCGGAATTGTTAAAAATTTGTAATTTGAATTTGTGGGATTGTAATTTTGTGCTATTTTCATATAAGGGCAAAATACAGTAAATTTGT  
TTACTGTGAGGCAATTTTGAATTAATATCAGTACACTAAAAATTACTGACGATTGATAATAACAAATTTGTATCATTAGTTTGTA  
ATTCATTGTCTTAATTTGAAACAAATTTAACTGAATGTGATTGGTGACAATCGCTTAAATGGAGGATTTTAAATGTTTAGTAAGA  
AAAAAGATAAGTTTATGGTTCAATTAGAAGAGATTGGTTTTCAATCTGGATCTGCTGCTATTGAATTCGGTAAAAATGGATTTCATA  
CTCATTTAGATTATTAAGCATACTCAGACACATTAACATTTATGATGCATCGGTGACGAATTAGTACATCAAGTAAATTACTGATT  
TAAATCAACATTTATCACACCAATTGAACGTGAAGATATTTATCATTTATGTATGCAATTGATGATGTTTATAGTGAATTTGAAG  
AAACGGCAGCTATGTTTGAATGTATTCAATCGAATACACAGATGAATATATGGCTGAGTTTGTGATAACATTCAAAAAGCAGTTG  
CAGAAATGAAACTTGCTGTGCGCTTATTAGTCGATAAAAAATATCACATATGCGTATTTCATTCAATTAATATTAAGAATTTGAAA  
CAAAGTGTGATGGTATTTTAAAGACAGTCAATTAACATATTTTCAATAGCGAAACAGATCCAATCACATTAATTTAAATAAAAGAT  
ATTTATGAAAGCATGGAAGAAATTTGCTGATAAATGTCAAATCGTAGCAAATAATTTTGAAGCTATTATTATGAAAAATAGCTAAGG  
GGAGTATATATTTATGTCATATATAATCATCGTCACTATAGCTGTAGTTATTTTCTCGTGATATTTGACTTTTATCAATGGATTCCATG  
ATACAGCCAATTGACAGTACTGCTGTATCTACTAGAGCGTTAAACGCCCTAAACCGGCAATTTTAAATGGCAGCATGATGAACATTTA  
TAGGTGCTTTTACACTTTACGGGCGTTGTCAGGCACCATTAACAGACATTGTCGATCCATTTAAATTTGAAAAATGGATTAGTTGTTG  
TGTTAGCTGCAATACTTTCGGCTATTATTTGGAATTTAGTACTTGTGTTTTACGGAATTCCAAGTTCGCTTCATGCACTTATAGG  
TTCAATTTGCGGTTGACGAATCGCATCTGAAGGCTCATTTGGAGTGTTACATTACCAAGGTTTCACAAAAATTTATTATTGTATTAAT  
CGTTTCACCGATTATCGCATTTTGTGTTGGTTTCTTGATGTATTCAATTTTTAAAGTTATCTTTAAAAATGCAAAATTTACAAGAGCG  
AATCGTAACCTTATAGATTTTCCAAATTTTCACAGCAGCGTTACAATCATTCTCTCACGGTACGAATGATGCGCAAAAGTCAATGGGT  
ATTATTACGTTTGGCATTAAATTTGTGCTAATGTACAGAATGATGGCAGCGTTGAACCACAGTTATGGGTAAGATTTGCCTGTGCGACA  
GCAATGGGGCTTGGTACTGCAATTTGGTGGCTGGAAAAATTACAAAACTGTAGGTGGTAATTTATGAAAAATACGTCCAGCAAAATGG  
TGCTGCGGCGATTATCATCATTAACAAATTTTTGTGTCATCTCGTACATTTCCCATATCAACAACATCAAGTTGTTGTCATCAT  
CAATCTTAGGTGTTGGTGCTTCTAACCGAGCTAAAGGTGTAATAATGGAGCAGTTCGCAACGAATGATCATTACATGGGTGATTACAT  
TACCTATTTTCAGCATATTGTTAGCAGGTTTACTATTTCTATATACTTAACTTATTTTTCTAATTGAAAAATAAACTAACTGAACTTCAGT  
ATCACAAACATATGGTGGTATTGAAGTTCAGTTTTTTATGTAAGTAGATAACATATTTTATAGAATTTACGTAGAATGACCAAGACA  
AAGCATTTTAAATAGGAGGCTAAGTTATAAATGTATTCATGGAACATAAACAGTTAGGTCAATTAATATAAGTAAGCGTAAAT  
AATGATTTAAATAGTTTATATTCTTCAATGAAGGAATAATTAATAGTTATCAACTGTTTAATTAACCTAAATTTGTATTGGACTTTAT  
TTAATATAAATTTGTATATGTAGACGAAAAAGCGTAAAAATACTGGTATAACAAATTAATTCATTATATAGTCAACTTAGTTGCATTA  
TTTTGATTTTTAATATATTAATGCAATTAATTTAATCAATAGGTAGGTTATTTTTTTACCTAACTACCATTTCATACAAAAATAAAAAT  
AGTATGATAGGGAAGGTGAGATAATTTTTGTACCAAAATGAAATTTTTTTCAAATAAAAAACTGCAATCTCATAGT  
TGTGAATTGCTAGTATATATAGTACAATTTATTTAATTAATGGATGAATGCATAGTGAAGAACTTCTGAAGCTGGAATTTGTACGGTA  
GTTTCATATTGTATGGACCATATGTGTAATTCATTTTCAGAAATCAAGATACTACCATCACCATTGACACGTTCAACATAAGCAACATG

ACCATATGGACCAGGTGTGCTTTGCATAATTGAACCAACTGATGGTGTGTTGTTTACTTGGTAACCATCATTAGCTGCGTTACCAGC  
CCAATACTTAGCGTCTGACCAATATGTGCTAATTGGACTACCAGCTTGAGCACGACGGTCAAATACGTACCATGTACATTGACCAGC  
AGTGTATAAAATTTTGGTGATTAAAAGATGATGCATTGCCATTGCTACCTGTTGTAGCTGTTGGTGTGTACCACCTGATCCACCATTA  
GGAATTTGTAATGTTTGGTTAGGCATAATTAATAACCACGTAAGTTATTGGCTGCCATTAATTGATCAACTGAAACACCATATCTG  
CTAGCAATGATATTTAATGATTCACCAGCTTGTACAGTATGAGATGATGCTGAACCAGCTTGTGGAGAAGTGTGTGACGTATTTTGT  
GCATCACTTCCACCTACTGAGATAACTTGACCAGGGAATACCAAGTTGTTATCTAATTGGTTATTTTGTTTAATACCTCTACTGAAG  
TGTGTATTTTGTAGCAATACTCCATAATGATTCACCAGATTGTACTGTATGTTGTGTAGAAGCTTGTGCATCATGATGCGTTAAAAA  
TGCAGCTGCACCAGATGTTGCTGTTATTGCAAATGCTAATTTTTTCAAAGGGACTCCTCCTTAAAAATTAAGTTTTACTACTTTTTAAAA  
ATTATTAAGACAATTTATATAGTAAATTAAGTTTTCGTTTTATATTACGATTTCCATATTATCAAAAAATAAGTAGCTTTGTGTGGTTT  
GTTATTATCTTGTAAATATTATTAACATTTTAGGATATCGGTTTCATATTTTATAAAATGCTGATTTGATAGTGATATAAAAGCGTTTGTAGT  
GATTTTAACTAATTATAAAAAATTATATTTTGTAAACATTGTAAAAATGTAAAAATTACTATACTTATTAAAGGTTATTTCTTTTGATGAA  
GCAAAATTTACTGTAAAAATTTGACGCATAAAACGACAGTAGAAGGAGGAATTATTTTGTGCGAAAAATACAAATCATTATCATATTATC  
ATCAAAACCAGCATGCTCAATCAATAAGTAAAGTGTGGCTTTATTTTATGTATTATTGGATTATATTGGCATAGGATGCTATCTAG  
GTCAGTTTTTACCATTAAGTTGGCGACAACCCCTTGTCATTTGGATTACTGATTATTATTTAGCAACACTTGTTTTTGAAGAGCGAG  
ACGGTTCCGGTTTTAATTATTTACATATTTACGCTGTAGTGATCGGCTTATTGTGCATACGCAACGTTTACCACGTATTTACAAAAATTA  
GGACCAGATATTTCTATAAAAAATATCGCATTAGCAACTTTTGCATTTATAGCATTTGGTATTATTGGTTATTTCTTCGTTGGAGATG  
CATCGAGTATAGGCAAAATATTATTCGTTACATTAATAACATTAATTATTGCGAGTCTAATTGGTATTTTCTTCAAAATCCTATTTTT  
TACACTATTATTACCGTCGTTAGTTTGTGTTATTTTACTACTTTTACTTTTATGATGTTTTAATCGTTTTAAAGAGGTTGACTATTACCC  
AAGAGAAAATGGGATTTAATCTATTTTATTAATTTGTGAAATATTATTAAGGATATACTTTATCTTGTCTAATATAGAAAGAGGTAAAGTTATGGC  
GTTAAATTAATAAAGAAATTTGTATAAAGTTTTGGAATAATCAATAATGAATATCAACCTTAAACTGGAGCGATTGTCATAAGTTAG  
AAACTTAAACTGAGATTTTACTGATAAAGCAATAAAAAATATATTACCTTAATTGTAAAGATATTATTAATCATTGAAATGATTAACCT  
GCTATAGTTCTAAAGTAAACAAATCTTAGAAGATAAACTTTAAACAGGTGTACTTGCCTTTCTAATTACACTTTTATTAGAAAAGTA  
AAGTATAGCTACGTATTAATTTTAAATCGAAACATTAATAGGAAGAAGTATAGATAATATAAACAATTTAATGTTAGTTTGAGCTC  
ATCTCAAAAGTAGAATGTGATTTAAATAAGTGTATTATTTTAAATTGAAAATGAATATATAACTAACAAAAGATAATAGTAATACGT  
TGTAAGATGTGGTCATTTAAAAATTTTGTAAAATACTAAAAAGTAGTGTGTTTTCAATTGGATAGTTTAATTAACCTGACTACATCTA  
TTTTGTAAATTTAAATGATTGATATATAAGTTTAAAAATTAACCATTTATAGTTTTATTTTATTTTGTATTGGTATTCGTTATTGTG  
TTAAATTTACGTTTAAATTAATAAGTTAAATATTATAGGGAATGATAAAAGTGGTACTTAAATATAGAAAGAGGTAAAGTTATGGC  
AAAATCATGCTTGCATATACTTACTAATAATGAATATGCGACAACGCGTTGCCAAGATGGCATAGTCTTATTTTGGCCAATTGACGG  
GGAAATCGAACTACAAAAATTTTCGTAAGTAAATAATTGAAGATGATATATATATTATTAATCATCTGGATGTATTTAGTATTAA  
GAATAATAAAAAAACGATCATGTTGTATTGTAGTAGCGATTGGTTTGCAGAAATTAGGCTTTACTTCTTAAATTACCACTATACAGC  
AAAGTTGATTAAATCATCCTATAATTGTAAATGTCTACTATTAATAATTTGACATATCGATACCTTGATAATCAGCCTCTTAATGACGCT  
GATATTAGAAAATTACAGGATATTATTAATAATCATTGCAAAAGAAAGCAAGTATGGATAAAAAAGATTGCACAAAAATCAATATCGATA  
TGCCTATTATGGTGATTGTCGTGACGAGCTCGAATATATTTATCAAAATGTAAATCAACGATTGACATTAAAAAAGTGTGCTGTGATA  
ATTATTGTCTCAAAAGTCAAATTTGTATCACAATTCACCTTACTTATGGGCATGGGTTTTAAAAATGATATTGATATTTGAAAAAT  
GGTAAATTCAGTTTAAATTTACTTACTACTGATAGTACTATTAGCAACATAAGTGAACATTAGGTTTTAGTTTTAGTAGTCTCACTTACT  
CTAAAAATGTTTTAAAGTTATATGGATATAACACCGAATGAATATCGTAATTTATCAAAATATAATAAATGTTTAAATGCTAAAGCCAG  
AACCCTAGTAGGCAAAATGGTACAAGAAGTAAAGAAATCATATTGAATTATATTGAACATTATAAAAAACCACTAACTGATGTT  
ATACATATTGATGAAGACAAATTTGAAACACCTAAATTTGTTTCAAACGGTTATTCAAATAAATACTTATACAGAAATGAAATTAGTT  
TTCTTAGAAGGAATCTTTAAACCTTATTGAATAAGAACAGTCAAGTTGTCTTTTTCATCATGCCATCGATTCTAAAAAGTAAAAAT  
ACCATGTCCGAAGAAGAAAAATTCACAATCATTAAAAACAATAATTGAAAGTGATCTAAAGATAGCATTAAATATAAATGATATTGA  
AACAACTTATTTTGTGGAAGAAGCTTTTATGAGTGTTTTCAGACAAATATCTCCAAACGAATTAAGTAATCATAATAATTACGAAGT  
GCATTTTGTTTTGTATTATCATATTGATGGAAATTAGAACAAATTTATCGAATGATATTAATAATACATCATGTTGAATGTGAAA  
TTAGGATTGAACATTACCTGTTTATTGAAAAACCTTCAGTTTTTAAATCATTAGTATCACAAATAAGAGCACTAAATTCGATTGCT  
TAATAATAGATAATGCAAAATTAAGTAGCCCTTATTGATGGGGGAAAGTGATGAGTTACTATTGAAAAATATTTTGCATTTTAAAA  
ATTTAAAAACAAGTAATTAATGAATTGGATATTGAACAAGAAAAGCTTATTTTCTAAATGTTGAAAAATCATAACTGCTTAATAATA  
AAGAACGAGATTTAAGTAATAGTGCTCCATTAATTTATAAGACATTAAGTGCCTGTATCACAACCTTTGATGGCTTTGGATTAAACA  
TTTTTGATAATCATCATACATTTAATGCGATGCATCTATATGATAAAAAATGGATTAAAAACAACACTAGGTCTTATATTGGAAAAAT  
TTATCGAATATGCTCGAAACCAAAATACGAAAACAGTTATTATTCTATTTTGTATATAGAGAATTATTATTGCCTGGTTATTTATGA  
TTGGCGAGTGATTGAGAGCGAGACAATTATGAGCAATTTTGAGGATAGTCAAGTTTATATAAATTTCAAAAATAATGTTTTAAACGA  
TAAATATCTAATTGTAATAGAAACATTGGACGAAAAATAGTGGCAACATTAATCATTGATTCTAAAGAATTAAGAGATAAATATG  
AATGGAAACCTAGTTTACTATCTAAAAATGACAACACTACCTTAAACAGCAATCGAGATTAAAGAGCATATTTTATGATGATAAATCTCT  
TGAATATTAACGTTATCTTTTAAATGCGTTATACATAATTAATAAGGAAAGCAATTAACACCTTGATATGTTGCAAAATTTAATTG  
CATTTGTGTTGTAATTTTGACAACGTATTAATAACAAATGAGAAAGACAATGGCAAAAAAATTTAAGATAAATAATGACAGAAGCATT  
GTCTTTATATATTTGGGGGTGCAACATTTTGAATACTGAGAAATTAGAAACATTGCTTGGCTTCTATAAAACAATATAAAGCATTATC  
TGAATATATTGATAAAAAATATAAGTTGTCGCTAAATGATTTAGCAGTCTTAGATTTAACGATGAAGCATTGCAAGATGAAAAAG  
TACTTATGCAATCATTTTTTAAAAACTGCAATGGATGAGCTAGATTTAAGTAGGACAAAATTATTAGTTTCTATAAGAAGACTAATTG  
AAAAAGAAAGACTTAGTAAAGTTAGATCATCTAAAGATGAGCGTAAAAATTTATATTTATTTAAATAATGATGATATATCTAAATTTA  
ATGCTTTATTTGAAGATGTAGAACAATTTTTAAATATTTAATTGAAATTTGAGTGTGCAAAAGCATAGAATTTGCTTATCGGCACATTTT  
TAATTTATACATATTTTAAACTAAGTAACAGTTTGAAGAAATCGTAGTGAACATAATGTTAATTTGTGAAATGTATATAAACATAAA  
AAAATCATGATATATGTTGTTAATTAACAGTTTGAAGAGCGAGATGACATTATGGGACGTAAATGGAATTAACATTAAGAAA  
AAAAGGCCCAAAAAAGATAAAAAACACAAGTAGAATATATGCGAAATTTGGTAAGGAGATTTATGTTGCAGCAAAATCTGGTGAACC  
CAATCCAGAATCTAACCAAGCTTTAAGGTTGGTGCTTGAACGCGCTAAGACATATTCAGTGCCGAATCATATTATTGAAAAAGCAAT  
AGATAAAGCTAAGGGTGTGGAGACGAAAACTTTGATCACCTAAGATATGAAGGATTTGGCCCAAGCGGATCAATGCTAATTGTTG  
ATGCGTTAACAAATAATGTAATCGTACTGCCTCTGATGTGCGAGCTGCTTTTGGTAAAAACGGCGGTAATATGGGTGTATCTGGAT  
CAGTTGCTTATATGTTTATCATGTGGCAACATTTGGTATTGAAGGAAAGTCTGTTGACGAAATACTTGAAACATTAATGGAACAAG  
ATGTAGATGTAATGATGTGATTGACGATAATGGATTGACAATAGTCTATGCTGAACCAGATCAATTTGCAGTCGTTCAAGATGCGC  
TTCGTGACGAGGTGTCGAAGAATTTAAAGTTGCTGAATTTGAAATGTTACCTCAACAGATATTGAACCTTCTGAAGCGGACCAAG  
TAACATTTGAAAAATTAATCGATGCATTAGAAGATTAGAAGATGTACAAAACGTATTCATAATGTGGATTGAAATTAATGAAT  
CAGCAGAACCAATGGATTGATGAATTGCAACTTGAATCACATCTGAAGGTGGTTTCTATAGAGAGACAATTCGAGAAGTATTGAAA  
GATGGACGCAGAGCGCGTTTATGATGATTTATTTTACTTACAGATGACAATATTTGCGATTTTCATCGAATTGATGCTGATGAAG  
TATGGTACTATCATGCTGGCGATTCTCTAACAATTCATATGATAAATCCGGATGGGGAATATACGACTGCAACATTGGGTACTGATA

TCCAAAAATGGAGATGTATTGCAATATGTAGTGCCTAAAGGAACAATTTTTGCTTCTTCAATCGAAATATCAAATACTTTTAGTTTAGT  
AGGTTGTATGTGTCAACCGGCATTTGAGTTTAAAGCAATTTGAATTGTTTAAAGCAATCTGAATTAATTACGCAATATCCGCATCTTAA  
ATCAGTAATTGAAAAATATGCTTTAAAAATAAAAAATGATCAATGAAGTGGTTTGAAGGTTGTTAATAAACCTTTGAGTCACTTCATTT  
TTATATGTATTCTTGATTGAATCAGAATAGATTTGATGCTTCAGCTGTTTTAATGAAAATAGCATTAAATGATTTTGA AACGATAA  
GAGTGTGTTATTTATATTTTGA AAAATCACTTTTATGAAGAAATGTGTGTACTATCTAATTAATATTGTCTATTTTAAAGTAAATTGA  
AGCGAGTTGTAGTAAATAATAATAATATTTTCATATGATTAACAAAAACTATAAACTGTATCATGACATGACATCATTTATGTA  
GTTTTATATAATAATGACAAGGAGTTGGTGACTGTGAAAGTAAAGTATATAGATAAACGTCACCTGGCGTCGCCTAATTGATAGGGA  
ATACACAGAGGTAAAAGTTAATAATAATAGGTTTAAAGGTATTATAGGCTTAGTCACGATGAAAAAGGTTCTGTATCCTTTAGAGG  
TGACGGTAGTTGGACAAAATATCATTGTGCGAGATGACAATTATAAATGGTTGCAAACTACTACCTGAAAAGAAACGTTATAGTATA  
ACTGTAATGTTTGATAATAAAGGCAATCCATTAGAATATTATTTTGATATAAAATATCAAAAATATAACGCAAAAAGGTAATGCGCGT  
ACAGTAGATTTATGTTTAGATGTTTTAGCATTACCAAGTGGTGAATATGAGTTGGTAGATGAAGATGATTTAATGTTTGCATTAGAA  
AGTGAGCAAATTACAAAAAGCAATTTTCATGAAGCATATATGATTGCACATCAAATTATGGCAGAGTTAGAAAAATGATTTTAAAGG  
ATTCCAAAAGAAAATCATGTACTGCTTTAATAAAATTAATGCAAAGGCTCAAAAAATCATCAAAGCCACAAAATAAACTAATA  
TTGAAAAAGCAAACAAATAAAGCCTAAGCAATATAATCAAACCTAAAAATCAACAACAACAAAAGAAAACTAAGTAATTCAAGC  
TGCAGCCATGCCAATAAAATTTGGTGAAATTTATCGTTAGTAATGAACCTCATGAATGCTTGTAGCCATGAAAGTTCAATAATTGAATA  
ATTTATGGGGGAAATTTATGAAGATTGAAGACTATCGTTTACTAATAACATTAGACGAAACGAAAACGTTACGTAAAGCGGCTGAA  
ATTTTATATATATCTCAACCTGCTGTTACACAAAGACTAAAAGCTATTGAAAATGCTTTTGGAGTAGATATTTTATCAGAACAAAA  
AAACAATTGATTACAACTGAAGGAACAATGATTATTGAGCATGCCCGTACATGTTGAAAAGAGAGCGATTATTTTGGACAA  
AATGCAATGCACATATTGGTGAAAGTGAATGGAACAATATCAATCGGGTGTCTCTTTGATTGGACAAACCTTACTTCTGAAGTTTT  
GAGCCTATATAATGCCCAATTTCTAATGTTGAAATACAAGTGCAAGTTGGTTCAACTGAACAAATTAAGCAAATCATAGAGATT  
ATCATGTTATGATAACTCGTGGAATAAGGTAATGAATTTAGCTAACACACATTTATTTAATGATGATCATTATTTTATTTTCCAAA  
AAATAGAAGAGATGATGTTACAAAGTTACCATTATAGAGTTTCAAGCTGATCCGATTTATATAATCAAATAAAACAATGGTATA  
ACGATAATTTAGAACAAGATTACCATGCAACTATTACAGTGGATCAAGTAGCAACTTGCAAAGAAATGTTGATTAGTGGTGTAGGT  
GTTACAATCTTGCCAGAAATTATGATGAAAAATATCAGCAAAGAACAAATTTGAGTTTGAAAAAGTAGAAATTGATAATGAACCGCT  
GATTCGTTTCGACATTTATGAGTTATGATCCGAGCATGTTGCAATTGCCACAAGTTGATTCTTTTGTAAATCTCATGGCGAGCTTTGTT  
GAACAACCAAAGGCGTAGTTTTAGACTAATTTAAGGTTTGATTTAATTTTAACTATTCCGTTAAATTGAACGTAGTTGGTTGCTA  
ATGCACCAACAGCAAAAAGAGCCCTAATTAATAAATTA AAAAGGGGACAAAGGAACGCAGTTGATTGCTAATGCACCAACAGCAAA  
AG

>021-contig\_267\_RC

AAGAGCCCCTAATTAATAAAATTA AAAAGGGGACAAAGGAATACAGTTGGATGCTAACGCACCAACAGCAAAAAGAGCCCCTAATTA  
TAAATTA AAAAGGGGCTCTAAGAAGCGGGTTATGGATATGTTTGCAGCGTTATTACAAATAAAGAATTATAAACTCTTTGTGCTAA  
TATGTTTCTACTAGGTATGGGTATGCGGTTACGGTCCCATATCTTGTCTTTTTTGCAACTAAAGATTTAGGTATGACAACAAATCAG  
TATGGATTACTTCTAGCATCTGCAGCGATTAGCCAGTTACAGTAAATTC AATTATTGCTAGATTTTCGGATACGCATCACTTTAATA  
GAAAAATTATTATTATTCTCGCATTATTAATGGGTGCGCTTGGTTTTTCAATATACTTTTTTGTAGATACAATCTGGTTATTCATATTA  
CTATATGCGATTTTCCAAGGATTATTTGCACCAGCAATGCCCAACTTTACGCATCTGCTAGAGAATCTATCAATGTTTCAAGCTCTA  
AAGATAGAGCTCAATTTGCCAACACAGTATTACGTTCAATGTTCTCATTGGGCTTTTTATTGGTCCATTTATTTGGTGCCCAATTAAT  
CGGATTA AAAAGGCTATGCTGGATTGTTTGGTGGAACAATAAGTATCATTTTATTTACTTTAGTACTTCAAGTGTTTTTCTATAAGGAT  
TTAAACATTAAACACCTATTAGTACGCAACAACATGTTGAAAAAATGCTCCTAATATGTTTAAAGACAAAACGCTTTTATTACCA  
TTTATTGCATTTATTTTATTACACATTGGACAATGGATGTATACGATGAATATGCCTTTATTGTTACTGATTATTTAAAAAGAAAATG  
AGCAACATGTCGGTTATTTAGCTAGTTTATGTGCTGGTTTAGAAGTGCCATTTATGATCATTCTGGCGTTTTATCATCTAGATTACA  
GACTCGAACATTGTTGATTTATGGAGCGATTTTGGTGGTTTATTTCTACTTCAGCATGGGGTATTTAAAAACTTCTATATGATGTTA  
GCAGGACAGGTGTTTTAGCTATTTTCTTAGCGGTTCTTTTAGGAATTGGTATTAGTTATTTCCAAGATATCTTACCAGATTTTCCAG  
GATACGCCTCAACACTATTTTCTAATGCAATGGTTATTGGACAGTTAGGCGGTAACCTATTAGGTGGTGCTATGAGTCACTGGGTAG  
GTTTGGAAAATGTATTTTGTATCAGCAGCATCAATCATGTTAGGTATGATACCTTATATTCTTTACTAAAAATCAAAAAATTACAAA  
AGAGGATGTGATATCAACATGACAATTATTTATGGCTACTTATCATCGCTGCCTTCATGTTAGCATTGTTGGGTGATTAAAGCCGA  
TTATTCCTCTGTTTTAGTATTATGGGTGGCTTTCTAATCTATCAATTTGGCTTTCATAATCAGCATTATCATGGGTGTTTTATGTAT  
CTATGACATTGCTAACAATACTAATTTTATGTGCGGACTTTTTAGCTAATAAATATTTTGTGAATCGCTTCGGTGGTTCTAAGTTTGG  
AGAGTAGCAGCTTTAATTTGGTGTTTATTTGGATGTTTGTGTTTACCGCCATTTGGAATTATTATTATACCTTTTATTTTGGTATTCA  
TAGTTGAATTAATACAAAGGCTATTCTATTGAAAGAGCAGTTAAAGTAAGTATAGGTTCAATCGTAGCTTTTAAACAAGTAGTATAG  
CTCAAGCAATCATTATGTTTATAATGATTGTATGTTTCTTTATAGATGCTTTATTGATTAATTAATAAAAAGCTTATTGCAAAAATATG  
TTTTTCGGTAACTGTAATTTAGTGATTTTATCATTACAGTACCAAAATTCGCATATGATGTAATAAGCTTTTTGTTTATAAAAAATGTA  
TGAGAATGTTTTTTCGAAATATTTCTTTCAATGCGTAATCCAATAGGTATAACTATAAATGAAAATATAATAAATACCCAATTGCTT  
ACCTGAATATATGGTCCAAGGCAAGTAATGATTGTGGAATAAAGAAATACATAGAAAAATCCTACAATTAGTAGAATGATTGCTAA  
ATAGGTGAATATCCATATCCAATTTGAATTGTTAAAAACATTGCAGTTGTATTGTTTTAAAACTAAACCATATAAATAAAAAAGACAAT  
AAAGAATCCGACGACTACTGAAAACGGGAATGAAACAAAATATAAATTACTTCCATTTTTCATGAAAAATCCTAAAAATCCTTT  
GAGAAAACTAACAATCCCAATTAATAGAACGATGTGTTGATAGATATATTTAAAAATATTTTAAATGTTTCAATTAGGCATCGCTTT  
TAGTTCTTTTATGATGTGCTTTTGGGTCGTGTTGAAAAAATCTAAGGCTAATAAACCATGTTGTTCTGCGCTTAATAATTTGTTG  
AGTATACGGTTAATAATTAACCTCTGTATCATGAGGGTTGACGCGAAAGTCAGAGCGCATATAAGTCATATAATTTCTGAAAGATTTCT  
CTATCAGTATTGCTTAATCTTAATGATTTAACATTATTTTCTTTTGTAAATTGCGCAGTACTTTTCATTGTTACTTAAGCGCTCCTTTA  
AAAATGTTTAATTTCCAAATTA AAAATGGAATGATTTTATAGTATTAGTAAGGTCAATCATATCATATTAACGCATATAATATAATGA  
TTAATATTGGAGAGGAAAATGAGGACACTTAATAAAGATGAACATAATTATATCAAGCAAAATAGCTAATATACATGAGACATTATT  
GTCGCAAGTAGAATCCAATATAAATGTACTAACTGAGTATTGCTCTTAGGTACGAGATGATATGTTCAAGATTAGAACATACAA  
ATGATAAAATTTATATATATGAAAAATGAAGGTCAATTAATAGCGTTTATTTGGGGACATTTTAGTAATGAAAAAAGTATGGTTAACA  
TTGAACTGCTATATGTTGAACCACAATTTTCGCAACTAGGAATAGCTACGCAACTGAAGATTGCGCTTGAAAAATGGGCAAAAAC  
ATGAATGCAAAAGCAAAATAGCAGTACAATTCATAAAAAATTTGCCAATGATATCTTTGAATAAAGATTTAGGTTATCAAGTGAG  
TCATGTGAAAAATGTATAAAGATATTGATTAGAATTAGGATTATGTTGCTAATTCATGTTAAAAATAAAAAAGATTAAATGACGTTAA  
GGAGTTTTATATGAAGAAATTAATCATCAGTATTATGGCGGTCATGCTATTTTTAACAGGTTGTGGTAAAAAGTCAAGAGAAAGCCAC  
TCTGGAAAAGGATATCGATAATTTACAAAAAGAAAAATAAAGAAATTA AAAAGACAAAAAAGAAAAGCTTCAACAAGAAAAAGAAAA  
ATTAGCAGATAAGCAAAAAGACCTTGAAAAAGAAGTGAAAGATTTAAACCATCAAAAAGAGATAACAAGGATGATAAAAAAGA

CGAAGACAAAAATAAAGACAAAGATAAAGATAAAGAGGCGATCACAAGATAAGCAATCAAAAGATCAAACTAAGTCATCGGATAA  
AGATAATCACAAAAAGCCTACATCAGCAGATAAAGATCAAAAAAGCTAATGACAAACACCAATCATAATCGAATTGCTTACTTGTTA  
TAGATGAAAAGGTACAGCGTTTTAAACCTTATTTTAAAGGGTATGTATTAATTAATTAATGTGGTCATGATTGAAACAGAACGTAAAAATA  
GACAACGTAATTAATAAAGGAGAGAAACGGCATGCATGAACAAGATTTTAGAATTTTAGAGGGTCAAGATATTACTTTGCCAGAAT  
TAGGTAGAGAATTAGAAAATATTACAGGACATACGATTGCTGATTCTACTGGCGAAATTAAGCGTGTAATTGCACATTTACCAAAT  
TTGAGTCCGATACAGATACTTTTGTGCTACATATCGTTTTAAACCATCAACAAGATTTTATAGATGCAACTTTTACTGCGCTGAAATC  
AGATAGAGCACGTTTTAAAGAGAGTGCCAGTTTATGTTGAACCTTATAAGTTATATTTCTAAATCAAAAATAAACTGCTATCTAAAACGC  
AAAGTTGATCAAAATATCGATTTTGTGTTTTTTATTGAGAAATATATAGGAGTGTCAATCGATGATTTATTGTGAAACAGAGCGTTT  
AATATTAAGAGACTGGCATGAAGATGATCTGTTACCTTTTTAAAAATGAATGCGAATTATGACGTACGTAATATTTTCCAAGTTT  
ATTGAGTTATCGTCGTTTCAGAATTAGATATGAGAAGCTATGGATGCGGTTATTAAGATTATGGCATTGGATTATTTGCTGTAGAAGA  
TAAAGAGTCACATCAATGGATAGGCTTTATAGGTTTGAATTATATTCCAGAAAACAAGCGATTATCCATTTAAAGAAATTACCGCTTTA  
TGAAATAGGTTGGCGCTTGTGTCAGAATTTTGGGGAAAAGGATTAGCAACTGAAGGCGCAAAGGCAACTTTGAAGTTAGCAGAAG  
AACATCAAAATATACGATGTCTATAGTTTTACAGCAGAAGCAAATAAAGCTTCACAACGTGTAATGGAAAAAATTGGCATGACAGTG  
TATGATCATTTCGAATTACCCAATCTAAGTAAGTATCATTTATTAAGGCAAGTACGCTATTACATTAATCTTCGAAAAGTGAAAA  
ATTTATACATAAGCGTAACAAACACCCCTAACATTGTTAGCTGATGATAACAATATTAGGGGTGTTTGTATTCTTTAACCTTAGA  
ATGATTAATCGTATGAACGAGTACCCAGAGGTTTGAATTTAATATTGATTCTATTAATGATTTCCTAGTGTCGCATAACGGTGCAA  
GAGCAGGATACTTAGGATCAATAAAACCTTCCTCAATCATATGGTCAATCATTGTTTGTAGTGGATTGAAAAAGCCATTATATTAT  
AAATGGCAATAAGGCTTTTCATGGATACCTATTTGAGCCCACTATCATTTTCGAAAAATCTCTAGTGAACTGCGCCACAGGAG  
CCATGACAAATGCATCGCAAGTTCGCAATTTTATTTTACGTTTCATGCATAGCAATCAATAAATATGTGTCACAATTATGCCCTGTATTGTT  
TGTGATTTTATGTTTATCTAACATTTTAGGCATGACGCCAATAGCTTTGCGGCCATGATCTAATACACCATCTTGAATGGCACCCATA  
ATGCCAATTGACCCTGCACCAAATACTAATTCATAACCTTGTTCAGCAAAAATTTTACCTAAATCGTATGCTTTTTGTACATATGAAG  
GGTCATGACCTTTGCTTGCACCACAATAAACTGCGATTGCTTTCATGTTAATCCAGCTCCTTAATTCGATGAATGACTTTTAATAGTG  
ATTGTTCAAACACTTTTTGATCTTGCTTTGTAAAAGGTGGGGGACCTTTGTGGCGACCACCTTGTTCATTTGTGCATTTCATATAT  
CGTTTATCTAATAGTTGTTGAATTTTTTGAATTTGTATATCTTCCCATTATGATGCATGACAATTAAGACTTTGTGCGACTAATAAAC  
TTGCGAGTCCATAATCTTGAGTGACTACGATATCATCTTCGTTGATAATTGAACAATTTTGTAACTCAACTGCATCTGGTCCATCATC  
AACATATAATGTTGATACATGTGGAGGATATAATTGGTTCGAAAAATGGCTGAAGCTCCGAATAATTGTGCACAAAAATGCCGTCTC  
AGTTGTTAAATCTATAATAGAAATCAACACAGGACAAGCATCTCCATCAATAAATATATGTGTCACAATTATGCCCTGTATTGTTT  
TCTTTATTTTGTGAGAGGCGCTTTTGGCAACATAATCTTTATATTTTAAATGACTTGATGCGTGCTTTATCAGCTTCTTGTGCGG  
TTTTTGTCTCTTGTGTGCTTTTCAATATTTTTTGTAACTTTTTATTCATTTTAGCGATTCTTTGCGATTTTTTTCAGCTAGTTTA  
TCGCCTTTTTCTCAGTTTTCTCATCTAATTTATAGGTGTTAAGCCTGCTTTTTCTTCGTATTTTGTGATTTTTTCATATCTTTAATAC  
GTTGATTTTCATCTTTTCGCGGGCTTTTGTCTCTCTTTATGACGCTTTTCAATATTTTTTGAAGTATTTAATTCATTTTATCAGCGT  
CTTTACGATTTTGTTTAGCTAATTTTTTCGCCTTTTTCTCAATATAGGCAGGATCATGTTCTCTAGCAAACTTTTTAAGTTCACGTTTA  
TTTTCAAAATCTTGTTTTTATCGCCGACATATCTTTAACATCACTCGCTGTGTTACTGATTGCTGCAGATGTTTTGAAGCAACTTT  
ACTTGTAGCATCTGTAACTTTTTGTACGTCCGGATGTTGTTGATACGTTTACGTTCAACAATTAACGGTACCAATCAATAGGTAAT  
ACATTAATCATAAATTTGATGACTTTTTTCTTATCCATAGATCTTGCCCTCAATAATTACTTTATTAATTTTACATACCTATGATACAT  
CAATATAAACGATGATAGTAGTGAATCACTATTAAGTATTTTCAAGATGTTTTTAAAGAAAGACAATAAAAACTGCCAATCAAGTGA  
TTCCTTAATTGACAGTCTATATTTTAAAGGAAATTAATACCTTTACCAATGCCAAATCCGAAGTAAAGTATAGCAATAAAGATTA  
CTAATACAATTTCTGTAATGGCAAATGGAATTAGTTTGTATTTGTTAATTAGATGCAAGAATGTTTTGATTGCAATTAGTCCAACAG  
TAAATGCAGCTAAAAAGCCTAAATATAAAAAAGGTATATCAGCAATCTGAATATCTTGATAATGTTTTAATAAAGATAAAACCTA  
GCTGCTAACATAATTGGAACAGCCATAATAAATGTAAAGTCCGATGCTGCTTTATGATTTAATTTTATTAATACCCAGTTGAAATT  
GTTGAGCCTGAACGGCTGAAACCAGGCCACATAGCTACTGCTTGAGAAATACCAATTACAAATGCTTGAAAAAATACTGATTTGATC  
TACTGTTTGTGGGTTTTTAACTTTAGCTGAGTATTTATCAGCAATAATCATATAGATAGCACCTACGAATAAGCCAATCATAACAGTT  
GGCAGTCAATAAATGTTCTCGATGAAATCATCAAAATAGTAAGCCTAAATACCTGCTGGCACCATACCCATACATGTAAT  
AAATTTAAACGCTCTTGGCTTTGAACGCTTTTGTGATCGTTATCTCTTCAACATGTTTGTGTTTACCAATATGTAAATCTCTAAGA  
AGCGTTTCGCGGAACACCCATGCTGCTGCAAGACGGATCCTAATTGGATGACGATTTTAAATGTAAATGCTGACTGAGAACCTAAA  
AATTCAGATGATTTTAACCACATATCATCAACTAGGATCATATGTCCAGTAGAGGAAACAGGTGCAAAATCTGTTAATCCTTCGACG  
ACCCCTAAGATAATACCTTTTATTAATTCAATGATAACATAATGTACCCACTTTCATTACTCAATTTAATTTATTTAATATCAAAA  
TTACCATATCATGATAGCATATTCATTTAAAGACATGCTAGTTATAGTTATAATACTAGACTAAAGATGTATATATTCATTTCTTTT  
ACATGTA AAACTACAATATTTTATTGAGCTATTTAATTTGATTTTAAGGAAAACCTTTTATAATAGGTTTAGGTGATATAATTGTGAA  
AAAATTAACAACAATACTGTTTCAATATAAAATTTTTCCGGTACTCATGTTCTTGGTCAGTACTGGTCTCGGCATACTCGTTATAACG  
CAAAATATTTTAATAGCAGATTTTTAGCTAAAATTAAGACATCAATTTCAAGGTTTATGGATTGATTTATTTATTTTATTAGGTG  
TTTTACTTTTAAAGCAACTGTGCAATTTCTAAATCAATGGTTAGGTGATACATATTAGCATTTAAAGTTAAAGCATATCTTAGACAGC  
GGGTTATTTATAAAAAATAATGGTCATCCAATCGGTGAACAAATGACTATACTCACAGAAAACATTGATGGTCTAGCACCTTTTTATA  
AGAGTTATTTGCCCTCAAGTGTTCAAATCAATGATGGTTCCGCTCATCATAATCATTGCAATGTTTTTCATCCATTTCAATACCGCAT  
AATTATGTTAATAACTGCACCATTTATTCCTTTGTTTTATATTATTTTCGGTTTGAAAACGCGAGATGAGTCAAAAGATCAAATGACT  
TATTTGAATCAATTTAGTCAACGGTTTTTAAATATTGCTAAAGGTTTATGACGTTTAAAGCTATTTAATCGTACAGAGCAAACAGAG  
AAGCATATTTACGACGATAGTACTCAGTTTGAACCTTTAAACAATGCGCATTTTACGCGAGTGCTTTTTTATCGGGATTAATGCTCGAAT  
TTATAAGTATGTTAGGTATTGGATTGGTTGCATTGGAAGCAACGCTAAGCTTAGTATTTTATTAATATTGATTTTAAAACTGCGG  
CAATTGCGATTATTTAGCGCCTGAATTTTATAATGCAATTAAGGACTTAGGGCAAGCGTTCCATAGTGGAAAAACAAAGTGAAGGTG  
CCAGTGACGTTGTGTTTTGAGTTTTTGAACAACCGCAATAATAAATGAATTTCTATTAAAGTATGAGGAAAACCAAAAGCCATTTA  
TTCAGTTAACAGACATATCATTTTCGATATGATGATTCTGATAGATTGGTATTAATGATTTAAATTTGGAAATATTTAAAGGTGATC  
AAATTGCACTTGTAGGTCCAAGCGGGGAGGTAATCCACTTTGACACATCTTATTGCAGGTGTTTATCAGCCAACAATAGGTACTA  
TAAGTACAAACCAGCGTGATTTAAATATAGGAATACTTAGTCAACAGCCATATATTTTCAAGTCTTCTATAAAAAGAGAATATTACGA  
TGTTTAAAGATATAGAAAATAATACTATTGAAGAAGTGCTAGACGAAGTAGGTTTATAGACAAAGTGCAATCTTTCACAAAAGGC  
ATTAACACAATAATAGGTGAAGGAGGCGAAATGTTATCTGGTGGACAGATGAGACGCATAGAACTTTGCCGTCTTTTAGTTATGAA  
GCCAGATCTCGTTATATTTGATGAGCCTGCAACTGGTTTAGATATTTCAAACAGAACACATGATTGAGAAGCTTCTGTTTCAACATTTT  
AAAGATACAACGATGATTGTCATTGACATAGAGATAATAACAATTCGCCATTTACAACGACGCTTGATATAGAAAATGGAAGACT  
GATTGCTGATGTCGCAATATTTTCAGTAAATATAACAGAAAAATGGTGATGACTTATGAAAACACGACTAAAATTTCAAGTAGATAA  
GGATTTATTGTTAGCTATAGTTTGTGTTGTTGTTGGAAGTTTAGTTGCGCTCGCCATGTTTTTCTTAAAGTGTTATATGGTGACAAA  
AGTGCACTTGGTGGCCACTATACGCTCTGATGATTTTAGTCGTAACAGTAAAAATGTTTGGGTTTTTAAAGAGCTATTACTCGATACG  
TAGAGCGCCTTATTTCTATAAAGCTACATTTACAATGCTACGTGATATTCGGGTACAGTTTTTTCGGTAAATTAGTAAATGTCATTCC

TAATGTTTACCGTAAACTGAGTTCTAGTGATTTAATTTACGTTATGATTAGTCGTGTTGAGGCATTACAAAATATATATTTACGTGTT  
TATTATCCACCACTCGTCATCGGTTTGACAGCGCTAGTTACAGTCATAGTTTTGGCGTTCATTTCAATCGGCCATGCGCTATTGATTA  
TGGTTAGCATGTTGTTTACTTTACTCATTTGTTCTTTGGTTAAGCTCAAAAAAGCACGTACTTTAAAAGAAACATGCAGCTAATGAAC  
AGGCCCGATTTTTAAATCATTTTTATGATTATAAAGCTGGTATGGATGAACCTACGTCGATTTAATCAAATTAATCATTATCGAGATA  
ATTTGATGGCTAAATTAATCATTTTGATAAATTACAACCTAAAGAGCAACGCTTTTTAACGATTTATGATTTTATATTAATATTAT  
TGCTATGCTTTTCGATTTTTGGTAGTTTAGTTCTAGGATTAATTCAAATTAATGCAGGCCAACTAAATATTATTATATGACGAGTATA  
GTTTTAATGGTCTTAACCTTTATTTGAACAAGCTGTACCAATGACAAATGTCGCGTATTATAAAGCGGATACTGACCAAGCATTCGCAC  
GATATTAATGAAGTGATATCTGTACCTTCTACTAATGGAAAAAACGCTTAATGATAAGTATGATGCAACGAACATTTATGAAGTT  
AAGGATGCTAGTTTTAAGTATTGGAATCAGCAAAACGTATGTGTTGTCGGATATTAATTTAATGTTAATAGAGGCGAAAAAGATTGCG  
ATTGTGGGTCCTTCTGGTTCAGGAAAAAGTACATTACTACAAATTAATGGCAGGGTTATATCAATTAGATAGTGGCTCTGTTCTGTTTC  
GAAAAATATGGATATGTTTGAAATAGATGACAAAGATAAGTTTGAATCGTTAAATGCTTGCTACAATCTCAACAATTATTTGATGGT  
ACAATACGTCAAAATTTATTTACCGATGAAAAAGATGAAGCGGTGCAAGCAATATTTAAGCAATTAGATTTAGAACATTTGGCACT  
AGAACGTCAAAATTGACTTAGATGGTCATACATTATCTGGCGGAGAAATTCAGCGTTTAGCGATTACGAGGATGTTATTAAGGATA  
CTGCATCAACATGGATTTTAGATGAACCAACAACCTGCATTAGATAAACAATAAGTTTAAAAAGTTATGGATTTAATTGAAGCACAT  
GCAGAAACATTAATTGTTGCTACACACGATTTAACCTTATTGTCACGTTTGGAGACCATCATTGTGATGATAAATGGTAAAAATAGTT  
GAAAAGGGAACTATCAACAATTACTCGCTAATCAAGGTGCTTTATGGAATATGATTCAATATAATGCATAAAAAAACTGCTTGAT  
AGGCTAAGAAACCTTTCAAGCAGTTTTTAACTAACAAGCTTACGCGTGCTAATGTTTTCTATTCTTAATAAATTCTAAACATTAC  
TTAATTGTCATGACAAAAAGTTAATTATTTTCTGTTTTCATCAATGAATGACTTTACCTAATAAGCGCAATTAGTTCTTTTA  
ACTTCATCTTGAGATAAAGAAGAAGCTGAAGCGTTTGTGCAGATGCTAATTAATTCGGTACTTTTGATATTGATAGCAATAGTATTTCAAATGAA  
AGTGAATAAATACTTCACGTTGATCGACTTCGGAACGTTACGCTTAATTAAGTCTACTTGTTCATTCTGTTTTAATAATGGTGATAC  
TGTACCAGTATCGAGTGCTAATTCAGTTACGACTTCTTGACGTTTACAGGAGATTTCATCCATAAAATTTGTTAAGACAAGAAATG  
TGGGTATGTTAGATTGTAATCTTAAAAACTTTGTTAGAGTAGTAGCGATTAACCTGTCTTTGAGCATTGTACAACTAAAGCATAG  
CTGTTCTTTTAAATTATGTTGATCAGACATTAAGGTTCTCTCCAGACATACTATCCGTTTTTTCTCTTTTCGGATTGGTAATCATTA  
AAAAGTTGATTGTTTATTAATTCACAACCTTCTTTGATTCAATGCCATGCTAAAAATTAAGTATGTTTAAAGTTTAGAAGATATTTT  
GATTAATCAAGCAAAAAGATAATTTAATATATATGTTATCATTTTTAAAAATAACTGTAATAGAAAAGAGAATATAAAATGAAAA  
ATAATAAAGATGAAAAAATAAGAATATCCATAATTAACGGATTTTGGGTAGTGGTAAAACCACGTTACTGACACATTATATTAGT  
GAATTATTAATAAATGATGAGAAAAATTAATAATCATCATGAATGAATTCGGTACTTTTGATATTGATAGCAATAGTATTTCAAATGAA  
ATTGAAGTCCATTCATTGATTAATGTTTGTGTTTGTGCGATCTTAACAAGAAGTGTCTATGAACTAAAAGCCATTGCTTTAAAAAG  
GGGACGTTAATCATGTCATCATAGAAGCGACAGGCATTGCGCATCTTTGGAATTACTAGTTGCATGTCAAGATCCGCAAAATCGTTA  
ATTTCTTTGAAAAGCCGATTATTTATGGTGTATTAGATGCGACTCGATTTTTAGAACGTCATCAATATACCGAAAATACAGTTTCGCT  
GATGGAAGATCAGTTGAACTAAGTGACATGATTATTATTAATAAAATTGATCTTATAACTGATGACAGTCTTGAGAAAAATTGATAA  
GCAATTAGGTATGATTGTGCAAGTATTCCAACTTATAAAAAACCTATGGAAAAAGTTTCGTTGGAAGAATTGGACTTAACTGTTAA  
AGACAGAGAGATATCGTCTCATCATCACCATCATCATGGGATTAAGATGACTTACACGTTTACAGGTCCGATTGATCGTCAATT  
GTTTTATCAATTTAATGAAATACCGGAATCTGTTCTACGTTTGAAGGTTATGTGTCATTAGAGATCAACCAATTGCAATTTAT  
GAATTATCAATATGCATATGGTTTACCAGACTATGGTAATTAATGGCATTAATACCATTAAACGATTGTTATTATTTGGTGAACTTTA  
GATACAAATCACATACGTAATCAATTGGATATGCTACAATTTACGTAAATCAGAAAAATGTGTTGTTTCAATTTAACCGAAATAGCAC  
ATTAATTTCTTAATACTTTTATTGTGAATATTTTGTGACATTGAGGGATGGAGTGGATGAGATATGGAACAAATAATGATTAATCAC  
TATGTTTCAATTTTCTAGGCTTGTAAGGTTTTTGGCGTGCAAAATGAATGGAAGATGACTGCGAAAGAGTTAAATTTTATAAAT  
GAATTAGTTGAACGTGGAATTACAACGATGGATCATGCTGATATTTATGGGGATTATCAATGTGAATCACTGTTTGGTAATGCTTTG  
GATTTATCACCCGAATTAAGAAATAAAATTCAAATTGTTACGAAATGTGGTATCATTTTGCTTCTAAGCAATTTGATTTTACAAATG  
GACATCGTTATGATTTGAGTAGTAAGCACATCGTGAATCTGTTGAACAGTCATTAATCAATTTGAATGTAGATTATTTAGATAGTC  
TACTCATTATCGTCTCCTTACCATTGATGGATCCAGAACAAGTTGCTGATGCATTAACCTAAACTGTTAAACAAGGTAAGTTGAAGT  
CATTCGGGGTGCGAATTTTATCATTTACAATACCAATTTGTTAAATCAATATATTATGAAAGAAGACTACATATTAGCATCAATC  
AATTAGAATTATCGCCATATACGTTGATAGTTTACAAGATGGAACAATGGATTCAATGTATCAAAACCATGTTCAAAATTATGGCTT  
GGAGTCTTTTGCAGGCGGTAATAATTTTCGACAAGGAAGATATTAAGCGCAACGTATTATGAAAGTTGTTCAATCAATAGCTGAC  
AAATATGGTGTGAGTGACACAGCTGTGATGATAGCATGGTTAGTAAAAATACCGCATCGTATCATGCCGATACTTGAACAAGTCA  
GTTAAAGCGTATTGATCAAGCAATCGAAGGGCTACAACCTAATTTAGATGATCAGTCGTGGTTTGACATTTACACCGCTATTATCGG  
ACAAGATATTCCGTAACTTATTTACTTTTAAATCATAAAGGAGCATATCATGACAAACGAAGATAAACGTTTCGACAAATTAAGAT  
TTGAACGCAAAATTTATAGTTATCCGTATTTAATTTATGCAGTCATTGTATTACTATTAAATATTTTCTATTCTGATTTGAAAAATAACA  
ATGACATTATTCGGACTTTTCTTTGCGTATAATGTAGTCATTTTGTTCATAGCATTTATTAAACATTATAAACGCACATTGTTACTAA  
GTCTTATTAACAGTGCTTAGTGGCGCGGCATCTTTTGAATATTATTTATGTTTATGTCATTAAATCAATTTTAAATATTAAGAGAGA  
CTATCTACAATAATCTGATTTTATCTAATCAATGTTTAACTTTTGTCTAGAAAAATGGTGCTATAGGATATTACAGTAGATAG  
TTTTTTTATGATCTAATATTTAACTTAGATATCGTTTTGTAATTAACCGAGATAAATCATCACCTAGCAATATTATTTACAAAAAT  
TTTCGATAAAATTTGTGATTTTGCATAAAATTAATAATGTATGTTTTAAAAAATTTGTTATAATTAATTAAGATTAAACAAAGGGGTGA  
CTGTTATGTCAGAAGAAAAACATGTAGTTGAACATGAACAACAAAAGAAAAGAAAAAGCAATAACAGCCATTTTGGAT  
TGTCATGAGTTTATAATACTTATAGTTGTACTATTACTCCCGGCACCTTCAAGTCTGCCGATAATGGCTAAGGCAGTACTAGCTATT  
TTAGCTTTTGCAGTTATTATGTGGGTAACGGAAGCTGTATCATATCCGGTGTACAGCACTTTAATTTATCGGCTTAATGATATTACTTT  
TAGGATTTAGCCCGGTTCAAAATTTAGGGGAGAAGCTAGGTAATCCGAAAAGTGGCAGTGCTGTTTTAGCTGGAAGTGACCTTCTA  
GGAACATAATCATGCATTATCATAGCGTTTAGTGGATTGCAACTTACGCTGAGCTCTCGTTGACGCCGATTAATTTTGGTCTG  
CTATGCAAGAAACGAATTTGCTAATAAAGACTAGCTCTTTTATGTTTATCAATTTGTTGTAATAAAGATAAGTATAGTTATTGGAG  
CAATTATCGTTTCAATTGTACTTGCATTTTTCGTTCTTCTGCAACAGCTAGAGCAGGGGCAGTTGTACCAATCTTGCTGGGTATGAT  
TACGGCATTTAAAGTTTCAAAGATAGCAAGTTAGCGTCTTTATTAATAATTACTTCAGTACAAGCTGTGTCAATTTGGAATATTGGT  
ATCAAAACGGCGGCAGCACAAAATATCGTAGCGATTAATTTTATAAACCATCAATTAGGATTTGATGTTTCATGGGGCAGTGTTTC  
TTATATGCAGCGCCTTGGTCCATAGTTATGTCCATAGCTTTATATTTCATCATGATTAAAGTATGCCTCCAGAAAATTAATACAATAG  
AAGGTGGTAAAGATTTAATAAAGAAAGAAATGCTAATAAATTTGGCCCGTTAGCGCACGTGAATGGCGTTTAAATGTTATATCGATGT  
TATTATTACTGTTTTGGTCAACTGAAAAAGTATTACATCCGATTGACTCTGCATCCATTACTATTATTGCTTTAGGTGTTATGTTAATG  
CCGAAAATTTGGTGTCTATGACATGGAACATGTTGAAAATAAAATACCATTGGGGAACAATTATCGTGTTTGGTGTAGGTATTTCTACTA  
GGTAACGTTCTTTTGAACAGGTGCAGTCAATGGGTTAAGTGATCAAACTTTTGGTGTTTAGGTTTAAACATTTACCTATTATATCG  
CGACAATTGCACCTTATCACGCTTTTAAATATATTGATTCATTTTGGGCTTTGCGAGTGCAACAAGTTTATCATCAGCGTTAATACCTGT  
TTTTATTTTCGCTAACCTCTACGTTACACTTAGGAGACCAGTCTATAGGATTTGTTTTAATTCACAATTTGTTATTAGTTTGGTTTCT  
TATTACCTGTTAGTGCACCTCAAAATATGTTGGCTTATGGCACTGGTACTTTTACGGTTAAAGATTTCTTGAAGGCAGGTATACCATT

GACAATTGTAGGGTATATTTCTAGTGATAGTTTTTAGCATGACTTATTGGAAATGGTTAGGTTTGCTTTAATTA AAAAATAAAATAAG  
AATCTAGGTTATTTTAAAGTGACAAAAAGCTTAATAAAAATAAAAAGATAAATTGAAGGGTGT TTTGTTTATGGCAATTGCTGTGTTAT  
TAAATCGAATGTTTCGAATGGAACACAATCCATTATTTGAATATATTTATCAACAAAAAGAAGACATTGATGCATGTTATTTTATCA  
TTCCGGAAGAGGACATGTCTTCAGCTTCTGATTTGAAAGCACAGTTTTATCGCGGTACTTTGCAGCGCTTTTACCAATCGTTGCACGC  
AGAAAAGCTTACACCTTATGTTATGTCTTATGACGATATCATTTCATTTTGTAAAGAAAAACAATATCTCTGAAGTAGTGACTGCGGG  
TGATATTATGAGTTATCATCTTGAAGAATATGATATTTACATCAACGTTCTTTATTCAATGAAGCACGCATTGCCGTTACTTTGATA  
CGTGGGAATCATTACTTTAAAGCGAGTAAAACAATGAATCAACAAGGGGAGCCATACAAAGTTTTTACTAGTTTCTATAAAAAATG  
GCGACCTTACTTGAGGCATAGAGACGTATATCACTATGATTTAAAAATCATTGGAAGACTTCGTCATTGCATCACCTGATGATTTAGT  
GTTTGATGACATAGCGTTTGGATCCTCACAATAAATTGAACAGAATAAATGGCAACATTTTTTAGATCAAGATATACAGAATTACGA  
AAGCGGAAGAGACTATTTACCTGAAGTGTTAACAAAGTCAGCTAAGTGTGCTTTAGCATATGGATTATTAGATATATTGAAATTTT  
TAATGATTTTATTGGCGCGTTATGATCAAGATGAGGCAAACCTATGAAGCATTATACGTGAACCTATTTTTAGAGAATTTTATTATGT  
GTTAATGACACAGTATCCAGAAACCTCATACCAAGCTTTCAAACCTAAATATCGACAGATAAAAATGGTCGCAAAATGAAGCGGATT  
TTAATGCATGGTGCGAAGGGCAAACAGGATTTCCAATCATTGATGCAGCAATAATGGAATTGACACAAACTGGTTTTATGCATAAT  
CGAATGAGAATGGTTGTGTCGCAATTTTAAACCAAAGATTATTTATAGATTGGACATGGGGAGAAAAATTCTTTAGAAAGCACCTT  
ATTGACTATGATGCAGCATCAAATATTCATGGATGGCAATGGTCTGCATCTACTGGTACGGATGCGGTGCCGTATTTTAGAATGTTT  
AATCCAATTAGGCAGAGTGAACGCTTTGATCCTAAAACATTATATATCAAAACATATCTTCCAGTTTTAAATCAAATTGATGCAAAAG  
TATTTACATGACACACATAGAAATGAATCTGAATTATTTAAACAAGGGATTGAGTTAGGTCGTCATTATCCAAAACAAATAGTGGAT  
CATCAAGAAAGAGACTCTCAAGTTTTAGCGACATTTAAAGCAATTAGACTAATTGCGCTCAATTGATAGATAGCAGGCATGAGTAAAT  
CTGGAGCAGAAATAGGTAAGTATTTCCACTCACTTAAATTTAGTCTCGCTGTAAGGTTGAATTGAAATTGGTTTCCAAATGGAATTAAT  
AAGTTGTATTTAGTTTTCTTATTAATTTGATGTTATCTTAGTATGTCCGTAAATAAAGTGAGGTATAGTACGACATACTCTAAAAACG  
TAGTGAGATAAATATATTTCAATCTAACTTTTATGTTTTGAGGCATTGCCATTTAGGATATTGTCGTTTCGTAATACGACACTTGTG  
TATAAATACACCTAGTCCAAATGGCAGCATCATGAGTAAGATACTTCTTAAATAACTTAAACCAATATCATACCATATGTGTCCAAT  
AATCAATTGAAAGCCAATGATAGATACTATTAACACGATTATATTTATTGTCACTTGTCAAACGCACCTCTTTTCCAAATAATAGA  
ATTGCTGCTTGCATCACAACCATAAAACATACAAACATAGCAGTTTTAAGCGTTAGACTTTCTAGAATGTGATTTAAACATGTAAAG  
GGCTCATTAAGAAATAAACGGAATGTAAGCGTAAGAAACGACCAATATAAATTCGGAATCCATTTAAAAACATTAGCACGACAAC  
AATTAATCTAATTAAGCCAACGGTGAGAAGTCAATGTTAGTATTTCAAAATAGATTAATAATCATCACATAAACCCGCTAAGAAGACAC  
CAAGCAGTAAATAGGTAAGTATTTCCACTCACTTAAATTTAGTCTCGCTGTAAGGTTGAATTGAAATTGGTTTCCAAATGGAATTAAT  
CAGTTACCATATAAAAATGTATTTGGTAAAAAGTAACACAAATATAAACTATATATGATAAATAGTGCCATTCTACTTTTTATTCTG  
GTTTGAATAATCGTAATAATAGACTAAGCTCAAAAGGTATATATGCTAAAAACAAATTTAAAGTCATAAATTGAAAAATTTTAGTCT  
CAAAAAGTGAGACGATAAATAAAATTAAGTAAGTAAATCTAGCGATGTATCGAGATTGCATCAATAATAAACTACTTTTCTAATG  
AAAAAGTTATTCATTCAAATGTGATAGTTATAAACGCATTCAATTCCTAATTAAAAATTTAATTTAACTCGTTGAAGTATATTAATA  
AACGAGAATGCATTTATGATTAAGCACTTATGATAACTTGTAAATAAAATTTGATTCAACTAAAAAGTAAAGTGCTATTGAGGATCAA  
GTAAATTTAAACCGACTGCATCTTTGAATGAACGTTGAATGTCCAAATCAGTTACAGTAAGAATGATTTACAGCAGTTGCAGAAACA  
ATTGCTTTAGCGAGATGTCCGCTAAAAGTTTCATATGATTGATACCGAAAGTAGCATGCAAAATGTGCAAAATGACCATTTGTCTAGA  
CGGAAATATTACCTAATAAGCTCGTCAATTCAGTGGCTCAGTAATATGTTTTCTTCTGTAATTGTTTCTGTTTAAATTGAAAAAT  
TTAATACAACGTCATCACATGCACCAATGCCGCTGACAGATGTAATGTTAAGTCTTGGTCATCTGCAAGGTTGTTATACATTCAA  
CGATATCTTCTCTTTTTTCCAACACTAGTAGTATAGTATGATTACTTTTTTGCAATTTTCATATGATCAATCCCTTTATTTTAAATATGT  
CATTAATTATACAATTAATGGAATAATAGTGATAATTACAAAGAAAAAATATTGTCAAATGTAGCAATGTTGTAATACAATATAGA  
AACTTTTTACGAATATTTAGCATGAATTGCAATCTGTTGTGGAAGAAAGAAATAACAGCTTTAAGCATGACATGGAGAAAAAGAG  
GTGAGCATATGAATAAACAGATTTTTGTCTTATATTTAATATTTTCTTGATTTTTTTAGGTATCGGTTTAGTAATACCAGTCTTACCT  
GTTTATTTAAAGATTTGGGATTAAGTGGTAGTGATTTAGGATTACTAGTTGCTGCTTTTGCCTTATCTCAAATGATTATATCGCCGT  
TTGGTGGTACGCTAGCTGACAAATTAGGGAAGAAATTAATTATATGTATAGGATTAATTTTGTGTTTTCAGTGTGAGAAATTTATGTTTG  
AGTTGGCCACAATTTTTCGTTATGATGTTATCGAGAGTGAATGTTGGTATGAGTGCTGTTGTTGTTGTTGTTGTTGTTGTTGTTGTTG  
AATAGCTGACATTTTACCAAGCCATCAAAAAGCAAAAAAATTTGGCTACATGTACGCGATTATCAATTCTGGATTCATTTTAGGACC  
AGGGATTGGTGGATTTATGGCAGAAGTTTCACATCGTATGCCATTTTACTTTGCAGGAGCATTAGGTATTCTAGCATTTATAATGTCA  
ATTGTATTGATTACGATCCGAAAAAGTCTACGACAAGTGGTTTCCAAAGTTAGAGCCACAATTGCTAACGAAAAATTAAGTGGAA  
AGTGTATTATTACACAGTTATTTTAACACTTGTATTATCGTTTGGTTTATCTGCATTGAAACATTGTATTCACTATACACAGCTGACA  
AGGTAATATTACCTAAAGATATTTTCGATTGCTATTACGGGTGGCGGTATATTGGGGCACTTTTCCAAATCTATTTCTTCGATAA  
ATTTATGAAGTATTTCTCAGAGTTAACATTTATAGCTTGGTCAATTATTATATTCAGTTGTTGTCTTAATATTATTAGTTTTTGTAAATG  
GCTATTGGTCAATAATGTTAATCAGTTTTGTTGTCTTCATAGGTTTCGATATGATACGACCAGCCATTACAAATTAATTTTCTAATATT  
GCTGGAGAAAGGCAAGGCTTTGCAAGGCGGATTGAACCTGCATCTACTAGTATTGTTGTTAATTTTCAATGCTGAGGTTGCTG  
GTTATTGATGTACAGATTGAAGCACCAATTTATATGCTATAGGTTGTTTATTAGCAGGTGTTGTTATGTTTATTGTTTAAAGGCAAA  
CATAGAGCAAAATTGAAAGAACAAAAATATGTAGCATAAGTATTTTGGTGTATATTGATATAAAGTAAAGCGTAATATTATGAATGA  
TTAGCATCGTTTTTCTTATGAATTTTATTAAGAAAAATTCGATGCTTTACATTTAAAAAGATTTCGATTGACTAAATGTTTTACTCTTTAT  
ATTTAAATGTTATATGTAACAAAAATGATTTTGAGTAATAAACATGTTACAAATATTACATTCTTTTAAATTTGCAATCCACATACC  
TAATTCATTAACGTTAATGTGTTAAGATGATAAAAAATGAGTAAGGAAATGTGGGTAAGGGGATGACAGTAAAAAATTTATTTTAA  
GGCTTTGTTGCTGTAATATTAACCGTTTGTTAATTGGTTTATTAATATTAGCAACAAATGAAGATGCGCTTGCTAAGGTACATAAAA  
CAATTAATACGCTTAACGCGATAAATGTATCAACTGAAGATACTTATAAAAAGAAAAATGGATATTCTCAATATTCATACTGCTAAAG  
CATCTGAAGTGAATGAAATGTGAAAAAGCAAAATCTTTAAACATCGTGTGAATGCAAAATAAATCAATCTTTTAAACGAAACA  
GAGTGAAGGTTATTGCTGATCGTTATGCGAGATAAGCATATCAATGATAATTATGTTTGAAGAAAGAAATTTCTAAGCAAAATCATGGA  
TATAATTATGTGATTCCAATGATAATTCAACTAGTAAGCAACATGTAAGTATTTCAAATCAAGGCATAATAACGAAAAATAGATG  
GAACAGTGTATTCTAATTGGATATACTGTTTTTATTTTGAATAATTTAATTTAAAAAGGTGAATTCAACTTATAAAATGATGTAAAT  
GTTATGTCAAATCAACCAATCCGTAATGATTTTAAATGTTAATATAGTTCTGAAGAAGTATAAATGAGGTGTTGAAATGGCTAA  
AAATAAGAAAACGAACGCGATGCGTATGCTTGATCGTGCAAAAAATTAATACGAAGTTCATAGCTTTGAGGTACCAGAAGAACATT  
TATCTGGTCAAGAAGTCGCAGAACTCATACAAGCAAAATGTTAAAAACAGTATTTAAAAACGCTTGTCTAGAAAAATACAAAACATGAA  
CATTTTGTATTTGTTATCCAGTAAGTGAACTTTAGATATGAAAAAGGCAGCTGCTTTGGTTGGAGAGAAGAAATTCAGCTTATG  
CCTTAGATAATTGAAAAATGTAACGGGGTACATTCGTGGTGGGTGTTCCGCTGTTGGTATGAAAAACATTGTTTCCAACAGTCTGTT  
GACAAATCGTGTGAAAAATTATGCTATATCAGTGTAGTGGTGGGCTTCGAACAATGCAAAATGCAAAATGCTGTTGAGGATTGATT  
ACAATAACTAAAGGCAAAATTTGGAGCAGTTATCCATGAATGATTAATAACAACAAAAAGTATGGGGCAAGATTAGGAGGTGTGACA  
GAGATGAAATTTTTATAAAATTCATTTCTGCCACACTCCTTTTTGATTGAATTAGCATTTTACGATCATAAACAGTCATTATAATTGA  
GTATTTGAACATAAAAAATGTAATTTTATCGTCACAAATTTGAGTGTGTTGTGATTGTTTTGGTAATTTATGATTGAAAAAGTGAAAGCGT

ACTCATTATAATACAGAGTGAGATGGGGTGATGATGATAATTACAGAAAAAGACACGAGTTAATTTTAGAAGAACTTTTCGCACAA  
AGATTTTTTGACTTTACAAGAAATTAATAGATCGAACTGGGTGCAGTGCTTCAACAATACGAAGAGATTTATCTAAACTACAACAATT  
AGGGAAATTGCAACGTGTGCATGGTGGTGCAATGTTAAAAAGAAAATCGTATGGTTGAGGCGAATTTAACTGAAAAATTAGCAACGA  
ATCTTGATGAAAAGAAAAATGATTGCTAAAATAGCAGCTAATCAAATCAACGATAATGAATGCTTATTTATCGATGCTGGTTCATCTA  
CATTGGAGCTAATTAATATATTCAAGCGAAAGATATCATTGTGGTAACCAATGGTTAACACATGTAGAAGCTTTACTTAAAAAAG  
GTATTAACAACAATTATGCTAGGTGGTCAAGTTAAAGAAAAATACACTTGCTACGATTGGTTCTAGTGCCATGGAGATATTAAGACGAT  
ATTGTTTCGATAAAGCTTTTTATCGGGATGAATGGATTAGATATTGAACCTTGGATTAACTACTCCCGATGAGCAAGAGGCATTAGTTA  
AACAAACAGCAATGTCATTAGCCAATCAATCATTGTACTTATTGATCATTCTAAGTTTAATAAAGTATATTTTGCTCGTGTACCTTT  
GCTAGAAAAGTACGACAATCATCACATCTGAAAAAGCATTAAATCAAGAATCGTTAAAAGAATACCAACAAAAGTATCACTTTATAG  
GAGGGACTTTATGATTATACAGTGACTTTCAATCCTTCAATTGACTATGTCATTTTTACGAATGATTTTAAAAATTGATGGTTTGAAC  
AGAGCAACAGCAACATATAAATTCGCTGGGGGAAAGGTATTAATGTCTCGCGCTCTTAAAGACATTGGATGTTGAGTCAACTGC  
CTTGGGATTTGCAGGTGGATTTCCTGGAGAATTCATTATAGATACATTAAATAACAGTGAATTCATCGAATTTTATTGAAGTTGA  
TGAAGATACACGTATTAATGTGAAATTAACAGGACAAGAAACAGAAATCAATGCACCGGGTCTCATATAACGTCAACACAAT  
TTGAACAACCTGTTACAACAAATTAACAAAGCAAGATATAGTTATTGTTGCTGGAAGTGTACCAAGTAGTATTCCAAGC  
GATGCGTATGCGCAAAATTGCACAAATTACAGCACAGACAGGTGCTAAATAGTAGTCGACGCTGAAAAAGAATTGGCTGAAAGCGT  
TTTACCATATCACCCACTATTTATTAACCTAATAAAGATGAATTAGAAGTGATGTTAATACAACAGTGAACCTCAGACGCAGATGT  
TATTAATATGGTTCGTTTGTAGTTGATAAAGGTGCGCAATCTGTTATTGTCTCGCTTGGCGGTGATGGTGCTATTTATATTGATAAA  
GAAATCAGTATTAACAGCTTAATCCACAAGGGAAGTGGTTAATCAGTTGGCTTGGTGATGATGACAGTTGTCAGGCATGGTGGC  
TGGAAATTGCTTCAGGTTTAACGATTGAAAAAGCATTCACAAAGCAGTCGATGCGGTACTGCCACGCGATTGATGAAAAAGCAAGCGGATA  
CAACACGGGACGCTATAGAAAAATAAAATCACAAGTTACGATTAGCGTACTTGTATGGGGAGTGAAAAATAATGAGAGTAACAGAG  
TTATTAACAAAAGATACGATAGCAATGGATTTAATGGCAAATGACAAAAATGGTGTATTGTATGAGTTAGTAAATCAATTAGACAA  
AGCAGGTAAATTAAGTGATGTCGCGTCATTAAAGGAAGCGATTACAATCGAGAATCACAAGTACAACCTGGTATCGGCGAAGGTA  
TTGCCATTCCACATGCCAAAGTGGCCGCGAGTTAAGTACCAGCTATTGCGTTTGGTAAATCTAAAGCAGGCGTAGATTATCAAAGTT  
TGGATATGCAACCAGCACACTTATTCTTTATGATTGCAGCGCCAGAAGGTGGCGCCCAACACATCTAGATGCTTTAGCTAAGTTGT  
CTGGTATTTTAAATGGATGAAAATGTACGTGAGAAATATTACATGCTTCATCACCTGAAGAAGTACTAGCGATCATAGATGAGGCTG  
ATGATGAAGTGACAAAAGAAGAAGAGGCAGAAGCTGAAGCACACAAGTTGCAACTGCAGAACATCATCTAAACAATCTAATGA  
GCCATATGTGTTAGCAGTAACCTGCTTGTCACACAGGTATTGCACACACATATATGGCACGTTGATGCAATGAAAAAGCAAGCGGATA  
AAATGGGTATTAATAATTAAGTTGAAACGAACGGTTCAAGCGGCATTAAAAACCATTAACTGAACAAGATATTGAAAAATGCAACA  
GGTATCATTGTTGCTGCTGATGTTTCATGTTGAGACGGATCGCTTCGATGGTAAAAATGTCGTAGAAGTACCAGTAGCAGATGGTATT  
AAACGCCAGAAGAATTAATTAATAAAGCATTAGATACAAGTCGTAAACCTTTTGTGCCCCGTGATGGTCAAAGAAAAGGTAACCTC  
AAATGACAGTCAAGAAAAATTAAGCCAGGTAAAGCTTCTATAAACACTTAATGAACGGTGTTTCTAACATGTTGCCACTTGTAAAT  
ATCTGGTGGTATTTAATGGCAATTGTATTTTATTTGGAGCAAAATTCATTTAATCCAAAAAGCTCAGAGTACAATGCGTTTGCAGA  
GCAGCTTTGGAACATAGGTAGTAAAAGTGCATTGCGGTTAATCATTCCAATTTTATCTGGATTCAATTGCACGTAGTATTGCGGATAA  
ACCTGGTTTCGCTTCAGGCTTGTAGGTGGTATGTAGCAATTTAGGTGGTTCAGGATTTATTTGGTGGTATTATTGCAAGTTCTTA  
GCAGGTTACTTAAACACAGGTGTTAAAGCGATGACACGTAAGTTACCACAAGCATTAGAGGGATTAACAAACCAATTAATTAATCC  
ACTATTGACAGTAACAGCTACAGGCTTATTGATGATTATGCCTTAAATCCACCAGCATCTTGGTTAAATCATTGTTATTAGATGGA  
TTAAACAATTTATCAGGTTCTAATATTGTATTATTAGGTTTAGTTATTGGCGCTATGATGGCGATTGATATGGCGGTCCATTCAACA  
AAGCGGCATATGTTTTTGAACAGGTGCGTTGATTGAAGGTAATGCAGCACCAATTACAGCTGCAATGATTGGTGGTATGATTCCAC  
CGTTAGCAATTGCGACAGCGATGTTAATTTTCAGACGTAATTTACAAAAGAACACGTTGGTTCAATTATCCCTAACTATGTGATGG  
GTATGTCCTTTATTACAGAAGGTGCGATTCCATTGCGAGTGCCTGATCCATTACGTTTATTCTTCAATGATGATTGGTTCAGGTAT  
AGGTGGCGCAATTGCTTTAGGCTTAGGTTACGAATTAAGTGCACCATGTTGGTATTATTGTAATTGTTGGTACGGATGGTGCACA  
CTTACTTCAAACCTTATTGCACTTCTAGTTGGTACATTAGTTTCAGCATTAAATTTACGGTTTAAATCAAACCCAAGTTAACTGAAACA  
GAAATCGAAGCTTCAAACATCAATGGACGAGTAGTTTAAAGTATGTAAGTATTGTTAGCAAGAGCTTCATATTCAATCTGTAAGTT  
CAATGAATATATGTTAGTTTATACATCGTGTAAACGGTAGCTTATACAAAGCTGTAAAAACACTTTCTATTAATTCAGTTTATGA  
ATTGATATGAAGGTGTTTTTATTTTATGATAAATGAATGAAGAAATAGACACCACAAATGTATAGACTTTTTTAATATTTTGCAAAA  
AGTTATGCCAAACGAAGCAGATATAGTAAAATATGAGTGTCTTAAAGTGAAAAATTTAATAAAGAAGGGTTTATACGTGCAGAA  
ATTAATTATATATAACGGCAAGTTTATACTGAAGATGGCAAAATCGATAATGGTTACATTATGTTGAAAGATGGACAGATTGTTGC  
AATTGGAGAAAGGGGATGATAAAGCAGTAATTGATAATGATACGACAAATAAAATTCAAGTGATTGATGCTAAAGGTCATCATGTAT  
TACCAGGTTTTATTGATATACATATTATGTTGGTTATGGTCAAGATGCAATGGATGGGTCATACGATGGCTTAAATATCTATCCG  
AAAATTTGTTATCTGAAGGGACGACATCATACTTGGCCACTACAATGACGCAATCTACTGATAAAAAAGATAAAGCACTTACAAAT  
ATTGCTAAATATGAAGCGGACGAAGATGTTCAATGACAGCGAAATTTGATAGGTATACATTTAGAAGGACCATTTATATCTGAAAA  
TAAAGTTGGTGCTCAACATCCGATGTTGACGCCATTTTACGATAAAATTAACATTTTCAAGAGACTGCTAATACAGTAAAT  
AAAGATTATGACGTTTGCACCTGAAGTTGAAGGTGCAAAAGAAGCGCTTGAACGTAATAAAGATGACATTATTTTTTCAATTGGTCA  
TACAGTGGCAACATACGAAGAAGCAGTGAAGCTGTTGAGCGAGGAGCTAAACATGTCACGCATTATATAATGCAGCGACGCCAT  
TCCAGCATAGAGAACCAGGTGTTTTTGGAGCAGCATGGTTGAATGATGCTCTACATACCGAAATGATTGTTGATGGCACACATTCTC  
ATCCGGCATCGGTTGCTATTGCTTACCGTATGAAAGGTAATGAACGTTTTTATTTAATTACCGATGCAATGCGTGCAAAAGGTATGC  
CTGAAGGAGAATATGATTGGGTGGACAAAAAGTAACTGTTCAATCGCAACAAGCACGCTTGGCAATGGTGCGCTTGCTGGTAGT  
ATTTTAAAAATGAATCATGGGTACGTAACCTAATATCATTTACAGGTGATACATTAGATCATTTATGGCGAGTAAACAAGTTTAAAT  
CAAGCCATTGCATTAGGTATCGATGATAGAAAAGGTAGTATTAAGTAAATAAGGATGCAGATCTTGTATTCTAGATGATGAT  
GAATGTAAAACTACAAATAAAACAAGGTAAGGTTACACATTTAGCTAAATAAATAATCATAATTAAGATTATGCAATAGATTAAAT  
CTGTTAAACATAAGCACTTTATATTATGATAAAATAGAAGCAATAACATTTTTTTCTGGGGGTGTCTAAATGGGAAGGCGATAACATG  
TAGTTGTAATTTAAGTCATAGTGATAAATTTGAATGCGTGTTACCCATGAGTGACACATATAACATGGAGGTGAATCCCTAGAAATA  
GGGAATTAATTGGAACCTTCGACCATAATTAGTTTGATTATATTTATTCTATTAATTGCATTAACCACTGTATTGTTGGTTTCAGAAAT  
TTGATTAGTAAAAATTAGAGCAACAAGAATTGAACAGCTAGCAGATGAAGGAAATAAACCTGCTAAAAATAGTAAAAAAGATGAT  
TGCTAATCTAGATTATTATCTTTCTGCTTGTCAGTTAGGTATAACAGTAACATCTTTAGGGTTAGGTTGGCTTGGTGAACCAACGTTT  
GAAAAGCTATTACACCAATATTTGAAGCAATCAATTTACCAACTGCATTAACGACGACGATTTGCTTTGCAGTGTCAATTTATAATC  
GTTACGTATTGTCATGTAGTACTTGGTGAATTAGCGCTAAATCTATAGCGATTCAACATACTGAAAAGCTTGCTTTAGTATATGCA  
AGACCATTGTTCTATTTCCGTAACATTATGAACCATGATTGGCTGATGAATGGTTCTGCACGTGTTATTATTAGAATGTTTGGTG  
TAAATCCTGATGCCAAACTGATGCAATGTCAGAAAGAAGAAATCAAATTAATTATTAACAATAGTTATAATGGTGGAGAAATCAAC  
CAAATGAATTGGCATATATGCAAAATATCTTTTCATTGATGAAAGACATGCAAAAGATATAATGGTACCTAGAACTCAAATGATT  
ACACTAAATGAACCTTTAATGTAGACGAATTACTAGAAACAATAAAAGAACATCAATTTACGCGTTATCCAATTACTGATGATGGT

GATAAAGACCACATTAAGGATTTATTAACGCTCAAAGAATTTTAACTGAATACGCTTCTGGAAAAACGATTAATAATAGCAAACATA  
TATACATGAGTTGCCAATGATTTTCAGAGACAACACGTATCAGTGATGCATTAATTAGAATGCAACGTGAACATGTACATATGAGTCT  
TATTATAGATGAATATGGTGGAACGGCAGGTATTTAACGATGGAAGATATTTTGAAGAAATCGTTGGGGAAAATTCGTGATGAAT  
TTGATGATGATGAAGTGAATGATATCGTTAAAATTGATAATAAGACATTCCAAGTAAATGGTAGAGTACTATTGGATGATTTAACTG  
AAGAGTTCGGTATAGAATTTGATGACTCTGAGGATATTGATACGATAGGTGGATGGTTACAATCTCGTAATACCAATTTACAAAA  
GATGATTACGTGGATACAACTTATGATCGCTGGGTGTTTCAGAAATCGATAACCACCAAATTTATTTGGGTGATATTAACCTATGAA  
TTTAATGAAGCGAGACCTACTATCGGACAGTCTGATGAAGATGAAAAATCAGAATAGATATTAATATATAAACCAACTAAGAATGA  
TTTAATTCATTTTGGTTGGTTATTTTTTGGACTAAAAATTAATGAAAAAGTGAAGTAAATAGTATTGGAACCTAATATCTTTAATGATTTAA  
TGAATATTTTTATTGAAAGCGATAATTTCGTATTAATTGAGTTTGTGAAAAATTTAGGGTAATGTAAAGATATAAAAGATACATAG  
ATTGGAGAGGTATAAAGATGTTGAATGAGATACAAATATTAATAATGGATACCCGATGCCTTCAGTTGGGTAGGTGTTTATAAA  
ATCTCTGACGAAGATATGACTAAAGTTGTAATGCTGCAATTGACGCAGGGTATAGAGCGTTTGATACAGCATACTTTTATGATAAT  
GAGGCTTCACTAGGACGAGCATTAAGGATAATGGCGTCGATAGAGAAGATTTGTTTATAACAACGAAGTTATGGAATGACTATCA  
AGGTTATGAAAAAACATTGCAATATTTCAACAAATCGATTGAAAAATTTACAACTGATTATCTTGATTTATTTCTAATACATTGGCCT  
TGTGAAGCAGATGGTCTATTTTTAGAAACATATAAAGCTATGGAAGAACTTTACGAGCAAGGTAAGGTAAAAGCAATAGGTGTATG  
TAATTTTAATGTTTCATCATCTAGAAAAATTAATGGCTCAATCAAGTATCAAACCAATGGTGAATCAAATGAGGTACATCCATATTT  
TAACCAACAAGAATTACAAGAATTTTGATGATCGTCACGATATTAAGTGACTGCATGGATGCCTTTGATGAGAAATAGAGGACTAC  
TAGACAACCTGTCTATTGTTAAAATTGCTGAAAAATATCATAAAACACCAGCACAAAGTTGTATTACGTTGGCATTAGCACACAATA  
GAATTATTATCCAAAATCTCAGACACCTAAACGCATTCAAGAAAAATATAGATATTTAGATTTTAAATTGAATTAACAGAAAGTAG  
CTGAAATTGATGCTTTAAATGAAATGCAAGACAAGTAAAAATCCAGATGATGTGAAAAATTTGGGATTTAAATAAATACCTGATGTT  
AAATTTTACGTTTATGAATGCCTTTTAATGTGTACATTAATAATAATGAGTTGGTTTACTATTTGATAAAACAATACTCAGGTACA  
TTCAAAATCTTTTAAATAAAAAGGATGGACATAGATGAAATTAGAGTCGTCATTCTTGTTTAAATGAAGGGGAAGTCATTACACA  
AACACATCAACAATTAAGTAAATCTTTACAAGATAGTAGTGTGAAAGGCTATGATTATAATATGCTTTTCATAGATGATGGTAG  
TACGGATACCACTATAGATGAAATGCAACATCTTGCCACAATAGATAGGCATGTCAGCTTTATTTCTTTAGTAGAAATTTTGAAAA  
AGAAGCAGCTATGATTGCAGGTTACCAGCATAGTACTGAATTTGATGCAGTCATCATGATAGATTGTGATTTGCAACATCCACCTGA  
ATATATTCCGAAAATGGTTGAAGGTTTTATGGAAGGCTATGATCAAGTGATTGCAAGCGTGATAGAAGTGGTGAAGTAAATTTAGTC  
GCAAAACATTAAGCCATTTGTATTATAAGTTAGTTAATTGCTTTGTAGAAGAAGTACAATTTGATGATGGTGTGGTGATTTAGAC  
TTTTAAGCCAAAGAGCTGTTAAATCCATTGCATCACTTGAAGAATATAATCGATTTTCAAAAAGGGTATTGGAATGGATAGGCTATA  
ATACTAAAAGTGTTTACGTATCAAAATGTTGAGAGACAAAAAGGAGAATCTAAGTGGTCCCTTTAAAAAGTTATTTAATTATGGTATTG  
ATGGATTGATTTCTTTAATAGTAAACCTTTGAGAATGATGATTTATCTTGGCTTGTTTATCTTTTCAATAAGCGTGCTATATATTATC  
TATTTATTCATCAATATTATGATATCTGGTGTTAATATTTCCGGGATATTTTCAACGATTGCAGCTATTTTATTATTAGCGGCATAC  
AGTTAATTTCAATTGGTGTTGTAGGTGAATATATTGGCAGGATATATTATGAAGTTAAGGCACGTCCTAAATATATTATCAAGCTA  
CAAATCTTTCAAGTATTGAAAATGATGAGAAGGATACCCATAAAGTTTATTCTAAATAAACAAAAAAGAAGCCCTCATTAAATGGG  
AGCTTCTTTTATGCTTTTGCATTTTATTTTATAAATAAATCGGATTATGACGTAATGTCTAATTTGTGTAATGTTACAGTCATCGTAGT  
TCCTACATCTATACACTGCTTACACTGATTTTGCCTTATTTTGTGCGGAGTTCATTAGCTATATAAGCCTAATCCGAAACCA  
CCCGTTTTTGTATTACGAGAGTTTCTACTCTGAATGTACGTTTCAAGTATACGTTCTTGAGTTCTGTTATAGTTAATGCAATACCTTCATC  
GCTAATAGCAATGTCGATAGTATCTTGATCTTTGTTTTCTACTAATATTAATATCAATGCGACTACCAACATTTGAAAAATTTAGCGCA  
TTATCAAGTAAGTTTGTTAAAATACGCTCAAGTGGCGTTTCGATATTGATAAAATGCATCAATTTGCTACAGAAATTCAGTTCTAAT  
GTGCGGTTTTTCATGTTTGATACGTTGCTCATATGGTTGCAATATTGATACAAGTAATTTGGTCTAGTTGTATTAATCTGGGGGATATG  
TTTTACCTGTATTTAAAGTGATAATATGAGTCATATCATCAAATAATGTTGATAATCTGTTTGCTTGTTTAAATTAATATGTCGTATGA  
CTCTTAAATCTCATGATCCTTAGTGATTATACCATCACGTAGTCCTTCAGAAATATGAAATAATGCTTGCTAAAGGTGTTTTTAAATCA  
TGGGCTAAGTTTTGAATCAGTTCTGTTTTTCTTGTTGTTTCGGATTTAATTTGATTCATTTGTTGCGTAATTTTCAGAAGCCATTTTATT  
AAAAGATTGATTAAATTCATAAATTTCTTTTGGTGAATTAACGTTTTATCATTGCTTGCGTAATTTCCGTTAGCAAAATGCTTAGTTT  
TTATATTAACCTGCTTAATTTTGTATAAGTGGATTAATAAAAACTACATATTAATAAGGTTAAACAGCTTGTAAATATTGTCGT  
TAAGGTCAAAGTTAGTGCATATGGCCGTAAACCACATTAAATATATGCAATTGCTAAAATAGTTGAAGTTAATAGTATACTCGA  
TACGACGCCAATAATGATTTGACTTCTAATTGATAACACCATTATCGGCTCCTTTCAAATTTATATCCTAATCCCCATACAGTTGTGA  
TGGTATATGTTGTAAGCTCTCTTTTCTAATTTTCTCTAATACGGTGTATATGGACATTCACGGTATTAGCATCTTCGTAATAGTCA  
TATCCCCAACTTTTCAAGTAATCTGATTTAGAAATAAATTCTATTTCTCTAGAAGCTAAATACCACAATAACTCAAATTCCTTAA  
TACGCATAGGGACTTCGTGACCATTACAGTCACAACCTTACTTAAGTTAATAAGTGTAATTCATCAAACGACAGTTGTCAACTG  
GTTGATGATGGTATTTCTTCTTCTGTAAGTAAATTAATACGTAACGAGTTCCCTTGGACTAAATGGTTTTTTGACATAGTC  
ATCTGCACCTAAAGTTAAGGCGTAAATGGTATCATGTTCTTGTGTTTTGGCAGTTAAATAGATAAAGGGGATATCTAATTTTTGCCTT  
TTCATTTTTCGCAATGTCGTAACCATTAACCTTCTGGCATGATATCAAGTACCATGATATCAATATCTAGTAGTAAGAAAGAA  
TTGCTTCTTACCGCTAGTTGTGCTGTTACTTTGTAACCTTCATATCAAAATAGGTTGACAAATGTCTACAATGTCTTGTCTATCA  
TCCACGATCAGTAAGTGGGTCATCTATTTTTTCACTCTGTTCTTACGACCTCTAAAGTAATTAATGATTCTTTAAGTGAATCTGTT  
TTAACAATGAGTGACTCATTAGTAAAAGGATAAAGAAAGTTAATTGAAGAGGATACGTAATATCATATCTGCTAAGATATAATTT  
ATCATAACAAAGGCTCCAAAGAACTAGCAGCATATGCAAAAACTCCAAAAATTAACCTAATCCAATTGCAATCTCTCCGAGTGG  
GACAACAATATCAATAATGACGTCGTATGTGCAACTATATTTGCGAAAAACCACTATACCACTCTGGTGAATCAGTATTGTTAGC  
GATGACTGGTACTAAACCTTTCAGCGTAAATCCGCCGTTAATTTTCGTAGCCTTGCAATTAACATAACAATACCTGAACCCACACG  
AATGATAAATGTAACGAGTAGCAATAATTTATTCATGATGTTACATTTCTTATTTATTGTGTGTAATTTATATAAACATAAGATT  
AAGCAACATAATGCGATTTGTAGTGTATGTGAACAGGAAGTGTTTGAGCTCATGGGTGCTTAAGTCAACAAACCTCAAGCTCTA  
AAAAATTTACTTATGTGCTGCTGCAATCTTATGGGATTTAATAGTTGTATATATTTGAAAAAGGAAGTAGTTTCTACAAGCT  
AGGGGGGCTGTGAAATCATACGCTTTCCATTGAGTAATGAGTGAATGTATATTTTTAAAAATTTGTAATGTATAGTAATAGTATGTT  
GTAAATAAAAGTTTAACTCAGAAATTGATTATTTTAAATTTAGCGCCGCCGAAGATGACGTGAGCTTTTTTACAATAGATTGTTACTTC  
ATCATATTTGCTTAAATCTACATTTTTAAGATCAAAATGTTTGTGTTTTCTTTATCTGATGCAACCATGCGATTCTTTACCGTTTTAAT  
GTCGCCATTTTTGTTAGGTAGACGTATAAATCTGGACCTTTTGATGATTTGTAGTTAGTAAGCATAATTTACCATTTTTAATCTCA  
GCTTTACCTTCAACAGTTTCACCGTTTTTGAAGTGAATGTACCTGTTAGGTGTTTTGTTTTATCAGTTTTAACATTGCTATCTCTGA  
CTTTGTTTTTGTTCAGTTTTGTTACCTTGATCTTGTGAATTAGAATACCACAAGCGCCTAAAGTTAATACAGAGGCAACAGCACCA  
ACTGCTAAAAAATTTTTGATTCATGCTAACTCCTCATTTCTTCAATTTGATAAGTTAAGTTTAAAAATGAAGGCAAAATATAGCCA  
TTAACTAATTTAACTTCGTTTAAATATCGCTTAACTAATTTGAAGAAAGAAATAAATTTGAAAAAGGAATATTGTCTGATTAA  
ATAAATAGGAGTCGAAATAAGAGGAGGCGATTTTTTATAGGTAGAGAAAAATTTATCTGAACTAGATAACACTATAAAACACTTCTG  
ATATTTTGAACATAAGAATATCAGAAGTGTGTTTATAGTTTGGTATTAAAAATTTATAAACCTTTTGCCACAATAAAAAACAAGAAA  
ATAAGATAGACGATTAATAACAAGTACCAATATGGTGTTAAACCATCATAACGATAAATGAAATGTTAATAATGATAAGTCCTTT

AATCATTAGTTTCTTTATTTTGTATTATTTTCAGCAGTTTCATCTAAGCTATTAATGTTGAAATAAACACATAATACCACCAATG  
ATGAAAAATGGCAGGGGCTAAAAATGGAATAGACATATATATTGATTGTGTAAGCTGTTGAAAAAGTCGGTAACACGTTGCGTTAAACTGAC  
AACATCGTTAATATGATAGCAATAAATTTTTGGTCTGTAATGTATACAGGTTTTAATTTTTATCAATGTAAACTGTAGTATCGTC  
CAAATGATAAACATCGTTATAGTACACAGAGTAATAAAGTTATATTTATCAATTATGAATGTATTTATAAAGCGGTTTTATCGTAATA  
GATAACAACATTGCACCTAATGATAAATGTTGCATTTGATGCCTATATAAATTGAATCCAGTTATAAGTACGACGATAGCAATATTA  
ATTAATATATATACATCATGATGGACTCCTGTTCTGTATACCTCAATCAACTATTATATCAATTAATATATTGTTATTCATTAGATA  
TGACTTGTAAAAAGTAAAAATAAGTTATCCTTTATACACCTTTTTATTGCTCCAAAAGTAATGTATGAAGTTGTGGTAACACATAAAC  
GTGATTTCATATCATTACTTTGCATAACTAAATCCACCAACTGCTCGTAGCGTTCTAACAACCTTTTCGGTATGATTATCTACGCTGTCT  
GATAAATATGGGTTACCAACTTGTAATAGAAAGGAATATCTGGATAACGGTGGTGTATCATTTTTGGCAAAATCATAATCTTTATCG  
TCGAATACAACACTTTTAAAGTTAATGAGGAAGGTACGCAATTGTGTAATCACTTCACTAATCTTTTAAATCAGGTGTCATAGTTG  
AACTTGGTGGTTTTGGACTAATCGTTAAATCATCAATTTGTGTCATCCAAGGTTGAATTTACTGCCTTGTGTCTCCAGTGCCTGAA  
AATACCTTTATCTTGAAATAAGTCAACTAACTCTTGATACCTTTAATTAATGCTGGGTTACCACCAGAAATTGTAACGTGATTAAA  
TAAATCGCCACCAATTCGTTTTAATTCATCATAAATTTCTTCAGCGGTGTCATGAGTTTTATATCGCCTTTAGCACTACCATCCCAAGTA  
AATGCAGAAATCACACCAGCTACAGCGATAATCACATCCAGCTGTCTCACAAACATCGTTTTTCTACCGATTACTCTTCCTTCACCCT  
GAATGGTTGGGCCGAATATTTTCGAGTACAGGAATTTTAGCCATTAGTTACACCTGTTCTTTGGTCTAAATACGACATAACTTGTG  
GTGTTTCTCTTACAAATACCTGAATACATTTTGGTGGTGTTCGAGCGATGCCAAATTTCTTTAACAATTTGATAAATGTTTCCGCT  
ACGATTTTCAGTTGAAGGGATTTGTTTTTAAAGCAGGTAAGTTATTTAACAGTTGATGGTCAAATTTACCGTGTATCATCTTTTTTA  
AATGGCTAAAGTCTACTAAAAAGCCAGTGTATCTAGTTTACCCGCAAAATTGTTAAATTAACAAAGTAAGTATGACCATGGACAT  
TTTGACAAATACCTGCTTCTTCACACGGAATGTGATGTGACGTGAAAAATTTAAATCTTTATTTAATTCGAATTGATATGGATGCG  
TTGTACTAGGATAGATTTGTTGTAACATTTTAAAGCGCTCCTTACTTTCAAGATATTGATTTAGTCCACGTTGACGTAATGACAAAG  
CTGGACATTCACCACAGCCATCCCCAATGATACCGTTATAGCATGTTAATGTTTTGTACGAATATAATCTAAACCTTCGAGTTCATC  
ACTTAATTTCCACGTTTCTGCTTTGTTTAAACCACATTAAGGAGTATGAATGACAAAACTTTGTCCATAGCTAGGCTTAATGTTACG  
TTCATTGATTTTATAAAACTATCGCGACAGTCTGGGTAGCCTGAAAAAGTCTGTTTCACATACGCCTGTAATAATATGCTTAGCCCCA  
ATTTGATAAGCTAGAGCGCTGCAAACGACAAGAAAAAGTAAATTTCTAGCTGGAACAAATGTATTAGGTATACCATCTTCATTATTA  
GTAATTTCCATATCATGTTGTGTTAATGCGTTTGGAGTAAGTTGTGATAATAATGACATATCTAAACGTGATGTTTCATTCTTGAT  
CTTGTGCAATTTGTTTTGCGACTTCAATTTTCAGTATCATGTCTTTGGCCATAATTAACGTTACGAGTTCAACTTCTTTGAAATGTTTT  
TTTGCAATAAAGAGACATGTTGTACTGTCTTGACCACCATAAAGACAAACGATGGCTTTTTTCATTATTTAATACACTTTCATTGTTG  
AATTGCTCCTATCATTAATAATATTAATAAAGAGGTTAATGGCATTGATAAGCCCCTTTTTAATTTATAAAAAAAGCCATATC  
TCCATAAAGAGATAGACGAAAGAAATGGGTTGCTCCTATAATATATTAAGGTTTACCAACGAATGTTTGAAATTTCAATGTCTAG  
TTTTTTATAGAGGGTTTCAGCTAGGAACCTCTGATATTCATTTATGTACGATGAATAGAATATACCATATATTAGTTAAAAATCAAGGT  
CAGGATAATGACAATGCCTTTAAAGTTTTAGCTACATCCAATACATATTATAAAAAATAAAACACATTTAGAACGGAGTATACAATG  
ATTCTAGTCATAGATAATAATGATTCATTTACATATAATTTAATAGACTATATTAAGACTCAAACGAAACTAACAGTTCAAGTTGTT  
GGTATTGATAATCTGCTGATAGAAGACGTCATTAATATGAAGCCAAAAGCAATTTGTTATTTACCTGGGCGGGTAATCCGGATGAT  
TATCCTATCTTGAATGAAGTGTTAGAACAATTTTATCAGCGTGTACCTATACTAGGTGATGTTTAGGATTTCAAGTATGATCTGTCTT  
ATTTTGGTGGAATATCATTCACGGCTATCATCCTGTACACGGACATACACAGTTACGCCATAACCAATGAAGTATTTTATATGAA  
GACTGCCTCAAAATTTCAATGTAATGCCTTATCATTCATTAATTTGCTGACGGAGCGACTTTTCCAAATTGCTTAAAGATTACAGCAA  
AAAACGATGAAGCGATTATTATGGCATTGAGCATATTAGATTTCCGGTTTTTGGTGTGCAATATCATCCTGAATCTATTTTGAGTGA  
ATACGGTTATCGACAAGTTGAATTTATTTTATCGAAGGTAGGTGATTACTGTGAGAATAGAATATAATTATCGCTACTATTTAACTG  
AAAATGAATATAAGCAATACCATATTCAATTAAGGGGATTTATAAAGAAGTATGTTGCTACTAAGTTGGCTGATGTGGGAGAAGTG  
ATACACTTTGCACAAGCGCAGCAACGACAAGGTAGATATGTCTCGTTATATTTAAGTTACGAAGCGGCAAAAGTATTTAATCATGTT  
ATGTGTACACATTCATTAGCTAAAGATGATATTTATGCAGTAGCTTATAGTTTTGAAAAAGCGGAAAGCATAAATTCACATATGAA  
CATCAAACTTCTTATGTATCAAAGCATCATTTTTCATTTGTTGAATCTTCTGAGGTTATGATGACTAATATTAACCGTGTCACAAAG  
CAATTTGTTGAAGCGCAACGTATCAAGTGAACCTATACGGCGCGCTTAACAGATAACATTTATTATTCCTATTAGTACTTTATATGAAC  
GATTAACCTCAATTTAGTAATGGTAATTATACTGCGTTATTACAAACAGATGAAATCCAAGTAGCGTCTATCTCACCAGAATTATTTTT  
TCAAAAAAGGACAATTTAACAATGTCGATAACGTTATCATAAGCAAAACCGATGAAAGGGACAATGCCTAGAGGTAACCGGAAGCT  
GAAGATCAACAGTATTATAAAAAATTGCAAACTTCTTCGAAAGATCGTGCAGAAAATGTCATGATTGTTGATTACTAAGAAACGA  
TATAGGGAGAATATCACAGAGTGGCTCAATTAAGGTGTATAAACTATTTTTTATTGAGGCATATAAACTGTATTTCAAATGACTTC  
GATGGTAAGTGGAATTTAAAAAATAATACAGACTTAACCTCAAAATTTAACATCGTTATTTCTTGTGGTTCGATTACAGGTGCACC  
GAACTGAATACAATGAAATATATTAACAATTAGAAAGTTCACCTCGTGGTATATACTGCGGAGCAATTGGACTATTACTTCCAAC  
TGAAGATGATAAAATGATTTTTAATATTCCGATTTCGCACTATTGAGTATAAATATGGACAAGCGATTTATGGAGTCGGAGCAGGTAT  
TACAATTTGATTCTGAAGCCAAAAGATGAAGTGAATGAATTTTACGCAAAAACCAAGATTTGGAGATGTTAATATGCAATTTTGAA  
ACAATGAAAATTTGATAATGGACATATCCCTAGACTTACTTATCATATACTAATCGCATAAAATGTTCTTCTGAGCGTAAACTTTAAA  
TTTGATGAACATGCATGGCGAAATGAATTAACGATGTAACAACAAAGTATCACAGTGGTCAATATAGACTTAAAAATCGTATTA  
TGCTGAAAGCAAATTTGAAACGATAGTGTACCTTTACCTGAGAAAAGTAGTTTTACAGCAAAATTTCAAGTGTGCCCCAAGTAGT  
TAATCCAATTTTATAAAAAATAAAACGACAGAACGAAAGCATTTAGCACACAATCATGAAACAGATTTAATATTGCTAACTTCAG  
AGGACGGCAAGGTCTTGAATTTGATATTGGCAACATTGTCAATTGAAGAGGATGGAAAATGGTACACACCAAGTTATAAAGATGAT  
TTCTTAAAGGATGCATGCGTGATTATTTAATAGATAGTGACAACTTGTGAAAAAGACTTTAATAAAAAACGAATTGATTTATAAA  
TATCATAACAATGAGATACGTTTATTTTTGATAAATAGTTTACGAGAGGTTGCCGATGTCCACCTTTGCCTTTAAATTTAGTATGATA  
ATAAAGTAGAAAATGATGTGAAAACAAAATTTAAATTAATGGGGGCAAAATGATTATTGTTTTATATTGTGCTGTTGTTAATCT  
TGATACGTAATTTATCGATTAGTGAATCGATTGCTTATGAAATAGAAATATAGTTGTTGTCGTTATGAGTACGAACATTTACTAGTT  
ATAAGCTTTATCTTGTATACGCATTAATTCAGAACTTATGCCTTTTGTGTGCGGGCAATGGATTAAATGTACCACCAGTAAATTT  
AGTGAGTAGGTAATGAATCAATCGATTCTATAATTAATAAGTAAAGTAAAGTAACCAATATTGAAGAGGTGTACAAATG  
AAAATATATAGTCAAGGTGACCAAGCCATTGATGCGCAATTGAAAAAGAAGTATCTAAAAGTTTAAACGAAGATTTATTAACACT  
TCGCTCATATTTAATTGAACAAAATTATCCATTTATTATAGAAATTTGTGCCATCAGAAATCAGACATGATGATTGTCTATGACGCAAG  
GGATATGATTAAACACCATAATATACAATCACCTTTTTTATACATGAAAGCACTAATAGAATCGATTCAATTTAAACATAAAACATGA  
TTTTAACCAGCAAGATTTGATTGAAATACCAATTGTGTATGGTTCGAAATATGGTCCGGATTTAGAATCACTTTTAAACATTACAA  
AATCAAGCTAGAACTTTTATTGAATTACATTTCAAGGCGCAATATTTTGTTCGATGATGGGATTTACCTGGGTTTCCTTATTTA  
ACTGGATTAAATAAGAAATTTGATATTTAATACAGAGTAAACAGAAAAATTCATTCCAGCTGGTCTGTAGTACTTTGAAGGGAA  
AAAATGCGGTATTGTAACTACGGATACAATTAATGATTGGTTAGTTATTGGTTATACACCATTATCACTTTTTAATCCGAAAGAATC  
AGATTTTCGCACGCTTAAAGTTAGGCGATAATATTAATTTAGACCTATCAATGAAATGAATTAGAAGTAGGAGCGTTTAAAGATG  
TCAATCATAATTGAAAAAAGTGCTTATTCAGTAGCTTTCAGGACTTTGGCAGAAGGGGATATGAACATGATGGTGAATTTCCATGT

GGTGCACCTTGATACCTTTAGCACATGAAATTTGCTAATCGATTAGTTGCAAATGACAAGAATGAAGCAACTTTGGAAATGACTAATAA  
AATGGCAACGATTTCGTTTTACAGAACCCTACGCTGATTGCATTAGCAGGGGGTAAATGTCAAAAGCTTACACTGAGCATATGACTATATC  
TCCATATAAAATTGTATTTGTTAGATAAAAGGCGATGTTTTAAAGTTTAGAGAAAACAAGTTATACATCGCGAGTGATTTAGCTGTGGG  
AGGCGGATTTTGAATTAGATGCATGGTTAGGATCTAACTCAACCGACTTTAATGTAAAAATTGGTGGTTTTAAAGGTAGAACATTACA  
AGATGGCGATGAAATAAAGCTTAAGAGAGATTATACAGCTCGTCATCATAAGTTATTTGAAAACCTTGCTCACACGAAACAAACAG  
ATTGGGGTATTGATGGATACGCCTTGTCATTTAATTATATGTCGTGATGATTTTCATGTCGTTAAAAATAAAGGTACGGAAGATTTTAA  
AGAAGATGCCATTCAAAGATTTGTGAAACATGATTATAAAGTAACGAGCAAAGCAAATCGCATGGGGATGATGCTTGAAGGTGAA  
AAAATCAAAGCTTTTTATGAAGATATGCCACCGTATCAGACTGTCAAAAAAGGAACGATACAAATTAAGCGTGATGGCACACCTAT  
TATCCTATTAATGATCATTATACGCTAGGTAGTACCCGCAAATCGGTACAATCGCAAGTTATCATTTAACGAAATTAGCACAAAA  
ACCGCAAGGATCACGTTTGAAATTTCAATTTATAGATATTTAACGGCTGAAAAAGAACCTTGTTAAGTATAGTAAGTGGTTAAACCA  
ATTATTCCATGGAATAGAATATAGAATGCAATTAGAAATGATGAAATAATATTTGGTACGTAGCTCATACTCGAGTCCGATGCAAAAT  
AATTTCTCCTAATGTATAATGAAATAATACTGTGTTTTATCTGCGAAATGTATCATTTTCTAATTCGTTTCACAGTAAAAAGAAAAAG  
ATAAAGTGTGTTTTACTTGAATTTTACTTAAATTTACTCTATATTTATTAATTGAGCTATGCTTATTATTACAATTTGATTACAAATTT  
TTAAATTTGTAAATTGAATGATAATATTAAATAAAGAACTTACACAAGCAAATATGAGTTGTAGCCCAAAATACTTGTAAATCAA  
AGTTGAAAGCTACAAATAATGAAAAATTATAAACTTGAATCTGAAAGTAATTACTATAATTATGACAATGTTAACTTTTAAACGCACCT  
TATTAATTAACATACATAATGTTAATATCTAATTTATTCAAGTACTTTCGCAAGATTTATTTATCTAAATAACGGGGGAAAGAATCATG  
AGTTTCACAAAAAAGAAAAATTAGTCTTTTTGCGTCTCTTATTAACCGTAATAACGATTACCTTGAAGACGATTTTTCTTATTATG  
TTGATTTTTCTTTAGGTGTAAAGGTTTAGTACAAAACTTAATATTATGATGAATCCTTATAGTTTCTAGTACGCTGGTTTAAAGTGT  
GTTCTATTCTTTAAAGGCAAAAAAGCATTTTGGTTCATGTTTCAATGAGGTAACAGTTTATACGGTTTACCGCAAGGTTCTGCGTTTTCAT  
TACTTTAGATTCTTCTCTGATTTTTTAAACGTTTAGTACTTTAAACCAAGTAGGTAACGTAGAATCTATGGGTGGTGCAGTTAGTGCAT  
CATTCAAATGGTATGACTTTGTTTATTTTATTGATACGTTAGTTTACTTATTCTATTTAATATTTAAAAACAAATGGTTAGACACAAA  
AGCATTAGTAAGAAATTTGTTCTGTGTAATGGCGGCTTCAGTAGCATTATTCTTCTTAACTTAGCTTTTGGCTGAAACTGACAGA  
CCAGAATTATTAACACGTACATTTGACCATAAAATATTAGTGAAATATTAGGACCTTATAACTTTACAGTATACGATGGTGTAA  
ACTATCGAAAAATAATCAACAAAAAGCGCTAGCATCTGAAGATGACTTAAACAAAGTATTAATTTATACGAAACACGTCAAACAG  
AGCCTAACCCAGAATATTATGGGGTGGCAAAGAAGAAAAATATTATTAAGATTCAATTAGAAAGTTTCCAAACCTTCTTAATTAATA  
AAAAGGTTAATGGTAAAGAAGTAACACCGTTTTTAAACAAATTTCAAGTGGGAAAGCAATTCACATACTTCCCTAACTTTTTCC  
ATCAACAGGTCAAGGTAACCATCTGACTCTGAATTTACAATGGATAACAGTTTATACGGTTTACCGCAAGGTTCTGCGTTTTCAT  
TAAAAAGGAGATAATACGTATCAGTCAATTACCAGCAATTTTAGATCAAAAGCAAGGCTACAAATCTGATGTCATGCACGGTGACTAT  
AAAACATTCTGGAACAGAGACCAAGTATATAAACACTTTGGTATCGATAAATTTCTATGATGCAACATACTATGACATGTCAGATAA  
AAACGTTGTAACTTAGGCTTGAAAGACAAAATTTCTTTAAAGATTCTGCTAATTATCAAGCTAAGATGAAATCACCATTCTATTCT  
TCATTTAATTACATTGACTAACCCTATCCATTACATTAGATGAAAAGGATGCAACTATTGAGAAATCAAACACAGGTGATGCAAC  
AGTTGATGGTTATATTCAAACAGCACGTTATTTAGACGAAGCATTAGAAGAATATATTAATGACTTGAAGAAAAAAGGATTATATG  
ACAATTCAGTGATTATGATTTATGGTGACCACTATGGTATCTCTGAAAAACCATAACAATGCCATGGAAAAACTATTAGGTGAAAA  
ATCACACCGGCTAAATTTACAGATTTAAACAGAAGCTGGTTCTGGATTAAAAATCCCTGGTAAATCTGGTGGTATCAATAATGAAT  
GCTGGTCAAGTCGATGTTAAGCAAAATTTACATTTGGTCTGGTATAGATACGAAGAAGTATTAATGTTCTGGTACTGATTTATTCT  
CTAAAGGTCATAATCAAGTAGTTCCATTACAGAAATGGTGACTTTATAACAAAAAGATTATAAATATGTTAATGGTAAGATTTATTCTA  
ATAAAAAATAATGAATCATAACTACTCAACCAGCTGATTTGAAAAAGAAATAAAAAAGCAAGTTGAAAAAGGATCTCGAAATGAGTGA  
CAACGTGCTTAATGGTGATTTGTTTAGATTCTACAAAAATCCAGACTTCAAAAAAGGTAATCCTTCGAAGTATAAATATGAAACAGG  
ACCTAAAGCAAACTCTAAAAATAATATCTAAACACGAACCTCGGATTGATAAAATATCAATCCGGGTTTTTATTATGTTCTTTTATA  
TTATGTTTTACATTATATGTGTTGATAAAAAAGGTATATTATAAAGATCATTAGCATAGTCATCAAAGCCTTAACAAGTTTATTTATA  
GTTGAAGCAACAATATATTAATTTATGACACTTAAACGGTATCGATTTCTTTGATTTCAAAAAAGGTGTATAATGTATAGAACTGATT  
TAAGTACGTAGAGATTTCAACAGAAGAAGGAAGATGGGTATGGAAGCATATAAAATTTGAACATTTAAATAAATCTTATGCCGATAA  
GACTTATTCGATAACCTAGATTTTATCAATTTTCAAGAGGTGAAAAAATAGGTTTAGTAGGCATAAAATGGTACAGGAAAAAGTACGT  
TGTTAAAAAGTAATTGGTGGTATTGATGATGATTTTACAGCCAAATGTTATGCATCCAAATCAATATCGAATTCGATATTCGTCTCAGA  
AACAGGACCTTAATGAAGATATGACAGTTTTTGTATGCAGTATTAAGTTCTGATACAACAACCTTTACGCATCATCAAGCAATATGAGC  
AGGCAGTACAAGCTTATGCGGATGACCAAGTGATAAATGTTCAAGCGAATGATGGATGCGCAAGATGCTATGGATCAACATGAT  
GCTTGGGACTATAACGCTGAAATTTAAACAATCCTCTCAAACTAGGTATACATGATACTACTAAATACATTAAAGAATTATCCGGC  
GGACAACAAAAACGTGTTGTACTTGCTAAAAACATTAATAGAACAAACAGATTTATTGTTATTAGATGAACCTACGAACCATTTAGAC  
TTCAATCAATCAGCTGGTTGATCAATTATGTGAAGCAATATCCTCATACTGTTTTATTCTGAACCCATGATCGATTTTTTTAAATG  
AAGTTTCCACTAGAATTATTGAACATAAACAGAGGTAAGTTAGCGTCATATCCTGGTAACTATGAATCTTATATTGAAATGCGCGCTG  
AAAGAGAACTAACACTTCAAAAGCAACAACAAAAAGCAACGACTTATATAAGGAAGAACTTGCTTGGATGAGGCTGGAGCTAA  
GGCTGTAAGTACAAAGCAACAGTACAATTAATCGAATTAATGACTAGAAAATGAAGTTAAACGAATTAAGAGGATAAAGACGATAAAG  
GTGAATTGAATCTTGCTTATTCAAGATTAGGTAAGCAAGTGTTCGAATTAGAAAGACTTATCAAAAGGCTATTAATGATAAAGTATTAT  
TTGAACATCTGACGGAATTTATTCAAAAAAGGTGAGCGTATTGGTGTGTTGGGCCAAATGGAGCTGGTAAAAACAACACTTTAAAT  
ATTTTGAGTGGAGAAGACCAACAATTCGAAGGTAAATTGAAGACTGGGCAGACGGTTAAAGTAGCTTATTTTAAAGCAAACAGATGA  
GACCTGGATAGAGATATTCGTATGATTGATTATTTAAGAGAAGAAAGTGAGATCGCAAAAAGAAAAAGATGGAACCTCGGTATCTA  
TTACACAACCTTCTGAACGATTTTTATTTCGAAGTGCAACTCATGGTAAAAAAGTTTATAAATATCTGGTGGAGAGCAAAAGCGTT  
TGTATTTATTACGTCTACTCGTACACCAGCCAAATGTTCTGTTGTTAGATGAACCGACAAATGATTTAGATACTGAGACTTTAACAAT  
ACTTGAAGATTATATTCATACTTTCCGTTGGTACAGTGAATACCGTAAGCCATGATCGTACTTCTTAAATAAAGTTGCACAGTCATAT  
TGGTTTATTCTGATGGTTCAGATGGAAAAAGATTATCGGAACCTTTTGAAGATTATGAAAGTTATAAAAAATCAATTAGATAAAAAATAA  
ATCCACATTGAAGCAACAATCTAAATCTTCTACAACGTGACGTAAGAAAAATGGTTTATCATATAAAAGAAAAATTAGAATATGAAC  
AATTGATGAAACGCATAGAACAAAGCGGAAGTAAGAATGGAAGAAATTTGATGTGCTCATGATTGAGGCAAGTGCAGATTATGGGAA  
AATTAAGAATTAACGAAGAAAAAGAACAACTTGAAATTCATATGATTAGACATCACAAAGATGGAGTGAGTTAGAAGAAATT  
AAAGAACAACAATAAGGGGTCAATTTATGATGCAACAACATTATCGCATTACTTTGGGTATGAAACGTTTCGACCAGGACAAGAA  
GAAATTATTAGCAAAGTATTAGACCATCGTAATGTGCTTGGTGTCTTACCAACTGGTGGAGGTAAAGTCTATATGCTATCAAGTACCA  
GGTTTATTGTTAGGTGGTACAACAATTGTAATAAGTCCACTAATATCATTAATGAAAGATCAAGTGATCAATTTAAAGCGATGGG  
AATTCAGCTGCTTTTTTAAATAGTAGTTTGACTCAAAAAAGCAACAACGTTATGAAAAAGCATTATCAATGGAGAAATTCATTT  
TTGTATGTTGACCAAGACGATTGAAAAACCGATATTTTTTAAATATGCTTCAGCGTATAAAGATTACCTAGTTCGCGTTTGTAGAA  
GCGCATTTGATTCTTAAATGGGGTCATGATTTACAGCCGAGTTACCAAAATGTTATTTCAAAAGATTACGTTACCTCAAGATTTTA  
CAATAATAGCGTTGACAGCAACTGCCACGGTTGAAGTACAGCAAGATATTAGAGAAAAGTTAAATATCGCTCAAACTGATCAAAAT  
AAAACGAGTACTAAGCGTAGAACTTAATTTTTAAAGTAAATCTACTTATCAACGTCAAAAATTTATATTGGATTATATTTAAACA

CACGATGAAGATGCAGGTATTATTTATTGTTCTACACGTAAGCAAGTTGAAGAGCTTCAAGAAGCCTTAGAAAAGTCAGAAAATTGA  
AAGTGTATATATCATGCAGTTTGTAGCAATAAAGAAAAGAGAAGAAGCGCAGAATGATTTCTTATTTGATCGTGTAAAGTAGTCG  
TTGCTACAAATGCTTTTGGTATGGGTATTGATAAATCCAATGTACGCTTTGTTATTTCATTATAATATGCCTGGAGATTTAGAATCTTA  
TTATCAAGAAGCGGGTCGTGCAGGTCTGTACGGGTTGAAAAGTGAATGATTTTGTATTATTAGCGAACGCGATATCAATTTACACGA  
GTATTTTATAACAGTCTCTCAAGCTGATGATGACTATAAAGATAAAATGGGCGAAAAGTTAACTAAAAATGATTCAATATACAAAA  
CAAAAAATGTCTAGAAGCAACAATTGTCCATTATTTTGAACCGAATGAAAAATTAGAAGAATGTGAACAATGTAGTAATTGTGTT  
CAACAAGATAAATCATATAATATGACACAAGAAGCTAAGATGATTATTAGTTGCATCGCTCGTATGAAACAACAAGAGAGTTATAG  
TGTTATCATTTCAAGTGTTAAGAGGAGAGTCAACAGATTATATTAAGTATAAAGGTTATGACCAAATTTCAACCCATGGTTTAATGAA  
AGGTTACACAACATCAGAATTAAGTCACTTAATAGATGAATTAAGATTCAAAGGGTCTTAAATGAAAATGACGAAATATTAATGT  
GTGATACTTCAATTAATAAAATTACTCAGTAATGAAGTAGAAGTATTCACAACACCATTTAAGCAAAAAGCGACTGAAAAAGTATTT  
ATAAATACGGTTGAAGGGGTTGACCGAGTATTATTCAGTCAGTTGGTAGAAGTTCGTAAAAAGTTAAGTGACAAATTAACGATAGC  
ACCTGTAAAGTATATTTCTGATTACACGTTGGAGGAATTTGCTAAACGTAAGCCTGCTTCGAAAACAAGATATGATTAATATTGATGG  
CGTAGGTAGTTACAAATTAACACATTATTGTCCAGCATTTTTAGAAAACGATTCAAAATTATAAAGCCAAAGTATAGTGAAGACACCT  
AGTAAGCATTCTTGTGTTTACTGGGTGTTTTTTGAATTCAGGTAATAAACACTATTTCTTAAGTGGAGATTACCTATTATTCATT  
ATTTTATTAATAAAGTTCAAGGATAAATCATTTAAATTTGAAAATTGTAATAAACGTGGTTAAATAGGGAATACATACATATAATCT  
CGGTTTTATGCTATGAGAAAAAAGAGGTGGCAAAAGTGATTAAGTTAAAAATGTAACCTAAGCGTTATGGCAAAACATGTTGCTGTC  
GATAACATTAGTTTCAATATTAATGAGGGTGAATTTTTGTGCTAATTGGACCTTCAGGTTGTGGAAAACTACGACATTAATAATG  
ATTAATCGACTCACTTCACTTAAGTGAAGGTTATATTTTAAAGATAAACCAATAAGTGATTATCCAGTATACGAAATGCGTTGG  
GATATTGGATACGTATTGTCAGCAGATTGTCATTATTTCCACATATGACAATCAAAAGAAAATATTGCACAAGTGCCACAAATGAAAA  
GTGGAAAGAAAAAGATATAGATAAAAAGAGTAGATGAATTAAGTGAATGGTTGGATTAGAACCTGAAAAATATAAAAAACAGAAAA  
CCTGATGAATTGTCAGGGGGGCAACGACAACGTGTAGGAGTTATACGTGCGTTAGCAGCTGATCCACCAGTTATTTTAATGGATGA  
ACCGTTTATGTCATTAGACCCAATCAGCCGAGAAAACTTCAAGATGATTTAATTGAATTACAACTAAAAATTAAGAAGACAATCA  
TATTTGTTACACATGATATTCAGAGGCGATGAACTTGGTGATAAGATTGTCTTTGAATGAAGGGCATATTGAACAAATTGACA  
CACCAGAAGGATTTAAAAATAATCCTCAAAGTGAATTTGTTAAACAATTTATGGGTAGTCATTTAGAAGATGATGCGCCATGTGTTG  
AAGAGAACGCAATTATCCGTGACTTGGATATTATGAAACCAATCGATGAGGTTACATCTATGAGCGCTTATCCAATTGTTTATGACA  
ATCAACCAATTGAAGTATTGTATCAACTTTTATCAGAGAGCGAGCGTGTCTATTGTCTATGCAAGAAGATAGCGTAGGTCATATGTTA  
TTGATAGGAAAGATATCTTCAAAATATTGTCCAGAAAAAGAGGAGGTAGCTCAACATGACTAACTTTTTCGACATATTGAGTGAACGT  
AAGGGGCAACTCTTTTCGACAATGATAGAACATATTCAAATATCATTTATCGCATTATTGATTGCAACTGCTATTGCGGTACCATTA  
GGTATTTTATTAACGAAGACTAAAACGATATCTGAAATCGTAATGAATATTGCGGCAATTCTTCAAACCATACCATCGTTGGCATT  
TTAGGTTTAATGATTCCTTTATTTGGTATCGGTCTGTGTGCCAGCAATTATTGCACTTGTAGTGTATGCGTTGTTACCAATTTAAGGA  
ATACGTATACTGGAATTAAGAAGTTGATCCATCACTATTGAAGCGGCTAAAGGTATAGGTATGAAACCATTTAGACGTTTAACTA  
AAGTCGAACCTCCGATAGCAATGCCTGTTATAATGGCTGGTGTAAGAACGGCTATGGTATTAATTATAGGTACAGCAACACTAGCA  
GCATTAATTGGTGCAGGCGGACTAGGAGATTTAATTTTATAGGTATAGACCGTAACAATGCATCGTTGATATTATTAGGTGCAATT  
CCAGCAGCCTTATTGGCAATTATATTGATTTAATTTAAGATTATGGCTAAATATCTTATAAAAAAGTTATTGATGACGTTAGGTG  
TTATAGTGATGATTATTATATACTGGCTATCGCTATTCCTATGTTTGCACAAAAAGGTGATAAAATTACGTTAGCTGGAAGCTTGGCT  
CCGAGCCTTCGATTATTACAAATATGTATAAAATTTAATAGAAGAAGAGACCAAAAAATACTGTAGAAGTGAAAAGATGGTATGGG  
AAAACAGCATTTTTATTTAATGCTTTAAAAATCTGATGATATAGATGGGTATTTAGAGTTTACTGGAACAGTTTTAGGTGAATTAACA  
AAAGAACCATTGAAGTCAAAAGAGAGAAAAAAGTTTATGAACAAGCTAAGCAAAGTCTTGAAAAGAAATATCAAATGACTATGT  
TAAACCAATGAAGTATAACAATACGTATGCTTTAGCTGTAAACGTGATTTTGCTAAACAACATAATATACGTACAATTGGTGATT  
TAAATAAGGTAAAGATCAACTTAAACCAGGATTTACATTGGAATTTAATGATCGTCCAGATGGTTACAAAGCTGTTCAAAAGGCTT  
ATAATTTAAATTTAGATAACATACGTACAATGGAACCTAAGTTGAGATATCAAGCGATCAATAAAGGTAATATTAATTTAATAGAT  
GCATATTTCACTGACGCTGAATTAACAATATGATATGGTTGTGTTAAAGATGATAAGCAGTATTTCCACCATATCAAGGAGC  
ACCATTATTAAAGAAAGCTTTTTAAAGAAACATCCAGAAATTAAGAAACGTTAAACAAACTAGAAAAAATACTGATGAAG  
ATATGCAAAATGATGAACATAAAAGTAACAGTTAAAAATGAAGACCCATATACAGTTGCGAAAAGATTATTTAAAAAGCAAAAGGGTTA  
ATCAAATAACGACCAACGCCACATAAGATGCGTAACACCAAAATTATATCTTATGTGGCGTTGTTATATTTAAATCTATAATTATGTT  
CAATTTAAACATGCAATAATGATTAAAAAATATGACATGTTAAACACAATGTAAGCTATTATGATGTGAAAATAGTAGCATTGCATT  
TTAGAAACATAGAGCGATATAATGAATATAAGTTTTTTTAAATTTTCAAGTAAATCTAAGGAGTTGTTTTTATTATGAAAAGAACAC  
TTAATCAACTATCAGCATATCAGCCTGGTTTATCTCCAAGGGCATTGAAAGAAAAGTATGGCATTGAAGGAGATTATATAAACTTG  
CATCAAAATGAAAATTTGTATGGACCATCGCTAAAGTTAAAGAAGCGATATCAGCACACTTAGATGAGTTATATTATTATCCTGAAA  
CAGGATCACCGACATTAAGAGCGGCGATTAGTAAACATTTAATGTAGATCAATCACGCATTTTATTTGGTGCGGGATTAGATGAA  
GTTATATTAAAGATTTCTAGAGCTGTATTAACGCCAGGGGACTATTGTTACAAGTGAAGCGACATTCGGTCAATATTATCAATCA  
GCGATTGTTGAATACGTATGATACAGTACCTTTAAAGAGTGGTGGCTTCGATTTAGAAGGATTTTTAAAGAAAGTATGAATGAA  
GATACGTCATTGGTATGGTTATGTAATCCAAATAATCCTACAGGTACATATTTAATCATGAGAGCTTAGATTTCGTTTTATCTCAAG  
TACCTCCACATGTACCAGTAATTATAGATGAAGCTTATTTGAAATTTGTGACAGCAGAGGACTACCCGGATACACTTGCTTTGCAAC  
AAAAATATGACAATGCTTTCTTATTACGTACATTTTCAAAGGCGTATGGATTAGCGGGTTTACGTGTGGGATATGTGGTAGCAAGTG  
AACATGCGATTGAAAAATGGAACATCATTAGACCACCATTTAATGTGACACGTATATCTGAATACGCAGCAGTTGCAGCACTTGAA  
GATCAACAATATTTAAAAAGAGGTAACACATAAAAAATAGTGTTGAACGCGAAAAGATTTTATCAATTACCTCAAAGTGAGTATTTCTTG  
CCAAGTCAAACGAATTTTATATTTGTAATAAAGCGGGTAAATGAACCTTTATGAAGCACTTTTAAATGTAGGGTGTATTACGCGA  
CCATTTCCAAGTGGTGTGATAATTACAATTGGTTTTAAAGAACAATAATGATAAAATGTTAGAAGTTTTATCAAATTTTAAATACGAA  
TAGTAAGTGGGAGTGAGACATAAATGATATTTCTCAAAATTTATTTCTGTCGTCACCCCTGGCAAGGTTGACTAGAATTGAAAAA  
AGCTTGTTACAAGCGCATT

>022-contig\_262

AAAAAGCTTGTTACAAGCGCATTTTCGTTTCAGTCAACTACTGCCAATATAACTTTGTAGAGCATTGAACATTGATTTATGTCCTAAG  
CTCAATGCAGTGTGAATGATGAGGTGAGAGTATTCAGTGTAATAAAGCAACAATAGATGATATTGTTTTGTATCAATTGCTTTTTCG  
TATACTGAATCAACTACTGATATTTTGAGGAGAAGATTAATAATGACCCGTAATCAATCGCGATTGATGATGAAGTATTGCGAG  
ATACATTAGGAGAAATCATTTGATGCTGTCAATTTTAGAGCGGATTTAGGTATTAATAATGGAAGCTTTGAATGGTCAAAAACTTAAAC  
ATGTTATTCCTGAACATGATGGATTAATTACAGAAGTATTGAGAGAACCAGGCTTCTTCAGACATCTTAAAGTGATGCCGTATGCAC  
AAGAAGTTGTGAAAAAATTAAGTGAACATTATGATGTATATATTGCTACAGCAGCAATGGATGTACCAACATCATTTAGTGATAAA  
TATGAATGGTTACTAGAGTCTTTCCATTTTATAGATCCTCAGCATTTTGTTTTTTGTGGTAGAAAAAACATCGTTAAAGCTGATTATTT

AATAGATGACAATCCTAGGCAGCTTGAAATTTTACTGGTACACCGATTATGTTTACAGCAGTGCATAATATTAATGATGATCGATT  
TGAACCGGTAAATAGCTGGAAAGATGTAGAACAGTATTTTTAGATAATATTGAGAAATAAAAAATATCACTTGAAAAATTCAT  
GTAGAAAAGATGATGGATAGGCTATAAAGTAATTTGTGACTGAGATGAACCTTTTATGTCTTAGACACTACAACACTATATTGGCAGT  
AGTTGACTGCGGGGCCCAACATAGAGAAATTTGGATTCCCAATTTCTACAGACAATGCAAGTTGGGGTGGGCCCCAACATAAAGAA  
ATACTTTTTCTTTAGAAATTAGTATTTCTTATGCATGAGTGTAACTCATGCATTCATATTTTTAAGTACACATTAGCTGTGACTAATG  
ATAAAGAATCGCTACATAATCAATCATTAGTCGTTCTTTATCATTTCCTGTCCTCAATAAATGTTAGTCTATCTCATTATTATA  
AATCGGATGAATGTGTTAATCTATGGCAGATTACACGTCATCCGATTTTTTATAGAATTTGAAAAAGACGCATAAACCACTATGATT  
TAAAAACAACATCAATCATTTTAGTGGCATGCGCCAAAATTATATGTCGTGTTTTGAAAAAGGGTAATAGCTTAAAGCTAATAAAA  
ACGAATATAAGGTGCGTTGAATCTTATGATTATACTCCAAACCTAATATAATATCGGGTTAAGATCATTCCGGATGCTTACAAATCA  
TTGACAGTAAGTAACCTGAATGGCATTGGTATAACCTCAATATCAATAGGTGTTTCTAATGAAATTTCCGCATCAATATCAACTTTC  
ATTGCTGGATCTGTTGTAAGTGAATCTTTTTACCAGGTATATGCTCAATACCTTGAGTAATTTCAATCCAAATTCATGCTATCACGCT  
TTTTAAAAATATCATTTAAATACTGAACTTTGTTCATTAATAAATGAAAGTGTCAGTTCACCATCTTGAGGAGACAAATCAGTCA  
ATGGTATACGACTACCACCAATGAATGGACCATTGCTGTTAGTATCATGGTCGTTTCGCCAGAATATGCTTATCATCTATTGATAA  
TTGATAATTAAATTGTGTTGGATTAGCAGTGTTTTGACAGTTGATCCAATATAACTCAATTTACCAATATATCTTTGAACCATCT  
TGTACGTTTTTCAGCGTTTTGAAACAATGAGACCTAAGCCAACAAAGTTGAGTGCATATTGATTATTTATTTAATTACATCGTATGTAC  
CAACTTGTGCAGAAATCATTTGTTCACTAGCTTGTTTATGATTAGGTGCTATATTTAGCGTTTTTGTAATAATCAATAAAGTACCGCC  
TGGTAAAAATGCCAATAGGGAGTTGAAGGTCATGTGACATAACACCATTTATAAGTTCGTTAACCCTGCCATCACCGCCAAGAATAA  
ATAATATATCTACATCTTTGTCATAGTTTGTAGTTTCTTGGAATATTTAATAATGTCACCTTCGTTTTCACCTCAATTGAAATA  
GAAAGATGCTTACAAATGAACCTAATGCTGTTGTAACCTTCCCAATACCTTGATTAATATTTTAAATCCCAATGCTTTCATGTTGTA  
AGAGGACACCATGTGTATATTTATTTCCATAGTTTAGCCTACTTTCTAAAAATTTGGTTCATTAATATATATACCCACTTTTAATTG  
TTAATACCAAAAATATGTTTTAAATAGAGAAAATGGTAATAACTGACATTGATGTCTATAGAGTGGGACGAGAAAAATATAGTTATA  
GCTGTCTATATCGAGCATATTAAGCTTTTATTTATACTGATATCTTGAATTAATTAATAGAAAACCTATAAAAAAACAGTAAGCCATT  
TAAATGACTTACTGTTTTTAAATTTAGGCCAACAAATATTAACGAATACCTTTTCATTGCTTTAATAATTAAGGTGAGAATGCTAATAC  
AATTGTTGTAACAATAATTGCAACAACACCTAGGAAAAATAAGTAATTTGTTTGACCTAGTGGTTCTATTAACCTTAACATAAGTACC  
ATTGATTGCTTGTGCAGAAAGCGTTAGTTAAGTACCAATACTCATCATTGGGCATTAATGCTTTAGGTGCTAACCTAACAGCAGC  
ACTATTACCGGTTGGTGATAAGCATAGCTCACCGATAACACAATAATGTACGATAAAAAAACCAGTTAACTGAGAAGTTTGATG  
AACCTGATGCATAACCTACAATAACCAATTAGTATGTATGACGCACTGTGAAGAACGTACCAATTGCAAAATTTTACTGGCAGGCTAG  
GTTGTTTAGTTCCAAGCTTTTGCCATAAAAGTGAATAAATTGGAGCTAGTAATAAAATAAATAATGGGTAAATTGATTGGAAGATCG  
CTTCACCAAAGTTTGTTTTCCAACCAAATAAGTTTAATTTTCATATCTGAATGTTCAATTCCATATATGTTTAATACATTAGACCTTGT  
TCTTGAATAGCCCAGAACACCATTTCCAAGAATAAATAATGGAATAAATGCTTTAACACGAGAACGTTCAAGTATCAGTGACATCTTTA  
CTTCTAATAATTAAGTGAAGTAAATGATTGGTAATGCAATACCTAATACTAAAACAGTATTACTAACTAAGTTAAATGATAATGAA  
TTAGTTAATGCACCAATAACGATAATTAATACAATTGCTAAGACAACACTTCCGATAATAAGACCATACTTTTTCTTTTCAGCTGGT  
GTCAATGGGTAGTAGGTTTCATACCAACGCTACCTAAGTTTTTGCGGTTGAAAAGTACATACCATACTAAACCTAATGCCATACCA  
ACTGCTGCAATCAAGAATCCGCGTGGAAGTTTTTAACATATAACAAAGTGTGCAAAAATAATAGGTGATAAATGCACCCATATTA  
ACTGACATATAGAAAATAACAAACCTGCATCATTACGTTCTATCATTTTCAGGATATAAACCGCCAACGATATTTGAAATGTTAGGC  
TTCATTAACCTGAACCAATAATGATGAAGAACATTGATGTGAATAAGCCGATTAATGCAAAATGGTAAGCTTAAACAAATATGTCC  
GATAATAATAAAGACTGCACCTAATAAAGTAGCGCTCTAGTACCTGTAATTTCTGTCAGCAATCCATCCGCTGGTATTGATGTCAT  
ATAGATTAATGAACCATAAACTGACATAATTGACATAGCTGTTGTTTTATCAATTTCCAAGGCCATTATCTGTTACGGCAAAGTACAT  
GTAGAAAATGAGTAGGGCACGCATGCCATAATAACTAAACCTTTCCAGAAGTCTACAAAGAAGAGTACGCCTAGTCTCGAGGAT  
GCCCGAAAAATCCTGTTTGAGGTATGCTTGAATTTGATTTCATGGGAGTTTTGTGTGTCATGTATACATCCCATCCTTTCTTCCCC  
TAATACAATAGTTTAAAGTAAATTTGATTGTGCCTTATCAACTAAATACCCCAACAAATCACAAAAAAATAAAAAATATTGAGAATATT  
CTGTTATTAAGCGCGCACAAATTAATTAGAGATAATATAAAAAATATACTTATTGACGTTAAAGTGCAATAGGTTCTATAAAAAATGTT  
GTTAATTCGTGTACTAATATCTTTTGGTGTACTTTGGTATCTTTGGTATCAAAATGTTATTTTAATGTAACCTATTATGATAAATGAAAAAC  
ACACCAATAAGTTAGGAAAAACAACCTTATTTGGTGTGTTTATTAATGATACATTTAACGATTATCTATTTTTTCGGGATATAAATCAT  
GATTCATCAAACGATGCTCAGCCATTTTTTCATATTTAGAATTTGGACGTCCATAGTTTGATAAGGATCAATAGAAATTCCACCAC  
GTGGTGTGAACCTTGCCCCAGACTTCAATATAATGTGGGTCCATAAGCTCTATCAAATCATTACATAATAATATTACATACTCTCGTG  
AAAATCACCGTGATTTCTGAAACTAAATAAGTATAATTTCAAAGATTTTGATTCAACCATTTTAACATTGGAATATATGAAATATA  
GATAGTTGCAAAATCTGGTTGCCAGTAATTGGACATAATGATGTAAATTCGGACAGTTGAATTTTACGAAATAGTACGACCTTG  
ATGCTTATTATCAAACGATTCTAATACATCAGGACGGTAGTCGAAATTTGAAGTATTGCTTGATTTCCTAATAAAGTTATATCTTGT  
AATTCATCTTGTGACGGCATGTGCCATATAAAGCGCTCCTTTAAATTTATTTTTTATTATTTTGGCGTCTCGGCGTGCTTTTTCAA  
ACATGTAATAAATGACCGGATAATAACGACGTAACCTAATGTTGCATAGAAATCTGGAGATTCTCCGATAAGATAAATAAATCCAAGT  
ATTGCTGTGAAAATATAGATGCATACGTAAAAATAGAAATATCTTTTGCGGCTGCAAAACTATATGCTAAAGTAACCAAAATTTGA  
CCCACAGCGGCAGCTAAGCCAGCCCTAATAGATAAAGTATTTCATCTGACTCATTGGTTCATAAGTATATGCAGTGAAAGGTATT  
AAAACGATGACAGAAAATAAGGAGAAGTAAATACTATAGTATATGGTGTCTCTCTTGTACTAAGTGCTCGAACACATGTATATGC  
TGATGCTGCAAAAATACCTGAGAATAAGCCAGCTAATGATGGAATCATAGATGATGAAAATTCAGGTTTCACTATTAAGCATAC  
CTAAAATAGCAATTATCATTGCTGTTATTTGATACTTCTTACTTTTTTCATGTAAGAAAACAATGCTTAATAAAAAATCGTCCAGAAAG  
ATTGAGTTTCATTAATGAATCGGCATCACTAAGTACCATATGATCAATGGCATAAAATATTTAACAATACACCAATAAGTCCAAGTGT  
TGATCGTGTTATTAATAAGGGTTGACTTGAAAGTCTGCCAAACATTGGCTGATGGTATTTATATATAAAAAATAAAGGAATAAACAT  
TGCTACTAAGTTTCTGTCTAATGATTTTTGAAAAACAGGAAGGTCACTGCAAGCTGAAAAACACTGACATAAATAAAGTAAACCAA  
TAGCCGAAATTAAGGATGGCAATGATACCTTTTACTTTAGGATTCATTTTACCTCCCTCTTTTATATAAATAAAGTAACTATTTATAG  
CATAAAACAACATGTTGTGCATAAATAGTTGAAATTTACTATAAAAAAGACTATAATAGACTGTACCGAAACAAACGTTCTGTATTTAT  
TTGTGCGGAATAATAGGGCATTACACTTTTATGAATGTTTGTGTTATTACATAAAACAAATATCAATTCAGTATCAAGCTAATAAGCT  
TTTTCTTGATTTCTGTTGATACAATTGAGATTGACACAGATTTAAAAAAATCAAGTGATATCTACTAAAAAATTTTTTTAAATTTGTT  
CAAGTTTTTCTAATTTAGTATTGGTGCCTAGTTGGAACGTTTTACGAACATTCGATTAGAAAATGGCACTTTAAATCATAGTGTGTCT  
TATGTATAATGAAACACATAATATAGTGTGGTGAAACGAAAAAGACACAATATCTTGTGTTTTGTATGCAAAATGCTTTATTTATGA  
AGAAATTACATTTAAAGTAATTTAACACAGAAATTTAATAGTTATTATCAATTAATAGTCATATTTTTAGAAAATGTACTGAGCAA  
ATGGAAGATATCCAATGATGTAACACTACATAGTGAATTTTATACATTCACCCATATAAGTCACTATTTTCTCAAAATATAAAT  
CTATGCAATTGGTTTACATTTGAGAAAATAAGTAGCTTCAATTAAGTAAATGCTGAGATAACCATAGTAACCATGTTGTTAA  
AGCATTTTTTAAATTGAATGACTACTTTATTTAAAGGGTTGAAGAAAAGAGGTGATCCAATGAAAATAATATATTTTTCTATTACT  
GGAAATGTCCGTCGTTTTATTAAGAGAACAGAACTTGAAAATACGCTTGAGATTACAGCAGAAAATTTGATGGAACCAGTTCATGA  
ACCGTTTATTATCGTTACTGGCACTATTGGATTGGGAGAAGTACCAGAACCCGTTCAATCTTTTTTGAAGTTAATCATCAATACATC

AGAGGTGTGGCAGCTAGCGGTAATCGAAATTGGGGACTAAATTTTCGCAAAAAGCGGGTCGCACGATATCAGAAGAGTATAATGTCCC  
TTTATTAATGAAGTTTGAGTTACATGGAAAAACAAAGACGTTATTGAATTTAAGAACAAGGTGGGTAATTTTAAATGAAAAACCATG  
GAAGAGAAAAAGTACAATCATATTGAATTAATAATGAGGTCACTAAACGAAGAGAAGATGGATTCTTTAGTTTAGAAAAAGACC  
AAGAAGCTTTAGTAGCTATTTAGAAGAAGTAAAAGACAAAACAATCTTCTCGATACTGAAATCGAGCGTTTACGTTATTTAGTAG  
ACAACGATTTTTATTCAATGTGTTGATTTATAGTGAAGCGGATCTAATTGAAATCACTGATTATGCAAAATCAATCCCCTTTAA  
TTTTGCAAGTTATATGTCAGCTAGTAAATTTTCAAAGATTACGCTTTGAAAACAAATGATAAAAGTCAATACTTAGAAGACTATAA  
TCAACACGTTGCCATTGTTGCTTTATACCTAGCAAAATGGTAATAAAGCACAAAGCTAAACAATTTATTTCTGCTATGGTTGAACAAAAG  
ATATCAACCAGCGACACCAACATTTTTAAACGCAGGCCGTGCGCGTCGTGGTGAGCTAGTGTATGTTTCTTATTAGAAGTGGATGA  
CAGCTTAAATTCATTAACCTTTATTGATTCAACTGCAAAAACAATTAAGTAAAATTGGGGGCGGCGTTGCAATTAACCTTATCTAAAT  
GCGTGCACGTGGTGAAGCAATTAAGGAATTAAGGCGTAGCGAAAAGGCGTTTTACCTATTGCTAAGTCACTTGAAGGTGGCTTTA  
GCTATGCAGATCAACTTGGTCAACGCCCTGGTGCTGGTGCTGTGACTTAAATATCTTCCATTATGATGTAGAAGAATTTTAGATAC  
TAAAAAAGTAAATGCGGATGAAGATTTACGTTTATCTACAATATCAACTGGTTTAATTGTTCCATCTAAATTTCTTCGATTTAGCTAAA  
GAAGGTAAGGACTTTTATATGTTTGCACCTCATACAGTTAAAGAAGAATATGGTGTGACATTAGACGATATCGATTTAGAAAAATAT  
TATGATGACATGGTTGCAACCCAAATGTTGAGAAAAAGAAAAAGAATGCGCGTGAAATGTTGAATTTAATTGCGCAAAACACAATT  
ACAATCAGGTTATCCATATTTAATGTTTAAAGATAATGCTAACAGAGTGCATCCGAATTCAAACATTGGACAAATTTAAATGAGTA  
ACTTATGTACGGAAATTTTCCAACCTACAAGAACTTCAATTATTAATGACTATGGTATTGAAGACGAAATTAACCGTGATATTTCTT  
GTAACCTGGGCTCATTAAATATTGTTAATGTAATGGAAAGCGGAAAAATTCAGAGATTCACTTCTGGTATGGACGCATTAACCTG  
TTGTGAGTGATGTAGCAAAATTTCAAAATGCACCAAGGAGTTAGAAAAGCTAACAGTGAATTACATTCACTTGGTCTGGTGTGATG  
AATTTACCGGTTACCTAGCAAAAAATAAAATTTGGTTATGAGTCAAGAAGAAGCAAAAGATTTTGCAAATATCTTCTTTATGATGATG  
AATTTCTACTCAATCGAACGTTCAATGGAAATCGCTAAAGAGCGTGGTATCAAAATATCAAGACTTTGAAAAGTCTGATTATGCTAAT  
GGCAAATATTTGAGTTCTATACAACCTCAAGAATTTGAACCTCAATTCGAAAAAGTACGTGAATTATTCGATGGTATGGCTATTCCT  
ACTTCTGAGGATTGGAAGAACTACAACAAGATGTTGAACAATATGGTTTATATCATGCATATAGATTAGCAATTGCTCCAACACA  
AAGTATTTCTTATGTTCAAAATGCAACAAGTTCTGTAATGCCAATCGTTGACCAAAATTGAACGTCGTACTTATGGTAATGCGGAAAC  
ATTTTACCCTATGCCATTCTATCACCACAAACAATGTGGTACTACAAATCAGCATTCAATACTGATCAGATGAAATTAATCGATTT  
AATTGCGACAATTCAAACGCATATTGACCAAGGTATCTCAACGATCCTTTATGTTAATTCTGAAATTTCTACACGTGAGTTAGCAAG  
ATTATATGTATATGCGCACTATAAAGGATTAATACTACTTTACTATATACTAGAAATAAATTATTAAGTGTAGAAGAATGTACAAGTTG  
TTCATCTAACAAATTAATGTTGAAAAATGACAAACAGCTAATCATCTGGTCTGAATTAGCAGATGATTAGACTGCTATGCTGTATT  
TGTCAAATTATTGAGTAAACATTACAGGAGGAAATTATATTCATGATAGCTGTTAATTGGAACACACAAGAAGATATGACGAATATGTT  
TTGGAGACAAAATATATCTCAAATGTGGGTTGAAACAGAATTTAAAGTATCAAAAGACATTGCAAGTTGGAAGACTTTATCTGAAG  
CTGAACAAGACACATTTAAAAAAGCATTAGCTGGTTTAAACAGGCTTAGATACACATCAAGCAGATGATGGCATGCCCTTTAGTTATG  
CTACATACGACTGACTTAAGGAAAAAAGCAGTTTATTCATTTATGGCGATGATGGAGCAAATACACGCGAAAAAGCTATTACATAT  
TTTCAACAACACTATTACCATCTAGTGAAACAAACTACCTATTAGATGAATGGGTTTTAGAGGAACCCCATTTAAAAATATAAATCTGA  
TAAAAATTGTTGCTAATTATCACAACTTTGGGGTAAAGAAGCTTCGATATACGACCAATATATGGCCAGAGTTACGAGTGTATTTT  
AGAAACATCTTTATTTCTCTCAGGTTTCTATTATCCACTATATCTTGGTGGTCAAGGGAATGACGACATCAGGTGAAATCATTCGT  
AAAAATCTTTTATGATGAATTTATTCATGGTGATTTACCGGTTTAGATGCACAGCAATTTACGAAATGACTATCTGAAAGTGAGAAA  
CAAAAAGCAGATCAAGAAATGTATAAATTGCTAAATGACTTGTATTTAAATGAAGAGTCATACACAAAAATGTTATACGATGATCT  
TGGAATCACTGAAGATGTGCTAAACTATGTTAAATATAATGGAAACAAAGCACTTTCAAACCTTAGGCTTTGAACCTTATTTTGAGGA  
ACGTGAATTTAACCAATCATTGAGAATGCCTTAGATACAACAATAAACCATGACTTCTTCTCAGTAAAAGGTGATGGTTATGT  
ATTAGCATTAAACGTAGAAGCATTACAAGATGATGACTTTGTATTGACAACAAATAACAATTAATTAAGGAGCAATTTACATGTA  
AAGGGAAATAGCGATTCTGTTCTGCTTGCCTCCTACATGTTGAAGGCTTTTCTCTATGCTTAAAGCGTATGCATATTTGAAAAAG  
TAAAAATTGTATTTAATGATGTCAATGAGGCTAGAAAGTATACAAGATATTGCATTACAAAAGGGTGTTCTATTTTACTTTAAGCAA  
ACAAAATACACATTCGAAAAATTAATTTTCACTTTAATTGCAAAATCAATAAAATTTGACACTAAATTTTGAAGGCTATTGAA  
ATTATGGTCAAAAACGCTACTATTAATGAGAAATATTATCAATGATAATGATTATCATTAATTTAAAGGGAGAAAAATTTGTAATG  
AAGTATTTATTAAGGGAATATTTTGCTTCTATTACTAATATTGTTGACAATTATTTCTGTTGTTATAGGTGTGAGTGAACATCAA  
TTAAAGATTTACTACATTTAACTGAGTCACAGCGGAATATTTTATCTCAAGCCGAATACCAAGGACGATGAGTATTTAATTGCTG  
GAAGTTCGTTGGCTTTAGCAGGCTTGATAATGCAACAATGATGCAAAATAAGTTTGTAGTCCGACTACAGCTGGAACGATGGAA  
TGGGCTAAACTAGGTATTTAATTGCTTTATTGTTCTTTCCAACCGGTCATATTTATTAATAACTAGTATTTGCTGTTATTTGAGTAT  
TTGCGGTACGTTTTTATTGTTAAAAATCATTGATTTTATAAAAGTGAAAGATGTCATTTTGTACCGCTTTAGGAATTATGATGGGT  
GGGATTGTTGCAAGTTTCAACCTTCATCTCATTGCGCACGAATGCTGTTCAAAGCATTGGTAACCTGGCTTAACGGGAACCTTTGCC  
ATTATCACAAGTGGACGCTATGAAATTTTATATTTAAGTATTCCTCTTTTAGCATTGACATATCTTTTGTCTAATCATTTACGATTGT  
AGGAATGGGTAAAGACTTTACTAATAATTTAGGTTTGTAGTACGAAAAATTAATAACATCGCATGTTTATTACTGCAACTATTAC  
AGCATTTGGTAGGTGAGTCTGTTGGAACATTACCGTTCTTAGGACTAGTAATAACCAATATTATTCAATTTACGAGGTGACATTTG  
AAAAATGCTATCCCTCATACGATGATGTTAGGTGCCATCTTTGTATTATTTTCTGATATAGTTGGCAGAATTGTTGTTTATCCATATG  
AAATAAATATTGGTTTAAACAATAGGTGATTTTGAACAATCATTTTCTTATCTTGCTTATGAAAGGTAGGAAAAAATTATGCGCAAC  
AATAATAAAAAAATAATGCTTTTAAATGTCAGTAACGTTATTAATTAGTATGCTGTACTTATTTGTAGGTATTGATTTTGAAATATTTG  
AATATCAATTTTCAAGTCGTTTAAAGAAAGTTCATATTAATTATTTTAGTAGGTGCTGCCATTGCAACTTCAGTGGTGATTTTCAAGC  
GATTACAAATAACCGTCTATTGACACCATCAATAATGGGGTTAGATGCAGTTTATTTATTTATCAAAGTATTGCCAGTCTTTTTATTT  
GGAATTCAATCGGTATGGGTTACTAATGTATATTTGAACCTTTATATTAACACTTATAACGATGGTGTTATTCGACTAATCCTATTTCC  
AAGGTATCTTTAAATTTGGACATTTTCAATTTATTTTATCTTACTTATTTGGTGCTTTTAGGAACATTTTGAAGCATAACAGGT  
TTTATTTCAACTGATTATGGATCTGAGTCATTTTAGCAATTAACAAAGTAGTATGTTTGCTAATTTAATGTTTCTTCAATTCGAATTTAGT  
TACTTTCTCAGCAGTGCTATTAGTAATCTTATTAGTCATTACAATTTTACTATTGCCTTATTTAGATGTATTGCTTTTAGGTGCTGCTG  
AAGCAATTAATCTTGGGATATCGTATGAAAAATTAACGCGAATTTCTACTTGTAAATAGTCTCAGTTTTAGTTTCTGTGTCAACTGCATT  
AGTAGGACCAATTACATTTTATAGTTTATTAAGTAAATCTAGCGCATGAACTAATGAAGACGATGAACATAAGTATATTTTAAAT  
TGCGACAATTTGCTTGAGTTGGATTAGTTTATTTAGTGCGCAATGGGTAGTTGAAAATGTGTTTGAAGCTACGACAGAAATGAGTAT  
ACTTATTGATTTGATTGGTGGAAGTATTTTCAATTTATCTATTAGTTAGAAGGAGAAATGCGCAATGATTCAAGTTGAAAAATTTAACT  
AAAACATAAAATAATCAAATGATATTGGAAGATATTAGCATAGATATCGAAAAAGGTAAATTTGACTTCTTTAATTGGACCTAATGG  
TGCGGGTAAGAGTACTTTACTTTGACGATATGTAGTTAATTCGTTTGTATAACGGTGAAAGTAAAAATAGATGGACGCTCATGTC  
TGATTATAAAAAATAAGTACTTGTGCAAAAAAATAATCTATATTAATAAACAAACCACTACTGAAATGAATATTACGGTAGAGCAGT  
TGGTAAACTTTGGACGATTCCCTTATTCTAAAGGTCGTTTGACGAAAGAGCATGATATTGTCAATGATGCGCTAGATTGTTGTC  
AACTACAAGATATCAGAAATCGTAATATTAAGTCATTATCTGGTGGACAACGTCAGCGTGCATACATTGCAATGACAATAGCACAA  
GATACTGAATATATTTTGTAGATGAACCATTAATAATTTAGATATGAAGCATGCTGTTCAAATTTATGCAACGTTAAAAATGTTA

GCGCATAAAATGAATAAAGCGATTGTCATTGTGTTACATGATATTAACCTTTGCGCTCCTGTTATTTCAGATCAGATTGTAGCATTGAAA  
AACGGACAACCTAGTTAAGTCAGATTTGAAAAGATAATGTCATTCAAAGTAGTGTTTTAAGTGATTATATGACATGAATATTCAAAATT  
GAACATATAAGAAATCAAAGGATTGTTTTATATTTTAAGGATTGATAATTTGGAGACACTTTAAAGGGGTGATGCGCCAATTAAG  
AAGGGTTAAACGTAAAGCATTTATTTATATTTACATCAAGCACACAGATTAAGCCAAAAGAGGAGAATATTATATTATGAAGAAA  
ACAGTCTTATATTTAGTATTAGCAGTAATGTTTTTATTAGCGGCATGCGGTAACAATTCTGATAAAGAACAAATCAAAATCAGAACT  
AAAGGTTCTAAAGATACAGTAAAAAATTGAAAATAACTATAAAATGCGTGGCGAGAAAAAAGATGGTAGTGACGCTAAAAAAGTTA  
AAGAACTGTTGAAGTACCAAAAAATCCTAAAAATGCAGTTGTGTTAGACTATGGCGCATTAGATGTAATGAAAAGAAATGGGCTTA  
TCAGATAAAGTAAAGCATTACCTAAAGGGGAAGGCGGTAAGTCATTACCGAATTTCTTAGAATCATTTAAAGATGATAAATATAC  
AAACGTTGGTAATTTAAAAAGAGTGAATTTTGATAAAATTTGCTGCGACGAAACCCGAAGTAATCTTTATCTCTGGACGTACAGCTAA  
TCAAAAGAATTTAGATGAATTCAAAAAAGCTGCACCTAAAGCGAAAAATTGTTTTATGTTGGTGACAGATGAAAAGAACCTTAATTGGTT  
CAATGAAAACAAAAACTGAAAAATATCGGTAAAAATTACGATAAAGAAGATAAAGCTAAAGAATTAATAAAGATTTAGATAACAA  
AATTGCTTCAATGAAAGATAAAACGAAAAACTTCAATAAAACTGTTATGTATTTACTAGTTAACGAAGGTGAATTATCAACATTTGG  
ACCTAAAGGTGCTTTTTGGTGGATTAGTTTACGATACATTAGGATTCAATGCAGTTGATAAAAAAGTAAGTAATAGCAATCATGGAC  
AAAATGTTTCTAACGAATATGTTAATAAAGAAAAATCCAGATGTTATTTTAGCGATGGATAGAGGTCAAGCGATAAGTGTTAAATCA  
ACTGCGAAAAAAGCATTAATAATCCTGTATTAATAAATGTTAAAGCAATTAAGAAGACAAAAGTATATAATTTAGATCCTAAATT  
ATGGTACTTTGCAGCTGGATCAACTACAACCTACAATTAACAATAATGAGGAACCTGATAAAGTTGTAAAAATAATTTAAAAAGAGGG  
GAACAATGGTTAAAGGCTTAATCATTGCTCCCTCTTTTCTTTAAAAAAGGAAATCTGGGACGTCAATCAATGTCTTAGACTCTAA  
AAGTTCTGTGTCAGTGTGGTTGAATGAACATGACTTGTAACAAGTTCAATTTCAATACCAGTGGGCTCCAAACATAGAGAAAT  
TTGATTTTCAATTTCTACTGACAATGCAAGTTGCGGGGCCAAACATAGAGAATTTTCAAAAAGGAATTTTACAGAAAGTGGTGCTTT  
ATCATGTCTGATCCACTCCCTATAATGTTTTGACTATGTTGTTTAAATTTCAAAAATAAATATGATAGTGATATTACAGCGATTGTTA  
AACCGAGATTGGCAATTTGGACAACGCTCTACCATCATATATTCATTGATTGTTAATTCGTGTTTGCATACACCGCATAAGATTGCTT  
TTTCGTTAAATGAAGGCTCAGACCAACGCTTAATGGCGTGCTTTTCAAACCTCATTATGGCACTTATAGCATGGATAGTATTTATTACA  
ACATTTAAATTTAATAGCAATAATATCTTCTTCGGTAAAAATAATGGCGACAGCGTGTTTCAGTATCGATTAATGAACCATAAACTTT  
AGGCATAGACAAAAGCTCCTTAACCTACGATTCTTTGGATGTTACCAATAATGCGAACTTCACGATTTAATTCATGCCAAATTTTT  
CTTTGACGGTCTTTTGTACATAATGAATAAGGTTTTTATAATCTGTAGCAGTTCCATTGTCTACATTTACCATAAAAACAGCGTGTTT  
AGTTGAAACTTCAACGCCGCCAATACGGTGACCTTGCAAATTAGAATCTTGTATCAATTTACCTGCAAAATGACCAGGCGGCTTTTG  
GAATACACTACCACATGAAGGATACTCTAAAGGTTGTTTTAGATTCTCTACGTTCTGTTAAATCATCCATTTTAGCTGTATTTCAGTC  
ATTTTACCAGGAGCTAAAAGTAAATGCAGCTTCTAATACAACCTAAGTGTTCTTTTTGAATAATGCTATTACGATAATCTAACTCTAATT  
CTTTTGTGTGAAGTTAATTAACGAGCCTTGTTTCGTTTACGCAAGCGCATAGTCTATACAATCTTTAACTTCGCCACCATAAGCGCC  
AGCATTATATACACTGCACCACCGATTGAACCTGGAATACCACATGCAAAATTCAGGCCAGTAAGTGCGTAATCACGAGCAACAC  
GTGAGACATCAATAATTCGACGCGCGCTACCGGCTATTATCGCATCATCAGATACTTCGATATGATCTAGTGATAATAAACTAATTA  
CAATGCCACGAATACCACCTTCACGGATAATAATATTTGAGCCATTTCTTAAATATGTAACAGGAATCTCATTTTGATAGGCATATT  
TAACAACCTGCTTGTTACTTCTTCATTTTTAGTAGGGGTAATATAAAAGTCGGCATTACCACCTGTTTTAGTATAAGTGATCGTTTTAA  
AGGTTATCATCAACTTTAATTTTTTTCATTTGGGATAAGTTGTTGTAAGGCTTGATAGATGCTTTATTTATCACTTCTCAGTACATCTTT  
CTCATGTCTTTAATATCGTATAGTATTATACCAATTTTAAATTCATTTCGAGAAATTTGAAAAGAAAGTATTAGAATTAGTATAATTA  
TAAAAATACGGCATTATTGTGCTTATAAGTATTTTTTACATAGTTTTTCAAAGTATTGTTGCTTTTGCATCTCATATTGTCTAATTGTTA  
AGCTATGTTGCAATATTTGGTGCTTTTTTGTATGGAATTGCAAAGCAATATCATCATTAGTTGATAAGAGGTAATCAAGTGCAAGAT  
AAGATTCAAATGTTTTGGGTATTCATTTGAATGATATGTAGACGCACCTGTTGTTTTAGTTCATGAAAATTGTTAACTTCGCCATCAT  
AACTTTCTTATTATATTTATGATGCAAGCGATAAAACCCAACATAATTTAAACGTTTTTCATCTAAGGAAGTAATATCATGCAAAATTT  
TCTACACCTACTAAAAATATCTAAAAATCGGCTCTGTTGAATATTTAAAAATGATGCGTACCGCCAATATGTTTTGTATATTTACTGGGC  
TGTTCTAAGAGGTTGAATAATAATGATTTCAATTTTCAGTGTATTGTGATTGAAAAACAATTAGTTAAATCACTATTAATGAATGGTTGAA  
CATTTGAATACATGATAAACTCCTTTGATATTGAAATTTAATTAATCAGATAAAGTCTGGAATACTATAACATAATTCATTTTCAT  
AATAAACATGTTTTTGTATAATGAATCTGTTAAGGATGGAATCATGAAAAAATTGTTATTATCGCTGTTTTCAGCATTTTATTTGT  
AGTAATAAGTGCTTGTGTAATAAAGAAAAAGAGGCAACAACATCAATTTACTAAGCAATTTAAAGATGTTGAGCAAAAAACAAAA  
GAATTACAACATGTCATGGATAATATACATTTGAAAGAAATTGATCATCTAAGTAAAACTGATACAACCTGATAAAAAATAGTAAAGA  
ATTTAAGGCACTACAAGAAGATGTTAAAAACCATCTCATACCTAAATTTGAAGCATATTATAAGTCAGCAAAAAATTTGCGCTGATG  
ATACAATGAAAGTTAAGAAATTAAAAAAAGAATATATGACGCTTGCAAATGAGAAGAAGGATGCGATATATCAATTAAAAAAATT  
CATAGGTTTATGTAATCAATCTATCAAGTATAACGAAGACATTTTAGATTATACGAAACAATTTGAAAAAATAGATACAAAGTTG  
AATCAGAAATTAATTTAGCTGATAATAAAGTGAAGCAACTAATCTTACGACAAAATTAGAACATAATAATAAAGCGTTAAGAGAT  
ACTGCGAAGAAGAACCTAGATGATAGTAAAGAAAAATGAAGTAAAGGCGCGATTAAAAATCACATTATGCCAATGATTGAAAAAC  
AAATTACCGATATTAACCAAACTAATATTAGTGATAAGCATGTTAATAATGCAAGGAAAAACGCAATAGAAATGTTATACAGTCTG  
CAGAACTATTATAATACAGTATTGAAACAATAAAGGTTAGTGAGAGGTAATCAAAAAGTTCGATGTAGATAGTTTGCCGAAAAAGGG  
TATAGATATAAATCAGGCGGATAAAGCCTTTGAAAAAAGCTTGAAAAAATTAGAAGAAAAATAACTATAATCATTTTTCAAAGTTA  
AAAATTTTGAATTTATGGTTAACATGTCAACTTACTATGTGTATAATGGTAAACATTGATATTAACATATGTATAAAAAATGTCACG  
CAGATGCTATTTAAATGTGATAAATATTTTTAGAGGTGAATAGAGTGGCTATAAAGCTAAGTTCAATTGACCAATTTGAACAGGTTA  
TTGAGGAAAAATAAATATGTTTTGTATTAAACATAGTGAAACTTGTCATATTCGGCAAATGCGTACGATCAATTTAATAAATTTT  
TATATGAACGCGATATGGACGGTTATTTTGTATTGTTCCAACAAGAACGCGATTTGTCAGATTATATTGCTAAAAAAAACGAACGTTA  
AACATGAATCACCTCAAGCATTTTATTTTGTAAATGGTGAAATGGTTTGAATCGAGACCACGGTGATATCAATGTGTGTCATTAG  
CACAAGCAGAAGAATAATGAACTATAGGGTTGGGAACATTTGCTTACACTACTAGACGTGAATAGCACAACCTTAATTTCTGTG  
AATCAGAGTAGTTTGGCTATAATGATGTTCTGACCTTTATTTTATGTACCTTTAGAAGCAGTTAAGTTAGTACTTTTTTACAAACA  
TATGTATAATGTATTTCAGATTTTTTATTGAAAAATTTTTGAAAAACGACGAATCCAATAAGAAAAATTTAAACATGATTTGTAAGTT  
AGTTTAAAGGAAATATATGCTAAACCAAAAGAAGCATACTGTTATTTACTGGAATAATTAATAATCATGTATGTTAAATGTTTCGC  
ATATAATCACGAGATAAAATCTAAATTTAAGATTAATCTTTTATGAATAAAAAACGTATCACAAACAAATAATAAAGTAAGGTGGT  
CAAGGTTATGAAAGTATTAGTAGCCATGGATGAGTTTCATGGAATTATTTTCAGATTATCAAGCTAATAGATATGTTGAAGAGGCAGT  
TGCAAGCCAAATTTGAACTGCGGATGTAGTTCAAGTACCATTGTTTAAATGGAAGACATGAATTATTAGATTCTGTATTTTTATGGCA  
ATCTGGGCAAAAGTATCGTATACCAGTACATGATGCAGATATGAATGAAGTTGAAGGTGTTTACGGACAACTGATACAGGGATGA  
CCGTTATCGAAGGGAATTTATTTTTAAAGGTAACCAATTTGTTGAACGAACAAGTTATGGTTTAGGAGAAATGATTAACAT  
GCATTAGATAACGACGCAAAACATGTTGTAATTTTCACTAGGTGGGATGATAGTTTGTATGCTGGTGAGGTATGTTACAAGCATTA  
GGTGCTCAATTCTATGATGACGAAGGGCGTGTCGTAGATATGAGACAAGGTGCTGGTGAATTAATAATATTTCGTCGTATGGATATG  
TCGAACCTTACACCCTAAAATGGAACAGCAAGAATTCAAGTAATGTCGGATTTTTTCAAGTCGATTATATGGTAAGCAAAAGTGAAAT  
CATGCAAACTTATGATGCGCATCAGTTGAATCATAATCAAGCAGCAGAAATCGATAATTTAATTTGGTATTTTAGTGAGTTATTTAA

AAGTGAATTGAAAATTGCAATTGGTCCAGTTGAACGTGGTGGTCTGGTGGTGGAAATTGCAGCAGTCTTGAATGGACTGTATCAAG  
CTGAAATATTAACCAGTCATGCATTAGTAGACCAACTAACACATTTAGAAAATTTAGTTGAACAAGCGGATTTAATTATTTTGGAG  
AAGGATTAAATGAAAATGATCAGTTGCTAGAAAACGACAACATTGCGTATTGCAGAACTTTGTCACAAACATCAAAAGGTTGCCATT  
GCAATTTGTGCAACTGCTGAAAAGTTGATTTATTTGAATCACAAGGGGTTACAGCAATGTTAATACATTTATCGATATGCCAGAA  
ACTTATACTGACTTTAAAAATGGGATTACAAATTAGGCATTATACGGTTCAGTCTTTAAAACTGTTGAAAACACATTTTAAATGTTGAG  
GTTTAGTAAAGAAGGACTAAATTGGTGATGCTGTCATGATGGTTAATAACATTTATGATGGTTAGCAAAACGAATTAGAAGATCGA  
AAGTATACGTAAAAAATATGAAAAATCACGCTATCATTGCACTGAATGTTAGCGTGATTTTTTTATTAATTAAGCCTGAGTTGAACT  
AGTATATAATCGTTGGTTTTTAGTGATTTTCAGCGATATCTTCTACAATTCCAATGATTACTTGTACTGCTTTTTCCATAACATCAATG  
GATGCATATTCATATGGGCCGTGGAAGTTACCGCAACCTGTAAAGATGTTTGGAGTTGGTAACCCCATAAATGACAATTGTGAACC  
TGGAATATTTTTCTGCCATATTGAAATATTGATCCGATATATCAACTTAACTGGATAATTTTCAAAATGGGAATTGATATCGTCA  
CGTATTTCTAAAATACGTTTCTTACGCAATTCGAATTGTTTTTATCATGATCACGAATAATGTATTGCAAAGTTGCTTTTTCAACAG  
TTCCTTCAAAGTTCATTAAGTGATAAAAGCCTTCGTATCCTTCTGTTTCGCTCCGGAACCTCACTATCAGGTAGCAAACATCGAATTG  
TTCACCTAAACGTATTGCGTTTACCATTGCATTTTATAGCTGAACCAGGATGAACATTACACCGTGCGATGTAATAACCGCTTCAGC  
AGCGTTAAAGCTTTCATATTGTAATTCTCCATATTGACTACCATCCATAGTATAAGCAAAATCAGCATTGAAGCGGTCAACATCAAA  
TTTATGTGGACCACGACCGATTTCTTCGTCTGGTGTAATCCAATGCGAATGGTACCATGTTAATTTCTGGATGTTCTTGTAATAA  
CAAATAGCTTCCATAATTTCCACAATACCCGCTTATCGTCTGCACCTAGTAACGATGTACCATCAGTTACCATTAATGTGTGACCAA  
CTAAACTGTTAAGTTCTGGAATACTTTAGGATCTAAGACAGTTTAGTATTGCGTAGTTTGTATGGCTTACCATCATGTTTTCAT  
AATTTGCGGTTTAAACATTTGAAGCATTTGAAATCAGGTGATGTATCAACATGCGCCAAAAATCCAAGCTTTGGGACGTGACATCGAT  
GTTACTTTCTAATGTAGCAAATAAGTAGCCATTTTCATCTAAATCAGTTGGCAATCCTAATGTTGTAATTCCTTTTTCTAATAAATGT  
AACAAATCCCATTTGCTTTTCAGTTGAAGGTGTTGTTGTAGATTTTGGATCAGATTGCGTATCAATTGTCGTATATCTTGTTAATCTAT  
CTATCAATTGGTTCTTCATTATATTCGACCCCTTAACTCTATTATTCATGTTGTAAGATTTTTATATGTCTTACCTTTGATTTTACCA  
TACAGTTGTTTGATACGTGTGTATAGGTAATATAGAATTTTCAGAACTAATATACCGAAAAGCAATCGCACCTGAAATCAGTGTAAC  
TCTAAAAATGTATTACAGCACTTGTATAATCATTGATACATAAAAAACGAGTCGCTTGATAAGCTGCACCACCAGGTACTAATGGT  
ATAATGCCTGGCACTATGAATATAATTACCGGTCTTTATATCTGCGACTCATAGTATGACTCATTAAAGCCTAAAAATTAAGCTTCCC  
AAAAATGAAGCGCCAACTTTTCCAACTCTAAATCTACCGTTAATTTGGTAATCGTCCATGCAATGGCACCCACAAAATCCACATGCT  
ACTAAGAGCGCTTTGGGTGCATTGAAAATGATAGAGAAAAGTACTGTTGATATAAAGCTGATTGTAAAAATGAAATAAAATAG  
CATGCTTTAACAGTCCTTCTTAAATGATTAATAAAACGATTGCGACACCAGCACCGATTGCGAATGCTGTTAATGCAGCTTCAACA  
CCACGAGACATACCTGCAAGTAATTCACCGCTAATAAATCTCGAATGGCATTGGTAATTAATATACCAGGGACAAGTGGCATGAC  
ACTGGCTATAGTAATGATATCTTGATTGGTTGCAATGCCTAATTTAGTAAATGTGGCTGCAATGGATATGACCACAGCGGCTGCAAC  
AAACTCTGAGAAAAATTAATTTGTATATAGCGTTGCACAAAGCTGAATGTTAAAAATGCGGATCCGCCAGCAATGACTGCAATCC  
AACATCTGATGCGACACCACCAAAACATAAATAGGAAGAAAGCCACATGCAATGGCAGCTGCAAAGAAATTCGTTAAAAAAGAATA  
TTGTAATGATGCATGCTGTAATGAATAAATTCAGATTTAGCTTCATCAATTTGTGAGTTCTTTATTTGATATTTTACGTGAAAGACTA  
TTCGTTAAAGCAATTTTCTCTAAATCTGTTGTACGCTCTGTGACAGAAATTAATCTTGACTTGTTCGATCATTAAATGAAAAATAA  
TTGCAGTTGAACCTGACAAAACATATGTATTATGAAGACATAACTATGTGCGATACCGTTCAATTTGATCTTCAACTCGATATGTTT  
AGCACCTGATTCAAGTAAAAATCTACCTGCAATTAATACAACATCAATCACTTTGTTTTCATCTATAATTGTGATTGAATCTGGCATA  
TCAATTCACCTCCAATGATATGTGTTATTTATTTGAACAATTGAAGTTTACAACCTTGTGTTGCAACTTTCAATAGTGAGACTTTGTG  
TTAGTATGATGAACCTGTATGGTTCAAATTTAAATAAGAAAAACTGTTAATCTTTGCTATTATACTATGATTTAATAATAGCAAAGG  
ATTAACAGTTTTTGTCTGTTGTTATAAATTGATAATAGGGTTAAACATTACTTTGTTTCGCCCTTGATTTTTGGCTACATGCACCATATC  
GTCTGCATCTTTAAACACTTTACGCTGTGATTTTGGATCGTCATCTGTTAAATAACCAACACCGATAGACACTGACAATTTAATAACT  
TCTTTGTTTGGTAAATGGAATGATGATTTTTCAACACCCGAACGAATATTTTCAGCCAATTTAACACTTTGATCAAGTGAATAATTGT  
GAATGACAACCTGAGAACTCTTCGCCACCATTTCTAAAAATTTAAATTGATTCCGCACATAGTTTTTAAGTAATTGAGACATTTGTTT  
TAATACAGCATCTACATTTGTGTGAGTAGGTATCATTTGACATCTTAAATCCATCGATATCGATTAAATAAATAGCGATACCTTTGA  
TGTTCTTTTTCAGCTTTTCGTGAAATTTCAATTTAAATGTCTATCAAATCTTTTACATTACCTAAGCCTGTTAAGTAATCATATTTATC  
TTCGTTTTTCATAACGATTTACGAGTGAGAAGAAATGCCAAATATCGACAAATGTTATCGCTGAAGCTAAAGTGATAATTAATGAAAT  
TGGTATTAATAATGATAACTTCCGATAGTGTGTAATAGGACTCACTAACGCGACACCAAAATAAAATGATTATTGTAACAACATTAA  
GTATTAATAATGATAGCACATCATTTTGTTTTAAAAATGGTCCAATAGCACTTGTTACTGCAGCAATAACAATCAACGTAACACCGT  
ACATAATCGAGTTGTTAAATACTACAATTTCAACAATTGCTACAATTAAGTGTGGCAGATAATGTATAGACCATATTTGTAATCTAC  
CTAAAAACAATAAAGGAACGAATGTTAAGTGAATTAATAATCTTCACGATAAGGGATAGGGTAGACAGATAATAAATGATAC  
GATTGTCATTAACACAGTGACATAAGCCCTTAGAAAAAACCATACGTTTGTCTTCTGAATACTGTAAGCGATGGAATAAATAGATTCC  
AGCGACTATAACAGATATATTGTATATAAATGCTTCGAACATGTCTGAATCGACTCCTTTAATTGACCATAGCTAATTTGTAAGTAA  
AACTTACAATTTGTCATTATTTTACATATAAAATTAATGATGATGATATAGACTTTGATGTTAAAAATGTTGCTTAAATGATATGATGAA  
AAAATGAATAATAGGCGATATATAAGAAATGAATCGTATAGTTGTAATATGATATCATTGATTGAACGAATTAATTTATAATAA  
GCTATAAGATATACGTAGAAAAATAGATATATCATTCTATAAAGACAATATTAATAAATAAATATAACGTTAAAAACAATTAATATCGAT  
GAAGTGAATAAATGGTTACATTATTACTAGTTGCAGTAACAATGATTGTCAGTTTGACGATAACACCAATTGTTATTGCAATATCG  
AAAAGATTAAATTTAGTTGATAAACCAAATTTTAGAAAAGTACACACTAAACCTATTTACAGTTATGGGTGGTACAGTGATTCTCTTT  
TCATTTTTAATAGGTATTTGGATTGGTCATCCTATTGAAACAGAAATCAAACCACTTATTATTGGTGCGATTATTATGTACGTACTTG  
GGCTTGATAGATGATATCTACGATTTGAAACCGTATATAAAATGGCTGGTCAAATTGCCGCTGCCTTAGTAGTTGCTTTTTATGGTGT  
GACTATTGATTTTATTCGTTGCCAATGGGTACAACGATTCAATTTGGATTTCTTAGTATTCCAATTACTGTGATTTGGATTGTTGCTA  
TTACAAATGCAATTAATGATGAGTGCATGATGTTTGGCGTGGGTGTTCTGCAATCGGACTCATACAATAGGGTTCATTG  
CAATTTTACAAGCTAATATTTTACATAACGATGATTTGTTGTGTTTTATTAGGCTCTTTAATTGGGTTTTTATTTTACAATTTCCATCCT  
GCCAAAATATTTTTAGGTGATAGTGGGGCTTTAATGATTGGATTTATCATCGGATTCCTTTCTTTACTCGGATTCAAAAAATTACAA  
TTATTGCATTGTTCTTCCCAATTGTTATCTTAGCAGTTCCATTTCATTGATACTTTGTTGCAATGATTGACGTGTGAAAAAAGGGCA  
GCATATAATGCAAGCTGATAAATCGCATTGTCATCATAAACTATTAGCTTTAGGCTACACACATAGACAAACAGTATTATTAATCTA  
TTCAATCTCTATTTTATTTAGTCTTTTCGAGCATTATTTGTATGTATCGCCACCATTAGGTGTTGTATTAATGTTTGTATTAATCATATT  
TAGTATTGAATTAATTGTTGAATTTACAGGATTAATAGATAACAACCTACCGACCAATATTAATTTAATTAGTCGTAAGTCATCTCA  
TAAAGAGGAATAGGGAATGAAAGCATAGCTGTATGGGATAATTTGATTATATGGCTTTACTCTTTACAATTTTTTTGTATTAATTTT  
CAAAATAAAAAGCATGCCATAAACGTGTACTTCAATTGTCGTTTTAATAATACGCAATTGATATTACCGTCTTATGATAGTGCTTT  
TTATTTTTATTCAGTTGGTATATCGAAAGGTAACGTCTTTGGAGTTTCTTCAGTCAAATCGAAATTTCTGACGTCAATTTGATTTAA  
AAGTTAATAAACGCTTCATAGTCACTTTAAACGACATCGATATAGTAGCTTACCTTATCAGTGTAAGTTTGGTTTCTTAACATAAAAT  
GAGTTGAAGCTAATTCATATTCAAATTTACCAGTTTGATCATAATTCAGTGTTACTATACATGGTACTGCTTCTCGTAGTTTCGACACG

CCCGATATCATAAATGACGTCTCTAACAGCACCGCTATAGGCGCGAATTAACCGCCACCACCTAATTTAATACCACCAAAATATCT  
TGTTACTACGACACACGCATTATGAACATCGAGCTTTTTAATATGTCTAACATTGGGACACCGGCAGTTCCTGTGCGTTCCACCATCA  
TCATTCGCTTTTTGAATATTCATTTTCAGGTCCAATAGTATATGCAGAACAATTATGAGTGGCATCTTTATGTCTTTTTTTATTGCAGC  
AATAAATGCTTTAGCTTCATCTTCATTTTGAACAGGTTTGATATGAGCAATGAATCTTGATTTACTAATCACATTTTCAATAATGTGT  
TCTTTTTTAACAGTAATGATATTTTGTGTCATAATAACTCCTTAATTCATAAGCTTAAGATTATTTAATCTTCATTATACACTGAAAAAT  
GACATGACTATAAATCGTTTGATTGCCATTTTCTTTTTAACTGAAATATTGTATCATTTGCTATGAGTATATTTTAGGAGGACGACTAT  
GAAAAATGCTGTGATGACCGATTCTACAAGTTATCTGTGCGAGGACTTAATCGATAAATATAATATTCAAATAGCGCCATTAAGTGT  
GACTTTTGATGATGGGAAGAAGCTTTACAGAAAAGTAATGAAATAGCAATTGAAGAATTTTATAATAAAATGGCATCGTCTCAAACGA  
TTCCAACAACAAGCCAACCAGCAATTGGCGAATGGATTACTAAATATGAAATGTTAAGAGATCAAGGTTACACAGATATCATTGTCT  
ATTTGCTTATCAAGTGGGATTAGTGGAAGTTATCAATCTAGTTATCAAGCAGGGGAAATGGTTGAAGGTGTTAATGTACATGCATTT  
GATAGTAAGCTTGCAGCAATGATTGAAGGATGTTATGTATTACGTGCTATTGAAATGGTTGAAGAAGGATACGAGCCACAGCAAAAT  
TATTGATGATTTAACTAATATGCGTGAACACACAGGTGCATATTTAATTGTTGATGACTTAAAGAATTTACAAAAAGTGGTCAAT  
TACTGGTGCTCAAGCATGGGTTGGAACATTATTGAAAATGAAGCCAGTCTTAAAGTTTGAAGATGGCAAGATTATACCAGAAGAAA  
AAGTTCGTACTAAAAAGCGTGCCATTCAAACATTAGAAAAGAAAGTATTAGATATTGTAAGAGACTTTGAAGAAGTAACCTTTATTT  
GTCATAAATGGAGATCATTTTGAAGATGGTCAAGCGTTATACAAAAAGTTACAAGATGATTGTCCTTCAGCTTATCAAGTAGCATAC  
TCTGAGTTTGGTCCAGTTGTTGCAGCACATTTAGGTTCTGGTGGATTAGGTTTAGGCTATGTTGGCAGAAAAATAAGATTAAACATAA  
TTATAAAATTTTATAAAAGAGTCTATATTGTAATTGGAATTTATCTCTCGTATACATGGCTTTAAATGTTTCATCATTTGAAAGCCAA  
AATGCTAAAGATATAAGAAATCATTATAATATTAGGCTCTTTTTACGTTGAAATGAGGTTTAAAGCATTAAACATTACGGGAAAT  
TAATTCATCCTCATACTTCACTTACTAATGAAAAAATAAAAAGAAAGTAACAGGTGTCATCAACAAAAATCAAACTATTATTGTG  
TTCAATGTGAAAGTACAAATCCAAAGCATTTTTATCAGTATGATTCTCAGTACATTCCAAGAAAATTGTATATTGCAGAAATTGTA  
TATCACTGGGTCGAATGGATAATGTAACAAGATATAAAATAACAGAGAGTTCGCAAAGTTCATCACAAGCATATTATCATCTCTCAT  
TTGAATTGTCGGAACAGCAGTCTTATGCCTCAGAACATATTGTTGAGCCATTAGAAAGAGACAAACGATTTTGTATATGCCGTAA  
CAGGTGCAGGTAAAGACAGAAATGATGTTTCAAGGCATTCAATATGCAAGAATACAGGGAGATAATATAGCTATTGTGTCAACCAGT  
GTAGATGTTGTTGTAGAAATTAGTAAACGTATTAAAGACGCATTTCTTAATGAAGATATAGACATACTACACCAGCAATCAAGACA  
ACAATTTGAAGGGCATTTTGTGTATGCACAGTGCATCACTTTACCGATTCAAACAGCACTTTGATACTATTTTTATTGATGAAGTC  
GATGCCTTTCCTTTATCAATGGATAAAAAATCTACAACAAGCATTGAAGTCACTTCTTAAAGTTGAACATGCAACAATTTATATGACA  
GCAACACCACCGAAACAACCTTCTGTGAGAGATTCCCCACGAAATATAATTAATTAATGGCAGCTCGTTTCATAAAAAATCACTTCCA  
GTTCTTAAATATCGTTATTTCAAACCTTAATAATAAGAAAGATTGAGAAAAATGTTATACCGAATTTTACAAGATCAAATTAATAATCAA  
CGTTATACACTGGTGTTTTTTAACAATATAGAAACAATGATTAACAACTTTTCGGTTTATAAGCAGAAAAATTACTAAATTAACATAC  
GTCCATAGCGAGGATGTTTTTCGCTTTGAAAAAGTTGAACAATTAAGGAATGGACATTTTCGATGTCATTTTTACTACGACAATATTA  
GAACGTGGATTTACAATGGCAAATTTGGATGTTGTTGTTATCGATGCACATCAATATACTCAAGAGGCTTTAATACAAATTGCTGGA  
CGTGTGGACGAAAAATTAGAATGTCCTACTGGAAAAAGTATTGTTTTTCATGAAGGGGTAAGTATGAATATGATTCAAGCTAAAAA  
AGAGATTCAAAGGATGAACAAATTAGCATTAAAAAGAGGTTGGATTGATGAATAATTGTTTGAAGTTGTTGGTGCTAAGTTATATGAA  
AATATAACCATTTATAATTGTTCAAGAAACCTAATAGATTATGTGACAGATGCAAAAGAGAATTTGGGACAATATAAATCTGATATT  
AAAGCAAGCGGATGTTCAAGTGTCTTAAACACACTTAAATCAAGATGAAGCGTATTGTTTGAAGTCTAGCTCAAGTTTCTATCGGCACACTT  
AATTTAATGGAACAATTATATTGTCAATTTCAATATGACGGTTTTAATGAAAAGAGATGATACATCAGTATAAATTTTTGAAAGACTAT  
TATTTATGTGAATTATTGGCACATTTGATTGAAATACCACAAACATCTTATGACTATATTGTGCCAATTCCTTCTTCGCCGGCACATG  
ATTTATCTAGAACATTTAACCCGGTAGAAGCAGTACTAAAAGCTAAAGGGATTTCGCTTTGATAAGATTTTAAAGATGTCAAATAGA  
CCAAACAGTCTCATTTAACTAAGAAAGAGCGTCTGGCAGATGAAAAATCCATTTATATTGATACGGAATTAGATTAAATGGCAA  
GGAAATATTACTCGTTGACGATATTTATACAACCTGGATTAACAATTCATCGTGCAGGGTGTAAATTATATGCTAAAAATATCAGAAA  
ATTCAAAGTGTTTTCGCTTTGCACGATAGCGTAAAAATGTTAAAAATATAATAAGAGTTACCAATAAAGAGGTTTAAAGGAGAGATTA  
CTATGATTAGATTTGAAATTCATGGAGATAACCTCACTATCACAGATGCTATTTCGCAACTATATTGAGGAAAAAATTGGTAAGTTGG  
AATGTTATTTTAAATGACGTACCAAAATGCAGTGGCGCATGTTAAAGTTAAACCTTATTCAAATTCAGTACTAAACATTCAAGTAAACA  
TTCCATTGAAAAATGTTACGTTAAGAGCTGAAGAGCGAAACGATGATTTATACGCAGGTATTGATTAAATTAATAAACTTGAAA  
GACAAGTTCGAAAAATATAAAACACGTATTAATCGTAAGAGCCGTGATCGAGGAGATCAAGAAGTGTGTTGTTGCCGAATTACAAGAA  
ATGCAAGAAACACAAGTTGATAATGACGCTTACGATGATAACGAGATAGAAATATTTCGTTCAAAGAATTACAGCTTAAACCAAT  
GGATTGAGAAGAAGCGGTATTACAATGAATCTATTAGGTCTGACTTCTTTGTATTACAGACAGAGAACTGATGGAACAAGTA  
TCGTTTACCGCCGTAAAGACGGTAAATATGGCTTGATTCAAACCTAGTGAACAATAAATTAAGTTTAAAGCACTTGTTGTTTTGCACA  
AGTGTCTTTTTTACTCCAAAAGCAATTTCTGACTAATTCATAGTTTCGATAATGTAATTTGTTGAATGAAACATAGTGACTATGCTAA  
TGTTAATGGATGTATATTTGAATGTTAAGTTAATAATAGTATGTCAGTCTATTGTATAGTCCGAGTCGAAAAATCGTAAAAATTTA  
TAATATAATTTATTAGGAAGTATAATTGCGTATTGAGAATATATTTATTAGTGATAAACTTGTGACAACAGAATGTGAATGAAGTA  
TGCTATAAATATATTTATATTGATTCTACAAATGAGTAAATAGTATAAATTTCTAACTATAAATGATAAGATATATTGTTGAGGCC  
AAACAGTTTTTTAGCTAAAGGAGCGAACGAAATGGGATTTTTATCAAAAAATCTTGATGGCAATAATAAAGAAATTAACAGTTAG  
GTAAACTTGCTGATAAAGTAATCGCTTTAGAAGAAAAAACGGCAATTTTAACTGATGAAGAAATTCGTAATAAAACGAAACAATTC  
CAAACAGAATTAGCTGACATTGATAATGTCAAAAAGCAAAATGATTATTTAGATAAAAAATTTACCAGAAGCATATGCACCTGTTAG  
AGAAGGCTCTAAACGTGTATTCAATATGACACCATATAAAGTTCAAATTTATGGGTGGTATTGCAATTCATAAAGGTGATATCGCTGA  
GATGAGAACAGGTGAAGGTAAACATTAACAGCGACAATGCCAACATACTTAAATGCATTAGCTGGTAGAGGTGTTACAGTTATTA  
CAGTCAATGAATACTTATCAAGTGTTCAAAGTGAAGAAATGGCTGAGTTATATAACTTCTTAGGTTTGAAGTGTGCGATTAACTTAA  
ACAGTAAGACGACAGAGAAGAAAAACGTGAAGCATACGCACAAGACATTACTTACAGTACTAATAATGAGGTAGGTTGATTGATTA  
CGAGATAACATGGTGAATTTCTGAAGATAGAGTAATGCGTCCATTACATTTTGAATTCATTGATGAGGTGACTAATTTTAAATC  
GACGAGGCACGTACGCCATTAATTTCTGGTGAAGCTGAAAAAGTCAACATCACTTTATACACAAGCAAAATGTTTTTGCAGAAATG  
TTAAAAACAGGACGAAGATTATAAATACGATGAAAAACGAAAGCCGTACATTTAACAGAACAAGGTGCGGATAAAGCTGAACGTA  
TGTTCAAAGTTGAAAACTTATATGATGTACAAAATGTTGATGTTATTAGTCATATCAACACAGCTTTACGTGCGCACGTTACATTAC  
AACGTGACGTAGACTATATGGTTGTTGATGGCGAAGTACTAATTGTGATCAATTTACAGGACGTACAATGCCAGGCCGTGCTTTCT  
CAGAAGGTTTACACCAAGCTATTGAAGCGAAGGAAGCGCTTCAAATTCAAAAATGAATCTAAAACTATGGCGTCTATTACATTCCAA  
AACTATTTTCAAGATGTACAATAAATCTGCGGGTATGACAGGTACAGCTAAAACCTGAAGAAGAAGAATTTAGAAAATTTTATAACAT  
GACAGTAAGTACAAATCCGACAAATAAATCTGTGCAACGTAACGATAAGTCTGATTTAATTTACATTAGCCAAAAAGGTAAATTTG  
ATGCAAGTAGTAGAAGATGTTGTTGAAAAACACAAGGCAAGGCAACAGTCTATTAGGTACTGTTGCAAGTTGAGACTTCTGAATAT  
ATTTCAAATTTACTTAAAAAACGTGGTATCCGTCATGATGTGTTAAATGCGAAAAATCATGAACGTGAAGCTGAAATTTGTTGAGGC  
GCTGGACAAAAAGGTGCCGTTACTATTGCCACTAACATGGCTGGTCTGGTACAGATATCAAATTAGGTGAAGGCGTAGAGGAATT  
AGGCGGTTTAGCAGTAATAGGTACAGAACGACATGAATCTCGTCTGATTGATGACCAGTTACGTGGTCTGTTCTGGACGTCAAGGTG

ATAAAGGGGATAGTCGCTTCTATTTATCATTACAAGATGAATTAATGATTTCGTTTTGGTTCTGAACGTTTACAGAAAAATGATGAGCC  
GACTAGGTTTATAGATGACTCTACACCAATTGAATCAAAAAATGGTATCAAGAGCTGTAGAATCAGCACAAAAACGTGTAGAAGGTAAT  
AACTTCGACGCGCGTAAACGTATCTTAGAATACGATGAAGTATTACGTAAACAACGTGAAAATTATCTATAACGAAAGAAATAGTAT  
TATTGATGAAGAAGACAGCTCTCAAGTTGTAGATGCAATGCTACGTTCAACGTTACAACGTAGTATCAATTACTATATTAATACAGC  
AGATGACGAGCCTGAATATCAACCATTTCGACTACATTAATGACATCTTCTTACAAGAAGGTGACATTACAGAGGATGATATCA  
AAGGTAAAGATGCTGAAGATATTTTCAAGTCGTTTGGGCTAAGATTGAAGCAGCATATCAAAGTCAAAAAGATATCTTAGAAGAA  
CAAATGAATGAGTTTGAGCGTATGATTTTACTTCGTTCTATTGATAGCCATTGGACTGATCATATCGACACAATGGATCAATTACGT  
CAAGGTATTCACTTACGTTCTTATGCACAACAAAATCCATTACGTGACTATCAAAATGAAGGTCATGAATTATTTGATATCATGATG  
CAAAATATTGAAGAAGATACTTGTAAATTCATTTTAAAAATCTGTAGTACAAGTTGAAGATAATATTGAACGTGAAAAACAACAGA  
GTTTGGTGAAGCGAAGCACGTTTCAGCTGAAGATGGTAAAGAAAAAGTGAAACCGAAACCAATCGTTAAAGGGCGATCAAGTTGGT  
CGTAACGATGATTGTCATGTGGTAGTGGTAAAAAATTCAAAAAATTGCCATGGAAAAATAATGATATAAAAAATAACTTCTTCCAATTA  
AACACCTATAGTTTGTGTTATGGGAGGAGTCTTTTTATTTTACAAGCGTTAAATACTTTAAAAAATGTGAAGAAGTTGTTAAACGTT  
GTTATGTACTTAGTTTTAAAAATCGGTTTAGGCATATGTCGATGATAAATGTACTGATTTTTAACAAATAAATGCATAAACTAATTGT  
CAGTGTGCTTATATTTCTTAACATTGTTATTTAACAAAATTATGTTAAAAATTAGCATTATAAAAGATGCAAAATCAATGACTTGAATT  
GAAATATAAATAGGAGCGAATGCTATGGAATTATCAGAAATCAAACGAAATATAGATAAGTATAATCAAGATTTAACACAAATTAG  
GGGTCTCTTTGACTTAGAGAACAAAGAACTAATATTCAAGAATATGAAGAAATGATGGCAGAACCTAATTTTTGGGATAACCAA  
ACGAAAGCGCAAGATATTATAGATAAAAAATAATGCGTTAAAAAGCAATAGTTAATGGTTAAAAAACTACAAGCAGAAGTAGATG  
ACATGGATGCTATTGGGATTTATTACAAGAAGAATTGATGAAGAAATGAAAGAACTTAGAGCAAGAGGTCATTAATTATTTAAG  
CGTAAAGTGGATGAATACGAATTGCAATTATTATAGATGGGCTCAGCATGCCAATAACGCAATTCTAGAGTTACATGCTCCTGGTGCA  
GGTGGCACGGAGTCTCAAGATTGGGCTAATATGCTATTTAGAATGTATCAACGTTATTGTGAGAAGAAAGGCTTTAAAGTTGAAAC  
TGTTGATTATCTACCTGGGGATGAAGCAGGGATTAAAAGTGAACATTGCTCATCAAAGGGCATAATGCTTATGGTTATTTAAAGC  
TGAAAAAGGTGTACACCGACTAGTACGAATTTCTCCATTTGATTTCATCAGGACGTCGTCATACATCATTGTCATCATGTGACGTGAT  
TCCAGATTTTAAATATGATGAAATAGAGATTGAAATCAATCCGGATGATATTACAGTTGATACATTTAGAGCTTCTGGTGCAGGTGG  
TCAGCATATTAACAAAATGAATCAGCAATACGAATTACCCACCACCCCTCAGGTATAGTTGTTAATAACCAAAATGAACGTTCTCA  
AATTAACAAACCGTGAAGCAGCTATGAAAAATGTTAAAGTCTAAATTATATCAATTAATAAATTGGAAGAGCAGGCACGTGAAATGGCTG  
AAATTCGTGGCGAACAAAAAGAAATGGCTGGGGAAGCCAAATTAGATCATATGTTTTCCATCCATACTCAATGGTGAAAGATCAT  
CGTACGAACGAAGAAACAGGTAAGGTTGATGCAGTGATGGATGGAGACATTGGACCAATTTATCGAATCATATTTAAGACAGACAAT  
GTCGCACGATTAATATATATTTTTAAACCGAGGCTCTAAAAGGGCGTCGGTTTTTGGTTTTTTTTAAAGGTAGCTAAATAAATTGTAA  
ATTAGATTTTGGAAATATGATTTGTTTATGAATATTTAAGTACAATTCGGTAGATAGAGTTAGAATATATTTTTTAAAGTTGTGTTTG  
TTAAACAACATATGCAGTGTGCATTTAGTAATATTACCTATGGCGATTTTCAAGGTATTGAATTAATTATTGAAAACGTTCTCAATT  
ACATGGTATGAATACATTTTACACTATGATAAAAGGTTGTATTCTTTTTATATTGTTAACCATTGATTACATCGTTATAACAAATAGC  
TTTTGACAAAATGTATTGTGCTATAGTATTTGCATACTTAAAAATACTAACAGCAAAGGAATGACAGCAAGATGAAAAAATCTCTTAC  
AGTGACGGTTTCGTCAGTGTTAGCTTTTTTAGCTTTAATAATGCAGCACATGCACAACAACATGGCACACAAGTAAAAACACCTGT  
TCAACATAATTATGTATCAAAATGTTCAAGCACAAACGCAATCACCAGCAACTTATACAGTAGTTGCTGGCGATTATTATATAAGAT  
TGCTTTAGAGCATCACTTAACGTTGAATCAATTATATTCATACAATCCTGGTGAACACCTTTAATTTTTCTGGTGACGTTGATTTC  
CTTGTGCCTCAAAAATAAGTGAAACAACTAAAGCGGTTAAATCACCAGTAAGAAAAAGCAAGCCAAGCTAAAAAGGTAGTAAAAAC  
AACCTGTACAACAAGCATCTAAAAAGTAGTAGTTAAGCAAGCACCTAAGCAAGCAGTAAGTAAAGACAGTTAATGTAGCATACAA  
ACCTGCTCAAGTACAAAAATCAGTACCACTGTACCTGTTGCACATAACTACAATAAATCAGTTGCTAACAGAGGAAACTTATATG  
CTTATGGAACTGCACATATTATGCTTTCGATCGTCGTCACAAATTAGGTAGAAGTATAGGAAGTTTATGGGGCAATGCAAATAACT  
GGAATTACGCAGCAAAAGTTGCAGGATTTAAAGTAGATAAAACACCAGAAAGTTGGCGCTATTTTCCAAACAGCTGCTGGCCCATAT  
GGACATGTTGGTGTGTTGAATCTGTAAACCCCTAATGGAACAATTACTGTTTCTGAAATGAACTATGCTGGATTTAATGTTAAATCTT  
CAAGAACAATTTTAAATCCAGGAAAAATATAATTACATCCACTAAGTAATATATCAAGACAAGACTATCCTCTTAGCCTGTTAAGTA  
ACAGTTTGACAGGATTTTTTGGTATCATTTAATCAGAGTTATATAAAGAAATGATATTTTAAATGATATTTTAAAGTATGTTTAA  
AGAAAGTATAATTTATGATTAATTAATGGAGGAGGTAATTGAAATGGGTGTACATCAATATTTTAAAGATTATCAGATATGAAAA  
GACTTATAAGATTACCTGGAAAAATTTAAATATTTTGAACACAATGTTGCAGCACACTCTTTAAAGTAACTAAAAATTGCTCAATATC  
TAGCAACAGTTGAAGAATATCATGGACGAAAGATTAATTGGAAGGCTTATATGAAAAAGCATTAAATCATGATTTCCGCCAAGTG  
TTTACTGGTGATATAAAAAACACCTGTTAAATATGCGAGTAGTGAATTAAAAAATTTTTCGCAAGTTGAAGAAGAAATGGTAGA  
GACCTTTATTGAAGAAGAAATTCATTACAATATAGAGATGTTTATAAGCAACGACTGCAAGAAGGTAAGATGATTTCATTAGAAG  
GCCAAATACTTTCAGTTGCTGATAAAATGATTTGCTTTATGAAACATTTGGAGAAATACAAAAACGTAATCCCGAAGAATTATTTT  
TCGAAATTTATGAAATGAGTCTAGAAACAATTATTCATTTGACCATTAGCATCTGTACAAGATTTTATTAATAATATCATCTCCAGA  
AATGTTGACTGAAAACTTATACCTAGAACAGAATTAAAGAAACAACCATTAACATTTTAAATAAAGAAAAAGGAAATGAATGA  
TGATATGGTATTTTAGCGAGCATTTTCCATGTGTCTTGGTAGTATTATTAGTGTAATAACAAGAAGAAATGGGTGCGGTACTAT  
TCTGACATTAATTTAATTGGTGCTCAATCTATAAAGAGTATTTCCATAACGAGTGGATTATTTTTATTGATGTAGTGTCATTATTA  
GCTGGTTATTTAATTATAGATCAACTCGAATTTTATAAACATCAAGATGAAGATCGCTAAGATTAACCTTTAAAAATAATGTTTCAAC  
AAATTTGTTGAAACAAAAATGATGATTAATATAATGTGTATTTACATACTAAAAATAACAAGATAAACGATTTGATTAAAGGCAAGC  
ATAGTTAGCACAACTATGTTTGTCTTCTTGTTCGACATTTTTACGAACAAACGTTTGCTTTTTGTGTGACTACTTTGCTAAAAATATG  
TAATGAGAAAAGCAAAGAGTTGAGCGGAAATATAAATAATACGTTGAAAGAGGAGGCATATGTGACAAATGGTTGAACATTATCCTTT  
TAAAAATACATTCGATTTTGAGCCTCAAGGTGACCAACCGCAAGCAATTAAGAAATCGTGGAAGGTATTAAGCGGGGAAAAAGAC  
ATCAAACTTTATAGGTGCTACTGGCACAGGGAACATTTACGATGAGTAATGTTATTAAAGAAGTTGGGAAACCAACGTTAATT  
ATCCGCGCATAACAAACATTAGCAGGACAATTATAGTAGGTTTAAAGAAATTTTTCTGAAACAGGGTGGAATCTTTGTAAGT  
TACTATGATTATTATCAACCAGAGGCATACGTACCGTCTACTGACACTTTTTATTGAAAAAGATGCCTCAATCAATGATGAAATTGAT  
CAACTACGACATTCTGCTACAAGTGCATTATTTGAACGCGATGATGTAATTATTATTGCTAGTGTAAAGTTGATATATGGTTTAGGTA  
ATCCTGAAGAATATAAAGATTTAGTAGTAAGTGTTTCGAGTTGGTATGGAATGGATAGAAGTGAATTACTTAGAAAACTTGATAGAT  
GTGCAATATACAGAAATGACATCGATTTCCAACGAGGAACGTTTCGAGTGCGTGGTGATGTAGTGGAATATTCCAGCCTCTAA  
AGAAGAATTTGTATAAGGGTTGAGTTTTTCGGCGATGAGATTGACCGTATCCGAGAAAGTTAACTACCTAACAGGTGAAGTGTTGA  
AAGAAAGAGAACATTTTGCATATTCCAGCTTCTCACTTCGTAACACGTGAAGAAAAAGTTGAAAGTTGCGATTGAACGTATTGAA  
AAAGAATTGGAAGAACGATTGAAAGAATTACGAGATGAGAATAAATTACTAGAAGCGCAAAGGTTAGAACAGCGTACCAACTATG  
ATTTAGAAATGATCGGAGAGATGGGATTCTGTTCAAGAAATGAAAATCTCCGTACATTTAATTTGCGACCACTGGGTTCGACAC  
CATATACTTTATTGGATTACTTTGGCGATGATTGGTTAGTAATGATTGATGAATCACATGTGACATTACCGCAAGTTCGAGGCATGT  
ATAACGGAGACAGAGCGGTAAACAAAGTTTTGGTGGATCATGGGTTTAGATTACCGAGTGCATTAGATAACCGTCCACTTAAATTT  
GAAGAATTTGAAGAAAAGACAAAAACAACCTGTGTATGTATCTGCAACGCTGGACCATACGAAATTGAACATACGGATAAGATGGT

TGAACAAATTATTCGTCCTACTGGTTTACTGGATCCTAAGATTGAGGTTAGACCTACTGAAAAATCAAATTGACGATTTATTAAGTGA  
AATTCAAACAAGAGTTGAGCGTAATGAACGCGTACTTGTTACACGCTCACTAAAAAGATGAGTGAAGATTAAACCACATACATGA  
AAGAAGCGGGTATTAAAGTTAATTATCTGCATTAGAAAATCAAGACATTAGAACGAATCGAAAAATATTAGAGACTTACGAATGGGT  
ACATATGATGTTATCGTAGGTATTAATTTATTAAGAGAGGGTATTGATATACCAGAAGTTTCTCTAGTTGTCATATTAGATGCAGAT  
AAAGAAGGGTTTTACGTTCTAACCCTCATTAAATTCAAAACAATAGGTAGAGCTGCGCGTAACGATAAAGGTGAAGTCATTATGTAT  
GCCGATAAAATGACTGATTTCGATGAAGTATGCAATTGATGAGACACAACGTCGTCGAGAAAATACAGATGAAACATAATGAAAAAC  
ATGGTATTACACCTAAAACAATTAATAAAAAAATACATGATTTAATTAGTGCTACTGTTGAAAAATGACGAAAAATAATGACAAAAGCA  
CAAACGTGATACCTAAGAAGATGACGAAAAAAGAACGTCAAAAAGACAATCGACAATATAGAAAAAGAAATGAAACAAGCAGCG  
AAAGATTTAGATTTTCGAGAAAAGCTACAGAATTAAGAGATATGTTATTTGAATTAAGAGCAGAGGGTGACAAGTAAATGAAAGAA  
CCATCCATAGTAGTAAAAGGTGCTCGTGCGCATAAAGTTGAAAGATATTGATATCGAACTACCTAAAAATAAAATTAATTGTTATGACA  
GGTTTATCTGGGTACGGTAAATCGTCATTAGCATTGATACTATATATGCTGAAGGACAACGACGTTATGTTGAATCATTAAGTGCC  
TATGCGCGTCAATTTTTAGGCCAAATGGACAAACCAGATGTTGATACAATTGAAGGATTATCGCCAGCAATTTCAATAGATCAAAA  
AACAACAAGTAAAAATCCAAGATCAACTGTAGCAACAGTAACAGAAATATATGATTATATACGTTTGTATATGCACGTGTTGGTA  
AACCTTACTGTCCAAATCACAATATAGAAATTGAATCGCAACAGTACAACAAATGGTTGACCGCATTATGGAATTAGAGGCACGT  
ACAAAGATTCAATTATTAGCACCTGTCATCGCTCATCGTAAAGGTAGTCATGAAAAGCTAATCGAAGATATTGGTAAAAAGGTTA  
TGTACGTTTAAAGAATCGATGGCGAAATTTGTTGATGTAAATGATGTACCTACTTTAGATAAGAAACAAGAATCATACAATAGAAGTTGT  
TGTAAGACCGATTAGTTGTTAAAGATGGAATTGAAACACGACTAGCTGACTCTATAGAAACTGCGTTAGAGCTTTTCAGAAGGACAAT  
TAACAGTTGATGTCATTGACGGGAAGACCTTAAGTTTTCAGAAAGCCATGCTTGTCCCTATATGTGGATTTCATCGGAGATTAG  
AACCAGAATGTTTAGCTTTAACAGTCTTTTGGTGCTTTCGCGCATGTGATGGCTTAGGCCAAAAGTTAACAGTCGATGATAGACT  
TGGTTGTTCCCGACAAAGATAAGACGCTAAACGAAGGTGCAATAGAACCTTGATACCGACGAGTTCTGATTTTTATCCAACATTGT  
TAAACGCTGTTTGTGAAGTTTATAAAATCAATATGGATAAACCTTTTAAAAAGTTAACAGAACGTCACCGTGATATATTATTGTATG  
GTTCCGGTGACAAAGAAATTGAATTTACATTTACACAACGTCAGGTGGTACTAGAAAACGAACAATGGTTTTTCGAGGGTGATGTT  
CCTAATATAAGTAGACGATTCCATGAATCTCCTTCAGAAATATACACGTGAAATGATGAGTAAATATATGACCGAACTACCTTGTGAA  
ACTTGTATGGAAGCGATTGAGTCGTGAAGCTTTATCTGTTTATGTAGGTGGTTAAATATTGGTGAAGTAGTCGAATACTCAATC  
AGTCAAGCGCTGAACCTATTATAAAACATTGATTTGTGAGAACAAGATCAAGCGATTGCAAAATCAAATATTGAAAGAAATTTTC  
CCGACTCACTTTTTTAAATATGTTGGGACTTGAATTTTAAACGCTAAACAGAGCTTCAGGTACACTTTCAGGTGGTGAAACACAACG  
TATTCGATTGGCAACGCAAAATGGGTCGCGTTTGACTGGTGCTTATATGATATTAGATGAGCCATCAATTGGACTGCATCAAGAGA  
TAATGATCGATTAATTAATACACTTAAAGAAATGAGAGATTTAGGAAATACCTTAATTGTAGTTGAACACGATGATGATACAATGC  
GTGCGGCTGATTACTTAGTGACATAGGGCTGGTGTGTTGAAACATGGAGGGCAGATTGTGTCTAGTGGGACACCTCAAAAGGTA  
ATGAAAGATAAAAAATCATTAACAGGACAATACTTGAGTGGTAAGAAACGTATTGAAGTACCTGAATATCGCAGACCGGCTTCAGA  
TCGTAAAATTTCTATACGTGGAGCTAGAAGCAACAATCTTAAAGGGGTTGATGTGGACATACCCTATCAATCATGACGGTTGTTAC  
AGGTGTATCAGGTTCTGGTAAAAGCTCATTAGTAAATGAAGTATTATACAAATCATTAGCTCAAAAAATTAATAAATCTAAAGTAA  
AGCCAGGATTGTACGATAAGATTGAAGGTATTGATCAACTTGATAAAATATTGATATTGATCAATCACCGATAGGTAGAACGCCA  
CGCTCTAATCCAGCAACATATCTGGTGTGTTTGTATGATATACGTGATGTGTTTTCGCAAAACAATGAAGTAAATTCGAGGATAT  
CAAAAAGGGCGTTTTAGCTTTTAAATGTAAGAGGTGGACGCTGTGAAGCTTGAAGCTTGAAGGTGACGGTATTATTAATTAAGTAAATGCAATTTT  
TTACCTGATGTTTATGTTCTTGTGAAGTGTGTGATGGTAAACGATATAATCGTGAGACACTAGAGGTTACTTACAAAGGTAATAAAT  
ATTGCTGACATTTTAGAAATGACTGTTGAAGAAGCAACACAATTTTTTGAATAATTCCTAAGATTAAGCGCAAGTTACAAACACTA  
GTTGATGTTGGTCTTGGATACGTCACATTAGGTCAACAAGCTACAACGTTATCAGGTGGTGAGGCTCAACGTGTGAACTTGCATCT  
GAACCTCATAAACGTTCAACTGGTAAATCTATTTATATCCTAGATGAACCGACAACAGGGTTACATGTTGACGATATTAGTAGATTA  
TTAAAAGTATTAACCGATTAGTTGAAAAATGGTGATACTGTTGTAATTATTGAACATAACCTAGATGTTATCAAAACAGCAGACTAT  
ATTATAGACTTAGGTCTGAAGGTGGTAGTGGCGGTGGTACTATTGTTGCGACTGGCACACCCGAAGATATTGCTCAGACAAAGTC  
ATCATATACAGGAAAGTATTTAAAAGAAGTACTTGAACGAGATAAACAAAAATCTGAAGATAAAATGAAGTAAAGAAGTGAAGG  
ATGTTATAAATTTATCCTTCGTTCTTTTTTATTAATTAGTAATGAATGATAGAAAAGAAAGATGCGTAAAAAGATGTTTAAAGA  
TAGGGTCAATCTAGAGTTGCTAAACATAAAGACTTGACTAATCGTAGGAATGGGAGTGGGACAGAAATGATAAAGAAATCACTAAC  
GATTTATTATGTAGTGGTTCTTTGTCAATTAGCCACAGCTATTATGTACTTAAAAATAGGAATGGGAGTGCAATTCATGCATAAGAAA  
TACTAATTTCTAAAGAAAAAGTATTTCTTTATGTTGGGGCCCCACCCCACTTGCAATTGTTTGTAGAATTTCTTTTCGAAATTTCTGT  
GTTGGGGCCCCGCCACCTAATTCCAATATATCATTGTAGAGCTTAGGTCAATTGATTTATGGCTCGGACTTTTATGGCGATATGAACC  
ATGTAATTAAGCAAGCAATAAATTAATGATTGATATTGACTTGTAAAATAATAACAATAATGAACAATTAATATTATTTTAGCTT  
TTCAATGTAGATTGGTGTTATATTTTGATATGATAAGAAGAGATGTAAGAGTAGGGATAAATACAATTGAGGTGAACCCATGTTAA  
CGACAGAAAAACTAGTTGAAACATTAAAGTTAGATTTAATCGCTGGTGAAGAAGGACTATCGAAGCCAATTAATAATGCTGATATA  
TCAAGACCGGGCTAGAGATGGCAGGTTATTTTACATATTGCTGATGATAGAAATCAACTATTAGGAACAACGGAATCATGCTTT  
TACAATTTATTACCAGATAAGGATCGCGCAGGTCGATGCGTAAACTATGCAGACCAAGAAACGCTGCAATTATTGTCAGCGCTGG  
ATTGCAGCCACCAGAAGAATTAGTTGAAGCTGCAAAAAGAATTAAATACCCCACTTATAGTTGCTAAAGATGCGACTACAAGTTAA  
TGAGTCGCTTAACAACGTTTTTAGAGCATGCATTGCAAAAGACGACATCTTACATGGTGTTTTAGTAGATGTTTACGGTGTGTTGGTGT  
ACTAATTACCGGTGATTCAGGAATAGGTAAAAGTGAGACTGCGTTGGAATTAGTTAAACGTGGGCATAGATTAGTAGCAGATGATA  
ATGTAGAAATACGTCAAATTAATAAAGATGAACTAATAGGGAAACCACCAAGTTAATAGAACATCTATTAGAAATACGTGGACTA  
GGTATTATCAATGTTATGACTTTATTTGGCGCGGGTTCAATATTAAGTAAAAACGAATTAGATTAAATATTAATTTGAAAACTGG  
AACAAGCAAAAGTTATATGACCGCGTAGGTCTTAATGAAGAGACGCTAAGTATTTAGATACTGAAATCACTAAAAAACAATACC  
TGTAAGCACTGGTAGAAATGTTGCGGTAATTATTGAGTCTGCAATGAACATTCGATTAATATCATGGGCATTAACACTGCCGA  
AGAATTTAGTGAAGATTAAATGAAGAAATTATCAAGAACAGTCATAGAGTAGGAGTAGGTTGAATGGGTATGATTGTTTAACTA  
TATAGATCCTGTGGCATTTAACTTAGGACCACTGAGTGTACGATGGTATGGAATTATCATTGCTGTGGAATATTACTTGGTTACTTT  
GTTGCACAACGTGCACTAGTTAAAGCAGGATTACATAAAGATACTTTAGTAGATATTATTTTTTATAGTGCATTTTGGATTTATCG  
CGGCACGAATCTATTTTGTGATTTTCCAATGGCCATATTACGTGGAAAAATCCAAGTGAATTAATAAATATGGCATGGTGAATAG  
CAATACATGGTGGTTAATAGGTGGCTTATTGCTGGTGTTATTGTATGTAAAGTGAAAAATTTAAACCAATTTCAAATTGGTGATAT  
CGTTGCGCCAAGTATAATTTTAGCGCAAGGAATTGGACGCTGGGGTAACTTTATGAATCACGAGGCACATGGTGGACCTGTGTCAC  
GCGCTTTTTTGAACAATTACATTTGCCTAATTTTATAATAGAAAAATATGTATATTAACGGCCAATATTATCATCCAACATTCTTATA  
TGAATCCATTTGGGATGTCGCTGGATTTATTTAGTTAATATTCGTAACATTTAAAAATTAGGAGAAACATCTTTTTATATTTA  
ACTTGGTATTCAATTGGTCTGATTCTTTATAGAAGGATTACGTACAGATAGCTTAATGCTCACAAGTAATATTAGAGTTGCCAATTA  
GTATCAATTCCTTTAATTTAATAAGTATAAGTTTAATTGTATATAGAAGGATTAAGTATAATCCACCGTTGTATAGCAAAAGTTGGG  
GCGCTTCCATGGCCAACAAAAAAGTGAAGTAGTGATTTTTGAGAAAAATTTTATCAAAAACACATCATCACACAAACCTTTTATG  
GCGTGTATACCGCTCTGTAAATTTTCGAAAGTTTTTAAAGAATGAATTATCATTGAATTTTCGAAATTTATCCAAGTATGGTACTG

AAAAGACATATATATATAAAACAACCTTTTAAATATTAATATCGGTAATCAATCGTCGATAGCTTATAAAGTAATGTTAGATATTTTT  
ACCCAGAACTGATTACGATTGGTAGTAACAGTGTTATTGGTTACAATGTAAACAATTTTGACGCATGAAGCATTAGTTGATGAATTC  
GTTATGGACCAGTGACGATAGGATCTAACACTTTGATTGGTGC AAAATGCTACCATTTTACCCGGTATAACGATTGGTGACAATGTAA  
AAGTTGCAGCTGGTACGGTTGTTTCAAAAAGATATACCGGATAATGGATTGTCATATGGCAACCCATGTATATAAAAAATGATTAGGA  
GGTGACAATTTTATGGCGCAAAAAGAATAAATGTAAATCCAAATGACTTTTGATGATGCATTTTATCGTAAAAATGGCTAAACAGAAG  
TTTAAACAAAAGAGAATATAAACGAGCTGCTGAATACTTTGAAAAAGTGTTAGAATTGTCACCTGATGATCTGGAAAATCAAATTGA  
TTATGCACAATGCTAGTGCAACTTGGTATTGCTAAAAAAGCAGAACATTTATTTTATGACAATATTATTTATAATAGGCATCTAGA  
AGATAGCTTTTATGAATTGAGTCAGCTCAACATTGAAGTTAACGAACCAACAAGGCATTCTTGTGTTGGTATTAATTATGTTATTGTT  
AGCGACGACCAAGATTATAGAGATGAATTAGATCAAAATGTTTGTATGTGAAATATCAAAGCGAAGAACAATTTGAACCTTGAAGCTCA  
ATTGTTTGTAGTTCAAATACTATTCGAATATCTTTTTCTCAAGGTCGATTA AAAAGATGCAAAAGAAATTATGTCTTACATCAACCACAA  
GAAGTTCAAGATCATCGTGTCTGACGTAATTTATTGGCAATGTGTTATTTATATCTCGGTGAATATGATACGGCTAAAGCATTGTAC  
GAAGCACTATTACAAGAGGATAGTACAGATATATATGCATTATGCCATTATACTTTGCTACTTTATAACACTAAGGAAAAATGAACAA  
TATCAAAAAATATTTAAAAATATTAACAAAAGTTGTACCTATGAATGACGATGAAAGTTTAAATTAGGTATTGTATTAAGTTATTTA  
AAGCAGTATCGTGCATCAACAATTTGTTGTACCCTTTATATAAAAAAGGGAAAATTTTATCAATTCAAATGTACAATGCTTTAGCA  
TATAATTATTATTATTTAGGTGAAGAAGACGAAAGTCATTACTCTGGGATAAATTGAAGCAAAATTTCTAAAGTGGAATTTGGACAT  
GCGCCTTGGGTAATTGAAAAATAGCAAAAGAAGTTTGTGACCAACATATTTTGCCATTACTTCAAAGTGATGACAGTCATTATCGTTTA  
TATGGTATTTTTTTTATTGGATCAATTAATGGTAAAGAAAATTTGTATGACGGAAAAGTATTTGGCAGGTTCTGGA AAAATCTAAATAAT  
TATGAGAAATTGTATTTAACGTATTTAGTTCAAGGTTTAAACGCTCAATAAATTAGACTTCATTCTCGCGCTTGTTAACGCTTTACC  
AAAATGAATTATTTGTAAGTGAAAATGATTTAATGGTTGCATGGATTAATCAAGGTGAACCTATAATTGCTGAAAAAGTAGATTTAA  
CTGATGTTGAGCCATATATCGGTGCGTTTATTTATTTGTATTTTAAAAATCAACCTCGAAACGTTACAAAAGAAGCAAAATTACAACAT  
GGTTAGGCATAACACAATATAAACTGAACAAAATGATTGAATTTCTCTTGAGCATATAGATTTATGAAAAGTTAGATTTATTATATA  
ATGCGCATAATGATTAATAATGAGGAGGCGTTAATAAAATGACTGAAAATAGATTTTGATATAGCAATTATCGGTGCAGGTCCAGCT  
GGTATGACTGCTGCAGTATACGCATCACGTGCTAATTTAAAAACAGTTATGATTGAAAAGAGGTATTCAGGCGGTCAAATGGCTAA  
TACAGAAGAAGTAGAGAACTTCCCTGGTTTCGAAAATGATTACAGGTCCAGATTTATCTACAAAAATGTTTGAACACGCTAAAAAGT  
TTGGTGCAGTTTATCAATATGGAGATATTAATCTGTAGAAGATAAAGGCGAATATAAAGTGATTAACCTTTGGTAATAAAGAATTA  
ACAGCGAAAGCGGTCAATTATTGCTACAGGTGCAGAATACAAGAAAATTTGGTGTTCGGGTGAACAAGAACTTGGTGGACGCGGTGT  
AAGTTATTGTGCAGTATGTGATGGTGCATTCTTTAAAAATAAACGCTTATTCGTTATCGGTGGTGGTGACTCAGCAGTAGAAGAGGG  
AACATTCTTAACTAAATTTGCTGACAAAAGTAACAATCGTTCACCGTCGTGATGAGTTACGTGCACAACGTATTTTACAAGATAGAGC  
ATTCAAAAATGATAAAATCGACTTTATTTGGAGTCATACTTTGAAATCAATTAATGAAAAAGACGGCAAAAGTGGGTTCTGTGACATT  
AACGTCTACAAAAGATGGTTCAGAAGAAACACACGAGGCTGATGGTGTATTCATCTATATTGGTATGAAACCATTAACAGCGCCAT  
TTAAAGACTTAGGTATTACAAATGATGTTGGTTATATTGTAACAAAAGATGATATGACAACATCAGTACCAGGTATTTTGCAGCAG  
GAGATGTTTCGCGACAAAGGTTTACGCCAAATTTGTCACTGCTACTGGTGATGGCAGTATTGCAGCGCAAAAGTGCAGCGGAATATATT  
GAACATTTAAACGATCAAGCTTAATTCGAGGTGCAATTAAGATGTTGAGTTGTAAGTTATTTGGATATTTATTTAATAGTGTATCA  
CATTGTTAAAATAATGTCTTACTTTTAAATTAAGCAAATTATATAGAAAACCTAGAACTTAGTACGTATCATTTGTGCGTTTCAATGA  
GTTCTAGTTTTTTTATATTATTTAACTTATAAATTTATGGGAGTGGGACAGAAAATGATAAAGGCCACTAATGATTATTATGT  
AGTGGTTCTTACACATTAGCCACAGCTAATGTGTA

>023-contig\_244\_RC

TCTGTGTTGGGGCCCTGACTAGAGTTGAAAAAAGCTTGTGCAAGCGCGTTTTTCATTCACTCACTACTAGCAATATAAAATTATA  
GACCCTAGGACATTGATTATGTCCCAAGCTCCTTTTAAATGATGTATATTTTTAGAAAATTTAATCTAGACATAGTTGGAAAATAAATA  
TAAACATCGTTGCTTAATTTTGTGCATAGAACATTTAAATTAACATCATGAAATTCGTTTGGCGGTGAAAAAATAATGGATAATAA  
TGAAAAAGAAAAAGTAAAAGTGAACCTATTAGTTGTAAACAGGTTTATCTGGCGCAGGTAAATCTTTGGTTATTCAATGTTTAGAAG  
ACATGGGATATTTTGTGTAGATAATCTACCACCAGTGTTATTGCCTAAATTTGTAGAGTTGATGGAACAAGGAAATCCATCCTTAA  
GAAAAGTGGCAATTGCAATTGATTTAAGAGGTAAGGAACTATTTAATTCATTAGTTGCAGTAGTGGATAAAGTTAAAAGTGAAAGT  
GACGTCATCATTGATGTTATGTTTTAGAAGCAAGTACTGAAAAATTAATTTCAAGATATAAGGAAACGCGTCGTGCACATCCTTTG  
ATGGAACAAGGTAAAAGATCCTTAATCAATGCAATTAATGATGAGCGAGAGCATTGTCTCAAATTAGAAGTATAGCTAATTTTGT  
ATAGATACTACAAAGTTATCACCTAAAGAATTTAAAAGAACGCATTTCGTCGATACTATGAAGATGAAGAGTTTGAAAACCTTTTACAAT  
TAATGTCACAAGTTTCGGTTTTTAAACATGGGATTCAGATGGATGCAGATTTAGTATTTGATGTACGATTTTACCAAATCCATATTAT  
GTAGTAGATTTAAGACCTTTAACAGGATTAGATAAAGACGTTTATAATTATGTTATGAAATGGAAAGAGACGGAGATTTTCTTTGAA  
AAATTAACGTGATTTGTAGATTTTATGATACCCGGGTATAAAAAAGAAAGGAAATCTCAATTAGTAAATTGCCATCGGTTGTACGGGT  
GGACAACATCGATCTGTAGCATTAGCAGAACGACTAGGTAATTTATCTAAATGAAGTATTTGAATATAATGTTTATGTGCATCATAGG  
GACGCACATATTGAAAGTGGCGAGAAAAATGAGACAAATAAAAGTTGTACTTATCGGTGGTGGCACTGGCTTATCAGTTATGGCT  
AGGGGATTAAGAGAATTTCCCAATTGATATTACAGCGATTGTAAACAGTTGCTGATAAATGGTGGGAGTACAGGGAAAAATCAGAGATGA  
AATGGATATACCAGCACCAGGAGACATCAGAAATGTGATTGCAGCTTAAAGTGATTCGAGTCAGTTTAAAGCCAACTTTTTCAGTA  
TCGCTTTGAAGAAAATCAAATTAGCGGTCACTCATTAGGTAATTTATTAATCGCAGGTATGACTAATATTACGAATGATTTCGGACA  
TGCCATTAAGCATTAAGTAAAATTTTAAATATTAAGGCAGAGTCATTCCATCTACAAATACAAGTGTGCAATTAATGCTGTTAT  
GGAAGATGGAGAAATTTGTTTGGAGAAACAAATATCTTAAAAAATCAATAAAAAATTTGATCGTGTGTTTTAGAACCTAACCATG  
TGCAACCAATGGAAGAAGCAATCGATGCTTTAAGGGAAGCAGATTTAATCAATCTGTTCTGGACCAGGGTCATTATACGAGCGTTATTT  
CTAACTTATGTGTGAATGGTATTTACAGATGCGTTAATTCATTCTGATGCGCCTAAGCTATATGTTTCTAATGTGATGACGCAACCTGG  
GGAAACAGATGGTTATAGCGTGAAAGATCATATCGACGCGATTATAGACAAGCTGGACAACCGTTTTATTGATTATGTCATTTGTAG  
TACACAACTTTCAATGCTCAAGTTTTGAAAAAATATGAAGAAAAACATTCTAAACCAGTTGAAGTTAATAAGGCTGAACCTTGAAA  
AAGAAAGCATAAATGTAAAAACATCTTCAAATTTAGTTGAAATTTCTGAAAATCATTTAGTAAGACATAATACTAAAGTGTATTCGA  
CAATGATTTATGACATAGCTTTAGAATTAATTAGTACTATTCTTTTCGTACCAAGTGATAAACGTAATAATATAGAACGTAATTAT  
ATTATGATATGATAATAGAGCTGTGAAAAAATGAAAATAGACAGTGGTTCTAAGGTGAATCATGTTTTAAATAAGAAAGGAATGA  
CTGTACGATGAGCTTTGCATCAGAAATGAAAAATGAATTAAGTAAATAGACGTCGATGAAATGCAAAAGCAGAGCTCAGTG  
CACTGATTCGAATGAATGGTGCACCTTAGTCTTTCAAATCAACAATTTGTTATAAATGTTCAAACGGAATAATGCAACAACGCGCAAGA  
CGTATTTATTCGTTGATTAAACGTGTCTTTAATGTGGAAGTTGAAATATTAGTCCGTAAAAAATGAAACTTAAAAAATAAATATT  
TATATTTGTCGTACAAAAGATGAAAGCGAAAGAAATTTCTTGATGAATTAGGAATTTTAAAAGACGGCATTTTTACGCATGAAATTTGAT  
CATTCAATGATTCAAGATGACGAAATGAGACGAGTTACTTTGAGAGGAGCTTTTCTGGCAGGTGGCTCAGTGAATAACCCTGAAAC  
ATCTTCGTATCATTGGAAAATTTTTTCTCAAAATGAGAGTCATGCAGAAGGCTTAACGAACTAATGAATAGTTATGAGTTGAATGC

CAAACATTTAGAGCGAAAAAAGGAAGTATTACGTATTTAAAAGAAGCGGAAAAAGATTTTCGGATTTTCTTAGTTTGATAGGTGGCT  
ATCAAGCGTTATTTAAAATTTGAAGACGTACGTATTGTAAGAGATATGCGTAATTCTGTTAACCGACTCGTTAATTGTGAAACGGCAA  
ATCTAAAATAAACAGTTAGTGCTGCGATGAAACAAAGTTGAGAGCATTAAATTTGATTGATAAAAGAAATTTGGTATTGAAAATTTACCA  
GACAGTTGAGAGAGATTGCTAGAATTCGAGTAGAACATCAAGAAATTTTCGTTGAAAGAGCTTGGAGAAATGGTATCAACTGGTCC  
AATTTCAAAATCAGGTGTAAATCACCGATTAAAGAAAACCTGAATGATTTAGCCGATAAGATTAGAAATGGTGAACAAATAGAATTAT  
AAGTAAGAAAGGTGTTTTTGGTAGTGAATTATCAAAAATACCTTTTTTATGATTAAGAAAGTGTTAATGAATAATAGTCGACTAACTA  
TTAAATTTAGCTGGAAAGTTAATGAAGGAAATTCATAACCAAGCGTTACCTAATTTTTCTCATTAAGTAGCATCATATGTATCAAT  
TTGGTCATAAGAAAATATGAATGTGATAATTAATTGAGTCACTGAAAGTCCCTGATCATAGACAAAAACAAAATCAGCATAAAATAA  
GAATCCCGACATTGCGGGATTCTCAGTATTGAAAAGTATTGTATTTTATTAACAGCCCTCCTTGAAGGGAATTGAACCCCTATCTT  
ACAATCTAAAATAGATATTATCAGTTTACAAAAGGAAAGAGAAAAGCGTCAAAACAATGTAACATTTTAAAGTCAAAAGTGTGACCA  
AATTTGACTTAATATGTAAAATAATGAGTAACAGTTATTACAAGGAGGAAATATAGATGAATTTAATTCCTACAGTTATTGAAACAA  
CAAACCGCGGTGAACGTGCATATGATATATACTCACGTTTATTAAGACCGTATTATTATGTTAGGTTTACAAAATTGATGACAACG  
TAGCAAATTCATTCGTATCACAGTTATTATTCTTACAAGCGCAAGACTCAGAGAAAGATATTTATTTATACATTAATTCACCAGGTG  
GAAGTGTAACAGCTGGTTTTGCGATTATGATACAATTCAACACATTAACCTGATGTTCAAAACAATTTGTATCGGTATGGCTGCAT  
CAATGGGATCATTCTATTAGCAGCTGGTGCAAAAGGTAAACGTTTCGCGTTACCAAATGCAGAAGTAATGATTCACCAACCATTAG  
GTGGTGCTCAAGGACAAGCAACTGAAATCGAAATTGCTGCAATCACATTTTAAAAACAGTGAAAAATTAACCCGATTTTATCA  
GAGCGTACTGGTCAAGTATTGAAAAATACAAAAAGACAGATCGTGATACTTCTTAAGTGCAGAAAGTAAAGATTAAGTAAAGTAA  
GCTTAATTGTAGTAAAGTAGGTGATGTAACCAAAATAATTCAAAGTAAAGAGTAGACTAAGCAGTCTGCTCTTTTGTATGAGTAA  
ACCGAGGTGTCAATAAATTTGTTTACTATACTTTGAGCGGAAATATGATTGAATGAAGCTAGTTGAACCGTAACTATATGAAATGTTT  
CCTTCAAAGTAGACATTGAAAGGAACATTTCAATCCTTTGTTTGTAGTGCCTCTAGACATTACATTTAGTACATATGTTGTTTCTAA  
TGCTCATTAATGGTATTGATTATCTTTGATTAAATCTTCAAGTGCCATTTTAAATTAATTAATTTAAATTTGGAATCCCAATGCTTGA  
ATTTTATTAGGTAATACTTTTGTAGTATCCAATACTACTGTTGACATTTGACCAAGTATGAGACGCAATTGCAAGACTTGGTGCCCAA  
GTTTCATGGGGCTTATGCATAGCTCTTGCTAAAGGTGAGCCAAATAAATTTTGACGCTCAGGTATAGGTGCAGTTAAATTAACCGGA  
CCACTAGCTGACTCGTTATTTATTAATAAATAAGCTTGAATTAATCATTGATATGAATCCATGAATACCATTGTTGACCAGAA  
CCTAATTTACCACCAATGTAATATTGTATGGTAGTTTCAATGTTTGTAAACGACCCGCTTCATTGATAAAATCATACCGAAACGAC  
CGATGACAACCTCGCGTACCTAATTGTTCAAATTTGTTGTCGCAACGTTCCCATTTGATACACAATATCTGATAAGAAATCAAAATGGTA  
AAGTTTTATAAACTTCTGTGTAACCTATAAATAAATCAGGAGGATAGTAACCAAGTGGCACTAGCATTAATAAATAAACTTTAGGTGCTT  
TATTACGAGATTTAAACAATTCATATAAAGCTTGCCTAGATTGAACCTCTACTTAGCATTAGCGTTTGTATATTTCCGGTGTCCATCG  
TTTATTAGTGTAGCACCTGCTAAGTTGATGACCACATCGATATTTTGAAGAACTTTGTGTTCCACCCAGATTTAGCCAGTTGACA  
TATGAAATTTTCTATCATTGAAATTTGGTCGTGTCGCGTTAATATCGTGATATGTGAATCTGATTTTTTAATTTCAATTAACCAATTG  
AGATCCAACCATACCAGTCCCAACAGTAATTAAGTATTGTTTCATTATCATTACCCCATGTAATTTTGTATTTAGTTACTATTTAAT  
AATCATTATTGTTGTTCAAAGGTTATACATTATTTAGACAATAATATGTCAATAACTTTTTTGAATTTGTATTTAATAAAAAATGATA  
TAAGTTATAATAAAGGTGACCTTCGATAACGAATAAACATCTCTTAAAGTATGTGTAACGCTGCATGATACAAACGAAGGTA  
AAAATTTGACTCCCTTTAGTAGTGGACCCGTACGTTAATCGTGGGTCGTTTTTATTTATTTCTTATTTCCCATATACATCAATTTAA  
AGCATTAATTTTTTAAACAATTTAAGAATACATAGTAATATAACAATCTAAACATAAAAACTTTTAAACACAACACTTAAACCAATG  
CTTTAATTTTCAATACGTAGCTATAATTTGTTGTAATAATCAAAAAGGTTAAATGTAAATTTTCAAAAAAGGCTCAAAATATGTTT  
GATTTAGTTATTTAAATGTTAAGATATATAAGACTACTATTTCTTTGTAATAATGAATCCGATTTACGAGTGAGTAATAGTGAAAGCA  
GTTTTAAGTTGAAGAAGGCAAAAAGAGTAAATGTTTATTAATATTTGTAGAACTAGGTAAGCAAAATAGTTGTGAAAAATGTTAAT  
GGTTGCGTGATAATTTCTATATTTAAATAGTTTGAAGTGAGGGAGAGTATGTGCAATCAAAATTACGACTACAATAAAAAATGAAG  
ATGGAAGTAAGAAGAAAATGAGTACAACAGCGAAAGTAGTTAGCATTGCGACGGTATTGCTATTACTCGGAGGATTAGTATTTGCA  
ATTTTTGCATATGTAGATCATTGCAATAAAGCTAAAGAACGTATGTTGAACGAACAAAAGCAGGAACAAAAGAAAAGCGTCAAA  
AAGAAAATGCAGAAAAGAGAGAGAAAAGAAAAGCAACAAGAGAAAAGAGCAGAATGAGCTAGATTACAGAAGCAACCAATATC  
AGCAATTGCCACAGCAGAATCAATATCAATATGTGCCACCTCAGCAACAAGCACCTACAAAGCAACGCTCTGCTAAAGAAGAGAAT  
GATGATAAAGCATCAAAGGATGAGTCGAAAGATAAGGATGACAATGCATCTCAAGATAAATCAGATGATAATCAGAAGAAAACCTG  
ATGATAATAAACAACAGCTCAGCCTAAACCACAGCCGCAACAACCAACACCAAAAGCCAAATAATAATCAACAAAATAATCAATC  
AAATCAGCAAGCAAAACCAAGCACCAACAAAATAGCCAATCAACAACAAATAAACAATAATGCTAATGATAAGTAGTAT  
TTAGTCAAAACAAAATGAACAGTATGACAGACAACAATTAATTAGGTTGTCTCGAATATTGGTTCTTATTTTATAATTGTTAA  
TTAGGGGAGAGATGATACTTAAATAGTTAGTTGTTTATTTTACGGATAGTGAAATTTATTTTGTAGTGAGGTGGGACAGAAATGATAT  
TTTCGCAAAATTTATTTCTGCTGCTGACCCCACTTCCACATTATTGTAAGCTGACTTTCCGTCAGCTTCTGTGTTGGGGCCCCGCCA  
ACTTGCACTATTATTGAAGCTGACTTTCCGCCAGCTTCTGTGTTGGGGCCCCGACTTTAATTTGAAAATGCTTGTGTTCAAGTGACT  
TTCTGTTCCGTCAGCTACTACTAATGTGACTTTTCGAGTTCTGAGTGCAGGATTGATTATGTCTTAGTTCAAATAAAGCAAAATGATTAGC  
GAGTCAGTATAAGGGTATACATTTGACTACAGCGAATAAAATAAAACGTTTTTGTGAATAACAAATCGAAAAATATATTGCAAGCGC  
TTTATCAAATTTATTAGAAAATTTAAGTTTTATGCTTGCAATTTTTGAAATAGAATAGTACTATTGCAAGTGTAAGAGGTTAATTTT  
TGTCACCGCGGGACTTAAAAAGGCAACCACTGGTTGTGACATATCCTTATTTACATTTATAAATATAAGGAGGAGGTAGTAGTGA  
AAGACTTATTGCAAGCACAGCAAAAGCTTATACCGGATCTCATAGATAAAATGTATAAACGTTTTTCTATTCTTACTACTATCTCAA  
AAAATCAGCCTGTGCGACGTCGAAGTTTAAGCGAACATATGGATATGACTGAACGTGTACTGCGTTCTGAAACAGATATGCTTAAG  
AAACAAGATTTGATAAAAGTTAAGCCTACCGGAATGGAATTTACAGCTGAAGGTGAGCAACTGATTTTCGAATTTGAAAGGTTACTT  
TGATATCTATGCAGATGATAATCGTCTGTGAGAAGGTATTAAGAATAAATTTCAAAATTAAGGAAGTTCAATGTTGTTCTGTTGATGC  
TGATAATAGTCAATCTGTAAACAGAAATTAGTAGACAAGCAGGTCAATTAATTTGAAGGCATATTACAGAAGAACGCGATAGTTG  
CTGTAACCTGGCGGATCCACGATGGCATGTGTTAGTGAAGCAATTCATTTATTACCATATAATGTATTCTTCGTACCAGCCAGAGGTG  
GACTAGGCGAAAATGTTGCTTTTACAGGCAACACAATTGCAGCCAGTATGGCACACAAGCTGGCGGTTATTATACGACGATGTAT  
GTACCTGATAATGTCAGTGAAACAACATATAACACATTGTTGTTAGAGCCATCAGTCATAAACACTTTAGACAAAATTAACAAGC  
AAACGTTATATTACACGGCATTGGTGATGCGCTGAAGATGGCGCATCGACGTCAATCACCTGAAAAGGTCATTGAACAACCTCAAC  
ATCATCAAGCTGTGCGAGAGGCATTTGGTTATTATTTTGATACACAAGGTCAAAATTTGCCATAAGGTTAAACAAATTTGACTTCAAT  
TAGAAGACCTTGAATCAAAAGACTTTATTTTTGCAAGTTGCAGGAGGCAAAATCGAAAGGTGAAGCAATTAAGCATACTTGCAGATT  
GCACCAAGAAATACAGTGTTAATCACTGTATGAAGCCGAGCAAAAGATAAATCACTTGAATAAGAGATAAAAAAGTTAATACATTTTAA  
ATACAGATTTTAAAGGAGGCCATTATAATGGCAGTAAAGTAGCAATTAATGGTTTTGGTAGAATTTGGTCTGTTAGCATTCAGAAAGAA  
TTCAAGAAAGTAGAAGGTCTTGAAGTTGTAGCAGTAACACGACTTAACAGATGACGACATGTTAGCGCATTTATTAATAATGACACT  
ATGCAAGGTCGTTTCACAGGTGAAGTAGAGGTAGTTGATGGTGGTTTCCGCGTAAATGGTAAAGAAGTTAAATCATTCAAGTGAACC  
AGATGCAAGCAAAATACCTTGGAAGACTTAAATATCGATGTAGTGTTAGAATGTACTGGTTTCTACACTGATAAAGATAAAGCAC

AAGCTCATATTGAAGCAGGCGCTAAAAAAGTATTAATCTCAGCACCAGCTACTGGTGACTTAAAAACAATCGTATTCAACACTAAC  
CACCAAGAGTTAGACGGTTCTGAAACAGTTGTTTCAGGTGCTTCATGTACTACAACTCATTAGCACCAGTTGCTAAAGTTTTAAAC  
GATGACTTTGGTTTAGTTGAAGGTTAATGACTACAATTCACGCTTACACAGGTGATCAAAATACACAAGACGCACCTCACAGAAA  
AGGTGACAAACGTCGTGCTCGTGACGCGGCAGAAAACATCATCCCTAACTCAACAGGTGCTGCTAAAGCTATCGGTAAAGTTATTC  
CTGAAATCGATGGTAAATTAGATGGTGGTGCACAACGTGTTCTGTAGCTACAGGTTCATTAAGTGAATTAACAGTAGTATTAGAAA  
AACAAGACGTAACAGTTGAACAGTTAACGAAGCTATGAAAAATGCTTCAACGAATCATTTCGGTTACACTGAAGACGAAATCGTT  
TCTTCAGACGTTGTAGGTATGACTTACGGTTCATTATTCGACGCTACACAACTCGTGTAATGTCAGTTGGCGACCGTCAATTAGTTA  
AAGTTGCAGCTTGGTATGATAACGAAATGTCATATACTGCACAATTAGTTTCGTACATTAGCATACTTAGCTGAACTTTCTAAATAAT  
TTAGTATAGTTTTATTCAAATACGCTAGTGCTCAGAACTATTTAGCATTAAATTAAGCTTATGAGTAAGCGGGAGCACAAAACGC  
TTCTCCGCTTATTTTTATATAAAAATTTCTAATTACAAGGAGGAAACACCATTGGCTAAAAAAATGTTTCTGATTAGATCTTAAAGG  
TAAAAACAGTCTAGTACGTGCTGATTTAACGTACCTTTAAAAAGACGGTGAATTAATAATGACAACCGTATCGTTCAAGCTTTACC  
TACAATTCAATACATCATCGAACAAGGTGGTAAAAATCGTACTATTTTCACATTTAGGTAAAGTGAAAGAAGAAAGTGATAAAGCAA  
AATTAACCTTTACGTCCAGTTGCTGAAGACTTATCTAAGAAATTAGATAAAGAAGTTGTTTTCGTACCAGAAACACGCGGCGAAAAA  
CTTGAAGCTGCTATTAAAGACCTTAAAGAAGGCGACGTATTATTAGTTGAAAAATACACGTTATGAAGATTTAGACGGTAAAAAAGA  
ATCTAAAAATGATCCAGAATTAGGTAAATACTGGGCATCTTTAGGTGATGTGTTTGTAATGATGCTTTTGGTACTGCGCATCGTGA  
GCATGCATCTAATGTTGGTATTTCTACACATTTAGAAACTGCAGCTGGATTCTTAATGGATAAAGAAATTAAGTTTATTGGTGGCGT  
AGTTAACGATCCACATAAACCAAGTTGTTGCTATTTTAGTGGAGCAAAAAGTATCTGACAAAATTAATGTCATCAAAAACCTTAGTTAA  
CATAGCTGATAAAAATTATCATCGGCGAGGTATGGCTTATACCTTTCTTAAAAAGCGCAAGGTAAAGAAATTTGGTATTTTCATTATAGA  
AGAAGATAAAAATCGACTTCGCAAAAAGATTTATTAGAAAAACATGGTGATATAAAATTTGATTACCAGTAGACATAAAGTTGCTAAAG  
AATTTTCTAATGATGCCAAAATTAAGTGTAGTACCATCTGATTCATTTCCAGCAGACCAAGAAGGTATGGATATTGGACCAAAACACTG  
TAAAAATTATTTGCAGATGAATTAGAAGGTGCGCACACTGTTGTATGGAATGGACCTATGGGTGTATTTCGAGTTCAGTAACCTTTGCAC  
AAGGTACAATTGGTGTATGTAAGCAATTGCAAACTTAAAGATGCAATTACGATTATCGGTGGCGGTGATTTCAGCTGCAGCAGCA  
ATCTCTTTAGGTTTTGAAAAATGACTTCACTCATATTTCAACTGGTGGCGGTGCGTCATTAGAGTACCTAGAAGGTAAAGAATTGCCT  
GGTATCAAAAGCAATCAATAATAAATAAAGTGATAGTTTAAAGTGATGTGGCATGTTTGTTTAACATTGTTACGGGAAAAACAGT  
CACAAGATGACATCGTGTTCATCACTTTTCAAAAATATTTACAAAACAAGGAGTGTCTTTAATGAGAACACCAATTATAGCTGGTA  
ACTGGAAAAATGAACAAAACAGTACAAGAAGCAAAAGACTTCGTCAATGCATTGCCAACATTACCAGATTCAAAAGAAGTAGAATC  
AGTAATTTGTGACCAAGCAATTCGAATTTAGATGCATTAACACTACTGCAGTTAAAGAAGGAAAGCACAAGGTTTGAATAATCGGTGCTC  
AAAATACGTATTTGCAAGATAATGGTGCCTTCACAGGTGAAACGCTCTCCAGTTGCATTAGCAGATTTAGGCGTTAAATACGTTGTTA  
TCGGTCATTCTGAACGTCGTGAATTATTCACGAAACAGATGAAGAAATTAACAAAAAGCGCACGCTATTTTCAAACATGGAATG  
ACTCAATTATTTGTGTTGGTGAACAGACGAAGAGCGTGAAAGTGGTAAAGCTAACGATGTTGTAGGTGAGCAAGTTAAGAAAGC  
TGTTGCAGGTTTATCTGAAGATCAACTTAAATCAGTTGTAATTGCTTATGAGCCAATCTGGGCAATCGGAACTGGTAAATCATCAAC  
ATCTGAAGATGCAATGAAATGTGTGCATTTGTACGTCAAACCTATTGCTGACTTATCAAGCAAGAAAGTATCAGAAGCAACTCGTA  
TTCAATATGGTGGTAGTGTTAAACCTAACCAATTAAGAATACATGGCACAACTGATATTGATGGGGCATTAGTAGGTGGCGCA  
TCACTTAAAGTTGAAGATTTTCGTACAATTGTTAGAAGGTGCAAAAATATCATGGCTAAGAAACCAACTGCGTTAATTATTTAGATG  
GTTTTGCAACCGCGAAAGCGCAACATGGTAATGCGGTAAAATTAGCAAAACAAGCCTAATTTTGATCGTTATTACAACAAATATCCA  
ACGACTCAAAATCGAAGCGAGTGGCTTAGATGTTGGACTACCTGAAGGACAAATGGGTAACTCAGAAAGTTGGTCATATGAATATCGG  
TGCAGGACGTATCGTTTATCAAAGTTTAACTCGAATCAATAAATCAATTGAAGACGGTGATTTCTTTGAAAAATGATGTTTTAAATAA  
TGCAATTGCACACGTGAATTCACATGATTACAGCTTACACATCTTTGGTTTATTGTCTGACGGTGGTGTGCACAGTCATTACAAACAT  
TTATTTGCTTTGTTAGAATTGCTAAAAACAAGGTGTTGAAAAAGTTTACGTACACGCATTTTTAGATGGTTCGTGACGTAGATCAA  
AAATCCGCTTTGAAATACATCGAAGAGACTGAAGCTAAATTCATGAATTAGGCATTGGTCAATTTGCATCTGTGTCTGGTCTGTTAT  
TATGCAATGGACCGTGACAAACGTTGGGAACGTGAAGAAAAAGCTTACAATGCTATTCGTAATTTTGATGCCCAACTTATGCAACT  
GCCAAGAAGGTGTAGAAGCAAGCTATAATGAGGGCTTAACTGACGAATTCGTAGTACCATTTCATCGTTGAGAATCAAAATGACGG  
TGTTAATGATGGAGATGCAGTGATCTTCTATAATTTCCGACCTGATAGACGACACAATTATCGGAAATTTTTCGCAACAGAGCATT  
CGAAGGCTTTAAAGTTGAACAAGTTAAAGACTTATTCTATGCAACATTCACCTAAGTATAACGACAATATCGATGCGGTATCGTTTT  
CGAAAAAGTTGATTTAAATAATACAATTGGTGAAATTGCACAAAATAACAATTTAACACAATTACGTATTGCAGAACTGAAAAAT  
ATCCTCACGTTACTTACTTTATGAGTGGTGGACGTAAACGAGGAATTTAAAGGTGAACGCCGTCGTTAATTGATTCACCTAAAGTTG  
CAACGTATGACTTGAAACCAGAAATGAGTGCTTATGAAGTTAAAGATGCATTATTAGAAGAGTTAAATAAAGGTGACTTGGACTTA  
ATTATTTTAACTTTGCTAACCCTGATATGGTTGGACATAGTGGTATGCTTGAGCCGACAATCAAAGCAATCGAAGCGGTTGATGAA  
TGTTTAGGTGAAGTCGTTGATAAGATTTTAGACATGGACGGTTATGCAATTATTACTGCTGACCATGGTAACTCTGATCAAGTATTG  
ACGGATGATGATCAACCAATGACTACGCATACAACGAACCCAGTACCAGTGATTGTAACAAAAGAAGGCGTTACACTTCGAGAAAC  
TGGTCGCTTAGTGACTTAGCACCTACATTATTAGATTTTAAATGTAGAACAACCTGAAGACATGACAGGTGAATCTTTAATTA  
ACACTAATATTGTAAAGATGTTAAGTAAACGCTTATTAAGACTTATTTTGAATAAATAGTAATATCTTTTGTAAATGAAG  
AATAAAGCTATAATAATTATAGAATAACTATTTAAAGGAGATTATAAACATGCCAATTATTACAGATGTTTACGCTCGCGAAGTCTT  
AGACTCTCGTGGTAACCCAACTGTTGAAGTAGAAGTATTAAGTGAAGTGGCGCATTTGGTCTGTCATTAGTACCATCAGGTGCTTC  
AACTGGTGAACACGAAGCTGTTGAATTACGTGATGGAGACAAATCACGTTATTTAGGTAAAGGTGTTACTAAAGCAGTTGAAAACG  
TTAATGAAATCATCGACCAAGAAATTATTGAAGGTGAATTTTCAGTATTAGATCAAGTATCTATTGATAAAATGATGATCGCATTAG  
ACGGTACTCCAAACAAAGGTAAATTAGGTGCAATGCTATTTAGGTGTATCTATCGCAGTAGCACGTGCAGCAGCTGACTTATTAG  
GTCAACCACCTTTACAAATATTTAGGTGGATTTAATGGTAAGCAGTTACCAGTACCAATGATGAACATCGTTAATGGTGGTTCTCACT  
CAGATGCTCCAATTGCATTTCAAGAATTCATGATTTTACCTGTAGGTGCTACAACGTTCAAAAGAATCATTACGTTGGGGTACTGAAA  
TTTTCCACAACCTTAAATTTTAAAGCAACGTTGGTTTGAAGAGTGCAGTAAAGGTGACGAAGGTGGTTTCGCTCTCTAAATTTGAAG  
GTACTGAAGATGCTGTTGAAACAATTATCCAAGCAATCGAAGCAGCTGGTTACAAACCAGGTGAAGAAGTATTCTTAGGATTTGAC  
TGTGCATCATCAGAATTCTATGAAAAATGGTGTATATGACTACAGTAAGTTTGAAGGCGAACACGGTGCAAAACGTACAGCTGCAGA  
ACAAGTTGACTACTTAGAACAATTAGTAGACAAATATCCTATCATTACAATTGAAGACGGTATGGACGAAAACGACTGGGATGGTT  
GGAAACAACCTACAGAACGTATCGGTGACCGTGTACAATTAGTAGGTGACGATTTATTCGTAACAAACACTGAAATTTTAGCAAAA  
GGTATTGAAAACGGAATTGGTAACTCAATCTTAATTAAGTTAAACCAATCGGTACATTAACCTGAAACATTTGATGCAATCGAAAT  
GGCTCAAAAAGCTGGTTACACAGCAGTAGTTTCTACCGTTTCAGGTGAAACAGAAGATACAACAATTGCTGATATTGCTGTTGCTAC  
AACGCTGGTCAAAATTAACCTGGTTCATTATCAGTACTGACCGTATTGCTAAATACAATCAATTATTACGTATCGAAGATGAATT  
ATTGAAACTGCTAAATGACGGTATCAAAATCATTATAGATAAATAATTTTCTTTTATAATCAAAATGCTGACATAATTTTA  
GTTGAGGATTATTATGACGGTATAAAATTAATAAAGATTTTGAGTTCACGCTTAAATAAGTTTACAGCTTAAATTTATAGCCTGCCAC  
AGAGTTGAGACTGTGGTAGGTTTTTTATTTTGAAGTATTAATCATAACAGACTAATAATCATGAGGTAACTAATAACACATATTTAA  
CTTGATTCTTAAACTGGTATAAATAATTTATGTTGAAATGAATATTGTATGACAGGGTATTCACCTTTTATTAAGGTAAAAATTA

TAAAGGTTTTATAGAACGTATTTAAATATATGAGGAGTAAACAAATGGCTGATAGAACGAATAAAGAAATTTAAACAGGACGCTTT  
ATTGCAACTGCATCAATCGTATTCTCAATATTATTGATTATTCATTACTTTGTTTCGTTGGATAATGCGACTGCCAAAGCATTACTTA  
ATTTAACGAATCAAAACACTTCAGATAAAGCGATTGATTACATTTTAAACAGCTTTAGATTCACTGGTATTATGTATATTTGGCTTA  
TCTAGCAGGCTTCATCACTTTTTGGAATCGACATACTTATGTGTGGTGGTTTATGTTTGCAGTTTATGTATCAAATAGTTTGTACGT  
TGATTAATTTATCAATCACAATTCAAGCAATAAAGCTGCACACGGTGCCTACTTAACATTGCCAATTTTAAATGTTATTATAGGTTT  
GGTTGCATTAGCGATTATATGCTTGTGTTTCTATCAAACGTAAAAGTACATTTAATCGCTAGAAAATTGATTTTAAACAATAAAAAAT  
ATGATATACTACTTGTCTGATATAAGGAACGGGAGGACAATTTATGCATACATTTTTAATCGTATTATTAATCATTGATTGTATTGCAT  
TAATAACTGTTGTACTACTCCAAGAAGGTAAAAGCAGTGGACTTTTCAGGTGCCATCAGTGGTGGTGCTGAGCAGTTATTCGGTAAAC  
AAAAACAACGTGGCGTCGATTATTCTTAAATAGATTAAACAATTATTTTATCAATATTATTTTTGTACTTATGATTGGCATAAGTTA  
TCTTGGTATGTAAGGTCCGGCGATGTAATGTCCGGCTTTTTTATTATTAATAAAGAAATGTAATAGTTTAAACAATAAGCTATGTAAA  
ATATATAGCCTAGTTAAGTATGCAAAGGGAGCGTTAGATTATGTCAGATAAAAATTACCAAAACCTTTCTTTTTTGAGGAAGGTAAAC  
GTGCCGTGTTATTACTACATGGTTTTACAGGCAATTCGTCTGATGTTCTGCAATTAGGTGCGATTTTTACAAAAGAAAGGTTATACATC  
ATATGCACCGCAATATGAAGGCCATGCAGCACCGCCAGAAGAGATACTTCAATCAAGTCCTTTTGTGGTTTAAAGATGCCTTAGA  
TGGCTATGACTACCTTGTGTAACAAGGTTATGATGAAATCGTTGTTGCTGGCTTGTCAATTAGGTGGCGATTTTGCATTAAATTAAGC  
TTAAATAGAGATGTAAAGGGTATTGTAACGATGTGTGCACCTATGGGTGGCAAAACGTGAAGGTGCCATTTATGAAGGCTTTTTAGA  
ATATGCACGCAATTTTAAAAAGTATGAGGGTAAAGATCAAGAAACGATTGATAACGAAATGTATCATTTCAAACCAACTGAACTT  
TAAAAGAATTAAGTGAAGCATTAGATACGATTAAAGATCAAGTTGATGAGGTGTTTGACCCAATTTAGTGATTCAAGCAGAAAAC  
GACAATATGATTATGTCACCAATCCGCAAAATATATATATGAACATGTAGACTCTGACGATAAAAAATCAAGTGGTACAGTGAATC  
TGGACATGTTATTACGATTGATAAAGAAAAAGAACAAAGTATTGAAGATATTTTCAATTTTATAGATCAATTAGACTGGTCAGAAATA  
AAAAGAGATTTTAAACATTAGAAAAGGAGGGGCATAATGAATTTAAAGCAATCTATAGAAGAAATTATTAATCAACCTGAATATGAAC  
CTATGTCCGTATCAGATTTTCAAGATGCATTAGGTTTAAAGCAGTCCGACTCGTTTATAGAGATTTAATTAAGGTGCTTGTGGAGTTAG  
AACAATCAGGATTAATCGAACGTTTCGAAAACAGACAGATACCAAAAAAAGCATAAGTTCTAGAGGTCAATCAAAATTGATAAAAGG  
AACGTTAAGTCAAAATAAAAAAGGCTTTGCAATCTTAAAGACCTGAAGATGAGGATATGGAAGATATATTATTCCCCGACGAAAA  
TTAATCGTGCCTTGGATGGAGATACTGTTATTGTAGAAAATCCATCAATCAAAAGGTGAACATAAAGGTAAAATCGAAGGGGAAGTT  
AAGTCGATTGAGAAGCATTCTGTAACCTCAAGTTGTTGGTACGTATAGTGAAGCTAGACATTTTGGCTTTGTTATTCGGATGATAAA  
CGTATTATGCAAGATATTTTCTTCTTAAAGGTCAAAGTTTAGGCGCAGTCGATGGTCATAAGGTACTTGACAAATTTACTAAGTAT  
GCTGATGGTTTCAGATAAATCCTGAAGGGCATATTTTCAGCAATATTAGGACATAAAAAATGATCCAGGTGTAGATATTTTATCTATTAT  
TATCAACATGGTATTGAAATTGAGTTTCTGATGTAGTATTACAAGAAGCTGAAGCAGTACCTGATCATATTGAGAATACTGAAATT  
AAAGGCCGTCATGATTACGTGATGAATTGACAATCACAATTGATGGTGTGCTGATGCTAAAGACTTAGATGACGCAATTAGTGTTAA  
AAAGTTAGCGAACGGTAATACGCAATTAAGTGAAGTATTGCTGATGTCAGCTATTATGTAACAGAAGGTTCTGCATTGGATAAAG  
AGGCATATGATAGAGCGACAAGGTATATCTTGTGACCGTGTAAATCCAAATGATTCCACATCGATTAAAGTAATGGTATTTGTTCAT  
TGAATCCTAATGTTGATCGTTTAACTTTAAGCTGTGCGATGGAATCGATGCTAGTGGTCCGCTGTTTAAACATGAAATTTTGTATG  
TGTTATACATTTCTGATTATCGAATGACGTATGATGCGGTAAATCAGATTATTACTGAAAAGGATCCTAACATTCGCGAACAATATAA  
AGAAATTACGCCTATGTAGATTAGCACAAGATTATCTAATCGTTTATTGATTCAAAATGAGAAAACGACGTGGTGAAATCGATTGTA  
TATTAGTGAAGCAAAAAGTATTAGTTAACGAAGCGGTATACCAACAGATGTTCAATTAAAGCAACAGTGGCGAGGGTGAACGCTCAA  
TTGAATCATTATGTTAATTGCAAAATGAAACAGTTGCTGAACATTTTAGTAAGTTAGATGTACCTTTTATTTACCGAGTGCATGAGCA  
ACCTAAATCAGATCGCTTAAGACAATTTCTTTGATTTTATTACAACTTTGGCATCATGATTAAAGGTAAGTGGTGAAGATATTATCC  
AACAACACTTCAAAAGGTTCAAGAAGAAGTAGAAGGTGACCTGAACAAATGGTCAATTTCAACAATGATGTTACGTTCAATGCAAC  
AAGCGCATATGATGATGTGAACCTGGGACATTTTGGCTTATCAGCTGAATATTATACGCATTTTACATCACCATTAGACGTTATCC  
TGATTTAACAGTTCATCGTTTAAATCCGTAAGTATTTAATTGAGAAATCAATGGATAACAAAGAGTGAAGCGTTGGGAAGACAAAT  
TGCCTGAGTTAGCTGAACATACTTCTAAACGTGAACGTCGTGCTATTGAGGCAGAACGTGATACTGATGAATTGAAAAAAGCAGAA  
TATATGATTCAACATATTGGTGTATGAATTTGAAGGTATTGTCAGCTCAGTAGCTAACTTCGGTATGTTTCAATTGCAATTTGCAAT  
ATAGAAGTATGGTTCATATTGCAATATGACTGATGATTATTACCGTTTGAAGAGCGTCAAATGGCATTAAATGGTGAAGCGTCAA  
GCTAAAGTATTTAGAAATTGGTGACACAGTTAAGGTTAAAGTGACGCATGTTGATGTAGATGAACGATTAAATTGATTTTCAAATTGTA  
GGTATGCCTTTACCGAAAAATGATCGATCACAGCGCCAGCGGAGGTAAGACAATTCAAGCTAAAACGCGTGGTAAATCATTAGA  
TAAATCGAAATCTGATGATAAAGGTGATAAGAAAAAAGGTAAGCAACGTAAAGGTAAAAATGAACGTAAAAATGACAAATCAGGA  
AACAGTAAACATAAGCCATTTTATAAAGATAAAAGTGTGAAAAAGAAAGCACGTCGTAAGAAAAAATAGCAGCAATGAGGTGAG  
TATGAATGGCTAAGAAGAAATCACCAGGTACATTAGCGGAAAAATCGTAAAGCTAGACATGATTATAATATTGAAGACACGATTGAA  
GCAGGAATTGTATTGCAAGGCACAGAAATAAAATCAATTCGCCGAGGTAGTGCTAACCTTAAAGATAGTTATGCGCAAGTTAAAAA  
CGGTGAAATGTATTGAATAATATGCATATAGCACCATACGAAGAAGGGAATCGTTTTAATCAGCATCCTCTTCGTTCTCGAAAATT  
ATTATTGCACAAGCGTGAATCATTAAATTTGGGTGATCAACACGTCAGATGATTGTTTATTCGATTGTCCGTTTAAAGCTTTATTGAA  
GCATGGACAAATGTAAAGTATTACTTGGTGTGACGAGTAAAGAAAAAATGATAAACGTCGAAGCTTTGAAAGAAAAAAGCAGTCA  
AACGAGATGTTGCGCGCGATATGAAAGCCCGTTATTAAGCGATTAGTTGCTTAATCGGGCTATATTTGATATAGTTATATGTGCTTT  
TGTAATTTACAAAAGTATGATTGTTGTTGATTTATTATTTTCGGGGACGTTTATGGATTTCGACAGGGGTCCTCCGAGCTCATTAAAGCGT  
GTCGGAGGGTTGTCTTCGTCAACACACAGTTTATAATAACTGGCAAATCAAAACAATAATTCGCAGTAGTGCCTAATCGCA  
CTCTGCATCGCCTAACAGCATTTCTATGTGCTGTTAACGCGATTCAACCTTAAATAGGATATGCTAAACACTGCCGTTTGAAGTCTGT  
TTAGAAGAACTTAATCAAGCTAGCATCATGTTGGTTGTTATCACTTTTATGATGCGAAACCTTTTCGATAAACTACACACGTAGA  
AAGATGTGTATCAGGACCTCTGGACGCGGGTTCAAATCCCGCGTCTCCATTATATAGTCTGCAACCTTAGTGTTGTAGGCTTTTTG  
TTTTTGATGTCACAGATAGTGCACAGAAAAATGCACAGGATACAAAAAGACACCAACCTTTAGTTGGTAGTGCTTTAAGCTTTAAGTATTT  
AACTATTCTTTCTGTGTATAGGATATAAATGACCATATCGTTTATATACTTCAGTCGATCGCTGTGACCTGACCTTAAAGCTATAGCTATA  
ATCATTACACTGGCCCTAGATTAACTAACATAGATGCATGACTATGTCTTAACCTCGTGATAACGATTCTAGGGAAATTTTGTCCAT  
TTGGTAATTGCTCATCCAACACTTTTAAATGCGTTAGTAAACCAACGATCAATGGTAGACTCGCTGTAAGCTTTATAGAATGTACCAA  
ATAATACATAATCATCTTTAAATATGTTATTCTCTTTATACCAATTTAAATAACCTTTGATGTGTCATCCATCATGTGAGTAGGCAATA  
TATATCGCGTATGGCTGATTTCGTTTATAGGGGCTGTCACTTACCCTGATAGTCCGTTTGTGTTATATGGATAAAATCATCATCAAAG  
TTAATATCGCGCCATGTGAGCGCTCTGATTTGCGCTTTGCGTGTCCAGAGTAGAACAATAGTTTAAAGAAATACTTTTGTGTTGTG  
TCACTAGCGCACCAATAAAATGATTGAATTGTTCTAATGTCCAATAATTCAATCGTTTCTGTGATTCTATTTCAAAATTCCTTACAAG  
AGATGCAACATTTTGTTTTAACTCATGAAACTTCATGTCATGATCAGTAAATGATACTAAATATACATGCATCTTCTTAAAGTAGTCT  
CCAGAATGCCCTCTTTAACTTCTTATTCTGAAATTTTATCATCATCTTGTGTAGTCAATTTAAATACATCCATAGATTTAAAGTAAG  
GTAGCAAGTGTTATTGTATGTGTTTTAATGCTTTTACACTTGATGCTTTTCGACGTGCTGAATACCAGTCTATATATTCTTCAACG  
AGCTTGTCAAAAGGTAATCTATTAAGGTGTCCGACTCCCTCTAATTCGTCCATCATTTTCGTTACATTTCTTAACTGCGTCTTTACGTTG  
TTTAAACCCCTTACGTGTTATGTACTTACGAGTATTGCTCTGTGCATAGTAAGTGATACGGAAATAAATAAGTACCGCGTTTAGTGTCT

TTATATATGTTATGGGATAGGTTTAAAGTTATGTGTCATGAGTATCGCCTTGTGTTTTTAAAAATATTTTTATTGAGTAACTTTCTTTCA  
TAACATCGATTTTATTCATTAATTTTTGGTATTCTTTAGAGTCTATAAAATCTGCTATTTTACTTCTTCTAGTATGATTGTGAATATTT  
CATGCTTAGTTGAAATTTCTTGTATATTACTTTTGAGGTCGTCAAATGCGACAACAAGTTTAAAAAGTAGACTTCAGGATATTTTAA  
TGAAATTTGGATTAATAAATGATAAATAAATTCAGTGAGATATAATTGTACAGGTAATTTTTTGAAATCTTCGTTTAGCAATAAATA  
AACACCGTGATGGTAAAAATGTCATGTTCTCATTTGAGATGAATGAATACATTTGTTCTATTATACAATCTATATTTGAATCTGTATGA  
TCATTAATAAATTGTAATTAAGTACTACTTTAAAAATAATAAGTATTTTGCTCACTAGAGGGCATATAAATAACGATAAAATCAATT  
AACTTGTCTTGAATATTGTTTTTCATATTCAGTATTTTATGTTTTGATAAATATCTTCGTATGAAATCTCATTTCCATATAGTAAAAA  
ATTAATAGACACATTACCATATTCTGCAATAGCTTTTAAACCTTTTGGCATTGGGGATTGACACCCCTTTTCCCATCGACTAACTATA  
CTATCCGAAATATAATTTTTTCTTTTGTAAATTTTGATATTTCTTCGCCAAATCTCTTAAATTCATCTTTAGCAAGTCTGATACTT  
TTGATGCGTAAACCAATATCTGTTTTTTATCCATATTTTCACTTCCTATCTAATGAGAATATCTATAAAAACTTTTCGTAACCCGACG  
TTTTTGTGTTGCTTTTAGTTTTCGTGTCTGTTATATTATACATACAGACGAGAACCTACGTCTAGGGAAGAGGTGATAATAAGTGAAT  
AAAGTACTGGGTATAGGAAAAATGTTGAACCTCACACAACAACAATGGCAAAAGAGCTTAAAAATATCAGAACAGTCATACAGAA  
ATAAAGAAAAAGGAAAAACGGAATTTAAGAAAGAAGAAATGTTAACTTTTAAAAACATACTTATTTCAAAGGGAATGACCAATAT  
AACTTTAGATGATATTTTTTTAATTAATAAATCCGACGTAAGAACTACGTAAAAAGAGGTGCTCAAATGACAAAAGTCTTATCCAATG  
TTATACATTACTAGAAAAAGAAAAAGGTGACACACAAAAAGAAAGTTGCTAGCAAACTTGGTATTAGTCCACAACGTTACCAGTTAAA  
GGAAAGTGGTAAAGCAATATTTAATTTAAATGAGTGTCAGATTCTTTCAGAAATGTATGATATGCCAATTGATGAGTTATTTTCATC  
AAAAATTAAGTAGGAGAATAGGAGGCAAGGCAATGAAAATGTACTTAACTTATATCTGCTTAGTTTCATTGTTAACAATTTTATTA  
CTAGCAATATGTAACATGTATGTTGCTTTTAGCGTTTATCTGGCTAAATAACTTTAGGATGTAATTTAACAGGAGGATTAGAAAAT  
GAATAATGAACAAAAAGAGTAATAAGAACACGTGGTTTATCAACTTGAGTTAAGTGTATGAATAACTTGGAAAGTTATGAACACA  
CAGAATATGTTAATGGTATTGAAGTGGTTTCAGAGATCAGTCGTGAAAAGCACTTAGAATTGATAATGAAATGGTGCACACAAGAA  
TTAAAGAATAATTTCAATTAGAGAAAGGAGAATAAAAAATGAATTGGGAAATTAAGATTTAATGTGTGACATTGAAGTGATAAAA  
CAAAAAATTAATGATGTAGCTACCAACATGCTTGGTTTGTGAAGATAGATTGTAAAAAATGAATTAGAAACAAAACGGGAACA  
TATTAATTTTCTGCTAGCTATTTAGAACATCGTATACAAAATGAACATACAGTTGAGTTATTACATGTGTACTTAAAAAGAAATCGGT  
GAAGTTATACAAAAATTCATGAAATAGAAAAAGCATCATCTGAGAACTTTGGCGAGGTATCAGATGACGCACAAAAATTAATAAT  
CACAGAGTAATTTAGAAATTACACATGTTTATTATAACATTTTTTACTCTGTGAATCACTAGAGGTGCAAAAAATGAATGAAATTA  
ATTAGAATATGACACACATGTTTCAGTGGTACATTAGAAAGTTTAGACTACGTTTCATTAAAGCTTTTCAAAAATTAATTTGGAG  
TAAGTTGGTTAATAAACTGTCTGTACCTATAGAAGCAAAATATAAGTATGCACGTGGTGTGCTGTTTACGGTGATATTAATAACCG  
TGCAATGATCATGGTGAATTTATCAAAAAGCATCGCAATGACGTTAATGTCGTATACAGAGATGTGATTGTACTTGTATTACGATGA  
AATAAATGATTTAAAGCAATTACATGAAGCAATCAGCTCAGCTTTAAGCAATGTTGCATGGTTTTGGCACACAAGTTACTCGCACAG  
AACTGAACAAGCTAGAATACGCCTGTATATCCCTCTAAATGAGCGAATAAGTGCAGATGATTATCGTAATTATACAAAAGTATTAG  
CGAATAAAATTGGCCACAAAAGTTGATGAAGGTTTATATCAGCCAAGTAGATGTTTTGCGTTACCAGTTATTCAAAAAGGACACATA  
TTTATTAACGAGTGAATGACTGTCCGATTATGAATGTTGATATGCTCGAGCAGTGGTCAAAGGGGTATAAACAATCAAATGATAG  
TCCTAATATCAAAGGGTACACACGACGTGATAGTGCCTATTGGCGAGATATAGCTTTTGGTGTAAAGTGAGGGAGAGCGCAATTCAA  
CATTTGGCTTCAATTACAGGTTATCTTTTGGCTAGGTTATGTAGATCCAAACTTAGTTTATGGGTTAGTGAGTGCCTGGGCAAGTGTAT  
GCAAAACCTTATTAATCAAGTGAAGTAAACAATCTTTTAAAGTATTTTGAAAAAAGATAGTAAATACAGTTAGAAATGGAGG  
TTTTTGTGTTGGAAGATGTTACAAACGAAGAAGTATTTGAAATGATTGATAGCAGAACCGGTGTTTTAAATGCTAATGATTGAAAAAG  
TCAATTAAGGCGTTCTGCTACTACACAAGCATTGAAAAAACGACTACAAATGCTGAAATCATATTGTGTAATGATGAGAGTTTAA  
AAGGGCTAGTACAATATGACGCTTTTGA AAAAGTAACCAAACTGAAACGCTCTACCGTATTGGAGGTCAAAGGGGATGCGAATTAT  
TATTGGGCTGATATAGATACCACACATGTGATTTCACATATTGATAGATTGTATAATGTGCAGTTTAGCCGTGATCTTATTGATACTG  
TGATTGAAAAGGAAGCTTATCAAAATAGATTCCACCCTATTAAATCGATGATTGAATCTAAATCATGGGACGGAATCAAAAAGAAAT  
GAAACGCTCTTCATTGATTATTTAGGTGCTGAAGATAACCATTACAATAGAGAAGTTACAAAAAATGGATGATGGGTGCAGTTGC  
TAGAATCTATCAGCCAGGTATTAATATGATTCCATGATTATTTTATATGGTGGTCAAGGTGTTGGGAAATCTACGGCAGTGAGTAA  
ATTGGGAGGTCTATTGGTATAACCAAGTATTAACACGTTTAAAGGTGATGAGGTCTATAAGAAATGACAGGTTCTTTGGATATGTG  
AAATTGAAGAACTATCGGCATTTCAAAAGTCTACTATTGAAGATATTAAGGGTTTTATAAGTGCCATTGTGATATTTTATAGAGCTT  
CGTATGGTAAACGCACAGAGCGTCATCTAGACAGTGTGTGTTGTAGGGACAACCAATAACTATGAGTTTTTAAAAAGACCAAAACA  
GGCAATCGTCGTTTTTTCCCTATTACGACAGATAAAAAATAAGCAACTAAAAGCCCTTTGACGATCTAACACCAGATGTTGTGCAA  
CAAATGTTTGCCGAAGCTAAAGTATATTTGATGAGAATCCGACGGATAAAGCATTGTTGCTAGATAAAGAAGCGAGTGAAATGGC  
TTTAAAGTCCAAGAAGCTCATTCTGAAAAAGATGCTTTAGTTGGAGAAATAGAAGAATTTCTTGAACGTCCTATTCCGTCAGACTA  
CTGGTATAGAACGTTAGAAGAAAAAGAGTGTCTGCGCATGGTGTATAGACCAAGACTATATTAATTTATATGGTGATGGTAAAT  
TGATTGAATTACCGAATACAAAACCAGGTGCTTATGTATGGCGTGACAAGGTATGTAGCATGGAATTTGGAAAGTGATGATGAAA  
CGAGATGACCAACCACAACAACACCATTTAAGAAAAATGATAAAGCTTAAAGAAATACAAATTTATTGTGACATTGTGAAAAAGCA  
AACGCGATATGGTGAAGTATTGGTAAGCAATATGGCTTTAGTGTAGATTAGCTTCTTATTATCAGAAACTTAAAGTTTAGACATC  
TTATTTTTAGGACAGTAAGACACTTATAAGACAAGTTTAAAGACACCCGCAATCCCTTGTGGCAGTATATGCCATGCTATAAGTGTCT  
TGGTGTCTTGATAGTTTTTAGGGTAAAGTTTTATAAAAAATTTTACACAATATACAAAATATATAAATGTAGGTGCTAAACAGTG  
GACAGTGAGACAGATTAAGTGAAGCCCTTGAGGGAGTAAAGTGTAAAAAGAAGTTCATAAGTGTCTTGAATTGCTATTTCGAATAAGA  
CAGTGAGGCACCTATCAAAAATTAGGAGGAAGAAAAATGAATAAAAAATCAATTAAGTGCAGAAATTTAGAAATATATAAAGGCGCA  
TGCTGGTACATCATTTGTAGAAATAGAACGTGTATTTGAAGAAAAATAATTTTGATTATAAAGGTGACGGCGCATATACAAGTGGTCA  
ACATCCCAATGTTGTGTTTTGGATTGGGTGGAGTCAAGAAGCGTTTGATGTTATCGCTGAACTTAAAAAAGACAGACGTATTGAGAT  
GGATATTTGTAGCCCAATTTGTTATATGGTTGATGGTAAAGGTTTGGATTTGCCTATTGTAAGGTGCAAAAAATTTAAAAACAGATCA  
TTGGCTACCTGTACAGTTTACTATTAGTAAGAAAGAACCGGAGTGTGTTCTAATGAATGACAAAGAGAAAAATTTATAATCAACTTC  
ATCATGATGCACCAATTCAAAATATACCAGCACCCGAAAAATTTATTTGTGCAATATATAGAAGCTGATGAAGTATGGTATTCACCAG  
TTGTATGTATGGCTTAAAGTAAAGCGCATAATATTAATTTTTATGATAGTGATGATGTGGGTGCATTGATAAAGCAGCCACATGTA  
GCATTAAAAAATTTAATCCTGAGACAGGTGAGTTTGAACAATTCAGCAAAATGGCTCAAAGGAGATAACGCAATGAACATAGAA  
ACTGTAGTAAATGAATTTGAAACACAAGCAGGCAGTTACTAAGGTACTACACTGGATTATTAGAACATAGTAAAGTACAACCGTA  
TTGCTTTAAGTTATACAATGATCCGTTTGATATGGTTTATGTGATGATGAACGGGAAGTTATTCCGGTCATGTATATATTAAGATTGT  
AAAGTAAAGCAATCATTTGAATTAGCGTCACCTAAGCACACTGAGGGGCTTATAAGAAGTATAGAAGGTCAATTATGTAGGTTATGA  
ATTACATGACGGTAAACAGCTTTCTATTAGTGATGATGATGGCCAGTCAATTTTGAAGATGAGTATTTATGTATGGATTACAAAC  
ATATGCAGAATCAAATAATGATGTGTTGAGTACCTAGAAATGGATTTGATACCGATACACTTGAAGGCACTTCAATCGAGTA  
ATACTGATGTGATATCGAATATTGAAATGTTGTATCAGATAGCTACGGGAATCAATGAACAGCACCCAGAGTTAGTTGAGGGGTTG  
AGATTAGTAACTGAGTTTGTACAAGATGAGAAGGCTGCACAAGAGGATTACACGGGGTTAGAACGTAAATTTGAATGATCTAAAAGC  
GTCTTATTATAGTATAAGTAAATAATGTTATGAGGGAGTCGCATGTAGTATGTGACTCCTTATAAAAAAACGGCAAGGTTTGTACAA

GGTATAGAAGTTTAAAATGGTAAGGTTTTTCGGAAGGTGTTGGCTTTTAAAAACCCAAAAGTTTCCCAAAGGTGCGCAGACTCTGAGA  
ACAATGAAATAGGAAGGTGTACAGGTTAAAAAAGCGAGGTACAGAACTTTAAAATAGTAATTTTGAGGTAGAAAAGAAAACAAT  
GTTTTATACCAGGGTTGCAAAATGGTGAGAAAAAGGATAAATATGAGCAATTGAATCAAGAAGAAAGTGA AAAACCCCAAGCTTTTCC  
GTAGGTTATAAGAATAGTGCGATTTTAGATAGGTACGAAGAATTGCGTCAAGAAGGAACTAAAGGTAAGTGGTTTTTGATATTGA  
TAAAAGTAATAAGGTTTTAATAAGGTATAAAAAATTTAAAAAGATAATATATGTTAATGTTTGTATTTTGAAGAGGGGCAAAAGTT  
TTGTTGTTTCGTATTTTGTTTCGTGTAAAAAACGGGAACCTTAAGTTCTGTAGAACTACTAAGTTTTACTACGGAATTTCTTTTGTTATT  
GTTTTAAGAGGGGATAGGGGTGATGCTAAACACCTGATATAATGCGATTTATAGCGAACATAAGTTTGATTTAGATGTGTAGAAATG  
GTATAATTAGAGTAAGCAAAACAAGCAAGCATGGTGAGACAATGAGTGAATTTGAAGTAAAAGAAAAGACGTACAACCTACCGA  
ATGAACACCGCCAAGTACTCAATGTGATAAGAAATACGTCTAATAAATATATTACTAAAAACAAAGCTGCTTAATCAATTGGGATAT  
GAAGTGAATAAGGCTAACAAATAGATGGTTAACACAAAGTCATTACAAGCTTAATCATTATTATCATTTATCCTATCGGATATAGCTAT  
AAAAAAGATACTAGAGGCTATTACATCATTAAAAACACAAGCTGATAAGATAGAAGCTATCAAAAGTATTAAGGGCTTAATTGAGGG  
CAGTCAGAACC GTTTAAAAGCCCTAGAAGAAATTGAAGTGTAACATGATAACTATGAAATGAAAGAGGGTAACATAAATGAAAAAC  
AAATCATTTATTTGAAAAATATTCCGATGAAGTAAAAGGCTACAAAAGAAGAAATTAATAATTTAGAATCTAAAATTGAAAAACTA  
CAAAAACCTATTGAAGATCTATCTTCCAAATATAAAGAGTATATAAAAGTTGGCAACGATAATGAGGCTGATAAGACGTTTAATAAG  
ATTTCAAAATTAGAAGATGAGAAAAGCAAAAGATAATAAAAGATTTGAAATTA AAAAGGAATTATTTAACAGTATTAAGCGCGAAA  
AACTCATAGACTTATTGTTGAATAGGAAGAAATTTCTTGAGTTATATCAAGAGGAAGCACAAATTTTAGCGCGTGAATTAGAAGGT  
ACAATCAAAACAGTTTAATAATGTTATTGATAAAATCAACAATATGAATGAAGAATATCGAGAAGATATGTATAAGTTTCGATTCTTG  
ATAGATCAAAATGAATGAAAAAGATAATTTATTAGACAACGATATGGCGAAGTGATTGTACTTTACCTCAACAACCTTCTTATT  
AATACAAAATCAATTCGTTTCAATGAACACAAAAAATTTGGAGGTTAAGAAATAATGCAATTTAGTAAAAACATAGAAGCAATAAAG  
AATGCTGAATTAGATGAAAAACCAACGCTTATCTATTTTAGAAGCACTTAAAGAAGATGTGAACGATGAGGAAAAAAGAAACGTAA  
GAGATGTTCCAACCTATTTAGATTTAGCTGATAAAGTAAATATTAGAAAAACAAATAGACAAAAGCCAAGCCTTAATTGGTTTGG  
CTTTATTAAGTAGTGGGGTGGATAAATGAACTGAGTAAATCTAAGAACGTTTTATATTATCGTAATGTGACAAATAAACTATCTGA  
GTATCAACTATTAACGCAATTTAACCCAGCATTTATTAATAAAAAAATTAAGATGTGTGAATTTCCAAATTGAAAGTATGTACCATAT  
GAGTGCCTGCGACCACAACATGTGATGAAATAATGGGGTCTGTCTGTCTCATATCCGATTGAAAAATTAGTTATCAAAATTATTGA  
AACAAAAGCAGGGTTACAAAACCTATAAAAAATAGATCTATAAATAATATGGCGTTGTTGAAAAAGGTAATAATCATTATACAGAAA  
AAGAGCAGAAGCAAGTTGTAATAATATATGCGTTCAAATGGACGATATAAGCCCTACAACGTCATTGAACGCTTACAAGTTGATTG  
TATCAAGCAAGTATTAACACAGCTTCAGAACGTCAAAAACAAAGAAATACAGCAATTGAAAAACAGTAAGATTGCGACGAGTAAATG  
AATATCACCAATCTTCATATGTAAAAGTGGTGTAACAATGGATAAAAAAGCAAATAAAAAGGCTTCGTGTGTGATTATCATAAGCGAA  
CTAGAAGTGATGTATTAATAGATGATGATATAAATACTGATGAATTCCTTTCAATAGGTGATGAAAAATTCTAATGAATGGATGACAG  
ACGATAATGTTGATGATCATATTATAAAGAAATCACTTAGAAAATGATTGTTGACCGAGTAGCTAATGATAAAGAGTTTTATATTTTCG  
ATTCCTTAATACAGGACGTAGTTATCAAGATATTAGTAGTGCTTAGATTGTTCTGAACAATCTGTAAGATTATGGTATGAAACCTT  
ATTAGATAAAATTTGTGGAGGTGATAGAATGAGTGAGTTAACGGCAAAGCAAGCGCGTTTTGTGAATGAGTATATAAGAACACTTAA  
TGTGACACAAAGTGCCATAAAAAGCAGGTTATAGCGCAAAATAGTGCACATGTGACAGGGTGTAGGTTATTAAGAAGCCACACATCA  
AGCAATATATACAAGAACAAAAAGATAAGATTATAGATGAGAATGTATTAAGTCAAAAGAGATTACTACATGTGCTTACGAATGCG  
GCAGTCGGTGACGAAACAGAAACGAAAGAAAGTTGTGGTCAACGCTGGGGAATATAAAGAGAAATCCACAAAGTGCCAAAGTACAGT  
TAGTCTATAATGAACATGTTGAACTGATAGAGGTGCCAATTAAGCCAAGTGATCGTTTAAAAGCTCGTGATATGTTGGGTAAATACC  
ATAAGTTATTTACAGATAAGCATGATATCAACGGGGATGTTCTATATTCATTAAACATTGGTGAATGGGACGGAGACGATGAGGAA  
TTAGATAAAACTGTAAAAGATGTATCTAACGCTAATCCTAACCATACTGTGATTGTGGATGATATACCGTTAGAGGATTGAAGAAA  
ATGAAGCTATGCTATTTATAAATTAATACTAATTAGTTTGATACCATAGCTTATTTACTGAGAAAGTAGACTTAAATGTAAACAACAC  
CAGTGTTTATTGATAATATTGGTGGGTTTGAGGAGTAGCAATAAAATAAAGGAGGTAATTGTGTAAAATATCTCTTTTGTATTCT  
TATTTATTTACAACCGATAAAATTAATGTATTATATATAACGATCTAGCCATAACTCTATTCGGGTTATGGCTACTTTTATAGGG  
GTAAATTTATGAAGCCATTTGAAAGTCATAATAAACAATTGAAAATTTCTAAGAAGAAGAGGAATGGAAGTACCGAGTAGTGCTAAA  
AGAGATTTAGAAAAATGAAATTTATTATAATATCATAAATGGTTATAAAGATTATTTTATAGAACTAGATGAAATTTAGGTAATTTTGT  
GTTCTGTATAAATAAAGCAAGGTACTATTTTAAAGAAGTCTTTTCTTTATACAACTAGATAGAAAATTTAGGAATGTTTATTA  
GAGTATTTGTTAGTATTTGAAACTCATATTAATCAAGAATTTTCATATTATTTTAGCGAAAAATATAGAGAACCACATTCATATTTAT  
ACTTTAAAAATTTATCATCTGACACAAGTAAGACAGATAGCATCGTGAAAAATGGTTGCTACATTTAGCTCGGTTATGAGTAATAGAA  
AAAATAAACCATTA AAAACATTATATTAATACTCATAATGGAGTGCCACTATGGATATTGGTGAATTTTAACTTTAGGTAATGTTT  
CAAAAATGTATTCCAATTTGGATGATGATCTTCGATTGGAAAGTTGCTAAAGACTATAAAAAGGAAATTTGGAAGAGATTATAAAACA  
CGTGTTCAAATAACTCCATCAGATGTAGACAGTATACTACAACAAGCACATATGTTTCGTAACGTGTGTGCGCATGAAGAAAGATT  
GTATGATTATAAAATAGACAGGGCTAAAAGTAGAGCTAATATATTCGCCAATTATAACAAAATATACGATAAAGAATACGTTCCCTA  
CAATGAATGGTAGTTATGATTTGATTTGTTGATTCTACTATGTTCTATTTTGAATAAACATGATTACATATAAAATGATGAAAAAT  
GGATAAATCAATAAGTAATTATTCACATTTCTTTCTATACAATTAATAGATGACCTATATAACAAATGAATTTTCCAGTCAAAC  
AAAAATACTGGATATGTTATAAAAGATATTTTTTAATGTCACTTACGAGTGGCGTTTTTTACGCTGAGAAACGCCCTGTGTTGCAGT  
AAACGATGAGTGTGTATATAGAAAATAGATAAAGTATAGATATAGATTTAGATATTATAAATTAATATTGAGATGCTGCCTCTTTAA  
AAAAAGACAAGTTACATTA AAAAGTAACCTGTCTTTATCTATAACTAGTTTATAGTTATTTTATCTATGTCTTTCTGTATAACATATA  
ATTCCTATGCTCAGTAAAATCTTGTTCCAACTATTCAGAGATTTTAGGATCTTTTGGTCTTTACTATGAATGGTTACTTTATCACCAT  
CTTTAATGATTTTCTGTCTTTTAATTTGTTAGTTAAATTTCTCCATGTATTATTAGCATCAATTTCTTCGTTGAAATTAATAATTTA  
CTTTTTTGATATTAATAGTAGTTAAACTTTCAATATCTATATTTTGTTTCGAAAAATCTCCATTAGAGTTCCCATTTTGCTGAAATTTTA  
TTTTCGCTACCATTTTCAATTTATAATTAACATCTATGTTTTCATTTTCCATCAATTATATTAGCCTCTTTCAAAGCATCTCTT  
ACATTTTCCCAACTGTCGGTCTGTTGTTTCAGCAGCTTTTGCAACGTTATTAATACCATTATAAATTTGAGAAGAAATGAAAACCTG  
AACCTACTGTTGTTAAAACTAATGCACTTGCTATCAATGTTTTTGTTAATAGTTTTTTATTCATTTTATTTTCTCCTATAACTTATTTGC  
AATCGATTACAAAGTAAATTTACAATAATTATTTAAGTAAATCAATTAATAATTATTAACAAATCTATAATATTTTATCATTA AAA  
TATAATAATTTTGAGCTAGAAAATATTCGTCATTTATGCTATAATCTTTTTAGACACAGCAATGTGTTCAAATTTTCATCTATTCGTAA  
GTTAACCTTCGGGCTGACTTTTTATTTCATATTTCACATGTTAATCTGTGTTGTTATTTAGGCAGGTA CTTCGGTACTTGCCTATTATT  
ATATCTCTATACGATAGGAATCGACTATATGACTTACTAAGTTTTATAGCAAATTAGACAATTAACACATAAGGCATTTAATATTGA  
GTTGTTATAGTAGTTGTATAATATATAGCTAGTTCCTTATAACAGCAAAAAAATAATTTTGACTATAAGATTAAATATAAGAATATA  
AAATTAACAGTAGAAAACCAATTTTGAATTTGAAAAATGGAATGCAATTAATTAAGAGTGTGAATATATATACAATGTTTATTAAT  
CAAGATGCTTAGAAAACCTCTGTTTCTCCTTGAGAAAAGAGTTTTGTATATAAGTTCAGATGAAGTATAGTTAATTAATTTTCAAAGC  
ATAACTTAATCTTAGAAAATAACGTGAATCAATAATATAATTAATTTTCTTTAATATTTTAAATTTGAATATTTAAGATTATAA  
CATATATTTAAAGTGATCTAGATACTTTTTGGGAATGTTGGATGAAGGAGATAAAAAATGAATAAGAGTCGATTTATTTTCATGCGTA  
ATTTTGATATTCGCACTTATACTAGTTCCTTTTACACCCAACGTATTAGCAGAGAGCCAACACAGACCTACGCCAGATGAGTTGCAC

AAATCAAGTGAGTTTACTGGTACGATGGGTAATATGAAATATTTATATGATGATCATTATGTATCAGCAACTAAAGTTATGTCTGTA  
GATAAATTTTTGGGCACATGATTTAATTTATAACATTAGTGATAAAAAAATAAAAAATTATGACAAAGTGAAAACAGAGTTATTA  
TGAAGATTTAGCAAAGAAGTACAAAGATGAAGTAGTTGATGTGTATGGATCAAATTACTATGTAACTGCTATTTTTCATCCAAAGA  
TAATGTAGGTAAAGTTACAGGTGGTAAACTTGTATGTATGGAGGAATAACAAACATGAAGGAAACCCTTTGATAATGGGAACT  
TACAAAATGTACTTATAAGAGTTTATGAAAATAAAAAGAAACACAATTTCTTTTGAAGTGCAAACGTGATAAGAAAAAGTGTAACAGCT  
CAAGAACTAGACATAAAAGCTAGGAATTTTTTAATTAATAAAAAAAATTTGTATGAGTTTAAACAGTTCCACCATATGAAACAGGATA  
TATAAAATTTATTGAAAAATAACGGCAATACTTTTTGGTATGATATGATGCCTGCACCAGGCGATAAGTTTGACCAATCTAAATATTT  
AATGATGTACAACGACAATAAAACGGTTGATTCTAAAAGTGTAAGATAGAAGTCCACCTTACAACAAAGAATGGATAATGTTAAT  
CCGATTTTGATATAAAAAAGTGAAAGTATTAGATATATTCGAAAAGGTAAGTACTTCGGTGCCTTGCCCTTTTGGATGCATATATAG  
ATTAACCCGCACTTCTATATTAATAGAAAGTGCGGTTATTTATACAGTGAATCTAACTATAATAATTGGAAATCATCTTTTGAATTT  
TCGACATCTAGATGAAATTTGTGTTGAACCAACAGTTTTATTATCTTTGTAAATTTTTAAGAAGCTTTCTGGAAGACCGTATCCTGTGT  
AAAATAAATCATACGAGAAATTAGAACCATCATTATGAAATACTACACTCCCTTATCAAAACCGCTATAAAATTTTGAAGAA  
GTGCCGTATTTCTTACCTTTACCAGTATCATTGTGTCCATAAATATTAATTCATCTTGCAAGTATTTTCTTAGTTTGACATCTATTTT  
TTGTGCGGTAACCATTTTTTATCTGTAGAAACACTTTTAGTTGTAAGTGTGATGCTTGCCATTGATAAATTAATTTATAGGTATTA  
TTCTTGGCGAATCTAATTTATTGTTTTCTGCTTTAGTAACACCACCATATATAGTACGAGAGTTAGAACCATATTTATAGCTTATACC  
AAAAACATCGACATTTTTCCCTTTAGATCACTAGTTATATATTCATTGTCAAATTCAGCATACAATGTATCATTTTTATACGAGTATT  
CTAAGCGGTGTGATTCTGGTGAATTTTGTCTTTAACATTTCTTAAATTCACATATTCATATTTAGTATAAAAAATTTCTTAGGTTTCCT  
GTACCTACATCGCCGTAGATAAGACTGTATGATTAGAGAAGAAAAATAAAGTAATAACAATTTACAAATTAAGTAGTTTCAGTTT  
TGGAGTACAAAAATCCGATAACTACTATTTTCAAAATGGACTCTTTTTCATTTTAACTTACATACCAAAATACATACAAAAATGATTAT  
AAAATGCAATTGAAAAATGATAATTGAATGAAAAATTTGTGATTTTGTGGTATTATGATAATATAAATTATAGAAAAAATTTGCTTATTC  
AACTAACGGGCAGGATAATGAGAAAAAGTTTTTTGATAGAAATAAGAAATTAGATGGTAAATTAGTTAAAAAGGCTGTGTTATAAA  
TGAAAGTTTCTTTGATTGCTGCGATGGATAAGAATAGAGTGATTGGCAAAGAGAATGACATTCCTTGAGAGATTCCCAAGGACTGG  
GAATATGTTAAAAATACTACAAAGGGACATCCGATAATATTAGGTAGGAAGAACCTTGAATCAATCGGAAGAGCCTTACCTGACAG  
AAGAAATATTATTCTGACGAGAGATAAGGGGTTCACCTTAAATGGTTGTGAAATTTGTTCAATCATTGAAAGATGTTTTGAGTTATG  
TAAAAACGAAGAAGAAATTTTTATTTTCGGAGGAGAACAGATTTATAATTTGTTTTCCCTTATGTTGAGAAAAATGTACATCACAAA  
AATACATCATGAATTCGAAGGAGATACTTTTTTCCAGAAGTGAATTATGAGGAATGGAATGAGGTATTTGCCAAAAAGGGATAA  
AGAATGATAAAAAATCCGATAACTACTATTTTCATGTATATGAAAGAAAAAACTTATTGAGTTAACGGGTGCGTTAATTGAAGAAG  
AACAGTAAAGATAAAGCACAAAGAGCTTGGGATTACTCCAAGCTCTTTTTGTCATTTGAAATAAATTATATCTTTCCAATCAAATTTGT  
TTATCTGTAATCCCTAATCTTTGAGCAGGTGTCAAAACCTTTTTATCCGCTGATTTAAAGGGCGACAAAAGTTGTAGTAAGTTCTTA  
GAATTGTAATCGCAAATTGAGCATACTTCGGATTGAAGTTAGCGTAAATATAGCTCTTCTTATCACCACGAGCTGTTGTTAATGGTC  
TTTCAAGAGATGATATATAACGTCTTATCTGTTGAATAAAGCTATTGGTTCGAATGGTCATTAACATTTAATAGCATCTTTCGATTTT  
GTTTGGTTCCAGAGCAGATAAATCCGTTCTACAATCAACTGAATAAAATCCTTTATCCTTAGTGGCTAATGGATGTTTGATAGGGTT  
ATCGGCATATTTGCGATATCTTTCTCCATCTTTACTAATAGCCTCTTCGTGGAATTGATGACTTGTAGTAATTCAGTTAGATAATGA  
GATGCCAAAGTCGCTAGAAACTTTGTTTTGAATCCCTCTGATATCTCCCAATCGAGCAGTCTGCTTTTGTCTGTCGGAATTTCTTTA  
AGCATTTGTTTTCTGCTTTTCGTTTAACTTGGCAAAATAAATGATGTGCATCGCTCAACCTTAATCTTTCTGTAATCTCTATAA  
AAGGCGTTTCTAATAGAGAAGTCATCATCACTAATCATTCGCCATTCTGTCGGCATTAACCATTTGTTAATTAACCAATAGTGAGCA  
GTTGTAGTATAAGGAGCATCAACATTTAAACCATCGACAAATCTACTCCTATTAGTAATTTCCCTAATTCGTGAAGATAAGCATTC  
CTATTTTCGCTATCGTTAGCGGATGGTTCTTGTGGATAATAAGACCAATCTAACCTATCATTTTTACGACTAAAAGTATTGAGATGGT  
CTTCTTTGAATTTTCTGTATCTTCATTTAATTCATCCATTGAAATATTCCAATCATAGGCAACATCAGAACGGAACACATATCTTGA  
TAAGACCTCAGCAGATACAACTATATACGTTTGCATATTAAGGTCTTCAAACCCCGTATATTTCTTTGAACCTTGTCTTTCTTACGG  
ACGTTATTTAGGTAGTAGTGATCTTGTCCGTATTAAGCCACATCTCGTTAAATTTCTTTGTTTGAAGGGGTTGTGTCTCATATCGTTC  
TAAAACTCCAAACAACGCCATATACAGCCACTCCAGCTTATGATAGTAGGTTCCAACCTCAATTCCTAAAAATACACAAGTACGACT  
GACTGAAACCTTCCAAACCACTTTAGCGAACATTGGAAGAATGGTGCTTTTGTGTTGTTGATAAGTAGTGTTCTTCTCTTTT  
GGTAGAACATTAGTGAACCTTCTTACACGCCTTACATTGATAGCGTTGAGATTTGCCCTACTTTTCCCCCTTTTGTAAATTTGCTTCG  
GCTCATTGAATGGGGTTGATTCTTCTTCCGAGCAGCCTTCTTTATGAAATTGATAATCTGGCTCAACATCTGGATGCTATTGATTTT  
TATAAGGCGTTTAAATTTCTTCAACAACAGACCAATTAGATAAAGGGGTTACTGTACAGTTTTGCGATACACCTCTGCCAATAGGATT  
GTCATTGCAGTACATACCTTTATGACCTTTATCTTTGGAATACCAGTCATTTTATATCGACTTGGTTTCCCTTTTACATCTTTGAATT  
TGTGCTGTTCTTTCCAAAATTACAACAAACCGATTGATGCAGTAATTATATTGAATGGGATATTGAGAACCCTTCCATTTAAAAAG  
ACGTTGGCAAGAACAACATTTTGTATACCTTGTGCAAAATCGTTTTGGAGTTAATAAATCATATTGTTTAGCCCTATCTTTAATTC  
TTCGTTTGAAATCGGAATTTTAAACATCTACAATTTTATCTTCTTCGTTGCTAATCTTTTAAAGCTTGGTCATTGTCTATCAACCCACTC  
TATCTTTGATACCCATTTTCAACAATCCGCTTACTTCTGCTTGTGGCAATCCATTCAATAAACTTCTTATCGTCTAAAAATGTTT  
AATAAGAAATTCATCCACTGCTTCGTTTTCAGTACGCTGTCATATTACGCGTATTGCTTAACCTATCACCCTTACTTGTCTGTATATTT  
CCAATCCACAGACTTAGCGTTCTTATTTTTTGGCTCAAGAAATTCATAGGAAAAATGCACCCCTTTTGTCTAGTAAATTTGAACCAT  
TTTAACACACCAATTTGCATTCTTACAATAATTTATTCAGTTTCGATTTTATATACATTTTAACTTACATTTTGTGGTGTAATTTAA  
CAACAAACGTTGATTTAACAATAAAAAACGAGTATCAAAATTCAGTTGCAATTTGATACTCATTTAGGTTTACATTTTCACTTTGTGA  
CTCCAAAACCTGAACACTTA

>024-contig\_320

TCTTTTTTTCATATTAGGCACTTCCTTTTTCATTATATTTATAATAACATTATAAATATAAGTTGAATAATAAATTTTAGGAAATTCATA  
AAAAATACAAAAGGTTATAAAGGAAGAGTTATAGAAAAATATGTATCATCCACACGTTGCAGGCAGTGAATACGTATTTGAATAC  
GTTAATTATGAGGTGATGTTGGGTGCACAAATTTATATAGTTTTATCAATTTTAAACATTTTACACACAACCTGATTAGTCAATTTAAAC  
GTTGATATGACAATGCTTATAGCGAGTTATACATGAATAGATAAACGCTTAAATGAACCTCCCGCTCTCCATATTTGTAGCCTACA  
ACCTTTGTGGATGTGGGCTTTTTTATTATGTGTTTTTCAGGGGATAATGCATTGTAGAAATAGTTGTGAGTATTGAAATAGCAGTGT  
TGTATAGGTGTTTATTTGATGGAGGAAAGAGTAATAAGTGATTATGAATTAAGTTTTGAGATATAAGAGGAAAGGGATGTGTGTCA  
AATAAGTGTCAAAAAAGTTGAGCTTAGAGTTTTAGAATGTAAATTTATTTGCAAAATTAATTAAGCTAAAGAAGTATCATAAATAA  
GAGAATTAAATATAGTTTAGAATTAGAATCAAGATTTTATAAATATTATATTTTCTTTTAAATTGACTTAAATTTGATATATTGTT  
TAAATGTAATGAGGAAAAGTTGTGATAGTTTCATATGTTTAAATTAAGGTTTTAATATAGCTGTTTTTAAATCGATTTTAAAGGATG  
ATATCGTTTGCAGTGAACGTATCTATTTAGTGAATAGTAATTATAGATGGGGGCGTAATCAATGAATGACTTGAGTTTATCTTCA  
TTTTTGAACGCAGTAACAAATTTATGCAATTCATTTGTTTTATTTGTTTGAATCTAATAATAGTATTTTACATAATTGGTATGAATAT  
ACAGGACTTTAGTGATTTTCTTAGTAAAGATTTAAATCATAAAGTGACTTATAATTTAATGGGTTTTTGGAGATATTGTTAATAAT

GCTTTTATAGTTCCTTTGGGTGTCACCTTATATTATCGATAATACCAATACCATATTTGTATTTTATTCCTACAATTTCTACAATTTATTC  
ATTGTCGGTTATTATTGGGGTTACATTTTCATATAAAATTAACGAAGGGATAGCTATTTTATTGGTATTTTGCCTCATGGTATTTTA  
GAAATATACTTAACAAGCATTGAACTATCAATGTTATTTCTTATTAATGCGTATATTAGAAAAAATTCAATGAATTTATTAGAAAA  
AGAAAAGAGACATTGCCAAAATTTTTGTTTTATTAATAATCAATAGTAAAGTGTACCTGCTAATATTTTACCTGTGGCATTTTTAT  
GCGCTTAATGAAATTACTGTTACACCAACTGTTACAAAATTTTAACTAATATAATATAGAACTTTTAAAAGGGCATAGCTAACT  
ATGTGTATAGGTTTATTTTGTATCGATAAGTATTGTTTGAAAAATGAGTTCACGAAAAATGTTGCATGGTATTCGTGAAAATTATGATC  
GAGTCATTTCAAAAATGACCATTTCAAAACAACAAAAAGAGTAGGCGAGCTACTCTTTTTTGTATATTTAACAATTAATAGTA  
TGTCATTATGAGTGTAAGTAAGCTAATCTATAATGACAATAATAACAGTAAAGATTATAACGTTGAATGCGAGCATTCAAAAATTA  
TACTTCATCTAAACCACTGTGGTCGTCATCTTTTTGCTTTTCTTTTCTTCTCCTGTTCTTGTCTTTTTTGTACTCTTCTTCAAATCT  
TTTTCTTTCTTTTCTACTTCTTCTTCTGTTTCCGCTCTATGAGAAAAATCTTCGGTTTTAAGTTTACTAAATTTGAATGATTTAGAATCA  
ACTGTTTTATCTTCTGAGTATTTATGGACATTTAAATTAATATTTCCATCACCTCTTAACTCATAGATGAACATGGCTTGTGCAGTTTT  
GTCTTTTTTAATTTGATCTTGGTTATGTTCTGTCCAATCTTTATATTTTTTATCATTAAAAAGATAACCATCTCTTAATTTATTTACTGT  
ATTTTTATCATCTTGAGTAATATTAATATAGTCATGAGAAATAGAAGATGGATTTAAATCTTTATCGTCTTTTTTAGCAGTAATTTCC  
ATTTTAAAAGCGATATATTTCTTTTCTCATCTTTTTTCATTGATGATAAACGGTCTTTTATTTTAGCTTCAAATTTGTCACTAACAAT  
AGTATCGCCTTTAATTTTTATATCCATATTTTTTTTGCTTTTAAATCTTTAAGTTCCTCATTTAATTTCTTCATTGTCAATTTCTTTCT  
TTGTGACTAGTGCTCTCTTTTTTTGCACTATCTTGATGATGTCCACAAGCACCTAAGATAAGTGTACTTGCTAATAATATCCCCATTA  
CTTTTTTCATTTAACATGTCTCCTTTATTTTCGCAAAAGTTTATTTTAAAAACTCTAAATGACTTATCATTTTGAGTAATTAACAAAGT  
TGATATTTTGTGAGATTCTAAGATGATATTAATAATCTTGTAATAATGATCTATGTATTGTTGCAATAAATTAATGAAACTATAA  
TTACTAATATTATATTACTTTTATTGATAGAAATATATTCTTTTAAAAAACTTGTAAATATATCGAAAGATTTAAATGTGAAAAATTT  
TGATTTGTTAAGAAATTACGTTTGTAAAAATAAAAAATCAACTTATTTGTATGAGATAAATATGTATTGAAGAAGAAGTGTATTATA  
ATTTGAAAAATACTGGTCAAAGATGGGAGCTCTCAAAAGCGTTATTGTATTTTATAGTCAATACAAATAGATTGCCGTAATAATAAT  
CGTACTTGATGGTTAAAAAATTACTTAAGGCTATAAAGCAAACTTTTTATATGAGCAGTCAATATAACGTTTAAAAATGATTGTTT  
TTGGATATAAACGATTAAAGTAAATGCTTTTTCAGTTTGAAATTAATCATATAAATTTCTTATGGGAGGGTTGATATCTTAATGATTA  
ACATTATTTTCACTATAGGATCTATTGGAACATTTATTATGGCTTTATTTTATTTTGTATCAGTTTCAGTTCAACTTTATCAAATGAAA  
ATTAGCTTTCTGCCAGCTTTAGGTTTTAACC AAAATTTTATTAGAAAGGGAGGAGGATCAACTTAATATAATGAATTCGGCAACAGAA  
GAGCATCATATAAAGATTATATAAACTATATAATTTAGTGGCGGTGCTGCTAAAAAAATGCAATAGAGGTTTTATTGGGTAAT  
GATAAAGTCATTCAGAAAAAATACGTGAATATTTTACCTAGTAAAGAGGGGACATGTTACCAATTAATAAAAAATGTTGATACGAAGA  
ATTAGAAAAGAACGATTGAGAACAAATGGTTATGAAGCTGATTTGAATGTACGTATGACTTATTATCATAATGTAAGTCGCAAAACAAC  
AGGAAGTTATATTA AAAAGGTCAAATCGACCGTTTTAATACTTATAATAATAAGAAATTTATGATTTGCAGTTTATCTAAAAATTGA  
TTTAAGAGGGTAGTTGTTTATTGCGAAAAATATCATTCAATTTTAAATGAAATAATGGCGTCACTACTATAAAATATTACTTTATGTTG  
TAATGCATTTTTCTATAAGATAGAACTAAAAGGAGGGGCAAGATGCAAAATTAGACAAATACATCAACATGACTTTGCTCAAGTTG  
ACCAGTTAATTAGAACGGCATTTGAAAATAGTGAACATGGTTATGGTAATGAATCAGAGCTAGTAGACCAAAATTCGTCTAAGTGAT  
ACGTATGACAATAACTTAGAAAATAGTAGCTGTTCTTCAAAACGAAGTTGTAGGGCACGGTTTACTAAGTGAAGTTTATCTTGATAAC  
GGAGCACAAACGGGAAATTTGATTAGTGTAGCAGCTGTATCTGTTGATATTATCATCAAAAATAAGGTTATTGGGAAGCGATTGATT  
CAAGCATTAGAACGAGAACTAATTA AAAAGGATATAATTTTATCAGTGTATTAGGATGGCCGACGTATTATGCCAATCTAGGATA  
TCAACGCGCAAGTATGTACGACATTTATCCACCATATGATGGTATACCAGACGAAGCGTTTTTAATTAAGAATTAAAAAGTGAACA  
GTTTAGCGGGAAAAACAGGTACCATAAAATTACACATCTGCTTTTGAAAAAATATGATTTCAAGCTAGGATTACATTAGGCAGAGTTC  
ATATTAATAATACAAATTTGTTTGCAATGAAATCGTACGTTGTCTGTTTGCAATTTATAAAATAGCAATAAATAAAATGTTTGTTAGGA  
AAGTATTATTGTGGATAATAAAAAATCGATACAAATTAATTGCTATAATGCAATTTTATAGTGTATAATTGCATTAATGGAGATTAAAT  
ATATCTTTAAAGGGTATACAGTTAATATAAAATGACTTTTTAAAAAGAGGGAAATAAAATGAATATGAAGAAAAAGAAAAACACG  
CAATTCGGAAAAAATCGATTGGCGTGGCTTCAGTGCTTGTAGGTACGTTAATCGGTTTTGGACTACTCAGCAGTAAAGAAGCAGAT  
GCAAGTGA AAAATAGTGTACGCAATCTGATAGCGCAAGTAACGAAAGCAAAAGTAATGATTCAAGTAGCATTAAATGCTGCACCTAA  
AACAGACAAACACAAACGTAGTGATACATAAAACAACGTCAAAACATAATAATGGCGAAACGAGTGTGGCGCAAAAATGACACAA  
CAGGAAACGACACAATCATCATCAACAAATGCAACTGCGGAAGAAACGCCGGTAACTGGTGAAGCTACTACTACGACAAACGAATC  
AAGCTAATACACCGGCAACAACCTCAATCAAGCAATACAAATGCGGAGGAATTAGTGAATCAACAAGTAATGAAACGACTTCTAA  
TGATACTAATACAGTATCATCTGTAATTCACCTCAAAATTTTACAAATGCGGAAAAAGTTTCAACAACGCAAGATACTTCAACTGA  
AGCAACACCTTCAAACAATGAATCAGCTCCACAGAGTACAGATGCAAGTAATAAAGATGTAGTTAATCAAGCGGTTAATACAAGTG  
CGCTTAGAATGAGAGCATTTAGTTTAGCGCAGTAGCTGCAGATGCACCGGCAGCTGGCACAGATATTACGAATCAGTTGACGAAT  
GTGACAGTTGGTATTGACTCTGGTACGACTGTGTATCCGCACCAAGCAGTTATGTCAAACCTGAATTATGGTTTTTCACTGCCTAATT  
CTGCTGTTAAAGGTGACACATTTCAAAATAACTGTACCTAAAGAATTAACTTAAATGGTGTAACTTCAACTGCTAAAGTGCCACCAA  
TTATGGCTGGAGATCAAGTATTGGCAATGGTGTAAATCGATAGTGAATGTTATTTTATACATTTACAGATGTAATGTAATACTA  
AAGATGATGTGAAAAGCAACTTTGACCATGCCGCTTATTATTGACCTGAAAAATGTTACAAAGACAGTAATGTGACATTTGGCTACT  
GGCATAGGAAGCAATACTGCTAGTAAGACAGTTTAAATCGACTATGAGAAATATGGACAATTTCCATAATTTATCAATTAAGGTAC  
GATTGATCAAATCGACAAAAACAACAATACGTATCGTCAAACGATTTATGTCAATCCAAGTGGAGACAATGTTGTATTACCAGTGTT  
AACTGGTAATCTAATTCCTAAGAGTAATAGTAATGCTTAAATAGATGCCAACAACTAATAATTAAGTTTATAAAGTGGATAATGC  
TGATGATTTGTACATAGTTATTATGTGAATCCAAATGATTTTGAAGATGTAACAGATCAGGTCAGAATTTTCATATCCTAATGATAA  
TCAATATAAAGTAGAGTTTCCAACAGACGATGATCAAATTACAACACCGTATATTGTAGTTGTTAATGGTCATATTGATCCGAATAG  
CAAAGGTGATTTAGCTTTACGTTCAACTTTATATGGATATGACTCAAGGTTTTGTATGGAGATCTATGTATGGGACAACGAAGTAGC  
ATTTAATAACGGATCAGGTTCTGGTGACGGTATCGATAAACCAAGTGTGTTCTTGAACAACCTGATGAGCCTGGTGAATTTGAACCAAT  
TCCAGAGGATTCAGATTTGACCCAGGTTTCAGATTCTGCGACGATTCTAATTCAGATAGCGGTTTCAGATTGAGGTTAGTGATTCTAC  
ATCAGATAGTGGTTTCAGATTCAGCGAGTGATTTCAGATTTCAGCAAGTGATTTCAGACTCAGCGAGTGATTTCAGATTTCAGCAAGTGATT  
AGATTTCAGCAAGTGATTTCAGACTCAGCAAGTGATTTCAGATTTCAGCAAGCGATTTCAGATTTCAGCGAGTGATTCCGACTCAGCGAGCG  
ATTCAGACTCAGGTAGTGACTCAGATTCCGATAGCGATTCCGACTCAGATAGCGACTCAGATTTCAGACAGCGATTCTGACTCAGAC  
AGTGACTCAGATTCCGATAGCGATTCCGACTCAGACAGTGACTCAGATTCCGATAGCGATTCCGACTCAGACAGTGACTCAGATTCA  
GATAGCGATTTCAGATTCCGACAGTGATTCCGACTCAGATAGCGATTCCGACTCAGATAGCGACTCAGATTTCAGACAGCGATTTCAGA  
TTCAGACAGCGATTTCAGATTTCAGATAGCGATTTCAGATTCCGACAGTGACTCGGATTTCAGATAGCGATTTCAGATTCCGACAGTGACT  
AGATTCCGACAGTGACTCAGACTCAGACAGTGATTTCGATTTCAGATAATGATTTCGATTTCAGATAGTGATTTCGACTCCGACAGTG  
ACTCGGATTTCAGATAGCGATTTCGACTCAGACAGTGACTCGGATTTCAGATAGCGATTTCAGACTCAGATAGCGATTTCAGATTTCAG  
AGCGACTCAGATTTCAGATAGCGACTCAGACTCGGATAGCGATTTCGACTCAGATAGCGATTTCAGATTTCGACAGCGACTCAGATTTCAG  
AGACAGCGACTCAGACAGTGACTCAGATTTCAGATAGTGACTCGGATTTCAGATAGCGATTTCAGATTTCGACAGCGACTCAGATTTCAG  
ATTCAGCGAGTGATTTCGACTCAGAAAGTGATTCAAATAGCGATTTCGAGTCAAGTTCTAACAATAATGTAGTGGCCCTAATTTCAC

CTAAAAATGGGTACAAATGCTTCTAATAAAAAATGAGGCTAAAGATAGTAAAGAACCATTACCAGATACAGGTTCTGAAGATGAAGCG  
AATACGTCATAAATTTGGGGATTATTAGCATCATTAGGTTCTATTACTCTTTTCAGAAAGAAAAAAGAAAAATAAGATAAGAAATA  
AGTAATAATAATATTAATTAATCGTATGATTTCATGAAGAAGCCACCTTAAAAAGGTGGCTTTTTTACTTGGATTTCCAAATATATTG  
TTTGAATATAATTAATAATTAATTCATCAACAGTTAATTATTTTAAAAAGGTAGATGTTATATAAATTTGGCTTGGCGAAAAAATAGG  
GTGTAAGGTAGGTTGTTAATTAGGGAAAAATTAAGGAGAAAAATACAGTTGAAAAATAAATTGCTAGTTTTATCATTGGGAGCATTAT  
GTGTATCACAAATTTGGGAAAGTAATCGTGCGTGTGCAGTGGTTTCTGGGGAGAAAGTCTATATGTATCTGAGTCATTGAAACTAA  
ATGATAACAAAAAGTAAAAGCTTATCATTAGAAAAAGTATAAAGAGAGTCTTAGAAGTATAATGTGTACAAAAGAAATCAACAAAAA  
TGATGGATATGATGAGCCTGAATATAAAGAAGCACTGAATACCTTACAGAAAAAAATTTTGTGTAATTAGATGCACCTTAATAAAT  
TTTTAGATGAAGAGAGAAAAATAGCCAGTTACATTAAAAAAATATGGAAGTGCCAAGTAATATTTTAGGATTAACACACGGTAGG  
TATACAGCAATATATAATGCAATTAAGAAAAATAAAAAATGAATTCGAAAAAAATGTAGAAAAATTTGAAAGTAAGCATCTGGATTT  
AAAAAGGTTTGATGAAGACAAAGATTATGAAGCAAGAGTTAAATTAATGAATTAGAAAAATAAGTTTTAATGTTAGGTCAAGCTT  
TTCCTGATAAAGTAGATGCTAGAGAAAGTCTTTATAATAAATTGGATATGATTGTTGGTTAAGTAATGATGAAATTGAAGAAAGAC  
ATCCTCAAAATGAAAGGTTATTAAGAAGACGAGTTGAAGATTTAGAAAACAATTATCGATGAATTCCTTAATGACATAGGTGAAAAAT  
AGACCGGAGAAATATATCGCCATTAACATAAATGAATATAAAAAATAAGGAAATGATTACAAAGCTAAAATCTGACACTGAAGCAG  
CTAAAAATGACGAAAAACAAGAGATGTAATCGAAGTAAAAGAAAGTTTAGATTCTCAAAATTTATAAATCTGCTTCACAAGAAGTAAC  
GCAGAGCAAAAAAGCAGAATATGAAAAAGAGCTGAAGAAAGAAAAAGCGAGATTTTTGGATAATCAAAAAATTAAGAAAAACCT  
GTAGTGTCAATTAGAATATGATTTTGAGCATAAACAACGTATTGACAACGAAAAACGACAAGAAACTTGTGGTTTCTGCACCAACAAA  
GAAACAACATCACCAGTACATATACTGAAACAACGACAGGTACCAATGGCTACAGTTGAGCGTCAAACTCAGCAACAACTTA  
TTATAAATGACCAAAAAACAATTTGGCTGGATTAAATGGTGAAAGTTCATGATTTCACAACAACGCATCAATACCAACAACCTTCAAATC  
ACACGCATAATAATGTTGTTGAATTTGAAGAAACGTCTGCTTTACCTGGTAGAAAAATCAGGATCACTGGTTGGTATAAGTCAAATTG  
ATTCTTCTCATCTAACTGAACGTGAGAAGCGTGAATTAAGCGTGAACACGTTAGAGAAGCTCAAAAGTTAGTTGATAATTATAAA  
GATACACATAGTTATAAAGACCGATTAAATGCACAACAAAAAGTAAATACTTTAAGTGAAGTCATCAAAAAACGTTTTAATAAACA  
AATCAATAAAGTATATAATGGCAAATAATTAATGCATGGCTGCAAGCAAAATAATGAGTTTGTGCTGAAAAATAACAACATTTTAAA  
CTAGCAATAAATAATATCAAAAGTCATCTTTCAATGATGCAATCTAGTATAGTCCACATTTCTAAACAGGTGTGGACTATTACTTTTT  
CACTTTATATTACGAAAAAATTATTATGCTTAACTATCAATATCAATAATTAATTTAAGCTGAAAAACAATAAAAAATGTTAAGACA  
ACGTTTACTTCAAGTTAATTATTATACTGAAAATCTGGTATAATAATGCTGTTAGTGAATATAACAGGGAATATTATTGGTTATAAT  
ATTGAGTCTATATAAAGGAGAAATAACAGATGAAAAAGAAATATTAGTTTTAACTATGAGCACGCTATTTGTACACAACTTATCA  
ATTCAAATCACGCTAAAGCATCAGTGACAGATAGTGTGACAAAAAATTTGTAGTTCCAGAATCAGGAATTAATAAAATTTATTCCA  
GCTTACGATGAATTTAAGAATTCGCCAAAAAGTAAATGTTAGTAATTTAACTGACAATAAAAACTTTGTAGTTTCTGAAGACAAATTG  
AATAAGATTGTAGATTTCATCGGCAGCTAGTAAAATTGTAGATAAAAACTTTGCCGTACCAGAATCAAAAGTTAGGAAACATTGTACC  
AGAGTACAAAGAAATCAATAATCGCGTGAATGTAGCAACAACAATCCAGCTTCAACAAGTTGATAAGCATTGTGTGCTAAAG  
GCCAGAAAGTAAATAGATTTATTACGCAAAACAAAGTAAACCACCCTTCATTACTACGCAAAACCCACTACAAGAAAGTTATTACT  
TCATACAAATCAACACATGTACATAAACATGTAAATCATGCAAAAGGATTCTATTAATAAACACTTTATTGTTAAACCATCAGAATCG  
CCTAGATATACATCCATCTCAATCTTTAATTATCAAGCATCATTTTGCAGTTCCTGGATATCACGCGCATAAATTTGTAACACTG  
GGCATGCTAGCATTAATAAATCACTTTTGTGTTGTGCCACAAATAAATAGTTTCAAGGTAATTTCCACCATATGTTGCACAACTTAC  
ATCGTATGCATGTACCAAGTTTCCAAAAATAACACAACAGCAACACATCAAAATGCTAAAAGTAAATAAAGCATATGACTATAAATAC  
TTCTATTCTTATAAAGTAGTTAAAGGTGTGAAGAAATATTTCTCATTTTCACAATCAAAATGGTTATAAAATTTGGGAAACCATCATT  
AATATCAAAAAATGTAAATTATCAATATGCTGTTCCAAGTTATAGCCCTACACACTACGTTCTGAATTTAAGGGTAGCTTACCAGCA  
CCACGAGTATAAAAAATTGGCCTAAGTTTACGAGATATGATAAATACCTATTATTTTAAATATAGTCTACAATCTATGTGGTTGTAG  
GCTGTATTTTTTGCAGTTTATCAATAAACACCCATCAACAAATTTATACCGTTTTTCTACTTTGAAAGTTGGAAGTAACATAATCTTAA  
TTAAATATATTATTAATTAAGATAAATATAATACTCAAGATTATTGTTAATAGTTTGATCATCGCAAGTTAATTATTGTTTCTAAAAAT  
ATTGGTATATAAATTTCAATGGCGAAGAAAAACAGGGTGAAAAAGTCGGTTTTTATATCAAAGCAATAAAGGGAGCATAAACAATG  
AAAAGGAAAGTATTAGTACTACAATGGGTGTAATTTGTGCAACTCAATTAGTGGCATTTCTAATCAAGCAACACGCTTAGTATGACAGA  
GAGTGTGAAACTAATTTTGTGTGTAAGATTTCGGATAAATAAATTTTACAAACCCCATACTGAAATTACTACTGAGGAGAAATT  
TTCAATAGTAGAAAAAGAGTCCATTAATAAATTAATAATCACTATCTAATGACAACACTACATAGAATATGATTTACATACTAATCAAAC  
AGGCATTAAAAAAGGTTGGTTTTATGGTTATAGTGAATTGACTCATCACATTTTACAGACCGTGATAAACGTGTTATTAGACGTGA  
TCATGTTAAAGAAGCACAAAGCTTAATTAACGATTATAAAGATACAAAAGCTATGAAGATCTCGCTAAGGCAACTGCAAAAGTAA  
GTACACTTAGTCAGTCTACCAAAATTTATTTAAATAACAAATTGATAAAGTGAATAATAAGATAGAGAAAACTGAAAAACGCTAA  
TCCAAAGTAAATTATAAGTTATACATCTCGTTTTTAAATGACAATTTATCCCGTAAATATTATAAATAATCTTTTCAAATTCGCAT  
AGATATAGAGACGCTAATAAACCTCTTTGTCTCGATATGATGCTGCAACGATTTCATGTTGTAGGCTTTTTAATTTTACAAATAAG  
GCTAAATATAAGTTCTGGACCTAAAAATAGAAAAATACATAAAGTAAGTATAGTTATTTTATTATAATTATTAATTTTATTA  
ATTAATTGTAAAAATGTAGAAATTACAATTAAATTAACGTTAATATTAATAAATACTAAAAAGAAAGAGGTGTATTAGTATGACAGA  
TACTTATTAAGTGCTGGCATATGTATGGCAATTGTTTCAATATTACTTATAGGGATGGCTATCAGTAATGTTTCGAAAGGGCAATAC  
GCAAAGAGGTTTTTCTTTTCGCTACTAGTTGCTTAGTGTTAACTTTAGTTGTAGTTTCAAGTCTAAGTAGCTCAGCAATGCATCAC  
AAACAGATAACGGCGTAAATAGAAGTGGTCTGAACATCCAACAGTATATAGTGCAACTCAACTAAAAAATTACATAAAGAACCT  
GCGACATTAATTAAGCGATTGATGGTGATACGGTTAAATTAATGTACAAAGGTCAACCAATGACATTTAGACTATTATTGGTTGAT  
ACACCTGAAACAAAGCATCCTAAAAAAGGTGTAGAGAAATATGGTCTGAAAGCAAGTGCATTTACGAAAAAATGGTAGAAAAATG  
CAAAGAAAAATTGAAGTCGAGTTTGACAAAGGCCAAAGAACTGATAAATATGGACGTGGCTTAGCGTATATTTATGCTGATGAAAA  
ATGGTAAACGAAGCTTAGTTCTGCTCAAGGCTTGGCTAAAGTTGCTTATGTTTATAAACCCTAACAATACATGAACAACCTTTTAAGA  
AAAAGTGAAAGCAAGCAAAAAAGAGAAATTAATTTGGAGCGGAAGACAACGCTGATTCAGGTACATATGCTCATTTATAA  
AGTGTCACTGCTGCTAGTGGCCTTTTATAATTTTGGATCACGATATGATTTATTATCAATTCAGAATTAAGAAAGTAAATAGTATC  
AAAAGCAAGTGATTTAATATTAGAAAAATAAAAAATTTTAAATTTAGTATTTAAATGGAATATTACTATATAGTTCAATGTGTATTAT  
CACAGAAAAATAAATAATGCTTTACTTCTATATTTAAAAAGTGATAATGAAAGTTAAGTAATAAAGAGCGTGAAGAAAAATGTGAG  
TTATTTATATAGAATATTCTCTTTTTCATTTATGAATTTGTTACAAAAATTTTAGTGCAAAAGCACGACGGAGGTATTCATATGAAT  
AACGGTACAGTTAAATGGTTAATGCAGAAAAAGGTTTTGGTTTCATCGAAAGAGAGATGGTAGCGACGTATTCGTACATTTCTCA  
GCAATCGCTGAAGATGGATACAAATCATTAGAAGAAGGCCAAAAAGTTGAATTCGACATCGTTGAAGGCGACCGTGGCGAGCAAG  
CTGCAAAACGTGAATTTAAATGTAATTTAACTTATTTCAAAACGCCCTTACTATAGGGCTGTTTTTTATGCTTTAAATCTGATAACAGTT  
GGTGTGGTAAAGCACTAGTGTATTATTTTGGTCCAATAAATATAGTGGAGATCTAACAATATATAATGGTTCTATAAATAAATCG  
AATTGATGGAAAGTTTTTTACTTTTCATCTGTCCGACTTTTGATTTTGAATATAAAAAAGCGCAATACAGAACTTTAATAATGACG  
AGAATTAAGTCTGTATATGGCGATAACAAGAAGTAATGTTAAACACTCAAAATGTTTAAACAATAATAGGATACCACATCGCATAA  
TATCTTACTACTTAATTAATAATTTAACTAATCAACTTTTTGTAAATTTTTTATTAAGACTGATTAATTTAGAGAATATTTATTGTTT

TTAAATCTCATAATAATTCAGTAATCTTGTTTTCAATTTAAAAAGGTGGAACATTAAAAATAATTAATAAAAAATATTGCGTTTAATTTA  
CAGCGTCAAAATATACTTATTTCTAATGCTTTGGGGTCTACTGAAACAAGTAAAGAATGATCGATGTTACTAATATTGCCATTCTCCA  
AATTTATTTCTGTGAGTATTTGGAAGCTACCATTAGGCAATGGTTTAAACAATAGACAATTGCTTTTCCGCTTGTTGATTAAAAAAGG  
TTTTGTAGATTGATTATTAATATGCCATTCACCTCATGTATGTTTTCTACTCCTGCTTTAAAATAGGGTTAAAAAGTTTTATAGTTGAGA  
CATTCATGTTCAACCAAAATTTTGTCAAATTCATAAATGCTTGTTTAAAAATAGAAATATTGTAAATGTTATCGTCCAAAATTTCA  
CCAGTTAAGTATTTGTTTTGAATTAATAATTTGGCAGTTAGTTAAGAGTCTTGATAATCACGATCGCAAAAATAGTTTTACGTGCA  
TCTTTAGCATCGCCAAAAAAGTTAGCGACTGTTTCTGTTTCTCCATTATTCGAACGTTCAATATATAATTTGTAATAATTTAGCTATTG  
TATACTTTTGTCTTTAGTTAGTTTCATTCAAAAATATTGGGCCTCCTGAAATATCATTGTGAATCTATACCCAATTTATTGCAAAACAC  
AAACTAATTTAACTATTTGATGAACTGTGTTAATAAGCTTTAACAAGCCTTAGTTTGTATGGATCTATAAAAATTATCTTTAATTGCA  
TAGGGTGAAATAATATGTAGTCCATAACTTTTAACTGATTTTTCTACTTACACCAAAATTTATAAGCTTGGTAGATAATTTTAGTACAAT  
ACGTAATAATTTTTGCTGTTCAAATTTAATGTAAGTACGATAACGATGATTTGTATTCTCATAGTTTTTTCTTAAACCAGTCAGCCGCTTTT  
TTACCTGCACCAGGATAGCTGCAACGATAAACTTTTATCCAATCATTTTTGCCACTTGCATAATTATTTAAAAAGATTTCGAAGGATT  
GTGTAGTTGGTTTGTGCGCAGGCCCTCAATTTGTAATAATCGTTTTATCATCAATCGCGATACTACAATGACCAAAAAATCCCCACA  
TGACAGGGCCTTTTGTAAACAATAATATCACCAGGTTGTAATTGGAATTTGTCATCTTGAATTTCTGAATACTTATTATCTGCAATTGT  
TTTTGGTGAGTTTATAGGGGATACGACAACGAATAATATAAGTAAAAATTATCGTTCGTTTAAATATAGTTCACTTAAAAGCTCCTTGT  
GAAGAAATATATGTAAATAGTCTTAAATTAGAATTGTAATCTTTAATAAGCTTGTAAAGACTAAAAACATATCTTAAATATTAAAGTAT  
GAGAGTGTGAAATGTCTATTAAGAATAAAAAACAGTCTGAAACATCATTGAGACGTTTCAGACTGGATATAAAAATGAATTTTCATTT  
ATAGCACACCAATATAAATGTGTATATTAATATAGCGAATCCAAAAATAGAGAATGACAGTGAACCTTAAATAGGACTCTTTT  
TTAGATTCTTTGCCAGTTTTTTTCTAATTAATACGAGTATAAACGTAACGCGCACTAAGAAAAATTAATGTAGCCAAAACAGAATTGCA  
AAATGTAAAGACATGTGAAACCTCCTTATATACCGTAATTATTAACCTATAAAAACTATAAAAAATAGGATAAATGTAATAGAGAA  
CGAGTACGATATTTATAAAAAATAATATTTCACTTAAACCAGTTTTTGTATTATCATTGCAATGGTAAAGGATACGATGAGTATCACAC  
CACAAATGATAATACCAGGCAGGAGCCAACATAAATCATCTAAATCTTTATTATATGTGATTAAAAATATTAAAGATAACAAAAGTG  
GTAGTAATAACTATATTGATAGCATTTAACAAAATGTTATTCATGACTGACACCTACTAGTATAAAAAATAGCTTCTTAATAAATATG  
ATAACACTATTTTCCAATAGGTAAATAAAAAAGTATAGTTATTTTTAAAAATATTATTGTAGAATGCTAAAGTTTATTAATTCAAACA  
AGTGAGCATATAGGGGTGTATAGTATTAATATGAAAAGAATATTACATACTAAAAACTCTTAAAGTTGTATAATTCGTTAATAT  
TTTTAGAATCAGATATGAAAAAATGTGCAAAATCACTTTTGCACATTTACAAATACTAGTTTCTGTATAAGATTAAATAAACACT  
TTAAATAGCGCTTAATAAATGAAGGGGGCAAGCTTATGACGTTTTACAATTTTCAATCATGCGGTTTTCAAAAATGATAACACACCATTT  
GGTATATTGGCCGAACACGTTAGTGAAGATAAAGCATTCCCTCGATTAGAAGAAAGACACCAAGTAATTAGAGCATATGTGATGTC  
TAATTACACAAATCATCAATTAATTGAAACTACAAATAGAGCTATTAGCTTATATATGGCAAATTAATTGAGTAGTACCAATTATG  
ATGTATTAGTGCATCCCAATATCTTTTGTTTTAAAGTTTTATTTTCATCATTTCTTATCGAAAATGGTGTAAATGTCTTTATCTAAC  
AAGTGTGTAGAAGTTCATTTGGTACACCATCTAACAAACATTTCACTTTTACTAATTATAAAACATTCCCAGTCAAGTGAAACATTTTG  
TGGATTACATAATTACATTGATTATGATTATCCATAAAACACTCACTCCTTTAAAAATCTGTACTCTTCATTGCGTTTTACCCCGTCAC  
ATTATCTTTTAACTAAAAATCATCACTTATGAAAAAATGTACATCAAAAGCAAAGGTTTTTCGCTACCGAAAAAGTTTTAAATAA  
TGGTTTAAATATTTGGTACTCATTTTAAATAAAAAAGAGAATACATTTTGAGCTATCAATACCTTTTATTGTAAGAGGTGTCTATTGTTGG  
CTAAACGCTTATATTTAATTGCGCCACGGACAAACTTTGTTTAATTTAAGGGACTAATTCAGGGATTGAGATTGCGGCTTCAACAG  
AACTTGAATTGCTCAAGCTCAAAAGGCACGTAGTTATTATGAAACTAAGGGGATAAACTTCGATTATATGCATCATCAACGCAA  
GAACGCGCAAGTGACACACTTGAAAATGTTGCACCTAACCAATCGTATCAACGTTTTAAGGGACTGAAGGAATGGCATTTTGGATT  
ATTTGAAGGTGAGTCAGTCTATCTATTTGATAATCTATAACAAGCCTGAAGACATATTCGGAGATCGAATTGTTCTTTCAAAGGAGA  
GGCAAGGCAACAAGTTGAAGATCGCATTGTGAAAACCTTACATGACATTATGTCTCAACAAAGAATAATGCATTAGTCGTGAGTC  
ATGGAACAATAATGGGAGTATTTTTAAGATATTGCCTTAACTAGATGAAGCATTAAAGCATAATATCGGTAATTGTAATATCCTGA  
AATTTGAATATGACAAATGGAACATTTAAATTTGTTGAGTTAATTGATCCAAATTTATAATAAATAAAGCGTTATACATAGACACAAG  
CATGTCTTTTGTATAACGCTTTTAAAAATACAATAAAGCCTTTAGAATAATAATTGAATAAGTTTTGTAAATATCATCAGAGCAA  
CAATAAATAATTATTATGCTTGATAATTTATTGATTATTGTTAATAATTTTCCGGTTTTATCAATTGATCCAAACCATTTTCTTAAAT  
GCGAGTAAAAAGAACCATAAACATGAAACGCTAATACAAGCGATTGTAAACGCAATTTTATTGCTGCCACTATATAATGCAGCACT  
ACTACCAATTACCAATTTGTATCTAAAAATAGCATGTGGATTGAGTAATGAAACTGATAAAGCAAACTTACTTGTTCATTGGAGA  
CATAATTTGAGCTTCTCCATCTGTTGAGGGTTTATCATGCCAAATGGTCCAAGCCATATACATCAAGAAAATTAACCAACTATATA  
AATAATTGCTTGAAGTACAGGTAAAGACATAATAATGATAGATACTCCTACCCTGCAATAATAATAAGTAAGCTGTCTGACAACC  
CGGCTGTAATTATTGCAAGGCAATACATATCTATATTTTGGTTGATTAGCTCCTTGGTTAAAAATAAATACATTTTGTGACCTAAAGG  
TAAATTAGACCAATCGCTAAGATAAATCCATGAATAATTGCGGTTACCATTAAAGTTTGACACCCCTAAAACATAGAATATTCTGA  
AAAACTTATTGATATCATACCAATAAAAAACAACACTACTCAATAGTAGAGTAGTTGTATGAAAAATAGAACCTATATGATTTGAA  
TTTATGAGAAATGTAGAATATATAAACTGTATTACTTATTAATAGTAACTATAAAAAAGCCAATGTTTCATCGAAAATAGGTAATTTCCG  
ATTTTAATTGCAATTTTTCTCAAAACCAAGAATGTGCAATCCTATGCACTATAGAAAACCTTTAGCACCTATGTTGTTTGACACAATTG  
ATGTAAGTAAAGATTCTGAATTGTTCTGCCGTGCATAATTAATAATGAAATTAATGAGCTCGCTATTAATCGATTATCGTTATTAGT  
AACAAAGTTGTATTTAATTAATGATTTATGTTCTTTTCCAACGTATCGAATTTGTTCTAAGGCAGCTGTTGCGATAAGTGTTCGTTTT  
CATAACAGCCAAATACAATACATTTCCGTGAACCTTGATTAAAAATGTCATGTATTAAGGTGTCAGTCATTGTTTGACTATAATGTG  
AATCTTGAGTGAATTTCTTATTGACTGTGCAACAAAGTCTCTTATACTCATTAAAAATCATTATTCGTTAATGTTTAATTTCAATCATT  
ACTGACCTCCTTAATCATTATTAAGAAAAGATTTTGTACTAAAAAAATTTCTTAATTACATATTAATAATGTTTATTAATAATTTTGAAT  
CACTGATTTATATGCACATTCTTGTAATGGATTATCAATTTAATTTATTTTAAAGTTTCAGGAAATTATGGAATTGGTTATTG  
GTCGCACTGGACTGTTATTTGTAGACGGTATGCGAAGAAGTCAAGCCAGTATTGGAACCGGTGCGATTTATGATGACTAAAGGTACA  
ATCTTTTTCAGTTAAATATTGCCAGAAAATTTCAATCAAGATAGAAAAATAACCAACCAAAATTTTGGTTGGCAAAATTTGAATTT  
TTATGTGAATTTTATTAATAACGTTGAATAATCTCTTTAAGTTAATGCTAATCTACAACATTTACATTTAAATCGACATTAATATTTC  
CTTGAGTCGCTTTTGAATATGGACAAAATTCATGAGCCATTTGTAATAATTTTTTCAGCTTCTTCTTGAGATATAACATTTTAAATGTG  
GCATCAATTGAAACACTTAATTTAGGACTTTCTGAGTCTGAATCATCTTCTAGTCTCACTGTTAGTGTTACTTCTGGATGAGCATCAC  
GCATTTGTTTTGCTTTAAAAATAGGTGCAAGACCGTTGAAGCAAGATGCATAACCTGCTGCAAAATAATTGTTGCGGGTTAGTAG  
CTTTACCATCTGCTTGAGCAGGCGGAACGATATCAATATCTAATGCTCGATCATCAGTATAAACATGTCTTTACGTCCGCCAACAT  
TCGTGCGCTTTAGTTTCATAATGTATTGCCATACTTATAACCTCCTAATTTAAAAATACATTTATGCTTTACCCATTGCAAAATACCTTAA  
TCATTTTCATTTATAGCATTTGTTGATTGAAGGATAAAAAAGTTGTTTACAATAAAAAATAATGAGTATCTGAAATGAGGGATTCA  
CTATGACACATGTGGAAGTAGTAGCAGTATCGCGCCACAATTATCTATCGAAGAACTTTAATTCAAAAAATTAATCATCGTATTG  
ATGCAATAGACGTATTAGAATTACGAATTGATCAAATTGAAAAATGTCACAGTTGATCAAGTGGCAGAAATGATTACAAAGCTGAAG  
GTTATGCAAGATTCAATTCAAATTTAGTTACGTATCGTACAAAGTTACAAGGTGGCTATGGGCAATTTACAAATGACTCGTATCTT  
AATTTAATATCAGACTTAGCAAATATCAATGGCATAGATATGATTGATATAGAATGGCAAGCAGATATTGACATTGAAAAACATCA

ACGAATCATTACACATTTGCAACAGTATAATAAAGAGGTGGTTATATCACATCATAATTTGCAAAGTACGCGCTCCATTAGATGAATT  
GCAATTTATATTTTTTAAAAATGCAAAAATTCAACCCAGAATACGTTAAATTAGCAGTAATGCCACATAATAAAAAATGATGTGTTAAA  
TTTATTGCAGGCAATGTCTACATTTTCAGATACTATGGACTGCAAAGTTGTTGGTATTTCAATGTCTAAACTTGGACTAATAAGTAGA  
ACGGCTCAAGGCGTTTTTGGTGGTGCATTGACTTATGGTTGTATCGGAGAACCACAAGCTCCAGGACAGATTGATGTTACTGATTTA  
AAAGCACAAGTGACTTTATACTAATAAAATGAATTAGGTTGCTTTTGTGTAAGTGCTGTCTTATAAATTGAGAAGTATTATCATTGTTT  
GTGGAGGAGCGATTTTAGATGGAATTACAACAAGCAATAGCTAATAGAAGAAGTGTGAAAAAATTTAAAAAGAGATATGCACATAG  
ATGACGCATTGCTATATCAAGCAATTGAGAAAAGCTGCTGATGCTCCAAATCACGGAATGAGGGAACCATGGAGAGTTGTGCATGTT  
CCGAAAGACAGATTAGGAGATATGAGTAAGGATATTTCTAAATTTGCATTTCTAATGAATTAGATAAGCAACAATGTCATTATGAT  
GCAGTTACGAAACTAGGTGGCATGTTATTGCTTATTTTAAAAACAGATCCAAGACAACGTCAAAATGATGAAAACTACTTTGCATTT  
GGTGATATGCACAAAATCTTATGTTGTTACTTTATGAAGCGGGAATAGGTACATGTTGGAAAATCGCCATTATATATCTATGATCCT  
AAAGTAAGAAAAACACTTGGTATAAAGAAAGATGAAGTTCTTGCTGGATTCTTATATTTAACGGATTTAGAAGAAGATATGCCTAA  
AGCACCGCTAAAAATAGAACTTAATTACATTATATTAATATGTATAATTATAGAAACATTAATAAAAGCTGAGTCATGAATTGAT  
GGACATCTATCGAGTTAGAGATTTAATCTAACTTACTAGAGTCGGTACAATCACAGTCTCAGCTTTTTATTGTGCAGTATATACACAT  
TTTTATTTTAGTATTTATTTAAAAAGTTTCTGCTAAAAATGATTCAACTTGCTCAGGTGACTTAGCATTGCTGAATGAAGGTGTGCAA  
TTTTGTGCGCGTTTTTAAATACTAGCAAGCTAGGGATACCCATAACTTCATTTTCAACAACACTACATCTTCTAATTCATCACGATTAA  
AGTATACCATTTGGTAATCATTATATTGTTCTACGATTGGGTCAATCCATAAATCCATAGCACGACAGTCTGGGCACCATCCTGCCTC  
AAATTTAACAATTACAGGTGTATCGCTATTAATTACAGATTTAAATGATTTCATTACTTTTGATTGATTGCATTGTAACAACCTCTCTA  
GATAGTTTAAATAATTTTATTATAGCTAAATTTATATCATAATAAAAAATTTTAGCTTCAAAATGAAAGCCTTTGTCTATGGAAAATG  
ATATATTTTATTTTAAATACATAAAGGAGGTTGCGAGTCGTATGATTAAAAATTTTACCAATATAAGAATTTGACAACTTGTAAAAAGGCA  
GCAAAGTTTTTAGATGAATATGGCGTAAGTTATGAACCAATTGATATCGTTCAACATACACCTACAATAAATGAATTTAAAAACAATA  
ATTGCAAATACAGGCGTAGAAAATTAATAAATTGTTTAAATACACACGCGCGGAAATATCGTGAGCTTGATTTGAAAAATAAATTACA  
AACTTTATCAGATGATGAAAAGTTAGAGTTGTTATCATCTGATGGTATGTTAGTAAAGCGTCTCTAGCAGTAATGGGCGATAAGAT  
AACATTAGGATTTAAAGAAGATCAATATAAAGAGACTTGGTTAGCGTAAAGTGAAATGTAAGCGTTTACTAAATATCTCGATATTTA  
GATTCATTACATGTAAAATGAAATAAGCTATACAATTGTTAATTTTATAAATATAGTTGAATAGCATCTAGCCTTATGGCATCATTA  
ATGATGTAAAGATTAATTAGGAGGGGATTCTCTTGGCAGTACCAAATGAATTGAAATATTTCAAAAGAGCATGAATGGGTAAAGTT  
GAAGGTAAATGTAGCAACAATTGGAATCACAGAATACGCACAAAGCGAGTTAGGTGATATTGTTTTCGTTGAATTACCAGAAACAGA  
TGATGAAATTAATGAAGGGGATACGTTTGGTAGCGTAGAATCAGTTAAAACTGTATCAGAATTATATGCACCAATCTCTGGTAAAG  
TAGTTGAAGTCAACGAAGAACTAGAAGATAGTCCGAATTTGTAATGAATCTCCATACGAAAAAGCATGGATGGTAAAAAGTAGA  
AATTAGTGATGAAAGTCAGATTGAAGCTTTATTAACAGCTGAAAAATATTCAGAAATGATTGGTGAATAATCACCGTGAACCTCTT  
AATCTAAGATTGAGGAGTTTATTTTAGTCTGAGTAAGTAAATAATATGAAAGAAAATTTATTAGGTACTATTATTGGAGTATTGC  
TACATTTTATTATTCAAGAATGATGAAAAATAATGAATTTAGCTATTTTAAAAATAAAAAATTTGGGGGAAGTTAATATGCTAAACATTC  
AAGACGTTAGTCATCTTTCTAAAAAGGAGCAAAAAAGCATATAACCGTTTCGTAGAATCTGTAGAAAACGGTAATTTACCAGTACTA  
CCATGTATTGAAATGGATCTAAAAGAGATGAAAGAAGAAACATTAAACCAGAGTAAGATTGGTGGAAATGCCATTTTAAAACTCTT  
TAAAGATATAACCATTAGATGAAAATAATGTACCAATGGTATTGTTAGCACAGATTAATTTGGATAATCTTCCAGAACAAACAAGAATT  
ATTTCTGTAAATGAAGGGATATTGCAGTTTGGATTAGTTCGAAAGATCAAAATGTATGGTATGACTGAAAAATTTAAAGGGAAACA  
ATATAAACTCAAGGCTTGTATTATATAAAAAAGGCCAATTACAGATTTATCACTCGAAAATATTCAAGCGCATTTGAAGTCATTAGATG  
CTGATAATGAGGATATCCCGTTCAGTGGAGCATTTTCTATAAAATTTAGATTGTGCAAAACAACTATTACATGTACTGATTATAAGT  
ACGATGAGGACGTGCTTGCATTGTGGAATAAAGTCAATCCATCCTTCGCGCTAAAATCAATGTTTGGTGGTTATGATGAATTGATGG  
AACCTGTGTGTAACACATTTACTGCTAAGGAACCATTTAATCAACTTGGTGGTTATCCATATTTTGACCAATAGATCCAAGAACGA  
ACGATCAAGAACTGAAAATGTATGATAGAGTCTTACTGCAAATTGATTCTACAAGAGATGGTAATCTTTCGATTATATGGGGTGATT  
TAGGTATTGCCAATATCTTAGTAAATCTACTGACCTTGAGGCTATGAAGTTTGATGATTACATGTATTTCATGGGATTGCAGCTAAG  
AGAATCATAAAAAATATATTACTTTAATAAGTGTAGTATCTATAGATCAATCTAGGGAGTGGGACAGAAATGATATTTTCGCAAAATT  
TATTTCTGTCGTCGCCACCCCACTTGCATTGTCTGTAGAAATTGAGAATCCAATTTCTCTTTGTTGGGG

>025-contig\_192\_RC

GCCCCTGACTAGAAATTGAAAAAAGCTTGTACAAGCGCATTTTCGTTACAGTCAACTACTGCCAATATAACTTCGTAGAGCATAGAAC  
ATTGATTTATGTCCAGCCTGTTTTCATAAGCCACAGCTAATGTGTATTTAAAAATAGGAATACATGAGTAAAACTCATGCATANGA  
AATACTAATTTCTAAAGAAAAAGTATTTCTTTATGTTGGGGCCCCGCCAACTTGCACATTATTGTAAGCTGACTTTCCGTCAGCTTCT  
GTGTTGGGGCCCCGCTATAATTGAAAAGTTTGTATAGGTGTATTTTCTTTTGGTTAACTATTGGTAATATAACATTGTAGATTTTAG  
GATGTGGGATTTTGTACTTACGCTTTGTCTGCTTATGTTTAAATGTTACAGGTAGTCAAAACATTGAGTTTGTAAATTATTATTAAGCTA  
GTTTAAATTTTGTGATTTATGTTTATTATACCAATTTTGTGAAATGATACAGTGACAGATGTTTATTGATTTTAAAGGGTGATG  
ATGATGGCTATTGTAATAAAGTGATAATTGTTGAAGGAAAACTGATAAAAAAAGGGTGCAACAGGTTATTGCAGAACACAGTCAA  
TATTATTTGTACTCATGGAACAATGAGTATAGATAAGCTTGATGATATGATAGAATCACTGTATGATAAACAAGTTTGTATTAGC  
CGATTCTGATGACGAAGGAGATCGAATTAGAAAATGGTTTTAAACGTTATTTGAGTGAAAAGTGAACATATATTTATTGATAAAACCTTA  
CTGTCAAGTTTCGAATTGCCCAAAACAATATTTGGCGCATGTACTTTCAAAAACATGGCTTTACTTGTAAAGAAAGAAACACCTCTTTT  
ACCGAATATAAATAATGAAAGGTTAGTTTTAGTAAATGAATAATTCATTAGACATCAAAGATGTAACATATTTTATGAGGAAGAC  
AAACATTTAATCTTTGGTTATACACCAACGTGTGCTACTTGAAGTTTTCAGAAAGAATGTTAGACATTGCTAATGAAATATTGCAG  
TTGCCATTATTGAAAATGAGTTTAACTTTTATCCTCAGTTTGTGTAAGAGATGCAAAATCATGTCTACACCGGATTATTTGTTGATGA  
ATAAAGATAAAGAAAGTAAACGAATTTATGCATTTAAATCGGTGACTGATTTGTTAGAAAATTTAAAAATGTTATTGACGAAATTTT  
ACTAAGGTGTTAGGATTAATACAAATTAATGATGCGTAAACTCTTATCGAGAGTGGTGGAGGGATGTGCCCTACGAAGCCCGGCA  
ACCGTCTTATATAGAAATGGTGCCAATTCACATAAAGTTTAACTTTTGAAGATGAGAGAAACAATACTACTATTGCTTTCTCAATTT  
TTCTATCGATATTGAGAAAGCATTTTTTATTTTATTAAGCAACACAGGGAGGAATCAACGTGATTGAATTTAAAGAAGTTGTTAAAG  
AATATCGGACTAAAAATAAAGAAGTCCTTGCTGTAGATCACGTTAATTTATCGATTTCGAGCAGGATCGATTTATGCGGTCATTGGTT  
TTTCTGGAGCAGGAAAAAGTACTTTGATTTCGAATGTTTAAATCATTAGAAGCGCTACATCAGGTGAAGTTATTATAGATGGAGACC  
ATATAGGTCAATTGTCCAAAAATGGATTAAGAGCAAAAAAGCAAAAAAGTAAAGTATGATCTTCCAACATTTTAAATTTGTTATGGTCA  
AGGACTGTGTTAAAAAATATTATGTTCCGCTTGAAATTGACAGTTGCCCTAGAAGGAGAGCTAAGCAAAAAAGCATTAAGAACTTGT  
CGAACTCGTCGGTTTTAAAGGTAGAGAAAAGGCTTATCCATCAGAGTTATCAGGTGGACAAAAAGCAACGTTGTTGGGATTGCACGAG  
CGTTAGCTAATGATCCAACGGTCTTGCTTTGTGATGAGGCAACAAGTGCACCTTGATCCGCAAAACAACAGATGAAATTTTAGATCTAC  
TACTAAAAATAGAGAACAAACAAAATTTAACAATTGTACTAATTACGCATGAAATGCATGTCTTCGTCGATTTGTGATGAAGTTG  
CAGTTATGGAAGTGGTAAAGTGATAGAACAAAGGACCGGTGACACAGGTTTTTGAATCCGCAACACACTGTGACAAAGCGATTT

GTGAAAGACGATTTAAATGATGATTTTCTGAAACATCTTTAACAGAATTAGAGCCATTAGAAAAAGATGCTTATATCGTTAGATTAGTT  
TTCGCTGGTTCAACAACAACCGAGCCTATTGTATCGAGTCTATCAACTGCCTATGATATTTAAATTAATATTTTAGAAGCAAATATT  
AAAAATACAAAAAATGGAACAGTCGGCTTTTTAGTTCTGCATATTTCCATATATTTCAAGTGATAGATTTTGGAAAAATTCGAAAAAGAG  
TTAATTGAGCGACAAGTTAAATGGAGGTGTTAAGACATGGGTAATCATTTAGTGAAATTATAAATGAAATGATTACAATGCCTA  
ATATTCAGTGGCCAGAAGTTTGGACTGCAATAGTCGAAACACTATACATGACAGTCGTCTCAACTATATTTGCATTTATACTCGGTC  
TTATTTTAGGTGTGTTATTATCTTGTCTGCTAAAGGTAAGTCTATCGGTGCAAGGTTATTTATTCTATCGTTTCTTCATTGTTAAC  
TTATTTAGAGCGATACCATTATTTATTTTAAATTTATTATTAATTCATTTACAAGTTTGATACCTGGAACGATAAGTGGTCCGACAG  
GTGCGTTACCAGCCTTGATTATTTGGCGCAGCACCCTTTATGCAAGGCTCGTAGAAATTGCTTTTAAAGAAATTGATAAAGGTGTC  
TCGAAGCGGCTGGTCAATGGGTGCCAATACTTTGGACAGTAATTCGTAAAGTCTCTTACCTGAAGCCATGCCAGCGCTAGTGTCTG  
GCATTACAGTTACAGCAATCGCTTTAGTTGGTTCAACAGCAGTTGCAGGTGAATTTGGTGCCGGTGGTTTAGGAAATTTAGCATACT  
TAACAGGTTTCACTCGAAATCAAAATGATGTCATTTTAGTATCAACTGTTTTTATTTTAAATTTATTGTATTATAATCCAATTCATTGGG  
GATTGGCTTACAAATAAACTTGATAAACGATAAATTTGGGGGGTCATTTTATGAAAAAATTATTTGGTCTTATTTTAGTATTAACATTT  
GCAGTTGTATTAGCAGCTTGGGTAATGGAACAAAAAGTGGCAGTGACGATAAGAAAATAACAGTAGGTGCTTCACCAGCACCACA  
TGCTGAAATTTTAGAAAAAGCAAAACCATTATTAGAGAAAAAAGGTTATGAAGTAGATATTAACAATTAACGATTACACTACGC  
CTAATAAATTACTAGATAAAGGTGAAATTGACGCAAACTATTTCCAACATACACCATATTTAAACACAGAGAAAAAGGATAAAGGT  
TACAAAAATCGTAAGTGCCGGTGATGTTCACTTAGAACCTATGGCTGTATACTCTAAAAAGTATAAAAGTTTAAAGAATTACCAAA  
AGGTGCGACAGTTTATGTGTCTAATAATCCAGCTGAACAAGGACGCTTCTTAAATTCCTCGTTGATGCAGGTTTAAATTAAGATCAA  
AAAAGCGTAAAAATTGAAGTGCTAAGTTTAGTGATATTACAGAGAATAAAAAAGATATTAAGTTTAAATAAACAATCAGCAG  
AATTTCTTACCTAAAGTTTATCAAAATGAAGACGCTGATGCTGTTATCATTAATTCAAACTTTGCAAACTCGAAACAAAACTAAATCCTA  
AAAAAGATTCTATTGCTGTAGAAAGTGCGAAAGATAATCCTTATGCAAACTTAATTGCTGTTAAAGAAGGACATCAAGATGATAAG  
AAAATCAAAAGCATTAATTGAAGTATTACAATCTAAAGATATTCAAGACTTCATTAATGAAAAATACAACGGTGCAGTTATTCTGTCT  
AAATAAATCATATTAATGGCTCAGTAACGTGATGTTGCTGGGCTTTTTAATTTAAACAGGTATTTATATGATATTTAGGAATGAGAT  
GCTATTACGGATAAAGTAAAAATCCTATATGCATGCGTGCTACTCATTATTCTTATTTTAAATTTACATGGATAGTGACTACTACAT  
CATAAATCATTAGTGATTTCTTTATTATTTTCACTCCCTCAAGTTAATGATGAATCTATTTGCTAGTTATAAAATGACGTCAA  
ATCAATATCAAAAAATTATTAAGTAAATGTTTAGATAATTTTTCAGTGGGTAAGTATTATATATAACATTTAATTATTCCGAGGAG  
GCATTTATTATGGCAGACGAAAGTAAATTTGAACAAGCAAAAGGTAATGTTAAAGAAACAGTAGGTAATGTTACTGATAATAAAAA  
TTTAGAAAAACGAAGGTAAGAAGATAAAGCTTCTGGTAAAGCGAAAAGAAATTCGTTGAAAATGCAAAAAGAAAAAGCAACTGATTTT  
ATTGATAAAGTAAAGGTAACAAAAGGCGAGTAATTTTACTTTTTTATTCCTAATACACTGCACATGCCACTTAGTCGGTATAACCAT  
CGGCTAGGTGGTTTTTGTATTAAAAAAGTGGATACCAAAATTTATTAATAATTATTTTAAATGTTAGAAAAAACTAAATAAAAACTC  
GCTAATGATATCCAATAATATGTATACAAAACGAGACATATATTGCATATGATTAACGAGATACTGAATATATTTTATCACCCCTAA  
AATGATTATTCATTTTCAGCGGTAAATTCGACCTAAAGTCAAACCTACAATAAAACCGATGATAAATACTACTAATGAAACGAACCAC  
ATCACGATATTAGTTGGTAAACCTGGAATACTGCAAAGAGGGAGCCAACAACAAAACCAATGATTAATGCAAAAGTCATTAGTTT  
ATGATGTGTTAGGAAATACTGGATAATTTTGCTTGAATAATGAATCCAGCAAGCACCCCAATCCGACTGCAAGTAATATAGGAA  
GACCGTAAAGGTTAAGTTTAAACAACCTCAGATATTGCTAGCATGACCGTACCATAGACGCGCAAACTACTAATAAGATAGTAAAGACCT  
GAAATCACTGGGAGTAACATAGCATAGCATACACTGCAATACCTGCAATAAAATATTTAATAAATAAGACTAGTTGATAGAGTAAGTGT  
TTCTCCAGCATGTTTATCACCATTTATTCATTAATGTAATAACAATTAAGATAGCGATACCAGCTATAACCATCATGTAATGTTTAGTT  
GTAAATGACGTTTTTATAGTTAGAAATTTTCAATAAATATGGAACGATACCAATGATTAATCCACCAAGAAAAACATAGTTGGAAT  
ATGGTGTGGCTTAATAAATAATTAAAAAGATTACTTAGTGATCCCATTGCCAGTAACATTCCAATTATAATGGGGATTAAAAATGT  
AAAACCTGGCCAAAACGTCGTGAGAATATGCCGTAATTGAAGCGATAAATTGATTGTAATACTCAACAATAATGCGATAGTCC  
CACCGCTAACACCAGGTACCAAGTCACCTCGTTCCCATAGCAAAACCTTTTGAATATTAATCCATTTAAATTTGTTGCATGAATAACT  
CCTTTCAAACGATTGGAATAAAATCATAAATAGCATCATACCATATTACAAATGTCCTAGTGAAATGATAACATATTTTAAATTCAT  
AAAATCCATTGAGAAATTATGTGCACCTATTATCATTTATATTTTAAAGAGAGCGGATTAGAGTTGACTTTAGAGTTATTAATAA  
TAATAAAAAGGGTTAAGTTGTTTTATTAAGGTATAAGTAAAGTTAATTAATTAACGCAATTATTACAAAAGTCTTTTTGACTACA  
AATTAATAATTATTATAAACTAGTTAAGAAAACTTTATATTTTACGGAGGGAATATAAAATGGCATCAACATTAGAAATCAAAAGACC  
TACATGTGTCTATTGAGGATAAAGAAATCTTAAAGGTGTTAACTTGACAATTAACACTGATGAAATACATGCGATTATGGGACCA  
AACGGGACAGGTAAATCAACTTTATCATCTGCAATTATGGGACACCCAAGCTATGAAGTAACATAAGGAGAAGTACTTTTAGACGG  
TGTAATATTTTGAATTAGAAGTTGATGAAAGAGCAAAAGCAGGATTATCTTGGCAATGCAATATCCATCAGAAATTACAGGTG  
TTACAAATGCTGATTTTCATGCGTTACAGCAATCAATGCGAAACGTGAAGAAGGACAAGAAATCAACTTAATGCAATTTATTAAGAAA  
TTAGATAAAAACATGGATTTTCTAGACATAGATAAAGACATGGCACAACGTTATTTAAATGAAGGTTTCTCAGGTGGAGAGAAGAA  
ACGTAACGAAATCTTACAATTAATGATGTTAGAACCTAAGTTTGAACCTTAGATGAAATCGATTACAGGGTTAGACATCGATGCATT  
AAAAGTTCTATCTTAAGGTTATTAACCAATGCGTGGGGAAGAACTTTGGTGCAATTAATGATTACACACTATCAACGATTATTAAGTTA  
CAATTCTCTGATAAAGTACATGTAATGTATGCTGTTGAAGCTGTTAAATCTGGTGGTCCAGAATTAGCAAAACGCTTTGAAGAAGA  
AGGATATGAATGGGTTAAAGAAGAGTTTCGGTTACAGCTGAATAATCTTAATTAATACAGTATCCATGAGATGTTTCTATATATGAT  
GAAAAATGAACATTTATACGAAATAGTAAATTTTATCAAGTAGGAGGAAAAAGTTATGACAACTGATATTTTGAACATTTCTGAAGA  
ACAACCTGTTGATTATTCTAAAGCCACAATGAACCTTCTTGGATGACAGAATTACGTAAAAAAGCTTTGAAATTAACAGAAACCTTT  
AGAAATGCCAAAACCTGATAAAACAAAATTAAGAAAAATGGGATTTTGATTCTTTTAAACAACACGATGTAAGGTTGATGTTTATC  
AATCTTTATCACAATTACCTGAGTCAGTAAGAGAAATATTGACGTAGATCATTCTAAAACTTAGTAATTC AACATAATAATACGA  
TTGCGTACACACAAGTTGATGATAATGCATCTAAAGATGGCGTTATCGTTGAAGGTTTAGCAGACGCTCTTATGAACCATAGTGATT  
TAGTACAAAAGTACTTTATGAAAAGATGCAGTAACAGTAGATGAACATCGTATACAGCGCTACACACGCGCTAGTTAATAGTGGC  
GTATTTGTTTTATGTTCTTAAAAATGTAGTTGTAGAACATCAGTACAAATACGTTGTTGTCACGACGACAAAAATGCAAGCTTTTAT  
AACCATGTTATCATCGTTACTGAAGAAAGCGCCGAAGTCACATATGTTGAAAATTACTTATCAAAATGCATCTGGTGAAGGAAATCA  
ATTAATAATTATTTCTGAAGTGATTGCTGGTGCAAAATTC AAATATCACATATGGCTCAGTGGACTATATGGATAAAGGCTTTACAGG  
TCATATCATTGACGTGGTATTACTGAAGCGGATGCCTCAATTAATTGGGCACTAGGTTAATGAATGAGGGTAGCCAAATTATTGA  
TAATACAACAAATTTATTTGGTGATCGTTCAACAAGTTC ACTTAAATCAGTAGTTGTAGGTACAGGCGAACAAAAAATTAATCTAAC  
ATCTAAAAATCGTACAATATGGTAAAGAAACAGATGGTTATATCCTTAAACATGGTGTTATGAAAGAACATGCATCGTCTGTATTTAA  
TGGTATCGGCTACATTAAGCATGGTGGAATAAATCAATTGCTAATCAGGAATCACGTGTATTAATGTTATCTGAACATGCTCGTGG  
TGACGCGAATCTTATTTATTAATTGATGAAGATGATGTAACAGCTGGTCATGCTGCATCAGTAGGTCGTTGATCCAGATCAACT  
TTACTATTTAATGAGTCTGGTATTCTCAAAGAGAAGCGGAAGCTGTTTATATACATGTTTCTTAGTCTGATGATAGTACGTGAATTA  
CCTATCGAAGACGTTAAACGTCAATTGAGAGAAGTAATTGAACGCAAAAGTTTCTAAATAATATTTTGA AAAATAAAAGTTTGAATA  
GATATAGACTGTGATATTGGTATAAGACTAATACAACGTCAGTATTTAAATGATTAGGATTTTTTATTTAAGAAAGGTGCTGAATGA  
AGTGGCCGAACACTCATTGACGTTAATGAAGTAATCAAGGATTTTCCGATATTAGATCAAAAAGTCAATGGCAACGTTTAGCAT

ATCTTGATTCAACAGCGACAAGTCAAACGCCTGTGCAAGTGTTAAATGTTTTAGAGGATTACTACAAGCGTTATAAATCAAACGTTT  
ATCGTGGTGTTTCATACATTAGGATCATTGGCAACTGATGGTTATGAAAATGCCCGTGAAACTGTTTCGTCGTTTTATTAATGCGAAGT  
ATTTTGAAGAAATCATTTCACACGCGGAACAACCTGCGTCGATTAACCTTGTAGCACATAGCTATGGTGATGCAAAATGTTGAAGAGG  
GCGATGAAATTTGTTGCTACTGAAATGGAACATCATGCCAATATTGTTCTTGGCAACAGTTAGCAAAGCGTAAAAATGCGACATTG  
AAATTTATACCAATGACAGCTGACGGTGAATTAACATCGAAGATATTAAGCAAACGATTAATGATAAAACAAAGATCGTTGCTAT  
TGCACATATTTCTAATGTACTCGGTACAATTAATGATGTTAAACCATTCGACAGAAATAGCTCATCAACATGGTGCAATTATCAGTGT  
TGATGGGGCGCAAGCAGCACCACATATGAACTTGATATGCAAGAAATGAATGCTGATTTTTATAGTTTTAGTGGTCATAAAATGCT  
TGGACCAACAGGTATTGGCGTATTATTTGGTAAACGTGAGTTACTACAAAAATGGAACCGATTGAGTTCCGTGGCGACATGATTG  
ATTTTGAAGTAAGTATGATGCAACATGGGCTGATTTACCTACTAAATTTGAGGCGGGTACTCCATTAATTGCACAAGCAATTGGGC  
TTGCAGAAGCTATTTCGTATTTAGAACGCATAGGTTTTGATGCAATTCATAAAATGAACAAGAATTAACGATATATGCTTATGAGC  
AAATGTCTGCAATTGAAGGAATTGAAATTTATGGCCCGCCAAAGGATCGTCGTGCAGGTGTAATAACGTTTAATTTACAAGATGTAC  
ATCCACACGATGTTGCTACAGCCGTAGATACAGAAGGTGTAGCGGTTAGAGCTGGGCATCATTGTGCGCAACCGTTAATGAAATGG  
TTAAATGTGCTTCAACAGCTAGAGCGAGTTTTTATATATACAACACGAAAGAAGACATTGATCAGTTAATAAATGCCTTGAAACAA  
ACGAAGGAGTTTTTCTCTTATGAATTTTAATAATCTAGATCAATTATATAGATCTGTCATTATGGATCATTATAAAATCCTAGAAAT  
AAAGGTGTATTAGATAACCGGTCTATGACAGTAGATATGAATAACCCGACATGCGGTGACCGTATACGACTAACATTTGATATAGA  
AGACGGCATTATAAAAGATGCTAAGTTTGAAGGTGAAGGTGTTTCGATTTCAATGGCAAGTGCATCGATGATGACACAAGCTGTTA  
AAGGTCATTCACTTGGAGAAGCAATGCAATGAGCCAAGAATTTACGAAAATGATGCTTGGTGAAGACTATGTGATTACAGAAGAA  
ATGGGAGATATTGAAGCATTGCAAGGTGATCTCAATCCAGCTCGTATTAATGTGCCACATTGCTGGAAAGCATTGGAAAA  
AGGTACTGTTGTGATAACAAATTTGCGGCGTTAAACTCAGCAGATGTAAGAAGAATAGAATGCTGTTAATCATAGATAAATTTGATATAGA  
CATATAAAAGTATAAAAAATTTTTATAAGATGTATGTCATTGTTATAATATGGTTTACATCATGAATAAAAAACTTACGCACGCCGT  
TGTAATATATTTTTAAGGAGTGATTGAAATGGCTAAAAAAGCACCTGATGTTGGGGATTATAAATATGGATTCCACGACGATGAT  
GTGTCCATTTTCAGATCAGAACGTGGTTAACTGAGAATATCGTTAGAGAAATTTCTAACATGAAAAATGAGCCGGAATGGATGTTA  
GATTTCCGCTCTAAATCATTAAAAATGTTTTATAAAATGCCAATGCCTCAATGGGGTGGCGACTTATCAGAATTGAATTCGATGAC  
ATTACTTACTATGTAAAGCCTTCAGAACAAAGCTGAACGTTTCATGGGATGAAGTGCCAGAAGAAATTAAGAACTTTTCGATAAAT  
AGGAATTCCTGAAGCTGAACAAAAATATTTAGCTGGTGTTCTGCTCAATATGAATCTGAAGTTGTTTACCATAATATGGAAAAAGA  
ACTTGAAGAAAAAGGTATTATCTTTAAAGATACAGATAGTCTTTACAAGAAATGAAGAATTAATCAAAAAATCTTTGCTTCTGT  
AGTACCTGCGACGAGATAACAAATTTGCGGCGTTAAACTCAGCAGATGTTGTCAGGTGGTTCGTTTCATTTATGTACCTAAAAATATCAA  
ACTAGATACGCCACTACAAGCTTATTTCCGTATTAACCTCTGAGAACATGGGTCAATTTGAACGTACATTAATCATTGCTGATGAAGG  
TGCTTCTGTACATTACGTAGAAGGTGTACTGCACCAGTTTATACAACCTAGTTCCTTTACACTCTGCTGTTGTGGAAATCATTGTGCAT  
AAAGATGCGCAGCTTCGTTATACTACGATTCAAACTGGGCGAACAAATGTATACAATTTAGTTACAAAACGTACTTTTGTATTGAA  
AACGGAAATATGGAATGGGTAGATGGTAACCTTAGGTTCTAAGTTAACGATGAAATATCCAACTGTGTTCTTTAGGTGAAGGTGC  
AAAAGGTAGTACATTATCTATTGCTGTTGTAAGGACAAGTTCAAGATGCCCGGTGCTAAAAATGATTCATAAAGCACCAAATA  
CATCTTCAACGATTGTTTCTAAATCTATTTCTAAAAATGGTGGTAAAGTTATTTATCGTGGTATTGTACATTTTGGACGTAAAGCAAA  
AGGCGCTCGTTCAAATATTGAGTGTGATACATTAATCTAGATAACGAATCAACATCAGATACAATTCATATAACGAAGTATACAA  
CGATCAAAATATCATTAGAACATGAAGCAAGGTTTCAAAAGTTTCTGAAGAACAAATTTATCTAATGAGTCGTGGTATTTCGA  
AGAAGAAGCGACAGAAATGATTGTTATGGGATTTCATGAACCATTTACAAAAGAAGTTCCAATGGAATACGCGGTGCAAAATGAACC  
GTTTAATCAAGTTGCAAAATGGAAGGTAGTATTGGATAGCTTTAAACCGCGATGTTAAGCTATTCTTGACTTCCGGAATGGCTATTG  
ATACCATTTTGATACTGAATATAACAAAAAGCCACATTACTGTGGCTTTTTTGTTTTATAACTAAATCGGATTGATAGATAAGCTTTG  
TACTTATTTATATTAGTCCGATTTTTGATTATTGTAATAAATAATCATTGATGGTGGATAAAGCGACAACACAAATACAACATGAT  
TGTGGCATTAGAGTGCTGGTCTTTATTAATTAATTGAAAACCTACATCAAAATATTCTTTAAAGATAATTCGATATTAGTTCGATTAAAG  
ATTCGTTGTATAACTGAGTTAAATAAGAAAACTATTAATAATATTAAGTTCACTACAGATGTTGCTAATGGACCGTAAGTTTTAAA  
GACATCTTTACTTTTATAACCAACAATCGCATCTAAAAATTGAACATAAATCATTGCAATGGATATAGTTATCAAAAAATATAGCACT  
ATGAATGACTATAAGAAAAATAGCTAATAAAAAATAAAGGTAAGCTTCGACTAAGTGCATAATATGACTTTTATATTATGGTATG  
AACATGCTTGAATTGAATAACCTAACTTACACTGGCACTGATTATTGTAATATTGCTAAAAACAAATACATGTTAATCCTTCTTTT  
TATATTTGGATATAAAACAAGTACTTGTCTAAAGTTATTTAAAAGATAATTAGAATAAATTTATGAGAACTTATTGTTATCATTATA  
ATGGTTTCAATTCATTATAACTATGTCATAAACTGAATTTGTTAAAAATTTTTTCAATTATGTAATTTATTAATAACAAACAGCTCGAAC  
TATAGCATCATTTTACTAATGAATGCATTAAAGTAACTATGACTAAAAATGCATATTAATTATCATCATTAAAGACTATTATATATAAT  
GAATTTTAACTGGTTTATTAACGAGAACGTCGGGAATTAAGTAATTACAATAAAAAATAAGATATGACAATAAGGAGACTACACGC  
GTGATCATTGCCATAATTATATTGATATTTATTCGTTTTCTTTTCAGGAAGCGAGACGGCATTAACGGCTGCCAATAAAACAAAAAT  
TAAAACTGAAGCTGACAAAGGTGATAAAAAAGCAAAAGGCATTGTAAAGTTACTTGAAAAACCAAGTGAGTTTATTACAACGATT  
CTAATTTGGGAATAATGTGCGCAATTTTTATTACCAACACTTGTTCAAAATTTAGCTTTACGTTGGGGGATTAGCGTTGGTATTGCAT  
CAGCTGTTTTAACAGTGTGTTATCATTTTTGATTTCGAAGTATTCCCAAGTCTGTCGCTGCAACATTTCCAGATAAAAATAACAAGGCT  
TGTATATCCAGTTATTAATATTTGTGTCATTGTGTTTCGCCCTATCACATTACTTTTAAATAAGTTGACGGACAGTATTAATCGAAGT  
TTATCTAAGGGCCAACCTCAAGAACATCAATTTTCAAAAGAAGAATTTAAACAATGTTAGCAATTGCTGGACATGAAGGTGCTTT  
AAATGAAATTGAGACGAGTAGGTTGGAAGGTGTCATTAATTTTGAAAAATTTAAAGTAAAGATGTAGATACAACACCTAGAATTA  
ATGTGACGGCATTGTCTCAATGCGACATACGAAGAAGTTTATGAAACGGTTATGAATAAGCCATACACTAGATATCCAGTGTAC  
GAGGGAGATATTGATAACATTATTGGAGTGTTCATTCTAAATATCTGTTGGCTTGGAGTAATAAAAAAGAAAATCAAATTACAAA  
CTATTTCAGCTAAGCCATTATTTGTAATGAACACAATAAAGCTGAATGGGTATTACGTAAGATGACTATTTCTAGAAAAACATTTAGC  
AATTTGTGTTGGACGAATTTGGTGGTACCGAAGCGTATAGTGCATAGCAAGACTTAATTGAAGAATTAATTAGGTATGGAAATGAAG  
ATGAGATGGGATAAAGAAAAAGAAAAAATTTCTCAAGTACGACAAATGAATTTCAACAACGGAATAATTCGAATGCTATATATA  
AGGAGCGAACAGCTATGTGGAATAAGAATCGACTTACTCAAATGTTAAGTATTGAATATCCAATTATACAAGCAGGTATGGCAGGA  
AGTACGACACCGAAATTAGTTGCATCAGTAAGTAACAGTGGTGGATTAGGCACAATAGGCGCAGGTACTTTAATACGCAGCAATT  
AGAAGATGAAATAGATTATGTACGCCAATTAACGTCAAATTCCTTTGGTGTAAATGTCCTTTGTACCAAGTCAACAATCATATACCAG  
TAGTCAAATTGAAATATGAATGCATGGTTAAACCTTATCGACGCGCATTACATTTAGAAGAGCCGTTGTAAAAATTACCGAAG  
AACAACAATTTAAGTGTATATTGATACGATAATTAAGCAAGTGCCTGTATGTTGTTTACTTTTGGAAATTCGAAGCGAACAGA  
TTATAAGCAGGTTGAAAGCAGCGAATGTCAAACCTATAGGTACAGCAACAAGTGTGATGAAGCTATTGCGAATGAAAAAGCGGGT  
ATGGATGCTATCGTTGCTCAAGGTAGTGAAGCAGGTGGACATCGGTGTTTCAATTTTAAACCTAAAAATCAATTTACCTATGGTTGGA  
ACAAATCTTTAGTGCCACAATTTGATGTGCTTTCAATTCGGTCAATTGCGGCTGGTGGAATTTATGGACGGTAGAGGAGTTTTG  
GCAAGTATTGCTTATAGGTGACAGAAGGGGTACAAATGGGCACTGCATTTTTAACATCACAAGATAGTAATGCATCAGAACTACTACG  
AGACGCAATTATAAATAGTAAAGAAACAGATACAGTCATTACAAAAGCGTTTATGTGAAAGCTTGCACGCGGTATCAACAATAGGT  
TTATCGAAGAAATGTCCCAATACGAAGGCGATATCCAGATTATCCAATACAAAATGAGCTAACAAAGTAGCATAAGAAAAGCCGCA

GCAAACATCGGCGACAAAGAGTTAACACATATGTGGAGTGGACAAAGCCCGGCGACTAGCAACAACGCATCCCGCCAACACCATCA  
TGCCAATATAATCAATCAAATTAATCAAATCATGCAATATAAATAATCGACCGCAATCCACAAAAAGCACAAGCACCCCCAAACAT  
TATTTTAGTGCTTGCCATTTTGTGGATTGCGTTTCTATTTTACCAATCTAGTCAAGCGAAATCATCAAACGAAAGTTCACCTGAAATG  
ATTATGATCAAACGAAATTATCAAACCTAAAGTTCGCTGAAATGATTATAGTCAAACGAAACATCAAACCTAAAGTTCGCTGAAATG  
ATTATGATAAAAGTTATATGGTATGATGACATTGGTGATATATATGATAAACATCGGATTAACAGGTTGGGGTGATCACTATTTCATT  
ATATGAAGATTTAGAACGCCAAACCGATAAACTTAAACATATGCTGGACATTTTCCGGTTGTCGAATTAGATGCGACATACTATGC  
GATACAACCCGAAAGAAATATATTGAAATGGATAAAAGAAACGCCTGATACATTTGAATTTGTGGTCAAAATTCATCAAGCACTCA  
CATTCGATGCAGACTACAAAAACATTTGCAGATACAAGGCAAGAACTATTTGATCAATTTAAGAATATGTTAGAGCCCTTACATACAC  
AGAAAAAATTAGCAATGGTATTGGTTCAATTTCCGCCATGGTTTGACTGCAATGCACAAAATATCAAATATATTTGTATGTAAGAC  
AGCAATTACAAGCATTTCCAATGTGTGTAGAATTTAGGCATCAATCATGGTTTAGTGATGCATTTAAAGAACAAACATTTGGCATT  
TAACAGAACATCAAATCATTATGCAGTAGTTGATGAACCACAAAGTGAAGATGGCAGTGACCTTTAGTCAATCGAATCACAAAT  
GAAATTTGCGTTTGTACGTTATCATGGACGTAATCATTACGGTTGGACTAAGAAAGATATGTCAGATCAAGAATGGCGAGATGTACG  
CTATTTATATGATTATAATGAGCAAGAATTAATAGACTTGGCACAAAAGGCACAAATATTAGCACAAAAAGCTAAGAAAGTTTACG  
TCATATTTAACAATAATTCTGGTGGTCATGCAGCAAATAATGCCAAAACATATCAGCGATTATTGAATATAGAATATGAAGGGTTAG  
CACCACAACAATTAATAATTATTTTAAAGAGGCGACGACTATGTTATTAACAATTACATTATTGGTTTTAATCGGAGGTTTGTACGCGA  
TTATAGGGTCAATCGTAGGCATTGGAGGCGGTATTATTATCGTTCCAACAATGGTTTTACCTCGGTGTTGAACATGGATTACTACATA  
ATATTACAACACAAGTAGCGATAGGGACGCTCTCAGTCATTCTAATTGTGACAGGACTTTCTTCATCACTTGGATATTTAAAAACAA  
AACAAGTTGATATTAATAATGGTTCCATCTTTTATTTGGACTATTACAGGTTTCATTGCTTGGGTCCTTATTAGTAGATATTTAAC  
ATTTGAGTCATTTAATTTATATTTTGGTATCTTTTAAATTTTCGTAGCTATTTTATTAATGGTGAAGAAATAAGTAAACCGTTTAAAA  
TTTTCGATAAACCCAAAGTATGAAAAGACTTATGTAGACGCTAAAGGTAAAACATATCATTATAGTGTGCCACCATTGTTTGTCTTTA  
TTACAACGTTTTTAAATTTGGTATATTGACAGGTTTATTTGGTATTGGAGGTGGCGCACTAATGACGCCACTAATGCTTATTGTATTTAG  
ATTTCCACCTCATGTAGCTGTTGGAACAAGTATGATGATGATTTTTCTTTTCAAGTGTGATGAGTTCTATAGGGCACATTGCTCAAGGT  
CACGTAGCTTGGGGTTATGCAATCATTTTAATTATTTCTAGTTATTTTGGTGCAGAAAATCGGTGTCAAAGTGAATCAATCAATTAAGT  
CAGATACGGTAGTAACATTATTGAGAACAGTAATGTTGTTAATGGGTATATATTTAATTTATTCGTGCGTTGATTTAATACAACCTTAA  
AAGGAGGACGTCATTTGAGGCTTACAATTTATCATACGAACGATATTCATAGTCATTTACATGAATACGAACGCATTAAAGCATAT  
ATGGCAGAACAACGGCCACGACTTAATCATCCTTCTTTATATGTTGATCTAGGTGATCATGTAGATTTATCCGCACCTATAACTGAA  
GCAACTTTAGGTAAAAAGAAATGTGGCATTACTAAATGAAGCAAAATGTGATGTTGCAACAATCGGTAATAATGAAGGGATGACCAT  
TTCACACGAAGCTTTAAATCACCTTTACGACGAAGCAAAATTTATAGTGACATGTAGCAATGTTATAGATGAATCAGGTCATTTACC  
AAATAATATCGTTTCTTCTTATTAAGGATATAGACGGTGTGAAAATACTATTCGTTGCAGCGACAGCACCTTTTACCCCATTTTAT  
CGTGCCTAAATTTGGATTGTTACCGATCCACTTGAATCTATAAAAAGAAGAAATTTGAACCTCAACGAGGTAAATTTGATGTATTAATC  
GTGCTAAGTCATTGTGGCATTCTTTCGATGAAACATTATGCCAAGAAATGCTGAAAATGATGTGATTTTGGTAGTCATACGCATC  
ATTATTTTGAACATGGTGAAATCAATAATGGTGTACTGATGGCGGCAGCTGGAAGTATGGTAATTATCTTGGAGAGGTTAATTTAA  
CTTTTGAGGCACATAAAGTAGTACATAAACTGCAAAGATTATTCCTTTAGAAAACATTACCTGAAGTTGAACTTCATTTGAAGAAG  
AAGGAAAAACGTTAATGTCCAATTTCAGTAATCAACATCCAGTAGTGCTTAAGCGTAGTATGAATCACATACTGAAGTGCATAC  
TTATTAGCTCAAAGTGTTGTGAGTATACACATGCACAATGTGCCATCATCAATGCTGGCTTACTCGTTAAAGATATTGTAAAGAT  
GAAGTGACAGAATATGACATTCATCAAATGTTACCGCATCCGATTAATATGGTGAAGGGTTAGACTTTCTGGTGTGAAATTAAGA  
GATTATAGCTAAAAGTAATAAAACAAGAATATATGTATGAACATGCACAAGGTTTGGGTTTCAGAGGGAATATATTTGGAGGATATA  
TTCTTTATAATTTAGGGTACATTCATTCTACAGGGCGTTACTATCTGAATGGAGAAGAAATCGAAGACGACAAAGAATATGTATTAG  
GTACGATAGACATGTATACGTTCCGTCGTTATTTCCCAACACTGAAAGAATTACCAAAAGAGTATTTAATGCCAGAGTTTTTAAGAG  
ATATATTTAAAGAAAAATTTATTGGAATATTA AAAAGTAAGATTATTAGATTTTCATTTGTCATGAATTTTCGATATAATGTTTAAAGA  
TACACTTAACAGGAGGGTATGTGTTGTTATGGCGACAAAAACGAGGAAATATTACGTA AACCCGATTGGTTGAAAATAAAATTTAA  
ATACCAACGAAAACCTATACAGGACTTAAGAAGATGATGAGGGAAAAAAATCTTAATACTGTATGTGAAGAAGCTAAATGTCCTAAT  
ATACATGAATGTTGGGGTGCACGTCGTACAGCGACATTTATGATTTTAGTGGCCGTATGTACAAGAGCTATGCTTTTGTGCGGTT  
AAGACAGGTTTACCTAATGAACTTGATTAAATGAGCCTGAACGTGTAGCTGAATCAGTTGAATTAATGAACTTGAAACACGTTGTT  
ATCACTGCTGTTGCGCGTGATGATTTAAGAGATGCTGGTTCAAATGTTTATGCTGAGACAGTACGTAAGTTAGAGAAAAGAAATCC  
ATTTACAACGATTGAAATTTTACCATCAGATATGGGCGGGGACTATGATGCGTTAGAAAACATTAATGGCTTCAAGACCTGACATTTT  
AAACCATAATATTGAACTGTTTCGTCGATTAACACCGAGAGTTTCGTGCGCGTGCAGCTTACGACAGAACATTAGAGTTTTTACGTCG  
TTCAAAAAGAATTACAACCGGATATCCCAACTAAATCAAGTATTATGGTTGGATTAGGTGAAACTATAGAAGAAATTTATGAAACGA  
TGGATGATTTACGTGCGAATGATGTAGATATTTAACGATTGGTCAATATTTACAACCTTCACGTAAACATTTAAAGGTTCAAAAAAT  
ATTACACGCCTTTAGAGTTTGGTAAATTAAGAAAAGTGGCAATGGATAAAGGGTTTAAACATTGCCAAGCTGGACCTTTAGTACGT  
AGTTCTTATCATGCGGATGAGCAAGTAAATGAAGCTGCTAAGAAAAGCAACGCCAAGGTGAGGCAAGTAAATAGTTAATATTT  
AACAATTAATAAGGCATAAAGGCTTAGTTTGTACAAAACGACAGTGTCAAGAAGTAATCATTATTTTATGAACACTAAAAAGTA  
TAAACTGAGCCTTTTATTGTCATAGATAGGTGAAGAATTTGATAAAAGTAGATCAACATTACTTTGAATTAATAGAAAATTATCGCG  
AATGTTTTAATGAAGAACAATTTATTGCTAGGTATTCAGATATTTTAGATAAATATGATTACATTGTTGGTGACTATGGTTACGATCA  
ATTACGATTA AAAAGGCTTTTACAAAGATTCTAATAAAAAAGCAGAGATGAGTAAACGTTTTTCAAATATTCAAGATTACATATTTGA  
ATATTGTAACCTTTGGTTGTCTTACTTTGTATTAAGACATTTGTCTAAACAGAGGTTAAAAAGTTAATCGAAGAAGTTCATCCGTCT  
GATGTGATAGATGACGACAATAAACTTCAAGATGTGAAGATTAAGCCAACCATTCAGATACTGAACATTAATAAAAACCTTAGCT  
AGATTGAAAATGGGAATCATGCAATTCAGCATGGACCTGTAATCTAGTTAGGGGTTTTTATCTTTAATGAATGACTTCATTTAAAT  
ACTCAGTAATTTTATCGCCTTCTCAGCATTTACACCTAAATATGAGCGATATAGCCTTCTTCTTTAAATCATCAGTACCGATAAT  
ACCGAATTTATTGTTTGTGATTAAGTACGAGTGCTTACCATAATGTCTATTTGATGGACTAACATCAATCATCAGTACTATGC  
TCGCCAACAAAAACCAACAACTGAACTTGACTCTCTTCTGTTGTATCATATAAAATACATATCAATCATTTTGTAGCGACTCCTTTTAA  
AAGTAGTAAAGTTAGTATAACGACAAATGAAGTATACTGCAAAATTTATGATAATATATAAGTGAGAGGTGACAAGGAATGTATTTT  
GTAGACAAAAGATAAACTAACTCAGAAATTAGCCTATTTACAAGCATTAACCTGATGATTATCATGAGAGCAAGCACAAATCATTATGC  
ATTTGAACGCATTGCTCAAATGTTGATAGAATCATCGGTAGATATAGGGAATATGATTATCGATGCATTTATTTTAAAGGGATCCTGG  
TAATTATAAAGATGTGATTGATATATTAGA ACTAGAAAATGTTATTACTAAAAGAAACACAGCAGGCGATTAATAAAACTGTCCGTA  
TTCGTAACAATTTACATATGATTACACAGCCTTAGATATTAAGATTATCATGCCAATGTTTGTATGACGCATTACCTTATTACAAACA  
ATTTATTACAGAAGTAACGACATTTTACATCAAGAAAATGTACCAGTAACAGCTTTTGGTAAAGGAGAAAAATCAATAATGAAACA  
GTATAAAGCTATTTAATCGATTTAGATGGCACAATGATATGGGAACAGATGAGATTGATGGAGCAAAACATTCATCGATTATTT  
AAATGTAAAAAGGCATTCTCATTTATACGTAACTAATAATTCAACAAAAACCTGAGCAAGTAACCTGAAAAAATTACGTGAAATGC  
ACATTGATGCTAAACAGAGAGGTTGTAACGTCAGCGTTAGCCACTGCTGATTATATTTTCAAGAACATCACCAGGAGCATCAGTA  
TATATGTTAGGTGGGAGTGGTTTTAAATACTGCGTTAACCGAAGCGGGACTTGTCAATAAAAAATGACGAGCATGTTGATTATGTAGTT

ATTGGACTTGACGAACAAGTTACATATGAAAAGCTTGCATTGCAACGTTAGGTGTAAGAAATGGTGCAACATTTATTTCTACAAAT  
CCTGATGTATCAATTCCTAAAGAGCGTGGTTTATTACCTGGTAATGGTGCTATTACAAGTGTTGTAAGTGTATCGACAGGTGTATCG  
CCACAATTTATTGGTAAACCAGAACCGATTATTATGGTTAAAGCATTAGAAATTTTAGGATTAGATAAATCCGAAGTTGCTATGGTA  
GGCGATTGTACGATACCGATATTATGTCTGGTATTAACGTAGGTATGGATACGATTCATGTACAAACAGGTGTATCTACGTTAGAA  
GATGTGCAAAATAAAAATGTGCCACCAACGTATTCTTTTAAAGATTTAAATGAAGCAATAGCTGAATTAGAAAAATAGATATAGTC  
ATTTTATAAAGTAGGTGAATTGATTGGTAAAAATAGTTGTTTCGAGGAAAAATCCCAGATAAAATTTTATCAACAATTAAGTAAACTT  
GGTGACGTTGTTATGTGGCAAAAATCATTAGTGCCTATGCCTAAAGATCAATTTGTGACAGCACTTCGTGACGCAGATGCTTGTTTT  
ATTACATTAAGTGAACAGATCGATGCAGAAATTTAGCGCAATCACCAATTTAAAAAGTAATTGCGAATATGGCTGTAGGATATGA  
CAACATCGATGTTGAAAGTGCAACAGCGAATAACGTGGTTGTCACGAATACACCAATGTACTTACTGAAACAACCTGCAGAATTAG  
GATTTACATTAATGCTTGCTATAGCACGCCGTATTGTAGAAGCTGAAAAATATGTAGAAGCAGATGCATGGCAAAAGCTGGGGTCTCT  
TATTTATTGTCAGGTAAAGATGTCTTCAATTCAACTATTGGAATATATGGTATGGGAGATATTGGTAAAGCTTTTGCAAGAAGGTTG  
CAAGGGTTTAATACTAATATTCTTTATCATAATCGATCAAGACATAAAGATGCAGAGGGGACTTTAATGCAACATATGTTTCTTTT  
GAAACGTTGTTAGCAGAAAGTGATTTTATCATCTGTACAGCGCCACTTACAAAAAGAAACACATCATAAATTTAATGCTGAAGCATTT  
GAACAAATGAAAAATGATGCAATTTTATTAATATCGGTAGAGGACAAATTGTAGATGAAACAGCATTAAATCGATGCACTAGACAA  
TAAAGAAATTTTAGCATGTGGTTTATAGTATTAGCAAAATGAACCGATTGATCATACACATCCATTAATGGGACGTGATAATGTCT  
GATTACACCACACATTGGTAGCGCATCAGTAACAACACGGGACAATATGATTCATTATGTATTAATAATATAGAAGCGGTTATGA  
CAAATCAGGTACCACATACTCCAGTAAATTGAAAAATAGTATGGTTTAAATCATTGGTAAAAACAAGCAAAAGCAATTGTAAATAT  
GTTATGCTTGACTTGCAGATGTATATTTGCGCTGATGATAATTCATAACATTATAAACTGCTCATATTAATGTGATGATTTATTT  
TGATTTTGACGTATATAACAAAATGTTTATATAGACTGTAAATGTTTATTGTTTAAATAAACCTTTAAATGAATGATGTTCTCAACAA  
AGTGTATCATTACAATAATTGAGTGATGACAACCAATTACTATGTTGAATCTATAAAATTTAAATTTGAATTTTATTATGAATATCG  
ATATAATGAATTGTAAAAACAAATTTTAAAAACGTATTTTATATTGAACGGTCTTTATAAAGGCGTTTTTACTAAGAAGTTTAAAGAG  
GTGCAATATGAAATCTAAAAAGTAAACAGCCACCTAATAAATATGTTGAAGCATTCAAACCATATTTATTAACACTATTGATTTGGC  
AATATTTATTACTTTATATTTAATTTATGGCAGTGGCGACACACAATAAATTCATTTATAAATGAGTTCATAATGAGGGAGACTTAAT  
ATGACAGATATTATTAACAAGCTGCAAGCGTTTGGCGATGCAAAATCCACAAAGCATTGCTGTTAGACACACAACCTGATGAATTAAC  
TTATCAACAGTTAATGGATGAGTCTAGTAAATTAGCACATCGATTACAAGGTAGTAAGAAACCGATGATTTTATTCGGTCACATGTC  
ACCATATATGATGTTGGGATGATTGGTGCCATTAAAGCAGGATGTGGATATGTACCTGTAGACACTTCAATTCCTGAAGACCGTAT  
TAAAAATGATTATTAACAAGGTTCAACCAGAGTTTGTATTATACGACTGATGAATCATTGAAAGTTTAGAAGCGCAAGTATTTAC  
AATAGAAGATATTAACATCTCAAGACCCAGTAAATTTTGTAGTACAGATTAAAGATAACGACACAGTATACACAATCTTTACATC  
TGGTTCTACTGGGGAACCTAAAGGTGTTCAAATTTGAATATGCAAGTTTGTAGTTCAATTTACTGAGTGGATGTTAGAAGTTAATAAATC  
AGGAAATGAACAACAATGGCTTAACCAAGCGCCATTTTCATTTGATTTATCTGTAATGGCTATTTATCCATGTTTAGCATCAGGCGG  
TACATTAAATCTTGTAGATAAAAAACATGATTAATAAACCTAAATTTAATAATGAAATGCTAACAGCAACACCGATTAAACATTTGGGT  
ATCAACACCATCATTTATGGAATGTGTTTATTATTACCAACGCTTAATGAAGAACAATATGGTAGTCTTAATGAATTCCTTCTCTGT  
GGTGAATTTCTACCTCACAGAGCAGCAAAAGCGTTAGTAAACCGTTTCCCAAGTGCAGCAGATTTACAACACATATGGTCCAACCTGA  
AGCTACGGTAGCAGTTACAAGTATTCAAATTACACAAGAAATCTAGATCAATATCCGACATTACCTGTTGGCGTTGAAAGACCA  
GCGCAAGATTACTTACTACAGATGAAGGTGAACCTGTTATTCGAAGGTCAAAGTGAAGTTTAGGATCTTAAAAATGACCAAAAA  
ACAGCTGAAGTATTTAATTTTCGATGACGGTATTTCGTACATATCACACTGGTGATAAAGCGAAGTTTGAATTTGGTCAATGGTTCATT  
CAAGGTGCTATTGATTTCCAAATCAAATTGAATGGCTACAGAATGGAATTAGAAGAAATTTGAAACACAATTACGCCAGTCTGAGTT  
CGTAAAAAGAACGATTGTTGTACCTGTATATAAAAAATGATAAAGTTATTCATTTAATTTGGTGCAATTGTGCCAACGACTGAAGTTAC  
GGACAATGCAGAAATGACTAAAAATATTAATAAATGACTTGAAATCACGCTTACCAGAGTATATGATTCTTAGAAAGTTTGAATGGA  
TGGAACAATTGCCATTGACTTCAAATGGTAAAAATTGACAGAAAGAAAAATTGCAGAGGTAATTAACGGATGATTCCATATGGTGATT  
TTACATTTCTTCTAATTTGCTTTAATTTGCATTATTACCAGTCATTATACTTGGATTTTATAGGTAAGCGAAGTTACATTTATAATGGCGTA  
GTTACAGCATTTATGATTGTGTTAATCTTTCTCTGATAAACATAATCTGTTTGACCAAAAGTATTTAAGTGTTCATTTAATTAAGTTT  
TATTATTTACGTCGTATGGCAAGTTTATGATAATGTTTATTATTCATTCACCAAAAGCAATTTCAATTTTCAAAATTTGTAATCT  
GTAATGGTTTTATCAATATTGCCATTAGCACTTGTGAAAGTGTACAAAAGTACATGGTTAGGTGGACATCAGATTCACCTCCATGAA  
AGTAAATTAATTGAATTTGTTGGTTTCTTAGGAATTTCTTATGTTACATTCAAAAAGTGTGCAGTTAATTATGGAATTCGTGATGGTT  
CTATCAAAAGAAATTAAGTATGGAATTAATTCAATTTATTTTCTTCCCAACGATTTCATCTGGACCAATCGATCGTTACAAAC  
GTTTCGTTAAAGACGATAAAAAAGTACCAACAGGCAATGAATATCGTGAATTAGTATTAAGCAATTCACATGATTATGCTTGGTT  
TCTTGATAAATATATTGTTGCTTACTTTATTAACACATATGCAATCATGCCGTTACAATTAGACTTACATGGCTTTGTCATTTGTG  
GTTATATATGTACGCATACAGCTTATATTTATCTTTGACTTTGCAGGTTATAGTTTATTTGCGATAGCATTTAGTTATTTATTCGGTA  
TTAAAAACACCACCAAACTTCGATAAACCTTTCAAAGCGAAAAATATTAAGATTTTCTGGAATAGATGGCATATGACATTATCATTTCT  
GGTTACAGATTGTATTACATAGATCTTTATCTACATGTCTCAGTAAAAAATTTGAAGAGTCAATTTGCAATGTCTAACGTTGGC  
ATTCTTAATCAACTTCTTACATATGGAATTTGCAATGGTATTCGAAGTGTATTACATTTGTTTATGGTTTATACCATGTCAGCATGTTT  
ATAGGTTATGGCTATTATGAACGTTGGCGTAAGAAACATCCGCCACGTTGGCAAAATGGTTTCACAACAGCACTTAGCATTGTGATT  
ACATTCCACTTTGTAACATTTGGCTTTTTAATCTTCTCAGGTAAACTTATATAATAAAGGAGAATTTAATTATGGAATTTAGAGAACA  
AGTATTAATTTTATTAGCAGAAGTAGCAGAAAAATGATATTGTAAGAAAAATCCAGACGTAGAAATTTTGAAGAAGGTATTATTG  
ATCTTTCCAAACAGTTGGATTATTATTAGAGATTCAAAATAAACCTTGATATCGAAGTATCTATTATGGACTTTGATAGAGATGAGT  
GGGCAACACCAAAATAAATCGTTGAAGCATTAGAAGAGTTACGATGAAATTTAAACCTTTTTTACCATTTTAATTAGTGGAGCGGT  
ATTCATTGCTTTCTATTATTACCTGCTAGTTGGTTTACAGGATTAGTAAATGAAAAGACTGTAGAAGATAATAGAACTTCATTGAC  
AGATCAAGTACTAAAAAGGCACACTCATTCAAGATAAGTTATACGAATCAAAACAAGTATTATCTATATACGGCTCTAGTGAATTAG  
GTAAGATGACCCATTAACTCTGCAATTGCAATTAATAAAGCATCAACGCCAACAAAAAGCAATTTATTAGGTGCTGGTGTTCTA  
CAGACTTAATTAACGCAGTTGAACCTTGCATCACAGTATGATAAATTAAGGTAAGAAATTAACATTTATTATTTACCACAATGGT  
TTACAAACCATGGTTTAAACGAATCAAACTTTGATGCTCGTATGTCTCAAACTCAAATTAATCAAATGTTCCAGCAGAAAAACATGT  
CTACTGAATTAACAGTCGTTATGCACAACGTTTATTACAGTTTCCACATGTACACAATAAAGAATACTTGAAATCTTATGCTAAAA  
ACCCTAAAGAACTAAAGATAGTTATATTCTGGTTTTAAAGAGAATCAATTGATTAAAAATAGAAGCGATTAAATCATTTGTTGCAA  
TGGATAAATCTCCATTAGAACATGTTAAACCTGCTACAAAACAGACGCTTCTGGGATGAGATGAAACAAAAAGCAGTTGAAATT  
GGTAAAGCTGATACTACATCGAATAAATTTGGTATTAGAGATCAATACTGGAAATTAATTCAAGAAAGTAAGCGTAAAGTTAGACG  
TGACTACGAATTCATGTTAATTTCCAGAATTCGAATTTAGAAATTAATGTTAAAAACAATGCGTGCTGCTGGTGAGATGTTCA  
ATATGTAAGTATTCCATCAACCGTGTATGGTATGACCACATTTGGTATCGATAAAGAGTAAAGCAAGTTTATAAAAAAATCC  
ATTCTACTGTTGTAGATAATGGTGGTAAAAATTTACGATATGACTGATAAAGATTATGAAAAATATGTTATCAGTGATGCCGTACACA  
TCGGTTGGAAGGTTGGGTTTATATGGATGAGCAAAATTCGGAACATATGAAAGGTGAACCACAACCTGAAGTAGATAAACCTAA  
AATTAATAACAAATAGCACATAACTCAACGATTTTGATTGAGCGTATGTGCTATTTTTATATTTTAAATTTTATAGAATAGAATAG

TAATATGTGCTTGGATATGTGGCAATAATAAAAAATTAATCAGATAAATAGTATAAAAAAATTTCCCATCAGTCCAATTTGACAG  
CGAAAAAAGACAGGTAATAAAGCTGATTATAAATAATTCAGTATTCCTGTCTTTGTTGTTATTCATAATATGTTCTGTTAACTTAATATC  
TTTATATTAGAATACTTGTCTACTTCTATTACACCAGGCCTTCTTCGTGTAATGCACGCTCAATACCAGCTTTAAGAGTGATTGTA  
GAACTTGGGCATGTACCACATGCACCATGTAATTGTAATTTAACAATACCGTCTTCCACGTCAATCAATGAGCAGTCGCCACCATCA  
CGTAATAAAAAATGGACGAAGACGTTCAATAAAGTCTGCTACTTGATCAAAACATCGTTGTATCTTCAGTAGGCATCAGGCAAGTCTCC  
TTTCGAGAGATGAATTTGATAATCTTTATTAGTATATTATAAATAGATAGTGAATAAAAAATCTATCAAAACCAATGGGGGATAAATAT  
ATGGAGCACGTGAGTGTGGTAGTATATGGGGCAGATGTTATATGTGCAAGTTGCGTTAATGCGCCAACATCGAAAGATATTTATGA  
CTGGCTACAGCCGCTATTAAGAAAGAAAATACCCAAATATATCATTAAATATACGTATATAGATATTACAAAAGATAATGACAACT  
TAACAGATCATGATTTACAATTTATTGAAAGAATAGAACAAGATGAACTATTTTATCCATTAATTACAATGAACGATGAATATGTAG  
CAGATGGTTATATACAAAACAAAGCAAATCACTCGATTTATAGACCAAAAAGCTTGTGAATGAATAATATACACATAACTAAAAGCAA  
TGTCAGTAATAGTGTGAAGTACATTTGCTTTTTAATTTTAAACCATTATGATATTTATATAACCAAAAGTACGCCGGATTTTAAATAGA  
AGCGAGTCGTCCTGTTACAGTGCAGTCCATGATATATGCAAAAACCTTGCTTATCTCCTAATGACCAACGATACCTTGACCTTTAGT  
TCCGGCATTTTGTCAGGTAATGGTTCATTTAGCCATTGCTTTTTAAGCACATCGGCAATTTGATCACCTTGAACCTTCGGCTAACTGAG  
CACTTGGCGCATGTGGTAAATCAGCACAATCACCACCTACATAGACGTTACGATATGTTGGTACTTGATGATACTGGTTAACTATCA  
CGCGTCCATTACTATTTATATCAATCGGCAAGTTACGAACAACCTTCAACAGGTTGAATTCCTGCTGTCCATACAATAAATCAATAT  
CTTTAGGTTTCATCAGGTTATATATTTTACCAGGTTCAACTTTATTAATATTTGAATTTGGAACAACGGTAACATTATTTTGGCGAA  
CCATTTTCGAACATACTTACTTAATTTTCTGGAAAATTTCTTAAATTCGCGGCCACGGTCATAAAGATATATTTCCAAGTCTGAT  
CTACTTTCTTAAATTCGCTGGCAAGTTCTATGCGCTTAATCCAGCAACAGATACCGACTTTAGCACCTTTCGAGTCTGACTAA  
TACTATGCAAAAGTATCCCGAGCCTTTGAGAGTGTTTGAATACTATGTATATTTCTTCCGCTCTCGAACGTTATGATATTTATCTTC  
ACATCCTAAACCAATGATTAGCTCATCATAATCAATTTTGAATTTACCGACTGAGACAATTTGAGCATCTAAATCTATGTCGTTAAT  
TTCACCATAAACTGTATTCACCTGTGGATGATTAGGGAATTTTCATACGAACATCTTTATCTGATTTTCGTGCCCGCAGCTAAAGCATAA  
AATTCGTGGTTTCAATCCATGAAATGGCATACGATCAACTAATGTGACTGTATAATCTTGTGGTAAAGAAGTAGTTAAATGCGTGAC  
ATGATACGCATATTACCATATCCGCCGCTAACAAAACCTAAGTTTTTCATAATGAAGTACCCCTTTTATATGTTAATATTTACTTTAA  
TTTTGAAAAGATCAAAGTGCATAGATATATTTGTTAATGAACAGTTATAAAATGCAAGTGTCTTTGATTTCATCAATAACCCCTAAAA  
AAGTAAATATGATTTATATGCTTATTATATATTTTTTGAATTTGACTACAAATAAATATTTGTACTAACTAAGGCATATTACATA  
ACTGGGATAAGAAACATCAGTTGTTGCTAATTTGAGCACATCATGTTAAATACCAGTTTTTAAATGCTATAATATTGTAACAAATGA  
AATAAGAAAGGTGAAGTATGAATCCGATCGTAGAATTTTGTCTCTTAACATGCGCAAAAAGGTGGAGATTATGTTTTTAAATCAACTGGA  
AAATGACCCAGATGTCGATGTGTTAGAGTATGGTTGCCTGACACATTGTGGTATATGTTACGCCGGGTGTATGCTTTAGTAAATGG  
TGATATTGTTGAAGGTGATTCGCCGGAAGAATTATTACAAAATATATATGCACATATAAAGAACTTGGATTTTTTAAAGGAGGAGT  
TATCATGCCAACAGTTATATTAACAGAAGCAGCTGCTACGAAGTAAAGATATGCTTAAAGCAAATGAAATGCCAGATGGCTATT  
TAAAAAATAAAGTGAATGGTGGCGGGTGCACTGGTTTAAACATACGGTATGGGTGCAGAGAAGCGCCTGGTGAAATGATGAAGTC  
TTAGAATACTTTGGATTAAAAGTATTAGTAGACAAAAAAGATGCACCCGATTAAATGGTACGACTATTGATTTTAAAGCAATCATTA  
ATGGGTGGCGGTTTTCCAAATCGACAATCCTAATGCAATTGCTTCATGTGGCTGTGGTAGTTTCATTTAGAAGTCAAAAAGTTGCAAGT  
AATCCTGAAAATGCTAATAAAAAAATCTTTTAAATGGTTAAACCAATTTTGGGATACAAATGATATCAATAACGATTAAAGGACAT  
ATTTGATTATGCTTATTTTTCGTAAGATATTTTGTGTTTATTAATAAAGCTTATTGAAAATTAAGAAATCTGACTATAAATAGTATTT  
TAAATGATCGTGATAGCGGATACATTTTAAATCGAAATCAGGCTACGAAAAAATTAATTAATTTTTTACAACTCTGACTGAATCTTG  
CTTGAATAATAACATAAAAAGCTATAGAATTAGTATTGGATTAAAAATGCTTTTTTTGTGAACATCACAGGTTTTTACATAATTTAA  
AAGACTTAAATAACAAAATGATGATAAACTAGTATACATTGTGGTAAAGTAGTAATGACCAGTTGTTACTAGTAATTATCAGCATT  
TGGTTAAAAAATATGAAAGCTTAGGTGAAATTAATGGCTCAAGATCGTAAAAAAGTACTTGTACTTGGTGCTGGTTATGCAGGT  
TTACAAACTGTAACATAAATGCAAAAAGCGATATCAACAGAAGAAGCAGAAATTACGCTTATTAATAAAAAATGAATATCACTATGA  
AGCAACATGGTTACATGAAGCATCAGCAGGTACACTAAACTATGAAGATGTATTATATCCTGTGGAAAGTGTCTTGAAGAAAGACA  
AAGTGAAGTTGTTCAAGCAGAAGTAACAAAAATGACCGTGATGCTAAAAAGGTAGAAACAACTCAAGGTATTTATGACTTTGAT  
ATTTAGTAGTAGCATTTAGGTTTCGTTAGTGAACATTTCGGCATCGAAGGTATGAAAGATCATGCTTTCCAAATGAAAATGTTATC  
ACAGCACGTGAATTATCACGTATATCGAAGACAAATTTGCTAATGTCAGCATCAAAAAGAAAAAGATGATAACGATTTATCTAT  
CTTAGTTGGTGGTGCTGGATTCACTGGTGTTGAATTTCTTAGGTGAATTAACAGACAGAATTCCTGAATTATGTAGCAATATGGTGT  
GGATCAAAAATAAAGTTAAATCACTTGTGTTGAAGCAGCACCTAAAATGTTACCAATGTTCTCAGAAGAATTAGTTAACCACGCAG  
TTAGTCACTTAGAAGACCGCGGTGTTGAATTTAAATTTGCTACACCAATCGTTGCTTGAACGAAAAAGGTTTTGTAGTTGAAGTAG  
ATGGTGAAAAACAACAATTAATATGCAGGTACTTCAGTATGGGCAGCTGGTGTACGTGGTAGTAAATTAATGGAAGAATCATTTGAA  
GGCGTTAAACGTGGACGTATCGTTACAAAGCAAGATTTAACAATCAATGGTTACGACAACATTTTTGTTATTTGGTGACTGTTACGCG  
TTTATCCCAGCTGGAAAAAGACGTCCATTACCACTACAGCACAAATTTGCAATGCAACAAGGTGAAAGTGTGCTAAAAACATTAA  
ACGCATCTTAAACGGTGAATCACTGAAGAATTCGAATTCGATCGTGGAACTGTTTGTCTTTAGGTTACATGACGGTGTAGG  
TATGGTATTTGGTAAACCTTATAGTGAACATTAAATGATTAATGATTTTATTCATGAGGGTACAGTATTGGCAATCCATTAA  
TTTGGCAAGAGACTTTAGTAATATGCCACCGAATGTATTAACACCACAAACATTTGCAGAAGATATTGTTAATCATTTTTAAAAATAC  
AAAGGTCAAAGTAGATGTTAAAGATTATGACACTTTAGTTTCTGAAGGATTCGGACTTTTACAAGCAGTAGGTAAAGGTAGTAAGC  
ATAAACCGAGATTAGTAACCATCAGATATAATGGCAAAAGACAAAGATGAAGCACCAATTCCTTAGTTGGTAAAGGTATAACGTAT  
GATTCGTGGTGGTTATAGTATTAACGAAGATGGCATGGCTACAATGAAGTTTGACATGTGTGGCGCTGCGAATGTCGTTGGTATC  
ATTGAAGCGGCTAGTCGTTTACAACCTGCTGTAATATTGTGCGAGTGCTTGCCTGTGCTGAAAAATATGATAAATGAAGCATCAATG  
AAGCCAGATGATGATTTACAGCATTAAAGTGGTGAACCTGTAGAAGTAATGAATACAGACGCTGAAGGTAGATTAGTCCTTGCAGA  
TGCTGTGTTTTGCAAAATCAATATCAGCCTAGTGTGATTATGGACTTTGCTACATTAACGGGTGCAGCAATTGTTCATAGGCGA  
TGATAAAGCTGCTGATTTGAATCGAATAGTAAAGTATATTAACAGATATTTACAAATAAGTTCTGAAAGTCGATGAATGGTATT  
TGAATTACCGATTACTGCAACCGAACGTGCAAGTATAAACACAGTGATATCGCTGATTTAGTTAACCATACGAATGGACAAGGTA  
AAGCGCTATTTGCGGCAAGTTTTGTAAACACATTTTAGTGGTCAAACACCTCACATTCATTTGCATATTGCAGGTCCAGCAACGACTA  
ATAAAGCTTCATATAATGGTCCAAAAGGGCCAACAGGATTTATGATTCCGACGATAGTACAATGGTTAAAAACAACAATAATTTAAT

TATTTGCCTGATACAACCTTGTGTCTTGATATACATTTCTAATTTAACTCTTGAAAGTATAAAGGATCGCATTGTATCAGGCATTTTCA  
TTGTTGTAAGAAAATATAAATCGCATATCCTTGTGAGCATAAATCAACTTGACTAGCATTGCAAAAAAATATTATAAGCATATGTTT  
ATTCAGTCAACGACTACTAATATTGCATTTTAGAACCTAGGATTTTGATTGGTGTTCAGCTTGTAAAAATTGTTAATTTAATGAAA  
GCTAAAAATTATTTAAGAAAGACAATTAACATAAAAAATAAGATTATTGGTATAGTTTGCTATTGACAGGTGTTAAAGCTACTGATA  
CTATGTAGTCTATAAGCGCTTTAGTTTCGATAGAGTGATAAAGGATGGTTGTCATATGATAAATGCAGTAGTAATAGCAGTAATTTTA  
ATGATTGTGCTATGTTTATGTCGATTAAACGTAGTTATAAGCTTATTTATCAGTGCGCTAGTTGGTGGCTTAATTTTCAGGCATGAGCA  
TTGAAAAAGTTATAAATGTATTTGGGAAAAATATAGTCGATGGTGCTGAGGTAGCATTAAGCTATGCTTTATTAGGTGGATTGTCAG  
CATTAATTTCATACAGTGGTATCACAGACTATTTAGTAGGAAAAATTATAAATGCAATTCACGCTGAAAAATAGTCGATGGTCAAGA  
GTTAAAGTCAAAGTGACAATAATCATTGCATTATTAGCTATGAGTATCATGAGTCAAAACCTTAATTCCTGTACATATTGCATTCAATC  
CAATTGTCAATCCCACTTGTAAAGTCTGTTAATGACTTAAAAATAGATAGACGTTAATCGGTTTGATTATCGGTTTGGGTTTATG  
TTTCCCGTATGTGTTATTACCATATGGATTCCGGTCAAATTTTCCAGCAAATTATTCAAAGTGGCTTTGCAAAGGCGAATCACCCAATT  
GAGTTTAATATGATTTGGAAAGCAATGCTTATTCCTTCAATGGGGTATATTGTTGGCTTACTTATCGGTTTATATGTATATCGTAAAC  
CACGTGAATATGAAACACGTAAAAATTTAGATAGTGACAATGTTACAGAGTTAAACCATATATCTTAATAGTAACAATTGTAGCA  
ATACTAGCTACATTTTATGACAAAACATTTACAGATTCAATGATTTTGGTGCAGTGGCAGGGGTACTCGTATTCTTTATTTACAGTG  
CATATAATTGGTATGAATTAGATGCTAAGTTTGTGAAGGTATTAATAATTTATGGCTTATATTGGTGTAGTTATTTTAACAGCAAATG  
GATTTGCTGGTGAATGAATGCTACTGGTGATATAGATGAATTAGTTAAAACTTTAACAAGTATTACTGGTGATAATAAATTTATTTA  
GCATTATCATGATGTATGTGATAGGTTAATTGTCACTTTAGGTATTGGATCATCATTTGCAACAATTCCTATTATCGCATCATTATT  
CATTCCTTTGGAGCGTCAATTGGACTAGATACAATGGCATTAAATGTCATTGATTGGAAACAGCGAGTGCAATTAGGTGACTCAGGTTT  
ACCTGCAAGTGCATTCAACATTAGGACCAACTGCGGGATTAAATGTTGATGGCCAAACATGATCATACCGGATACATGATGTGATCCAA  
ACTTCTTGTTTTATAATATTCCTTTAATGATTTTCGGTACTATTGCTGCTATGGTACTATAAGCATAAAGAGGTGAAAAATAGACTCA  
TTTATTAGAGACATTTGAGATGTCAATAGATCACCAGGAAGATGGTTTAGTTGTTATTTCTATGCCTGTTACTGATAAAGTAAAAACA  
ACCATTGGATATTTACATGGTGGTGGCTTCGATTGCTTTAGGTGAAACAGCATGTTTATTAGGATCTGCTAATCTAATTGATACAACC  
AAATTTATTCCATTAGGTTTAGAGATGAATGCCAATCATATTCATTCTGCTAAAGATGGTGCATGTTACTGCGACAGCTGAAATTTATC  
ATCAAGGTAAGTCGACACATGTATGGGATATAAAAAATTAAGAATGACAAAGAACAAATTAATTACAGTTATGCGTGGTACAGTTGCT  
ATTAAGCCTTTAAAAATAAAGAACTGCTAGCTGAAATGTTATGAGATATTCATAACTACGGCTAGCAGTTTATTTATGCGCTATATT  
GTTGTAATTTAGAAATGCTTGTTCATGCGTTCCGACGCTTTACGGCCACCATAACATTTCTACCAAATGGTCTTAATTTCTAAGTC  
TGCAAGCATCCTGCGACAAATAGATTGTTGATCCATTCTAATTTTCGGAATAACAGGGTAATTACATTCTGTTGATAGGTGCATC  
ATAATTTTGTATTAATTGCTTAATAAGTGGTTGTGACATAAAATCTTGTTCAAAACCAAGTTGCAACCATAATCTGTTGATATGGAAC  
AGAATTATTTTCAGTGTTAATTAACCATCACTAATTTGAGTGATAGGTGTTTTATGCACATTTATACGACCATTTTAAATATGTTTTT  
TAAGGCGTAAGTACAGTTCGTGAGGCATTGATCCTTTATGACGTTACGTTGTACAATGGCATTCTTTTCAGGCATGCTTTTAGTACT  
TAAAAATGTAGACATATCTTCCGACCTAACCAACCAGGATCAGCATCAAAGTCATGTATTTCAATATCTTTATTTAGCCATAAATG  
AATCTTTTTATCGTTATCATGATTTAACAATTTAAGTGCAAGATGTGACGCCGTAATGCCACTACCAACGATATGATCGGTCTTATCA  
TATACTAGTTGATCATGTTCTTTCTCGAAGATATGATTTACATTCTGTTTGTCTTTTAAAAATGTCAGGCATAAACCGGAATATTTGTAC  
TACCTATTGCAATAACGACGCAATCTGTAGTGAATTTGTCCATTCTTAACATTGATATGCCATTGTCTTCTGTTTATCTAAGGTT  
TGAACCTAAACCTTGACCAAGCAATCCTCTAATTGATATTGTTTAGAAGCATGTGCAATATGATCCATAAACCAATTGTCAATTCAGGT  
CGTTGATAAGGACCATAAAAAAGCATTGTTATATTGGTGTCTTTTAGCGAATTGTTTTAGATGGAACGGTTGTGGATGTACGTGATGT  
ACAATCGGTGATCTTAAATAAGGCATTCTATTTCGATTGTTATATGAGTTAAACCTTTGGCAAAAAGTTTCGTGTGGGTCAATGATT  
GTTAATCGGTCTGTTGTTAATCCGCTTGATAATAGTTTTGTGCGATTGCAGTTCCCTGTATGCCACCGCCGATAATTGTCCAATGCA  
TAATAAAACCTCTCTCTTTTAAACGTAATCGTTACGATTATAATTATTATATCATAATACATAACGACATGAAAGGCAATTA  
ATTAAGAGATATATGTAGATAGGGCGAAGCTGTAGTCAAAGAAAAATCATTGAAAAAGAGGTAACAATGTCAAAAGAAAAACAG  
CAGTAAAAATCATTCTAATTTGGAATCATCTTACTGCTGTTTGTGTTGATTATATTCATGATTTTGTATATAATCTACAATTTGT  
GTCTTTTAAGTCTTCCGAAATTTTCATCGACTTTAGTCTTTTAGTATAAGGCGTTTTAATATTATATGCTGCTTTCATAATCATATGAC  
TTGAAAGAGGACCTGTAATTAATACAAAGATAAATCGCAACCAATTAATTGATATTGCAAAAACCTTGATGACATAAATATAAA  
AACGTACCAAAATAGTAATGACATTGCACCTAATGTTGATGCTTTTCCGCGACATGTGCACGTGAATATACATCTTCAAGTCTCAAT  
AATCTATAGCTGCTAGGGCGCTAATTAAGCACCGATGATAACAAAGATAAGTGCAAGACTAATCAGTATGATTTTGTATCATGTTT  
AATCACCTTACCTTTGTCCATAAATTTAGAGAATACTGCAGTACCTAAAAAAGCTAATATACCAATCATCATAATAACGACAATCAT  
GTATTTAATATTTAATAAAATACTGAATAATGCTATAACTGCCATTAATTGAAGACCAATCGCATCTAATGCGACAACACGATCGGC  
AAGTGATGGGCTAGCACACGCGAATGAGCATAGCTAACATAGAAATGACAACTATGATTAATGCAATAACGATAATAACATTAT  
GATTCATTATATTTGCCCCCTCTCTTACAATTTTCTCTAATGATGTTTTAATACTTTCTACTTCTTGTCTTTAGTTGAAAAATCTAT  
GGCATGAATATAAATTTTGTACGATCGTCACCTTACACCAAGCACTACAGTACCAGGTGTTAATGTAATTAATTTAGACAGCAAGAC  
AATTTGGCAATCTTTTAAATCTGTGTGATAAACAAGAATCCTGGTTCATTTTAAATCGAAGGTGTTAATAAATTTTCAAAACA  
TCAAAATTAGCTTTAATCAGTTGATTAAGAAAATAAATACTAATTTAATAACGATATAGCGTGATGACATAAATCTACCTGGT  
AACACCTGTGTAAGAGGTAAACAAGAACTAGGCCAAAGATGAAACCTAACACAAAGTTATTTGTTGTGTAACCTATTTGTACAAAA  
CAACCAAAACACTGCGATAATAAAGTTTAATACTAATTGTACAGCCATGTTATTTACCTCCTAATACAGCTTTAACATAGGTTGATG  
GATTGTAGAATGTTTCTGCAACAGCTTTTACCATTGGATATAAGTAATCTGCTGACAATCCATATAAAACAGTTATCACAACTGCAA  
CGATTGCAATCGTAGTTAAATAATTGACGTCGACTTTGTTATTAAGATCATATCCTTTTGGTTGACCGAAAAAGCCTTGATAGGAATA  
TGCGAATGACAGAATATAATACGACTAACTTGATAATAAGACAATGACACCCTTAAATAAAAAATCCTCTTTCAAATGTTGATTGG  
ACAATGAAAAATTTTCCATAAAAGCCACTGAGTGGGGGAATGCCAGCTAACTTAATGCTGCGATAAAGAATGACCAACCAAGTAC  
AGGATATCGTTTAAATTAAGCCACCAAAATTGTCTTAAATCAGCAGTGCCTGTAATTTAATCATAATTCGGATAAGCAAGAATAATGC  
AAGTTTATGACTAACATGTCGTGCAATGTATAGTAATGACCCCAATCATCACTGACTGCTGTCATCATCAACGCGCACTAAGATCAC  
ACCTACAGCAATCATGACATTGTATAGGATGATTTTAAATGTTGGCATATGCAACAGCACCGACACAACCAAGATGATCGTTAA  
TAATGCTAAGAATAAAATGACATAATGTGAAAAGCTTACATTATCACTAAAGAATAGGCTCAATGTTCTAGCGATTGCATAAACAC  
CAACTTTTGTAAACAAAGCACCAAAAGAATGCAATGATTGGAATTTGGTGGTGCATAGTATGCACTAGGTAACCAAAACAACATTGGG  
AATACGCCAGCTTTTGTAGCAAAAACAAGATAAATAGTATGAAAACGATATTGACTAAGCCACTGTCATGCGCTGAAAGGTTAGC  
TAATTTATTGCTTATATCTGCTAGATTCAATGTTCTACTACTGAATATAAAATCGCTACACCCATTACGAAGAAGGATGACGATAC  
AACGTTAAACAAGAACATATTTGATTGTTTCTGTAGTTGAATTTTGTAGAACCAATTAATAAAGAAATAAGATGACATTAATAA  
TACTTCGAAAAATACGAATAGGTTGAAAATGTCACCAAGTTGTGAATGACCAATGATACCTATTAACATAAATAGTACTGAAAAAT  
ATAAATAATATCTTTCAGCTTCAATACCAATGTTTGGTATGAATAAATAAATAAGCTGTAATAAATAAATACTAGTAATATTATTA  
GTAGGGCACTGAATATGCTCTAATAACAAAGACAATACTGTATGGTGCTTTCCATGAACCTAGCTCTACGCGTATTGGTCCATGTTTAA  
CAACATTTGCTAAATTGATAATTGCCACGACCAAGGTTAATAATGTACCGCTAGTGCGACATAACGCTTTATAATAGGACGCTTTC  
CAATAAAGACAAGTAATATGGCTGTAATTACTGGAATAACTAGCGTTAACACAAGCATATTACTTTCAATCATCTTCTGGAACCTCT

TTCTACTCTCAACGTTATCTGTGCCTAATCTTTATATGTTCTAAATGCTAATACTAAGAAAAAGGCTGTTGTCGCAAAAGGCGATAA  
CGATTGCTGTTAAAAATAAGTGCTTGC GGGATAGGATCAACATAGCTTTTACGTTTCGCTTCATAAATTGGAACAGTACCATGTTAA  
GTCCGCCCATAGTTATTAATAAATAAATTTGCTGCATGTGTTAATAGTGTAGTTCCTCATAACAATTCGTATCAGACTTTTAGACAAAA  
CGAGATAGACACTAATTGCTGTGAGAATACCACTAACAAAAATCATAATAATTTCCACTATTCGTTCTCTCCAATCGAAATAATAAT  
TGTCATGACAGTACCAACTACTGCACATAAAACACCGAAATCAAAGAATACTGCTGTTGTCATATGAACAGGTTCTAATATAAATA  
ACGGTATATCAAATGTGACATGCGTAAAGAAATTTTGCCTAAAAACCAACTTGCGATAGGCGTCGAATACAAAAAACTAATCCG  
ATACCTATCAAGATTTTAAAAATCTAATGGGAAAAATTTACGCATTGTTTCTATATCAAATGCAATCGTAATGATAACAAGTGAACCTT  
GCGAATAATAATCCGCCGACGAATCCGCCACCAGGTGTATAATGTCTGCTAAGAAAAAGTGAAAAACCAAGACCATTACCATGAA  
AAAGATAATAACTGCAGCAAATTGCAAAATTAGATCATTTTGTGTCTATTCTATGATTTTTACCTCGTTACCTTGCGTTTGACGCTT  
TTTACGTAATTTAATCATTTGTATATACAGCTAATCCTGCGATACCAAGCACAGATGACTCGAATAAAGTATCCATACCACCGAAATC  
AACAAGTATGACGTTTACCATGTTTTTACCGTGAGCTAAATCATAAACGTGCTCTTGATAAAAACTTAGATATCGATTCAAAATGTCT  
ATTTCCGTATGCAATTAACCGATAATAATGACGGACAAACCAACACCAGCAATTAAGCATTAGTAAGCTGGAATGAGCGCT  
TTTCATTATAACGATTTAAATTTGGTAAGTGGTAGAAGCATAATAAGAACAATGCTGTTGAAATAGATTCAACGACAAACTGTGTCA  
ATGCTAAGTCGGGTGCTTTAAAGAATATAACAATACAGACACAGCATATCCAACCTGCACTTAACATAATGATGCTAAATAATCTT  
GATTTAGCGAAAAAGATTAAAAAGGCAGCACTTAATAATAAAATTACGATACAAACTTCGAAAAATTCTAATCGGACTAACGCTTTT  
AAAATTAATGTTGAAAGGTACTGAGAATATAGTGACAAATGTTAATAAAATTAATGCACCAAAAAATGATAACTAAATATTACGTG  
AATAATCGGTAACATAGCTATTCTGCATCTTTTCAGAGTAGTTTGGAAATAACATTTGCACTTCTGTTGTACCAATAATTTGAATGTTAG  
TTTACCAGGTGTGCTGTTAACAATTTACCCAATACTAAATGTCACAAATAGTAAAGTAACTTAAATACCTAAAATGCTAATGTTGA  
TAAAAAGCGAGGCGTTAATCCATGGAACATATGGAATTAACATCATCAATTAACCGTATGATTAAATCGAAGATGTAGCTGTTCAA  
TAATCGAATTAGTTAAAAATGCCAGGGAATAAACCGAATACAATTACTAATGTAGCTAAAAATAGCTGGTGATAAAAGCATTAAATATT  
GATACTTCGTGTGCTTTTTTAGGTAATTGTTTCAGGTTTATATTGTCGAAAAATATATGCATTATAAAATTTAATTGAATATACAAATG  
TGAAGACACTGCCACTATACCAATGATTGGGAATAGATAGCCTAATGTATCAACACTGAATAAATTTGCTTGGCTTGCTGTAAATG  
TTGTTTCTAAAAATGATTCTTTTGATAAGAAACCATGAAACGGTGGTACACCAGCCATACTTAATGCTGTAATAACAGTGATTGTAA  
ATGAAATAGGCATAATTGTTAGTAAGCCACCTAATTTCTTAACATCACGTGTACCAGTAGAATGATCCACTGCACCTGTAATCATAA  
ATAGGGCACCTTTAAATGTTGCATGGTTGATTAAATGGAATATTGCAGCCGTAAATGCAGCAGCATATTTTTGCTATCATCGCCTT  
GATAGTGATAACTAATGGCACCGGATTCGAAGCATGCCATAATCATACCTAATTTGGGACTGTTGAAAAATGCCAGTAACTACCTTTCA  
AGTCTTGTTGTTTGTGTCGTTTAGCGAAGCCAGAATAACGTAATTAACCAACAGAGTGTGACAGTCCATACCCCAACCTTGCGGATG  
CTGCGAAGATTGGTGTCAATTCGAGCGATTAAATATAACCTGCTTTAACCATTTGTTGCTGAATGAAGATAAGCACTGACTGGTGTAG  
GTGCTTCCATTGCATCTGGTAGCCAAATATAAAATGGAACCTGAGCAGATTTTGTAAAAGCACCAATCATGATTAAATCATCGCA  
AAAATGAAGAATGGGCTATTTTGAATTTCAAGAGCATGTTGAATCATGTACTGAATGCTAAATGATTGTGTTGGTATAGCGAGTAAG  
ATGATACCACCTAATAATGATAGACCACCAATACTGTGATTATGAGCGATTTTGTAGCACCATATATAGATGCTTGTCGTTCCGCGC  
CAGAATGAAATAAGTAAAAAACTAGAAAAATGACGTTAGCTCCCAGAATAAATATAGAATAATAACATTATCTGAAAGTACGACAC  
CTAACATTGCACCCATAAATAGTAATAAATAACAATAAAAAATTCCTAGTTGTTCTGACTTACTTAAGTAGCCGATTGAATATAATA  
CTACTAACTCCCGATTCTGAAATAAGCAAACCTAAGAGTAAACCTAAGCCATCAAGATATAAATCAAAGTTTATACCAAAAAATGA  
GGCATCCAATTTAAGGTTTTCATTACAGTATTACCTGACATCGTCTGTTTAAATTAATGAAGCATATAAATGAATGACGATAGGG  
ACAGGTAATACGAACCATCTAAATGTATACGTTTAAAAAATCTATACAGGATAGGAATAATGAGTGCGAATATTAACGGTAATAT  
CACCGCAATATGTAACAACTCACTATGTTGTCTCTCTTTAAAAAATATTTATGTTATTCTATTATACATGAATGATATAGTTCTGAAA  
AACGTACACACTCCTTGTTGTGCTTTATTTTCAGAAGTATTTAAATAAGAAGAAACACGTCATTTTTTATTTAAAAATTTCTTTGTATT  
GAAGTGAATAATCTTCTTTTAAGCGTGCTAAACTAGCTAAAGACATTTACGATGTTTGTGTTGCTGAGCTTTAAGTTAGTTTCTAA  
ATCTGTAATTGCTTGTTGAAGTGAATCTTCATAGCGCAATACATCAACATTGAAGTCGCGTAATTGTGAACGTTTCGTATAGCGTTTT  
TCAAAATGGCTTAATGCTTTGCGTTTCATGAAAAATACACCTTCAGTTTCAGTAGGGTTATGTAAATCACCTTGTTTCGGGTGTTTGA  
TAACCTGTTCACTTTAACAAGGACATCGTCTCCATTTTCTCAACAATCGTGACACCATAGCTACCTGTTTGTGTGAAAATCGATA  
TAGCTTCAGTATTTTCCCTCCCTTAAAAGTATGTTAATATATATGATATCATGAATGGAGATAAATATGTTGCTAAGTACCTAC  
AGTTAAACAAAGAGTACAACAAGGTGAAATTAAGTGGTTATGCACACAATAAAGGTGACATGACATTCAAATTTATTTCCAAAT  
ATTGCACCAAAAAACAGTTGAAAAATTTTGTGATACATGCAAAAAATGGTTATTATGATGGAATAACATTCCACCGTGTCAATATGAC  
TTCATGATTCAAGGTGGCGATCCAACAGCTACTGGTATGGGTGGCGAAAGTATTTATGGCGGTGCTTTTGAAGATGAATTTTCATTA  
AATGCATTTAACTTATATGGCGCATTATCAATGGCTAACTCAGGACCTAATACTAATGGTTCACAATTTTTCATTGTTCAAAATGAAA  
GAAGTACCTCAAATATGTTAAGTCAACTGCGAGATGGTGGTGGCCACAACCAATCGTTGATGATATGGCGAGAAGGGTGGTAC  
ACCATGGTTAGATCAAAAAACATACAGTATTCGGTCAAATCATTGATGGTGAACTACATTAGAAGATATTGCAAATACAAAAGTGG  
GACCACAAGATAAAACCACTTCATGATGTTGAATTGAATCTATTGATGTTGAAGAATAATATCTAAACATAATTAACCTACCAACATT  
TTAAACTCGGATAAAGCTAATTTATGAATGGATTAGTATATATTCCAACGAAATAAATAAACTAATATGATGAGCAATCTCAATAT  
ATTTATCAAGAAAGCAGTTTAAAAATAGATGTGATTATTAAGATAAATAGTTGAGGTTGCTTTTTATGTTTTTACAGAGAATTTGCT  
ATTCAAAATAGTAATAAATTGAAAAACAAAGTAGCTGGATATCATATTGATTAGATAGGAATTTGTTGCTAATTTTATTTGTAAATC  
CAAGTTTGTAGAATTTCTATTCTATTATAAAATAATATTCGTATGATTGATGTTTTAATTAGTCCACCATTTCGATTTGTGCTATGAT  
AATAGTGTTAAGTAAACGAAATAAGGGGTTATTAAGTTGAATAACTACAAAATTTGGCCAACATATCAAGGTGCGTGTAAGTGGTAT  
TCAACCATACGGTGCGTTTGTGAGACCCCTAATCATACTGAAGGACTGATTCATATATCAGAAATTATGGATGACTACGTTTCATAA  
TTTGAAGAAATTTCTATCAGAAGGCCAAATTTGTTAAAGCTAAAAATTTGTCTATAGATGATGAAGGAAAGCTTAATCTATCATTTAA  
GGATAATGATTACTTCAAAAAATTTATGAGCGTAAGAAGGAAAAACAATCAGTATTAGATGAAATCAGAGAAACAGAAAAATATGGG  
TTTCAAAACACTTAAAGAACGCTTACCAATCTGGATAAAACAGCTCAAGAGCAGCAATTCGAAACGACTAAAGGAACAGATAAATCGT  
ACCGAAAATCATACAAAGGCTGAAATGAAGTTTCTTAGCTATAAAAGAGATTAGTATCTATTAATTTTATAGATACTAATC  
TCTTTTGTCTACGATAACGTAATATGATTGATTCTATTTACACGTACAAATGGTTAAGGTGACATATCCATTATCTTTGTTAGATA  
GAATCGTTGATTGCAATATTGTATGTGGATTGTTTTTTTTTTATTTATTTTAGAAATGAGAACTACAACCTTAAAGTATTAAACGAATT  
GCAACTATATAACAGATAATTGGAGAATGAAAAAATACATGTTATAGTCAACTCAATAATTTTAAAGGAGGAATTAAGTAATGAA  
AAGTAAATACGAACCATTTGTTTGATAAAGTGAATTAACCAATGGAGTAGAGTTGAGAAATCGATTGTGTTAGCCCTTTAACAC  
ATATTTCTTCAAATGATGATGGTACTATTTTCAGATGTAGAATTCCTTATATTGAAAAAGCGTTTCAAGATGTTGGTATTACAATTAA  
TGCTGCGAGTAATGTGAGTGATGTCGGAAAAAGCATTTTCAGGACAGCCATCAATCGCGCATGACAGTAATATTGAAGGACTAAAAAC  
GATTAGCTACAGACAATGAAGAAAAACGGTGCCAAAGCACTCGTACAAATACATCATGGCGGTGCACAAGCAATTGCCTGAATTAACA  
CCTGGTGAGAGCTGTAGCACCAGTCCAATTTCTTTAAAAAGTTTTCGGTCAAGAAACAAGACATAGTGCTAGAGAAATGACGAA  
TGAAGAGATTGAACAAGCAATCAAGGATTTTGGTGAAGCAACGCGACGTGCAATTGAAGCAGGATTTGATGGTGTGAAATACATG  
GCGCGAATCATTACTTAATTCATCAATTTGTATCACCATACTATAATAGAAGAAATGATGTATGGGCAATCAATATAAATTTCCCGG  
TTGCTGTGATTGAAGAAGTGCTTAAAGCGAAAGAAGTGATGGCAATAAAGACTTTATTGTTGGATATAGATTGTCTCCGGAAGAA

GCGGAGTCTCCAGGAATCACAATGGAATTACAGAGGAACTCGTTAATAAAAATTAGCCATATGCCAATCGACTATATTCATGTTTCA  
ATGATGGATACGCATGCAACGACACGTGAAGGTAAATACGCTGGACAAGAAAGACTGCCTTTAATTCACAAATGGATAAATGGTCG  
TATGCCACTTATCGGTATTGGTTCAATTTTCACAGCTGACGAAGCTTTAGATGCAGTTGAAAATGTTGGTGTTGACTTAGTAGCCATT  
GGTAGAGAGCTACTATTGGATTATCAATTTGTTGAAAAAATTAAAGATGGACGGGAAGATGAAATTATTAATTACTTTGATCCAGA  
GAGAGAAGATAATCATCACTTAACCTCTAATTTATGGCATCAATTTAATGAAGGATTCTATCCATTACCACGTAAAGATAAATAAGT  
GTTTAACTGTTACCACTAATGATATTGTGTATGCAATTTGTTAGTGGTTTTCAATATTTATAAATAAAAAATATTCTTAGTAAAAATATA  
CTTTTGATTAAAGTGTAATAATTATCAATTTCTTTGCTTGTAATCATTTAAGTAATTATGTCATTATAAATGTAAGGGTTTTCAAAATAG  
ACAAATTTAATGAACTTAGTGATTATTTTCATCTTTTTTGGTGGAAAAAGTATCTGCTTTGAAAACCTAATGTAATTTATTTGGATAATGT  
TTCATGTATAATAGTTATAAATGATGAAAAAGGGGAGATATGATGACTAAATCTGAAAAAATTATTGAGTTAACAAATCATTACGGA  
GCACATAATTATTTACCATTGCCAATTGTCATTTACAGAAGCTGAAGGGGTATGGGTTAAAGATCCCTGAAGGCAATAAATATATGGAT  
ATGTTATCTGCATATTCCGCTGTTAACCAAGGTCATAGACATCCGAAAAATTATTCAAGCATTAAAAAGATCAAGCTGATAAAGTGACT  
CTAGTTTCACGTGCTTTTCATAGTGATAACTTAGGTGAATGGTACGAAAAAATTTGTAACTGGCAGGTAAAGATAAAGCTTTACCA  
ATGAATACAGGTGCTGAAGCAGTAGAAACAGCTTTGAAAGCAGCAGCAGCTGGGCATACGATGTTAAAGGAATTGAGCCAAATA  
AAGCAGAAATCATTGCATTAAATGGTAACTTCCATGGTCGAACAATGGCGCCAGTTTCATTATCTTCAGAAGCAGAATACCAACGTG  
GTTATGGTCCGTTATTAGATGGATTAGAAAAAGTTGATTTGGAGATGTAGATGCATTGAAAAGCTGCAATTAATGAAAATACCTGCAG  
CAGTTTTAGTAGAACCATTCAAGGTGAAGCGGGTATAAATATACCGCCAGAAGGATATTTGAAAGCAATTAGAGAATTATGTGAT  
GAACATAATGTCTTATTTATTGCTGACGAAATCCAAGCAGGATTAGGTCTGTTCCGGTAAATTATTTGCTACGGATTGGGATAATGTA  
AAACCTGATGCTATTTTAGGTAAAGCAGTACTAGGTGGTGGTGTCTTCCCAATTTCTGTTGTATTAGCAGATAAAGAAGATTAGAT  
GTTCTTTACACCTGATCTACATGGTTCAACATTTGGTGGTAAATCCACTTATCAATGTGGATGACTTTGAAATGTGGCATTGATAACTTACCTGTG  
ATGAGGATTTACCAGGGCGCTCTTTAGAATTAGGAGATTATTTTAAAGAACAATTAAGCAAAATTGATCATCCATCAATTAAGAA  
GTCCGTGGACGTGGTTTGTATAGGTGTGGAACCTAATGAAAGTGCTAGACCATTGTGAAGCTTTGAAAGAAGAAGGTTTATTA  
TGTAAGAAACGCATGATACTGTCATTCGTTTTGCACCACCATTAAATTACTAAAGAAGAATTGGACCTTGCATTGAAAAAATA  
AGACATGTATTTCAATAATGTCAAAAAGTTGTAACAATCAGTTTGTAAGGGCTTTAAAAAGGAATACGTTATGTTACAATATGTTTG  
AAAGCGAAATCATTAGGTAAAGAAGAGGCGAAAAGGATCATGACTGAGAACAATAATTTAGTAACTTCTACTCAAGGAATTATTA  
AGAAGCATTGCATAAATTAGGATTTGACGAAGGAATGTACGATTTAATTAAGAACCCTTAAGAATGTTACAAGTGCGTATCCCTGT  
ACGAATGGATGATGGCACTGTTAAACATTCACAGGTTACCGTGCAGCAACATAATGATGCTGTTGGACCAACAAAAGGGGCGGTGC  
GTTTCCACCCAGATGTTGATGAAGAAGAAGTAAAGCATTATCAATGTGGATGACTTTGAAATGTGGCATTGATAACTTACCATACG  
GTGGTGGTAAGGGTGGTATCGTTTGTGATCCACGTCAAATGAGCATTATGAAGTTGAACGTTTATCACGCGGATATGTAAGAGCA  
ATTTACAAATTCGTAGGTCCGAACAAAGATATTCCAGCACCAGATGTATTTACAACTCACAAATTATGGCTTGGATGATGGATGAA  
TATAGTGCATTAGATAAATTTAATTCACCAGGTTTCATCACAGGTAAACCAATTGTATTGGGTGGTTCTCATGGACGCGACAGATCA  
ACTGCACTAGGTGTAGTTATTGCAATTGAACAAGCTGCAAAACGTCGTAATATGCAAAATTGAAGGTGCCAAGGTTGTTATTCAAGGT  
TTCGGTAATGCCGGAAGTTTCTTAGCTAAATCTTATATGATTAGGTGCAAAAATTTAGGTATCTCTGATGCTTACGGTGCATTAC  
ACGATCCAAATGGCTTAGATATAGATTATTTATTAGACCGTCGTGATAGTTTGGTACGGTAACAAATTTATTTGAAGAAACAATCT  
CAAATAAAGAATTTGTTGAATTAGATTGTGACATTTTAGTACCAGCGGTATTTCAAACCAAAATTACAGAAGACAATGCACATGATA  
TTAAAGCTAGTATCTGTTGTTGAAGCTGCTAATGGACCTACAACACCAAGCAACACGCTATTTTAACTGAACGTTGATATTATTAG  
TTCCAGACGTATTAGCAAGTGCTGGTGGTGTAAACGGTTTCTTACTTCGAATGGGTACAAAATAATCAAGGTTATTATTGGTCTGAAG  
AAGAAGTTAATGAAAAGCTACGTGAAAAATTAGAAGCGGCATTTGATACGATTTACGAATTGTCTCAAAACCGAAAAATAGATATG  
AGACTTGCAGCATATATCATAGGTATTAACGTACAGCAGAAGCAGCTAGATATCGTGGTTGGGCATAATTAATTATCATATGTGAT  
TTAACGAGCTTGGGACAGAAAACAAAGCCCTAAGCTCGTTAATTTTATTTTAGCAGTAGTTGACTGTAAAACAATGCCCGTGTAACA  
CGCTCTTTTCAAAAATAGTCGGGGCCCCAACACAGAGGCTGGTGAAAAGTCAGCTTACAATAGTGTGCAAGTTGGCGGGGGCCCCAA  
CACAGAGGCTGGCGGAAAGTCAGCTTACAATAATGTGCAAGTTGGGGTGGAGCCCCGACACAGAGAAATTAGCTCCTCAATTTCTA  
CAGACAATGCAAGTTGGCGAGGCCCCAACACTGAGAATTTCTAATTAACCGCTCAACTATATAGTTGATCAAAAAGACAGCAGT  
AGGATAATTTCAATTTGGAAATATCTTACTGCTGTTTTTATAGTAAATAGCTATATTTTGTATTTTCTAGTTTAAACAATCT  
ACTTAATTACTTCTTTATATTTATCAGCGAAATTTGTAAAGACACCATCAACGCCATATTTTATTAATCGTAACATATCAGCTTGTTC  
ATTCACTGTATAAGGATGTACTATAAATCCTAAGCTTTTTAAATGATGGGTATTTTGTTCAGTTAAATCTGTATAATCAGGACCTAAT  
CCAATCGCATAAGAGCGTATCTCTTTTAAAGCGTTGGTCGTTAAATTTGTGTAGTTACCTTTATCAACTAATTTTACTAATGGCACAT  
GCTTATTTTGACGATGAATTTTCTTTAACTTTCTGTCAGAAAAATGATTGAATCATTACATGTCCATTTTAAATTTATTGTTATTTAAA  
AGGTGATGCTTTTTCAATGAAGCTAATAATTGTTCTTCCATTCCTGGGTATACATCAGGTGACTTTGTTTCAATATAATAGTTGCAT  
TCGGGCCATAACGTTCTAAAATTTTCATCTAAAGTGGGTACTTTAGCATTTTTATAAATTGCTCTTGCATTTTTGGATTTTTTTATTA  
AACCAACTTCTGTCATCTAAGTGTTTAATTCATCAAGGGTATAATCCTCAACTTTACCGTGTCCATTTGTTGTACGGTTAACAGTTT  
CATCATGTAGAACACTAAATGGCCATCTTTGGTACGTTGTGAATCAATTTGATATAAGATGCTTTTAACTCAATTTGATGCTGACTTATC  
ATATGCTTGAACGATGCTCGGGTGCTAGCCACTTGGCCACGATGGCGGATAGTAGTGAATCGCTCATTCGTTAAATTTGTATG  
CCATTGAATAGCCTGAGGTTTATTTGCAATTTGATTTGTTTGTTCAGCGCCAGCAGTAGGTACTGATAAAAAATCCCATAGTAAAAAC  
AGCAGAAGCAGCCATAAATTTAGTGAAGCTTTTGAAGAGTTAGTCATAGTCTTTATCCTTTTCATCTCTTTATTTGTAGTCTAACAAT  
TTTTAAATACTACAAAAACCTGCTTGTGAAAACGCTTTACACATTTCTTTTACAATTTATAACATTTTGTAAATATAAATTTAAAAAGA  
ATTATCAAAATTTTAGGAATCTTAAAAATGTGATGTTCAACAAGACGAAGAGAGCATTAAAAATACCCACAATGTAATTTTAATAG  
ACATTTGTGGGTAGGTAGATTAACGTATTTATTGTGATAGTAATTGTTTAGCAACATCAAGTTGTTGTTTGACCGATGATTGACCTGTT  
GAACCGTAACTTTGACGTCGTTTTAAACAATTTTCAGGCTGCAATAATCGTAAATATCGGCATCAATACTAGAATGATGTTGTTGA  
TATGTTGCTAAAGGAACATCTAATAAATAATGACCTTGTGTATACATCTTAAGACAATTTTCTCAATTTTCAATGTCAGTTCTTAA  
ATGGAATATTTTATGTTACTAATAAATCTGCTAGTTCCGTTGTATTTGAAAAATCTTCTTTAACAGTTGTTGAGTCGCTCTTTATTA  
ATTGTCATCGTTTGAATCATACCTTCGAAAATACGTAAAGAACCTTTAATTGTATGGACAGCATCGAATAAACCTTCTTTATCTTCCT  
GCATATCTTTGTTATATGCTAGAGGTAATCCTTTTAAAGTCATAAGCATGCTCATTAAATGACCAGTCGTTTCGACCAACTTTACCTCT  
AATTAATTTCTGCCATATCAGGATTTTCTTTTGTGGCATAATAGATGAGCCAGTTGAAAATGCATCTGATAATGTAATGAATTTAGCT  
TCGCTGTGGACCAGAAAATAATTTCTCTGCAAGCGTGATAAGTGAACCATCGTTAAAGAAATATTATGCAATATTTCAATAATA  
TAGTCTCTGTCACTAACAGCATCTAGGCTATTCTCATAGAGACTGCCAAAGTTCAACAATGCTGTTGTCTCGTGTCTATCGATAGGGT  
ATGTTGGTACCATTAAAGGCTGCTGCACCTAAAGGATTAATATCGATTGTTTTAAACTATCTTCAAATCGTTGTTGGTCTCGTTGTAA  
CATCCAAAAATAAGTCATAATATGATGTGCAAAATGAAATTTGGCTGTGCACGCTGTAATGAGTATAACAGGCATAAATTGTATCAA  
CATTATTGGAAGCGATGCTACAATTACACTTTGTAAACGACTTAATTAATGCGATGATATCTTGCACTTGTGTTTGTAGTGACAAAGTG  
CATGTCTGTTGCAACTTGATCGTTTCTACTGCGTCCAGTATGCAACTTACCACCAGCATCACCAATACGTTTAAATTAATTCATGTTCA  
ATATTTAAATGAATATCTTCTAATGATGCACTAAATTTGAATTTGATCTTGATGATAATCATGTTGAATAGATTTTGTCTTGTATAA  
TTTGTTCGCTGTCTTGTGACTAATAATTCCTTGATTGCGCAAGCATAGTTGCATGTGCAATGCTGCCTTCGATATCTTGATCTATGAG

CGTTTGATCAAAAAGTAATGGATGCGTTAAAGTCGTCAACCCACTCTTCAGGTTGTACTTCAAATCTACGCCCCCAAGCTTTATTGCTC  
ATTGCTATAGCCTCCATGTAGCATCGCATTTACTTGAGTAGGTAACCATAGATATCGATAAAAGCCAACAGCAGCGTCTTGATTAAA  
TGCATCTTCTTTTGATAAGTTGCTAATTTTTCATCATATAATGTGTAAGGTGATTTTCTACCATTTACGATGGCATTACCTTTGAATA  
ATTTAATCTGACATCAACCTTACGTATTGCTGAGTACTATCAATAAAATAATTTAAGCTATCAGTTAAAGGTGAGAACCAAAAGTC  
CATTGTATAGTTGTTTCAGCAAATGCTTCTCGATGATTGGTTTAAAGTGTGCGACATCTTTCGTTAACGTAATCGTTTCTAATGCTTT  
ATGCGCTTTTTAAAAAATACTTCTGACGAGGTGCCTCATAAATTTCTCTTGATTTGATACCTACAAGTCTATTTTCTACATGGTCAATT  
CTCCGATACCATGCTTACCAGCTAATGCATTCAACGTTAAAAATTAATCGTCTAATTCATATGTTTTGCCATCAATTTGAACTGGGA  
TGCCTTTATCAAACGTTAAAAATGATTTTCATCAGCAGTATCTGGTGTCTTCTTCAAAGCATTGTTAGATCGAACGCATCCTCTGGTGG  
CGCAGCATAAGGATCTTCTAAAAATACCACATTCATTGCTCTGCCCATAGATTTTGATCGATAGAATAAGGTGAATCATGGTTGAT  
TGATACAGGGATATTATGTTTAAATGCATAATCGATTCTTCTTCACGACTCCATGCCACTACGTACAGGTGCGAATGCTTTTCAAT  
GATGGGTAAATGCTTTAATGGCAACTTCGAAACGTACTTGGTCATTCCCTTTACCAGTACAACCATGTGCAATACCTACTGAATTTG  
TTTTCTCAGCAATCTCTACTAATTTTTAGCGATTAATGGTCTTGATAAAGCTGAAACTAATGGATATGCATTTTCATACATTAAATT  
TCCTTTGATTGCATAACTTACATACTCATCTAAATTCCTTTGTTGCATCAATAATATGACATTCAACTGCTCCCATATCTAAAGCTT  
TTTTATAAACGATGTCTAAATCTTTACCTTCACCAACATCTAGGCAACAAGCTACAACCTCGTATCCTTTGTCGATAAGCCATTGAAC  
GGCCACACTTGTATCTAGTCTCTGAATATGCTAAAAACAATTTCTCTTCATAAAATTCACCTCATTGTAGTTATCTGAATATTTT  
GTATGAACACATGATAGCAAACTTTTAAATGAAAAATAAAACCATTATTTTACATATTTATTCATAAAATGCGATAGAGATAGTTAGAG  
TTGTAAGTATAAATGCTTATTTATCAATGTTTAAAAAGTATTTTAAAAAACATGCAAAATGTATAAAAAATGTTGAGTGTGTTGACGC  
CAGTTTGAATGTTTGTGAAAAATAGGTGTGAAACGTCACATAAATATCAATTTTATTGATTAAGTACAAACTGTGAATTTGAATC  
GCAACAGCTAAACTAGTAAATTAAGATATTAATGAAACAGGAGGCTTTTATAGATGACTCATATTTCAATAGATTAGTTTAGTAAAAAC  
GTTAGAATTTTTCGGTGAACACGAATTAACCAACAACAAGAAATTGTTAAATCAATTCACAAAACAATTCATGAAGGTACTGGTG  
CAGGTAGTGACTTCTTAGGCTGGGTGATTTACCAGTTGATTACGACAAAGAAGAATTTTCAAGAATTGTTGAAGCATCAAAACGCA  
TTAAAGAAAATTCTGATGTTTTAGTAGTCATCGGTATTGGTGGTCTTACTTAGGTGCACGTGCAGCAATCGAAATGTTAACGTCAT  
CATTTAGAAACAGCAATGAATACCCTGAAATTTGATTTTGTGGTAATCACTTATCATCAACATATACGAAAGAGTTAGTTGATTATT  
TAGCAGACAAAAGATTTCTCTGTAAACGTTATTTCTAAATCTGGTACAACCTACAGAACCAGCAGTTGCATTTAGATTGTTCAAACAAT  
TAGTTGAAGAAAGATACGGTAAAGAAAGACACAAAACGTTATTTGCAACAACGGATAAAGAAAAAGGTGCTTTAAACAGTT  
GGCTACAAACGAAGGTTATGAAACGTTTATCGTACCTGATGATGTAGGTGGAAGATATTCTGTTTTAACAGCAGTAGGATTATTACC  
AATTGCAACAGCTGGAATTAACATCGAAGCTATGATGATTGGTGCTGCAAAAGCACGTGAAGAATTATCTTCAGATAAAATTAGAAG  
ACAACATTGCATACCAATATGCGACAATTCGAAACATTTTATATGCAAAAGGTTATACAACAGAAATGTTGATTAACATGAACCAT  
CTATGCAATACTTTAATGAATGGTGGAAACAATTATTTGGTGAATCAGAAGGTAAAGACTTCAAAGGTATCTATCCTTCAAGTGCCA  
ACTACACAACCTGATTTACATTCTTTAGGTCAATATGTACAAGAAGGCCGTCGTTTCTTATTCGAAACAGTGGTAAAAGTAAATCATC  
CTAAATATGATATTACTATTGAAAAAGATAGTGATGATCTAGACGGATTAATTTATTTGGCTGGTAAAACAATCGACGAAGTTAAC  
ACAAAAGCATTGCAAGGTACATTATTAGCGCATACTGATGGTGGTGTCTTAACATGGTAGTGAACATTCCACAATTAGATGAAGA  
AACTTTCCGTTATGTGCTATACTTCTTCGAACTTGCTTGTGCAATGAGTGGATACCAATTAGGTGTAATCCATTTAAACCACTGGT  
GTAGAAGCATATAAACAACCAAGTTCGCAATTATTAGGTAAACCTGGTTTGAAGACTTGAAAAAGAAATTAGAAGAGCGTTTATA  
AAATCAATTACTTCAATGATTAGTGAAGTTGAAAAGATAGAACTAGACGTTAACTATTTAAAGCATATTTTCGAGGTTGTCATTAC  
AAATGTAATAATGTAATGACAACCTCGTTTTTATTTATATGCAAGAAGTACTAGTTACTAGCTAATGTGACAAGATGTTAAGAGAAAAAT  
TAAAGAAAAATAACATCTGTCATACAATAATATTGTTATACTACTAGAGACTGATTTATTAGCATGATTACATGTTAATGTTTCTTT  
ACTTAGTAATTAACCTTTATAATGTAAGAATAATTATCTTCAACCAAGAAAGGGATTGATGATTGTGCTTTCATCAAGTAGAAGAA  
TGGTTTGAGATATTTTCGACAGTTTGGTTATTTACCTGGATTATATTGTTATATATTAGAGCGATAATTCAGTATTTCTTTAGCACT  
CTATATTTTAAATTAACATTCAAGCTTATGGACCTATTTTAGGTATATTGATTAGTTGGCTTGGATTAATTTCTGGAACATTTACAGTCT  
ATTTGATCTGTAAACGATTGGTGAACACTGAGAGGATGCAGCGAATTAACAACGTAAGTCTGCTGTTCAACGCTTGATTAGTTTTATTG  
ATCGCCAAGGATTAATCCCATTTGTTATTTTACTTTGTTTTCTTTTACGCCAAATACATTAATAAATTTGTAGCGAGTCTATCTCAT  
ATTAGACCTAAATATTATTTTCTGTTTGGCATCATCAAAAGTTAGTTTCAACAATTATTTTAGGTTATTAGGTAAGGTAATTAAGTACTA  
CAATTTTAAACGCATCCTTTAAGAGGGATATTAATGTTAGTTGTGTTGGTTGATTTTGGATTGTTGGAAGAAAGTTAGAACAGCATTT  
TATGGGATCGAAAAAGGAGTGACATCGTAAAAAAGTTGTAAAAATATTGATTTTCATTGATACTTGCTATTATCATTGTACTGTTTCG  
TACAAACTTTTGTAAATAGTTGGTCATGTCAATCCGAATAATGATATGTACCAAGCCTTAACAAGGGGATCGTGTATTGTAAATA  
AAATTAAGTTACATTTAATCAATTGAATAATGGTGATATCATTACATATAGGCGTGGTAACGAGATATATACTAGTCAATTATTG  
CCAAACCTGGTCAATCAATGGCGTTTTCGTCAGGGACAATTATACCGTGATGACCGACCGGTTGACGCATCTTATGCCAAGAACAGA  
AAAATTAAGATTTTAGTTTGCACAATTTTAAAGAATTAGATGGAGATATTATACCGCTAACAAATTTTGTGTGCTAAATGATCAT  
GATAACAATCAGCATGATTCAAGACAATTTGGTTTAAATGTAAAAAAGGATATTATTGGTAATATAAGTTTGAGATATTATCCTTTT  
TCAAAATGGACGATTCAGTTCAAATCTTAAAAAGAGGTGCAAAATGAAAAAAGAAATTATTGGAATGGATTATTTCAATTGCAAT  
CGCTTTTGTCTATTTTATAGTAGGTAATTTATTGTACCAATATACGATTAAGGTTAAAGGTGAATCAATGGATCCAACCTTTGAAGAT  
GGCGAGCGAGTAGCTGTAAACATTATTGGATATAAAACAGGTGGTTTGGAAAAAGGTAATGTAGTTGTCTTCCATGCAACAAAAA  
TGATGACTATGTTAAACGTGTATCGGTGTTCTGGCGATAAAGTAGAATATAAAATGATACATTATATGTCAATGGTAAAAAAC  
AAGATGAACCATATTTAACTACAATTTAAACATAAACAAGGTGATTACATTACTGGGACTTTCCAAGTTAAAGATTACCGAATG  
CGAATCCTAAATCAAATGTCATTCCAAAAGGTAAATATTTAGTGCTTGGAGATAATCGTGAAGTAAGTAAAGATAGCCGTGCGTTT  
GGCCTCATTGATGAAGACCAAAATTGTTGGTAAAGTTTCATTTAGATTCTGGCCATTTAGTGAATTTAAACATAATTTCAATCCTGAA  
AATACTAAAAATTAATATGAAACAAATACAACATCGTTTGTGCGTTTTAATACTGATAAACGATGTTTTATTTTGTAGTACCACAA  
TAAAGCTAAGTTCGAAATGAACTTATAATAAATACATACAACTTGTGTTTAAAAATATGTGTCAAAAGGAAGTAGGGTTTGTG  
ATGACATTACATGCTTATTTAGGTAGAGCGGGAACAGGTAAGTCTACGAAATGTTGACCGAAATAAAAAATAAAGTAAAGACAG  
ATCCGCTTGGAGATCCAATCATTTTAATTGCGCCAACCTCAAAGTACATTTCAATTAGAACAAGCCTTTGTCAATGATCCGGAATTAA  
ATGGTAGTTTAAAGACAGAAGTGTGTCATTTTGAACGATTAAAGTCATCGTATTTTCCAAGAAAGTTGGTAGTTATAGCGAACAAAAGT  
TATCTAAAGCTGCAACGGAATGATGATTTATAACATTGTTCAAGAACAACAAAAGTATTTAAACCTTTATCAATCACAAGCAAAA  
TATTATGGGTTTAGTGAAAAATTAACAGAACAAATTCAAGATTTTAAAAAATATGCAGTAACGCCTGAACATTTAGAACACTTTATT  
GCTGATAAAAAATATGCAAACTCGAACTAAAAATAAGTTAGAGGATATTGCTTTAATATACCGTGAGTTCGAACAACGCATTTAAAA  
CGAGTTTATTACGGGTGAGGATTCATTACAATATTTTATTGATTGTATGCCGAAATCAGAGTGGCTAAAACGTGCTGATATATATAT  
TGATGGTTTTTCAACAATTTTCAACGATTGAGTATTTAATAATCAAAGGATTAAATTAATTCGAAGAGTGTCAACAATTATATTGAC  
GACAGATGGTAACCAGCATCAATTTAGTTTATTAGAAAAACCATCGGAAGGTGTACGACATATTGAAGAAATAGCAAAATGAACCTCA  
ATATTTCTATTGAACGTCAATATTTCAAGCAATTATATCGCTTCAATAATCAAGATTTAAAGCATCTTGAACAAGAATTTGATGCAC  
TCAATCAATCGAGTGGCATGTCAAGGTATATCAATATTTTAGAATCTGCGACTATGAGAGAGGAAATAAATGAAATTTGCGCGAC  
GTATCATCGTTGATATTCGTGATAAGCAATTACGATATCAAGATATTGCAATTTTATATCGTGACGAGTCTTATGCTTATTTATTGGA

TTCCATATTACCGCTTTATAATATTCCTTATAACATTGATACAAAAGCGTTTCGATGACACATCATCCGGTCATGGAAATGATTCGTTCA  
TTGATTGAAGTTATTCAATCTAATTGGCAAGTGAATCCAATGCTACGCTTATTGAAGACTGATGTGTTAACGGCATCATATCTAAAA  
AGTGCATACTTAGTTGATTTACTTGAAAAATTTTGTAAGTGAACGTGGTATATACGGTAAACGTTGGTTAGATGATGAGCTATTTAATG  
TCGAACATTTTAGCAAAAATGGGGCGTAAAGCGCATAAACTGACCGAAGATGAACGTAACACATTTGAACAAGTCGTTAAGTTAAAG  
AAAGATGTCATTGATAAAATTTACATTTTGAAGCAAAATGTCACAAGCGGAACTGTAAAAGATTTTGCAACTGCTTTTTATGAA  
AGTATGGAATATTTGAACTGCCAAATCAATTGATGACAGAGCGAGATGAACCTGATTTAAATGGTAAATCATGAAAAGGCGGAGGA  
AATTGATCAAAATATGGAATGGCTTAATTCAAATCCTTGATGACTTAGTCTAGTATTTGGAGATGAACCAATGTCGATGGAACGTTT  
CTTAGAAGTATTTGATATTGGTTTGAACAATTAGAATTTGTTATGATTCCGCAACATTTGGACCAAGTAAGTATTGGTACGATGGA  
TTTGGCTAAAGTCGATAATAAGCAACATGTTTACTTAGTAGGTATGAATGACGGCACCATGCCACAACCAGTAAGTGCATCAAGTTT  
AATTACTGATGAAGAAAAAGAAATATTTTGAACAACAAGCAAAATGTAGAGTTGAGTCCTACATCAGATATTTACAGATGGATGAAG  
CATTTGTTTGCTATGTTGCTATGACTAGAGCTAAGGGAGATGTTACATTTTCTTACAGTCTAATGGGATCAAGTGGTATGATAAGG  
AGATCAGCCCATTTTTAAATCAAAATCAATCATTGTTCAACCAATTGGAAATTACTAACATTCCTCAATACCATGAAGTTAACCCATT  
GTCATAATGCAACATGCTAAGCAAAACAAAATTACATTATTTGAAGCATTGCGTGCTTGGTTAGATGATGAAATTTGGCTGATAG  
TTGGTTAGATGCTTATCAAGTAATTAGAGATAGCGATCATTTAAATCAAGGTTTAGATTATTTAATGTCAGCATTAAACGTTTGACAA  
TGAAACTGTAAAATTAGGTGAAACGTTGTCTAAAGATTTATATGGTAAGGAAATCAATGCCAGTGTATCTCGATTGAAAGGTTATCA  
ACAATGCCCATTAAACACTATGCGTCACATGGTCTGAACTAAATGAACGAACGAAGTATGAACCTCAAAAACCTTGATTTAGGTG  
ATATTTTCCATTCTGTTTTAAATATATATCTGAACGTATTAATGGCGATTTTAAACAATTAGACCTGAAAAAATAAGACAATTAA  
CGAATGAAGCATTGGAAGAAATTTACCTAAAGTTCAGTTTAAATTTATTAATTTTACGTTACTACTCTGTTATTTATGAAGCGCAT  
TGGCGCTATTGTAGAAACAACAATAAGCGCATTAATAATACAGGCATTAACCAAGTATTCGCAAAAACATTTGAGACAAGTTT  
TAGAAGGAAACCAAGAACAATGACGAATTAATTGCACAAACATTAACGACAACCTCAAGGTATTCCAATTAATATTAGAGGGCAA  
ATTGATCGTATCGATACGTATACAAAGAATGATACAAGTTTGTTAATATCATTGACTATAAATCCTCTGAAGGTAGTGGCAGACTT  
GATTTAACGAAAGTATATTATGGTATGCAAAATGCAAAATGATGACATACATGGATATCGTTTTACAAAATAAACAACGCCTTGGATTA  
ACAGATATTGTGAAACCAGGTGGATTATTACTTCCATGTACATGAACCTAGAATTAATTAATTAATCGTGGTCTGATATTGATGAA  
GATAAACTAGAACAAGATTTAATTAAGGTTTAAAGCTGAGTGGTTAGTGAATGCGAGACCAAACTGTTATTGATGCATTGGATATT  
CGTTTGAACCTAAATTCATTCCAGATATTGTACCAGTTGGTTTGAATAAAGATGGCTCTTTGAGTAAACGAGGCAGCCAAGTGGCA  
GATGAAGCAACAATTTATAAATTCATTACGATAACAAAGAGAATTTATAGAAACAGCTTCAAATATTATGGATGGACATACTGA  
AGTTGCACCATTAAGGTACAAACAATAAATTACCATGTGCTTTTGTAGTTATCAATCGGTATGTCATGTAGATGGCATGATTGATAG  
TAAGCGATATCGAACTGTAGATGAAACAATAAATCCAATTGAAGCAATTCAAAATATTAACATTAATGATGAATTTGGGGGTGAGC  
AATAGATGACAATTCCAGAGAAACCAAGGCGTGATTTGGACTGACGCGCAATGGCAAAGTATTTACGCAACTGGACAAGATGTA  
CTTGTGTCAGCCGCGCAGGTTCAGGTAAACAGCTGTACTAGTTGAGCGTATTATCCAAAAGATTTTACGTGATGGCATTGATGTC  
GATCGACTTTTAGTCGTAACGTTTACAAACTTAAGCGCACGTGAAATGAAGCATCGTGTAGACCACGTATTCAAGAGGCATCGATT  
GCTGATCCTGCAATGCAACACTTGAAAAACCAACGCATCAAAATTCATCAAGCACAAATATCTACACTTCATAGTTTGTGTTGAAA  
TTAATTCAACAGCATTATGATGTATTAATATTGACCCGAACCTTAGAACAAGCAGTGAAGCTGAAAAATTTTATTATTAGAACA  
ACGATAGATGAAGTTATAGAACAAACATTACGATATCTTGATCGCTTTTATTGAATTAACAGACCAATTTGCTTCAGATGAAG  
GATGATCAGTTTTCGAATGATTATTAACAATTGTATTCTTTGAGCTTGCAAAATCCAATCCTACAAATTTGGTTGGATCAATTTGGTGA  
CACCATACGAAGAAGAAGCACAAACAGCGCAACTTATTCAACTACTAACAGACTTATCTAAAGTATTTATCACAGCTGCTTATGAT  
GCTTTAAATAAGGCGTATGATTTGTTAGTATGATGGATAGCGTCGATAAACATTTAGCTGTTATAGAAGATGAACGACGTTTAAATG  
GGGCGTGTTTTAGAAGGTGGCTTTATTGATATACCTTATTTAACTGGTCACGAATTTGGCGCGCGTTTGCTAATGTAACAGCGAAA  
ATTAAGAAGCAAATGAAATGATGGTCGATGCCTTAGAAGATGCTAAACTTCAGTATAAAAAATATAAATCATTAAATTGATAAAGT  
GAAGAGTGATTACTTTTCAAGAGAAGCTGATGATTTGAAAGCTGATATGCAACAATTGGCGCCACGAGTAAAGTACCTTGCAGCGTA  
TTGTGAAAGATGTTATGTCAGAAATCAATCGAAAAAAGCGTAGCAAAAAATATTTTGGATTTTCTGATTATGAACATTTTGCATTAC  
AAATTTTAACTAATGAGGATGGTTCGCCTTCAGAAATTTGCCGAATCATACCGTCAACACTTCCAAGAAATATTGGTCGATGAGTATC  
AAGATACGAACCGAGTTCAAGAGAGAAAATACTATTTCGATCAAAAACGGGTGATGAACATAATGGTAATTTTATGATTTGGAGAT  
GTTAAGCAATCCATTTATAAATTTAGACAAGCTGATCCAAGTTTATTTATTGAAAAGTATCAACGCTTTACTATAGATGGAGATGGC  
ACTGGACGTGCAATTGATTTGTGCGAAAACTTCCGTTCTCGAAAAGAAGTACTGTCAACGACTAACTATATATTCAAAACATATGATG  
GATGAACAAGTCGGTGAAGTAAAAATGATGAAGCGGCACAGTTGTATTATGGTGCACCATATGATGAATCGGACCATCCAGTAAA  
CTTAAAGTCCTTGTGTAAGCGGATCAAGAACATAGTGATTAACTGGTAGTGAACAAGAAGCGCATTTTATAGTAGAACAAAGTTA  
AAGATATCTTAGAACATCAAAAAAGTTTATGATATGAAAACAGGAAGCTATAGAAGTGCAGACATACAAGGATATCGTTATTCTAGAA  
CGCAGCTTTGGACAAGCTCGCAATTTACAACAAGCCTTAAAAATGAAGATATTCCATTCCATGTGAATAGTCGTGAAGGTTACTTT  
GAACAAACAGAAGTCCGCTTAGTATTATCATTTTAAAGAGCGATAGATAATCCATTACAAGATATTTATTTAGTTGGGTTAATGCGC  
TCCGTTATATATCAGTTCAAAGAAGACGAATTAGTTCAAAATAGAATATTGAGTCCAAATGATGACTACTTATCAATCGATTGTA  
AATTACGAATTAATGACGAAGCAGCAGATGCAATTTTAGTTGATAAAATAAAAATGTTTTTATCAGATATTTCAAGTTACCAACAATAT  
AGTAAAGATCATCCGGTGTATCAGTTAATTGATAAATTTATAATGATCATTATGTTATTCAATACTTTAGTGGACTTATTGGTGGAC  
GTGGACGACGTGCAATCTTTATGGTTTATTTAATAAAGCTATCGAGTTTGAGAATTCAAGTTTTAGAGGTTTATATCAATTTATTTCG  
TTTTATCGATGAATTGATTGAAAGAGGCAAGATTTTGGTGAGGAAAATGTAGTTGGTCCAAACGATAATGTCGTTAGAATGATGA  
CAATTCATAGTAGTAAAGGTCTAGAGTTCCATTTGTCATTTATCTGGATTGTCAAAAAGATTTAATAAACCGTATTGAAACAACC  
AGTTATTTTAAATCAGCAATTTGGTCTCGGAATTGATTATTTTGATGTGGATAAAGAAATGGCATTTCATCTTTAGCTTCGGTTGCA  
TATAGAGCTGTTGCCGAAAAAAGAACTTGTGTCAGAAAGAAATGCGATTAGTCTATGTAGCATTAAACAAGAGCGAAAGAACAACCTTA  
TTTAATTGGTAGAGTGAAAAATGATAAATCATTACTAGACTAGAGCAATTGCTATTTCTGGTGAGCAGATTGCTGTCAATGAACG  
ATTAACCTTCAAAAATCCGTTCCATCTTATTATAGTATTTTATCTAGAACATCAATCTGCGTCAATTCAGATTTAAAAATTTGAA  
AAAGATATAGCACAAATTGAAGATAGTAGTCGTCGAATGTAAATATTTCAATTGTGTACTTTGAAGATGTGTCTACAGAAACCATT  
TTAGATAATGATGAATATCGTTCGGTTAATCAATTAGAAACTATGCAAAATGGTAATGAAGATGTTAAAGCACAAATTAACACCA  
ACTTGATTATCGATATCCATATGTAATGATACTAAAAAGCCCTCAAAACAATCTGTTTCTGAATTGAAAAGACAATATGAAACAG  
AAGAAAGTGGCACAAGTTACGAACGAGTAAGGCAATATCGTATCGGTTTTTCAACGTATGAACGACCTAAATTTCTATGTGAACAA  
GGTAAACGAAAAAGCGAATGAAATTTGTTACGTTAATGCATACAGTGTGCAACATTTACCATTCAAAAAAGAGCGCATATCTGAAGT  
TGAGTTACATCAGTATATCGATGGATTAATCGATAAACATATTATCGAAGCAGATGCGAAAAAAGATATCCGTATGGATGAAATAA  
TGACATTTATCAATAGTGAGTTATATTCGATTATTGCTGAAGCAGAGCAAGTTTATCGTGAATTACCGTTTGTAGTTAACCAAGCATT  
AGTTGACCAATTGCCACAAGGAGACGAGCAGTCTCAATTATTCAGGTATGATTGACTTGTATTTGTTAAGACCGGTGTGTCATTA  
TTTTGTAGACTATAAAACCGATGCATTTAATCGTCGTCGTGGGATGACAGATGAAGAAATTTGGTACACAATTAATAAATAA  
AGATACAGATGAAATATTATCAAAATACGCTTCAACGATTTCTAATAAAGAAGTTAAAGGTTATTTATCTTCTCAAATTTGGTA  
CATTGCAACTGTAGTATTTTGATTTTCAAAAGAATAAAAAATAATTTTCGATTAAGTGCAAGCCCTGTAGCAGAATGAACATAACT

CATTTTCAAAATTGCTTACTTATTTATTTGTTATTTGATAACGAAAAAGTTATAATGTGAATTAAGATAAAGATGAGGAGTTGAG  
AATGAATGAAATTCCTTATCATTCAAGTATAATGACAAAACCTCATATGGCGTTAAAGTAAAACGCGAAGATGCTGTATGGGATTTA  
ACACAAGTATTTGCTGACTTTGCAGAAGGAGATTTCCATCCTAAAACATTGTTAGCTGGTTTACAACAAAATCATACTTTAGATTTTC  
AAGAACAAGTACGTAAAGCAGTTGTAGCAGCAGAAGATAGCGGCAAAGCTGAAGACTATAAAAATTTCAATTAATGACATTGAATTC  
TTACCACCAGTAACACCTCCGAATAATGTGATTGCTTTTGGTAGAAAATTACAAAGATCATGCGAACGAATTAATCATGAAGTAGA  
AAAATTATATGTATTTACAAAAGCAGCGTCATCTTTAACAGGAGATAATGCAACAAATTCCAAATCATAAAGATATTACTGATCAATT  
AGATTATGAAGGTGAATTAGGTATTGTTATTGGTAAGTCTGGTGAAAAGATTCCAAAAGCATTAGCTTTAGATTATGTTTACGGCTA  
TACAATTATTAACGATATCACTGATCGCAAAGCACAAAGTGAACAAGATCAAGCATTTTTATCAAAAAGTTTAACTGGCGGTTGCC  
AATGGGTCCCTTATATCGTTACTAAAGACGAACTACCATTACCTGAAAATGTAAATATTGTTACAAAAGTTAACAATGAAATTAGACA  
AGATGGTAACACTGGCGAAATGATTCTTAAAAATTGATGAATTAATAGAAGAAATTTCAAAATATGTTGCACTACATCCGGGAGATA  
TTATTGCAACTGGTACACCAGCAGGCGTTGGTGCAGGTATGCAACCACCTAAATTTTTACAAACCAGGTGATGAAGTTAAAGTGACTA  
TTGATAATATTGGAACGCTGACAACCTTATATCGCTAAATAATTATCATTTAAAAAGCTAACCCAGTCTTTATATAGATTGGTTAGTTTT  
TTCTTGCTTTTCTAAAAAGGTGTTAAAGATAAAATTATTTATAATGTTACCATTTTGAGATGAAAGTGAAATATTGATATTAAGAAGT  
AGTTGATTATTTTACAGCAGATTACAATATTCTAATAAGGAATAAAATGTCATGTTCTCTCTCAAAATATAGAAGTGTGGTAGAA  
TATATATTCTGTATAATCAAATCATGATTAAATTACAAGCAAGTGGGTATTAATCCCAAGAAGCTTTAATTTAATAATATAAATAA  
TTAAAGTGGGGGAATCAGTATGTTACATTTACATATATTAAGTTGGGTATTAGCGATTATTTTATTTATCGCTACATACTTAAACATT  
TCAAAAAATCAAGGCGGATCACCATTTTTCAAAACCGTTGCACATGATTTTACGCTTATTTATGCTGTTGACGTTAATTTACAGATTTT  
GGATATTAATTCAGTCATTTTGAATGGCGGGCAATCATATGTTGCTTACATTGAAAATGCTGTGGTGGTTGTCAGTAGTTGAGT  
TGATGGAAGTGTGCAATTTGCTAAAGAAAGAGACATGAACAAAGTGCACAAATGTTTTGGATAAACAATGGCATTAATATCATCACA  
ATGGTATTAGGTGTCATTTACCGTTAGGGCCTATATCAAAATATTTCGGTATTGGCTAATTGATAAGACATATAGTATATGACATA  
AGGCATGGACAATTATTAGTCCAAGACCTTATGTCTTTTTGATTCTAAAAATGTTTAAACATAAAAAAAGGACTGGATAGTAGTAC  
CAGTCCAACATAATTCTAACCTAGACAATTAAGATTAGATTGAATCGCATGATTCATTTATTTAGCTTTGTAACCAATCATATTGATT  
AAATCTTTAGGGTGGCTATATGGTGGTGCATAAGCCACTTCAAACTCAGTTAACTCATCTACAGTTAGCTGGTTCATCATTTGCCATC  
GATAGTACATCAATACGTTTATCTGCACCTTCTTTCTACTGCAGCTGCTCTTAAATCTGCAGGTTTGAAGTGTCAATAATATACCC  
TTAAGTGTAAGGGGAATTTCTGGGTAATAATTCGCGTGTGCACCTTGAGTGACTTCTACCATTTTATAGTCAAATTTGCTTTAGTTC  
ATTTGGTTTAAACGCCGACACTCGCAATGTATAATCAAAGAACTCACAAATATTGTTGCCTAAGAAGCCTTTGAATTCATAGTGTCT  
ATTTCCAGCAATTTGTTTCGGCAACAATACTTGCTGCACGGTGAGCGCCCCAAGCTAAAGGAACACTAGCCGGTAGATGACATGTC  
GATAATGTGATGTTGCAATATCGCCTATTGCATAAATGTTTGAACATTTGTTTCAAAATTTATCGTTTACCGGTATGAAACCTTTTCG  
ATCAAGTTTGATATTTGAACCTTCGATAAATTTGAATTGGGGTGAGTACCGACACCTTCAATAATCATATCGTAATGTTCAACTTTT  
CCTGATTTAAATGTAATTTCAATTCCATTGATAGCATCAATTTCTCATTTTAAACGGTATGGAATCTCCCGCTTATCTAATTCATCAA  
GTATAGGTTGATTCATGTCAGCATCCATTAATTTATTTATCTTATCAGATCGATGAATTAAGTAGGGTGTAACCACGTTTCGTA  
GATTTTCAAGAATTTCTAATGAAACATACCCTGCACCTACAACATAACTTTATCAACTTGATTGCTTTGATGAATTGATCGATAGC  
ATCAGTGTCTTCTAAATTTCTAAGTGTAATGTAATATCACTTTCAAAGCCAAGGCTATTTGCACCTGCACCAGGGCTTAAATGAG  
TTTATCGTAAGATTCTTCAAATTTGTTGCTGTTGCTTTCTATTTAATACAGTTACAGTTTGTCTTTTATCATGATTGCAATAACTTCA  
GATAAGTTTTTACTGTAATTTGCTTTCTATCATAAAAATTTTACAGTTATACGTTAAAGCATATTTTCTATCTTCAACCACTTCGCCA  
ATGACATAAGGCAATGCACAATTAGCAAAGCTCATATCACGATCTTTTTCAAAAAATAATAATGTCACCTTCTTTATCTAAACGTCGA  
ATTTGGCTGGCACATGTTGCACCGCCAGCGACTGCTCCGACTACGACTATTTTGGGCATCGTAACCTTACCTCCTATTGTTTTAAATA  
TTATAAAATGATTAGTTATAAATTAACAGTAATATCTAATATTTAAATTAAGAAATCATTCAAATATCGACCAATGCCATCTTCAT  
TATTGTTGAATGTAATATTGTTGCTACATCTTAAAGTTCTTGCAACCATTTTCCATAGCAACACCATGGCGGGCGTACTCAATCAT  
TTCAATATCATTTATCTTATCACCGAATGCAATAATATTATTCGGTCAATATTTAAAAATTGCTAACTTGCTCAATGCCTCTTGCTT  
TATTAATACCAAGTTTACAATTTCAATGACAGGGAATGGTGCGCCCCAGCGTCGATGCTCAATATGATCGGCATAAAAAATGAGTA  
AGCATATTTTGAATTTAGGTTACCTTTTCTTTCGGCTTCAATTAATTAAGGTTAGGGGATTTCTTCAAGTGGAACAAGTAATTTAC  
CAGTTGAATTTCTGGATTACCATTTGAAAAACCTTCAATAATCTTGGATCATGTTGTTAATGAAAACATACTTTTCACTTCTGTC  
TATAATATTCGATACTTGATATTGTTGTAATCCTTGAATGTTTTGTGCGATGCCTAAATCTAAAAATTTATGGCAAGTTTGAAG  
TTTTTATCTTTAGGGTGATGTACGTAAGCGCCATTAAAAATTAACAATTGGTGTCTGTTAAATTTAATTCATGATAATACATTTGACTTG  
CACGATAAGGTCTGCCAGTCGCAATCATAATTTGGTGTCCACGTTGTTGTAATTCATTTAATACTTGTTTAGTATATGATGAAATTTT  
TTGTTATCGTTTAAATAATGTTCCGTCTAAGTCTAGACATATTAATGTGGTTGCATATCTCTCTCCTCATAAGTTGCTTAGTTTCATAT  
AGATACATCATAGCATTTTATTGGCGTTTTGTGCGGATATTTGATATATTATGAATAATATGACATTAAAGAGGTGATATGGATGGAA  
GAGGCATTGAAAGATAGTATCTTAGGTGCATTAGAAATGGTAATTGACCCTGAATTAGGAATTGATATCGTTAATTTAGGTTTAGTA  
TACAAAGTGAATGTTGATGATGAAGGCGTATGTACAGTTGATATGACTTTAACATCAATGGGATGTCCAATGGGACCTCAAATTTAT  
GATCAAGTTAAAAACAGTATTAGCAGAGATTCCTGAAATTCAGGATACTGAAGTGAATATCGTATGGATGCCATCTGGACAAAAGA  
TATGATGTCACGTTACGCTAAGATTGCACCTGGTGTGAGCTAACAATAAACGTGCATTGCTGTAGAAATTTCTTTAGAAATTTCTCTGT  
GTTGGGTCCCGCAGTCAATATAACATTGTAGAGTATAATTCATTGTGAATAAGCTCCCTTCAAAGTAGACATTGAAAAATGAAAA  
TTTGAAGGGAGCCTTATTTATGTTCTAGGTTCTGATTTCATTTTGAATAATTTATATCTAACTTGTTTCAAAAAATATGAATTAAGACA  
GTGACTTGCACCTTCCAAGAGTGCACAATTCATTTTCTAGTTGAATATTTTCTTGAAAAATTTTATAATAAATGAATTTATATTACAG  
TTATATTACAATACATAATACTTCATAGTTTTTAAAGTTGCCGAGTTGCATTACAAATTTGGATTTCGAAGTAAGAATCATCATTGGTAA  
TTTTTTTAAATTTAACAGTATTTTAGTCAATATGATTTTGATGATGTCGTAATTCAATAATATACATATGCATTTCAATATTTCTTTAAA  
CAGCATAACTAAATTTAATTAAGCATCTAAGAAGAACAGTTTTTAAAGGGAAGAATGCAAAAAATGAACAAAACAAAGGGTTTTAC  
AAAGTATAAGAAAAATGAGATATATGCCAGGGCTCGATGGTTTGAGGGCAATCGCTGTTTAGGAATTTATTTTACCACCTTAAACA  
AGCAATGGTTGACAGGTGGCTTTTAGGTGTGGATACATTTTTTGGTACTCTGGTTATTTAATTAACAAGCTTATTACTCAAAGATA  
TGATGACACAGGTATCTAAATTTGAAAAAGCTTTTGGATACGTCGTTTAAAAAGCTTTATTACCAGCAGTCATAGTTTTATTAATGGTT  
GTAGGGACAGCAACCTTATTATTAATAATCAGATAATATCATTAGGGTTAAACATGATATTATTGCTGCGATATTTTATGTATCAAA  
TGGTGGTATATAGCAAAAGATGTTAATTTATTTGAGCAATTTTCATTTATGCCATTAAAGCATTTATGGTCTTTAGCAATTGAAGAAC  
AGTTTTACATATTTTCCAGTTATTTTGGTTACATTATTGTTAACAATTAAGGCGATACAAAATAGGATTTATTTTTTGGGAGT  
ATCAATAATTTCTTTAGGGTTAATGATGTTTATCTACAGTATTAATGGGGATCATTCACGAGTGTATTTTGGTACAGATACTAGATTA  
CAGACATTGTTACTGGGTGTTATTTTAGCTTTTTTATGGCCACCGTTTAAATTTGAAAAATGATCCACCTAAAGTTGAAAAATATGTTA  
TTGATAGCATAGGTATTTATCATTTATAGTACTTATATTATTTTTCATTTAATGATGAGACGAATGGATATGATGATGGTGG  
TTTCTATTTAATATCCATAATAACGTTATTTATTATGCTAGTGTCTTACATCCATCATGATGGATAGCGAAGATTTTCAAAATCCAG  
TGTTAGTATTTATCGGGAAAGGCTTTATAGTTTATATTATGTCATGTTTGCAGTAATTAGTTTCGTACATAGTTACTATGTAGACGG  
ACAGATACCTGTATATGTGTACTTTATAGATATAAGTTTAAACAATTTATTTGTCAGAGCTATCATATCGCTTTATAGAAACTCCATTT  
AGAAAAGAAGGTATTAAGCTTTAAATTTGGCGACCTTCTTATATACCACAATTTATAAGAATGGCAATTGTAGTAACCTTGTTAATT

CCATTATGTTGATTATTAGTAGGAGTGCATTCATAAATAATGGTAAAGACATTATTGGAGAAAAAGCGAATAGCTTTGATACCAACAATT  
GAAGATAATTATTTAATGCGGATAGCACCAATTGATAACATACACATTGATGGCTTAGTAAGTGAGAAGAAAAAGGAATCTTCCGA  
CGTATATAATAATATTAAACCTCTTTTAATCGGTGATTCAGTAATGGTTGATATCGGTGAGTCATTTAAGTCATCAGTTCCCTAAGTCT  
AGAATTGATGGAAAAGTAGGGCGTCAATTGTATCAAACTTACCTTTAGTTAAAGCGAATTATTCACAATATAAAAAATCATCTGAT  
CAAGTCGATTAGAATTAGGTACAAATGGGACTTTTACTGTCAAAACAGCTCGACGATTTACTTAATCAATTTTGGAAAAGCCAAGATT  
TATTTAGTTAATACACGTGTCCAGAAGATTTATGAGGCAATGTAAATCGATTATTAGTACGCGGGCAAAACGAAAGTCCAATGTC  
ACATAATTGATTGGTATAGGCGCATACAAGGCATAGTGAATATTTTGCACAGACGGGTGACATTTAGAGTACAAAGGAGTCCT  
AGCTTTAAAGATGAAATATTTAAAGCACTTAAAAAGAAATAACATATGTTTAAAGTCTAGTTAATGTGTAACGTAACATTAGC  
TAGATTTTTTTTATTTCAAAAAAATATTTACAAATATTAGGAAATTTAAGTGTAAGAGTTGATAAATGATTATATTGGGACTATAAT  
ATAATTAAGGTCAAAGAAAGTCAAAGTCAAAGTGCAACTTGACCAACTCTACAAATTAGAGGTGAAATTATATGGATATAAATAA  
AATGACATATGCTGTTCAAAGTGCTTTACAAACAAGCAGTTGAACTGAGTCAGCAACATAAAATTACAAAATATAGAAAATTGAGGCAA  
TTTTAAGCGCTGCCTTAAATGAAAAGTGAAAGCTTATATAAAAGTATTTTAGAACGAGCAAATATTGAGGTAGATCAATTAACAAAA  
GCTTATGAAGACAAAATAAACACGTATGCATCTGTAGAAGGTGACAATATACAATATGGTCAATATATTAGCCAACAAGCAAACCA  
TTTGATAACTAAGGCTGAATCATACATGAAGAATGAGAAGTGAATATATTTCAATGGAGCATATTTTACGTTCCGGCAATGGACA  
TTGATCAACAAACAACAAACATTATATAAATAAATAAGTAGAAGTTATCAAAAGAAATTTAAAAAAGTAAGAGGGGGAATCCAGCT  
GACATCACAAAATCCAGAAGTTAATTACGAAGCATTAGCTAAATATGGCCGCGACTTAGTAGAAGAAGTTAGACAAGGTAAAAATG  
GATCCTGTTATAGGAAGAGATGAAGAAATTCGAAATACGATTTCGATTTTAAAGTCGTAAACTAAAAACAACCCTGTGCTCATTGGT  
GAACCAGGTGTTGGTAAAACTGCAATTGTTGAAGGATTAGCGCAACGTATAGTTAAGAAAGATGTGCCAGAATCATTATTAGATAA  
AACTGTTTTTTGAGTTAGATTTAAGCGCATTAGTAGCGGGCGCTAAATATCGTGGTGAATTTGAAGAGAGATTAAAAAGCAGTCTTAA  
AAGAAGTTAAAGAGTCTGATGGTAGAATTATATTTTATTGATGAAATCCATATGCTTGTAGGTGCTGGTAAAAACAGATGGTGCCA  
TGGATGCAGGCAACATGCTAAAACCAATGTTAGCACGAGGAGAGGTTACATTGTATTGGTGCAACAACATTTAAATGAATATCGAGAA  
TATATTTGAAAAGATTCCGCTATTAGAGCGTCGTTTCCAAAAAGTAGCAGTTAGTGAGCCTGATGTTGAAGATACAAATTTCAATTTA  
CTGGTTTTAAAAAGAACGATATGAAGTGATCATCTGTTGCGTATTCAGATAGACGCTTAGTTGCTGCCGTGAATTTGCTGATCGT  
TACATCACTGATCGTTTTTTACCAGATAAAAGCGATTGATTTAGTTGACCAAGCATGTGCAACAATTCGTACGGAAATGGGATCAAAT  
CCAAGTGAATTGGATCAAGTTAATAGACGTGTCATGCAATTAGAAATTTGAAGAAAGCGCACTTAAAAATGAATCTGACAATGCGAG  
CAACAGAGATTACAAGAACTACAAGAAGAGCTTGCCAAATGAAAAAGAGAAACAAGCAGCACTTCAATCTCGTGTAGAATCAGAA  
AAAGAAAAAATAGCAAAATTTACAAGAAAAACGTGCGCAACTAGATGAAAGTAGACAAGCGTTGGAAGATGCACAAACAAATAAC  
AATTTAGAAAAAGCTGCTGAACACAATATGGAACAATTCCTCAATTGGAAAAAGAACTTAGAGAATTAGAGGATAATTTCCAAGA  
TGAGCAAGGTGAAGATACAGATCGAATGATTCTGGAAGTTGTAACAGACGAAGAAATTTGGCGATATTGTCAGCCAATTGGACAGGC  
ATACCAAGTTTCAAATATTAGTTGAACAGACGTTGAAAAATTACTTCAATTAAGTGACATCTGCATAAACAGTGTGTAGGTCAAGAT  
AAAGCGGTTGACCTGGTTTCAGATGTCAGTAGTTAGGACGAAGCAGGATTAAGAATCCAAACAGACCTATTGGTAGTTTCTTATTC  
CTAGGTCCAACCTGGAGTAGGTAAAACTGAATTAGCTAAATCATTAGCTGCATCATTATTTGATTCTGAAAAACATATGATTTCGTATT  
GATATGAGTGAATATATGGA AAAACATGCAGTATCAAGATTGATAGGGGCACCTCCAGGATATATTGGACATGATGAAGGGGGTCA  
ATTAAGTGAAGCGGTTCTGTCGTAATCCATACTCAGTTATCTTATTAGATGAGGTTGAAAAAGCGCATACTGACGCTCTTAATGTATT  
ATTGCAAAATTTAGATGAAGGCGGTTTAACTGATTCTAAAGGACGTAGCGTTGATTTTAAAAATACTATTATTATTATGACAAGTAA  
TATTGGATCTCAAGTTTTATTAGAAAACGTAAAAAGAGACTGGTGAAATTACAGAATCAACAGAAAAAACTGTTATGACAAATTTAA  
ATGCATATTTCAAACAGAAATTTTGAATCGTATGGATGACATCGTATTTTAAACCTCTATCTATTGATGACATGAGTATGATTGT  
AGACAAAATTTAAACGCAATTAATATAAGATTATTAGAACAGCGAATCTCAATTTGAAGTTTCTGATGATGCTAAAGCTTGGCTAG  
GTCAAGAAGCTTATGAACCTCAATACGGTGCAAGCACTTAAACAGTTTGTACAACGCCAAATTTGAAACACCATTAGCAGCTATG  
ATGATTAAGAGGGGATTCCAGAAAGGTACAACGATTAAAGTTAATTTAAATTCAGACAATAACTTAAAGCTTTAATGTTGAAAAAAT  
TCATGAATAAAATTTGAACCAAGAATGTGATGATTAATCGCATTTCTGGTTTTTTAGATTTGAAATTTATTATAATTGTTTATTGGCAA  
TATACTTTTTAAATGATTTAATAAAAAACCAATATTTCTGGGCTTTCTTTTTTGTCTGATATATATGTAATGAAATAGGCGCTTGTAA  
AATTTCTGTTGTTAATAACCGAAATATTGTAATCACTATCTGTTGTTATATAAATAGGCAGGAATGATATACCTTGATTCATTTCGATT  
AATTTAATTGAAGTATGCACATCATTGATAGATAGAAATTTGTGCTTTTCCATAAATATTTAAAAATATTATTTTAAAGTGATGACCAAT  
ATTCTGGATGGTTATCACTTATTATTTTGTATTTTCAAATAAAGAGTGCCTCAGTTAGAAGATGATTATTTCTTTTATTGGGAGCAAT  
CAATACAATTTTACCTTCGCATACTTTTTCAGATGAACCTTCTTAGTTTAGTTGCTTAATGCTTAATCCGATGTCATACGTATGAT  
TATAAATCTTTTTTCAATATTTTCAATTTTTGACATGGAGGAAACATCGATAAAGCAGGATGCTCGTTAAAGAAAGATTTTAAAAATTT  
GGGCATAATGAATGTCGCGATATATGAAGACACGACAACATTTAATTTTCGATTGAAACATCGTTTTTTTTAAAGTTGGATATGTTTGAT  
GCCACTTTCATATTGTTCAATAAAACTTTGCGCAATTGGAAGAAATGTATGACCATCTTCAGTCAAGATAATTTGATTTTTATAAGTT  
TCAAATAGTTTCACATTGAGATGCTGTTCTAAATTTTAAATTTGCTTATGTATAGAAGGTATAGTGAGATTAATTTCTTCACTAGCTA  
ATCGATAGTTTAAACGTCTTCGCTAAAAATGACAAATGTATAGTACCAATCTAAATTCATGAACCTTACCTCTTTCAAAAAAGTTAATAA  
TTCATTAGATAATATTTAATTTTTATTGCATAAAAAATAATATTAATATTATATCAGAGGTTACCGAGGGGGTGAAGTAATATGATTC  
GAATTCAGATAATAACAATAAGGGATGGTATGCAACAAAGATGTTTTCGAAAAAGTCAATTATAAAAAAGAAAGTATTGAAACA  
AATTAACAAGTTAAATATAAATTTCTGTTGAAGTAGGCATGTGTACAACATTCGAGGATGAAATTAATTTATTCATCAATTCAGAGACAT  
TTTAAGTCTTGAAAAAGAAATTTAGTAGATTAGTACTAGGCTTAATGAAAAAGAAATAAAAAAATAGTCAAAATAAAAAATTCATAATTT  
AGTGGTAAAAATACTATTGCCAATATCTGACTTGCATATAAAAGAAAAAGCTTAATTTTTCAAATAAATATTATATTAGAAAAATCAA  
AGACTGCTTGGATATATTTAAAGAAAGATAAAAAAGGAGTAGATATTTGTTTTGAAGATGCAACAAGGACTTCTAGAGAAAAATTGA  
AGGAATACATGGAATTTATTTCAAATATCAAGTTAGAACAGTTACCTTTGCGGACACTGTAGGATGTTTCGACACCATTAGAATAC  
GGAGATATTTTAAATTACTTTGTA AAAAATATTCTAACATAATTTTCTGCTCATTGTCATAACGATCTAGGGTTGGCTACTGCAA  
ATACATTAGCTGCAATTTTAAATGGTGCGAAACAAATAGAACTACATTTTGGGAATTGGTGAGAGAGCGGCTAATGCTCCTATTG  
AGGAAATAATTAATTTTGAACAAAAACAAATAAAAGTACGGAATTCACCTTTACCCGACGTATATAAAACCTAGTATTATTAATTT  
CTAAATTTCTGATTTTCAATATCAGAAAAACAACTATAATTTGGTGAAAAATATTTAAACATGAATCAGGAATTTATCAAGATG  
GTACTAAAAAATAATAAATATGATATCAATATTTAGTTCTTAGTGAATTTAGGATTGAAAAATTCACAAGTTGTTTCAAGTTTCAATAA  
GTAATATTTCTAGTAAGAAATCTTGACAAATAAAATTTAAATCAATAGTTAAACACTGAAGAAATTTGATGAAAAATTTTCTTTCTATA  
AACTTGTGAACAAGTTTTACCTGAAGTAGCACCTGAAGATACAGTGGATTTACTTCAGATAATAAAAAAGGAGGAGTAAAGATGGA  
AATTTTAAATGATTCTGTAAAAAGTTTTGAAAAACTTTATTTACAATTACAAGATGGTTTTCCAGTGATTGTTTCTTACTGATACTAAT  
TATAATTTATGTAGTTTACCTAACACGATCTTTGTATCGATAAAAAATTTGAATATAAAAAAGCGATCGAAAGATAAGCCATTATCA  
TTATTTATTGATAAGCCAGAGGATTGGAAATTTGATGGAGATAATCAAAATACGGAATAGTTGATAAACTAGTTGAAATATTTTGG  
CCTGGACCATTAAATATTATTTTAAAAAATAAAACAAAGCTATAATATTGCTCAATAATTCAGATAGTATAGCTATAGGATGGTGA  
CAAAAATAAACAGATGAGAAGATTTTTCATATATTAATTCACCTATAGCAATTACTTCACGAATATATCTGGAAGTCCGCGATGAT  
ATTTTAATAACTGAAAATGAAGCAATTAAGCACATGGGCGAAAAATGTAAGATATATGCTAAGAAAGTCAAAATAAACTAACTATAA

AACATCTAGTACGATTATTTAAAGTGACAGATAATAAAATTGAATTATTAAGAGAAGGAGATATAAAGTTTGAAGAAAATAAAGAA  
AGACTAGGTACAGGTATTATTTATGAATAAGTTAATACTTGGGATTTATTTATACCGAATTTTTTCACGAGCATACTTTTATTACCG  
TTTTTATTAATTTACTTTTTGATTCAAGGTTATCCATAATACAATTAGAAAATATTAATGGCGTCTTATGGCATTGCAGCATTTTTATT  
CTCTCTATACAAAGAGAAGTGTTTTAAAAATTTGTAACCTTAAAAGATTCTAATAAATTAGTTGTTAGTGAATATTCAAAATCATCGG  
TTTATTGTTGTTATTATATCAAAATCAATATTTAATTTTAGTAGTGGCACAAATATTATTAGGGTTAAGTTACTCAATGATGGCGGGT  
GTTGATACCGCAATAAATTAAGAAAATATAACAAATGAGAAAATACGTACAAAATAAGTCAAATAGCTATATGTTCTCTATCATTATT  
AATTCAGGGATTATAGGTAGTTATCTTTATGGAATAAAATATTAATGGCCTATAATAATGACTGGTATATTTCAATTCTAACAATT  
ATAATTATTTCGATGCACATTAGTTGAAAAATAGGGAATTAATTTAATAGGAGAAAACAAAGGGAAAGATAAAGAAATTTCTACCAGA  
AGAGAAGTTTTGGATATTGCATTATCTTTTTAAGAGCGTTAATATTAGGATTTTTATAGGATTTATTCGAATTAATATATATAAT  
GATTTAAAACCTGAATAATTTACAATTTATTTTCAGTATTAACCTGTTACACAGTTATGGGTTTTGATCTTCACGTTATTTAACTAAAT  
ACTTGAATTATAAGTTTGTGTCAGAAATTTGTTTAGTAATATTTTTAATAATATATACATATCAAAAGTTTCATAGCAGTTACTATTTT  
TATGATATTTTTAGGTATTTCTTCAGGGTTAACTCGTCCACAACTATAAATAAACTTTCTAGCAGTAGTAACCTTAAGAGTGATGCTT  
AATTATGCAGAAACGTTATATTTTTATTTTTAATATCGCATTTTTACTTATGGGTGGTACTTATATACAATAGGAACTATTCAACT  
TAATATTATTTATTTTCGTTATTAATTTTTATATATTTAATAATAATATTTTATTTTACAAGGAGAGAGCAACATGAAAATAAAAACTG  
AATTTAAAGGGAACAATATACCATATGAATACGCAGCAGGTGCAGATGTGAGTGATTCTATTAACGGGAATCCAATTAAGTCATTT  
CCATTTGAAGTAATTGAATTACCGGAAGGGACTAAATATCTTGCTTGGTCTTTAATTGACTATGATGCAATTCCTGTGTGTGGCTTTG  
CATGGATTCAATGGAGTGTTGCTAATGTAAGTGTTAGTGGCAATTCATTTCTATAAAAAGCAGATTTATCAAGAACAAAGGGTGACT  
ATGTACAAGGTAAAAATAGCTTTACTAGTGGGTTATGGGTGAAGATTTTTCAGAAATAGAAAATCCTACTATAGGACCTACACCAC  
CTGATCAAGATCATCAATATGAATTAACAGTTTATGCGTTAGATCATTTCTTTAAAATTTGAAGAATGGGTTCTACTTGAATGAATTTT  
AAAAGAAGTAAATCAACATAAAATTTGATCAAAACAAGTATTAACCTTATAGGAAGAAAAATTTAATACTAAATATCTCATCAATATA  
AAAATGTTCAATTAAGGTACAAAGAAACAAAGGTTTTAATTTATATATTAGGTACGGCGTTCGCTATAATGCAAAGAAGTAATTA  
AATTTAAGAAATGTAACTTAGTTATTGTAATGTGAATTTATTTGAAAAAATAGAAAAGTATTAACAATTATAGCTTTTACATTAATT  
AAAATTTATTTTAAAAACAAGTAAACAATTTACATACTTATAATTTTGAAACTTTTCAATTTGTGTTATATTGATTTTGTAAAGATA  
CTTTAACTCACAAAGGAGAGAGATTATATGAAATTAATAATCATTATACTGTAACCTTTGGCACTGGGCATGATCGCAACGACTGGC  
GCTACTGTGGCAGGTAATGAGGTATCTGCAGCAGAAAGGACAACTACCGGCAACTCAAAAAGCTAAAGAAAATGCAAAATGTTT  
CATATACAATTGCAGTAGATGGCATTATGGCTTTCAATCAATCTTACTTAAATTTACCAAAAGATAGCCAAATATCATATTTAGATTT  
AGGAAATAAAGTTAAAGCTTTATTATATGATGAACCGGGTGAACACCTGAGAAGATTTCGAAATGCAAAATCTGCCGTTTACACGA  
TTACTTGGAAAGATGGCAGTAAAAAAGAAGTGGATTAAAGAAAGATAGTTATACAGCAAACTTGTGTTGATTCAAAATCAATTA  
CAAATGATATTAATGTAAAAACTAAATAAACACTTAAATTTATCAAAATTCATCATGAAGCATTTAATTTTACAGTGATGATTATA  
AATAATTGCCTTGATACAAAGATTACTCGTAAATGACATCTTTGTATTAAGGCTTTTCTAAATTTAAAAGTGATGGGTTAGAGGTC  
ATTGAGCTTTAAAATATTCAAAATACAAAACATTAAATGGCCAAAAATAAAAGCCGCCTTTATCTGGGCAGCTTCAATTAAGAAA  
GACATATTTCAATTTATACTAAATAGTTATTGTGATGAATCTTTCCGGCGGTTAATTACTGCGCAAAAAATTGCTGTGAAAAATCGTGA  
ACAATACTGCCATGATAATTGGATTCACTACATTTAAGCTGTCTCCACCTACTAGGCTATTAAGTACAAAGTTAACCATTTCGATTA  
ATAATAATGCCCAAAAGAATGTTACGAGGTGTTTCATGTCATTTACTCCACTTTAATTATATATATTTTAAAGTGAAGTTA  
GATTTGTTATAGTAACATCTCATATATTTTGACCATATTATACAGTTTAAATGAATGATTTTATCTGAATGGCTTATCTAATTTAAG  
CGCATTAACCAATTTCACTAGAAATTTGACGATAATAAAGCATTAAAAATTTTATTAAGTATGCAATATTCCTACCTCTGACTTGA  
GTTTAAAAAGTAATCTATGTTAAATTAATACCTGGTATTAATAATTTTATTAAGAAGGTGTTCAACTATGAACGTGGGTATTAAGG  
TTTTGGTGCATATGCACCAGAAAAGATTATTGACAATGCCTATTTTGAGCAATTTTATAGATACATCTGATGAATGGATTTCTAAGAT  
GACTGGAATTAAGAAAGACATTGGGCAGATGACGATCAAGATACTTCAGATTTAGCATATGAAGCAAGTGTAAGCAATCGCTG  
ACGCTGGTATTACAGCCGAAGATATAGATATGATAATTGTTGCCACAGCAACTGGAGATATGCCATTTCCAACGTGCGCAAAATATGT  
TGCAAGAACGTTTAGGGACGGGCAAGGTTGCCTCTATGGATCAACTTGACGATGTTCTGGATTATGTATTCATGATTACAGCTA  
AACATATGTTCAATCTGGAGATTATCATAATATTTTAGTTGTCGGTGCAGATAAATTATCTAAAATAACAGATTTAAGTACCGCTT  
CTACTGCAGTCTTATTTGGAGATGGTGCAGGTGCGGTTATCATCGGTGAAGTTTTCAGAAAGCAGAGCTATTGAAATGATAAATGG  
GTTCTGATGGCAGTGGTGGTAAACATTATATTTAGATAAAGATACTGGTAAACTGAAAATGAATGGTTCGAGAAGTATTTAAATTTG  
CTGTTAGAATTATGGGTGATGCATCAACCGTGTAGTTGAAAAAGCGAATTTAACATCAGATGATATAGATTTATTTATTCCTCATC  
AAGCTAATATTAGAATTATGGAATCAGCTAGAGAACGCTTAGGTATTTCAAAAGACAAAATGAGTGTTCTGTAAATAAATATGGA  
AATACTTCAGCTGCGTCAATACCTTAAAGTATCGATCAAGAATTAATAAATGTTAACTCAAAGATGATGATACAATTGTTCTGTGTC  
GGATTCCGGTGGCGGCCTAACTTGGGGCGCAATGACAATAAATGGGGAAAATAGGAGGATAACGAATGAGTCAAAATAAAGAGT  
AGTTATTACAGGTATGGGAGCCCTTTCTCCAATCGGTAATGATGTCAAAACAACATGGGAGAATGCTCTAAAAGGCGTAAATGGTA  
TCAATAAAAATTACACGTATCGATACTGAACCTTATAGCGTTCACCTAGCAGGAGAACTTAAAACTTTAATATTGAAGATCATATCG  
ACAAAAAAGAAGCGCGTCGTATGGATGATTTACTCAATATGCAATTTAGCAGCTAGAGAGGCTGTTTAAAGTATGCAATTTAGAT  
ATCAATGAAAATACTGCGATGCAATCGGTGTATGGATTGGTTGTTGTTGATGGAAACATTTTAAAGATTGCACATAAACA  
ATTAATGGATAAAGGCCCAAGACGTGTGAGTCCATTTTTCGTACCAATGTTAATTCCTGATATGGCAACTGGGCAAGTATCAATTGA  
CTTAGGTGCAAAAGGACCAATGGTGCAACAGTTACAGCATGTGCAACAGGTACAAATTCATCGGAGAAGCATTTAAAAATTGTGC  
AACGCGGTGATGCGATGCAATGATTACTGGTGGTACAGAAGCACCAATTAATCATATGGCAATTGCAGGTTTCAGTGCAAGTCGA  
GCGCTTTCTACAAATGATGACATTGAAACAGCATGTCTGCCATTCCAAGAAGGTAGAGACGGTTTTGTTATGGGTGAAGGTGCTGGT  
ATTTTAGTAATCGAATCTTTAGAATCAGCACAAAGCTCGAGGTGCCAATATTTATGCTGAGATAGTTGGCTATGGTACTACAGGTGAT  
GCTTATCATATTACAGCGCCAGCTCCAGAAGGTGAAGGCGGTTCTAGAGCAATGCAAGCAGCTATGGATGATGCTGGTATTGAACC  
TAAAGATGTACAATACTTAAATGCCATGGTACAAGTACTCTGTGGTGACTTAAATGAAGTTAAAGCTATTAATAAATCAATTTGG  
TGAAGCAGCTAAACACTTAAAGTTAGCTCAACAAATATAGTACGTGTTACTTACTTGGTGCAACAGGTGGAATTTGAAGCAATCT  
TCTCAGCGCTTTCAATTAAGACTCTAAAGTCGCACCGACAATTCATGCGGTAACACCAGATCCAGAATGTGATTTGGATATTGTTT  
CAAATGAAGCGCAAGACCTTGATATTACTTATGCAATGAGTAATAGCTTAGGATTCGGTGGACATAACGCAGTATTAGTATTCAAG  
AAATTTGAAGCATAACTATAAAATCTTCAGTAACGTTGTTTTAGTTACTGAAGATTTTTTCAGTTCTTTTATACTAAGATGAGCGAC  
AGCACAATCGTCATAATAAAATATAAAATATTTATTAATAATAAGGGGATTATCCATGTAGAAACAAAGTAATGCTCTTTTTTACC  
TCTTGTGGGTTGAAAAATGGATCATCAGAGATAGACTTCTTCTTTTTCGAAGATGACATTTGATACTTTAATCTTCTAAAACCATAAC  
TTGTGCGCATCAAAATGCCTTCTGTACAAGTAAAAATCAAAAAATATGCTAATAAAAAATAATTAATGAAACATAAAACAATATTTA  
AATATGTAATGATAGTATGGCTATTTAAAAACCCATATAATAAACGTTAACATTGGGGTTATTAGTGCCATTTCAAGCCATTTTTCA  
ACATTTGACTCCCACTTATAGAAAACCTTACGCATAGTTTACATTAATAAATGAGACATTGAGGAATGATTTTTTAAATTTCTTCAA  
CTTTATTGAAATTTCTAAAATCAAAACATTTCTATTAGTTTAAAGCAAAAAAACATTGATATATAGTAAATATTGTATATATAATATTA  
GTTAAGATTTTCAGAAAATTTTGAAGGGAATGGAAAATTTAGAAATCGGAATTTGTTAGAGGAGGGGATTAGATGGGGAAATATATTT  
TCAAACGATTTATTTATATGCTTATTTCTTTATTTATTATTACAATTACATTTTCTTAATGAAATTAATGCCAGGTTCCGCAATTT

AACGATGCTAAATTAATGCTGAACAAAAAGAAATTTTAAATGAAAAATATGGATTAATGATCCTGTAGCTACGCAGTATTTACA  
TTATTTAAAAAATGTTGTTACAGGCGATTTTGGTAATTCATTCCAGTATCATAAATCAACCTGTGTGGGATTTGATTAAACCGAGACTA  
CTACCTTCTTTTGAATGGGTCTTACAGCAATGTTTCATCGGTGTGATACTGGGACTTATTTTAGGTGTTGCAGCAGCTACTAAACAAA  
ATTCTTGGGTGACTATACAACACTACAGTTATTTTCAGTTATTTGCTGTATCTGTACCATCTTTTGTACTTGCTGTACTTTTACAATATGTA  
TTTGCAGTTAAATTAAGATGGTTCCCAGTAGCTGGATGGGAAGGTTTTTCGACCGCGGTATTACCGTCACTTGCATTATCTGCAGCT  
GTTTTAGCAACTGTCGCCAGATACATAAGAGCAGAGATGATAGAGGTATTAAGTTCAGACTATATTTTATTAGCGAGAGCTAAAGG  
TAATTCGACAATGCGTGTACTTTTGGACATGCACCTTAGAAATGCTTTAATTCCAATTATTACAATTATCGTTCCCATGTTAGCAAGT  
ATTTTAACAGGCACCTTTAACAATTGAAAAATTTTTTGGGGTTCCTGGATTAGGGGATCAATTTCGTACGTTCAATTACAACAAATGAT  
TTCTCAGTAATCATGGCAATCACACTATTATTTAGCACACTGTTTATCGTTTCTATTTTTATTGTAGATATTTGTACGGTGTGATAGA  
TCCACGAATTCGTGTTCAAGGAGGTAAAAAATAATGGCTGAAAAATAAAAACAATTTGTGCGATTAACGACGATCATTCTAAATGCAGC  
TATGACGCATACCTCTGACGCTATCGCATCATCTGATTTTATTATTAGAGATTTAGATTTGAATCAGGAACCTGAAATGCAACGAGA  
AAGCAAAAACTTTTGGCAAGATGCTTGGGCTCAGTTAAAACGAAATAAGTTAGCTGTTGTGCGGTATGATAGGTTTAATTATCATTGT  
AATATTTGCTTTTATCGGTCCAGTTATAAATAAACATGATTATGCTGAACAAAAATGTAGAACATAGAAATCTCCGGCAAAAAATACC  
TGTATTAGACAAAGTCCATTTTTACCTTTTGATGGTAAAGATGCAGATGGCAAGGATGCTTATAAAGCAGCAAAATGCTAAAGAAA  
ATTATTGGTTTGGTACTGATCAGTTGGGTCGAGATTTATGGACAAGAACATGGAAAGGTGCTCAAAATTTCAATTGTTTATCGGTGTTG  
TTGCAGCGATGTTAGATATTTTTATTGGCGTTGTATATGGTGCGATTTCTGGATTCTTCGGTGGACGTGTGCGATACGATTATGCAACG  
TATACTTGAAGTCATAGCATCTATTCCGAATTTAATTGTCGTAATTTTATTGTATTAATTTTTGAACCATCCATTGGACAATTATAT  
TGGCTATGTCTATCAGCGGTGGTTAGGCATGAGCAGAGTTGATCGTGGAGAATTTTTAAAAATTAAAAATCAAGAGTTTGTCTATGG  
CTTCGAAAAAATTATAGTAAAGCACAAGCTAAAAAGCGCGCATTTGAAAATCTTAATACATAACATTAGGTGCTATCGTGGTTACATCAAT  
GTTTACAGTACCTAGTGCTATTTTCTTCGAAGCATTTTTAAGTTTCATTGGTATAGGTGTACCCGCACCTCAAAACATCGTTAGGGTCA  
TTAGTAAATGATGGGCGCGCAATGTTATTAATTTATCCACATGAATTATTTATACCAGCAATGATTTTAAGTTTATTAATTCTATTCT  
TTTACTTATTTAGTGATGGATTACGTGATGCATTTGATCCGAAAAATGCGTAAATAAAAGGGGGCATAGCATATGACTGAAAGAATAT  
TAGAAGTAAATGATTTGCATGTTTCTTTGATATTACAGCAGGGGAAGTGCAGGCAGTGAGAGGTGTAGATTTTTATTTAAACAAAG  
GGGAAACATTGGCAATTGTTGGTGAATCAGGTTTCAGGTAAATCTGTAACAACAAAAGCAATTACAAAATTATTCCAAGGGGACACA  
GGAAGAATTA AAAAGGGAGAAATTTATTTTTAGGGGAAGATTTAGCAAAAAAACCTGAAAATGAGTTAATTAATTAACGTGGCAA  
AGATATTTCAATGATCTTTCAAGATCCAATGACATCTTTAAACCCAACGATGCAAAATGGTAAACAAGTCATGGAACCATTAATTA  
GCACAAAAATTATAGTAAAGCACAAGCTAAAAAGCGCGCATTTGAAAATCTTAATACATACTAAATCTTGTAGGTTTACCAAAATGCAAGAAAAAGA  
TTTAAAGCATATCCACATCAATTTTCAGGTGGACAAAGGCAAAAGAAATTGTTATTGCAACCGCATTAGCTTGTGAACCTAAAGTGCTC  
ATTGCTGATGAACCAACGACTGCATTAGACGTAACGATGCAGGCACAAATTTTAGATTTAATGAAAGAACTACAACAAAAAATCGA  
TACAGCAATTATTTTTATAACGCATGATTTAGGGGTGTTGCGAATATTGCTGATAGAGTAGCAGTTATGTATGGTGGTCAAATGGT  
TGAAACAGGAGATGTTAACGAAATATTTTATGATCCAAAGCATCCATATACATGGGGATTATTATCGTCAATGCCTGATTTATCAAC  
AACAAATGCACACCATTACTAGCGATTCTTGAGCGCCACCTGATTTATTACACCCACCTAAAGGTGATGCATTTGCGAGACGTAG  
TCAATATGCATTAGATATTGATTTTAAAGTAGAACCACCGTGGTTTAAAGTTTCACCGACACATTTTGTGAAATCTTGGTTATTAGAC  
GCACGTGACCAAAAGTTGAACATCCCGAGCTGGTAAAAACAACGTATGAAACCGATGCTAATAATTTAGAAAACCACTCAAGGT  
AGAAAGGGTGTCTGTTCAATGAAAAATGATGAAGTGCTATTATCCATTAATAATTTAAAGCAATATTTTACCAAGCAAGAAAAAGAA  
GAAGTGAGAGCGATTGAAAATATTTCTGTTGATATATACAAAGGGGAAACATTAGGTTTAGTAGGAGAATCGGGGTGTGGTAAATC  
TACAACCTGGTAAATCAATTATTAACCTTAATGATATTACAAGTGAGAAATTTTGTATGAGGGTATTGATATACAAAAGATTTCGTAA  
ACGTAAAGATTGTCTAAATTTAATAAAAAAGATACAGATGATTTTCAAGACCCATATGCGTCTTTAAATCCTAGGTTAAAAGTAAT  
GGATATAGTAGCTGAAGGTATTGATATCCATCATTTAGCAACTGATAAACGTGACCGTAAAAAACGTGTCTATGATTACTTGAAAC  
TGTGGAATTAAGTAAAGAACATGCCAATCGCTATCCTCATGAATTTTCAGGTGGACAACGCCAACGTATTGGAATTGCCCGTGCATT  
AGCCGTTGAACCAGAAATTTATTATCGCGGACGAACCAATATCGGCATTGGATGTTTCAATCCAAGCTCAAGTAGTTAATTTATTATT  
AAAATTACAACGTGAAAGAGGGATTACGTTCTTTATAGCTCATGATCTATCAATGGTGAAGTATATTTTCAGATCGTATTGTCAGT  
GATGATTTTGGGAAAAATGTTGAAATTGGACCGGCAGAGAAGAAATTTATCAAAATCCATTACAGATTACATAAGTCTTTATTATC  
AGCCATTCCACAACCTGATCCTGAATCAGAACGCAGTCGCAACCGATTAGTTATATTATCATGATGAAGCAATAATCATTTAAGACA  
ATTACATGAAATAAGACCACAGCATTTTGTCTTTAGTACTGAAGAAGAAGCGGCACAACCTACGAGAAAAATAAATTGGTGACACAAA  
ATTAAGGGGAAGGGGGAATGCAATGACGAGAAAAATTTAGAACCTTATTTTAATTTTGATTGCTACAATTGCATTAAGTGGTTGTG  
CTAATGATGATGGTATTTATTTCAGATAAAGGTCAAGTATTCAGAAAAATTTTGTGCATCAGACTTAACATCCCTTGATACATCATTAA  
TAACGGATGAAATATCTTCTGAAGTACTGCGCAAAACATTCGAAGGTTTATACACATTAGGAAAAGGTGACAAACCGGTGTTAGGT  
GTTGCGAAAGCTTTTCTGAAAAGAGTAAAGGTGGTAAAACCTTTAAAGGTTAAATTAAGAAGCGATGCTAAATGGAGCAATGGTGA  
CAAAGTGACTGCGCAAGATTTTGTATTATGCTTGGAGAAAAACAGTTGACCCTAAAAACAGGTTCTGAATTTGCATACATTATGGGGGA  
CATTAATAATGCGAGTGATATTAGTACTGGTAAGAAACCTGTAGAGCAATTAGGTATCAAAAGCATTAGATGAACCATATTACAAA  
TTGATTTAGAAAAGCCGGTTCCATATATTAATCAATTATTAGCATTAATACCTTTGACCTCAAAATGAAAAGATTGGCCAAAAAAT  
ATGGTAAAAATTACGGTACGGCAGCTGATAGAGCGGTATACAATGGTCCATTTAAAGTTGATGATTGGAAACAAGAAGATAAAACC  
TTACTATCTAAAAATCAGTATTATTGGGATAAAAAAGAAATGTAATAATTAGATAAAGTGAATTATAAAGTTATTAAGACTTACAAGC  
CGGTGCATCATTGTATGATACTGAATCAGTAGATGACGCAGTTATTACTGCAGATCAAGTAAATAAATATAAAGATAACAAAGGAT  
TAAACTTTGTGTTAACGACTGGGACATTTTTTGTAAAAATGAATGAAAAACAATATCCTGATTTTAAAAACAAAAATTTAAGACTGG  
CTATCGCACAAAGCAATAGATAAAAAAGGATACGTTGATTAGTGAAAAACAATGGCTCAATTCCTTCCGATACACTAACAGCCAAA  
GGAATTGCGAAAGCGCCTAATGGCAAAAGATTATGCGAGTACCATGAATTCGCCTTTAAAAATATAATCCTAAAGAAGCAAGAGCACA  
CTGGGACAAAGCTAAAAAAGAGTTAGGTAAAAATGAGTGACATTTTCAATGAACACAGAAGATACACCGAGATGCAAAAGATATCT  
GCTGAATATATCAAAATCGAAGTTGAGAAAAATTTACCAGGAGTTACTTTGAAAAATTAAGCAATTACCGTTTAAACAAAAGATATC  
ATTAGAACTGAGTAACAATTTTGAAGCATCACTTAGTGGTTGGTCTGCAGATTACCCTGATCCTATGGCTTATTTAGAAAACAATGAC  
CACAGGTAGCGCACAAAATAATACAGACTGGGGTAATAAAGAATATGATCAATTACTTAAAGTAGCAAGAACCAAAATTGGCACTTC  
AACCGAACGAACGATATGAAAACCTGAAAAAAGCAGAAGAAATGTTCTTAGGAGATGCACCGGTAGCACCAATTTATCAAAAAGG  
TGTGTCACATTTAACAAATCCTCAAGTAAAAGGATTAATTTACCATAAAATTTGGTCCAAATAACTCACTTAAACATGTATATATTGA  
TAAATCGATAGATAAAGAAACAGTAAAGAAGAAAAAATAATATGCTTTGTAAATTAGGCTGGAGACATATCTCCAGTCTTTTGTG  
TTGGATAAAAACTTTGGGAATAAAAAATTTAAAAATAAGTCGTTTTTTAAATTACTGAAATTGATTAATGCATAAAATAACTGAATATT  
CTAAAAATAAACTTGTAATAATTTTTCTATGAGTAAACTAAAAAGAAAAAATTAGATTGAAAGTAGGAGGCATATAAATGGGGAA  
GCTAATTAATATATTCTTAATCTATTGTTATCGTTTTAGTGTGAGTCTTGGGAAAAAGCAGTAAACAGATGAAGGATGAAGGATAA  
AGATGCTACTAAAAACAGAAACCTCAAAACATAAAGGTGGTACCTTGAATGTAGCATTAACAGCACCTCCAAGTGGTGTATTCTTC  
GTTATTAATAGTACACATGCGGATGCTGTAGTTGAGGGATATTTTAACGAAAGCTTATTAGCAACTGATAAAAAAATACGTCCTAA  
GGCATATATTGCTTCATGGAAGGACATCGAGCCGGCTAAGAAAAATAGAATTTAAATTA AAAAAGGTATTAAATGGCATGATGGTA

ATGAATTGAAAATTGATGATTGGATTATTTC AATTGAAAGTCTTAGCTAACAAAGGACTACGAAGGTGCTTATTATCCAAGGTG TAGAAA  
ATATCCAAGGTGCGAAAAGATTATCATGAAGGAAAACTGATCATATTAGCGGATTGAAGAAAAATAGATGACTACACTATG CAGGTT  
ACATTTGATAAAAAACAAGAAAATTACTTAA CAGGATTATTACTGGACCTTTATTAAGTAAAAAATATTTATCAGATGTACCAATT  
AAAGATTTAGCGAAATCAGATAAAATCCGAAAATATCCTATTGGTATTGGACCGTATAAAGTTAAGAAAAATCGTTCCAGGTGAGGC  
TGTTCAACTCGTTAAATTTGATGATTATTGGCAAGGTAAGCCTGCTAGACAAAAATCAATTTAAAAGTTATTGATCAAGCTCAAAT  
TATTAAGGCAATGGAAAAAGGCGATATTGATGTTGCGAATGATGCTACCGGTGCAATGGCAAAAAGATGCTAAGTCATCTAATGCTG  
GTCTCAAGGTATTATCTGCGCCAAGCTTAGACTACGGTTTAATAGGATTTCGTATCTCATGATTACGATAAAAAAGCTAATAAAACTG  
GTAAAGTGAGACCAAAATATGAAGACAAAGAATTACGTAAGCAATGCTTTATGCAATTGTAGAGAAAAATGGATCAAAGCGTT  
TTTCAATGGTTACGCTAGTGAATCAATAGTTTTGTACCATCTATGCATTGGATAGCAGCCAATCCTAAGGACCTAAATGATTACAA  
ATATGATCCTGAAAAAGCTAAAAAAATCTTAGATAAAGTTAGGTTATAAAGATAGAGATGGTGACGGATTTAGAGAAAGATCCTAAAG  
GTAATAAATTTGAGATTAACTTTAAACATTATTCAGGTTCAAATCCTACTTTTGAACCAAGAACTGCTGCGATAAAAGATTTCTGGG  
AAAAAGTTGGCTTGAAAAACAAATGTGAAGTTAGTAGAATTCGGTAAATATAATGAAGACTTAGCAAATGCATCTAAAGATATGGAA  
GTGTACTTCAGATCATGGGCAGGAGGTACAGATCCAGATCCATCAGATTTATACCACACTGATAGACCTCAAATGAAATGAGAAC  
AGTTTTACCAAAATCAGATCAATATTTAGATGATGCATTAGACTTCGAAAAAGTAGGCATTGATGAAAAGAAACGTAAGATATTT  
ATGTTAAATGGCAAAAATATATGAATGATGAGTTACCTGGATTACCAATGTCCAAGGTAAATCGATAACTATTGTTAACGATAAA  
GTACGAAACTTAGACATTGAAATTTGGAACGTATCAAAGTTTATATAATTTAACTAAAGAAGCTTAGTAATGTAACCTCGACGATTTT  
GTCGAGGTTTACTTATATGGGGGGATGTTATGAATAATGTATTGTTAGAGGTTAAAGATTTAGAAACATCATTAAAAATAAATAATG  
AATGGTTAGCAACTGTGAAAAATATTTCTTTGAATTATCTAAAGGAGAAAGTTTGGGTATAGTAGGGGAATCTGGTTGCGGTAAGT  
CCATATTAAAGTCAATTATTAATTAATTAATTAATTAATTAATTAATTAATTAATTAATTAATTAATTAATTAATTAATTAATTAAT  
ATCGATACGCTCAATGAGAAGCAATTGCTAGATATTCGAGGAAATGATATTGCTATGATTTTCAAGAACCTATGACTGCTTTAAAT  
CCTGTATTTACCATAAAAAATCAACTGTGGAATCTATAAAATCACATAAAAAAATTTCTAAAAAAGAAGCAAATAACTTAGCAAA  
AGATTTACTAAAAAAGTTGGAATTGCTAGACAAGATGAAATATTAATAGCTATCCACATCAATTATCTGGTGGTATGAGACAAA  
GAGTAATGATTGCAATGGCCATTTTCATGTTCTCCTAAATTAATGCTGATGAACCTACAACAGCATTGGATGTCACGATTCAAG  
CGCAAATATTAGACTTATTAAGAAGATTGCAAAAAGGAAACGCAAATGGCAATTATGATGATTACACATGATTTGAGTGTAGTTGCT  
GAGTTTTGCGATAAAGTCTTAGTTATGTATGCAGGTCAAATGTAGAATTTGGAGGCATAAAAGAAATACTACACAATCCGAAACA  
TCCTTATACCCAAAAATATTATCAACAATTCAAAACTTAAAGAGAGCAGAAACGACTTGAAACGATAGAAGGAATGTGCCAT  
CAATCCAAGCATTTCACGTTAATAAAGTGCAGATTGCAAAATAGATGTAACAAAAAACTGGATATTTGTAATAATCAATCTCTAAAAA  
TGCATGTTTGTGAAGACGTCATTGTACGTTGTCATTTGTACAAAAATGAATATAAGGAGATATAAGAATGGAAAAATATTTTAGAAGT  
CAACCAAAATAAAAAAATACTACAAAATTA AAACTGGATTATTACAAAAAACTCAGTACGTTAAAGCTGTTGATGACGTATCGTTTT  
CAATAAAAAAAGGACAAACTTTTGGATTAGTAGGAGAATCGGGTGTGGTAAGTCAACGTTAGGTAAAGTGATTATCAGGCTTGAA  
GATGCAACTTCAGGCTCAATAATTGTTAATGGTGAAGATATAACAAGATTACAAGGTAAAAAACTCAGAAAAATCACGACAACAATA  
TCAGATGATATTTCAAGATCCGTATGCATCATTGAATCCGATGCAAAATGGTTGGAGATATCATTTCAGAACCTATTTTAAATTATAA  
AAAATTGCCAAAAGAAGAAATAAAAAAAGAAGTACTATATTTATTAATAATGTGTTGGCCTAAGTGAAGATGCATATTATAAATATG  
CACATGAATTTTCAGGTGGACAGAGACAAAGAGTGGGAATTGCAAGAGCATTGGCTTTGCGTCCGAGTTAATTTGTTGCTGATGAG  
CCTGTAAAGTGCAATTAGATGTATCTGTTCAATCTCAAGTACTGAATTTATTAAGAAGATTTACAAGAACAATTTAACTTAAGCTATTTAT  
TTATCGCACATGATTTAAGTGTAGTAAAAACATATAAGTGATGTCATTGGAGTTATGTATTTAGGT CATATAGTTGAAATCGCATCTG  
ATAAAGAAATTTATGAAAATCCCAAACATCCATATACAAAAGCGTTGATTTTCATCAATACCACAAATTGATAAACATAATAACAAT  
AGAATTATATTA AAAAGGAGAATTACCTTCGCCAAGTAATCCGCCGCAAGGTTGTCCTTTTCATACAAGATGTCCGATTGCAAAAGAT  
AAATGTAAGAAAAATATACCACAATTAAGGACATTGGTGATGAACATCAAGTTGCTTGT TTTTATGTAAATAAAGTAGGTGATTTA  
AATGGTTAAATTAATATTAAGAGATTAGGTTTAATGATTCCGTTACTAATTTTAAATTTCTATTGTTGTATTTTCATTAGCTATCATTC  
AACCAGGAGATCCATTTTCAGATTTACAAAACGGAAAAATAAAACAAGAAGCGATAAATGCACAAAGGGAAAAAGTTAGGCCTCAA  
CGACTCTATATCACATCAATACATTAGATGGGTCAATCATGTTATACATGGTGATTTAGGGGAGTCAATCAAATATAAAAGGCCGGT  
AATTGATGTTATTGAGGAAAGAAATCCAAATACAAATATTACTCGGTGCTATTAGTCTAATTAATTATTACTTATCTCATTATCTCATT  
GGAATAACGTCAGGTAGATATTCTTACAGTTTGACTGATTATACTGTGCAAAATATTTAATTATTTGATGTTAGCTATTCCATCTTTTA  
TTGCGGGAGTATTTGCAATTTTTATTTTTCTTTTGAATTACAATGGTTTCCGTTTCAAGGTTCTGTTGATATTAACCTTAAAGAAGGT  
ACTTTTGAATATTATATGAGTAAAAATTTATCATACATTTTTGCCTGCATTA ACTTTAGGATTATTATCTACTGCTGGTTATATTCAATA  
TTTACGTAATGATATTATTGAAAATCTAAAAAAGATTATGTATTGACGGCAAGGTCAAAAGGATTATCTATGAATAAAATTTATAA  
TAAACATATATTGAGAAATCTTTAATACCTATTATTACATTTTAGGTGCTGATATTGTAAGTATTTTAGGTGGAGCTGTGATTACT  
GAGACTATCTTTTCATATAACGGTATCGGTAAATTAATTTTAGAATCGGTAATAGGTCAAGACTATCCATTAATGATGGCATTAACG  
TTGTTTTTCTCATTTTTAGGTTTACTGGGTAATTTGATTTCTGATATTACTTATGGATTTATAGATCCAAGAATTAGAAGTAACCTAGG  
GGGGATTGGAATGCAAAAATAGTCAAAAATCGCCTTTTAAAATTGCATTGTCTAGATTTATTCATAATAAAATGCAATTTTATCGAT  
TATTTTTTTATTAATCATAACTATTGTATCAATTATAGGCCCAATTAATAGTCTCTTTTCCAGTGAACCAACAGATTATTAAATATA  
AAAGGTGAAATGACAGCACAAAACATTCTTGGTACAGACTCTGGTGGTAGGGATAACTTTAGTCGTTTGTATATGCAGGTCTGATT  
TCATTATCCATTGGAATTACATCTACAATAGGAATGCTTTTGATTGGAATTACAGTTGGAGTGATTCTGGTTATTTCCGAGGTATTG  
TTGATACATTATTAATGAGAATAACCGAATTTGTTATGTTATTTCCATTTTAAATTTTGAATTGTATTAATGCTGCACTTGAGAGA  
TAAAAATAAAAATCCTTATGGATCTGCCATAATCTTGTTCTAGTTATTATCGTATTAAGTTGGGGAGGTATTGCAAGACTTGTTCTGT  
GGTAAAGTACTTCAAGAAAAAGAAAAATGAATACTTTTTGGCAGCAAAATCAATTGGTACACCCACATATAAAATTTTGAAGACA  
TCTTTTGCCGAATATATTAAGTGTAGTTATCGTACAAGCAACATTGTTATTTGCCGGTATGATTGTAGTGGAATCAGGATTGAGCTTT  
TTAGGATTTCGGAATTAGTAAAGCAATACCATCTTGGGGTAATATGTTGAGTGATGCTCAAGAAGGGGATGTTATAAGTGGTAAACC  
GTGGATATGGATGCCACTTCTATAATGATTACATTAACATAATTAAGTATAAACTTTGTAGGGGAAGGGCTTAAAGATGCTTTTAA  
TCCTAGAGGTAGACGTTAAATAATAAAAGAGGCACTAGTTAATTCTAGTACCTCTTTATTTTATCTCTTACGTCCTAATCCCATCGCT  
TTTTCCATTTTCTTCACTGTTTTAAATGAACTTTGTGTGCTTTATCTCTACCTTGATCTAAAAATATCATCAAGTTTATCTGAGTTATA  
GAACTTTTCGATTTTTCTTGGAAATCTACTAAAAATGCTTTAACTATTTTCAGCAAGGTCACCTTTAAATTTACCATAACCTTCCCCTT  
CATATTTTGCCCTCAATGTCTTTGATAGGCATGTGCGTTAATCCAGCATATATTGAAATTA AATAGTAATGCCTGGTTATTGTGCGG  
GTCGAATTTAATAATACCATCTGAATCAGTTACAGCGCTTTTAAATTTTTTAGCTGCAACATTCGGCTCGTCTAATAATGAAATGAAG  
TTTTTAGTATTATCATCACTCTTACTCATTTTTCTTGTGGGTCTTGTAAACTCATGACACGTCCACCAACTTTAGGCATACGAATTC  
AGGTTTCAACAAGCATCATTATAGCGACTATTAATCTATCTACAAGGTACGAGTCAATTTCGATATGCTGCTTTTGGTCACTCCCA  
ACTGGAACGATATTAGTATTGTAAGAACAATACAGCTGCCATTAAGGTGGATATGTTAATAGACCAGCAGGTATACCTTCAAC  
TGCTTTCTGAGCTTTATCTTTGTATTGCGTCATACGCTCTAATCTCCAACAGAAGCAATCGTAGTTAACATCCATCCTGCTGTGACG  
TGTGCAGGGACTTCAGATTGTATGAACATGTTGCTTTGTCTGGATCTATACCAGAAGCTAAATAAATCGCTGCTAATTGTCTGGTC  
TGTTTACGTAATTTTAAACGATCTTGTGGCATTGTAATTGCATGTTGATCTACGATACAGAAATAACAATCATAGTCATTTTGCACAT

CAACAAATGTTTTAGTGCGCCAATATAATTTCCAATAGTAGGAATTCCACTAGGTTGGATGCCTGAAAATAATGTCTCCATTTAAATGCGCTACTTTCTTAGTAATATTTAATAATTATCATTATAACAGTATTTCTTAAAAATGTAAGATGTGTTAGAAATATACGTATAACTTACTACTAACAAAGGGATTAATAATCTTTTTTATAAGGTAGAGAACTTATCTGAAAAATTAGGTTTTCTCATTTAATTTAATGTTAGATAGTTATAATAAATAGTAACGATTAAGAATTTTAGAAAAAATGTTTTTCTTGATCTATACTAAATTTAAGCAATGAATTTTATTCATTCAAATAGGAGAGTGAGATGTATGGTAACATTATTTACTTCACCAAGTTGCACATCTTGCCGTAAAGCGAAAGCATGGTTACAAGAACATGACATTCGGTATACGGAGCGTAATATTTTTCTGAACATTTAACAATTGATGAAATTAAGCAAATATTAATAATGACTGAAGACGGTACTGATGAAATCATTTCTACACGTTCTAAAAACATACCAAAAAATTAATGTTGATATTGATTCACTACCATTACAAGACTTATATTCAATCATTTCAAGATAATCCTGGCTTATTACGTCGTCCAATTATTTTAGATAATAAACGACTACAAGTTGGTTATAATGAGGACGAGATTCGACGTTTCTTACCTAGAAAAAGTTCGTACGTTCCAATTACAAGAAGCACAACGTATGGTTGACTAATAACCATTTAACTATGTGTCATACTTTACTAAAAAGATATGTCAAGCAACACTATTTCTATAGTGTGCTTTTTTGGTTTTAATTTTACAATAATTGCTTAGTATCTTTTTAAATCAAATGTGCAATTGTTAATATAGTCTATATTAGAGTGTGTTGGATGAAACATTTGCTATGATAAGGTAAAAATTAATTAAGAAAGTGCTTTAATGCTTTAACTGTATAAATCATTTAAATAGTTTTGCTACAACGAATATGTTATTATAAGTTACCAAAATATTTAGAGAAAGAAATCAAACAAATAAATTTGATTTTTGTTTGATGCTTTAATACAATGTGGATACTATTCATCGACTGTAAGGAGTGAGATGATATGAGAATAGAACGAGTAGATGATACAACGTGAAAAATTGTTTATAACATATAGCGATATCGAGGCCCGTGGATTTAGTCGTGAAGTTTATGGACAAATCGCAAAACGTGGCGAAGAAATCTTTTTGGTCAATGATGGATGAAATTAACGAAGAAGAGATTTGTTGTGAAGAGTCCATTATGGATTCAAGTACATGCCTTTGAAAAAGGTGTCGAAGTCACAAATTTCTAAATCTAAAAATGAAGATATGATGAATATGCTGATGATGCAACTGATCAATTTGATGAACAAGTTCAAGAATTGTTAGCTCAAACATTAGAAGGTGAAGATCAATTAGAAGATTATTGAGCAACGAACAAAAAGAAAGCTCAAGGTTCTAACGTCAAAAGTCTTCAGCAGTAAAAATCAAGAACATTATTGTGAAATTTAACGATTTAGAAGATGTTATTAATTATGCATATCATAGCAATCCAATAACTACAGAGTTGAAGATTTGTTATATATGTTGATGGTACTTATTATTATGCTGTACATTTTGATAGTCAATGTTGATCAAGAAGTCATTAATGATAGTTACAGTCAATTGCTTGAATTTGCTTATCCAACAGACAGAACAGAAGTTTATTTAAATGACTATGCTAAAATAATTATGAGTCATAACGTAACAGCTCAAGTTGACGTTATTTTCCAGAGACAACTGAATAACGATATTAATTAAGCAACGCACTATGAAAGGAGACTCTTTGGAGTCTCTTTTTTATTGATTTCAAAAGCTGAAAAAGTAATAGTAGTTAACTTACGTGTAATATTTTGAGGTGAAGATATGTTAGTAGCTTTAAATGAAGAAAAGAACGTGTGTTAGCAACTACTGCATTGAGAAAGACACAATATTTTGTCGGGTGTGTGGCAAGCAAGTTATTTTAAAGCGTGGGCTCAAAGTAATTAGTCATTTTGCACATAAACATTTAGCGGAACAAAAATGTTTTAATAATGAAACGATTAAACATTATAAAATAATTGATTTTAGCAGAGATGATACAGCAACAAGGATTTAAAGTAGAGATAGAGCCATTTTTAAAGAAAAACAAATTTCCGATATTTTGATTAATAATAAATATGTTATTGAGCTACAGTATTCGCCAATCTCTTATAAACAGATTTCTTCAACGAACGGAAGTTTAAGAAAAATGGGATATAAAGTAAGTTGGTTATTTAAATGATGTTGATTATTGTCATAATAAAGTGAAGTTCAATCATTTTCAAAGTATGTTTATTAATCCATTCACCTCGAAAACCTTCATACGTTCAATTTAGAGAAAAACAAATAATGATGTTTCAACAAATACAATATTTAGGCGGGCACAAATATGTCGCTGAAAAAGAAATGCCAAATTAGTGAGTTGTTAATGAGGCGCCTTGATGATTATCATGCTGTTTATAAATATCAAAAGTTCGCAATTAATCAATATATCAAAATTTGTCGCTGGCAAAATCTGTTTAGAACCCACTTTAAGTGCAATGTATCAATTACAGTTAACTGATCAAGAAGTAGTGACAAATTATGGTTATATTTTCCAGAGCAAATTTATATTAATAATCATCCTATTGAGTGGCAATTACAAGTTGATTTATGGTTAAAGAATGGAAGAAAGCAAATTAGTAAATGACAATCTTAATTTTAACTGAAAAATTTATTGTGCTCTAGAAAGTGAAGAACGCAATTAAGAAAAACTTATTAACAATTTTAAATATTTGTTTCAGATAAAGGTAATGACGTGCAATTTGTCTCTAAAATGAGAAAATTATCAATTTATTTTATAGGAGTTTACTACATATGAGTCAACAATTCAGAGGAAGAACAGGAACGTAAATATCCTGAATATACATGGGACTTAACAACAATTTTCAAAGATGATGAAGCTTTTGAGGCTGCATTTAAAGAAAGTTGAAAATGAGTTAGGCAAGAAGAACAAATTTAAAGGACACATTGGTGATAGTGCTGAGACATTATACAATGCGTTAGAATTAGAAGATACATTAGGTACTAAATTAGAAAAAGTATATGTATACGCGCACCTAAAACAAGACCAAGATACAACGAACGACAAGTATACTGGTATGGAGTCAAGAGCACATCAATTAATTATTAATTTAGCTCGCATGGAGTTTCTTAGTGCCAGAGATTTACAAATTGATGAAGATAAAATTCATCATTTGTAAATTCATATGATAAATTACAAAAATTCGCATTTGATTTGAAGTTGATTAATGAAAAACGTCCTCATATTTTATGCTGAAACTGAAAAGTTATTAACAGAAGCGCAGGACGCGTTATCAACGCCATCAAATGTATACGGTATGTTTAGCAACGCTGATTTAGTATTTGAAGATGCGATTGATAAAGATGGAATGACACCCGTTAACACAAGGTACATTTATTAAGTATTTAGAATCAGATGATCGCAAACTAAGAGAGTCTTTTAGAAAATGTATATAAAGCATATGGTGCTCATATAATAATACGTTGGCGCTAGCTAGCAGGTGAAGTGAAGAAAAATGTATTTAATGCTCGTACACACAATTACAAAACGTGAAGAGAAAAAGCATTGAGTAATAATCATATTCCAGAAATGTATATGACAATCTAGTAAAAACTGTACATAAATATTTACCATTGCTACATAGATATACTGAATTGCGCAAGAAATGCTAGGTTTAGATGACTTGAAAAATGTATGATTATATACACCATTAATTAAGATATTAAGTTTGAAATGCCTTATGAAGAAGCTAAAGAGTGGATGTTAAAGCTTTAGAACCAATGGGTGAAGAATATTTAAATGTAGTTAAAGAAGGCTTAAACAATCGTTGGGTCGATGCTATGAATAAAGGTAAACGTTACAGGTGGCTATTATCAGGTGCACATTTAACTAATCCATTTATTCTACTTAACTGGTCTAATACTATTTCAGACTTATACACATTAGTTCATGAATTTGGGCATTCAGCACATAGTTACTTCAGTAGAAAAATCCAACCGTCAAATTTCTAGTGACTACACTATTTTGTGCTGAAGTTGCATCAACTTGTAAACGAAGCACTTTAAGTGATTATATGGATAAACATCTTGATGATGAAAAACGCTTATTTATTAACCAAGAAATAGAACGTTTCAGAGCTACATTATTCGCAAAACAATGTTGCGAGAATTTGAGCATAAAATTCATGCAATAAAATTCATGCAATAAAATTCATGATAAAATGCTGGTGTAGATATGACAACACCTGAACCAATTGAACAAGCTTGTGAAGTTTTGAACAAAAATTTGAACGCTTTTGAATAATTAATGAAAGCTTAGTACTATTGTATTGCTTACATTATGAACAGATTGTGACAATTTAAATTAAGTACTATTAAGGTTGAAATGGTAGAGATAGCATGTTATATTATGAACATGAAATTAATCACATAACAAACATACCCCTTTGTTGAAGTGAAAAATTTCTCCCATCCCTTTGTTTAGCGTCGTGATTTCAGACACGACGTTTTTTTATGTTCTTTTTAATAAGAGGGAAGTGAAAGTTGATATAAAATGTATTAATATGCATTTTATACATTAACGATTATATGCTATTATGTTACCAAAATTATATAATTTGATAATTTTTCGAACTGGTTAAATTCGAAAAATATCATATAATATTAGATCGATGTGTAACATTACGTTCACTAATAATTATATGTTGCAAAATTAAGAGTCAGTAAAAAGACCTCGTTACATTTATGGGTGACGAGGTCTTAAATTTATTTATTTTATTTGATTTGATTTTAGGCATTTTAGATTTCCAGAAATCGCCATCTGGATATTTAAGTTTTTCAATTTTTTGTGTAATGGCTAACTCTTTAACTCTTTGTTTAAAGTTTTCTGGCCATTCATAAATAGTAAGTAATCTTCCATCGTTACAAGTTGTTGTTGCTGTATATAAGTTCTAATTTAGGAGGAAGATTCTTTTCGATAGGTTTACCCATCAATTCATTAATTATATAAGTATAGATGTGATATGGGTATAATCCTTCGACTTTTAAACCTCTTCATGAACATCTTCACTAAAGAAAACGAGAGAAAGGGCTTGTTGCGATTTCCATTTCTTTGCAATATGCAAAATCAATTTTCAAGCTTTGCGTTAGTTACTTTTTTGAAGTCGCTTTAAATACTTCTAAATCAATACCTGCATTTTGAATACAGTCACAAATCATTGATTCGTAATAATATCTCTTTTAGGTATGATTTCAATTTTGCAATTAATGTATAAATCGTTCGGCACGTACACGACCTGTAACCTCAGCTGCTTTATAAGCTAGGGCGATGTTACAAGTTGGATGTACTTTGAGCTTGGCATTTCGTTAATACTTTTAAACGAAGGATTTAATATATGTCGATGATACGATATATATTGATTATATTCATTTCTAATTTGGATAAGATTGATACGATATATATTGATTATATTCATTTCTAATTTGGATAAAGATTGATGATAAATTTGCAATTTTGAAGCAATCGGAGCTAAATGGATCGAAAAATGAATAAAATTTGATTTTACTTACAGGTGATAGATTAATATCTTACGACTCTTATTTTCCATTATTCGTAATTTCTCCAGCCATGTTTATTCACCTACAATTAATTTTAGGAATTCACCATATGATTAGCAGTTAATCTTAAGCGCTCAAATAAATAATCTCCAACACCTTGTTG

AAACGCAGCGGATTAATTGCTGTCTGCATATTTTCTAACCATGCATCTCTTTCAAATTCAGTGATTGTAAAATCCATATGCTCTTTT  
CTTAGCATAGGATGTCGGTGTCTTCGGTATAAATGTTTGGACCGCCAAAAAAGTGTGTAAAAATGTTTTGTTTACGACTTGTTT  
CTGCAAAATCTCCTGGAAACAGGTGATTAAGTCGTTTCATCTTTTTCTACAAGGGTGTAAAAATAATCAATCATATCGTATAACGCTT  
CTTTACCAATGATGTCATATGGTGTGTTGTCATTTAATCACCCATTTTCAAAAAATTTACTATTACGAACCTAAGTTAATATATAACT  
AATATAACATGATTTTAAACATTTGAAAGAAATATGCATATTTGCCAATTTAATTTATATTGTTTAAAAGTGTTCCTTTTTCTTGAA  
AAAACGTTGAACTTTATTTAAAGGTTGATGATGTTCCGAGGTTTAGTTCGTTTAAATAAAGATTGGAACCTTTGTAAACCTTGATTATAG  
TCTTTAACTTCGAACTCTAACTCATAATCCGCAGTATCGAAATACTCACTTTTATCTAAAACGAGTAAATCACCTTTATATTTAGTTT  
CTTGGCGATATGTCGTTAATGCACCAAGTATTGATAAAGTTGTATCTTTTACACCAAACTGTTCAACTATAATTTGACGAATGTCATC  
TGGAAGATTGTCGTTTGAATAATCAAGTTCATCTCTGGTTTAAATGTCGACGATATAGTTGTATTCTAATAGACCAACCTTTGCTGGT  
GTCTTTAAAGTCATTTTCATATTGATTGCTTTAACTCTTATGCGTAGTGACAGCGATGTTCCCTTTAATTTGAAATCGGGGTATCAA  
TATAGTAATTGACTTGCTTAAAAAGCACACTGTCTTTAAAAATATTCTCTTGCAATTTATTATAGATTGATGCAGTTATCATTTGTTTA  
AATTTCTATTTTCATGATTTGTTGCCATGATATGTATACACCTCGTATCAAATTTCAATTTATCTTAACTATATTATGAATGACAAAAGTTG  
AATTTTAAAAAGCAATTTCTTTTATCTATTATCAATGTAAATTTGACCATTAAAAATAGTGTTTCGTAAGTGTTTGTATTATTGAATTGT  
GTTAAAAATGTTATGGAATAAGAGGAGGATTAAGCATGCGTTTATATATTAATGAAATTAAGATTAAGATGACATACCTTTATTGTTA  
TACAGAAGATTCTATTTAAAGGATTATCTGAAGTAGGACAAATGCTCGTTGATAGTGATAATTATGCCTTTGCGTATACATTAGATGA  
TGGTAAAGCGTATGCTTATCTCATTTTCGTACAAGAAACATGGACGATGTTGCATGAAAACACGACTAAAAAAATTTATTATCAATGA  
TGAAC TAGAATTGACTGAATTCACCAAGAACTTACTTATATTTTAGACAACATAAAAAGGGAATAATAATTATGGTAAGGAATTTGT  
TGCAACCGTTGAAGAAACATTCGACATTGAATAAAGCGGGGTGAAGCACTAATGAATCAATGGGATCAGTTCTTAAACACCTTATAAG  
CAAGCGTTGATGAGTTGAAAGTGAAAGTGAACCTTAAAGCATGCGCAAAACAAATGAAGTTGGTGAACAAGCGTCGCCAATAGAATTTGT  
TACTGGTCGTGTTAAACCGATCGCTAGTATTATAGATAAGGCAAAACAAACGACAAATACCATTGATAGGTTAAGAGAAGAAATGT  
ACGATATCGCTGGTTTAAAGATGATGTGCCAATTTGTAGAAGATATTGATGTTGTCGTCATATTTTAAAGACAAAGAAAAGATTTTA  
AAGTAATTGAAGAACGAGATTATATTCGTAACACTAAAGAAAGTGGTTACCGCTCGTATCATGTCATTATTGAATATCCAATTGAAA  
CATTACAAGGCCAAAAATTTATATTGGCTGAGATTTCAGATTTCGTACATTAGCAATGAATTTCTGGGCAACGATTGAACATACCTTAC  
GATATAAATATGATGGTGCTTATCCGGATGAAATTCACATCGTTTGGAAAGAGCGGCAGAAAGCAGCGTATTTACTTGATGAAGAG  
ATGCTGAAATTAAGATGAAATTCAGGAAGCTCAAAAAATATTACACGCAAAAACGTTCTAAAAAACATGAAAAATGATTAAACGAG  
GTGTTATAAATCATGCGTTATACAATTTTAACTAAAGGTGACTCCAAGTCTAATGCTTAAAGCATAAAATGATGAACATATATGAAA  
GATTTTCGCATGATTGAGGATAGTGAATACTGAAATCCTGAAATTTGTTATTTCAAGTTGGTGGTGAATGTTTAAAGCATTCCATCAG  
TATAGCCACATGTTATCAAAAGTGGCATTGTTGGAGTTTCATACAGGTCATTTAGGATTTTATGCGGATTGGTTACCTCATGAAGTTG  
AAAAATTAATCATCGAAATTAATAATTCAGAGTTTCAGGTCATTGAATATCCATTGCTTGAAATTTATTAGATACAACGACAACG  
GCTATGAAACAAGGTATTTAGCATTAAATGAAGCAACGATGAAAACGAAAATGGCTCAACACTTGTGTGGATGTTAACTTAAGA  
GGGAAACACTTTGAGCGATTAGAGGCGATGGATTATGTGTATCAACACCTTCGGGTTCAACGGCTTATAACAAAGCGCTAGGTGG  
CGCACTGATACATCCTTCACTTGAAGCAATGCAAAATACAGAAATTTGCCTCAATAAAATAATCGTGTGTTTAGAACGGTAGGATCACC  
ACTTGTATTACCAAAGCATCATACATGTTTAAATATCACCAAGTTAATCATGATACCATTAGAATGACGATAGATCATGTTAGTATCAA  
ACATAAAAAATGTTAATTCATACATAACCGTGTAGCAAAATGAAAAAGTGAGGTTTGCACGTTTATAGACCACTCCCGTTCTGGAAACG  
TGTACACGATCTTTCTATCATCAAGTGATGAAGAACGATGAAATTTAAAGTATCATATATCAACAAGAACTGTTAAAGCTTTTTTA  
GCACGACATGATTTTTCTAAGAAGACAGTGAGCGCCATTAATAAATAATGGCGCTTAAATTGTTAATGATGAACAGTCACAGTACGT  
AAGCAATTAATGCCAAATGATATATTAGAAATTCATTTACCGCGAGAAATACCGAGTGTTAATTTAATACCTTATGCTCGTAAGCTA  
GAAGTATTGTATGAAGATGCTTTTTATCATCATAGTTACTAAACCAAAACAATCAAAATTTGTACGCCTTCGAGAGAACATCCTCATGAA  
AGTTTAATCGAACAAGTACTATATCATTTGTCAGGAACATGGTGAAAATATTAACCCACATATTGTTACGCGCTAGATCGTAATACA  
ACTGGTATTGTGATATTCGCTAAATATGGACATATCCATCATTTATTTTCTAAAAGTAAACTTGAAAAAAATATATACTTGCTTGTAT  
ATGGCAAAACCCATACATCTGGTATTATTGAAGCTAATATTAGACGGTCAAAGGATAGTATTGTAAGTACGAGAGGTTGCCTCGGAT  
GGTAAATACGCTAAAACATCTTATGAAGTAATAAATCAGAATGATAAATACAGTTTATGCAAAGTTTCACTTGCATACGGGACGTAC  
ACATCAAAATCGTGTACATTTTCAACATATTGGGCATCCAAATTTGTGGGAGATCTTTGTATGATGGTTTTCATGAACAACTTATGGT  
CAAGTACTGCAATGTACGCAAAATATATTTGTTTCATCCAATCAATAAGAACAATATTTATATTACAATTGATTATAAGCAATTACTT  
AAATTATTCAATCAACTCTAATTCACACAGGGGGTGTAAAGTATGTCAATGAACACAGATGAAAAAGAGCGTGTTCAAGAGGAATTA  
TATGATGAGACATTATTAGATCAATACTTAGAAAATGATGATATTGATCAATTTAGAGATGAATTTCTAGCATTACACACATATGAA  
CAAAGTGAGTATTTTGAAGATACTACCGATGAAAATAGACAAAAGATTTTCAATATTTATCACCTGAAGAGGTTGCAAATTTCTTT  
GATCAATTAGATATTGATGACGATGAATATGAGTTGCTATTTGATAAAATGAATGCGACATACGCAAGTCACATATTAGAAGAAAT  
GTCATACGATAATGCAGTAGATATTTTAAATGAGTTGACTAAACCAAAAGTTGCTAGTCTTTTAAACATTGATGAATAAAGATGACGC  
GAATGAAATCAAAGCATTACTTCACTATGATGAGGATACGGCCGGCGGTATTATGACGACGGAGTATTATCACTTAAAGCGCATA  
CGCTGTTTAAAGAAGCGTTATTATTGGTCAAAGCGCAAGCGCAGCGAGCAAGAAACATATATGTTATATTGTCGTTGATGATG  
GTAAATTAGTAGGTTTATCTACTAAGAGATTTAATTGTGATGAAATGATGCTTATATTGAAGATATTGAATGAACAGCGTCA  
TTAGTGTGAATGTAGCAGACGACCAAGAAGATGTTGCTCAAGTTATGAGAGACTATGATTTTCATGGCTGTACCTGTTATAGATTACC  
AAGAACATTTGCTTGGTATCATCACGATTGATGATATTTTAGACGTTATGGATGAAGAGGCTAGTGAAGACTACTCTCGTTTAGCCG  
GGGTATCAGATATCGATTGACTAATGATTCAATCATTAAACAGCATTAAACGTTTACCATGGTTGATTATTTTAAACATTTTAGG  
AATGATTACTGCGACAATTTTAGGGAGATTTGAAAAAACATTAGAAAATGTAGCGCTACTCGCAGCGTTTATTCTTATTATTAGTGG  
TATGTCAGGAAATTCAGGTACACAATCTTTAGCCGTTTCAGTTCTGAACATTACGACAGGGGAAATTAATGAGCAAAGTAAATTTAG  
AATTGCATTAAAGAGAAGCGGGAAGTGGTGTATTATCGGGCGTTGATGTTCAACAATATTATTTACAATTTATTGTTGCAATATATCA  
TCAGCCACTTTTAGCATTAAATCGTTGACGGAAGTTTAACTTGTGCGATGACGGTGGGACGTTTGTAGGTTTCGATGATTCATTATTG  
ATGAATAAATTAATATCGATCCAGCAGTGGCTAGTGACCATTATTACCAACAATTAATGATATTATTAGTATGTTGATTATTTTGG  
GTTTAGCTACATCATTTATGGCTTACTTAATTTAAGGAGGAGTTATGGAGTTTTTATCTTTAGTTATTGTTGTTTTAGCAGCGTTTTTA  
ACTCCAATAATTGTCAATCGATTAAATATTAATTTCTTGCCAGTTGTTGTTGCAGAAATTTTATGTTGGGATTGTGATTGGAAATTCAT  
TTCTAAATATAGTAGAAAAGGATTCAATTTCTAAATATTTTATCAACGTTAGGCTTTATCTTTTAAATGTTTTTAAAGTGGTTTGAAGAT  
TGATTTTAAAGCTTTTAAAAAAGATAAACGCGCACGTCAAGGACAAAATGATGATGAATCCTCAATCCAGGGCATCTTAATCTAG  
CGTTAACTGTATTTGCATTTATTATGATTATTTTCGATTCTTTTAGCGTATGTATTTAAATGGCTTGGATTAGTGATGATGTTATTA  
ATGGTCATTATCATTTCAACTATTTCTTAGGCGTAGTTGTTCCAACCTTTAAAGAAATGAATATTATGAGAACAACATATAGGGCAA  
TTTATCTTATTAGTAGCAGTACTTGCGGACTTAGTAACATGATTTTATTAACGGTCTATGGCGCAATCAATGGTCAAGGCGGCAGT  
ACAATATGGTTAATAGGTATATTAGTTGTTTTCAACGAATTTTATATTTAGGTGTTCAATTTAAAGAAATGATCATTATTTTACAAA  
AATTGATGGATGGTACGACGCAAAATCGGTATTCGTGCGGTATTTGCATTAATAATATTATTAGTAGCCTAGCAGAGGGAGTTGGCG  
CAGAAAATATATTAGGTGCATTTTAGCAGGTGTCGTTGTTTCATTATTAATCCAGATGAAGAAATGGTTGAAAAGTTAGACTCAT  
TTGGTTATGGGTCTTTATTCCTATTTTCTTTATAATGGTTGGTGTAGATTTAAACATACCTTCATTAATTAAGAACCGAAATTA

ATTATCATACCGATTTTAATCGTTGCATTTATCATTTCAAAATTAATTCAGTCATGTTTATTCGACGTTGGTTTGATATGAAAAACA  
CGATTGCATCAGCATTGTTTATTAACATCAACATTATCGCTCGTGATAGCTGCAGCCAAAATTTAGAAAAGATTAAATGCTATTTTCAG  
CTGAAACGTCAGGTATATTAATTTTAAGCGCAGTCATTACATGTGTATTCGTTCCGATTATTTTCAAAAACTGTTTCCAGTTCCAGA  
TGAGTTTAACCGTAAAATGAAGTTAGTTTAATTTGGTAAAAATCAATTAACGATTCTATAGCGCAAAATTTAACATCTCAGTTATA  
TGACGTGACATTATATTATCGCAAAGACTTGAGTGATCGTCGTCGAATTGTCAGATGATATCACGATGATAGAAATGCTGATTATGA  
ACAAGATGTTTTAGAACGACTAGGTCTGTTGACCGAGACATAGTTGTTTGTGCTACGAATGACGATGATATTAACCGAAAAAGTTGC  
TAAATTAGCCAAAGCACATCAAGTTGAGCGGTGCATTTGCAGACTTGAAAGCACAAACGGACGATACAGAGTTAGTTGATTACAGGTA  
TTGAAATTTTCAGTAGCTACTTAAGTAATAAAATCTTATTAAGGTTTAATTGAAACACCTAACATGTTGAATTTATTAAGTAATGT  
TGAAACGTCATATATGAAATTCAAATGTTAAATTTATAATATGAAAATATTCAATTACGTAATTTCCCATTCGGAGGAGACATCAT  
CTTCGTGCGTATTATCCGTAATAATGAGTCGATTGTTCCGCATGGAGATACACAATTGCGATATGGAGATCGCTTAATTGTTTACCG  
TGCTAAAAGAATACGTTGATGAATTGAAGCAAGAGTTAGAATTTTATTTTAAACAATAATGATATTAATGACAGCGTATTTTAGTA  
CGACGTAATAATGATTTTTAAATGCTAGTATGTATATGATTTTGATAAATAAATGCTTTTTACGTAATCAAGTTTGATACAGA  
AAGGACTAAATCAAACATTTATCGTTGTAATACGTTTAAATAACTTTATTAAGAGTCATAATAGTGTTAAATGTATTGACGAATA  
AAAAGTTAGTTAAACTGGGATTAGATATTCATCCGTTAAATTAATTATTATAAGGAGTTATCTTACATGTTAAATCTTGAAAACA  
AAACATATGTCATCATGGGAATCGCTAATAAGCGTAGTATTGCTTTTGGTGTCGCTAAAGTTTATAGATCAATTAGGTGCTAAATTAG  
TATTTACTTACCGTAAAGAACGTAGCCGTAAAGAGCTTGAAAAATATTAGAACAAATTAATCAACCAGAAGCGCACTTATATCAA  
ATTGATGTTCAAAGCGATGAAGAGGTTATTAATGGTTTTGAGCAAAATGGTAAAGATGTTGGCAATATTGATGGTGATATCATTCA  
ATCGCATTTGCTAATATGGAAGACTTACGCGGACGCTTTTCTGAAACTTCACGTGAAGGCTTCTGTTAGCTCAAGACATTAGTCTCTT  
ACTCATTAACAATTGTGGCTCATGAAGCTAAAAATTAATGCCAAGAGTGGTAGCATTTGTTGCAACAACATATTTAGGTGGCGAA  
TTCCGAGTTCAAATTTATAATGTGATGGGTGTTGCTAAAGCGAGCTTAGAAGCAAAATGTTAAATATTTAGCATTAGACTTAGGTCTT  
GATAATATTCGCGTTAATGCAATTTAGCTGGTCCAATCCGTACATTAAGTGCAAAAGGTGTGGGTGGTTTCAATACAATCTTAAA  
GAAATCGAAGAGCGTGCACCTTTAAAACGTAACGTTGATCAAGTAGAAGTAGGTAACAGCGGCTTACTTATTAAGTGACTTATC  
AAGTGGCGTTACAGGTGAAAATATTCATGTAGATAGCGGATTCCACGCAATTAATAATATCATTCAACAGCTTTGTTACGTTATC  
ATATATGTGAGCAAAGCTTTTTGCTTTTATAATAATCGGACTGATGGAAAATTTTATGATATTTTCATCTGACTGATTTTTTTATGCA  
CAAAAAATCTCCTCAAAAGCTGTAGTTTCAACTTTTGAGGAGATAGTATCTTATATTTCTTAAAAGACATCCACAGAATTAGTCCTT  
AACATTACTGTTTGCTTTATCAATAATGCGTTGGCGGTATTGAAAAATATTACTAACACCGTTTTAAGTACAGCATATAAATGGCAGT  
GCAATCAGAACATAATGTAAAGCCACCTAAATCTCCTGCTGCTGCTAAGAAATAACAACGATAATTGTTAAAGGATGGATACCTTAAAGATT  
ACCCATTACATTTGGCGTAATGATATTACCTTCAAGTTGGTGTCATTAATGTAATGATACAAACCCATATAAATGTAGTAGGACT  
ATCTATAATACCGAGTATTGCTGCAGGTGCAATGATAACCATGAACCTAAGAAAGGAATTAAGTTTGGCAGACCAGCAAAATAGAA  
CTAATAAAGGAATATATGGTAAGTCAATAATGAATAACCGATATATAAGAATATACCTAAAATAACACTGACAGTTACTTGACCT  
TGAATGTAAGATTTAATGTAAAGTTAAATCAGTTAATAATCTACGAAAAATACTTTACGTTACCTTTGAAAAATTTAGCAACA  
GCTGGGATAAAATTTTCATGGTCTTTTAACATATAAAATTAAGAAGATGGAAACCATAATCAATAAGAAGATGGTTGAAATTAATGAT  
GTAATGTACTGTAATGAATTAGATAAAATATTAGTAACGCCATCACCCATTGATTTAACCATATTTGTAATTTCTACTTGTTACATCTT  
CAGGTAATTTATCCATTGAGCTAGTGCGAATTTAATAATTTGCTCTGCTCTTTTGTAGGGCAGGTGCTGACTAATTAATTTGTT  
GATATTTGAAATGATGATTGGTGCAACAACCGCAACAAATTAAGCCGATAATAGCAAAACAAGCTAATGATTTGTTGTTATACTAG  
CCCATCTTGAAAACCGACTTTTTCAAGTAAGTTTTGAAAAGGTAGACAGATATAAAATAAAAAACCACTAATTAATAAATGGAAGA  
AATACAGAACCGATGATTGTAGCTATTGGAGTAAATACTTCGTGCACCTCCATAAATAGTTTGATGAGAATGAACAGCATAATCAG  
AGCGATGCCAGTTCGGAACCAACCTTGTTAAACATAAACGATGTTCTCTCTATTTTTCTAACTTAGTTATTATTTAGTATATCCTA  
AATAGCAGTGCTTAAAAAGGTTAATATTTTTTAAATATACTTAAATTAACCATTCACCTTCTATTTTAAGATATTTACTTTCAATAGT  
TTGTGAGACTTTTCAATGACTCGTAAGTCTGCAATTGGATCAAACAGCACCGAGTTTATATGAATAACTTATTTTAATATTAACCGTGT  
TTAAATAATGAAATGATCATATCAATATTTATAAGAATATTCTGAAAAATATATTGAAGTGTCTCGTGCTAATCGTATAATATTTTT  
ATGTTTAAACAATAGGGGAATCTTATGATTGAAAAATTAGTAACCTTTTTAAATGAGGTTGTTGGAGTAAGCCATTAGTTTATGG  
TATGCTAATTACTGGTGCTATTACATTGCGTATGCGATTTTTCAGGTTAGACATTGATAACATTTTAAAGAAATGATTCGATTAAATGTTCAA  
GGAGAGAAGTCTCCTAATGGTATTTCAAGTTTTCAAGCGATAGCCATGTCTTTAGCAGGCAGGGTTGGTACAGGTAATATTGTCGGT  
GTATCTACTGCAATATTTATAGGAGGACCTGGTGCAGTATTTGGATGTGGATTACTGCGTTTTTAGGTGCAAGTAGTGCTTTTTATTG  
AATCTACACTTGGTCAAAATTTCAAGAGAGTTGAAAATAATGAATACCGTGGTGGACCAGCGTATTATATTGAATATGGTATTGGTG  
GTAAATTTGGTAAAATTTACGGAATTATCTTTGCTATTGTTACGATTATCTCAGTAGGTCTATTGCTTCTGGTGTCGAATCTAACGC  
TATAGCAAGTCTATGCATAATGCGATTCATGTTCCACAATGGTTAATGGGTGCTATTGTTGTAGTTATTTTGGGATTAATATTTTT  
GGTGGTGACGTAGTATTGCCAATGTTGCAACAGCCGTTGTACCATTTATGGCAATATTTACATACTGATGGCTGTCATTATCATTT  
GTATCAATATACAAGAAGTGCCAGCGTTATTTGCATTAATTTTCAAATCAGCAATTTGGATTACAATCTGCTTTTTGGTGGTATCGTTGG  
CGCAATGATAGAGATTGGTGTTAAACGTGGATTACTCAAAATGAGGCTGGTCAAGGTACAGGTCCACAGCAGCAGCGGACGAG  
AAGTATCAGATCCAAGTAACAAGGTCTAGTACAAGCTATTTTTCAGTTTATATTGATACATTTTGTATGTATGATGCAACTGCTCTGAT  
TATACTTATTTCTGGTACATATAATGTGACTGATGGTACGGTTAATGCGAATGGCACACCGCATTTAATTAAGATGGCGGTATTTA  
TGTTGAAAATGCAACAGGTAAAGATTATTCAGGTACTGCGATGTATGCACAAGCCGCGATTGATAAAGCGTTCCATGGCAGTGCGT  
ATCAATTTGATCCTACTTTCTGCGGTAGGTTTCGTACTTTATTGCATTTGCTTTATTCTTCTTTGCATTTACTACAATTTTGTGCTACT  
ACTACATTACAGAAACAAATGTTGCTTATTTAACGCGTAATCAAAATAATCAAGTTTCATCGATATTTATTAATATTGCTCGTGTGAT  
TATTTTGTTCGCTACATTTTACGGTGCAGTTAAAAACAGCTGATGTAGCATGGGCATTCGGTGATTAGGTGTAGGTCTAATGGCTTGG  
TTAAATATCATTTGCGATTGTTGATTTTACATAAGCCTGCCGTAAATGCTTTAAAAGATTATGAAATTCAAAAAGAAACGTTTAGGAAAC  
GGTTATATGACAGTTTATCAACCTGATCCGAATAAATACCTAATGCTGTCTTTTGGTTGAAGACATATCCAGACGTTTAAACAA  
GCACGTGCCAAAAGTAACTACTTTTGTATTAGTATGTAGTATGATCTTTTATGATAAAAAAGAAACAGCAATGTGATTAATAGGT  
GCTCAGAAATTTGAATTTTAAAAATATAGTGTCTCTTGGTACAATAACAATACAACTACTAGGGGGCACTTTTTATGTCAGAATTT  
AAAACCTGGTAAGATTAATAAACATGTTTTATATAGTAATATTTTAAATAGAGATGTCACGATAAGTATTTATTTACCAGAATCTTAT  
AATCAACTTGTTAAATATAATGTCATTCTTTGCTTTGACGGATTAGATTTTTTACGTTTCGGGAGAATACAACGTACATATGAATCGT  
TAATCAAAGAAGCGCGTATTGATGATGCGATCATTGTTGGATTCCATTATGAAGACGTTGATAAGCGTAGAGAGGAATTCATCCAC  
AAGGAAGTCGTTCTCATTTAACTATTCAATCAGTCGGTAAAGAAATATTGCCATTTATTGACTCGACGTTTTCTACACTGAAAGTAG  
GTAATGCAAGGTTATTAGTAGGGGATAGTTTAGCGGGTAGTATTGCCTTATTAACGGCGTTGACCTATCCAACGATTTTTAGTCGTG  
TAGCAATGTTAAGTCCACATTCAGATGACAAAGTATTAGATAAGCTAAATCAATGTGCTAATAAAGAACAATGACAATTTGGCAT  
GTCATTTGGTCTAGATGAAAAAGATTTTACTTTACCAACAAATGGTAAGCGTGCCGATTTCTTAAACACCGAATAGAGAATTAGCTGAA  
CAAATTAAGAAATATAATATAACTTATTATTACGATGAATTTGAAGGTGGTACCAATGGAAAGATTGGAAACCATTTGCTGTCAGA  
TATATTATTGATTTTTTACGTAAAAACACAGATGATCAACATTTAGAGTAATTTACATTAGTAGATTTAGTATGAATTTGCTTCATA  
TAGTTTGGTCTATAATATAATTTATAAAAGATTTTACTGTTTGATTAAATTTAAATTTGTCGAAATTGCAAAAGATGTATAATGAATT

ATTTTAAATGTAACGGTTTTTCAAAGAAATTTGATATAATAGCAATAGGTTAAACAAAGGAGGAATTCAGATGATTTTAGGATTAGCA  
TTAATTCCATCAAAGTCATTTCAAGAAAGCGGTGGATTCTTACCGTAAAAGATATGATAAACAGTATTCACGAATTAACCACATGTG  
ACAATTAAGCGCCATTTGAAATTGAAGATGGTGATTTAGATTCTGTCAATTGAACAGGTTAGAGCTCGTATTAATGGTATACCAGCA  
GTAGAAGTTCATGCTACAAAAGCTTCTAGCTTCAAACCAACGAACAATGTGATTTACTTTAAAGTTGCGAAGACGGACGACTTAGA  
AGAATTGTTAATCGCTTTAATGGAGAAGATTTCTATGGAGAAGCTGAACATGTTTTTGTGCCACACTTTACAATAGCACAAAGGACT  
ATCTAGCCAAGAATTCGAAGATATTTTTGGTCAAGTAGCATTAGCTGGGGTAGACCATAAAGAAATTTATCGATGAATTAACCTTTGTT  
ACGTTTTGACGATGACGAAGATAAATGGAAAGTTATTGAAACGTTTAAATTAGCTTAAGTAACATAATAGTATTGTTAATCGTAGTA  
TGTTTGAATTAATAAGAAAATGGTCATTTTTATTGAATGTAATAAAAATGACCATTTCTTTATTTTAAATACGTTTTAACCTTACT  
TAGCTTTTTCTCTATTTGCTATAAAGTAGCTTCCATAAAAATACAGCTAAGACTAAAAAGATTAATGCCGAGAAAATAAATGTATTGT  
TTAAATCGTTGGTAAATTTGTGTAATTAATCCGCCAAATAATGGCCCTATCATTGAGCCGAATCCTTGGGATACTATTAACAAACACCCC  
AAGTTTCTTCTGTTCATCTGATTTGATAAATCGTGCCATAAAGGTATTCCATGCTGGTAATAAGATGCCATACATTAGACCGATAGC  
TAAAGCGATAATCCACACGATGTGAATATTAACAATCATAGATAGAGTAAAAATTAATATCATGTATAAAAATAAATCCGCTTAGAA  
TAACACCATAACATAAAGTTTCTGCTGCGGTTATCTATTAGTTTCGATAAAAAATAGCATCGAAACTGCACAGCCGATACCACCAATAA  
TGATTGCAACAGTATATTC AATTGTGCTTACGTTAATAACCTTAGTAGCATATGTTGGTAATATAGGAACTAGGGCAGCAATTGCGG  
CACCTTGTAAGAATAACAGGGAACAACAATAAATGGCGCTTTGTCAATCAACAATTTGTCTCAATTGAGCTTTAACTGGACGA  
GTATTATAATTTGTTAACTTTACATCGACAAAATAATATAATATCCATGCAATTAACACGACTAAAGACATCATGAAGGCAAAGCGT  
GTTGGGTGCACCTTTGATAAGTAGATTCAAAAAACCATACCTACCAATAGGCCTAACAACCATGAAAAATAACATAGCCCATTG  
TTTGCCAGCTTATCTTCTTCAACACTGGATAACATAATGACCCAAATAGGACTAAGTCAATACCGAGCATAGCATAGCAATAAT  
GATTACAAAAGGTGATGCTGGAAACCAAATAACTAAAAATAAACTGTAAATGCTAAAAATAAATCCAGTCGTTAAACAGATTTTGTG  
TGCCGAATTTTTTCAGTAAAAATCCTATAACAAAGTTGTAGATGCATCAGCAATAAAATGTATTGAAAATGCTAGAGACGTTATTG  
CTACAGCAATGGATGTAAGTGTGGCAAGAAATTAATATAGCTTAGGATATACATGCCTCTCGCAAATTCATTAAAAATAAGATA  
ATAAGCATTAAAAATGAAATTTTATGATTAGCGTAATTATTTAACGAAGAATCTTGCATATAAAGGAACCTTTCCATAAATCTCTTG  
TGGTGTGATGAATGACCGATTAAATCAAGTAAGTCTCGACATATTGTCTGTGTAGCATACTTAATTTTATCTTGTTCATTGTACTA  
ATCATGTTAGTTAATTGCTCATTACCGTTCGTTAAACTTGCTACAATTTTTATTGCTTCTTCTGGAGTATCAGCGATTTTACAAAACC  
TTTTTCTTCAAAGTAAAGGGCATTTTCAAGCTCTTGACCAGGTGCAGGATTTAGGAAAATCATTGGAATACAACGGGCGAACCTTC  
AGTTATTGTGATACCACCAGGTTTCGTAATCATAAGTTGACTTGATGCCATTCATTATCATGTGTTTGGTATAACCTAGAATCAAT  
ACATTTCTGTTAGATTTAAACCTTAGCTATTAAGAACGCTTTAGCTCTTTGCTCTTACCACAAATCATAACTACTTGTGCATTGTCAC  
TTTTCGCTAATATATCAGTAATCATCGTGTCAAAACCTTTAGATACACCAAATGCACCAGCTGACATTAATAAGTTTGTCTATCTGG  
ATCTAAGTTGTTGTCTATTAACCACTGCTTTTGATTAATAGGCGTTTCAAATTTGTTATCAATAGGAATACCTGTCACCTTAACTGTT  
GAAGGATCAATACCTACGCTATGAAGTCTGTTTCGTTTCTTTTGTGGCCACATAATATCTTGTGTAATACGGCGTAATCCAGTTTT  
TATGTAAGCGATAGTCTGTCACTGTAGCAACTGGAATATTAATGTTAAATTGCTCAGTTAGTACCGACATAACTGGTGTAGGAA  
ACGTTAATAATATTAATCTGGCTTTCTTTTATCAATAAAATTAATTAACCTATTAAGTCCATAGTATTTGTAAAAAACATTTGTCTAG  
TTTATCTGGGCGGTGTAATAAAACCTTTGTACATATTTCTAAAAATTTTAAAGCTATTGATATACCATTTTTTACAAATAGAAGTC  
AAAATTGGATGAGCTTCCATAAATAAATCGTGCTCAATGACGCTTAAATGGTCTAGATTTCATATTAAGTTGATTAAACGACTCT  
TGTTGAATTCGATATGACCGTTACCGAATGAGCCAGTAATAATCAATATCTTTTTATTGTTAGTAAACCATTAATAGCCACCTCCGT  
TAGTTTGAAAATTTTATTTAAGTGTAACCTTATTTACGGCATTATAAAAGAAATAAAGACGCAAAAGTCGTTACATTTATAGCAATTTT  
AATCAATAGATGAATTGATACAAAATAAAACGTTATTTTTATAAGCAATTTATTGTTCTATGTTTTATTGTATATTTAAATTTATCC  
AGTATACAATTATAGCATATTTTGGAAACAATTATGATATTATACCATGTTACAAGATGGTTTTAATAATTTAAGATGAGCCATAA  
TTGTAAAACTAATTCATAATACCGTATGTTTTATTTTAAATAGTAGAAATTAGAAAATGCTGATTAGTAGGATATAACAGTGAAATT  
ATAAATTTATTAACATCAACAAAACGTGTATAATAAACATATTGTAGAAAAAGGAGCGGTTCAAGTTTGGATGCAAGTACGTTGTTT  
AGAAAGTAAAGTAAAGCGTGATTGGGTTCTTTAGAACAACAAATAGATGATATCACTACTGATTCACGTACAGCGAGAGAAGGT  
AGCATTTTGTGCTGCTTCAAGTTGGATATACTGTAGACAGTCATAAGTTCTGTCAAAATGTAGCTGATCAAGGGTGTAAGTTGGTAGTG  
GTCATAAAGAACAATCATTACCAGTAACGTAACACAAGTGGTTGTGCCGACACATTAAAGAGTAGACTTATTCAGTACACACAC  
ATTATATGATTATCCGAGTCATCAGTTAGTGACATTTTGGTGTAAACGGGTACAAATGGTAAAACTTCTATTGCGCATGATTCATTT  
AATTCAAAGAAAGTTACAAAAAATAGTGCATATTTAGGAACTAATGGTTTCCAAATTAATGAAACAAAGACAAAAGGTGCAAT  
ACGACACCAGAAAACAGTTTCTTTAACTAAGAAAATTAAGAAGCAGTTGATGCAGGCGTGAATCTATGACATTAGAAGTATCAAG  
CCATGGCTTAGTATTAGGACGACTGCGAGGCGTTGAATTTGACGTTGCAATATTTCAAATTTAACACAAGACCATTTAGATTTTCA  
TGGCACAATGGAAGCATACGGACACGCGAAGTCTTATTGTTTAGTCAATTAGGTGAAGATTTGTGCAAGAAAAGTATGTCTGTGTT  
AAACAATGACGATTCATTTTCTGAGTATTTAAGAACAGTGACGCCTTATGAAGTATTTAGTTATGGAATTGATGAGGAAGCCCAATT  
TATGGCTAAAAATATCAAGAATCTTTACAAGGTGTCAGCTTTGATTTTGAACGCCTTTTGGAACTTACCCAGTAAAACTCGCCTTAT  
GTTGGTAAGTTTAAATATTTCTAATATTATGGCGGCAATGATTGCGGTGTGGAGTAAAGGTACATCTTTAGAAAACGATTATTAAGCT  
GTTGAAAATTTAGAACCTGTTGAAGGCGATTAGAAGTTTATAGCTCTCGTTACCTATTGATTTAATTATCGATTATGCACATACAG  
CTGATGGTATGAACAAATTAATCGATGCAGTACAGCCTTTTGTAAAGCAAAAGTTGATATTTTTAGTTGGTATGGCAGGCGAACGTG  
ATTTAACTAAAACGCCTGAAATGGGGCGAGTTGCCTGTCTGTCAGATTATGTCATTTTACACCCGATAATCCGGCAATGATGACC  
CGAAAATGTTAACGGCAGAATTAGCCAAAGGTGCAACACATCAAACTATATTGAATTTGATGATCGTGCAGAAGGGATAAAACAT  
GCAATTGACATAGCTGAGCTGGGGATACTGTCTGTTTTAGCATCAAAAGGAAGAGAACCATATCAATCATGCCAGGGCATATTAA  
GGTGCCACATCGAGATGATTTAATTGGCCTTGAAGCAGCTTACAAAAAGTTCCGGTGGTGGCCCTGTTGATCAATAAAAGATTTATTG  
ATGAAGGTAACCTATTGATGTTTATTTATTCGAAGCATTAATAAACAGATAATCATTGCTATACCAGATTGGTTTTGGTCATATC  
AGATGGCAATGACATTAGATGAAGAACTTGTTTTGAAGCAATACTCATGCAATTTGTTTGTAAAAAGAGGAAGAGGCGAAG  
TCGATTGCACTACAACTAACAGATTGGATAGAAACATATAAAAGAGGAAAGACTAATGAACCTTAAAGCAAGAAAGTTGAGTCTAG  
AAAGACTTTTGGGATTATTTACATCCCGATGCAGGGAACAAACGTTAACTGAAAAACTATTGTACTTCAGTGGTGCTATTCTGTGA  
AGCGGGTACAGTTAAAGGGAAGAAGACTGGTAAATTTGCGACAAGTGACTGGATGAAAGTTGAACAAGAGCGTGGTATTTCTGTGA  
ACTAGTTCAGTAATGCAATTTGATTACGATGATTATAAAATCAATATCTTAGATACACCAGGACATGAAGACTTTTCAGAAGATACG  
TATAGAACATTAATGGCAGTTGACAGTGTCTCATGGTATAGACTGTGCAAAAGGTATTGAACCACAACATTGAAGTTATTTAA  
AGTTTGTAATAATGCGTGGTATTCCAATCTTTACATTCATTAATAAATTAGACCGAGTAGGTAAAGAACCATTGGAATTATTAGATGA  
AATCGAAGAGACATTAATAATTGAAACATACCTTATGAATTGGCCAATTGGTATGGGACAAAAGTTTCTTTGGCATCATTGATAGAA  
AGTCTAAAAACAATGACCAATTTAGAGATGAAGAAAATAATTTACATTTGAATGATGATTTTGTAGTTGGAAGAAGATCATGCAATT  
ACAAATGATAGTGCTTTTGAACAAGCGATTGAAGAAATTAATGTTGGTTGAAGAAGCGGGTGAAGCCTTTGATAATGACGCGCTGTT  
GAGTGGAGACTTAACACCTGTATTTTTTCGGTTACGCTTTAGCTAACTTTGGTGTACAAAAATTTCTTAAATGCATATGTTGATTTTGGC  
CCAATGCCAAATGCGAGACAAACAAAAGAACGTTGAAGTAAGCCCGTTTGTGATGATTCATTTTACAGGATTTATCTTTAAATTTCAA  
GCCAACATGGACCCTAAACACCGTGATAGAATTGCCTTTATGCGTGTCTGTAGTGGTGCATTTGAACGTGGTATGGATGTTACTTTG

CAACGTAATAAAAAAGCAAAAGATCACACGTTCAACGTCATTTATGGCAGACGATAAAAGAACTGTGAATCATGCTGTAGCAGG  
CGATATCATTGGACTATATGATACTGGTAATTATCAAATTGGAGATACTTTAGTTGGTGGAAAAACAAACCTACAGTTTCCAAGATTT  
ACCACAATTTACGCCAGAAAATTTTTATGAAAAGTTTCTGCTAAAAACGTCATGAAAACAGAAGCATTTCCATAAAGGTATTGAACAATT  
AGTACAAGAAGGTGCGATTCAATACTATAAAACATTACACACAAACCAAATTAATTTAGGTGCTGTTGGTCAGTTACAATTTGAAGT  
TTTCGAACATAGAATGAAAAACGAATATAATGTTGATGTTGTTATGGAGCCAGTAGGCCGTA AAAATTGCACGTTGGATTGAAAATG  
AAGACCAAATTACAGATAAGATGAACACATCAAGATCGATTTTATGAAAAGATAGATATGACGATTTAGTATCTTATTGTGAAAAT  
GAATTTGCAACAAGATGGTTTGAAGAGAAAATTCCTTGA AATTAAATTTGTATAGTTTACTTTAACAGCTCAATTGTATAATCGAATTT  
GTTACATTA AAAATAATTGTTTCGTTGAAGAAAAATAAATTTGTATATTTTAAAAAGAAAAAGGTATACTATGATGTATCAAATGAATA  
ACCTGTGGCATTGTTGTCAGAGGGGAGTAACTTAAGAATCATGACCGTATAAATGATTCGACACTTTATCGTCATTACGAAGATATCT  
TCCGGTAAAGTGGGCAATTTAAATTTGCTTAGTGAGACCTTGCTATTATTTAGCATAGGCTCTTTTGTGTTGACTTAACTTATTTATT  
TAAAGGAGTTGTACATGTTAATGGATCCAAGTTTGATCTTACCTTATTTATGGGTACTTGTGCTTTTAGTATTTTAGAAGGCTTATT  
AGCAGCAGATAACGCGATTGTTATGGCTGTAATGGTTAAGCACTTACCACCCGAACAACGTA AAAAAGCTTTGTTTTACGGTTTGT  
AGGTGCATTTGTATTTAGATTTTATGCAATTATCTTAATTAGTATTATCGCGAACTTTTGGTTTATTCAAGCTGCAGGAGCGGTTTACT  
TAATTTATATGTCAATCAAAAATCTGTGGCAGTTCTTTAAACACCCAGAAATTGAAAGTCCTGAAGCTGGAGATGATCATCATTATG  
ATGAATCTGGTGAAGAGATTAAAGCAAGTAACAAATCATTCTGGGGAACTGTGTTGAAAATAGAAATTTGCAGATATCGCATTGTC  
ATTGATTCTATGCTTGTGCTTTAGCTATTGCTGTAACACTTCCTAAAGTTGGTATTCACTTTGGTGGTATGGACTTAGGTCAGTTCTGT  
AGTCATGTTCTAGGTGGAATGATTGGTGTTATCTAATGCGTTATGCAGCAACATGGTTTGTAGAGCTATTAACAAATATCCAGG  
ACTTGAAGGTCAGCTTCGCGATCGTTGGTTGGGTAGGTGTTAAATAGTTAGTCTAATGGTATTAGCGCACCCAGACATCGCTGTATT  
GCCTGAGCACTTCCACATGGCGTATTATGGCAATCTATTTCTGGACAGTACTAATTTGGATTAGTAATTATCGGTTGGTTAGGTTCA  
GTTGTTAAAAATAAAAAATCGCATAAATAATTGATGTGAAGCGGACAATCTTAATTTAGTTTAAAGTTGTCCTTTTTCATTTAATTGA  
GTGATTTATGAAAATGGATTTTGAAGAATGTGAATCAAAAGATGCGATATAGTATTAAGAAAATGTGCTTTTATATTTAGCATT  
TTTCAATAGAAATTATATAGATTTTAAAGCAAATTAGGTGTTAATGTGTCATAATGATAAGTGATTTTATTGAATGGAGTGGACATT  
AGTGGATATTGGTAAAAAACATGTAATTCCTAAAGTCAGTACCGACGTAAGCGTCGTGAATCTTCCACAACGAAGACAGAGAAG  
AAAATTTAAATCAACATCAAGATAAACA AAAATATAGATAATACAACATCAAAAAAGCAGATAAGCAAATACATAAAGATTCAAT  
TGATAAGCACGAACGTTTTAAAAATAGTTTATCATCGCATTTAGAACAGAGAAACCGTGATGTTAATGAGAATAAAGCTGAAGAAA  
GTAAGTAATCAGGATAGTAAGTCAGCATATAACAGAGATCATTATTTAACAGACGATGTATCTAAAAACAAAATTCATTAGAT  
TCAGTGGAACAAGATACAGAGAAATCAAAATATTATGAGCAAAAATCTGAAGCGACTTTATCAACTAAATCAACCGGATAAAGTAGA  
ATCAACTGAAATGAGAAAGCTAAGTTCAGATAAAAAACAAAGTTGGTATGAAGAGCAACATGTACTTTCTAAACCTTCAGAACATG  
ATAAAGAGACTAGAATTGATTCTGAGTCTTCAAGAAGTATTGAGACAGCTCGATGCAGACAGAGAAAAATAAAAAAGACAGTTC  
AGATGGAATAAAAAGTAGTAATCTGAAATCTGAAGTAATATCAGACAAATCAAATACAGTACCAAAATTGTGCGAATCTGATGATG  
AAGTAAATAATCAGAAGCCATTAACTTTACCGGAAGAACAGAAATTGAAAAGACAGCAAAATGAGCAAAACAAAAACCTA  
TACATATGGTGATAGCGAAACAAAATGACAAGTCTAATCATGAAAATGATTTAAGTCATCATACACCATCGATAAGTGATGATAAAG  
ATAACGTTATGAGAGAAAATCATATTGTTGACGATAATCTGATAATGATATCAATACACTATCATTATCAAAAATAGATGACGATC  
GAAAACCTTGATGAAAATTCATGTTGAAGATAAACA AAAATCGAGACTCGTCTGAAACGGTGGGATATCAAAGTCAGTCA  
ACTGCATCTCATCTGAGCACTGAAAAAGAAAATATTCTATTAAATGACCATGATAAAATTAACCGTCAAAAAACAAATACAAAGAC  
ATCGGCAAAATAATAATCAAAAAAGGCTACATCAAATTTGAACAAAGGGCGCGCTACGAATAATAATTATAGTGACATTTTGA AAA  
AGTTTTGGATGATGTATTGGCTAAATTAGTTATTCTAATGGGTATTATTATTCTAATTGTTATTTTGAATGCCATTTTATAATGTG  
AACAAAAATGATCGCATGAATGATAATAATGATGCAGATGCTCAAAAATATACGACAACGATGAAAAATGCCAATAACACAGTTA  
AATCGGTCTGTTACAGTTGAAAATGAAACATCAAAGATTCTATACCTAAAGATAAAGCATCTCAAGACGAAGTGGGATCAGGT  
GTTGTATATAAAAAATCTGGAGATACGTTATATATTGTTACGAATGCACACGTTGTGCGGTGATAAAGAAAAATCAAAAAATACTTTC  
TCGAATAATAAAAGTGTTGTTGGGAAAGTGCTTGGTAAAGATAAATGGTCAGATTTAGCTGTTGTTAAAGCAACTTCTTCAGACAGT  
TCAGTGAAAGAGATAGCTATTGGAGATTCAAATAATTTAGTGTTAGGAGAGCCAAATATTAGTCGTAGGTAATCCACTTGGTGTAGA  
CTTTAAAGGCACGTGTGACAGAAGGTATTATTTCAGGTCTGAACAGAAATGTTCCATTGATTTCGATAAAGATAAATAATGATAT  
GTTGATGAAAAGCTTTCCAAATTGATGCATCAGTAAATCCAGGTAACCTCGGGTGGTGTGCTGCTCAATAGAGAAGGAAAATTAATAG  
GTGTAGTTGCAGCTAAAAATTAGTATGCCAAACGTTGAAAATATGTCAATTGCAATACCTGTTAATGAAGTACAAAAGATTGTA AAA  
GATTTAGAAAACAAAAGGTAAAATTGACTATCCCGATGTAGGTGTTAAAATGAAGAATATTGCCAGTCTAAATAGTTTGAAGACA  
AGCAGTTAAATTGCCAGGAAAAAGTTAAGAACGGTGTTGTTGTAGATCAAGTTGACAACAATGGTTTAGCAGATCAATCTGGTCTGA  
AAAAAGGTGATGTAATTACTGAATTAGATGGCAAACTTTTGAAGATGATTTACGCTTTAGGCAGATTATATTAGTCATAAAGATG  
ACTTGAAATCAATTACAGCGAAGATTTATAGAGATGGTAAAGAGAAAGAAATTAATATTA AACTAAAATAATGTTGAGGTGAACAA  
CGTGTCATTTTTAGCCAGTTTTTAAAAAGATCAAGCCCTCAACAAGGTATTGTATTGTAATATATCGTCGCAATTGTCATTGCAATT  
TTATTATTA AACTACCGTATGTTTCATAAACCAGGTGTAGAAGTAAATCCAATTGACACATTATTTGTTGCCGTATCCGGAATTAGTG  
TTACTGGATTGCTCCGATAAGTATTGTCGATACCTTATCTACATTTGGCAATTAATTATCCTCGTATTAATAATATTGGTGAAT  
TGGCGTCATGGCAATTGGTACGATGTTATGGGTGGTACTAGGTAAACATATTGGAATTAGAGAACGTCAGTTAATTATGTTAGATAA  
TAACAAAAACACAATGAGTGGTACCGTCAAATTGATTATTGATATTGTA AATCAATATTTGTAATCGAACTCGTAGGAGCCATGTT  
ATTAGCATTTTACTTTTATCGAGATAATCCAGATTTAAAATATGCAATCATGCAAGGTGTTTTTGTGTTCTATTCTGCCACTACCAAT  
GGTGGATTAGATATTACAGGTAAGTCATTAATTCCTTATGCACATGATTATTTTGTACAAGCGATAGTTATATTTTAAATAATTTAG  
GATCAATCGGCTTCCAGTATTATTAGAAGTTAAAGCTTATATTCAAAAATAGGGTTACTAATTTTAGATTTTCAATTATTTACTAAAAAT  
TACGACATCAACATATTTATTCCTATTTATTGTTGGGGTATTAGCCATTCTATTATTGTAACATAACCATGCGTTCAAAGGTTTAAAGT  
TGGCATCAATCGTTATTCTATTCGCTGTTTCAATCAGCGACTACAAGAAGTGCGGGCTCTCAAACAATTTGATGTGACAACACTAAGT  
GACCCCACTAATATTATCGGGTATTTAATGTTTATAGGATCTTCGCCAAGTTGCGTTGGTGGCGGTATTGTCGACAACAACAACTTCG  
CTATTTTAAATTTGTTTAAATTA AACTTTAGTAATAATGCCGATAAAACATCCATTAAGTTTACAATAGAGAAGTACACATTATGGA  
TATTCAACGTTCAATTGTCAGTATTTACAATGGCGACAATTTTAAACATTTTATAGGAATGCTAATTATATCAGCTACTGAAAATGGTAAG  
CTTACATTTTACAAGTATTTTGAAGTCATGTCTGCATTTGGAACCTGTGGACTATCGCTTGGTGTACAAAGTGATATTAGTGATA  
TTTCTAAGGTCTGACTAATGGTACTCATGTTTATAGGACGTGTTGCTTAATATCATTTATCATTATGATAGCAGGACGTCGAGAACC  
AGATAAATTCATTATCCAAAAGAACGATTCAAATAGGATAATATAATAGCAATCTAAGTTTATGTTAATATAGATTTTAACTGGAA  
CTTAGATTGCTTTTTAGTTTGTATTTTAACTTATTTTATAAGACGATTGGTTTTCAAATGGTAAACTAGTAACAATGAGAGGTGT  
AACATGATGGAAAAAATGAAAACATTAATGTAGAGATTTTAACTACGTCAGATATGCATAGTCAATTCTTAAATGGTGATTATGGT  
TCAAATATTATAGAGCTGGTACTTATGTTAACC AAAATAAGAGCACAAAATCATCGCGTCAATTTATTAGATAGTGGCGGAAGTTA  
GCTGGCTCGTTAGCGGCTATTATTATGCTATTGTTGCACCTTATAAACGACATCCAATGATAAAGTTAATGAACAGAATGCATTAT  
GATGCTAGCGGTGTGAGTCCAAGTGAATTC AAGTTTGGTTATCATTTTTAACTCGTTCAATTGCTTTGGCACGTTTTCCATGGTTAT  
CAGCAAAATTGAATACAATGTTACTAAGGAGCCTATTTTTCAACTCCATATTGTATTAACATTTTGGTGACTTAAAAATTGCTAT

CGTAGGCGTCACAGCAGATGGTTTAAATGGAAAAATGAGTATTCTGAAATGGAGCAAGATGTATCTATTGAAAAAGACATTAGTGGCAT  
CAAAACGTTGGATTAGATATATCCATGAAGTTGAAGAGCCAGATTTTTTGGATTGTAATTTATCATGGTGGATTGAATAAAATTAGTA  
ATAGTACGAAAAATAAAAAGGCAAGTTCGAATGAAGCTGAAAAATTAATGGAAGAACTCGGTGTTATAGATTTAATGATTACAGCT  
CATCAGCATCAACAATAGTAGGTCAAGATCATGAAACGTATTATGTTCAGGCTGGTCAGGATGCCAAAGAGCTTGACATCTTTTCG  
ATTAATTTTAAAAAGAGAACAACAACCTTATGATGTTGAAAGCATTGATTCTAAAGTGATTGACTTAAATGAGTATGAAGAGGATCA  
AGAATTATTAGATTTAACATTCTATGATAGAAAAGCAGTGGCTTATTGGTCACAGGAAATCATAAGTGATAAAGGTTTGATGTTATC  
AGTGAATGGGTTACAAGATTTAGTCTGTCAAAACACATCCATTTTCGCAATTATTACATGATGCAATTCAGCTTGCAATTTGATAATGAT  
ATAACATGTGTCCACGTGCCTATGAACGGAGAGAAGGGGTTGAGTGGACAGATTGCAAAATGAAGATTTGTATCATGCATACCCATA  
TCCAGATAAGCCAATGGATATGACAATTAGTGGTCAAAATATCAAAAGATATATTGGAGTATAGTTATTCACATTTAGATTTTGTAA  
CGAGCAATTAAGCTTAACAATTATTGATGAAACGTTATGTACAATGTGGCAAGGATTCAATTATGAGATTGATATGAATCAAGAAC  
CTGGGCAACGAGTAATGTTAGATCAAATTGATTTGACTAAGAGTTATAGAGTTACAATGACTGACTATTGTTATCGTAACACTACAAGA  
ATTATTTAAAAAATGCTATTATACATGAATCGTACGATGAAACAATGAGTACATTAATTGCAGAGAAGTTAAGAGATCCGAATTAT  
CGTATTTTCATGTAGTGATAATTTTGTAGTTAAAAACAGGTAATATTGCTATGTAATAAAATTAATTATAAGTTCAACAAGTATAAAA  
ACCTTTCTTAGAGAAGATTATCTAGGAAAGGTTTTAGAAATTTTAAAAATTGATATAAAAGAACAGTGAAATTTCTATTTCATTATATA  
TAAGTAAACAAAAAGCTAAAAATGGTATATACCATTTTAGCAAGTAACGGAAACGGAGGGATTGCAACCTCGCGCCGCTTTTCGCG  
ACCTACACCTTAGCAGGGGCGCCTCTTCAGCCAACCTTGAGTACGTTTCCAATGGCTCCACAGGTAGGACTCGAACCTACGACCGAT  
CGGTTAACAGCCGATAGCTCTACCACTGAGCTACTGTGGATTAATTTGTATGTGTTGAATATCAAGCACAAAATATTATTATAACAA  
GATTAAGTTAATTTGCAATGATACCTTAAAAAATATGCAAGACATTTACACTATATTTATAAAACATTTCCGCATATTTTAAAAAT  
AAACAATTTATTTATCTTCAAAATAAAGAATAGCGTGTCAATGCTTCAACACACATTCGAATGTGGCTTTATTATAAATCTATTGTTGGT  
GGGATTTTTTGATATCATGCGAGATTGTTTATCTACCATGTAATAGTAAAAAATGGAATTGTTATATTGATGCCATAAACTGTGGTAT  
GAAACATGAAGAATGATAGATTCATTATTAATAAATGTCACTTTACATTTACGATTTTTTAATCTTTAATACTTTTCGATATAATGCA  
TATTTAACCAAATATTTTCATTTTGTCTGTCAGAATGTGTTGGGAAAAAATAAGTTGGAATAATGGTGTAGTAAAATAGGTGGTT  
TACTAGAAATGCCAGTAATGCGGTTTGTCTCTGCTTCTTGCCAAAGATAAGTATTACCATAAAATTTGCAAGAGCGTTCAATGATTTT  
CTGGACTTTAAAGGATTTTGAATACGCGTTTTGTCAAACCGAATTAATTTCACTACCGTTTCTTTGATCGTCATCATCAAATGCTGGT  
CGAATAACCATGTCTCCTTTGCGTATCACATAAATATTTGAGAATACATAAGCAAAACCTCGCTTTATTAAGTTTAAACCATTAAAT  
ATAAAAAACAATTAATGATATAAAGATATTTTATAATAAAATCTGAGTTGTCAAGTTATATTTTGGTGAAAATGTACAATAATTT  
TTAACTAATAGTCAGAATATTCATTGATTTCAAAATAGAAAATGTATACTTATTATAAAATTAAGAAAAGGTAGTGGTTCTATG  
AAATACAATACTAATGTTAAACATACAACCTTTAGAAGCGTTTGTCACACTGTCAATGATTTGGGTATTGAATTAATTATCAATGAA  
GCACTTCGAGAGGTAAGAAAACGACAGCTCATAGAACCTTATAGATGACGCACTCGTCAATAAAGATGAAGCAGCATTTAATCAATA  
TACGGCAGAATACAAAAATTTGGAGGCATTTCTCGGTGAATAACATTGATTGCAATTCATAACGCAATCATAAAAGGACTATTCTT  
AACATCTCATACATGTAAGAATAGTCCTTTAATCGTTTATGACATTAATCTAATTAATTCATGTCTATCTATGTCACCGAAATAATGA  
TATAAATCATATTCTGATAGTGCTTCTTCTATGTGCTCAAAGTCGTGTAGACAGCCAACTAATGCATTTTCAAGATCAGTGACATCTC  
CGACACCAAAAGAAATCACCGAAATTTTTGTCATGTTTCGATTTTACCTCGTTTAACTCAAACTTAATTTGTACAAATCCTTTTTCAAA  
TTTTCTCTCGCGTTCAAAGTTATATTTAGGGTTTCTACCATAATTCATGCCAAAGTTCTATATTTGTCGTTACTTAACTTTTCAATAT  
TTTCCCACTTTCATCCGTTAATTTATATCTTCTACTTCAGTTTCTCCAAAGATAGTTTTTCAAGATGAGTTTTTAAATCTTCAATTT  
CTAAAGGGTCATTTAAAAATTTCTTGAATGTTTGCTACTCGTTTACGAACAGATTTAATACCTTTTGATTTAATCTTAGCTGGATTAAC  
TTTTAGTGCATTTCTGAACCTTCGTCTAAATCACTATTTAATCAACGTACCATGACTAAACATTTCTATTTTAACTTTAACCATAGCA  
TTCCCTGAGATTTTCGCTTGCCAACCTTGAATATCGTTACGACCAGTTAATTCAGCATTACGCTAAAGATTGTAATGCTTGAACAA  
TTGGTTTCAGTGAATTTTGGAAATGTGGAAACTGTTACCATCATCATCTGTTATAAACTAAAGTTAAATGGCCAGTATCATGATA  
AACAGCGCCACCACCAGAAATTTCTTCTAACTACATCGATGTTATGAGCATCTATATATGTCTGATTTACTTCTCTATCGTATTTTGA  
TTCTTTCCAACAATGATAGATGGTCTATTTATGTAAAAATAAAAAGTAACTTTCTTCTGCTGGTAAATTTTTTAAAAACATATTTCTTCCA  
TTGCTAAGTTTAAAGTTGGATCTGTAATATTATTACTAATGAATTTTCAATCAATCTCTCCCTTATATCTATATATATTTCTACT  
TATTTAGCCTTAACTTTTGTCAAAATGCCAATTATATACTACAAATCAATCTTAAATATCGGCTTAAAGTTTACATTTTATTATTTTG  
ATTGTTAATAGTTTATTTGTTAAGTGAATTTTAGTACAATAAATTTAGTTATGATTTAAGGAGGACTTAAATGACTGTTGCAGAAG  
TGGGTAACATTGTTGAGTTTATGGATGGATTAAGAGGTCGTGTTGAAAAATCAACGATAACTCTGTTATTGTTGACTTAAACAATTA  
TGGAATTTTAAATGACCTTGATTTACCGGAAAAAACTGTTATCAATCATAAACGATATAAGATTGTTGAATAAGAAGGTAAGTTAT  
AATGAATAAAATCTCGAAGGCTTTAACTTGGTTTATTATAAGTTTCATTATATTTTCATCTCATATTATTTATTATGTGGGGCGAACAC  
CAAGAATACTGGTATTATATACAGGTATAATGCTAATGCTGGTATCAGTTATGTATTTATCAAAGAGATATTGAATCTAAGCGG  
TTGCTTACATCAATTGGTGTGGTATTATTACGGCAATTTTAAATATGCTTCAACTTTTATTTCTCACTTATAACTTCTAATTTAAG  
TTATAGTTTCAATTAATAAGAATTAGCAAGAACAGGTGTCAATTGGAAGTGGCAAATGTTAGTAACTTTACTTTTTGTCATTCCATGT  
CAGGATTTATATGAGAATGTTTACAAAAAAGAAATTAACACATTTTCAATACCGAAATGGATAGCTATATTAATAACTGCAATT  
TGTTCTAGTTTCATTTATTTATTTAGATAATTTGGTGGATAGTAACTTATATTTGTTGCAAGATGATTTATCATTAAGTTATGTA  
GTATACTCGACGCATAGCAACAACATCCGTTGCGCAAAATGTTGCTATTATATTGTTATTAATTTTAAATGCTTAAATAAGCTTTTCT  
TAGACGCTGTGTTCTAAGAAAAGCTTTTTGCTTTAGAAAAGCAATACGAAGATTCAAGGCATGCTTTATTATAGTGTATACATTTTT  
AACGGCAAGCAGTTATTATTGAGGTTATATTTAGTCAAGTTTTATTACTAAATATTTTAAAAAATAGTATAATATTTGTGGGCAA  
GTTGAATTGATGGTGGCTATCTGAGTAAAGGGGGGGTGGTACCTATGGCATTACTTAACACTTTTGAAAGGAAAAGCCTATTGTGATA  
TCTATTGCAAACGCATTACATTTAATGTTAAGTTTCGGTATGTTTATCGTCACTTTTCATTGGTATAGTAGTACGAATAATAAATTTAA  
GCAATAAAAAAATAACCATCATTTCAAACTTTGACATAGAATGATGGTTAAAGAAAAATCTCATTTAGTACCGCTCTTTTTAACGGGC  
TCATTAGGCGACATGTTCTGTCATGTCGCTTTTTACATTTTTATAGTAAACATATCTTTTTATTATTTATGTTCTATTTTATTAGATGTGTA  
ACAAAATTTTGAAGTATTTTCCGATATATTGCTGCTAAACATGTCAGATTTGAAAGGAAAAATCATACTGGTGTAGAAAATCAATTATG  
ATTATATGGTAGTACTTTATAAATAAGTGATTTCTATTGAATATGTAATGAAGTTTCATATTAATATAAATTTTCAATTGATATAGAAGT  
CGCAATGATTAATTTAAACAATAAAAAACAACCATCATTTCAAACTTTGACAACGAATGATGGTTAAAGAAAATCTCATTTAGTC  
ACCGTCTTTTTAACGGGTTCAATAGGGGACATGTTCTGTCATGTCGCTATTTATGCACTGCGCAATTTAAACAATAATACAATTATAC  
TTTGATGTCCATTTAACATAAAGTGTTGAAATTTGTAGCAAATAAATTAACCTTGACTATTTTCAGAAAATTCTGTATAAATAACG  
AAAAAGAGATATGGATTAATATGAAGAGGTGTTTTATAGAAGAATAAAATTTTTGGCACTATATTATATTTAACTTTAGCACTTG  
GATTATCAACAGCAGCTTATGCATCTACAGAATACGCAGAAGGAGGCACTTGGAGTCACGGTGTGCGGCAGTAAGTATGTTTGGTCT  
TATTATTATCATGGTCATAAAGGACATGGTGAACAGCTATTGGAANAATATAGATCATTTAGTGGTTATACAAGAGCTGGGTGAAAA  
GCAAAAGCATAGCTACTAAACATAATTGCTGGGTCAATAGAGCTATTATAACATTTATTAATACTAAAAAATCATAGAAAATA  
AACAACGCAAGAGGTACAACATGAAATGGTTCAAATTAATACTTGATGTTACAACCTTCATTCTGATTGCTATATTGTTATTGTTTA  
TACATATAAAGAAAACGAAGAAATATTGCTGATACTAAATACCCTATAGCGGTAACGACTGGAATAAAAAATATAGTAAAAATG  
AGATTTATAAACGTATAAATCAATTCGCTAAAAATGAGAACGTAGCAATCTATAAATCAACTTCAAAATATACAAACAAAAACGTA

GATAAAGATATATATGTATTTAATAAAATCAAAAGCAACAACATCATCTCCTTTTAAACGCTAAATATAACATTCATTATTTAAGTGAC  
GACGAATTATTAATAAAGATATCAAAAGGAAGTTATTTTGTAAAAGACAAAAATTTTGACGTGTCTAAATTCATAAATTTTTAAAA  
GAATATGGTGTTACTGCTGAATCATACAAAATAGATCATATGATGATTGCCGTTGGTGTCATTAACCAAATGAATATAGAAGTTCGG  
TTATCCGCACCTTTAATCGTTTATTTTATTTATATTTTCGAAAAAGAACATTAATTTCAAAGCGTATGCGATTAAGTATTTAAATG  
GTTTTACATTAAGAAAAATAATTTTGA AAAATTTTCAAAAAATGCACGTATTGGGTAAACGTTAATCATAAGTCAAATCTTTTAA  
CTACAAGTGACTTTGGATATTA AAATTACACGGGTAATTTAGATTTATTCATATTAAGATTAGTCTGCTTTTCATGTCTTTTCATTTTA  
ACGATTAGTGTTATTAATTTATGGACTTTCTTAATGTTACTAAATTTAAATATTGCTAATATGATTAAAGGTAAGCAGCACTTTAAAA  
CAATTCGTTTTATTAATACAGTTTGTA AAAAGTATTCTCTTAGTACTAATAGCTAGTGTAATGATAGAAAAATACTAGTGTTATTAAGA  
TTTGAATAAAATAAAGGAACTGAGAAATATTGGAATGTATTAGATGATTATTACACGATTGAATTTGCACCTTATCACGAAACGA  
AACAAAGTTTGATTGATAATATGCTGCGATCAGAACAAATTAGTAAAGGCTAGTGAAGCAGAAAAATAATGCGATTTTATTCAAACCA  
AAGGGTGACTCCGTTGACAATGACAACCTTTTCGCTGATGAGGGGAATGTAATATTAGTAAATAATCAGTTCTGGTCGATTTATTAC  
AAGCAGTTTCAACCTGATATTCGATAAAAAATCAAAAAATAATGTGCAAGTAATTATTCACAAAAAGTTTCATGCAATGCGTAA  
TGAAATCAATCAAGCATATCATTTCATGGTTTGAATTTGTACAAAATAAAAAATAATAAGAGAATAAGTTATCTATACAGTTTATCAA  
CAAAAAATGATTATCGAATTTTTTCATTTGATGCACGAGATAGTCGCCATTTGTCATTTATAGAGGCGCCAATCATTGTGAATGTTTCAG  
GCATCAGATTTATCGAATGATTTTTATTATGCCATGATCAGTCAAGCGCGGTATTTATTCAAAAAATTATGACGCGCTAGTAAAAAAT  
ATTGAAAAATTATCATCTTGATGGGGAAATCAGTGGAATAACCAATTATAAAGATAGCGTGATGGAATGTATCATGAAAACAATTT  
GAAATTAACAGTACTCACTTTTCACAAAATCATTATCGCAATCATTTTAATAATTATTATTTTATTTGATGTGAAATATTATTTTGAA  
CAGCATCGAAAAATTACTCGTAATCAAAAAGCTATATGGTTATTCACATTAAGAGCCAATTACCAATCTATTATAAATAATATA  
GTTGTTGTTTTATTGGAATATTGACGAATGTAATTTTACATTTCTCAGTATATAATGATGATATTGCAAACTTCTTGCTGCTTCAAAT  
ATTATTGCAGATTTGCAGCCTATACTATCATGGCCGACGTTTTAATGAAGTTATCAAGGAGTTTTAACTATGAAATTTATCATTGCAA  
TATTATTAGGATTAATCGTATCCATTACTATTGCTTTTACAATCATACATCATCTATACTTGATCGTTTTAATCCTTTCTTAAAAACG  
GAGTATAGTTATGCCAAAAGTGCCAAAAGGTACGCAACAATATGTTAATATTACGGCTTATAGTGAAAGAGGGGAAAAAGCTTGATTA  
TAAATTAACATTTAATGGATTTTCACCTAGTAGAACGTATGTCGAAAATAAAGCATAAAGGGCAATATGTCATATCGATCACATATGT  
TGAAAAAGAGGATATACCAAAAGAGGTAAAGACAAGAATGATAGAATTA AAAGATTAAACCATACAAAAAGGTAATATACATATTT  
TGAAGAACTTAATTTGAAATTTCAATGTGGA AAAATCATATGCACCTATTGGTAAAAGTGGATGCGGTAAATCTACATTATTAATA  
CTATTGCTGGACTTGAAAAACGGGGAACAATATGTCTATTTTAATGGTCAATTAGAACAATTTAAATCTAATTTTACAGAGATA  
AATTAGGATATTTTATTTCAAAATTTATGGATTAATCGGATAATTTGACAGTAAATGAAAATTTAGATATTGGATAGCATATAAAAAA  
TAAGTAAGAAAAGAAAAAGAACAAATTAAGATACGTTATATAGAACAGTTTGGTCTGTCAAACAGTTTAAAAAGAAAAGTTCATACG  
CTAAGTGAGGTGAACAACAACGTGTGCTTTAATTAGAATGATGTTAAAAGATCCGATTGTTATGTTAGCTGATGAACCAACGGG  
TGCGTTAGATCCTAAAAACAGGACAGATGATTATTCAATCATTATTTGATTTGGTCGATGAAAATAAAGTGCTGATTTTAGCAACACA  
TGATATGGCTATTGCAAAATCAATGTGACGAAAATAATAGATTTAGAACAGTATAGTAAAGTAGCATCTATGTGATATCCAAAAGATA  
AAATTA AAAAGCCAATCAATGGGAAATGTTGACTTCAACACTCCGTTTGATTGGCTTTTATAATGTGTTACTAAGTTATGAAAGTAAC  
AACGGTAAACTGAAAAAAGCAATATAATAATTTAATACGATTAGTAATAAATGTAATTGATTTTTCGTTTTAATATAGCAAAAA  
ACAATGACTAAAGATAACAACAATATCATGATTGCACCTGGGAAGAACCATAATGCTGAAGCTGTGTACCAAAATCATTTGGTAAACG  
CATAATAATAAAGATATAAGACAAGAAAGGATACCAATAATATTATTAAGTTCTAGTCAAAATTTACACCTTCAATTTTCATTTTAAA  
ATGACATGCGTAAACAATCATTTTAAATACATCATACAATAAAAAATTAATTTGTGCGGTAGAAGAATTTGAAATTA AATTTGAATTG  
GCTTGATTAAAAGGTGATTTTATAGAAGTTAATAAAAAATGGTTATTTAATAGAAAAACATAATTTAAAGACATGGCTGATAAAAT  
ACTAAAGCTTGTTAATAATGATGTTTTAGCAGAGGAGTTTGGTTCGAAAGCGAGAGAAAAACATTATAGAAAAATATTCAACGGAAT  
CAATATTAGAAAAATGGTTAAATCTTTCAATAGCTAAATGAAAAAATCCTAGGTATTCATGAGTACCTAGGATTTTACGCATGAT  
ATATACAAAAAAGAGAGGATAGTCTCTCAAATAATAGTTAATAAATTTGTAGCCATTTCTTCCAGCTGTAACCTACTAATACAAGC  
TAAGTTTCATTACGATATGTATGATTTCAAATTCATAACCACTTACATATCCTCTTGTAAGTTTAAGTGTGAAGATTGAGCCTAACATA  
ACACAAATATAAAAAACATTAACATAAGGCGTTAAAAAGCCGATAATAAGTGCTAAACCTCCAACAACCTTACCAATTTGACATCAA  
TACTGCGATGGTAGGTGGTAAACCTAAAGGCCTAAGAAGTGAATTTGCTTCCATCTAAATCAACAATTTCAAAGTACCATTGCAATA  
AGAATGATGTTGCTAACATCCATCTAATTAAAGCATACCTAATTTTCATCATGTCACCTCCAACATTCATATTTTTAAAAACATAGTCC  
AAATTATATTTGTAACATGTGGAAGTAAAGATTTTTTATAAGATTAATTATTAATATTTATTAATATTCTATTGTATTGAACAA  
TTGTTGTAGAAAGATGTTAAGTCATCAGTTACTTTTTGTATTTATAAATAAAGATTAGTACAGCATAGTGCAAAGATTATAGGGAA  
ATGAATTA ACTATTGCATCGCTATTATGAATCGTAAACACTATTATGAAATTGCGAGAGTAGTATGGATAATTAGAATGATGGTTT  
GAGATAAATGAGTATTATTAACCAAGTGCATCTTCAAAATTAGAGGCCATTTGCTGTTATAATAAGAAGATTTGATAATAAACT  
ATGATAAGAAAAAATAATAGCATACCAAAATATATCATAAACAAATTAATGATAAAATAATAATGCAGTTTTCTATTAAAGTTGTTT  
GGAGGTAATATGTGAATAGGAATATCGTTAAATTAGTTGTGTTATGCTAATCTTAGTTGTAGCAGTAGCGGGTTGTGGTCAAAAA  
GATACTGAAGAGAAAACTGAAATGACGACAATAAAGATGAATTAGGAACCTGAAAAAATTAAGAAAAATCTAAACGTTGTTGTTG  
TATTAGAATATAGTTTGTGATTATTTAGCAGCATATTAGATATGAAACCTGTTGGTATTGTCAGATGATGCGACACTAAAAATATAA  
CAAAGTCAGTAAGAGATAAGATTGGGGCATATGAATCGGTTGGATCTAGACCGCAACCGAATATGGAAGTGATAAGTAAATTA  
ACCGGATTTGATCATTGCAGATGTTAGCAGACATAAGAAAATCAAATCAGAATTGAGCAAAATTTGCTCCGACAATCATGTTAGTTA  
GCGGTACGGGAGATTATAATGCAAATATTGAAGCATTTAAAACAGTCGCTAAAGCAGTAGGCAAGAGAAAAGAGGCGAGAAGCG  
TCTGGAAAAGCATGATAAAATATTAGCGGAGATTAGAAAAGAAAATTGAACAGAGTACGTTAAATCTGCATTTGCATTCGGTATCT  
CAAGAGCAGGTATGTTTATTAATAATGAAGATACATTTATGGGACAATTTCTAATTA AAAATGGGTATTCAACCTGAAGTCAAAAA  
GACAAACTACGCATGTTGGTGAACGCAAGGGTGGTCCTTATATATTTAAATAATGAAGAACTTGCCAATATCAATCCAAAAGT  
TATGATTTTAGCCATTGACGGA AAAACGGACAAAAATAGAAGCAAAATTCATTGATCCTGCAGTTTGGAATCATTAAGAGCTGTGA  
AAGATAACAAAGTTTATGACGTTGACCGAAATAGAGTTGTAATTCAGGGGATTATCGCAAGTGAAGAGTATGCGAGAAGATTTA  
GAAAAAATTGCAGAAAAAGCAAAATAAAAAATACAGCGCTACTCGTAAATCATATAAGAGTGGCGCTGATTTTTAATTATGTTTAT  
TATCTGTGCGATGTGATGATTTACCTGAAAGTTTATTTGCAATAAATTTAATTACATAACCGACAAGGATTGTTTTAACAGTCTTTT  
AATGAATTGGCGCATCGTTACATACCTCATTTCTCTATATCTTACGAACATATATACCCATTATATATGCTTTTTAAACGTCATTGTC  
ACAATTTAATTTTAGGGAATATAATATAACCATCTTTATCTGCTTTTTTAGTAAAAATGACAAAAATTGCATGTATTATTGAGATGA  
TGGTAGGGATACCTGTCCAGAAAAATAATAAGTGAAAAAGACCTTGTC AAAATTTATCAGCATAAAAATTTATGAATACCTAAACCT  
CCAAGAAATAATGCAACAATAACATAAATGGCTTTATTGACTTTTCAATTTGTAATCTCTCTTA ACTATAATTCTACTTAAATTCGTTG  
TGAAAACCAATATTCTA ACTTTAGAATTTTCAAACCTTTCTAAAATTAAGTATATATCTTTTTAAAAATAAGCTAGAATTTCTATATA  
TAAATGTTTAAATACGTAAAAGGGAATGATGACATAGTCATAGCAGTCCAGAGGACCGATTGATATTGCGAAGTTAGTT  
TATATGGTTTTGGGATGATATGGAATTAGAATTGGTAAAGCATCTACCTAAAGACATGGTATTAGATGCAATTGAAAAAGCTGTGTT  
GATGCAACATATCGAACTTTTTATCAGCATATTTTAGTTTATGAAGTAGAAAAATAAAGTAGCAGGTTGTATTATTAGCTATAGTGGT  
GAAAATGAATTGAAATACGAAAAAGCATGGGAAC TACTTGACTTGCCAGAAGAAATAAAACAATATGGCACGCCATTACCTGTAA

AAGAAGCTAAAGACGATGAGTATTATATAGAAACAATTGCGACATTTCGAGCATATAGAGGTAGAGGCATCGCGACAAAGTTATTA  
ACGTCATTACTTGAATCAAATACACATGTTAAATGGAGTTTGAATTGCGATATTAATAATGAAGCAGCATTAAAGTTATATAAAAAA  
GTAGGCTTTATATCTGATGGACAGATTGAATTATACAAGCACATGTATCATCTTTAATTGTTAAATAAAAAAACTCGACAGTTCTGA  
TGTAAGTCGATTGCCGAGTAGTATCATTTTCTATTAAATGCCTGCAAATAATGCACTAATATAAATACCTAATGCATATAATAAACC  
GAAAAATGTATTTGTTTTACCAGCAGCAGCCATTGCTGGCATCATTGTAGGCGGTGTATCATTCTTCTTGAAACGTCTGATAACTTTA  
ACAGGCATTGGGAATGATAACAACGCAAGTAAGTAAAAATAATGAGCCACCAGGTTTAATAATGATCGTAAGTACAATAAAGGCAT  
AAGCGATAAAGTACATGATTGCCATAAATGTTAAAAGAAGCATTTTTACCTAATAGAATGGGTAAAGTTTTGCGACCACCTTGCTTTAT  
CTTTGACACGGTCGCGAATATTGTTAGCCATATTAATTAACCGGATAGTGATTACTATAGGTACACTTAACCAAATTACATAACTTT  
GAATATTGCCAGTTTGAATAAAGAATGCAATAACGATAATAAACATACCCATAAATACGCCTGAGAATAATTACCGGAAAGGCGTC  
CATGAAATAGGGAAAGGGCCACCTGTATATAGGTAACCAACAGCCATACATACTAATCCAAGTAAACCAAATGAAGAGTT  
AGCAGCTAAAAACAAACCTAATATTGCTGTGAAGATGTAATGCAATGGCTAATCTAGCACAAGCTCTGGGCTCATACCGTTGC  
GAACAATGGCACCACCAATGCCTACAGATTTCATGATCATCAAGGCTTTTTTATAATCATAGTATTTCATTAACATATTAGTTGCTG  
CTTGAATAAGTAAGCATGCTAGTAACATGGCAATGAATAGGCTGATTTAATATGATCTTCGCTACCAAGAAAATATATTTTAGATG  
CTGCTGTACCAACTAAACCGGGTACTACGGAAGCAGTTAATGTATGAGGACGCATTAAATGCCAATATTCTTAACTGTAGAATATT  
GCTGATATTGATTACTCATTGAATACAAAACCTCTTTAAATCATATTTTTTATAACAAAGATATTTTAATAGAAAGTAGCATAAAGG  
TCAATTGACGTGAAAAATTGCAAGATAAGTTAAGCAATTCCTGTAACACAATTATCCAAAAATGATACAATATAAATGAGTGA  
AAAAAGACGAAAGAAAGTGAATGGATGGCTACGGGCGTATTAGAGGACGATATTGTCAAAGAGATATATGGCAGCTCAAAGG  
AATGGGTTTCAGTTGAAGTGAATTTACAGTCACCTAGCAGCCGAGCATTATTTTCATCTCACTGACAATGAGGACGAGGATCGCT  
TTTATATGCGTTTGAATGATAATCGAACGTCATATTTGGCTACAAAGCAATTCAATTTATTCAAATAATTCTAAAAATAACAAT  
CTATTTTTAAAGACTGGGAAAAATTAACATAACATCACATTTATACATCCGCAATCTGAGAAACATCATCTTCGAGTTGTTGGAG  
GGTTTCAATTTTCAAGTCATAAATCAGATGATGAATGGCGAGAGTTTGGACTAAATCATTTTGTATTACCTGAAGTTTAAATTTCAAC  
TGATAATAATGGGACATTTTTAACTTATACAGTTAAAAGGGAAAGTTTTACTGTTGAGGCATTGAACGATTTAATGGATTGTTCAA  
CAATATATCGGATATAGATGTGGACGAGCAAATTTGGGGAAATTACTAGAAATGAAGATATTTATAAAGATGACTGGCGTCAACTTG  
TAGTAGAAGCTATAGAATCTATTAATAATGAAGAAAAAATTGTAAGTACGACGTAGACGGTTAATAAAGTTTCGATAAAGATATCAGT  
ATTCCATATATTCTAAAGCAAGCATATTCTAAAGAAAAAACAGTTATATATTCTTGTAGAATCACAAGATTCTATTTTCTTTTCAC  
AAACACCTGAACAATTAATAAAGGTCAATAATAAAATCTATCGACTAAAGCTGTAGCAGGTACAATTAACGTTCAAGAAGTAG  
GACGAAGATACAAAAATGTTGAAGCATTTTTAAAAAGATAATAAAAACTTAATCGAACATCGATTTGTTGTTGACAGTATTTACAT  
GATATTAACCTTATATCACTGAATTACATTATGATAAGACGCTAAAAATTCTAAAAAATGATCATTTATATCACTTGTACACTGAA  
ATAAAGGCGCCACTGAAGGATGATTTCGTATATTAGTTTAATTGATCATTTACATCCAACACCTGCTTTAGTTGGCTATCCAAAAAGAA  
TTTGCGATGGATTTTATTGAACAGAAAGAATTGGTACACGAGGATTATATGGTGCGCCGGTTGGCTATATAGATATATATGATGAT  
TGTAATTTATTGTTGCAATTCGTTTCGATGCTTATTAAGAAAGCAAGCAACTTTATTTGCTGGGTGTGGCATTGTTAAAGATTCTG  
ATCCAGATAGTGAATTGGCAGAAACGAACCTTAAGTTCACACCTATGATGAATGCATTAGGAGTCGATATGAATGGGAAATCATAA  
AGCAGCTTTAACGAAGCAAGTTTTTACATTTGCATCTGAGTTATATGCATACGGCGTAAGGGAAAGTAGTTATCAGTCCGGGATCACG  
CTCAACGCCACTTGCACTTGCATTTGAAGCACATCCAAATATTAACATGGATACACCCCGATGAGCGAAGTGCAGCATTTTTTTCG  
AGTTGGGTTAATTAAGGCAAGTGAAGACCTGTCCTATATTATGTACGTCAGGTACAGCAGCAGCAATTATACGCCTGCAATTG  
CTGAAAGCCAAATTAGTAGAATTCCATTAATCGTTTTAACAAGTGACCGTCCGCTATGAATTAAGAAAGTGTAGGCGCACCAAGCG  
ATTAATCAAGTAAATATGTTAATAATTATGTAAGTTATGAGTTCGATATGCCTATTGCGGATGATAGTAAAGAGACCATTAATGCA  
ATTTATTATCAAATGCAAATTGCTAGTCAATATTTATATGGACCACATAAAGGGCCAATTCATTTTAACTTGCCATTTAGAGATCCGT  
TAACACCTGATTTGAATGCAACAGAATTGTTAACTTCTGAGATGAAGATTTTACCGCACTATCAAAAAAGTATAGATGCATCGGCAT  
TAAGACACATTTTAAATAAGAAAAAAGGTTTAATTATTGTAGGGGATATGCAGCACCAAGAAAGTTGATCAATACTAACGTATTCA  
ACGATATATGATTTGCCTATTTTAGCTGATCCTTTAAGTCATTTAAGAAAAATTTGATCATCCGAATGTTATCTGTACATATGATTTGC  
TGTTTAGAAGCGGCTTAGACTTAAATGTGGATTTTCGTAATTCGTGTTGGGAAACCAGTGATTTCTAAAAAGTTGAATCAATGGTTAA  
AGAAAACCTGATGCATTTCAATATTAGTGCAAAACAATGATAAGATGATGTCTTTCCTATAGCGCCAGATTTTCATATGAGATTT  
CTGCAAAATGATTTCTTTAGATCATTAATGGAAGACACGACCATCAATCGCGTAAGTTGGTTAGAAAACATGGCAATGCTTAGAGAAA  
AAAGGGCGTAAAGAAATTAATGTTATTTGGAACAAGCTACAGATGAGAGTGCATTCTGTTGGTGAATTGATTAAGAAAAACATCTGA  
AAAAGATGCATTATTTATTAGTAATAGTATGCCTATCAGAGATGTAGATAACTTGTATTGAATAAAAAATATAGATGTCTATGCGAA  
TCGTGGTGCGAATGGTATTGATGGTATCGTTTCACTGCCTGGGTATGGCTGTGCATAAACGAATAACATTATTGATAGGTGATTT  
GTCATTTTATCATGATATGAATGGAATTAATGTCAAAATTAATAATATTCAGATGAATATTGTATTATTGAACAACGATGGTGG  
CGGTATTTTTTCATATTTACCACAAAAAGAAAGTGCAACTGACTATTTTGAACGGTTGTTTGGCACACCGGACGGGATTGGATTTCGA  
GTATACAGCTAAGTTATATCAATTCGATTTTAAACGTTTTAACAGTGTTTCAGAATTTAAAAATGCCACATTTGTTATCTGAAACCTCG  
ACGATTTATGAATTTGATAACGAATCGCGAAGATACTTTAAACAGCATCAAAATTTATATCAGAAATTTAGTGAAATGATTCATGAC  
ACATTATAAACTATGAAGCAACGTTGAGACCAATCAAGTTTATAGTATTACTGATGGTTTCTTCTATGACGACAGTCGATCTATTAT  
AATCACATCGATAAATATACTGATATCTGTATGTCATCACTATAGACTTACCAGGCCATGGCGAAGATCAGTCTTCAATGGATGAA  
ACGTGGAATTTTGATTATATTACGACGTTGTTAGACCGAATTTTAGATAAAATATAAAGATAAATCAATAACATTGTTTGGATATTCA  
ATGGGTGGGCGTGTTCATTATATTATGCAATTAATGGTCACATCCCTATATCTAATTTGATATTAGAAAGTACGTCACCAGGTATT  
AAAGAAGAAGCAAATCAATTGGAACGCCGTCTTGTGATGATGCACGTGCTAAAGTATTAGACATAGCAGGTATTGAATTATTGTT  
AATGATTGGGAAAAAGTTGCCATTATTTCAATCGCAACTAGAATTACCAGTTGAAAATACAACATCAAAATAAGACTACAACGATTGTCT  
CAATCGCCACAGAAAAATGGCCAAAGCATTAAAGAGATTATGGTACAGGTCAAAATGCCAAACTTATGGCCGCGCCTGAAAGAAATTA  
AGTACCAACATTAATATTAGCTGGAGAATATGATGAAAAATTTGTACAGATTGCGAAAAAATGGCAAATTTAATCTTCAATAGTA  
AATGTAAATTAATTTCTGCTACAGGTCATACAATTCATGGAAGATGATGAATTTGATACAATGATACAATTTAGGATTTTAAAGG  
AGGAGCAAAATGACTAACAGACAATGGGAAACACTTAGAGAATATGATGAAATCAAAATATGAATTTTACGAAGGGATTGCTAAGG  
TAACAATAAATCGCCCTGAAGTACGCAATGCGTTTACACCTAAAAACAGTTGCTGAAATGATTGACGCATTTTCACGTGCACGTGATG  
ATCAAAACGTTTCAGTTATCGTATTAATCTGGTGAAGGTGATTTAGCATTCTGTTCTGGTGGTGACCAGAAGAAACGTGGACATGGTG  
GTTATGTAGGTGAAGACCAAATCCCTCGCTTAAATGTATTAGATTTACAGCGTTTAAATTCGTATTATTCCAAAACCGGTTATCGCGAT  
GGTAAAAGGTTATGCTGTAGGTGGCGGTAATGTACTAAATGTTGTTTGTGACTTAACGATTGCTGCTGATAATGCTATTTTTGGACA  
AACTGGTCTCAAGTAGGTTCAATTTGATGCAGGTTATGGTTTCAGGATATTTAGCACGTATCGTTGGACATAAGAAAGCACGTGAAAT  
CTGGTACTTATGTCGTCAATACAATGCACAAGAAGCTTTAGATATGGGCCTAGTAAATACAGTGGTACCTTTAGATAAAGTTGAAGA  
TGAAACTGTGCAATGGTGTAAAGAGATTATGAAACACTACCAACAGCTTACGATTCTTAAAGCAGCTATGAATGCTGACACAG  
ATGGTTTAGCTGGTTTACAACAAATGGCTGGGGATGCAACATTGCTTTATTACACAACCTGATGAAGCGGAAAGAGCCGTGATGCG  
TTTAAAGAAAAACGTGATCTGACTTCGATCAATTCCTAAATTTCCCATAAAGTTATTTGAATATGATATTAAGTCACTTGCCTCGTT  
TATTAGCGACGATAGGTGGCTTTTTTATTTTATAAGAATTTAAAGAGAAATTTTAATTAATTATCATAAAGATAAGATGGTTTGAAT

AAATTAATAGAGAAAGAATAAATGTTAAAGATTATTATTACAATGAAAAAACGAGCTGGTGAGAAATTGAATTCCTGCCAACCCGC  
TTTATGAAGTGAAATCATTTAAATTAGTTATACTAAGCGCTCATAAACGATTGGGCGCGAAGTGCCAATACCTTGTGGATGACGT  
TTGCATGAGGATATGCTGTGTATCATCATAATCAAGAATAAAGTGATTCTTCATTATCAATAGATGAAAATTTAATGCGTTGATG  
TGCCGTATCTATAAAAAAGAATATGATATTGATTGTGACTTGTATCATCGCCATGACGTATACAAATTGATTTTTGTAATTGATGATTA  
CTCCAATTACCAATGAATAAATTGATATTGGTTTGTCTAGATGTGTGAGTTTGGTTGTGTCGTAACCTAAATTTATAAATTGTAGTT  
GATACATAGTTTTACCTGCCTTTAATCAATATCTATATTACTTTTTAGTAACCTATCATTGAACCATACCGATTATAATCACGATTGA  
ATGATAAATGTAATAGGCTTGAATCTGCATCTTGGATTGATAATTCTGTATCCCAAGGATTCCAGTAAATAAGTTTTCTTGGTCATT  
AATTTTAGCATTACCAACAACCTGCTAGGGCATGTCCTAAATGTGGATCATTAGGGTTTTGAGATACACTTTGTGCAAGAATCATAAT  
TCCTACATTATCTTTGTAAAGTTGATCAACTTGTTCATATGATGGTACGCCTTCTTGATAATGAATATCTCTGCCTTGTGATTTACCGT  
ATTCAATCATTGTATTAGGGAATGTTGAGCAATTAGGAAGGCTTGGCTCACTTACCTCAGGGTATAATGTACGCATAATATCATGTG  
CATTATAAGTGTCTGTATTTTTAGTTGCATTAAATAATGCTGCCATACTAAATCCTGCACACCATGAGTTATCGAATTGTTGTCTCT  
AATTTTGAAGTTTTTTAATGTATTTTCATATTGAACCTTGATCTTCTGTATCGCTTCGTTTTCTTCAACTTTAGTAGGTGTTACTGTATT  
TTTTAACTCTTGTTCATTTTGTGCTGAAACTGTTTTAGCACTTTCTTTTTCTTTTACATTACCAGGTAGTGGCGTAGCTTTTACTAATCT  
AACTTTGCCATCTTCTTCAAAATAAACCCCTTTTTCATCAGTAAGAACAGTGATATTGAATTTTTATCTTTAATTGGTCTAAATCTT  
TAGCGATGAAGTTTGAATTTTAACTGTAAATTCATGTCTTCTTTTGATTGTGTTAAATCATCTTTATTTTTAGGGCTAAGTGTTAAA  
GTATAAAACAATTTTACCGTCTTTTATAACTGGATAATAGTAACTATTATCTTCTTACCATTAAATTTATAAATTTTAAAAGCTTCGC  
CAAGTTATATTTTACCAGTTTTTGCATTACTTTGTTTATCTAATGCTTTAGCATAACCAGCAAATTTGTTGTTGTGCTAGATCTTTTACT  
TTTTGAGGTACTTTGTCACTTTAACTTAATTTCTAGCTGTTTAGAGTGTGAATCGGCTTTGGCTTTATGTTATTAGCAAATCGGCC  
TAGTGATAAAATAAGCATTGAAACCATTATGATGCTTTATAATATTGAATCTAGATTATATGAACATTATCATTAATACCTCC  
ATTTAAATCAAAATATTTTGCCTTGCTAAGACTTTGCTTCTATTTACTAAATCTAAATTAAGATGAAGTTTATGCAGCGTCAGGGTTG  
TCTGAATTATTGTTATCGCCATTGTCTGGATTATCAGGGTTGTTAGGGTTGTCAGGGTTATTTGGTTCATCTGGGTGTTAGGGTTAT  
CAGGATTGTTAGGGTTGTCAGGGTTATTTGGTTCATCTGGGTGTTAGGGTTATCAGGATTGTTAGGGTTATCAGGATTGTTAGGGTT  
ATCAGGATTATCTGGGTATTAGGTGGTCATCGTTGGCAAAATGGATATCTTCAATATTTTGTTTTAAGAAGTTGCGTACATTTTCA  
TTAATAAATACCGCACCATTAAATTCATTTGGTACACCGCCCCAATGAATCCGATCACTTCATTTTTTTCATTAAATACAGGTGAAC  
CTGAGTTACCACAGTTGTACTTAAATCATATTGCATAGCTTCGCCTTTGAGGTAAGTGATTTTTCTTTACTTTCCACATTGTTGCT  
ACAGGTTTATCACCAGGATATCTGTTACAGTAATATTTTGGTTAACTTGTGTTTCAGCATTATTACTATTGTTGCTGGTTTAACTAC  
TTCACCAATATGTTTGTGTTTGTCTCATTAGGGGAGAATTTAACTATTGCTAAATCACCCTTCGCCTGAATATTTAGTGATTTGTTACGA  
GTGAAACCACCATTGGGATAATTGTCTTGGTTAATTGCAGAAAGGAATGCTTTTAAAGCATGAGGATCACCGTGCCTAGCATCTACG  
ACGTGTTTATTTGTTAAAAGAGTATCTTTACCTACAACCTACACCGGAAGCAATAAATGTACCAGTAGGTGCTTCAACTTGAATATAA  
GTTACGGGTGCATAATGACCATTGCTGTATCTGTGATTGTTGGTGACGATCGTTATTCGGTAATATAACATTGCGTGTTCAGGTTGTT  
CTAATGGTTTAAAGTTACCGCTTTTTTAATCTTAGGTGTTGCTGTTGCTTGACTGCGTTTGTGTGGATGATTGTCCATAGCCTTT  
GATGATAACGCGTTTGTCTGCTGGAGAACTCACAAGTGCTGCTGTTGTCAAAGTTGCAACGAATAAAGAACTAACTTTTTAAAAATTTA  
CCTTTTCATCTAAAAACCTCCAAAAAATTTATTTACAAGTTAAATATAACACTAAAAATTTTTAAGTCAATAAGAATATATAAATAAA  
TTAAAAAGTTTTTTGTAAAGATTAGAGTTTACAAAAACATTAAGGGAATTTAAATTTGAATTGTATTATCTTTTCAATTGAGTTAA  
ATTGATAAGATCGTCAATTTGTTTGCATTATCTTAAAGAAATAAATAAAGAAAGAAATTGAGAGCGAATTGGAAGTAAAGTATTGTTTATAAT  
AATAAATAGTAACTTTTGAATAATAATTGTTTGGCCAAAGGTAGATTAATATGAATGGTGATATATTATTGAGTGCTTAAAGTTTCG  
AAGAACAATTATAAGTTAGCATATTTAAACCTTTTGATAGAATCATTTTGTAGTGAGGTGTTTAAAGGAGAGGAATATAACTCGGTA  
GTATTTACAGTCTCTATAGAGTATTATTTAAACTTATAGAATATAAAAAACTGAACGTACTATGAATTTAGTTTCACGACGTCCAGT  
TCAACATATCATTTTTATTAGTATTTAAATATTTAGCAAGTCTCTTCATACCTTCTTTTAAACATCCATTTCATAAGCATAGGAAAT  
CCTTACAAATCCTTTACCGAATCTGTAAAGGATGAGCCTGGAACGATTGCTAAATGTGTGATTCAAGTAAATCGACACAAAATTC  
GAAATCGTCATCGGTGATATGTTTAACTTTGGGAAAATATAAACGCGCCTTCAGGTTGAGCGGTAATCTCAAAACCTAATTTAGT  
TAATTCAGATACATAAATTTCTCGTCTACATAAGCTTCGTTTCATATTTAGGAGCTTCTAATCCTTCGTTAAGTGCTGTATAC  
ATGCTATTTGAGCTGGAACATTGGCACAAATACAAATTTATAGCGGTGCATAAATGTTAATTTATCAATTTAGAGGCCCTAATA  
GAAAACCAATTCCTATTCCGGTTGTGAGTGTGATTACTTAAACCACCAATTAATTAATTGATCAGCAATGTCTTCAAAATTCAGC  
GAAGGATACATGTTTACCCTAAATGTATTTTACGCATAAATCTCATCGCTAATAATAAATATCGGATATTTTTTAAATACATTTACG  
ATATTTAAACTTTCATTTCTTTTAAACTACGCCAGTTGGATTAGTCGGATAATTTAACAAGACAGCTTTTGTCTTTGGAGAAATAT  
GACTTTCTAATGCATCAGGTGTAATTTGAATTGTGTTGCTGTTGTATCAATATAAATTGGTTTACCACCTAGTACTTCGATGAGTGG  
TATGTAGCCTGCATAAATTGGTCCCGTATTATAATTCATCTCCAGGCTCTATGATAGAACGTAACGTTGTGTCTATTGCTTCACTT  
GCTCCATTGTGCACAATAATTTCTTCAGGATCATAGGAAAAATGATAACGATTTTTGAAGTATTGACTAATTGCTTCGCGAGTTCTA  
ATAACCTTTATTGTGAGAGTATGATGTCTTGTTCATTGTTAATAGCATCAATATATGCCTTTTTCACAACATCAGGCATCGGGAAGTC  
TGGTTGGCCAAATGTTAAATTAACACAATCATCAAAATTTATCATACGATTGAAAATTTGGCGAATACTTGGTGCTCTTAAATTTT  
AGAATTTAGAATTTAAAGAAAGTTTCATTGTGACACCTCAAAATATAAATTTGCTTAAATTTAGAAATTTAATAAATATCAT  
AACATACTTTTAAACCAAAAAAGGGTAAATTTACTTAAAGCTTTATTTGAAAAACGAAAAATGTCTAAATACACTGTAGTAACTACTTT  
TCAAAATGAATAAAGTGGTTACAGTTAATGTACTTAGACACTATAAAATTTGAATCTTTAAACTGTGATGGTCTTTGTAAATTAAT  
TATTGGATTTGTCCATTTACAAACAAAGTTTGTAGATAATACATATACGATGATTACAGATATACTTATTAATAAAGATAAGTCAT  
TAATGATATAGGATTATCGAATGGGTACCATTCAAATCCTCTAACAATGCCAATAATTAACCATGTAATAAATATACGTATAGCGT  
ACGACTACCAATATAAGTATATAATTTTTCTTTGTTGACATTAATTTAGAAAACGCGATCATTCGGATTAATATAATTCCATATAAT  
ATAAGTCGTTTAAAGGACTGAATATACTCTGTCCTTCATTTTCAAGTGAAGTATATGGTGAACCTTCCCAATAACCAATCTGCATTG  
ATAGGATGAATCAGTAAATGATAAAAAACAAAAAAGGTAATGATAGATACCTGGTATTAGTTTTTATTTTTAAAAATAGCCGT  
ATGTTTTTGGTGAAAATGTAACCTAGGTAAATATTTGGGAAAAATACGATTGTCTTGAATGCTCAAGTAGCTATCGATGTTATC  
TGAAAAACCTGCTCCAATAGATATAATAATTGAAACTGATAGCACTTTATATGGATTAATCTTCTAACTATTACTAAAAATGACATG  
AAAGAAAAATAGCGTGATCAAAAAACCATAACGCAAACTAGGGTTAAAGGATCAAGTTGTAATTCGTCACCTTTACCTGTTAAGA  
AATAATATATTGAAAAGAAATGCAAAAAATATCATATAAGGTAATCAAAACGTTTTGAAAATTTTTTCTAAATAGTATGGTTTATCAA  
TATTTTTCGCGAAATAACCAGATATAAACAAAAATGTTGGCATATGGAACTATAAATAACTAGGTATAATGCTGATAAATATTTAT  
CGCCACTAGTGTAGGGTTGTAACATATGTCCAAATACGACTAATAATATTTAAATTTGCTCTTGCGTTGTCAAAAAAATAATCTCTCT  
CTTTTAAATGAAGTCATATTTTATCTCTTTATGTCCATAAGACTCTTACTAATTTATTATATTTTGTATTAGTTATGCAACAAATTTGT  
CTATTGTGTCGAATAGTATTGTAAAAATTTAAAAATCATATAATATTATAAATAATATGATGAGTGGAGTAGAACAAATCATGATAAA  
CAACTTGAAAAACTTATTACACTGACTAACAATGACTTAACTTAGTGAATGAAGAACTTTGGACAACGCACGGATATCATATCTGA  
ACAGCTAGAACTTCTCCGTATTTTATTTAATTACGATCGCTTATCAGATGATGATTTGACGATGAAGATTAGCAGGGAACAACTAT  
AGTTTCAAGGTGGATTAAAGAAATAGTTTTGAAAGGTTACATCACAAGTCAACAATCTAGCGAAGATTAAAGATGTAAAGAAATTA  
TTTTGACTGATCAAGCACGTACATTAATTTACAAAAATAAATATGCACGTTGCGAATTGATTGAAGCAAGATGCAATGTTTATCGG

AAGTCGAATTAGACAATTTAAATCAATTACTTGATAAGTTAAATCAACGACGCATATCGTTGTAACACGACAATAGCAAACACATA  
ATTTAGTGTCAATTGTGCACACAACAAAAATTGAATCATGAATTACAAGCAAAAAGTAGCGGTGATTGTTAAAAATTGATGGTAAACAA  
TCACCGCTATTTTGTCTGTATGTATAAAAAAGGGATCAAAGGTCATCCCCATGATTGATAGTGGGGGATGACTTTTGTATCCTA  
TGTTTCATGTTGCTTATTTATATTGTGGGATGTCGAAGTATTTGCCGACTTCGCCAATTTTATCATAGTAGCCTTTGATGATTTTAGCAT  
TGATGTTAGCCCAATCTACATCTGTAGCATATTGGTGTGTTCTGGATGTGCAGGATTCCATCTCATTTTGTAAAGTGATTTTGACC  
AGCTTTTACATATGAGTTGCCGATGAATTTAGCACCAACGATTGCTTTTGATACTGTGTCCCAACCAGCTTGTTTAGCATATTTA  
ATACCTTCACGTAAAGGATCGTTATCATATGCAGCAATACCAAAATACGTTATGGTATTTTCGTGTTTGAGTTAGTTACAACCTTTGTTGT  
TCACTACATCTGCACCTTTTCGCTAATTGAGAAGTACCGTTACCTGTTTCTAATAGGGCATGTGAGATAAGATAAACTTCATTAATGC  
CATACATTTGAGCAGCTTTGTTAAATGCAGCACCTTGGTTTTCTAATACACCTTTACCTTTTAAAGAATTGATTAATTTTATCAATAGA  
AATATTTTGTGGTTGGTCTAAGCGTAAGAATTGATATTTTAAATGCTGGATCTTGAGCTAAACGCTTCGTATCCATTGCATGCTTAACA  
TCATTAAGGTTAGCATCTGTCCACTTACCTGGTACACGTTGTACTTGTGGTTTATATTGTAAACCAGCTTGATTTTGAGCAACTTGGT  
TTAATGTCATACCTGTTTGATTATACCTTAATTAATCTTTAGCTAAATCAGTTGATTTAATCCATGCTAATTTACCGTTAGATAATTTA  
CCATAGTACCAAGTTTGTCCATTAATGACTTGTTCTTTAACTGCGAATGGTTGTTTCATTAATAGCTTTTAAATGAGTATTTAGCTG  
TATCAGAATTTGGTGTACATAGTAATAACCATTACCATTTTTAATTACATAAGTGTAGTTATAATCTTTGGCAGCTGATGTAGTTGG  
TTTCACAGCAGTTGGTGCAGTTAAATCTTTTGCATTTACCCAACCAGTGCGGTTAATAAGTACCGTATAAAATAAACATCTTTGCCT  
ACAGATACTTGTTCGTTGCATTAATGTACCTTGAGCAATGTTATTGCCTGTTAAATGACTTGGTTTTAGTACCCCAAGGAACCA  
TTGATAAGCCGTTATTTGATTTATTAACAGTATATTTTTGAGTCGTTTTAACTTCTTTGCCTAAGTTTTGAACATTTAAGTCTTTTACA  
TTGAACCAACCTAATGGGATGTTATGGCTTGTTATGTTTAAATAACATACAGTTTTCATTACCATGAGCAGCTCTTTGTTACATAGA  
ACGTACCGGTCTGCATATTTTCGCACCGTTTTTCGCTGTTTTTTCATAAACAGAACGACCAATACCAGTTGTGTTTGTGTTAACTTGAGC  
AATCTTGCTAACTGTTTGTGCTGTTTGTGGTTTGTAGTAACAGTATAAGCTTTTACAGCTGTTTTTGGTTGTGCTACTGCTTTTTAGGTG  
CAGCAGGTACAGCTAAATATGCTTTACTTACCCAACCAGATTTACCATTTACAGTTCCAAATAAATAGATAGATTTATCAATTTGTT  
GTTGCTTAGTCGCTTTAAAGTTTGGTTACCTGTACCAGAACTGCACCAGCTTCTGTTTATAAGTGCCCCAAGGTACTGAATATAA  
TTAGTGCCTGGTTTTACTGTATATGTTTGCATTACATTTACAGGTGATTTTGCATTGTTATAAATAACGTCACCTTGTTTAAACCAAC  
CAATTAAGTTGGACTATTGTAATCTTTAACTAAGTAGAATTTGTTTCCACCTAAACTTGCTTCTTTGTTACAGCAAATGTTTTTGA  
ACTTCTTTTCGTTGGCTTACCAGTTTTGTCATAAACTGTAGTGAATAAGCCATTGTTTTTACGATTAATTTGAGCAACACCGTTAATG  
ATGAACTGTTAATTTATTTGTTGTAGGTGTTGATGGCTTAGGTATTGGTGTAGGCGTAGGTTTAGCAGTATCACTAACTAAATATGC  
TTTACTTACCAACCAAGATTTACCATTCACAGAGCCATATAAATAAATTTGATTTATCAATTTGTTGTGCTTTGAAGCCTTAAATGTT  
TGGTTTTCCAGAGCCAGACACGCTACCAGCAACTTGTTTAGATGTACCCCAAGGTACTGTATAAAGTTTCGTACCAGATTTGATTGAA  
TATGATTGATTTACATTTACAGGTGATTTAGCTGTGTTGTAAACCACATCGCCTTCTTTAACCAACCAAAATTTATTACCAGAATTGT  
AATCTTGAACAAGATAGAATTTTTGATTACCTAATGTAGCTGTTTGTAGATACAGCAAATGTTTTTGAACCTTCATTAGTTGCTTTACC  
AGTTTTGTCGTAACAGTAGTATATAAACCACTATTGTTGGTTTGATTGTGCGACACCATTGTTTGTGCAACTGTTAATTTACCA  
GTTGATGGTTTCGACGGTGTGTTGGTTTTGATGGTGTAGTAGGGGTAGTTGTAAATTGCGTACCCCATGGCGCCACTTTACCCATTT  
TTATTAATAATTTTTTCAATTAATTAAGTCATATAATTGATCATAACTATAATTATGACTTCTTAAATATCCATGTGGATCGGCATGGTC  
CGTACCACCTAAATATTTACTTACAGCGTAGTGAGTCCATCTGATACCATTTCCATCATACTCAGCAGCTGTCTGGTTTTAAACCAATA  
TATTGTAATTGTGTAGCTGCATAGTCAGCATAGTTATTCATTGAACGTGCAAAATGAAGCATAGCTGTGTGTTGTGATGACGATTTCAACA  
TTGATGAATCTAGGGTTACCGACTGCACCGACACCCCAAGATAAGTAATCCGTTGGTGTGTTTCGATTATACGATCCCCATCAACA  
AATGCATGTACGAATGCGTTTTGATAGTTATTTTTCATATAACTAATTTACCATTTATCGTCGAACGATCATTAGCTGTATCATGAA  
CTACGATACCTTCAGGACGACCTACGCCGTTACGGTATGCGTATTTAGGGAAGTAAGATGTATAATCTTCTCAATTTTAGGTGCTTT  
TAAGTTATTTTTACGAATGTAATCGTTAATTGAAGAGTTTACTTGTGGTTTATATTTTGGCAAACCTCGTTTTTGGTGTGTCAGCAACT  
GATCTTGGTTGTGCTGAAGCGCTAAAAGTAGTTACTTTAGGTGTGCTTCAGTTTTAGCTTTAGGTGCTGCGGCTTTATATTGCGTTT  
CAAGAGCTGCAGGTTTAGCAGCTGATTTAATTAATCTGGATTAATTTGATGTTCTGAATTATCATCTTCATCATCAACTAACTATA  
ACCAGCATTTGTAAACATTAGTGTAGTTTTAGGTGCTGTAGTGCTTGTGACTTTGCAACAGGCTGCGTATTATTGTAGTCGCTGAT  
TGATTAGCACGAGTGTCCACTTTACTTGTGCGAGTATCAACTTTTTGACTTACTTTGAGCATTTGCCGTTTTGTTGTTATTGCTGTTTTGG  
TTGGACAATAGCAGGGTCTTGATATACCTGAGTGCCAGAAATGTTTTGCGTTGGATTTTTTACCTCAGCTTTTGTGTTTGTGCTGCTG  
GCTTTAACTTTATTAATCTATAAAACATTTTTATTAGTAGTTTGTGCTGCTCAGCTGCTTGAACCTTGATGTGCAGTGACTGC  
TGAACCTACAAGCGTTAATGCAACCATTGATGGTAGTTTGAATTGAATTTTTTCGCCATTCTATTTATTACTCCTAACATTTATTAAT  
TATTACTAACATTATAGTACCTGTTTTATATACCTGTGCGTATTTAACCAATTTGTAATATACTCTTAATTTACATTTTCACTGTAAAA  
AAATGAAAAAATTTTGAATCTCAATGGTGACGTGACAAATCAAATAGAATTGATGTCAATTTAAGAATTGGTTTATTACAAATGTT  
TCTAAAAATAGATACAACCTTTTTTAAATTAAGCGAGGTTAACTTTTTTGTCAATTTCAATATGCTCGATGCCTTCCTCAAGAAATATATT  
ACCTCTCATTTTAAAGTTTAACTTTTCAAAAAATGGGATAGCATGACATTTGGGCATTCATAGTAGCTACGTAAAAACCTTCATCTTTA  
GCTAATGATTCTACAGCTTGCATAAGCATTCTACCATTTCTGTGTCACGATGTGATTTTCATCAGAGTACTGCTTCTATTTTGTGACAG  
TTGTTTCAATTAATAGGCGTATTCGAGCAGTGCCAACTGGCTGTCCATATCATATCCAATGAGGTGAATGATTTTGTGATTCAGATTCAATT  
CATCAATTTCACTTTTCTCAGGGACGCTTGTCTTCTACAAACACTTTCTTTCTTATATAGAAGCAATCTTCTAACATCTTTTGATTG  
TTTACTTTTGA AAAACATAAAATTCCTCCACATCCTAACAAAATCATTTACATTTAATTTACTAATAATAACATAGAATAACGATTGTT  
ATTTTCTCAAAAAATAATTAGACATAAAAAAGCTATAAAGATGATTACAAGAATCATCTTTATAGCTAATTAATTTAATGTTAT  
AGTGCTTCTTTTCTAATAATTGCTGTATATTGCCAAAAGATTGCGATTTGAGCAATATTCCAATTATTCAATCCCATTTGTAATCCTG  
AAGGCTTAAATATATTACATCAGTTACTTCTAATGCTGCTGCAACTAAATATTGTAATGGAATGCTTAGTGATTTTCAATGTTTCGGT  
AATGCCATTTTCATCATATACCCATGAAAATGGTAACTCTGATTGCAAAAACATCAACACTATTGAAAATTTCAAGGTAGGGCTAAAAAT  
ATAACATGCACCATCTACAATAGGATTGTCGATACTATTTTGTGAATAAATAGGAGTGCTTCATAGTTTCTCGATGCTCATGATTG  
ACGTAAAAAATTTCACTTTCTAATAATGAGCCATATCTTGGCTATGAATGATTGTTGTTCTAACAATTAACATGCCATTTAATTTG  
CAATCTTTTCTGATGTTTTTCTACTCATGTATGATGCTCCTTTTCAAAATAGTAAATGTTAATCGTCATATAATATTAATTTACAACAC  
CATTTTGGTTATTTGAAGCTTGTGGCGCTTGTGTGTGCCACCTTGATTTTGATTTAAGTTTTGATCTGTAGCAGGTTGTTGTTGATTG  
CTGGAATCACTGTTATTAGTTGAATCATTGTTCTCGTTAGATGTCTTATCTTTATCTGTCGTATCATTTTGTCTTTTCTCAATAAACT  
ACTATCTAAAGGCGTTAACGGTATTAATGAACCATAATGATTAATGACACGTTGATCTAAGAAATCATTTTTATCATTAATAGGTGA  
TAATTTCTAAGTCTTTACGAAGTAAGTTGCATATTTTTGAATGCTTTCAACACTTGGATGATAATAGTAAATACCATTTAACATATCA  
TCTTTACCTTTAATTTGCGCAGTTTTAATTTCAACATCATTTGTTAAGTACATTTTGTCTAAAGCTTTAATTTCAAGGTTAGTTAAAT  
ATGCTTTGCAATTTTGCCTACAATTTGAATCAGTTATCAAGTTATCAATAGAATCAACTTCTGTGCTTTTGAATAAAAACTTTA  
ATTAATTCATTTGACGTTGTCCACGTTTTAAGTCTGAATCATGATGATTTCTAGCTAGCAACTGTCAAGCCCTCATCACCATTAAAT  
TTTGGTACCCTTTTTAATTTAATCTTACCAGTATCATCTGTGTAGGTTTCAATTAAGTCGTATGGCAGCATCATGATATGCCACCA  
AGCTCATTTACAGCCTCGACAAATGCTTTTCAATTTACTCTCACATAATAATCAACAGGTACATTCATGGTAGCTTCTACCGAATCCA  
TTGCGGCAATTGGACCACCATATGCATGTGCATGGGTAATCTTATCGTAATAGCCAACCTTAGGAATGTAGCTGATAGTATCACGTTG

GAATACTAAGCATTCTAATTTGATGTTTTGATTGATTAAGTAGTTAAATCATAGCGTCTGATCTAGAGTGTTTCAGCATCCTGTCC  
TTTTTTCTTCTTCCATCGTTATCATCGATACCTAAGAAAAAGAAATAGAGATAGGTTGTTCTTCAGGATTGACTTTATTATCTCTTAAGT  
TGGATTGACGATTAGCATTTTTGCTGTCCTGAGAAGATTGCAATGCATCTTGGGACGTTTTAAAAAGTAACGTAGCGAAGACTATTG  
GAACAACAATGAGAACCAATGCTAGAAGGATCAAAAAGTATTTTAAAAATTTATTCATGATTGATGCTCCTATATTTAAATTTTTGT  
AAATCATAATCATAATTTTAAAAATATAATTAGTTGAACGATATTTATACAACCTTCATTACTAATACATTATAGCCTTAAATTGTAGTA  
CTTTATAGTAAAAAATACAAATGTTATGTCAAAGTTCCTTGTAATTTGAATGTTTTGTTAAAAATCAAAAAGCATTTTTTAAAAATATA  
ATGCGACTTTAGTATGATGCTTAAAAAATTTAAAGGCGTAATATAAAATTCGAGTGATTATACAAAAGTGATAAGGTATAATTAATT  
TTGTTGTATAGATAACATATTAGAAAACTTATTACTATGTAGCGTAAAGCATAAATGAATGATAAGTTAATTTTTGTAAGTTGTAT  
TATTAGGCATCTAGGTTCAAATTTTTAACGATTTAAATATATAAAATGAATACATTGTGAGGCAATTATCAAATGAAATTTAATAAA  
GTAAAACTAGTTATACATGCGTGTGACTATTATTATCATTATTTCTATAGCGTTAATTTTTTCATCGATTACAGACGAAGACACATT  
CTATAGACCCAATACATAAGGAAAAAAAATTATCAGACAATGAAAAATATTTAGTGGATCGTAATAAGGAAAAGGTTGCGCCGTCT  
AAACTAAAAAGAGGTATATAATAGCAAGGATCCTAAATATAAGAAAAATTGACAAGTATTTACAAAAGTTCATTATTTAACGGTTCAGT  
AGCTATATATGAAAATGGCAAATTGAAAATGAGTAAAGGTTATGGATATCAAGATTTTGAAAAAGGTATTTAAAAACACACCGAATA  
CGATGTTTTTAAATAGGTTTCAGCTCAAAAATTTTCAACAGGGTTACTGTTAAACAGTTAGAAGAAGACATAAAATAAATATCAAT  
GATCCAGTAAGTAAATACCTTCCATGGTTTAAAACATCTAAGCCTATCCCATTTGAAAGATTAAATGTTGCATCAAAAGTGATTATAT  
AAATATAAAATCCTCAAAAGATTATAAAAAATTTAGATCAAGCAGTTAAAGCGATTCAAAAACGTGGTATTGATCCTAAGAAATACAA  
AAAGCATATGTATAACGATGGGAATTATTTAGTACTTTCGAAAAGTAATTGAAGAAGTTACAGGTAATCTTATGCTGAGAATTATTA  
TACAAAAATAGGAGACTCTTTAAAACTTCAGCACACAGCATTTTATGATGAACAACCTTTTAAAAATATATAGCAAAAAGGTTATGC  
TTATAATAGTACAGGACTTTTCATTCTTAAGACCTAATATTTTGACCAATACATATGTTGTCAGGTAATTTATATATGACACCAACAGA  
TATGGGTAAATTAATTACTCAAATACAACAATATAAAATTTATCAGTCTAAAAATAACCAATCCATTATTACATGAGTTTGGTACGAA  
ACAGTATCCAGATGAATATCGATATGGTTTCTATGCTAAGCCAACATTGAATAGACTTAACGGGGGATTCTTTGGACAAGTCTTTAC  
TGTTTACTATAATGATAAGTATGTAGTTGTACTTGCATTAATGTAAAAGGAAACAATGAAGTTCGAATCAAACATATTTATAATGA  
TATTTTAAACAAAAATAAACCTTACAATACGAAGGGTGTATTGTTCAATAATTAATATAGAAGATATAACATGTATATGGCATTAA  
GGCATCGACCTTATCTGACCAAGTATACGAGTTATATCTTCTTTTATAGTGGTAAAAAGTTTAAAGTATAAGGTTGAAGAAGGATG  
AGTTTAAAAATATGTGTTAACTGATAAAAAGGGGAAATCATTTGGTGAGTTGGCATCAGACTAAAATGAATGAAGACGAATACGTTG  
GTCCATGCGTGGTGGAATGTTTTCTAAATCTAACTGGAATGATAATTTAATAATGTACACTTTTGATTGTTTAAACATGTACAATT  
TTTAAAAACCTAGGGATAATTTTATTGACGTGAACAACATTGAGATTATCTTTAGACATAAATATGGATTTTGAAGTTACTATATTTA  
TTAGTTGTGGTTGTTAATGTATTAATTGAATTGATTATAATGATTGTCTTTATAAGATATAGAAGGGGACTTAACCATTTAAAAATTGA  
AGGAAAAATAAAAAACCAGCTAACAAAAAGTGTTAGCTGGTTAACTTTACATTATTTAAATGTTGTTTATAAGTGTGAAGAGTGACCG  
CCTTGCATAACCAATATGTTCCGACAACGAAACAAAGTGTAATTACAAGAGCAAAGATAACTTTGAATGTTTGTAACGTCCATCT  
TTACCTTCAGTTAAATGCATGAACATTAATAATTGAAGTCTGCTTGGACGAATGCAAAGCCAAAGATAATTGTCAACTTCGCGTGG  
AATGTTAATGACGTGTATAGTGTACGTATACGTCTAAAAAGCGTTAATACGATAGATGCGATAAATCCTACAGTATGTTTCATTATT  
GTACTCATCCGCTATACACCATCCCTATCATATATACGGCAGTAAAGATGAAAACCCAAACAACATCTAAGAAGTGCCAGTATAAA  
CTTACTATAAATAATTTGGCGCATTAATTTGTCTAATCCGCGTCTGTTGGATTATTAATAACAATGGCCCAACCCATCGATCACTA  
GCGTACGTGACAACCATGCGTTCTTAATAGGATAAAGAACTAGACGATGAAGAACCAATTGTTGGGTTAACGCCCTCTGATGCA  
TAGTGTGCGAATTCATAAATTCGAATCCAACAAAGACTAAACCTAAAAAGTAACGTAATGATCATCCAAAAACATCATTAACCTTTGT  
TTTTCTTGGCGCATGTAGTAAATAGCAATACCACATGTGTAAGAAGTGAATAATAATGCAAACGTCATTATTTAAAAACAAGAGGCAA  
TTCAAATAACTCAGTAGTCATTTTACCTGCATAATCGCCACCATGTTGCAAAGTTAATAGTGTGCGAAATAGGGTACCGAATAACGC  
AAATTCGGCTGTAATGAAAATCCAAAAGCCAAGCTTATTTAATTCGCCCTCATGTGTGCGTGAATCAATAGTGTGTTGTATCATGACT  
CATGACTTACAGCCTCCCTTTCTTTAATACGCGCTTCTCTTAATCTAGCTTCAGTTTCAGCAACTTCAGCAGCAGGGATATGATATCC  
GTGATCGATTGGAAGTTCGATAAATCATAGTACCAAAAAATACCGAATAAACAATAATGCTGGAATTACAGTTTCGAAAAATTA  
AGAAGAAACCGCCGATAGTCATAAAGATACCAATCCAGAATCCAACAGGAGTATTGTTTGGCATATGAATGTCTTTGTAATTATGG  
TTGTCTAAGTAATGACGACCATTGTTCTTTCATATCAACAAATGTGTCGATGTCATTCCAATTCTGGTGAATAGGCAAGATTTGTATAG  
GTGGAATTGCTGATGCAGTAGTCCACTCTAGAGTACGACCAAGGCCATCCAGTTATCTCCAGTTGCTTCAGCTGGAGATTTGAAGT  
GACTGTATACGATACTAACAACAAGGAATAAGAATCCGATTGCCATTAATAATGCACCGATAGTTGAAATTAAGTTTAAATAAGAAC  
CAACCATCTGATGGCATATAAGTGTATAAACGACGTGGCATACCATCTAATCCAAGAATGAATTGTGGTAAGAAACAACGTTAA  
TCCGATCATGAAGAACCAGAAGCACCATTGTTTAAATGTTTCGTTTAAATTTGTAACCCATCATCTTTGGATACCAGAAGATTAAACC  
AGCTAAGCAGGCAAATACAACACCAGTAACCAATGTATAGTGGAAGTGAGCTACTAAGAAGTACGTATTGTGATATTGATAGTCAG  
CTGATGCCATTGCTAACATTACACCCGTAACACCACCTAAAAGGAAGTTAGGGATAAATGCTAATGAGAATAGCATTGGTGACTCA  
AATGTAATACGTCCTTTATATAATGTTAATAACCAAGTTAAACAATTTACACCAAGTTGGAATACCAATCAGCATTTGTTGAAATGAG  
AAGAATGAGTTGATTACGACACCATACCCATTGTGAAGAAATGGTGAAGCAAACTAAGAAACTAAGGAACGCGATACCGGCAG  
TTGCCATACCATACTTTGATGTCGGAATAAACCGTTACGAGCAATGTGCGGGATAATTTCTGAGTAATAACCAATGCTGGAAGGA  
TAACGATATAAACTTCAGGGTGCCCCATACCCAGAAGAAGTTAGCCCAAGCATTTGGCATACCGCCATGTGCAACTGTGAAGAAT  
GCTGTGTCAAATATTCTATCAGTTGTCAATTAATGCTAACGCTACTGTTAAAGGAGGGAAAGCAAGAATAACAATTAATGTAGTAATA  
AATGTTGTTACTGTAAACATTGGCATTTCGATAAACTTCATAGTTGGTGTGTTTACATCTTAAATTTGTTACAAAGAAGTTGATACCTG  
TAGCTAAGGTACCAAGCCCTGAAATTTGTATAGCTATTAAGTAATAGTTAACACCCGACCAGGACTGAATTCACCTGCTAGTGGCG  
CATAGTTTGTCCAACCAGCTGCTGGTGAACCACCAATAATAAATGACAGGTTGAATAAAATCATACCTGCAAGAATAGCCAGAAA  
CTTACGTTGTTAATACTGGGAATGCAACATCAGTGCTCCAATTTGTAATGGAACAACGATATTCCATAAACCAAGATAAATGGC  
ATTGCCATGAAGATAATCATGATTACACCATGTGTACTAAAAATTCGTTATAGTGGTTAGATTCTAAAAATTTGTTATCAGGTTACT  
GTTAATTGCGCAGCAATAAGTAAACGCATCAATACCACCGGACCAACATTAATACGGCACAGATTAAATACATAATACCATGTTT  
CTTATGGTCTACAGATGTGAACCATTTCTTTGTAAGATATTTCCATAATTTAAAGTAAGTAATTACTGCGATTAAACCAATAACTAA  
GAATGGGGCACCAATTTGTGCCATTGTAATCATCCAGTTACCTTTAACTAGTAATTGATCCCATGGAATAATTCATTAATGTCCACCTC  
CATGATCATCATTTGCTTGATCTTGGCATCTTTTGAATTTTCTTCATTTCTTTCGCATTTTTCGATTTCATCTTTCTTGAACCTCATTGT  
TATATGGTTCGTCAATTTCCAAGAATCATCAACTTCATACCATGTCGTTTATAGTTTCGCATTTGTAATTTGAGCTTTACGAGCAGGTAT  
TAATGGTTTGTCTGATACATCTTTAAACATATTTTCTCACTAGTGAAGTTTGGATCTTTCAATTCGAAATTTGAAACGTTTATATGCA  
TAGAAGATGTATTCTGGATCGGCTGCTGGATCAACAAACGCCATATGTGTACCATTAAATTTCAAAGCTTTATTAGGTGTGCTTGGT  
AATAATTGTTTATCAAATGTATCTTGATCTAACGTTTCTTACCTTTAACTTCTTTACCCATTTGTCGATGCTTTTGGTACTAACGGC  
ATTACTTTAAATGTTTACGAGTGAAGATCCTTACCATTAAGATTAGAGTTACGACCTTGAACGATCCAGTTTGGAGATGCTTTCTAAC  
GTCCAATTCATTGTCATGCCAGTCATGGCATAATTTTGACCACCTAATTGTGGAATCCAGAACTTGTCAATGTATCCATAGCTTGAA  
GCTTAAATACAACAGGACGATCTTTAGGGATTGTTAATGTGTTAACAGTCTCTATATGTTTCATCTGGATAAGCAAGAACCATTGTT  
ATCCTGCACTTACTGCATATAACAACATTGGATCTTTCTCACTCTTCGGTGGTTTTTCGTAATCGTATAAAGTTTAACTGTAGGAAT

AGCTAAAGCAGCAACGATTATGATAGGTATTACAAACCATATTGTTTCAATGATGGCATTATGGTGCATCTTACCAGATTCCGGCATT  
CTTATTATAACTATACTTGTAAATAAAAAATGGCGAACATGCCAAGTACAACGAAACAAATAACAAGCATGAAGACGATTGAATAAA  
GAATCAAGAACTTCTGACTACTTGCTACTGGCCCTTTTGCCTTGAATAATTTCTATATTTGAACAACCACTAAGTAAAATTAGTGTGCC  
AAATAATAGAAGCAAAGACTTAAATTTTGACACTTTTTTGACCTCTAATACTACAAATGTAGGGCTTAACATTAATTTTAAGTTATT  
ACACAATATTTACAAGGGCTTATGGGAAAAAAATTAATAAAATTGTATCAAAAATGTTGATAAATCAAGGTGTGACGTGGGTTTAC  
ACATTTGTTAAAAATTATGTGTACATTTTGTGACTAATAGCGTTTTTGAAAAAATTGCTTCATATTTAAAAGGAAAGTTGAGAATAGC  
TTCAATTAAGGTTAATTGAATGAAAATAAAAAAAGTTTGAATTTGTCTAATAAATTGAAAATGATGGCTAGTTGATTGAAAGGA  
AGCGCAACATTTTAATAAGGAATTTGCCAAAAAGTAATTTATCGTTAAACAATGAAAAGTGGAATTTGTTTGTTCAAAAATCAAAA  
CATTTTTTTAAAAAGAGCAGTTAAGTTTAATAATTTGATAGGTAGTCCTTTGGTATACAGAAAAAATACAATATTTGGGTAAAGT  
TGCAGATGAAGTTAGAATAACAAATAAAATGGTAGCAAAACATGTTCTGTTTGGCTACCATTTTATTTGCAATATAGTGATGAGGGCTA  
TTAACTCAATATACCTAGTGGAATTTTAATTGCACCATCTGAATCAGTGACATGATATTTAATTGATATTTACCAGATTTAGAT  
GTATCAATTTGGCCATCGACTTTAATTTTATCGGTTAAATCTCCATCTTCTTTATCAAATGCACCTTATGCCGTTTAGAAGTTATAATC  
TTGACCTTTCTTAATAACGATATCATTAGCGCTTTAATTTGTGGTGTAGTATTCGTCGTTGCATCTGCATTTAAATTTGGTGTACTA  
GTGTAGCAGAAACACCGAGGGCTGATAATGACTGTAATAGTTTATTCATAATGTAACCTCCGAATGATAAGTCATTTCTGAGTTAGC  
TTACTATACCTTAATTTATATTATTTACACATCATACTATAGTCCTAATCTTACCCTATAAAGAATGAAATTTAAATATAAAATTTAT  
AAATAATGAGGAAATAATTAATTTTGAATACTGCCACAATTTGTAATAATTAATAATTTAGGGATAATTTGAAATCAAAATATAACT  
TTATTCGACAGTTTGAACCTAAATTTTGTGTTTCAAAACAATAAGAAAAGGGAGGGGAAATGATAAAGAACCCTAATGATTAA  
CTATGATAGTACTTTATAGTCACAGCTTCTGTGATGGGGCCCCACCCCACTCGCATTCCTTTGTTGGGGCCCCATCCCAACTTGCA  
TCTCTGTGTTGGGACTCTCCCAACTTGACATATTATTGTAAGCTGACTTTTCGTCAGCTTCTTTGTTGGGGCCCCATCCCAACTTGCA  
CATTATTGTAAGCTGACTTTTCGTCAGCTTCTTTGTTGGGGCCCCGACTATAAATTGAAAAATGCTTGTGTACAAGCTTATTTTCATTC  
AATTAACACTGTCTATATAAAATTGTTGAGCCAAGAACAAGTGAATGCTCCCTTCAAAGCCTTCATTTATTCAATGTCTACTTTG  
AAGGGAGCATTGATCGATTAATGTCCCAGATTTTTCTTGTATTTCATTTCAATTGCGAAATAATATTAAATGTGGGTAAAAGACTT  
CATTAAAACTCAGTTATTAGGGAGTGGGACAGAAATGATATTTTCGTAAAATTTATTTTCGTCGTCACCCCGGCAAGGTTGACTAG  
AATTGAAAAAAGCTTGT

>026-contig\_248\_RC

ATTGAAAAAAGCTTGTACAAAGCGAATTTTCGTTCACTACTGCCATTATAACTTTGTAGAGCATAGAACATTGATTTATGTCT  
CAGGCTCTTTACGAATCAATACCTCGACGCATTTTTTCTGCAAGCAAAGTATTATTAATACCATAGTAATTGTTAATGGACCAACG  
CCACCAGGAACCTGGTGAATAGCTCCAGCAATTTCTTTAACCGCATCATAATCAACGTCACCTTTTAATTTGCCATTTTCATCTGGCG  
TATTGCCAACATCGATAATTACTGCTCCTTCTTTGACCACATCTTTTGTACTAAACCAGGCTTACCAACTGCACGTGACAATGACATC  
AGCATCTTTTAAATATGATGCCATATCTTTGAACGAGAATGTAAGATTGTTACTGATGCATTTTTTTGAAGTAGTAACTTAGAACT  
GGTGTCCGACAATATGACTCGTCCAATTACAACGTGATTTTTACCTTCTAAATCAATATCAGCATGTTTTTAATTTCCATGATGC  
CGAGCGTGTGCAAGGTACAAAAGTTTGTTCATCGATATATAATTTCCCTATATTTATGGATGAAAAACCGTCCACATCTTTTTCAGG  
ATTGATTGCTTCTAATATTTTCTGTTGCTAACTTGTTTTGGTAATGGTACTTGTACCAAAATACCACTTACAGAATCATCATTATTTA  
GTCTATTTAGTTCGTTTAATACTTCTTCTCAGTAGCTGTTTCTTCCAAATGTACGATTTCTGAAATCATAACCAATTTTTTCAGCTGCT  
TTCTTTTTTGATCTAACATAACTTTGACTAGCGCCATCATTACCAACTAATATAACGGATAATTTAGGTGTAACCCCTTTTCTTTTA  
GCGCTTCAACTTGATCTTGTAAACCCCTGTCTGTAGTCTTTGGCAATTTGTTTACCATCTAAAATTTTAGCAACCATAAAAACTTCTCC  
TCCTATTGTCAATATCCTAACTTTGTTAGTTTATAAACTAATTTACATAGCAAAAAGACGTAAATTCAAACAAAAAATCAAAATAAA  
GTTGATTTTTGATTGAAAAAGCAGAAATTGCTTGTATGCTATATCTATAATATACAACCTAAAGTAATTCACAATTCAACTTTTGA  
AAGGGTGTACAAAGTGAAAGTAGCAGTCATTATGGGCAGTCTTCCGATTGGAAAATTATGCAAGAGAGTTGTAACATGTTGGATT  
ATTTTGAATTCCTGACGAAAAACAAGTAGTATCCGCACATCGTACGCCAAAAATGATGGTTCAATTTGCTTCTGAAGCGAGAGAA  
AGAGGTATAAACATTATCATTGACGGCGCTGGCGGTGCGGCACATTTACCAGGTATGGTTGCATCATTAACGACGCTACCAAGTTATT  
GGAGTGCCGATTGAAACAAAAAGTTTAAAGGTATAGATTCTTTATTATCAATTGTTCAAATGCCAGGAGGTATCCGGTTGCAACG  
ACTGCAATTTGGTGCAGCAGGTGCTAAAAACGCAGGTATACTTGCAGCAAGAATGTTAAGTATTCAAATCCTTCTTTAGTTGAAAA  
ACTAAATCAGTATGAATCTTCGTTAATTCAAAAAGTGGAGGACATGCAAAATGAACCTCAATAAATTAAGTTTGGTGCAGCTATTG  
GCATTATTGGTGGTGGTCAGCTTGGAAGATGATGGCACAATCAGCTCAAAAAATGGGTATAAAGTGGTTGTATTGGATCCTTCTG  
AAGATTGTCCATGTAGATACGTTGCACACGAATTTATACAAGCCAAGTATGACGATGAAAAGGCACTCAATCAATTAGGACAAAAA  
TGTGATGTGATTACTTATGAATTTGAAAACATTTAGCCCAACAATTAATACTATTATGTGAAAAGTACAATATCCGCAAGGTTAC  
CAAGCTATACAGTTATTACAAGACCGCTTAACCTGAAAAAGAACATTAATAAGTGTGTTACCAAAAGTTGCCGCTTCACTTTCAGTA  
AAAGAACTCTACAGATATTGACAAAGCAATTGAACATTAGGATATCCTTTTATTGTAAAACTAGATTGTTGGCTGACTGAGGCA  
AGGTCAAGTTTTTAATTAACAACGAAAAAGACTTACAAGAAGTTTTAAATTAATTGAAAAGTGTGAATGCGTAGCTGAAAAATATT  
TGAATATCAAGAAAGAAGTATCTCTTACTGTTACAAGAGGAAACAACAATCAAATCACTTTTTTCCATTACAAGAAAAATGAGCAT  
AGAAATCAAATACTTTTCAAAACAATTGTTCCAGCGAGAATAGATAAAAACAGCTGAGGCGAAAGAGCAAGTTAATAAAATTATCCA  
ATCGATTCAATTCATTGGAACATTTACAGTGGAATTTTTATAGATAGTAACAACCAATTGTATGTGAACGAGATTGCACCAAGGCC  
TCACAATTCGGACATTATTCAATTGAAGCATGTGATTATTCACAATTTGATACCTATATTTAGCAGTTACCGGACAATCATTACCA  
AATTCAATTGAATTATTAAGCCTGCAGTCATGATGAACCTTACTAGGTAAGACTTAGATTTATTGGAAAATGAATTTAATGAACAT  
CCAGATTGGCATTACATATTTATGGTAAGTCTGGGCGTAAAGATAGCAGAAAAATGGGGCATATGACTGTACTAACGAATGATGT  
AAACCAACTGAACAAGATATGTACGCTAAATTTGAGGGGAGTAATTAAGCATGACATTATATGAAGGAAAGCGAAGCGC  
ATTTTCTCAACAAATCAAGAAAAATGAATTAAGAGTTGAATATAAAGATGAAGTTACTGCTGGAACGGGGCTAAGAAAAGACACAAT  
GGCAGGTAAGGGGCGATTAAATAATCAAATTACTTCTATTATATTTAAATATTTACAAGAAAAATGGAATAGAAAGTCACCTTTATTA  
ACAATTATCTGAAACAGAACAAATTAGTTAAGCCTGTGAAAATAATTCCATTAGAAGTAGTTGTTCTGTAATATTGCTAGTGGATCTAT  
TACAAAGCGTTTAGGTTTTGAAAATGGTGAAGTTTTTAGAGAACCCTGTGAGAATTTTTCTATAAAAAATGATGCGTTAAATGATCC  
GTTGATAACGGATGACCATGTTAAATTGCTCAATATAGCATCAGATGAAGATATTGAAATACTAAAAATCCAAAGCATTAAAGATTA  
ATAATGTGTTGAAACAATTAATGGATGCTATGAATTTAAATTAGTAGATTTTAAATCGAATTTGGAAGACTGAGACTGGTCAA  
ATTTTGTAGCGGATGAAATATCTCCAGATACATGTGCAATTTGGGATAAAGCTACCAATGCAAACTTTGATAAAGATGTATATAGA  
AATAACACTGGATCACTGATTGAAACATATCAAAATTTTTAAACAAATTTGGAGGATTTAAATGAAGAAACATGAACATACAT  
ATCACATTACAACCACAGTATTAGATACGCAAGGACAAACGCTTACTCGAGCTGATGACTTAGTTATGACACAAGTGAATGA  
TATTCGTGTAGGAAAAAGTATTATATATGACAGTGGATGAGGTTAGTGATGAAAAGGTACACAACATTTATTACAACCTCTAAGTGAAA  
AATTGTTTGCAATACAGTGATTGAAGAATATAGCTATAAAGTGTTAGATGATGAAAAGGAGAATGCATAAAATGAAATTTGCGGT  
TCTTGTTTTTCCAGGTTTCAATTTGTGATAGAGACATGTTTAATGCTGCTATTAAGAGTGGTGTGAAAGCGGAATATGTAGATTATAG

AGAAACATCACTAAGTGGATTTGATGGCGTACTTATTCCTGGTGGATTTTCATTCCGGGGATTACTTAAGATCTGGGGCAATGGCTAG  
TGTAGCGCCGATTATTTTCGGAAGTTAAACGTCCTTGCAACTGAAGGTAAGCCAGTATTAGGTGTTTGTAATGGGTTTCAAATTTTAAC  
TGAAATAGGCTTATTACCTGGTGCATTATTGCATAACGATTACATTTATTTATTAGTAGAAATGAAGAGTTAGAAATAGTGAATAA  
TCAAACGGCATTACAAAATCTTTATGAGCAAGGTGAAAAAGTTATATATCCTGTAGCTCACGGTGAAGGTCATTATTATTGTACTGA  
TGAAATATATCAACAATTAAGGCTAACAAATCAAAATTATCTGAAATATGTGAATAATCCGAACGGTTCATATGATGATATTGCAGG  
AATTGTTAACGAAAAAGGCAATGTATGTGGCATGATGCCACATCCTGAAAGAGCTTTAGAAACGTTGTTAGGTACTGATAGTGGTG  
TGAAATTATTTGAAGCGATGGTAAAAAGTTGGAGGGGAACAACATGTCTAAATTTATCGAACCAAGCGTTGAAGAAAATTAACCTTGA  
AAAAGTATATCAAGATATGGGATTAAGTGATCAAGAATATGAAAAAGTTTGCATATTTTAGGCAGACAACCTAACTTTACAGAAA  
CAGGTATCTTTTCTGTTATGTGGAGTGAACATTGCTCTTATAAACATTCTAAACCGTTTTTAAAGCAATTTCTACGTCAGGTGAGCA  
TGTGCTTATGGGTCCAGGTGAAGGTGCAGGGTAGTCGATATAGGTGATAATCAAGCCGTAGTATTTAAAGTAGAGTCTCACAAATC  
ATCCATCAGCAATTGAACCATATCAAGGGGCTGCTACAGGCGTTGGTGGAATCATTCTGTGACATTGTTTCTATTGGGGCTAGACCTA  
TTAATTTGTTAAACAGTCTTAGATTGGGAGAATTAGATAATAAACAAAACCAAGATTACTTAAAGGGGTTGTAAAGGGTATCGGA  
GGTTATGGTAACCTGCATTGGTATTTCCAACAACCTGCTGGTGAAATCGAATTTGATGAATGTTATGATGGCAATCCACTTGTAAATGCA  
ATGTGTGTTGGTGTATCAATCACGACATGATTCAAAAAGGCACAGCAAAAGGTGTAGGTAATTCGGTCAATTTATGTTGGTTTGAAA  
ACTGGTCGAGATGGTATTCATGGTGCTACTTTTGCATCTGAAGAATTGACGGAAGAAAGCGAAAAGTAAACGACCTTCTGTACAAAT  
CGGTGATCCATTTGTAGGTAAAAAATTAATGGAAGCAACACTTGAAGCAATTACATTTGATGAATTAGTTGGTATTCAAGATATGGG  
TGCTGCTGGTTTAAACATCTTCATCGTCTGAAATGGCGGCAAAAGGTGGTAGTGGGTTACATTTGAGATTAGAACAAGTGCCAACACG  
TGAGCCAGGTATTTCTCTTATGAAATGATGCTTTCAGAACTCAAGACGTATGTTACTAGTTGTAAGAAAGTGAATGAACAAAA  
ATTCTTAGATTATTTGATAAGCAGCAATTGGATAGTCTGTTATAGGTGAAGTTACAGATAACAAATCGTTTGTGTTTAAACATATGAT  
GATGAAGTTTATGCTGACATTCCAGTTGAACCACTAGCTGATGAAGCACCTGTATATATTTAGAAGGAGAAGAAAAAGATTATAA  
TACTTCTAAAAATGATTATACACACATCGATGTTAAAGATACTTTCTTTAAATTACTTAAGCATCCGACTATAGCATCTAAACACTAT  
TTATATGATCAATACGACCAACAAGTTGGTGCCAATACGATAATTAAGCCAGGACTTCAAGCATCGGTAGTACGTGTGGAAGGCAC  
AAATAAGGCAATTGCTTCAACAATGATGGTGGAAGCGCGTTATGTATATAACAATCCATATGAAGGTGGAAGATGGTAGTAGCTG  
AAGCTTATCGAAATTAATTGCCGTGGGTGCAACACCATTAGCAATGACAGATTGTTTAAATTATGGTTCCTCTGAAAAGAAAGAAA  
TCTATCAACAGTTGATAGATTCAACGAAAGGTATGGCAGAAGCATGCGACATTTTAAAGACACCAGTAGTTTCTGGAATGTATCTT  
TATATAACGAAACGAAAGGTACTTCTATTTTCCCAACACAGTGTGTTGGAATGGTAGGTTTGAATGTAAATGTAATTTTAAATG  
ATTTTGAACCTCAAGTTGGAGATAAAATTATATTTAACTCGGTGATACTAAGGACGACTTTGGTGGTAGTCAACTTGAAAAGTTAAATTT  
ATGGCAAAGTTAATCATGAATTTGAGTCATTAGATTGAGTTTCAAGAGTTGAAAAAGGTGAATCAATCAAGACCGCTATTCTGTGAA  
GGACTATTATCACATGTTCAACAGTTGGTAAAGGTGGCTTACTGATTACTTTAGCTAAACTAAGTGCGCATTACGGTTTAGGATTA  
AAGTCTTCAATAGATATAACAAATGCACAATTGTTTAGTGAGACGCAAGGCCGATATGTTGTTTCTGTTAAATCAGGTAAAACCTTTA  
AATATTGATAATGCAATGAAATTTGGACTTTTAAACAGATAGTGATAATTTCAAAGTAACAACACCATATACAGAGATTAGTGA  
TGTTTCAGATATTAACAAAATATGGGAAGGGCAATTGCTCAATGTTTAACTACTCAGGATTAACGGAAGATGTGGCGTGTGTTGGT  
ATTTGGAATCATCTGAAGCAGCGCAACTAACATATATGGGACTTCATAGTTTGCAACATCGTGGTCAAGAAGGTGCAGGTATAGTT  
GTTTCTGATCAAAATGAATTAAGGCGAGCGAGGATTAGGCTTACTAAGCGATTAAGATGATCAAAATGGAACGATTA  
AGGATATCAACATGAATTTGGTCACGTCCGTTATGCTACTTCAGGTAAATGAAGGTATTGAAAAATTCAACCGTTTCTGTATCATCTT  
TATGATATGAGTGTAGGTATTTGTCATAATGGTAACCTCATTAATGCTAAATCATTGCGTCAGAATTTAGAAAAACAAGGTGCTATC  
TTCCATTCTGTTCTGATACTGAAGTCATTATGCATTTGATACGTCGAAGTAAAGCTCCTACTTTTGAGGAAGCGTTAAAAAGAAAGT  
TTGCGAAAAAGTTAAAGGCGGTTTTACATTTGCGATATTAATAAGATGCGTTATATGGCGCAGTAGATCCAAATGCTATCAGACCA  
CTTGTTGTAGGTAAAAATGAAAGATGGTACATACATCTTGCAAGTGAAACATGTGCAATAGATGTGTTAGGTGCAGAATTTGTTCAA  
GATATTCATGCAGGTGAATATGTCGTGATTAACGATAAAGGTATTACAGTTAAATCTTATACACATCATACGACAACCTGCAATTTCT  
GCGATGGAATATATTTATTTTGCTAGACCAGACTCAACAATAGCTGGTAAAAATGTCCATGCAGTACGTAAAGCTTCTGGTAAAAA  
ATTAGCCCAAGAAAGCCCTGTAAATGCTGATATGGTCATCGGTGTACCAATTCATCGCTATCAGCTGCGAGTGGTTATGCTGAAGA  
AATAGGTTTGGCATATGAAATGGGACTAGTTAAAAATCAATATGTTGCAAGAACATTTATTCAACCAACTCAAGAAATACGTTAGC  
AAGGTGTGAGAGTGAAGTTATCTGCGGTAAGATATAGTAGATGGGAAAAATATCATCTTGTGATGATTCCATTGTTTCGCGGTA  
CGACAATTCGACGCATTGTGAAAAATGTTAAAAAGATTCTGGTGCAAAATAAGTACATGTGCGTATAGCATCACCGGAATTTATGTTCC  
CAAGTTTTTATGGAATCGATGTTTCAACTACGGCAGAAATTAATTTCTGCAAGCAAAATCACCTGAAGAAATTAAGATTATATTGGCG  
CTGATTCATTAGCATATCTATCTGTAGATGGGTTAATTGAATCAATTGGTTTAGATTATGACGCGCCATATAGTGGCTTATGTGTAGA  
AAGTTTCACTGGAGATTATCCTGCAGGGTTATATGATTATGAAGCAATTAATAAGCGCATTTAAGTCATCGACAAAAGCAATATAT  
TTCTAAAAACAAACACTTTTTTGATAGCGAGGGAAATTTAAATGTCTAAAGCATATGAACAATCTGGTGTAATATTATGCTGGTT  
ATGAAGCTGTAGAAAGAATGTCTAGTCATGTTAAACGTACGATGCGTAAAGAAGTTATCGGTGGTTTAGGTGGATTCCGTGCTACA  
TTTGATTTATCACAATTAATATGACAGCACCAGTTTATGTTTCTGGAACAGCAGGAGTAGGTAGCAAAATTAACATAGCTATCGAC  
TATGGGAAACATGATTGATAGGTATCGATGCGAGTCGAAATGTGTGTTAATGATATTTTAAACGACAGGTGCAAGAACCATTTGATTTT  
TTAGATTACATCGTACAAATAAAGTTGTTCTGAAAGTTATTGAACAAATTTGTTAAAGGTATTAGTGATGCATGCGTTGAAACGAAT  
ACTGCACTTATCGGTGGAGAGACTGCTGAAATGGGTGAAATGTATCAGGAAGGTGAATATGATGTAGCCGGATTGTCAGTTGGAGC  
AGTTGAAAAGGATGACTATGTAGATGGTTCAGAAAGTGAAGAGGGGACAAGTTGTTATAGGGCTTGCCTCAAGTGGCATTCAATCAA  
ATGGATATAGTTTATGTGCGCAAAATTAATTAATGAATCAGGCATTGATTTGGCATCAAACCTCGATAATCGTCCATTTATAGATGTCTT  
TTTGAACCAACTAAATATATGTCAAACCTGTACTTGCTTTAAAAAAGAAAGTTTCTATTAAGGCAATGAATCATATTACTGGTGG  
AGGCTTTTATGAAAATATTCCACGTGCATTGCCAGCCGGATATGCTGCTAGAATTTGATACTACATATTCCAACGCCAAAAATATT  
TGATTGGTTACAACAACAGGCAATATAGACACAAATGAAATGATAACATTTTAAACATGGGTATGGGTATACGGTTATCGGTTATG  
TGAAAAAGATGCTACACGCGCTTTGAAGATTTTAGCAGAAACAAATGTTGGAAGCTTATCAAATTTGGTCAATTTGTGAAAAATAGT  
CAACTGCAATTGAATTTGTTGGGGGTATAACAATGGTTAAATTTGCGATTTTGCATCAGGTTTCAGGAAGTAACTTTGAAAAATATAGT  
TGAGCATATTGAATCAGGAAAACTTGAATAATTGAAGTTACGGCGCTATATACGGATCATCAAAATGCGTTTTGTATAGATAGAG  
CAAAAAAGCAGCGTATTCCTGTTTATATTAATGAACCAAAACAAATTTGATTCAAAAGCAGCGTATGAACAACATTTAGTAACACTAT  
TAAATAAAGATAAGGTAGAGTGGATTATTTAGCTGGCTACATGCGTCTAATAGGTCCAGACTTATTAGCATCATTTGAAGGTAAAA  
TATTGAATATACATCCATCTCTATTGCCGAAATATAAGGGGATTGACGCAATAGGCCAAGCATATCATAGTGGCGTACTATTACTG  
GTTTCGACAGTACATTATGTTGATAGTGGTATGGATACGGGAGAAATTTTGAACAGAGAAAAATGTGATATTAGACCGGACGATTCA  
AAAGAACAATTAAGAAGAGAAAGTAAAAAATTTGGAATATGAATTTATCCAAAGTGTATTGCTAAAAATTTGAAAAATGAAGAGTGTG  
TATGTGATGAAGAAGAGTATTTGAGCGTATCAAATAAACAGGTATTGTAGAGTTTGTCTAAAGCGTTAACGCAATTAATTAATGA  
ATTATATTCAACAGGTGGTACTAAACGTATATTAGATGAAGCAAAATGTACCAGTTCGTTCTGTTTCAGACTTAACACATTTTCCAGA  
AATAATGGATGGCCGTGTTAAAAACATTACATCCGGCTGTTTATGTTGGCATTTTATAGCTGATCGAAATAAACCGCAGCATTTAAATGA  
ATTATCAGAACAACATATAGATTTAATTGATATGGTAGTAGTTAATTTATATCCATTCCAACAACTGTTGCAAAACCTGATGTGAC

GATGGACGAAGCAATTGAAAATATTGATATTGGTGGTCCAAACAAATGTTACGTGCTGCAGCTAAAACTATAAACATGTAACAACAA  
TTGTACATCCGGCAGATTATCATGAAGTATTGACGCGATTAAAGAAACGATTCTGTTAGATGAGTCATATAGACAATCATTAATGATTA  
AAGTTTTTGAGCATACTGCAGAATATGATGAAGCGATTGTACGTTTCTTTAAAGGGGATAAAAGAACTTTAAGATATGGAGAAAAAT  
CCACAACAATCAGCGTATTTTGTGAGAACTTCGAATGCTAAGCACACGATTGCAGGCGCTAAACAATTACATGGGAAACAATTAAG  
CTATAACAATATTTAAAGATGCAGATGCTACACTAGCTTTAGTTAAAAAGTTTGATACACCTGCTGCAGTTGCGGTTAAACACATGAA  
TCCATGTGGTGTGGTATCGGTGACACGATTGAACAAGCATTTCAACATGCGTATGAAGCGGATAGTCAATCAATATTTGGTGGAAAT  
TGTTGCATTAAACCGAGCTGTAACACCTGAGTTAGCAGAGCAATTGCATAGTATCTTTTTTGGAAAGTCATTATTGCACCAAAATTTAC  
AGATGAAGCATTAGATATTTTAAAAACAAAAGAAGTGTAAAGATTATTAGAAATTGATATGACTATAGACAGTAACGAAGAAGAG  
TTTGTTCAGTATCTGGCGGATATTTAGTTCAAGATAAAAGACAATTATGTCGTGCCAAAAAGAAATGAAAGTTGTTACAGAAGTA  
GCACCTACTGATGAACAATGGGAAGCAATGTTATTAGGATGGAAAAGTTGTACCATCAGTAAAAAGTAATGCAATTATTTTAAAGTAA  
TAATAAAACAACTGTAGGTATAGGTGCTGGACAAATGAATCGTGTGCGGTGCTGCTAAAAATTGCGTTAGAGAGAGCTATTGAAATCA  
ATGATCATGTAGCGTTAGTATCTGTATGGATTTTTCCCTATGGGAGATACAGTTGAACTTGACAGCACAACATGGTATAAAGGCAATTA  
TCCAACCGGGTGGTTCGATTAAAGATCAAGATTCAATTGATATGGCTAATAAACATGGTATTGCAATGGTAGTCACAGGCACTCGA  
CATTTTAAACACTAATTTTAAAGGGGCGTAACATAAATGAATGTATTAGTAATTGGTGGTGGTGGACGAGAACATGCACTTGCATAT  
AAACTTAATCAATCGAATCTAGTTAAACAAGTGTGTTCATTCCAGGTAATGAGGCAATGACACCTATAGCTGAAGTACACACTGA  
AATTTTCAGAATCTAATCATCAAGGGATACTAGATTTTGCTAAACAGCAAAATGTTGATTGGGTAGTTATAGGTCCAGAACAGCCGCT  
AATTGATGGATTAGCAGACATTTTACGAGCTAATGGTTTCAAAGTGTGTGGTCCAAATAAGCAAGCAGCTCAAATCGAAGGCTCAA  
AATTATTTGCTAAAAAGATAATGAAAAATATAATTTCCAACTGCTGATTATAAAGAAAGTTGAGCGAAAAAGGATGCTTTAACA  
TATATTGAAAACCTGTGAATTGCCCCGTGTGTGTCGAAGAAAGGTGACAAATGTACAAGATGCACAGCGAGACGCATACGAAAA  
GCAGCCAGAAGTGCTATTGAGATTATGTATGGTGATGAAGAAGAAGGTACTGTTGTATTTGAAACGTTTTTGAAGGTGAAGAGTT  
CTCGCTAATGACATTTGTTAATGGTGATTTAGCAGTACCTTTCGACTGTATTGCACAAGATCATAAACGCGCATTTGATCATGATGA  
AGGACCAAAATACTGGTGGTATGGGGGCTTATTGTCCAGTACCACATATTAGTGACGATGTTTTAAAACTTACAAATGAAACAATTGC  
ACAACCATTTGCAAAGGCAATGCTTAATGAAGGTTATCAATTCTTCGGTGTATTATACATTGGTGCTATTTTAACTAAAGATGGTCC  
AAAAGTAATAGAATTTAATGCCCGTTTTGGTGATCCTGAAGCTCAAGTATTATTAAGTCGCATGGAAAGTGATTAAATGCAGCATAT  
TATTGATTTAGATGAAGGAAAACGTAATTCAAATGGAAAAATGAATCTATTGTAGGGGTCATGTTGGCATCAAAAGGATATC  
CTGATGCATATGAAAAAGGCGATAAAGTAAGTGGCTTTGATTTAAATGAAAACTATTTTGTAGTGATTAAAGAAGCAAGGTGAT  
ACCTTTGTACTTCAGGTGGTAGAGTTATACCTTGCCATCGGAAAAAGGTGACAATGTACAAGATGCACAGCGAGACGCATACGAAAA  
AGTATCTCAAATACAAAGTGACCATTTATTCTATCGTCATGACATTGCGAATAAAGCACTACAACCTAAATAAGTATATTTAAAAAA  
TACTAAGATTAGCTATGAAGAAATCTATAACGATAGTTTTTTTTCATAGCTTTTTTGTAGTGTAGAGTCTAGGACATTGATTTCTGTACC  
AAATTTGTGATTATGCATATGTAATACAAAAGAGGCGCCACAACATGTTTGGATGAACAAAAATAACATGTTTGTGGCACCTCTTTTG  
TTAGTATGGAATAAATGGTTTTCTTTTTCTATACAATGAATTTCTAATTTAGTATCTATACAATTATGGATAAAATTTAACTACAC  
GACCAAGACGAACATCATCTATGCCCGTGATGGGTAAGGTGATTGAACAATAATATGCCATAGTAATAATGGCAATTTAACTATA  
ATAAAGATTATATCTTTATATGAGAAAGGTACGTTGTAATAGTAAGTACGAGGACCATCTCTAAATCCTTTTCGACTCCATCGCAACT  
GATAATTGATGTGCTTTCTTAATATTTGGCTAATAGAGGTTAATTAATGCTTTAAATCGCTTAAACCTCTATAATTTGTGCGT  
CTATCATCTGATAGCGCATTTTAAAGATCTGCGAAGCTGTATTAAGAAGCAATCAATCAATTAAAGGTATCATCAGAAATGGCAGCCATGA  
ATGCATAAGCAACTTTTGATTTAACCTTTAAATGTTGCATTAACCTATAAAAATATCATGACAACCTGAGATGTAAGTGCGATTAAAGA  
TACCGAAAAATGAAATAGCAATGGTCTTAAATGATACATGTAAACCACGAACCTAACTTTCTGTGTGAATATGGATAAATCCGAATT  
TCAAAATTTGATGGCTACCATTTCCCGTATAAAATCATGAACAGGGAAGAGAGTAATGCAAAGCCAATACTTATAGTTATAAAAAATT  
GCTGTAATTTTAACTGAGTACCATTAAACATCAATAAGAAAACCTAACATTAAGATAGTGATATAAAGCATAAAATCGAAATTATG  
CACAAATATAATAAAGAAAAATAGTATAATTCCAAGAAATAGTTTCGTTATAATGTTGACATCATCAACAAATGATTGCCGAACCTT  
CCATTGCTCATACATTTCGTATCACCATCACAATCTAGTAACGCACCATCTGAAATTTTAAAGTCTTCTTGATGGATAACGTTCAATTAT  
TTCATCGTCATGTGAACCATGACAATACTTTGTCCCAATTAATTCGCTTTTGGAAAAAGTTTGATCAACTGGAATGTATTATGGCTA  
TCAAGTCCAAATGTCGGTTTCATCTAAAAAGATAATATCAGCTTTAGAACCTTAGTGCGGTAGCTACGTAAGGCGTCGTTTTTGACCA  
ATAGACAACCTATAAGGATGTTGATCTTTACATTTTGTAAATCTAAAAAGTTTTTAAAGTTGTATCGTTTCATCATCACTTTTGATCTT  
TAGAAAGGTGATTAATAATGAATGTTAATTTTCATCATAAACCGAATTTGTTATAAATTGTAATTTCTGGGTTTTGATAAACTAGGTACA  
TGTGTTTTGTGTCATGTTTAAATTTTTGTAAACGCTGATTTTCAAATAAACATCACCTTGATATTTAATCAATTGCATAAATTGATTCA  
AGCAAGGTGTTTTTACCCTACCATTGCCCCGTGAATTTGTAATCCACTCACCTAGACCAATTTCTAAATCTGAGAATGAGAGCAAT  
GTTGATTTACCGCGAATAATACGTCCATTTTTAAATTTGTAATAAGTGTGAGTTTGTGTTGGAAGTCAACACGACTTGGTGCGAAT  
TCCCATGCACGTGGATGCCACACACCATATTCACCTGAGTAAATGAACATACTTCTGTAATATGATTTTCAGGACATTTCATCGGCAATG  
ATATTTCCGTTATAATCCATCAAAATGACGCGGTGACATGATTCCAGATGTGTTAACTTTATGTTCAACGATTACAACAGTGTGAT  
CTTCCCAAAAGTTCAATAGTTTAGTCCATAAATCTTCTGTTGCTTACAGATCTAACATTGCTGCTGCTGCTTCAAAAAACGATGTTTT  
TGATTTGTAAGAATGGTTTTCAACAATTGCCAATTTCTGTTTCTATCCCGCCACTTAAATCTTTGATATACGTTTACAGGGGTAACATTT  
AAATTGACCATATTTTAAAGCATTGATAATTAACGCATCCATGTCTTCACGTGGTACTTGTCTATTTTCTAAAACGAATGCAAGTTCTT  
CGTATACTTTTGGCATACAAAACCTGGCTATCAGGGTCTTGAAAAATAACGCCACTTAATGGGTCAACGATTAGTTCATCATATTTTCA  
TAGGTAATTCATTAATAATTAGGAACAATACCACTTAATACATTCAGAAGTGTACTTTTACCGCAACCAGAAGGACCGAGTAAAAGT  
ACTTTTTCTTTGTCTTGAATAGTGATATTTAAATGATCGAAAAATTTACGCTGACCATTGGATATTTTAAATCGTAAATCACTTACTTT  
TAACACTCTGAATGCTCCTCTTATAAGTTGTCGTAATCTTCTTTAGCAGCTGGTCTAAATAATTTTGTACGCTGTCTTATCTAAAGC  
TTTTACTAAAAGGTAAGATAGGACGCCGGCGACTAGCTGCACCACTAATTAATCTAAATACGATGAATAATGTTAAGTTCCAACCTGC  
AACTTCATTTTAAATAACCATAGAAATAATCTATAGGAAAGCCGCGATGCTGTACAAAAACCTGCTAACATAGCTACCAATAAGT  
AACGAGATTGATATTTTAAAAATTGCAAAGACAAGTTACACAGCTTAACTTTGATGAAAGCGTAACAGATTGTGTCGGAATATCGAAA  
CGACCCATAATGATAGTTTCGCCGGCACCTGCAGCAAAATTCAGCCAGTAAAGCAATACCTGGTTTTTGAATAATTAGATAGCAGAC  
AATCGCTGCCATGAACCAAAACCCGTTTTGTTAATTGTTTCGAGGTGAAGGCTGTAGCTTGCACACCATTGTAAACAAACCACATAA  
ATTGTAAATAACTGCGAATACTACTGAAATAAGTACGGTTACTAGTATTTTCAAGATAGCTTTAAACCTTTTGACATTTTACATCCTCC  
TAATAAAAAAACGCACAACCATCCATAGGAAAGTTATGCGTTTACAATATATATTAGTAAAAACATATGTATAGTAACACTTTTCTAC  
GCTAGTTCAAGCTAGATCAGGTTCAAAGGGTTTGAGGGCAAGCCTCATCTCAGTATAAAACACCCCTAGTGTGTGCGATTTATTTAA  
TTAATTATACTGTAAGACGTTTTGTAACCTTATGTCAATAGGTTGTCTTCATGAAATTTTCGTTTAAATTCGATTTAAAAATTTATAATATT  
AGCATTGGATTTAAATTTGAAGATGTAGTAGGAATGTTAGTAATTAAGAATATAAAAAATATGTGACATGTAATAAGATTGAGCTGAT  
AAATGAAGAGGGATACCTTATCAATCATACCTTTTAAACAACAGTGAAGAACCCGTGCATAATGGCTTACGAATTTAGTTTGTAGG  
GTAAAAAGAGGGATACATGCGCCGAGCACATGCAAAAAAGCCCTAACAACTAAAAAGTTGTAAGGTAAAAAGAGGGATACATGCGCC  
GAGCACATGCAAAAAAGCCCTAACAACTAAAAAGTTGTAAGGTAAAAAGAGGGATACATGCACCGAGCACATGCATAAAATCCCTT  
AACAACTAAAAAGTTGTAAGGTAAAAAGAGGGATACATGCACCGAGCGCAAGCAAAAAAGCCCTAACAACTAAAAAGGTGTAAGGAA

GAAGAGGGGATACATGCACCGAGCACATGCATAAAATCCCCTAACAACTAAAAGTTGTAAGGGGATTTAAATTAATTTAGTGTATCT  
TGGATATCTTGTTTTGTTTGATTAATATCTTCTGTTTTCTTCTTTTTATCTTTTAATTTTCTTCAACTTCTTTAGCTTTTTCTGCTGC  
TTTTTTATTTTGATTTTCATTAGACATGATTAATTCCTCCCAAATTTGGATAAATTATTTATATATAAATCTTACCCGGTTGTACTTTCTG  
TAACTTTTCTAAGTCTATAGCACTATTTATTCATTTATCTAAAGACAACAACATTAGATTAATATATAATGATTTTGAGGTGAACAT  
AATGTCTTTTCTTAGGAAACACGCCGAAATTATTTTAGCTATTTAATCGGTATCGTTTCACTCTTCACTGGTCTCATTATTTAATTA  
ACTTGCCATTAATTAACAATTAATGATGGTGGAAGTTGATACACATGTTCAATAATGTGTGGGAATTTCTGAATGCATTTTCA  
GTGAAATTATTAAGTAATGAGTCGATTTATAGGTAATTTCCCTATAGTTAGTGCAATTTGTGATAATTATATTCGGTATTTTAGTTAT  
GTTGATTGGTCATACATTACTTAGAACTATTAAGTATGACTATGATATTTCTATCTTTTCTTAGTTATCGGTATCATGTACTTTATTA  
TTACTCTTATATTAATGACTCAAGTTTATGGATTCTTTGCAGTGATTTTCATTATTCATTTACAATTCATATAGGATATATCGTCTAT  
AAAGATGAATTGAATCAGGAAAAATGTAAAAAATCATTTTCATGTGGATAAATTGTGAGTTATGGTATAAGTTACTTAATTACACAAAT  
GCATTGTATGGCAGAATTGATGCTAATGAAATAGAGTCAATTGATATCTTAAGTGTCAATGCTTTCTTTATAATTATGTGGTTACTTG  
GTCAAATGGCTATTTGGAATTTCTTGTTCTTGCGCCGAGCTTTACCTTTAACAAAGCAAGAATTAGGTGAAGAGGAGCCAGAATTAT  
CAAGAACAAGTAAAGGGAATGTCACGAATCAAACCTAAAATTCATTGAAACAACCTCCAAGATAAGACTACAGAATATGCACGTAA  
GACAAGAAGAAGTGTGATTTAGATAAAAATTAGAGCTAAAAGAGATAAATTCAAAAAGAAAGTTAATGATATTATCGATATTCAAG  
AAGACGATATTCCTGATTGGATGAGAAAACCGAAATGGGTAAACCAATGTATGTGCAACTATTTTGTGGTGTGCTCATCTTTTAT  
TCACATTTTATAGAATTTAATAATCGTAATGCATTATTTGTATCTGGTGATTGGAAATTATCACAGACACAATATGTTATTGAATGGGT  
TACATTATTAATCTGTTATTCATTATTTATCGCATATATCGCTACAACGTTAACTTTCCACTTGAAAGGTAAAGTTTATTATTTACAAC  
TATTTATGGGGAGCATTTTATCTTTTAAATTTGTTAAACGGAATTTATAAATATGATTGATTGACTACTACTTTTCAAGTGTTCATTAC  
GCCAACATTACTATTAATGTTATTGGCAATCATCTTTCTTATTCGTTACAATTACGAGAGCGACATAATTTAAAGCATTATAAAA  
GTACTATCTATTAACATTTTGTATGTGTACGCTATAAGTTAGATATATCTCTAACTTATTTAGATACAGGTCAATGAAGTTTATGGAT  
AGTACTTTTTTTGTAAGTATGATTGATTGATTGATTGATTGATTGATTGATTGATTGATTGATTGATTGATTGATTGATTGATTGATTGATT  
TAGTTGAAAAGTTATCCATTTGTAAAAACAAGAACTAGTAAATAGTTGAAGCGACATATGGAATTTGCGAAACGATATATAGTA  
TTTCTTTGTAGAAAATTAACATATATCATTCGAATTACTAATTTGTTAAAAACAACAGTAAGATTAGAAAGTAGATGATTGAAAT  
TGGCAACAATTTAATCTATATAAACTACAACGAAACACAGAAAGGAAGTTGTCAGATGAAAAATAGCAACTCTGAACAAAGGCA  
AAGAAACAAAATATTTAATGGATATCCTTTAATTGAAGAAGAGGATATCTATTACAAAGATCATTAAAAAGAAGGAGATATTTTTC  
AAATTGTGACTGATAAATCACAATATGTTGCAACGGCTTATGTTGGTCGCCAACATAAAGGATTAGGTTGGGTTTCAACATACGATA  
AAGCTCAAGAAATCAACACAGCTTTCTTTGTGAAATTTGTTAATACTGCAATTAGCAGAACGCTGATTATTATTTAATATAGATGGAA  
CAAATGCTTTTAGATTATTTAATGCTGAAGGTGATGGTGTGGGGGATTAAACAATCGACAATTACGATGGTCAATTTGTTGATTCAAT  
GGTACTCAAAAGGTATTTATAAATTTAAATATGCCATTCTTGAAGCGGTTAGAAAAGTATTTGATTATAAATCTATTTACGAAAAAG  
TAAGATTTAAAGACAGCGAATATAGTGGTGGTTTTGTTGAAGCGGATGCACCTGAGTTTCCAATTTGTTATCGAAGAAAACCTTCACAT  
TTTATAATGTAGACCTTGAAGATGGTTTGATGACAGGTATCTTTTAGATCAAAAAGAAGTGCAGCAAGAAATTAAGGGGTCAATAT  
GCCAAAGAACGCCATGTTTTAACTTATTTAGTTATACAGGTGCTTTTTCTGTAATAGCAGCAAGTGAGGCATCTTCAACAACAAGT  
GTAGATTTGGCTAATCGTTCTCGTAGTTTAACTGAAGAAAAATTTGGATTAAATGCTATTGATCCTAAATCCCAATATATTTATGTCA  
TGGACACTTTTGATTCTTATAAATATGCTGCACGACATGGACATAGTTATGACACGATCGTGATTGATCCACCTGATTTGACACGCA  
ACAAAACAGTAACTTTTCAAGTGAACAAAAGATTATGACAAATTAATTAAGGCGCCTTAAATATTTATCATCTGAAGGAACATTAT  
TGTATGTACAAATGCAAGTGTATATCCATTAAAGCAATTTAAAAATACTATTAATAAAGACGCTTGAAGAGAGTGGCGTTGATTATG  
AATTAAGTGAAGTTATGGGATTACCAAAAGATTTTAAACGCATCCACATTATAAGCCATCTAAATATTTAAAGCTGTTTTTGTAA  
ATATTAGACATTAATTTGATAAAAAGGGGTATAGTAACCTATTGAGAAAAAGAAGGGTGATAATATTATGGGATTCAAAAACAATT  
TAACATCAAAATTTAAACAATAAAATTTGGTAATTCAGTCTTTAAATAGAAAAATGTTGACGGAAGAGGTGCAATGCCAACGACGATT  
CAAGAATTGAGAGAAAGACGACAACGTGCTGAAGCAATTGTAAAGAGAAAAATCTTTAATGTATCAACAATGAGCGTTGTTCCAAT  
TCCGGGTTTAGATTTTGGTGTGATTAAAAATTAATGAAAGATATTATCGAAGATGTAATAAATAATACGGATTAGATCATAAGCA  
AGTTAATAGCCTTGGGGATGATGTGAAAGAAAGAAATATGCTGACGACGCAATTCAGGTAGTCAATTTATTTGGTAAAAAGAAAT  
CAAGTGCATTTTAAATAAGTTATTAGAGATGTAGCTAAACGCTATGCTGCAAAAACAAACAAATGTTTCTGTTGTAGGACAA  
GCTGTGTCTGCATATTAGTTACTATTTATGAATAAAATTTGAAAAAGATCACATTCAAAAATGCGAAAAATGTTATTAATAAATGTC  
ATGTAGGTGCTATAATAGTTTGTCAATTTGCAAAATTTACTGAAACCGGTTTTAAACGAATTGAATTTAAAGCATGGTTTTGGTAA  
GTTAATGTATAAACTAAGTTAGTATTGTAATAATATTGAAGATTCTAACTATACGAAGGAGAAATGTAATTATGGAACAAAATTC  
ATATGTAATCATCGACGAGACTGGTATTCACGCTAGACCAGCAACAATGTTAGTACAAACAGCTTCAAAATTCGATTCTGATATTCA  
ATTAGAATATAACGGTAAGAAAGTAAATTTAAATCAATCATGGGTGTTATGAGCCTTGGTGTGGTAAAGATGCTGAAATTACAA  
TTTATGCTGACGGTAGTGATGAATCTGACGCCATTCAAGCAATCAGTGACGCTTATCAAAAAGAAGGATTGACTAAATAATCATGTC  
TAAATTAATTAAGGTATTGCCGCATCTGATGGTGTGCAATTTGCTAAAGCTTATTTATAGTTGAGCCAGACTTAACATTTCGACAA  
AAATGAAAAAGTCACTGATGTTGAAGGAGAAGTTGCAAAAGTTCAATAGCGCTATCGAAGCTTCTAAAGTTGAGTTAACTAAATA  
GAAATAAGTGCAGAGGTTCAACTAGGTGCTGATAAAGCTGCTATCTTTGATGTCACATTTATAGTTTATAGTTGACCTGAATTAATTC  
AACCAATCCAAGATAAGATTAAAAATGAAAACGCTAATGCTGCTACAGCATTAAACGGATGTAACAACACAATTTGTTACAATTTTT  
GAATCTATGGATAACGAATACATGAAAGAACGTGCGGCTGATATTCGCGACGTTTCTAAACGTGTGTTATCACATATTTTAGGTGTA  
GAATTACCGAATCCGAGTATGATTGATGAAAGCGTTGTTATTGTAGGGAATGACTTAACGCCATCTGATACTGCTCAATTAATAAAA  
GAATTCGTACAAGGTTTTGCTACAAACATTGGCGGAAGAACAAGTCACTCTGCAATTATGAGTCGTTCTTTAGAAATTCAGCAATT  
GTTGGTACAAAATCAATTACTCAAGAAGTTAAACAAGGCGACATGATTATCGTAGATGGATTAAATGGTGATGTAATCGTTAATCC  
AACTGAAGATGAGTTAATCGCTTATCAAGATAAACGTGAGCGTTATTTTGTGACAAGAAAGAAATTAACAAAACTACGTGATGCTG  
ATACTGTTACAGTTGATGGTGTTCACGCAGAGCTTGCTGCAAAATATTTGTTACACCTAATGATTGTCAGGTTGTTATTGAAAAATGGTG  
CACAAGGTATCGGCTTATATAAGAACTGAGTTTTTATATAGGTGCTGACCAAAATGCCTACAGAAGAAGCAATTTGAAGCTTATA  
AAGAAGTATTAGAAGCAATGGGCGGTAAACGTGTTGTTGTACGTAATTTAGATATAGGTGGAGATAAAGAATTATCATACTTAAAC  
TTGCTGAAAGAAATTAATCCATTCTTAGGTTACCGTGCGATTCTGTTATGCCTTGCGCAACAAGATATTTTCAGACCACAGCTACGTG  
CATTATTACGTGCATCAGTTTATGGTAAGTTAAATATCATGTTCCCAATGGTTGCAACAATTAACGAATTTAGAGAAGCTAAAGCTA  
TATTATTAGAAGAAAAAGAAAACTTAAAAATGAAGTGCATGACATTTCCGGATGATATAGAATTAGGAATCATGGTAGAGATACCT  
GCAACAGCAGCATTAGCTGATGTCTTTGCTAAAGAAGTAGATTTCTTCAGTATCGGTACAAATGATTTAATTAATACACATTAGCT  
GCTGACCGTATGTCAGAGCGTGATCATATCTATACCAACCATATAACCCTTCAATCTTACGTTTAGTTAAACAAGTTATTGAAGCG  
TCACATAAAGAAGGTAATGGACAGGTATGTGTGGTGAATGGCTGGAGATGAAACAGCTATTCCATTATTGCTTGGTTAGGTTTGA  
GATGAGTTCTCTATGAGTGCACAGTCTATTCTGAAAGCAAGAAGACAAATTAATGGTTTAAAGTAAAAATGAAATGAACTGAACTGTC  
TAACCGTGCAGTGCAGTGTGCAACGCAAGAAGATTATTGAATTAGTTAACAACACTACGTAAAAATAATTAATCTTTCGAAAGACA  
GAATTATAAATAAACCCGAAGTATTCATTGTGAGTAATTATGAATACTTCGGGTTCTTTTTATGATTTATGTTAATTTCAATGGAAT  
GTTGTTGCTAACTAATTAACAACATATGTGTCATTAAACAAATGTTGTTCTTTAATTAATGTTAGTTAATTTAAAAATCGATATTTAA

TTTATGATAGCTATAAATGATGAAGTTGATTAGATGAAAATTAATCTTGGATATTTAATACTTTGTTGATTTCATCAAGATCAACAT  
GGTACATTGGATTGCCATTCAACAAAAATAAACGGAGTTGAAAAAGCATCAAAATCTATCATTTTCGTTTCGATATTGTTGATTGTTGA  
TATTTCTCTCTTCAAAATCAATTTGATGCTCATTTAGATAATTTTTTACAAATGTACAAGGTGGACAATCATTTCTGCGTATAAACGAT  
TATTTCTGACATGTATCATGCTCCTTCGTGCTTTATTTCTAATGTAATATACACAATTATACATTGAAATTCAAATTTGTGAACACATT  
GTGAACTGACATAAAATTATACACAATTTATAGCGCATAATGTTTTAAAAATACACATTATAGCAATTATAATTAAGTTCATTGTGT  
TGTGCATCAAAAAAAGAAAAAGGTGATGTTTTTAAATGGATACAGTTGAAATCAGTCGGTTTTTGACAGCTATGACTTTAGCAGTTCA  
TATCATTTTTTGCAACGATTGGTGTGGTATGCCTTTAAATGTTTCGCAATTGCAGAATTTTTAGGTATTTCGCAAAAAATGATCTTCAATAT  
ATAGCTATGGCCAAAAGGTGGGCTAAAGCTTATACAATTACTGTAGCAGTGGGAGTTGTTACAGGTACAATTATAGGACTTCAATT  
ATCATTGATTGGCCTACTTTTATGGAAATGGGTGGACACGTTATTGCACTTCCATTATTTATGGAAACATTTGCGTTCTTCTTTGAA  
GCTATTTTCTTAAGTATATATTATATACTTGGGACCGTTTTAAAAATAAATGGACACATTCTTAATTAGTATACCAAGTAATTTTTG  
GTGGCTCTTTCTCAGCATTCTTCATTACTTCAGTGAATTCATTTATGAATACGCCTGCAGGTTTTGAGTTGAAAGAATGGAAAGATGGT  
CAATGTTCAACCTATAGAAGCGATGTTTAAACCCATCGTTTATAGTTTCGATCATTTTCACGTAATTAACAGCCGGTATGACGATGGC  
ATTTGTTATTGCATCAATAGCAGCTTTTAAATTATTGCGTAATCGTCAACCTAAAGATACTGTCTACCATAAGAAAGCTTTGAAAAAT  
GTCTATGATAGTTGGATTCTTTTCAACTTTACTTTCTATGTTGGCAGGGGATTATCTGCAAAATTTTTGCATAAAATCCAACCTGAA  
AAATTAGCAGCTTATGAATGGCATTTCGATACATCTTCCCATGCTAAATATTATTATTGGTGTGTTAGATGAAAAGACTCAGCAA  
GTTAAAGGTGCGATTGAATTACCTGGACTATTGAGTTTCTTAGCAGATAATAGTGTCAAAACTAAAGTGCAAGGGTTAAATGATTTT  
CCAAAAAGTTTACATCCGCTATGATTGTCCATTATTTCTTTGATTAAATGGTAACGATGGGAATTTTATGTTTTGTCATTTACGGTGT  
TTATGTTTTAACTTTAATGTTTTAAAAAGCTTAGAAAGTTTTCTACTCATAAATGGATGCTTTACGGAATATTATTAACAGGACCAGCT  
TCAATGCTAGCTATAGAATTTGGATGGTTCTTAAACAGAGATGGGTAGACAGCCTTGATTGTCTGGTTATATGCGCGTGGCAGAA  
GCAGCAACACAAGCAGGCGGAATAACCTTCGTTACAATTTTTATTTGGCATATTGTACATCATTTTAAATGTATACATGTGCATACGTA  
TTAATTCGTATGTTTAAAAATAAACCGGCGTATGAAGATGTAATCGTTTAGCCAAGAAGCAAGGAGGAGAAATAGAAAAATGATT  
TATGCATTTATAGGTATAACAGTGTATGTTGTTTTATTTTGTCTATATCATTATTGCTTCTATAGATTTTGGGGCAGGTTTCTTCGC  
ATTGCATTCAAAGTTAACTGGTGATGAAAAGAAAATTAATCACTTAATTTACAGTTATTGAAACCCAGTTTGGGAAGTTACGAATGT  
ATCTTTGTTTTCTTCTTCGTAGGATTTCGTAGGTTTCTTCCAGAGTCAATCAAATATTTAGGCACGGTATTGTTAATACCAGGTTCAA  
TAGCACTGATTATGATATCATTGAGAAACAGTTTTTATGCATTTGAAAATATGGTCAAGATACAAAATTAGCATGGATGATCATGT  
ATGGGGTAAGTGGATTATTAATTCAGCTTCATTATCTACTGCTTAACTATTACAGAAGGTGGCTATATTAATGTTTCGAAAACAATGT  
TATCGATCTAGATTGGGTGCAGTTACTATTAAGCCCATTTGCTTGGTCTGTAGTATCTTGGCAATTATTTTCAGTTTTATATATTTTCAT  
CAGGATTTTTGACATATTATGCTAAAAAAGCAAATGACGAACCCAGCATATAATTTAAACAAGACAATGGCACATATTTTTAGGGCCG  
CCGATGATTATCATTTGTTTTATTCGTATTTCTATCATTACGCATTCAAAATCTGAACATTTTTATTTCAGCTGTTTTGACTATTGGTG  
GATGTTTGCTATAAGTTTCTTATTCTTTGCATTAGCTTCATTGTTAACATTCTTTAAGAAAAAACATGGTTTGGCTTTTGATTTTGTTA  
TTTTACAAATGATGTTTCGCGTCTTTGGCTATGGAATTAGTAAATGCCATACCTTTTATATCCGTTTGTAAAAAATTACAGATTGCATA  
TGTTAATCCAGAAATGGGCTGGACATTAGTGATTGTCTTTATTTTAGGTTTACTTTTATTACTTCCATCGTTAATATTATTATTAAGAT  
TATTTGTTTTTCGACAAAGAATATGTTGAAGGAAAGAAATCATAAGTTGAGACGATACCCCACTTTTCATTTACTTGCATTACTGCAT  
TTAGATAATTTAGTTGGGGTACTCATTTATAATAATTTAAATTTATATTTTCAATGAATTGATGAAAAATCATTAAATGGAGGGCGAG  
TATGGGTAAAGAATATGTAGTCATCGGTCTAGGTCTTTTGGAGGTAGTATCGTTTCGTGAGTTGAATGCATTAGACATGGATGTAAT  
GGCCATCGACCATGATGAAAATAGAGTGAATGAATATAGTGATATCGCTACTCATGCGGTTGTTGCAGACACAACAGATGAAGCAG  
TTATGAAAAGTTTAGGTATCCGTAACCTTTGATCATGTTCATTGTGGCAATTGGTGAAAATATTCAATCAAGTACGTTGACGACTTTAA  
TTTTAAAAGAGTTAGGTGTAAGAAAAAGTAACTGCTAAAGCACAAAATGATTATCATGCAAGATTTTTAAATAAAATTTGGAGCAGAT  
ACGGTTGTGCACCCTGAGCGTGATATGGGTAGACGTATTGCCATAATGTTGCGAGTGCAAGTGTACTTGATTATCTTGAGTTGGCA  
GACGAGCATTCTATTGTAGAATTGAAAGCAACTGAAAAGATGGCGGGGAGTCTATCATTTGATTTAGATATAAGAGCACAAATATGG  
AATTAACATTATTGCAATTAACGAGGCAAGAGATTATCATTTTACCAAAATCCAAATATTAATTTAGAAATAGGTGATATTTAAT  
CATGATTGGACATGATAATGATTTAAATCGCTTTGAAAAAATATTGCGACGAGATAATCGGGAGTGGGACAGAAATGATATTTTC  
TCAAAATTTATTTCTGCTGCCACCCCGGCAAGTTGACTAGAATTGAAAAAGCTTGTT

>027-contig\_249

AAAAGCTTGTTACAAGCGCATTTTCGTTTCAGTCAACTACTGCCAATATAACTTTGTAGAGCATTGAACATTGATTATGTCTCAAGCT  
CATCATATATAAAGAAAAAGCTACTAACAATGTGTGGTGAGTTTAATTAAGAACTTCACCTCAAAGTTAGTAGCTTTTTGATTATTTAT  
TGTTTGATTCTTTTTGTTTCGTTTACCTTCATAATGACTGGTAAAATCATTTGGTTTTCTAGCTGTTTTTTCAAAATAAATAAGGTTTGAAT  
GTTTCAATGATAGAAGATTTAATCTGATGCCATTGAATATCTTTATTTAGTTAACTTACTAATAACATCAGTTTGTATTTTGCATTG  
TGCAATCAAAATTAATTCGACCTGATTTCCCTCATATATACAAATCCCTCGAGAAATAATGTCTGGACAGAAAGTAATTTATTTGATT  
AAAATCAATACTAACAACAACGATAAATAACCTTCTTCAGATAATAGCTTACGGTCTCTTATTACAACATTACCGATATCACCGAT  
ACCACTACCATCAACAAGTACATTACCAGATGGAATGCGACCAGCTTTACGTGCTGAATCGTGTGTTAAAGCTAAGACATCTCCAAT  
ATCAAAGATGAAGACATTATCTTCTCAACGCCGATTCAACACCAGTCTACCATGTGCTTTTAACATACGGTATTACCATGAAT  
AGGTAAGAAATATTTTCGGCTTGATTAATCGAAGCATTAATTTGTTGATCACCTTGAGAACCATGCCCTGAAGTATGGATGTTAGAAAT  
CTTGCTATGGATAACATCTGCACCAGCTTTATACAAGGAATTAATAGTTCTGTTAATACTTTTTGTATTACCTGGGATAGGTGATGAA  
CTAAATACAACGGTATCTTCAGGTATAATTTTAAATTTGCTTATGAGTACCATTAGCAATTTCTAGATAATGCTGCCATTGGTTACCTT  
GTGAACCAAGTACACAGTATCAATAACTCATGCTTCGGTAGCGTATTAATTTTATAGGTTCAATAAATGTTTCAGGTGGTGTCTTAAAT  
ATAACCAAGTTCCATACCGGATTTAATATTGTTTTCATCGCAACGACCGCAACGTAACAAATTTTACGGTTATTTTTGATAGCAGCTTCA  
ACTGCTTGTTGAACTCGGTAAATATTAGAAGCGAAGGTAGCAAAATATAATACGACCTTTACAATTACGGAAGATCTTATCTACGTTT  
TGACCAACTTCACGTTTCGCTTAAAGTAAAAATCAGGCACAAGTGAATTTGTTGAGTCTGAAAGTAAACATAGAACGCCTTCTTCGCCT  
AATTGAGCCATTTTAGCAATGTTTGCTGGTTTGCCTACAGGTGTAATAATCAAATTTAAAGTCACCGGTATGAACACTTTTCTCCTCAG  
GTGTATCTACGATGACGCCATAAGTTTCAGGAATACTATGCGTAGTTAAGTAGAAAGAAATCGTAAAGTGCTTAGATTAAATCACAC  
TGTCTCATTTGATTTTCAATTAGTTTAGCAGTACGTAATAAATGATGTTCTTCAAGTTTATTACGGATTAAACCTAATGCTAAAGGACC  
ACCATAAAATAGGTATATTAAGTTGTTTTAATAGGAAGGGCACACCGCCTATATGGTCTTCGTGACCATGTGTTATAAATAGGCCAAC  
AATTTTATCTTGGTTTTGAACTAGATATGTGTAGTCAGGTATAACATAATCAATCCCTAATAAGTTATCATCAGGGAATTTGATACCT  
GCATCGTAATGACAATTCGCTTTTACTCAACTGCATAAGTATTTTACCGATTTCACCTAGACCTCAAGTGCATATACACCTA  
CTTCATTTGGATGTAATTTGTTTCTATTATTTAGCAATCTCCACATTAAGTGTCTCTGAGTTTCTTTTCGTAATCTAAATGTGCGCCCT  
CTAATTTAGTGATAAATTCGATATTAATAATTACGATCTTTCAAGTAACGACGTAATTTGTTCTTCTGTTTGTGAGCTTCAACATAAAGTGA  
TTGTGATTTTTCACGCACAATTACCTCGTCTCTGTTATGTTGATAAAAAACTTTAAATACTGCCATGTTAAAAATTCCTCCTAAGAAAT  
GTTTGTTTAAATTTATTGTTAACCTAGTAAAAATCGTATTGGAGTATATATCGATAAATTCATTCCAATTATCTCTATAATTTAACTTAA

TAACGATTTGGTTAATAAAGTTCATCATGTCGTTTATTTAAAAAATTAGTGAAATAAAGTAAATTTAGTTAAATCTTATTT  
TACATGATGAATGATAATAAATAAAGCAGTTTATCTACTAGAAATCTAAGTATTTTGAATAAATGTGCAGTTCTATTTATTAATAA  
AAATGTAGAGATTATAAATTAATGTTAAGAAAGAAATTAAGGATTTTATATGAAACGGTAAAAATTTAATGAGGGGATAAAAAAGTT  
TGGTAGAAAAGGTGAATATATTTAACTGTTGTTTATTCGAAAAAGTTGTACAAGAAAAAGCTTAGGACATCATATTTATCCTAAGCTT  
TGATAATTAGTAATAGTGTGTTTAACTTCTACTGCATCTGTATGTGGTTGTAATGGGTGGTCTTTGTCAATGTGATCATAGAACAT  
TACACCATTTAAATGATCAATTTTATGTTGGAAAAACAATTGCTGGATATCCTTTTAGTCGTAATTGTATATCATTACCTTCGATGTCT  
TTGGCTTTAATTGTAATTTCTATTATGACGGTGAAGTACAGGCAACATTATCATCGACACTAAGGCAACCTTCACCAGTTGGTAAA  
TAAGCTTCTTGAACGCTATGACTTACAATTTTGGGTTTACAAGCATATAGTCATAAGATTTGCCACTGCCATCATCTGGTATTAATA  
CAGCAATCATACGTTTAGAAATATTAATTTGAGGTGCAGCCAAACCAACGCCTGAACGTAACCATATCGTTTCGCGATTTCCTCAT  
CTTGACTATTTACTAAAACTCTCTCATGGCGATTAATGTTTCTTTTCTTCTTAGTTAATGGTAATTTCTAACTACGCTGCTTTTGA  
CGCAAAGTTGGATGACCATCTCTAATGATGTCTTTTATTGTTAACAATATATTGCACCTTCCTATTTTAAATTTGTTTGAAGTGA  
AGTAAAAAGGTTGTTAAGATACTCATGCATTTTATGTGTAAATATCTACAAAGTTAACCAACTACTGCCAATGTTTATTTAGATA  
GTATATGTAAATTTTCAAGATATGCTAATTGCTTAAAAAATGATTAAGTGTGTTGTTTCAAGCAATGATACTTTAGAAATTTATTTATC  
ATCTTGACTTTAAAAATTATATTATAAATGACGTAAGTGTCAACAGATATACTTAGTAATGAAGATGTGTAATGTAATTGTTAAAA  
TTGATTTCCAAGCAGATTTTATTTATCATTTAATTTAAATAGCAAGTGGAGGTACAAGTAATGAAATTTGGAAAAACAATCGCAGTA  
GTATTAGCATCTAGTGTCTTGCTTGCAGGATGTACTACGGATAAAAAAGAAATTAAGGCATATTTAAAGCAAGTGGATAAAAAATTA  
AGATGATGAAGAACCAATTAAGTGTGGTAAGAAAAATGCTGAATTAGATGAGAAAAAGAAAAATTAAGTGAAGATGTCAAT  
AGTAAAGATACAGCAGTTTCGCGTAAAGCAGTAAAGGATTTAATTAATTAATTAATTAATTAATTAATTAATTAATTAATTAATTAAT  
AAGACGCAATTAAGAGTCTGAACAAGACTTTAAGAAAGTAAAGTAAAGTAAAGTAAAGTAAAGTAAAGTAAAGTAAAGTAAAGTAAAG  
AGTAAAAACAATTAGATGATGTATTAAAAAGAAAAATATAAGTTACACAGTGATTACGCGAAAGCATATAAAAAAGGCTGTAACTCA  
GAGAAAAACATTATTTAAATATTTAAATCAAAATGACGCGACACAACAAGGTGTTAACGAAAAATCAAAAGCAATAGAACAGAACT  
ATAAAAAAGTTAAAAAGAGTATCAGATAAGTATACAAAAAGTACTAAATAAGGTTGGTAAAGAAAAAGCAAGACGTTGATCAATTTAA  
ATAATTAATATAATACAGATGGTAGGAAACAACATAACAGTTCCTATTATCTGTATCTTTTATTAATAAACAGAACTTTTCAAAT  
GGTTTAAACAGTCCCATTTATTTGTTGTTACAATTAGTAAGGATAAAATGAATTTCTATACAATTATGGGAAAGGTATGGTGAATTGAA  
TGGCTCCTAAGTTACAAGCCCAATTCGATGCAGTAAAGTTTTAAATGATACTCAATCGAAATTTGAAATGGTTCAAATTTTGGATG  
AGAATGGTAACGTCGTAAGTGAAGACTTAGTACCTGATCTTACGGATGAACAATTAGTGAATTAATGGAAGAATGGTATGGACT  
CGTATCCTTGATCAACGTTCTATCTCATTAAACAGACAAGGACGTTTAGGTTTCTATGCACCAACTGCTGGTCAAGAAGCATCACAA  
TTAGCGTCAACAATACGCTTTAGAAAAAGAAAGATTACATTTTACCGGGATACAGAGATGTTTCTCAAATTTTGGCATGGTTTACCA  
TTAACTGAAGCTTTCTTATTTCTCAAGAGGTCACCTTCAAAGGAAATCAATTCCTGAAGGCGTTAATGCATTAAGCCACAAATTTAT  
ATCGGTGCACAATACATTCAAGCTGCTGGTGTGTCATTGCACTTAAAAACGTGGTAAAAATGCAGTTGCAATCACTTACACTGGT  
GACGGTGGTTCTTACAAGGTGATTCTACGAAGGTATTAACCTTGCAGCAGCTTATAAAGCACCTGCAATTTTCGTTATTCAAAAC  
AATAACTATGCAATTTCAACACCAAGAAGCAAGCAAACTGCTGCTGAAACATTAGCTCAAAAAAGCAATTTGCTGTAGGTATTCCTGG  
TATCCAAGTTGATGGTATGGATGCGTTAGCTGTATATCAAGCAACTAAAGAAGCAGTGACCGCGCAGTTGCAGGTGAAGGTCCAA  
CATTAATTGAAACTATGACATATCGTTATGGTCTCTACAAATGGCTGGTGACGATCCAACCTCGTTACAGAAGTTTCAAGCAAGATG  
CTGAATGGGAGAAAAAGACCCATTAGTACGTTTCCGTAAATTCCTTGAAAAACAAGGTTTATGGAATGAAGACAAAGAAATGA  
AGTTATTGAACGTGCAAAAGCTGATATTAAGCAGCAATTAAGAGGCTGATAACACTGAAAAACAACCTGTTACTTCTCTAATGG  
AAATTATGTATGAAGATATGCCTCAAACTTAGCAGAACAAATATGAAATTTACAAAGAGAAGGAGTGAAGTAAGCCATGGCACA  
AATGACAATGGTTCAAGCGATTAATGATGCGCTTAACTGAACCTTAAAAATGACCAAGATGTTTTAATTTTGGTGAAGACGTTGG  
TGTTAACGGCGGTGTTTTCCGTGTACTGAAGGACTACAAAAAGAAATTTGGTGAAGATAGAGTATTCGATACACCTTTAGCTGAATC  
AGGTATTGGTGGTTTACGGATGGGTCTTGCAGTTGAAGGATTCGCTCCGTTATGGAAGTACAAATCTTAGGTTTCGTATTCGAAGT  
ATTTGATGCGATTGCTGGACAAATTCACGTAAGTCTGTTTCCGTTACAGGCGTACTAAAACTGCACCTGTAAACAATTCGTAGCCCAT  
TGGTGGTGGCGTACACACACCTGAATTCACGCAAGATAAATAGAGGATTTTAGCTCAATCTCCAGGCTTAAAGGTTGTTATTC  
TTCAGGCCCATACGATGCGAAAGTTTATTAATTTCTTATTAGAGTAAATGACCCAGTTCGTATCTTGGAGGATTTAGAAATTTGTA  
TCGTTTATTCCGTGAAGAAAGTGCCTGAAGAAAGTATACAATTGACATTGGTAAGGCTAATGTGAAAAAGAAAGGTAATGACATTT  
CAATCATCACATACGGTGCAATGGTTCAAGAATCAATGAAAGCTGCAGAAGAACTTGAAAAAGATGGTTATTCTGTTGAAGTAATT  
GACTTACGTAAGTGTCCAAACCAATCGATGTTGACACAATTGTAGCTTCAAGTTGAAAAAACTGGTCTGTCAGTAGTAGTTCAAGAAGCA  
CAAGTCAAGCTGGTGTGGTGCAGCAGTTGTAGCTGAATTAAGTGAACGTGCAATCCTTTTATTAGAAAGCACCTATTGGAAGAGTT  
GCAGCAGCAGATACAATTTATCCATTCAAGCTGAAAAATGTTTGGTTACCAAAACAAAAATGACATCATCGAAAAAGCAAAAGA  
AACTTTAGAATTTAATACATTTTAAAAAGTTAACGAAGTTAGCGTATTTTAGTCTCATTGATTAAAAATGAAATGTTAATTTACGAAA  
TCTTAGGAGGGGCAAAACGTGGCATTGAAATTTAGATTACCCGATATCGGGGAAGGTATCCACGAAGGTGAAATTTGTAATGGTT  
TGTTAAAGCTGGAGATACTATTGAAGAAGACGATGTTTAGCTGAGGTACAAAACGATAAATCAGTAGTAAGAAATCCCATCCACG  
TATCTGGTACTGTAGAAGAAAGTTATGGTAGAAGAAAGGTTAGCAGTAGCTGATGTTGGTGACGTTATTGTTAAATTCGATGACCTGATG  
CAGAAGATATGCAATTTAAAGGTGATGATGATTATCATCTAAAGAAGAACCTGCGAAAGAGGAAGCGCCAGCAGAGCAAGC  
ACCCGTAGCTACTCAAACTGAAGAAGTAGATGAAAAACAGAACTGTTAAAGCAATGCCTTCAGTACGTAATACGCACGTGAAAA  
GGTGTAAACATTAAAGCAGTTTCTGGATCTGGTAAAAATGGTCTGATTACAAAAGAAGATGTAGATGCATACTTAAATGGTGGTGC  
ACCAACAGCTTCAAAATGAATCAGTTGCTTACAGTACAAGTGAAGAAGTTGCTGAAACTCCTGCAGCACCTGCAGCAGTAACATTAG  
AAGGCGACTTCCAGAAACAACCTGAAAAAATCCCTGCTATGCGTAGAGCAATTGCGAAAGCAATGGTTAACTCTAAGCATACTGCA  
CCTCATGTAACATTAATGGATGAAATTTGATGTTCAAGCATTATGGGATCACCGTAAGAAATTTAAAGAAATCGCAGCTGAACAAAG  
TACTAAGTTAACTTCTTACCTTATGTTGTTAAAGCACTTGTTCGCAATGAAAAAATACCCAGCATTAAACATTCATTTCAATGAA  
GAAGCTGGTGAATTCGTTCAAAACATTACTGGAATATCGGTTATGTCAGCAGACACTGATAGAGGATTTAGTACCTGTTGTTAAA  
CATGCTGATCGTAAGTCTATTTTCCAAATTTTCAAGATGAAATTAATGAATTAGCTGTAAAGCACGTGATGGTAAATTAACAGCCGAT  
GAAATGAAAGGTGCTACATGCACAATCAGTAATATCGGTTACGCTGGTGGACAATGGTTCACTCCAGTTATCAATCACCCAGAAGT  
AGCAATCTTAGGAATTTGGCCGATTGCTCAAAAACCTATCGTTAAAGATGGAGAAATTTGTTGCAGCACCAGTATTAGCATTATCATT  
AAGCTTTGACCACAGACAAATTGATGGTGAACCTGGCCAAAATGCAATGAATCACATTAAACGTTTATTAAATAATCCAGAATTATT  
ATTAATGGAGGGGTAAAACATGGTAGTTGGAGATTTCCCAATTGAAACAGATACTATAGTAATCGGAGCAGGTCTGGTGGATACG  
TTGCAGCAATTCGTGCAGCTCAATTAGGACAAAAAGTAACAATCGTTGAGAAAGGTAATCTTGGTGGTGGTTTGTCTTAAACGTAGGA  
TGTATTCTTCAAAAGAAATTAACATGCTTCTACCGTTTGTGTAAGCACAACATTCTGAAACTTAGGTGTTATTGCTGAAAGTG  
TTTCTTAAACTTCAAAAGAAATTAAGAAATTAACATCATCAGTTGTTTAAATTAATTAATTAATTAATTAATTAATTAATTAATTAAT  
ACAAAGTTAAACATCGTTAAAGGTGAAGCATATTTCTGTAGATAACAATAGCTTACGTTGTTATGGACGAAAAAGAGCGCACAAACATAC  
AACTTTAAAAATGCAATCATTGCAACAGGTTCAAGACCAATTGAAATTCCTAATTTCAAATTCGGTAAACGTGTTATCGACTCAACA  
GGTGTCTTAACTTACAAGAAGTACCAGGTAATTAAGTTGATGTTGGTGGAGGATACATTGGATCAGAATTAGGTACAGCATTTGCT

AACCTTTGGTTTCAGAAAGTAACCATCCTTGAAGGTGCTAAAGATATCTTAGGTGGCTTCGAAAAACAAATGACACAACCTGTTAAAAA  
AGGTATGAAAGAAAAAGGTGTTGAAATCGTTACTGAAGCTATGGCTAAATCAGCTGAAGAAACAGATAACGGAGTTAAAGTTACTT  
ATGAAGCTAAAGGCGAAGAGAAAAACAATCGAAGCTGATTATGTATTAGTAACTGTAGGTCGTCGTCCAAACACAGACGAATTAGGC  
CTAGAAGAATTAGGTGTTAAATTCGCTGACCGTGGATTATTAGAAGTTGATAAAACAAAGCCGTACGTCTATCAGCAATATCTATGCA  
ATTGGTGATATCGTTCCAGGTTTACCCTTGCTCAGAAAGCTAGCTATGAAGCTAAAGTTGCTGCTGAAGCAATTGATGGTCAAGCT  
GCTGAAGTTGATTACATTGGTATGCCAGCAGTATGCTTTACTGAACCAGAAATTAGCTACAGTTGGTTATTTCAGAAGCGCAAGCTAAA  
GAAGAAGGTTTAGCAATTAAAGCTTCTAAATTTCCATATGCAGCAAAATGGTCGTGCATTATCATTAGATGATACTAACCGGATTTGTT  
AACTTATTACACTTAAAGAAGATGATACTTTAATCGGTGCTCAAGTAGTTGGTACTGGTGCATCAGATATTATCTCTGAATTAGGT  
TTAGCAATTGAAGCTGGTATGAATGCTGAAGATATCGCATTAAACAATCCATGCACATCCAACATTAGGTGAGATGACTATGGAAGC  
AGCAGAAAAAGCTATCGGATACCCAATCCATACAAATGTAATAACTGATTATCTATAAAGATTTCAGTATTAAAAAGCTGTAGCATAT  
GCTACGGCTTTTTTGTAGGTAAAGTAATGTAAGGAAATTGATTGAGATATCGTTAAACATGTGACATGCATGTTATACTAGCGA  
TGCTAACAAAAGAATTGAAATGGAGGGTTCAACAATGGAATATGAGTATCCAATTGATTAGACTGGAGTAATGAAGAGATGATTT  
CAGTGATAAAATTTCTTAATCATGTAGAGAAGTATTATGAATCCGGCGTGACGGCAGGCGACTTTATGGGTGCGTATAAAAAGATTTA  
AAGAAATTTGTGCTGCTAAAGCAGAGGAAAAACAAATTTTAACTTTTCGAAAAAAGTAGTGGCTATAATAGTTACAAAGCAGTT  
CAAGATGTAAAAAATCACTCTGAAGAACAAGAGTAACAGCTAAAAAATAATTTCGTTTCGAAATTAACACAATTTAATAGGAATTT  
TCTTTAAACTATTGCTAATAAAGCTATATTTTGATACCTTTATCAAGTGTTAAACAAAATGTTTGATAAAAGTAACTTAATATAGC  
TTTTTAGGTGAAAAAATAAATGAACATAGGTAATAAAATTTAAATCTTAGAAGAATTAATAAATTTAACGCAAGAAGAACTTGCT  
GAACGTACAGACTTATCGAAAGGCTACATTTACAAAATAGAAAGTGAACATGAACTACCAAGTATGGAACCTTTCTTAATATTAT  
AGAGGTGTTAGGAACGACGCCAAGTGAATTTTTTAAAGACAGTGAATAAGTAAAGTATTATACAAGAAGGAAGAACAAGTTATT  
TATGATGAGTATGATGAAGGTTATATATTAATTTGGTTAGTTTCAAAGTCAAATGAATATGATATGGAGCCATTAATATTAACCTTTA  
AAGCCTGGAGCATCATATAAAAAATTTAATCCATCAGAGTCTGATACGTTTATTTATTGTATGTCAGGTCAGATAACACTTAATTTA  
GGCAAAGAGATATATCAAGCACAAGAAGAAGACGTTTTGTATTTTAAAGCACGAGATAATCATCGTTTGTCAAATGAATCAAAACA  
TGAAACACGAATACTTATTGTAGCGACAGCTTCATATTATAGGGGGGATCTTATTGGAACCGTTATTATCATTAAAAATCAGTTAG  
TAAAGCTACGATGATCTTAATATCTTAGATGACATAGATATTGATATTGAATCAGGATACTTTTATACATTATTAGGTCCTTCAGGT  
TGTGGTAAAAACAATTTTAAATTAATTGCAGGGTTGAATATCCTGACAGTGGTGAAGTGATTATCAAAACAAACCAATTGGT  
AATTTACCACCAATAAACGTAAGTGAATACAGTCTTTCAAGATTATGCATTATTTCCACACTTAAACGTCTATGATAATATCGCT  
TTTGGTTGAAATTAATAAATTTATCAAAAACCGAAATTTGATCAAAAAGTAACTGAGGCATTAATAATTAGTAAACCTTCAGGTTA  
TGAAAAAAGAAATATTAATGAAATGAGTGGCGGACAAAAAGCAACGTGTTGCAATTGCACGTGCTATCGTAAATGAACCAGAAATA  
TTATTGTTAGATGAATCTTTATCCGCATTAGATTGAAATTGCGTACTGAAATGCAATATGAATTACGAGAATTGCAATCTAGATTA  
GGTATTACATTTATATTTGTAACACATGATCAAGAAGAAGCGTTAGCATTAAAGTGACTTTCTTTTGTATTAAGAAGATGGGAAAT  
CAACAATTTGGCACACCAACAGATATATATGACGAACAGTGAATCGATTGTTAGCTGATTATTATTGGAGAATCTAATATTGTTGAA  
GGGCGCATGGTTAGAGATTATGTCGTGAATATTTATGGGCAAGATTTTCAATGTGTGCATATGGGTATTCCTGAAAAATAAAAAAGT  
AGAAGTCGTTATTTCGACCAGAAGATATATCATTAATCAAAGCTGAAGAAGGATTATTTAAAGCAACTGTTGATTCTATGTTATTTAG  
AGGGTGCCACTATGAATATGTTGTATAGACAATAAAGGTTATGAATGGGTAATACAAACGACTAAAAAGCTGAAGAAGGCAGT  
GAAGTTGGTCTTTTATTGATCCTGAAGCCATTCAATATTGTTCTGGAGAAACAGAGAAGAATTTGATAAACGTTATGAAAGC  
TATGAGGAAGTAGACAATGCGTAATACTAATAAATTTCTCTTAATCCCGTATTTACTATGGATGGTTATATTTATTATTGTACCAGTT  
GTATTACTCATTTATTTTTCATTTTATAGATATCAATGGACATTTTAGTTTCACGAATTATCAACAAATTTTACTACAAAAATTTTGAA  
AATGTTTGCATATTTCAATTTTATATGCCGCTTTAATAACAATTATTACCTTGACTATCAGTTATCCAGCTGCCTATTATATTACTCGTT  
CGAAATTTCAAAATATCTTATTAATGATAATGATTATCCAACATGGATAAATTTATTGTTAAAGACATATGCTTTTATAGGTTTATT  
AAGTCATGATGGCGTGATTAATCAATTTTCCACTTATTTAATTTACCATCATTTCAATTTGTTATTTCAACTGGTGCGTTTTTAGTAG  
TGGCAAGTTACATTTATATACCATTTATGATTTTACCTATATTTAATAGCATGAAAGCAATTCCTAATAATTTATTGCAGGCCTCAAG  
TGATTTAGGTGCTAGTCCTTTCTATACCTTTTAGAAAGTAATCATGCCGTTAACAAAAAGAGGTGTTATGACTGGAATTCAGTAAC  
CTTATTCCATCAGATTTTCAATTTATGATTACAGATTAAATGTCAGGTAATAAGTCAATAATATAGGTACGGCAATGAGGAACA  
ATTTTAAACAATTCAAAATTATGGTATGGGATCAACTATAGCTATATTCTTAATTGTATTTATGGCATTCAATTTAATCATTACAAAA  
TCATCTAATGGGAGAGGGTGAATCATATGAAATGGTATGGAAAGCTGTATATCGGGATACTTTTAGCGATTTTATACATCCCAATAT  
TCTTTTAAATGTTCTATTTCATTCAATTCGGCTGGTAATATGATTCACTTTGAACATTTTACATTAGAGCATTATCAATCATTATTTCAA  
AATGATCATTAAATGTCGGTCATTTTAAATACGATAGCTGTAGCACTTTTAGCAGCCTCAATTTCTACAGTTATTGGTACATTTGGTG  
CCATTGCTATTTATTATTTAAGAAATAAAAAAGTTTAAAGTAACCTTACTAACATTGAATAATGTCTTGATGGTATCATCCGACGTTGT  
CATAGGTGCATCATTTCTAATTTATGTTTACAACGATTGGCCATTTTACTGGTCTTGTTTAGGATTTTGGACAGTTCTAATATCTCAT  
ATTGCATTTTGCATACCTATAGTTGTGATTATCGTCTTACCACAACCTGTATGAAATGAATAATAATATGTTAAATGCTGCAAGAGATT  
TAGGAGCGACTGAACCAATTAATTAAGCAACATTTATTTCTAATATTTTACCTTCTATTATAGGAGGTTTCTTTATGGCTTTAAC  
TTATTCACTAGCAATTTTACAGTAAGTTTCTTCGTTACTGGTTAAATGGCTTTAGTGTTATCAGTTGAAGTTATGCTATGCGCAGAGA  
AAAGGAATTAGTATGGAATTAATGCGATTTCACATTATTGTTTGTCTGTTATTGTATTAGGAATACTAGGATATTATTTGATTCAAT  
ACGTGATAAATAAGAAAAAACTAATCAAGCGAGGTGTAAAATAATGAAACGTTTTTTACAACCTCATTATAGGTGCATTAGTTGTGG  
GTATGCTTTGTCTTACTTTAAGTCATTGGTTTAAATCTAAAGAACAGTGCATACAAATCAAAAAATTTACGTATACAATTGGGGCG  
AATATATTGATCCAGAGTTAATTAAGAAATTTGAAAAAGAACTGGCATTCAAGTCGTTTATGAACTTTTCGATTCAAAATGAAGCG  
ATGGAAGCCAAAATTCGCAATGGCGGTACACATTATGATGTTGCTTTTCTAGTGAATATACAGTTCAAAAAATGAAAAAGAGATCAT  
TTATTGTTACCAATAGATCATAATAAGGTACCTAATATTAATAAATTTAGATTTCAGATTATATGAATATGTCATTGATAGAGGCAAT  
AAATATTCTTTACCTTATTTCTTTGGAACTGTAGGTATTTTATATAATAAAGAAAGTATCCAAATGAATCATTGTATAGTTGGAAGT  
CATGTGATAAATCCATAAATTTAAAAACCAATTTTACTAGTTGACGGTGTAGAGAGATTATAGGCATAGTTTGAATAAACTTTGGGT  
ATAATCTTAATGACCGTAATTCGCACCATTTAAAGAAAGCAGAGCGAGATTTAAACCAAACTAGCACCACAAGTAAGAGGTGTCGTA  
GGTGATGAAATTACCATGATGCTTCAACAAAATGAAGGTAACATAGCGGTTGTTTGGAGTGGTGTGTCAGCACCTCTAGTGCAAGA  
AGGGGATAAATAAATATGTTATTTCTAAAGAAGGATCGAATTTATGGTTTCGACAATATGGTAATTCAAAAACGGCACAAAATA  
AAGAGGGTGATATAAATTTATGAATTTTTTATTAGATGCTAAAAATAACAGCAAAATACAGAATTCGTAGGCTATGCAACGCCA  
AACAAGGCTGCTCGACAATTGTTGCTTAAAGAGATTAAAGACGACCATCGTTTTTATCCGACTAAGAAAGAGCAAGAACGCCTTGA  
AGTTTATAAAGATTTAGGACCTGAAGTTTAAAGTGAATACAATGAAAACCTTTTGAATTTCAAAATGTCATTAAAAATAAATCATAA  
ATAGTAGTTATTTACTGTATATTTAGTTATAATAACGGGATAAGTACTATAAGGAGTTGTAACGAATGACTGGAGAACAAATTTACTC  
AAATTAACGTCAGTAAGTAGATTAAGTAAAAAGTTCTAGGTTGGTTATGTTGGGTGATGTTATTAGTCTTACTGTACTTACGA  
TGTTTATAGCACTTGTTTCATTTCAGTAATAACACATCGATTGCTAATCTTGAAATAACATTAAACAATAATGCTATTATCCAGCAATT  
ATTAGCTGGAAATGGCTATAATAACACAATTTGTAATATGGTTACAAAATGGTATATGGGCTATTATCGTTTACTTTATTGTTTGT  
TTGTTGATTTTCAATTTTATAGCTCTCATATCTATGAATATAAGGATCTTGTACAGGTTTCTTATTCTTAATATCAGCAATTGTAACGATTCC

TTTAGTTTTACTTATCGTTACTTTAATCATTCCGATATTATTCTTTATTATTGCGATGATGCTATTTATAAGAAAAGATAAAAGTTGAAA  
TGGTTGCGCCACAATATTATGAAGAGTATAACGGACCGATTATGATTATCGTGAACCTGTGTATGAGCGCCCCAACCGAAAAGAT  
GATTATTATGATGTGCCTAAATATGAAAAAGAATTGGATAAAATCAAATACTGTATATGATCAAGAACAGGAAAAGAGATAAATATGA  
TCAATTTCTAAACGTGCAGTTGAAAGTGAATATAATCATGATGAGCGCACTGAGGAAGAACCATCAGTATTATCCAGACAGGCTA  
AATACAAAACAAAAAGTACTGAAGAACTAGGTATTGAAGATGATGGTTATTATGCAGAACCTGAAGTTGATCCAAAAGAATTGAA  
AGCACAAACAAAAGCGAGAAAAAGCTGAAATTAAAGCTAAGAAAAAGAAAAACGTAAAGCTTATAACCAACGAATGAAAAGAACG  
TAGGAAAAATCAACCTAGCGCAGTTAGTCAACGTCGAATGAATTTTGAAGAGCGACGTCAAATTTACAACAAATGATATTCTGAAG  
AACGCAATTCAGTGAAGTTAAGGACAAAAAGAGCAAGAATAAATATTGATGATACCCAGATTAGTAAGCAGAGGTCCTTTTGCTT  
ATTAATCTGGGTTTTATACGAGGTTAATTATCGATAACGTTTAATTAAGTGTATTAGGTGCATAATTTTAAATGACGATTTCTCAT  
TACTATACACCTAAATATCATCAATCTGAATTCAGATGTTTTATTATAAAAAATTAGATGAAAAATATGTTAATATACAAGTAATTTA  
ATGTGCGTATATCTATAGGCTCGTAGTATACTTATTAATAATTTAAACAAAAAGGATTTTAAAGATGAATAGAAAACTGAATTA  
ATCATGGCTTGATTGCAAAATAGTATTAGTATTATTTATTTATTAGTTATGGGGCTATCCTATTTTCTTTAAAAAGTGGTAATGCAT  
CACAACGTGAAGAATTAGCGAAGCAATTATCTCAGAACGGTGGCAAGGTTTCTTTAGATATGCTTCAGACAACAATGGGTGCATTA  
GCAATTATTTTATTAATTTCAACACTTTATGGTATATTTGCGACAATTTGTATTAAAGGACGTAGAAAATTATCGATTATACTTTTG  
TTATCGCGATAATTGTAAAGTTTGATGGCTCTTAATTTAATTGCAATTGTCTTATGGATTATCGTGATGATTATGTTGATTCTAAAAA  
AGAATCAAAAAGAACTACACATAAGGACGATGAGTATATTTATCATTAAATATGTTTCATAGCAAAAAAACCATTAATAATGTTAAGT  
TGTTAATTATTAGATAACAACCAACATTTTAATGGTTTTATTTTAACTTTGTAGTTCCTTGAATGTTTGAACGATTAATAGACATTT  
AAAATCTTAGAATAATAAAGTGTCCATGAAATGATATAACCCATGTTTTATTATAGAAAAGTCCCACGATCTTTATTACTTA  
GTAGCTAATTGTAAATGGTATTAAACAGAATGGCAGAGCAATACTTAAAAATAGTAAAGTACATCAAGTACAGTTATTAGTGCA  
TGCATTACCTTTAAAAATGATTAAGCATACGATAACAGGAATGACAGCAAGGGAACGTGTAATTAACGCTCTTAACCAATTTGGTA  
TGTGTAATCTTAAAAATCCTTCCATTACAATTTGTCTGTCTAAAGTACCAGTAATCGTTGAATTTTGACCTGACGCTAATAATGCAAC  
TGCAAAATAATGTACTCATGATTGCACCCATTGTTGCACCTAGTACAGGTTTCAGTTTTTAAGGCGTGATATAAATCATAGAAACCACC  
TAAATCGTCAGCATTGTAGTTGAAAAATAGTGATGCTCTTAACACTAATAATAAGCAATTGACTACAAATGCGATTGATAACTGAAT  
GTTGCAATCTATCGTAGCAAAATTAATCGCTTGCCTTTTCTTCATTGTTATGTCTTGAGTATGTTCTAGATTGTACAATTGATGAAT  
GTAAGTACAAATTATGAGGCATAATTGTAGCGCCAATAATACCTAATGCAATATAGAGAATGCCGTTATTTGTAATGATTTCACTAT  
GTGGTATAAAATCCATTTAACACAGCATTCAACTGTGGTGATGAAATATAGACTTCAAAATATAAGATGAATAACACTGTGAAAAAT  
AATGTACCAACAATAGCTTCAATTTTCTAAAAACCATATTTCTATTATAAATAGTAGTAAAAATACATCAAGTACAGTTATTAGTGCA  
CCGACGATTAAGGTATGTTAAATAGGAGATTAAGAGCAATAGCACTACCAATAACCTCAGCAATATCTGTAGCGATAATTGCTAG  
TTCTGCAATGATCCAAAAGATTATAGCAATAGGTCTTGATAAATAATGTCGTGTCATTTGAGCTAAGTCCATACCTGTTGCTATTCT  
AATCTCACTGTCATGCTTTGAAGTAACATTGCTGATAAACTTGAAATAAGAATTACGAATAGCAAAAGTATAGCCATATTGGGCGCCA  
CCTTGCATTGATGTTATCCAGTTCCGGGATCCATGTAACCAACAGCGACTAATAACCCAGGTCCAAGAAATGATAAAAAATTTCTGT  
TTATTTGAACGCGATGATCGAATTTAATTGTATTGTTTATTCGTCTAACTTAATTGTTTCATTTGTTGAATGTCGTTTATTATTCAT  
TTTGACTCACCTCTACTTCTTATGGACAATATAATAACCTAATAAAAAATGTTTAGGTCACCTAAATTTATTTTAAAGGT  
ATGAATTATTATGTTGAACGTTTCGATTTAATATTAAGAAAAAGAGCAGAAATCATGGATGTGATTACGTCGCTATTATTTAAA  
CAAAGTTATTTATGCGAATAAAATGGTAAGAACTGATCGAAGGTTTCTTCTAAAAATGCAATAAGTACGTTGCTATTTTAACT  
TTTATCTTGTGGTGTGATTGCACGCGCTATAAAGAATTCACCTTTTTTTCACATTGATGGCTCTTTGTATCGCTTCTTTAAATCATCAT  
CCGTTAAATCTTTAATAAATGGTTTATCAGGTTTCATATGATCTAAGCAACACGATAATCATCAGGTAATTGTTGAATAGCTTTAA  
ATTTTCTTTCAAAAACTTTTGCACGTGTTGCTTTATCTTTTGTCTCATGATGATTCCAAACATAACAAACAGTTGATCTTCAACAT  
ACCAATTTGGAAATGAGGTAAACATTTTATAGCCTCTTTGTTTGTGCAAAAGCAACCCATGTATCTTTAGGAGGATTCACACTTCT  
CTAGCATGCTTTGCTACGTGAGGATAAAATGTTTCACCAGTTTGACTTGTAAGAAGTCACTAAAAATATTCCTCAATTCATGGAGT  
TGTGGTTCGATGTATTTCGTTTAAAGCTTCCATTTCGTGCGTCTAAGCCTTCTACGTTGAACGCTTTGAAATCTTTAGGTTTAAATGTAT  
ATTTTGTATAGAGTACCTCCTGTATAGTGTTTAAAAATATTGTAGCATATGTTTTATCAATTGCGGCTTAAGACGCTCTCATTAAAA  
TAGTATTTTTCATTTTATCATAAGAAGTTATTTTATAAAATGTTGTAGTATATAAAGATGTTAGGAGGATGATTGCTTTAGGCACTTT  
ATGGATTTGCCAAGGACTTATTCAAGAAAGCAGGAATTAGAATTAAACAATTGATGGAGCAAAATTTAACAAATTGAAACAAAGTCA  
AATCCGAATGACCTTGTACAAATGTAGATAAAGCAACAGAAGATTTTATTTTGTATACAATTTTAGAAACATATCCCAATCATCAA  
GTATTAGGTGAAGAAGGGCATGGTCATGACATCGATACTTCCAAAGGTACGGTATGGGTGTTGACCCAATAGACGGTACATTGAA  
TTTTGTTTCATCAACAAGAAAATTTGCAATTTCAATTGGTATTATATCGATGGTAAACCTTATGCAGGTTTGTATATGATGTTATG  
GCTGACGTCTTATATCATGCTAAAGTAGGGGAGGGTGCATATCGAGGTAGCCAACCTTGAAACCATTTGAATGATTCTAATCTAAG  
ACAAAGCATTATTGGGATCAATCCGAACCTGGTTAACTAAACCAATTTTAGGAGAAATCTTTAAAGAAATGTTAATGATTCTAGAAG  
TGCAAGGGCATATGGTAGTGCAGCGCTTGAAATCGTTTCAGTTGCTACAGGTAATTTAGAAGCATATATGACGCCAAGACTTCAACC  
ATGGGATTTTGTGCGGATGTTGTTTATATGAAGTAAATGGACAAGCTTCCAATTTACTAGGAGAACCATTAACAATTAGTGG  
TCCAAATTCATCTTATGTTGGAATCGTGGTCTCCATCAAGAAATAGCAATGATTATTAGAGCCCCACCATGATGCGTTAATAGCA  
ATTACATGAACAACGATTTAAAAAGAAAATCAAAATAATTACCAAAAGCGTAATATGTAGTCCTAACAAATTAGGTAACATATTACGC  
TTTTATACCTTAAATAATAAAAAACACGCGCCAATATAAAACAGTTAAATGTTTCATCATGAACATGTGTGGTCTTAAATCAACGCGT  
GTTACTGTGATATAACTTATAGCCAATCGTTTTCTCGATATTTTCTTGTAGTAAATCCAATTCCAAAGGTTGCAACGAGTAATA  
TAAATGTTAAATCATCATTGGTACATTTGATGCACCAACAGCAAACTAAATAATACTAAGAAAAACAACAGCTAATATAGAAAAAT  
ACCCAAAAGATATTTTATGATTTTGTGTTTCATCCTATCCCCACCTTTTGCTTATCTTTTCTCAATTATATGATATAATAAAAAAGT  
TGTAATTAAGAGTGGGATTTTACTTAAGAAAAGAGGAACTATTTATATGACTAATAAAAGAGAAGATGTCCGCAATATAGCAATT  
ATTGCTCACGTTGACCATGGTAAAAACAACCTTTAGTAGATGAGTTGTTTAAACAATCTGGTATATTCAGAGAAAATGAACATATGCGAT  
GAACGTGCAATGGACTCTAACGATATCGAAAGAGAGCGTGAATTTACGATTCTAGCAGCAAAATACGCTTTGATTATATAAGGTTAC  
ACGTATTAATATTTTGATACACCAGGACATGCAGACTTTGGTGGAGAAGTAGAACGTATTATGAAAAATGGTTGATGGGGTTGTCTT  
AGTAGTAGATGCGTATGAAGGTACAATGCCTCAAAACAGTTTTGTACTTAAAAAGCGCTAGAACAAAACCTGAAACCTGTTGTTG  
TTGTTAATAAAATGATAAACCATCAGCAGCTCCAGAGGGTGTGTAGATGAAGTTTATAGATTTATTTATTGAATTAGAAGCAAACG  
ATGAACAATTAGAATTCCTGTTGTTTATGCTTCAGCAGTAAATGGAACAGCTAGCTTAGATCCTGAAAAACAAGATGATAATTTAC  
AATCATTATATGAAACGATTATTGATTATGTACCAGCTCCAATTGATAACAGTGATGAGCCATTACAATTCCAAGTAGCATTGTTGG  
ACTACAATGATTATGTTGGACGTATTGGTATTGGTCGTGATTTCAGAGGTAAAAATGCGTGTGCGGAGATAATGTATCCTAATTTAAAT  
TAGACGGTACAGTGAAAACTCCGTGTAACATAAATCTTTGGTTACTTTGGATTTAAACGTTTGAAGAATTGAAGAAGCACAAGCT  
GGAGTTTAATTGCTGTTTCAGGTATGGAAGACATAATGTTGGTGAACCTGTAACACCACATGACCATCAAGAAGCATTGCGAGTT  
CTACGATTATGATGAGCCTACTCTTGAAATGACATTTAAAGTTAAACAATTTCTCCATTTGCTGGCCGTGAAGGTGACTTTGTAACAGCA  
CGTCAAAATCAAGAACGTTTAAATCAACAATTAGAAACAGATGTATCTTTGAAAGTTTCTAACACAGATTCTCCAGATACATGGGTA  
GTTGCTGGTCGCGGTGAATTGCATTTATCAATCCTTATTGAAAATATGCGTCGTGAAGGTTATGAATTACAAGTTTCAAAACCAACA

GTAATTATTAAGAAATAGATGGTGTAAATGTGTGAACCATTTGAACGTGTGCAATGTGAAGTGCCACAAGAAAAATGCAGGTGCTGT  
TATTGAATCATTAGGTGCACGTAAAGGTGAAATGGTTGATATGACTACAACCTGATAATGGACTTACACGTTTAACTCTTAAATGTACC  
GGCTCGTGGTATGATTGGTTATACGACTGAATTTATGTCAATGACAAGAGGTTACGGTATTATTAACCATACATTTGAAGAATTTAG  
ACCACGTATTAAGCACAAATTTGGCGGTCGTCGTAATGGTGCATTAATTTCAATGGATCAAGGTTCTGCAAGTACTTATGCCATTTT  
GGGACTTGAAGATAGAGGTGTAACTTCATGGAACCTGGTACTGAAAGTTTATGAAGGTATGATTGTTGGTGAACATAATCGTGAAA  
ATGATTTAACTGTTAACATCACTAAACAAAAACATCAAACCTAACGTACGTTCTGCAACGAAAGACCAACAAAAAATGAATAGA  
CCGCGTATTCTAACATTGGAAGAAGCGTTACAATTCATTAATGATGATGAACTTGGTGAAGTTACACCAGAAAGTATACGTTTAAAGA  
AAGAAAAATTTAAACAAAAATGTTCTGTAAGAAAGCAAGCGATCAAAACAAATGATGCAAGAAAAACGAATAATTTAACATAA  
TAAAGAGAAGCTGGGCGATGAAAGTTGCTTAGCTTCTCTTTTGGCATATAATATTTGAAAAAGTGTTTAAATGCTATTATTTCTGT  
TACTTTACATTTTCAAATTTCTAAGTTGTTTATTACAGATATAATATCAGCGGATAGTGTGCGCACGTTGTTAGGTGTGCTAATC  
GACTTTTACAATCATCACACATAAATGTTCTGAATAGGATTGTTTTTAAAGTCGTTTACAGTCTAGTTGTGCGCTCATCTATAAATACTTT  
TGCATCACAGATAATGCATTGCACTTGTCTCAAATTAATCACCTCAATATGAGTTACTTGGTTGATTTCGATATGAATAACCATCTTC  
TTGATTGTAAATAAACTATCTACACCATTATCGCTGTAAAGTCGTTTACCGTCTTTTGCAAATTGGAAAAATAAATAGGGTAATAG  
ATCTATCGGTATATCTAAATGATCATGCTCATTGATAATCGAATAGTAGTTGCAGAGTCATGTGGTTCGGAATGTTTGAAGAAATGG  
TGTCATATTAATGACAAATGAACCTTCTAACATGGCACGTTTTTTATATTTTATTTCTGAATTTAAAGTAGGCGGATTAGTTTGTCTT  
TCTAGGATAGCACGATTCCATTATGATTATCTTCAAAGTCGATTGGTTTTGAACCATCAAATACACCTTTTTCTAAATCTTCGATGC  
TAACCTTTCTATCATCGAAAAATCCAAGTCGTAATCTAATGTTATAGGAACTTTACGGCTCCTTTAATTTGTATCATTTTCCCCTC  
CCTATCAATGATATAGCATTATTTAACACAAATTTGTAACGACACATGTTTAAATCTACTTGTCTTTTAAATTTAGTAAGATAAAC  
TTTTAGTAAGACTTTGAGAATTTATATAGAGGGGAGCGTGTCTATGGCGAAACAGCAACAATGCAAAAAATGCAGCTTTGAAACAATT  
GACTAAAAGATGCTGATGAAATCTTGCATCTGATTAAAGTTCAACTAGATAATTTAACATTACCTTCATGCCATTATATGAAGAAGT  
ACTAGATACACAAATGTTTGGACTTCAAAAAAGAAAGTTGATTTTGTCTGTTAAATTAGGTTTAGTTGACCGCGAAGATGGCAACAAAT  
TATGTTACGTCTTGAGAAAGAACTTTCAAATTTACATGAAGCTTTTACACTTGTTTAAGGTTTAAATATATAAGCATATTAAGAAATGGC  
GTGAGATATCGACAATTGAGCTGCGCCGATTTTATATTATAGTTTAAATCTGATTAAAGTGGCTGTTATGTTGTCTTCTTGATGAC  
ATGTCAGTCACTTTTATTGGGTTTTAGCAATTCACGATATTAAGTAAACAAATATTTCTATAAATACCTCAAGAGACCTGTTAATATT  
TGTGATTATGACTGTGTCATGTATATAAAGTAACATGGATTTTTAAATTAAGTATAAACGAAATCATTGAAAGTATAAATTG  
TAGAATTGGATGACTGAATATATGAAGAATTTAGAAGTATTTACGGTATATTGGTAAACCTCAAAGTTTATTGATTATCCGTTA  
TTAGTTACATATATTGTATTGAGTTTAAATGGATTAGTTATGTTATATAGTCAAGTATGGTTCCAGCAACTAAAGGCACATTGACT  
GGTGGTATCGATGTTCCAGGAACGTATTTTTACAACCGACAATTAGCATATGTCATAATGAGTTTTATAATTGTATTTTTATTGCAT  
TTTTAATGAATGTTAAATTAAGTAAATTAAGTGCAAAAAAGGTATGATTATAACTATCGTCTCACTATTATTACTGACGTTAGT  
AATAGGTAAAGATATTAATGGTTCTAAAAGTTGGATAAATCTAGGATTTATGAACCTACAGGCATCTGAGTTATTAAGAAATTTGCAAT  
CATATTATATATCCATTTATGATCAGTAAAAAATGCCTAGAGTATTAAGTAAACCAAAATTAATTTTAAAGTCTTATTGTATTAGC  
ATTAGGTTGTACGTTTTTAGTTTTCTACAAAAAGACGTAGGGCAAACATTACTAATATTAATTTTATAGTTGCGATCATTTTTTAT  
TCAGGAATTGGGGTAAACAAAGTCTAAGATTTGGTATACCAGCAGTGCTAGGATTTCTAGTAGTATTTGTCATTGCATTAATGGCT  
GGTTGGTTACCAAGTTATTTAACAGCCAGATTTAGTACGCTAACAGATCCATTTCAATTCGAATCAGGAATCGGATACCATATTTCC  
AATTCATTGCTTTCGATAGGTAACGGTGGCGTATTTGGAAAGGATTAGGAAATAGTGAATGAAATGGGCTATTTCACGAAC  
ACATACAGATTTTTATTTTGCATTTATTTGCGAAGAATTAGGTTTAAATCGGAGGATTGCTAGTTATTACTTTAGAGTTCTTTATTGTA  
TATCGTGCCTTCCAGTTTGCATAAATAAACATCATCATATTTTTATAAACTTGTGTGTGTTGGGATTGCCACATACTTTGGAAGTCAAA  
CGTTTGTAACATTGGCGGTATTTCCGCAACAATTCATTAATCTGGTGTGCCATTGCCATTTATCAGCTTTGGTGGATCATCAATGAT  
TAGTTAAGTATTGCTATGGGATTACTTCTGATTGTAGGTAAACAAATCAAAGTAGACCAGCAACGAAAGAAACAACAACAAAAAG  
TTGATATAAGAAGACAATTTAATTAAAAAAATACTAGCCAATATTTAGTACGAGATGACTTCTGTCATTAAGCAATGCTAAACATTG  
GCTATTTGTATACTCTTTGTCAAATTTGACTGATGAGTTCAATAACGGAAGTTAGGCAACCAAAACAACGCTTAACTTCCTTTTTGTTT  
TGATATTACGAGATTACTCATGATTATCAAATTTTATAAAACAAAACAACGTATAATTATAACTAAATTTTATGACTAAAAATTACTA  
AATGTGGTGGCGAAATAGAAATCATGATGATAAGATAAAGTTATCGCTATTGTAATAAATGTTGATGTTTTGCAATTTTATTTTTA  
ATTTTTTAGAGTTGTAGAAATCGAAAAATGTTTCACAAAAAACCGTGAACCTACCTGTTGTTGCATAGTCATTTTTGAAATTATTATTT  
CTGAAGCGGAGGTTTTAATTGTCTCAAGAATGTTAAATTTGAAATTTGAAACATAACTATAGCAAAACAGAGCGCTTTAAGATA  
AAATTTTATTATCTAATTAGTTAGAAAATCTAATAGTTTGGAGGAGTGATCGCTATTGAAACAAATAAAAAAGTTACTTGTGCTA  
ACCGTGGAGAAATTGCAATTCGTATATTACAGAGCGGCGGAGAAATTAGACATCAGCACAGTTGCAATTTATTGCAATGAAGACAAA  
AGTTTACATAGATATAAAGCAGATGAATCCTATTTAGTTGGAAGTGATTAGGTCCTGCTGAAAGTTATTTAAATATTGAGCGT  
ATCATTGATGTAGCAAAACAAGCGAATGTGGATGCGATTATCCTGGCTATGGATTTTTAAGTGAAATGAACAATTTGCGCGTCTGT  
TGTGCAAGAAGAAGGAATTAATTTATTGGTCCTCATTTAGAACATTTAGATATGTTTGGAGATAAAGGTTAAAGCTCGTACAACGGCT  
ATCAAGCGAGATTACCAGTTATTTCTGGTACAGACGGTCCAATTAATCATATGAATTAGCAAAAGAAATTTGCAAGAAGAAGCTGG  
TTCCCGCTAATGATTAAAGCCACAAGTGGTGGCGGCGTAAAGGTTAGAAATCGTTGTAAGAAGGTAATGATAAGATGCTT  
TCCATAGAGCAAAATCAGAAGCTGAAAAATCATTTGGTAATAGTGAAGTTTACATAGAAAGATACATTGATAATCCAAAGCATATT  
GAAGTACAAGTTATAGGTGACGAACATGGAATATCGTACACTTATTGAACTGATTGTTTCACTACAACGTCGTCATCAAAAAAGTT  
GTAGAAGTTGCACCATCAGTTGGATTATACCAACATTACGTCAACGTATTTGTGATGCTGCAATTTCAATTGATGGAAAAATATTA  
TATGTCAATGCAGGTAAGTTGAAATTTCTAGTATCTGGTGACGAATTTCTTCTTATAGAAGTTAACCTCGTGTACAAGTTGAGCATA  
CAATTACAGAGATGGTAACAGGAATTGATATTGTTAAGACACAAATTTTAGTTGCAGCAGGTGCCGATTTATTTGGTGAAGAAATTA  
ATATGCCGCAACAAAAAGATATTACAACATTTGGGCTATGCCATCCAAATGTCGATTACAACAGAAGATCCGTTAAATGATTTCATGC  
CGGATACCTGGAACAATCATTGCTTATCGTTCAAGCGGTGGCTTTGGTGTACGTTCTCGATGCTGGAGATGGTTTCAAGGTGCTGAGA  
TATCACTTTATGATTACTTCTGTAATAATATCTACACCGGATATCATTTAAACAAGCAAGAAATGGAATGATGATGATGATGATGAT  
TACGAGAAATGCGTATTCGTGGTGTAAAACTAATATTTCCATTCTTAATTAATGTAATGAAGAATAAAAAAGTTCAACAAGTGGTGATT  
ACACAATAAATTTATTGAAGAAACACCAGAACTTTTCGACATTACGCGTCTCTAGATAGAGGTACTAAAACATTAGAATATATA  
GGTAATGTAAACAATTAATGGTTTCCCAATGTTGAGAAACGTCCGAAACCAGACTATGAATTAGCATCAATTTCAACTGTATCTTCA  
AGTAAAAATCGCTTCATTTAGTGGTACGAAACAATTGCTTGATGAAGTAGGTCCAAAGGTGTAGCTGAATGGGTTAAAAAGCAGGA  
TGATGTCTTACTAACAGATACAACCTTTAGAGATGCACACCAATCATTATTAGCTACACGAGTTAGAATAAGGATATGATTAATAT  
CGCATCCAAAACAGCGGACGTATTTAAAGATGGTTTCTCACTTGAATGTGGGCGGTGCTACATTTGATGTGGCATATAATTTCTT  
GAAGGAAAACCCATGGGAACGACTTGAACGTCTACGTAAGGCTATTTCCAAATGTATTATTTCAAATGTTGTACGTGCTTCAAACGC  
AGTTGGTTATAAAAACTACCTGATAATGTTATTCTAATAATTCGTAAGAAAGTGTCTAAAGCAGGCATAGATGCTTTAGAATTTT  
CGATTTCTTAAACTGGGTAGATCAAATGAAATGGCAATGAAGCAGTACAAGAAGCGGGCAAAATCTCTGAAGTACTATTGTT  
ATACAGGTGACATTTTAAATCCTGAGCGATCAAAATTTATCTTTAGAGTATTATGTCAAACTAGCTAAAGAGTTAGAAGCTGAAG  
GTTTCCATATTTTAGCGATTAAAGATATGGCAGGCTTATTAACCTAAAGCCGCTTACGAATTGATTGGTGAGTTAAATCAGCTG

TAGATTTACCAATTCATCTTCACACTCATGATACAAAGTGGTAATGGTTTATTAACATACAAAACGAATAGATGCTGGTGTGCATA  
TCATTGATACTGCTGTTGCTTCAATGAGTGGTTTAAACAAGTCAGCCAAGCGCCAATTCGTTATATTATGCATTAAATGGCTTCCCACG  
CCACCTTAGAACTGATATTGAAGGTATGGAGTCACTTAGTCATTATTGGTCAACTGTACGTACTTATTATTCAGACTTTGAAAGTGAT  
ATCAAATCACCGAATACTGAAATTTATCAACATGAAATGCCTGGTGGACAGTATTGCAATTTAAGTCAACAAGCTAAAAAGTTTAGG  
TTTAGGCGAAAGATTTGATGAAGTCAAAGATATGTATCGCAGAGTGAATTTCTTATTTGGTGATATCGTAAAAGTAACTCCATCGTC  
TAAAGTAGTTGGTGATATGGCACTTTATATGGTACAAAATGATCTTGATGAACAATCCGTGATTACAGATGGCTATAAATTAGATTT  
CCCAGAATCAGTAGTGTCTTCTCAAAGGCGAAATAGGACAACCTGTAAATGGTTTAAATAAAGATTTACAAGCGGTTATTTTAA  
AGGCCAAGAAGCACTAACAGCTCGTCCAGGTGAATATCTAGAGCCAGTTGATTTTGAAAAAGTCCGTGAGTTGCTTGAAGAAGAGC  
AACAAAGTCTGTTACGGAGCAAGATATTATTAGTTATGTATTATATCCAAAGGTATATGAACAATATATTCAAAAGTAAATCAAT  
ACGGAACCTTATCGTTACTTGATACGCCTACATTCCTCTTTGGGAATGCGTAATGGTGAAACAGTAGAAAATCGAAATCGATAAGGGTA  
AACGATTAATTATTAAGTAACTAGAAAACGATTAGTGAACCAGATGAAAAATGGTAATAGAACGATTTACTATGCGATGAATGGTCAAGCG  
AGACGTATTTACATTAAGATGAGAATGTGCATACAAATGCGAACGTTAAGCCAAAAGCAGATAAGAGTAATCCAAGTCATATCGG  
TGCGCAAATGCCAGGTTCACTGAAGTCAAGGTTAGTGTAGGTGAATCTGTGAAAAGCTAACCCAGCCGTTGCTAATTACTGAAG  
CTATGAAAATGGAACAACAATTCAGACACCATTGACGGTGTGATTAAACAAGTAACTGTAAATAATGGTGACACAATAGCGACA  
GGCGATTTATTAATCGAAATTGAAAAAGCAACTGACTAAAATGATTAAATAAAACGAGATTACACAACAATTGACGTGTAATCTC  
GTTTTTACATGGCTTAGGTTTAAATTTTAAATATTGATATAAAAAACCGTAATTTTAAATGGGCGTGCCATTAAAAATTACGGTTTGCTTT  
TTTGTTATTGCTTGTCACTTCTTACTGATCGTAACATTAGCATGATAAAGTATGTTGTCATACCAAATAAATAAGTGATAAATAATGC  
ATGGAAGTAGCGATTATCAGGTTAACATTGTGCTAATAGATAATGCACCTGTGATAAATTGTAATAACAAGTATAAATAGCAGC  
TGTATAAACCATAAATGAACAGTACGGTTATTTGGATAATTTTTAACAGCGTGAATATAAGTAATCATATAAATCGTAAACACTATAAA  
AGCCATGATACGATGCGTGAGTTGAACCCAACTCTTGTTCTGAATGTGGTACAAGATCGTGGAATGGCAATGGCCAACCCACCATATG  
CTAAACTTGCATCCGCATGTCTCACTAGTGCACCAGTATAAACACCACAATAAATGATGATTGCCATTAACCATGTTAAACGCTCTTA  
ATGGCTTTTTGATATATAATTCGTCAGCTTCATATTTTTGATCTATAGAGAAAAATAATCAATGTTATTAATAAATACAGATGAGAAAC  
TGATTAATGATATACCAAAGTGCAATGCTAAAACGTAATCGTTTTGTTGCCAAAATAACAGCAGCAGCTCCGATTAAATGCTTGCAATA  
ATAAGAATCCAACACTAATGATTGATAAAGGTTTAAATTTCTTTAATATAGCCTATATGTTTCCATGCAGTGATAACTAACCATAAGA  
CCATTAATAAAGACAAAGCTGAAACGGCTCTATGACTTAACTCAATAATCGTATCAATAGGAAAGAATTCTGGAATCAACGCACCA  
TGACATAGTGGCCAAGAAGAACCACAACCATCAGTGCAGTCCGGTTTTGGTAACTAAGGCTCCACCAAGTTGTACAAATGTCATCATT  
AACGTTGCTACGACACCTAACCATTTTAAATTTCTTTTGCCAAAACAATTTATACACCCCATCATAAAAAACGCATCAGTGAATTA  
AGAATTAATAGCCGGATTGAGATGATACTATAAATTGACCTGATTGTAGGATATGAAAAGATGGGATCCAACGCAGGAAATATGA  
TTTAATTTTACAAGTATTGTATGTGGACGACATAAAAAAGAACTTAATCGTAATGATTTTTTTATTGGGATAATTATGTAATCCACGTT  
TACTCAAATTTGAAGCTTAAATATTAATCTCTTTAGATGCATGATTCTACTTATTAATAATTTTCTAACATATACATTATAGCAATAA  
ATTAATGTTATTGTGTGCACAAAATTGACATTTCTCTTGTCGTTAATTTGTCACAATTAATTTTATTAACCTAGTCTTTTTATGC  
AATCTAAGATATCATAATCTTATATGAACAAATTTAAGGAGGGGGATTATGAGCAAAGAGCATACTTTGTGCACAAAATATTAGCAG  
AGTTAACTTCAAAGAATTGCAACAGATAATTAAAAATGGGACTTGTTCAGGTAACCTAATTCGGCTTTTTCGGGGCGCATGGCTAGC  
AGTTGTAATGACAAATCATTCTCTTATCATCAATACCTCAAAATTTTATTAATGCTATTTGGATCTACTTTAATATGGGTGGCGCA  
TGTGCGTTAAATAATTATTACGACCAAGATATTGATCGTATTATGCTTAGTAAACAAAATAGACCAAAATAGAAATATAAGAAATTACA  
GATCAAAATTTATTACTATTAAGTTTGGTATGATGTTAGTTGGAGAAATTTGTTGTTTTTATTGAATATACCATCAGGCGTACTTG  
GTCTTATGGGGATTGTAGGTTATGTGTCTTATTACTCAATATGGTCTAAAAGACATACAACATGGAACACAGTCATTGGGAGTTTTT  
CTGGAGCAGTACCACCACTAATTGGATGGGTGCAATTGAAGGACAAATAGTTTAAACAGCGATTGCGCTGTTTTAGTTGTATTTT  
GTTGGCAACCAATTCATTTTTATGCCTTAGCTATTAAACGTAAAGATGAATATGCACTTGCAAATATCCAATGTTACCATCAGTTAA  
GGGCTTTAAACGTACAGTGTCACTATGTTTATCTGGTTGATTATTTTATTGCCAGTACCTTTATTACTAATAAAATTTAGGTGTCGTA  
TTCGTAGTGTTAGCTACATTATTAATTTAGGATGGATTGCATTAGGTTTAAACAACATTTAAGAAAAATTCAGATCAAACAAAATGG  
GCAACACAAATGTTTATATTTCACTAAATTTAGTGATCTTTTTCGTGTTAGCTGTGATTGTTTCATTACTTCTTGTATCTAGAT  
TAATTAAGTTAGGATGAAAAATATGGGCGTTCCAATTTTACCAACGATTAGTACGACATGTATTGTCTATTGATGCAATTTTAAATTGC  
CATTGGTTGGAGACTTATTTGAAAAAGGGAAATAAATAAACACAAAAATGTTATGTTAGCTGCAGCTGTTTTGCTTTAACTTTTTTCT  
TTAATCTATGCAAGTAGAACGATTTTTATCGGTAATACAGCATTGGCGGACCAGCATCAATTAAGAAATATTATACGATTTTCTTA  
TTTTTCCATATTAATTTAGCAACAATTGGTGGTATTCTAGGCCAGTTCAAATTTACTGCATTTAAAGATAAATATAATGTACACC  
GCAAATTCGGGCCATTGCTTCAGTTATATGGTCTGTACTGCAATTACAGGTGTAGCAGTTTACTTATTATTATATGATTATATCC  
AGGTGGAGAAACGACATCACTGATTAAAGCAACATTTGGTCATTAATATGCTTATACAAATGATACTAATCTGATAAGGCAATTTGT  
TTTATCAGGTTTTTTGATGAAGAATAGTCGGACAGTTGATGGTATTCATTGATACCTTAACTGTCCATTTTTTATACATATTTAAT  
CTTAATAATGAAATTCACCTGAAAACATAAAGATAGGTTATGATATAGAGTGTAGGGAAAAATCTTTATGACGTTAAAAATTATGCCT  
GAAGATAGTTTGTGTTTATGAAAACGACAGTTATGTCAGTGTGAAAAATTTGCTAATTAATGTGTGTTTTTACAATAGTATTAA  
TACTTTTTTAGTTGTTGATTGATGAAAAAGTTAATTATAAGAGTCGTCGGTGATTATTTTTTAGTTGGATTTTTTAATATATCTTTTTTA  
TTCACCGAGATTAAAAATTTGATGTATTAGAGAACCCGAATAAAGGTAATAAAGTAAATAGATCTGAACAGGTGAATAAATCAAATA  
ACCATGCTGAAAATCCAAAGCCTAAAGAAGGTGTTGGTACATGGGTAGGTAAAGATATTAAAGTGCTTACTTCTAAATTTGGACAA  
GCAGATCGTGTCTACCCTTTAGAGATGGTTACAAAAATTATGTGTTTAAAGACAAAAACAGTTATTACATTGTTTCACTAAACGT  
GAAGAGATCGTTTCAGTGTATGCTACAGGTGAGAAAAGTCAATGTTAGTCCGTTAAAAATAGGACAACATTCTGCAGAAATTTTTAAT  
CATACAAGTATTAATCCAGAACCGTCCTTTAAAGTTGATGGTAAAAAATATGAATTTGAACCTTCAGATGAAGATTTAAAAACACA  
AACACTGATTAAATATGGCGACATATATGCACAAGTGTATTCTGATCAACAATCGAAAAAGGTGCTAAGTGTACGATTTTTTAACAA  
AAGAAATGTTAGCAGATATTGAACCTTATCAATTAATTTCTAATTTACGTGAGAAGAGCATAATAAGCGTCCAGTTGAGCAAAAT  
CCAAATCAATTAATTTCTCTTTATGAAGTAACGAATGAAATGAGAAAAATTAAGGATTAAAAACCTTAAAGTAAATCAATAGCGATTT  
AGCACATATTGCATCTAATAACTTATATGAAGCGACCTCTAATGGTTCTGATAGTGTGAATTTACAGAGGACGCATTAAGAGGGCA  
ATTAGATAAAAAATCACGTTACTTATAAAAACAACTGCTCAAAATGTTGGTTATGCGTTTAAATGATGTACCAACATTAATCCATAGTTG  
GATGAATTCAGATATACATCGATCTCGTCTATTAATTAATCAAAAATACGATGAGATGGGTGGAGATGTAATGAGAGATTATTATTCCT  
AATTTTCTTAGAAAAATAACAATGAGGGGTATTTATGATTAATGAAGCTTCACTAGCGATATTAGATGATATTGATGAAGTACGCTGA  
TATGATAGTTGCATCAGATATTTATGCATCATTGAGCAAGCTAAACAGGCGCTCGAAAAACAATGACGAAGCACATTTACTTTATCA  
ATCATTTTTAAAAATCAAAAAGAGAAATATGATGAAGTAATGCGTTTCGGGAAATATCATCCTGATTATAAGAAAGTCATGTTAGAGA  
CAAGACAACGCAAAAGAGCATATGAGATGCTTGACGTTGTGATGCATTACAAAGCTAGGGAAATGGCATTCAACATTTAATTGAT  
GAAGTTGTTACGAAATTTGCGTACGCTGTTTACAGACATGTCAAAATGAGAAACAGGTAATCCATTTTCAACATCAGATGAGTGGT  
TGTGCGACGGGCGGATCTGTAAATTGTTTATTATAGAAAAACATCGAGTCAGAAAAAGATGGTTATTGAAACCACTAACTAGCATCT  
GACTCGATGTTTTTATTGTTTCGGGATTGTTGTTTGAATTTGTTGTGCTAAATCTGGTCGATCTGTCACAATCGTGTGTGCACCTTTTT  
GGTATAAATCATTATCAGATCTATACTATTTACGCCATAATAGCCTGGAACGATATTCATATCATTTAACCATTGTGATAAACGAG

ATGAAGTCAAATCAATGCCTTTAAATGAGTAGGCATTTGGAACGTTTGTGCTAATGGTTGGTAGTACCTACCACCTAATAAATGAT  
ATTTTAAAAATGCTTCTGTAACCTCCTGTTGGCTAGCACCAATTGCGACGGATCCTTGTGCAATTTTATTAAAAACGAACGATTTGTTT  
TTTATAAAAACTTGTACACAAGAACGCGGTCAAATGCTTGATTTTCTGCAATTGTATCAAAACATAATTTGTGGTGCGATTGAGCCTTC  
ATAGGATTACAGGAGCATCTTTAAGTCTACGTTTATATACATATCAGGATATTGCTTCAGCAACTCATCGAAGGTTAGTATAGCTGT  
GTGTGCATGACCACGATATGGTGTTAGTCCATTGATATCTTTGAAGTGATAAGCTGCGTCTAATTTCTTTAATTCTGCTAATGTATGG  
GCACTAACTTTTCCAGAGCCGTTCTGCTGTTCTATCAACAGTTGCGTTCATGAAAAACGATAAGCTGTTGATCTTTTGTGAGTCTCACAT  
CTGTTTCAAAGCCATCAACGCCTAATTGTTTAGCATAGTCAAATGCAAGTTGCGTTTGTCTGCTTAAAGCCATACCACCGCGAT  
GCGCAATATATATGGTGCATTGCCTTTGAAAAAAGCAGGGATGGTTTGTCTTTTAGTAATCACTTTATTTTTATTGATCATTAAATAG  
ACTACTTAAAAATCCAGCACCAGCTAGTACCGCATTTAAATGTTTCTGTTTACTTTTTTCATAGAAAAATCCTCCTCGTTTACTTTTA  
TAGCTTAACAAAATCATAGTTCTGACTACAGCGAAATGTGTGGTTAATCATATAGTGATGCTCTTGAGAATTGAATTAATATAATGA  
TGTTAATATAATCTAAATACATTTATCGAGCAATTACATAAGACATAATTAAGGTAGCTTAATATTTTAAAAATTAATAAAGACATG  
ATATGATTAATGCTGAAAAATAAATGGAGTGAGGTTTAAATGAATTTAATCCCAAGAACTAGTATTGTAGTTTATTTAAACATATGA  
AACATGAACGACAAAATCCGAAAATATGGACATATCGTTCATTCAAATAGAGATCGTAAATTTGTAATTATGTATGTGAATGAGCAG  
GATGTTGATCAAATTTGATACATAAACTAATGCAACTTAAATACGTTAGACATATTGATGGCTACCATATAAACTCTAAAGAAAAC  
TACGAAAAAGAGAAAACAGAAATATATAATTAATATTATTGAAGTTCTGGTATCCATTTTGGAGCCTTAACACACTAATTAATAA  
TTATAATATAACGATAAAATCATGAAATGCTTGAGGGGGCTGTACATCGATACCTAAAAATAGGTATGTGCAATTTTTCAGCACAATCA  
TTAATCATTTGAACTTTTATTATTGAATCTGGATATGGATATTTAATAGCGTTTATCATGATATAAAAATGCTTGGAAATGATTGCCAG  
TTGTAGGGTTCCATAATGATTGCTACAGATGACTTTTTATTTTACGCTTGTGGTGAATGAAAATAGATAATTTTATCAATACGTTGATG  
GTTATATTCAATCATCGTCATGAAATTCGAACAAATCTGTTAGACCTTCACCAAGTGAATAAAATGTTTGTTCATTGGTTTATCATTC  
TCCTTTTTCTCAATAAATTATATTAAATACTAAATGAATTGGAAGTGTGAACAACATGCGCGCTCATTGCAAGGTAAACATAAAAAGTA  
AAGCTATAGAAAGTATGGAAGGCCGTAATACGAGACCAACTATGGATAAAGTTAAAGAAGGTATCTTTAATAGTTTATATGATGTG  
TCAGGTATAGGTTTAGATTTATTTGCAGGAAGTGGGGCGCTTGAATAGAAGCACTCTCTCGAGGTATGGATAAGGTAATCTTTGTT  
GATCAAAATTTTAAAGCTGTAAAAGTTATTAATCAAATCTTGCGAATTTGGATTTAGAGGCACAATCTGAAGTTTATAAAAAATAAT  
GCAGATAGAGCTTTAAAGCATTGTCAAAACGGGATATTCAATTTGATGTCTTTCTTAGATCCACCTTATAATAAAGGTCTCATT  
GATAAAGCTTTAAACTAATTTTCAGAGTTAATTTATTGAAAGAAAAATGGTATCATCGTTTGTGAATTTAGCAATCATGAAGAAATA  
GACTATCAACCGTTAATATGATTAAACGTTACCATTATGGGTTGACAGACACATTGTTATTAGAAAAGGGAGAATAGCATGGAAC  
ATACAATAGCGGTCAATTCGGGTAGTTTTCACCCCATTTACTTATGGTCATTTAGACATTATTGAGAGAAGTACAGATAGATTGATG  
AAATTCATGTCTGTGTTCTTAAAAATAGTAAAAAAGAAGGTACGTTTAGTTTGAAGAGCGTATGGATTTAATTGAACAATCTGTTA  
AACATTTACCTAATGTCAAGGTTTCATCAATTTAGTGGTTTACTAGTCGATTATTGTGAACAAGTAGGAGCTAAAACAATCATACGTG  
GTTTAAAGAGCAGTCAGTGATTTTGAATATGAATTACGTTAACTTCAATGAATAAAAAGTTGAACAATGAAATTGAAACGTTATATA  
TGATGTCTAGTACTAATTATTCATTTATAAGTTCAAGTATTGTTAAAGAAGTTGCAAGCTTATCGAGCAGATATTTCTGAATTCGTTCC  
ACCTTATGTTGAAAAGGCATTGAAGAAGAAATTTAAGTAATAAAAAATAACAGTATTTTAGGTTTATCATGGTTTACAATCCTAAAAAT  
ACTGTTTTCATTTGTTAACGATATTGCTGTATGACAGGCGTGTGAAATCTGTTTGTGTTGTTGCCCGCTTATTGCAATTGATATGTGTGT  
TGCTTTGATTTTCATTTGTGAAGTAATGTGCATTACTTTTGTAAATATGGTTATATATTGCTTTCTTGGGAACGCTGTTTAAAAATGCT  
TTAAATATTGCTTGCACGGTCTGTTACGCTAAATCACTTTAACTGCGTGAATGTTTCTCGTAACTGTTAGGTTAATGTTTAAATAA  
TACATTCATTAACAGTCTTTGGATATGCGTATATGTATAACGCTTTGTTTTAGTAATTTTACAAAATGATGAAAATCAGTTGCTTCA  
TATATGTTAGATTTCAAACGATTTTCAAACCTTCAGTAACAGTATAAAATATTTTTAATGAATCTGTAGTCATAGCTATGATTTGAT  
ATTTCAAATATGGAATATTTGATTTAATGTTATATGAGGTGTTACGTACAAGTGTGAATATCTTTAGGTACCACATGATGCCAAT  
GATTATCTTGACTAATGATTGATGTTCTAATAGATGTACCCTTGCAAACTGATGGTGTGAATTAATGAATCATGATGTTGAGCATT  
TTCTCGTTTAAATAGAAATTGCATTGATGTTTTAGCATTTTAGCAATTGCTTTCAGATAACTAATACCAAGTATGTTGTTAGGACTT  
GCTAGTGCTTCATGATGCTCTAATAATTCGCTAATGATACGAGGGTAGCTTTTACCTTCTTTTACTTTTTGTGAAAAGGATTACAGATT  
GTTCAATTTTCATTAATGCTGTGTGCTAATTGCTTTAATGTTTTGATATCATTATTTTCACTACCAAATGCAATTTGATCGACACTCATA  
TAATCTGCGACTTTAATGCTAGTTTCGGCAAAATGATCGCCAGATGATAAACTGGCAGTTGCTGGTAGTTCGATAACTAAATCAGCT  
GTTGATAATGCCATTTTTCACGAGTAAACTTATTATAGATTGCTGGTTCGCCACGCATGACAAAGTTACCCTCATTATTGCAATA  
GTAACGTCAGCATTGTGAAGTTTTTATAGATTGATTAATATGATATTGATGCCCATATGAAAGGGATTATATTCTGTGATTAAGCCAA  
CGCTTTTCATTTGCAATTCGCTCTTTTCGGTATTCAATTAATATTGTAACAGAACATGATATGTTAAGAAAAAATCTTGACAACCTG  
TTCTTAGAAAGTTAAAAATAAATTTTGTGCTTGTAGAGGTGAAGCCATATGAAATGGTCAATTACGCAATTAAGGAAATATCAAGGT  
AAGCCATTTGAATTTGATCAAACGGTGAGTTTTCGCAATTTAAAAGAATCATTAGATTTAATTGATTTATCTCCAATTACAATCCAA  
GGTCAGTTAACCATTAAAGTCAACAGAAGTCGTTGCGGATATTACATTACTGGAACGTATACAATGCCTTGTGCACGTACTCTTGTA  
CCAGTTAAAGTCCCACTAGATGTAACCTACTACAGAAGTATTTGATTTAGAAGGGTACAATCAGTATAACGATGATCAAGATGATGT  
AGATGAACACTATACATTATTAAGATGGTATGGTTAATCTTCAGGATATTGTCGAGGATATAGTTATTATTGAGAAACCAATGAG  
AGCTTATTCAGAGCAAAAGTGACCAAAATGTTGACAGTAGGTAATGGTTGGGAAGTAATCGATGAGGATCAATTGATGAGCTTGCTA  
AACAGCAAGAACAAGATGATTCAGAATCACGACAAGTTGATCCAAGGCTTCAAAAATTACAACAATTATATGATAAAGAGCAATA  
AGTAGTTTAATTAATGATATAATGTTGTTAATTAACCTAACATTTAGTATTTTTCGTTTATAATCTAAGGAGGATATATCATGGCAGT  
ACCAAAAAGAAGAACTTCTAAAACTAGAAAAAACAAACGTCGTACGCATTTCAAAATTTTCAGTACCAGGTATGACTGAATGCCCAA  
ACTGTGGCGAATACAAATTATCACACCGTGTATGTAAAACTGTGGTCTTACAATGGCGAAGAAGTAGCAGCTAAATAATTTTAGT  
TACTCAATATAAAAAAGTCCCGCTTAAAAATGATTGTTTTAAGTGGGACTTTTTATATTGAGAAAAATAATTGGCGAACGAGGTAACCTG  
GATACCTCATCCGCCAATTTAAATTTGTTAATTTAATAATTAATAAATAAAGACGATTTATTAGTTTTTACGTTTTCTAGGTAATACGA  
ATGCAACGATGCTACTAAAGCTAATAATGCCATTAATGGTAATGTCATATCTTTTATTGATTCTTCACAGTTTGTGGTAATGATT  
TGCTTTATTGTTGTTGTTATTTTATTGTTTTGGCTTTGAGTGTGCCATTTTGTGTTTTTAATGTTTGTCTTTTGTGAATGAGCACT  
ATCTTTTGTCTCGCTAGAACCTGCTGAAGTTTGAACAACATCTTTTGTGTTTTTGTATGAAGCAGTTGTTGGTTTTGCAACATTTTGAG  
TCGTAGATACTACCTTAGTTGGAGTTGTACTACTTGATTCTACTTCACCTTAGTTGGTTTTGTAGCAGGCGTTTTGTCTTTACCTGAC  
TCACTAGATGCGTCATTTCTTTTTCAACACTTGGTAATTGTTTATTGTATCTTTTTGGCTGTCTGTTTTTGTGATTCTTTTTCAACA  
GGTGATGGTGTGGTTTGCTAGGCGTAGCTGGAGTAGCTTCTTCTTAGCTGAGTTATCTTGTGTTCTTTTTGTTAGATTTATCGGT  
ATTGGCTTTTGTAAATGCTTCTTTATCAACGATTCTGACATGGTATTGTCCATCATAATCAATCGTTTTTACGTGAACCTTAACGATA  
GCATCATATAGAGTTTACCTTCAACATATGGGAAAATAATGTTCTAGTATTATTTTAGCATCTTTGCTTATAGTTCTAACACGTT  
GACCTTCAACCATGAAATCTTTCCAGTAATCGTCATTTAGTAGTTCCATCACCATAATTTTTTGGCGTTAAGCATACCTGTTTAAAT  
AGGGTGTTTAAACAAAAGTATCCATCATAGATTCGTTATTCTCAACACTTTCATAAACAACATATTTTGTATCTGTGAATCAGTCATT  
TTTTCATTTGTTGGTTGTACATTTTGGAAATTCAGTAATAGCTGATTTCACTTGCTCATCTAAAGCTTCTTTGTATCCTCTAAATTTCTC  
TTGTACTCAGCCTTTAATTTTTCAGGAAGTTATCTTGAATTTTATTTAATTCATAAACTTGTCTTTCTAGTGTTCGCTTTTTTATAT  
GGCGCTAATAATTTTTCAGCTTTATAATCTTCTTCAGTTTGAATTTATCTGCAGTGTATAAATGGTTGTGCGAATTCATTAAATGT

GTAATCGTATTTTTCTTCTTTGTTATTGAAGTGTGTTGAACTAACAATTTTAACAGCTTTTGTTCATTTGATACAGAGAAGCGAATG  
TAAGCATAATCTTTAACAGTATCGTATGATACTAATTTAATTGGCAACTTTTTGTACCTTCATAAACTTCAAATTTTCTCCAAAATT  
GACCTGATTGTAATCCTAATTCAATTTCTGGTTTTGAATCAGTGAAAAATAACTCTAGCAGGTTTAAACAGAACTTGACATAATGATAAA  
ACTGTTGAGTTCATCTTTCTTTTCATTTCAAATCAATTGGACGAGAGTTTGGTGCGCTATGATCTTTGTCTTTTATTGCAGGGTTT  
TTAATCGCTTCTCTAAGTTCCTGATTCAAAATAGGATATGTATTGTTAGTGGCTTTTGCTGCTGGTTTAACTTCTTTGTTTCAGAACT  
AGGGGCCTCAACTCTTTATTAGATACTGAGACAGCATTAGCTACTGGTTTGTGTTCTGGAGCTTTTTCAGATGTTGTTGTTGGACTT  
GCAACTGCTTCAGTTTTTGGTTGTGCTTCTGTATTTGTACCACCTGTTTCTTCAGCTGCTGCTTGTGCTTCGCCATTTGACATTAATAA  
TAAAAGTGTACTAATTGCTACAGATGCAACGCCTAGTGATGACTTTCTAATTGAATAAAATGATTTAAATTTCTTTTGTCTGTTTGTTC  
ATGTTGTAGAAAACACTCCTAATTGTATATTATCAACTGATAATCATTATCAATTGATTACTTGTATTGTACATTGAAATGGTAGTTA  
ATTGCAACGTTATTTTATAAAAAAATAACCTATGTTATAGATTATGAAATATCTATGACATAGGTTAAATAAAATTTAAAAATAAAAA  
ATATATTAAGTTATGAGTGTGACGATGATTTATTAGATTCTTTTCTTTTGAAGTAATAAAGATAATGAACCTAAAAAGGGCAAGT  
GTTGCGAAGGCAACTGTGCTAATAAAGTTATCAACTGAAGTTAAACCAGTTTTTGGTAATTCTTTAGCTTTAGATGCTTGTTTAGGCG  
TTTCGTTATGTTTTGTAACTTTGTAGTTTGTGTGATTTATTATCACTTACAGCTTGATTGTTGCTTTCAGATTTTCGCTGTTGCAACAT  
CTTAAACAGGTGTTTGAACCTTTATTTGTTCTTGAGCAGTTTGTGCTGTTTAACTGTATGAGCAGTTTGTGTTTATGTTTGTATCTTTT  
GTTGTGTGCTGACTTACAACCTTAGTAGAGTGATTGTCTTCAACTTTGCTTGTGTAGTTACAGTAGGTTTAACTTTTTCAACTTTAGG  
TTGAACTGGTTTGTGCTCAGTAGGTTTGTGCTGAGCTGGTTTTGGTTGAACCGGTTTAACTGTTTGGTTTTGCTGCGTCA  
GCTAATGTAGGAATTGCTTTTTCAAATTCAAATGCGTAGTATATCTATGATTGTAATTAATTGTGGCAGCACAATATGTAATTTAG  
TAGTTAAGCTCTTATATCCAGGTTCAACTGCAACATGATTGTTCTAGTATCCGCTTTTTTATTATCGTTAAACACAGTTGTTGCTAAT  
TCTTGATTGTTGCTAATTGTAAATTTGTAATCTTTCCAGAATGATGCATGTTTAAACACGGTTTGGAAATAATATTTATTTGTTT  
AATTACTTTACCAGGTGTTGCATATAGTCATCCATGTGTGACTTCTCTGAAGAGCCATCTTTTTGCACTTGGAAATTAATTGGTTGT  
GATGTTGCTTGAGAACTTGTGTGCTTTGATTATTAGTTGCGTTCGTAGCTTCTGTTGCCGATTGACTTGTGGCTGCCTGCGCCTAT  
GTATACAAGGGAACCTAAAATGATAGATGCTGTACCCATTGTAATCTTTTCATAGCTGATGAACGTTGTTCTGATTGATACTTACTG  
TTTAAATAATGTTTGTGCTGTTGTTTTCTCCTAAGGATACAAATTATGTGTTGTTATATGAGATGATTAACTTGCATTTGATAA  
TGGTTATCAATTATACTAGCACATCTATTTTCGTATAACAATAATAAATTGATTATAAAATAAATATTGACAATGATAATCATTATTA  
TTTATGATTTTACTAAAGACTTAAAAGCAATCATAAAAAGGAGGATTATGTTTTGAAAAATATTTTAAAGTTTTTAATACAACGAT  
TTTAGCGTTAATTATCATCTCGCGACATTTCAGTAATTTCTGCAAAATGCCGAGATAGCGGTACTTTGAATTATGAGGTTTACAAATA  
CAATACCAATGACACGTCAATTGCTAATGACTATTTTAAATAACCGGCAAGTACATTAAGAAAAATGGTAAATTGTATGTTCAAAT  
AACTGTCAACCACAGTCATTGGATTACTGGAATGAGTATCGAAGGACATAAAGAAAAATATTATTAGTAAAAACACTGCCAAAGATG  
AACGCACTTCTGAATTTGAAGTAAGTAAGTTGAACGGTAAAAATAGATGAAAAAATTGACGTTTATATCGATGAAAAAGTAAATGGT  
AAGCCATTCAAATATGACCATCATTACAACATTACATATAAATTTAATGGACCAACTGATGTAGCAGGTGCTAATGCACCAGGTAA  
AGATGATAAAAAATCTGCTTCAGGTAGTGACAAAGGATCTGATTGGAACGACTACTGGTCAAAGTGAATCTAACAGTTCGAATAAAG  
ACAAAGTAGAAAAATCCACAAACAAATGCTGGTACACCTGCATATATATATGCAATACCAGTTGCATCCTTAGCATTATTAATCGCAA  
TCACATTGTTTGTAGAAAAAATCTAAAGGCAATGTGGAATAATGAGAAATGTTAAACAAATTGCTACAAAATCTATTATAGCTAT  
TATTAGCTTAGGTACTTACATATACAACAATGATTGGTAGCGTGTGGCTGATGAGATAAAAATATCCATCAGCCAAATTTAATCA  
ACCTGAAGCAAAAGATAAAACAGAATTAACATACATCAATTTTGTATGAAAAAGATAAAAGAGAATAAAGCGTTAGATTACTAATTT  
TTAATCAAGAAAAATAAAATGTAACCTGAGGAACAACAACCTAGTTGACGAAAAAGGCGCAATTGATTTCAGATATGACTGGTAAATTT  
TACTTGCAAGTAAAGCTAAAAGGTCAAATAGATAAAAGAACAACCTGTTTTTCAAATGACAAAAATGAAGAATTTCTTTTGTATTA  
AAAGATGAAAAAGGATGACACAATAGTAAGAATTTTAAATTGAACAGCATATGGATAAAATCAATATGCATGTTAAAAACGTTGGCTGA  
AAAGAAAAATCTAGATAACAAAGAAATGGTGTATTCTATTCTTTTAAAGAGAAAAAAGTACAACATGATGATGCAAAAAGAAGTG  
CCTTCAAAACATCAAAATCAAGAAAAATAATCAAGATCAGCTTAAAAAAGATATTGATGACAAAAAAGATAGTCAAAAAATCAGATA  
CTAAGGAAAAGACGTACTAGCCTTTTTACTGAAAAAGGATTAAATGATATTCCTGTACAAAAAGATAAAGTGCAACAAGACAGTAAT  
AAAAAGATTGAAAAATGAGCGACCTAAAGCATCAGGTACATTAAGTTGAAAAATAGCCCTCCAACAATAAAAAAGGTTGAAAAATA  
ATCACAAGAGCAACCGAACCATAAAGATGAAAAATCAAAAAAGGAAAAAGTATTGAAAAAGAAAAAGCTTACCAG  
CTTTAATAGAGATGATGATAGCAAGAATAGTAGTCAATTATCTAGTGATATTAAGAACTTGATGAACCAATCATAAAAAGCAA  
TATATGTTATTTGCAGCTGGCATTGTGTTAGCAACTATTTTACTTATTTTCGGCACATTTATACAGCAGAAAGAGAGGTAACCAAGTTT  
GAGAATCATAAAGTATTTAACCATTTTAGTGATAAGCGTCGTTATCTTAACCAGCTGTCAATCTCCAGTTCTCAAGAATCAACTAA  
ATCCGGCGAATTCAGAATCGTACCAACAACCTGTTGCATTGACAATGACATTGGACAAATTGGATTTACCAATTGTGCGCAAAACCCAC  
GTCATATAAGACATTGCTAATCGTTATAAAGATGTACCTGAAATTGGTCAACCAATGGAGCCGAATGTTGAAGCTGTTAAAAAATT  
AAAACCAACACATGTTTTGAGTGTGTCAACGATTAAAGATGAAATGCAACCATTTTACAACAATTAATATGAAAGGCTACTTTTA  
TGATTTTGATAGTTTAAAAGGGATGCAAAAAGTCGATTACACAATTAGGTGATCAATTTAATCGTAAAGCACAAGCAAAAAGAATTA  
ATGACCATTTAAATTTCTGTTAAGCAAAAAATGAAAAATAAGCAGCTAAACAAAAAGAACATCCCCAAGATTAATATTAATGAGGT  
GTACCGGTTAGCTATTAGTACCACTGATAAATCATATATTGGTGATTAGTTTAAATATAGCAGGTGGAGAAATGTTATTAAAGTG  
AAAGATCGTCAATATATTTTCGTCTAATACTGAAAAATTGTTGAATATCAATCCAGATATTATTTTAAAGATTACCACACGGAATGCCT  
GAAGAAGTTAAGAAAAATGTTTCAAAAAGAATTTAAACAAAATGATATTTGGAAACATTTTAAAGCTGTGAAAAATAATCATGTTTA  
TGACTTAGAGGAAGTGCCATTCCGTATTACAGCAAATGTTGATGCTGATAAGGCAATGACTCAATTATATGATTTATTTTATAAGGA  
TAAAAAATAGTGAGTTGATATGATGATAAAAAATAAAAAAGAACTACTATTTTTATGTTTGTAGTCATTTAATCGCAACGGCTTA  
TATTTTCGTTTGTAAACCGGTACAATTAATTTGTCATTTAATGACCTATTTACAAAATTTACAACCTGGTAGCAATGAAGCAGTGGAATC  
AATCATTGATTTGCGATTGCCACGTATATTAATTGCTAATGATGTTGGGCGCAATGTTAGCAGTTTCTGGAGCATTATTACAAGCAGC  
ACTACAAAATCCTTTGGCAGAGGCGAATATCATTGGCGTTTCTTCAGGTGCACTTATAATGAGAGCATTGTTATGTTTATTTCCA  
CAATTGTACTTTTACTTACCATTATTAAGTTTTATTGGAGTTTAAATACCATTTTAAATAATTATATTGTTGCTTAAATTTAGATT  
CAATGCTGTAAGTATGATATTAGTAGGTGTTGCGTTATTCGTATTATTAATGGTGTTTTAGAAATTTTAACTCAAAACCCCTTAAATG  
AAAATTCCTCAAGGCTTAAACATGAAAATATGGAGCGACGTATACATATTAGCAGTATCAGCATTATTGGGATTAATATTAACATTA  
CTATTGTCCCCTAAATTTGAATTTACTAAATTTAGACGACATACAAGCGCAAGTATCGGTTTTAATATTGATCGTTACAGATGGTTA  
ACAGGTTTATTAGCAGTATTTTATAGCAAGTGCAACTGTTGCGATTGTTGGACAACCTAGCCTTTTTAGGTATTATTGTGCCACATGTGG  
TTAGAAAAGCTAGTTGGGGGCAATTACAGAGTACTTATTCGGTTTTCTACAGTTATTGGTGCATGGCTATTGTTAGTGGCTGATTTATT  
AGGACGAGTGATACAGCCTCCTTTAGAAATTCAGCCAATGCTATTTTAAATGATTGTGCGTGGTCCAATGCTAATTTACTTAATTTGT  
CAAAGTCAACGAAATCGAATCTAAAACGGTACAACAACCTGGTTTGTGATGACTGAAGAAACGTCGTTAATAAAAGAGGATTTTAA  
TGAAATGAAGCGATTTTAACTATTGTACAAATTTTAACTGTTTGAATTTATTTATCAATTTTGGTTACAAAATTTGTTCAACATATAT  
TGAAGATAAGCAAGAACGCGCAAAATATGAGAAATTACAACAAAAATTTCAAATGCTGATGAGCAAAATCAAGAACATGTGAGAA  
CCACAATTTGAATCACTTGAAAAAATAAATAAAGACATTGTTGGATGGATAAAATTTATCAGGAACATCATTAATTTATCCAGTACT  
ACAAGGTAAGCAAAATCAGGATTATTTAAATTTAGATTTTGTAGCGGAGAATCGACGTAAAGGTAGTATTTTATGGATTTTAGAAA

TGAATTGAAGAATTTAAATCATAATACTATTTTATACGGGCACCATGTCTGGTGATAATACGATGTTTGATGTGTTAGAAGATTATTT  
AAAGCAATCGTTTTATGAAAAACACAAGATAAATTGAATTTGACAATAAATATGGTAAATATCAATTGCAAGTATTTAGTGCATATA  
AAACTACTACTAAAGATAATTACATACGTACAGATTTTAAAAATGATCAAGATTATCAACAATTTTATAGATGAGACAAAACGTAAA  
TCTGTAATTAATTCAGATGTTAATGTAACGGTAAAAGATAGAATAATGACTTTATCAACGTGCGAAGATGCATATAGTGAAACAAC  
GAAAAGAATTGTTGTTGTCGCAAAAAATAATTAAGGTAAGTTAAACAGAAAAGAGGATAATTATGAAATTTATGGCAGAAAATAGG  
CTGACGTTAACAAAAGGAACAGCAAAAGATATTATAGAACGATTTTACACGAGACATGGGATTGAAACATTAGAAGGCTTTGATGG  
CATGTTTGTTACACAACTTTAGAACAAAGAAAGATTTTGATGAAGTGAAAATTTTAAACAGTTTGGAATCAAAGCAAGCTTTACGGA  
TTGGTTAAAAATCTGATGTCTTTAAAGCAGCGCATAAACATGTTAGAAAGTAAAAATGAAGATGAAAGTAGCCCCGATTATCAATAACA  
AAGTAATTACATATGATATAGGCTATAGTTACATGAAATAATTGAATTTAAAGAGGTTGCAGTACTTGTATGACAATTTGGTATTGT  
TAGCTTTTGTAAACGACCATACATGATACCGATGATGGTCGTTTTTTTAAATGAACACAAACATGCTAACACAAATTTGCTAAAAACATA  
GTTTGATTTGAATGTGCTTTGAAAAATAATCATCAATTATATCATTTTTGATTTATTTTGAAGAAAGAAAAAGAAATTAATAATGATATTTTA  
GGGCGTATGATTTATAGTAGTAGTATCGATAAAAGAAATTTATGCAATTTGAAATATTATGAGTGATAAAAGCGATTAAATTAATATT  
AACTATACAATCAAATGTTTTTCATCTTATTAATGATTAATATTTTTATTTTTTAAAAATAAAGCGAGGAGCTATCAATGGAACAAATT  
ACTTCTGCACAAAATAATAGAATTAACAAGCGAACAAGCTAAAAAAGAAACGTGAGAGGGGATAAACTGGATTAGCTTTAATTG  
AAGGTGTGCATTTAATTGAAGAAGCTTATCAAAGTGGAATTGTAATTACACAATTTATTGCAATTGAACCGGCAAGATTAGATCAGC  
AAATTATCGCATACGCGCAAGAAGTTTTTGAATAAACATGAAAGTTGCTGAATCTTTATCAGGTACAGTGACACCACAAGGGTTTT  
TCGCAATCATTGAGAAGCCGCAATTATGATATTTCTAAAGCACAACAAGTATTGCTCATCGATCGTGTCAAGATCCTGGAATTTAG  
GCACATTAATTAGAATGCTGGGATGCTGCTGGAATGGATGCTGTAATAATGGGAAGGGTACGACAGATCCTTATCAAGATAAAGTG  
TTGCGAGTCAGTGCAAGGTAGTGTTTTCCATTTGCCAGTTATGATACACAAGATCTCGATACGTTTATTACTCAATTTAATGAGTGTCTGTTT  
ATGGTACAGCACTTGAAGAACGAGTGGCATACAAGAAAGTTACTTCAAGTGATTCTTTTGCATTACTATTAGGTAATGAGGGAGAA  
GGTGTTAATCCTGAATTATTAGCACATACTACAAAAATTTAATCATACCTATTTATGGTAGTGTGAAAGTTAATGTAGCGATT  
GCAGGTAGTATTTTACTTTATCATTTGAAAGGTTGACCGTGTGAAAGTTTCCGATATAATTATAATTAATTGTTTAACAGAACATT  
TCTACGTGATTGCATACACAATTGAATATAAACCAATAAAAAAGGCATGGACATTTATATAAATAAATTGTTTTAGGGAGAATAATCGT  
GACTGCAAGTTATTTCAATTAATTTAAAGTCTTTTACCTTTTGGTTACTTAAAGAGATTAAAGTCGGAAAGACAATCCGTTATCAAT  
ATTAACAAGTGATGCTTAGGCATAAATTTGGGTGGTACCACGGAAATGACTTTCGTCCTTATTTTTTAAAGAGGATGAAAGTCTT  
TTTTTAGTTAAACAACAATAATGATAAATAAATAAATGAATAGTTGCAATAGGGAGGTCAGTGACATATGTCTGAACAACAACAAT  
GTCAGAGTTAAAAACAACAAGCGCTTGATGATATTAATGAAGCAAAATGATGAACGTGCACCTGCAAGAAGTTAAAGTGAAAACTTAG  
GTAAAAAAGGGTCAGTTAGCGGACTAATGAAATTGATGAAGGATTTGCCGAATGAAGAGAAACCTGCGTTTGGTCAAAAAAGTGAA  
TGAATTGCGTCAACAATTCAAAATGAATTAGATGAAAGACAACAGATGTTAGTTAAAGAAAAATTAATAAGCAATTGGCTGAAG  
AAACAATTGATGTATCATTACCAGGTGTCATATTGAAATCGGTTCAAAGCATCCATTAAACAGTACAATAGAAGAAATGAAGAC  
TTATTCCTTAGGTTAGGTTATGAAATTGTGAATTGGATATGAAGTTGAACAAGATCATTATAACTTCGAAATGCTGAATTTACCTAAA  
TCACACCCTGCACGTGATATGCAAGATAGTTTCTATATTACGGATGAAATTTTATTACGTACGCATACATCACCAGTGCAGGCACGT  
ACGATGGAATCACGTCATGGTCAAGGTCCAGTTAAAAATTTTGGCCTGGTAAAGTGATCGTCTGCTGACTCTGATGATGCGACACAT  
AGTCATCAATTTACACAAATGAAGGATTAGTTGTTGATAAAAAACGTTAAATGAGTGATTGAAAAGGCATTTAGAATTTGTTAGCT  
AAGAAATTTATTGGTGCTGATCGTGAAATTCGTTTACGTCCAAGTTACTTCCCATTCGTAACCTTCTGTAGAAGTTGATGTGTGCAT  
GTTTTAAATGTAAAGGAAAAAGGTTGTAATGTGTGTAAACACACAGGATGGATTGAAATTTTAGGTGCTGGAATGGTACATCCTAAT  
GTATTAGAAATGGCTGGTTTTGATTCTTCAGAGTACTCTGGATTTGCATTTGGTATGGGACCAGACCGTATTGCAATGTTGAAATAT  
GGTATAGAAGATATTCGTCATTTCTATACTAATGATGTGAGATTTTTAGATCAATTTAAAGCGGTAGAAGATAGAGGTGACATGTAA  
TGTGATATCAAATGAATGGTTGAAAGAATATGTAACAATCGATGATTCTGTAAGTAATTTGGCAGAACGTATTACGCGCACAGGT  
ATTGAAGTGATGATTTAATTGACTACACAAAAGATATCAAAAAATTTAGTTGTCTGGCTTCGTTAAGTCAAAAGAGAAACATCCTGAT  
GCTGATAAATTAATGTTTGCCAAGTTGATATCGGAGAAGACGAACCTGTACAAATCGTATGTGGTGCACCGAACGTTGATGCAGG  
ACAATATGTCATTGTTGCTAAAGTAGGTGGCAGATTGCTGGTGGTATTTAAATTAAGCGTGCCAAATACGCGGTGAACGTTTCA  
AGGTATGATTGTTTCGTTACAAGAAATGGTATTTTCAAGTAATGATGATCAACAAAACGTTTGAATCTGGTATCTGATTTTAGTGA  
AGCCCAAGTTCCAGGAACAGATGCCTTACAAGCTTTATATTTAGATGATCAAGTAATGGAATTTGATTTAACGCCGAATCGTGAGA  
TGCTTTAAGTATGATAGGTACTGCTTATGAAGTTGCAGCATTATATAATACAAAAATGACTAAGCCAGACACAACATCAAATGAGC  
TTGAGTTATCTGCAATGATGAAGTACTGTGACAATAGAAAATGAAGATAAAGTACCATATTATAGTGCACGTGTTGTTTACGAC  
GTGACAATTGAACCCTCGCCAATTTGGATGCAAGCAGCGTTAATAAAAGCGGGTATACGTCCTATTAATAATGTTGTTGACATTTCA  
AATTATGTATTATTAGAATACGGTCAACCATTGCACATGTTTGATCAAGATGCGATTGGTTCACAACAATTTGTTGTTCTGCAAGCT  
AATGAAGGCGAAAAAATGACAACATTAGATGATACAGAACGTGAATTATTAACGAGCGATATTGTCATTACTAATGGACAACTCC  
AATTGCATTAGCTGGTGTATTGGGTGGCGATTTTTCAGAAGTTAAAGAACAAACATCAAATATAGTGATTGAAGGTGCTATTTTTGA  
TCCAGTTTCAATTCGTCATACATCAAGGCGTTTTAAATTTACGCAGTGAATCATCTAGTCGTTTTGAAAAAGGAATAGCTACTGAATT  
TGTAGATGAAGCAGTCGACCGTGATGTTATTTATTACAAACTTATGCAACCGGAAAAAGTGCTAAAAGATAGAGTGTCTTCAGGAG  
AACTTGGTGCATTTATTACACCAATCGACATCACTGCTGATAAAATTAATCGCACTATTGGATTGATTGTCACAAAATGATATTGT  
TACTATTTTTAATCAATTAGGGTTTGATACAGAAATAAATGATGATGTTATTACAGTGCAAGTACCATCACGTCGTAAGATATTAC  
AATTAAGAAGATTTAATTGAAGAAGTTGCACGTATATATGGTTACGACGATATCCATCAACGTTACCTGTCTTCGAAAAAGTTAC  
TAGTGGTCAGCTAACTGATCGCCAATATAAACTAGAATGGTTAAAGAAAGTGTTAGAAGGTGCTGGATTAGACCAAGCTATTACGT  
ATTCGTTAGTATCTAAAGAAGATGCTACTGCATTTTCGATGCAACAGCGTCAAAACAATTGATTTATTGATGCCAATGAGTGAAGCGC  
ATGCGTCATTACGTCAAAGTTTATTACCACATTTAATCGAAGCGGCATCATATAATGTGGCACGCAAAAAATAAAGATGTAAAAATTAT  
TTGAATTCGGCAATGTCTTCTTTGCTAATGGAGAAGGTGAACCTACCAGATCAAGTTGAATATTTAAGTGGTATTTTAACTGGAGATT  
ATGTAAGTCAATCAATGCAAGGTAAGAAAGAAACGGTTGATTTCTATTAGCAAAAAGGTGTCGTGGATCTGAGAAAGTTA  
AACCTTGAATTTAGTTATCGTCGTGCCGATTTGATGGATTACATCCAGGTGCTACAGCTGAAATCTTATTAGAAAATAAAGTTGTT  
GGTTTTTATTGGTGAATTACATCCAACATTAGCAGCTGATAATGATTTAAACGTCAGTATGTTTTTGGATTGAATTTTGTATGCATTAA  
TGCTGTGTGTCGGTAGGTTACATTAATTACCAGCCAATTCGAGATTCCCAGGCATGTCTCGTGACATTGCATTAGAAGTAGATCAAA  
ATATTCCAGCAGCTGATTTATTATCAACGATTTCATGCATATGGTGGCAATATATTAAGATACACTTGTCTTTGATGTATATCAGG  
GCGAACATTTAGAAAAAGGTAAAAAATCAATTGCAATACGTTTAAATTTATTTAGACACAGAAGAAACATTGACAGATGAGCGCGTT  
TCAAAAGTACAAGCGGAAATTGAAGCAGCATTAAATTGAACAAGGTGCTGTTATTAGATAATGATTTAAACCCCATGTATAAGGATA  
TCTGAAGTAGATTGATATCCTTAACATGGGGTTTTATTTTGGATTACCTATTAGGTTCCAATTCATTTAAAAAGTCAAAGAGGAAC  
AGCGGAATACAGATGATGCTTTGCACAACATGCATATAAAGTCATACTTATGAGCAAGCAAAATTAGTATGACTTACCTAATA

GGAACAGCGGAATACAGATGATGCTTCGCATCACTGCATATAAAGTCATACTTATGAGCAAAGCAAATTAGTATGACTTACCTAAT  
AGGATACCAATTAGGTTCCGATTCAATGATTAAAAATCAAAGAGGCACAGCGGATTACAGTTGATGCTTCGCACAACATGCATA  
AAAGCCTCTAATGATTAAAAATCAAAGAGGCTTTAAAAATTTTTGGGCTTTTTCACGATTTTTAAAAATGCTTTTTTGAAATGGTATCT  
AAACGTGAAAGACCGTATTTTTTATAATTTTGGCGGCAATTACATCGACTTTAGCACCGGCACCTTTAGGAATCGTCATATTAATAT  
TTTTTGATATTTGATCCATATATGTAACAAATGCGTATCGAGAAATTATGCTTGCCACTGCAATGGCTAATGACTTCGATTCTCCTTT  
TGTTTCAAATTTTGTTTTCTTTGGAAGTGGTATATCTGATAATGCGTAATGGCTATACACTTCGCGTTTTTGCGAACATGATCAATGACG  
ATATAGTCTAATTGAGACGAATCAATTTTTCAAGTACATTTTTGATGGCTTCATTATGAAGAACAGCTTTCATTTTTACTTTGAGTCC  
AGCCTTTTGCTTGCTGAATATTATTTTTTCATTGTGTAGTGTTAATAGTGAATGTGGGATGAAAAGTAACCAATTGCTCAGCAAGTTC  
TACAATTTTGGTATCGGTTAATTTTTTGAGTCACTACACCCAAAGTTTTTAAAAATAGGGACATGCTCTTTGGTAACGAAAGCAGCA  
CACACAGTCAACGGACCAAAGTAATCACCACCTCCAGCTTCATCACTACCAATACAGTTAAATTGATCATACATTAAAGTTTGTTC  
AGAAAAGAATTAGCCATATTTTTCTTTTTAGTTTTATTAGTATTCAATTGAGAATGCTGCGGTAGAAATTCTTCAGACACAGCTTCTG  
CATGATTACCCTGAAACATGACTTTACCTGATTGGTAAATATTTACAGTTGTATTTTGATACCTTGCACGTGCTTTCATACCTTGAGG  
TAAATTTCTCAGTATCAAAAAGAAATGCGTGACATTAATGTCGTTATGTCTTTATCCGACAATTTAAAAACGATATTCGCCATTTGTGTA  
AATCCTTTCATATAATTTTCATTATCATTAGCAAAAATAATCATATCATAAATGATAATAACGTCAGAAACATTTATATATGTTGTAA  
AGAATTAATTGCGGATACTTACAAAATACATAGTGGTCATGTATAATGTTTATGAAAATGTTATAGTGACACAATTTAAACATGATA  
AAGTATTGAATAGAAAATTTCTTTACATTATTTTCATTATAAAAAGAACATTAAGTCATCTATAGAGATTGTGTTGTTGTTTTATCATAA  
TTGCAATATAACAATATTAGTATCAAAATTCAGACAAACTATCCAGTCATATTTTATAACGTGAATTTAGATTTTAAAAAAGGATCA  
GGAGAAATTATAAATTGGCAGCTTTAAAAACAAGGTAATGTATCAATTAATGATCAGCTTTTTACAATTGTTGGGGAAGATAACC  
CAGAGCACATACGATATGACACATTTAGTGTAGTATGATAAAATGATAATTAAGGTATAGGGTATAAAGCAGCAGGTTAGATACCTCAAGA  
AAAGCAATACTAAGTGTGTGAATATTATGCATGAAAAAGTACTACTAGAAGAAGAAAATCGACGCTTTGAAACAACAAATTCACAA  
ATTGCAGCAGCGTGAGCAATAAATGGTCATTGATTTTTATCATAATCATTTTCTTTGTGTATTTTGTATCCTTGGATTTCAGACGAGGT  
TTTTGGTTATCTATGATACATTTGAGTGCAACGATTGTATCATTGTGGATTGCCAGTCAATTTTACAAATCTATTGTAGAAAGATTAA  
TTGATTTTATCCATATCCTAAAAACAACAGCATTTAATACAACCTTTTGCCTTCATTTAATCATCTACAAAATCGATTGTAAGCGAT  
TGTAAGCTTTTTAATGATTACATTGTTTTGTAAGTTCATTTTATATCTAATTATCGTAACCTTTTGATAAAAATAATAGCGTATCAAAACA  
TTCATATTTTCAGTCGTGCAATGGGTATGATAGTTGGTGTGTTTATGACGATAATTGTCTTACACTTTACGTTATATCTATTGGCATT  
TATCCTAACGAAGCATTACAACATCAGCTTAAAAATCTATTGTGAGTCATTTCATTGATTTTTTACATCCCGTATTTATCGGCTTTCA  
CCATTAATTTATAAATTATCATAGAGGTACAGGACAAAGGTATATATTAATGATATGTCCTGGTCTCTTTTTATGGAAGTGTATTAT  
GACAAAAAAGATGTTATCAAACATTTAGAACAAATTGCTACTTATATGGAATTTAAAGGGGAAAAATACTTTTTAAATATCAGCGT  
ATCGAAAAAGCAGCTCAAAGTCTTGAATTAGATGAACGACCATTAGATGAAATATCTGATGTAACGGAGTTAAAGGCATTGGTAAA  
GGTGTTCGAGAAGTAATCAATGATTACCGTGAGACCGGTGAATCTCAGTATTTACAGCAATTACAGGAAGAAGTCCGGAAGGTCT  
TATTCCACTTTTGAAAATTCAGGACTTGGAAGCAAGAAAATTGCTAAGCTATATAAAGAGTTGAATATTGTTGATAAAGCGTCACT  
TCAAGTTGCTTGTAAGAAATGGAAGGTTAGTGAATTAAGCGGATTTGCTAAGAAAACGGAACAAAAACATATTAGAAGCTGTGAAAC  
AAGTTGGTGCTAAGAAAGATAGATATCCAATTGATCAAAATGAGAAGACTTAATCAAGAAATCATTGATTATATAGATACATTAAAT  
TATATCGATCAATATTCATCTGCAGGAAGCTTCCGTCGTTTTAAAGAAATGAGCAAAAGATTAGATTTCATAATAAGTACCGGATAAC  
CCAAAAGCAGTGCAGCAGCAATTATTAATATTTCCCAATAAAGTAAAGAAAGTTGCAAGTGGGGAACCAAAAGTTTCATTAGAAATT  
AGCGTATGATGATGAAACGATTGGTGTGCTATTTTCGATTAATTGAACCAAGTGCTTTTTATCATACATTGCAGCATTTTACTGGGTCA  
AAAGAACATAATATAAGAATTCGACAACCTTGCTAAAGCACGTGATGAAAAAGTTAGTGAATATGGAATTGAACAAGCTGATGGTAC  
ATTAATTCAATATGATAGTGAAGCCAAGATATATGAACATTTTAATGTGAATTTTATACCACCTGCTATGCGAGAAGATGGTAGCGA  
ATTTGATAAAGATCTAAGTAATATCATTACATTAGATGATTAATGGTGATATTCATATGCATACAACGTATAGTGATGGTGCGTT  
TTCTATTCGAGACATGGTAGAAGCAAATATCGCAAAAGGTTATAAATTCATGGTAATTACTGATCATTCACAAAGTTTACGTGTTGC  
TAATGGCTTACAAGTGGAAGACTTTTTAAGACAAAATGAAGAAATTAAGGCTTTAGATAAAGAAATATAGTGAATTTGATATTTATT  
CAGGTACAGAAATGGATATATTACCTGATGGCTCGCTGGATTATGATGATGAAATTTAGCACAACTTGATTGTATGTAATTTGGAGCTA  
TTCATCAAGCTTTAACCATCAGAAGAACAAATTTATGGAACGATTAGTAAATGATGTCGCAATCCATACGTCGACATATAGCG  
CATCCAAACAGGGCGTATTATAGGTAGAAGAGATGGTTATAAACCGAATATTGAACAATTAATGGCATTAGCTGAAGAAACGAATAC  
AGTATTAGAAATTAATGCCAATCCACATCGACTGGATCTGAACGCTGATATCGTTTCGTAAATATCCAAATGTGAAATTAAGTATTAA  
CACTGATGCGCATCATACAAATCATTTAGATTTTATGAATTATGGCGTAGCAACTGCGCAAAAAGGATTTGTAACAAAAGATAGAG  
TGATTAACGCATTATCGCGTGAAGCTTTTAAAGACTTTATTGAAAATAATATAAACTTAAGAAATAGAGGGATTTTATGAGACAA  
AAAACATTAGACGCTTAGAATTGCAAAAAATAAAATCACTCGTTGCCAATGAAACTATTAGTGACTTAGGCTTGGAAGAGGTCAA  
TCAAATGATGCCAGCTACTAATTTTGAAACGGTTGTTTTCAAATGGAAGAAACGGATGAGATTGCTCAAATCTATAATAAGCATCG  
TTTACCAAGCTTGAGTGGCTTATCTAAAGTATCAGCATTCATTCATCGCGCTGATATTGGCGGCGTTTTAAATGTATCAGAGCTTAAC  
TTGATAAAAAGATTAATTCAAGTACAAAATCAATTCAAGCACTTTTATAATCAATTTGGTTGAAGAAGATGAAGGTGTTAAATACCC  
AATATTAGATGACAAGATGAATCAATTACCTGTGTTATCACTGATCTTTTTCAACAAATAAATGAAACATCGCATACGTATGATTATA  
TGATAATGCGAGTTATGAATTGCAAGGGATTAGAAGTAAATTTCTAGCACGAATCAACGTATTAGACAAAAATTTGGACCGTATTG  
TTAAAAAGCCAAGCAAATCAGAAAAAATTATCAGATGCTATTGTAAACAGTTAGGAATGAAAGAAACGTTATACCTGTCAAAGCTGAA  
TATCGACAAGATTTTAATGGGATTGTACATGATCAATCTGCTTCAGGACAAACATTGTATATTGAGCCATCATCAGTTGTTGAAATG  
AATAATCAAATTAGTCGATTACGTCATGACGAAGCAATTGAAAAAGAACGCATTTTAACGCAACTAAGTGTATGTGGCTGCGGA  
CAAAGATGCACTACTTGTGGCAGAACAAGTCATGGGTCAGTTAGATTTTTTAATCGCAAAAGCGAGATATAGTAGAAGTATTAAAG  
GAACAAAGCCGATATTTAAAGAGGACCGTACTGTATATTTACCTAAAGCATACCATCCATTATTAATCTGTGAGACTGTTGTAGCTA  
ATACCATCGAATTTATGGAAGATATTGAAACGGTAATTATACAGGACCGAATACAGGTGGTAAAACTGTAACATTAATAACATTA  
GGTTTAATTTATGTTATGGTCAATCAGGATTGTGATTTCCCACTAGTGTAGTCAAGTTAAGTGTTATTTAAAAATGTATATTGCG  
ATATCGGAGATGAACAATCAATAGAACAATCATTATCAACTTTTTTCATCTCATATGACGAATATAGTTGAAATTTTAAAGCATGCGAG  
ACAAACATAGTTTAGTTTTATTTGATGAATTAGGTGCAGGTACAGATCCGAGTGAAGGTGCTGCATTAGCAATGAGCATTTTAGATC  
ATGTTAGAAAAATTTGGTTCTCTAGTAATGGCAACGACGCACTATCCTGAACTTAAAGCATATAGTTATAATCGAGAAGGCGTTATGA  
ATGCGAGTGTAGAATTTGATGTAGATACTTTGAGTCCAACGTATAAGTTAATGAGGTGTGCCGGGTCGTTCAAATGCTTTTGACA  
TTCTAAAAAGTTAGGTCTTAGTTGAATATTATTAATAAGGCTAAGACGATGATTGGTACTGATGAAAAAGAAATAAATGAAATG  
ATTGAATCATTAGAGCGTAATTACAAACGTGTAGAGACACAGAGGTTAGAAGTGGACCGTCTTGTAAGAAGAGCGGAGCAAGTGC  
ATGATGATTTATCTAAGCAGTATCAACAATTCAAAATTATGAAAAGTCTCTAATAGAGGAAGCGAAAGAAAAAGCAAAATCAGAA  
GATTAAGCTGCAACAAAAGAGCTGACGATATTATTAAGACTTAAGCAATTTGCGTGAACAAAAAGGTGCAGATGTTAAAGAA  
CATGAATTGATTGATAAGAAGAAACGATTAGATGATCATTATGAAGCGAAATCTATAAAGCAAAATGTACAAAAACGAAAAATACG  
ATAAAATTTGTTGCTGGTGATGAAGTAAAGTATTATCTTACGGTCAAAGGGTGAAGTTTTAGAAATTTGCAATGATGAAGAAGCA  
ATTGTTCAAATGGGAATTATTAATAAGATTACCTATTGAAGATTTAGAGAAAAACAAAAAGAAAGTTAAGCCAACGAAAA

TGGTTACACGTCAAAAATCGTCAACAATTA AAACTGAAC TTGACTTACGAGGCTATCGTTATGAGGATGCTTTAATTGAACTAGATC  
AATATTTAGATCAAGCTGTTTTTAAGTAATTACGAACAAGTTTATATCATTCATGGTAAAGGTACAGGTGCACTTCAAAAAGGTGTAC  
AACAACATTTGAAAAAGCATAAAAAGTGTAGTGACTTTAGAGGTGGTATGCCAAGCGAAGGTGGATTGGCGTTACCGTTGCAACA  
CTAAAAATAAATTATAATTTGATAAATTAAATAGCTGCAGTTAAAAATAATGTAAAGCAACAAGAATACATTTCAAACATGTTATTTGA  
AATAAGCATAAAAAATTGAGCAAATAGAAATACATGAAGCATGTTATCTGATATAAATTTGAACATCATAATAATAATTAAGGAGGAT  
TGGCATTTATGGCAATCGTAAAAGTAACAGATGCAGATTTTCGATTCAAAAAGTAGAATCTGGTGTACAATTAGTAGATTTTTGGGCAA  
CATGGTGTGGTCCATGTAAAAATGATCGCTCCGGTATTAGAAGAATTAGCAGCTGACTATGAAGGTAAGCTGACATTTTAAAAATTA  
GATGTTGATGAAAAATCCATCAACTGCAGCTAAATATGAAGTGATGAGTATCCAACATTAATCGTCTTTAAAGACGGTCAACCAGTT  
GATAAAGTTGTTGGTTTCCAACCAAAAAGAAACTTAGCTGAAGTTTATAGATAAACATTTATAAGTTACAACCAATGACGACTGGGG  
CATTTCTTTAATGAATTGCTCCAGTTTTTGTGTTGTTTTAATAATAAAAAGTTGAATGATAAGTCATCATATTGTTTACGACTTGAGA  
ATGGTGGGATTAATAAAATCTATGAACGTTAAATGTTAATCAAGCATGCTGATAGATATGTAGCAGTTGGTTTGATAAAAAAATGTT  
CAATATTACATGATGTGCATGAAAAGTCATACTCGAAGATGTTGATTATGAGCTAGAATTAGTGGTGATAAATTTGAAGCACTTTTG  
TAGCATCATTCATTTTAAAAATTAGAAGGGGGGATATTATTGGAAGACTATAAGCAACGAATTA AAAATAAATTAATGTCTGACCT  
ATGGAACCAAGGCTGCTATTTAATGAAAGATCGTAATGATCAAGTGATATATGTTGGCAAAGCTAAAAAGCTAAGAAATCGATTGAG  
ATCATATTTTACGGGTGCTCATGATGCTAAAACAACGAGACTGGTTGGTGAATACGTCGCTTTGAGTTTATTGTACGTCAGTCAAGTGA  
AACAGAGTCACTTTTACTAGAATTGAATCTGATTAAACAATATCAACCAAGATATAATATATTATTAAGGATGATAAAAGTTATCC  
ATTTATTA AAAATTACGAAGGAGAAATATCCTAGACTACTAGTGACGAGAACTGTAAAAACAAGGTACTGGCAAATTTTCGGACCGT  
ATCCGAAGTCATATTCTGCTCAAGAACTAAAAAGTTATTAGCAGAAATATATCCATATCGCAAATGTGATAAGATGCCAGATAAA  
TTATGCTTTTATTACCATATTGGACAATGTTTAGGACCATGTGTATATGACGTTGATTGAGTAAATACGCAGAAATGACGAAGGAA  
ATTACTGATTTTCTGAATGGGGAAGACAAAAAATTTTAAAAAGTTTAGAAGAGCGAATGTTAACTGCAAGTGAATCACTTGATTTT  
GAACGGGCTAAAGAATATAGAGATTTAATTCACATATTCAAAATCTGACAAACAAACAAAAAATTATGTCATCAGATAAAACGAT  
TCGTGATGCTTTTGGTTATAGTGTGATAAAGGATGGATGTGTATCCAAGTTTTCTTTATACGACAAGGTAATATGATAAAGCGAGA  
TACAACGATGATTCCATTACAGCAAACAGAAAGAAAGAAATTTTATACATTTATTGGACAATTTTATAGCTTAAACCAACATATTTT  
ACCTAAGGAAGTTCATGTACCACGTAATTTGGATAAAGAAATGATTCAATCTGTTGTGGACACTAAAAATCGTTCAACCCGCGCGAG  
GTCCCAAAAAAGATATGGTTGACCTAGCTGCACATAACGCTAAAGTATCCTTAAATAATAAATTTGAATTAATATCAGTGATGAGT  
CAAGAACGATTAAGACTATTGAAGAACTTGGACACAAATGGGAATTCAAACACCAATTAGAATTGAAGCATTCGATAATTCTAAT  
ATTCAAGGTGTGGATCCAGTGTACGCAATGGTTACATTTGTCGACGGTAAACCCAGATAAAGAAAAATTATAGAAAGTAAAAATCAA  
AACGGTTAAAGGTCCAGATGATTACAAATCAATGAGAGAAAGTAGTAAGACGACGATATTCTCGCGTTTTAAACGAAGGATTACCAT  
TACCTGATTTAATAATAGTAGATGGTGGTAAAGGACATATGAACGGGGTTATTGATGTGCTACAAAACGAATTAGGTCTTGATATCC  
CTGTTGCAGGTTTGCAGAAAAATGATAAACACCAAAACATCTGAATTATTATATGGCGCTAGTGCAGAAATTGTACCACTGAAGAAA  
AATAGCCAGGCATTTTATTGTTGCATCGTATCCAAGATGAGGTTACAGATTTCGAATCAGATTTTCATAGACAAACACGTCAAAAAG  
ACAGGCTTGAATCAATACTTGATGATATAGATGGTATCGGTAACAAACGTAAAAACATTATTATTGCGTTTCATTCGGTTCAATCAAG  
AAAATGAAGGAAGCTACACTTGAAGATTTTAAAAATATAGGTATTCCTGAAAACGTCGCAAGAACCTACATGAACAATTGCATAA  
ATAAATTAAGTGGCATGAGAATCATTTCTATGCCCAATAATATAAATAATGTTTACAATATGGTTAAACAAAGTTATTTTTTTGAA  
TGTACGTGGAAGCGTTTTCTAAATGAGAAAGTTTATCATCAAGCAATCTAAAAATATCGAATCCAAATCTTACATGTTTGCACATG  
CAGTTTGGTGATCGTGCAGTGTGTATTGTCTTTAAAAATGTTTCGCTTAATGATAGTGACAACGCTAGAAAACGATATCACTTTAGGG  
GGTTAAGCGTACGTTTAATATAAATAGCTCAATAAATTAATATTCGTTACAGGGGGGACTCCTTTTGGCTCAATCAAAAAATGAA  
TTTTATCTAAGACGTATTCACCTGTTATTAGGTATTATCCCAATAGGTGCATTTTTTGGTCGTTTCATTTATTAGTGAATCACCAGCAA  
CACAAGGTGCTGAAGCGTTAATAAAGGCATCTAATTTATGGAATCATTACCATTTCTAATTATTGTAGAATTTTTATTATATACAT  
TCCGTTGTTATATCACGGTTTGTGGTATACACATTGCATTTACAGCAAAAAGAAAAATGTTGGACATTACTCGATTTTAGAAACTGG  
ATGTTCTTTTTCCAAAGAGTGAGTGGTATCTTAAACATTTATCTTTATTGGTATCCATTTATGGCAAACACGTTTACAAAAAGCATTTT  
ACGGCAAAGAAGTGAATTACGATTTAATGCACGAAACATTGCAACATCTTGGATGGGCAATATTTTATATTATTGTATTATTGCTG  
TTGTGTTCCACTTTGCAAAATGGCTTATGGTCATTCTTAGTTACTTGGGGTGGACTTCAATCTCCAAAATCACAACGATATTTCATATG  
GGTTTCATTAATCGTATTCTTAGTTATTTCGTATATTGGTGTACTGCAATTATTGCCTTTATGTAATACATCGCATTTAACAATAATA  
GATTGAAAAATTTAGGGGAGTGAAAAATTTTATGGCAGAGAAACATCTTATTGTTGTGCGAGGTGGCCTAGCGGGCTTAATGTCAACA  
ATTAAGCGGCAGAAAAAGGTGCACATGTAGATTTGTTCTCAGTTGTACCAGTAAAGCGTTCGCACTCTGTTTGTGCCAAGGTGGC  
ATTAATGGTGGTCAATACTAAAGGGGAAGGCGATTCTCCTTGGATTACATTGATGATACAGTGTATGGTGGCGACTTTCCTTGCA  
AACCACCACTGTTAAAGCGATGACAGAGGCGACCTAAAATATTTCATTTATTAGACCGTATGGGCGTAATGTTCAATAGAAC  
AAATGAAGGTCTATTAGATTTTACAGCTTTCCGTGGTACATTACACCACAGAACAGCATATGCAGGGGCAACAACCTGGACAACAAT  
TATTATATGCATTGGATGAACAAGTTCGTGCATATGAAGTAGATGGATTAGTTACGAAGTATGAAGGATGGGAATTCCTTGGCATA  
GTTAAAGGTGACGATGATAGTCAAGAGGTATCGTTGCACAAAATATGACAACCTGCTGAGATTGAAACATTTGGTTCAGATGCACT  
TATTATTGGCAACGGGTGGCTGGTATTATTTTCGTA AAAACAACAACCAATCAATGATTAAATACAGGATCAGCGGCTTCCATTGTTA  
CCAACAAGGCGCTATTTATGCTAATGGTGAGTTCAATTCAAATTCCTACTGCAATCCCTGGTGATGATAAACTGCGACTAATGAG  
TGAATCAGCACGTGGTGAAGGTGGACGAATTTGGACATATAAAGATGGTAAGCCTTGGTACTTCTTAGAAGAGAAATATCCTGATT  
ATGGTAACTTAGTACCTCGTGATATCGCAACGCGTGAAATTTTCGATGTATGTATTAACCAAAAATTAGGTATAAATGGCGAAAACA  
TGGTATATCTTGATTTGTCACATAAAGATCCACATGAGTTAGATGTAAACTAGGTGGTATCATTGAAATTTATGAAAAATTCAGT  
GTGATGACTCACGCAAAGTACCAATGAAGATTTTCCAGCTGTTCACTATTCAATGGGTGGTCTATATGTAGATTATGATCAAAATGA  
CAAATATTAAGGGTTATTTGCAGCTGGAGAATGTGACTTCTCTCAACATGGTGGTAACCGCTTAGGTGCCAATTCATTGTTATCAG  
CGATTTATGGTGGTACAGTAGCAGGTCCAAACGCGATTGATTATTTTCAAAATTTGATCGATCATATACTGATATGGACGAAAGTA  
TTTTTGAAGCGTAAAGCTGAAGAGCAAGAACGTTTTGTATAAATATTAGCTATGCGCGGTACAGAAAAATGGCTATAAAATTACAC  
CGTGAACCTTGGTGAATTTATGACAGCAAAATGTAACCTGTTGTCGTGAAAAATGAAAAACTGTTAGAAACAGATAAAAAAGATTGTTGA  
ATTGATGAAACGTTATGAAGATATTGATATGGAAGATACTCAAACCTGGAGTAACCAAGCGGTATTCTTTACTCGTCAATTATGGAA  
CATGTTAGTACTTGCACGTGTTATTACGATTGGTGCATATAACCGTAACGAATCACGCGGTGCCATTATAAACCAGAAATCCCAGA  
GCGTAATGATGAAGAGTGGTAAAAACGACAATGGCCTCATTCCAAGCGCATTTGAAAAACCACAGTTTACTTATGATGACGTGCG  
ATGTGAGTTTAAATACCACCTCGTAAACGTGATTACACAAGTAAGTCTAAAGGGGGTAAAAAATAATGACTGAACAATCAGTAAAAA  
ACACTCCACAACATGAAACACAATCTAAACCGAAAAACAAAAACAGTAAATTAATTATTAACGACAAGATACAAGTGATTCTAA  
GCCTTATGAAGAAACATTTGAAATTCATATCGTGAATAATTTAAACGTCATTGCTTGTTAATGGAATTTAGACGTAAACCGATTAA  
TATTAAGGTGAAAAACACACCTGTTGTCTGGGATTAAGACTGCTTAGAAGAAGTATGTGGAGCATGTCTATGGTTATCAATG  
GTCGTGCAAGACAATCTGTTCTGCGATTGTTGATCAATTAGAACAACCTATTTCGTTTAGAGCCAATGAATACTTTCCAGTTATCCG  
TGACTTACAAGTTGATCGTTCTAGAATGTTTCGATAACTTAAACCGTATGAAAGCATGGATCCCAATTGATGGAACGTATGATTTAGG  
TCCGGGACCACGTATGCCAGAGAAAAACGTCAACACGCTTATGAATTATCTAAATGTATGACATGTGGTGTATGTTTAGAGGTTTTG

TCCTAATGTTACTGAAAAATAATAAATTCGTTGGTGC GCAAGCAATCTCGCAAGTTCGTTTGTAAATTTGCACCCAACAGGATCTAT  
GACTAAAGATGAACGTTTTAAATGCATTAATGGGTACTGGTGGCTTACAGCAGTGTGGAAATTCACAAAACGTGTGTTAATGCTTGCCC  
TAAAGGTATTCCATTAAACAACATCCATTGCAGCAATGAACAGAGAAAACAACATTCACATGTTTAAATCATTCTTTGGTTCAGACCA  
TGAAGTAGAATAAAAAATTAATCCCTTTTGAGTTAAAATGTTATGTTCCCTTTCAAAATTAATTTGAATGGAGATACACAATAACTTGG  
AAGGGATTTTTTAATAAGCAGATTACATGACAATATGATAGTGGGCTGATTTAAAATAAATATTATATTATAATGACAAAAATGGT  
AAACACAGTGCATAATACTAAAAATCCAATGCTTAGTTATGATAAACTAAAAATTAATTTAAAAGTAAGGATGACCGAATATGAATA  
AACCAATAGGTGTAATAGACTCTGGTGTGCGAGGTTTGACAGTAGCTAAAGAAATTTATGCGTCAGTTGCCAAATGAGACGATTTAT  
TACTTAGGTGATATTGGGCGATGCCCATATGGGCCAAGACCAGGAGAAACAAGTAAAACAATATACAGTTGAAATCGCTCGTAAATT  
AATGGAATTTGATATAAAAAATGCTCGTGATTGCTTGTAAATACAGCAACTGCTGTAGCTTTAGAATATTTACAAAAGACCTTATCAAT  
CCAGTGATTGGCGTAATTGAACCAGGTGCTAGAACAGCAATAATGACTACTAGAAAATCAAAATGTATTAGTACTAGGAACGGAAG  
GCACAATTAATCTGAAGCATATCGTACGCATATTAACCGTATCAATCCACATGTAGAGGTACATGGCGTTGCCTGTCCAGGTTTTG  
TGCCACTTGTAGAACAATGAGATATAGTGATCCAACAATTACAAGCATTGTCATTTCATCAACACTGAAACGTTGGCGTAATAGT  
GAGTCTGATACTGTCATTTTAGGATGTACCCACTATCCATTGCTCTATAAACCTATCTATGATTATTTTGGTGGTAAAAAGACAGTGA  
TTTCGTCTGGATTAGAAACGGCTCGTGAAGTTAGTGCATTGCTAACATTTAGTAATGAACATGCAAGTTATACTGAAAATCCAGATC  
ATCGATTTTTTGCAACAGGTGATCTACTACATTACTAACATTATCAAAAGAGTGGTTAAATTTATCTGTCAATGTGGAACGTATATC  
AGTGAATGACTAGGAGGATTTTTAATGAAAGAGATTGTTATTGCATCGAATAATCAAGGGAAAAATAAATGACTTTAAAGTAATATT  
TCCAGATTACCACGTAATAGGTATTTTCAAGAACTAATACCAGATTTTGATGTGGAAGAAACAGGATCAACATTTGAAGAAAAATGCTA  
TATTAATAATCAGAAGTGTGCAAAAAGCATTGAATAAAACGGTCAATAGCTGATGACAGTGGACTAGAAATTTTGCATTTAAATGGT  
GAGCCAGGTATATACTCTGTCACGTTATGCTGGTGAATAAAGCGATGAAGCAAAATATTGAAAAATTTAAATTAAGCTTGGTAA  
TACAACCTGATCGTCTGTCGCAATTTGTTTGTGTCATAAGTATGAGTGGCCCTGATATGGAACAAAAAGTATTTAAAGGTACTGTTTC  
AGGTGAAATTCAGATGGAAAAATATGGCGAAAAATGGTTTCGGATATGATCCGATATTTTATGTACCGAAATTAGATAAAACCATGG  
CTCAACTTTCAAAAGAACAAAAAGGGCAAAATTAGTCATAGACGAAATGCGATTAATTTACTTCAAGCTTTTCTTGAAGGTGATAAA  
AATGTCTAAATGGATTATTGTGAGTGATAACCATACAGAATCAGGCGTTTTATATCAAAATTATGAAATGCACCCAGATGCAGATGT  
ATATTTACATTTAGGAGATTGAGAAATTCGCGTATGATGATACGGAACCTAGCTTATTTAATAGAGTAAAAGGCAATTGTGATTTTAA  
CCCAGAAATTTGAAATGAAGCGGTGCGCAAAATATAATGACGTGAAAGCATTTTATACTCATGGACATTTATATCAAGTCAATCGAA  
CAAGAGATTTATTAGCTGAAAAAGGACTTGAATTAGGTTGTTTGTGTTGCATTTTATGGACATACACATGTGGCAAAATATGAGTATA  
TTAATGGTGTTTCATGTTTATTAATCCTGGAAGTATATCTCAATCTAGAAGTTCATGGAAGAAACATATGCTGAAGTTATTATTGATG  
ATCAAACTTTACATGGCACCATCAATTTCAAAAAATCGACATCACGAAACAATCAGTCATACTACTTTTTAAATAGAAGTAGCTATGG  
CTTTTTTTAGTTTATAGACTGATTTAACTAGGAGGTGCTGTCATGAATGTTTGTGTTTAAAAGTATTTCTGACAATTTTATAAGATAATT  
GGAATGAATAACACATTTATGTTATGAAAAGAAATTGTAATTTTAGAGAATGTGATTGTTGATGACCCTATATGGTTGAATCATGTTG  
ATTATTTGGTTAAAAGTGTATTATTAATAAAGTATAAAATTAAGATTCCAAGAAAGTCAGGAAATTTGAAATTTTAGTTAAAATCATGA  
TTCGTATACATATTTAAAAGGATTTCTAAAGTCATAAAATTATATCAATAATTTGATGGTTAAAATATGGAGTAGCAAAATTCCTTGAA  
ATTCAGAAATGTAGTGACACAAATATTAATGTTTAGTTAATAAATAGTTAATGTAGTTTTTTGTATCTGTCTATTATTATAAATATAT  
ACAAAATAAATTTGAGGATAGGTGTTATTAATATGAAAAAGAAATTTTATTGGGAAATCAATTTTAAGCATAGCTGCTATTAGTT  
TAACGGTATCAACGTTTGCCGGTGAATCTCATGCACAAACTAAAAACGTCGAAACTGTAAAAAAATATAACGAGTATCAAAACAAAC  
TTTAAAAAACAAGTAAATAAAAAAGTAGTGGACGCACAAAAAGCTGTAAACTTGTTCAAACGTACAAGAACTGTTGCAACACACC  
GTAAAGCACAAAGAGCTGTTAATTTAATTCATTTCCAACACAGCTATGAAAAGAAAAAATTACAAAGACAAATCGATCTAGTTTTA  
AAATATAACTTTAAAAATAATTGATAGAAGCCATGCTATAGAGTGTGGCTTTTTGCTATATTCAAAGGTATAATTAGTTTATAATA  
TTGTGTTTCATTGTATGGTGAGATTATTAGAATAAATCATATAAATAATTACTTAAAAGTGAATGCAATAGTTGTTTATGTTTTGAAC  
AAGCGAGGTGGCTATTGTGAAAAGGAAATCGAATGTATTAACAATCATAAAAATTGTAACGGATATAGTGGCAACCGTGTTAATCA  
TACGTGCTTTATTAACAGTCGTAAAGATGCTAAATAAATTGGAAGTTACTTAAAAATAAAAAAACACGCCAATACGTTAGCATTG  
TTTTCTAACGTTTGGCGTACAACATTTAATTCAGTATGTTTTTAATACCAAGTAATCGAATTCGATTTTACCTTTAGCGACTACTTTA  
ATATTTTTCTGTTCTCTTAAAGGACGAGTTAAGTCAAAAGTATAGTAATCTTAGGACCACCATTTAATTTCTGACAACCTGTT  
TCTTCACATCACCTTGGCTTAATTTTTTAACAATAAGGTACAGATCATTAACAGTTTCAGCTTTGTAAGGAGTTAGATTTTTATCAGA  
CTCTTTCATTAACCTTATCAATACGTTTCATCGTCTTTTTAGCTTGATCTGCTAAATTTTTTGGCGATTTCTAAACCTTTCCATTTCATACT  
AAAGAAAGCTTTAGCATCATTAGTTTGAGTTGAAAGACCTGCAGCGATTACTGTAGATGCGATAATAGTTTGTGATATTTTTTTTC  
ATAATAAGTTCTCCCTGTAAAATAAATTTGTACTTACTAATGCGAGTACACTGCTATTTTACAAACGGTTTCATGCATTTACCAGTTA  
ACACTTCATTAATTAATAAATTAAGTGCAAAATTAATAAGGTTAATGCAATCGAAAAAGAATAATGATGAATTTGATGGTATTATTTT  
ATTTGAGGTATTATTGAATTTGTTGATAGTATAATAATAGTAGTAAACGTCGCTCAACTATGATTGGATAATTTTTATTGTTAAAACG  
ATATATATTTCTTTGCATTTTGTGTTGCAATGTTGGGTAGACAAACACTCCAAATTGTTATACATATAGCTTTTTTGATAATTAATGTTT  
ATAAAACAAAGAAATGATTCTAGTAGAGAAGTAAATTAATAGTATAATTTTACTTATAAAGAAATAAGAGATATATTTCAATTAAG  
GGTTGATATGTTATGATTAAATATATAAGTTAAAAATTTACTATTTAATGAATTTAGCATTTTCGAATTTTCGAAGTAAAGCATAATTCACACTT  
ACATTTTTAAATAGATAAAATAGTGTAATAACACGTGCCAAGATTACTATAGAGTAGGCATTGAGTATTATTGGCAATCACTTAAGT  
GATTGTTATTTTTCTGTTGTTCAATAATAAAGATATAAATAAATATATTGAGGTCAAACGATGATAATTAATAATTTAACAATTTCTATT  
ACTACTTTGTATATTGAGCTATTGTTTACAAATAGAAAGAAGCCTTTTCTGTTCTTAAAGACACTCTTTATGGGTGTGGTATTTATC  
TTTATAGGATATATTTCACTGGCAATATCTGCCGTAATTATTTATGGTATTATTCATTTATCACAATTGATTTTGGTAGTTTTTCTT  
AATGGGTATTATATTGATCTTGATTCAAGTATATTCCAATTTATTTATAGTTAGATTACTTTTTAGAAAAAAGAAATGTGCGATTGACA  
GAGGTTGTCGTTTTAGAGCATTAAATTCATGTTCTTAGTTTACTTTGCGATCTATCAAGCAGTAAATGAAAAAATGGACATTAAT  
GATATTAATATCGACAATTTCCAATCTGTCTTTTTGACGTGTCTAATTTGAATTTAGTAATTTCTACCAACGTTAATCTTAGTAGGGG  
TCACAATATTTAACTATAGAATTGAGAAGTTACAATAAATCTAGTAATTTGAAATTTACCATTAGGCACCAACACTCAATTTGGTGTCTTTT  
TTGTTGTGTGGTTTTATTTTTGAAATTCGAAAAAGTAGAGGCGTGAATTTTTTGACTAGTGTATCAGTGCTGATGAGTCAACAAGATA  
GATAACTATATTTGTCTATATTATAAAGTGTATAGTTAATTAATAATTAGTTAATTTCAAAAGTTGTATAAATAGGATAACTTAA  
TAAATGTAAGATAATAATTTGGAGGATAATTAACATGAAAAATAAATTTGATAGCAAAATCTTTATTAACAATAGCGGCAATAGGTA  
TTACTACAACCTACAATTGCGTCAACAGCAGATGCGAGCGAAGGATACGGTCCAAGAGAAAAAGAAACCAGTGAGTATTAATCACAA  
TATCGTAGAGTACAATGATGGTACTTTTAAATATCAATCTAGACCAAAATTTAACTCAACACCTAAATATATTAAATTTCAACATGA  
CTATAATATTTTAGAATTTAACGATGGTACATTCGAATATGGTGC GCGTCCACAATTTAATAAACCAGCAGCGAAAACTGATGCAAC  
TATTAATAAAGAACAAAAATGATTCAAGCTCAAAATCTTGTGAGAGAAATTTGAAAAACACATACTGTCAGTGCACATAGAAAAAG  
CACAAAAGGCAGTCAAACTTAGTTTCGTTTGAATACAAAGTAAAGAAATGATATTGCAAGAGCGAATTTGATCAAGTATTAAGCAA  
GGATTAGTGAGATAAACTTTTATCATTACTGTAGGTTCAAAATAATTTAATCTAATATTAATTTCTATTAATAAAAAAGCATGTCTA  
TTTAATAGTAGGTTAATGTAACCTTCTCAAAATTTGACTTTATAATCATTAAGTATCAACTTTAAAGGAGAGTTTACAATGAAAAATTA  
AAAAATATATATTAGCAGGCTCATTAGCAGTACTTTTTATCGACAACAGCGGTATCAACGTTAAACGGGAACAAAGCAGAAGCAAGT

AGTCAGAAAAGATTATTTAATTCAAAGTCAGTTTCATGATAAAAAAATTGCTGAAGAATTGAAATCATTACTTAGACAATCGAACGT  
ATATGACTTGGCTGCAGGTAGCTTAAATCGATATTACAAACGTACGATTATGATGAATGAATATAGAGCTAAAGCGGCCTTAAGA  
AAAATGATTTTCGTATCAATGGCTGATGCTAAAGTTGCATTAGAAAAAATATACAAAGAAATTGATGAAATTATAAATAGATAATAA  
ATAAAACAGGTTGAGACAAAAAATGGTCTTAACCTGTTTTCAATTTGCATATGTGATAAATTCTATATCAAAATGCTTATGTATAAT  
GAATGACATTTAAAAGTAGGGGAGACAAATATAAATACAATAGTTCCTAGGATTACTCTCAAAATAACTATATCAATTATTTACTTT  
GCTCTCTATTTTTTAAAATATGTACATGTTTAAACAATCAAAAGGTGTACAATATTAAATTATCATTTCAGTTCTAGTGCTATATTG  
GTAGTAGTTGACTAAATGAAAAACGCTTGTAACAAGTTTTTTCAACTCTTGTTGGAGCCACAACAGAGAGAAATAGGATCACCAAT  
TCCAACAGACAATGCAAGTTGGCGGGGCCCAACATAGAGAAATTGGATCACCAATTCAACAGACAATGCAAGTTGGGGTAGGA  
CATCGATAAAAAAATACTTTTTCTTTAGAAATTAGTATTCNTATGCATGAGTTTTACTCATGTATTTCATTTTTAAGTAGACATTAG  
CTACAGCTAATGATAAAGAACCACTACATAATAAATCATTAGTGGTTCTTTATCATTCTCATCTCTTTTACTGGAAGAAAAAGT  
TTACGTTTGTAGAACATGCCACAATACCAAAAAATAATTAAGAAAAATAAGACGATAAGCATGATGACACTTTTCAACAACCTCTA  
TCAGTTTCTCCGATTTTCTTTGTTGAACCTTTTTATAATCTTCAAGTAGTTTTGTGCGTTTTTTATTTATATGTTTATTCATGATGTTG  
ACTCCTTATAATATATGTTTAAATTCATTAATAAGTTGAAAACATGACTTGAAATAAAGATATAAAGCTAAAGTAAGGATGTTCAAT  
TGTTTCAAATTTTATGAAAGTATAACGTTAAATATGTTAATTTGATGATGATATTGCTTTTTATTTTCCAAATGGAATTTACTTAAAC  
TGATGCATTAAAATATTAATGAAGCACTAGAATACATAAATGAATAGTAATGGTGCACAGTATAGAATAATTAAGGCTATATTAAG  
TATAAATATCGTTAACTGTAAGCTATCTTTAGTTTTAATATAAACTATTAGGATAATCGACGTAAGAAGAATCATATATATTAATGA  
TGAAGAAGTCCATACAAAATCCGCATCATTGTTGTTAATAATGGGACTATAATTAATCCGAAATTAATCATGCATGCTATATATAC  
TATAATGTTATACACAATGTTAATTTTTGTTCCACCCTTATACTTCTATTTAAAAACTTCTTTATAATGATATATGTTTAAATGTTG  
AAATAATTAGATTATCTAATTTTCATTTGCTTTACATGTTAAAGGCTATATATAGTATGCTCTTTATGATTTCTAAATGCCTTTTAAAT  
TTAATGCTCATCAACATTTGGATTTTGAATATTCAATTCAAAACTTTATTAGTACGTCAATTGTAAAATCAGAACCATAGTTGACA  
TGAGCTACTTTTAAATTTTCCATCTAAATAATAGATTGCGATTGCAACATCGTAAATTCGTCAATGACAAAATAAATCTTTTCGTTTG  
TTACAACCTCATGCTCTCCTGAGTATACAACGTTAATTTCCCAATCATTAAAAACCATTGTTAACCTCCTTGAACATTTAAATTGAT  
TCAACTTAAGTTTAACTTATTCATACAACCTTCGTACAATATCTAGATGAACATTAATTGTATTCTAGAAATCTTTTCAATTATATGT  
ACTAATTATACTTTTAAATTTCTTATTTTCAGTATAGTTTTAAAAACGATTTTAAAAATAATTCTGCAATATATTAACACATAATGTGTT  
CAAAAAGTTTGAACAATTTCAAACTTTTATATAAAGGGTTTGACAACATGGAATTCAAATTTCTTATTTTAAAAATTACCTCATAT  
AGTGTCAATGTTTGTCTAATTTTAAAGTCAGGAAAGCAAATCAAGTACATAGTTTAAATTAATAAATCATAGAAATTAATTAACCTAA  
ATTAAGTATAAAAAATTAGCCGAAAAACATCATTTCTGAAGTTATCGGCTAAAGTTATAAAATTATTTATTGTTACATGAACAAATA  
ATTTACATTAATTTGTCTTTCTTTTCCCAATCGATTTTATATCTTTCTGAAGAACGATCTATCCATTTATCTTTAGTATTGGTAC  
CTTTCCAATTTGTTGAAGTCCAATGCAATTGGTAGTCATCAGAACTCGTTCGTATATTACATCTATATTTGTTTGTGTTTGGATGCT  
TTTCTATCCATAGTAATAACTGTAGCGAAGTCTGGTGAAAACCTGAAGATAATAGAGAAGTGGCTTTGTTAGGATCAAGGAAGTTA  
TCTGCTGCTTTCATAGAACCATTCTAGTTTTCATGAAAAGTTGATTGCCATATACCGGGTCCAAGAATCTCTATCATATGGTCCCC  
AATTTTGATTACCATATTGTTAAATATCACTTTCCAGCCTACTTTTTTATCAGTTGGGCTCTCTAAAATTGTTTGAATCAGGTTGA  
ACATATTTCAAGTGTATGACCAATCGAAACATTTGCACCAATAAGGCCGCCAATTTTTCCTGTATCATCACCAGTAACATTACCGTTG  
AATCCATAAGTTAAAGTACTCATATACTCTTTTGATCAATCGAATTTCTTGGATAGCAATCAGATATTGAGCTACTTCATTATCAG  
GTAGTTGCAACTGTACCTTAAAGGCTGAAGCCAGGCTAAACCCTTTTGTAGCACCTTCTTCGCTATAAACTCATATATTGACCAG  
CAATGGTACCTTTCTGTTCTAATAACTAGCAGTTTTTTATTTGTGATTTTTATCATCGATAAACTATAAAATACTTTTTTGTGCATGCCA  
TTTTCTTTATCATAAGTGAATAACTACCTGTTTTTACTGTAGTATTGCTTCCAATATCTGTAGTACCGGTTTTAATATTAATATCAGA  
ATCTGCGGCATTAGCGACAGGATTCATTAATATGGAACCTAGCAATAGTGTGTTGTTACTGAGCTGACTATACGTGTTTTCAATTTT  
ATCATCCTTCTATTTTTTAAACGATTTGAGGAAACAATAATCAATATGTCAATTAGAATATTGCAGTTGAGACATATCAAATATTT  
ATAATCGTTTATATTAGTATATTTAATATAGCAACTGATAAATTAAGTGTGATGATGAGTGATTATTTAAGAATATGTTTTAACT  
TTTATTTAAAAATTTGAAAGGAAGCATTTCAATTTTCGAGGGTTAGTCAAAGTTGAATAAATTTCTTTATGAAACAAGGAAAAAGATATAG  
CTAATTTTATTGATTAATTTCTTAAAACTAATGATTTGTTGATTTAAAAATGTAATAGATTACAATATAAAAAATACAAATATCTTA  
GAATTAATCAATTAATTAATTAATAAAAAATTAACATATATTAACCTGTAATTAATAAATAGAAATGAGAAAAAGGG  
TATTAATTATGTTTGAATTTTCGTCGGGAATAATTTTGCCATTACATAGAAATATCTAATAGATAACGAAAAAGTATCGTATGTATT  
TTTAATATAGTGTAATAATATCATATGTAAATAAAATGTAGATTTTTAGTTAGAGGCATTATAAGAAAAATTTGAGTATAGGTTAGC  
TTTTAATTATGAATCTTATTGAAATTTGATTAATAAATATATGATAGGGGATTAATAAGAACTATTTTATATCGTATTTCTTATTAT  
TATATGGCTGAATATATTTTTAGGAAATGAAATTATCCATACACTGACTGTTTTAATAACAACATTGTATATTGTTAATTCAGAAA  
GGGGATTAATAAATGACAGAGTTGAATAATATTAAAACTCTCTCAATCTTTGTTGAGTCTGAATCAGGCTATAAAATTTGAAAA  
ATTCAGGAGTTCCATATCAAACAGTACAAGATTTAAGAAATGGGAAAAACCAACTAGAAGATGCTAGATTTAGAACGATTATTA  
CTTTATAGTTACTATGTCTCATTAAGAAGACATTAATCATGGGACAATAAAGTATTGCTAAAAATAATTAATCATTAATGAAGGAA  
TAGAGAGGCTGGGACATAAATCCCTAAAAAAACAGCAGTAAGATAATTTCAATTAGAAAAATCTTACTGCTGTTCTCTATTTATA  
CAATACTTCGTATTGAATGGCTTCGCT

>029-contig\_258\_RC

TTATAAAATACATATCAAAAAAGCTGATTCTATCAAATAATTAATAGAAATCAGCTTTTTTACATTGCCTAAGAACTTAATGTCCC  
AAGCCCTCTACAATATTATATTGGTAGTAGTTGACCGAATGAAAAATGCCCATGTAACAAGCATTTTTCAATTATAGGCGGGGCCCA  
ACATAGAGAAATTTCAAAAAGAAATTTACAGACAATGCAAGTTGGCGGGGCCCAACATAGAAGCTGGCGGAAAGTCAGCTTACA  
ATAATGTGCAAGTTGGGAGTGAACAAGAAATAAATTTATAAAATACCAATTTTTGTGCACATTCTCTACTCCCAATTCATTAAATA  
TATAGAAAAATTTACCTATTATATACATCATACACTTTAAAAATTTATCATTTAAATAATCTGATTGGAATTAAGTGCATGAAGTAT  
AAGTCACCTTCATATACTAATCAAAGAGGACGTCAACAGTTATTTTATTAGGATTTTTAACATAAACATTTGCTAGATCTGAATGTA  
ATCTTTTGCTTAAATCAATAGTGTAGTTATTACCGCCACCGGTGATCTTAAGCTTACCTTTATTACGATTTTCGTTATATAATATTTTA  
TTTTTTATTAACGCTTCTCGTGACGGAATCGATTTCTTTCAATGTTAATACTGGTTTATTGCCTGGTATATTTTATGCGCACCAAT  
AATCGTTTGTAGTTATCTTTGTATTGCACAAAAAGATTATAAGTTTATCAGAAGGTTTTGCGGCTGGTGAACGCCACCTGTAAAT  
GTCTCTCTATAAGACCACCATAACTGATCAGTATCTTTGTCTTTTAGTCCAAACACATCTACGTAACGATCTTTTAACTGATTAATAT  
TTCCCCAATTTTCAGCGCCCCATAAAGATATATGTGCTGACCATGAATATCTCTTAAGTTCAACATAAATGTTTCCATTATCATATTG  
ATATAGCCATTTATTTGAAAAATGAAAAATGAGGCTGTGTGTAATTTAATTAATTCATTGATGTTAGTTTTCATCTTGACCACTA  
TAAGCTTTAGCTTCAGAGTAAAAACTAAATACTGGTTTTTGATTTTGAGGTAATACAGTACCTAATAGTAATAATGTTGTCGTTAAA  
ATTATATTTTTCGTGATGTTCTTACTCATTAGAACATCTCCTTTTCAGAGGAATCATGATACGAGGAATAAGAAATTTAAATGTGAGC  
GAAGTCAATATAGTATTTGCGATTATTTTATTAATCCATTATTATTGTTAGTTTGATTTTTCGAGGATAAATTCATTTTGCATTT  
TGAGGTTTTTTAAACATATCTATTGCATCAGTTGATGGCAACCTTTTACTTAAATCTATTGTGTAGTTATTGTCTGCACCTGTTATTTT

AATTTGCTCTTTATTATAAGAATTATTATATAATTTTTTACTTTTAATTAATGTTTGACGAATACGAAAACTAATCTTTTAAAGTTA  
AAACAGGCTTATTGCCTTCATAAACTGGAAATCCGCCAGTAAACGTTTCTGCTTTATCTTTATATGTTACATTCAGTTTATAGTGTTT  
ATCGTTAGATGTTGCTGACGAGTAACACCACCAGTAAACGTTTCTTGAGATAATGCAAAAGAATCAATGGTTTCTTGGTCTTTTAT  
GCCAAAAATATCAACGCTTTTATTTCTTAATTGGTTGATTTGCCCAACTTTCAGGTCCATAAACTTGAATATGACTATACCAAGAA  
AACTGTAACAACGTTGCATGAATCGTACCGTTATCTTTTTGCCATAACGTACTGTTTGAGAAGGTTAAATATTTTTGCGAGTAATATT  
TAGTTAACTCATTACGTTAGTTTCGTTTTGATTTATATAAAGCTTTCGCTTCAGATGAAGAATTGATAGGTGTATTAGGAAATTG  
TGTAGATGCTGTACCTAATAGTAACAATGTTGTTGATAAAAATAATTTTTTTCGTGATGTTATTGTTTCATTGCAATTTCTCCTTTGAGTA  
TTGTTGGAAGTTTAATTATAAAAAAGGGGTTAATTAGATAAATTGAAATTATCCGCATTTACAAAAGGTAATAGGTTAGTTAGATTTT  
TCGAGTATGACTTCAATTTGTGCATTTTATAGGATTTTAAACATAACGTTTGTGTGAGTTAATTTTAACTTTTACTTAAATCAATCGT  
GTAATTTATTTCCATCAGCAGTTATCTTAATTTGACCTTTATTAATTTCTCCGTTATATAACTTTTTTATTTCTTTATTAATGTTTGACGAA  
TACGGAAGTCTAATTTCTTTAGAGTTAATACTGGTTTATTTCTTTGTAAAAATTCATGTCCACCGATGATAGTTTGTGTTTATCACTA  
TATTTTAAAAATAGTCTATAAGGTTTATCAGATGAAGTAGCTGCTGGCGTAACACCACCAGTAAATGTTTCATCATAAGTCCAGTAA  
CCTTCAACTGTGTCCTCATCTTTAGTTCCAAATATATCAACGTATTTATTTCTTAACTGATTAATGTTTCCCCAACTCTCGGATCCAAA  
CACTTGAATATGACTATACCAAACCCACGTTTGCAATGTTGCATGAATGCTACCATTGGGCTTTTGCCATAACCATTTATTTGATAGT  
GATAAATGAGGCTGTGTATAATACTTTATTAACTCATTGATATTAGTCTCGTTTCACTGATATTATAGGCTTTTGCTTCAGATGAAA  
AACTGATTGGTGTTTTAGGAAGTTGTGTTGATGTGGTTCCTAAAAAGTAACAATGCAGTTGATAAAAACTAATTTATTCATGATGTTCTT  
TTTCATATGAAAATCTCCTTTGCGTGAATTACCCAAAGTATATAAGCTATTACACCGATTTCGGAATTAATAAAAAGCTAAAACTATG  
TTAAATAAACTTAAACAGTTAGTAGTGTATTTTAAGCAAACTTATCATTTTAAAGTTTGGACAGAAACAGTACTTAATAAAGTAG  
GCGGGAGTTATATATTAAAAACGACACGTTAGAATTATTTCTTAATTTGCAATTTGATTAATTTGTTGATAAATGAAATTTCTAACTACT  
TGAAAAATAGTTATACTTTAAATGTAGTACTTATTTAATTATTTCTACTACTTAAATTTAATATTAATAAAAAATGTTCAATTTAATTAT  
TGATAAAATATTACAAATTTTAAATAGTAGGTTGTGTTTATTTTGTATGCGCTTACAATTTAGGTGTAACATAAAAAAGGAGTTGTT  
ATTAATGAAAAATTTACGAAACAGAAGTTTTTAACTTTATTAGACTTTTACGACAAGAGGTAGAATTCTTATTAACACTCTCCGA  
GGATTTAAAAACGTGCTAAATATATTGGCACTGAAAAGCCTATGTTAAAAAATAAAAAATATTGCACTGTTATTTGAAAAAGATTCTAC  
AAGAACGCGATGTGCATTTGAAGTTGCAGCGCATGATCAAGGTGCAAAATGTAACCTTATTTAGGCCCACTGGATCACAAATGGGTA  
AAAAAGAAACAACTAAAGATACTGCACGTGTGCTTGGTGGAATGTATGATGGCATTGAATACCGTGGTTTTTCACAAAGAACAGTA  
GAAACTTTAGCTGAGTATTCAGGCGTACCAGTGTGGAATGGTTTAACTGATGAAGATCATCCTACTCAAGTTCTTGCTGATTTCCTTA  
ACAGCAAAAGAAGTCTTAAAAAAAAGATTATGCAGATATTAACCTTTACATATGTTGGAGATGGTCGTAATAACGTTGCAAAATGCATT  
AATGCAAGGTGCTGCCATTATGGGTATGAACCTTCATTTAGTTTGTCCAAAAAGAATTAATCCAACAGATGAATTATTAATCGCTG  
TAAAAATATTGCCGCTGAAAATGGTGGAACATATTAATCACAGATAATATTGACCAAGGTGTAAGGTTTCGGATGTAATTTACA  
CTGACGTTTGGGTATCAATGGGTGAACCTGATGAAGTATGAAAAGAACGACTGAATTTATTGAAACCATATCAAGTAAATAAAGAA  
ATGATGGATAAAACTGGTAAATCCAAATGTTATTTTGAAGCATTGCTTACCATCTTTCCATAATGCTGATACGAAAATTGGTCAACAA  
ATTTTTGAAAAATATGGAATTCGAGAAATGGAAGTTACAGATGAAGTATTCGAAAGTAAAGCTTCAGTTGTATTCCAAGAGCTGA  
GAACAGAATGCATACAATCAAAGCAGTGATGATTGCTACATTGGGTGAATTTTAAATGATATAAGGAAGTGAATATGATGGCGAAA  
ATAGTAGTAGCATAGTATAGGTGTAATGCTTTAGGAAAACTCACCTAAGAACAACCTGAGCTTGTTAAAAATCTGCGAAATCATTAGT  
AGGATTAAATAACAAAAGGACATGAGATTGTTATTAGTCAATGTTAATGGACACAGGTTGGAAGCATTAAATTTGGGACTTAACTATG  
CTGCAGAACATAACCAAGGTCCGGCATTTCCATTTGCTGAATGTGGCGCAATGAGTCAAGCTTACATCGGCTATCAATTACAAGAA  
AGCTTACAAAATGAATTGCATTCTATTGGAATGGATAAAACAAGTGGTAACACTAGTGACACAAGTTGAAGTTGATGAAAATGATCC  
GGCATTTAACAATCCTTCAAAACCAATTGGGTATTTTACAACAAAGAAGAAGCTGAACAAATTCAAAAAGAAAAAGGATTTATAT  
TTGTTGAAGATGCTGGAAGAGGATATAGACGCGTTGTTCTTACCACAACCCATCTCTATTATTGAATTAGAGAGTATTAAAAACAC  
TTATTAATAAATGATACACTCGTTATTGCTGCTGGCGGTGGAGGTATACCAGTAATTAGAGAGCAACATGATGGTTTTAAAGGTATTG  
ATGCAGTTATAGACAAAGATAAAAACAAGTGCATTGTTGGGTGCTAATATTCAATGCGATCAATTGATTATTTTAAACAGCAATTGATT  
ATGTATATATTAATTTTAACTGAAAAACCAACAGCCTTTGAAAAACAATAAATGTTGATGAATTAACACGATATATAGACGAAAAAT  
CAATTTGCAAAAAGGATGTTTACCAAAAATTTGAAGCAGCCATATCATTTTATTGAAAAACATCCAAAAGGAAGCGTGCTTATAAC  
ATCATTAATGAATTAGATGCTGCCTTAGAGGGTAAAGTAGGTACTGTGATTAAAAAGTAATTGAATTGAAACGCTTTTCAATTACT  
ATATGTCAAAATGCATGATTTTTATTATTTATGTGCACCCCCGAAAAATAATGCCTCTATTTTGATGCGGGGTGCACTTTCTTAATTTAT  
ATTTATAAAATCTTTAAGGTAGAAATGCTAGGTTAAATGTCGAAGGAGATGAAACCGTGAAAAATACAATTAATGAAAGTGAAAAAG  
AAAAACGATTTAAATTAATAATGCCAGGTGCATTTATGATTTTATTCATTTTAAACGTTGTTGAGTTATAGCAACATGGGTATTTC  
CTGCTGGTGCATATTCTAACTTTCTTACGAACCTTCATCCAAAGAACTAAAGATAGTTAAACCCTCATAACCAAGTAAAAAGGTTTC  
CGGGTACGCAACAGGAACCTAGACAAAATGGGGGTTAAAAATTAAGATTGAACAATTTAAATCAGGTGCAATTAATAAGCCGGTATCA  
ATTCCGAATACTTTATGAAAGATTAAAGCAACATCCAGCTGGACCAGAACAAATAACAAGTAGCATGGTTGAAGGTACGATAGAAG  
CGTTCGATATCATGGTATTCATTCTTGACTAGGGGCACTTATGGCGTAGTTTCAAGCCAGTGTTTGAATCTGGGATTTGTTAGC  
TTTAACGAAGAAAAACAAAAGGGCATGAATTTAGCTAATTTGTGTTTGTATCAATAATGATTATCGGCGGACATATTATGTTGAT  
TGAAGAAGAAGCTGTAGCATTTTATCCGATTTTATGCTCCCTATATTTATAGCGTTAGGATACGATTCTATCGTTTCAGTTGGTGCCATA  
TTCCTTGCCAGCTCTGTGCGTAGTACATTTTCACTATTAACCCGTTCTCGGTTGTAATTGCCTCTAATGCCGCTGGTACAACCTTTTAC  
GGATGGCTTGATTGGAGAATAGGTGCTTGATTGTGCGGTGCGATTTTGTATTAGTTATTTATATTGGTACTGTAAAAAAATTTAAA  
AACGATCCTAAAGCGTCATATTCTTATGAAGACAAAGATGCTTTTGAACAGCAATGGTCTGTATTAAAAGATGACGATAGTGCCCAT  
TTTACTTTGCGTAAGAAGATAATCCTTACATTATTTGTACTACCATTTCCAATTATGGTATGGGGAGTTATGACGCAAGGTTGGTGGT  
TCCAGTTATGGCTTCAGCATTTTAAATATTTACAATTATAAATGATTTTATGCTGGGACAGGTAATCTGGATTGGGAGAAAAAG  
GAAGTGTAGATGCATTTGTCAATGGTGCATCAAGTTTAGTAGGTGATCTTTTAATTTATGGTTTAGCTCGAGGTATTAATTTAGTTGT  
GAATGAAGGTATGATTTTACATCAATCTTACACTTTTCTATCATCTTATGTTCAACATATGAGTGGACCATTAATTTATCATCGTATTA  
CTATTTATTTTCTTCTGTTTAGGTTTATCGTGCCATCATCTTCTGGCTTAGCGGTATTATCAATGCCTATCTTTGCACCACTAGCTGA  
TACAGTAGGTATACCAAGATTGCTCATCGTTACGACATATCAATTTGGTCAATATGCGATGTTATTCTTAGCGCCGACTGGACTTGT  
ATGGCCACACTACAAATGTTAAACATGCGATATTACATTGGTTCGGATTTGTATGGCCGGTAGTTGCTTTTGTATTGATTTTCGGTG  
GCGGAGTACTAATTACGCAAGTACTAATTATTTCATAAATTGAAATGCTATATTATAAAAAATACTAATGGGGTTTTATGCATCTCG  
TAGGTTTGTAGAAATACTAACTAAGCGAGGTGCATTTATTTTTGATTAAGAAAAATAATGACGGTAATGATAACACTAGTAAGTA  
ATTGATACAATGCTCTATTTAATAATGATATTTTTAAAAATTTGTTTTTAAATGTAATGTTAGATCTATGGTATATTATTTATCGTGGT  
AAATATGTATTTGCTGTAACAGTTTTTGTAAACATGATACATATGGTTGTGAAAAATAGCATATATAAAGGATGGCTATAAATGAC  
ACATTTGACAAAGGTTTTAGATACACTAAGTGAATATGCGTAGTATTATTATTAGTAAATTTTGTGGCGTAGTCAAAATGAGT  
GTTTGATTGGAATTTAAGATGGTATTGCTAGAAAAACATACCACATTTGCCAATTATATTTATTTATCTGATGTTATTTTTCGGAGTA  
CCTTCTGAAATGATAAAAAAGTAGGCAAGGAAAAATAACGGTGTTTAAATTTATCGATATTTAGAGGTGATAAAATTTGTCAACTATT  
ACAAAGACTAAAAATAAAATCTTTATTAATTATTTTATTGGTATATTAGCCTTGGCGTTTGTGCTTATATATTATTTAAATAAAGGT

TAGAGTGAAACGTGTTTATGAAGTACGCTTCTAGTATAGTTACTACAGCTTTAGTCAGAAGGTATCATTGATAAGATCATATTTAAATCAAAGAGGCATTGATATACACTAAAAAGAGGCCAAGATTACCTGCCTCTTTTTAGTTATTTAAATATACGTGTTAATTCCTGGTAATAGTGTACTGAGACGCATTACGAAGAAATTTATCTTGTTTTCTTTTTAAAAAGAAAGTGAAGATATCCTATAAAGACTCTAAGTACTATTACAGTGGCTAATAACACTTCGATAAAACAAAAGACCTTTCCAAATGTCTGGAAACATAAGTACAGGCAAACTGTTCTTTAAAGCAGTTGCTGAGATTACTAAAGGGAATGTGAAAGCTGAAAATACGGGCGAAAAAGGTTCTTTAGTAATTTAGGCAATTTGTATAATGATATAAAAAATAAAATATTTGAGCTAATAGTAAAAATATAATTACGATAAAAGCATTGCGCTTAGGAAAAAGCTATAACATATGCTGCGCGACTAAAAGAAAATGGTGCACAAATTTGTCGATGTGTTCCGGTTTGATTGACGTCTGCAATGGAAATGCTTTTAATCGCTTGAAAACATAGGTAAAGACAATACAAGTAGCTACAAAGCCATATATTACTGTTAATTGACCTATGAAAAAATATCCGCTAACGGGTGCCGTCAACTCTGCGATAGCAATACCAATAAAAAAGTACAGTCCACGAAGGATAAACATTTTCAAGTGAAAAATCTTTTAAATATTTTATTGAAAAAATAATCATATGCGTCATAATTCCCAAGGCATAAAAATCCAAATAGGCGTTATTAAGCTATTGATAAAAAGTTATGTTACTAAAAAATGTTATTTAAATAAGTAGTACCTAAAAAGCCAGACATGAAAAATGTTGTGAACACTGATGAAACTAGAGGACTGTTTAATTGTTCTTTCACATTATTAATAATTTAATCATAGTACATAAAAGGTGAATCCAAATCAAGAAAGCAAAAGATTCCGCAAAACAGCGTTTAAAGTAAAGATAAGTCTTTTAAATAGATTACCCAGGCCTAATAATCTTAAGACTAGTCCTGACGTTACTAGAGGTGCTTTTTGAAGTCTCATGATTTACAACCTTTCTTATGTGATTTTCTTCTACTAATTATATCATGATAGCTATGGCCAATTAATAAGAAGAGTGTGTACTATTACGTTATTAGAGTATGTATATTGGATTGATAGACACATAATTGACATTTAAATCTCAAAATTAATGATATTTGAGGTATGCTTTGCAACCTAAATATTGGAATATGTGGAAGAAAGTAATTATTTAATTTAAATGATGATTGAAGATTTACAAGGGGTGTACAAAATGAGAAATCAAATTCAAAACTATTAGACAGTGATTGAGCAGTTTACATATATCGAAACAAACAGGAGTTCACAAAAGCACAAATACACAGAATGAGAAAAAATGAAAAGATCATTAGATAAATATGTCATTGAAAAACGCTGAECTGCTTTATAAATTTGCCAATAGTATTTAGCAATGAAATTAAGAAGAATAAATTAGTGAATTTGAATTAATAAACCACGTCGATGGAGCTGTTATTTTTTAGATGTATATAAATTAATAGGATTTTCGGGCCCTGAAAAAGTCCCTAAAAATTTTGAATAGTATCATAATCTATAGGAATAATATAATAATAAAAAATCTCTACGCATGCAAAATGGTGAGTGTTAAAAATCTTGGTGAGTGTTGGTGAGTTCAGGTGCAGTATAGATGAAATTTGAGCGCAAAATTACTTAATTAAAAATGTATAAACAAGTGTACAGACGCGTGCAATTGTGTGTCAAAAAAATCTATAACGAATAAGCATACTTGTTTTTATTACTGTATTTTCGGGGATTATGCGGGGGACGTTTTGGTGACGCATCATACTATATTACTGAAATTCAAAAACAAAAGAGCCCCGTAATCACGGAACCTCTTTATTTGGTAATGCGTATAAAAAATACCTATAAACGTCCTGGGAGGGATTGCAACCCCCGACCGATGGCTTAGAAGGCCATTGCTCTATCCAGCTGAGCTACCAGGACACGTTTAAACAACACAAGAATTATTATATCTAAATGAACTTAAATTAGCAATACCTTGTAATAAAAAATGTTTTATATTTTCTACTATTATAGAGCTATTTTCTAAAAAGGTTCAATAAGACTTAAATACGAATTCAGGCAACTTAATTGTGTTAAATACAGTTTTTGAATGCCTAACCTGATTTCTTTCTTTTAAATAACAGTTAAGTACATTATAAGATGTTGTGCGGATAAACAACTAATTGCATCAAATTTATTTTAAAAATAACAACAACAAAACGTTAAGCGAATAACATTTCCGTGATTTTAAAGCTACGCACGTTTTTGTATCTTCAAATTTAAATTTTAAAGGAGTGTTTTCAATGGAAGGTTTATTTAACGAATTAAGATACCGTAACCTGCAGCAATTAATAATGACGGCGCAAAATTAGGCACAAGCATTGTGAGCATCGTTGAAAATGGCGTAGGTTTATTAGGTAAATTATTCGGATTCTAATATCAATATGTTATGTAAGTAATCAGGATTATTTCAAAGGTGAGGGAGAGATTTAAATGACTGGACTAGCAGAAGCAATCGCAATACTGTGCAAGCTGCACAACAACATGATAGTGTGAAATTAGGCACAAGTATCGTAGACATCGTTGCTAACGGTGTGGGTTTACTAGGTAAATTATTTGGATTCTAATATAATAACTAATATTCTTTAAAAATAAACTGGGTGAGCATACTTTAATGTTATGCACTCAGTTTTATTTATTGCGAAATTTGAGCCTCTGTTAAGATTATAGATAAGACAATATAGGAGATGGGAAATTTGGGATATAAAAAATTTTGTATAGACTTTTGATGATACAAATTGTTGATTTTTATGATGCAGAAGAATGGCGCTTTTCACTATATGGCGAATGTTTTAATCTATAAAGCAACAAAGGATGATTTTTTAAACATTTAAAAAAATCAATCACCAACATTGGGAAGCTTTTCAACAAAATAAATTAACGAAGTCTGAAGTATTATCAGAACGATTTGTGAATTACTTCAAACATCATCAAATGGAAGTTGATGGGCATCGTGCAGATGTGTTATTTAGAAATGGATTAGCAGAAGCTAAAGTTAAATACTTTGATCAAACATTAGAAACAATTGTGCAATTATCGAAAAGACATGATTTATATATTGTTACTAATGGTGTAACCGAAACGCAAAAGAGAAGGTTAAATCAGACGCCGTTGCATAAATATATTAAGAAAGATATTTATATCTGAGGAAACAGGATATCAAAAACCTAATCCGGAATTTTTTAATTATGTTTTTAATGATATTGGTGAGGATGAAAGACAGCACTCGATTATAGTTGGAGATTTCTTTAACATCTGACATTTAGGTGGAATCAATGCGGGTATAGCTACTTGCTGGTTAATTTTAGAGGATTTGATCATAATCCAGGAATTATACCTGATTATGAAATTAATTCATGGAACAACATAAATGATATTGTACGTTAAGACAAAATAATTTGAAAAATGGTTTACTTATATTAGCTTTAAGAAAGTAATTGTAAAGACACTACGAAAAGATGCATTTTCATGCTCGTAGTGCAATATTATTATTTATGTTTCCACAATAAGACATCATGTCCCTCTATATTTTAGCTTCCACATCTGTAAATCCATGATGTAAAAAGAAATCCTTAGAATCATTCTGCCAATGGCTTTAATTGGCATAATTGAAACTCTTTGCAAAATCAATCAATTCTGAAGCGTACCCTCTGTTTTGATATTTTGGTAATACTTCTAACTTCCATAAATAATATATAATCTTCAAAATCTGGGAAGTAGATTTCTTCGACATCACCTTTTTTTAGTAATGCCATTCTAGCTCTAATTGATCTCCGACAAATATGCCATAAAATGGTGAATCTGAACTTGCATCAATCATTTGACCGTTTAACTCATTGACCATGTATAAGTCTTTGTTGCCAAACGCTCTAAAGTTTTTCGAATAATTCTGCAGTTTTGTAAATTAATTTCAAGACGTTTGATTCTACTCATATTTATCTACCCCTTATTTGTTTACTACTATTATTATACATTAAACCACCTTGTTGTTTTTCAATTGATTGAAAAATGTAAAAACAATGAATATTATAAATTTTCCATGATTAAATGATTTTCAAGCCGTAATAATGTCAATCACCGGTATAGACTTTTATACTATAGTTTGAATCGCGTACTTAAAGGAGAAAAACATGGACTGTAAAGTAGTTAGTTTAAATGAAAAAGATCAGTTTATACAAAAATAAAGAGCAGTGACCCTGTAATAACAGGATTATTTCAATGATGCAGCTAACAAACACTAGTTTTTGAAGAAAGGATGTCTAAAGAAAAATTTGGAAGAGAAAGCGGCATTAGCGAATGTTATTCGTGAATATATGAGTGATTTAAAGCTTTCTAGTGAACAAGAATTAACATACAAACATTTAGCTAATGGTTCAAAGTTGTGATTGGTGGACAACAAGCAGGGCTTTTCGGGGGACCATTGTATACATTCCATAAAATATTTTCAATCATTACTTTATCTAAGGAATTAACGGATACACATAAGCAACAAGTAGTACCAGTTTTTTGGATTGCAGGAGAAGATCATGATTTTCGATGAAGTGAATCATACATTTGTTTATAACGAAAATCATGGGTGCGTGCATAAGGTTAAATATCATACAATGGAGATGCCAGAGACGACTGCTCTAGATATTATCTGATAAGGCTGAGTTGAAACAACTTTAAAAACGATGTTTCATTATCATATGAAAGAACTGTTTCATACACAAGGTCTACTGGAATTTGTGACAGAATTATTGACCAATATGACTCGTGGACTGATATGTTTAAAGCACTACTGCATGAAACATTTAAAGCATATTGCGCTTCTATTTATGATGCGCAGTTTGGCCGTTAAGAAAAATGGAAGCCCTATGTTTAAAAAGATTGTAAGAAATCTGTTGAAAAAATCATCAGTATGTTGATGAGCAACACAACGCACCTCAAAATAGGCTTGAATGCGATGATACAAACAGATACAAACATGATCAATTTTACATTTTCTTACATGATGAAAAATATGCGTCAATTAGTTTCGTATGATGGTAAGCATTTTTAAATTAATAAAAAACAGATAAGACATATATAAAGGAAGAAATTATAAATATTGCGGAAAAATCAACCTGAATTTTCTAATAATGTAGTGACAAGACCATTAAATGGAAGAATGGTTATTTAACAACGGTGGCATTGTTTGGAGGACCGAGTGAAATTAAGTACTGGGCTGAACTAAAAGATGTATTTGAACTATTTGATGTTGAAATGCCTATCGTGATGCCAAGGCTTAGAATTACTTATTTAAATGACCGTATAGAAAAATTACTTTCGAAATACAATATTTCCATTAGAAAAAGTGTAGTCGATGGTGTTGAAGGAGAAAAAGTAAGTTTATTAGAGAACAAGCATCACATCAATTTATTGAAAAAGGTAGAAGGTATGATTGAACAACAGCGTCTGCTAAACCAAGACTTATTAGATGAAGTGGCGGGGAATCAAAATAATATTAACCTTGTGAATAAAAAATAATGA AATTCATATACAACAGTATGATTATTTGTTAAAAACGTTATCTTTTAAACATTGAAAGAGAAAAACGACATCAGTATGAAGCAATTTAGAGAAATTCAGAAATTCAGAAACACTCCATCCAATGGGAGGATTACAAGAAAGATATGGAATCCACTTCAATTTTGGACAGATGTGTTCAAGCCCTCCACCTATCCACCACCTTTCTTACACTTTTGATCATATTATTATAAAAACTTAATATACCAAGGGTTTAGCCCGATTTTATCTTAATGATAAAATCGGGCATTTTTTTTGTTTTTTAAAAATAAATTTTACAAAATTTTGTATAAATAGTGGTGGATAGTGGGGAGATGTGGTAAATTATATATAAGGTGAGGTGATAAAAAATGTTTCATGGGAGAATACGATCATCAATTAGATACAAAAGGACGTATGATT

ATACCGTCCAAGTTTCGTTATGACTTAAATGAGCGTTTTATTATCACAAAGAGGCCCTTGATAAATGTTTTATTCGGTTACACTCTAGACG  
AATGGCAACAGATTGAAAGAGAAAAATGAAAACCTTACCTATGACAAAAAAGACGCACGTAAGTTTATGCGTATGTTCTTCTCGGT  
GCTGTTGAAGTAGAACTTGATAAGCAAGGGCGTATTAACATCCCTCAAAACTTGAGGAAATACGCTAATTTAACTAAAGAATGTAC  
AGTAATCGGTGTTTTCAAATCGTATTGAGATTTGGGATAGAGAACTTGGAAATGATTTCTATGAAGAATCTGAAGAAAGTTTCGAAG  
ATATTGCTGAAGATTTAATAGATTTTGATTTTTAAAAATGGAGGAATTGAAGTGTTTCATCATATCAGCGTTATGTTAAACGAAACCA  
TTGATTATTTAAATGTAAAAGAAAAATGGTGTGTACATTGACTGTACGCTAGGTGGAGCGGGACATGCCCTTTATTTACTAAATCAAT  
TAAATGACGACGGAAGATTAATAGCAATCGATCAAGACCAAACTGCAATTGATAATGCTAAAAGAGGTATTAAGGATCATTGTCAT  
AAGGTGACTTTTGTTCATAGCAACTTCCGTGAATTAACCTCAAATATTAAGAGCTTAAACATTGAAAAAGTAGATGGAATTTATTAC  
GACTTGGGTGTTTCAAGTCCCCAACTCGACATTCAGAACGAGGATTCAAGTATCACCATGACGCAACATTAGACATGCGTATGGAC  
CAACACAAAGAACTAACAGCATATGAAATTGTTAACAAATGGTCTATATGAAGCGTTAGTGAAGATTTTTTATCGTTATGGCGAGGA  
GAAATTTTCAAAACAGATAGCTCGAAGAATCGAAGCACATCGCGAACAAACCAATAACAACAACATTAGAATTAGTTGACATTA  
TAAAAGAAGGTATTCCTGCAAAAAGCAAGAAGAAAAGGCGGACATCCTGCAAAACGAGTATTTCAAGCACTACGAATTGCAGTAAA  
CGATGAATTGTCAGCTTTTGAAGATTCAATAGAACAAGCGATTGAATTAGTGAAGTAGACGGCAGGATTTCCGTAATCACTTTCCA  
TTCTTTAGAAGATCGTTTATGTAACAGGTGTTCCAAGAATATGAAAAAGGTCCAGAGGTACCAAGAGGATTACCAGTTATACCAG  
AAGCATATACACCTAAGTTAAAGCGTGTTAATCGTAAACCGATTACCGCTACAGAAGAAAGATTTAGATGACAATAACAGAGCACGA  
AGCGCGAAATTACGTGTAGCTGAAATACTTAAATAAGGAGCAATTTATAATGGCTGTAGAAAAAGGTGTACCAACCATATGACGAAC  
AAGTTTATAATAGTATACCGAAGCAACAACCACAACTAAGCCCGAAAAAGAACTGTTTCGAGAAAAAGTGGTTGTACAATTAAC  
AAATTTGAAAAAGTTTATACATAAATTTGATTACTGTAATTGCTATGTTAAGTATTTATATGCTATCTTTAAAAATGGATGCGTATG  
ATACGCGAGGAAGATTGCAGATTTAGATTATAAAATAGATAAAACAACTCAAGTGAACAACTGCTTTACAATCTGGAATCAAAAAAG  
AATTTCTTCTTATGAACGCATATACGAAAAAGGCTAAGAAACAGGGGATGAGCCTTGAGAACGATAATGTAAAGGTAGTGCAGTAA  
TGGCGAAGCAAAAAATTAATAATAAAAAAAATAAAATAGGGGCAGTCTACTTGTGGTTTATTCGGACTGCTCTTTTTTATATTGG  
TTTTAAGAATTTTCATATATCATGATTACTGGACATTCTAATGGTCAAGACTTAGTCATGAAGGCAATGAAAAAGTATTTAGTTAAGA  
ATGCAACAACACCAGAACGAGGAAAGATATATGATCGTAATGGTAAAGTGCTAGCAGAAGATGTAGAAAGATATAAACTTGTTCG  
AGTAATAGATAAAAAAGGCGAGTGCCAATTCTAAAAACCTAGGCATGTAGTTGATAAAAAAGAGACTGCAAGAAATTTATCTACA  
GTCATTGATATGAAGCCAGAGGAAATTGAAAAGAGACTTAGTCAAAAGAAAGCTTTCCAAATTGAATTTGGACGCAAGGAACAA  
ATTTAACGTATCAGGACAAATGAAAAATAGAGAAAATGAATTTGCTGGTATTTCTTTATTGCTGAAACAGAACGCTTTTATCCAA  
ATGGCAATTTTGCATCACACTTAATTGGTAGAGCTCAGAAAAATCCGGATACTGGTGAACCTTAAAGGTGCACTTGGAGTTGAAAAAG  
ATTTTTGATAGTTATTTAAGTGGATCTAAAGGATCATTGAGATATATTCATGATATTTGGGGATATATCGCACCAATACTAAAAAA  
GAGAAGCAGCCTAAACGTGGTGATGATGTCCATTTAACAATCGATTCAAATATTCAGTATTTGTTGAAGAAGCTTTAGATGGCATG  
GTTGAAAAGATACCAGCCGAAAGATTTATTTGCGGTTGTCATGGATGCCAAAACCTGGAGAAATTTTAGCATACAGTCAGCGACCAAC  
ATTTAATCCTGAACTGGTAAAGACTTTGGTAAAAAGTGGGCAATGACCTTTATCAAAACACATACGAGCCTGGATCAACATTTA  
AATCATATGGGTTAGCAGCTGCTATTTCAAGAAGGTGCTTTTGATCCTGATAAGAAATATAAATCTGGACATAGAGATATTATGGGTT  
CACGTATTTAGACTGGAATAGAGTCGGTTGGGGTGAATCCCAATGTCACCTCGGATTTACTTATTCATCTAATACATTGATGATGC  
ATTTACAAGATTTAGTTGGTGACAGAAAAATGAAATCTTGGTATGAACGATTTGGATTTGGAAAACTCAACTAAAGGTATGTTGATG  
GAGAAGCAGCTGGATGGAATTTGGATGGAGTAATGATTACAAACAAAAACGTCATCATTTGGTCAATCGACAACCTGGAATGAAACG  
CAAATGTTACAGGCGCAATCAGCGTTCTTAAATGATGGTAATATGTTAAAAACCATGGTTTGTGAATAGCGTTGAAAAATCCTGTTAGT  
AAAAGACAATTTTATAAAGGGCAAAAAACAAATCGCAGGCAAAACCAATAACAAAAGATACTGCTGAAAAAGTTGAAAAGCAATTGG  
ATTTAGTTGTGAATAGTAAGAAGAGTCACGCTGCAAACTATCGTATTGATGGTTATGAGGTGCAAGGTAAGACTGGTACAGCACAA  
GTCGCTGCACCTAATGGTGGTGATACGTTAAAGGTCCAAACCCATATTTTGTAAGTTTTATGGGTGACGCACCGAAGAAAAATCCT  
AAAGTTATTGTATACGCTGGTATGAGCTTGGCACAAAAAAATGACCAAGAAGCTTATGAATTAGGTGTTAGTAAAGCGTTTAAACC  
AATAATGGAAAAATACTTTGAAATATTTAAATGTAGGTAATCAAAAAGATGACACATCTAATGCAGAGTATAGTAAAGTGCCAGATG  
TTGAAGGTCAAGACAAACAAAAAGCTATTGATAATGTGAGTGCAAAATCATTAGAACCAGTTACTATCGGTTCTGGCACACAAATA  
AAGGCAATCTATAAAAAGCAGGGAATAAAGTCTTACCTCATGATAAAGTACTGTTATTAACAGACGGGAGACTTAACATCACTGTTGA  
CATGTGACGATTGGACGAAAGAAGATGTCATTGCTTTTGAACCTTAAACAAATATTAAAGTAAATTTAAAGGTAGCGGTTTTGTGT  
CCCACCAATCAATTAGTAAGGGACAAAACTTACTGAAAAAGATAAAAATAGACGTAGAATTTTCATCAGAGAATGTAGACAGCAAT  
TCGACGAATAATTCTGATTCAAATTCAGATGATAAGAAGAAATCTGACAGTAAAACTGACAAGGATAAGTCGGACTAACAAGAATG  
GCTACATTAAATAAGGGTGTATTGTCATTTTGTTTTACTAAAGTAATGCTGTGATAGAAAACAACATCTTCATTTAATCTTTATA  
AATAAGTGTGATAGAGAATTTAAGGTAGACGAGGTGAGTTAACTTGTGTTATAGGCAAACTTTTTATACTGGCCTCTTATGC  
CGTAAAAAAGAAAAATTATAAATTTTGATTACAACCTTTGTTTATTTAATTGAAAAATTGATAATATATTAGTGTTAAAAAAGTCTG  
GATTAAGAAGAGGAGATAGTTATGATTTTTGTATATGCGTTATTAGCGCTAGTGATTACATTTGTTTTGGTACCTGTTTTAATACCTA  
CATTAAGAAAGGATGAAATTTGGTCAAAGTATTCGAGAAGAAGTCCAAAGCCATATGAAGAAGACTGGTACACCAACGATGGG  
TGGATCAACATTTCTATTAAGTATTGTGATAACGTTTGGTGGCTATTATTTGTGGATCAAGCTAATCCAATCACTACTGTTATTA  
TTTGTGACGATTGGTTTTGGGTTAATTGGTTTTATAGATGATTATATTATTGTTGTTAAAAAAGAATAACCAAGGTTTAAACAAGTAAAC  
AGAAGTTTTTGGCGCAAAATTGGTATTGCGATTATTTCTTTGTTTTAAGTAATGTGTTTCATTTGGTGAATTTTTCTACGAGCATACAT  
ATTCATTTACGAATGTAGCAATCCCACTATCATTGTCATATGTTATTTTCATTGTTTTTGGCAAGTAGGTTTTTCTAATGCGGTAAA  
TTTAACAGATGGTTTAGATGGATTAGCAACTGGACTGTCAATTATCGGATTTACAATGTATGCCATCATGAGCTTTGTGTTAGGAGA  
AACGGCAATTGGTATTTCTGTATCATTATGTTGTTGCACTTTTAGGATTTTTACCATATAACATTAACCCTGCTAAAGTGTTTTATGG  
GAGATACAGGTAGCTTAGCTTAGGTGGTATATTGCTACGATTTCAATCATGCTTAATCAGGAATATCATTAATTTTTATAGGTTT  
AGTATTCGTAATTGAAACCTTATCTGTTATGTTACAAGTCGCTAGCTTTAAATTTGACTGGAAGCGTATATTTAAATAGTCCGATT  
CATCATCATTTTGAATTGATAGGATGGAGCGAATGGAAGTGTACAGTATTTTGGGCTGTTGGTCTGTTTCAAGTTTAAATCAGTTAATCGGT  
TTATGGATTGGAGTGCATTAAGATGCTTAATTATACAGGGTTAGAAAATAAAAAATGTATTAGTTGTGCGTTTGGCAAAAAAGTGGTTA  
TGAAGCAGCTAAATTTAAGTAAATTAGGTGCGAATGTAACGTCAATGATGGAAAAAGACTTATCACAAGATGCTCATGCAAAAAG  
ATTTAGAATCTATGGGCATTTCTGTTGTAAGTGGAAGTCATCCATTAACGTTGCTTGATAATAATCCAATAATTGTTAAAAATCCTGG  
AATACCTTATACAGTATCTATTATGTATGAAGCAGTGAACGAGGTTTGAAAAATTTAACAGAAAGTTGAGTTAAGTTATCTAATCTC  
TGAAGCACCAATCATAGCTGTAACGGGTACAAATGGTAAAACGACAGTTACTTCTCTAATTGGAGATATGTTTAAAAAAGTTCGCT  
TAACTGGAAGATTATCCGGCAATATTGGTTATGTTGCATCTAAAGTAGCACAAAGAAGTAAAGCCTACAGATTATTTAGTTACAGAGT  
TGTCGTCATTCCAGTTACTTGGAAATCGAAAAGTATAAACCCACACATTGCTATAATTAACATTTATTCGGCGCATAGATTACC  
ATGAAAAATTTAGAAAATATCAAAATGCTAAAAAGCAATATATAAAAACTCAACCGGAAGAAGATTATTTGATTGTAATTATCAT  
CAAAGACAAAGTGATAGAGTCGGAAGAATTAAGAGCTAAGACATTGTATTTCTCAACTCAACAAGAAAGTTGATGGTATTTATATTA  
AGATGGTTTTATCATTTATAAAGGTGTTTCGTATTATTAACACTAAAAGATCTAGTATTGCTGGTGAACATAATTTAGAAAAATATATTA  
GCAGCTGTGCTTGCTTGATTATTTAGCTGGTGTACCTATTAAGCAATTATTGATAGTTTAACTACATTTTCAGGAATAGAGCATAGAT

TGCAATATGTTGGTACTAATAGAACTAATAAATATTATAATGATTCCAAAGCAACAAACACGCTAGCAACACAGTTTGCCTTAAATT  
CATTTAATCAACCAATCATTTGGTTATGTGGTGGTTTGGATCGAGGGAAATGAATTTGACGAACCTATTCCTTATATGGAAAAATGTT  
GCGCGATGGTTGTATTTCGGACAAACGAAAGCTAAGTTTGGCTAAACTAGGTAATAGTCAAGGGAAATCGGTCATTGAAGCGAACAA  
GTCGAAGACGCTGTTGATAAAGTACAAGATATTATAGAACCAAAATGATGTTGTATTATTGTCACCTGCTTGTGCGAGTTGGGATCAA  
TATAGTACTTTTGAAGAGCGTGGAGAGAAATTTATTGAAAGATTCCGTGCCCATTTACCATCTTATTAAAGGGTGTGAGTATTGATG  
GATGATAAAACGAAGAACGATCAACAAGAATCAAATGAAGATAAAGATGAATTAGAATTATTTACGAGGAATACATCTAAGAAAA  
GACGGCAAAGAAAAAGATCAAAGGCTACACATTTTCTAATCAAAATAAAGATGATACATCTCAACAAGCTGATTTTGATGAAGAA  
ATTTACTTGATAAATAAAGACTTCAAAAAAGAACAAGCAATGATGAAAAATAATGATTCTGCTTCTAGTCGTGCAAAATAATAATA  
TATCGATGATTCTACAGACTCTAATATTGAAAATGAGGATTATAGATATAATCAAGAAATTGACGACCAAAATGAATCGAATGGAA  
TTGCATTCGACAACGAACCTCAATCAGCTCCTAAAGAACAAAATGGCGACTCGAATGATGAGGAAACAGTAACGAAAAAAGA  
ACGAAAAAGTAAAGTAACACAATTAAAGCCATTAACACTTGAAGAAAAGCGGAAGTTAAGACGTAAGCGACAAAAACGAATCCAA  
TACAGTGTATTACAATATTAATATTGTTGATTGCTGTTATATTAATTTACATGTTTACCACCTTAGTAAAAATTGCGCATGTAAATA  
TAAATGGAAATAACCACGTTAGTACTTCAAAGATAAAACAAAGTTTTAGGTGTTAAAAATGATTCAAGGATGTATACGTTTAGTAAA  
AAAAATGCTATTAATGATCTCGAAGAGGATCCATTAATCAAAAGTGTTGAGATACACAAGCAATTACCAACACATTAAACGTAGA  
TATCACAGAAAAATGAAATATTGCTTTAGTGAAATATAAAGGTAAATATTTACCTTTATTAGAAAAATGGTAAATTGCTTAAAGGTT  
AAATGATGTCAAAATTAATGATGCACCTGTCATGGATGGTTTCAAAGGTACAAAAGAAGATGATATGATTAAGGCGTTATCTGAAA  
TGACACCTGAAGTTAGACGATATATTGCCGAAGTGTACACGCCCAAGTAAAAACAAACAAAGCAGAATTGAATTGTTTACGACA  
GATGGACTTCAAGTAATCGGTGATATTTCGACGATATTTCAGAAATGAATTAATTTCCGAGATGTCACAACTATTAAAGGGAT  
AGTTTCGGGTAACTAAAAACACGAGGCTATATTGATTATTAAGAGATTAGTTCGCTTTCATTTATCCCATACCGTGGAACACGCTAGTCAA  
TCAGAAAAGCGATAAAAAATGTGACTAAATCATCTCAAGAGGAAAAATCAAGCAAAAAGAAGATTACAAAGCGTTTTAAACAAAATTA  
ACAAACAATCAAGTAAGAATAATTAATAATTTTGATATTGTCTATGTTTATAGTTTACAAGCCATTCAACGTATTGTAACTAAGG  
ATAGTGTATTTTTTAAATAGTAATTTGTCAGGAGGTGCCTATCTATGGAAGAACATTACTACGTAAGTATTGATATTGGATCATCAA  
GCGTAAAAACAATAGTAGGCGAGAAATTTACAAATGGTATAAATGTGATAGGTACAGGACAAACCTACACGAGCGGTATAAAAAA  
TGGTTTAATTGATGATTTTGATATTGCGCGACAAGCAATCAAAGACACAATTAAAAAGGCATCAATCGCTTCGGGTGTTGATATTAA  
AGAAGTTTTCTGAAATTACCTATCATTGGAACGGAAGTTATGATGAATCAAATGAAATCGACTTTTATGAGGATACAGAAATCAA  
CGTTTCACATTCGAAAAAGTATTAGAAGGTATTAGAGAAAAAATGATGTGCAAGAAACAGAAGTAATTAATGTGTTCCCGATTCT  
GTTTTATAGTCGATAAAGAAAAATGAGGTTTCAGACCTAAAGAAATTAATTGCCAGACATTCATTAAGGTTGAAGCAGGCGTAATT  
GCTATTCAAAAAATCGATTTTAATTAATATGATTAATGCGTAGAAGCATGTGGTGTGATGTATTAGATGTTTACTCTGATGCATATA  
ACTATGGTTCAATCCTAACAGCTACTGAAAAAGAGTTAGGTGCATGTGTCATTGATATTGGTGAAGACGTTACGCAAGTTGCTTTTT  
ATGAACGCGGTGAATTAGTAGATGCTGATTCTATCGAAATGGCAGGCGGTGATATTACAGACGATATTGCACAAGGATTAAACACT  
TCTTATGAAACTGCTGAAAAAGTTAAACACCAATATGGTCATGCATTCTATGATTCTGCTTCAGATCAAGATATCTTCACTGTTGAA  
CAGGTTGATAGTGATGAAACAGTACAGTATACTCAAAAAGATTTGAGTGACTTTATTGAAGCGCGGTGATAGAAGAAATATTTCTCGA  
AGTATTTGATGTTTTACAAGATTAGGATTAACAAAAGTAAATGGTGGGTTTATTGTAAGTGGTGGATCTGCAAACTTACTTGGCGT  
AAAAGAATTATTATCAGATATGGTAAGTGAAAAAGTTAGAATTCACAGCCATCACAAATGGGAATTAGAAAACCTGAATTTTCTT  
CAGCAATTTCTACAATTTCTAGTAGTATCGCTTTTGATGAGTTATGATTGTTTACAATTAATATCATGTAAGCAAGGCGTAATT  
AGAAGATGTTATTGATGTGAAAAGACAAAGATAACGAATCTAAATTAGCGCGATTTGATTGGTTTTAAACGTAAAAACAAACAAAAA  
GATACTCATGAAAATGAAGTAGAGTCAACAGATGAAGAAATTTATCAATCAGAAGATAATCATCAGGAACATAAACAGAATCATG  
AACATGTTCAAGACAAAGATAAAAGATAAAGAAGAAAGTAAATTCAAAAAACTAATGAAATCTCTATTTGAATGATTATTGGCCAAT  
AAAACCTAGGAGGAAATTTAAATGTTAGAATTTGAACAAGGATTTAATCATTTAGCGACTTTAAAGGTCATTGGTGTAGGTGGTGGC  
GGTAACAACGCCGTAAACCGAATGATTGACCACGGAATGAATAATGTTGAATTTATCGCTATCAACACAGACGGTCAAGCTTTAAA  
CTTATCTAAAGCTGAATCTAAAAATCCAAATCGGTGAAAAATTAACACGTGGTTTAGGAGCAGGAGCTAATCCTGAAATCGGTAAAA  
AAGCTGCAGAGGAATCTCGTGAACAAATTTGAAGATGCAATCCAAGGTGCAGACATGGTATTTGTTACTTCTGGTATGGGTGGCGGA  
ACATGGTACTGGTGCAGACACGATCGTTGCTAAATTTGCAAAAAGAAATGGGCGCATTAACTGTTGGTGTGTAACCTGTCCTTACTG  
TTTGAAGGACGTAAACGTCAAACTCAAGCTGCTGCTGGAGTAGAAGCTATGAAAGCTGCAGTAGATACATTAATCGTTATACCAAA  
TGACCGTTTATTAGATATCGTTGACAAATCTACGCCAATGATGGAAGCATTTAAAGAAGCTGATAACGTGTTACGCCAAGGTGTACA  
AGGTATCTCAGACTTAATCGCTGTTTCTGGTGAAGTAACTTAGACTTTGCAGACGTTAAGACAATTATGTCTAACCAAGGTCTGC  
ATTAATGGGTATTGGTGTCTTCTGTTGAAAATAGAGCGGTAGAAGCTGCTAAAAAAGCAATCTCTTCTCCATTACTTGAAACATC  
TATCGTTGGTGCACAAGGTGTGCTTATGAATATTACTGGTGGCGAGTCATTGTCATTATTTGAAGCACAGAGGCTGCTGATATTGT  
CCAAGATGCTGCAGATGAAGACGTTAATATGATTTTCGGTACAGTTATTAATCCTGAATTACAAGATGAGATTGTTGTAACAGTTAT  
TGCAACTGGTTTTGATGACAAACCAACATCACATGGTCGTAATCTGGTAGCACTGGATTCCGAACAAGCGTAAATCTTCTAGCA  
ATGCAACTTCTAAAGATGAATCATTCACTTCAAATTCATCAATGCAACAGCACTGATAGTGAAGTGAAGAAACACATACAACCT  
AAAGAAGATGATATTCCTGACTTCAATTAGAAATAGAGAAGAAGACGTTCAAGAAGAACAAGACGTTAATCGGTTAATATATATAC  
ACAAATAATTCAACACAAATCATCAGATAACATATCTGATGATTTTTTACTAATTTTTAGAACATGTAGAAGGACATTTAAGTTTTT  
CAAAGTTATTAAGTGTTTAAGTATCGTGTCAAAATTAAGTCAAAAATTTATTGCGCAACATTTTAACTTTAAACATAAATGTTAT  
ATTATATAATTATTAACCTTTGTACAGTTAGACGAAGATAATTTAAATGAAATGATGGTGACGATCGAGTGAATGATAATTTAAAAA  
GCAACCGCATCATTTAATATATGAAGAGTTATTACAACAAGGTATTACTCTAGGTATTACAACCTAGAGGCGATGGTTAAGTGACTA  
TCCTAAAAATGCTTTTAATATGGCGAGATATATTGATGATCGCCATATAATATTACTCAACATCAATTGCAATTAGCTGAAGAAAT  
TGCGTTTGATAGAAAAAATTTGGGTGTTTCCCATTCAAACACATGAAAAATAAAGTCGCTTGTATTACAAAGGATGATATAGGCACAA  
ATATAGACACTTTAAGTATGCGCTTCATGGTATTGATGCGATGACACATGATAGTAATGTCTTTATTAACGATGTGTTATGCGAG  
ACTGTGTACCAGTATATTTTTATAGTACAAAACATCTTTTATGTCATTGGCGCATGCAAGGTTGGCTTCCCTACTATAGTAAATTGT  
AAAAGAAGTGCTAAAAACATGTGAACCTTTGATTTGAAAAGACTTACATGTCGTTATTGGACCATCTACATCATCAAGTTATGAAATTA  
TGATGATATTAATAAATAAATTTGAAACATTGCCAATTGATAGTGCCAACTATATTGAAACTAGAGGACGAGATCGTCATGGTATTG  
ATTTGAAAAAAGCCAATGCTGCATTATTAATATTATGTTGTTCTTAAAGAAAAATTTTATACGACAGCGTATGCTACATCTGAAC  
ATTTAGAATTATTTTCTCTTATCGATTAGAAAAAGGTCAAACAGGACGCATGTTAGCATTCATTGGTCAACAGTAACAAGGAGGA  
GATATGCTTGCCTGTGAAAAGATAATTTACAACAAATCTCAACACAAATTAATGACAAAAAGTAAAAAAATAATTTTCAACAAAAAC  
CAAACGTGATTGCAGTTACAAAATATGTTACAATAGAGCGAGCTAAAGAAGCGTATGAGGCTGGAATAAGACATTTTGGTGAGAAT  
AGATTGGAAGGCTTTTTTACAAAAGAAAGAAGCATTACCATCAGATCGCGTGATCCATTTTATAGGATCATTACAATCTCGAAAAGTT  
AAGGCGTTATAAACGACGTAGATTATTTCCATGCTTTAGATCGATTGAGCTTAGCCAAAGAAATTAACAACGTGCGAGAACATAA  
AATTAATGTTTCTTGCAAGTGAACGTTTCGGGAGAAGCTTCTAAACATGGTATTGCTTTAGAAGATGTTGATGAGTTTATAGATGA  
TCTTAAAAAATATGACAAAAATCGAAATTTGATAGGTTAATGACGATGGCACCATTGACAGATGATGAAGCATATATTAGATCGTTATT  
TAAACAGTTACGTTTGAAAAAAGAAGAAATACAACGACTCAATTTAGAATATGCGCCTTGTGATGAATTATCAATGGGAATGAGTA

ATGACTATCTTATTGACAGTTGAAGAAGGTGCGACGTTTGTAGAATTGGGACTAAACTTGTAGGAGAAGAGGAGTGAGCCACTTGG  
CTTTAAAAAGATTATTTAGTGGATTTTTTGTAAATAGATGATGAAGAGGAAGTAGAAGTACCTGACAAAAACAACAGGTCAATGAA  
GCGCCAGCAAAAAGAGCAGTCACAACAAAAACAACAAAAACGAATCAAATCAGTCCCTCAAAAATCTGCATCAAGATATACAA  
CAACGTCAGAAGAAAGGAATAACCGTATGTCTAATTATTCAAAAATAATTCACGTAATGTTGTAACATGAACAATGTACACCA  
AACAATGCATCACAAGAAAGTTCAAAAATGTGTTTATTGCAACCACGTGTTTTTCAGATACACAAGATATTGCTGATGAGCTTAAA  
AACCGCGGTGCGACACTTGTCAATTTACAACGTATTGATAAAGTATCAGCGAAAAAGAATTATTGATTTTTTAAAGCGGTACTGTTAT  
GCAATCGGTGGAGATATCCAACGTGTAGGTACTGATATTTCTTATGTACGCTGATAATGTGGAAGTAGCTGGAAGCATTACAGAC  
CATATTGAAAATATGGAACATTCATTTCGACTAAGGAGTTAACATATGGATATAAATGTGCTAGCTACAATATTTAAATTTATCCTTT  
TTGTTGTTGAAATTTATTATTTCCGCATGATTATATATTTCTTTACATCTTGGGTACCAAGTATTAGAGAACTAAGGTAGGTTATTT  
TTAGCGAAAAATATATGAACCTTTCTTACAACCATTTAGAAAAAGTAATTCACCTATTGGAATTATCGACATATCATCAATCGCTGC  
AATTATCGTTTTAGTATTATTTCAAAAAAGGGTACTCCAAATCTTAAATTGGATTTTAAATTCAATTACAATAAATTAAGCGACATAAC  
GAGGCAAGGTACATGATACCTTTAGCCTCGTTTTTGATATGTATTTTTCTGAATATAAGGGCAATAGATGGTATTTTTATAATTTTTTT  
AAGGTAGTGATTAACATAGATATTTATCAACACTTTAGACAGGAAGAATACGAATTAATTGATCAGCTAACGGATAAATGTGATCA  
AGCGGAACAGCATTATGCACCAGTATTAACGCATTTTTTAGATCCAAGAGAGCAATATATATTGGAAGTGATTTGTGGCAGTTATGA  
AGATTAAACGTATCTTTTTATGGTGGACCTAATGCTGAAAGAAAAAGAGCAATCATTTCGCCGAACTATTATGAACCTAAAGAAA  
GCGACTTTGAATTAACCTTAAATGGAATAGATTATCCTGAAAAATTCGTCACCTTAAAAACATCAACATATTTAGGGACATTAATGT  
CTTTAGGTATCGAACGCGAACAAAGTTGGAGATATAATTGTGAATTGAACGAATTCATTTGTTTTGACAAGTAGATTGGAATCATTTA  
TTATGTTAGAAATTAACAACGTATTAAGGCGCATCGTTAACTTTATCTACTATCCAGTAACAGATGATACAATTAATGAGAATTT  
GGAAAAATGAAAGTGAACAGTTAGTTCTTTAAGGTAGATGTTGTTATTAAAGAAATGATACGTAATCAGTACGTAACGTACGATTGCGAAA  
CAACTAATCGAAAAAAAACGTGTTAAAGTGAATCACACTATTGTTGATTACGACAGATTTTCAATTACAAGCAAATGATTTAATATCC  
ATCCAAGGTTTTGGTAGAGCACACATTACTGACTTAGGTGGTAAAACTAAAAAGATAAAACGCACATTACCTATAGAACATTATT  
CAAATAGTAATGATTTAAGGAGGATAACAAATGCCTTTTACACCAAATGAAATTAAGAATAAAGAGTTTTTCAGTGTAAAGAAATGG  
TTTAGAACCTACTGAAGTTGCTAATTTTTTGGAGCAACTAAGCACTGAAATTGAACGCTCTAAAGAAGATAAAAAACAACTTGAAA  
AAGTAATCGAAGAGAGAGATACTAATATTAAGTCTTATCAAGACGTGCATCAATCTGTAAGTGATGCTTTGATACAAGCTCAAAAA  
GCTGGTGAAGAACTAAGCAAGCTGCAGAGAAACAAGCTGAAGCGATTATAGCTAAGGCAGAAGCGCAAGCTAATCAAAATGGTTG  
GTGACGCGGTAGAAAAAGCACGCCGTTTAGACTTCCAGACTGAAGATATGAAACGCCAATCAAAAGTATTTAGATCGCGTTCCGT  
ATGTTAGTTGAAGCGCAATTAGACTTATTAAAAAACGAAGATTGGGATTACTTGTGAATTATGATTTAGACGCTGAACAAGTGACG  
CTTGAANAATATTCATCATTTGCATGAAAATGATTTAAAGCCAGATGAAGTTGCAGCAAATGCACAAAAATAATGCATCAAAATACACC  
AGACAATAATCAACAATCCAATGATTAGAAAACAATAAGAAGTAAGAATTAATAAAGACAGACGCGTAATATACATTTAACTTT  
TCACAGCGAATTAGGTAATGGTGAGAGCCTAGTAAAAGCATGTATGTTATATCACTGGCTTTTTAATATTTAATAATGTAATGAGA  
GAACTCTAAGTTGAGTTAATAAGGGTGGTACCGCGAGCAATCGTCCCTTTAATTTAACTTAGAGTTTTTAAATTTTTAAGGAGTG  
AAAAAATGGATTACAAAGAAACGTTATTAATGCCTAAAAACAGATTTCCTCAATGCGAGGTGGTTTTACCAACAAGGAACCGCAAAT  
TCAAGAAAAATGGGATGCAGAAGATCAATACCATAAAGCGTTAGAAAAAATAAAGGTAACGAAACATTCAATTTTACATGATGGC  
CCACCATACGCGAATGGTAACCTTACATATGGGACATGCCTGAAACAAAATTTAAAGACTTTTATTGTACGTTATAAAATGATGCAA  
GGGTTCTATGCACCATACGTACCAGTTGGGATACACATGTTTACCAATTGAACAAGCATTAAACGAAAAAAGGTGTTGACCGAAA  
GAAAATGTCAACGCTGAATTCCGTGAGAAATGTAAAGAATTTGCTTTAGAACAAATTGAATTACAGAAAAAAGATTTTAGACGTT  
TAGGTGTTCTGTTGACTTTAATGATCCATATATTACATTAACCTGAATACGAAGCTGCACAAATTCGTATTTTTGGAGAAATGG  
CAGATAAAGGTTAATTTATAAAGGTAAGGAGCCAGTTTATTGGTCTCCTTCAAGTGAGTCTTCATTAGCAGAAGCAGAAATGGAAT  
ATCAGATAAACGTTACGATCAATTTACGTTGCATTGACGTTAAAGATGACAAAGGTGTCGTTGATGCAGATGCTAAATTTATTA  
TCTGGACAACAACGCCATGGACAATTCCATCAAAATGTTGCAATTACCGTTCATCCTGAATTAATAATATGGTCAATACAATGTAAATG  
GCGAAAAATATATTATTCGAGAAGCCTTATCTGACGCTGTAGCAGAAGCACTGGATTGGGATAAAGCATCAATCAAAATAGAAAAA  
GAATACACAGGTAAAGAATTTGGAGTATGTTGTAGCACAACATCCATTCTTAGACAGAGAATCGTTAGTGATTAATGGTGATCATGTT  
ATACAGATGCTGGTACGTTGTGTACATACAGCACCAGGCCACGGGAAGATGACTATATTGTTGGTCAAAAATGATGAATTAAC  
AGTAATTAGTCCAATCGATGATAAAGGTGTATTTACTGAAGAAGCGCGCAATTGGAAGGGATGTTCTATGATAAAGCTAATAAAG  
CCGTTACTGATTTATTAACAGAAAAAGGTGCACTATTAATAATTAGACTTTATTACACATAGCTATCCACACGACTGGAGAACAAAA  
AAACCTGTAATCTTCCGTGCTACACCACAATGGTTTGCCTCAATCAGTAAAGTAAGACAAGATATTTAGATGCAATCGAAAATACA  
AACTTCAAAGTAAATTTGGGTGAAACACGTATTTACAATATGGTTTCGTGACCGTGGCGAATGGGTTATTTCTCGTCAACGTGTGTGG  
GGTGTACCGTTACCAATTTTTATGCTGAAAATGGCGAAATTATCATGACGAAAGAAACAGTGAATCATGTTGCTGATTTATTTGCA  
GAACACGGTTCAAATATTTGGTTTGAAGAGAAAGCGAAAGACTTACTACCAGAAGGATTTACACATCCAGGCAGCCCTAACGGTAC  
ATTTACTAAAGAAACAGACATTATGGACGTTTGGTTGATTCTGGTTTATCACACCGTGGCGTGTGGAAACAAGACCGGAATTAAG  
TTTCCAGCGGATATGATTTTAGAAGGTAGTGACCAATATCGTGGTTGGTTCAACTTCTATCACAACTTCAAGTTGCTACAGAGG  
AGTATCACTTATAAATCTTACTTTCTATGTTTGTATGAGTGGTGAAGGTAAAGAAATGAGTAAATCTTTAGGTAATGATGATT  
GTACCTGACCAAGTGGTTAAACAAAAAGGTGCTGATATTGCGAGACTTTGGGTAAGTAGTACGGACTATTTAGCTGATGTTAGAATT  
TCTGATGAAATTTTAAAAACAACATCTGATGTTTATCGTAAATCAGAAATACATTAAGATTTATGTTAGGTAACATTAACGATTTT  
AATCTGACACAGATAGCATTCCTGAATCAGAGTTATTAGAAGTGGATCGTTACTTGCTAAATCGTTTACGTGAATTTACTGCAAGT  
ACGATTAACAACATATGAAACTTTGACTACTTAAATATTTATCAAGAAGTTCAAACTTTATCAATGTTGAGTTAAGTAATTTCTATT  
TGGATTACGGTAAAGATATTTTATATATTGAACAACGTGATTCTCATATCCGTCGTAGTATGCAACAGTGTTATATCAATTTTAGT  
TGATATGACGAAGTTGTTAGCACCAATCTTAGTGCATACAGCTGAAGAAGTTTGGTCTCATACACCACATGTTAAAGAGAAAGTG  
TTCATTAGCAGACATGCCTAAAGTTGTAAGAGTAGATCAAGCTTTATTGGATAAATGGCGTACATTTATGAATTTACGTGATGATG  
TGAACCGTGCATTAGAACTGCTCGTAATGAAAAAGTTATTGGTAAATCATTAGAAGCTAAAGTTACGATTGCTAGTAAACGATAAA  
TTAATGCATCTGAATTTCTAACTTCATTTGATGCATTACATCAATTAATTTATCGTGCACAAGTTAAAGTTGTAGATAAGTTAGACG  
ATCAGGCAACAGCTTATGAACATGGTGATATTGTATCGAACATGCAGATGGTGAANAATGTGAAAGATGTTGGAACATTCAGAG  
GATCTTGGTGTGTTGATGAATTGACGCATCTATGTCCACGATGCCAACAGTTGTAAAATCACTTGTATAATTGAAATTTGATAAAA  
GTACTCATACAGATGATATAAATTAAGCTCTCTTCAATCATGTTGTAGTTTTTGTGACATGATGAAGAGAGTTTTTTTGTGAAT  
AAAAAATGACCAAGTTACCGTTCATATATGTAATAAATGTGCGATTTACTAAAAATAAATTTATTCAGGAATGGTACAAATTTCTC  
TGAGGCATATAAATGCGTTATAGTTGCTATTCTCAATATGTTTCGCGATAATTTAAGTAAAGTAAGCACAGATATTGAATTTGAT  
AGGAGTTAATTTGAATGTATCAATAACAGTAACGCAAACTTTGTAAATGGTATCACTTTAAATGTGAGAGATAAGAATGAATTAAGC  
CATTTATGAGGAGCTATTAGGATTAATATTAAGTAGACATTAACATCGATACAATATGAAGTGGTCAAAATCAATCATGTCA  
TTACACTTGTGTAATTACAAAATGGACGTGAACCTTTAATGTCCGAAGCGGACTGTTTCATATCGCAATTAACACTACCTCAAAATTA  
GTGATTTAGCTAATTTACTAATTCATTTAAGCGAATATGATATTCCAGTTAACGGAGGTATACAGCCTGCTTCGTTATCATTATTTTT  
TGAAGACCCAGAAGGAAACGGTTTTAAATTTTATGTTGATAAAGACGAAGCGCAATGGACGAGGCAAAATGATTTAGTAAAAATTG

ATATTAGACCATTAATGTACCGAGATTAGTGAGTCATGCAACAAAATTGTTATGGTTAGGTATTCCAGATGACGCTATTATAGGTG  
CATTGTCATATTAAGACAATTCATTTATCAGAGGTAAGAAAGACTACTACCTCGATTATTTTGGACTAGAGCAATCGGCATATATGGATG  
ATTATTCAATATTTTTAGCATCGAATGGCTATTATCAACATTTGGCCATGAATGATTGGGTATCAGCAACGAAACGTGTAGAAAATT  
TTGATACGTATGGATTAGCAATTGTTGACTTTTCATTATCTGAAACAACACATTTAAATTTACAAGGTCCGGATGGTATCTATTATCG  
CTTTAATCATATCGAAGTTGAAGATTAGTATATACTTTGAATGGACGAACCATATAATGAATCGTTTTTAATGATCTTTTTATACAAG  
TTATGAAGGAGGCTGGGACATTAAGTCTTAGGCAATGTAAAAAGCTGATTTCTATTAATTATTTGATAGAAAACAGCTTTTTTGAT  
ATGTATTTTATAATGTACAGCT

>030-contig\_240

AAAGTGTCTTATTTTTTAAAAAGTATTTCAAAGTAAAAATTACATGTTAATACGTAGTATTAATGGCGAGACTCCTGAGGGAGCAGTGC  
CAGTCGAAGACCAAGGCTGAGACGGCACCTAGGAAGGGACCCATCATCAAAAATTCTATTTATAGAATTTTACAGTAATGTGCCA  
GATGGGCATAGCGAAGCCATTCAATACGAAGTATTGTATAAATAGAGAACAGCAGTAAGATAATTTTTAATTAGAAAATATCTTAC  
TACTGTCTTTTTAGGGATTTATGTTCCAGCCTGCTTTCTAATTTTTAATGTCATCTTAAATATGATAAATGAATAATTAAGTTCATAT  
TTAATGTCAAAACATAGTAGTTTATCAAGTATTGAGTGAGTAACATTAGATTTAATGTAATATGCTTACTTTTTTTATTAGCAGGTGT  
AAGCTATAATATAAAGAGTTGTCTCATGGACGATTGATTGGAGGAACGAAAATGCACAAAAAATTTTTATTGGCACTTCCATTTTA  
ATAGCAGTATTTGTCGTTATATTTGACCAAGTTACTAAATATATTATAGCTACTACAATGAAAATTTGGAGATTCATTTGAAGTGATA  
CCGCACTTTTTAAACATAACATCACATCGAAATAATGGTGCTGCATGGGAATATTGAGTGGAATAATGACATTTTTCTTTATTATT  
ACCATTATTATATTAATAGCCTTAGTATATTTCTTTATTAAGATGCTCAATATAATTTGTTTATGCAAGTTGCTATTAGTTTACTTTT  
TGCAGGTGCACTTGGAACTTTATTGATAGAATTTTAACAGGAGAAGTTGTTGACTTTATTGATACAAATTTTTTGGTTATGATTTT  
CCAATATTTAATATCGCAGATTCAAGTTTAACAATTGGTGTAATATTAATTATTATTGCCTTTATTAAGGATACCTCCAATAAAAAAG  
GAGAAGGAGGTTAAGTAATGGAGACTTATGAATTTAACATTACAGATAAAGAAACAAACAGGTATGCGTGTAGATAAGTTGCTGCCT  
GAATTAAGTATGATTGGTCTCGTAACCAGATACAAGATTGGATTAAAGCAGGTTTAGTCGTTGCAAAACGATAAAGTTGTTAAATCT  
AATTATAAAGTGAACTTAATGATCATATAGTTGTCAGTAAAAAGAGTGGTTGAAGCTGATATTCTACCTGAAAAATTTAAATTTA  
GATATTTATTATGAAGATGACGATGTTGCAGTTGTATATAAACCAGAAAGGCATGGTAGTTTCATCCATACCAGGGCATTATACCAAT  
ACATTAGTTAATGGTTAATGTATCAAATTAATAAATTTGTCAGGTATTAATGGAGAAAATTCGTCCAGGTATTGTTCCACCGTATAGAT  
ATGGATACTTCTGGTTTATTAATGGTTGCTAAAAATGATATTGCTCATCGTGGGCTTGTAAGAACAATTAATGGATAAATCTGTTAAA  
AGAAAATATATCGCTTAGTTACACGGGAATATTCCTCATGATTACGGTACAATCGATGCGCAATTTGGTAGAAACAAAAATGATCGT  
CAATCTATGGCTGTTGTTGATGATGGTAAGGAAGCAGTGACACATTTTAACGTAAGTACAATTTTAAAGATTATACGCTTGTGAA  
TGCAACTTGAAACAGGACGTACGCATCAAAATCCGTGTTACATGAAATATATTGGCTTCCCATTAGTTGGTGATCCAAAGTATGGA  
CCGAAAAAGACATTGGATATTGGTGGTCAAGCTCTACATGCTGGACTTATTGGATTGCAACATCCAGTAACAGGTGAATATATTGA  
AAGACATGCTGAATTACCACAAGACTTTGAAGATTTATTAGATACAATTCGAAAAAGAGATGCATAATTGTGTGCTGTCTATAATTAC  
GATAACGTTATTTATGTAACATAAGTATTTATCGTTTTCGTTTTTAAAAATGAAAAACATTATAAAAAATAGATTAAAGTTAAACAT  
TTTACTGAGATCGGTTAATTTTTCAATATAGATTGCAAAAGCGCCTGATTAGTATTATCCTTATAACAGTTTAAGTACAACATAAAG  
AGTCTTTAATTGAGCGTCCAGAGAGACGTCAAAAGACATGAAAATATAGATATATACTAAAAATGATCATAACACTTTCACATATGCA  
AGAATAAGTAGTAATACTACGATTCTTCTATGTAATAGGCTGATTGTATATACTAAACCTCATGTGATATTAAGACATGAGGTT  
TTTTGTTTCTAAATTTTGAAGGGTGAGAATATGCTGAACGTATCATAATGGATGATGCCGAATACAACGTACAGTGACGAGAAT  
CGCTCACGAAATTTTGGAGTATAACAAAGGTACTGATAATTTAATTCCTTTTAGGTATCAAAACAAGAGGTGAATATTAGCGAATCG  
TATACAAGATAAAATTCATCAAAATTGAGCAACAACGTATACCTACTGGAACAATTGATATTACATACTTTAGAGATGATATAGAGC  
ACATGTCATCACTTACGACAAAAGACGCAATAGACATCGACACAGATATTACAGATAAAGTAGTCATCATTATTGATGATGTGCTG  
TATACTGGTTCGAACGGTTCGTGCTTCACTTGATGCTATTTTGTCTAAATGCTAGACCTATTAATAATTTGGTTTAGCTGCTTTGGTTGATC  
GAGGACATCGTGAGTTACCAATTCGAGCAGATTTTGTGGTAAAAATATACCTACTTCTAAAGAGGAAACGGTAAGTGCTATTTAG  
AAGAAATGGATCAAAAGAAATGCAGTTATAAATTAATAATACCCCTTTAATTCAGTACGAGAGACTGAAAAAGGTGGGGGAGTTGA  
ATGATAAAATAAGTTTTCATATGCTTGTATTCTAATAATACCCCTCATGTTTCGACAACATAAGTCAATTTCTATGGACGAAAATGACT  
TGTAAGCAACTTGTCACACTTTTTGTCTCTTTACATATACTGATGTAAGAGATTTTTTTATTATCGGAGGAAATGAATATTATGCAAA  
ATGATGAAATGTTTGAACGAACAGTAAACCAGTACTAGATGTAATGAAAAACCACAACCAGCGCAATGGGCATTTTAAAGCTTA  
CAACATTTATTTGCGATGTTTGGCGCAACAGTACTAGTACCATTCTTAACAGGACTACCAATATCCGCAGCGTTACTAGCTTCGGGA  
ATCGGTACATTACTTTATATCTTAATAACGAAGGCGCAAAATACCAGCATACTTGGGATCTAGCTTTGCATTATCACACCAATTATC  
ACGGGATTAAGTACGCATAGCTTAGGAGACATGCTTGTAGCATTATTCATGAGTGGTGTTATGTACGTCATCATCGGAATTTCTAATC  
AAATTAAGTGGGACAGCATGGTTAATGAAATTTATACCACAGTTGTTGTTGGACAGTCATCATGGTAATTTGTTTAAAGCTTAGCG  
CCTACTGCACTCAATATGGCAATGTATGAAAATCCTGGAGATTTAGAAAGTTTACAATATCAGTTTCTTAATTTGTTGCAATGATAACC  
TTGCTTGTAACAATAGTCGTTCAAGGATTTTTTAAAGGATTCTCTTTAATACCAGTACTTGTAGGTATTATCGTAGGTTATGTGG  
TAGCGATTTTTATGGGGATTGTGAAATTTGATGCAATTATGTCAGCAAAATGGATAGATTTCCCTCATATTTATCTGCCATTTAAAGA  
TTATGTACCTTCATTTCACTTAGGACTTGTACTTGTAAATGATTCCGATTGTGTTTGTAAACAGTAAGTGAACATATTGGGCACCAATG  
GTATTGAATAAAATCGTAGGTAGAAACTCTTTGAAAAGCCAGGACTTGATAAATCAATCATTGGTGATGGTGTTTCTACAATGTTT  
GCCAGTATTATTGGTGGACCACCAAGTACAACATACGGTGAAAAATATCGGTGTATTAGCGATTACCAGAATATACAGTATTTACGTC  
ATTGGTGGTGCAGCAGTTATAGCAATTTGTTTAGCATTCATTGGTAAGTTCACTGCATTAATTTCTTCTATACCTACACCAGTTATGG  
GAGGAGTATCTATATTACTTTTTCGGAATTTATGTCAGCAAGTGGCTTAAAGATGTTAGTTGAAAGCAAAAGTGAATTTGCGCAACAATC  
GAAATTTAGTTATAGCTTCTGTAAATTTAGTTGATAGGTATCGGTAATTTAGTATTAACTTAAAGAAAATTTGGTATTTACCTCAAAAT  
TGAGGGGATGGCATTAGCTGCACCTTTCAGGAATTTATTTGAACCTTAATCTTACCTAAAGAGAAAAACAAAAACAATTAAGATTTAC  
AAATTAAGGAGGGCGCTTTTATGAATCATTTATTATCAATGGAACATTTATCTACAGATCAAAATATACAACTTATCCAAAAGGCAA  
GTCAATTTAAATCTGGTGAACGTCAACTACCAAACTTTGAAGGGAAATATGTCGCAAAATTTATCTTTGAAAAATCTACTCGAACAA  
AATGTAGTTTGAATGGCAGAACTTAAGCTAGGGTTAAAAACGATTAGCTTTGAAACATCAACATCATCTGTTTCAAAAGGTGAAT  
CTTTATATGACACATGTAAAACCTTAGAAAAGTATTGGCTGTGATTTATTAGTCATTAGACATCCGTTAATAACTACTATGAAAAATT  
AGCGAATATTAACATCCCAATTGCGAATGCTGGTGATGGTAGTGGAACAACATCCAACACAAAGTTTACTTGATTTAATGACGATATA  
TGAAGAATATGGATATTTTGAAGGCTTGAATGTATTGATTTTGGGAGACATTAATAATTCACGTGCGCACGTAGTAATTACCATAG  
TTTAAAGCATATTAGGTGCAACAGTAATGTTAATAGCCCAATCTGGAGTATTGATGATTCTTTAGAAGCAGCTTATGTAATATAGA  
TGATGTTATAGAAAACAGTAGATATAGTTATGTTATTAAGAATTCACATGAAAGACATGGGCTTGCAGAGAAGAACTAGATTTGACAG  
CAGATGATTATCATCAAAAGCATGGCTTAAATGAAGTGCGCTATAACAAATTACAAGAACATGCTATTGTTATGCATCCGGCACCTG  
TGAATAGAGGAGTAGAAATACAAAGCGATTTAGTAGAAGCTTCAAAATCAAGAATTTTTAAGCAAAATGGAAAATGGCGTTTACTTA  
AGAATGGCAGTCATTGATGAATTTAAAAATAGGTAAGGGGACGAAAATGATGAAATTAATTAACCGGTAAAGTATTACAAAA

TGGAGAATTACAACAAGCAGATATTTTAATTGATGGTAAGGTAATTAACAAATTCACCTGCAATTGAACCAAGCAATGGTGTG  
ACATCATAGATGCGAAAGGTCACCTTTGTGTCACCTGGATTGTGTCGATGTTTCATGTTTCATTTACGTGAACCTGGTGGTGAATATAAAG  
AGACAATTGAAACTGGTACTAAAAGCTGCTGCTAGAGGCGGATTACAACTGTATGTCCAATGCCTAACACAAGACCGGTACCAGAT  
TCTGTAGAACATTTTGAAGCTTTACAAAAATTAATCGATGACAATGCTCAAGTACGTGTATTACCTTATGCTTCAATTACAACACGT  
CAATTAGGTAAGAATTTGGTTGATTTCCAGCACTAGTAAAAAGAGGTGCCTTTGCGTTTACAGATGACGGGTGAGGAGTACAAAC  
TGCAAGCATGATGTATGAAGGCATGATTGAAGCTGCAAAAAGTAAACAAAGCCATCGTAGCACACTGTGAAGATAATTCATTAATCT  
ATGGTGGTGCAATGCATGAAGGGAAACGCAGTAAAGAGTTAGGTATACCAGGTATTCCAAACATTTGTGAATCTGTTCAATTCGCA  
AGAGATGTACTATTAGCTGAAGCAGCAGGTTGTCATTATCATGTATGTCATGTTTCTACTAAAGAAAGTGTAGAGTCATTCGTGAC  
GCTAAACGCGCAGGCATTCATGTTACAGCTGAAGTTACACCACACCATTTATTGTTAACAGAAGATGATATTCCTGGTAATAATGCC  
ATTATAAAAATGAATCCACCATTGAGAAGTACTGAAGATAGAGAGGCTTTGTTAGAAGGGTTACTAGACGGTACAATTGACTGTAT  
CGCAACAGACCATGCACCACATGCACGTGATGAAAAAGCACAACCAATGGAAAAAGCACCATTCCGAATTGTTGGTAGTGAAACA  
GCATTCCCATTTATATACGCATTTTGTAAAAAATGGTGATTGGACATTACAACAATTAGTAGATTACTTAACAATTAACCATGT  
GAGACATTTAATTTAGAATACGGCACATTAAGAAAAAATGGTTATGCAGATTTAACAATCATTGATTTAGATAGTGAACAAGAAAT  
TAAAGGAGAAGATTTCTTATCAAAAGCAGATAATACACCATTATCGGCTATAAAGTTTATGGAATCCGATCTTAACAATGGTTGA  
AGGCGAAGTTAAATTTGAGGGGGATAAATAATATGCAAAAGCAAACGTTATCTAGTGTGAAGACGGTCTTTTTACGAAGGCTAC  
CGTTTAGGATCTGATAACTTAACTGTAGGAGAAATTGTATTTAATACAGCTATGACAGGTTATCAAGAAACTATTTACAGATCCATCA  
TATACAGGTCAGATCATTACTTTACGTATCCATTAATCGGTAATTATGGTATCAATAGAGACGATTTGAATCATTAGTACCTACAT  
TAAACGGTATTGTAGTGAAGAGCGAGTGCGCATCCAAGTATTTTAGACAACAAAAGACACTTTCATGACGTTTGTAGAATTACTGAT  
CAAATTCAGGGATTGCAAGGTGTTGATACAAGAAATATTACGCTTAAATTCGACAAACACGGTGTGTTAAAGAAAGCGTGTTCATGAT  
CGAAAAGAAGATATTGATCAACTTGTCAAACATTTACAACAAGTAGAATTACCTAAAAACGAAGTAGAAATCGTTTCGACTAAAAAC  
ACCGTATGTTTCGACAGGTAAGGATCTAAGTGTCTGACTTGTAGACTTTGGTAAGAAGCAAAATATTGTTGAGAATTAACCGTCAG  
AGGTTGTAACGTCACAGTTGTACCATATACAACACTGCGCAAGAAATTTAGCAATGGCTCCAGATGGCGTTATGCTATCAAACGG  
ACCAGGTAATCCTGAAGTTGTAGAATGTGCGATTCCAATGATTCAAGGAATTTAGGGAAAATTCGGTCTTTGGTATCTGTCTAGG  
ACATCAACTTTTTGCATTATCTCAAGGAGCAAGCTCATTTAAATGAAGTTTGGTCATCGTGGTGCAACCATCCAGTTAAAAATTT  
AGAGACTGGAAAAGTTGATATTACGAGTCAAAACCATGGATATGCAATAGATATAGATTCTGTTAAAAAGTACTGATTTAGAAGTTA  
CTCATCTTGCAATTAATGATGGTACTGTAGAAGGTTTAAAAACATAAAACATTACCAGCATTTTCTGTTCAATACCATCCTGAAGCAA  
ATCCAGGACCGTCAGATTTCAAACTATCTATTGATGATTTTGTAGCAATGATGACTAATTTTAAAGGAAAAGGAGCGTCATATCAATG  
CCTAAACGTAATGATATCAAAAAAATTTTAGTAATAGGGTCTGGGCCAATTATCATAGGTCAAGCAGCTGAATTTGATTATGCTGGA  
ACACAAGCATGTCTAGCTTTAAAGAAGAGGGATATCGAGTTATTCTTGTAAATTCAAATCCAGCGACAATCATGACTGATAAGGA  
AATTGCGGATAAAGTATATATCGAACCCTTAACCTCATGATTTTATAGCGCGAATTATACGTAAAGAGCAACCTGACGCTTTACTTCC  
AACTTTAGGTGGTCAAACAGGTTTAAACATGGCGATTCAACTACACGAAAGTGGTGTGCTTCAAGATAATAACGTCCAATTATTAG  
GAACTGAGCTAACATCAATTCAACAAGCAGAAGACCGTGAAATGTTTGAACATTAATGAATGATTTAAACGTTCTGTACCAGAG  
AGTGACATTGTAATACAGTAGAGCAAGCCTTTAAATTCAAAGAGCAAGTGGGATACCCGCTAATTGTTAGACCGGCATTTACGAT  
GGTGGTACCGGAGGCGGTATTGTCTAATGATGAAGAATACATGAAATCGTCTCAAATGGTCTTCATTATAGTCCAGCAACGCA  
ATGTTTATTAGAAAAATCTATCGCAGGTTTTAAAGAAATCGAATACGAAGTAATGCGTGATAAAAAACGAATAGCCATCTGTAT  
GTAACATGGAATAATTTGATCCAGTTGGTATTATACAGGCGATTCAATTGTTGTGGCTCCTAGCCAAACATTATCAGATGTTGAGT  
ATCAATGTTACGTGATGTTTCATTAAGGTTATTTCGAGCTTTAGGTATCGAAGGTGGTTGTAATGTTCAATTAGCATTAGATCCCCA  
TTCATTGATTTATATATTATAGAAGTAAATCCGCGTGTATCAGGTTTCATCAGCGTTAGCTTCAAAGCAACAGGATATCCTATTGC  
AAAATTAGCTGCTAAAATCGCGGTTGGTCTAACATTAGATGAAATGTTAAATCCAATTACAGGAACATCTTATGCAGCGTTTGAACC  
AACTTTAGACTATGTGATTTCAAAAAATACCAAGATTTCTTTTGATAAATTTGAAAAAGGAGAACGAGAGCTTGGCACACAAATGA  
AAGCAACAGGTGAAGTTATGGCCATTGGTCAACTTACGAAGAATCATTGTTAAAGCAATTCGATCACTTGAGTATGGTGTGCAT  
CACTTAGGATTACCAATGGTGAAAGCTTCGATCTTGATTATATTAAGAACGTAATTTACACCAAGATGATGAACGATTATTTTTC  
ATCGCGAAGCAATTAGAAGAGGCAACACTAGAGAAGAAATTCATAATATGACTCAGATTGATTACTTCTTACAGAACTTCCA  
AAACATTATTGATATTGAGCATCAATTAAGAGAGCATCAAGGTGATTTAGAATATCTTAAATATGCAAAAAGATTATGGATTTAGTGA  
TAAACAATAGCGCATCGCTTAAATATGACGGAAGAAGAAGTATATCAATTGCGTATGGAATAATGATATTAACCTGTTTACAAGA  
TGGTTGATACTTGCGCAGCTGAATTTGAATCTTCAACACCATAATTATATGGTACATACGAAACTGAAATGAATCCATAGTTACTG  
ACAAAGAAAAAATCTTAGTATTAGGCTCTGGACCAATTGCAATCGGCCAAGGTGTAGAATTTGACTATGCGACAGTTACACGCCGTTT  
GGGCAATTCAAAAAGCAGGGTACGAAGCGATAATTGTGAATAACAATCCAGAAACAGTTTCAACAGACTTCTCAATTTCTGACAAA  
TTATACTTTGAACCTTTAACTGAAGAAGATGTGATGAATATCATTAATTTAGAAAAACCTAAAGGTGTCGTTGTACAATTTGGAGGA  
CAAACAGCGATTAATTTAGCAGACAAATTTGGCTAAACATGGTGTAAAAAATCTTGGTACTTCACTAGAAAAATCTAAATCGTGCTGA  
AGATAGAAAAAGAAATTTGAAGCACTATTAAGAAAAATTAACAGGCTCCACAGCCACAAGGAAAAACAGCTACATCACTTGAGGAAGCA  
TTAGCGAATGCTGCAAGAAATCGGATTCGGTTGTAGTAGAGCTCTTATGATTTAGGTGGTGCAGCAATGGAAATTTGTAGACAAT  
GACAAAGAGTTAGAAAACTATATGACCCAGGCTGTAAAAAGCGAGTCCGGAACATCCGGTACTAGTCGATAGATATTTAACTGGTAA  
AGAAATTGAAGTTGATGCGATTGTGATGGAGAAACGGTCATTATTCCAGGAATCATGGAACATATTGAACGTGCTGGTGTGCATA  
GTGGTGACTCAATCGTGTATATCCGCCACAACTTTGACAGAAGACGAGTTAGCAACACTTGAGGACTATACTATAAAATTAGCT  
AAAGGTTTAAACATCATTGGCTTAATCAACATTCAATTCTGTTATAGCTCACGATGGTGTGTATGTTTGAAGTAAATCCACGTTCTA  
GTAGAACGGTACCATTCTTAAGTAAATTAATGATATTCCAATGGCACAATTAGCTATGCGAGCAATCATTGGGGAAAAACTAACA  
GATATGGGTTATCAAGAAGGGGTTCAACCATATGCTGATGGTGTCTTTGTGAAAGCACCGGTATTTAGTTTAAATAAATTGAAAAAT  
GTTGATATTACTTTAGGCACTGAAATGAAGTCAACAGGTGAAGTATGGGGAAGATACTACATTAGAAAAGGCGTTATTTCAAAAGG  
GTTAACAGGTAGTGGTGTGAAGTTAAAGATCACGGTACAGTATTAATGACCGTCAAGTACAAAGATGACAAAGGAAATGTTTAAAT  
TGGCACAACGCTTAAATGAAGTTGGCTATAAAAAATTTAGCAACGCTGGAACAGCTAATAAATTAGCTGAGTATGACATACCTGCA  
GAAGTAGTAGGCAAAATTTGGTGGCGAAAAATGATTTATTAACACGTATTCAAAATGGTGATGTTCAAAATCGTTATAAATACAATGAC  
TAAAGGTAAAGAAGTAGAAAGGGATGGCTTCCAAATTAGACGTACTACAGTTGAAAATGGTATTCCATGTTTGACATCTTTAGATA  
CAGCTAATGCCTTAACGAATGTAATTGAAAGTATGACATTACAATGCGTCAAATGTAAATCAATCAAACTGTATCGGTGGGGCTGT  
AATTAACCATTTACTTAAAGAAGTTTATATTACAGCCTCATTATTTAATGAATTTCTTAATATAAAGGGAGACATATATGATGAAA  
GATTTACCAATTATTGCATTAGATTTTGAATCAAAAAGAAAAAGTAAATCAATTTTATGATTTATTGATGAATCATTATTCGTA  
GTAGGTATGGAACCTTTTATCAAGAAGGTCCTCAATTAATGATGATAAAGAAAGAGGCCATGATGATTTTATGATTTTAAAA  
CTGATGATATTCTTAATACAGTTGGTAAGGCGATGGAAGGACTAGCTAAATGTAATGTTGATCTGTTAAATGTTTATGCTGCTGGT  
GGCGTAAAAATGATGTCTGAGGCCATTAAGGATTAAGAAAAACATAATCAACATACAAAAATTTATTGAGTAACACAGCTTACGTC  
AACAACAGAAGACATGTTACGACACGAACAAAAATATACAAACATCGATTGAAGAGGCCGTTTTAAATTTAGCCAAGTTAGCAATG  
CAGCTGGTTTAGATGGCGTTGTTTGTTCACCTCTTGAAAGTCGTATGTTGACTGAAAAGTTAGGTACATCATTTTTAAAGTAACACC

AGGTATTAGACCTAAAGGTGCATCTCAAGATGACCAACACCGTATTACGACACCGGAAGAAGCAAGACAGCTTGGTTTCGACGCATA  
TTGTAGTCGGTAGACCGATTACACAAAAGTGACAATCCAGTCGAAAGTTATCATAAAAATTAAAGAAAGTTGGTTAGTATAATGGCTA  
AAGAAATTGCAAAATCATTATTAGATATTGAAGCTGTAACATTATCACCAAATGATTTATATACATGGAGTTCAGGTATTAAATCAC  
CGATTTACTGTGATAACCGTGTTACGTTAGGTTATCCTTTAGTTTCGAGGGCGCAATCCGCGATGGTTTAAATTAACCTAATTAAGAAC  
ACTTTCCTGAAGTAGAAGTTATTTCTGGTACTGCAACAGCTGGTATTCCACATGCAGCTTTTATTGCTGAAAAATTAAAAATACCAAT  
GAATTATGTTCCGTTTCATCAAATAAGAGTCATGGTAAGCAAAATCAAATCGAAGGTGCTAAAAAGTGAAGGTAAAAAGTAGTTGTGA  
TAGAAGATTTAATTTTCGACAGGAGGATCTTCAGTCACAGCAGTTGAAGCCTTAAAAACAAGCAGGTGCAGAAGTATTAGGTGTTGTA  
GCTATCTTTACTTACGGTTTGAAGGAGCAGATGATACATTTAGCAATATTCAACTACCTTTTACACTTTAAGTGATTACAATGAAT  
TAATTGAAGTAGCTGAAAATGAAGGTAATTTCTAGTGAAGATATCCAAACATTAGTTGAATGGAGAGACAACTTAGCATAATAT  
AGACACTAGAAGGAGGAATTCACAAATGAATGACAAAAACATCTAATGATTATATGGAAGATAAAACATTGTAACGAATTTATC  
AATCATTCAAATGATTCCAATCTATCTAGTAGTCACGATGTGACGAGAAAGTTCAACGAAGCAAAAAACATATAAAAAATAAAACAC  
TATAGATCATAATGATGATTTATTTAAACATGTAAAGGATATATTACGTAAACAAGGACAAATTTAAAAACAAAAAAGCTATAGTG  
TTTAATATCAGGGGCTGCTTAACCGCATCCGAATATTACAAACACTATAGCTTTTATTATATAAAAAATTTATTAGCGGATAATTA  
CTTTATTAATAATCCAACCAATTAAGAATACGAGTAATAGGACTAATACTGGAATCACATAATGTAACATAACGTCCTCCTTTAACT  
TAATTTTAATTTGAATCAAATTTGACAATAAGTCAAAACATTAATACCTATGATAAGTATCATTTATTAAACATATGTATCATATTTT  
AATCTTGCGTAATTTTATCGTTAACTATGTGATTTAATCAACAGGCCAATAAGACGTTTGTCTTCGTGCACATAACGGTATGACGC  
GCTTTTGTCAATTTAATTAAGTAAAGTATAGTATGTTAATGAAGTTCAATCTATAGGAGGCATAGCATGGATTTCCAAAAATCAC  
GACATTTTTAATGTTAATAACCAAGCTGAAGAAGCTGTAAACACTATACACAAGCTTATTGGAAGTAGTGAGATTATAACAATGGC  
TAAGTATGGTGAAAATGGACCTGGTGATCCTGGGACTGTACAACTCAATATTACATTAAATGGAGCAAGTATTCATGGCAATTGA  
TGCTAATAGTGGCACAGAATTACCAATGAATCCTGCGATTTCAATTATTTGTTACAGTAAAAAGATACTATTGAAATGGAACGACTATT  
TAATGGATTAAGAAGATGAAGGTGCCATTTAATGCCAAAAACGAATATGCCACCATACAGAGAGTTTGTCTGGGTTCAGATAAGT  
TTGGAGTAAGTTTTCAATTAGCATTACCTGAGTAAAAGGATTCGCACAGCGTTGAATGATAAAGAAACACTTTTTCTTATGCATGCG  
TTTACCTATGTATTTCTATTTTAAAGTATACATTAGCATTTTAGTTTCACTCATTTTTAAAAATCACAAAGATAATTTGTAACCTAAATG  
ATGATACGTTATTTAAAAACACGATACTTCGTTTCAATGAACGCATTAAATAATAATAAACACCTCGCAAAAGAAAGTAGTCCTTT  
CTTATGGTGAGGTGTTTATTTGTGCGACAACCTTGATTATGATTGTTTCATTTTTGAATAAGTTTCATAATCAGGTGTAGCATACAAAGT  
TTTTGATTGTGCATATGTTACAAACCCAGGCTTTGCACCTGATGGTTTATGCACATTTTAAATTAACGTGTAATCAACAGGTATTTGT  
CCGAATTAACAGCTTTTGAAAAATATCCTGTCAACATAGCCGCTTCTTGTATTGTCGTATACACTTGGTGATCATTTAAATAATAACGA  
CATGTGAACCAGGAATATCTTTTGTGTGTAACCATGTGTGAGTTTTTTTAGCTTTTTTATTGTTAAATAATCATTTTGTCTGTTATTC  
TTGCCAACATATATATCGTCGCCATCAGTTGATACATAATGTTGTAATTGAATCTGCGCTTCTTTTCTTAGTTTGATTTTTACGCTG  
TTTCATAAAGCCTTGTCTGTCAATTCATCTCTAATTTTCATCAATGTCATGGACAGAAATATGATGTAATTGTTGTTTCGATTGTTGAA  
AAATAATCTATATTGTCTTTCGTCAATTGAATTTGATGTTGTAATTCACGTTCTCTCGTTTTTCATACGATTATATTGTTTATAAATA  
TTGAGCATTTGCTGATGGGGATTTTGTAGGATTTAAAGGAATGACAACCTCTTCATTTCGTATAATAATTCAATGCCGTCACCTTCTTA  
TCGCCCTTGCTTAATTCGATATATATTAGCAGTGATCAATTCACCATATAACTGTTTCAGTATCTTTATTTTTAGACTGTCATATCTTC  
AATCAACTTCGCTAATTTATTTTGATATTTGTGCAACTGCTGTTGAACAAATCGAACTAAATCATTGCGACGTTGTTTAAACGCGTTCA  
CGTTGCCACGCGCATCAAAAAACGGTCAAGTAAATCATTTAATGAATCGTATGTAACGTGATCATCATTAATTAATGATTAACTTT  
ATAAAATAGAAATCCTCTTTACCTGTTTCATGATTTTTATGAAAAATAGGAGTAGGTGGTAACTTGGTTTCTGCCATTACTTCGTCAA  
ATGCTTCTGGTAATGTTGATGAAGTCATAAATTGACGACGACTAACGATTTTCATTTCGTAATTAAGGGGCTAAATCCTTCAAACCTGAT  
TCAATAATTGTTTAGCAATATTACCTGCGTTAAATCGATATATTCAACACCTCTGCACCTGTAATATCATACGGATTTATTTGTG  
CTGAGTAGGTGGTGCTTCATAATTAATCCTGGCATTACTGTACGATAGTGATTTCGTATTTGGTGTTAAGTGTTTAAATCCTTCAATT  
ATTTTGCGATTTTCATCTACTAAATTAAGTTACTATGTTTACCCATAATCTCAAGGATGACAGTGCGGTAAATAGTATCGCCAATTT  
CATCTTTACTCTTTATATCGATTTCAATGCGACGATCATACCAATTTGCTTAATCGATTTCGATAATACCACCTTCTAAGTGTTTTCTA  
AAAACACGCGCAACATGGGTGGATTAATGGATTATCATATTTTTAGTAGTTAATTGTAATCTTGAAAGGTTTGGATGGGATTGAC  
ATAACAATGATGGTTTTGTCTATTTTTGACGTACAACCATTAGTATCGTGTCATTATCAGGTGATGATTTGTGTAACGCGTCTCG  
TTGTTAAAAAATTGTAGAGACTCAACCATTTTCTTTGTAAATAAGCCATCATAAGCCATAATTTATCTTCCACCTTCTTCATATCATTC  
GTTTCATTTTAACATGATTGTAACCTTTTCGGTATAGTTATTGAACCATACATTATGCCATACATTTTACATTATCTAAAAAGTTTGCAAT  
TCAATTTATTTAATTAATAAATTAATCGTGCAATATAACGATATTGTTAGACTTAATAGAAATTATGGCATGCAATTTCAAATATGCTAT  
ACAATATAAAGAACAATGTGATATCATATTTAAATAATAGAAGATTAGCTTAGAGAGGTGCGTAAGGCATGGATAATGAAAAAGGAT  
TGTTAATCGTTTTATCAGGACCATCTGGAGTAGGTAAGGTACTGTTAGAAAACGAATATTTGAAGATCCAAGTACATCATATAAGT  
ATCTATTTCAATGACAACACGTCAAATGCGTGAAGGTGAAGTTGATGGCGTAGATTACTTTTTTAAAACTAGGGATGCGTTTGAAG  
CTTTAATCAAAGATGACCAATTTATAGAATATGCTGAATATGTAGGCAACTATTATGGTACACCAGTTCAATATGTTAAAGATACAA  
TGGACGAAGGTGATGATGTTATTTTAGAAATTGAAGTAGAAGGTGCAAAAGCAAGTTAGAAAAGAAATTTCCAGATGCGCTATTTAT  
TTCTAGCACCTCCAAGTTTAGAACACTTGAGAGAGCGATTAGTAGGTAAGGAACAGAAATCTGATGAGAAATACAAAGTCGTAT  
TAACGAAGCGCGTAAAGAAGTTGAAATGATGAATTTATACGATTACGTTGTAGTTAATGATGAAGTAGAACTTGCGAAGAATAGAA  
TTCAATGTATTGTAGAAGCTGAGCACTTAAAAAGAGAGCGCGTAGAAGCTAAGTATAGAAAAATGATTTTGGAGGCTAAAAAATAA  
TGTTAAATCCACCATTAACCAATTAACGTCACAAATTAATCAAAGTATTTAATTGCAACAACCTGCAGCGAAAAGAGCGCGTGAA  
ATTGATGAACAACCTGAACTGAATTATTAAGTGAATATCATTCATTTAAACCAGTTGGTAGAGCGTTAGAAGAAATTTGCTGACGGT  
AAAATTCGCCCTGTTATTTCAAGTGATTATTATGGTAAAGAATAGTTTCGACCATTAAAAATATGTGAAGCTAGACGTACATCAAT  
ACGTCAAGGCATATCCAAATCAAACGCACCTATGTAGGTGTGTTTTTTTAGTTTATCCAAATGATTGATGTTATAATAATACTAAATTT  
GTATCTATAAAAAAGTAAATGAGCATTGTGCGCATATGATGATGTAAGCGTAAATGTGATGATTTAAGGGAGATTTGAATA  
TGAAGAAAAATATTATTAGCCGTTACAGGTGGCATATGCGGCATATAAAGCGATTGATTGATTGACAAAGTAAACAACTGGGTAT  
GAAGTTGCGGTTATGTTAACGAATCACGCACAAAAATTTGTGACACCATTAGCATTTCAAGCAATAAGTCGAAATGCTGTTTATACA  
GATACTTTTATAGAAGAAAAATCCTTCAGAAATACAGCATATTGCATTAGGTGATTGGGCAGATGCAATCATTGTTGCACCTGCAACG  
GCAAATACAATTGCAAAATTGAGTGATAGGTATTGCTGATGATTGGTGACATCAACGTTGCTAGCAACAGAGACACCGAAATTTATT  
GCGCCTGCTATGAATGTGCATATGTATGAAAATAAACGTACGCAGCAAAATATTAATATTTTAAAGAAGATGGGTATCATTTTATC  
GAACCAGGAAGCGGATTTCTAGCATGTGGTTATGTTGCTAAAGGACGTATGGAAGAACCCTTCAAATCGTTTCTGTTATTGATGCT  
CATTTTCAAATAGTAATCGTTTAGCTAATAGTTTCATTTCAAGATAAACGCGCATTTGGTTACAGCAGGACCAACTATTGAAGTTATC  
GATCCAGTCAGATTTGTATCCAATCGTTCTTCTGGAATAATGGGCTATGCAATAGCTGAAGCAATTGCGAAATCGAGGAGCTATCGTG  
ACGTTAGTTGCTGGTCTCAACACTAGAGGATCCAAAGATATTGAAGTTATTCATGTTCAAAGTGTGCTGAAGAAATGTTTGAACAA  
GTGACAAGCCGATTTGACGAACAAGATATTGTTGTAAGAAGCAGCAGCCGATCTGACTATACACCAGTTGATGTATTAGAACATAA  
GATGAAAAAGCAGGATGGTGATTTATCAGTATCTTTTAAACGTACTAAAGACATTCTTAAATATTTAGGTGAACATAAAACATCACA  
GTATTTAATAGGCTTTGCAGCAGAGACTGAAGATATTGAAAAATTATGCACAACAAAAATTACGCAAGAAAAATGCAGATGTGATTA

TTTCAAAATAATGTTGGGGATATGTCTATCGGATTTAGTCTGTATGATAATGAATTGACAATGCATTTTAAAAATAATGAAAAGGTAA  
ATATCAAGAAAAGGAAAAAAAGTAGTATTAGCTGCACAAATTTTAGATGAAGTAGAACTAGGTGGCAATAATGATAGCGAAAAGTC  
ATAGTCGATGTCGCGTCGAAGAGCGTTGACTATAAATTTGATTATATAATTCCTGAACAACCTCGAATCTGTCATCCAACCTGGTGTG  
CGTGTGATTGTACCTTTTGGACCAAGAACGATTCAAGGTTATGTAATGGAAGTAACAGCAGAACCTGATGCACAACCTTGACGTTTCG  
AAGTTAAAAAAATCATAGAAGTGAAAGATATACAACCTGAATTAACATCAGAATTAATAGCTTTAAGTGAGTGGATGGGTTCAAC  
TCATGTTCATTAACCGTATTTCTATGCTAGAAAGTGATGCTTCCGAGTGCTATTAAGCGGAAGTATAAAAAAGCATTTAAGATGAAAGA  
TGACAAAAGAGGTACCTTCAGCTTTATTACAAAAATTTGATAAGCATGGTACTATTATTATAAAGATGCGCAAAAAATAATGATAT  
TCAATTGCTTATGAAGTTGTTAAAAAGATGATATCGTTGAAGAAAAAACGATTCTCACACAAAATATAACTAAAAAACCAAGCGTG  
CTGTTCTGTGTCATTGAAGGGTATCATCCTGATGAAGTATTAGCTAAGTTGGAGAAAAGTTATTAACAATACGATTGTATGCTTACT  
TGCTGGAAGAACACATAAAAAACAATATTTTAACTGATATTGAGGATATGGGCTTTTCAAAATCCAGTTTAGATGGACTTATCAAAA  
AAGGTTATGTTGAAAAATATGACGCGGTTGTTGAAAGAGACCCATTTAAAGATCGTGTTCGAAACAAGAAATCAAAACAGCAATTA  
ACAGAAGACCAATATAAAGCATATGAAGCGATTAAAGCTAAAAATTGTAAGCCAAGAGCAAGAAACATTTTTACTTCATGGTGTGAC  
GGGATCAGGTAAAACAGAAGTATATTTACAAACGATAGAAGATGTTTTAAGCCAAGGAAAACAGGCGATGATGTTAGTTCTCTGAAA  
TCGCTCTAACACCGCAATAGGTTTTACGCTTCAAACGTCGATTTGGTGATGACGTTGCTGTATTACATTCCTGGCTTATCTAATGGGGA  
ACGTTATGATGAGTGGCAAAAAATTAGGGATGGTCTGCGAGAGTAAGTGTGGTGCAAGGTCAAGTGTGTCGCACCTTTCAAAA  
ATTTAGGGTTAATCATCATTGATGAAGAACATGAATCTACATATAAGCAAGAAGATTATCCGAGATATCATGCTAGAGAAAATTGCC  
CAATGGCGAAGTGAATATCATCACTGCCCAGTCATTTTAGGAAAGTGAACACCATGTCTTGAAGTTATGCACGAGCTGAAAAAGG  
CGTTTACTTTGCTATCATTTACCAAACAGAGTGAACCAACAAGCTTTACCTGAAATTGATATAGATAGATATCGTGAAGCAATTGAG  
TGAAGGTAATCGGTCAATGTTTTCAAAAGATTTACGTGAAGCCATACAATTAAGATTAGATGACAGGAACAAGTGTGTTTATTTT  
AAATCGACGTGGTTATGCATCGTTTATGTTATGTCGGGATTGTGGATATGTACCGCAATGTCCAAACTGTGATATTTCAATTAACGTAT  
CATAAAACGACAGACTTATTAATGTCACTATTGTGGTTACCAAGAGACGCCACCGAATCAATGTCCAAATTGTGAGAGTGAACA  
CATTGCGACAAGTAGGTACTGGTACTCAGAAAAGTTGAAGAAGTATTGCAACAAGAATTGAAGATGCGCGCATAATTAGGATGGATG  
TAGATACAACCTCAAAGAAAAGGTGCACATGAAAAGTTATTGACTGAATTCGAAAAAGGTAAACGGTGATATTTACTAGGTACTCAG  
ATGATTGCGAAAGGATTAGATTATCCAAATATTACTTTAGTTGGTGTGCTGAATGCAGATACAATGTTAAATTTACCTGATTTTCGG  
GCGAGCGAACGTACTTATCAACTATTAACGCAAGTGGCTGGTAGAGCTGGTCTCATGAAAAGGCAAGGTCAAGTCATCATTCAAAAC  
GTATAATCCGGATCATTTATCAATATTGGATGTTCAAAAAATGATTATTTAACATTTTATCGTCAGGAAATGGAATATCGTAAAT  
AGGAAAGTATCCACCGTATTATTATTGATTAATTTCACAATCTCACATAAAGAAATGAAGAAGGTTATGGAAGCATCGCAGCATGT  
TCATAAAATTTTATTACAGCATTTAAACAGAAAAAGCGCTTGTAAGTCCATCTCCGGCAGCAGCTTGGCAGAAATCAACAATGAATT  
TAGATTCCAAATTTTAGTGAAATATAAAAGTGAACCTGGATTATTACAAGCCATTCAGTTTTTAGATGACTATTACCATGAAAAATT  
TATAAAAGAAAAATTAGCATTGAAGATTGATATTGATCCACAGATGATGATGTAACTACTAATTATTAGAAACAAGTTCAGTAT  
GTACGAGTATTTGAACCAAGTGTGTTGAATTTACTTTAAGTACAGAAAAAGGCGAGAATATACAACGTGTTAACCATTAAATTAGCA  
GTTTATATTCTGCTTTTTATATGGCTTTATAACTTACGTGATTTTGATTGATTAGGAATTTATTAGTATTTTCATTTACGAATTCCTGA  
TTTTAATGTAGGTGCCATACTTACTGATGAATAAAAGTACTAATGATTAAACAAACTATTTTTAATGGCAAAATTGAAATAGTGCAA  
ATTTTCACTTTATAAATTAATGGCTATAAACTATTTATCTATCTATGTTTTAACTACTTAAATTTATAGACAAAAAATTTTCTTA  
AATTATCAATTAAGTATTTTAAAAATTTGATGGTTAATGTAATAATGTTCAATAAATAAGTTTTTTTAAATTTATGATGTTTTATTG  
ATTCAAAAAAAATAACTTAAGAGGAGAAAAGTTTATGAAAAAGACACTGGGATGTTTACTTTTAAATTATGCTTTTTAGTCGTAGCAGGT  
TGTTCTTTTGGTGGAATCATAAATTATCATCAAAGAAATCAGAAGAATCAAAACAAGAAACTGTAAAAAAGAATCGGAAGAAG  
AGAAAGATCCAGATTTAGAGAAATATGAAGAAATAGAGAAGAAAATGAAAGGAATTAAGATGCGCCATCTCTTGATAAGTTGGA  
TCCATTAATGACAGAAAAGTCGTTTACGAATAGTAAAGGGATTCAAGGATGGAAGATTACAAAGAATTAATGGGTAAAGTGGAA  
CTTGACAGATTATAGATTTACTAAAGATTCAAAGGATCTTCAATAAAAGATGTTGATGCATTCCTTTAAAGGTAAAGAAAGGTATAAA  
AAGGAAAGTGATTGAAACACACGATGATGTAACAAGTTGATTATTGGTATGTAGATCCAGATGGAAGAAAAATTGGCAATTCAA  
ACACACCTGTTTTTACGCAGAAATTATGACAAAAATATAAGATGGAAAGTTAGTTTATGCATCAGTCGAACCAGGATCTTACGTAA  
TACATAAAGATGATGCAATTAATATGACGATTATTCTAAGTTAAAAAAATTAAGTCAGTAACTAATGATCATCCAAACCA  
GTTCCATATAGCGTAGCTCAAATCAAATCTTTTCGGAGTACCTTTAACAAGCGTTTTCATTTATGACACATGGATCAAAAGGATCACTAAA  
GATGAAGTGTGCGCGCATTTGGCCTATTTCACTTTTTCACCAAAAAATTATGAAGACAAGTCTAATCCAGATCCAAAAAGTTTAAAT  
TTAGTACATATGGATTCTTAAATGCATCTAGTGATTTTGGTAACGCACATTTTGTGTTTTAAGTAAATATATTAAGAGTATGAAT  
CAAATATGAAACAGCGTCAGATGATTCTTAAAAATAGTATTTACTGTGTGAAAAATAAATAGTGTACTACATTAATAATCGCAAT  
AATAATCCCGATAAACAATCAGCATTACTGCTTATCGTAGAGTTCGTAATAACTATACTCTATGATTCCGAATTAATAAATGATTG  
TCATCGGGATTTATTTTTATCAATTTATAATGTAACATTACCATGTTCTGCAGCTGGTTTGAAAAACAGTAATATCGCACTAATAATT  
GCTAATATATGTGGGATGACTGTCCAAAAGAATTAAGTGTAGGAAACCTTGCAATGTTTTTGGCGGCATAAAATTTATGAATACCA  
AACTACCTAAGAACAATGCTAATAAAAAATAAAATAAATCTTGTTTACTTGCAATTTTCCCTCCAGTTGAATGCTTTATAATGACAT  
TAGCTTCTCTTTTATTATACCCACTTTTAGTTCAAACATTCAGTTTAAAGCATTTCCCAATCATCTAAATTTTCAGTTATTAATCTT  
CAATAAACTTAGGATTTCACTTCAGTTACATTGTATTATTTTACGTGTGAAATATACGTAATGAATCACATGACATTTCTTAAATTGA  
AAAATATACATTCTATGATGTAAGGTCGCATTTTTAATATATTTACGTTATAATGGTTTGATGAATTTTATTGAGGAGTAAGAGCTAT  
GGCGATTAAAAAGTTAGTACCAGCATCGCATCTATTTTAACGAAAAAAGCGCAAGCAGTTATAAAATTTGATGATTCTGTTAAAAA  
GATTATTACAAGATTAGAAGATACAATGTATGCACAAGAAGCAGCTGGCTTATGTGCACCTCAAATTAATCAGTCATTGCAAGTG  
GCAATCATTGATATGGAATGGAAGGATTATTACAACCTGTTAATCCGAAAATTATTAGTCAATCAAATGAAACGATAACAGACTT  
AGAAGGTTCAATTACATTGCCAGATGTTTACGGCGAAGTGACAAGAAAGTAAAAATGATAGTTGTGCAAAAGTTATGACGTCATATGGGA  
ACAAAGTTGAACATACTGCATGAAGATGTAGCAAGAATGATTTTGCATATTATAGATCAAATGAACGGTATCCCTTTTACAGAA  
CGTGGGACCGTATTTTAAACAGATAAAGAAGTGAGGAGCATATTTTATAAATGACTAAAAATAATATTATGGGTACACACAGACTTTTC  
AACAACTGTTTTAGAAATGCTTATTGACAGAACATGATGTCATTGCAGTCGTAACGCAACCAGATCGACCTGTTGGACGTAAACGTGT  
TATGACACCACCACAGTTAAAAAAGTTGCAATGAAATATGATTACCTGTATATCAGCCTGAAAAATTAAGTGGATCAGAAGAAT  
TAGAACAATTGCTTCAATTAGATGTAGATTTAATTGTAAGTCTGCTTTTGGACAATTATTACCTGAATCATTGTTGGCATTACCAAA  
ACTTGGGGCAATTAATGTACATGCATCATTGTTACCGAAGTATAGAGGTGGTGACCAATTCATCAGGCAATTATCGATGGTGAACA  
AGAAACCGGCATAACAATTAATGTATATGGTTAAAAAATTAGATGCGGGTAATATTATTCGCAACAAGCAATTAATAAGAGAAA  
ATGATAATGTCCGTACGATGCATGATAAATTAAGTGTATTAGGGGCAGATTTATTAAGAAAGCAATTTACCATCTATTATAGAGGGCA  
CAAATGAAAGTGTACCTCAAGATGATACGCAAGCAACATTTGCTTCCCAATATTCGACGCGAAGATGAGCGAATTAACCTGGAATAA  
CCAGGAAGACAAGTGTAAATCAAAATTCGTGGATTATCACCATTGCGGCTTATAGAAACGACTAAGAACTAAGTGAATAA  
TACGATGCTGAAGTCTGTGAGACTAATAAGATAAACGAGCCTGGAACCATTTATAGAAACGACTAAAAAAGCCATTATTGTTGCTAC  
AAATGATAATGAAGCTGTTGCAATTAAGATATGCAATTAGCTGGGAAAAAGAGAATGTTAGCTGCCAATTTAAGTGGTGGCG  
AAAACACACTAGTAGGGAAGAACTTATATGATAGAAAACGTGAGAAGTCTTGCTTTTGACACGATTCAAGATATATTAATGAAG

GTGCGTATAGTAACCTTGCGTATTAATGAAGTGTTGTCAGAAAATGAATTAATGCAATGGATAAAGCCTTATTTACAGAAAATTGTCT  
ACGGAACCGTTAAAAGAAAATATACGTTAGATTTTTATTTAAAGCCTTTTGTGAAAACAAAAGATTAAAGGCATGGGTTAGGCAATTAT  
TATGGATGAGTATTTATCAATATGTTTATTTAGATAAAGTTCCAAATCATGCCATTATTAATGAAGCAGTTGAAATAGCAAAAAGAAC  
GCGGTGGCTATCATAATGGTAATGTCGTAATGGTATTTTACGTACAATGATGCGTAGTGACTTACCTGATTTTAAATGAAATTGCAG  
ATCCTAAAAAAGAATGGCAATCGAATATAGTAGCCGAAGTGGATTATAGATCATTGGGCAACACATTATGGTCTCGAAGAACT  
GAAACAATTTTACAGTCATTTTTAGAAACGACATCAACAACTGTGCGTGCCAACTGACGCGAGCATCATTAGATGATATTATTGAA  
AAGTTGCAAGACGAAGGTTATGACGTTGAAAAAGATCATGACTTACCTTATTGTCTCCATATAGGTGGACAACCAATTATTCATTCT  
CGTTCATTTAAAGATGGATTTCGTTTCAATTCAAGATAAAAGCTCAATGTTTGTGTCACACATTATGAATGTAGACCGACATGATCAC  
GTATTAGATGCATGATGACCTGGCGGTAAAGCTTGTACATTTGCTGAAGTTTTAATGCCAGAAGGGCAAGTTGACGCTTCAGAT  
ATACATGATCACAAAATAGACTTAATTAATTTTAAATATAAAAAAATTACGATTAACAAATATTTAAAGCTTTTCAACATGATGCCGACA  
AAACCTTATGATAAAACATACGATAAGATACTTGTGATGCACCATGTAGCGGATTAGGTGTAATGAGACATAAGCCGGAGATTAA  
GTATACTCAAAGCAAACAACATATTGAGTCACTAGTTGAATTACAGCTTGAATATTGGAATTTGAAAAATGTAAAAACAATGTAAAAATAG  
GTGGCGAAATCATCTATTCAACATGTACAATTGAGCAACTAGAAAATGAAAACGTGATTTATACGTTTTTAAAAAATAAAAAAC  
TTCGAATTTGAACCGTTTCAACATCCGATAACTGGAGAGTTGGTCAAAACGTTACAAATCATGCCGCAAGACTTTAATTCAGATGGA  
TTCTTTATCACTAAGATAAAAAAGAAAGGACAAATTAGGAATGATAACTGCTGAAAAGAAAAAGAAATAAAATTTCTTCCAAATTTT  
GACAAGCAATCAATATATTCATTGCGATTGACGAAATGCAAACTGGCTCGTTGAACAAGGTCAACAAAAATTTTCGAGCGAAACA  
GATTTTTGAATGGTTATATCAAAAAAGAGTAGATTTCGATTGATGAAATGACGAACTTATCGAAAGACTTACGACAGCTTTTAAAG  
ATAACTTTACTGTTACAACCTTAAACAACGTAGTAAACAAAGAAAGTAAAGACGGTACAATTAATTTCTTATTGAATTACAAGATG  
GCTATACAATTGAAACGTGTTTTAATGAGACATGATTATGGAAATTCAGTATGTGTAAACGACACAAGGATGGTTGCGTATCCGATGTGA  
CGTTTTGTGCTTCTACACTTGGCGGCTTAAAAAGAAACCTTGAAGCTGGCGAAATTTGTTTACAAGTTTAAACAGTTCAAAAAGCCC  
TTGATGCTACAGAAGAGCGCGTATCTCAAATTGTCATAATGGGTATCGGTGAACCATTTGAAAATTATGATGAAATGATGGACTTTT  
TAAGAATCGTCAATGATGATAATAGTTTAAATATTGGTGCACGTCACATTACAGTATCAACATCAGGTATCATTCTAGAAATATACG  
ACTTTGCGGATGAAGATATCCAAATTAATTTTGCTGTAAGCTTACACGCCGCAAAAGATGAAGTGCGATCACGCTTGATGCCAATTA  
ACCGTGCAATATAATGTTGAGAAGTTAATCGAAGCAATTCAATATTATCAAGAAAAACAATCGTCTGTTACTTTTGAATATGGTC  
TGTTTGGTGGTGTGAATGACCAACTAGAACATGCAAGAGAATTAGCACATTTAATAAAAGGCTTAACTGCCATGTTAACTTAATTC  
CTGTCAACCATGTTCCAGAAAGAAATTTATGTGAAAACGGCTAAAAATGATATCTTTAAATTTGAAAAAGAAATTAAGAGACTAGGA  
ATTAATGCCAATACGTCGTTGAACAAGGTTTCGGATATTGACGCGAGCTTGTGGTCAATTAAGAGCAAAGGAACGACAAGTAGAAAA  
GAGGTAAAGACAAATGCTAGAGGCACAATTTTTTACTGATACTGGACAACATAGAGATAAGAATGAAGATGCGGGTGGTATTTTTT  
ATAATCGAACTAATCAACAACCTTTTAGTTCTGTGTGATGGTATGGGCGGCCATAAAGCAGGAGAAGTTGCAAGTAAATTTGTTACA  
GATGAGTTGAAATCCCGTTTTGAAGCGGAAAACTTTATAGAAGAACATCAAGCTGAAAATTTGGTTGCGTAATAATATAAAAGATAT  
AAATTTTCAGTTATATCACTATGCACAAGAAAATGCAGAAATATAAAGGTATGGGTACAACATGTGTTTGTGCACTTGTTTTTGAAAA  
ATCAGTTGTGATAGCAATGTCGGTGATTCTAGAGCCTATGTTATTAATAGTAGACAAATTTGAACAAATTAAGTATGATCACTCATT  
TGTTAATCATCTTGTTTTAAACGGGTCAAATTACGCCGGAAGAAGCATTTACACATCCACAACGTAATATTATTACGAAGGTGATGGG  
CACAGATAAACGCTGTGAGTCCAGATTTGTTTATTAAGCGATTAATTTTATGATTATTTATTTAAATTCAGATGGAATTAAGTAT  
TATGTTAAAGACAATGAAATTAAGCGTTTGTAGTAAAGAAAGGTACAATAGAAGATCATGGTGATCAATTAATGCAATTATGGCATT  
AGATAACCATTGCAAGATAACGTTACTTTTACTACTCGCGCTATTGAAGGTGATAAAGTATGATAGGTAAAAATAATAAATGAACG  
ATATAAAATTTAGATAAGCTTGGCGGCGGTGGCATGAGTACCGTTTATCTTGCTGAAGATACGATACTTAACATTAAAGTTGCAAT  
TAAGGCGATTTTTATACCACCTAGAGAAAAAGAAAGAACATTAACGCTTTTGAACGAGAAGTACATAACTCATCACAGCTATCAC  
ATCAAAATATAGTAAGTATGATCGATGTTGATGAAGAAGATGACTGTTACTACTTAGTAATGGAATATATTGAAGGTCCGACTTTGT  
CTGAGTATATTGAAAGTCATGGGCCATTAAGTGTTGACACGCGGATTAATTTACGAATCAAATATTGGATGGTATTAACATGCGC  
ATGATATGCGTATTTGATACATAGAGATATTAAGCCACAAAATATATTAATTGACAGCAATAAAACGTTGAAAAATTTTGATTTTGAA  
TTGCTAAAGCTTTAAGTGAGACGCTTTTAACTCAGACTAATCATGTGTTAGGTACTGTGCAGTACTTTTCGCCAGAACAGCAAAAG  
GTAGGCAACGGATGAATGATACAGATATTTATCTATAGGTATTGTGTTATATGAAATGCTTGTGGTGAAACCCCTTTAATGGAG  
AAACTGCAAGTTAGCATTGCGATTAAACATATTCAGGATTCTGTGCCAAATGTGACAACAGATGTACGTAAGGATATTCGCAATCTT  
TAAGTAATGTCAATTTTACGCGCTACAGAAAAAGACAAAGCGAATCGTTACAAAACAATTCAAGAAATGAAAGATGATTTGAGTAGT  
GTTTTACATGAAAAATCGAGCGAATGAAGATGTCTATGAACTCGATAAAATGAAAACGATAGCGGTACCTTTGAAAAAAGAAGATCT  
AGCAAAGCATATTAGTGAACATAAGTCAATCAACCTAAACGTGAAACGACGCAAGTACCTATTGTAAATGGGCTGCTCATCATC  
AGCAATTTCCAAAAGCCAGAAGGTACGGTTTACGAACCAAAACCTAAAAAGAAATCAACACGAAAGATTGTGCTCTTATCACTAATC  
TTTTCTGTTGTTAATGATTGCACTTGTCTTTTGTGGCAATGGCAATGTTTGGTAATAAATACGAAGAGACACCTGATGTAATCGGGA  
AATCTGTAAAAGAAGCAGAGCAAAATATTCAATAAAAAACAACCTGAAATTGGGTAAAAATTTCTAGAAGTTATAGTGATAAATATCCT  
GAAAAATGAAATTTAAGACAACCTCCTAATACAGGTGAACGTTGAAACGTTGACAGTGTGATGTTGTTATATCAAAAAGGGCCC  
TGAAAAGGTTAAATGCAAAATGTCAATTTGTTTACCTAAGGAGGAAGCCATGCAGAAATTAATAATCGTTAGCTCTAAAGATGTTA  
CGATTGAAAAAGTATATAATAATCAAGCGCCAAAAGGATACATTGCAAAATCAAAGTGTAAACCGCAAAATACTGAAATCGCTATT  
GATTCTAATATTTAACTATATGAATCTTTAGGCATTAAGCAAGTTTATGTAGAAGACTTTGAGCATAAATCCTTTAGCAAAGCTAAA  
AAAGCCTTAGAAGAAAAAGGGTTTAAAGTTGAAAGTAAGGAAGAGTATAGTGACGATATTGATGAGGGTGTATGATTCTCAATC  
TCCTAAAGGAAAAATCAGTAGATGAGGGGTCAACGATTTTCATTTGTTGTTCTAAAGGTAAAAAAGTGACTCATCAGATGTCAAAA  
CGACAACTGAATCGGTAGATGTACCATACACTGGTAAAAATGATAAGTCAAAAAAGTTAAAGTTTATATTAAGATAAAGATAAT  
GACGGTTCAACTGAAAAAGGTAGTTTCGACATTACTAGTGATCAACGTATAGACATTCTTTAAGAATGAAAAAGGAAAAACAGC  
AAGTTATATTGTTAAAGTTGACGGTAAAACTGTAGCTGAAAAAGAAAGTCAGCTATGATGATGTATAAATATAAATGAAGTAATGT  
ACCGAGTTTCTATTGGAAGTCTCGGTATTTTTATGTTGAGATTGCGGTGATGTTTTAAATGCTTTCATGTCATATATACAGGTGAGC  
ATTGTCTATCAATTTCTGTATCACTCTCACAATATTTATATCATTTGAAATGATCATTATATATTAATTTTCCAGTCTTTGATATAATA  
AATGCAGTAAAAATTAATCGAGAGGTGCCATTTTGAAGACAGGTGCAATAGTGAAATCAATTAGTGGGGTATATCAAGTAGACGTTA  
ATGGCGAACGTTTCAATACAAAACACGAGGATTATTTAGAAAGAAAAAATTTTACCGGTAGTTGGTGTATAGTGGAATTTGAA  
GTACAAAACATTAACGAAGGTATATTTCATCAAGTGTTTGAAGCGGAAAAATGAGTTGAAAGACCACCTGTAAGTAATATAGATAC  
ACTAGTAATTGTAATGAGTGCTGTGAGCCAAATTTTCAACGCAATTATTAGATCGATTTTTAGTTATTGCACATTTCGTATCAGTTA  
AATGCGAGAGTTTTGGTGACTAAAAAAGATAAAACACCAATTGAAAAGCAGTTTGAATAAATGAGTTGTTGAAAAATATATGAAA  
ATATTGGCTATGAGACTGAATTTATTGGAATGATGATGATGCAAAAAAATTTGTAAGCTTGGCCAGCTGGACTTATAGTACTTA  
GTGGTCAATCAGGTGTCGTAAGTCCACTTCTTAACTATTATCGTCCAGAAATTAATCTTGAGACAAATGATATCAAAAATCAT  
TAAATCGAGGAAAGCATACTACAAGACATGTGCAACTATTGCAACGTCAAAACGGTTATATTGACAGACACCTGGATTACAGTGCT  
TTAGATTTTGATCATATAGATAAAGATGAAATAAAAGATTATTTCTTGAATTAATTCGATATGGTGAAACATGTAAGTTTGAAGAA  
TGTAATCATATCAAGAACCTAATTGTAATGTAAAGCATCAATTAGAGATAGGGAATATTGCGCAATTTAGATACGACCATTATTTA

CAACTATTTAATGAAATTTCAAATAGAAAAGGTTAGATATTAATGACAAAACATATCCATCATTATTATCTGTTGATTTTTTGGATT  
TACAACATGAATTAACGACTTGAAGAAGCAGGTGTCGACGGAGTTCATTTTGATGTTATGGATGGTCAATTTGTGCCATAATATAT  
CTATTGGTTTACCAATATTAGATGCAGTAAGAAAAGGCACAACATTACCTATAGACGTACATTTGATGATTGAAAAATCCAGAAAAAG  
TATATTGCATCATTTCGAGAACATGGTGCCGATATGATTTCAATTCATGTGCAATCAACGCCTCATATTCATCGTGTATTCAAATGA  
TTAAACATTTAGATAAAAAAGCTGGTGTAGTAATTAATCTGGTACACCAATATCACAAATTGAACCTATTTTAGACATTGTTGATT  
ATGTAAGTATGATGACAGTTAACCCAGGGTTTGGTGGTCAATCATTTATGATCAATGCGTAGAAAAAATAGCGGGTCTTAATGCTA  
TTAAAAATGGAACGTCAATTAACCTTTGATATTGAAGTTGATGGAGGCGTAAATACCGATACAGCGAAAGTTTGTGTTGAAAAATGGT  
GCTACAATGCTAGTAACAGGTTCAATTTTCTTTAAACAAGAGGATTAAAAAAGTCAACACAAGGATTGAAAGGTTGAGTGTATAT  
GCATATAAATTTATTATGTTCTGATCGACACTTGCCGCAAGATATTTGGGCCAAAAGTAATGAAGGTAATGGGGCGGCGTTGATA  
GAGGTGCTTTGATTTTATTGAAGCATCAAATTATCCCTTTTTTCTCAGTGGGAGACTTTGATTACAGTCAGTAAAGAAAGAACGCCAAC  
TTTTAACAGAACAGTTACAAATCAAACAGTTCAAGCTGAAAAAGCTGATACGGATTTAGCTTTAGCGGTTGATAAAGCTGTTGCAC  
TTGGATTTGATAGTATTACAATTTATGGTGAACAGGCGGACGATTAGATCACTTTTTTGGGGCAATTCAGTTATTATTGAAAAAAG  
CATATTATAACATGATGTTTATATAGAAGTTATCGATCAACAAAATAAAATTGAATTATTGCTTAAAGGTCAACATACAGTTGAAA  
AAGATAAGAGTTATCCGTACATTTTATATACCGATGACTGATGATGTAAGACTTTCTCTAGCAGGTTTAAATATAATTTAGCTAG  
ACAAATGCTTAATATAGGTTCTACTTTAACTATTTCCAATGAAATTGAGTCTTTGCAAGCGAAAGTAACGTACATGATGGGTTGAT  
TTTGCAAATTAGAAGTACAGATTTAAATTAAGTATATTCAAATTTGTGAGGATTTTAAATAAAGTGCATGAGTTATTTAATAAAGTG  
ACGTTTATAGATAGAATTTATAACATAATAATAGATGAATCACGCTGTAATTAATGAAGATTATGGCGTGATTTATTATTGAAAGGA  
AAATTTGATAGTCTAGTACATTGATTTATGTGCCAAAATCGATTAAGTGAAGTCAATTTGACAGAGAACCAATTTAAACAG  
TATTAACCAAAATTAATTGATGTTGCAATTTCACTATGAACCATTAATGATTGTTGTTGGTAAACAAAAAGAACTAAGAGGTTGAGC  
TCTTAGTCTTAAGTAAATGCGTCTCCACATAAGGTACACATTTTTATGTGCAATATATTTATTAAGTCTAGTTACTTTACCAGATT  
TTAAAGCACGTGCAGAAACCCAACTTTTTAGGTTTACCGTCAACTAGGATTCTAACTTTTTGAAGGTTAGCGTTCCATCTACGTTT  
AGTAGAGTTTAAAGCGTGTGAACGTCTGTTACCAGTCAAGCTTTACGACCTGTTACGAAACATTGTTTACCCATATGAGTACCTCC  
TTAATAAATATAAATACACATAACTACTTATATACCTTAATTAAGATAGCATAGTTTCATTTGAAAAACAAATGAATAATTTTCACAT  
AAAAGTCAAAAAATACTGAGTTTGTGATATAATTGTAGACTGTGAAGTTATGTAGTATGATATTTTAGAGAAAATAAGTGAATGAAA  
CATTTAAATTTTTATTTAATGATACTACATCTATTAAGAAAGAAACGCCTATAGATAATCGTCATGAGTGTAATTTCAATTTACTCAA  
AATATAATAGGTGATTTAAGCGTAAGTCAATCTGATAAGTTGTACCATTGATATTTTATAAAAAATAATCAATGAAACTTAAAGCGTT  
TATGACTACACTAAGTGGTAAAAATTTAAAAAGTGATTAGGGAACCAAGTAATAAATAAACTTTGAAATTTAGGAGGGCAAGATATGA  
CATTAGAGATTTCAAATGATTACGGTAAAATTGATATTTCAAACGAAGTGATTGCTTCGGTTGTAGGTGGAAGGCCGTTGAATGTT  
ATGGTATTGTAGGTATGGCATCTAGACAACAAGTTAGAGATGGTATTGCGGAAATACTAGGACATGAAAATTATGCTAAAGGCATC  
AAAGTAACTGAAAATAATGGCGTAGTGGATATAGATATGTACATTATTGTAAGTTATGGTGTGAAAATATCTGAAGTTGCCAATAA  
TGTACAATCAACAGTGAAATATACTTTGGAAGAAATCACCTAATGTATCAGTAAATTCAATCAATATATATGTACAAGGTGTACGTGT  
GAATAATACAGGCAAGAAAGCTTAGGAGGACAACCTTGAAATGATTAGCAAAATTAATGGTAAATATTTGCCGATATGATTATACA  
AGGGGCACAAAATTTATCTAACAATGCAGATTTGGTAGATTCTTTGAATGTGTATCCAGTGCCAGATGGTGATACAGGAACAAATA  
TGAATCTTACTAGTACTCAGGTCGCGAAGAAGTAGAGAATAATTTGTCGAAAAATATCGGCGAATAGGTAAACCAATTTCTCGAAA  
GGTTTCAATAGGGTGCAAGAGTAACTTGGTGTCATCTGTGCAATTAATTCAGAGGATTTTGTAAAAATATTGAAAGTGAATCT  
GAAATTAATTTCAAATTTGTTAGCTGAAAGTTTTCAAGCTGGTGTGAAACGGCATATAAAGCTGTTATGAAACAGTTGAAGGTAC  
AATACTTACAGTTGCAAAAAGATGCTGCGCAAGCTGCAATAGAAAAAGCAAAATAATACTGAAGATTGTATAGAATTAATGGAGTACA  
TTATTGTAAGGCAATGAATCACTTGAACACACACCAAACTTATTAGCTGTACTTAAAGAAGTTGGTGTGTTGATAGTGGCGGTA  
AAGGTTGTATTGCGTTTACGAAGGATTCTTAAAGCGCTTAAAGGTGAAAAAGTTGAAGCCAAAGTTGCAAGATAGATAAAGAT  
GAATTTGTACATGATGAACATGATTCCATGGTGTAAATTAATACTGAAGATATTATTTATGGCTATTGTACTGAAATGATGGTTCGTT  
TTGGAAGAATAAAAAAGCCTTTGATGAACAAGAATTCAGGCAAGATATGAGTCAATTTGGTGATTCTTTATTAGTCATTAATGATG  
AAGAAATTTGTGAAAGTTCACGTGCATACCGAATACCCAGGTAAAGTGTTAATTATGGTCAACAATATGGTGAATTAATTAACCTA  
AGGTTGAAATATGAGAGAACAGCATCGTGAAGTGATTCGAAAAGAACAGCACACAGCTAAACCGAAAAATGGAAACGGTTGAAC  
AGCGATTATTACTATTTCTATGGGTGAAGGTATTTAGAGATATTTAAATCAATGGGTGCCACACATATCATTAGTGGTGGACAAAC  
GATGAATCCTTCTACAGAAGATATCGTTAAAGTCAATTGAACAATCAAAATGTAAACGTGCAATTTATTTACCGAATAATAAAAAATAT  
CTTAATGGCAAGTGAACAAGCAGCAGTATTGTTGATGCAGAAGCAGTTGTTATTCCAACGAAATCTATTCTCAAGGTATAAGCG  
CACTATTCCAATATGATGTGGACGCAACACTTGAAGAAAATAAAGCGCAAATGGCTGATTCAGTAAATAACGTTAAATCTGGTTCA  
TTAACGTACGCTGTTCTGTGATACGAAAATTGATGGCGTTGAGATTAAAAAAGACGCGTTTATGGGCTTGATTGAAGATAAGATTGTA  
AGCAGCCAAAGTGATCAATTAACAACGGTTACTGAGTTGTTAAATGAGATGTTAGCAGAAGATAGTGAATATTGACTGTGATTAT  
TGGTCAAGATGCAGAGCAAGCAGTTACAGATAACATGATAAACTGGATTGAAGAGCAATATCCAGATGTAGAAGTGGAAGTTTCA  
GAAGTTGGACAACCAATTTTCAATATTTCTTTAGTAGAATAAAAAATTTAAATAAAAAATACCAATGATAAATCACTAGTTGG  
TAGTTTTTTATTTGCTATTTTAGTGAGATAGCGGTTAAAGTATCACTTCGAGTTGCTAAACAATGTCATGTAACCTTAGTCATG  
ATAAAATAAAATAACATACTAAATGATACGTAATAAATAAACAATAGGTGATTTATTTTGGCTAAAGTAAACTTAATAGAAAAGT  
CCATATTCTCTTTTACAATTAAGGATATAGGTCCTAAGAAAATAGAAGTATTGCAACAATAAATATTATACAGTGGAAGATCTT  
GTTCTTTATTTGCCAACTAGATATGAAGATAATACAGTGATTGATTTGAATCAAGCAGAAGATCAATCTAACGTTACGATAGAAGGA  
CAAGTATATACAGTCCAGTAGTTGCATTTTTTGGAAAGAAATAAATCAAAATTAACCGTTTCAATGTTAAATAATATTGCTGTC  
AAATGTATTTTTTTCAATCAACCGTATTTAAAAAAGAAAAATCGAATTAATCAAACTATAACTGTTAAAGGTAAGTGGAATAGGGTT  
AAACAGGAAATTAAGGTAATAGGGTTTTCTTTAATTCACAAGGGACACAACTCAAGAAAACGCAGATGTTCAATTAGAACCAGT  
CTATCGTATTAAGGAAGGTATTAACAAAAAGCAAATACGAGACCAAAATAGACAAGCGTTAAATGATGTGACAATTCATGAATGGT  
TAACGTAGTAACATAAGAAATATAAATTAGGACCTTGGACTTTACTTTGAACACATTACATCTCAAAATGAAGGAT  
TTATTACGTGCTCGTAGAACCTATGCATTTACTGAACTGTTTTTATTGCAATTACGTATGCAATGGCTAAATAGATTAGAAAAAGTCAT  
CTGACGAAGCAATTGAAATTGATTATGACATAGACCAAGTTAAATCATTTATTGATCGTTTACCTTTTGAACCTAACTGAAGCACAGA  
AATCCAGTGTTAATGAAATTTTATAGAGATTTAAAGCACCAATACGTATGCATCGATTACTTCAAGGTGATGTAGGTTACAGAAAAA  
CAGTAGTTGCTGCAATTTGTATGTATGCGTTAAAAACGCTGTTTATCAATCAGCATTGATGGTACCAACTGAAATTTTAGCAGAGC  
AACATGCTGAAAGTTTAAATGGCTTTATTTGGAGATTCTATGAACGTTGCATTGTTAACTGGGTGAGTAAAGGTAAGAAACGAAAG  
ATACTTTTAGAACAACTTGAAAAATGGTACGATTGATTGTTAATTGGAACCCATGCTTTGATTCAAGATGATGTGATTTCCATAATG  
TTGTTTATGACAGCAAGCCGATACCAAGAACACTAGCAATATCAGTTTGGTGAGATGGATGTTGCTTCAATTAAGCAATTAACCA  
AAAGGTGTAAGCAATATCATTACTTTGGGCAAGCATGAGCAATACGATAAAGTTTGTGATGCAAAATGTTGTCGATTGTACGAGTC  
AGGTCGTCAAGCATATGTCATTTGCCCCGTTATAGAAAGTTCTGAGCATCTCGAAGATGTTCAAAATGTTGTCGATTGTACGAGTC  
TTTACAACAGTATTATGGTGTTCCTCGTAGGGTTATTGCATGGTAAGTTGCTGCGCATGAAAAAGATGAGGTCATGCAAAAGTT

TAGCAATCATGAGATAGATGTTTTAGTTTCTACTACTGTTGTTGAAGTAGGTTAATGTACCGAATGCAACTTTTTATGATGATTTAT  
GATGCGGATCGCTTTGGATTATCAACTTTACATCAGTTACGCGGACGTGTGGGTAGAAGTGACCAGCAAAGTTACTGTGTTTTAATT  
GCATCCCCTAAAACAGAAACAGGAATTGAAAGAATGACAATTATGACACAAAACCGGATGGATTGAAATTGAGTGAACGAGACT  
TAGAAATGCGTGGTCTGGCGATTTCTTTGGTGTAAACAAAAGTGGATTGCCAGATTTCTTAGTTGCCAATTTAGTTGAAGATTATCG  
TATGTTAGAAGTTGCTCGTGATGAAGCAGCTGAACCTATTCAATCTGGCGTATTCTTTGAAAATACGTATCAACATTTACGTCATTTT  
GTTGAAGAAAATTTATTACATCGTAGTTTTGACTAATTGCCATGCTGATTTGTCAATTTGAGTGCAACACTTCGTTAATTGAGTGATA  
TGACACTTGAACCTATTTAAATGTAAAGTGGTATTTTAACAATTTATAAAATTTTCGACTAAATAATAGCTAAATATTACAGTTATTTGT  
TGAGTCGGTTAAATAGAAAGTGTTATGATATGTGAGGAATGTTTAAAGACTAGGTACTAAAAAATGAGGGGTGAGACGTTGAAACTA  
AAGAAAGATAAACGTAAGAGAAGCAATCAGACAACAAATTGATAGCAATCCCTTCATCACAGACCATGAACTAAGCGACTTATTTCA  
AGTGAGTATACAAACAATTCGTTTAGATCGCACTTATTTAAACATACCAGAATTAAGGAAGCGTATTTAAATTAGTTGCTGAAAAGA  
ATTATGACCAAATAAGTCTATTGAAGAACAAAGAATTTATTGGTGATTGATTCAAGTCAATCCAAATGTTAAAGCGCAATCAATTT  
TAGATATTACATCGGATTCTGTTTTTCATAAACTGGAATTGCGCGTGGTCAATGTGCTATTTGCTCAGGCAAATTCGTTATGTGTTGC  
GCTAATTAAGCAACCAACAGTTTAACTCATGAGAGTAGCATTCAATTTATTGAAAAAGTAAAATTAATGATACGGTAAGAGCAG  
AAGCAGGAGTTGTAAATCAAACGCAAAACATTATTACGTCGAAGTAAAGTCATATGTTAAACATACATTAGTTTTCAAAGGAAAT  
TTTAAATGTTTTATGATAAGCGAGGATAAAATTATGGTTAAATTAGCAATTGATATGATGGGTGGCGACAATGCGCCTGATATCGT  
ATTAGAAGCCGTACAAAAGGCTGTTGAAGACTTTAAAGATCTAGAAATTATACTTTCGGTGACGAAAAAAGTATAATCTGAACC  
ATGAACGAATCGAATTTAGACATTGTTCTGAAAAGATTGAAATCGGAAGTAGCCGTGTAGAGCGATTAAACGTAAGGATGATAGC  
TCAATGGTAAAAATGGTGAAGCTGTGAAATCTGGTGAAGCAGTAGGATGTGTGTCAGCAGGTAATAGTGGTGTCTTAATGTCAGC  
TGGTTTATTCATTTGTTGGACGTATTAAGGTTGAGTGAACCGGCTTTAGTAGTAACATTGCAACGTAATGTTGCAAAAGGTTTGT  
CTTTTATGACGTTGGTGCAAATGCTGATGCTAAACCTGAACACTTATTACAGTATGCGCAACTAGGGGATATTTATGCTCAAAAAAT  
TAGAGGTATTGATAATCCGAAAATCTCATTATTAATATAGGAACCGAGCCAGCTAAAGGTAATAGTTTAAAGCAAAAAATCATATG  
AGTTATTAATCATGATCATTCAATTGAATTTTGTGGGAATATTGAAGCGAAGACATTAATGGATGGCGATACAGATGTTGTAGTTA  
CCGATGGCTATACCTGGGAACATGGTCCTTAAAAATTTAGAAGGTACTGCAAAATCAATCGGTAAAATGTTAAAGATACGATTATG  
AGTAGTACTAAAAATAAATTAGCAGGTGCAATATTGAAGAAAGATTAGCTGAATTCGCTAAAAAGATGGATTACTCAGAATACGG  
TGGTTCGGTATTATTAGGATTGGAAGGTACTGTAGTTAAAGCACACGGTAGTTCAAATGCTAAAGCTTTTTATTCTGCAATTAGACA  
AGCGAAAAATCGCAGGAGAACAAAAATTGTACAAACAATGAAAGAGACTGTAGGTGAATCAATGAGTAAACAGCAATTAATTTT  
TCCGGGACAAGGTGCCCAAAAAGTTGGTATGGCAACAAGATTGTTTAAATAACAATGATCAAGCAACTGAAATTTTAACTTCAGCAG  
CAAAGACGTTAGACTTTGATATTTTAGAGACAATGTTTACTGATGAAGAAGGTAAATTGGGTGAAACTGAAAAACACGCAACCAGCT  
TTATTGACGCATAGTTCGGCATTATTAGCAGCGCTAAAAAATTTGAATCCTGATTTTACTATGGGGCATAGTTTAGGTGAATATTCA  
AGTTTAGTTGCAGTGACGTATTATCATTGAAGATGCAGTTAAAATTGTTAGAAAACGTGGTCAATTAATGGCGCAAGCATTTCTCT  
ACTGGTGTAGGAAGCATGGCTGCAGTATTGGGCTTAGATTTTGATAAAGTCGATGAAATTTGTAAGTCATTATCATCTGATGACAAA  
ATAATTGAACCAGCAAACATTAATTGCCAGGTCAAATTTGTTGTTTCAGGTCACAAAGCTTTAATTGATGAGCTAGTAGAAAAAGGT  
AAATCATTAGGTGCAAAACGTGTATGCCCTTTAGCAGTATCTGGTCCATTCCATTATCGCTAATGAAAGTGATTGAAGAAGATTTT  
TCAAGTTATATTAATCAATTTGAATGGCGTGATGCTAAGTTTCTGTAGTTCAAAATGTAATGCGCAAGGTGAAACTGACAAAGAA  
GTAATTTAAATCTAATTATGGTCAAGCAATTATATTACCAGTACAATTCAATTAACCTAACAGCAATGGCTAATAGACCAAGGTGTTGAT  
CATTTTATTGAAATTGGTCTCGGAAAAAGTTTTATCTGGCTTAATTAAAAAAATAAATAGAGATGTTAAGTTAACATCAATTCAAACT  
TTAGAAGATGTGAAAGGATGGAATGAAAATGACTAAGAGTGCTTTAGTAACAGGTGCATCAAGAGGAATTGGACGTAGTATTGCGT  
TACAATTAGCAGAAGAAGGATATAATGTAGCAGTAACTATGCAGGCAGCAAAAGAGAAAGCTGAAGCAGTAGTCAAGAAATCAA  
AGCTAAAGGTGTTGACAGTTTTCGATTCAAGCAAATGTTGCCGATGCTGATGAAGTTAAAGCAATGATTAAAGAAGTAGTTAGCC  
AATTTGGTCTTTAGATGTTTTAGTAAATAATGCAGGTATTACTCGCGATAATTTATTAATGCGTATGAAAGAACAAGAGTGGGATG  
ATGTTATTGACACAACTTAAAAGGTGTATTTAACTGTATCCAAAAAGCAACACCACAAATGTTAAGACAACGTAGTGGTGCTATC  
ATCAATTTATCAAGTGTTGTTGGAGCAGTAGGTAATCCGGGACAAGCAAACTATGTTGCAACAAAAGCAGGTGTTATTGGTTTAACT  
AAATCGCGCGCGTGAAATTAGCATCTCGTGGTACTGTAAATGCAGTTGTCACCTGGTTTATTGTTCTGATATGACAGATGCTT  
TAAGTGATGAGCTTAAAGAACAAATGTTGACTCAAATTCGTTAGCACGTTTGGTCAAGACACAGATATTGCTAATACAGTAGCGT  
TCTTAGCATCAGACAAAGCAAAATATATTACAGGTCAAACAATCCATGTAAATGGTGGAATGTACATGTAATATATTGAGCTAAA  
GCTCAAGATAAAGACGTAGTAATCAATAAATTGATAACTGATAAGCGGAACGCCTGAGCTAAAGCTAATTGACGCAGTGGTTGACT  
GGTCATCCAATGGAGAATTGCTGACCTAGTCAACTTTGCGGGGGAAATTCTAAGCAACCTAGATAAGGTTTCGAGAATTTCTCCCTA  
AGAAACACTAATCAATAAATTGATAAGAAGATTAGAGGAACGCTTAGCTAAAGCTCATGCATAAGAAACACTAATCAATAAATTG  
ATAACTGGGATAGAGGTACGCCTGAGCTAAAGCTCATGCATAAGAAACACTAATCAATAAATTGATAAGTGTTTCTAAAATTTCTA  
CTTGTTTTTTAGAATTTAAAATGGGAAAAATATAATAGTCTATGTATAGGCAATTTTAAAGGAGGTGAATCGACGTGGAAAAATTTCTGA  
TAAAGTAAAAGATATCATCTGTGACCGTTTAGGTGTAGACGCTGATAAAGTAACTGAAGATGCATCTTTCAAGAGATTTTAGGCG  
CTGACTCACTTGATATCGTGAATTAGTAATGGAATTAGAAAGCAGGATTTGGTACTGAAATTCCTGATGAAGAAGCTGAAAAAATC  
AACACTGTTGGTGATGCTGTTAAATTTATTAACAGTCTTGAAAAATAATAAATCTTACATCTGGGTCGTCAGTATTGTCGACTCAGTT  
TTTTCTTTAATTATCAATAGTTTAAACGTAATAAAGATGATTCAAGAGCAACACATAAAGGAGATAAAAATAATGTCTAAACAA  
AAGAAAAGTGAGATAGTTAATCGTTTTAGAAAGCGCTTTGATACTAAAATGACAGAGTTAGGCTTTACTTATCAAAAATATTGATTTA  
TACCAACAAGCATTTTCGCATTGAGTTTTATTAAATGATTTTAAATATGAATCGTTTAGACCATAATGAGCGTTTAGAGTTTTTGGGTG  
ATGCGGTATTAGAATTGACGGTTTCACGATATTTATTTGATAAACATCCCAACTTGCCAGAAGGGAATTTAACAAAAATGCGTGCCA  
CTATTGTATGTGAGCCCTCACTTGTAATATTTGCGAATAAAATTTGGATTGAACGAAATGATTTTACTTGGTAAAGGTGAAGAGAAAA  
CAGGGGAGCTACAAGACCATTAATATCAGATGCATTCGAAGCATTATTGGGGCATTGATTGTTGATCAAGGACTAGATATA  
GTTTGGAAATTTGCTGAGAAAGTCATTTCCACATGTAGAACAAATGATTATTAGGCGTGGTATGTTTAAACACAATTCCAA  
GAATATGTGCACCAGCAAAATAAAGGTGATGTAACCTATAATTTAATAAAAAGAAGAGGGACCGGCACATCATCTCTATTCACTTC  
AGAAGTTATTCTGCAAGGGGAAGCAATAGCTGAAGGTAAAGGGAAAAACGAAAAAAGAATCAGAACAACTGCTGCTGAAAGTGCC  
TATAAGCAATTAACAAATTAATAGAAATTTATATGATACGACATATAGGTGTTTCGATTTAGGATTTAAGGAAGAATTTTAAATA  
TTTTATGGAACAACTTCGAAATTTAATATACAAATACTAAAATATCGTATACATGTGTCTTTAAATTTGTGATAAGGAGTTTAGGA  
TGGTTATTTTAAATCAATAGATGCCATTGGATTAAAGTCTTTTGAGATCAAACCAATGTTCAATTCGATAAAGGTGTAAGTGC  
TTGTTGGTCCAAATGGAAGCGGTAAAAGTAATATTACAGATGCTATTAATGGGTGTTGGGTGAACAACTCGGCTAAATCATTACGT  
GGCTCAAAAATGGAAGATATTATCTTCTCAGGTGCAGAACATCGCAAAGCTCAAATATGCTGAAGTACAGTTAAGATTAGATAA  
TCATTTCAAAAAGCTCAGTGGTTGATGAAAACGAAGTTATTGTAACAAGAAGATTGTATCGAAGTGGTGAAGAGTACTACATAA  
ATAATGACCGTGCAAGATTAAAAAGATATTGCCGATTTATTTTAGATTCTGGATTGGGAAAAAGAGCGTATAGCATTATCTCGCAAG  
GTAGAGTTGATGAAATACTAAATGCTAAACCAATTGATAGACGTCAAATATTGAAGAAATCGGCTGGTGTACTTAAATATAAAAAA  
CGTAAGGCTGAATCATTAATAAACTTGACCAAAACAGAAGATAATTTAACGAGAGTAGAAGACATTTTATATGATTTGGAAGGTGCG

CGTAGAACCTCTAAAAGAGGAGGCAGCTATAGCTAAAGAATATAAGACACTTTCACATCAAATGAAACATAGTGACATTGTAGTTA  
CAGTGCACGATATTGATCAATATACAAAATGACAATAGACAATTAGATCAACGTTTAAATGATTTACAAGGTCAACAAGCAAATAAA  
GAAGCTGACAAGCAACGTTTAAAGCCAACAAATTCACAATATAAAGGTAAACGACATCAACTTGATAACGATGTTGAATCGCTTAA  
TTATCAATTAGTAAAAAGCTACGGAAGCCTTTGAAAAATATACGGGACAATTAATGTTTTAGAAGAACGTAAGAAAAATCAATCTG  
AAACAAATGCACGATATGAAGAAGAACAGAAAAATTTAATGGAGCTTTTAGAAAAATATATCAAATGAGATTTCTGAAGCTCAAGAT  
ACTTATAAGTCTCTGAAAAAGTAAACAAAAAGAACTCAATGCTGTCATTCTGTGAACCTTGAAGAACAACATATATGTTTCAGACGAAGC  
ACATGATGAAAAATTGGAAGAAATTA AAAACGAATACTATACATTAATGTCTAGAGCAATCAGATGTTAACAATGATATTCTGTTTTT  
AAAGCATACTATAGAAGAGAATGAGGCTAAAAATCAAGACTAGATTCTCGATTAGTTGAAGTTTTTGAGCAATTGAAAGATATTC  
AGGGTCAAAATAAAAACGACAAAAAAGAATATCAACAGACCAACAAAAGAACTTTCTGCTGTAGATAAAAGAAATTA AAAATATAGA  
AAAAATATCTCACTGATACAAAAAAGCACAAAATGAATACGAAGAGAAAATTGTATCAAGCATATCCGAAAAAATGAAA  
ACACGTATTGATAGTTTGGCAACGCAAGAGGAAGAATATACTTATTTTTTCAATGGCGTCAAACATATTTTTGAAAGCTAAAAATAAA  
GAATTAAGGGTATTCATGGTGCAGTTGCGGAAATTATTGATGTGCCATCTAAATTAACTCAGGCAATTGAAACAGCATTAGGTGCT  
TCATTACAACATGTCATTGTAGATTGAGAAAAAGATGGACGCCAGGCTATTCAATTTTTAAAAAGAACGTAATTTAGGTCTGTCGACG  
TTTTTACCATTAAATGTTATACAGAGTAGAGTGGTAGCGACTGATATTAATCTATTGCTAAAGAGGCAAACGGATTATTAGTATC  
GCTTCGGAAGCAGTTAAAGTAGCACCAGAATATCAAAATATTATCGGGAATTTATTAGGTAATACGATTATCGTTGATCATTAAAAAG  
CATGCAAAATGAATTGGCACGTGCGATTAAATATCGAATCTGATTGTTACTTTGGAAGGTGATATTGTAATCCTGGTGGTTCTATG  
ACTGGTGGTGGCGCTCGTAAGTCCAAAAGTATTCTGTCTCAAAAAGACGAGTTGACAACAATGAGACACCAATTAGAAGATTACTT  
GCGTCAACAGAAATCTTTGAACAACAATTTAAAGAGTTGAAGATGATCAATTAAGTGAACCTGATTTTTGAAAAAGTCA  
AAAAGCATAATACACTTAAAGAGCAAGTGCATCATTTTTGAAATGGAGCTCGATAGATTAACATACAGAAGAAACAAAATAAAAA  
TGATCATGAAGAATTCGAATTTGAAAAAATGATGGTTATACGAGTGACAAAAGTCGACAACTTTGAGTGAAAAAGAAACTCATT  
TAGAAAGTATTAAGCATCTTTAAACGACTAGAAGATGAAATTGAACGCTACACAAAACCTTTCTAAAGAAGGTAAGGAAAGCGT  
AACTAAAACACAACAACGTTACATCAGAAACAATCTGATCTTGCTGTGGTTAAAGAGCGTATTAAACACAACAACAGACAATAG  
ATCGATTAAATAATCAAAGTCAACAACTAAACATCAATTAAGAGATGTTAAAGAAAAAATTGCATTCTTAATTCGGATGAAGTG  
ATGGGCGAACAAAGCTTTTCAAAATATTAAGATCAAAATTAATGGTCAACAAGAAACGAGAACACGCTTATCTGATGAATTAGATAA  
ATTGAAACAACAACGATTGAGTTGAATGAACAATCGATGCGCAGGAAGCTACACTACAAGTTTGTCCACCAAGATATTTTAGCTA  
TCGAAAACTACTACCAAGATATTAAGCTGAACAATCAAAGTTAGATGATTAATTCATCATGCGATAGATCATTTAAATGATGAAT  
ATCAATTGACTGTTGAACGTGCGAAATCTGAATATACGAGTGATGAATCGATTGACGCATTACGTA AAAAAGTTAAGTTAATGAAG  
ATGTCGATTGATGAACTAGGTCCTGTAAACTTAAATGCAATTGAACAATTTGAAGAGTTAAATGAACGTTATACATTTTTAAGTGAA  
CAACGTACAGATCTTCGTAAAGCTAAAGAAACATTAGAGCAAAATTAAAGTGAAATGGATCAAGAGGTTACTGAAAGATTTAAAGA  
AACTTTCCATGCTATTCAAGGACATTTTACAGCTGTGTTCAAACAATTTGTTGGTGGAGGCGATGCAGAATTGCAATTAACGTAAGC  
CGATTATTTAACAGCTGGTATTGATATTGTGGTACAAACCACGGGTAAAAAGTTGCAACATTATCGTTACTGAGTGGTGGTGACG  
TGCATTAACCTGCTATTGCTTTACTATTTGCAATTTTAAAAAGTAAGATCTGCACCTTTTGTATATTAGATGAGGTTGAAGCTGCACTA  
GATGAAGCAAATGTTATTAGATACGCAAAATATTTAAATGAGTTATCAGACGAAACACAATTCATTGTTATTACACACCGTAAAGG  
AACAATGGAATTTGCGGATAGGTTATACGGTGTAACAATGCAAGAATCAGGTGTTACTAAACTTGTGAGTGTGAATTTAAATACAA  
TAGATGATGTGTTGAAGCAGGAGCAATAATGAGCTTTTTTAAACGCTTAAAGATAAGTTTGCAAAATAAGAAAAATGAAGAAG  
TTAAATCCTTAACAGAAGAACAAAGGTCAAGACAAATTAGAAGATACACATTCTGAAAGTTCAACGCAGGACGCAATGATTTAGCA  
GAAAATGCTGAAGTGAAAAAGAAGCCACGCAAGTTGAGTGAAGCGGATTTTGATGACGATGGCTTAATATCAATTGAAGATTTTGA  
AGAAATTGAAGCTCAAAAAATGGGTGCTAAATTTAAAGCAGGACTCGAAAAATCTCGTCAAAATTTCCAAGAACAAATTAATAATT  
TGATAGCGAGATATCGTAAAGTAGATGAAGACTTTTTTGAAGCTTTAGAAGAAATGTTAATCACTGCAGACGTCGGTTTTAATACAG  
TGATGACGTTAACTGAAGAATTACGTATGGAAGCACAACGACGTAATATTCAAGATACTGAAGATTGCGTGAAAGTCATTGTTGAA  
AAAATCGTAGAGATTTACCATCAAGAAGATGATAATTCAGAAGCTATGAACCTTAGAAGATGGTCGTTTAAATGTCATTTTAATGGTT  
GGTGTGAATGGTGTGGTAAAAACAACAATTTGAAAAATTAGCTTACCAGATATAAAATGGAAGGTAAAAAGTAATGTTAGCTGC  
GGCGATACCTTTTAGAGCGGGTGCTATTGATCAAATTGAAAGTTTGGGGCAACGCTGTTGGTGTAGACCAATTAAGCCAAAGTGAAG  
GTTCTGATCCAGCTGCTGTTATGTATGATGCGATTAAATGCCGTAAAAACAAAGGTGTTGATATTTTAACTGTGATACCGCTGGAC  
GTTTACAAAATAAAACAAATCTAATGCAAGAATTAGAAAAAGTTAAGCGTGTAATTAATCGAGCAGTGCCAGATGCGCCTCATGAA  
GCATTACTATGTTTAGATGCTACAACCTGGTCAGAATGCGTTGTCACAAGCTAGAACTTTAAAGAAAGTAACAATGTTACAGGTATT  
GTATTAACGAAATTAGATGGTACAGCCAAAGGTGGTATCGTATTAGCCATTCTGAATGAATTGCACATTCCAGTTAAATATGTAGGT  
TTAGGTGAGCAATTAGATGACTTACAACCATTTAACCTGAAAGTTATGTTACGGCTTATTCGCTGATATGATTGAACAAAATGAA  
GAAATAACAACAGTTGAAAAATGATCAAAATGTAACAGAAGAAAAGGACGATAATCATGGGTCAAAATGATTTAGTTAAAAACGTTA  
CGAATGAATTTTGTGTTGATTTTTATCAATCCTTATTGACGAATAACAACGTAATTTATTGGAATTTTTTATCTTGAAGATATTTC  
TTTAAGTGAATCGCAGATACCTTTAATGTGAGTAGACAGCAGTTTATGATATAAGAAGAACTGGCAGTTTAGTTGAGAAATTA  
TGAAAAGAAATTGGAATTATACGAAATTTGAGCAACGCGAGAAATATATGATGAAATGAAACAACATTTAAGCTAATTCAGAA  
CAAATACAACGTTATATTCAACAATTAGAAGACTTAGAATAGATATAAATTGAGGGAGGACATCGATATGGCATTGTAAGGGTTAT  
CAGAACGCTTGCAAGCGACGATGCAAAAAATGCGTGGTAAGGGTAACTTACTGAAGCTGATATAAAGATAATGATGCGTGAAGT  
AAGATTAGCGTTACTTGAGGCTGACGTAAACTTTAAAGTGGTAAAAGAATTTATTA AACAGTATCAGAACGCGCATTAGGTTCCG  
ATGTAATGCAATCATTAACACCAGGGCAACAAGTTATTA AAAATAGTTCAAGATGAATTAACGCAGTTGATGGGTGGAGAAAATACG  
TCGATTAATATGTCAAAATAAACACCTACTGTTGTTATGATGGTTGGTTTACAAGGTGCTGGTAAAAACAACAACCTGCAGGTAAATTA  
GCATTATTGATGCGTAAAAAATACAACAAAAAACCTATGTTAGTTGACGAGATATTTATCGTCCAGCAGCGATAAATCAATTACA  
AACAGTAGGGAACAAATTTGATATTCCTGTATACAGTGAAGGAGATCAAGTAAAGCCACAACAAATTTGAACATAATGCAATTA AAC  
ATGCTAAAGAAACATTTAGACTTTGTAATCATTGATACAGTGAAGCAGGTACGATTACACATCGATGAAGCATTTAGTGAACGAATTA AAA  
GAAGTAAAAGACATTGCTAAACCAACGAAATTATGTTAGTTGTGCGATTCAATGACGGGTCAAGATGCTGTCAATGTTGCAGAATC  
TTTTGACGATCAACTTGATGTCACAGGTGTTACCTTAACTAAATTAGATGGTGATACACGTGGTGGTGCAGCTTTATCTATTCGTTCCG  
GTGACACAAAAACCAATTAATTTGTTGGTATGAGTGAAGGTTAGATGGTTTAGAGCTATTCCATCCTGAACGTATGGCATCACGT  
ATTTTAGGTATGGGTGATGTGTTAAGTTTAATTGAAAAAGCGCAACAAGATGTGGATCAAGAAAAAGCAAAAAGATTTAGAGAAAA  
AGATGCGTGAGTCATCGTTTACTTTAGATGATTTTTTAGAACAACCTTGATCAGGTGAAAAATCTAGGACCACTGGATGATATTATGA  
AAATGATTCCAGGTATGAATAAAATGAAAGGGCTAGATAAGCTTAATATGAGTGAAGGCAAAATTGATCATATTAAGCGGATTATC  
CAGTCAATGAGCGCGGCTGAAAGAAACAATCCAGACACATTGAATGATACGTA AAAAGCGTATTGCTAAAGGGTCTGGTCGTTTC  
ATTACAAGAAGTCAATCGTTTGATGAAACAATTTAACGATATGAAGAAATGATGAACAATTAAGTGGTGGCGGTAAAGGTA AAA  
AAGGTAACGCAATCAATTGCAAAATATGTTAAAGGTATGAATTTACC GTTTTTAATGTTTAAATATAACACGCTGATTTTTGTTGCA  
ATGAGATGTGCATCCCGAAAGTTATACTAAAGAATATAACTTTATGGGGTGCATATTTTTAGATACACAATAATAATTA AAAACTGA  
AATTGCGGATTTGCTAGAACATGAGGTTATTGTTGCTAATATTAATAAGTTATATTGGGGGAACGTGTGCGGTAGAAGTGGTACCAT

TCATGTCCTTACGGGATAAAATTAACATAACACGATGTGGTGAAGGCTACTATGAATTTTTATAACCTATTAACAGTCTAATTTAGT  
AATACATAGTTATTATTGTAAGAAAAAGGTTCATAAATTTTCTGGTAAAGAAAAAACTCTTTACAAACATTACACACCTGTTAA  
TATTATTTCTGTAGAAAATAAAAAATTAACATGACTTAAAGGAGATTTTATAAATGGCAGTTAAAAATTCGTTTAAACAGTTTAGG  
TTCAAAAAAGAAATCCATTCTATCGTATCGTAGTAGCAGATGCTCGTTCTCCACGTGACGGACGTATCATCGAACAAATCGGTACTTA  
TAACCAACGAGCGCTAATGCTCCAGAAATTAAGTTGACGAAGCGTTAGCTTTAAAAATGGTTAAATGATGGTGCGAAACCAACTG  
ATACAGTTCACAATATCTTATCAAAAAGAGGTATTATGAAAAAATTTGACGAACAAAAGAAAGCTAAGTAATTTAGCGTAAAAATG  
TTCTAACAATAAGAATAAAGTTCGTTTACACTGACAGTTATTACTCAATGATACGTTGGGAATATCACATGTTAGTAATATAGAACGTA  
TTGGGTACCATAATGGTGCCCTTTTCTTTGAATTATTTTCAATTAATAAGAGTGTTCAAAGCATAGAGTTGGAGGTAATAGAAT  
GAGAGTTGAAGTTGGTCAAAATGTTAACACACATGGTATTAAGGTGAAATTAAGTAAAAATCCAATTCAGACTTTACAGACGTTT  
GTTTTCAACCCGGTCAAGTGCTGACAGTTGTGCATAACAATAACGACCTTGAATATACTGTTAAGTCACATAGAGTGCATAAAGGGC  
TTCATATGCTTACATTTGAAGGTATTAATAATATTAATGATTTGAGCATTAAAAAGGGAGTTCTATTTATCAAGAGCGTGATCATG  
AAGATATCGTACTTGAGGAAAAATGAATTTTATTATTCAGATATTATAGGATGTACAGTTTGTATGATCAAGAAACACCAATAGGTC  
GTGTAATTAATATATTTGAAACAGGTGCGAATGATGTGTGGGTGATTAAAGGATCTAAAGAATATTTGATTCTTATATTGCTGATG  
TTGTAAGAAGAGTGGATGTTGAAAAATAAAAAAATTATCATCACGCCAATGGAAGGATTGTTGGATTAATGAAATTTGATTATTTAA  
CTTTATTTCTGAAATGTTTGTGTTGTTTAAATCATTCAATTATGAAACGTGCCAAGAAACAAATAAATTACAAATCAATACGG  
TTAATTTTAGAGATTATGCAATTAACAAGCACAACCAAGTAGATGATTATCCGTATGGTGGCGGACAAGGTATGGTGTAAAGCCT  
GAACCTGTTTTAATGCGATGGAAGACTTAGATGTCACAGAACAAACACGCGTTATTTAATGTGTCCACAAGGCGAGCCATTTTCA  
CATCAGAAAGCTGTTGAATTAAGCAAGGCGGACCATCGTTTTCATATCGGACATTATGAAGTTACGATGAACGTATCCGAAC  
ACATCTTGTGCAGATGAAATATCAATGGGTGACTATGTTTTAACTGGTGGAAGATTGCCAGCGATGACCATGACGTATGCTATTGT  
TAGACTGATTCCAGGTGTTTTAGGTAATGAACAGTCACATCAAGACGATTCAATTTTTCAGATGGGTATTAGAGTTTCCGCAATATAC  
ACGTCCGCGTGAATTTAAGGGTCTAACAGTTCCAGATGTTTTATTGTCTGGAATCATGCCAATATTGATGCATGGAGACATGAGCA  
AAAGTTGATCCGCACATATAATAAAGACCTGACTTAATTGAAAAATATCCATTAATAATGCAGATAAGCAAAATATTAGAAAAGAT  
ATAAAAATAGGATTGAAAAAAGGTAGTATTGTGCTAACATAATCTGAGTGTGGAACACAAAAATCACTATGATCCGCTGCTATAT  
ATTTGTGCGAGGCAAGAACATAGGTTGAAGAGGAGAATTTATAATGACAAATCACAAATTAATCGAAGCAGTAACATAATCACAAAT  
ACGTACAGACTTACCTAGTTCCGTCCTGGTGATACTTTACGTGTACACGTACGTATCATTGAGGGTACTCGTGAGCGTATCCAAGT  
ATTCGAAGGCGTTGTAATTAACGTCGTGGCGGTGGCGTTTCTGAAACGTTTACAGTTTCGTAATAATTTTCATCAGGTGTTGGCGTGGA  
ACGTACATTCCCATACACACACCAAAAAATTGAAAAAATCGAAGTTAAACGTCGTGGTAAAGTACGTCGTGCTAAATTAATTACTT  
ACGTAGTTTACGTGGTAAAGCTGCTAGAATCCAAGAAATTCGTTAATCAGCATTAAACAAAGCTATGTATGAGTCAAAATTCGACTC  
AAACAATAAAGCCATCTAGGTCACCTTTATGGAGTGATATAGATGGCTTTTTTGTCTGTTTAGTTAATGTAAAGTTGATAATGTAATT  
GTTTATCTCTCTATTATCAACGTGTTTGTCTAAAATGGTTATATAAACAAGGCTGGGACATAAATCAATGTTCTATCTCTACG  
AAGTTATATTGGCAGTAGTTGACTGAACGAAATACGCTTGTAAACAAGCTTTTTTCAAT

>031-contig\_247

AGAAGCTGGCGGAAAAGTCAGCTTACAATAATGTGCAAGTTGGGGTGGGACGACGAAATAAATTTTGCAGAAATATCATTCTGTCC  
CACTCCCATTAAATATATGCGTAGCTACATTATTTTGTCTTGCCATCTCGTGAAATAATACTACATATAATGCCAAATATAGTAA  
TTGTTATAAGTAAATAATAGTATGGTGGGGCATAGCTCAATTGAATCTTTGTTATATTTTTAGGTGCTTAAATGCCGGTCATAACACC  
ATTTACTTGTTCACCTTTAAGACTTTGATCACCTGATGTGCTTTTCATACCTTGATTATATGCTGTTGGCAAAACAATATACCCAGAT  
GAATTTTTATTTTAGTAATAGTATAACCTTGCTTTGTCTTACTAATTTGACAGCCTTAATGAATTTGAAGCGTCTTTAAGCGTGGT  
ATAATCTTCGCCGTATATCCCTTTTAAATTTACACGATACTTACCTTTAGGCAATGATAATCTAATCCTATCTGAAGCTTTAATGCGT  
ATTGTTACGGGTGTTACAAAGCGTCGATATTTATAAGTGAGTTTATTTCTTTCTGTGTATATTCATTCACTTTAACATCATGAGCTTT  
ATCCGGCGAAAGTAATTTCTAAATCCATTTCAAAATACAAATCTTTAAATTGATTAGAACTGATTTTGGCACTGTACAGTTAGACC  
ACCATATTTTGTGTTAACCTTGAATAAATGTTTGTAGGAGATTGCCAGGCTGCACTATTTAATTTAATTGTTGAATCTGATAGTAAA  
TTTTATTTGGCTTTAAATGTGTATTAACATCTTTAGTCTTGTAGAAACAATCCCTTGCAACATTGCTTGTCTTTATCTAATGGAGA  
TTTTAATCTTTATTGGAAAAGACCTTATTTGTAATATGTGCACTTGGATAATGGATGGTATTTTGAATGAATCCAACGAACCTTTA  
TTGCTTTTGTGTTTACAGCTTAATTTTAAATCCATATGGTAAGTTGTATCATGATTCACTCTAATTCGATCATTAACATTCCAAAGTG  
ATAGTAAATTTTGACGATTGCCAAGTAATCTATAAGTGCTGTTTTATCGATTGGCATATTAATTTGGAGTGTCTGTGCATAATATTT  
TAATATGTCTCCATTAATAATACTAGAAATATAATGAAATGCCATTATAATGATATATAAATGGTGAATTTAATGCATAGTCTGACAT  
ATAATCAATGCGATTAAATGGACCAGTTGCATTTTGATTTATCTTTTTATAAGCTGGTTTACATAGTTACTATGGTAATCGTGTGT  
TTCAACCTTGATAATGATTGTTGATAAGGTTTGATTGCCATATTTTATTGTTATCTAAAATGACGATTGTTGAATCATAACGATTA  
ATACTAATATTGCAACCGTTAATTTTATAACGCCATAAACTAAATTTTAAAATAACGCGCAAGCACCATTAGCAGGATAAATACCTA  
CTATAAGTGCAAGTGGGTGTGTCGGTGATAGTAATACATAAAAGTAATGCGATGATGCTTACTGGTATTGTTCTGATTAAATAATATT  
TCATATTTAATGTTGATAAATGTTGAATAAACAATCCGCAAGAGCGCTTGATGATAGTGCTAAGATATACACCAACGCTTTCTG  
GAAATGAAAAACCATTAAGCACTGTGCAAAATCTGTGATAATGAACCAATAAATAAATACCATGTTACTATTGCGAAAAGTCTA  
TAAAAGTAAAAACGATACAGTTGAATGACAATAATGCAACGATAGTAAGAATTGAAATCGTAATATAAATCCATCGCTAAAGAA  
AAAATAATGGTAATCAAGTGGTGTCAAAAACGGTATATCAACATTGGGATTTTGTCTTCTGTCAATTTCCAAAAACGCAGAAATGCC  
AGTGAATAAACCAATACACTTGATAACACACTCAAACTGTAGCAGATATGACGCAAAATTAATTTTGTGTTCTAGAGACAATGTC  
ATATTTGTAAGTGAAATGAGTCGATATAAATAGTAGCAACCTATAATAATAGCTTGATAATAACTGAAATAAAAAATTTGATAATA  
GTGTTAAGGCTATCGCAACAATGAAAATACCGATTTTGTGCTGTTGAAAAATATCTTTCCAAACCAAGATCGATAATGGTAATAAAT  
ATAATAAACTTCCATAAAATGACCAAGTAAATTAAGTATATAACGACAGTTGACATGCCGTATAAAATCGTAGCGATCATATTT  
GTTGAGCGTTTAAAGTGAATATTTTAAATAAGTAGAAGGTCACGACAAATGTTATGATAGCTCTTATCATGGCCATAATAAGTTGG  
TTTGTGCGCCAAAAATGTATTGTTGTCGGATTAAATATACCAACCGTTTCTCTCTATTTAATGAATAGAAAATTTAGCCACATTAAG  
GTGACAGCGAATAATAATATGATAGTCTTTTCATATAATCGCCACCTAATCCAAACGATGCATCATATAAACTAGAAAACTACTTA  
AATGTTCATACAAATACATTTGAAATGGCATCATTTGACGGAATCCATCTCCAGCCCCACTAAAAACAGTACCATTACAAATATAAT  
CATAGATATGAGTAGAAAATAAAAAAAGCGTTAATATTACACTAATGAAAGTTATAACAAAGAATTGTTTGACGTTTGAATTTAGC  
CACTTTTTTAAACACAACATTATCCTCAACTTTCAAAATTTAAATTAAGTTTAACTGAAACTAAAGTTAATGAGGTTCTTGATAGGTAA  
AGACGAAGATGACTGTGGAACAGATACCTTATCATAGTTACTTAACTTTTGGATCATTTTTCAGTTTATCATTAACAAATAATATTGA  
ATAATAAAAAATGTCATACCTGATAAAGATGAATGTCACTTAATAAGTAACCTTAGATTTAACAAATGATGATTTTAAATTGTAGAAAA  
TTGAAATAATCACTTATACCTAAATCTAAAGCATTGTTAAGAAGTGTGACAATGTTAAAAATAAATATAGTTGAATTAATGAATTTGT  
TCTATAATTAACAGGTTATAGATTTTAAATAATGAGAAAAGATTGACGAAAGTAAGGTGAATTAATGGTTATTCAATGGTATCCA  
GGACATATGGCGAAAGCCAAAAGAGAAGTAAGTGAACAATTAAAAAAAGTAGATGTAGTGTGTAAGTATGATGAAGAATTC

CATATAGTTCAAGAAACCCTATGATAGATGAAGTTATTAACCAAAAAACCACGTGTTGTTATATTAATAAAAAAGATATGTCTAATT  
TAAATGAGATGTCAAAATGGGAACAATTTTTTATTGATAAAGGATACTATCCTGTATCGGTGGATGCTAAGCACGGTAAAAATTTAA  
AGAAAGTGGAAAGCTGCAGCAATTAAGCGACTGCTGAAAAATTTGAACGTGAAAAAGCAAAGGGACTTAAGCCAAGAGCGATTAG  
AGCGATGATTGTTGGAATTCCAAATGTTGGTAAATCCACATTAATAAATAAACTGGCAAAGCGTAGTATTGCGCAGACTGGTAATA  
AACCAGGTGTGACCAACAACAACATGGATTAAAGTTGGTAATGCATTACAACCTATTAGACACACCAGGGATACTTTGGCCTAAA  
TTTGAAGATGAAGAAGTCGGTAAGAAGTTGAGTTTAACAGGCGCGATTAAAGATAGCATTGTGCACCTAGATGAAGTAGCTATATA  
TGGATTGAACTTTTAATTCAACATGATTTAGCGCGATTAAAGTACATTATAATATTGAAGTTCCTGAAAGATGCAGAAATCATAGC  
GTGGTTTGATGCGATAGGGAAAAAACGTGGCTTAATTCGACGTGGTAATGAAATTGATTACGAAGCAGTCATTGAACTGATTATTTA  
TGATATTCGAAATGCTAAAAATAGGAAATTTGTTTTGATATTTTTAAAGATATGACTGAGGAATTAGCAAATGACGCTAACAATTA  
AAGAAGTTAAGCAGTTGATTAATGCGGTTAATACAATAGAAGAATTAGAAAAATCATGAATGCTTTTTTAGATGAGCGAAAAAGGTGT  
CAAAATGCCATAGCTAGGCGCAGAAAAAGCGTTAGAAAAAGAAACAAGCTTTAAAAAGAAAAAGTATGTTGAAATGACTTACTTTGAAA  
ATGAAATATTAAGAGCATCCTAATGCAATTATTTGTGGTATTGATGAAGTTGGAAGAGGACCTTTAGCAGGTCCAGTCGTTGCAT  
GCGCAACAATTTTTAAATTCAAATCACAATTTTGGGCCTTGATGACTCGAAAAAAGTACCTGTTACGAAACGTCTAGAATTAATG  
AAGCACTAAAAAATGAAGTTACTGCTTTTGCATATGGTATCGCGACAGCTGAAGAAATAGATGAATTTAATTTTATAAAGCTACTC  
AAATCGCCATGCAGCGAGCTATTGATGGATTATCAGTACAACCAACGCATTTATTGATAGACGCGATGACGCTTGATAATGCACCTGC  
CTCAAGTATCTTTAATCAAGGGTGATGCAAGAAGTGTATCTATTGCAGCGGCAAGTATCATGGCAAAGGTTTTTCGTGATGATTATA  
TGACACAGTTATCTAAAGATTATCCTGAATATGGTTTTGAAAAAACGCGGGTTACGGTACCAACAACATTTACTAGCAATCGATG  
ATATTGGCATTATGAAAGAGCATAGAAAAAGCTTTGAAACCTATAAAATCGTTACTGTAATCGTAAAAATCAATTAATGATAAAA  
AAGTAGCATTTAAAGTTTACAATAGCGCTTACATTTTTATAATTGTAAAGGAACTTAACCTAAGTAACAGGAGGATGGAAGATGAAT  
ATCCACGAGTATCAAGGTAAAGAAATATTTTCGTTCAATGGGCGTTGCAGTTCAGAAAGGACGAGTAGCATTTACTGCTGAAGAAGC  
GGTGGAGAAAAGCAAAAGAATTAATTTCTGATGTTTATGTTGTAAAAGCACAAATTCATGCTGGAGGTAGAGGTAAAGCAGGCGGA  
GTAAAAATTGCTAAATCTTTATCTGAGGTAGAAACATATGCAAAAAGAATTATTAGGGAAAACTTTGGTGACACATCAAACCTGGTCC  
AGAAGGTAAAGAAATTAAGCGTTTATATATCGAAGAAGGTTGTGCTATTCAAAAAGAATATTACGTTGGATTTCGTTATTGATCGTGC  
GACTGACCAAGTAACATTGATGGCGTCTGAAGAAGGGGGCACTGAGATTGAAGAAGTTGCTGCGAAGACTCCTGAAAAAGATCTTCA  
AAGAACTATCGATCCAGTAATCGGACTTTTACCATTCCAAGCAAGACGAATTGCGTTTAATATTAATTTCTAAAGAATCTGTTA  
ACAAAGCAGCTAAATCTTATTAGCACTTTATAATGTATTCATTGAAAAAGATTGTTCAATCGTAGAAATCAACCCATTAGTTACAA  
CAGCTGATGGTGATGTATTGGCATTAGATGCTAAAATTTATTTGATGATAATGCATTATTTCAGACATAAAAGATGTTGTAGAATTAC  
GTGATTTAGAAGAAGAAGATCCGAAAAGAGATTGAAGCGTCTAAACATGATTTATCATACATTGCATTAGATGGTGACATCGGATGT  
ATGGTTAATGGTGCAGGTTTAGCCATGGCAACAATGGATACGATTAAATCATTTTCGGTGGAAACCCAGCCAATTTCTTAGATGCAGGC  
GGAAGCGCTACTAGAGAAAAAGTAACTGAAGCATTAAAATCATTTTAGGTGATGAAAAATGTTAAAGGTATTTTTGTAAACATTTTC  
GGTGGCATTATGAAATGTGATGTTATCGCAGAAGGTATCGTTGAAGCTGTAAAAGAGTAGATTTAACTTTACCCTAGTTGTACGC  
TTAGAAGGTACAAATGTTGAGTTAGGTAAAAAATCTTAAAAGACTCAGGATTAGCAATTGAACCAGCAGCAACAATGGCTGAAG  
GTGCACAAAAAATGTTAAACTAGTCAAAGAAGCATAAAGGAAAGGATGGGAGCACTAAGATGAGTGTATTTATAGATAAGAATAG  
TAAAGTAATGGTCAAAGGTATTACAGGGTCTACTGCCCTTTTCCATACAAAAACAAATGCTTGATTATGGTACGAAAAATAGTAGCAG  
GTGTGACGCGCTGGTAAAGGTGGTCAAGTTGTTGAAGGCGTTCTGTTTTCAACACTGTTGAAGAAGCTAAAAATGAAACCTGGGCA  
ACGGTTTCAGTCATTTACGTTCCAGCACCATTTTGTCTGCAGACTCAATTTTAGAAGCAGCTGATGCAGACTTAGATATGGTTATTTGTA  
TCACTGAACATATTCCTGTATTAGACATGGTTAAAGTTAAACGCTACTTACAAGGTAGAAAAACACGTTTAGTTGGTCCAACTGTC  
CAGGTGTGATTACAGCAGATGAATGTAAAATGGTATTATGCCTGGCTATATTCACAAAAAAGGTCATGTTGGTGTAGTATCTCGTT  
CAGGTACATTAACATATGAAGCAGTGCACCAATTGACTGAAGAAGGTATTGGTCAAACCTACAGCTGTTGGTATTGGTGGAGACCCA  
GTCAACGGAACAACTTTATTGATGTTTAAAAGCATTCAATGAAGATGACGAAACGAAAGCAGTTGTTATGATTGGTGAAATCGG  
TGGTACGGCTGAAGAAGAAGCAGCTGAATGGATTAAAGCGAATATGACAAAACCAAGTTGTAGGCTTTATCGGTGGACAAACAGCA  
CCTCCTGGAAAACGATATGGGACATGCTGGTGCAATCATTTACAGGTGGTAAAGGTACTGCTGAAGAGAAAAATAAAAATTAATAG  
TTGTGGTGTGAAAACAGCGGCAACCTTCAGAAATGGTTCAACATTAATTGAAGCTGTAAAGAGCAGTATTTTAGTGAAGCAT  
TATTAAGTGTAAATAAAATGAAGTTAAAGATGATATAAAATGGCTATAGCCATTCCATACCTTTATAAAAGTATTGGAATGGGCTAT  
TTGTCTGCGATGAATTTTAGTACACTTTTCATATTTTGGAAAAGACAAGTTAATTTATTTTACCTCCTACAATAGCTTTACAAAAACAA  
GAAAATTTTAATTAATAATATATAGCGCACTATGTTATAATGTTTGTATATTATTGTAAGGAGTGTTCATCATGAATAAACAAACAA  
GTAAAGTACGCTATTCAATTAGAAAAGTTAGTATTGGAATTTTGCAATTTCAATAGGTATGTTTTTGGCATTGGGTATGTCGAACA  
AAGCATATGCAGATGAAATTGATAAATCTAAAGATTTTACAAGAGGGTATGAGCAAAATGTATTCCGCAAAATCAGAGTTAAATGCT  
AATAAAAAATACGACAAAAGACAAAATAAAAAATGAAGGTGCTGTTAAACATCGGACACAAGTTTAAAGTTAGACAACAAATCAG  
CAATTTCAAACGGAATGAAATTAATCAAGATATAAAGATTTCAAATACTCCGAAAACTCAAGCCAAGGTAACAATCTAGTTATT  
AATAACAATGAACCTACTAAAGAAATTAATAATGCAAACTTGAAGCTCAAAATTTCTAATCAGAAGAAAACGAATAAAGTTACTAA  
TAATTACTTTGGTTACTACAGTTTAGAGAAGCTTCAAAAAACCAAAATCTATACTGTAAAAAAGAGACACACTTAGTGTCTATAGC  
ATTAATAATACAAAACCTACAGTTTCAAATATTCAAATAACAAATAATATAGCAAATCCTAATTTAATATTTATTGGTCAAAAAATTA  
AGTGCCAATGACACCATTAGTAGAACCAAAACCAAAAAACAGTGTCTTCAAATAATAAAAGTAATAGTAATAGCAGTACATTAATTT  
ATTTGAAAACATTAGAGAATAGAGGATGGGATTTGACGCGTAGTTATGGATGGCAATGTTTCGATTAGTTAATGTATATTGGAATC  
ATCTTATAGGTATGGATTAAAAGGATATGGAGCTAAAGATATACCATATGCAATAAATTTAATAGTGAAGCTAAAAATTTATCACA  
ACACACCAACTTTCAAAGCTGAACCTGGGGACTTAGTGGTTTTTAGTGGAAGATTTGGTGGAGGATATGGTCATACAGCTATTGTCT  
TAAATGGTGATTATGATGGAAAAATTAATGAAGTTTCAAAGTTTAGATCAAACTGGAAATAATGGTGGATGGCGTAAAGCAGAGGTT  
GCACATAAAGTTGTTCAATATGAAAAATGATATGTTTTTATTAGACCTTTAAAAAGCATAATTTAAATCGAAGGCAGGACAT  
TGAAATATGAAATTTTCAACTTTAAGTGAAGAAGAATTTTACCAACTACACCAAAAAAGCACTTCAACATATATACAGACTATAG  
ATTATATAATTATAGAAAATAAAATAAATCATGAAGCACATATTGTGGGAGTGAAGAATGATAAAAAATGAAGTTATAGCTGCATGTT  
TATTAACAGAGGCACGAATTTTTAAATTTCTACAAATATTTCTACTCTCATAGAGGTCCTTTACTTGATTATTTTCGATGCTAAATTAGT  
TTGTTACTTTTTTAAAGAATTATCTAAATTCATTTATAAAAAATAGAGGAGTATTTATCTTGTGATCCATATTTAATAGAGAATTTA  
AGAGATGCAATGGTAGGATAATAAAGAATTATAAATTCAGTGATAGTAAAGATGCTAGGGAAAATTTGGGTATCTCCATCAAGG  
TTATACAACAGGATATTCAAATAAAAGTCAAATTAGGTGGATTTCTGTATTGGATTTAAAAGATAAAGATGAGAATCAACTTTTAAA  
AGAAATGGAATACCAACTAGAAGAAATATAAAAAAGACTATTGAGATTGGTGTAAAGGTTGAAGATTTATCTATTGAAGAAACAA  
ATCGATTTTATAAATGTTTCAAATGGCTGAAGAAAACATGGTTTTTCATTTATGAAATGAAGATTATTTAAACGAATGCAAGAAA  
TATATAAAGATAAGGCAATGTTAAAGATAGCTGTATATAAATCTAATGAATCAAGATAAATTAATAAATCAATTTATTGAAAATC  
GAAAATGAAATGATGACTGTGAACAGAGCATTAATGAAAATCCTAAATTTCTAAAAAATAAATCAAAATTAATCAATCAGTTAAATAT  
GCAATTATCTAGTATTAATAATAGAATTAGTAAACCGAAGAACTAATATTGAAGATGGACCTGTTTTGGATTTAGCTGCTGCTTT  
ATTTATATGTACTGATGATGAAGTTTATTATCTATCAAGTGGATCAAATCCGAAATATAATCAGTATATGGGTGCATATCATCTACA

[illegible]

ACAGTACAATCGTTATTAGGTCATGTTAATTTGTCAACAACCTGGTAAATATACACACGTATCTAACCAACAATTAAGAAAAAGTGTAT  
CTAAATGCACATCCTCGAGCGAAAAAGGAGAATGAAACATGAGTAATACAACATTACATGCAACAACAATTTATGCTGTAAGACAT  
AATGGGAAAGCAGCTATGGCTGGAGATGGGCAAGTAACGCTTGGTCAACAAGTCATCATGAAACAAACGGCAAGAAAAAGTGGCGAC  
GTTTATATGAAGGTAAAGTGTAGCTGGTTTCGACAGGTAGTGTAGCAGATGCGTTTACGTTATTTGAAAAATTCGAAACAAAATTAC  
AACAGTTTAGTGGTAACTTAGAAAGAGCTGCTGTTGAATTGGCACAAGAATGGCGAGGCGATAAACAATTACGTCAATTAGAAGCT  
ATGCTAATTGTAATGGATAAAGATGCTATTTTAGTTGTCAGTGGAACTGGCGAAGTTATTGCCCCAGATGATGACCTTATCGCTATT  
GGATCAGGAGGCAACTACGCATTAAGCGCAGGACGTGCATTGAAACGCCATGCATCGCATTTGTCTGCTGAAGAAAAATGGCATATGA  
GAGCTTGAAAGTAGCGGCTGATATTTGTGTCTTTACCAACGATAATATTGTTGTTGAAACACTATAATAATCAGAGCACGATAAATA  
ATTACGAGCAATTAATTTTAGTTAAAAAGACGGAGGAATGAAATTAATGGATACAGCTGGAATAAGATTAACCTCCAAAAGAAATCGT  
ATCTAAATTAATGAATACATCGTTGGACAAAAATGATGCTAAACGTAAAGTGGCAATTGCCTTACGTAATCGATACAGAAGAAATT  
TATTAGATGAGGAATCAAAGCAAGAAATTTACCTAAAAATATTGATGATTGGACCAACTGGCGTTGGTAAAACTGAAATTGCA  
AGAAGAATGGCCAAAGTTGTGCGCGCGCCATTTATAAAAGTAGAAGCTACTAAATTTACTGAGGTAGGTTATGTAGGACGAGATGT  
TGAAAGTATGGTTAGAGATCTTGTGTATGTTTCAGTAAGATTAGTCAAGGCACAGAAAAAATCATTGGTACAAGATGAAGCAACAG  
CTAAGGCCAATGAAAAACTTGTAAAGTTATTAGTTCGAAGTATGAAAAAGAAAGCGTCTCAAACGAATAATCCTTTAGAGTCACTTT  
TCGGAGGTGCAATTCCAAATTTTCGGACAAAAATAACGAAGATGAAGAAGAACCCACTACTGAGGAAATTAACAAAACCGTTCTGA  
AATTAAGAGACAGCTAGAAGAAGGCAAACTTGAAAAAGAAAAGGTAAGAATTAAGTTCGAACAAGATCCTGGTGCTTTAGGTATG  
CTAGGTACAAATCAAAATCAGCAAAATGCAAGAGATGATGAATCAATTATGCCTAAAAAGAAAGTTGAGCGAGAAGTTGCTGTTG  
AGACGGCAAGAAAAATCTTAGCTGATAGTTATGCGGATGAACATAATTGATCAAGAAAGCGCTAACGAAGAGCGCTGAAGATTGACA  
GAACAAATGGGTATCATCTTTATAGATGAAATCGACAAAGTTGCGAGCAATAATCATAATAGTGGTCAAGATGTCTCAAGACAAGG  
TGTTCAAAGAGATATTTTACCTATACTTGAAGGTAGCGTTATTCAAACCAAATATGGTACTGTGAATACTGAACATATGCTGTTTAT  
AGGTGCTGGAGCTTTCCATGTATCTAAGCCGAGTGACTGTATACCAGAATTGCAAGGTGCTTTTCCGATTAGAGTTGAACCTTGATAG  
TTTATCGGTAGAAGATTTTGTAAAGATTTTGACAGAACCAAATTTGTCATTAATTAACAATATGAAGCATTGCTTCAAACAGAAGA  
AGTTACTGTAACTTTACCGATGAAGCAATTACTCGCTTAGCTGAGATTGCTTATCAAGTAAATCAAGATACAGACAACATTGGTG  
ACGTGCGACTTCATACAATTTTAGAAAAAGATGCTAGAAGATTTATCATTGCAAGCACCAAGTATGCCGAATGCAGTTGTAGATATTAC  
CCCACAATATGTTGATGATAAATTAATCAATTTCAACAAATAAAGATTTAAGTGCATTTATTCTATAAAAAATATACAAAAGGAG  
AAAAATTCATGAGCTTATTATCTAAAAAGAGAGAGTTAAACACGTTACTTCAAAAAACAAAAGGATTTGCGGTTGATTTTAAAGAT  
GTAGCACAAACGATTAGTAGCGTAACCTGTAACAAATGATTTATTGTATCGCGTCGAGGTAAAAATTTTAGGATCGAGTCTAAATGAA  
TTATTAAAAAAGTCAAAGAATTATTCAAATGTTGGAAGAAAGACATATTCCAAGTGAATATACAGAACGATTAATGGAAGTTAAACA  
AACAGAATCAAATATTGATATCGACAATGTATTAACAGTATTCCACCTGAAAACAGAGAATTATTCATAGATAGTCGTACAACATAT  
CTTCCCAATTTTAGGTGGAGGGGAAAGATTAGGTACATTAGTACTTGGTCGAGTACATGATGATTTAATGAAAAATGATTTGGTACT  
AGGTGAATATGCTGCTACAGTTATTGGTATGGAATCTTACGTGAGAAGCATAGTGAAGTAGAAAAAGAAGCGCGCGATAAAGCTG  
CTATTACAATGGCAATTAATTCATTATCTTATTCTGAAAAAGAAGCGATTGAACATATCTTTGAAGAAGTTGGCGGTACGGAAGGCC  
TATTAATCGCATCAAAAGTTGCAGATAGAGTTGGTATTACTAGATCTGTAATTGTAATGCCTACGTAATTAGAAAAGTGTGGTG  
TAATTGATACGTTCTTTAGGAATGAAAGGTACTTTCATTAAGTTAAAAAGAAAAAATTTCTAGATGAATTAGAAAAAGTAA  
TAAGTCGATGAGTCTGGGACATAAATCAATGTCTAGTCTGAGCATGTTATCTTGGCGGTAGTCAATGAAATGAGTCTTATGATTA  
TGTGGAAGTCATTTCTTTATTTTGTCTAATTTTCAATCAAATTGATATTTACATTAACCTTGATAGAATTACCTTTAAATTTATGGAA  
AAATGCTTGAAAAACATTTGCTTTAGACACGGCATTATGTTATATTTATTTTCGGCTATAAAGCCAATACACACATATCAAACGTGA  
TTGTGTAAAGGGTGAATATTTATATATTGTCTTTACAATAGTTTGCTATGGAGGTAATTAACCAATAGGAGGAATTTATAATGGCA  
GTAATTTCAATGAAACAATTACTAGAAGCGGTGTTCACTTCGGTCACCAAACACGTCGTTGGAACCCAAAAATGAAAAATATAT  
CTTCACTGAGAGAAATGGTATTTATATCATCGACTTACAAAAAACAGTGAAAAAAGTAGACGAGGCATACAACCTTCTTGAAACAAG  
TTTCAGAAGATGGTGGACAAGTCTTATTCGTAGGAACATAAAAAACAAGCACAAGAATCAGTTAAATCTGAAGCAGAACGTGCTGGT  
CAATTCATACATTAACCAAAGATGGTTAGGTGAGTATTAACTAACTATAAAACGATCTCAAAACGAATCAAACGTATTCTGAAATT  
GAAAAATGGAAGAAGATGGTTATTTCGAAGTATTACCTAAAAAGAAAGTATGAGAAGCTTAAAAAGATACGACCGTTTAAAGT  
AATCTTAGGCGGAATTCGTGATATGAAATCAATGCCTCAAGCATTATTCGTAGTTGACCCACGTAAAGAGCGTAATGCAATTGCTG  
AAGCTCGTAAATTAATATTCCTATCGTAGGTATCGTTGACACTAAGTGTGATCCTGACGAAATTGACTACGTTATCCCAGCAAACG  
ACGATGCTATCCGTGCGGTTAAATTTAACTGCTAAAATGGCAGATGCAATCTTAGAAGGTCAACAAGGCGTTTCTAATGAAGAA  
GTAGTGCAGAACAAAACATCGATTTAGATGAAAAAGAAAAATCAGAAGAAACAGAAGCAACTGAAGAATAATCAACTGTTGAAT  
CTGACTTAGATATAGTTTAAATGGGTGATAAGATATTAATGCTTATCACCTTTTTTAAAAAGAAAATCGAGGCAAAATTACAAATATT  
CAATTAGAGTATTGGCAATCTTGCTATAATAATGCTAAAAATCATAATATATAAAATGATAACTTATTGGAGGAATAATGAATGGCA  
ACTATTTCAAGCAAACTTGTTAAAGAATTACGTGAAAAAAGTGGCGCGGGTATGATGGATTGTAAAAAAGCGCTAACTGAACTGA  
TGGTGACATCGATAAAGCGATTGACTACCTACGTGAAAAAGGTATTGCTAAAGCAGCTAAAAAAGCAGCGATTGCGGCTGAAG  
GTTTAGATACATGTAGAAACTAAAGGTAAACGACGAGTATCTGTTGAATCAACTCTGAAACAGACTTGTTGCTCGTGAACGAAGGTT  
TCCAAGAGTTAGTTAAAGAAAATCGCTAATCAAGTATTAGATACAAAAGCTGAAACTGTTGAAGCTTTAATGGAACAACCTTTACCA  
AATGGTAAATCAGTTGATGAAAGAATTAAGAAGCAATTTCAACAATCGGTGAAAAATTAAGTGTTTCGTCGTTTGTCTATCAGAAC  
TAAACTGATAACGATGCTTTGCGCGCTTACTTACACATGGGTGGACGCATTGGTGTATTAACAGTTGTTGAAGGTTCAACTGACGA  
AGAAGCAGCAAGAGACGTTGCTATGCATATCGTGCATCAACCCTAAATATGTTCTTCTGAACAAGTTAGCGAAGAAGAAATCA  
ACCACGAAAAGAGAAAGTTTTAAAAACAACAAGCATTAAATGAAGGTAAACCAGAAAAACATCGTTGAAAAAATGGTGGAAGGACGTTT  
ACGTAATACTTACAAGAAATTTGTGCTGTAGATCAAGACTTCGTTAAAAACCTGATGTAACAGTTGAAGCTTTCTTAAAAACAAA  
AGGTGGAACAACTTGTTGACTTCGTACGCTATGAAGTAGGCGAAGGTATGGAACAAACGCGAAGAAACCTTTGCGGATGAAGTTAAA  
GGCAAAATGAAATCAATCTGCATAAAAGTAAACAGGAAGAAAGACACCTTTAATGTTGCTTTATTAATAATGCAATCTTAATA  
AAACGACAACCTGTGTCTTCTTTACTTGTATATGTTACATATATTACGATAGAGAGGATAAGAAAAATGGCTCAAATTTCTAAATATA  
AACGTGTAGTTTGAACCTAAGTGGTGAAGCGTTAGCTGGAGAAAAAGGATTTGGCATAAATCCAGTAATTATTAAGAGTGTGCT  
GAGCAAGTGGCTGAAGTTGCTAAAATGGACTGTGAAATCGCAGTAATCGTTGGTGGCGGAAACATTTGGAGAGGTAAAAACAGGTA  
GTGACTTAGGTATGGACCGTGGAAGTGTGATTACATGGGTATGCTTGCAACTGTAATGAATGCCTTAGCATTACAAGATAGTTTAG  
AACAATTGGATTGTGATACACGAGTATTAACATCTATTGAAATGAAGCAAGTGGCTGAACCTTATATTCTGCTCGTGCATTAAGAC  
ACTTAGAAAAAGAAACGCGTAGTTATTTTGTGTCAGGTATTGGAAACCCATACTTCTCTACAGATACTACAGCGGCATTACGTGCTG  
CAGAAGTTGAAGCAGATGTTATTTAATGGGCAAAATTAATGTAGATGGTGATATTCTGCAGATCCTAAAGTAAACAAAGATGCG  
GTAAAAATGAACATTTAACGCATATTCAGTCTCAAGAAAGGTTTCAAGTAATGGATTCAACGACATCCTCATTTCTGTATGGAT  
AATAACATTCCGTTAACTGTTTTCTCTATTATGGAAGAAGGAAATTTAAACGTGCTGTTATGGGTGAAAAAGATAGGTACGTTAATT  
ACAAAATAAATTTAGAGGTGTAATAATGAGTGACATTATTAATGAACTAAATCAAGAATGCAAAAATCAATCGAAAGCTTATC  
ACGTGAATTAGCTAATATCAGTGCAGGAAGAGCTAATTCAAATTTATTAACGGCGTAACAGTTGATTACTATGGTGCACCAACAC

CTGTACAACAATTAGCAAGCATCAATGTTCCAGAAGCACGTTTACTTGTATTATTTCTCCATACGACAAAACTTCTGTAGCTGACATCG  
AAAAAGCGATAATAGCGGCTAACTTAGGTGTCAACCCAACAAGTGATGGTGAAGTGATACGTATTGCAGTACCTGCCTTAACAGAA  
GAGCGTAGAAAAAGAGCGGTTAAAGATGTTAAGAAAAATTGGTGAAGAAGCTAAAGTATCTGTTTCGAAATATTCGTCGTGATATGAA  
TGATCAGTTGAAAAAAGATGAAAAAATGGCGACATTACTGAAGATGAGTTGAGAAGTGGTACTGAAGATGTTTCAGAAAAGCAACA  
GACAATTCAATAAAAGAAATTGATCAAAATGATTGCTGATAAAGAAAAAGATATTATGTCAGTATAAACTAATATACAATGACATA  
TTAAAATGCCAGTATTAAACGATAATGTAAACATTTAAAAATGGGCATGTTTAATTAAATCAAAGATGCATGTGATAATTTAAATTCAC  
AATGAGCATAAAAAATGGTGTTTAAACAAGTTAATTAACATATACTTTATAAAATAATAGGCATTAGGTATATTGCTATAATAAAGTT  
ATGTAATTTTTAACCTCAGTATGTATGTCACATTTCTGGTGTAAACTGTACCGAGTCAGACTTTGGTACAGTTTTTTTATTTGCTTATT  
CAATGCATTAATGAGTATGATAAAATGATAATGATTGTTTAGTAACCTTATACTATATGACAGAGATGATCAGGCTCGGAGGAAAG  
ACCATGTTTAAAAAGCTAATAAAATAAAAAGAACACTATAAAATAATTATAATGAAGAATTAGACTCGTCTAATATACCTGAACATAT  
CGCTATTATTATGGATGGTAATGGGCGATGGGCTAAGAAGCGAAAAATGCCTAGAATTTAAAGGTCATTACGAAGGTATGCAAAACAA  
TAAAAAAAATTACTAGGGTAGCTAGTGATATTGGTGTAAAGTACTTAACTTTATACGCCTTTTCCACTGAAAAATTGGTCAAGACCTG  
AAAGTGAAGTAAATTATATTATGAATTTGCCTGTCAATTTCTTAAAGACATTCTTACCGGAACTAATTGAAAAAATGTCAAAGTTG  
AAACAATTGGATTTACTGATAAGTTGCCAAAATCAACGATAGAAGCAATTAATAATGCTAAAGAAAAGACAGCTAATAATACCGGC  
TTAAAATTAATATTGCAATTAATTATGGTGGCAGAGCAGAACTTGTCATAGTATTAATAATATGTTTGACGAGCTTCATCAACAA  
GGTTTAAATAGTGATATCATAGATGAAACATATATAAACAATCATTTAATGACAAAAGACTATCCTGATCCAGAGTTGTTAATTCGT  
ACTTCAGGAGAACAAGAATAAGTAATTTCTTGATTGGCAAGTTTTCGTATAGTGAATTTATCTTTAATCAAAAATTATGGCCTGAC  
TTTGACGAAGATGAATTAATAATGTATAAAAAATTCATGCTACGTCACGAAGACGCTTTGGCGGATTTGAGTGAGGATAGTATAG  
TATGAAAGTTAGAACGCTGACAGCTATTATGCTTAACTGCTATTCTTGCTTACCATTATTAATATTTTATTAATACAATCTTAATGCTGA  
GCTAATATATTAGCATTGATTGCATTAAAAAGAATTGTTGAATATGAATATGATTAAATTTGTTTCAGTTCCTGGTTAATTAGTGCAG  
TTGGTCTTATCATCATTATGTTGCCACAACATGCAGGGCCATGGGTACAAGTAATTCAAATTAAGAGTTAATTGCAATGAGCTTTA  
TTGTATTAAGTTATACTGTCTTATCTAAAAACAGATTTAGTTTTATGGATGCTGCATTTTGCTTAATGCTGTGGCTTATGTAGGCATT  
GGTTTTATGTTCTTTATGAAACGAGATCAGAAGGATTACATTACATATTATATGCCTTTTTAATTGTTTGGCTTACAGATACAGGGG  
CTTACTTGTTTGGTAAAATGATGGGTAAACATAAGCTTTGGCCAGTAATAAGTCCGAATAAAACAATCGAAGGATTCATAGGTGGC  
TTGTTCTGTAGTTTGATAGTACCCTTGCAATGTTATTTTGTAGATTTCAATATGAATGTATGGATATTACTTGGAGTGACATTGA  
TTTTAAGTTTATTTGGTCAATTAGGTGATTTAGTGAATCAGGATTTAAGCGTCATTTCGGCGTTAAAGACTCAGGTCGAATACTACC  
TGGACACGGTGGTATTTTAGACCGATTGACAGCTTTATGTTTGTGTACCATTATTAATATTTTATTAATACAATCTTAATGCTGA  
GAACAAATCAATAAACGTAAGAGGAGTTGCTGAGATAATTTAATGAATCTCAGAACTCCTTTTGAAAATTATACGCAATATTAAC  
TTTGAAAATTAGACGTTATATTTTGTGATTTGTCAGTATCATATTATAATGACTTATGTTACGTATACAGCAATCATTTTTAAAAATA  
AAGAAATTTATAAACAATCGAGGTGTAGCGAGTGAGCTATTTAGTTACAATAATTGCATTTATTATTGTTTTTGGTGTACTAGTAAC  
GTTTCATGAATATGGCCATATGTTTTTGGCAAAAGAGCAGGCATTATGTGTCCAGAATTTGCGATCGGTATGGGGCCGAAAATTTT  
AGTTTTAGAAAAAATGAAACACTTTACACTATTAGGTTATTGCCTGTGGTGGATATGTTTCGTATGGCAGGAGATGGCTTAGAAGAG  
CCACCAGTCGAGCCCGGTATGAACGTTAAATTAACCTTAATGAAGAAAATGAAATAACACATATCATATTAGATGATCATCATAA  
GTTTCAACAAATTTGAAGCGATCGAAGTTAAAAATGTGATTTTAAAGTAGACTTATTCATAGAAGGTATCAGTGCTTATGATAATGA  
AAGCATCATTTTTAAATTTGCTAGAAAGTCTTCTTTGTTGAAAATGGTAGCTTAAAGTTCAAATTTGCTCCGAGAGACAGACAATTGC  
ACATAAAAAAGCCATGGCCGAAATTTTTAACATTATTTGCGGGACCGTTATTTAACTTTATATTAGCTTTAGTCCTATTTATTGGTCTT  
GCATATTATCAAGGCACGCTACGTCTACTGTAGAACAAGTCGCAGATAAGTATCCAGCTCAACAAGCAGGATTACAAAAAGGTGA  
TAAGATCGTCCAAATTTGGCAATATAAAATATCTGAATTTGATGATGTTGATAAGGCGTTAGATAAAAGTTAAAGATAATAAGACGA  
CTGTTAAATTTGAACGTGATGGTAAAACAAAGTCAGTTGAATTAACACCTAAAAAGACTGAAAAAAAAGCTACTAAAGTAAGTTCA  
GAGACGAAGTATGTTCTCGGATTCCAACAGCGAGTGAACATACACTTTTTAAACCAATTGTATTTCGGATTTAAAAAGCTTTTTAATC  
GGTAGTACTTATATTTTTACAGCTGTAGTAGGTATGTTGGCTAGTATATTTACGGGCGGATTCTCATTTGATATGTTAAATGGTCCGG  
TTGGTATTTATCATAACGTCGACTCAGTTGTTAAAGCGGGTATCATTAGCTTAATTGGTTACACTGCGTTAATTAGTGTAACCTTAGG  
TATTATGAATTTAATTCCTATTCTGCACTAGACGGTGGTTCGATTTTATTGTTATATGAAGCGATTTTCAGAAAAACCGTTAAT  
AAAAAAGCGGAAACAACGATTATTGCTATTGGTGCCATTTTATGGTCTGTATAATGATATTAGTAACGTGGAATGATATTCGACGA  
TATTTCTTATAATTTAGGAGGATAAAATAATTATGAAGCAATCCAAAGTTTTTATACCAACGATGCGTGACGTGCCATCAGAAGCAGA  
AGCACAAAGTCATCGTTTATTATTGAAATCGGGTTTGATAAAACAAAGTACAAGTGGGATTTATAGTTATTTACCGCTAGCAACACG  
TGTGTTAAATAATATTACTGCAATTGTGCGACAAGAAATGGAACGTATCGATTCTGTTGAAATTTAATGCCAGCGTTACAACAAGC  
TGAATTATGGGAAGAATCAGGACGTTGGGGTGATATGGCCAGAAATTAATGCGTTTACAAGATAGACATGGAAGACAATTTGCAT  
TAGGTCCAACACATGAAGAATTAGTTACATCAATAGTAAGAAATGAATTGAAATCATACAAACAATTACCGATGACATTATTCCAA  
ATTCATCTAAATTCGGTGATGAAAAGAGACCACGTTTGGTTTACTTCGTGGGCGTGAAATTTATTATGAAAGATGCATATTCATTC  
ATGCTGACGAGGCATATTAGATCAAACTGATCAAGATATGTATCAAGCGTATAGCCGATTTTGGAGAGAGTTGGCATTAACGCA  
AGACCAGTAGTTGCAGTTTCAAGTGCTATAGCGGTGATGCCATACACATGAATTTAGGCATTAAAGTATTCGGTGAGGATACAAT  
CGTTTACAGTAAAGAAAGTGATTATGCTGCTAACATCGAAAAAGCAGAAAGTCGTTTACGAACCAATCATAAGCATACTACTGTGC  
AACCTTTAGAAAAAATTGAAACACCAATGTTAAGACTGCGCAAGAATTGGCAGACTTCTTAGGTAGACCAGTAGATGAAATCGTT  
AAAACGATGATTTTCAAAGTTGATGGCGAATATATTATGGTTTTAGTGCGTGGCCATCATGAAATTAATGACATTAATTTAAATCT  
TATTTCCGACAGATAAATATTGAATTAGCAACACAAGACGAAATTGTTAATTTAGTTGGTGCAAATCCTGGTTCACTAGGTCTGTGA  
ATTGATAAAGAAATCAAAATTTATGCAGATAATTTTGTGCAAGATTTAAATAATTTAGTTGTCGGTGCTAACGAAGATGGTTATCAC  
TTAATTAATGTAATGTAGGTAGAGACTTCAACGTTGATGAATATGGCGATTTCCGTTTTATTTTGAAGGCGAAAAAGTTAAGTGAT  
GGTTACGGCGTTGCACATTTTGTGTAAGGTATTGTAAGTTGGTCAAGTATTCAAATTTGGGTTACTAAGATTACGAATCAATGAATGCT  
ACATTTCTTAGATAACCAAGGAAAAAGCTCAACCTTTAATTTAGTTGGTGTGTTACGGAATTGGAATTTCTAGAACGTAAGTGCAGTTG  
GAACAAAATCAGATGATAATGGAATTTGTTGGCTAAATCAGTTACTCCGTTTGATTACATTTAATTTCTATTAATCCTAAGAAA  
GATGATCAACGAGAACTAGCAGATGCACTATATGCTGAATTTAATACTAAATTTGATGTGTTGTACGATGATCGTCAGGAACGTGCA  
GGTGTCAAATTTAATGATGCCGATTTAATTGGTTTACCCTGCGAATTTGTTGTTGGTAAACGTGCATCGGAAGGTATTGTAGAAGTT  
AAAGAACGTTTAAACAGGTGATAGCGAAGAAGTTCACATTGATGACTTAATGACTGTCATTACAAATAAATATGATACTTAAATA  
ATTAAGATCGAATGAATTATAAGAGTAGGAAAAAGCTGAAAGAAATCTGATGCTTATGTCCTGCTCTTATTATTTTTGATATAATGA  
TTATTCGATGAAAAATGACTGAAGACATAGTATAATTAAGATAAAATTTGTTTTAACAATATAATGATTAGCCAAATATAAAGCATT  
TAATTTCTATCATTACTATGCTCACATAATCTAAATATTGTTTGAACACGTAAGAAATTTCTATTTAAGGTGGTAATTGTCTTGG  
CAATGACAGCAACAAAAATTTAAAGTGCTTGCTGATCAAAATTTAAATTTCAAATCAATAGATGCTGAAATTTTAAATTTAAGGTG  
AACTGACACGTATAGATGTTTCTAACAAAAACAGAACATGGGAATTTTATATTACATTACCACAATTTCTAGCTCATGAAGATTATT  
TATTATTTATAAATGCAATAGAGCAAGAGTTTAAAGATATCGCCAACGTTACATGTGCTTTTACGGTAACAAATGGCACGAATCAAG  
ATGAACATGCAATTAATACTTTGGGCACTGTATTGACCAAAACAGCTTTATCTCCAAAAGTTAAAGGTCAATTTGAAACAGAAAAAG

CTTATTATGTCTGGAAAAAGTATTAAAAAGTAATGGTATCAAATGACATTGAACGTAATCATTTTGATAAGGCATGTAATGGAAGTCTT  
ATCAAAGCGTTTAGAAAATTGTGGTTTTGATATCGATAAAATCATATTCGAAACAAATGATAATGATCAAGAACAAAACCTTAGCTTCT  
TTAGAAGCACATATTCAAGAAAGAACGACGAACAAAGTGCACGATTGGCAACAGAGAAAACCTTGAAAAATGAAAAGCTGAAAAAGCG  
AAACAACAAGATAACAACGAAAGTGCTGTGATAAGTGTCAAATTGGTAAGCCGATTCAAATTGAAAAATATTAAACCAATTGAATC  
TATTATTGAGGAAGAGTTTAAAGTTGCAATAGAGGGGTGCTATTTTGTATATAAACTTAAAAGAACTTAAAAGTGGTCGCCATATCGT  
AGAAATTAAAGTGACTGACTATACGGACTCTTAGTTTTAAAAATGTTTACTCGTAAAAACAAAGATGATTTAGAACATTTTAAAGC  
GCTAAGTGTGGTAAATGGGTAGGGCTCAAGGTCGTATTGAAGAAAGATACATTTATTAGAGATTTAGTTATGATGATGTCTGATAT  
TGAAGAGATTAAAAAAGCGACAAAAAAGATAAGGCTGAAGAAAAGCGTGTAGAATTCCACTTGCATACTGCAATGAGCCAAATG  
GATGGTATACCCAATATTGGTGCATGTTAAACAGGCAGCAGACTGGGGACATCCAGCCATTGCGGTTACAGACCATAATGTTGT  
GCAAGCATTTCCAGATGCTCACGCAGCAGCGGAAAAACATGGCATTAAAAATGATATACGGTATGGAAGGTATGTTAGTTGATGATG  
GTGTTCCGATTGCATACAAACCACAAGATGTCGTATTAAGAAGATGCTACTTATGTTGTGTTGACGTTGAGACAACTGGTTTATCAA  
ATCAGTATGATAAAATCATCGAGCTTGCAGCTGTGAAAGTTCATAACGGTGAAATCATCGATAAGTTTGAAAGGTTTAGTAATCCGC  
ATGAACGATTATCGGAAACGATTATCAATTTGACGCATATTACGGATGATATGTTAGTAGATGCCCTGAGATTGAAGAAGTACTTA  
CAGAGTTTAAAGAATGGGTTGGCGATGCGATATTCGTAGCGCATATGCTTCGTTTGATATGGGCTTCATCGATACGGGATATGAAC  
GTCTTGGGTTTGGACCATCAACGAATGGTGTATCGATACTTTAGAATTATCTCGTACGATTAATACTGAATATGGTAAACATGGTTT  
GAATTTCTTGGCTAAAAAATATGGCGTAGAATTAACGCAACATCACCGTGCCATTTATGATACAGAAGCAACAGCTTACATTTTCAT  
AAAAATGGTTCAACAAATGAAAGAATTAGGCGTATTAAATCATAACGAAATCAACAAAAAACTCAGTAATGAAGATGCATATAAA  
CGTGCAAGACCTAGTCATGTCACATTAATTGTACAAAACCAAGGCTCTTAAAAATCTATTTAAATTTGAAGTGCATATTGGTG  
AAGTATTTCTACCGTCAGCTCGAATTCACGTTCAATTTGATAGTAAATATCGTGAGGGATTATTGGTTGACGACGCGTGTGAGAA  
GGTGAATTTTACGCGAGTTATGCAGAAGGACCAGAGTCAAGTTGAAAAAATTGCCAAATATTATGATTTTTATTGAAATTCACCA  
CCGGCACTTTATCAAGATTTAATTGATAGAGAGCTTATTAGAGATACTGAAACATTACATGAAATTTATCAACGTTTAAATACATGCA  
GGTGACACAGCGGGTATACCTGTTATTGCGACAGGAAATGCACACTATTTGTTGAACATGATGGTATCGCACGTAAAAATTTAATA  
GCATCACAACCCGGCAATCCACTTAATCGCTCAACTTTACCGGAAGCACATTTTAGAACTACAGATGAAATGTTAAACGAGTTTCAT  
TTTTAGGTGAAGAAAAAGCGCATGAAATTTGTTGTAAAAATACAAACGAATTAGCAGATCGAATTGAACGTGTTGTTCCATTAA  
AGATGAATTATACACACCGCGTATGGAAGGTGCTAACGAAGAAATTAGAGAATAAGTTATGCAAATGCGCGTAAACTGTATGGTG  
AAGACCTGCCTCAAATCGTAATTGATCGATTAGAAAAAGAATTAAAAAGTATTATCGGTAATGGATTGCGGTAATTTACTTAATTT  
CGCAACGTTTAGTTAAAAAATCATTAGATGATGGATACTTAGTTGGTCCCGTGTTTCAGTAGGTTCTAGTTTGTAGCGGACAAATGA  
CTGAGATTACTGAAGTAAACCCGTTACCGCCACACTATATTTGTCCGAAGTGTAAACGAGTGAATTTTTCAATGATGGTTCAGTAG  
GATCAGGATTTGATTTACCTGATAAGACGTGTGAAACTTGTGGAGCGCCACTTATTAAGAAGGACAAGATATTCGGTTTGAAACAT  
TTTTAGGATTTAAGGGAGATAAAGTTCCTGATATCGACTTGAACCTTTAGTGGTGAATATCAACCGAATGCCATAACTACACAAAAG  
TATTATTGGTGAGGATAAAGTATTCGGTGCAGGTACAATTGGTACTGTTGCTGAAAAGACTGCTTTTGGTTATGTTAAAGGTTATTT  
GAATGATCAAGGTATCCACAAAAGAGGTGCTGAAATAGATCGACTCGTTAAAGGATGTACAGGTGTTAAACGTACAACCTGGACAGC  
ATCCAGGGGGTATTATTGTAGTACCTGATTACATGGATATTTATGATTTTACGCCGATACAATATCCTGCCGATGATCAAAATTCAG  
CATGGATGACGACACATTTTGATTTCCATTCTATTCATGATAATGTATTAATACTTGATATACTTGGACACGATGATCCAAACATGA  
TTCGATGCTTCAAGATTTATCAGGAATTGATCCAAAAACAACTACCTGTAGATGATAAAGAAGTTATGCAATTTTAGTACACCTG  
AAAGTTTGGGTGTTACTGAAGATGAAATTTATGTAAAAACAGGTACGTTTGGGGTTCAGAAATTCGGTACAGGGTTCGTGCGTCAAA  
TGTTAGAAGATACAAAGCCAACAACATTTTCTGAATTAGTTCAAATCTCAGGATTATCTCATGGTACAGATGTGTGGTTAGGCAATG  
CTCAAGAATTAATTTAAACCGGTATATGTGATTTATCAAGTGTAATTGGTTGTCGTGATGATATCATGGTTTATTTAATGTATGCTGG  
TTTAGAACCATCAATGGCTTTTAAAAATAATGGAGTCAGTACGTAAAGGTAAAGGTTTAACTGAAGAAATGATTGAAACGATGAAAG  
AAAATGAAGTGCCGGATTGGTATTTAGATTTCATGTCTTAAAAATTAAGTACATGTTCCCTAAAGCCCATGCAGCAGCATACGTTTAA  
TGGCAGTACGTATCGCATATTTCAAAGTACATCATCCACTTTATTACTATGCATCTTACTTTACAATTCGTGCGTCAGATTTTGATTT  
AATCAGATGATTAAAGATAAAACAAGCATTTCGAAATACGTGAAAAGACATGTATTCGCTATATGGATCTAGGTAAGAAAAAGAAA  
AAGACGTATTAAGTGTCTTGGAAATTATGAATGAAATGGCACATCGAGGTTATCGCATGCAACCGATTAGTTTAGAAAAAGAGTCAG  
GCGTTCGAATTTATCATTGAAGGCGATACACTTATTCGCCGTTTCATATCAGTGCCGTTGGGCTTGGCGAAAAACGTTGCGAAACGAATT  
GTTGAAGCTCGTGACGATGGACCATTTTATCAAAAGAAGATTTAAACAAAAAAGCTGGATTATCTCAGAAAAATTATTGAGTATTTA  
GATGAGTTAGGCTCATTACCGAATTTACCAGATAAAGCTCAACTTTCGATATTCGATATGTAAAATGAAATAATCAAGGTATTTATT  
TAATGCGTATGGCGTAGTTAAAGAAATACAAAATTGTTGCTGGACATAAAATTATGCCTGTATTCTTTTCAACGTCTTACGAGTCT  
ATTCGAATGTAATGGTGAAATAAATGAACAACTTTTACAAGAAATCTCTGATTAATAGTGAAGTCATTTGTTTCAAGCATAAACTTA  
TGCTATAATTAAGTTGCTTAAAAATTAGTGAAGTCAAGGAGAGTGGGAGATTCCCGCTCTTTTCTATTTGCCAAAAAGGGAGGC  
CTGTATGAGTAAAATTACAGAACAAAGTAGAAGTGATTGTTAAACCAATTATGGAAGACTTGAATTTTGAACCTTGTAGACGTTGAAT  
ATGTCAAAGAGGGTAGAGATCATTTTCTTAGAATCTTATTGATAAAGAAGGTGGCGTAGATTTAAATGATTGATGCTAGCTTCTG  
AAAAAATAAGTGAAGTATGGATGCAAAATGATCTTATTCGTAAGTATTATTTAGACGTAGCGTACCTGGTGCGTAGCAAGCTCCA  
ATTAAAAAAGAAACAAGATTTCCAAAATGCAATAACTAAACCTGTATTTGTTTCTTTATATGTACCAATTGAAGGTGAAAAGGAATG  
GTTAGGCATTTTACAAGAAGTCAATAATGAAACAATTGTAGTACAAGTTAAATCAAAGCAAGAACGAAAGATATAGAGATACCG  
AGAGACAAAATAGCAAAAGCACGTCACGCAGTTATGATTTAACGTGATGAGGAGGAAAAAACGTGTCAAGTAATGAATTATTATTA  
GCTACTGAGTATTTAGAAAAAGAAAAGAAGATTCTAGAGCAGTATTAATTGATGCTATTGAAGCAGCTTAAATTACTGCATACAA  
AAAGAATTATGATAGTGCAAGAAATGTCCGTGTGGAATTAATATGGATCAAGGTACTTTCAAAGTTATCGCTCGTAAAGATGTTGT  
TGAAGAAGTATTTGACGACAGAGATGAAGTGGATTAAAGTACAGCGCTTGTAAAAAACCTGCATATGAAATTTGGTGATATATACG  
AAGAAGATGTAACACCTAAAGATTTTGGTCTGTAGGTGCTCAAGCAGCAAAACAGCAGTAATGCAACGTCTTCGTGATGCTGAA  
CGTGAAATTTTAAAGAAATTATAGACAAAGAAGACATCACTACTGGAATTATTGACCGTGTGACCATGTTGATGTATGTATAT  
GTGAATTTAGGTGCTATCGAAGCTGTTTTATCTGAAAGCAGAAAGAAGTCTTAACGAAAAATATATTCTTAACGAACGTATCAAAGT  
ATATGTTAACAAGTGGAACAAACGACAAAAGTCTCTCAAATCTATGTTTCTCGTAGCCATCCAGGTTTATTAACCGTTTATTTGA  
ACAAGAAGTTCAGAAATTTACGATGGTACTGTAATTGTTAAATCAGTAGCACGTGAAGCTGGCGATCGCTCTAAAATTAGTGTCTT  
CTCTGAAAACAATGATATAGATGCTGTTGGTGCATGTGTTGGTGCTAAAGGCGCACGTGTTGAAGCTGTTGTTGAAGAGCTAGGTGG  
CGAAAAAATCGACATCGTTCAATGGAATGAAGATCCAAAAAGTATTTGTAAAAAATGCTTTAAGCCCTTCTCAAGTTTGAAGTTAT  
TGTTGATGAAACAAATCAATCTACAGTAGTTGTTGTTCTGATTATCAATTGTCTATTAGCGATTGGTAAAAAGAGGACAAAACGCACG  
TCTAGCTGCTAAATTAACCGGCTGGAAAAATTGATATTAATCAGAAACAGATGCGCGTGAAGCGGGTATCTATCCAGTAGTTGAAG  
CTGAAAAAGTAAAGTGAAGAAGATTGCTTTAGAAGATGCTGACACAACAGATAACCGGAAGGTTAAATGATGTTTCAGTTGAA  
ACAAATGTAGAGAAAGAATCTGAATAATAGGTTGGAGTGAAGTATCTATGAAAAAGAAAAAATCCGATGCGAAAAATGTATTCTT  
TCAATGAAATGCATCCCAAAAAAGATATGATTCGTGTTGTTGTTAATAAAGAAGGCGAAATCTTTGCGGATGTTACTGGAAAGAA  
ACAAGGCCGTGGCGCATATGTTTCTAAAGATGTTGCTATGGTTGAAAAAGCACAAACAAAAAGAAATTTTAGAAAAATATTTTAAAG

CATCTAAAGAGCAATTGGATCCTGTTTACAAAGAAATTATTAGATTAATTTATAGAGAAGAGATCCCCAAATGAGTATAGATCAAA  
TATTAAACTTTTTAGGATTAGCAATGAGAGCTGGTAAAGTAAAAACAGGTGAATCAGTCATTGTTAATGAGATTAAAAAAGGAAAT  
TTGAAGCTCGTTATTGTTGCAAATGATGCGTCTGATAATACAGCTAAATTAATTACAGATAAATGTAAGAGTTACAAAAGTTCCATTC  
AGAAAGTTTGGAAATCGAAATGAATTGGGAATAGCACTTGGAAAAGGTGAGCGTGTTAATGTAGGGATTACTGACCCAGGCTTTGC  
TAAAAAGTTGCTATCAATGATAGATGAATATCATAAGGAGTGATTATATGAGTAAACAAAGAATTTACGAATATGCGAAAGAATTA  
AATCTAAAGAGTAAAGAGATTATAGATGAGTTAAAAAGCATGAATATTGAGGTTTCAAATCATATGCAAGCTTTGGAAGATGACCA  
AATTAAGCATTAGATAAAAAAGTTCAAAAAAGAACAAAAAGAACGACAATAAACAAAGCACTCAAAAATAATCACCAAAAAATCAAAAC  
AATCAAAACCAAAATAAAGGGCAACAAAAAGATAACAAAAAGAATCAACAACAAAAATAATAAAGGCAACAAAGGCAATAAAAAAG  
AATAATAGAAAAATAAAGAAAAATAACAAGAATAATAAACCAAAAAATCAACCAGCTGCTCCAAAAGAAATACCATCAAAAGTGA  
CATATCAAGAAGGTATTACATTAGGCGAATTGCGGATAAAATTAATGTTGAATCATCAGAAATATCAAAAAATTATCTTACTTG  
GTATTGTTGCTAATATCAATCAATCATTAAATCAAGAAACAATCGAATTAATTGCCGATGATTATGGCGTTGAGGTTGAAGAAGAA  
GTTGTGATTAATGAAGAAGATTTATCAATCTACTTCGAAGACGAAAAAGATGATCCAGAAGCAATTGAGAGACCAGCAGTTGTAAC  
AATTATGGGACATGTTGACCATGGTAAAACGACTTTATTAGATTCAATTCGTCATACAAAAGTTACAGCAGGTGAAGCAGGCGGAA  
TCACTCAACATATTGGTGCATATCAAAATTGAAAACGATGGCAAAAAAATCACTTTCTTAGATACACCGGGACATGCTGCATTTACAA  
CGATGCGTGCAGCTGGTGCACAAGTAACAGATATTACAATTTTAGTAGTTGACGCTGACGATGGTGTATGCCACAAACAATTGAA  
GCAATTAACCATGCTAAAAGAAGCAGAAGTACCAATTATTGTTGCAGTAAATAAAATTGATAAACCAACTTCAAACCTGATCGAGT  
TATGCAAGAATTAACCTGAATATGGTTTAATTCCTGAAGATTGGGGCGGCGAAACAATTTTCGTTCCACTTTCTGCATTAAGTGGTGA  
TGGTATCGACGATTATTAGAAATGATAGGATTAGTTGCAGAAGTTCAAGAATTAAGCAAACTTAAAGCAAACTTAAACCCGTGTTGGTA  
CAGTTATCGAAGCTGAATTAGATAAATCAGTGGTCTTCTGCATCATTATTAGTACAAAATGGTACATTAATGTTGGTGTGATGCGA  
TTGTAGTTGGTAATACTTACGGCCGTATCCGTGCAATGGTAAATGACTTAGGTCAAAGAATCAAAACCGCTGGTCCATCAACGCCTG  
TTGAAATTACAGGTATTAATGATGTGCCACAAGCTGGGGATCGCTTTGTTGATTTAGTGATGAAAAACAAGCTCGTCGTATTGGTG  
AATCAAGACACGAAGCTAGCATTGTACAACAACGTCAAGAAAGTAAAAATGTTTCATTAGATAACCTGTTGAACAAATGAAACAA  
GGTGAATGAAAGATTTAAACGTTATTATTAAGGTGATGTTCAAGGTTCTGTTGAAGCTTTAGCTGCATCATTAATGAAAATTGAT  
GTTGAAGGCGTAAATGTTCTGATCATTCATACAGCGTTGGTGCAATTAATGAGTCAGACGTGACACTTGCTAATGCCTCAAATGGT  
ATTATCATTGGTTTCAATGTTCTGTCAGACAGTGGTGCAAAACGTGCTGCAGAAGCTGAAAATGTTGATATGCGTTTACACAGAGTT  
ATTTAATGTTATCGAAGAAATGAATCAGCGATGAAAGGTTTACTTGATCCAGAATTTGAAGAACAAGTTATCGGACAAGCTGA  
AGTTCTGTCGAAGCTCAAAAGTTTCTAAAGTTGGTACTATTGCTGGATGTTATGTTACTGAAGGTAAAAATACGCGAAATGCTGGTGT  
ACGTATTATTCGTGATGGTATTGTTCAATATGAAGGCGAATTAGATACACTTAAACGTTTCAAAGATGATGCTAAGGAAGTTGCAAA  
AGGTTATGAATGTGGTATTACAATTGAAAACCTACAATGACCTTAAAGAAGGCGATGTTATCGAAGCATTGAAATGGTTGAAATTA  
AGCGTTAATTAATAAATTACAAGCTAAAAGTATAGTTAAGATTGATATGCTCCCTATAAATATTGCACCTTTTAAAGTGTCTACTTTA  
TAGGGAGCATATTTGATACTAGCTTTTGGTTTTTTATTAGAATAGATTACCTATTAAAAGTTACGTTATATGGACATGATTTTGTATA  
AAATTTTGTGGTGGCTAGAATGATTTTAAATGACAAAATATAATGTCGACTATTATTGGAATAATTTCTGTTGAAATGCCTATCTTA  
CGGCAAACTTTATTGATTTTATAGGCTTAATTTATTAATAAACGTGTGAGCTAAAAATAATTGTTTAAAGCATTGTTACACTAAAAA  
ATGCAAAATAACAATTGAACCTTAAAGATAAAGAGGTGACAAGGATGAGCAGATGATGAGAGCAGAGCGTGTGGTGAACAAATGAAGA  
AGGAATTAATGGATATCATCAACAATAAAGTCAAAAGTCCAGTTCGAGTTGGTTTTATTACAATTACAGATGTTGTTTTAAACAATGATT  
TATCGCAGGCTAAAGTATTTTTAACTGTATTAGGTAACGATAAAGAAGTAGAAAAATACATTTAAAGCACTTGATAAAGCAAAAGGC  
TTCATTAAGTCTGAATTAGGTTCTAGAATGCGATTACGTATTATGCCGAATTAATGTATGAATATGATCAATCAATCGAATATGGT  
AATAAAATTGAACGAATGATTCAAGATTTACACAAACAAGATAGATAATTTAGTGTTAGGTATCTGAAAAATGTTTGATAATTTCTT  
AATATCGGTATATTAACATTAACAGTTAATACATAGATGTGTAGAAATAGTTAACATTTCCAGTTTTTTTATGAATAAATTCAGTT  
GATACGCTATTAATAATATATTTTAAAAAAGAGGTGACTATATGTATAATGGGATATTACCAGTATATAAAGAGCGCGGTTTAAC  
AAGTCATGACGTTGTATTCAAATTCGCTAAAAATATTAATACTAAAAAATAGGTCACACGGGTACGCTTGATCCCGAAGTTGCGAG  
CGGTGTTACCGGTATGTATAGGTAATGCAACGAGAGTTAGTGATTATGTTATGGATATGGGCAAGCTTATGAAGCAACTGTATCG  
ATAGTAACAGTACAACGATGAAGATCAAAACGGGTGATACATTTGGAACAAAAGGTGTACACTCAGCAGATTTTAAATGAAGCAG  
ATATTGACCGATTGTTAGAAAGTTTTAAAGGTATCATTGAACAAATTCGCCGATGTACTCATCCGTCAAAGTAAATGGTAAAAAAT  
TATATGAATATGCGCGTAATAATGAAACAGTTGAAAGACCAAAGCGTAAAGTTAATATTATAGACATTGGGCGTATATCTGAATTA  
GATTTTAAAGAAAATGAGTGTCAATTTTAAATACGCGTCATCTGTGGTAAAGGTACATATATTAGAACGCTAGCAACTGATATTGGT  
GTGAAATTAGGCTTTCCGGCACATATGTGCAAAATTAACACGAATCGAGTCTGGTGGATTTGTGTTGAAAGATAGCCTTACATTAGAA  
CAAATAAAGAACTTCATGAGCAGGATTCATTGCAAAATAAATTGTTTCCTTTAGAATATGGATTAAAGGGTTTGCCAAGCATTAAA  
ATTAAGATTTCGCACATAAAAAAACGTATTTTAAATGGGCAGAAATTTAATAAAAAATGAATTTGATAACAAAATTAAGACCAAAAT  
TGTATTTATTGATGATGATTAGAAAAAGTATTAGCAATTTATATGGTACACCTACAAAAGAATCAGAAATTAACCTAAAAAAG  
TCTTTAATTAAGGAGATAGAATTTATGAAAGTCAATAGAAAGTACACATCTATACAATCTAAACAGTATATTACAGGAGTGTTCG  
AATCGATTCCGATTTTTCGATGGCATGCATAAAGGTCATGACAAAGTCTTTGATATATTAACGAAATAGCTGAGGCACGCGATTT  
AAAAAAGCGGTGATGACATTTGATCCGCATCCATCTGTCGTGTTGAATCTTAAAGAAAACGAACAACGTATTTAACGCCACTTTT  
AGATAAAATCGAAAAAATTAGCCAACATGATATTGATTATTGTATAGTGGTTAATTTTTCATCTAGGTTTGCTAATGTGAGCGTTGA  
AGATTTTGTGAAAATTATATAATTAATAAATGTAAGAAAGTCAATTGCTGGTTTCGATTTTACTTTTGGTAAATTTGAAAAAGG  
TAATATGACTGTACTTCAAGAATATGATGCGTTTAAATACGACAATTGTGAGTAAACAAGAAATTGAAAATGAAAAAATTCTACAA  
CTTCTATTCTGCAAGATTTAATCAATGGTGAGTTGCAAAAAAGCGAATGATGCTTTAGGCTATATATATTCTATTAAAGGCACTGTAG  
TGCAAGGTGAAAAAAGGGGAAGAACTATTGGCTTCCCAACAGCTAACATTCAACCTAGTGATGATTATTTGTTACCTCGTAAAGGT  
GTTTATGCTGTTAGTATTGAAATCGGCACTGAAAAATAATTTATATCGAGGGGTAGCTAACATAGGTGTAAGGCAACATTTTCATGAT  
CCTAACAAAGCAAGTTGTCATCGAAGTGAATATCTTTGACTTTGAGGATAATTTATGGTGAACGATAGGACCGTGAATTTGGCAT  
CATTTCTTACGTCCTGAGATTAAATTTGATGGTATCGACCCATTAGTTAAACAAATGAACGATGATAAATCGCGTGCTAAATATTTA  
TTAGCAGTTGATTTTGGTGATGAAGTAGCTTATAATATCTAGAGTTGCGTATAGTTATATAAACAATCTATACCACACCTTTTCTTA  
GTAGGTGCAATCTCCAACGCCTAACTCGGATTAAGGAGTATTCAAACATTTTAAAGGAGGAAATTGATTATGGCAATTTACAAGAA  
CGTAAAAACGAAATCATTAAGAATACCGTGTACAGGAACTGATACTGGTTCACCAGAAGTACAAATCGCTGTACTTACTGCAGA  
AATCAACGCAGTAAACGAACACTTACGTACACAAAAAAGACCACCATTCACGTCGTGGGTATTAAAAATGGTAGGTCGTCGTA  
GACATTTATTAACTACTTACGTAGTAAAGATATTCAACGTTACCGTGAATTAATTAATCACTTGGTATCCGTCGTTAATCTTAATA  
TAACGTCCTTTGAGGTTGGGGCATATTTATGTTCCAACCTTAATTTATATTAATAAAGCTTTTTACAAATTAACATTTATTATATGT  
TAAGCTAATATTGATTGAATAAAGGTTACAATGAGATAAAGTATGATATAAGTACACCTAGAGTAATAATCAAGATATTAAAAAT  
AAAGTATGTTTTTTTAAAAAATATAACTTATATTTACTGATAAAGGTTGGGACGATAAGTCTATTTTGTAAATAATAGATGGATAT  
CCCGCTCTCTTTTTTTTCCAATTCAATATTTTATACTAATATTAATAACGATAATAAATGATATGATATACTATTAGATTCAAGAG  
AGGAGATTTATAATGTCTCAAGAAAAGAAAGTTTTTAAACTGAATGGGCAGGAAGATCTTTAACGATTGAAACAGGGCAATTAGC

TAAACAAGCAAATGGCGCTGTATTGGTTCGTTATGGAGATACAGTCGTGTTATCGACGGCAACTGCATCAAAAAGAACCTCGTGATG  
GAGATTTCTTCCATTAAACAGTGAACCTATGAAGAAAAAATGTACGCTGCGGGTAAAAATTCCTGGTGGAATTTAAAAAGAGAGAAGGA  
CGTCTGGTGACGATGCAACATTAAGTGCAGATCCTGATTGTTACCACAAATGGCTGCAATGATTGGTTCATCTATGGCGCTTAGTGTG  
CAAATTATGAACATGGTATTAAGTGCAGATCCTGATTGTTACCACAAATGGCTGCAATGATTGGTTCATCTATGGCGCTTAGTGTG  
TCGGATATTCCATTCCAAGGGCCAATCGCCGGTGTAATGTGGGTATATTGACGGTAAATATATCATTAAACCAACAGTAGAAGA  
AAAAGAAGTTTCTCGCTTAGACCTTGAAGTAGCTGGTCATAAAGATGCAGTAAACATGGTAGAGGCAGGCGTAGTGAGATTACTG  
AACAAGAAATGTTAGAGGCGATCTTCTTTGGTCATGAAGAGATTCAACGTTTAGTTGATTTCACAACAACAAATCGTCGACCACATTC  
AACCTGTTAAACAAGAATTTATTCCAGCAGAGCGTGATGAAGCGCTAGTTGAACGTGTAAAAATCTTTAACCAGAAGAAAAAGGACTT  
AAAGAAACAGTTTAAACATTTGATAAACAACAACGAGATGAAAAATCTTGATAACTTAAAAAGAAGAAATCGTCAATGAATTTATCGA  
TGAAGAAGATCCAGAGAATGAATTACTTATTAAGAAGTTTATGCAATTTTAAATGAATTAGTGAAGAAGAAAGTTAGACGTTTAA  
TTGCAGATGAAAAAATTAGACCAGACGGCCGTAACCTGATGAAATCCGTCCATTAGATTCTGAAGTTGGTATTTTACCTAGAACGC  
ATGGTTCAGGTCTATTTACACGTGGTCAGACTCAAGCACTTTCAGTTTTAACATTAGGTGCTTTAGGCGATTATCAATTAATTGATGG  
TTTAGGACCTGAAGAAGAAAAAGATTTCATGCATCATTACAACCTCCCGAATTTTTCAGTAGGTGAAACTGGTCCAGTACGTGCGCC  
AGGTCGTCGTGAAATTGGACATGGTGCGTTAGGTGAAAGAGCATTAAAAATATATTATTCCTGATACTGCTGATTTCATATACAAT  
TCGTATTGTAAGTGAGGTACTTGAATCAAATGGTTCATCATCTCAAGCGTCAATTTGTGGATCAACATTAGCATTAAATGGATGCGGG  
CGTACCGATTAAAGCACCAGTTGCTGGTATTGCTATGGGCCTTGTTACACGTGAAGATAGCTATACGATTTAACTGATATCCAAGG  
TATGGAAGATGCATTAGGTGATATGGACTTTAAAGTCGCTGGTACTAAAGAAGGTATTACAGCAATCCAAATGGATATTTAAATTTG  
ACGGTTTAAACGCGTGAATTAATCGAAGAGGCTTAGAACAAGCAGACGTGGTCTGTTAGAAATAAGTGAATCATATGTTACAAACA  
ATTGATCAACCACGTACTGAATTAAGTGCTTACGCGCCAAAAGTTGTAACATATGACAATTAACACAGATAAGATTAGAGATGTTATC  
GGACCTGGTGGTAAAAAATTAAACGAAATTATTGATGAAACAGGCGTTAAATTAGATATTGAACAAGATGGTACTATCTTTATTGG  
TGCCGTTGATCAAGCTATGATAAATCGCGCTCGTGAATCATTGAGGAAATTACACGTGAAGCGGAAGTAGGTCAAACCTTATCAAG  
CCACTGTTAAACGTATTGAAAAATACGGTGCGTTTGTAGGCTTATCCCGGGTAAAGATGCGTTGCTTCACATTTACAAATTTCAA  
AAAATAGAATTGAAAAAGTGGAAGATGTATTAATAATCGGTGACACAATTGAAGTTAAGATTACTGAAATTGATAAACAAGGTGCG  
AGTAAATGCTTCACACAGAGCATTAGAAGAATAATATTTAAAGTCATATGACGACAATGTATCGTCATGTGATTTTATGCCCATT  
TTTTACGAAGTGACCCGTTTGAATTTGTTGTATTGAACATTTTAAACGCTTTATTATTTTGTGTGCAACTGTTAATTATCCTGTATG  
TATAGTGATTAATAGTGATCATCAAGTGTTTTTAACTTATAATGAATAGTGAGTTTATATATGGACGGGTAACAAATTTAGGAGGT  
AAGATTTTGAGTTTAAATAAAGAAAAAGAATAAAGATATTCCGATTATACCATTAGCGGGTGTGGCGAAATTGCTAAAAATATGTA  
TATCGTTGAAGTAGACGATGAAATGTTTATGTTAGATGCTGGACTTATGTTTCCAGAAGACGAAATGCTAGGTATTGATATTGTTAT  
ACCAGACATTTACATACGTACTTGAAAAATAAGATAAATTGAAGGGTATATTCCTTACACACGGACATGAGCACGCGATTGGTGCAG  
TGAGTTATGTTTGAACAATTAGATGCACCAGTATATGGATCTAAATTGACAATAGCGTTAATTAAAGAAAAATATGAAAGCCCGT  
AATATTGATAAAAAAGTTCGCTACTATACAGTTAATAATGATTCAATTATGAGATTCAAAAAACGTGAATATTAGTTTCTTTAATACG  
ACACACAGTATTCTGATAGTTTAGGTGTTTGTATTACACCTTCATATGGTGCCATTGTGTATACAGGTGAATTTAAGTTTGACCAAA  
GTTTACATGGACATTATGCACCAGATATTAACCGTATGGCAGAGATTGGTGAAGAAGGCGTATTTGTCTTAATCAGTGATTCTACTG  
AGGCAGAGAAACCTGGATATAATACTCCGAAAAATGTGATTGAACATCATATGTATGATGCTTTTGCAAAAGTGCGAGGTCGCTTG  
ATAGTTTCATGTTATGCTTCGAACCTTATACGTATTGACGAAGTTTAAATATTGCTAGCAAGCTAAATCGTAAGTGCATTTTATAG  
GAAGATCACTTGAAAGTTCATTTAATATTGCTCGTAAAAATGGGGTATTTTCGACATTCCTAAAAGATTTGCTAATTCCTATAACAGAAG  
TTGATAATTATCCTAAAAATGAAGTGATAATTATAGCTACTGGTATGCAAGGAGAACCTGTAGAAGCCTTAAGTCAAATGGCGCAA  
CATAAGCATAAAATTTAGAATATCGAAGAAGGCGATTCTGTATTTTTAGCAATTACGGCTTCTGCTAATATGGAAGTTATCATTGCG  
AATACATTAAATGAGCTTGTACGTGCTGGCGCACATATTATCCAAATAACAAGAAGATTTCATGCTCAAGTCATGGTTGCATGGAA  
GAATTAATAATGATGATTAATATTATGAAACCTGAATACTTTATTCTGTACAAGGTGAATTTAAAATGCAGATAGCACATGCGAA  
GCTAGCAGCTGAAGCAGGTGTTGCACCAGAAAAAGATTTTCTTGTGAAAAAAGGAGATGTCATTAATTACAACGGTAAAGATATGA  
TATTAATGAAAAGGTAAATTCAGGAAATATTTAATAGATGGTATTGGTATTGGGGATGTAGGAAATATCGTGTGAGAGACCGT  
CATCTTTAGCAGAAAGATGGTATCTTTATGGCTGTAGTAACGTTAGATCCTAAAAATAGACGTATGCTGGGACCTGAAATTTCAA  
TCTCGTGGGTTGTATATGTACGTGAAAGTGAAAGACTTATTACGTGAAGCAGAAAGAGAAAGTACGTGAAATAGTAGAGGCTGGTTT  
ACAAGAAAAACGCATAGAATGGTCTGAAATTAAGCAAAATATGCGTGATCAAAATTAGTAAACTATTATTTCGAAAAGTACAAAACGTC  
GTCCTATGATTATTCCAGTAATTTCTGAAATTTAATCAAAAAGTCATTAACATAAAAGAGGTCAGAACAAGTCACTGAAATATAATG  
GTTGTCATGGACAATTTACTTATATTTTATGATGGTCAATTGAAGGGGTAACGATTAACTCTGTTATCTTAAGTAAATTGATACATAGA  
TGATATTGTTCTAACCTCTTTCATCGTCTGTTTGGACTACATATTCTAAACATCAAATAGGAAATTATATATAAATACGTCGTTTAA  
CTAAGGCAACATAAGGAGGTGCGTCAATTGGCACAAGCAAAAAAGAAATCGACAGCTAAGAAAAAACAACATCAAAAAAAGA  
ACAAATTCGAGGAAAAAGAAGATGATAATCCGATACGTTATGTCATAGCTATTTTAGTAGTGTATTAATGGTGTGGGTGTTTTTC  
CAATTAGGAATAATAGGTCGTCTAATTGACAGCTTCTTAAATTTATTTGGGTACAGTAGATTTAACATATAATTTTAGTACTCT  
TAGCAACTGGTTTTATACATACTCTAAACGTATTTCTAAAACTAGACGAACGGCTGGTTGCTGATTGTATGCAAAATTGCATTTGTATT  
TGTATCACAGTTAGTTTTTCATTTAATAGTGGTATCAAAGCTGAAAAGAGAACCTGTACTTTCTTATGTGTATCAGTCATACCAACAC  
AGTCAATTTCCCAAATTTTGGTGGCGGTGTATTAGGCTTTTATTATTAGAGTTAAGCGTACCTTTAATTTCAATTATTGGTGTATGTAT  
TATTACTATTTTATTATTATGCTCAAGTGTATTTTATTAACAAACCATCAACATCGTGAAAGTTGCAAAAAGTTGCACTGGAAAATATA  
AAAGCTTGGTTTGGTTCATTTAATGAAAAAATGTGCGAAAAGAAACCAAGAAAAACAATTGAAGCGTGAAGAAAAAGCAAGACTTA  
AAGAAGAACAAAAGGCACGTCAAAATGAACAGCCACAAATAAAAGATGTGAGTGATTTTACGGAAGTGCCCTCAAGAAAGAGATAT  
TCCAATTTATGGGCATCTGAAATGAAAGTAAAAGCCAGAGTCAACCAAGTCGAAAAAACCAGTGTGTTGATGCAGAGAATAGTT  
CGAATAACATCGTAATCATCATCAAGCAGATCAGCAAGTAACATTAACAGCAAACTCATAACAGCTGTTGAAAGTGAAGAACAC  
TATTGAAGAAGCTGGTGAGTTACGAATGTATCGTATGTTTCCACCGTTAACTTTACTTAATCAACCTGAAAGTGAAGAAACAAAC  
ATCTAAAGCTGAAGTGCAACGTAAAGGACAAGTACTAGAGAATACATTAAAAAGATTTTGGGGTAAATGCAAAAGTGACACAAAT  
AAAATTGGTCTGTAGTAACTCAATATGAAATTCACACAGCTCAAGGGGTTAAAGTGAGTAAATTTGTAACCTTGCATAATGATATT  
GCATTAGCTTTAGCAGCAAAAGATGTTAGAATCGAAGCGCCAATACCTGGTCTGTTCTGCAGTAGGTATTGAAGTGCCAAATGAGAA  
AATTCATTAGTTTCACTAAAAGAAAGTTTATGATGAAAAATCCCGTCTAATAATAAACTAGAAGTTGGATTAGGAAGAGATATATC  
AGGTGATCCAATTACTGTTCCACTAAATGAAATGCCACACTTATTGGTGGCAGGATCGACGGGTAGTGGTAAATCTGTTGTATAAA  
TGGTATTATTACAAGTATTTTATTAATGCTAAGCCGCATGAAGTTAAACTTATGTTAATCGATCCGAAAAATGGTTGAACATAATGT  
TTATAACGGAATTCACACTTATTAATTCGGTGTGTTACAAATCCTCATAAAGCTGCTCAAGCTTTAGAAAAAATTTAGTCTGAGAT  
GGAAAGAGCTGATGATTTTATTCACACATTACAACTAGAAACATTAAGGTTATAACGAATTAATCCGTAAGCAAAATCAAGAAT  
TAGATGAGAAAGTAAACAGAAATACCTTATATCGTTGTTATGTAGATGAGCTTGCAGATTAAATGATGGTAGCTGGTAAAGAAGTTG  
AAAATGCGATTCAACGTATTACACAAATGGCACGTGCAGCAGGTATACATTTAATTGTAGCGACACAAAGACCTTCTGTGGATGTA  
ATTACAGGTATCATTAATAATAATATTCATCTAGAATAGCTTTTGTGTGAGTTCTCAAACAGATTCAAGAACTATTATTGGTACT

GGCGGCGCAGAAAAGTTACTTGGTAAAGGTGACATGTTATACGTTGGAAAATGGTGACTCATCACAAACACGTATTCAAGGGGCGTT  
TTTAAAGTGACCAAGAGGTGCAAGATGTTGTAAATTATGTAGTAGAACAACAACAGGCAAATTATGTAAAAAGAAATGGAACCAGAT  
GCACCACTGGATAAATCGGAAATGAAAAGTGAAGATGCTTTATATGATGAAGCGTATTTGTTTGTGTTGAACAACAAAAGGCAAG  
TACATCATTGTTACAACGCCAATTTAGAATTGGTTATAATAGAGCATCTAGGTTGATGGATGATTTAGAACGCAATCAGGTAATCGG  
TCCACAAAAAGGAAGCAAGCCTAGACAAGTTTTAATAGATCTTAATAATGACGAGGTGTAAAAAATGTCAGAAATGAATGCGGT  
ATATAACGTTAAACAATACATTTTTAAATTTGATTAAGCAAAAATAAATTGGAATATGGTGACCAACTTCCAAGTAATTTATCAATTGC  
CAGAGAATTAATGTAAAAACCGACGATGTTTATGAAGCAATTCAGGCATTGATTACTGAACAAGTCATTAAGATAATTTTGAAG  
AGGGCACAAAGTGTTAAGTCACTGCCCCCTTTCTTTTATCCATTGAATGAACCTTATAAGTATTGGGCAATGATTAAAAATGCAGGAT  
TTGAATGCGGAACCTGAATACTTAAATTTTATGATGAGCAACCGCAACTATGTTAGATGCAAAATTTGTTGAGCGTTGAAGAAGGATATC  
CAGTAACCATTTATAGAACGATTACGAACCTGCCGATGGAGAACCGGTCTCTATTGTTTATAGATAAAAATGTCAAAAAAGAAATTAACA  
TGTACAGAGTATCAAATGAGCAATGGATCGATTCTAAGTGCGATAAAAAAGCAAAAGTAATCATAATATTTGTTATGCTGATACAGA  
AATTGAAGCGGTAAATTTAGAACCTCGAATATCCGAAGTACTGAATGCTTCGCCACACGAAGGTTTGATTTTATTAATAAATTACGCA  
CTATAATGAATCAGATGAACCTATTTTGTATTCTAATAATTATATGAAAAATAGCTTAGTTCAATTTAAAAATCACTAGAAAAATATA  
GATGTAAGAAGATATAGAGGAGGCTATATATTTGAGTAGACAATCTCAACCAATATACATATCAAAGTTTCACCAACAATAAAT  
TTAAAAACAATACTACTATAGTTTTTAAATTTATGGCACCTTTAGAATATGACACAATAACAGCTAGATCATTATTAAGCAAAATTATTAG  
TTGAGCAACTAAGAAATGGCCAACCGATAAGTCGTTTAAATAATCACTTAGCCGATTTATATGGTGCGTATGTGAATAGTACAATTT  
CAAAATTCAAAGATCAGCATGTCTATTACATTTTCATTAGAAAATTTGTTAATGAACGTTATTTAAGAAACGGTGAATCATTATTTAATC  
AAGGATTAGATTATTACAAGAAATCATTGGAATCCATTAATGAAAATAAAGCAATTCGAATGATAATTTGTTAACCAGAGAAA  
ACATTATTAGCCAAAAAATAGAAGCAATGGTAGATAAATAAGCAACAATATTCGTTTTTAAATTAATCTCGACCTATGTTTGAAGAAAT  
GAAGCATATAAATACTTATCTACAGGACAACCTAGAACAATCCACATATTACTGCTGAAACACTATATCATACATATCAATCAATG  
ATTAATAATGATCAATGTTCTGTTTATGTTGTCGGCAATGTAGAACCTGAAAGTGTGAGAAAACAATACGTGAAAAATTTGCACTT  
AAACCATTGATAAACATCAATTCCAACATTCTACTCATCATTTACACGATGAAGAAGTTGATTATATTGTTGAATATGATGACGTG  
GATCAAGCTAAATTAATATGGGATACCGTTTTCCAACACAAATATGGACAAAGTGGATATGCTGCCTTTGTTGTATTTAACATGATG  
TTTGGAGGAGATCCTTCATCTGTTTTATTTAATGAAGTGCGAGAAAAGCAAAAGTTTAGCGTACTCTATACATTCACAAATGATGGC  
AAAAATGGCTATTTATTTGTTTTGAGTGGGGTTTTCAAGTGATAAGTACGAAACTGCAAAAGACACTATTATAAGTGAATTTGAAAAA  
ATAAAAGCAGGAGATTTCACTGAAGAAAAATAGAGTTAGCTAAAAAGTAATCATTTCATCATGATGAATCTGAAGATCGTCC  
GAAAAGTATTATAGAGATTATGCATAACCAAAATATTATTAGAGCAACACAAAGCAAAAGAAACATTTATAAATGATATACAGAAG  
TAAGTCGCGAAGATATTGTTTCTGTTGCTGAAAAAGCATTTTTAGATACAATCTATGTGTTGACAAAAGGAGGGGATAAATAATGA  
AAGAGCGTTATTATGAATTAATAGACGAAAGAGTATTCGAACAAGAATTAGAAAATGGTTTACGATTATTTATTATCCCAAAACCA  
GGTTTTCAAAAGACATTTGTCATCTACACTACACAATTTGGTTTCATTAGATAATCAATTCAAACCCCTTGGACAAGACCAATTTGTTA  
CTGTACCTGATGGAGTTGCTCATTTTAGAACATAAATTATTGAAAAAGAAAGAAAGACCTATTTACTGCGTTTGCTGAAGATA  
ATGCACAAGCAAAATGCGTTTACAAGCTTTGATCGTACAAGCTACTTGTTCAGTGCAACTGATAATATTGAAAAACAACATTAACCGTT  
TACTTACAATGGTTGAAACGCCTTATTTTACAAAAGAACTGTTGATAAAGAAAAAGGTATTATTGCAGAAGAAATAAAAAATGTAT  
CAAGAACAACCTGGATATAAATTAATGTTAATACATTGCTGCAATGTATCAACAACATCCAATACGCGTTGATATTGCGGATAGT  
GTAGAAAGTATATACGATATTACAAAAGATGATTTGTATCTGTTATGTGAACGTTTTATCATCCATCCAATGATGTTTTATTTGTTG  
TTGGCGATGTGGATCCTGAAGCAATATGTGCAATAGTAAACAACACGAGGATGCTCGTAATAAAGTTAACCAACCCAAAAATCGAA  
CGAGGACTTGTGATGAACCGGAGGATGTTAAAGAAGCATTTGTTACTGAATCTATGAAAATTCATCACCAAGACTAATGCTTGGT  
TTTAAAAATAAACCATTACAAGAAGCGCCTCAAAAATATGTACAACGTGATTTAGAAATGTCATTATCTTTGAGTTAATTTTGGG  
GAAGAAACAGATTTTTATCAGAATTTATTAACGAAGGACTTATCGATGATACATTTGGTTATCAATTTGTACTAGAGCCGACGTAT  
AGTTTTTCAATCGTGACAAGCGCTACTGAAGAACCAGATAAATTAAAAAAATTATTATTAGATGAGTTGCGTGATAAAAAAGGCAA  
TTTCCAAGATGCAGAAGCATTTGAACTTTTGAAAAAGCAATTTATAGGTGAATTCATATCAAGTTTAAACTCACCTGAATATATTGC  
TAATCAATATACTAAATGTATTTGAAGGTGTTAGCGTGTGTTGACATGTTAGACATTGTTGAAAATATCACCTTAGATAGTATTAAC  
GAAACGTCATCGTTATATTTAAATTAGATCAGCAAGTCGATAGCTGTTGGAGATTAAAAAGTAATGAAAGCATTAGTATTAGGTG  
GTTCTGGTTCAATTGGTCTGAGATAGTCAACAATTATTAACCTGATGGATTTGAAGTTTATGTGCAATATTATCGTACTGATATAAA  
TGAATTAACCTAGCAAATTTAATGATGATAAAGTTCGTTTTATACAAGCGGATTTATCTCAAACAATTGATATTGACAAGACATTTGG  
TGACATTAATCATTAGACTGTTTAATATATGCAAGTGGTCAGTCTTTATATGGTGTGTTTACAAGATATGAAAGACCATGATATTGA  
TGCATGTTATCAGTTAAATGTCTTGCAATTAATTCGATTATGTAGATATTTCTGTTGATGTTTACGTCAAAGTGTCATGGAAGAATT  
ATTGTAATTTTCATCAATTTGGGGTGAGACAGGAGCTAGTATGGAAACTATTTATTCGGCGATGAAAAGTGACAAATTAGGTTTCGTT  
AAGGCGCTTAGTCAAGAGCTTGCACTAACATCAGTGACAGTAAATGCTATCGCACCTGGATTTGTAGCCGGTAATATGGCAAGTGA  
GTGGCAAGAAGATGAACCTCAAGCAATGATAACTGAATTACCACAACAGCGATTTGGTTTTACCGAGTGAGGTTGCTCATACATGCG  
CCTATTTATATCAACCAATCTAGAAAGTGTACTGAACTATACAGAAAGTTAATGGTGCCTTGGTATATTTAAAAATATAGAACT  
TTTTATGAGCAATGTTTTATGATTGATTATGTTAATGTAATGTAATTAACAATGAATGTAATTAATTTGTTAATTAACAGGGGTGAGGTT  
ACCATGACAGTTGACAGAGAAAAAAGAAATGGTACCTAGAATACGAAATGAAATTAATAGACCGGGTCTTTTAGGTGATGTATCTAG  
TTTATTAGGTATGTTAGGTATAAGTATTGTTACAATTAATGGTGTGATCAAGGTAACGAGGCTTTTAATTAACAGACAATCT  
TGAAAAAGTTGAACGTTTTGAGCAAAATAGCTCGTGGTATAAATGAAATTGAAATAACAAAGCTTAAAAAACAGAAATTAAGAGACC  
GTCTTGACGTAAGACATGGTAGATATATTGAGCAAGATGCAAAAGATAAGAAAACCTTTTCGATTTGAGCGTGAAGATTTAGGCTTG  
TTAGTAGACTTTTTAGCTGAATTTGTTCAAAGAAGAAGGTCATAAGTTGATTGGCATTAGAGGTATGCCACGAGTTGGTAAAACTGAA  
TCAATTTGTTGCGGGAAGTGTTTGTGACATAAGAGATGGTTATTTATTAGTTCTACTTTAATAAAACAACTGTACGTAGCTCTCTAA  
TTAAAGGGGAATATGATGCCAATCATGTATACATTATTGATGGTGCAAGTACTGCCAGAGAATCTAATCCAAAAACATCAAGAGCTT  
GTTAACGAAGTTATGACGTTACCATCAATCAAAAGTCGTTGAACATGCCAGATTTATTGTTGAAACAAGTACTGTACAATGGAAGAT  
TTTGACTATATTATCGAATTGAGAGAAAAATGAAAATCAAGAAATACATTACGAAGAAATGAAGAAAACAGACAGTCCAAAGTAAGA  
ATAATTTAGATTTTGGAGATCCGTTTGGTGGTGGTTTTGGTTTCTTCGAGTAAGTGTAAGGAGGCTATGAATTGAAAACGGTCGGTG  
AAGCGCTAAAAGGTAGACGTGAAAGGTTAGGAATGACTTTAACAGAATTAGAGCAACGTACTGGAATTAACCGTGAATGCTAGT  
GCATATTGAAAATAATGAATTCGATCAACTACCGAATAAAAAATTATAGCGAAGGATTATTAGAAAAATATGCAAGCGTAGTAAATA  
TTGAACCTAACCAATTAATTCAGCTCATCAAGATGAAATTCATCGAACCAAGCGGAATGGGACGAAGTAATTACAGTTTTCAAT  
AATAATAAAGACTTAGATTATAAGAGTAAATCAAAAGAGCCAATACAATTATTAGTAATCATGGGTATTACAGTTTTAATACTTTA  
TTGTTATGGATCATGTTAGTTTTAATATTTTACAGAAATAAATAGTGAGAAATGAGGATGTATAATGAATTAATCCGAACCAAGAT  
ACGGTTTTTATAGTAGTGTAAATACCAAGTTTTTATAGTTTGCAGTTAGTTGATTGGAATTTGGCAATGTGTCATTTAGGAGGAT  
ATGAAAATAAGGATTAGTTAATTAATCAGTGGTTTTATTTTTATATTGGCTTCCCTTAGCGATTTTGTTGATGTTTATTAGCTAGAAA  
ATGGAATTTAGTTACAAATATGGGGAAATTTTTGGATCCATTAGCGGATAAATATTAGTTGCAAGTGCTTTAATGTACTTGTGCA  
ACTAGGACTAACAAATCTGTAGTAGCAATCATTATTATTGCCAGAGAATTTGCCGTAACGTGTTTACGTTTACTACAAATTGAACA

AGGATTCGTAAGTGCAGCTGGTCAATTAGGTAAAAATTAACAGCAGTTACTATGGTAGCAATTACTTGGTTGTTATTAGGTGATCC  
ATTGGCAACATTGATTGGTTTGTTCATTAGGACAAAATTTATTATACATTGGCGTTATTTTTACTATCTTATCTGGTATTGAATACTTTT  
ATAAAGGTAGAGATGTTTTTAAACAAAAATAAATATTTGTTTATACTAGATTTTCATTTTCATATGGAATCTAGTTTTTTTTAATCCCAA  
TTTTAGAAATTAGCCACGCAATTGTTTATAATGATATATTGTAACCGATATTTGTTTCATTTTTTAGGCAAATGTGTTGTAGCATCTG  
ATACATTGAATCTAAAATTGATGTGAATTTTTAAATGGAATACATGAAAAAAGAATTAACGATACAAGGGGGATATAAATGTCA  
ATTGCCATTATTGCTGTAGGCTCAGAACTATTGCTAGGTCAAAATCGTAATACCAACGGACAAATTTCTATCTAAAGTATTTAATGAA  
ATTGGACAAAATGTATTAGAACATAAAGTTATTGGAGATAATAAAAAACGTTTAGAATCAAGTGTACGTCATGCGCTAGAAAAATA  
TGATACTGTTATTTTAAACAGGTGGCTTAGGTCCTACGAAAGATGACTTAACGAAGCATACAGTGGCCCAGATTGTTGGTAAAGATT  
AGTTATTGATGAGCCTTCTTTAAAAATATATTGAAAGCTATTTTGAGGAACAAGGACAAGAAATGACACCTAATAATAACAAACAGG  
CTTAGTAATTGAAGTTCAACTGTATTAACAAATCATCATGGCATGGCTCCAGGAATGATGGTGAATTTTGAAAAACAAACAAATTA  
TTTTATTACCAGGTCCACCGAAAGAAATGCAACCAATGGTGAAAAATGAATTGTTGTACATTTTATAAACCATTAATCGAATTATAC  
ATTCTGAACTATTAAGATTGCGGGAATAGGTGAATCTAAAGTAGAAACAATATTAATAGATCTTATCGATAAACAGACTAATCCTA  
CGATTGCGCCTTTGGCGGGAAGTCATGAAGTATATATTAGATTGACTGCAATGCCGACTCAAAAGAACAAGCACAAATCATTGATT  
CAACCTGTTAAACAAGAAATCTTGATCGTATTGGAGAATATTATTATGGTTCAGATGACACATTAATTGAGCAAGCTGTAATAAAG  
AAAATTCATGAACCTTTTGAATATATGATGGTATTACTAATGGTGCCTTATATCATCGATTGAAAGAGTGGATTAAACGATGTT  
CTAAAGGTATGATTAATCACAATGAAAACCTTTGTTGATATTAATAAACCTATTGAGCAGCAATTAAGATGCAGTGCAATTTGTT  
AATAAATTGTTTAAATGTGTCATCAGCAATTATCTATTAGAGTATGATGGTGTAGTCCATATAGGCTATGATAATAACTTAGAATTTA  
AACTGAGCAATTTAAATGTCTAAATCTAGAAATTTATTAAGACAGAGAAGTCAAAATTAGCGCTATAAGATTATTAATTTAGG  
CTTAGAACACAAATTAATTGTATTATCGATAAAAAATATAAGCACGTTTGTTCGTTTTGCAATTTGATTTTAAAGATTATATACGAAC  
AAATATTGCAAAATACTTGTATTTTATTTGAATCCTTGTATAGTATTGGTAAGATAATTAAGATAGCAATTTCAATTAGGAGG  
TCTCGCTTTGGATAACGATCGTCAAAAAGCTTTAGATACAGTAATTAATAATATGGAGAAATCTTTCGGTAAAGGTGCCGTAATGA  
AGTTGGGTGACAATATAGGTGCGCGAGTTTCAACTACATCAACTGGTTCAGTTACATTAGATAATGCGCTAGGTGTAGGTGGCTATC  
CTAAAGGACGAATTATTGAAATTTATGGTCTGAAAGTCTGGTAAGACAACAGTAGCGCTTCACGCTATTGCTGAAGTACAAAGT  
AATGGCGGGGTGGCAGCATTTATCGATGCTGAACATGCTTTAGATCCAGAATATGCTCAAGCATTAGGCGTAGATATCGATAATTTA  
TATTTATCGCAACCGGATCATGGTGAACAAGGTCTTGAATCGCCGAAGCATTGTTAGAAGTGGTGCAGTTGATATTGTAGTTGTA  
GACTCAGTTGCTGCTTTAACACCTAAAGCTGAAATTTGAAGGAGAAATGGGAGACACTCAGTTGGTTTACAAGCTCGTTTAATGTCA  
CAAGCGTTACGTAAACTTTACGGTGCTATTTCTAAATCAAAATACAACCTGCTATTTTCATCAACCAAATTCGTGAAAAAGTTGGTGTT  
ATGTTTCGGTAATCCAGAGACTACACCAGGTGGACGTGCATTTAAATTTCTATAGTTTCAGTAAGACTAGAAGTACGCCGTGCAGAACA  
GCTTAAACAAGGACAAGAAATTGTAGGTAATAGAATAAAATTAAGTCGTTAAAAATAAGTGGCACCACCATTAGAGTAGCTG  
AAGTTGATATTATGTATGGACAAGGTATTTCTAAAGAGGGTGAACCTATTGATTTAGGTGTTGAAAACGACATCGTTGATAAATCAG  
GAGCATGGTATTCTTACAATGGCGAACGAATGGGTCAAGGTAAGGAAAAATGTTAAAAATGTACTTGAAAGAAAAATCCACAAATTA  
GAAGAAATTGATCGTAAATTGAGAGAAAAATTAGGTATATCTGATGGTGATGTTGAAGAAAACAGAAGATGCACCAAAGTCATTATT  
TGACGAAGAATAGTACACAAATTTATATCTATAGTTAACTTAGCAAATATCCTTATAGGATTGATTGAAAGTGATATTCATCTCAT  
AAAGCTAGAAATAATATCTAACTTTATGGGATACACTACAAATCGAGACTATAAGGTTTTTTATTTTATTATTATACATTATCAATA  
GTTTTATAATCGAGTTCTAAACCTTAGAAAAATAGTAAAAATAGCAATAGCAATTAATAGTGCAAAAGTGCAAAATTTGATGACACTT  
ATCTCTATAAAACCGTACAATTAATTTGTATGATTTATATATAATTTCTATAAAGTCATATTGAATTTCTATATAAAGAGCAAAACCTAG  
AAAAGGAGGTGTTTGTGTGAATTTATTAAGCCTCTACTCATTTTGTCTGGGGATCATTCTAGGAGTTGTTGGAGGGTATGTTGTTGCC  
CGAAATTTGTTGCTTCAAAAGCAATCACAAGCTAGACAACTGCCGAAGATATTGTAATCAAGCACATAAAGAAGCTGACAATAT  
CAAAAAAGAGAAATTACTTGAGGCAAAAGAAAGAAAACCAAATCCTAAGAGAACAACTGAAGCAGAAGTACGAGAAAGACGTAG  
CGAAGTTCAAGACAAGAAACCGACTTCTTCAAAAAGAAAGAAAACCTTAGAGCGCAAATCTGATCTATTAGATAAAAAAGATGAG  
ATTTTAGAGCAAAAAGAATCAAAAATTTGAAGAAAAACAACAAGTAGATGCAAAAGAGAGTAGTGTTCAAACGTTAATAATGA  
AGCATGAACAAGAATTAGAAGCATCTCCGGTCTCACTCAAGAAGAAGCTATTAATGAGCAACTTCAAAGAGTAGAGGAAGAAT  
GTCACAAGATATTGAGTACTTGTAAAGAAAAAGAAAAAGCTTAAAGAAAGTTGATAAAACAGCAAAAAGTAAATTATAGCT  
ACAGCAGTACAAAGATTAGCAGCAGATCACACAAGTGAATACAAGGTATCAGTAGTTAACTTACCTAATGATGAGATGAAAGGTG  
AATCATTGGACGAGAAGGACGAAACATCCGCACACTTGAACCTTTAACTGGCATTGATTTAATTATTGATGACACACCAGAAGCGG  
TTATATTATCTGGTTTTGTATCCAATAAGAAGAGAAATTGCTAGAACAGCACTTGTAACTTAGTATCTGATGGACGTATTCATCCAG  
GTAGAATTGAAGATATGGTCGAAAAAGCTAGAAAAGAAGTAGAGGATATTATTAGAGAAGCAGGTGAACAAGCTACATTTGAAGT  
GAACGCACATAATATGCATCCTGACTTAGTAAAAATTTGATAGGCGGTTAACTATCGTACGAGTTACGGTCAAAATGTACTTAAACA  
TTCAATTGAAGTTGCGCATCTTGCTAGTATGTTAGCTGCTGAGCTAGGCGAAGATGAGACATTAGCGAAACGAGCTGGACTTTTACA  
TGATGTTGGTAAAGCAATTGATCATGAAGTAGAAGGTAGTTCATGTTGAAATCGGTGTAGAATTAGCGAAAAAATATGGTGAAAATG  
AAACGGTTATTAACTTCAGTATCATAACAATTTGTGCAATTTGTTGAATCTCATCTATCTCTGCTTGGCTGCTGCAGATGCATT  
GTCTCGGCTCGTCCAGGTGCAAGAAAAAGAAACATTAGAGAAATTTATCTGCTGATTAGAAGCTTTAGAAACGTTTATAGAAAGTT  
ATGATGGTGTAGAAAAAGCATTGCGATTACGGCAGGTAGAGAAATCCGAGTGATTGTATCTCCTGAAGAAATTGATGATTTAAAA  
TCTTATCGATTGGCTAGAGATATTAATAATCAGATTGAAGATGAATTACAATATCCTGGTCATATCAAGGTGACAGTTGTTTCGAGAG  
ACTAGAGCAGTAGAATATGCGAAATAATTTTGTCTCCCTCACAATTAGTGAGGGAGCTTTTTTAAGTTGTAGTCTCAATCTAATT  
AGACAGCACTTTATCGGTAGTAAGTATAGTAAACAGTAGTTATTGAAAGTAAAGACGGACCTTATATTAATAAAGAAGTTATTGCTT  
TTAATAAAAAATGTTTTAGGCTTCATAATTACTATATTTATATTATGTAAACCTTTAAAGATGAGTGCTTTTCTAACCAATAAAAAAGA  
AGAGAAGATGTAACACATCTTCTTCTGCAATATTAATTAGGATTTATTTCTAAGTTGAGTTATTTTAATTGTAATCTGTTTTCTTT  
AATTTCTTTTAACTTCTGAGTATCATAACAATTTGTGCAATTTGTTGAATTTGTTGAATATCTCTGCTAAACGATATGCATTAATGTAAGAGCT  
TTAAACTTTCTTAGCTATATCTCTGCACTCTTCAATTTGATGGGTTAGACATAACCACTAATCTGCAATTTTCTGAGTCAATA  
TTAATAGACATGTATTTATTTACAACCTCTATTTATTTTGTATGCTTAAATACTAACATATTGAAGTTTTCAGACAAAGTAATGTCTCTC  
TATAATTGAAGAAAAATAATTTCAAAGAATTTAATATTTACTTTAAATATTAGAACGTATGAATTAACCTAGTATTTATGAGAGGATG  
AACAAAACATGAGAATAATGTTTATAGGGGATATCGTAGGTAATTTGGACGAGACGCAATTGAAACGTACATACCTCAACTGAAG  
CAAAAGTATAAACCAACAGTTACAATTGTAAATGCTGAAAATGCAGCAGATGGTAAAGGTTGACTGAAAAAATATATAACAATT  
ACTAAGAAATGGTGTAGATTTTCATGACTATGGGTAATCACACATATGGTCAACGTGAAATTTATGATTTTATAGATGAAGCAAAAC  
GACTAGTAAGACCAGCGAATTTTCCGGATGAAGCGCCGGGAATTTGGTATGAGATTTATACAAATTAATGATATTAACCTTGCAATT  
ATTAATCTGCAAGGAAGAGCGTTTATGCCAGATATTGATGCTCTTTTAAAAAGGCAGATCAATTAGTCAAGGAAGCACAGAACA  
AACTCCGTTTATATTTGTTGATTTTTCATGCAGAAACAATCTGAAAAGATGCAATGGGATGGCATTAGTGGTAGAGCTAGCGC  
TGTTGTTGGAACGCATACACATTTCAACAGCAGATGAACGTATTTTACCGAAGGGGACAGGGTATATAACGGATGTTGGTATGA  
CAGGTTTTTATGACGGCATTTTAGGAATAAATAAAACAGAGGTAATTGAGCGTTTTATCACTAGTTTGGCCACAAAGACATGTTGTTT  
CAAATGAAGGTAGAAGTGTATTATCTGGTGTGTTATTGATTTAGACAAAGAAGGTAAAACGAAGCACATCGAACGTATATTGATA

AATGATGACCATCCATTTTCAACATTTTAAAAATTACGTAAGTAAACATTTCGAATTGGACCCTATCGTCCATTAGTATGAATTTAATAT  
AGTACCCTGTTTACATAGTAAATCGGTGGTTCCTTTTGTATCATTTAATATGAAATATATCCATAGGAGGCATATAACTATGAAAC  
CACAATTATCGTGGAAAGTTGGCGGTCAACAAGGCGAAGGTATTGAATCAACTGGGGAAATCTTCGCTACGGCTATGAATAGAAAA  
GGATATTATTTATATGGATATAGACATTTTCAAGTCGTATCAAAGGTGGACATACGAATAATAAAATTAGAGTTTCTACGACGCCT  
GTTTCATGCAATTAGTGATGATTTAGATATTTTGATTGCATTTGACCAAGAAAACAATTGATGTTAACCATCATGAAATGAGAGAAGAC  
AGTACTATTTTAGCTGATGCCAAGGCTAAACCTGTGAAACCAGAAGGATGTCATGCACAGCTTATTGAATTACCTTTTACAGCAACC  
GCTAAAGAATTAGGTACAGCATTAATGAAAAACATGGTTGCAATAGGTGCTACTAGCGCATTGATGAATTTGAATACAAATACATT  
TGAAGAACTTATTACTAATATGTTTTCTAAAAAAGGTGACAAGGTAGTTGAAGTCAATATCCAAGCATTAACGAAGGTTATCAATT  
AATGCAATCCCCTTACCTGAAATCGACGGGGACTTTGAATTAGAGTCAACAGATGCACTACCACATCTATATATGATTGGTAACGA  
TGCCATTGGATTAGGTGCAATTGGTCGAGGTTCACAATTTATGGCGGCATATCCTATTACACCTGCGTCTGAAGTTATGGAATATAT  
GATTGCCAATATATCTAAAGTAAACGGAGCGGTTATTCAAACAGAAGATGAAATTGCTGCTGTAACCTATGGCTATTGGTGCAAAATT  
ATGGTGGAGTCAGAGCGTTTACGGCTAGTGCTGGTCCAGGTTTATCTTTAATGATGGAAGCAATTGGATTATCTGGTATGACTGAAA  
CGCCATTAGTCATTATTAATACTCAACGAGGTGGACCTTCTACTGGATTACCTACGAAACAAGAACAGTCAGATTTAATGCAAATGA  
TTTATGGTACACATGGTGATATTCCAAAAATAGTTGTAGCACCACCTGATGCAGAAGATGCATTTTATTTAACTATGGAAGCCTTTA  
ATTTAGCAGAACAATATCAATGCCCTGTTATAGTTTAAAGTGATTGCAATTATCTTTAGGTAAACAACTGTTGAAAAATTAGATT  
ATAATCGCATTGAAATTAAACGTGGTGAAATCATTCAATCTGATATTGAACGTGAAGAAGATGATAAAGGTTATTTCAGCGTTATG  
CGTTAACATCCAATGGTGTTCCTCTAGACCTATCCCCGGTGTTAAAGGAGGTATTCATCATATAACTGGTGTGGAACACAATGAAG  
AAGGTAAACCTAGTGAATCTGCGTCAAAATAGACAACAACAATGAGAAAAAGCAATGCGTAAAATTGACAGCTTACTAATTGAATC  
GCCAGTGAAGCTAACTATACACATGAGGATGCAGATATTCTTTATATCGGTTTATTCTACAAAAGGTGCAATTAAGAAGGTAG  
TAACCGTTTGAATCAACAAGGCATAAAAGTTAACTATACAAATTAGACAATTGCATCCATTTCCCAACAAGCGTTATTCAAGATGC  
AGTTAATAAAGCGAAGAAAGTCGTTGTAGTGGAGCACAATTATCAAGGACAATTGGCTAGTATTATAAAAAATGAATGTCAATATTC  
ATGATAAGATTGAAAATTATACAAAGTATGATGGGACACCTTCTACCACATGAAATCGAAGAAAAAGGCAAAAATAATTGCTACT  
GAAATAAAGGAGATGGTATAGATGGCGACATTTAAAGATTTTAGAAAATAATGTTAAGCCTAACTGGTGCCCTGGATGTGGCGATT  
CTCAGTACAAGCTGCAATTCAAAAAGCAGCCGCAAAATATAGGGTTAGAACCTGAAGAAGTAGCTATCATCACCGGTATAGGATGTT  
CTGGCCGTCTTTCAGGATATATTAATTCCTTATGGCGTTCATTCTATTACGGACGTGCATTACCTTTAGCTCAAGGTGTAATAATGGC  
GAATAAAGATTTAACTGTTATTGTCATCTGGAGGAGATGGTGATGGTTATGCTATAGGTATGGGGCATACAATCCATGCTTTAAGAAG  
AAATATGAACATGACGTATATAGTCATGGATAATCAAAATTTATGGTTTGACAAAGGGACAAACATCGCCGTATCAGCAGTAGGAT  
TTGTTACTAAAAACAACGCCAAAAAGGTAATATAGAAAAAAATGTTGCGCCTTTAGAAATTAGCATTATCATCTGGTGCCACATTTGTAG  
CCCAAGGTTTTTCAAGTGATATTAAGGATTAACAAAATAATTGAAGATGCAATTAATCATGATGGATTTTCATTCTGTTAATGTCT  
TTTCACCATGTGTGACTTATAATAAAATTAACACATACGATTGGTTTAAAGAACATTTAACAAGTGTGATGACATTGAAAATTATG  
ATTCTACAGATAAAACAATTAGCGACTAGAACTGTTATTGAACATGAATCTTTAGTAACCTGGTATTGTTTATCAAGATAAAGAAAACAC  
CATCATATGAATCTCAAAATTAAGAGTTAGATGATACACCCTTGCTAAAAGAGATATCAAAATTAAGTGAAGACACGTTCAATGCA  
TTAACTGAACAATTTATTTAATAATTAAGGAGTGTGATATAAATGTATTTATAACAGATCCATTTATGCTACTCAGTTTTTTTACTA  
TTACAAAAATAAAGGAGTTTTTAAAAATGAAAGACACATTAATGAGTATACAAAATAATTCCTAAAAACACCAAAACATGACAATG  
ATACCTTACGTAGACGAGCGGATTAATAATTTGACGAATCTGGTTTGCATTTTAGAGTAGGTCGTTAGAAACACGATACAAGG  
AAATATGAATGAATGTTAATTTAATACAATCATTAAATGAACGAATGGTAGAACTTGAATGTCCAAGTATTATTAGCCAAGTTAA  
GTTTTATCATGTGCCAGATGGCATCACTATTGAAACTTTAACTGGAAAAATATGATGAATAACATTAAGTGAAGTAACTGGATTT  
GAATTGGCTTGTAGAGATGACGTATAACTTTAACTGCTTTTGCACCTTTATAGTTAAATTTAATATAATTATTAATGATACGGGCAA  
ATAGAAAAGGATTTTGTAAAGTGAACGAAGAACAAGAAAAGCAAGTTCTGTGGATGTTTTAGCTGAGAGAGATAAGAAAAGCAGAA  
AAAGATTATAGTAAATATTTTGAACATGTTTATCAACCGCCTAATTTAAAAAGAAAGCGAAAAAAGAGGTAACAAAGAAAGTTCGTTA  
TAATAGAGATTTCCAAATTGATGAAAAATATCGCGGTATGGGGAACGAGCGTACATTTTAAATTAACCATATGGATGTCAAATGA  
ATGACATGACACTGAGGTGCTGCTGGTATACTTAAAGCATTAGGCTATCAAGCAACGACTGATTAACACTGCAGATGTTATTT  
TAATTAACATGTGCGATTAGAGAAAATGCGGAGAACAAAGTGTGTTAGTGAATAGGTAATTTGAAGCATTTGAAAAACACGA  
CCTGATATTTTAACTCGGTGTTTGTGGTTGTATGTCAACAAGAGTGCAAGTAGTGAATAAAAAATTTTAAATTCGTATCAAAATGTAGAT  
ATGATATTTGGTACACATAATATTCATCATTACCAGAAAATTTTGAAGAAGCATACTTATCTAAAGCAATGGTTGTTGAAGTATGG  
TCTAAAGAAGGAGACGTTATTGAAAATCTTCCAAAAGTCCGTGAAGGCAACATTAAGCATGGGTCAATATTATGTATGGTTGTGA  
TAAGTTTGTACATATTGTATTGTTCCATTACAAGAGGTAAAGAACGAAGCCGTAGACCTGAAGACATTATAGATGAAGTACGTGA  
ACTTGCTCGTGAAGGTTACAAAGAAATAACGCTTTTAGGTCAAAATGTAAATCTTATGGTAAAGATTTACAGGATATAGAATATGA  
CTTAGGAGATCTTTTACAAGCAATTTCTAAAATAGCGATTCCAAGAGTTCTGTTTCAACAACAGTCATCCTTGGGACTTTACAGATCA  
CATGATTGATGTTATTTTCAAGGGTGGTAATATCGTTCCGCATATCCACTTGCCAGTTCAATCTGGAAATAATGCAGTATTAATAAT  
AATGGGTAGAAAATATACAGAGAAAAGTTATTGGATTATTAGTAAATGAAATCAAGATAGAATTCTAATGATGACATTAACACTACAG  
ATATTATTGTAGGTTATCCAAATGAATCAGAGGAACAATTTGAAAGAACTTTAACTCTGTATGATGTGAAGTTGGTTTGAACATGCAT  
ATACGTACTTGTATTACAAACGTGATGGTACGCCTGCTGCTAAAAATGAAAGATAATGTACCTTTAGATGTCAAAAAGGAACGATTGC  
AACGTTTGAATAAAAAAGTTGGTCATTATTACAAATAGCTATGAGTAAGTACGAAGGACAAACTGTAAACAGTACTTTTGTGAAGGT  
AGTAGTAAAAAAGATGATCAGGTTCTTGTGCTGCTACACTGATAAAAAATAAGCTAGTTAATTTCAAAGCGCCTAAAGAAATGATTGG  
TAAACTAGTGGAAGTACGAATAGATGAAGCTAAACAGTATTCAATTAATGGCAGTTTGTAAAGGAAGTAGAGCCGGAAATGGTGA  
TTCAATAAATGTATAATAAAGATGACGTGTTGAACCAAGCGGATAATATTGCAAAATAAAATTAATAATTTGGATACTATCAAAAACA  
TATCAACAAATGAAGCACAGATTCATCAGAACCAACGATAAAGACTAAAAATGGATATGTTAAAAAAGCATCAAAAACAAGCAG  
TAAACTTTCAAATACCGGAAACAAAATGCGTATGAAACAGTCGGAACATACCATTACAGATATAGAAGCAGAAATAAATACATTG  
CCCATAGTTGAACAGTTTCAAACTTCACAATATGAAGCGAATCAAAATTGAAAAATGTTTGTATCAACAATGAAGAACACGTTTAAAT  
GACCATAATAAAGCCAAGCATAGTGATTAATTACAAACAAAAAGGAGAACAATCATATGAAATCAAGAAAACTGGCTATAACTGC  
ACTTTTAATTGCAATAAATGTTGTATTAAGCAGTATTATCATCATTCTCTAGGACCAGTTAAGGCAGCACCAGTACAGCATTTTGTA  
AATGTATTAAGTGGGTGATAGTAGGTCCTTGGTATGGATTAGCTCAAGCGCTTATATCATCAATTTTAAGAGTTCTTTTGGTACTG  
GTACAGCTTTTGCATTTCCGGGTAGTATGATTGGAGTTTATTGGCTAGTATGTTTACATATATCGTAAACATATATTTATGCCCCG  
GGTCCGTGAAGTACTTGGAACTGGTGTCATCGGAAGTTTAAATTTGTATACCATTAGCATATTTCTTGGGCTTCAAGACTTCTTCATT  
AAACCGTTAATGATTACGTTTCATAGTCTCAAGTGCTATCGGATCTATTATAAGTTATTTCTTATTAATTAATCTAAAAAAGCTGGTA  
TTCTTCAAAGGTTTATAAAATAATTTATGATATAGATTTCAACAGAGTCATTTGTTCAATTTAATTAAGTAAACGCCCTTACTTAAT  
AAATGTTGTAATGATGTTAATTTAATTTAATTTCAAACTGATTTAGACACATTTTATTAGGTTTGGGCGTTTCTTATACATTTAA  
GATGCTTCGTGATTATATGGTATGAATAGGTTTGTAAAAAGTAAGTATGTTAAAAATGTATAAGTTAAATAATTAATAATTAAGGCT  
TACAAACGAATATATTGTAAAGACAAATTTTAAAAAGAGACAAGGGTTGTGAAGAAATAATATGTCTAATGTTACACCAATGATGC  
AGCAATATTTAAAAATAAAATCAGAATACCAAGATTGCTTATTATTTTTAGACTAGGTGATTCTATGAAATGTTTTATGAAGATG

CCAAGGAGGCATCACGTGTACTTGAATTTACTTTAACTAAAAAGAGATGCTAAAAAGAAAAATCCAATTCGGATGTGTGGTGTTCGG  
TATCATTTCTGCAGATAGTTATATAGATACACTTGTTAATAATGGATATAAAGTAGCTATTTGTGAACAGATGGAAGATCCGAAACAA  
ACGAAAGGTATGGTTAGACGTGAGGTAGTAAGAATTGTGACTCCAGGAACGTGTATGGAGCAAGGTGGTGTAGATGATAAAACAA  
ATAACTATATTTTAAAGTTTTGTTATGAATCAACCTGAAATTGCGCTTAGTTACTGTGATGTTTCTACTGGCGAATTAAGGTTACACA  
TTTTAATGATGAAGCGACTTTATTAATGAAATTACGACGATAAACCCCTAACGAAAGTTGTTATCAATGACAATATTTCCGATAATTT  
AAAAAGACAAATTAATATGGTGACAGAAACAATAACAGTCAGGGAAACGTTATCATCAGAAATCTATAGTGTGAATCAAACTGAA  
CATAAATTAATGTATCAAGCGACACAATTATTGCTAGATTATATTCATCATACACAAAAACGTGATTTATCGCATATCGAGGATGTT  
GTTCAATATGCAGCTATAGATTATATGAAAAATGGATTTTTATGCTAAGAGAAAACTTGAGTTAACGGAAAGCATTTCGATTAAAAATCA  
AAAAAGGAACGCTACTTTGGCTAATGGACGAAACGAAAAACCAATGGGAGCACGCCGCTTAAAAACAATGGATAGATAGACCAC  
TAATAAGTAAAGAACAAATTGAAGCACGATTAGATATCGTTGATGAATTTAGTGTCTATTTATAGAAAGAGACACCTTAAGAACA  
TATCTTAATCAAGTGTATGATATTGAACGCTCTTGTGGGCGTGTAGTTACGGAAATGTTAATGCGAGAGATTTAATTCAACTTAAA  
CATTCATTTCTGAAATACCGAATATTAAGCATTACTAAATCTATGAATCAGAATACTCTTGTACAAGTTAATCAACTAGAACCC  
CTTGATGATTTACTTGTATATATTAGAACAGAGTTTAGTAGAAGAACCACCAATTTTCAGTTAAAGATGGCGGACTATTCAAAGTTGGT  
TTAATACGCAATTAGATGAATATCTTGAAGCTTCAAAAAACGGAAAAACATGGTTAGCAGAATTACAAGCCAAAGAAAGACAAC  
GTACAGGAATAAAATCATTGAAAAATAAGCTTTAATAAAGTGTGTGGTTATTTATAGAAATAACACGTGCCAACTTGCAAAATTTTG  
AACCAAGTGAATTTGGTTATATGAGGAAGCAACGTTATCGAATGCTGAACGTTTTATACTGATGAACCTAAAGAAAAAGAAGAT  
ATCATTTTAGGTGCGGAAGACAAAGCCATCGAATTAGAATATCAATATTTGTTTCAGCTACGTGAAGAAGTTAAAAATATACTGA  
ACGTTTACAACAAGCTAAATTTTTCAGAGCTAGTTGTTTACAGAGCTTTGCGAAATTTGCTCAAAAAATATAATTACACTAG  
GCCTTCATTTTAGTGAAAAATAAACATTAGAATTAGTGGAACTTAGGCCACCTAGTAGGAAAGAGTAATGAGATTAAATGACTATG  
TGCCTAATAATTGTCGATTAGATAATGAAACATTTATATTTAATTACAGGTCCGAATATGTCTGGTAAATCGACATATATGAGAC  
AAGTTGCCATAATTAGTATAATGGCCCAATGGGAGCTTATGTCCCTTGTAAAGAGGCAGTGTACCTATATTTGATCAAAATTTCA  
CTAGAATAGGTGCGGCAGATGATTTGGTTTCAGGTAAGAGTACGTTTATGGTAGAAATGCTAGAAAGCACAAGGCATTAACCTTAT  
GCAACAGAGGATAGTTTGATTATTTTCGATGAAATTGGACGTGGTACTTCAACGTATGACGGTTTAGCTTTAGCGCAGGCAATGATA  
GAGTATGTAGCTGAAACATCGCATGCTAAACGTTATTTCAACACATTATCATGAATTGACAACATTAGATCAAGCATTACCAAGT  
CTAAAAAATGTTACGTCGCTGCTAATGAATATAAAGGTGAACCTTATATCTTGCATAAAGTCAAAGATGGTGCAGTTGACGATG  
TATGGTATTCAAGTTGCGAAATTAGCTGATTTACCTGAAAAAGTTATTAGCAGAGCACAAGTGATCCTAAGCGAGTTTGAAGCGTCT  
GCTGGTAAAAAATCATCGATATCAAAATTTAAAAATGGTCGAAAAATGAACCTGAAATTAATCAAGAAAAATTTAACTTAAGTGTGA  
AGAAACAACTGATACTTTATCCAAAAAGACTTTGAACAAGCATCATTTGATTGTTTGAAGATGATCAAGAAAGCGAGATTGAAC  
TACAAATTTAAATTTGAATTTATCTAATATGACACCAATTGAGGCATTGGTGAAAGTTAAGTGAATTACAAAATCAATTTAAATAG  
AGGTGTTGCAAAATGGGGAAAAATTAAGAAGCTCCAAACCTCATTAGCAATAAAATCGCAGCAGGTGAAGTAGTTGAAAGACCGA  
GTTCTGTTGTGAAAGAACTGTTGGAAGTGTATAGATGACAGCGCTACAGAAATAAGCATTGAAGTAGAGGAATCTGGCGTCCAA  
TCTATTCGCGTAGTCGATAATGGAAGCGGAATTGAAGCGGAAGACTTAGGATTAGTATTTTCATAGACATGCGACTAGTAAATAGA  
TCAAGATGAAGATTTATTTTCATATTAGGACATTAGGATTCCGTGGTGAAGCACTAGCCAGTATTTTCATCAGTTGCTAAAGTAACATT  
GAAGACTTGCACGGATAATGCTAATGGAAATGAAATATATGTAGAAAAATGGTGAATATTAATCATAAGCTGCAAAAGCGGAA  
AAAGGAACAGATATACTGTTAGAAATCATTATTTTATAATACACCAGCAGCTTTAAATATATTTAAAGTTTATACACTGAAGTGGT  
AAAATAACAGATATTGTCAACAGAATGGCAATGAGCCATCCGGACATTGCAATAGCACTCATTTTCAGATGGCAAAAAATGTTAAG  
TACAAATGGTTTCAGGACGAACTAATGAAGTGATGGCAGAGATTTATGGGATGAAAGTTGCACGAGATTTAGTACATATATCTGGAG  
ATACAAGTGATTATCACATTGAAGGTTTTGTTGCAAGCCTGAACATTCTAGAAGTAATAAGCACTATATTTCTATTTTATTAATGG  
ACGATACATTAAAACTTTATGCTAAATAAAGCGATTTTGAAGGCTATCATACACTCTTAAACAATAGGTAGGTTCCCGATTTGTTA  
TATTAATATTGAAATGGATCCAATCTTAGTAGACGTAATGTTTCATCCAACAAAACTAGAAGTGCGTTTATCAAAAGAAGAGCAAC  
TATACCAATTGATTGTGAGCAAAATACAAGAAGCATTTAAAGACCGTATATTAATTCCTAAAAATAACTTGGATTATGTGCCGAAA  
AAAAATAAAGTGTTACATTCTCGAACACAAAAAATCGAATTTGAACAAAGACAAAAACACAGAGAATAATCAAGAGAAGACGT  
TTTACTCTGAAGAAAGTAAACAGTAAGCCATTATTTGGTAGAAAAATCAAAACGATGAAATAGTTAAGAGAAGATTCATATAATCCCA  
TTCGTAACGAAACGCTGTAAGGTTTAAATAGCTGATGATGAATCTTCCGGTTATAATAATACAGTGAAAAAGATGAAGACTACTTC  
AAAAAGCAACAAGAAATTCTACAAGAAATGGATCAAACATTTGATTGCAATGACGATACATCTGTGCAAAATTATGAGAATAAAGC  
GTCTGATGATTATTATGATGTAAACGATATTAAGGAACAAAAAGTAAAGACCCTAAACGAAGAATTCATATATGGAAATTTGTG  
GCCAAGTACATGGAACGTATATTATTGCTCAAAATGAATTTGGCATGTACATGATTGACCAGCATGCAGCTCAAGAAAGAAATAAAA  
TATGAATATTTTCGAGATAAAATAGGTGAAGTTACCAATGAAGTACAAGATTTATTAATCCCGTTAACATTTTCATTTTCAAAAGAT  
GAACAATTAGTCATTGATCAATATAAAAAATGAGCTTCAACAAGTAGGTATCATGTTAGAACATTTTGGTGGTCATGATTATATTGTA  
AGTAGCTATCCAGTTTGGTTCCTAAAGATGAAGTAGAAGAAATTATTAAGATATGATTGAGCTAATTTTGGAGAGAAAAAAGT  
AGATATCAAAAAATACGTGAAGATGAGCAATCATGTATGTCATGTAAGAAAAATCTATTAAGCGAATCATTTTACAAAAACATG  
AAATGTCTGATTTAATTGATCAATTAAGAGAAGCGGAAGATCCATTTACATGTCCACATGGTCGTCCTCAATGATTTTTCATTA  
AATACGAATTAGAAAAATTTAATGAGCGTGTGATGTAGAGAGGATGAATCAAGTGAATAACAACATATTGCTGCCATAAGAAACA  
TTAAAGATTTAGAGAACTGATTAAACAGATTATAAAATGTGTGTGCTTCTAGATATGCATATAGGACATATAAAAAAGTATTATG  
GAATTGCTGAAGCAAAATCATATAGAGTGTTTTATTCATATAGATTTGATAAAAGGTTTAAAGCCACGATGAATTTGCAAGTGAATTT  
ATTATTCAGCAATACAAGCCAAAAGGTATCGTATCGACTAAATCTAAAGTAATAAAAAAAGCTAAATCATTAAATACCTTTAACGAT  
TTTTAGAGTATTTATTATTGATAGTCAAGCATTGAAACGCAGTATAGATTTGATAAAAAAAGTTGAACCTGATTTTGTGAAAGTACT  
TCCAGGTGTTGCGAGTAAAGCGATTTCATCATATTAGAAAAGAAAAACACACAAGTCATTGCAGGTGGCCTAATTAATACAATAG  
ATGAAGTCAATGAAGCTGTTAAAAATGGAGCGAAATATGTAACAACCTAGTTATGATAAACTTTGGTAAATCATAAGTCTGCAAAAA  
TTTCATTTTTCACGAGATTAGTCATATAACATATAAAAAACCGCTTTTCATATGGGATATGTAAGGATTTAAGGTATTAAGGTATCATAC  
AAAGAATAATTAATAACATAATTAGCACCTCTAAAAACGATTAAAAATCATTAAAGTTTTAGAGGTGTTTATTAGTAAAAAATGCAA  
CTAGTCATAAAAAATATGGCTGAAGAATGTCAATTAACATAATGGCGTCATAAATAAATAGTGGGATTGATATTTCTAGTTTTT  
AAATTAACACTACTTTTATAAAGACTTGAAAAATTAATTTGACAAAAATTTTACAAAAACCATTGACAACGCTTTCATATCGATAGT  
ATCATAACAAATATAATAAAGTTAATACATAGAATAGAGACGGGAGATTTCTACGAGCCAACTGCTAGTGTAGGAATCTCTTTG  
TCTTTTTGGGAGGACATTTAATATGAATGTATTTTAGCAGAATTCCTAGGAACCTGCAATCTTAATCCTTTTTGGTGGTGGCGTTTGT  
GCCAATGTCAATTTAAAGAGAAGTGTGCGAATGGTGTGCTGATTGGATTGTATCACAGCTGGATGGGGATTAGCGGTTACAATGGG  
TGTGTTTGTCTGCTCGGTCAATTTCTCAGGTGCACATTTAAACCCAGCGGTGTCTTTAGCTCTTGCAATTAGACGGAAGTTTGTGTTGTC  
TTAGTTCCTGGTTATTTGTTGCTCAATGTAGGTGAATTTGTCGGAGCAACAATTGTATGGTTAATGTACTTGGCACTTGGAAAG  
CGACAGAAAGATCTGGCGCAAAATTAGGTGTTTTCTCTACAGCACCGGCTATTAAGAATTACTTTGCCAACTTTTAAAGTGAGATTA  
TCGGAACAATGGCATTAACCTTTAGGTATTTTATTTATCGGTGTAAACAAAAATGGCGATGGTTTAAATCCTTTAATGTGCGGAGCAT  
AATTGTTGCAATCGGATTAAGTTTAGGCGGTGCTACTGGTTATGCAATCAACCCAGCAGTGATTTAGGTCCGAGAATTGCACATGC

GATTTTACCAATAGCTGGTAAAGGTGGTTCAAATTGGTTCATATGCAATCGTTTCTATCTTAGGACCAATTGCCGGTGGTTTATTAGGT  
GCAGTGGTATACGCTGTATTTTATAAACATACATTTAATATTGGTTGTGCAATTGCAATTGTTGTAGTTATTATTACTTTGATTTTAG  
GTTACATTTTAAATAAATCATCAAAAAAAGGTGATATCGAATCAATTTACTAAAAATAAAAGAAACGTAAATAGCATAATTTAAACA  
TGTTTGATTTCATGGATTATGCTATTTTTTCGCCAAAATTTAACAGATTTTGTACAATGGGTTAGCGATTATTTTTTAATAAAGGAGAT  
ACTACTAATGGAAAAATATATTTTATCTATAGACCAAGGAACAACAAGCTCAAGAGCGATTATTTCAATCAAAAAGGGGAAATTG  
CAGGGGTAGCACAACGTGAGTTAAGCAATATTTCCACAATCAGGTTGGGTGAACATGATGCAAAATGAAATTTGGACATCTGTGT  
TAGCTGTAATGACGGAAGTAATTAATGAAAAATGATGTTAGAGCTGATCAAAATGACGGAATCGGTATTACAAAACCAACGTGAAACA  
ACGGTTGTTTGGGACAAACATACTGGCCGCCCAATTTATCACGCAATTGTTTGGCAATCACGTCAAAACACAATCAATTTGTTTCAGAG  
TTAAAAACAACAAGGATATGAACAAACATTTAGAGATAAGACAGGATTACTTTTAGATCCGTATTTTGCAGGTACAAAAGTTAAATG  
GATTCTAGACAATGTTGAAGGTGCACGAGAAAAAGCAGAAAATGGCGATCTATTATTTGGAACGATTGATACTTGGTTAGTATGGA  
AATTATCAGGAAAAGCTGCGCATATTACTGATTATTCAAAATGCGAGTCGTACATTAATGTTTAATATCCATGATTTAGAATGGGACG  
ATGAGTTATTAGAATACTTACAGTACCTAAAAATATGTTGCCAGAAGTTAAAGCTTCGAGTGAAATATATGGTAAGACAATTGATT  
ACCACTTCTATGGTCAAGAAGTACCAATCGCTGGAGTAGCTGGTGATCAACAAGCAGCATTATTTGGACAAGCTTGCTTCGAACGTG  
GTGACGTGAAAAACACATATGGAACCTGGTGGCTTCATGTTAATGAATACAGGTGACAAAAGCGGTTAAATCTGAAAGTGGTTTATTA  
ACAACAATTGCTTATGGTATTGATGGAAGTAAATATGCGCTTGAAGGTTCCATCTTTGTTTCGGGTTCAGCAATCCAATGGTTA  
CGTGATGGATTAAGAATGATTAATTCAGCACCACAATCAGAAAGTTATGCGACACGAGTTGACTCTACTGAGGGTGTATTATGTTGTT  
CCAGCTTTTGTAGGTTTAGGAACACCATATTGGGATTCTGAAGCACGTGGTGCGATTTCGGTTTAAACAGTGAACATGAAAAAGAG  
CACTTTATCCGTGCAACTTTAGAACTCACTATGTTACCAACTCGTGACGTTATGGAAGCAATGTCAAAAGCACTCTGGTATTGATGTC  
CAAAAGTTTACGTGTGATGGTGGTGCGAGTTAAAAATAACTTTATTATGCAAGTTCAGACTCCAGAGTGGATGCTTTTACCAATGCATAAAGGT  
CCTGAAATTCAGAACTACAGCTTTAGGTGCTGCATTTTATGACAGGTTTATGACAGTTGGATTCTGGGAGAGTAAAGATGATATCGCT  
AAAAACTGGAATTTAGAAGAAAAATTCGATCCGAAAAATGGATGAAGGCGAAAGAGAAAAATTATATAGAGGTTGGAAGAAAGCT  
GTTGAAGCAACACAAGTTTTTAAAACAGAATAAACTTGTAGATTAGACTTTTGTATAAACATTGTGATACAATCAATTTAAGTTAAT  
ATTTGAATCGAGAAGCGAGAGATTTGTTTCGAACATGTACAATTGAAGGATTGTTTATGTGGGACAGTCTCTCGTTTTTACATTTTTT  
AGGAGGCGTTTTGGAATGGCATTGTCTACTTTTAAAGAGAGAACATATTAAGAAAGAAATTTAAGAAATGATGAATATGATTAGTAATT  
ATTGGTGGCGGTATTACAGGTGCAGGTATTGCACTAGACGCGAGTGAAAGGGAATGAAAGTTGCATTAGTTGAAATGCAAGACTT  
TGCACAAGGAACAAGCTCAAGATCTACAAAATTAGTCCATGGTGGTTTGCAGTTACTTAAAACAATTCCAAATTTGGAGTAGTTGCCG  
AAACTGGTAAAGAACGTGCGATTGTTTTATGAAAATGGGCCTCATGTTACGACTCCAGAGTGGATGCTTTTACCAATGCATAAAGGT  
GGAACATTTGGTAAATTTCTCAACATCAATTGGTTTAGGAATGTATGATCGTTTACGAGGTGTTAAGAAGTCTGAACGTAAAAAATG  
TTATCTAAAAAAGAACTTTAGCTAAAGAACCATTAGTTAAAAAAGAGGTCTAAAAGGCGCGGTTACTATGTTGAATATCGTAC  
TGACGATGCGCGTTTAACTATTGAAGTTATGAAGCGTGCTGCTGAAAAAGGCGCAGAAATTATCAACTATACTAAATCTGAACACTT  
CACTTATGATAAAAAATCAACAAGTAAATGGTGTTAAAGTTATAGATAAAATTAACATAATGAAATTTATACAATTAAGGCTAAAAAAG  
TGGTTAATGCAGCAGGTCCATGGGTTGATGATGTTAGAAGTGGTGATTATGCAACGCAATAATAAAAAATTACGTTTAACTAAAGGT  
GTACATGTTGTTATTGATCAATCAAAATTTCCATTAGGTCAAGCAGTATACCTTTGATACTGAAAAAGATGGAAGAATGATTTTGTGA  
ATTCCAGCTGAAGGAAAGCGTATGTAGGTACTACAGATACATCTATGACAATATCAAACTCTCACCATTAACTACACAAGAAGA  
CAGACGATTTTAAATCGATGCGATTAAATACATTTCCCTAGTGTTAATGTTACAGATGAAGATATTGAATCAACATGGCGAGGAAT  
TAGACCATTAATTTACGAAGAAGGCAAGACCTTCTGAAATCTCTCGTAAGGATGAAATTTGGGAAGGTAAATCAGGTTTATTAA  
CTATTGCAGGTGGTAAATTAACAGGCTATCGTCACATGGCTCAAGACATTGTTGATTTAGTATCTAAACGCTTGAAGAAAGACTACG  
GTTTAAACATTTAGTCCATGTAATACAAAAGGTCTGGCAATTTTCAAGGTGGCGATGTAGGTGGTAGCAAGAAGCTTTGATGCGTTTTGTAG  
AGCAAAAGTAGATGTAGCTAAAGGATTTCGGCATTGATGAAGATGTTGCAAGACGTTTACATCTAAATATGGTTCAAATGTTGAT  
GAATTGTTCAACATTGCGCAACATCTCAATACCATGATAGCAAGTTACCATTAGAAATTTATGTAGAATTGTTTATAGTATTCAA  
CAAGAAATGGTATACAAACCTAACGATTTCTTAGTTCGTCGTTCTGGTAAAAATGTATTTCAATATTAAGATGTATTAGATTATAAA  
GATGCTGTATCGATATTATGGTAGATATGCTTGATTACTCTCCAGCTCAAATTTGAAGCATATACTGAAGAAGTTGAGCAAGCAATT  
AAAGAAGCGCAACATGGAATAATCAACCAGCAGTTAAAGAATAATTAATTTGTACAATATAAAGAGCTGGTGCTTTTAAAGGC  
ATCAGTTTTTTATACGAGATACATTAGTCAATTGAAACTATGCATCACTAAATGTATGATAATAAAGAAAGCAATATAAAGCGGT  
TGTTATTAAGGTGTGAGATGATGACTGAAAAACAATTTAAATTAAGTGTACAAGATAATACGAATATTGAAGTTAAAGTGAATTTT  
ACAGATGTAGATTCAAAGGAATTATTCATATATTTTCATGGTATGGCTGAACATATGGAACGTTACGATAAATTAGCACATGCACTT  
TCAAAGCATGGCTTCGATGTGATACGTCATAATCATCGAGGACATGGTATTAATATTGATGAATCAACAAGAGGGCATTACGATGA  
TATGAAACGAGTTATCGGTGATGCCTTTGAAGTAGCGCAAACAGTGAGAGGCAATGTTGATAAACCATACATTATAATCGGACATT  
CAATGGGATCCGTTATAGCTAGATTGTTTGTAGAAACATATCCGCAATATGTTGATGGTCTAATTTTAAAGTGGTACTGGTATGTATT  
ATTATGGAAGGTTTACCAACCGTTAAAGTGTACAACCTGATTACAAAAATTTATGGTGTGAGAAACGAGTTGAATGGGTTAACC  
AGTTAGTATCAAAATGTTTAAATAAAAAATACGTCCATTACGTACACAAAGTGATTGGATTCTTAGTAAATCCAATTGAAGTAGATA  
ACTTTATTAAGAGTCCATATGATGGATTAAATGTGTCAAATTAATTTATATGATAAAGAGCTTATATGTCATACATACGACAAAT  
AAAAAATATGAAATGTTAAATCATGCCATGCCATATTTATTAGTTTTCAGGATATGACGATCCTTTAGGTGATTATGGTAAAGGGAT  
TTTAAATTTGGCGAATATATATTGAAAAGCTGGCATTAAAAATGTTAAAGTGAATCTTTATCATCATAAACGTCATGAAGTGTATT  
TGAAAAAGATCATGACAAAATTTGGGAAGACTTGTTTAAATGGTTGAATCAATTTTATAAAAAATAAAGAAAGTGAATTAATAT  
GAATAAAAAATAAGCCTTTTATTGTAGTAATTGTGGGGCCAACTGCTTCAGGTAACAGAGCTTAGCATAGAATCGCGAAGCGTA  
TCAATGGTGAAATCATAAGCGGTGATTCTATGCAAGTTTACAAACATATGAATATTGGAAGTGAACACCTGAAGAAATG  
GATGGTATTCCACATCATTTAATTGATATCTTGAATCCTGATGATACATTTTCAGCATATGAATTCAGCGATTAGCAGAAGATTTA  
ATTACTGATATAACGAATAGAGTTAAAGTTCCAACTACATAGCAGGTGGAACAGGCTTATATATTTCAATCATTAATATATAATTGAA  
TTAGAAGATGAACAGATTACACCTGACAAATTATCCATAGTTAAACAAAAAGTTATCTGCATTAGAACATTTAGATTAATCAGCAACTA  
CACGATTATTTAGCTCAATTTGATGCGGTTTTCTGCAGAAAAATTTACCCTAACAAACCGCCAAAGAGTGTTCGCGCTATTGAATAT  
TATTTAAAAACAAAAAACTTTTGTAGTAATCGCAAGAAAGTGCAACAATTTACTGAAAATTATGATACATTATTATTAGGGATTGA  
AATGTCGCGTAAAACATTATATTCAAGAAATAAATAAACGTGTTGATATTATGTTGGATCACGGATTATTTAGAGAAGTGCAACAAC  
TGTGTAACAAGGCTATGAATCTTGCCAAAGTATGCAAGCTATTGGATATAAAGAAATTAATACCTGTGATTAAACGACAAATGATTTA  
TGAAGATGCTGTCAATGATTTAAAGCAACATTCACGCCAATATGCAAAACGACAAATGACATGGTTCAAGAAATAAATGAGTGTTC  
ATTGGTTAGATAAAGAAAAATATGTCACCTTCAAAATGATGTTAGATGAGATTACAACCCAGATTAAAGTAAAGAGTCCGACAGATGA  
TTGCAAAACGAAAACATCCAAGACAAAGCACTAGAGAATTTTAAAGCAAACCAAACTGAAGTAACTGTATTTCTTAAACGGTTTT  
CAAATGAAAGGTGTTATTGAAGAATACGACAAGTGTGCTGAAGTTAAATTTCTCAAGGCAACAACTGATTGTTTACAAACATGTC  
GATCAGCACTTATACAGTAGAAACTGAAGGTCAAGCATCTACTGAAAGTGAAGAATAAGTTGTAATCATATGGGCACGATTTAATG  
ACTCGTGATACATAACGTTTTGAAGTATGATAAATAGATATAGAAAATAAGTCATATGTGACATCAATTAATGATGTTCAAAATGACA  
AGATACAATAGAGGAATGTTTGAATAAAAAACGCTTCATATAAAGGTGCGAGTCAATATATGATACGACTTTATATGAAGCGTTTTAT

TTGCTATGAGCTAGTATATTTTATAATAATTTTCTATTCTCTTCGATTTGAACAGGTTTTTTTTGAGGTGCAAAATCGTTTAAACAAC  
GTTACCTTCGCGATCCACTAAAAAAGTTAGTGAAATTCATTTGATTTTCTCATTAAAGAATCCGTTGTGCGCGAGTCAAAATATCTA  
AATAAAGGTAATTGATGTTCCCTTTTACGTCTATTTTTGATGCATAGGGAAGGTAACACCATAGTTTAATTTACAGTTTTGAGCTG  
CTTCTTCGCCTGAACAGGTTCTTGCCACCAAATTGATTACAAGGGAACCTAGAAATTACAAACCCTTGATCTTTGTATTTCTCGTA  
TAATGATTGCAAACCTTCAAATTGTGAAGTAAAGCCACATTGCTAGCTGTATTAACAATTAGCATAACGTCACCCTTATATGCATC  
TAATTTGTAAGTAACACCTTTATTTGTTTCTACTACAAAATCATAAATTGTCCTCATTGTATCATCCTTTGATTTACTTAAAAATGTAC  
CACAAAAATCGTGTAATAGTCTTTACTAAAACTCTATGATAGAATACTTTGAGTAGGATTTTATTAAGGAGATGTATAACATGGCTCA  
GCAACAAATTCATGATACTAAAAATAAAGTGAAGAAAGCTGTCTTAGTCGGTGTACATGCTCAAGATGATAAGCAATTTAATTTTG  
AGTCTACAATGGAGGAATTATCATCTTTATCAGAGACTTGCCAACTTGAAGTGTGGGTCAAATTACTCAAAACAGAGATCGTGTAG  
ATCGCAAATATTATGTTGGTAAAGGTAAGTTGAAGAAATTCAGCATTTATTGAGTTCAAAGATATTGATGTAGTCATCACAAATG  
ATGAATTAACGACTGCACAATCCAAATCACTAAATGAAGCTTTAGGTGTAAAAATTATTGATAGAAGTCAAGTTGATTCTTGAAATAT  
TTGCATTAAGAGCAAGAAGTAAAGAAGGTAATTGCAAGTAGAGCTAGCACAACTTGATTATTTATTACCTAGATTGCAAGGCCAT  
GGTAAAAGCCTTTCTCGTTTAGGTGGCGGTATTGGAAGTAGAGGCCCTGGTGAACGAAGTTAGAGATGGATCGCAGACATATTG  
AACTCGTATGAATGAAATTAACATCAATTGCGGACGGTAGAAGAACATCGCGAAAGATATCGAAATAAAAGAAATCAAAATCAG  
GTGTTTCAAGTAGCTTTAGTTGGTTATACAAATGCTGGTAAATCATCATGGTTTAAATGTTTTAGCAAATGAAGAGACGTATGAAAAA  
GATCAATTATTTGCAACGTTAGATCCTAAAAACACGACAAATTCAAATAAATGATGGATTTAATTTAATTATTTAGATACTGTTGGT  
TTTATACAGAAACTACCTACGACGTTAATTGCAGCTTTTAAATCAACTTTAGAAGAGGCTAAAGGTGCAGATTTATTAGTACATGTC  
GTAGATAGTAGCCATCTGAATACCGTACGCAGTATGACACAGTTAATCAAACTAATGATTAATCAAAATAGATAGTATGATCATTTCTCAA  
ATAGTTATTTTTTAATAAAAAAGGACTTATGTGATCATGCATCAAAATCGTCCAGCAAGTGATTGCTAATGTTTTGCTTTCTTCTTAAAA  
ATGATGGTGATAAATTACTTGTTAAGACGTTATTTATTGATGAAATCAAAAGGCAATTAACCTATTATGATGAGACAATTGCGACGA  
ATAATGCAGATCGATTATATTTTCTAAAAACAACATACATTAGTGACTGAACTTAAATATGATGAAATTGAAATGTTTATCGTATAA  
AAGGATTTAAAAAATAATAAAAGGACGAAATTCAAATGAAAGATATAAGTAAGATAGTAGCTGACGTCGAATCAACGTTAGCACC  
ATATTTTAAAGAAATTTGAAGAAACAGCATATATTAATCAAGAAAAAGTATTAAATGCATTTTCATCATGTCAAAGCAACCGAAAGTG  
ATCTACAAGGATCAACAGGATACGGGTATGATGACTTTGGACGTGATCATTAGAAGAAATATATGCGCAGGCATTTAAAGCAGAA  
GATGCAATTGTTTCGTCGCAAATTTATTCAGGTACGCATGCGATTACTATTGCATTACAAAGTTTATTAAAAACATGGTGATGAATTA  
ATTTATATAACGGGTAGTCCATATGACACTTTACTTGAAGTCAATTGGCGTAAACGGAAATGGTATTGAAAGTTAATGGAGCAGCGC  
GTATCGTATAAAGATATTGCACTTAAAGAAGGTAAAGATCGATCAATTTGAAAGTGTGTTAGATGGGGTTTCTGAGCGCACCAAAGTAAT  
AGCGATTCAACGTTTCGAAAGGCTATGATCAAAGACCTTCAATTCCGCTAGATGAAATTGAAAGGTAATTACTAGGTTGAAAAACG  
TGCATCCTAATATTTAATATTTGTGGATAACTGTTATGGGGAATTTGTTGAAAGACGTGAACCTATAGAATGTGGTGCCGATTAA  
TAGCAGGATCATTAAATTA AAAACCTGGCGGTGGTTTAGCTAAGATTGGTGGATACATTGCTGGTAGAAAAAGATTTAATTGAACGA  
TGTGGTTATAGATTGACAGCACCTGGTATTGGTAAAGAAGCGGGTGCATCATTAAATGCATTGCTTGAATGTATCAAGGTTTCTTT  
TTAGCACCACACGTTGTCAGTCAGAGTCTTAAAGGTGCATTGTTTACTAGTTTATTTTTAGAAAAATGAATATGAACACAACGCCG  
AAGTACTACGAAAAACGAAGTATTAAATTCAAACAGTTAAATTTGAAACGAAAGAACAAATGATTTTCAATTTTGTCAAAGTATTCA  
ACACGCATCCCCAATTAATGCACATTTTAGTCCAGAACCTGATTATATGCTCTGGTTACGAAGATGATGTTATTATGGCAGCTGGTAC  
GTTTATTCAAGGTTTACGTGAATTATCTGACATGCGACCTTTCGCTCTTATGAAGCATATGTTTCAAGGAGGATTAACATAT  
GAACACGTTAAAAATTGCTGTGACAAGAGCTGTTAATCAGTTGAAAGAACAAAGGACTTATATAATAGATTAAATTTACCCATAAATG  
ATAATGTGTTTTGGGTGAAATTTTTTGGGAGATTATCAGATTATTTTTAAAAATTGAAAAATATTTTAGCTGTAGATTGTTTTAT  
GTCGTTTTAGAAGTCGAAATCGCAGTTATATCAATGTTTTAAGCTTTATGTTAGAAAACTGACATATTTTTGAAATCCTAAAAAAA  
TTATGATAAGTTATTAACAAGTTCAAAAGTAGAGGAGAGGAACAATGATATCGAATGATGCAATCAGACGAAATATGGCTGTCTTC  
TCTATGAGTGTAGTAAGTAAGTTAACGGATTTAACACCAAGGCAAAATACGTTACTATGAAACACATGAACTCATCAACCTGAAAG  
AACAGAAGGTCAAAAACGCTCTGTTCTCACTCAATGATTGGAAGATTACTAGAAATTAATCATTATTAGAAAAAGGATTTAATA  
TCAAAGGGATTAAACAATCATTTATGACTCACAAGAGCATTTAACAACAGATGAACAAGAGATAAGAAAAAAGATGATTGTAGA  
TGCCACGCAAAAAGCCTATTGGAGAAAATTTGCCAATAAATCTGGTGATTATATCCCGATTATTAAATAAAATTTGGAGGATTTAA  
AATGCCAAAAAGTACTTTCACTAAAGACGACATTTCGTAATTTGCAAGAGGAAAAATGTAAGATATTTAAGATTACAATTCAGTG  
ATATTTTAGGAACAATTA AAAATGTTGAAAGTGCCTGTAAGCCAATTAGAAAAAGTACTTGATAACGAAATGATGTTTGACGGTTCTT  
CTATCGAAGGTTTCGTACGTATCGAAGAATCAGATATGTACTTACATCCAGATTTAGATACTTGGGTAATCTTCCCATGGACTGCTG  
GACAAGGTAAGGTTGCACGTTTAATTTGTGATGTATATAAACAGATGGAACACCATTGGAAGGGGATCCTCGTGCAAACTTAAAA  
CGTGATTAAAAAGAAATGGAAGATTTAGGCTTCACAGACTTTAACTAGGGCCTGAACCAGAATTCCTTCTGTTTAAAGTTGGATTGAA  
AAAGGGGAACCAACTTTAGAACTTAATGATGATGGTGGATATTTGATTTAGCACCTACAGATTTAGGTGAAAACGTGCTGCTGAT  
ATTGTTTTAGAAATTAGAGGATATGGGCTTCGATATTGAAGCTAGTCACCATGAAGTTGCCCTGGTCAACATGAAATGACTTTAAA  
TATGCAGATGCTGTTACAGCATGTGATAATCAACATTTAAATTTGGTTGTTTAAAAACAATCGCACGTAACATATTAAGGCTAGAG  
ACATTTATGCCTAAACCATTTTCGGTGTGAATGGTAGCGGTATGCATTTAACGTTTCAATTATTAAGGTAAGAAAGAAATGCAATTC  
TTTGATCCAAATACTGAAATGGGCTTAACGGAACCTGCATATCAATTTACAGCAGGTGTGCTTAAAAATGCACGCGGATTTACTGCT  
GTATGTAACCCGTTAGTAAACTCATATAAACGTTTAGTACCTGGTTATGAAGCACCATGTTATATTGCATGGAGTGGTAAAAACCGT  
TCACCATTAATCCGTGTACCATCTTCAAGAGGATTATCTACTCGTATCGAAGTACGTTCAAGTAGATCCAGCTGCAAAACCCATACATG  
GCGTTAGCTGCAATCTTAGAAGCTGGACTAGATGGTATTA AAAATAAATTA AAAAGTTCCAGAACCAAGTTAACC AAAATATTTACGA  
AATGAACCGTGAAGAACGTGAAGCAGTAGGCATTCAAGACTTACCTTCAACACTTTATACTGCATTAAAAAGCAATGCGTGAAAATG  
AAGTTATTA AAAAAGCTTTAGGAAATCATATCTATAATCAATTTATTAATTC AAAATCAATTGAATGGGATTACTACAGAACTCAAG  
TATCTGAATGGGAAGAGATCAGTACATGAAGCAATTAATACGCTAAACAAATGATGGGAAATCAGTAATATCAAGGGCTAGAG  
CGTTTGTCTTTAGCTCTTTTGTGTTTGGAAAGATGGGATTCTACTTGACCACTTTTGTGTTAAAAAATGGATTGTGGTGTGTTGCTCA  
AGTAAATGTTTTATGTATTTATTTTTTAAAGCTGGGGAAGACCATTTTATATTTTAGTTTACATGAATTTAATATATTTGGAGGTG  
ATGAGATGAGGCGATAAAAGAACGTCGCGAAAACGTTGAGTATTACTTGA AAAATAGCCATATTCATATTACTTCTCATCGAATTCAT  
TTGCAGAACGTTCTAAGGTAAGACCCCGAAAAGAGGGACCTTACTACGCATTATTAAGGGGGTAATACTATATGAAAAGAGAAACA  
AAACAAAAAATATCTTTTGTATTCGATCGGTATTTTCATTTAGTTATACTACTATTGATATTCTAAAAAATTA AAAATTTTCGCT  
CATCTAATTTATGAATTGCTATGATGAAATATTCATACAATCAAAAAGTTGATAGAAAACAAAGAGATATCGAGTTATCAAAATTA  
ATAAAGATACTGGGATAAGTTACGGTAATATTAATGCTATGCGCCGTGGAGAAAGAAGATAGAAAATTTAAGCTTAAAGAATTCA  
AAAATCTTATATGAATATGCGAAAAAGGTATTATAATATAAGCATAGGTTCAATAGGCGTATAATAACTGCCAATCTAGTGACTG  
AGTGGATTACTATAGTATAAAGTTTCTAAAAAGTGAAGAAATCATGTTTAGTGATTACTTATGTTTTCGAAATAGTATAAT  
AATTTTATATAATATAGAACTTCAGTATACCTTTTGGTATATATGGAGTTCTTTCTTTTACAAGATGTATATGATAAATGGA  
AATGTTTATTACATTACATAAAAACCTTTAGGTGCTCTTAGATGGATGTTAATCATAAAAACAAAGTGATTTTGA AAAATATAGGTTA  
TTATAATTTAGAATTGCAAAATATAAATCTTGTCAATTGGATATGGGAATTCAAACATATCACTTACAACAATTTGTGGAATGTTAAA

TAAGTATAAAGAGGAAAGGAGAAAAAATGATAAGAATGGTTAAAGAAAAAGAATGAATAGCAAAATTTAAATTTCTAATAGCTGTG  
ACGAGCAAAATAATTCAAGTACTTAATTTTATCAAATCGTTCTTTTAAAAAGGTAAAGAACAAAAGACCTTTACCACATTAAATAGG  
GAGGTGGTATTTATGACAAGAGAATTAAGGAAAAAATTAACCTCTCTATCTTAACATTGCAACTTTAATATTATTTATTATTAATTTAA  
CTAGAAAAAATAAACTATTCTTTTCATTTTGACAAAAATAATGAACCAGTTTAAAGAAATTTATAATACAATAGAAAAATTACTAA  
ATGATAAAACAATATCTAATTATAGAATTAATCAAGACACTGGTGTCTTCTATGGTGGTATAAGTGAATTAAGAAGCGGAAAAAGA  
AAAGTGAATAATTTAACTTTAGAAACAGCGGAAAACTCTATAATTACCAAAAACAATTAGAAATAATGATTGAAGATTAAAAATAA  
GACCATATCTTTTGAAATATCATGGAGTGAGCCTTTTAAATCATCTAATTTTAAAGTATATTAATATGGATAGCTTAATGTGAATAT  
AAATAAAAAAATTATCAAATAATATAATATAGAATAGAGGGAGAGAAGAAATTTTATCAATATATAATATAAAAACTCCAATACTAT  
TAGGTATTAGTTTATGAATTAAGTAGATTGGCACTAGAAAAAACAATGTATTGCTAAACGTAGTTACTGCATTAGGATTATTATA  
ATTATAAAATAGAAAGAGAGTGTGATTAATAATGAATGAGATTGAAACTATTATAAGTGAAATAGAAAAGTTATTAACATAACAATAC  
ACCATATAGTATTTCAAAAAAAGTACAGGTGACCACGTCAAACAGTTACTGATTTAAAGGTAGGTAAAACTAAAATAAAAGAAGCTA  
AATTTAAACGATAATCAAGTTATATGAATATCAAAGAACATTAGAAAAATAAACAGAAATGTTAAACAAAAATATTTTGTAGGTTA  
GGTGGACAAGAAATTAATTTCTAATGATTTTCATGGTTGTCTGTCCACGTTTGTCCACCTCAATAAGATAATCTCTTAGTTTTAGAA  
ATTGTACATGGTTAAATAATCAAAAATGCATATTATGAAATTATCATTGCCATTAAATCTTGAATGATCTTTAAGCGATGATATAAA  
AGGCTGAACACAGTAAATAAGTTAACTTTAATGCAGTATTCTATACTATACATATTTTGTAAATAATGTTTATGCACATAATTTTTCAT  
TGACAATTTTTTATATTAATTTGTGTAATTTGGCATATATGATGATTTGTGATAATTATATTGTAATATAGCATTGGTTTTATGATTCT  
AAAATTAATAGATTTGAAAAGTATACTTTATTTTCATGAAAGTTTTTGGTACATTTATTTGAAAATGTTTTTATTACAAAGTTACATGG  
CTAAATGTTTCTTAACAAAATTAATTTTTCGAGTGTAAGAATCGTGTGGTAAACATAATTTATATAGATTATAAGGAGGTGAAAAAT  
GGTGCAGGAAGTTAAACAGATAAAATGATTTGAATTTTGAATTTTCAATTTCTGGTAGGACTATTGAAATTTGCAATCTAAATAAGAATG  
TGAGGTTTGAATTAATATGAAGTCATATTTCTTGAATAAAATATTACTTTCTCACCATTAGTAAAAATGAAGATGACTATTAAGTGC  
GAAAAACAAATAAAAAAGAGAAAAATAGAATTTTAAATAGGGACGTTTATAATTTCTAGTAATATTAGGGTTCAAAATTTATGAAA  
TAAATGTATAGTATTTGAGAAGTCTATATGACTCCGAAAAAATTAAGTCTAAAGATATCTCAATATCTCAAATTTAATAGACTACT  
GTAATTAGTAGTTTGAATATTGAAAGACACTAATCTAATAAAAAATACATAAAAGGTAAACTTTAGAAAGTGGTTGTAAACTTCAATG  
AATACTAAACATTGAAGTTTAGTAAAAGGCGTAAGGTATACAAGACAAATCGTTTATCTTTGACAAAGTAATTGATGATGAAAAAGT  
CGTTAATATGTAGAAACAAAAATGAAAAATATAAAATTTAACTATTATGAAGTGTGATAGCCATTAAATAATAGAAAAATAATA  
AATCATTTATAAATAAAAAATACGTTGAGTTCACAGAATTTGAAAAAAGCAGAAAAACATGGTACAGATATTGGAGAGTAAAAA  
TGTGAGAATACAAGAAAAAGATAATTGAATTAATTTGAAGTAAATTTAACAGGATATGAAATTTCTAAAAAACTGGAGTTTCTCAA  
TATGTACTTTTACAATTAAGACAGGGCAACCGGAAGTAGATAATCTAACCTTAATACAACAGAAAAATTATATGAATATGCCAA  
TAAAGTTTTGTAAATATAAAATACTGTATAAAATTAATCAAGCTATGTTTATTTTATTTAACTATTAATAAAAAATCATATGGGAAATGTAT  
ATTATAATAATTAATAACAAAAATAGTAGATTCCAATTTGTGAAAAAGGAGTATGTCGTTTCATTAGAATTTATTGCACTAAATTT  
AGCATCGAATAAGGGAAATTAAGTATTAAGTTTAAATGATAAAAAAGATTGGAATGGATCGTCTTGAATGCTCCCTTCAAAGTTT  
TCATTTTTTCAATGTCTACTTCGAAGGGGGTATTTCCATTAAATTTGTTATAGCTTTTTATTTGTATAATGAACATATAAGTTTAAAG  
AGATGCGAGTGAAGGAAATAAAAAAGCTCAAATGTACCAAAATTTGTTAATCTTAATAAATCTCTACTTTATAAAGATTGAATGGACA  
TTCGAGCATTAATCAGTCAGGAGGGAATTTCACTCTACAATTTAATAATAACTTGCTTCACCAGTGTACAAGGAGTGAATTTGTT  
ATGTTCAAGTGAATTTATTCGATTTTAAAGTTATTATTCAGAAATATAATATCGCAGTAAGTTGGCAACGTTTAAAGAGAAGGAAAAACA  
ATAAAAAACAAGATTTAATACTGCTGCGTCATGAGGCGCTTGAACATTATTTGATGAATAAGTATAATTTCAACTATGATTATGCAC  
ATAAAATTTGTATCAAAAAAATACGATTATTCAATTTTTATAAAAAAGAAGGTGGATTAAATGCTTACATTAATAAAATTTGAAAGAA  
GATGAACAGGTTATAATATATGAATATATACCTGAAGATGATATAAGTAACGGTAAAGGTTCAAGTAACCTTTAATAAAAAAGATGC  
AGAGGTTATAGATTTCTCATTATCTGAAATAGAAAATGAAGAATATTTTATGTTATATCGTAATAAGTCTTTTCTGTAGTAAGAGA  
CTTTATCGAGAAGCAAGAATTTCCGAAAAATTATAAAATAGCATGGTATTAATGCATCCTTTCTAGACAGATAAAGAGAAAAGTGGT  
GCTATTTTTATATGCTTTTTTAACTATTTACTGAAATAGCAGAATCACAAGGTTAACATATTTAAAAAGAACTTGGTGAAGATGGCG  
AATATAAATATGTTGCCAAAAATAGATAGTAAAACGTCTAACTATGTCTATTCGCTCAACGGCAAGTATTTAAAGTTAAAGATATG  
TACCAGGTGTGATGCGCCACCTATGCATCTGGTGTAGAAGTACCACATGGCAGATGTTGGCAATTTGGTGAAGCAAGTTCTTT  
AAAGAGCGTGAAGGTAAATATCAAGTAGAAGATGACACACCAAGATGAATTACAACAAGCTAAAGTATTAGGAGAAAAATAT  
ATATTACTGATCAAGCAATTGATAAAGTCAGATATGTTGATATTCCAACACATACCAAGAAGAAAAATCAATTTATACAAGAACAA  
CATAAAGCCTTGCTTAAAGATGCCAAAGAAAACAATGATAGCAATGAAGTAGCTTATTTATTAAGATGGTAAAGTTACAAAAGT  
ATATGGTGATCAAGATAGTGTATCTTTGCACCAGGGGAAAAAGCAACAGAATTGTTATTTAACAGTAAACCGAATTCAATTGTTAT  
GTTACATAACCATCTGGGCAGTCTAGTTTTCTCTTACAGACTGTATTTATTTATTTAATAATTTCTATTAAAAACACTGACAATTG  
TTACAAATAAAGGTCAACAAAAGTACTTAACTAAGACAAAAGAATATTGCAAATCAACTTGTATTGATTGATTAAAAAATATAAT  
AAAAATAAGAATATAAAAAAATTCATCATAAGGATATTGATATGATTCTAAAGAGATTATATAATAGTGGTAACATAATATATAA  
AGTTAGGTGATTAATATGATATTTTGCACAGTTAGATGGTGAATTAACATAAACAAGTACACAAGAATTATTGGATATAAGAATAACA  
GAAAGCAATAGTAATAAGAAATAAGAAATAAGAAACAAAAATTGAAAAATAGCATCTTTCTACACAGATAAAGAGAAAAGTGGTG  
CTATTTTTATACACTTTTTTAACTTTCCAATGTGAAGGTTATTTTTTATTGTCCAAAACGTGCTGATGACATTTTAAAGCAAGTATG  
GAATATCAGTCGACAGACTATAAACGGAGGTATGTCTCATGGAGAAAAATGAAAGTAATATTACTGACGTAACCTCAGAACGAAGA  
GCAACTAGACAACAGTGATGAACAATCACAACAGAATGAGAAAAACATTTTCTCAAGAAGAAGTATCACAATTGATTAAAGAGCGT  
ATAGCTAGAGAACGCAAAAAATCAGATGAACGTATTAAGATGCGGTTCAAGAAGCTGAGAAGTTAGCTAAAATGAAGTAGCTTA  
TTTATTAAGGTTGCTAAAGTTACAAAAGTATATGGCGATCAAGATAGTGTATCTTTTGTGCCAGGGTAACAAGCAACCGAATTATT  
ATTTAACAGTAAACCGAATTCAATTGTTATGTTACATAACCATCTCGCAATCAGGATTTTCATTGAATGGTTTAAAGATGTTTATT  
GGAAATAAATCTATCCAAACAAGACTATTGTTACTAATAGTGTAGTAAACATATAAGTAAACTTCATTATATAATCAGTCT  
CAAGTTTATAAAATTTAGAAAGATATAAAACAACTATACTAATAGTAAATGAAGCGATAGTTGATAATTCTAATAAGCAACT  
TTATAATAAAACATATATAAAACGAAAGGACAAATAGGAGTAATACATTATGTCAATTCAACAATTAGATGGTTACATTCTATAG  
AAGATTTTTTTAAGCATATGGATGAATTATCGAAGAAAGAAGAAATTAGAAAAAGAAATTAATCAATCAAAGTCTAAATATCAATAG  
CATCTTTCTACACAGATAAAGAGAAGGTGGTGCTATTTTTATACGCTTTTTTAACTATTTACTGAAAATGCAGAATCACAAGGTT  
AACATATTTAAAGAACTTGGTGAAGATGGCGAATATAAATATGTTGCCAAAATAGATAGTAAACATCTAAATTATGTCATTCAC  
TCAACGGAATAATTTAAAGTTAAAGATATGATACCAGGTGTGAATGCGCCACCTATGCATCCTTAGTGTAGAAGTACCACAGTG  
CCACATGTTGGCAGTTGGCGAGACAAGTTCTTTAAAGAGCGTGAAGGTAAATATCAGGTAGAAGTAAAGAAGCTAAATACAAG  
AAAAAGCTAAAAACCAGATGAAAGAAATGATTGAAAGTTGTAATTAAGAAATAGAAATAAATTTGTGAAAAACAAAATGGACATAT  
TTAGGTCATCATCTATATAATGAAAAATAAAAAAGGCCATTTTAAATAAAGAAATGCTGATACATAACTTTCTATAGA  
TTTATGAATGAATTGTTAAGAGAAAAATGTCAACAGGCAATCTAATATTAAGTGATGAGCTATTTGATATGAAAGAGATTATTA  
TTTTAATCAAATTTATTGAAAAAGTACATATCGATAATGTGTATATTGAAACCAGAAAAAGGAAAGTGCATTATTCGAAGACAGGTG  
CTCATATAGTACCTTATATTGATAAGTAGGTGAAAAGTATTGAGAATTGAAGATGCATATCGTAAAGATGTTATTATCACGCTTTTG

AATAATGAAGAATACGAAGGGTTTGTAACTGACTATGAAAATGAATTTGAGAGTGAAACAGGAAATCTTGTTGTAGATATACAGAC  
TGATTTTGCTGTTTATTCGTTTGATGAAACTGAGATAAAAAAGTATTAGATTATTAATAAATTTCTAAATAGCATCCTTTCTACACAG  
ATAAAGATAAAAGTGATGCCATTTTTTGCGCTTTTATAACAACATAAGGATACAAGACACATACCTTCAACAAAATCTTCATCTAAACC  
TATCGATTTCCCTAAGTTCAATTTTAAACACAAAGTTTATTTGTAAAGATGCACACCTATAAAAAATCTTAATCATCGAAAAAGTCACAA  
ACATCTCCATATTA AAAA ACTTAAATAGTGCATTTTCATTTAACTAAATATCGATATTCCTACCAAAAATAAATTTAGTAATTCAATTGC  
TATTACATGACTTTCATAAAATAACTACAACCATCATAACTTTTCAAATCTCGTCAAATTAAGTAAATACAGCACAAATTAACA  
TTTTAAATATATAAAAAATAAACAGATACTCAATAATCTGTAGTATCTTGTTTTGGAATAATGTAATTTTATATCATCAACGGCTTC  
AAATGAGCAGTTTCATATATAAATAAACATAACTACTCAACTGAACTGGCTTAATTAATAAATGATTTGCCAGACGAAACATAACA  
GCATTATTAGATTAATTCTAATAGTTTATTTAAATTTTCTCGGTTGTCGCCCAGCTGGTTGCGAATCTAACACACGATGTTGATCA  
TCGATTTTTTCCCAACAGCAAATTTAACTTTTGTCTAACTCTGCTATTTTCTCGTTACTTAAAAATAAAAAATGTTGATTGGTTGG  
AGAATCAAAGTAAAGACGATAGCCTTTATTTTTAAACCCGCTTTTCATCTTATTTGCCATTTGATAGCATGTCTGCTTATATTA AAA  
TATAAATTGTCCGTAAATAATTCTAAAAATTGTATGCCTGTTAACCGTCCTTTTGCTAAAAGGGCACCGTGGTGGTTGATTGAGTGG  
TAAATTGTTTTGGTTTCATTATTTTTGTGAAAACAATAGCTTCTCCGCAAAGTGCACCAATCTTCGTACCACCTATATAAATAACATC  
ACAATATTTAGCGATGTCTTTAATAGTCATATCTGATTGATCACTCATTAAATGCATATCCTAAACGTGCACCATCCATAAATAATGG  
AAGCTTATATTGCTTACATACCTTACATAACTCTTTCAATTCTGATTTAGAGTATAATGTGCCATATTCTGTAGGATGAGAAATATAT  
ACCATTCTGGGAATACCATATGGTCCTTTTTAAAAATCACTTTTAAATGTCTCCATGTAAGTTTCAACATCTGAAGCACTAACTTTTC  
CTTCGTTAGATGTCTAACGTAATTACTTTATGACCACTAAATTCATAGCAGCCGCTTCATGTACAGCAACATGTCCCGTATCCGCTGA  
CAATACACCTTCGTAGCTTTTCAACATTGAATTAATAACAACCTGATTGGTTGCGTTCCACCTACTAAAAACGGATAGTAGCATT  
TGGACAATCAATTGTATCTTTAATCTTTTCAATTGCCTGAGCTGTGAATTTGATCAAAAGCCATATCCGAAGCTTGACAAAGATTGTA  
TCTACTAATCGTTTTAATACTTTTTCATGAGCACCTTCTAAATAATCATTTTCAAATGAGATCACTACATTTCCCCCTAAAACTAATA  
TCAGCATTTTAATAAGATAAACTAATTTCAAACTAGTTCGATATTTAAATGTATTGTGAATTGTTAAAGTTTGTATCGCATTATCG  
CGAAGTTGAATAAATATATTATACATCAACAATACATTAAGAAAAATTAATTAATTTTTAATCATAGCGACTTTTCGTGCTGGAACA  
CATATATTAATGATTGAATTTTACTGTTAAAAAGTTCTATGATTTAGGAAATAGAGAAAAGAGGGGATTTAAATGGAACAAATTA AA  
CTTAAAACTTTTACAGCTGAGACTTTAGAGTTATTAGAAAAAAACATTAATGCTTTTTTAAGTTCTGAAGAAGCTACAAATTTAAAA  
TTAGTAAATATTACTATTAAAGAAATAGAAGAAAGAACATTTCCCAAATAATGAAGAAGAATTCAATGCAATTTTAACTTTATCTGTG  
AATAAATAATATGACGTGAAAGGTGCAAAATGTTTTTGTGCCTTTCTTTATAGGAGAAAAGACTATGCGATATACATTTTCAAAT  
ATTTAGGAACACTTTTTACCATTATTTTAGCCATTGGATTGCATCATTAACCTAGGATTAGGTTTGGTATTATCTTTTTAGAAAAGAAAT  
AGGCGTACAGCGAGTTCAACTTGGGCATGGCTATTTGTACTTTTTGTCTTACCATTGATTGGTTTTATTCTTTACTTGTTTTTTGGTAG  
AACCGTTTCGGCACGCAAATTGAATAAAAAACAATGGTAACGTGTTAACGGATTTCGATGGACTTTTAAAAACAACAATAGAAAGCT  
TTGATAAAGGTAATTATGGTACTGATAACAACAAGTTCAAAAACATCATGATTAGTACGTATGCTTTTGATGGATCAAGATGGTT  
TTTTAACTGAAAAATAAAGATTGATCATTTTCATTGATGGAATGATTATATGATCAAGTTTTAAAGATATTAAAAATGCAAAAG  
AATATATCCATTAGAGTACTATACTTTTCGCTTTAGATGGTTTAGGTAAGAAGATTTTACATGCTTTAGAAGAAAAATTGAAACAAG  
GTCTAGAAGTAAAAATATTATATGATGATGTTGGATCTAAAAATGTTAAGATGGCAAATTTTGATCACTTTAAATCATTAGGTGGCG  
AAGTTGAAGCATTTTTTGTCTTAAATTACCTTATTAATTTCCGTATGAATAACAGAAATCATAGAAAAATCATCGTAATCGATG  
GTCAACTAGGTTATGTCGGAGGTTTAACTTGGTATGTAATCTAGGATTAGGTTAACTAGGTTATGGAGAGATACCGCATTTAC  
GTATACAAGGGGATGCGGTTGATGCACTGCAGTTGCGATTATTTTTAGACTGGAATTCGCAAGCGCACCGTCCACAATTTGAATATG  
ATGTTAAGTATTTCCCTAAAAAGAACGGACCATTGGGCAATTCACCAATTCAAATAGCTGCAAGTGGCCCAGCTAGTGACTGGCAT  
CAAATTGAATATGGTTATACAAAAATGATTATGAGCGCTAAGAAGTCGGTATATTTGCAATCGCCTTATTTTCATTCCGGATAACTCA  
TATATAAATGCCATTAAATGTCAGCTAAATCAGGTGTAGATGTTTCATCTAATGATTCCATGTAAGCCAGATCATCCTTTAGTTTATT  
GGGCGACATTTTCAAATGCCTCTGACTTATTATCAAGTGGTGTTAAAAATTTATACGTATGAAAATGGATTATACATTCTAAAAATGT  
GCTTAATTGATGATGAAATCGTATCAGTGGGCACAGCAAATATGGACTTTAGAAGTTTTGAATTAATTTTTGAAGTAAATGCCTTTG  
TATATGATGAAAATCTTGCTAAGGATTTAAGGGTGGCTTATGAACATGATATTACAAAATCAAAACAACATAACCAAGAATCATAT  
GCCAATAGACCGTCTGTTTAAATTCAAAGAAATCGTTAGCAAAATTTAGTTTCGCCAATTTATAATTTTGTGAAGGAGTCTCGAT  
TATAGAGGCTCTTTTTATTTTGCCCAAAATTAATAACAGTAAATATATTATGTAATCTAATAATGACATTTGTCATTTCAAATCT  
ATGACAAAAGTGTTCTATTTTAAATCTAATAAATTTACTAATATTAATTAAGAAAAAAATAGAGGTGATTAATTTGATTCAAATATC  
TAATATCAACAAGTCATTTAATAAAAGATGTGTTCTAAAAAATATTTTCGTTTCGATATTGAACAAGGTAAATGTATCGCTTTAATTGG  
AAAAATGGTGCTGGAAGTCAACGTTAATTGATATATTAATTGGTAATGTTAATGCTAATTTCTGGTGAGATATTGATAAAGACAA  
GTTATTACAAAGTGAAAAATCGCAGTATAATGTTCCAAAAACGATGTTTACAGATCAATTAAGTTATTGAGATTATCAACTTATA  
TCAATCATTTTACGAAAAATCCATTACCATTGGAAGAAATAATAGAACTGACGAAATTTGATTCTAGTCAACTGAACCAATTTGTAAA  
TAACTTTCTGGTGGTCAACAACGATTACTCGATTTTGTATTATCTTTAATCGGACAACCACAATTGATCTTATTAGATGAACACA  
TCGACTATGGATATAGAAATTAGAGAATATTTTGGTCAATTATGAAAAATTAAGAAAGATAATCGAAGCATACTCTATACATCG  
CACTATATTGAAGAAGTCGAACGTATGTCAGACAAAAATTCTCTCATTTGAAATGGAAGAAATAATACTTAATGATTCAACGTCACAT  
ATTAGAACCAATCAGCAATCTCAGATTACGTTATCCGATGAATATATAAGAAAGTTAAAACTAGATAAAGATGATTTAGTTATTCAA  
AAAAATCATAATGGCACTATCAAAATTTACTTCAAATGTAAATGATACGATTTTATATCTTCAACAACCTTCATATTAATTTGGATG  
ATATTGAAATACAAAAAGTCTCAATTGTTGATTCTACTTCAACAATAAAAAAGCAAAGGGGATCTAATTATGATACTAAGTTACTTG  
AAAATCGAATTTAAAGTTATAATGCGTAAAAAAACAACATTAATATTATCTATTTTATTCTCTGTTATATTCTATATATTACTT  
CGATATTGGAATTGCCGGAAGATGTTAAACCTAAATTTTATAAGAGTATATGTATAGTATGACGGTTTATAGTTTGTAAAGTTTTA  
GTTTACTAACTTTTCCATTAGATATTATTAATGAAAAACAAAATGAATGGCGCCAAAGATTAATGGTAACACCATTTACTTTTACTA  
GTTATTATATTTCAAAGTAGTGAAAACTATGCTGCAATTTGCAATAGCGATATTAGTTATTTTTATGGTTGGACATTTTATAAAGG  
TGTTGCAATGAGTGCAGTTCAATGGTTAGAGTCAGGAATATTTTTATGTTAGGTGCGTCTCTATTAATAACTTTTGGCATATTATTT  
TCTTTGTTAAATGATATTCAAAAAACAAGTGCTTTAGCTAATATCGTAACAATTTGGTTTAGCAGTATTAGGTGGATTGTGGTTTCCGA  
TAAACACATTTCCAAATTTGGCTTCAACATGTTGCTCATGTTTTACCGAGCTATCATTTGCGTAAACTAGGTGTAGATATTGCTTCAAA  
TCATCATATCAATTTAATATCATTTGCTATAAATACTCTTGTATGCTTTAGGGAGTATAATAGCAGTATATTGTATTAGTCATTTTAAA  
AGGGCGGAATAAAATATGAAATTTTTAAAAGATACTTCAATTGCTGAAATATCGTCTATACCTTATCTGATTTTCTTATTGCCGGTA  
TATTTTTTAATGAAGTATATGGTCCCAAATGGTTGTATATTATATCAGTCATTGTCTTTTCGTTGTCGTATCTTATATTAGTTATAGTA  
AATAATAGACTTAATACATTAATGTTTTACATTTTGTGATTATTCATTATTTTATTATTTGTTATTTTGTGTTTTCAGTGTACATCCAATG  
CTAAGTTTGTGTTTTCTTTATAGTGCTTTTGCCGTTCCATTTACTTTTAAAAATAATGTTAAAAAACGGCAACTAATCTTTTCATACT  
AACAATGATTATATGACAATAACGTACTTATTGTATAACAACTAATTTTGTGCAATGATGGTTTATTATGTCTGTTATATCGTTTAT  
ATAATGCTAGATAATTTTAAAAAAATGAAAAACCGTGAAATATCAAAAAAGAAATAGCAGAAAAAAATAGACATATTAATACATTA  
TTGCTGAACAAGAGCGACATAGAATTGGTCAAGACTTACATGATACGTTAGGGCATGTGTTTGAAGTTTATCATTAATAATCAGAAT  
TAGCTTATAAACTAATAGATGCTGATGTAGAAAAAGTAAAAGCTGAATTATTAGCAATTAATAAATTATCTCGTGAATCATTGAACA

AAGTTCGAGAAATTATTGATGATGTAAAATTACCATCATTATTATTGAAGAGATTGATAGTATACGTAAAAGTTTTAAAAGATGCTGATA  
TTGATTTTACATTTGAAAATAAAGAATTAGCGCAAGTATTAAAGTCCTACTAAACAATCTATGTTAGTTATGATTACGCGTGAAGCGA  
TAAATAATGTTATTAAACATGCAAATGCTTCAAAAGTTCATGGTAAATTA AAAAAGTGTAAACAATCATAAATTACTGCTTATGATTG  
AAGATGATGGCAAAGGTATCGATAGTGATTGTGAGGTGAAAAGTATTTACAGCGTGTACAACATTTAAATGGAACCTTAGCAGTC  
GACTCAACAAATGGAACATAAATAATCATTGAAATCTCAACAGGAGGAATAGCATGACATCTTTAATTATTGCAGAAGATCAAAAT  
ATGTTACGACAGGCAATGGTTCAATTAATTA AACTACATGGTGATTTTGAAATTTTAGCAGATACTGATAAATGGTCTCGATGCAATG  
AACTTATTGAAGAATAAATCCTAACGTTGTTATTTAGATATAGAAATGCCAGGCATGACTGGACTTGAAGTTTTAGCGGAAATT  
AGAAAAAGCATTTGAATATTAAAGTGATTATTGTAACAACCTTTAAAAGACCGGGATCTTTGAAAAAGCAGTTGTGAATGATGT  
GGATGCATATGTTTTAAAAGAACGTTCTATAGAAGAATTGGTGGAACCATTAATAAAGTAAATAACGGAGAGAAAAAGAATATAGC  
GCCACATTGATGACTTCATTTTTTGATAGATAAAAAACCCATTAACGCCCAAAGAACAATTTGATTAAGGGAAATTGGCAATGGTTTA  
AGTAGTAAAAGAAATAAGTGAAAAATTATTTTTGACAGATGGAACAGTTAGAAATTATACATCTGTTATAATTGATAAAATTATTTGCA  
GATAATCGTTTTGATGCTTGGA AAAAGGCAAATGAAAAAGGCTGGATCTAAATACAAACAAAAAGTATTGAGTGTTTTGATTAA  
GAGACTTGGAAGTGAGTCAATAATCAAAATCTTACTCAATACTTTTATTTGGTACTCGCAATTTAGATTGTGTTAACTAATTTTTTC  
GCTTATTATAAAACGAAACAATCAAGTAAACGATAAAGCCTACAAAGATACCCAATAAAATAGATAGTACTGCCGTCATTAAT  
GGTAATTTGAAAAATATTTGTAGGAAAATACCAATGATAATTGCGGATAATTACTGCAATTAATGTGACTGTATTTTCATTTGAAATG  
TTCATTTATTTTCACTCCTTAACAATAACATTATATCATGCTATAGCTTTCCAAAATATTGAAATATGTAGATATGGCTATTGACGAT  
ATTTCTTAACTTTTATATGATTAATCGGAATGAAAAAGAGAAGTAGGTGGCAATATGAAGTCAAATAAATCGCTTGCTATGATTGT  
GGTAGCCATCATTATTGTAGGTGATTAGCATTTCATTTATGAATCATACGGGTCCTTTCAAAAAGGGACGCAATCATGAACTGT  
ACAAGATTTAAATGGTAAAGATAAAGTACATGTTTCAAAAGATTTGGATGATACATTTATTGCAAAATCAAAATGGTAAAGAAA  
TTAAAGTTAGGCTTATAGGGTTGATACGCCAGAAACGGTGAAACCGAATACGCCTGTACAACCATTTGGCAAAGAAGCATCAAAT  
TATAGTAAGAAGACATTAACAAATCAAGATGTTTATTTAGAATATGATAAAGAAAAACAAGATCGCTATGGTAGAACATTGGCGTA  
TGTATGGATAAGTAAAGATCGTATGTACAATAAGGAATTAGTGAAAAAGGACTTGCTAGAGAGAAGTATTTTCACCAAATGGCA  
AATATAGAAATGTATTATAGAAGCAGAAAAATAAGCTAAACAACAGAAATTAATATTGGAGTAAATAATTAATAGGTGATTA  
TATATATTAAAGTAAATATACTTGAAGCATCGATTATTATTACCATAAATTTATATATAGAAATAATTTAAAGGCATAATAACCA  
TAGTGCGTATCGAGCGTAATGGATTATTATGCCTTTGATTTTACTTGAATATAGCTGTGATTGTATCAACCTGTTCTTTATTTAAAGG  
GTGTTTAGATAGCTCTATGGCTTCGCTAATAATACGTCGTAACGAAGATTTTGTGAACTGTATCAACATATTTATCTCTTTCTTCA  
GAACCTTGAATGATATTAACTGTACCATCACTAAAGTAAATAACACCGGTACTTTGGACTTTAAAGTTAAAGTTTGTTCATATGA  
TCCTTTAATGCTTTGCAATTATTTGCTGCTAATTGATACGGATCATAATCATAAAAAATCATAAATAACACGATTGGTTGAAGTGT  
CTGTA AAAAGTATAGATAGACTTTCTTGATGAATTAACCTGATCATGATATTGCTGGCTAATGTAATGACCGACAACCTTTTTCAATATT  
ACTATTGCTTATTTCTGTATCATGCTCATCAGGTACATCAAAGTGATAAAATGTTTTTTCACCCAGCTTTTACATCAACGTTTATTA  
AACCGATATCTGAAACAATGATAAAATCAAATGAACGTGCATACCGAAAAACGGATGTTAGTAGCTAAATTGCTTGTAACGATA  
ATATCGTAATATTTAATTTACCATTTTCGAGATAGCTATCTAAAAATCTTGCGTAATTCCTTTTAGCATTTTTGTATGATGGTGGCC  
AACATCATTATTAGA ACTCAGCATTTGACTTCTTAATTCAGCATTTTCTGCACTTAATGCTTTGTCTTTTTAATAAGTTGCTTTCTTG  
CATAAACTTCGGTATCTATTTTACTATTACTATACCTTTGATTTTAAAACTAATATACCAATTAATGCTACAAATGATAATGAAGTAC  
AACCTTGAATGATATTAACTGTACCATCACTAAAGTAAATAACACCGGTACTTTGGACTTTAAAGTTAAAGTTTGTTCATATGA  
TTCCACATTTTTATTAGTTGATTTTAGTTTATCATGTTTATAATCAAATTATAAACTGACAGATATTGATGTTCAATGAATATGAC  
GTGAAAGATTTCGTGAATTCAGTTTATGTGCAATTTATGTTATAACGGTCATTTAAATGACAGAATTAGGTCACATAGTATTTTG  
AAGATTGAATTCATTAATTTTAAATGTATAATGATATTGTGAAAGCGCTTGCTTAGGAGGTGATTTGAGAGTGAATGAAATGAA  
TGCTAAAGAACAATTAGTGGACAATTTAATGAAAACATCATCGCAATTATTTAAATTCACGGTGAAGTTGCCATGCAGCTTTCTT  
AAATGATGAATTA AATTTACCTTCTATTGTTGAAATATGCGTAGAACGTAAGCGTTTAAAGTGATATTGTGAAAGTTATCCGCAATC  
ATATGCGTTACTATACATAGATAAGCAAGATCAAGCAATAGCTAAAGAAGATTTATCACTTTCAAAAATGCAAAAGTTTATGTGC  
AATATGATGATACAACAATAATAGTATTTTCGTTTATGATGTAGTAAACGATGAATGGATTTTATAGATTGGATCCGAATATACGTA  
TACATAAGAGTAACATATACCTCCATAGTTTAAATGGGATGTGGATTATATTAACCGGAGATCGTTCTAATGATGATTAATGC  
AACACCATCAGTATCATCATTATCCAATTATAAACGAGTCATAGTGATGCTAATTAAGCTACTATCAATTTTTTATTTAAAAATTTGTAGT  
AGGTGAGCAACGTATTAAGGATGCAATCCAGAGAACAAATAAATAATTAAGAAAAAGCAATTCATAACGCAGTTGAATACATGTGTT  
ACGAATTGCTTTTATATTAGTTTATATCACACAAGTTTTTAAATGCAACCCCGTGATAGCAAACTCATATGTAGATAATACAGCTTT  
TTCAGCATCATCTACATGAATTCCAAACATCATCGAGATTTCCGAAGCACCTTGGTTAATCATTTTAAAGTTAATTTTGAATCAGCT  
AAGGCATGTGTAATTTTATTTGCAAGTACCGATGACTTTATTCATACCTTCGCGGACAATCATTAATATTGCTAAATCATGCTCAATAC  
TTAGCTCATCAACATCACATTTTACGAATTTTCAATTAATACTTTTGTGTTCTTTATTTTGAATTTGTTTTGAGCGCATAACGTA  
ACTG ATAGTATCAATACCTGAAGGCATATGATCAAAATGAAATATTATATCCTCTAAGACACCTAATATCTTTCTAGTAAGCCGACTTGT  
CTATTCATTAATACTTTTATGATTAATAACGGTGAAAATCTTTATCACAACCTTATACCGCTAATCAGATTTTTCGATTTTCTCT  
ATCATGCACTATAAATGATACCTTTATCTTGAGGGCGGTTCTGATTTTAAATCCACAGGGATGCGATCTTTATAAAGTTAGTTGTAAG  
GCTTCATCATGGA AAAACACTAAAACCAGCATAAGATAATTCACGCATTTCTCGATAAGTGATTTCTTCGATTAATTCAGGATCTTTG  
ATGATATTGGATTAGCTTTATAAAATACCAGACACATCGGTGAAATTTTCATAAATTTAGCTCTAACACCACTTGATATGATGGCG  
CCAGTTATATCTGATCCGCCACGTGGAATGTAACATATATCCTTCATGAGATACGCCGAAAAATCCTGGGATAATTAGTTTCTCA  
TCATAATCTCTTAATTTTTTAATTTACAGAGTAAGCACTATCTAATATTGTGCTTCTGTGGGACGTCAGTAACAAAAATACCCGCTT  
CCTTCGGTGATATATATTTTGTGGTATACCTTGACTATTATTATATAAAGCTATCAATTGCGCATTA AATCTTACCACAAGAAAG  
TAATGCATCTAATAGTCTCTTTGGTTTCAATTTTTAATTTGATTAATATAATGTTCCAAAGTCACATCTATCGTCCGTA AATACCTTT  
CCATTTGCAATTTCTTTACAATATCATCAACCGCTGAATAATTTCTCTTTTATCATGATAATCAAGATGATTAACTGCTTTTCA  
TATAATCTGATTAAACAAATCAGTTGTTTAAATATCATATATGCTTTTACCTGGAGCAGAAACGATAACAATCTTTCGCTCGGAT  
CAGAATTAACAATATTTAAAACTTTTAAATTTGAGTAGCATTGGAGACGGAGCTACCACCGAATTTGGAACCTTTCATAGTGCATG  
CCAACCTTTCTAAAAAATCAGAAAATTTGATTTCAGTTTGTAAAGTAAGAATGATATTATGATTTTATATTTGAATATTACGAACCTT  
ACAAAAATAAAGAATAATTCTATACTATACTATCATCTAGTGTTTTTCAATAATGCATTTGTTTTCTCAAAAGCACAAACGGAGGT  
ACATAAAATGAAAAAATTAATATAGCATTATTAGGATTAGGTACTGTGCGGATCTGGTGTGTTAAATCATCGAAGAGAACCGAC  
AGCAAATTCAGATACATTAATAAAGATATTGTCATAAAGCATATTCTTGTTTCGAGATAAATCTAAAAAGAGACCGCTAAATATT  
AGCCAATATCATTTAACTGAAGATGTTAATGAAATTTTAAATGATGATTTCATTAGATATTATCGTTGAAGTCATGGGAGGAATTGAA  
CCAACGTAGATTGGTTAAGAACAGCACTTAAAAATAAAAAACATGTTATTACCGCAAATAAAGATTTATTAGCAGTACATCTTAA  
ACTTTTAGAAGATTTAGCAGAAGAAAAATGGTGAGCTTTAAAGTTTGAAGCGAGTGTAGCAGGTGGTATCCGATCGTAAATGCCA  
TAAATAATGGTTTGAATGCGAATAATATTTCAAAATTTTAAAGGGAATTTTAAATGGTACCTCTAATTTTATTTTATCTAAAATGACTAA  
AGAGCAAACGACATTTGAGGAAGCACTTGATGAAGCGAAAAAGACTTGGTTTTGCTGAAGCGGATCCAACGTATGATGTAGAAGGG  
GTAGATGCAGCGCTAAAGTTGTCATTACATCATATTTATCATTTAACCAAGTCATTAATTAACGACGTTAAACGAAGAGGAATT

AGTGGCGTAACTTTAACTGATATTAATGTAGCCGATCAACTGGGGTATAAAATTTAAATTGATTGGTAAGGGAATATATGAAAAATGG  
CAAAGTTAATGCATCGGTAGAACCAACGTTAATTGATAAAAAAGCATCAATTAGCAGCTGTAGAGGATGAATATAACGCGATTTATG  
TCATTGGTGATGCTGTTGGTGACACGATGTTTTATGGAAAAAGGAGCAGGCAGTTTAGCAACAGGTAGTGCCGTTGTCAGTGATTTAT  
TGAATGTAGCATTATTCTTTGAATCAGATTTACACACATTGCCACCACATTTTGAATTAAGACAGATAAAACACGGGAAATGATGG  
ATTCAGATGCAGAAATTAATATTAAGAAAAATCCAATTTCTTTGTAGTAGTGAATCATGTCAAAGGTTCAATTGAAAAATTTTGAAA  
ATGAGTTAAAGGCAATATTACCATTTCACCGATCATTAAGAGTTGCAAATTACGATAATCAATCATATGCCGCTGTTATAGTTGGAT  
TGGAATCATCACCGGAAGAATTAATCACTAAGCATGGATACGAAGTTGACAAAGTATACCCAGTAGAAGGAGTTTAATTATAATGA  
GAAGATGGCAAGGATTAGTAGAAGAGTTTAAAGCACATTTACCAGTAAATGAAAAATACACCAAAATTAACATTGAACGAGGGAAA  
TACACCACTCATTCAATTGTGAAAATATGTCTAAAATACTAGGCATAGATTTATATGTGAAGTATGAAGGTGCCAATCCGACAGGTTT  
ATTTAAAGATCGCGGTATGGTAATGGCTGTGACAAAAGCAAAAGAGCAAGGTAAGAAAATTTGTAATATGCGCTTCGACTGGAAATA  
CATCAGCGTCTGCAGCAGCATATGCAGCGAGAGCAGGTTTAAAGCTATCGTCGTAATACCAGAAGGTAAAAATTGCATTAGGTAAA  
TTGTCGCAAGCAGTAATGTATGGTGCAGAAATCGTTTTCTATTGAAGGAACTTTGATGAAGCTTTAGAAAATTGTAAGAAATGCA  
AAAAGTGGCGAAATCGAGCTTGTAAACTCTGTCAATCCATTTAGAATCGAAGGACAAAAGACAGGCTCATTGTAAATTGTACAACA  
ATTAGACGGTGAAGCACCTGATATTTTAGCGATTCCGTAGGTAATGCAGGTAATATTACTGCATATTGAAAAGGCTTTAAAGAATA  
TCATGAAGCTAAAGGATACAATTGCCGAAAAATGTTTGGCTTCCAAGCTGAAGGCGCATCACCATTGTTCAAAATAAAGTCATTA  
AAAATCCTGAAACGATTGCAACTGCTATTTCGAATTGGTAATCCTGCTAGTTGGGATAAGGCGACTAATGCTCTTAAAGAATCAAATG  
GATTAATAGATAGTGTTACTGATGATGAAATTTCTAGAAGCATATCAGTTAATGACAATAAGAAGGTGCTTTTAGTGAACACGCG  
AGTAATGCTTCTATTGCAAGTTTAAATTAATGGCATAGACAAGGTAAATTAACCTCAAGGTAAAAAGTAGTTGCTATTTTAACTGGT  
AATGGATTAAAAGATCCGTGATACCTGATTTTCTACTAGATGAATCCGATAAAGCCATTGCCAAATGATAAAGATGACATTATTCGAT  
TATATTAAGGAGCTTTATAACATGTGCAATGTTTTGGAGTTAACAATTCCTGCATCAACAGCCAACCTTGGAGTTGGCTTTGATTCT  
ATAGGTATGGCTTTAGATAAAATTTTGCATCTGTCTGTAAAGGAAACATCAGGGACAAAATGGGAATATATTTTCCATGATGATGCA  
TCTAAGCAATTGCCTACTGACGAAACAACTTTATTTATCATGTAGCACACAAGTTGCTTCTAAATATAGTGTGACTTGCCTAATT  
TATGTATCGAAATGAGAAGTGATATTCCATTAGCAAGAGGGTTAGGTTCTGTCAGCTTCTGCTTTAGTAGGAGCTATATATATCGCAA  
ATTATTTTGGTGATATCCAACGTCTAAACATGAGGTATTACAATTAGCGACTGAAATCGAAGGACATCCTGATAATGTTGCGCCGA  
CCATTTATGGTGGTTAATCGCTGGATATTATAATGATGTCTCGAAAGAAACGTCAGTTGCACATATCGACATACCAGACGTGGATG  
TGATTGTAACGATACCAACTTATGAACTAAAAACAGAACATCAAGACGTGCTTTACCACAAAAATTAACACATAGTGAAGCGGTT  
AAAAGTAGTCAATTAGTAATACAATGATTGTGTCATTAGCACAGCACAATTATGAATTAGCAGGTAACTCATGCAACAAGATGG  
CTTTCATGAACCGTATCGTCAGCATTTAATTGCTGAATTTGATGAAGTGAAAACAATTGCTATTCAACATAATGCCTATGCAACTGT  
AATTAGTGGTGTGGACCAACTATTTTAATATTTAGTCGTAAGAAAATAGTGGGGAATTGGTTCGCTCTTTAAATAGTCAGGTAGT  
ATCATGCCATTCTGAATTGGTCGATATTAATATCAGTGGTGTTAAAGAACGAATTGTATACCAATAGACGCTTTATATTGTAAAATA  
GTATTAATGCAGAATAGAGAGGAGATTTAATGCGATATGACAAATTTATAAAGTTGTCGTTTTAGATATGGATGACACATTGCTAA  
ATTCAGATAATGTGATATCAGAAGAACTGCAAAATTTTAAACAGCAATTCAGATGAAGGTTATTATGTTGTTTTAGCATCTGGTA  
GACCTACTGAAGGTATGATTCCAACCTGCTAGAGATTTAAAAATTAACCTGAACATCATAGCTATATTATTAGTTATAACGGTAGTAAAA  
CGATTAAACATGACTAATGAAGAAGTAGAAGTAAGTAAATGATTTGGTAAGCAAGATTTCGATGAAATTTGATAGTTATTGTCGAGAT  
AGAGGCTTTTTCTTCTTCTTACATATCATGATGGTCAAAATTTATACGACGCAACATGAGTATATGAATTTGAAGCAAGATTAACA  
GGTTTACCGATGAAACGTGTTGATGATATCAAAGCGTATATTCAAGGCGATGTACCCAAGGTATGGGTGTAGATTATGTAGCGAA  
TATTACAGAAGCTAGAATTGATTGTAATGGTGTGTTCAATGATAATGTAGATGCTACGACAAGTAAGCCATTCTTCTTAGAATTTAT  
GGCCAAAGACGTTTCAAAGGTAATGCAATTAAGCGTTATGTACAAAATTGGGATATTCGGTGGATCAAGTCATTGCTTTTGGTGGA  
TAGTATGAATGATAAATCAATGTTTGAAGTCGCAGGTCTAGCTATTGCTATGGGGAATGCATCAGATGAACCTAAGCAATATGCAA  
ATGAAGTTACGTTGGATCATAATGAAAATGGTATTCCACATGCGCTCAAAAAATTTGTTATAAAATTTTAAATAAGCCTTAACACATG  
ATATTTGAATAAGATATCTTGTGGTTAAGGCTTTTTATTTTGTGAAAATGACTTCAGTTATACTATGGAGGATTTGAAATACATATT  
TTAGATTAGTAATGATATCAAACGAATAGAGTAAATGTATATTTTGAATAAATCAAGTATTAACCTAGTCACTGAAGGTAGATAAA  
TAAATTTGATCATTCTGCAATAATAACGAATGCATTAATAAAATGCAGTGAACAATTAACATTAATTTGTTAAATCTAGTCAAGCATCT  
TGATTTTATTTAGCTGTTTGTGTCCAGTCATGCTTACCCTGAAACGTTTACATGAGCATATATTTGGTCAGCAGTATAAATCTAAAT  
TTGTATAAACTGTAATACTGAACGCTGATTGGTTTTTCAGCAAAATGATTCTTCGGAAAAATAATTCCTTTAAGTGCATAAAATAAATCATT  
CATTTGTTTTATGGTTTAAACCGGGATATTCCTTAAAGTTCTCTTTAATAATTTGTCCGTTCTTTTCTTCTAATGCTTGAACCTACAATAA  
CAAATCTTTCATCTTGCTTTAGTACATCATCAATAAAATTTGTTTGTCCAATCATTGAATTCACCCCTGAAAAGTTATTGTTATCTAT  
ATTATACACGATATGCAAAATATCTAAAAATAAGAATGGTAACATGGTAATAATAAAATATAAACAGAATACTAGTTAATACACTT  
TATACTAGAAAAAGATATTAAAGTATATCTGCTTTACACCATTAAAAAGCGGCAAAATGCTATAGATAATCTAAAGCATCTGCCGTAT  
GAGAATTTATTTATTTTGTGTTGTCATAATCGTGTGGTTTTAAATTTATTGTTTCTAGCTTTACAAATTTGTTTTGTGAATGATTTTAT  
GAATAAGGTAATAACGCTAGAAATGATTAAAGGTAAGGTAAGGTTTTTAAAGCAATTTAAACCATTTGATCTTTTAAAAATATTTCAACTG  
AGCCAAACAAATAGCAAGAATAATAGTGATGATGACAAATGATTGGTTCCTAATGGAATAAAAGGTGCTTTTATATGGTAGGACCTTA  
TTAGGGTCTTGACCTTGTTTTTAATAGCTTGTGCAATCGTATTGTGACCAAAATGCTTGATCCCCAAACAACTATAATCATTGAAC  
CAATAATTTCAAGTAAATTAACGCGCATTTGAATTAAGTTTGCATAAAATAAACAATAACAACGACTGCATAAGTAGTTAAT  
AATGCTCTTAAAGGTAACCTAGTTGCTTGTGTTAATTTACTTAAAAATTTGGGGTGCTTTTTTGTCTGAACTTAAGGAATACAACATTC  
TGCTGTGTGATAAACACCTGAATTTGCAGCGGATAAATGAAGTTAAAAATAACCGCGTTGATTACTGATGTGCAAAAGGCTATGC  
CTACTCTATCGAATACAATTGTAATGGGCTTTGACTTATTGAACTACTTGCTCTTAATAATGATGGATCTGTGTACGGAATAATTGC  
ACCAATTACTGCAATTGATAAGACATAGAATAAAAGAATACGCCAAAAATCTTGTTAATTGCCTTAGGCATAGACTTTTTAGGGTC  
ATCTGATTACCAGCAGTACTGCTACTACTTGTACCACCAACCGAAAAATCCGGCGACTAATAATACGCCTAAGAAACAGAGAT  
ACCACCAACAAACGGTGCTTGGCCTTTTGTATAGTTTCAAAATCCATATGTATGACCACCTAAGATACCCAAATCATTAATAAAGCC  
AAAAATAACGAATACGATAATTGTTAAACCTTTAATCAATGATAACCAAACTCAGTTTCTCCAAATGATTTTACAGAAAAATGTT  
TAATAATAGTAAATTTGAATAAAGATTAAGCTCCAAGTAATGGGGTGAAAAATTTAAATGTGTCCAGAAATAAAGCACATTTG  
ACGCTACTATGACATCAACACTTGTAACTAATGACCACAATGCCAATACAACCATCCCATGGTAAAGCCAAGAGATGAGTCAATA  
AAGCGTGTGTAATAAGAGCTGAATGAACCTGATCTGGATAAAATGTTGCCAACTCTCCAATTGATGACATTAAGAAATATAGCAT  
GACACCAATAACAAGATAAGCGAGTATAGCGCCTCCAGGACCAGCTTGAGAAATGATATTACCAGTAGCTACAAATAGACCAGTCC  
CAATTGCACCACCTATAGCAATCATGGAAATGTGTCTTGAGTTAAGACTACGGTTCATTTTATTATCTTCCATATTTAGTCTCCCATC  
TATTTAAATATACCCATTATTGTAAGCTTTTTAAGTGTACTATTCAATAACTATTTAGTACTGTAAAGCGAAAAATTAATAATTTTCT  
GATTTTTAATCATCTTTAGCATGTTTTAATTGTAATTTTGTAGGGGTTAAATATAATATGTAATTAATAATTAATAATTTAGTTG  
GAGGGATGACTATGTCACAACAAGACAAAAAGTTAACTGGTGTTTTTGGGCATCCAGTATCAGACCGAGAAAAATAGTATGACAGCA  
GGGCCTAGGGGACCTCTTTAATGCAAGATATTTACTTTTTAGAGCAAAATGTCTCAATTTGATAGAGAAGTAATACCAGAACGTGCA  
ATGCATGCCAAAGGTTCTGGTGCAATTTGGGACATTTACTGTAACTAAAGATATAACAAAATATACGAATGCTAAAATATTCTCTGAA

ATAGGTAAGCAAACCGAAATGTTTGCCCGTTTCTCTACTGTAGCAGGAGAACGTGGTGCTGCTGATGCGGAGCGTGACATTCGAGG  
ATTGCGTTAAAGTTCTACACTGAAGAAGGGAACCTGGGATTTAGTAGGGAATAACACACCAGTATTCTCTTTAGAGATCCAAAGTT  
ATTTGTTAGTTTAAATCGTGCGGTGAAACGAGATCCTAGAACAAATATGAGAGATGCACAAAATAACTGGGATTTCTGGACGGGTC  
TTCCAGAAGCATTGCACCAAGTAACGATCTTAATGTCAGATAGAGGGATTCTAAAGATTTACGTCATATGCATGGGTTTCGGTTCTC  
ACACATACTCTATGTATAATGATTCTGGTGAACGTGTTTGGGTTAAATTCATTTTAGAACGCAACAAGGTATTGAAAACCTAACTG  
ATGAAGAAGCTGCTGAAATTATAGCTACAGATTCGTGATTCATCTCAACGCGATTTATTCCAAGCCATTGAAAAAGGTGATTATCCAA  
AATGGACAATGTATATTCAAGTAATGACTGAGGAACAAGCTAAAAACCATAAAAGATAATCCATTTGATTTAAACAAAAGTATGGTAT  
CACGATGAGTATCCTCTAATTGAAGTTGGAGAGTTTGAATTAATAGAAATCCAGATAATTACTTTATGGATGTTGAACAAGCTGCG  
TTTGACCAACTAATATTATCCAGGATTAGATTTTTCTCCAGACAAAATGCTGCAAGGGCGTTTATTCTCATATGGCGATGCGCAA  
AGATATCGATTAGGAGTTAATCATTGGCAGATTCTGTAAACCAACCTAAAGGTGTTGGTATTGAAAAATATTTGCTCTTTAGTAGA  
GATGGTCAAATGCGCGTAGTTGACAATAATCAAGGTGGAGGAACACATTATTATCCAAATAACCATGGTAAATTTGATTCTCAACCT  
GAATATAAAAAAGCCACCATTTCCCAACTGATGGATATGGCTATGAATATAATCAACGTCAAGATGATGATAATTTTGAACAACC  
AGGTAAATTGTTTAGATTACAATCAGAGGACGCTAAAGAAAGAATTTTTACAATAACAGCAAATGCAATGGAAGGCGTAACGGATG  
ATGTTAAACGACGTCATATTCGTTCATTGTTACAAAGCTGACCCAGAATATGGTAAAGGTGTTGCAAAAGCATTAGGTATTGATATAA  
ATTCTATTGATCTTGAAACTGAAAAATGATGAAACATACGAAAACCTTTGAAAAATAAATTTGATATGTAGTTTCTATATTGCGTAGTT  
GAGCAGTTTATGATATCATAATAATCGTAAAGATTCTTAACAAGAGAGGGGTGTTAACGTGCGCGTAAACGTAACATTAGCATGC  
ACAGAATGTGGCGATCGTAACATATCACTACTAAAAATAACGTAATAATCTGAGCGTATTGAAATGAAAAATATTGCCCAAG  
ATTAACAAATATGATTCATCGTAACTAAGTAAATCTTATCAATTAACGACGATTGAAAAATAAGCGGGCTTACCTATT  
ATATTGGGGAGCTCGCTTTTTATGAAATTTTGTGAAGAGTGATTAATGGATTGAGTTTCATCGGTAGAACAAATATATGATTGTATT  
AGTTGTTACTTTATTAATAATTTGAGAATATTTATAGAAGGAAATAGATTACTGATTTTATAAAGTCACTTTGTTAGCGAATGCTTGAA  
AGAGTATTTAATATAGTAGAATTTAAATTTCAAAGCGGAATTTAATAAGTACGAAGTAATTCTGGGTATGTTTTATAAATGTTTCGA  
TAATACACTTTAATCTTAAATATGATGGTTTTAGAAAATGATTTAACAAAAGAAATGAAACTTTACTGTTGAATTATGTGAGGATTGTG  
TTATTATATAAATCGTAATAAATTACGATTTGATAAAAAAGTGAGGTAACCTATATATGGCTAAGAAATCTAAAATAGCAAAAGAGAGA  
AAAAGAGAAGAGTTAGTAAATAAATATTACGAATTACGTAAAGAGTTAAAAGCAAAAGGTGATTACGAAGCGTTAAGAAAATTAC  
CAAGAGATTCATCACCTACACGTTTAACTAGAAGATGTAAAGTAACTGGAAGACCTAGAGGTGATTACGTAAATTTGAAATGTCT  
CGTATTGCGTTTAGAGAAACATGCGCACAAAGGACAAATTCAGGTGTTAAAAATCAAGTTGGTAAAAATCAAAATTCGTACTTTAG  
CCCATTTACAATATCAATAAAACAATGTACAGTATATACGAATGCTATAAACTGAATGTTTCTCATATTATAAGGAACCATTCGG  
TTTTTAATTTGCATTTAAAAATAATTAGTTTTTAAAGGGGCTATTTAAAGTGAAAAATTTTGATTACGAAGATATTCAATTAATACCT  
AATAAATGCATAGTTGAAAGTAGGTCTGAATGTGATACAACCTATCCAATTTGGTCCGAAAAAATTCATCTACCTGTAGTTCCTGCA  
AATATGCAAAACAGTTATGAATGAGAAATTAGCGAAATGGTTTGTGTAAGAAATGATTACTTTTATATCATGCATCGTTTTGATGAAGAA  
GCAAGAATACCTTTTATAAAACATATGCAAAATTCAGGCTTATTTGCATCTATTTCAAGTTGGTGTAAAGAAAGCGGAATTTGATTTT  
ATTGAAAAGTTAGCTCAAGAAAAATTAATCCCCGAATATATTACAATAGATATTGCGCATGGTCACTCAGATTCAAGTGATAAACAT  
GATTAACATATAAAAAACCATATACCTGATAGTTTTGTTATTGCTGGTAATGTTGGTACGCCAGAAGGTGTTAGAGAATTAGAAAA  
TGCTGGTGCTGATGCTACCAAAGTCGGTATAGGTCCTGGTAGAGTTTGTATTACAAAGATTAAACAGGTTTTGGTACTGGTGGTTG  
GCAGTTAGCGGCATATGTAGTAAAGCATATGTAAGCAGCTCGTAAACCTTATTGCTGATGGTGGTATAAAGAACGCATGGCGCATCG  
CTAAATCAATTAGATTTGGTGCATCAATGGTCATGATTGGTTCATTATTTGCGGCACACGAAGAATCACCTGGTGAAACTGTAGAAC  
TTGATGGTAAACAGTATAAAGAATATTTTGGTAGTGCATCTGAATTTCAAAAAGGCGAACATAAAAAATGTGAAGGTAAAAAATG  
TTTGTAGAACATAAGGGTTCATTAATGGATACCTTAAAGAAATGCAACAAGATTACAAAGCTCAATTTCATATGCCGGTGGA  
AGACTTGAAATCATTACGTACTGTAGATTATGTTATTGTTAGAACTCTATTTTCAACGGTGATAGAGATTAATATTTATAGTAGGTG  
ATGTAAATTAAAAAATTCATAGTAACCTGTTGTTGCGTTTTTATCAATTATTATCATTGCGCCAATAACAGAATTTAAACCATTTCATTC  
ATTTACAAAATGAAGTAAGACAATATATTGACATTCACATCAATAAAGAAACAATTTCTGCGGAAAAATAAATGGATACGCCGAAG  
AAACAACAATTTGCCTTTAAACAATATACAAATGAACATGTCAAAATCAGATGTTGAGAAAACATTAAATAAACCAAAAAGAGTGAC  
ATTTAATGAATATACGTAAGTGGTATACGTATTATGATGACGATTACCAATAATTTTATAATGAAATGACATTAAAGATTAAGT  
TAATGCGTTATATACAAATCAAAATATAATCACTTCAAAATCAAAAATTAATAACAATACACCGAAATCGGTTGTAAGGCAAGAT  
TAGGCGAACCAGAAACAGAGATTGTTAAAGGTAGAGTGCGTTACGAACAAAATAATAAAGAATATGATGTTTTCCATAAAAAATCAC  
ATTTATACGACGGTATTTTATGATAAGCATCGACGTAATAATGTAACAGCTGTTTTACAAGTAAGTGATGCTATGGAAAATAGATTA  
AAAGAACAATATGGAGCACCTTCGAAATCGCTTGCAGATAGTTTTGAACTACAAAATTTTGATTAGTTAATGCTGAAAGAAAACA  
ACATCAATTATCTACATTGAAGTATTCTAAACAGAAATCTGAAACTGCACGTAAGCATAGTAAAGATATGGCCAACAATCATTATTT  
TGATCATACAAATTTAAAAGGTCAATCACCATTTGATCGATTGAAAAAAGATGGTATTACATTTAACTCAGCCGGAGAGAATTTAGC  
ATATGGTCAAGTTAGTAGTATCTATGCACATCAAGGATTAATGAATTTCTATTGGTCACAGAAAAACATTTTAAATGATACGTTTAA  
AATATTAGGTGTTGGTGTGATTGTTTAAATGATGAAAAACAACCTTTTGGACAGAAAAATTACTGGTTAATGTTTGGCATGAGTTT  
AAAGGGTAAATGTTTCTGTGTAAGGAAGTAGATAAACAATGATGACACAGATAAACAACCAAAAGATGCGGATACTTGAACGCGTCA  
AAGATATACTTAATAAAAAAGAAAAGAAAAAATAATAATGGCTCGCTCTGTAAATTATTACGGGGGCGAGTTTAAATTTGTTTAA  
CATTTTGCAGGAATCTGTAATTCAAAATTTATATTAAAGAATGAGATTATCTAACAATTCGCAATTTCTGTTGAACCTGAATTTAGAT  
TAGAATAAATAAAAACCTCTTGAAAACGTAACCTTTTTCAAGAGGTCCAAAATTTATAAAAAATGAGGGCTTAAACAATTACGATAATAT  
ATAACGGTTTAAAATATTACATTTGCGGGTACAAACCAATTACTTTCCCAATTACAGCAACATTGTGCGAGGTAAATTTGGCTCCATTG  
TACTATTTTCAGGTTGTAATCGATAACGATTTTTTCTTTATAGAAGCGTTTGACAGTTGCTTCATCTTCCTCAGTCATAGCAACAAT  
AATGTCTCCATTTTCTGCTATGGTTTACTGCGAACAATTACTTTGTCTCCGTCTAATATACCAGCCTCAATCATACTGTGCGCTACG  
ACGTTTAAATATGAATATGTCGCTATTGTGTGTCGATGTAAAGTGTTCAGGTAATGGAAAAATTTCTCAATATTTTCTACTGCGGTAA  
TAGGAACACCTGCTGTGACTTTACCAATAACTGGCAGTAAAGTCTGTTTCTTCATATTAATATTTCATTTGTTGATCACTTACAAT  
TTCTATAGCACGTGGTTTCGTGCGATCTCTTCTTATATAGCCTTTTTCTTCAAGACGTGAAAAGGTGACCATGAACAGTTGAACCTGGAT  
GCTAAGCCAACCTGCTTCACCAATTTGCGGAACACTAGGCGGATAACCTTTCATTTGAACAACCTGTTTAAATATAGTTATATATTTCCG  
TTTGTGCTTTTGTAAATCTCTCATATATAGGCACCTCCCTAAATTAATTTATATACAGTATATCATTAATTCACAACCAAAAACAAACA  
TTTGTTCGTTAAAATATTGACAGAGAACATAAGTTCGTATAAATTACTAATACAAACAATGTTCTAGGAGTGGAATGATGTTTTA  
CAATAAATATAAAAAACGTATCAACATATATCATCATATTTTTAGTTTCAAGTGCAGCCTTTGCAATATTTCTGTTAAGTGCGAACATT  
AGTGCTCACTCGGAACAAGTGTACGAAATGACTGACCATCAAAATTAAGAACAATACGATAAAATAAAGCATACGAACATAAAGACC  
CTACAAAACATAGCGAACAAAGAGATGGGAAAGGTTCGCTTTAATAAATGATACATTGTGCACAACGTTATTTTGCCTATTTTTCG  
GAAATAGCGTTTTTTTATTACTTTTTTACTGATCTTAAATTTGTTATATTTGTTAAAGTATTATAATGATTGAATAAACAATTTGAAG  
GTAGGTTTTTTAATTGAGTAATTCTGATTTGAATATCGAAAGAATTAACGAGTTAGCTAAAAAGAAAAAGAGTAGGATTAACCTC  
AAGAAGAAGCAAAAGGAGCAACAGCCTTAAGAAAAGCTTATCTTGAGAGTTTTAGAAAAGGGTTTAAACAACAATTTGAAAAATAC  
TAAAGTAATTGATCCAGAAGGTAATGATGTAACACCTGAAAAAATTAAGAGATACAACAAAAAAGAGATAATAAAAAATTAATC

ACAAATCTGTAAAGAATTTTCTGACATTATAACTTGAAATAAGTATTTTACTTATCTTTTTATTTTAAAAATAAGTTATAATGTATTTG  
ATAAAATTTGAAGAAGGGAAGATACACAAGATGTTTAAATGAAAAAGATCAATTAGCTGTTGATACGCTGCGTGCCTAAGTATCGAC  
ACAATCGAAAAAGCGAATTTCTGGTCATCCAGGATTACCTATGGGAGCTGCCCAATGGCTTACACTTTGTGGACACGTCATCTGAAT  
TTTAATCCACAATCTAAAGATTACTTCAATAGAGACCGTTTCGTATTATCTGCAGGGCATGGTTCAGCATTATTGTATAGCTTGTAC  
ATGTTTCTGGTAGTTTAGAATTAGAAAGATTAAAGCAATTTAGACAATGGGGTCTAAAACACCAGGTCATCCTGAATACAGACAT  
ACAGATGGTGTAGAAGTTACTACCGGACCCTTGGACAAGGTTTTGCTATGTCAAGTAGGATTAGCTTTAGCAGAAGATCACCTAGC  
AGGGAATTTAATAAAGAAGGATATAATGTTGTAGATCATTACACATATGTATTAGCTTCTGACGGTGATTTAATGGAAGGTATTTG  
GCATGAAGCAGCTTCATTTGCTGGACATAATAAATTAAGTAAATTAGTTGTTTTATACGATTCAAATGATATTTTCATTAGATGGCGA  
ATTAACAAAGCTTTTTCTGAAAACACAAAAGCTCGTTTTGAAGCATATGGTTGGAATTACTTACTAGTTAAAGATGGTAATGATTT  
AGAAGAAATTTGATAATGCGATTACTACTGTCAAATCTCAAGAAGGACCAACAATTATCGAAGTTAAAACAACAATCGGATTTGGTT  
CACCGAATAAAGCAGGAACATAAGTGTTCATGGGGCACCTTTAGGTGAAGATGAAAGAAAATTAACATTTGAAAAATTACGGTTTA  
GATCCTGAAAAACGTTTTAATGTTTCAGAAGAAGTATACGAAATTTTCCAAAAACTATGTAAAAACGTGCTAATGAAGATGAATCT  
CAATGGAATTCATTATTAGAAAAATATGCAGAAACATATCCTGAATTAGCAGAAGAATTTAAATTAGCAATTAGTGGTAAATTGCC  
TAAAAATTATAAGGATGAATTACCACGTTTTGAACTTGGTCATAATGGTGCATCTCGTGTGATTCTGGTACTGTTATTCAAGCAATC  
AGTAAAACTGTTCCCTTCATTCTTTGGTGGATCAGCAGACCTTGCTGGTTCAAACAAATCCAATGTAAATGATGCAACTGATTATAGT  
TCTGAAACACCTGAAGGTAAAAATGTGTGGTTTGGTGTACGTGAATTTGCTATGGGTGCTGCTGTAAATGGTATGGCTGCACATGGA  
GGTTTACATCCATATGGTGCAACATTCTTCGTATTTAGTGATTATTTAAACCAGCGTTACGTTTATCATCAATTATGGGATTAAGT  
CAACGTTTCATCTTACACATGATTCATTTGCAGTAGGTGAAGATGGTCCGACTCATGAACCAATTGAGCAATTTAGTCTGGAATTAAGAG  
CCATTTCCAAATATGAATGTTATCCGTCCTGCTGATGGTGAATGAAACAAGATAGCATGGGAAGTTGCGCTTAGAATCTGAATCTACAC  
CTACTTCATTAGTATTGACACGTCAAAAACCTTACCGGTATTAGATGTACCAGAAGATGTAGTTGAAGAAGGCGTTCCGAAAAGGTGCCT  
ATACAGTTTATGGCTCTGAAGAGACACCAGAATTCCTATTATTAGCTTCAGGTTTCAAGAAGTATGCTTTCAGTTGAAGCTGCTAAAG  
ATCTTGAAAAACAAGGTAAATCAGTACGTGTTGTTTCAATGCCTAACTGGAATGCATTTGAACAACAATCTGAAGAATAAAGAA  
TCAGTTATTCCATCAAGCGTAACAAAAACGTGTTGCGATTGAAATGGCTTACCAGCTTGGATGGCATAAATATGTAGGTACTGCAGGT  
AAAGTTATTGCTATTGACGGCTTTGGCGCAAGTGCACCTGGCGATTTAGTAGTTGAAAAATATGGATTTACTAAAAGAAAAATATCTTA  
AACCAAGTTATGAGCTTATAAGAATAATTTATAAAGCGAGTATGTTTAGAAGTCTAGGATGCATAATCTTAGGCTTCTTTTAAAGTG  
TTGAAATTTAGAGTATAGCACTTAACTACATCATAAGTGATAAGTTATGAAAGTATACTATTTCAGATTAATCTTTTAAAGCTCTG  
TTATAACAGCATGATTTTTGATATATTATTTTAGTATCGATATTAATAATCTTGAATAAACTAGTTCTTGAATAAATGTGATGAATTTA  
GTAAAAATTCAGTAGGATAAAGAAAAGCGGGTGAACCAATGGCAACTTGGTTAGCAATTATTTTTATAGTAGCTGCATTAATTTTAGGT  
TTAATTGGAGGTTTCTTTTAGCTAGAAAAATATATGATGGACTACTTGAAGAAAAACCCACCAATCAACGAAGAAATGCTTCGTATG  
ATGATGATGCAAAATGGGTCAAAAACCTTCTCAGAAGAAAAATTAATCAAATGATGACGATGATGAATAAAAAATATGGATCAAAATAT  
GAAGAGTGCGAAAAAGTAAATTCGCAATTGATAGAGGCTATTTTCCAGATATGGAATGGCCTCTTTTATAATCAAAATTAATAAA  
AACAAATATGTTTATTAATAAATTAAGTTAAACAAAATGACGAATAGACTGAGAAATGCTATAATTCATTTTGTATGATTTACAGAGAG  
TTTATTTAACGAGAAGGTGTCTGCTGTCTATTTAATATTTTCAATCATTGTAGCTTTATTTATGGGAACATAGTTATAGTTATTCG  
TATGAAAGCTCAAAAATTATCCGGTAAATGAGAAAAAATAGTTTTGCCACCGTTTTTTATGGCGACCGGTGATTGATGACGCTGTG  
TCCATATTTTACGCTAATCAGGATCGGAAATGCTAGAAGCCTTTATAAATTTGGTTTGGCTTTTTTCTACAGTTCTAATTTGCGATTCGTA  
TTTGAAGTCAAAGGTACAGAAATTTATATGAAACGATCTAAAGCATTTCAGTTATTTTGTATTTTCTACTTATCATTCGTACTGTGA  
TGAAAAATATTCATTAGTAATGAAATAGATCCTGGAGAATTAGCGCGCATGTTCTTTTTATTAGCATTCTGTATGATTGTTCTTGGAG  
AGCAGCAATGCTATATAAATACAAAAAACTAAAGAAAACATTAATCAATTAATTACTTTTAAAACCACTTGTGATCGACTTCTAAAT  
CAGTCGATGAGTGGTTTTAATTTTACTTGAAAAGGTGAAATGATTATATTAATAAAAAGCGAACAAATGTTCTATATGGAGGCAGT  
AATGAAAAATTATACATACAGCAGACTGGCACTTAGGGAAAAATATTAATGGCAACACAGCTTTTAGAAGATCAAGCGTATATTTAG  
ATATGTTCTGTAGAAAAATGAAAGAAGAAGAACCCGATATCATTGTGATAGCTGGAGATTTATATGACACAACATATCCAAGTAAA  
GATGCAATCATGTTATTAGAACAAGCGATTGGAAAGTTAAATTTAGAAGTGGCTATACCAATAATTATGATTAGTGGAAATCACGA  
TGGTAAAGAGAGGTTAAACTATGGGGCAGTTGGTTTGAACATAATCAGTTATTTATAAGAACAGATTTTACATCGATTATTAACACC  
AATAGAGATAAATGGGGTTAATTTTTATACACTCCCTTATGCTACTGTGAGCGAAATGAAACACTACTTTGAAGATGACACCATTGA  
AACACATCAACAGGGAATTACGCGCTGTATTGAAACAATAGCACCGGAAATTTGATGAAGATGCCGTCAATATTTTAATTAGTCATC  
TGACTGTTCAAGGTGGAAAGACATCTGATTCTGAAAGACCATTAATCTTGAACCGGTTGAATCAGTTTCAAGAAAGGTGTTTTGATA  
TATTTGATTATGTCATGCTAGGTCATCTGCATCATCCATTTAGTATAGAAGACGACAAAATTAATATAGTGGCTCCTTATTGCAGTA  
TTCATTTTCGGAAGCGGGTCAAGCTAAAGGTATAGACGTGTAACAATTAATGATGGCATTATTAACGATGTATTTATTCCTCTTAA  
GCCACTTAGACAATTGGAATATCTCAGGCGAATATAATGATGTTATTAATGAAAAAGTTCATGTGAAAAATAAAGATAATTAATTT  
ACATTTTAACTTAAAAATATGTCTCATATTACTGATCCAATGATGAGTTTAAACAAATTTATCCTAATACTTTAGCGCTGACGAAT  
GAACTTTTAAATTAACAATGAAGAAAAATAATGCTATAGAAATAAGTGGAAGAGATGACATGTCAATTAATCGAAATGTTTTATAAACA  
TATAACTGATAAGAATTATCGGATATCCAATCTAAAGATGATAAAAAATATTTAGAAAAACGAATTGGAAGAGGAGGATTATGAAG  
TGAAACCATTACATTTAAAGTTGAATAATTTGCGCCCTTTTTTAAAAAGAAAGAAATTGATTTTTCTAAAAATTGATAATAATGAATTGTT  
TTTAATAAGTGGTAAGACTGGATCGGGTAAAAACAATGATTTTTGATGCAATGACTTATGCCTTGTTTGGTAAAGCATCAACTGAACA  
AAGAGAAGAAAATGATTTGAGAAGTCATTTGCTGATGGTAAACAGCCGATGTCAGTAACATTTGAATTTCAATTAATCATCGAA  
TTTATAAAGTGCATAGACAAGGCCCTTATATCAAGAAGGTAAATACAACAAAAACGAACGCTAAATTTGATGTATTTGAGATGGTG  
GATGGCAAGTATGAAATTAGAGAAAAGTAAAGTAATTCAGGTACCCAATTCATTATTGAATTATTAGGAGTAAATGCAGATCAATT  
CCGACAATTGTTTTATTTGGCTCAAGGTGAATTCAAACGCTTTTTAATATCAAAACAGTCGTGAAAAGCAAGGGATATTAAGAACACT  
GTTTGACAGTGAAAAATTTGAGCTATACGAGAAATATTAAGAAGAAAGTAAAAAGAAAGGCTCAATTCGAGAATAGATAT  
CAACAAATTTGAGCTTTTATGGCAAGAAATTTGAATTTGATGATGACAAATTAAGAAGGCTTATTAGAGTTGCCACTCAACAGATA  
GACAAATTGATTGAAAAATATACCCTTTTACAAGCTAGGTGCGAAAAGAAATACTAGCATCTGTAAATGAAAGTAAAGAAACTGCTAT  
TAAAGAATTTGAAATAATAGAAAAAGAAACATTAGAAAAATAATATATTAAGAAGATAATTAATCAACTCAACAAAAATAAAATT  
GATTTCTGTTCAATTGAAAGAACAACAACCTGAAATAGAGGGAATTGAAGCTAAGTTAAAGTTGTTACAAGATATTACAAACCTATT  
GAATTATATTGAAAAAGAGAAAAAATTGAACTAAAATTGCTAATAGCAAAAAAGATATTCTAAAACCAATAATAAAATATTGA  
ATCTTGATTGTGATAAGCGAAACATAGACAAAGAGAAAAAATGTTAGAGAAAAACGGAGATTTAATTGAAAGTAAATCTCTTTT  
ATTGATAAACTAGAGTATTATTTAACGATATTAATAAGTATCAACAAAGTTATCTCAATATTGAAAGCTTGAGAAGTACGAGGTTGA  
ACAATTAGGTGATGAATTAATAATCTAATTAAGGTTTGAAGAAAGTCAAGATTCATAGGTAATAACGAAAGTATTACGAGA  
AAATTAATCGAATAAATAATGCGATAACTAACATAAATGAATTAATTAATAAAGAAAAATGAAAAAGCTAAAGCTGAATTA  
GATAAACTATTAGGTAGTAAGCAAGAGTTAGAGAAATCAAAATTAATGAAGAAAACAACTATAATGAAGAATCTCGAAATAAAAATTAG  
ATCACTACGATAAATCAAAATTTGACTTAAATGATAAAGAAAGCTTTATAAGTGAATTAATCTGCTGTAAAGATTGGAGATCAA  
TGTCGGATATGTGGTAATGAAATTCAGGATTTAGGGCATCATATTGATTTTGACAGTATTGCTAAACGTCAAAATGAAATTAAGAA

ATTGAAGCAAAATATCCACGCAATAAAATCGAATATTGCTGTGCATAATTCTGAAATTAATTTGTAAATGAAAAAATATCGAATATT  
AATATTAAAAACGCAAGTGATTTTTCTACTCGAAGTATTGAATAAGCGTCTGCTAGAAAAATGAAAAATGCATTGAATAATCAAAAGAGA  
TCTTAATAAATTTATAGAACAAATGAAAGAAGAAAAAGATAATCTAACGTTGCAAAATTCATAATAAACAAATTGCGACTAAATAAAA  
ATGAATCTGAGTTGAAATTATGTGAGATCTCATCTGAATTTGAAACACTCTCGAAATATAATAATCACTAATTTTGGAGGTGG  
ATTATAAGAAGTATATTCAAGATGTGAACCAACATCAAGAACACTCAAAGGAGATTGAAGATAAGTCAATGCAATTGTCTCAAAGA  
AAGTTAATTGAGCAAAATATCTAAATCACTATGAAAAATCAACTAGAACTTACAATAATGACTTAGAATTGAATGAAAAATCTAT  
TGAAATGGAAATGTGCGAGGTGAATTTAACTGACGACAATGATATAAATGAAATAATAGCCTGGAGGGGCGAGCAAGAGGAATTA  
GAGCAGAAAAGGGATACTTATAAAAAACGTTATCATGAATTTGAAATGGAAATAGCTAGGTTAGAATCATTAACCAAGGATAAAG  
AGTTATTGGACTCTGATAAATTAAGATGAATATGAGCAAAAAAAGAAAAAGATGAATACACTGATAGATGAATACTCTGCTGTT  
CATTATCAATGTCAAAATAATATTAATAAAACACAATCTATAGTTTCGCATATTAATTACTTAAATCAAGAAATTAAGGATCAACAA  
GAAATTTTTCAATTGGCTGAAATTGTCAAGTGGTAAGAATAACAAAAATCTTACATTGGAAAACCTTTGTCTTAATTTACTATTTAGATC  
AAATTATTGCCAAGCAAATCTGAGATTAGCAACAATGTCAGATAATCGATACCAACTAATTAGGCGAGAAGCGGTTTCTCATGGT  
CTTAGTGGCCTAGAAATTGATGTATTTGATTTGCATTCAAATAAGTCTAGACATATTAGCTCGTTATCAGGTGGAGAACTTTCCAA  
TCGTCGCTTGCAATTAGCTTTAGGGTTAAGCGAAATTGTACAGCAGCAATCAGGAGGTATTTACTAGAAATCAATATTTATTGATGAA  
GGATTCCGGTACATTAGATCAAGAAACGCTTGAAACAGCGTTAGACACTTTATTAATCTTAAATCAACTGGTAGAATGGTTGGGATT  
ATTTACATGTGAGCGAATTGAAAAATAGAATACCTTTAGTTTGAAGTGAAATCAGATCAATATCAGAGTTCAACAAGATTCAA  
AAGAAATTAATAAATAAAAAATAGAGATGGTACTTTGGAATGTATAGAACAACCTTAGCCCATCTCTTTTATTTAAAAATTTATTTT  
TTCTACGTAATAAATCTCTGATTTCAAGTAAATAACACAACATTTTCTCCAACTGCTTCTTCTCGGCTTCTTCTTCTCATTAA  
TGTATTTGCAATCTTAACAAAGATGAATAAAGCAAAACGCGATGATAATAAAGTCGATAACAGATTGGATAAAATAAACCGTATTTAA  
TACCCAGAAATGACCATCTTTAGCAAAATCAACTGATCCGAAAATTTTACCAATTAATGGCATGATGATATTTCTACTAATGAAG  
ATATAATCTTGTGAAAGCTGCACCCATCACAACAGCAATTGCTAAATCTAAGACGTTACCTTTAAGGCGAACTCTTTGAATCTTT  
TAACATTACACTCAACCTCTCTTTTAAATGTAACCTCAATTATACAACAAATAAAAAAATTAGAAAATAGATTATTCAAGAAAAT  
TTGATTATCGCAAAAGACCTTTGTTATCCTATAAAGGTGCGTGAGTTATTGAATAAAATGTTTAGATAATCTTTTATTCTACTACATA  
AAATTAATATAGAATTGAAGGGAGTAATTAATTATGAATCTTCTTACCAGAGAATCCAAATGGAAAAGAGTATTACCAGTCTT  
CATCTATAGTGCAATTGTTGTTGCTATAGTCGTATTACTTGGTGCATTTTACCTGAACAATTCAACTATGTTACCAATAATATTTAA  
ATGTGGATTACAGAAAAGTTAGGTTGGTATTATCTTACTACTACGATTATCGTGTCTTCTGTATATCTTATTTTATGCTCTAT  
TGGAAAACGTGAATGAGTAAACCAAAATGACAAAACCTGAGTTTAAATACAATTTTCATGGTTTGCTATGTTGTTTAGTGCTGGTATGGG  
GATAGGTTTGGTGTTTATGGTGCAGCTGAACCGATGGCGCACTTTGCTACGCCACCTACAGCAGATCCCAAACTACTGAAGCTTA  
TACTGAAGCTCTACGTTCAACATTTTCCATTGGGGATTCCATGCTTGGGCTGTTTATGGTGTGTTGCGTTAGCGTTGGCATATTTCG  
CAATTCGGTAAAGGTGAACAGGTTTATTATCTAGAACTTTACGTCCTCTTTTAGGTGATAAAGTAGAAGTCCATTGGGATTTTTA  
TTGACGTTTTATCTGTATTGCGACAATCGTTGGGGTAGCCGTTTCGTTAGGTATGGGTGCTCTACAAATTAATGGTGGTTTACATTA  
CTTGTTCATGTTCAAATAATACGTTTGTACAAGCGATTATCATCATTGTTGTTACTATCTTATTTATAGCAAGTGCATGGTCTGGA  
TTAAGTAAAGGTATTCAATACTTAAGTAACTTGAACATTGGTTTAGGTACTATTTTAAATGGTAGCTGCTTAAATGTTGGACCACTG  
TTCTTATTTAAATATGTTAACTAGCTTACGGGTAGTTTACTAAACACATCTTGTGTTAAATAGTTTGTATACAGCAGCTTTAAATCCT  
CAAAAACGTGAATGGATGCTCTCATGGACCTTTATTACTGGGGTGGTGTGTTAAGTTGGAGCCCATCGTTGGAGTGTTTATGCA  
CGAGTTTCAAAGGACGTTCAATTAGAGAGTTTCTTCTGGTGTCTTGTAGTTCCAGCAATTGTTAGTTTGTGTTGGTTTAGTGTCT  
TTGGTGTATTAGGCATCGAGACAGGTAAGAAACACAAAGAAATTTTGATATGACTCTGAAACACAGCTATTTGGAGTGTTTAAATC  
ATGTGCCATTTGGCATTGTTTTATCGTTGATTGCATTATTATTAATTGCATCATTCTTTATTACATCTGCTGACTCAGCAACATTTGTA  
TTAGGAATGCAACAACATTGGTTCATTAATCCATCTAGTATGGTAAAAGTTGTTTGGGGAATTTACAGGCCCTTAATAGCATT  
GTACTTTTATTAGCTGGTGGCGGTAACGGCGCTGAAGCTTTAAATGCGATTCAAAGTGCTGCAATTATAAGTGCATTCCCATTCTCCT  
TTGTCGTCATACTCATGATGGTAAGTTTCTACAAGGATGCGAACCAGGAACGTAATTCCTAGGTTTAAACATTGACTCCGAATAAAC  
ATCGCTTACAAGAATATATCAAGAGTCAACAAGAAGATTATGAATCTGACATTCTTGAAGAGCGTCAGTCACGTAGAAATATAGAG  
AAAAAGATAACTAATAAAATTAGTTAAGTATTTAAATGAATAACAAAGTAGTATGTCATTCTAGTAGTAACAGATATTTACTAGTT  
TGTTTTTGTGGAATAATTGAGTATATTCAAAAGGATAAAGAACGAGAATTCGTTATTAACTACGAATTCTCGATTTTTTTATATTT  
AAGATAGGTTTATTCTGACAACCTAATAGAAAGGGGTTTGACAAAGCTAAAGTGAAGTACGACGGTATAAAAAATTAACATACT  
TTTATAGAAAATTAACCTCAGACTGGGACATAAATCAATATTCTATGCTCTACGAAGTTATATTGGCAGTAGTTGACTGAACGAAAAAT

>032-contig\_259\_RC

AATTGGATTCCCAATTTCTACAGACAAATGCAAGTTGGGGTGGGACGACGAAATAAATTTTGCAGAAAATATCATTTCTGTCCCACTCC  
CATCAAAAGAATGACATTGAAAAGAAATATTAAGTTTGGTGCCATAATTTTCTTCTGCTCAATGAAATAATACGTTTAAAAAATTG  
AATTGAATCATTCGCGAAATTGATAATTATTCTCAATTAATAAAAAATACTTATTACACCTTACCTGTATGATAAGTTTGTCTATAT  
ACTCTGATTAATAAAGTCAAAAACCTAAATTAAGCGTTTTCTAAGCATGATGAGTTGTTTATCAATAAATATAATAATACAATTTAATC  
AAGGCATATAAATATAAAAAATGATCAAGGGGGATCATTAAATGGCTGCAAAATTTTAAAGAGCAATCAAAAAACATTTTGACTTG  
AATGGCCAAAGTTATACTTACTATGATTTAAAGCTGTAGAAGAGCAAGGTATTACTAAAGTTTCCAATTTACCTTATTCAATTCGT  
GTTTTGTGTAATCTTTACTTCTGTAAGAAGATGATTTTGTAAATTACAGACGATCATATTAAGCTTTAAGTCAGTTTGGAAAAGAT  
GGAAATGAAGGCGAGGTACCATTTAAACCTTCTCGTGTTATTTTACAAGATTTACAGGTGTACCAGCCGTAGTTGATTTAGCTTCTT  
TACGTAAGCAATGGATGACGTTGGGGGAGATATTACTAAAATTAATCCAGAAGTACCGGTGGATTTAGTTATTGACCACTCAGTTC  
AAGTGGATAGCTATGCAAAATCCAGAAGCTCTTGAACGTAATATGAAATTAGAATTGAACGTAACCTATGAACTTATCAGTTTAA  
ATTGGGCAACGAAAGCATTGATAATTACATGCAGTTCTCTGCAACTGGAATAGTTCACCAAGTTAAGTTAGAAATTTTAGCAA  
GTGTTGTACATGTTCTGTATGTAGATGGTGAAAAAAGTGCATTTCCGGATACATTAGTTGGTACTGATTCACATACAACAATGATAA  
ATGGTATTGGCGTACTAGGATGGGGTGTGGTGGTATTGAAGCTGAAGCTGGAATGCTTGGACAACCTTCTTATTCCCAATTCAG  
AGGTTATTGGTGTACGACTAGTAAATTCATTACCACAAGGCGCAACAGCAACTGATTTAGCGTTAAGAGTAACTCAAGAGCTACGT  
AAAAAAGGTGTTGTTGGTAAATTTGTAGAGTTCTTTGGTCCAGGTGTACAACATTTACCACTAGCAGACCGTGCTACAATTGCAAC  
ATGGCACCAGAGTATGGAGCAACTTGGCGATTCTTCCAGTTGATGATGAATCTCTTAAATATATGAAGTTAACTGGTAGATCAGAC  
GAACATATCGCGCTAGTAAAAAGAATATTTGAAACAAAACCATATGTTCTTTGATGTTGAGAAAGAAGATCCTAATTATACAGATGTT  
ATCGAATTGGATTTATCAACAGTTGAAGCATCGCTTTTCAGGACCAAAACGCTCTCAAGATTTAATTTCTTAAGTGATATGAAATCA  
TCATTTGAAAATTTCTGTAACAGCTCCAGCAGGCAACCAAGGACACGGTTTAGATAAAAAGTGAATTTGATAACGAAGGCTGAAATTA  
CTTTAAAGATGGATCAAAAGCTACAATGAAAACAGGTGATATTGCAATAGCAGCAATTACATCATGTACAAAATACATCTAACCCCTT  
ATGTAATGTTAGGTGCAGGTTTAGTTGCTAAAAAAGCAGTTGAAAAAGGCTTGAAAGTTCCTGAATACGTTAAAACCTCTCTAGCAC  
CAGGATCAAAAGTTGTTACCGGATATTTAAGAGATGCTGGCTTACAACCTTATTTAGATGATTTAGGCTTCAACTTGGTTGGTTATG

GATGTACAACCTTGTATCGGTAATTCAGGTCCTTTATTACCAGAAATTGAAAAAGCGATTGCTGATGAGGACCTATTAGTGACATCTG  
TATTATCTGGTAACCGTAACCTTTGAAGGTCGTATCCATCCTCTTGTTAAAGCCAATTACCTAGCTTACCACAGTTAGTTGTTGCTTA  
TGCATTAGCTGGAACGGTTGATATTGATTTACAGAATGAACCTATTGGTAAAGGTAATGACGGTGAAGATGTATATTGAAAGATAT  
TTGGCCATCAATTTAAAGAAGTTTCAGATACCGTTGATAGTGTGTAACACCTGAATTATTTATTGAAGAATATAATAACGTATACAA  
TAACAACGAATTATGGAATGAGATTGATGTAACCTGATCAACCTCTATATGACTTTGATCCTAATTCAACATACATTCAAAATCCATC  
ATTCTTCCAAGGATTATCTAAAGAACCGGTACGATTGTCCATTAATGGTTTACGTGTTATGGGTAAATTCGGTGATTCTGTGAC  
AACTGACCACATCTCTCCAGCAGGTGCAATTGGTAAAGATACGCCAGCTGGTAAATATTTACAAGATCATCAAGTGCCTATTTCGTGA  
ATTTAATTCATATGGTTCAAGACGTGGTAATCACGAAGTAATGGTTCGAGGTACGTTTGCTAATATACGTATTAACCACTTATTAGC  
GCCAGGTACTGAAGGTGGTTTTACAACCTATTGGCCAACAAATGAAGTAATGCCTATCTTTGATGCTGCAATGAAATATAAAGAAG  
ATGGTACAGGTTTAGTTGATTAGCTGGTAACGATTATGGTATGGGTTTCATCTCGTACTGGGCAGCAAAAGGTACAACTTATTAG  
GTGTTAAAAACAGTTATTGCACAAAGTTATGAACGTATCCATCGTTCAAATTTAGTTATGATGGGTGATTACCATTAGAGTTAAAA  
AAGGTGAATCAGCTGATTCTCTGGTCTAGATGGTACAGAAGAAATTTCTGTTAATATTGATGAAAATGTTCAACCACATGACTACG  
TCAAAGTTACTGCTAAGAAGCAAGATGGTGATTGGTAGAATTTGACGCTATGGTTCGTTTGGACTCACTTGTGAAATGGATTACT  
ATCGTCACGGTGGAAATTTACAAATGGTTTAAAGAAATAAATTAGCGCAATAAAAAATAGATATCACAGTAAAAATTTAATCGGTAT  
TTGAGGCACTTTGATAGTGCTCAAAAAATCTTCTATAAACTTTATGATATAATAGGTCGGTTCAAAACCTTTGTGTTCTTGGCCGGCC  
TCTTCTGTATTTTATGTTAGAATGAGATATAAAGTTAACTGAAAGAAGGCTTAAAAATGATATATAGTATTACAGAAATAGAAGCG  
CGTTATGCTGAACTGATAAGATGGGTGTAATTTATCACGGGAATTAATGCAACTTGGTTTGAAGTTGCGCGGTTGGATTATATATCG  
AAGTTAGGTTTTAGTTATGCTGATATGAAAAACAGGAATCATTTACCTGTGACTGACCTCAATGTCATTATAAAAAAGCTTATT  
TTTTATCCGAAAAAGTTAAAGTTAAAACTTGGGTTGAAAAATATTCGAGATTACGTTACAGTGTATAAATATGAGATTTTTAATGAA  
AAAGGTGAACCTGCAACTACAGGTTCCACAGAATTGATTTGCATTAAAGAAGATACTTTAAGCCTATACGGTTGGATCGTTATTTT  
CCAGATTGGCATGAAGCTTATAGTAAAGTGCAACCGCTCAATAATGAAGGGAAAAACAGTAGAGATAATGGATGATATTGATTCTTT  
ATAAGTTACTGTAAATGTTTGGAGAGGCAATATTAACAATTAATCTATAAAAAATAGCCAATACGTTAACATTAATGTAATTAGCGT  
GAAGATAAGCTAATATATAGCAAAAAACGAACCTGTTTCATACAACATCAGATGTGCTAAACCAAAAGTACAACCTCCGAGGTTCAAGGA  
CACATCAGAATGTGTAACAAGTTCGTTTTATTTAGTTATTTTGTGGAATAAGAAATTTTCATCTTCGTGATCAACTACATTTACAAT  
AATGTGGTCATCTTCAAAGTACCACAAATCTTTTTCCGCTACGACAACATTTAAATCGTCATATTGTTGTTTCATAGCCAATATCAACA  
TCTTCTTTGGTTCAACTGTAAAAGCAGGACTAAATCCTTGCTTGAGTTGGAATTCGCCACCATATCTTACAAAAAACACGAGCACT  
TTATTATTTTCAGGCAACTCAAGTTCATTTTTAAACCAAGTTACTGCTGCATCAGTAAGTTCTATTGTCATAACAATGACCTCTTATA  
TTTATTACAGAATGGGAGTGGGCCAATTTGTATTATTTGTGGAATTTCTTATCGAAATTTCTGTGTTGGAGGCCACCCCAACCTGTCT  
CATTATTGTAAGCTGAATTTCCATAAGCTTCTATGTTGGGACCCCGACCAGAATTGAAAAAACCTAGTTATAAGCACATTTTGTTC  
GGTAACTACAGCTAATATAACATTGTGGAGCCTATGACATTGATTTATGTCTCGGTCTCAAATGTTCTTGTAAAAAACTAAGTAT  
AGTTGAATTTTAAAGTTAAAAAAATGTTTTGCAAAAAATAAAATAATCCATCAACTGCAAAAAATATGCAATGATGGACTAATGTCT  
AAAAAATTTGTATCCATTTTATTTTAGGTTCTTCGCCTCTAAAAATCCTTGCGATATTAGAGCGATGTCTAATTATCAATATGATT  
GAACTAAGAACTAACGACTAATAAAATATAGTCTTGAATGATAAGCGAGCCAATCACACAGCAAAATGCTGCAACGATACTTGC  
TAAAGAACATATTTAAAAATCTTCAATACAATAAAGAAGATAATTGCAAGTATTAGTAAAAAGTATCGGATTGACTCCCAAGACGA  
CACCTGCATAGTTGCAACAGCTTTGCCACCTTGGAAATTTAAATAAACAGGATAAACAGTGTGCTCAAGTATAGCGAATAAGCCAACA  
ATTAACCATTTGTAAAAAAGTACTAATAGGGCCATCTGCGTGAACCTGGTAACCATAAAGGGAAGAAAAACAGTTATGAACCTTT  
GAAAATATCTAGAAATGTTACCAAGAATCCTGCAGGACGACCTAATACTCTAAAGCTATTAGTAGCGCCAGTATTACCACTACCAA  
ATTGTCTAATATCTTTTTTGA AAAAATAATTTTCCAATTACGAATCCACTTGGGAAAAGCGCCGATAAGATAACTTAGTAGTAACATGA  
CGATTATCATCATAAATATTACACATCCTTTAATATCTTAGGACTATTTTATCATATTCTGTTAAATTACGGCTAAAAATTTAAAAA  
CGGGGATTAATATATGGAATTAAGCTATGAAAGTTAATTGATACTTGCATTTTACGCTGATTTATATAAGAATAACTATTGTATAGT  
TTTAAAAACGAACGTACGTTTGCAGGAGGCGAAATCATTGGCAATGAATAAACAAAAATAATTATTTCAGATGATTCAATACAGGTTT  
TAGAGGGGTTAGAAGCAGTTCTGTAAGACCTGGTATGTAATTGGATCAACTGATAAACGGGGATTACATCATCTAGTATATGAA  
ATTGTCGATAACTCCGTCGATGAAGTATTGAATGGTACGGTAACGAAATAGATGTAACAATTAATAAGATGGTAGATTCTTCTATA  
GAAGATAATGGACGTGGTATGCCAACAGGTATACATAAAATCAGGTAACCGGACAGTCAAGTTATCTTTACTGTTTTACATGCAGG  
AGGTAATTTGGACAAGGCGGTCTATAAACTTCAGGTGGTCTTCACGGTGTGGTGCTTCAGTTGTAAATGCATTGAGTGAATGGCT  
TGAAGTTGAAATCCATCGAGATGGTAATATATATCATCAAAGTTTAAAAACGGTGGTTCGCCATCTTCTGGTTTAGTGA AAAAAGG  
TAAACTAAGAAAACAGGTACCAAAGTAACATTTAAACCTGATGACACAATTTTTAAAGCATCTACATCATTTAATTTTGATGTTTT  
AAGCGAACGACTACAAGAGTCTGCGTTCTTATTGAAAAATTTAAAAATAACGCTTAATGATTTACGCAGTGGTAAAGAGCGTCAAG  
AGCATTACCATTATGAAGAAGGAATCAAAGAGTTTGTTAGTTATGTCAATGAAGGAAAAAGAGTTTTCATGACGTGGCTACATTTT  
CAGGTGAAGCAATGGTATAGAGGTAGACGTAGCTTTCCAATATAATGATCAATATTCAGAAAGTATTTTAAAGTTTTGTAAATAATG  
TACGTATAAAGATGGTGGTACACATGAAGTTGGTTTTAAACAGCAATGACACGTGATTTTAAAGTATTATGCACTGCGTGAATAATG  
AACTTAAAAACAAAAGTAAAACTTAGATGGTAATGATATTCTGTAAGGTTTAACAGCTGTTGTGTCTGTACGTATTCCGAAGAAGAA  
TTATTACAATTTGAAGGACAAACGAAATCTAAATTTGGGTACTTCTGAAGCTAGAAGTGCTGTTGATTTCAGTTGTTGCAGACAAATTG  
CCATTCTATTTAGAAGAAAAAGGACAATTGTCTAAATCACTTGTGAAAAAAGCGATTAAAGCACAACAAGCAAGGGAAGCTGCAC  
GTAAAGCTCGTGAAGATGCTCGTTCAGGTAAAGAAAAACAAGCGTAAAGACACTTTGCTATCTGGTAAATTAACACCTGCACAAAGT  
AAAAACACTGAAAAAAATGAATTTGATTTAGTCGAAGGTGATTCTGCGGGAGGTTACGCAAACTTGGACGAGACCGCAAAATCCA  
AGCGATATTACCATTACGTGGTAAGGTAATTAATACAGAGAAAGCACGTCTAGAAGATATTTTTAAAAATGAAGAAATTAATACAA  
TTATCCACACAATCGGGGAGGCGTTGGTACTGACTTTAAAAATTGAAGATAGTAATTATAATCGTGTAATTATTATGACTGATGCTG  
ATACTGATGGTGCGCATATTTCAAGTGCTATTGTTAACATTCTTCTTCAATATATGAAACCGCTTGTGTTCAAGCAGGTCGTGATTTAT  
TGCTTTACCTCCACTTTATTAATTTGAAAAAGGTAAGGCAAAACAAAGCGATTGAATACGCTTGGACGAGCAAGAGCTTAATAA  
AATTACAAAAAGAACTTGGTAAAGGCTTCACGTTACAACGTTACAAAGGTTTTGGGTGAGATGAACCTGAACAATTATGGGAAACG  
ACGATGAACCCAGAAACACGAACCTTAATTCGTGTACAAGTTGAAGATGAAGTGCGTTTCATCTAAACGTGTAACAACATTAATGGG  
TGACAAAGTACAACCTAGACGTGAATGGATTGAAAAGCATGTTGAGTTTGGTATGCAAGAGGACCAAAAGTATTTAGATAATTCTG  
AAGTACAAGTGCTTGA AAAATGATCAATTTGATGAGGAGGAAATCTAGTGAGTGAAATAATTCAAGATTTATCACTTGAAGATGTTTT  
AGGTGATCGCTTTGGAAGATATAGTAAATATATTATCAAGAGCGTGCAATTGCCAGATGTTTCGTGATGGTTTTAAACAGTACAACG  
TCGTATTTTATATGCAATGTATTCAAGTGGAATACACACGATAAAAAATTTCCGTA AAAAGTGCGAAAAACAGTCGGTGATGTTATTGG  
TCAATATCATCCACATGGAGACTACTCAGTGACGAAGCAATGGTCCGTTTAAAGTCAAGACTGGAAGTTACGACATGCTTAAATAGA  
AATGATCGGTAATAATGGTAGTATCGATAATGATCCGCGCAATGCGTTTACACTGAAGCTAAGTTAAGCTTACTAGCTAAGCTGAAG  
AGTTATTACGTGATTAATAAAGAGACAGTTTCTTTCATTCCAAAATATGATGATACGACACTCGAACCAATGGTATTGCCATCAA  
GATTTCTCACTTACTAGTGAATGGTTCTACAGGTATATCTGCAGGTTACGCGACAGATATACCACCACATAATTTAGCTGAAGTGA  
TTCAAGCAACACTTAAATATATTGATAATCCGGATATTACAGTCAATCAATTAATGAAATATATTAAGGTCCTGATTTTCCAACCTG

GTGGTATTATTCAAGGTATTGATGGTATTAATAAAGCTTATGAATCAGGTAAAGGTAGAATTATAGTTCGTTCTAAAGTTGAAGAAG  
AAACTTTACGCAATGGACGTAAACAGTTAATTATTACTGAAATTCATATGAAGTGAACAAAAGTAGCTTAGTAAAACGTATCGAT  
GAATTACGTGCTGACAAAAAAGTCGATGGTATCGTTGAAGTACGTGATGAAACTGATAGAACTGGTTTACGAATAGCAATTGAATT  
GAAAAAAGATGTGAACAGTGAATCAATCAAAAATTATCTTTATAAAAACTCTGATTTACAGATTTTCATATAATTTCAACATGGTCGC  
TATTAGTGATGGTCGTCCAAAATTGATGGGTATTCTGTCAAATTATAGATAGTTATTTGAATCACCAAATTGAGGTTGTTGCAAAATAG  
AACGAAGTTTGAATTAGATAATGCAGAAAAACGTATGCATATCGTTGAAGGTTTGATTAAAGCGTTGTCAATTTTAGATAAAGTAAT  
CGAATTGATTTCGTAGCTCTAAAAACAAGCGTGACGCTAAAGAAAACCTTATCGAAGTATACGAGTTTCACAGAAGAACAGGCTGAAG  
CAATTGTAATGTTACAGTTATATCGTTTAAACAAACACTGATATAGTTGCGCTTGAAGGTGAACATAAAGAAGTTGAAGCATTATCA  
AACAATTACGTCATATTCTTGATAACCATGATGCATTATTGAATGTCATAAAGAAGAATTGAATGAAATTTAAAAAGAAATTCAAA  
TCTGAACGACTGCTTTAATTGAAGCAGAAATTGAAGAAATTAAAAATTGACAAAAGATTATGGTGCCTAGTGAAGAAGTTATTTT  
AAGTATGACACGTCATGGATATATTAACGCTACTTCTATTCTGAGCTTAAATGCTAGCGGTGTTGAAGATATTGGTTTAAAAAGATGG  
TGACAGTTTACTTAAACATCAAGAAGTAAATACGCAAGATACCGTACTAGTATTTACAAATAAAGGTGCTTATCTATTTTATACCGGT  
TCATAAATTAGCAGATATTGCTTGGAAAGAATTGGGACAACATGTATCACAAATAGTTTCTATCGAAGAAGATGAAGTGGTTATTA  
ATGCTCTTAAATGAAAAGGACTTTAATACAGATGCATTTTATGTTTTGCGACTCAAATGGCATGATTAAGAAAAGTACAGTGCCTC  
TATTTAAACAACGCGTTTAAATAAACCTTTAATTGCTACTAAAGTTAAAGAAAATGATGATTTGATTAGTGTTATGCGCTTTGAAA  
AAGATCAATTAATTACCGTCATTACTAATAAAGGTATGTCATTAACGTATAATACAAGTGAACATACAGATACCGGATTAAGGGCA  
GCTGGTGTTAAATCAATAAATCTTAAAGCTGAAGATTTCTGTTGTTATGACAAAAGGTGTTTCTGAAAATGATACTATATTGATGGCC  
ACACAACGCGGCTCGTTAAACGCTATTAGTTTAAATCTTCAAGTTGCTAAAGAGCACAACGTTGGAATAACTTTATTAAGAAGA  
ATTAAAGAAAAATCCACATCGTATTGTAGCTGCACATGTAGTGACAGGTGACACATAGTCAATATACATTATATTTCAAAATCAAATG  
AAGAACATGGTTTAAATTAATGATATTCATAAATCTGAACAATATACAAATGGCTCATTTCATTGTAGATACAGATGATTTTGGTGAAG  
TAATAGACATGTATATTAGCTAAAACTATATGCAATCACGAAATTAATGATAAAAAACAGTAATGTTAAATTTTGACTAAATTC  
AGGGATTATATTAATGCTGACCAAGTACTTATCGTTAAATTAGCGATATACTTTGACCAAATAATATAAATCTCTTGATTGTAT  
AAGAAATGATGATGTATCTATATTACTGAAGTTTCAATTCGGTCTAATTTTATAGAAGGTACATGATTCATGTAGAGGATGCGA  
GGGGTTTATTTTGAAGATTTTCGATAGTTTAAATTCCTGGATGGTTTAAAGAATTTGTCATGTTGGTACCGATTAAATATGGTCTCAA  
TATTTAATTGGTCTATTATTGACAGCTGGATTCTTCTTACAATTAGTTTCTAAATTCGTCCTCAATTACGAATGTTACCTGAAATGTTTAG  
AGCTTTAGTAGAAGTCCAGAACTTTAGAAGATGGTAAGAAGGTTATTCGCCATTCCAAGCATTTGCGATTAGTGCTGGTTCGAG  
AGTTGGTACTGGTAATATTGCTGGTGTGCGACTGCCGATTGTTTTAGGCGGTCCAGGTGCAGTGTTTTGGATGTGGGTTATTGCAATTT  
ATAGGTGCAGCGAGTGCATTTATAGAAGCGACTTTGGCTCAGGTTTATAAAGTACATGATAAAGATGGTGGATTCCGTGGTGGTCC  
AGCTTACTATATTACTAAAGGTTTAAATCAAAAAATGGCTAGGTATCGTATTGTGCGATTTTAAATTACAATTACATTTGCATTTGTATTT  
AACACAGTGCAATCTAATACAATTGCGGAGTCGTTAAATACGCAATATAATATTAGTCCAGTAATCACAGGTATTATTTAGCAATC  
GTAACAGCTATTATTATATTGGTGGTGTACGTAGTATTGCTACGTTATCTTCGTTAATTGTACCGATTATGGCTATCATTACATTG  
GTATGGTTTTAGTAATATTGCTATTTAATTAGATCAAATTTGTTCTATGATAGGTACGATTATTAAGAGTGCATTTGGTATCGAACA  
AGTAACTGGTGGCGCTGTAGGTGCTGCGGTTCTTCAAGGTATCAAACGTGGTTTATTCTTAACGAAGCTGGTATGGGTTCTGCGCC  
GAATGCAGCGGCAACTGCTGCCGTACCACACCTGTTAAGCAAGGTTTAAATCCAATCATTAGGTGTGTTCTTTGATACAATGTGGT  
TTGTACAGCAACTGCAATCATTGATTTTACTATATTTCAGGACTGAAATTTGGTGATAACGCACTCAAGGTGTTGCAAGTTACTCAATC  
AGCACTTAATGAGCATTTAGGTTCTGCTGGAGGTATTTCTTAAACAATAGCAGTTACACTGTTTGCATTTTCATCTGTGGTAGGTAAT  
TACTATTACGGTCAATCTAATATTGAATTTTTATCAACAAACCGTGAATATTATTATCTTTAGATGCTTGTGTAGTACTTGTCTT  
TGTCGGTGCAGTTGTAACAAACAGTAATGGAATACGGCAGACTTATTTATGGGCTTAATGGCAATTGTAACATTATTTCCAT  
TATAGGACTGTCCAATGTAGCTTTTGCATTGATGAAAGATTATCAAAAGCAGAAAAAAGAAGGCAAGAACCCTGTCTTTAAACCTG  
AAAACCTAGAAATTAACCTATTTGGAATTAGTGCTTGGGCGCTAACAATATAAGAACTCTGATAAATAAATATTTTAAATGTAAC  
GATTCATTATATAAAAAATCAATAAACCCTGAGGTTTTCAAATTAAGCGAAAAATCTCAGGGTTTTAAATTTGACTCAATAATCAT  
CTGTATCATTACACTAGTTAATCTAAGATTTGATTATATTAATATAGTAAGGTTGAGATTTATTTCTCCATTGGTGTGCAAAAGAC  
TATACCATGATAAGACATATTGTTGGATAGATGAATATAAATTTATTTAGCTTTGACACAATTTAGTACGTTTGTAGTTGTATT  
GAGTATTAATTCAGATAATATATAAATAAGAAATTATTGTAAATATGGGAGTCAGATTTTTTTATTATAGTTATTCCACTTTGAG  
AGGCATCGAAATTAATTAAGATATATCATATAGGATAGGCGTGAATAGAACACAAGTATTTAAATTATTATCTTTCAAGTTAGA  
CATTTCCGATATATAATCTTAATAATAGAAAAATAGGTGATGATAATGGGAGAATATATTGTTACTAAAACATTGAACAACAATGTC  
GTAGTATGTACTAATAATGATCAAGAAGTTATTTTAAATCGGTAAAGGTATTGGTTTTAACAAAAAGAGGGAATGGCGTTAAACGA  
CCAAACTATTACAATAGAGAAAAATTTATAAATTAGAGAGTGAGCAACAAAAAGCACATTATAAAAGTTTAGTTGAAATCGCTGATG  
ATAATGTATTACAAGTAATATTGATTCTGTTGAATTTTATTTCTAATACTGCGATGAATGTTGATTCAAAACAACCTGTAGTTTCATT  
AACGGATCATATTATATTGCTTATAAACGCTTAAACAAAAATCAAGTTATTAGCAATCCATTGTTTATGGAACTATGCAGTTATA  
TAGTGATGCATATCATATTGCTAAACAGGTGATTGATCAGTTAAATGCGACGATTAGATGTACATTTTCTGAAAGATGAGATAGGATT  
TATTGCATTACATATTGCATCTAATACAGAAGATTATCTATGCATGAGATGACCTTGATCAATAATGTAATAAAAAAGGTATAGA  
TATCATTGAATCAGACCTTGTGACAACCTGTTGATAAGGAATCATTACAATACCAACGTTTTATAAGGCACGTACAATTTTAAATTCG  
CCGATTAAGAAGAAAAAGAATATATACATGCACAAGATGATTTTGTGTCTATGATTAATAAATCCTATCCGATTGCTATAACACAGC  
ATATAAAATTTTAACTATGATACAAAAACAATTTGATGTTAATATCAGTGAGTCTGAAATTATATTTAACATTACACATTCATCAT  
TTTGAAGAAAGGATTAATCAATCCTAAATTAAGTGTATTACACGGGCGTTTCGTTACTGTAAAGGGTATTTGTATGGTATCATTGAT  
GTTAGTAATTTTACATAAGTGGACTGTTTTTATACAACATCTTATGAATATTTTAAAGTGGTGGTGAATCTATAATTGAATGAAAAATGA  
AAAGAATATAAGAAAGAATTTTTTAAATTTACCGAATCACGGTATATGAAGTTTGTGGTGGGAATGATTTAGTCTTCTCATTAAAT  
AGCGCTAGTATTGTTGGGTATTGTTATTTTATTTTCGAAAAAGTATCATATGTTTTGATCCTTTTATCATCGCTTTTAAAGACGATAG  
ACGCCACTATCATCTGCTCTTTAATTTCTATTCTATCTATAATCCCAATCGTAATAATATGATGGAACGTTATAGAAATACCAAGAGTTGC  
AGGTATTTCTATTATTTATCTAGCTGTAGTAGGTGTTATTACGTTAATTGTTAATTTATTGATACCTATTATTGGTTCGCAAGTAGATA  
GTTTAGTTAAAAATTCACCGCAATATCTAGAAAAATTAATTAATTTCTATTGATAAAATAGCAAATAATACGTTTTTCTCTTCGTATTA  
TAGTCAAATTAATGATTGGTTAAATTTCTTACCTAAGAAAAATACCATCTATGTTAAGTGAATTTACAGATGGCTTTGGGTCTAAATTT  
GCAACGTTTGCAGAAACGATTGCTAATATTGGCGTTGTGATTGTCACAACACCATTGTACTATTCTTTATGCTTAAAGATGGACATC  
ACTTCAAAAGAAATTTCAACGAATATTATGCCACCGAAATTCGAAAAAGATTTTCATGATCTACTTGAAAAAATGAGTGTTCAAGTTG  
GTTTCATACATTCAAGGACAAATTCGTTTCATTCTGTATCGGTATACGTTGTTTATCGGTTATTCGGTTATCGGGTTGAAATATAG  
CTTAGTATTAGTATGATTGCGGCAGTTACAAGTTGTGATACCATTATTAGGCTCTACTATAGCAGTTTCTCCAGCTATTGTAATAGCT  
GCTATAACATCGCGGTGATGCTCTTAAATTAAGCATAGTAGTATGAGCAATTTAGTACAATTTGTTGAAGGCGACTTCATTTCACCAAT  
ATCATGGGTAAAACACTTAAGATTCTCACTTACAATCATTTTCTATTTTACTGTGTGCAGGCAATTTGCTTGGTATTGTAGCGGTTA  
TTTTAGGTATTCGGGATATGCTATTTTAAAGTATTAGTTACTCATTTATTCCAATTTATTTAAACGTCGATACAATCGTTTCTATGGT  
AATGATGATAGGTGAATATGATATTAAGAAAGTAATAAAATAGTTGAATAAGTAATAAAAAATACCAATGACTATATGTTTGTGG

TATTTTTTATGGTGCTTATAATGTTGGGCAGTTACATTTATGATTATCAGCACATGTTTAGCTTATAAAATTTTACGAAAGTTTAGCC  
GTTTATAAAGCACATGCGATAATGAAACGAGTATTTGCCACTTGATTAGTACTTCATTATTATGTCGAAAAATAAAAAACAAGTGGTATT  
TTTAATATATTAAGAAGCACTCATAATCGGCTGTTAATTAATAATATTTTTCATAAGTATTGATTCATCATTTTCTTTATGTTAAATAT  
GAATCAGTATAGATAACCATATTGTTCTGTTTGAGATAGAAAATTTTCTATTTACTTCTTAATACAGATATCAATATGACAAAAGTG  
TTATATAAATCAAAGGTAAATGATATGCTATTTTATGTTTATATGATATATTTTGATTATAACAGAAAATAATTAGAATTGATGTG  
AAAAAATGAATCAGGAAGTTAAAAACAAAATATTTTCAATCTTAAAAAATTACGTTTGCTACAGCTTTATTTATTTTTGTAGTAATCA  
CATTTGATCGGGAGTTATCTGGTATTAACTTTAAAGATACGTTGGTTGAATTTAGTAAGATTAACCGTATGTCCTTAGTTTTACTATT  
TATTGGTGGTGGGGCATCGCTTGTTATTCTATCAATGTATGATGTGATTTTATCTAGAGCTTTAAAAATGGATATATCCTTAGGCAAA  
GTTTTAAGAGTAAGTTATATCATCAATGCATTGAATGCGATTGTAGGTTTCGGTGGCTTTATTGGTGCAGGCGTTAGAGCTATGGTTT  
ATAAAACTATACGCATGATAAAAAAGAAATTAGTTCACTTTATATCCTTAATACTTATTCAATGTTGACAGGTTTAAAGCTTATTATC  
ATTGTTAATTGTATTCCATGTTTTTCGATGCATCTTTAATTTTAGATAAGATTACATGGGTAAGATGGGTATTATATGTAGTGCATTTT  
TCTTACCATTATTCATTATTTATTCAATGGTTAGACCACCTGATAAAAAACAATCGTTTTGTAGGATTGTACTGCACTTTAGTGTCTGTG  
TGTTGAATGGTTAGCAGCTGCAGTTGTATTATATTTCTGTGGTGAATTTGTTGACGCTCATGTATCATTATGTCCTTTATTGCAATAT  
TTATCATTGCTGCATTATCAGGTTTAGTCAGCTTTATTCCTGGTGGTTTCGGCGCTTCGATTTAGTTGTATTACTAGGATTTAAACT  
TTAGGTGTCCCTGAGGAAAAAGTATTATTAATGCTACTTCTATATCGTTTTGCGTACTATTTTGTACCGGTAATTATTGCAATTAATTTT  
ATCATCATTTGAATTTGGTACATCAGCTAAGAAGTACATTGAGGGATCTAAATACTTTATTCCTGCTAAAGATGTTACGTCATTTTAA  
ATGTCCTATCAAAAGGATATTATTGCTAAAAATTCATCATTATAGCAATTTTAGTATTCTTTACAAGTATGATCTTTTTTGTA  
TAACCTTAACGATTGTTTACGATGCTTTATATGATGGAATCACTTAACGATTATTCTATTGGCAATTCATACTAGTGCTTTGTTA  
TTACTTTTACTGAATGTAGTTGGTATTTATAAGCAAAAGTAGACGTGCCATCATCTTGTCTATGATTTCAATTTTAAATATCAGATGG  
CGACATTCTTCACTTACGCTTCATATATTTAATAACATGGTTAGCTATTATTTTTGTTCTGCTTATTGTAGCTTTCCGTAGAGCACGT  
AGGTTGAAACGCCCAGTAAGAATGAGAAATATAGTTGCAATGCTTTTATTCAGTTTATTTATTTATATGTTAACCATATATTTATTG  
CTGGAACGTTATATGCATTAGATATTTATACGATTGAAATGCATACATCTGTATTGCGCTATTACTTCTGGCTTACGATTTTAAATCAT  
CGCTATCATCATAGGTATGATTGCATGGTTGTTTGATTATCAATTTAGCAAAGTACGCAATTTCTTCTAAAATTGAAGATTGCGAGGA  
GATTATTAATCAGTATGGCGGTAATTATTTGAGTCACTTGATATATAGTGGTGACAAGCAGTTTTTCACTAATGAAAATAAAACAGC  
ATTTTTAATGTATCGTTATAAAGCAAGTTCATTAGTGGTCTTGGAGATCCGTTAGGTGATGAAAATGCCTTTGATGAATTTGTTAGAA  
GCATTCTATAAATTACGCTGAGTATTAGGCTATGATGTTATATCTATCAAGTTACAGATCAACACATGCCTTTATATCATAAATTCG  
GTAACCAATTTTCAAATTAGGTGAAGAAAGCAATTATTGATTTAACGCAATTTTCAACTTCAGGTAAGAAACGCCGTGGATTAGAG  
CGACTTTAAACAAATTCGATGAACCTTAATATTTTCATTTCGAAATATTGAACCACCGTTTTCAACTGAATTTATAAATGAACCTTCAACA  
TGTAAGTGATTTATGGCTAGATAATCGTCAGGAAATGCATTTCTCTGTGGGTCAATTTAATGAAGAATACTTATCTAAAGCGCCAAT  
TGGTGAATGCGAAATGAAGAAATGAAGTAATTGCATTTTGTAGTTAATGCCAACATACTTTAATGATGCCATTTTCAGTCGATTT  
AATTAGATGGTTGCCAGAGTTAGATTTACCATTAATGGATGGTCTATACTTGCATATGTTACTTTGGAGTAAAGAACAAGGTTATAC  
AAAATTTAATATGGGTATGGCAACGTTATCGAACGTTGGTCAATTGCATTATTCATATTTAAGAGAACGACTTGCAGGCCGTGTCTT  
TGAACATTTCAACGGTCTATATCGTTTCCAAGGATTACGTCGTTATAAATCTAAATATAATCCGAATTGGGAACCACGCTTTTTAGTT  
TATCGTAAAGATAAATTCGCTTTGGGAATCACTTTCTAAAGTAATCGGTGTAATACGTCACAAAATAATTAATCCAAAGTCTAAGAG  
GTATACAGTTATGCTGAAGCGCTTGGATTTTTTCTTCTATAAAGAAATGATTATATAAAAAACCGTACAGATAAGAATTTAAGT  
TTCTATCTGTACCGTATTTTAATATTGAAATGAGCTTAAAGTTAAGTCGCTTAACTTTTATTATCAGTCCATCAGTTTCATCAAGTA  
TAAATGTTATTGCTTATTTTTGTATTCTTGGCGTATTTTTGTCTCTGCATAGCGCTCTGGATTTTTCTTATAAAAAATCTTGGTGATA  
GTCTTCGGCTTTGTAAAATTGTGACGCGGGTAATATTTTTGTGTGAATTCGCTTATCAGCATTAATCGTATTTTTAAGCTGCTCGATA  
TAAGTCTCAGCGAGTTCTTTTGTATGATCATTAGTGTAGAAAATAGCTGTTTGATATTGAGGACCACGCTTGTATTTGACCCCTG  
TATCTAATGGGTCAATGACTGAGAAAAATATTTCTAATAACTTATTGTATGAGAATAATGCAACATCATATTGAATTTCAACAGTTT  
CTAAATGACCACTCGTACCTGATTTTACTTGTTCGTAAGTAGGATTTTCAATATGTCCGCCCATATATCCAGAAGTTACTTTTTCTAT  
GCCGTCAAAGGTGTCAAATGGTTTCGTCATACACCAAAAGCAACCTCCGGCAAAATAAGCTGTATTAATATTCATTTTTGACATCCT  
TTCAATACGCTTAGTACGATTATTAAGAAATCACTTGTCTTTTGAAGTATTTTATATAACGTTAATATGTGATTATTATGATACAC  
AAAAATCTATTTTGAAGATATAAGGTAGGTAAATATGGATAAAGAAACTAATGACAACGAATATAGACGTCAAAGTGAACATCGC  
ACTTCGGCGCCTAAGCGAAAAAAGAAGAAGAAATTAGGAAATTACCTATCATTCTTCTGATTGTTGTAATTTTACTTATCGCATTA  
GTTGTATATATTGTGCATAGTTACAATAGCGGTGTAGAATATGCCAAGAAACATGCGAAAGATGTTAAAGTACATCAATTTAATGG  
ACCAGTAAAAAATGATGGTAAAAATTTCTATTCTTGTACTCGGTGCAGATAAAGCACAAGGTGGACAATCAAGAACAGATTCTATCA  
TGGTTGTTCAATATGACTTTATCAATAAAAAAGATGAAAAATGATGTCTGTCATGCGTGATATTTATGCAGATATTCCAGGATATGGAA  
AACACAAAATTAATTCAGCATACGCTTTAGGTGGTCCAGAGCTACTTAGAAAAACACTTGATAAAAAATTTAGGAATTAATCCTGAA  
TATTATGCAGTAGTTGATTTTACTGGATTTGAGAAAAATGATTGATGAATTAATGCCAGAAGGTGTACCAATTAATGTGCGAAAAGGAT  
ATGTCGAAAAATATTGGTGATCTTTGAAAAAGGGTAAACCATAGTTGTAATGGTAAAGAATTACTTGGTTATGCAAGATCCGTCAC  
GACCTGAAAGGTGACTTTCGAGCGCTGCGACGTGACGACCAACAAGTGTGCAAAACATTGAAAAAAGAAATGGTTAATTTTGAACAGT  
TGTTAAATTAACCAAAAGTTGCAGGTATTTAAGAGGCTATGTGAATACAAACATTCTGATTTCAGGGATTTTCCAAACAGGTTTGAG  
TTTTGGTATCCGAGGTGAAAAAGATGTTAAGTCATTGACTGTGCCAATCAAGAACTCATACGAAGATGTCAATACAAATACTGATG  
GTAGTGCATTACAGATTAATAAAAAACACAAATAACAAGCTATTTAAAGACTTTTTAGATGAAGATTAAAAATAACAAGGCGATTT  
CTATCATACTCAGATAGAAGTCGCCTTGTTCGTTTCAAGAATTAATTGGCATGCATCTTATGAAGAATTATTGATCTGACTTTCTT  
ACGCCAGCCACACCATAATGGTTTGGTTTCATTTCTTCTATAACAACGTGAATTGCTTGTCTATTTGCCCGGTTGTTTTTCTACGGC  
GTCAGTTACTTCGTAACCTAAATTTTTAATTGTTTATCCGAACGACCTTCTAATAATTTTACATTGACGATTGGCATCATCCAAACC  
TCCTAATCATTATTAATTTGAGTATATCATGTAATCTTAAAAATTCATTTGCAAAATAACAGAAGCTTCGTTCTAAAAATAGTTGAA  
ATGGAACACGTTGTCGTATATAATGAGATTCAAAGTAAGGAGGAATAACAGTGTATAAATATCATTATTAGAAGTATAGGATGTT  
CTATGTATTGACCAAAAAAGTTTTTTTGCAGTGTCTTGTATTGAAAAGGGGCTAGATCCATTAGAAACAAAGCTAGCTGTTGTT  
GCAGATACTAAGCGTCAGGGTTCTGTAATATTGGCTGCGACACCTAAATTTAAAGAATTAGGCATCAAGACAGGGTCGCGATTGTT  
TGAAATACCACATAGAAATGATATTTACATTATCAATCCAAGTATGCGTAAATATCTTAATGTTTCAGTTGCTATTTCTAAGATTGCA  
TTGCGTTATATTCCACCTGAAGATTACACCAATATAGTATTGACGAATTTTTTATGGATGTTACTGATAGCTATCATAGATTAGTT  
CTACAGTACATGCATTTTGCGAAAGACTTAAACGTGAAATTTATGAAGAAACAGGCATTTATTGTACTGTGGGCATTGGTTCTAATA  
TGTTATTAAGTAAAAATTGCTATGGATGTTGAAGCGAAGCATAGTCAAAATGGTATAGCTGAATGGCGATATCAAGATGTACCAACG  
AAATTATGGCCAATTCAGCCCTTGCAGATTTTTTGGGGTATTAATCGTCAAGACAAGCCAAATGAATAAAGAGGAATTTTACT  
ATAGGAGATTATGCGAAATATCCATATAAATTTTTTAAAAAAGAGTTCGGTATTTTAGGTGTTGATATGCATCTACATGCGAATGGG  
ATAGATCAGAGTAAAGTACGTGAAAAAGCACAAGATCAGCAATCCATCGATATGCAAAAGTCAAAATTAATGAGAGATTATCATTT  
TGATGAAGCAAAAGTAGTAATGCAAGAGTTAATTGAAGATGTTGCTAGCAGAGTTCGAGCAAGAAAAAAGTGGCAAGAACGATA  
CATTTTGCCTTTGGCTATAGTGATGAAGGCGGTGTACATAAGCAATATACTTTGAAAGATCCAACAAACTTAGAAAAAGATATTTAT

AAAGTAGTAATGCATTTTCGCAGATAAAATTATGTAATAAACAAGCACTATATCGTACGCTAAGTATATCTTTGAGTCAATTTATTAAT  
GAGGATGAGCGACAGTTAAGTCTGTTTGAAGATGAATACCAACGCAAACGTGACGAATGTCTAGCTAAAACGATAGACCAATTACA  
TTTGAAAATACGGCAAAGGTATTGTGTCCAAAAGCAGTATCGTTTACAGAAGCAGGTACAAAAACCGGCAGATTAGGTTTAAATGGCTG  
GACATAAAAATGTAATGACTATACGGTTTAAAGTAATATATAACTGTGATTCTGTATAAAAATAAGTCTCTAAAGATAAAATATTTTCATATA  
TCACAATAGATTTTCACAATAATATCTAAGAATACATGGAATTTATCAAAAAGAGACTTAATAAATTATTGGATATAACAATCAAAATCA  
CTCAATGCTTGCATACCGCGTTCCTCGGTACAGTAGGGTTTTTGGAACTAATTTTTTAAAGCACCGTATATATCTTCGGCTACTTCTAAGA  
TTCTTAAGTTGCTTATAGATATGTTATGTAAACTCAGGATATAAGTCACTTTACTTATCATACCTGATTATCCGGAATGTCTACATA  
TAGATCATACGCAGTATTTAGTCCACCTAGTTGTTTAGCGGGTAGTGCCTGCGGATACGATTTAGCTTGGGCAAAAAATGATAACAA  
TTTTTCAGAATCATTGCTTCAATTAGTCTTTCTAAATCTTGAAACTGACTTTTTAGCTGTGCAATCATTTCTAAATATACGTTTTAT  
TACTCAAGGTGATATCTTCCACATTTGTGCATTACTACTAGCTATACGAGTGATATCACGAAAACCACAGCTGCAAGTTTATTAA  
CTAAATGATGTTCTTGACCGTTCCTTTGACTAACATGAACATAAAGTACAGTGAACGATATGAGGTAAATGACTTACGACGCTTGTTA  
CGTAGTCGTGTTCTTCAGCAGTAGTTACAATAAATTTAGCAAGAGTAGGTGATAACAGTTCCTTTAACGTGTTTGTCTGCTTGTCTATT  
TCTTGGCTCATTGTAGACTAAAATATAATAAGCGTTTTCAAATAAGTGTCTTTTAGCATTTAGTACACCAGATTTATGACTACCAGCC  
ATTGGATGACCACTGACTAAATGAATATTATGCTTTAATAAATTGCATTCTGTGTTGTGTATCATTGCTTTAGTACTACCAGTATCAG  
AAACAATAACACCAGGTTAGTTGGCATATCTATAAGCTCGCTAAGATATTTATTTGTGATAGCAACAGGTGTTGCATAAATAATTA  
CATCGGCTTTTTTAATAGCTTCACTATAATTTAAACATTTTTTCATTAATAATGCCGATTGATTTAGCTTTATCTAACTGAGAAGTATCT  
GCATCGTATGCAATAATATTAGTATTAGGGTTATGGTATTTTATATTGCTAGCAAGACTTCCACCAATTAATCCAAGCCCAACAAAT  
AAAACTGTTGTCATATAAATACCTTATTTTCGAAATTTTCAGAATAATAACATTGTAATGAGCTGTGACACAGTGAATAGTAAA  
TAAAAATCGATAATAGCATTAATAGATAAAACGGAGATAAATCATCTACAATAAAGAGTATAGTAACACAACTGGCAACGGAGGGGT  
AAATCAATGGAACCAATATTAGAAATGATTAACCAATTAACAGGTATTAATAGTCTTCAGGAGACACAGAAGAAGCAATTCAATT  
TGTCGAAAAATATGCAAAAGACTTGGGTTATCAAAACAACATAACAAATAAAGGTGCGTTATTAATAACAGTGCCAGGCAAAAAATG  
ATGAAGTACAACGCTGTATTACTGCTCATGTTGATACTTTAGGTGCAATGGTTAAAGAAATTAAGAAGATGGTCGCTTAGCAATAG  
AATTAATTGGAGGATTCACGTATAACGCGATTGAGGGTGAATATTGCCAAATTAAGACTGATGCTGGTCAAAATATATACAGGAACA  
ATTTGTCTGCATGAAACAAGTGTTCATGTATATAGAAATAATCATGAAATACCTAGAGATCAAAAGCATATGGAATAAGAATTGA  
TGAAGTAACTACATCAGAAGAAGATACAAAGAGTTAGGTATTTAGTATAGGTGATTTTGTAGCTTTGATCCACGTACAGTTATCAC  
GTCATCAGGTTTTTAAATCTCGTCAATTTAGATGATAAAGCTAGCGTAGCGATGATACTACAATTACTAAAGAAATTAAGAAGA  
GCAAAATAATATTACCACATACAACGCAATTTTATATTCTAATAACGAAGAAATAGGTTACGGTGCAAAATGCATCAATTTGATTGCAA  
AATCAAAGAATATATTGCATTAGATATGGGCGCGTTGGGAGACGGTCAAGCATCGGATGAATATACAGTTTCTATTTGTGCCAAAG  
ATGCTTCAGGTCCATATCATAAGCAATTGAAATCGCACCTAGTTAATCTTTGCAAAATAAATAACATTCCATATAAAGTAGACATAT  
ATCCATATTATGGTTCAGATGCTTCAGCAGCTTTACATGCTGGTGGGATATCAGACATGGTTTATTTGGCGCTGGCATTGAATCATC  
TCATGCAATGGAACGAACACATATTGATTCTATTAAGCGACAGAGAAATTACTATATGCATATTGCTTATCACCATTGAGTAAAC  
AATTAGTGTTGACAAATGTGAACGACCTATGTAATATAATGAACTATAAAAAATAATTAGAATTTTCTAAAGAAATAGTAGCAGATA  
TGAACGCTAGCAAAATAGAAAGCTAATGGGTGATGGGAATTAGCACGCCATATCTTGTGAATTGGACTTTGGAAAAACAATTGAATGA  
GTTTTGAAAGTGAACATGAATTATGTTAACTAAGGTGGCACCACGGTAAACGCGTCTTACAGGTATATGCGTTATGTGGTGCTTTTT  
TATTAGACAAAATGATGTTAATTAAAGGTAGCAACAGAGAAAGTATGTTGATGTGAACATAACCCGAGATTAATGAATTTG  
GGTTTTGTCTGCAACAGAAAAATTATATATAGTAAAGAGTGAACATATGAATATTTTCAATATTCGGTTAATTAGGTGGTACCACGC  
GTCAGCGTCTTTTATATTGATAAGGATGCTGGCGCTTTTTTGAAGGAGCGTATAGAATGGATATATTTTAAAAAATAAAGCA  
AATGTAACGCCCCAAGTTTTAGCACAACTTCATTCCAAGAAGATCATTTTGGAAAGTACAAATCAACAACAACTAAAGGTGCGCTA  
TTCAGTTGTTATTTTTGATATTTATGGCACTTTAACTTTAGATAATGATGATTATCAGTAAGTACTTTAAAAGAATCGTATCAAATC  
ACTGAAAGACCGTACCATTATTTAACGACTAAAATAAATGAAGACTACCATAATATTCAAGATGAGCAACTTAAGTCATTACCATTT  
ATATCTGGATATGTTGGGACGTGTAGCTTTGATTTAGTAAGACATGAATTTCTAAATTGCAATCAATACAATTAGAAGTACAAAG  
CAGCAGATGTAAGGTTATATATGGTTGAACAAGTTTATGTATTTGACCATTACAAAGATGAGTTATATATCATCGCGACGAATCAA  
TTTTCAAATTCAACAAAATCAGATCTTGAGAATCGAGTTATTAAGTCTATCGAAGACTTAACTAAAATCCAACTTCACTACA  
CAAGATTTTGTATTTTAAACTAAAGAAATTAATCAAACATTTCTGAAGAAAGATTTATCGAAATGATTAGTATTTCAAAGAGAAA  
ATAACAGAAGGGGATATGTTCCAAGTTGTGCCATCAAGAATTTACAAATATGCGCATCATGCTAGTCAGCATTTAAATCAACTTTCTG  
TTTCAACTGTATCAAAATTTAAACGACAAAAACCAAGTCCATATATGTATTATCTTAATATCGATCAACCATATATTGTCGGTAGTT  
CTCCCGAAAGTTTCGTAAGTGTCAAAGATCAAATTTGTAACAATAATCCTATTGCAGGTACGATTCAACGTGGTGAGACGACACAA  
ATAGATAATGAGAATATGAAACAACACTACTTAATGATCCAAAAGAATGCAGCGAACATCGTATGCTAGTTGATTTAGGACGTAATGA  
TATTCATAGAGTAAGTAAAAATCGGTACCTCAAAAATTACTAAATTAATGGTTATTGAAAAATATGAACATGTTATGCATATCGTAAG  
TGAATCACAGGTAAAATAAATCAAAATTTATACCAATGACAGTTATTGCGAATTTATTACCAACAGGTACCGTTTCAGGTGCACC  
AAAATTACGTGCAATTTGAAAGATATATGAACAATATCCACATAAACGAGGCGTTTATAGTGGTGGTGGTATACATAAATGTAT  
ATCTAACTTAGATTTTGTCTTTAGCAATTCGAACGATGATGATAGATGACGAGTATATCAACGTAGAAGCTGGTGGTGGCTGTGT  
ATGATTCTATTCTGAAAAAGAAGTGAATGAAACGAAATTGAAAGCTAAAAGCTTATTGGAGGTGAGGCCATGATCTTAGTTGTAG  
ATAATTATGATTCTTTACATATAACCTAGTGGATATTGTTGCTCAACATACTGACGTCATTGTTCAATATCCTGATGATGATAATGT  
GCTGAATCAATCGGTGGACGCTGTTATTATATCTCTGGTCCAGGGCATCCATTAGACGATCAACAGTTAATGAAAAATCATATCAAC  
CTATCAACACAAACCATTTTAGGTATTTGCCTAGGTGCTCAGGCACTGACTTGTTATTACGGTGGAGAAGTCATTAAAGGCGACAA  
GGTTATGCACGGAAAAGTTGATACACTAAAGGTTATATCGCATCATCAACATCTGTTATATCAAGATATACCAGAACAGTTTTCAAT  
TATGAGATATCATTCATTAATAAGTAACCCGTGACAATTTCCAGAAGAATTGAAAAATTACTGGACGTACCGAAGATTGTATACAGTC  
ATTTGAGCATATAAGAAAGACCGCATTACGGTATTCAGTACCCTGCTGAATTTGCTACAGACTATGGTGTCAAAATTAATCAAA  
TTTTAATCTAGTGAAGGAAGGATGAAACCATGACATTACTAACAAGAATAAAAACTGAACTATATTACTGAAAGCGCAT  
TAAAGAGCTAATCGATATACTTATTCTCCTAGTATTGGAAGTATTAATATGAATTAATTAATTAATTAATTAATTAATTAATTAAT  
CCAACAACAAGAATTAACATATATTGTACGTAGCTTAATTAATACAATGTATCCACATCAACCATGTTATGAAGGGGCTATGTGTGT  
GTGCGGCACAGGTGGTGACAAGTCAAATAGTTTCAACATTTCAACGACTGTTGCTTTTGTGTAGCTAGTGCTGGCATAAAAGTTAT  
AAAACATGGTAATAAAAGTATTACCTCAAAATTCAGGTAGTACGGATTTGTTAAATCAAATGAACATACAAACAACAAGTGTGATG  
ATACACCTAACCAATTAATGAAAAAGACCTTGATTTCATTGGTGCAACTGAATCATATCCAATCATGAAGTATATGCAACCAGTTA  
GAAAAATGATTGGAAGGCTACAATATTAACCTTGTGGGTCCATTAATTAATCCATATCACTTAACGTATCAAAATGGTAGGCGTCT  
TTGATCCTACAAAGTTAAAGTTAGTTGCTAAAACGATTAAAGATTAGGCGAAAAACGTGCAATCGTTTTACATGGTGCAAAATGGTA  
TGGATGAAGCAACACTATCTGGTGATAATTTGATATTAAGATTGACTGAAGATGGAGAAATCAAAATTAACATTAATTAATTAAT  
GATTATGGTTTGAATATGCACCGAATAGTGATTTTAAAGGTGGTTCACCTGAAGAAAACTTAGCAATCACACTGAATATTTTAAAT  
GGTAATGATCGCTCAAGTCGACGTGATGTGGTTGCTTAAATGCAGGTTTAAAGCTATATGTTGCAGAGAAAGTGGATACCATCGCA  
GAAGGCATAGAAGTTGCAACTACATTGATTGATAATGGTGAAGCATTGAAAAATACCATCAAATGAGAGGTGAATAATATGACGA

TTTTAGCAGAAATTGTTAAATATAAACAGTCACTTTTACAAAATGGCTATTATCAAGACAAAACCTTAATACCTTAAAAAGTGTGAAGA  
TTCAGAATAAAAAATCTTTTATAAACGCAATTGAGAAAAGAACCAAGGCTAGCAATTATTGCAGAAATTAATCGAAGAGTCCATACA  
GTTAATGACTTACCTGAACGAGATTTATCGCAACAAATCTCAGATTATGACCAATATGGTGCAAATGCCGTGTCCATTTTAACTGAT  
GAAAAGTACTTTGGTGGTAGTTTTGAAAGATTACAAGCATTGACGACAAAAACAACATTACCCGTATTATGCAAAGACTTTATTATA  
GACCCGCTTCAAATTGATGTTGCCAAACAAGCTGGTGCATCTATGATTTTATTGATCGTTAACATCTTATCGGATAAACAATTGAAA  
GATTTATATAACTACGCTATATCGCAAAATTTAGAAGTGTTAGTTGAAGTACATGATCGCCATGAATTAGAACGTGCCTATAAGGTT  
AATGCCAAATGATTGGTGTAATAACAGGGACTTAAACGATTGTGCACAAATGTGGAACATACAAATACTATTTTAGAAAAATAA  
AAAACCAATCATTATTATATTTCTGAAAGTGGTATTCACGATGCATCTGATGTAAGAAAAATCTTGCATAGTGGTATCGATGGCTT  
ACTAATAGGTGAGGCGCTTATGCGTTGTGACAATCTATCTGAATTTTTACCACAACGAAAAATGCAAAAGGTGAAGTCATGATGAA  
ATTGAAATTTTGTGGCTTTACATCAATAAAGGATGTTACAGCGGCCAGTCAATTACCTATTGATGCGATAGGTTTCATCCATTATGA  
AAAAAGTAAAAAGGCATCAAAACAATTACCCAAATAAAAAAGTTAGCGTCTGCTGTTCCAAATCATATCGATAAAGTATGTGTCATGG  
TAAATCCTGATTTAAACAACAATTGAACACGTATTAAGCAATACGTCAATTAACACAATACAGTTACACGGCACAGAATCTATTGATT  
TTATACAGGAAATTAAGAAATATTCAAGCATTAATAATCACTAAAGCTTTAGCTGCAGATGAAAACATAATCCAAAACATAAAT  
AAATATAAAGGGTTCGTAGATTTATTTATTATCGACACACCCTCAGTGTCTGATGGTGGTACCGGTCAAACATATGACTGGACTATT  
TTGAAGCACATAAAGACATACCTTATTTGATAGCAGGAGGCATTAACCTCTGAAAATATTCAAACAGTTAATCAACTTAAATTATCA  
CATCAAGGTTATGATCTTGCATCAGGTATAGAAGTAAATGGGCGAAAAAGATATAGAAAAATGACAGCAATTGTAAATATTGTGAA  
AGGAGATAGAGACAATGAATAAACAAATACAAACGGAAGCAGATGAATTAGGTTTCTTTGGTGAATACGGAGGGCAATATGTTCC  
AGAAACATTAATGCCAGCAATTATTGAGTTGAAAAAGCTTATAAAGAGGCAAAAAGCAGACCCAGAGTTTCAAAGAGAACTGGAA  
TACTATTTTACAGAGTATGTAGGACGCGCAGCCACTTACATATGCTGCATCATATAGTGAAGAGCTAGGTGGCGCTAAAAATATAT  
TTGAAACGAGAGGATCTAAATCATACAGGCGCCCATAAAAATTAATAATGCGTTAGGTCAAGCGTTACTTGTCTAAAAGAATGGACAA  
GAAGAAGCTTGTGCTGAAACTGGTGCAGGTCACATGGTGTAGCTAGTGTCTACGGTTGCTGCATTATTTGATATGGAACCTGTTGT  
CTTTATGGGAAGTGAAGATATTAAGACAACAACCTTAATGTATTTAGAATGGAATTACTTGGTGCAAAGGTTGTGGCAGTTGAAG  
ATGGTCAAGGGACTTTATCGGATGCAGTTAATAAAGCATTGCAATATTGGGTAAAGTCATGTAGATGATACACATTATTTATTAGGTT  
CTGCATTAGGTCCAGACCCGTTCCCAACGATTGTTAGAGATTTTCAGAGTGTGATTGGTAAAGAAATAAAATCACAGATATTGAAG  
AAAGAAGGTCGACTTCCGGATGCAATTGTAGCATGTATCGGTGGTGGCTCAAATGCAATCGGTACATTTTATCCATTTATTAAGAT  
GATGTTGCATTATACGGTGTGGAAGCCGAGGTCAAGGCGATGATACCTGATAAACATGCATTTGCAATTGGCAAAGGATCACCTGG  
CGTATTACATGGTACTAAAAATGTAATTAATTCAAGATGAAGATGGGCAAGTGCAACTAGCACATTTCTATTTACGACGAGACTTGATTA  
TCCTGGTATTGGACCAGAACATTCTTATTACCACGACATTGGTAGAGTAACTTTTGAAAAATGCAAGTGATACACAAGCAATGAATGC  
TTTAATCAACTTTACAAAACATGAAGGTATTATACCTGCAATTGAAAGTGCACATGCACTGAGTTATGTTGAAAGACTAGCGCCTAC  
GATGTCGAAAGAAGATATTATTGTAGTAACTATTTCTGGACGTGGCGATAAAGATATGGAACAATTAGACAATATATGGCAGAGC  
GAGGTCTTGCAATGACTAAATTATTTATACCTTATATTATGGGCAATAAAGATTTGATTGAAAAATGCAACATTGTTGAGTGAAAAAT  
GGTGCAGATATAATTGAAATTGGTGTACCTTTCTCTGATCCGGTTGCTGATGGTCCAGTTATCATGGAAAGCAGGTCAACAAGCGATT  
AAACAAGGCATAACGATAGATTATATTTTCGAGCAATTAGAAAAACACGGTAATCAAATTAAGTGTAACCTATGTATTAATGACGTA  
TTATAATATTATTTGTCATTATGGAGAACAAGCGTTTTTTGAAAAATGTCGAGATACTGGTGTCTACGGCTTAATTTATCTGATTTA  
CCATTATGAATTATCGCAGCGTTTTAAAACAACAATTTTGTCAACTATGGCGTCAAAAATCATATCTGTTAGTTGCCAGTACTGATGAC  
AAACGTATAAAAAGATATCGTATCCCATGCGGAAGGCTTTATTTATACTGTGACGATGAATGCGACAACAGGGCAAAAACGGTGCCTT  
TCATCCAGAATTAACAGAAAAATGAGTCAATTAAGCGATAGCCAAATGTGCCAGTTGTGCGCAGGATTTGGTATAAGAACCAC  
AACATGTTGCGAGATATAAAGAGGTTGCAGATGGCATTGTCATTGGTAGCGAAATCGTTAAGCGATTTAAATCTAACACGCGTGAG  
GAAATCATTAATATTACAATCTATCCAACAACATTGAATAATTAAGTTTACTTGATTAAAAAAATTAGCGCAATACTGTTTGA  
AAAAGTGAAAAACGGTGAATTATAAAATTGAATAGAAATGATACAAAAGTAATATGAGCAAACCCAAACGTTTATATTACTTTTTT  
TGAAATTGTATTTAAAAATCTAAATATTACTATAAAAGTATACGCAATTAAGCGTTTTATGTTTTAGTTTTAACATTAACCTATTGTAT  
ACTTATTTAGATTAGATTTATTTTGTGACATTTGCAGAGGGGAAATAGAAAAACTGCAAAATACGGAAATGAAATTAATTAACGAG  
AGTAAATAGGAGTAATGATAATGAAGTTTACAAATTTAACAGCTAAAGAGTGTGGTGCTTTACAGATAGCATGCCATACAGTCA  
TTTCACGCAAACTGTTGGCCACTATGAGTTAAAACCTTGCTGAAGGTTATGAAACACATTTAGTGGAATAAAAAACAATAAATACG  
AGGTTATTGCAGCTTGCTTACTTACTGCTGTACCTGTTATGAAAGTGTTCAAGTATTTTTATTCAAATCGCGGTCCAGTGATCGATTA  
TGAAATCAAGAACCTGTACACTTTTTCTTTAATGAATTATCAAAATATGTTAAAAAACATCGTTGTCTATACCTACATATCGATCCA  
TATTTACCATATCAATACTTGAATCATGATGGCGAGATTACAGGTAATGCTGGTAATGATTGGTTCTTTGATAAAATGAGTAACTTA  
GGATTGAAACATACTGGATTCCATAAAGGGTTTGATCCTGTGCTACAAATTCGTTATCACTCAGTGTTAGATTTAAAAGATAAAACA  
GCAGATGACATCATTAATAATATGGATGGACTTAGAAAAAGAAACACGAAAAAGTTAAAAAGAATGGTGTTAAAGTAAGATATT  
TATCTGAAGAAGAACTGCCAATTTTATAGATCATTTATGGAAGATACGTCAGAATCAAAAGCTTTTGTGATCGTGATGACAAATTTT  
ACTACAATCGCTTAAAAACTACAAAGATCGTGTGTTAGTACCTTTAGCGTATATCAATTTTATGATGAATATATAAAGAACTAAATG  
AAGACGCTGATATTTTAAATAAGATTTAAATAAAGCAATTAAGGATATTTGAAAAACGCTCTGAAAAACGCAATTAAGCAACAA  
GCGAGATAAATTACAACAACAACCTTGATGCAATGAGCAAAAGATTGAAGAAGGTAAACGTCTACAAGAAGAACATGGTAATGAA  
TTACCTATCTCTGCTGGTTTCTTCTTTATCAATCCATTTGAAGTTGTTTATTATGCTGGTGGTACATCAAATGCATTCCGTCATTTTGC  
CGGAAGTTATGCAAGTCAATGGGAAATGATTAATTATGCATTAAATCATGGCATTGACCGTTATAATTTCTATGGTGTTAGTGGTAA  
ATTTACAGAAGATGCTGAAGATGCTGGTGTAGTTAAATTCAAAAAAGGTTACAATGCTGAAATTATTGAATATGTTGGTGACTTTAT  
TAAACCAATTAATAAACCTGTTTACGCAGCATATACCGCACTTAAAAAAGTTAAAGACAGAATTTTTTAGGAAGGGAATTATCAAA  
ACATGAAATTTACAGAGTTAACTGTTACCGAATTTGACAACCTTTGTACAAAATCCATCATTGGAAAGTCATTATTTCCAAGTAAAAAG  
AAAATATAGTTACCCGTGAGAATGATGGCTTTGAAGTAGTTTTTATAGGTATTAAGAGACGACAATAACAAAGTAATTGACGACGAAGC  
CTTTCTCTAAAAATCTTACTATGGGAAGTTATGTTTACTATTCGAATCTGCTCCAGTAATGGATTTTTAGTTAGTTAGGATTAGTTG  
ATTATTATTTAAAAAGAGTTAGATAAATATTTACAGCAACATCAATGTTTATATGTTAAATTAGATCCGTATTGGTTATATCATCTATA  
TGATAAAGATATCGTGCCATTTGAAGGTGCGGAGAAAAATGATGCCTTAGTAAACTTGTTTAAATCACATGGTTACGAGCATCATGG  
CTTTACAACCTGAGTATGATACATCGAGCCAAGTACGATGGATGGGCGTATTAACCTTGAAGGTAAAACACCCGAAACATTGAAAA  
AGACATTTGATAGTCAACGTAAACGTAATATTAATAAAGCGATAAACTATGGTGTAAAGTCAGATTCCCTGAACGTGATGAGTTCA  
ATCTTTTCTTAGATTTATATCGTGAAACTGAAGAGCGTGCTGGATTGTATCAAAAAACAGATGATTATTTTATAACTTTTATTGACAC  
ATATGGAGATAAAGTATTAGTACCATTAGCATATATTGACCTTGATGAATATGTGTTAAAGTTGCAACAGGAATTGAATGACAAAG  
AAAATCGTCGTGATCAATGATGGCGAAAGAAACAAATCAGATAAGCAATGAAGAAAATTGCAAGATTAGATAAGCAAAATTGA  
TCATGATCAGATGAATATTGAATGCAAGTGAATTAGCAGCAAAACGACGAGCCCAATTCTAAACCTTGCTTCTGGCGTTTATTGTC  
AAATGCAATATGAAGTGAATTTCTCTGGTGGTTTCTAGACAGAAAAATATAATCAATTTATGGGACCATACATGATGCATTGGTTTAT  
GATTAACCTATTGCTTCGATAATGGCTATGATCGTTATAATTTCTATGGTTTATCAGGTGATTTTACGGAAAAACAGTGAAGATTATGGC  
GTATACCGCTTTAAACGTGGATTTAATGTACAAATCGAAGAATTAATAGGGGATTCTATAAACCAATTCATAAAGTGAATATTGG

TTGTTCCACAACATTGGATAAAATTACGTAAAAAATTAAGAAATAGATGTAAATGATGTTAGGGCTTATAGTTATTGATACTATAGGC  
TCTTTTTTATATGTTTTTAAATAAGCCTCTAATGATATATTAAATGACAAGTTTAAACAAGTGATTGCAATAAAATATAAATATGAATT  
GCACAACCTATTTGTAATGATTGAGTTGAGTATACCTTTTTAATTCATTCAATATGACTCAAAACAAGCCAATATGTATTATATTTTT  
GGTGAATAAACCTTAGCATAACAATTTATGTCTGATTATATATGTGTGTGTTTGAAGTGTGTGATACAAATGTCATATTTGTCTAA  
TTGTAATTTATAAAATGCATGAGCAATGATTGCTGTAAACAAATCTAGCAAAGTATTCAGTTTGTATTTTGAAGATAAAATGATGA  
TAGATGTATGATCGATATAAAAGATTTAATATGCACCAAAACGTGAGTAATTGGTTTAAATGAAACATAACATGAATGTAATTTAG  
CTTACTGACATAAACACTACACAAACATACAGTTATATAAGTCCCTTATGGAATTTACATTCTAGTTACATAATATATATTATAG  
GAAGTAATGTGTGTGACGCAAAAGGTACCCTACATCATAATCATTATCTAATATCGTCACATAAATTACTTATGCTATAATCATGGT  
ATTATATTGTTTGGAGTGATTGATGAGATTTGTCTTTGATATTGATGGTACGCTTTGTTTTGACGGCCGATTAATTGACCAGACTAT  
TATTGATACATTGTTACAATTACAACATGCTGGTCATGAACCTTATATTTGCATCAGCACGTCCGATTTCGTGATTTGTTGCCAGTTTA  
CCATCAGTATTTTCATCAGCACACATTAATTGGCGCAAAATGGTGCTATGATTTTCACAGCAATCAAAAGATTTCTGTTATCAAACCAATT  
CATACAGATACATATCACCATATCTTAAAAATAATTCAAAAGTATGAGTTAGATTATATTATTGATGATGATTGGAATTATGCTGCA  
CAACTTGACGCTGAGAACGCGATTTTTGAGCGTTTAGATCCACATAAGCTGGCAGTTTGTATTGATGTTGCAAAATATCGACACACCA  
ATCAAGATCATTTTATAAATATAGACCCGGCACAATTAACACTATATTAGACGAGCTAAATAAATACCATCAAGAATTGGAAATG  
ATTCACCATTCAAAATGAGTATAACATTGATATAACAGCGCAAAATATTAATAAATATACTGCATTACAATATATATTTGATGCGAGAT  
GTTAAATATATAGCATTGTTGTAATGACCACAATGATATTGTTCATGTTACAACATGCTAGTAGTGGCTATATTATAGGACCATCAGAA  
GCATACACACAGCAATATTGAAACTTGATAAAATCAAAACATCAATAATAACACAAGCTATTTGCAAAAGTCTTAAATCATATA  
TAAATAAAAGACCCCTATCAATGATAATCATTATCAATCGATAGGGGCTATTTTAAATAAAATCGTCCCTCGAACATTCTTCTCT  
TCATCTAATCCAAATAATTCTGCCATTTCTCCATGTTCAATTAACTGTTTAAATATGCATCGCGGAGTCTTCTTCACTCATCATCT  
AATCATTTCTTTAAGACTATCAATCCACATATTTCTGCGTAATTGATAGTCTTCTTCAACTTCGTTTAAACATCATTATATGTTTATTG  
CTGCTTCTGGACTAGCTGTAAAGAGTAATGCAATCATATGTTTACATATCACTCGTCTTCCATCAGCATGAGGACAATTACATTGG  
ATTTTCTAGGATGTTCCATATCAATATAACAACGATATACTTTGTTGCCACTGCCCTTTACTTCAGCCTCATGCTGCGTTTCTGAAAA  
TGATTTTAAAGTTAATGACGCATTCACTTTGATAATAATTAAGCCTCTTTCTATAGAACGAATACTTGAATATCAAGTAATCCCATT  
AATGATACTCCTTTTATTATTATTTTAAATAAAGAAAATAAAATCGATAAGTGTCTAGATTAATACTTGATTTCATCTATATTTT  
ATAACAAGTCTAGAATTATCGCATTCTTAAATAGCTAATATGAAATAGCTTGCCTTGCCTAATCTTTTGTATAAGGGTGTCTATCAACATT  
AAATAATTCTCTATTGCAAAATCATCGACTATCATGCCATCTTAAAGAACGATAATTTCTATTAACCTAAGCGTTGTAACACGGATAA  
ATCATGAGAAATAACGATAAAATGATTTAAGTTTCGTAATCTGTTGCGCTTTTAAATATATTTGATTACATTTTGTTCAGCTATAACATCT  
AAATTTGAAGTTATCTCATCACATATTAACACGCGAGGCTGTGCTAATAACGAACGCATGACATTAAATCTTTGTAATTGTCGCCCA  
CTCACTTCGCTTGGTAATTTAGTCAATAATTGCGCGTTTAACTCAAAAGTAGATAAATGTTGTAATAATAATTGATCTGAGCAGTA  
TTATCAGTTAGGCCTCTGTAATAATATAACGCTTCTTTAATGAGGTCTCAATCGTCCAATCAGGGTTAAAGCTAGTTAAAGGGTGT  
GGAAAATCGGTAACACAGCATTGTCACTTAAAGTAAATTTCTCTTTAACAGGTTTAAACAAGCCAAGAACCAATGAAGCGAGCGTA  
CTTTTACCACAGCCACTTTTCGCTAAAAATACCAACATTTTCTCCATCGGGTATAGTAATATTGATATCTTGTAGCACCATCTGCTTTT  
ATTATAACCAAAAGTCACATGTTTTAATTCATCATAGTAATCCCTCTTTAATTGTGTCTATATTTAATTAGACGTTCAAGTATACGG  
ATGCAAAATGCTCATATTGAAATGATTAAATATTACCTCGTTCAATGATTGACCTTCTTTTAAACATAAATGTACTGACAATATTTT  
AATACATGACTTAAGTTATGTGTGATAATAAATGTTTGACCATGTTCTAATACAATATGCTGTAATAAATCCATCACTTGTATTAC  
CGTTCAAAAGCATCCAATGATGCAACTGGTTCGTCTGCAATGATTAATTTAGGCTCCAACATGAGAACGCTTGTATGTATACGCGTT  
CAAGTTGGCCCCCAGAAAGTTGGAACCTATATTTATTTAATATATCTTTGCTTTGTAAATTAACCCACGACAAAGCCTTATCAACTTT  
GGACAAAGCCTCTTCTTTACTACCTTTATAATGCTTACGATAAATCGCAGTTAACTGTTTACCTAATTTAGTATGGTCTGTTAAACTT  
TCTGCATAATTTGGGAAATATAGCCAATTGTATGACCATAATATTGACTCAATCTACTAACATTTTCTCCATCAAATGGTATGAAT  
CATACGTGCAGGTTAAATCAAAATGGTAAATATTCAAGTAAGGCTTTAGCAATCAAACTTTTTCCAGCGCCGCTCTCTCCAATCAAGG  
CATTAATCTGTTGACTAAAAATTTTCAAAATCAATCCCTTTAATAAGTGATTTCTCACTAGTATTCTTTATTGTTAAATTTTGTATATCA  
ATGAGACTCATCATATTACCCCGTTGTTTTCAGCAATCTATCTTTCAGCGCATCTCCGGTTAAATTAATAAATAGTTATAGCA  
ATGACTGAAGCAGGTGCAATCAACATAAATTGGATGAGACGAAATAAAATACGACCTTGTGCAACATAGTCCGCCCCCATCTGATTG  
TGGCGGTTGTGCACCTAACCCAATAAATGATAGTGAACCTTATATATAGAATGATTTTACCAGAAATCAACGACCATCAAAACGATAA  
TAGCCGGTATAATTTTAGGTGTTAAATGACGTATTAATATTGTTCTTGTAGGTACATGAAATAATTGTGCCATTTTATATAAGGCTT  
ATTCATTTTCGCTATTAATCTACTTCTAGTCAACCTTGTGTAATTCATCCATTTTATTACTGTAATTGAGATAACTAAATTCATAAA  
GATGGTTGAAAAAAGCTTGCTAAAGCAATCATGATGATAAATCTGGAATACTTAGACCAACATCAATAAACCTTAACACTAATCG  
TTCAATCCACCCTTTTTATATCCGGCAAATAGACCTAGTGTAAACCTATGACAACGATAGCTATTAATGTTAAACAGTAACAAA  
CAATGTTGAACGTGCACCGATAATAATTCGGGTAAATAAATCTCTCCATAATCATCAGTTTCTAATAAATGCAACCAACTAATAGG  
TTCAAAAGTTTGTGATAAATTGACTTTGGTTGCATTTTCACTACTGACAAAGAATTGCAGTACAATTACCACAAAAATAAATGCAAC  
GAATACAAAAAATATCAGTTATTTTTTGAATAATTTTATGCATGACGGTCACTACTTCTGATATCAATGGTGTATTGGTTTTGTT  
TTTTGATTTTCTAATGATAACGCTGCTTCGGATGAAGTAATTAACGTTAATAAATCAGCAATCGTATTTGATAAATAACGAAGAA  
GCCAATAAATAACACGCATCCTTGAATAACAGGATAATCTCGAGATTTAATACTATCCATTAATAGATAACCAATACCAGGTATATC  
AAATAAATTTTCAATCACTACAGTACCACCTATTAGACTGCCAAGTGAAATCCCTAGTAATGGGATAATCGGCAAAATTTGTTGGTTT  
TAGTAAATCATGAATTAATAATAACGTTTATTATACCGCGTAATCTTGATGCTTGTACGATATTACTTTGCAATAACATCAATAA  
ATTAGAACGCACTAAACGAATGATGTATGCACACATACCTAAAGATAGCGTGATTACAGGTAATATAAACTGACTTAGTATAACGC  
TATCTATATTCTATTAATTTGTGACAATAAATAAATAAATAAATACCGATAAAGAACGCTGGTAAACTAATCGATAGTGTGAGATCA  
CTCTAATCACTTTATCCGTCCTTATGAAATCGTTTGGCTGCTATAATGCCGAGCGGTATAGATATGCATAACGACACTACTAATGT  
TGAACAAGATATGAGTAATGTTATGGGTGCATAGTTGAATAATATCTGTGTTACCGGTTCTTTTATTCAAAACTTTTCTTAATTA  
AAATGATAAATAAATGATTCCTCAATGCCACCTGATACCAATAAAGAATCATTTAATCCCAATTTATCTTTTGGTTGCTATTATTGTT  
CCGTGCGACACTTGTGCTACATCAAGATGTAATATTTTATCAACAGGATTGCCTGGTGATAATTTTATTAAAAATGAATGTAAGTGTAG  
AAATAACAAATAAAACAACATCATTTGCATCAGTCTATACAACATAGACTTAATTATGAACATAACAGTCCCCCTCTTGTGTAAG  
TTACTAACACTTTCTTTTACATGAGAATGGCGCATGTATATGCAACTTACATATTAAGAACCAACGTTTATTATAGTATTATCCATA  
AAGAAATGGAAGTATATTAAATTTTAAACAAAATCATTATAAAATATAATATTTTGAATCAAGTCAACCATGTAAAATATAAAAA  
GTCAAAACAAAAACAACATATAGCACTGTATCCATCTCTTTCGAAATAATTGTTACTGCAGTGTAACCTTAAAGTTCGATGATTTTGT  
GCATATAGTTGTTGAATATTATTTTTATCTTTACGGCGAAGTTTACGCGCCCTCATAGCCGATTTTTTCAATTTGCTTTTCTAATTTAC  
GCGCTTTTCTTTTACGCCAATTTCTAGTAAAAATACCAATAAGAAAACTAATTAATAAATCATGATCGCTAAAAATGCAGCGT  
ATCTTAATAATGGTTGATTTTATATCTTGAAATTTGGAATAAAAAATGCAAGCACACCTAATATAACAAATGTAATTTACTGACG  
ATACAAACCATTTTATTAATAAAGCAACGAATATTGTTAATAAATCATTATTAATGTTGTGATCCATAAATAATTAGGTATAT  
CGAATAATGTCATATTCATTCTCTTTTATTTCATTACTTTCTTGTATACATTTTATTATAAATTTTTAAAAACTTAAACAATAGCAG

TCAGTTTCAAGCAATATTCTATCGGTTCTGTTGCAAAGTTGAATTTATAGTATAATTTTAACAAAAAGGAGTCTTCTGTATGAACTAT  
TTCAGATA

>033-contig\_261\_RC

CTATATAAAAAAGAACCGTAGATCTGAAGAGACCTGCGGTTCTTTTTATTAAAAATTATATTATAAAATTCAACTTTGCAACAGAACCTT  
CTATCTACTATTAGAAAAATCATTTGTTCTTGGCAGATGGAATTCGTAACATTATCGTTTAGGAGACAAAATTATGTATAATGAATG  
TATTATACCAAAGGAGTGATTATATGTCTCAAGGTTACCTTTAAGAGAAGATGTTCCGTGTTTTCAGAAACATGGGATTGTAGTAGACT  
TATTTAAAGATGATCAACAATATTATGAAAGTATTGACGCTCTAGTACAACAAGCAAATCAATTTTCATCATACATATGCAACAACAT  
TAAATTCGAATCGAACAAATTAATACTGCTTTAGCTGAATTAGAAAAATTTTAATTGCCTTAGATCGCTTAAGTAATTATGCAGAAC  
TACGTTTAAAGTGATAGATACTAGTAATATCGAGGCACAAGTATTGAGCGCTAAATTATCTACTACATACGGTAAAAATTGTTAGCCAAT  
TATCATTTGTAGAGTCAGAAATACTTGAATTACCAGAAGAAATACTTCAACAATTAGAAGAATCATGTCCATATCAACACTATATTA  
AACAGTTAATAAAAAACAAAAGCCATTCCAATTATCTGCGTCGGTAGAACAAGTATTAGCAACTTTATCACCTACGCTAACAGTCCTT  
ACGATTATACGGCACGACAAAAATGCTAGATATTACATTCGATTTCATTGGAACATGATGGTACAACGTACCCTGTCGACTATGCTA  
CGTTTGAAAAATGATTATGAAGATAATAAAGATCCTGAGTTTAGACGTAAAAAGTTTCAAATCGTTTAGCGATGGGATTTCGAAAAATATC  
AGCATACTACCGCGGCTACATATAATATGCAAGTACAACAAGAAAAAATTGAAGCTGATTACGTGGATTGGAATCAGTCATCGAT  
TATTTATTACATAGTCAAGAAGTAACGCGTGATATTGACCGCTCAAAATCGATGATTATGCGTGATGATTGCGCACCAGTTATGCAG  
AAATATGCTAAACTTTTACAACGTATTTCACGGATTAGTAACATCGCTTTTGAAGACTTGAAGATTCTGTAGACCCTGATTATGAA  
CCAGAGATTTCAATTGAAGACTCAAAAAATTATATTTTCGGTGCGTTAAGTGTTTTAGGTGATGACTATACAAACATGTTACGTGAA  
GCATACGATCAGCGATGGATTGATTTTGCACAAAATAAAGGTAAAGATACAGGCGCATTTTGTGCAAGTCCATACTTTACACATTCA  
TATGTGTTTTATTCTTGGACTGGTAAAAATGGCTGAAGCATTGTCTTAGCACATGAATTAGGTGATGAGGTCATTTTACATTAGCTC  
AAAAACATCAACCATATCTTGAATCAGAAGCATCAATGTACTTTGTTGAAGCCCTTCTACAATGAATGAAATGTTGATGGCCAATT  
ATTTATTTAACACAAGTGATAATCCAAGATTTAAGCGTTGGGTATTGGCTCAATTTTATCTAGAACATATTATCATAATATGGTTAC  
CCATTTATTAGAAGCTGCTTATCAACGTGAAGTGTATCACAAGTAGATCAAGGTGAATCTTTAAATGCGCCGACATTAATGAAAT  
AATGCTAAATGTTTATAAAACAATTTTGGAGATGACGTAGACATGACTGAGGCTGCTGAATTAACATGGATGCGTCAACCTCATTA  
CTATATGGGATTATATTCGTATACGTATTCTGCTGGCTTAACAATCGGAACGTGCTTTCTCAAAGATTAAAAATGAAGGCCAACCC  
AGCTGTTGATGCTTGGTTAGAAACATTGAAAAAAGGTGGTAGTGATCACCTGTCGAACTTGCAAAACATTGCAGGTGTAGACATTAC  
TACAGAACAGCCACTTAAATCTACAATTCAATATATTTCTGATTTAGTCGATGAAGTTGAAAAATTAACAGATGAAATTGAGCAAGC  
AAATAACTAAGATGCGAGACAATTTATAGTAGAACAAATAAAACCAAGATTTTACATTAATAATTGTGAGAATCTTGGTTTTTTTG  
AGGGTTTATGAATGATAGAAATATATATTTATCGTAAGGGATTTTATAGTAATAACTTTAAGTTATTGTTTCGTAATGTGTACCTGTTA  
AATAAAAAATAAACACTTTTCAGCGATGTTAATAATATGATACCAATACGTTCTAAATGTCTTGCTGCTAAATGAGCTTGTGCAGCGA  
CAAATGGATCGTTATCAATAAGATACGTTGCGTTAATAATATGACTATATAAGTCATCGATATCTTCATCACGCTCAATTTATTTCTCT  
TATTAATACGGTATCTTTCTTTTAAATGCTTGATCTAAGTCCTTTAACATTAACTAGCTAATTTACCCATTGTCTTTAAACCGGGTTA  
ACATAATCATCTGTAATCTTTGTACGCAATCGAATATTGGCAATACTCGATGCAATATCTCTATCTTTCTTAAATCGAGCGCAT  
TTTTAATGAAGAAATCATCATACGCAATCACTCGCAATGGGCTGTTGCTTTGTAATTAACATGATAACTCGCTCATTAATATCATA  
ATTTAATTGATTGATATGTTTATCGTTTTTAACTGTTTGTGCTGCAAGCCTCTATCGTCAATACTTAATGATTTTATACCATTTCAA  
TACTCACATAGACATTTGCACCTAACCGACGTAATTCCTTTATTTAAATCATCAAGTTGCTCCTGATATCGCTGTCTAATTATTGCCAT  
TATATATCAACCAAACCTTCTGAAATATAATCTTCTGTTTTCTTGTGTTGATGGGTTAGAGAAAAATTTATCAGTATCATCATATTCA  
TTGACATAACCATTTAAGAAAAATGCAGTTTATCTGATACACGAGCTGCTTGTGTCATATTATGTGTAACCATAATAATTGTATACCT  
TTCTTTTAGTTCTTGAACCAACTCTTCTACTCTTAATGTTGAGATTGGATCTAATGCTGATGTGCGTTTCATCCATTAATAAATCA  
GGTTCAATTGCTAAACAACGCGCGATACAAACACGTTGTTGTTGCCACCGGATAAACTATATGCATTTGTGTGCAACCTATCCTTT  
AATTCATCCCAAAATTGCAAGCGCCACGTAATGATTCTCAACGATTTCATCAAGAACCTTTTTTATTTTAAATACCGTGAATCTTTGGAC  
CGTAAGTAATATTATCGTATATTGATTTTGGAAATGGATTAGGTTGTTGAAAGACCATGCCACATTTGTACGTAATTGTCTTTTAGA  
ATATTTTGTATCAAAAAATGTCTTGATCTCGATATAATATTTTACCAGCTGTTTTACAGAAGGTACTAACTCAACCATTCGATTCAAA  
GTTTTAATATATGTTGATTGGCCACAACCAGATGGACCTATAATGGCAGTAATTTGGTTTTTCATAAATATCTAAATTAATATTTTGT  
ATGCATGATTTTTCGCCATACCATAAGTCTAAATTTGTGTTGAATATATAACAGAATGTGAGTTTGTATCATCTGGTGTGTTTATGATG  
ACTTTGTGAGACATCAACGTATGACTTTGAGATATTGTTTAGTTTGTGCAAGTGTGCGCCATATTTAAACCTCCCTTTTAAATA  
GATAAATGAGATTGATTGTTTAAATTAGAATTTTTTACTAAATTTGTTACGTAAAAATAATCGCAACGCCATTTCATTAAGATTAAAGAT  
AACTAGTAAACGATAATGCCTGCCGATGCAACATTCTGGAATCTTCTTGGAGGCATTTTCGCCCAAGTAAATATTGGATTGGTAA  
TGCTGAAAATAGTCCAATATACTTCTAGGTGTGGCAATATAATAGTCGGTATACCGATTAGCACAAGTGGCGCTGTTTCTCCACG  
TGCTCTTGAAGAGACAAAATGAATCCAGTTAAAAATACCAGTTAACGCTGCTGGTAAAGACAACACGCTTATCGTTTGGCAATTATT  
AGCACCTAAACCATAAGAAGCTTCGCGTACTGAGTTAGGTACAGCTCTAATTGCTTCTGACTTGAAACAATAATAATTGGTAATAT  
CAGTAAGGTCATTGTTAGCGCTGCTGCCAATATACTGTTACCCATTTTCAAGGCTTCAATCCCCGCACCACCAACGAACAAAGTGTA  
ACCTAATAACCCAAATACAACCTGATGGTACACCAGCTAAATTGGAAATACTGATTTTAACAACTGAGTAAATTTGTTGTTTTTCGC  
ATATTTCTTAAGTATATAGCTGTACCTATTCCTAGGATGATTGATAATGGAATGATACTTAACATTAACCAAAAGTGAACCGATTAA  
CGCGCCTTTAACGCCAGCCATAGATGGTGTTGAAGAAGAAAAATTAGTAAAAAATTGTAATTTAAATGACTTACCCCTTTAATCAA  
TGTTTGAGTTAACAAACGCAATAAGTACGACAAGTCCTAATAATGTACATGCTAAAAATATGAGTTTGAACACTTTATTTTAAACCGT  
TCTGGATGATAAATGTTTTTGGACAAGTTGTTTACGACGAGTGATTGTCTAATATTATCTGTGCTTTCCATATTAATACTCTGCCATA  
AAACGCTTAAAGATCCCATGAGAAAGTAAATTCATGAGTAAGTAAAGATAAGTGTGAACCCCTACAGCATAAATACCTGCTGAA  
AATATTTGATCCAAATGTTGCATACCTGTGCTATCTCAACAATATATCCAGTCAATTGTTTGAATCGAACTTGTTAAACTTAATGAA  
GCTGTTGGCGAACTACCTGCCGCTAATGATACAATCATCGTTTCTCCAATTGCTCTTGAATCGCGAGAACGATTGAAGCTACAATA  
CCTGATGTTGCTGCGGGAAGTACGACTTTAGTTGCTACTTCTAATTTAGTTGCTCCAAGTCCATAGGCACCTTCTCGAATTTTATTG  
GTACAGATGCCATTGCATCCTCACTCAAACCTTGTGATGAGAGGGACAATCATAATACCGACAATAAGCCGGGACTTATAGCATT  
AACTCTCAAGACCTGGTATGAAAGATCTTAATACTGGTGAACAAAGGTTAATGCAAGAAACCAACACAATTGTTGGTATTCC  
TGCTAAAAATTTCTAATATCGGTTAATTATGCGTCGTGCACGGTCACTTGCATATTCACTTAAATAAATTTGCTGCACCAAGCCCGACT  
GGAACGTCAAAATATAGTCGCAATAACTGTGATTTTTAAAGTCCCTATTATCAATGCCCAGATACCAAACTTAGGGTGTGAACCGGTA  
GGATTCCAAGTAGTAAAAATGAAATTCAGTTATTGGAATCTGGTGAAAAAAGTGATGGTTTCTAAAGCAATGTGATTAATAT  
ACCTAGTTTGTGTTAAAAATGGAATCGCTGAAATTCGGGTAAAAATAACTGGTATAAATTTGTCATTATGCTTCCCTTTTTATTATTA  
TTTTTTTCGATTAAAGCTTTAACATTAGTAGATGAAGTCATAATCAAAACCTCTTTCTATTACTCCAAAATAATTAGATTTGTAAAAAT  
AATGATGAACCACTATTTTAAAGTTGATAAGCTTGTAGACTAACTGAATGTCAAAATCAGCGTCTCGATAAATCAAGCTTTGTACTCT  
AAATAATGATTCACCATCAAAATCATGTTTCAAGACACATTTGAAATTGCGTCTTATTATTTTTGTCTTCAGACTTTTTATCATCAG

ATTTCCTGTCGCTGATTTTTGATTTTTATCAATAAATGCTTTTAAATCATCTAATTGTGATTTGTATGTTTTCTCTGGTGTCTACAT  
ATCCAGCTTCTTCAGCTGCTTTACCTTTATCTTCTAAGACGAATTTGATAAATTCTGACATTACTTTATATCTTTCAATGCTTTTTCA  
TTTACATAAATGAATAATGGTCTACTTAATGCATAAGAGTTATCTTGAATTGTTTTTTCTGAGGCTCTGTGTCTTTACCATTTCATC  
TTTGATTTTTAACTTCTTTTAAATTTATCTTTATTTTGAACGTAGAAGTTATATCCAAAGTATCCGATTCCCTCTTTGTTTTCTGTACAGA  
AGAAACGATAGCATTTGTATCAGCATTTTTTCTGCTTTAATATCTTCTTTATTCATTACTTCATTTTCAAAGAAGTCATAAGTACCAT  
GACTTGAGTTTGGTGATACAGCATTTATTTTTTATCTGGCCATTTACTATTAACATCTTTCCATGTTTTAGCTTTTCCAGAATAAATT  
GCTTTTAATTGCTGTTTGTCTAATTCATCCACAAAATCATTTTCTTTATTTATAGCAACCGTTACACCATCTTGCGCAATTTTGAATTC  
TTTGATTTTGATATTCTTATCTTGTAAATTTTTGCTTCTCTTCATCTTTAATTGGTCTAGAAGCATCAGCGAAGTCGATATCTCTGCAA  
TGAATTTTTGGAAACCAGCACCTGTACCAGCTTGTCTGTGAGATTTAGCATCCGAGTGATCTTGAGCCCATTTTTCATTTAATTT  
CTCCACAATTGGTGTCTACTGTTGATGAGCCATCACCTTTAGCTTCCCCTTTTAAATCACTATTACCAGTCCACCATTACCGCCACCA  
CAAGCACCTAATAATAGTGTGACCTAAAGCTGTAGTACCAACAAATTGCCATTTTTTCATTGAAATATCCTCCCTGTATGAACAA  
CAAATAGTATTTGTATTGATTACATCTTTATCTTAACCTTGAATTATTAACCTCATTTTTAGAACTGTAAATGTTACATAAAAAATTT  
GTTAAGAAAATGTAAATATTAATTTTTGTAAATCTAAAAAATATTGCTTCATTAGTAAAAATTAATGCTTCTGGAAGAAATTATCGA  
AATTTAAATATGAATACAAAATGGCTGGGACATAAATCCCTAAAAAACAGCAGTAAGATAATTTCAATTAGAAAATATCTTAC  
TGCTGTTCTCTATTTATACAATACTTCGTATTGAATGGCTTCGCT

>034-contig\_264\_RC

ATAAAGTTAAACGAGAGCTAGGTTTTGTATTAATGGCACTTAATATAAGGAAAATAGCAGCTCAACGAGCTGTACATTATAAAAATA  
CATATCAAAAAAGCTAATTTCCATCAAATAATTAATAGAAATCAGCTTTTTTACATTGCCTAAGAACTTAATGTCCCAGCCTATTCTGT  
TTGAATTATTTAATTTTTTACTTTGAAAGGAATGTTTAAAAAACTACTTCATCTGTCCGACTTAATATTGAATATAAAAAACACGCAT  
CCTACGACACGTGTAAAAATGATTATCTTTTGAAGTCAATTGAGTCCCAACCTTTTTTAGTTAAAGTGATTTTACCTGTTTCTATATTA  
ATAATCTTCTGTTTATATAAGTGACCGATTGCACGTTTGAATGAACCTTTACTCATATTGAATACTTCTTTAATCGCTTCAGGGCTTG  
ATTTGTCCCAGAATGGTAATTCACCATCATATTCAACTAGTAAATCAAAGATGACTTGGCCGTCATCGTCTAAACGTTTCATGTGCAA  
GTGGTAAAAATGAACCATTTAACTCACCTTTATCATTATGCCGATAATTTCAACTGAACAGATTACCTAATCTTGGTTTACGCTTT  
ACGTTCTGATTCTGTACGAAAATTTGTAACCTGATTTCGCTTAATAAAGTACCAATTCGTAATACGCGGTAAGGTTTGGCTTC  
AATGACTTCGTTTTTTAAATTATCATCGTGTACAGGTGTAAACATATTTTCTACAACAGATTCACTCGCTAAACGTCCTACATATGA  
TTCTCACGGTCAATTCGTAATGTAAGTACGAAATGATCACCAGGTTGTGGCCATAGTGATTTCACTTTTGGTAAATCTTCCCATGGTA  
CTAACACTTCACGGGGTAAACCAACATCTATACGTGCCCCATCGCATCCGTTTTAAGTACTTTAGCAAAATCATATTTATCTTTCTGT  
AATATCAGGCATATTTTGAAGTGTCAAATAATTCACCTGAACGGTTTGGATAAATGAAGAACTATATCTTCACTTCTTAATTC  
ATCATCATCGTTTCATTTCTGATTGGTTTTAACTTTACGTTTTTACCCTTTGGTCTTTTTAAAAGGTAAGTTGAGCCTGTAAACCTACTA  
CTTCAAGGAATTCATAGAACCTACTATATCTTTGTCTAATGCCATGTTATTTCTCTTCGATTCTTGTATTCTTTATTATTATAACATG  
TGTGAGTCACTTATCATTAACAATTTATGAGGTGCAAACTGTGACGATAATATGATATAATTTCTCCGTTAGAATATCGAATGAA  
AAAAAGGAGAAAATGCATGTTTACAAGTAACCTGATGTGAGTTTACGTTTTGGAGATCGTAAACTATTGGAAGATGTAATATTAAT  
TTACAGAAGGTAATTGTTATGGATTAAATGGTGCAATGGTGCAGGTAAATCAACATTCTTAAAAATATTATCTGGTGAATTAGATT  
CTCAAAACAGGACATGTTTCATTAGGGAAAAATGAACGTCTAGCTGTTTTTAAACAGGACCACTATGCTTATGAAGATGAACGCGTG  
CTTGATGTTGTAATTAAGGTCACGAACGTCTTTATGAGGTTATGAAAGAAAAAGATGAAATCTATATGAAGCCAGATTTCAGTGAT  
GAAGATGGTATCCGTGCTGCTGAACCTGAAGGTGAATTTGCAGAAATGAATGGTTGGAATGCTGAAGCTGATGCTGCTAACCTTTTA  
TCTGGTTTAGGTATCGATCCAACTTTACACGATAAAAAAATGGCTGAATTAGAAAAACAACCAAAAAATTAAGTATTATTAGCGCA  
AAGTTTATTCGGTGAACACAGCTACTATTACTGGATGAGCCTACTAACGGTCTCGATATTCAGCAATCAGTTGGTTAGAAGATTT  
CTTAATTAACCTTTGATAATACTGTTATCGTAGTATCGCATGACCGTCATTTCTTAAATAATGTATGTACTCATATCGCTGATTAGAC  
TTCGGTAAAAATTAAGTTTATGTTGGTAACCTATGATTTTTGGTATCAACTAGTCAGTTAGCTCAAAAGATGGCTCAAGAACAAAAC  
AAGAAAAAGAAAGAAAAAATGAAAGAGTTACAGGACTTTATTGACAGTTTCTCAGCTAACGCTTCTAAATCTAAACAAGCAACAAG  
TCGTAAAAAACAACCTTGAGAAAATGAAATTAGATGATTTCAACCATCATCAAGAAGATATCCTTTTCGTTAAATTCACGCCTGAGCG  
TGAGATTGGTAACGACTTATTAATCGTTCAAAATCTTTCTAAAACAATTGACGGCGAAAAAGTATTAGATAATGTATCATTACAAAT  
GAATCCAAATGATAAAGCGATTTTAATTGGAGATAGTGAAATTGCAAAAAACAACATTACTTAAATATTAGCTGGCGAAATGGAAC  
CAGACGAAGGTTTCATTTAAATGGGGTGTTACTACATCATTAAAGTTACTTCCCTAAAGATAAATCAGAGTTCTTTGAAGGTGTAAATA  
TGAATCTCGTTGATTGGTTAAGACAATATGCTCCTGAAGATGAACAAACAGAAACATTTTTACGTGGTTTCTTAGGTGCTATGTTATT  
TAGTGGTGAAGAAGTTAAGAAAAAAGCTAGTGTGCTTTCAGGTGGAGAAAAAGTACGTTGTATGCTAAGTAAATGATGTTATCAA  
GTGCGAATGTACTTTTACTTGACGAACCTACTAACCACTTAGACTAGAAAGTATTACTGCTGCTCAATGATGGTCTTAAATCTTAA  
AGGTTCTATCATCTTTACTTCTTATGACTTCGAATTTTATCAACACGATTGCAAAACCGTGTTATCGATTGTTAAATAAACAAGCGGCGTT  
TCAAAAGAAATTCCATATGAAGAATACCTTGCAAGAAATCGGCGTTTTTAAATAAACATAATATGTAGAATTTCTTTTCGAAAATCTC  
TGTATTGAGGCCCGACCAACTTGCACATTATTGTAAGTTGGCTTACTGTCACCTTCTATATTGGGACTTATTCGCAACTTGTATTGT  
TTGTAGAAATTAGGAATCCAATTTTCTATGTGAGACGCTGACAAGGATTGAAAAAGCTAGCTACAAAGTCATTTTCATTACGTCA  
ACTACTGTCAATATAACATTGCAGGGCCTAGGACATTGATTCATGTCCGAGACTATATTCATTTAATAGACATTAACCTGGGCGTCT  
CGATGCTAATATTTATAGCATCGAGGTGTCCTTTTTATTTTATTTTTTAGCACATCAGCACAGTGAACACCCCTTCTCTAAATTACAA  
ATACAGTTATCAACGCATTAAGAGAGTACATTTATTTAATGTGCATATTGATTATGCTATAAGTATTTGAATTTTATTTTTCAAAAA  
GTCTCATTATCACCACCTTTTAAAAATATAAGCAACGCTATAACTTGAATTTTTCAGGTTATTTCAAAAAATCTAAATATCGGTTTACA  
TTCATATTGTTCATATGTATAATGAACACATACCAATTAATAATATTTTGTAGAGCGCATCAATCAGTAAAGTTAGATTACT  
GTCTGCTAACAGCTAAATTTGAAAGGGTGCATGCCGAAGCAATTATAATAGCAGTTATAATTTGTTGGACTTTTGGTTAAGAGCT  
GAGAGTTTGTCAATTATTTAAAAAATAATGGAGTGCATCACTTGTATATAGATTAAGAGCAAGTTTCGATTCCGAACCTGTTCTTTTTTT  
ATTATTGTGTGCCCTTCTTAAACAATTAGGAGGATTATATGGTAACAAGAAGTGTGTTGAAATTTGGCGGATCATCCGTCAGTGATT  
TACAAAAATAAAAAAGGATCGCTGAAATGTTAAAGGAGCGAGTCAATCAAGATGAACAATTAATTGTCGTTGTAAGTGTATGGGTA  
ACACAACAGATCAATTAATGACGAATGTATCGACCTTGACTAAAGCACCAAAACAACAAGAACTGGCATTATTATTGACAACCGGA  
GAGCAACAACTGTATCTTATTTATCAATGGTATTTAAATGATATCGGTGTGAATGCCAAAGCAATGACTGGCTATCAAGCAGGTATT  
AAAACCTATTGGCCATCATTTAAAAAGTAAATTTGCTCAAATTAATCTTAAACATTTGAACAAGCCTTTCAAGAAACAGATATTTTA  
GTAGTTGCTGGATTCAAGGCATCAATGAACATCAGGAATTAACAATTTAGGACAGGCGGTTGATACGACCCGCTGTGGCATT  
GCTGTTAGTAATCAAAATACCTTGTGAAATTTATACCGAGCTTGATGGTGTGTATGCTGACTGACCCAAGACTTTTACCAAAAGCTAAA  
CGACTAGACATCGTCTCATATGAAGAAATGATGAAATGAGCGCTTTAGGTGCTGGTGTACTTGAAACAAGAAAGTGTGAATTAGC  
TAAAAACTATAATATCCCTTTATATTTAGGAAAACTTTATCGAACGTGAAAGGAACATGGATTATGTCAATGAAGAAATATTAG  
AGAAAAAGCAGTTACTGGTGTGGCTTTGGATAACATATGATGCATGTAACAATTAGTTATCCCTACCTGACAATCAGCTACTTA

CCCAACTATTTACGGAACCTGAAGAAGGTGCTGTAAATGTTGATATGATTTACAAAAATCGTCAACTTGGATGGACTACAACATATCCT  
TCACGATTAAAGATAGTGATTTTCATCAAATTTCTATGATTCTTGAAACATTAAAGAATCAATATGAAGCATTAGCTTATAAAATCA  
ATGAGCATTATGTCAAATTTTCATTAATTGGCTCAGGCATGCGTGATATGTCAGGTGTGGCATCAAAAGCATTTTTGACATTAATTG  
AAAATAATATACCTTTCTACCAAACAACAACATCTGAAATAAGTATTTTCATACGTCATTGATGATTTTAATGGGCAACAAGCGGTAG  
AAAACTATATGACGCATTAAACATTTAATGGTAAAATGATTGTTAAAATATTCTAAAAATTGGAAATTATTATAAAATGGAGTGAC  
AAGTTATGACAAAGTTAGCAGTTGTGGGTGCAACAGGATTAGTAGGCACAAAAATGTTGGAGACATTAAATCGTAAAAAATATTCTT  
TTCGATGAATTAGTATTATTTTCATCAGCACGTTCTGCAGGGCAAGAAGTTGAATTTCAAGAAAAAACATATACAGTACAAGAATTA  
ACTGATGCTCGTGTAGTGAACATTTTCGATTATGTATTAATGAGTGCTGGTGGCGGTACAAGCGAACACTTTGCCCCACTCTTTGAA  
AAAGCTGGTGCAATCGTTATAGACAATTCAAGTCAATGGCGTATGGCAGAAGATATTGATTTAATCGTTCGGGAAGTCAATGAACC  
TACATTTACAAGAGGTATCATTGGCCAATCCAACTGCTCTACGATTCAATCTGTTGTGCCATTAAGTATTGCAAGATGCTTATGG  
TTAAAAACGAGTGGCATATACAACATATCAAGCTGTATCAGGTTTCAGGGATGAAAGGTAAAGAAAGATTTAGCTGAAGGTGTAAATG  
GTAAAGCACCAGAAGCATATCCACATCCAATTTATAATAATGTGTTACCGCATATTGATGTGTTTTAGAAAAACGGATATACAAAAG  
AAGAACAAAAAATGATTGATGAGACGAGAAAAATTTTAAATGCGCCAGACTTAAAAGTAACAGCAACATGCGCACGTGTGCTGTT  
CAAGATAGTCATAGTGTGAAATTGATGTAACGCTTGACAAAAGAACGACAGCAGAAGATATTAAGCGTTATTGATCAAGATGA  
CCGCGTTGTTTTAGTAGACAATCCAGAGAACAATGAATATCCAATGGCAATTAATTCCACTAATAAAGATGAAGTGTGTTGTTGGCCG  
TATACGTAGAGATGATTCATTAGAAAAACTTTCCATGTATGGTGTACATCAGACAATTTATTAAGGGTGTGTCATTAAATGCTGT  
ACAAGTATTGGAACAAGTTATGCGTTTTAAAGGAGCGCAATTAATGACACATTTATTGAGGGTGTGGCGTTGCACTTACAACCC  
CTTTTACAATAACAAAAATTAATTTGAAGCTTTGAAAACACACGTTAATTTTACTAGAAAAATATGCCCAAGTCAATCGTTA  
ATGGAACACTACTGCTGAGAGCCCTACTTTTAAACAACAGATGAAAAAGAACGCAATCTTAAAAACAGTTATTGATCTTGTAGATAAACCT  
GTTCTGTATAGCAGGAACCTGGCACTAATGATACTGAAAAGTCAATCCAAGCTTCAATCCAAGCTAAAGCCTTAGGGGCTGATGC  
AATTATGTTAATTACGCCCTACTACAACAAAACGAATCAACGTGGTTTTAGTCAAACACTTTGAAGCGATTGCAGATGCTGTGAAATT  
ACCAGTCGTGCTGTACAATGTTCTTCAAGAACGAACATGACAATTGAACCAGAACTGTAGAAATATTAAGTCAACATCCTTATAT  
AGTTGCTTTAAAAAGATGCTACGAATGATTTTGAGTATTAGAAAGAAGTAAAAAGCGAATTGATACAAATTCATTGCAATTATATAG  
TGGCAATGATGACAACGTCGTTGAATACTATCAACGTGGCGGTCAAGGGGTTATCTCTGTTATTGCCAATGTCATTCCTAAAGAATT  
TCAAGCGTTATACGATGCTCAACAAAGTGGATTAGATATTCAAGATCAATTTAAACCAATCGGCACACTGTTATCAGCCCTATCAGT  
TGATATTAACCCAATTCTATTAAGCTTTAACAAGTTATTTAGGATTGGAAATTATGAATTACGTTTACCATTGGTTAGCCCTAGAA  
GATACAGATACTAAAGTGCTTCGTGAAGCATATGACACATTTAAAGCGGGTGAAAAATGAGTGAAAAATATTACTAATTGCTATGGT  
GCAATGAATCAACGCGTTGCTAGATTAGCAGAAGAAAAAGGACATGAAATCGTTGGGGTCAATTGAAAAATACCCGAAAGCAACAA  
CGCCATATCAACAATATCAACATATTGCAGATGTTAAAGATGCCGATGTTGCAATAGATTTTTCAAATCCAAATCTGCTTTTCCCTTT  
ATTAGATGAAGAGTTTCATTGGCCATTAGTTGTGGCAACAACCTGGCGAGAAAGAAAACTACTTAATAAGTTAGATGAATTGAGTC  
AAAATATACCTGTATTTTTAGCGCGAACATGAGTTATGGCGTTCATGCACTGACTAAAAATTTAGCAGCTGCTGTTCCCTACTTGA  
TGAATTCGACATCGAATTAACCTGAGGCACATCATAATAAAAAAGTAGATGCACCAAGTGGTACGTTAGAAAAATTGTATGATGTGA  
TCGTATCTTTGAAAGAAAAATGTAACACCTGTGTATGATAGACATGAATTAATGAAAAACGCCAGCCACAAGATATTGGTATACAT  
TCTATTCTGGGAGTATGATTGCGGTGAACATGAAGTCTATTTGCTGGCACTGATGAAACGATTCAATACGCACTGTGCACAA  
TCAAAAGATGATTTTTGCGAATGGTGCAATACAAGCAGCAGGAACGCTTAGTTAATAAACCAACCGGCTTTTATACGTTTGACAACCTTA  
TAAACATATTAAGGAGATTGATTATTTATGGTACAACATTTAACAGCTGAAGAAATTATTCAATATATAAGTGATGCTAAAAAGT  
CTACACCAATAAAAGTATATTTAAATGGTAATTTTGAAGGCATCACATACCCAGAAAGTTTTAAAGTATTTGGTTTCAAGAACATCTA  
AAGTAATCTTTTGTGAAGCGGATGATTGGAACCTTTTTACGAAGCATATGGTAGTCAATTCGAAGATATAGAAATTGAAATGGATC  
GTCGCAATTCTGCCATTCCATTAAGAGACTTAACAAATACGAATGCACGTATTGAACCAGGTGCATTTATTAGAGAACAAGCCATTA  
TTGAAGATGGTGTGCTGCTATGATGGGCGCAACAATTAATATTGGCGCAGTCGTTGGCGAAGGTACAATGATTGATATGAATGCTA  
CTCTCGGTGGTGTGCTACAACCTGGTAAAAATGTACATGTAGGGGCTGGCGCAGTATTGGCAGGTGTGATTGAACCCCTAGTGCAT  
CACCAGTTATAATCGAGGATGATGTATTAATCGGTGCAATGTCAGTTATTTAGAAAGGTGTACGTGTTGGTAAAGGTGCTATTGTTG  
CAGTGGCGCGATTGTGACACAAGATGTACCAGCTGGTGCAAGTGTGTTGTTGTTGTTGTTGTTGTTGTTGTTGTTGTTGTTGTTGTTG  
GTACAAGATACTAAAAAGAGATTGTAGCAGCATTAAAGAAAACTGAATGACTAGTGACGTCAACGTATAATAATTTCAAGGTTGAG  
ATACGATTATGTCTCAACCTTATTGTTTATCATTGAATAAACTTATGATCACAAATTCGAAATACGTTACACTATTTATATAGTAAT  
TTAACACAAAGGATTGATAATTATGAATGAATTAGAATTTGTTACGAAACATCGCCGTCATTTACATCAACATCCTGAATTAAGCTT  
ACATGAATTTGAAACAACTGCTTATATTAAGCGTTTTTAGATAGTTTAAATATTAATACGATTGCCCATTTGAAACTGGCGTCAT  
TGCATACTTAGAAGGTAATGGCTCACATACGATAGCGTATAGAGCTGATATTGATGCGTTACCTATTTTAGAGGAAAAATGATGTGCC  
TTATCGCAGTCAATCTGATCATGTGATGCATGCTTGTGGACATGATGGTCATACAACCTGCATTAATGCTTTTTGTACAACGTTGCAAA  
GACATGCAAGACGCGAGGTCAATTACCGCAAAATGTCGTTTTCATTTTCCAACCTGCAGAAGAACTGGTGGCGGTGCAAAATCGATT  
AATAAAAGCCGGTGCCTTTGATAAGTATCCAATTGAAGCGGTATTGGTATTCATGTTAACCCATTGCTGATGAAGGCATTTGCAAGT  
GATAAGAGATGAAGAAATACGGCCAGCGCAACAGAGTATCGCTTTTTCTTAACAGGCCTGTCAAGTCAATGTTGCTGATAAAAGAAC  
AAGGTCATTCTTGTGGTGAAGCATTACAACATGTATTAACCTCAAATATCACAATTTCAACAATTTACCTTAACGTTTTGAAACGAA  
ATATTGTTCATATTGGTCATTTTAAAGCTGGTGAAGCGATTAACTGTACCAAGTAATGGTTATTTAGAAGGTACAATTCGTACAT  
ATGATATTGATGATTAAACAATCGTTAAAAATCAAATGCACAAGATAGCAGAAAGTGTCAAGCTTCTGTTAATGTAGAATGTGAA  
GTTAAATTTGCAGAAGGTTATCCCCCTACAATCAATAGTCCGAAATTACGTACTCAAATAGAGGACGCCTTAATAAAAGCTGATTTA  
AATGTCTATGACAAACCAACGCCATTCTTATTTGGGGAAGATTTTAGTTTTTATGGTCAACAACCTAGCTCCAGCTTACTTTGTTTTTA  
TAGGAACACGAAATGAAGATAAAGGTTTTGTAACCTGGTTTGCACACATCACATTTAAATTTTGATGAAAAAGTGTAAATAAACGCTG  
GTTAATTTTTACGAAAAATTTATTAATAATTACAAAGAGGTGTAATACATTTGACAGCAACATGGTCTGTAATAAGAAAAATATTTT  
ACAAAATGCAATACAGTCAAAAAACAATACCCATTAATGGCAGTTGTTAAAAATAATGCATATCTACTAGACTGACCTAGAATTTGCTG  
TAACTCAGTTTTATCCATGCAGGTATAGATACATTTAGCACAACATCACTACGAGAAGCAATTCAAATAGACAACCTTGCTCCAGATG  
CAACAATCTTTTTAATGAATGCAGTATACGAATTTGATTTAGTCCGTGAACATCAAATACACATGACTTTGCCGTCGTTGACATATTA  
CTATAACCACAAAAATGATTAGCTGGTATTCATGTTCACTTAGAATTTGAAAATTTATTACATCGGTCTGGATTTAAAGATTTAAAC  
GAAATTAAGAAGATTGAAGGATCACCATCAAAATCAAAATGCAAAATGATTATTAGTGGTTTATGGACCCATTTTGGATATGC  
TGATGAATTCGATGTGTCAGATTATAATGTTGAACGTTCACAATGGATGGAATTTGTTGAATCACTTTTATCTGAAGGTTATCAGTTC  
GACCTAATCCATGCACAAAAATAGTGCGAGTTTTTATCGGGAAGGACAAATATTACTACCCACCATACACATGCGCGTGTAGGTATT  
CGGTTATACGGTTCAAGACCATATAGTTCACTGAATCAACATGATATTGTTGACTGATTGACTGTAAAAGCACATGTTATTCAAGTG  
CGCGAAGTCAAGCTGGTGATTATTGCGGTATAGCTTTGCTTTGAGTTGACTAAAAACAATACAAAATTAGCTGTAGTTGATATC  
GGTTATGGCGATGGAATTTTAAAGAACGTGCTAAACATGAAGCACTTATCAATGGTAAACGCTACCCGATACGTGCATTAATGAT  
GAGCCATATGTTTGTGAAGTAGATGGCAATGTACATGCACAAGATGAAGTTATCTTTATAATAATGATATCCGCATCGATGAATA  
TACCTTTAAAGGTGTTGGTGCAAAATCTGAACAATTAAGTGCTATGAATCATGATTCTTTAAAAAAGGAGTACATTTCAATGACTG

TTAAATATAATCAAAATGGCGAATTAACAATGGATGGTATTAGTTTAAAAACGATTGCACAAAGCTTTGGTACACCTACCATTGTTT  
ATGATGAACTACAAATTAGAGAACAGATGCGCCGTACCATCGCGCATTTAAAGATAGTGGATTAAAATACAATATTTTCATACGCC  
TCAAAGGCATTTACTTGCATTCAAATGGTCAAACCTGTAGCTGAGGAAGATTTACAGTTAGATGTTGTTTCTGAAGGTGAATTATAT  
ACAGCTTTAGAAGCAGGTTTTGAACCGAGTCGCATCCATTTCCATGGTAACAATAAAACGAAACATGAAATTAGGTATGCTTTAGA  
AAATAATATCGGTTATTTTGTATAGATTCATTAGAAGAAATTGAATTAATAGACCGCTATGCTAATGATACGGTTCAAGTTGTATT  
ACGAGTTAATCCAGGTGTGAAGCACATACACGAATTTATTCAAACCTGGGCAAGAAGATAGTAAGTTTGGATTATCAATTCAAT  
ATGGCTTAGCTAAAAAAGCAATTGACAAAAGTCCAACAATCTAAACACTTAAAAATAAAAGGTGTACATTGTTCATATTGGTTCACAG  
ATTGAAGGTACAGAAGCATTTATTGAAACTGCTAAAAATTGTTTTACGTTGGCTTAAAGAGCAAGGCATTCAAGTTGAATTATTAAC  
CTTGGTGGTGGCTTTGGTATTAAATATGTTGAAGGTGACGAAAAGTTTCCCTATCGAAAGTGGTATTAAGATATTACAGACGCAATA  
AAATCCGAAATTAAGTTCTAGGTATAGATGCACCAGAAATAGGTATTGAACCGGGACGATCAATTGTAGGTGAAGCTGGCGTTAC  
TTTATATGAAGTTGGAACCATTAAGAAATTCAGAGATTAATAAATATGTTTCAATCGATGGCGGTATGAGTGATCATATCAGAAC  
TGCACTTTATGACGCAAAAGTATCAAGCATTGCTTGTAAATAGAAATGAAGAAGCAGATGACAGTGTAACTATAGCTGGAAAATTAT  
GTGAGTCTGGTGATATCATTATTAAGACGCTAAATTACCTTCATCAGTCAAACGTGGAGACTATCTTGCTATATTATCAACTGGTG  
CATATCATTACTCTATGGCATCCAATTACAATCAAAATGCAAAAAGCCTTCTGTGTTTTCTTAAAAAGATGGCAAAGCACGTGAAGTTA  
TAAAGCGACAATCGTTAAGACAACCTATTATTAATGATACAAAATAAAAAATAAACAAAGTAATCCCCGAAGCACAGAAAAATTATAC  
TGTGACTCGGGGAATTTTATGCATTATAGATGACTGTAGAAAACATGCTTGGACATATACTCTAAAAAAGGAAGAAGCACACATT  
TTTAGTTAGAAAAGTATTTATTTCTTTTTGTTCATTAATCCTTTATATTAGTTAGCCCTATTCAACTAATTTAAAGCATCATATACATAC  
CACACTTTAAACAAGCATGAAATTAGATTTTATGCTTTTACTGTTTTTCAAATAATATAAAACGATAAGAAATTAACAACAAT  
ATAATGTATAAAACAGAAATTTTCATCAAAATCCAAAATCTTACTGTAAATTAACATACATCAATATCTTCTAATTCATCATCTCTGCTTT  
AATATAATTATTAACCTTTGGCAAAGTCATTAATGTACATTGTAAATATAGTAATAAAAGTCGATAAATATGATGTTAAAAAATAT  
GTATGTTTTATCAATATTAGTTTGA AAAATAGTATCCAGAAATCATTATCGGAATCACTAATACAATCATCATTGCTGCTAAAAT  
ATTAATATTTAATCCAATTGCAGATAATACACCGAAAACCTAATAAATTAGCAACTAAACTAAGGATAAGATTTTCATAAAATCAC  
CTCGTCGTTGTACACCATAATTATATTATATAAAATATAATTTTCTATTGCAACAATGTTGGTGATATAAAAAAAGAGTTCTCAATTT  
GGCTGAGAAAACCTATCGCGTTAAGTATTTGTAATAAGCATATAAAAAACACCTTACTTCTTGGTAAGGTGTTAGTTAAAAATCAATGAT  
TCAAACTAAGAATTATAGTTTAAACAACGTTTGCAGCTTGTGGACCGCGGTGCGCTTCAACTACTTCAAACTCAACAGCTTGACCTT  
CTTCTAATGATTGTGAACCATCTTGGTTAATTGCTGAAAAATTCAGAAATACGTCATTTTCTCTTCAACTTCGATAAAGCCGAATCC  
TTTTTCAGCGTTAAACCATTTAACTGTACCTTGTTCATAAATCTGAAACCTCCAAGACTAAAATTCATTAATATGCTTATTCGCATA  
TTACAAAAAATACATGCAAAATTTCACTCAAAATATTCTTTGCAATATGGAATAATCATCTGCTTAACTTGTATTATAGTGCAGTTATTA  
CCAAATTGCAATACAATAATAAAAAATATTCATTTAATCAATTATTGGTAGTTTATAATATACTTCATTATTTTGTAAAAACAATGAA  
ACTATAAAATATTTGTAAATCCTCTTCACAATCTTCGCAATAGTTCATGTACAAATATTATAAAATGCATAAATATTATATTGCTT  
GTGACATAATTATCGAACTGAACCTTACATTGATTAATCAATTGTTGATAGTGCTTAAACATGTCATCAAAATCTTGATATTGATATT  
TTTCAACAATGTTTCTGGCCAGTCACTGAATAACCACCATCCCTCATAATCGGCTCTAATTTTGGTAAGTGTCCACATTATTAAGA  
CCCCTTCATACTTCAAAAATCTTATACCTTTATCTCTGAAAATCAAGTTTGACGACTTGAAACAAACAAAGTAG  
TAACATAAGTAATTATAGTTTAAAAAGTAAACTACGTAATAAATCAATTATGAGGTGGTAAAAATGAGACATATACATTTACAAG  
TATTTCGACGCGTTCAAGCGTCGGATTAGATATTTACACAACGCATTGCAATGAACATAAATGTCGCTGATTTCAAAATG  
TAGATGACTATGTAGAGATATATGCACAAGGGGATGACGCAGATATAGAGAGATTTATTCAAGGTGTAATTGAAGGTGCCTCACCA  
GCATCAAAATGTAACAAGCCATCAACTGGAAGAGTTAGAATAAATCAAAAAATTATCGGATTTTCGATCAATATAAAATGCTAAATA  
AAGGAAGATGACAGTGAGATATAAATTTCTCATATATTTGGGGTGTTAGTGGGAATTCCTGTAGCGTTTTTAAACAAGCATATTGG  
GATGATTGCACTTGATGTATCTTTTTTAAATTGATATGCTATTGGTATTGTTGGCTTTTTAATGACATACCTACCGATACAAAACTC  
ACTTCACGCAAAATATTTAAACGAAATTGGTTGACTAGAAAAGACTATCGCTATATTCGAAATCAGTTAAATCATACACACCAAAA  
ACTTAGAGGTATTTTAAAAACGTATGTCAATATAAGATCAATTAAGATTTTAGGCAGATTAAATGATATATACCAAAATTTACAGTTT  
TATTTATACGACAGTTAGACAGAGACCTGCATCTTTTATAAAGTTGAAGGCTTTTTTATTCTCATATTGATAATGCTTTAAATTTG  
GTTGATGCATATACAGCTTAGCAAAAAATGCCAAAAATCAATTAATGAACAGCAAAAAGTTAGAACAACACGAAATTAATTTGGA  
TGAGGTCAAACGAACATTAATCGCTGATTAAAGCGTCTCAACGAAGATGATTATGAACGTTTAGATATTGAAATGGAATTAATA  
AGTTACATCAAAAACATCATCAAGATTGATGTAAAATAGCAACTATTGGAGAGATGATTGATGACTGAAAATAAAAGTTTCAAAGA  
AAGCCATCCACTAGATGATTTTATAAGCGATAAAGAATTATCGAATACTACTATTCAAAAAGAAAAGTTAACAATTGAACAACAAA  
AACAGGTAGACACAATCAGTAAACAAATTAACCTTTAGACAATGAAGGTTTATTAGCGTTTGGTTCTGATTTACAGAAACAAATGT  
CTCAATTTTCACATCAAAATGTTGGATGAAGTACAAAGTAAAGATGTTGGTCTTATTGGAGATACTTTGTGATCTAATGTCAAAAC  
TAAAGTCAGTTAATCCAAATGAGTTAAATACTGATAAACCATCTATGTTAAAAAAGAAATTTTACGAGAGCAAAAGTCGTCTATCAATG  
AAATCTTTTCAAGAATGCAATCAGTTAGTGCTCAAGTCGATCGCATAACGATTCAACTGCAGAAACATCAACACATTTAACAAGA  
GATATTGCAATTATAGATACGCTATATGATAAAAAACAACAATCTTTGATGACTTATCATTCATTCATGCTGCACAGCAAAAA  
AAGTTGCAATTAGAAAATGAAAAGCTACCACAATTGCAACAGCAAGCGCAACATCCACTAAATCAAAATGGATATTCAACAAGTTGC  
AGATATGCAGCAATTTATAGATAGACTAGATAAACGCATATATGACTTACAGCTTTCAAGACAAATAGCTTTGCAAACTGCGCCAC  
AAATTCGATGATTCAAAATGTTAATCAAGCACTTGCCGAGAAGATACAAAGTTCAATTTTGACAAGTATTCCACTATGGAAAAATC  
AAATGGCCATTGCGCTTACATTAATGAGACAGCGTAATGCAGTTGCTGCACAACGAGCTGTCAGTATACAATAATGATTTATTAA  
CAGCAAAATGCTGAAATGTTGAAAACAAAATGCGATTGAAAACGCAAGAAATGAGCGTGGCATTGTTGATCTTGATACATTGAAA  
CGTACACAGCGTAACATTATTGAGACAATTGAAGAAAACATTAATTATTCAACAACACGGTCGCGAAGAACGACAATTAGCTGAAAA  
AGAATTACAACAATTAGAACAAGATTTAAAGTCACATTTAGTGAACATCAAAGGACCGAATAAACAATCATAAATTACGAATTAGA  
TATAACAAAAGGAAGCATCTACGATTAAATTGGAGATGCTTCTTTTATATTTCGTTATTCTGTTGATATTAAATTGGATCTT  
GTTTTCAAAATATGCCGACTAGATAGCCTAATATCGTTGCAAAATATGCTTACTGGGAACCACTTCAAGAAATGAAATGAAATGAAATG  
ATGATTCTATAAAGTTAATTTTACGCCAACCTAACTTACTAATAACACTGAAAATCGACAATATAAATACGATAATAAAGTGAATTT  
GTTGTGAAATGCGTTTTGTGCGGTATGAATTTGGCAATTAATAATACAACAGTTATTGCTACTGGGTATACAATGCTTAATA  
CCGGAATTGACATTGAGATAACAGCATTTAAACCTTGGTTAGCAATAATAAAACTCATTAAATGAAAACCTAATACAATGCTTTGT  
ATGATACTTTAGGTACGATTCTATGGAATATTTCAGAACTGCAACAATAAGCCCGCATGCTGTAGTTAGACATGCCAGCGCCACA  
ATGATGCCCAATAAATATTTCCGAATGAACCAATCCTGTTGAAGCCATTGTGCTTAATAAATATGTCCCAATGTTTCGATCTTTGG  
ATTTCAATTGATCTAACGTATGTCACTTACTGGCATATGATTACCAATATAACCTAATGAAATATATATGAAAATTAAGCTACGG  
CTGCAATTAACACGAGTCAAAGTTTGTGAATATTGATTGTTTGTAGTAATGCTGTTAGTTTACTGCAATTAACAACAATCAT  
TGAAAAAGCAATTGCTCAATGGCATTCATTGTTAAATAGCCTTGTGTAAAGCCTTCAGCAAAAACCTGAAAATTAAGAATGATATA  
GTGCTTCAATTGCCCCTTCCAGCACTATTACCGCTAAAGTCTAAGTATCCTTTAATAATCATCGCTAAAAATAGTAATCAATAAATG  
TGTTAATAATGAACCAATACGATCGATTAACTTAGATGGATTTAAACAAATATACAAAACGACTATGAAGTAGATAATCGTAAATA  
TAAATAAAGCGATACTACTATTGCTATGTATAATTGGTGTAATTGTTCATTTCAAAGATGTAGATGCAGTTCTAGGTATTGCGAAAA

GTGGTCTATAGTCAAATAAATGATGATTAAGAACAATATTGAAAATTTAGGTGAAATTTTATTTAATGCGCCAATATATCCTTCTTT  
ATCAAGTGCACCTACAATCACACCTAATAATGGTAAACCAATCCAGTTAGAACAAACGCTAAAATGGCGGGCCAGAAAAATTGAC  
CACTATCCAATCCGAGATTAGGAGGAAAAATTAGATTGCCTGCGCCAAAAACATAGCGAAGAGCGTAAACCCAATGACCCATGTA  
TTTTTATTCATAGAGTTACTCCTTTTTTTAAAACACGAAATAATTTACAAGTAAATATTTTAGCACAAAAAATAATAAGAGTCTATA  
TGAAATATGTTGTACATAGCAGAAACAAAACACATGTGTTGTTTAAATCAAATTATGCCAGAAAAATAAAATCTTCAAATTTACTTT  
TTAAATAGTAACCTGATGACTTTTTATTCACACTTTCATATAAACTCATATTTTAAACTTATTATAAAGATTTAAGTAGTAATTTTTTA  
ATAATGGAGAGAGATGTCCAGGTAAATGCGCAACACCTTCAACGAAAAATAGCATATTGACCATAAAATATTATGAATTGTTTGTTCA  
ACATCTTCAGTTATTGGATCTTGACTCAAAAACACATTAATACTTCAATGCCAAATTTACGTGACATTTCTACAGCTTCATACGTAT  
CAATAATACCATCTTGACTATAATTAATGCAGACGGTTCGCCGTCTGAAAAACGATTAAAAATCGTTGATGTTGATTTTCGACGCA  
TTAATCGTTCACCTTGCAACTCTAATAGCAACACCATCACGATTATCATCTTGAGGTTCAAGTGCCATAATACGTGGGCCATCTTTTT  
AAAGGTTGAGTAATCATAGTTAATAATTTCAATTAATGATATTTGGTTGTGCATGATCGTCTGAATCAAAGGCATCCTCACTGAATGA  
TAAAAATTCATGTTAATGTTCAATGCTTTTAAACGTCTCGTGAATAACACTACACCTTTCTCGTTTCAGCCATTTTATCATGCATAC  
TTGCTGACGCATCAATTAACAATGTAAACGTGCGATCAATGATTTACTTAAATCTTGTTTTTGTAAAAACAATTTATATTGATCGTC  
GATAAACCAATTAATTAATCCTTTTGTAAATCGTCTTTTGTAAATTAACGTGCGATCTCGTTGTTCTCGTTCAATCGTTTTCTTTA  
TAATTTGAATTAAGTCTTTGATTTCATATTGTACGTCTTGTTTCGATTCTTGATATTCTAAAACATATTGTGGCTCAATTTACAGGAATT  
TGCCATTTTATTTCTACATTTTTGTTTCACACCATCAAGTTGAAATGCTTGCTTTGACCAACAGCATCGCCTTCTTCACGATTTAGCGT  
ATCGTTTGAACCTTTGCCCTTTTTGGTCATCATATCAGTCATATCATCTGTAGCATCGCCTTCACGTGCTTCATCATTACCCAATGTT  
CACTATTTTGTCTCTTGCGAAGTTCCATTTCTAAATAGGCGCCACCTTTTGACTCACTATCTGCAGATTAGAGTCAGCTTTTTCACTT  
CCGTTATCATCATCTTCTGAAGTATCATCTTGCCCATCGACTTGACTGTGCATCAGTTCTCTTTAAATCATCAAACTCTGGACTAGCTA  
ATGTATTATATAGTGTTTTAGGTAAGTAATAATATTCGTTTAGCATATCTTCTTTTAAATATCATCTACTTGATACATAATTTCTTTGA  
GCCAGATACATATTATCTTCAGAATTTTGATTTTGGAAAAAATTAGGTAATATAAGAACATATTAACATAATATCATCTAAATCT  
GAATGTATAGATGGTATATCAAAGAAATCTTGGCTTAAAAATGCATGTTCTAAATACAAAAATAATAAATCTGTATATTGTGTTTTA  
GTACGATACACTTTAATTTGAGATTCCGTATATGATATACGTGTATCTAAGCGAAGATCAATTAATTTAGCAGTACTTGGGCGCTCA  
ACTTTAATAGAATTTAATACGCGCATATCTTCTAATAATTTAAAAAGTTGTTGATAAAAAATTTAGGGTGTTTAAAGTTTTATCTTGTA  
CTACTTCATTTACAATTTGTACATCCATCATATGATAACCGTAAGCAGCTAACATAACATCTGTTTTTAAACCAGCCATTTTCGATATG  
GCTTTGTCGATGTGACCAAAACCACTCGAATCAAAACATTTTGAACAGGATTATAGTAAGGGAATTTTGGATTTTAACTTGTGT  
TTGTTCAATTTTAAATAAGAGTCGAGCTAAGTCTTGCAACATCATTACTTGCTTGCCATCTAACTGTTTCGTCGTTAAATTTTATGAAA  
CGATCACTCATGTTTTATCCCTCTTTAAAAAGTTTAGTTCTACAGCATTATATATTGCTTGTTGTTTCACGTTTCATCTTCCAATTTATCAA  
TAATTTGTACGTTAATTTGCACGTTCAACTGGCATTACAGTGATTAAATCACACAAGTCTAATAATGCACGGATACTAGCGGCTTCTT  
CAGAAATTTGTCCCTGCTTAGACATAGTACGTAAATCTTCGTTAACTTAAATAATTTGTTTCGATTGTGTTTATCATCTTGTAATAAACT  
TTGCTCTTTAATCACATTTTTTAAAAATGTCCCATCAATATAATCAACGTGAATAACAACAAAGCGATTTTTTAGTGCTTCATTCATT  
GGCAAAGTACCAACATAACCTTCATTTATCGCTGCTATAACGTTAAATCCTGGTACAGCTTTGATTACTTCACCAGTGTATGGATTCCG  
TAATTTGACGACGATAATCTAAGACCCCATTTAATACAGGCAATGTTTCAGGTTTAGCCATATTTATTTTCATCAATATATAAAATATG  
CCCCCTTTCTATAGCTTTAATAACTGGACCATCTACAAAGACAATTTCTTGTTGACCTTCCGCATTTGTTTAAATTTGTTTAAAGCCTA  
ATAAGCTTTCTGTATCTAAATCAACAGAACAATTTGACTTGATGATCGATGGGTGTTTCAACAACCTCACTTAAGTTTCTGCCAATTCGCT  
TTCCCTGAACCTGTTGGACCTTTAAGTAAAATATTTTTATTTAAATCAAATAATGCCTTCGCATCATTGAAAACTGTTGAATCTGAA  
TTCTTATAATGTTTTAGTGCCATTTTAAACGTTCTCCTTTAATAAATTAAAAACTAAGACATGGAATAAGTTCTCCAATGCCTT  
AGTTTACTATTCTATTCTGATATAAAACGCAATGCTTAGTATGCGAATTGTTTATATTTTACCAAATTTACTAATTGAAAATCTCATA  
TTAGGCTTCATTTCAATAATTATGCGTTTTAACTTCTTTGAAATATGTTTATAGTAACCGCCAATAATCCAGAATTATCTATTATTT  
GATAATATTCTTCAGTTTCGTTGATAACATCATATTGTTTGCCAACCGTTAACATGTCAGAACTGTAAATTTCTTTGCATCTGTATT  
AATGACTTCTACTTTCTTGATTGGTGTACGTTCTTTCCAAGTTTCATGTAACATAAAATTTGTCCTCACTATCGTAAAAAAATTTATTT  
TGTAAGTGAATATAAACGATAATCCACTGTTTTAGTAATTTCTAATTTGATTCAATATCATCTTGCTCAAGCGTTTGATATGGTATTT  
CCACTTCATCTAAGCGCGATTTTCGTTGATTAAAGAAATCTGCATCTTTGCTTCAAACTCAACTGATGCGATGCGCCATATTCGG  
CATTTGTCATTTTCGTTTCTACAGGCATTAATGTATTTGCGCCACCTAGACCACCGTTCCAATTTTGAATACTTGGACATGATAGTCA  
GCATTGTGCAAGGGTTGGTATTCTGCAAACTACTTCAAGTCCGAATATATTTGTTAAAAATTTGACCTGTAATATCTACATGATTCACTT  
TAAGAATCACTGGTCTAAACCTTGCACTTGATGTAAACGGATTGACCGCACTCTCAAAGAAGGCATACCTAAACCAACGCCATAA  
TTATTCTCGTTTGAATATATTGAGAAAAATATGACCATTGTTATCTTCGAGACTGAAATATTTATTGCCATTTAATCTTTAACTGTTGT  
AAATGGAATATCCTTATTCGATAATATTTCCACATACTCCTCTAAACCTGAGTCGGTTGGTGTACGTAATCCAATACCCACAAAGTG  
AGATTCTTCTAATTGCTCACTTGGAACCTGTATAAATGAAGTCTTGTTCTGGGCTTATATCTGCATCGCCGAAACGAATTGAGTTT  
TCAAGAAGTTCTTCATAATTTAATCCTAATATGTCAACCATGAAATGTTTGTCTGTTCTATATTTGTTGTACCTAATGTTATACTTCT  
AAGTCCACATATAGCCACCTCTATCTTTACTATTATATACTATTTTAAATCATAAAATATAGAATATCGGTCACTT  
GATTTTGATTATAGATTAAATGTGAAAAATGTATTTCTTTAAAAAGTAACATTTTAAATGAATGAACATAATTTGTTATGTTGTG  
CTATTGAGTCTGTCAATTAATGAGTATCTGTATCTAGCAATTGAATATTTGTTTTTGTAGTACATAAAAAACATATATATGTCGTGT  
TCATAAAGTGAATTTACATCTTGTTTCAGATGATTTTAAATTAACATAAGGCGCTTATAGAATTCATAAATTTTCATCGCTTGTTATTAT  
CTAAAATGATTTTCATTAGCATATTGTAACACGCTATTCTACCTATATTTCTATTGTGAGTCTATTTCAATAGAAATGATATATTTTTTA  
AGTAGTCAAATTTAAACTCACATTTAATACGAAGCATTATAAAAAATAAAGTACAGCAGTAAGATATTTTGACTAGAAAATAATCTT  
ACTGCTGTTTGTATTGATTGATTACGTTTTTAGGAATAGTAAACTATATTGTGTTGTGGATTAAGATTCTAATAATAAGCTTCTG  
GGTTTTCAATTAATTTCTTAAATGTTTTAAGAATCCAAGTCTTCTTACCCTCAATAATTTCTATGATCATAGCTTAATGCAATATAC  
ATCATTTGGACGATTTTCGATTGTATCTTGATCAATCGCAATTTGGTCTTGTAATAATTGAATGCATGCCTAAGATTGCAGCTTGATTGAT  
CATTTGATAATTGGCGTACTCATCTGATGCCAAAAATCCGCCATTGTGAATCGTAAATGAACCATTAACCATATCTAAGCCAA  
GTTTTTCTCTCGTGTCTTAACTGCTAAATTAGCAATTTCTGCTTCGATTCTGCAAAATCTTTTTATCACAACTCTTACAAATGGT  
ACTAATAATCCATCATCTGTAGAAACAGTACACCAATATCATAATATTGTTTCGTAATCATGTCGTCGCCGTCGATTCTGCAATTA  
CTTCTGGATACTTTTTCAAAGCTGCTACAGAAGCTTTAGTAAAGAATGACATAAATCCTAATTTAGTACCATCATGATCTTTCATAAA  
TTGTTCTTCTTACGTTTACGCAATTCATAACATTTGTCATGTCAACTTCGTTAAATGTTGTTAACATAGCTGTATTATTAGATACCT  
CTAATAATTTTTTGGCAGCTGTTTTCTTCTGCGTGACATTTTTTACGAATCACTGGTTTTGTAGGATATTGATTGATTTTTTCTCTT  
CTTTTGCAGGTGCTTGTGTGTTGTTTGTGTTGATGCCGGTGCCTGTTGTTTCTTATCAATATCTTCTTTACGAACCACATCATTTGTTT  
TCGGACTTACTTCAGCAAGATTACACCATTTTACGAGCATATCGACGCGCAGAAGGCGTAGCATTAATACGTTGCTGATTGTCAT  
CATTTGCTGATTGAGTTCAGCTTTATCTACCGAATTAATTTGTTGTTCTTCTTTTATTATTGTTTCTTATTGTTGTTGAGTATT  
GTCGTTACTATTTCTTTAGAAAGCATTGCCACTACCTTCGCGGATGACAGCAATTGCTTGTCCAACCTTCTACAGTGTGCGCTTCACTT  
GCAAGTTGTTTCAGATAATACACCTGCTTCTTCAGATACAACCTTCGACATTAACCTTTATCAGTTTCTAATTCAAGAATAGCTTCACCTT  
TTTCTACGCTATCCCTACGTTTTTCAACCATTTCTGCAATGGTACCTTCTGTAATAGATTCTGCTAATCTGGAACCTTAACTCTGGC

ATGACTTATTTCCCCCTAGTTATTTTTTAATGCATTTTCTATAATTTTATTTTGAACAAGTTTATGAATTTCTCCATCGCCTTCAGCTG  
GAGCAGCCCTTTGAATTCTGCCATGATAACTTAAATCATATTTATCTGCAACTAGCACTTTAACATATGGATAGACATATAACCATG  
CACCTTGATTTTTAGGTTCTTCTGTACCCATGACACTTCTTCAAGGTTTGGCAATTGTGCTAGTAATGCTTCAATCTCTTCTCTGGG  
AATGGATAACAATCTTTCAATCGCAACGAGTAATACTGATTCTGCTGGATTTTTAGCTAATGCTTCTTTTAAATCAATGAACATTTTAC  
CAGTCGCTAAAATAAATTTTGTAACTTATCCGATTGATATGATTCTGTCAAAATTGGCTCAAATCCACCAGAAGTAAATTCATCAA  
TTGGTTTTGCAACTGTTTTATTTCTCAATAAGCTTTTTGGTGACATAACAACCAATGGTCGCATTTGTTCAAGATCTAAACTAGCCGC  
TTGTGCACGCAATAAGTGGAAAAAATTACTTGAAGTAGATAAGTTGACAACCTGTGCAATTATTTTACAGCAGCTAATTGTAAAAACCT  
CTCTAATCTTGTGATGAATGTTTCAGGACCTTGACCCTCATATGCATGAGGTAAGAATAATGTTAATCTTGAACGTTCTCCCCATTTT  
GAGCGAGAACTGAATAAGAAGTTGTCAAAAAATCATTGTGACATATTTGCAAAATCACCATATTGCGCTTCCCAAATATTGAAGCTT  
TTTTGTTTTTCCACATTATAGCCGATTCAAAACCAACTACTGCTGCTTCTGAAAGCGGAGAATTGTGTATATCAAATGTCTGCTTTT  
GATCAGGAACATGATGTAAAGGTGTATATGTTTACCTGTTTGTCTCATCATGTAACACGGCATGCCTATGACTGAATGTACCACGTT  
CACTATCTTGACCAGTTAAGCGAATCGGTGTACCATCTGTAAAAATTGTCGCAATGCAAGTTGTTCTGCTTGTGCCAATCAACTA  
AGCCATCTTCTTTATTAACGGCTCATGACGCTTCTCAAGAACTTTGTTAACTTTTTCAAAATGTTAAAGCCATCCGGATATGTTAA  
CAATGCATCATTTATTTCTTTCAAATGATCAAACGTAAATGATTGTCTGCTGTGTAACGGTAATGCAAGTTCTGCAGGTTTTTCC  
ATATCTGGATTATCCATTTTATCAGCTTTATTAATTTTATCATGAGCTTGTCTTAGTTCTTTTTGGACTTGTCTATAAATGAATGCAT  
TTCATCTTCTGAAATGACACCTTCATTAACAAGCTTTTTACCAAAACATATTTCAACAGAGTCATGTTTGCGAATATTCTGATAAGGA  
ACTGGATTAGTAATTGATGGTTCATCCATTTCTGTTATGTCCGAAACGACGATAACCTACTAAATCAATAACGACGCTTTTATGAAAC  
TCTTTTCTAAATTCATATGCAATCAATTGCTTCAAGTAGTACGTTCAACGTCATGACATTGACATGGAATATTGGCACATCAAAAC  
CTTTGGCCACATCTGTAGAATAAGTTGTTGAACGTGCATGAATGGTTCTGTAGTAAATCCAATTTCTATTGTTAGTAATAATATGCAA  
TGAACCAACCGTAGAATAGCCTTTCAAGTTTCTAAGTTTCATTGTTTCAAGTTAATTCTTTGACCAGGATAAGCAGCATCGCCATG  
TATAATAATTGGCATTGCTTTATGATGATCAGTCGTCGGAGCCCCAGCACGTTGTGTATCATCTTGTGCTGCTCTCGTACGCCCTCA  
ACAACAGGTGCAACAATTTCCAAGTGACTTGGATTGTTAGCCAGTGCAATACGCTGCATTGTACCGTATGAATCAGTAGTTTTAATG  
CCACCAAGGTGATATTTACATCACCAGTCCATCCAGCAGTTAACTGCAAGCTACCATCTTCAGGTAAGAATTTCAATTGGATCTGTA  
TGCATAAATTCTGAAATCATCATTTCTGTACGGTTTTTCTAAGACATGCGTTAAACGTTTAAACGTTCCACGGTGAGCCATGCCTATTT  
GTATATTTTTAATACCTTCTTTTCGACGAATCGTAATAGTACGTTGTAACATCGGTACAAGTGCGTCTACCCCTCAATTGAAAAACG  
CTTTGACCAACGAAGTTTTATGAAGATTTTTTCAAAACCTTCAACATACGCTAATTGTTTGAATAGTGCCCTTTTTTTCGTTATTAT  
TTAACGTTACTTTATATAGGCGTTTCAATCTTCTTTTTAACCAACACGCTCGGTATTGTTATTAAATATGTGTATACACTCAAATGCAATT  
GGTCTTTGTAACGTTTTTCCATTCTTAAAAATTGCTTCATAAGCATTATCATAAATGTCGGCAAAAGTGATCTGAAACAATTCCTGCTG  
ATATACCTTCCAAAGTCTGTTGATCTAAATCAAAGTCTTCAATCTCTAATTTAGGTACATGTTTCTTTTTGGAGGATTTACAGGATA  
AATATCGGCTTTAAGATGCCCGTATTGGCGAATATTATCAATTAACGCATGACACGCTTAATTGTGCCGTCGCTATTTTGGCTACTT  
GTACTTTTTAAAGCTGGTACAATTGAGTCATCTTCTAATTGTGCTGAATAAGACTTGTAATCTTCTGGTACAGATGATGGATCTT  
GTAAAAAGTCATCATATAGATCTAACATTAGACCTAAATTCGCACCGAAGTTTACAGGAGCCTCTGAAACTTCTTTTCTTTCGTTAGT  
CATTTTACACCTTCCACAAAAATGTTGAAACGCTTACAATGTAATAATATCACTATTTAGTTATTTGTTAAAGTAGATTTACCTATTT  
ATCTGCTAAAAAGAAGATCAACAAAAAGCGTTGATCTTCTTAGTTTATAGATGATTTTATTGTAATTTTGGGAGTACACAGAA  
ATGATAAAGAACCACTGTTTATTGTTTTATAGTTGTTCTTATACATTAGTACAGTAAATGTTGTAATAAATTTGTAATAAATGATCCTATGAC  
TTTGATTGACGTCCTCAGTCATGATTAATAATGATTTTAAACGTTGTTCTTTGTTAATTTCACTTTTAAATTTAATCGATCCTCCGTT  
TAATTGAATGATTTTTTGGCAATAGATAATCCAAGTCCATTACCGCTTGAATCTTGAACGAGATTTATCCACTCGATAAAAGCG  
ATCAAAAAATGAAATCTTGATCTTCTCTGGAATACCAATTCATGATCTGTAATTTCAATTATTTTTTGGCTATTTTTTAACTTGTCT  
TAACTTTAATTTCTTATTCTTACATCATATTTGATTGCATTATCAATAAAGATTAAAAATAATTGTTGCAATTGATGAGGTTTCATT  
TTAATTTCTAGATTTTTAGATGTGATCCGATCAAATTGATAATCAGGATGCAATTGTTTTAATGAGTGTATTCGCGAACGAATTT  
CATCATTAATATGCACGGTCTGTGCTTCAGAAGAAATGTCATTTACATCTCCTTTAGTCAATTCAGTAATTTCTTCGACTAATTTTAT  
GATACGATTCAATTTCTTCAATAGAAATATTTAACGATTCTTCTAATACTGCTGGGTCTTTTTTCCCCATCGCTGAATCAAATTTAAAT  
GACCTTGAATAAATTTGTAATGGTGTTCGTAATTCATGTGACGCATCTTCAACAAATGTTGCTTTGTTGATTAATGATTTCTTCAATTTG  
GCTCATCATCTCATTAACGTAATTGTCTAAATTTATCTATTTCTTCATAATTTGTATTTAATTGCAATTTATTTTGAACCACTCTCGTC  
GAATCTCAATCATTTTATTGATAAACTGACAAGCGGTTTAGTAATTTGTGTTGAAAAATACATAACTGATTGTGGCAGTTATAATTGT  
TGCAATCACTCCAAATGCCAGCGCAATGATATACAATGATTTTACGATGTTATCATAATTTTCTAGTGAATGAATTAACAAGCTATA  
CCCTTTGAAATCTTGCGTTGTAATTGGTCTTTAATAATTAATATTCAATGCTTTTATAGCGTTTTTTTATTACGCGGTCAAAATAAC  
GGTGTTCATAACCTGGTTCAACTCTCACTGTGTTATCATTCGATGTCTCAAATAATTTATTATTATGCTCATCATAAATAATTATCTCT  
TGAAAAATTACCTAAAGATGCATTCAAGTCTAATGCAGATATATCTTTAACAGGCTTAGAATGAAATAAATTATTAATATCGCTTGAG  
CTTCGTTCTGCATCATCAAGCTCACTATTATGCAGTGTATCTTTCAAGAAAAAATAATAATTAACAAAAACAAAAATATCGTGACA  
AACGTAATCATTTGTGGTAACAATAATCCAGTTATTGCGCAAAATTTACGTTTGTGTCATCGTATCACATACCCACGCCACGAAGTTTTC  
AATCATTTTGTACAGTATGTTGTTTTAACTGTTTTCGTAATATCTTATAAATCATCTACGACATTTGTTTCTACTTCACTATTAT  
AACCCCATACATGATTTAAAAATTTGTTCCCGTTGCATAACATGGTTTTTATTTTCAAGCTAGAAGATATAGTAAATCATACTCTGTTTT  
TGTTAATTTCAATTTCTGCGCCATTTACCGTCACTTTAAAGCGTTCTTATCAATTGTAATACCGTTGACATCGATAATATCTTTTTGTG  
GCTGACGACGTAATAATTGCACGAATTTCTGCTAAAAGTTCTTCAATATCAAACGGCTTAACTATATAATCGTCTGCACCGTAATCAA  
GCCAGCAACTTTGTCATACGTATCACTTTTCGCTGTAATTATAATGATAGGTGTAGATTGTTGTTGTCTAATTTTGCACAAATTTCT  
TAAGCCATTAATTGACGGCAACATTAATCTAATATGATTAATCATAGTAATGGCTAAGCGCTTTATCTAAACCGTCTTGTCCATC  
ATACTCTGTGTCACATTTGTAATTTTCAATGTGTGAGTTCCAATTCAGAAATCTTGCTAAGTTTTGTTTCTTCTACTATTAATAATTT  
GCGTCAATTTGTACACCTCATATTACGACTTTTTCTAATAAGGTAATATATTTTAAATTTTGTATTTTCTATAAATAGTTGCTTTTTTA  
AATTAGTTTGTGTTACGTTTAAATTTTATCAAAATCAATAACCATGTTTTAAATTTTTCAAGCTACAATCATTAATTTTATTAACCT  
AAATATTTAATAATCAGTTAATGGCATTCTGTTAATTTCTGATTGCAGTACTTAAATATAGAATACTGTAAACACAAGGCCTTACCGCA  
ATATTAATTTGTTGTCATATACTGACTTTTCACTATTGTAAAATGAATAGTTATTATCTTTATTTTCAAAAATGACCGTAGTTTAAAC  
ATTTACACATCATTTCAATGTGCGATTTTGAACCTTGAAGTAACATTTTCAATGATGTAATTCAAAAGGAGTATGTAAACAATAT  
AATGTTTAAACCTCATCACTTTTAAATATTCTAATTCTAATGAGAAATACAAATTTTTTTATTTTCTAAAAATAGCGTAATCATGCGTT  
TTATTTACTATTCTTAAAAAATATTCAAAAAAGTTTTAGTTTCTAATTGACAAATGATTCTCACTAATGTATAATAGTAGTTGAAAAAT  
GATTATCAATACCACATAGAACATCCCCCCCCACAACGTTTCGTTCTTGTGATTGGTCATTTTCAAAATATCCCCCTTTTATATGCC  
CGTAAAAAGACAATATACGTTATAACAACGTTTTATAAAGCAGTAAACCCCTACGACACTTTAGGTTTACTGCTTTTGTGTTTTTCT  
ATTTAATTTATTAATTTTCTAAGTAATAACGTTGATAAAAAATATGCAAAATACGCCACCAATAATCGCGCAATAATATCTGTT  
GGATAATGTACACCTAGATATACAGTGATATGAAATCAATAAAATCATAGCTGCACATAACCCATAAAGAAATACCTTTTGAATTA  
CCTTGATTTAATCGATTTAATAGATAGATACCACTTCCAAAATATGCAGTTGATCCCATAGCATGACCGCTAGGAAAACTAAATCCT  
GTTATATCAATTAACGCAGCAATGTAGGCTTTTCTCTATCGAATATATTTTTTAAATGCTGGATTCAAAATTCAGATAGTGCCATTG

TTAATGCAAAAAATAATGCTTCAATTTTGTGGCGCTTTAACATGAGATATGCCACAAGAAGTAATGAAATACATAACATTGCCAG  
ACTTCACCTACTTTAGTAGCCCCAAGCATGATAGATGTCGTAATAAAGCTCTCTGATGAATATATAAAATTCATAAACTTCATTATCA  
ATCCATTTCCCTAGTCTTGATTTCGTGAAAAACGCGATAATTCCAAAAACCAATGTAAAAACGATGAGCAAAAGAGATACGTTTCCA  
TTGACTCATAAAGCATTACCCCCCATTAATTCATGCGTCTTTAATCATCTTATCAAATAAAGCTTCTTTTCGTATAACTTTGTTTCATAC  
GATTTTCATATTATTGATAATTCGAGTTCCTTCTGTTCCATTTCATTTAGTTCCTGTGAATAAAATTTGTGCTGTTAATTGTTCTTCATCA  
ATCGTTTTAGCATAACCTTTATCAGCAAAATGATTTGCATTGTCAATTTGGTGCCTCGGGATTGATCTAAACCTAATGGTACTAATA  
ACATTTGGTATACGTAATGTTAAGAAGCTCATAAATCGCATTTGATCCAGCTCTACTTATTACTGTGTCCGTAATTGCTAATAAATCTGT  
TAAATCCTCTTTAACAATTCATATTGTATATATCCTGATTTTTTAACCTTGAGCATCTTTTAATCCTTTACCAGTTAAATGTATCACTT  
GATATTGTTGTAATAATGCATCTAAGTTTTTCGCGAATAATGCTATTTAATTTTTTACTTCCTAAGCTTCCACCCATAACGAGTAAAAAC  
TTTTTATTTTCATTAAAGCCTGTTAATTGATAACCATTATGTGCATTACCATTTTTTAAATCTTCTCGAATTGTTGCTCCAATAAAAT  
CAGCTTTCTCTTTAGGTAGGTAGTTTAGCGTTTCTTCAAATGTTGTATATATTTTCTTGGCAAATTTAAGTGCTATCTTATTGCTAAT  
CCTGGTGTAAAGTCAGATTTCATGAATAATAGTTGGTATATTTAATGATTTGGCTGCAATAACAACAGGCACAGATACAAATCCACCT  
TTTGAATAAATAGATCAGGTTTTTCTTTTTTCAAACTTTACGAGCATCAAGAATACCTTTCAATACTTTAAATACGTCTTTGGCAT  
TTTCTAAAGAAATATATCTTCTTAATTTACCCTCGAAATAGGATAAATACTTAATTTCTGGTAGTTGTGATTCAATCTTTCTTTTCA  
ATACCATTTTTAGAACCAATATAAAGCGCTTCATAACCTTGTGATAATGCAGTTGGAATTAACCTTAAATTTACTGATACGTGTCCA  
ACTGTTCCCCCTCCGGTAAATGCGATTTTCGTCATTAATATTACCTCTATCTTTTAAATTTTTATAATATGCATAAAATGGTTCACCT  
TTATCATATGGCGGATATTCCATTAATTGTTACCCGACCTTATGAAATCCAAATTTGCGAAATAAACCTTGTGCAGGTTTGTTTAACG  
CAAAGGTGTCGGTTAAAAAATCTTGCACCCAGCTTTAACTACATCAATAACATAAATTGAATAATCTGTAGCAGCTCCTTTAT  
ATTCTTTGCAACCAAGTTAATCGATGAATAACAAGGCGCTTCTCTATTTACTGGCAGTCAATGTCTCATACCAATTTCTGTTGGTC  
TTGGTCGACAACAATAAAGCCATAAATTTGTCAATTTCTCTCTAATACATACAAATAATCTTTAGCAATATCTTCTTCAAAATGTCT  
AAAAGAGGGTACTGATCGTCCCATTTGCTCGTTGCTGTTCTTTTCATTAATCTTTTGTCTCTCTACTAGATTTAAGATTTGATCTAA  
ATCTGACATTTTACCTAGACGGATCATGTACGTCACCTTATATCATTATGTTAAACATGTTTTTCAGTACATGTTAATCTTACACA  
CTATTAACATGCTTTAAACCTTTATTATGAATGAAAAATAGTAATTATCACACTATGGGATAAAAAATAACCAATAAAAGTATCATAT  
ACCAATTAATTGATTGTTAAACTAGTGAATAATACTATTTAAAAAGTTTATGCTCATAGTATATTAACCATGAATTGTTAACAGC  
GATGATAGAAATTGCGTTATTTACATCATATGTAATGTCTAATTTATATCTTTTAGAGTTAGACGTCAATAAAAAATAATCACGCCG  
AGGCTGGGACATACATCCCTAAAAAAGCAGTAAGATAATTTCAATTAGAAAATATCTTACTGCTGTTCTCTATTTATACAATACT  
TCGTATTGAATGGCT

>035-contig\_268\_RC

AATTCAAAAAACACTATATCGTGACTTAGTTGAAGAAAAGCTGATTTCTATCAAATAATTAATAGAAATCAGCTTTTTTACATTGCCCT  
AAGAACTTAATGTTCCAGCCTGAGCGTGTCAATTAACATAATAATAATACAATTTTAGCAGTGTGTATCTTATTTTAAAAATATTAAT  
CAATTTATCGAGAACATCATCTGTTTATTAGCTTTTTCACCTAATAAAGCTGATTAATTTATTTATCGTTCTTTTATTAATTTACCCAG  
TTACCTCGAGTTTATTTCGTTTGTGGAAAGCTTTAACTTGATTTTCTAAAGCTTGATCAAAATGCGTTTCTTATTCACTTCACTTTATAA  
CCTAAAGCTGACAAACCAATTTTAATAGTTTAAATATTTTATCATCGTCTCCAACCTTTAAATGTTTTCTGATTAGGAATGACATTTA  
AAGATTGATATTTAGGTGTGTCAATAGTAACGTCTGGTTAATGCCTTTACCGTGAATATAATGACCATCTGGCGTTAACCATTTTCAT  
TTCAGTATATTTTAAACATGAACCATCCTTAAACTCTCTTGTAGTTTGTACGACACCTTTGCCGAATGTTTTGACCCATAAACTTTA  
GCTTTATTATAGTCTTTTAGCGCACCAGTAAACACTTCAGAAGCGCTAGCTGAACCTTCATTCACTAAGATGGATATATCCATGTCTT  
TCGCTTCTTTTAAACGCATCATTAGAAGTTTGAATGTCTCAGTATCTTTACCTTTTTCTAGTTTAAACAACAGTTTTCTCTTTATTGATA  
AAAATATTTGCCATTTTAAACAGCTTCATCTAGTAGTCCACCTGGATTATTTCTTAAATCTAAACAATCTTTTTTCAAACCATCTTTGT  
GAGCTTTTAGAACTGCATCTTTCAATTCACCTGATGTATCATTCTGGAATTTATTAATAGTAATAACTCCAACCTTTACCTTTTTCTTA  
TACTCAACACTTTTAAACATGAATTTTTTCAGTTTAACTTAAACGCTTTTTTCTTCACTACCTCGTTGAACAGTTAAAGTGACTTCAGT  
GTTTTCTTTACCACGAACATCTTTGACAACCTTCATCTAATGCTTTTCCCTTAAATTGATTTTCCATTTACTTTAGTAATGACATCTTTAG  
GACGAATGCCAGCACGTTCTGCTGGAGATCCCTTCATAGGACTAGTAACCATAATTTGATCATTTTTTCTTTTGCATTTCTGCACCAAT  
ACCTACAAAATCACCTGAAACACCTTCATTAAAGGATTTTCGTTTGTCTTTTTGTTAAATATTCAGAATAAGGATCTTTTAATTTCTTG  
ACCATGCCATCAATTGCAGCTTTACTTAACTTGTGACAGTCTGTTTTTTGTAATAATCACTATTTAAGATTTTATACACATTTTCAAT  
TTATTTTAAAGTTTGTGATCAGTTTGTGTTAAACCACTTATTTTTTGATTTATAAAAAATATATGCAACAACCTGTGATGACAGCTGTTA  
TTAGGATTGTACCAATTAATATTGATATGAATTGCCAACGTTTTAAGTGAACGCGTTTCGATGAATTAGTTTCTTGGTCTTGATTGCT  
TGTTGCAATTTACAGCGCTTCATCATCGGATGAAGATGTGTGTTGCTTATCATCCATTGTATCACTTCCTTATTATGTATTATGTACTT  
TTAAATTTCTGTGTAGTTAATCATATCAATTTATGCAAGATAGCGACCATAATTTCACTATAAATGATTAATTTTATAGTCAACAATAG  
TTTATTTTAAATTAACCAAGGATAACGAATTGCATCACCTGGTTCTTAACATTTATTAATAAATTTTAAATTTTAAAGTTTAAAGTTT  
CCGTATATTTCTCATATAAATCATCAAATACAGACATTGGCAATGTGAAATCACCATGTGTCTCAATATAATCAGACAGTATGTTAA  
AATCATCATCGTGTTTTGGGAAAGCAAGATCGTCAAATATCTCTTCTGCTAGACGACCTTTATCGTCTGTGCGACCACGAACGTGCA  
TGACAAATTGATAAAACGAATAGTTTTTCATTAGTTTCATTGTCACATCAATCACTTTTGTTCACCTTTAATCAGACATTTTCATCAT  
AAATATTAATTGAAGTCTGTTGATCAGTGTAGTAATTATAATTGGTGAAATTACAGATTTAGCGTTATTATTAATATATTCAAGGTT  
GAATCTTACTAATGGATCTCCGACGTTAACTTCGTCACCACTAGACACTAACACTTCAAATCCTTCACCGTCTAATTGAACCTGTGTCT  
AAACCGATATGAACATAAATTTCTAATCCGTTATCTGCTTTTAAACCAATCGCATGCTTAGTTGGAAAGACATTGTCAACACGTCCT  
GCAATTTGGAGACACAACCTCTCCTTCAGTTGGATTAATACCAAAACCTTCGCCCATCATTTTTTGTGCGCAATACAGGATCTGGAATA  
TCTTCAATTTTACGAATTTCCAGTTAATGGTGCATAAATTCGATATCTTCTGAACCTCTTTGCTTTTCCGAATAATTTTTTAA  
CATACTTTTCACTCCTACTTATCAAATGTGATATTAATTCGCCATAACCAATTTCTTCAACTTTTTCATATGGAATAAATTTGAATTG  
CAGCGGAATTGATACAGTATCTTAAGCCGCCACTTTCTTTAGGTCCATCATTAAGACATGTCCTAAATGACTATTTGATTCTTCTGA  
ACGCACTTCAGTTCTCAACATACCAAAATGATTTGTGCGACTAATTCTATAATTTTCATCGTCATCAAGCGCTTTGGAAAAGCTAGGCCA  
TCCACATTGAGAATGAACTTTTCTTCAGATGTAATAAAGGTTTACCAGAAATTTTATCTACATAAATTCCTTTAGCAAAATGATTTC  
CAATATTCATTCATAAATGGTGGTTCAAGTCCGTTTCTTGTGTAACAATATATTCTATATCTGTTAGTTCACTTTTATCTTTTTTAAAG  
CATTTTGATTCCCCCAATGTGATTCTATAAACGCTTTTCTACCTGAACCACGTTGATATTGGTAATAATGTACCGGGTTCTTTTTATA  
ATAATCTTGATGGTAGTCTTCAGCTGGATAGAAATTTTATATGGTTTAAATAGGTGTAATCACTGGTTTCTTGAATAACCTTGTTCA  
TTAATTTGTTGCTTTTTTAACTCAGCAGCTTTTTTCTGATGTTTCATCATGATAGAAAATGACTGGTTGATAGCTTTTCGCTCTATCGA  
AAAAATGGCCTTGATCATCAGTTGGGTCAAATGTTTGAATAATATGTCTAATATATTTTCAAAGGAAGTAACCTCTGGATCAAACG  
TAATTTGTACTGCTTCGACATGGCCGGTTTGATTGCTACATACCTGTTTCATAAGTTGGGTTGTCAACATGACCGCCACTATAACCAGA  
TACGACTGACTTGATGCTGGATATGATGTAATGGTTTAAACATGCACCAGAAACATCCTCCTGCTAATGTTGCATATTTCTTTGTCT  
ATATGAATTACCTCCTCTATCTATCTAATTATAAATTTAGTCTATAAAGGATTGAAATGGAAGTAATTAACACTGAAAAGATTAAAT

TTACTTCTTAAGGACTACTAGGCCAATCGCACCTTGACCAGTATGTGCAGAAATAACTGGTGTAGTTACATTTATATCGTAATTATTC  
ACATGAAAAGCTTCATTAAAAAAGCTTTCTTCAATTTATCAACATATTCAATGACGTTAGCATGTGCGACACCAACGGATTTGATTTC  
TGATCTCCTATAAAATTCAGCAATTTCTTTTCAAGTATTGGATACTAGAATTTTGAGTTCTCGCATTGTGCACAAGCTCTAAGCGAC  
CATCATCTAGTGTACCAATTTGGTTTAAATTTTCATAAGATTACCAATCAAACCTTTTGTCTTACTAATTTCTGCCACCTTTAATTAATTGA  
TTCAATTTGCCCTATAACTACAAATAATTTAATGTTTCTCTTAAATGATTAACTTTTAACTATTTTCAAGAGTTGAGACACCTTCTTT  
TACAAGCTCTACTAGGTGTTGATTGATACCCTAAACCAAAAGAAATAGATTTTGAATCAATAACAGTTACATTAGCATCTACCAT  
TTGACTTGCTTGGTAAGCAGTGTATATGTACCCTTAATCCTGAAGAAAAGATGAATACTTATGATTTCAGAGCCATCTTTTCTAGT  
TCTTCATAAGCAGATATAAAATTCACCTATGGCTGGCTGACTTGTCTTTACATCTTCATCATTTTCAATATGATTAATAAAATTTCTTCTGA  
TGTAATATCTACTTGGTCAACGTATGAAGCTCCTTCAATAGTTAACTTAAAGGAATTACATGAATGTTGTTTGTCTTCAAGTATTCT  
TTAGATAAAATCGGATGTTGAGTCTGTACTATAATCTGTTTTGTCATGGTCTGTTTTCCCTTATTTTTACGAATTAATGTAGAAA  
GGTATGTGGAATTGTATTTTTCTCATCTAGTTTACCTTCAACTGAAGAGGCAATTTCCAGTCTTCAAATGTATAAGGTGGAAAGAA  
CGTATCACACGGAATTTACCTTCAATAACAGTAATATACATGTCGTCCTTATCAATCATTTCTTCAAATAATGTTTGGCCCTCCA  
AATATGAAAACATGGCCCGGTAGTTGGTAAATATCTTCAATAGAGTGAATTACATCAACGCCCTCTACGTTGAACTTGTATCTGAA  
GTAAGTACAACATTTTCGACGATTCCGGTAGTGGTTTACCAATCGATTCAAATGTCTTACGACCCATTACTAAAGTATGACCTGTTGAT  
AATTTTTTAAACATGCTTCAAATCATTTGGTAGGTGCCAAGGTAATTGATTTTCAAACCAATTACTCGTTGCAAGTCATGTGCAACTA  
GAATGGATAAAGTCATAATTATCCTCTTCTTCTATCATTTTCAATTTTATTACTAAGTTATCTTTAATTTAACACAATTTTTATCATA  
AAGTGTGATAGAAAATATGATTTTGCATAATTTATGAAAACGTTTAAACAAAAAAGTACTTTTTTGCACCTGAAAAATACTATGATG  
TCATTTTGTGTCTATATGGTTAGCTAACTATGCAATGACTACACTGCTTATTGGAGCTTTTATTGCTGGATGTGATTCATAGCCAACA  
ATTTCCAAATCTTCATAAATTTATGTCGAAAATAGACTTGTCACTGTTAATTTTAAATGTTGGAGGATTGAACTTTACGTTGCTAATT  
GTGTTTGAATCGCATCAATATGATTTGAATAAATATGTGCATCTCCAAATGTATGCACAAATTTCTCTACTTCAAGTCCACATTTCTT  
GGCAATAAGGTGTGTCATAAAAGCGTAGCTTGCGATATTAATGGCACACCTAAAAAGATATCTGCGCTACGTTGGTATAACTGGC  
AACTTAACCTACCATCTTGGACATAAACTGGAACATGGTATGACAAGGCGGAAGTGCCATTGTATCAATTTCTGTTGGATTCCATG  
CAGATACGATGTGTCGCTTGAATCTGGATTATGCTTAATTTGTTCAATTACTGTTTTAAGTTGATCAAAATGATTACCATCTTTATC  
AACCAATCTCGCCATTGTTTACCATAAACATTTCTTAAATCACCGAATTGCTTCGCAAAAAGTATCATCTTCAAGAATACGTTGCTTA  
AATGTTTCAATTTGTTCTTTATATTGTTCTGTTAAATTCAGGATCACTCAATGCACGATGCCCGAAATCTGTCATATCTGGACCTTTATA  
CTCGTCTGATTTGATATAAATTTCAAAGCCCATTCGTTCCATATATTATTATATTATTTAATAAGTATTGGATGTTTGTATCTCCTT  
TAATGAACCATAATAAATTCGGTTGCTACTAATTTAAAGAACTTTCTTTGTCGTTAATAGTGGAATCCCTTTAGATAAGTCAAAAGC  
GAAGTTGATGACCAAATTTTGAATCGTACCTGTATTTGTGCGATCATTTCGTGTATTTCTTCTTAAACTTCTTCACAAAGACT  
GTGATATGCTGCATCAAATGAATTCACATATGCGATAACACCTCATTTTCATTATTTATAGTATGTATATTTAGTTTGTATATACTT  
AACTTTATGTAGCATTTTGTATCACTCATTTTAGGAATATGATATTAATATCATGAATTCGGTTACTTTATTTATAAAATGCTGATTA  
AGTACCTACCCCATCGTAACGTGATATATGTTTCCAATTGGTAATTGTTTACCCAAATCTATAACTTTAATGCTAAAAAATTTTAAAA  
AAGAGGTTAACACATGATTTGAATATTATGTTTGTATGTCCTATTAACACAGTTAAATTTCTAGAAAATATAGTTGGTAAAAACGGAC  
TTTATTTAACAAATAGAATACAACATATTCTCTATTTTCAATGACAGACACCATTTTTAATATTATAAAATGTGTTAACTTTATAT  
TTATTTATGTGACTATTTACAATTTTCGTCAAAGGCATCCTTTAAGTCCATTGCAATGTCATTAATATCTCTACCTTCGATAAATTTCT  
CTAGGCATAAAAATAAACTTACCTTGAATAAAGCATACGAAGGACTAGATGGTGTCTGCTGGAATGAATTTCTCGCATTTGTA  
GCAGTTGCTTCTTATCTTGGCCAGCAAAACTGTAAGTGTATTTGTAGGTCTATGTTTCAATTTTGTGTTGCAACTGCTACTGCAGCTG  
GTCTTGCTAATCCAGCTGCACAGCCGCATGTAGAGTTAATAACTACAAAAGTAGTGTATCAGCATTTACTTGGTTTCATATACTCCG  
ATACTGCTTCGCTCGTTTCTAAAAGTGTAAAACCATTTTGAGTTAATTCGCCACGCATTTGTTGCGCAATTTCTTTTCATATAAGCATC  
ATATGCATTTCATTTAATTCCTCCAATTAATTTGTTCTGTTTGCCATTTGTTTCCATACTGAACCAAGTGCCCTCATCTCCGTTTTCAA  
TACGAGATATGGCCATTTCAATTTGTAATTTAACTTCAAACGCATTGTCAATTAATAGGGCTTTTGTGCGGGAAGCTGCTCTGCATT  
ACCTTCATCAAAGATAAACATAGCAGCAGCCACCTAACGATTTTCTGTGGATCATCTAATAGTAGCACCATTCTGGTAGTGCCTC  
TGGATACCCCTAAATCGCTTATGCAATCCCTGCTGTTCTTCTTACAGCAGGACTTTTATCACGAAGCCCTTATATAAATACGGTAA  
ATTCTTTTCAATACCTAATAATAACATACCTGCTGACGTCTAACCAGTACTTTTTCATCAGATAAAGCTAAATCAAGCAGCG  
GTATATCTTCAAAGTTCGGCTTTGGAAAATGGTTTAACTTCGTAATCGAGTCTTCCAATTATCAGTCGCATGATATTCATCCAAAG  
AGACATGTGATAGAAATGATAATTATAGTTACGTGATTTTCTTCTAAAGCATGCTTTACCAATACAGGTAAGTGTGATTCTGGAT  
AGGTAGCTAGCACTTCTTCTAGGACACCATCCATTACTTCTTCAATATTTCCATAGCGATTTCCCTAAATCTAGCCATTTACGCATAAA  
AACAATATTGTCATGTTCTGTTTGCCTTGAGTCATATAATCAACATATGTTTGTGGTAATTGTTCTCTTAATTTCTTGGTCAAGCAGAA  
GTTAGCTTAATTTGATACGGTATACCCCTAAAGGTTAATAGTTCAGCTTTAATTTACCAAAAATGATTGTCAATTTGAGCTTCATTTA  
CAGATTCTAAAACCTGATTCCCATCAGAAAAAACAGCTTTAATATCAGGTAATATGACTTCCCAATCAGCTTTTGGCGCCTTATCAA  
CAGCTAAGAAGTTCATGACATGAAAAATAGAAGTGATACCGTCTATAGATAACAACCTGATTATAAATCTTGGTTGTGTTTCTTCTA  
CTTTTTTATAAGTATTAGATAACTTGTCTTTTCTTGTAAATGACAAAACAACCTTTCATTGTATTTGGACTTGGCGTTGGCTCTATACGT  
AAAAATTTCCATATACCTTTATTTCCCGGAATACAGTTGATGAAAAATTTATTCGAATACAGCCTTACTTTTGGCAATACGTGTTCC  
CAATTTGCGTCATTTTCTTATCTACTGAAATAAAGTCCATAACATGGAAAAATTGATTTAACACCTTCAACCTTTAAGATGTCATTAA  
TAAATGCTGGCTGTGAATCATCAACTTTAGTATACGTATCTGATGTCATACCTTCTCTGCTTTCCTAAGTGAATCTTTCATTGTGTTG  
TGGTTCCGGTGTCTGATATAGATATAATTTGCATTTGACTTCCTCCTATTGAAGTTCAATTTCTTAATTTGTTTATTTCTTTCCCTATTG  
AACACTCATTGATACAAAATGATGGGCCTTCGTTTTCCCTCTAATTTACGCAGACGAGTTTGTGATTGGACATTGATTGCAATAAG  
TATTCATTAAATCATCTATTTTCGCGAGTGCATTTTGTCTGAAAAAGTTAAAAATACGCGACACTTCCTTTATTTACTTCAAAAATATTG  
CAACCTTGTAATAAGTGTTACTGTTTTAAATTTGACATAAAAAATATTATAACATTTTGGACCCTAAGATTTGAATGAAAACCTTTTAC  
AATTTCTATACGTAATAATGATTTTATATTCAAATGCTATTGCATCGCAACGATTTTTCAGTAAATGAGTTAGTTATTTATTTAGCGG  
TTTCTAAACACCCGATGATAAAATTTAGGAGGACTTTTAATATGTATAATGAATTTTAGGACTAGTTACGTTTATTGCAACGTT  
CGTACTTATGGTACTTATGTATCGCTTTTTTGGTAAACAAGGTTAATTTGCATGGGTTGCAATTGGCACAATCATTTGCCAACATACAA  
GTGATTAAAACTGTAGAAATCTTTGGTATTTTCAAGCACTTTAGGTAATGTATGTTTGTCTTCTATTTATTTAGCAACAGATATTTTAA  
ATGATATTTATGGGCGTAGAGTTGCAAAAAGAGCAGTTTGGTTAGGCTTTTTCATCAACATTAATTTATGATTATTGTTATGCAATTGTC  
ATTACATTTTATCTGACACAGAGATATGGCACAAAAGCATTACACGCAATCTTTGATGTTGTGCCACGATTGCTTTAGGCTC  
AATCGTCGCATATATTATTGGTCAACATATTGATGTATTTATCTTTTCACTAATTAAGTATTTAGTTCTGATAAAACGTTTTC  
ATCCGTGCATATGGTAGTACATTTTAAAGCTCAATAATTGATACAGCTTTATTTGTAGCTATCGCTTTTATCGGAAGTTTACCTGGTA  
CAGTTGTATTTGAAATATTTATTACAACCTACGTATTAATAATAGCTTCAACAGTTTTCATGTACCATTTTGGATATATTGCTAATC  
ATTTTATCGTAAAGGTAAGATTGATAAGTTAGATCAAGGCTAATAACGCATTACTACACAAAAGAATAAGTTTTAAGGGAGTGGG  
ACAGAAATGATATTTTCGCAAAATTTATTTCTGCTGCCACCCCACTTGCATTTGTCTGTAGAAATTTGGGAATCCAATTTCTCT

AAAAAGCTTGTTACAAGCGCATTTTTGTTTCAGTCAACTACTGCCAATATAACATCGTAGAGCATAGAACATTGATTTATGTCCAGC  
CTGAAGATGATTTTTTTGGAAGTATATTACAGTACTACGTATTAGAAAATCATCTTTGACTCAGCGAGTATTTTAAACACGTGTTACT  
TATTTAAGTGATGCGTGTTTTTTAATGGATTACCCAACATATTTGTATTACAGTAATAGTAACTTTAACTAAGTATTGAATAGAAA  
TAGGTTTTATTATGGCGAAAATAAATTTTGATGCTGCGACGAAAGGAAATCCAGGCATAAGTACATGTGCCATTGTAATCAAAGAAG  
ATGAGCAGCATTATACATATACACATGAGTTAGGCGAAATGGATAACCCACTGCAGAAATGGGCTGCATGTATTTATGCACTAGAA  
CATGCACGTGAATTAATGTTCAAAACGCACTATTATATACAGACTCAAAGCTAATTGCAGATAGCATTGAAGCTGGTTATGTGAA  
AAACGCAAAATTTCAAACCTTATTTTGATCAAAATAGAAAATATTTGAAAAAGATTTTGATTTATTATTTGTTAAATGGATACCGAGAGA  
ACAAAACAAAGAAGCGAATCAACACGCTCAACAGGCATTGTATAAATTAATTAAGAAATAAATAAAAGGAGCACCAGCTGATG  
TGATGTCAATCGGTGCTCCTCTATTTATCAAAGAAACAATATTTTTATTTTCTTAGATTTCTTTTCTCTCTTTTAGCTGCTACCT  
TTTTAGAAGTATTTTTTGATGCTGACTTTTTGCTTTGGATTGGTTATCTTTTTGATTTTTCTTTTAGCCAATAATAAAGGAACGTCCCT  
CATCTTTAGATTCAATACTAGTTGTTGTTTCAACATCTTCTCTTTATCTTTGCGTCGTTTTGCGAATAAGAGTGGTGAATGTTTCGTTA  
TCTTTCAACACTTTTTCATCTGTGTTTTTCATTTGTAACCTCCACATCTTCTTCATCTTCTTTACGACGACGTTTTGGTAAGAAGAACGG  
CGTATGTTTAACTTTATCGAGTGACTCGCCATTATTTAGCGAATCTTTTTCTTCAACAGTAACATCTTCTTCATCTTCTTTTCTGCGAC  
GTTTCGCAAAATAAAAGTGGTAAATGTTTGTATCGTCTAAAGTCTCTTTTATTGAATCTTTATTATTATCTCTTATTCTAATCTTCC  
TCTTCATCTTCTTTACGACGACGTTTGGCAATGAAGAACCAGAACTAGCTAGTAAGCCAGAGATACCCACCACACCAATAGCGTTT  
TTAATAACATTACCGAAATTAATTAAGTGACGCATATGAAGTGGATCAATGTCATCATCTTCATCAATTTCTTTTTATGTCCAA  
TAGTCGAAGTGTAAATGGATGATTTGCAGTTCATAACCAATTGTTAAATGGCTATTAGATTCAATTCAGTACTTGACGATTGTT  
AGCACGATCAGATATTAACAATTTGACTGCTGAAATTCGAGCAATACCATTGTTCAATGCAGCCTCAACTGCTGTGAATGATTGCGC  
ATTATTAATATCTCTAATGTTTCAAGCAAAATTCGTTAATTTGATTGATTGCTGCTGTTGTTTTTCATCAGTTGTCGAATTTCACTAT  
TTCGAATACTATTTATTTTTCATTTGAAAAAGTCTTTAATTTCTACTAATTGCTTCTTGTGCTGCTTTAGCTAGTTCTTCTGCTGTTGGAT  
TAGCTGCTTTTCATTTGAGCTTTAAATGTTCCAATTGCTCAGTTATTTTCATCGATGCTTTGCGCAGCTTGAATCGCTTGAATTGCTTGT  
TCTTTAATTGATTTAACTTAGCAATAGCTTCTTGTCTCTCTTTATCTGTTAGATCAGTACGAGCTTTGATTTTCATCAATCATATGTTG  
AATTGCATCTTCAATCAATTTAATTGCATTTGATTTTGCTTGTTCGAATCGTAAATGTTCTGGATTAAATGTTCAATATGCGCTTGT  
CTTGTTGTTGAATTTCTTCAACTGAATGAACATCAGGTGCATTGTTAATATGATCAATCGCTTGTGTTAAGCTTATTAACCTCTGC  
AATTGCAGCTTCTTTTGTTCAGTGTTAATGTCACACTATTATTGATTTCAATTAATCTTTTGTGTGCTGCATTTTCGATTGATTCAAT  
TGCCTGTTGTTGACTACTGACAATCTTTTCTACAACCTTTACAGGAACATTAACAATCACTTTTGATCCATCAAGCAATGTAAT  
TCAACTTTTGCTGTTAAGCTATCAGAAATCGTTGCAGTTGATGGTGATCAATAAATCTGCTGAAAAGCTGATCAATTAAGTTTATGT  
GTGCAAGAATATCTTGTCTGTAATGATGTATCAGCATGTAACATGAGTTCACCATTAACCTAGGATTGCTCAGGTGTTGCTTCAA  
AAATTTCAATTTACAGCAGGTGTTTCATCAACCTCCCATACATGTGATTTCTAATGTATCTAAACCTAAGTTAATCCTCGATTAA  
TTGATCTATAGTTTGAAGCATTCTCAACGTTTTGTAGTGCTCGTTTTTCAGCTTCGTCGAATTTCTTTGAGCGCTTTTGCTTTTTGCTCAG  
GTGTTAAATCTGGATTGAATTGATTTGATCAGCTTCGCATTAGCTAAGGCTTTTATTGCATTTTCGCACTCTTCTTAGCTTTCAT  
AAATCTTTGATGTCTTGAATGCTTGTGCAAGTTGTGCTTTGGCTTGTTCATTTCTTCTTTAGTCATCGCATTGTTAATGCCGTTATG  
ACCTTGTGTAAGTATTTGATTAATTCGATCTTTAAGTGCTTGTTTTTCTTATCTGTTAGATTGGAATTTGATCGATTTTCGTCGAATTA  
AAGCTTGTACACGTTATCAATATCTTGTTCGCAATTTCTTAGCTTTCATAAACTCTTGATGTCTTGTAATGCTTGTGCAAGTTGT  
GCTTTGGCTGTTCAATTTCTTCTTAGTCATCGCATTTGTTAATGCTGTTATGAACTTGTGAAGTATTTGGTTAATTTCTATCTTTAAG  
CGCTTGTTTTTCTTATCTGTTAGATTGGAATTCGATCAATTTCTGTCGAATTAATGCTTGAACCTGCTTGTCAACATCTTTATTCGCAT  
CAATTTTAGCTTTTCGGTATTTTCATTGGCATGCACTTGTTCGAATCGCATGGTTGCCAGCTGTTTGAACCTGAGATACATCCTGATTACT  
TGTTGCTTTATTAATGTTGTTGATGATGCTGTTTGCCAATTTCTTCTGCTTTATTTTTCGCAATAAGCTTGTCTTGATCCGTCGCATTTG  
AAGCTTCGATTTCTTTAGCTTATTAGCTAAAGCTTGATTAATAGATTGAATTGCCCTTTCTTTAGCATCTTGATGCTGTTGATCACC  
TTAAGATTATGGATTGCATCATTGACTGCTTGGATTGCGCCATTGATATCATTACATTTGTGTTATCACTATTTAGCAATGTATTTG  
CTAGACGTTTGGCATCATCGAAGTTTGTTTTAGCATTATCGTCAGCGTTTTGGTAATTGACAGTTTGTCTGCAATTTGGAATTTTCATT  
GTCAACTAAATGTTCAATGTTTCCATTGCATCATTTAAGTCAATTTGATTATTAACAATATCTGTTACATCTGATACAGTATCGGCA  
TTGTTAATGTCTTATGTGCAAGATCTTGTGCTGTTGATTTAATCCATTAAACGAATTAACAAACGCAATTTGCTTTATCTTTGGCATT  
TGCAAGGTTTTGGTCTCCATTTAATGCATTTTGAGCATCGATAATATTTGTTTCAATTGCTCTGCTTCAGCTTTTGCAATTTGCATTAC  
CTTGCACTTTATCTAATCATGTGCTGCATTCGCAATTTGCATTATCATAATTTGCTTTCAAATTTGTCATCTGCATTGATGTAATTTGTG  
CTGCTGATAACACCAAGGTGCTGTTTCGTCGAATATATTTGTTGTAAGTGCACCCATTGCATTATCTAATTTAGTTGCTCTATTAATTTGCTC  
GAGATGCTTTATTTAGCGTTTCAGCATTATTAATTTGTTGGATTGCTAATTTGCTTTGAGCATTGTTTAGATGTGTTAATTGATCCAAT  
CTTTGTAATGCTTCAGCTTACGATTATTAAGTCTTTCTTCACCATTTAATGCTTCTTAGCTGCAAGTGCATCATTAAATTTGAT  
AACTTGTCTGCAGTTAAGTTTTGCCAGACGATTTATCAAGTGCTTGTTCGCTTTATCAACCGCTTCATCATATACTTGTGTTGACTT  
GTGATCTGCATTGACATAGTTCGTGCTACCTTTTCGTGCGTCTTCATTGCCAGTGATTCTTGTGACAATTTGATCCATTGCACGATT  
AAGTGCTTACGCTCATCTACAATTTGTTGGATTGATTAAATCGTTTGGATTGATGATGCGACCTTTAAATCCATCTTGTGAGCA  
TTGTTAATGCTTATGTTGCGATGTTGATGTTTACCATTGTTTGTAGCAAGTGCTACACGTTTCATCCATTAAATGCTTGTGTTGCT  
ATTTAAAAATATTTGAAGTGCTTGATCCACTTGTGCTTATTCGCATTTTGTTCGAATACATTTTCAGCATCAGCAATCGCTTGTGTTAT  
AAGCCTTTTGCTTATCTGAATCTGCTTGTGTGTAATCTATAGTTTGTCTCAACGTTAGCATGTTTCATTAAGCTGCTTGTGTAATTGATCC  
ATTGATTGGTTCAATTTGCGTTGCTTGATCTACTAATTCAGCGATTGGTTGAAGTTTCGTCGCTTGATCAATATTTTGTGTTAGCAGTTGC  
AATTGATCAGCATTAAATGTGTTAATTGGTCAATAGTTTGTTCGCTTGTGTTTTAGCTTCAGCGACTCTCTCATTACCATTAACT  
CATTCATTTTCTTGAAGCTTAGTTAATGCTTGTCTACAGCGTCTTTATTTCGCATTTGAACCATTAGTTGGATCTGTAATGCTTTGT  
GCAGCTTGTAAACGCTTGATCTACTGCTTCTTTTTATCAGTTGACGCTTCAGTGTAATTTGGTTGAGCCTTATCTGTATTCACTTGATC  
AATTTATTTTCAATGTTTCCATCGCTGATCAAGTTTCAGTAGCAGTTGAACATGTTGTGCAACCTCTGTTCTTGAGCGCTGCA  
TTATAGCATCAGTTAATGTTGTTGTTGTCATGATTTAAGTTTGGCAATTTACAGTTGTTACTGCTTGTGTTGTTGATCAGGAGC  
AAGTTTTGATCACCATGTAGATTATCTTTTGCAAGTTGTTACTGCTTGTGTTAATGTTCTACTTGTGATTGTTGCGAGTGTGGAATTAC  
CTGTTTGGTTAATTAATCTTTTGCATTTTGAACCTGCTGCTTGGTAAGCATCTTTTTGCGGTTTATCTTCATTGATAAATTTGCTACCC  
GCTTCCGTTTGTGTTGATCTTGAATACTATTTTCGAATGCTTGCATTGCTTGATCAAGCGCTTTTGCTTCAGCTAATTTTTCGCTAC  
TTCGCCACGAGTTGCTGCGTTGTTATTTGGCTTTCAGTGCTTGACGTTGCGGATTATTCAAACCATTAAATGATTTAAATCAGTA  
ACCGCATGTTGTTTATCGTCTGCAAGTTTTTGATCACCGTGTAGGTTATCTTTAGCTTGTTTAAAGCATGTGTCAATTTGTCAACTTG  
TGCTTTATCAAGCGTTGGATTACCTGTTTGGTTAATTAATCTTTTGCATTTTGAACCTGCTGCTTGGTAAGCATCTTTTTGCGGTTTAT  
CTTCATTAATAAACTTGCTACAGATTCTGTTGTTGTTGATCTTGAATGCTATTACGTAAGCTTCCATTGCTTGGTTAAGTGCTTGT  
GCTTCAGTTAATTTTGTGCTACTTACCACGAGTTGCTGCATATTGATTGATTTTCAAGTGCTTGACGTTGCTTGACGTTGTTGATCAGTT  
AGACAAGTTATTTAACGTTTCTGTTGCACGTTGCTTATCTTGAGCTAGTTTGTGATCACCATGTAAATGTTTTTAGCATCAGTCACTG  
CCTGTGTCGCTTGATCAATGATTGATTTAGCTAATGTAGGATCAGTTGTTTTGTTAATCAAACTTTTCGCGTGTGTACTGCTTGCCT  
ATATGCATCTTTTTGCGCTTGATCCTCGTTAATAAATTTACTACTGCTTCAGTTTGTGGTTGATCCTTAATACTTTCTTTAATGCTTT

CATCGCTTCATTTAATGCTTGCCTTGTGCAATGATTTTCAGCCACTTTATCACGAGTTGTTGCATTATTAATTTGATTTTCTAGCGCTT  
GTTGTTGAGCTGGTGTAAATTGATCTAAATGATTTAGAGAATTTCCAGCAGTTTGCTTATCTTGAGCTAATCGTTCAACACCATCTAA  
TGCATTTTTAGATGATATTACTGCTTGAGTCGCACTTGATACATTACCTTTATTGATAGTTGGATTATTTAATCCTGCAATGATAGAC  
TCAGCATTTTGAACGTCTTCATCATAGGCTTGTTTTTTATTCGGTTCTGCATTGACATATGCACTGCTCGCACGTGTTGCATCTTTGTC  
AGCAATACTTTGTTGTAATGCATCCATAAGTTGATCTAATGCTTGTACTTCAGTCAAACTCTTGCTTAACTGCTGTTCTAGTTGTTTCAC  
TATCAATTAACGTATCTTCCATATGTTTTTGTGCATTGTTTAGATGTGCTAATTGGCTAACCGTTTGTTTAGCATGATCTTTATCATTT  
TGTAATTTACATCACCATGTAATGCTGCTTTCGTTGTATTACAGTTGCCGCTACTTGATTAATCGCATTATTATCTAATGTTGCAGT  
TTGTTTCATTGATAATATTATTTGCGGCTTGAACAGCTTGATCATAGTTTTTGTGCTCTGGTTGATCTTCGTTGATATATTTGCTATTTG  
CTTTAGTTGCTGCGTTATCTTGAATGCTCTGTCTTAAACCATGCATTGCTTGGTTAAGCGTATTTCGCATTTTGTTCATTTGATGAAC  
GCAGTTACTAAAGTTGCAGCTGTAACCTTGGTCTTTTAAATGCTGTTTTTGGAGGATCATTTAAGCTTGTTAAAGCATCAATTTGCTTGC  
TCGCATTTGTTTTAGCAACTTGTAATATGATCTCCATTTAAACGCTTGAAGTGTGTTTGAACCTTTAGTAATAGCTTGTCTACTTCT  
GTTTGGTTTCGCATTTTGACCAGTTTGTGTTTGAATCATTTGCTGCTGCTTCATTTACCGCTGTATTATAAGCAGTTTGTATTCAGTATC  
AGCATTGATGAAGTTACCAGTTGTTCAACGGCTTCATGATCTGCAATCGCATTAAATTAAGTTACCCATCGCAGTATTTAAAGATTCT  
GCTGTTTGTGTTGACCATTAACGTCAGCAATATCAGATGATTGCGTAATTTGTGATTGTAACGTTGCTTTTGCAGCATTATTCAAAT  
GATCTAATTGATCAAGTCTGTTGTTGCTTGTGTTTAGCTGCTGCAAGGTTTCATCACCATCTAATGCAACTTTCGTATTATTCAGT  
TGTGTCGTTGCACCATTAACATCATCTGGATTTCATCGTAGGCGATGTAGTTTGATTAATGATATTATTAGCAGCTGTTACAGCTTTGT  
TATAGTCAATTTGTCTTTGCGCAGTTGCATCATGATAATCTTCAGACGCTAATGTCGTTGATTATCCGCAACACTATTTCTTAATAAT  
TCCATCGCATGCTAACGTTTGTGCTTTTGTGATTAACTGATAGTGTGACATCTGTAACAAGTGGCGCTTGTGTAAATTTGCTTTCAATG  
ATTGTTTTTGTGCATCATTTAAGTGTGTTAAGTTCGCCAATTTGTTGTTTTGCTTGTGTTTTGCTTTTGCATTTGCCAAATTTGCTATTCACATTTA  
ATGCTTGTTCGCTGCGTTCACTTCATTAGTGATGCTTTCAACTTGTGCTTGTACTTCATTAGTACCAGTTTGTATTCAATAATGCT  
TCAGCTTTTGCTACTGCCTGTTTATACGCATTTTGTGTTGTCAGGATCTGCATTTAAGTAATTACCGTCCGCTAATATTTGATCTTTATC  
ATTAATAGCTTGTGATAATTGATCCATTGCTTGATCTAGGCTCGTTGCTGTTTGTGTTAACTTGGTTCACTGTAGCAATTTACGGCGAT  
TGATCGATTGACCTTTTAAATGCTTGTGTTTGTGAGCATCGTTTAAATGCGTCATTCCACTTACGGCATCTTTAGCATTTTGTCTTTTCACT  
GGCTAATTTAGCTTACCGTTTAAAGCTATTTTGTAGCATCAGTCACTTGAGTTAATGCACGAGTAATGTCATCTGGGTTAAGCGTTGGA  
TTTGTGCTTTGATTGATAATACCTTCCGCTTGAGACACTGCATTTGTATATGCTGTTTGTCTTATCGACATCAGCATCGTGGTAGTTCTC  
ACTTGCTTTCACAGTATCTTTATTTGCAATACCTTGTGTTTCAAGTTACCCATTGCTGTATTACATTTTGTGCATTTTGTGTTAGTTTGTTC  
AATGTAGCTAAAGCTTGTGCTTGATTGATTGTTTGTGTTTCTGAATGCATCAGTTTGTGTTGATTAAAGTCACGTAACGATCAAGATTT  
GCTAAAGCATCTTGTTCGCTTGCCTAATTTTTCATCACCGTTTAAATGCATCTTTCGCTTGATTATAGTTGTAACGCTTTTGTGTTAC  
TGTATCAGGCGCAATACAGGTGTTGGTGTGCCATTTGCGATTGTTGCGCTTGGTTAGCTGCATTGTTATAAGCTTGTGTTGTTGCT  
TGATCCGCTTGTGTAAGTCAACTGATTGTGGTACTTGACTATTGCTTGAATTTGTGTTTCAACGTACCCATTGCATTATTTAACG  
CATCAGCATTTTGTCTAATAGCATTAAACACCTGTAAACAAGTCTGATGCGACACTTGGTCTTTTAAATGCTGTTTTTGTGTTGATT  
AAGTTTGGTAACGATCAATGGCTGTATTGCAATTGCTTTAGCAACTTGTAAAGTTATGGTTACCGTTTAAATCACCCCTTAGCTTGAT  
TCACTTGTGTAACGCTTGAGCCACTTGTGTTGGATCCACGTTTGCATTTGGTGTACCCTAATGATTGTTTCAGCATGCGCTACCGC  
ATTGTTATATGCATTTGCTTATCAGTATCAGCATGACAAAGTTACCAATTTGCTTTAGTTTGGTCTTTATCTGCAATACCTTGTGTTCA  
ATTTGCTCATTTGATTGATTAAATCTTGTGCTGTTTGTCTTAAATCGTGTTTACATTTGCAACAGTTTGCACAGTATCGCATCGATCTGTTT  
AATGCATCTTTTGCCTTGATTAAATCATTTGCAATTGTAATTACTTGTTCGCTGCATCTTTTGCACGTTGTACATTGTCAATTACC  
ATTCAATGCTTGTTCGCTTCGTTACACGTTGCATCGCTTGTTCACCTTCAGTTTGACTTGCATTGCTGCCATTTGCTTTAGATAAAAA  
TACCTTCTGCATGTGAAACCGCATTAGTATAATCATCTTCTTAGCTTGATCTGCATCAGTAAAGTTAATGCTATTTAATGTCTCAGT  
TTTATCTTGTAAATGCATTGTTAAGTTAGTCATAGCATTATTCAGATTTTGTGAGCATTTTGTCTTAACTTATTAAGCTTGTGCAATATCTG  
GTGCTTGTTCAACTTGAGTTGTTAGCGCTTGTGTTTGTGATCATTTTAAATGATCTAGTGTACCAAGTGTGCTTAGCATCTTGTGTTG  
GCATCAGCTAATTTTGTGATTACCGTTAAGTGCTTGATTGTTGTCATTACCTTTAGTTAATGCTTGTGTAATTTGATTTGGATCCATTGT  
TGGATTGTTGTTGTTTCAACAATCTTCTGCTTTTGTGTTTACTGCATTATCATATGCTGTTTGTGCTGATCAGCATCGTGATAGT  
TCTCGCTACGTTAATTTGTGCTTTATTCGCAATACCTTGTGTTTCAATTTGTGTCATCGCTCATTAAGCGTTGTGCGCTTGTGGAATTTGATCAA  
GCATTGACGTTTGTGTAAGTGTGCTTGCCTGATTGTTTGTGTTGCTGATTATCATCACGTTGCGCTTGGTTTAAAGTTTGGCAATTGATCAA  
TAGCATGTTGAACATTTTGTTCGCGCTTGCTAAGTTTGTATTACCATTTAAATCATTTTGTAGCTTGCCTAAGTTTATTTAAGCTGCA  
GTAATTTGCTAGGTGTAACGACAACATCAGGCGTACCCTAATTAATGCTTCAGCTTTCGCTACTGCTTGATTATATGCATTTTGTCT  
TGTGAGAATCTGCATTGACAAAGTTACCATCAGCTTTTGTGTTGCTTTATCTGCAATGCCTGTTTTAATTGTGTCATCGCATTGTTT  
AACTCTTGTGCGCGTTTGTGTTAACATTGTTTACACCAGCTACAGTAGTTGCATTTTGTACTTGTGTTTAAATGCATCTTCTGTGCTTG  
GTTAAGATCATTAGAGTTATTAATTAATGCTGTTGCTTCGCTTTTGCATGTTGAACGTTGGCATTACCATTAAATGCTTGTGTTGCTG  
CATTTACTTGTGATTGCTTGTGTTCACTTCAGTTTGTGTTGCATTACCACCTTAGCTTTTGAATGATATTTTTCAGCATTTGTAAC  
GCAGTGTATATGCTTGTGTTTGTGCTTGATCTGCATCAGTGAAGTTAACTTGTGCTTTTCGCTAGCATTTATTCAGCATCTGCTTGCA  
CAAGTTACCCATCGCATGATTAAAGTTTGTGCGCATTTTGTCAATTTGATTGCTTTCATCAACAGTATGCGCGCCATTAATTTGATTA  
GTAACAGCTTGTGTTTGTGCGCATTTAATTAAGTTGTCTAATGAACCTAAAGATTGCGTTGCTTGTGCTTGTGCTGCTCTAAGTTTTCATT  
ACCATTAAAGCATTTTGTAGCTGCTTACTTGTCCAGCAGCTTGATTGATAACAGTCGGATCTAATGAAGGGTTGTAGTTTGTATCA  
ATAATACCTTGTGCAGTTGTGACAGCATTATTGTACGCATCTTTTATTCGGACTTGCATCAGTATAATTTTGGTTTTGTTTTGTTGT  
CGCATTATCTGCAATACTTTGACGTAATTTGTCCATTGCTGCATCAACATTGTTTGTCTTTTGTTCATTACCTTGTGCTTCTGCAACAG  
TAGTCGATTGTTGTACCAATTGTTTTAATGCCCTCTTTTGTGCAATTGTTAAATGGCTTAAACCGTCAATTGCTGTATTGCGTGTGT  
TTCGCTTTTCAAGGTTTTGAGTACCATTAAAGCGCTGCTTTTGTAGTATTCACCTTGATTATAGCTGCTTCAACTTGATCTTTAGGCAC  
GTTTCGTAACCTGTAGATTATTTTAAATATTTTTCAGCATTTACGAACCCGCTTCATTGTATGCATTTTCTCTCTGATCTGCATCTGCAA  
AGTTTGTAGTGCAGTGTAGTGCTTTATCATTTCAAGTATTTTCAAGTTTACCCATCGCTGTATTACGATCTCTGAGCGCTTTGAAT  
GGCTTGCCTTACTTCAGCTACAGTGTGCGCTTGATTGATGTTTCCAGTAACAGCACCTTTTGTGCATTGTTAAGTTATCTAACGTA  
GATAATGTTTGGTTTGCATTGTTTTTGTAGCATCTGTTACTTTCTATCACCATTTCAACGCTTGTGTTAGTAGTTGTACAGTTGAAAGTGC  
TGCTTCAACTTGTGATTGTTTGCATTTGTACCATTGCTTGATTAATAATATTTTTCAGCAGCAGTTACCGCATTGTTGTATGCTGTTT  
GTTTTTCTGGATCTGCATCTGTAAAGTTAACACTTGTGTTCACTTGATCTTTGCTTGGATTCCGTTGATTAAACGTTCCATTGCTTGA  
TCTAATTGTTACGCTTTAGTTTTCACTTGATTTACTGTGCTAATATTTGGTGCATTTGTCACTTGTGTATTTAAATCTTGCTTTTGTGAGC  
ATTGTTTTAAATGACTTAATCGGTTGATGTTAGCAGTTGTTTCTTGCTTTTATTTGTCAAGTTTTGCGCACCATTAAGCGCAGTTTTGT  
TAGTGTTCACCTTGATTAGCTGCTTGTGTTACTGACAGTGGATCAAGTGTGCGGTGACTCGTTGCATTAATGATATTTTTCAGCATCTGT  
AAGTGTGATTGTATGATCTTTGTTTATCTGATCTGCATCAACATATGTTGACTCGCTTTTACTTATCATTTTTCGCAACTACTAT  
TTCGAAGTTGATTACATTGCTTGTCAAGATTGTTGCTTTTACACTTTGTACACCAGTTACTTGTGTGCGCTATCAATTTGA  
CCAGTAATACTTTGTTTTTGTGCATCAGATAAATGTGTCAATTTGACGTAATGCATCTTTAGCTTGTGCTTTCGAGTTGCTAAGTTTGT  
ATCACCATTTAAACTTGTTCAGCATTATTGACACGTTGTGTTGCCGAGTAACATCTGCTGCATTTGTAATCACATTAGGTGAACCA

TTTACGATATTCCTTCGACGATTATATGCATCAGTGTAAGCACCTTGTTTATCAGGACTTGCGTTAGTGTAATTACCACCAGCTACAA  
TTGTGTCATGATACCAATTGCTTGTTTTAATTGATCCATCGCATTATTAAGTGATGTAGCACTATTTTTTCAGATCAGTTACACCTGA  
TACGCGTTGTGCAGCATTCACTTGTTGTTTCAATGCTGTTTTTGCAGTTGATTCAATTGTGTCAAGTTATCGATAGCTTGTTAGCTT  
CAGTTTTAGCGCGTTGTAAGTTCGCGTCACCGTTCAAAGCATTTCAGTAGACGTTACACTTTGAATTGCTTGTTCAACAGCTTGCTT  
ATCTTTATTCGTACCATGATCTTTATTTAAGTAAGATTACAGCTTGTTGATGATGGCATTATCAAATGCTGTTTTCTTAGTTGGATCTGCGT  
CAATGTAGTTTTTCGCTCGCTTTAGTTTGATCTTTATTTGCGATTGCTGACTCTAATCGTTGCATTGCACCATCTAAGCTTGTGCTTTC  
GTTTTAACACTATTTACACCGTTGACTGTTGTTGCACCTTCGATTTGTGATGTTAAATCTTGTTTTTGTGCATTATTTAAGTGTGTTAA  
TGTACCTAAGTTTGCTTTCGCATCTGATTTTGCTTGCTTACATTTGCATCACCCTTTAAAGCATTCTTAGCAGTCGTTACTTGATTTA  
ATGCAGCTTCAACTTGTTGCTTTTGTGCATATTTGACCGTTTGCTTTATCTAAAATACCTTGAGCATTTCGTAACAGCATTGTGTAAAGC  
ATCTTTCTTACCTTGGTCAGCATCTGTAAGTTCACTTGTTGTTTAAACAGTGTTTTTGGTCATTAAATACCATTTTGAAGTTGACCCATTG  
CTGTATTTAATTCAATTAGCAGTATTTTGTGCAGCAGTTACGCTGCTACTGTCGTTGCATTGTCAATTTGACTAGTTGCTGCAGTTGAT  
TGCGCGTTATTCAAGTTACTATATGAAGCTAATGCACGTTTTGCTGTTTTCTTCGCTTGAGCAACTTTATTATCACCATTCAAGTCGTT  
TTTAGCTTGATTCAATTGGTTAAGCGCTGCTTGAACCTTGTTTCACTTCGCGTTACTGCCATTTGCATTAGTAATTGCTTCTGCTTGTG  
TAACTGCAGTATCATACGCTTGTTGTTTTGGTTGATCCGCATCTGTGTAATTGACACTACGTTTCGTATTATCCTTTTCAGCAAGTGC  
ATGTTTCAAATTACCCATCGCTGTGTTAACGATGTTGCTTTATTTTTAGCCGCTGTGACAGCTGCAAGATTGGTGCTTGATCCACT  
TCAGCATTTGCCGCGAGTTCGTTGTGCATTGTTCAAGTCTGTCAAACGACCGATATCTGATTTTCGCAGTTTGTTTTGCTGCTGCTAATTT  
TTCATCACCGTTCAATGCAGACTTCGCACTGTTCACTTGCTCGCTTTTGGTTAATTGTATCAGGATTCAATTCAGGGTATTTCGTTG  
CACTAATAATACCTTCAGCAATTAGTTACCGCATCATGTAATGCATTTGTTAAATCTGCATTTCGCGTCTTGCAATATCTCGCTTGATT  
GTCCGATCTTTAGAAAGCAATACTTTGTCTTAAATTGATTGATCTTGATTTAAAGTACCAGCATTGTGCTTGATGCCTTGAACACAG  
CAACAGTTGTACCACGTTCAATTTGTTCTGTTAAGTTTGCTTTTTGAGCATTAGTTAAATGTGACATTGTCGCTAATTGTTGTTTAGCT  
GTGTTCTTCGCTTCATTTAATCGCGCGTCACCATTAAATGCTGTTTTAGCAGTATTCACACGTTGTAATGCTTGTTCAACGGCTACTTT  
ATTGTCATTTGAACAGCTGTTTTATCTAATAACGTTTTAGCTGCTGTTACAGCATCATTGTATGCAGTTTGTTTTATCTCTATCTGCTT  
CAGTATATTTCTGAGCTGCTTTTGAGCTGCTTCGTCATTAATACCACGTTGTAAGTTGCTCATTGCAGTATTTAATTCAGATGCCATT  
GTAGACACTTGATTACACCTGCAACTGTTGTGCGCACCTTCAATTTGTGATTCAATGCTGCTTTTTGTGCATTATTAATTGATGTAA  
GGTTATTCAATGCATTTTTCGCAGTTGCTTAGCGTTCCGAACATTTTGATTACCGTTCAATTCGTTTTAGCACGTTGTACATTTTGT  
AACGCAGTTTCGACACCGTCTTTTGCAGTATTTGACCTTGCTTTTATTTAAAATTTGTTTCAGCTTCGCTACTGCATTTGATATATGC  
ATTACGTTTTCGCTTCATCTGCATCAGTGAAGTTAACACCTTGCTTAAATCGTATTTTGATCTTGAATACCATTTTTCAAGTTTCGTCATAG  
CTGTATTTAATGCGTCCGATTATTTTGCCTTGTTGTTACTTCATTAACATGCGTTGCACCTTCGATTGGCGTTTCGCTGCATCTTTT  
TGTGCATTAGTTAAGTCACCTAAGCCATTCAAATGTTGCTTCGCATTTGTTTGCAGCTTCTTAAGTTTTCTTGACCGTTTAAACGCTTG  
TTGTTTAGCTGTCACTTGGTCTTTCGCTTGATTAATTTCTTGCGCAATCATTGATGGACTAGTTGTTTGAACCAATGATTGCTTTTGCTG  
CAGTACTGCATTGTTGTAGTCATTTGTTTGTTTTGACTTGTCATCTGTGTAGTTTTGACCTGCTTAAATCGTTGCTTCATTGCAATG  
CTATCTCGTAGACCTTTTCAATTCAGTGTTTTAATGTTTGTGCATTATCACGAACAGTTTGAACATTTGGCAACGTCGTCGCTTGACCCA  
CTTGTTCTTTAAGTTTTGCTTTTTTGCAGGACATTTAAAGAAAGTTAAACCATCAATTTGCTGTGTTAGCATTTTGTTCGCTACTTCTAAA  
TTATGATTACCGTTTAACTGCGTCTTCGCATTGCTTACTTGCGTTGCTGCATTTGTAACATCTGATGGTGTTAACGTTGGTGTTGGTG  
ACCATAACGATATGTTCTGCAGCTGTCATTTTCACTATGCTTGCGGTTTATTTCGCATCAGCATTGACATAAATACCACATGCT  
TTTGTGTCAGCTTTATCAGCAATGGCACGTTTTTAAAGCTGTATCGCAGTATTTAATTCAGTCGCAGTATGTTCAACACCATTGCTG  
CAGATACGCGTCTGCAGCTTGTTACTTGCTTTCAATGCTTCTTTTTGTTTTGTATTTAAGTCCGAAGCATTGTAATCGCTGTGTTT  
GCAGCTGTTTCGCACGTTCTAAGTTTTGAATACCGTTAATGCAGTATTGGCTTGTTGAACAGCTTGCAATTGCTCTTTCGACATCTG  
CTTAGAGTGATTTCTCCAGCTGTTTTATTTAAAATAGTTGCTGCTGCATTTACTGCTTGAGAATAAGCCGTTTCGTTAGCATCATCA  
GCATCTTGATAATTTTGACTTTGTAACGTCGTTGCTTTATCACGAATTGATGTTTCTAATTGACCCATAGCACCATCTAATTGTTGCG  
CTTTGGCTTTAACTGTATTAACACCTTCAACATTTGTTGCTTGTTGTAATTTCAATTATCTAACGCATTACGTTGTGCATTATTAATGTGT  
GTTAATGTACCTAACGTTTGTTTCGCAGCAGCTTTAGCTTCATTTAATTCGCATCACCCTTCAACGCCGCTTCGTAAGTTGCTGCTT  
TTGTAATGCTTGTTCAACTGCTGCTTTTTCTACATTTTGACCACCTAGCTTTTGTTAAATGCTTTTGCTGCATTTACTGCTTGATCAT  
AAGCTGATTTCTTACTTGCTCAGCATCTAGGTATTTCTGAGTTGTTTTGTTTGTGCTCATCTATTGATACCATTTTGTAACCTGTGC  
ATTGCGTTATTTAATTCGTGTGCTTTTGCAGTTTCTTGATTTACACCAGCTACTGTAGTTGCACCATCAATGTTACGCGTTAAGCATC  
TTTTTGTGCATTGTTAATTGATGTTAAGTTATTCAAGTTGTTTTTCGCTGTTGCTTCTAGCTTGAGCTAAGTTTTGCGCACCATTTAATG  
CATGTTCTTTAGTTGTCATTGTGATGTTGCTTGCGTAATAGTATTTGGTTCCATCGTTGGGTTTCGATGTTTGATTAATGATTGCTTTT  
GCTGCAGTAACTGCGCTGTCGTAATCTGTTACGATTATTTGGACTTGCGTCAGTGTAGTTTTGACCTGCTTTAATCGTTGCTTCATTG  
CAATACTATCTCTTAAGCCTTTCATCGCTGTATTCAACGTTTGAGAACTATTTTAAACAGTTTGAACACCATCTAATGTAGTTGCACT  
TTGAACTTGTTCTTTAATTTTGCTTTTTGTACATTATCAATTTGTGCTAAGCCGTTCAATTTGATTGTTAGCATGCTCTTTCGCTACAC  
GTAAGTTGTTATCACCATTAAATGCTGTTTTAGCCGACTTGACTTGATGCGCAGTATTTACGTCATTGACTGTTAATGTCGCATTT  
GGTGTAACCATTAATGATATTTTCAGCGTTAGTCACTTTGATCATACGCTTGACGTTTTCCTTGATCAGCATTTGACATAAATACCGC  
TTGCTTTTTGTTCTTTCTTTATCCGCAATAGCTGCTTAAAGTGTGTCATCGCACCGTTCAATTCAGTAGCTGTATGTTGAACGTTATTT  
GCATCAGATACAGCTTGTCATTGTTAACTTGTTGTTTTAATGCATCTTTTTGTTTTTGGTTTAAAGTCTTGCGCGTTGTTAATTGTGTT  
CGTCGCATTTGTTTTAGCTTGAGCTAAGTTTTGTGCACCATTTAACGCTGCTTTTGTGTTATTGACTTGATTGGCATGTCATTAATCG  
CATTAGCATCCATATTTGATTGTTGCTTGCAATTAATACACCATTTGCATTATTTACAGCAGTATTGTAATATTTTTGTTGCTATCA  
GATGCATCAAGATAATTTGACTTGTTTTTCGTCGTATTATCATTTTGATACTTGTTACGTAATGCACCCATGGCAGTATTTAATGTAT  
TACCTTTATCTTTAACACCATTTACACCACTACATTTTGCCTTGTTTCAACTTGATGCTTCAAGTTGCTTTTTTGTAAATGTGTTAAG  
TTAGGTTAAACCATTAATCGTATTTGTTGCTGAAGTTTTCGATTTCTTAAAGTTTTCAGCACCATTTAAAGCCGCTTCGCTCTTGTAAC  
TGCATTTAATGCATTATCAACGCTGCTTTAGATGTTGTTTACCACCTGTTTGTTTATTTAAATGCCTTACGCCGCTTGACAGCTTGC  
GTATATGCATTTTCGTTTTGATTTCATCTGCATCAAGATAATTTGATTTCTTAATGTCGCATCTTTATCATTGATTGCACCTTGTAAGCT  
ATTCATAGCGCCGTTCAATGTATTGGCATTGTTTTTACAGTATTAACGCCATCAACAGTCGTCGCTTGATTGATTGACCTTCTAAC  
GCAGTACGTTGTGCATTGCTAATATGGTTTAAAGTACCTAAGTTTTGTCTAGCTGCCGCTTTCGCTTCTGCCAGTTAGCATCCCCAT  
TCAATGCATCTTTCGTAATGTTACTTGTTGTAATGCACGTTCAACTGCTGCTTTATCTGAATTTGAACCTGTTTGTTTATTTAAAAT  
GCTTTCGAGCAGCTACAGCTTGATCATAAGCAGTTTTCTTACTTTGTTTCAGCGTCACGATATTTTGTAGTTGTTTTGTTGCTTTTC  
ATCATCAATACCATGTTGTAATTGACCCATAGCTGTATTAAGTTCAATTTGCAGTTTGTTGGATACTTGTTACATTTGCAACACGTTGC  
GCATCTGTCACTTGCTTTTCAACGCATCTTTTTGCGCTTTATTTAAGTTAGTAGCACCATCGATGGCATTGTTGCTGTTTGTTCGC  
TTGCGTTAAATATGTGTACCATCTAATGCATTTTTCGTTGATGTCACTTGTTGATAGCGATTGGTTAATTGCATTAGCATCCATATTG  
GATTGCTTGTTGCATTAATGACACCATTAGCACTATCAACAGCATTGTTATAGTTTGTGTTTGTACTTCTGTAGCATCAAGATAGTT  
TTGGCCATTTTTCGTAGCTGTGTTATCTTGAATGCTATTTCTTAAAGTACCCATAGCACCATTAAATGTGTTGGCACTTGATTAAACG  
TATCTACACCTGCAACATTTTGTGCTTGTTGCACCTTGTTGTTTCAATTTATCTTTTTGAGCAGTTGTTAAATGTTGAAGTCCGTTTATA

GTAGTGTTCGATTGATTTAGCTTGCTCTAAATTATGGTTACCATTTAGGGCACCTTTTCGCATTAGCAACTTGTGACAACGCGTTTT  
CAACGGCAGCTTTATCTAAATTTGATCCACTATTTTATTTAAATATTTTCTGCGTTGCAACGCGTTGAGTATAAGCAGTTTTCTT  
ATCTGAATCAGCATCATGATAGTTTCACTTGCTAGTGTATTTGCTTTATCATTAATACCATTTTGAAGTTAGCCATCGCTGTATTCA  
ATTGTGTACCTGTATTAGATACAGCTTCAACACCAGCTACAGTTGTGCTTGATCAATTTAGTTGTTAAGTCACGTTTTTGTGCATT  
ATTAATTGACGTTAAGTTATTTAATGCATTTTAGCTGCATTCTTCGCATTTGTAACGTTTTGATCACCATTCAATGCATTTTAGCAC  
TTGAAACATTTTGAATAGCCGCTTCAACATCTTGTTTAGACGATTTGCACCTTGCGTTTTATTCAGAATTGCTTCAGCTCTGCTTACC  
GCATTTGTATACGCATCACGTTTAGCTTTATCTGCATCAGTGAAGTTAACACCTTGTTAACTGTGTTTTGATCATGGATAGCTTGTT  
CCAAGTTGCCATTTGCGTGTTAACTCAGTTGCTGCATTTTAGCAGCTGTACCTCACTCACATGACCTGCACGGTCAATTTGTGA  
TGAGATGGCAGATTTTGGTTATTTGTTAAGTGTGATAACGTATTTAAGTTTTGCTTAGCAGTGTTTTGTGCATTTCTTAAGTTTTAG  
CACCGTTTAAACCATTTTATGACATTATTCACCTTGTTGCTGACGCTGGGTAATCGCACTAGCATCCATAGTCGGATTGTTAGTTTGATT  
AATGATACCTTTTCGCATTTGACACAGCGCTATTATATGTTGATTGGTTATTCCGACTTGCGTCTGTATAGTTTGTAGCTTGCTTTGACTG  
TTGTTTCGTTAGCAATACTATCTCTTAAGCCTTTTCATTGCATTGTTCAATGCTTGTCATTTGTTGAACAGATTGTACGTCTTCTAAT  
CTATTGGCTTGTCCTACTTGTTCTTTAATTTAGCTTTTGGAGTGATTTAATTGTGTTAATGCATCAATAGCAGTATTGGCGTTTTG  
TTTTGCTTCAGTAATCTTTCGTCACCATTTAATCTTGTTCGCGCTGTTTACTTGATTAGCTGCAGCTGTTACTTCTGAAGGTGTCG  
TAACAACCGTTGGCGTACCGCTAATAATATGTTTCAGCATTTGGTAACCTTAGTTGTGTAAGCATTTTGTTTAGTGCTATCGGCATTAAC  
ATATTTACTGCTTGCTAACGTATTCGCTTATCTGCGATGGCATGTTTTAATGTGCCCATTTGCCGTGTTCAAGTTCAAGTCGATTGTGCT  
GTACATCTTGTCATTAGATACGCGTTGAGCACCATTAGCTTGCTGCTTTAATGCATCTTTTGTGTTTTGATTTAAATCAGATGCGCC  
ATTGATTGCTGTAATCGCTGCTGTTTCGCATTTAAGTTTTCGCTACCATTTAATGCATGTTTCGCACTATTAACTATTAAAGTG  
CTTGTTCAACCGCTGTTTTGCTGTATTGCGTCCAGTTGTTTATTTAAATAGTTTCGCGAGCTGATATAGCTGATTGTTAAGCATTAA  
CGTTTTTGTCTATCAGCATCCAAGAAGTTTTGGCTCGCTAATGTTCTGACTTATCGTTGATAGCCGTTTGAAGTTACCCATTGCGC  
CATCTAAACTATTTGCATTTGTTAACTGATTCAACACCAGCTAAGTTGTAGCTTGTAAGTTTGAATTTGTTAAATCATTGCGTTG  
TGCTGTAGTGATATGCGTTAAAGTACCTAAATGTTGTTTCGCTGCGTTTTGAGCTGCAATTAATTTGCATCACCATTCAATGCATCT  
TTCGAGTATTAACACGTTGCAATGCTGCTTCAACTGCATTTTGCAGAGTTTGGACCTGTCGATTATTTAAATCGCTTTCGCTG  
CAGTAATAGCATTATCATACTCTTGTTGTTTATTTGTATCAGCATCACGATATTTCTCAGATGATTTCACTTGAGATTCTGTTGTTAATA  
CCATTTTGAAGTTAGTCATAGCTTGATCTAGATGTTGTGCATTTTGTGTTTACAGTATCAACACCCTCACTCTTGTCGCACTAGTAA  
TTTGACTAATCAAAATGTTCTTTGAGCATCTGTAATACTCGTAAATGTGTTTAAAGTACGTTTTGCGATTTGTTTGGCGTAGCTAAG  
TTTTCATCACCGTTAAGTGCCGTTTTAGAAGTATTCACCTTGCTGCTTTTGTGTTAATCGTAACTGATCTGATTCTGTTGATTACTATT  
TGCATTAATAATCGTTTCAGCAGCAGCTACTGCGTTGTTATATGCTGTTTGCTTATCATTATTAGCATCTACGTAATCTTCACTTGCTT  
TAGTCGCATCTTTGTTGGCAATACTTTGTCTTAACGTATTCATGGCTTGATCTAATGTATTGGCATTGATTGAACCGTATGAACACC  
AGCGACAGTAGTACCCTATTAATTTGGTTTGTAAATTCGTTTTTGTGCAGTTGTTAAATGCGTCATATTATTTAACTGCTGTTTTG  
CTGTTTGCTTCGCTTGATCTAATAAACGCGTACCCTAAGTTATTTTAGCAGAATTCACCTTGATTCTCGCTTCAGTAACTTGATCT  
TTCGTTTTATTTGACCATTGATTTATTTAAATATCTTTCGAGCTTGACCGCATTTGTGTATGCTGTTTTCTTACTTGGTGTCGCA  
TCTTGATAATTTGACTATTAAGTGCTGTTTGTTCATCATTGATCGCACCTTGCAAGTTACCCATCGCTGATTTAAATCTGTACCTTG  
TTGTTTAAACAGTATTTACGCCAGCAATATTGATGCAGCATTAATTTAGATTAAACATCTGCTTTTGTGCATTATTTAAATGTGGTA  
ATGCATCAATGCTTTGACCATCTGTTTTAGATTGTGCTAATTTTTCATCACCATTAAATGCATTTGTTAGTAAAGTAAAGCTGAA  
GTTGCTCGATTAAACATCATCAACAGACATTGTGCGATTAGCTGTTTGATTAAATAATGTTTCAGCACTTGAAACTGCACTATTATATG  
CATTTTGTGTTAGCTGTATCTGCATCCGCATAATCTTCTGTACGTTTCACTTGATCTTTATCTGCAACAGCTTGCTTAAAGTTACCCATT  
GCACTATTTAAGTTAGTTGCATTTTGTCTTAATCGTATTAACGTCTCGATTGATGCGCACCATTAAATTTGCGATTGTAAGTTTGTGAC  
GTTGTGCATTATTCAAGTTATTTAATTGACCTAATGCAGTGTTGCTTCTGTTTGGCAGCATTTAATTTGTATTACCATTCAATGCT  
TGTTCTTTACTTGTCATTTGATAAAGCATTTGTTAACATCACTTGGTGTTATAACTGGATGTTGTGCATTACCATTAAATAATGTCAT  
TCGCATGGTTGTATGCATTGTTGAATCATTTTCTTATTAGTATCTGCGTTGACATAATTATCACTTTGTACGACTTGTTTATGATTA  
GCAACGCCACGTTTTAAACCTGTCATAGCAGTATTTAAGCTTTGAGTCGTTGTTTAAATATCATTACTGCTTGACGTTTTGTGCAC  
TATTCATCTGTTGTGTTAATGCATTCTTTGTGCTTGTTGTTTAACTGTCATGCGTAATCGCATTTGTTGCTTATTAGTAAAGTAAAGCTG  
GTAAGTTTTGTTGACCATCTAAAGCATCTTTCGTCGATTAAACAGATGCTGCTTTTGGTTCACTGTGTTAATCATCCATCGTTGGATT  
AGTCGTTTCTCCAATGACACCTTTAGCCGCATTAACGTCAATTATCATACGCTTGTTTATTAGCTGGTGTTGCGTCAGTGTAATTTTGA  
CCTGATTTAATTGTATTATTATCCGCAACACTGTCTTTAATTTGTCATCGCAGTATTTAAAGCCGTAATGTTAGACTTAATTGTTTC  
AAGCGCAGCATGATTTGAGCAGCATTAAATTTGTTGCGTGAAATTTTGTGTTGCTTGTTTAAAGTTAGATGCACCATGTAATGTT  
GTTAACGCTGGCTGCTATCTAATGTTAAACCTTGACGTGCTGTATTTAATTGATCCTTAGCTTGTTTGTCTTCCACTTTATCATT  
GATATTTTGGACAGTTGGGTTGCCATTCAACACTTGATTAATTTCAAGTTAATTTGACGCGCTGCTTGTAATTTTGGTTGTACGCA  
TTTAACGAAGCGGTCGTCATACCTGTTGTATCCGTTGGTTGATTAAATGCTTTGTTCTAATTGCGTTTTGCGAGTTTGAAGCGATGCTTT  
ATCTGGTGTAAAGCTTGACGTGCATGATCCAAATCAGATTAGCTTGATTGCTGTCAGACGTAATTGTTAATTGATCTAGCTGTT  
GGTGAACCTGCTAATACCTTGATTGATTGTTGTAATCTTATTACGTGACGCCGTTAACTTCGCATTGTATGATTAACAGTCTTGCG  
TCATACCAGTTGTAATTTGCGTATCAATACTTTGTTGTAATTGAGCTTTCGCATTTTCTAAAGGCGCTTTATCGACTGTTAAGCCA  
TTACGTGCTTGATCAAGTGCTGATTAGCGGCATTGCTGCTGTCACGTTTTGACGAATCGTTGCAACATCTGGATGAGAAGCCAGT  
ACGCGATCAATTTCTGAATTTTAGTTCTAGCTGCTGAAAGTTTGTCAATTAATGCAGCAACAGATGCGCTTGTCATACCAGTCGTAC  
TCGTTGGCTGATCAATATCATTTGCAACTGAGTTTTGTCAGTTTGAATGGTGCCAAGTCTGGTGTTAATCCAGCAATTGCTTGTTT  
TAAGCTATTATATTTTCTTACTTTTGTTTTTCTGCGGCAATTTGTTGGTCTGTCGCGTCACCATTTGTTAATAACATTTTGTGCATT  
TGTTGATTCTGTTTGACCTGCACGTTTAGCATTTTATATGCTTGATTTGATGATTGTGTCATACCATCAGTACTGATTATTTGTA  
TTTCTTCAATCAAGTTTCGCTTAGCAGTTCTTAAAGCACTATTATCAGCTAAAGGTAATGATTAAATGCTTGCGCTTAATCGCTC  
ATTGACAGCATTTACATTTGTTAAGCAGATTGTAACCTTGTGCTGCTTCTTATTGGCTTCTGAATGATAGCATTAAGCTATTTTAA  
GCACTTGTTAAGTCACTTTGAAGTGCACGAATCGAATTAATTGTAAGCAGTAATACTTGCCGCTTCTTACCAGTCGTTGTACCTGTGC  
GATTCAATTGTTGCACTGCTTGCTTAAGGCATGTGTATCTGCAGTTAAATCATGTTTTCGCTTGTTTAAATGCTGTTAATGCGTTATC  
AACACGATGTTTTTCACTGAAATTTGTTGTGCAGTTGCATCGCCATTGTCAATAACACGTTGAGCTGCAGTTATTTCAAGTTTCTGCT  
TCACGCTTCTTCGATTATAGTTATCAATACTTTGTTGCGTCATACCAGCAGTTGATGGTACTTGTTTACAGAACTTTGTAAGTTAT  
TTTTAGACGTTACTAATTGGCTATTATCTTCTTTATTTGAAGTAATGCTTTAGCTTGATCAATCTTAGTTTGTGCTGCACGAACCTTA  
GTTAGTGCTCAGAACTTGTTGTGGTGTTGCACGCTCATTATTAATCACTTGTTGTGCTTCTGTTTTGCGAGTATTGATTGTTGTG  
CGCATTAATGCATTGCATTATGTTACTGCGTAATTGTACCTGGCTTTTACCTTCAGTGCTTACTGGATCATTAAGTATTGTTGTTG  
TGATTAACCTCAGTTTATCCGCTTTTGTGAAATGGACTCTGTACTTTCAGTACTACCATCATGTAAGTTACTGTCACAGGAAT  
CGTCGTTGTGCTACCAACAGCTAAATTAGTAGGCAATTGCTGTGCCATTTTAAATCGTTGCAGTACGTTTATTAGCAACTTGAAGTGA  
TTGTTAATTTCACTGCTGTTTACATTTGAACCATAATCTTTCACAATTTCAAGTTGTGTTGACAGTATGTGCTGCCGGTGCAGTTAATG  
TACTTGGAATTACTACTGAGTGACCTGTACCTGCTTTCGGAGTAATTGTGATTGATGAATTTGGTTTTATAGTATTGGCATTGAA

CGTCACTTTACCAGTTTGTGCATCTAACGTTACATAGTCAGGCTTATTCGCAATTGTCCATTGATTATTCTGACCACGAACAACATTA  
ATTGTCTTACTATGTTCTGCACCAATTACCCACTTTTTTCAGTGTAAGCAATATCCATTGCTTGTGTTGGATTAAATTAATGTCCTGATGG  
ATTATTAGGCGTGATATCAATATGACCATTTTGCCAAATCTTAGTAGTCGTTGGTTTCGGTTGTGGTGCACAACTGTGAAATCATC  
ACTACGTTGCTCATCACTGATTGTTTACCACCTACCTTGTGTTGCAACAACCTGAATTGTATCAGCAGGATTGAAAGTACCTGCTGCA  
ACAGTAATACCATTATTAGTTCAGCAATACCTGCTACAGTTGCTGCAGATGCTTCTTTCACCCATGGACTTGTATTATTGCGACGTG  
TAAATGTTGTACGACACTGCTGTTACGTTTAAATACTAATTTATCAGCATACGTCGTTACGTTACCGGCATGTGTATTCAGTGTG  
GTTTGTCTCCAGGTGCAATTGTAATCGCTCCTGCCGCTGTTTCAGTCACAGTTGGTTTCGCTGGTTGCACATCTTTACTACAAATTC  
GCTGGTAAAGATGTTGCAAAAAGTATGTCCGTTATAGATGACGTCATATTTTGCGTTAACGACTTTAGCCATATTAGGTTTATTTCATAG  
CTGCCCAGTTTGCATCGTTTGTACCAGTTGCTGCATTATTCATTTATACGTAATCCATCTGTTGGTAAACCATTAGCGTTTTCAT  
ATGTGCATATCCTGATGCTTGGCCTACCACCTTGCTAAAGTGCCACCAACTGTTGTTGTATAAGTAGTTTGAGGGAATTCAAATTGATA  
TACGTTACAGTTACAGGAACTCGTTTAGCAGCTGAAATACCTGGATATGTGACATCGACATTTAAATGTTGAACGCTGCTTGTGCTG  
GTTATTTGGTTGTTGTCTATTTGCCCATGCTGCTGTAATACCATTCTGATTAGTATTTTGATCAAATGTAATGTAATCAATAGCGTTTG  
TACCATGTGTCAAATTTTGACCTTTCACATCAGTGATGGCGCCTTAGCATTAGCAACTGGATAAACCTTGACTGGAACCTCAACATT  
ACGCGTACCTTGACCACTAGGTAATGTTACAACCGCAGTTTATGAGTGTACCGACTGTATTCTTCATGTATCTGGACTATCATGC  
CATGCAACCGTTGCCCATGTGGCGGGTTTGAATAAACTTTCTACGTGTCCGAAATCAAAACCGTCGCCACCTTTAATAAATACA  
GCGCCTTCAGTAGTTGCTTGAATTGTGGTGTCACTGTTACTGTTGCACTGTCATTTGAATCAACAGATTCAATTTCTGTTTACATCTAT  
CGCTCGACCATGTTTCATCTTGAGTAGTGTACGTCACATTATTCATTTGTGATAGAAGACCTTGCCTTAATCACACCACTTTGGTAACGCA  
TCACTTACCGTTACAACCTGCAGTATTACCACCTACCATAAGTCGTTGTTGTAATCGTTAATGGCGCTATTATGCTTTAAATAATTTAA  
TAGATGAACCTACTTAACACATTAATTAATTTTAAATTTGTTGGTTAGTAAGACCTGCTTTATAAGTCACAGAGTTGCCATCAATTCGCGG  
TGGATCTGGTTTAACTTTTGCTAAAATCTTGATAATTTGCGTTTGGTGATTATCATAAGTAACTCGAATATCCCTTGTGAAATACCA  
ACCACATCTTTACTTGGTCCATATGAATTTGTAAATTTGGAATTCATACGTTGCGCATTTTGTGTCCAAGAATCATTAACTGGTTTAA  
CATATTGTTTCGCATCATACACATCAGATACACCTGGGAACACAGCGCCTCTATTCTGCTCAAAGACATGCTTCGGTACTGTACTTA  
CTACTTTATATGTTGCTGTTTTCGTAATCGCGCTGTTTACCATCAATTAAGATATGTGCAGTTACTGTTATATCTTCACCAATACGT  
GTATTATCTTTATTTGGCGCTTGACCACTTACCCAAGTAATCGTCGCATCTGGAATGGCACTACCATTAGATAACTTAAAGTAATCTG  
ATGCACTAGAACCATTACCTGCTGGGAAGCTTGGCCTTGTACAGTGTAAATGCGAATGTGCAACGATTTCTGGAATGACATGCTTTA  
CAGGTACAGTCACTGTTGATGTTGTTCCATCTGTAAAGTAGCAGTTACTGTAAACATTGGCATTATTTCCAGTACGAGTACGACTTACT  
AAGTGTTTTACTAGTGATTTCATTCGCACCTTGTCTTGCATAAATCTTATTTGGTACTGTTTCAGTAAACGTTAATGAATTAATAATTG  
CTGTTTGATCAGCTTGTGATACTGTGCGATTATTCGAAATATTGGCAATTCTCACAGGATTAGCAGCCGTTGATGAAGTACCAACTC  
GATATTTATCACGCAAAGGTTTCACTGTTACATTGAACGAAGTTGTAGCTGTATTGCCGCTTGTATCAGTTGCTAATAAAATTGATTGT  
CTTATTAGTTGCTGATGTCACATTTGGTGGCGTTGCAGAAACATGTTGATGGTTATTATCAACAGTACCTGTAATTTGTGATGTATTT  
GGTACAGTTACAGATTGCACACCAAAGTTATCATTGCTGTAATAGTATTGTAAATGTTTCACCTGAGAACACTTGATGATTAGTG  
TAATTACCTACTGAAATTGTAGGATTAACATAAGTCACTTGGTACAAAATAAATGTTAATAGCGTCAGTAGTATTTCTGTATTTTGAT  
TTAAATGTTCAACATATTGTTTTGGACCATATGGCGTTAAGTATAAATCTGTGCTTTATAAACTGCATCACTTGCATTATGTGTAGAATT  
ACTTTTTACAACGTGGTCAATTGTAAATGCGCCAGCACGATTAGCTGCCGTTTCGTTACGTTAAACACAGTTGAGTTACTATGTTTT  
GCACGAGTATTGAAATTTGTAACAGGTTGCCACCATAACCGTTTGAAGGTTGATGATGTCATAACACTTGAATCACTTGACCATTC  
AACGTAATTTGACGTTGACCATCAGTTGTGCGATTGATTGTGAATAACAGTCGTTCTAAAGTTAGGTCTTCGCCAGCTTCTGCTT  
GTGTTTTTTCATTACCAGTAATATTATACGCAATCCAGGCACGTAGTAGTCGCTTTTAGCATCGTTAAAATATCATTAGTTGTAAT  
TTGTGTGCCTAATGTAGCATCATAACGATAAAATTAAGATTTATGGTCATCAGACCATGATAAAACCACCATCTGTTGGTCTGTTTGC  
AATTTTTGCATTGCTCCATGTCACTGTATAATCTTGCGGGAAATTAACCCAACGCAAGAAATTCATATTAGCTAGGTTTGACGCGAA  
TGATTTGCTTAATCGACCTTTATTAATATTACTGTAATAGTACTTACATTAGCACCATTAGGTGTATTTGTAACCTGAAATATCACCC  
TCGGCAAGCGTAATTACATCTCTATTTGCATTAATAAAAGCTTGTTTTACTTTTGAGATTTTCATCAGTTGTTAAATCATATGTTGACG  
TACGATACACACGTTGATCGCCTTCAGGTTGTTTCACATCAACGATTTTAACTAATATAGAAATCTTCAGTGTCTTTATGATATGC  
ATTTGAAGCAACTATATGATATAACTGCGTGCCTGCATTCTATTAGTGAATCTTGTGCAAGTTGGAATAGTTCTATCAGATGTAATA  
TTTGTAATGTGCCACTTGGAATAGCTTGTCCATTACTTAAAGTAAATAATTGTTAATATCACCAATACTAAATGATTGTCTTTAG  
CAATCGTTACCGTTGCAGTTTAGCTGCATTGGCAGTTTGATATTCAGATTTCACAACTGGTTCGTATGTATCACATTTGTAGCATC  
AAGCGTTGTTGATGAGCCATCACGGTAATGTAATGTGACATTACCATTATTATCGACAGTTACTGGATCAGTTGATGCTAAATATCC  
TCTTATATTTTGGTTTTTATTCTATAAAGGCAGTAATTATGCTTTGCTTTTCATCATTAGATACAGCAGTCGGATTGACTACTACAACCT  
TCTCAGTATTTCTTAATACAATCGGATGAGCATCTTCACTAATTTTACCTACATGAATTGACACATGTTTAGATTGACTATCATTGT  
CGTATTATTGACATTGTCTGTGCTGATACTTTAAATGTAATATCACTGTTAAATGCCTGATTCTATAGAGACTCTACCTGTAATAGCT  
AATGAGCCGTTTTTGTGTGCGGATTTAGTTAAATTTGATGTCCAACCACCTTGGCAATGTGCTAATAGTTGTACTTTTTAATCCAGAAT  
GTCTATCTGAAACCCCATAGTAAAGCTAATTCATCACCACGATAATATTGGCATTATTCCAAACAGGATTTATTGATTGTTGGTGG  
AATGTATCTGGGCAAAATAGTAACAGCAATTACTCATATTAGATGCAACTACTTTATTATAAATAAATCACTGCTTCAATTTGTTTACCT  
ACTGGTGGTATGAATACAACATAATCTTTGGTTGTATAGTAATTGTGTTATGGACCCCATCAGGTGTACCAGTCGCAAGTATCGTA  
TAACCAGATGGTATTTGATCTGCCTCACTACCACCATTCGTAGTTTGATTGTTGGTGCAACTAAATAAACCAATGCAGATGGATCC  
AACGGTATTTCCGAAATATTAACAGGCACCTTTTGTAAATGCTGTACCTCTTAATTGCTCAGCTGTCGTTGTAATTGTTGGTGTATGTG  
GTTTAAACACGAATTTGCAATAATTGTCTTTACGTCCAAAACGTATCGTACCAAAGTAATCCCCTGGTAATAAATTAACCAACAAGTT  
CAATGTTACGTTCTCTAGCATTATTAGTTCTATTTGTGCGAGTTTCAATGTGTAATGTACGCGGAATACCTGTAATTTGCCAATCTTTA  
TCTGTAAAATCTCATTACTTGTAAATTAATACGTAATGGTTGAATAGATGTTACGCTACCACCTAAATTCACGGAAGCATTCCCTT  
GGTTACCTGCATATACATAGAAAACCTGGATGCCAGCTTGTTTTGAAATGGTTTTTCAGCAATATTTTGGATATCGTCATTTTTAAA  
GAATTTAATATTATGTTGATTTCAGGTAATACCGTTAAGTTTAAACGGAACATAAAGTTTCACTATTACCAATCAACCATCAGGATAGTC  
GAAACCAATCATTAATCTTATTGGGTTTCTAGTTCTTGTGCTGCTTCTTGAATTTTTGATCAGTAAATAATTGACTTAATTGATATTAT  
TTAATTTCTGAACGCCCCCGGTCTAAAAGCGTTAGTATTTGCATTAGTTGGGTAAAAACCTAACACTTTATTACTCGGCGTCTTAAC  
ATAACTTAAAGGATCATCAACAAAATCATCTATATTTAGGTTTGTACTTTCTAATACCTTTTTTCGTTTGTACATTTCTTGGACTCACTT  
CTACACGTTTAGTTGTACCTATGCGATATGTACGATTAACCACCTGTCTTAAACCATTAAGACGTTGTTGATGGTCTTGCCTTGATTC  
GACGTATAGTTGACTGTACATAAATAATTGATTGTACTCTAAAGCACGCCCACCTGCTGCATAATACAATTTATTAACAGTTGGACC  
TTGTGTTTTAAATGAAATTGTATAAATTGCTACCAATGCTTTAGTAGCAGTGTGCTCCAGCTTCACTAAAATAATCACTCGCTCTA  
GATAAATCTTCTGAAAGATAAATATGGACAGTTGGCGAGTCATATTAATTGGCCACTTCTATTCTTATTTTAAAGTCAATGTGAAC  
GATGAGGATCATTTACTCCATATTTCCACATTTGTTGAAGTGTTTATTGTGACCTGCTCCTGCTCCATGACCTCAATTTGATATTGTT  
CCATCTGAATTAACGTGTACAAAGTCAGTTCTTCTACTGGCACTTGGTCTGCTGGTAATGCAAACCAGAAAATCATATTTTGTATGTG  
GAGCATGTCTTTATTAACCTTAATAACCCATTGGTACCCGCTCTCCAGTTTGTTCGCTGTCATAAGAGCAATTTCTTTGAGTCAGA

GGCCTTCAATGTATTCCATGGTGTAGTTGGTAAATTATATGGCGCCCTTTACTAGAAGCATTGATATATGTACCAACAGGATAGCC  
CGAACCATCATTAGCATTTC AACATAATATGATGAATTTGCATTTTGATAGTCTGATACTGATCTAGGCTCTGCAGCTCTTGATTCA  
ACCGAACGCGTTTGAATTCTATTTGAACGTCGGCTAGTCTGTTGACGTTGAGGCATTGTACGAATTAAGCAACAGCTTGTTCGAAT  
TCTTTGTATGCAAGTTGCAAGTCTTTATTGTTTATTGGATCATTACTGCCTAATAACGTATTAATCTTATCAAAAATGCCTTTTACATA  
GTTAAATGTGCCAGAATCTGCATTTTCACGGTCAATAAAGCGATAATCATGATAATTTGCATCAAAAATGCTTGTAAATTCATTTCG  
GTCATGTTGTACGTTACCATTATCAGATGAATCTGAAGCTGTTACTACATTTGCTTCATGATTTTCTACATGAGCCGCTCTATTGTGCG  
TTTCCATTTTATTAGCAGATTGACTTTTCGTTTGTATTAGCTTACTTTGTCTTTATCTGGTTGTGTTGTCGAGCCGTTGCCGAATCT  
TTCTTTGTATTTACATTTTGAGATGCTGGTTGTTTCATCATTAGTAGTAGATGATTGCGCTACTTTTTGATCTACTAAATTAGCTTGACT  
AATATTTGGTTGCTCATTTTCATGAGTAGCAGATAATGATTGACCATTTTGTGAATTTTGAGAATTTGTACTTGAGATTCTCGATTCT  
TCAGTCTGTTTCATTACTTTGTTGTTCTGTTTAAACCACGCTTGCTGGTTGATTGTTTCAGCAGCATGTGCTTGTGATGATTGAA  
TCCTAAAAATACCAATGTCGCAATGACAGTTGAAAATGTACCAACTGTATATTTACGAATACTAAACTTTTGAATTTTATCACGATA  
ATTACAGCTATTGTTCACTCCTTATCTTGTGTTATGTCTCTGTTGTGTTGTAATGTATTTACTTTTGATTGCTTGTATATTGTAATG  
CTCATTCCATTCTCATTTAAAAATTTAAAACGATGACGATTCAATACAATTTTCGCAATCTATCCAAAAAGTATTGAAACACATTACA  
ACTATGTGTTGAACAAATTTATTTATGCTCCAGAATAATAACACAAAAATATATTGTATGGTAAATTGAATTTGTGACAAATTTATAAT  
AATTATAAATAAAGTAGCGTAAAAAGAGTAATAAAAAACCAATCCCTATGTTTCATTTTAAATAATGACACATAAGAATCGGTTTATA  
TTTTTGTTTAATATTGTAGCGACTTGTATGATTTCAATTTAATTCTCAATTATCATAATTGAGTGTGCTTTTGTTTAGGCACAAGTAAC  
AAAATGATAACGAATGATAATATCCCATACCTGCATTTAACCATAATGCAATCATTTGCACCTGTATAAATGTTTGTGCATATTGAT  
ACGATTGCATATATGACCACTCAATGCGACGCCAACATGCTCCACCTAATGACAGAAGCCATTTATAGATACCTGACGCAACGCCCT  
ACTTTTTCTAACGGTGAATTTGCAATTGCTGTATCTGTTGATGGTGATAGCATATATCCCTAGTCTCTAAACCAAAAGATAAAATAACCTA  
TAATACAACAAATGACATACAATATTTCTGGCAAGAAAGTTAATGAAATGAGACATTCTCCGACAATAAGAACTCCTGTTCCAATT  
AACATTGGTTTCTTGCATCCGAGTGTGTTGAAGTAACTTTTACCAACACGAATCATAATTAGTACCATTACTAAATAAGTGATTGAT  
AAACTTCCTGCTTGAATGAAGAATATCCTAAACCTCTTTGAACAAATGTGTTGGCTACTATTAATGTTCTGCAACACCATTTAACA  
AAAAGTTTGAAGCTGTGACCTGTGTAAAGCTTTATTTTAAATAATTTAAATCGATTAAAGGATTGTAGACAGCTTTTCAAGAA  
CTATAAATAAACTAAAAGATCCAATTGCAATAGCTAATAAAGTAATAAAAAAGAGTGAGGTTACACCTAATTCTGATCCTTTAGTA  
ATTAATAATATTTAACTGAGGAGCATAATGACTAAAAGAACCAGACCTTTAATGTCAAAATTTATTTAGAGAAATCGATTAGATTTA  
GTTTCAGGTGTGCTTTAATAAGAAACAGTGAATTAATGAAATTTAATTGATAGGATGAAAATCCAACGCCAACCTTAAAGCGT  
TGCAACTGCACCTCCAAAAAATGAACAAACACCAGCCGCCCATGAGCCAATTGACCAATAACTTAAAGCGCGTTGTCTATCTT  
TCCCAATGTAATATGACTTAATAATAGACAAAAGTTGCAGGCATAATACATGCTGCTGAAAGTCTTGAATTAATCTTCTATAATAA  
GTAATAAAGGAATATTTGAAATAATGATTAATAATGAACCTAATATATTTAAGATAATACCAATGTTGCTGAGTTAATTCTGCCAT  
ATTTATCAGCAAGACCACCTGCTCCTACTACAAACATTCTGAAAATAAAGCAGTTATACTAACGGCGATATTAACCGTTCCAATAT  
CTGTATTGAAACTATCTTCAAGTATTGGTACAACATTAACCAATGATTGTGCAAAATAGCCAAAACGTTATTACACTTAAACAAATTC  
CTATTAACAACCTTATTATTGCCTTCAAATGCCTCTCTTGACGGCTTTTCCATCTCTATTGCTCCCTATACTTTGAAAAACAGACAA  
ATTCCATAACAGAAATTTGCTGTTCGTTAGAATAATTGAATGGTTTAAATTTAATGTGTAAACTTTAAATTTATTAGTAGTCCAT  
CCATTTATCTCAATGCTAGTTATCTTACCTTATGCTGCTTTTGTGTTCTTCTTATAGTAATAAACTGGTATACCAAGTGTGCTTATTA  
GAATTTCCAATGATTGCTAATAAATGTAATAACAGTGTTAATTAATTAACAAAAGATCCCTGCCAAAATAGCAATTAAGGATG  
ATCGGATATAACGGTACTTTATATGGACGCTCCATATTTGGTTACGTTTCTTAAAAATTATTACAGCAACAAATGACATACAATAG  
AACAACCAAAATAACAAAGATTAAACATGTTTGAATTTGTATCAAAATGCTCCCATGACATCATGATGATAGCGATTATAAGTTGTATA  
ATTGCGCCAAACCATGGTGCACCAGATTTTGTAAATTTTGCGAATAAGTGGCTAAATGGCAATAATTTTCTTTCAGCCATTGCATATG  
GTACGCGCATACCAGTCATAGTATAGCCATTGATCGTACCATAAACAGAAATTAATATACCGATTGTAATAATCTTACCGCCATTTT  
CACCAATAATATTTTGTATGTATCTGAAGCTGCATTTAAATTACCAGCAAGTAGTTCTATTGGCAACGTTAATAAGAATGTAGCGT  
TAATTAATAAATAACACAGCCATAATACAACCGATACCAACTGAAATCGCTAAAGGTAATTCGCGTTTAGGATTTTAAAGTTCCCGCG  
CAACATTTCTACATGAATCCAACCATCATAAGCAAAACATAGTTGCTAATAAACCACTACCAATTGCTGTAAAGAAACCATTTCTGT  
AATTACCTGTAGTTGGAATTAATGAAAAAGTGATATCTCCAGATTGAAAAATACCAAAATGATGGAATCAAGT  
TTAATTACTAAAGTAACTGATTGTAAATTTCCGCTGCTTTTGAACCTAGGAAATTTATCAACACAATAGATAACGCAGATGCGATT  
GCTATTGGTATTAAACGAACCTATAGATAAATGGAATAAATTAATTAGCTGTGTCGCAATACGATAGACAATGCTGTACGTTAGCT  
GGAAAATAAATAAATGATTGCGCCCAACCTGATAGGAAGCCCCAGAAATCACCGTATGTATATTCTATATACTTCGTTAAGCCACCT  
GTTTCAGGGATTGCAGCAGCAAGTTCTGCTGCTGTTAACCCCGCACAAATGGTAATGATGCCGCTAGGAACCATAACAAACAAGGC  
CATTCCTGCTGTTCCTGTTACTTCTGTTACGTTTGATATTTTAAAGAACTCTCTGAACCAATAACTGTCCCATATAACAATAGCAAAAC  
GCTGAGAAGAAACCTATATTTTTTGTAAATCTTTACCATTGACATAATTACACCTCATTTTAAAGATTAAATGTTTTAACCTACCA  
CACCTTGCTTGTATCTGCAATATTCAGTCCATGTTCAATGACACCTGAAACTAGTTAAGTCAACATTTCCCGCTGAAACTAAAG  
CAACAACATTTTATCTTCAAGCCATTTATTGTTTATTTTCCACTTAAATTTGACGCTGTTGGTAATGCGCTGCACCTTCAGTAATA  
ATTTTGGCAGCGTGCATTAATCTTTTATAGCATGTTTCAATTTCTTTCAGTAACAAGAATAAATTCATCTACTCAATGTTTAACTA  
CTTCATATGTTTGTTCACCAGGAACTTTATACATCACAACCATCTGCTATTGTGCTATCCACTCGATGTTCAAGTTAAATCTCTCTTATAG  
AAAGACTCAGCCATACCATGAACATTCTCAGATTGAACACCGATAATATGAATTGAAGGGTTAAATGATTTTAAATGCGGTGGCAAT  
ACCTGCAATTAATCTCCACCGCCAACTGGTACGATGACTGTATTACATTCCAATATCATCTAAAATTTCTAAACCAATGTTCCT  
TGGCTGCCATTACAACTTATCGTCATATGGATGAACGATTGTCATGCCATTTTCTTTTCGCTAATTCTTCCATATAAAGTCTAGTTT  
CGTTAAAGTTTTTACCTTTTAAAAATGACTTTTGCACCATATCCTTTGGTAGCATTCTGTTTAGCAATTGGTGCTGTTTCTGGCATCACA  
ATCGTTGCATCAATACCTAATAGTTTGTGTCAAAAGCTACACCTTGTGCATGATTTCCGGCTGATGCGCCAATAATACCTTTAGCTT  
TTTGTTCATCTGACAAATGATTAATTTTATTGTAGTACCTTCAATTTTAAATGAACTGTAACTGCATATTTTCAAGTTTAAATA  
TACGTTACCTTTAGTGATATTTGACTTAAATACATAGATTTAATTAGTGGTGTTCGACGAATAAATGGTTAATGCTTGTCTTATAGCT  
TCTTCGATATCTCTAAACTTACAATATGTGCTGTTTGTAAATGTAAGTGTGTTGGTTGTCATAATAATTACATCCTTCCGTTTTGTAA  
TTTTTAGTCCAAACTATAATGCTATATTTAAAAATATTCATTTCACTCAATTTCAATTTAAATTTATTATCTATTTCGATAACATTTAATATT  
TCTTTATAATCTAGGTCATGTGATGAAGCTAATCCTTGATTTGTCACTTGTCTTGGTAAATGTTTACACCACTACTTAAGGCTTCAT  
TATCTTTAATGCTTGTCTAAGCCTTTGTACAAATTTCTAATATATAATCAATATTCCTTGTGCTAATGCCATTGTTGAAGTCTCT  
GGGACTGCTCCTGGTTGATTTGGTACACCATAATGAATCACACCTTCTTCTCATACACTGGATCAGAAATTGTAGTTGGTCTAATTG  
TTTCAATAGTTCCACCTTGGTCAATAGCTATATCGATTAACTGAACCTTTTTTCAATTTGATTTAACCATCTCACGAGTAACCAATTTT  
GGCGGTTTTCGACCTGGAATTTAAATTTGTAGAAATAATACATCTGCTTTCTTAAATTTGTTCTGTAAATTTTCTGGTGTGATTGTA  
CTACTGTGACATCTTTTTCATACATATCTTCAAGATTTAATGCGGTATCTGTTAACTCGATAATGATTACTTTAGCATATAG  
TCCCAAGGCAACATTTGCTGCATTTGTTGCTGTACGCCACCACCGAAAAATACATATGTACTACCAGGTATATCCACATTTTTCATGT  
ACACCAGTCACTAAAGTACCTTGACCACCATGTTGTGCTTCAGAGTAGTAAGCTCCCATAAATTGCTGAGCGTTGACCTGCTATAGCA  
CTCATTGGCGCTAATAATCTGCTTTTCCATTTTTTATAATGGTTTACCACCTAATCGCAGTTACACCAACTTCTTGCAATTTTTCTAC

TATTTCTTTTGAAGATGCTAGATGTAAAAATCCCCAGATAATTTGATTCTTTTGAATATTGATATTCGTTTCATGAGGTTCTTTTA  
CTTTGATAACAAGATCAGCTTCCCATGCTTGTTCGTGAGTTACGATCTTAGCGCCTTCTTTTTCATACATATCGTTAGAAAAATCCTGA  
ACCAATGCCAGCATTTTTTCAACAATTACTTTATGCTCCTGCATCCGTTAACTTACGCACATTTTCGGGTGTGCAAGCTACACGTCCT  
TCACCTTGTTTTAATCTTTGACTACTGCAACTAACATTTGCAACACTCCCTTTTCGTTTGTGAATAATTTACAAATATTTTTATCCTTT  
GGTTATGAATATGTAAATACCATTAATTAATTATTCATATTTTATCTATAATTTGTTAATAAAATTTAATATATTATCTTATTCTTA  
AATATTATGTGCAATTATACCACTATATTTATTTCTTATACTCCATTTGATTTATAGTTGTATTAATACATTGACTCAAAAACTAATTA  
ATCAAATATGTTTTTAGATTAATAAAAGTTGTAAGTGTACTATTTGTAGTGTATGGTAATTTATTTGGATGAAATATAATCTTTAT  
ACTCTATTGATTAATCAAATATGTATCTATCAAAATTCGGCTTATTTATTCACCTGTGACATATCCAAATACGCAAAAAAGACTATTTCT  
ACCTTGATATCGATAGAAAATAGTCTTTTTTACTTAATTTGGTTAAATTTTCATAAAATCTTATACTTTTTAAAAATGGGATGAAATAT  
ATTTTCTGAAACATGTAATTCATGTTTCGTTACAAATGTATAAAATATGATTAAGCGTTGTGCAAAATGACATTTTCTCAAAAAAGCG  
CTTCACTATCAATTGGTACTTGTGTGTGAATTTAGCAAGTGCCTTCGATAAATATAGTTCATCTAAATGTCAATTTATCTTATTACGT  
TGACCAGCTGATAATGCATCAATGTTTTCAACCACATTTTCAACGCTTTGATATTGCTGAATTAACCTTAATAGCCGTTTTCTCGCCAA  
TACCTTTAACACCTGCATATCCATCTGCTGTATCACCATAAACGCTTTAATATCGATCAGTTGTTGTGGTTCAAGGGCATATTTCTTC  
GTTAAACGATGTAATGTATATCTATTATAAATGTTAAACCTTTTTTAATTAGCCAAACTTCAACATTGTCATTAATACATTGCAGT  
AAATCTTTGTGCGCCGTAATAATATAGACATCGTTATCAGTTGAATATTTGTTGTGCTAATGTACCTATAACATCATCCGCTTCATAGT  
TTTTAACGCCAATATTTACAAAGCCAAATTGCTCTGAAATTTCTTTAACATAATCAAATTTGTGGTATCAATTTCTCTGGTGGTGCAGA  
ACGATTTTGCTTATAACCGTCAAACATATCATTTCTAAAAGTTGATTGTCCCATATCCCAACATACAGCTACATGTGTAGGGCGTATT  
TCATGTTTGGCGAAAAAGATATGACGCACAAATCCTTGTATTTCCATTTGATAGGTACACCTTGTGAATTTGACATAAAATGTTTATGAA  
GACTGTAGCGTAGAAAATGTCTAAATAATAGTGCCATACCATCTACAAGTAATATTTTATTAGGCAATTTAAACAGCTTCTCTTTCTT  
AATATAAAATAGTTTTAGTTGTTGATGTTTTATCTTTCAATTGATTGATAAGTGTGTATCTAAATCAAATGCTAATAAAATCGTTTAT  
TTGCGTTTGAATATTAGCTTCAAAACTTTCAAATTGCGATTACGCTTCTACAGCCATTTGCTTAACATATAATTCAAGTTGTTGCCTC  
AATAATCCCATTTGTGGTTGTAATAATCCTAACGTACTTTGACAAATGATTTCATGTATATCTCTTTGCCCATTTGGATTCAAAATTTT  
ACGTTTTGTAAATTGTTTAGGCAATGCATTTAGCATATCGTTGAAATCGATGTGCAATAATGGTTGCTCTATATTAGCTGATTCAAAG  
TTAAACTGAGGATTAATAATGACATGTAAATCTGCTAATTGTTGAACGATTGGTGAATTTGCTCAGTGAGTTGCTTATTAAGTAT  
TTTTTATACGTTCTGTAATTAAGATTGCTCTAAAAACAATCGTTGATGAATTTGATCTAAGTATACTCTCGTAGACACTTTCTTTTC  
TTCATTAATAACTACTATTTTGGCTCATTGAGAATTAACACTGATTTAACATCGTCAAGTAGTTGTAGTTTAAACGGGCAATTTAA  
TGATAAACTTGTTCTTCAACTTCGTTGCTGTATGTTGTAACGTCGCATCAATTAATTGATGTTGTAAACGCGTGTATTATCTTTATAATC  
TGTTAACCTTTGTTGGCGACGTGAAATATCAGCTTTATTTGTTTCAAATCTGTAATCATCTCTACATAAGAACGATCCATTTGTTGA  
AGCTGATGAATCATTTGTTGTTCTAAAATTGATTAGATTCAACATCAACAAATTTGTTGTATGCTTTGTTTTAATTGATCAATGCCCT  
TATCTTCAGCTTGAATGCATTTGACTTGATACAGCAAAAATGTCTGATTGTAAGTGTACTTGTCTTAATGCATCTGATACATATGT  
TTCAACTGCTTCAAGATCATCTTGACTTTCTGCTAAATCAGCAGCATTAATTACCATTTTAAATGCTTGGTTTCATTCAACTGGTTCA  
TATCTTTATGTTCTATAAAACGCTTTGTCATTATCAGTAAATGAATGATTAATAAACTTACATACAATATTAAGTCTGAAGAAGT  
TAAATTTGTTTCGTTTCAATTTGATGCTTTGGTTATTTGAGTGTAGCCCTAATGAATCAACAATATTTTACCTTTTAAACCAATCAT  
GCATTAATGCAATGTGACTGTTTAAACAAATGTTGCGTATTTCTCTGCACTCCACTTTTCAATTTCTGTTGATTAATGGCATGT  
TTTTACCATTTTTCAACATATTGACATACAAATATAATGTTTCTTCAACTGTCATGTACAAAAGCGAGTTGATTTTATTATTAATG  
ATTTTAACTTTTCTAAATCTGAATTAATAAAGTCTTCTATAGTTGAAAAAGACATATCTTGGTATTCAACTACTGCATTAATTTTCATC  
TAATAATTGCGATTGTGATTTTAGCGTTATATAACTCTCGTCTCCATAAGATATTTCTGTAGTAGCTGCTGTAGTAGGATTTGGAGAA  
CTGACTAAAATCTGCTCGCTAATAATGCATTTATCAAACACTTTTACCAGCACTAAATGTTCCAAATACACCTATTTTATTAATTT  
TATTATCTATACGTGTTAATGTTTCGTGGATATCTTGCTTTGTACGCTTGAACAAAGGCACATCCGAAATTATATCAAGCGCTTTTGT  
AATATCTATAGACATATTTGTTGTAGCTGTATTTGATTAGCTGCTGATTATCACGATTATCCTGAGTATTATCAGTAGCCACTTGA  
TATGTTGTCTCTTGTCGACCTATTAATTTATCTAGAGATTTCATCTAAATGAATATAGTAGTGACGATAATTTCTAGTCGTCATGACT  
GACGCAGCTCATTTAATCTGTATAACGTTGATATCTTTTAAATCATCACTTTCTCTGTTGGTAATTCATCTGCCTGTACATTTTCT  
ATTATTTCTTAAAAATGGTGTGTTGATTGTTTCAACATATTTCTTAATGGCTTTAACCACTTCGCTGAAAAATGTAAGTACATAAG  
TATTGCTGATTGATGTTTGTGGTTGATATAAATCTTCAATCATTTCCGGCTTAACGTCATAATGCTGATTTAATACTTTATCTGAAGCT  
TCTTTTTTATTGATAAAACGCGTTACAAATGACATATCTTCTCGCATTGGTTGACGAATTTGTTGATTAACATGTTCTTGTAAACGCAT  
CTGTCGCTGTTAATAATCGCTGTTGTTGAATTTGTAGCTTTTTCTTCTTTTTTATTAATAAAACCCACCAACATTAAGTCTTGAGACAT  
ACTTTCCAAATAACTTCGTAACATTCTCTCATATTATGCGGCATAATGTATGCATTTTCTAAAATATTTTTACGCTTATCTTTAAAA  
ATGCCATTAATTCATCTGGATTATTTAAAGTTGTGCTCTTCACTAATTGCTTGATGTTGTGACTATTTAAAAATGCTTGTTCAAA  
CTCCGCTTCTTCGATACCTAAATCTTCTAGTACTTCTGAATTTTCAAGTGAATCTAGCTGAGCTTCGGTAATGTATTCAACC  
GTTCTTGATGTATAATCCTCTATTGTCTCTCTATGTTGATCTAATGAAATTAGATAACTTGATAACTTCAAGTTCAATTTTACGGGTG  
ATCAAAATTTAGATACATAAAAGGTGCGTTCTAATTTAATGCTCCCAATTCGCAATTTGATTTTCAACTCGTGATTTAAACGATGAGAA  
TGCAAAATTCATCGCTTGCTTGATTTGATTAATGATTAACACACAGGATTTCCAACATCTTTATATGCTTCAATGATTAACCTTA  
AAGTTAAGTTTCAAGATTGAACGTGGTTATAGTCAACCGTATAAAATATCATATTACTTGTATACATATATTGTTCTGTTATTGACTGAT  
GTGATGCAACATTTGAATCAACACCTGGTGTATCTTGAACGTAACCCATTTTCAAATTTAGCTGATTGAAAAATTAATTTCTACAG  
ATTCAACGTCGACATTTTGGCGATTCTTTCCCTTACTTCATCATAATTAGATAATTTGGCATACGTTTGATTGGGCAAAATTAGCAAT  
AATATCGTGATTGTCTGAAACTGACACAATAGCAGTATTACTTGCTGTTGGTACAGGAGAACTTGGTAAGATATCTTGTTCATTA  
TAAATTTATCAGTGTCGATTTACCTGCAGAAAAATGTCCAACGAACGAACATGTATATTGCTGCAAAATATACTTTCTTAATTTACTTG  
GTTAATTTGATGTAAAAAGTGCTTCAATTTCCGACATTTTCAACTTCTTTTTTAAATTTATATAAAAGATCTAATTTGTTCTTTATTAATCA  
TGTTACTTTCCCTTTGGTTCTGTTACATAGAAATGCTTGTGTTTACAACGAATTCATACAATATCGATGTCCATTTAAACATATGAT  
CGTTAAATGGCTCGCATGTATTAATGTTTAAATTTATCATAGCTGCTTGATTAACCAACATACGAATAATCAATTTTCTTCAACATCTC  
AACTTAAAAAGTTTCAATTTTCTAAAAATCACAATCATCGTTAAATTTTCTAGAAAAATAAATATTGTACAGTTTGTTCACACACGTC  
ACAGAATTGACACCGTATAATAGCCAATTGGGAGGGAAATATGAAAAATACATTTAATCCATTACAAAGATTACATTTCTATGCAG  
CAATATTTATTGCTCCACTGTTAATCACTTTAACCATTTTCGGGCATTGGTTACTTGTCTTTCCAGAAGTTGAAAAATAATATTATAA  
GAATGAGTTTTTGGTGACAGTGATGTAAAAACGCATCAAACATTAATGATGCAGTACATCAAGTTGAACAACAATATGAAGGAT  
TCTTTGTAAGTAAAGTTAGCATACTTGATGAACCATATAACAAACGAATTACACTGAGTGATATGGTAGGAAATCAACGTTACGTCT  
TTCTAGATCATAACAATCAATTTGTTGCAGATCAAAATGCGAAACATACGTATTCTAATGTGATGCGAAGTATACATAGTTCTTTGT  
TTACTGAAAAATACTATTATTAATTTAGTAGAGTTAACCGCATGTTGGACGATTCATGATTTTATCTGGTACTTATTACTCATTT  
AAGAAGCATTTAATTTCTAACAAAGTAAGGCATTTCTGTTGGCAAAAGTGGCAGCAATGATTGGAGTTATCATTTGCAATTTCCAGT  
ATTTGTATTAGTTTTAACTGGATTGCCATGGTCTGTTTTATGGGCAGTAAAAATTGCCGGTATGATGGACACAAACGGTGACCTTGG  
TCAAGGTGAATTAGCGATTAATCCACCTAAATCAGATTTGAACGAATTACCTTGGGCTACACGTAAAAATAAACAGCCAGCTTCATC  
CGAAAAAGGTTCAAGTGGTCATCATGGTAATGCAGCAATGCCTCAAACCAAAATTAGATTATCAAAATATCTATTGATAAGGTCGTTG

AACAGGCGCAAAAATCTGGTATTA AAAAGCCGTTTCAATCGTATATCCAAGTGATAAAAATGGTGCCTTTATTGTATCTAATACTA  
GTAATTCAGGTGTTACTGGGCTAGATGTATCACCTTACAAGGAACAAACACTTTATTTTCGATCAATATAGCGGTAAAAAGCTAGGTA  
CGATTAAATATGATGACTACGGTATTATTGCTAAATGGTTTACATGGGGCATTCCGCTTCACGAAGGTCATTTATTCCGGCATTTTAAA  
TAAAATCATTAATTTATTGTATGTATCGCTTTATTAGTAGCCATTGGCATGGGGTTTGTCTCTTGGATAAAGCGTACAAAAAATACT  
GCAGTAAAAGTACCACATCGCGTAAAAAAACCAGCATCTATATCACTCATAATATGTTTAATTGTATTAGGATTATTAATGCCATTA  
TTTGGATTATCACTTATCCTTGTATTTATAATTGAATTAATATTATATTAAGATCGTCGTGCTAAACAATAATGCACTTAAAGTT  
TTGAACTGACGAAATTTACAAAATGATTCTCGTCTCTTAATTACTTAAAACGGGTCTCTATAATAAATCATACTGATGGAAGTTTTT  
ACTTTTTATCTGTCAGATTTTTTGAATTTGAAGATAAAAAAGCATCTAAAACGCATAAGAAGATAACTCTACTTCTTCAAAAATTACG  
TTATAGATGCTTTTTTATTAATTCATATGCATGTCGTGAATTTTCATCATTAAACCGTGTGGGACGTCATCATGTTTAACAATCTCTTG  
TTTATAAAAATGTCTCCCATCATCTTTAGAAAATAATTTTACAAGTCTCCTTTTTTCGGCTTGAAATCATTAGATGGTTCTACTTTGA  
TATTATGTTTGACTAATCCATCTTTTCACTGACAACCTTTTCTGCATTTGTATTACTATTTCATATAACCAAAATAAGTCGTTTTTTGA  
CTAGAAAAAATCATTAACATACAAACGGCAATACCAATAACAATCAATGCAATAGATAAACCTAGACCCATTTTTTTACCCATTTAT  
AGACTCCTCCATTTTTTCAAAAATACCTATTATCATGAGAACTTAATTATTACTAATTTTAGTCACGCATTAGAAACACTTTAGTTTTT  
AATAGTTTTACGTTCTGTCTTTTTACCCAGTATTGATAATAAGTACATTCTATATATCCATTAAATAACTTACGTCGCTTTGTTGCTT  
TACGATCTACTAAATATTCAAATCTTTATTACTTGTAAAAATGTATGTAGATAAAAAATGGATGTTGTTTCATTAGTTTACCAATATA  
ACGGTACATTTCTCAACTTCTTCACGATACCAATACGTTACCATATGGAGGATTTCCAATTAACGCCACCGGTTCTTCTGTATCA  
ATTGTTAATGTATTGACATCTTTTACACTAAATTTAATAATATCAGACAACCAACTTCTTCAGCGTTACGCTTAGCAATCTCTACCA  
TTTCTGGATCGATACAGAAGCATATACTTCGATTTCTTTATCATATAACAGCCACTTATCCGCTTCATACGTTAATCATCATCAAT  
ATTTGCTGGCATGATGTTTCCATTGCTCTGATACGAACTCGCGATTAAACACAGGTGCGATATTTTGGAGCAATTAACAAGCTTCTAT  
AGCTATTGTACCCGAACCGCAAAATGGATCAATTAAGGTGTATCACCTTTCCAGTTTGCAAGACGGATTAAACTTGCTGCCAACGT  
TTCTTTAATTGGTGCTTACCTTGTGCTAATCTATATCCACGTCTGTTCAAACAGAACCTGATGTATCGATAGTCAATAATACATTA  
TCTTTTAAAATGGCAACTTCAACGGGGTATTTTCGCACCTGATTCAATTAACCAACCTTTTTCGTTATATGCGCGACGTAATCGTTCAA  
CAATAGCTTTCTTAGTTATCGCCTGACAATCTGGCACACTATGTAGTGTGATTAAACGCTTCTACCTTGAACCTGGGAAGTTACCCTC  
TTTATCAATTATAGATTCCCAAGGGAGCGCTTTGGTTTGTTCGAATAATTTCGTCAAACGTTGTTGCGTTAAAACGTCCAACAACAATT  
TTGATTCCGCTGCTGTGCGCAACCATAAAATTTGCCTTTACAATTGCACCTTGCCTCTCCTTCAAAAAATATACGACCATTTTCAACAT  
TTGTTTCATAGCCTAATTTCTGAATTTCCCTAGCAACAACAGCTTCTAATCCCATTTGGACAACTGCAAGTAATTGAAACATATATG  
ATTCTCCTTTTATACAGGATTTTATTCTTAGCTTGTGTTTTTATACATTCCCAACAAATTTAATCGCTGATACATTAACGCATTTCGC  
TTATTATTTTAAAAACAAGGCAGTGTCAATTATATCAAGACAAGGCGTTAATTTTAAAGTGTCTTTTCATGAAAAAAGCTCTCCATCATC  
TAGGAGAGCTAAACTAGTAGTGATATTTCTATAAGCCATGTTCTGTTCCATCGTACTCATCACGTGCACTAGTCACACTGGTACTCA  
GGTGATAACCATCTGTCTACACCACCTCATTTCGCGAAGTGTGTCTCGTTTATACGTTGAATTCGGTTAAACAAGTGCTCCTACCAAA  
TTTGGATTGCTCACTCGAGGGGTTTACCGCGTTCACCTTTTATATTTCTATAAAAGCTACGTCACGTGTCGACCTTTCAAATTACTCT  
ATCCATATCGAAAGACTTAGGATATTTCAATTGCCGTCAAATTAATGCCTTGATTTATTGTTTCATCAAGCACGAACACTACAATCATC  
TCAGACTGTGTGAGCATGGACATTTCTCTATATAATATAGCGATTACCCAAAATATCACTTTTAAAATTATAACATAGTCATTATTAG  
TAAGACAGTTAAACTTTTGTATTAGTAATTTTACCAAAATACAGCTTTTTTCAAGTTTGAATACGTTTAAAAATATCTACATATTG  
TTGAAGATGATTTTGTGTGTTATTATTCGAAGAAAAACTTTTATTGTCCTGAGGTCTTGATGTTGCTGATACCTAGTCTTAATTCTTCT  
AATTTCTTTTAAAGTTTATGATTCTCTTCTGATAATTTTACAACCTCATTATTCATATCGGCCATTTTTTGATAATCAGCAATAATGTC  
ATCTAAAAATGCATCTACTTCTTCTCTTCTATAGCCACGAGCCATCGTTTTTTTCAAAATCTTTTTTCATAAAATATCTTTTGCTGATAATT  
TCAATGAAACATCTGACATTTTTTCCACCTCATTAGAACTTTGATCTTCAGACCCTGTAAGTCATTGATGAATGCTGTTAATTCAT  
CGAACGTCACAATATCACAAGTATAGTTTGTATCCATAAAATCAACTAACATCTGCTTGAAGAAGTCTAGGACTTGCCTCTTGTTC  
CTCATCATAAATGAGCAATGTTTGATCCGAATGTTCAAGCATAAATTGATCTGCTTGTAAATTGAAAAGGACCCTGATACGACGT  
ATGAAAAATACTATCAACATAATCTGCATGCTTAATTAATGTTGGCATACTTACTTTGATTATGTTTCATTCCACTTTTCTGTATGTCCTT  
GGAACGGTGTAATTACAGCAAACTTTAACGAATCATATGTTTCGTTGTAATTCATAAACAACCTTCTGCAGTCCATAATCTATACCCA  
TTTGCCCTTGATTAACACCCATCTAATCCTTCATCCAACAGTGTTCATTAATTAATAAATTGTTTATAAAATGTTTAAATAGTACTTCA  
GGTGCGTCATCTTTAAAAATGTTAATTGAATGATTGTAACCTGTTACATAAACTGTTTTAAACCATGAGTACCTCTTTTGTACG  
CCATCTAATATATTTGTAAATCATATTGAACACTTTTAAAGCTTTTCTATAAAATAACTTTCGACTTGTTCGCTTAAATGACATTGCA  
CAGAAAGTTGTTCAATGTTAGCAATCAGTAGCTCAAATTTCCCTTGAATTCATATAAGGTACTTCTATAATAAAATTCACGATGTAATTT  
GATCTCATTGAGCATGCTATCAATATGTTTCAGTATATGGCTTTACAGTTTGGTAAAAATCATGATCTTGTGTTGTGATTTCACATTT  
TCAAAATTTTGTGATGTTGTTAACTTCATAAATTAGTGATTGCGACTACATCATTCATGAGGACGCCTCCTACATTTTTTAATTTATC  
ACAATATACTGTATTCGTCATGTTTAAACACTCTATATAATTTGATTTAACTATTTTTTCAAATGTGTTATCTGTTAAATCAAGTAAAT  
CTAAAAACTTCTATATAAAATACAAAATTTTATCGTGTATGTTGTTATACGATGAAAAATCTTTTAACTAATAAAAATCATTTAAATC  
AAATACACCTCTGCTGATTAAACAACACATACTTGACTTGCCTCAAAAAATAAAATTAAGTATGATCATGATTGACTTTTATAACAAA  
TTCAAAAAATATTGTAATGAGTATTCTATTTTATAAGCAAAACTTTTCAATTAATTAATAAATTGTTGATGAAATTTCAAAATACGGTA  
AATGTATTATAATATTATTGTGTTAATGCTGAAATCACGTTAAAAATAAGCTTTGGTGATTGTGTCTTTTCGATTTTATACTAATTTAA  
GTTTGGTGTTTCACTATAATGTTGTGTATAATAAAACAACGTTTACTACCAAACTTGTGTGGTGAAATTTATGAATTATCCAAATGGTA  
AACCATATCGTAAAAATAGTGCTATAGACGGAGGAAAAAGACCGCTGCCTTTAGTAATATTGAGTATGGTGGACGTGGTATGTCA  
CTTGAAAAAGATATCGAACATTCAAATACGTTTATCTTAAAAAGCGACATTGCAAGTATTACAAAAAGCCTACGCCAGTACAAATA  
GTTAATGTCAACTATCCTAAGCGGAGTAAAGCTGTGATTAAACGAAGCTTATTTTCGTACACCTTCAACAACGTATTACAACGGCGTT  
TATCAAGGTTATTATATTGATTTTGAAGCAAAGGAACTAAAAACAAGACGTCCTTTCTTTAAATAATATTTCATGACCATCAAGTC  
GAACATATGAAAAATGCATATCAACAAAAAGGTATTGTGTTTTAATGATTCGTTTTTAAACGCTAGATGAAGTTTATCTTTTACCC  
TATTCAAAATTCGAAGTATTTTGGAAAGAGATATAAAGATATAATAAAAAGTCTATAACAGTTGATGAAATACGAAAAAATGGTTA  
CCATATTCTTTATCAGTATCAACCAAGATTAGACTATCTAAAAGCAGTTGATAAGTTGATATTAGATGAAAGTGAGGACCGCGTATG  
ACGGAACAAACAAGGATCTTCTCAGCCTAAGAAAAATGGTAATAATGGTGGGAAATCCAACCTCAAAAAAGAATAGAAATGTGAAGA  
GAACGATTATTAAGATTATTGGCTTCATGATTATTGCATTTTTTCGTTGTTCTTTTACTAGGTATCTTATTGTTTGCTTATTATGCTTGG  
AAAGCACCTGCTTTTACCGAAGCTAAATTACAAGATCCGATTCTCGAAAGATATATGACAAGAACGGAGAAGTTGTTAAACATT  
AGATAATGGCCAAAGACATGAGCATGTAAATTTAAAAAGACGTGCCGAAATCAATGAAAGACGCAGTACTTGCAACTGAAGACAAT  
CGTTTCTACGAACATGGCGCACTTGATTATAAACGTTTATTCCGTTGCAATTGGTAAGAACTTGACTGGTGGATTGGTTCTGAAGGT  
GCCTCAACATTAACACAACAAGATTGTTTAAAGATGCATTTTATCACAAATATAATCTATTGGACGTTAAAGCTCAAGAAGCATCTTA  
TCATATCGTTTGAACAAGAGTATAGTAAAGATGATATCTTCCAAGTATATCTAAACAAAATTTACTATTCTGATGGCGTAACAGGT  
ATTAAAGCTGCTGCTAAGTATTACTTTAATAAAGATTAAAAAGATTAAACTTAGCGGAAGAAGCTTATTTAGCCGGTTTACCTCAG  
GTTCCAAACAACATAATATTTATGATCATCCAAAAGCTGCTGAAGATCGTAAAAACACTGTTTTTATACTTAATGCATTATCATAAA  
CGCATTACAGATAAACAGTGGGAAGATGCTAAGAAAAATCGATTTAAAGCGAACTTAGTAAATCGTACTCTGAAGAACGTCAAAA

CATTGATACAAATCAAGATTCTGAGTATAATTCATACGTTAACTTTGTGAAATCTGAATTAATGAATAATAAAGCATTCAAAGATGA  
AAATTTAGGTAATGTATTACAAAGTGGTATTAAAATTTATACAAATATGGATAAAGATGTTCAAAAAACATTACAAAATGATGTTG  
ATAATGGAAGCTTCTACAAGAATAAAGACCAACAAGTTGGTGCAACGATTCTTGATAGTAAAACTGGTGGTTTAGTTGCTATATCTG  
GTGGACGTGATTTCAAAGACGTCGTTAACAGAAACCAAGCAACAGATCCTCACCCTACTGGTTCATCTTTAAACCTTTCTTAGCGT  
ATGGACCTGCCATTGAAAATATGAAATGGGCAACAAACCATGCGATTCAAGATGAATCTTCATATCAAGTTGACGGTCTACATTTA  
GAAACTATGATACGAAGAGTCACGGTACTGTATCTATTTATGATGCTTTACGACAAAAGTTTCAATATCCCAGCTTTAAAAGCTTGGC  
AATCAGTTAAGCAAAATGCTGGTAATGATGCACCTAAGAAATTCGCTGCCAACTTGGCTTAAACTACGAAGGCGATATTGGTCCA  
TCTGAAGTACTTGGTGGTTCTGCTTCAGAAATCTCACCAACACAATTAGCATCAGCATTGCTGCAATCGCTAACGGTGGTACTTATA  
ACAACGCGCATTCAATTCAAAAAAGTAGTTACTCGTGATGGTGAACAATCGAATACGATCATACTAGCCATAAAGCGATGAGTGAT  
TACACTGCATACATGTTAGCTGAGATGCTAAAAGGTACATTTAAACCATATGGTTCTGCATATGGCCATGGTGTATCTGGAGTAAAT  
ATGGGTGCTAAGACAGGTACTGGTACTTACGGTGCTGAAACTTATTACAAATATAATTTACCTGATAATGCAGCGAAAAGACGTGTG  
GATTAACGGCTTTACACCTCAATACACTATGTCAGTGTGGATGGGCTTCAGTAAAGTTAAACAATATGGTGAAAACCTCATTTGTGGG  
ACATAGCCAACAAGAATATCCACAGTTCTTATATGAAAATGTGATGTCAAAAATTTTCATCTAGAGATGGCGAAGACTTTAAACGTC  
CTAGCTCAGTAAGTGGTAGTATCCCATCAATCAATGTTTCTGGTAGTCAAGATAACAACACTACAAATCGTAGTACACACGGTGGTA  
GTGACACATCAGCAAAACAGCAGTGGTACTGCACAAATCAAATAACAATACTAGATCTCAACAATCTAGAAAACAGCGGTGGATTAACA  
GGTATATTCAACTAATCCACTCAACATAAAATCCTCAGTTATACCATATTTATGGTGTAGCTGAGGATTTTTTAGGTTCTTCATCTT  
TTATGGTGGGAAGGTAACCTTCTGCTTTTTTATAAGTATTCATACGCTATTGCTATATTAGTAGAAAACCGTAAAAACAGTCATTC  
ACATACATTTTGAACACTCAAAATAGTTTTTCATATTCATCTTTAGCTATGTAAAAATTATTGAATTTGAATAGTGGTTGTTCCCA  
TTTTAAAAATTAGATTATATTTTCTCATAGTCTTTAGACGCTGTTTTAAATTGATATATTTTAAATCCCTGTGTACGTTAGTATCA  
GTGAAATATCAACATGTTTGCAACATATTTTCACAATCATAGATATAAGAAATCCACCTACGATTGCAAAATAGATATCTTAAAGCAT  
ATCTCAAGATATCCATTATGATGTAGATGGACAGTTTTTATATTAAGACGTTGTAATGACACGACACCTAACATAAAATATAAATATG  
TGTGCATGAATTAGTTTTACATATTTTCAACATTAGGAAATGATCAATCTTGTCTATACCTGCTTATTCTTTAACCTTGTTTGATAACT  
AGCATTCATTTTAATCAATTCAGTTTTAAAGGCTTTCATTTGTCGATAGCCCATAAAATGATATTACGTTCAATCATATAATCATAT  
CTTTCTTTAAATTCATTGGCACAACAGGATATTGATTTAAATATCAAAAATCAATATTGCCAGTTATGTCAATTAACCTGCTTAAAAAT  
AATCAATAATTTTACTATGGTATTCATCCAAGTAGGGCTTTGCTTCACTAGAACCTAATGTCTTATTTTTGGCAAAATACATCAATCTC  
TTGTTCTAAATTATCAAAATACCTCTTTTGTAAATATTTGTCATGTTATCAGCTTCTTTCAAACCTAGCTTTATAACGTTTTTGTCTTCTC  
TACAATCTTCTAATAATGACAAAATATCGCATTTAGGTTTTCGGGCTAAACAGTGGTATCTTCCAAAGAAAAATGAGTTGATGATGGC  
TCCTATTCCATCTATCTCTAGGTATGACAGAACATAAACGGTCTTCTACCTGTCTCACATTATCTTTCCAACGATTAATACCTAAGCG  
TTTAGAAACACGTTCTACATGCGTATCAACAGCTAATGAAGGTTTCATCAAATGCTACACTCATGACTACATTAGCTGTTTTACGTCCT  
ACACCTGCTAAACTTTCTAATTCCTTATGTGTTTGTGGTATTTCTCCATTAATTTGATCAATCAAAGATTGACAAAAGTTTCTTAATATT  
CTTAGCTTTGTTACGATACAAACCGATAGAACGAATATCATTCATAAGTTCTTCATCACTGACTGCCAAATAATCTTCAGCGTTTTG  
TATTTTTTAAACAGCTCAGTTGTTACTCTATTTACTAGAACGCTGTGACATTGCGCTGACAATAATACAGCAATAGTTAATTCGAACG  
GATTATCATGTTTTAATTCACATTCTGCATCCGGAACATATTTGCTATAACATCAACCATTCTAATGCTTTTTTCTTACTTACCATC  
AAGGTTCTCCCCATTTAACCAATCAAAATTTAGGTACCGTTTTAACTGTGTGCGTCATTTTCGGTTATTGAATTTTTCTTCTTATTTTTC  
TAGAATCGTCAATTGTTTTGACATTGTTTTTCTTCCAATTAAAGTAAATACGATCTATATATTTAAAGCTAAGTTTATTCAAACTATT  
CGCCTCGTCTAATGCCGCTTGTATAATTGCAGTATCGTGTTTATCAACATCAATCCATTGATTAAACGTTTCTATTTTCATATGGAGAT  
AACGGCCTTGCAAATGTATCCTCTAAAACCTCTAATAATTGTTTAAATTTTTCTTTACTATTTTGTCTTTTCGTTTCCATACCTTTGTTG  
CTTCAATATATGACTTAATTTTTCGAAAAAAGGATCTAGATTATATATTCGGTAAATCTACCTTCTTCATCTTTTTGAACTTGTAATT  
CTAGCAATTCACGTTGTATCAAATTTGAATAACCATTTGAATATCAGTGGTTGCATAGTTGAGCCCTTCTGAAGTAATTCAAATTGA  
AGGCTGTTTTATTGATGTTTCGGAAGCATAAATCAATTTAAGCAAAATGACTAAATCTTGCTCATCTAAACCTAAGTCACTGTAATG  
GTCTAATAATTCCTTTCGTATCACTACAGGCTTGTCTTTAATTGATATTTATCCATGTTTCGTGCCCTTTTAAATTTAACCATTA  
TAATAGTATAAATCATTTTCTTAAATTTTCGACTAAAATCGTTAATATATTTAACTAGTAGCAAAACAAATTTTAAATACAGTATTTT  
TTAACTAGATGATTTAAACATGAACCTTATTTTATAATCAGATGAACCTATTTATTTTCCAAATATAGTTACTAAACAAAAGTTTTC  
TGATTAATATAAGCCGTTATCAATCTTCATTTTCCAAGCATAAATCGCCAGCTATTAATATAGGCTGGACGATTCTTTTTATTATCA  
TAATATATATTTAAGTAACGACCTAAAACCTTATGGATATAAACGGTTAATAATCTTGGAATGGCGCTGTTTCACGAACGTGTT  
CAACACCAGAAATCCATGCTACTGTACGTTCTAAACCTAAACCAATCCACAGTGTGGCACACTACCATAACGACGTAAGTCTAAG  
TAGTAATATATGCTTCTTCGTCTAATCCATGTTCTTTAACGCGTTGTCTAACAATCTAAGTCATCCACAGTTCAGATCCACCAA  
TAATTTACCGTATCCTTCAGGTGCAATTAAGTCTGCACATAATACAGTTTCTTCATTTTCAGGATTTGGTTGCATATAGAAAGGCTT  
AATTTTAGTTGGATAATTAGTAATAAACACCGGTAAATCATAATGATTAGCAATGGCTGTTTCATGTGGCGCACCAAAATCTTCGCC  
CCATTCAATATCATCAAAGCCTTCTGATTTTAAAGAAATCAATTTGCATCATATGAAATTTCTAGGGAATGGTGTGCAACTTTTTCA  
AGTTTGTAGTATCAGCTCTAAAATTTTCAACTCTAGTTTACAATTTTCAAACTGATTTTACAACATGTGTTACATATTTGTTCTGT  
AATTTCTAAACTTTCAGCATGATTGTGAAAGCCATTTCCCTTCAATCAGAACTCGAATCAAGTGTCTACGTTGATTTTGTATTTT  
CAGCTCTGAAAGTTGGACCAATGAAAATACCTTTCCGTGTGCCATTGTGTCAGCTTCTAAGTATAACTGACCACTTTGAGATAAAA  
ACGCATCTTGATCAAAGTATTTAGTATGGAATAATTCACCTGTACCTTCTGGCGCACTTGTGTCAAAATTTGGTGGATCAACCTTTGT  
AAATCCATCTTTGTTGAAAAATTCATACGTTGCACGAATAACTTCATTTCTAATTTTCATTACAGCATGTTGTTTTTGAACGTAAC  
CATAAATGACGGTGATCCATTAAGAATTCGTACCATGATTTTTAGGTGTAATCGGATAGTCATGCGCTTCTGAAATAACTTCAATT  
GATTTCACTTGCATTTTCGTATCCTAAGTCAGAACGATTATCTTCTGTAATTTGTGCTGTAACGTATAGAGATGATCTTGAGTAATTT  
CTTTGCAAGTTTGAATACCTCTTCATCAACTTCTGATTTAACTACTACGCCCTGCATAAAGCCTGTTCCATCAGTAATTTGAAAAA  
GGCGATTTTACCACCTTGAACGTTTATTTGTTAGCCAAGCAACCAATTGTAACGCTTGGTTTAAATGATCTTTCCGCTTGTTTAATCGTT  
GTTTTCTAAACCTTCTCCTATTTATTTTTCGTTATGATAACATAACTTATTTTAAACAAAATCCGCTTTCAGTTCTAGAAGTACT  
AAAAGATAACGTGTAATGGTAATGATTTAAGCACAGATTTGAACATTAATTTATATTAAGACAATACAATCATCAGTTTCAGACA  
AAATATATAATAAAGCCTCAATATTATTAGTATGAAGGTGTTTTTGTGCTAACATTCAAGTTTAAATATAAAACTCAAATTTTGAC  
GACCAAAACAAAATCTTGTGAACAGAACATAGCACATGTCATGTCACAAGAATTTTACTTTGTATTTCACTTTTTCTTTTTTGAATT  
TGTCTTAATAATTTTCCAACTGTTGAATGTCGCTTTTTTCTGACGATAATTTTCAAGTGTGTTGTTCAAAAAAGTTTTTATAATTACT  
GTTTATAAGTCGATCATCAAATGAAACTATTATGCCGCGATCATTTTCACTTCTAATTAATCTTCCAAGTCCTGTCTAAAACGTGTA  
ACTGCATCAGGTAATACATATTCCTTGAAAGTTGAAGTGAATTCAGAATCCATAAGCCAATATTTTGCATTATGCTTGTTCATAAAC  
GGTAACTTCGCTATCATCACATTTAATACCATTGCTTGAAATCAAACCTTCAAAAAATGTTGACGTACCAAGCAGTATGGCC  
TTATCAAAATATTAACTGTTGACTATTTTATAATTTTGGTCTGCTGTTGTTGTTAATACAACATCTTCAAAATTCGGCAATTC  
ATTTAGCATATCTGTACCATATGCATCATTTTATAAECTCGTAAATAAGACTAAACATTTTGTATGACGTTATAGTCGTATATTCAATA  
ATATAGCTTACAATCGATGCTACATACTCATCTATATTTTTATATTGATAAGATGCTACATCACTCGGTATAAATACACTTGTATTTT  
TTGCACTTTGTAACGACGTGTTAACTTCAAATGTATTAAGTGAACATCTTTGTTGAATAACTGTTTAAAGCTTCAAACGAATGATT

AAATTTTAAAGTACCAGATATAAAAAATGAGTGATTTAAATTTTCCAATACTTGTTCGTTAATACATCTTTTACAGCGTAATCTTTT  
ACATATAAACGTATTGTTGATTTTGGAGATAAAATTTTAAATCGAAATGAAACTAGTATGTCCAGCTTTTAAACTTTGTTTCGATATTTT  
TAAATTTATCTTTTAAATACAACAACTGTTTCCGTAATGATTTAACTGTTTATGACTAATGCCATTGAATATTTCTAGCGTTTTATTT  
AACTTATCGATAATCGCATGTAAATCCTTCAAAATGTCTTTTGTTCAAAAGTAAATACATTATGGAAGCGATGAATATCATCATCA  
TAAACATCAGAATCATTGATAATCGTAAATATCGTTGAGAACAAATTGCTCATTTAACTCATGAATCTCATTCACTAGCCTTCAAG  
CCAAAAATATCAATTGGTGCAATATCTAATTTTTCCAAAAATTCGTCGCTTTTCCAGTTGATCAATTGCCTTTAACAATTTTTCATTTT  
GTTTTTACCAATCAAAACCAAGCTGATATTTAATATCAGCATAACTCAACTCATTGTCACCTTGATTTAAGGCATAGTCTGGTAAGCG  
ATGTGCTTCATCCACTATACAATCATCAAAACAATTGATATATTGAATTTTCAACATCAGAATGAATTAATGTGCATGATTTGTAAT  
ACCAATTTGAATGTCTGTGCATTTTCGCTTAATAAAATTATAAATGAACATCGTGACGTGCCGGTACATATGTTTCAATTTTCTGG  
TCAAAATACATCTTTTGACCACCTTTTAAATTTAATTCCTGTATATCTCCGGACGGCGTCTCTGTAATCCAAATCAACAATTGCATTT  
TCAAGATATTCACTTCGTAATTACTTGTGTCTCTTTTAAAAATTTGACTAATAAGTCCCAATGAAATGTAATCACTTTTACTTTTAATC  
AATAGTGCATTAATTTTAAATTTCAACGCTTCATTCATTGCTGGAATATCTTTTTCTAACAATTGACTTTGCAGTAATTTAGTATTGG  
TAGAAATCATGACATGCTTCCAGTTTCAATATTATACATCAAGGCCGCAAGTAAATATGCTAATGATTTACCCTGCCTAGTGATG  
CTTCAATCATGCTTTTCTACTATGCATGAGCTGATCTAATATAGTTTCCGCTAAATATAATTGTTGCGGTGATATGTTAAGCCAAG  
TTGATCTACAGCTTTGCTATATAAGACTTCAAGCTGCCATTATAATTTGTTGTGCGCTTTTAAAAATCAACTTGCTTACGATAGATA  
ATCTGTTTCAACTTTTTCGTACGATTTATCCAATGGCTTTGCATCATATTGCCAACCATCTCAAGAAAAATATCATACAAATCGTATT  
TCAACTGTTTACTTAAATAATATAATTGCTTTAAAGTATCTAACGGTAACCTTTTCAAAATTTTCAAAAGCTAATATCATCAATTTAGC  
AGTAGTACGGGCATCTTCGTCAGCTCGATGGGCAATTTGCTAAGGTAATACCATGTCCTGCTAATTCATTAATTGATAGCTTTT  
TCTGTAGGAAAAGCTATTTTAAAGATTCTAGTGTATCTATAACTTTTGGGACGATATTGAATATTACAATCTTTTAAATGCCTTTT  
TAATAAAATTTCAAAATCAAAATCTACATTATGAGCGACAAAAATGCAATCTTTTATCTTATCGTAGATTTCTTGTGCAACTTGATTAA  
AATATGGCGCTTGTGTAGCATATTTTCTCAATGGATGTTAACGCTTGAATGAACGGCGGAATCTCTAAATTTGTTCTAATCATAGA  
ATGATATGTATCAATAATTTGGTTATTGCGCACAAACGTTATACCAATTTGAATGATATCGTCAAAATCTAATTGGTTGCCTGTTGTT  
TCCAAATCCACAACGGCATAGGTTGCCATACCCATAGCTATCTCTCCTTGCTTTAGTGTTAAAAATCTATATCTGCACTAATTAACG  
GTGTGATTACCCCGCTTCATCTCTAACAATTAGATAGCCATCGTAATCTAAATCAATTGCTTGTCTTTAACTGTTTATCATTTTCTG  
TAAATAGCAACGTTCTATTCCAAATATTAGAAGCTGCAATATATTCTTCACGAATTTCAAGAAAAAGGTAACGTTAAAAATGATTAT  
ATCTTTTTCATTTCTTGAAGTAATCTCTCTAAAAATTGATATCTATCTAATTTATTTTATCATGTAATTGTATACCTTGTGTCTAT  
GCTAATACTTTTCAACAAAGCTCTTAGTTGTTGCGTCAAAATTAATACCTATACCACATATTATTGCTTCTATACCATCATTTATTAGCA  
ACCATTTTCAAGTTAAGAAACACACACTTTACCATTATCAATATATATATCATTCGGCCATTTCACTTTGACTTCATCTTGACTAAAAAT  
GTTGAATCGCATCTCTTATCCCTAATGCAATAAAATAAATTAATTTAGATATCATTGAGAATGCAACGTTAGGTCTTAACACGACAG  
ACATCCAAAGTCTTGGCCTTTTGAAGAACTCCAATGTCTATTAAATCGCCACGACCTTTGCTTTGTTTCATCACTCAAGATAAAAAA  
TGAAGATTGATTTCCAACAAGTGACTTTTTCGCAGCAAGTTGTGTAGAAATCTATTGAATCGTATACCTTCACTAAAATCAACAAAGC  
AGAATCTTTTGTATATTGGTCTATTATACCTTGATACCAAATATCTGGGAGTTGTTGTAATAAATGCCCTTTATGATTTACTGAATCA  
ATTTTACATCCCTCTAACTTTAATTGGTCAATCACTTTTCTTACTGCACTGCGCGATATATTAAGTGATTCGCAATGCTTTGTCCAGA  
TATATAATTCGGTTATTTTATAGAGTAATTGAAGTACATCTTGACTATATTTGACATGATTATCCACCCATTTCAAAATTTCAAGTT  
TCTTCTGTTGCTTACTTTACCTGTTACAATCGCTATCTCAATTTGCTTACGACATCTTTAACCAGGACCACTTTTGGCATTAAATG  
TGCCATAAGTACACCGCCATTAACCATCATGTCTTTTCTATTATGCATAGGTAAACGATGCAATGTTTCATCAATCGTTTGAAGGTTA  
ACGATTAATGGTTCATGTCTTGAATATCATTGCTTTTAAACAGCTGCTGCAACCATTACATTTTAAATGAGATGCGTATCATAAT  
CATAAACAAACATTTTAAATTTGTTCTTTTGAATAATACTTGGTAATGCATTCATAATTTGAATATATTGATTGATATCTTTTACTTGT  
CGTTACTTAGCTTTAAAGGCTTCAATGAGTAATTAATATCAAAATTTAACTGACACTATAGCAATCAACAATTCTAAATCAATTGGT  
TCAGTTACATTAATTTGATTCATATCAAGTTGTTCGAAATATGGCATATAATTAATGCTTTTCAAGCATTTTAAATGAATAAACTCT  
CTTCAACATTAATACCTCGCATTAATTTAGTTAGTTCAATCACTATACGCTCAATTGATAAAAAATTAATATCTGCCATTTGTGTACG  
CATCGCTTCAAATGTTTCCGTTGCAATATCAAATGATAATTGTGACTGGAATCTTAAACATCGAATCATACGTAAGACATCTTCTTG  
GAATCGTTCCTCAGCTATACCTACAGTTCTTATTATTCGATTCTGATTATATCTTGTGACCAATCAAAATCATCAATTTGATGCTG  
GTATCCATTGCTATCGCATTCATCGTGAAATCTCTCGTTGCAAAATCTTCGTATAAAATCCCGAACAAATGTAACACCCTTGGTCTAC  
GGTGATCGACATAATCTTCTCAGCCCGGAATGTTGTCACCTTCATAATTTTCAATTATTAAAAACTACATTTATGGTGCCATGTTCTTT  
ACCTACAGGTATCGTATGACTAAAGATAGATTCTATTTTATCCTCGGCGTTGCACTTGTGTGATATCTATATCATGAATATTTCTTCCC  
ATGACATAATCTCTTACAGAGCCACCTACATAATATGCTTCAAAACCATTGTCTTGAATTTGTTCTAATATAGGCCTTGCCTGTTCAA  
ATAATGATTTATCCATATTATCTCGCTTACTTTTGTATGCTCATTTAGCATTTTTTGATAATAATACTCATATTGATCTGTAAT  
AAGTTCTGATCCAAACGTTTCAGCAATATCTGCTAGCATGTTTTTCTGAAGTTTGTGTATAACACCTTATCTTCAAGTAATCGGATA  
GCATAGTCACTCGTGAATCACAATCACCCACATCTACGACAAATCCAGTTTACCATTGTTAATAACCTCTTTAATTCCACCGGCAT  
TTGAACCAATTGGAACGACGCTGTTTTCATAGCCTCAAGTAAAGTTAGTCCAAAGCTTTCTTTTCACTTAATAATAATACTAAGTC  
AGATAAATTGGTAAATTTCAATCTACGAAATCTTGTTCCTCAAAAAATAAAACATCCTCTTCTACGTTTAACTTTCTGCTCAATTGACGC  
ATTGGCACTAATTCAGGACCATCTCCAAGTAAATTAATTTACTAGGTATCTTTTACGTAATTTTGCAAAATGTTTCTATAATAGTAT  
CTATGCGTTTTACTTGTCTAAAAATTCGATACATGTATTAACACTTTTTTCTGCTGCTATACCAAAATTTGATTTTATGCTGTGTTA  
TGTTTATGTTGGAACCTCATTTTACGTACAAAATTATAAATCGGTATAAATTTCTTTGTTAGTTTCAATAATTTTATGTTTCTTGTG  
TAAAGATTTACTCACACTTGTACAAATATCACTTTTTCATGCCAAATTTAATTGCACCTTGGAGTGAATGATCATAGCCCCAAAC  
AGTAATATCAGTACCGTGTAGCGTTGTCAATAATTTTATATCTTTACCTGACATCTCACGAGCTAAAAATCCCAAAATTCATGAGGT  
ACAGCATAGTGCATATGCAACAAATCAAGATCATATTCTTTAATAAATCTCAGCGATTTTATGACTTAAACGTAATATCATACGGTGA  
TACTGAAATATGCTATATTGATCACTTCAACTTGATGAAAAATCATATTGCGTAATGGTTTTCTTATTCTAAACGGGATTTTGAAG  
TGATAAAATGTACTCTGTCGACCTCGCTGCTAATTTAATCTTAAATCTGCGCAATAATTCAGAACCCCATGACGGGTAAC  
ATGTTATACCTATCTTCATTCGCTTGGCCATCCTTTCTTTCTATTCTCTCTATTATTTCTCGATGCGTAGATAATTGTTTAAATTTAAGT  
TTATAGTAATGTTGAGTTTATAATTTTATATATCTAAAAAACAGGTGTTGTATATATAATCATTTATCTAGTTATATTTACTTTAAAA  
ATAATATAATTTTATGCGATGCAATTCATTGGTCTATGTTTTAATCTTAATCAAAATCCAAATAAAGCATATATTTTATCTTCACTTT  
CTTTCGAATCGATTTTATCTCTTGTATTAACTTTTCCATAGTTTCATTAAAGCTCTCTGTCATATCTATTTCCCATTTGAATTCGCTAA  
ACATAACAACACAAATAAATTTATCACCTAATTTCTGCTTAAATCGTATTGCTTCTCTGAATCTTTCTTCTTTTTTTCACCATAGGTAT  
GATTTATTTTACGTTGCAAGTTTCGCCACTTCTTTCAGTCAATCTAGCTAAGTTAGCTAATGGTGAAAAATATCCTGTTTTAAATTTGCC  
AATATATTCATCACTTCAGTTGCAATTTCTACCATTGATTTCACTTTCTACGTTCTCTTATATTGCAATTTCTAATATAGTATATATCA  
ATTTGAAGTCTCATGCTATGTTTGTGCAATCTACTGACTCTAGCTAAGTAACTAGATGACAAAGTTGTTTATTTAGAAAGTTTAAATTTCA  
GTTTATATAAATGTAATGCATTCTTAACATAAATTAATCAATTGAAATTTGGTATTATAAATTTTATGATACGTACCACTACAATAAAAA  
TAATATAGTGAATAATCTACCATTAGAAAAATAAGCACAAAAAACTAGCAACCACACAAAAATGTGATTAGCTAGTTAATAAGTG  
TCTAATTTAAGTTAATTTGTTAATCCATAAGATTAATCACTTGAACGCGCAATCAAAATAATACGTACAAGCTCTGCTACAGCGACTG

CAGTTGCTGCAACATAAGTCATTGCTGCTGCAGATAAATACTTTACGCGCATGCTTGTATTCTTTTTTCATTTACAATGTTCAATGCCGT  
AATTGTTTCATCGCTCTTGAACCTCGCATCAAACTCAAACTGGTAACGTAACAATTGAGAATAATACCGCTAATGACATTAACCAGC  
ACCAATCCATAAAGCAGTTGAACCAAATGCACTACCTATCGCTGTTAAGATAATACCTAACATGATGATCATATAACTTAATGAAC  
CCCTAGGTTTGCAACAGGTACTAATGCTGCTCTGAATCTTAAAGAACCAATATCCTTGGTGATCTTGAATGGCATGACCAACTTCGTG  
GGCTGCAATTGCAGTTCAGCAACTGATGGTCTGTCATAGTTTGCAGGAGATAGTGAAACAACCTTCTTTTTAGGATCGTAATGATC  
TGTTAAGAATCCTTCACCTTTAAACAACCTTCGACATCATAAATACCGTTTGCATGTAAAAATTTCTAATGCAACTTCACGACCCGTTTTA  
CCACTAGTTGATCTAACTTGTGAATATTTCTCATAGTTAGATTTAACTTTGTGTTGTGCCCATAAAGGAAGCACCATTAATATTACGA  
AATAAATTATCATAGTAAAAATGAAGACAATAAACTCACTCTCCTTTATAAAATATTTACTGTCAATTTGCCGTTTTATCAAATCAT  
TTACACTTTAATAATTTGTTAATTTCAATATAAAGCAAAAAGTCCAAAAACACTTAGACAACATGATAATACACCAATTTGCCACACA  
TGTGTAGTTATAAAAAATCATAATATGGAATTTGAAGGTGAAAAATAGTCAATATAATCATTCAAAAAACCCAAATCATCGCTACACT  
GATTTCAATCATAGAACGTTTAAACCTAGGATAGAAAGTAAATTGCTGAAACAGCCATTATACTGTGGGAAAAACATTAATACCAAAAC  
CATTTACTGTAATATCACCTTGTTCATAATAAATAATATATTCATTATAACTGCCCAAATCCCATATTTGAATAATGTTACAAATGC  
CAGTGCATCGATAATACTATTTTGTGTTTTGAATTAATATCAATGAGATAGAAATAACTAAGTATAATATTGCAGTTGGGCTATCTGG  
AACAAAAATCTTAAATGCCACGGCGTATGACTTAATTGTTCCACCATACCATATATAACCATAAATCATCCCTAATATATTACAAAT  
GAGTAGCAGCATTAAACCAAGAACGTTGATAAAGGTATATTGCCAAAATGTATTAATCGTCATCTGCTAAGTCCTCAAATTGATTAT  
GTTTATTTACTAGCTTGAGTGTATTTAAAAATTTGCGTTAGTTGATAAAAAACGTTGCTTTTCATTCATCTGTAAACTTAAATCAATATT  
GTGTAACAAGTAATCTATTAATAACGCATGTTTATGCCGATCTATAGCCATACTATTTAAGTCATGAAGATAAGTTTGATAACTGGG  
CGATCCCGTTAGTTGAGCAACTATTAATCATCTAGCCTTTGCTCAGCTTTGACACGTTTGCGAAGTGAATTTGAATATCAAAAAGC  
ACAGTTATGATTAGCGATATAATCAAAATATTTCAATTTGTATTCTAATTAATTTATATTACGCTTAGTAAATTTGAATTTGCAGAAGCGTGA  
CTTCCCACTTCTGCAATTTCTAATGTTTCATGATGATTAATTTTTGTATCTACAAAATGAATGTTTGCCAATTTGCGCTCATTACCTTT  
TATATAGTTAAGCACCCAAACTGCAATACGCGACTTAAATCGATATTGAAAAAGTAAATATTCAATAAAAACTTTCTTTAATTTGATT  
GAGTGTCTCTGACATCAAATACCCCATTTAAGATCGCAATCTTGATAAATCGTCATGCCAATTTTCGTTACTTGGCTCTAGTTCCAA  
CAATTTGATTTAAAAATAATAATTGCTTGTCTCTTTGACCAATCTCAATTAATGAAGATAATAATCACTCATAAAAATCAATATTTGTT  
TTCATCGTTGGATATGCTAATTCAAAGAAATGTTGAGCTTCTTTATCTCGCTCTTCTTGACCATAGGCGAACGCTAAATGCCACATGA  
ATGTAGGATCCAAATCTTCTTCATCTACATATGTTAATAATTCAATGATTGCTTCATAATCTTCTTCATTACGATATAAATCGCTTAA  
AATCAATAAAGGTTCTTGGAAGCATTATCAACCTCTAATGCTTGTGTTTAAACAATAATACACCTTCATTAGCATCGCCGTGTTCTATT  
TCCAAACATCCAGTTGTATACATTAACTCTTTATAAAATTTGACTTAGCTAGTCTGAATCCTTCTTTACCCGTCTCAATGGCATCTGGATAAT  
TTTTTTCATTTTCATATAATGATTGTAAATACAAGTAGCCTTGAATATAATCAGGATCTTTAGAAAAGTAATGTAGTCATTATTTTAAT  
TGCTTCTTGAGTGATGTCAATTTTATCGTAAGAAATGGCTTTTTTGAGATAATCTTCTGAAGTCATTTTCATCTTCATTAATTTTCATCGT  
ATAAGCGAATCGCATCACTATAGTTACCCTTTGTAACTACAATCTGCCATACGAGAGAATAAGTTTACACCATTAACCTTGATATT  
CACCAGTTTCTAAAACGGTTTCGTATTCAGAGGTAGCACGTAAATATTGACCATCATAATATAACATTTACGCCAATGCAAAATGGA  
TTATTGGATCATTTGGCTCTAGTTCAAGTGCTTCTTGTAAATTTATCAATAGCAAACTCCATCATATTAATTTGTTGATATAAAATCTGCT  
TCTAACATCAACTTTTCAGGTGATGGTTCAACATAACTTAAATATTCTAACGCTTCGTCAGTTTGATTTTCAGACATTAACCTTCAA  
TAAAAAATCAGCAAACTCACTTTTCGCTCTGGATATTTTGTATATAACACGCGGAATACTTCCAAACCTTGTGGCATTAATCCAAAAT  
TGTAAGGTGCTCTCTCCTAGATAAAATAATGCGCTATCGTTGTGCTAGTATTGCTTTCATTAACACGAGAGTCTAAATTTTCTAGTTT  
TTGTAGATTGATATCGTCTATTAATTTATAGATATCTTCCATTTTATATTATCCCTCATTTTCTAAAAAGCTTTAGTTTGGTAAAAATC  
CTGGAAATGATACATTTACAGCATCAAATTTGTTGATTTTGACAGGCTCGCTTGAAAGTAGAGAAGCAACTGCAAGCATCATTCCTA  
TTCGATGATCAGTTAACTATCAACTGTTGCATTTGTTTTAAATCTGACGGATGAATAATCAATCCATCATTAGTTGGTTGTAATTC  
AAACCCTAACAAAGTTTAAACATATCAGCCGTGTATCAATTTCTATTGTTTCTTTACTTTTAATTCCTCGGCATCTTAAATGTACTCG  
TGCCAACTGCTTGTGTACAAAGTAATGCTATTACAGGCAGTTCATCAATTGCTTTTGGAACATAATTCCTCTCGATTGTTATTGGTTG  
AAGCATTGGTGTGATTGAATACGAATAGAAGCAGTAGGTTACAGCACCAGTTGTTTGATTGAAAAGTTGGATATTACCGCCCATTTT  
TTCAACAATATCAATAATACCTGAACGTGTTGGATTGATTCCAACATTATGAATTGTTACATCACTTCTGGTGATGAAGTGCTGCA  
ACAATAAAAGACGCTGCAGACTGAATATCGCCAGGAACATGAAAATCTGCAAGTTTAAATGTATCGAATGTTTCAGGGGTTGATT  
AATTGATAAACCTTCTGCTCAATTGGAATATTAAGATGTTTGGAACATCGTCTCAGTATGATTTCGACTTACATCTAATTCCTTTAATG  
ATGGTCGGTTCTTAGAAAACAAACTTGCAAAATAAAATGGCACTTTTTACTTGTGCACTTGCAACTCCCATTTGATAATTTATACCTT  
TTATGACAGATGGCTTAATAATTAATGGTGTATAATTATCTTCAATACCTTCAATATTCGCATCCATAAGTTTCAATGGTCTCAAGAC  
ACGATCCATTGGCCTTTTACCAATTGAAACATCGCCAGACAAAACACTTCAATACCTAAACCCTTAACAAACCAGCTAATAATCG  
TGTTGTGCTGACCAAGATTACCTGTATACAATACTTGATGTGGCGTGTAAAAAGATTGATATCCTGGGGAAGTCACAACATAATTTTC  
ATCATCTTCTTTGATTTCTACACCTAACAGTCGGAAGATGTCCATCGTACGACGACAACTTTCGCCAAGTAGTGGCTTATATATAGTA  
GATACACCTTCAGTAGCGACGCCAACATGATTGCACGGTGTGTCATTGACTTATCGCCCGGCACACTTCTATTTCGCCCTTTAACGGA  
CTGAAATATCAATGATTGTTTCATTTACCATTTTCACTCACTTAAAAATATGTTTTAGTTGTTTCACAGCATGATTGCAAGTGTGTG  
TGTATCAATGTGTGACTTACAATATCGCCAAAATGTTTAACTAATCAACTTTGAACCTCTTGTGCTGTTTTTCACTTAGCA  
TGTATTGATATATCGTTTCGAAATCTATGTGCGTTATTGTTTCTAAAGGATAACCTAATTTTCGTTAAATAATTAATATAATGTTGGAT  
ATCGTGATTAGAATTGAACAATATATTGCAACAATAAATTGATATATTATGCCTATCATTACGGCATGACCATGAGGTATTTTATG  
ATAGTATTCAACAGCATGCCCAAATGTATGACCTAAATTTAAAAATTTACGTACACCTTGTCTTTTTTCATCTGCAACAACAATATCC  
AGCTTCGTTTCAATACCTTTAGCAATATATTTATCCATACCATTTAATGACTGTAATATCTCTCTATCTTTAAAGTGCTGTTTCGATATC  
TTGCGTCTGTTGATTACCATTTCAATAACGCATGCTTATAAACTTCTGCATAGCCACTTAATATTTGCTCAAATGGTAACGTCTTTAAA  
AAATCTAAATCATAAATCACAGCAGTTGGACGATAAAATGCACCGATAAAGGTTTTTACCTTGTTTTGAGTTAATACCCACTTTACCG  
CCAACCTAGAATCATGCGCCAAAATCGTTGTAGGAACCTGTATAAAATGGACACCTCTTAATAGTGTGTGCTGCTACAAATCTGCA  
AAATCTCTGTCGACACCAACAGCTATAATCGCTGTATTACCGCTTACATGATGTGACAAAAGTATTCTAAGATGTTCTTGAT  
ATTGCTCAAATGTTTTGCTCTTTTACCAGCTGGAATAATGACTTTATGCACATTTTCATATGATAAAATATCATCAAATTTATCAGC  
AAAATATTGATTTACATGCTCGTCAATTAATATAAACTTTGATCAAACCTGATCAATATACGTGCTAATATGGTCAATTCACCATG  
TTCAACAAAATATTGGATAATTGTTTGAAGGATAGGTTGTTTGAATTTTCATGATCACACCTCAATTTGTTCTCGTTGTTAAAACTCAAC  
ATTTAATTGCTGCGGTGAGCAATTTGTTGTTGAAGTTGTTCAATATGGTTTGATTGAAACTCTTCAAGTAATGCTTTCGCTATTTCA  
AATGCAACAACGTGTTACACACTATACTTGCTGCAGGTACAGCACAACCTATCAGAACGTTCAATTTGTTGCCTTAAAGTCTTCTTTA  
GTATTTATATCAACTGAATTTAATGGTTTATATAACGTAGGAATAGGTTTCATTACACCATTTACAATAATTGGCATACCATTTGACA  
TACCACCTCTAAACCCTAAATGATTAGATCCACGATAAATAACCAATTTCACTATTATAGAAATTTCACTTGAATCTCACTACC  
TGGCTTTTCAGTGTCTTTAAATCCTTACCAAAGCTTACACCTTTAAAAAGCAATTTATGCTGACAAACCTTGTGCAATCTTACCATCT  
AACTTACGATCATAATGCACATAACTACCAACCAACAGGCATATTTTCAACTACAACCTGAAACGACACCGCCAAATGAATCTCCT  
TCATTTTTAGCTTCGTCAATTTTATCTCGCATTTGCTGTGCGTACTGTCAATTAACACGAACATCATTACGATCAAGATTTGCTTT  
AAATGTTTCTGAATCATAAAAAATCTTTATCTTTAATTCACCTATTTCAACAACACGACTGTATATATCGATATCTAACTGTTGTAAT

AACACTTTACATAAGGCACCGACTGCAACTCGAGCTGCTGTTTCTCTAGCAGATGATCGCTCTAGCACATTTCGTAATACACGATGA  
TTATATTTTCATACCTCCAACCAATCTGCATGACCAGGTCTTGGTTTTGTAATAGTACGTTTCATATTTTCACGTTCTTCTCACTTAT  
TGGAGCTGCTCCCATAAATTTTCTCCAATGCGTAAAGTCATCATTGGTTACAACCATAGTAATTGGACTACCTAATGTATAACCATTT  
CTAACGCTGATACTATTTCTACTGTATCTTTCTCAATTTGCATGCGTCGGCCACGACCATAACCCCTTGACGCTTGAACATTTCTTT  
ATTAATATCTTCAACTTTAATTTCTAAATTTGCTGGTATACCTTCGACAATAACTGTTAATTGAGGTCCATGTGATTCTCTGAAGTT  
AGATATCTCATACACACTCGCTCCTTTCATACCTCCGCAATAACATTATAATATGTTGTTAATCTTATCACATTCATTGTGGATTTCAT  
AAATGTTTGGTTTCAAGCTTAATTAAGAAAATGGATGACATCTCATTTTAAATGTCAGAATTATCTTAATATTAACGAACTAAAAAT  
TAATTATAATATATTCGCTGTGAGAAAAGTATCATGAATTTCTAAACAGTTGCATCATATAATCATTAAATTAAAAAATGATTAGCCG  
TTTTAATATAATCGTATCGCAACTTTAGCAATAATATACTGACTACATTTCTTAATACAAAAGAACGAACTGTTAATTATTAATAA  
AGTTAATCAGTCCGTTTAAAAAAATATGATATTAATAATACATATGTTAAGCGCTTTGTTATACCTTTGACTTCAAAAAATATAATC  
AATCTTTTTACTAATACATAAAAAATATAAATGAGAGTCAGTATAAAAAATAATTTTTGTTATAGGATTAAGTGGTTTTATCTAAAAAT  
ATAGCACCATATAGTAATTCATTAATTTTAAGAACATTAAAAATCCCCAAAATAATCGAAATAATATTCTTCATTTTAAACACCCCTT  
CTCTCTGTTTAGTTTCATTTGATAAAGAATATTCTCTCTTTTTAATACGTGTTACCAAAAAACTATAAAATTTTTCAAGTAATTTACT  
ACAACATAAAAAACGGGCCCTTGTATGTATAATCATAATGACTAACCACATAACAAAACCCCTTTCTACCTTTATAAATAAATCGTAA  
AGGTTTACAGTTTATATTTTATTCATATAACCATGCATCACGTGGTGAAGCATAGCTAGTAATTTTCATTTTCATTAAACCATAGATTA  
ATTTACAGTTACAGCAGACTCTAATGAATCTGAACCGTGAATGATATTTCTACCAACAGTTAAACCTAAATCACCTCTAATTGATCCT  
GGTGAAGCTTCTGAAGGATTGGTGTGCCAATAATATGTCATAGATACATTAACCTGCATCTTCACCTTCAACTACCATTGCGAACACT  
GGTGTGATGTAATAAATGAAATTAATCATTATAAAACGGTTTGCCTTGGTGTTCACCATAATGTGTTTTCAGCAAGTTCCTATTGGT  
ACTTGCATTAATTTACACCGACAAGTTTATGTCCTTTTCTTCAATTTCTGAAATTACTTCAACCAATTAAGTTGATTCTTTGTACACGATT  
TGGTTAATCATTAAAAAATGTACGTTCACCTTTATGTATCCCCCTGTGTTAATAGGTTTATGTATATTACTATTATATTAACAGGT  
TGGTAAAGCGCTTTCAATACTTTTCATAAATACTACGTGTTTCTTGAACCCATTTTTTTCGTCAAACTTAAAAAGTAGTGATTTCGGAT  
GTCCATCTGGTAACTCAGAAATCAAATCCAAAGCTTTACTTAAATACTTCGAACTTACTGCTTTAGATTCATTAATACTGTCAGACTT  
TCTAATAATTTGAATACATTCTTCAAATCTTTTCGATCGCTGTCACGTGCTAATTGCTCAATTTTCAATTTGAAGTCTGGGTTTTTAC  
GCATTTCTAATAAAATCGGTAACGTAATATGACCATTAAAGCAAATCACTTCCGACCGGCTTACCTAATTTCTTTTCGGTACTTGTGAA  
GTCTAATACATCATCAATGATTGGAGCTCATACCTATATAATGACCAATCATTTTCAATTTTCGTACAGTCTCTTTATCAGATTGA  
GATGTAATTTGCACCAACTTCAGTTGATAATTGAATTAACAGTGCTGTTTTCGATTGATACGTCGTAATAATTGATAATTGTCTGTT  
GACTGTAAATTTGGTCTTGAATTTGGAAAAGTTCCCTCTACAACATCAACGATAGATTACAGATATCAATTTGATGTACACAGATTAT  
CTTTAACGGCCATTAAAGTGTCAAGTCTAATGCCAATAAAAAATTTCCAGTTAAATAGCCGTTGTCTGATCCCATTCTTTGATAT  
GGTTAACTTGCCTCGACGCTTGTGCTTTTTATCAATAACGTCATCATGAACAAGTGTGCCATATGAATTAACCTAATGCGACTGCA  
ACATGATACGTTTGTTCAGACGTTTGTTCATCTTTACCAAATTGGCTACTCAGAATCACAATGCAGGTCGTACACGTTTTCACCAG  
AAGACAATAAATGTAAAGAAGCTTGTCTAGAACAGAATCTTTACTTTTTATTGCCTTTTCAAGTCTGTTGTCCACTTTCTTAATTTT  
ATTGTTTCATGTTAACTTTGCCACGTTAATCACCTTTGGTATTATCTTTTTCTTTATAGCCAAGGTGCATTGCAGCAACGCCCCCTGTA  
AACTACGTACTCTTACATTTATGAAACCCGCTTCTTCAAACATGCGCTTCAACTCTTCTTTTCCAGGAAAAATTAACGTAAGATTGCT  
GTAACCATTCATATCTTCTTTGATTTTGCAAATAATTTCCAAAAATAGGCAATAACAAATTTAAAGTATAATGCATACATTTGTTT  
AAAGACTGGCAAGTGGTGTGGCTCGTTTCAAGACATACCACCATAACCTAGGTTTAAAGTACTTATCTTCTTTTAAACGCGACT  
AAATAGTCTGGCACATTTCTTAATCCAAACCCAATTGTTACATAATCAAAAAGAATTGTCTTCAAACGGCAATTCCATTGCATCACCA  
TGAACAAGTTTAACATTTTCCATTGAAGCAGTTTCTTTTCTTCTACTTCTAACATATTCTCACTAAAGTCAATACCAGTAACTTCACC  
TGTTGGTCTCTACAGCTTGTCTTAATGCGATTGTCCAATCACAGTACCACAACAACATCTAATGCTTTCGTCCCTTTTCTAACACCC  
ATGCTCTTCATGACGCGTTTTCTCCATACTTTATGCTGCTCAAAACTAATAATATTATTAATCTATCATATTTTTTTGAAATATTTG  
AAAAACGCGATGTACTTGCTCTTTATTTGCTTATTGTCAGCCATGCTTAATTACCTCTACTTTTTAAATAACTTTTTTGGATATCGTG  
TAAGTAATGCTTTACTTCACTTTGATTATATTTCTTGAAGTATGATGGATAGTAATCAGACATATCTTCAAATAAAATAATTATATATT  
TCCGACTCATCAATATTGATACCGAAATGAGATAACGTAATATATGGGAAAAGTGTTCATTTTACTATTGCTTGAGAAATTTCA  
TAATCATTTAAAGCTTGATGATAATGAAGATTTCATTAATTTCAACAATTGCTTTACTAATTTCAATTTGAAATGATAAAT  
CATTGATTTCTGCTAGTAGCGTATAAAAAATGTGCATTAATTAATCTCCAATCAAAATGGAATGTTTAGACAAATGATTATATGTAA  
TGTCATCAAGGTGTCTCATTGATGTGTCAATTGTGAGGCATGCCACTTTGGCAACATCTGGAATATCATATGAATCAAGTAACTTAC  
CTAACCGATGATTAATATTAATGGATTCTATTTCTGATACGCCCTTAAATCTTTCTTCTATTTGTCTTTCCAATTTGCTAACAGTTGTT  
TCCATGTCTACACCTCACGATATTATCACTATTCTATTAACATTATATGTAAGAAATTAATCTTTTGAAGCATTAAAGATTACTTA  
TCATTTTTAAATTTCAATTTAAACTAACAGTAATTTATGTAGCTTTTGTAAATTTCTCATAATAACCTTTACTTCATTACATTATTCATC  
TTTTTAAATAACGTAATAACTATAGTAGACATGGTTACCTTTTAAAGTAAATTCACGCTAACAATTAATCTCAATATTTCATATGTAT  
ATTTTGTAGTTGCTATTTTTATCAAACTATTATGTCATGTAATATTTTGAACGCTTAAACAATGAATGTCCAAAGATTAACAACTT  
AGAAGAACATTACAAATTTATGTACAGTTGTAAGTATAATAAGCAAAAATAAAAAAGCCCTTATTACGGGCTTTTTAAGTAAAAATTAT  
TTACAGCATCTTTTAATGCTTTACCAGCTTTGAAGTCTGGAAGTTACTTGCTGGGATATCAATTTCTTTACCAGTTTGGAGTTTACG  
ACCTTTACGTGCAGCACGTTACGTACCTCAAAGTTACCGAAACCAATTAATTGTACTTTTTACCTTTAGCAAGTGAGTTTTGGATT  
GATTTCGAATACAGCATCTACTGTGAACAGCTTCTTTTTAGTTAAATCAGCTTGCTCTGCAACTGCATTGATTAAATCTGTTTTGT  
TCATTAGACATTACCTCCTGAGGTTTGATAATGATATGTTTATATCATTATGGTAAAACTTTAACACAAGCATTACATAAATCGCA  
ATCATTTATGTGGCAAAAACGTTGAATTTAAGCCATTCTATTCTATTTACGTAATTATTAGCCGTATATGTGTAATAATACACATTT  
TATTACAGATTTTTATCGCGCTCCATTAAATCTTTTACGCATTCTTTTACTGAGATATTTTCAAATAATACTCTATATAATGCATTTGT  
AATTGGCATATCCACATTTTTTTCTTTAGCTAAATGATAAACTGATTTAGTTGTATAAATACCTTCAACAACCATATTCAATTCAGAT  
AATGCTTGTATCCATTGATTACCTTGTCCAAGTTTATATCTCTAATGTGAAATTTTCGAGAATGTGTGATGTGCAAGTAACGATTAAAT  
CACCATAACCAAAACCTGAAATGTCATAGGATCGGCACCTAATCTTCACTTAATCTACTAATAATTCGCTGATAAACCACAGGTCA  
TTAATGCAGCTTTTGCATTATCACCGTAGCCAATTCCAGCTACGATACCACTTGCTACTGCGATGATATTTTCAATGCACCACCAAG  
TTCAACACCAATCAAGTCATCATTCGTGTACACACGTAATAATCATTCATAAATAAATCTTGCCTTAATTTACTTACATTTTTATCT  
TTTGATGAAGCAGCAACTGTAGTTGGTTGCTTGACTACAACCTTCTCCGATGACTTGGCCCGGACAACACGCCAATACCTGCATTA  
TATTACAGGTGAAATAGAACTTTCAATCATTTCTGACACACGTTTAAATGTCCCATTTTCAATACCTTTAGCAACATGTATAAAAGTCT  
TTTTAGATGTCAGCTTATCATTAATTTGAGTAGCAACTTCTCGCATTGCTTTAGTAGGTAAAGCCATTAAGTAAATATCTGCAAATTG  
AATTGCTTTGGTCATATCTGAAGTAGCGATGATGTTAACATCTAATTTTCGCGTATTTTAAATACTTTTTATTTGTATGACATGTATTTA  
ATTCATCAACAGCATCTTGATTTTTACCCACATCAAAACATCATGTCCATTTTCTGCAAGAACATTGGCAAGGGCTGTCCCAAACT  
TTCCCATACCAAAAACGGTAATTTAGTCATTGTTATCCCCCAATCGTTAATTTCTCTTTTCGAGCTATAATGAAATGGTGTACCTT  
CAAAACCAAAAAGCGGCACGGATTGTGATTCTTAAATAGCGTTTATAAGAAAAATGCATTAATTCTACATCATTAACAAATACAACA  
AATGTCGGTGGTTCTATAGCAACTTGTGTTGCATAAAAAGACATTCAAACGCTACCTTTGTCTGTTGGTGTAGGGTTCATGGAAATT  
GCATCAGTAACGACTTCATTTAAAGTTGAACCTTTGAACACGTTTTTTATGGTTTTCACTTGCTTCATTAATGTAAGGGAATAATGTAC

GTAATCTTGTGCGTTCTTTAGCAGACACAAAAGCAATTTGTGCATAATCTAAAAATTGGAATCTTTACGTACTTCATCTTCAAATTT  
CTTCATCGTTTTACTATCTTTTTCCACAGTATCCCATTTATTTACGACAATCACGACTGCTTTACCTTGTTTCATGTGCATATCCTGCAA  
CGCGTTTATCTTGTTCATGATGCCTTGTCTGCATCAATGACCACTAAAACAACATTTGAACGTTCAATCGCTTTTAAAGCTCTTAG  
TACTGAATATTTCTCAGTTGATTCATATACTTTTCTTTTTTACGCATACCAGCAGTATCGATTAACATAATCTTGTCCATCATAAC  
TATACTCTGTATCAATAGCGTCTCTCGTTGTCCTGCAACATTAGAAAACGATAACGCGATCTTCACCTAAAATAGCATTTACTAACT  
TGATTTACCTACGTTTGGTCTGCCAATAATGGATAGTCGAATTGTATCTTCATCATAAGGATCTTCTTCTCTTCACCAAAAATGAGAA  
ACAACTGCATCTAACAAGTCACCAAGACCTAAACCATGTGATCCTGATATCGGATACGGTTCACCAAAATCCTAATGAATAGAAATC  
ATACACGTCTGTACGCATTTCCATATTATCTACTTTGTAAACCGCTAATACGACCGGTTTTTATGATTTGTATAAAATTTGAGCGACC  
ATTTTCATCGCTTTGTGTCAATCTTCACGCACGTTAACCATAAAAAATAAATACATCCGCTTCATCTATGGCGATTTCTGCCTGCGCTC  
TAATTTGTGTTTGGAAATGGTGCATCACCATTTCAATACCACCTGTATCAATAATATTGAAATCATGTGTTAACCATTCACCTGAAGA  
ATAAAATACGATCTCGTTTACACCTGGCGTGTCTTCCACAATCGAAACAGTTCTCCAACTATTCTATTAATAAATTTGTAGATTTACCT  
ACATTAGGCCTACCTACAATAGCTACTATAGGTTTGTATAGCTAATGCTAATCTTCTCTCTTTCTTATATCTTTTTAATAATATCAGATGA  
GACTGTGTATTCAAATGAGTTTATTACTGTAATGATAAAAAATCAGCACTTAAAACTTTATCTTTTTAAACACTTAGTTAAATTTGTC  
CACGTTATCATTCGAGTATATTTTGTACATAAAAAATACTCCACATGCAATCATAAATCATGTGGAGTTGACTATTAAATATTAAAT  
ATAGTTTAAAGATTTTAAAGTTTATCACCATCATATCGCAATTTGTTGGATTATCTTCTTCTTCGTTTCTAAGTACGCCTTAGTCGTA  
GAAGGATCACTTTCAACAACATCTTCGTTTGGTAATGTTGCTTTAATAGATAGTGATACTCTTTCATTCTCTTCATCAATACCTAATA  
TTTTAACATTTACTTGTGACAGGTTCTAACACTTCACCTGGCGTACCAATGTGTTTGTGTGCAATTTAGAAAATATGTACAAGTCC  
TTGTACACCTGGTGCAATTTCAACAAATGCACCAAGTTTGCATCTTACTACGACACCTTCAATGACATCAATTTCTGTTGAATTTG  
ACCTTTAATATTTTCGAAAGGTGTTGGTAACGTATCTTGTGTTGATAATGAAATACGTTCTGTATCTCATTAATAGATTTAATTTTA  
ACTTTAACATCTTGACCAATTGAACTACTTCTTCTGGTGTGTTGAACATGTTCTGTGAGAAAGTTTCAAGATACATGCACTAAACCATCA  
ACACCACCAATGTCTATAAATGCACCAAAATTGAGTTAAACGCGCTACTTTACCATCAATAACATCGCCTTCATTTAAAGATTGTAAT  
AATTGATCTTTTTTAGCATCGTTTTCTTCTTGTTCAACTGCTTTACGGCTTAAATGACTCTATTATTTTCAGGATCCAATTCTTCAAC  
TTTAATACGAATGTTTGTCCATCAAACACAGAGAAATCCTCAATGAAGTCTGTTGAAATTAGTGAAGCCGGAACAAAACCTCTTTG  
TCCTACATCAACAACCAAAACCACTTTAACTTCTGTTACTTTCGCTTCGATGATTTTCAATTATTATCTAATTTTTCTTGTAAATAAC  
TATAAGACTTCTCAGTTTCAAGTTGTCTTCTAGATAAGATGTAAGCTCCAGTTTCATTTTCTTCATCAAACCTCAACTTTAGTGACATA  
TGCTTCAACTTCGTCGCTCTTTTACAACCTTCACTTGGGTATCAATATGATGCGTAGATAGTTGACTAATAGGAATAATCCCATTA  
AATTTACCACCGTTGATATGAACAACAACCTTGCTTGTCTTCAACTTGTGTTGACCTCGCCAGTGACTTTGTACCTTCTTTAATATCGTT  
AATCATTGATTCAATTGAATTTCTCAGTCATCTTGTGTTGCTCTTATACACTACATATTATAACATCTTATAAACTGACAGAATTGTC  
AAGAAATTTACCTCGATTACATTTTTCGAAATAGTCATATACATAAATATGTCACCTTTATCATATTCAAGTCGTCATATCGATAAAT  
ATTTATTACAACCATTTTTGTATCAAAGTAATACAGTTTGCTATGTTTATACATATTTTTTGTATAAAAAATTAGCATAGCTTACTATTT  
TGTTTTATAAGTCTGTCAATTCATTGTTCTCTACAAGATATATTATAGTAAAAATTTTACTTTTATAAAAACAAAAAGCCACGTAATT  
GAGAACTTTTACATTTTGTAGTAAGAGTGTGTATATTAGGCATCATTCTTTAATCATTATATTGTTAATCGTAATAATAAGTCA  
TTGCTAAATAGCACTTTAATATTGATGATTTTTAAAGCATCTCTTTAATTTTAAAAAGTAAATTTAAATAACATGCTATTTTAGCTT  
TTTTGTTAATACAATTATAGGTTGTTTATAAATCAGTTGAATTAATAGCTTGGTTAATTAATACGCATTTTATTTCTAGATTAT  
CGTTATTCGTTTATAAAATTAACAAAGACCAATTTCTATTGCTATTAGAATAAAACACGCTTTTCCGTTTCATCAAGTAATTATAAATTT  
TATTAATGTTAGCTTCTTAATTATTTAATTTGACTACCATCGCTAAAATTTTCGTCAGTAACTTCTTCAATCGACTTGCTGTGCTATC  
TAATGTCACTGCATCATCTGCTTTTCTTAATGGTGATATTTACGGTTTCATGTATATTGATCAGGAGCTTCAATATCACGTTTTAAAT  
CTTCAAAATTTGATTGATACCTCTTAATTGATTATCTTTATATCTTCTTCTGCTCGCTCTTCAACTGATGCAATCATATATACTTTT  
AAATCTGCATCTGGTAGCACTACAGTTCGATATCGCGACCATCCATTACGATACCTTTTCTGCAGCTAACTCTTTTGTTTTTAAAC  
GGCGAATGAACGTACTGGCTCTTTAGATGCAACGTATGAAACATGTTGCGTACATCATTATTTCTTAAAAAGTCTGTTACATCTTC  
GTTATCTAAAATGACACATTGACCTTTATCTGCTTTATAAGTTAAATCTAATGTTGTTTGGTCAACTAGTTTTCGAAAGTCCTCAGTT  
TTGTTTAAATTTAAATATTGATGTTAATGCACGATACATTGCTCTGTATCGACATAAATCATTGATAGTCTACTGGCTACACGTT  
TTGCAATTGTACTTTTCCGGCAGCAGCTGCACCATCTAATGCAATTAATAGGCTTTCATGCGTCTTACCTTCTTGTGCTTTTAT  
GAATAATATTTTATCATAAATTAGGTAAATGAAATATAGGAGGAAATATATGAAACATCTACTGGTTATTCTACTGTTGGTGGCACCATT  
AGTATGTCAACAAGACCAATCTAATAAAGTAGTAACAAATGATATCAACCCTATTTCAATGCATAAAGATGTCAATAAATCAATATGC  
ACAAATAGATGAATTAATCCTTTTAAATGTACCATCACCTCATATGACAATCCAACATGTTAAACAATTAAGGATATTATTTTAGA  
AGCAGTAACAAATAAATATTATGATGGTTTCGTTATCACGATGGTACCGATACGTTAGAAGAACTGCCTTTTTACTTGATTAAAT  
ATTAGGTATCGAGCAACCTGTTGTTATTACTGGCGCAATGCGCTCGTCTAATGAAATTGGTCTGACGGATTATATAATTATATTTC  
GCTATTTCGCTTGCTCTGATGAAAAGGCCGTCATAAAGCGGTGATGGTTGATTTAATGATGAAATTCATACGGCGCGTAATGTT  
ACCAAAACACATACGTCTAATACAAACACATTTCAAAGTCCAAATCATGGTCCGCTAGGTGTATTGACAAAGGATCGTGTGCAATT  
CCATCATATGCCATATCGCAACAAGCATTGGAAGATGTCAATGACAAATGAATGTACCATTAGTAAAGCAATATATGGTATGTC  
CAGGTGACATTTTTAGTTTTATAGTCGAGAAGGTATCGATGGTATGTTTTGAAAGCGTTAGGCAAGGCAACATACCTCCAAAGCG  
CATTAGAAGGCATTCAACAATTAGTATCTTTAAATATACCTATTGTGCTAGTTTCACGTTCTTTAATGGTATTGTGAGTCCAACCTA  
CGCATACGATGGTGGTGGTTACCAACTCGCACAACAAGGTTTTATTTTTCTAACGGTTTGAATGGTCCAAAAGCAAGATTAAAAAT  
ATTAGTTGCGTTAAGCAACAATTTAGATAAAGCTGAAATCAAATCATATTTGAATTATAATGATTACGTAACATAAAAAAGGTCTAT  
GTACAATCATTAGTCATCAACCTCATTTGACATATCATGAATGTCAGTCGTTGTATAACTAAGATATTAGTACATAGACCTTTATTT  
TTATGATTCTAACGGCGTTTGTCTTCTAGCTAGCATGCTTTGAGCAATAATGCCACCGTGGAATTTACCATTTTCAATAAAAAATGGTA  
TTTCGATCATTTCCCTGCAGCAATCACACCTGCAATGTAGCAATTTTCGATATTTGTTTTCGTATGTCTCTTTATTATACATAGGCGCTGT  
TCCAAATTCATTTGTATTAAATTTGAATACCTACAGATTTTAAAAATTCATAATCGGGATGATAACCAATCATCGCAAAAAACATACT  
ATTGTGATCGTTTACTTTACCATTACTTCATAAGTCACAGTATCTCAGTTATTGTTGGTAAACATTAGCATTAAGTTTCCATGTCAA  
TTTTTTCATGATTTACTAATGCTGTGAAATTTGGAAGTATCCACGGTTTAAATGAAAGGCGAATAATCTCCACCACGATATAGAACCG  
TCACGTTAGCACACGCTTTTTTCCAACTCCAAAGCAGCATCGATAGCCGAATTTCTTACCACCAATAATAACAACATCTTGATCAAAAT  
ACGGATGTGCTCTTTAAATAAATGGAACACTTTAGGTAAATCCGCACCTTCAACCTCTAATGTATTATGCTGACCATAATAGCCTG  
TCGCGATTGTTAAAAATCGACATTCATAAACATCTTTCGTCGTAGTAATTGTAAATTTATTATTCATTTTTTAAACAGTTAATACTTCT  
TCAAAATGCATTTACTTTTAAATGATGATGTTTTACAACCTTCTCGGTAATAAACTAGCGCTTGATTACGTCTTGGTTTACTTTCTTCAAC  
GATAAACGGTACGTCCCCAATCTTAATTTATCACTTGATGAGAAAAATGTTTGGTGAGTAGGATAATTATATATTGATTCAACGCAC  
ATTACCTTTTCAATAATTAAGGTATCAATACCTTTTCTTTTTTGTTCATATAGCCGCACTTAATCCGCATGGCCCTCCACCAATTATGA  
TACTTTCAACTTTTTGTCATTTTTCGCTCTCTTTAATCCCAAACTATTATAACAGTTTCAAGTATTGATGCGCTTCAAGTCTGTGTTGAA  
GATTTATGATATATTTTCGACAAATTTGTTAATATGCATAGAGAATTTGTAGCTACGGAGTTGAATAACACTACAATTTAATATGTTG  
AATTTATTTTTTATTCTTCTCGTTAAATTTGTTGATTGTGGTGTTTTATCTTTTTGATGACTATGTAAAAAATTTAATTGATATGCCAA  
TATTCGAGACAACACCTTGTTAAATAACAAACTTTGAAAAATGAAAAAACCGCTACATACTTATAAGCGCAATTTAAGTTCTCCAAA

ATATTTAGAGATACTTTTAATATGCACGTTTGTATATAGCAGTTCAGTTACAATTTATATAGTTATATTATGGAATAACGATTTGTG  
ACCGTTTCTAATATTGTTACCACTTAAACCATTGGCACGTCTAATTTTTTCAACATTTTCCGGTGAACCTGAACCGTAGTATTGAATT  
GCGATACGGTATAAGTTTCTTGACCATTCACTGTATGTCTTTGGCCACCACCTTGACGTTGTTGTTGCTGTTGTTGATTGTTGATTAGC  
TTGTTGTTGATTGTTGATTATTTGTGCTTGATTGTTTCGCTTGATTAGCGTTGTTTGTATCATTATCAGATTCATCTTTAGTCGCTTTGTC  
TTGATCCTCTTTTGATTATCACTGTCTGTAGATTTTGATTATCTTTAGAAGCGTCTTTAGATGTGTCTTTGTCTTTACTTTTCATCAGC  
ATTATTTTTATTGTTATTCGCGATTTTATTTTCTTTGTACCATTATTATGATTGTTTAAATGCCATGCCCTCCAAATATCGCTAATGCACC  
GATAATTAGTACAGCTGCAATTAATGGTAACAATACTTTGGCCATGCCACCTTTTTACGTTCTTTATCTCTGTCATGATTGTCATGTT  
CATCATGGTTTTGGCTTGCAATTATTAGAGGCATGTGGTTTTGAAGCGGCAGAAGCACTTTTACTGTGCGCTCCAGCCAAACCTG  
CTGTTCCAGCACCGATCGCTGCACCTTTTTTGCCATTATGATGATCTTTAGACTTATCTTGAGACACTTTATCCTCAGTCGAGTTATTC  
GACTTGTCAGAATTACTTTTGTGTTTGAGCGTCATTTGAATGTTTCTTAGCTTTAGAAAACACCCATTGCACCAGCTGCACCTGCAACAC  
CCGCTGTTCCAGCACCAATTGCTGCGCTTTTTTACCCTATGATGATCTTTAGATTATCTTTGTCTTGCTTAACAGTTACATCATCA  
TGTTTATCTTTTGATGTTTGTGTTGGTTAGCACCTGTTGCAAAATATGGTTTAGGTTGCTGAGATTGTTAGCTTCACTCTTATCAGA  
AACTGTTGAATGCTCAGTGTTATTTCTGCTTCTTTAATAGTCTCGTGTTTATCATTGTCTTCGATTGGTTCTGGATGTGATTTATCCA  
TTGCAAAAGCATTCTTATTATAATTCCTCTTCATGTTGAGGTGTAAGTGTCTTGATGGCTAGGTTCTTGACTTTCAGTACTGTGTGAT  
GATTGCACTTGACGATCATCTATTGTGCCAGCCTCATTTTGAACATTGTCTTCAGATGTTTGTGATTCAATTGTGAACCTGTTTATTATG  
ATTCGTTGCTAAATCACGGCGTCTTTTCTTCTTTGGGCATTTCTTGCGGAAACTGTTGCTCCGATTTCTCTATTGTATCCTGATGTT  
CTAATTCTGATTGGTCTTTTTCAACATCTCCGATGGTCTTGATGTGAATTTGTGTCTATCGATTGACGATTTTTTTCAAAGTCATCT  
TTAAAAATTATAGACATAGCCATCTCCTTTCTATTCTATTACAATGATTTTACATAAAAATATACCCACATGACATATGTTTATGAT  
ATTTTTCAAATTTATTTCAATCATTTTTCAATTGTGTATACACTAATTATAGCTTGCAATTTTCTTTTAGTAAAGTAATACTACTATCTGA  
GAAATAAATTTTGCACTTTTCATCAAATCCAATACTTCTAATTACCTTCTTCTTATTTAAAAATTGCGATATCAGTTATATTAGAATC  
ATTGTCACAACATCGATCTTGTCGGGTGGATATTCACCGAAAAATTCTAATAAATACTTCCGCTACATTGATCCAATTTGCAATA  
GCCAATCATGCGAAAGAATCCTAATTGCTTTCGTTTAAATGATTGCTTAAATATCTGTTTCAAGGCGCCGATACTATAGAATGAATG  
CAACGTTGTCAAAACGCTTGTTTATCGGGAGCTAAAAATTCCTATTTTCAAAATTTGTACATCTTCTTCTGTTATCATATCTGCA  
AATAATAACGTTTCTAAAAATATATTTATCGTCCGGTTGGAATAAACTAATTGCCTGACTTAGTTCACCATCGCGACCCGCACGGCCA  
ATTTCTTGAATGTAGTTAGAAGGACTTGTTGAAAGATGAAAGTGAATGATTGTGCGAATATCTTTTTTATTAATTTCCCATACCAAAA  
GCACCTGTTGCGACTATAATCGGAATATCATTATTTAAAAATTGTTGTTGAAGTGTGTGCTCTTGATAATTCATATCACCATGAT  
AAATACCTGTAAGAAAAACCTGAATCATAAAATAAGTTGCGCTAAATTCAGACACATCTTTTTTCGATGAGACATAAAATAAATCGTTGGT  
CCGACTGTTGTAGAAACGGCAGCAACCATTCAATTTTTATCTTCATCATCATGAAAAATTAAGATGCTTAAAGCTTATGTTTGGGCGAT  
TCATTGTAGTTTTAATAACATTGAATTGAATCGCTAACATTTCCGTCAAATCATCTTGTAATGCGGTGGTGCAGTTGCTGTCAATGC  
TAAGACAACCGCTTCTTTAAATGCTTTGTTACTTTTCTTATTAGAGCATAATGTGGTCTGAAATCATATCCCCATTCAGATAGGCAA  
TGTGCTTCATCTAGAACAATCATGCCAAAGTCTATCATAGATATTAATTTAAAAATTGACGGTTGCAGGAGAAATTCGGACTTAGA  
AAGATGAAGCGGTATGTCGTAAACATTTAATATTATGCTTTTTCTCAATTTTCATCCATACCAGAGTGAATAGATGTTACATGTTTTT  
CTCCATTTATTTTCAACTGCATAACTTGGTCATCCATTAAAGATATTAACGGTGAGATAATTAATGTCGGCTTACCTGATAAATACGT  
AGGTATTTGATAACACAACTCTTTCCACTTCCAGTTGGAAGAATACCTAGAGTGTGCTGTTGAGACATTACTTTCTATAAATTTCC  
TGTGTCCGGTTTAAAACTCTCGAAGCCAAATTTGTTTCGTAAATATCATGCAACATTCAGATCACTCTTTTCAAAATCCAAACGATT  
AATACTTTTAAATGAAAAATATGATAACGTGTCAAATTTGTTCTTTGTAATAATTTAATCGTTTCGCCACGATGTTGTTGATAAAAAATCA  
AAAATTGCAGTTGATTTTCTTGTTCACATAATCATCGTAATTAGACATGTAACCTTTGATTAAGATTTCAAGTACATGATCTTCGAT  
AGTATTGATTTTAACTTGTGTTGAGCCGCTATATCTTCCATCGTGAATTTGTTCAAGCAATCTTGATAAGTAATATAAGTTTGGTTT  
AATAATGTAGGTTTCATTATTATTTTGATAAAATAGTATATTCTCCACTTCTAATTCAAACATCATTATCACTAAATTTATCATTTT  
GTATTTCAAACAATTGCTGTTGAGATAGTTTTCTATTAACTAAGTGTGTTGCTCGTATACATTGGTTTCATCATAGCCTTGCAAAATA  
TAATGTAAGTAACATGGCCCTTTTAAAGTTATTGCTTTAAACAAGTTATGTAGTTTCATTTTCAAAATCAATTTGTAGCTTGTTTTCTTT  
AATGTAGTTATAGACAATCTTTACAGTTTCTTGATCTTATTATTTTGTAGAGATTGGTACAAAATGAAAAACATGTTGTTGGTATTA  
GACATGGTTTGACATAAATAGTTGAATTGCTTGAATGTTTGCCCATACCTTTCAAATGTATATCAGGATGCAACATGATTCTTCCATT  
CAGCATTAATTCAGTTATATTTTCTAAAAATAGCTCAAAAGACGGATATTTAATAGTGGTAAACTGTGATATAATGACAAGTGT  
GTTGACTACAAGCGTCAAAAAAGGTTTGGTGAGATTTCTTACCAACTAAGATATTGTAATACTTTTATTTGTTTTATAGTTAAATGT  
TTGTTGTAATGCTGTTTTTATAATGTGTGCAAAATTTAACCCCTCACTCTGTAAAACGGATAATTTGAAAAATAAAAAATGATGCTGTCTA  
AAATTTTAGTCACATTACTATTTTAGCATTTTATCAAAGGAGGCGAAGACATTGGCAAAATATACAATCGTTGATATGGATACTTG  
TATTGATGTGGTGCATGCGGTGCAGCAGCACCAGATATATGATTACGACGACGAAGGTATTGCTTTCGTAATCCTTGACGATAA  
CCAAGGTACTGCAGAAGTACCTGAGGAATTATATGAAGATATGGAAGATGCAATTGATGGATGCCCTACAGATTCTATTTAAAAATTG  
CAGACGAATCATTTGATGGGGACGCTTTAAAAATTGAATAATTGATTTTTTAGACAAATGTTCTATAGAAAAAGCAGGCAAGCTATC  
GTTTATTAGTAGTACCTGCTTTTTATTATTATGTGTATATTTTGTCTTTAATTTGATTAAATTTCTTTTCAAGAAATTCGCAAGCTC  
TCTATTAGTAAAAATAAATAACAATAGAAATGACGATACCTTTAATAATATGAATGGTATAATTTCTGTAAGAAATGATTACTTTAAG  
ATTATTTGCGATATCAGCTAAGTTAAATATCATACCGTACAAAGGTAATAGAACGAAATAGTTCAAGATACTCAACACGATAGTCA  
TAACGATTGTTGCAATGATTAATCCAGTAATCAAAGATTTTGTGAAACGTTTATTTTATAGATGGCGTAAGCAGTTAATAAGAAAC  
TTGCGCTGCTAAAAAGTTAGCAAATGGTCCAAGTGGATCGCCATACTAAATAAGTAGTTCAATAAATTTTTAACAGTGCAACTA  
CGATACCGGCAACTGGTCCAAACGTAAATGTAGCTAGTAGTGACGGTACATCACTAAATCTAAAGTTAAGTATGGTGGCAAAAT  
GGTATAGGAAACTTGATAAAAGTTAACACAAACGCAATCGCGCTCAACATACTTATTGTGATAAGACGTTTATTTGTTGCATATTC  
AATTTTCTCCTTCCATTCATCTCGTAAGAATAGGAGGATTATTGCACAACAAAAACCTCCATCTTCTCCCATCCAGACTATATGTC  
GGCTCTAGAATCTCACTAGATAGCCACTAATATGATACATACTAGCAGGTGCGAGGCTTAATTTACTGCGGTTGGGAATTACACC  
CGACCCGAAGATGAATTTTACATTATTAATTTTATTTCCATTAATTTTATACATATATATCACAAACCTCAATAACTATGTTTAAA  
ATGAAAAATTAATTAAGTTGGTGATGTATAATGAATTTGCGATTGTCGAGCATTGGTTGGAATGTTGTTTGTGTTGATTAAATTTTGA  
TGGCTTTTTTGAACCTATCTTTTTATGTTTTTGTGTTAATCATTCGTGTTAGCTTATTCATGATTAATAACACCTACTTCTATTACATC  
CTTCTTACTATAAATTAGGTCTTGTTGTATTTATATATTTATTAGAAATTTGAAGAGAAACATTCAAATCATGAGGAATATTCTTTTTCT  
TTTTTAGCACTTCAGAAAAATCAATCATCTCGTCTATTGTATTATCTTTAGTAAATATCTTTAGTACTAAATAAAGTTGTAACAAC  
ATATGGACGTGATTATCTTTAAGTTGTTTTTTGAGTTTCTCATACCGTCCCTAAAAGACTTATCATCTCTTTGATTAAGGGTTGAA  
AATACTTTTTATATTATCTAAAGTATATGGAATTGCAGTCAAATAATAATACTCATTTTCTAAAACCACTATTCTCGGTTTTTCATAAT  
TGCATTTTTCAGTATAACCAAGTATATTTATATTACTTTTATATTTTAAACCTCTGTTAAATATCCAACCTTCTCTTATGTGCTCG  
ATATTTCAAAGCCTAACCACTGACCACTAAAGTACTATCATATCATCGCTTTATCTCCTACTTAAATGAGCTATCACTGTCAATA  
ATTGATTGTCAAATGGAATACTCGCATTAATAACGATATCGTGGTATCACAATGCACGTATACTTCTACGCGTGCCTACCTACCT  
ACAACATTGCTAGCTTTAACTTTTAGACCGAAGTTATCCATAAAAAATTTGTTGCGCACGTTTAGCAATTTTATCTTTATGCTTCTTCG  
CAAATTCATCGCATCTTTTTCTGCAGGTGGTTGGAAGCCTTGACCTACATATTTTGAAGCTTCCATTTCTTCTGGTACTGATTTGTT

TCTTTATTAGATTCGTTATTGGTAGTTGAACATCCTGATAGTATTATCGTTGCTATTAAGATTAGTTTAAATCTTTTAAACATAGCTCA  
TCTCCCATTTATGTGTTTGTTTAGAATATTTAAAGCAATTTTTTAAATTTTATTCACCTTTACTGTGCACCCCATATTCTATTGGACG  
ATTATCATCATAAAAGGCTTTTTTAGTATTAATAGTAGGCTTACCTATTTGAATTGTAATTGTAGATTTATCTGGTTTATTTTTAAAT  
TATATAATTTATCACTTAGTTCAATTACATCATCTTCTGTATTGTCATTAGTAAAATTTTTCTTTGTACTAAACAGTGTGCTACTGCA  
TCTGTATCAGCGGCATAATTCACCTCTTTTCTTGCTCGTTCCATTCTCTTTGAATTCCTTATCATTTTTTTGAATCAAAGGTTTCATAA  
TACTTTCGATATTCTTTTAAACTTCTAGAAAGATATGTAATATAAAAAATATTCATTTTTATATCCAACGTTTTGTGCTTTATTAATTGC  
TTCTTTAGTAAAACCTGTATATTGATATTTCTTTTCATTTCTTTTGAAAAATTTATATAAGTTATCATACTTTTCTTTTTGCGCTCGATA  
TTCAAAGCCACTCAGCACTGTACCCACCATCATACTCATATCATCACCGTTGTCATTACTACGCATTGATCCTTTTTGATGGATGGCA  
TCTTTGTACAAGGGCAAACTTGCATTAATAACAATGCCATGATCATCGCAATGCACATAAACTCTATACCATCATCTTTACCTACA  
ACATTGGTAGCCTTTACCTTCAGTCCAAAAGTTGCTTTTAAAGAATTGTTACCTACTTTTTCAAATTCCTTACGATGCTTCTTCGCAAA  
TTCAATCGCATCTTTTTCTGCAGGTGGTTGGAAGCCTTGTCACATATTTTGAAAGCTTCCATTTCTTCTGGTACTGATTTGTTCAT  
TGTTGGATTTCGTTATTGGTAGTTGAACATCCTGATAGCAGTAATGTTGCTATTAAGATTAGTTTAGTTCTTTTAAACATAGCTCATCA  
CCCATTTATGTGTTTGTTTAGAATATAGAGAAATTAGCTGATTTCAGTCATTTCGACCTCAATCCTTATAGACTCATTATCACTGTAA  
TTAACTCGATTAGTACTAATAGTAGATTTTGCTAGTTGTAAAAATATTTTCGATTTTCAAATAAAGGTGTAACCTTTTCGTACTTTC  
AGACAAATCTATAACATCATCTAATTTTTTGCTCTTTGAAAAGTTACTACTCTCGAAAACAATGTTGTATGTACTTCTATTGCACT  
TTATAGCCTACTCCTTTCCCTTGCTTGTTTCATACCTTTTTTAAATTCAGATTATTTTTCTTTATTAGGGGTTTCGTAATATTTCTATAT  
TCTTGGAGCGTCGGTATATTAGCAACTATATAAAAAATATTCATTTTCATATCCACTATTTTGCTGCTTGTAAATTGCCTCTTTGTAAA  
TCCTGTATATTGGTATTTCTTCTTCTTATATCTTTTAAAAATTTATATAAAATGTCATACATCTTTCTTTTGTGTTGATTTCAAAGCACT  
CAACACTGTACCAACTAAAGTACTCATATCATCGCTTTGTCTCACTTCTTAAATGAGCTATCACTCTCAATTAATTGATTATTCAAAT  
GGAATACTCGCATTAATAACGATATCGTGGTCATCACAATGCACGAATACTTCTACACCGTCGCCACTACCTACAACATTTGTAGCT  
TTAACTTTTAGTCCAAAGTTATCCATAAAAAATTTGTGCGCACGTTAGCAATTTTATCTTTATGCTTTTTCGCAAATTCACCGCATC  
TTTTCTGCAAGTGGTTGGAAGCCTTGACCTACATATTTTGAAGCTTCCATTCTTCTGGCACAGATTTTGTTCATTGTTGGATTTCGT  
TATTGGTAGTTGAACATCCTGATAGTAGAATCGTTGCTATTAAGATTAGTTTAGTTCTTTTAAACATAGCTCATACCCATTTATGTG  
TTTGTA AAACTTTTATGTTTGAAAAAGCTACTTATTCTCAATGAAAAACAAGTAGCATTTAATAAAATTAATTAGTATACAGCTAGTTT  
TCTAATTGTTCTTTAACTTGAATTAAGTTTGACCGTATTAGAGAGGACAGATTGATCCATCGTTTGAATTGCTTGTCTTCATTTTTCGTT  
CAAGCCATTACAAACAACCTTCAAAGTGTGTCATTTGATCAAGACGCGCATGAGCTTGTGTGTTTAAAAATAACATATCGTCATA  
ATGTGATGGTAAATTGACATTTTCGTCGTTGTACGCAAAATGTATAAAAACCTTGTATACCAAGTCTTTATTATTTTAACTTTTAA  
ATTTTCCACAAGTGTGTCCTTATTTAAATAATCCGCCCTTTTTTGGCCTGAAAAAATAACCACGTCAATTAAGACGTGGTTACCC  
TAATATAGAAAGAAAGTGTGTTGTAATTTTAAACATATTTAAGATTTTGTATTATCTATCTGTTTAGCTCATAGGATTTTTTCTTAG  
ATTGAGTATCTATTAATTTAACTGTATGATTTTCCCAATCAACTTCATAAATTGATGTATGAGTTGCTCTATTTTCATCTTTATAATTA  
TTACCTATCCAGTGAAGTTGATTCCAAAAGTTTGTATATCTATCCATTCTCTTTGATAAGTAACAGTAATTTTGTATTTTGTGAGC  
GTTTTGTTTTCGAGATAGGACACCAATAAATCTGGATTGAAGTTACCTCTGGATAACACTGGCATTTTGTGATATTTCCAAGAAGTTT  
TGTCAGCATTTAAGTTGCTTTGTCTTGAGCCTAAAAACATTTCAATTACCATAAGTTGAATGATAACTATCTCTGCCATATGGTCCCC  
AACCATTATTCATAAATTTATGTGCTTCAACATCCCAACCAATTTTTTGAATTAGTTCTTTTATCTAAGCTAGTTCTATGCTTTCT  
TGTTTATGTTAAATTGTCTTGAAAAAGATTTTGAACCAATTACCTCCAGCTGATAAGCCGTTAGAGATTTAATATCTTCCACCATAAG  
AATAACCTACCGTTTGTGTACTTGAAATCTTCATTTTGAATTTTGGTGCATAATCTACAACGTTTACTGAGTCATTAGAATCTGA  
ATTAATTGAAATGTTGTACTTAGAACCCCAATAAAATTGAGAATAATAGTGTCTTTTGGATTGGCTTTGTATAGCCAGAATAAAT  
GTTTCCAGCAGCTTTGAGTATTAATGTATCTTTATCATAACTTTTATCTTTAATAAAAATTTAAAGTTAAATCTGAGAAATTTTAACT  
TTATCGGAATCTGATGTTGCAGTTGTTTTGTACAAAGTAATTTTATCATCAACCTTTTCTCACTTACAGGTGTGATATGTTGAGCTG  
CATCAACTGTATTGGATAGCAAAAGCAATGCAATTGATGTAACAACTGATGATTGACTATTTTTTTCATATCAATTATGTCCTTTCA  
CTTTAATTTTCATGAGTTTTCCAGTTCACCTTCATATTTAACTGTGTAATTTCTGTTTACAAATGCGTTGTGTATTTCTAGATCCTTCTAAA  
TAACTATTGCCATAGTGTGTTGTTCTTCTAGTAGCATGAGTAACATCCATATTTCTGCCATACGTTATTTCAAATTCACCTGTATCTCC  
TGAGCCTTTTTCATGAGAAACAGTTGCAATAAATGAAGGATTGAAACCACCTGATGTAATGAGGTTATTCATTGTCTGGCAGCAAA  
ATAGTCTCTCGGATTTTGACTATATGGTTTATATCCAACAAATAAATTTGGATCATGTCCAGACATTTTACCTAATGATGTGATAAAT  
GAATTAGCTTTTATTCCCATTTGAACACTTTTTGAATTTTGTGTTCTACTTCACGTGATATAGTTTGTGATTATAACTAATTGTTTTT  
GAATAATTAATGAACCATTACCTCCTGTTGATGGACCACTATTAATAATTACCACCTATGTTATAACCTAATGTTTGACTAACATTTA  
CTGAATCTATTTTATTTTATAGGTAGATAATTTATTAATCTACATTGGGGTCATTTGTTTTGAGACCAATATTGTATTGAAAAGGCCA  
CCTCATTGCTTTTATATGATCTGTGTTTTGTAAATTGTAATAAGTAGTCTTTGAATTGATAAAAACCTTGCATTTTAAAAATCAAAGCGT  
CTTTGTTATACCTTTTATCTTTAACAAAATCAAACCTGAATATTTTGTGTGACCCCCACTTATCGCTACTTGTATCTTCTGTTCTTTTG  
ACTACCTCAGCGCCATCACCATATTTCTCAATATTGTTATCAGCTTTAGATTTCATGAAACGAAGTAGCAATAGGAGTGATTATTCCT  
AAGACAATGTTGACGTAATAGTCTTTTTTTGACCATAAAAAATCTTCTTTCTTTATAAAATTTTATTACATTTTATATTTAAACCT  
TTTTAGACTTTTATTAATAATTAATTTTAAAGATTTCAGGATTTAAAAATATCTATAAATGTGTTTTTTTACTATTATTTCGAAA  
AAAACCCGTTTCAATTACCAAAACAAATTATAAATAATTTATATTTTGTATTGATAATAAACATAAAACCACGATATAGTTGACCATAACA  
ACTTTTTAATCATAGCACACAATACGAACACAAAATAATTTATATACTAAAAACGTTTGTGTTTTTAAAAATTTAATATATTTCATGTAA  
AAATTAAGTGTATTAATTTTAAATAATAGGCAAGTACCGAAGTACCTGCCTAAGATTTCATCATATACAATTATCAAACCTGCACTA  
AACTTACCAAAACCTGCTATTCTATTACCTGCCTGTCTACCTCTCCTGTAGCAATATAACGACGTTGTCCACTATTAGCAATATAAG  
TAATCCATCTATACCCATTGATGCAATATGCGCCGTCATATTTGATTGTTGCGTTATTAGGTAATACACCTGTAATTCTTGAATTAGT  
TGAATAGCCATCCCTCACGTTATTACCTTTAACATTTGGCAACTGTGTAATAACCAGTTTCTTTTTTATACGGTACATATTTTTTATCGG  
GTGTATAACCTGCTGGCACTGGCGGATTCTTTTCGTTTAACTGGTGTTTAACTCCTACTAGATATCACACCAGGATAGGCTTACC  
ATGAATCGCAGCGCTATTAAATTTAGAATACAAGTCATATTTTCTTAAATCCATATCATTTTATTAGTGATAAAACCTAAT  
TCAGATAAGCGATAATTTATATTTATTTCTGCTGATACGTTAACATTTAGTAAATCGTTACGAGGTGTTACACCTCTTATTGTCTTA  
AATTATTTTTAATAACATCTTGTATACTTTTATCAATAGTATCTGCATTGAATTGACTTGAGATAATAACATGCCACCACCTTGCCT  
TTCTCCTGCTGCGTCTAAATGTATTTCTAGAACAAATGTCATACCCCTGTGATTAAACCAATATAAGCCATAATCTTTTTTATTACCTA  
CATTAAACCCGATGCTGTATCTTGATACATGCTTGTGATTGACTTGAGCCACCATATAATGCGACTTCATGACCGCATGTCTTAA  
ATACTTAGCGATATTTGGCGTTATATATTTACGTATAAAATCGCGTTCGTTTGTTCGTTTCTACTGTCTCCAGGATCGTTATAACCA  
TGACCGGCTACAAGCATAATTTTTTTAGGTTTAAATTACTGCTTGCTTTTTTGGCAGTTGCTTGCTTAATAATGCTTTTATGCTTTATCCCC  
AACACTTACTTTGTGACGGGAAATTTAATCTAATAAAATACATTTGGGTCATCGTAATAATGAACATAGTCTTGTAAACAGTTTCAGGACC  
CAACACAGTTGCAACAACGCTTTGTCCAACCTTTACCATTTCAAAATTTTGGCCAAACGATGTGAAAGTGTAAAAATTTGCGCTCTCA  
ATAATTTCAACGTGTCAGCTCCGCCACCATACTTCGACGGGAAAACGACAATGTCCAACCTTTTGGCGTAAAAAGCTATCATAGTTT  
TTAATTTATTTGCCCGTATTTTTCAATCCTTGCTTTATTATCAAATGGAATATTATAAGCGTATAAACCTTTGTAACCTTTTCGCTGTTGC  
TATCATAAAAAACATATTTGCGTAATCGTAACACTGAAATCCATAAAAACAAATCAGGATTGAAGTCTTCCCTAATGAATTATCAAA

CCATTTTTCTGCTTGGTTTTTTGTATCAACATTGGTCAACACCTACCCTAAATCATTGTGTCGTTTCATATTCGATAGGTGTCATTACT  
TCTTTAATTGGCGCTTGCCCTGTTGCTTTTCTATACTTGTTTTACGCTTTATATTTCTTTAGCTTTTGATTGCCATTTACCTTCTTGA  
GATGTTGGATTATCTTTATATGTAGTATATAAAGCAACAACCTGTTAAGATAATCGATGAAACACTTTCTTCATCTACTGGTATCGGA  
CTTATACCTTTATTCGCTAAAAAAGTATTGACTAACGCTAAAAATTAATACTATATATCTTGTATTACTTTTGCATTCAATTTGTTTGT  
CCTTTTATCCAAAAATAAAGACGACTAATAAGCCGTCTATTTGATATTTATATTATGGTGTGTTAATTTATATTTAGAAAAAGGGC  
AACATACGCAAAACATGTTACCCTAATGAGCCGTTAAAAAGACGGTGGCTATTTTAGATTAAAGATTAAATTAATAACCATTTAACC  
ATCGAAACCAACCAAAAGTTAGCGATGGTTATTTTTTATTGCTTAATTCAATAAGCTTGATTACTAGACCTATCAATGCAATAAGGA  
ATAAACCAAACTGCAACATGGTACTAATTGTAATCATTAGGCGTCTCCTTTCTAAAGATTTCAGTAATGCCACCATAGGCACCACCT  
CCTTATACTCAGATAGCCACCATCTATCCAACCTGCTCAAAGCATATTATAGCACATATACTTTTTTACTGCTTGTAACCTTCAGA  
TTATTTCTCGGTTCAATAATCTGAACATTACGTGTTCAAAACTACCATGTTTAACTTGATATAAAATATATCAATATGCATGTTT  
TCAGAGTTAATCGTTTTATTATCTCTATATATTCTTAATAGTGATTGTAATTCTGTCCTTGAGCACCAAAATAAATCGTAATTAACCG  
AAGGTTCTGTAGAAGTATGAAACACGATTAATCCCCTCTGAACCTTCCCATCAAAAACATCAGAGTTATATAAATTATATTTTCTCT  
GTAAATAACGTCTTGCTTGAAGATCCAACCTCTGAACAGTTACATTTTTCTTATTGCTTTTAAACGTTTCCAAAGGTACTGTATTTGT  
TTACCGTCTAGCCATAAATTGATTGGCACTTTTTTCTCTCGGTCAATCGATTATTATCATGTAACGTTACACCACCATACATGCAAG  
CTGTTTTGTTTGGTGTACCACCCGCACATTGATAACCATAATAAGCACCATATAAGTCTACTTTTTTCCCTTTATATTTATCAACAAT  
ATCCTTTGAATCAAAATCTACTAATAAAATCGTTATACCATGAATGATTGTAAAAAAGCCTTTAAACAATATAGTATGCTGTAAAAA  
TTGATCGTGACTCTCTTTATTTTCAGTTTTAGCTTTTTTCAATTGTAATAATAGATTGTGTTAAGATTGCCTAAAGCTGTTCCCTGCAATT  
CAGACTTTTTTCGCAAACTTTTTCAATTATTTCTGCTTTTTCTGCTACCATTTACAAGTGGACTTGTGTGCACGTTAGGGCAATG  
AATAAAAGTAGTATAAATGCTGTTTTTTTCTATTTGCTCACCTCTAAAGCATAAATTCATACAAAATTTTTATTATCTAAAAATATTG  
GATGATAGATTATTTTTGTCAAAGTAATTATAGTTATATACAATAATTATAGAATTATCATTATTTACTTATACATACATATATTAC  
TATACCTTTTTTATACTTGCTATAATATAAAAAAGATTTCATTTTTACTCTATTATACATTTCAGATATCTTACTTACTTGGTATT  
GACAACACTTCCCAACTTCACTTGCAAGTATGCTTCTGTCTTTTGAGCTGTGTAATACCATGTACGTACCTCTTTTCAATCAAAATAA  
AAAGCCAGTGCTGAAGCACTGACCAAAAAACATTATTTACATTACGACCATACAAATAACATGATAACCATCTTGCCCAACTCATT  
TGCCACCTCCCTTAAGGTAATAACGCAGTAATTGATGCAAGTAATGACTGCAATCATAACAATTGTTACAAGCGCCCATATGGCACC  
TACGAGCCATTTATTTGGGCGAGTGCTTTTTCTCATTTTTTGGCGAACATCTACTTGCGTTGATATCTTTCTTCAATTCTGTTTAA  
TATCTTTGTGTGCTTAAATCTCATCTACAACCTTATCTTGCTTATCTTTAAGTTCTTTATGAGATTCTCTTAGTTCATTATGATGTTG  
CTTATGTTCCCTCTCTAAGTTCAAGCACATGATCAGCTGTTTCGTTTGTGCTAGTATTTCACATCATCAACACGTTCAACTAATTTCAGAA  
AGCTCTTTTTTTATTTTCTGAATATCATCAAAACTACACCTACTTTCTAAGAAAGCTATGAGCATAATGCTCATAACTTAGTATAGT  
TACATTATTTTCGCTATCAACTGATTTATCAGATGACAAGTCAGTTCTATCCACAACCTTCTTTCACAACCTTCACACCGTTTTGATTGCC  
TGTTAATTGATATAAAAGATTTAAAGTTTCAGCAATCTTTTTAGCGTTTTCTCAGATTTAAAACTTTGTGCATAACTTGCTGAATCG  
GACGTTGTAAAACTGCCTACAAAATCTTGATACAAAACGCGCTCTGTTCCCTCTTTGTCAATTTGTAATAAAATCTCTCTGTTT  
TTTTGATAATTTCAATTTGCCATATTAATGACCTCCTTAAATTTTTGTATAAAAAATAGTGCCAAGGATTACTCTTCCCTCAGCACTTTTG  
CTTTTTTCATTTTGTCTTGTATATATGCTTTTAAACATTGCATTTTCTTGTGTTAGTCTTGTGATTTCTTGCGATAAAATAGTGAATTGTA  
TATTGTGGATTGGCTGTAAACCTTGATTGCTATCTTATTTAATTCCTCCAGTTTTTCGATTTTTGATTGCTGGTTTTTAACCTAAT  
AGGTATTAATGAACCCAAAGTCTATCGTATGCGATACCTTCGATTTCTCCGTTGTCATCATAAATAACAAATTCATTAATCTCTAAT  
TCTTCAACCTCTTCCGCTATTAAGCCAGTATGTCGACTAAGTTAAAAAGTATCATCAGATAACTTTTTACCCTTTCCAATTTCTTTAG  
CCATTATTTCCGATTATATTTGTCAAACCATGTACGAATTGGAAGCTTTAAAAATCTCTTTTGAATGACTGAACTGATCGTCTTCATT  
GATGTATTGGTTTTCGATTGAAATTTTATACTTTTTTGGCAGAAAGTAGCACGCCCAATTGTTCCAGCAGAAGTAATGTGTAAGTTAGC  
AGGTGCTGAATAAGTACGCTTATAAATAGAAATAGAAGCGACTCTATCGCCAGCATTATCAGAACCTACCGCCAATAAATCATAAC  
TTTGAATGCTAACGTAACATTTCCATCTCTTCGTTTAACTAAGTTGAATTTGCCCATACCTGATTCAATTGTAGTGTCTCCGCTGTA  
GCATAGTCACCATTAACGACTTGAACCAATCCTTTATTGCTACGTTTAGAAAAATCTTAATCCAGCACCGTACTTATAGTTTTCATCTG  
AACCAACATGATATAACCGTCAGTTTCGTATGCACTATCAGCGTTTGATAATGTGAATGCGAATCGGTTTTAAACCAGGTTTTATTTT  
TGGTGTTCGGAGATAAATATATCGGTGCTTCTCTACTTTCAATATTAGCTGAAGCATATGAATCGATAAATTCGGTTGTAGTCAG  
ATGTTAAAGCGACTACACCGCCATAAGAATTGATTGTTATGCCATTATACCACTATCACTGTAAGTTTATCCCACCATGAAATAGT  
ACCGGATGAACCTCCGCTTCTCGCTTCTCCATCAATATATGTTGAAATACCAAAATGTGACATATAAAGTGAACCGCCTGCGGTATT  
ATTTCTAAACCTTAGATGTCCATCTTTAAGACGTGTGAATATATCATCGGTTGATCGTTTGCCTTTCCAAGTTCGTTGTACGATTCCG  
CCAAGTTCAATAAAATCATTGTGAACCTGTACATAACGGTTAGCATTCCGCTTTAATACCAATCTATTACATTGATGTCAAGAC  
CTTCATTTGATAAGTTTAGGCTATTAACAATGTCATTTTTACCAACTTTGTTATTAATATATTGCGACTACATTAATTTCTCTATT  
GCTGTTATATCAACTTTATCGCCACTAATTTTACGCCATCTTTATCAATAGTATGTGAAGTAATCGCCCCATTTTCGTCATACCTTA  
AATAGATGCCTTTTATAGCATTACAGTGATGCTGCTAACACTCTTGATAGTGTCTTTTAGAAGCATAAACTCTTCTTTAGTAGT  
TCTTAATTGATTTCCTTACCATTTTGTATAATTTGAGAACCATAGCAGTCAATGTTTTCTCTGTGCATCTGTGCTTCTTTGACCT  
TGTTGTCTGATAAAGCATTAGCTTTCTTTTACGCTTTCTAGCTTTAGTTCGCGTTTTGTTTTGCTTCAAGTTTACGTTGAGCAT  
CTTGATAGCGCGTTGCTCTTCTTCCGAAATTTTACCATCAGCATACGCTTGCGATTCTCTCTTTAAGATCATCTTGAGCATCAATG  
TATGATTTTAAAGCTTCTTGCGCTTCTTGATTGTGTTTCAATACTTGCTTTAATCTCAGGATTATTGGACAAATCACTTAACTGGTC  
ATCAGTATATTGTTTTGTTCTTCCAATCCGTTTCGATATTCGTTTAAACGTAACCTTTATCTTTGATTTACCTTTTAAAGTCGTTCTCTC  
AGCTTCAGCAGTATCTAAACGTTCAACAATACCGCTTCTGTCTGTTTATAGTCCGATGTTTTACATAGTACGTAATTGTTCTTTTG  
TGGATTCTCTAGCTGCTTCAATAGCTGTTTAAACAACATTAGGTTCTCCGACTAACTGCAAACTTTCATTACCCGTTAAACCAAAATTT  
TGTTGCTATTTATTTCCAACGCTTCTTTATATTTTTCATCAGTGTATTGTGACTGTAATAATTTAAATCTATCTGAAATGGCGATTTTAA  
CATCTTCTACATCTGTATAAACATCTTGTAATTTCTTTCTATACTACAAGAAATAAAGCTTGTTGATCTACCAACCGCAACCTGTTGC  
AGTTTTCGGGTGTCATAGATTCTAAATTAATTTTATTTGATTATTAACATCAATCACAGCGTCTAAACTGCTTGTGTAAGTCCGCTTTT  
AAATCATTATCTACTAAGTACTCGTATTTCAGTAATTCTGTAGCTTCTGACAAAAGACTAGCGTGTGTATAGATAAATTAATAAAAA  
ATATTGTTTAAATTCAGTGAATAGCGCTTCTCTCTTGTATACCACCTAATTTTTCAACATCATTTGGTGTGCTTCAATCCATCGACC  
ATTCCAATATCTACGCAAGACAGCAACATCAGGGTTACTTGATCATACCAAAAGCATATCATTGACTGGATTTTCTGGCGGTGTATC  
ACTTTTGATGATTTTGGCTTCAAAGTATTCTAATTCACCATCTACAACATCTTAACTATAGTGTGATGTTGTAATATTATCGTTTA  
ACTTTTGATGATTTATGTTCAATCGCTTGTTAAACTCTTCTCGTAATTCTGATTCTTTGAACCTCTTTAGGTTGACCGAATGTATATGTG  
CTATTTTCTGAAATATGTTATATTCTTCGGCAATAACTTCTGCCTCTACATACAATGGCGGGTTAAATCTCTATGTTTTACTCTGAC  
TGTATACCAATTTGATATAATCTCGTGCGGATACGTAACCTTCAAATCAGTAGAAGTAATCTCATATGACATAACTGCCGCAATCTACG  
TTTATTTAACTCTGTTTTGGCTAAAGAACGCAACCGGTTTTCATTCATATTTTGATCATCTGATTGAGGTTGCTATATTTCCCAATAT  
AACGGGTAGGTAAGTTGAATTGACTTTGTGCTTCGTCATCAGTCACAACCTAACTCTAAACGCTTTTCTTTGTCAATTTTCAGGTCCAC  
AGCAATTAATGCTGTTTTGATTTCTGACATATCAATCTTCTAGTTAAACCAACCAAACTTTTACCATACTCAATTTCTTTACCTTTGA  
ATAAGCTGTTTTTCTTTTTGAGTACCACATATCTACCTTTGACGGTATTAGAACCTAAGCTCTATATAAAAAATCCAATACCATTTTATA

GGTTGTACATAATTGCTTTAAAACTTCATATCTAGTTTGATAAGAAGTCCATGACGTAGTACGTAAGCCATCGTATTGCGTTTGTTCAGAACTTCCCAACCTGTATCGCTCAACACATCTTTCAATGCTTCTGAAGTTGTCTTTTCTCAAAATTTGCCTGGTGCATACGGTTTAGCTGTTGTTATATCAGCAAGATAAGACGCTATACATTCTATCTCTGTGTAGCCGTCCATCGTATCTTGAACCCAGTTAATAATAAAATTCACGCCATTGTTTGTGTTGAATCCCTTATAATAACACGATGTCGTTACGGAACCTTTTCAGCTCTTTCTGATGATATGAGCAGTTCAAGCATTTCTGAATTGTCATTAACATTACGTTTATGAATCGCTCTAACTAAGGAAGGGTCATCAGTAGAAAAGGAAATCTATAATCTTGTGCTTAAAAATCTAAAACATGTATCACACTCTCATCTCCTTTCTATAAAATATCTATCTTGCCATTAAACCGTCGTATCAAAGACGTTTTCAGGTTGTATGATTAATTCACTGTACCCAGAATCAACATTGAAATAATTACTTCCAAACGATTCTCGCTCAACATTGGTTCCTCATTGATGACAACACTTTTTGCTTGCATATCTATTTTTACTAAATCACCTTTTTGTATAATGACATCCCTTGCGCCTTTTCGGTTTTGGTAGAATCTCCGTATTGAATGAACCTAATCCATTCTCCATCCACTTATAACCATTATACTTCGCACTATAGATAGCTATGATAGAAGCTGGACGCTGATAAAACCTTACCGCCATCTATCCACTCTTTCTCATCCATATCAATAGGTTTACGTCTATCTGGGTCTTAATGTGATCAAAATTTCCAAGTTTTAATAGAAAATTTATTACCTACTCTTCTGAGCCGCATATAAAACAACGATTCTGTCCAAGTTATACATTATCGGTTTTATCTGATAGTCGTATATCTTTTTGGGGTCTCCTTTTTGGTTATACAACGTAACAACAATATGTCCTATTTTTCTATCATGATATTTATTTTATAACCAATAGAAGCAAGTAACTTACCATCACTATCATAAATATGTTGTGCTGTTCTTCCGGCACCTTTACCTTTTTGTTCACAACAATACATTATAGGTAATTTGAAAATCTGTCATCGCTTTAGGGAGCCCTCGTTTCGTGCCAGCACCAACCCAACCTTTTGCATCAGGAAAAATAGTTGCTTTATATCCTTCGCCAAGATTGGATATCACAAAGTCACCGCCGACCTTACCACCTAAATCATTACTTGGAAATATCTTCAGTAATCATCTTAGTCCAACCTTTGAAATCACGAACTCACTATGATAAACAGGAGGCATGTAATCCTTAACTTCTTTGGTTACCTCATATCACCAACCATAAAATAATCTTCATCATTTTTAGTGATCATAAAGTAACTAGATGGTTAATTGCTCGGGCTTCAACAATTAAGGAGTGTGACGAGTCCCACTATTTACAACCTGAAACTTGGTGTGAAATCGCAGTATTTTTATTTCCTGTTACTGAATATTTGTAAGGGTCTGTAGTACTACTTTGATAGTGAACCTAACAGGTAATGTAAATCTTTGTGCAGCTTTATTGGTCTTCAAAATAAGCGTTCCAGTACC AATCTTTAGATTGAAATTGAATTTAACTTGTTCCTCGTAGTTAAAAAACTTTACTAATTCATTCAAGACGTCATCATATGTTTTAATGCCGTTGTGAGATAAATAGTCATTACGTACCACTAAAGGTATATCAAACTATAAGATTCAAGCCTACGCCCTTATATATAGCCCCGAACGTCCATCTACATTTTCTGTTTTTAAAAACATAATTAAGAGGGTATTTCAAACCTCTTTTCGACATACAACCAAGGAATTGTTTGTGTTCACTTTAATAGTGCTATCATTGAATAGCAATTCCTCCTTTTCTAACTTTACTTTTGTGATTCTTGCCCTTCTCGCTTTCTATAGACGCGTTCACCTTTTTATCAAAAGCGTATTCGTCAATAATCGGCTGATAATCTTTATCTGCAATCACATCGTTTGATTGCGCTATTTTCAGTAATAAAGCTATTTGTTGTTGCTGTTGTTCAATCATTTTTCAATAATAAGCTTGGGTGCATCAAAACCCATTTACACTAGACAATTGACTAGGACGCTTATTTTTACTCGCTTTTCTCCCTCTTACTTCTGCTGCTGCATAATGTAACATCTTCATTGCTTTCGTTTTACGTGAGGATCAGTAAGAAATAACCCACTCGGATATCCTTCTCTCTCTAAGTGGTACAATCCGTTGTAGACTTTGCCACGATGACATATGCGTAATCACAGCGCGTTTGAACGCAGCTCTCCATGAGCCCGTTTCTGGTACCCATTTACCCACAATATATCTCATAGCCGATATAGCTTGATGAGTTGGGTTAAGAGGATTATTGTAACCCGACTTTGCGTACGCTCTAAATGAAGGATCTATCATTGGAACATACCTCTTGAAGGTGTACCAGCTCTTGCGTTGCTATCCCAATTATTAAGTGCATTAGCTGTATAATTGGATTACAGTCTTGCTACACGCATCATTTCGTGTGAATCCAGCTAGCTTTGTATTGACCTCCAAGTATATTTGAGCTGTCTAATCGCTCTGCGCGCATTTTCAAGAACCTCCCTCCAGGTGAATCTTTCCACCAGTTTTGTGCTTTTTCCGTAACCAAGGAATAGGGTCTGTGCAATACCTATTGGACTCTCCGCTTGA TTGACTTGGAATGTAAATGGCGGTAATTAGTCATAGAACCTGTATTACCTGATTTACCAATTAATTGACCAGCTTTAATTTGTTTACCTGTCTCTACGCAATTTGTTTCAGATAAGTGCATGAACACAAAAATTTCCGACCTTTTGAACAGTAATTGCTTTACGCCACCATAGTGTGCATACCAACTTCTAACACGTCACCCACTGGATACGTTAGGGTACCGGTGCGGTATCATAGTCAACACCATGATGAACGCTCCGTTAAATGGATAAATTGGGGTTAGGAGGTTTTGGCGGTGCTGAATAAGGTTGTAGTATTCTGAAACTATCAAAACACAGAACCATCTCCCGCTTGGCTCTCTAATCCTTCTTTATCCAATTAATCGCCTTACTTTTAATCTTATTCCAAGACGCTTTTGTATATCGCCAACAATACCCATACCTTTAGTTAGAGAGCTAAAAGTCAACACCAACGCTTTGAGCACATAATTTAAAAGCTTACCCGGATTATCAATAAAGTCCATTACATCGCCAACCTTTATCGCCAAGCCATTTGGTACCTTTACCTATTTGATCTTTGTCCAGTTAAATGCCAATGATGCACTAGATTTAATATCTTTCCACATAGTAGTACCGAAATGAAATCTCGGAAGCGTTCGTTTAAACATTGAATAAGTTTGTGCACCGTTGTATACTTTTTGAGCCTTTAGGTAAATAAGCAGTAGTGTCTGTATTAGGTGTGATTACACGTTTACCGTTAGGGAAATCAATCATTTTCATTCTA AAACCATTTGGACCATTTCCACGTCCTTTATCCCCAACTGTAGCGAATGTATCACGTGCAATCTTACCGTTCTTAACTAATCTTTGTAGTAGTATGTGTGTGCTGTACCAAGTGTGTAACCTAGGTATTCTTCCATACCTAACTTACCACCGACCCAGTTTAAAGCCTTCAATTAA TTTATTAAGTCTTTTTTAAATAGCATCTACCATAACGCCGATATGATCTTTAATTTTACCAATGATAGATTTTAAACCGTCACGCATGTTTCCGAAGATATTACGTACTTTATCCACAAACGACCAGCTATACCTACCGTGTATCTTTAATAGAGTTCCAGATGTTTGACATCC AATTTCTTAATTTAGTAAATATATCTTTTCGTGCGATTCCATAAACTTGTGAATTTAGACCTTACACCCGTAAATAACGAATGAGCCTTGCCGACGGTATTGCTTTTGATATTATTCCACGCATTAGATAACCAGTTTTCATATTAGTGAAAATAGATTTAACAATATTGTATAAG AAACCAAAAATACTTTTCGTTGCATTCCAAATTGCAGATAATGATTTGTGAAAATACCTTTGACAACACCCCAAGATACCGGATATTAAACCTTTAAGCAATCCACCAAAAGTATCTAACAACACCTAGAATCTTACCTACAAACCACAGTTGTATTAAATTCAAATTAACCTGCACAGTGCCTTTTAGTATCATCACAAATACCGTCCCAACACCTCGCCAATTACCAGTGAATAAACTTGAAAAGAACTTAATAAGCCAAGTATGATATTTAAAGCACTTGTATTACTCTTTTATATTCTCCAAAGTACTGACAATCAAGGCTTTAACCGCCGGCCAAATAAATGCATCACTTTGCCAAATCGCAAAACATGATTTGGTTTAAATACAAAATTTAAGATAAATTCAAATATAGCTTTGATAGAAATGTCATATATTTGAAGCGCTTGAACAATAGAAAATCCGTTTTTCATTAAAGAATCCATTAATTTGACTCCAAATATCTTTAGCGAAATCAACGATTGCTGAAACCGCTTGTTTAAAGACGTTTTTAAACGGAATCAATGAAAGGTTGGATAAATTGAATGAAATTATTAACGTTTGTTTAACAC TGTTAATTGCACCATTAACAAAATTTCTGAATGTTTCAGATTTCTTATAAGCTATTGTAATGCGACTGCTAAACCAGCCAGTACACCTAACACGATACCAATTGGACCAGTTAATGCTGTGAAGACTGTTCTAAAATAGGCACCTTAGTTGATAAAAAACTAAATCAATCCGTCAGCCTTTGCAATACTAGCTAATAATGGAGCTAATACAGTTACTGCGTTGCCAACTGTGCTTATGAATGCACCTAATCCAAAACTACAGGACCAATTGCAGCAGCAATACCACCGAATATAACAATCGACCTTTTAGATCCATCACTTAACTTGAAAACCAATCAACTGCTACAGATAGCTTTTTGATTAATCTTCCATGACTGGAGCAAAACGCACTTTCAATAGAAGCCCATACATCAGCACTACTAATTTAAGTTTATTCTAGTCTTTTAAATCTTCGGAGCCACTTTCAGAATCTTAAATGTCGTAGTTGACCGTCTCTTCCGATTTCTCGAATGTTTTTAAAGAACTCTTGGTAACTAAAAGCGACCGCTTTAATAGCATCTGCTAAATCAGGACCTGCTTTTGCACCAATGCTTCAATCGCTAAAC TTGTTGCGCTAGCTATATCCGGTGTCTTTCAATTTCTGCTAATGCTCTTCTTAAATCTTCTCTTGGGTCTTTACCGCTTTACCCCAATGGATATAGCTTTTTTCAAACCATTTGAAGGCTATTTAGTATTAACACCTGATTTCTCCCATTGAGAGAATAAAGCGATTGATTCTTTCATCTCAAAGCCCATAGCCCTCATTGGAGCACCGTATTAGTAATGCTATCAGCTAATGTATCAACACTTATACCGCTAGCCTGTGCTGCTTTTCGCTACCATATCAAGTACACTTTGATACTCATCAGCTTCAATACCTGCATCACCCATTGCACGCGTAATTAATTGAACGGCTGTACGCCGTCAGAACCTGTATGTGACTAAATTTCAAGAATGACTCTGTGGCACTCTCAAGTCTTTTGCCAGTGAACCTAACCTTGTGTTAACTTCCCTTAAAAACCCGCTACAGTCTCAGCGTCTTCTGGAAAAGTTGCCATAAAATCTTTAAATGAATTTGCAACTTCTTAAGCTCTCCGCGTTGCTCTCTGTTGCTTGGTAACTGATATTAACCTTTTCAACTTCTGCAAAAGCTTTTCTGATAGTGTGCAATACCTAAAAACAGGTGCAGTTACACCAATCATCAACCTTTACCAATGGATTTTAAACCATCACCCATTTTGTTAATTTAGGTCCCATACTTTTCAAAAACCTTTACTGGTTTTTCCCGACGCACTTTCTGCCATTCTTTGAGCTTCAACTTGAGCTTTTTTGAACCTCTTCAAACTCAGTTGTTGTTTTTCTAGTTCTTTTTCTAAAAAATTCAGCTCATTTGCTTGTGTTATATCTTGTGCTGAATTTTTGAGCTTCCGCGCT

GTTTTCGCCCTGTTCTTGAGATACCTTGCCATATTGCTTGGCTAAATCATCAACGTTTTTCTTATAACCTGTGATAGTTCCATCAAGTT  
CTTTAATCCCTTGTGTTGTAACATAGAGTTGATTTTTTCGGTATATTTGAAGTTGTTACCGGTTAACTTTAAGTCAGAATTTAAAGTTTTA  
AAGTTTCGTTTGATTTCTGCAAAATGATCTATTTAAATTTGCTGCATCTAAATCCAAACCTATAGATAAACCTTTTATTCTTTCTCCCAT  
TTTTTACCTCCTTTCTAAAAAAGTTCAAAAAAATAACCCTAACCAAACGGTTAAGGTTAAAAACGCATCAATTTAAAGCCTCTGCTTTT  
TCTTCAGAAATGTTATTGTTTTATTTTGATATATGGAAAGTACATAATGAAATGGCATTTTTAAAACTTCGTTAGCGTCTTTACCAT  
TTCAATTAAGTCCATCATGAGAGTATCCATATTTTCAACATTGCTTTATATGTTAAATCTTCAGGCTTTATTTTCATGTTCTGGATAA  
AATTTCTAGTTTCTCAGTTTGCTGACCTTGAGTAATGAAAATCACTTGTTACACGAAAGTGCAATTCATTCCATCAGGTGCATGCATACG  
TTCTTTTAGGTCTTTAACTGTGAATTGGTTATCGTAAATTTTTACAACCATATCCATCAATCTGTACAGGATTCTCTTGGTTTCATCG  
TGCTATTTTCGTCCTCAATATCATCGATTAAATCCATTGCTTCGTATACAATTTCAAATGAAATGAAGTGTGGTGTTAAGTACGTTTG  
TAATTTAATTTTCATTGCTTTCGGGTCTTCTACTAATTTGAATAATGTTACGTTTTTAATTTTGCCATTTTATAAATACTCCTTATTTTCA  
AATAAAATAGAGGGGTTGCCCTCTTATGCTTCTACATTTATTGTTATAGTGTCACTCATATTACCAACTGTTGCTTTAACCCTAGC  
AATGCCTTGTGCTCCGCAGTAACCTGACCATCACTATTGATTGATACAATATTCGTTTGATCTGTTGTGATTTTCAATAACTTACTTT  
GATTAGATGGCTCTACTACAACATTTAAATCGTATGTGTGCGCAACTTTAAGTGTTTTAAATGCTATCTGGTATATTAACCGACTTTAC  
CGCAGTTCCGATGAAGCCGGTTTTGTACAAAGTTTCTTCGTTACCTCTGTGCACGTTTCCAGTATATTCTTCGCCTAAAAATTTCTT  
TAAGAAAGCCTCTTCGCCTTTTTACACGCTCTCCATCATGATTGTGCATGTTAGCTGAATCAAAGATATACTTACGTACTGACTTTTTA  
TTATCAACTAAAGGAAAAAGTGCTCACCTTCAACCTCTTCACTTGAGAAATCCCAATCTTTCTCAGCCGTTTCTCCATCGATTTTAG  
GATTTGTAAACATAACTTTAGGTAATAAACTGTTCTAAATGTACCGTCTCTACGCTCTTGTCTGAACCATCAGCTACGTAATGTT  
TGTGTTACCTTGTGTTCTCTGTAACGCCATCTTCATATAATCTTCAATAAAAACAATTTTGGCAATCTCTTTAGGGAACGCATGC  
ATTTGTAAATGAGATTTTACCTTCTCCGTCTGTATTCCCTGTGATTTCAATTTGGACGCCATCAGCATAAGCTGTTTTAGTTCTCCACCAGT  
TTCAACACCAATTTTTGTAAATCCTCTTGTTTTTGTAAATATCACTATATTTTAAATCCGCGCTTCTTTGTTAATTTAGCGAAACCTA  
AACCAGTAATGTTAATATACGCCTTTGGCGCACTTGCATGTTTTACTGCCATTTAATTTTCTCCTTATAAAAAATGCCCTCGTAAAC  
GCGAGAGCTTCTATATGTTTTAAATCTTCTATATATTCGGGTTTTCCATTTGAAACATTTCCCATTTTTAGTTCAGACCATAATAACT  
TTGAATGCGATTAGATATCTTATTCTTATGATTCTCGCATATATTTCATCATTGTACTTAACAAAAACATCTATTTGGACAATATA  
ACTATATGCACACTCATCTCCGTCAGTATAAGTTGTAGGTATTGGGTCGTCGATATCGTCAATAACAATAAAAGGTACATCAGTATC  
TTTTACATTAGGTATTTATTGAACTTAATATTATTGATTTTACGTGCTCTCTAATAATCTGTCTTGACTAATCACTTTCATGAACCT  
TGTACAAAATATCAATCACAATTTTTCAACTCCCTTTTAGCGCTCTCAAAATACTTATTTGCCCTTGCTTTATTGCTCTATTAACAC  
CGCCATAGCTTTAGGTTTGATAAAATTTACCTGTCTCTTTTGAACGTGTCCATATTCAATTAAGTACGATTTTATAACGGTCTTTA  
GAACCTCGCCAATGAACAGTAATTGTACGTTTTCCGTTTATCCATTCAGGTTTTACTAAAACTTACCTCATTAATTAATGCTCCCGTAT  
CTTTTGAGGGCTTTAGTTGTTTTTTTACTTCTTCAACAATTACCTTAGCACCAGCTATTAACGCCTTATCTTGAACCTTTTACCATCTCT  
TTTATGCCAAAACGTTTTTCTAATTCTCTTCTAATGCTTTATCACCTATCACTTTCACACTCATGAACTATATCTCCACGAATCATA  
ATAAAGTCTTTATTATCCAAATCTGGTGATACTTGCTTTATATTCAAACGATTTTTTGAAATATCTTGATTCAATTTCAAGATAATGTT  
CTTCACTGGGTAAATAATCACCTTGCGGATCACGAATATACAATTTAATGTCATTTTGGGTTCCGTTTGAGATAGCTTGTTCTAATTC  
ACGTAACCAGACACCATCAATACTCGCCCAACAGCTATATAATAATTTTTCTTCTTTTTCTCCAGCTTCTGGACCATTATTTTCAGTA  
TACTATATAAAATGAACACAGTATTTAAACGTTTAGTTGTAATCTAGGTTTTTAAACACTTCTTCTCATCTCTGATACCTCCATTA  
GAGATAACGAAAAATCTATTATTACGGTCTGTAATTTACGTTGTAAGTGTCTTAATAAATTTGATAAGCATTTTATAGCGCTGTATAA  
GTATCAATCTTGACCTATTAATTTCTCTAATTTCAAAAACTCCGCACTGATTTTTTATACGCTCGTACGACATTTTTAACAACCTGCTTT  
AAGTACTCATCTCTGAATTATGGTCAATCTTTTCAAGTGATTTAAATTTGACAAGCAAATCATCAATCGTCATTGTCTTCACCATTTC  
AATAAGTCGACGATTTCACTTTTAAACCATTGAACAGACGCTTTTTTTTGTAAATGATTGCGCATAGTTCTAATAATCTTGTGTTTGTGAG  
CTTATCTAAAGGTACGATATAAACTTTGTGCTACTTATTTTGTATTGATTGTGCAACAATTCAACACGAGGATTGTTATACCCTTCA  
GCTGGATACAACCTCCCTACTTTGTACTTGTGTTGATTGTGCTCTATGCTTTTAAAGCTCTAACAACCTTTAAATTTTACCATTTTATC  
ACCTCATAAAATTTTATAGTGTTTCTTCGGTACCTTCTAAAGCTGGCTTATGTCTTTTAAATCTAATTTCCAAACAGCAGCAACTTT  
ATTATCTTTTCGCTTTGCGGTAAGCAAATGTTTTGTCAGTGTATAAATCCATATCATCTAACGCAAGTGTTTCTTTAAATTTCTGAACA  
TTAATAACCACAGCTAAATAACCATCATATAAACCTTTAACGTACGTTAAACCTTACCTGCTTCTGGACTGTAGACTCGGATAACA  
TTCAAAATTAATGGTAAAGCAGTAACATATACGCCATTTGCAATTTAAATGTGTATACTGTGCTTGAACCTCAAAAGCATCGGACGGA  
TTAACAACCATTTGTACATTACCTTTAACCCTACTGATTTACCTTTCTCGTTAGTTGAGTGGTATTTAAACACTTGCGTCAATTCATT  
AACTGTAGCGCGCGGATTAGCAAATGTAAGCGTACCTTGTCTCTTCTCTGATAAGCACCTCAGTTACCGATACACCTTTTTGT  
ACTTGACGGTTTAAAGCGGATTGGTTGGTCTTTACCAGTACCTTTTAAAGAACGCAGTTTCAAGCGCCACTGCAAATGCTTCTTCGATTT  
GAACACGAACAAATCTTTCAATCCACGCAGGACCAAAATCATTTAAATCTTTTGGTAAACAAACAAACGCTGTCAATTTATTTTGAA  
TTGCTGTTTCTTCACTGAACGCAGCATCTAATTGACCTTTAATTTACCATAGATTTTACCCCAAACGGCTACGCCAGAAGTTTCAGA  
TTTTAAGAACCTTCAACGCAAAACAGCGTTTTTAATACCTAAATCAGCTAATAACGGATGATTGCTGCTCAAAATCTTCAAAAAATCT  
ATCAATTTGTTCTTCTGCGAAAAGTTTTTCTCTTTTATAGTTAACGTTTTTATGATATCCATGAAGAACTCTTTGGTTTGCACTCA  
AAGATTTGTTGCTGATTTTAGGTAAACTAGAACTCTTTACGTTCTGCTTTTGGTTGTAATTTAGTTTCTTCAAAATGTTGGTTGTTCAATCAT  
GTCACCGTACAATTCATTTTGTCTTTCTTTCGCGGTTACCGTTGTTTACTGCATTAATAAATTCGTTTTTTCGCAATTTGCGAATGTTCCG  
ATAAATTTATAGTCATTTTATGACCTCCTATTTTTGTATTAAAAAAGGAATCTTGAAAATCCATTTGCTGATACTTTACTATCTGCA  
ACATCGATTTCTGATTCCTTTTCTTTTCATATTTATTTTTCAATTACTTTATTTGCTATTGCGTCAATATCAATGTTAACCCTCTGGCGTT  
TTACTTACCAAAGCTGTTACACGATTTAATACATCTTTCGATAACACTTGTGTATTGCTTGTCTACAATTTGCATATTGTCGTTTTCAAA  
CATTTTACTATCCGCAAAACCTTGTTCAATGGCTTCATCAGCATTTAGCCACGTTTCCCTAGCCATCATTCTACAAGTCTTGTTTTGT  
TTTTACCAGCTTAACCGCATATGCCGAGCCATTATTTGACCAACATGTTCTTAATGTTTCTGCAAGCATGATTAGATCTTTTCGCTTCT  
CCTTGCGCAATAGTTGAAGGATTGTGAATCATCTTCTAGCAACCGGACTTCTCGATGTGGTACCAGCCATTGCGATAAGCGAT  
GCCGCACTTGCTGATTGTGCTGTGATACGAACATCTTCTGCTTTATGACCTTAAATGTTGATATATTTACTACCAGCTACTA  
GGTTACCACCATTTGAGTTAATTATAATATCAACATCTTCATCACTAAATTTCTAGTTGTGTTAAAAACATCTTTAGGACAAGTCAATC  
CATACCAAGCATTTTCGTAAACCCATTTATCTTCGTTGGAAACGATGACGCCCTTAAATCTCCGCTTTCATCTTCATCACCACCTTTCAA  
AGTGTTTTCATCTTTTTCTTTTCATCATTTTACCACCTGTTAGCTTTTTCGTAGTTTTTGTAAATCAGGTATTGCTCTAATTCAGGATT  
GTCTGATGATTCTTCACCTAACATAATCCGCACCTATTCTTGTAAATGAACCAGAACTTACAAGTTGTCAATTTGCTTCAGCATAT  
TGAAGTGGGTCTTTTTTATTCACACCGACAATTTCTATTCTGTATCTTCAAATACATACTTTGTGTTATGAGTTTCGCGTTTTAATTC  
GTTCTGAATCTTTTTTAATAAAGGTGTTAAACAGAACTTCTCAAATACAAGCGTGTTTTTTTCCAAATCAGCTGTTTCTCCGTAAATC  
AAACCTGGAGGTATACCAATCATCAACGCAACATTTTTTTGTCATCTCTCAATAGCTCACTAATTCAGAAAAAGGCATGTTACTA  
TTCTTACCACCATAGATAATTCCTCATAATCAAAACCTTCTATCAAGGCCGAGTGTGATGTTTTTATTAATAAGTATTGAATA  
ATTTATTTGTGAACGCTTGTAATTTTTCTATATTCTTTTCGTCATATGCGCTAGAGGCAGATTTCAAAATCCCTCTTATTTGATAGTTT  
TTAATTTGTGCACCTATCATTTCTCCGAATATTTCCCGTAATCTTCGAATAGACTTCTACAAAGTGTGTCACCTTTATTGTTGTTGTA  
CTTTAAATATATGACCTCTTGCAATTGTGAAAGTACGTTGATAAGTATAATCTTTAACCGTTACATCTTTGAATATATCATCATACAAA

GCGTACTCTTCTCTGTAAAAGCTATCTGCGATAAGTAATTCTTTGCTGTCACTTACTACGATTAAAAACCTCGTTATCATAAAATTAGTT  
TATATATAAAGTGTGGCAAAAACTATCGCTTGATAAGTCAGTATTTGGTTTTATTTAACTTGTAGTAAACATCATTCTTTGAATT  
CTATTACCTTCCAATACCTTTAAAAATGACTTTGAGCGACAGCTCGCGCAACAAATTCATACAACATATCAATCGCTAAACGTTTCACA  
TACGCTTGTGTGATAGATCTTCTATCATATCTAAATCAAGCATATATGTTATATCTTTCTAGTTTTAAATATCTTTTCTAGAATACT  
CATGTCTCACCTCTCTATTAGAAAATCTATACTCATTAAATGCATCAAGCGCTTTAGACATGTCTTTGTCTACTATATCGTCTGCTCTAT  
ATAATGCGTGAACAAAAGCCATGAACCCATCGGTTTTCTTCTATTTTCATCTTTTTTAATATATTCTTTATTACCATCGGGTTTAAACC  
TTTACTGCAACATTATTAGTAAACCAACGCATCAAAGGATTGTCTCCATATATTACGTTATGTTTCGCAAAACATTGTATCGATACGTG  
GTGCAAGTAATCCATGTATTGCTTTTGGATTTCTAAGTACTTCAAGTTTTATGCCAGCATCTCAAACGCACGCTTTACAATATCAGT  
TCTATAATTATCAGCTATGACTTTTTCAAGCCCATATTTTCTCTAGCCTTTAAAAACCAATCAACTATATATTCAATTTCAATTGACAT  
CATCATCGACAATGGTCAATAATCCCATTTTTTCCCATCTTAAATAGGAGGTTCTAATTTGACATCATCCAAAAACCTTGCTTAC  
AAACGAATGTCTTAACCAAAATGTAATCATCGTTTTTTCGGAATAATAGCCCTACACTTGCAAAATCTCGAATGTTTGCAAGTCTAA  
ACCACCAATACACATTTGATTATCTAAATTTGGTATCTCTCTATTAGTCGCTAGTATTTCTTTCCATGGTGCTATTACTTTTTCAAGGT  
CAACTTCAGGCAAATTCATTGCTTAGTCATGAATTCGGGCTTATTTGAACGGTTGAATGGTAAATCGTTATATTCTTCTTCAATCGT  
ACTTAGCAGTGTTTAGCGTATTCTGATAACGGTTATGTAACATTGGGTTGCGCTTTTCCACGCTGTCTGTGCATCAACTTCTTTTG  
GATCGTCTAACTTACAATAAAAAAGCAACAATCTACTATTTTTAACCTTGCCACTTAATACACTTGCAATTTTGTGCTTCATTGCATC  
GATATAACCTCTCTAACAAAACCATCAGTACTTATATAAAACGTTCTTCTATTTTTCTTTTACCTAATCCACCACGTTTGACGTTTA  
CCATTTCAGGACCAAGAAAATGAATTTTCATCAAAAATAACACACCCCTCACGTCCACCCTCTTTGGTTTTTGTGTTTGATGTGTT  
ATATCGAATAACCGATTAGTTGCACGGTTTATTATTTTGTCTTTACTAAGTCAAGGAGCTTTTGGCGTTTTTACCGCTGTATTCTC  
GTTTGTATTCCATTAAACGGTTCTGATTTCATCAAAACGATGTTTTTGTCTTACCTTACCTATTAGCAACAATGGAGATGTGATATTC  
TTAACTCCGTGTAAGGGCGTAGAAAGAAAATCACTAATAGCACTTATTAGACCGTTTTTCCCGCTCCACGTCCCATGAAAATAGC  
AAATCTGTAAAGAAAGCTTCATCTGTATTTTTATCTATAAGAAATATATTAGCTATGATAAACCTTTGAAATGGTAATGTTGGAAA  
ATACCATTTTTCAATAAATTTGATACAATCCTCGATTTTCTGTTTCATCAAAAATATACATCATCTCGTGAATATATATGTTTTTGTAGAT  
AATTAAAGAGATCAATCTTTCTTATTTAAAAATATCTTTCCCTGTTTCCACAAATTTATATATTTCATCAACGATTATTACTTATC  
ATAGGTAATCATCAGATGGCGTTTCTGTGCTTCTTTCTCTTCGGGCAATAAAATCCGATAATTGTTTGATTATTTTTGATATGCAGC  
ATCTCTAGCATTAATAGTTTGGCTACTGGTCTTTCCCTTTTCATATGGTGGCGCTTTTCAGATTGAGTAAATAATCATAGTCACCT  
TTTTCTTTATGTCTTCCCACATGTAATCAAGCATTACACGTAGCCTTGCTGCTGAATAATTAACCATCAACTACTTTTAATTTATT  
GCTAGGTATGTCTTTATATAATAACTTGCAGCCTTTCTTTTCTTTAAGCACTAAGTTTTTCATCAACTATAATCTCCATTTTCATCAGCTG  
CCTTAAAAATGGTTATAAGAGGGGGGGTTATACATGGATTTTTAAAAATTATCGCGAAGTCGAGCCCTGCCCGTTCCCAAGTATTTT  
GATCGCTTTTGATTTTTTTGACCCGGGGGTTATTTACCATTTTTCGTCTTTCCATTTATTTTCTTTTTTATAAATCTCTTTTCTTTTTGT  
TGTGACATTTAATACACAGTGTCTTAAATTTGTTAAGTCATGAGCAAACTCCGGATGATGTTCTAGCGATAATATATGATCTACATC  
CAACGACTTACGCTTGCTTTTGTATATGTCGTTAACTTGCGCTCTCTTACATTGTTGACATTCAATATCTCTTTCTAGCACTC  
TTTTCTTGTGTTTGCCATTCTTTAGACTTATAGAATCGTATGCGTTCGTCTTTAGTCATCATAATGTTTCACCTTATATAACTTAAG  
TAGTATCAAGACTCATCTATACTTGATGTGTAGTAATGTATTTACTATTAGTTTGAACATGTTTCATACCTCATAAATAAAAAAGACAC  
ATCAGATGAATAGCGCCTCTGTTTCATGCGTCGTATTAGCATTTAATAAATTTAAATATTAAATCTGATACATAACATAAATCTGTT  
TTAATGCGGACTTACATAGGTTAAAGTCCGCTACACATAACCAATATACTTTGCTAACTTATCGATGCACTGCTTCTTCTACGTA  
ATATACTTGTCTTACTTGTACCAAAAGTAATGTGCTATATCTTCCCATTCATAACAACCAATAGGACAATCCCAATATCTAAACCTTAA  
TAACTCAAGCGTATCCTCATCATTTCATCTATCAATCTATCTACACCGTTAACTATAATTTCTTAATGTATTGTACCTGTTATCACTAA  
ACTTCTTTATTGCACATCGTTCAATCGGATTACCCGGCAAATTAATTTTGGCAGCTCCCGCATTATCTGGTTTCATGACTTTCAAGTAA  
TTCATATTCTCGCATCTTCAACTCTCTTCGATAGTTATCGATGTGCTGAATGTATTCTTCAAGCTTTTGTATATCGTGTTCCTCAATCT  
TTATCATTCAATGCAATACCTCCGATAATATAAATTACTTTTTAATATCGTTATTTCATTCGCTTTAATTTAATCCTGTATTCTTCTAAC  
CCGTTGTATCCTTTAGTTTAACTACTTCATCAAGTAGATAATCATTATATATCTGAGTGCTTGTATCTCTCTTGCACGATCACTATT  
AATACTGATACAACTAATAGCAATATAGCAAAACAATAGTCATAGTAATCCACATCACTCACTTACCTCCGCTCGAAAGACGTA  
ATCACTCGGCGCTTACATCATCATTAGCCGTCATCATAATATATATACTTGTCTAGTTACCTACATACTACATACGTCATGTCATG  
AAGAATAATAATCTTATATTGCTTAATCATTTTTTATCTACCTTCTTACTTCGTATAAGACCGGATATAAATTTAAAAAGGTAT  
TCTATATCCAATCGTCTTAACTTTTACTTTATCACCTACTTTTAACTAGCTTGTATGTCTGCGCTATCAAACCTTCTTTGAAGAATA  
AGTCTGAGTTTTTCGATGACTTGTATTATCATCTAATACAATATAGAATTTGTCCTCTTTATCTTGTCTTTTGTATATTTATCTGTAATTG  
TCCCTTGATGACTTCTTTGTTTTGGTAACTAGCCACTGTATAGATAGGCAATGCGACAACAAGTAGCAATGCGGTTATACCGAATA  
ATGACAGTATTCCAACAATAAAGATGTGCAACCCATCCATATTTTTAAGTTTTTAAATCATTTCACACTCCCTTATATTTTCAAAC  
AACTGACCCACTTTAATAACTGCATCCCTTTTAACTTGTCTCGTACTTCTCTTTCGCTTCTTCTTACTCTCTGCCTCAACAACCTGTA  
AACCTTTGATTACTCTTAGCTTTAGTTATGTGTGTATGTTACGTCCTGTTGAATCTTTGAATGTTGTGACTAAGTATTGTGTCTATCC  
TCATAGCTCCCTGAACTTGTGTTGAGCTTACTCATAAAAAAATCTACTAAAAATGCTATTAAGATATGCGTCTTTTGATGTTTTATAAG  
CAAAATGTAGATAGATAAGATAGCAAGCATTAACATTTATATATGTTTGTGTATAGTCTTTTACTCTTAAAGAAAAATAA  
TTGCTATGCGATAAAAGAGATAAACGCCAAACCTATTAAAAATATTTCTAACATGTCGCTCACTTCCCCAAAACCTCCTTGACCCG  
ATCTAAGATGTCTTTACACTCCGCTACTTCCGAAGCCTTTTGTCCACGTTCTGAAACACTCTCGAATTCCTCCACTTGCCTTAGTTCA  
GGTGTCATATAGGCACGATAACCAGTTGTGCTAGTTTGTGCGCTTTGTTGATTGGTAAACTCTTCTTATGCCTCTTCCATCTTGATC  
ATAGTTACCTTTTATATCTAAAAATGCTTATTAATCCATCTTCTAATTCAGCGTCTATATCATCATATAAAAAAGGATTCCATCACGT  
TCTTCATCATTTCTAATATTAATCCCTAAATTGCCGTGATATCCGGCGTCTATCTTGCCCTGTTTCAATCACTAAATGTGTTTTACTACT  
TACACCACTACGGCTAGTTAATAGCCCGACATAGCCCTCTGGTATGCTTACAGTACATCTGTTTTAATCACTGCCTTTTCTTGTGGC  
TCAAGTACGACAGTTTCAGTGAAGATATGTCATAACCTGCATCCGCTTATGATTTCGTTCCGGGCTCTAGCATTTTCTGATAATA  
GCCTTACTTGTAAATGTGTAGTCAATTTTCTGCTCCTCTTGATTAAATGAATTTGTTTAAACAACAAGTCTATAAGCAATGAATAG  
ATCCGTCAGATAACTTGTAAATGCGTGTCTCTAATATCGCCAACAAGTTGTACAATTTCTAAAGTTGAATTTGTTTCTGGATTAATAAAC  
CTTGTCTCCTACACTAATGCTCATTTTCTGTTTCTCTCTCATATTTATAGACAACCTGACCTGCCATAATCCCTACTGCTTCATCAAGT  
TCAACACCTTCTTAACTGAATGTTGAATAGCATTGTGTCATTTCCCTCAAGTATTTTCATCAACGCTTGCCTTTCTTATACACGTCTTC  
AATCTCTTTTAGCAATCCCTCTGTGTCATTGCCGTTATACGCACTAGCACTGATCACTGATTGTTCTATTGTTTCACGGTTATCCATT  
GTGTCATCCTCCGTAAAAATTTTATTGTTTAAATCCATCCCAAATTTAACTCTTTTCATCATCGTTGCCGAATTCGTTTATTAATCTTT  
TTCAACGCTCTTGCAATACCTATCCCATGCGCTTGCTTTCTTCTCTAGATCTTTGTTACGTTCTCTTAACTTACCTATATCCCAATAA  
GCTCATCTCGTTGCTTTGTTACTCATCACGTTGTTTTCTCATCTTCTTCAACCTAGCGTCCATTACACCTAGTTGGACCCCTGTTTCA  
TAGTTCACTTCTTACCTCCAATAAATGTGATGATTCATTAATATGTTGCTTTAACCCTACAGTCATATCTAAGGAAGGATTTTATGTC  
TATATACTCAAAGTAATCAATTTTCGGAGACTGCGCCCTCAAACATAAAATCTTTTAAATGAATACCATTTACAACATCAATAGATAT  
TACTGCTCTATTAATTTGTTCTATTACAGATTTCATCGTCTGGCATCTCTAATATTTTCATCTTCAAACCTCAACTATATCTCCCGCATATA  
TTTCGTTGTTGTTTTTGTCTTTAAGTCTGTACTTTGCATAAGTTCTACATCTTTAAATCTCTTGCATGTATTAAGCTTCTGCTTCCG

CGTAGTTTTCATAGTGAACCTTCAGTCTCAATGAAGTGAATCCTACAACATCGTGTATTCTTCCGTGTATATTCGTCACACTCGATA  
TTTCGGCATCATACTACTACCTCCACTTTTTCGACCTCTATGCTTGCAGTTTTAATTCTCATCATTTTCATCTCCTCTAAAAATAAGTT  
AGTTGCTTCTGCTCCTCGTATTCCAAACCATGTTGCTTTATATATGTTTCAAGCTCTTTCGATGTATCAAATGTCTTTTTCACGCTTG  
CCAACCTGGTACGATATGCCCGTGAAGTAATAAGTGCCATTTACTACATGGATATGTGCCACTCGCTCGTTATCCTGATACAGATA  
TCTCTTAGAGCCGAAAAATTGGTTTAAAGTATTCTTTGCGTGCATTATCTGTCATGATCTACTTCTTAACTTTCACGAATATGTCGTTTT  
CCATCAGGTAGCACGCATAACGTCTCTTGGATGCACCTTGTGGCACATTAAACAAATGTGGCTTCTTTCTCTTAGCTCAGCCTCTTT  
ACGTGCTTGCCTAGCCATTTACGTTCTTTGCTCTCTCGCTCCATGATTTTGGATAACACAATTTCTTTATACTCAGCTAAGCGCATAC  
CATAAGGTGCATGTAAGGCTTCTAACAACGCCCAGCCACCTCGTACTCTTTTTCGAACCATTCCTGGAGTTAAACCATTTCTTTTTAT  
CAATTCATTTTCATGTTCCGTAATTTATATGGTTTACCCTTAATCTTTACGATACTCATTTATCCACCTCTATATATGCGTGTCTTA  
TTGTTATGCTGTCATACTCTAGTATTTCGTCGGGATTGTTATATAAGTAATCTGCCAGTGCATCTTTTTCATCATCCACATCAAAAA  
TGCTGATATTCAACTTCGGTAGGTATTCTTATATCAATCGTTGCATTTATATATGCTTGTGTTGTCATTAAATCACITTCATTTCTCTTT  
TTCTTTTACGCTGACTTTCACTAAGTCCTCATATACCATCCATTCTTGACCTGTGTATTTAGGCGCTTTACATATCCACGTTAAATTC  
ACATCTCTATACTGATATCTGAATATCTTCGCTTTGATGTTGGCAACTTCAGTCGCCTTACCTTTAACATCTAAAACCTTCGACCAGTT  
TGCCATCCTTCCACAAAGAGAAATCAGCTATATACGTAATCGGTCTTTGTTTCCCAAATTTAGGTTGTAGTTTCAATTTTCGGTTGTAT  
TTCGATACGATCATAAGTTAGTGCCATTCATATTAATCTTTCTAAATATTGGTAATATTCACACTCTACTTTGCTATCAAATACAAATTCCTT  
TGTAATCAACTTTCTTAGCGTTGTATTTACTCATCGTCCACCTCTAAATATCAAATATCGTTGCTTGTAAACCTAGCTCTTGCTCATAT  
AGAAGTCCGTGAGCGCTTTAAATCGTTTGGTCACTATCAGTCATAATTTCTTTTCGTCGCTGAAATGGGCTCCTGTGAGCGAAT  
AAACTTCATCTCATTTTATACCTTGTATGACCTTAATATCTTCTGTGCCATCTTCTCGGTATAAGTAATATTTTCTTTCGGCATTT  
TTTAACTCCTCTTAATATTCGACGATAGCGGGCGGTGTATGACGTTTCTGCAAGTTTTTGGATAAAATAGGTCGTACAACCTATTTTCAT  
CGCCCTGTGCCTCATCTATGAGTTTCTGAGCGTACATATCTGAACACTCAAGTTTGTATTTTAAAAATTTCTTTGGTTACCATGTATCT  
CGTCCCTGAAATCGTCTCCGATTACTCTTACTTTTCTTGCAATTGTGTTTCATTCTTGAATTGATACGTTGCCAGTTCATATTTGATTT  
AGTTCTTTATCACTAAAGTTAGTTGTAAAGATGTTGTTTTACCTACTCTGTTATCAACAATGCTGAAAAGTTTATTTAAAGTGTGCT  
CTGTGTTTTCTACACCATATCATCTAGTACAAGTAAATCAATATCACTTAGCAATCTGACTAGCTCGTCTGTAGTCTCTACTGCATT  
TTTGTGTATGTCGCTTTGATACGATCCATCAACATTGGTATGTGCATAAAAGCAACCGTATGCCCTTTAGCTTTAACTGCTTTTGCG  
ATAGCGTATGCTAGGTGGCTTTTACCAGTTCGGTATGAACCTTGCAATATTAATGATTTTGGCTCTTTTGTAGAGAAGCCTTGAACGT  
ACTCTATTGCTGTTTGTAGCGTGTACTGTTTTTCAATTTTGGCTTGTAGTTTGTGACTGTTGCATCTCTTAAAGACGGATTAACG  
TTTGATTGATTGAATATGTTGTTATCTTCCGTTGCTTGTTCGCTTATATTCTCATAGATTTCACATTTGCAACCGCTTTTATACCTG  
TAACCATTCGGGTGTTTTTGTAGTAGGAGCAAACTTATATAAGTCGTATTCACCTCCACATCTCTCACATTTCAATCCTTTTTTCGACAT  
GAGTAGGTTGATATTTTTCAAGCTTTCGTTTATCTTTTCGCTGAATAGTGGTTTCATAATATCCCCCTAATCCCAATAACTTTTCGTCG  
TACTTCATGCGTTCCAATTGATTCGTGCCAGTTGGTTGTATTTTTGATTGAGGTACCCCTCAAATTTACTGCCAAAAAGTGTTCGTG  
GTCTAAGGTATTTATCGCTATCCGTGTTTAAACATTACAGCTGTTTGTATCAATACCTTTTAAAAATCCTCAACCTAAAAATCTTG  
ATCCATCTTGCTTTAATAAAAAATCTTTTGTTTTAGCTGTATTATGTTTAAAAATGCTTTTCTGCTTTTTTATTTAAGTATTCGATAATTC  
TTTATAGGGAATGGAAGACACCGTCGGGTGCCCCGACAATATACTTCTTCATTATTAGTATTGTTATTATTAGTTAAATCATTATTA  
GTACTATTATTATTAGTAGTATGCGATTACCATTAAACGGTTTTTCCATTTGTGGTTTTACCAGTTAACGGTTTTTCCAACGTTGGAAAA  
TCGAATTGTTGGTCCGTTGTCTCATATACTAAGTACTATAACCATTTAACTTACCACCTTTTATCAGTTTTCATCGTTTGTGAATGTAT  
CCAATTTCTTCCAGTTCCTTGATTCCACTCTTTAAACCGCTAAGTCCATCAGTTGAATGTTGCTCTAGTTCTGTTTCGTAAATTTGCCA  
GTTATCAGGTGACTTAACAAATAAAGTAGAATACCTTTAGCCTTCCAACCTTATATTAGAATCATGTATAAAAACTTTGTGTACTGTG  
ACAAAGTTACCTGATTCTTTGTAACTCTAAATGTTGCCATTTTCGTTATCTCCTTTCTGGTATAATTTTGTATCGCTACTGCGTTAGA  
TTGGGGGTGAATAAAATATGGAATAAACCTTATATGTTAACATATGATTTAACTCACCCGGACAAAAATATGAGGAATTGAGAAAT  
GTTATAAAAAAGGAAATTTCTAATGGTCAATTGCAATTATTGGAATCTTCATTTTTATTCCGTCTTCTTTATCAACTTCAGAAATGA  
TAGAAAAGTTGAAACCTTATCTCGATTCTGGAGATAAGCTGTTTGTACAGAAATAGTCAATAACAAACAAGGGTGGTTAACAAAA  
GAACAATGGGATTTTATCAACCATAATATTTTTATTAGGTTCTTTTATTGAATCTTTTGTATATCAGGAAAACTTTAGAATCCTC  
AGGGTAAATTTTTTAAATTTTTTGTAGCGTCTTAATCTTCCGCCAAGATGACGATTAGGAGTGTATTTTTATTATTCTTAGCTAT  
TCATTCCTTTTCTCTCCTTTCAACATTTTGTTAATCTTCTATCAACTTTAGCCATGAGTCATGCAAGTGATATTATCATCAAAACG  
ACTTAACGCCAATCGCATGTTGCTCGTTGTGATGTTTCGCGACATAACGCTAATACATGTTTGTATAGTGGTTCATTTGTTTCTGTT  
CATGCCTCTACCGACTGCTTCGTAATGTGCTAGGTACGCGTAGGGCTTTCTGCATATTACACAGTTGCGGTTGATTGTAGCCCAATAT  
AATAACGCTTTATCTTCGCTTAAACACTTACTCGTTTCTACACTCATAGGTATTTGATGATGAAACATAAACGCTATAATCAGTTCTA  
TTAACTCCCTTGCAACTTTTCATAGAACAGTCGCGCAGACTGATTTCTTCATAACCTTTCATAATTTCCAATCTGTTTGTAAATAATTT  
CTAATTGATTCCACCGGTTCTCCCCAGTGAAGTTCTATATCTCTACACATTGCGAATATTTTTTTCGCTTGTCTATAGATAGTTTTTT  
ATTATCCGGAACCTCTACTTCTGCTTTTAGTGGATATCCGTTTTCTAGTAAGTCAATGTGACTTTGTTCAAGTTCAACACCCAGTAGCA  
ACGACGGAATAAGTCCGCTATTGTCTTTCTGGTATCTTGTATGATGATTGCATTTAAACCACACTTAAACCGCTAAATCTTGGTCTG  
CATATCCAAATTTGCCATCTGCTTTCAAATGGATTGTTTGTGATGACATTGATGTTTGTGTTGTTGTTGTTGTTGTTGTTGTTGTTGTTG  
TGCTTATCTGCTTTCGGAATAGGTTTGTAAACAACATCATCGCCCTTTTTGTAAGGTTTAAATAAATGAAAAATCCGTAAAAATACTTAC  
CTTCATCTTCATTGAATTTCCATTTCAATACCAAGTGACAAAACCTTACCAATAAGATCATTGGTATCAAAATCTAAGCTAGGAAGAT  
TTAACTTAATACCTAATCGAGTAACTAATTCAATCAATTGTTTTTCTTGAAATCATATTTATACGGCGGTACAAATTGATTATGTTT  
ATATTGTTTGCCTTCATCATTTTCAAATACGATTGTGAAATATCTATTTCTCTATCATTGAATTCATATTTTAACTTTCAGTGTGA  
ATTCTCCAGCTTGAACCCCTGCTGAGCCGTTATAAACTTTTCTTGATTTGTTTCTTTAGTAAATTGCGCTTGTCTGTGATTTTCATA  
ATTAATACCGTCTCTTTAATTAATTTTTAGTTTCCATTTCTAATTGCTTCTACTACGTCCGTAATGCTAGGATTTGCAAAATTTCTTAT  
TGTTAATGTTATTGAAGGTGAATGTCTAATCTTGTTTCAAACGTAATTAGAAGTTTACGCTTTAGAATATATCTAGCTTCTTTTCT  
CCGTTATCATCAAATTTCTCAATCATTGCCCTAGCTAACACATCACTTTGAGAAGTAATAGCTTTTTTAAATTTGTTTCTTGCCTTCAAT  
AGTGATAGTAGGGTTGATAGTGTACCTTCATCATCTTTATCTTTGTTGATACCTTCATGACCTGTAATAACAAAGTGGAATTTGTAT  
TCTTCTTGAAGTTTTCCTATTAATCTGTACATACTGACAATTCGTTACAGCAACTTCTCCCAATCATTAACCGTTGGTTTTTTAGACTT  
ATTTTTCATCACATCATTCAATGTATATCTCTAAGTTTTTGAATAGTTTCAATAACTACAACATTGATTTCTTGTCCGTTTTCTCTCA  
TCTCCTGTAAAAATTGAGGTAAAAAATTTACAACATAAAACAAAGTGTGATAGTTCTCGATTCTACGCTGTATCCTTCGTACAGTAAC  
CGTTGTTCCACCTTCGTTAATGTCAATGACGAAAGCGTCTTTATCTCTTGTAAGCAACCGTGGTTTTTCTGAGCCAATTTTTCCGTAT  
ACTGCAAAATTTATAGAATTTCTTTTATTTTTCTCAGCGATATTATTTATCTTTAGTTTTTGTAGTATGCTTACTTTTTCTTGTGGTTCT  
TGTTTTTCTCAGTCAATGTTCTACCTCCTCATACTCAATGTTTCTGTCACTGTTTCTTGATTGCTTTGTGCTTAGACATATCAATAAC  
AGTTTTGTCTAGTCCGTAATTTCTTTCGCTCTCGCATACCTTCACTGTAATCTTCACTGATCGTTCAGTTCTCGTTGGTGGTTGTAA  
TAAATAGATTTTCATCTTTATGCTTGATTAGATAAGTTACAGTCTGTTTATAGCGACCTCTACCATCTCATGACTAAGTTAATTAG  
TCTGTCTGTTCTGCTGTGTTCTCTTCAATCCATTCATCTATTGCTTGGTTGAATAAGTCTGATGCCATATCTAAGTCATTCTCATCTA  
CGACATAAGCATGTTTAATTGGTATGTTGTTTCATATCTTTAACTTGATTGATATGCCCATATGACCTTTTAAAAATGAATAGCTTAA



ACGCGCTATTAGATGAATGGCTTGAATATCATATAAAAAACATCAGGTTCAAAGTTGACTACTCTTAATAATATAAAAAATAAGAATTA  
AAAACATTAAACGATACTGCTCTGAGAACTTGCTTTTAAACAAAACCTTGATACAAAATATATGCAGATATTTATTAATAAATTATCAG  
ATATCTATTCTCAAAAATCAAGTAACCCGTCAACTCGGAGATATGAAAGGAGCTATTAATATGCAGTTAAATTTTACAATTATCCAA  
ACGAATATTTGTAACTAATGTCAAATACCTAAAAGAAGAAAAACAATAGAAGATATCGAAAAAGATGAATCTAAAAATGTACAA  
CTATTTAGAAATGAACCAAGTCCTACAGATACGTGATCATATACTAAATAATAATAAGTTACACAAGCGAAATCGCATTTTAATTGC  
CAGTATCTTAGAAGTACAGGCTTTAACTGGTATGCGCATAGGAGAATTACAAGCACTTCAGGAAAAAGATATAGATTTATTAAACA  
AAACTATCAATATAACAGGTACAATTCACCGCATTAATATGAAGAAGGATTCCGGATACAAAAGATACTACAAAGACTATAAGTTCA  
AAAAGAAGTATCAGCATCAATTCTAGAACCCTAGAAAATTTTTAAAAAGATAATACTGGAAAAACAAAATGTTGAAAAAGATGGAATTC  
TAGCTATGTTGACAGAGGGTTCATATTCACAACAAAAAAGGAAATCCTTTATGTAATAATCAAATTGCCAGTGTGCTTAAGAAAA  
CTACAAAAGCTTTAAATATGAATAAGAAAGTTACCACGCACACATTTAGACATACACACATAAATTTATTAGTAGAAAATGAATGTTT  
CTTTAAAAAGCAATTATGAAAAAGGGTAGGACATGTAGATGAAAAACAACAATTTCGCATATATACTCATGTAAGTAAAGAAATGGAT  
AGAGAACTAACTCAAAAACCTCGAAAAATTCCAAGTTAGCTTAAATCTGCCCTTTTTTTGCCCTTATATTTTTTATAAGCTTTATAAAA  
ATGCTTGAAAAACACTGGCATTAAAGATTTTCTTGGACTAATTATATCATCATATAATGTGATGGTTCAAATATCATTTGTACAATCAAA  
GGCTTCATGTTCTTAACAATATCATCTAAATGGTTATCTAAAATTTGGTGACACTGCTTTTAAATCATTAAAGAAAAGGCTCCCATTGTC  
CTAAAGTATTATCTAATTCTCTAATTTAGTTTAAATATAATTACAAGTTACATTAGGAATCAGGGACAAAAATCTTCTCTTTTTAC  
ATTTAACATTTCATTGTCATGCTTAAATTTCTTACGTATTTTGGGAATTTGATTAAATCAAATATTTTATTACATCGACAATTTTCGATG  
CATATTCATCATATATACTTGAACATAGTCTGCTATTTTTTAAATACCATCATCGATATGGTCTTTTTAAATATTTTCATTTTTCTTCTCTA  
AATAATTAGAAGGTAAGACTAGACCCTGCACCATTTTTACCCTGATAATTAATTTGATAATTTCCATTAATAATTTGTTGACATGTTGCTG  
TTGCTTCATAAATCTTCTAATATCTGCAATTTGCCTACCATAAAATCATATTTTGATTTTATTTGCTGAATATCTGTTTACTACTTT  
CAAATGTTTCATCATTTTCTTCAGATACTCCATCCTTGAAGTCATGATCAATATTTTTGAAAAATTTCTAAAAATTTCAATTATCTATACTAT  
CATACACTTTTTCTATAAAAGATTTTATACCTTTAAACAACCTCATTAATTTCTTTCTTTAATGCATCCAATGCAAAATCAGGTAATAA  
GTGTTTAACAGCACTAATACTTTCTATTGTTTCATCTGCAACTTCTTCAAGTGCGTTTATTTTACTAATTAAGTTCTTTCCATTCTTCTC  
TAATTGAAAAAAGTTAATCTTATCCTTAAATCCTTCTGATAATTTGTTTCTTTCTATCTGCAAAAATTTTATTTCATTTCCTGAGATGTT  
AAAACTTTCATTAAAAAGATTACGCATTCTGCTAACATACCACCTGTTTCACCAGTAATCAGTTTACTCAACGCATCAAGATTTTCT  
AAATTAAGTTTAATTAAGTTCCCTTTTCCGGAACGTGCAATCGAATCTCCTGTCCAAACATTTATTGGAATTCGCCCATCCATATCTA  
ATGTTATGTTAATAGTCTTTTTTACTTTTTTCCATTTTTTAATTTCTGTATCTTTTACCAGCTTAATTTTGATTAGTGGTACAGTATCGT  
ATGTGTTATCTTTTCTATTTAACCTTCTTTTATAACCTACCATAGGCTGTCTATTAAAGCATCTAACCTGGGCACACCATCACTAATGTTA  
ACGCGTTTTCTCGCATATCTTTGATGAATGGATCTTGTAAACCATGTTAATAAATCGTTGGTACTATTAATACTAATCATATTATCAA  
AGCGTGGTCTAGCAAATTTCTGCCAAGCAGCATAAGGAATCATTGCTGAGTCAGTAGCAACAACCTTTTTCATTCCGGATGTTTCGCTC  
CTTGATATTTTGCTCCTGCACCACCTTCCGAATTACCACCATCCGCCACAATTGTTTTGTTTTGTAATTATAAGGTTAGTTTTGTAT  
TTCTTCTAAATTCATTTCATCAAGAACAGAAGCATCTTTAATTTTTGTGCGATAACTATTTGCGAATTCCTTCTACTTGCTTTAAATA  
ATCTGTGCTTTCATTATCATTTATTCATTAATTTAGCATTTTGGAGCCAATCATCTCCAAAACCCGATGATTTAATGGATTATTTGGGT  
TAATTGCCTCATTAGATGTTCCCTTGATAAATTAATGTCTGTTGACCAGTTGGATTCCCCTGATCATTAAAGTAACTCGTATGTTTAATA  
TCAGCAGACCCATTATATCATTAATCTACTATTATCATTAATTAATATCTATTGTTTGAACCGTTTTCATTTAACTTTACTTTTAACTCTTTTTT  
TCATTATATCTTTGATAAACCCCAATAAAGTCTCAATTTCTGCTATGTCCCTATCATTTTATTTATTCATTTATATTCACCTACCTTCA  
ATTGGATTTATATCGTCATAAAAATGGTTTTTTAGTATTTTACTAGATTTTCTTAATTTGAATAGTAACCTTGAGATTTTTGAGGCATATT  
GGGTTTTTCTTTAATTTTATTACTCAATTCAATCACATCATCTACTGTATTGTCTTTAGTAAAGTTTTTCTTAGTTGAAAAAGGTGTAG  
AAACTGCATCAGTATTGGCAGTATAATCTAACTCTTTTCTAGCTTGTGTCATACCTTCTTTAAATTTCTTTATCATTTTTATGAATCAAC  
GGTTCGTAATATTTACGATATTCTTTAAGTTCTTGATAAATATGTGATATAAAAGTATTCAATTTGATATCCAACGTTTGTGTCTT  
GTTAATTGCCTCTTTTGTAAGCCTGTATATTGATATTTCTTTTCATTTCTTTGAAGAATTTATATAAGTTATCATACTTTCTTTTTTG  
CGCTCGATATTCAAAGCCACTCAGCACTGTACCCACCATCATACTCATATCATCACCATTGTCAATTACTGCGCATTGATCCTTTTTGA  
TGGATGGCATCTTTGTACAAAGGTAGACTTGCATTAATAACAATGCCATGACTTTCACAATGCACATAAACTTCTATACCATCATCT  
TTACCTACAACATTTAGCCTTTACCTTCAGTCCAAAGTTGTCTTTAAAGAATTTGTTCCCTACTTTTTTCAAATTTCTTTACGATGCTT  
CTTCGCAAAATCAATCGCATCTTTTCTGCGAGCGGTTGGAAGCCTTGGCCTACATATTTTGAAGCTTCCATTCTTCTGTTACAGAT  
TTTGTCTCTGTGTTGTGTCTTTATTTGATTCAATTTCCATCGCGGAACATCCCCCTAAAATTAATGTCTGTGGTTAAAACTGATCCAAT  
GAACCTTTTTCATATGACACCTCGAATAATTTAATTAATACAATATATCTATATTTTACCCTATTTTTATAATCAAATAAATAACTTTAT  
CAAATTTTATATTTTGTATAAATTAGTAATATATTTAATAGTTGATATTCGCAAAAACCCCTAAGTTCTAATCCACATACAAAATTC  
CCACATCAATCAAAAAACGATGCTATAAATTAGAGTCTCTAATCAATAACATGCGTTTCTGAAAATAACTATAATTCATTTTATTTCTG  
GTTTTGGTAGTTAATAATAAATGTTGTGCTTTCCCTAATTCGCTTTAACATCTATGGAACCACCATGCTCTTCGATAATCATTTTA  
CAAATGAACAAACCTAAACCGGTACCTTGTTTACCTCGCGTTCTCGTGCATCAACTTTATAAAAAACGATCAAAATCACTTGTGTAAA  
GTTTCTGTGCAATGCCTGTACCTGTATCTTTAATGTATAAAAATCTTCGCTTTTCATTTTCATCACAAGTAATGCAATTTTCATCTCC  
AGGTTTCGTATAACGTGATGATTAATCAATTAAGTTCTGTAGTACTTGTGTCATGCGATCCATATCAACTCCAAACACGCTTCTTA  
CAATAATTTAAAGTCATATTTAGACCTAAATCATCAGCTTGTGCGGATACTTAATTTTCATCTTATCTAGTAACGCTGCAATAGGCT  
GAACCTCTTTATTTACGGATAACCTTTCAGCATCCATGCGTGCACATTTAACAATTCATTAACCTAAACGATTTAAACGTTTCGATT  
ATCAAGGACAATGGCAAGCGATTCTTTTATTTTCATCCGGTCTGTAAACAATACCATCTACAATTGATTACGTATAACCTTGAAGTAA  
TGATATCGGTGTACGTAATTCATGTGATACATTAGCAATGAAATCTTTCTTCATTTGATCTAGATTGTGCTCATTAGTCATATCACGA  
ACTGTCACAACAACACCCTTTTACCTCCCTGTCAATCTTGTGCGATATAGCTTGTGGTCCACAACAAAGAATCGTGCATTCAATTTCTA  
AATCGCGCATTTCACTTTGTTTTGATTTAAAGTATCTTCTATTGTTCTTAATAAGAAAGCTTTAGCATCTTCATCAATATTGTCCATA  
ATATCATTCGCCATCTTATTAGATAAGATAATTTGTGCTACTCTCATTAATACTAGGACACCTTCTACCATAGAGTTAATTAAGCTGT  
CTCTAATATTTTAGATGTGGATAATGCGTGCAGATGCTCTTCGATTTCTGATTTCTGATTAAATGCCTGCGGATAATTGACCAAT  
TTCATCTTTCTGTGTGACAGAAGGTTTATAAGAGTAATCCCTTTCAGATACACGTGTAGCTTGGTCTCTTAAACGCTTTAAAGGTTTT  
GTAATTTCTGACGATAAGAAAAACGCAAGACTGTTGTAATTTGTTAAGAAAATAACAGCCGTAATTTGTTGATAATCGTAATAGC  
ATTATTTGTATCTTCGATTGATTCAAGTCTTTATATATAAAGACTCCACTATATTTGCTATGACTATTCTTCTGTGCTTTTTGTTGGAT  
AGCCTAACAAAATATATGTTGAGATGAGCCCTTTTCTTTAATCGTTACATTTTCGAGTAACAGATTTACCTTTATCAAACACATCGTC  
AAAATGGTCTGTTGTTGACTACTTCATTCAACATTTGCTTTTTAATATTAGAAAAGTGAAGCCGTTGATTGACGATGTTTATTATTATA  
ATCATCAACCCACCAGGATTTTCAATTAATGTTTGAATATATTTTATTGCTTCTTCTTTATTATGTGATTGTTTCGACCAGTGAACCTTAT  
ACGTTCTAGCATCTTCTCTTATGGCATTTCGGTTTTCTGTGTGAAATAGTATTGCATAAAGGTAATTAAGCAATACTTAATAAAAAAT  
AAAACGTCTGCTCACTTATAAATAATAGTTAAACACAGTTTAATTACGACTATTTAGCCGCTCATCATAGATTAACTTAACTCAAA  
TTTATACCCAACGCCCCAGACTGTTGAATCATATGCGCAGCTTCGCTAGACACACGATTTAACTTTTCTCTAAGTCGTTTAAACATGA  
GTATCAACTGTTCTTAAATCACCATAGAATTCATAATGCCAAACTTCTTTTAAATATTGTTACGGTCAAATACTTTATTGTTGTTTT  
AGCTAAATATATTAATAATTCGTACTCTTTAGGAGTCAAATTAACCTTCTTGATTATCAGCAAGTACGCGATGTGCATCATTAATCTATT



CCAACCATTTAGTGTAGAAGTCATTTTCAGTAATAAAAAACAGCGGCATGAGGCGTTTCATTATAAAAAATGCCTTACTGCTGTTGTTT  
ATGTACAATTCGCTATAATTTATGATTAAGATTACTCACTTATGATAGAAAATTAAGAGTCGTCCTCACGCATCAGTATTTAGTAATT  
TCGCCCTGCGGCAGTGCCTTAAGCAAACCTTCTGCCACTTCATCTTTTAATAATTTTATTAACACATCTTTCTATATTTCACTTCGCATG  
TTGATTATCATATTATTAGTTATTATTTGTACACCCAGCACATTTTCCTTGCAACACAAGTAGTTTGAATTTTTCACAAGTATAATATAA  
TGTACTGTCTGAAATTTGGTCTACAGAAATATCGCCTAAAATATCCAGCACTGTAAATTTCTCAAACACTGATAGTTGTTCCGCATAT  
CGTACACAAAGTCTTACCACACTCTCCGATTGACAGTTCAATTGCCATCCACCTATTTATGCTTTATTTTTAAATAATTTAGGAAAAAC  
ATCGTTCAAAAAATCTAGGCGCAATTTGATACATTTTCAACGCATGGTGATCCATTTAGGCCGATTAAATTTCTAATTTGTTTTGTTTT  
AATGCCATAAATGATATCTTCTGCAAGCTGGTTAGCATCAAGCATAATTTTCCCCATCTTTTTAGCATACTTCATTGATGGGTCCGGCT  
TTTTGATGAAAAGGTGATCAATCGGGCCAAACATTAAGTGTATGATATGTAAGTTTGGTGACTCTAGTCTTAAAGCATTCAATTAAT  
GCATAAAACCCCTGCTTCGATGCCCATAAATGTGCAGCATTTTGTCTGAGTGGAAAAATGCAGCTTGACTTGAATACCTACAATATGT  
GCGTTAGATGTTAAATATGGTCTCAACACAGTATATAAAAAACATTAATAAATAAGCTGATACGTTTCAATCATTTCTGAA  
AAACTATGGTCTGAAATAGATTTGAAATAACCTAAACCTGCCTATAAATGAATCCATCGAATGATGTATTGCTTCAAATTCAGT  
GCCTGTATCGACTTCATATCATTTAAGTCACAAGGAATAACATTTATAGTTTTCCTCAATTCCTGTTCAAAGATTCTAGTTGCTTTAT  
CAACATCACGCACCAACAACGTTACATGCATTTATTTCTAGTAATTTCCGACAATCGATAAAACCTAAACCACTCGTACCACCAG  
TCACTATAAAATGTTGTCCTTTCATCAATTAACCTTCTCTTTCAATTAATAGAAATGCAATTTATCAACTTTACATAATTGAGACAAG  
TTGATTATCTTTCTAATATATACATAAATAAGAAAAATATAACATACAAATCAAAAACTAAAGGGATGTGACGTTAATGAAACTC  
GTATTTTATGGAGCTGGTAATATGGCACAAGCTATATTTACAGGAATTTAACTCAAGCAACTTAGATGCCAATGATATATATTTA  
ACAAATAAATCTAATGAAACAGCTTTAAAGCATTCGCTGAAAACTAGGTGTTAACTATAGTTATGATGATGCGACATTTATTA  
AGATGCAGATTATGTTTTTATAGGTACCAACCGCATGACTTTGATGCTCTAGCAACACGCATCAAAACCATATCACAAGACAA  
TTGCTTCATTTCAATTAATGGCAGGTATTCCGATTGATTATTAACAACAATAGAAATGCCAAAATCCAGTTGCTAGAATTATGCC  
AAACACAAATGCGCAAGTCGGACACTCTGTTACTGGCATTAGTTTTTCAAACAACCTTTGACCCTAAATCTAAAGATGAAATTAACGA  
TTAGTTAAAGCATTGTTGTTCTGTAATTGAAGTATCAGAAGATCATTACATCAAGTAACAGCTATCACCGGAAGCGGCCAGCATT  
TTATATCATGTATTTCGAGCAATACGTTAAAGCTGGTACGAAACTTGGTCTAGAAAAAGAACAAGTTGAAGAATCTATACGCAACC  
TTATTATAGGTACAAGTAAGATGATTGAACGTTGAGTTTGAAGCATGGCTCAATTAAGAAAAAATATTACCTCTAAAGGTGGTACG  
ACACAAGCTGGCCTTGATACATTTGTCACAATATGATTTAGTATCTATTTTCAAGATTGTCTAAATGCTGCCGTCGACCGTAGTATTG  
AACTTTCTAATGTAGAAGACCAATAAAAAACAAACCCGCCAACACATGTATGCATCATCGCATACATAGTTGGACGGGTTATTTTTAT  
AAATTATTACTATTTGGCAAGCATTTGTTTATTACTTTGTCATTTAGACTTTAAAAATCATCAAAATCTTTTACAAAAATTAATTAAGGTG  
TATCTTCATTTTGTATCAATGTTTGATAAATTTCAATTTATATCTTCTGTATTATAGCGATTGCTCAAATGTGTAATCAACGTACGTTA  
ACATTGGCTTCTTTTATCAATGCAAAATACGCTCTCAATATGGCTATGATGATAATTGTTGGCTAAATGCTTTTACCATCTATATAGG  
TCGCTTCATGTACCATCACATCAGCATCTCTAGAAATCACACGTTTCAATAGAACATGGTTTTGTATCACAAAAAATTGCTACAACCTG  
GACCTGTTTGGACTCACCTCTAAATCTTTTGTATTGATAAACTTGACCATTATGTTCAAATGTATCATGAGATTTTACTTCTTGATA  
TTTAGGACCTGGTTCAAGACCAATGTTTTTAAACGCTTCAACATTGATTGTACCTGTAGTTTCAGGTGCCATTACTCTATATCCATAT  
GATGGAATACCATGATTAAAGTAAATGCGCCTCTACAGTAAACCATCATGATGATATGTCAGATGATCATCGATTTCATATATGTA  
ATTGGATAGTTTAAATGTGACTCTGATAAATTCATAGACATTTCCACATATGCTTTAATTCCTTTTGGTCCAACCAATGTAAGCGGCT  
TCTGTTTACCGCCTGAAAGAAGACGACTAGAAAGTAAATCTTGCAAAACCAAAATATGATCGCCATGATATGAGTAATAAATATA  
TGTGTCATTTTCTAATTTAATTTGCATGATGTAATAATTTGGTGTGTGTACCTTACCAACGTCGAAAAGCCATATGGAATTGGAAT  
ATGGTTCTAATTTAAGGCGATTGCTTGTGTATTTCTCTCTTTTGTAGGCAACCTGCCTCGTTCCAAAAAATGTAACCTCCATATA  
TGCCCTCTCTTTTCTTCAATTCATTTTATCATAAAATTTGTATCAATTTAGTTTAAATTTTACTTGAATCAAAATCTGTTAAAAATTC  
GTCTTTGCTAGTTAATTTTCTAATTTAACGTAGACAAAATATATAAATTTTGATAATTACGTTATACCTATCATTAATAAGTATC  
ACATTAACATGATACATGAATCGATATTTCAATTAAGACACTGCATACGTGAGCATATTGAATGACCTGCTGAATGGATTATCT  
TATAATAATAAATCATATATCTAATTAAGAATTGAGGTTTTAATCTTGAGTACTAAAAACAAACACATCCCTTGTTTAAATCACAAATC  
TTTGGTGAACCTGGTGACTTAAGCCATCGTAAGTTGTTTCCATCAATATCCATCTCTACCAACAAGACAATTTAGATGAACATATTG  
CCATCATCGGTATTGGACGTCGTGACATTACTAATGATGATTTCGTAATCAAGTAAATCATCAATTTCAAGGCTAAAAGATA  
CAAAACAAATTTGACGCGTTTATGGAACATGTCTTCTATCATAGACATGATGTTAGTAATGAAGAAAGCTATCAAGAATTACTAGATT  
TTAGTAATGAATTAGATAGCCAATTTGAATTAAGGTAATCGACTATTCTATTTAGCAATGGCACCACAATTTCTTGGCGTTATTTT  
TGATTATCTAAATCTTCTGGTCTTACTGATACAAAAGGATTTAAACGCCTTGTTATCGAAAAACCATTCGGTAGTGATTAAAAATC  
AGCCGAAGCATTAACAATCAAATTCGTAATCATTTAAAGAAGAAGAAATTTATCGTATTGACCACTATTTAGGAAAAGACATGG  
TTCAAAATATCGAGGTATTACGTTTGCGAATGCGATGTTGAACCATATGGAATAACAATATATTTCAAACATCCAAGTTACAT  
CTTCTGAAATACTAGGTGTTGAAGATCGTGGTGGTTATTATGAATCAAGTGGTGCGCTAAAAGATATGGTGCAAAACCACATGTTAC  
AAATGGTTGCATTATTGGCTATGGAAGCACCTATTAGTTTAAATAGTGAAGATATCCGTGCCGAGAAAGTAAAAGTACTTAAATCA  
CTGCGTCAATTTTCAATCTGAAGATGTTAAAAAGAATTTGTTCTGGTCAATATGGCGAAGGCTATATCGATGTTGTAACAAAGTTAA  
GCATACCGTGAAGATCGCGTTGACATGACTTAACACACCTACCTTTGTTTTCAGGTAAATTAACAATGTAACACTTTAGTGG  
GCTGGCGTACCAATCTATATTCGTACTGGTAAACGTATGAAATCTAAAAACAATTCAAGTTGTCGTTGAATTTAAAGAAGTACCAATG  
AACTTATACTATGAACTGATAAACTGTTAGATTCAAACCTATTAGTAATCAATATCCAACCTAATGAAGGTGTATCTTTACATCTA  
AATGCTAAGAAAAATACACAAGGTATCGAAACAGAACCTGTCCAATTTGCTTACTCAATGAGCGCTCAAGATAAAATGAATACTGT  
AGATGCATATGAAAATCTATTATTCGATTGTCTTAAAGGTGATGCCACTAACTTCACGCACTGGGAAGAATTAATAATCAACATGGA  
AATTTGTTGATGCAATTCAAGATGAATGGAATATGGTTGATCCAGAATTCCTAATGATCAGGTAATGTTGCTCATTAGAAA  
GTGATTTACTACTTGCTCGTGATGGTAACCATTTGGTGGGACGATATCAATAATTGAATTAACGCACATGTTAAACAAAAATAAA  
TGAGCGAATGCAAGGATTGATTACGAATCAAGTAAATCAATTTGCTATCATCTCGCTTTTTTCTAGACTATATTGAAATTTATAT  
TTTACAGTCCCAAACTATTTTAAATCAATTGACAAATGGGTGTATAATTTATAGAATAATGTAAGAATAAATAAATGATTG  
AATTAATTTGAGTGAAAGTTTGGACGTTATCAAGCAAATACAACAGGCAATTTGTTTATATTGAAGATCGTTTATTAGAGCCTTTCC  
ATTTGCAAGAATTAAGTGATTACGTTGGTCTTTTCGCCATACCATCTTGATCAATCATTTAAATGATTGTGCGGCTTATCTCCAGAAGC  
TTATGCACGCGCGCTAAAATGACACTCGCTGCAAAATGATGTGATTAATGGTGCTACACGACTTGTAGATATCGTAAAAAATATCA  
CTATGCAAAATCAAATGATTTTGCAAAATGATTTTATGATTTTACGCGCATCACCTATTCAAGCTTCTACTAAAAAAGATGAATTA  
CAAATTCAGAGCGATTATATATCAAATTAATCAACTACTGAGAGAGCACCTATCCATACAGATTAGAAGAGACAGATGATATTT  
ATTGGTTGGATATGCACGATTTATAGACACTAAGTATTTGTCACATCCTTTTAAATGTTCCGGATTTTTTAGAAGACTTGCTCATTGAT  
GGTAAATTAAGAGTTACGACGATATAATGACGTTAGTCCATTTGAACATTTGTTATTAGTTGTCTCTTGAAAAATGGTTAGAA  
ATATTTGATGGTTACCAAGTGAACGTTATCTGACACTAGAAAGCCGATTTTTACCTGGCAACACTTGTTGCGAAATTCAAATTA  
CAAGGTGAAATTTGATTATGCAACTAATGAAGCTTGGTACTATATTGAATCAAGTTTGCAGTTAACATTGCCATATGAACGAAATGAT  
TTATATGTTGAAGTGTACCCTCTCGATATTTCAATTAATGACCCATTCACTAAAAATTCAGCTTTGGATTCTGTAAACAGAGTCCTT  
ATGACGAAGTTTAAAAATTAACAAAGAGCCCTAATATATCTATAGGTCTACAAATGGCCTTAGATTCTATTAGGGGGCAT

ATTAATATGTTAATTTAGTTCGATAACACATGCTTCATATGGACGTAAGTGTGTTTAAATTAACCTTGGCATCATAATTAATAGCTTT  
ACTTCTCCATGGCTTAAATCAAATGGTACAGTTAATTTCTGCTTCGTGGTTAGTAAGATTACCTACAATAAGAACTTGCTTTTCATTTA  
ATGTTCTCGTGTACGCAAAAACTTGTGAATTTTCAGCATCTACTAAATCAAATTGACCATATACGTATACATCATTAGACTTTCTTAA  
TTGAATTAATCTTTATAAAAATTGTAATACTGAATGCTCATCTTCTAATTGTTGTGCAACATTGATAGTTTTATAATTCGGATTCACT  
AGGAACCACGGTTCACCATTTGTAAATCCTCCATTTAACGTATCATCCATTGCATTGGTGTGCGAGAATTATCTCGGTTCTCATCTT  
TATATTTTCGCAAGTAAAGCGTCTACATCTCCACCTTGAGCTTTTACTATTTTGATAGTCATTTTAAACAGCAACATCGTTAAACGTTTC  
AATACTTTCAAATGGATAATTCGTCATACCAATTTCTTGACCTTGATAAATGAATGGCGTACCTTGTGCAAGAAATAAACAGCTGC  
ATGACTTGTGTGCTGATTACATACCAATACTTGTGCATCGTCACCCACGTCGATACACGTCGTGGTTGGTCGTGATTTTCAATAAACAAC  
GCATTCCAACCTTTATTTTCAAGTTGTTTTGCCATCTATTTAATACAGATTTATACGAATTTACATCAAAGTGAGAATCACCACAT  
TCCACAGTCCCAAATGTTCAAATTGGAATATCATATTAAATTTACCATTTTCTTCCCGACCCAGTCATCAGCATCATCAGGACTTAC  
ACCATTCGCTTCACCAACAGTCATAATGTCTACTTACTTAATGAGCGATCTTTTCATCTCTTGTAACCAAGTTTGTATACCTGGCTGA  
TTCATATCTACATCAAATGCTGGAGCATATGTTTTATCTCAGGTACAGGTAAGTCACCCGCTTCAAACGCTCTTTTAAATATGCGTAA  
TTGCATCTACTCTAAATCCATCAATGCCTTTATCAAACCACAGTTTCATCTTTCAAATACAGCATCTCTAACTTCTGGATTAGCCCA  
ATTCAAATCAGGTTGTTTTTACTGAATAAATGGAAATAATATTGCTCAGTATTAGCATCATATTCCCATGTAGATCCATTAAAGATA  
CTTTCCAGTTGTTAGGTTACAGGCCATCTGGCTTTGGATCTTGCCAAATATACCAATCGCGCTTTGGATTGTCCTTACTAGACTTAG  
ATTCTATAAACCAAGGATGTTATCAGATGTATGATTTACAATAAATCTAAAATAAGCTTCATGCCTCTATCATGAACACCTTTTA  
ATAACGATCAAAGTCTTCCATCGTTCCAAATTCATCCATAATCTTGGTAGTCACTAATATCATAACCAATTGTCATATTAGGTGA  
TTTAAACATTGGACTGAGCCAAATGACATCGATACCTAAATCTTTAAGTAGTCCAATTATCAATCCAGGTAATCCCAATCCCAAT  
ACCATCGTGATTACTATCATTAATAAATCTTGGATATACTTGATGTACTGCTTCTTTCCACCATTGCTTATTCATTTTAAACTCC  
TTTGCTATCGCTGTGTTGATTTTCTTATTTTAAATCTATATCTATAATGACGAGTTCAATAACATCCTGTGCTTTATTTTAAATATAT  
TTAAAAATTGCTGCACCAGCCTGTGACCTAACATTGAGGCTTGATGTCAATACTGGTTTGAGGTGGTGACGCAATTCGGTTAAAT  
AAGAATCATTGAACGTTGCTGTCAATTACATCTTTCCGAATTTCAATATTAAGTTCATATAGGACACTTAAATCGCTAAATGTAACA  
CAGCATCTAACGAAATGATTGCCTGTTAATATTTGGGTCCTTCAAACGCGTATGTAGATTTTGCATGTAATTTAAAAATAACTTCTCT  
TTCATTACTAGTCTCAATAATTTGATAAATTAATTTTATTTTGAGAAGCTATCGTTTCAAATCCTTGAATCCTGTCTTTTGAAACTTCAA  
AATCGCTTTTTCTGTAATAAATATTAATTCATCTACACCTTGTTCAATAACATGTCGTGTCAAATTTTCAGAAGCTAATATATTATC  
ATTATCTATATGTGAATTTGATGATCTATATCCGATGTAGGCTTACCAATCACAATAAATGGCATGCTTTTCATCAATTAACATTTGT  
TTAATCGGATCATTTTCTTTTGAATAGAGCAGTATAAACGCATCAACCATTCGTTGTTTAAATCATTTTATAAACTTCATCCATTAAAT  
CATTCATATTATTTGAGACTGTCGTTTGTGTACCATAGCCATGCTGGTTACATGTTTCAGAAATCCCTAGCAATACATTGATGTAGAA  
TGGATTACGTGCAATAGGCTCCTCAGACCCTTTTAACTAAACCAATTTTATATGTTTGGTTAGTAATTAAGTTCTAGCAGCAGTA  
TTAGGAAAATAAATCAATTTCTCCATAACTTTCTTCACTTTTGAAATTGTCGCTTCGCTAATACGTTCAATTCCTTTTATAACTCTTGA  
AACTGTGCAAGGAGAAACACCGGCTTTTAGTGCAACATCTTAAATCGTAACCATTTAATCACCTCCTGTTAATTTCTGCATTGGAAA  
ACGCTTCCAAACTCTGTATAATACCAGTTTAGTCACACTTTCTAAAAAGTCAAAGATTGTGCAACGATTGCATAAAGCGATAA  
AAATAAAACCTTCATACTGAAATTCATCCGAAAATCAATATAAAGGTTTGTATAAATAGGTTCTATAATAATCGGACTGATGGA  
AAAAGTATTTTAACTTTTCATCTGTCCGATTTTGTGATTTTGAATATAAAAAAGCGCAATTATCTCTATAATTAAGGTCCTTAAACA  
AAAACCTAAAGGAGATAATGCGCTATGAATAATGTATATACTAAATCCTTTGATTTTAAAGATAAAAAATATTATTTTGACGGTAA  
ACTTGAGAAAATTGAGTATAAAGGGAGAAAAGTGTCTTTTATTACGCAAACTAATCTATACACCTGAGGTGTGCCAAAACCTGCA  
ATTGTAAAAACATTAATGGTAATTTAATCAAAAAATGGATCTAAGACTTCTAGAATCACTATGCCTAAAAATCTCCGAATATCCAACCT  
ATATCATGTTGCGTAAGCAACGTTTAAATGTAAAACGTGCGAACGATACTTTACAGCCGAAACACCTGAAGTTGATAAAATACTGTT  
TTATATCAAAAAAACACGATCAGCTGTACTTAATAAAGCAGCAGAAATTCGTTCTGAAAAATCTATAGCGAAATCCTGCTCTGTGTC  
AGCTACCACAGTTTCTCGTATCATTGATGAGGCCGCTCAATCGCTTCATCAATCGCCGATTCTGCACTTCTGACATATCATGATG  
GATGAATTTAAAGTTTAAAAATGTTTCTGGGAAAATGAGTTTATATACGCTGATGCACAAACGCATCATATTATTGATATTGTT  
GAGGATCGTAGATTAAGTGAGTTGAAAAAGTATTTTATCGTTTTCACTTAAAGCTAGAAAAACGTGTAAGACTGTTTCCATTGAT  
ATGCATGAAGGCTATATGACATTGATTAAGAGATGTTTCCGAACGCTAAATTAGTTATCGTATGATTCATATTGTTTCAATTTATTA  
AATCGTGCTTTAAATGGTATTCGAGTCGCTGTTATGAATGAATTAAGAACGAAGAATCAACCTTTATATAAAGTTTAAAGATAT  
GCGAAATTAATTAATAAACCTGGAGAAGATTAGAGGCATTTGAATATCGTAAAGTAGCTTTATTTAAGGAATGGAAGACACAAAA  
GGGTATCGTCAAGTATTTATTAGATCAAGATGATTCGTTAAATGACGCCTACCAATATATCAATCAGCTACGATTCAAACCTTAAACA  
TAATGATTATGAAGGCTTTATTCACGAATTAACACATATGCCATTATCCAAACGCATTAGTTGTCCAACGAGCAATTAAGACACT  
TAACAAACATGAATACTTTATAAAAAATACATTTGATTATTACAATTTATCAAATGGTCTTTAGAAGGTATAAATAACAAAATAAA  
ATTAATTAACGTAACATCTTTTGTTATGGAAGTTACAATCAATTTGCGCAATCGAATATTATTATGTTCAAACTTTACGCTCCAAAA  
AGTAAAAAGGAAGTTAAGCAATGTTTAGTTGCCTAACTTCCGATTTGAACGCATCATTTCAATTTGACATAGAGCCTATAAATATT  
AAAATCAGATTGTTTAGTCACTAACTGCAAAATAGTTACCTTGCCATCTTGAAAATTAATAACAGTTGACCATTCATTTCTACTATA  
TCATGCCAGTTAAACCTTAATCATTTAATTTTGAATATATGCATCAAAGTTTTCTCTTTAAACATTAAGATGGTGTTCCTAGGT  
TCACTTCCGGGCTATACTTTTCAATAAATCTTTTGCCATAATCGTCAATGACGTTTCAGCATCTTTCGTAGGTGATACTTCAACTGC  
AACATAGTCTCAGCTAACGGTGTTCACCTTACAACAACAAATCTAAAGTTTCTGTCCAAAATGCTTTTCGCTTTGTCAACATCATCA  
ACATATAACATAAATGATTTAACTTTTCCATAAGTTAATACCTCTATTTTCTCTATAGTACATGCTATCATAACACAGTAAATATTTT  
ATTACTTCACAAAATGCTTAAAAATATGGCGGGATGCTTTAAGGTCAAAGATAATACTTGTGTAATTTTATAGGTTGTAGCTACT  
CTATCACACTCTCTTTTATATTTATCAAAAAGATATAAAAAAGGATAGTATCTTTCAACTATCCTTTAATCAATATTATTCTTCAATCC  
ATTGTGATGGAATACGCCTTCTTTATCTTTTCTTTCGTACGTGTGAGCACCGAAGTAGTCACGTTGTGCTTGAATTAAGTTTGCAGG  
TAAATCAGCTGCACGGTAACATATCATAGTAATTAATACTTTGATGAGAAACAGGTGTTGGTACACCATTTTGAACACCGAGTTGCGAC  
AACATCAGCTAACGCATCTTGATATTCAAGTAACGATGTTTTTAAAGTAAGGATAGCAATAAGTTTGTAACTCTGATTATTATC  
GTAAGCATCTTTGATCTTTTGTAAAGAAATTGTGCACGGATAATGCAACCTTCTCTCCAAATCATAGCTAAATCACCAGTTTAAATTC  
CATTCATTATCTTCACTTGCTTTACGCATTTGCGCGAAACCTTGTGCATAAGAACAATTTTACTCATATATAATGCTTTACGAATTT  
TTTCTAAAAAGTCTTTCTGTCAACATCAAATGATGCTTTTGGACATTTAATCTTTTAGAAGCATTTACGCGCTCTTCTTTGATTGAA  
GAGATAAAACGTGCAAAATACAGATTCAGTAATGATTGTTAATGGAATACCTAATTTCTAATGCGTTAATTGAAGTCCATTTTCTGTGA  
CCTTTTGTGACCTGCAGTATCAAGAAATTTTCAACTAATGCTTCTTTATTTTCATCTAATTTTCATGAAAAATACACAGTGATTTCAT  
TAAATAAATTTCTAATTCACCAGCATTCAGTCTTTGAACGTTTGAGCAATGCTTTCATGAGACATGCCTAATAATTTCTTTCATCATA  
GCATAAATTTCTGCAATTAATTCATGTCAGCATTTGATACATTTGTAACCATTTTACATAGTGTCCAGCACCATTAGGTCCAA  
TATAAGTAAACATGAAGACCGTCTTTTGCTTTGCGCAATTTGCAATTAAGAAATATCTGCAACTTTGTTATAAGCTTCTTCTGTGCC  
ACCCGGCATTAATGACGGACAGTTAACGCTCCAATTTCAACACCAGAAACGCCATACCAATAAAGTTGATTGACATTTGTGCTAA  
TGCTTTATTACGCTGATAGTATCTTGATAGTTTGTATTACCACCATCAATTAATAATCTCCATCATCTAATAAAGGTAACAACTA  
TCAATCGTTGCATCCGTAGCTTTACCTGCTTGAACCATTAATAAAATTTTACGTGGTTTTTCTAAAGAATTAACAAATTTCTCCAATG

AGTACGTTGGATGAATATTTTTCCCTTTTGATTCTTCAACCATTAAATCAGTTTTTTCACTTGAGCGGTTAAATACAGATACACTATA  
TCCGCGTGATTCAATATTCCAAGCTAGGTTTTTACCATAACGGCTAAACCAATAACTCCAATTTGTTGTGTCATATTACTTACCTCA  
CTTGTTGATTTTTTCATTAGTATTGTATCACAAAAATAGACATACACTACACTAAATCATTTCGATTGTGCGCGCAACTATTTTGATTATTT  
CTAACACTTGACTTGCAAGCAAGTTCAATGATTTAATCGGCATTCTCTCATTGTTGTATGGATTTTTTCATAACCCACTCCTAAAAAT  
GACTGAAGGAATACCAAATGTATTAATAATACTGCCGTCTGAACCGCCACCAGAAATAATTGTATTGCGAGATAACCCTAAATTAC  
GAGCACTTCTTGTGCAATTTTAAACAACCGTTTCATTATCATTAAATTTTAAAACCTGGATAAATTTGCTCCACTGTAACACTACTGCTTTC  
CCACCTAATTCTGTATGCGAGTTGTTTCAAACACATCAGTCATATGTTTGACTTGTGTTTTTATTCTTTCTGGATCGTGAGAACGTGCCTC  
TGCTTCTAAAATGACTTTCATCTGCAACAATATTCGTAGCTGAACCGCCATGAAACTTACCAATATTGGCAGTAGTTATTTTCATCAACT  
TGTCCTAATTTTCATTGACTAATTGCTTTCGCCGCAATATTAATAGCACTAACACCCTCTTTTGGCGTACTTGCAATGAGCCTTTTGGCC  
AATAATTTTAGCTGAAATTAACATTTGCGTCCGTGACCTACAACCGTAGTACCGACATCAGCACTTGCAATCAATAGCATAACCAAAA  
GTCCGCGTCCAACAACCTGAAATTTAATCTTTAGCACCAATTAACCTGATTCTTCTCAACAGTAATCACAATTTGAATTTGTCCA  
TGTGAGATTTGTTGTTCTTTATCATTGCAAAAACCTCAAGCATAGCTGCTAATCCTGCTTTATCATCTGCACCTAGAATAGTCGTAC  
CATCAGAGTATATGTAGCCGTGCTCTTTTACAATTGGCTTTACATTAATTGCGGGTACAACAGTATCCATATGGCTCGTCAAATATA  
ATTTAGGTACTTCGCCCTTCTCGATAGTACTTTTCATTGTACACACTAGATTATTGGCACCTAATTTAGGATGTTTAGCCGCTTCATCT  
TCTTTAACATCTAACCTAATGCTATGAATTTTCTTTTAAAATAGGTTGGATTGTTGATTTCATCCCTGTCTCAGAATCGATTTGTAC  
AAGTTCTAAAACGATTAAGTAATCTTTGCTCATTAAATCATAATGGAACCCCTTTTATCAAAAATTTTCAAGTACGCCAAACGGTAA  
AAATTGATGAAATAAAATGTTACAGTAATTGACGTTACACAGATTTATCAGGCTTGTAATTTGTGTCATATTATTTTCAATTTAATAT  
ATATATTTTACTGTAACCTCAAACTAAGCTTTGTCAAAAAATATTGATTGATTTTCAAAAGATATCGTAAATGAGGAAAAATGACATA  
AGCAAACTTACTCATGTTTTTTATAATATTCCTTTATGATGATTGCTAGTTATATCGTCTCAAATTTAAAGTTTTATATCTTATGTCGT  
AATTATTAATACAAAGGTTATTCATTGAGGACACAAAAATGCAAAATAAAGTTTTAAGAATTATCATTATCGTTATGCTTGTATC  
AGTTGTATTAGCATTGTTATTAACGAGTATCATTCCAATTTTATAAACTATATCTCAACTACCTATACAAAATCATACAATTAAAAAAT  
CCATCCGTTATAAACGCGATGTATTAATAAGTTATCGTATTGCAACGATTATTTTCAAACATGGGTCATACGGATGGATTATTTTTAA  
GCTACTTCATATGCAATTTTCAATGAACCAAAATTGCGATTGATTGTAAATATTTCTTCAATTCATTTAATATTTGAATAATACTTGC  
TCTCGAGTTAAGCGCTTTGTGTGTTGTTGGCAATGGAAGTTTCATCCAATTTCAAACGCGTCTCATACAAAATTGTGTAAACGCATTGCT  
GTATAGTCATTACTATTACATTTAGACCAATTTCTTTCAGCAGTACGCGAACATCATTTAAAAGTGGATCTTTATGACAGATACTTT  
CGATGAGCGGTTTTCATTCTCATTAACAATTCCTTGTCTTCTCGCATATCAAAAATATGATAGTATGAATTTTCGTTTCTAACAAA  
ATGATTTTTTAACATCTCGGAACGCGATAGACTTCGCCTTTTTAAATTTTAAAAGTAAACACTTCAAATTCATGCGCAATGGTATCTTCA  
TATTTTTTCAAAATATAACTATATTTACTAAAAATATCAGCAATTTGTTGCTCAATTTTACATTTGTATTCTGCTAGTTGTTTGTCTAA  
ACTTGGCATCATTAATTCATTGTAATGCAATGCTTAGTCCAATTAACAGTAATAATGTTTCATTAACAATTAATGTGCATCAATT  
GATTTTGCATTAACCAATGAAGTAATATAACGCAACTCGTAATGACACCTTCTTGTACTTTAATACGACAGTTAATGGTATAAAT  
AACAATACGATAATACCGAGTACAATTGGACTCTGACCTAATAAACTAAATATTGCTGAACCTAAAAACAATACTAAAAAACATGA  
TACTAATCTTGAATAATCGCTTGTAGCGAATGTACTTTTGTATGTTTAAATACATAATACGACTAATATGGCGCTTGAAGCATAATTA  
TCTAAACCTAACAGCTTACTAATAATTACACCTAAAGTCATACCCACTGCTGTTTTTATTGTTCTAAATCCAATCTTGTAAAGGATTTA  
ACTTTAACATGGGTTAGCGCCTCTTATCTTTTCACAATATTTATTGAATAATGTTTGAATTGATTAATACGTTTCATCATCATCATG  
ACCTTCGATTTGATGCTCTTCAATCATTTCGTAACTTTTCCATCTTTTACTAATGCAAAATGACGGAGTTGAAGGCGCATAACCTTCG  
AAGTATTCACGCGCTCTTTGTGTCGCTTCTTTATCTTGTCCAGCAAATACTGTCACTAGACGATCAGGTAATACGTCATAATGTAAAG  
CATGTGATGCTGCTGGTCTTGGGATACACCTGCACAACCACATACAGAATTGATCATAACTAGTGTGTACCATCTTGTTTAAGAA  
CTTTGTCAACATCTTCTGCAGTAGTTAATTGCTCATATCCCGCAGATTCAATTTTCATTCTTGTCTGTCTACAACACCGTTTCATGTAT  
AAATCGAAATTCATGTCATAAGTTCAATCACCTATCCCTTTATATTTAAACTATCCTCATCTACTAATTAATAACATATTGTTCAA  
TAAACTAATCTGAATCACACCTATATTTAGACACAATTTTAAACAATATACCAAAACATTATTGTGCTTAAAATCATGGTAACTAATTT  
GTTTCATGTTTTCATTAATATGTTTCAAGTATGATGTCTATTTTGACTTTTACTGCAAAAATTCATCAACCATGTTGATTATTGTTTC  
TTTATCTTTTTTGAATATATTGCACATATTTTAGTGCCAAAAAATAATACATCCATCGACAAGAACAAGATAAAAAACAAGTTGTCAT  
AGATGCATCTATGTTTACTAATAATATATTTGTATTTTCTAAAGTATACATGTTTCGATACGCTGTTTAAATATGATTCATAAAATTTACCT  
GTTTGTAAACCATTCAAAAACGATGATCAATTGAAATACATAAAATTAACCATGTTACGAATTGCAATCATATCATTAAATTACTACT  
GGCTTTTTAACGATTGATTCTACTTGTAAAATCGCTGCTTGTGGATGATTATAATACCCATTGATGATACTGAACCAAAATGTACCAG  
TATTATTTACCGTAAATGTACCGCCCTGCATATCTTCAGCTGTCAATTGCTTATTACGCGCTTTCATTGCTAAAGTATTAATTTCTCTA  
GCTATACCTTTGATTGACTTTTCGTCTGCATGCTTAATCACAGGTACGTATAATTTATTTTCATCAGCAACAGCAATTGAAATATTA  
TGCTTTTATGTAAGACAATTTTCATTTCCCTTGCCAGCTACTATTTAATAAAGGATATGCTTTTAAAGCATCTGCTACAGCTTTTACAAA  
GAAAGCAAAGAACGTTAGATTATATCCTTCTTTATTTTAAAGCTGTTTTTATAATGATTTCTCGTATTCAAGATTGTAGCATCT  
ACTTCAATCATCATCCATGCATGTGGAATCTCTGTTACACTATTAACCATATTTTGGCGAATTGCTTTACGCACACCATTTACTGGTA  
TTGTGCTGTTTTCATTAATTGTCTTCAGATGATTGGTTACTTGTATCTACTGATGTTGATTTTGTGTAATGTTTGTGACTGTTTGTG  
GCTTGGTACCACCTTTTCAATAACTGCATTATCTCTTGTAGTTACACGACCTTCAAATCCACTACCTCAACTGTTGATAAAT  
CAATGTCATGCTCTGAAGCGAGTTTAAATACAACAGGTGAAAAGCGACCATTATTACGTGGTTGATTTTGTGTTAGCAGTAGATGTCT  
GTTCCACTGTTGCACTAGCTTTTTTAGTAGATTCTGAGTATGCTCATCCACTTTTGTGTTGATCTCTTCAGTTGTTTCAATTTGTCTTTT  
CATCAGCAGTTTCAATTTTACAGATAAATTGTATCAATAGCTACTGTCTGCCCGCTTCAACTAAAATTTCTGTAATTGTTCTCTGATAT  
CGTGGAAAGGACTTCAGCTGTCACTTTATCTGTAATAACTTCACATAATGGTTCATATTCATCAATATGATCACCACAGAACTAA  
CCATTGTTCAATGGTACCTTCATGAACACTCTCACCTAACTTAGGCATTGTTATTTCCATGACTTTCCCTCCCTAGAATTTCTGCTAATT  
CACGCATTTTATTTAAGATTTTTTCTGGATTTCATCATAATTTTCATTTTCTAATAACAGGTGAAAATGGCATAGATGGTACATCTGGAGC  
AGCTAAACGCATGATTTGGTGCATCTAAATCGAACAAGCAATCTGCAATAATCGCTGACACTTCTGCATAAATACTACCTTCTAA  
ATTATCTTCAGTTACAAGAAACTTTACCTGTATGTTTATGACGCTATACATAAATAATTTGTTTCTTTATCTAATGATGAATAACAGTTCTGAAA  
TCTACGACTTCAACATTGATACCGTCTGCAGCTAAAAATATCAGCGGCTTGTAAGCAATAATTGACCATTAATCCATAACAAAATACT  
GTTAAATCTTCACCTTCACGTTTAAACATCTGCTTTTCTTAAAGGTACAGTGAATATTCTTCTGGCACTTCTTCTTTAAGAAACGAT  
AAGCTTTTTTATGCTCAAAGTACAATACTGGGTCATTTGATTGATAGATGATAATAAAAGCCCTTTAGCATCATACGGTGTGGAAG  
GAATAACAATTGTTAAACCTGGTGATGAAGCAAATATACTTTCAATACTTTGTGAATGATATAGTCTCCGTGAACACCGCCACCAA  
ATGGTGCACGAATCGTTAATGGGCATTGCCAATCATTATTTGAACGATAACGCATTTTTCGACGCTTCACTAATAATTTGATTGTGCG  
AGGTAATAATAAATCTGCAAAATGAATTTCTGCAATTGGTCTTTTACCAACCATAGCTGCGCCAATAGCTGTTCCGACAATATTTGA  
CTCAGCTAATGGTGATCGATAACTCTGTCTCACCATTATGTTGTTGTCAGTCTTGTAGTAGTACCAATACGCCACCTTTTTTACCA  
ACATCTTCACCAAGAAATAACATCTTATTTTGTGTAATGCTAAGTCTTGTGCTGGCGAATCGCTCTAAATGAAGATAATTTAG  
CCATTAGTTAAGACTCCCTTCTTCGTACACAAATGCATAGGCTTCTTCGACACTTGGATATGGCGCGCTTTCAGCAGCCTTTGTGCGCT  
TTATTGATAATGTCTTTATGTTCTGCTTCTATTTCTGCCAACCAAGCATCATCGATAATGCCAGCTGAAAGCAACTCTTTTTTGAACCT  
TTCATTGCAGTCTGCTTTTTTAAAGCGCTTCACGCTCTTCTTTCGTACGATATTGATCGTCATCATCTGATGAATGAGCTGTCAACGAC

TTGTTACTGCTTCAATCAAAGTTGAACCTTGACCAGAAATAGCTCGATCTCTTGCTTCTTTTCATCGCTTTATACATTGCTAATGGATC  
ATTACCATCTACTTGTTCACCATGTATACCGTAACCAAGTGCTCTATCCGATAATTTTTTCAGCTGCGTATTGTAATGAATCAGGTA  
GAAATTCATATTTATTATTTATAATGACACATACAAAAGGAAAGTTTGTGTACACCCGCGAAGTTTAAACCTTCATGGAAGTCACCT  
TGGTTTGAGCTACCTTCACCAACAGTTGCTGTTGCAATTTTCTTACCATCCATTTTATAGCTAAAGCAGCACCACAGCATGGG  
GTATTTGAGTTGCTACCGGTGAACCTTTGTGACAAAATATTCTTAGCTCTACTACTAAAGTGTGATGGCATTGTGTTCCACCAGAGTT  
AACATCGTCTTTCTTTCCAAACGCTGATAAAAACGTATCATACGCTGAGATACCCATATAAGTAACGAAAGCTAGATCTCTATAATA  
AGGCGCTGTAATATCACCTTCTTCTAATGCGTATGCCATCCCAATCTGAGTTGCTTCTTGCTTGGACCTTACAACAAATGGAATT  
TTACCTGCACGGTTCAATAACCACAGTCTTTCATCTATTTTTCTACCTAAATCCATCCATTTATATATTACTTTTAGGTCTTCTTCGCT  
AAGGCCTAATGATTATAATCAATCATGTTAAATCCTCCTATTTATACGTGAATAGCTCTACTTTCTGCTTTCATCCTAATTCCTATC  
AACACTTCAGAGATGGAAGGATGTGCGTGTGTTGTTAGTCCTAATTTCTAATGCCGAGCCATTTCATGAACGTGAACAGTGATGCCCTCA  
TTAATCAATTCTGTTACATGTGGACCAATCATATTAATACCCACAATTTCTTCAGTTGATTGATCAATCACCATTTCGCTATACCCCTT  
CGTTTGCGTCATGGCTATCAATCACTGCTTTACCAATTGCTTTAAATGGTACTTTAAAACCTTTTAACTTTTCATTCCCTCTGCTTTGCT  
TGTTCAATGTTTAAACCGATAGAAGCAATTTAGGTTGTGAATAAATACACTTAGGCATCATGTTATAGTTTACTGGGATTGGGTTTC  
CCCTCAAACATATGATCAACAGCCACAACACCTTCTTTGATCCAACATGTGCCAATTGTAATTTTCTATACAATCACCAGCTGCAT  
AAATATGTTTATCTTCAGTTTGTGAAATTCGTTTCGTTAAAAATATGTCCTGATGTTGAAAGTTTATTTTAGTGTTGTTAAACCAATA  
TCTGATGTGTTAGGTTTCTACCAATCGATAGCAACACTTTATCTACTTTAATTATGTCGTGAGGAAATTTCAAACGTAACACCATCTT  
CGTTAACATTTATATCATTTTCAGAAAGTTTTATTCCCTCATAGAATTTAACACCACGTGCTGACAATGATTTTTTAATAGTTGTGA  
AGCTTGTTTACTTTCAGTTGGTAAAATTTCTTACCTGCTTCTATAACTGTACGTCAACACTTAAATCATCATCAATGATGCAAAAT  
TCCATTCCGATAAACACCACCAATAATACCAATCTGATGGTAACGCTTTAATGATAATATATCATCGCTAGATAAAAAATTTTA  
TCATGATCAAAATGATAAAGATGGCAACTCTGCAGGCGAAGAACCAGTTGCAATTAATACAAATTTGGTTGGGTAATAAGTCTGATTC  
ACCATCTTCATATTCGACAGAAATTTGCCACTTTGAGGTGAAAATATAGATGTACCTAGAATACGTCCCGTGCCATTATAAATGTC  
AATGTGATTGTGTTGCATTAATGCTTTACACCTTGATACATTTGATTAATAATGTCTTCTTTTCGTGCCAACATATTTTCAAAATTA  
CATTAGCATCTTTGACATCAACGCCAAACATTGCTGCTGTTTTACTGTTTGAAATACTTCAGCAGATTTAAGCAGCGATTTAGTAGG  
AATACAACCTTTATGGAGACAAGTACCTCCTAATAGTTGTCGTTCTACTATTGCCACTTTTTTACCTAATTGAGACGCACGTATCGCA  
GCAACATATCCTGCAGTACCTCCACCGAGAACGACTAAATCATATTGTTTCTCTGACATGTTCTTACTCCTAACTAATGATATATATC  
CATTGAAAATTTATTAATACATAGTTTTCATGTCCATTAATTACCTATTTCATGATTGTCTATTAGTTTGAATGCACATAAATA  
ATCCATAAATGAGTATTCAACACACTTTGGAAATTATCTACGCTTTGATTGTGTTGTATCATTTCTCTTCGATTTTCTCGAGTTAAAT  
CAGTAACACTTGCACCTGAAATCATTCGTGCAATTTTCATCTACTTTATCATCGCCAATTAACCTTGAACCTGTGTTGTTGTACGATC  
ATCTTTTGATGACTTCGAAATTAATAAATGATGGTCGCTCATCGATGCAACTTGTGGCAAGTGAGAAATACAAATAACTTGTATATA  
TTCTGCTATATCTCGCATTTTCTCTGCCATTTTTGTGCGGCTTGTCAGATACACCTGAGTCAACCTCATCGAATAAAATTCGAGTTT  
GACCTCTCGATTTAACAAAAATACTTTTTAACGCTAACATAATTCTAGAAAGTTCTCCACCTGACGCAATTTTATTTAAACTTTTTAA  
TGGTTCCTTTTATTTGGACTGATTAATAAATTTCTACAAATTCGATTCCATCAATATTCGGTTCTTCTAATTTTTTAAATGAAATCTCAA  
GATTTGCGTCTTTCATTTGTAAGTTTGAATTTCCGATACAATGTGGTCTCTTAACTCCCTAGCGACTATACGACGCTGCTTTGATAA  
CGCTTGTCAACCTCTATAACTGATTATACAATGCATTTATTTCTCTCGTAACCTGCGATGTACTTTGTTTCATAGTTTTCATTTTAT  
TGATTTCTATTATTAAGCTTTTCTTGATATGCGATTAATTCTGAAATATCTTTTCCATATTTACGTTTAAATATTCAGCAAAATTCATA  
CGAGATTCATACTCGTTTAACTTGTTCGTCGAATTCTGTATTAGCCATTTTCATCATATAACTCATGTTTTCATCTTCTAAAATGTA  
ATAAAATTTGATCAATATCTTCTTTTAAATTTGTCATATTTGTTTGGAACTATATCGTTTATTGTTAACAAATGGTTGCTTAGTTCATACA  
AACGATCAGTGATAGCATTTTCATCCGTTAATGTCATATGTGCGTTATTAAGCGCTAAGCTTAATTTTTCAGAGTTTGAATGCGTTT  
AATATCTATTTCAAGTTGCTCTATTTCCGCTTCTTTTAGATGTGCTTCAGACAATTCCTTAATTGGAATTTTCATTAATCTAAACGCT  
GCAGCAATGCTTGGTCTGCTGATTCTAAATCTTCAACTCTTGCTTTTTGCTTTTATAAATTTTGAAGTTTGTATGATTTATCCAAC  
AAATCTTGATAACGTGATTCTGCGTAATTATCCAATAATGTTAAATGGTATTTTTGTTTCAACAAAGACTGCGTTTCATGTTGGCCAT  
GAATATCTAATAATTTCTTGATAACTTTTCGTAATCTTGTAAAGTAACTGTTTGATTATTAATTTTACAAAGACTTTTACCAGAGCT  
GAAAATTTCCCGTTTAACTAATAAAAAATCTTCATCTGATCAATAATCCATATTTTCAATATATGTATAGCATTTTACTCTCGTCA  
ATATCAAAATATACCTTCGATGACAGCCTTTTTTACCATGTCTTACAAAATCAGATGAAGCTCTCATTCCAATTAATTGTCCAATTG  
CATCTATAATAATTGACTTACCTGAACCCGTTTACCACCTTAAACAGTTAAACCATCAGAAAAATTGAATTTCTAACTCTTCAATAAT  
AGCAAATTGCTTGATTGATAAGGTTTGAACATAAACTCATCGCATCCTTATAACAAATTGAAAATTTCTGACTTGATTTTCATCACTT  
GCCTCTTTGCTTCGACAAATAATTAACAAGTATCATCACCACAAATTTGTCCTAGTACTTCTTCCCAATTGATTTGGTCTAATATAG  
CTCCAATAGATTGTGCAATTACCAGGTAATGTTTTAGAACAAGTAAATTTATCAGTACCATCTATATTAACAAAGGAATCCATTAAAT  
AACGTCCCAATTTTTCTAAAGGATGGAATTTTCTATCATTTGGTAAACTATAAACATATTGACCTGAAGGTATAGGTACTTTAATAA  
GTTGTAGTCTTTAATATCACGAGAAACAGTTGCTTGAGTGACATTTAAATCATAATCGTTTAAATCGTTTAACTAATTCATCTTGTGT  
CTCTATCTGTTTCATTTGAAATAATTTCTCTAATTTTATATGCTTAACTGCTTAACTGCTTAACTGCTTAACTGCTTAACTGCTTAACT  
TATACATTTTAAACACATGCTGATTTACGATCTACTAACACCTTTACGTTTAACTGCTTAACTGCTTAACTGCTTAACTGCTTAACTGCTT  
TCTATTTATAAATATTTTTCATATTACGCATAACAATTGCTTAAATAATGTATAAAAAATGAATATATGTGTAATAAACTTGTCAATTA  
TTAGATTTAATAAGCGTCAATTGTTGAACATATTTAATTAATAATCACATTGATATCACAGATGCGAATATTGTGCTATAGAAATTTG  
AAAATTTCTATTTTAAATGAAAGTCTTCAACATAATTTAAGTTTCAACATGAGAAAAATCGATTAAACAAACACGTCAGTTGAAT  
ATGCTTTTGGAGACATTTCAAACCTTACAATTGTTGCTAATCGATATATTGCTTTTATGATGCCCTGCTATAAAAAATAATCAACGAT  
TTCTAATAAGTGTTTGTATTGAATTTGTCATCAATTTGCGTTAGTTCATCCACTGCTGCGTCTCTATGATAAGTCAATTTATCTTCTG  
CGCCATCTTTCCCTAATAAACTCACGTACGTACTTTTATTTTCAAGATCGCTGCCACTTTTTTACCTAACTTTGCTTCATCACCA  
TAGCAGTCTAATAAATCATCTTTAATCTGGAACATCATACCTAAATGATCAACTAATCTTAAATGTTCTTTAGTTGTCATCATCGA  
CATTAGCGATATCTGCTGCACTATAACCGCAAAAGTTAATAATGCTCTGTTTTTGTGTTTAACTTCCAAAGTTTCAAGATC  
AATTTGGTTGGCCTTCGCTTTGCATATCTAACATTTGACCGCCGACCATTCCAACATGACCACTTGCTATTGACAGCCGTTGTAGAATC  
TTTATTTTACTTTCATCAGTTAATCTATCATCACTTGAAATAAGTTCAAAATGCTTTAGTTAATAAAGCATCACCTGCTAATATCGCAG  
TCCACTCACCATATACTTTATGATTTGTTAATTTCCCTCGTCGATAATCATCATTATCCATCGCTGGTAGGTCATCATGAATAAGTGA  
ATATGTATGAATCATTCTAGTGCAATTGCGCTTTCACACCTAACTCATACTCGGTATTTAGTGAATCTAAAGTGAGTAATAACAG  
AACTGGTCGGATGCGTTTACCTCCAGCATTTAATGAATACAACATGCTTTCTTCTAGCTGAGTATCCATTACTGATTTATTTATCGCA  
ACCGATAATTCAATTATTGACTTCATCTATTAATTTATTCATCGGTAGATTTCGTCATTTTACATCCTCAGCTTCTTCTTTATTAAGTC  
ATTCACCTTTTTTTCGGCATTTTTTAAAGTTGTGTCAACAGCTGCTGATAGTTTCATACCAAGTTGATATAAATCTAATGATTCCTCTA  
AAGATACTGTTTCATATCTAATTTTGAACAAATTTGCTCTAATCTTTCATCACTTTCTTCAAACTTTGCGTTTCTTTAGTCAATTAT  
ACACCTTACTTTTCGTAACCTTTGTCATCTACTAAGCCATCTTTCATTGTTAACGTCATTTGATCATTCTGTTTAAATCTTTAGTACTCG  
TAATGACTTCGCTTTTTTTATTAACAATTCGATATCCACGCAACATTGTATTAGTTGGACTTAAATTTGTTTAAAGTTTCTACTTTATTT  
TTCAAATCATTTTTATAACTAATATCTTAGAATTCAATAATTTAACAAGTTGGTTGTCAATTGAAGATTATTTGTTGTTCTTGATT

AACACTACTTAGTAATGCTTTTAAATTATAACGTTGTTGCAACAGCATTAAATCGATGTCTCTGTTGTTCAAAAGTTGCCTGAATTTGT  
TGTTTCAGTCTCTTTTCTAAATCATCTCGACGTTGTATCTGTTGATCATACAATAAAGTTGGTTGTTTAAACTTGTAAATACGATGACA  
AATGTTCAACATGTTTACGTTGTTGTTCTAAATGTTTCTTGATGAAACGAGTCAATGTAACTGATATTGCTGTATTTGTTGCAGCAA  
TTCATATTGGTCTGGTGTGCAATAACAGCAGCTTGAGTTGGAGTCGCAGCTCTGATGTCTGCAGCAAAATCACTTAATGTAAAGTC  
TGTTTCATGACCTACTGCTGATATAATCGGTGCTTACAATTATATATTGCACGGACGACAGCTTCTTCGTTGAAATTCATAAAATCT  
TCTATGGATCCACCACCTCGACCTACAATAATGGTATCTACACCTAAACTATCTGCATATTCAATTTTTTCAATAATGTCGCTTTTTG  
CTTTTTACCTTGAACCAAAGTACTAATTTGTATTTGTTTCAGCTAATGGAAAACGACTATTTATCGTTGAATGGATATCTCGAATTGC  
GGCACCTGTACTCGCTGTTAAAACCTGCAATTTTTTATAGGAACTTAGGTATTGATTTCTTATTCGCTTTATCAAAAACACCTTCTTCA  
GTTAATTTTTTCTTTAATGCTTCTAATTTTTTGATATAAGTTCCTTATACCATCTAATTGCATTTTATTTACATAAAATTTGATAGTTTCCA  
CGACGTTCAAAAACAGAAACACGCTGCTTCTAATAAGACTTCACTCTCTCTTTAGGTTTCAAGTTTAAATTTAGAAGCACTACCTTTG  
AACATCATGGCACTTATAACGCTCTCTTTATCTTTACATTAAAGTATAAATGACCACTTGAATGCTTTTTGAAATTTGAAAGCTCAC  
CTTTAATCAATACAGATTGGAGATGTGGATCTTGATCAAAATTTATATTTAATATATTTTCGTTAAAGCTGAAACACTTAAATAATCTGA  
CATATAACATCACTCAATTTTATTTTTTATATTACTCAATACACCATTATATAAATTTATAATGATCATCATCACTGAATGTTTTGTT  
AATTCAACTGCTTCATTACGACTTTAGCAGGTGTATCACTGTGTAATATTTCATATGTTGCCATTCTTAAATAATACGATCCG  
TTTTTAATAAACGTTGCAATAGTCCAACTTTTTAAATAAGGACTAATTGTCTCGTCTAATACAGGTTTCGTGATCTTAAACGCCAGAAAC  
TAGCCAATGAATAAATTCAAAGTCTAAATCTGGATTATCGTCTTTAATAAACTTATCGCTTCATTTATCGTTAAATCACTGTCCTTC  
ATTTCTAATTGAAATAAAGTTTGAAAAGCTTGCACCTCGGGATTCTTTACGACTCATTTTAACTCCTTCAAACGTTTGTATTTTCTTT  
ATTTAATTACTGAATTAGGTATGACATTACTTTCAATAACGATTGTGTAATGTAATTTAATTTGCTTAGGTTCTTACGCTGTCA  
TATTAGAAATTTGAATTTAAAAATTTGACGTTTGAATTTGTTTGCAGTTTGTGAAATATTAAACACCAATTTGTTTTAATGCACAAATACATC  
TATATATATGCCATCTTCTTTACTCTCGATTTTTAAATCACGGCTTAAATTTTACGACTAACTTTTTCTAAATTTGTTTCTTTAATTC  
AGCAAAATGGCCAGTGATGCCTTCGACTTCCGAAGTAGCTATACTTGAATAACAGATAGCACTTCTGGCGCTATTTCTACTTTACC  
TAATTTTGAATTTGAATAATCAGTTACTTTGACCATGGATTGACCTCTATTAACCTTCATCATTCATAATGCTATTTTGTCTAAAA  
AGTTTGTATTAAATTTACCGCTTCTAAATATATCGTTATTCAATAATTTAATATGGAATGGAATAGTTGTATCAATACCAAGAACCAC  
AAATTCACTTAATGCAACGAATGCCAGCCATAATCGCTTCATCTCGTGTGCGTTTCATGTATGATTAATTTTCGCTACCATCGAATCATAA  
TATGGCGGTATCGTATAATTAGTATAACATGCTGACTCTATTTCGAACACCATATCCACCTGGTGCAAGATATTGCTCAATTTTACCTG  
GTGATGGCATAAAGTTCTTGAAGGATTTTACGATTAAATTTCAATTTCAATTTGCGTGTCTGTTAATTTAATATCTTCTGTTTATAC  
GGTAACACGTCACCCATAGCAACCTGTAAATTTGAATTTAATAAATCAATTTCTGTTACCAATTTAGATTAAGTTGCTGAATTTTAAATA  
TACGTGTATTCTTTCCATAAAAATAAAATTTATTATCATTTAAATCATATATAAACTCAATTTGTTCCCGCATTTTCCATAATTTACAGCT  
TTCGCTGCACGCACTGCGGCATTTCCCATTTTACGACGCTGTTTCATCATCTAAAATTTGGGGAAGGTGCTTCTTCCACTAATTTCTGCA  
TACGCTTTTGAATTTGTACAATCAGTTTCTCTAAATGAATTACATTACCATAGCTGTCCCCAACAAATTTGGATTTCATATGGCGGAA  
GTTTTTCGATGAATTTCTCCATATAAAGTCCACCATTACCAAATGCAGTTTGAGCTTCTTGTCTGTCAATTCGGAAGCCAGTTTCAAGT  
TCTTTTTCATCACGAGCAACACGAATACCTTTTCCGCCACCACCAGCAGTAGCTTTAATGATGACCGGATAGCCAATTTTTTTAGCGA  
TTTTCTTAGCTTCTGAGACGCTTTTCATTAAACCATCACTACCAGGAACAACCTGGAACATTGGCTTTTGATCATTTCTGCCTTAGCAAC  
ATCTTTGATACCCATTTTGGATAGATTGATAACTTGGTCCAATGAACCTCAATTTGGCATGCTTCGCATAATTTGCAAAAGTCAGCA  
TATGACTTAAAAAGCCATAACCCGGATGAACGCCATCAACAACTGTAGAAGTTGCAATAGATAAGATTGTTGCGAATTTTAAATA  
TGAATCTTTAGACAAAGTGGGACCTACGCAATATGCTTCATCAGCAATTTGAGTATGTAGCGCATCTTTATCCCTTCCAGATAGAT  
TGCAACAGTTTGGATGCCTAAATCACGACAAGCGCAATAATCCTAACTGCGATTTCACCGCGGTTTGCAATTTAAACCTTTTTTCAT  
TATTTACCTTAAATAACGGTTGGCCATACTCTACCATTGTGCGTCTTCTACTAAGATTTCAACAATTTACCTGAAATTTCTGCTTG  
AATTCATTAAATAGTTTCATTGCTCTAAAATACACACTGTTGTTTCATTGAAACAGTGTCCCCAACTTGCACATATGCTTCTTCG  
TCTGGAGATGGCGATTGTGAAAATGTACCTACCATAGGTGCATTAATTGTTTTGTGATTATCTGAAGTTGGCTTTTGAGCTTCAGTTT  
TATTGCTATCAGTTGATTGTACTTGAGGCATAGGCATTGCCGACGCTTCAACTGGCATTGTGTGAGATTTGTGGCGTGATAATCTCAGT  
TCTTTTTTCTTTCTTAAAGCGTCACTTTGCCTTTAGTATCTTCAATATTGATTTCGGTTAAAGTTGATTATCCAGAATTTCAATTAATTC  
TTTGATTTCTTAAAGTTCAATTATTACTGACTCTTACGTTTGTGTTTCTACTCCCGTCTATTTTACTTGAGACAACCTCTTCAATTTATC  
GCATGTTTCATATTGCTGGCGACATTATAAGTCTATCCCAAAGATATAATAAAAAACATTTTAAATTAACCACTTGTGTATTTAT  
TACTTAACATTGACTCATCTTAACTCTTGATTAAAAATTTTATGCATTACGTTAAACATATCAATGTTATTTTTATTAGCTATTATGTT  
TAATCCTCAACAATATGATATGTAGATATATACCTTTACTCATGTCTATGTTTTTCTACTACCAATTAGACGATTGTTTTATATTTTA  
AAAATATTTTTAAAAATAAAAGCCTCATATCAGCATATAACCTATAATCATTTTAGGCAATAGCTTTATGAGACTTATTTAGAATA  
TCTTACGTTAAATCAGTATAGTGAATACAAGCTATTTGTTAACAATTTAGAGATTATCCTCTTGAATGTAGCTTCCATCACCAGTGT  
TGATAATTAACAGTCACTTTCGTTTACAAATAAAGGTACATTTAATGTATAACCAGTTTCAACAGTTGCCGATTTAGTGGCACCAG  
TTGCAGTATCACCTTAAATACCAGGTTCTGTTTCAGTTACTGTTAATTCACAGTTTATAGGTAATTCACACCGATAGTTTACCTTC  
GTATGTTTGAATTTGACTTCCATACCTTCTTTAAGTAATTCATTTCTTTTAAAGTAATCACTTGAAGTTGTTGTTGTTTCAAGC  
TTCATTATCCATAAATACATGATTATCTCCGTCAGCATATAAATTTGCATGCGACGATTTTCAATGCTTGTGTTTCACTTTTTC  
ACCAGCTCTAAACGTTTTCTCTTGAATTGACCAAGTTCTTAAATTACGTAATTTTGAACGAACGAATGCTGAACCTTTACCAGGCTTT  
ACATGTTGGAAGTCTATAACTTTCCAAATAGCGTTATCAACAGAAATTTGTTAAACCTGTTTTAAATCATTAAACGAAATCATTGAG  
TTTCTCTCTCATTTTACACGCTTATGTTAAACTATAAGGTCTTTTGTGCATTTAGTAAAGACTTGACAACCATTTTCTGTAATTTAA  
ATATCATCTTCTATTCTTATACCGCCCAAACCTTCTATATAAACACCAGGTTCTACTGTAACACAGTTGTTAACTTGAAGTTTATCTT  
GTATCGTACGAGCCAGCATTGGCCCTTCATGGATTTCTAAACCAATACCATGTCCTAGTGAATGTCCAAATTTCTTTCCATACCCTTT  
TGACTCTAAATAGTTTCTTGAATGGCATCAGCTTCTGCACCAGTCATGCCAGGTCTAATCTCATTAATTGCTTTCATTTGAGATTCA  
AGTACTATTTGATATATTTCTTTCAGTTTAGGATCTGGTTCTCCAATAGCAATGTTCTAGTAATATCTGAACAAATAGCCGTTATAAT  
ATGCGCCAAAAATCAATGATATCATGTCGCTTTTCTAATAAATTTGTCACTTGCAACACCATGTGGTATGTCACCTTACCTGTACAGCA  
TGCTACAATCGTATCGAATGATGGTCCATCTGCTCCTAATTTCTAGCATTTTACTTTCTAATATTGCCTTTAATTTCTTTTTCAGTCATAC  
CTGCTTTTACAACAGTTAAAATATATTCATATGTTTCATCAACAATATTAGCTGCTTTTTGAATTAAGCAATTTTCGTCAGCATCTTT  
GACGCTCTCAATTTTATCTACAGTATTAGAAATGCTTATTAATGATATACGACTTTTATTTAATTCAGGTATGTATCATAACTTACA  
TGATGCCCTCAAAACCTACATTTTCAAAATTTTCTTGGTGTAGCAATTTCTTAATCTCACCATAAATAGTAGATTACGATTAAATA  
TTTCATAATTTGGCGCTTGCTTAGTTGCTTGATCAATATATCTAAAGTCTGTTATCAAAATATTGTTTATCTTTAGATATGATAAGTGCT  
CCACTGGTACCAGTAAACCTGATAAATATCTTCTATTGTAATCCGAAAGAATGATAATCGCATCTAAATGTTTTTGTCTAAAAATA  
CGATGCACTTGTGTTATTTCTGCTCATCTTATTACCTCCTAGTGAACGTTTGTGCAATTTCACTTTTATACATTAATAATATCATAAT  
GAGGATAAAAAATAAGATATTGATTTTAGGGAGATAGTAAGCAAAAAATTTGGTTTCAATTTGTTGGCGCAACATTAATTTGAGCTG  
GATGTGGATCAGAAAATTTAGCACCATTAGAGAAAAAACAAGATTTTAAAGAGAGATAATCATCAAACTCAAACTAGATATTCAA  
GAACTTAATCAACAATTTAGTGATTCTAAATCTAAATTTAAAGGGCTTGAAAAGGATAAAAGAAAAACAGTAAAAAACTGCATCTAA  
TAATACGAAAATTAATTTGATGAATGTTACATCAACATACTACGACAAAGTTGCTAAAGCTTTGAAATCCTATAACGATATTGAGA

AAGATGTAAGTAAAAACAAAGGCGATAAGAATGTTCAATCGAAATTAATCAAATTTCTAATGATATTCAAAGTGCTCACACTTCA  
TACAAAGATGCTATCGATGGTTTATCACTTAGTGATGATGATAAAAAAACGTCATAAAATATCGATAAATTAACCTCTGATTTGAAT  
CATGCATTTGATGATATTAAGAGTGGCTATCAAAATAAAGATAAAAAACAACCTTACAAAAAGGACAACAAGCGTTGTCAAAATTA  
CTTAAATGCAAAATCATGATAGGAGTCTTTAATGCGTAATATAATTTTTATCTTGTAATTTATTGCTGCGATTGGATTAGTAAT  
GAATCTAGATGCCTTTATTTTTCAATCGTCAGAATGTTAATCAGCTTTGCTGTAATAGCTGGTATTATTTATCTGATTTATTATTCT  
TCATCTTAACTGAAGACCAACGCAATATCGCAAGCAATGCGTAAGTATAAAAGAAATCAAAGAAGAAAATAGATAAAAAAACG  
GAAGCACTTGTAAGGTAAGTCTACGTGCTTCCATTTTTATTTCTAAAAACTACTTTCTAAACATCCATTCTATCTGAACGATATTT  
TTCAGTTAATTTCTCCACTTCTGCCAATTGAGCTTCTGTTAATTCAAGTGCTTTAATTTCTATATTTAAACCTTTCTTAAACCTTTCT  
CGAAAGCTTCTCCATTTGACTAATAGTAATGTGTTTATCTGAAATATCATTGATGGCAACTGCTTTTTCAACGAATGCCTCTTTTCAT  
TTTTAATTTTAATCTTTCAATTTTTATAAAATAAACATATCAAAACAGTTCATCAATATCAATATCTTGTAAGTAACTCGAACCGTGTGGAGG  
ATTACGCCCTTTTGTCTCGTTGAGCACTCCAGCAATCTTACGGCCTTCAACAACTAGCTCATACCAACTTGGTGCATCAAAACACA  
CTGAACCTTCGAGGTTGTTTTAATTTTTGACGCTCTTCAGGCGTTTTAGGTACCGCAAAATAAGTATTAATCTAAGTTTTTAAATCC  
TTCTAATAATCCTTGTAAGTCACTCTGTACGCTTCTGTAAGTGTAGAAGGCATATTCGGATGCGATTACAGGCACAATCACACTGTA  
AGTTAACTCTTTATCATGTAGCACCCACGGCCACCAGTTGACGCTTACGAGACCAAAACCTTTCTCTTTAACCTTATCAATATCA  
ATTTCTTTTTGTAGCCTTTGGAAATACCCTATTGATAATGTTGCAGGATTCATGTGTAAAAACGTATAACTGGATCAATTTACCTC  
TAGAGACAAAATTTAATAACGCTTCATCCATTGCCATATTATAATATGGGTCTTTACTTCTGTATTAATAAAATTTCAAAGTTTCAGT  
CATATTCAGAAGCTCTATCAGCAAAATGTATAATTTGATTGCTAATTAATCAATTTAACTAAATGAATAATAATTGCAATTTCTT  
TAGTGAATATTTTGATAATTTGACCTAACAGTCTTATAATTTATTTATTTAATTTAGGAGGATGCAAGATAGAGTCTAGTTGT  
ACATCGCAATAATTTTAGTTATAGCAATTATTGCTTATGATTGTGTTCAACAAATTTCTTAACAAGCGAGCTGTTAAAGTAATTAGATC  
AAAATGAATTCATAATGGGATTAGAAAAGCTCAAGTCATCGATGTTAGAGAGAAAAGTTGACTATGACTACGGTCACATTAATGGG  
TCTCGCAATATTCCTATGACAATGTTACAGGCAACGATTCCAAGGATTAAGAAAAAGACCAACCGGTATACTTATGTGATGCCAATGG  
GATAGCTAGCTATAGAGCCGCTCGTATTTGAAAAAAATGGATATACAGATATCTATATGTTAAAAGCGGCTATAAAAAATGGA  
CTGGAATAATAAGTCTAAAAAATAGTTTTGTAAATTTAATATACGATTTAATAAAATCTGAGTGTTAATTGATCATCAATAACAAT  
ACTCAGATTTTAATTTTTTAACAAAGTCTGTTACTATATTTCTCTAGCTTCACTAATCATTAACCTTAGTTTCAGCATAATAAAGAAA  
GTTACAGTCAATTTCAATACGATTCAATTACCGCAATCTAAAAATGAAAAGACAATTTCTATGAAAGAATAATACCAAAACCTTAAG  
AGTTATTACTTCGGTTTAGTTTCTGTTTAAATAGAAATGTCTTTTCAATTGATTTGAAACCATTTATCCTTAAATCTTCATACAA  
AGTTAGAATAATAATCTCGGAATATGTGTTAATACCTTTATTTTCTGTTTAAAGATTTTCAAACTTTAATATTGGTTTACGAGCAG  
CTGTAGCTTCGTCTAATCGATCAATCACAGTTGTATGTGGTGCTTCTAGCACTTTATCAGGATCATTTTTAGCTTCTTCAGCAATACT  
AATTAATGTATCGATAAAATAATCAAGTGTCTTTAGACTCTGTCTCAGTCGGTTCAATCATCATACCTTCTTCAACATTTAATGGG  
AAGTATATTGTTGGTGGATGTACACCGAAATCTAATAATCGCTTAGCCATGTCTAAAGTACGTACACCAAAATCTTTTGTACGCACA  
CCACTTAACACAAACTCGTGTTTACAAATATTGTTTATAAGGTATTTCAAAGTGTTACAGATAAACGTCGTTAATATAATTTCGCATTAA  
GAACCGCTGCTTCAGAAACCTCTTTAAGTCCAGTTGCTCCCATAGTTTCGAATATACGTATAAGCTCTTAAAGTAAATACCAAAAGTTAC  
CATAAAATGGTTTTACACGTCCGATAGAATTTTTAATGTCAATTATCATATTTAAATTTGTGCGCATCTTTAATAACCATTTGGCTTTGG  
TAAGTAACCTTGCTAGTTCTTTTACTACACCGACTGGACCTGAACGAGCCGCCACCACCATGTTGGACAGTAAATGTTTTATGCAA  
GTTTAAATGAACAGCATCAAAATCCCATCTCTGGGCGAATTTGTCCATAATAGCGTTTAAATTCGCACCATCATTAATATAATAG  
ACCACCAGCATTATGGACGATTTACGGATTTCCATAATTTTTTTTCGAAAATACCTAAAGTGTGTTGGATTAGTTAACATAATAGCT  
GCTGTATTTTCAATTTACAACACGTTTCAAGTCATCAATATCAACTTCGCCACGTTCTGTTTGTATTTTACAGTAACTGATTTAAATCCTG  
CAAATGAAGCTGAGGCTGGATTCTGATCATGCGCAGAATCTGGCACAATGACTTCATCAGATGACCTTCACCATTATTTCTCATGGT  
AAGCTTTAAATATCATCAATGCAGTCCATTACCATGTGCGCCAGCAGCTGGTTGTAATGTCACCTCATCCATACCAGTAATTTCTTT  
TAATTTCTTTGCAAACTATAAAATAATTTCTAATGAACCTTGAACCTTGATCTTCATCTTGTAATGGATGTGATTCACTAAATCCTGGT  
ATTCTAGCAACCTTTTCATTAATTTTAGGGTTATACTTCATCGTACATGAACCCAATGGATAAAATCCGTTGTCTACACCGAAATTTT  
TATTTGAAAGTTTCAGTATAATGACGTACTAAGTCTAGTTTCAGCAACTTCAGGAACTCCGCTTTGTTTTACGAATAAAATTTATCATC  
TAACAATGACTCAACAGAAATTTGTTTTAATATCACTTTTGGTGAATGAATATGCATATGCTGCCTTACAGAGATCTTCAAAATTAAT  
GGACTTGATTTACTAGTCATTTAATCACTACAGCCTTTTCTACAAATGTATCGATTTTCATCTTTTGTCTTAATTCAGTTACAGCTATTA  
ACATGTGATTTTTAAAGTCGTCTGAAAACAACACCTAAATCAAAACCACCGATAATATTGTACTTCACTAATTCCTCGTTAACTTGTTG  
AATTGGTTTGTCAAATTTGACTACAAACTCATTGAAAGATGTACCATCTAATACTTCAAAACCTTTTTTAATAAATTTGTTGTTTAGCA  
TAGTTAGCATGTTCTATATTTTGAAGTCAATATCATAGATACCTTGTTTACCAAGTGCTGACATTGCAATTGATGACGCTAAAGCAT  
TTAATGCTTGGTTAGAACAAATATTAGATGTCGCTTTATCGCGTCGAATATGTTGTTACGTCGCTTGTAATGTTAATACAAAGCCACG  
ATTACCTTCATCATCTTGTTGTTTACCGACTAATCTACCTGGCACTTTACGCATTAACCTTTTCGTCGTTGCAAAATATCCACAATGT  
GGCCACCGAATTGAGCAGGAATTCGAATGGCTGAGTATCACCTACAACAATATCTGCACCAATGAACCTGGAGGTGTAAGTAA  
TCCCAATGCTAATGGATTGTCATATACGATAAATAATGCTTTTTATCTTCAATAAAGCTATGAATCTTTTCAAGATCTTCAATTGAA  
CCGTAAGGTTTGGATTTGTACTGCAAAAGCTGCTGTTTCATCATCCACTGCTGCTTCTAATTTTTCAGTCTGTAACAGTGCCAT  
CTAAATCGATTTCCATTACTTCGAATTCCTTACGCGTCTTAGCATAAGTATGAAGTACTTGTAATGCTTGATAATGTAAACCTTTTGA  
GACTACAATTTTTATTTTTCTTTGTTGACTAAATGCTAAGATACATGCTTCAGCAAAAGCTAGTCATCCCATCATACATAGAAGAATTT  
GCTACATCCATATCTGTTAATTCACAAATTAAGTTTGGAACTCAAAAAATGGCTTGTAATTCACCTTGAGAAATTTCCGGTTGATAT  
GGCGTATATGCTGTGTAATAATCTGATCTTGAATCATAGCATCCACAACCTGATGGCGCGTAATGATCATAAACACCAGCACCCAA  
AAATGATGTATGCGTTTCTTTAGTGATATTCTTGCTTGCAATGCGATTTAATCTTCTAAGTAACGTTGTTTCCGCTTCGCCCTTCAGCAA  
TATTTAAATCTCTATTTAATAAAATGTCACTTGGTACATCACCGAATAATTTCTCTATAGATTTTGCACCAATTGTTTGTAAACATTTCT  
TGCTTGCTTTTTTTCAGTTAAAGGTATATAACGATGACTCACAATGCACACCCCTTTTTAATTTATTTATCAATTTGATTTTTCTTAAACA  
TTTTGCTTTTTAATGACGCTTACGAACCTTGAACAGTCAACTCTACCCATTTCAAACTCACTCTTTTATCTTATCTTGAAGTGAATTT  
GATTTTCTGATGATGGAGACTGTGTTCTGAAGTACTTCTCCAATAATATTTCCATCTAAATCCATAACTTCATAACCAGTTCTTG  
CAATTCCTTTTTCAAGTAATTTCAATCCCACTGTTCTTCTTGGTGACCATTTTCTTTTTGATCTTTTTAATACAGATTTACCAATAAAA  
TCAGTATCAATTAATGGTTTACTTGCAAAAGCGATACCACCTTCATATGGTGTAATTGATTACAGTTAAATCTTGTCCATGTAATGGCA  
ATCCAGCCTCTAATCTTAATGTATCACGAGCGCCTAACCCACATGGCATAACATTATACTCTAATAAACCATCCCAAATTTTTTCAGT  
ATCATCGATATTACAATAAATTTCAAACCATCTTCACCTGTGTAACCTGACTGAGATAAAATGACGTTTGCTCCAAATAATTTGAA  
ACCTGTTTAAATTCAAACATTTTCATTTACAGTTACATCTTCATCACTAATTTGATTAATTAATCTCTAGCTTTTGGTCTTGTATTG  
CTAATTGACCATAATTGGTTTGATACATTTTGTACTTCAACATCAAAATTTCTTTTGTGTTTTAAATCCAATTAATCTTTTTCAGTA  
TTAGCAGCATTAACCAATAATTTGTCGTCAGTCAATTTATATTAATTAATCAATAATACCGCTTCTTCATTACATA  
AAGCAGTATATAATGCTTTTGAAGTAGTTAAATTATCAGTATCATTTGATATAATAAATATTGCACAACTGACTAGCATCTTTACCTGT  
TACTTCAATTTACCCATATGACTAACATCAACAGGCCAATTTTCGTATCGAACAGCATTATGCTCCTCTTTAATACTTGAAAAATGA  
ACAGGCATCGCCCATCTCCGAATTCACAATTTTTGACCTCTATCAACATAATTTTGATATAAAGGTGTTTGTTTTTAATCACTTG

ACATTGAAATACCCCCTTAAAAATTATAAAAAACAGGATAGCAATCGCTACCCTGTTTATAAATCACCAATTCAGGAACGCGTTACAGT  
ATTATCCTTTTGCCTGAGAGTTTCGTAATAAAATTACTTGCACCTTCGGCGATAGAGTCTTAAACGCTCTATTCTCTAATACTGATCA  
CTCGCTTTTATTAAATTTAGCAATTCATAATATATTTCTGAAATTGATAGCAATGACTATCAAATTTCTTGAATGCGATTTCATTAT  
ATCTTAAATTCGCGAGCAATACAAGTCATTTAACTGCTTGATTGCTTATTATTTGCATTAGGTCGATGTGGGTCATCATTGATTTCG  
ACTATATATAATATCAATATTACAATCTAACCAATAATGTTTTTTGATTTTCAAAAAATTAAATGCCTCTTCACTTTCAATTATA  
CCACCACCAGTAGCAATTATATCTGCAGTGTTAATACATCTTGCACCAATGTGAACCTCTAAATTCCTGAAATATTGTTCCACCATGTT  
TACTAAATATTTCTGGTATTGTTAACTTATACTTCTCTTCGATATATGAATCTATATCAATAAATGATAAATTTTGCTCATCTGCAAC  
GTATTTACCAATCGTAGATTTACCGGTACCCATGAAACCAATTAAAAATTATTGGTGATTTATCATGATTTCATGCGTTTTCCCTTCTTT  
CAATAACAAAAACAATCTTATAGTTATAGTCAGTTTCAATATTATATAATGTCTTTAATTTTAACTATATTGACTGATATAAAAAAGTG  
AAAATGGAAAAATAAATTTGCTGTTAGCATCAATAAGAACGGCGTAACATATCCTTTTCTTTATATAAAATCAAAATTAATAAATAT  
TTCACATCCTTTTAAATAGTACTCATTTAAATACTAGTAAGTTATACATAAAATAGTTTTAGTCTGCACATTTGTACCGACTTTAACTGT  
TATCGTTATTTTAAATAATGGATTATAGTAGATATTTGCAGTAAATGCTGTAAACATTATTAATCATTGTTATATTTCTCTGTCAATTA  
CAACTTTAATAATTTTATTATTTATTAATTTGTATTTCGATCATTTCCTTACCTTTATGTAAAATGATACGCTGTTGCCTAATTTCAATA  
TCGTTTCTATCTACTCCTTTAAAAATCCTCTAGAATATCTCTTGAGAAAAATTTCGAAATCTACAGTTGTTAATTCCCTACTTTCAATTAG  
AAAAGTTTTGCTAAGTCTAATTAAGTCTGGAACAATTAGTAAAGTTATACTTATAACCATCATCGCTACTAACATTTCAATGAGCGA  
AAAAGCTTTGACATTAATACTGTATACATGTCTTTTGATAAGAAGTGGTATTTTTTGAAATAGCACAAATTTGTTGGTCACTTTGCTT  
AATATCATACTTCCCTATAGTTACCCCTTCTTAAGTCTTCTTTATTAATTTTAGATACAGTCGTCAAAATTACTTTAGAACATCAA  
TTGTTTGTAGTTTATGGTTTATACCTCGCTTGCAATTCATCTGGTATCAATAGTAATGTAATCAATAGCAAAAAATAGCAAAAAAT  
AGCCATACTATCTATTAAGAATGATCCTTTACACTTATAGCTTTTCTATAACGAATTTCTTCTTTTCAATATGGAATATTATTCTATAA  
ATTGAATTGTTATTGTCAATTTGTATACTACCAAAATTTATTGATATTCCTTTTTTATCAAAGGCAATAATATCAACTTTTGCAACATT  
AATTATTTTGCTCACTTTTAAATTTTAGAAATCGTATTTTATTATCTCTATTACTTTAATAGTGTCACTGTTTTCATAAAATCTAACATT  
GATATATCCTTGATTGCTATAGCTTGCGACTTAATATAATTCATTCAGTAATAAAAGAAATGATATTGCCTCATCATCTATTACT  
CTAAGATTGCTTAATCCTTTAGATGTCAATTGTCAAAAAGTAGAAATATACTGATTAACATCATTACCACAAGCATCTCAATCATAGTA  
AATGTGACTGCTTCTAATTTGCAACTGCTTCTCCATTACTAATTGTTATTGTCTCTCCTGATTTACATGTCTTTTGCTCTCTTTTAT  
AAAACCATCTGCAATTAAGTCTTCAATAGACGATGGATTTCTATTATGTTTCAATGCATACGCTTCAATTTGACTATTAACCATTTTT  
ACCTGTGCATTACAACCTGTTGATTGTATGTGAGCAGTTTGTTTAGCAATATTTGGAATGATTAAAAATTAATAAACTGATGATT  
AATAACACTAATAGCATCTCTATCAATGTAAACGCTTGAGTTTCTTAAAGAAATTTAAACATATATTAACCTCCATTATTTTATACTT  
TGCATCATTTGAAACATTGGTAACATAATTACTAAATAAATTGCGACAATAAAATAAACCTAAAAATCAAAAAATAAATAGGCTGTAA  
AAACTGAGTCTGTTTTATCGCTTTATCTTCTATTTGTTTTACTAATATTTGCGAATATAACTTTAGTTCTACTTCTAGCTTCCCTCTCTT  
TTCACCTGTAGCACAAACTTAATTAATTGAGGCTTAAAGCATTTTAGTTTTCTAAAATTTGAGGCAAAACCATATCCATTTCTGAA  
TAAGTTAATAAGTATTTACCTAGAACTGTCTAAATGGATCACTACTATGGTTAATATAAACGTCTACTATTGATTGAAGTGAATA  
CCATTTTTATAAAAAACAACACTAATTCATTAGTTACAAAAATAAGTTTTAAATAATTGGAATAGCCTGATATTAGCGGTAGTTTCATC  
ACAAAGTTTATCTTATTGAGCATATTTAAATTTGTATAAATTAATTTTCATAATAATAGCCAACATAGATACTATTATGAGCATTACTA  
CAATTATAGTAGGTAAGTGGTAATGAAAAAGACAATGTTTTTGAAGAAAGAGGATAGTTGAATATTCATAGAAAGTATATAATTGT  
TGAAACTGTGGAATTACTGTGAGTTTAAATATAAATAATCATAGCAATAAAAAATAGAAACTAGTATTAAAGGGTATTGCGAGTCTTT  
AACAATCGTTGTTCTGACTTTCTATTCACTTTTCATATAAATTTACGGTTTCTTCTAGAACGTCTATAATATTACCAAACTTTTCTGCCAA  
ATATACTTGCATGACGATAGTATCGCTATAACCTATCAGTGATAATATCTGATTGCATGGTGCACCATTTGAAATTTCACTTAGAAT  
GGTGGCACCTAATTGCTTATTTTTATATGCCATTTGAAGATTTAAAAATTTGAAACCTTTGATACAGAGTGAAACCATATTTCAACAA  
ATTACATAAATTTGAAAGTAAGTCGATTGTGGGCCCTTACTTAATTGTGCGCTCTTAGAATGTAGTTTAAATGTATTTATCCATTGT  
AGTTTCACAAATGACACCTGCTTTTGTCTATATCATCAAGTTTATCTTCTAAGTTCTTAAATGATGATGGTAATGAATGATTATGGGAA  
AAGAAATATCGGAGTTGTGCTGAGATAGAATTTACATACTAATTTGTCGCTGTTGCTTAATAGTAGTTACAAGTCGTTGGTTTATA  
ATTAAGTTAGTTGCCTGTATCAATTTCTGTACAGAAATGCCATTTCTAATAGCCTTAAAAATAGCACCTTTACAATCAGTTGCATGCA  
ATGTAGTCAGAACAAGGTGACCACCTTAACTAGCCTGTATAACACACTTGGCAACATCTTTATCTGATTGACCTATTAAAAATAA  
CATCAGGATACATCTTAAAAATAGCTTTAAACGAATTTACATAGTTTATGCCAGCTTTATCATTCACATTAATTTGGACGATACCAG  
GAATTTGCATCTCTACAGGATCCTCTATAGAAATTACATTTAAATTTCAAGGCTTTATTCGCGTATGAGACCATTGATACATTAATGT  
ACTCTTCTCTGAACCAGTTGGTCCACTAAACAATAGTAATCCTTGTTTCTTATTATCATGAGGTGTTTAAATCATTGAATTTATAAGTT  
GATTTCTGTGGTTGAAAAAATTGAGGTACAATTTCTGATAACACAACCTTTCTTGCCCAAGTGACAATGGTAAAGTTGATATTCTCAA  
AAATATATTTTATTGAAAAGGTAACATATATCGACCGCTCTGTGCGACTTGCTGTGTAGAAACATCAAGCCAGCTTGAAACTTCATA  
TAAACTAATAACTTTTGATAAATGCTATTCCCAATTTGTTTCATACTGCTCCAAGTTATCATTAATTTCTAAATTTAATACTTACTTCATT  
TTTAACCTGGAATAAAATGTACATCACTCGCTTTCATTTCTATCGCTTTTATTAATTTATTTCTTGAATAGAACTTTCAAAAAACACCT  
CCTACATATAATCAGTACGAGGAGGTTTTTATTACTTCAATTTAACCGTGTAAAAATGGATTTAATTGTTTCATCATCAACCGCTGAT  
ATGGACCATGTCCAGGGAATAAAGGTAAATCGCCTTCTAATTCAAATATTTTATCTTGAATAGAACTGACTTAACTAGCTTTCATAATC  
CTTTATATAAAATCTGTACGTCCGATTCCATTATTAATAATGTATCTCCAACAACCTGCGAATTCATCGAACACATATGTTAACTTCC  
TGGTGAATGTCCAGGTGTGTGTAACACATTAAACTTAAATCCTTCTATTCTGTGCTACCTTCGTTTAACTTTTCAGGAGTTACCTTA  
CTTGTAATAATTTGGTAATCCATATTGCTTAAATTTATCTGCCCATTTTAAACGGGATCTTTTAGAAAATCAAACTCTGCTTCATGCA  
TATAAACCGGGACATCGAATCGATCAACTATATCATCGACTGCTCCGATATGATCAAAAGTGTGCATGTGTTAATAAAATAGCTTTTA  
ACGGTTTATTTATTTGGTTAATTTTTTAATAATTTTTCACTTTCACCTGAAGGGTCAATCAGAATAACAGCTTTGTCAATTTTCGATG  
AAATACGTATTAGTATCAACTAAGCCTAAAGTTAAGCTTGAATCCTCATAGGTTTTTACCACATTTTCTAAATGTTTTTGTACTGA  
TGTTAGTTTATCATTCATTTTCTAGATTTGTCTCGTCGCTCATCAATACGGATATTTGTACAAACTCTACTTAAACCTTTATCAAAAG  
GTAATTCATGTACTTGCACAACTTCTAATACATCGCTTAATTCACCTTCAATTAGAGTATTCAGTTGATTTGAATGAAATCAAT  
TTTACCCATTGCTTTATATTTCTTGAAGTTTTTCTGAATATCTGCAATATATTTACTAACACTCGGACCTTCCGTTCCAACTGGAATAA  
CAACCACATCAACAATAGCCATTATTTTACCCCTCTTTATCTAATACATAGGTCTTGATTAATCCTGCTGCTCCTGTAATACCTGCA  
TCATTACCTAATTTGCTTGTACAATTTCAAGTTTCAAAATGAGCAGGTGCAAAATGTTAAATATGATATTCTGTTTTAATATTTTCAAT  
TAAAAATAGGTCCTGCAGTAGACATTCTCCACCTAGAACGATATATTTTCGATTACTTGTAACTAATAATACTACATAAAATATCC  
AATATAGTTTGCAACCTTTTCAGTAATGAAAATACAGAATTGGTCACCAGCTTTTGCCGCATCAAAAACAGCTTTTGCTGTAACCTT  
ATTTTCTTTAATCAATTCTAATATAGAAGATCTAAACGTCAACTTCGGATAGTAGAAGTTAACTAAGTTAAACACGCTGTGCTGGA  
AGCAACTGTTTCAATACATCCAGAACGACCACAATACATTTAAATCGTTGATCGAAGTCTGCTCTAAATGACCTATTTCTGCGCC  
AGACCATGATGACCATGTACATTTACCATTTGAAATTAATTCCTCCACCTAGACCTGTACCAAGTGTGATGGCAACAACATCATC  
GGCACCTTACCAGCACCTTTGTGTTTCTCCCTAAAGCAGCTATGTTAGCATCATTATCTACATACACTGGACAATCAACGAATTGT  
TCAAAAAATCTCAGTACATTAACTTTTTCTGGCCAAATAAGTTTACTGCTCCATTTACTGTACCTTTTTTCAAGTCAACAGGACCTG  
GTACACCAATACCTACGCCAAGTACATTTGAAAAATTATAATTTTTCATTTACTTTTTCAACAAACGAATCATAAATTCCTTTCAAA

AAGTGTATATCCTGTACTATCAGATGTATCAGTGTGAATAGACCATTATGTAAATTGTTCTAATTCAGGTGTGAAAAACCTAATTTT  
CAAGTCGTCCCGCCTACATCAGCTGCTAAAAATAATTTTGTCAATTCTGTTCATTCTCTCTGATTAAATATCAACGTACATTTCAAA  
TATTCTTCTCTAGATAACAGTTCATATTGATACAATGATGAAATCTCCTGTTGAATCATTTCTGTACATATCTTCTGGATTTTTAAAT  
ATATTAGAAATCCGTAACCTTTTCAATAACTGTTGTACATCATAAAAGTTATTTATTTTCGACTCATTTGATTTAGTCAACTCTTTTTT  
TAAGTTAATATAATCTGTATTTTAGGGTCTGCATTTAATGCTTTACGCACATATTTAATGCTTTTTATCATCATTTAATGAACGAT  
TTGCTATCGCTAACTCAAAATTTAATAAACCTGATTAGGAAACATTTCTAAGTCCTCGCTCCCATTTCTGTCATACCTTCAGACTTAGA  
ATTGATAGTAGCCATAATCATACCCTTAAATAATATGTTTGATCATCGGCATAATTTTTATTTATTGTCTGCTTCACAATATTTTGA  
GCATTATCATAATTACCACTAGTCATATCATCTTTGATCAATTTATTATAAATATTATCTTCTTTAATTGTAAAAATTTCTAATTTGAAG  
TGCAATAAATAACAAGCATACCAATTAGTAAAAATCCAAAAATATTACGATTCACCTTTATAGTAATAGCCAATTTAAAGTTATTAA  
TAAACCACCAATGAATCCTCCAATATGCGCCACAATATTTATATTTTGACATAAAACAGAGAAACACCACTAATATCATAATGCAAT  
TAATAACTGTCCTAACATTTTTTTGTTAAATGTTTTTGAACATACATCATCGCAAAAAATTGATCCAATCAGACCAAAATATAGCACC  
ACTAGCCCCAACTGAAATTGTAGTCGTATTAATGATAGTGATACAAAGTTTCCAAACAACCCTGCAATAAAGTATACAGTTAACAT  
CCGCCATGAACCAATAATTGCTTCGACTATTTTACCAAAAAATAAATAATGAAAGCATATTCATAAGTATATGTTCAAAACTAAAATG  
TAAAAACATCGATGTAACAAATTCGATACCATTACCATGTACGACATTAATAATGCACTAACCAGCCCAACATCTAATAATTTTACATC  
CGAAAAATTTATTTAAATATAAAATCATACATAACCATATTAAGACATTTACAAATATTATTGTGTATGTTGCCGGTGAAAAATTTCTG  
CATATATTTATCTAAAAAGTTATCGGTTAATACTTTGCGTTTATAGAACATATATGTCTTTTTATCATTTATCTTCTGAAATAAGTCTAG  
CCAAAAATATATTCGGCATATGCTTTATCAAAATCTTTTGTGTGCTTATAACATTTGAATTTAATTCTAATTGGCGAAACTTCATTTAA  
TTGTTCTTCTGAAAAATTCGGATTCTGTAAAAATAAAAAATCAAAACTTTGTGGTTCGAAAGAAATAAAATTTGCTATTTCTATTG  
TGTTCAAGCACTTTTCGCTTTGTCAAAACGTATTTTCTGGGTAGCACTTGATGTGTTGTTTAAAAATGACTACTGTTTTTTTCTTTTATG  
GGCTAACCAAAATTTCTTGGTCATCTTTTTCCCTACTGACAATACAAAATTCAGTACCTAATCCAATAATATATTGTTTTCCAAAAAT  
TGTTTGTCTATGTTCAATTTAGTCTCCACTATGCTGATTGATATATAATCAATTTATCGACTGGTTGATCGAATGATTCGGGTTCAAAT  
GATGTTATTTGAAAATCGTATAATAAGCTTATTGTCTTTGTCTGATAATTAGCTAAAAACCTGTCGTAATAGCCACCACCATACCCA  
ATTCTATATCCATCGTCTTGAATCCAACACCAGGAACAACAATTAATCTAGGTTATTCGTTGTTTCACCTTTTGAAAGTTGGATAGT  
AAATCCCCTTATTATCGACATCAATATCTTTGAGATTAAATATTTCTTTAAAAAGTCATTTGATGATTTAAATAATCCATTTTCGGTAC  
AAAAATACGTTTATGATCCATTAAGGCTTGTTCAATAATAGAAAAAGTATCTACTTCATGATTTAAAGAAAGAACTAGCGCAATTG  
CGTTTGCTTCTTTGTATTTCTCAGTTGCAAAAAATGATTTCTTAACCATTGTGCTGCTTTTCGCTTTTCAGCTTTTATTAATTTCTTCA  
TTTTATGTAATAATGTATTTTCTAATCTCATTTTTAGTCACATTATCACCCACTTTATTTCAATTTCTATTATATCGTTAATAACAATACAT  
GTCATTATGTTGTCATGATGAATTATGCGACAATTTCTAAAAATTTATTATTCAATTGAAAAATCTTTTATCATTTTCATACGTGTGCATA  
ATTAATAAAGGTGAAACCTCTTATTTGAGATTTCACCTTTTTTATTGTTAATTTAAATTTAATTTTAAATGATTATTTGTTTCACGGTG  
TAAAGTTTGTGTTTTCACGTGAACAGAATTTCTTCATTTCAACACGTTCTGGATTATTTCTTTTGTCTTAGTTGTAATGTAGTTTCT  
GTCACCACATTCCGTACAAGCTAAAGTTACGTTTACGCGCATGGTTATTCCTCCTTATCATTTCTAAATACGACTTTATTATTATACC  
AACATCTATAATATTTGCAAAGTTAAAAATTTTACAACCATGCGCTACACAATCGTCAGGTAAAAATTTTATTGTCTTTGTCTTTATTTT  
TATCATCTTTACCTAAGTCTTAAAGTAGTAGTTAATTACATCTCTACCTAAGTCTCCACCTGTTAACCATGGTGGGTGACAGGCTG  
ATTTGTATATACAATTTGAAACGCTAATTTGGATCATCAATTTGGCGGTATCTCTATAAAGTAGAGTTAACTCTTGGCTCTCCGTTT  
TGGAACACTTCAGCGGTACCCGTTTTACCAGCAGTAGGTAAGTACTGTATCTTTAAAACTAACATATCCGTAACCATCTTATCATTA  
ATGCCATTTTGAATCCTTCTTGAATTTGTTGATTTCTTTTTCAGTATTATTAACCTTGTTCAAGACAGTGCCATTAATTTTCTTCTTGA  
GTGGACCAACCTCATCTTTATTAGTTGATTATGAATCGTTAATCCAATGTGTGGCTGTATTCTATAACCATCATTCGCTATAGTTGA  
AACATATTGTGATAATTGTAATGGTGTATAGGTATCATATTGACCAATTGATAAATCTAGATAAATTACCTGGATTATTTGTTAATGGT  
TCGATTTGACCTCTTGTTCATTTGGTAAATCTATCCCTGTTTTACACCTAAGCCTACTTGATTTAATCCTCTTCTAAGCTTTTGGGC  
AGGTGAACCTTATATCTGAAGGTAAAGCCATACCAGAATAATAAGGGTCTCCCGCTAATTTTAAATGCTGTTTTAAACATATATACGTT  
TGATGAATGCATCAAAGCTTGCTTATCATTAATAGATACATGCCCGTTTTTATTGAAAGTATGATCGTTTTGTCAAACACCTTGGA  
TGTAATGGTTTCATCGACCAATGTTTCTCCAACCTTTGATAGCTTTATTTGATAACCCAGCTAATAATGTTCCACCTTTTACAGAAGAT  
CAAGCCAAATTTGAAAGTAAACGTACCAATGTCAATAATGACATATTTTACCACCTTTATTAATCTGCTTTCCGGCAAGCGAAGAA  
TGCTCCATTTTAGGATTTGTACAACCATCATAGCATTATCCATATCTTTTGACCTTGCGTGCAGCTTCTTAATTTGTTTATCT  
AATAATGCTTCTACTTCTTTTGAAGATCTATATCGATCGTTAATTTCAAATCTTGACCGCGAGCGCCAGGATTTAAACACTTCTGAAG  
ATGTAACCTTACCAGATTGTCCGTTGTGTATTTCTTTCTTCTTACCACGCAATACATCTTCATATTGATATTCTAGGTAAGAT  
TTTCCAACACGATCATTGCGTGAATATCCTTTGGATAAGTAATGTCTGTCAATCTTTTGAATACCTTCAGCAGGTGTCGATACAT  
CTCCGAATATACCTCTTAAAGTATCGCCATATGGATATTTCTATCCCAATCCATAGACGTGTTAACACCTGGTAATTTGAAAGTTG  
CTGAGAAACTGCTGCATACTCTTTTCACTGACATCTTCATTTTTATCATTTGTGGATCTAAAACGTTCCTGCATTTCATCTCTCGAA  
AAATAGCTAAAACTTGTAATCTTTAGAAGACAATTCATCTAATTTGTGATTTTCCGATTTTCGATAACAGTTGTTTATCATATTGATC  
TTGTTTAAATCTTCCATCTGCTAACATAGCTTTGTTCTTTGTGCATCATGCTTTTGTCTTTTAGGATGCAACTGAATCCAGAAATCTT  
TCTTATCAGTTCTGTAATTTTCTTAGTATCCATCTTGATTAGCTTTGATAACTTTTACGCCGATCCCAACATTTCCGATTTGTTGTT  
TTTCGACCCCTAGTATATGTAATAGCCATTTTAGAAGCATTATCAACTAAAACTTTCCCATTTCTGTCTAAAATACGACCTCTTGGCAC  
AGACTCATTCAGTGAATGTTTTTCATCATTTTTTATAATTTGTTTATAATGTGAGCCTTGTCGATTTGTAAATAACCTAAACGTAGT  
ACTAGTACTGCAAAAAATAAATAACAATCACACCAAAATATAAAGTTAATTCTCTTGTTAATTGTATTTTGAACGATTTTCATCATTTGATT  
TTTCTTTTGTCTTTTAAACAAAACCTACCTACCTCTATTCAAAAGTCTTTCACTTTAAATCATATATGAATTTAGAAATTTATTTCTATCT  
TTTTGACAAAAAATAACGGTCTCATTTAAGAGACCGAACAAGTAATCATACTTTATTTTGTGCAATTATATAATTCGTCAACTTTTT  
CCCAGTTAACTACATTCCAAAATGCGCCAATGTAGTCAGGGCGTTTGTTTTGATATTTTAGGTAATAAGCGTGTTCCTACATCGTCTAA  
ACCTAAAAATAGGTGTTTTACCCTCAGTTAATGGATTATCTGGTTTGGGTGATGACAAATTTCTAAGTGGCCATTTGTTACGACTAAC  
CAAGCCAACTGCAACCAAGCGTGCAGCTGTTTGTGCAGCAAACTTTTAAATTTCTTCTAAGAAGACCCCATTTGTTCTTAAATTT  
TTTCTACTACAGTACCTTTTTCTTCTGAGTTTGGTGAAGTAACCTCCAGAATAATGAATGGTTTAAATGTCCACCGCCATTATTACG  
TACAGCAGTTTGGATGTTAGCTGGTACACTGTCTAAATTAGCAACAATTTCTTCAATAGATTTAGATTCTAAATCTGTACCTTCTACT  
GCAGCATTTAATTTGTAACATACGTGTTATGATGTCTGTCTGATGGTGAATTTCCATAGTTTCTTTGTCAAAATGTGGTTCTAATGCAT  
CAAATGCGTATGGTAATTTTGGTAATTCAAAAGCCATAAATAATCATCTCCTAAAATGTCTGTAAGTAATAATAACAAGCAGTGA  
CTGGTTCAACAAAGAATTTGCTTAAATTTCTACTACTTATTATTTTCTCTACTCATTTAATATAACTCAAAATCAAAAAATAATTAACAT  
TTTGTATATAAAAAAGTTAACAGATTGGCCATAAAATCATACGAACGGAGTATGAAATGAACCTTTATCTTCTATAATTTAAAAAATG  
AGATTTATGTCATACATCTGACCAAAATGTGCATAAAATCTCATTTCTTATATTAATCTTGGCAAGACTCACATACCCATAAACTTCAA  
GTTTGTGTTGTGAATATTAACACAGGTAGTGATAATTTTATCTGATATTGTGGACAATAATCTTACCTTTGTATCTCCACACTTT  
TCACAGATAAAATGATGATGATGATGTTGTGTAAGCGATTCTAAACTTCATTTACCATCAAGTTCTGTATTTTCAATAATCTCTA  
AATCTTTAAATAAGTGCAGGTTTCTATATATTGTGTCGAATGAAATTCAGGATAATTTTCATCCATAACTTGTGTATATACCTTTGC  
GTTTATATACCTTATCTTCTCGACAAAAATATCTAACATATCTTTACGTTTATCTGTATATTTTAAACCGTTCTCTTTTAAATTTTAA

TAGCATCATTGTATTGATATTAGCTCCCTTTTTAACTTCATTGCGATTTTCTGATAAGCCATTGTAATCATAAGTAAAAATAA  
CAAGTAGAACTACAATTACACCACCCGGAGAAATGTCCATATAGAAAGCTAGGACTAAGCCTAATATTACTGATAATTCACCTAAA  
AATACACTTAGTAATATCAATTGCTTAAAACTTTTTGTTATTTCGCATACTTATTGCAATTGGTAACGTGATTAAACGCATTACTAACA  
GTATCCCTACAACACGCATTGAGGCAGAAATAACCATCGCTACAATAACAATAAAATAAAAATTGAATCCATTTAGGAATGCCAATG  
ACTTTACTATATTCCTCATCAAAATGACAATATAAAATAATTCTTTATAAAAACAATGTAATAAACAGAACAACTATGATGGCAATGACA  
ATAATCGTTGTTAAATCACTTATATTCACTGCGCTTATTGAGCCAAATAGCAATCCACAATTTCTTGATTGAACCCATCAGCTAATG  
AAATGAAGATTGCACTCAAGGCGATACCAGCACTCATTATAATTGGAATAGCAATTTCTTGGAAGCAGTGTATGACGTTCTTAATT  
TTTCAATTAGAAGCGCACCTACTATTGCGAATAAGATTCCAAACCACATTGGATTAAATAACTAGTGTGGCATAATAGTAAGTA  
AAAACATACCGAAAGATATACCACCTAAAGTTACATGACTTAGAGCATCAGCTATAAGTGATAGTCGTCTAACAACGATAAAAAGCA  
CCGATTAGAGGCGCAATAAAACCTATCAAGATACCCTAATTAAGAGTACCTCATAAAAATCAAAATTCATAATGCATCTATCAAA  
TTGTGACACGCTTTCCATTTTAAATAAACTCAAATCTTTATTAAATTACAACATTCTCGATTATGCTGATGATCGACAAAACGTACAG  
GATGTCCATAAAATTTTGAATTTCAACTTCATCAAGTGATTTAACTCATCAGTTGTACCATGGAAATGCAAATGCTTATTTAAACA  
TGCTACTTCAGTAGCAGTATCTGCTACAACACCGATATCATGAGTAACTATGATAATGGTGATACCTTCTGTTTTAATTGATCTAAA  
GTATTATAAAATTCATTACATGTTTTGCATCAATACCATTGCTTGGTTCATCAAGTACTAATACTGCAGGTTCTGAAATCAATGCTC  
GAGCAATCATTACACGTTGTTGTTGACCACCTGATAATTCTGCTATATTTTTATGAATTAATCACTTATATTCACTGCTTTCTAGTACT  
TTAATCACTTTTTCATTATCTTTGCTATTAATGTTTGGAAGAGACGTTTTGCTTTTGTTAATCCGCTTAAACAACCTTCTTTAACACT  
TGCTGGGAAACCTGAATTAAGGCATTGCTTTTTGTGATACATAGCTTAATTTAATTGATGTTTTCTTATTTTTAAATCAATACCTT  
CAACAAAACTCACCCTTTGTAAGGTAAATAACCTAGAACTCAACTTCAATAATGTTGATTACCAGCACCATTGGTCCCAACAA  
TTGCTAAAAATTCACCTTTTATTATTTTAAATGTTTTATATTTTCTAACACTTTTTATGATCATAGTAAATTGACATTTTCAATTC  
AAGACTGGTGTATCGTATTCTCACCTCGCATTCAACTATACAACTCCTAGTAACATATGTAACAGTAATGTTTACGACTCAAAAT  
TAGACAAAAATAAGAGATATGCCCCCTCAAGTTTTATTTATCGCATTTCTGAAGAGAGCATTATCATTTTATTGTTGCATAACCTT  
ATTTTTAATTCTGGGTCAAATGCTGTTGTTTTAACATTTCAATTTCAAGTTTTATATGGCGGTTTTTTATTTTTCTTATCTTCACCAAC  
ATAAGGTGTTTCTAAGATTTTCGGAATATCTTTAAACTATCATGATGCACAATGTAATTTAATGCATCAAAACCAATGTAACCGAA  
GCCAATATTTTCATGTCGGTCTTTTGAGCGCCACGGTCATTTTGAATCATTGACATGAACAACCTTTGATTCTGTGCTGACTCCAATG  
ATTTTATCAAATTCATTTAATACGCCATCAAAGTCTCTTTAACATTATATCCAGCATCATGCGTATGACATGTATCAAAACATACTG  
ATAAACGTTCTGTTATTATGAATCCATCAATAATACGTGCTAACTTCTCAAATGAGCGACCAATCTCTGTACCTTTACCTGCCATCGT  
TTCAAGCGCAATACGTACATTATTGTCATTGCTTAAACTTCATTTAATCCCTTCAATAATCTTTAATTTCCGCGCATCAACACCAGCT  
CCAACATGCGCACCTGGATGTAATACAATATCTTTAGCCCCATAGCTTGCGTCTTTCAATTTCTTGTGCAAGAAATCTACACCAA  
GATTAACGTTTTCTGGTTGGTTGATTTGCAATATTAATGATGTATGGTGCATGAACAACAATATTAGATAAACCATATTTTTCCAT  
CACTTCATGACCTTTAGTTATATTTAAATCTTCAATACTTTACGGCGCGTGTGTTGAGGTGCACCAGTATAAATCATAAATGTTGTT  
TCACCATATTTCATGCGCTTCTATAGCAGAACCTTCTAACATCTTTTACCACCTCATTGAAACATGTGATCCCTAATAACATAAAACACA  
CCTAACCTTTTTTGTTTTGCTTACGTTTTTGCTATTTTTGCTGCTTACTAAATTGCTTACGCTCTTGACGTTTCATTTTTTCAACTTCTTG  
TTTAAATTTCTTCTTATAACCTGGTTTAACTTTGTTTTTAAATTTTACTTCGAACCTTTGTTCTTCACTTGATTAGTTAAATGGTCATCTTT  
GCGCATCTTGCTTGACGCTGATTGTGCGCTTTTAACTTCTTTAACTCACCATTCTTAATATCAACAGTATTGAATACAAAACCGCA  
TCTTCTATTAATGAATATTGTTCTTTCATCAGACTATAAAGCGTAATTTGCTACACCTTTAATAATCCGACGACCACTTCGCTCCAA  
CTCTATGCGTAAAGAAGTCAATATCATTGTCACATCAAAATTGATGACATGACTAACACCTTCAATATCAATACCACGAGATGCTA  
AATCGCTGGCAATAACGTATTGGAATTCTAAATTACGTATACGTTTCATTTGTTGTTTACGTTACGTTGGCGTTAAACCACCATGAAT  
CATACCAACTTTAATACCAGCTTCATTTAGTGAACGTGCTAAATCATTGTCATTATCTCTACTATTACAGAAAATAATACATAAGTAT  
GGATTAGTATATCAATTAATTTAAAGTTTTTCAACTTTAGCTGCACCTTTAGTAGGTATTAAGAAAGAAATTCGATGTTCTTTTATT  
TTGTTTTTACTGTGACAGCTACATATCTGGATGACTTAAATATTTATTTAAAAATGGTTGTAACCTGTTGTGGAATTGTAGCACTA  
AACACCGCAATATTTGCATTATCTTCCAATCTTGACGCAATGTAATCTACATCTTCAATTAATCCTAAGTCAATCATAAGATCCGCTT  
CATCAATAACTAAATATGATGCTAAGTGCACATGTAATGTCCCGTTTTAGCTAAGTCATTAATTTCTAGTAGGGGTGCCTATAATCA  
ATTGTGGTTGTGCATCAACGTTGTCTATCTTCTATCTGATCCACCAATAAAACCTTAACTGAAACACCAAGCTTTAAATTTG  
GCTTAAATGGTTCGCTGCATCGTATAGTTGTTGTGCAAGTCTCTGTTGGTGCAACTACGATTGCTTGTGGTTCTTTTTTCACTAT  
CAATTAACCTGCATTAATGGTAATAAAAAATGCATGAGATTTCCCTGTACCCGTTTGAGATTGACCAATTAATTTGTTCTCTTTAGTAT  
TCTTGGAATAATTCGATTCTGAATTTCAAGTTGGTTTTTCAAAATTAAGGTCTTTCACAGCGTCAATTAACCTAGATTCTAGATTAAT  
TGTTGCAATGGATGTTTTGCCATGATTTGGCCTCCTTATATGTTTCATCTTACTATTATAAAGTATAAATGTGCTATTTTAAATAAAA  
ATATTAAAACCTCGAAATTTCAAAATTTAGAAATCCCGAGATTTTAGTTTAAATATATTGAAATGGATCTGTATTAATTTAGATGC  
TTCAACATCTATATTTATTTTCTGTATTGAACCAATTCATTAGTAACGTTTTTAAACCTTCTTTCATCACATATTCGCTGTAATGAT  
TAATATCAATTAATTCACACCATGAATTTTAGCATCTAAGGCATCATGATGTTTAAATACACCTGTAACAAAGACATCTGCGCCTT  
GTTGGACAGCTGATATTCATATCCAATACCTGAACCAATAATTTGCAATACGTTTAAATTTCTGATTAGACTACCAACCAAC  
GGACACTTGGGATATTTAATTTAGATTTAATATACATGCTGCAAACTTCCAATGTCATTTGATTATCCACTTCTGCCATAACGCCAAG  
TCCATAAAGGGATGTTTGTGTTTATCTCAATAAAATCAAATACCGGTGTTTCATATGGATGGTATTGTTTAAATTAATTGCTCAGCCCTT  
GACTTTTGATATGCATCTATCATAAATTCATTTTAACTTCATCTACATATTCAATTTTATCAATTTGTCCTATTGTTGGATTAGCTTC  
ACCAACTGGTTTGAATGGCCTCTTCTTCACTTTCAAAGAAACAATATTCAATTAACCTTCTTGCCTAATCCATTTTCACTAAGC  
TTATCTTTAAATGGTCCAACATTATCCTTAGGTATATATGTTTGAACCTTATAGTATACATCTTGTGATTATTTATTATTGAAATGTT  
CTTCAAAACCATCGCCTTCGCCAACATCATATTGACACCATACGGATTTACATCTAAATTTGTATGCATCGCTATTAATTAATGTCA  
TGTTGAATTAGTTTTCTAATGATCAAACCATAACCATTAGCTTTTAAATGATGTTACGCCTTTAAAGATTAGAGGATGATGACTAATA  
ATAGTATTATAACCTTTTTCGATTGCTTCACTTACTTCAACGTACAGTCAATGCTGTTAAAAACACAGTAACCTTCAACATCTT  
CATCACTTAAACAATCTACATTATCCCAAGATTACAGCACTAAATGGCATAATGGCAGATGATGATCTAACAATGCTAATAATACGCTA  
TTTTCACTACTATAACACCTTTCAATTAACAGCAATTTCTGCTAATTTGAGCTAAACGTTGATGATGTTGTTTCAGTATTGAGTTTCTG  
ATTTAATATGATAAAGTGCTTCTAACTCTCTTTGCCATTTTTTATAAAATATTCATTTTTGTTGTTTCAGCAATTTTGGTCCGAATTTT  
AATTCATCAGATGATAGCTCTATTAATTTGTGTAGAATATTCTGCTACAACAATTTTCAAAATATGGCCTTTTTCTTCCATTATTTTCT  
ATCAATATTTTCAATTTCAATTTGTTGTAATGTTGCTTAAATTTTCAAGTTGGATATTACTTTGTAAAAATCAACCTTGGATGTTGAC  
TTAACTTATCTTGCCATCTTTTAAATTTTAGCAATAAGTGGTCCGCCATACCACAAATTTGTGATATTATCGATTACGTCCTCAGG  
ATGAATAACACTTAAGCCATCCCTAAACGTACATCAATCTTCTACTAAATGATTTGCAGCTACATTTTTTACAGCAGCTTGA  
AGGGCCTTGAATAACTTCTCTGCAATACCGTAATCGCATAAATGGTTTTGAATTTGCATAGATTGGCAAATAGCATGATCTGAGCC  
AATATCCGCGATTGACTTGTGTTTTAAATAATCGACTACCGTGTAAATCGGTTATTTAACGAAATCAATTTTATCTCTCTTATGAAA  
AAAGAGGTTGAACATTATTCAATGTACCAACCTCACTCAAGTAAATCTTAACTTAAATAAATAAGCGCTTATTCATGTCTTGGT  
ATCAATCATTAATAATTTGATATAAATTAATCCATAAAGTCTTTCAAACGTTTACTACGACTTGGATGTCTTAATTTTCAAGTGCTTTT  
GCTTCAATTTGTGCAATACGTTACGTTGTAACACCGAAAACTTTACCAACTTCTTCAAGTGTTCTGTTCTGCCGTCATCAAGACCAA

ATCTTAATCGTAATACATTTTCTTCTCTATCAGTTAATGTATCAAGCACATCTTCTAATTGCTCTTTTAATAATTCATAAGCAGCATGA  
TCTGAAGGACTTTGTGCTTCCTGATCCTCAATAAAGTCTCCTAAAAGACTATCATCTTCTTCCACCAATTGGTGTCTTCTAATGAAACAG  
GTTCTTGCGCAATTTTTAAAAATTCACGAACCTTTTCTGCTGGTAAATCCATTTCTTCCACCAATTTCTTCTGGTGTGATCTCGACCT  
AAGTCTGTAAATAATTGACGTTGAACACGAATTAATTTATTAATTGTTTCTACCATATGCACAGGGATACGAATCGTACGTGCTTGG  
TCAGCAATTGCACGAGTGATTGCTTGTCTAATCCACCATGTTGCATATGTTGAAAACCTTAAATCCTTTGTTAAAGTCAAATTTTTCAA  
CAGCTTTAATAAGACCATATTACCTTCTTGGATTAAATCAAGGAATAACATACCACGACCTACGTATCTTTAGCAATACTTACAA  
CTAAACGTAAGTTCGCTTCTGCAAGCTTGATTTTGCTACTTCATCACCTTGTTCAATACGTTTGGCTAATTTCGATTTCTTCTGTGCA  
CTTAATAAGTTAACACGCCCAATTTCTTTAAGGTACATACGAACCTGGGTCATTTATTTTAACACCTGGAGGGGGCACTAAGATCACTT  
GGATTCAGTTTCTCGTCAGTATCTGAACTATCTTTTTCATTAAGTGTGAAATATCATTATCATTTAATTGATCAAAGAAATCATCCA  
TTTGATCAGAGTCGATATCAAAATTTCTGAAGTTTTTCAGCAATTTCTTCATGACTTAAATGACCCTCTTTTTTACCTTTTTCAATTAAT  
TGCTTCTTAACATCTTCTAATGTTAATGTCGGATCAATTGTTTGTTTTTTAATTTTAACTGTGTATCAGACATGAAACGGCCTCCCGA  
TTTTAAATATGAACATTCGAAATTTATTCAATATTGCTATTTTAACTAAATTTCTTAATTAATTTCATCCATATTTTTAATTTTTATTTTA  
CAAATTGGAACATAATCCCAATATTTATTTTTCAATAGTGTGTTTAAATGCGGTAACTATCATTTACCCTTATACATTTTGACATAAT  
CATTATTCGTATTATTCTTTAAAAATCACATGCTACATGCGTCTTTATTCTTAGCAACAATTTGCTGTAAATAGTATTTTTGTAATTCT  
ACATCGCCAATCCTTGTAGCTTCCCTTAATTTATGATTCAATGACTCAATTGTTTCTTGTCTTTTTCATTAATAACATTGACATAATC  
ATCAATTTCAATTTTCATATGGTTCGTCAATCAAAATTATATTGTTCTAAGCTAATTAGTGTCTCTCAACTCAATTGAATTAACATACT  
GCACAGCATCACTGATATTATATTGATCATTTTCCGCATAAAAAATCATGTAAGACTTCGAATACATATTTAAAAATGCTGATTGTGA  
AGTTATCCTTATCAACACTTTCATAATAAATTTAAAAATGTATCTTTATCTCTCATTAAATGTTTTAAAAATGCTCGCTCCGCTTTTTCT  
TGACGGCTCAAATGTATGTTTCGACCTGAATATCCAAACAATTTCTTCTGCGCATTTTTCAAAAGGAAACATAATACGATTTTCGAAATCTA  
GGTGTCTGATTGAATTGTATTTCGTTAGCTAACTGCTCAGGACTAACATTGAAAAATGGCGCAACATCATTTATAGCCTTTTGTGCA  
AAATCGATGACTTCATAAGTGAAATGTCATGACTCAGTTCTTTCAAATAACGTTTCATATGAAAGGTCATTATGTGCAATTTTCATCTTT  
TAATATACTTACTTTATAATGTGCAAAATGACTTTTTGTCTATTTTTACAAAAGTAGTAAATGCGTCGTTGCCATACTTACCAATGTAT  
TCATCCGGATCCATGCCAGATGGCAATTGTATAACAAATACATTTAGCCCTTGCTGTAAACAAATTTTGACCTGTTTTAAGTGTGCTT  
CACTACCCGCAAAATCCCATCAAAACATTAATGTTATATTTGATGTTAACTTTCGTATAAAAAGTAATATGTTTCATCTGACAACTGTGT  
CCCCATGTTGCAACAACGTTTTTCAAGCCAGCAGTATCAGATTTTATAACATCCATAAAACCTTCTAGTAATACGATTTTCATCTAAT  
TTTCTAATTGATTTACGCGCTTTATCTAAGTTGTATAACAATCTTCTTTTTGAAAGATAGGTGTTTCAGGACTATTTAGGTATTTTTGG  
TTCCTGACCGGTATATGTTTCGACCTGAATATCCAAACAATTTCTTCTGCGCATTTTTCAAAAGGAAACATAATACGATTTTCGAAATCTA  
TCGTAATAACTGAAATTTTCTTCGTTACGTGATAATAATCCGGCTTCATATGCTAATTCAATATCGTAACCCCTTTTTTTGAAGAAAAAT  
CATGACAAAAATGTGAGCTATCGGGTGCAAAGCCAATGCCTCGCTCTTAAATAAGCGCATCTGTAAAACCACGTTCTTGTAAAGTATG  
TTAATGCTTGTTCGCCCTTCGACTGTCTTTGTTAAAGCGTAATAATAAAATCTTGTATTAACTCATGCATTTCAATCATTGTAAATCA  
TCAGAAGCAATTTGAACATTTGAGTTAGATTGTGTTGCCTCAATATCTACAGCAACATTAACCTCTATACCTAATCTTTAACCGCTT  
CAACAAATGATATGCTTTAATTTCTTGAGTAAATTGAAAAACATTGCCACCTTTTTTACAACCAAAACAATGACAGATTTGTTTATC  
TTCAGAAACTGTAAATGAAGGTGTCTTTTCATCATGAAAAGGACACAAACCTATATAATTGCGTCTCTCTTTTCTAGTTTTACATAT  
TCATTTACCAAGTCTAAAAATGTCGGTTTTATCTTTTATTTTCATTAATGATCGATTGATCTATTTCGCAAAATTAACCTATTAAGCA  
TTAGTTATACTATTATACCTAATTTTTTGACAAAAATGAAATCTTTCGATTTTGTGTTCAATATAATGGAATTATATCGTTTGTGTT  
TCTTCGATTGCTTTTTGAGAAACATCAATGACAGGACATCCAATTTCACTTACGATTTCTTCAAAGTAATTCAATTTCTTCTTGGATT  
GAGCTTCTGTTGCATAACGAGCTGTGTACCTAGTCCCAATTGTTTTAATCGCTCTTTTCTAATGCGATTTAATTTTTCTTCACTTATT  
TTAAGTGCATACATTTCTTTGGATCAATATCATATAAGCCATCTGGCGGTGTCACTTCTGGTACAATCGGTACATTTCATAACTTTGT  
AACTTTTATGCGCTAAATACTGGGATAATGGTGTCTTGAAGTCTCGAAATACCAAGTAAACAATATCAGCTTTAGGTAATCCTT  
TAGGATCTTTACCATCATCGTATTAACTGCAAACTCTATCGCATCAATTTTCTTGAAATATGCATCATCTAATCTATGAACGATACC  
TGGCTCATTATAAGGTTTTTCTTCAACCGATGCTGATAATAAATCCATTAATGGCCCCATGATATCGACGGACTTCAATTGGAATTCT  
GCTACTTTCTCACTCATATATTGCTTCATTTCAAGTTTAAATAAGTGTATAAAACAATGATAGCATTGTATCTTTTGAACCTTGAATCA  
CTTCATCAACATCTTCAAAAGATTCAATATATGGATATCTTAATAATTTACATTTTACATTGCTTAGGAATAAATGTGAAATACCTGC  
CCTAGCAAACTAACTTGCCGTTTACCTATAGAATCTGAAGCTACGATAATTTTAATTTTTTCCATTACTTCTCACCTATTCTTTATAT  
AATGCTACTAATAACTTAGCTATTGTTGTTTTGGAATTTCTTCCAATTACTTCATACTTTTGATTATCTTTTTTTCTTACAATTGGAAT  
CGAATCAATTTCTTTTCAATCATTCTATCTGCTGCGTATATGACTAATTCGCTTTCCTCTAAATAAGTGACATTAGGCATACGTGTC  
ATATTTACACTAATAGGTACTGTATGAATATCTGCTCCAATCATTGAAGCTCTTAATAAATCTTTTCTTGAAACACACCAACAAAAAT  
CGTTATCTTCATTAATAATAAATAATGTACTTACATCTTCTAAAAAAATGTACAAATAGCGTCATAAACTGTTGTATTCTCTCTTAG  
CACACAGGTTGAGACATATAGTCCTTAACCTCAAATTTGTCGAAGTTTTTCATTAAAAAATTTACCTTTTGATTACCTGAATAATAA  
TATCCAACTCGGGGACGCGCTTCTAAAAAACCTGACATTGTTAATATCGCTAAATCTGGTCTGAGCGTTGCTCTTGTGTTAAATTTCACT  
TATCTGCTATTTGTTTACCAGTAATGGGTCTTGAGTTTTTAAACAATTTTCGATGATTCGTTCTTGTCTTTGACTGAGTTCTATAGGCTT  
CACCCTTTTTTATTACATTATTATTATACCGATATTCTTTTCTATGTCACAAACACATTAATTTTACTTGCTTTAAATAATCTATCAA  
TTAGAATAAACGTACAGCGAGTTAAGGATAGTGTAAGCTTAACAATAAGATTGGCGCAACGAATCATTTTAAAAATAAAAGCGAGTG  
ACTACACTAATTTGGGTGGAACCGCGGGTTAAATACGTAACCTTATTTTGATTATATACAATTTAAAAATTAATCTCGTCCCATGGA  
AGTAAAGCATATTTACTATGCTGTTATTTCCATGGGGCGTTTTCATGTATGAGGAGAGGTAATTATGGCAAAAGATATGGATACAA  
TTGTTTCATTAGCAAAACACAGAGGTTTGTGTTCCCTGGTAGTGATTTACGGTGGTTTATCAAAACATGGGATTATGGTCCTTT  
AGGTGTTGAATTAAGAATAATGTTAAAAAAGCTTGGTGGCAAAAAATTCATTACACAATCACCGTTTAAACGTTGGTATCGACGCTGC  
AATCTTAATGAATCCAAAAAGTATGGGAAGCTTCAGGACACTTAAACAACCTTCAACGACCCAATGATTGATAATAAAGATAGTAAAA  
TTCGATATCGCGCTGATAAATTAATTGAAGATTATATGGAAGATGTTAAAGGTGATGAAAACCTTATTGCCGATGGTTTAAAGTTTGT  
AACAAATGAAAAAATTAATTGACGATGAAGGTATTGTTCCTGTGAAGTAAACCTGCTAATCTGAAATGCTGCAATTCGCAATTCGAAT  
TAATGTTTAAACATTCCAAGGTGTAACCTGAAGATTCTACAAATGAAATTTTCTTACGTCCTGAAACAGCACAAAGGTATTTTTGTAA  
ACTATAAAAAACGTGAACGTTCAATGCGTAAAAAATTACCATTGGGTATCGGTCAAATTTGGTAAATCATTCCGTAATGAAATCACTC  
CAGGTAATTTCAATTTTCAGAACAAGAGAAATTTGAACAAATGGAACCTGAATTTCTTCTGTAAACCTGGAGAAGAAATCGAATGGCAA  
AATTATTGGAACCTTTTGAAGTGACTGGTTAACAAGCTTAAATATGAGCAGTGAAAAATATGCGTTTACGTGATCATGATGAAGAT  
GAATTATCTCATTACTCAAATGCAACAACCTGATATTGAATATAAATTCCTATTTGGTTGGGGTGAGTTATGGGGTATCGCAAGTCGT  
ACAGACTTCGACTTACGTAAACATGCTGAACACTCTGGTGAAGATTTTACAGATACCATGATCCAGAAACGAACGAAAAATATATTCC  
ATATTGTATCGAGCCATCACTTGGTGACATCTGTAACTATGCTTTCTTATGTGATGCATATGATGAAGAAGGCGTTGAAGGTAG  
TAAAGATGCACGTACAGTTTACACTTCCATCTGATATTAGCACCATAAAGCAGCGATTTTACCTTTAAGTAAGAAATATCTGG  
CGAAGCGATTAAGATTTTGTAGCAATTAAGTTCTAAATTTCTCAATCGATTTTCGATGAATCACAATCTATCGGTAAAGATACCGTCG  
TCAAGATGAAATCGGTACACCTTATTGTGTAACATTCGACTTTGATTCAATTAGAAGATAATCAAGTTACAGTACGTGACAGAGATTC  
AATGGAACAAGTTCGTATGCCAATCTCAGAGTTAGAAGCTTTCTTAACTGAAAAAACAAATTTCTAATTTAAAAAGACTCTCCACCAT

ATGTGGTGGCTATATAATTTATAAAAAAGAGATACTGGTTAGTAAAAATTGCCAGTATCTCTTTTCTATTTCGAAAAAGGTATTCAAATA  
AACACATCTATGTGGCTACTTGAATACCTTTTATTTATTTTATGTTAATTGTCCAATCTTTTTAATTGGTTGATTAGTTTCTGACTTTTAA  
AAAACATACCTGCATATTACGATATAACATTAATAATGATATCTGACATTCATCAATAATTTCTTGATGGATATTCAATGAATTCAT  
TTTATCTATTGGTAATTTTGTAAATACATCTAATAAATATAGTGTTTTATTCGATAATATAACTGCATGTACATCTTTAGAAGCCTCTT  
GCCTTGAAATCGCACCGTCAAACTTAAACTATAACCTATTAAATCTGCTTGTGTGTCATTACCCTCACAGCACAGCGATTAAATG  
ATGCAGTAAACCAAATCGTTTCATACACTTTAACATAACTACGACTGACATTAACTGTGCAGATGTACCTGATTCTATTTTTTCAAG  
AACAAATTGTAATAATTGATAGTTATATGGTGCAATGTCACCTTCATCCATTGAGCGCTCAATAGTTTCAGCTGCCAGAGAGGCATA  
ACTGCTTACGTAAAGGTCCATTTGTAATTTATAATGTTGACTAATAACATCTACAGAAATTTAACGTTCCCATACCTCGCCACTGATTG  
TAAATAAACAAACCATAAACAAACAATTGCGTTTGGCCTTGTAACCCGCTTAACTTTTTAGCACGCTTGCCATAAGTGGTACT  
TTTGCACCATGCTCATTTAAAAATCGTGATAATTTATCAGATTACCCATAATCAACTGCTTTGATGATAATCCCTTTTGGCGCATT  
ACAATTATCTTACCACCTTTTAAAGATTAATCTTGGTCTTCAACATAACCAATTTGGCGAATAAAGTTAACTTTGTTTCCGAGTCTCT  
TTGAACTTTGACCCATAATTCTAAGTAAACTTTAGAGCCTAGAAGCATTTCTATATCACGCTCTCGCACGTTTTCCTACTTCTTTAACT  
TTTTACCGCCTTTTCCAATGACAATTCCTTTTGGCAATCTCTTTCAACATATATAGTTGCTTCGATATGAACACGATCTTCGCTTTCT  
TTAACCATACGGTCCACATTAACACCAATCGCATGAGGGATTCTTCACTTGTGAAGATGAAGGATTTTTTACGAATGATTCACCC  
ACTACAAATTGTTACAGGATGGTCTGAAATTTGATCATCTGGATAATATTTAGGTCCTTCGGGTAAATACGCTTTTAAACATCAATA  
AAATGATCGACATTTAGCCCTTCTAATGCTGAAATAGGTACAATCTCTGTAAAGTCCATATAACTTTGATATTCTTCAATCTTTGGCA  
TTAATTTCATCTGGATGCATAAATCTATTTTATTAATACTAAAAATCTGGTGTCTTAACTTTTCAACATTTCTATAATATATTCA  
TCGCTCGTCAAATTTCTCTATGGCATTAAACATAAATCATGATCATCTATCTCAGATAATGATATTTTTCAGCATTTTCATCATAT  
AGTCACCTAATTTGTGTTTAGGTTTATGAATACCTGGCGTATCAATGAATATAAATTTGCGCGTCACTCTCTTGTGATAACACCTGAAT  
TTTATTTCTAGTTGTTTGAGCTTTATCGGACATGATTGCTATTTTATGGCCGATCACTCTATTAACAAATGTTGACTTTCTACATTTG  
GTCTACCTATAATTGAAACAAATCTGATTTATGTTCTGTCTATTTTCTAAATCCTTTCTGAAAATCCAAATGGTAGTAACTCTGC  
GACTGTCTATCAACCATATCTCTTTATGATTTGTCTATATACACAGGCATATCATCATACATAATTCCTTCAAACTTGACGACAT  
GCACCACAAGGTGATGACGTTTATCTGCATCTACGGTTACAGTTATTGATTCAAAATCAGCTGGTCTGTATCCTTGAGAAATTGCC  
GATACCAAACTAGCTCGTTACGACATATCGATAATGGATAAGAAGCATTTTCTACATTGGTACCATAAAAAGTTCTACCGTCTTTC  
GTTTTTAAATAAGCCCTACTTTAAATTGACTGTATGGCGAATATGATTCTTGTGTGCTTTTCTAACTTCTTGAATAATGAGGTT  
GATAACTCATATATGCCTCCCTAAAAATACGCTATAAAATGTGGTAAAAATACTATTAACCTATAATAAATGCTAATATTGAAACT  
ATAAGTACACTAAAAGCCGCAATATCTTTAGCGTATTTAGCTAAATCATGATATTCAACGGTCACTAAATCGACAACATATTCAATA  
GCAGTGTTTAAAGCTTCAACAGTGAGAACTAATGCAATAGCAATGAGTATAAATATCCACTCAATCCGATTAATATTAGTACGAG  
ACCAAAGACAATAGCAACAATCATTGCAACACATGTAAGAAATTTATAGTCTTTTGAATTAAGATTTTCAGCCCATCAAGTGC  
ATATTTAAACCTTTTCATAATTAGTCTCGTGTAAATCCATATGCGTTTAAATATTGTATCTTGTGCGACCAACATTTCTTTTCATCCGC  
TTCAGTCATATGATCATAACCTAATAGATGCAAAAATCCATGTAATGCTAAAAATCCTAATTCTCGTTCAAAAGAATGTCCGTAATT  
GTTTGCTTGTCTTGGCGTACATCCGTACAGATAATTATATCCCTAAAAACAGTGGTATATCAAGACCACTAAAAATCAATCTCTGGC  
TCATCTTCTTCTAAAGCAAATGAGATTACATCTGTAACCTTTATCTTTATCTCTATATGTTTCGATTAATTTCTTGTATTTCTTGTATCT  
ACAAATGTAAACAGAAAGCTCAGCATCGCTTCTATATGCTCTCTTTTTCAGCAAAATCTAATAAATCTCAATTTGTTTATACCAAG  
CATCTTTAACTAAGCCTGTGTGATCGCTAAAATCTATCGTAAACATTTAATTTCTCTCTCTCTAATATGTTCAATGATCTTACTTACCA  
TGGATGTCTTACTACATCGCTCTGATCTAATTCAATATACTTATACTTTAACGTTGTGTAACCTACTGACCGCTTCTTAAAGTCCAC  
TTTTAACACCTTTAGGTAAATCGATTTGAGTTTGGTCACCAAGTAACTACCATTTTTGAGCCAAAACCTAGTCTTGTAAAAACATTTT  
CATTTGCGCATGTGTGATTTCTGCGCTCATCAAGAATTACAAATGCATCTTCTAATGTTTCGTCGCGCATATATGCAAGTGGCGCT  
ATTTGCGATAATGCCTCTTTCAATAAATCGCTCTGTTTGTTCACGCCAAGAAGTATATAGACCATCATATAAAGGTCTTAAATATG  
GATCTACCTTTTCTTTCAAAATCTCTGGTAAAAATCCAAGTACTCTCTGCTTCAACAGCAGGTCTTGTAAATACAATACGTTTAAAC  
AGCACCTTTACGGAGTTGCTTTGCTGCATAAACTACAGCTAAGAATGTCTTACCTGTACCAGCAGGACCTATACCAAAATACTAAATC  
ATTATTTTTCATGGCATTAAACATATACGTTTGGCCATCGTTTTCGCACGAATCGTCTTACCAAAATGCATCTTTAGTTATCTCTTCAT  
CATATAAATCTAACAGATGTTGAATTGTGTTATTATGCGCCATTTAATAGCTGTTCAACATCTTTAATTGTAAATATTATTACCTAA  
ATCAATAACCTTCAGCAAAATTGATTAATACTGATTCCGCTTTTTCTACGTTTCTATTTTGTACCTTTAACGGCACTTCTTGTCTC  
TTGCATGGATGACAACATCGAACTCTCTTCAATTGCTTTTAAATGTTTCATCATTATTTCCAATTAAGCTTGAGATTGGTTCATATC  
GTCTATTTGTATAATTCCAGGCATACACGCGCTCTTTTCATATATCATTTATATTCATTCTATGATGCTTTAATATCTACTTAATTAT  
ATCATGCAATTGATTGATTTAAACATCTTTGCATTGACTTACTCATTTTTCTTTAATTTAAATAATCATTTATACTTTTCACCTGTCT  
ATAAAAGCAGATTCAATTTTAGACTAATCAATTTTTTGTGTGAATTTAAATAACTAATATTTCTCGAAAGATTCTCTTGTTTTCAAT  
TTTTCTTAAACGTAAAAAAACAAGCACTACCATTACGATAGTGCTTGTTCAAAAAATTTTATAATTGTTTGGTTTGTAGCTAAAAAT  
TCTGACCATATCATACCATGATTACTTCATCTTTATCAAATTTGGAACGCTGATTAGTCAAATCTTTTTTCGACATTTTGAAGATTA  
GCAACTGCTTTAATTTCAAACGTTTTGTACGTTTCAGATAAGTATTTATCTCAATAATATCTAGCACGTTTTCATTTTAGCAATT  
TGCTTTTCTTTTCTCTATCAATGTACGATCAAGTCTTTTAAATATCATCTCTAAGTGATTTTCTAATTGACGTCTAATTTTCGTCAGA  
ATTATCTTGTCTAGAAGGTCTATGTTTCTGCTCCACCGTTCTGCTTTAGGCACTGTAATTGGTTTCTCTGTCTATCGGTTTGTCTCTG  
GTTGTTTTTAAAGGTGCCATAGGTTCTACAACAGGTTTCGATTTAGGCTCTTCTTTGGAAGTTTCATCGAATAAAGGTGGTAACGTATC  
ATCATATTTTCGTTTCGATGATTCTTTTCTTCTTCAATTAATCTTCACTTATTTCTTTAAACGTTTCGCTCAATTTCTTCAAAAAAGCC  
ACCTTTTTTGGTTCAATTATCGGTAGATGTTTTTGGAGTGGCTTTTGATTTTGTCTATCTTTATGACTATTTTCGCGCATAGTAGTAA  
TGATAGAAATGATCACTGATATGACAAAAATAGAATACCGACACTCATTTAATCACCTCTCGACTTAATGTTTCAGGTGACTCATCA  
TCACTTTGATCAGTTTCTTTATTAATTGCAATTTCTCATGCTGTATCAGCTTCGATATTTTTCAAATTAATAATCTTTAACACTGAT  
ATTACCTGAACGTAATGCTTCAGCCATAGCTAATGGTACTTCAGATTTCGGCTTCAACTACTTTAGCATGCTTTTGTGACACGCGCT  
TTCATTTCTGTCTAGTTGCTACAGCCATAGCTTACGTTCTTCTACGTTTGTGCTGCAATATTTTGTCTGTCTAATGCTTGTCTAGTT  
TGTAAGTCTGCACCAATATTTTACTAATATCAACGTCAGCAATATCAATTGATAAAATTTCAAATGCAGTACCTGAATCTAAACCT  
TTGCTTAAACTGTTTTAGAAATATTATCTGGGTTTTCAAGTACTTCTGTATGATGCTTACTAGAACCAATTGTTGAAACGATACCTT  
CACCAACAGTGCATGATTGTTTTCTTACCAGCACCACCAACAAGTCGAGCAATATTAGCTCTAACTGTGATACGAGCTTTGGCTT  
TCACTTCAATACCGTTTCATTGCTACACCTGCGATAAATGGTGTTCATGACTTTAGGATTAACAGACATTTGAACCGCTTCTAATAC  
GTCACGTCCTGCAAGGTCAATTGCAGCAGCAGTTCGAAAGGAAGTCAATGTCAGCACGTTGTGTCAGCAATATTAGCGTCAACAA  
CTCTGTCAACATTTCTCTGCTAGATAATGCGATTCTAATTGGTTTGTGTTAATGCTAGTCTGCTTTATGCGCTTTAATTAATGGC  
GCTATAACTTTTCTGGAGATACACGAGCTAAACGCATACCAACCAATGTAACCTATACCAACATGAACGCCAGCTGCTAACGCTGA  
AATCCATAAACCAATGGGTACAAATGAGAATAAAATAAGTAATGCAACTACTATAATAAATGCTATTACGATAAAACCTTAAACTAA  
ACATGGTATCGCTCTTTTAAATTAATCTACTTCCCTCACAACTACTCTTGTTCCTTCAACTTCAAGGATTTTACCCTTTTATGCGTA  
AAATAAAGTTGCCATCTGAAACAGCATCAATACGTTTCGTTTTCAAAAAAATAATCCCTGCAGGTGCAAGATCTGTAACGTGTTGAG  
CAGTCTTTCCTACGAGGTGCGAGCGGTTATCATGAGAATTGTAACCTGACTCAGAATTAGTTGAATCTTTTAAAGATAACTTTATCCA

AAAACGGAATCTTTCTGTTGAAAACTTCTACTAATATCACCCATTCTACAATCGTTAAAAATCAAGGCAACGATAACATTGCAAGCA  
TAAATAGCAAATTATCACCGAGCGTTGTTATGCTTATAGTTATCAGTATCATGCCAATAATACCAATTACTGCACCAACTACAAATA  
ATTCAATTACAATAATATAACGCCAATTGAGAATATTAAGATAGAATGCATATTGACATTTCCCTGGATTAGAAAATCCAAAAATA  
AAATAAGTAATGATAATGTGGCGATAATACCAGCTGCATTGATTTTTTTAGAGTAAAGTTGATATACAAATCCTAAGAATGTCAAAC  
AGGTTAATATTAACGTAAAAATAGGTTGAACAATTATATTACTAAGTTGTTCAACCCAAGTATCTCCAGCCGTTGATTCCAAGATAG  
TTGTCATTTGTAATAAATTATTATAACTCACAATTTACCTCGCCCTCACATTAATTATACATGAAAATTGAATATACTTTATAGTTAT  
AAGAACCTATAGAATATCAATTTGATTATTTATAAACTATATAACTTTTTTTAATTAATAAATTTGACAACAAAAAACATCACATATT  
AGTGTAAAGACACTAAGTTGTGATGTTTGTATATAATTAATATTTCGTGTTGAGGGAGTCAACAGAGGTATTAATTTATTTGAATTA  
CGTTTACGTGCAGCTTCTGATTTCTTTTACGTTTACGCTTGGTTTTCTGTAATAATTCACGTTTACGTACTTCTTGGATTGTTCCACTT  
TTAGAAACTGAACGTTTAAATCTACGTAAACGCATCTTCAAGTGATTCTTTTACGTACTACTGTTTAGACATCTGTATTTCCCTCC  
CTCCAAATATCAACGGAACCTTTATAGTCAATTGCACAGTAAAACTATGCATTTATAAGTATAATATATCTGTAATTTATGGTCAATT  
AGTAAATTTGTTTTTTATTTGAAACATATTTACATCAAAATCACAAAGACTTTTAGATTTTGTCTAAAAATCTCTTAATAATTTATTT  
AATGAGAAGAGTTGCTTATATAGTAAATTTGTGAAGCCGTTAAAAACAACGTTACAAAACCTATATCTTTAATACGGAACCTTATGGTA  
TGAATCAAGGAATACTTAACTAAAACCTTCTCTATCAGATTTATTTGTTGCGAAATCAACAACCTTTAATTGCTTGCCTTCATTTAAT  
GGATAATTTGCTTGCCTAATTTTAACTTTTACAATTTGACCTATGAGTGATTCTGTCACCTTCAAATTTGACTTTTATATAATTATCTGC  
ATATCCAACATAATGTGCCTTCTGTGTCACCTGTTTCTCAGGAATTACTTCAAGCACATCTTGATCAAATTTAGACGCATATAACTTT  
CCGAGTTGATTGCTTAGCGTAATTAACCTATGCACCCGTTTCAATTTTAAATTTCTTCATCAATTTGGTCATCCATTCTTGCAGCTGGCGT  
GCCAATTTAGGAGAATAAGGGAACATGCAGTTCAGAGAATATGCTTTTACGATAAAATCATATGTTTCTTGGAACTCTGCTTC  
AGTTTACCTGGGAAACCAACAAATTACATCACTGTAACCTGCAAGTCTGGTAAAGCTTTATGCAATTTGTTAATCGTTCTGTAATA  
TCTATCCATTGTATACTTACGTCTCATACGTTTTAATACTGTATCTGAACCAGATTGTAATGGAATATGCAATGACGCACAACCTTTT  
GTTGAACGTTCTAAACGTCAATTACTTCTATCTGTAAGTTGACTTGCTTCAATTGAAGAAATTCGAATTCGTTCTAATCCATTAATCG  
TTTCAAGATCACGTAATAATTGGGCCAAGTTATAATCTTTTAAATCTTGACCATATCCACCTGTATGAATTCCTCGTCAATACAATTTT  
CTTATATCTGAAATTCAGTAGTTGCGTCGCTTGTTCAACTACTTTTTCCGGATCTCTTGAACGCATTAAGCCACGAGCCCATGGAATA  
ATACAGAATGTGCAGAAGTTGTTACAACCTTCTTGAATTTTTAATGACGCACGTTCTATCTGTAAAAATATGGGACATCTAATTTCTT  
CATATTTACGATTTTTCATGATATTTCCAACACCATTAAATGGTTGGCGTTCTTTACGGAATTCATCAATGTAACCTAATAGTTTATGT  
CTATCTTGTGTACCAACTACTACATCGACACCAGGAATTTCCATAAATTTACGTGATGAAGTTTGGCGATAACAACCTGTTACACAG  
ATTACAGCATCAGGATTTTGTCTTATTGCACGTCTAATTAATTGACGACTTTTTTTATCACCTGTATTCTGTTACTGTACAAGTATTAAT  
AACAAATACATCAGCATTCGCTTCAAAGTCAACGCGCTCATAGTTTGTCTTTTAAATAATTGCCAGATTGCTTCAGTTTCATAATGG  
TTTACTTTACAACCTAATGTGTGAAACGCAACTGTTGACATAAATATTCACCCATTAAATCTTTTTCATAACTTATTGCACTTAAACG  
CATACAATGGCGCAGTTTCTGCCCCTAAAATTTCTCGGTCCAAGACCAACAACCTGTACTAGTATTACTAAATAATGAAATTTCAATTT  
CTGACAAACCACCCTCAGGACCAAAAAATCATCAACACTTTATCCTGAGCCTTGAATTGTTGTAAAGTTTGTGTAAGTTGCTTAACT  
CACCATCTTTTGTCTTCTTCTCATATGCAATAAGAATATAGTCATAATTATCAATAGTATCACAAATTAATTTTAAATTCGACTCGAA  
TTGAATAGATGGAATCACTAAACGATAGCTTTGTTACGAGCTTCTTTAATTAATTTTTTGCCAACGCTCTATCTTTTGGCAACTTTTCG  
CCTCGTTTAAATTTAACAATTGAGCGTTCCATGCTCAGACGTATAAATGATGAAGCACCAATTCAGTAGCTTTTGTAGCAACCCTC  
ATATTTGTCAGCTTTAATTAGTCCACTGCAAACTGTAACATCACTGGAATTTCTGTATTAATATTTTGTCTTTTAAATCAACTG  
CAATTTTATCACTTGTATGTGACGAATTTACATAAATAAACTGTTTGATCATTAAAAAGTTAAAAATAATTTTACTACCAACATCATA  
TCTCATTACATTTGTTATATGATGAATATCTTCTTTTTTGTAAATAAAAAAACGCTGACTTACATCAGCGTTTTGGTCTATGAAATAA  
CGTTGCACATTATTCACCTACTTCTTGGCCAACAAGACAAACCAACCATTGTCATGTTGTTCTGAAATAATTTTAAAAACCTACACGC  
TCCATATGTGACTGTATACCTTCATACTTCTCTTTTATAATACCAGAAGTAATAAATAAACCGCCTTCATTTAGAGTATTATAAGCAT  
CTTCAATCATTTTCATCAATAATATGCGCTAAAATATTTGCTATTACAATATCAAATTTTTCTGTTTCGCTTTTCAATTAAGTTACCTGGA  
ACAGCTTCAATTAACGTTTTCACAATGATTTCTTCTGAAGTTTTCTTTAGCTACACTCACTGCCATTTTCATCAATATCCAACGCTTTAAT  
ACGTTTACACCGATTAGATGACTTGAATACTTAATATACCTGAGCCGATACCAACATCAATTAATGATGCTGTGGCAATACATA  
TGTTTCTATTGCTTCAACACATACCTTGTAGTCGATGATCGCCTGTGTCAAAAGCCATACCTGGGTCGAGCTCAATGTTCAACACTC  
TTCATCCGCTTCTTTAGCATATGTTTCCCAACTAGGAATATTGTGAACCTTCTTCGACGCTCGGAATGGATGGAATAGTTTTCCAT  
TCATTTTCCCAATCCGCTCTGCAATAAATTTGCTCACTGAATTGAATGTTATGTTGATCAAGTTTCATCTAAATTTAATAACTCATCTT  
AATTTGCTGTGCAACTTATCATCATAAGTCATTTCAATTAATAAGGCTTTCAATCTTACTCCCTTATCTGGATAATCCTCTTTTTTCA  
AAGCGTAAATTTACCGTATTTATCTTCTGTTGGTTAATTAATCATCTGAATCTTCTATACGACACCATTGATCCATGATTTTC  
AAGTATATTGGTAGCCAAATTCAGTCTTCATGATTAATAATAATTGAAAGCTCTGTCAGTTTCATCTTTATCTCCCTTAAAGAAT  
CTTTTTGCTCTATCTTTAAATTCGAAGGTTGTTCAATTTCTTCAACATTTAATTGGGCAAAATCTTTTCAATAGTTCTTTTTGTCTA  
TCTGTTAATTTAGTAGGCGTTACTACTTTAATATCAACATATAAACTCCTGATCCATAGCCATGAACATTTTTATACCTTTTCTTT  
TAAGCGGAATTTGCTTACCTGTTTGTGTACCAGCAGGATGTTTAACATAACTTCATTATTTAATGTTGGTATTTTATTTTACTCGCT  
AAAGCTGCTTGTGGGAAGCTTAACATTTAATTTGTAATAAATATCATCACCATACGTTTAAATGTTTACGATGGTTTAACTCTAAAT  
ACTACGTATAAATCACCAGCAGGTCCTCCATTACGCTGAGAGCCTTACCAGCTAATCTAATTTGTTGTTCAATTGTCGACACCTT  
CAGGTACTTTCACTTCTAATTTAAGTGTATTTTACGTACCTTTTCCGTGACATGTTGGACAAGCTTCTTCAAATTTCTTGACCACTT  
CCATTACATTTAGGACAACTTGTTCAGTACGAACCTTACCTAAAATTTGTTGTTTGTCTACAGTACATGACCAGCGCCATTACAGT  
AACTACAAGTCTTTTTACTTGTTCAGGCTTTCACCATCACCATGACATGTTTCGCATGTTACATCTTACGGATTGAAATTTCTTTT  
GTTGTACCAATACCGCTTCTTCAAATGTTAATGTCAATTTGATACTGAAGATCATCACCTTTTTGCGGTGCATTTGGATCTCTTTGTCT  
GCCGCCACCGAAGAAAGAGCTAAAGATATCTTCAAACCGCGCCACCGAAGCCACTAAAACCGCCAAAGTCAGAGCCATTGAAT  
CCTGTGTCACCAAAACCTTGTGGACCATATGTCCTTCTGATAGCTTGCCTGTTTATTATCATCACTTAAACCTTCAATAGGCTT  
GAAAATTTCTTTAACTTTTCACTCTGCACCTTCTTCTTGTGTAATATCTGAGATGATTTTTTTCGAAAGCTTTTCGATACGCTTTTTG  
ATTTATCTTTTGAAGCATCTTTACTAATGCCTAAAACTTCAATAAGTCTCTTTTTGGCCACAGCTATCTCTCTTTTCTTAATTAACCT  
CATATAGTTTAAACGTAATATGTCATACTATCCAAATAAAAAAGCCAAAGCCAATGTTCTATTGACTTTGACTTTTTCAGATCATGACAA  
CATTTCAATTTGATTTGTTAATTAATTTTTTGTGCTGCTCTTTTACTTCTTTAAATTCAGCATCTTCTACAGTACTATCGTTGTTTTGACC  
AGCATTTGCACCTTGTGCTTGTGTTGCTGTTGAGCCGCTTGTCTCATATACTTTTGTGATAATTCTTGAATCACTTTTCAAGTTCTT  
CTTTTTTAGATTTAATATCTTCTATATCTTGACCTTCTAAAGCAGTTTAAAGAGCGTCTTTTTCTCTTACAGCAGATTTTTTATCTTCTT  
CACCAATATTTTCGCTAAATCAGTTAAAGTTTTTTCAACTTGAATACAGTCTGACGTTCTGTTTCTTAAAGTCTACTTCTTACG  
ACGTTTTTTATCTGCTTACGCTTAACTTACAGATCTTTTACCATACGCTGATTTCTGCTGATAATGAAGAATTTGATGAATG  
TAATCTTTGTTCTTTTATTTGACCTTTTGTACCTTTTGCAGTTACATTTACAATACCGTTTTTTATCGATACAAACGTTACTTCAATTTGA  
GGTTTACCAGCTTACGCTGGTGAATATCAGTCAATTGGAATCTACCAAGTGTTTTATTATCCGACGCCATTGGACGTTACCTTGT  
ATACGTGTACATCTACTGATGGTTGATTATCTACTGCTGTTGAATAGATTTGAGATTTAGATGTAGGAATCGTAGTGTACGTTCAAT  
TAACGTATTCATACGTCCACCTAAAATTTCAATACCTAAAGATAGTGGTGTACGTCTAATAATACTACGTCTTTAACGTCACCTGTG

ATAACGCCACCTTGGATTGCAGCTCCCATTTGCCACTACTTCGTCCGGGTTTACACCTTTGTTAGGTTCTTTACCGATTTCTTTTTTGAC  
AGCTTCTTGTACTGCTGGAATACGAGTTGATCCACCACTAAGATAACTTCATCGATATCTGAGTTTGTAAAGCCAGCGTCTTTCATT  
GCTTGGCGTGTAGGTTCCATTGTTCTTCTAATTAATGAATCTGATAATTCTTCAAATTTAGAACGAGTTAAGTTTACTTCTAAGTGTA  
ATGGACCGTTTTACCAGCTGAGATAAATGGTAATGAGATTTGAGTTTGTGATACACCTGATAAGTCTTTTTTAGCTTTTTCAGCAGC  
ATCTTTCAAACGTTGTAATGCCATTTTATCTTGAGATAAGTCTACGCCATTTTCTTTTTGAATTTCTGCAACTAGGTAGTCAATAATTA  
CTTGGTCAAAATCATCACCGCCAAGTTTGTGTACCGGCTGTTGATAGTACTTCGAATACACCGTCACCTAATTCAGGATAGATA  
CGTCAAATGTACCGCCACCTAAGTCAAAAACAAGAACTTTTTTCATCTTTATCAGTTTTATCTAAACCATATGCTAATGCTGCAGCTGT  
TGGTTCATTAATGATACGCTCAACTTCTAAACCAGCAATTTTACCAGCATCTTTAGTTGCTTGACGTTACAGCATCGTTAAAGTATGCA  
GGTACTGTAATTACAGCTTTGTCAACTTTCTCACCTAAATAGCTTTCAGCTGTATTTTTTAAGTTTGTGAAAATCATAGCTGAGATTTT  
TTGTGGTGTGATGATTTACCTTCAATATCTACTTTATAATCACTACCCATATGACGTTTAAATAGATTGAACAGTGTTTGGGTTGT  
ATAGCTTGACGTTTGTACTTCAACCACTTGAGTTTCTCCATTTTTGAAAGCTACAACAGATGGTGTGTACGTGAACCTTCAGGGT  
TTTGAATTACTTTTGGCTCATCGCTTCTAATACTGTTACACATGAATTTGTTGTACCTAAGTCTATACCAATAATTTTACTCATAATA  
AAATTCCTCCATTTAATCATTAATTAATTTAATTTTAAACAATGTCTTTTCGCCAAATTTAAGTTATTGGTTTACTTTGACCATTGAT  
GGTCTTAATACTCTATCTTTAAGCTTGTATCCTTTTTGTAGTCTTGAGTGATTTGCCAGATTCAAAATCAGGGTTATCATCTTGAAC  
TACAGCTTGGTGAATATTTGGATCAAAATGCTTCACCTTCAGTTTTAATAACTTCAAGACCATTATCTTTTAGTGCCTAATCAAACCT  
TCATGCATCATTTGTACACCTTTTTGAAGAGATTTAAAAGTCTCATCATCACCTTCAATTTGAAGTGCACGTTCTATATTGTCTATTG  
CTGGTAAAATATCTGTTAACACACGTTGTGCTTGATATGTTTTATTTATTTCAATTTCTTTTTGAATTTACGCTTATAATTTTCAAAC  
TCAGCGTAGAGCCTTAAATATTTCTCTTCGTTTCTGTAATTTGTTGAAGTTCATTAATTTTTGATCTTTTGGATCTATTCTTTCTCA  
ATAACATTTCTCGTCAGACGTTTCTTCTATTGCTTCATCTGTAAATGACCTTTACTTTCTCAGCTTGTTCACATGAATCATCAATATT  
TTGTTTGACGTTTGTCTTCAACTGTTGATTGAGTGTTTTTTCAACTGATTCGTCTTTATTTGTCTTTCTGTCTCCAATACTTTCT  
AATCCATCATTACCAAATTTCTATTTAATAATTGAATGACATTTTGATAATGCATAGCTGTAGGTCCAATCACAGCGATTTGACCTTTT  
AACGTTTCATCAAAATGATATTGACTTGTACAATTGAAATATCACTTAAGCTGTCATCAATTTTATTACCAATTTTACATTAATAT  
TTGGTGAAGATATATCTTGTAAATAATTCTGCAATTTCTATTTGATTCTATATATTGTAGAATGGGCTGAATTGAAGATACATTACTTTC  
ATTCATGATCAATAAGTTTAACTTTCCACCCATATAAATGCTATTACTTTGATTAGAAATATGATTATTCATCGTATTTAACAAT  
TTATTGATAAATATTTCTCTGCTCTGATTGAACAAAAGAGACAATATCATCTGTAAATTTCTGATTAAACTCAGTTAGTTTGTGTTG  
TAACAAAATTTGATATTGTATTAGTTTGTCTATTATTAACGGTATGTCTGAAGCAAGATGTACATGCTCAACATGACCTGATGAAA  
ATACGATAACCATTAATACTAAATTAGGATTAGCACGAATCAAGTGTACATTATTGATAATATCTTGTATTGATTAGGATGAACAA  
CTAAAGTTGTATATTGAGATATATTGATAATTCATCTGCAAAATATGTCAATGCTGATGATACATCATATTGATTCTCAACTAACAA  
TTGATTTAATCGTCTTAATTTATTTGTTTTTGTAGATGTTTTGTTCAAGTAAACGATTGACATAATACCTAAAACCTAATTGTGAT  
GGCGAACGCCCTGAAGAAGTATGTGCTTTTCGATATAGTTTAAATCTTCAAGCTGTTTCATCTCATTTCTAATTGTAGCAGGACTAA  
CATTCAAGTTATGTGCTCAATTAGTGTTTTGAACCAACGGGTTGTCCAAAATCAACATAATCCTCAACAAATTGCGTTAATATACT  
CAATTGCCTATCTGTAATCATGTTTTACCTCATTAGCACTCACTTATCTCAAGTGCTAATTATAATTTATCAAATTTGGTCAAAAGTAA  
GTCAATGTTAAAGACTCGAAATTTCAATTTTTTTAATCATTTATTAGGAAAGCTTCAAAAACCTCATACCTATGACTTTCCCTCGC  
TTTGTTAGTGCAATCGCATGTTCTTTCTACAATTAATTCCTTCTTTTTAAATATTTATTGTTTGACCAAGACACTTTCAATAGA  
TTGGTCAAACTCTTTTTGAACCTACTACTCTACACCTTCACTTTAAACGCAAAACCAAGAAACATTTCTTCTCCATTTCTCAGTC  
AAAGAAGGTTTATTGATACTAAAATTTGCTTTACTTTCTTTATTTATAGCTTTGATATAATGATTCAGTGGATTGATATTCGTATAAC  
GCACACCATCTACATAACCACCTTGACCTGCTCCAAATCCATAATATTCCTCATTAACCAGTAAACCTTATTATGTTCTGATTTCATG  
GCCATCTAATGCAAAATTAGATATTTCTGATTGATGAAAAGGAGATTGTTCTATCTTAGACATCAGCAACTGATACATGTCAGCACC  
TAAATCCTCATTAGGAAGTTTAAAGCAACCTTTTCTATACATATTATAAAATTTGGGTTTATAGGTTCAAGTATTAAGCCGTAACCTCGAA  
ATATGTTGAATATCCATATCTAAAGCTAGATCTAAACTTTGTTCAAAATCTTCAATCGTCTGTTTCGGTAAATGATACATTAATCTA  
AACTGATTGATTTAATACCTGCGTTTTTAGCATTTAACACCGAAGTGTAATATCTTCAGTATTGTGCGTTCTACCTAAAACAGACAA  
TAACTCCGGCTTGAATGTTTGAACGCCCATTTGAAATTTCTGTTTACTCCATATTTTCTAATAGTTGGACTTTCTCTTTAGTTAACTCAT  
CAGGATTGTCTTCAATGTATACCTGCTGTGATTGTAAACGTATACGTTAGTCTTAAAGTAATCTTTCCAACTGATTAAATAGAAAG  
GGCGGTGGTGTGCCGCCACCTACATACATGGTCTTTAAGTCTCTATATTTGCTGTAGACATTTCTGTTATTAGTGCATCTAAGTAC  
TCATCTACAGGTTGATTCTGTATAAAAATTTTATTGAAATCACAATATGTACATATTCTTACACAAAATGGAATATGTATATATGCAC  
TTTGTACCGTCAATTTAATGCCCCGCTTCTCAGACTGTTTATCCAATCGGCTATATCCTGTTGGACTATCTGCAATTTATTCTTACTTTT  
AACTTTAACGTTTAAATCAATGGTTGTCTAATATATCGATTCTTTTGTATTTATTCTTGTTTAGAGGGAGTGAGATAGAAATAATAA  
AGAACCCTAATGATTATTATGTAGTGGCTCTTACACATTAGCCAGATGTAATATGTCCATAAAAATAAAATTACATGAGTAAAC  
TCATGCATAAGGGAGTGGGACAGAAATGATATTTTCGCAAAATTTATTTCTGTTGTCCACCCCACTTGCATTGCCTGTAGAATTTCT  
TTTCGAAATTTCTATGTTGGGGCCCCACCCCACTTGCACATTTATTGTAAGCTGACTTTTCGTACGCTTCTATGTTGGGGCCCCACAC  
CCCCAAGTGCATTCGCTGTAGAATTTCTTTTCGAAATTTCTGTGTGGGGCCCCATTGTTATAAGCTCATTTTAACTTCTGTCATGAT  
CTGCCAATAACATTTGTAAGCCAGGACGTTAATTTTCTAGGCTCCCTCTTTTATGTTTAACTTTTCTATTGTTAAATGTT  
AATAAATTTTTTAAAACTTATTCTGTCATCCATTTTCAATACAGCCAAGAAAGCATCTGTGGAATTTCAACATTACCAACTGCTTTC  
ATCTTAGCTTTACCTGCTTTTTGTTTTCAAGTAATTTACGTTTACGGCTTATGTCACCGCCATAACATTTAGCTAAAACGTTTTTACC  
CATTGATTAAATATTTGTACGCGCTACAATTTTTGTCTTATTGCAGCCTGTACAGGTAATTTCAAAATGCTGTCTTGGAAATTAACGTTT  
TAAGTTTTTCAACTAATGCTTTACCACGTTTATGCAAAATCTCTATGAACATGAAGCTTAGCGCATCCACTTTATCACCGTTTAA  
TAAAAATATCCATCTTAACTAAATTACTTTCTTTATTTTCGATGAATTCATAATCAAATGATGCATATCCTTTAGTATTAGATTTAAGTT  
GATCGAAGAAATCAAATACAATTCAGCTAAAGGTAATTCATAAAACAATATTTACACGAATATCATCTAAATAGTCCATATTTATAA  
ATTGTTCCAGTTTACGTTGACATAATTTCCATTACTGCACCTACATAGTCAATTTGGAACCATCATAGTTGACAGCAACATATGGCTCAA  
ATATTTTATCAATTTTATACGATCTGGCATTGTGCTGGGTTATCAACCGTCACCTTCTGAACCGTCCCTTAAAAATACATTGATAAAT  
TACAGATGGTGTGTTGCAATTAATTTCAATGCCAAATTTCTCTTTCAATTTCTTTCTGAAATTTTCCATGTGTAAACATACCTAAGAAA  
CCAGTTCTATAACCAAAACCTAATGCTTGTGACGATTACAGGCTCAAATTTCTAATGATGCATCATTCAATTGTAATTTTTCTAATGCTT  
CTCTTAAATCATTATAATTTTTGTTATCTATTGGGAACAGTCCGCAATATACCATTTGGATTCTTTTCTTATAACCTTGCAATGGTTCT  
GATGCAGGTCTACTAGCTAATGTGATGGTGTACCAACCTAGAATCATCAACATTTTAACTTGAATAATATAACCAACATCA  
CCAAGTGTAAATTCATCAACTGGAAGCTGCTTAGGTGTATTAATTTCAACTTCTGTTACTTCGAACCTTTTACCAGTCGCCATCATTC  
GAATTTTATCTCCGGCTTTAACAACACCGTCTACAATTTCTATCGATGAAATTAACCCCTCTATATGGATCATACTCAGAATCAAATAT  
TAACGCTTTTAGTGGTGTCTTGGGTGCGCATCTGGAGCTGGCACAACCTTCAACTATTTTCTTAGTATCTTCTCAATTTCAATGTTA  
GATTTAGCACTTGTAAACCAACATCGTCTTGGTCTAAACCTATCATATCTTCAATTTCTTGTGTTTACGCGTTCAGGTTCTGCAGCAG  
GTAAATCAATTTTGTAAATAACAGGCAATAAATCTAACTCATTATCTAATGCTAAATAACATTTGCTAATGTTTGTGCTTCGATACC  
TTGAGCCGCATCTACTACTAAAATCGCGCCCTCACAAGCTGCCAAAGAAGTGACACTTCATATGTAAATCGACGTGTCCAGGCGT  
ATCGATTAATGGAATGTATAAGTATTCCATCTTTAGCTTCGTACTTTAAACGAAGTGCCTTTAATTTGATTGTAATACCACGTTCT

CTTCTAAATCCATTGAATCTAGTAACTGATCTTGCATATCTCTTGTTCAACTGATTGGTATTTCTAAAAATTCTATCAGCCAATGT  
AGATTTTCCGTGGTCAATATGTGCTATAATCGAGAAATTCCTTATATCTCTCTTCTTTTAAAGCGTTGCTCATTATCCATTTTATCCT  
TCTCACTTTCATAAAAAAAACCCGATTATCTTTTCGCATCTTTGATATAATAACGTTTTTAATAGGTAAATGCAAAACGCCATAATCTT  
GGATGAACCTTTGAAATTATAACAATCTTTATTTAAATACATACTTGTTTAAATACATACTTGCATATGTTAATATGTTAATTACGTA  
CTTATAATTATAAAACGATTGATTGTGTTTCCAACACAATTTATTTAAATCTGCAAAATTTTAAAGCTAACCCCATCAAATAAATGATT  
GCACAACGGTTAGACTTTTGTAAAAATATTTCTTGTGTGAATCAAAATAAAATTTTGATAAGATGAACCTCACTTTTAGGAGGTGACAG  
AAATGGCAAATATCAAATCTGCAATTAACGCTGTAAAAACAACCTGAAAAAGCTGAAGCAGCAACATTTACAAAAAGAGTGCAAT  
GCGTACAGCAGTTAAAAACGCTAAAAACAGCTGTTTCAAATAACGCTGATAATAAAAAATGAATTAGTAAGCTTAGCAGTTAAGTTAG  
TAGACAAAAGCTGCTCAAAGTAATTTAATACATTCAAACAAAGCTGACCGTATTTAAATCACAATTAATGACTGCAATAAATAATCTT  
TTTAAATAAAAGTTCAAGCGCATGCTTGAACTTTTATTTTTATAAAGATAGAATGAATAATTCAGTATTAACCTGTTATCCATATA  
TGATGATTTAAGTTTATAATCAGTTTCCGCACAAGCATCTATAATATTCAATAATTCATCAAGTTGATAATGTCTTACTTGTCTTAAC  
GCTAATTTTACTCTGTATGGATGTACGCCTATTGTTTTAGCAATTTGCTGTCCACTATATCCTTTTTGACTCAAAATCTTACATTGATA  
AAATAATCGGTAATTACTTGTGATTAGTGCAAGTAATTTAATAGGTTCTTCTTTCATAGTTATTTAAATCTTTTACTAAATGAATTGCT  
TGTCTTTTCTTCTTTTCTGAATGTATTCAGTCAGTAAAAATACATTTTGTCTTAACTTCTATTAATAATTTGGTTAACATCCTGCTT  
ATTAATTGTTAGTCTATCGCCTAAAAATAAAATCAACTTTTCTATCTCTTGTGAGACAATATTTAAAGTTAATACCTGTCAACTCAATA  
AATAAATCTAATGCATCTCTTTTGATATCTTTGAAATTCCTCATTTAATTTACTTTGAAATCCATTTTTTTATTTCTTCTCAGACATTTGC  
TCTATTTTTTTAAGCCTTGCAATGCTTTTTTAGAGTTTATGTTAACTTTTTCTTTCATCAAGTTTATTTTGATATATCTCAAAGACAATC  
AAATTTTCGCCATCATATTTTCAATAAAATCTATTAATTGATTACATTATGAGCCATATCTTTTGGCGCTTTTTCACCTGTAAATC  
ATATGCATTTTAAACCAAAATGCTTTTTATCTGAAAAGAAAGGCAATGTTAATGTTTCTTCAACAATTTGGTGCAATCTCTGTTTCG  
TATAAATTATATTTCAAAAGTTAAAGTCATCTCTATCACTTTTCAAAAATTTGTGATATAATTTCTGCACTTTGTTTTTCAACCAATTC  
AGGCACATCTCCATAAATAGCTACAATATTGTCGCTCATTACACCCCTTTCATTGCTTGACACATCAATAGATTATATCATGTT  
TCTGTATCTATAAAACCACTTGCATTTCCATAAGAGTTTGAATCAACTTTTAAATTATCATCTAAGTCAATTGTAACCTGACCGTTTTG  
TTGACTATTGTAATGCGACTGCGAATCCTTTGCAATCGTTTAAACAACTTCTATATTAGGAAGATGATACATATTGTTCTTCCCAGAA  
GAAATCAAACTTATTTTAGGCTTAATCATCTCTATAAAATCTTTAGAACTACTTGTCTTGTCTCCCATGATGACCTACTTTTAAATAT  
CAATCTCCGGCAAGTTATATTTTTTAGTAGTAAAGATTCAATTTTTTACTAGCATCGCCCATTAATAAAACTTTTTTATTTTGATAT  
GTAATCATAGTAATAATCGAATACTCATTTTTATCTCGGTATTGGAATAAAAATCAAAAAATAGAAAACCTACTATCTCCAAGT  
TTAAACTACTAATCTGTCTTACATCTATAAGTTTAAATGTTGACTTATGGCTTAATTTTCGATAATAACATCAATGTATTACTACTAT  
ATCCCTTATTGTATATCACTATATGTTTAAATTTAATATGACTAATAATATATTCCACTTCACCAATATGGTCATTGTGTGGATGTGTT  
AAAATTAGATACTCTAATTCATTTATCCCTCTTTCATTTAGCGTTGGTAAAATATGATATTAGAAAATTGAATAACTAGGTTGTTTAG  
TATCATCAATCACTTTCCACCTGTATCAATCAAGACATTTTGGTTCTTACCGCCTTCATATAAAATACTGTCTCCCTGCCACATTT  
AACATTGTAATTTGTGATGTGAATTTGTTGGAACGTTATTAATAATGTCAGAATAATTATAGTCCAAAACGTAACCAATATATAT  
TTACGTTTAGCCAATAACCAAAATATGTAATAAACAGAAATTATAAAATATTATAAAATATCCAATCATTAAATTTGGGAACAGAAAA  
ATGTGATTGCTTAATCTTGTGAATAGGTCTAGTAACGAGTCATGAAAAATAAAACCTTAGGTCAACCAAGTAATTTAGCGGCGTTAA  
TCCCAACAATAAAATGACTTGTGAATAAAGAATAAAAATAGATAGCGGAAACAATAATCGAATAGTACGGTACAAAAATCAAAATA  
GATAAAAAATCCCACTTGAAGTTGATGAAAGTTTGAATGCGCAACGATAAATGAAGCTAATTGTGCAATAAACGTAATTAATTAGAA  
TAATGATTGTAACCTTGACAATTGCTGTAAAAAAGGAAAAAGTAGCATAATAAAAAATGAAATGATGAATGAAAATTGAAATCCAA  
TATCATAAAACAAGTAGTGATTTAAAAATAAACATAATTATAAATGCAAATGCTAATAGCTGAATACCCCTTTATTTTAAATTTGCTTAG  
TAATAAGCAGTACAAGAGTTGTCATTATTATAGCTCTTACAGCACTAGGTGCATAATTTGTGATTGAGCAAAATAAGCTAATACAA  
TGATTGTAATTCCTTTAATGACAAATAAAGGTAAATTTAATCGTTTTAAAGGTTTGTAAATTAAGAATACAATTGCAGCTATATGCG  
AGCCACTAACTGCCAGCAATGATATATACCTATCTCTTAAACACGTTCCCTTAAATTTGCTCATTAAATTTCTTTTACGTACCAAGTAAT  
CAATGCCATAATACGATCCGGAAACCTTAATACCCGAATCATAAAATTCGATTCAATTATAAACTGTTTATGTTTCTCAATTAATTTAGA  
CCGTTTCGATTCTAGGCAGCTTTGTACAACCTACTTTGTAATTTAAGAGTTACAACTTATTGTCATTAACTTTGAATTTGCTCTTA  
ACAATCAATTAACGACTTTTCAATTTCTTTTAAATCAAAATCTTTTTATTGTTTAAAAAGAAAGGATATATTTCTTTTTTAAACTCA  
ACCTACCTTTTATATGTGTCACTACCTTGACGTTGAATTTGGATTACTTGAGCAGCTCATTAAACTGAGAATTACGTTCAATATAATT  
GATATAATTAATATTTGCTTGTGTGTAATAATGTAAATACCATGAGGAGAAAAATGATTAAAAAGAGAGAAATAGGGGCATAAACG  
ATTTTATTTTTACGATAAGTAATATACAAAAGTAAATGAAAAGAAATGTAGAGAGCACTTTGCTAGAATTCCAAAGCACTCCTAC  
AATCATTGATAACGCGACATACAGCAAAACATTAACCTTTAGTCAGATATTAGCAACATATTCTGGTGAAAATGGAATTTTTTTAA  
ATTCAATACCAGATTGTTTGAGTAATTTAGTTGCATATTATGTTGTTATGATAATCTTCTGCATAGTAGATACGCTTTATACCTGCTTG  
AATAATTGACTTTGTACAATTTAGGCATGAAAAATGAGTAACATAGATTGTTGCACCTTCAGTAGATACACCTTGTTTTGCACATTG  
TAATAAAGCATTCAATTTCTGCATGTATCGTTCTGATACAATGTCCATCTTCAATTAACATCCTTCATCTATACAATGCACCTCGCCA  
GCTACAGAGCAATTAACCCAGCAATAATACGATTATCTTTAACAATCTTGTGCACCTACAGATACTTTTGACAAGTTGAACGT  
AATGCTAGCAAAATGACTTTGTGCCATAAAATATTCTTCCCAATTTGATTCTTTTCCAAAGATGTTCACTTCCATCTTTTAACTAGTAA  
CATTTTCTAATAATATAAGATTAAATCACAATAAAATTTGCAATTAATAAATCCATTATGTGCTGAAATAAGATTTCAGTTTA  
TCAAAAGTTTACTTCCAAAACCTTTTACTTTTTTCAAATCGTCAATTTCTTGAATGCACCTTGTGTTGCGATATTCAACAATTGC  
ATTAGCTTTAGCTTGCCCTACTCCAGGAACAGACATCAATTCTGATACAGATGCCGTATTTAAATTTACTTTAGTATTATTTGTGTTT  
CCATTTTTTACGTGCACACTGTTTACTTCAATTTGTGGTTCAACATTCCTTTTGTCTTTATGAGGTATGAAAATCATTTTTTGTATCTGT  
TAATTTTTTACAGACAAATTAATTCGACTTACATCTGCATCATCCAATAATTGTGCTTTATCAAGTAAATCAACTACTCTATCCTTAGAT  
GTCATTTTATAAACATTAGGATGTTTAAACAGCACCTTTTACATCGACATATACAGGACCTTTATTTTTGGAATTATCTCCATCTTTGA  
CCTGGACATCTTCTAATTTGGACAACTATTATTTCACTAGTGCTTTGTTTCAGAGCAGTATCTTTATTTTCAAAATTTCTTGAAGTA  
TAATCATCTTGTCTCCAGATAATAAAACCAATTAATACCATAATTAATAACACAGCACTTATAATATAATATCTTCCACTGAGTTAA  
AAATCTTTATAGCGTAATAAAAAATTGATACAATAAAACCACTCCTCAACTTTTATACACGCTGTGAGCGAGTGGTTTTACTTTTATTTT  
TCGCAATGAAAAACAATCTTTCTGCATCTTCATTATGTTTCTATATATTAATAATCAGTAAATGTTTCAACATGTTTAAAAACCACTTG  
AGCTAACCAAGACAAATATGCTTTTTCATCAAAATGTTCTCTGAAAATGAGACTCATCAAACTTGAATATGTTTCTATCTTCATGTCGA  
ATGAAAAATGTCATATCATGATAAACACTTAAAGGTAAATCTCCTTGCACAGCATCCCATGCTAAAAAAATGTCCCTTTATCATCA  
ATATAACTTTGATTATTAACAAAGTCATCTTTTATAAACAGTATGTACATCAAAAAATAAATACACCTGAATCAGTCAGATGATGA  
TAAACATTGATGAATGTTTCAATCACTGCTGTTTCATCTTGCAAAATAATTTAGAGAGTCACAAAAAATAGTGATGATATCAAATTTGT  
TGTGTGCAAAATCAAAAGATGTCATATCTCCTTCAAGCAATTTACATTTGCTGATTTTGTGAGCTGCAACAGTCAACATATCAACACTTA  
AATCCATACCAGTAACATTAACCTAAGCTTCTAATTTGAATGAACTGTTAACTACCAGTACCGCATCCAATATCAAAATATTTGATTCAT  
CTTTGCAGTGATTTTTTACAATTTCAAACCATTTTTCATATGGTTGATCTTGAGTCAATTGATCGTACACTAGGCTCATTTCTGCATAT  
TGCGACATAATTAATACGCAACCTGACCATATGATTCTAATGGTGCATCTTGATATAACTTTTCAATATTATAATAATTTCTTTCGTC  
TTTATGGAACCATGTACCACAACATCAGCTAAGTCAATTAATATCCAACGCGCTTCATTGTATCCTTCCATACGTTTTACTTCTATA

TTTTGTTTCATTGGCTACTTCTTTCCACCGCTCTAGCAATCGCTTGAACCTGTGCTTCATTATTTCCGTGCGTTACAACAAAATAATCTGT  
CATATCGCTGATACCTTTCATTTCTAAAGAAATCGTATCTTCGCCTTTTTTATTGTCAATTGCATCCACAGCAATTGCTAATAATCTT  
GTGAATTCATTTAATCATCCTTTATTCTTTCGTCACTATAGTTATAATAATTTAAACAGTCAATCGTCTTATTATATACCGTAATATCT  
TTCTGTATTAATAAATAGTACTGTGCGTTTAGAAATTTCAAAATTTGTCTTATCTAAACTACCTTGATTGTATGCCATATCTCGAATAT  
CATCAACTCCTGGGATTGTTCTTCCAGGTTTCGATGTAATCTGCAATAAAAAATCAGTTTTTTCAGTTTTTGTCAATTTGTTGACGTCCAGT  
AGTATGGTATTTGATAGCCATTAATACTTCCTCATCATTGATACCATATTCATGTTTCCATGATTGCTGCACACACAGGGCCATGCAAT  
ATTTCACTACCATAACTCAGTAGATCATTACCTAATTCGTAATTGTGCGAACAATTTGATACATTTTACCTAAATCATCATATTTACAGA  
AATCATGTAATACACCTGCTAATTTCTACTTTACTAGTGTCTCCATCATAAATTTCTGCCAATTTAATAGCTGTTTCTGCAACTCTTAA  
AGAATGATTATAACGTTTCTCTGGCAGTTTCTCTTTTGAAGCCGTTTGTCTTTTCAATGTTTCATATAATCCTTCCCCCTTAATATAG  
TTTCAACGGATTAGGAACAAGAACCTGGATAGATTTCCCTTCACTAACTCTTTGTGCGAATCATTGTGCGAATTTATATCTACCCTAG  
GTATCTGAATTGCAATCATAGCATTTCACATTTTGACTATTTTGTCTCGATTTACAACCTACAAAAGTAACCATTTCTTTTAAGTAT  
TCAATTTGATACCATTTCTCTAGTTGGTTATACTGATCCGTCCCAATAACAAAGTACAACCTACTGTCTTTGTGTTGCTCCTTGAATG  
CCTTGATCGTGCATAGGTATAACTCTGACCACCACGTTTAATTTTCATCGTCGCAAAATATCTCCAAAACCAAGCTCGTCGATAATCAT  
CTGTATCATTGTTAATCTGTGCTGAACATCTATAAAATTATTGTGCTTTTTCAATGGAGACATAAACTAGGTAAAAAATAAATTC  
ATCTGGCTGTAATTCATGAAATACTTCGCTAGCTACTATCATATGTGCGAGTATGGATAGGGTTAAACTGACCGCCGTAAAGTACTAT  
CTTTTTCATTTATTATGGCAATTCATTTCTTTATTTTCTTTAGATTCTCTATAAAATCACTATCATAGATCCAATCACTTGCCTAATTC  
ACTACGCGTAGCTTCGCTTAATGTTTCAGCTAATTTCTTTTTATCATCAAAAGTTATTTTGTAGTACATGTACTTTAATCAATTTCTCTGT  
TTTCTAACGTATCATCTATTGTTTAAATCATATTTTCGTTGATACCCGCTTTTCCAATTTGAAAAATCGGATGCAATTTGTGTGCTAAA  
CTTCTTAAGTATCTTTTTTGTGTTGCCAGTAAGCATGTATTCTCCTTTTAAATGTTGTGTAAGAACTGCTGTTTTCATAGAAATTAATATC  
AGCATCTTTATTAGTCCAAATTTTAAAGCTTTCCGCACCTTGGTAAACAAACATATCTAAGCCATTATAAATATGGTTTCCCTTGGCG  
TCTGCTTCTCTAAAATAGGTGTTTATACGGTATATAAACAATATCACTCATTAAAGTATTGGGAGAAAGATGCTTTAAATTAATA  
ATACTTTCGTTATTTCCAGCCATACCCGCTGGTGTGTATTAATAACGATATCGAATTCAGCTAAATACTTTTCAGCATCTGCTAATG  
AAATTTGGTTTATATTTAAATTTCCAAGATTCAAAACGAGCCATCGTTCTATTTCGCAACAGTTAATTTGGGCTTTACAAATTTTGCTAA  
TTCATAAGCAATACCTTTACTTTCGACCCACCTGCGCCCAAAATTAATATGTATGCATTTTCTAAATCTGGATAAACGCTGTGCAATCCT  
TTAACATAACCAATACCATCTGTATTATACCCTATCCACTTGTCTATCTTTTATCAAAACAGTGTTAACTGCACCTGCATTAATCGCTT  
GTTTCATCAACATGATCTAAATACGGTATGATACGTTCTTTATGAGGAATGTGATATTAAGCCATCTAATTTCTTTTTCGAAATAAT  
TTCCTTAATTAATGAAATCTTCAATTTGGAATATTTAAAGCTTCATAAAGTATCATTAAGTATCATCTAATCCTAAAGAAATTAATTTGCTCTATGC  
ATAACGGGCGACAAGGAATGTGAAATAGGATTTCCGATAACTGCAATTTTCATTTTAAATCACCTTATAAAATAGAATTTCTTAA  
TACAACATCAACATTTTATAGGAACACGAACGATTACTTTAGCTCCTGGTCTATAGTTATAAAGCCTAGACCAGAGATCATAACATC  
GCGTTTCTCTTTGCTGTTTCAAGTCTAACAGCCTTTACCTCATTAAGATCAAAATTTTGTGGATTTCAGGTGGCGTTAATAAATCG  
CCAAGTTGATTACGCCATAAATCATTGGCCTTCTCCGTTTTAGTACGATGTATATTCAAGTCATTAGAAAAGAAACAACTAACCGGA  
CGTTTACCACCTGATACATAATCTATGCGCGCTAGACCGCCGAAGAATAATGTTTGGCGCTCATTTAATTTGATATACGCGTTGTTTTA  
TTTCTTTCTTAGGCATAATAATTTTCAATTTCTTTTTCACTAACTAAATGCGTCATTTTGGTGATCTTGAATAATACCTGGTGTATCATAC  
ATAATGATGTTTTCATCTAAAGGAATATCTATCATATCAAAAGTTGTCTGAGGAACTTGAAGTTGTTACTACATCTTTTTTACCAA  
CACTAGCTTCAATCAGTTTATTAAATCAATGATGTTTCCCAACATCTCGTGGCTTACAATATACACATCTCATTTTCTCGAATTTTC  
GCAATTGATGATAATAAGTCGTCTATGCCCCAGCCTTTTTCAGCTGAAATTAATACGACATCGTCAGCTTCCAAACCATATTTTCTTG  
CTGTTCTGTTTAAACCATTTCTTAACTCGACGTTTATTAATTTGTTTCGGAATAAATCCAATTTATTTGCTGCTAAAATGATTTTTTTG  
TTTCCGACAATACGTTTAACTGCATTAATAAATGATCCTTCAAAGTCAAATACATCCACGACATTGACGACAATACCTTTTTATCCG  
CAAGTCTGATAATAATTTTAAAGTCTTCACTTTCTAATCTCATCTTGAACCTTCGTTATAATTTTCAAGCGGAACAAACGCTCT  
GCAAATCACGTCATCACGAAACATATTATGCTCTGGTACAAAACAGGTTTATTTTTATCTTCAGATTGAAGTGGCGCACCAACCA  
GATACATTTTAAATGTCAGACAATCAATTTTCTCTCCCATGTGATATAACCTTTTTTACTGAAATGACGTAATAATCGTCTTTCAATT  
AATCTATTAACCTTAGTAATAAAGCCATCAGTTTCGTTTAACTGGAACAACCATAATTGTATATAGACCTCGACGATTACCACCAAT  
CATCAAGTAAACATTTGGTCACTTATAACAACAGTTGATCTGGTCTGATATTCATCTTAGTTATTGCTTATAACGCTTTTCCCA  
TTGGCTTTCTCGCTTTAAAAATAAATCGATGTCTAAATGCTGACTAAAACTAGCAACACGAGACTCATTATTATTAGACACGATTG  
TAATAGTGATTCTTTTTCATTAGCTTCTTAAACCATGCTTTAACACGTTCTGTAGGTTCTTTAACATCCCAACCTACTAGCGTATTA  
TCTAAATCTGTAATAATACCTTTAACGCCTTTGTCCACTAACTTGTCTAAATCAATTTGAAATATTGATTGAACATATGAATTCGGCA  
TAAAAAACTTGCGAATAAACCCATTTAACTCACCTTTACCTTTTTATAATTGAGACACTAATGCTTCAACAGTTTGACTTGATGATA  
CAGCTGCTTTTTCTAAAAATGCTTCGAAGCTCATTTCGCTTCTCCATTGCTAAGTCTGAAACTGCACGAACCTACAACAAATGGTAC  
ATTAATTTGATAACATGTTTGTGCAATTGCAGTTGCTTCCATTTCAACCGCCATCGCATTTGGAAATGCTTTTTTAATTTTTTGGCGTT  
GTTCAACACTACCGATAAAGCTATCACCACTTACAATTAAGCCTACTTTAGCTGTTAATTGTTGTTGTTGTACAACCTTGAGATACTTT  
TTCTATTAAGGTTTACTTGATTGAAATGCTACCGCATCTGTGGTATTGTTCATATTCATAACCAATGCTGTTGCTATGCTATCTTA  
TGATATTTTACATCATCTTATAGAAGCTCACCTCATTTTAACTTTTCATCTAAGCTCCAGCAAGACTGCTGATTATAAATGACGT  
CCGGTTTAACTTTATTAATTAATAATGTGCTAGAAATTGCAGCATTAACCTTTTCCAATGCCACTTTGGGTAATCACTACTTCTCTATC  
TTTTAAAAATGCCAGTATAAAAATTAACATGTGCAACTGAAATTTTCGCTTAATTGTGTTAATTTATTTTTAATATTGTTACTTCTTCTT  
CCATGGCACCAATTATACCAATCATCCTTTGATTACCTCTTTTAAAAAATCCTAGCATTTGTTATTTTATCACATTTTAACTACTACA  
ACGACAAGTATCATGATTTTCATTACTGTATAAACTTTTGCTTTATTTTATAAAAAAGCTCTTCAATAAATCTGGTATCATAAATAA  
TTATTTTTGAACTCATAACAGTGAATTCGATGCTTCTAATTTGTCTATTTTTCAAAAACTAATCATATCAATTACATCAACCAATCGT  
GTCAAGAAACTTTATTAATAACAGGAAAATGATATGTTTAAAAATAATATGATGAAATAAGAGGATTTTACAATGGCTGAAAAATA  
ATCAAAATAGTCTCGTAACAAGATAGCTACATACCGCAGTTTATTGCAATTGCGTCTGTTGCTATTATTTTATAAGTATATTTTT  
AAAGTTTTCATTTAATATCGAGTTTACAGCAACAATTTAGAACATATGTCGCTACACTTAATCTAGGATTCTTATGATATGCTTTCA  
CCTGATGTTGTTGATAAAAAACATCAAAAAAATTATATTCGATGCATTTATTATCATCGTCTTTATCTTCTTTTACTATAGTAGTTTTA  
TTTTGTTATTACACAGTTAATCATATTTGTTTCGATCGAATTCCTGTGTGATTAAAGATAATTCTAATAGAAAACAGCAGTAAGAC  
TTTTCTAAGTGTATCATCCTTACTGCTGTTTTTATTGTAAACAGTATAATGACAGGTACTTTATATTTCACTGTCAAAGATTATTAAT  
GATTAACCTAATTAATTAATGATTGAATAAATAGATATCTAAATGCAATTTGTCATATTGATAGTTTATTATCAGCATACATTTT  
TAATACCTCATAACCATACTCACCATTTAAATTATAAAAAATCATATTTCTACATTTTGTTCATCATCATTATGATATTTAACATACCCTT  
TAACAATGTGCGCCACCTTGTTCGTACAACCTTATACTTCTCATTTCAAAATAATTTCTTAATTTGAACATCTAATTTCTGAATGGTAACAAT  
TTTCTTTTTCGTTTACTGCTGTGTAATTTCTATCTGTGATGTCGCTCAATCCATAAATTACAAGGTATATTTCTATAATCATCGTA  
TTTATTATGTCATTTAAAGTAAACACCACCATCACTACATGCGTTTTTATTGTTGCTCCCCATGACATTTCTATGATAGCTTTCCA  
GCAAAATATATCGATATCCTTATTATAAATTTCTTTGAAAGTGCCCTATTTTCAAAATTCAACTTTAAATCCTTTTTTCGAAGCAACAT  
TTACGAACATGTATGAAATAACAAATCATGCTTCAACAGTCTATCGTTTGTGTTTTTATTTTCAAGCTGAGTTGGATTGATGAATGA  
CATCTTAGCATTACTTAGACGCTTTGAATCAAACCTACTTTTATGATGTAAGTCTGAATATTCGATTGCCTCGCTGAATTTGTA



AGAACCTTGAAGTTTGTCTGATTCAAGATCAAGCGTTACGTGATGAATTAAGCGCACAGTTGGGGCGCAGCAAAACAATTAG  
ATACAGCGAGCCATTTTGTGCTAATTTTTCGCGCTAAAAATGTAACGTCAAAAATCACCGTATGTACAACATATGTTAAGAGATATTA  
AAAAATATGAGGCACAAACGATTCCAGCTGTTGAACAAAAATTCGATGCATTCCAAGCAGATTTCCATATTTCTGATAATGATCAA  
GCCTTGATGACTGGTCAAGTAAACAAACGTATATCGCATTAGGCAATATGATGACGACAGCCGATTGTTAGGTATTGATTCATGT  
CCGATGGAAGGTTTTAGTCTGGATACAGTGACAGACATTTTAGCAAATAAAGGTATCTTAGATACTGAGCAATTTGGTTTATCAGTG  
ATGGTTGCATTTGGCTACAGACAACAAGATCCACCGAAAAATAAACACGCCAAGCATATGAAGATGTTATTGAATGGGTTGGACC  
AAAAGAATAAATAGAATACAGTATGTCTAAATATATAAAATTAAGTTAGCAATAAAAAAGCCTGCGATTACATAAATGAATC  
GCAGGCTTTTGCCTGAAAAAATTGTATTAATAAAGTATGGATGATTATTTTCTGGAACAAGGTCAGTATTGAATGAACGTGTATG  
TCAAACCTTCTGGTGCCGTAATGTATGTGTTGAGGCGTCGGGTTGATAAATATCAACATGTGTTAATCCATAACTTTGTGCATTGT  
TTGTCTTGCTTGATTGGATTGCCAAGTATTAGCAGCAATATGATGGTGATAATGATTTCGTTGACATAAAATAGCGCACGTTGGAAAAAT  
CAGACACATGTTGGAATCCCAATTGTTCAATGTAACATTGATATGCTGCGTCTAAATCATGTGTTTTTAAATGTAAGTGCCAATCAT  
GCCTTTTGTGCGCATTCCTTGCCAACCTTCATCAGTACGATGTGTTAATAAGGTTTGGCTATCAACTTCTAAAGTATCCATTTTAACT  
TTGCCATTTTGCCATTTCCCATGAAGATGAAGGTCTATCGCGATAGACTTCAATACCATTACCTTCGGGGTCATTGAAATATAAGCT  
TCACTTACTAAATGATCACCAGCGCCGATGCCCATATGTTTTTGTGCCACAAAATATAAGAAAGTTAGCTAGATCCTCAGTAGTTGGT  
AATAAAAAATGCTATATGAAAAAGCCCTGCTTACAGTGGGGAAGTCTGACGCGCCGTCTTCTAATAAATGTAACGTTAGAGTATGGCC  
ACCAGTCCCAACAGATAATACGGTTGTATTATCGTCAGAACTTTTAAACGGATAGTCCTAAAAATGTTTTTGTAAAAATGTTGTCATTAA  
GTCTAAGTCTCTACGTTTCAGTTCATGTTTGTCACTTGTGTTGCTGTTTTATCGTGAAATGCCATTATGCATCGCCTCGTTTTCTATT  
TTTCTAAGTGTAGTATAAAAAAGTATACCAGAAAAAGAAATGAATTTGATAGCATAAAAGTTTGAATGCAAAAAATACATAGTCGTTTT  
GCAATTTTATATTGATGCGAACAAAAAGCGATGGTACAGTTGCACCATCGCAAAAAATTTATTTAACCAAGATATACATCTTGATATG  
AATCTTCTTTTCTAACATATGTTTGGCAATGAACATGAGGCAATAATTTTAAATGATTTTCTCGAGCGTGTTCACAACTGCTTT  
AACTAGTTTTTTGCCAACCTTGACCACCAAGTTCATCAGATACGCTGTATGATCAATGTTAATTTTCATTATTATCCACAAAACGG  
TATGTGATTTTACGTAAAGCATTATTTTCATCATCACCATAATAGAAATTTGTTCTCGCCTGTTTGTATTCAAGGTTACTCATACATAT  
CAACTCCTATCATGTTTGATTATAATATTTCCCTATTCTATTTTAACTTAAACGAAGTAAAAAGGTGCATGACAGTCATGTGACGACAT  
TGCCGCATTTATGTAGTCGTTTTTATTAAGCGCAATTTGAAATAAAGATGAAAAACACGTATCTTGACATTAAATCCATTACAGCTATAT  
AATTTATCTCGAAATCGAAATAAATTAAGAAAGTTGGTGATGATATGGATCGAACGAAACAATCGCTCAATGTCTTTGTGCGGAATGA  
ATAGGCGGTTAGACACATTAGAGCAAAATACAAAAGAAAGCAGTAAAGCGATATGGCTTAAATATTACTGAATTTGACAGTGTCTCGAG  
TTGCTTTATAATAAAGGTCCGCAACCAATTCAACGTATTAGAGACCGCGTATTAATTTGCAAGTAGCAGCATTTCATATGTTGTAAGT  
CAATTAGAGGACAAAGGTTGGATTACACGTGAAAAAGGATAAAGATGATAAACGTGTATATATGGCTTGTTTAACTGAAAAAGGTCA  
AAGTCAAATGGCAGATATTTTCCCTAAGCATGCTGAGACATTAACAAAAGCGTTTGATGTGTTAACAAAGGATGAATTAACAATCTT  
ACAACAAGCGTTTAAAGAACTAAGTGCACAATCTACAGAAGTGAAGGCGTGCATAAAAAATTTACATTAAAAATATCTCGATTTCTG  
AGATAAAATACACTGAAAAATATAAGAGGGTATATAAAATGATAAATAATCATGAATTACTAGATATTCACCATGTACACAGCAATGA  
CAGATGATGCAGAACGTAATTATAAATTTTACAGAAGTATTAGGTATGCGCTTAGTTAAAAAGACAGTCAATCAAGATGATATTT  
ATACGTATCATACATTTTTTGCAGATGACGTAGGTTTCGGCAGGTACAGACATGACGTTCTTTGATTTTCCAAATATTACAAAAGGGC  
AGGCAGGTACAAAATCCATTACAAGACCGTCTTTTAGAGTTGCCTAACGATGACGCAATTAATGTATTATGAACAGCGCTTTGATGAGT  
TTGGTTTAAACACGAAGGTATTCAAGAATTATTGGTTAAAAAAGTGTGGCCATTTGAAGAAGTCGATGGCCAAGTGTATCAATTA  
TTTCAGATGAGTTAAATGAAGGGGTAGCACCTGGTGTACCTTGGAAGAATGGACCGGTTCCAGTAGATAAAGCGATTTATGGATTA  
GGACCCATTGAAATTAAGTAAAGTTATTTTGACGACTTTAAAAATATTTTAGAGACTGTTTACGGTATGACAACTATTGCGCATGAA  
GATAATGTGCGATTACTTGAAGTTGGCGAGGGAGGCAATGGTGGCCAGGTAATCTTAATAAAAGATGATAAAGGGCCAGCAGCAC  
GTCAAGGTTATGGTGAGGTACATCATGTGTCATTTCTGTGTAAAAATCATGATGCATTAAAGCATGGGCAACGAAATATAAGAG  
GTAGGTATTAACAACCTCAGGCATCGTTAATCGTTTCTATTTTGAAGCATTATATGCACGTGTGGGTCATATTTTATAGAAATTTCAA  
CAGATGGACCAGGATTTATGGAAGATGAACCGTATGAAACATTAGGCGAAGGGTTATCCTTACCACCATTTTGTAGAAAAATAAAGA  
GAATATATTGAATCGGAAGTTAGACCTTTTAAATACGAAACGTCAACATGATTAATTTGGAATGAGGAGGATTTGTGATGGAACATAT  
TTTAGAGAAGGACAAAATGGTGCGCCAATACTAATATTATTGTCATGGTACAGGTGGTGATGAGTTCCAGTTTATTACCGTTAGGCGA  
AGCATTGAATGAAATTTATCACTTGTTAAGTATTAGAGGACAAGTTTCAGAAAAATGGGATGAACCGTTATTTCAAACGTCTTGGTGA  
AGGTGTTTATGATGAAGAAGATTTGGCATTTCGTGGACAAGAATTGTTAACGTTTCATTAAAGAAGCTGCTGAACGTTATGATTTTGA  
TATTGAAAAAGCAGTACTTGTGGATTTTCAAATGGATCAAATATAGCGATTAACTTAATGTTGCGTTCAGAAGCACCATTTAAAAA  
AGCATTGTTATATGCACCGTTATACCCAGTTGAAGTAAACGTCAACAAAGGATTTATCAGATGTCAGTGTGTTGCTTTCTATGGGGAA  
ACATGATCCAATTGTGCCATTAGCTGCAAGTGAACAAGTCATTAACCTGTTTAATACACGTGGGGCACAAGTCAAGAAGTTTGGGT  
GAAGGGCCATGAAATTACAGAACTGGATTAACGGCTGGTCAACAAATACTTGGGAAATAACAGTTCTATTAAGAAGCGGACAGA  
TGGAAAAGATTTTTACTTTTCATCTGCCCGCTTTTTTGATTTTGAAGTGCTGTACTAAATTTTACAATAGTATAGATATTTTAAATCGAT  
ATGAGATTGCGGTAATACGCTTAATTAACCTTTATAGAGTACAGGTATGAGTAAGATGAAACCGAACAATCCCATAAATAGGGA  
ATACTTTTCCAAATTAATGAAATGAAACCGATAAATGTACTAATATAAGTATGATGACAGCCATTGTAATAAATGATGAAGAACGTC  
TGCTGAATGGAACGCTGAAACGTGACGCAATGCATACATTAATCCAACAACAGTATTGTAGATGACAAGTATCATAATGACAGAC  
ATAATAATACCAATTGACGGAGACATTTGTGTCGCTAATTTAATGTAGGTAGATCTACGTGTTTAAATTTATCGAATTGAGAAATT  
AAACCTAGATTAATCATCATGAGTAAAAATGTAATGATTAAACCGCCAATCAAGCCCCGTATAACGTTGAGTCACGATATTTAACT  
TACTACCCATCACTGATAAGAAGCTGAAGGCAGCAGCAATTTGCAAGCTTGCAATAGTTAATCGCATCAAACCACCATCCAGGTGA  
TAATGATTTCTGCTTATGAATCTGAGCATCATTATTAGCGGCAGTAAAAATCAAGATGACTTGTTGTGAAATAGTAGACCGCAATCAT  
AATGACAATCGCAATTAAGAAATGGGGTAACACCGCCAAGCAGCAATTAACAGATCGAATTTTAGATACAGTGTGCTAAAAATAA  
AGGCGACTAATATGAGTGCCTCAGCCAAATACGGTTGAAGTTGAACTTTGATGAATGGTTGACGCACCACCTGCAGTCATAATAA  
GCTAAAGACAACATAAACATCTGTTAAAAATAATATAAAACCTCTTGCAATAGAGGGGTATAAGAAATAGTTAATGAATGAGAAATG  
ATTTCTGGACTTTAGATGATGACCTGTATGCATGACAACCATTCACCTAAAGTAATCAATAGTCCTGTTACAATAATGCCTGAAAT  
GCTATATGCGCCATGACTTGTGAAAACTGGAAAAATTTCTTGACCAGTAGCAAGCCGGCACCAACGACAACACCAACAAAGGCAA  
ATGCCACAATAATGGACTCTTTTAAAGATACGCGATGATTTAAAAATGTCCCTTCGTAATTTTAAAGTAATATAGAAAATGTAACATACA  
TGTTAATGAAAAATATAGTACTAATATAGTATTTTGTAAATTTGGAGTAGAAGCGAGGGGTGTCGGTCATTTTCAATTTTATAGTT  
GATTTTGCATTTTGTGCTGTAAAGTTGTTATAATACAGTTAAACAGGAATTAGCATAGATACACCAATCCCCCTCACTACTCGCAATAG  
TGAGGGGATTTTTTTCGGTGTAGCTAGGTCGCTATTTATCATCGTGTGTTGCGTAGCCAATGCGTAAACACAGTACCCTAAATAAG  
TGCACGATACATGCATCAAAATGTCGCTTTTAGTCTAAGTAAACGATATGCATTAACATTTTCAAAATATCTATTTGAGCTTGAAGATC  
TTTACCAATATTGGTATACGAATCTTCTTACGTTGTAATCTTTATCTACGACGCGCTTATAGAAAAGTTTATGATACCTTCGGAA  
AGTATTTTTTCTTTAGCGTTAAATTTGTTGGTGTGCAACGAGTTGCATACCGAATGAATTATACAATAGTGTATAGCCTGCAATGCCA  
GTTGTTGACTGATAAGCTTTTGAAGGCCACCATCAATGACAAGCATCTTTCCATCAGCCTTGATAGGATCTTCGCCATTGATTTCTT  
TCACTGGTGTGTGACCATTAATAATGCGTCCTTCATCTGGATTTAATCCGAAATCACTGAGCATTTTACGAACCATATTCACATCTTC

ACGAAGATGATAGTACGGATTCTTTTCTCTTTATGAGAAGCTTTATCTGCAATAAAGTATCGCTCAAACGTAAGTCATGGCACGTTT  
ACCAAATAGTGACGAATATTTCCAGTCCATAAATACCAAATAAATCCGTCGATAAGTCATCAGTATTTTCTTTTTCATCAAATGA  
TTTACGGACATGATACTCAAACACATCTAATAATTCTTGGCCGCTGTAAGTATGACCATCAATTTCAAATGATTCCATCTCACCATT  
TCATCAACTGGAATACAACCATGAATGAGTAAATTACCATTATATGGTAAGTAAAGCGAACCTTTACGCATCAAGAAAGACATATG  
ACGACGTAATTTTTCAGATTGTTGGAATGACAATAATAGTTTATTCATGACTTCTTCTTCTCAGGTAGTAATTCTGCTGGATTATTA  
CGATTGATAGTTTGGAAACATGTGTCTTCAACGGGTATGTATTACCATAAACTGTAATTTTCATTGTATCATAAATTAACCTTTTCAA  
GCACAAGACGTTCTTCCATTTTCGAAATTTGGACGACGTTTAATAATTGGTATTTCTAACTTGAATTGAATCATCGCAATAGCTTGATG  
AATTTTAGTAATTTGACTTTCTTACGTTGAGTTAAACGTTTCGTGTTTGTGAGGTCTTTTTTAGGCTTAAAGCAGGATTATCTGCGT  
CATAGTATTTTTCAGCTAAAGTAAGCAGTGGTCTTAAATTAATGCCATAAGCGTCTTCGATAATATCTAAATATCATAGCGTGCAC  
AAATTCGAAGTAAGTTTGTCTAAGCATACTTTTGACCCAGCATAGGCTCCAAACCCAAAGCACATCATGATTACCCCATTTGAATATCTA  
GGGAATGATAATTAATCAGTGTATCCATAATTTTATCTGGTTGTGGTCCACGATCATAAATATCACCGACAACGTGTAAATGATCGA  
CGACTAAGCGTTGTACGGAATAAGCGAGTCCAATAATTAATCATCTGCCTGTTTAAAGTTCAATTACTTGGTTAAACAAGTGTTCGT  
AATATGATTTTTTATTTTGATATTCATTACTTTTATACAGTAGTTTCTCAATAATATAAACGTAATTGTTTTGGCAATGCTTTACGCAGT  
TTTGAACGCGTATATTTTGAAGACAATTTAATCAACTCAATTAATGTTTCGATTGTTGTGATATACCAGACATTAAGTTGACCG  
CAACTTTGGAAATCATTTTAATCAATTTAATTTGTCTTCTGGATAGTAGACAAGAGCAGTTAAATCATTAAAGCTCCTTAGTTGAAA  
GTCTCTCTTTGAAAAATATCATTGATTTTCGCTCGCACATTTCCAGAACCGTTGCGTAATACGTGTTGGAAAGCTTCGTATTACCATG  
TAAATCGCTGACGAAATGTTCCGTACCTTTAGGTAATTTCTAAAATTTGATTCTAAATTTGATAATTTTCAGTTGCAAGTTTCTGGAGTA  
TCAAAAATTTGGGATAGTAATCTAAATCTTCTTTTAAATTTTTCAGTAATTTGAGTCAATTCGTCTACTCTGTAGTATATT  
TCAAACGTTAGTTTATAAAAATAAATGCGCTTACAATGATTTTAAATCTTAAAGAAACGTTAAACATTTTCAATAAGTATGCTTGGATTGATAA  
AAATAGAGGGCAGGATTTTGGTATTAGGAGTCGTTGCAGTTAGTTAAGTAAAGTGGGAAAGTGATATATTTATTTAAAAATGA  
GAGGAGGAATTTGTTATATTCAGTAGTTTCTAAAAAATTACGATATGTAAAATGTGGAATTGCCAAAATTTGGATAAAAAAATCCC  
CGCACCATTATTTGGGTGAAGGGATTTGAAAATGATTTTGAATTACGATGGAATATGTGTGATTTTATTCATCTAATACTTTAAGTTA  
CTAAATATTTTCTTCTTGAAAAATAAATACTACAAAGTATTAAGAAAAATAGAAATATAAGCAATATTACCAATAAAACAATTCATGAAG  
TTCTAATTTCTGTCGACTTACTAAAGCCTTTTCAACTGTTTGAAGCATAATATTCATCATATTAATAGGATTCCACTTTAGCCAGTCT  
ATTTTCTTAAAAAGTGCCGTTTGAATAACTGCTAAAAATAGAAGTTGCAAAAAAACAATACTACAGCAATGGCTACACCCGTT  
GAATTAGTTGCAGATGATAATAGCAACGTTAAGCTTAAAACTAACCAAAACGCCAACAAATGTACCTAACTAACTAACTAAATAATTTG  
ATTCAATAAAGATAAATTGATTACCGCTACTTTCAAATATATTTAAATCATTAAAGAAATAAAGACCCAATAACAATTTGAAGCAATAAT  
TGTAATAACAAAATAAATTAAAGAAATAATAAATAATGTGATGATTTTGCTAACCAATCATAGTTGTTCTTGAATATTCAGGATAGAG  
TAAATTTTAAATCGTACCGTAATGAAATTCCATTGAAATGATTGTACTTGTGTAATAATTAATAAAAAATGCAACCATGAAAAACC  
ATTATAAGCAGATGTGAAAGATTCTGTGGCGTAAAAATTTTCAATTGTATTTGTAGCGATATAACCTTGAGCAACCATTAGTAGAAT  
GAAGACAATAGGTGCGATAAAAGTTGATTCTTTTAAATAATTTGAAACATCTTGTGTTAATTAAAGTTCCCATTTTATGCTTGGTC  
CTCCCTTTCTATGATTTCTAGTAATACATTTTCTAAATCATTATCTTTAAATTGTTTAAAGTTCTTCTCCGATGTTTCTGTAACAATTT  
ACCTTTGTTAATAATAAGGATAGAGTTTGTGATTTTAACTAACTCACTTAAATATGACTCGAAATTAAGAAAAGTAACACCTTCTTG  
CGACTTTTGGACATCAATTCAGTACATCTCGCAGCTTTTGGATCTTAAGCCGTTTATTGGTTCACTAAGATAATGAATGATTGAGGT  
TCATTTAAAAATGTCTATGACAATTCCTAATTTTGTGTTCTATACCAAGAGAATACGTTTATAGCTTTTATGAATGTATTCATCCATATG  
AAGTTGTGAGACAATTTTATCGATATCTTGAGTGTTTTTGATTTCATTCAATAAAGTTTCAAGTTTTCATATCCAGACATAAAAGGATAT  
ATTCTCGATTTTCAATCAATGCACCGATATTGCTTTTGTGCTTCTTGTGTTAATAACATTAATAAATTTCCGCTTTGGAACTAGAGT  
AACCTAATAAAGTTTCAATTAAGTTGTTTTACCTGCACCATTCGCTCCAACGAGACCAACTATTTGTCCGCGTTTCAGCTTAAATGA  
TACATCTTCGAGAATCGTTTTGTGCTATCTTCTTTGTTAAATGTTCTATTGTTAAACACCCATATCACTATCTCTTTGCTATTAA  
ATAATCTGAATCTTAAGATTTTATATATAAAATTAATTTTATCACATAGCAAGTGTATATAAAATATGGGTTTAAAAAATTTAATA  
ATATAAAATATAAATATGAACACGAGTATTTTGTAGCGTGCAAAATGGTATTGCTACATTTATTAATAATGCGCAATTTGTTATGAGT  
AAGTTTTTGGATAGTAGGCACATTAAGGTGTCGAAAACAATTTGTGTGGAGGACAGGGTAAATTTCTGTTTATTTAAGATGATAGTT  
TATTATATAGATTGTTGTGAGATAAGTTTGCAGGATGTATACATACGAGGGAACGTAAGTTTGTGATGGGAACTTCAATATCT  
CTTAACGTAAGGATTTTAGGTGACTTTAGCTAAAGTATGCCAAATAAAGTTTAAAAAGCAGTGAATCATTTCATAGATGGAAT  
GATTTTACTGCTTTTGTGTATAGAAATTTAAAAATTCATGCCTTTTATACTAACAACAATATTTTACTCTCTTACGTTTGCCAATGT  
AACGTATAGCAAGTAATGACTGCGATAATGATGACAACATACATAATACGTGAATATGTATGAAGACCAGTCATCAACATACCA  
AAGCTATCGCTCAACGTGCGTCTAGTAAATTAACCGAAATTCCAAATTTGTGTACCTATTAATGAAATAACGGTAAATGTCACA  
ACATTCATGCGGTTTACACCGGCTGGAATGGTAATCAATACAGTAATACAGGTATGAAACGACAGATAAATACAGCCCATACGCC  
ATACTTTTAAACCAATCATTGCTCGCTTAAATCCTTACTTTTCAATTTAATCCACTTACCGTGTGATCAATAAAACGATATAGA  
CGTTCTTCTGAAATCAAACGGCAGATATAATATAAAATTAACAGCCCTATAAACGATGCGATGGTTGCAATAATAAATAAGGTTAA  
AATTGATAAATGTGATTTAACAGACATAAGGCCAGCAATGTCAGAATAATTTCCGATGGTACGATAGGTAACAACTTTCTAATA  
AAATTAATAAATAAATGGCTGCATACCCAAACGACTATAAATAATTCAGTGATAATTTGTCTTATTTAATAAAGCTCCTTTAAT  
TTTCAGCAATTGCAGACAAAATAGAACTGGATAAAATCAAATGAATAATGAATGATGTCGATGCGATGTTGAAACAAGCATTGT  
CTTAAATGTATTATAAGCAATAAATCAAAAAATTTGCTTGTATAAGTACGAAAAGTCAACAAATGATCATCTAATAACAGGCGC  
TGCACAATGAATGAGCAATGTAGTTTTATGCAATTTAAAAATGAATGTGCAATATGTAAGAAAGCCTGCAATATACGTTTAAAAAC  
TAGGATTGACGATTTTAAATTAACAAATGATAGGCTACTATGTAACATAAAAGTTCCCTTATATCGTTTAAATAGCAAAAGTTAAGC  
GGAATTTAATAAAATTTTATAGATTCTATTGTAACGCTTTCCATGTCTGATAATATTATAAAAAATAAATTTGGTACAATTTTGTG  
ACAAAGTAGGGGTGGACATGCCAGATGTCCGAAAATTTTAAAGTTTTCAGGGTAAGTTTAAAAAATTAATTAGGGAAGTAGGAATA  
GTTATGAAGGAAAAACGAATAACGTAAGGTGGATGTTTCGCGCTTGCCTTCTTCTTATTGGGGTTATTGCGTATATGGATAGCA  
AACATTTTATATATCGCTAATAACAAATGATGGATGATTAGGATAGGACCAAAACCAAAATTTGGTTTATGGCATCTTCTCTCTAG  
GTTATGCATTAATGCAAGTACCATCGGGGATGTTGGCTGAAAAATTCGGTCCACGTAAGATGATTACAATTGCATTAGTTTGGTGG  
GTGCATTTACAATCTTAACGGGTATGATTAAGAACCACGGTTAATTTATTTAGTGAGATTCTTATTGGTGTGGGTGAGGCGCCAA  
TGTATCCTTCTAATGCTGTGTTAACTCATTTTGGTTCTCTAAAAATGAAAAAGGTAGAGCATCAAGTGCATTATTAGCAGGATCAT  
ATTTTCGGACCTGTATTAGCACCAATAGTTACAATTGCTATTGTTAACGCATTTAACTGGCAAGCAGTATTTACATTTTGGTGCAGT  
AGGTATTTAATGGCTGTATTATGGGCGATTATTGCCAAAGACTTACCTGAGCAACATAGAATGGTTAATGAAGCGGAGAAACGTTT  
CATTATGAAAAATCGTGATATCGTAGCTACTGAAAAGTCAACACCACATGGAATAATTTCTTTAAACGTTTATAGCTTCTATGCAATT  
GCAATTCAATACTTTGTTGACAAATTTATCATTACATTTCTTAAATTTGGTTACCGACGATTTTAAACAGAAGTATCCACGTTAACTT  
TAAAGAAATGAGCATTAGTTTACCTTGGTTAATTAATGTTCTTCTTAACTTATCAGCAGGTGCAATTTTACCGGTGTATTAGGA  
TTAGGTCGTTCAAAATTCGTAGCTAGAGGTGTAATTGCAATCGCAGGATTTATTGTGTTGACGTTTCAATTTATCTTTGTGTACGTA  
CAGGAAATTTATATGTAAGTATTTTCTGGTTATCACTAGGTCTTGGTGGTATCGGTATTTCAATGGGTATGAGTTGGGCTGCAGCAA  
CTGACTTAGGACGTAACCTTCTCTGGTACAGTATCAGGGTGGATGAACCTTATGGGGTAATATAGGTGCATTAATCAGTCCGCTATTAG

CAGGTCATTTCGTAGAACATTTAGGTTGGACAATGACATTCCAATTGTTAATCGTTCCAGCAGTAATCGCTGTGATTATGTGGTTCTA  
TGTGAAACCAGATCAACCTTTAATTGTTAGTGATGATAAAGCAATAGAAAAATAATTTAAACAAGCAGTAAGCTTTCACATTGTTGG  
GGCTTATTGCTTTTTTACGTTGAAATTGAACTTTTTAAAAACAGATATGGTTTAAAGATGAACGGGAAGTTATTAATGATATATGT  
AAAGAAATAAAGTTTTAAACATTAGTCAGGTAACGCTTGTAAGTACATATAAATTTAACTAGCCCAAAGGTGGGCGACCAAA  
GGTTCACGATGTTAAATAACATTAGAAATTAATTTAATTGGACTTTAAAGTTTTTAAATTTAGATAAATTGAGCATAAGGTGTTA  
TAATCACATATGTTGCGTAATTAATAATTTATAGCAACAAATTCATTTAACTATGCTAATAAAAAAGATTATGGAAATATTTTGACAA  
GGAAAGGAGAAGTCGAAATGACATCTTTTGACATCACTTATAAAAAATCAATCGACTTAACTTAGACTTTTATAAAGGTGTAAGAC  
AGGGACTGTTAATGATTATTCCTGCAATAATCGGTTACTTATGTGGTAATTTCCAATTTGGATTATTAGTTGCAACCGGAACACTAGC  
CCATATTTATGTTTTTAAAGGTCCGTCGCGATCTAAGCTGCGAATGTAATAATTTGTAATTTAGCGTTTGCAATATGTATGATGCTT  
GGTACGCTAACAGCCAAAACGCCACTCGTTTTTGGAAATGACATTATTAATTGTTACGGTTATACCATTTTATATATTACTGCCTTAA  
AAATAGCTGGACCGTCATCGACATTCTTCATTGTGACATTGAGTCTACCCATTAACTTACCTATAGCTCCCGAAGAAGCATTATATA  
GAGGCTTTGCGATTTTAGTAGGCGGTATCTTGCCACTATGATGGTGTAAATCACGATCGTATTTTCTAAAAACAAAGCTGAAGAAC  
AAGCAATTCAAAATGATTTTAACTCATATCTAAGTTGTTACACACTTATAATGATAAAGCTGCTTTTTTACAAGTAGCAAAAAACAG  
CGGTGGATAGTTTTAAAGCATCTGATAAATTATTAATCACTTCTACTTCAAGTAACGATAAATTAAGTAGACGTTTCCAAAAATTAT  
TATTATTACACACATCTGCCAAGGGATTTATCTGAACTGTTAGAGTTGAACGCTAAACAAATTCGACCAATTGCCAGATGAGTTAA  
TTGAAATGATGGATCATATCATTGCACAACCTAGATAATAGTGATGAAAATGTAAGATATTGGCGAAAAGAAGTGACAGTAACAGAG  
GAATTTCAAAATTTATTCAACCATATATTGAAAATTGATGAAATGGTGCATGCAATGAAGCGCGTATTGCGTATGAAGCAGACAT  
GCGAAAACCTTTATAGTAAGAACGCATTATCAAAAATTAACTAGACTCTATTGTTTTAGAAATACATTGAGATATACAGCAT  
TATGATGATAGCGATATTTATTGCGTTAATGTTGATTTTGA AAAACATCCTGATACCGTTATCTGACATACAATATTACTAGG  
AACATCAACTATACATGCAATCGAGAGAGGTATGGCACGAGGTTTAGTACTATTTTAGGTGTGTTAGTACTTTCAGTCATATTGTT  
GTTTTCAATACCAACACCTGTTGCAGTAATTTAATGGGCATTGCAGCATTGTTTACTGAAGCATTGGTGGGAGCAAATATGCGAT  
TGCAGTAGTTTTTATTACAATACAAGTTATTTAATGAATGGATTAGCATCACAGAATTTAAACAATTAACATTGCGTTTCCAAGAGTT  
ATTGACGTTGCAATAGGTATTGTGATTGCAATCATAGGTTTATTTGTCCTTGGACAACGTACCGCATCCGTATTGCTTCTAATGTAA  
TGGCTGAAGTTGTTTCGTAAAGAAGCAACGCTCTTCCATTATTTGTTTTCTGAAAACCAATATAAAGATAATGTGTATCAGAAAAACA  
CGGCCATGAACCTATCTGTGAAATTAATAACATGACGCAAGTTTATAATGCAAGTAAATGGTGAATTTTAGTGATAAGACATTGA  
TTCAAAATTTATCTAGCTTATTCGCATTAGAAGAAATTAGCTTTATGTTAAATAGAGCCATGGCTAATGAAGATAGACTTACAA  
TAAATGAACAATTAATGGGCGAGTATTTAGCAACATTTGAAAACATCGCTAAGCATTTTGAATTAATAACAGAAATTAAG  
ATATTACCAGATTTACCACAGTATAATTATATTTCAATCAGCAATGATGAATATTCAACACAATGGTTTTCTGTGAGAGAGACAAGAAC  
GTTTAAAAATAAAATATTTATCAGGTCAGACTAACGTTTGTCTGAAGTTATTATGACGGGAGTCTAAAAAATTTGTGTTAATATGTTTC  
ATTTTATAATTATGGTGGTATATAACATGAATTATAACATATTGGAGGTTAAGGAAATGCCCTTTACAATGAAAGGTTACCCCGAAA  
AATGGAAGAATTTGAAGTAATTAACCGGCAAAAAGCGATAGAAAATTGCGAATGCAATGTTAAAAGAAGGATATCTTGAAAAAGA  
TGTGTTCTCTATTGCGGCGAAAAAAGCGAAAAGATTGGTATCGAGCGTTATCGAAAAGAAGAAATCAAAGCATTAGAAGAAGAGAAC  
TTCGTACAATTCATACAGCAACAATGGAAAAAGCAGAGGTGGATAGTGAATATGCAACAACCTGATAATGAAGAACATATTCAAG  
AACAATCAAAATCAAGATAAATCGTACTTTGATAGCGAATCAATTGGCAACCAAGTGGTGGCGTTTCGACAAAAGAGAACCCTTATG  
GATGGTGCACATCAAAAAGTTGTGAATCATTTAAAGACGTATAACATCTCTATCAATTAAGCATTTGACCTATATAACCGTAACA  
GGTGTTTTTTTGCGTTAAATCATTTTAAAAATTACTTCTGTAAATTGAAGTTTTGATACATAATTCGGATTGTTTGAGTTCTTTGTGC  
TGTTTCAGTATCAGCCCAAAGTTTCGATAGTGATTAGTATTATCTTAATAAAATGTTAGGTACAATAAAGATGATTATATATCGGAG  
GTTAGTATAAAAAATGTATGTAGATCGAAAACCATCACTATATTTAGAGGATTTGCGACATGATTTTAAAAATAGTTTAAAGTAAATTT  
GAAAATGGTGATGAAGCATTGATACGTTATTAGGTTTCGTAGAGTTAGATCATATTTATTCGTCAGCACTAAAGGAAATAAGCACT  
AACTGAGTATTTTAGATGACAATTTCAATCACATTATAAACACAATCCTATACATCATATGGAGCGACGTGTGAAAGAAATGCGT  
AGTTTAATAGAAAAGCTTAATCGTAAAGGATTACAGATTAGTGCAGAACTGCCAAAGAACACATACTGGATATTGCGGGAATTCG  
CGTAGTATGAATTACTTAGATGATATTTATTTGATTGAAGAGATGTTGCTTAAACAAGAAGACGTACAATTGATAAAACGTAAAGA  
TTATATTAGCACCCCTAAAGAAAATGGTTACCGCAGTTTACATATCGTTGTATCTTCCAGTCTTTTAGCAGAACGCGTTGAGGTA  
TTGCTGTTGAAATTCAAATTAGAACGATAGGTATGGATATGTGGGCAAGTTTGAACATAAAATACGTTATAAAAAACAATGCAGA  
GACGGAAAAGTATCGAGATTTACTGAAAGAATGTGCGACAGAGATTACTGAAGTTGAAGATAAATTACAACAATTCATTCTGAAA  
TAACAGAGTAGACGTTTAGTAGGAGTGTGCTTAATTTGAGTGATTTTGTAAATCAACATGGTACGAAATCATAAAAAATAAGACGC  
CAAGTATAATAAATTTCTTAAAAATATGGAATTTGACTTGCTCGTGACGTCGGGTCATCACTATGGTGATTGTAGGAGGTGGAAT  
CTATGTCTAACTATTCGACTGGAGAACTCGCAAAATTAATGCAATGTGACAACACGAACGATTCAATATTATGATCGCAAAGGTATTT  
TGAAACCACAAGGATTTACAGAAGGAAAGCGTCGTGTGTATACAGAACAACAGCGACAAACATTAGAGTTAATCTTATTGCTTAAA  
GATTTAGGTTGTGCGTTAAGCGATATAGATATGTTGCTAAAAGGTGAAGGTACTTTGAAGACACTCAATACCTTACTAACCATTGAAA  
CAACAAGAAATTAACCAACAAGTCAAAACAGCAACAAGCGGTATTAACAAAAATTAATAAATGTTCAATATTACGTAAATGAAGCGT  
CGAGCTCTCAATACACACTTAAAAGACATAGACAGATGTCATTGAGTAAATCGACTGAAATGAAAAGTATTTCGTCTGAACATTTGG  
ATTAGTGCTGGTATTATAGGAATAATTCAATATTCTAGCATTATGAGTTCAATCTTGATGAAAAACAAATGGCCGTTTTTAATTGCTT  
TACCATTTATGAATTTGTTACGGCATTGGTGTACTTTTTATTACCAACAAAAGGTTGCCTATTTATGTCCTAACTGCCAGCATATATT  
CTCACCATCTTTGTGGGCAGTTATCAAAGCGAAACATACAGCGACAACACGTCGATTGCAATGTCCGAAGTGTGATGAAACGCATT  
ATTGCATTGAAGTACCTAAAGCGCATATGAGTACAGAACAATTAGAAAATATCCACATACAACATAACAATTAATCATTCGTGTG  
ATAGTGATCATTCCCTTTAAATTTACATCGAAGAGGGGTGGTCACTATTTTAGTTTCGCATAAAGAAAGCGCTTGCAAAACACTTAAAG  
ACTATATTAACATACTTGTATACAAGTATGTCATGTAATGAAGGAGTGCTTTGATGATGTATGGATATCCAGAGAAATGGTTGGAAG  
GTATGACAACCTGGAGAAGGTATCGCGCAAGAATTCGCTTAGGTATTGTGAATGGTACATAGAGTGAAGGTACGTTACTCACTGAA  
AATCAAAATGGCAAAATTTAATGTGAGTCGTTTCGCCAATTCGAGATGCAATTTAAATTTAGCAACAAAATACTCATCAAAATTA  
GAAAGAATGGGTGCACATGTGTTGCCGTTTGGGGAACAAGAAAAGAAAGAAATGTACGATTTCGCGACTGATGCTAGAGTCATTTGC  
ATTTTCAAGAGTTAAAAATCAAGAGAGACTACCTATCGTAAAAGAAATGAAGAAACAACCTGAAATGATGAAAGTGGCAGTAAAA  
TTTGAAGATGCAGAATCATTTACGAAGCATGACTTTGAATTTTATGAAACATTAATCAAAGCATCTAACCACCAATATTTAAACTCA  
TTTTGGAGTCATTTAAACCAGTAATGATGGCACTCGTTTTAACATCCATGCGACAACGTATGCAACAGAACCCGCAAGATTTTGAA  
CGCATACATCATAATCATCAAGTGTATTATTGATGCAAGTGAACAATACGACAGTCAAAATTTGAAGGAAAGCGTTTTCAATTTAAATTT  
GACGATGTTGGTAAAGATATTGAAGGATTTTGGTTGAATTTAAATGAAAGAAAGAAGGATTTATCATGAAATATATGATTGGTGTC  
GACATTTGGAACGACGAGTACCAAGTCAGTCTTATATGATGAAATGGAGCTTTTATCATGAAACATCAAAATCGGCTATGATTTTACAC  
ACACCAACCGTTGATGTCAGAGAAGAAACCCAGATGAATTTAGTGGCGTATTAATGACAATTAATAACATAATGAGGGAAT  
GAAAGTTAATCAAGATGATATAAATTTGTGTCAATTAGTGGCGCAATGCATAGCTTGATTGCGATGGAATCAGCAACATCAAAAGATT  
AACAAATAATATTACTTGGGCAGATAACCGCGCTGCAAAATATGCAACAGTAATAAATGAAGTGCATGATGGCAATGCGATTTATC  
AGCGAACAGGTACGCCTATTCATCCTATGTCGCCTTAGTGAAAATTTTTTGGATGAAACATGAATGGCAAGATGATTTCAACGTA

CTGCTAAGTTTGCAGATATTA AAAACATACATTTTCTATCATTTATTTGATACATATATCATTTGATTATTCAATGGCTTCCGCAACAGG  
GATGTTTAATTTAGAAACATTAGATTGGGATGTTGGGGCATTAGAATTGCTTGGTATTTCCAAGGAAATGTTCCCGGAATTAGTGCC  
AACAACTGACGTAATGAAAGGCATGAAAGAACGTTATGCAACATTAATGGGGCTTAATGAAGATACACCGTTTGTATTGGTGCGA  
GTGATGGGGTCCTTTCTAATTTGGGTGTCAATAGTGTGGTAAAGGAGAAGTTGCTGTCACAATCGGTACATCTGGCGCGATTTCGTA  
CTGTGATAGATAAACCACGTA CTGATTACAAAGGTAGAATATTTTGTATGTCTTAACAGAGGACCACTACGTCATCGGAGGTCCTG  
TAAATAATGGTGGTGTCTGATTGAGATGGTTGCGCGACGAGTTGCTAGCGAGTGAAGTCGAAACTGCGAAACGTCCTCGGTGTTGAT  
CCTTATGATGTCTTA AACTCAAATTGCAAAGCGTGTTAAACCAGGTGCAGATGGTTTAATATTCCATCCCTATTTAGCTGGAGAACGT  
GCGCCGCTTTGGAACGCAAAATGCAAGAGGTTCAATCTTCGGTTTAACTTTATCTCATAAAAAAGAACATATGATTTCGCGCTGCATTA  
GAAGGTGTTCTTTACAATTTGTATACCGTCTACCTTGCACCTATTGAAGTAATGAATGAAACGCCTAATATGATAAAAGCAACAGGT  
GGTTTTGCGAAAAGTGAAGTATGGCGTCAAAATGATGTGAGATATATTTGACACAGAGTTAGTGGTTCCTGAAAGTTATGAAAGTTCA  
TGCTTAGGTGCCTGCGTGCTTGGACTTAAAGCTGTAGGTGACATTGAAGATTTTTCAATCGTTTCATCGATGGTGGTGCTACAAAT  
AATCATACGCCGTTTGAAGAAAATGTCGCTGTTTACCAAGAGCTCGTATCCATTTTTATCAATTTAAGTCGTTCTTTAACAGAGAATT  
ATGAACAAATTGCAGATTTTCAACGCCAACATATGGCTGAAAATAAAACACAATAAATACGTCACCTCAAGCATCTTAGATAAAAGTT  
GTTGTGCCATGACTACTATATATTATCTGGAATACGTGCGCGACGACGTTTACATTCTATTGAAAAGAGAAAAGAGGGGAATGTC  
ATGTTTAACGAAATATGGCCGTTAATCAGTGTGTTTATAGGTATCGTTATTTTATTAGTATTAATTATTGGGTTTAAATTAATACAT  
TTATTTTCATTAATTATCACATCGATGATTACAGCGTTAATGCTAGGTATACCATTTGACTAAAAATTATGGAGACGATTGAGAAAAGGGA  
TGGGCAGTACGCTCGGCCACATTGCACTAATATTCGGTTTAGGTGCCATACTTGGGAAATTACTTGTGATGGTGGTGGTGCAACT  
GAATTGCAGACAGCTGTGATTCAAAAAATTTGGTCAAAAACATGTACAATGGGCAATGCTTGTTCAGCATTTATCGTCGGTATTGCTAT  
TGTTCTTTGAAGTAGGTTTAGTCTTACTGATTCCATTAGTATTTACAGTAGCAAAAACGCGCAAAATGTTTCAGTGTTTAAACTAGGACT  
ACCTATGGTAACAGCTTTATCTGTGACACATGGCTTTTTACCACCACATCCAGGACCGGTAGTCATCGCAAAAAGAAATTAAGGCCAAA  
TGTTGGAGATGTATTACTGTACGGTATGATTATTGCCATTCCAGTTACACTCATTGCAGGACCTATATTTAACAAAGTTGCACAAAA  
AATGATTCCGCTCTGCTATACACGAGAAGGCGATATTTACGCGTTAGGTGCACAAAAAGAAATTTACGGATCAAGAGATGCCAGGAT  
TTGGTATGAGTTTATTA AACTGCAACATTACCAGTCATATTAATGTTAGTGTCTACGATAACGCAACTTGTAACTGGGCACGACAAAC  
CTACAAATCTATTTGAATCTATCATTTATATGATAGGAACAGCAGGGACAGCCATGCTAATAGCAGTATTATTTGCAATCGTTACGA  
TGGGATTAATGAGAAAACGTAAGATGAATCATATTATGGAATCAGTGACGAATGCGATTATCCAATCGGAATGATGTTATTGATT  
ATTGGCGGTGGCGGTACATTTAAACAAGTATTAATTGACGGTGGTGTGCGAAATACAATTGCTAAAAATGTTTGAAGGTACAGAGAT  
GTCTCCAAATTTTACTAGCATGGATTGTTGCGAGCTGTGCTACGTTACGATTAGGTTTCGGCTACAGTAGCTGCGATTTCAACTACAGGT  
ATTGTCTTACCATTATTACAATCATCAGATGTAAATGTTGCATTAGTTGTACTTGCAGTAGGTGCAGGTAGTGTGATTTTGTCTCATG  
TAAATGACGCAGGATTTTGGATGTTTAAAGAATATTTTGGTTTAACTGTAAAAGAAACATTTCTTAACATGGTCATTATTAGAAAACGA  
TTATTTCCGTTTCAGGTATCATCTTCATTCTATTATCAGCTTATTTGTTTAACTAAATATTAAGTAAACGTTTATTAGGTAATTGCA  
ATATATTGCCTTGAACACGTTTATTTTTATGCGAAAAATCGTCTGAAAATAGTCAGAAATCCGAACGATATAAAAAGTATATTGGGGA  
TTTTAGTGTAATGAAAAGCGTTTCAAGACATGTTTTTGTGCGTATTGTACAGGCGATAATTATGAAACACTTAGTATATTGTTTTAAA  
TTAGATAATGATGAATTTAATTTGAAAAATAAGTATAAAAAATACAAGCCTTGTGTGACAAGGGTTTATGATGACTTGAATACAATT  
TATAGGTATATTTCAAATAATAAAATTATCAATTAACATAAAATTAATGACAATCTTAACCTTTTCACTTAACCTCGCTTTTTTGTATTGC  
TTTTAAAGAACCGCAACAATATAGACTTGCATTTATTAAGTTTAAAAAAATTAATGAATTTTGCATTTTAAAGGGAGATATTATAGTGAA  
AAACAATCTTAGGTACGGCATTAGAAAACATAAATTTGGGAGCAGCATCAGTATTCTTAGGAACAATGATCGTTGTTGGGATGGGAC  
AAGATAAAGAAGCTGCAGCATCAGAACAAAAGACAACCTACAGTAGAAGAAAATGGGAATTCAGCTACTGATAATAAAACAAGTGA  
AACACAAACAACCTGCTACTAACGTTAATCATATAGAAGAACTCAATCATATAACGCAACAGTAACAGAACAAACCGTCAAAACGCA  
ACACAAGTAACAACCTGAAGAAGCACCAAAAGCAGTACAAGCACCAAACTGCACAACAGCAAAATGTAGAAAACGTTAAAGAA  
GAAGAGAAAACCTCAAGTTAAGGAAACGACACAACCTCAAGACAATAGCGGAAATCAAAGACAAGTAGATTTAACACCTAAAAAGG  
TTACACAAAATCAAGGGACAGAAAACAAAGTTGAAGTGGCACAGCCAAGAACGGCATCAGAAAAGTAAGCCACGTGTGACAAGATC  
AGCAGATGTAGCGGAAGCTAAGGAAGCTAGTGACGTTTCAGAAGTTAAAGGCACAGATGTTACAAGTAAGTTACAGTAGAAAAGT  
GGTCTATTGACGACCTCAAGGAAATAAAGTAGAGCCACATGCTTGGTCAACGTTGTCGATTGAAATACAAATGATAAGTATGAGTGA  
TGGATTAAAAAGAGGAGATTATTTTATTTACATTATCAAATAATGTAATACTTATGGGGTTTCAACAGCTAGAAAAGGTACCAGA  
GATTA AAAATGGCTCAGTTGTAATGGCTACAGGTGAGATCTTAGGGAATGGTAACATAAGATATACATTTACTAACGAAATTGAAC  
ACAAGGTAGAGGTAACAGCTAATTTAGAAATCAACTTATTTATTGACCCTAAAACGTGACAAAGCAATGGAGAACAAAAGATTACT  
TCTAAATTAATGGTGAAGAAACAGAAAAACAATACCAGTTGTTTATAATCCAGGTGTAGCAATAGTTATACAAATGTAATGG  
ATCAATTGAAACATTTAATAAAGAATCTAATAAATTTACACATATAGCTTATATTAAGCCAATGAATGGAAACAGTCAAAACACTGT  
ATCAGTAACAGGGACGTTGACTGAAGGTAGTAATTTAGCTGGTGACAACCTACTGTTAAAGTATATGAATATCTAGGGAAAAAAG  
ATGAATTGCCACAAAGTGTTTATGCAAATACATCAGATACTAACAAATTCAAAGATGTAACAAAGGAAATGAATGGAAAAATTGAGT  
GTGCAAGACAATGGTAGTTACTCATTGAATTTAGATAAGTTGGGATAAAGCATATGTCTATTCTATATACAGGTGAATTTTGGCAAGG  
TCAGATCAGGTTAATTTAGAACTGAATTATATGGGTATGCTGAGAACGAGCATATAAAATCTTACTATGTTTATGGGGATATCGTTA  
ACTTGGGATAATGGTTTATGTTTATATAGCAATAAAGCTGACGGCAATGGTAAAAATGGACAAATATTCAAGATAATGATTTTGAA  
TATAAAGAAGATACTGCAAAAGGAACTATGAGCGGGCAGTACGATGCCAAGCAAAATTTTGAACAGAAAGAAAATCAAGACAATA  
CACCGCTTGACATTGATTACCACACAGCTATAGATGGTGAGGGTGGTTATGTTGATGGGTATATTGAAACAATAGAAAGAACGGAT  
TCATCAGCTATTGATATCGATTACCATACTGCTGTGGATAGTGAAGCGGGTCACGTTGGAGGATACACTGAGTCTCTGAGGAATCA  
AATCCAATTGACTTTGAAGAATCGACACATGAAAAATC AAAACATCACGCTGATGTTGTTGAATATGAAGAGGATACAAATCCAGG  
TGGTGGCCAAGTAACAACCTGAGTCTAACTTAGTTGAATTTGACGAAGAGTCTACAAAAGGTATTGTAACCTGGCGCAGTGAGCGACC  
ATACAACAATTAAGATACGAAAGAATATACGACTGAAAGTAATCTGATTGAACATAGTAGTAACCTGAAGAACATGGTCAA  
GTACAAGGACCAATCGAGGAAATTA CTGAAAACAATCATATTTCTATTCTGTTTGGTAAAGTGAACCTGAAATGAGTACCGGTAAAT  
GGCGTGATTGAAGAAATCGAAGAAAATAGCCACGTTGATATTAAGAGTGAATTAGGTTACGAAGGTGGCCAAAATAGCGGTAAAC  
AGTCATTGAGGAAGACACAGAAGAAAGACAAACCTAAATATGAACAAGGTGGCAATATCGTAGATATCGATTTTCGACAGTGTACCT  
CAAATTCATGGTCAAAAATAAAGGTGACCAGTCATTGGAAGAAGATACAGAGAAAAGACAAGCCTAAATATGAACATGGCGGTAAATA  
TCATTGATATCGACTTCGACAGTGTGCCACAAATTCATGGATTCAATAAGCATAATGAAATTATTGAAGAAGATACAAACAAAGAT  
AAACCTAATTATCAATTCGGTGGACACAATAAGTGTGACTTTGAAGAAGATACACTTCCAAAAGTAAGCGGCCAAAATGAAGGTCA  
ACAAACGATTGAAGAAGATACAACGCCGCCAACGCCACCCAGACACCAGAAGTACCGAGTGAGCCGGAAACACCAATGCCACCGACA  
CCAGAAGTACCGAGTGAGCCGGAACACCAACGCCACCAACACCAAGGTGAGCCGGAAACACCAACACCCACCGACTC  
CGGAAGTACCAAGTACCGGAAACACCAACACCCAGCAGCAAGTACCGAGTGAGCCGGAACACCAACACCCACCGACTC  
AGAGGTACCAAGTGAACCTGGTAAACCAGTACCACCCGCAAAAAGAAAGACCTAAAAAGCCTTTCTAAACAGATGGAACAAAGTAAA  
GTAGTAACACCTGTTATTGAAATCAATGAAAAGGTTAAAGCAGTGGCACCAACTAAAAAGCACAACTCTAAGAAATCTGAACTACC  
TGAAACAGGTGGAGAAGAATCAACAAACAAAGGTATGTTGTTTCGGCGGATTATT

CTGTGGCTAATGTGTAAGAACCCTACATAATAAATCATTAGTGGCTCTTTATCATTTCTGTCCCACTCCCTTGAGCCTACAATTTTG  
ATTATGTATCACGTTTCATAATACTTTCCAATTTGAAATACCCTGTTTCGCAATTATTAGTTGAGTTATATCAACCAATACAGTGTAAC  
ATAAAAAATTCACAAACCGTTTAACAGTATATCAGAAAAAATGATAATCATTTCTTTTATTTTATTAAATTTTCATAATGATTTCATATAA  
TATTTCGATTAACCAATCACAATACTGATACACAACAAAAAGAGCAGTACATTTGTGCATGCACCCTCTCAACAAATATATTTTTCAT  
ATGAAGCAATTACGCGATCTTACAAATACTATAAGTATAGCTGAATCACAATTTATTTTATAATCGAATTTAGAAAATTCATC  
ACTTATCTCATAAATTTGTTGGTCTACTTTTAATTTTAACTAAGTAGTTATCATATTTTAAATTTGTATTATTAATTTTACTCTTCCTAC  
TCCCAATATGTTCTCTAAATCAATTAATGTTAATCTATTTCTTTTATTTCACAAATTTATCCATTGAAAGGAGATACAAAAATTCAT  
TAATCTATCTGTTTATAATGACTAGTTAAATAAAGCGTTAATTTTTCAGTCGCATCCATTTTGGTATTAACTCATCAAGTATTTCTTT  
TTGTCTGCTATCAATAGCTCAAGCATTGTGTCAATAAATTCGTCACAAATCACCACAATTCAAATGATTGAAAGCAGTCATAAACGC  
CTTGTAATATTTTCGATTTATTTCTATTTATAACATATGAAAATGTCAAAGCAGTATAATTATCATAATAATCACTCAAGAGCTTGGCA  
ATTATAAATCTTCCAATCTACCATTGCCATCATAAAAAAGGATGTATATTTCAAACAGATAATGACTAGCCATGATTTTGAACGGC  
TGAGGGCGCATCAAAATATTTTAAAAATGTTAGCATTTCACCTATATATTTCAACAATTTTGGTTTCAGGTTGTAACCAACATGTATAT  
ATTTATTCGTTGACCCATCATGCACACCGACAAAATTTTACGAAATAGCTCTCCATCTAACTTATCTTGTTCGTTAATTTTCATTTGA  
AACTAATTTATCATAAATCGCTCTAATGTCTCTTACATTATCAACTTTAATTTTTTATTAAAGTTCTATCTCTTTATATTGATCCACGA  
GGCCTCTGAACCTTAAGAAATTTCTGATGCTTGGTTATTTAACGCATGTGCAATCTCTGTTTAGTACTAAATACATTTTCAATTTTCATT  
AGTACTTTGTAATTCATCGATTAAATAAATTTAAAAATATTGTTCTCTAGCTGCATATGGTAAAGAATTAAGTGCTCTATCAATTTT  
CTACTATTAATTGATATTAATTTCTTGTTTTTTTGATAGATTTTTAGTCACCATAAAGAATAGAGGATATTCCAAATCATTAACTTTTT  
TCCATTTTCCATAGGTATGATATTAATATTAGTATTGAAAGAAGCTAAAGAATTAATCTTTTAGTATACTCTTCCTTCATTTTACTTT  
CATTGTGTTTCATGAAAAATACTTTTAAAGTTCTGTAAACCATTTGCAGCCTCTCTACTCATTTAAATGTATTTTTTGTCCAATAAA  
TCCATTTTCATTAGATTAGCTAAATATTATCACTTTTTTCTTTAAAACTATATAAAATACTATTTTCTCAATCAATAGAAAAAGAT  
TTTTCATCACAAAAAGAGCAGTACATTTGTGCATGCACCCTCTCCCTTAAATATATCTAATTATGCTTTATAAATGAATCACC  
GAAATCAAAATATATCTTGCCTAATACTAACAACATTTACAGTGATGCTATTAGTCGAAATGTCTTTTAAAAATACTGAAGTACTTC  
TTTGAATGAGAATATACCTGTCAATATTGTAACAAGTACTGCAACGATACCAAAGATGAACATCCAATTTGGGTGTTTATAATCACC  
AACAATTTGATTTCTTTTTACTTTGCAATCAAAATTTGCACCTAACGTAATAGGTAAAAATCCATCCATTTATCGCGCTGCTATAATTA  
AGGCTGATTGGTTTTTCCAATAAATAAGAAATCATTGTTGAAATAACGATAAACACAATCACAATTAATTAATTAATTAATTAATTA  
GATTTATGAAGTGTTTTTAAAAATGTTGCGCTTGTGTATGCTGAGCCAATTACTGATGACATAGCTGCAGCAAAATAACACAATACCA  
AAAATATTCTTTCCAATTTGGTCCAATTTGCGTGTTCAAAACTGACGCTGGTGGATTTCGAACTTAGTGTACACCTGTTACAACA  
ACTCCTAATACCGTAGGAATAGTAACGTTCTCATAATACCTGTAGTTAAATACCAGCAATTGCTGATTGATTTACAAATGGTAAA  
TATTGCTTACCTTAATGCCAGAGTCTAATATACGATGTGCACCTGCAAAAGGTAATATAACCACCTACAGTTCCACCAACTAACGTA  
ATGATGGGCAAGACTAATTTTCATTGGATGTTCTGGCGCAAAATGTATGCACAAAAGCATCACCATAAGGTGGATTAGAAACAAACAT  
CACATATGCCACAATAAATCATCACAATACCAAGAATCATTGAAACAACGTCCTAATTTTTTGGCCACTTTTACTTACAAAAGAT  
TAATATTGCAAAAGATTGACAGTAATAGCTGCGCCCAATTTTACATCTAATCCAAAAATTTGCATTTAAACCTAAACCGGCACGCAAT  
ATTACCAATATTAAGCTAGACACCAAAATGCAATCAATTTGAGATAACAGTACCAAGCCAGGAACAATTTATTGATATTTT  
TTGACCTCTTAAACCAGTTACAATAATATGCGCCATATTAATTTGTGCACCAATGTCAATGATGATAGACAGTAATATGGCAAA  
TGCGAAACTTGCAAAAAATTTGTGATGTAAATACTGCTGTTTGGCTTAAAAATGCTGGCCCAATTGCAGAAGTTGCCATCAAAAAATAC  
AGAACCTAATAATAACCTTTTATGATTTTTTGTGAATTCAAAGTCACTTTCTTTTTTAAAGCTTTAAATTTCTCCCCATTTTTTAGCCC  
CCTATAAGGATTGAATATCAATGCCTTCTTTCATTAAAAATTTCTCTAATTTTCGAAACAAATAAATATGCATGTTCTCCATCACCATG  
CACACAAATTTGATCTGCTTGTAAACGTTACTTCTTATTGTTTTTGAATAAATTTTATTTTCTTCCATCTTTAAAACTGCTTAA  
GTGCTTTCGTCAGTATCAGTAATCAGCATCACTTTCTTTTCTACTAACGAGCTGCCCATCATCTTCGTATCGTCTATCAGCAAAACAC  
TTCAGAAGCTGTAATTAATCCGACATTTCTTGTCTGAAATTAGATATGAATTTGCTAATCTACTAACACTAGTGATGGATCAAA  
GTCATAAACAGCTTTGCTATTAACGTTTGCTATTTCTGCTCTTTTGCACCCATCTGATACAATGCACCATGCGGTTTAAACATGATTA  
ATTTTAAAGTTGATGAATGCGACAAAACCTTTGTAATGCACCTAATTGATAAATCATCAAAATTATAAATCTCGTCGTTAGAGATATCT  
ATATTTCTGCTGCCAAAGCCTTTTCAAAATCAGGTAAACCAGGATGTGCACCTACTGCAACATTATGTGCTTTGGCAAGTTTACC  
CATTCATTACATTTTCATCACCAGCGTGAACCAACAGCAACATTTGCACCTGTAATTAACGGAATAATTTGATGATCACCACCA  
AGGAATAATTTCCAATGCTTTCGCTTAAATCACAATTCAAATCAACTCGCATTTATAATTCACCCCTTTAAACAATTTGATGTTTTCT  
AAAAATTTAATATCAACATCTTTTGCATCTCCATCAGATATAGTGGATAATTTAAAACTGCATATAAAAAATTCGGCAGTTGTAGAA  
AATCCATCTATCACCATTTTCATTAAGGTGACTTTCAACTTATCAATTTGCTGAAGCTCTATCATGAGATTTTACAATTAATTTAGCTA  
CTAAAGAATCATAATATGGTGAAACTTGATAACCGTGATATAGTAAAGAATCGACTCGCATTAAGACCTTGAGGTAAATGTAAC  
GCTGTCACCTTTACCTGGTGTGGTTGAAATTTCTTTTTCAGGATTTTCGGCATTTTATTTCTCGCTTCTATCAGTACATGACCAATTAATGAAT  
ATCGCTTTGTGAAAAAGGTAAATGATTATGTTTCCAATAATACAGTTGCTGTGCAACCAAAATCAGTTCTGCTGCATCTCTGTAAAC  
AGTATGTTCAACTTTGATTTCGAGCATTCATTTCAATAAAGTAATGTGCGGTATCAGTTACTAAAAATTCATCGTACCTGCACCTTCTA  
TAATTTGCTGCACGTGCAACTTTAACAGCATCGTTACATATTTGTTGCTGCTGTTCTTTCAGTTAATGCTGCACAAGGAGATTCTTCGA  
TTAATTTTTGATTTTTTACGTTGTACAGAACAAATCAGTTCCCTTAAATGTACATAATTATCCTGCCCATCTCCATAACTTGAACCTC  
AACATGTTTTGCAACAGGTATAAAAGCCTCAACATAAACACGATCATCATAAAGTATTTTTTCTTCACTTTTACGTTCTTTAAAT  
GCCTTTTCTAAATCTTCAGCTTTCTTTACAATACGTATACCTTTTACCACCACCGCCACTGGCAGCTTTGATAACAACCTGGATAACCGA  
TGCTTTTGGCAAGATTTCTCAATTTACAGACATGATTACAGACCACTTTGATCCTTGAATCAGGAACACCTGCATGATGAAGCT  
TTTGTCTTGCTGTTATTTTATCCCCATCATTTCCATCGTTTTTATAGTAGGCCCTATAAACGCTATGCCTTGTCTTCTCAACGTTTGA  
GCAATTTTGTGATTCTGATATAAAAGCCATATCTGGGTGAATTTAGTATAGCACCAGTGAATTTGTGACAGATATGATGCGGTCA  
ATATTTAAATAACTATCTAAAGCATTAGCTTCCCCAATACATATAGCTTGATCTGCTAAATGTACATGCAAGCTTTGCTCGTCCCTT  
TTGCATAAACTGCTACAGTTTCAATCCCATATTTCTGCAAGCTCTTATAATCCTTACAGCAATTTACCTCTGTTTCGCAATTAACAA  
ACGAAGCATTTACTTACCCCTTTACTTAATACGTACCAAACTTTGGTCTGATTCAACATTTGTGCCATGATCAGTACTATTTTCAGT  
AATTTCTCCAGCAACATCTGTTGTACCTCGTTAATACCTTTCATCGTTCAACATATCCTATAATATCTCCCTGTAACTTTGTACAC  
CGACATTCACAATTTGGTTTCAGTTAATTTCTTTACTATCTTGTAAAAAGAATGTACCTACCATTGGTGATTTAATGTATGATAATCATT  
TGTCGAAACATCGGAGTTATCATTCGCTTTTGAAGCTGTCAAATCATTATTGTTTCATCTTTGATTTGATTGATTACTGTGTGCAGCC  
AAATGATTCGAGTCAGTGAAGTCAATTTCTATTTCACTTTCAAAAAATTTTATATTTAAATTTCTTAACATCATTTTCTTCACTAATTT  
GATTATTTGTTGATTTTTTCAATATTTCAATTTTACAAATCCCCCTTTTAAATTTGTTGATAATTTTTCGAAGTATGTCGAAGTAGAT  
GTATCAAAAAATTTGAGTCTTTTGTGACTCTTAAGAATTTTCAATTAACAGAGACATTTGTTCCCGATTCTTATCTACAGCTTCTTGGGA  
ATGATATCCATTTAAATTTGAATTTGATCTTTTGGTTTCTGTGCTAACTTTGGCAGATCAAAATTTGCATACAGTTGCAATTTTGGT  
ATAACCACCTATCGTTTGTATCATTAAGCAGAATAATAGGTTGACCATCATTTGGTACTTGAACACTACCAAGAGCAACCGGTTT

AGAAATGATATCTGCTTGATTAATTGGTGCAACGCTGTCACCTTCCAAACGATAGCCCATACGGTCTGATTGTTTCAGTAATTAATA  
TGGATGATTTACAATTTTCGCTCTAGCCTCTTCAGAAAAATGCCTCGAATTGAGGTCCCTGAAGAATGTGTATAATATTATTTCTGGC  
AATAAATCGTCCTGTAATGAATAGTCTTTCCAATGTTTTCTTTAAAGTCATTATTTATTTTCACTGTTATTACATCATTAGCTAATAA  
CTTTCTACCTTTGAATCCTCTCTATACTGCTTCGGGTATGTGTTGCATAAATTCAGCAATAGAAGGTACGTTGATAGAATGACAAAA  
AGTAAGATAACCGCGTGACCTTTGGTTATAGCACCTATTTTTAAAAATGTCACCTTTCTCAGCTAATATGACAGAATTCATTGATATA  
GTTTTATTATTTAGCGAAGCATTAACTACCACCGGTTATAACAAATGTATTTTGCCTATTAAATTTGAATGGTAGGACCAATCAAA  
GTATATTCAATCGCTGGACCATCATGTGTAATTAATGACTGCGCAACCTTAAAACTAAATTTGATCCATGGCACCTGCGCCTGAAAAAT  
CCAATATGTTTCATAACCTATTCTTCCTAGATCTTGTACCGTTGAAAAGAGACCTGGTTGTAAAATCTTAATTGACATTTTCAATCACC  
ACCCAGTCATCAACATTAAGGTTGCCATCTGATATATCTCTTTTCGATTTGTATAAAATTTCTGTTTCATCTATTGCATAAAATTTGATCC  
ATTCTCCTGCTTCGTACATTGACATTGGTTACGCTCGCTGCTAAATACTTTTAAACGGTGTGCGTCCAATAATTTGCCATCCGCCAGG  
AGAATCTGATGGATATAGTCTGTTGATTATTCGCAATACCTACAGAACCTGCATGAATTTTTAACCTTGGCTGATTACGTCTAGGT  
GTATGTAGTTGTTTCATCAAGTCCGCCTAAGTATGGAATCCTGGCATAAATCCTAGCATATATATTAATAAAGGTTTACTTGTATGTT  
TTTCAATAAATTTGCTCAACAGTTATTTCGATTATGCTTTGCTACTTCTTCAATATCTGGTCCATATGTACCACCATATTGAACAGGTATT  
TTAATAATACGATTGGTTTGATTACAGCATGAACATTTTTTTCATTAAATTTGTTAAGTTCTAAATTTTCAATTAATTTAGAAGATG  
TTATAGCTTGTTCATCAAAATATATTAGAAGTGCCTGATACGAAGGGACAATATCTTGAATTTCTAATATTTCTTTTCTCGTATCCA  
CCGTACCATTGCTGTGACATTACGATATGTCTCTTCGGATATTTTATTTTCAAAAATAAATCATAATTGTCTGCTCGTTAATAAAATCTT  
ACATCCACTTTAAATCCCCCTTTGTATTGCAATAAACACAGTATTGAATACCTTTTCATTGTATCATTGAGAAGCACAAGTTGTTTAAT  
AAGTAATTCAAATCGCATACAATAACAAATGATAATCAATTTGTTTTCTCGGAAATATTTTGCTTTTTTAAAAATGGAGTAGTTAATAT  
TGTAACCTTACACTAATTTAGGTTCTGCTATCATTCGGTCTGATGGAAATTTTACTTTTCATCTGCGCATTTTGTGATTTTGAAT  
ATAAAAAAGCACGACCGAAGTATCATTAACACACTTCAATCGCGCAATTAACAATCTATTTGATCATTTATTGGATATTAACAATT  
TTTACGTTTCATTTCGCCACCATTAGGTAGTGGAACACGAACTTCATCATCTAAACCTTTACCAATTAACGCTTTAGCCATTGGTGATT  
CATTTGAAATCTTACCATTAAATGCATCTGATTACGCTGAACCAACGATTGATAACTTTCCTCTTCATCACCTGGTAATTCTACAAA  
CGTTACTGTTTTACCAATTTTAACAACGTTGTATCTCCAGTATCTTCAATGATTAATGCATTTCTTAACATATGCTCAATTCTTTGAA  
TATCTTGTTCGATGAATCCTTGTTCATCTTTTGTGTCATCATACTCAGAGTTCTCTGATAAGTCACCAAAATGAACGTGCAACTTTAAT  
TTTCTCTACAACCTTCAGGACGCTTAACTGTTTTTAAATCTTCAAGTTACGCTCTAATTTTTCAAAACCTTCTTGAGTCATTGGATATT  
GCTTTTGATTTTCCATATTGTCTATCTTCTTTACTGAATTATACTATTGCTTGCTAACTAAAGACTGAATTTTTGTTGTCTAATATCT  
ATTGCAACTTTTATTGCTCCCACCTTCAGGAATAATATATACAGCATATTTCTTAGTCGGTTCAATAAATTTGGTCATGCATAGGTTCTAA  
CAACACTTAAATATTGATTGATAACAGAGTCCATTGAACGCCACGCTCTTTAGTATCTCGTGTTAAACGGCGTAATATTCTCAAGT  
CTGCATCTGTATCAACATATATTTTAAACATCCATCATATCACGTAATACCTTATTTTCTAAAGCGAAAAATACCTTCTACGATAATAAC  
ATCTTTAGGTTTAAAAATCAATGGTAATGTCACCTTCTGTATGACTAGCATAATCATATGTCGGTACTTCTACTGCTTTACCATTTTTCA  
AGTCTTTAAGATTTTCAATTAATAAATCATTATCGAATGCAAATGGATGGTCATAATTGGTTTCTAGGCGCTCGTCGAAAAGTCAAGT  
GCTTTTGATCTTTATAATAGTAATCTTGAGCAAGTAAAGCGACACTATGACCTTCTAAGTTTTTCATAATTTTCGTTAGTTACAGTTGT  
TTTTCTGAGCCAGATCCACCAGCTATGCCAATGATTGTAGTAGCTTTTCATTAGCCAATTTCCCTTCTCATCATGTTGTTTGGATATAT  
CGGGCGATCCACTTTAATTTGAACGATTTGTAATGGATGGCGCGCCGCTCAAGCTGTTACCTTCTCATCAATAAATGCTTCTACT  
ACTTGTGAATATTGTTCAATTTCTGGACCAAGAATTCTATTTCTTGACCTGGTTTAAAGTTATTTCGTTGTGAATAGTCGAATTTT  
TGTATCTTCATTATAGTCTAATACCAAAACCACAAAAATCAAAATGGTGATTTTTTAGATTGTTGTTGACCAAAACATCTGTTCTTCATAA  
CCAGGTGTTCCCTCAAAGAATGCTGGTGCAGTGTCTCTATTTGCACATTTATCTAACTCAATTAACCATTCCGGATTAATCTTAAAGT  
TGTCAGGATCTGCCGCATACGCATCAATGACTTTACGATATACTGAGACAACTGTTGCAATATAATGAATTGACTTCATACGTCCTT  
CAATTTTAAATGAGTCCACACCAATATCCATCATTGAGGAATTGATTTCGATTAATTTTAAATCTTTAGGACTCATCGAAACGGTGT  
AACTTCACCTTGATTATAAAATACATCAAGTTACCATTTATCATCAACTTCTAATAATTCATAATCCCAACGGCAACTTTGACAGCA  
ACCGCCTCTGTTGGAATCCCTTGCAGTCATATGATTACTTAATGTACATCTACCTGAATAGGCGATACACATAGCACCATGAATAAA  
TGCTTCGATTTCAAATATCTACTTTTTCTTTCATTTACGCATTTCCATCGCGCCGGTCTCACGTGCTAATACAACACGATCCAACTCTT  
CTTCTTCCAATTTCTACAGCTTTGTAATTAGAAAAGTGATTGTTGAGTAGATAAATGAATTTCAAGTTTGGCGCACTTCTTTACA  
TGTTTCGATAATTAAAGGACTGTGCAACATGATACCTGTGCGACCAGTCTTTTCCAAATTACGCAAAATATGATTCTAGACCTTCAAT  
ATTCTCATCATGTGCAATAATATTTGTCGTAACATAAAATTTTGGCACCGTAACGGTTTCGCAAAATTCACACCTTCAGTATTTCTTCC  
ATCGTGAAATTATCAGCATTTGAACGTAATCCATATTCTTGACCACCTAAAAATACGGCATCAGCGCCATAATGTACTGCTATTTTT  
AACTTTTCTAAGTTTCCAGCAGGTGCTAATAATTTCTGGTTTCTTCATAACTGTTTTAGGAGTTGATTTAATCTCTTCTATTGTCTTCAT  
GATTAACCTCCTTAATATACTGTTTGTATATAAGAAACCTTCGTCAAATGGTCGATGATCAGGTGAATTTCTTCAATTGGATCAA  
TCAACATAAATTTCTCATCTTCATAGATTTTCAGGATCTTCATTGTACAAATCTATCGCTTGACGATACTGTTCCGTTACCACATTAAT  
ATATTCTTCCGTTTGTAGAATACCATCGATTTTAAATGAATCTATACCCGCCTCAAAAAATGGTGCTAATTTCTCAATTAACAAATG  
TCGTTTGGTGACATAATGTGCGTACCATTGTAATCTTCGTAACCTGGGTAATTTTGTCTTTCTTCATATAAAGTAATAAAGATT  
GTTTCATCATTCGACGCTTCAATTTTCATTGCGCATTTTGGAACGTATAAATTTGCTAGTAGACATACGCTTTGATTGGAACATACA  
AGTCATTCCTTGAACCTTGACCTCAATTTCCACATTTGAATTTTCTTTTATATTAATAATTTTCATCCAAATTCAGCTCACGTGCTAAGA  
CAGCTCTTGATGCGCCTCTTTTACCCAGTAATTACATTGAAAATGATTAGTTACTAACGCTCTCTGCATTCCAATGAAGTGGTATTGG  
ATTTTCTTGCCTTCACATACATTACTACTGCTGGATCCCCGAAAAATAATTTCTGTCAACTCGTATTTTCATGTAAAAAATTAATATAA  
TCTTCTACAGCATCTAAATGATAATTATGAAATAATCCATTCACTGCCGCATATACTTTTTATCGTTTTTGTGAGCTAATGCGACAG  
CCTCTGTCAATTGTTGTCTATTGAATTTCCCTGGAAGTCTTAAACCAAACCTTTTGTGCGCAATTACAAAAGCATCTGCACCTAAATC  
AATAAGTGTTCATATGGCTTAATGACTTGGGTGTGACAAAGTAATTTCTGTCTATAGTCATTCTCCTTTAATTGAAATCGTAAATCCAT  
CGTCTATATTTAAAAAATTCGTTGATATCTCGTTGCTTTTATTAACCACTCATTATAATCTTGAACCTTTTTAACCATTTGTCTTACA  
TTTCTCGATCTAACAAATCCCAATATCCGATACAAAACCGTGATATAAAACATATCTGTAATTACGAGACGCTTGGTGCTTTAAAAAGT  
GGTGTATATATTTCAAAAAATTTCTTTGATTGCGCTTTTGTGTCATCAATAAATATCATATCATAAACTTTGTCAATTTACATTTTCAAA  
TTGCTCTAAAGCATTACCTTCAATAATTCGAACCTGGTTTTCAAAATGATAAGTAGCTAAATTTTGTGTTAGCATATTGAATCATCGTT  
TCATTACGCTCTATCGTTGTGACATGAATGTCATCAGATATAGAAGCGAATTGCATAGAAGTATAGCCGATTGCTGTACCAATTTCT  
AAAATATTTTTAACATTATTCATACGAATTAATTGCTTAATTAATCTAATGTTAAACGATCTACAATTGGCACCTCATTCCCTCGG  
CAAATTCACGCAAAACCTTCGATTGAACTATTTTGATGTTGATGTAATCTATTAATATTTTTTATTTAGGTCATCCATGTTTAAAC  
TTCCTTTATGTAATAAAGTCAATATGATTATGACAATAAAATAAATCAGCCTTCACAATTGATTATAATTTTGCCAACCAATTAATA  
TGACTGATTTCTTGTAGACGCAAGCTATTTTATTTATAGAAGCGAATCATTCATATAAAATTTAACTTTAGATATTTTACCATATT  
TTCAATAAAATATAAGCGTTAATTTATATACATTGTGACTTAAAAAATACTTTGCTTACCCTTAAAGTTAGCAAGAGTA  
AAATCTTTTTAATATTCTTCCATTTAGTATTTACAACCTTCTTCAATCATGTCCATTCTTCATCAGTTTCGATTGGTACTAACTTAC  
CACCGTCACCTGACTCATCTGGTTCAATTGATCATTGGTACAAGCTCAATCATATCGTCTTCATCTGATTGAGCACCTTCTTCAGCTAA  
GATAACATACTCTTTTTTGAATTCAGGATGATAAAATTTCTAAAACCTTTTCGGTATAAAACTTCATTTCCCTCTTCATCGAATAAAGTT

AATAATCTCTCTCGTTATTAATTTCTAGTTGTGAATCATGATTATGTTTCAGTCATAGTAAAACTCCTTTTAATGTAGTGAATCTAAATAGCCTTGTAATAATAACCGCTGCCATTTTATCAATCACTTGTTTCTTTTTGTCTTGAAACATCTGCTTCTAATAATGATCGTTCAGCAGCCATTGTGCTTAATCTTTTCATCCCACATCACAATCTCAATAGAAGGATAAGCTTCTAATAATTTTTCTTTATATGTTAACGAACTTCGCCTCGAAATCCTATTGAATTATTCATGTTTTAGGTAGTCTATTACGACTGTACCCACATTATGTTTTTAATAATGTCTACTAATTGGTCAATACCTAATTCATTATTTTCTTCATTGATTCGGAGTGTGTCTAATCCTGTGCGCTCCAACCCATTATATCACTAATTGCAATTCCTACCGTTCTACTACCGACATCGAGTCCTAAAAATTTATGTTGTAACATAAAATTATTTATTTTGTCTTTTTAAATAGTAAGAACAAGTTCTTCCATAATAACATCTCTATCAATATGACGAATTTGATTTCTTGCTTCATTCTGGCGTGGAATATACGCAGGGTCACCTGATAATAAAATAACCTACAATTTGGTTTACGGCATTATATCCTCGTTCATCTAATGTTTCGATAAACATTATTTAAAAACATCTCTTACATCTTGCGTGGGAAGTTCTTCATAGTCGAATTTTCATTGTTTTATCAAAAGTTTCCATTGTCGACACTCCTTAATTACAAATATAAATCATTATCATCATACAATATTATGGCTTAAATTTATAGATTTTTAATGTAATCTTAAATAAAGCTTAATGATTTTGAGATATTTTCAGGTGTGTACCGCCACCTTGAGCCATATCTGGACGACCGCCACCTTTACCACCAACGATTGGTGCCATTTGTTTGATAAGATCACCAGGCTTTAACGTTATTTGTAAAGATTTAGGGACAGTTGCAACCATCGATACTTTATCATCAACATTACTTGCAAGAATGATAATTGTATCTTGTA GTTTAGATTTAAAAATCATCCATTGTCGAGCGAATTGCTTTTCGCAATTTGGTACATCCACTTCAGTAACCAATACTTTATAGCCATTGATTTCTTCAACTTGATCTTCAATATTACCCATTTTAAGTGATGTGATTTCTTTGTCACGTTGCTCTAATTGTTTTAATAATGCTTTTTCTTCATCTTGTAATTGTGTTAACTTTTCGACTACTTGATCATCAGATTTTCATTTTCATCTGTGATTTTCATCGTATTAATTTCTCTTGAATATCTTCTAAATATAAGAAAGCTGCTTTACCTGTTAATGCTTCAATACGACGCACACCAGCTCCTGTACCTGACTCACTTACTATTTTGAA TAAGCCAATTTCAGAAGTATTGCGGACATGAATACCACCACATAATTCAAATTGAAAATGGTGCCATATTTACTACACGCACAACATCACCATAATTTTACCAGAATAATGCCATTGCGCCCATTTCTTAGCTGAAGCAATATCCATTCTTGAGTGTAAACGTCAATACCTTTCCCAAATTTCTTCATTTACTAAGCGTTCAACTTGATCAATTTTCATCATATTACATGTAATTTTCAATTTCTTCACTTCAAGCGTTCAACTTGATCAATTTTCATCATATTACATGTAATTTGACCAAAAATGAGAGAAATCAAAACGTAAACGATCTGTCTTACTAGTGAACCAGCTTGGTTAACATGATCACCAGTACTGATTTCAACGCTGCATGTAATAAATGTGTTGCACTATGGT TCTTTTGAATGTCACGTCGATCATTTTGGTTCACTTCAGCAGACACTGTAGCGCCAAACATTTACTTGGCCAAATGTACTACTCCTTTATGCAAGTTTGGACCATTGGTGCTTTGGTTACTTCACTAACAGCAATTTCAAAATGTCATTATAAACAATACCTGTATCCGCAACTTGTCACCACCTGACTGCATAAAATGGTGTTTCCGTTAACATGAAGTATACTGTTTCAACCCGCTTCAACTTGTGAAACTTCTTCACCAT TATATATCAAGTGTGTTAGTGTTGTTGAGCTGTCGCAGTATCATAACCAACAAAAGTACTTGCAGATGTAATATTTTCAATACTTC ACTTTGAACCTTGCATTGATTGAGAAATTTGACGTGCTTGACGTGCACGATCAGCTTGTGTTGCATTCTTGACTCAAATGTTGTCATA TCAACTTTCAATCCTGTGCTGCACTGCTATTTCTTCAGTTAATTCAAATGGGAACCCGTACGTATCATACAATTTAAATGCATCTTTCCC ATTAATTTTCATTTGTGTGTCGCTTTAGCTTTTTTAATTAATTCATTTAAAAATCGCTAAACCATCTCTAATGTTTCATGGAATCGTTCTT CTTCAGACTTTATAACACGCTTAATGAAATCTGCTTTTTCTTAAACATTTGGATAATATGGTTCATAATGTCTGCAACAATATCAAC AAGTTGTACATAAAATGGCTCATTTGATTCTTAACGTTTGACTAAAACGAACGGCAGCAGTAACAATCGACGTAATACATATCCTCT ACCTTCATTGGCAGGTAATGCACCATCAGAAATTGCAAAATGCAATCGTACGAATGGTGCAGCAATTACTTTAAATGCCACATCTTG TTCGTTGTTTACTAAATATTGTTTACCTGATACTTTTTCGATTTTCATTATAGGCATAAAATAAATCTGTTTCATAGTTAGTACGTA CATTTTGAGAACTTGAGGCCATACGCTCAAGCCCCATGCCGTTATCAATATTTTTATTAGGTAATGGTGTGTAACATGATCTTTATT ATGATTGAATTCATAAAATACTAAGTTCATACTTCAAGATAGCGTTTCATTTTCTCCACCTGGATACATTTCTTCTGCCGGATCGTCT TGTCATATGCTTCTCCGCGATCATAGAAAATCTCAGTGTTCGGTCTGGAAGCCCTTCACCAATATCCCAAGAATTTACCTTCAATTCG GAATAATACGACTTTCTTCAAGCCCAATATCTTTATGCCAAATGTTATATGCTTCCATATCTTCCGATGAATCGTAACGTACAATTT ATCTGGCTCCATACCCATCCATTTATCACTCGTTAAAAAATTCCCAAGCAAAATTCATCGCTTCTGTGTTAAAAAATATCACCATTGAG AAGTTACCTAACATTTCAAAGAATGTATGGTGACGCGCTGTGAAACCAACATTTTCAATATCATTTGTACGAATAGCTTTTTTGAGAG TTTACAATTCCTGGCTTTTTAGGTGTTTCACGTCCATCAAAAATATTTCTTAAATGTTGCTACACCTGAATTAATCCATAATAATGTATC ATCATCAATTGGCACTAATGGTGCAGAAGGTCAACCATATGTCTTTTTCAACAAAGAAATCTAGATATTTTGTCTAATTTCACTC GCTTTTAACTTTTTCATCTTTTACACATCCTATTTACTGTTTTTAAATTACCATTCATAAAAAATGATGACACAGATAGTCGATTTGA AAAACTAGTATAAATCAATATCATTTTTTTATTATTAATAAAAAATAAAAAACGCCCATCCTCAAAAGGGACGAACGTTATCGCGGTACC ACCCTAGTTATAAATGCAATTCACACATTTATCACTTTAAATCGACTATACAGTTGTGCATAAAGTAGCGTTCACTAATGTTTGTG TACTTTTACCACCGGATACTCTGATAAACAAATCAATTAACCTACTCATCTTTATACGAATTTGAATCTATTTTAGTTACATTTTACG CTGTGTGTAACGTTCTATAAAGTCATACGGCGTGATTTCTCCATATTAATCATTTGGGTCAATTTTAAACATTGTAGCTTCCGTTAA TACATTTATATCTGTTTTGTGTAATCAGACGTAACCTTCCACTATCATTCGATGACATTGGCGCTTCTACTTGATCATCTATTGTGCG TTTGTGAAGCTCCTGTATCATTAGTTGCTGTGTTTTCCAGCATTTCTTCATCTTCTGAATTAATAAATTTTTCAACAATGTACATAAT TGTGTTAAACGCGCTTGACCATTGTTTTTAATCCAATATCAAATGCTTCTGGATCACCAGTAGAACTAAACTCGTTTTCGCTCTAG TTAACACAGTATATAATATCGGTCTTTGTAACATTCTAAAATACTGTTTAAACAATAGGCATGATAACAATAGGAAATTTCTGAACCTT GTGATTTATGGATTGATGTACAATAAGCATGTGTTAATTCATCATATCTTGTTTCGTAATGTAATTTTCATTACCTTCAAAATCCAC AACAAAGTACATCTTTATTAAGGGCATTTTCTTTCGCCCAAAAAATACCAACAATAACTCCTATGTCACCATTGAATATGTTATCATTT GGCCTATTAACAAGTTGTAATACTTTGTACCTTTTCAAGACTACATACCAAACTCAATTTCTCGTGTCTTCTTTTTAGGGTT TAAAATATCTTGTAAGAACTTGATTTAAACGTTTAAACCGGTTAAATACCGGATTTCTTTATACATTGGTGCAAGCATGTAATACGCCATAGTA TACCTTTTATTAACAGCACTAGTAACCTTCTCAACAACGTGTTGGTATTTGGTTTGCCTGACAGTTAATAAACTTCTATCATGAA AACGCTGTGTAATATCAATTTTCTGACCCAATTTTCATTCGATGTGCTAATTTCTATAATGCTTGAACCATCTTGTGACGATATACTTC AGTCAGATTAACCTCGTGGTATAGCTTTTCGATTCAATTAATCTTTAAATACTTGACCAGGACCTACAGAAGGCAATTGGTCTCATC ACCTACAAATATCAATTTGTGCATCTAAAGGAAGTGCATTTAAAAATTTGGTGAAACAACCAAGTATCTACCATAGACATCTCATCAAT GATTATGAGTGTGCGCTTTATTTTCATTTTCTAATATATCCTCTGGCTTTGTGTCTTGATTCCAACCTATTAACAGATGAATCGTCATTG CTCTAATCCAGTTGACTCTTGTAGTCTCTTAGACGCTCTTCTGTTGGCGCTGCTAATACAACCTGGATAATCATCATTTGACATAATC ATCATAATCTAATGATAAGCCATGAATCTCAGCATATAATTTCAATACCTTTAATTAATGCTGTCTTCTTCTGTTCCCGGTTCCACCG GTTAATAGCATACCTTAGAATTTGATAGCCGTTTGCAAGCTTCTTTTTGTAAGCTGCTATGCTAGTTCAATGTTCCGATCTTCTATTT CACCAATATGCATTTGTAAATCTGACTGTTCAATTTCCGTAAGTTTATTTGTATGCGTCTTTATTCTGAATAAGTTTGAACACTTTTG ATTTTCAGAATAATAACAACTTGGAATTGCAACTTGTTTCATTGTCAATAATTAGTCGTTTTTCTCATTTAAGTATTGCAACATTTCTGT CTAATTTTTTCAGGTTTCGATGACCTTTCATCTTGATAATTTAATACATCAACCGTTAAATCTATAACAACATTGATAGGCAAAATATGT ATGTCCCTGTTTAAATACATCTTCTTCTAACGTATAGAGCAACGAGCTTTTAAATCGTTTCATTATCGTTATAAGCGATACCAATATTT CTAGCAAGTTGATCTGCTTTATTAACCAATACCTTTAATATCATAAATCAATTGATATGGATTTCGATCTAAAATAGTCAGTGTAT CGCCGAGATAAAACTGATAAATTGCCATTGAAAAGTTTAGGACCAAAACCTAAATCATGTAAACGAATCATTATTTTTTCAGATTCTT GATTTGCTGAAATTTGTTCTGCAATTTGTTTCTGTTTCTTTTATAGATAATCCCCGAAACTTTTCTAGCACTGAATGGTGCATCTAATATA TCATTTATCGCATGTGCACCTAATGTATTAACAAATATTTTAGCTGTCTTTTACCTACACCTTTAAACAACTACAGTATGAATAAAC TTATAATTGCTTCTTTCGTTGTGGCATTTCTTTTCAAAAGTCTGTGCTTTAATTGTTTACCATAACGTGGATGATCAACAACCTTGC CCTTTAAATGTGTAGACATCGCCTTCAACAATATTCGGAAGAAACCTACAACAGTTGGCATTGTATCAAAGTCTTCATTTGTTTCA ATAGTATCTACTTTAAGCACTGTATAAAAAATTATCACTGTTTTGAAACAATATCGCTTCAACAGTACCTTTGATCATTGAATAATCAA

ATAGTGTAGGGTCTGACATGTTACTCCTCCTCTTTTCATTTTGTAGTGAATGTTTTCAGCGCATGCTGACTTAATAAGTGTGTTAGGGTCGA  
TAGTCACAGCTTCTTTAAAATGAGTTATTGCTTCATCAATATCTTCATTTTTCATAAAATAACGCTAAGCCCAAATTGTATCTTGCATC  
AACATGATTTTTATCAATCGTTAATACATGTTTAAAGTTGAGTTATGGCTTCATTAACATTCTTAATTGACATAATACAAGACCATAT  
TGAAATTGAACCTTCGCATCTTTGTCTTTATCTAGTTCGCGAGCAGTCATTAAATACGGCAATGCCAGCTTAAATGATTCTAACTGAT  
TAAACGCCATACCGATCATATAATTACAATCAACTTGTTCATCTCTGTTTGTAAATGCTTGTGATATAATTTAATAGCTTCTTGATA  
ACGTTGCTGATTATAATATACATTTGCTAGATTAAAAATACGACGCCATCTTCGGATCTATTGTTAAAGCTTTTTGGAAAAAACGC  
TCTGCCTTTTCAATCTCATTCGCATCAGCAAGTACGATACCAGCATTAATATAATTTTCAATAATTGTAGGATCTTCTTCGATATTTT  
CGAACATGCTTGTAAACGCTTCTTCTATTTTTTCCATTTTGTATGTATTGTATAAATTGTTTGTGATCTATCATTTACGAACCTCATTTC  
TCATCAATTATAACATCTTGATAAATTGTATGTCTCGAATCACTTAACAACGAATAAAATATAATCTAATATCATTTCATTTCATGAA  
AAAGCGGGAATGGAATAGAAATGCTAAAGAACCATTAAACGTTTATTATGTAATGGTCTTCCACATTAGCCACCATTATTATGTAC  
TTAAAAATAGGAATACATAATTAGATTATGCATAGGGAGTGGGACAGAAATGATATTTTAAACAAAATTTAAATTCGTTATCCCCAA  
CTGGCATTGCCTGTAGAATTTCTTTACGAAATTTCTGTGTGGGGGCCCATCCCCAACTTGCACATTATTGAAAGCTGACTTTTGG  
TCAGCTTCTATGTTGGGGGCCCGTCCCCAACTTCCATTGCCTGTAGAATTTCTTTACGAAATTTCTATGTTGGGGGCCCGCCAATA  
TAACATTGTAGAGCCTAGGACATTGTGATGTCCAGACTCTATCATCATGAATTATTCTCATCAAAAACGTCTTTTCGTCTATTTCGA  
CGTTGAAACTTCAAATAAGTAATTTATTGTTGCCATTGTTTATACAACATAATTTAATTGACCTTCATTTTGAACACATCGTCAATT  
GTTGCACCACCAAGACACACATCACCTTGATAAAAAACAACCTGCTTGTCCAGGTGTGATTGCTCTTACTGGCTCAGCAAAAGTAACA  
CGTAGTGCATGGTCGTTTTACGTTTCACAAAAACCTTCGTATCTTTTGGCGATATCTAAATTTAGCTGTACATTCAAACCTTGAT  
CTAAGTCAATTATCTTGGATTACAAATGAATAGTCTGAAGCAATTAAGTAATCACTGTATAATGCATCTGATGGAATCCTTGTTT  
TACATATAAAACATTATCTTTTAGGTTTTTACCGACAACAAACGAAGGATCGCCATCTCCACCTATACCTAATCCATGCTCTTTGTCTT  
ATTGTGTAATACATCAAAACCACTATGTTTACCCATTTTCTTACCATCAAGTGTATCATATCACCCGGTGTGTCAGGTAAATATTGTG  
ATAAAAAATGTTTTAAAGTTTTTTTCGCCGATAAAACAAATGCCTGTAGAATCTTTTTTCTTAGCAGTAACAAGTCCTTGTCTTCAGC  
AATTTCGACGCACTTCACTCTTTTCGATGTGCGCAATTGGGAACATCACTTTTGAAGTTGTTGTTGAGATAATTGATTCAAGAAGTAT  
GTTTGATCTTTATTATTATCTACACCACGTAACATTTCAACATGACCATCTTCATGACGATGTATGCGTGCCTAATGTCCTGTTGCTA  
CATAATCTGCACCTAAATTATCGCATGATCTAAAAAGGCTTTAAACTTAATTTCTTTATTACACATAACGTCTGGATTGAGGTACG  
ACCTTTTTTGATTATCTAAGAAATACGTAAAGACTTTATCCCAATATTCTTTTTCAAATTAACAGCGTAATATGGAATGCCAATT  
TGATTACACACTTCAATAACATCGTTGTAATCTTCAGTTGCAGTACATACGCCATTTTCGTCAGTGTCTATCCAGTTTTCATAAATA  
TGCCAATGACATCATAACCTTGTTCTTTTAAAGACGTGGGCTGTTACAGAACTATCTACACCGCTGACATACCAACGACAACACGTA  
TATCTTTATTGACAATTATGACTCCTCCTTAAATTTAAAAATATATTTTATGAATTTAGCTACAATTGCATTAATTTCAATTTTCAGTA  
GTCAATTCGTTAAACTAAATCGAATCGAATGATTGTATGCTCCTCATCTTCGAACATTGCATCTAAAAACATGCGACGGTGTGTA  
GAGCCTGCTGTACATGCAGATCCAGACGACACATAGATTTGTGCCATATCCAACAATGTTAACATCATTTCAACTTCAACAAACGGA  
AAATATAGATTTACAATATGGCCTGTAGCATCCGTCATTGAACCATTTAATTCAAATGGAATCGCTCTTTCTTGTAATTTAACTAAAA  
ATTGTTCTTTTAAATTCATTAAATGAATATTGTTATCGTCTCGATTCTTTCTGCTAATTGTAATGCTTTAGCCATCCCGACAATTGT  
GCAAGATTTTCAGTACCTGCACGGCGTTTCAATTCCTGTTACCGCCAAGTTGAGGATAATCTAATGTGACATGGTCTTTAACTAATA  
ATGCAACCGACACCTTTTGGTCCGCCAACTTATGTGCAAGTAACTATCTGCTGATCTCAAATTCGTCAAACCTTAACATCAAGAT  
TGCCAATTGCTTGAACCGCATCAACATGGAATATGCATTGTCTCAGCAATAATATCTTGAATATCAATTTGTTGACTGTGCGC  
AACTTCATTATTTACAAACATAATAGATACTAAAATCGTCTTATCTGTAATTGTTTCTTCAAGTTGATCTAAATCAATAGCACCTGTA  
TCATCAACATCTAGATATGTTACATCAAAACCTTCTCGCTCTAATTGTTCAAAAACATGTAACACAGAATGATGTTCAATCTTCGAT  
GTGATAATGTGATTACCAATTGTTCAATTTGCTTTTACTATGCCTTTAATTGCCGATTATTTCGATTCTGTTGCACCACTCGTAAATAT  
AATTCATGTGTATCTGCACCAAGTAATTGTGCAATTGACGCTTGACTCATCTAAATATTTACGCGCATCTCTCCCTTAGCATGT  
ATTGATGATGGATTACCATAATGCGAATTGTAAATCATCATCATCGCATCTACTACTTCAGGTTTTACTGGTGTGGTCGACGATAAT  
CTGCATAAATTTCCATGTTTGGACACTCCTCACAAATTTTATCAATGTTCCAATAATAGCACCTTACATACTATTTTTCTACTTTTCTGT  
TTAACTTTATTTAATAGTTTAAATTAATTAATTTTACCATTTTCTACACATGCTTTTCGATAGGCTTTTTTAAAGTTTATCGCTTTATCTT  
GTCTTTTTTATAAATTTAGTATTTTGCAGATATTTTTCATTTTGTGAAAATGTAACGTACTATTATTGTTTATGATGCAATTTCAATATT  
TATCTGGTTATTCGATTGGTATACTTCTTATATCATAAAAAAGGAAGGACGATATAAAAAATGGCGATTAAATATTCAGCATTAACC  
TTGTCCCTATTCGAGAAGGTGACGATGAACGAACAGCAATTAATGATATGGTTAAGCTCGCACAAACATTTAGATGAATTATCGTATG  
AAAGATATTGGATTGTGTAACACCATAACGCTCCCAACCTAGTAAGTTCAGCAACTGCTTTATTGATTCAACATACGTTAGAACATA  
CGAAACACATACGTGTAGGTTCTGGAGGAATCATGTTACCTAACCATGCTCCATTAATCGTTGCGGAACAATTCGGCAGCATGGCA  
ACATTATTTCCAAATCGTGTGATTTAGGATTAGGACGTGCACCTGGAACAGATATGATGACCGCAAGTGCATTAAAGACGAGATCA  
ACATGATGGTGTATATAAATTTCCAGAAGAAGTTTCATTATTACAACAATATTTCCGGCCAGCTCACCAACAAGCATATGTTCTGTG  
TTATCCAGCAGTAGGTAATAATGTGCCTTTATACATTCTTGGTCTTCAACAGATTCTGCACATTTAGCTGCTCGAAAGGGCTTCCA  
TATGTGTTTCGTGGACATTTTGCACCTCAACAAATGAAAGAAGTATCGAAATTTACAAAACGTTATTGTAACCTTCTGATGATTA  
GACGAACCTTATGTTATGTTATGTTTAAATACAACTGTTGCTGAAAAATGATGACGAAGCACAATATTGAGCTTCTATGTCACAA  
GTAATGGTTAGTATCACTCGTGGCAGAATGCAGCCCGTTCAACCGCCAACACATGATCTACAAAATATATTAACGCCGAGAGAATA  
TGCGATGGCTATGGAAGACAGAAAATATCATTAAATAGGTTTCAGAAAATACTGTTCAACAAAAAATTCAGATTTTATGGAACCTT  
ATGGTGAAGTCAACGAAATTATGGCAATAAGTTATATTTATGATAAAGATATGCAATTAGACTCTTATCGTCGGTTCAAGAATGTTA  
TAAATCAGATAAATGAAAAAACCTTTATAATGTGATAAATAAACTAAGTGAAAGTATGTATCCATAATATTAATAAAAAATAAAC  
AGTAACAGCATTTTGAATAAAAAGATGTCTTTATTGTTCAATCATTTGTTTTAGTAATGATTCAAATTCACCTTAAAAATCTAAAGCAAA  
TATGAAAGCGCCCCCTTCAACTTTACACTGTGTTAGTGTATTATTGATGGGGCGCTTTCAAATATTGAAAAGCATATCCAAAAATTTA  
AAGAAATTTATTTCTTTTATCTTCATTTCTTTTTCTCTGTTATTCGATCTGTATATTCATTATCTTTATCTTTACATTTTAAAC  
TTGTTCAATTATCGCTATTTTAAATTTTCTACTCGCTCTTTAGCTTTATCCATAAATAAAGCTTATTAATCGCTCCTCTTATTTGATTA  
GTTAATTTGAACCTATTTTAAAGTTTATCAATTGCATCAGTTATTTGTTTTAGCATTTTCAACAACCTTCTTTGCTTTACCAGTCGC  
TTTATCTTGTGACCTTCTTTTCTAATTTCTTTGTTATCAGTAACGTTACCTACTGTTTCTTAAACATTTTCTTTAAATTTGATCGAACCTT  
ACTTTCTGCTGCCATAGTGAAACCTCCTTGGATGTATATTTATATACCACTAAGGAGGTTTCGCTAAACATTATAATATGAAGTTTT  
TATGTTATAGTATAGTATTTATACGATTAAATATAAACATGTATCCGTCTAAATCTTCACTTGTATCTACATATCCGCTAAATATT  
TCAATGTTGTATTATCTAAAACATCTCTCACTGCATCTCTCATGCGAATCCATAGTTGTTTTGCGCAGGTGGTTCTGATTCAATACTT  
TCAACAAATGTAATTGGACCTTCTAACAGTCTTATAATATCCCTGCTGAGATTTCTTCCGCTGGTACTCTTAATTGGTATCCACCTT  
TAGCACCGCGTACACTTCGAATTAACCCCGCATTTCTTAAGGACCTACAAGCTGTTCTAAATATAAATCACTCAAAATTTATTTCTC  
AGCAATTTGACTTTAATGATATACATCTTGCCTCTTTTTTAGCAAGAGAAATCATCAATGTAAGTCCATATCTCCCTTTAGTAGAA  
ATTTTCATTGTATAACCTCACTTAATTCGAATATTGATATTTCCATTTTAGCATTTTGTAGTTAAGTAGATATAAGAAAGGTGTGAC  
AAATGTGAGTACAGAACCATTAGCATCGAGAATGCGCCCAAAAAATATAGATGAAATCATTTCCCAACAACATTTAGTTGGACCAA  
AAGGCATTATCAGAAGAATGGTTGACACAAAAAATTAACCTCAATGATTTTTTATGGTCCACCTGGTATAGGCAAAACAAGTATT

GCCAAAGCAATTTTCGGGCAGTACGCAATATAAAATTCAGACAATTGAATGCTGTAACCTAACACTAAAAAGATATGCAACTTGTGTG  
TGAAGAAAGCTAAAAATGTCTGGTCAAGTTATCTTGTGTGTAGATGAAATACATCGACTAGATAAAGCTAAACAAGACTTTTTATTACC  
TCATTTAGAAAAATGGCAAAATCGTCTTGATTGGTGCTACAACCTCAAATCCTTATCATGCTATCAATCCAGCGATTCTGTTCAAGAGC  
GCAAATTTTCGAGTTATATCCTTTAAATGACGAAGATGTGCGCCAAGCGTTAACTCGTGAATAGAAGATGATGAGAATGGTTTGA  
AAACATATCAACCCAAAATTGATGAAGATGCCATGACCTACTTTTCTACACAAAGCCAAGGTGATGTTCTGATGCGTTAAATGCAT  
TGGAATTAGCTGTATTAAGCGCAGATAAATGACAAAGACGGTTATCGACATGTTACATTGCAAGATGCTAAAGACTGTTTACAAAAA  
GGTGCATTTGTAAGTGATAAGGATGGTGACATGCATTACGATGTTATGAGCGCTTTCCAAAAATCTATCCGTGGTAGCGACGTCAT  
GCCGCTTTACATTATTTAGCACGATTAATTGAAGCTGGAGATTTACCTACAATAGTTTCGACGATTACTTGTAAATTAGCTATGAGGAT  
ATAGGCTTAGCCTCACCTAATGCTGGTCAGAGAACAACCTTGCTGCTATTGAATCAGCAGAACGCTTAGGTTTACCAGAAAGCTAGAATT  
CCACTAAGCCAAGCAGTAATCGAACTATGCTTATCACCTAAGTCAAATTCAGCAATGAGTGCCATTGATAGTGCATTGTCCGATATT  
AGAAACGGTCATGTGGGTCAAATTCAAATCATTTAAAGATGGACATTATAAAGGTGCTAAAGATCTAGGCCGATCTATTGGTTA  
CAAATATCCACACCAATATGTTAATGGCTATGTTTCACAGCAATATTACCTGATAAACTTAAAAACAAAAATTTATTATGAACCAAA  
AACGACATCTAAAAGTGAACAACAACCTCAAAGAAATATATAACAACCTTACTTAAACAAAGGCCGTAAAAATAAGATTAAATCGATT  
ACCTTTGATATTTTAGCTATAATCAAATCAAACTGACTAGTACACGAGGCATATTCTACTATGCTTGCGAAGTAGTCAGTTTGTAGTT  
TTATGGTGTGGTTACACTTGCCTTACGTTGAAAAATATGACTTTCAAAATGAATTATTGCCCTTTGTCTTTAATGCGACGAACCTGGAA  
TATCTTTTAATACGTCAATTCACCACATAACTAGCACAAATTAATCCAACAACACTTGGCACAAGGCATTTGAAGAAGGTGGCATT  
GTCCTTTTCGATTGATAGCATTTTATCTCCAACATACTCTTTACATCTTCTCTTATGACAATTGGAACTTTCATCTGAAAATACAAC  
GGAATCCCTTTACGAATTCCTAGTTTTCATTTTTCAGCAATAAATTTGGCCATTGGATCGGTATGTGTTTAGAGATAGCTTGA  
TTGTAAAACGTGTTGGATCTGTTTATTTGACGACCCATACCTTTGTCAGTCCCTCATATAAAGCGGTGACGCTGCAAGAAACCTTTTCAATTAAGTG  
TACTTTGTACATTATTGTATCACTTGCATCTACAAAATAATCTATATCGTAGTTATCGAAAATTTCTTCATATGTCTCTTCTGTATAAA  
ACATATGTAAGGGCGTGACTTTACAATCTGGATTAATTAATTTAATACGTTCTTCCATCAAAGAACTTTACTTTGTCCTACCGTTGT  
AGTTAAAGCGTGTAATTGTCTGTTTACATTTGTAATATCAACATCATCTTTATCTATTAATATAATATGACCAATATTCGTTCTTGCTA  
ATGCTTCAGCAGCAAAATGAACCAACACCTCCAACGCCAAGTATGACAACAGTTTGTGTGCTTCAATAAATCTAAACCTTGTGTGCCAA  
TCGCTAGTTCATTTCTGAAAATGATGTTTCATTATTTTACCTCTTTCAGTATTTATACATAAGTACATAGTAACCTAAAAATTTTAT  
ATTTAGCATTATCGCTTTGATTATTTTCCCAAAATTCACGAGGAAACATTTATTAACGCTATAAAACCCAACTAATCTTTATTA  
AACTTAAAGAAACGCATAAAAATACGCAAGACAAAGCTTTCGCTATCGATAGAGTCCGTATTGCCGTAGTTATAATAGCTTGTATC  
ATTCGGCCTGTTATATACAGGTGGGTGCCCTGTTTCTGTTTGTACGTCCTTCATATAAAGCGGTGACGCTGCAAGAAACCCATTG  
GGCTCCCTTGATCAAAGAGTGTTAGGCCCAAATTAAGCAAACTTACGAACAACCTCAGATGACTATCTTATGATGTTATATTACC  
ACATAATTAATAATTAATGAAATTATAACAAACCAAGTTTATTGATTTTTTAAATTTAGTGACGAATTCGCAAGAAAGTTCTTCT  
AATTGTTTATCAGAACTTCACCAGGCGCATTCTGTTAATAAATCATGTAGCAGATGCTGTTTATAGGAATGCGATTGTATCTCTCAAG  
TTGTCTTATAGTCAATAACATGACTAATCGGTCTAATCCTAATGCAATACCGCCATGTGGTGGTGCAACCATATTTAAATGCATCTA  
GTAAGAAGCCGAACCTGTTCTTGTGCTTGTCTTTAGTAAATCCAAGAACTTCGAACATTTTTCTTGTAACTCACCATCATGAATTCT  
GATTGAACCGCCACCTAATTCATAACCATTTAATACTATGTCATAAGCATTTGCCTCAGCTTCTTCTGGCGCAGTGCCAAGCTTAGCA  
ATATCAGCTCTTTTGGAGATGTAATGGATGATGTCTGCAACGTAACGTTTTCGATCTTTCATCATATTTCAATAATGGCCAACTG  
TCACCCATAAGAAGTTTAATTTTGTTCATCGATTAACACTAATTTGCTAATTTGACGTAATTTGACACGTAATGCACCTAACTTTGTGCAAC  
GACATTTGGTTTGTCTGCAACAAACATTACTAAGTCACCAGCTTCAGCACCAGTTAATGTAAGTAATGTTTCAACATTTTCTGTTTCA  
AAGAAACGTCCAATTGGACCTGTCAAACCATCTTCCACAACCTTTAACCCACGCTAATCCTTTAGCACCATAGATGTTTACAAATTCT  
GTTAAAGCATCCATATCTTTACGAGTATATTGTTACGCTGCACCTTTAGCGACAATTGCTTTAATTTACCATCATTTTCAACAGTAT  
CTTTAAATACTTTAAAGTCCATATCACGTCTAATTGAGAAACGTCAATTAATTCCATTTCAAACGCTGATCTGGTTTATCAGAACC  
ATAGCGACGCATCGCTTCTTTATATGTCATGCGTGGGAAAGCGCCATTAATTTCAACGCCTTTAACTTCTTTAACAACCTTTTAAAGC  
ATTTCTTCACCCATTTGCATCACATCTTCTTGATCTACAAAACCTCATTTCAATATCGACTTGTGTGAATTCAGGTTGACGATCTGCAC  
GTAATCTTCGTCACGGAAGCATTTTACGATTTGGTAGTATTTGTCAAATCCACTAATCATCAATAATTGCTTAAATAATTGTGGTGA  
TTGTGGTAATGCATAAAATTCACCATCATGAACACGAGATGGTACTAAATAGTACGCTGACCCCTCAGGTGTTGATCTGTTAGTAC  
TGGTGTTCGATGTCAAAGAACCCTTCATCATCCAAATATTGACGAATAGAACGTGTAATTTGATGTCTCATTTTAAATGTTTGGCT  
AACTCTTGACGACGTAATCTAAATAACGGTATTTTAAATCGAATATTTTCATCAACGTTAACATTTTCTTCATTTATAGAAAAATGGTG  
GTGTCTCAGATTTATTAATCACTTTAATATTTGTAACCTTGACTTCAACTTGGCCAGTTTAAATTTAGGATTAAGTTTTCAGGGTCA  
CGCTTCGTAACGTGACCTTGAACCTCTACAACATATTCAGAACGTACTGTTTCAGCAATTTTCAATGCCTCTCTGAAAATGCAGGAT  
TAAACACGACTTGTACAAATCTCTCTATCTCTTAAATCAACGAAAATCAATCCACCTAGGTACGACGATGTTAACCCTATCCTT  
TAATGTAATTTCTGTCTTAAATGCTTCAGTAACTAATCCACAATAAGTTGTTCTTACTCATATTTTAAACGCCCTCTCTACTTCT  
TAAAAATTTGACTAATGCGTCTAATTCATTTGTTTTCAGATTCACCAGTTGTCATATTTTAAACATCGATTTTATTATTTTCTAATTTCT  
TGATCACCAATAACGATTGTAACCTTGGCACCTAAACGGTCTGCTGTTTCTTATTTGCTTTAATTTACGCTGTAAGTAGTCTTTAT  
CTGCTTTAATAACCATATGTCTCAAAATGATTAAATAACTTCACAGCATATCGATCTGCTTGATCACCCTAGGTGTTAACAATGAATAAATC  
TAAGTTTCTTCAATATCTAATTCGATACCTTCTTCTTCAAGTGCAAGCAATAATCGTTCTATACTTAGCGCAAAACCAATACCTGTT  
TCACTTGGACCATCTAGCAATTCTAATAAACCATTTAACGGCCACCACCACAAAGCGTTGTAATGGCACCATCATAGTTAGGATTA  
TCCATCATTAATTCAAATGCTGTATGTGTATAATAATCCAATCCACGAACCTAAGTTAGGATCTTCAATATATGGAATACCTAAATCA  
TCTAAATAAGCTTTTACTTGTTCATAATATGCCTTAGATTCTCTATTTAAGAAATCAGTGATTCTAGGTGACGCTTAATCGCTTCTTT  
ATCACGGTCAACTTTACAATCCAAAATTCGCATCGGATTTGTATGCAACGTGATTGACAATCTGAACAAAATTCATGAATTACTGG  
TTCAAAGTGTTTCACTAACGCTTCGTTATATTTCTTTTCGAGACGCCATATCCCTACACTATTAATAACAAGCTTTAAATGTTTAAAT  
CCAAATGATTGATAAATATGCATAACCATAGTCAATCTCTGCTATACGCTAGGATTTTCAGCACCATAAGCTTCTACACCAAAAT  
TGATTAATGACGATTAGCGCCCTTTTGTCTTACGTTCATCTTAAACATACGCTGCCATTTGTAATAAAGTTAATTTGGTGTGGAT  
TACCTTGCATTTTATGTTCAATATATGAACGCACAACCTGCAGCTGTTCCCTCAGGTCTTAATGTAATACTTCTATCGCCTTTATCTTTA  
AATGTATACATTTCTTTTTGTACGACATCGGTTGAATCACCAACACCTCTTGCAAAAAAGATCTGTACTTTCAAAAAATTTGGTGTCTT  
TTCTTTTATAAATATAAAATGTCATTAATTCATCTAATTGATTTTCAATGTAACGCCATTTCTTTGAATCTTCAGGTAAAAATATCCTGC  
GTCCCTCTAGGTATTTAATCATTTTGACATCTCCCTCGGCAAACTATTTTATTTAATTACCTTTTAAAACTAAACCTATATACGATC  
ACTTAACTTTGCATGATAAATCATAATTTTAAAGCAAAAGAAAAAGCCCTTGACACAGCCTGAAACTGCACAAGGGACGAATATCC  
GTGTTGCCACCCCTATTGGTTTAAAAAACATGCCTAATTGTAATCATCATTACTTTTTATAAGCGTGCAATTAATAAACCCACTCAAA  
ACGTTTAAACGTACGTTTAAACGGCTTACTTTTCATAAAGCACCTCTTCTGTGTTCAATGTATATAAACTACTACGACATAATCTTTCA  
GTCTATGGATTATATCTCACAAATCTTAGTTAGTTGCTACCTATTTTCAATTTACCATTCAAGAATACTAACGGTTTTAGTTATAA  
AATTAATATCAATGATAACTACTTTCACATATTTTGAAGCCCTACGCAAGAAAAATAAATTTAAGTCCATCAACAATTTGTTGTT  
CTAAAAATTTGTCTATGTAATTGATCTTTAATCATCGTTTTCATCAGTTGGGTTACTAATATAACCTAATTTCTAATAAAACAGCAGGAAC  
TTTTGTTTGTCTTAACACTTGATAATTTTCTTGTCTTGAACCGCGATTAGAAAGTAAACCTTTCTTCTGAATCGTAGCGTCAACGTAT

CTGCTAAAGCTCTTTGATTATCATGATACCAATAAACTGTCAATTCATTGTCATTAGATGATTCTAATGCATCATTATGTATACTCAA  
ATAGGCATCGCCTTTGATATCACGATTTTCTAGTGAAACATATGTATCGTCTGTTCTTGTCATCTTAACAGTTGCGCCTTCTTTTCTA  
AAGTACGCTGCAATCTTTTGCTGTTTTCAACGTATAGTCTTTTTCTAACTTTTATATTTAGTATTGCTTGAAGCACCTGGTCACTA  
CCTCCATGACCAGGATCAAGCACTATTGTTTTACCTTGCAAAGGATTTTTCTCCTTCGTATTATCCGCGACAATATCTAAATTTGTGT  
GCCATCCAGCTATCCAACCTTTTTCATTACTGGATGTATCTTCAACTTCAATCCATTTACCTACTTTACCAATCTTTTTAAAAATGGTCA  
CCTTCTCAACTTTATATATGACTGGATACGCAGCGTTTGGACCTGTACGTAATTCAGTATTTTCAGTTATCGTGATGTTCCCACTAT  
CTTCACTATTGCTATTAGCAATAAAAAATAAAAAAGATGATAAATAAGACAAAGGCAATCACTACTATTAGAGTACGTTTATTTTTAA  
GACCTTTTTAGATAACCATGCCTCTATTTTTTTCATTGAATTTTGCCGCTCTGACTTTTCATAAATAATAGTGACTGGACCATCATTAT  
TTATGCTAATCATGTGTGTTCCAAATTCACCTGTTTTACAGTAAGACCATACGCTCGTAGCGCATCTAAAAATACTCATAAAT  
TTTTACCGCTTGATCAGGATTTTGAATTTGAGAAACCTGGACGGTTACCTTTTTTACATCTGCATAGAGAGTAAATTTGTGAAACT  
GATAGTATTTACCACTTCATTGTTGGATATTAAGTTTAATTTATTATTGTCTATCTTCAAATAATCTTGCATTAGCAATTTTCTTTGC  
AATTACATCTGCATCTTGCTCTGTAGAGTTCTGACCGATACCGACTAATAAACAATATCCTTTTTTGATTGATTATTTAATGTATCA  
TTCGTCACCGATGCTTCTTTAACTCTTTGTACAACCTACTTTTCATATTTTGACCTCTAGTTCCAACTCTTGTACTGTATAAACATCA  
CCAAGTGTGTTGATCTTTTCTACCACACGATAAACATCATTACGTTTTCACCATGACACTAATATTTATTATTGCATTTTATCAAT  
ATCTGAACGTCCTGAACTTTAATTAAATTTGCCGGCTGTGCGAGCTAACAGCTTGTAGTACTTCATTCAACAAGCCATTTCCGGTCATA  
CGCAGTTACCTCTAAATCAACCTGATATTTTGGAGTTGCGTCTTTGATTTTACCATTCACATTAATTAGTCGTTTTCAGTTTTCGTTCT  
TAATATTTGGGCAATCAGTGCGATGTACTTTAATACCGTGACCTTTGGTGATATAACCTACAATATCATCACTGGTATAGGATTAC  
AACATTTTGACAATGATAAGTACATTTTCTAAACCTTACATAGACACACTATCAGTAATGATGTTGCTTTAATAGGCAATGTA  
TTTCGTAATCTCTGTGCTTCAATTTAAAGCAGCTTGTGTTTCTATAAATACGTTGTCTTCAGTTAATTTAACAATCTGTAAGGATG  
TCACGCCGCCAAATCCTACAGCTGCGAATAAATCATCTTCATTGCAAAAGTTATATTTTTCATTAACAACCTGAATATTTTCTCTGT  
CAAAATATCTTCGACTCTAAATCCTTGCTCTTTTATTCAACTTCAACCATCATTCCGCCCTTTTTCATATTAGATGAACGATCTTGTT  
TTTTGAAGAACTTTTAATTTTACCTTTGGCACTAGACGATTTAACAATTTTCAACCAATCAGCACTTGGTCCATATGAATGTTTACT  
AGTACGTATTTCAACAATATCGCCTGTTTGTAATAATAGTCAATTTGGTACAATTTTGCCATTCACCTTGGCACCAATCATCTTATTA  
CCTACTTCAGTGTGAATCGCATAAGCAAAATCAATCGGCACAGCACCATATGGCAACTCAATAACATCACTCGCTGGGGTAAATGC  
GTATACTTTGTCACTCTGTAAGTCATATTTAAGGTTTCCATAAATCTTGAGCGTCAGACGATGTATGATCCGCTTCAGCTAATTTCT  
TTTAACCAATTTAATCTATTTGATAAGTTTGATCTTTTCACTTACTTTTTTACCTTCTTTGTAAGCCAGTGTGCTGCAACACCATG  
CTCAGCAATTTCTGTCATATCAAAACGTTCTGATTTGGATTTCGAGCGGGTCTCCATTTGGACCTACTACTGTAGTATGCAATGACTGA  
TACAAATTTTGTATTAGGCATTGCAATATAATCTTTAAACGCTCTGGCATCGGTTTCCATAACGTATGCACCAACCAAGTATCGCAT  
AACAATCATTAATAGAATTGACAATAACACGTATCGCCAACAAATCAAAAATTTGATCAAAATGTTTTTCTGCTTCATCATTTTCCG  
ATAAATACTGTAAATATGTTTAGGCTACCATTTATATCGCCTTCGATATTCATTCCGGTCCATTCAGTACGTATTCTATCAATAGCC  
GTTTCGATATACGTTTCAGTTCACTACGTTTCTTCTCATTAAATGACTATTCTAAAATATTGCACATTATCAATATAACGAAGAG  
CCGTATCTTCTAGTTCCCATTTAATTGTATTAATACCAAGACGATGTGCTAAAGGTGCATAAATTTCTAATGTTTCTCGAGAAATTTCT  
AATTTGTTTTTACGCGGCATGGCTTTCAAGGTACGCATATTATGTAATCTGTCTGCTAATTTACCAAAATACGCGTACATCTTTG  
GCAATCGCAATAAATAACTTGCAGTATTTTACGTTGTTGTTCTTTTGTAGCGGTATTTTACTTTTTAAGCTTTCGTCACACCATC  
AACAATTCGACAACCTTCTTCAATGAACATTTCTTTACATCTTCAAAATGATACCGGTATCTTCAATTATCATCATGCAAAAACCT  
GCGACAATCGTCGGTCCGTCTAATCGCATTTCTGTGTAATAACCTGCAACTTGTATAGGATGCATAATGTATGGTAATCCGTTTTTCT  
GGAACGTACCTTTATGTGCTTCATAAGCAATATGATAGCTTTTTAAAAACATACTCATATTCATCTGCTGACAAATATGATTTTGCTTT  
GTGAAGAACTTCATCTGCACTATATGGATATTCGTTGTTTCAATATATGATACACCCCATTCATATTTATTACTTCGCTTAAACAATG  
ATTTAGGTACTCTGTTGAATAGTATTTGTCCACACCAATCATACGTCCGTCGACGATAAATATTTATCCTGTGCTCATTAAATCGTA  
ATATTAATTTTACTTGAGCGAGTTAATTTGTATACTATTCCTACTTTTAAAACTTTTACAAAAATTCGACCTAAATCTACTGTTTCAT  
TTTTTAAATATTAGTCTATGATACTACAATTTATGAAATAAATAAACGATGTTATTAAGGTATAATGCTCAATCATCTAACATTTTC  
AGTAAATAAAAAATCCTAACATCTCATGTTAAGAAACCTTAAACAACCTTTTTAATTAAGTCATTGGTCTTATACATTTTGATGAAG  
GATTTCAATTTGACATAAAATATATTTATTATTCTGCTGATGAGATTAAACCTACATAACATCGTAATCTTTAATTTTCAAGCAAT  
TAAATATTTCAATTCATTAATAAATGCAATACCTACTACGATACCGCTAATTTTCAACTAATTTTATTGTGCTTCAATCGTACCA  
CCAGTAGCTAATAAATCATCTGTAATTAACACACGTTGACCTGGTTAATTGCATCTTTGTGCATTGTTAAACATTTGTACCATATT  
CTAGGTACATACTCATAACGAATGACTTCACGAGGTAATTTCCCTTCTTTTCTAACAGGTGCAAGCCAAATCCCCATTGAATAAGCTA  
CAGGACAGCCAATGATAAAGCCACGCGCTTCAGGTCTACAACGATATCAACATCTCTGTCTTTTGGTATTCTACAATTTTATCTGT  
TGCATAGCCATATGCTTCACCATATCCATAATTTGATGAATATCCTTGAACTAACACCTGGTTTCGGCCAATCTTGAACCTTCTGAT  
ACGTATTGCTTTAAATCCATTAATATTTCTCCTAAATTTGCTCACGACAATTTGACTTTATCCAATTTTTTATTCTGAAAAATCTTG  
ATATAATAATGCTTTTCAACATCCATACGTTGTTGCTTAATTTGATATACTTTGCTGGAATCAATCGATCTTTTATCAGGTTGTTGAT  
TGATTCGAATTAACCATCTTCTGTGTTACAAATTTTAAAGTCTAAGAAACCTTCAACATGAATTTAAGGTATATCTGGTTTACACT  
TAAATGTTGACACAATAACATACCTCTTCTGATTTTGTGTTCTGTTTGTATTAGTTAATTAAGCTTTTAAACATTTTAAAAATATCCA  
TATTAGGTATACCATCGAAGTAAATCGAATGATTATGTTGCAAACTATATAAAGTTGAGAAAATTGCAGTTGTTGCAAGGAATTA  
GACAAGTCTTCCATTGACGTTGGTAAATCTCTTAATACTACTTTATCAGTTTGTGTTAATTTCTTACCATAATAATATTCAATTCGC  
ATTTACTTTATCACTTTTAGGATGAATAAGCAGGACAATTTTTCATCATTTTCTGTAAAAGGTAAACTTTTTCGCTTACTTCTATAAT  
CTAATATTTGCTGTTCATTATCGCAATATCTGAATAATTAATTGCGGTGATTGATTACCATTCCATTCTGATTGTAACAGATCC  
TAATATATTAATTTGGCTGTTATCTTGTAACTCAGGTTCTAAGTGTCATTTTGCCAAAATAGCGCGGCGATATTACTTTACCAAGT  
GTCAATTTTAGATGATTTTTTTGTTGACCGATCGCCTTAACTGAAGAAACTGATAAATCATCCATTTCAAAAATAGGCTAGAAAAA  
TCTGTTCCGAAGGGTCTTAAACGATTATATACGAATATTTTAACTGTTATATCATTTTCTGTTAATAATACGCTACTGGCTTTAC  
GGGATCTAACGAAGTTGTTTATAGATAATTTCTTCAATTTTAAACCTTACGCTAACGATTCTATTTTCAATATGCTCATCGTCA  
TACCTGCAGCCATATGATGGCCGCCAAATTTAGCGATTAACCTCTGATGTGCTGATAGTATTTCAAACATCGACACTTGATCAATTTG  
ATCTGGCGGAACCTTTTGCATGATTTTGTCTCCATCAATATTTAAAAATTAATGTTGGCAAAGCAAAATGTTTCGACAATTTTCAAGC  
AACAATACCTAAGACACCTTCATGCCAATTTTCTTTTGCTAAAAGTAAAAATAAATCTCCCTTTTTAACTTTCTGTTTCTGCCATAGCC  
ATTGCTTCTCTGTGATAGTTGCTACAATATCTTTCTTTCACGGTTAAATGTTCAACTTGTCTGCTAAAAATGCAGCTTCTTCTTC  
GTCGTCAGTCATCAACAATTCGCAAGCTAATGATGCGTCATCTAAACGACCTACAGCATTAAAGTCTAGGTCCAATAATAAAACCAAT  
TGTTTCTTCATCAATATTGTCAATTGTATCCCGCTTCTTTAGCAATGCTTTAACAGAGGTGCGACATTGATCATTTAAGACTTTTAAATC  
CTTGTTTCACTAATGATGATTTTTCATCAGTTAAGGATACTAAATCCGCAATGGTACCTATCGCAACTAATGCTTTAAAAATAATCAG  
GTACATTTTCAATCAATGTTGCTAATTTGTATGCAACACCTGCACACACAATTTGTTGGAACGGTAATTAACAGTGGATGCA  
TTGGATGTACGATTGCATATGCTTCTGGTAATGTACTACCAATTTTCATGATGATCAGTTACAATGACATCAACTCCTAAATCTTGAAC  
CATTTTAATTTCAATTATGACCTTGTATGCCATTATCAACAGTTATGATTAATGTTATGCCTTCATCATGAGCATTCTTAAATGCTAGTT  
CGTTTGGTCCATATCCTTCGGTAAAGCGGTTAGGAATATGCCATCTACTTGTGCACCTAAAAAGTTGTAATGTTGTCACTAAAAATTTG

AGTTGAGGTAACACCGTCGGCATCGTAATCACCATAAACTAGGATTTTCTCATCATTCGCTATCGCTCTTTTAATCTTTCAATAGCC  
TTAGTCATATCGCTCAATTGCAATGCATCATGATTGACATCTGTGTCTGAAATGATGGATTCAATTGCTTGTTCATCAATAATCGATT  
TACTTTCTAATATTTTTTTACGATTGGCGTTAACTTTAATTTTGATGTTAATTCATCACTTATGTATTCAGCTGGTTTAGTTAATTTCC  
ACTTATACCTTCGGTTAATCATATATATTTACGCCTCATTTCCAAAAGACATTATATCTAAAAATTACTTTAAATAAAAAAGCACTTATC  
TAAATAATCAAGACTTTAATTATACCATTTTTTAAAAATGAATGCGGGAACCTATTTATATATATTTTGTTAAATTTAAATAAAGTAA  
AAAGCGGTATGTGAACCTTTTATTGTTTCACATACCGCTTAATTCATTTTAAACTAAAAATCTTTTCATCGTTTCGATTTCCTTTCTTTAT  
ATACAACTAATTTGTGTTTCGGCGATTTTTTCAACTGACGTTTTTTTCATTATTCCCCATAGCGGAACGGCAATGAAGATTGAAGAGA  
ATACACCAGAAATCAATCCGATAAAATAACGCTAAAAGTAAAGTTGAATATCGTAGGAGCACCGAAGAATAGTATAGCAACTACTACT  
ACAATAACTGTTAATACTGTATTAATTGAACGTGTCTATTGTCTGTCTAATTGATCTATTAACGATATCATCAATTTGTTCTGTGTGTCGT  
AATCACTTTAAACCTTTTGTAAGTTTTCACGTACACGGTCAAACGTTACGATTGTATCATTAAATTGAATAACCGACAATGTTAATACA  
GCGGCGATAAATGTTAAATCTACTTCAATTCTAAATAAACTGAAAATCGCTACTATAATGAATACATCATGTAATAATGCCAATACA  
GATGAAAGACCCATGCGCCATTCAAATCGTAATGATACATAGATGATGATACCTATCGATGCATAGATTAATGCAAGCATTGCATTT  
TTTGCTAATTCCTGTCCAATAATTGGTGATACAGTATTAATTTGAGGTGTGTACCCGAATTTTCGATTTAATCTTATCACTCAATTTATT  
ATCTTGAGCACGCGTTAAATCGTCTTTAAATTGAACAGTTGTCTATTATTATCTTTACCATTGATTGTAATTTGATCCGCTTTAAGTC  
CACTATCTTTTACAACCTTGCTCAACCTTTTTGTTGAGTAATTGCTTGTTAGATTGGAATCTACACGTGTACCCTTGAGAAATCAAT  
TCCTAAGTTTAACTTGAAGATATAAAGAATAACTAAACCGACAACCTACAATTTAAATACTTACTCCAATTAATGGCTTAGCTAATTT  
AACAAAATTCATTTCTCGAATGAAGTTTAAAGGTCATGAACATCTACACCTTCATTAATATCATGTCTGTTTATTCTTTTAAACACCA  
AATAACAAAATGATTGTTTGAATATATTTGATGAAACAGTAATGATAAAGAATCTTGATAAGAACACGGCTGTAAACAAAGAT  
CATTAGAATACCTAATAATAACATTGTCGCGAAACCTTTAACTGAACCTTTCACCGAAGAATAACTACTGCGCGGATAACTGT  
TGTTAAGTTAGAATCAAAAAATTGTTAGGAATGAACCTTTGTTTGCTTTAGAAAAGGCTTGCTTTATCGTTCTACCTATTGCAAGTTCA  
TCCTTAATACGCTCATACATGATAATATTGGCATCTACAGCCATACCTACACCTAATACCAACGCCGCTAATCCTGGTAAAGTTAGA  
ACCCCGGAAATGAAATTTAAATGCTACTAACGTTAGATAGATATAAGTTGTCAATGCAATAATCGCTACTAAACCAGGTAATCGGTA  
GAATCCAAGCATGAATAAATAAATTAATGCTACACCAATAAACGATGCAAAACACAGTTTATCTAATGCATCTTGACCAAAATTGGG  
CACCTACTGAGTTGAATAAATTTCTTTCAAGTCAACTGGTAAAGAACCTGCATTTACAATTCGGCGATTTGTTTGTCTTTTAAAC  
GCCTTCTGTCTCTTTAAATCCACCCGAGATTTCTACGCTATCAGAATTGATTGGTTGATCAACACTTGCTGCAGAAATAAATTTAGGG  
TTTTCTTTTGTGCTCTTTTATAGCTGTACCTTTTTTGAATCTAACCAACCAACCATGACATTATACGTTTCTTAGAGATTCT  
TCCGTTACTTTTTTAAATTTGTTTTGTCTTTTACTTTAAAGTAACTGATGGCTGGTTTGTCTCTGTTTAAATCTCTGTTTGGCAGAT  
CCCTGTTTAAATATCAGAACCCTTAATTTTACTTTATCTTCTGCATCGCGAATTGTTAAATTAGCTTGAGAAGATAAAATTTTACGTG  
CTTCATTCTGGTCTGTTACACCAGCAAGTTGAACCTAATTCTATTAGGTTCTTCAACTTGAATTTTAGGTTCCGAAACACCTAAAAC  
GTTAACACGATTTTCTAATGTTTGCCTGTTGATTGTAAGGCTTTTTATCTATTTTGTGCGCTTTATTTAAAGGATCGACTTGATAAA  
GCACCTCAAATCCACCTTGCAAATCAAGTCTTAATTTGACATTCTTTATAACACTTTTATAAGTTGCAGCCATTCCGCGAAACAACA  
ATACGACTAAAAGCAAGAACGCAATTATTCTACTACTTTTCTTCACATGAACACCTCATTATTTACGTATGTATTTAGAATACTTGAA  
TACTATTTTATAACGCAAGTTAAATCTTCTTACAAAATTTATTAGCCTTATACATATTAACATACTAGAGCAGGGAGTAAAAATAG  
TCATAGATATATTTAATTTAAATTTAACAATTTATATGATATACAAATTTCTTTTTTGAATAAAAAATAAGTATTCTACATACTACTT  
ATAACTTAAAAAGGATGAACCGTATTTCGTTTCACTTTTAAATACCACCTTCGTTATGAAGGTTCAAGGTTAATATAGCAGGTT  
TTTCGAAAGTTAATTCAGTACCATGACCATTAACTGTAATAACAACAGTTGTTTCTACTGCTTTAAACAGTACCTTTAATACCACC  
AATAGTTGTAATCTTTGACCAGATTGAATGTTATTAATCAACTCACGATGCTGTTTCGCACGTTTTTGTGTGGTCTGATCATCAAG  
AAATACATAACCGCAAAAATTACGACTATATATATTAGTAATGAAAATTGCATTTTATACGCTCCTCTTGCTTAAAGTTTTTGGGT  
TCTCAACATTTAATCCATATTGCTCGAAGAATCTTCTTTGAAATCTAAAAGACGATCTTCTCGAATGGCTTGCTTATATCTTCCATT  
AATTTTAGCAGAAAATGTAAATTATGAATAGTAGTAAGACGAATACCAAAAGTTTCTCTGCTTGATTAAATGACGTATATACGCT  
CTTGAATAGTTTGGACATGTATAACAGTCACAATTTCTCATCTAACGGTCTTAAATCATCTGCAAAATTTTGCATTTTTAAATACTAAAC  
GACCTTGCGATGTACATAAGTACCATTCTGGCAATACGTGTGCGTGAAGACACAATCAAACATATCCATGCCGGAATACTACATT  
CGATTAACGCATCTGGAGATCCTACACCAATTAATCTTGGTTATCTTTTAGGCATAAACTGCTGTATGTGTTCAACATTTTATA  
CATAACCGGTTTAGGTTACCAACTGACAAACCGCGATTGCATAACAGGAAATCTAATTCTACTAAATCCTTTGCATTTGTTT  
TCTTAAATCTTCATATTGCCACCTTGATAATGCCGAACAATGCTTGATCTTCAGGTCTTTGGTGTGCATCTAGACATCTTTTCGCC  
AACGTGTTGTACGTTCAATAGATTTTTTACATAATCATATTACGAGGCATCGGTGGACATTATCAAAATGCCATCATAATATCAG  
ATCCTAAATCATTTTGAATTTGCATTGATTCTCAGGACTCAAAAATAATTTAGACCCATTAGTATGATGTCTAAATTCACGCCTTC  
TCTGTAAATTTACGTAAATTTACTTAACTAAACACTTGGAACCGCCTGAATCTGTAAGAATCGGACCATCCAATTCATGAATTT  
ATGTAATCCCCAGCGTGTGATAATATCATTTCCGGGTGTAACCACAAATGATATGTGTTGCCCAAAATGATTTTTGCTTCAATT  
TGCTTAACTCTTCTGGACTCATTGTTTTAACGGTTGCTTTAGTACCAACTGGCATAAACATAGGTGTTTCAAATGAACCGTGTGGTG  
TGTGCAGCATACCTAAACCGCACCTGATTGTTTACAAGTTTTAATGTGTTCTGATGTTACTGCGAGCATATTTCAAAATCCTCACATT  
CTTTTATATAATTAACATTTGCATCGCCAAAACATAAGAATCTATATTCTAAATTTACTGCTGTTTATAAGCATTTAGAACATTTTC  
ACGAGTACTAAACGCTGATACTAGCATAACTAATGTTGATTTTGGTAAATGAAAATAGTAATCTGGCCATCAATTGCTTTAAATC  
AAATCCTGGATAAATAAATATATTAGTCCAGCCACTCGTTTCAACAAATTTATCATGATCGCGTGAATTTGTTCAAGTGTACGTGTT  
GAAGTTGTACCAACTGATATAATGCGATGTCCTTTGGACTTAGTATCATTTAATAAATCAGCTGTTTCTGTGTCAATTGATAATATT  
CACTATGCATTTCTGTGGTCAATTCACATCATCGACGCTACCGGTCTAAACGTACCTAACCCAACATGTAATGTAACAAATGCGATAT  
TAACGCCCTTTATTTTTAATTTTCAGTTAATAACTCATCAGTAAAAATGTAATCTGCTGTTGGTGCTGCCGCTGAACCACTTTCTTTAGC  
GTAAACTGTTTGATAACGATCTGGATCATCTAAACGTTCTTTGATGTATGGTGGCAGTGGCATTTCCTTAATTCATCAATCTTTCT  
TGTAATAATACCTTCAATATGTAACGCATGATGCGTCCACCTTGATCCATTCTTTTATGCACTACGTATAATTTTGCCATTACCAA  
AATTCATTTTATACCAACTTTAATACGCTTAGCTGTTTACCTAGTAAGACTTCCCAATCATTACCTCAATTTAAGTGAACATTAAAT  
TTCAACTTTTGCACCAGTTTCTTCTTTTAAACCAAAAAGTCTAGCTGGCATTACTCGCGTATCGTTAAGCACTAATGTATCACCAGGT  
CTAAAATACTCAATGATATCTTTGAAATGTAAATGTTTCATTTACCAGTTTCTCTATCCATGACTAATAAACGACTATGATCAGGAT  
CTTTTAAAGGCGTTTGAGCAATTAATGATTCTGGTAAGTCATAGTCAAAATCTTCAATATTACGTTATCCTCTCTCCTCATTGCACTT  
TGCAAAATGTTTATAGTAATGTTGTTTCTGCCACGTGGCGTACGTTCTAAAAGCCTTTCTGAAATAAGAAATGGCTCATA  
AACGTCCTCAATTGTAATACGTTCTTCACCAATTTGTACGGCAATCGTATCTAAACCAACAGGTCCGCCATTATACTGCTTAATAATA  
CAGTTCATCATTTTATGATCAATGTAATCTAGTCCGTGTTGATCAACTTGAAGTAAACCTAATGCGTGCTTCGTTGTTTCAATGTATA  
TTTGTTTCATCTTTCATCACTTGCTGGAAGTCTCTTACCCGCTTCAATAGTCAATTTTGCTACTCTTGAGTCCCTCTAGAAGCTTTAGCA  
AGTTCAATGGCACTTTCTTCAATACCTGTGCTTAAACCTCAGCTGTTCTAATAATGATTCTTTTAAATCTGATTCAATGATAAT  
ATTCTAATCTTAAAGTGCACACCAATCGATCCCTTAGTGACCTGTTAAGCTGCCAGCTCGCGTTGTTGCACCTACCAAGTGAATG  
GAGGTAAGTCGATACGGATACTTCTAGCCTCATCGCTTTACCAATGATAATATCTAAAAAGAAATCTTCCATTGCAGGGTATAACA  
CTTCTTCAACAACACTACTCAGTCTGTGATTTTATCAATAAACAACAAATCTCCAGGTTGAAGTCTGATAAAATTTGCAGCCAAAT

CACCAGGCTCTTTCTAATGAAGGCCCTGATACTGTACGTATATTAACCTCCATTTCATTGGCAATGATATTAGATAATGTTGTCTTACC  
TAATCCAGGGGGGCCAAAAAGCAATACATGATCTAATGGTTCATGACGAAGTTTAGCCGCTTTAATAAACTCTTAAATTACTTTT  
TATTGAATTTTGACCAATATATTGTCGTAATCTCGTAGGTCTAAGCGACAATTCGAAATCAGTTTCTTCACTATGCATTGATTGATCA  
ACCATACGCTCATTCATGACAACACTTCCCCTATTAATCTATTTAAAAATTAAGATACAACCTAATTGAAGACCTGCCTTAACAGCTTC  
ATCAACTGAGTCATATTTATTTTATTTAACGTTTCTCAACTTTTGCAAGCTCTCGTTTGAATAACCTAATGCTTCTAACGCTAACA  
TTGCTTCTTGACGAATGATCTTGACCGCTCGAAGTAGCGTCTACTTGTAAATAATGAATCGCTATCTTCTTCACTGATTTTCACTTTA  
CCTTTTAAATCTAAGACAATCTGTCTTGCCGTTTTCTTACCAATTCCTGGGAATTTAGTTAAATACGTATCATTTTCATTTTCAATGGC  
ACGTTTTACTTTCATTAGGCGTACTTGTGCTAAAAATAGCTAAAGCTGATTTTCGGACCAATACCAGTAACTTTAATTAACCTCAAGAA  
CATATCTTTCTTCTTCTACTACTAAATCCATACAATAATTGTGCATCTTCACGAACAATTAAGATGTATGAATTAACCTTCATGA  
TCTAGATGCTTTTGAAAAACGATAAGAATTTGGTGTGTTGAATTTTCATAACCAACACCAGCAGTTTCAACAACCTACGTGTGTAGGATAT  
AAATGTGTAACTTACCTTTGACATACGCGTACATTATAGGCACATCCTTACATACTCATACTAATTAATTCTACTTTTGATACATAA  
TCTAAATTTCTCAAAGCGCCAATAACATCTTCTACTGAAGTTTCTTTAGATTAGCATTACGTGATAATGTTATTGTTGCTTTTTCTTC  
CATTGGAATACTTTGATGAATCGTTAATACAGATAGTTCTAACTTTGATATAACATCTAGTACACGTGCCAACATACCCACAATATC  
AGTTACATATAAAATTAATGTAAATCTCGATGGTCAAGCATTATTCGTCTACTGGAAATATCGTTTCTCTATATTTATAAAAAGCA  
CTTCTAGATAGATCAAACCTGTTTAAACGGCATCATAAATGGACAATGTCCGATCACTTTTAAAGGCATCTTAAATCTCAATGTTTTAA  
CCACGGATTACGGCAAGACATCTTCTTAATTAATAAACTTTTTATAATCTTTATTGTCCATCATGTTACGCTCCTATTTCAACGAA  
TTCAAATTTCTCTCCAAGAATTTCAACGATATCACCATTTTACAACCACGTCTCTAAGCGCATCATCAATACCCATCGAACGCATT  
TGACGAGCAAATCGACGTACTGCTGGATCACTGTTAAAGTCAGTCATTTTAAACATTCTTCAATAGCATTACCACCTACCACATAA  
GCACCATCATCTCTTGAAAATTGTAAATTTATCTTGTGACGGTGTATGTTTATATAATACTCGGTTAATGCCAACCGACTCCTCTT  
CTTCAACTGTGAAGTCAACATCTTTATATTCTTCTAATTTATCTGCTATTGCATATAATAATTGATCAATATTATCACGCGTTATTGTT  
GAACTGGAATAACTGGCACATCTTCGCCAATTTCTTCTTAAACAAGATTAAATTATCTTGTGATTACGGTAAATCCATCTTGTTAG  
CTACTACGATTTGAGGTCTATCTTCTAAACGTTGCTCGTACGCGGCTAATCTTGATTAATGACTTTATAATCTTCAATAGGTTCTCT  
ACCTTCAGAACCACCTCATATCAATCATGTGAACAATAACTTTTGTCTCTCTACATGTCTTAAAAATTGATGTCCTAATCCAACGCCA  
TCAGATGCACCTTCAATTAACCTGGTAAATCTGCCATAACAAAACCTTCGTTGATCAGGTGTTGAAACAACACCTAGATTTGGTTTA  
ATCGTTGTAAAATGATATGCCCCAATTTTAGGCTTAGCTTTTGAACGATAGATAATAAAGTCGATTTACCCACACTAGGGAAACCT  
ACTAATCCTACATCAGTCAATAATTTCAATTTTAAAGATACATCTAATCTCTCACCCTGGTTACCTTTTTCTACTGAAGTCAGGTGCAG  
GGTTTCTAGGTGTTGCAAAACGTGAATTACCTCGGCCACCTCGACCGCCCTTCGCTACTACAGCTCTTTGACCATCTTCAACAAGATC  
TGCTAACACTTCGCTGTTTCAACATTTTTAATAATTGTACCAGGTGGAACTTTTAATACTAAATCTTCCGCATTTTTACCATGCATAT  
TGCTACTTTGGCCATTTTCACCTTTGCTTGCTTTAAATGACGTTGATATCTAAATCTAATAACGTTCTTAAACCTTCATCCACTTCA  
AATACGACTGAAGCACCTTTACCACCGTCACCGCCAGCTGGTCCACCAATGGTACATATTTTCTCTCTGTATGCGGTAATACCAT  
TACCACCATCACCGGCTTTAAGAGATATTTTGACTTGATCGACAAACATATATCTCACCTCTTTTACATATAATTTTCATTTTCCCAA  
TAATTATAGCATATTAGAGCCCCCTATAGTTTAGCGATTAGGGGCTCTTATGCAGTTGCTTTTATAAATCTTTGCTTTAAATACTTA  
TATTTCCGAGTACCAAATATGATACTTTTTTGCTTTTTATCTGCAACTGTATTCTTTTGTCCCTTATAGTTTAGCGATTAGGGGCTC  
TTATGCAGTTGCTTTTAAAGTTTACTTTACTCAAAT

>038-contig\_319\_RC

CTGTATTCTTTTAGCCCCCTATATATTGTAAATAATTAGGGGCTCTTATGCAGTTACTTTTATAAATCTTTGCTTTAAATACTTATA  
TTTCTCAGCACCAATTGTGGTACAGTTTATCTTTTAAACGCTGCAACTGTATTCCTTTTGCCCCCTTATAGTTTAGCGATTAGGGGCTC  
TTATACAGTTGCACATTTAGTATAACGTCTAAAAATCCCATTTTTTTATTACATAATGAAAATAATAATGAAAAACGTTTTATAAAAA  
GTAAAAAACACCAGAAGATTCACTTCTGGTGTTAACTAGACAAAATTTTCAGCTACTGCATATACAGAACTTGTTTTTGTGCGG  
ACCTTTACGTTTGAATTTAACAACGCCGTCGATTTTAGCGAATAATGATATCATCGCCACCACGACCTACATTTTACCAGGGTAAAT  
TTAGTACCACGTTGGCGATATAAAAATTGAACCACCTGTTACGAATTGACCGTCAGCACGTTTAGCACCTAAGCGTTTTGATTTCAGA  
GTCACGTCCGTTTTTTGTAGAACTTACCCCTTTTTTAGATGCGAAGAATTGTAAGTTTAATTTTAACATCGGAATGCACCTCACTTAT  
AATTTAATCTAATATTCTCATTATATTCTTCTTCAATAGTTTGTAAAGACACAAGCATTGTTTGAAGAATTAGTTGCGCTTCATCGTT  
ATTTGTATCAACGTTCTTATATGAAAATGACCACCATTTGTCGTACATAATTGATATCTGGTCTCTCAGATGTCAATCCTATAATCGCA  
TTAACTACTACCAAACAATACAGCTGAAGCTCCAGCACAAACGATATCATGACCATATTCACCATGGTCAGCATGGCCATCCATAAT  
AACGTCTGTTACTTTGCCTTCATCATTAACTGTAATATCAACAGTAATCATAATAATTACGCGTTGATTTTATCGATTGTTAATTTAG  
TGTATGGTTGACGATGGCCTTTTTTACGTTTTTGAATTTTTACGACGTTTGTATGTGAATACAGTAATTTTTTACCAGCGACCTTGTTA  
TTAAACAGTAGCAATGATGTCACCTTCAACTGTTGGCGCTCCAACCTTAACTGAATCTCCACCTACAATAATACCTTATCAAAATG  
TAAAAGTATCTCCTTCTGTTTTACGTCTAATTTTTACGCAAGATTTCTTGACCTTCTTCTACTTTGATTTGTTTTCCACCTGTTTCAATA  
ATAGCAAACATACTTTGCACCTCCTGTATAATAAGTCACGCCATACATAGGTGACATTTTCGTTATTGAGTCAAGCGTTTGCACCTCTA  
CGTTGTTTTCGGTCGCAACTCGAGTCATTTATAAACATAAACTCTTCTCGTTTCTTCTTCAACGCCTTGATTGACAATCGCTTTCTTTC  
AATAACTTCTGCAATGAGTCAAGCGTTTGCACCTCTGTGGGAAAAATCGCTTCTTCAATAAAAATGTTCTTGAACCTATATTTGAGCG  
GTTGTATGTAGCTACTTATACTACTCAACTATTGCATCTTACCATTGACGACGTTTCATGTCAATGTCAATTGTTTGTTTTTTAAAGGA  
ACTTTATAATCAACGGATAAAGCATAATCAACAGTACAAAATTCATAATTAATGTTGGCAATAATCTAAAGACTACAAAATGAATA  
ATATCAAATGAATGAATCCTAACATACCGTATATTAATGCCACATAGACTTCTAATAATAAGGTGCTGGCTAATATAATAATGAAT  
AACATCGAATGATCTTTGTAAAAAATTTTAAAGAATCGATCTATAAGTGCTAAAAACAATATAGCCAAATAAGTACACTCCATA  
AATACTACCAAGATCATCAGTCATTACGCCTAAAAATATGCTGAGCAATAATGATACGCCAAAGCCACGATACACTACCTACCA  
TTAAAAATACATAAAATGTAAGGTGTGGTACAAATACAAGTTCAAACTTACCTATGTGCATTGGAATAAAGAAGCCCAATTGCAAGTA  
TCTATATAAAATAGTAAAAATACCTATCAAAAAATAATACAGTGTACGCATTATTTATCCCTGCTTTCATCATCAGGAATTGTTTTAGG  
ATCTCTTTTTTGCAACATAAACATGACTCAAATCTGTTAAGTCTGCACCAAGTCTTAAACCCTAATCTTTAGCTAAGCCGATTGATCA  
TTTTGAACCTTAGTCACTTCTCTATATATAAATTACTTGGTAGTTGATCAGCTAATCCACTTGTAACGACTTTATCACCTTTTGAGAT  
ATTATCTCTATTATTAATGTCACTAATTACAGTTCTGAGTTCTTTTCATCATAACGATCAATTAACCAAATATATTTTATAGAACCG  
TGTTGTATATTTACAGATAATTTACCCGCACGTGATTAGTTGAGATTAAATCAACTTGTGAAGAAAAATTTATTAACCTTTAGTAACCT  
TTCCAACAAAACCTTTGTGATGTCATCACAGCCATATTTGAAGTTATACCTGAGTTTATGATCCCTTATCAATTACAATTGTATTATCCCA  
CTGATCCGGATTTCTTGCCAAAACCGTAGTAGAAATGAGTACAAATTTGAAATATCTTTTAAATCAAGCTCTTTTTTAAATTTTCA  
TTTTCCGCTTCTAATTGTTGGTTCTTAGATTCTAAGTGGCTAATCTTATTTTTAGATTCTTTAGAATCTCCTTTTTTAAAAAAGTCCCC  
AATCGTACCAGCAACAAAATTAACCTGGATAACTCACAACCTCGTTGTCCAAAAGACACAGAATCACCTATATATTGTTACAGGAGGTG  
ATTGAGATTGTGAACGTATGGACAGCCCAATTAATGCAATAAAAAACGATAATTGCACATAAAAACAACAATTAATTTGTTATTTTTAA  
AAAACCTAAGCACCCAGAACACCTCTATTATGTCAAAATATTGTATATCCTTTTCTATTTTATATTACTCCCATATGAAATAAAGCA

CTAACTACGAATTACTTTGAAAATGAACAACTCCGTAAAAAATTTGTGGCATTTTAAAAACAAAAAAGCTACTAGCAACATTCCAG  
TCACTAGTAGTTTAAATAATCGATTAAATTTTAAAAATTATTTGTTTGTATCGTTTCGAGGATTCACTGTTGCAATTCTGAAGTTGTCTC  
CAACGTGCGAATAAGTTCTGGGCTTTTGTGTTTCATTAGCTTGTCTGTTTGTGTTTCTGCCATTTGAACACACCAACCTTTTA  
AATTTATTCTAGTGACAGGATAACTAAAAATATTTTCTTATGCAATAATTTCTTATTGATAAGCATTTCGGGTTTGTAGTTGTAAATT  
TTGCCCTAATTCATTAAAGTCTTGTGTCATTTCAAATTCAGTATTGTAACACGCATTGACTCATCTCCAAATTTATAAAGAATAAAAT  
TCGCTCCTCTTTGACCTATAATATATTGATCATTATAAGCCATGCGATTTCAGACACAGCCATAAACTCTGTTTATCTATCA  
TTTTAAATACATTTTTAATTTGGCTTAATGGTACATTCTTTATTAATCATTTTCTTTTAATGAATATTTCTCACCACCTTACATAAAACA  
TGTTGGGCATCATTAGTGGGTTGCGTAACTTGATTTCATTGATCATTATCGTGATTTACAGGATTCCAATCTTGTCTTTTAAAAAAG  
GTGCGTATTTCAAGGCGATATAAACAATTATCACAATTGCTATTACTGCTATAATGTTTTAATCATACTAAATATCAATCTCATAGT  
TCGCTCCAATGTCTTCATCTAATTATATATTTTATTATGTATATTTCTCAGTCTTCAGCCTTAATCATGATATATCTTAGGACTGA  
TGCACGTTTCATTTAAAAATAGCTTATAATTTTGTATGATTAAAAAGCGTATGAGGAGGTTGTAGCATTGAGTATACTAACAATTATT  
TTAATAGCACTATTAGTCATCTCCTTTTATAGAGTTGGACTTTCTATTTTGCATTTTTAATTTATGTCGGACTTGTTTTATTATGTATT  
TACTTAGGATATCAAGGTTTAATATGGTTGCTCGATTTTTTCAAATAAATAGTGGGTTTTTACCGCACTTTCAATTTAACAATTAAA  
TTATTCTGCATAACAAAACCTCCTAATGTACTAGTTAGAATTTTTAACTAGCTCCACATTAGGAGTTTTAATTTGTTTTCAAGCAC  
GGATACTACTTGATGAACAGATCACTATTACTTACGCCAAATGCGTTAGATAAAAAATCGTATCAGCGCGTAGCTACCACCTTAGTAA  
AAGGCCCCAAACGATTCCAGTAAAAATGAGCCAATTGCTACACTTAATAAAGGAAAAGCTTGTTCGTAACGATCACACCTGCTA  
ACGCTGTTACTAAAAACCTAACGTAGATAAAGCTAATGTTATTAATAGATTGCGCTTTGTTACAGTTTCATTTTAATATTTAACTG  
CATGGTATAAACCATTTGGCAGCAGAGAACCCGATAATAATAAATAGAGTCACTATTTTCTCCAATGAAAGTACTTCGTAGGTATTA  
TACACAAGATACGTCATTAAATCTATCAACTTCAATCATTTTTCATCAAAAGTAACCCGCTTCTACAAGACTGGTAAATCTTATCACC  
GATTATAATATGATCCAACAAATCTATCCCTAAATCAAACCACACTCCTTCAACCTCATTGTTGTTATGATATCTTCTGTGAGGGC  
GTTACATCACCGGATGGATGATTATGAACTGCGATAATTGCATTGGCATTTTCTCTACCGCAATACTAAAAATTTACGTGGATGT  
ACAATCGAACTATTTAATGTACCTTTAAAAACACAGGTTTCTTTAATCACTACATTTTGAATTTAACAATAAAATGACAAAATGTT  
CTTGTGTTAAATCTTTCATTGTTGGAATCATATAATCAGCAACATCACTTGGTTGCGTTATTTTATACGATTATTTTCAGCTCTTCTC  
CCCATCCTTTCCCTAGCTCAATGCTGCTTTTAAAGTAATTGCTTTTTGTAATCCAATCCCTTTAACTTGTATCAAATCGTTAATTGA  
AGATTTTTTCAATTCATTAGATTGGAAGCAGATTAAAGCAGTTCACTAATGTCTATGCTCGAGAATCCTTTTCTCCGGTGTTA  
ATTAATATAGCTAATAATTTCTGTATTCGAAAGACTTTTTGCACCATTGGCTTAACAAACGTTCTCTTGGCATTTTGAAGTTACCATT  
CTTTAATTTTCAAAAAATATACGCCCTCTAAAAAATGATGGATATCATATAAAAAAGTGAATTGATAAAAAAGGAAATAAATATAA  
ATGGAACAAGGGGTAATAGTTTAATCGGCTTAAATATCATGGTAATTAAAGCAACTAAACCAGCAATGACAAATGTAAATAAAATG  
ACATAAATAGTGAATTGGAGAGGAAAAACAAAGAAAGTGCAGATATTAGTAAACGTCACCATAACCAATATATGCCGAAATA  
AAAAGTAGAATATATGCGTGGTCATACTAATAATGAGAAAAGCTACTGGATAAATCATACTTAACGAGAGAGAAACGATACAATA  
AATTATAATTAACGACAACTAATCTAATCTAATGAGAAAGTGATATCGGTCATAGTAAAAATAAGCAGAAAAACATATGTAGTTATAAATA  
GCGTAGCATTTACGTATGTGAAATCATACTTAATAAAGACGATAGGTATTAAGCAAAAGGTTTCCCTTAAGAAATGTGTTAGGGAA  
ATACGCTTTCGACAGTTTCGACATCGCCCTTTTAATAATAAAAAACTAATAATCGGCATTAATTCATACCATTAAAGTGACGAATTA  
CAATAATCAGTTTCGATCTTCTATGTAATAATCAAAATGACGTTTCTTCTATAGATATAAATGTATAGAAAAACTAAAAATACAA  
CTGCAACTATAAGATAACAATACTACCAAAATGACAACCTCCTTACGTAAGTATAGTCACTTATATCAAAAAATGTAAATATACACTA  
TTTTTCAAGAATTGAACCGCTTTTTTCATTTAAATTTTTCAATATTGCTAAGCGTAATTGATGGATACTTTAACAGCCCATTACTGCTC  
GGCAAAATTAATAATGGCAAGAAATTGAACCTTATAAACACATACGATTTAGAGCATAAAAAATAACCATGAAGCTCTACCTATTG  
ATTAATAAGATTCTTCATGGCTATTTTAGTTTTAGTTTTATAATGCTTCAAAGTCTAATTTTGATTAACTTCATTATGAAATACAGA  
CTACCGGTAATTACTAATGTATCACCTTGATAATTTTTTATAAATTCAACGTAGTCATCTACTAATTGTATTTCATCTTTCAATACT  
ACCTACAATTTCTTCTTTGCGTAACGCTTTCGGAAAAATCAAATTCAGTTGCATAAAACGTATGCGCAATTAAACTTAAATGTTTGACC  
ATCTCGTTAATCGGTTTTCCGTTTTATTGCTGAGAACAAAATATCTACTTTTTCTTTATCATGGTACTGTTAATTGTATCAATTAGAGC  
ATCTATACTCTGCAATTATGTGCGCCATCCAAAATGATTAAGGTTTGTCTATGCACCTGCTCAATACGTCCAGTCCAACGAAGTGA  
TTCAATACCGTCTATCATCTTATTGAAATCTAATTCATTAATTAATTCATTAATTCAATAAGAGCTGTTATGGCTAATGCGAGCA  
TTTTGTTTCTGATGTTACCTAGCATACTTAAATGATTGTTTCTAATTCATAATCTTTATAACGGTAAGTAAATTCATCTTTTGCGA  
TACAACAACAATTTCTCTATCTAATTCAATTGGCTTCGATGTTGTTCAATTGCGCGTTACGGAACATATTTTAATGCATCTTCATTTT  
TAACAGCATATATCACTGGAACGTTAGGCTTTATAATCGCGCCTTTATCCCTAGCAATATCTAGATAAGTACCACCTAAAAATATCTG  
TATGGTCTAGACCGATACTAGTTAAGATTGATAAAACCGGTGTAAGACATTTGTGCAATCGTTCTTTATACCAATCCAGCCTCAA  
CAATGACAAAATCAACAGGATGTATTTACCAAAAATATAAAAACATCATCGCTGTGATTATTTGCAATTCAGTTGCAACACCTAAAT  
CTGTTTCAGTTCCATCATTTCACTTACTGGTTTAATACGTGATACTAATTCTACAATAGCGTCATTTGATATTGGCACACCATTAG  
ACTAATTCGTTTCATTAAATGTTTCAATAAACGGCGACGTAAATGTACCTACTTCTAACCATTTTCAACTAAAGCTGTTCTAAGGTA  
AGCAACTGTAGAGCCTTTACCATTGTGCCCACCTACATGAATACCTTAATGTTATTTGAGGATTATTAATTTGTGCTAGCATCCAT  
TCCATACGTTTAAACACCTGGTTGTAGTCCAAATTTAGTCTTTCGTGTATCCAATACAAGCTCTCTAGGTAATTCATTTGTTACTA  
CCTATGCTTTTAATTGTTCAATTCTTGCCCTTACACCATCATATTTTCTTGATAATCTTGTTTTTTACGTTTTTCTTCATTTATAACCTT  
TTCAGGTGCTTTACTTACAAAGTTTTTCATTAGAGAGCTTTTTATCTACTCTATCTAATTCGTTTTGAAGTTTAGCTAATTTCTTTTCCA  
AACGGCTGATTTCCCTATCCATATCAATTAGCCCTTCTAATGGTAATACCACCTTACCTGCAATTACAACCTGATGTCATTGCTTTCTC  
AGGAATTTCCACGTACGTGCTAATATTTAAGGTACTAGGATTACAGAATTTGATTAATAATCTTTGTTTTGTGATAAAGTTGTTTCA  
ATTTCTTTATCTTTAGCTTGAATTAATAAGGTATTTCTTTAGACAATGGCGTATTTACTTCTACACGTGATTGTCTTACAGATTTAAT  
GATTTCAACAAGTTGTTGCAATTGTTTACTTTCTTCAAAAAATCAATGATTACGCACTTCTGGCCATGAAGCTTTAACAATTGTG  
TCACCTTTCATGTGGTAAACTTTGCCATATTTTCTCTGTACAAATGGCATGAATGGATGTAGCATTCTCATAATATTGTCTAAAGTAT  
AACTCAATACTGAACGTGTAACCTGTTTTGTTCTCATCATTAACCATTTGGAATTTACTCAATTTCACTAATGACCAATGACAGAA  
ATCATCCCAATGAAATTATATAATGCACGTCCAACCTTCGCCAAATTCATATTTGTCACTTAGATCAGTAACTGTTGCAATCGTTTCA  
TTTAAACGTGTTAGAATCCATTTATCTGCTAATGATAAGTTACCACCTTAAATCGATATCTTCAACTTTAAAGCTTTCACCGATATTCA  
TTAAACTGAAACGTGCCCCATTCCAGATTTTATTGATAAAGTTCCACACTGACTCAACTTTTTAGTTGAGTATCTTAAATCATGTCC  
TGGAGATGAACCTGTTGCTAAGAAGTAACGCAAGCTATCAGCACCGTATTCGTCAATAACATCCATTGGATCCACACCATTACCTAA  
TGATTTACTCATCTTACGCCCCGCTTCAGCACGAACTAAACCGGTGTAATAATACATCATTAATGGACGACGATCTGTAAATTTCTAA  
GCCTTGGAATATCATGCGTGCTACCCAGAAAAAGATAATATCGTAACCTGTAACCTAAGGCATTTGTTGGGTAGTATCGTTTAAAGTC  
TTCATTTCTAAATCAGGCCAACCTAACGTAGAGAAAGGCCATAAAGCACTTGAGAACCACGTAATCAATACATCTCATCTTTGTG  
CCAATTTTCAATATCAGTTGGCGCTTCTTCTCCAACATATATTTCCGCTGTTTCTTTATGATACCAAGCCGGAATTTGATGACCCGAC  
CATAATTGTCTTGAAATCGTCCAATCTCTAATATTTCCATCCATTGGTTAAATGTATGTTGCGAAACGTTGCGGATAAAAAATCAATAC  
GATCATCTGTTTTTGGTTATCTAATGAACGTTTCGCTAAGTCTTCCATGCGCACAAACCATTTGTGTTGATAAATATGGTTCAACAAC  
AGCGCCAGATCGTTCTGAATGACCTACAGAATGAACATGATCTTCAATCTTGATAACTAAATCTTGTCTTTTAAATCTTTAACTAGC

TGTTTACGACAATCAAAACGGTCCATACCTTCGTATTTACCCGCTTTGTGCTTCATTTTACCATTTTCATCCATAACGATAATATTTTC  
TAATTGATGTCCTTTGACCAATTTCAAAATCATTAGGGTCATGTGCTGGTGTCACTTTTCATAGCACCAGAACCGAAGTCTATATCAAC  
ATACTCATCTGCTAAAAATAGGCAGTTTCGCGTCTACGATTGGTAATATAACAGTTTTACCGATTACATCTTTGTATCGTTCGTCATTA  
GGGTTAAACAACATCGCTGTATCACCTAACATCGTTTCTGGTCTTTGTTGTTGCAATTTCAATAAAACCTTCACCATCAGCGTAAGGAT  
ATTTAAAATGATAAAACGCACCTTGAACATCTTCATGTATTACTTCAATATCAGATAAAGCTGTACGTGCTTTAGGATCCCAATTTAT  
AATACGTTGCCACGATAAAATAATTCCTTTATTGTATAAATCAACAAAACTTTTTTAACTGCTTTACTTAAACCTTCATCTAAAAGTA  
AAACGTTCTCTACTATAATCTAAACCTAGACCTAATTTAGCCCATTTGCGCACGAATAAATGACGCATACTCTTCTTTCCAATCCCATG  
CCTGTTCTAAAAACTTTTCACGACCAAGATCATATCTAGTTATTCCTTGTTCATTTAATTTAGCTTCTACCTTTGCGCTGTGTGCGAATA  
CCAGCATGATCCATACCTGGTAAGTATAACGTATCGTATCCTTGCATACGTTTCATACGTGTAATGATATCTTGTAAAGTCGTATCCC  
ATGCATGTCCTAAATGTAATTTACCAAGTTACATTTGGTGGCGGGATAACAATTGTATATGTTTCTTTGATTTATCTTCTGACGGTTT  
AAAATAACCATTTCTTACCCATTCTTCATAACGTCGCCGCTTCAACTTCACGAGGATCATATTTTGGTTTCATTTCCATTTGCTATACCT  
CCTAAAAAATAAAAAATATCCATCCTATATACAAATAGGACGGATATTCGGTGGTACCACCTATATTCAAGAAGGATGATTAATAT  
CAAATTCACCTCTTTTAAACATAAATTGGAATAATCATACCAATACTATCATCGTGAAATTTGAAATGCTTCATCTCTTCAAGCACTCTAG  
ATTATGATTAACGCTCAAACACGTCTTAGCCTACTATTAATCACGTTTCAGCTAAGATACTCTGTGGGCTACCTTCAGTAAAAATCATT  
TACATACTCACACCAATCATATGCTCTCTTTAAAAATAATTTGAACCTTACTCTTCCCAATCCTATATTAAACTCTTAACCTTATAGTA  
TAATGATTGACAAAATAAGTCAATGTATAGGTGGGAATAAAATGAATGAATGCGCATTTGGTACTAAAGATCCAGTCTACTTAGAC  
TATCATGATCATGTATGGGGACAACCGCTCTATGATAGCAAGGCATTGTTTAACTTTTAGCATTAGAATCACAAACATGCTGGGCTA  
TCTTGGTTAACTATTTTAAAAAGAAAGACCTATGAAGAAGCATTTTATGATTTTGAACCAAGGATGACAAATGACCGT  
TCAAGATATCGACCGCTTAATGACTTTTCCAAATATCGTTTCATCTGTAATAAAATAGAAAGCAATTTGTAATCAAGCTAAGGGTA  
TTTAAAAATGAACAAGCATATGGTAGTTTATGTAATTTTATGGTCATATGTAAATGGTAAGCCTAAAGATTTGCAGTATGAACA  
TGCTTCTGATCGTATCACAGTTGATGATACTGCAACACAACCTATCTAAAGATTTAAACAATACGGGTTTAAATTTTTAGGTCCAGT  
AACAGTATTTTCGTTTTTGAAGCAGCCGGTTTATATGATGCACATTTAAAAGATTGTCCATCAAAGCCTAAACACAATTAATTTGC  
TATAGCATCATAAAGTAAACGAGACATCATCTATTTTAACTAATAGACTGTCTCGTTTTTGTATGTGAAAATTTATTCAAATCATAA  
GTTAAAGTTCCAAGTTAATGCACTGCTAATATTAGATATCTTAATCTAAAAATAGATGTACAACCTTTGCTTAAACCTTAATAATGA  
ATTCTATCCTAAGCATAAATCAACTTAAATGGATGATAGTTTCTAATCTTCACGCTTATTCGAACGATATTTTAAAAAGTAATTAAT  
CCTGGTGAATAATAAATAGGATGAAAAAGATTGCGAAAAATGATAACTCGTAATCATAGCAACATCGGCACCAGTAGTAAATGC  
AACTAAAACTATCTGATTAACCCCTCCTGGTGCTGCACCAAGAAACAATTCATTAATAGGATTATTATCAAAGAAATGTATGACATA  
AACCATGATTAGCGCACCAATTATCAACATAATATTTGAATTGTAATTGCGATTGCTAGTCTACCTTTTAAATCTGACAATAAATGC  
GCAATTTGAACCTCAATTCTAATCATATATATTAGTTGTGCCATGTTCAACAACCAATGATCTAGTGTAATGTAAACCTGTAGAA  
AAATTCCAAACAATTAATACAATGAGTGGTGCTAATAATTGAAATGTTGGAACCTTTATTTTAGACATAATTAGATAAACTATAAAG  
ATAGCTATCGCTAAAAATAACTATTTGCCTTATGTTAATACTTGTGATAAAGGCAAGACTTTTGTAACTTTCCATTCGCATGCATGT  
TACCATCATGAAAAAATATGAAATGAACGGTACTAAAAACAACAACAAATATAATTCGTGATGTTTGCCTTAAAGCTAACAACCTAAC  
AAATTAGCACGTTTGTCTTGTTCAGCCATGACCAGCATTTGTGTTAGTGCTCCTGGTATAACACTTAAAAATAGCTGTTTCCGTATTAA  
TACGTGCAATTTTTTTAAAAATAAATGCCATTACTATTGCAATTAATAATATCGAAATAGATAACAATAAATCGAAAGCCAATTGT  
CTTTGAATATCCATAACGACATTTTTCGTAACCGTTGATCCGATTGTCACCCCTAATAGTACAATCCCTAATTCCTAAGTAAAGATG  
CCATTTAATATCAAGTTTGAACCTTTACACAAATGATTGATGCGATAATAGGACCAAAACATAAATGGGAGTAATACGTGCGATG  
AATACAATATAATACTAATAAAAAATGATAAAACGAACACAATGAAATTATTTCTATATATCATTTGTCATGTTTTCCACTTCTTTCA  
ATAAAAAATAAATGACTAAATTGCTGCTTGAGCTTCACGTTTGTTAAGATAACAATATCCGCTAGCAGTTTTGACTACAAAGCATA  
TATGGACTTTCATATCAAGACGCCCATGCGTGATATACATTTAAAAAGAGCCTGAACAAAGTTCAGGCTCTCAATTTGTCCGTATA  
TTATTTTACAATACGACTTAAAGCCGTATCAAATGCTTGAATCGTTTTTCAATATCTTCTTTCTGTGTGCGGTAGATAGGAATGT  
ACCTTCAAATTGAGATGGTGGTAAAAACACACCTTCTTTTGCCATTTCTCGATACATTTCTGCAAATAATTTCAAATCACTTTTATTC  
GCTTGTTCAAAATTAGTTACAGGTCTTTCATTTAAGAAATAACCAATCATTTGAACCTGCTCTATTTACAGTTATTGGTACATTGTGTT  
TAGCAAATACAGCTTTAAACCGTCTTCAAGTATATCGCCTAACATATTAATAACTCATATGTCTCTGGCGTTAATTGGCTTAAACGT  
TTCATAACCACTTGTCTATTGCAAGAGGATTTCTGTATAACGTACCCGCTTGATAAATATTTCTTAATGGTGTCTATATGATCCATGATT  
TCTTTTTTACCACCAAAAGCACCTACAGGTAGTCTCCACCGATAACTTTTCTTAAGCAAGTTAAATCTGGTGTACACCAAAAGTAA  
CCTTGTGCACAATGATAACCGACTCTGAAACCGATCATTACTTCATCGAAAATTAGCAATGCGCCGTATTCAGTCGTAATATTTCTT  
AATCCCTGTAAAAAACCTTCAATCGGCGGTACGACACCCATATTACCAGCAACAGGTTCTACGATTACACCAGCAATATCGTCTCCA  
AATTTTTCGAAAGCGATTTTAAAGTGCATCTAAATCATTTGTATGGAACGTGAATTGTATTTTAGCAATACCTTCAGGCACACCAGGA  
GAATCCGGCAATCCTAATGTTGCCACCCAGAACCAGCTTTGATTAATAACGAATCACTATGACCATGATAGCAACCTTCAAATTC  
ACAATTTTATTTCTTCCAGTATAACCACGTGCTAATCTTAAAGTATCCAATGTAGCTTCTGTACCAGATGACACCATACGCACTTTTT  
CTATTGAAGGTACTCGGTCAATAACGAGCTGCGCAATTTATTTTCAAGTAATGTTGATGACCAAAAATCTGACCTTTATCAATTTGC  
TTATGTAAATGACTAATAACTTGAGGGTCTCTATGTTCTTAAATTAAGTGCGCCCAACTTAGTACATAGTCGATATACTCGTTACC  
ATCGATATCATAAATTTTTGAACCTTTACCGTGATCCATAAAAAATGCTGGTGTATCTACTGATTTAAATGCGCGTACTGGACTATTT  
ACACCACCAGGCATTAAGTTTCAGCAACCTTCATTGCTTCTTCTGATTTCTGTATATCTCATAAAGTAAATTCCTCCTATAGTTTATG  
GAAAATCATACATATAAAACCTTATTTATCTAAATAGCGACAATGTCTTTGCAAAAATACGTAATAATCATATCAGCACCTGCACG  
TTTCATTGAAACCATTTGTTCCATAACGACACGTCTTCATCTATCCAACCATTTTGTGCGCGTGTCTTAGTCATACTATATTCTCCAC  
TCACATTATATGCAACAACCTGGAACATTCGTATGATTTTAAACATCTCGAACTATGTCTAAATAACTTAGAGCAGGTTTAAACAATCA  
TCATGTGCGACCCCTTCTTTAAGATCACTTTCTAATTCACGAAGTGCTTCCAAACGGTTAGCAGGGTCCATCTGATACGTTTTTCTATC  
CCCAATGATGGCGCTGAATCTGCTGCATCTCTAAAAGTCCAAAGAAACTTGATGCATACTTGACACCATAACTCATTAAGGAAT  
ATTGTAATAGCCGGCTCATCTAATCCACGACGAATTTACGAACAAAACCAATCCATCATATTACTGGCGCAATTAATACGACACC  
AGCTTCCACTTGAGAAATTGCTGTTTAAACAAGTAGTGGAATGATTTATCATTGTCAACGTGATGTGTATGGTATCAATCACACC  
ACAATGACCATGATCAGTATATTACATAAAACAAGTGCTGCAACAATTAATAAGTCATCATACATTTTTTTAGCAATACGTGTTGC  
CTGTTGAATAACACCATCGTGAATGTATGCACCAGTACCTATATCATCTTTGAGTTTGAACACCGAAAAACATAATGGCACGTAT  
GCCTAAGTCATAAGCTTCTTTTAAATCACTTTCAAGTAAATTCAACTGATTTGGTATACACCTGGCAATGACTTAATTTCTTTTTCA  
CATCGTCTTTTTCAACTACAAAAATGGATATATTAATCTTCTTTTCTTACATGATTTCTCTAACCATATCTCTCATTGTGCGTGAT  
GATCTCAATCTTCTATGTCTATCAAATTTCAATTTTAGCCCTACTTTCTAAAATCTTTTCAATTAAGTGATTTCGAGTGTTTGAATTTCT  
GCAATTTGTTACTGGTTGTTGATATGATTTAATGGTCCGTGCTGTTTGTCTCCAATAGCAAAATACGACTTGAATTTTGGTACAAATC  
CTTCATTAATAATAAAGTACGACGACGAATGAAAAATGTTAATGCATCGATTTGTTGATGTTCTATCATTTTCTTTAATCATCTTG  
TATATTTTGTGTTGTTAGGCACTGAAGTATATAAATCTATTTTAAACAACCTCATTATCTTTAGATAACGCTGCTAATAACAATGGTCTC  
GCCAATTCACCTCGAAGGCAAAAGTATTTTGGTTAGTTTGAATTAATGATTTTAAAAATCCTTCTTGAGAAAAGTGGTTGGCATA  
AAATCAACTCGAATGCCAAGTGATTACAAATATTGCGCTGTCTTACTTCTATCACAGCAATGTTATCAACATTAATTCCTTTTATAGAT

ATTTATAAAAAGAATTTTCACAGCATTTTGTAGATGAAAAAATAAGCCAGTCATAGCGTTGATTAAACAAATGAATATCAAAATTTAGTG  
GCTTTATATCAATAAAGGGTTTGTGAATAATTGATACTAAATCACTTTGCATGTCATTTGTTTGTGTCATAACTACAACCTGGCTTCAT  
ATTTAAACGTCACCTCATTATTTAATGTTGTTCAATTTAAGCGTTTATAATTTTCATAAGCACCTTGCTCTTTAATTTGTTACTCACTG  
TTTTGCCTAACTCAACCGGATCTGTTCCGTTCAATTGTATATTCAAATCGTTCTTTACCATCTGGGGTCATAATTAACCTGTAAATTC  
GATTTGTTTTGATCTGAGATTGTAGCATATCCTGCGATTGGCACCTGACAACCTACCATCCATTTCTGCTAAAAACGTTTCGTTACAGCA  
GTCACACATTTTGCACCTCATCATTTATGTACTTTGCTTAATAATGTTAATAGTTCTTCATCGTCACTACGACATTCTATCCCTAAAG  
CACCTTGTCCGATTGTCAGGTAACAATGTATCTCTATCAAGATAAGATGTTACAATATCATCTGACCAGCCCATTTCTTTAAACCAG  
CTGCAGCTAAAATAATCGCATCATAATCTTCAGTTTGTAACTTTTCTAATCGTGATCTATATTACCTCTAATCCATTTAATCTCTAA  
TTAGGATACTTAGATAAATTTGTGACCCAGCAGCTAATGAACCTAGTACCAATAATACTGCCTTCTGGCAATTGGGATAGTGGTGTA  
TGTGTTTTAGAAAATATACGCATCAAAAAGTAATTTCTCTATCAGGGATACAACTAATGTTAAACCTTCCGGAATTACACTTGGTACG  
TCTTTAAGCGAGTGTATTGCCATATCGATATTTTTTTCAAAAAAGTTTCATGTTGTATTTCTTTAACAATAAGCCTTTGCCTCCGACTTT  
AGACAATTGCTTATCTACTATACGATCGCCTTTTCGTGACAATTTCTTTAATTTCAATTTCTAGATTGGCTCGACAGCTTTTAATTTAT  
CAATAAATGCTGGCTTTGTGTTAAAGCTAATTTACTTCTTCTGGAGCCAACGACTAATTTACGCATGTTCAATTCCTCTAGGAACG  
GATTGCTCTAGATTATTTTCTCAATTCACAAAAATGTGTTGCAAAAAATAAATTAATCATATTTAAGCAAAAAATAAATGTTATAG  
TATATTAAATACCTTGAATTCACCATTTGTTGATTCTAAGCAATATATAACTTCCATATAATATTGTAATAATTGAAGAGAGATTATTA  
CCTTCGGGTCAATGAATATACGTTACCAACTGAAATTACACCCACTGTGTACCTAAAATAATACTAAATATGAGAATTATCCACC  
CACTTAACGTTGAGTAAAAACACAATTGATTCAAGTGAGCAACGCTACCTATTCTAAAGTATTTTGTATCAAAACGTTTTTCCTCAA  
ATTACGGTATTGCATGATATACAGTAATGCATTGACAAAAGTAAAGCAAGACATAACTTAACACAGCTAGACCCGATATGGA  
CTAACAGTAACCTCGTCTACAACAGCAATTTCTGAACCTTATTAGTATAATGTGTCGGTTGAAATGTTATTCATCCCTAAAAAGTGTAA  
CCCTATTAAATTCAGAAAAACACAGAGAAATTCATACTTTGATAAGGTTAAGAATTAAAGAGATTGAAATAATCAGCCAACCTTA  
AAGTATAGAATACATCTGAAATAGACCCTAATGGAATATGTCTAGTTTGTATAATAAAAAATAGATAAAGAGATTGTTTGTAAAACC  
CAAACAATCCCCAATAAATATATGCCTAACTTCTAATCTTATGACTTTTTTGGACAAAATCATAAAAAATAGCAAATGATACTGATT  
AAGTATATTAATAATAAATTTCAATTGAATCGAATAAACAGGTTTTCTTGCATATTATCACCATATTAAATATGCTTATTCAAAACTAA  
AGATACGTCGCGCTGAAATTTCTTGACCTTGCTTTCTTTTTGTTGCTTCGCTTGCTCATGAGGACATTCAGCTTCGATATCAAAATAT  
ATTTTGAATAGCTCTAATTTTTCTATTACTTTTCTTATCACTACTTAATTTCTTTGGCCTGTTAATAGGATCTTTCAACATTTGATTGAT  
GATACTTTTTGTATGTTTGTAGATAAATTTACGTTCTCTTTCGCTTAACCTTGGCAATTTACGATCAATACTGTCCATCGTTTCTGCTT  
GAATTGTCTAGCTTTTTTTCACGTAAAGCTCTAATCACTGGAACAACACCAACATACTAATCCACTCATTGTGTGCATGTTATTTCTGC  
AGGAATTTGTTCCGAAATTTGTGTCAGCCGCTAATTTGTCGCTCACGTAAGTTTGCATCAACTAAACCTTTTAAGTCATCAACATCATA  
ATTAAGATGTTTGTGATGGCACTAATACCAGGTTCAATATCTCGAGGAACGCAATATCAATCAATACTAGTGAATCTTGCTTTCT  
ATTTTCTGCAATCTTTCTATCATTTTCAATTTGTAATGATATAAGATTGTGCACTCGTTGAACATAATCACAATATCTGCACTTTCAAGTA  
AATTTGGTAATGATGATAGTTTCATCATATTTCACTTGATGCTTTGCTGCTAATTTTCATAGCATTTTCAATTGTTCTATTACTACTGTA  
ATATCAGTAATTCAGAACCAAGAAGATTTAATAGTGATAATTCACCTATTTCCTGCAACCAATAATGATAGCTTGCTTACTTTTCA  
ATTTGCCAAATACTTTTTTCGCCAACTCGACCGCAGCATAAGACACACTTACAGCATTTATCAGCTATATCTGTTTCATTATGTGCTCT  
TTTTGCAAAAGTAATTGCCTGTTTAAATAGATGATTAATAATTTGCTCTGCTGCTGCTGCTGCTGCTGCTGCTGCTGCTGCTGCTGCT  
ATTTGACCTAAATTTTGAATTTTCTCCAAGTACGATTGAATCTAAACAGAAAGTGACACGCAATAAATGTTCTACTGCTTCTGCTCCCC  
ACTTTTACTTCTGACATTGCTTTAATATCATCTACTTCAAATCCAAATGCACGAGCTAGAAATCGTTGAATATAGTAACGACCTGTGT  
GAATTTGATCAACAACAGCATATACTTCAAGTTTCGATTACATGTTGATAATATGACATTTTCTAAAATAGATTTAGTTTCATATAAATC  
TTCATGGGCAATTCGTAAGGCATCATCTCTAAAAGCAACTTGCTCTCTTAGTGCAACATCAGCTGTGCGATGATTTATACTAATTGC  
AATAAAATGCATTTGAAACGCCCCCATATATACTAACAATACAAATATTATAACATAATTTAAAATCCAATTAAGTACGATGCTTAA  
ATAAATATATAATCTTTCTAATTTACTTTTGAGTTTTTGACAAAATGATGAACGTTGAAAAATGTTATCAATTGTGTACTAATTAAG  
TTTCGTGCTTACATTATTTTAAAAATTTTGTATAAGTTTTGTCGTACAAAAACTATGAAATATACGGTTCAATTAATTTCCATATTTG  
TTGTTGTTTATTATTTGAATTTGATGAATAACTTACAATTTGATATCGTCTGGGTCCATATCTAATTTGTGCTTAAATTTTTAATATGCT  
TTTGAACCTTACCTTTTGGAATTTTGTCTTCTTATGTCATATACTAAAGTAAAGTAAAGTAAAGTAAAGTAAAGTAAAGTAAAGTAAAG  
GATATCATCTTGTTGGATCATGTCTTAAATCAACTAATGAATAACTAATTGCAAAATCTCTCTCTTATATATTTCTCTCAATC  
ATTTTCCAAATTTTTCACGTTGTGTTTACTTACTTTAGCATATCCATACCCTGGAACATCCACAAAAATAAGTTGTTTCTATATTT  
ATAAAAAATTAACGTTTGCCTTTGCGGGGTTGCTGTGATGTACGTGCCATATTTTCTGCCAATCATACTATTGATAAATGTAGAC  
TTACCTACATTAGATCGACCGCTCAGTGCAACTTCAGACAATTCTGTTTCTGGATATTGTTCTCTTTTACTGCACTAATGATTAATTC  
TATATTATTAGGATTAACCTTTCATTTTATATCCTCACTTTTTTATATTCTCTTCAACTCTACCATTATATAATTTGAACCTTTCGGT  
ATACATTATAAAAAAGCTCCGATCAAAGTTAAACTATTTGAGCGTCAACTTTGATTGGAGCTTTTCACTTTTATAACACATCAATGA  
TTAAGCTGATGTTTACTATTATTAATTAATTTGCCTTCTGCGTCGTATAGTTCTGGTTCAGTTTCTTCAATTAATTGTTTGTGCTGTA  
TAACACTCTCGTTACATTTTCGTTAGAGGCACATCAACATAATATCGATTACGATTCTTCTATGATTGAACGTAAACACGCG  
CACCTGTTTTTCTTCAATTGCTTTTCTCAATAATTGCTGATATAAGCTTCTTCAAGTAACTCTAAATCCACATCAATTAATCCAGCAT  
TTAGTATATTGTTTCAAGTGCATTTTAGGTTGCGTTAAGATGTTTTCACGCAAGTTACATCTAATGTTTCTAAATTAGCTACAA  
TTGGCACACGTCGGATAAATTCAGGAATCAAACCATAGGCTTGCAAATCTTCTGGGCGAATTTGTGCTAATAATGCTTGTTCGTCAT  
ATTTATCAGCTTCATTGCTTGAGAAACCAATAACTTTTTACCAAGACGGCGCTTAATCACTTCTTCAATACCATCAAAGGCACCAC  
CAAGAATAAATAAGATATTTGTTGTATCAATTTGAATCATTTCTTGGTTTGGATGTTTGCCTCCCTTGTGGCGGAACACTTGCAGT  
CGTACCTTCTAAGATTTTAAGCAATGCTTGTGTAACACCTTCACTGAAACGTCACGTGTTATAGATGTGTTTTGAGATTTACGTGCA  
ATTTTATCAATTTTCATCTACATAAATAATACCTTTTTTCGGCTTTATCAATGTCAAAGTCAGCTGCTTGAATTAATCTCAACAAGATAT  
TTTCAACATCATCGCTACATAACCAGCTTCAGTTAACTTGTGCTGATGCAATTTGCAAAATGGTACATTCACGCTTCTGGCATATGT  
TTGAGCTAATAATGTTTACCACCTGTTTGGGCCAATTAATGCAATGTTACTTTTTTGTAAATTCACATCACTCTTCTTTTGGTCTTA  
ATGTTGAAATACGCTTATAGTGGTTATAAACAGCTACAGCTAAAGATTTTTTAGCTTTTTCTTGACCAATAACATATTCGTTTAAATG  
ATCCATAATTTCTTTAGGAGTAGGTAATTCGTGCATCGCTTCAGAAAGTGTTTGAGCTAATTTCTTCTCGACGATTTCTGAGCATAAT  
TCAATACACTCATTACAAATATATACACCACTTCTGCTACAAGTTTTTTTACTTGATCTTGGTCTTTTCCGAGAAAGAGCATTTC  
AATTTTCTTCTATCTTCAATTGAATTTAAACATTTCTTTTACACCCCTATTGCTTAAAGACTATACTAGATTGGATATTACAATGCAACAT  
ATTAACATACAACTTTTTTGCTTAAAGAATAGTAGCAGATACATAAGCTATGCATCTGCTACTCATTTTTGTAATTTAATATTTAATG  
ATATCAGTATTACCTAAAGTATTTTGTATCTTCAAGCTGAGATTAATAATTTGTTTACTCATTTTTTCTAATTTCTTATCGATATCTTC  
ATCAGTAGCTTCGATTTTTTACGTTTCAGCGATTCGAGTTAAAGTTAAGTTAGTTTAAACACGTTGTTTCTGCACTGCTTTTCAATGCT  
CTCTTAATTGAGTTTCATCTTGACCTGAGATTGGAAGTACGTTTGTAAATCTAAACCTTGTGTTGAATTTTGTGCAAAATTCAG  
CACCATACGATCTAATTCAGTATTAACCATGCTTCAGGAATATCGATTGTTGTATTATCAGTAGCTTTTGAATCGCTTCTTCTTTTT  
CAACATTTTCAGCATCTGTAGCTTTTTTGTTCAGCTAAACGTTTACGTAAGTTTTCTTTGTACTCGTCTACTGTATTGCTTCTGCATCT

AATTCATTAGCAATTTTCATCTGTTAATTTCTGGAACTTCTTTAAATTTAATTTCTGTTAACTTTTGTGTTTGAAGTTGCTTCTTTACCAGC  
TAATTTCTTCAGCATGGTATTCTTCTGGGAATGTTACGACAACATCTTTTTCTTCGTCAACTTTCATACCTTCTAAATGCTCTTCGAAAC  
CAGGTATGAATGAACCTGAACCGATTTCTAAATCGTAACCTTCAGCTTGTCCACCTTCGAATTTCTTCCGTCAACTGAACCACTAA  
AGTCGATGTTAACTGTGTGCGCCATTTTCAACAACACCATCTTCTTTAACTACCATTTCAGCTAAATGTCCTAAGCTGTGGTCAATCGC  
TTCTCGTAACTCATCATCAGATAATTCAGTTTCTTGTGTTTCAATTTCAAGACCTTTATAGTCTCCTAATTTAACTTCTGGCTCAACTA  
TAACTGTTGCTTCAAAAATGAAATCTTTACCTTTTTCATTTGAGTAACACTTACTTCTGGTTGTGCAACTGGTTTAAATATCAGTTTCG  
TCAATTGCTTCACCATAAGCATCTGGTAATAAAATGTCGATAGCATCTTGATATAATGCTTCTACACCAAAAGCGTTGTTCAAAAATT  
GGACGTGGCACTTTACCTTTACGGAATCCAGGTACGTTAATTTGTTTAAACACTTTTTTGAATGCTTGATCTAACGCTTTGTTTACTTT  
TTCTGCAGGAACAGTAACAGTTAATAAACCTTCGTTACCTTCTTTTTTCCCAAGTTGCTGTCATGTATATACCTCCATGATTAA  
CTAATTTATTTTTCAACTTCCCATTATATATCATAGGCTATTCCCTATACAAACATTGAAATCACACGTTTATATATTTGTAATCA  
ACTTTTTCTGTCAAAACCTATATTAATAATGCTGAGTATTATTTGCAACAATTTAACTATTATTATTCAAATCTAATTGCTGAATAAAA  
TTAAATGCATCGATACTTTGTAATTCACATTTAAGTCCTAACATATTTTTGAAATAACATTTCGTATGCATTAATCCATTTATTCGTTTC  
AAACAAAGTTTCAATATCAATTGGATAAATCATGATAGAGTGATTATTCATAATATGGTGTGCTTCTTCAGCGATATGTAAAGCACC  
ATCATTTAATGTTTCCATAACGTTAGGTATAACTTTTTCTTTCAGTGTTGTATGTTCTAGCCCATTAAATAGCTGGTACAAAAGTTA  
CATCCATACCATACTTTTCAATTGTCTAGTTCTTGTGTACAAATTTGCAAACCTTAAATACTCAATCATTAACTAATGAGGTTATAACT  
GTACGTATTAGATTTTAAATATATATAATACCGTTTCTTGAAATTGAAAATGACCATTGTCTATTAACCTTCAAAAATCAAGTGCGTCTGT  
TCCCTCATTGATAACGATATCAAAATCAGTTAATGACTGAGTCAATCGTTTTTCATCTTCAATTAATTTTGACTTAGCAAATTTCTTTAA  
GAGGATGATAAGTCCATTTGTTTGTGATCTTTGACTTCATCAATAATTTGATGAATTAATTTGACTTACCGCTTCAAAAATTTGCTCCAA  
ACCAATCAAACTTTTCACGTAATAAAATCATCAATGCATCATATGTTGTATGCCAGTTTCAATAAGCAATTTGTTTCTTCTCTTAAT  
TCAAGAAATGACCCCGTCTCATATAACATACGGCATTTCATCATTGCTATTTCTTCAGTGAGTTCAAATGACGTTTCATATTGCACAA  
TATATTATACATCAGGTATCAATTTTGGTCTTGTTCAGCACGTTTTATATCTTTATATAACTTTTTCGAAGAGTTAGGAACTGAAT  
AATATCTGACATATATGTCACCTCGTTTGATTATAAATCTTGAAGGATTAATGCGCTCCACGTTTCGAAATCATCATATGACTCTATG  
TTGCTTTTTCAACCCATTTTATTCTGTAAGTATCTGTTTCTTAGCTTCTACATCATTCTGACTTACAGTGATTTTAAATACACACC  
AATATGTACCTTGCCCACTTCATTATTATCTGTCATTAATAAAACCGATATATCCATATTTTGTGAATCTTGCTCACTTAAACCTACTT  
CTTCTTCTAATTTCTCTCTGTGCATTAACCTCTCAATACTTCGTTAATAGATTCTGCTCCTGGAACATCATTTCATATGACCGCTACACCT  
ATTGAAGATTGTCCATCGCAATCGAGCTTCTCCACCGCCAGATAATCGTTCATACATAATATCTCGCCATGCTCATTTTCAAGTAAAC  
AATAAGAAATGAGTTGTTTATATGATGGATCCTCTTCCCATATCGCCGCGTCTGCTTAACTTCATATTGACTTAGCGCATCAAAAATATT  
TTGACCTTCTGGTTTATTCTTATTTAAAAACCCATTGAAAGTATTCTTTTCATTATTAATAAATAATTTCTCTAGGTACTACAATGATT  
GTTTCATCAAATTTAGACATCGTATAAACTCCTCACTTTAATGTTTGTCTCTTAAATGCATTTTAGCAAATATGTCATATTTAGCG  
ATTAATGTGGCATTTTGTCTTTTTAAAAAATAAAAAAGAGATGACAATGCCATCTCTTTTTTATAAGTGTTATTATTTTAAAGCATCT  
TTAGCTTTAGTTACTAATTGAGCAAATGCTTTTTCTGTCAGAAATTGCGATTCTGTGATAACATTTACGGTTAATGTCGATACCAGCTT  
TTTTCAAACCGTTCATTAAACGTGAGTAGCTCATTTTCATGTTGACGAGCTGCTGCGTTGATACGTGTAATCCATAATTTACGGAAGTC  
ACGTTTACGTTGACGACGGTCACGGAAAGCATATTGACCTGATTTTCATTACTTGTGCTTAGCTACTTTGTATAATGTATGTTTTGAA  
CCGAAGTAACCTTTAGCTAATTTAATCGTTTTTTACGACGCGCTCTTGTACTGTTCCACCTTTAACTCGTGGCATAAAAAATCTCT  
CCTTAGGTAATCTCTACCGATTCTGTATTTGTCTTATTTTGTATGCTAATAATTGTTTACAGTTTCATATCGCTCTTAGACACT  
AATCTAGCTTTACGTAATTGACGTTTTTGTAGTGCTCTGTTTGGCAATAAGTGAGATGTGAAAGCTCTTGAACGTTTTAATTGAC  
CTGAAGCAGTTCTTTTAAACACGTTTAGCTGCTCCGCGGTGAGTTTTCATTTTTGGCATAATATAAGTCCTCTCTGTAATAGCTTTAATT  
ATTTTTAGCTGTTGGCGCTAACATGATAAACATTTGACGCGCGTCCATTTTAGGTTTTTGTCAACTGTTGCTATATCTTTGCATTCA  
TCTGCATATTTTCTAGCACAGGTTGACCAATTCCTTATGCGTAATGGCACGCCCTCTGAAACGAATAGATACTTTACATTTATCGC  
CTTTAGTTAAGAATTTACGTCGGTTTTTCAACTTAGTTTGGAAATCATGTTCTCTCAATTGTTGGACTTAAACGAATTTCTTTAACATTG  
ATAATTTTTTGTCTTTTTTCATTTCTTTTTCTTTTTCTGTTGTTTGAATTTGAATTTACCGTAATCCATAATTTCTTGAACCTGGTGGTT  
TCGCATTCGGTGCAACGACCACTAAGTCTAAATCTACAGCTTCAGCCATTTCTAAAGCTTCACGCTTTGATTTAACACCAATTTGTTT  
ACCATCTTGACCGATTAAACGTAATCTTTTTGACGAAATTTTTGTCTAGTTGATTTGCTTTTGTGATCTTTGCTGATGACCTTCAAACT  
ATTTTTACGAAATTTGACCAAGCAAAAAGGAAGCAGGTATAAAATACCCGCTCTTCTTATACACAGTTATGTGTAATGTGATT  
AACCTGCCAACTGCTTTATGCGTCGCTACAGGTGAGAAGCGGGTGCTTCTACTTGGTTGCTTTTCGTATTCAACGTTGTTAATCATATC  
AACAATTCACATTTAAGTCAACACTATAACTGTAATTAATTTTATTTTAACTTTTATTTTCATCCATTGACACGCTTTGACGTAATCT  
ACTTGTCTAATGGAATTTTTTCTGTTTATATCGAAGCTTATGATAAATAAAGAAATGCTAAAAATACTGGGATTCCCATATACGTAA  
TTAAGAATCGACTAAAATTAATAATCTCTGTTTTAATAAAGTCAACATCTTGACCAATAAATACTACAATACATAAAAAGCCAGCAA  
ATAATGGTCCGAATGGGAATAATTTAGCAGTATATTTAATTTAGATTTGTCTATAATTTGTTTATCAAATGCTCTTCTAAATCGATA  
ATGACTTACTGCTATACCTACCCAAGCAATAAAACAGTTAAACCACTTGTGCAACGATATATTCGTATGCACCTTTTGTAAAGGCT  
TTGTAATACGAAAATTAATACTACAATGATTGCTGTAAACGATAACGACATATATGGCACACCGTTTTTATTGTTTACCAAAATGCT  
TCAAACGCTAATTTATCTTACTCATTGAAATATAGCATTCGAGTTGAAGCATACATACCTGAGTTACCTGTGATGACACAGAGCTT  
AAAATGACTGCATTCAAAATGATGCTGCAAAACGAAATCCAGCATTTTTTAAACACTAATGTGAATGGAGACGTTGCTACATTATCA  
CTACCACCCATTAATGCACTACTATCATAAGGAATTAACATACCGATAACAAAAATGGCTAAAATGTAAAAATAATAAATTTCTCCA  
GAATACTTGTTTAATTGCTTTTCGGCACAGCACGTTTACAGGATTTTCTGATTACCAGCCGTAATACCAATTAACCTAGTACCTTGAAT  
GAGAAACGACGATTAAGAATACACCTAGAATTGATAATAAACTTCTCTCTAAGTTGCCACCAAGAATAGGACCTTCACCTTTATTA  
AATATTTGCAATCTCAACATGACCACCCATGATTCGGACAATCGTTAATAAAACCAATTGCAATGAAAACAATAACTGTAACCACT  
TTTATCAATGCCAACCAAGTATTCACCTTACCATAGACGCGAACTGATAACGAATTCAGACTAAAAATTAATACTAAGAACAACGC  
ACTCCATGCCAAAGCGGGTATGCCTTGCAATGGTGCCAATTTGAATGACTTGTGCTGCAATGCTGAATATCTGCTGCTACAGTTAC  
TACCAGTTAAACCAATGATTCCAACCAAGCGCAAAACCTAAAGATGGATCAACAAATCTTGAGCATATGTACTAATGACAACTG  
ATACTGGCAAAATACGTAGCCATTTGCGCAAGTGACGTCATTAAGAAAAATACCATTATTCCGATAATTGCGTATCCTATTAATGCAC  
CCAAAGCACCTGCATCATGAATTGCTCCACCAGAAGTTACAAATAAACCTGTACCAATACAACCCCAATCGCAATCATAGAAATA  
TGACGATCTTTAAGTCCCCTTTTGACAACATTGTTACTTTTCATTTTGAACTTTTGACATATAAGCTCCCTTTCCATGTTTTAGAGGCCA  
AGAAATAAATAACCTTTATTCATTTTCATACCCTTTTTTACAGAACATAGTGATATTAAGTAAGTAAAGTGGCTACATACCTTTAA  
GATATGCAACCACTTTGGCAATTATCTATATAAGGTAGCACATCACATCTGTGTGACAGTACAGTTTCTATTCGAAAACCTGTCCCAAT  
AGATATAATTTATGGTTTATATCTATTTCCGGCATCTTTACCTTTCACTTGTTCAACTTAGGTACCATAAAATACTTCTGACAAGTTACTA  
ATTAACATGCAACCTTAACCTCAATTTAATATTTTAACTAATCTGTAATATACAGGATTCATCAGCATAATCAACCTGTAAAAAC  
TTGATACGCAATAAAAGTTTACAGCATTTTATTCGCAACACTGTCTATCTATGTTTTTTTCAACGAATTCATCACTAGATTCCAG  
ATAAAATTCATCTTTTTCAACTGTTTCTTGGTCTTGCATCCATATTGACGCACATTCACTTGATTATTTTCAACTTCTTATCCCCAAC  
TACGATTTGATAAGGTATTTTTTGCATTTGAGCTTCTCTAATTTTATAACCCATTTTTTCATTACGGTCATCAATACTTACACGAACAC  
CTTGAGATTTCAATTCATCTTGCAATTGGCGCGCATAATCATAATGTAAATCAACGTTAACTGGAATGATTGAACTGTTTTGGCGC

TAACCAAGTTGGGAATGCACCTTTAGTTTCTTCAGTTAAAAATGCTACAAATCGTTCCATTGTTGATACAACACCACGATGAATCAC  
AACTGGACGATGATGTTACCATCTTGACCAATATAAGTTAAATCAAAACGTTCTGGTAATAAGAAATCAAGTTGTGCTGTTGATAA  
TGCTCTTCTTTACCCATCGCTGTTTAACTTGAACATCTAGTTTCGGACCATAGAATGCCGCTTCACCAATCGCTTCTTCGTACGATA  
AGCCAAGCTCATCCGTCGCTCTTTAAGCATATTTTCAGCTTTATTCCACATGTCATCATCAAAAGTACTTTTCTTTATCTTCAGGG  
TCTCTATAACTTAATCTAAAGCTATAATCCTCGAAACCAAAGTCTTTATACACATCAATAATCATGTTTACAACGCGTTTGAATTCTT  
CTTTAATTTGATCAGGTCGAACAAAGATATGTGAATCATTTAAAGTCATACCACGAACACGTTGTAATCCTGTATACAGCACCACCTTG  
CTTCATATCTATGCATCGTTCCCTAGCTCAGCGATACGGATAGGTAATTCACGATATGAATGTGGTTTATTTCGCATAAAATCATCATATG  
ATGTGGACAGTTTCATTGGACGTAATACCATAGATTTCAGTTTCATCTAACTGCATTGGTGGGAACATATCTTCTTGATAGTGATCCCA  
GTGACCAGATGTTTTGTATAAATCAACATTAGCAAGTACTGGTGATAAACGTTGGTCATATCCCATGCTAACTTCTTTATCAACAAT  
GTAACGTTCAATTTACGTCATATTTGTTGCACCGTTAGGTAACCATAAATGGCAAACACGACCAACTAATTTGGCTATTTGTGAATAG  
TTCTAACTCTTTACCAATTTTACGATGATCAGCTTCTTTACGCTCTTCTAACATTTGTAAATGTGCTTTCAATCTTTTTTATCAAAAGA  
AAGCAGTACCGTATATACGTTGTAACATTTTGTGTTACTATCTCCACGCCAGTATGCACCTGCTGTAGATAATAGTTTAAACTCTTT  
AATTTTAGCTGTTGATGGAACGTGAACTCCACGACATAAATCAGTAAAATCACCTTGACTATATAATGTTACATTTTCATCTTCAGG  
AATCGCGTCGATTAATTTCTAATTTGTATTTCATCATTGCTGAATAACTCTTTCGCTTCATCTCGTGAAACCACTTTTCGTTTCGATTTTCA  
TATTTTCGTTAACGATTTGTTTCATTGTTTTTCAATTTGTTTCAAAAGTCATCAGATGAGATGTTTTGGTCAATGTCGAAGTCATAGTAG  
AATCCACCTTCTATTACAGGACCTACACCAAATTTAACATTACCATATAACCTTTTAATCGCGTGTGCCATTAAATGTGCAGTAGAA  
TGACGTAATACCTTAACGCTTCTTCACTACCTGGTGTCAAAATTTCAATTTGATCCATCAGTTTCAAGCGGTTAGTTAAATCTACAA  
GTTGCCCGTTAAATTTGCCGGAACAGCTTTTTTACGTAATCCAGGACATATTTGATTGTGCTATATCTTCAAGTAGTAGTACCTTTATC  
AAAGCCTTTTTTATTACCATTGGAATTTGAATATTAATTTGTTTCCATGTTAAACCCCTCTATTTGCTTTATAAAATACTTTTATCTGAC  
CTCGTTAAAAAATTGAACAACAATCATCGTTTTTAACTTAAACCTATTAACAATAAACAGGGAATTTATGACACCAACAAAACATTTA  
TGCTGAAAAAACCACAAAAATCCCGCCCTATACAAGGGACGAGATCGTCGTGGTACCACCTAGTTATCTAATACAATTTATGTAT  
TAAATATCTCTGCTTAAAGATAACGGTCTTGATCCGGGTATTCATTACAAATACCATAAATGAAGTAGTAATCATCTAATTTATTAAC  
CATATTCTCATCAAAACATGGCTTCTGTGTAATATTGATTAGATCATCTTGCTTCAATCATTTAAACGATTTAGATTTGTATTTCATT  
ATACACCAATCATTTTAAATTTCAATTTGTTTCTGAAATTTTCTCCTGATAAAAAAGTATGGTGTGACAAAAGATTTGACACGTTCAATA  
ATACGTGCTGCTTTAGTCTTCTTCCACATCAGGATCATCGCTAAATGATGTTCCAATTCACTATAGTCAAAATTAGAATAAAGA  
ATGTTGGTAATTCATGAACCATTCGATAATGTAGCAAAGGTCCAATTAACCTCATCTCACCATTGGAGTCACTTCTCAGCCCCAAT  
ATCATCAAGCATTAAAAATGTTGCTTCTTACGCGATGTAATTTCTTTTCAAAAGAACCATCTTTAAAGCCACCTTTTAAATGTTCTA  
ATAAATTCGGTAAATAAATAATTGTCGAACGTACCTTCTTAGATTTGAGCTGATTGCAATTCACCTAGAATAAAAGATTTACCT  
GTCCCAAATGGACCATAAAGGTAAAGGCCTTTCACCTGTTCCCATTAGTTATTGCTGTACAAATATCATCTGCTGCCATAGCTACAT  
CAAGACGGTCTCGATGATTATATAAATATCTTTCAATTTGGCATTAAAGTATCTCGTTGCATATGATGAGATGTAATTAGCTCAGC  
TTCAAAGCGTCTTCGTCGTAATTTGATTTTACATGGGCATTGTAAATAGCGTATTTTAATTCGGTTATTATCAACATATAACTCAGGC  
ACATGCCCTTTACGAAATTTGGACAATCAGCAAATTTATGACCGTCATAATGTTTTGTTGATCTTTTATCTTGTAAACACATTTA  
AGTCTTCATCAATCATAGCATTTCGTTAATTCAGCTCGATGCGCTTCCAAAAATTTGCTTAACATCTGGGTCATTGATTACTTCTTTTTT  
ATCTTTTCTATTCTTTTTTCAAAGTCTGCGACGTGTTAATATACATTTTAAATGCTTCATTATTGACCTGCTCTCTCCCATTTTTTATG  
ATAATTTATCTAGAAATGTTGTCGATCTTGCTCTAATTTGTTGATCATCTACGCTATTATCTTTAGCCGAATCTTCTTCACTAGGTTTA  
TCTCTATTTTCTAACCATTTAGGTGTTTTTCTTTTGAATACGATTACGCTGCCCATAGTATGAACCACGCTTTTGGTAATTTCCGCT  
AGAACCCTCATTTTTAGATTGATTAACTTTTTTAGCGTAATTATATGCTTCTTTAGCTGTCTTAATACCTTTTTTCTTCAAATTTGATGC  
TATTTCCAAATATACGCTTTAGGAAGTTTCATATCTTCTTTTAAACATGACAAATGCAACAAAATATTAATGACGCCAAAAGACAT  
ATTTTCACGTTCAATTAATCTTCAACCATTGTCTTTTGGCATATAGTTGGTCTGATTTAGACCAAGAAGTAACATATCAATTGGA  
CTCGTTTGTTCAGTAACCTCAAACCATTCATCACTTTGTGGCTTTGGATTCACTTCTGAAGATTTACCCGTCGAAGATGATGTAGCAG  
GAGATTTACCTGTAATTTAGGCATTTGATTTTCGTGTTCCATTAAGTAATACGAGCGTGCTTGTTCACGATTTCTTCAAAGGATAA  
CTGTTGTCCACTTGTAATTTGAATTTAAATAACATGCTTCATGCCATCTGCTGTTAAACCATATAAAGTCGCGAGTTGTGTAATTTAA  
CGTTTGCATCTTTGGTAACCATGCTTGGACTAATAAATGTTTACCTAACATTTGTCTCAACATTTCAAAGTCAAAAGACATTTTG  
ATAAATCGATACCTTGGTACGGTTCATTAATCGGAATATCACTTGTATCGATATCTATTTTTGTAGACGGCACTTTAAAAACATCAGT  
AAATTTGTCTTGTACCTGTTTAAATTCACCTCAAATCAATTTGTTGATACTCAAAGTATTTCTTCAACTCATGAAATCGACGATGCTCG  
ACTTCACTATATAAAAAAGATTGACAACATTGGATCATTAAAAAATAAATGTGCTGAAGGCGGTTGAATTAATTGGTAAACAAATTTG  
TGTTTCTTGTTCATCATGTTTGACAAACGCCTTTAACAATCCAATCGCTTCAAGTAAGTCCATTGTTGTCTAAACTCTAGTAAATTA  
ATTTTAAGTTCATTCATAAAAAATATAATGAGAAAGAATCAATGTTTCATTATGACTTCTTTAACGAATTGAGTCATAAAATGATAT  
AAACCCACTGCTTGCCTTCAATTTAGCGGTGTATACAGTCGATTCAATACCTCTAAATGATTCGATTTTAAATCAAAGTGTTCATA  
ACTTTGAATTTGATCCTTTGGTCTTAAAGCCGAATTCGAAGGCTTGTGCTCCCATTTAAGCATCACTCCGTTTGTTCGCTTAAATCC  
CTTGATCGATGCTAACAATTTGATCAACATCTTTAAATCTTTATAGCTGATGCAAAATCAACATATGAAACTTGATCAACATGCA  
TTAACAAGTTCATAAGCTGTTACCTATATCTCGTGAAGACACTATCCGATGACCTTCATCTCGTAATGCCATTCAACCTTGTGTTGT  
TATGTCTTCAAGTTGTTGATATCTAACTGGTCGTTTCTCACAAGAACGCACAAGTCCATTAAGTATTTTTCTCTTGAAAACCTGCTCT  
CTTGTGCCATCTTTTTTCACAACTATAAGCTGACTAACTTCGATATGTTCAAATGTAGTGAAACGTTGCCACAATTTTACATTCTC  
TTCGTCTTCGAATGGCATTAAATTCATCGGCATGCTTGAATCTACAACCTTTAGATTGTGTAGAAATTACATTTCCGGGCATTTTCATTAC  
ATCACCTCTTTATTTTGATTATGCCTAATTATACTATAAATCTAGAGATGAAAAAAGAATCCCTCAATTTAATTCATTTAACCAAAT  
AATGAAACAATAAAAAACATTTATATCGTTACTTATTAAGTAATTTGCATGACAATATTATGTATTAAAAAATAAAAAACCTAACTC  
CGAAGTCAGAGTTAGGCTATAAATTAATTTGATTAACCTTGCACTTACAGTTTCTTTTGATGTCAAAGTGCTCCAATTTTGCTCAGCAA  
CATCTACAACCTATTTTGAATAACCCCATTCATTATACACCAAGCAATAAATTTACTTTTATCCCTGACATGACCAATTTTGATTTT  
GCATCAAAATAGCTGAATTTGGATTAGTATTAATAATACACAGACACTAGTGTGATGTTGCTGACTTATGATACCTTCTTAAACCT  
GCATTTTCAAAGCTTGGTTTACTTCTTCTGCAGTTACTTCTTTTCTAAATCAACAATAAATCAACGAGCGATACATTCTTTGTTG  
GTACACGTAATGCCATGCCGTGTAATTTACCTTCTAATTTCTGGTAATACTTCTTTTAAAGCTTTCCGCGACCACTAGAAAGTAGGAAT  
AATGCTTTCATTACATGAGCGTGCACGTCTTAAATCTTTATGTGGATTATCAATATTTTTTGGTCAATTTGTAATAGCGTGAACAGTA  
GTCATTAAACCATTAACTATTCCAACTGATTATTTAAACTTTTGCAACTGGACCAATGCAATTAGTAGTACATGAAGCATTACTA  
AAAATGTCAAATGCTTCTATATCTAATTTGGTTATCATTTACGCCTTTAACTACCATTTGAACATGTCCACCTTTTGAAGGACCAGTTA  
ACAATACTTTTTTGGCACCTGCTTTAATATGTGCGATGGCTTTATCACCATGATTAAATTTACCAGTTGCATCTATAGCAATATCGAT  
ATCTAATTTCTTCCATGGCAAGTTTTCAGGATTGCGATCAGCAACCAATTAATTTTATGATCACCACCTTGCAATCCATTTTCAATC  
GGTTCAACTTTTAGATTATATTTCCATGTGTTGTATGCTAATGATTAAATGTGCAATTTGCGGTTGGATAACTAGCATTATTCG  
CTACTACATTTTAAATTTTTTATTTGTAATGCAATACGTAATACCATTCTTCCAATTCTACCCATACCATTAAATTGCAATATTCGTTGAC  
ATTTAAAGCACCCCTTGATTTTTATGTGTTTAACTTTATGGAATTAGTATAGCATATTATATGAAATTTGAAAGCGTTTTCCGTTGAT  
TTATTTATCTTTTTTATAAAAAATAGTCATTACTTACATACATCAACGCGTACGTAAAGTAATGACTTATTTATAGTGAATATTAAT

CTTCTTCTCCGTAATACGGCTTTTCAATATAACCTTCTTCTTCTAACAATCTCTCAAGGTTTTGTTTTAATTCAGTTTTATCCCTAAAT  
TTATCGATAACATGATCGGCCATTTCGGCTTTTTTATCAATAGAAATTTGGCTATAGACACGTGCTTTCGCATCTTCTAATGACAGAT  
TATTACGTTGCATTAAACGATCCATTTGTATACTTTTCTAAGTGTATACAACCCACACTTCGTCTACTGTATTTTCCAATTCATTTTCA  
AATAATAATGGAATATCCATGATTACATTATATCTTGTGTTTTAAATATTCTTGTCTTTTCTTCTCCATAATATCTCGCAGGATAGGATG  
TATGATAGCATTAAATTTAAGCGTTTTTCTGGATGGTTAAACACTAAATCACCCATATAACGACGATTCTATCTACCATTTTCATCA  
ATTGCTTCATCACCAAAGACTTCTCGTACTTGAGCTAAACCTTTACTCCCTTTTTAACAGCTTCCCTGGCTGCTTTATCAGCATCTAC  
TACTTTAAAACCGAATACGGATAAGAGTTCTGATACGTGTGATTTTCTGAGGCGATTCCACCTGTTAGACCAATAACCTTCGGCAT  
AATTTCACTCTTTCTTTATTTTGGACATACTGGACAATAATGACTATTTCTTGTGCGGATGATTTTTGTTTCAATTTGACTTCCACACA  
CTTTGCATACCGGTGCTTATATACATTAAGATGCAATTGCATCTCACCAGTTTTTCCATCAGCATGACGATAATCTGAAATACTTGT  
ACCGCATATTTAATACCTTCTCTAGTACTTCTTAACATAATAAAAAACCACTTCTTGTGTTGGTGTGTTAAGTCTTTTACTTTTT  
TATCTGGTAAAACACCTGCACGAAACAACGCTTCACATGCGTAAATATTTCCACAACCTGCGATTACTTTATGATCCAAAATCACTT  
GTTTGATTGGTTTATTCTTATTAGACTGTTGATGAATTCGATTTAAATAATACATCAATGCTTCATTTGAAAAAGGTTTCAGGCGCTAT  
TTCTAAAAATGAAGGATAAGATGCTACAGACGCAACATTTCTAATTTCTCCAAAACGACGTATATCTGAATAAATTAACCTTTTTGTC  
ATTTGACAACCTCAAAAATAACATGCCAATGCTTACGATAATTAGGTATCATAATATCTTCAAGTTTCATCTACAATGAAAAAACACC  
CGCCATACCTAAATGACTAATTAATGTACGTTGTTCTCGTTTATTATCTAGCTGAAAAACGATATATTTACTTCTCTGTTCTACATTA  
GTAATGGTATAGCCTTCCGATAAAGTTTTAAAGTATCTAATTCATTCCTTTTATAATTGTTTCTTGCCTTGAGCTTTACCTTCGAT  
CATTTTATCCGAAAAATTAACGTGTTCAATTTTTGATTATAACGTAGGGTTCAATTCCTCTTTTTTACATGTTCTACTTCTGGTAAT  
CGGGCATACCATTAACCTCACTTTATTTTGCATCATACCAAGTTGACCACTAATCTGAGTCTACTTTAATGGAACATCTAATTTGCAA  
TGCATTTTCCATTTATTTCTTCTACAAAATCAATGAACTACTTCTGACTAGGTACTTCAAAAATTAATCTGATCTGACTTGTATGTA  
ATAATAGTTTAGCTTGATATGTTGTCTCTTTCATTTTTTGTGCAAAATTAACCATTGCCAGTTTAATGATATCTGCAGCACTGCCTGT  
ATTGGCGTATTCATAGCAGTACGTTACGAAAGCCGCGTAAATTAAGTTACGACTCGTAATATCAGGAATATAGCGTCGACGATG  
TAGCAATGTTTCCACATAACCTAAAGCTTTGGCATCTTTTACAATATCAGACATATATTGTTTTACACCTGGGAACTAGCTAAATA  
ATCATCAATGAATGCTTTTGTCTTTTACGAGTAATACCTAAACCTTTGACTTAAACCATAATCACTTATCCCATAAACAATTCCAAAG  
TTAACCGCTTTTGTCTGACGACGATTAACCTATCGACTTGATCAGCTTCTACACCAAATACTTTTCATAGCAGTTGCTGTATGAATAT  
CATCGCCGTTGATAAATGCTTCTTTCATCTCTCATCTTGTGTAATGTGTGCTAATACACGCAATTCAATTTGAGAATAATCTGCTGA  
TAATATAACGCTATCTTTTGAAGTTGGTTTTAAAGGCTTTTCTTATTTTACGCCCTTCTCAAGTCTAACCGGAATATTTTGTAAATAG  
GATCTACACTTGATAAACGTCAGTTTGCCTAAAGTTTGGTTAAAACGCTGTATGGATACGTTGATCATCTACTAATACCTTTTGTCAA  
TCCTTCAACATAAGTAGACTGTAACCTAGATAATTGACGATATTCTAAAATATAATCAATGATAGGATGTTACCTTGCAATTGCTC  
TAAGACATCTACAGCAGTAGAATATCCTGTTTTCTGCTTTTTTAATAACAGGTAATTGTAATGTCTCAAAACAATACAACACCTAATTG  
CTTAGGAGAATTTATATTAATCTTACCAGCTGCATCATGGATATTTGGAATCAAGACGTCTAATTTTTCTTGAATTTCTTTTTCC  
ATTTCTTCTAAATCATGAACATCTGTAAATATACCAATTTCTTCCATTTCACTTAAAATCTTAGCTAGCGGTAGCTCTAAATCAGCTA  
AGAGTTCTACCTGATTGTATTCTTCTAATTTGTTTATCCATATTTGGTTTCGCAAAGTAAATTCATCAGTAATAGAAGCAACATATGG  
ATTTAAAACATCATCTTCAGGTACCTTAAATTTCTTACCTTTTCCATATATACTCACATCGTCTTTCACAAAACCTTTGACCGTACAAT  
GAAACAACGATTGAACATCTACTAATCGTACGAGATGGATCAATTATATACTGGCCAACATAATATCGAAAGAAATATTTGAAT  
ATCAATTTCCCAATCTATGTGATGCTACATATGTTTTTATGACATATAACGACTTTTTTCTGATTCGGATTTTCTAACCATTTTGTCAA  
GTTCCGGCATAAATTATTTATGTATCCGCATTAATTACAATATGTTTTCTCACCTGTAAATAAAGAGAATTTCAAAATATTATTTGCAA  
ATAGTTACCACCGTCTAATTCGAAATGGATGGCCGCTTCTTTCAATAAAGTAAATCAATATTATCAAAAGACGTTTCAATTTCAAA  
TGCTTTTTCTATTGCATCTTCAACGCTTGCTGATTGATCAATGTCAGCCAACAATTGTTTGAATTTCTAATCTTAAACAATTCGATTT  
TTCTTGTGTTTCATCTTGATGAGTCATTAACGTATCTCAAGTTTTACTTCAATCGGACTATCTACATTAATCGTTGCTAATCTTTA  
CTCATTAATGCATCTTCTTTGCTATTTTGAAGTTTTCTTTTTAACTTTTTACCTGAAATTCATCTAAATGTTTCATAGACACCTTCTACT  
GTGTCAAATTTGGTTTAGCAATTTTATTGCTGTTTTCTCTCAACACCTGCAACACCTGGTATATTATCAGAAGTATCTCCCATTAATC  
CTTTCATATCAATAAATTTGATTAGGTGTTAACCCGTTGTATTTTTCCGCAATAAAGTCAAGGTGTAATGATCAACATCAGTAACACC  
TTTTTAGTGTAATAAATGTTACATTATCCGTTGCAAGTTGTGTTAAATCTCGGTCTCCGTAATAAATTTGTCGAAAGCCCGCT  
TTATCTGCTTCTTTACTTAAAGTTCCGATAATATCATCTGCCTCATAGTTATCTAATTCATAACGTTTAATATGATAAGCATCTAATA  
ATTGGCGAATATAAGGAAATTTGCTCACTTAGTTACAGGCGCGTTTTCTGCGCTCCACCTTTATATTCATCTATATTTTTCATGTCTGAA  
AGTCGTTTTACCTGCATCAACGCTACTAAAAATGATTGGCTTTTTCTTCTTTTAAAATCTTCTCTAGTAACATTGCAAAACCATAT  
ACTGCATTGGTATGAATGCCTGCTTGTGTTGATAACAAAGGTAATGCATAAAAAGCTCTAAAACCTTAAGCTATTACCATCGATTAAT  
ACTAATTTATTCACAATTTTAACTCCAGAACTAATTTATATATATTTTATGATATTCGACTGTGATGTCGTAATTAAGAAACTATC  
TCATAGAGTATTTATACACGACCTAATTTCAATAAAAAACAAGTGCCTATATAGACTTAGCTAAAAAATAAAAAAGACATAATCATG  
ATTGTTCTTGATGAGCACTCCATAAAGTCAAGTTAAAGTCCAACCTTTTGAGATGCACATTATCATTTTCATGATTATGTCCACTTTTT  
AATATTTTATGCTGCTATTTTTAAATTTTTATAGGTAAGAATAAGTTATGAACTGCTGAACCAATGGAATATATTTAACTTTGGTC  
ATTTTTCGGTAATTTCTCATAAATTTAAACCACTCTTGGTAATTTTTATGATTGGTGACGGATGATGCATATAATGTTTCAACGGCA  
ATGATTCCACTGTATAAACCTCTTGTGCTGGATGATCTTTAATTTGTTGTTTTAATAACTGAACTCTTTTTTCATGTTTCATAATGAACA  
TAAATAAATGCACTAAGATATATCACAGCTAAAACCTAGTGATGCACCTTTAATAAAAATTAACATTGATTGACTTATATTTCCGAAAT  
TCTTTTAATAAAAATAATTAATGATTACATGTATCGTATAAACAATCAAAAAATTACCTGGTTCTATTGGAGTAACAATGACTAGT  
GTCGACGCCGAAACACATATTGCAATAAGTAAGGAATATAAAGTGATTTGTGTTTACGATCATTAATAGACAAATAAAATACCTAC  
AAATATCGAAAAACGCAAAGTAATCACATACAATTACGTTTCACAAAACCAACCAATCCAATATCTGTATTTTTATTTAATAAAAACTG  
ATTTGAAAAATAGTAAATAATAAAGCGGTAAAGTGATAAATCCTATCATAATGATACGACGCTTTAATATTGTTAAATGTACATACCG  
ATCATCTTCAAGCAGTAGTAAATAATAAGCGCTGCAATCATACTTAAAAATTATAATCTGACTGAAAATGACACCATATGGAAGTG  
ACGTTGATATCATTTCTGCAAAATTTGAAAAGATACCTTGATTATTTGAAACTGTTGATATTTCTGATCTCAAAATAAAATTTTGTGCG  
ATAATTTGGATTGGAAAAACATAATGATTGTACCTATAGTAGCAATCATAAATGAAAAACAATAATTTATAATTAAGTGTTCGATTGTC  
AGTAAATTCATATAGAAAAGCTAAAATTAATAATGATACAGTGAATAATGTCACATTCTCCATAAATAATTTGACCGAAGAAGCATA  
AAACATAGAATAGTACAGTAACACTTACCGGCTGCTTTTTCTTATATATAATTGCATTAATACAATAATAAATAATAAAGAGTGAAA  
TTAGTGTGATGTCGCATAATTATAAAATCCTGCAAACCAGCCATATGTATCTGCATAAATAGCACTTGGTAAAATTAACATTAAAG  
AAAATGCTAAACAAATAATAGCTTGTCCACGCTTTACAACGTGTAATGTGCATAATCATCCAAATGATGCCCATACTAATGAGACCAT  
ATGAAAGCCAACGTAACCAGCTTACATGTACAGCTATAATTTCAAAGATAATTTCCGATATAGCGACCATTAAAGTATGCAAAATCCTA  
CTTTTAAAAATCAGTATTATAATTGCTAAACCATGTAAATCATCGTATGAGTGGTAGTAAGATACCCATAAAAGTATAAACA  
ATAATATCGCAATTAATAACAGTTGTCTTGTAATTGTAATTTTCACTTTTGTCTAATCTCTCAAAATCTAGTTAAATTTTCTCAAC  
TTGTAGGTGCAAAAATTAATTTCAATATTTTTAATGTATTTCTAATTTTCACTATGATGTTTCTCAATCAAAATAGATAAACAAGG  
TATTTAATATTACTTTCAACAATTTATCTAAATCGCCCCCTCGTCTTTTTCTATGACGAATGATTACACTTGTCTATTCAAGTGTTTAAA  
TTAAGATTTATTTCCGTTCAAATAAAACCTTATTACTTTTTAATTAAGCATCTATTTTAAAGCGGTTACTAAAAATTTCTTTATTATAATA

AATATATTATAAAATTGCTTGATTACACAACAATCTATTACTTATAACTTACAAATCGACATATGCAAATGACAAAATTGACAACCGA  
ATTTATTCCACTTCATTAACCTCTAATTTAATACCAATAGAGATTGGAACGAAATAAAAAAGCAGCAACAACCTTCGTGAAAAATACAC  
GCGCTGTTACCACCTTAATTTTATTCTTTATAATCTTTTAGAATAACTTTGAACGTTGAGCCTTTGCCAACTTGACTATTCACTTCAA  
TATTGCCCTGGTGGGCTCTACTATATGCTTTGTAATTGATAATCCAAGACCTGTCCCACCAGAATCTCTACTTCGTGCTTTATCTACT  
CTATAAAATCTTTCAAAAATACGTTGTTGGTCTTCTAATTTAATACCTATACCAAAATCTTGACTTCGAAAATGACACGAAAGTCAT  
CTCGATACACACGAACGTTAATATCTCCATCTTCAATAAGAATAGTTAATTGCATTTCGTTAACAAATTCGTGATAACTTGAGCAATTTT  
ACTTTCTTGCTTTAACAATGACATCTTTTCAATATCAGTATGAATGGAAATATTTTTTTGATTGGCTTGAGTCATCATATTATCAA  
TAATACGCCGCGTTAAATCTGATAAATTCATATAGTCTGTATCTAACTCTGTATGTTGCTCAATATGCGATAAATCTAACAAATCTGT  
TACTAAAGATTCTATTGATTGATTCTTTAAAAATTATGTTTAAAAACATGTCTAATGATTCCGCATCATTTTTTGCAACCATCAATA  
AGCGTTTCAGCAAATCCCTTAATTGAAGTAATAGGTGTTTAAATTCATGTGAAACATTTGCTACAAAACCTACGCTTTAGATTTTCAA  
GTTGTTTCAGATTGTTATGTCATGCATCACAACCTAAATCCCTTGCAAACCTTTTTTGAGACCTAGTTAAAAATCGGAACGCATGAAAT  
ATCAAAGTACTTGGCATGGACTTGGTTTATTGCAACTTCCAATTGTTTCATAAATAGGTTTTTCAACTTTAAACCTTTCTAAAAATTAAT  
TGCTCAATTTCAGTATTAACATAGCCGTGATAGCCTACTTGTTCATATTATGCGAGATGTTGAACTGTTTCATAATACGCTTTATTTG  
CAACAACGATTTTTCCATTTCGATCTATCATTAAATAGCACTTGAATATTTTCAATCGTTGTTTTTAAACGTTGGATTGAATTTTT  
TGCTCATTATTAAGCTTTTGAAGGCGTCGTGCTAAATCATTGGTAGACACAAAAAGCGCTTAGTTTCTACAACATTACTTTTCAGGTA  
CACGTATGTGATAATAACCATTTGCCAACAATTGTGTTGCATAAGTAACCTTCTGAATGGGACGGATTAATGTACGCTTAAACCTAC  
GGCTTGCAAAATACAGACAAAGGAGTACAACCTAAACATGTCAAAATAAGATATTTCCACAACGTCCAATGCATTCTGTAAATACG  
TTATTGTAACCTTTAATCATGATGATAACCGTTAACCCTTCTATTAAAAATAAAACGTCCTTTTTGTAATAGTCAATCATCTAT  
TTGGGATAGCTTTCAAGTTTGGCACTACTAAACACCTTTTTATCATGTTTAGTTATCAATAAAATCTATATTTTGCTGTTTTACAATTCT  
TTAACTTTATCAATCTCATTTATCTTGGACTAAATAAATATATGATCTTGCATCTGTTGCTAGAGCTTGTTCGTGTTTTTCTGATAAAAC  
ATATGTGATGGAAGCGTGAATAAATGCCTAATGTAACAAAACCTGATAATTAATATACTGCTTATCAATAACATTAAGCGGTGGT  
GAACTTCATCATTTGTTCTTTAGGTCTTTCCAATTTATAGCCTAAGCCACGCACAGTTTTTAATAAGTTGTGGCTTCTTAGGATTATCTT  
CTAATTTATCTCTAAATGACTGATATGTACATCAACAATCTTGAGTCTCCTGCAAAATTCATAATTCCATACCGTATTTAACATATG  
CTCTCTCGTAATGACTCTGCCTTGTCTTTCTATCAAATAAAGCAAGAGTTCAAATCTTTTCGGTGTTAGCTCCAATAAATCATTATGC  
TTATATACTTCAAAAATAATCGGGTCTAATACGTATCGATCCGATGGTAATATCATCGTCAATCTCTTCTACTTCTTTTACAAATTGAG  
AACGCTTTAAAAATGGCTTTACACGGGCAACAACCTTCTAAGTGAAAAAGGCTTAGTCATATAGTCAATCGGCACCTAATTTCAAAC  
CTAATACCCGATCAAATTCATCATTTTTTCGCCGTAAACATTAAGTAAATATAGGGACATAAATTTTTATTGTTCTTACAGTCTTACATACGTC  
AATGCCATCTTTTTTAGGTAGCATAACATCTAAATAAATTAATCTGGCTGTTCACTTTCTACCTTTTCTAAAGCCTCATCACCATCA  
AATGCGACAACAACCTTCATAACCAGCTGTTTCTAAGTTATATTTAAGTAATGTTACGATTGAATGTTTCGTCATCTACTACCAACACTT  
TTTGCGACATGGTATGCCTCCCTAACTTATAATTATATTTACATTATAACCGAACTATTTATAAAAAATAACATCTACACATTATCTT  
TACACATTTTTTACATTACTTTACACATAAAATAAAATACCTTCTATATTTCCCTTCTATCATTTGATGACTTACTCTGGGACAACGAA  
ATAAACTTTTTGAAAAATATCATTTCTATGCCACTACCTATGCATGAGTTTTACTCATTTATTCTTAAGCTTATGTACACAATCGCTTTG  
CCTAATGTGTAAGAAACACTATATAATCAATCATTAGTTACTCTTTATTATTCTATCCTGTTGCCAACTTCAATTCATTTAAAAAGG  
CGAACCTAGCAATTAAGTTGCTAGACTACCTATTTTATTGTTCTATTTTAAATTTTAATCAATTCATCTGCAAAATGCTGATGA  
GAAACTTCTTCAGCACCATCCATTAAACGGGCAAAAGTCATAAGTAACTTAAGGCAATTTGTAAGCAATTGATCTTCAATTTGAATCTGTAATC  
TTATCTGCCGCTTCTTGCCATCTAAATGTTCTAACATTAATACAGAACTTAAAAATTACTGAAGATGGATTCACTTTATTTAAACCTG  
CATATTTTGAGCTGTACCATGTGTTGCTTCAAAAAATAGCATGACCTGTTTCATAATTAATGTTTGACCTGGCGCAATACCAATACC  
ACCAACTTGTGCAGCTAAAGCATCTGAAATATAGTCAACATTCAAGTTCATAGTTGCTACAACATCATGCTCAGCTGGACGAGTTAA  
AATTGTTGTAAGAAAATGTCAGCAATAGAATCTTTAATGATAATCTTGCTTCTTTTTCAGCTTTTCTTGAGCAGCATTAGCAGCA  
TCTCTGCCTTCTTTTCAACAATTTCTGCATATTGTTGCCAAGTGAATACTTGATCACCAAATTCAGATAATGCTAAATCGTAACCCC  
ACTGCTTAAATGAGCCTTCTGTAAATTTTCAATAATTACCTTTATGAACTAAAGTAACTGATTACGGTTATTATCGATAGCATATTG  
TATAGCTGCTCTAACTAATCGCTCAGTTCTTCTTTAGAACTGGTTTAAATACCAATACCTGAAGTTTCTGGGAATCGAATGTTTGCT  
GCACCTATTCTGTTTGTGAAGTCAATTACCTTTTAACTCTCTGTTGACCTTTCTTAAATTCATTAACAGCATAAATGCTTTCAGT  
ATTTTCAGGAAAATAACCATATCAACATCTTGTGGACGTTTAAACAGGTGATGGTACTCCTTAAACCAACGTACCGGTCTTAAACA  
AGTAAATAAATCTAATTTCTGGCGTAAAGCCACATTTAATGATCTAATACCACCACCAATTTGGTGTGTTAAAGGTCCTTTAAACAGC  
AATTAATAATTCTTTAATTGTATCAAGTGTTCCTTGAGGTAACCATTCACCAGTTGTATCAAATGCTTTTTTGCCAGCTAGCACTTCT  
TTCCATTCAATGCGTTTTTTCGCCATTATAGGCTTTCTCAACAGCAGCATCTATAACTCGGCTTGCTGCCTTCCAATATCCGGTCCAA  
TTCCATCACCGATAATAAATGGGATAATTGGTTCATTAGGTACGTTTAACTCTCAGTTCCTTGAGTAATTTTTTCTGCAGTCATAGT  
TATTTTACCTCCAAATTTTACATCTTCATTTTAAATTTGATTGATTATTTTCTTTCTTCAAGCGGGATATACTTACGATTTCGTTTCGCC  
AATATATTTGCTCTAGGACGCATAATTCTATTATCTTTATATTGTTCTAAAAATGAGCAATCCATCCTGCAGAACGACTTACAGCA  
AAGATTGGCGTGAATAAGTCAATGAGGTATTTCCATAGCATGATAAACAACCTCGCATATAAAAAATCAACATTAGGAATTAATCTTTT  
TCTTCTGCCATAGCTTTTTTCCATTTTCACTGACATTTCAAAATAATCTTACGACCAGCGCTTTTCGTAATTTGACGGCTCACTTTCT  
TAAATATTTGCTCTAGGATCACCATCTTTATATACACGATGACCGAAGCCATTACTTTATCTTTATTAGCAAATTTTTCATCTAAG  
TAAGCATCAACATTTTCAATTGACCAATCTCAGATAACATCGTCATAACTTGTTCGTTTGACCAACCATGTAATGGCCCTTTTCAGAG  
AACCTACAGCTGCTACAATACCTGAGTACATATCTGACAAATGATGATACCGCACAAACGTGCTGTAATGCAGATGCGTTCAACTCAT  
GATCAGCGTGTAATAAAGTGCTTTATTGAAGGCTTCTACTTCTATATCTGTTGGTAATTCGCCACGTAACATATATAGGAAGTTTGC  
CGCATAACTTAAGTCAGGATTAGGCTTAAGTGGTCTTTATCTTGTCTTACTCGAGCAAAACGCTGTAACATAATGATGCTACTTTAGCC  
TGTATACGCAATGCTCTTTTCAACGATTTTTCATCTGATTCAATTTTTCAGCATCAGGATCGAAATGTGCAATATATGATAATGACGTAC  
GTAATGCTGTCTAGTGGATGCAGTGTATCTGTAACATACTCTCAAAATGTGATATACACAGGAGTTAATGATCATGATTGATTAT  
ATTTGCTTTTATAGTAGCAAGCTTCTTCTGTTTGGCACTTCTGTTTCCATAATAGGAAAATAACTTCTTCAAAATGCGCATATTTT  
AGCTAGATCATCAATATCATAGCCGGCATAAGTCAATTGACTTTCAATAAATTGAACTTATTTTAGTCTCCGCTGCGATAACCCCTTCT  
AAACCTCTTTGTAATTTCTGCCATGATAAATTTCCCTTTTACTGTTTCTTTATGAAATGGCTTTCAACTAATATTATAGCTAAACGCATT  
TCGTTTGTGAAATATAAAAACTGGCATTATATGTGCAACAATTTTTTTGTAATCTATGTAATGTACAGAAATAGCCACAAATAGC  
ACCATTAAAGCTTTTTCAAGATGTGAATAATCCATGAATTTTACAATAGAATTAATTTTCAATTGGTTATTATATATGATTATAAAA  
ACCAAAGTATATTAACATGGAATTTTACACATTTTACCAGAAAATAATTGTATATATCTCAATATAAGTGCATAATAAACATATCTA  
TATTTAAGGGAGATGTATTATGGCTGAAAAATTACAAAGGGAACCTGAGCAATCGCCACATACAATTAATTGCAATTGGCGGTGCAA  
TTGGTACAGGCTTATTCTTAGGTGCTGGTCAAACGATTGCATTAACGGGCCCTTCAATTCTATTAACATACATCATTATAGGATTTAT  
GTTATTACGTTTATGCGAGGTTTAGGAGAAATCATATACAGAATACTGAATTTAAATCTTTTCAGAGATGTAACCAATACATATATT  
GGGCTTTTGCAGGATTGTTTACCGGATGGACATATCTGTTTCTGTTGGATTATTACAGGTATGGCTGAAGTAACGGCTGTGGCAAAA  
TATGTTAGCTTTTGGTTCCAGAAAATCCAACTGGATAAGTGCATAATTTTGTGACTGTTATTAATGTCAATTCAACCTACTTAGCG  
CAAGACTTTTTCGGAGAATTAGAATTTTGGTTCTCTATCATTTAAATAGCGACAATTATTGGTTTAAATAGTAGTTGGTTTCGTCATGAT

TCTATTTGCATTTAAAACTCAATTCGGGCATGCCAGTTTCACAAAATTTATATGAACACGGCATATTCGCTAAAGGTGCTTCTGGATTCTTTATGTCTTTCCAAATGGCACTATTCTCATTTGTAGGAATTGAAATGATTGGTGTTACAGCTGGGGAAACAAAAGATCCAGTTAAACAAATTCAAAAGCAATTAACAGTGTACCCATTAGAAATTTAATATTTTACGTTGGGGCGTTAGCGGTTATCATGTCTATTATCCCTTGGCAGCAAGTTGATCCTGATAACAGTCCATTTCGTAATAATTTTCGCATTGATCGGTATTCCGTTTGTCTCGGGCTTGATTAATTTTGTAGTATTAACCGCTGCTGCTTCATCATGTAATAGTGGTATATTCTCAAATAGCCGTATGCTTTTTCGGTTTATCAAGTCAACAACAAGCACCTCCGAACCTTTCTAAGACGAATAAATATGGCGTTCCACATGTTGCAATCTTTGTCTCATCAGCATTATTACTTGTGGCAGCATTACTAAACTATATTTCCAGATGCGACAAAAGTATTTACGTATGTGACTACCATCTCTACAGTGTTATTTTAGTTGTATGGGGTCTGATTATCATTGCATATATCAATTATAGTCGTAAAAACCCAGATCTACATAAAAAATGCTACGTACAAACTATTAGGTGGTAAATATATGGGCTACTTAATATTTGTATTCTTCATTTTGTGTTCGGGTATTATTTATTAATGTTGATACAAGACGTGCAATTTATTTATTCGGATTGTGTTTATACTTTTAGCATTTATGTACTTAAGATATAAACGATATCGCTGCTAAATCAAATAAATAACAACAAGTTTACCCTGTGGAATATACTAAAGTTCAACAGGGGTTTTTATATGCAACTTATAATATTAATTTGCGTACTTGGCTCAATACTTTTACTTTCTCATCTATTTATAATGTATCATTTTCAGAAATACATCCATACTTCTATTTTATAATAAATTTCCAAAAGTAATATGAGTGAAAGTTTGAAGGTGATAATGTACATGTATAAAAGATATAAACATTTATATAGATTGCCATTTCATACACTATCATTATCAAATAACCTATTAATTACGTCATAAAATACCAGATGAACCAAAAAACGCCTTTCCATTGTTGATAAATGGAAAGACGTTTTTTATAAATTATAGTACGTTTGCATATCCTTCAAAGATTTTACCTTGAGCAGCATCAATCGTAACTAACATGTTATTGCTTATGTTTTTAACAGCTTTTCTACACCTACAACGTGTGGAATACCTTTTTCTAAACCAACAATTGCACTTGGTGATGTAATACCATTTTCTTCTGTAATTAAGCCTAAAGCTTTTTCTACATAAGGTACAACGTTTCATCGATTGAGTTAGTAACGATAAATTTGTCAGATAAATCTTTACCTTCTAAATCTTTAACAGTTTCAGCAACTAACGTAGTACCAACAACGTCCACGTCCAATACCTTGACCATTAGCAATTTTCGTCACCAACTAGGTGGATTTTCATCATATTAGTAGTTCAGTTTACCAAGTTGGTACACGAGTAATAATGATTAAATCACCATTAGTACTCTACCAGTTTCAACAGCTGTGTGCAACTGCATTGTTTAAATGTCATCTGTACTCTTACGTCTTTTTTAACTACAGGTTGAACTCCCCAAACAATTGAACATTGACGTGCAGTTTCTTCACCTTGAGTACCCGCAATAATGTCTGAATGTGGACGATATTTAGAGATAGTACGTGCCGTTGAACCACTTTCAGTAGCAGCTACAATTGCTTTAACATTTAAGTTTAAAGCTGTATGTGCAACCGAAATACCGATAGCATTCACTAATGAAGTTTCAACTAATTTAGTACGATCTGACATAAATCTTTTGTAAATCTTGGGCTGCTTCAGCTGATACAGCAATATTTCTCATTTGTTTTAACAGCTTCTTCAGGATATAAACACGACAGAGTTTACCAGATAACATTACTGCATCTGTACCATCATAGATTGCGTTGGCAACGTCCTAGCTTCTGCACGTGTAGCAGTGGGTTACGTTGCATAGAATCTAACATTTGTGTAGCTGTAATAACTGGTTTACCTAATTTGTTACATTGTCTGATTAAATCTTTTTGAACCAATGGTACTTTTTCAGGTGGAATTTCAACACCCATGTCCACCGTGCAACCAATTAACCATCAGACACTTCAAGAATTTCCGCAATATTAACAATACCTTCTTGATTTTCAATTTTAGGGAATACTGAAATGTTATGCTTTTTGTCTTCTAAAAATTCACGAATTTCTAAACATCACTAGGACGACGTACGAAACTTGCTGCAATGAAGTCAACATTTTCTTTAATACCGAAACGGATATCTTCAGCATCTTTTTCTGTAATACCAGGTAAACTTACTCTTACGCCAGGTAAGTTAACACCTTTTTTGTTTTTAAGCTCACCAGAGTTTAAAAATATCACATTTAACTTCTTTTTTAGCATGGTCAATATCTTTAACTTGTAATTCAATTAAGCCATCATCAAGTAAAATGTATGAACCTACTTGAACATCGTTAATTAAGTTTTCATATGTTACTGAGAACTTTTCAGGCGTTCCTTCAACCTCATTCATGCTAACAATAACTTCGTTACCACGTTCAAGTTCATGATACCGTCTTTCATATTATGCGTACGAATTTCTGGACCTTTTGTATCTAATAAAATTTGCTACAATTTTGTCTAATCTTTTAGCTACTTTACGAATTTGTATCAATTTCTACCTTTATGCTCTTCATGACTACCATGTGAAAAGTTTAAATCGTGCAACGTTTCATACCAGCATTGATTAATTTCTCAATCATTTTCTGATTCTGAAGCTGGTCCAATGTACATAACAATTTTAGTTTTTCTCATTTTATAATCCCTCTGAAATCTTATATAGATAACTTGTGTAGCAAGTTTCATATAGACTATAATCAAAATTTATGATCTTTACCATCAAAAATTTCACTAAAGATGTTGCTACAATTTATTGTTCTTAATTTCAACACCCCTTAGCTGTTTACCTTGCATTAATAAGTCTACCGCATATCCACCTAAACGTGATGTAAAACTCTATCCGCACCTGTTGGGCTACCACCAGGTTGAACGTGACCTAACACAGACACTCTATTATCAACATTGATGTATTGTGATAATTCTTTTGACAATCTTGGCGAGTCATACAACCTTCTGCTACAAGAACGATTGAGTGTCTTACCACGTTTAAATACCTTGTTCAATTTTATCAGCTATTTCTTTAATATCTGTTTTCACTTCTGGAACCTACAATTGTCTCAGCACCAACTGATAATCCAGCCCATAAATGCTAGATCTCCAATCACGGCCCATTGCTTCAATGATAAATGTTCTGTCGTGACTTGACGAGTGTCTCTAATTTTGTGCTAAGCCAATAATCGTATTTAATGCTGTGTCAAAATCCAATTGTAAAAATCAGTACCATTGATATCATTGTCAATCGTACCAGGAATACCGATAGTTTGAATTTCTTGCATTCCTCACTGATGCGTTGTGCACCGCGATAACTACCGTCAACCACAATAACTACAAGGCCCTCAATCCCTCTTTTACGTAAGTTTTCGATTGCAACTTTACGTACTTCTTGCTCCTTAAACTCTGGACATCTTGCTGAATACAAGAATGTACCTCCACGTTGTGTCCAATAACGATCCCAACTGATCCTAATTCAAGTTTATGAATATCATCATTTAACAATCCTTGGTAACCATGATACACACCATAAACTTCAATTTTCATTGTAATTTGCTGTACGAACAACCTGCTCTTACGGCAGCATTCAATCCAGGTGAATCTCCACCACTAGTTAAACTGCAATTTTCTTCATGACGACATACCTTTCTATAACTGATTATCTTTAACTCTAAATACCACAAATTTGATATGTCAATCCATCAAACTAATGTATTGAATTGATGTAAACGTTTTTAAATATTGAATTTATTTTAACTTAATTAAAAAAGAGGTTCTCCACCAATGTGGTGGGT

>039-contig\_321

TCCCACCATAAAAGATGAAGAACCAAAAAAGATTAGTAGCCACAATTTTGACTACTAATCTTAGTTAAAAATTCAGTATCTAAATATTAAATATTGTTTAAATGTACTTCAATTTATGGTAAAAACCCAGTATCGATTTAACATAAAAAATGCTCAAGTTGATTATTCTATATAAGAACCGATATTCTGAATTTTTCAAAGCGATCATTAGCAATTTTCATCAGTGATAATGACTCAAGTGAATCTAACTGTGCAACAAACGCTGATTTAATAGCTAAAGCTTGCTGTCAACATCTTTATGTGCACCGCCAAGTGGTTCAGAAATGACATCATCTATAATACCTAATTGCTTAATATCATGGGCAGTAATTTTCATTGTTTCAGCTGCAATTTTAGCCAAATTAAGTGTCTTCCATAATAATGCCGCTGCACCTTCAGGAGATATAACAGAGTAAGTACTATTCTCTAACATCAATACTTTATTGGCAATACCAATACCTAGAGCACCTCCACTGCCACCTTCACCAATGACAATCGCAATAACTGGTACTTTTAGTGAAGCCATCTCAATCAAATTTGTTGCGATAGATTACCTTTGTCCACGTTCTTCCGCAAGCTTTACCAGGATATGCACCTTTTGTATCTATAAATGTAAAGATAGGACGATTGAATTTTTCAGCTTGTTCATTAAACGTAATGCTTTTCGATAACCTTTCTGGATCGCCATACCAAAATTTTCGATAAATATTATCTTTTGTATCTTTTCCACGTTGTGTCCTCAATAACAGCACGACCATTTAAAAAGCCAATACCACCAATCATTGCTGGATCATCTCTAAAAATTACGATACCATGTAGTTCCATAAACGAATCAAAGATATATGGAATATAATCTAGGGTCGTAGGTCTTTTCTTGCAACGCGCAATTTGCACACGATCCCATGGTTTTAGATTTGTATATTTTTTTTAGTTTCTCGTTCCAATGACGCTTCAAGCATGTCAATTTCTTCTTGTAAATCCACATCATTTTTATCTTGAGATTCTTTTTAAAGATTCAATTTTATTTGCAATTTCAAAAAGTGGTTTTTCAAAATCTAACATTATTTAGTCACTCTTGATGGATTTTTAGAAATTCAGACAATGTTTGACGCATATCATTACGATGTACAACCTTATCCAATTTGTCATGCTCTAATAAAAAATTCGAGTTTGGAATCATCTGGCAATTTTTCGTTTATTGTCTGTTCAATAACTCGACGACCTGCAAAACCTATCAACGCTTTTGGCTCACTTAAATTTATATCACCAACTGATGCAAAAATTCGAGATACACCACAGTAGTTGGATGTGTTAAATATGATATATAAATAGTCCAGCGTCAGAATGACGTTTTTAAAGATACACTGGTTTTACCATTTGCATCAAGGAAATATACCTTTCTGCATACGTGCACCACCACTTGCGAGAGAAAAGAATAAATGGTAAACGGTTCTCAGTGCAGTAATCAATGATGCGACATATCTTTTCCAGGATAACCGATCCCATACTTCCCATTTCTAAAACGTGAATCCATGACAGCAACGCCAAATTTCATACCATCTAGTTGCGCTGTACCAGTCACTGCTTTTAAAGACCTGTCTTTTGTGGTCCCTTTTCAATTTTTTCTAAATAACTTGGAAAACTAATGGATTTCGCAGAGGTCAATCCCTTATCGAATTTCTGTAAATGATCCTTCATCAGAAATGTCTCTATACGTTTATACGCAGTTAAAGCAATATGATGATCACAAATTAAGCACACATTTAAATTTTACGCTAATTTCTTTTGTGTAC

ATAATTTTCTTACACTTTGGACACTTAGTCATAATACCTGCAGGCACATCATTATTTTTAGAGTCTTGTACTGTAAGATATTTCTTTTT  
CTTGTTCGATTAAAAAATCTTTAAACATAGGAAAACCTCCAAATAACCTCTGTTCTAACCATTTAGAGCCTTAAACTGAACTTGA  
CCAGTTAAAAACGGGTTTAAATTTATTTGATTTATATTCGTTTGACTGTTGAATGTTTATCATAAACTTTTCATTTTCATCATTTTAATG  
ACTCTTTATTTGCTAACTTTTAAAGCAATTTAATTAACGTTAATTTATTTTTATTGTAAATCTGTAAGTTTCATTGTTTTATCATACACAT  
CTTGCGGATCAACTTCAATCCTAGCTACTCCAGATTCCATTGCCGCTTTAGCAACATTACGAGCAACTGATGGCGCTACACGTTTATC  
AAACGGTCTCGGATACAGTAGTCTTCATTTAATTCAGAACTATCGATTAAATCAGCAATCGCTTCTACAGCTGCCTTTTTTCATTTCT  
TCATTTATATGTGTAGCTTCAACCTCTAATGCACCTCTAAAAATACCAGGGAAAGCTAATACATTATTAATTTGGTTAGGATAGTCT  
GAACGTCTGTACCAACAACTCGTGCACCTGCCGCTTTGGCATCATCAGGTATTATTTAGGATTGGGATTAGCCATTGCAAAATATA  
ATTGGATTATCTGCCATACTCTTAACCATATCTTGTGACAGCGCATTAGCTACAGAACTCCGATAAATACATCTGCGTCTTTACGA  
CTTCTTCTAAAGACCCCTTCAATCTTATCTTTATTGTGCCATTTAGCTACAACATCTTCGTAGGATTACATACCATATGAACGTCCTTCA  
AAAATTGCGCCTCTTGAGTCACACATAACCATATTTCTTACACCATACGCGTATAGTAATTTAACAATGGCTATTCCCTGCTGCACCA  
GCACCATTTAGTACAACCTTTTATTTTAGCAATATCTTTGTAAACAACTCTCAATGCATTTACCAAACTGCCATTGTTACAATTGCTG  
TACCATGTTGATCGTCATGGAATACCGGAATATTAGTTCTTTTTTCAATCGTTCTTCAATTTCAAAAACACGTGGTGCCGAAATATC  
CTCTAAATTAATACCACCATAATTAGGTTCTAACAACCTTAACTGTTTAAATGATTCTTCGGTATCAGTTGTATTTAACGCAATAGGC  
ACCCCATTGATACCAGCGAAGCTTTTGAATAATACTGCTTTACCTTCCATTACAGGAATACTTGCTTCAGGTCCAATGTTACCTAAAC  
CTAATACCGCTGTTCCATCAGTAATAACTGCAACTGTATTTCTTTAATTGTGTAATCATATACTTTTCTTTTATCTTCATAAATATCT  
TTACACGGTTCAGCAACGCCAGGTGAGTATGCTAACTTAAATCTCTTTATTAGTAACTTTTACATTTGGTTTAACTTCTAATTTAC  
CTTGATTACGTTTGTGCTATTTCAATGCTTCATCTTAATGACATGAAATCAGCCCCTAATTCATATTTATTTAAAAAATCAACTT  
GGATAAAACGCAATTACATTATAAAAGTAAAAATATTGGGTAATCTGAATGAGTAAGAATTTATGGTTTATTGATTATGTAACACAAA  
TAGCGATAAACGATAATAAAATAATTTTATAAAGATACATTAAACCATACTATCTAAAGATATACCTTTAATTATTATAATGGATA  
GCAAAAACCAATATATCAAAAAGTTATTATTTTCCGCACGATATATCGACAAAATCTTTACTCAATTTATGTATACTGCTTTTTGT  
GCTAATTATTCTTATGGATTAATCAATAATGTAAAGTGAACTCATAAAAAATAATAAGCATAAAAAACTAATATAAACGCAAACTG  
ATGGTTAAAAAATATCTAACCATCAGTTTACTATATCATAATTTATTAGTTGATAAAAGTTATATAAGCCTAATATCACTAGGGTTA  
AAGGATTGTATAAAATTAATAACATACTATCTTTTGTATTAATATAGCCTATAGTAGTCATTTGTTTAAATCGTTTCATCATAAAAGG  
ATAACATAACATCATTAGCATCTCTTTCTGAGCTTTAATCATCTCTTCAACATATCTATTTGTGATTTATTTCTAATTATAATTTGT  
TTGGCAAAATGCTAATTTTGTCTTCAAAAGTGGCTAATGTTTGAATCTCATTATAATTAGTTGCCGTTGTGCTTTCTATGGTCAAA  
TTTCCCGCTAACTATAAACAAAGTCATTATGTGATAACAACCTCTTCGTACTTTTTAAACTGATTAGGGAAAAATCACACCATCTAAAGTT  
TCAATGCCATCATTTAATATGACGAATGCCATATTTTGACCATTTTATGTTTGAATTTGTTTAACTTTATCAAACTGTACTAATATAG  
GTTTATTATTTCTGCGCTTACTCAATTTAAATATCGTTAAATATTGTTTGGCAACAACTTTTATCTACTGGGTGTTGCGAAACATA  
AAATCCTAAATATTCTTTTCTGACTGACTAATAAGTGCATCAGGCAATTCTTCTTTATCTTCATACATCTGTTTGGCGTTAAAAATAT  
CAAATAAAAAACCATCTTGTTCATGTTTAAATCGCCATCCAACACTTGATCAATAGCTTGCAACAACGTTGAACGTGTTTTACCAA  
AAGCATCAAAACGCTCCCACTAAAAATCAGTGCTTCAAGTAACTTTCTCGTTTGAATCTCTTCGGTATACGTCTAGCAAAATCAAAGA  
AATCTTTATATTTGCCGTTCTGATAACGTTTCATCAACAATCACTTTTACACTTTTGATAACCAACACCTTTAATTGTACCAATTGATAA  
ATAAATGCCTTCTGGGAAGGTTTATAAAACCAATGACTTTCTGTTAATGTTCCGTGGCAATATAGTGAATACCTTGTTTTTGTCTCT  
TCTATCATTTTAGCAGTTTTTCTTCTCACTTCCAATAACATTCTTAAATATTGTCGTAAAAAATAATTGGATAAATGACATTTTAAAA  
AGCTCATAATGTATGCAATTTTAGAATAGCTGACAGCATGTGCTCTAGGAAAAACCATAATCAGCAAATTTCAGAATCAAATCAAAT  
ATTTGCTTACTAATGTCTTCGTGATAACCATTTTGCTTTGCACCTTCTATAAAATGTTGACGCTCACTTTCAAGAACAGCTCTATTTT  
TTTACTCATTTGCTCTTCTTAAAAATATCCGTTTACCATAACTGAAGTTTGCAAAATGTGCTCGCTATTTGCATAATTTGCTCTTGATAAA  
TAATAACACCGTAAGTATTTTTAATATCGGTTCTAAATGCGGATGTAAATATTGAACTTTGCTTGGATCATGTCTCTTGTAATGTA  
AGTTGGAATTTCTCCATTGGACCTGGTCTATACAAAGAAAGTTACAGCCACAATATCTTCAAAAGTGTCCGGCTTTAATTTTTTAAT  
ACACTTCTTACACCGTCAGACTCTAATTGGAATATGCCAGTCGTATCTCCTTGGCACAACAATTCAAACACTTTTTGATCATCGAACG  
GAATCTTTTCGATATCAATATTAATACCTAAATCTTTTGAATTTGCTTGAATTTGATGAATAATCGATAAGTTTCTCAACCTAG  
AAAATCATTTTTTAATAACCCAATACGTTCCGGCTTCAGTCATTTGCTCAATTTGCGTTAATAATCCTGATATCCCTTTCTGTTAAAGGGCA  
TATTCATATAATGGATGGTCATTAATAAATCTCTGCCGATGTGTAGATGTATGCTTGGTAAACCTTCTAATTTTACAAATAC  
TGAACCAGCGTTATGTCGATGGTTTCGATGTACAACTTTTTAAAAATCGTCAATTTGATATGCTTCATCAAGTGAATTCCTAATTT  
ATGTGGGATTAACCTTGAAATTTTCATTTAATGTAACCTTCATCAAAACCCATAATTTCTTCAACATCTCTAGCAACTGCTCTTGCAAGC  
AGATGACCGAAAGTCACAATCCAGATACATGTAGCTCGCCATATTTTTCTTGGACGTAATGACCTTTCTCGGCGTGTATCTT  
CAAAGTCAATATCAATATCAGGCATTGTTACACGTTCTGGGTTTAAAAACGTTCAAATAATAGATTGAATTAATAGGATCAATCG  
TTGTAATTTCCCAATAAATAACTGACCAGTGAGCCAGCTGAAGAACCACGACCAGGACCTACCATCACATCATTCGTTTTCGCATAAT  
GGATTAATCACTTACTATTAAGAAATAATCTTCAAAACCCATATTAGTAATAACTTTTACTCATATTTCAATCGCTCTAAATAGAC  
GTCATAATTAAGTTCTAATTTTTTCAATTTGTGTAATCAAGACCGCCACAATAATTTTTAGCTGATTATCATATTAGGTTGCTCATAT  
TGAGGAAGTAGAGATTGATATTTTAAATCTGCATCACACTTTTGAGCTATAACATCAACCTGCGTTAATAATCCTGATATCCCTTCTGTTAATAT  
CTAATTGATTAATTTCTTTTTCAGTTAAAAAATGTGCACCAAAATCTTCTTGATCATGAATTAAGTCTAATTTTGTATTGTCTCTAATA  
GCTGCTAATGCAGAAATCGTATCGGCATCTTGACGTGTTTGGTAACAAACATTTTGAATCCAAACATGTTTTCTACCTTGAATCGAA  
ATACTAAGGTGGTCCATATATGTGTCAATTATGGGTTTCAAACACTTGTAATAATACACGATGTTGATCACCGACTTTTTTAAAAATGA  
TAATCATATTGTTAGAAAATCGTTTAAATAATCAAAACGACACATGTTCTAATGCATTCATTTTATTTCGGATGATAGTTGATACAA  
ATCTTTTAATCCATCATTATTTTAGCTAGAACAACTGTTTCGACTGTATTTAATCCATTTGTCACATATATTGTCATACCAAAAAATCG  
GTTAATGTTATTTGCTATACATGCATCATAAAATTTAGGAAAACCATACAATACATTGGTGTGAGTTATGGCAAGTGATCAACAT  
TTTCAGACACAGCAAGCTTACGGCATCTTCTATTTTTAAGCTTGAATTTAACAAATCATAGCCGATGAATTTAAATATAGCCAC  
CATGATTGAATGGCTCTTCTATTTAGTTAAGTTTGTGCGTAAAGCTGTGAAGTTGCTCAAAATTCATCCGAGTTGCTTCACTGAAA  
CTCCTGACGCATTCGGATGACCACCGCCACCAAAATCTTGGCGCAATATCATTAAATAATCAATTGCCCTTTAGAACGTAATCGACATC  
TGATTTTCAATTACCTTCATCGACTGCAAAATACCCATATTTTCAATCCTTTGATGTCAGCAATTGTATTAACAACTGAGATGCTTCATT  
TGGCTGAATACCGAATTGCTCCAAAACATCTTCAGTTATTTTAACTTGGCAGAATCCATCATCCATAAGTTCGAAATGTTGTAAAAC  
ATAACCTTGAAACGGCAACATTTTTGGGTCTTCTCCATCATTTTATTTAAAGCGCATTATGATCAATATCATGCCCAATTAACCTT  
CCAGCAATTTCCATAGTATGTTCTGAGGTATTGTTAAAAAGGAATCGCCAGTATCACCGACGATACCAAGATATAAAAACTCGC  
GATATCTTTATTAACAATTGCTTCATCATTTAAATGTGAGATTAATCGTAAATGATTTCACTTTGATAGTACGCGTTTCGTATTAATC  
AATTAATATACCACTACTGATCAACTGCAGGATGATGATCTATTTTAAAGTTTACGACCTGTACTATAACGTTTCATCGTCAATTC  
GTGGAGCATTTGGCAGTATCACAATAACAAAGCGCATCTTGATGTTTATCATCAATGTTTACTAATCTCAACTTCCAAATAAACTTA  
ATGATGATTCCGCTTCACCCACTGCAAAATCACTTGCTTTTGGCGAAATTTCTGCTGAATATAGTATTTTAAACCAAGTTGTGAACCATA  
TGCATCAGGATCTGGTCTAACATGTCTGTGTATAAATTTGTATCGTTGCTTTCGATACATTTTCAATAATTTCAATTCAAAGTACTAATC  
ATTTTCATACTCCCTTTTTTGAAGAAAGTTGCTTAATTTAAGCATTAGTCTATATCAAAATATCTAAATTAAAAAATTGTTACTACCA

TATTAAACTATTTGCCCGTTTAAATATTTAGATATATATATTTTCATACTATTTAGTTCATAACGATTATAGGACATCAAGCAATATT  
ATACTAGCAACAGTTGACCAAATAAAAAATGCACAAATAACAAGCTTTATTTAATTCAGGGGGCCCCAACACAGAGAATTTTGAAAAAG  
AAATTTCTACAGACCATGCAAGTTGGGGTGGGGCCCCAACACAGAGAAATTTGGACCCCAATTTCTACAGACCATGCAAGTTGGGGT  
GGGGCCCCAACACAGAGAATTTGAAAAAGAAATTTACAGACAATGCAAGTTGGGGTGGGCCACAACACAGAAGCTGACGTAATG  
TCAGCTTACTATAATGTGCAAGTTGGGCTCCAACGTTGTGCGAAATCTATCTTATGCCTATTTTCTCTGCTAAGTTCCTATACTTCGT  
CAAACATTTGGCATATCACGAGAGCGCTCGTACTTTGTGCTTTTGAATGCTATGCATGTTCACTTCTATTTTGGCGAAGTTTCTTCCGAC  
GTCTAGTATGCCAAAGCGCACTGTTATATGTGATTCAATAGGTACTGTTTAAATATACACGATATTTAAGTTCTCTATCATGACATTA  
CCTTTTTTAAATTTACGCATTTTCATATTTGATTGTTTCTTCTATAATACTTACAAATGCCGCTTACTTACTGTTCCGTAATGATTGATT  
AAAAGTGGTGAAAACCTTCTACTGTAATTCATCTTGATTGTTTATATATTTGGCGATTGATCGTTAATTTGTTTCACCCATCTGAG  
GCTGTCTTCCATAAAAGTTGCATAGACTTTAAAACATCTTGTCTATTAATCACACCCACTGCTTTTTATTACTCGAAACGACAGGAAT  
CAATTCAAATACCTTCCCAAATCATCATATGCGCACAACTTGCTACTGTAATCATAGCATTTACATAAATAGGATTTTCGCGTCATCACT  
TTATCTATTTTCGTCGTCGCTCTTTGTATTAATCATCTCTCGACTTGTACAATACCTACTAATTTATAAGACTCATTGACTACCGGAAA  
TCTTGTATGGCCAGTTCGATTGCGCCATACGCTTATAATCTGCTATTTTCATCGTATCAAACAGCACAGATAAATCATCTAATGGCGTC  
ATTATATCTTGAACATTAAGATATCTTTTCGTATTTTCTGATTAAAAAGTGCTTTGTGTAATAATTTGCAACTAGGAATGTATCAT  
AAGTTGATGATAGAACAGGTAAATCATGTTCAATTCGCAAAATTAATAAATTTATTAGATGGCTTAAATCCACCAGTAATTAATATAG  
CCGTACCTCTTTTTAAAGCTTCAATCTGCACATCTTCGCGATTTCGACAATCAATAATGTCTTTGGACCAATATATTTTAAAAATATC  
TTGAGTTCATTGCTCCAATTGCAAAATTTAGATACCATCTTAGTGATACCTTTATTGCCACCTAACACTTGCCCATCAATAATATTG  
ACAATTCATTAAGTGTAAATGTTCAATTTTCAATTCAGTATACGTTTTCGATTTCGAACCGTACCAACGATCTATCGTTGCGACCA  
TGCCCATTTTTATCAGCATCTTTAATTGACGATATGCTGTCTTTCAGATACGTTTAAATTAAGCATTTTACGACCCGAAATTTT  
AGAGCCTATAGATAACGATTCAATATAATCTAAAATTTGTTTCATGTTTGTCTTCTTTTACCTCTTCTTTTTCGAACAGTATTAAC  
ATTATAACTTTATTTTGGATAAAAAAGCATTGAAGTGAAATGAAATAATGATCGTTTACCTATTTTATTTTGGAAAAATACAAACAA  
ACACAAAGATCACAAAATCTTTAATTTTAAATGGAAAAATCCATTATTATTATTAGAATGTAAGTGAGGAGGGATGTAATAATGTA  
TAAAAATATATTACTTGGTGTAGACACTCAGTTAAAAAATGAAAAAGCACTAAAAGAAGTGCTAAATAGCTGGCGAAGGTACAG  
TCGTAACAGTTTTAAACGCAATCAGCGAACAAAGATGCTCAAGCATCAATTAAGCAGGTGTTTCAATTTAAACAAACTTACTGAAGAA  
CGAAGCAAGCGATTGAAAAAACACGCAAGCTTTAGAAGATTATGGTATTGATTATGACCAAAATAATTGTTCTGTTGTAATGCAAA  
AGAAGAATATTAAAAATGCTAATAGCGGTAAATACGAAATTTGTTGTTTAAAGTAACCGTAAAGCAGAAGACAAAAAGAAATTTG  
TACTTGGAAAGTGTCAGCCACAAAGTAGCAAAACGTGCGACTATCCCTGTATTAATCGTTAAATAAAATTTTATCCAGAATCACAAA  
TAATCTTTCAATCATGATGCAGTCTCAAACGACTGAGTAAACACAAGAAATGATTATGACTGTGGTTCTGGATTTTTATATCGTAG  
TAAATTTATAATCAATGTCTAATTGTATAAACTAAAATTTACGAGAGTAGGTGAGAAATGATAAAGAACCACTGATGTCCCCCGTCC  
ACGTCGTAACCTGAATCAGTAGAATATAAAAAACCCCACTAAAATATGCGAGCAGATAACTTCCACATAGATTAGCGAGGTGTTTTT  
TAGTGTAAAAATCTATATTCTATTTAAAACTGAACAGATTACCTGGTTTTAAATTTGCACGTCCCTACATTAACAGCATCTTTAAA  
TTGTTGTGGATCTTGTTCGATTAATGGGAATGTATCATAATGAATCGGTACAGAAATTTTGGTTTAAATAAATTCATTAATAGCATAA  
CTTGCATCATCAATACCCATCGTAAAAATATCTCCAATTTGGTACAAAACATACATCAACTGGATGACGTTTCGCAATAAGTGACATG  
TCACTAAACAGACCTGATACCCAGTATGATAAATGTTTTCTTCAACTTCAAAACGATACCCATTTGGCATACCTAACTAAATAAAT  
GGAATACCATTTTTATGTGTAAAACTTGAACATGAAATGCTTGAACAAATTTAACGCTTCCGAAATCAAAAGTTTGCTTTTACCACCA  
ATATTCATACCATGAACATTTTCAACACCGTGATATGAAGAAAGATAGTCAGCCATTTCTGCACTTCCAATTACTGTTGCTCCTGTTT  
TCTTTGCTAGTTCACAAACATCACCAAAATGATCAAAATGACCGTGCGTTAAACGATATAGTCTACCTGCACTGTTTCAATATTCA  
AATCACACTTAGGGTTATTTGAAATAAACGGATCTACGATAACCTTTTTGTTGTTCCCTTCTAAATAAATCGTTGATTGACCATGAAA  
TGATAACTTCATTGAGCATCCTCCTATCAATTGCTATATAAAATTTAGTACCCTTTTGCCACTTAATTATAACAAATTCCTCAATTTTA  
AAAATTGAAAAATCTAGTTAATGTATTAGCTCGATTTTGAAATCTAATAATAATTGGCATAAAAATGGAAGTAATATTATGTTGAGGAG  
TGTTTATAAAATGACAAAAATATCAAAAAATAATAGACGAACCTGAACATCAACAAGCTGATGCAGCATGGATTACAACACCGTTGA  
ATGTATATTATTTACTGGATACCGTAGCGAACCCCATGAAAGATTATTTGCATTATTGATTAAGAAGATGGTAAACAAGTACTAT  
TTTGTCCAAAATGGAAGTCGAAGAAGTCAAAGCATCCTTTTACAGGTGAAATCGTTGGATTTAGACATTTGAAACCCCTTTCT  
CACTTTATCCTCAAAACATCAATAAATTTACTAATTGAAAGCGAGCACTTAACAGTAGCACGCCAAAAACAATTAACCTCTGGTTTCA  
ATGTCAATTCATTTCGGAGATGTTGATTTAACAATCAACAATTTGAGAAATATTAAATCCGAAGATGAAATTAGCAAAATACGTAAA  
GCTGCTGAGTTAGCAGATAAGTGTATCGAAATAGGTGTTTCTATTTTAAAGAAGGTGTGACTGAACGTGAAGTAGTCAACCATATT  
GAGCAAACTATCAACAATATGGCGTCAATGAAATGAGTTTTGATACGATGGTTTTATTTGGAGATCATGCCGCATCACCTCATGGC  
ACACCAGGAGATCGCAGATTAAAAAGCAATGAATATGTACTATTTGATTTAGGTGTAATTTATGAGCATTATTGTAGCGATATGACA  
CGTACCATTAAATTTGGTGAACCTAGCAAAAGACACAAGAAATTTATAATATTGTATTAGAAGCAGAAACATCTGCAATCCAAGC  
AATTAACCTGGAATACCTTTAAAAGATATCGATCATATCGCTAGAAATATTATTTAGAAAAAGGTTATGGTGAATATTTCCCTCA  
TCGCTTAGGTCATGGTTTAGGATTACAAGAATCAATATCAAGATGTTTCAAGTACTAATTCTAATTTGTGTAAGAGCTGGCATGGT  
TATTACAATCGAAGCAGGTATTTATGTACACAGGTGTTGCAAGGTGAAGAATTGAAGATGACATCTGTCACTAATGAAGGATATGA  
AGTATTAACACATTACGAAAAATAAGGAGTGGGATAAAAAATGAAAAGCTTGTACAAGCGCATTCTCATTCAGTCAAACTGCCA  
ATATAACATTGTAGCGCTAAGACATAAATTTTTATCCAAGTCTAAATGCAATATGTAACAAACAAGCTAGAAACACATATGCAGG  
TATGTTTCATCAGTAACATGTAATGAATCAATCAATATCATTGTTGATGATTCTTTCGATTGTTTCTAGCTTTAATTTATCATT  
ATTTAATTTTAAATAACCAAGGAGATGATAACGTCATTCTTTAGTACGCTGTAATCCATTCCCTTTTCATTAATTTCAAATTATAATTG  
TAATGCTTCTTCTACAGATTTATATTCCATTTCAAATGCCTCTGCAACGCCTTTATTGGTTACATGACCTTTGTAAGTATTTAAACCTA  
ATGATAATGGTTGATTGATTAAATGCTTCTATACCCTTTATTAGCTAGCATGAGCGCATAAAGGTAGCGTAGCATTATTTAAAGC  
TAACGTGCAAGATACGCGTACTGCACTGGCATATTTGCACTGCATAATGAACCAACCATGCTTAATATATGATAGGATCATCATG  
TGTGTAATTTTATCAGTTGTTTCAAAAAATACCGCTTGTGATCAATGAATGTCATAATAAATCACTAGCCATTTTCTAGTTGTTAATC  
ATGCTTCTGTGTACAAGTCTTGGCGCTTTAGCACCTGGAATTAATACTGCACTTACTAAATCACTTTGTTTAAACATACAACCTCAA  
TATTCAACGGATTTGACATAATTGTATGTACACGTCCACCGAATAAATCATCTAATTTGTTGTAACGCTTTGGATTAACATCTAAAA  
TCGTAACATCTGCACCTAGTCTAGTGCAATTTTAGCTGCATTTGTTCTGCTTGACCACCACCGATAATAGTTACTTTACCTTTAGG  
TACTCCTGGAACACCACCTAGTAGAATTTCCCATACCACCTAGGATTTTGTAGGAACCTGACCAACTTGAGCTGACATTCTTCCT  
GCTACCTCACTCATTGGTGATAACAATGGTAAAGATCGGTCTGGTAACTGCACAGTCTCATATGCAATACTAATTACTTTTCTATCTA  
TCAAAGCTTGTGTTAATTTTTCTTCATTTGCTAAATGAAGATAAGTGAATAATACAAGCCCTTCTTTAAAAATATGGATATTCAGATT  
AAGTGGTTCTTTAACTTTAATAACCATATCCACATCCCCAACTTTTGCTTGTTCAGCAACAATCTCAGCACTGCTCTTTGTAATCT  
ACATCTTCAAAGAACGATCTGAACCCGATTTGTTTCCACTAAAACAGTATGCCCACTTCTACTAAAGCGTGACACCACTTGGT  
GATAAACCAACACGATTTTCATTATTTTAAATCTCCCTGGTATACCAATTTTCATACCATCCACCTCCATAATCATCTTAACGCGAA  
CATTTTGAAGCGCAATCAAAAAATCCACAAAATTTGTAAGGTTATTACACTGACTTTTCCGAAAAATGTGGTAAAAATATAATTAAGA  
AAGAACAAGGAGGCACTTACTATGATTACTTACAAAAATATTTTAAATCGCAGTTGACGGTTCACATGAAGCGGAATGGGCATTTAA

CAGAGCAGTTGGTGTGTGCTAAACGTAACGATGCGAAGTTAACAATTGTGAATGTAATTGATTCAAGAACGTATTCTTCTTATGAAGT  
TTATGATGCTCAATTTACTGAAAAATCTAAGCATTTTGCAGAAGAATTATTAAATGGTTATAAAGAAGTAGCTACTAACGCTGGTGT  
TAAAGATGTAGAAACGCGCTAGAGTTTGGCTCTCCTAAATCTATCATTCTCTAAAAAGCTTGACATGAAATTAATGCAGACTTGAT  
TATGAGTGGTACATCAGGCTTAAATGCCGTGGAAAGATTTATTGTTGGTCTGTATCAGAATCTATCGTTTCGTCATGCGCCATGTGA  
CGTGTAGTTGTTCTGACTGAAGAGTTACCAGCAGACTTCCAACCACAAGTTGCAACAACCTCAATTACGTGAAAAATATCAAAATTA  
AATATAGATGATCATTAGATAACTACTTGTATCATTATGAACCAAGTGCAACTTTCTGCACTTGGTTTTTTATTGTTTATAAATAAAAC  
TCATTTAATAATGTTTTTATAATCTTCTTCGACTACTTAATTTCTTAAAGATATTCGTGAAAAAGAGACATTACACTAGTTAATTTTCAA  
ACAATACAAAAAGCGTCTACCTCCTACATATAATTGTAGCGGAGATAGACGCTTAATATTTATTTAAAAATTTATTTTAAACCACCGA  
ATGTCATAACATCAGGGCAATCATACTTTCTTCATCTGTTGGAATAACGACAACCTTAACTGGTGAATGAGGATAGTTAATAAATC  
CTTCTTTACCACGTAGTAAGTTTTCATTTTCTTAGGATCCCAAGTAAACACCCATAAAATCTAAGCCTTCAAGAACTTTTCGCACGAAT  
TTCTACTGAGTTTTACCGGATACCTGCTGTAAATACGATAACATCAACACCATGCATTCTCGCAGCATATGATCCAATATATTTGTGA  
ATTTTAGAAGCAAATACATCTAAAGCCATTTGTGAACGTGCTTTACCTGATTACAGCTTCTTCTGATAAGTCACGTAAATCACTAGAT  
GTACCTGATAATCCTAATAAAACCTGATTCTTTGTTTAAAGATTTCCTAATCTTGTTCAGCAGTTTTACCTGTTTTTCCATAATAAATGG  
AATTAAGCAGGGTCAATATTACCAGAACGAGTACCCATTGTTACACCAGCAAGTGGTGTGAAGCCCATTGATGTATCAATAGATT  
TACCGCCATCGATAGCTGCAATTGATGCTCCATTACCAATGTGACATGAAATAATACGTAATCTTCAATTGGCTTATCTAACATTTT  
TGCCGCTCTTTGTGATACAAATTTATGGCTTGTACCATGGAACCCATACTTACGAATGCCATAATCTTTATAATAATGATATGGCAA  
GCTGTATAGATATGCTTTTTTACGGCATTGTTTGTATGGAATGCTGTATCAAAAATGGCCACATGAGGGATATTTGGTAATAATTTACG  
GAAAGCAGTAATACCCATCAAGTTAGCTGGGTTGTGAAGCGGTGCTAATTCGTTAATTTCTTCAATTTCTTTTCAACCTCATCAGTA  
ATAGCTACTGATTACAGGGAATTTTACCACCATGTACAACACGGTGACCTGTTCATCGATATCGTTAATCATTAATAATATTGT  
GCGCTTTAAAGCATCCAACATGATATCAACTGCCTCAACGTGATCCTTGATATCTTGTACTGTTTTAACTTTTTCCCGTTGACTTC  
AATTGTAAAAATTTGAATCCTTCAATCCGATTCTTTCTATTAACCTTTTGTACTAATTCCTCTTCAGGCATTCTAATTAATTGAAATT  
TTAATGATGAACCTACCAGCATTGATAGCCAAGATTAATTTTGACATAAGTAATGATCCTCCATCGTTTGTCTTTTTTACTATTTTCAAT  
TCTCATTTTATCATTCATACAGTTTTATGACTATACTATTACAGATTATTTTTTAGGACGATTTGTGTCCATCCACTGATTTAACTCTG  
TCATAAATCCTTGAATTTGTGAAGGATTTTTGAAATCAGGAATATTTGCCAATAATACTTCAACTGGCTTTGTTTACCCCGATTTTT  
CTTTTGTAAAAATTAATATAGATTTTTCGCGCTTTTTCATTTTTAAATAAAGTTGGTGGTAAATTTAAAAATGCTTGCATCTCTGTCTCTG  
TTGCAATATATTTTTCAAGCTGTTTTACATGTTACCTGTAAAAATATTACTTGGTACCACTAGAAAGGCATATCCAGCATCTTTTAA  
TACATTTATGCTTGTCTTATTAATAAAATAATGTGAATAACTATGTCCTTCTTCAAAACCTAGCTTAAACTCCTTACTTCTTTCATCAA  
TTGGATAATAGCCTACTGGAAAAATCACCATAACGATATCTGCTTCTTCTAATGGTAGTGGCATGATGGCATCTTGAGGATACACAT  
CGAAAGGAATTTCTAAGAAGTTTGCTAAATGTACACTAACACGTGATAAACTGGATCAACTTCAATTAATGATGCATAACCGCA  
ATTTACAGGTAACACTTCTTTTACAGTAGCACTTAAATGACCGGCACCCTTGAATATCAACAATATGTAATCTTCTTGGTTGTTC  
TAAAAAGCTCAACTAAAAATCCTAGTATCAATCCAATTGAATCTGGTGAATTTGATGATTGTCTTGTATCTTTCTTCTCGCATTA  
ACTTAAATATGCAATTTGAATGCTTTACGTCGATCTTGTAAACGTCGATTGTTCTAACAATCCTCTTTCATTGGTATATACCTGTTCC  
ATTGCTAGCCCAAGATTTTCAATAAAACTTTTGCCATTTTCATTATTTAATGTTTTAGCTTTTTTCTATCAATGTATGAAACAAGCGTTC  
CATAATTTGTTGTTGTTCTGCCATATTCGTCCCTTCCAATAAAAAAGTGGCCATAGGTCTTAGCAATCAGATAAAAAACAATTTCTATTT  
AATGCTTGTGACAACGATGGACACGATGATACATTTAAGATTATCTTCTTAAATGATTAAATATTTTGTATGCAAGTTCAAGCAGC  
ATCAAAATCTGGGAAATCAGTACCTTCACTAACGATTTCTTTATAAAACAACCTTTATTTATCTGCATCTAATACAAATACTGCACGAGC  
TAATAAGCGAAGTTCTTCCATAACAACGCCATAGTTTTACCAAATGATAAGTACGGTGGTCACTTAATGTAATGACATTGTCTAA  
ACCTGCTGAAGCGCACCATCTTTTTTGTGCGAATGGTAAGTCTGCTGAAATTGTAAGCACAATCCCCTCTTCTTTAGAAGCATCAGA  
GTTGAATTTGCGAGTCTGCTGATCACAACACCTGTATCAATTGATGGTACCACACTAATTAATTTCTTTTACCAGCATAATCTGCT  
AATGTTACTTGATTAAAGTCATTATCTAACACTGTAAAAATCAGGTGCAAAATCACCTTCATTAATTTGTTGACCTTTTAAGTGGATTG  
GTCCACCTTTGAATGTTATTTACAGTCATATACTTGACCTCTGCAATTTAAAAATTTCAACTACATCATACGACAATTTATGGTTTGATT  
ACAATTTTCATGCTTTAATCAAAAGCAAATTTAATTTTATACAAATTTGTTGAATATAATCAAAAGCATTTTTTAAAAATAAAAATAGC  
AGTAATAATAATAAATAACTTTTACATAGCCAACACCTTGTGTTGATAGCAAAATGTGCCAGTATATGACCCAGCAATTCATGCT  
TGTAGCCATTATTAACCTATTACATAATCTACTTGTCTTAATACCATAAATAATCAAGCGCACCTATATTAGAAGCAAAGTTCAA  
AACTTTAGCATTTCCTGCTGCACTTAAAAAATCAAAACCAAAGACTAACAATCAAAAAAGCATAAATGAACCTGTTCCCCCACCTA  
CAAATCCATCATAAAAGCCGATTAATATAAAAAAGTGTGCAATAGTATGGCTTTCTTAAATGTAAATTGAGTAAACGTACGTGTAT  
TGCCCCAATCTTTTTTAAAGTAATGTGAATATAAACACCGACGAAAGTGAATAATGATTAAAGGTTTCAATATTTGTGACGGAACCA  
TCGTTGCAATATATGCGCCACATGCAGATGCCAAAAATACAAAACCAAATAATTTGGCAACAACATATAAGTCCACTTTACCGGAC  
CTTATAAACTTTATCGTACTAGTTAAAGAACCAAATGAACCTTGCCAATTTATTTGTACCTAAAGCCACAGATGGTGGTAGACCGATT  
GCTAATAATGCTGGCGTAGAAATTAACCGCCACCCCTACAAACCGAATCTATAAACGCCGCGATAAAACCAAATAAAATTTATGAT  
TATAATCATCGTTAAGTTCAATCCATAGTTTAACTCCCTTATGTTTAAATTTACTCTAGGATTTTATTTATAAAAAAGTCAATTTATT  
AATTTGTTTGTGCTGCTTCTTAAATAGTTTATATAATCACTAGTTATTTCAAGTGTTCATATTTTCAACAGCAGCATTAATCATCTC  
TTCAAAATCAAAAGACGCTTTTATATTGAACCTACCTTATCAAGTTTGGTTTCGGTTACTGGATTTTTAGGGGTGAAAATTTGTACAACA  
ATCTTCAATGGTTGAATAGATGTTTCAATGTACCAATTTCTTTTCGATTTAATAATAATTTCTTCTTTATCGTAAGTTAATAAAGGA  
CGTAATACAGGAGTAGAAGTTACATTATTAATTGCATACATGCTATGAAGTGTGTTGACTGGCTACCTGCCCTAGGTTTTTACCATTTA  
CAATAGCTAAAGCCCCTATTTGATGTACTAATTTATCAGCAACACGCATCATCATACGCTCTGTTGAAGTCATTGTATATCTTGGATG  
TACAACTTTATTTACCTGTTTTTGAATTTCTGTAAATGGTACAATATGCAATTTAATTTGGTCCAACACGTTACAGCTAAAATACGTGTC  
AATTTCAATAACTTTTTCTTTTGTGTTGATCACTTGTAAATGGTGGACTATGGAATGAATCGCTTCAATTTGTACGCCACGTCTCATCA  
CTTCCATCCCAGCAACTGGTGAGTCTATACCGCTGAAAGCAATAGTAACGCTTACCACCAGTACCAACTGGTAATCCCACTGAAC  
CCGGAACAACCTTCTTACATATAAAATGCACTTAATCTAATCTCACTTCCATCGAATTTCTATGATCTGGACGTTGATCTTACTGAAAT  
ATTGTCGAAGTGTTCATAACTGCACCAACCAATTCACGCTGTAATTCATACGATCCATTGGGAAATTTTTATCGGCACGCTTCACA  
TCAATTTTAAATGTGCTGTTTTCTTCAAAATGTGCTGCGCAAAATTTAATTTGCCGCTGCACTCATTGCCTCTATTGTTTTTCTACTTTTAAAT  
ACTGGACTAATAGATTTAATACCGAAAAATTTTGATAATCGATATGTTATTTCAATTTATATCTGCATGGTCTTCAAGTTCAATATACA  
TACGATCTCGTTTGCCTTTAAAGGACAAACCCATCAAGTCCCTTTAATGACTTATTTACATTATTTCTTAAATGATTTACAAATTTTTTT  
CTATTTGAACCTTTAATGTTAACTCCCCGTATCTAACAAGCAAGTGATCATACTTCATTATTTTAGCAACTCCTTAATTTCTCTATA  
AATGATGATAAATATTTCTTTTAAACCTTGCTATATCTTCTTTAGTTGTAGTAGCCCCAAATGATAATCTTATACTACCTTCAATAGAT  
TTGCTGTATAATCCCATTGCAGCCAATACTTCATTTAATTTATACGTTTAGATGAACAAGCACTCGCTGATAGATCATCAATGTGTCAT  
ATTTTGA AAAAGCATTAACTAATACCTTTTACCGCAGGAAACTAATTTTAAAAACGAATGGTGAACCAAGAAATTTGAAGAA  
TTAATATAAACTCCATGATATTTATTTAAAAATTTGACGGACGTCATTATTTAACACAGTAACAATGCATTCAATGCTTCAAAAGTTTT  
CATTAGCTATCTTCATCGCTTTAACCATTGCAATATCATTTGGCAAAATTAAGTGTCCACTTCTAACGCCATATTCTTGACCACCACC  
ATGGACAGTTGGTTCAACATTTTGAATGTGATTTACAAGTAAGACGCTTGGCCTTTTAAACCATTAAACTTGTGTCCACTTAAACTA

ATACTATCTATGTTATTGAGATCCATTGAAATTTTGCCGAATGCTTGAACCGCATCTACATGAAAATGTGCCTTAGGATAATTTTTTA  
TAACTTTAGCCATTTGTGGAATAGGCTGTATTTGTCCAGTTACATTATTTACATACATACATGTTACTAAAACCGACTTTGTCTGACAT  
TAATTCCTTTGAAGTGTTCTAAGTTAATACTGCCATCTTTCTTTACATCAACATATTTAACTTTAAATCCTTCGTGTGCTTCCAAATATC  
TTACAACCTCTAATACGGACGGATGCTCTAACACGGATGTAATTAATTCCTTCGTGTATCAAATTTACGATAGGCAATACCTTTTTAA  
AGCAAGATTATTGGATTACAGTTGCACCACTAGTGAATACAACATCATAATTTGTTTTTGAATTAATCATTGCATTAATTTGGGCTTTT  
GCTTGTGTAGTAATTGATTTGCCTGCAAACCGACTTTATGCGGACTATTCCGATTATAATACATTGATTGATTACTTTTTAAATAAG  
TATCTAACACTTCTTCAAATGCTTTCGTGCTTGCCGCATTATCTAGATATATCAAAAATAAACACTTCTCTTTCAATTAATCATCAATCGT  
TAAAATTGTTTTACTCAAGCATTATACTATTATCCGACAAAAATAAAGGTTATAGCGCAAAAATAATCTTATTTCTACTTATTAATA  
AAAATTAGACTATTTCACTCTATTTAAACAGCTGTGTGATTATGCTTTTTCACTACTTATATTAATTAACCAACACATTTGATTAC  
GTTTATCTTTAAACAATTGCTATTTATATTTATTGTCCCTTTTCATTTATCCATATAAAAAAGAAGCTAGACAACGTATCGTTGGCTAA  
CTTCAATTATTAAACTCATCAGTCCAATTTGACAGAGTGCTCATATTATTTAAGTATAAATACTACTAGTTTCTATTGCTTAATAAC  
TTCTTCTTCAATATGTTTAGTAACACCTGGCTCAACACTTTCAAGAGCTTGCTCTGCAATTTCAATCGCACGCTTATAGCGATTATTTT  
TAAATAATCGTTCAGTTCATTTAAGCTCTTATCAACATTGCTATAGTCCTTACGATATCTATTTCCATATTGAATTAATTTCTCTGCA  
TAAACAGCATTAAACAAGAATCATTTGCTTCATCTTCAAATGTATTCAATTTGAATACAATTTTAGACACTTTATCTTTTAACTGTT  
TAACGTGTATTGGACGTTCACTAAATTTGTTGCTTAACATCACGAACCTTCATGATCAATTTTCATTTTCATGATGATAAACCTTTCAGG  
AACGCTTGTTAAGTTAGAAGCAAGTAATCGACGATACACTTCTTCTTCTTCGATTGGACTCGTAGCAGATTGTCTTCTGCTTCTGCT  
TCATCTTCACGCAATTGAATCAGATGATTTTGTAGCTTTTCTGTTTGTTCATTAAATACTGTGACATGATCTTCTAAATATTGTAAATT  
ATCCTGAACCTCGTATATCGCACAGCAGATTTAGACATTTCTTTTAAATATCATCATATACAGAAATTAACCTTTGAATTTCAATT  
TCAAATTTGACGAACACTTTGAGCATCAGATTCATTTATATAGTAGTTTTCACGTACATATTCAATTTCTGTTTGAATTAAGCTTCA  
TGTCTTTAGCTTTGAATAAGTTATCCGTAATGATATCTTTTGTCTTCTCGACATCATTTTTAGCTTTAACTTCATGTTCAATTAATCA  
TACATGTCATCTAACTTATCATTGATATTAGCTAGTTTATCATTAGCTTCTTCTAATTTCAAGCGGCTAATTAATGGTTCAACGAAAC  
TAAGCTCTGTTTTAAGCTTTGTAATGTACTGTCTACTTTTACGTGATCCAGATCATACCCTTCAACTTTAAGATCACGGCAACCATA  
TTTTAAATCTTGAATTTGACCAGGTAATTCCTTTTGTAGTTTCTCTAATTAATTTCTGGTATTTCTTCCATATAAGATCTTAGCTGTTTCA  
TTTGTTCATTTCAAGGCAGCTATATGTTTGTGCGCTTGACATAATTACCATCAGCTTTTAGTACTTCATATTGCTCTAACCTTGGCTCA  
AACTTTTCAATTTCAAGTTCAAGTAGACTTGTGCTCACCATAATGATGACGATTGCTAAAACATCAGCTTTCAATTTACAGATAAT  
CAACCTTACATTTGTATATAATTCATCATTATCTTTGTATAACGCAATAATTTCAATTTACATCTTCTAATTTGTGTGATGATGCTTTGT  
TCGTAACATATCCATCAACTCATTGTCATCATCAATTTCACTTTGAGATGCGTTGAAACTAAATTTATCTAATAAAGCCTCAGCATTAT  
GGATTTTTTCTTCCACAGGAGCTAGATACTTATTGTACTTTCTACGTTGTCTTTTTTCAATTGTCATCGTATTTCGTTTTTGTTCACCTT  
TTAAATTTCAACTTAGATAAATTGTGCAAGGTTTTGATCAAAAAGGTAACGTTCTCAATTTTCAATTTTACGTTTCGATTGCTTTTTCAATAAT  
TTGTGCTTTTATTGAACGTAAATAGAATAATACACCTACAGCAATCAATATAATCACAAATTATTGCCAAAATGATATATAACACCAT  
ATGCTTCTCCTCCTAATTTATCATTACTATTATAACGTAATTTTGTGTTAAGGATAAATTATAAAATGAATTTATTGCCATAATATTTTC  
GAAATTTCTATACTATTATAAAATCTATGAAAATAAGAGGTTTTAAATATGACAACAATTAACCCAAACAAACTACACATTATTAAG  
AAACAAGCAGCAAGCCTTATTGAAGATGAACATCATATGATTGCTATTTTAAAGTAACATGCTGCGCTTATTAATGATAATCTAGAT  
CAAATTAATTTGGTTCGGCTTTTACTTATTGGAACAAAATGAACCTTATACTTGGACCTTTCCAAGGACACCCCGCTTTGTGTCCACTTC  
CAATTTGGAAGGTTATGTTGTTGACAGCCGTTTCAAGACGTTGACACAAGTTGATGCTGATGCTCATTAATTCGAAGGCATATC  
GCTTGTGATGCTAATAGTAAGTCTGAGATTGTGCTTCCAATTTTCAAAAGATGATAAAATTATCGGCGCTTCTAGATATCGATGCCCT  
ATAACTGATCGATTGATGACAATGACAAAGAACATCTTGAAGCAATTGTTAAAATTATTGAAAAGCAACTCGCATAAAAGGACAT  
CAGCATTTTCAATAAAGTGTTGACAGTTAGCAGGAAAATGTTACAATAATCTTTGTGTGAATTAACGAAAGTAGCAGTTGTATATTA  
TTGAGCGCTATGTTGTTCCCAATGCGGACGTGTCACGTAACGTGCTGCTATAAGGTGAAGACACATAAAACAATATATCTTAGTAAGC  
ATGCAACACTCTTTTTTGTATTATTCATAACAACAAAAAGAATTAAGGAGGAGTCTTATTATGGCTCGATTTCAGAGGTTCAAACCTG  
GAAAAATCTCGTCGTTTAGGTATCTCTTTAAGCGGTACTGGTAAAGAATTAGAAAAACGTCCTTACGCACCAGGACAACATGGTC  
CAAACCAACGTAAAAAATTATCAGAATATGGTTTACAATTACGTGAAAAACAAAAATTACGTTACTTATGGAATGACTGAAAGA  
CAATTCGGTAACACATTTGACATCGCTGGTAAAAAATTCGGTGTACACGGTGAACAACTTCATGATCTTATTAGCAAGTCGTTTAGAC  
GCTGTTGTTTATTCATTAGGTTAGCTCGTACTGCTGCTCAAGCACGTCAATTAGTTAACCACGGTCATATCTTAGTAGATGGTAAAC  
GTGTTGATATTCATCTTATTCTGTTAAACCTGGTCAAAACAATTTCAAGTTGCTGAAAAATCTCAAAAATTAACATCATCGTTGAATC  
AGTTGAAATCAACAATTTCTGACCTGAGTACTTAACTTTGATGCTGACAGCTTAACTGGTACTTTCTGACGTTTACCAGAACGTAG  
CGAATTACCTGCTGAAATTAACGAACAATTAATCGTTGAGTACTACTCAAGATAATACGTTCAATACAAACACCCACAATTGTGGGT  
GTTTTTTTTATTAATTTAAAAATGATAGATTCAAAATTATATGGAGCTACCCTATTTTACAATCAACTTAGAATTTACAAGTCTTATT  
TGTTTAATTATCTTTAGTATTTATCATCTAGTTTTTAAAAATTATCAATTGCGATATACGAATCCTCATCCCTCTATCAAATTACCATT  
ATCGTCTCACTTAATAAATAATTTCCGATTATCTGTAATTAATCCATCTACACCCATTTGTCTTAATTTTTCTCCAGTTTTCAATTTAT  
TAAGTGTGATTGGCATAACCTGTAATTGATGATGATGTGCTTTTATCAACAAATTTCTGGTCACTAATGCATAATTAGGATTAACATA  
ACTAGCAATTTGAGCAATTTCTGAAAAGTTTGGCTTTTATACCAATAATTACGTTTACTACAAAGCACCTTAATTCATATATACTG  
CCCAATGTGTTTAACTTTTCGATGCATTGATATCAAAAGATTGTATAACTACTTGTGTGCGCATCGACTTTCTTTTCTCCAAAAATG  
CCAGCAATTTACATTCTATTTCTGGATATAAATTCGGACTTTTCAATTTCAATCAATAGCTTTTTATCATACTTTAAGCATAATGAAAG  
TACTTCATCTAACGTGGGTATTCTGTTCTCCCTTAAAAGCAACATCTTTATAACTACCAAAATCAAATGATTTTAATTGCGATAATGTG  
TAATCAGCAATACGCCCCCTACCATCCGATGTTCTATCAATTGTTTCATCATGTATCACAACAAAATGTTGGTCTTTGGTCAAATGAA  
CATCTATTTCTAACATAGCAACATTGAGCCCCATTACCTCTCGATAACCGACCATTGTATTTTCAGGAAAAATCACTCGGCAATCCAC  
GGTGGCAAAACAATTTGTAATTCATCTTTCAAGTTTATTGAGAGTCATTGATAAGTCACCTTTCTGTTAAACTTTGATAAACTATTCTAA  
AATTAACATCATACAATTAATTTGGAGGTTAAAGCAATTGCATCAACATGACTTTTAAAGTCCAACTTCTTTGGCAAGGTGGTCGTAA  
CAATGTCGGAACGTTTCAAGCGACATACCTTCAGAGAATTTCTATACCTGCTTCTTCTAGGTGGTGTGTTTGGTTAGGAATCAATCC  
CGATGAATTGTTAGTATCAGCCGCTTCATCATGTTATATCATCTCATTAGCAGCTACTCTTGAACGTGCAAAAGTTCACAGATATTTC  
ATTGAACAACAATCGATTGGAACAGCTTGTTTAAATAACGGAATAATTCAGTATGTCAAAAATTGTGCACCATCTCAAATTCAAATT  
CCAAGTGATCAAATAGCACAATTAGAAAAGCGATTACCAAAATTGATAACAATTGCAGATAATAATTGCATGATTTCAAATGCTGT  
AAGAAATAATGTGGACATAAAAAATTTATCCATCATTCAGGCCAAATAAAATCTTTAAGTGATAACGTTTGTTCGACAATATAGCGT  
TATCACTTTTTTAGGCTTTTAAATTTTCAAGAAAATTTGTAAAAATAGTGAAATCTTATTTATAGGAGGCATATAAATGTATTATCATC  
AACCCTTGTATTAAACACCTGGCCCAACCCCTGTACCTGATGCCATTATGAGAGAAATTCAGACCTATGGTTGGTCATCGTTCTA  
AAGATTTTGAAGACATCGCAACAACAAGCATTTCAAGGCTTAAAGCCAAATTTGGGAGTCAAAATGATGACTTATTTTAAACATCTA  
GCGGTACAAGCGCTTTGGAGGCTAGTATGTTGAACATTGTAACCCATGAAGTCAAGTACTCTGTTGTCATTGTTTCAAGGTCCCTTTGGTA  
ACCGATTTTAAACAAATTCACAAAACTTATACAAAAATGTGCATATTTATGACGTAACATGGGGAGAGCTGTAGATGTCAAAAGAT  
TTCATCAATTTCTTTCAACTTTAAATGTTGAAGTGAAAGCAGTATTTAGTCAATATTGCGAAACATCTACGACAGTGCTACACCCTA  
TTCACGAGTTAGGAAATGCCATCAATCAATTTAATAGTAATATTTATTTTGTAGTTGACGGCGTAAGTTGCATTGGTGCTGTTGATGT

TGACATTAACAAAGATAAAAATTGATGTACTTGTCTTCTGGTAGTCAAAAAGCAATTATGTTACCTCCAGGATTAGCTTTTGTAGCTTAT  
AGCCACCGTGCAAAAGAACGTTTCAAAGAAGTAACCTACGCCAAAATTTTATCTAGACTTAAATAAATACATTTTCGTACAAAGCTGA  
CAATTCTACACCGTTACACCAAATGTGTCTTTATTTAGAGGTGTAAATGCATACGTTGAAACCGTAAAAGCAGAAGGTTTCAATCA  
CGTAATAGCAGCAGACTATGCAATTAGAAATGCATTAAGAAGCGCCTTAAAAGCATTAGATTTAACTTTATTAGTCAATGATAAAG  
ATGCATCTCCAACGGTTACAGCATTCAAACCTAATACAAATGATGAAGCGAAAATAATCAAAGATGAACCTAAAAATCGGTTTAAA  
ATAACAAATTGCTGGTGGTCAAGGCCATCTTAAAGGTCAAATTTTAAAGAATTGGTGCATATGGGGAAAATTAGTCCTTTTCGATATTTA  
TCGGTAGTATCTGCTTTAGAAATTTATTTAACTGAACACCGTAAAGTTAACTATATCGGTAAAGGTATATCAAAAATATATGGAGGTT  
ATTCATGAAGCAATTTAATGTACTCGTTGCGATCCCATATCAAAAGATGGTATCAAAAGCATTATTAGATCACGAACAATTCATATGT  
AGATATTTCAAACCTGGCTTGTCCGAAGAAGCATTAAATCAAAATTATACCTTCATACCATGCTTTAATCGTTTCGTAGTCAAACTACGGT  
TACTGAAAAATATCATAAATGCTGCTGATCTTTTAAAAGTAATCGCACGCGCCGGTGTGGTGTAGATAAATATTAATTAATGCTGC  
AACATTTAAAAGGTATTTTAGTTATTAATGCCCCAGATGGTAATACGATTTTCAGCTACTGAACATTCAGTGGCAATGTTATTATCAAT  
GGCTCGAAAATATTCGCAAGCACACCAATCACTTACAAATAAAGAATGGAATCGAAATGCATTTAAAGGTACTGAGCTTTATCATA  
AAACATTAGGTGTCATTGGTGTGTTAGAAATTTGGTTTAAAGTGTGCTAAACGTGCGCAAAGTTTCGGAATGAAAATACTAGCTTTTG  
ACCCTTACTTAACGGATGAAAAAGCAAAATCTTTAAGTATTACGAAGGCAACAGTTGATGAGATTGCCAACATTCTGATTTTCGTTA  
CATTACATACACCACTAACACCTAAAACAAAAGGCTTAATTAATGCTGACTTTTTTGCCAAAAGCAAAACCTAGTTTGCAAAATAATCA  
ATGTGGCACGTGGTGGTATTATTGATGAAAAGGCGCTAATAAAAGCATTAGACGAAGGACAAAATTAGTCGGGCAGCTATCGATGTG  
TTTGAACATGAACCTGCAACTGATTCGCCTCTTGTGTCACATGATAAAATATTGTTACACCTCATTGGGTGCATCAACAGTCGAA  
GCTCAAGAAAAAGTGGCAATTTCTGTTTCAAATGAAATCATCGAAATTTTAAATGATGGTACTGTAAACGCATGCAGTGAATGCACCT  
AAAATGGACTTAAGCAATATAGATGATACTGTAAATCATTCAATTTTAAAGCCAAACAGTTGGTGAATTAGCTATTCAATTAATG  
TACAAATGCACCAAGCTCTATTAATAATTACGTACGGTGGCGACTTAGCCTCTATTGATAGTAGTTTATTAACACGTACAATTATTACTC  
ATATTTTAAAAGATGATCTTGGTCTGAAGTCAATATTATCAATGCTCTAATGTTGTTAAATCAACAACAAGTGACATTAATATTG  
AAAATAATAAAGCAGAGACAGGTTTATAGTAACCTACTTAGAGGTAGAACTATCAAACGATAGCGATTCCGTTAAAGTTGGCGCTTCT  
GTCTTTACAGGTTTCGGTCCAAGAAATGTTAGAAATTAATAATTTTCTGTAGACTTAAAGCCAAATCAATATCAAAATTGTGTCATATC  
ATAATGATACTCCAGGTATGGTAGGAAAACTGGCGCATTGTTAGGTAAATACAATCAACATTGCATCTATGACTTTAGGTAGA  
ACTGAAGCGGGCGGAGATGCGCTAATGATTTTATCCGTTGATCAACCTGTTTCAAACAATATAATTGATGAACCTAAACAAGTTGGT  
GAATACAATCAAATTTTCAACCTGAATTGACGGTACAGTCATAAACAATTTATGTAAATTCAAAATGCCAAGAAGACATGGGCTT  
GGGACATTAAGTTCCTTAGGCAATGTAAAAAGCTGATTTCTATTAATTATTGATAGAAATCAGC

>040-contig\_241\_RC

TACGAAGTATTGTATAAATAGAGAACAGCAGTAAGATATTTTCTAATTGAAAATTATCTTACTGCTGTTTTTTAGGGATTTATGTCC  
CAGCCTGTTGCTTCTTGGCATTTTTTCATTATTAATTTTCATTGTAACCTCAATATGAAACCTTTGGTTCAATCATTCACTTCAAGTTATG  
CTGTCAAACAACAATCAAAATACAAATTTATCTAGTACACCTCTAAGTTACCTAAATGATTAATAACATAGTCGGCATGATGCGCTT  
CTAACTACCTGCAGACTCCTTACCCTTTAAACCTGTTAATGTTTCCAATAAACGTTGACCTATTTTTTGGACCTTAATAAGTCAGC  
TAACGAATCGCCTACTATAAATACGTCATCTTTATTACAATGTTATCTTGCTTATTGATATAAGATTTCATATTTATCGCGATTATTAC  
CATATAAAGCTGCGATATAAATAAAGGATTTCGGCTTTTCTAATGGTCTGCTTGGCGATACATATTCTCTGCTTCTAAAACATCAC  
TTGCTGTTGCAATAAAATCAGCTTCAAAATATGGTAACAATCCTAAATTTTCAAATGGCACAACAGTCTCAGTATAAGGACGACCTG  
TTGCAATACCTAATTCGAAACCAGCACCTTTTAAATCATTGAGAAGTACCTTAACTTCATCTACTGGTCTCAAAATAATTTCTTGATA  
AATATAACCTGTCTTAAAAGTAGTTCGTGCTATTTTCTTTTCAACATCTTCATACAACCTTCGATCCTAAATACCATTCTTGATAAACTT  
CTTGCGCTAACGTCCTAATGCACCCTTCAAACCTAAATAAAGTAGCATCCGAAACATGTAACCTCTGTTGTTGCAAACTCTTCCAAAG  
CAGCATAAATATTATTTTACCAACTTTTACATTATCCAAAAATTGTAAAGGTAGTTGTTTCATTTAAATTTAAACAGTCTGCTAAGTT  
TGTGCTTATTTTGAACCTCAATTCGACAGGCTCATCTTGATACATGAATGCCTCAATTTATCATGTGATAACTTTTTTCAAATA  
TCAATTAATGAATACTAAAAACGATAAATAACATATCCCAATTTGAATTCAGCCCTAGCGATTTTAAATTTGTTTAAAATCTTATCTT  
TTTGA AAAAATTCGATTCTAATGTCTTGATATCGTTATCAGTCAAAGTTTCCCAATCTATATGTGAATGAAGACCTAAATAACACTT  
ATCCATTAATAATTCATATACCGTTAATGCAGAGACATCGAAACAACGTTCTTCACTTAAAAAAAACGCCATCAACATCAAAATAAAT  
TTTCTTCACAATCCCACTCCATTTCTGAAAATTCAGATATAAATCATTCTACTATTTGACTAAAAAAAAGCGCAAACCTATTGAAGT  
TGGATTTGCGCTTAGCTGTTTAAATTTTATAAATGTTTTTCAATTTTCATCAGCAACCTGCTGTACGTGTGTACCGACAATAAATTGA  
GTTGAATGTTTACCATTAACAGTAACACCAACTGCACCGCGCTTTTTAATCTTCTGTTGATCAATAATAGATGTGCTTTTAACTCTA  
GACGCAACCTTGTGTCACAATTGGTTAAATTAACAATATTCTTGTGACCGCCTAAACCTTCTAATATTTGTATAGCATGTTGATGATA  
TTTACTTTGTTTAAATATCATTTTACCAGGAGCAATATTATCTTTACAACCTGTTGGATCAACTAATTCATTTTACCTCTACCAATCG  
TATTCTAAGTTAAATCTTGGATTACTACACGAAAAATCAGATATAAGATGAAAAATACAACACCTTGAACAAGCAACATCAAT  
GGATGATTTGATACTGGATTAATTAGTGATAACACATAATCTATCAAACCTGCACTAAATGAAAATCCAGCTGTCCAATGGAATGTA  
GCTGCGATAAATAAAGATAATCCTGTTAATAACGCATGAACAACATATAAGATTGGCGCAACAAACATAAATGCAAACTCAATCGG  
CTCTGTAACACCAACGAAAAATGCTGCAACTGAACTCGTAGGAACCAACCGTAAACCTGTTTTTCTGAGTCGTTTTAGCTGTATG  
ATACATTGCTAACGCAGCGCTGGAATACCGAACATCATGATTGGGAAGAATCCCGCTTGATAGCGTCCTGTAATACCTTTTATAGC  
ATCTTTGCCACTTTGGAATTTACCAATATCATTAATACCAATCGTATCAAACCAGAACACACTATTCAAGTGCATGATGTAATCCTGTA  
GGAATTAATAATCTATTGGCAACACCATATATGAAGGCTCCAAACGATCCTAAACCGACTATAGATTACCAAATTTTACAATCCAT  
GAATAAAGTAGTGGCCATAAGAATAACAATATGACAACTAAAAATGTACAGTAAAAATGCAGTCAATTTGGAATAGACGTTTACC  
AATAAAAAATGATAAATGTAATGGTAATCTGTTTCACTAAACCTTATTGTATGCATAGGCTGTCTATTAACCTATTACAATAACCA  
AAAGACATTGGCATTATTCATCTTTTCAAAGCTGAATTTATTCCGAAGCTTTCAATTCCTAATAAAGGCGCTAATTTCAATTGGTGTAT  
AATACAACCTGTAACATAAAAAATATCCTAACGTAGCTGCAAGCGCGACTGCACCATCATTTTTCTTTGCCATTCTATAGCTACACCA  
ATTGCAAAATAAAATACCTAATTGCTCTAAAATCGTAGTACCTACCGTAGTAAAGAACATTGCGATTTTCGGCGTCGCATGAAGTGCA  
TTTAACGTATTACCAATTCGGGCAATAATTGCTGCAGCGGTAATAATGGCAACTGGTAACATTAACGAACGCCCTAAATTTTGAAA  
AATTTATACATTGAATGTCATCCTTCTTAAAATAAGGTAGAAATATAAAGATTACTAATGTAACTAGAATAACTACTTCGATACTCC  
GTTATAGTCACCTAGGCATACTAACCAGCTATATTTCTACCTCAAGTTATTTTATAAACTTTTACAATTTTCATGCAATTTCTGTTGTA  
ACTTTGCTGTTCTGTTTCAATCTCTTTTGTAAATGTAATCGATACGCTCGTTTCGTTTAAATCTTTAGGTAAATCGTTAATATCGATT  
GGTTTACCAATATTATGATGCTTGTCTGTTTAAAGACCATGAATCTTAGTAGGACCAACATAAGCAACAGGTAATATTGGTGTAC  
TTACTTAACATTGCAATTTGTTGAAGCACCACTGTTTAAATGGTGCACCTTCTTGGCATGTGCGGAGAACCTGTTGGGAAGATACCAACT  
GTCTTATTATCTTTCAACAATTTGATTGGGCGTTTTTAAAGTACTAGGTCTGGATTTTACGATCTACAGGAAATGCATTTAAAGACG  
TTAAAAATTTACCAATCCATTTATTTTGAATAATCTTTTTTAGCCATATAATGAATTTGATTAGGATATAATGCCATACCTAGCAT  
AATAACTTCGTTATAACTTTTCATGCGTACAAGTTACGACATATTTACTATCCTTAGGAATATTATCTTTACCGATTACGTATAATGAT

TTTGACATTTTAACTAAAAATGAAATTCAAAATCTTACTAATCACTGAATACATTGTGCCACCTACTTAACTTATTTGTTTATAACAAC  
TAGATTTTATCACTATATTTTACTAGAACAAAGATAGTCTGAAAAATACATCTAAAGTTGTATAGTGTATTACTAGCAATAATTATAA  
AAAAAAGACATAATTAAGCATATATAAATCATATAATGGAGGTTAAGTATGTCAGATTTTAAATCATACAGATCATTCTACAACAA  
ACCATAGCCAAACACCTAGATACAGAAGACCTAAATTTCCATGGTTTAAAACAGTCATCGTTGCATTGATTGCTGGAATTTATGGTG  
CACTTCTAGTACTTGGTATAGGCCAAAGTATTAATAGTACAATTTTAAATAAAGATGGTTCAACTGTTCAAGACAACAAATAATAAAG  
GTGGCAATCAATTAGACGGTCAAAGCAAGAAATTCGGTACCGTTCATGAAATGATAAAATCTGTCTCCCTACAATTGTTGGAGTTA  
TTAACATGCAAAAAGCATCAAGTGTAGACGACTTATTAAGGCAAAATCATCTAAACCATCTGAAGCTGGAGTAGGTTCAAGGTGTT  
ATCTATCAAATAAACACAATTCAGCTTATATCGTTACAAACAATCATGTTATTGATGGCGCAAATGAAATTAGAGTCCAATTACAT  
AATAAAAAACAAGTTAAAGCGAAATAGTTGGTAAAGATGCAGTAACGTATGTTGCTGTACTTAAAATTGAAAAATACAAAAGGTAT  
TAAAGCGATTCAATTTGCCAACTCTTCAAAAGTACAAACTGGCGATAGCGTATTTCGCAATGGGTAAACCCATTAGGATTACAATTTGC  
TAACTCTGTAACATCTGGTATCATTTTACAGCAAGCGAACGTACGATTGACGCTGAGACAACCTGGTGGCAATACAAAAGTTAGCGTTCT  
TCAACAGATGCTGCTATTAACCCAGGTAACCTCAGGTGGCGCATTAGTAGATATTAATGGTAATTTAGTTGGTATTAACCTCAATGAA  
AATTGCTGCGACACAAGTTGAAGGTATCGGGTTTGCTATTCCAAGTAATGAAGTTAAAGTAACAATTGAACAACCTTGTAACATG  
GTAAAATTGACCGCCCTTCGATTGGTATTGGTTTAAATTAATTTGAAAGATATTCTCTGAAGAAGAGCGCGAGCAACTTCATACTGATA  
GAGAAGACGGTATTTATGTCGCCAAAGCTGATAGTGATATTGATCTTAAAAAAGGTGATATTATTACAGAAATTGATGGCAAGAAA  
ATTAAGATGATGTTGATTAAAGAAGCTATTTATATGAAAAATAAAAAACCTGGTGAATCAGTCACTGTTACCGTTATCCGTGATGGT  
AAAACAAAAGAAGTTAAAGTGAATTAACAAACAAAAAGAACAACCAAAACGTCAAAGCCGATCAGAACGTCATACCTGGCC  
AAGCGATAGAGATTTCTTTAGATAATTTACAGACAGAAAAGTACATTAAGAGCTTACTCATTACATCTTTAGGAATGAATAGAT  
AGGCTCTAATTTTATTAGCTATGCAATTTATTTATTGATAGTTAACCATGAAGTATTTTTTCTTACCAGCGACGATAAATCGTAAAT  
CGCCATCAATTTTATCTTCTGGTGCTAAAGCATAATTAACATCTTGTGTCTCTCACCATTAAATATAAATCGCACCATTGTTAACATC  
TTCACGTGCTTGTCTGTTTAGAAGGAGAAAATGCCTGTTTCAATAAGGACTTCAACGATATTTGTTGTGTCATTGATAATGTCATTGA  
GGCACATCTTTAAATCCATCTTTTAATCTTTCGCTGATAATGATTTTTAAATCACCCTAAATAATGCTTGTGAAATACGGATTGCAT  
CATTAAATGCATCTTCACCATGAATAAATTTAGTTACTTCTTCAGCTAATGTTTTTGGAGCTTCACGTAATGCGGTGCTTCATTTTTA  
GATTGTTCTAAGCGATCAATTTCTTCTTTCCTAAGAAAGTAAAGTATTTTAAAGATTTAATTACATCTTCGCTGATTGATTAATCC  
AGAATTGATAAAATTCATAAGGACTTGTTTTTCAGCATCTAACCAACAGCACCTGACTCAGACTTACCAATTTCTTACCATCTG  
ATTTAGTTACAAGCGGAATAGTTAAACCGTATGCGTCTGTTTGACCATACATACGACGCATTAATTCATACCCTGTGATATTAC  
CCCATTGATCTGATCCACCTACTTGAATCTTACAATTCATCTTCTATTCAATGACCTTCAATTAAGACCGAAATCAATAGCTTGTAAATCGTGATGT  
GAATCTGTATATGAAATACCATGTTCTAAACGACTTTGGATTGAATCTTTACCTAACATGTAATTAACGCCGACGTGTTTACCATAG  
TCACGTAAAAAGCTAATTAATGAAATTTGCTTAACAGTCTCTATTATTAACAAGCACTGCACCATGGTCTGTTCCAAATTCAAAA  
ATATTGTGCATTTGTTTACTAATACCTTCGATATTTTATCTACTTGTCTTCTGTTTGTAGCACACGTTCTTCTGATTTACCTGATGGA  
TCACCAATCATACCTGTACCACCACCAATTAACGATAGGACGATGTCCATGTTCTTGAACCGTCTTAATGTTAAGAATGGTAGT  
AAGTGACCAATATGTAACCTATCTGCCGTTGGATCGGCACCGCAGTATAACGTCACCTGTTCTTTATTTAATAAATCTTCAATACCTT  
GTTTCATCAGTTTGTGATAAATAAGACCTCTCCATTTTAAATCTTCAATTAATACATTCGTCATTATTATTTCTCTCTATTTATAATTA  
TTTATTGAATACTTGTAAAATACTTTAAAGTTTTTTGAACGTAAAAAACCCCTTACAACAAATATGTAAGGGCGCGATTGCACGTT  
ACCACCAACTTAAACATAATCATAAGATAATGTTCACTCTTAAATGATACGTTTCAATTAATAAACGTAAGGACATGTTAGTTATAAA  
GGTGTATTATATTAATAAACACTAGTTTACAGCGACCACTAGCTCTCTGATGATTTCAAATAATATTACTTGTCTTTTATCCTA  
TTCTTTATGCATTTTCCCTAATTATAATTAACGTTAAAAATAAAAGTCAAATTTGCTTAAATATGGTATACTATACGTAATTTAGGAGGT  
TAAAGATGACGAATCAAGACAACATCATCAATGAATCATCGTATATATCATTTTGAAGATATATAAAGCTATCAAACATGTC  
ATTGTTTTTATATTTATGATTTTCATTGCCATCGTTGCTATCGCTGTGATTGCGATGCTTTTATATTTTCATCATTAACTAAAACGTC  
CGACTCATTATCAGATGATGCTTAAATAAAAAAAGTTCGACAAATACCTGGCGATGAATTATTAGATCATAATAACAAAAATTTATT  
ATATGAGTATAACCATTTCTCAAACTCACTCATTATAGGCCCTAAAACATCAAGTCCAAATGTCATTAAAGCATTAAACGTCATCTGA  
AGACACTTTATTTTATAAACATGATGGCATCTTACCAAAGGCGAGTTTAAAGCAATGATACAAGATATTTTAACTAGTACAAAG  
TTCAGGTGGTAGCACAAATTACACAACAACCTGTTTAAAAATCAAGTTCTTACCAACGAAAAAACATATAGTAGAAAAAGCAATTAAG  
TTCGCTAGCAATTAGATTAGAACACCTACTCTCAAAAGATGAAATTATATACATATTTAAATATAGTTCCCTTCGGTAGAGATT  
ATAATGGCGCTAATATTTCCGGAATTCATCCGCTTCATATAGTTTGTGTTGGTAATTCACCAAAAGATTATCAATTGCACAATCTGC  
ATACCTTATCGGTTTGTGCAAAGCCCTTATGGCTATACACCCTACGAAAAAGATGGAACGTTAAAAATCGGATAAAGATTGAAATA  
TAGTATTCAAAGACAACATTATGTATTAACCGTATGTTAATCGAAGATCAAATCACTGAAAAAGAATACAACGACGCATTAAAT  
ATGATATTAATACATTTGTTAAATCGAAAAAAGCGTTAATTGATGCTCACTTTTAAAGTAACCACAACATGCGTCCAAATATT  
AAAAACAGCAGTAAGATTATTTCAATTAGAAAAATTTCTCACTGCTGTTCTTTATTTTAAATACTCTAAAGGAAAGCCATTAAACCA  
ATCAATAGTTTATAAATTAATTGCTTTCACATTGTCTACAAAGTTAATCATACATATGCTATATCCAGTTAATTATTTAGATTCTTTTC  
TGAATTTAGGAATGAGTAAAGCTAACATACCTAATCAACGATATAAGCCCCACCATGATTGGCTGGAAGTTGTTTCTCCAGTTTGTG  
GTAGCATTTTAGATTGACTAAGTTTGTCTTCTTCGATGGTGTGCGGCCCTTTCTTTGTTTCTACGTTTGTGTCACGATTTTATGAA  
TATCACTCGGCAGATGTTTCAAGTTGCTTTTTTGTGCACTTTGATAGTACTGATAGGATGATATTTCAATTGTATCAATGTTTGTTC  
GTTCCAGTATTATTAACCTTTATTTTATCGGCAATATGAGCAAGCTGTATGACTTTGTCTTTATTTTATTAGAGTCTTTATCAGTATC  
GACATTGATGACATACCAACGCTATTATCAACACCCTTATCAGTGTCTTTAGCAATTTGAGTATCCATTTCTTTAAATCATACTTA  
TCGAAGTGATTGTTATCCAACATATCGGATAAATGATCAACATCATGTTGCACATCTTTGTCAACACTACTATCAGTATCTTTAACCA  
TGTCAGACTCTGGTTCTATCACATCTGCTTTATCAGACGCATCTTTAGGATTTGTTGCAAGTGTGCTATTTTCAGCTACATCTGTATCA  
GCAACCTTATCTTCTGTCTGTTTGTACATTTAGCGGTTCACTCGTGTATTTTTGTGATATATCATCATCTTTTGTATTGATATCCTG  
ATTTATAATTCTGACATGATATTGACCTTCATAACCAATGTTTGCCACAACGACTTTAAACAATCGCATTTGAAAGCTGTTTGTGACGGT  
ATATATGGGAAATCAGCGTTCTAGAATTTATTTTAGGATCTTTAGAAACAGTAGTGACAGTTTACCTTCTACAATTTAAATCTTTCC  
AGTAACTGTCTATCTTTGTTTTCATCACTACATATTTTGGACATTTAAAGTTGCTGTATAGAATGGATGTTCAACAAAGCCGTCAT  
AACTGACTCACTATTTTCTTCACTTTCAAAAAACAACAAATGCGCTTCTGTAAATCTGTTAATTGATCATTGTTAGGTGTAACATTT  
TCAAAATCCGTCAGTGTGATTTAACTTGATCAGCTAACTCTACTCTAGTTTGTATCTAATTTCTTTTATATTCGCTTATATTTTCT  
GGCAATTTCTCTTGTAAATTTTCTAATTCATAAACTGTCTTTCTAACGTTTTAGCTTTGTGATACGGAGCTAATAATTTTGTAAAT  
GTATGTTTCTTCATCCACATAGTCGCTGCGGTATTAGTAATAGGCTGTGCAAAGACCATTAGCGTATAATCATAGTCTTCATGGATG  
TTCTCACCATATTCAATAGATGACACAATTTTAACTTCTCTCGTACCATTAGATACTGGGAAACGAATATAGGCATAATCTTTATCAG  
AATCATATGACTAATTCGACTGGTAACTTTTTGTACCTTCATAAACTCAAATTTCTTCCATGTTGAAGCTGTCTTTAAACCTAA  
TTCAATATTGGTCTGTTTTTGTAAAAATGACAGTTGCTGGTTCAACAGTACTAGCATAATGATAGGACTGTCTTTACCTTTACCTTTCA  
TTTTTCAATTGAAAAATCAATTGGTGCAGCAATTATCAGCTGTATGTTCTTTATCGATGATAGCCGGGTTTTTAATTGCATCTTGTAGTGA  
TTCATCTGCTGGTGGATACTGTTGATTAACATCCGACTGATTACTTGACTATTCGTTTTATCGTTAGTATTACCATTAGAATTTGTTT  
CATGAGCTGGTTGGCTTGACGCTTGATCTGCATTCGTTGACGATTTTGGTTGTGACAGTTGACTCATATTGGTCTGTGCTGCGGTTG

ATTATTAGCATTGTTGATCATTGATGATTTTTGATTAGATGTATTCGTGTTTGTGGATTACTTGGCGACTGAACTTGATTGATCATTGCTG  
TACTACTGCATCATTTGTATCTGATTTTACAAGTGAAGGATCGTTATAAATAGGTTTAGCAAATACTAATTTAGTATAATCATAATT  
TGTTTCTTCTCCATCATCAATTTGAGTCGAAGAAACAATTTTCAATTCCTGTGTGCCATCTGAAAAGTGGGAATCGAATATAGGCATGG  
TCTTCTGGTACAGGACTATATGATACAAGTCTCACTGGCAGTTTTTGATTGTTTTCATAGACTTCAAACCTTCTCCATGTTGAAGCAG  
TATTGATGTCTAATTCAACTTCTGCTTTCTTTTTAGTGTAATACACATCTGCTGGATCTTTGATGTGAAAAAGTGATAGTACTGCGT  
TTCATTGTTTTATCTAATAACTGGAATGACTTGTCTCTTGGACCTATATCATGTTCTTTATTTTCTAATGCAGGATCTTTAATTG  
CATCTTTAAGTGATTATCCGCTGCAGGATAGTTTTTCGCAGTGTGTGCTGGTTCGCTAGCAGGTTGTGTTGATTGTATCCTTAGG  
TGGCTGAGTTGTAGTTGCATTATTTTGTATTTTCCGAGATTTTATCTGAAGTATTTGTATTTTCTGCTGCTTGTGCTTGATGTTGAG  
AAGTAATTAATAAGTGTACTGACAATGACCGATGCAACGCCTAGAGTTGATTTTCTAATAGAATAAGAAAGACCTTAATTTGGGT  
GATGTTTGTTCATGTTGTTAAACAACCTCTATAAGATTATATTTAATTGATAAATAATTATCAATATCAATTATTAGTGTTAATTGTAGC  
GCATCCCAATTAATAATTGCAACCTATTTTATTAATTTTTTAAATATGGAATATTCATTGCATCGCTTTCCTATTCTTCAAGCCCACTT  
TTTATCTTCATATACATTAATTAACCACCTTCAAACATTGTCGTTAGATTTCGCCAAATTGAATCTATTTTATAGCACAGCAAAAAACCG  
AACTGCTGAAATAATGCATCTCCAACAGTCCGGTCTATTAACCTATTTACTTATCTTTATTAACAATTGACATGATTTATTAGAATA  
ACCCAATTGCATGACCATCATCAGTAACATCCATGTTAATGCTGCTGGTTTTTATAGGTAAACCAGGCATAGTCATGATTGCACCTGT  
CAACGCTACGATAAATCTGACCTGTTTTCGCTTCTAATTCACGAATTGTAATTTCAAATCCTGATGGTGCACCTAACAACGTTTGA  
TCATCTGAGAATGAATATTGTGTTTTGCCATACATACTGGGTAATTATCCCAACCATTTTCTTTAAATTGTTTTAATTGTTTTGCGC  
TTTACTGCTAAACGTTACTTTTGAACCGCCATAGATTTTCAGTCACAATCTTTTCAATCTTTTGTCTAATGGTAATTTCAATTCATATA  
AAGGTTTAAATGAATTAGTTGATCAATGACTTCTAATCTTCAATGCTTAAGTCAACGCCACCTTTACCACCTTTTCCAACTTC  
AGTTAAGGCAATTCGATCGTTATTTCTTTAGCCCAAGATTTTACATATTCTACTTCTGCATCGGTTACCTTGGTGAATATGAAGATATGCAATA  
GCAACAACCGGTTCTACACCGAATTTTTAATATTATTAACATGACGCTCTAAATTAACAATTCCTGCTTTTACTGCTTCTACATTTTC  
TTCTTTTAAATTATCTTTCGCTACACCACCATGCATTTTAAACGCACGAATTGTCGCAACAACAACGACAGCTGCCGGATCAAATCCT  
GCTTCACGCGCTTAAATATCCATGAATTTTACGCGCTAAGTCTGAACCAAATCCAGCTTCCGTTACAACGATATCAGCTAAATCA  
CGTGCTGTTTACAGTTGCTAAAATTGAGTTACAACCGTGTGCGATATTCGCAAATGGTCCACCATGAACATAATGCAGGTGTCCCTTCA  
ATTGATTGTACTAAGTTTGGTTTTATTGCATCTTTTAAATCATTGCAAGTGCACCTTCCACTTTTAAATCTGCAACTGTAACCTGGCTT  
GCGATCTCTAGTGTAACCAATAGTAATACGACTAATTTTATCTTTAAGTCTTTAATACTTCTACTTAAACATAAAAACTGCCATAATT  
TCAGACGCTACTGTAATATTAAGCCATCTTCAGTGGTACACCTATTGTAGGTCCACCTAACCCAACGTTTACATGTCTAAGTGCA  
CGATCATTCATATCTAATACACGTTTCCACTCAATACGCTCTTTCATGATCGATTCTTAATTCGTTACCTTGGTGAATATGATTATCGATAA  
ACGCAGACAATGCATTATTTGCAGTTGTAATCGCATGGAAATCTCCGTTGAAATGTAAGTTGATATCTCCATAGGTAAGACTTGCG  
CATAACCACCACAGTCGCACCACCTTTGATACCAATGTTGGTCTTAAAGCAGGCTCTCTTAATGCAACCATAACGTTTTTATTTA  
ACTCATGGAATGCATCAGCTAAACCAACTGTAACCGTTGATTACCTTCACCAGCTGGTGTGGGCTCATCGCAGTTACTAAAAACA  
CTTTCCTTTGTTTTCTTGGCGTAATTTTATTAATGTCGATTTTAGCTTTGTAATGACCATAAGGTTCTAATGCATCCTCTGAAATA  
CCTACTGATGCAGCAATATCCTTAATTGGTTGTAGTTGATTGATTTCGCAATATCTAAATCTGATAAATGAGTCAACTTTTTTCGCC  
CCTTTTGTTTAATTTATGCATTTATAATATGTAAGTTGTAGCTAAGAAATTTTACTTACATTATATAATAACGAACGTAAAAA  
CTTGTGCACTAAATCGGTTAGCGCTTTCATTTTGAATAAATCACTTATTAAGTTTGTATTATAAACTTTTAGCGTTTGATAC  
TATTGATAACTATATTTTTCTATTATTTAAATAAATCATCTTCCAAAGATTATATTAATAAATAAAGCAATTAAGATATGCCATT  
ATTGTTATGTCATCATTTTTCAAATGCTTTCTACGAAATGATATGACACAAGTTAACAGCTCTTTATATTGCTTATCGTAAAGTAAACG  
ATTATTTAAACATTGACATGAAATATGTTGTCACCTTTTATCTTCGAAAAAATCTTCAATAACATTTCATGTCATTATTCATTGTA  
CTTAAATCCCAGCATCTAAATTTAATTCCCAAGCTTTAATACACGCTCTCATAATTTTACCTGACCGTGTTTTAGGTAATTTATCTTT  
AAATTCGATTTCACGTGGTGTGCTGCATGTGCCGACAAACCTTCTTTAACAATATACGAATGTCTTCTTTAATTCTGCTGTTGGTTCA  
TATCCTTTTCTCAGTGCAACAAACGCCCTTAATTTTACCAGCGAACCAGGATCTGGTTTACCAATAATTCTGCTTCGGCAACTGCTT  
CGTGTTCACCAATTTAGACTCAACCTCAAATGGTCCAACCTCGTTACCAGCTGTCATAATTACATCATCAACACGTCCTTGGAAAC  
AGAAGTAACCATCTTCATCTTTATATGCCGAATCACCAGATACATACCAGTCTCCAATAAAATATGATTATATTTTCTGGATTCTT  
CCGATACGATACATCATTTGATGGCCAGCCTTTTTTATAGCAAGTTGGCCATTTCGATTTGGTGGTAATTCATTCTTACGATCATCG  
ATAATTGCAGCTTGAATACCAGGTAATGGTTTGGCCATTGAGCCAAGCTTGACGTCCATCGTTGGATAGTTAACAATCATATGTCCA  
CCTGTTTCTGTCATCCACCAAGTATCTAACACCGTTAAACCGTATACTTTTTTCGCCCATTTTATAACTTCAGGATTTAAAGGCTCAC  
CTACTGATAGAATCGAACGTAACGATGACAAGTCATATTTCTCAACAATATCGTCACCAGCACTTAAACATTCTTAAAGCTGTTG  
GTGCCGTATACCAATCGTCACTTTAAATCTTCAATCATACTATACCAGTGTCTGGTGAAAAGCGACCACCAGCTATACAATTTG  
TAGCGCCATTTAACCATGGTGCAAAAATACCATAAGATGTTCTGTAAACCAACCTGGATCTGCTGTACACCAATAAACATCATCTT  
CTTGTAATCTAATACATATTTTCCAGAAATATAGTGCACTAACATTGCTTGTGTAACATGCAATACACCTTTAGGTTGCCAGTAG  
AACCTGATGTATAATGTAAAAATCAAACCATCATCCGACTTTAACCATTCAATGTCAAATTCATCGCTAGCAGTTTCCATCAAACCTAA  
TGAAGTCTATGTAATGTCTTCTACATCCCTCATCAGACAACAATTTTTTCAAGTTCGGTAATTTATCTACAGGTACATCGAGGTAA  
CAATGCTTATTAGTAATTAACACTTTAGCTTCACTGTTCTCATATCTATCCGCAACTGCCTTTTCCATTAATGCTTCAAAATGCAAGGC  
CCAACAATTGCACCAATTTTTTAAACACCTAACAACGCAAAATATAGTTACAGGTGTACGCGACATAAAATATAAATACTCTGTACCT  
TTGTCAACTTCTGCATGTTGAGCAAAAACATTTCGCTGCTTTATTAGATAATCGTTGCATATCTTTATAAGTATACGATTCTTTTCTGTA  
CTCATCTTTGTAATTTAACGCTATTTTATCCCCTAATCCTTGATCTACATGGCGATCTATACATTCATATGCCATGTTTCTTTTCCAG  
TTTCACTCCAAGAAAATGCTTGTCTACGCTTTCCAATCAAAAGTATTATATGTTTCTTCAATCTTTAAGGTTATGTTTACCTTGC  
GCTCCTTTATAAACTTCGACTTTCATTTGAAACTCCCCCTTTGTTATGTGAAAACGCTTTCTTTCTCAATATTATACATAACATTTCTA  
ATTATTCAAAATTTTACTTTTATCCTTTTCTAGTATTAATTTGTAATTTTCTATATAATGAATTTAATACAATCACGACGTCGA  
TTGAGGAGTTGAAAATATGAATCATTTAAAGACGTATCAATCCGAAGATTATTACATTCATGACAAGCAATTTGTTATTGAAGTCC  
TTTAAACATACGAATATTTGAAGCGCTTACTTTTCAGTCGCAATTTAACCCGATTTAGAGATGCTGAAGATTAAGTAAAGCTTTGTT  
AGAAATTACAACATTACCAGAAGGTAGAATTTATGTTGCTCGCCAAGATCAACTCATTGTGGGTATGTCACTTTCCACTATCCTGA  
TGAAATTGAGCGCTGGTCTACAGGTAACCTTCCATATTTAATCGAATTGGGGGCAATTGAAGTCAGCATCAATTTTAGGCAATTACA  
TCTTGCAGAAAAGCTAATACAACCTTAGCCTTTCTACACCAGAATTCGAGGATTATATCGTTATAACTACTGAATATTACTGGCATTG  
GGATTAAAAAATTCAAAGTTAGATGTATTTGACTATAAAAAATTAATGCAGCGGTTAATGGCAACTGGTGGACTTGAAATATTCCG  
TACAGATGATCCAGAAATAACAAGTCATCCAGCTAATTGTTAATGGCAAGAATTGGCAAAAATATTACATTAGAACAGCAACAAG  
CGTTTGATGATATTCGTTATATGAATCGGTTTTTCTTTAATTTTTTGAATATCGGAGGGATTATATGCAACAACATTCATCAAAAAAC  
TGCATATGTTTATTCAGATAAGTTATTACAATATCGATTTCATGACCAACATCCCTTCAATCAAATGCGTTTTAAATTAACAACAGA  
GCTACTTTTGAATGCAAAATTTATGTCTCGAACAATAAGTACAACCTAGAATTGCAACAGATGAGCAATTAAGTAAATGTTAATTCATA  
ATATGATTACGTCGAAGCAATTAAGCATGCTTACATGGCATTATCAGTGAAGATGAGGCTAAGAAATATGGATTAATGATGAAG  
AGAATGGTCAATTTAAGCATATGCACCGCCATAGTGCCACAATTGTTGGAGGCGCTTTAAGTTAGCAGATCTTATTATGTCAGGCA  
AAGTATTAATGGTTGTCACCTAGGTGGTGGATTGCATACGCTCAACCTGGTCGAGCTAGTGGTTTTTGTATATACAATGATATTG

CAATTACCGCACAACTACTTAGCTAAAGAATACAATCAACGCGTTTTAATCATAGATACCGATGCACATCATGGAGATGGTACACAA  
TGGAGTTTCTATGCCGATAACCATGTTACTACTTATTCTATCCATGAAACCGGAAAAATTTCTTTTCCAGGCTCTGGTCACTATACTG  
AGCGCGGTGAAGATATCGGCTATGGACACACTGTAAATGTCCCACCTGAACCGTATACAGAAGATGCATCATTTTTTGGAGTGTTTTA  
AATTAACAGTTGAGCCTGTCGTAAAGAGTTTTAAACCTGATATTATTCTAAGCGTAAATGGTGTGATATACATTATCGTGATCCAC  
TAACTCATCTAAATGTACGTTACATTCATTATATGAAATTCCATATTTTGTAAATATTTAGCTGATTCTTATACGAATGGAAGGT  
AATTATGTTTGGTGGCGGAGGCTACAATATTTGGAGAGTCGTACCACGTGCATGGAGTCATGTATTCTTAAAGTTAATTGATCAACC  
AATTCAAAAGTGGTTATTTACCGTTAGAATGGATTAATAAATGGAAACATTATTCATCTGAATTATTACCTAAAAAGATGGGAAGATCG  
TTAAATGATTATACCTATGTCCCCCGCACAAAAGAAATTAGTGAAAAAATAAAAAATTAGCTTTACATATAGCGAGTTGGTACG  
AATCTACTCGTCAATAAGTAACCTAATCTGCAACGATTTTAAAAGATAAATAAAAGGCATTCTTCCAACACCCATATAATTCGGGTC  
TTAGATGAATGCCATAATTTTGTGAATTTATTTGTAGTTCCTCGGTATTCAATTCTGTGAGGTAAAACTACATTTGGTCTTCTATCT  
TTTCATCGTTTATATATTTTGTGAATAAGCGCATCCCTACTGCACCGATATCATATAATGGTTGAATAACACTAGAAAGTTGTGGTCT  
AACCATCTCAACTAAACGTGTATTATTGAACTAATAAATTTGTAATTCCTCTGGAACCTTAATACCAGCATCCATTGCACTATGCATA  
ATACCAATAGCTTCTTCGTCACGTATACATAATATAGCATCTGGAAGATTACCTTTTCAATTTTGGCAAAAGCTTTTACGCTTCTTTAT  
AATTTACAGCACCAGAACAAATTCATGTATCACCTAATTGAAGACCATTTTATTTAACACTTCAGTTAAACCTTCTAAAACATCTTC  
TTGAGCTTTTTTAGAATGTTCTCCACCTACTAAAGCAAATGATTATAGCGCTTTTTCAATTAATTCTCCCGTAATTTCTTTTCGAGCTT  
CAGTAAAAATCAATATTAACCTGATGCTATATGTGCATCCTTACCATTGTTCCTGATACTACTACAGGTACAGATGATTGATTTATCAA  
TCTTTTCAATTTCTCAGTAATTTGTACCACCAAGGAAAAATAATACCATCAACTTGTTTACTTAATAAGTTATTAATAAATTTCTTTTCTT  
TTTCAGGATCGTTATCTGAATTTGAAATAAATTGAGTGATATTTATACATTGTGCAATATCTTCAAGTCCACGAGCAAGTTGTGAATA  
ATAGATATTAGATATATCTGGAATGATCACACCTACTGTTGTGTCTTTTTACTAGCTAAACCTCTAGCAACAGCATTTTGGACGTAA  
TTCAAACGCTTAATGACTTCGTTAACTTTATTTTTAGTTTCTGCTTTAAACATTTTGGTTCCCATTAACAACACGCGACACTGTGGCCAT  
AGAGACACGCGCTTCTCTGTACATCATATATAGTAAGTGTCTAATTTCTCTCTGTAAACGTTTTATTTCATTATAATAACATGTT  
TTCATTTTCAATTTTCATAGTTTACCATATTTAATTTACAGTAACATATTTTGTGTTTGGAAAAATTTAGCGAAAAGCTTGAAATAAAAA  
CAAACGCTAAATGATAACGAACGATATATTTAATTTTATATAAACTTTTTTCAATTTTAAATTGTAATGTTTGGAGAAAGCCTTTTCA  
AATATCAATTCATTTGTTGAAAAATGTTTCAATTTTCAGTAACAAATTTGGTGAATCTATTATATTACAGATAATTCATAGTTATAAT  
TTTAATTACTGCTGTCAGTCATATTTCTTAATAATTTGTGAAATTTGGACAAGTGTGCAATATTATAACAATCGTTAAGTGTAGTATAG  
CCTTTATTTCTATACAAAAAATAATAGCCAATCTAAAAGTAATATACTCTTAGATTGGCTACTAGTTTAAAAATTGTCGATTCAAAGA  
TAATATTCTACTTCATCATGACATATTAGTTAAGTAGTCTATAGTCTCCTTGGGAATATTATTTTAACTTTTTAGCGTTATATAAAATCAG  
CTAAAGGCTTTAATTCATCATATAAAATGCTTGGAAATTCATCTAAATCCATTTGTTGACCCGCATCACTAAGTGCAACAGATGGATCTG  
GATGCACCTCAGCCATAACACCATCAGCACCTACTGCTAATGCTGCTTTCGAGTTGGTAACATGATATCTTTACGACCTGTACTAT  
GCGTAACATCTACCATGACTGGTAAGTGTGTACCTGTGTTTTAAAATTTGGTACTGCTGAAATATCTAAAGTGTACGTGTGCGCTTTTC  
ATAAGTTCGATTCCGCGTTCACATAAAATAATGTTTTGATTACCTGTGAAGCAATGTATTCAGCTGCATAAAACAACTCTTCGATT  
GTAGCAGATAAAACCACGTTTTAATAGAATAGGCTTTTTTCGTACGCCAGCTTCTTTTAAATAACTCAAAGTTTTGCATATTACGTGCAC  
CAATTTGGAATACATCTAAATATTCATCGGCTACTTCAAAATCATTAGGATTTACAATTTCACTAACTACATTTAAATCGTATTTATC  
TTTAATCTGTTTAAAGTATTTTAAAGTCTTCAACACCTAGGCTTTGGAAGTCATAAGGCGATGTACGTGGTTTAAAGCACCGCCACG  
AATAAACTTTTCACTTTTGGCATTGTAAATTTTAGCTACCGCTTCTCATTTGTTTCAATGATTCAACAGAGCATGGTCCAAATACAAAT  
GATTTGTTGCCATCTCCAATAATACCCCCATTTTCAAATGTTACAATCGTATCCTCAGGTTTCAACTTACGAGATACGTATAAATGTT  
TTTCATTTTTCAGATTTTTGTAAATCTGTAGAGGCTTTGAAAATTTCTTTTAAATAATTGTTTAAATAGTATTATCGTTGAATGGTCTTTG  
TTACTATCGATTAAAGTCGTTAAGCATTTCTTTTTTACGTTGTGGATCATAGATACGTGTACCTGTGTTTTAATTTTTCTTCCCAATTTTT  
TGTGCTAGTTTACCACGTTTAGATAATAAGTCTAAAATTTGATGATTTCAGTGATACAATCTCACTTCTGTATGATTCTAATTTATTAC  
TCATCCTTACTCACCTCTACTAATTATTCAAGTATATTTCCACTTTAAAGCAATAAAATATAATGTTAAAAAATATTCTAACAATATC  
ATATGTATAGTTCAACCCTAAATTTGACAGAAAAATAATCAATTTTCTAATTATATGATTTCGAGACTGACATTTTCGATTTTCTCAGTCAT  
TATTGGAAAGTTATATTCTATATTGATATTTATTAGCAAATGTTAATCAATTAATAAGTGTCTATTATTATAGCTTATTTTGTAGTCAA  
CATTATGCTTTTAAAGAAAAATTTTCGTTTCTATCTTATTATATAAATCTCAAAATTTCTATACATTTCAACCTTAAATAAAAAAT  
TAACAACCTTTGCTTTGTATATTAATAAATCTATAGTGAACATCACTACCAACACATTTCAGCTATATTTAAATAGTGAACGTC  
ATTGTACCTTCTAAGATTCATTGTTTATTGATTATCGAATATTTTCCATCTTCAGCTCAAAATGTGCAATATCACTATTGTAATCTA  
ACGATGTTACAAACAACATAAAATACATGGAATGATCGCGTTGCCCTTTCAAATAAACTGATGATATCAAAAAAGAGGCTGGGACAT  
AAATTCCTAAAAAAACAGCAGTAAGATAATTTTCAATTAGAAAAATATCTTACTGCTGTTCTCTATTT

>041-contig\_187\_RC

GCTGATTCTATCAAATAATTAATAGAAATCAGCTTTTTTACATTGCCTAGGAACCTAATGTCCCAGCCTTTTTATTTGAAATTCAA  
TTTTTAAAAATATAATACATAGCTTACTGCTATGATTGATTATTAACGATTTTAGTAATCTTAGTCATTGAATGTACGTTTCTCTATT  
TTACTATTAGCTTTTTCAACTTTAGCATTTGGCGTTTTTGTATGCATTGGATGATTAGCATTTGTTGTTTTTGAATTTCTTATTACTAGTT  
TGATTATTCTTTTGAAGTTGACTTACTTGAACCTACTTTGTTTCTTTGCACCTTGTGATGATTCTTATTATGTTGCTTTTTCTGACCTGAA  
GTTTTATTTGTAGATGCTTTTGTATGCTTTTGAAGGTGTTGTTTTTTAGATTGTTTACCTGATTCTTGTCAACAGCTGTA  
TTATTAGTTGTTTTTTCATCAGCTTTACGTGTAATAACACCATTTTCAAATTTAGCTTCTTTTTGTTTAAACAGTGTCTTTATTATCTATA  
TTAACTGTCTCTGTCTGTATACATCATTTCTTTTGTAACTAATTGAGGAATTTCTTTCAAGTCAATTTTGAACCTGGTTTTTCTGC  
AAATAACGCTTCAGTTAATGACTCTCTTTTGAACCTGGTGTTAATTTAGCTTGCTTGTGTTTGCAGCGTTTGTCAATCTTTACAGCTT  
GTGACTCTTCTTTCGATACCTTTAATGCCACTGCTTTTGTATCTTTATTTGATACCTTCTGCACTTTTATCTGTTTCTGCTTTGCTTCTT  
TTTTAGCTTCTTGAATCTCTTGTGCCTTGTGTATGATCACTCAAATTTTGCACCTGCTTCTTCTTTTATTGCTGCTTGTGTTGCTT  
TTAATGCCACTGGTTTTGATTCTTTATTTGATACTTCCGCACCTTTATCTGTTTCTGCTTGTGCTTTTTTCTTCGCTTCTTGAATCTCTTG  
TGCCTCTTGTGATGATCACTTAAATTTATTTGCACCTGCTTCTTCTTTATCGCTGCTTGTGTTGCTTTTAAATGCCGCTTGTCTATTTT  
AGATTGTTTTAAAAATCCTTCAACACGTTCCCTTGTAAAGGCAACCGTTTCTTCAAGTTGCGTTTTTCTTCTTCAAACCTTTTGCAGCA  
GTTCTTGTCTTTGACTTTTAAATCATCTGCTTTTGTATAAACTTATTTTTTAAAAATACAAACCTAAAGCTGAACCAACAAGCGCGCC  
AGTTATAAAACTAACAACAAAATCTTTACGGTTGGGTAATGGTTTCAATTTGATAAGTGTGTTTATTTTTTAAATGTTCTTTTATTATTT  
GTTGTTGCGTCATTTGTGTATCCTCCTATAACAAATGCATTTAAATAAGTAACAACCTCATTTAAGTGCATTTGTTTAAATTTAATTT  
ATTTATCTACTCGAGAAGTATAGCTATGATTGTCATGCTGCTACATTATTAGCTTTGTAATTTGCACCTCCACGAGCGGTAGTGTCT  
ATTTTGCCATTTGTCTGCAATTTTCCATTGCAACATTTGACCATTGAACAACCTTGTGAGATTATCTTCAATTTTGGAAAAATATTATGTG  
TAATTTGAATTTGTTACACGATCTACAGAGCTGTTTAAACGTTTGTACTGAGTCACCGATACCTTTAACAGCATCTACAACCTGAGTTTAA  
ACGATCTACTTTACCTTGATATCCTCAGTTAAACGTTTACTTTATGAAGTAAATCTGTTGTTTACAGAGTAATACCTTGAACCTTGA  
CCTTCTACACCGTCAAGTGTTTTTTGAACATAATCTAAGTTTTTCTTAAACAGAAATTAATACAGCTACGATACCGATACATAAAATTA

AGAATGCAATCGCAGCGATAATTCCAGCAATTGGTAAAAATCCAATCCATTAATAAACGCCTCCTAATTAACATGTAATAATGTCATTA  
ATAATAAATACCCATACTACTCTATTATAAACATATTAATAACGCATTTTTCATGCCTAATTTATCTAAATATGCATTTTGTAAATTTT  
GAATATCACCTGCACCCATAAATAAACACAGCATTATCAAATTGTTCTAATACATTAATAGAATCTTCATTAATTAACGATGCAC  
CTTCAATTTTATCAATTAATCTTGTATCGTTAATGCGCCAGTATTTTCTCTAATTGATCCAAAAATTCACATAAGAATACACGATC  
TGCTTTACTTAAACTTTCTGCAAATTCATTTAAAAATGCTTGTGTTCTAGAGAAAAGTGTGTGGTTGAAATACTGCAACAACCTTCTTTA  
TGTGGATATTTCTTTTCGTGCTGTTTCAATTGTAGCACTAATTTCTCTTGGATGGTGTGCATAATCATCTACAATAACTTGATTTGCAAT  
TGTAGTTTCATTGAAAACGACGTTTAAACACCACCGAACGTTTCTAATGCTTCTTTAATATTTGTAACATCTAGCTTCTCTAAATAACTA  
ATCGCAATTACAGCTAATGCATTTAAAACTGTATGGTCACCATAATTGTGGAGACAGGAAGTGATCATAAACTCACCATCCACATAC  
ACATCTGCTTCAATTTTACGTAGATGTTTCATCATCACCCCAAGCAATAATACCTTTTAAACATATATGTGCCATTTCTTGGAAATGCAT  
CAAAAACATCATTAAATATCTTTAAAAATAATCAGGATGATCGAAATCAATATTTGTCTAATAATTGCGTAATCAGGTTTATAACTTAAAA  
AGTGACGTCTATATTCACATGCCTCAAAAAGCGAAATAATCACTTTTCAGGCAATCCCATACCTGTGCCATACCAATTAATAATGAAG  
TTTTTTTATCACCATTCATAACATGTGATAATAAACCTGTTGTAGAAGTTTTACCATGTGCACCAGTTACAGCTACTGAAGTATATTG  
ATCAATAATCTGTCTTAAAAATCATTATAAATTACAACATCTAATTCAATTGATGTGCACGTAATTTCTTCTATGGCTACTGCG  
AATGCATTACCTTGTATAACTACCATATCTTCTTTATGTTATTAGCATCAAAATGGTAATATTTTTATCCCTTATTCTAAGAGCAAC  
TTCTGTAAATACGTAGTTCTCAATATCCGATCCTTGAACCTTCATGTCTAAATCATGCATGATTTGTGCTAATGAACCTCATGCCAGAA  
CCTTTAATTCGGACAAAATGATAGTGTGTCATTATATAAACTCCTTACTCATAATTATTCCTTTATTTAAATCTGCTTCCGTAACATA  
AACATCCCTTGGTTTTGAACATTAGCACTCGAAACATAACCGAGTTGCTCTAATTGATCGATAAATCTTGGCTCTATTATAGCCA  
ATTTGGAAATGCTTTTGGATTAATGATGTTGAAATATGTCCTTCAATTAACCATAAATGCACAAACATCAAAATCAATTCATCTTGTG  
ATTTGTGTTTGTGTTTTTTTCAACAATTTCTTTTCTTCAAATAGATAGTCCGGTTCTTTTGTGTTTGATAAAATCAACAACATCATCA  
ATTTTCGTATCAGAAAACAAATGTACCTTGAACCTCTAATCGGTTTATTCATACCGCTACCAAGATATAACATATCGCCATATCCTAAC  
AAGCGTTCTGCTCCACCAGTGTCTAATATCGTTCTCGAATCTACACTTGATGATACCATAAATGCAATTCCTTGTGTTGATGTTGGCTT  
TAATTAACCTGTAAATACATTGACAGATGGTCTTTGCGTAGCTACTAACATATGAATACCACATGCTCTCGCTTTTGTAGCAATTCT  
AGCAATAGACTGCTCAACTTCTTGGCGAGCCATCATCTAAATCAGCCAACTCATCAATTACAATGACAATTTTGGCATTTCTTTCA  
TCATATGGTGTCTTTTGTAAATGCTGTTATATTACGTACATGGTAATGTGCAAAATACTTATAACGTGCTTCCATTTCTTACGGC  
CCATTTTAAACTCTGTGTAGCTGCTTTGACATCTGTAATACCGGTGCAACTAAATGTGGCAAACATTATAAGGAGCTAATTCAC  
CATTTTGGATCGATAAGTAATAATCTTAATTCCTCAGGGTGATTTTTATATAGTAAAGACATCAAAATCACTATTGATACAAACTGA  
TTTCCCTGATCCAGTTGCACCTGCAATTAGTGGCTGTGGCGTTTTAGCAATATCCATAAGTAATGGTTCATTATTAATTTCTATACCCC  
ATCGCAACTGTTAATTTAGATTACGATTTTTTAAAACTTGGAGATTCAATAATAGAACGTAAGTTGACTGTCGTTGGATTTTGGTTG  
GAACTTCAATACCAACACGACTAGTTCCTGGAATAGGCGCTTCTATACGAATATCTTTCGCTGCCAATGCCATTTAATGTCATCTTG  
TAATGCCGTAATCTTGAAACTTTAACACCTTTTCAACTGATAATTCAAATCTTGTAACACTTGGACCTTCAGTTACATCTTGTACTT  
CTGCAAGGTACATTAAGTAAAAATAATGCGTCATTACAGTTCTTTCTTTTATCTGTAATCCAGTCCCTCGTCCGACTCAATAACTTGTGG  
TTCTTCTAGTAATGAAACACTTGGCAATTTAATATTTGGGCTTTACGAATCATCGGCTTAGATGTTGTACAGCTTGATTTGTTGCA  
ACATCTTGTGTTGTCGTCGAGGTCTATTTTCATTAGCTGTATCTTCATTTGATTTGAAAAATGAAGGCTGTAATCTTTTGTGATC  
ATCATTAATCTTGTGTCACCTAGTATTTGATGTTGTTCTTTCGCTTTTCACTTATGTCGTTATGTCGTTACTTGAACCTGAAGACG  
AAGTTGATTGATCAACTTGCTCATTTTCCAATTGATTATCATCTTGGCTTCTTCAAATATTTCCGTTTGAAGTTGAATCAGCAGAAGG  
TTTCTGCTCTGAATATTGTTGTGCAATTTGATAATCATTTTCTGTTTCTGATGACCAATAAGTTGATTGTTCTCAACATTATTTGATG  
TCATATTATTTATTTATATGCATTTGTATTTGACTCTTGTGAATAAGTGCTTGATGATGGTGTGGCTTGACTCGCAGTCTTGCTTTCA  
CTCACAGCTTGCTTACTTTGTACAGGCTTCAATTACGGCACATTGACTTTTGAATGCTTTTACGATCCATCATACGCTTTTATCAGA  
TGGCGTCATGACAACATTAAATGGTCTTTTACTTAAAGTTGAAACCTTTTCAGTCTGTTTCTTTGGATTTACGTTTTCAATAGTTTTCT  
CTTCGACATTTTGTTCATTTTCAGCTGTTTCGTTTTGCACATTTTCTGTAATTTCTGCGTTATGCTTTTCTATTTCATTATGCTTGAAT  
CTTCCACAACATGACCATCATTCACAATATTCGTTTTCAATGAGTTGACACTTAAAGTTTGTGTTGGTCACTTTTTTATGACGCGGTGCT  
AATTCAAATTCATTATCAACCGTTTTATCGATATTATTCTAGATTGACTTACTGCGTGCTCTTGGCTTTAGGAGCGTCTACATG  
TATTTCAAGACGCGTTTTTATTTGTTATTATCTCGATATTGAAAGTAGTATCCTCATCTACTTCTGTATCATTTAATTCATAAAATCTG  
CATCATCGATTTGACTTCTGAATATTTCTTTTATTCGTTGCTCCATCTTCTTGAATCAGCAATTAATCTGGATTGATTTTTTAGTT  
CATCTTTATCATTTACTTCAACGTTATGTTGTAGTGCTGATTGATGTTGAGACGTTACATTCGAAACCGTAACCTCATCATCTGACAA  
TTGTTTGTGTTGTCGATACTTGATTCAAACCTAATTCCTCATAATTGTATGGACTTTCATCTACATGAGAGTCATTAGTGTCTTCATTT  
GTATTGACGCTTGTTATTTTCATCATTTGATACAGTTTCATTCTCTATGCCATTTGTATGAAGCTGACTAGCATCTGTACTATTATCT  
GTTAAGTCACTATCATCATTTAATGAACATACCAACATAGCGTTCCGCTTGTTAGCATACATTTTCATCAATTGCACGTTGTATTG  
CATCTTGTCTTCTGTTTTATGTTCTTCACGCTTTTGTGCAACGCTTTTTTAAATCGACGCTTTTGAAGCACTTTACGTTCTCGTTAC  
GTCTAATTTCTTCAACAATTTGTGAAGCATAAATATTTCAATTTGATAGTATTATCAACTTTTGAATAATTAGGCATGATTGTTGTT  
GTTGATGATACATTTTATCATGATGATTAGATGATGCTTCTTGTGCAACACTATCATTTTGTTTTCTTGTCTAATTTGTTTATTT  
TGAGACGTTTGGCTCTTAGCTACATATTTATCATATTTTGTGTTATCTGACTCAACTTTTCTGAAGGTTTACTTACAGGGATACGACC  
ATTTTCTAACTTTTTAGGTTTCATTGTGCCAAAAATAGCTGACGGTACCTCTGAAGTCTTGAAACTTTCTTTGTGATAATCTGGAGTT  
GAATCTTTAGCACGATGATTGTATTATTAGAATACATATTATGTGTTTTGACTTGTGCGTTTCTTCTCAATACCATTAATTGCAGA  
AACATATGTACCTGGCTTATTCGTATGGTAATGTGAGTGATCTTTATATTTTATACTTTGCTGTGATATTTAGAATTCACGCTTGT  
CACTATAATTTTGTCTTCAGTTGTTTGATTCTTCTACGGCGATGTCGTTTTTGTGAACGAGAATCGTGGCTTTGTTTGCATAGTCT  
CGATGGTATTGTTCTTTTTCATCTGAAATAATATCTGCAGATTGTTCAACATTTTCATTTTCATAAGCTACGCTCATAGGAAAACGGA  
ATTTTCCCCTCGGACGACTATAAATATCATTATTTTGAAGCAGTAATGAGTCAATGATCGTTATCTATATTTTGTGATTCTTGACGCTT  
ATTTCTTCTATGAATCAAGTCATCATTTGAATCATTTGATCTTTCGCGGAATAATTTATCAAAACGATCATATTTTCTACTACCTTCTT  
AATTATTCAAAAAATGCTTGTCCAATTTTCATAGCTGTCATTTAATACCATAATACCTTTTTTCTTACGGTGCATTAGGTAATTTCAATT  
CTTTCATTGAACAAATCATACCGCTTGAGGCAACACCACGTAATTCAGCATCTTTAATTACCATACCGCTAGGCATCACTGCACCTA  
CTTGAACAACAACATTTCTGTCCAGCTTCAACGTTAGGCGCGCCACATACAATTTGTAATGTGTCATTTCCAACGTTTACATTTAG  
TACACTTAATTTATCTGCATCAGGATGTTTGTCTTTAGTTTCAACGTAGCCAACTACAAATTTCCGGTGATAGATCAGATTTAATTTA  
TAATCAAAACCAGCTTCTGAAATACGCTTTTGAATACATTTACAAGTTCATCAGTTAATTTAATATGACCTTTTTCTTCAATTGTTA  
TATCTTTTGAAGATTTCAAAAAATATTATAACCTACAACATTACCTTCATTAGTAATTTCAACAACATTACCTTTTTTATTGTAGTTAAT  
TCACCTTCAACTGGTTCAATTTGTAAAAATGCGACATCTCTACATATTTAGGATGTAAAAATAAATCATTATGACAAAACTCCTTA  
TCCAATTAATCTTATTTATCTTTAATAATTTACGACGATTTGCTTCTAAACGCTGAATCACTGTTTGGATCTCTTTTGTGTTTATTT  
TTACCTAAAAATAAATACGGTTCAAGATGACCCTGTTTATATCCAAGGATAATGATGTAATTTGGAAGTACGCTTTAGTGAATAAT  
TCCATTGTTAAATGTGCCATCACATCATATCCTGTTTTATTGCGTATATCTGCAATAATTAACACATCTTGGTGTGGCACTGCTACGA  
GCATTTGCGCTTGACATTGTGCCTCAATTTCAATTTAAAAATGCAGTATTTAGTATCCTACTTGATCATACCCGTCATTTGAGTTAAT

AAAAAATAAAATATTACCTTTTACTTCATCAGTCGTATATGAATTTGACAATTTTCTAACATTAAACAGAGACATTTCTCTTATTGTT  
TGTTTCAGTTAACTTCAAATCCTCTAACATGCTTTTCGTCAATTAGACGATATGATTTCCCTAAAATCGACTGCATAATAAACTGCTGTTT  
CTGCAGTATGCTCATCATAGATAAAAGGAACACCTTGTTTAGTTTTTTATCAAAGCTAGTCGCTCTAATGACAGGCATAATTTGACT  
AGATGATATACTCTCAAGGGTTTTATCTGCCATTTGTGCAATAGCTTCATCAACGTAATAAACAATTTTCATCTACAATTTTTCTTTTT  
TATCTTCATATTTTGCAGCTATAGCGTTAAGTTTAATCGTGATACCTTTGTTATTATCTGTTTCGATAAAATACGCAAAGTTTCTTCTCA  
CGATTAAATTTAAAAACAACGTCTAAATGGCTTAAACGTTCCCTTTAATTTATCTCTCATTTGAAAGGTATTTCATATGTAACACTCCTA  
ATTTTCGCACCTTATAATAGTTTACAATAAATCAACACATAGTAACAGAGAAAAACGAGTATTACCCCGTTTTTCTCTAGTCTAAATT  
ACACGTATTGAGCTAAAAATGCATCTATCTGTTCAATTGATTTTCGTTCTTTTCCAATATAACTTTCCAAGCAGTTCTCCATTTTTATAT  
ACTAGAAAACTTGGAAATACCCATAATACCATTTTCAATACAAATATCCATAAAATTTATCACGGTCTACTGATACGAAAGTCAAACATA  
GGATATCTCGCTTCTAATTCGGTAAATCTGGTTCATCCTCTACAATCTGGACACCCAGCTGCAGTGAATTCAAATCTGTAGCA  
CCTTGTTTTAAAGATTCAAATGTTGTTCTGATTCAAGTTGTTTCATTTTTATGTCTCCTTAATTAATGATTATATAACTATTTAGA  
GATAATAGTTGTTATTACCCGATTATTTATATTGTAATGTTTCTATTTGATTATTATCTAAATTACAAATGGCTTCTGAAAGTAAAGA  
TCTAGCTGCAAAATAGTCTCTTATATCAAATACTGAGTCTGTACTATGAATATATCGTGCACATACACCAATAACTGCAGTCGGAAT  
ACCAATATTAGCTTTATGAATTTCTCCACCATCTGTTCCACCTGGTGACATATAGTATTGATGTTCAATGTCATGTGCTTCTACTAAC  
TTTAATAAATAGTCTCTAAATACAGGCTTTAAATCATTGTACCGCTTTTATGCGAATTAACGTCCTTTTACCAAGTTTACCAGATA  
ATGGTTGGTTTCCCTTAAACGTCATTGGCAGGTGAACAATCAACTACAAATGCAACGCTCGGGTCTATCATCTCTGCAGATGCTTTCGC  
ACCTCGTAATCCAACCTCTTCTTGAACATTTGCGCCAACATACAAGTCTACATCTAATTCTATATCTTTTAATAATTCTAGTATTTCA  
ATTGCCAAGACACAACCATAACGATTATCCCATGCTTTAGCCTATATCGATGTTTCAGATAACTGTGTGAATGGCGTGTGAGGTACA  
ATTATCTCTCTATATCTATTCCGCGCTCACGCACTCATCTTCTATTTGAGCAGCTATCTAATGTGTAAATCTTTAATTTCCGGTGC  
ACCTTCACTACCAGTACGAAAATGTTTAGGTATATTAGAAAACAACACCGATAATTTTTATCGCCATTTCTATTTTTAATTACTAAGCGT  
TGTCCTTGCCAAATATCATTGTGCAACACCACCTAAATTTGTGAATTGAATCATTCCATTTTTAGTGATATTTGAATCATAAATCCGA  
TTTCATCCATATGTGCTGCAATCATTACACGTTTGCATTTGGATTTTTAGATTTTTTACACCAAAAAATCCACCCATACGATTTTCA  
ATAAATTCATCTACGTACAGCGCCATTTGCTGAGTCATATAATTTTTTACTTCTTCTCAAAACCTGGTGCCCATGAAGCTCAGTTA  
AAGTTTGAATTCGTTGTAATGTTACTTTTTTATTTATGTTTCATAAAAGTTCTCACTCCTTATAAGTTATTATATCATCTTCAATATGGT  
AAACTAATGATATGAATTTGAAATCAAGGGAGCATAAATGATGACTAAACTGAAATATATAATTCCAACAATAATTGCAGTAGCCA  
TTGTAATTTTCTACCATTTCAATCATCCAATATATTAATCGTAACGCTATAATCCCGTTAAAGTACTTAATGAAGTAAAAATCATA  
TTTTATGAATGTCAAAGGCTCATATATCGTTTATGAACCATCTTCATCTTCATCCGAAACTGATAAAATACCGTTTAGTTTATCAAGGTGGA  
ATTACAACATTTAAAAATGGTCAAAATATTCATTATGATTTTTATGCAGATGCATATACTGGTGAAGTCATTAACATTGTAGAGCGT  
TAATACGAATTTTTATCCATATTTGATTTGGATCGTAAACTTAAAAATGAGCCACACCCTAATTAGTAAGATTGGATGTGGCTCAAT  
TTTTTATTTTTGAAAATTTGTTTAGTAATACATCTTTATTTTAGTTATTATCAACTAATGTTTCACGTAATAATATATGCATCTATGTTTT  
CACCATCATCGCTGTATTTTACAGCAAAGTAGTTTTCATCATGATAAAACAAGAACCAATATTGTTGCTGAATAAAATATGGTATCA  
TGCGTTCTTTTTTACGAATCGATTGCATAGGATAATCATCATATGCCGTTACCCATAGAGGATTTTTATGTGCAGTAGTTGGGAATAT  
ATCACCCATATGAAGTCTTTATCTCCTTGACTTTCAATCGTAATAATCGTGTGGCCAAAGCTATGACCTCCACTATGTTGCATCTTG  
ATACCCGGAACCGGTTCAAAATGTTTTTGAATAAAAACTGTTACTATAATCGCCTTTATCTTATCCAGTAAGTTGATTATAC  
TTCTTATATTAGGTGCAAAATCAAGTCAATGCACTCATCTTGTTGCAACCAATGAATTCGCAATTTTCAAAATTCGATTTCCCGCTTGATC  
AGTCAAAACCGGCAGCATGATCAAAATGCATATGTGTCAATTAGCACATAATCAATATCCTTTGGCGTTAAATTATAATTTGCCAAATC  
AGCAATAATATGACTTTTCTCATCTACTCCAAAATTACGTAATTGCTTTTCAGATAATTTACCATTACCAATACCCGCATCTATAATC  
AAATTATATTGAGCCGTTTGAATCAAAATTTGGATGTGTGCGTAAATTGATTGATTTCGTTTCATTGCAATTGTATTGCTTTGACCACA  
ACGGCTTCGGAACAACACCAACATTGCACCGCATCCATTTTTGTATTGCCACCATTAGATAATGAATAGATATATCCCCGATTT  
TCATAACATCACCTATTCTTTCTGTATTCTGTTATTACAATTAGCATGTGTTTATTACATCATATCACTATTTCATAAATGCGAACAATA  
ACGAAACGCCCCACACTAATACACTTCTAACTATTTATAAAGATTAATGCAATCATATTTATGTAAATGCATCATAACCATCGGCC  
TGTAATTTTAAATTAATAATTAATAAATGCAAGTAAATGCAAGCTTTATCTTTTAAATCAAAGGTATTTAGTATAACATTGTTTCAT  
AGGCGCATATTGCTTTAGTTATTGTTTAGTCACTTTTAATTATAGAGAAATTTGCGCTTTTTTATATGCAAAATCAAAATCG  
GACAGATGAAAAAGTAAAAACTTTTTTCCATCAGTCCGATTTATTATGTAACCTAATATGCTTTTCTATAGAACCTATATAGTACG  
AAAAAACACTTATGATTGTATGTGTACATACCCTCATAAGTGCTCTATTTTTGTGAATGGAATTTTCGCTTCCATACGATAAATACGTG  
ACCCTTTATCCGAAAAATTTCTTTTCATATCTGTTAAAAATATTACTGCCATCGTCTTCTTGATGTAAATTTAGATTTATTTTTGTAATA  
TACATTCCAAATTGAGACATACTTTCTAAACTGTAGGCAAATAGTCCTCTGTTATCAGTTTTTAAATGTAAATCTCCTTCATCATTTA  
AGATTGTGTGATACACGCTAAAAACGTATGATACGTTAAACGTCGTTTTGCATGACGATTTTTTGGCCATGGATCTGAAAAAGTTCA  
AATAAATACGCGAAACTTCGCCGCTTTAAAAATATTCATTTAATTCAATGGCGTCATTACAAATAATCTTTAAATTTGTTAAACCCAT  
CTCTTTAACTTTATCCAATACTTTATAAACGATACTTTTCTCACGTTCCATTGAAATATAGTTAATATGAGGATTTTGAGCAGCTAAT  
GTTGTAAATAAATGCCCATACCCGAACCAATTTCAATGTGTATCGTTGCGTTTTATCAAACCAATTCAGTCAATTTCCCTGCATGTT  
GACCGTCATGTCAACCAATTACAGGATGACCTTTTAAATAATCTTCAGCCCATGGTTTGTATTCGAATTAATTTTATTTATTTCTCTCT  
AAATAAACATGTTACTATTTCATAACTTCATTTAGGAATTTAAGCCAAGTGTTTCATATCCTTATATCTTTTTGCTCTTCATACCATTGA  
ACAAGACCTATAGATTGAATTACCGTATACCATTTCATACGTTTATTTAAATTCAGCTCTCTTGAACACCATATGTTTCAAGCCATT  
CAGACCATTGTTGTTGTGGAACATAGTTGTAAAGCAGCATTCCGATATCAATTGCCGGGTCTGCGATCATTGCACCTTCCCAATCGA  
CTAAAAATAGTTTCATCCCGATCAGATAATAACCAATTATTATGATTACATCACCATTGACAACAGTGAAAAACGTGAATCTAAA  
CTCGGCATATGCTCTTCTAAATAGGTTAATGATTTTCTCACAATATGATGTGTTAAAACTTCCCTTGATAAAGAGGCATTAATTTTAT  
TAAGCATAATCTCAGGAGTAATAGGTTCCATTTCCATAGCTTTAACATACTTAAATAAAGGTCTAGAATTGTGTATCTTCTTAAATAA  
ATGTGCAACTCTTGTTGCTTCTATTTGCGTTTGAAGATAGTTCACGCCCCATTTTCCAATGTTGTGCTGTAACAACCTCGCTTCTTCA  
TGCGTTTCGTCTCACTAATAATTTGGGCACAATACCTTCTGCTGATAATGCCGAATAAATGGATTGTGAATTTCTGTTTCAAAATCAAACT  
TTGTCCATCTTGTTTCAGCCATATATGCTTCACCAGATGCACCACCTGCTGAATCAAGTGTCACCCTAATTGATAAAACTGCTCCAAC  
TCGTCCACCTCACTTTCAATTAGAAAATGGCTCTAGAAAATAGGTTTTTCAAGAGCCATATATTCTAATTTATAACACCATACTGGTAC  
AAATATTATGTCCAGATAATTATTGTAAATCCTAAACTAATGCCTACATTAACAACCTTAAATTAATCAATATGTCTGTCATTGAC  
ACCATACATTCTAAAGTCGCTTACATGACATATAATGTTACCGTGTCTAAAACCTACATGTTTTTGAATCTCTGTAGGCGATAAACTCT  
AGTTTTCAAAATAATTGCTATCCCATTTTCATGGTTAGCATAAAATTTATGAAGTGAACATTTACGTACTTAGTAAAAATATGATGCAC  
ATCATATTTGTAACCTCATAGAAAATTTTATAATTTTTATCATTATATTTCAACTGAAAAATGAGAAACAAAATGGCACTTTTTACTAAT  
ATGTGTTTTCTAAACAACACTTTAAGCTTCGTTTAAATTAACATAAATTCACCTACGAAAGTTGATAAATTAAGTAATTTAATC  
TAAAAATATGATGAAGAATTTTAAATCTGTGTGACTATATACCTTTTCAAAATCCTTCTGTAGTTGACGTGTAATTTGGCCAACT  
TTACCATCATTAAGTGGTTCACCATCTAATTTAATAACAGGTGTAACTCAGCTGAAGTACTTGAAACAATAAATTCATCTGCGTTTT  
TCAAGAAATCTACAGTAAACGTTTCTTCTTTAAATGGGATGTTATAGTCTTCGGCAATTTTTTTAATTACAATTCGTGTAATACCATT  
AAGAATATAGTTGTTAATCGGATGTGTATAAATCACACCGCTTTAATTGCATAAGCATTACTTGAAGATCCTTCAGTTACAGTTTCA

CCTCGATGTTGAATTGCTTCAACTGCATTATATTTACAGCATATTCTTTTGCTAATACATTTCTAATAAGTTCAAGCTTTTAATGTC  
GCAACGTAACCATCGGATATCTTCAACGTAACACCATTCACACCATTTTCTAAATGATCATAAGGACGATCATAACTCTTTGTATA  
AGCAACAATTGCTGGTTCTACTTCAGGTGTCGGGAAGCTATGATTCTTTTCAGCTACACCACGCGTTGCTTGAATATAAATTGCCCC  
AGTTTCAATTGATTTCATATCAACTAATTTACGAGATAGTTCAATTAATCTTCTACAGAATAATTTAAATCTAAACCAATCTCATTG  
GCACTACGTA AAAAATCTTTCATAATGTTCTGTTACTGTAAATAACTTACCATTATATACTCGAATGTATTTCATAAATACCATCGCCAA  
ATACGTATCCTCTGTCTGTTGATGAAACCTTTGCTTCACTTGGACTTACAAACTCACCATTAAAAAAATTTTTTCCATATATTATTCC  
TCCACGCATAATGAATAAATTGCTTCTAAGTAAATACTAGTTGCGTTAAATAACTGTTTTTTAGTGATATATTCAATTTTTCTGATGCA  
TTAAATCTTCAGAATCACTAAACATTGCGCCAAATGCTACACCCTTGCTAAGTTTCTCGCATAAGTACCGCCACCTATAGTATAAG  
GTTTCAGTCATATCATTTGTTTGATTTCTATATGCAGTAACCTTTTGTACAAAAGGATCATTTTTATCAACATAATGTGGTGTTG  
GACTTTACCTAATTTCACTTCAAAGCCATATTGTTGAATCTCATTTTGCAAAAACGATCCATAGCTTTTCAAATTCAAATCCTCTTGGG  
TAGCGTAAAGTTGATACCGAAAAAGACCTGCGTTTTTCATTATCATATGTAATAACACCAATGTTAGTTGTACGTCACCCATGACATCT  
GTATGGAATTTTCATTTCCATCTTTTACCACAAATCTGAATTAATAAGTAGCGATTACTAAATGCTACAAACGCTTGTGCATTATTAT  
CAAGATTTAATGATGCTAAGAATTTTAGTAAGTAAAGACCCGCATTACACCGATAGATGGATCCATACCATGAACCGCTTTACCTT  
CAACTGTTAAAACTAGAAATGCCACTATCAACAGTACTATCACCTTGTAATGATTTTGTCTAAAAAGTACTCAAAGTCTTGAATAA  
CATCTGTCTATTTTCTTTAAACAAGCACTCTGTCTCTGCATGATCAGGTACCATGTTGTAACGTTTACCAGATTTAAAGTTATTAA  
TTCATAATCAGGTTTCATCTTGATCTTCAGTAAAGTTATTTTGAACATAAATCAAAATGTTGTAATGCCTTTTTTACCATGAATACATGGA  
AATTTCTGCATCTGGTGCAAAACCTAATGTTGGCATTCTTCTGTTTTAAAAAGCGATCCGTACATTTCCAATCAGATTCTTCATCCG  
TACCAATAATCATATGAATACGTTTCTTCAATCCACATTCATCTTCTTAATCTTAATGTCATAAAGCAGCAATTGTGGACC  
TTGTGCATCAAGTGTACCTCTAGCTATGATAGCATCTTCTGTTTACAAACGGCTCGAACGCGATTACTATCCCATCCATCACCAGCAGG  
AACACGTCACCATGACATAAGATACCTAATACGTCATTTCTTTTACCTGCCTCAATTCTTCTGCAATATGATCCACATCATGTGTT  
GTAATCCATCTCTATGTGCAATTTCATACATGTAGTCTAATGCCTTACGAGGACCTGGACCAACTGGTGCGTCTTCTGATGCTTTTG  
CATCATCTCTCACACTTTCAATTGCTAATAATCCTTTTAAAGTCATTAATGATTTGATCTTCGTATTGTTGAACTTTTTCTTTCCACATT  
GAAATCGACTTCTTTTTTCTATAAGTTAAATTTCTATTTTACATGAAAAGATATAAAAACTACAATAAGATGTCAGAAAAATAATAAA  
AAGGAACAAAACGATGCTATTGATATGACACAAATCATAAATAGCTGCTTTGTTCTTTTTTAAATTTATATATTTAAAAATACACATAT  
TCAAGAGCTCGAGATATAAGTCAATGTACTAGGCACACAATTTAATATTGACAGTAATTAACCGAACGAAAAATGCGCCCCGGGGCC  
CCAACATAGAGAATTTGCAAAAAGAAATTTACAGACAATGCAAGTTGGCGGGGGCCCCAACATAGAAGCTGGCCAAATAGTCAGCTTT  
CAATAATGTGAAAAGTTGGGGTAAGGGCCCCAACACAGAAGCTGGCCAATAGTCAGCTTTCAATAATGTGCAAGTTGGGGGCCCC  
AACACAGAAGCTGGCCAATAGTCAGCTTTCAATAATGTGCAAGTTGGGGTAAGGGCCCCAACACAGAGAATTTCAAAAAGATAAA  
GAAATACGTTTTCTTTAGATATTAGTATTTTTATGCATGAGTTTCACGCATGTATTCTTCTTTCTAAATACATATTAGCTATGACTAA  
CGATAAAGAACTTGAAACACTAATAAATGTCCTATAGTTTACAATATTATATTGGCAGTAGTTGACTGAATGAAAATACGCTTGTA  
CAAGCTTTTTTCAATTCTAGTCAACCTTGCCGGGGTGGGACGACGAAATAAATTTTGCTAAAAATATGATTCTGTCCCACTCCCTTAT  
CATTTCTGTCTACTCACATCTTATTCTTTATCAGATAATGCATTTTATTCTTTTTTAAATCTTCTTCAGTGACGATACGTAAATTTAT  
ATTTGGTGCTGCGCCACCTTCATCATCAAAATTTACCTTTTTCAATACTTTTCGTCAGTCTTATTGTTCATATTCCGTAATTTTGATTTTT  
CTTCTTCGAAAAATGCTTTTGGATATTTTTTAATCTATTAGCATATTTCTTCGGATTGTTTCTTACTCTTTAATTTGTTTCTTAGCA  
TTGTTCTAATTGCGTCGCTTTATCCTTAGCATTATCTTTATAGCTTTTGAGGATCTTGTATATTATTCTGCTTTTCAGTTCTGTG  
CACGACTATCTTTACGTGTAACAAGTACAGCTGCTACAGCGCCACCTATACCTAAAATCGCTTTAAATAAATTACCTTTTTGCCATATC  
AATCGTCTCCCTTTTTATTATAATTTAATTTGTCAAAATCATTTTCAGTTAATAAACGATATTCTCTGAATCTAGATTGCTGTCCAAT  
TCTAAATCAGCAATTTTGATACGCTTTAAATGTAATACCTCATTTTGAATGCTATGAAACATTGTTTAACTTGATGATATTTTCTTCT  
ATAAATGTTTACGTGTGACGTTTGATTATCAATATAAGTTAAATTCGAGGCTTAACCTTGCCATCAGACAGTGTTACACCTCTTTA  
AAAGCTTGAATGTCGTTTACGTGATAGGATTGCTGAAATAACTTCATATTTTTTAGAAACATGTTTGTGTTGGACTCATTAATTCAT  
GATTAATAATCACCATCATTCGTTATCAATAAAAGCCCTTCTGTATCTTTATCAAGACGACCAACCGGAAAAATATTTAGATGTTGGT  
ATTCAGGTATTAATCAATAACGGTTTTTGAATGATGATCTTCAGTTGCCGATATATAACCTTTTGGCTTATTTAACATAATATAGAC  
ATTTTCAACGTATTTCTATTAAATCTCCACGAAGTGTATCTTATCGTTTCTGGTTCTATATGTTTGTGTTGATTAAATTTACTTGTTC  
GTTGACATTTACAAGGCTTTTTTAAAGTAACTGTTGACCTCATTACGTGTACCGACGCCCATATTTGCTAAAAATTTATCTATTCTC  
ATCGTAAAAACCTAATCTACGTCTTAATTTTTTACAGGAATTTACCTAAGAATTCGTCGCAAGACGCGTTTTAATTTGTGATTGTACC  
GTAAATTAGAATACCTACTGTAAACCTAAAATAATAATGATTAAAGTAACCAAGTTTAGTAGGTTCTAAGAATAGATTGCAAGGA  
AGAATACTAATTTACACCTAGCATCATAATAAATGAATACAAGAATATTTTTGCAAAATGAATCCAATCTAGCTGAATTTAACT  
TCGCATATTTTTTAAAGAATATAGAAATTACATCCAATTGCAAAATAATAATGCGATACTAGTACTTAAATTTGCACCAGGTGTATGGA  
ATAACATAATTAATGGATAGTTTAAACGCTAATTTGATAACTACAGAAGCTAAAAATAACATAAACTGTTAATTTCTGTTTATCTATAC  
CTTGTAACATTGATGCCGTTACACTTAATAGTGAATTTAGTATTGCTACAGGCGCATAATAGAATAAAGCGACTACCATCATGGT  
TAGGGTCATGACCTAAAAAATTTGGATCGTAACCATGAAGAACTGTGAATAATGGTTGTGCAAGGCCATAATTTCAATGATGATGCT  
GGAACAGTATATAACATTAATACCAATAGATGTTCTAATTTTATGATGATCATTTTCATGTAAGCGACCTTTCGAAATGTTTTTGT  
ATATAAGGAATTAACCTCACTGCAAAACCAGCACTTAATGATGTCGGAATCATTAACAATTTTATTAGTTGACATATTTAGCATATTA  
AAGAATATATCTTGAACGTGTAAGGTATACCAACTAAAGATAAAGCACCGTTATGTGTAATTTGATCTACTAAGTTAAATAATGG  
ATAATTCAACTTACAATAACGAACGGTATACTATAAGCAATAATTTCTTTATACATCTTGCCATATGACACATCTATATCTGTGTAA  
TCAGATTCGACCATACGATCAATATTATGCTTACGCTTCTCCAGTAATACCAGAGTGTAATATACCAATAATCGCACCAACTGCT  
GCTGCAAAAAGTAGCAATACCATTGGCTAATAAAAAATAGAGCCATCAAAGACATTTAGTACTAAATAACTTCCGATTAATATGAAAAAT  
CACGCGTGCAATTTGCTCAGTTACTTCTGACACTGCTGTTGGCCCCATAGATTTATAACCTTGGAATATCCCTCTCCATGTCGCTAAT  
ACAGGAATAAGATAAACAACCTAATAATGATTTCTTATAATCAAGTAAATCATCGACTGACCAACCGTTTTTATCATGAATGTTT  
CTAGCTAATGTTAATTCAGAAATATAAGGTGCTAAGAAATACAGTACCAAGAAACCTAAAAACACCGGTAATCACTATTACATAAAA  
ACTCGATTTATAAAATTTCTGACTTACTTTATATGCCCCAATAGCATTATATTTGCAACATATTTTCAAGCTGCTAATGGTACACCT  
GCTGTCGCAACTGCAATTTGCAATATTATATGGTGCATAAGCGTATGTGAACGGCGCCATATTTTCTGTGCCACCAATTAATAGTTG  
AATGGAATGATAAAAAAGTACGCCCAATACCTTGGTAATTAATACTAATGGTAATTAAGGTTTCCACGCACCATTTCTTTACTT  
TCACTCATTACGAATCTCCCTATCTCATGTTATTAAGTTTGTAAACTAAAAGCTGTTTCTCTGTAAAAATCATTTTTCATTATTATG  
AATATATCACAAAACTTTATTTTCATTGTCGTATATTCAATGAATTATCATAACAAAATTATCAACACATTGTCATTGAATACTAGATT  
TTGATTAGAATATTACGAAATTTTCATATAAACATTATACTACTATTTGAGATGAACATCGCATAACAGTAGAAAAATCATTCTTATC  
ATACACATACATCTTCATTTTATGAAGTTACATTATAAATATTTCAACATAATTTGTCATCTCATAACACAAGAGATATAGCAA  
AGTTTAAAAAGTACTATAAAATAGCAATTGAATGCCAGTAACAAATTTGGAGGAAGCGTATATGTATCAACAATATTATATCGG  
AGGCGGACCTAGCGGCTTAATGGCGGCAGTAGCTGCAAGCGAACAAAGTAGCAGTGTTACTCATTGAAAAAAGAAAGGTCTA  
GGTCGTAAACTCAAAATATCTGGTGGCGGTAGATGTAACGTAACATAATCGATTACCATATGCTGAAATTTAAGAACATTCCTGGA  
AATGGGAAATTTTTATATAGTCCCTTTTCAATTTTTTGATAATGAATCCATCATAGATTTTTTTGAGTCTAGGGGTGTTAAATTAAG

AAGAAGATCACGGGCGTATGTTTCCAGTTTCCAACAAAGCACAAAGACGTGGTTGATACATTAGTGACAACTATCGAACGCCAACAT  
GTAACGATTAAAGAAGAAGAAGCTGTTAGTAGAATCGAAGTTAATACAGACCAAACTTTCTACTGTACATACTCAAAATAATAGTTA  
TGAAAGCCATTGCTAGTGATTGCTACAGGTGGTACAAGTGTCCTCAAACCTGGTTCAACTGGTGATGGTTATAAGTTTCGCACAAGA  
TTTAGGTCATACCATTACTGAGTTATTCCCGACCGAAGTTCCAATTACATCAGCTGAACCTTTTCATCAAATCCAATCGTCTAAAAGGT  
TTAAGTTTAAAAGATGTTGAATTGTCAGTACTTAAGAAAAATGGTAAAAAACGCATCAGTCATCAAATGGATATGTTATTTACTCAT  
TTTGGTATCAGTGGTCCAGCTGCATTAAGATGTAGTCAGTTTGTGTTATAAAGAACAAAAAATCAAAAGACACAGCACATTTCTATG  
GCAATCGATGCATTTCTCTGAATTAACCATGAACAATTAACAAACACATCACATCATTATTATCGGACACACCAGATAAAATCATT  
AAAAACAGTTTGCATGGTCTAATTGAAGAGCGCTACTTACTGTTTCATGCTGGAACAAGCAGGAATCGATGAAAAATACCACATCACA  
TCACTTATCAAATCAACAATTGAACGACTTAGTAATATGTTTAAAGGGTTTGTATTTAAGGTGAACGGGACATTACCTATAGATAA  
GGCATTGTGCACAGGTGGTGGTGTGTCACCTAAAGAAATCAACCTAAAACAATGATGTCTAAATTAGTCCGGGATTATTTTTATG  
TGGTGAAGTATTAGATATACATGGTTATACTGGTGGTTATAATATTACAAGTGCACCTCGTAACAGGACATGTCGCTGGATTATATGC  
CGGACATTACTCACATGCATCAATGGAATAATAGTATAAAATTTGGTTCGATTCTCTTTAGTAGATCAACTTTTTCATTCAAATAAAA  
ATGACCTTAATATAACTGAGTCACTAAAAAGTGTGCTTATATTAAGGTCATTTTCGTTAATTATGATTCTTTTTCGTTTTAGTACGTCT  
TCTAGCTAACAAAGCCGCACCTGTAATCAGTGCAAATCTTTCAATGGTAAATCCATTCTTCAGAACCTGTATTTGGAAGTCTTTTT  
TCAACTTTGCGCGATTCTATGTGTCTCTCTTTTTTAATAGGCGTACAAACTTTTGGAGCTGGCTGAATTTCTTTTGGTGATACTTTCTGT  
CGCTTCAGCTGGTAATTTAATTGCTAAAAATTTTCATCAACAATGAATTGCGTGTGTTGTTTGATGTCAATTAATGTCGCATCTTCATCA  
ATCATTCTATTGCCATCTGCAACATATTGATCAATTAATACTTTTACTTTAGCTAATTGTTCTGGTGTGCGATCGCTTTGAATTTTCGC  
ATATGTTTGTGAGCAATGTTATCAATTCGCAGTAAGCTATTTCTTTTTCAGTAATTACTGCTTCTATATCGCTTAATGCAACATAA  
ATCGTTTTAAAACTGCATCAACATCAGCATTAGTGGCTGTGTTTTTAATCTTCATCCATTGTAAATTTAAAGCAGTTATAGCTTTT  
AATGCATCAGCCTTATTACGATTACTTACTTTTCGATAATTTTGCATAAAGCAGTGACGCGTGCAAGATCATCAATTCGTTTTTT  
CAGCATCTGGCTTTTTAATAGGATGTACATCTAAATCATGTATTGTTGTAGATTAAATGATGCTGTTTTATCAACTTGTGCATTGCT  
ACGATCTTGATCAATTTGTCCAATAGCAGTGTCTAAAAATTTTTGTAAGTGTGCTAATATACTATTCTTTCTTCTACCGTTGCTTGAA  
TATTCGCTTCAATTTGCTTGTTTTTATCGTTGAATAATGTTGTCAATTGTTCTCGAGCAGACGCCTTTCTGTTAATAACAGGTTTCGATT  
TCACGAATTTGCTTTTTCTCATCATGCAATAAATATGCCACATCAGCATTAGTCACTGCACTAGCAATTTGTTGTTAGCTTTAATTA  
ACTTTTTTCAACTTGTGCTATTGCAATATTTTGTCTTCATCTGTCGCTTCGTTAATTGCTTTAATTAATTAATTTTATTGTAGCGA  
TATTTTGAATTTGTTGAATGCTGTTGCTTTAACTGTGTGCTGGTTTAAATTTTGAATAATATTTTGAAGATTTATAGCTATCTTGA  
TTAACTTGGGCAGTCTTATCTGCATGATTGATCTGATCAATAAGCCTGATTAAAGTGCTTGTCTACTAAATGTTTAGCAGCTAGCTTT  
CTTCTTCAGTTGATAAATCGCTTTGATCGATTAGTGCATTTTGAGCTTCGGCTTTTACACCAACAGATTGACGCGCTGCTGGTTAAC  
TTGAACCTTAGGTAATACTACTTTGATGTTGTCGTTGCCATCAGTCTCAGTTCGATCCACTTCTGCATTTCGTTTTGTTTTGTGCAATGT  
CATTTTTAATTTGATTTTACAATTTTATTTAAAGTATCAATAGCAACATCTCTTCATCTTGAGTAGTATCCAACGTATTTCCGATTGCA  
TCGAGTTGATTTTTATTATTTCTTCATGCTATCAAGCGCAGCTCGTTTACGCTTACTTTAGGTTTTATTGCTCTATTGCTTGATT  
GTTTGATTTCTAACATCAGTAACAGCAGCATCTTGATTGTTTCTATTTCTTGTGCGCTTGTGTTGAGTGTGTCGCTAATTAATTG  
ATTCGCTTCATCTAATTCATCAACTGTTGCATGTGGTGTATCTTTATTGATTCTACTTGATTTTCTGCATTGCTTTTATTGCTTGTG  
TGCTTCAGGCTTAATTAACATATGAGGTTGTACACCTTTTAGTGAGCAATGCCATTGTTTCAACACGTTTACATCATTATTCGCT  
ATTGCTTGACGTGTTTGTGAATGCACGTTTTTTCATTATTCGCTAATTGATTAAAGCAACTTGTTTTTCTTCATCAGTCGCATGTTT  
CGCTTGCTCAATTTTCGCGCTTTTTAGCTTCATATTGTTGCTTAACTGCATCTCTAGCAGCTGCTCTAACAAATATGGTCAGGCGTCACT  
AAAGCAATGCTATCAAGCGCTTGACTTGTGTATCATCAACTTGTGATTGTTTCTATTATTCGTAATATCTGTCATGGCTTGATTTAC  
AAATTCATTGATTTTATCTAGTGCTACTTGTCTTCTCTGCTGTTGCTTCTTTATCCTGATTAATCTTAGCACGTAATTCATTGCTTT  
TTGATTGATTTTTTCACGTGCAGCTGGTTTAACTTTTGTTCAGGTTGAATAATTTAATCGCTGATACACCATTGTTGCTGCTTGAT  
TCACCTGACTATTCGTTTGAGCTTGGTCAATAGCTGCAAGTGCTTTTTCTTTTCTTTTGCTAATGCTTGTGAAGCAACTTCTTTCTCA  
TTATCTGTTGAATCAAGACTATTATCAATTTGCTGTTGCTTTTCTTTAACAGCTTTTCAATATCTGCAATTGCCTTTGGTTAATTAC  
TACTTCAGCTTCAACATTATCTATAGCATTACCCTTGATTGTAGTTGCGTCTACCTGATCATTGTTTGGTTTTGATTAATTTGAT  
TAAATGCTTGATCTTTAAGTTGATGATTGATTAACAGCAGCCTGCTTTTCTTCGTCAGTTGCATTAGGTGTTGTTTAAACCGCTCA  
ATACGCTTCGCCACTTCAGCAGTGATTTTATCTCGCGCTGCTTGTTTTTTACTACGTCAACTGAACAGCATCGATATTATCTCTGCG  
TACTGTGCGAGCTTGGTCTACTTCTGCATTTGTGTTAGCTTGTTTAATACTTTCAATAGCTTGTGTCTGTCTTGATTTAAAGTATTGA  
TCGCAGCATTTTTCTCATCATTCGTTGCATCTGGTGTAGCATTGATTTACGTAATTTAGCATTATAATGCTGATTGATTGTGCTAAT  
GCTGCAGGTTTTTAAACAATATTTGGCTGAATCGCATTAATTGCTTTTGTACCTAATTGTTGCGCTTGATCTACTTCCGCATTTGTATC  
AGCTTGATTTATATTAAATTTGCCGTTGCTAACTCTTGATCCACTTGATTTAAAGCCACTTGCTTTTCTTCAGTTGTTGCATTTGTGT  
TTTGATTAATTTCTTGCTTTTTAGCAGTTGCTAAATCATTAAATACACCTGTAGCAGTTTGTTCCTTCGTTACATGCGGTTGAAGTGC  
CCGATTTGATTGACTGCATCATCTCTAATACTATTGACCATCGCAGTAGTAGACGTCACACCAATATCAGTTAATGCTCTATTTTAA  
GTGATTGACACGATTTATCGCTTCTGTTTCTCTCGAGTCGCCAGGCTGTTGCAATTGATATTGTTATCGCCTCTCGCGCTTGA  
TCATTTACAACATTTGCAGCATCCGTTTTAACTTGTGTTGCGCGTTGAATACAACTATATTGTTGCGCCTGATCTTTTGTGTTGCG  
AACTTCTTGATTGCTATCTGCTGCATTAATATTTTGTCTCGCTGTGGCTACAGCTTGATCAAGTAATTGTTGTGCTGCTTGTGTTCTT  
CGAGCGTCGCATCATTATTATTAATATCGTATTATGTTGCGTTTCCGCACCTTTATCAATGGCATTTTTTGTCATCTGTTTTACTTTT  
GTAGCTGGTGAATTTGCTTGTATTCCTTGTATCGCATTGTCTTCACTTGTTCCTTTCAGCATTGGTATTAGCGTTAAAAATGTTTGT  
GTTTGTGTCAGTTACAGCAGCATTACTTTGTCAATTGCTGCTGTCTTTCTTCTTGAGTGCATCAGGATTAGCATTGATCTCTGCG  
ATATGTTGTTGTGCATCATGTGATACAGCATCCCTTGACGCTTGCTTAACAACAGTTACAGGAGCAATTGGATTAATGGCATTTAGA  
CCATCTCCTTTGGCGTTATCAACATCAGCATTGTTGTTGCTTGATTGATTGTTTCTAAAGCATGGTTGGTTGCTTGAGTTAATTCGTT  
CAATGCTGCATTTTTCTCTCCTGAGTTGCTTCTCTATTACTATTTATTGTTGCTTTTTCGTTGCTTGGTTGTTAATTGCTATCTCT  
TGCAGCTTTTTATGAGTTACTTGAGGAACAACGTGCTCAATAGTATTGATGCCATTATTTTACGTTTGAACCTGAGCATTGTGA  
GTAGCATTGCTAATCATTAATAGCATCTGTTTCATCCGTAGCTAATTGATTATTGTCATCTGAACTCTGCTTTCAGTAGCATCTG  
GTGTTGCATTGATAATTTCCCTTTGTTTCTGTTGCTTTATCACGATTGCTTTTTTAGCATTGGTTTAAACAACCGGTGTTGCAGTATCC  
CCACTTAAGGTCTGTATACCTTGATCTTTGATTCTAGTAACGCCATCATCAGTCGTTTGATCACCATAATCACCATAATATTGCCCTT  
TATGTTCTCGATAACTTGTATTGCTGCTGTTTTTCTTCATCTGTCAGTTTCATCTTTTGATTAATACTAAATCTTCCATTGATCAGCTT  
TTTGATTTACTGCATTTTACAGCATCAACACTTCGAATTAAGTATGTTGCATCTGATTAGTTAATGTATCAATATCTGCTTGAGATAC  
TCTTTTATTTAATGGTACATTGTTACGATTTTCAGCTAAAAATGTTTGTGCACGTTTTTAAAGATCATTAAAGATATCTAATGATGCA  
AATGTATAATCAGCTGTTGTAACGTCTGTCAACTTCGGCTGTAATGCATCTTATTCATGATGATATCGATAGTATAGGATTGT  
TACTTACAGTATGACTTTCTGACGTGAATTAATGAATCTTGTGTATATGTTTATACGTTAATGATCATTAAATGTTACTGTTCTT  
GGTGTCCGATCATTATTAACACGCACTTATACTTTAAATCCAATATTTTATCAGGCATTAGTCGTGCAGGTGAATTCGTTGTGCCAC  
CACCAGTGCTTTTAAATGTTATCACTCGATTCCGCCGCATCATATGTAACATTCATATCAATCAACGCCTGAATTTGTTACTTGG  
AAAATCTTTAGTCAATGAATTGTTACATATTCTACCCCTTCAGGTAATTGAATTTTATAAACAATTCATCTGTGTCTAAAGAAGCA

CCAGAATTACCATTATTTTTAGTGATGTTGTAAGTGTAAATCTTTATTATTCGTTGCTGTGGGTTCCATTGTTCTCTTTCAACATA  
AACATGTGACCCAGAATGAAGTCCGATAGAGTCAACAAAGCTATAGTATTTGTAACCATCTTTTAGTTGATAAAATGCCACGCGCATC  
TGTTATTGCGTCATTTTTAGGTACAAATGAATTTTGAGATTTCTCAGTATATCAGGTACTTTAAATAAACGCAAAAGTTGGACCGCCT  
TCAACAGTCTTTTCAGCAATCGTATCATTAGTATCAGCATTTTTGATAATAACATTTGTTGCGCCTTGACCATTTTTAGTTGGCATTGT  
ATTAATAATCAAAGATTAATTCAGAATTTGGATTTACTGTTAAAGATTTTCAATACCATTAAAATCTCCATGATTACTAGCGTCCGTC  
CCGCTTATACGTCCTAATGCAAGTACATTGCCTGTGCTGATAGGTTCTGTTGCTCCAGCCTCAAACATACTGTTCTAACCATCG  
CATGACTTAGCACACCTACTTTACCACCATTGATAAGTGTAAAGCCTGGTAAATATCAACAACCTGTTACTGATGGTACAGAACGGT  
TGGTACTTGGTCTAATACTATTGTCATCAAATGACAGCACTTCGTTAGGTGCATTTTGTCTGCAATTATTGGCATTAGGATCAGTTGT  
AGGCGTGTATGGCGCTGAATTTGCAACTGGTGCACCACCGTTTCTGCCGCTGCAGCCCTGGATCTGCTGGAGTTGCATTAGGATC  
TGCCGTTGCCGACGCTACTTCTCTTTTTCGGTCTATTAGATGCTGGTTCAGCAATTGCAACTAGCTCTGGTTTATCTGAAGAATGA  
CGAACATCTTCTGAATTTCTTTAAAGTTAGATGTCTCTGTAACCATTTTCATTTGTTTTATTGTTGATACATTAATGTGGTATTATT  
CGACGCTACATCATTATTATTAGCGTTTGACACTGTCTCAGTTGCTGTTGATTGCCATCTGTATGATTATTGTTTTGTGCTGAAGGC  
GTACTTGATTGCACTGATGTTGGCGTAGCTTGATTACTATACTACCATTATTATGATTAACCAATGCTTGATTGCTGTTGATTGG  
TTGTTGCAAGATTGATTAGGTGTATTCTGCGCACTATTGCTAAACCTCTATTATTAGCAACATCTTTATCTGTGAATTTACAGGTGTT  
GCTTGATTAGTATCGCTTTGTACATTATTATCCGTAGTTAAGGCTTGTGCACCATTGTTGGGTTTGAAAGTAATAAAACTGTTCCGATTA  
AAGTAGAGAATATGCCTACTTTATACTTCCTAATACTATATTTATTTTCTTTAACAACATTCATTTTCTCTCTGTTGTCTGTT  
CTCTGCTGTGTTGTTAAGAATTATGCTAAAAATACGCTCCCTCACATTATGTTTATAGCTATATTATTTGTACAATATTTAAGTT  
CACTCAATTTTATCACTCATTTTATAAAAAAAGTTTATTATTACAAATTTAGTTTCCGTTTGTAATTTAAATTTAAATTTAAAC  
ATAACAAGAAGCCTTTAGATTGTTTGTAAACAGAAAGTAATTCATACCAAAAAACACCAAGCAACCGAAACGTTACTTGGTGTAT  
TACAAATGTAATATTATTTAAATTTATGTCACACTTTTAAATCTTTTATTTCACAACTTCATCGCCCATGCGTGCATGCCGCTT  
CGACATTTACGGCATCAATGCCATTGCTCTAAATATTCTACAACCTTTAGCGCTTCGAACCTCCACCAGCACATACAATATAATATAT  
TTCATTTTTATTAATGAATTTAAATTTATCCGGAATGGTATCCATTGGAATCAACTTTGCATTAGGAATATATCCATTGCTGTTTCTT  
CGTCAGTACGAACATCAACAATTTGAACCTGGTTTAGATTCTAAAAGTTTGTTTTTTAATTCATCTGTAGTAATTGACTTCATTTCAAA  
GTCCTCTTAAACATTATTTAGCTACAATATTGACTAATTTTGGAGAACAGCGATGACTTTTCATGATGTCTTTACCTTCAATACTC  
GCTTTAACATTGTCATTAGATAAGGCAATTTCTGCACTTCTCTTTTGATGTATCTTTAGCAATTTAATTTTAGCTCTCAATTTACC  
ATTTACTTGAACAACGATTTCTACTTCATCATCTACAAGTAGTGTCTGCTATAAGTTGGCCAAGTTGGTAGCTAATAGACTCTTCA  
TGTCTAATTTTGACCATAAATCTTCACCGATATGTGGTGAATAAGGTGCTAACATTTTAACGAAGCCTTCAATTGTAAGGTTTATAAAA  
CTTCATCAACTTTATAACACTCATTAATAAATACCATTAAATGACTAATAGCAGTATTAAATCCTAATGTTTCAAAGTCTTCTGTTAC  
CTTTTTAACAGTTTGGTTATAAACTTTATCTAAAGATTTATTATTGTTAGTTACAATTTTGAACCTCAATGTTCCATCTTCATTACCA  
TTAAACGCCATACGCGATCTAAGAATCGACGAGACCCATCTAATCCTTTTCACTCCATGCAATTGCAGCATCTAAAGGTCCCATAA  
ACATTTCTGTAAAGACGTAAGATATCTGCACCATGAGACTGTACTATATCATTAGGATTGATTACATTTCTTTAGATTACTCATCTT  
CTCATTACCTTCTCCTAAAATCATACCTTGGTTAAATAATTTTGGAAAGGTTCTTTAGTAGGTACGATACCCAAATCATAAAGGACT  
TTATGCCAAAATCTTGCAATATAAAGTGAAGAACCAGCATGTTCTACTCCACCGATATATAAATCAACAGGTAACCAATGTTTTAAT  
TTTTAGGATCTGCTAACAATTTTCAATTTTAGGATCGATGAACGTAATAATACCAACAACCTGCTGCAATTTGTTGCAATTTGAT  
TTGTTTACGACGCTCTTTCATACCTGTTTTCATCTACAACATTTACAATGAATCAATATTAGTATGGAGACTCACCAGTCCC  
TGATGGCTTGATTTCATCTGTTTCAGGTAACAACATGGTAGCTCTTCTTCAGGAACAGTTGTCAATTGTTTCCATCTTCCCAATGAATG  
ACAGGAATTGGTTCGCCCCAATAACGCTGACGACTGAATAACCAATCTCTTAATTTGTAATTAACCTTCTTTTCGCCAGCACCTTTTT  
GCTCTAATAATTGAATAGCTTTAGTAATTGCCGCTTCATTTTCTAAACCATCAAGTTTACCAGAAATTAATATGTTTACCTTACCAGT  
GTATGCTGCTTCTCAACATTTCCACCTTCGATGACTTCAATGATTGGCAAATCAAACCTTTTAGCAAAATCATAATCTCTGTCATCA  
TGCGCTGGTACTGCCATAATTGCTCCAGTACCATATGTTGATAATACATAATCAGCAATCCAAATTTGACTTTTTACCAGATAAA  
GGATTAATTGCATATGCACCAGTAAACACACCTGATTTATCTTTTGCTAAATCTGTACGTTCTAAATCTGACTTTTTAGAAGCTCTG  
TTTGATAAGCTTTTACTTTTTCTTTATATTATCATCAGTTGTAATTGAATTAACCTAATGCATGTTTCAGGACTTAAGACTAAGAATGATG  
ACCATAGATTGTATCTGGTCTAGTCGTAATACCTTCTATTTCTTCCGTTCCGTTATTATCTACATCAAAATGAACTTTGGCCCTT  
CAGAACGTCCAATCCAATTGCGCTGCATATCTTTTAAAGATTAGGCCAATCTAAATCATCTAAATCTGTAATAATTGATCTGCAT  
ATTCTGTGATTTAAGTACCCATTGTTTCTCGGCTTACGATAAACTGGATGTCCACCACGTTACAGACACCATCAATCACTTCTTC  
GTTAGATAAAACAGTGCCTAATGCTGGACACCAGTTAACTGCAACTTCATCAACGATGTCTAAACCTTTGTTATATACTGTATGAA  
AATCCACTGTGTCCATTTATAGTATTCTGGATCTGTTGTATTAACCTCACGATCCCAATCATAACTGAACCCTAATCTTTAATTTGTC  
GTTTAAAGTTTGGATTTTTCTTTGTAAATTCACGTGGGTCGTTGCCAGTGTCTAAAGCATATTGCTCTGCTGGTAATCCGAATGC  
ATCCACCCCATCGGATGTAATACATTATATCTTTGCAATCTTTTATATCTTGAAATGATATCTGTTGCTGTATAGCCCTCAGGATGT  
CCAACATGTAAACAGCACCTGATGGATATGGAAACATGTCTAAAGCATAAAATTTCTTTTGACCTAAGTTATCATTTGTTTTAAAT  
GTTTTATTTCGTCCTAATAGTCTTGCCATTTCTTTTCAATTTGATTTGTTGTTGTAATTCACACATTTCTCTCTATCAATAAAAAAG  
ACACCTCTAATCTTCTTACATAGGACGACATTTTCCGCGTTACCACCTATTTCACAAAAATTTGTGCACTCATTTTAATAGTA  
AGAGATGTCATTCATTCAATTTAAATTAATACGATTTACATTTAGTCTTAACACTAGCTCTCAGCATCACTAGCTTTCTGTAGAAA  
AGCTCCAAACGAAATTAATTAACAATTAATATTATGTTATAACGACATTTATTTCAGTCTATAACGTTAATTCTATTTACTCAT  
TATGCATCTATTTTTTAGGTTGCGTATTATCTCTTGAACCAATTAATAATATTAAAGCAATACAAGTAGTAGCATCATACCGA  
TAAACATCATGCGCATATAAACGCATCAACTAATACACCACCAAGAAATGGACCAATGCTTTTCTTACTGTAGCAGCTGAATTC  
CAAAACCTTGGTACTGTCCTTGCTTACCATCTGGCGCTAAGTATTGGCTATAGTTGGAACCTGCTGGCCATACAAACATTTCTCAA  
AAGTTAAAAATAATCATACCGACAACAAATATTGTAAAGTTTTCGGCAAACTCGTGACAAAGAACGACAACATAAAAAATGATGATG  
CCAACAAACATTTGCTTCTTTAAGTTTCTTTTAAACAGATAGAGAATCGGTTTAAATTAATGGTTGTGCTACTAAAATCATTATTCGT  
TAATTGTCCATAAAACATATATTGTGCCATTGAATTAATAGATTGTGTAATGATGCGGATTGATGCGGATCCCATTTGAATATACG  
CAACCAACAAATTTGCAACATTGCACAAATTAAGTACTAATGAAATAAATCTTGCTTTATTTTACCAGTAATATCTAAATGAG  
TTGGATATTTAATTTTCGATTAATTTCAATATTAATTTGCGTTACCGCGACAAGCGCAACACACATACATAATAAGATTGGCTA  
AAAAGATATAGTTAAAGCTAAATCTGCGACAAAGCCGCCATTGCAAGCAGCAGCCACACCAATATTTTGCCTAAGTATATC  
GCATTAAACGTTTGTCTTCCGCCATTGGCCACACTGCTCCAGCCATAGCGTATATCGCAGGAATAATCATTCGCCACCAACCTT  
AACATTACAAGCCATACAGCATACCAAGGCCACCGTGAAAGAAATTAAGTAGCGTTGTAACAAAGACAAGTGAAGTTTCCAAT  
TAAAACTGCTTGTATCCACCTAATTTATCAAATAGTGAACACCTAATAAGTTTCCAATAACCATGCCAAATGAATTTATCATTAG  
CACTAAACAGCAACAGTTAAACCTTTTCCAAGTCTTGTTTTATATAATTTGATTTAAAGGCCACAAAAAATGGAACAGTAAT  
ATTTAACGCCATGCCAATTACTAGCCACGACTGATTAGGTATATTCATATTTTCAAGTTCTCTCTCTTTTGTCAAACTATAAT  
AAACACTATAACATTAATAATATGTTAAAAATCTGTACTTGAACACTCTTTTATAGAAAAGGAAAAATGACATATGGGCAATCATTTCC  
AATACGCTTTTGAACAAACCGTTATCACACATGGAATTAACATTTAAAAAATAAATTTGGACAAAAAATTTTAAAGTTGCATTGG  
ATGGCGGGTTGACTGTCTTAACCGCGATGGCACTGTAGCACATGGTGGATGTACATTTTGTCTGCTGCAGGTAGCGGAGACTTTG

CAGGTAATCGTGCAGATTCAATCGCAGTACAATTTAAAGAAATTAAGAAAAAGATGCATGAGAAATGGCACGAAGGAAAAATATAT  
TGCTATTTTCAGGCATTTACAAATACACATGCACCGGTTGAAGTATTAAAAAGAAAAATTCGAACCTGTACTTAAAGAACCGGGTGT  
TGTGGGATTATCTATTGGTACGCGTCTGACTGTCTACCAGACGATGTTGTGCAATATTTAGCAGATTTGAATCAACGAACATACTT  
ATGGGTTGAATTAGGACTACAAACAATCCATCAGTCAACATCTGATTTAATCAATCGTGCCCATGATATGAAAACCTATTATGATGG  
TGTGGCAAAATTACGTAAGTATAATATCAATGTATGTACACACATCATTAAATGGCTTACCTGGCGAAGACTATGACATGATGATGGC  
TACTGCCAAAGAAGTTGCACAAATGGATGTACAAGGTATTAAAAATTCATTTACTTTCATTTGTTAAAAAGGTACACCGATGGTAAAAACA  
ATACGATAAAAGGTTTTATTAACCTTTATGACTCAAGAAGAATACACAAACCTAGTTGTGGATCAATTAGAAGTGATTCCCCCTGAAAT  
GATCGTTACCGAATTACCGGTGATGGTCCAATAGATATCATGGTCGGTCCAATGTGGAGTGTTAATAAATGGGAAGTATTAATG  
GCATCGATGCTGAATTAGCACGTAGAAATTTCTATCAAGGCTTGCCTTACAAGTCTAAGGTGAAGCAATGAAATTAGAACGTATAC  
TCCCTTTTTCAAAAACACTTATTAACAACATATAACACCAGAAAGTATTGTTGTAGACGCAACTTGCGGTAACGGCAATGACACTT  
TATTTTTAGCGGAACAAGTACCAGAAGGACATGTTTATGGTTTCGACATTCAAGATTTAGCTTTGAAAAATACACGTGATAAAGTTA  
AGGATTTCAATCATGTTTCTTTAATAAAAGATGGACATGAAAATATTGAACATCATATAAATGATACACATAAAGGTCATATTGATG  
CAGCCATCTTTAACCTAGGTTATTTGCCTAAAGGTGATAAATCTATCGTGACAAAGCCTGACACGACAATCCAAGCTATTAATTCAT  
TGCTATCATTAAATGTCAATTGAAGGTATTATTGTAATGTTATATATCATGGTCATAGCGAAGGACAAATGAGAAGCATGCATTGC  
TTGATTACTTGAGTACTTTGGATCAAAAGCATGCGCAAGTTTTGCAATATCAATTTTAAACCAACGTAATCATGCTCCATTCATTG  
TGCCATAGAAAAAATTTCTTAAGCATTTGCTGCGCTATACTATTTATAATTTAGGATTGAGTAGTCAACATTTGAAAAATTAATACC  
AACAACAAAAAGAGGTTTTCAACTTAATGAAAACCTCTTTTATGCTATTAAACCTTACACAGCAATAATTGCGTTTAAACTATTTTG  
CATTGCTGTTGCTCTACTTGCATCGCATCTGATGAAATTCACAACTTACTTTCTCTGTTGTAACCTTTTCAATGAAATGAATA  
ATAACTGTTCTTTCATCGTCAACAGGACGCTCTTTGTAATCCATTCTAATTCAACTAAATATTATACGTTCTCGTACGTTTATACG  
GTTTAACTTCAACAAATCTGTCCATTTCTTTAAGCGTCATAGAACCTTTTTGCCATAAAGTTAGTAAAAATAAAAATTTCTTCTCTAGA  
CATTTTGTATTGCTTTCAATCTCGCTGAAAATTGAGTTAATGTACCCAAAAAGTGTTCTAATTGCAAAATCCCAATACAGTGTCG  
TTATTTACTTTTTTCATGCTAAACATCTCCCAATTAATAATCACATATTTAGCTACCATAACAAGTATTAACAAACATCCCAACAATCC  
CAAACTTGTATGTGCTAACTTATGCATAAAACTACAAGTGTAATAAACTTGCTTTCTATTCAATTGTCAAAGTTGAATAAAAATTA  
AATAAGTATAAAAAACCAATAATCAATAGAGTTAATATTTAGAAAATAAGATAATAGTACATAAAAACAAATCACTCTATTACATATTA  
ATTTTATAATTTATATACAAAGAAAATATATCAATATTACCATTAATTTGCAACAATTCTACATATATTTCTTCAAAAAAGATACGC  
ATTGAATTTTTATTACATAAATCTCATGAAAATTGATTAACATAAATTAATTAGTTAGCCTTAAATTTAACAAATTAATCAAAACC  
GAATGAGGCTAAATTTGGTTATTTTCAAGATATGATTTGTATAAAATCAAAACATTTCTTACAAATCAAATGTGTATAAAATGTGATA  
TACATTCTCAACCTTAAAAAAGTTAAAAAAGATGAGCATCTACTGTCTCATCTTTCAGTTCTTTTTTACGGGTCTGTTTTCTAATT  
TGAGCACAATCTTCGATTCTTTATCTAAA

>042-contig\_273\_RC

AAGTATTGTATAAATAGAGAACAGCAGTAAGATATTTTCTAATTGAAAATTATCTTACTGCTGTTTTTTAGGGATTTATGTCCCAACC  
TTTTAGAATATTAAATTTCTACAATTTCTGCATCTTCAACAATAAAGGCCATTGTATTGACGCTGTTATTAAAGAAAGTCAGAATAT  
AACGCATTACTTCATCACGTTCTGGCTCATTGTGAACCTCGTGGTAAAAACCTTGCCAAGCTTTAAATATAATTCAGGTGTTTGATA  
TTTTCTTTAAACTCATCAATTGCCCTAGTATCAACAATTAATCCTTCGTTCCATACATTAATAGCGTTGGCATTGGTTGAATGTCA  
TGAATATGAGCCATCGTATCTTTCATCGTCTCATTAATTGTATTATACCAATGATACGTTGCTTTTTTTAAACATTAAACCATCGTTAAC  
TGTTTCTTCAACAATTTCTAAATTACGTGTTAAATCTTTTGGTTCTACACCAACATTAAACCGTGTGTCTTTTGAAATTTTACCTATAT  
TTGAAACAAGTTTATCTTTACGATTTTTTCCATTCTTTGAAGTTCATGATAGGAGAAATTAACATCATCCCTCGATTGGCAATTC  
TACTTTTTCAAGTAAATTTAATAAAATCAAACCGCCAAGTCTACCCCTAATACATAAGTAGGAATTTTATATTCAATTAGCTATCTTT  
AACCAGTCTAGCAAACCTTTCGTGATACGTTTGAAAGTTTTCAATTTGTCTTTTATTAGCTCTTGAAGTTTGACCTTGACCAGGCAAT  
CTCCCATATACATGATAGCCATTTCTTCTTAACATCGTAATAACATATGCATATCTTCCCGTATGTTCTTAATATATTATGAGCAAT  
AACAACGACGCTTTTCGCATCATTTTCAGCTTCCCACTTCCACATATTATTACTGCCCCCTTTTTCATTAATCTTCAATAACATAATTAT  
AGCAAATTCATATGTAGATTTCTATTTATAGTATTATTGTTGTCCATATTATTATATATAAATGAAATCAACATCAATAATAGTGTA  
ATTATACATAATTATTTTTGATTGTTTTTGATGAAAACGCTTTCTCGAATATTTTTTTCATGCTAAACTTATTGTAAACACAAGGGTTT  
GGAGGAGTAGCAATGGCACTATTAAGAATTTTTTATCGGATTATCTAATAATAGTTTTTTAAACAACGCAGCAAAAAAGTGGG  
CCCACGTTTGGGCGCAATAAAGTCGTTGCCGGAATACAATTCCAGAGTTAATTAATACAATCGAATACTTAAATGACAAGAATA  
TCGCTGTTACGGTAGACAATTTAGGGGAATTTGTGCGGTACAGTTGAAGAAAGTAATCATGCTAAAGAACAAATTTTAAACAATTATG  
GACGCGTTTCATCAACATGGCGTAAAGGCACATATGTCTGTTAAATTGAGTCAGTTAGGTGCAGAAATTCGACTTAGAATTAGCTTAC  
CAAAATTTAAGAGAGATTTTACTTAAAGCAAACTTACAACAATATGCATATAAATATTGATACTGAAAAATATGCTAGCCCTGCA  
ACAAATTTGTTCAAGTTTTAGATCGTTTAAAGGCGAATTTAGAAATGTGGTTACTGTAATTCAAGCATATTATACGATAGCCACGA  
ATTAGTTGATAAGTACCAAGATTTACGATTACGTTTGGTTAAAGGTGCATATAAAGAAAACGAATCAATTGCATTCAATCTAAGGA  
AGACGTAGATGCAATTACATCAAAATAATTGAACAACGTTTGTAAACGCACGCAATTTCACTTCAATTGCAACACATGACCATCG  
CATCATTAATCATGTAAACAATTTATGAAAGAAAATCACATTGAAAAAGATCGTATGGAATTCCAATGTCTCTATGGTTTTAGATC  
AGAGTTAGCAGAAGAAATCGCAATGAAGGCTATAATTTCACTATTTATGTACCTTATGGCGATGATTGGTTTGCCTATTTTATGAG  
AAGATTAGCAGAACGCCACAAACCTATCTCTTGCTGTAAAAGAATTTGTGAAACCTGCTGGCTTAAACCGTGTGGCATAATTGC  
AGCTTTAGGAGCTACAGTTATGTTAGGTTTAAAGTACAATTAATAAATTTATGCCGTAATGAAACATTTATAAATCTTTGATTATGAACACACA  
ACAGTGCTCTATAGATTTTAAATAAATTAGCCATTTCAATTGCACTTACTGCTGCTTCAGCACCTTTATGGCAGCTTCTTGC  
ACCTGCTCTTTCCACAGCTTGTTCATTAATCTTTCAGTCGTTAAAAATACCAATATGACTGGTACATTAGTTTGATCATTCACTTTAGAA  
ACACCTTTTCGCGACTTCATTACAAACATAATCATATGAGACGTAGCACCGCGAATTACGCATCCTAATGTAATTACTGCATCATAA  
TTTCTGATGAGGCTAATTTTTAGCTACTAAAGGAATTTCAAACGCACCTGGCACAAATGCTACATCAATATTGTCTTCATTAACAT  
CATGTCGAATCAAAGTATCTTTTGACCTTCAAGTAATCTTCCAGTGATAAAATCATTAAATCGACTAACTACGATTGCAACTTTCA  
AATCTTTTCCAATTAATTTACCTTCAAAATTCATGTTAAAGTCCTCTATATTAATGACCCATTTTTATTTTTTTCGTTTCCATATAA  
TCATGATTATGTACCGTTTCTGGTACGATAACTTCAATTTCTTCTGCAATATCAATGCCATATTGTTTTAATCCCTCAAATTTACTTGG  
ATTATTACTTAATAAATTTGATATGTTTCGATGTTAAAAATTTTTAAAAATCTGTGCAGCAATATGATAATCTCTGTAATCTTTCATCAAAA  
CCTAATGCTAAATTTGCAAGTACTGATCATATCCTTGCTCAATTAATTCATATGCGCGTAATTTGTTTAAACATCCTATGCCACGAC  
CTTCTTGAGGTAGATAAAATAATCATGCCACCATGTTCAATTGATATACCTCATAGACGATTCAAGTTGAGCACCAATCAACACGTT  
GACTATGAAAAATATCGCTGTAAAGGCACGCAGAATGTAAGCGTACATTTTCATGTTGTGCAATTGCACCTTTTGTACGTACAACTA  
TCTCTTCATCTGTGATGTGCTTTTAAACCATACATATCAAAATGTTCCGAAATCTGTAGGCATTTTCACTTTTGCCTTAAATTCATTT  
TCTGGTTCTAATTTTTTACGATATTCAATTAATCATCAATCGTAATCATCTTTAATTGATGTTTTTCTTTAAACTTTTGTAAATCTTGT

CCTTTCGCCATCGTGCCGTCATCATTTCATAATCTCACAAATGACACCAGCGGGCTTGGCACCAGTAAGTTTAGCTAAATCAACAGCC  
GCTTCTGTGTGCCATTTCTAGCTAATACGCCCTTATCTTGTGCTACTAATGGAAATAAATGACCAGGACGATTAAAAATCTTTAGCTT  
CACTACTAGGATCAATGAGCTTTTTTGGCAGTCAATGTACGTTTCATAAGCACTAATTCCTGTTGTTGTATCTACATGATCAATACTCAC  
TGTAATTTGCGTACCAAAGATGTCGGAGTTATCATCAACCATTTGTACCAAATCCAAACGTTGTGCAATATCTTTAGACACTGGTGC  
GCATATTAATCCCCTTGCTTCTTTCGCCATAAAAATTAATGGTATTATCGTTCATCCATTACGTGACCGCTACTAAATCACCTTCATTTT  
CACGATTCTCATCATCTACTACAATAATTGTTTCTCCATTTTTTAAAGCCATTAAAGCACTGTCAATATTATCGAATTGCATGCTACC  
CCTCCTAAAAACCAAATGCTCTTAATTTATCTACAGATAATTGGTCTTTATCTTTATTTAAAAATATTTTCAACATATTTAAAAACAAAC  
GTCTGTTTCTAAATGTACTTTATCTCCTAATTTTTTGGATGATAAAATCGTTGAACGCCTCGTTTCTGGAATAAGATGAATGTCAAAA  
CTGTTATCATGCTTATCAAATACCGTTAGACTTACACCATCCACAGTAATAGACCCTTGCTTAACTAACTGATTATTAATATGTTGGC  
TACATTGAATCGTAATAATTTTGGCATTGGCTGTTTCATTTATTTTTGAAACTGTTCTAGTTCATCTACATGACCCAGGACAAAATG  
TCCACCAAACCTACCGTTACCACCCATGGCAGCTCTAAATTTACTTCTGATTGTCGCTTAACATCTGCTAAATAGGTTTTATTTTCA  
GTGCCTTTAATTACTTGAACAGTAAAAGATGTCTGATTAATAATCAATCACTGTAAACATGCACCATTAACTGATGGAATCACCA  
ATATGCATATCTGCCGTAATCTTATGTGCTTCGATTTCATCGTCTGACTGATTGACGAATTTGAACACTTTTAAACGACACCTATTT  
CTTCAACGATGCCAGTAAACATGCATCATCACTTCTTCGTAAAGTTAATTTAACATTTTGATTAACTCGGAATGAACAATTTT  
AAATTGGTTCGCATCTGGTATCTCAATCACATCATTTGTTTGATAAAAATTGATAATTTCCAGATCCGCCAATTAATTTTCGGGGCATAA  
TAGAGAATAAAATTCATCTATATAATTAGATTGGAGAAATTTCTGAAGTAGTGGTTGGACCTGCCTCGACTAGCAAAGTTCCAACCTCCT  
CTTTTATATAAATGTGAAGAATTGTTGTTAAATCGCAAGACTTCAAGTAAATAATTTCAATATGTGTTTGATTGGTTGTTAAATTTG  
GATTTTCAGTATATGCAAAATGGTGTGATTCACTTGTGATAAATTTGCTGATTAAATGAATATTTCCAGACTTAGACAATATTAC  
TTTTATAGGGTTTTTCCATCTTGAATACGTGTAGTATATTTGGATCATCTAATTCAACTGTACGTTCTCCAGTTAACACTGACGCTCGT  
GTCGATTTCTTAACTTATAGACATCTTGTTTAACTCTTTGTTAGTAATCCATTGACTTTGTCCATTATCATTCGCTTGTTTACCATCT  
AAACTTGCAGATACTTTCACTGTAAATTTGTGGCAGTTGCTTTGCTTTTGCTTTAAAAAAGGCTTGGTATAATTTGTGATGCCGTTTCAT  
CATCAACGCATTCAACCTCAATACCGTGAGCCCGTAACGTCTCATCACCATTGTGTGTCTAACGAATTTGTCTTTTGTGCGTATACTAC  
TTTTGCTATCTTACAATCAATTAATTTTGTTAAACACAGGGTGGTGTGTAACCAAAAATGACTACATGGCTCTAACGTAATATAAATCGTC  
GCACCTTCAGCATTTTGTGTGCCATATCAAGTGCTTGAACCTCCGCATGCTTGTACCTTTTCTCAAGTGTGCACCAATACCAACAA  
TCCTACCTTCTTTAACTACAACAGCGCCAACGGGTGGATTAACACCTGTTTGACCTTGTACCATAATTTGCAAGTTGAATCGCATAATC  
CATAAATGACTCAAAATGATCACCTCTATAAAACAAAAATCCTCACATCATGAATTAAGATGCAAGGAGAAAAATTTATCGTTAAAT  
AAGCCTATTTGTACACATTTTACAAATACGCTACATTATCTTTGTGCGATAATTAACATTCTTTCTCCCATCCAGACTTTAACTGTGCG  
CTCTAGAATCTCACTAGATCAGCCACTAATATGAAACATATTAGCAGGTGCGAGGCTTTATTTACTGCCGTTTGGGAATTTACCCCT  
GCCCCGAAAAGAATTATATATGAAATTTGTTATAGATTATTTGAGTACGTAGTATGTCAACTACATTTAAAAATGATACTATATGTTTCT  
GAAAAACAATTAATGACGGTTTAAATTTAATATAATCTGAGTACTATAGGCATCTCATTGATATGATTCTTACTAACAGACATTAA  
AATCAAACCTTCAATTCGTCTCTATAGAGCGTCTCTTTATTTATCTTCTAGTTACAAATATTGATTGTCACTGCGCTGTTGTTGCTCA  
TTCGATTCTAAAGCATCATATAATTGAGATACTGTATGCGCAACTTGTCTACTATCATTTTCACACCATTTTCGTAGTTTATTAACAC  
CGTTTGTCAATTTGACCTATCGCAATCATATTTGTTAATGTTCCAAACCTTGGACTAATAACTTGATTGGTTTCCGGTATGATTTGTATG  
CTCCCATTTGGGTGTGCTTGTACAATTTGTCTATTTTCAAGATTTTAAATTAATGATCATCTTGATCCAATTCATTAAATGACTTTT  
TGCACCTGTGCGGTTAATGACAACATTATATATGCTACTGATCTTGTGTTTGTATGAAAAATAATAACAATTTGCCATTCATGTTTC  
ACATCTTCTAAATCTTTTTTCAAAATTAAGACTTATTTTTCGATTAATTAATAAATTAGTTCAGCAGTTCTTGGAGGCATTGGATTG  
AATTTAATTGAATCATCTTTGAGTATTTTTGATTAAATTTGATGTTGGTCTTCAATACTTAAAGCTATTCCATATCCAATTTAAATTTCTCT  
TTCAAATGTTCAATCATACTTTGGAAAATGCCATTTCTGTTGGACGCGCTAAATCATACTTCAAATCTGCAATATGATTTCCTGTAC  
GTCTATGTACTAATTTTTTAAATCAATGTCATATTCAGCACATCTTTTAAAAAATAAAGAACTAAAGTATCAAGCGGTGCATTGC  
CGAAATGATGTTTTTAAATGTCATTTAATTTGTCTTTAGTTAAGTACTTGAATGTCACGCTATCATTTGTACCTCTTACACTTGGTAAA  
TGAGCAGAACGACTCGTCATAGTAATTGGTAATTTTCGGATGATGAGCAGCAACATAACGGACAACATCTAAACTGGCAAGGCCTGT  
ACCAATAATCGCAATATCGTCCAGTTCACTTCTCGTCTAACGTATTATATGTTGGATAAGGCGTAGCGATATATCTTTTTTACCC  
TTAAGTTATATGGATCAGTACGCAATGTACCACATGTTAAAAATACATAATCGTACGCTTGCCATGATTGTTCTGAAATTTGTA  
GTACATATGTAATAAGTTAAATTCGTTTCATCGATATTAGAATTTGTATAAATCTCTTGAACCTTATTATAATTAGTTGATATATTTG  
GATATTTTTTCTGTGAACATAGATAAAATAAGATTTTCATATAATGTCCGAATACAAATCTAGGTAAATATGCAGGTTTCATCAAAATTA  
AATCAGTTTGTGTTTATACCACTTCCAAAATTCAGTCTCATCATCTAAATTTAAACTCATCTTTTTCGAAGGCATATTAATTAGCAG  
CTCAGAACTATCATTTTGAATGGTACGCCCTGTCCCATATTTACTTTATCATCGTATAAATCTATATCTAATTGATTAACTTCGGG  
TGCTTAACTAATCTCTCAATACACTTACACCAGCAGTTCCCATGCTATTATTGCTACACGCATATATCATCCATCCTTTTGTAAATC  
AAAATATTATATTTAACTATTACCTATAAATTATAGCAATTTGGTATTTTTAATAAAATTTATTAAGGCAAGCTATTATTTCACTTTC  
ACAACCATTAAACATTTTAACTTTTCATTTAATATCAACCTTAGTGTTTGTGTTAAAAATATTTTAAACGAGGTGAATTAATTTGAA  
ATTTATAGCAAAGATATTAATCTCATGATTAATCTATTTATGATTTTTAGTCTGTAACAAACAAAGCTTCTTAATCAATACCCCTGATT  
ACAAAATAAATCAACTAAGGTGATTGGCCATACACTCAAGATATGGCTAATCACTTTTTCATAGTCAAAAACAAAGAGTATATTTTG  
CAAAATCAATATCTATAATTTATCTTTAATACCCTTTAAATACTAAAACCAAATTTAAATTACATAGTCATATCGTGAATATACCAA  
AGGAACATAGACATTCATCTATATAGATGATAATCTATTTAACGTCTAGGAGGTATGTTATGACGTATAAAGAACTAGCAACATTTT  
TAAAAGTTTATCAGATTCAAGCAGATTAGAAATACTAGATTACTTTCTTGTGGAGAGTTATGCGCTTGTGATTGTTAGCACATTT  
TCAATTCTCTCAACCTACACTTAGCTATCATATGAAAGCATTAGTAAATCCAACCTTAGTTACGACACGAAAAATCGGAAATAAACA  
TTTATACCAGCTCAATCATAATATTTTTGAGTCCGTAATTAATAAATTGTCTAAGGTTTCATACCTCTAATCAACGATGATTTTGTCA  
AACCTTAAGACTGGTGAATGCTAATGATGACAACCTTTAGCGACACTCATTTTCTAGTAACTTTATTTATTTGATTATGGCAACCTAA  
AGGCTAGATATTGGCATTACCGCATTAACCTGGTGCCTTTATTGCTGTTATTACTGGTGTGTAAGTTTTCGGATGTTTTAGAAGTA  
ACAGGTATTGTTTGAATGCTACTTTGACTTTGTCTCAGTACTTCTTATTTACTTAATATTAGATAAAGTGAAGTTATTCGAATTTGTA  
AGCTATTCACATGCTTCATGCTTCAAAAAGGCAATGGTTAAAAATGTTTCGTTTATATCATATTATTGGGTGCCCTTGTGCTGCATTT  
TTCGCAAATGATGGCGCAGCGTTAATCTTAACGCCTATTGTATTAGCAATGGTTAAAAATATTGGATTAAATAAGCGCGCAATATTA  
CCATTTATTATTGCAAGTGGTTTTATAGCTGACACAACCTTCTTACCTTTAATCGTGAGCAATCTAGTGAATATTATATCTGCTGATT  
ATTTTCATGTAGGATTCGTTTCGATATTTTAGTAGAATGATTATACCTAATTTATTCTCACTTTTAGCAAGTATTATAGTATTGTGGTTA  
TATTTTAGAAAAGCGATACCTAAAACGTTTGATGATAATAATATAAAGCATCCTAAAAGATGCCATTAATGATTTAAAGCTATTTAAA  
ATTTTCATGGATTGTTCTAGTTATATTACTTTTCGGCTATCTAATCAGTGAATTTACTAAAAATTCGGGTATCAATTTTCACTGGAATCAT  
TGCTTTTATTTTTCTAATGTTGGCTCGTAAATCAAATGCTGTAAATATAAAGCAAGTCATTAAGGGCGCACCTTGGAAATATAGTATTA  
TTTTCAATTTGTTATGATATCTGCTATTCGGCTTAAGAAATGCTGGCATTACTTTAATATTGGCTAAAAATATTAGCAATATATTTCCA  
ATTACGGTCTATTAGCACTATTTTGGGAATGGGCTTCATTTACGCGTTTTTATCATCAATAATGAATAATATGCAATACAGTTTAAAT  
AGATGCGATTGCTATTGGTCAATCAAATGTCCATGGCATGTTAAAGAAGGCCTAATTTATGCGAATGTTATCGGTTCTGATTTAGG  
TCCAAAAATTAACCGGATAGGCTCTTTAGCTACATTACTGTGGTTACACGCTCTTAACACAAAAAGATGTTAAGATTCTTGGGGCAC

ATACTTTAAACTGGTATCATCATTACAATTCCAGTACTATTTATAACCCTCATAGGGTTGTATCTAACACTTATCATATTTTAATTA  
ATTAGGAGATTGTTATGACTAAAAACAATTTATTTTATATGTACAGGCAACTCATGTGCAAGTCAAATGGCTGAAGGTTGGGCTA  
AACAAATCTTAGCAGATGATTGGAATGTATATTCTGCTGGTATCGAAACACACGGTGTAAATCCCAAAGCGATAGAAGCTATGAAA  
GAAGTAGGCATTGATATATCAAATCATACATCAGATTTAATCGATAATAATATTATTAATAAATTCAAATTTAGTTGTTACATTATGT  
AGTGATGCAGACGTAAATTGCCCTTCTTTACCAACAAATGTTAAGAAAGAACATTGGGGATTGATGATCCTGCAGGCAAGCCTTG  
GTCAGAAATCCAACGTGTAAGAGATGAAATTAATAATCGCAATTGAAATTTCAAATCACGATGAGAGTGGGACAGAAATGATAAA  
AAAACACTAATGATTTATTATGTAGTGGTTCTTTATCATTAGCTATAACTAATGTGTACTTAAAAATAGGAATACATGAGTAAAACT  
CATGCATAAGAAATCCTAATTTCTAAAGAAAAAGTATTTCTTTATCGATGTCCTGCCCCACTTGCAATTGGTGGGATTATCAATCAAT  
GTGTTTCTCTAATGCAAAAAGACGCTTCTATCAAAAACAAGATAGAAAGCGTCTTTTAGGGTCTTCATCTTTATGGTGGG

>043-contig\_278

CACATTTGGTGGAGAACCCTTTTTAGTATGTCCGAGTCATAAAAAACAACCTCGTAGCTTATCAAATTACTTATTCAAATGTTTACTGTC  
ATCTTTATACACAAAGTATTTGAAGTATTTTCCTTCAGTCTTCATGTTCTTATAAAAGTCAGCGATAATTGTTGCATTACTTTCTGCC  
ACTTAATATCTGTAGCATATTGATGTTCTCTGGATTTTTTGGATTCCATCTCATACTATACAATGTATTTTGATCTGTGCTTGATAAG  
AAGTGCTTATGAATGAAATCAGCACCGCTGAAATAGCTTTTTCAGGTGTATCCCAACCATGCTTTTAGCATATTCTGCACCTGTTT  
TAATTGGGCTTTATCAAGGGCTCTACTCCATAGAAATGTAGTATTTTTTGCCATCAATTCGACTCCATTAGCAATTCACCTTTTA  
ACTGCGCCAGTTTCTAATAATGCATGTGAAATTAATAAACTTCGTTAACGTGCTTATCTTTAGCAGCTTTTAAAGAAATCATCCGTAT  
GTTTCAATAACGTTGGTCTATCTACTAACATACGTTTAATTCTATTTTTATCAATCCCTTGATACTTTGATAAATCTAAAAATTGATAT  
TTTTGCTTTTTCATTATCGATAAAAGTACCGCTATCCATTGCACCTTTTAATTTTCAGTTGCAGATGCATCTCTCCATGCATCATTCTTTT  
ATTTGATACCTGTTGACTCGTATAAATTATTTATTTGTTCTTTGCTGCATCGTTAATGTAACATTTAACTTTTCAATCTTAATGTCGG  
ATTTAACATGTTTGAAAAATATCTGATCGGATATCATTGAGAAAAATAAAAAATGAGACAACAGCAAATATGACAACAAGTCCCTATT  
ATTCCAAAAATAGAACCTTCTTGTTTATTCATATCCACACCTCTTAGGTCATTGTTGTTATACATTCAGTTTGACTACGATAATA  
AAGTTTAACATTATTAACCCTTTAACAATTTTATCTATGCATTGTTACATATTCATAAATAAACAGTAATGTAAATGAAACGTTTT  
AAACCATTATCAACATTACTTTACGTTGATCTACGAATCATAAATGTTTATCTTTTGTATAACCTTTGAAAACTTTATATCAATA  
ATCTTATTATTCAAGTATTAAAAAACAATAAATCTTTTGTTCTTTTACTTATGTTTCTTTTATAATCCATCATATAAATAAATCTGCTG  
CATTTGATCTATTTTTATAATAGTACTGATTTAAATCAATCGTGCCTTCAATTTGACCATCACGATACATCATTTCATTAGTGAAGTT  
ATTTATCATCACGAAATCAGCGCGATCTCTTATAACATCTAAATCGTCGTTTCGTGCAAAAAAATGTTCTAAATTTAAATGTGCGTA  
ATCCATTGTTACCTCCCGATTACAAATTTTGTCTATCTACTATTTAGCAAAGTAATAATACATCATATCACATTAATTAATTACTT  
ATGCTTATATTTAACACTTAATTTAGCGATTACGCAAATGAATGATTTTCTAAATATTTTATTCTAATTTATCCGGAATATTGTT  
TATACGTATAACTTGGAGAATGACTACTTGAAATTTAATGACGTATACAACAAACACCACAAAATCATACACCATCTTTAAAAAA  
ATATAAATATTAGCTATAATTATGATGAGTATTATCAACTACTCTTGATAAAAAATGTGGCAATTGAGTCAGATATATAAACCCCTCAAG  
CAAGCAATCTTTATCTCTTTTATTCACTCGATTACATTTAACCTTATCGATTATTTCAGACAACAAATCAATTAAGATGTC  
ATTTTATGTGAAATAATTACCAACATTAACCTGAACACCAACTACTTAAATGAACATGACCTTCGATTACGAATATTAATCAAG  
CTTTTAAATCATAGAGAAAGACTATGGCTCAAACTATACCTGAAGGATACAAGCAATTTGAAATTGCTGAAATCATGTCATTATCG  
CTTTCAACGATTAAATTAATTAAGATGTCCGTTAAGCGTAAATGCCAACATAATTTTAATTAGTTTATTGTGAAATTTTCGGTCGATGT  
GTTAATGATGTTGAAACACCCTAACATCTTCATATAAATTTATTTTAACCATTAAATTAACAACCTTATTATACGAGGAGTACTATATT  
TGCAAGACAATTCTACTAAATATCTACTTTATATCCAACTGCTACTTCAAACCATCTCGAAACAAATTGTGCTTTTTACATTGCGA  
TTATATTCTTAAAGTTCCAATTAACAACTCGTTTCATATTATGCGAAATGCAATTTGTCATCACAAAGTGTGCTAATTGAGACTGCA  
AAAAACATACTAAATATTAATAAACTGGTTCCATTTACATCAACCCAAAACTATACTTTTCCGTTAAAAACATAAACGTGCACCG  
ATACAAATTTATATCAATGCACATTATATTGTTGGTATGACTGCCATAGAGAATTCACATTAATACATTTTCAAGAAGGCATTGAG  
CTAGAAGTTGATGAGCCATTTTCTAGTTTCAAAAAATGTCATGAAAGTTTAGCTTTGAAGCACTTCATTGAAAATACTATTTTCG  
AATTAATTTAATTTCTAAAAGTTTCTTAGTAAAGTATGATGTCACAATTTTATAAAATATATGCTAAACATTAATAAATAAATCGC  
TCCAATAATTGTTAAAAATAACAACAGTTGTTGATAAATCTACCTTAGGACTAACGAAAAATTTGTACGCCAGATAGACTTGTAAATTAG  
CCCAATAAAAAACAAGCCTAATAAAGCAACATAAGCAAACATCATCACTACTAATGTAACAAACATACTATAACTTTTTGTTTCTTT  
ATTTGAAATACATTTTGTCTTAAGTAAGCATTAGCAAAGGTAACAGGCTTATTTAAGTTAACGCTGTCATCATCAGATATAGAAGA  
TAATCGTTGATCTAATGCTTGTTCTCCTTCTTGTTCAAAAAACCATAATTGCTTTTTAACTTTTTATCAAATGATGCTTTATTCATAA  
TTAAGGATTTCTCTCTTTATAATATTGACGTAATTTTAAACATTAGCGTCAATTGAAAGTGATTTTATATATTTTACAGAAATATA  
TGTATCAAATCTACAAAAATCCATATTACAATTTTCATTTATGGTGATTGACGCTAAAAATACAGTCTGCTAATTTTCAAACCTAATGC  
TTTTTAGGTAGGTACAATGATAAATTTAATCGTAAATATGTTTCATATATTGAATCTAGCCTTAATCATATTGCTCTCAAAATAA  
TTTTAAAAATGAAAAAGAAAGATTAGCATGCAAAAAATTCAAAGACTTTTTTTACGATGATTATTCGGTTACAGCAGGAAATATT  
TTTTAACTTTAATGGCAGCATTTTTTATTACTATCATTTTATTTATCGGCATAGTTGTCAGTGAAGTACATTTACTTTATAGCATGCTA  
ATTGTATTAGTAGGTTAATTCTATTGAGGCTATTCAAAATCAATTTAATCTCTTTAAAAAATTAACATTGTCTCAAGTTATTTATAT  
TATAGGCGGTGCACCTATTAATTTATGGGTTAGATAATCTTTATTTATATTTTCATGACGTACCGGCAATGAACAACAATTAGAGCA  
AGAAATACGAAATACACCATTCTATATTTCTATTTTCACTGTTACCATCATCCCGCTATTGTGGAAGAAATGTTTTTCGCGGTATG  
ATAATAAGGGTTATCTTCAGAAAACACTTGTTTTTAGGGTTAATTGTGTCTAGTTTAGTTTTGTCATCATTACACGAATCTGACACTT  
GGATTGGTTATTTACCTTACTTATATTCTGGTTTGATTTTTGGTCTAATTTATATAAAAAACAAACGATTAGAAGTGGTAATATTTCAT  
GCACTTCTTAAATAACTTGTGAGTCTGCTCTTTATAATATGGGGATAATTTGAGATAACCTTTCAATATTATTTTCAAATTAATCTATC  
TGATATTTATTTTATTGAACCTTGAGTCACCCTTAAACTCAAAATACGTGTCACAGTCAAGTGCAAAATAATTTAGAACAATACAAAC  
ATAAAAAATTTTGTCTTACGCTTAAAAATCAAAAGTCACATCTAGATATAAGTACAACCTGTATATTTTGTACTCTAATAGGTATGT  
GGCTTAAATAATATTTAATCTTGAGTTGCATATAGTAATTGTTTTATTCATTTTCTAAAAATATGCGAGACTAATTTCTTTTCTACT  
CCTGTTGAATCAATTTAGACTTTTTTATAACTCAAGCTTTTACTTAGCTGAATTTTGACTTCTTCTTCATTAATAACTATTATGAAAA  
CCCCATAAGCACAAATGCCTATGAGGGTTAAATATATTTATATATAGAAATAGAAAGACCTGAAGATTGAATATCTTTTCGCAAA  
GCCTTTAACTGTATCTACTGATAATTGTTAATATCGCGACCTAAGTTTGTATTCACTTTTTCACAACATCTGCAGGGCATGTAATA  
ATATCTGCACCAATTTTCATCAGCTTGAATCACATTGAATAATTCGCGGCAACTTGCCCATATAATTTAACGCCGTCTTTACTATGCG  
TAACCTTTTACAGCCTCTTTTCATTAATGGTAATGGATCTACGCTGTATCTGCAATACGTCCTGCAAAATCTGAAACATATGTTGGCAC  
ACCTTCAGTTAGCTTTCAGTTATTTCTTAACTTGTTCAATTTGTGTAACACCGGTAACTTAACTCATGTTTTCAGCTGAGTGAAGC  
TTTTAATTAAGGAATCGTTGATTACCTTTTGATTTACAATAGGAATTTTAAACAATATACATTTTCGCCATATTGTTTTAGAATTGC  
TGCTTCTTTTTCATAGTTTCTAAATCGTCTGCAAACTTCAAAATGAAATTGAAGCATCTGGAATTTCTTTCACAGCTTCTTCAGCA  
AAAGCTTTGTAATCTGTTACGCCGCTTTTCGCCATTAATACTAGGATTTGTTGTAACCATCCACTTGTTTGTTTTATAAGCTGCTTT  
CATTTCTTCAATATCTGCACCGTCCGCAAACTTCTACATTTAGTTTAGCCATATAATATAGCCTCCTTGATCTTATTAATAATTTTA

ACAACATCTGCATGTCTTTTTCTTACAACCATTTGTAAAAAATGATTTTTATTTCTTTGTTATATAAAACATTTATATCACGCTTTTAT  
AATATATAGCTAATTTTTTGCCTATATTTTTTAAAAATGACTTTAGCAAACATTTGTGTCTACAAGTTAATAAAACATTTGTTTTATGA  
TTGTTTTATGATACGATATGTAATGATAACCATCCAGGAGGTTTAGCATGTCTCGTTCAAAAAAATACTTTTACTTATCTAGCTTAAT  
GATTATTTTTAAGCTTTTTCTTAAATACAAATAACGTTTTCTAAGTGGACTTTTTAATTCCTTTTATTAATTAATACTTTTCTGCAGTG  
TTATTAACCTCAATTGTACTAATTTGTCTATAATTTTGCAGATCGTTCAATTAATCACTAAAGCCTGATGCAGATTGGATTAGAAT  
TGCGAGTAAAAGTTTGCCTTGGATTATTCTAATTGTTATTTTAGTACATATCTTTTCAATTGTTTCGTACATTCGGTTTTATTTAAAAAA  
GATAAAATGTCAATGTAGCGTTAATACAAAACAATACAATGTATCATGCTATAATGAGTAAAACAATTTGATGACGTTGTTGCGTAT  
AAAAAATATTAGATTTTCGAAATCATAACTATGCATCTAATCGCTATAGTTATACAACAAGATATAACATATAATGAGGTTTGATAA  
TGCATCGACAATTTTTGTCTGCTGTTGCCAAAACCTCTTTTTTAAATTCAACTACTTCTTTTCGAGGTGAACCAATGCAATATGT  
ATATATTTTTATCGGTGGTGCTTTAGGCGCTTTATTACGTTACCTCATTCTTTTTCTGAATACTGACGGAGGTTTTCCAATCGGAACAC  
TGATAGCCAATTTGACTGGTGCCTTTGTAATGGGATTGCTAACAGCCTTAACAATTGCATTTTTTTCAAACCATCCGACCCTAAAAA  
AAGCTATTACGACTGGTTTTCTTGGTGCTTTAACGACTTTTTCAACATTTCAATTAGAATTAATACATATGTTTGATCATCAACAATT  
TATACTTTACTACTATATACTGTAACAAGTTATGTCTTTGGTATTTTGTATGTTACGTCGGTATAAACTAGGTGGTGGTTTATCA  
TGATATCAATCATTTTAGTCATGATTGGCGGCGGTTTCGGCGCAATTGCTAGAAGTGCCATTACTGATTATTTAATCATAAATTTAC  
TTCAAAGTTACCTATCGCAACATTGATAGTAAATCTAGTTGGTAGTTTTTAAATTTGGATTAACTATAGGCTTATCAATTTCAATCTCA  
TGGTTCCTGCGTTCTTTGTTACCGTTTTTGGTGGCTTAACAACCTTTCTCAACGTTAGCTAAAGAACTTACACTAATGATGACGC  
CAAAATTTAATATTAACCTTTTTCTCAATTATTCATTTTACAATTCATCATTTGGATTATAGCTTGTATATTGGCTATCATATTTAA  
AATAAAATGCTTCATTACAGAAATAGGTAATAGCAGACCTTCTGCAAGCAAGCATTTTTTAATTTTCATGCAAAATTTTTAACAC  
CATATAATGCCTACCAAAATAAACAATCTTTGTGCGGTTTTAAATAATGTGAATGTCAATACATCTCCAACTAGTCGAAATAA  
AGGGAGTGGGACAGAAATGATATTTCTCAAAATTTATTTCTGTCGTCCACCCCGCAAGGTTGACTAGAATTGAAAAAAGCTTGT

>044-contig\_322\_RC

AAAAAGCTTGTACAAGCGCATTTTCGTTCACTGCTGCAACTGCTGCAATATAACTTCGTAGAGCATAGAACATTGATTTATGTCCAGC  
CTGTGACAATCCATCTAACCTTTTCATCAGTTGAGCGATTTTAACTATCTCTTCAAAAGTTTTTGGATCAGGTCCAATTCTCTTATCTT  
GATTTAAACCATCAATTCGCGTCATTTGTTTCATCTGATAATTCGAAATCAAAATATTTGGAAGTTTTCAGAGATTCTGTTTGGTGTAC  
CGATTTAGGGATTATAACCACACCATGCTGCACATTCCATCTTAAACAACCTTGGGCAGGTGACTTTTCTAATTCTTGAGCAATGTC  
TTTAATTGTCTCATCATTTAAAAATTTGTGCATTTCATCAATGGTGACCAAGATTCCATCACGATATGTTGTGCTGCCAAATATAATTTT  
AATTTATGTTGCGTTAAATATGGATGATATTCAACTTGATTAATTACAGGTTTAAATGACACTTGTGCCAACAAAGCTTCCAAATGTT  
CAGGTTCAAAATGCTGACACCTATATTTTTAACTTTATTATTTTTATATAAATCTTCCATACCTTTCCATGTATCAACCATTACGGCT  
TCGTTCTGACCTGGCCAATGTACTAGATACAAATCTAAGTATTTTAAACCTAATCTAGATAAACTAGCTTCGTAAGCAGCTGCTACA  
TTTTACGACCGAAATCCTCAAAATATAATTTTGAAGTAATAAATAAGTCTTCTCTAGCAATACCAGTTGACTCCAATCCGGCACGA  
ATGCCAGCACCTACTGTTCTTTCATTTCCATAAACTTTTGGCGTATCAATACTACGATATCTTGTTCATAATGGCATACTTAACTCTT  
CCATGCAATTTTTCATCATTGTTCCACAGCAATGTCCTTAAACCAATTTGTGGCATCTGTTTCCATATAAAATGTTTTAACTCCAT  
AAATATCGCCTCACCTTTTTGATGTATTATACCTGTTATCATAACAAATCTGAGTTGAATACATGAGAAAAAACCTTAGAGAAAT  
CAACCACTAAAATCTAGTAATATCTCTCAAAACATTAATCAAAATGTAAAAGCAATTCGTGTTAAATATGACAACTAAAAAAGCC  
GAAGTCACAACATATAGTCATCACTTCAGCCTAACATTTAGTTGAATGATTCAATTTTATCCATCATTGTTGTGAAGTCTTCCACGTT  
GTATTGAATACGACCATGGAATACAAATTTGTTAAAGAACTCGTCTAATTGTTTCAGCACCGACAAGCACTTTGACAGCACTATTTTG  
ATTATAATTTGAAATCGTTACATCGCCTTCATTTTAGGATTAAAGTATAAAATTTGAAGTTGGCGTATATTTGGCACCTAATTCCTTT  
TGTAAGTCTTCAGCCAATTTGTTAATCGCCTCAATTTGATCTGAATAATTTACAAAAGATAATGAACGTTTGTATCATTTTGTATCCA  
TCACAATAGTTTGTGGTCTAGATTTATCTAAATCCAATGTATCAAAATCTGTTCCATTGGTGGTAAATCTTTAAATTTGACCGCCACT  
AATACCATTATAAACATGACCTTTTAAACAATTGAGAATCAATAATATAAAGACCAGTTCTTGTTAATACTAAATGACTAATTCGTTT  
AATATTATTAAAGCCATCCTTTGGTAAAAAGATATTGCCATAATGTGCATATCTTCTGGTCGAATTCGTTTTCTTTAACTAATCTTT  
CACGAATACCAATTAATCTCATGTCCGTTACATATTCATCTATGATTTTTCGAGAACAATTTTAAATGCGTCAATCTCACGATCTTTGT  
ACTAACCATGTGATTATAATCTTCTTGTGTTTGTGAATTGTCTTTTTATTTTGAATACGCTCTTTCTCTAAAGCTTCTTCATGAGACTT  
TTTAATGTTTGTCTTGTGTTTCATCTTTCTTCTGTTTGTGCTTAACTTTTTTCTTACTACCTAAGGCACTAAGAAAAGGACAA  
AAAAGATTAATGCAATGACTACTGCAATAATGAGTCCAATGACTACCGGTGAAGATAAATCCATCACAAACACGCTCCTTTTAAAT  
ATATGAATAACTTTAATTATAATAGAAAAGCTAAAGATTTTCGATACATATTATCATTTATATATCGAAAAATCTTTTATTTAGCTATA  
TTCAATTCATCTTATTATTTTACTGCGTCTTTTAATTCCTCCACTTTGTCTAATTTTTTCCCATGGGAATAAGACATCTGTACGTCCAAA  
ATGACCATAAGCAGCAGTTTGTGTTGTAATTTGTTTCAATCAAGCATTTTAAATAACCAGCAGGTCTTAGGTCAAAGTGTGTTT  
CTAACTGCTTCAACAAGTTGCGCTTCAGAAACTTTACCTGTTCCAAATTTGTCATCAATTTGCAATTGACACTGGTCTGCAACACCAATCG  
CATATGCCAATTGTACTTCATTTGATCTGCTAAACCTGCTGCAACAATATTTTAGCCACATAACGTGCAGCGTATGCAGCTGAAC  
GGTCTACTTTTGTAGGATCCTTACCCTGAAGCATCCGCCACCATGACGTGCATAGCCACCGTACGTATCAACAATGATTTTACGTC  
CTGTTAATCCTGCATCACCTTGAGGTCCACCGATTACAAAGCGTCTGTAGGATTGATGTAGAATTTAGTTTGTTCATTAATCAAGTT  
TTCTGGAACAGTTGGATAAATGACATGTGCTTTAATGTCTTCTGAATTTGTTCAAGTGTACATCCTCAGCATGTTGTGTTGATACG  
ACAATCGTATCAATACGTAAGTGGTTATCATTTTTCATCATATTTCAACAGTGACCTGAACTTTACCGTCTGGTCTGTAATAATTTAACG  
TACCATCTTTACGCACATCTGATAAACGTTTTGCCAATTGATGTGATAAAATAAATTTGCTAGAGGCATATACGTCTCTGTTTCATTCGT  
TGCCTAACCACCAATTAACCTTTGGTCACTGACCTGTGCTTCAATTTCTTCTCTGCTATCTTTATCAGCATACTCTAATGCATTAT  
CCAGCCTTGTGCAATGTGAGGTGATTGTTTCATCAATTCGAGTTAAATTTGCAATTGTTTCATAAACCATACTTTTGTCTTGT  
GTATCCAATTTCTTAAATTTGTTTCTTCAACAACCTTTCGGAATATCAACATATGTTGTTGTAGAAAATTTCCGCCGCGATCAATGCCATA  
CCTGTTGTAACAGTTGTTTCAAGCTACACGTGCATTTGGGTGCTCTTTTAAAAATAGCATCTAATATTGCATCTGACACTTGGTCAG  
CGATTTTATCTGGGTGTCCTTCTGTAACAGACTCTGAAGTAAATAATCGTTTGTATTTAACATAGTTTGTCTCTTTAAATTTATATTA  
CGAAAATTTCTCTCTGTGAGCTAAATAAAAAAGACCTTCTAACTATTAATATAGAGAGAAGGCCTAATACGTCCATTGCTCTTAT  
CGTTCAGACCTATTTGTCTGCAAACGTTTGGCACCTTTCTTTTAAAAAAGAGGTTGCTGGGTTTCATTGGGTCCATGTCCCTCC  
ACCACTCAGGATAAGAGAATCCGTTAAAAATAATAGTACCTAATTAATGAATTAATGTCAATTTTTACAAAATAAATTTACAGTAAA  
ATATTGTAGATTAATATGTTAATGTGTTATACTAATTAATGTAAAGGCTTACATTTAAATTTATCGCTTTGGAGGGATTTAGGATGT  
CAGTAGACACATCAATGAACAACATAAAATTTGACAAATCTGAAAAAACCAACGTCACATTTTCACTTTTCGACGACACAACTT  
TATAATAAAATCTTAGACAATAACGAAGGGGTATTAAACAGAACTTGGTGCTGTTAATGCAAGTACTGGGAAAAATATACTGGTCGTTT  
GCCTAAAAGACAAATTTTTGTCTCTGAACCTTCATATAGAGATAACATTGATTGGGGAGAAATTAATCAACCTATCGATGAAGAAAC  
TTTCTTGAAGTTATACCATAAAGTACTAGACTATTTAGATAAAAAAGATGAACTATACGTATTTAAAGGCTACGCTGGTAGCGATAA  
AGATACAATGTTAAAACTTACAGTCATCAATGAATTAGCATGGCATAATTTATTTGCTAAAAATATGTTTATTAGACCTGAATCAAA

AGAAGAAGCTACAAAGATTAACCTAACTTCACTATCGTTTCTGCACCACATTTTAAAGCAGATCCAGAAGTTGATGGTACTAAATC  
TGAAACCTTTGTCAATTATTTCAATTAACACAAAAGTCATTTTAATCGGCGGTACTGAATACGCTGGTGAAATGAAAAAAGGTATCTT  
CTCTGTAATGAATTATCTCTTACCGATGCAAGATATTATGAGCATGCATTGCTCAGCAAACGTTGGTGAAAAAGGCGATGTTGCATT  
ATTCTTTGGTCTATCTGGCACTGGTAAAACAACCTTATCGGCTGACCCACACCGTAAACTAATCGGTGATGATGAACACGGATGGAA  
TAAAAACGGGGTCTTTAATATCGAAGGTGGCTGCTATGCAAAAGCAATTAATCTTTCCAAAGAAAAAGAACACAGATTTTGTACG  
CAATCAAATATGGTGCAATTTTAGAGAACACTGTAGTTGCAAGATGGTTCAGTGGACTTTGAAGACAATCGTTATACAGAAAAAC  
ACGCGTGCCGCTTATCCAATTAATCACATTGACAATATTGTAGTACCATCAAAAGCAGCACATCCAAATACAATTAATTTCTTAACT  
GCGGATGCATTTGGTGTTATTCCACCGATTTCAAAGTTAAATAAAGACCAAGCAATGTATCATTCTTGAGTGGTTTCACTTCTAAAT  
TAGCTGGTACAGAGCGTGGTGTGACAGAACCCTGAACCATCATTCTCAACATGTTTCGGTGCACCGTTCTTCCCGTTACACCTACTG  
TTTACGCTGATTTATTAGGTGAACCTTATCGATTACATGATGTTGATGTTTATCTTGTTAATACTGGATGGACTGGCGGAAAAATATGG  
TGTAGGACGTAGAATCAGCTTACATTACACACGTCAAATGGTAAACCAAGCGATTCTTGCCAAATTGAAAAATGCAGAATATACAA  
AAGATAGTACGTTTGGTTAAGCATTCCTGTAGAAATTGAAGATGTACCGAAAAACAATTTTAAATCCAATTAATGCTTGGAGCGACA  
AAGAGAAATATAAAGCACAAGCAGAAGATTTAATTCAACGTTTTGAAAAAGAACTTCGAAAAATTTGGTGAAAAAGTTGAACATATT  
GCTGAAAAAGGTAGCTTCAACAAATAAATTTGAATACTAATTAAGAGCCAACCGTTGTTATAGTCTAACAATGGTTGGCTCCTCTT  
ATTTTATGTGCTAAAAATTTATAGGCAATTTTATTACAACAATGTACATTTAAGGTGACCTTCATGCCAAAAATCGCATCACTCATTTA  
ATGGAAGCAGCACGTCTTCATATAAAGTACCGATCCCTAATTCAACGCATGTAGTACCACATCTTCAAAGCTTGATAGTTCCCATGC  
GCACACCACGTTTCATACTAGCTATGCGACTCAACTTGGTTCATAAACTCTTTAATATAAGTCAATGTTTCAACCATCGCTGGTGGTC  
TTGGCACAATGTCTTCCATTGTGATAAAATGTTTACGCTGGCAGCTTTTAACTCTAGTTGGTGGCTAAAAATACGCATAGCATG  
AATACCAACTGTGCTGGTCTTTCCCTCCATGTACAATTAATGTTGCGGAGCTGTTTTCATTAATGTTTGAATTCGTTGGCGTGCTCA  
TATGCCGCTCGATCTTTTTTCGGATGACCAATCATTCTTCGTAGCATGCCTCTTAAATCGACACGTTCTTCATACATTAATCAATAT  
CTGAGACACCACCCAGATTGTATAACTTGTACTGGTAAGTCTTGAATGTCAACAATCCTTGTAACCACCTCGCGAAAAACCAA  
CCATGTGGATAAATGCATGTGGATATTATCATGTAGCAACCTTAATAATTGCGTCACATCATTTAAATCGCCACGGTAAAAATCGT  
CTTTACCTTCACTCCCATTGTTACCTCGGTAGTATGGCCCAATCACTAAAGTTTGACTATCTGAAAAATTGCATTAATCTACCTGCGCG  
CACACGTCTACTTGACCTTTGCCACCTCGCAAATATACTACAATGCGATTTACTTTCATGATGTGGTGTGCATCATTAAAGCTTTTACT  
TGTAAGTCATCTGACAAATATGTAATTTCTTCGAATTGATGCGTAAAATATTCAATTGGCATTGCTTTACGTTTGATAAAACCCAAGT  
GATTGCACCCCTCTACGCATTTTAAAAATGGTACTATCTTGCAGTAAGAAACTCCGTTGTGCGAGTTCAATATCATTGATACAGTTAA  
ACAACACTGGCCCTGCTGTTTCTAAATAAATCGTTCTTGCCTTACCAATGATTCAACTTCGATAAAAATATACATCTTTTACAAAATCAGT  
TTGATCATGTGTTCAATGGTATATTGTGCTATGTAATAAATATTTTTAACTTTGGCGCCTGTTTCTTCATATAAATTCACGTGTAAGT  
CTTCAGCACTACTTTCCCGCGTTCCCTTTTACCACCAGGAAATTCATCCCCCGTAAATTATGTTTGGTAAAAAGCAATTGATTTTT  
AAACGTTGGAATAGCTAGCACATGATTGCCATCTGCTATCTCATTATCCTTTTTAAATGTCAAATTAACCTTGACGATTATCTTTATCC  
CTAAACTTCACGCGCATCACATCCCTACATTGTATGTTAATATAATAGTTAATTACTATCGTTGGAGGCATTAATTATGAAAAAGAT  
ATCTTGGCGATGATTCATTTTATCAACGTTTCATTTGCCCACTCACTCCACCAACTTGTGCTTTTTATCCAACATGTTTCAGAGTACA  
CTAGAGAAGCGATTCAATACCACGGTGCTTTCAAAGGCCTTTATTTAGGTATCCGTCGTATTTAAAAATGTCATCCGTTTCATAAAG  
GCGGCTTTGACCTGTTCGGTTAAAAAAGACAAGTCAGCAAGCAAGCATTACATAAACAATTAATATGGTTGTAATTGA  
GTTATATCCACTAAAGGGGGGCGAAATTCGAGTTCGCCCTCTTTAATATGCCTGAATGCGCCACCATCTTGTGTTCAAAAATATAA  
CCTGCTGGTGTAAATCTCCTGGATAATCACCTTTACGAGCAAGCATCGCTGTAAATAGCGGCTTAAACCATATTCGTACATGCCG  
CCAATAACCACCTTTTGACCATGACTTTTCAAAGTATCAATTGCCGTTTGCACTTTATCAATGCCACCTAGACGAAATGGTTTTAATA  
CAACAACCTTTCACATTGTATAATTCTATCAAAATTAATTATGTCGACAATGATGTGCGCTTTTCATCTAGAGCAATCGGAGGTATTGT  
TCCATCCACTACTTCATCAAGCATGGAGATATCTTTAAATGGCTCTTCGATATAAAGAACCTGTTACACGCGCTAATAACTGTAAGT  
TGTGAAATCTTGACGATTCAAGGACTCATTTGCATCTATAACCAATTGAAAGTGAAAGTCTAATTCTCGTAACACTCTAATTTGATC  
CATGATTTGAGGTGTCCATTTTAATTTAATTTCTAGTCGGCTTTGTTGCTTTCAATGACTCTAGTTGTTTATTTGATAAGCCGCTCGCTG  
TCGCTCCATATGCTACTGAAAATGAAGGCAGTACATGAACATTTGATACAATGCCATGACAATAGTTGCCCTTGCGAAGGCGTA  
TTTCCAATGAATCTACTAATTTTAGTGCTGCTTCATACGTTTCAAGTATTAATTTCTATTATCTTCGCAACATTGCTCAAAATAGATG  
TTTCACTGAAGCAATTGTTTCATGATCATACCAATCTGTTTGAAAGCGTTTACTCCCCGAAATATGCATTTCCCTTATCATCAATC  
AATTCGATAAACAACAATCACGATGCATTAATGTGACTTTCCGGTGTTACAATTTGTGCCTTAAATGGCTCACTATATTTATAAAAA  
TGCAAAGCTGTCAACTTCATCAAAATCATCCTCTATACAACTTATTTCTCTGTAATTTACCCGTTGATGTATAAGGTAAAGTATCAACC  
TTTTCAAAGTGTTCGGTACTTTATATTTGCTAAATGTTTGGATAAATATGCAATCAATTGTGCCTTTGAAATGTCACTTTCACTGAC  
AAAATATAATTTAGGCACTTGCGCCCAAGTATCATCAGGATGCCCTACACATACTGCGTCACTGATACCTGGAATTTGCTTCGCTAC  
CGTTTCAATTTGATATGGATAAATATTTTACCAGCCACTAATAATTAAATCTTTACGTCGGTCATAAATCATGACATAACCTTCATAA  
TCTATTTACGCAATGTACCCGATTTAAAAATAACCATTTTCAAACGTATCCGTTAAATCTGTTGGATACAAATATCCATTTCATC  
TGGCGCCTTTAATCATTAAATTTCTCATGACCTTTCTTTATTAGGATTTTAACTTTTACATCAACATTGGCAATGGCAACCAAGT  
GTCAGGACGTGCATCAACTTTCGGGTGTTGCTGTTAAAAATGCGAACATGTCTCAGTCATACCAAAATGAATTTATAAATGGCAG  
GTTATATTGTAATGCCGACTCTATCATAGTGGCAGATAATTTAGCACCGCCGAGTAATATTTTTGTAAATTATAAGGTTTCATGTAAA  
CCTGTTGTCATAAGCCAATTTAAAGTTTGTGGCACAAGCGAAATGTGCGTGATTGCTTCATTTTTAATCATCGTTAAAAATTTGTTCCG  
CATTGAATTTATCAACAATGCGCACAGTAAAACCTTCAATAACAGCTCTTAAAGTACACTGAGACCCGAAATATGATAAATCGGC  
AAGACAGATAGCCAATTAGTGTACGATCAAATCCCAAGCTCTCTTTACATCCGATTGCACTGGCATAATGATTACGAAACGTTTGT  
GGCACCGCTTTTGTAGGGCCCGTTGTCCTGATGTAACATAATTGATGCAATGTCATCTAAATTAATGATGTATTTAATATGTTGG  
ACGGCGACTCTTTCCGACCAACAGTTTCATTGATGTATCATATTTGGATACCCATTGTGTTGTCCAACAAACCGTTTCGTTGTAATATC  
CCTTCCAGCGAATTCATATCATCCAGCGATACAAATTTGAAACCTCGCAATTTCCAGTGGCAAGGTACAAAAATCAATTTGATCATC  
GATTGACCTCATCTGATTGCTCATCTCATTAGGTGTTCAACCTTGTTAATCATCGCAATTTCAATTTGCAAAATCAACATGATGATG  
ATTAATAATGATCGATTGAATCGAATTATCTATGTATAGCCCGACACGAGATTGTTGATAAGCCTTGAATCTTTAGCCAATAGACTC  
GCTTCACAGTATAAATTTTGTAAAGTATAAGATTCTTGACCGTCTGTTATCGCAATATGATGTCCATTTTGTGTTGCTGTTTATATA  
ACCAAAAGTCCATGCGTTATTCTTCCAAAATCATTTACATTATAATTATAACGATTTTATGACATTCTAGCAGTGGTTATGTTTAAAA  
ATATAAAAAAGTAGACGAATTGATTCAATTGATATGATTGTTATAATGCTCAATACATATCGTTATATCATCTCGTCTACTATTATCAGT  
TATTTTTATTAAATTTAGTGTCAATCTGTCAATTTGATGTGGTGATTTACCCATTGTTGCCACATCATCTGCAATGTCAATTGGTATA  
CGATTCATGCTTTGTAATGCACTTAAATGGAATACTTCATCATCTAAATTTTCAATGAGATATACATAATATGTTACCTTGTCTTTTT  
ATATTTTAACGTTTTTCCAAAAGTCCGGCTTGAATTCATAATACATTACCGGAATATATTCAATAAATAAGTAACGTTTGTGCTACT  
TTGTCTACGAAATATTTTACAGTGCCCTTTTTCTATACCTTTATATGTGCATAGTCTGCTGAAAAAGTAAATCACTACCTATTGTTTCATT  
ATGTTGTTGTATTTTCAAACTGTTGGCCTACTATTTTATTTTGTGCCACAACACTTAAAAAAATCAGTAGATATAGCATTAAGAACAT  
ATTTTCATCCCTTGAATTTTAAAACTTTTTCAAAGCAACACCTCTAAAAATAAATACAATATATTATATCAAATAGAAATTATTA  
TTTTGTTAAATTATGTTGTCATGTTTCGTGTCATTTTGAGTGTGAATACAACCTTTACAATTATTAATTAACACTTCTACAATCCAAAA

ATATTTTTAAAGTTTTGAAAAAATTAAGTATTTCCACTACTAATTTGGTAAAATATGATTATGTGATATAGTGAAAGCGTTTTACAC  
CTTAATAACTCCCTCTTAAATGCATCCAGGTTTTATGTAGTAAATCATGAAAAAATACATATAAAATATAGAGGAGATTTACCTTTGAA  
TACAGAGAACAAACAAGAAATCAAAACCAATCTGTTAAAAATTCTGAAAGACGCGGCATGTTAAAAAGGATGCGGCGGTTGCCTTATTT  
CTTTTATTTTATTAATAATCTTATTATCAGCCTGTTCAATGATGTTTAGTAATAATGACAATTCCTACTAGTAATCAATCATCAAAAAAC  
GCAATTAACCTCAAAAAAGATGAAAAATAAAATGAAGATAAGCCTGAGGAAAAATCAGAAACAGCAACAGATGAGGATTTACAATCA  
ACCAAAGAGTACCCGCAATGAAAAATACTGAAAAATAATCAACATGAAATTTGATGAAATAACAACAAAAGATCAATCAGACGATG  
ATATTAACACACCAAACGTTGACAGAAGATAAAATCACAAGACGACTTGAAAAGATGATTTAAAAAGAAAAGCAACAATCAAGTAACCA  
TCATCAATCCACGCAACCTAAGACCTCACCATCAACTGAAACAAACACGCAACAATCATTTGCTAATTGTAACAACCTTAGACAAG  
TATATCCGAATGGTGCTACTGCCGATCATCCAGCATATCGACCACATTTAGATAGAGATAAAGATAAACCGTGCATGTGAACCTGAT  
AAATATTAACAACAAGCGAATTGAATTCAAATTTGATTTAGCTTTATGCTACTAATCACAATAGTAAATATGAGGGAGATTTTTTTTG  
GCATGAGCAATCAATTCAAAAAGCGAAGAAGAGCGAAGACAATGGGAACAATTCCAGCTTTCCAAAAATCAACAAAACCAACAGCA  
CCAGCAATACGGACAAAAGAAATCTAAAAAAGATGGTTCTGGGGCTGTGGTGGTTGCTATTATTATTTATTTAATTATCATCGG  
TATTTTCAGCTTGTACAGCTGGTATTACAGGTAACCTTGGCGGAAATAGTTCTAAAGAAACGAACAAAACCCATAAAATCGGTGAAA  
CTGTTAAAAATGGCGACCTTGAAGTCACTGTAAATTCAGTGGAACCTATGAAATCTGTAGGACCATCTCTTGACCAACAAACGCTA  
AAGGTATATTTGTCGTTGCTGATGTGACGATTAAAAACAAAGGTAAAGAAGCGTTAAACAATTGATAGTTCAATGTTTAAAGCTAAAA  
TCCGGTGATAAAACATTTGAAGCAGATAATACAGGTTCAATGTCTGCTAATCAAAGTGACAACGGTAGTATAGAAAAATTCATTTTTT  
TTACAGCGTATAAATCCTGATAGCACTGCACAAGGTAAAATTTGTTTCGATGTGTGAGAAAACATAGCCAACGCAAAAGATAAAAA  
ATTAGAAGTTATTTCTAGTTTTATTAGCGTCAAGAAGATTACATTTGATTTTCCGATGCTAAAAAACATCAAAAGATCAAAAAAGA  
CAAGCAAGATACAGAAAGTACGTTGTCGAGTTCAAAATAGCGATAATGTAAATTTATGAAGCTTCGGCTACTACACCTGCTACAACCT  
CTAGTGCGGATACTGATTCTGAAGATAGCGAAAAAGTCTAGTAAAGATGAGGATAAACAGAATGCGTCTAAAAGTGATAAAGATAG  
TGTAGAAAAAAGTGAATCTAATGAGGAACTGCTCCTGTAGAGCCCATGCCCCAGAGCAAACTACCCTAGTGAAGCACCACCTA  
GTCAAAAATAATCACAACGAAAAATAACATGTATGATGCTTCAACAGAATAAAATTTTCAGGGTAGCTCAGCTACCCTTCTTTTTCGGTA  
AAAATAAATATACATAGCAATATAAGGAGATTAAAAAATGAAATTCAAAGCTATCGTTGCAATCACCATTATCTTTTCACTATTAAC  
TGCTTGCGGTGCTAATCAACATAAAGAAAAATAAGTAAATCAAATGACACTACTAAAAAGACGCAAGAAACTGACAACACTACA  
CAGTCAAAATACAGAAAAGCAATGACACCACAAGAAGCCGAAGATATCGTTTCGAAACGATTACAAAGCAAGAGGTGCTAACGAAA  
ATCAAACTAATAATTAAAAACAAATCTTGAACGGAGTAATGAACATGAATATTATGTTGAACATCTAGTCCGCGATGCAGTTGGC  
ACACCTTTAAACGTTGCGCTATTGTTAATCGACACAATGGTAGCTTAAATTTATGAAGCTTCGGCTACTACACCTGCTACAACCT  
GAATTTGAAGCATTAAAAAGAGAAGCCCTAAATACAACCCAGGTATGAGTGATCATGATAAAACAGATGGTGAGTCAGAAGACA  
TTCAACATCATGACAATGATAATAACAAAGCCATTCAAATGATACACCAGATCAAAAAAGCCGTTGATAAAAAACGATAAAAAATGCT  
GTTAATAAAGAAGAAAAACAGATAACCGGTGTAATAAAATCAGCAGAACTAAAGTTAAATAATGGCATACCAAAATTTTAAATCT  
AATATGGAAGGTATTATTAATTTGAAGAAATATATATTTTTTAAATAGCGATTAGTTACGCATGTTAACTAACTCTGAAGAAGCTT  
ATGCTGATGTAGGTGTTCAAAATTTAAGGAATTATTATGGGAGCTATGAATTTACAGATTTGAAAAATCAAAGTGATAAAAAACAAT  
CCTCAAAGTCATCAATTAGAATATGAAGTTGAAGGTAAAGCACTTTATTCACAACCTTTCAAGTGAACATGATGTTAAAAAGACTTAA  
TCAAAAAAGTTGATATTTTGGAAATCCCTATACTGGTATCACAAAAACGTTGAATATATATATGGTGAATAACTTTATCTAAT  
GATTACTTAGATACTTAGAAATATCCGATAAACTTTGGATAAAATGGTCAACACAAAAACAATTTCTACTGATAGAGTATCCACA  
AATAAAAAACAAGTAACCGCTCAAGAAATTTGATGTTAAATTACGAAGATATCTTCAGGAAGAATATAATATATATGGTCATAATAA  
AACAAATAAAGGGCGAGAATATGGAAACGAATCTAAGTTAACTCTGGATTTGATAAAGGAAATGTAATTTTTCATTTAAACAATG  
GTACTCAATTTTCGTATGATCTTTTCTATACTGGTCATGGTCAACCTGAAGACTTTCTTAAAGTTTATAATGATAACAAAACAATTGA  
TTCAGAAAAATTTTCATTTAGATGTAGATCTCTTCTTTCTAAAACCATTTAAATACAATACAACCTTAGGAGCCGCACATGAAACTAT  
TCTTTATATTTAACTTCATTCTAAATACTATTATGTCTCAAACAGACTATTCTGATCCAACGTCAAACCAACTAAACAAAAACAAGTCA  
ATATGAAGGTTTAAATGTATAATATGAAGGCGCTCTATGAATCAGATCCTGTATCTTTTGAAAAAGATAAAATCATATGATCAATTTTT  
ATCTTTTGACTTGATTTATTTTTATCAAACTTTACAATATAACAGAATTTAAACCGAATTAACCAATGATCTTTCAAATTTATATAAA  
GATAAAGACGTAGATTTATTTGGAGTAAAGTACTTTGTGAAATTTTCTCAGATAATAAAGACATAAAAGAAATTCACCAAGT  
AACGATAGGGTTTGTATGTATGGTGGTGTACAGAGCATGAAGGTAATAGAACTAAACTGTTTGGTTATACGATAGTAGTTTCTGT  
TATATCGACAATAGAAATAGTCGCTCATTTACCTTATCAACAAATAAAGATCATATTACAGCTCAAGAATTAGATTATAACGTTAGA  
AATCAGTTAATTAAGATGAACAATTATATGAATTTGAAAGTTCTCGTTTTGAAACAGGCTATATTAATTTATTGAAAACGGTAAA  
GCTGTATTTTGGTATGATCTAATGCCACCCCAAATTTTACGCAGAGTAAATATCTAATGATTTATAAGATAATAAACTTTGTTAT  
CTTCCAAAACCTGCAATTGAAGTTCAATTAACAAAGAAAAAATAACAATGATTATTTAAATATAAACTTAAATTAATAAATGAAT  
CACTACAACGAACCTCTACATTCACCTTAAAAAGCGATTTACGATAGCCTGTAATTCGCTTTTTATACAACCTTAAACGGATAATATT  
TATCAAAATATGTATTCCTAAATTATACAGCCTTAATCCAGCAGCTACTTTCGAACTTCCAACCTTAATTGATATAAGATTTAATAGTT  
TGTTTCGTTCTTTTTCAGATAAAACAGAAATTTAAATTGATATTATTGACTTCATAAAAAATTATAGACTAATGCCTCTATTGTCTTTTA  
GGCATAGAAAGTACGATGAAACCTGATTTACGTTGATTAATCAATCTTCATGTAATTTCTTAGACTGAAATTTCTTAGCTTGTATCTT  
TATATTTGTATAAAATAACGACCGAGTTCACGAGCTATTGCAAACTCTGTATTATTAATCGAGTGATTATTATTGATATAAAATCGTTCT  
TCCACTTAAATAACCCGAAAAATTACCCTCTATTTTAAATATATTTAACTTTTAAATTAAGTTGAAATAATAGCTTGTCTATGTCAATA  
GCAAAATGTTTCAGAAGTAATAAAAAAGTTGATCCATTTTGTCTTTATAAATGGCTGAAATAATCGAACTATTTTTGGTTCTAAAATA  
TCTTCATAATGAACCTTCTCAATAACTTTCGAATTGATCCCCACCCTAACTAAAAAATTAACCTACATCATTTAATAAATTTATAACT  
ATAGGTGCAAAACATTATTAATAAATAAACCCCTTTACTACTATATGTAACGAAGGGACATGAATTCAAAAATAAAATACCTTTTTTATA  
AATTTATTATAATATTTTTCATTATGCTGTACAACCGAATCTAATCCAACAATCCCGAAAAAGAAGAACAAAGGTGGTTCTGCCTCAT  
AATCATTTTGTGCTAAGTGTCTTTTCAATTAATTCACCTAGTAAATCGGTCTTTAGCATCTTTCTCTTTCAATAATCGCCCTATTT  
TTCTTCCTTATATCTTATGCTACTATTAACCTGATTTCCTTCATCTCTGTATTTATATATATGCTGAAATTTCTTAGCTTACATTAT  
TTATATATTCTTTAATAAAGTAAGCATTACCCGGGCTTTTTTGAACTTTGTTATTTTCATAGACTTATAGTGATTACAGGTTATGCTTA  
AAATACAAATCGATTTCGCTTTTCTGTGTCTCAATATAATGTTCTTTTTTACTTTTGTGAAACGCGTATGCAATAACAATTAGTACTA  
TTAATAATACAACAACCTACCACAAATACATATCTCTTTTTCATTTTAAACCCCAAAGTTTAGTATTTATTTCTTATAGATTTTAGATTT  
AAAAAAACAATTCACCTTTGACATGCTATCTTTTTTCTATGTCCGTTTACGCCCCCTCATGAAACGTTGTTTCAAAATACCTTTAAAAA  
TTATTTGCTTGACATAATTATAAATACATAAAATAACGCTGTTATATATGGCGTTTATAAAATGTAGGAAAAATGGCGAAATGAAAAAT  
GCTGTTTTTCCTAACGTCAAAGGTGTTAAATCATACTCGTGTATAATTTCAATTTCTGGCTTACCATTATCATATAATCTAACCATTTA  
TAACTTAAACACTGAACTAAATGTTCTTCTTTTCAAAATTAACAAAATCTACTCTCATAGAAATTTGTCCAATTTAGATGATATAATAGT  
AGAGTCGCTATCTCTAGGCGTCAATTTAGACGAGAGGAGGTGTATAAAGGTGATGCTTATTTCTGTTACATATAGCACCAG  
TCATCAGTGGCTGTGCCATTGCGTTTTTTTCTTATTGGCTAAGTAGACGCAATACAAAATAGGTGACATATAGCCGACCAATAAAAA  
ATCCCTCACTACCGCAAAATAGTGAGGGGATTGGTGTATAAGTAAATACCTTATTTTCTGTTATCTCAATTATACTGCTAATTTTTCTTT  
TTGTAATAATATGCAAGGTTTTAAAGAGAAAAATCAAGAATAAAAAAGGCTCTATGCCAAATTTGGACTGATGAGTTCAATATCGGA

AGTTAGGCAACTAAACATTGCGATATATAGCAACTTGGGAAATGGAAGAAATAGAATACTTACATTTAGAGGATGAATACAAAGA  
AGATATACTTTATTTTGAAGAGGATGATAAAGTAATAGCAGTTACAAATATTTTATGGACTTGCTCTGGTTCAATGATATTTGA  
TCAACTCAATAATGAGTCGCTAGCTTTATTAATAAACTCCTTTAAAGGGTTGTTTAAATTTAAATGTAGGCGATTTTATTAATGCTT  
GAAGAAAGAGAATCTATCCTCTTAAACTGAATTCGTCAAATTAAGTACAAGATATTTGAGAACTATAGAGTACCAGTCTAAGT  
AAAATAATTCCCCAAAAAGCTGATTCAATTTAATAGACTGGTCATCTGTAAAGAAAGTTGTTCCCTCGATTTTACGACATTTTTATA  
TAGTTATACTAAGTCATTTATTTTGAACAAAAATAATCATAAATATGATTTAAATGTTTATCTAAATTTTTAAATATCGATTTACAT  
CATCTATTGAAATATTTACATATGGATAATGAATACTTTTTTGTAGTATTCCTAACTTTTTTCGTTGCATCTTTTCTAGCTTTACTAATA  
CTTCTCGAAAATTCATTTTTATTATTTTTTCTAACTTTTTCTAAGATGCTATTAAGAAATCCTTCTAAATTTTTATCCTTTAATTCCATT  
TCAGCTTCGCTCATGTTTCATAGCCTGTAAAGCATAATATTTAAATGAGTATCTAAAAACATTCTAACAGCTATTTTGATTAAAAAC  
TGTATTCTCCATTAATATTTTCTTTACTTAAAAAGTAAATTAATTTATTTAATTCACCCGCATCAAAACATTCTATTTTCTCATAATAT  
TTATTATAAAATTTATTCGAAAGACATTTTTTCGCTTCTTACTTCTCTATTCTTCTCTTTAATCTCGATACTTATAGTTCTCGAATCAATT  
AATATACTTTTCTTATTATTTCTCCATAAAAAATATAATTAAGCTATATTTTCTGGTATATTAGGTGAAACTATCTTATAATCTTCTAT  
ATTTAATTCGTCACCTCTTAAATTCATATATTTATCTCCCTCAATTTTAGTTTTTATATTTTCCATTAGATTAAACATTGCTTTTTTCGGA  
AATAATTAAGATTCTCTATTAACCTCTATCTTTATTGTTCTTTTCTCGTTTTCCACATCTACCTTTTGACTTTTAGAATTATCAATTTG  
CTGGTTAAATTCCTTTATTTCTTCTTTTTCACCTTATTATTAGATACTTCTTTTTCTATTTTATTAATTGTTTATGTCACCGAATCATT  
AACATTACTTAAATCATTATTTCTGTTTCATAATTATCTATTAAGGAATAATAAAATCTTCAATTTCTTCTGCTCTATTTAATAACCTTG  
ATACTGCTATTTTCTTTTCTCTAGCTTCTTTTTCAACAGTATCTATTAATAATTTATTATTAATAATTTATTTTAGGAATAGCATTTT  
CGCTATCTAATCTTCTTTATTTAAACCCACCTTTTTTTACAGCAATATTGTTAAATAATCTATCCAAGGTGGTTAACGGAATTTT  
TTAGTGACATCTAGTCTTAAATTTTGGTTAAAGTATCTGCAATTTATAAAACCAATATTAACCTTTTTTTCTCTTTTGGAGAATTT  
TTGCTTTTCTTTGAATTCATTGTTTCACACCTTTACCTTGATTCTCTCCGAGTGCATTATTTCCATTATATAGTAAGCACGCTCTTT  
AGTGGTTAATAAACATTTAATTTTCATCAATTTTATTATGCTTTTCTATCTTTTTTAATTTCAAACTTTCTTCATTAATTTCTCGTCGAT  
ATCTTTTAATATATTAGGATTATTAATAATTTAATACAATAATCTTCTATTTCCCTCGTACACAATATTTTATCTATTTTGTCTAT  
CAAAAACATAAACCGGTAAATTAGCCCTATAAGTCCATTTAAATAAATATCTTCTAATAAATTTATACATTTGACTCGAGCCAACCT  
TAGATATCAGTTTGTCTAAGGTTTCTCTTTGATTTAATGTAACCTTCATGTCTAGGATTTTCAGTATATAAAAGTATATTTTCAACATTA  
ATATTTTGAATAGTTTCCATATATAGCTCCTTTTGACTTAATTGCTTTTGAATAAAACATATACTCAATAGCTGTCTTTTTGTTTTGTA  
ATGAATAATTCAAATTAATTTCTTTAAAGACTAAATATCATACATTTTCTTAATTTTCATCACATTTATCATATGTTGATTATCCATTT  
CTATTTTTTAACCTTTCTTTGAATATAGTTAGCTAAATTTGTGATGATCTTCATGTAAATAATAAATTTGTATATAAATCCAGACCCCTTTT  
ATAATATGGTGGGTCAAAAAATGTAAATACACTTCTCCTTTTCATTAATACTTTATCTATAAATTTCCAATGCATCCATATTATAGACT  
TCTATGTTCTCTTTAAGTTTGATATTTGAACATTTTCTTTATTAACTTTCTTTATTGAACCTACAATCTATTAGATAAATCCCATT  
TGTTTAAACCCCAATAGGACCAGCCTTATCTATAATCCAGATCTATTAGTTCTATTTAAAAAAATGTTGAAAACCTATTTCTA  
AAATACTATAATCTGTAAAGTTTTTCTTATATTTTTTGAATATGCCATGTATCAATATCTATTGTAGTAGATTAAATGAGATTTATA  
AAATCTTCAGTATAATATAATACTATACCAAAAGCAATATATTGTGTAATCAAAATCATTATTATAATTTTTTTTACTGCCTCAC  
TTAATAACAACCTCTATTGATAATGCTGAACCTCCAGCAAACTTTCACAGTAGGTATTACATCCACTATTTTCTACAAGACCTTTTAC  
ACTTTTTAATAATTTATACTTTCCACCAGGATATCTAAGCGGTGAAGGATTCATGAAATCACCTTTTCTGTTTATTTTTAATATTTT  
AATTTAAATGAACAATTTTGAAGAAATCCTTGTTACGATTTTTTAGGCTTTCAATCTTTTTTTCAGATTGTTCAATACGTCGATTTA  
TAATAAGTATAAATTGACTAATTTTATCCTGTTCAAACTTTACAGGTAATGGAATGGGATTAATTTCAATTTCTTTTACAGGCCTAA  
ATTGGTTATTGCCGACCCAGGATTTGCCTCTAGGATTTTCTTTGCAATTTGATTGCTCCTCATAAATATCAAAAAGAATTCATTCTA  
ATTTTATGGTTAGTTCTAAATCTAATAAGCGCTTGGTTTATAATCCCTTTGTAAAATTTCTGAGGAATGAGTGATAATCTCCAATAG  
TACCTGAGCAGCTCATTATTATATCATTGGTTGAACCGAAAATGATAGCATTTCATTATATTTATTTTCGCTATATAATACCTGAA  
GTTACTTATATCATAGATTGCATTCCTTTGTTCATAAACTGCATAACCGCTTCTACAAAGATATCTTTCTTTAATGCTCCTCCAAAA  
GGCCCCCTTTTATACCTTCAGTTTTATCCTTCAAACTTTTTGAAGCATTACATTTTCCCAATCTGGATAATCATTTCATTCTCATC  
CTTGAATCGCAATTCCTGTGAGAAGATTTCTGCATATAGCCTTTTTTCTGTTGTTTAAAGTAATTCAGTTTGTGTTCTTCAATTTCA  
TTGTGCGTCGAGTTTACTAAATAAGTCACCGATTTTGTGCTCTTAAATTTGATGGAACTTCACATTTATTTTCTTAAATATCT  
TGACTAACATTAATCTGTACTACCACAGCCGCTGAACCAATTTTCATATCTTTTTTTAGGTATATTCAAAGCTTCTTTGAGAAATA  
TAGGATTATAGTCCGATACCTTTTTCCCTCTAATTATAAACCCACCATAACAATGCATAATTTTATCTAAATACACATTGCATAAGCC  
AACATCTTCTCGAGTTTCTGAACCTCTTAAAAACACTAAATCTCCAAATTCACCTTTATTATTTTTTTCGACATTTTCAGGTACAGAA  
ACTTTACCAATTATACTTTTATAAGTAATGAAATTGTTGTTTAAATATATCTAAAACATTTATAAATTTTCTACCCATTCCATACTGTT  
TTTTTAGCATTTATTCCATTATTAACCTCACAAAACCTCCCTAACTTCTTTCTTCCATTGCTTCAAACCTTGGAATCTCAACT  
CTGGCAAAATTTTTCTTTGTGATTACTCATCTTTCAACACCCCAAGTTCTTTTCAGGTATGCATTGATTCTTGTTCACCTGTGCGAT  
TTCTTTGTCGATATTTTCAAATCTTGTGAGCTTGATCTAAATCAATTGGCGCTTCTTCTCGAATGTATCGACATACCTCGGTATGT  
TTAGGTTGTAATCGTTATCGCGATCTCTTGTAAATGTGCGCTGTAGCTATATTTATCAATCGTTTCTTTACGCTTATATGTGTTAATA  
ATGCGTTCGACTTGGGCATCGCTTAAA

>045-contig\_58

ATGTGGAGAATTTTGATGTTGGTGAAAATCAATCATTGATTGGCTTTATTTGAGACATTCTTTTCTAATTTATTATAAATTTCCAGCT  
ATAAACTTGTTTAACTTACTGATTAAAATACTCACCAACAATCTTTGATAAAAACACTTTTTCTCTAATTTTTATAATTCAAAAC  
ACTAAAACGATGTTAAAAATAATCTATTTTTTAGTTAATAGATAGTTAATGCAATTTTGTATTTAGTTAATTATCTTTTTAAAA  
AATATTATTATATTACATTGTAACAGTTTACAATATAAAAAAGGAGCAATTAATAATGAATACAAAATTTTTTAGGTAAGAACATTAGT  
AGCAAGTGCTTTAGTATTAACAACATTGGGAACAGGATTACATTCTTCATATTTAGGATTAGATACAAACAAAGTTGTTAAACAGC  
AAAAGCAGAAGAAAATATGACAGATGGTCAGTTGTGGAAAAAGTTAAAGATTCAATTAATTGATTGAGATATTATTAGTGGTAACC  
GAGATGAAGAAAATAAAGTAACCTATTCACTTAAAGATGGTAATTCGCTAGTGTGACTGCACCTGGAATGATAGCGCGATAAT  
TTAATCAAAAAATGATTTTGGTAGTTTAAACAAAGTTGATATAAGTAACAAAATATTGGTGAAGAAGATTTTAAACAAAGATT  
AGATGCGAATAAACTTGGAACACTTTTACTCAAAAATTAAGGATGCTGGTTTATTGAAAAATGGTCAAAAAAGTAACCATTCAAA  
CTACTAATCCAACAACATCTTCGACAAACAGTATTACCGGCACAGTAGGTGAAACATTGAATGATAAAAAATGCTGATCCATTAGAA  
AAACGCTTAATCAACAAAATCACAATTGAATAATCGCTAAACTCAAATTTCTTAATTCATAAAAACCTTAATAACTAACCCCTTTCTT  
ACAAACCCCTAGCCCATATAAATTAACGCTCAATTTTAATTCATACAGCGGATAAAAATAAAACCATTCGCGATTAACCTTTG  
GCAAGTTGGAATGGTTGAAAAATTAATTTAGAAGCCACTAGACGGCTTACTAGGACGACATGTTAGCATATGTGCTCTTATTTATAT  
TCATATAATAACATACAATTCAATAAAATGTCTAATCGATAAAACGCAATTTGATTTAAATGTAGAGGGAAATTTATGTTCTCTTCT  
TCTTTTCTCTTATTCGGCTACTTAATTAAGAAAGTAACCTACATAAAATTTTATTTATCATTTTCAGCACTAAGATTAATCCTTAATCGTT  
CTGCCACTCCATTTATTAATCCTTTGAAAAGTAAACTGCTAATTACAACGTGATAAATAATATAGGTTACCATTATCATCATCTATA

GTATATTTTCCTTCAATATATATACATAACGCGTGGCATATGTGATTGGTAAATAGAACACGAATGATCTCCAAGCACTTCTAATCC  
AAAATAGACATTAATATATAATATTTAAAACACCGGCAACAATAGCTAATATATCTTTAATAAAATGATAAATTTAGAATTAATAAC  
AAATTCATTTTTACATAAGGACTAAACTTTTTCAAAGTTTTTATAGATATTGAAGCTATTACCGAAGAAGAATGTAACACTTAAAAAAT  
TATTAGGTTTATATAATAACAATTTTATAACTACTTGTACTGAAAAATAATATAAGGATTTAAGATCGTAAAACTAACTAAGGAGAT  
GTTTAAATGCATTTGAAACTGAACGATGAAGATTTAAATTATTTAGTAAATATAAGTAAAGAAATACTTGAACAATACAATATTA  
ATTAGACGAAACTTGTAAAGGGAGATATTAACATAACATCATGTAATTCTGAATACTTTTTCACTTTAAGCTATTTTTTAAAGCCTGGA  
AAAGCAACTATAAATTTCAAGAGAATGCCGTTACAACATAGCTTGTACGTTTAAATCTTAATGACGGTTTTTCATAAAAACTCTAAT  
AATGAGAAAAATAAGGGGAAATAGAATTAATATATTTTCTGAAAAATGAATTTATACAAAAAGCTGATGGCGCAACCCATATGAAAGC  
ATATCCTTTACCTTATAATATATTTGACGATAGCTCTGATTTTGTAAAACAATTATTTACTTTGCTTGAATATACAAAACTAATCAT  
AATGATAATATTAATAATGAACTAATCTATTATCATGAGTTGGTGATACTATGCATGACAACACAATTAATCTATTAGCAAAAGACTA  
TTTTGATTACTTACAAACAGAATCAAAGTTTTATCCATTAGAAAAATGAACTATAGAATTTTATTCACCTATCGTCGATTATTTTGGT  
GATTCTATTTCTGTAAATATATCTTTTTTCAGGGGATCGATATAAACTAAGTATCATGGTGAAACTTTGTGGAACATGGAACAATTT  
GGTTTAGATCTAATAATCATAAAAAACAAAAAAGTATCAACTTCTCAATAATATTATACAAAAATACGGTCTAGTCATTGAAAAAT  
AAGCACATAAACTTTTATACAAATAGAATAGACTTATCTCAAGCCATTATGATTATGTTTGGCTATTTCGAGATTAGTTATTTGG  
GAATATTAAGAAAGAAAAATATTAAGTCATTATTTAAAGACGAAGTGATGCAATATTTTCTATCAACAGAAAGATTTATCCTAAT  
ATATTTCCCGAATTTAAGGTAGAGGGGAAATCTAAGTTAATTCATAGTTTCGAAGCAGTATTTCCAGGAGAAGCTACAGAGTATGTT  
AAAACAATTAACGAATCGATAAAAAACAATGCAAAAAATGTCCTTTTCGATTGGAATGATGTTGAAGTACATAGAAAATAAAAATTT  
TGATTCTAATGTAGACTTAATATCATTACAGAACCAAGGCGATTAACGAAGCAGTATCAACAATGTTGCTCAATATAATATG  
AGAGGTATTTTCATTTGAAAAACAAAAACAACCTGAAGAAAAGTTAGTAACGTATAAAATATCATGCCACATAGTGCATACTGTGGA  
TAATACTTTTAAATCCACATTACAAATCACTTAACTTACTCAATATGATAAATTTTCTGCTACCATTCTTATGATGAACTTTCACCG  
TCATACAATTTTAGATGCCATATATACAAAAAGAACCACGCCGATTATGACGTGGTTCCATTTTTTTATTTTTTATATGATGAAA  
GTTTTAAATAAATCTTCTGTCTCTAGTTTAGCACCTGATATTTATCAAAACATTCTATGTTTCACCTACTAAAAATCATCATGTTTGT  
AGATAAAAAATTAATGCTATGATTTAGCCGAATTAAAAAACATATATACTTATTTACTATGAACTAAAAAGTTTATCCTAAAAATAAA  
AAACCATGATTTTCAAGTCTTCATAAACTGAAGCTTCTACTCTCATGGCAATTTATACTATGATATTCAATTATAATGCCTAGTCTCA  
TAGTAAACGGCTACTACATTCGCATGTACTTCGTTTTACTGTCCACGCATGTTTCGTTGACTTATTTATATTATAATATAAATATTTGT  
TTTTCAATACTTAATTTTAAAAATCCCCTATGAAAATGTTGATGAGCTGCATCTTTAAATCTTATTATACATTTGTAATGAAATTATATT  
CGAGGTTACTAAATGTATAATATACACTTTTGGTTGTATGCATCTCACCTATCTTTTTTTGCTTTTTTCAATAAGAAAGATTATAA  
AAATTAATGCCTATACAACGTTAAAGGAGGAACAGACATGGCTAAACTCGATTTAAATAGTCTTGACGACGAGCAGCTAAATTTAT  
TAATAAATGAATTAATAATATCCAGAACTCATATCGATGTAAATGAATTAATAACAATAGTTGCTAGTCAATAAATGAAAGGCAA  
GAAATAAATAGTTTTAAGTTAGGAATAAAGTACTTATTAACAATAAAAAAGAGGGAACATAGAAAAAGATAGGTTTTCAATTTCAAT  
CATTTTTAAAGATACCTATCACACCTAGTTAGAATAGATATTAACGGTGGTACTCACGATAATCCAGATGGAACATTTCGCTCCGAA  
AAGTCATATTCACATATATAATGATAAGTATGATAAAAAAGGATAGGTTTGCCTATGAAATTAACCTTGAAAGATTTCCCCGACATCTA  
TAACCTTGATAATGTGTATATGTCGTTTTTAGAGTATAATAATATAAAAGACCTTGAATAAAGGAGGGATAATATGACTACATTTGA  
TGCTAAAAAATTAATAAAGAATATCTTGATTGGTATAATCAGACCTTAGAGTTTCTAATTTATCAACAATGTAGTAAGAATAGA  
TACTCCCTTTTAAAGATAATCTTTAGATAATTTAATAATTTACGCTTTATACGATCAGTCCAGAGACATGATTACACTGACAGATGAC  
GGCTATACTATATTTGATTTAGAAAATAATGGTATTTTTTTAAATAAATCAAAAAAACATAAAAAAGATTTTTGAAAGACACCTTTCA  
GCTTACGGTATTAATATAACGATAAAACTCACGAAATTTTTGTTCAAACCTAACTTTAAAAATTTTAATAAATCGAAACATAATTTA  
TTACAGTGCCTTATATTTGTTAATGATATGTACTTACTTTCTAATCCTAAGTACAGAACATATTTACAGAAGATGTTGCAAAACAAAT  
TGGATGAACATAACATTTATTACGGAAGAGATTTACCTATTATAGGAAGCAGTGGTGTGTTTCATAATTTTCGACTTTTTTATTAGCGC  
TAAGAAAAATCAAAAAAGAAAAATTTATCAATGCTATTTCTAACCCCTAATAATTCTATGATTATTAAGTCGAAAAATACCGGATGCTAT  
GCAAGCAAAAAAATAAAAAAGACACAGGCAAAATGAGTTTATTTTTATTTTAAATGACTCAAAAAAGAAATAAATGAACATAAT  
AAAAACCTTCTTCATGAAAACTATATTAGTACTATAGATTATAGCGAATTAGACGAAAAGATAGGTTTATTGATTTAATATTTCTGG  
ACGTGATAATCTCAATTTTTTTTAAATAGAGAAAAATTTGACAATTTCAAAAACAGATTAAAGTATGCAAAATTGCATGAACCTTATTGA  
TAATGCAGAATCGTCTACAAATAGTTAAACAAATTTTGGAGAATAATTATGTTAAACTATATGGGTAGGCGATTTTATTTTGACA  
AGAGACAGAAGAACATATATTTAAAGACTTTAAATTGCAAATGGTTAAACTTTATGAAAAATGGTAAGTCTAGATACGAAATTTATACG  
CGAATACGATTTAACACTCTCAATCTTCTCGAACTGAATAAATAATGGGTCATTCAATCATCAAGACAACCTAAATATGTGATAAAAA  
ATGGTCAAATCATTTTGCAAATTTAAATAGACACTCTCAATAAATTTGCAGAGTTCAAAATTTAAAAATGTCAACATTATAGTAACTA  
ACATAGTCCCTGTTTCATATCTTCAATATTTAAATCTTATCGAACAAATAAAAGCAGATAATTTTTTAATTTGAACGTTTTATTTTA  
GAACAAAAAAGAGCAAGGTTAACGAGTCAGAAAAATCTTTTTCTTGATACGTATATGACACTTGCTCTTTTAAGAATCTGAATATTTT  
ACGCTATTTCCATTAATTTAGCGGAGAATGAATGATATCTTTATACTAATAAATTTAACTTTTTAACGTATAAAATTAATGCATTGTA  
CTAAAGTTTCAATTAATTTTATAATTTGTATGAATGAATCGTATACACTAGTTAGTCAAAATCTAAGAATTTAGATATTTGTTAATTTTA  
AAACTATCGATTACATATAATAAATAAAGGAGATAACAGCATAGGAGATTACTCAGTCTATTACTAGTACATGATCAATGATTTTATGTC  
GCATGTGGGAATGCTAACATGAAAAATAAGAAAAAGGAAGCAGAAAAAATCAGAAGTAAAAAAGAAAGCTAAGAAAAATAAT  
GATAAACCAAGAACGAAAAGAAGAATCAAGATATAAATAAAAAACAATAATGAGCAAGTTCAAAATGTCAATAATAAACAACCCAG  
TCTTAAATAATAATAGTAATCATAACAATCAACAACAAAGCAATAAAAAACAATTACACAGTTATAGAAAACGGGAATACAGTTACA  
GAAATTTATAATGGACAATCACACACAACCTACAAATAACCCTATTAGAGAAGAATATGTAGAGGGAGAAACAGACACGATATATA  
AAAGAGAGTATAAGCATTTTTATACACCTGAAGAAGCTCAAAGAGCACAAAGAAAAATAGCGACCAAAATTTTAAGAGAAATGGGTCT  
CGAACCGAAAAGATATGAATAAAATCAAACTAAATAATTTCCGGTAGCCCCCTACCCTTATTATTTTTTGTCTAAGAAGTAATAAT  
TATATTTCTAATATGATTAGGTTTCGATGTTAATGGTATGATCATGCAAAATGCCAAAATGAAGAAATACCTACGCCACATATA  
CACATATATACTGAAGAATATAAATAATGGTGGTATTGCGATTCTCAATAAAGCAATTTGAAGATTTTAGAATTTAGAACAGTGAATTTATA  
GAATCATTAGACTTCTTTATGAAGTATACTAATATAAAAAACAGATAATGTTATAATAGAACAAAGATTACTGTAAAAAGAAATGGAG  
GGATACTTAGTGAAGACAATCGAAGAAAGAATGAACGAATATTTCAACTGGTTAAAGCAAAATTTATATCTTCAAGAATTAGATAG  
TTCTACAGAAATTACTACTCCCTTAAAGAACCATTGGAATGATTTTATTAGAATATATGCTGATACACTACCTAATAATGAAATTTGT  
CTATCAGATGACGGATTGACGATTAATGAATTAGAAATGTTGGGTATTGATATAAACACAAAAACGAGAACTAACTTATACAAAA  
TATTTTTAAATCAATTTAATTTAAAAATTAGTTGATAAAAGAAATTACAGCGGATGTTAAAAATGAGAGTTTTGCTCAGTCTAAACATAA  
TTTAATTCAGGCATATTGAAAAATTTATGACCTTACTTTAACTACTAAATCTAACGTTACAAACATATTCTATGAAGAAGTATTTGAA  
TTCTTATATGACCAAGAAATAAGAGGTTTAGCAAGTTTCTGTTTCTGGAGAATCAGGTTAAAAATATTTCTATTGATTATATTGTTT  
CTGAAACAAAATCACAACCGAAAACTAGTTAACTTTACAAACAACCTTAGATTTCACAAAAATACTAATGAAGCTTATATTAT  
CGTGATATCAAACCAACAGACCATCCAGAAACAAATTAGAACCTATCATGTTGATAAATGTAAATGATGTAGATCATCCGATAAA  
TGAAAGAGCACAACTGTAGCAGAACATGAAAACCTTGAGATATTAATAATGGTCTAATAAATCAAAAAATCATTTGAAACTTTAACCT  
CATAAATTAGCAGTAGTCCCTTATTTATATTTCTTAATTTCCAAACCATATCGTGCAAAATAGAAAAGCAGATAACTTTTTTATTGCA

CGTTTTATTTTAGAACAAAAAGAACAAGGTCAACGAGTCAGAAAACTTTTTCTTGATACGTATTTGACACTTGCTCTTTTAAGAA  
AACTAACAAATTCATTGTATTTCCGTTAAATTAACGGAGAATTCGGATTACCTCGATAGATTTACCTCTAGAGTGTTAAAAAATTGTA  
CATTTCTTAAACAATCATAAATGTACGTTATTAATTTATCATTTCCACTGGAGAATCATGTGCGACTAAAAAGATTATAAAATTTAAAAAT  
ACATATAAAAGCACGTCATTTTCAAACCGCCATAAAACAGCATTTTTAAACCGCTATTGACATAAAACATATTTAGAATAAATCATT  
TAGAAAAATTAATAATTTAACC GGCAATAAACTAACTATTTACATGAATCTATAAAACACTTAGAACAAAAGTTTGGAAAAACGCA  
CTTTATGATTGTATAGTGATATCAAATATACTTATCAGTGAGTATTAAGAAATACTTCCATTTTAATACTCTTAGAATCAACAACCTT  
ATTATCTCCGTAATATTTAAAACTTATATGGAACAAAAGGTACTAGTTCTTTTTTAGGAAATAAGTCAAACCAAAAACTTGATT  
GTTCTTTTCAGTAAATTTTATATATCCAGATTCAAATGCAGAACCATCAAACCTCGTATAGCTTTTTTCTTTAGTGAGCTAGTGTCTTG  
CTTTGTAATCTAGTTCTCGAATAGTAACCATAATCTTATTTGTAGTTATTGTAATCCAAGTGATTGTCTATTGTGCGATTGTTACCTGT  
ACAGTAATTAATTTATCTCTTTTCATTTTCTGAACTATTAATGTAAGACCACCATACATACAACAACCTCCAAAATTTTGGTTTATAT  
CCGGTTCAGATTTAGGTATTATACATGTATAAAAAATATGGAACGCCAAAAATGTCTACTTTTTTATCTTTATAATTGTTAGCTAATTC  
TGTATTTTCTAATTCAGTTTAAACCTCATTATAACTCTTATACTCAATTGGAAAAATTAATCATGAGATAAAAACTGTCTAGAATTA  
ATAACTCCTCTTCTTCAACAGGTGGAGACGTATAAAGATTCAATTACATTACCCATAGTTCCTTATTATTTTTATAATCACTTACTTT  
ATTTAGTTTCGTCTAATTTAGGATCGGGTTGAGCATTACATAATTCATATTATGAAAACTATTTCTAGAAATCAAAATAAATAATTAC  
AGTAGATAATTTCTTCATAAAACCTCCTCTAACTTATTCAGTCTATTTGACAATGAACCTTATTATAAATTCACGCTTATAGATAGTT  
CAGGTGTAGTGTGTCGATAGCATTGTTTTAAACCTAAAAATTCAGTACGAGAATAAATTAATAATTCATTTATCATTATTACTAATT  
ACAACAAAATATTTGAATCCGTATTCAAGATAATATATAAATTTCAAATTTTACTACAATTCAAATCATTTCCTCTCATATAATGG  
TTTAATTTTCATGATTGAGTGAATCATCAATCACTTAATCTTTATATAAAAAATACATCAATATGATAAATAGATGAGCTAAGTGT  
CTATTATCACTATAAAAAATGAAAAAACTGTCTCCCACTGAACCTTTTACGTTATATAAATCATAAATAAATGATTGATCTTGATGAT  
TATGAGAATGAAAGAAAATGCATCCTTTTTGTATGTTACCGGTATCTTTATTGTATATTTTATATAAATTTTCTAATTTAAATCGAAC  
TTTAGTGTCTAATTCGTACTGTTACTTTAGCCTTTTTGGTTTTTATAACAAAACCTTCTTGTGGACACCATCTTAAATACATTAA  
CGCCTATAAATTTCTCTTCATCTAATTGATTTCATCATGTATCGTAACTCCTCCGTATAAGCATGATGTTTTTCTTCAGTTAAGCCT  
ACACATTTATTTCCAAAATACAGTCCATAAATATCTATATTTTCTTTAAATTTGATTGCTAAATCTGATGAGTTAACTCAACTTT  
CAAAC TAGAAGTTTAAAGTACGGATATATCAATATTTTAAATATTATAGTATTATTCAGTAGTTGATCTGTACTAATTTTATTTGAC  
TCGTCTAATTTGCCACGTTATATCAGTATAATAGCTTGTTAAATTAATAAATTAACCTTACTACTATCTAGATCAGATTTTTTCTTTAAATCTTT  
TTTGTCTACTTCAGCATTAACATAATTTATTAATAAGACATAAATAAGTTATTATAATTCAGCTATGTAGAACAATCTCATAAGC  
TTTTTAATATTTTTTATAATATTCTCTCCCTCAATTTATTTTTGGTTAAATGAACCTTCTACATTAATAGATTTACTCTCAACTGTTTTAT  
TATCATTATAAATTAGTAAATATTTAGTCGGATAAAAAATTTTTTACCAGATTTCAGGCATCAAATCATACCAAAAAAGAATGACCACTTC  
CTTCGATAAACTTTATATAGCCAGTCTCATAAGGCGAACTGTTAAATTCATATAAATTTTTATGCTTAAGTAAATAGTTTCTAATCTTT  
ATAATCTATTTCTGTGCTGTTATGTTTTCTTATTAGTAGGTATATCAAAAGATAATGAATTTCTCTCGTTTTTCATAAACTTTAATTA  
AGATATTATGAGAGTTATCAGTTGAATTTATTTTATCTATTTGATTTCATCATGCTCGGTACACCGCCATACATACAGTTTTTTTCA  
ATTAATCTACCATCATTTAATTCATATTATCCGATGAAAAATAGCATTGATTATAATAGTTTGTCCCAACAAATCTACGTTTTTAT  
TTTTATATTTATCCGAAAGGCTTTTATTATTAAATTCGTTTTTTAAATTTTAGAACCATTTATTTTAAATAATAAATCATGTTGTAAA  
AACTTTTCTGGGATTTAATGTTTGTGTTCTGATACGTGTTTATCATCATACAAATACCTCATATTATCCATTAGACAGTGAATTCAC  
CGTTTTATTCAATTGTCTGGTTTAGGATTGCCATTTAACATAAATAGTAAGCTGCAAGACTTAACACATTAATGAAGATAAAAGCAAA  
TAACTTCATTACAACAACCTCCATATTTAATTTTTTATAAATTTGATGTATTACAGGGAATATTTAACGTACACATTAGCCCTAGAGA  
CTTTAAAAATTTAAATAGTTAATACATATATTAATTTTCGTATAAATTCGCATTTTAGTGTTAAAACTAATTATCATTAGTTACTATCTA  
CATATGATATTTTCGACATCAAGATGAAATTTTTCAGATTCTATTATTTTATTATCTTCATAAATTTTCAAAAAAATTTACAGGCAGTCC  
ATCTCCTGTATAAAACAAATCATATGAAAATGATTTTTTCATTATTTAAATGAAATAAAACCTTCCCATTTATAAAACCTGAATAAAA  
TTTAGATTTATATCCATATTTCTTGGCTTTACCAGTGTTATTATGACCATATATATTGTATTCTTCTTGAAGATATCTCCTTAATTTAA  
CATCAATTTCTTGAGCTGTTACTAGTTTTTTATTAGTTGCTATTTTGTGTCAGTAGAAATTTGTTTTATGTTTGCCATTAACCCAAAGATTA  
ATAGGGATTTTTCTAGCAGAATTTAAGTATTGTCCTGATAAAGTGGCCCTCCAAACATGTATTTAGATTTACAAGGACCATATAA  
TCAATGCCAAAAATATCCAGTTTCTTTCCTTTAAATTTACTTATTTTCGTCCTCAATTTATTAGATTCTGAGATTCAAATTTGATGCGAAGATG  
TGAAAAATTCGAGTTGATTGCAATAGGTAGATTTTTATCTGTGACGCTTTTAAATCTATATAATCATGTTTTGTATAGAAATTTCTT  
AAGTTACCTACCCAATATCACCTTGAGCATACGTAAGATCTTTAATGTTAAAAAGTAATATAAAAACTAATATAAAAACTATATTTA  
AATTTTTTTCATGGCATTTCCTTTACTAAGTTATGATTGAAATACTTCAACTTTTCGTCCTTATAAGATATTTCTACATCTAAATGGAATT  
TTTCAGTTTCGACAGTTTTGTGTGTCATTATATATTTTAAAGAACTTTTCAGCTTGTCTGTTCCAGTATCAAATAAGTCATAAGAAAA  
TGATGAACCATCATTCAAATGAAATAATATTTTCTGCAATTAATCCGAACTAAATTTTGACTTATTACCATAATTTCTTCTCTTA  
TTTGATCATTTAAAGCCATAAATATTATATCTTCTGTAGATATCTTCTTAATTTAGTATCAATTTCTTGAGCTGTTACTAATCTTTT  
ATTAGTTGATACTTTGTGTCAGTAGATATAGTTTGATGTTCTCCATTAACCCAAAGATTAATAGGAATACGCTAGATTTCTCTAAATAA  
TCACCTGCTAATGTAACCTCCACGTATATATATTTGTTTTCAACAATATCCACTATAACTTAGACCATAACATCATACAGCATGAT  
TTTTGAATTTCTTTACATCATCAACGTTCTTAAATTCAGCTGTTATTGTCGAATTTCCATAGAAAAAACTAATTTGATGCGAAGATG  
ATTATTTTCAGGATTAATACTTTTGGTGGTCTTCAATTGGATAGCTACCATAATAGTTTCTAAGATTCAAAACTCCGACATCAGCGGTT  
GCGATATGATTTTGGCAATAGCAAAACAATAAAAAACAATGATAAGTATTCTTTTCATATTTTATTTCCTATATTTAACTTCTC  
TATCTTTATTATCTTTTATTGTAAAAATAACCAATTCCTTCTTAAATCATCATGATTCTATCCCCTTATATATTATTACTCGTTAATCT  
GGTTTTGTATCTATACTAAAAATAGAAAGCTTTTTATAGTAATAAAGTTAGATTGAAATCACTATTTCGTTCTTCATCATTTACTAAGC  
TACTTTGTAAAAATATGTTAATATCTATAGTTCTTTATAGGATTGTAAGTTGATATCCATCAACTTTCAGATTGTTATGTAATAAAT  
AAACATCAATATGATAGTCTGATGAATCTATTGTTTTATTATCATTATAAATTTGCAAAATATTGATCTGGTAAATTTCTTTAATATA  
AAATAAAATCATAATAAATGATTCTTTATGCTCCGAATGAGAATGAAATTTAATAAACCCTTTTGTACATCATAGTACTTCTGTC  
TACAATTTATATGATTATTTAATTTTGTCTTAAATTAATCAAGTCTTGTGACGTAACCTTTCTTTTTATCTGTAAGTAAACGATAAA  
TGTATTAACATTTACATTATCTTTATACACAGCTACTCCTATATTTTTAGGCTCGCTTAATTTATTATTTTTCATGAGGTGTTACCCAC  
CATATGTACAGGCAGTATCCACTTGATGCTCACCATGACAATGTGCTTTATAGTAAACACCATAAATATCAACAGTCTTTCTAGAA  
ATTCTTTAGAAATCGCTGATGAGCTAAATTCACCTTTTAAATCTTTAAATTCAGCAGATATTCATCTAACCAATTAATACTTTTAAA  
TAATAAATCGAAGTCTAAGAATTTTCTGTAGTTGATACAATTGATTTTACTGTGTAATCGATTATTTATATAATCATCATTAAATA  
TTATGTAAAGCAATAGGGTCTACACTTGACTTCTTACACAAACTCTCTATTTTAGGATCTTCTTCATTTGTCATATGCATTGTTACACT  
ACATATTGCAATTAATTTAAAAATTAATAATAATACATTTAACATTACTTTACTATTTTAAATAATATCCCTCCTTCACAAAAATTTTT  
TCTTAATAAACTGAAAAATCTGTTTTTAACTTTTAAATATTCATAATATTATAGATTACGATTTTAACTTAAACATCCTACTTAC  
TATTGAACAAAACAAATTTTAAATTAAGTGACTCAGATAATAGACAAAAAACTTAAAAATAGCGCTTAAATGGGTAAACACCTTT  
TAAGCGCTATAACGGAGAGTGAGGGATTGCAACCTTCGAGACGTTGTGGCGCTACACACTTTCCAGCGGTGCTCCTTCGGCCAA  
CTCGGACAACCTCTCTCAACAATAAATATGTAATAAAAAAACAGAAGCGATATTTCACTTCTGTTTGTATGACTCCTACGGGACTCG  
AACCC

GGGCGGCTGAAGGGGATCGAACCCCTCGAATGTCGGAACCAATCCGATGTGTTAACCCTTCACCACAACCGCCATGAATTAAGA  
ATGGTTTCAGGACAGAGTCGAACCTGCCGACACATGGAGCTTCAATCCATTGCTCTACCAACTGAGCTACTGAACCGTAATGGTAATA  
ATAATGGCGGTCTCGACGGGAATCGAACCCGCGATCTCCTGCGTGACAGGCAGGCGTGTAAACCGCTACACTACGAGACCTATTAA  
ATTAAAACTATGTATTGCGGGAGGCGGATTGAACCACCGACCTTCGGGGTTATGAGCCCGACGAGCTACCGAACTGCCTCATCCC  
GCGCTAATATTATTTGAATTACCTAATTAATATACCATAATCAAAAACCTAAAGTCAATAAATTTTTGAATTTAATTTAAATGTTAT  
CTCTTAAATAATTACTTAAATATCGTAGCAACATGTTCTCTGTTGAACACAAATATTAGTATATTCATTTTTGTAGTGTACGTCAACG  
ACATTTTCAAAGTTTTTGTGTAAAAAACGCTTCTTATTCCTTTTATCATATAAGTGTCTAATAGTTGTGCATAAATAGTGTAAAG  
CATTTAAAAAAGGTATAGGAGTTATAAAGTTTACAACGCCTATACCTTCTGAAAAAGAAATTATAAAGCTTGTTACACCGCATATTC  
TTTCAGTCAGCGACTACCAATATAACATTGTAGCCCTAAGACATTGCTTGACGCCTCAATTACAACAATTTTTCAAAATCAGCAGCT  
ACCTACTGACACAACATAACACAACCCATACACTAACTATCGTGTATGTAATCTTGATCCGATCTTGCAACGCTGTAAATGTTTC  
GAAGCCATCCTCTTCTAAGAAGTGCCCTCCATCTTCCACGATTGCGAAGTTCCTCTAATGCATTCAATTAACGCTGGGTTCTTTA  
TAAGAAACGTATTTGTCATTTTTAGAACTCAATCCGTAAAAAATTGTCAACTTCTTTTTAATATTATCGTAATCAATGGTTACATTAC  
TTAAATCAATATCTAAATCTATATTTTCTGCATCTTCTTTAAAGCCCGCTATACTAAAAAAGCCTTCAATCGGCTGATCAATCATTTT  
AATATATTTTAAAGCTGTGATTGAACCTAAACCATGTGTTACAAAATATGTATCCTTTTTGCGTACATTAATTTGTTTCGTCATAGCT  
TCAATCCACTGATCCACTGCTTCTCGCTTACAGGGGATTCAAAATTAATAATGTTACGTCATATCCTTCTAAAGTTAAGTTATGCTCCA  
ACCCTGATACCAATGATTTCTACTATTTCCATGCATAGAATGTACAATAATTACATCTGTCATCTCATTTCTCTCTTCACTTAACTACTA  
CTTCTTTTCTATTTTTAAAAAATGACTGATTACCTATAATTGTAAAAATAAAAAACCTTAATTAGAAATGTTATATCGCAAAAGTGAC  
ATTTCTAATTAAGTGTATTGTATCATATTTCAATATCATTTCAAAAAACAGCTAAACCTTTGTCTCTGCTTCAATTTACAAAAATAATT  
CCCGCTGAAAGTATCTATATTTACACACTACTTCTACCATCATATAACTTAAATGACTATATTTTCATCAAAACATTATCTAAAGGCGT  
CGCACCTACACCACACCATCCAACAATTAACCTACAACCTGCGGATTCTTCTCAGCAGCAACTTTACCTTGCGTAATACAATCAG  
GTAGTCCAACCGCTTCAAAAAGATGCACCAAGTTACTCTAAGTCGTGGATATGTTTGTAAATATGTGCTGAATCTGTCTAATTTGTG  
AATATGACCGACATGGTACTGTGGCATACTTTTCGGCAACGATTGACAATTGTAAATTCAGGATCACCTTTAAATGTATCATTTG  
ACTTAAATCTCTACGTACAATCGATACTAATTCATTATCTGTATGATCATCAACCACAGTATCACCTGGTTTACCTACATACGCACGA  
ATCAAAACCTTACCTTCTGGGTAGTAAATGGCCATTTTTTCGATGTCCAAGTACATGCGGTAATGTCTGTATCACTTGTCTCGCAA  
TCACGAAGCCAGTACCATCATAAGTATTTCAATGTCTTTTTTCATCAAAATGCCAATACAACAGTTGCAACAGTCGTACTATCCATCGT  
TTTAAAGTAATCAAAATGCTGGATCTTGCCCGAACCAATTCAAAAAGACTTGATGTGGTGTGTCATAATTTCCATCGAATACATC  
TTCTTGTGATTACTGTAGACAATTTTATATTGCTTTTGAGATGTAATAATATCATCCACTGACGATTGTAGCGTATTGTACACCTT  
TATTTTAAACATCTTGTCTAATGCTTCAATAAATGAGCTTAAACCATGCTTAAATTTGTTGAATTGCTCTTTTGGTGCGCCAGGATA  
TAATTGTCTTTGTTTCAGACGCTTATTTTCTCATCTTTCATACCTTTTATCAGACTTCCGAATGCCTCTCTTTTTCTTTAAAAATTAGG  
AAACGTACTCATCAAACTTAATTTATCAATATCGGTACCATAAATACCACCCATTAAAGGCTCTATTAATTTCTCAAGTACCTCATT  
ACCTAATCTTGCTCTGAAAAATGCACCAACAGAAATGTCACCATTCTGCATTTGAGTAGGTTTTTTTAAATAAATCAAACCTGCTCTT  
AATTTTCCAAATGGTGAATTAATTTAGTTGTCAACACGCTTGTATATCTGTCGGAATTCCTCAATATGATCCACTGGAATAGGA  
TACAATTTGTTTTTCGCAAAAAATAAGATTGTCACGCTGATTGTGTAATAATATCTTGTCTTAATCCAATATCTTCGCTAATCTGT  
CATGATTGTTTTTCTACCTAAATAAGATTACAGGCCCTAGTTCAATCATATAACCATCTTTACGATACGATTGAATCTTTCCCCCGGA  
CGATTGATGCTTCAAGATTGTTATGTCAATATTAGGATCCTGCTGTTTTAAAAAATATGCACTTGATAAACCTGTGATCCCCGCTC  
CTATTATAGCCACTGATTTAGTCACAACGTTTCACGCTTCTTTCATAATTAATAATGGAATTTATTTTCATCAACAATTGCACCGATA  
AATAATGGATGTGATTTCGGCATTTCCGGTCGATAAATTCGCACCAATATCATCGCAACAACCTTTACATTCATAATCATTTGTCAT  
AAAGCACCTCTAAATGCTCACATACAAAACCTACTGGTGTATATATAAAGTTTATATACTGATGTTTTTCATATAAATCACGTGTTAA  
ATCTTGATACATCTGGCCCTAACCAAGGTGTACCTGTATTACCTTCAGATTGCCAACCAATCGCGATATGTTCAATATTAGATTGTTCT  
TTAATTAAGGTCAGTATGTTCTAGTTCTTGTGGATATGGATCATTATCTTTTCGATTAAACCTTTTGGCAAACTATGTGCCGAAA  
CAACTAATACCGTGTCTTATGTTCTCTCCGGTATTGAGCTAATGTTCTGTTGACTTTATTCGTTCCAATATTCATAAATTTAGGT  
TGTTTATAATAATGTTTACATGTGTAAAGTTGAATACCATATTTTGCAGCTTCTTCATCAGCACGTTTGTATATGATCTCTACTGAAA  
ATGAAGAATAATGTGGTGCTAGTACTACAGTAATGCTTCAGTAATGCCATCATTGTGCATTTGTTCAACCGCATCTTCGATAAATG  
GTGAAATGTGTTTTAATCCTAAGTATAGTTTAAATTCACATCTGCATATGCTTTATTTAATGCTGAAACTAGCGCATCAGCTTGGTC  
ATCTGTTGTACCTGCTAATGGTGATAAACCACCTATAAATTCATATCTATCTTTCAAACTTGAAAGTTCTTCTTCAGATGGACGTTTA  
CCATGTCTAATATCTGTATAATATGGCTCTATGTCACTTTCTTTATAAGGTGTGCCATAAGCCATAACTAATAATCCCATTTTTTTAGT  
CATTGATAATACCTTCCTTTAAATGAATTATCTTTTCATGTGCTTCAATGTAATACTATGATTATCTTTGTGTATATGTGTGACGAATT  
CGCTTACTTTACGTAACGCTCTGCTGTTGCACTTCTGGGAAAACACCGTGTCTTAAATTAAGATGTGTTTACCGTTCTCCATACCTTG  
ATCTAATATTGTTTCAATCTCTTCAATGACATCTCCATGGTGTCTAATAAATGATGGATCTAAATCCCTGTAATGTTTATGTA  
ACGCTAATATTGTTGAGCCTGATTAATAGACGTTCTCCAATCAGGCCAATACATCAATCCGGTAATCATTCCATTATGATTAAT  
GACTGGCACCTACACCGAATAAAATACCAGGCACATCATGTTTTTCTTTAACTCACTGATTAATCGAATCATATGTGGTTTAAATGTA  
ACGCTGTAAATCTCGACATTTAATGCACCTACCCATGAATCGAAAAATTGAATCAATTCGGCGCCTGCTTCGACTTGAGCTGTTAC  
ATATTTAACAGATACATCAACTAAATGATTCATTAAAGCAAAACCATGTTGCTTCATCTCTATACATCATCGCTTTTGTAAAATTGTAA  
TTTTTCGATGGTCCGCCTTCAATCATATATGACGCTAATGTAAATGGTGCCCAAGTAAATCCTATTAGCGGCACATTTAACTTTCTT  
CTGTTAAAAAGTTTAAATGTATCTAATACATATGGTACATCTCGTTCCGGGTCTATTTGAGAAAGTTTCTCAACATCTTGAATGTTTT  
GATTGGATTATGAATCACTGGACCAATACCCGATTTAATTTCTACATCGACCAATTTGGCTTTAATGGTGTGATAATATCTTTGTAT  
AAAATTGCTGCTGATGATAAATATCAACTGGTAAATGTGTTACATAAGCGCACAACTCCGGCTGATGTGTAATATCAAGTATG  
GAATATTTTTCTTTCAATTTTCGATAATCTGTTGCGAACGCGCCACTTGTGCGATAAACCAAAACAGGTGTATGTGATGTTTCTTCAC  
CTTTGATCATTTTTAAAAATTGATTGTTTTTATATGACCTTAAAGGCCCTCTAAATTAATAATCATTTCTATCTATATTATCATATCG  
CTCATTCGTTTCGATTTTTCAATAAATAAATGTCATAAACTGACATTTAATCATAGAACTATTTATTGTAATTTAAATTTCTAAAGTC  
CATTATTTTGTATCATTACTTCTAAATATCTCGCAAGATTCAATTATAGTAATTTAATCAATTATTAATAGTGGTAATGACTAGTTTAT  
CATCGTATAATAAATAAAAAACATAAGGGGGACCTTTCATATGAAGAACTATATACATCTTATGGCACTTATGGATTTTACATCAG  
ATAAAAAATCAATAACCCGACCCATCAACTATTCCAATTTTCAGCATCAGATACTTCAGTTATTTTTGAAGAAACTGATGGTGAGACT  
GTTTTAAAAATCACCTTCAATATATGAAGTTATTTAAAGAAATTTGGTGAATTCAGTGAACATCATTTCTATTGTGCAATCTTCATTCAT  
CAACAGAAGATCATGCATATCAACTTGAAAAAGAACTGATTAGTGTAGACGATAAATTCAGAAACTTTGGTGGCTTTAAAGCTAT  
CGTTTGTAAAGACTGCTAAAGGTACAACATACAAAATTTATTTCCGATTTTGTGATCGACATGCATACGAAGACTTTTAAAGCAATCT  
GATGCCTTTAAATGACCATTTTCAAAAAGACGCATTAAAGTCATTACTTTGGTTCAAGCGGACAACATTCAAGTTATTTTGAAGATAT  
CTATACCAATAAAAGAATAGATTGGAAGAAACTTCCATTGGTTATGTCTGTTAACGTATAGATGCTAATGTAATCTGAACGCCGTA  
TCATTTGGCGTTCAACATTACATGCACCTTTACAACATACATGCCAATGGAAGTTTTTTAGTCTCGTAATAATGTTTCTGATATTTT

AAC TTTT TTAATAA TACTTCTAATCGTTAATAAACCTACAATATAGAAAAATGAGTACAACATAGAATAACGTCATATGTTTTATAATA  
AATGTCAC TGC AAAACACAGTACAAATAACAAACATTAATCTATATAAAAACTGTT CATACCC TTTGATTACCTTCTCTCAGGTACA  
GGCCACACTT GAGGCCATAAGCCATATGCTTGCTGTGAATAAAAAATTGTGCCATTTGTAACAATATAATATATACAAAAAAACACCCA  
ATAATTGCTGTCACTAATGGATATGATAACCAAACCATTAATAAACTGCAATAATTACTAACCTAAAGATAATATTAATGCGTCT  
CTCCCTCTTATAAAGCTTCTAATAAATAAGAATAAATACATCGCATTAGAGTTAAATTTACTACCC TTTGGAAGTGGTAAAAAGTATA  
TCTAGATAACTTCTCTGACTGCGAGATTCTTTCAAATGTTTTACATCGGTGAACATATTAACAAATTTATAATAATTCATATGATGTC  
GATGTTGCGATTGCAATCATTTTCTCCCAAGGATACAAAAAGCCTGGTTTATATTTTAACTAAAAATTTCTATTAACACAGGCAAAG  
CAACCATCACAAATGCGATGTACCATTTTGGAGCTAATAGTAAGTAATATGTTAGAGCAAAGGTGATGAATGATATTAATTAACCT  
GCCATGTTTTAAGTCCCGATTGATACCATTTGCCATCTTAAGCGTTAAACCAACATATGGAAAAATTAATGCACTGACTCCAAAAACAA  
TATAAAATGCCACATTATGTTGATTAATATTGTAAAAACAACGGGAACATTACAATAACAATAATGAGTTGGATTAATATGCGCGCA  
AAGTAACTATATAAAATCGCATGACGCATAAAATTGAGACATGTGTTTTTCAAATGGTAATAAAAAAGATTTTATCCGCTTCTTTAAC  
AGTGGTCGCATTGGAAAAATAGATGTCAACGCAACAATCACTGCTGCTATTAATGAAAAATTGATATTCGTTGGAATATGTTTTAAC  
CATTCACCATATCCAAAAATAAATGCACCCAGCAAAAAAAGTAAAAAGACCATGAAATGACCATTAAATATAAACTTATTATAATA  
ATTTTTCTCTTTACGAAGGGCATGTAATCTTTTATTAATAATGTGGTGCCTTGGTTATGCATGTACATCTCCACCTTGCCTGCACATG  
AATATATATATCGTCTAATGTTTGTATGTAAGCCAGTTTGTGTCTCAATGCTTCTAAATCTCCAAATGCAACGACTTCACCTTCG  
TCTAGTATGATAAAACGATCACAATAACGTTTCAGCTGTTGCTAAAAATATGTGTACTCATTAGAACGGTTCACCTTCGTTTTCTTTT  
CAACCATTAATCTAACATGGATTGAATTCCTAATGGATCTAGGCCAAGGAATGGTTCGCTATAATATACAATTCGGGATTAACGA  
TAAACGCACAATAATCATGACTTTTTGTTTCTATCCCTTAGAAAAATGACTCGGAAAACTTTCAATTCATTTTCTAAACGGAATG  
TCTTTAATAATGGCATTTGCTCGATTTCATCGCTTCATCAGCATCAATATCATATGCCATTGGCAATTGCTGTCATCTCAATGTTCTCTAATGTG  
AGTTCTTCATAAATAACCGGTGATTCCGGAATATAAGATAACTTTCTCTATAAGCCTCTATGTCATCATTAAATGTTGATATCTGAAA  
TTGATAGAGATCCTTCCATAGGTGTAAGCAATCCTAGCATATGTTTAAATCGTTGTACTCTTACCAGCGCCATTAAGGCCAATAAGTC  
CAACGATTTGCGCTTTGTTTAAATCAAAATTTATATCTTTAATTACAGGGCGTTTTCCATATCCACCTGTAAGCTGTTCTACTTTAACT  
GTCATAAGGCACCTCCATGACTTATATGTACCAAAAAATTATAAAATGCTCATATTAATAACACATGCTCTAATATCGAATTTTATAG  
CGACAATGTTATAATGAATGGTAATACAAGTTGAAAAGGAGTGTAGTCATCATGTGCAAAAAAATTTTCGGCAAAAAATTTAACTGG  
AGAAATTCCTAGCTTTAAAGTATATGAAGACGATTATGCTATGCCTTTTTAGATATATCACAAGTTACTAAAGGACATACGTTATT  
AATTCCTAAAAAGCTTCTGCTAATATCTTTGAAACTGATGAAGAAACAATGAAACATATCGGTGCGAGCATTACCTAAAGTAGCAA  
ATGCTATTAAGCGTGCATTTAATCCTGATGGTTTAAACATTATTCAAAAATAATGGTGAGTTTGCAGATCAATCTGATTTCTATATCA  
TTTCCACTTAATTCCTCGATATGAAAATGATATTGATGGATTGTTTATAAGTGGGAAACACATGAAGACATTTTAGATAACGATGC  
AAAACAACAAATTTGCTGAACAAATTCAGCACAAATTTTAAATGTATGCTTAATCTAAGCTCGAACGGGTATAATATGATTAATATTA  
TAACAATTTGCGTTTGAAGTGATAACATCAAGTTAGCAATTTTAAACAAAATGAGTTATCAAGATAACAGATGTTAAAAGTGAGGA  
GAATATAAATGAAAGCATCAGCATTCTATTCGGTATCGGTGTTGGCGTAGCAGCTGGTTTTGTAGTTGCACTTCAAGGACGAGACG  
ACAAAAGTGTCAGAACAACACGATCGATCGTACTGCCCTACTGGTTCAAAAATCAGAACTACAACGTGAATTTGAAACGATTAAA  
CAAAGTTTTAATGACATTTTAACTATGGTGTCAAATTA AAAACGAAAGTGCGGAATTTGGTAGTTCAATTTGGTGGTGAAATTAAG  
TCATTACTTGGAACTTCAACTTGACATTAATCCTAATGTTTGAACGTTTACAGTACACATCGAAAATTTACAAAATCGTGGCGAG  
GATATTGGAACGAAATTTCTAAGTAGCACGTTTACGTTCTCGATCACAACTATTATTATTAGTAAGACGCATATTTATTTTTTAAAT  
AAATGCCAAATAAACGAGATGACATTAGAAATTAGATATTTCTGTGCTCTCTTTTTTATAACTCAAATGAACTTATGTTTACAAAT  
ACAGGAATACATCGTTTGTAGTGATTTTCGCTTAAATCATATTTATGAATTGATTGAAAAATTGCTTAGGATTCATTGTGTTATCCT  
TGCACTTTGATTACGCTTTACTTAAATCATTATCGACAAACAACATACTTATATTTTCATTGAGCCGAACCTTTTATGCACATTACAT  
ATACCTTACTTGACAAATTAATATCTGGTATTATTATAATTACATATCACTATATTTTAGCATTTGTATAACTTAGTTGGTCAAA  
AGATGCTTTTGCATATGCCCTGCCATATCCATTTTTTATATTATTCAAGTTTTCAAATACTCATGTACACGCGCTTTTTCATAAGTG  
ATGCTTTATTAGCAAGAAGATGTGTTTCGCAGAAATTTGTTCTGCATTCTACTTCTACGCTAGTCAATCAGCCAATTTTACCAAACCTC  
ACTTTGCGGTTTCAAATCAAACAATACTTCGCCCCCTTCTCTTATATAACAATTTCTTAACATGATATGTTACTATTGAATTACTGA  
ACCTGAGTTAGTTAATACTAATCTATATTGAAAAGAGATGAGGCGTAAGATATGTTTTATGTATAAAGACAAATTTGATATCAATGC  
ACGATTTGGTTTGCCTAGAATTGCATTTATGAGTGCAGTTGCAACCATCATTATGTTTTAGTTAGTTATGAAGCAATGTATTTTTTA  
TCTAATACGCCATTATCAGATAGACATTTTCTCATCTTTTTATTACTTGTATTTATGACGTATCCATTACATAAAAGTATACATTTGTT  
ATTTTTCTTACCATATAGAAAATCGTTTAAAGTTCATAAGTTGACTAAAAGAAAATGGCTTATATTCTATAATACCTACGTCAATCA  
ACCTGTACACAAATTTTATTTTGCATTAACTTAATATTGCCGTTAATTATCTTATCTGCAATGTTTCGTTTATCTAACAATTTTATCC  
CGCAATATGGACATTATTTATGTTCTTATTGGCATTGAATTCGGTATTTCCATTACAGATTTATTATATTTAAAAATAATTATATTT  
TCTAATTATGGACAATATATAGAAGACATAGTACAGGTATTAATATTTGAAAAAAATTA AAAATCCATATCATTTATAACAAAAT  
AATTATAGCAAGGTGTTATTATTTGTTTTAGGCTATGTAATAGCTTACAATCAAAATGTATATAGACCTTGTTTTTTTATTTTCATCAA  
TTTCTACCCCTAAACCTAATGCTCTAGTCTGATGTCAATGGGTTATTGATTGGTGATAATATAAACTATGTTATATTCACGATGATTA  
ACTTACAAAGGAGTTTCAACTATGAAGATGATAACAAATTAATCGTTCCGGTAACAGCTAGTGCTTTATTATTAGGCGCTTGTGGC  
GCTAGTGCCACAGACTCTAAAGAAAATACATTAATTTCTTCTAAAGCTGGAGACGTAACAGTTGCAGATACAATGAAAAAAATCGG  
TAAAGATCAAATTGCAAATGCATCATTTACTGAAATGTTAAATAAAAATTTAGCTGATAAATATAAAAAATAAGTTAATGATAAGA  
AGATTGACGAACAAATTGAAAAATGCAAAAGCAATACGGCGGTAAAGATAAAATTTGAAAAGGCCCTTCAACAGCAAGGTTTAAC  
AGCCGATAAATATAAAGAAAATTTACGTACTGCTGCTTATCATAAAGAATTACTATCAGATAAAATTA AAAATCTCTGATTCTGAAAT  
TAAAGAAGACAGCAAGAAAGCTTCACATATTTTAATTAAGTTAAATCTAAGAAAAGCGACAAAGAAGGCTTAGATGATAAAGAA  
GCGAAACAAAAAGCTGAAGAAATTCAAAAAGAAAGTTTCAAAAGATCCAAGTAAATTTGGTGAAATCGCTAAAAAAGAATCAATGG  
ATACTGGTTACAGTAAAAAAGATGGCGAATTAGGTTATGTTCTTAAAGGACAAACTGATAAAGATTTTGAAAAAGCACTATTTAAG  
CTTAAAGATGGTGAAGTATCAGAGTTGTTAAATCAAGCTTGGATATCATATTATTAAAGCTGATAAAGACAAACAGACTTTAAGAGT  
GAAAAACAAAGCCTGAAAGAAAATTAGTCGATCAGAAAGTACAAAAAAATCCAAATTTATTAACCTGATGCATACAAAGATCTAT  
TAAAGAATACGATGTTGACTTTAAAGATCGTGATTTAAATCAGTTGTGCGAAGATAAAATCTTAAACCCTGAAAACTTAAACAA  
GGTGGCGCACAAAGGCGGACAATCCGGCATGAGCCAATAACACAAAACCGAGCGACCGTGGTTCAAAAATCATACCAGGCCGCTC  
GGTTTTTTCGCATTA AAAATCGGACAGATGAGCTCATGTTTCAGTATACTCATCTGTCGATATCTTTTAAATCTTAATCGAGTGATT  
CAGGATTGTAGAATCTACGATTTTCAAGACCAAAATATTTATCTGTAAAACCTGACCTTGTGCGATTTTATATGCCTTTTCAAACAT  
ATTCATTCTAGCATCGATATTTATCGATATAGCATAAAAATTTCTGCTTCTTTTAAAGTATGGCAGTTTGGCGAACCATACTCTAACTTA  
CCATGATGAGATAAAATCATATGTCTTAAACAACATGATTTCTTCTCTCAATTCGAATTCACAGAGCTGCTTCAACTACTTCTATCAC  
TCGCAATCGAGATGTGCTCTAATAAGTTACCTTCGATGTATACGACGTGCAACAGGACCACTCAATCTTCAACTTTACCAATAT  
CATGCAAAAATAATACCCTATATAACAACCTTTTGTTTAAACAATGGATAAATGTACAAAATTGATTTTGCATAACGTAACTACGTTA  
ATACATGATAGCTTAAAGCCACTCGCAAAGTTATGATGATGAGAACTAGCAGCTGGATATGTGTA AAAATCGTTCTTGTATTTTTTCA  
ATAAATGACGTGTGATACGTTGTAAATTAGCATTTTCAATATCTAGCAAATAATGAGAAATCTCTTCTGTATTTCTGCCGGTGATAA

AGGTGCACCATCTACAAATTGTTCTGTTTTAAATTGATCTTCAGTTGTCGCTAGTCTAATTTGGTTGACTTTCATCTGTTTATTTCCGC  
GATAGTTTATGATGTCACCTTTAACATGTACAATTTCTTCAGGCTTGATTGTTGCCATATCATTTTTTGTAGCCGTCCAAAATTTTCGCT  
TCAATTTACCACCTTTTATCTTGCAAATGTAATGTATATAATCTTTACCTTGCTGTTACACCCCTGTGTAGCTTTATGACTAAGAA  
AAAGTGATCAACTGAATCTCCGGGATTAGATTCTCTATATTTCTCATCGTTTCCCGCTTCTCTATTTTGTAAATGTAATCACTTC  
TTTTGATGGAACAATATTATCTTTACACATGTAAAGTATAGTACTTGATAGTGTCTGATAATGATCGTAAATAATTCAACATTTTT  
TCAGTACGCTTTTTATCAAAATGAACAAATGCATCATCAACAATTAATGGGAACGGATAATATGGTCTTAGTACCTTAATTAACCTG  
ATACGTAAAGCTACATAAAGTAATTTCTTTGTAGATTGACTTAGTTCAACAGGATCATATAATTGACCATTAAACATGTTTAAACCGTA  
ATTGAATCTTCATTATAGTTAATCATCGTATATCTGCCATCTGTTAAATGCTTCAATATTTCTACCGCTTCATTAATAAAGTTGAGGCA  
AACGTTTATCTTTAATTTGTTAATGTGTTTCATCAACTAACTTTGTAATAAAGTTGCTTAACTTGCCCAATCTTTTGCATATCATTAAGT  
TGATTTTTAAGACTGTGATATTCATGTCTTAAATTAGCAAGCGTTGTATCAGTTTCCATGTGATTGTTTGTGCACTTAAATCACTGA  
CTTGTTGCTTGCATTTCAAGATATTGCTCATTATATTCTGTCAACTTGAGTAGCCAATAAATGATCTTCTTCTCAAGTTGTGCAAGTTGTT  
TTTTCACTTAACTAGAACCTTAATTCATAAGAATAGTTTTGGTTCTCAAGATATTTAGTTAAATCATTAACGACTCAAATTACTAG  
TATAAGTTTGGTAATCTTCATGATGTTGGTAAAAATCTTCTTCAGTACCAACATTGATAAAATCGAATAGTGTGTAATTTCTTTATT  
ATTTCTTCTAATTGAGCATTAAATGATTAAATTCATTGTGAACAAGTTGGTATTTTCAGCATTAAATACGCCATTTTTCATTCTGTGT  
CTTCAGCTGATTTCACCATTTGTTGCACATCGTGAATAAAGATAATTTGTTGAAATAACAAATTTGTGATTTTGTAAACAGCTTCAG  
CATGATTGTAGAATGTATCTAATTTCTGAACCAATTGCTGGCGTTGTTGATTAAATCACTGATATGTTGATCTAATGCTTTAATATT  
CGCCATTGTAGAAATACTATCAACAATTAATCACTTTGAAATTTAGATGATAAGTATAATTCATCCTTAACGTTTCAACTGTCTGAT  
TGTAATTCATCATGACGCCCTTCGCATCATTAAACGACCTTCAATACTAGTACGTTTCTTCTTAAATATCTTTATTTTCAATGTC  
CTGTTGCCAGTGATACGAATGCGATATTGCTCATCAAGATCAAAATCTAAGTCAATAGTTTTCATCTAAAATGGCTAGTTTTCAGCTTTA  
ATTTCTTCGATTTTCATCTGTGATGGCTCGCTATAATCTACTTCTTTTGTATTTAGACATGATGATACCGATAACAAATACTAAAGTTA  
ATACTGCGAAAATAATACCAACAGCATGTTGTTTGAATAAATGAGAAGGCAGTTAAACCAATACCTACTAATGTTAAAAGAATA  
AACGTTGTTTCGTAACAATTTTGTGACGTTTTTGTCTTCTGTTGCTCAATTTGAAAACGTTCTTCAATTTGCTATACAAGTCTCTTTT  
TCGTTAATTCATGACTGTTGTTGTGAGTATCTTTTTCTTTTCAAAAGTCTCTTCAGGAACATTTTTTCTTCAACAGAATCTAGTTC  
GCTATGAACCGCATTATCTTCGATTTTATTTCTTCTAAACTACGTTCTAATTGTTTAAATGTATGCAGCTTGTCTTGTATTCTTGAT  
TTGCTCACTGACATAACTTTTCATTGCCTCTGAACATCTACGTCATGATGCGTTTCAGACCAACCAATATTTGCTTGAATTCATCTT  
TATCAGCTGTTTATTTCGCAATATCTTTTCGATTGCGATGAGTGAAGTCAAAATCTTTATTTTAAATTTCAATTTCTGTTGATTCAAACTAA  
TAAAGGCGTCAATATCAGATTGCTTAACTGGCTCTAATTGAGTGCCTTCTTCTTAAAGTTGAGCTAAACGCTCATTCTTAAACCAAT  
ATCTCTTTCTAACGATTGCTTATGCGCTCGTCTTTTTCTGTAACGATCCACACCTTTTTCTGGGAATGTGATTGGCTCAATATTTAACT  
GTTGTTCTAGAGACTTCCATTCTGTGAATGATCATGTAAGCAACCTCTTTTTGTTTTCTTCATGCATTTTGTAAATGATTAAAA  
TTATGCTTTAAATCTCTAATCGACGTGATGATTATCAGCATCTACTAAGCGATGATATGTTTCTAGTTTAGCTTCTTCTTCACG  
AATTGACTTTCTAGTTGTTTAAATGCTCAATTTGTTGATTAATGATCGGATTTTACCTGATTTTTATATAATTCATCTTTTTTACG  
ATTAATCACTTCGCGCATTGACGTGAATTCAGTTGATCCTAAAGCCCTGCTTGTAAATAAATAATCTTGCAATTGTTTTCATTTAGA  
TTTCTATGAATGCTTGAAGCCCTAGTACATCAAATGAAAAGTACCTTGATATGCTTTTTAGAAAATAAATTAAGTTTCTTTTGTGA  
ACCAAGCATCATCAGCACAGCACCATTAGTAAATATACTTTACATACCTTGAGCAGTGCCTTTAAATTCGTTCAACTTCAATCTC  
TAAGCCATCACTAAGAATAAGTACTAATTTACCACCGTATTGTTTACCTAGACGTGGTTCTAGTCTTGGCTCTTTAGACTTTTTAGTT  
GGAAAACCAATAATATCGAATGGATGAATGCTTGAATCGTCGATTACCCGCTTCATTTTACCAAAAAATTTCAAGTGAAGTTTTTA  
TTAAATTCATTTTACGTTGAACAAATTGACCGTAACCATAAAATTTCAAGTGATTAAATATCATTTTGTTCACCTCTCATTTTCAGCTT  
TTAATATTTCTTCAGCAGGATTAATAATGCTGTATGGTGAATGTTCCATAATCGTCTAGGAACCTTTGATGCCCTTGGATTTAAATA  
TAAATCTGACATCGCTTTATCAAAAACAGTTTGATCGACTAATAATTCGCTGAAAATTCATTAACCTAAAGGTGACTCATCTTTGT  
GCATATTGTATTTTAACTCATCAATATATACAAATTGATTTTCGTTTTCTTCATAATCTGTAATCATTTCTTCAACTTGTAATAAATC  
TTGAGGTGAAATTAATGTCTCACTATTAATAACAAGCGTTAAACGATAAAAGGCTTTTCTTCTCTCACTTGTCTTTAAAGTTT  
TGAATGACCTCGTATAAACCTTGCTTAGATGCTTATCCGTTTCAATAGTTGCTTCTTCAAATCTAATATACTGTGTAGGATAAAAT  
TAGTCTTTAATTTTAAAGTGGTACCCTCGATTAAATAAGCAACCTTTTTCACCTTGCTCATTAAATGTCTACCTTGAATTTCACTGA  
ATAGTTAATTACAGGCATATCACTTAATTGTTGACGTTTCATGTATATGACCTAAAGCCCAATAATGATACAATTTACTGTTTAAATCT  
TCTAAATGAACCTCGGTATATCTTTCGTTAACTGAAGATTTACTATACGTACCATGCAAGACACCAATATGTATGCCTTTTTGGCCTT  
GACTTGATGGATATTCATCAATCTTGTCTCATAACTTGCTCTATTTTCATAACTAAATCCGTGAATATAAATGTTTCACCAGATTT  
AGTAATTGCTTCATACGTCTCAACTTTATTTGAAAATACAGAAACATTATCTGGCCAGTTTGATGAAATCTTTGATGATAATGGGTC  
GTGATTACCATGACAAACATAAACAAGATTGTTTCAATTTGTAAACGTTCAAATTTGCTGTTTTAAGAAAAATTCAGCAGCTAATGT  
TCTGTTTTCACTATCAATAAATCACCCGCGATAATTACAAAATCAACATCTTGTGTTGAATGCAATATCTACAATATTTTAAACCTT  
TCATAAGCACTTTTTTGAACATCCTCAAAAATTTTAGGGCTTATAGACTCTTAGATTTGAAAGGACTATCTAAATGTAATCCGAA  
CAATGAATAAATTTAACCATATCCATATCTCCTTAATTAAGGTTCTAACAATCAATTTTGCAAAATCCAATCATACAAAGCATTC  
TAATCACTATAATCATACTATAGGTGATGATGATTACGTGATTTATTAAAAACAGTCGCCATTTTATTTCGTTAAAAAATCTAT  
TATCTACACAATAATAAAGTGCTTTAGTCAAAATCGTGATGTTTTATTATTAACAAGTTTATTATTTCTTCATTTTACCATAATACGCT  
TCATATCGTCGATGAACATATGAAATTGAGACACATTTATAACAGTTTAAAAATTTTATTGTAGCGTACGTTGATATTTTCAAAAAAC  
TTCAGTCGAAAATGCAATTTCCGTAATTGTTAACACCGCTAGTGAACCAACTGACACATTAAGATTTACATGATTACTCTACTAGA  
TTTGCTCGGCAGTAATGACCAATTAGAACTAAATGTCAAACTATCATTCGACTTAATACGCCAAACATTTTCAGGCCGTTCTTAA  
TGAGTCATTAAGGTGAAACGCTTTTCCATCAGTCCGATACATGACCGAACTAATAGTATTATGTTGAAAACCTTTACACTTCAAAAT  
GCAAAAAGGAAGTTAGGACACGTTTACTAGCCTAACTTCCGTTATCAAGCTCATCCGCCGTTTGGCATAGAGCTAGCCATGTTTG  
ATTGCCAGCTTCCGTCGCTGTTCTGAGCTAAAGCTAGGACATGTTTAGTAGCCTAAATCCGATACGAACGCATCTGTCCAATTT  
GACAGAGAGCTCTAAGTTTCCGTTATCAAGCTCATCTGCCGTTTGGCATAGAGCTAGCCATGTTTGTATGCTGCCAGCTTCCGTCGTC  
CATTTCTGAGCTAAAGCTAGGACATGTTTAGTAGCCTAAATTCGATAGTGAACGCATCTGCCCAATTTGACAGAGAGCCTCTAACTT  
CCGTTATCAAACTAAAAAACTACCCACAAAGTCTCGGACTCTGTGCGCAGTCTATTCTCTATTTAAAGGATTGAAAAATATTAT  
TTTAATATTAGTCAGCGTAAATTTCTGCTAATGGTTAACGATAAATTTGGTTGATTTCTTGAATACTTGACTCATTTTTTGTTCAGCA  
TTCATTAATGCAGAGATGTTTTCACTTTTTCAATTGCTTGCCTGTTCTTGGCTTTTTGTAAATCTTCTTCAGCAATTTCTTCACCT  
TGCAATTTGTTTTGTTGGAAGTTAATTTGAGTTTCACGGAACCTCGTCAATAAATTTTTAGATTCTTCGTTAGCTTTTACATTAGCGAA  
TGCTTCTTTGATTGCTTTGATTCTTCGCTTCTCTTAAAGCTTGTCTAATTGATTGTCATAATCATATAAATTTACTGCCATGGTTAT  
AGCACTCCTTTGTTGTGATGTTTATAAAGCTTCGATATTACTTTACACATCTCGCTTTTTAGACAAAGATTGCAACCAACCTT  
GGAAAAATCCAATAATACCACCTAAACCTAATGACATAATCAACTTTAGTTCTTTGTAGCAATTTCTATAAATTAATTTTTC  
AATATAATCTAAGTCAACGATTAATTTGTTCTTCAATTAATCCTCGTAAATCCACTTTTTTCATAATTGTAGATAAGTGAATCGAT  
AATTTTTCAATGATTAAATTTGCTAATTTGCTAGAGAGTTGACCTTCTAATAATCAACGAATTGAGGCATTAACGTAACCACTGGC  
TTATTCGCTTGTGTTGCTTGCATATGTTGTTACATACACTGATAGATTTTCAGCGATTTTCATTAACCTGCGATGCATCTAACAGTTTCATT

CAATGGTTTATCTTTAAAAAGTTTGATATTCATTGGTAATTAACGATGTCACAATTGTTCTTGCTTTAGGATGAGATGTTAAACGTATA  
AGTTCTTGTTGAATGCGATCTGCAATGCTCTCTTTTGTCTATAAACATTTGCAACATACCAATTAACCTTACCTTTCTCATTGAAAAAAG  
TATCCAACATATCATTAATATCTTGTGTGCCCTTTTGAGATGATAAAATAATCCTTGACGATCACATAATAAGTCTGTTGCGTTATC  
TACATGCTGATCTAAAAATGTTACAAGTTGATTGGCAATAAAGATGCTATTGTTTGGTTTTGATGCTTTGTATAATAATTATTCAT  
TGTGATTCAATATATTGATTTCATTAGTTTGTAACTTGTCTAAATCAATATCGATTGAGAAGTAATTTGTTTTATTGACAATTG  
ATCTTTCGTCACCTTTTGTAACTGCTGTTGAATCATAGATTCTATTGCTTGTGATTGCTCGCTTTTAAATTTTCATTAATTAAG  
TTCTGTAAGCAATGCTCTTCAATCACTTGGCCAATTTTAGTTGCAATTTCTTCGCGTCTTTTCGGTATTAAACCTGGTGTAATGG  
GACTCTAAATTTAAATATATAGTATGGTTTAAAGGGGTGAAAACAGCATTCTAATTGCAATTACATTAGTAATGCCCCCAATTATCGC  
CCCTACTACAATCATAAATATGATAATAAATAGTGCATTCTAATTTTGACTCCTTTGTGACAACATAGTTATTCATTATACCACTAT  
TTTTATTTTTTAATTCATTAATCATTTCACCTTCTGCTCAATTTATTATTAGTTTACATACAAAAAGCGATGCCCTACCTCTCGAAACA  
GGTGTGTTACATCGCTTTTATTATTTATTTAAAAAGTATATAGGCCTAGATATGTACTAATTTCTCTTTAGCATTCTGTGTAAGATGTT  
TCAGCTTCTCTCATTTTAGAAGTACCGAAAAATTGGTTGGTTATCTGGATTAAATACACGATAAATATTGCTTACTTTGTTACTTTGTA  
AAATGTACCCATTACGAGTCTCAATGTTATTCCAATAAATATCACTTGTGGTGCATGGTTGGATATGCACAGTGATTCTTGAAAT  
TGTTTGAACGATTCTAATGGATCACAGCCAAATGTACTGTTAATACTTCAGAGTCTCTGAATAATGCACAAATTGAAATACAAGT  
TGCCAGTTTGGTAATACTCTCTCTTTTTCGATTGTACTAAAGTCTTTTAGAAAGTCCAATTGTTTGCGCCATAGTATCTTGCCTAT  
AACCAGCCTCTATACGAACCATTTTAAATTTGTTTGAATTAATCTGTAAAACCTGTCTATCCATTCTGTTATCTACCTTTCTGTTT  
GGGGAATTTATCCGGACACAAGAAATGCAATAATACACATTTCTGAAACACAGATTACATCTTAATATATTTTAAATAAAATGA  
AAAGAGTCAATTTACATTTGTATTAAATTTTGATCAAGTCAACAAGAGTTTAACTTTATAATGAAGCGAAAGTAAATGAAGT  
AAAATTTTATGCATAATCACTAGATTGTATAAACTTACACTTTTATAATGATATCAAAATTTACAAAAGAAACTGTATAATAAACCC  
TATCGCTATAAAAAATTCATCAAAATCAGATTAAAAATTTGTCTATTTTTCGACAAATATTTAAAAGTCTATTCTAAATCAACTTATTT  
TCCATTGCATAAATTGCTGCTTGTGTACGATCGTAACCTTGTAATTTACTAAATATATGACTGACATGTGTTTTAATTGTTTTTTCAGA  
TACAAATAAAGTTTCTGCAATCTCTTTATTTGTTTTACCTTTAACCATTTCACGTAACACTTCAATTTCTCTCTTTGACAACCTTATTCG  
TGTAGTGTGGTTTTTGGCTAACTGTTTCGAATACATCTTGTGCCTTAGGATGTATCATTTTTCACCGTTCATAACTCGTCTAATAGTT  
TCAATTAATTGCTGAGGCTCAACGCTTTTCATTTTCATAACCATCAGCACCTTTATTAATTGCTGAAAATTACATGTTTCATCATCAACAT  
AACTTGTTAATACCAAACTTTAATATCCGGATAATGTGCCTTAATATATTCCGTAATTTCAATACCATTTCATGCCAGGCATCACTAA  
ATCTAATAGCACAATATCAGGGTGTCTATGCTCTTTAAATATTTCTAAAAATGTTTCTCCATCTGCAAGTCTGTGTAAGCTTCTATG  
TTTTCAATCGTGGATAATAAAAAATCGCAATCCTTGTGCGACAATAATAATGGTGCATCTACTAATATTACTTTGTTTCATGGGTATCTCC  
TTAAATCAAGCTATTTTATAGGAATTGTGAATTGTATTGTGTACCCTTTGTTGGCTGAGAATGAAAGGTCACCTTTACCTCTTAATAA  
TTAACTCTTTGTTTTATGTTATTAATACCGTGTGATGAAGCTATCTGAACATTATCGATCTCAAATCCTTGACCATAATCAATCACG  
TCAATATATAGTATATCGTTCATTGTTTTAATGTAAGATCCATTTTATTCGTATCAGCATGTTTCTTAACATTATTAATACACTCTTG  
TAATGCTCTGTATATGTTTTCTTCGATTTCATTAGATAAATCGATTAAACCTTCTACATTACATTTAATTGTATATGCATTAATTAC  
TATATGCTGTCAAAGCATGAATTAACCTTGCTCAAGTCCAACCTGGCTTAAGTTGCCAAATCAATGCACGCATTTCAATTAACGGCAT  
TTTGACTCGTTTCTCAATCGTCTTGAATGCTTGTGTTAGCGATGGATTCTGTTGACATGCCATACGCAGCATGTGCTGTTAGTTTTAC  
AGAAAATAACATTTGATTTACTGAATCATGTAATCTCTAGCTAAACGATTACGTTTCAATTTTTTGGCGCTCTTTTTACCGTCT  
GTTAAATAAATACGTTTGAATGGCTGACCCTAATTGAAATGCGACAGACTTACGCAACTCTAAATCTTCATCGCTATATATTTTCAGTA  
TTTGAGAGACGTACATTTAAATGCCGAATTGTTCTTGACCCGATTAAAGTGGTACCCTTGCATGATGTGTAATATTGTCAATTTTGGC  
TAGGAAATGCTTTAGAGGCTAAGTTAATACGAGAACAATTGACGATATTCGACGCTTTTATTAGCCTACGTTGATTAAATGCTTTCA  
CACACCAACAAGACCCATCTTTAATATAGTGACAGTGGTCTGCTGTCAAAGATTGTGGTAGAGCCACATGTGATACAAGTTCATGTT  
CACCTACGCTATTGATGAAAAATATCCAGCCTGTGCTGAAATTACTGCCCTCAATTAATATTTAACGCACCTTGGGTCTATGCTAT  
ACATTTACAGTTTCTTCGTTTAAAAATTCGGCAATCTCTTTAATAAAGCTAGTCGCGTCTTTGTTCCATCAAATCGCTCCAATTCATT  
TTTACGTGTATTAACATATTATACATTGAGTTATTATATTTTAAATCTTAGACGTAAACATGATAAAATGGCCTTGATTACTCAATAG  
TTATATTTCCGGAGAACTGATTGTGATATGATATTAAGACTATAGGAGGATTTTATGAAATTTAAATACCAGAAAACTTTAATGA  
CTTAAGTTTACGAGATATTTTCAACAACCTTAAGTTACCTAAAAAAGATTATACATCATTAAATATGTCTAAAGATATTATTAAT  
GATAAACCTGCGCATTAATGGATAAAGTGCATACTGGCGACGATGTATTTGTTTCCAACCATCGATGAAAAAAGTAATTATGTTCCA  
AGTTATCGTTATGCACAAATTAATACGAAGACGATGATATGGCAATCGTAATGAAACCTAAAGGTGTTAAGACTCACCTAATGA  
TTTAAAAAGAAAGCAATACCTTAATGAATCATGTGATTACACTATTGATAGTACTATGTCGAACCAATTCATCGACTGGACCAGGA  
AACAGTAGGATTATTAATTGTTGCTAAAAATCCTTTAATGAAAAAAATCTTGATCGCATGTTAGAAGACAATGATATTACGCGGAT  
ATACAAAGCAAAATGTTAAGGCACTTTTACCTTTAAACCAACAACGATTGATATGCCAATTGGTAAAGATAAATTCATTTCGAATAA  
ACGACGTGTGTCTCTACTGGACAGCGTGCAATTACACACATTTTAACTTCAAAAATGATAAAAAGAAAGCTGTGTGCCAACTTGAAT  
CAAGTTGGATACTGGACGTACTCATCAAATTCGTGTGCATTTAGCTGAAATTGGTCACCTGTTATTGGTGATCCTTTATATGGTGAT  
TCAACGTTAAGACAATTAGAAGTTGAAAGTTACAAAATAGAGTTTGTGCATCCCTTGACTAAGGAAGTCAATTTCCGTTTCTTTGGAT  
GACTAAATTTGATTGATTTTGGATGATATTTAAACATGCAATACCGCATTTGTAACCTAAATCAAGTAACTAAATCGGATAGATGG  
AAAATTATTAATTTTTCAGATGTTTCGGTTTTTTTTTTACGATGCTTAGGATTTTATATTTTGATATTTTAGTAATTATTCATTTTATAA  
CATCCTTGGATAATGACTTGTAGTCTTTTTCAACTGCGTTACGTGTATCTATGGACAATACATGACATCATAAGATTTTTATCACAGG  
TTGTTTGGCCAATACATGTACAACAATTCATCATATAAAAAATAGGTTCTATAATAAAACGGACTCCATGAAAAGTTTTTCCTTTTC  
ATGGCTCTATATCAAATCAGACTTATAAGTTCAATTTGACATAGACAAAAAATAAAGCTTGAACACTACATCTACCTGTAATGCCCA  
AACTTTATTTTATATTAATATTTAATTAATGAGGATCTACCATATCTTCTGGTTTAAATCCATGCTTCAAATTTGTTCTTCTGTAACATAT  
CCAGTTTGAATTGCAGATTCTTTTAAAGTTAAACCTTCTTTAGGCTTTCTTAGCAATTTGAGCTGCTTTTTCATAACCAATATGTGG  
ATTAATATGCACTAACTAACATTAATGATTGATTTAAATAATTAATCTTCTTCGATTGGTTCAATAGCCCACTGCACAATTTGTTA  
TTAAATGTTTCCATACCATCAGCTAAAAGGTAATTTGATTGTAGTGTATTATGCTATAAATAACTGGTTTATAAACATTCATAATTCAAAG  
TTACCTTGTGAACCTTGCGAAGCCAACAACCTGTATCATTACCCATTACTTGGACTGCAACCATTGTTAACATTTACATTGTGTAGGAT  
TAACCTTACCAGGCATAATTGATGAACCTGGTTCATTTTACGGGATGGAATTTCTGCCAAACAGCTCGTGGCCCTGAAGCCAACC  
ATCTCACATCATTAGCAATTTTCATTAAGTCTCCTGCTAGCGCCTTCAATGTTCCATGTAGTTGTACTACTTCATCATGTGCTGTTAAT  
GCATGGAATTTATTTTCAGAAGATACAAATGGATAACCCGATTTTCTGAAATATAATGTGCCACTTTATACCAAATTCAGGATGC  
GCATTAATACCAGTACCAACAGCCGTACCACCGATGGCAAGATTTAAAAATGTGCTTCTTAGATTTCAGATAACATTTATTCGCAACGG  
TCAAGCATATAACGCCAGCCACTAATCTTGTCTAGTTTGATCGCGTGTGCATCTTGTAATGTGTACGACCAATTTTAAATAATTG  
AATCAAAATTTGCTTCTTTTCTTTCAAAAGTATTTCTTAAAAAGTTTAAATGCAGGTTCTAATTTTGTTCACCTCTTGATATAATGCA  
ACGTGCATAGCAGTTGGGAATGTATCATTGCAACTTTGTGATTTTATACATCATCATTGGGTGGATCTTTTCATCAATTTGATGAT  
CTTTTAAATACATATTAGCAACATAACTTACTACTTCTGTTACATTTATTAATTTGTTGTTACCCTTCTGTTTGGCATAACAAGTATG  
GGGAAGTGTTCATCTAATTCACCTGATAAAAAATTTGATCACATGCGTATACAATGGCATCTTTCTTTGCTCGCTTAATTTTCTCTAAAT  
CAAAATTAGCTAATGCTGCTGCACGCTTAGTTGTGCAAAACCATAAACTACTTTCGATTGGCATAACGCTCTTTACCAACTGGGAAAT

TACGTTTACTTCTTTCTGTTTGAGCACCCCAATATTTATCTGCAGGTACTTCTATTTCTCCAAAAGTATCATGTTCAATTCTTACTGAC  
ATTCAATTTCTCCCTTATCACTGTTTTATTTAACTGTAGTATATCATTAAATAATTTAATTGAGCAATTTATGATTAACCGTTTTTCAT  
AATTTGAAAATAAAATACACTAATCGCACGTGTTCCACCCTTTATTACAGTGATACGGTCATACGATTAGTGTGTTATCTATCATTATT  
TAGTTATTGTTGAACTAAGTTTAATTACGATACTTTGTTTTAGTAGCTTCAACCGTAGCAATAGCTGTAAGTATATATAATACAGCAC  
TAACAATTGTCGTATATGGATTTAGAGCAACAAGCGTACCTAATACTCCTGTTAAACTCGCATAAAACCCATCAAGTGATAATACA  
ATATTCTCTGTTATTAATAAACAAACAAATTACACTTATTACAATACCTGATTGATTACTTTTTAATGAATGTTTGGCGCATTAACATCATC  
GATTAATCCTTTTGATAAATTGAGTTGTAATTTTATTACTTTGAAAATAACAGGTAAAATATAATGCCCAATTGCCAATGGAAAAAGC  
TTTAATTGATATTAACCTTATAATAACTGTTGCTATCAATAATTGAATCCAGTATTTTCCTAACATAAAATATATAAATCTCCTCTAAT  
TTCATTCTTCAATAGCATATCATAATCTTGGCATATTAAGAAACGCGGTTTAATGATTTCATTAATAAATTACTGATAGATGACTTC  
TTCAATTATGTCTGGAGTAATTAATTATCAATTCCTGTTTAAATGGTGTTTAATATTTAAAAATTGAATTTTGGATATATTACTATGTC  
TGGTACACAAATCAATGTTTTATGCTTTACAAAGTTATATTGGCAGTAGTTGACTGCGGGCCACAAACTCAGAAAGCTGGCGGAAAGT  
CAGCTTACAATAACGTGCAAGTTGGCGGGGCCACAACATAGTGAATTGGATTCCCAATTTCTACAGACATTGCAAGTTGGCGAGG  
CCACAACATAGAAAAATTGGATCCTCAATTTCTACAAACATTGCAAAATTAGGGAAACGGGCCACAAACTCAGAAAGTTGGTGGAAAG  
TCAGCTTAAAATAACATGCAAGTTGGCGGGGCCACAACATAGAAAAATTGCGATTCCCAATTTCTACAGACGATGCAAGTTGGCGGG  
GCCAACATAGAAAAATTGGATCCTCAATTTCTACAAACAAATGTAAGTTGGGGAACAGCCCCAACACTGAAACTGGCAGAAAGT  
CAGCTTAAAATAACATGCAAGTTGGCGGGGCCCAACATAGAAAAATTGGATCCTCAATTTCTACAGACGATGCAAGTTGGGGAAA  
CGGGCCACAAACACAAAAGCTGGCGGAAAGTCAAGCTTCTATGAATATAATAAAAAAGCTAGGTAACAAAATGCTACCTAACTTCAT  
ATTCAAGATTATCAATCCTATTGATATAGGTTCTATACCTATTGTTTACATGATAAATAGCTGAATATTACAAATATAAATAC  
TTTCACTGACTGTCTTCTCAGAAATCTTTCTTGATCATTTTGATCAGAAATTTGTTCCATTTCTTTACCTAATTTCTTTAAATCTTCAA  
AATCCGTTACCATACTGTTTTCTTCTCATGATAATTTAATTTGGATCTTTGCTTTAGACATAATCAATACCTCAGAGATTTTAAAT  
TAAGCAAAGCGTGACGTAAAGTAAGCTTTAACATCTTCAGGTAAACCTGCAGCCGCTTCTTTATCAAGAATAATATTACCATTCTA  
TGTGCTTTTAAATCGGCTGGTTCGAAGCTTGTTTTACCATTCTTCTGATATAATTTTCAACTACATCTCGTTTATTAGCACCTGTCAC  
TACTAAGAAAAATTTCTCTTGCTTCCATTAGTCTTGACGAATACTAACATTTAACTTACCTTGCTCATCGATAGAAACAACTTGTAAT  
GTTAATTTCCCTTTATTTCTTTAGTTTTAATCTTATCAGCGATTAATTCGATTGCATCTTTTTCATAAGCAATTGGATAAACTTGACC  
TGCTGGTACACCTAACCTTCGAAATATGATTTTTTATCGTCATAATCTAAAATATTTATTTGGCTAAAATCAACAGCATGTTTTTCA  
ACATTTTCTTAAATTCATCTAGAAGCTGGCGCTTGATCTGTATCTAAATGAAAACCTGCAATTGTAGTAGGATTATTGTTAAATGTCT  
TTCTAATAATATCAGCAGCATATTCTGCTACAAGTTGACTATTGTCAAAAGACTTTAAAGTTTCATTGCCATGATTTCTACACTCTCTT  
AGTTTGCATTTTACATAAAAAACGGCGATATTAATAATTATTATACCTAACTTTCAATATATCAAACCATTTAAGTTTAAACATGCTTA  
TACTCTAAATATAGCACTTAAGCATCATTTTATAATGAAAATAGACGAATTTTAAATCAATCCTGGAAAATCTTGTGACGTAACGC  
TTCATAAATTAACAACGCAGCAGTATTGATAAATTTAATGAACGAATATGTTCACTCATAGGAATTTCTAATGCTGTGTCTTGATAT  
TTCTCTTTACCCAGTCTGGTAATCCTGTCGTCTCTTTTCCAAAAATGAAGTAAAAATCTTTGTCATGATTGAAAAATCAAAATCAC  
TATAAGTCTTTTTACCAAATTTTGTTAATAAGTAATACTCGCCATTTGTGGCTTCAAAAAATGCTTCAATACTATCATGATACGTAAT  
ATTCACAAATTTCCCAATAATCTAAACCGGCTCTTTTTAACATTTTATCATCAGTTCTAAATCCAAGAGGTTTAATTAATGTAATGT  
GTGTTTGATCTGCACACGTACGTGCAATGTTACCAGTATTAGCTGGGATTTCTGGTTGATATAAAACGATAGATTGTCATATTAC  
TATTCTCCTGTGTCTAATCTTTATCATTTCTGAACTCTGCATCTCTTGATCATAAATTAGCATATTGATAAAATCTTCTGTCT  
TCTTCCCAAGAATTTGACCAATGGCCCAATAAGCAGTTGCTCGAATCATCGGTCTTTTCATCTGTTATTGCAACTTTTTTCAATTCTG  
GAATTGCATCCACTTCATTAATAATGCGCCAATGCTAAAATAGCATTTCTGTTGTATCGGTTTTTTACCACGCCAAGCACCTGCAAGGT  
GACCATATGTTTGTGTTGAATTTCTTTATTAGACATACGTAGTAAAGGTAATCTTGGCTTTAAAAATTTCTGGTTCCAAAATAATGTC  
ATCTGTGTCGGTATTAATACCTCTATTTTTCGGACAAACTTGTGACACGTATCGCAACCATAAATCTATTCCCAATTTTATAACGA  
TATTGGTCAGGCATATAGCCTTTTGTTTGCCTTAAAAAACTAATGCATTTCTGACTATTTAATTGGCCATTTCCAACTAATGCACTTG  
TTGGACAACGATCAACACAAATGTACAATCACCACAGCTATCTAATAATGGATCATCAGGTTCAAAAAGGTATACTGACTAACATTT  
CACCGAGGTATGTCCATGTTCTTAGTTTAGGATTGATGACAAAGCCATTACGACCAACAAATCCTAAACCTGCACGTTCTGCTACTG  
CCCTATCTGATAATACACCCGTATCTACCATAGATTTTATTCAACACTGTGGAACCTTTAGATTCAATAAATGAAGCTAATGCTCTAA  
TCGTTTACGCATAAATTGTATGATAATCTTGACCCACGATGCTCTAGCAAATAAGCCTCTGCGATCACCTCTAACACTCTTAGGTGCA  
CCTTTTCAGTTTGTAGGATAACCAACTGCAATTGCTATGATTGACCTTGCTGTTGGTAAGGATAAATTAGGCTCCGTTCTGTAAGCAA  
TATCAGATTCTTCAAAATCCTGAGGCATAACCATTTGCATGATATGCTTCTAGCTTTTGCTTCAATTTCATCAAGGGATCGGCAGTTGT  
AAATCCAATACTGTCGATACCAATTGTATATGCATAGTCAATGATATCTTGCTTTAACTGCTTTGTATCCAATCGTATGCCCCCATA  
AAATAATACTATGTTATTTTAAACAACCATTTATCATATTGAGGTTTCATTTACATAATTTAATAATAAAAAAGCTTGAATATATG  
ATATAACTTTGTGGTGCATATCATATTCAAGCTTCGTTAGGTTGTTATAATACTCTTGCTAAGAAATTTGTGTTCTTTTCATGTTGC  
GGTTGTTCAAATATTTGACTGGTGTGCTGACTCTACGACAACGCCATGCCCATAAATATGACTTTGTCACCTTACATCTTTGGCAA  
ATCCCATTTTCATGTGTACAAACCATGGTGCATACCTTCTTTGGCTAGGCTTTTCACTACTTTTAAATACATCAACCACTACCTCAGG  
ATCTAATGTCTGAAGTTGGTTCTGCAATAAAATAACATCTGGATGCATTGCTAAAGCTCTTGCAATTTGCTACCTTTGCTTTTGACCA  
CCTGATAATTGATTGCGATATACATCTGCTTTTTCTTTTAAATCCCACTTTATCTAATAACGACAATGCTTCTCTTATGTAATTCATCGTT  
ATTATCTTTCTTTAATAATTTAGGAGCTAAAATAATATTATCGACAACCTTTTTATGTGGAAATAGGTTGAAGTTTGAAGTAAACATA  
CCCATTTTTTGACGTAGTTTATCTACTTGTGTCCCTTTTCCGTTAAGTCATTGCCTTCAAAAACTACTTGACCTTTAGTGGGTACTTC  
TAATAAATTCATACATCTTAACAATGTACTTTTACCCTACCAGATGGACCTATTATTGCTACTACTTCCCTTGATTGATTTCAGGA  
TTGATATCTTTTAAACCTTCATTATCTCCAAAACTTTATTAAGATTGTTTATTTTAAATCACTGGCATTCATCTCCCTTCAATCATGT  
TCATAATGCGTGTAAGTACAAATGTTAAGACAAAGTATAATGCTGCTGCCACTATTAATGGTGTGAATGGGTCAAATGAAATACCTT  
GAACCACTGTGCTATAAACAATAATTTCCGCAACTCCAATTTGTGACACAATAGATGATTCTTTAATTAAGTGACAAATTCATTAC  
CTAAAGCTGGTAAATATTTTAAATTTGCTTGCGCAATAATTACATTTCTGCTTTGCTATAAATTAACCAACTACGATACGTCGGC  
TTCCATTTGGCCTTTATCAACAGCATTTTATACCTGCACGAATAATTTAGCAATGTAAGCTGAGGAATTAATAACTAATGCAATTGTT  
CCACAAACAAGAGCTGAAATGTCTAGTCCTAATGCAGCAGTTATACCAAGAATACGATAAATACTTGAACCTAACATTGGTGTTC  
TCTTAATATTTTCGATATAGATAGAAGCAATCCATGAAATAATTTTATTTTACTTAATTTTCATTAACGCAACGAATGCACCTAAAATA  
GAACCTAATGCAACACCGATAAGTGAAATTAATATTGTAATCTTAATTCCTTTCAAGAAAAAATACCATACTTAGAAATAAAACC  
ACTGTCATCATTCATCGCATTTGCGACATTAGTCATATATTATCGATTAATCCTTTATCTTTAACCTCCTTAATCGTTTTATTAATTT  
GTGACAATAATTTTGGTGAATCTTTTGGCACTGCTATCACTGTATCTTTTCTTCTTCAATTAATTTACATTTGAAATTCCTAATTTA  
GGATTTTGTTTAAATATGCTTCTGCTACAGGTTTTCACATACAGACCTTCAACCTTTCCACTTTAAGTGCTAATAACGCTTGG  
TAAACGGCTTAATGAAGTAAATGACATTTTCAATTTCCGTTTGGAGCATTTTTTCTGTTGCTAGTTCCCTTTTGTGCCCTACTTTTT  
TATTATTAAGTCTTTGATATCTTTATATTCACTTATCTTTCTTTTACAAGCATGATATTTTATGTCATCATATATGAATCTGAA  
AAATCAACTTGCTTCTTACGTTACGGCGTTGAAGTCATTCCGGAATAATAATATCAATTTTCCAGTTTAAAGAGCTCCTAACAAAC  
TATCAAAATGACATATTGACGATTTTAAATTTTAAATTTATATCTTTTCGCAATTTTTTTAGCTAAATCAATATCTACACTGCATACTCA

GTCTTACCATTAACTGTATGCTCAAATTCATTGGTGCATAATCTGCAGAAAGACCCACTCTAAGTTACCCGCGTTCTTTAATCTTCT  
CCCATGTTTGATCTTGTTACGACATGTGCTGTGGGATTGATATACACCATAGCACTGCTAATTAACAACCCCTAATACTAATATAAACCT  
AATTAACACTTCATTATATACAGCCCTCCCTAATTAATATTCATAATTATACATATTAATACATTTTGATGCAATAGTGTTTTATAAA  
TGTATTTTTATTAATATAAAGAAAAGCTTCTTTTTAAAAGACTGTACATAAAAAAATCCGCTATTATACGTGAACAAATCTCACATTT  
TAAAAATCAATAAAAAAGCGCTACTATCAATATCTTATTGACAGTAACGCCTATATTTATCATATATTTAAACTTATTCTGTGCATCA  
AGCTATAAATTATTGTTTTGGAACCTCAAATTTATAAATATCATTAGAATATATAGGAATGAATTTTTTACACAATTCATGAACAATA  
AATGCCGATACAAATGGTATGACAAAAATAACCAAGTGATAATAAAATAATATTCAATTGTTGGATCACCTGACATTCGGTTAAATGC  
ATTTATTGGGCCAACTAATCCTGTATATCCAAATCCAGCAGACAATGGTGTTCCTTTAACCTGAAGAACGTAAGCAATGATTCCAGT  
AATTATTCCATTATAGTCAATGGTATCGAAATAATTAATTTTTCAAGTAACTGGGATCATCATTTTTGCTGCTCCTATGAGTAAA  
ACTGCATTTACACCAATAGAATTGACACGCAATGAGCCAAATAAGAAAGTAACACAGGCAGCCACTATACCTAGGTTTGTGCTCC  
ACTTCCTAGTCCGTTTAACTAATCGCAGTTGCAATCGCTACTAACGATATTGGTGTACCATTAAATAATGAAAATGCCACACTAAT  
AAGTATAGACATTAACAACGGATTTAAGTCTGTAAAAGAATGAATTACATTTCCAATTGCTTGAGTAATTTTTCGAATGTAAGGTAA  
TGTGATTAGACCGATACCCCCACTAACGATAGGTACTAAACTGGTAATATAATTAATTCAAAAGATCCAAGTTTGTGTTGTAATAC  
CATATATATAAGACATGCAATAATAACAACCAAACTCGTATTATAATGTCACCTATACCTTTTAACATAAAACTATTATTGCTATAT  
ACAACAGCACCTGAACCAATCATAGCTGATGTACCTACTATAGCAGCACCTGCGCCATTAAATTTAAATTTGATGAGCAGCTAAAAC  
CCCAATAATAAATGCCATAAATGATTGAATTAGTATCACTAACTGATACGTTAATTCTAAAAATTTCAATTACCACTTTTAAATATTTTT  
AATACTTCACTTAATAAAGCATTTCGGAACAAGTGCAATAACAACACCAGCACCAATAGAATTTAAATCTTACTGAAAACTGTTT  
ATTATAGCATTCTTTGCGTTACTCATAAACGACCTCCAATTTGAACATTAACCTCATATTTAGAAAAATTAACCTTTAACAATGA  
TTAGTTGGCTAATTTAATCTAAATATAACAATTCACAAAATGAATAAAGTAAATTTAAACAATCTACTCACTAATCAATGTCATGCT  
AATTTTAAAATACTACTAATTACATCCTGTGACTAATAATGTAATAAATTTGTAATATTAAAAATAGCCATATTACTATTAAGATAGA  
TAAATTGAATCGACTTGGTATAAAGCAGAATAAAAATAGCACTTTTACAATTATTTTATTAGAAAAAGTTAAACAAATACATAACCCC  
AGATAATATAATCATTATCATTAAATGTAATACCAAAAAAACAACAAAAAGAAAGTTAAACAATGTATAGTTGCTTAACTTCTAATATTG  
AACTCATCATTACAATTTGACATAGAGCCTATTAAGCGGTGTACCATTGAGTCCACTTTTATTGTTATTGTATAGAGAGAAATAAA  
AAGAAACCTTGTTTACAAGGTTTCTAGTACGTTATGTTATGTAATAACAGTTAATTATACCGTGGTTCGGGGTGAACCGGACACT  
CCACAAGTGAACGGGATTTGAGTCCCGCGCTGTGCCAATTCGCCACACCGGCTTAATGGTAAACAAAAAACTTCCCTTTGGAA  
GCAATTATGGAGCGGAAGATAGGATTTACACCTATACCTCGTTCGGGAAGGAACGTGTTCTAAAAGTTGAACCTACTCCCGCAAT  
ATTAATTTATGGAGCGGAAGATAGGATTTACACCTATACCTCATCCAGGAAGGAATGTATTCTAAGAGTTGAACCTACTCCCGCATT  
ATTATTAATTTATGGAGCGGAAGATAGGATTTGACCTATACCTCGTTCGGGAAGGAACGTGTTCTAAAAGTTGAACCTACTCCCGC  
ATAAACCTGGAGGCGGAACCGGATTTGAACCGGTGATAAAGGTTTTGCAGACCTCTGCCTTACCCTTGGCTATGCCGCCAATAAC  
TGGGCTAGCTGGATTGCAACCA

>047-contig\_203

ATGAATATGATGTAGATTCAAGGATCGAACCACACCAAAAGGTTTTGGAGACCTCTATTCTACCGTTGAACCTATGCCCTATTAAAA  
ATAATAAATGGAGGGGGCAGATTGGAACCTGCCGAACCCGAAGGAGCGGATTACAGTCCGCCGCGTTTAGCCACTTCGCTACCCC  
TCCATAAATGGTGCCGGCCAGAGGACTTGAACCCCAACCTACTGATTACAAGTCAGTTGCTCTACCAATTGAGCTAGGCCGGCTAA  
GAAATGGTTCAGGACAGAGTCGAACTGCCGACACATGGAGCTTCAATCCATTGCTCTACCAACTGAGCTACTGAACCATAATAAAA  
ATGTAATGATGGCGGTCTCGACGGGAATCGAACCCGCGATCTCTGCGTGACAGGCAGGCGGTGTTAACCGCTACACTACGAGACCT  
ATAAAAATATTGCGGGAGGCGGATTTGAACCAACCGACCTTCGGGTTATGAGCCCGACGAGCTACCGAATGCTCCATCCCGGATAA  
TAAAAAATAATGGCGGAGGAAGAGGGATTGCAACCCCGCGGCCCGTTAAGGCCCTGTCCGTTTCAAGACCGATC

>048-contig\_124\_RC

ATTCCTCCAAAATTATATGGACCTTGCAGGACTCGAACCTGCGACCGAACGGTTATGAGCCGTTAGCTCTAACCAACTGAGCTAAAG  
GTCCTAAATATAATTTTACAACCTAATAATAGTGGCGGTGGAGGGGATCGAACCCCGACCTCACGGGTATGAACCGTACGCTCTA  
GCCAGCTGAGCTACACCGCCTTATATAGTTTGTAATAATATGGTGGAGACTAGCGGGATCGAACCCTGACCTCCTGCGTGCAAA  
GCAGGCGCTCTCCAGCTGAGCTAAGCCCCATAATAATTACAGTATATCGGGAAGACAGGATTGCAACCTGCGACCCCTTGGTCC  
CAAACCAAGTGCTCTACCAAGCTGAGCTACTTCCCGTATAATTAACGCGCCCGATAGGAGTCGAACCCATAACCTCTTGATCCGTAG  
TCAAACGCTCATCCAATTGAGCTACGGGCGCATATGTTTTATTGAAAATGGTGGCGGAGGACCGGAATCGAACCGGTACGGTGATC  
ACTACCGCAGGATTTTAAGTCTGTGCGTCTGCCAGTTCCGCCACCCCGCACTATAAAAAATGGAGCAGAAGACGGGATTTCGAAC  
CCGCGACCCCAACCTTGGCAAGGTTGTATTCTACCGCTGAACTACTTCTGCATATGCGGGTGAAGGGAGTCGAACCCCAACGCGTA  
AGGCGCTAGATCCTAAGTCTAGTGCGTCTGCCAATTCGCCACACCCGCAATGGTGAGCCATAGAGGATTTGAACCTCTGACCCTC  
TGATTAAGATCAGATGCTCTACCAACTGAGCTAATGGCTCTTCCATGGTGCCGGCCAGAGGACTTGAA

>049-contig\_251\_RC

ATGATGTTTGATTAGCTCATAAATACTAAATAATGTTTGTAACCTAATAGTTACGTTTTTGGAAATTAACGTTGACATATTGTCATTACG  
TTTTCAATGTTGTTTTGCTACTTACAAGATTTAATTATAACTCGTAAGTTTTTGTAAGTCAAGAATTATTTTAATTATTTTATTCTA  
AAAAATAAATTTCTAACTCAATTAATTCAACAAATATTATTTTATTATGTATTTGTTGCAATTTCAATAGTCAAAATTTACACTTTATT  
AATATTTTAAATCAACAACCTTAAACATTTGTTTTTAAATATTAGTGCCGTTTGACGACTTTTATATAATATCAAGTTATTCTAGTA  
GAGTCAACATAAAACAACACTTATTTTGTGTTAAAAATTACTGTTGAAGGGATTATTTCTATTCTGAAGTACTATATGTATTTAAAG  
TGTAATTCCTTACGCTTTTACTTCAGTTTACAAACAACTTATACTCACTTTATGGATAGTTATTTAGTAGACCTTCGTTTGAATAT  
TTTTATGTTATTTATAAAGGATACTAGTTATTAGTTAATACCACTTCGCTAGTTAGAATATTCTTTTCTTCAATTTAAATATTTTCA  
GAATAAGCATAAAAAAGAAGTTAAACAACCTTTCATGTGCTTTAACTTCTTAAATATTACACTTACTTATATGAAGTAAGCTAACGCT  
TTTTTAATTTGTCTACTACCAAGTTAAATATTATCTTGGCATTCTTTACAACTCCATAAAATTTCCATTTCGATGATGTGTTACGT  
CAAAGTCAGTCATATGCTGAGCTAATCTTCAATTTCAATTTAACTGTGGATATTGAAAATCAACAATCTTACCACATTGTTTCACATAT  
AATATGATAATGATTATGTGATTAAAGTCGAATCGACTTGATGAGTCTCCATATGTTAATTTCTTTTACAATTTCAATATCTTTAAAC  
ACTCTTAAGTTATTATATATTGTCGCAACCTTATATTTGGAAAAATCAGGTGAAAGTGCTTGATAAATTTATCAGCTGTTGGATGA  
GTATGTGAAGAAATTAATAACGTAATATTGCTTGTCTTTGAGGTGTAATCTTACGCTGCTTGTGCGCAATGATGCAATTGATTCTT  
CTAGTTCATGTTCAATTGATTCTATTTCACACTCATCTATATCACCATCTTTCTTATATAATAATAAATTATTACTTACTATAAATA  
ACTGTAGTATTGCGCGCGTGTCAATATTTACATGATGATTTTCAATTAATAGCCTTTTTTAGTATCCACTTCATTCTCAATTAGACCATT

CTTATTGAGAAAAATTAAGTACGATTGTTTTTAAAAATATCTAATAAGTCATACTTTGCTTCATAATCATTACCAGTTATATGTGCTGTT  
ATGGTTACATTTTCCAATTCATATAATTCATAATTAGGTTTCAAAGGTTCAATTTTCAAACACATCTAAATATGCATGTGCAATAAAGTT  
TACTTTTTAATACTTCTATTAAGACCGCTTCTTTAACTATGCTACCTCGTCTATATTTATAAAAAAGTGCTTCATCTTTCAATTAATTCA  
AAATGTTTTTCTTTAGTAAATGAATCGTTTCTTGCGTTTCTGGTAAAGCATTATAATAATGTCAGCATTTGGTAATGTGCTTTCAA  
GTGATTGCGATAGTATATATCTCGTCAAACCTCATCTTTGTTCTGACCTGACTTGCTCAGACCAATTAATTCATATTAAGCCTTTGC  
TAACTTCGCAGTTCTAGTAGCAATTGCACCTGTACCTAAAAATAAACTGTTTGTCTGATAGGCGTTTACCAGTTATTTTCAATCA  
TATATATGTTGTCGTTGGTTATCATATGATAGTTTCATCTTTTTATAATCATCTAAAAATGAAAAGCTAAAAATGTATTAGATAATTGTT  
TAGCTTGAACACCTTTTCCATTAGTTAAAAAGTATGCCGTGATCTGCAATATAATCTAACGGTAATGTATTTACACCGTTTCAAAC  
ATGCAATCCATTTTAAATTCGGGCAACGTTGTAAAAATGCCTCATTGATACCGCCATCATAACCACTAATATATCTAAATCAGCCA  
AGTCACTCTCAGGTATTTCTGATGCTTTTTTATAAAATTTAAATCTAAATCTGAAAAGCGTTGTGTAATTCAGTTTCAACTTCAG  
CATAACGATTCAACCAACAACCTTTATATATGTCACCCCAAAATGTTTTAAGTTCTTCTATTTGTGTTTTAACCTTAACTTCTCGAT  
AACATCTAATACTTTACCTTGTTTCATCTATTATAAAAGTCGTTCTTACAATGCCATACCTTTCTTGGCAAAATGATTTTTTCAACTGAT  
ATACGCCAGTTTCTTTAGCTAATTTAAATCTTCATCTACTAATAAATCGAAATTCATCCGTGTTTCTCAATAAAATTTTGGTGT  
TTCTTTGAATCACCGCTTATACCATATACTGCAACATCTAAATCATTGAACATTCTAAATGTCTCTAAAGTCACAAGCTTCTGTGG  
TACAAGTAGGTGATTATCTCTAGGATAAAAAATATATAATCGCCTTTTACCTTTAATGTATCATTTGTAATGACAGTTCCGCTTG  
ATTTTCTAATTTAAATATTGGAAATTTGTTCTCTTTTTGCAACATATAATCACCTTTTTCTTCATTATAATAATTTATGATACGATAT  
TAGATGAAATATTAATTAAGAGGTTGATATAAATGAATTTTAGTGAAGTGAAAGTTTACAACAACCTTTCAAACGAATATAT  
TCTAGGCGGTGTCAATTTCCCTTCTCGTTTATAAAGCTGTAGGAGCGGTGACCTGTTGTTATGAAAGAAGGACCGGTGCATATA  
TTTATATGATGTCGATGGCAATAAAATTTATTGATTACCTTCAAGCATACGGTCCAATTATTACGGGGCATGCACATCCTCATATTACT  
AAAGCAATTCAAGAACAAGCAGCCAAAGGTGTTTTATTGGTACACCGACTGAACTAGAAAATTGAATTCAGCAAAAAATTACGTGA  
TGCAATTCATCTCTTGAGAAAATTCGCTTTGTAATTTCTGGAACAGAAGCAGTCATGACAACAATTCGTGTTGCACGTGCATATAC  
TAAAAGAAAATAAAATTATAAAATTTGCTGGATCTTATCATGGCCATTCTGATTTAGTATTGGTTGCAGCAGGTAGTGGCCCATCTCA  
GCTCGGTTCTCCAGACTCAGCTGGTGTCCAGAAAGCGTCGCACGTGAAGTCATTACTGTACCTTTCAATGATATTAACGCATATAA  
AGAAGCAATTGAATTTTGGGGTGATGAAATTTGCCGCAGTATTAATAGAACCAATTGTTGGTAACCTTTGGAATGGTAATGCCTCAACC  
TGGATTTTTAGAAGAGGTTAATGAAATTTTCGCATAACAATGGGACACTAGTGATTTATGATGAAGTAATTACTGCATTCCGTTTCCA  
TTACGGTGCCGCTCAAGATTTATTAGGTGTTATCCCTGATTTAAGTGCATTTGGTAAAATTTGTGGCGGTGGTTTACCAATTTGGAGGC  
TATGGTGGACGTCAAGATATTATGGAACAAGTAGCACCTCTAGGACCTGCATATCAAGCTGGTACAATGGCTGGTAACCCGTTATCT  
ATGAAAGCAGGTATTGCATTACTCGAAGTACTAGAACAAGACGGTGTTTATGAAAAATTAGACAGCTTAGGCCAACAACCTAGAAGA  
AGGTTTACTTAAATTAATCGAAAAACATAATATCACAGCTACAATTAATCGTATTTATGGATCTTTAACATTGTACTTTACAGATGA  
AAAAGTCACACATTATGATCAAGTTGAACATTCTGACGGCGAAGCGTTCGGTAAATTTTCAAATTAATGTTAAATCAAGGTATCAA  
TTTAGCACCTTCTAAGTTTGAAGCTTGGTTCTTAACAACCTGAACATACAGAAGAAGATATTCAACAACTTTAAAAAGCTGCAGACTA  
TGCTTTTAGTCAAAATGAAATAACTTTTAAGGAAGTATATTTTTAATTGAATTAATAAAAAAAATGCTCACATAGTAGATTCAATTT  
ATATCGTTAACTATTAACGTTTAACTTGATATGTCACATATGTGAGTTTTTATTTTACAAATTTATACTCTTTAATCTCTGACTAAAGT  
TTTACATCGCTATCAGTATTATGTATGATTTATTTTAAACAATATAAATAGCTGAATTTGTAACTAGTAAGTGATAACAGTAAT  
GAATACGAATATTAGATATTCAATAAACTTAAAGGGCGCTATTATTTTGGAGCTAGGAGCTCGGATTTTTTAAACTGGTATAGC  
CATTATTTTAGCTATGTCTATCGCTTCTTACTACCGGATGATGTTGGTCTGAAAAGCCTTAGCTGGTGTGCTGCTGTTGTTGCAATG  
CAACCTAGTATTTATCGTTTCAATTTAAACAGTTTCTGATCAAGCATTGGGTAACATTATAGGTGCCATACTATCTGTTACAATGGTAA  
CAATTTTTAGTGATAATTTTATCATTATGGGTGTTACCGTCATAGTACTTATTGCTATTTTATTTAAATTTAATTTAGCACATGTTGCT  
ACTTTGGCGAGTGTAACAGCATTAAATCATTATGGGACAACATACCGGTTCTTCTATATTACCGCCTTTTACAGGTTGTACTTGTA  
TGATTGGTGTGATAAGTTCATCTCTAGTTAACTTTGTGTTTCTACCACCTAAATTTGAAACAAAAATTTACTATAATTCATTAAATAT  
ATCCTCAGATATTTTTATGTGGTTTAAATTAGTATTAATGATACGACGGAGTTTAAATATTAACAAGATAGTCATAATTTAA  
ACAACGTGTGCAAAAGTTAGAGAAAATTTATGATTACTATAGCGAAGAAGCTCCTATTACAAAAAACATATTCACCAACAGATA  
GAAAGAAAATGCTTTTACAGAAAGTAGTTTACAGACGCTAGACAAGCTTATGAAGTATTAACAATTTGTCGGCTTACAAAACGAC  
TTATATTTACTTAATAACAATTTCTATTACAAATCAAAATTAGATTTAGATTCATTAACCTGCTTTTACAGGCAAAATTTAGCTAGCC  
TTTCTAAAAAAGCAGTTATAATGTGACACATGTTGATTATGAGTTAGATAATCCGCAGAAAAAAGATTTATTGTCTACATTTACAGC  
ATGAGTTAATAAATCATCCTTATCAAACGGAATATTCGTTTGCCAATGTTATGCAAAATGTTGCAGCCATCGAAGAGTATCGACACC  
ATTTAGAGCATTTAGACCGCATAAGAATTAGCTTTTTCACATATCATAGATCTGATGCAGACATTGAAATGTTGAAGAAGACTTTG  
ATTTATAACATTAACAAATTCCTGTAATTAATACCACAATGAGATAAAGTAATATTGAATCTCGAAATTAATTTAAAAAAGCAGT  
AAGATTATTTTCAATTAAGAAAATCTCTTACTGCTTTTTCTATGTTATGACCCCAACCTCTGTTACGAATTTTCTCTTCAAGATTGTA  
CTGAAGTCAAACAATACTTTATAAGTTTGAATGCTATATAAATGCTCGTAAGCACCTTGTGTTGCAATTCACGATGCGT  
ACCTGTTTCAACAATATGTCCTTTTCAATTACGCAAAATTTTGTCAGCATGTGTAATAGTGGACAAGCGATGCGTACGATAAGTGT  
CGTTCGATCTTTACTACACCATCTAATGCTTCTGTAATTAATGGATGTTACTTTCTAAATCAAGTGCACTTGTGCTTACCTCAAGATA  
AGAATTGGCGGATTATTTAAAAATATTTAGCAATCGATAATCTTTGTTTTTGACCACCTGATAATTTAACACCTCGTTACCTACTT  
CAGTGTATATCCCTGTGGCAAGTTTCAATAAAGTCATGTGCATTAGCCATTTTTCGCCGCTTCAACTACTTCTTCATCTGTTGCTGT  
TGGACGACCAAGTAAAATATTTTCTTAACTGTATCAGAGAATAAAATATTATCCTGTTGCACCAATCCTATTGATTCTTAACTT  
CCCGTTAAAAAATCTTAAATATTGTGACCATCTATTAATTTTGCCAGAAAGTTACATCGTAAAATCTCGGTATTAAGTTAATTAATG  
TTGATTTACCACCACCACTCATACCTACGAAAGCAACTGTTTCTCTTTTTCAATACTCAAATTAATATCTTTTAAATTTGGATCTTC  
GTTATCGTTATATTGAAAACCTAACATGATCAATATCAATACGACCTTGTGTTAATTTCAATAGGTTGAGCACCAACACCATTTTTAATG  
TCATAATCTTCGTCAATTAATTTGGAATACACGGTCCATTGAAGCAAACTTTGCGTTAAAGTTGTAATGATGCGATAACACGAGT  
AAAGGCCCGAACAATAACTTGAAGTATCCAACAATGTCTGCAAGTGTACTACTGTGATTGATCCAGAAATGAGCAAGATATGCAACC  
AACACCGATGACAATAATTTGGTCCAATATCTGTAACCTGTATTAATTTGCGGCAAAAGGAATAGGCATTCCATCTGTATGTTTCAACGC  
ACGTGTTAAGAAATTAGTATTCTTTTTATCAAAGTTTTTCGCTTCATTGTCTTCAATCGCAAACTTTTAAACGACTGAAATACCTTGA  
ACACGTTTCATGCAAGAATCCTTGAACCTCAGCTAATGCTTGAGATCTTTACAGTGTCAATTTTCTTAATCTTCCAAAGAAAACGTAC  
ACCGTTAAAAATGTAATTTGGAAGATAAACAGTGTGCTAAAGTCAATTTACATCTAAAAAGAACATTATGGATAGTGCAATAAT  
AATTGTTATACAATCTAACCAAAATATTCATTAACCCGTTAAAAATGAAATCTTTTGTGTTTCAACATCATTAATCACTCTAGATATT  
ACTTGACCTACTTGATTATTAGCATAAAAATCTCGCACTTAAAGCTTGAAATGGTTATATAACTTTTTACGTATATCATACAATATTT  
TATTACTTGTCCATTGCGCCAAATATTGACGTATAAATCAATTTGGTGGTCTCACTATTACAAAAATAAATGCGATACCAATGG  
CAATAGTTAAATGATGAACCTTTTTCATCAGTCGTTAATGCGTGGTTATTAATCACGCCATCTATTGCATATTTAAATTAAGGTTAT  
AAGCATTTGGTATACCAAACTTAATTTATCCAAACAATAATCGTTGCAAAAAATACGATATTTGTATGGCTTACAAATTTGCAAAATATCG  
TTAATCATACAATCCCCCTAATCTATTGCCCTATCTATTTCATAAGCATAAAAAATGAATAGAGGTTGGATACATAATTTGTAGAT  
GTAAATCTTCTTACAATTTACATTTTTTAAATTAAGATATCTCAACCTCTGTATATTCATGTGATTAAATACGTTGTCTTATTTCGTA

TGTTATATTCTATTCAATTTAATCTATGGATACTGTGTCCCCACACGACAGCAAAAAGTTATCATACTTCTTTACATCACTAAGTCAAT  
ATAAAATGATTTAATCAGTATTTACACTTTATTTGCTTAATACTGTCTAATTTTTTTGTAAACGTTCTTTCCAAACTTTGATAAAATCTGG  
CGCGAATGGGCCCTTCTTCTGTTCTATCCATTGTTGAAGAATGTCACGTTGCGTCTTAAAATAATATCAATATCATGCGGATAATTC  
ATTTGATTCATATGTTGCTCATATTCATCTTCATCTAATAAATGATACTTTCCGTTTGGATATACTTTAATATCTAAATCATAGTCTAT  
ATATTTAATGCCTCTTCATCACAACAAATGGTGATGACAAATTGCAATAGTAATAAATTCATCTTCTCTAAACATGCAGATAAC  
ATTAACCAATATTCTGAGTGAAAGTAAACAATTGCCGGTTCACGTGTTATCCAAGTTCCTCCGTCACCTTCAGTTACTAACGTATGA  
TCATTGCCACCAATGACAACATGATCAGTACCCTTTAATATTGTTGTTTCAGACCAAAACGCGATGAATCTTACCATCATGTTTATAAC  
TCTGAATTTTAAATGTTTTCCCTTCTTTAGGTATGGATTCTCTGACCATACTCCACACCACCTTCTGTTAATTTAACCATTATAAAATTA  
TAGCATATTTTCAGAAATAGTATTATATAAATACATATTTTTACGAAATAAGATTTTACTACTTAATAATTAACCTAGGTAATATTGGCT  
AAGTACTACAACAGAGATTTACATGTCCCATTTAAAGTATATAAAATCATCACTTTTATAAAATCAACACTTTAACTTTTGGACATTGT  
TATCCTATGAGATTTAAAGATATCATTTATACATTTTTTAAATTAATGTCACATGTTTTCCGATAATATTACCAATCATCGAATGTT  
ACCCATTTATAAATTGATAAATCTTTGACATAGGTACAGGGAATGTATATTGGTCTCGATCACTTAAATTAACCAAAATCATGTCAT  
CTGGTAATGTTTCAATGTTAATTGCTCCTGAAACGGCGTATACCTTAAATCTTCCATGTTAAATGAGTAAATTGATGCTTCAACTCAAA  
AATAGGTGTTTCTACTGGTTGAATGTCATGACCGATTTTTTCAGTCATTTTACGTCTAGCATGCTCAGTTTCAAACATAGGAAATGTC  
CACATACCATGCAATAATTTTTTCGTACGCTTTTGCAACAGATATTGACCTTGATTATTTCTAATTA AAAAGACGGATTGCTCAATTA  
CTTTTTTACTTACATTTTTAGATTTAACAGGTAACCTTTTCAAATGTACCTTTATCAAATGCCTCACAGTTTTCTTGAACCTGGACAAAAT  
AAGCATAATTGGATTTTTTGGTGTACAAATTAACGCCCTAATTCATCATAGCTTGATTAAACGTTCCAGCTTCTGTAGTAACATACG  
GTAATAATTCTTGTTCTGACGATTTCTCGTCGATTGTAATTTAATATCTCGATAGTCATTCATTAAGCTAGACACTTCGAAATTCGAAAC  
ATTTCCGTCTACAGTTGCTAGGTGTACATTATATGCAATGTCTACTTACGAGCTTGTGTGTATGGGCCAACACCTTTTAAACGCTTTA  
AATTGATCAGGATCTTTGGGAACCTAAGCCTTCATATTTATCATGAACTTCTTTAATCGCCGTATGAAAAATTCGAGCTCTACTATAAT  
ATCCTAAGCCTTCCCAATACTTTAACACTTCATCTTCCGAAGCTTGACTCAAACTTCCACAGTTGGAAATCGTTCAACAAAAACGAT  
GATAATAGTCAATAACTGTTTTAACTTGTGTCTGTTGTAACATGACCTCACTTAACCAAAATATAGTACGGATTGGTCGTTTGTGCCA  
TGGCATTTCTCTTTGATTTTCATCAAACAGGTGTATCAAATTTTCTTTAAAACTAGACTGCTGATACATTATATAAACCCCTTCTCTCAC  
CAAAATTAATTGCTTTTACTCATAATGTTTTATTGTACATTAAAAATCATGATTAGTATGTAAGTTAATTTAGTTATTTGCGAAATG  
GATTATAATAGTATATATAATATTATGAAATGAGTGAACCTGATATGGACACTGCAACACATATCGCAATTGGGGTGGGCCTTACATC  
ACTTGCAACTCAAGATCCAGCAATGGCTTCTACGTTTGGTGCAACAGCTACAACCCCTTATCGTTGGTTCATTAATTTCTGTATGGGA  
TACTGTTCTTAAATTAAGGACAATGCAACATATATTTTCGATCATAGAGGTATCACGCATTCATCCCTTTCACAATACTATATGGCC  
AATTTTAATTACATTTTTAATATTACGTTCTTTAGTGGAACCAACCCATTTTCATGTATGGATGTGGGCTCAGCTCGCAGTATTTTTA  
CATGCTTTTGTAGATATATTCAATTCTTATGGTACACAAGCGCTTAGACCTATCACAACAAATGGATTCAATTAAGTGTGATTAAC  
ACATTTGACCCTATTATTTTACAGTCTTTGTATTGGTATTGTATTATGGGTTATAGGCTTGCATCCATTTGCAGTCTTCTTTCTCTAT  
AATCGCTTTACTAATCATTTATTACATGATTTCGTTTTTAAATGAGAGCCGTAATTAAGCAACAAGCTTTAAAGCAATTCACAAGA  
GCATCACCCCTGTTAAAGTATTTGTTGCGCCAACAATAAAATTTATGGAATGGCGTGTGCGGATACAAAATGATGCACATGACTATGT  
TGGAAAAGCATATGGTAGGAATGTGGTGTATTAGTGATAAAGTGGAAACGTCAAACATTATCAACAGACTCCATTTTATGGAAAGTCA  
AAGGTAATAAAGATATACGTACTTTTTTAAACTTTTCACTCAATCTATCGTTGGCAACAACAACGTTAGCAGATGGTTCTACTGAAA  
TTCGTTTGATTGATTTGCGTTATTTTAAAAATGATCATTATTTCATTTTGGCAATTGACATGTAACAAACGATAATGTCATAGACCA  
CTCTTATATTGGCTGGGTATTACAGAAGATAAGTTACAACGTAAACTGTATGCTAAATAATTTCAAGTTATTATTCACTAAAAGTTA  
ATCTATAAAAAATGAACAACCGGGCAGAATGAAAAACAAAACGATTTTACTCTGTCCGGTTTTTTAATGTAAAACTATGAATGCTT  
TTACAAAATCTAAAATTTATATTGTTGCTAACAACTACCTTTAATGACTCGAAATATCAAAATCAGTATAGGAAAACAATATCTAG  
ATGATATTCTAATTGTTTCTGATTCTCACAGATTAATTTACACAACAGGTCAGTAAACATCATGAAGAAGTATCCGCCTCGTCTGTA  
CTATCATTTGAAACATCCTGTTGATTATCAGTTTGTGTCACTTTAGATGTTTTATTATAAATGCGTGTGTGCTATACCTTGCTAATAC  
GAAATTTACTGCAGCTATTAACATAAGAATAAAATAAAGTAAAAATGATATGGAATGTTTTCCATACTTGATATACCAAAATATGAT  
AGATTGTGCTATACCATTAACAATGTAATACATTGGATTAGCATTTAGGATGTGATTGATAAATACATGATTGGATTGGTATGAA  
AATAATTGGTAACAATAAGAACACAATAACAAAACCCCAATAAATATGATATTTTATTTTTCAGTTTAACAGTCAATAAGACCAA  
AAGTAACGGATATTAATCCTACAAAAATAGTTGCCATCACAATAAAATAGAATAGCGCTATATGATGTTTCGAAGTTTACTGGTT  
TAACCAATGCACTAATCATCGTCAAAATGACTAGCATAATAAAACTTAAATAGACATAATAACTACTGGCGTGTGCGGAAATA  
TTAAATAACTTAGTAATTA AAAAGTCAATTCATATAATGATGATAAGAGATATAAATGTGAACATCACTACCGCAAAAAACAATCAA  
TACAATGATTCTAAATAACCATCTCACCTCTTAAACATCGGTCAAATGACTAAAGGAAAATAGCGTTTCACTTGAATAATAAGTAT  
TAAACATGCAGCTAATACGATTAGAAAACCTTTCCAACCTTTGTTTTAAACGTTCTGTTACATACCTTTTAGTATGCGGTAAGTTTTTA  
AAATATAAAATAATATTATCTAGCATCTTTACACCTACAATTCATATAAATCCATTTGTCTTCTTTCAAATTTGGCAATACAATATCC  
ATTTCCCAACTTTAGTAATCCAAATGTTATTGTTAATATAAATCTATCTTTTAACTCTTTTATCTACAATTTGGATAAAACAAAACCGT  
ATAACTGATTATTATCATTGAAAAGTAATTGTATCGGTTGTGTGTAACGGATGCAACGAAACGTTTATCATCATCAGGAATAAAG  
TTTTATGAACTGAACATGCTTTTTATGTAATTGACTATTAAGTATGCTATAGTAATTAATTTACTATAAATTTTATCATATGGTGCTAAT  
TTTTTAAACTATGCGTTTGATATAAACTGCGGGTTAAATATTTCTAATTTATCTTTACTAACATAGTAAGTCTTATTATCGGCGG  
TAACACGATAAATTTTACTATTTTCGCCAGTAATTGTAACCTACACTATATTTTGGAAATTGTGACTTGTTTATCCCTTGCATATCCACA  
CTGCCATTA AAAAGCAATTCATAAGCTAACTTTTCGCCATATGGATCTTTATTTTCATTTTGCATCGTAGCACGATTTCGTA AAATCTG  
TTATCGAAATAATTCCTATATTATTGAAAATGAGCAACATCATCAATGCTAAGCCTAAAATAGTACCTGAGGCTAAAGTCCAAAAA  
CGCACTAAAAAATTAGGCGGTTTTGTCATGATTATAGCGCTCAACACGTTTGAAATTATAGGTCATCTCTGGTATTCTTGTACGATTCT  
TTTTCCAATCTAAATCAAAGTTTTCAATTTCTTCTTTGAGTTTAGACTTAATCGATCACGTTTCATGTTCTTTAAAAAGATGGAATAACT  
TGTTTAAGTGACCCCTCCATCTCTAATTGACCATTGTGAAAACCAAGCTATGTAGTTACTCACTTGTGAAATTTTATCAATATCATCAC  
CAATTGACACAATCGTTAAATATTTTCAATATAAATTTGTTAATTTCAATGCTACGTCACGTTCCATAAATTTGATGTGTAATAGTCAAT  
AACATGATTTAAAAATAATAATATTGATTTTGTATGAGCGTGCAATACTTAATAGTAATTGAGCGTATGCCGCTTTCGATATATGGTT  
AACCGGCTTCGTTTTATAATCGCCTAAATGTGCATATTGAATAATCTGTTACAGCTTTATGATCATTAATTTTCATATGGAAATAGTTGA  
ACTAACTGCGCTGTATAAGCTTCAACAGTTTGTATGAATTAACGATTGATCTTCAATATATCCGTAAGACAAATCTTCAGTACAACT  
ACTTTACCTTTATCAGGTTTAAATTGCACCTGCCAACAATTGACCTACCAACGCTTTGGAAGATTTCAGGTTACCAATTAATACCTAATG  
CTTCTCCTTGATAAAATATGTA AAATAATATTGTTTAAATCGATATCTTCAGCATCATATCCAAAAGGTA AAATACCATTTCTTATTCTG  
TTTATTCTATAGTAGTGTGTTACTTTTAGTAACCTTTAAAAACAATTGAACCTCCCATCTATTTTCATCCTTCTATAATTGTAATAACGC  
TTACTGCCATCAGTCAGTTTATAAATTTTCAATTTTCTATCTTTTCTGTCTACTAAGTAACCTTTCGGCAACAATTAATCTTACTTTG  
ATAAACGTCATATTCATTTAAATACCATTCATCTCAGCTTTTCTCATTTTCTTCTTTATAAAGTTGTATTTCTGTCTTAATTTCTGGCT  
CAGACATCTCACTCAATTTCTTCTGTTCCATCGGCAATACCACTTTCTTCTAATTTAGCTTTAATTTTATCATATTTATATCTTTTCTC  
ATAAGGCCTTCGATAGTTTTTGAATTAATTTCTGTTGCGTGTACTTCTTCGATTTTTATTATAAATTTTTTCTAAATCTCGTTGTAA

TAAATCGTCTAAAACCGCTTCATCTTGTGTAATAATCCATTTTCATTCAATACAGCATGAATGGTTTCCATTTCAAACCCTTTTGAATT  
AAAGATTGCATTACTTTTTCTTTAACCTTATTTTGTGGCCCTTTTTTGTGTTTAGATATTTTTTCAGCAATTTGGATAATATCATCAAGT  
TCCTGTTGTTCTCTATAAAGTTCTGTAAACATTTCAATGATATTTGGTTCTATACCAAGTTGATATAGTTTTTGTGATAAATTTAGG  
TCCTTTATCTGTCGTGCGAATCATTTGATTTTTTAACTTTCCGCATAATCTTGATGGTCGATTAACTTTTCGCGATAACAATATTCAA  
TCACTTCAGAAATCGCTTGCTCTGATATCTCTCTTTTTGTAAATATTGTATAAATTCTTTTTCAGTTCTCTTTTTATATGATAAATATT  
GGATTGCTTTGTTTAAACCTATGCGATAATGATCATACTTTTGAACTCTCGCCATGTCAGCAGCTTCAAGTTGTTGCCCTTTTTTAAA  
TTAAATTTGACTAATGTATCGATATCTATACCCATTTCAAATTTGTTTCGTCTAAAAAAGATTAAACGTTCTTTGTTTTCTTTGAAC  
TTCTATTTTAGTAATCTTCGGCACTGGATCACCCTGTTACTTTCTCAAGTTTTAATACAATACTCTTTTATTATTCAATAAGCCACTTC  
CTATAGCAAATGTTAACTTTAAATATTTTCGATGCTAACAAAAATCACACTATCATCTTTTAAAAATGAAAGTGTGATTACAAGC  
AAATCTGTAAAAATTTATAAAGCAGAAACAATTCAACTTTATCATTATGACATTTCAAATTAACCTTCTACATTATAGTTCCCAAGCATC  
TTACACATGAATGCAAGTATTTAACGATTTAATTGTGACATAGCCTGTTGATATTGTGTTTCATTGATATAATTTTGTGCTTCATTTT  
TTCTAAGTTCGTGCTTACACGTTGCGTAAAAATTTCTGACATATTATTGATATTATATACGCTAGGTGCATTGACTTTACTAGCTAAA  
ATAGCGCTTTGTAAACTGTTATGTGAGACATTGTTGTACTATTTTTATTACGCTTGTTCCAAAGTAATGGTTTGTGCTGCGCCCTCAA  
GCGTATATTGATTATCCCCAAAGTAAATATTATTTAAATAAAAGCTTAAAAATTCGTTCTTATTATATTGTTTTCAACTCGATGAGC  
TACAAATAATCTTTTACTTTTCTAGTAAATGAACGATCATTATCATAAAAAATAATTTTTGACAACTTGTGTGTAATGGTACTACCA  
CCTTGACATCTCTGTCGCTAATCGTTGAAAAATAAGCTCTAGTTGTACCTTTCAAATCGAATCCATGATGATTGTAGAATCGTTTCAT  
CTTCCATTGAAATAAAGGCACCTTTAACATACTCTGGCATGTTATCAGCTGACACAAAACACTTTTTATTTTCAATTTTCTTAGTTC  
ATCCACATTATCGCGTGTAGATAAAAAATACATGATACCAATAAACAATGCGATAATGATTAGAATGGTTAATAATATTTTAAATAG  
TATTCGTTTACTTTTTCTTTTTTCGGCGGTTTGCCCAACTGGTTGATAAATACGTATTATAGTGAGGTTCTGTTTTCATATGCTCAAAAT  
GTTCAATTTGAGTTTGTGACTTATCGCTTCTTTTTCATGCGTTTGTCTCTTTTTTAAACTCACTTAGTATATACCTTGAGTTTACCAG  
TACTATCACAAATAGGCTACACTTTTTGGGAAAAATCAGTCCAAGGGCTTACAATCGTATACGCCATCATACTTACTTTTTGTTTTT  
GAAAAAATTATAGATAAATCATTGCAATTTTAAATATTAATCATGTCAAATATTGTTATATTTTAAAAAATAAAAGACCATCCCTA  
TTAAATGCCAATAGAGACGACCTTTTATTTGTTATTCATTTATTAATAAATAAATCCATATTTTCATTTCAAACGAAAAATATATAAAT  
TTAAACAATCGATAACCACAATACTTCTATTGTAATTGTTTAAACGATTTCTCGATTAAAAATCATCTAAATCGTCTGGTACTCGACTGT  
TACAATATTGTTGTCTACAACACTGACTCATCAACTACATGTGCGCCTGCATTTGATAAATCTTTGCGCACATTTAATACTGCTGTT  
AACGTACGACCTTTTAAATCGTCTGTATCTATTAGTATTTGTGGCCCATGACAAATGGCAAATGTTGGTACATATTTTAGTAAAGT  
ATTTAGCAAATGTGCCATATCGACCTTCTGTATCTCCACGTAAATGATCTGGTGAATAATCCTCCAGGAATTAATAATGCATCATAAT  
CTTCTGGTTTAGCTTCTGCAATGCCTACATCGACAGTAACTTTTTACCGTGTTTACCAACAACCTTCACTATTTGCAGTATCTCCAATC  
ACTACAGTATTAAGCCTGCATTCTCTAATGCCTCTTTAGGGCTTGAATATTCTATATCTTCAAATTCGTTTGTGCTAGAATAATTGCTA  
CTTTTTTAGTCATTGAAAATCACCTTTCTATATATCATTGATATAATTACTATAGACAAGTAAATCAGTGATTAAACATACAAGATAT  
AAAAAATATTAAGCGACTATCGCGATATCTAACTCTAACACATCTTATGCGGCATTTACTTAGATACTAATTTAACCTTTTCTTCAAG  
CTGATCTAACAATCCAATCCATTCTATATCTTCAACACGTAATTCATCAGGATTTACATGATCGATATCTCAATAAACTTATTT  
AAACGCGCTTTTATCTGTTTCGATTGTTTGTGTTTCATTCATAAAAAAGTTAACTCCTTTTATTTTGTCTTTTTCATTATTATCTTAAC  
AGAAATGCGTTAAAGCGATATAATCTTAGCTATATTTATGACATTCAAATATTTTGACTTTTAAAAATCCCCCTTTTCAATTAACATA  
AAATTAAGAGATGTTTGTATACGAGTGATAATACGAATGGTATCATACCGGATGAACCAAAATAGAAAGAAAGGAAGTTTAAAGCG  
ATGAATAGCGTCAAATTTGAAGCAACCTGTTAGCATTTACAATGATCCATGGGAATCATATAACGATGTTAAAGAACATGGCCAATT  
AACTTTAAGTAACATCGAATTTACAACACAAATCTTTGTAATATGCGTTGTAGCCACTGTGCAGTTGGTTATACTTTACAAACTGTC  
GACCCCGAGCCTTTAGATATGGACTTAATTTATCGTAGACTTGATGAAATTCCAAATCTGCGAACGATGTCAATTACAGGTGGCGAA  
CCAATGTTTTCTAAAAAGTCTATTAGAAATGTTGTTAAACCTCTATTAAAGTATGCACATCATCGAGGTATATATACACAAATGAAT  
TCAAACCTAACATTGCCTCAAGATCGTTATTTAGATATTGCTGAATATATCGATGTTATGCATATCTCACATAACTGGGGAACAACT  
GATGAATTCGCAAATGTTGGCTTTGGCGCAATGAAGAAGCAACCACCGTTAAAGCTAAGTTAAAAATTATATGAACAAATGATTTTC  
GAATGCACGTACATTATCAGAACAAGGAATGTTTGTATCTGCGGAAACAATGCTCAATCAAAGTACGCTACCACATTTACGAAAAA  
TACATCAAGAAGTCGTTATGATGAAATGTAGCAGACACGAGATTCACCTATGTATCCAGTCACTTTGCAAGTTGCAAGTTTAAATG  
TGTTAACTCTAGCGGAAATGAAAAAGACAATTCATGATATATTGGATTTTACAGAGATGAAGATATTTGGATGTTATTTGGTACTTTGC  
CTGTGTTTCCATGCTTAAAGATGATGAAGATCAAAAGTTACTATCACGTTTAAAGAACTGCTAAAAATGTAACGACTAGAAATGAC  
CCGGATGGCCGTAGTCGTTTAAATGTCAATGTATTTACAGGTAATGTAATCGTAACCTGATTTCGGAGATGAAACAGGTACAATTTTCG  
AATATACAAAAAGATAAATTAACAGATGTATTTGATAAATGGTTATCCTCTGATCTTGCTAAATCATTAAATTGTCATTGTTCCGAG  
TTAGTTGTTTAGGACCAATGTTCTTGTTAAAAATATGTACTATCCGAATATGGATTTTAAAGATAATGAGCGTCATATGCACAAA  
CAACCACAAATTATACAATTTTAAAAACGCTTAATTATGCGGAGAAGCACTTTATCGATAAGTAGTCTCCGCATATTTTAAATGCTAT  
TATAAAAAATAAAAAACAATTAATTGCTGGCAGTACTCTACTTTAATAATAAAGGTCATTTAATAGGACTAATAGTCTATAATAAAAG  
GGGTAAATTTTAACTAAAAGCATAAACAGTGCATAATCAAAAAGACAGATTTAGGTGGAATATTGCAACATAACAGTTCAATTCAT  
CCTTAAACAATCTGCTTTTATTTTTAGTCTTATTTTGTGCTTGTGCACTTAAATATTCAATTGTTGTTTCAATTTTCAATGCGACGTG  
CTTTTCTTCGTTCAACACGTTGTGGTGTGTATCATAAAACCATTTTTCAACATCATCTTCTGGATATACACCAGGTACATGTTTAGG  
TTTGCCTTCATCATCTAACGCAACAAATGTTAAGTAACTTAATGCAGCTAAATCATGCTTGTTATTAAATACATCGTCAATTCTAATT  
TGAACGACCACTTCCATTGAACTAGTCCCAGCGTATGAAACCATCGCTACGTATTGTAATATGTCCCCTGTTTTAATCGGCTTTAAGA  
AATCTACTGAGTCTGTAGATGCGGTAACCTACTTGCGCACCGCATGTTTCATAGCTGTGATTGCTGCAATTTTCATCAATATTAGCCAT  
CAATGTACCACCAACATTGTATGATGGTGATTCTGTATCTTGAGGGAACCTTGCTATTTTTTATAACATTTTGATTCTGACATAGAT  
TTCATTGGTCTGTCTGATTGTGCTATTATTTATCTCCCAATCTATACTTTAATCAGCTATTTGACCTTTAAATACATGTTTCATTTCCT  
ACTCAGCACTCAAAATAACATTTATTAATAATGTTGATGCCAATTTCCATTTTCAAATACTAGTCTTTTGAACCATCTTCGAATAT  
GCCATAAATAGTCAAAATGACTACTACCAATCATGAAATCGACATGTACATTTGAATCATTTAATCCCGTTGCAATCTTTTCTCAACA  
GTCATTTCCGTTCCACCTTGAATATTAAGGCGTAAGCAGATCCAATCGCTAAATGACATGCTGCATTTTCATCAAATAAAGTATTG  
TAAAAAATGGTATTACGATTTGATATCGGTGAATCATCAGGTACTAATGCTACTTCACCTAATCTTCTTGAACCTTCATCAGTATTGA  
TTAAATCTTTCAATACCGTTTACCTTTTTTCAGCTGAAAAATCAATAATCTCTCCATCTTTAAACATCAATTTAAATTTGATCGATAAT  
TGTGCCATTATAACTTAAAGGCAATTTATTAGTAACATATCCATCTACTCTATTTCGATCTGGTGTGTAATACTTCTCAGTTGGT  
ATATTAGCAATAAAAGCTTGTTCCTTGCCGTTAACATAAATTTGTAGCATCTTCCCAGATATGATTTTTCGCTAAACCTACCGTTAAAT  
CAGTACCTTCAGATACATAATGCAACGCATGGTAATTTTTTGTGTAACCTTTTGAGCGTAAACACTTAAATTAGCGATGTGTTGACG  
CCAATTTTCAACTGGATCGTTACCATCAATTCGCACAATATCGAATACCTCGCTCAATAAACTTAAATATAGCTTCTTCTACAGATAGT  
TCAGGATACACTCTCTTCGCCCAAGCTTTAGATGGAAGCAAGCTACGACCCATGGAAATGATTTTTTTTGTACACTTTTCCATATATC  
CTTAAATGCGCGTGCGTTTTTGTGTTGAAATGCTTGTAAATTTTGGCTATCGATACCATCCATTAAATCAGGATCTTCACTAATAAG  
TGCTAAATTAGCAGCGCCACGTTTAAACGTAATCCATTCTCGCTTCAACATCATATGATTTTTAACTCATGATTAGCAAAATGTTCCACA  
GATTCATTTTCAAATTTTAAAGCGTTTAAAGGTTGGATCGCTATATACAACACGTACATCTGAAGCGCCACAATGATATGCTTCTTCTA

CAATTAATGCGTTAATTCTAATGTTTCTACTGATGATCTAATAAATACTGGCTGTTTTGGTTGAACATTTCATACCAACCTTAACTAA  
TAGTTCAGCGTATTGTTGTAACCTTTCTTTGTAATTAGTCAAAATTTCCCACTCCTAGTCGTGTCGCAATTGCTCTAAAGCGTCAGCAA  
TAGCTGTCACTTCACTTGGCGACAATCTTTCTCTTGATTGAACAAAATCATATATATCTGTTAATTCTTCTTCATTTGCATTTTTATAT  
TTTTCAGGATCTAATAATCCTTGATTAACAATATTTAACTTCTCTCTAATAGCTAATACCTTCTCTTCATTTGTCATAGCCACAATGTT  
CACCTCTAATAATAGTTATGTTATCAAAGTATCACAATTTAATAAACTTTAATAGAATTTTATATAATCTGCTTTCTTATTGTTTAAA  
GTCGCTATAAAATGGGGATATAACTACATAGTTTGGAGGAATCAAAATGGTAGATGTAGCATTGTCTGTCTTGGCAATATATGTGCG  
TTCTCCAATGGCAGAAGCAATCATGCGACAAAGACTTAAAGACAGAAATATTCATGATATTAAGTACATTCAAGAGGTACTGGTA  
GCTGGAATTTAGGAGAGCCGCTCATGAAGGTACACAAAAAATCTCAACAAACACAATATTCCATTTGATGGCATGATTAGTGAA  
TTATTCGAAGCGACAGATGATTTTGATTACATTGTGGCTATGGATCAAAGTAACGTTGATAATATTAATCTATCAATCCTAATCTTA  
AGGGACAATTGTTCAAACTGTTAGAATTTAGTAATATGGAAGAGAGTGTATACCAGATCCATACTACACGAATAATTTTGAAGGT  
GTATACGACATGGTATTATCATCTTGTGATAATTTAATAGACTACATCGTAAAAGATGCAAAATTTGAAAGAGGGGTAGTTTTTTATG  
GAAAATAAAATTTGTTCTGGTATTTTAATTGGTGCCGTAATTGGTGGTGCAATTAGTTTAGCTGATAAACTACACGTCAAGCTTTAG  
TTCAATCAGTTAAAGATGCAAAAAATGGTAACCGCACTCGTAAGCCTTCTAAAGTCAGCAAGATTAAGACGAAAGTTTTATACTGG  
AAAGATGTTGTTGAAGAAATTCGTCGTAATAATCCTGAATTAGAACGTTTCATTAAAGGATGCGAAAGAAACATTTGTTAATAGAAA  
AAATCAACGCTAAGATGATTTTGTTTTATAAGGCAATACTTAACAATTTGGTGTACGCTTTTCATAGTTATCATTATTAATGATAA  
TACAATGATTGGCCAACTGCATTGTTTCAGTATTGCCCTTGTTTTAATTTTAAATCAAAAATAGCCTATGAAAGATTTAAATCAATTA  
ATTTCTATAATATTATCATTTTTTAAAGCATATCATTGTTTAGTTTTTTATAATTGGATAAAATACTAAATAGTTACTTTATAAAACATTA  
CATAGAGAAAGGTTAAGGAGTGCATGTGCAAAAAGGATCACTCTTCTTCAAAATACCTTAATTTCTGTTAAGGAAGCGCAAGAGG  
AGTCAAAAAAAGAAAAATAAAGTAATCCCAAAATTTAGTGTGATCGTACATATATTGAACCTCAACAATTTCAAAATCAAGAAACCT  
AAAAAAGATGATCAGGTTTTCTTCTTATCAAGATTAAATAAACCTGCAAAATATAAGAAAGACTCTAATTTCTTATCATATCTCATC  
TATCGCATAGGAAAAGATGATGCCCTCAGGACTAGCAGCACAAATGACTTACCATTTCGTAATTGCTATGTTCCCTATGTTGCTTTTTCC  
TATTAACATTATTACCATTTTCAATATTAAGCAGAGTCAAATTACTAATATGTTAAGCAATGCACCCGCTGAAACATCTACTCTAAT  
TAAGAGTGTAATTGGTGATATAACTCAAACTCCAGTGGTGGCTTATTATCTATCGGTTTGATTGACAAATTTGGTCAGCTTCAAAT  
GGAATGACTGCAATTATGAATTCCTTCAATGTTGCTTACGATGTAGAAGATAGCCGTAATGGAATCGTATTAAAACTACTAAGTGTT  
GTCTTCACTGTAGTTATGGGCGTTGTGTTTGTAGTTGCTCTAGCATTACCAACGCTTGGTTCTGTAATTAGTCATTTCCATTTCGGTCC  
ACTTGGATTGACGAACAAGTGAATGGATTTTTAACCTTATTAGAATTGTGTTACCAATCATTATTATATTATCGTATTTTATCGTG  
TTATATTCCGGTTGCACCTAACGTTAAACGAAGCTTAAGTCAAGTATTACCAGGTGCAGTATTTACTTCAATTATTATTGCTTAGCTGGTT  
CATTTGGTTTTGGTTGGTATATTTCAAATTTTGGTAACCTATTCTAAAACATATGGCAGTATCGCGGGTATCATCATTTTGTACTATG  
GTTATATATCACAAGTTTTATTATAATTGTCGGTGCTGAAATCAATGCAATCATTATCAGCGTAGTGTAATTAAGGTAACCAACC  
TGAAGAAGCAGCATTAGAACATGATGACAATAATAAAAAATCATTATAATGAGAACACTAGGTACGAATATGATGAGGATAATAAT  
GCAACACATCAACGTACGTATCATGTTGATGAACATCCTAGTGATACCTATCCAGAAGATGATAAAAAATATAAAAGACAAAATCGT  
TGATAAGCTTAAAAAAGACTAAACAACAACAAAACAGAGGTTTTCGCTAATGATTGCGAAGACCTCTGTTTTTGTGTCTATTTGAT  
GTTATATTGTGATTGGCGTAAGTAACTTTTCTTAATTCGATATGAACATTTGAATTAATTAATGTTGGAATGCATAGATGACAGCTTG  
TGTTCTATTGCACTTCTAATCTTAACTTAAATGTTACTACATGTGCTTAAACCGTTTTAATAGTAATATGCGATGCATAGCAATTTT  
CTTGATTGAGTAACCTTTCGAATCAATAATAATATTTCATTCTCTGTTCTGTAAGCATTTTCATATAACTCTGCGCGTTTTTTCATA  
CGGTTACGCATTTTCACTAAACCTCCGGTTCAAAAACAGATTCTCTCTAGAAAGTTTACGAACCTGCATCGGCGATATCTTTTGCAC  
TTGTTGTTTTTAAAAATGTAACATCGACACCTGCATCTAATGCACGATATACCTCTTTATCTTCAATAAAACTAGTTAATATTAATAC  
TTTAATTTGCGGTAAATCTTTTTTAATCTGAGTCGTCGCTTCTACACCATCCATGTCATCCATAAGTAAATCCATTAAATTAATATCT  
GGCTTCAACTCATGGGCTTTGGCAATTGCTTCTTACCAGAAGCGCCTTCACCAACTACTTCAATATCACTTTGCGTTGATAGATAAC  
TTGAAATTCCTATACGTACCATTTTCATGATATCCCAACAACAACTTTAATCGTCATACGAATCCTCCTTATTAAAGGTGCTTTCA  
CCTCGATACGTGTACCTGAATCTGGCAATGATACAATATGGAACGTTGCACCAATTTCCAAAGCTCTTTTACGCATATTTTTAAGTCC  
ATAACTTTGTCTAATTTTTTCATCAACATTAACAACTTTACCATTATCTTGAATTTCTCAACAATAAATAATCGTCTTTATTAACAAT  
CTACTGTCACTTTTGTACCGTTTGAATGACGCAATGATTTCGAAATTTGCTTCTGTTGAATTTCTGTAATTTCTGAACAATGTTCAATCTTT  
AGGCACTTTAAATCTTGATTTTCATGCACAACCTTTCATTGGCACTTTTTTTTGTAAATCAATAACTAAATCTTTAATACCCTCACCTA  
AAGATTTGTCTTTTAAACCAAGCGGTCTTAAATGTAACAGCAAGACGCAATTTCTAAGTGCGAATCTTGAACCATTTTCTCTAAAA  
TAGGAATTTGTTGGTCTAATGGTGGTTCTAATCTCGTTTCTTTGATAGCAGATAGCATCATACTTGGCGCAAAAAGTTGCTGACTAAC  
AGAATCGTGAAGTTCTCGTGCTAGTCTTTGACGTTTCTTCAATAATCTTTTTAACTTTCACATCATTAAATATTATAATTTTCATTGG  
TTAAGTTTGTAGTTTAAAGTCGCAACTTATGCAATCTTGTATTAAAGGTACGAGTGATGGTATAAATCTAACGTTTCACTATATAT  
TTCTATATTTGATCATTAATGCCAACTGTTTCGCCTTCCATTGAACGCTCAATTTGCGTCTTAATCCAATCATTTTGCTGATTGATTT  
TGTAAGCGAGTACCGAACCAACAATAATACACAATAATATGATGATGAGATTTAAAAATAAAAAAGACTGGTATTCCGAATATTTGT  
GTATAAAACATACCTTGAATAATAGATATTTTCAAAAACTTTATCGATGAACAGAAATGCAGCTAGCATGCTATATACTAATAAGT  
GAGCATTTGAACCAATTTGTTCTAATGTAGTGGTTTACATCGATAAACTACCTTCAAGTCTCCGATAAAACGTTGATACGTAGATATTA  
GTATAGTTATCCGGTTTTCATCATTTCTTCAATATGAATATTGTTATTTTCAACTTTATATGATTTTTCATTTCACGTAAGTACTTCCATA  
AAAAGCAGTACATGTAAATTAATATTGTAATTAACCGGCAATATAACCTGCACCTTTACCTAAAAATGTGTCTAACAACAATGGTATT  
ATTTTCTTAAATATTGTCAGCTTTTGTAAAGTCAATATGTAGGTCGCAATTCATGTTGAATTTGTACATCTTCCCACTTATATACAT  
AAACTGGTGACGTTGCTCACCAAAACCACTTTTGTTTAATAAAAGATGGTGAAGTCATAACCTCATCCGTCGCAACTACTTTTTTGG  
TTTAAACTTGTGTATTAATAACGCACAATAAGTAGTAATAAAAAAGACGAACAAGATGATGATTGTATACTTATTAGACAATAATG  
TGAATGCAATTAATAGCGCGCTATCCAAAACGCCAAAAGGCCACGTATTTTATGAAAAATAAGATATCCTACATAAACTAATACA  
CATCCCAATAATAGACGAGTAAAAAGCCAATTTTTTCAAAAAATGTAGTAAAAATGGCAATAATCATTAAATGTCAGTAAAAAT  
GATCAACATTGACGATATATTTGTGTGATCATGTTTCCAAAGCCCTTATGATGCCACAGCGTTCATATAATTTATTAGATACGATG  
TTTTTCTGTTGCTATTTTTTCAAGTTGAAGTTTGTGAATTTGAGTTTCAATTTGTGCATAATATGCTTCACTTTATTCAACTCTGATT  
TAATATTTTCAATTTCTTGATTATTGATTTCTCTTGCACATTGAATTTGAAATGCTTCAGCAATATCAATATATTTATTTTCTAATGTT  
AGCATTAGACTGTCAATTAACCTTGTAAGTTGTCTTTTTTAGTAATTAATAACGCATATAATCATCTAAATTTTTCATTTTTCATC  
TAGCATTAAAAGGTAGTGCTTGATATATTCTTACTGTTGCTCTCAAAAACCTGTTCAATATAACGTTCAACATAGTTCATAACTATC  
ACCTTTTATAATAAGTTTTTAAAAATACCAAAATGCGCTATGTATCTCGTTGATGTGCGATGATATGTTTGCTTAAAAACTACTTTATTAC  
AACATATTTTGAATGACGCATTGATTGTGTTCTTAATATTATAAAACAGTTCCGAAACCAATATGAATAGGCTCCGGAACATAAA  
TGATGTTTCATCTTATGCTATAGTATGTTGAACCTATCTTCTCAATTTTTTGTGTTAAAACTCGGACCATCTTATGTCACGATAACC  
GTATGCTCAAAATTTGAGCAACAACAACTTTTATCGCTGTTTCAAAAGCCCATTCATTTTACCTTCTGTGAACAATAATGATGCATTTGATG  
AGATAAACGTTTCAATAGCTAATACCATACCTTCAGTTAATAAGTGTGTTTGTCTTTTGGATCAAAGTAATTAAGTACATGTGCTGGTG  
CTTCATGTAATGATAAACCAACACCATGACCTGTAAAGTTTTTAATGACTTTCAAATCATTTTGTCTAGCTGTATTATGCACCGCTTT  
ACCAATGTTACTTAACTTAGTACCCGTTTTACTTTTGCATTTGCATTCTCAAAATGCCATCGTTGCTACGTCACATACTTTTTGTTTCA

TTGGATCATCTGATTCTCCAACGACAAATGAAATACCTGTATCTGCATAATAGCCATTCTTCAAAGCCGATACATCAATATTTACTA  
AATCTCCTTCACGAATGACACGCTTACTTGGAATCCCATGTGCCACCTCTTCATTGACACTAATACAGTTTGACCAGGAAAAATTTTC  
ATCATGAATTGGCGCAGAAATAGCACCCTATTCTTCAAATAACTCTTTTCGCAATATTATCAAGCTCTTTCGTAGTGATACCTGGTTTG  
GTTGCAGCTTGCATTGTATTGCGCACTTTAGCGCATATGTATCCAATTTCTTTAAACGCTTGTAATTTCTTCTGTTTTTACAATCAT  
TTTATCCCGTTCTTTTTATATAATTATAACTTATTATAGCAAAAATCTTTGATATACTAAAGATGTTACTTTAGTATTTTTGAAAAG  
TGAGTGAGACATAGTGTGATAAAGAAAAAATATTCTTTATCGTTGTACCCCAACTTGCATTGCCTGTAGAAAATTGTAGATTCAATT  
TCTCTATGTTGGGGCCCCGCCAACCTGCACATTATCGTAAGCTGACTTTTCGTGAGCTTCTGTGTTGGGGCCCCGGACTATAATTGAA  
AAATGCTTGTACAAGTGCATTTTATTTTCAGTCAACTACTAACAATATAACATTGTGGAGCCGAGAAGTTTGATTAATGTATATGAA  
AATCAAAGTAATGCTTAAGTATGATTATTTCAAATATTTTACATACATGAACCTTTTCCAATGTACGATACTATTATTATAAAGCGCTC  
GCTAAGATTTTACGATGATTAGAGGTTAAAAAATGAACGATCAATGGTATAAACATTAAATTTGGTGCCAGAACAAATTAACCTGGT  
ATTGCCATTTTAAACAGCTGTCTTTTGTATGGCACTAGATTTAACACCCATCTATGCCATTTTAAACAGCTGTAGTCACAATTGAAC  
CAACTGCCAAGGCATCACTTATTAAGGTTATCGTAGATTACCTGCTACGGTAATTGGTGCAGGCTTTGCAGTATTATTTACATATTT  
ATTCGGCGATCAATCACCTTTTACATATGCATTGAGTGAACGTTTACGATTTTATTCTGTACAAAACCTCAAATTGCAAGTTGGTACG  
AATGTCGCTGTACTAACATCATTAGCTATGATTCCAGGTATTCATGATGCCTACATATTCAACTTTTGTCTCGAACATTGACAGCAA  
TTATTGGACTCGTGACATCAGGTTTAATTAACCTCATGGTGTTCACCTAAGTATTATGGTCAGGTCGAAGAAAAATTAAGTAAGA  
CAGATGCCTTGATGTATAAATTATTTACAATCGCTGCCAAGAAGTTATCTTATCAAGACTGCAATCTGATAAAAGCGAAAAATCAT  
ATAAAAAATTTTCAATTTAAATAATCAAGTTGAAACGTTAATAAGTTATCAACGTCATGAATTAAGCTATCATAAGAAAAAAGAA  
TGTGATTGGAATTACTCAATCAATTAACATAAAGTCATATCAAGTATCGTTTGTATTATCACTATTATCAATATCATTTACTTAC  
CTAAAAAATACTCGTGTAACTTTTCAGGTGACGAAAAAATGGCATATGCTTAAAGATTAGTAGTAGCAATCAAGATATATTTTATGATG  
GTTCTTTTAAAGAGAGAAGATGATTCTGTAGAAAACCTTACGTTGACAAATAAAAGCACTTGAAATTAGTGGTGAATAATCAAAATAAA  
AGTCATATACTATACGAAGTTCTAATGATTTATCGACTGCTAGACAGCAGATATGCTTAATTTAAGTACCTTATACTAATTGGCACC  
ATGGGAGTGGGACAGAAATGATATTTTCGTAATAATTTATTCGTCGTCACCCCACTCGCATTGCCTGTAGAATTTCTTTT

>050-contig\_246\_RC

GCCCCTGACTAGAAATTGAAAAAAGCTTGTACAAGCGCATTTTCGTTTCAGTCAACTACTGCCAATATAACTTCGTAGAGCATAGAAC  
ATTGATTTATGTCCCCGCCTCTTTTTATCGTATATAGCATGTCCCTTTTTAAATTACAAGCATAAATATTCAGACTCAAATATAGCC  
ACACCCCTAAACTACGGAGGGATGTGGCTGTCTTTTTTGATTATAATTATGTATCAGATTTAAATCATTAAATGTAAAGAGGCTAATT  
CATTAATAAATTTAGTAAAATCTGATTAGCAACATTTATCCTTAATGAAATACCAGATTCTGTTGCCATGTTTGAATGCCTTAAACC  
AGAATCAAAATCAATATAAATACAAAGCAGTTCCTGATTAATAATCAATAATTATAAAATGTAAATCAGGTTCTATAAAATATATTTT  
AGTAACAGGATTGTCGAATCCATATGTTTCAAATTTGCCATGTCACATATCAAAAAGTGCAAAATTCAAATTTAACTTCTTGATCTTCG  
AAAGTTGCACTAGTGTGCAAAATAATAAATTTTATTATCTTCTTCGATAACTACATCTTTTAAAAATAAATGTTATCGATGTTTTGCTAT  
GTAAATAAGATGCATCTCTTAAATCACTCTAGTGGGCTTCATCGTCAAAATCTTTTCATCATTCAATTTTTTCATGTTGCATAATCAC  
CATTACTATTGATAATTTAGGATAGATACTCATTGTATAATAAATTATTCAGTACGACAAAAAACACACATCAATTTGGTTGTTTCC  
ATCCAAAAATAATGTGTGTGTTTATACATATATGATTATTACTAACTTCATCGTTTATCAATATTAATCCATTGATGCGATTTTCA  
GAGTTAACGAGATTTCTTCTGTCTATTTGCTCTGTCTATTAATACTTGTTCGCTTGTATTTCCGCTTCATTATCTATTTCTTTAGGCTC  
AAACGGAATCCCTTACGTTTACAAGCTTTTTCTAACAGATAATCAGTGATTTCGTAATTTTTAGGTAATAATGGTCCGTGTAAATA  
AGTACCTAATAAATTTTTATAATGAATGCCTTCTTTTTATCTTCATCATTATTACCATAACCAAAAGTAACATGACCAAGTGTACCG  
AAATTATGATATGTCTACCACCGTGATTTTCAAACCTACAATAGTTCCAAAAGTATCACTTTCGATAACAATATCTCCTGTTAATC  
GATTTGTCTTTGATTGAGTATAAAAAATCTAAAATACCTAACCTTCTAATTCGTACCATCAGGCGTGATATATTTTTCCCTAAAAA  
TTGATAGCCTCCACAAATTTGTTAATCCTGGCATAACCATCTTCAATCGCTTCTTAAAGTGGTGTCTTAATTTTACTTAATTTCTTTGTTG  
CTAATGCTTGTCTCTATCACTTCCACCACCGATAAAGAAAAATATCATTTCATCAAGGTAATACCTTCTGTTTCAATGATTCTTAC  
GACATTAACCTTTAATATTTTCGTTTATAGCACGTTGTCTTAAAGCAATAATATTTTCTATATCACTGTATAAATCAATTTATCTGACA  
TAAAAATGATAAATAGTCAATTCATGCATATTATGATTGACCTCCTTCAAACGAACGGTTTAATTGTTCAAGCATAGGCGCTAATGAT  
GTATAGTTTGGTATTGCAACTGTGAAACCTTTATAATCCATAGTCTTTGCCGTTGCTTTATAAATATCACGCTCAACTATAATTGGTA  
CTTCAACCTCTGCTAATCTCAATCGCAATTGAAGTTCTTCTGCTCGTGACCTGTCACGATGATAGCTTCAATTTGTTGCTTAGATAA  
TTTTTCAAATCTGCATCATAAATCCATGAAGTATCTCGACCATCTGCAGCGTTATCATTTAGCGAAATAACATACACTTTTTCGCCT  
TCTAATTGTTACCAACTGATAAACTTGCATTTCATCTGACGGGTTTTAGCTAAATTGATCATCGCTTCTTTTCGTTCTTTTTTAA  
GTACTGCATACGACCAATTGTCTGATGTATACGTTTCAAAGCCATTTTAAATTGTTTGTTCATTTAACCCTAATCTCTTAAAACTGAA  
TATGCTGCTAACGCGTTATAAGCGTTAAAGTCACCTGCAATTTTCATATCATATTTTTCATCATTGATATTTAAATGTAAGAAACGGTG  
CCACATCAAAACTTTGATATTTTCATATTTTGTCTGCTTGTGTTGAAACCACTGACAGTGATAAATGACCAATTTGATATAATGAAT  
ATAATCGTATTGCAATAAGCGACACAGTTTGGACAATATCTACTTTTCATTCATCGTACTTTGTTCAAAATTCATGGGCATGTGCTTTC  
ATGCCATAGTACACAATCGTATCACTTGCATTTTCAAACGACTCACAATGGATCATCAGCATTTAGCAATAATTTGATGCCTTTA  
TTACTAATTGTCTCTGCAATGTTATTAACCATAATATCAATTTACCGAAGCGATCCATTTGATCTCTAAAGAAATTAGTAAATACCA  
TCATTGAAGGTGTAACCTCTTTTAAACACACGTGGAATCGAACCTTCATCAATTTTCGATTACCGCAATTTTAGTCTTAGGTGTTGATTG  
CATGATGAATGCAGAAGTTATACCTGCAGCCATATTAGCACCTTCATTATTGTGTATAATTTGAATATTATTGCTTTTAAAGTATGT  
CCAATTAAGTTTGAAGTCGTTGTTTACCATTGTTCCTGATAAATACAATATCATCAACTTGCTCTGCTAATTTTCTTAATATATC  
TGTATCCACTTTTCTAGCGATTGTGTCAGGTAAATCTGTCTCTTTTACCTACTGCTCTACTTGCTTTACGCGCCAATTTTCGCTAGAT  
GGATTCCGCTCAGTGTCTCATGTTTCCCTCTCAAAATTTCCACTCGCATATTATAACATGACAAGGCAATTCAAAAAGTTTCT  
CAATCACAATTTGATACAGTGTTCCTAAATTATAATCATTTCTCATTAGATAATTAATAATGATATTTATTCTCAATTAATAATATCGCT  
AAATGATACATTTTCTCAATTAGAGTGCTAAAATAAGGTGTTAAATTATAATTATTATTATTTACAATTGAGAATGAGTTTGTATAC  
TAAGTTTAATTCATAGTAATTTTAATTTACAAATAAGAGGTGTATCAAAATGTTAAGTAAAAATTTATTAGAAGCATTAATGATCA  
AATGAACCATGAGTACTTTGAGCACACGCATATATGGCAATGGCAGCATACTGTGATAAAGAATCGTACGAAGGATTTGCAAACT  
TCTTCATTCAACAGCTAAAGAAGAACGTTTCCATGGACAAAAGATTTATAACTATATTAACGACAGAGGTGCACATGCAGAATTC  
AGAGCAGTTTCAGCACCAAAAAATGACTTTTCAAGCATACTAGAAAACCTTCAAAGACAGCTTATCTCAAGAACAAGAAGTAACAAG  
ACGTTTCTATAACTTATCTGAAATCGCTCGTCAAGATAAAGATTATGCAACTATCTCATTTCTTAACTGGTTCTTAGATGAACAAGTC  
GAAGAAGAACTAATGTTGAACTCACATCAATTTTAACTCGTATCGGCGATGACAGCAATGCATTATATCTTTACGAAAAAGA  
ACTTTGGCGCTCGTACATTCGACGAAGAATAATTAACATCACTACAATAGACAGATAAATATCATACGACATGATAGGCATTTGGG  
TCACTTACAATAACCAATGTCTATATTTTGTCTTACGGAGATCACTAGATTCAATTTTCTGAATCATTTGATCTGCGTTTTTTCATT  
TTCAAGGCTAATTTATGATTTTTAGTCATTTATTTTTTAACTACTAATGTTAATAACTCTAAATTTGATGTTGAATTAATTTGACCG  
ATTTTAAAGCATATCATCATTTACTTTTTAATCAGAGTTACATCCAAATGATAGATTTACGTTATACCTTCACGTATAATATTATGT

ATCGTTTGTAAAGCAAATGACTAAAAGTCTATTAATATATACATTTAATTAATTGAAAGGATTGACTACATGATACAAGATGCGTTTG  
TTGCACTTGATTTTGAAACAGCAAATGGTAAACGTACAAGTATTTGTTCTGTCGGAATGGTTAAAGTCATTGATAGTCAAATAACAG  
AAACATTTTCATACTCTTGTGAATCCGCAAGACTATTTTTCACAACAAAAATTTAAAGTTCATGGCATAACAACGAGAAGATGTTGAAA  
ATGCACCTACGTTTGACTACGTATTTCCATATATGATGCAATTTATTGCAGATTTACCTGTTGTCGCACATAACCGGGCATTGATAT  
GAACGCTTACATCAAAGCATTCAAATATTGGTTTACCAACTCCAAATTTAACTTACTTTTGTAGTTATCAACTTGCTAAAAGAACC  
GTTGATTTCGTATCGATACGGTTTAAACATATGATGGAGTTTATCAATTAGATTTTCATGGTCATCATGATGCATTGAATGATGCCA  
AAGCATGCGCAATGATTACTTTTAGGCTACTGAAAAATTTATGAAAAATTTAACATATGTAACATAATTTATGGTAAAAATCTAAAAAG  
ATAAAGGCTAGGACTAAATAAAATACTCCCTTCAAAGTAAGCATTGTAAAAATGTAACTTTGCAGGGAGCTTTATTTTATATAAAG  
TCATATATCGTCATATTTTATAAGTTGATTGTTCTAAATTACCTACAGTGACACCAATAAGTCGAATTGGTACATCAGGGTCTTTTA  
AATCGTTATAAAGTAAATATGCAATATTATAAATATCTTCTCAGAACTAACCGAATCTCTTAAACTCATCTGTTTAGATAGCGTTTC  
AAATTGATAAGTTTAAATTTTAAACCGTTACAGTTTATAGCTGACTTCTGTAATTTATTTAGACGTTACAGCTGTTTACCTGACAATTC  
ATACTTTTCTTAAATCTCTTCATCATCATTACGCTCTGTTGCAAATGTGCGTTTCAGTCCCTACTGATTTTCTTACTCTTGATGATTTT  
ACTTCACTATGGTCAATACCGCGTGCCTTGTTATATAAACCCCGACCTCTTTTCCAAACAAACGTATTAATTCAAATTCGTTTCT  
CATATAAATCTCTACCGTTAAAAATACCATTATCATGCATTACTTTTGTGAAGCTTTACCTACGCCTGGAAAAATCTCCAATATCCAA  
TGTTCATCAAATATCATGGACATTTTGATAATCAATCACAGTCATACCATCAGGTTTATTCATACCCTCGCTAATTTAGCTAAAAAT  
TTGTTATAAGAAACACCTGCAGATGCTGTTAAATGTGTCTGCTCTAGAATATCTTTTCTAATATACTGAGCAATTTTCGAAGCAGGA  
AGGTTCTGGTCTCACTAATCTGTAATATCTAAATACGCTTCATCCAATGACATCGGTTCTACCTTATCTGTATAACTTCGGAAAAATAG
[truncated: 761,757 more chars]
